# Supplementary material for: Dioxygen–halogen bonding exemplified by crystalline peroxosolvates of N,N′-bis(haloacetyl) bispidines
Source: Royal Society of Chemistry journal article supplement (doi:10.1039/d3cp05834d), 2024-01-01
Supplement: d3cp05834d1.pdf [file d3cp05834d1.pdf]

## Crystal 1 CAM-B3LYP

PROCESS 0 OF 24 WORKING  
PROCESS 1 OF 24 WORKING  
PROCESS 2 OF 24 WORKING  
PROCESS 3 OF 24 WORKING  
PROCESS 4 OF 24 WORKING  
PROCESS 5 OF 24 WORKING  
PROCESS 6 OF 24 WORKING  
PROCESS 7 OF 24 WORKING  
PROCESS 8 OF 24 WORKING  
PROCESS 9 OF 24 WORKING  
PROCESS 10 OF 24 WORKING  
PROCESS 11 OF 24 WORKING  
PROCESS 12 OF 24 WORKING  
PROCESS 13 OF 24 WORKING  
PROCESS 14 OF 24 WORKING  
PROCESS 15 OF 24 WORKING  
PROCESS 16 OF 24 WORKING  
PROCESS 17 OF 24 WORKING  
PROCESS 18 OF 24 WORKING  
PROCESS 19 OF 24 WORKING  
PROCESS 20 OF 24 WORKING

\*\*\*\*\*

```
*
*
*          CRYSTAL17          *
*   public : 1.0.1 - Jun 21st, 2017   *
*   HTTP://WWW.CRYSTAL.UNITO.IT      *
*
*          *
*          MAIN AUTHORS          *
```

\* \*  
 \* R. DOVESI(1,11), V.R. SAUNDERS(2), C. ROETTI(1,11), R. ORLANDO(1,11), \*  
 \* C.M. ZICOVICH-WILSON(1,3), F. PASCALE(4), B. CIVALLERI(1,11), \*  
 \* K. DOLL(5), N.M. HARRISON(2,6), I.J. BUSH(7), Ph. D'ARCO(8), \*  
 PROCESS 22 OF 24 WORKING  
 PROCESS 23 OF 24 WORKING  
 \* M. LLUNELL(9), M. CAUSA'(10), Y. NOEL(8), L. MASCHIO(1,11), A. ERBA(1,11) \*  
 \* M. RE'RAT(14), S. CASASSA(1,11) \*  
 \* \*  
 \* CONTRIBUTIONS TO THE CODE HAVE ALSO BEEN GIVEN BY \*  
 \* \*  
 \* M. FERRABONE(1,11), M. DE LA PIERRE(1,11), M. FERRERO(1,11), \*  
 \* J. BAIMA(1,11), E. ALBANESE(1,11), M.F. PEINTINGER(12), R. BAST(13), \*  
 \* B. KIRTMAN(15), V. LACIVITA(1,11), R. DEMICHELIS(1,16) \*  
 \* G. BRANDEBURG(17), S. SALUSTRO(1,11), G. SANSONE(1,11) \*  
 \* M.T. RUGGIERO(18) \*  
 \* \*  
 \* (1) THEORETICAL CHEMISTRY GROUP - UNIVERSITA' DI TORINO - TORINO (ITALY) \*  
 \* (2) COMPUTATIONAL SCIENCE & ENGINEERING DEPARTMENT - STFC DARESBUY (UK) \*  
 \* (3) UNIVERSIDAD AUTONOMA DEL ESTADO DE MORELOS - CUERNAVACA (MEXICO) \*  
 \* (4) UNIVERSITE' DE LORRAINE - NANCY (FRANCE) \*  
 \* (5) UNIVERSITAET STUTT GART- STUTT GART (GERMANY) \*  
 \* (6) IMPERIAL COLLEGE - LONDON (UK) \*  
 \* (7) OXFORD E-RESEARCH CENTRE - OXFORD (UK) \*  
 \* (8) UPMC - SORBONNE UNIVERSITES - PARIS (FRANCE) \*  
 \* (9) UNIVERSIDAD DE BARCELONA - BARCELONA (SPAIN) \*  
 \* (10) UNIVERSITA' DI NAPOLI "FEDERICO II" - NAPOLI (ITALY) \*  
 \* (11) NIS - NANOSTRUCTURED INTERFACES AND SURFACES - TORINO (ITALY) \*  
 \* (12) MPI FUER CHEMISCHE ENERGIEKONVERSION - MUELHEIM AN DER RUHR (GERMANY) \*  
 \* (13) UNIVERSITY OF TROMSO - TROMSO (NORWAY) \*  
 \* (14) UNIVERSITE' DE PAU ET DES PAYS DE L'ADOUR - PAU (FRANCE) \*

\*(15) UNIVERSITY OF CALIFORNIA SANTA BARBARA - SANTA BARBARA (USA) \*

\*(16) CURTIN UNIVERSITY - PERTH (AUSTRALIA) \*

\*(17) UNIVERSITY COLLEGE LONDON - LONDON (UK) \*

\*(18) CAMBRIDGE UNIVERSITY - CAMBRIDGE (UK) \*

\* \*

\*\*\*\*\*

EEEEEEEEEE STARTING DATE 11 10 2023 TIME 16:18:11.5

\*\* eometry was taken from 2048268.cif, del O5 H5 O6 H6, B3LYP CHNO 6-31G\*\*\* I -p

GEOMETRY INPUT FROM EXTERNAL FILE (FORTRAN UNIT 34)

3D - CRYSTAL

\*\*\*\*\*

LATTICE PARAMETERS (ANGSTROMS AND DEGREES) - PRIMITIVE CELL

| A | B | C | ALPHA | BETA | GAMMA | VOLUME |
|---|---|---|-------|------|-------|--------|
|---|---|---|-------|------|-------|--------|

|         |          |          |          |          |          |             |
|---------|----------|----------|----------|----------|----------|-------------|
| 7.78730 | 13.90390 | 16.13670 | 90.58630 | 92.08030 | 99.96120 | 1719.467764 |
|---------|----------|----------|----------|----------|----------|-------------|

NUMBER OF IRREDUCIBLE ATOMS IN THE CELL: 86

CARTESIAN COORDINATES (ANGSTROM) - IRREDUCIBLE ATOMS AND SYMMETRY RELATED

| AT.IRR. | AT | AT.N. | X | Y | Z |
|---------|----|-------|---|---|---|
|---------|----|-------|---|---|---|

|   |    |     |                     |                     |                     |
|---|----|-----|---------------------|---------------------|---------------------|
| 1 | 1  | 253 | -3.442026677536E+00 | -4.928341543409E+00 | -1.426404791236E+00 |
| 1 | 2  | 253 | 3.442026677536E+00  | 4.928341543409E+00  | 1.426404791236E+00  |
| 3 | 3  | 253 | 4.175445400627E+00  | 3.154592632265E+00  | -2.242178384147E+00 |
| 3 | 4  | 253 | -4.175445400627E+00 | -3.154592632265E+00 | 2.242178384147E+00  |
| 5 | 5  | 8   | 5.738848262490E-01  | -5.795299364942E+00 | -1.497225150477E+00 |
| 5 | 6  | 8   | -5.738848262490E-01 | 5.795299364942E+00  | 1.497225150477E+00  |
| 7 | 7  | 8   | 3.639760996830E-01  | 4.073949587051E+00  | -2.304392729680E+00 |
| 7 | 8  | 8   | -3.639760996830E-01 | -4.073949587051E+00 | 2.304392729680E+00  |
| 9 | 9  | 7   | 1.224018081296E+00  | -6.097299289593E+00 | -3.648663903981E+00 |
| 9 | 10 | 7   | -1.224018081296E+00 | 6.097299289593E+00  | 3.648663903981E+00  |

11 11 7 -4.380854221330E-01 5.531022623540E+00 -3.837305084417E+00  
11 12 7 4.380854221330E-01 -5.531022623540E+00 3.837305084417E+00  
13 13 6 1.330400487955E+00 -6.325317829523E+00 -2.328766438904E+00  
13 14 6 -1.330400487955E+00 6.325317829523E+00 2.328766438904E+00  
15 15 6 2.372986293267E+00 6.619437733871E+00 -1.819317248780E+00  
15 16 6 -2.372986293267E+00 -6.619437733871E+00 1.819317248780E+00  
17 17 1 2.589661922730E+00 5.773733407563E+00 -2.460612103237E+00  
17 18 1 -2.589661922730E+00 -5.773733407563E+00 2.460612103237E+00  
19 19 1 2.038666963383E+00 6.256346665361E+00 -8.528459500260E-01  
19 20 1 -2.038666963383E+00 -6.256346665361E+00 8.528459500260E-01  
21 21 6 -4.850699468830E-01 4.918862332419E+00 -2.638153552556E+00  
21 22 6 4.850699468830E-01 -4.918862332419E+00 2.638153552556E+00  
23 23 6 -1.574823551117E+00 5.284828194725E+00 -1.655738254942E+00  
23 24 6 1.574823551117E+00 -5.284828194725E+00 1.655738254942E+00  
25 25 1 -1.707149675938E+00 6.356229545487E+00 -1.530519616759E+00  
25 26 1 1.707149675938E+00 -6.356229545487E+00 1.530519616759E+00  
27 27 1 -1.342766341192E+00 4.827067090722E+00 -7.010507224390E-01  
27 28 1 1.342766341192E+00 -4.827067090722E+00 7.010507224390E-01  
29 29 6 7.218295451500E-02 -5.357512542549E+00 -4.161666629405E+00  
29 30 6 -7.218295451500E-02 5.357512542549E+00 4.161666629405E+00  
31 31 1 4.323605455360E-01 -4.494228631323E+00 -4.731937797340E+00  
31 32 1 -4.323605455360E-01 4.494228631323E+00 4.731937797340E+00  
33 33 1 -5.022221055820E-01 -4.993059391377E+00 -3.311961782727E+00  
33 34 1 5.022221055820E-01 4.993059391377E+00 3.311961782727E+00  
35 35 6 -7.987899105200E-01 -6.230082982079E+00 -5.083994554374E+00  
35 36 6 7.987899105200E-01 6.230082982079E+00 5.083994554374E+00  
37 37 6 -1.430360094870E+00 6.493599294215E+00 -4.322717026956E+00  
37 38 6 1.430360094870E+00 -6.493599294215E+00 4.322717026956E+00  
39 39 1 -2.010741402798E+00 -7.028294785398E+00 -3.485325967109E+00  
39 40 1 2.010741402798E+00 7.028294785398E+00 3.485325967109E+00  
41 41 1 -2.118210643171E+00 5.974455122920E+00 -5.000892791116E+00  
41 42 1 2.118210643171E+00 -5.974455122920E+00 5.000892791116E+00

43 43 6 5.666248954130E-01 5.096231421598E+00 -4.814466186134E+00  
43 44 6 -5.666248954130E-01 -5.096231421598E+00 4.814466186134E+00  
45 45 1 7.666412358800E-02 4.415898594829E+00 -5.520844063034E+00  
45 46 1 -7.666412358800E-02 -4.415898594829E+00 5.520844063034E+00  
47 47 1 1.322004997471E+00 4.529595198526E+00 -4.271823633892E+00  
47 48 1 -1.322004997471E+00 -4.529595198526E+00 4.271823633892E+00  
49 49 PROCESS 21 OF 24 WORKING  
6 1.198978583884E+00 6.258576836850E+00 -5.595562754578E+00  
49 50 6 -1.198978583884E+00 -6.258576836850E+00 5.595562754578E+00  
51 51 6 2.037143200052E+00 -6.732464555087E+00 -4.684193494278E+00  
51 52 6 -2.037143200052E+00 6.732464555087E+00 4.684193494278E+00  
53 53 1 2.859438921407E+00 6.622103369625E+00 -4.230744369421E+00  
53 54 1 -2.859438921407E+00 -6.622103369625E+00 4.230744369421E+00  
55 55 1 2.475111337849E+00 -5.943792887622E+00 -5.306734999786E+00  
55 56 1 -2.475111337849E+00 5.943792887622E+00 5.306734999786E+00  
57 57 6 -1.925825946494E+00 -5.364935198700E+00 -5.644835849982E+00  
57 58 6 1.925825946494E+00 5.364935198700E+00 5.644835849982E+00  
59 59 1 -1.521370523777E+00 -4.519633635236E+00 -6.207083001079E+00  
59 60 1 1.521370523777E+00 4.519633635236E+00 6.207083001079E+00  
61 61 1 -2.551643360771E+00 -4.966757141898E+00 -4.839951630442E+00  
61 62 1 2.551643360771E+00 4.966757141898E+00 4.839951630442E+00  
63 63 1 -2.560358744955E+00 -5.945295717738E+00 -6.319291720205E+00  
63 64 1 2.560358744955E+00 5.945295717738E+00 6.319291720205E+00  
65 65 6 2.104889558636E+00 5.693049255635E+00 -6.687187038740E+00  
65 66 6 -2.104889558636E+00 -5.693049255635E+00 6.687187038740E+00  
67 67 1 1.532126584615E+00 5.062456175034E+00 -7.372133034350E+00  
67 68 1 -1.532126584615E+00 -5.062456175034E+00 7.372133034350E+00  
69 69 1 2.912072398611E+00 5.076704338742E+00 -6.280541250402E+00  
69 70 1 -2.912072398611E+00 -5.076704338742E+00 6.280541250402E+00  
71 71 1 2.551195990410E+00 6.507475848554E+00 -7.264511168628E+00  
71 72 1 -2.551195990410E+00 -6.507475848554E+00 7.264511168628E+00  
73 73 6 7.816936363700E-02 -6.796131807842E+00 -6.203951960311E+00

73 74 6 -7.816936363700E-02 6.796131807842E+00 6.203951960311E+00  
75 75 1 5.142250895690E-01 -5.980731290468E+00 -6.791009881485E+00  
75 76 1 -5.142250895690E-01 5.980731290468E+00 6.791009881485E+00  
77 77 1 -5.356662543670E-01 6.495170148064E+00 -6.872442082482E+00  
77 78 1 5.356662543670E-01 -6.495170148064E+00 6.872442082482E+00  
79 79 253 8.510222042460E-01 -2.286656725067E+00 -6.938239406879E+00  
79 80 253 -8.510222042460E-01 2.286656725067E+00 6.938239406879E+00  
81 81 253 2.185700378248E+00 1.845839772692E+00 -5.629239979040E+00  
81 82 253 -2.185700378248E+00 -1.845839772692E+00 5.629239979040E+00  
83 83 8 -2.876994461825E+00 -1.435811359896E+00 -6.605458261723E+00  
83 84 8 2.876994461825E+00 1.435811359896E+00 6.605458261723E+00  
85 85 8 -1.714967170583E+00 2.740879908670E+00 -5.808563764736E+00  
85 86 8 1.714967170583E+00 -2.740879908670E+00 5.808563764736E+00  
87 87 7 -1.806167221087E+00 -1.356345635994E+00 -4.607806968708E+00  
87 88 7 1.806167221087E+00 1.356345635994E+00 4.607806968708E+00  
89 89 7 -2.593628911831E+00 1.338254931933E+00 -4.261181744874E+00  
89 90 7 2.593628911831E+00 -1.338254931933E+00 4.261181744874E+00  
91 91 6 -1.847153833332E+00 -1.218385769421E+00 -5.943611522882E+00  
91 92 6 1.847153833332E+00 1.218385769421E+00 5.943611522882E+00  
93 93 6 -6.223973679830E-01 -7.424394801410E-01 -6.682182317567E+00  
93 94 6 6.223973679830E-01 7.424394801410E-01 6.682182317567E+00  
95 95 1 -1.227627937830E-01 1.036888091110E-01 -6.219297197642E+00  
95 96 1 1.227627937830E-01 -1.036888091110E-01 6.219297197642E+00  
97 97 1 -9.368592475870E-01 -4.808416964780E-01 -7.686634610747E+00  
97 98 1 9.368592475870E-01 4.808416964780E-01 7.686634610747E+00  
99 99 6 -2.659054110640E+00 2.039470576247E+00 -5.409926414669E+00  
99 100 6 2.659054110640E+00 -2.039470576247E+00 5.409926414669E+00  
101 101 6 3.782230739957E+00 5.666205779130E-01 -6.280041671633E+00  
101 102 6 -3.782230739957E+00 -5.666205779130E-01 6.280041671633E+00  
103 103 1 3.376942585690E+00 -4.410001162420E-01 -6.324726984883E+00  
103 104 1 -3.376942585690E+00 4.410001162420E-01 6.324726984883E+00  
105 105 1 4.017145744371E+00 9.206050583650E-01 -7.279630892454E+00

105 106 1 -4.017145744371E+00 -9.206050583650E-01 7.279630892454E+00  
107 107 6 -3.024412464403E+00 -1.694965476917E+00 -3.875885540852E+00  
107 108 6 3.024412464403E+00 1.694965476917E+00 3.875885540852E+00  
109 109 1 -2.859891949142E+00 -2.628716097077E+00 -3.329337907239E+00  
109 110 1 2.859891949142E+00 2.628716097077E+00 3.329337907239E+00  
111 111 1 -3.819496094080E+00 -1.857713652432E+00 -4.602084774245E+00  
111 112 1 3.819496094080E+00 1.857713652432E+00 4.602084774245E+00  
113 113 6 -3.412105985031E+00 -5.921947554400E-01 -2.876299353888E+00  
113 114 6 3.412105985031E+00 5.921947554400E-01 2.876299353888E+00  
115 115 6 -3.750176764346E+00 7.147291808760E-01 -3.611096107980E+00  
115 116 6 3.750176764346E+00 -7.147291808760E-01 3.611096107980E+00  
117 117 1 3.140613974730E+00 -8.234435296010E-01 -4.347397025234E+00  
117 118 1 -3.140613974730E+00 8.234435296010E-01 4.347397025234E+00  
119 119 1 3.515968539343E+00 8.027991129200E-02 -2.881231078351E+00  
119 120 1 -3.515968539343E+00 -8.027991129200E-02 2.881231078351E+00  
121 121 6 -1.373323164907E+00 1.431001969149E+00 -3.455153240673E+00  
121 122 6 1.373323164907E+00 -1.431001969149E+00 3.455153240673E+00  
123 123 1 -1.506225242552E+00 2.206769255089E+00 -2.695066445099E+00  
123 124 1 1.506225242552E+00 -2.206769255089E+00 2.695066445099E+00  
125 125 1 -5.686144933200E-01 1.759817660402E+00 -4.109210867328E+00  
125 126 1 5.686144933200E-01 -1.759817660402E+00 4.109210867328E+00  
127 127 6 -1.018543073415E+00 1.145419923710E-01 -2.751837515216E+00  
127 128 6 1.018543073415E+00 -1.145419923710E-01 2.751837515216E+00  
129 129 6 -6.715163558900E-01 -1.006782629000E+00 -3.751446142492E+00  
129 130 6 6.715163558900E-01 1.006782629000E+00 3.751446142492E+00  
131 131 1 1.840288296530E-01 -7.235760484210E-01 -4.361029577693E+00  
131 132 1 -1.840288296530E-01 7.235760484210E-01 4.361029577693E+00  
133 133 1 -3.909347939600E-01 -1.895421272293E+00 -3.173575360467E+00  
133 134 1 3.909347939600E-01 1.895421272293E+00 3.173575360467E+00  
135 135 6 3.022908821662E+00 -2.386128236431E+00 -2.097289552058E+00  
135 136 6 -3.022908821662E+00 2.386128236431E+00 2.097289552058E+00  
137 137 1 3.228033994603E+00 -3.301038385687E+00 -1.537577650041E+00

137 138 1 -3.228033994603E+00 3.301038385687E+00 1.537577650041E+00  
139 139 1 2.173952665221E+00 -2.576897479680E+00 -2.761720584137E+00  
139 140 1 -2.173952665221E+00 2.576897479680E+00 2.761720584137E+00  
141 141 1 2.716032311229E+00 -1.620258060756E+00 -1.380580425858E+00  
141 142 1 -2.716032311229E+00 1.620258060756E+00 1.380580425858E+00  
143 143 6 1.972448217670E-01 3.604511016760E-01 -1.860356372043E+00  
143 144 6 -1.972448217670E-01 -3.604511016760E-01 1.860356372043E+00  
145 145 1 -6.238144552000E-03 1.141872898167E+00 -1.124032639384E+00  
145 146 1 6.238144552000E-03 -1.141872898167E+00 1.124032639384E+00  
147 147 1 1.055835598931E+00 6.879789338800E-01 -2.455719567496E+00  
147 148 1 -1.055835598931E+00 -6.879789338800E-01 2.455719567496E+00  
149 149 1 4.665226529090E-01 -5.559817558280E-01 -1.330182904597E+00  
149 150 1 -4.665226529090E-01 5.559817558280E-01 1.330182904597E+00  
151 151 6 -2.230397780636E+00 -3.407750191890E-01 -1.932723140536E+00  
151 152 6 2.230397780636E+00 3.407750191890E-01 1.932723140536E+00  
153 153 1 -1.991660706802E+00 -1.249354648243E+00 -1.368263113891E+00  
153 154 1 1.991660706802E+00 1.249354648243E+00 1.368263113891E+00  
155 155 1 -2.497061117568E+00 4.362139897900E-01 -1.204747984513E+00  
155 156 1 2.497061117568E+00 -4.362139897900E-01 1.204747984513E+00  
157 157 8 9.086691845800E-02 -3.231519619737E+00 -9.343940383970E-01  
157 158 8 -9.086691845800E-02 3.231519619737E+00 9.343940383970E-01  
159 159 8 -1.155811412525E+00 -3.381874210019E+00 -2.350476724710E-01  
159 160 8 1.155811412525E+00 3.381874210019E+00 2.350476724710E-01  
161 161 1 2.480150478090E-01 -4.153490552571E+00 -1.245398607414E+00  
161 162 1 -2.480150478090E-01 4.153490552571E+00 1.245398607414E+00  
163 163 1 -8.526875078450E-01 -3.582261117736E+00 6.825970358050E-01  
163 164 1 8.526875078450E-01 3.582261117736E+00 -6.825970358050E-01  
165 165 8 2.787541182944E+00 -4.390649795079E+00 -7.379321671019E+00  
165 166 8 -2.787541182944E+00 4.390649795079E+00 7.379321671019E+00  
167 167 1 -4.058864333372E+00 -2.597819344083E+00 -7.080438519177E+00  
167 168 1 4.058864333372E+00 2.597819344083E+00 7.080438519177E+00  
169 169 8 2.456021370395E+00 -4.849636206017E+00 7.369820107446E+00



169 170 8 -2.456021370395E+00 4.849636206017E+00 -7.369820107446E+00  
171 171 1 2.103609257955E+00 -4.056789070142E+00 6.898910591484E+00  
171 172 1 -2.103609257955E+00 4.056789070142E+00 -6.898910591484E+00

SPACE GROUP N. : 0

NUMBER OF SYMMETRY OPERATORS : 2

\*\*\*\*\*

LATTICE PARAMETERS (ANGSTROMS AND DEGREES) - BOHR = 0.5291772083 ANGSTROM

PRIMITIVE CELL - CENTRING CODE 1/0 VOLUME= 1719.467764 - DENSITY 2.024 g/cm<sup>3</sup>

A B C ALPHA BETA GAMMA

7.78730000 13.90390000 16.13670000 90.586300 92.080300 99.961200

\*\*\*\*\*

ATOMS IN THE ASYMMETRIC UNIT 86 - ATOMS IN THE UNIT CELL: 172

ATOM X/A Y/B Z/C

\*\*\*\*\*

1 T 253 I -4.559644921365E-01 -3.996834878268E-01 -8.846581974721E-02

2 F 253 I 4.559644921365E-01 3.996834878268E-01 8.846581974721E-02

3 T 253 I -4.669154095753E-01 2.768810176190E-01 -1.390602092700E-01

4 F 253 I 4.669154095753E-01 -2.768810176190E-01 1.390602092700E-01

5 T 8 O 6.727153963918E-02 -4.113963476446E-01 -9.285810808888E-02

6 F 8 O -6.727153963918E-02 4.113963476446E-01 9.285810808888E-02

7 T 8 O 3.583269455795E-02 2.947819863952E-01 -1.429187514675E-01

8 F 8 O -3.583269455795E-02 -2.947819863952E-01 1.429187514675E-01

9 T 7 N 1.411847455618E-01 -4.275405414803E-01 -2.262906330874E-01

10 F 7 N -1.411847455618E-01 4.275405414803E-01 2.262906330874E-01

11 T 7 N -7.647118901622E-02 3.875685398767E-01 -2.379901848331E-01

12 F 7 N 7.647118901622E-02 -3.875685398767E-01 2.379901848331E-01

13 T 6 C 1.617118574237E-01 -4.409792491516E-01 -1.444304122387E-01

14 F 6 C -1.617118574237E-01 4.409792491516E-01 1.444304122387E-01

15 T 6 C 3.002132993699E-01 -4.961693700387E-01 -1.128343039665E-01

16 F 6 C -3.002132993699E-01 4.961693700387E-01 1.128343039665E-01

17 T 1 H 3.252289745956E-01 4.449569173818E-01 -1.526074983274E-01

18 F 1 H -3.252289745956E-01 -4.449569173818E-01 1.526074983274E-01  
19 T 1 H 2.614993306793E-01 4.746774089218E-01 -5.289362216861E-02  
20 F 1 H -2.614993306793E-01 -4.746774089218E-01 5.289362216861E-02  
21 T 6 C -7.654899898327E-02 3.444162773505E-01 -1.636186432350E-01  
22 F 6 C 7.654899898327E-02 -3.444162773505E-01 1.636186432350E-01  
23 T 6 C -2.136758248589E-01 3.581756566075E-01 -1.026891124527E-01  
24 F 6 C 2.136758248589E-01 -3.581756566075E-01 1.026891124527E-01  
25 T 1 H -2.302969112127E-01 4.337151924235E-01 -9.492303542983E-02  
26 F 1 H 2.302969112127E-01 -4.337151924235E-01 9.492303542983E-02  
27 T 1 H -1.786052390947E-01 3.293533696169E-01 -4.347926144527E-02  
28 F 1 H 1.786052390947E-01 -3.293533696169E-01 4.347926144527E-02  
29 T 6 C -1.157850949592E-02 -3.895114727550E-01 -2.581071321037E-01  
30 F 6 C 1.157850949592E-02 3.895114727550E-01 2.581071321037E-01  
31 T 1 H 3.250511789870E-02 -3.235711981164E-01 -2.934754277373E-01  
32 F 1 H -3.250511789870E-02 3.235711981164E-01 2.934754277373E-01  
33 T 1 H -8.218369762601E-02 -3.695137976429E-01 -2.054083215933E-01  
34 F 1 H 8.218369762601E-02 3.695137976429E-01 2.054083215933E-01  
35 T 6 C -1.297874997846E-01 -4.644005405357E-01 -3.153100358372E-01  
36 F 6 C 1.297874997846E-01 4.644005405357E-01 3.153100358372E-01  
37 T 6 C -2.082918482727E-01 4.436704761735E-01 -2.680954997308E-01  
38 F 6 C 2.082918482727E-01 -4.436704761735E-01 2.680954997308E-01  
39 T 1 H -2.797383231991E-01 4.648400098396E-01 -2.161603919595E-01  
40 F 1 H 2.797383231991E-01 -4.648400098396E-01 2.161603919595E-01  
41 T 1 H -3.013940101842E-01 3.968128905039E-01 -3.101560531430E-01  
42 F 1 H 3.013940101842E-01 -3.968128905039E-01 3.101560531430E-01  
43 T 6 C 4.959422109319E-02 3.677912888467E-01 -2.985938496691E-01  
44 F 6 C -4.959422109319E-02 -3.677912888467E-01 2.985938496691E-01  
45 T 1 H -1.784937651821E-02 3.118057659500E-01 -3.424035019608E-01  
46 F 1 H 1.784937651821E-02 -3.118057659500E-01 3.424035019608E-01  
47 T 1 H 1.508172913728E-01 3.372440421719E-01 -2.649390845500E-01  
48 F 1 H -1.508172913728E-01 -3.372440421719E-01 2.649390845500E-01  
49 T 6 C 1.281007636682E-01 4.584204701219E-01 -3.470375654037E-01

50 F 6 C -1.281007636682E-01 -4.584204701219E-01 3.470375654037E-01  
51 T 6 C 2.419769543651E-01 -4.642206935383E-01 -2.905143195479E-01  
52 F 6 C -2.419769543651E-01 4.642206935383E-01 2.905143195479E-01  
53 T 1 H 3.514746068589E-01 -4.927874123668E-01 -2.623913429633E-01  
54 F 1 H -3.514746068589E-01 4.927874123668E-01 2.623913429633E-01  
55 T 1 H 2.959392580031E-01 -4.027281206136E-01 -3.291244286487E-01  
56 F 1 H -2.959392580031E-01 4.027281206136E-01 3.291244286487E-01  
57 T 6 C -2.795587352106E-01 -4.171005803462E-01 -3.500934895026E-01  
58 F 6 C 2.795587352106E-01 4.171005803462E-01 3.500934895026E-01  
59 T 1 H -2.296617089222E-01 -3.518845051272E-01 -3.849641345172E-01  
60 F 1 H 2.296617089222E-01 3.518845051272E-01 3.849641345172E-01  
61 T 1 H -3.570931055821E-01 -3.953816686675E-01 -3.001744604019E-01  
62 F 1 H 3.570931055821E-01 3.953816686675E-01 3.001744604019E-01  
63 T 1 H -3.656905848654E-01 -4.676829372148E-01 -3.919233345853E-01  
64 F 1 H 3.656905848654E-01 4.676829372148E-01 3.919233345853E-01  
65 T 6 C 2.407074437473E-01 4.278521276478E-01 -4.147402524303E-01  
66 F 6 C -2.407074437473E-01 -4.278521276478E-01 4.147402524303E-01  
67 T 1 H 1.625762156816E-01 3.744243318767E-01 -4.572206965206E-01  
68 F 1 H -1.625762156816E-01 -3.744243318767E-01 4.572206965206E-01  
69 T 1 H 3.479986273609E-01 3.942174503552E-01 -3.895200251617E-01  
70 F 1 H -3.479986273609E-01 -3.942174503552E-01 3.895200251617E-01  
71 T 1 H 2.959849488689E-01 4.913577790689E-01 -4.505459737264E-01  
72 F 1 H -2.959849488689E-01 -4.913577790689E-01 4.505459737264E-01  
73 T 6 C -2.109843327042E-02 -4.954067924110E-01 -3.847699469417E-01  
74 F 6 C 2.109843327042E-02 4.954067924110E-01 3.847699469417E-01  
75 T 1 H 3.279349504091E-02 -4.319725028924E-01 -4.211793593012E-01  
76 F 1 H -3.279349504091E-02 4.319725028924E-01 4.211793593012E-01  
77 T 1 H -1.045017026215E-01 4.519610029852E-01 -4.262297955163E-01  
78 F 1 H 1.045017026215E-01 -4.519610029852E-01 4.262297955163E-01  
79 T 253 I 7.596242807139E-02 -1.622123772703E-01 -4.303105545517E-01  
80 F 253 I -7.596242807139E-02 1.622123772703E-01 4.303105545517E-01  
81 T 253 I 2.565793726338E-01 1.534690561217E-01 -3.491262314592E-01

82 F 253 I -2.565793726338E-01 -1.534690561217E-01 3.491262314592E-01  
83 T 8 O -4.084167493013E-01 -1.477008320865E-01 -4.096714225300E-01  
84 F 8 O 4.084167493013E-01 1.477008320865E-01 4.096714225300E-01  
85 T 8 O -2.528928122827E-01 1.683509046853E-01 -3.602479171120E-01  
86 F 8 O 2.528928122827E-01 -1.683509046853E-01 3.602479171120E-01  
87 T 7 N -2.587273316645E-01 -1.260116965783E-01 -2.857768168112E-01  
88 F 7 N 2.587273316645E-01 1.260116965783E-01 2.857768168112E-01  
89 T 7 N -3.596480955828E-01 5.826784463823E-02 -2.642790731413E-01  
90 F 7 N 3.596480955828E-01 -5.826784463823E-02 2.642790731413E-01  
91 T 6 C -2.708083900566E-01 -1.182436469357E-01 -3.686235974958E-01  
92 F 6 C 2.708083900566E-01 1.182436469357E-01 3.686235974958E-01  
93 T 6 C -1.148500862851E-01 -6.944673599512E-02 -4.144298589404E-01  
94 F 6 C 1.148500862851E-01 6.944673599512E-02 4.144298589404E-01  
95 T 1 H -4.737329674844E-02 -1.712955799310E-03 -3.857216606544E-01  
96 F 1 H 4.737329674844E-02 1.712955799310E-03 3.857216606544E-01  
97 T 1 H -1.609155583174E-01 -5.583483539760E-02 -4.767261271941E-01  
98 F 1 H 1.609155583174E-01 5.583483539760E-02 4.767261271941E-01  
99 T 6 C -3.739719973205E-01 1.064670105522E-01 -3.355243742774E-01  
100 F 6 C 3.739719973205E-01 -1.064670105522E-01 3.355243742774E-01  
101 T 6 C 4.614521051391E-01 8.083412866517E-02 -3.894890412183E-01  
102 F 6 C -4.614521051391E-01 -8.083412866517E-02 3.894890412183E-01  
103 T 1 H 4.083853950350E-01 3.189569699247E-03 -3.922604304421E-01  
104 F 1 H -4.083853950350E-01 -3.189569699247E-03 3.922604304421E-01  
105 T 1 H 4.870387377006E-01 1.080361696798E-01 -4.514837010608E-01  
106 F 1 H -4.870387377006E-01 -1.080361696798E-01 4.514837010608E-01  
107 T 6 C -4.138702410654E-01 -1.648576775250E-01 -2.403829500045E-01  
108 F 6 C 4.138702410654E-01 1.648576775250E-01 2.403829500045E-01  
109 T 1 H -3.896635536267E-01 -2.292673547073E-01 -2.064859912060E-01  
110 F 1 H 3.896635536267E-01 2.292673547073E-01 2.064859912060E-01  
111 T 1 H 4.788043729536E-01 -1.874958209716E-01 -2.854219255300E-01  
112 F 1 H -4.788043729536E-01 1.874958209716E-01 2.854219255300E-01  
113 T 6 C -4.593761015820E-01 -8.921642712687E-02 -1.783884783222E-01

114 F 6 C 4.593761015820E-01 8.921642712687E-02 1.783884783222E-01  
115 T 6 C 4.928403351462E-01 -3.901409813875E-04 -2.239606732543E-01  
116 F 6 C -4.928403351462E-01 3.901409813875E-04 2.239606732543E-01  
117 T 1 H 3.875457707328E-01 -2.487924402730E-02 -2.696261565910E-01  
118 F 1 H -3.875457707328E-01 2.487924402730E-02 2.696261565910E-01  
119 T 1 H 4.438791008270E-01 4.665625754285E-02 -1.786943445462E-01  
120 F 1 H -4.438791008270E-01 -4.665625754285E-02 1.786943445462E-01  
121 T 6 C -1.964797645982E-01 8.134039871531E-02 -2.142890753497E-01  
122 F 6 C 1.964797645982E-01 -8.134039871531E-02 2.142890753497E-01  
123 T 1 H -2.099739350335E-01 1.363878189988E-01 -1.671483885947E-01  
124 F 1 H 2.099739350335E-01 -1.363878189988E-01 1.671483885947E-01  
125 T 1 H -9.486090496965E-02 1.143530026171E-01 -2.548538185835E-01  
126 F 1 H 9.486090496965E-02 -1.143530026171E-01 2.548538185835E-01  
127 T 6 C -1.466764237972E-01 -7.999245461983E-03 -1.706693381083E-01  
128 F 6 C 1.466764237972E-01 7.999245461983E-03 1.706693381083E-01  
129 T 6 C -1.064728008623E-01 -8.548864960624E-02 -2.326652015418E-01  
130 F 6 C 1.064728008623E-01 8.548864960624E-02 2.326652015418E-01  
131 T 1 H 1.998415872559E-03 -5.505971947712E-02 -2.704716493543E-01  
132 F 1 H -1.998415872559E-03 5.505971947712E-02 2.704716493543E-01  
133 T 1 H -6.697613155239E-02 -1.451493551081E-01 -1.968255768056E-01  
134 F 1 H 6.697613155239E-02 1.451493551081E-01 1.968255768056E-01  
135 T 6 C 3.835480090850E-01 -1.360010764842E-01 -1.300741841377E-01  
136 F 6 C -3.835480090850E-01 1.360010764842E-01 1.300741841377E-01  
137 T 1 H 4.131151134693E-01 -1.985266728960E-01 -9.536077561685E-02  
138 F 1 H -4.131151134693E-01 1.985266728960E-01 9.536077561685E-02  
139 T 1 H 2.695102736740E-01 -1.612593785290E-01 -1.712822873910E-01  
140 F 1 H -2.695102736740E-01 1.612593785290E-01 1.712822873910E-01  
141 T 1 H 3.471523306167E-01 -8.391620394973E-02 -8.562378635496E-02  
142 F 1 H -3.471523306167E-01 8.391620394973E-02 8.562378635496E-02  
143 T 6 C 1.633385840100E-02 2.613669955659E-02 -1.153795559899E-01  
144 F 6 C -1.633385840100E-02 -2.613669955659E-02 1.153795559899E-01  
145 T 1 H -6.482475979558E-03 8.067013970977E-02 -6.971265763876E-02

146 F 1 H 6.482475979558E-03 -8.067013970977E-02 6.971265763876E-02  
147 T 1 H 1.252738792883E-01 5.980920775821E-02 -1.523040625933E-01  
148 F 1 H -1.252738792883E-01 -5.980920775821E-02 1.523040625933E-01  
149 T 1 H 5.411618578101E-02 -3.572425137729E-02 -8.249812521096E-02  
150 F 1 H -5.411618578101E-02 3.572425137729E-02 8.249812521096E-02  
151 T 6 C -3.005463725869E-01 -5.505080097436E-02 -1.198677528444E-01  
152 F 6 C 3.005463725869E-01 5.505080097436E-02 1.198677528444E-01  
153 T 1 H -2.665730120809E-01 -1.166907018322E-01 -8.485986498640E-02  
154 F 1 H 2.665730120809E-01 1.166907018322E-01 8.485986498640E-02  
155 T 1 H -3.316422496064E-01 -1.644476122082E-03 -7.471863435511E-02  
156 F 1 H 3.316422496064E-01 1.644476122082E-03 7.471863435511E-02  
157 T 8 O 7.134507661458E-03 -2.324152249776E-01 -5.795124573444E-02  
158 F 8 O -7.134507661458E-03 2.324152249776E-01 5.795124573444E-02  
159 T 8 O -1.518797932870E-01 -2.581198089664E-01 -1.457768871261E-02  
160 F 8 O 1.518797932870E-01 2.581198089664E-01 1.457768871261E-02  
161 T 1 H 2.605485255595E-02 -2.971214666088E-01 -7.723979153312E-02  
162 F 1 H -2.605485255595E-02 2.971214666088E-01 7.723979153312E-02  
163 T 1 H -1.077303837081E-01 -2.675788571089E-01 4.233476128272E-02  
164 F 1 H 1.077303837081E-01 2.675788571089E-01 -4.233476128272E-02  
165 T 8 O 3.262205012984E-01 -2.896153577790E-01 -4.576665367475E-01  
166 F 8 O -3.262205012984E-01 2.896153577790E-01 4.576665367475E-01  
167 T 1 H 4.350958448710E-01 -2.467859536559E-01 -4.391297628957E-01  
168 F 1 H -4.350958448710E-01 2.467859536559E-01 4.391297628957E-01  
169 T 8 O 3.573855364720E-01 -3.087438900970E-01 4.570772484785E-01  
170 F 8 O -3.573855364720E-01 3.087438900970E-01 -4.570772484785E-01  
171 T 1 H 3.090630913532E-01 -2.567490158795E-01 4.278713760555E-01  
172 F 1 H -3.090630913532E-01 2.567490158795E-01 -4.278713760555E-01

T = ATOM BELONGING TO THE ASYMMETRIC UNIT

\*\*\*\*\*

\* GEOMETRY EDITING - INPUT COORDINATES ARE GIVEN IN ANGSTROM

\*\*\*\*\*



8 F 8 O -3.583269455795E-02 -2.947819863952E-01 1.429187514675E-01  
9 T 7 N 1.411847455618E-01 -4.275405414803E-01 -2.262906330874E-01  
10 F 7 N -1.411847455618E-01 4.275405414803E-01 2.262906330874E-01  
11 T 7 N -7.647118901622E-02 3.875685398767E-01 -2.379901848331E-01  
12 F 7 N 7.647118901622E-02 -3.875685398767E-01 2.379901848331E-01  
13 T 6 C 1.617118574237E-01 -4.409792491516E-01 -1.444304122387E-01  
14 F 6 C -1.617118574237E-01 4.409792491516E-01 1.444304122387E-01  
15 T 6 C 3.002132993699E-01 -4.961693700387E-01 -1.128343039665E-01  
16 F 6 C -3.002132993699E-01 4.961693700387E-01 1.128343039665E-01  
17 T 1 H 3.252289745956E-01 4.449569173818E-01 -1.526074983274E-01  
18 F 1 H -3.252289745956E-01 -4.449569173818E-01 1.526074983274E-01  
19 T 1 H 2.614993306793E-01 4.746774089218E-01 -5.289362216861E-02  
20 F 1 H -2.614993306793E-01 -4.746774089218E-01 5.289362216861E-02  
21 T 6 C -7.654899898327E-02 3.444162773505E-01 -1.636186432350E-01  
22 F 6 C 7.654899898327E-02 -3.444162773505E-01 1.636186432350E-01  
23 T 6 C -2.136758248589E-01 3.581756566075E-01 -1.026891124527E-01  
24 F 6 C 2.136758248589E-01 -3.581756566075E-01 1.026891124527E-01  
25 T 1 H -2.302969112127E-01 4.337151924235E-01 -9.492303542983E-02  
26 F 1 H 2.302969112127E-01 -4.337151924235E-01 9.492303542983E-02  
27 T 1 H -1.786052390947E-01 3.293533696169E-01 -4.347926144527E-02  
28 F 1 H 1.786052390947E-01 -3.293533696169E-01 4.347926144527E-02  
29 T 6 C -1.157850949592E-02 -3.895114727550E-01 -2.581071321037E-01  
30 F 6 C 1.157850949592E-02 3.895114727550E-01 2.581071321037E-01  
31 T 1 H 3.250511789870E-02 -3.235711981164E-01 -2.934754277373E-01  
32 F 1 H -3.250511789870E-02 3.235711981164E-01 2.934754277373E-01  
33 T 1 H -8.218369762601E-02 -3.695137976429E-01 -2.054083215933E-01  
34 F 1 H 8.218369762601E-02 3.695137976429E-01 2.054083215933E-01  
35 T 6 C -1.297874997846E-01 -4.644005405357E-01 -3.153100358372E-01  
36 F 6 C 1.297874997846E-01 4.644005405357E-01 3.153100358372E-01  
37 T 6 C -2.082918482727E-01 4.436704761735E-01 -2.680954997308E-01  
38 F 6 C 2.082918482727E-01 -4.436704761735E-01 2.680954997308E-01  
39 T 1 H -2.797383231991E-01 4.648400098396E-01 -2.161603919595E-01



40 F 1 H 2.797383231991E-01 -4.648400098396E-01 2.161603919595E-01  
41 T 1 H -3.013940101842E-01 3.968128905039E-01 -3.101560531430E-01  
42 F 1 H 3.013940101842E-01 -3.968128905039E-01 3.101560531430E-01  
43 T 6 C 4.959422109319E-02 3.677912888467E-01 -2.985938496691E-01  
44 F 6 C -4.959422109319E-02 -3.677912888467E-01 2.985938496691E-01  
45 T 1 H -1.784937651821E-02 3.118057659500E-01 -3.424035019608E-01  
46 F 1 H 1.784937651821E-02 -3.118057659500E-01 3.424035019608E-01  
47 T 1 H 1.508172913728E-01 3.372440421719E-01 -2.649390845500E-01  
48 F 1 H -1.508172913728E-01 -3.372440421719E-01 2.649390845500E-01  
49 T 6 C 1.281007636682E-01 4.584204701219E-01 -3.470375654037E-01  
50 F 6 C -1.281007636682E-01 -4.584204701219E-01 3.470375654037E-01  
51 T 6 C 2.419769543651E-01 -4.642206935383E-01 -2.905143195479E-01  
52 F 6 C -2.419769543651E-01 4.642206935383E-01 2.905143195479E-01  
53 T 1 H 3.514746068589E-01 -4.927874123668E-01 -2.623913429633E-01  
54 F 1 H -3.514746068589E-01 4.927874123668E-01 2.623913429633E-01  
55 T 1 H 2.959392580031E-01 -4.027281206136E-01 -3.291244286487E-01  
56 F 1 H -2.959392580031E-01 4.027281206136E-01 3.291244286487E-01  
57 T 6 C -2.795587352106E-01 -4.171005803462E-01 -3.500934895026E-01  
58 F 6 C 2.795587352106E-01 4.171005803462E-01 3.500934895026E-01  
59 T 1 H -2.296617089222E-01 -3.518845051272E-01 -3.849641345172E-01  
60 F 1 H 2.296617089222E-01 3.518845051272E-01 3.849641345172E-01  
61 T 1 H -3.570931055821E-01 -3.953816686675E-01 -3.001744604019E-01  
62 F 1 H 3.570931055821E-01 3.953816686675E-01 3.001744604019E-01  
63 T 1 H -3.656905848654E-01 -4.676829372148E-01 -3.919233345853E-01  
64 F 1 H 3.656905848654E-01 4.676829372148E-01 3.919233345853E-01  
65 T 6 C 2.407074437473E-01 4.278521276478E-01 -4.147402524303E-01  
66 F 6 C -2.407074437473E-01 -4.278521276478E-01 4.147402524303E-01  
67 T 1 H 1.625762156816E-01 3.744243318767E-01 -4.572206965206E-01  
68 F 1 H -1.625762156816E-01 -3.744243318767E-01 4.572206965206E-01  
69 T 1 H 3.479986273609E-01 3.942174503552E-01 -3.895200251617E-01  
70 F 1 H -3.479986273609E-01 -3.942174503552E-01 3.895200251617E-01  
71 T 1 H 2.959849488689E-01 4.913577790689E-01 -4.505459737264E-01

72 F 1 H -2.959849488689E-01 -4.913577790689E-01 4.505459737264E-01  
73 T 6 C -2.109843327042E-02 -4.954067924110E-01 -3.847699469417E-01  
74 F 6 C 2.109843327042E-02 4.954067924110E-01 3.847699469417E-01  
75 T 1 H 3.279349504091E-02 -4.319725028924E-01 -4.211793593012E-01  
76 F 1 H -3.279349504091E-02 4.319725028924E-01 4.211793593012E-01  
77 T 1 H -1.045017026215E-01 4.519610029852E-01 -4.262297955163E-01  
78 F 1 H 1.045017026215E-01 -4.519610029852E-01 4.262297955163E-01  
79 T 253 I 7.596242807139E-02 -1.622123772703E-01 -4.303105545517E-01  
80 F 253 I -7.596242807139E-02 1.622123772703E-01 4.303105545517E-01  
81 T 253 I 2.565793726338E-01 1.534690561217E-01 -3.491262314592E-01  
82 F 253 I -2.565793726338E-01 -1.534690561217E-01 3.491262314592E-01  
83 T 8 O -4.084167493013E-01 -1.477008320865E-01 -4.096714225300E-01  
84 F 8 O 4.084167493013E-01 1.477008320865E-01 4.096714225300E-01  
85 T 8 O -2.528928122827E-01 1.683509046853E-01 -3.602479171120E-01  
86 F 8 O 2.528928122827E-01 -1.683509046853E-01 3.602479171120E-01  
87 T 7 N -2.587273316645E-01 -1.260116965783E-01 -2.857768168112E-01  
88 F 7 N 2.587273316645E-01 1.260116965783E-01 2.857768168112E-01  
89 T 7 N -3.596480955828E-01 5.826784463823E-02 -2.642790731413E-01  
90 F 7 N 3.596480955828E-01 -5.826784463823E-02 2.642790731413E-01  
91 T 6 C -2.708083900566E-01 -1.182436469357E-01 -3.686235974958E-01  
92 F 6 C 2.708083900566E-01 1.182436469357E-01 3.686235974958E-01  
93 T 6 C -1.148500862851E-01 -6.944673599512E-02 -4.144298589404E-01  
94 F 6 C 1.148500862851E-01 6.944673599512E-02 4.144298589404E-01  
95 T 1 H -4.737329674844E-02 -1.712955799310E-03 -3.857216606544E-01  
96 F 1 H 4.737329674844E-02 1.712955799310E-03 3.857216606544E-01  
97 T 1 H -1.609155583174E-01 -5.583483539760E-02 -4.767261271941E-01  
98 F 1 H 1.609155583174E-01 5.583483539760E-02 4.767261271941E-01  
99 T 6 C -3.739719973205E-01 1.064670105522E-01 -3.355243742774E-01  
100 F 6 C 3.739719973205E-01 -1.064670105522E-01 3.355243742774E-01  
101 T 6 C 4.614521051391E-01 8.083412866517E-02 -3.894890412183E-01  
102 F 6 C -4.614521051391E-01 -8.083412866517E-02 3.894890412183E-01  
103 T 1 H 4.083853950350E-01 3.189569699247E-03 -3.922604304421E-01

104 F 1 H -4.083853950350E-01 -3.189569699247E-03 3.922604304421E-01  
105 T 1 H 4.870387377006E-01 1.080361696798E-01 -4.514837010608E-01  
106 F 1 H -4.870387377006E-01 -1.080361696798E-01 4.514837010608E-01  
107 T 6 C -4.138702410654E-01 -1.648576775250E-01 -2.403829500045E-01  
108 F 6 C 4.138702410654E-01 1.648576775250E-01 2.403829500045E-01  
109 T 1 H -3.896635536267E-01 -2.292673547073E-01 -2.064859912060E-01  
110 F 1 H 3.896635536267E-01 2.292673547073E-01 2.064859912060E-01  
111 T 1 H 4.788043729536E-01 -1.874958209716E-01 -2.854219255300E-01  
112 F 1 H -4.788043729536E-01 1.874958209716E-01 2.854219255300E-01  
113 T 6 C -4.593761015820E-01 -8.921642712687E-02 -1.783884783222E-01  
114 F 6 C 4.593761015820E-01 8.921642712687E-02 1.783884783222E-01  
115 T 6 C 4.928403351462E-01 -3.901409813875E-04 -2.239606732543E-01  
116 F 6 C -4.928403351462E-01 3.901409813874E-04 2.239606732543E-01  
117 T 1 H 3.875457707328E-01 -2.487924402730E-02 -2.696261565910E-01  
118 F 1 H -3.875457707328E-01 2.487924402730E-02 2.696261565910E-01  
119 T 1 H 4.438791008270E-01 4.665625754285E-02 -1.786943445462E-01  
120 F 1 H -4.438791008270E-01 -4.665625754285E-02 1.786943445462E-01  
121 T 6 C -1.964797645982E-01 8.134039871531E-02 -2.142890753497E-01  
122 F 6 C 1.964797645982E-01 -8.134039871531E-02 2.142890753497E-01  
123 T 1 H -2.099739350335E-01 1.363878189988E-01 -1.671483885947E-01  
124 F 1 H 2.099739350335E-01 -1.363878189988E-01 1.671483885947E-01  
125 T 1 H -9.486090496965E-02 1.143530026171E-01 -2.548538185835E-01  
126 F 1 H 9.486090496965E-02 -1.143530026171E-01 2.548538185835E-01  
127 T 6 C -1.466764237972E-01 -7.999245461983E-03 -1.706693381083E-01  
128 F 6 C 1.466764237972E-01 7.999245461983E-03 1.706693381083E-01  
129 T 6 C -1.064728008623E-01 -8.548864960624E-02 -2.326652015418E-01  
130 F 6 C 1.064728008623E-01 8.548864960624E-02 2.326652015418E-01  
131 T 1 H 1.998415872559E-03 -5.505971947712E-02 -2.704716493543E-01  
132 F 1 H -1.998415872559E-03 5.505971947712E-02 2.704716493543E-01  
133 T 1 H -6.697613155239E-02 -1.451493551081E-01 -1.968255768056E-01  
134 F 1 H 6.697613155239E-02 1.451493551081E-01 1.968255768056E-01  
135 T 6 C 3.835480090850E-01 -1.360010764842E-01 -1.300741841377E-01

136 F 6 C -3.835480090850E-01 1.360010764842E-01 1.300741841377E-01  
137 T 1 H 4.131151134693E-01 -1.985266728960E-01 -9.536077561685E-02  
138 F 1 H -4.131151134693E-01 1.985266728960E-01 9.536077561685E-02  
139 T 1 H 2.695102736740E-01 -1.612593785290E-01 -1.712822873910E-01  
140 F 1 H -2.695102736740E-01 1.612593785290E-01 1.712822873910E-01  
141 T 1 H 3.471523306167E-01 -8.391620394973E-02 -8.562378635496E-02  
142 F 1 H -3.471523306167E-01 8.391620394973E-02 8.562378635496E-02  
143 T 6 C 1.633385840100E-02 2.613669955659E-02 -1.153795559899E-01  
144 F 6 C -1.633385840100E-02 -2.613669955659E-02 1.153795559899E-01  
145 T 1 H -6.482475979558E-03 8.067013970977E-02 -6.971265763876E-02  
146 F 1 H 6.482475979558E-03 -8.067013970977E-02 6.971265763876E-02  
147 T 1 H 1.252738792883E-01 5.980920775821E-02 -1.523040625933E-01  
148 F 1 H -1.252738792883E-01 -5.980920775821E-02 1.523040625933E-01  
149 T 1 H 5.411618578101E-02 -3.572425137729E-02 -8.249812521096E-02  
150 F 1 H -5.411618578101E-02 3.572425137729E-02 8.249812521096E-02  
151 T 6 C -3.005463725869E-01 -5.505080097436E-02 -1.198677528444E-01  
152 F 6 C 3.005463725869E-01 5.505080097436E-02 1.198677528444E-01  
153 T 1 H -2.665730120809E-01 -1.166907018322E-01 -8.485986498640E-02  
154 F 1 H 2.665730120809E-01 1.166907018322E-01 8.485986498640E-02  
155 T 1 H -3.316422496064E-01 -1.644476122082E-03 -7.471863435511E-02  
156 F 1 H 3.316422496064E-01 1.644476122082E-03 7.471863435511E-02  
157 T 8 O 7.134507661458E-03 -2.324152249776E-01 -5.795124573444E-02  
158 F 8 O -7.134507661458E-03 2.324152249776E-01 5.795124573444E-02  
159 T 8 O -1.518797932870E-01 -2.581198089664E-01 -1.457768871261E-02  
160 F 8 O 1.518797932870E-01 2.581198089664E-01 1.457768871261E-02  
161 T 1 H 2.605485255595E-02 -2.971214666088E-01 -7.723979153312E-02  
162 F 1 H -2.605485255595E-02 2.971214666088E-01 7.723979153312E-02  
163 T 1 H -1.077303837081E-01 -2.675788571089E-01 4.233476128272E-02  
164 F 1 H 1.077303837081E-01 2.675788571089E-01 -4.233476128272E-02  
165 T 8 O 3.262205012984E-01 -2.896153577790E-01 -4.576665367475E-01  
166 F 8 O -3.262205012984E-01 2.896153577790E-01 4.576665367475E-01  
167 T 1 H 4.350958448710E-01 -2.467859536559E-01 -4.391297628957E-01

168 F 1 H -4.350958448710E-01 2.467859536559E-01 4.391297628957E-01  
169 T 8 O 3.573855364720E-01 -3.087438900970E-01 4.570772484785E-01  
170 F 8 O -3.573855364720E-01 3.087438900970E-01 -4.570772484785E-01  
171 T 1 H 3.090630913532E-01 -2.567490158795E-01 4.278713760555E-01  
172 F 1 H -3.090630913532E-01 2.567490158795E-01 -4.278713760555E-01

T = ATOM BELONGING TO THE ASYMMETRIC UNIT

\*\*\*\* 2 SYMMOPS - TRANSLATORS IN FRACTIONAL UNITS

\*\*\*\* MATRICES AND TRANSLATORS IN THE CRYSTALLOGRAPHIC REFERENCE FRAME

| V INV | ROTATION MATRICES |       |      |      |      |       | TRANSLATORS |      |      |       |      |      |      |
|-------|-------------------|-------|------|------|------|-------|-------------|------|------|-------|------|------|------|
| 1     | 1                 | 1.00  | 0.00 | 0.00 | 0.00 | 1.00  | 0.00        | 0.00 | 0.00 | 1.00  | 0.00 | 0.00 | 0.00 |
| 2     | 2                 | -1.00 | 0.00 | 0.00 | 0.00 | -1.00 | 0.00        | 0.00 | 0.00 | -1.00 | 0.00 | 0.00 | 0.00 |

DIRECT LATTICE VECTORS CARTESIAN COMPONENTS (ANGSTROM)

|  | X                   | Y                   | Z                  |
|--|---------------------|---------------------|--------------------|
|  | 0.766990738397E+01  | -0.134705679589E+01 | 0.000000000000E+00 |
|  | 0.000000000000E+00  | 0.139039000000E+02  | 0.000000000000E+00 |
|  | -0.623729567955E+00 | -0.165121797444E+00 | 0.161237955553E+02 |

CARTESIAN COORDINATES - PRIMITIVE CELL

\*\*\*\*\*

\* ATOM X(ANGSTROM) Y(ANGSTROM) Z(ANGSTROM)

\*\*\*\*\*

|   |       |                     |                     |                     |
|---|-------|---------------------|---------------------|---------------------|
| 1 | 253 I | -3.442026677536E+00 | -4.928341543409E+00 | -1.426404791236E+00 |
| 2 | 253 I | 3.442026677536E+00  | 4.928341543409E+00  | 1.426404791236E+00  |
| 3 | 253 I | 4.175445400627E+00  | 3.154592632265E+00  | -2.242178384147E+00 |
| 4 | 253 I | -4.175445400627E+00 | -3.154592632265E+00 | 2.242178384147E+00  |
| 5 | 8 O   | 5.738848262490E-01  | -5.795299364942E+00 | -1.497225150477E+00 |
| 6 | 8 O   | -5.738848262490E-01 | 5.795299364942E+00  | 1.497225150477E+00  |
| 7 | 8 O   | 3.639760996830E-01  | 4.073949587051E+00  | -2.304392729680E+00 |

8 8 O -3.639760996830E-01 -4.073949587051E+00 2.304392729680E+00  
9 7 N 1.224018081296E+00 -6.097299289593E+00 -3.648663903981E+00  
10 7 N -1.224018081296E+00 6.097299289593E+00 3.648663903981E+00  
11 7 N -4.380854221330E-01 5.531022623540E+00 -3.837305084417E+00  
12 7 N 4.380854221330E-01 -5.531022623540E+00 3.837305084417E+00  
13 6 C 1.330400487955E+00 -6.325317829523E+00 -2.328766438904E+00  
14 6 C -1.330400487955E+00 6.325317829523E+00 2.328766438904E+00  
15 6 C 2.372986293267E+00 6.619437733871E+00 -1.819317248780E+00  
16 6 C -2.372986293267E+00 -6.619437733871E+00 1.819317248780E+00  
17 1 H 2.589661922730E+00 5.773733407563E+00 -2.460612103237E+00  
18 1 H -2.589661922730E+00 -5.773733407563E+00 2.460612103237E+00  
19 1 H 2.038666963383E+00 6.256346665361E+00 -8.528459500260E-01  
20 1 H -2.038666963383E+00 -6.256346665361E+00 8.528459500260E-01  
21 6 C -4.850699468830E-01 4.918862332419E+00 -2.638153552556E+00  
22 6 C 4.850699468830E-01 -4.918862332419E+00 2.638153552556E+00  
23 6 C -1.574823551117E+00 5.284828194725E+00 -1.655738254942E+00  
24 6 C 1.574823551117E+00 -5.284828194725E+00 1.655738254942E+00  
25 1 H -1.707149675938E+00 6.356229545487E+00 -1.530519616759E+00  
26 1 H 1.707149675938E+00 -6.356229545487E+00 1.530519616759E+00  
27 1 H -1.342766341192E+00 4.827067090722E+00 -7.010507224390E-01  
28 1 H 1.342766341192E+00 -4.827067090722E+00 7.010507224390E-01  
29 6 C 7.218295451500E-02 -5.357512542549E+00 -4.161666629405E+00  
30 6 C -7.218295451500E-02 5.357512542549E+00 4.161666629405E+00  
31 1 H 4.323605455360E-01 -4.494228631323E+00 -4.731937797340E+00  
32 1 H -4.323605455360E-01 4.494228631323E+00 4.731937797340E+00  
33 1 H -5.022221055820E-01 -4.993059391377E+00 -3.311961782727E+00  
34 1 H 5.022221055820E-01 4.993059391377E+00 3.311961782727E+00  
35 6 C -7.987899105200E-01 -6.230082982079E+00 -5.083994554374E+00  
36 6 C 7.987899105200E-01 6.230082982079E+00 5.083994554374E+00  
37 6 C -1.430360094870E+00 6.493599294215E+00 -4.322717026956E+00  
38 6 C 1.430360094870E+00 -6.493599294215E+00 4.322717026956E+00  
39 1 H -2.010741402798E+00 -7.028294785398E+00 -3.485325967109E+00

40 1 H 2.010741402798E+00 7.028294785398E+00 3.485325967109E+00  
41 1 H -2.118210643171E+00 5.974455122920E+00 -5.000892791116E+00  
42 1 H 2.118210643171E+00 -5.974455122920E+00 5.000892791116E+00  
43 6 C 5.666248954130E-01 5.096231421598E+00 -4.814466186134E+00  
44 6 C -5.666248954130E-01 -5.096231421598E+00 4.814466186134E+00  
45 1 H 7.666412358800E-02 4.415898594829E+00 -5.520844063034E+00  
46 1 H -7.666412358800E-02 -4.415898594829E+00 5.520844063034E+00  
47 1 H 1.322004997471E+00 4.529595198526E+00 -4.271823633892E+00  
48 1 H -1.322004997471E+00 -4.529595198526E+00 4.271823633892E+00  
49 6 C 1.198978583884E+00 6.258576836850E+00 -5.595562754578E+00  
50 6 C -1.198978583884E+00 -6.258576836850E+00 5.595562754578E+00  
51 6 C 2.037143200052E+00 -6.732464555087E+00 -4.684193494278E+00  
52 6 C -2.037143200052E+00 6.732464555087E+00 4.684193494278E+00  
53 1 H 2.859438921407E+00 6.622103369625E+00 -4.230744369421E+00  
54 1 H -2.859438921407E+00 -6.622103369625E+00 4.230744369421E+00  
55 1 H 2.475111337849E+00 -5.943792887622E+00 -5.306734999786E+00  
56 1 H -2.475111337849E+00 5.943792887622E+00 5.306734999786E+00  
57 6 C -1.925825946494E+00 -5.364935198700E+00 -5.644835849982E+00  
58 6 C 1.925825946494E+00 5.364935198700E+00 5.644835849982E+00  
59 1 H -1.521370523777E+00 -4.519633635236E+00 -6.207083001079E+00  
60 1 H 1.521370523777E+00 4.519633635236E+00 6.207083001079E+00  
61 1 H -2.551643360771E+00 -4.966757141898E+00 -4.839951630442E+00  
62 1 H 2.551643360771E+00 4.966757141898E+00 4.839951630442E+00  
63 1 H -2.560358744955E+00 -5.945295717738E+00 -6.319291720205E+00  
64 1 H 2.560358744955E+00 5.945295717738E+00 6.319291720205E+00  
65 6 C 2.104889558636E+00 5.693049255635E+00 -6.687187038740E+00  
66 6 C -2.104889558636E+00 -5.693049255635E+00 6.687187038740E+00  
67 1 H 1.532126584615E+00 5.062456175034E+00 -7.372133034350E+00  
68 1 H -1.532126584615E+00 -5.062456175034E+00 7.372133034350E+00  
69 1 H 2.912072398611E+00 5.076704338742E+00 -6.280541250402E+00  
70 1 H -2.912072398611E+00 -5.076704338742E+00 6.280541250402E+00  
71 1 H 2.551195990410E+00 6.507475848554E+00 -7.264511168628E+00

72 1 H -2.551195990410E+00 -6.507475848554E+00 7.264511168628E+00  
73 6 C 7.816936363700E-02 -6.796131807842E+00 -6.203951960311E+00  
74 6 C -7.816936363700E-02 6.796131807842E+00 6.203951960311E+00  
75 1 H 5.142250895690E-01 -5.980731290468E+00 -6.791009881485E+00  
76 1 H -5.142250895690E-01 5.980731290468E+00 6.791009881485E+00  
77 1 H -5.356662543670E-01 6.495170148064E+00 -6.872442082482E+00  
78 1 H 5.356662543670E-01 -6.495170148064E+00 6.872442082482E+00  
79 253 I 8.510222042460E-01 -2.286656725067E+00 -6.938239406879E+00  
80 253 I -8.510222042460E-01 2.286656725067E+00 6.938239406879E+00  
81 253 I 2.185700378248E+00 1.845839772692E+00 -5.629239979040E+00  
82 253 I -2.185700378248E+00 -1.845839772692E+00 5.629239979040E+00  
83 8 O -2.876994461825E+00 -1.435811359896E+00 -6.605458261723E+00  
84 8 O 2.876994461825E+00 1.435811359896E+00 6.605458261723E+00  
85 8 O -1.714967170583E+00 2.740879908670E+00 -5.808563764736E+00  
86 8 O 1.714967170583E+00 -2.740879908670E+00 5.808563764736E+00  
87 7 N -1.806167221087E+00 -1.356345635994E+00 -4.607806968708E+00  
88 7 N 1.806167221087E+00 1.356345635994E+00 4.607806968708E+00  
89 7 N -2.593628911831E+00 1.338254931933E+00 -4.261181744874E+00  
90 7 N 2.593628911831E+00 -1.338254931933E+00 4.261181744874E+00  
91 6 C -1.847153833332E+00 -1.218385769421E+00 -5.943611522882E+00  
92 6 C 1.847153833332E+00 1.218385769421E+00 5.943611522882E+00  
93 6 C -6.223973679830E-01 -7.424394801410E-01 -6.682182317567E+00  
94 6 C 6.223973679830E-01 7.424394801410E-01 6.682182317567E+00  
95 1 H -1.227627937830E-01 1.036888091110E-01 -6.219297197642E+00  
96 1 H 1.227627937830E-01 -1.036888091110E-01 6.219297197642E+00  
97 1 H -9.368592475870E-01 -4.808416964780E-01 -7.686634610747E+00  
98 1 H 9.368592475870E-01 4.808416964780E-01 7.686634610747E+00  
99 6 C -2.659054110640E+00 2.039470576247E+00 -5.409926414669E+00  
100 6 C 2.659054110640E+00 -2.039470576247E+00 5.409926414669E+00  
101 6 C 3.782230739957E+00 5.666205779130E-01 -6.280041671633E+00  
102 6 C -3.782230739957E+00 -5.666205779130E-01 6.280041671633E+00  
103 1 H 3.376942585690E+00 -4.410001162420E-01 -6.324726984883E+00



104 1 H -3.376942585690E+00 4.410001162420E-01 6.324726984883E+00  
105 1 H 4.017145744371E+00 9.206050583650E-01 -7.279630892454E+00  
106 1 H -4.017145744371E+00 -9.206050583650E-01 7.279630892454E+00  
107 6 C -3.024412464403E+00 -1.694965476917E+00 -3.875885540852E+00  
108 6 C 3.024412464403E+00 1.694965476917E+00 3.875885540852E+00  
109 1 H -2.859891949142E+00 -2.628716097077E+00 -3.329337907239E+00  
110 1 H 2.859891949142E+00 2.628716097077E+00 3.329337907239E+00  
111 1 H -3.819496094080E+00 -1.857713652432E+00 -4.602084774245E+00  
112 1 H 3.819496094080E+00 1.857713652432E+00 4.602084774245E+00  
113 6 C -3.412105985031E+00 -5.921947554400E-01 -2.876299353888E+00  
114 6 C 3.412105985031E+00 5.921947554400E-01 2.876299353888E+00  
115 6 C -3.750176764346E+00 7.147291808760E-01 -3.611096107980E+00  
116 6 C 3.750176764346E+00 -7.147291808760E-01 3.611096107980E+00  
117 1 H 3.140613974730E+00 -8.234435296010E-01 -4.347397025234E+00  
118 1 H -3.140613974730E+00 8.234435296010E-01 4.347397025234E+00  
119 1 H 3.515968539343E+00 8.027991129200E-02 -2.881231078351E+00  
120 1 H -3.515968539343E+00 -8.027991129200E-02 2.881231078351E+00  
121 6 C -1.373323164907E+00 1.431001969149E+00 -3.455153240673E+00  
122 6 C 1.373323164907E+00 -1.431001969149E+00 3.455153240673E+00  
123 1 H -1.506225242552E+00 2.206769255089E+00 -2.695066445099E+00  
124 1 H 1.506225242552E+00 -2.206769255089E+00 2.695066445099E+00  
125 1 H -5.686144933200E-01 1.759817660402E+00 -4.109210867328E+00  
126 1 H 5.686144933200E-01 -1.759817660402E+00 4.109210867328E+00  
127 6 C -1.018543073415E+00 1.145419923710E-01 -2.751837515216E+00  
128 6 C 1.018543073415E+00 -1.145419923710E-01 2.751837515216E+00  
129 6 C -6.715163558900E-01 -1.006782629000E+00 -3.751446142492E+00  
130 6 C 6.715163558900E-01 1.006782629000E+00 3.751446142492E+00  
131 1 H 1.840288296530E-01 -7.235760484210E-01 -4.361029577693E+00  
132 1 H -1.840288296530E-01 7.235760484210E-01 4.361029577693E+00  
133 1 H -3.909347939600E-01 -1.895421272293E+00 -3.173575360467E+00  
134 1 H 3.909347939600E-01 1.895421272293E+00 3.173575360467E+00  
135 6 C 3.022908821662E+00 -2.386128236431E+00 -2.097289552058E+00

136 6 C -3.022908821662E+00 2.386128236431E+00 2.097289552058E+00  
137 1 H 3.228033994603E+00 -3.301038385687E+00 -1.537577650041E+00  
138 1 H -3.228033994603E+00 3.301038385687E+00 1.537577650041E+00  
139 1 H 2.173952665221E+00 -2.576897479680E+00 -2.761720584137E+00  
140 1 H -2.173952665221E+00 2.576897479680E+00 2.761720584137E+00  
141 1 H 2.716032311229E+00 -1.620258060756E+00 -1.380580425858E+00  
142 1 H -2.716032311229E+00 1.620258060756E+00 1.380580425858E+00  
143 6 C 1.972448217670E-01 3.604511016760E-01 -1.860356372043E+00  
144 6 C -1.972448217670E-01 -3.604511016760E-01 1.860356372043E+00  
145 1 H -6.238144552000E-03 1.141872898167E+00 -1.124032639384E+00  
146 1 H 6.238144552000E-03 -1.141872898167E+00 1.124032639384E+00  
147 1 H 1.055835598931E+00 6.879789338800E-01 -2.455719567496E+00  
148 1 H -1.055835598931E+00 -6.879789338800E-01 2.455719567496E+00  
149 1 H 4.665226529090E-01 -5.559817558280E-01 -1.330182904597E+00  
150 1 H -4.665226529090E-01 5.559817558280E-01 1.330182904597E+00  
151 6 C -2.230397780636E+00 -3.407750191890E-01 -1.932723140536E+00  
152 6 C 2.230397780636E+00 3.407750191890E-01 1.932723140536E+00  
153 1 H -1.991660706802E+00 -1.249354648243E+00 -1.368263113891E+00  
154 1 H 1.991660706802E+00 1.249354648243E+00 1.368263113891E+00  
155 1 H -2.497061117568E+00 4.362139897900E-01 -1.204747984513E+00  
156 1 H 2.497061117568E+00 -4.362139897900E-01 1.204747984513E+00  
157 8 O 9.086691845800E-02 -3.231519619737E+00 -9.343940383970E-01  
158 8 O -9.086691845800E-02 3.231519619737E+00 9.343940383970E-01  
159 8 O -1.155811412525E+00 -3.381874210019E+00 -2.350476724710E-01  
160 8 O 1.155811412525E+00 3.381874210019E+00 2.350476724710E-01  
161 1 H 2.480150478090E-01 -4.153490552571E+00 -1.245398607414E+00  
162 1 H -2.480150478090E-01 4.153490552571E+00 1.245398607414E+00  
163 1 H -8.526875078450E-01 -3.582261117736E+00 6.825970358050E-01  
164 1 H 8.526875078450E-01 3.582261117736E+00 -6.825970358050E-01  
165 8 O 2.787541182944E+00 -4.390649795079E+00 -7.379321671019E+00  
166 8 O -2.787541182944E+00 4.390649795079E+00 7.379321671019E+00  
167 1 H -4.058864333372E+00 -2.597819344083E+00 -7.080438519177E+00

168 1 H 4.058864333372E+00 2.597819344083E+00 7.080438519177E+00  
 169 8 O 2.456021370395E+00 -4.849636206017E+00 7.369820107446E+00  
 170 8 O -2.456021370395E+00 4.849636206017E+00 -7.369820107446E+00  
 171 1 H 2.103609257955E+00 -4.056789070142E+00 6.898910591484E+00  
 172 1 H -2.103609257955E+00 4.056789070142E+00 -6.898910591484E+00

\*\*\*\*\*

\*\*\* PSEUDOPOTENTIAL INFORMATION \*\*\*

\*\*\*\*\*

ATOMIC NUMBER 53, NUCLEAR CHARGE 25.000, GIVEN IN INPUT PSEUDOPOTENTIAL

| TYPE   | EXPONENT   | COEFF.      | N | EXPONENT   | COEFF.      | N |
|--------|------------|-------------|---|------------|-------------|---|
| P0 TMS | 40.0333760 | 49.9896490  | 0 | 17.3005760 | 281.0065560 | 0 |
|        | 8.8517200  | 61.4167390  | 0 |            |             |   |
| P1 TMS | 15.7201410 | 67.4162390  | 0 | 15.2082220 | 134.8076960 | 0 |
|        | 8.2941860  | 14.5665480  | 0 | 7.7539490  | 28.9684220  | 0 |
| P2 TMS | 13.8177510 | 35.5387560  | 0 | 13.5878050 | 53.3397590  | 0 |
|        | 6.9476300  | 9.7164660   | 0 | 6.9600990  | 14.9775000  | 0 |
| P3 TMS | 18.5229500 | -20.1766180 | 0 | 18.2510350 | -26.0880770 | 0 |
|        | 7.5579010  | -0.2204340  | 0 | 7.5974040  | -0.2216460  | 0 |

\*\*\*\*\*

LOCAL ATOMIC FUNCTIONS BASIS SET

\*\*\*\*\*

| ATOM | X(AU) | Y(AU) | Z(AU) | N. | TYPE | EXPONENT | S COEF | P COEF | D/F/G COEF |
|------|-------|-------|-------|----|------|----------|--------|--------|------------|
|------|-------|-------|-------|----|------|----------|--------|--------|------------|

\*\*\*\*\*

|     |        |        |        |  |  |  |  |  |  |
|-----|--------|--------|--------|--|--|--|--|--|--|
| 1 I | -6.504 | -9.313 | -2.696 |  |  |  |  |  |  |
|-----|--------|--------|--------|--|--|--|--|--|--|

1 S

|  |           |           |           |           |
|--|-----------|-----------|-----------|-----------|
|  | 5.900E+03 | 2.419E-04 | 0.000E+00 | 0.000E+00 |
|--|-----------|-----------|-----------|-----------|

|  |           |           |           |           |
|--|-----------|-----------|-----------|-----------|
|  | 8.985E+02 | 1.547E-03 | 0.000E+00 | 0.000E+00 |
|--|-----------|-----------|-----------|-----------|

|  |           |           |           |           |
|--|-----------|-----------|-----------|-----------|
|  | 2.004E+02 | 4.284E-03 | 0.000E+00 | 0.000E+00 |
|--|-----------|-----------|-----------|-----------|

|  |           |            |           |           |
|--|-----------|------------|-----------|-----------|
|  | 3.142E+01 | -3.942E-02 | 0.000E+00 | 0.000E+00 |
|--|-----------|------------|-----------|-----------|

1.565E+01 9.609E-01 0.000E+00 0.000E+00

2 S

1.182E+01 7.596E-01 0.000E+00 0.000E+00

6.461E+00 4.250E-01 0.000E+00 0.000E+00

3 S

1.793E+00 1.000E+00 0.000E+00 0.000E+00

4 S

2.229E-01 1.000E+00 0.000E+00 0.000E+00

5- 7 P

1.973E+02 0.000E+00 7.395E-04 0.000E+00

2.006E+01 0.000E+00 6.617E-02 0.000E+00

9.763E+00 0.000E+00-2.855E-01 0.000E+00

8- 10 P

1.298E+01 0.000E+00-4.910E-02 0.000E+00

3.620E+00 0.000E+00 3.891E-01 0.000E+00

2.023E+00 0.000E+00 6.561E-01 0.000E+00

1.037E+00 0.000E+00 3.180E-01 0.000E+00

11- 13 P

4.758E-01 0.000E+00 1.000E+00 0.000E+00

14- 16 P

1.500E-01 0.000E+00 1.000E+00 0.000E+00

17- 21 D

1.191E+02 0.000E+00 0.000E+00 8.260E-04

3.340E+01 0.000E+00 0.000E+00 6.838E-03

1.781E+01 0.000E+00 0.000E+00-1.031E-02

4.899E+00 0.000E+00 0.000E+00 2.267E-01

2.452E+00 0.000E+00 0.000E+00 4.418E-01

1.182E+00 0.000E+00 0.000E+00 3.678E-01

22- 26 D

2.537E+00 0.000E+00 0.000E+00 1.000E+00

27- 31 D

6.887E-01 0.000E+00 0.000E+00 1.000E+00

32- 36 D

2.068E-01 0.000E+00 0.000E+00 1.000E+00

2 I 6.504 9.313 2.696

3 I 7.890 5.961 -4.237

4 I -7.890 -5.961 4.237

5 O 1.084 -10.952 -2.829

145 S

5.485E+03 1.831E-03 0.000E+00 0.000E+00

8.252E+02 1.395E-02 0.000E+00 0.000E+00

1.880E+02 6.845E-02 0.000E+00 0.000E+00

5.296E+01 2.327E-01 0.000E+00 0.000E+00

1.690E+01 4.702E-01 0.000E+00 0.000E+00

5.800E+00 3.585E-01 0.000E+00 0.000E+00

146- 149 SP

1.554E+01 -1.108E-01 7.087E-02 0.000E+00

3.600E+00 -1.480E-01 3.398E-01 0.000E+00

1.014E+00 1.131E+00 7.272E-01 0.000E+00

150- 153 SP

2.700E-01 1.000E+00 1.000E+00 0.000E+00

154- 158 D

8.000E-01 0.000E+00 0.000E+00 1.000E+00

6 O -1.084 10.952 2.829

7 O 0.688 7.699 -4.355

8 O -0.688 -7.699 4.355

9 N 2.313 -11.522 -6.895

201 S

4.174E+03 1.835E-03 0.000E+00 0.000E+00

6.275E+02 1.400E-02 0.000E+00 0.000E+00

1.429E+02 6.859E-02 0.000E+00 0.000E+00

4.023E+01 2.322E-01 0.000E+00 0.000E+00

1.282E+01 4.691E-01 0.000E+00 0.000E+00

4.390E+00 3.605E-01 0.000E+00 0.000E+00

202- 205 SP

1.163E+01-1.150E-01 6.758E-02 0.000E+00

2.716E+00-1.691E-01 3.239E-01 0.000E+00

7.722E-01 1.146E+00 7.409E-01 0.000E+00

206- 209 SP

2.120E-01 1.000E+00 1.000E+00 0.000E+00

210- 214 D

8.000E-01 0.000E+00 0.000E+00 1.000E+00

10 N -2.313 11.522 6.895

11 N -0.828 10.452 -7.251

12 N 0.828 -10.452 7.251

13 C 2.514 -11.953 -4.401

257 S

3.048E+03 1.835E-03 0.000E+00 0.000E+00

4.574E+02 1.404E-02 0.000E+00 0.000E+00

1.039E+02 6.884E-02 0.000E+00 0.000E+00

2.921E+01 2.322E-01 0.000E+00 0.000E+00

9.287E+00 4.679E-01 0.000E+00 0.000E+00

3.164E+00 3.623E-01 0.000E+00 0.000E+00

258- 261 SP

7.868E+00-1.193E-01 6.900E-02 0.000E+00

1.881E+00-1.609E-01 3.164E-01 0.000E+00

5.442E-01 1.143E+00 7.443E-01 0.000E+00

262- 265 SP

1.687E-01 1.000E+00 1.000E+00 0.000E+00

266- 270 D

8.000E-01 0.000E+00 0.000E+00 1.000E+00

14 C -2.514 11.953 4.401

15 C 4.484 12.509 -3.438

16 C -4.484 -12.509 3.438

17 H 4.894 10.911 -4.650

313 S

1.873E+01 3.349E-02 0.000E+00 0.000E+00

2.825E+00 2.347E-01 0.000E+00 0.000E+00

6.401E-01 8.138E-01 0.000E+00 0.000E+00

314 S

1.613E-01 1.000E+00 0.000E+00 0.000E+00

315- 317 P

1.100E+00 0.000E+00 1.000E+00 0.000E+00

18 H -4.894 -10.911 4.650

19 H 3.853 11.823 -1.612

20 H -3.853 -11.823 1.612

21 C -0.917 9.295 -4.985

22 C 0.917 -9.295 4.985

23 C -2.976 9.987 -3.129

24 C 2.976 -9.987 3.129

25 H -3.226 12.012 -2.892

26 H 3.226 -12.012 2.892

27 H -2.537 9.122 -1.325

28 H 2.537 -9.122 1.325

29 C 0.136 -10.124 -7.864

30 C -0.136 10.124 7.864

31 H 0.817 -8.493 -8.942

32 H -0.817 8.493 8.942

33 H -0.949 -9.436 -6.259

34 H 0.949 9.436 6.259

35 C -1.509 -11.773 -9.607

36 C 1.509 11.773 9.607

37 C -2.703 12.271 -8.169

38 C 2.703 -12.271 8.169

39 H -3.800 -13.282 -6.586

40 H 3.800 13.282 6.586

41 H -4.003 11.290 -9.450

42 H 4.003 -11.290 9.450

43 C 1.071 9.630 -9.098  
44 C -1.071 -9.630 9.098  
45 H 0.145 8.345 -10.433  
46 H -0.145 -8.345 10.433  
47 H 2.498 8.560 -8.073  
48 H -2.498 -8.560 8.073  
49 C 2.266 11.827 -10.574  
50 C -2.266 -11.827 10.574  
51 C 3.850 -12.723 -8.852  
52 C -3.850 12.723 8.852  
53 H 5.404 12.514 -7.995  
54 H -5.404 -12.514 7.995  
55 H 4.677 -11.232 -10.028  
56 H -4.677 11.232 10.028  
57 C -3.639 -10.138 -10.667  
58 C 3.639 10.138 10.667  
59 H -2.875 -8.541 -11.730  
60 H 2.875 8.541 11.730  
61 H -4.822 -9.386 -9.146  
62 H 4.822 9.386 9.146  
63 H -4.838 -11.235 -11.942  
64 H 4.838 11.235 11.942  
65 C 3.978 10.758 -12.637  
66 C -3.978 -10.758 12.637  
67 H 2.895 9.567 -13.931  
68 H -2.895 -9.567 13.931  
69 H 5.503 9.594 -11.869  
70 H -5.503 -9.594 11.869  
71 H 4.821 12.297 -13.728  
72 H -4.821 -12.297 13.728  
73 C 0.148 -12.843 -11.724  
74 C -0.148 12.843 11.724



75 H 0.972 -11.302 -12.833  
76 H -0.972 11.302 12.833  
77 H -1.012 12.274 -12.987  
78 H 1.012 -12.274 12.987  
79 I 1.608 -4.321 -13.111  
80 I -1.608 4.321 13.111  
81 I 4.130 3.488 -10.638  
82 I -4.130 -3.488 10.638  
83 O -5.437 -2.713 -12.483  
84 O 5.437 2.713 12.483  
85 O -3.241 5.180 -10.977  
86 O 3.241 -5.180 10.977  
87 N -3.413 -2.563 -8.707  
88 N 3.413 2.563 8.707  
89 N -4.901 2.529 -8.052  
90 N 4.901 -2.529 8.052  
91 C -3.491 -2.302 -11.232  
92 C 3.491 2.302 11.232  
93 C -1.176 -1.403 -12.627  
94 C 1.176 1.403 12.627  
95 H -0.232 0.196 -11.753  
96 H 0.232 -0.196 11.753  
97 H -1.770 -0.909 -14.526  
98 H 1.770 0.909 14.526  
99 C -5.025 3.854 -10.223  
100 C 5.025 -3.854 10.223  
101 C 7.147 1.071 -11.868  
102 C -7.147 -1.071 11.868  
103 H 6.381 -0.833 -11.952  
104 H -6.381 0.833 11.952  
105 H 7.591 1.740 -13.757  
106 H -7.591 -1.740 13.757

107 C -5.715 -3.203 -7.324  
108 C 5.715 3.203 7.324  
109 H -5.404 -4.968 -6.292  
110 H 5.404 4.968 6.292  
111 H -7.218 -3.511 -8.697  
112 H 7.218 3.511 8.697  
113 C -6.448 -1.119 -5.435  
114 C 6.448 1.119 5.435  
115 C -7.087 1.351 -6.824  
116 C 7.087 -1.351 6.824  
117 H 5.935 -1.556 -8.215  
118 H -5.935 1.556 8.215  
119 H 6.644 0.152 -5.445  
120 H -6.644 -0.152 5.445  
121 C -2.595 2.704 -6.529  
122 C 2.595 -2.704 6.529  
123 H -2.846 4.170 -5.093  
124 H 2.846 -4.170 5.093  
125 H -1.075 3.326 -7.765  
126 H 1.075 -3.326 7.765  
127 C -1.925 0.216 -5.200  
128 C 1.925 -0.216 5.200  
129 C -1.269 -1.903 -7.089  
130 C 1.269 1.903 7.089  
131 H 0.348 -1.367 -8.241  
132 H -0.348 1.367 8.241  
133 H -0.739 -3.582 -5.997  
134 H 0.739 3.582 5.997  
135 C 5.712 -4.509 -3.963  
136 C -5.712 4.509 3.963  
137 H 6.100 -6.238 -2.906  
138 H -6.100 6.238 2.906

139 H 4.108 -4.870 -5.219  
140 H -4.108 4.870 5.219  
141 H 5.133 -3.062 -2.609  
142 H -5.133 3.062 2.609  
143 C 0.373 0.681 -3.516  
144 C -0.373 -0.681 3.516  
145 H -0.012 2.158 -2.124  
146 H 0.012 -2.158 2.124  
147 H 1.995 1.300 -4.641  
148 H -1.995 -1.300 4.641  
149 H 0.882 -1.051 -2.514  
150 H -0.882 1.051 2.514  
151 C -4.215 -0.644 -3.652  
152 C 4.215 0.644 3.652  
153 H -3.764 -2.361 -2.586  
154 H 3.764 2.361 2.586  
155 H -4.719 0.824 -2.277  
156 H 4.719 -0.824 2.277  
157 O 0.172 -6.107 -1.766  
158 O -0.172 6.107 1.766  
159 O -2.184 -6.391 -0.444  
160 O 2.184 6.391 0.444  
161 H 0.469 -7.849 -2.353  
162 H -0.469 7.849 2.353  
163 H -1.611 -6.769 1.290  
164 H 1.611 6.769 -1.290  
165 O 5.268 -8.297 -13.945  
166 O -5.268 8.297 13.945  
167 H -7.670 -4.909 -13.380  
168 H 7.670 4.909 13.380  
169 O 4.641 -9.164 13.927  
170 O -4.641 9.164 -13.927

171 H 3.975 -7.666 13.037

172 H -3.975 7.666 -13.037

INFORMATION \*\*\*\* SET\_MPP \*\*\*\* PCRYSTAL CALCULATION

INFORMATION \*\*\*\* READM2 \*\*\*\* NEW DEFAULT: FOCK/KS MATRIX MIXING SET TO 30 %

INFORMATION \*\*\*\* READM2 \*\*\*\* NEW DEFAULT: FULL DIRECT SCF MODE

INFORMATION \*\*\*\* READM2 \*\*\*\* NEW DEFAULT: COULOMB BIPOLAR BUFFER SET TO 32 Mb

INFORMATION \*\*\*\* READM2 \*\*\*\* NEW DEFAULT: EXCHANGE BIPOLAR BUFFER SET TO 32 Mb

\*\*\*\*\*

NEW DEFAULT: DFT INTEGRATION GRID INCREASED TO XLGRID

NEW DEFAULT: DIIS ACCELERATOR ACTIVE

USE KEYWORD NODIIS TO TURN IT OFF

\*\*\*\*\*

WARNING \*\*\*\* RDDFTP \*\*\*\* CAM-B3LYP ACTIVE

RANGE SEPARATION - OMEGA: 0.3300000000000000

Alpha(Beta) FOCK EXCHANGE IN CAM-B3LYP: 0.19000( 0.46000)

INFORMATION \*\*\*\* BIPOSIZE \*\*\*\* COULOMB BIPOLAR BUFFER SET TO 20000000

INFORMATION \*\*\*\* EXCHSIZE \*\*\*\* EXCHANGE BIPOLAR BUFFER SIZE SET TO 20000000

INFORMATION \*\*\*\* LEVSHIFT \*\*\*\* LEVEL SHIFTER ACTIVE

INFORMATION \*\*\*\* TOLDEE \*\*\*\* SCF TOL ON TOTAL ENERGY SET TO 11

INFORMATION \*\*\*\* READM2 \*\*\*\* FULL DIRECT SCF (MONO AND BIEL INT) SELECTED

INFORMATION \*\*\*\* MAXCYCLE \*\*\*\* MAX NUMBER OF SCF CYCLES SET TO 200

INFORMATION \*\*\*\* READM2 \*\*\*\* LEVSHIFT DISABLED BECAUSE NOT COMPATIBLE WITH DIIS

INFORMATION \*\*\*\* READM2 \*\*\*\* TO MAKE LEVSHIFT EFFECTIVE YOU MUST SET NODIIS

\*\*\*\*\*

N. OF ATOMS PER CELL 172 COULOMB OVERLAP TOL (T1) 10\*\* -6

NUMBER OF SHELLS 664 COULOMB PENETRATION TOL (T2) 10\*\* -6

NUMBER OF AO 1792 EXCHANGE OVERLAP TOL (T3) 10\*\* -6

N. OF ELECTRONS PER CELL 784 EXCHANGE PSEUDO OVP (F(G)) (T4) 10\*\* -6

CORE ELECTRONS PER CELL 152 EXCHANGE PSEUDO OVP (P(G)) (T5) 10\*\* -12

N. OF SYMMETRY OPERATORS 2 POLE ORDER IN MONO ZONE 4

\*\*\*\*\*

TYPE OF CALCULATION : RESTRICTED CLOSED SHELL

KOHN-SHAM HAMILTONIAN

(EXCHANGE)[CORRELATION] FUNCTIONAL:(CAM-B3LYP)[LEE-YANG-PARR]

NON-LOCAL WEIGHTING FACTOR (EXCHANGE) = 0.9000

NON-LOCAL WEIGHTING FACTOR [CORRELATION] = 0.8100

HYBRID EXCHANGE - PERCENTAGE OF FOCK EXCHANGE 100.0000

CORE PSEUDO POTENTIAL TOL. ON PSEUDO (TP) 10\*\*-6

CAPPA:IS1 3;IS2 3;IS3 3; K PTS MONK NET 14; SYMMOPS:K SPACE 2;G SPACE 2

\*\*\*\*\*

MAX NUMBER OF SCF CYCLES 200 CONVERGENCE ON DELTAP 10\*\*-21

WEIGHT OF F(I) IN F(I+1) 25% CONVERGENCE ON ENERGY 10\*\*-11

SHRINK. FACT.(MONKH.) 3 3 3 NUMBER OF K POINTS IN THE IBZ 14

SHRINKING FACTOR(GILAT NET) 3 NUMBER OF K POINTS(GILAT NET) 14

\*\*\*\*\*

\*\*\* K POINTS COORDINATES (OBLIQUE COORDINATES IN UNITS OF IS = 3)

1-R( 0 0 0) 2-C( 1 0 0) 3-C( 0 1 0) 4-C( 1 1 0)

5-C( 2 1 0) 6-C( 0 0 1) 7-C( 1 0 1) 8-C( 2 0 1)

9-C( 0 1 1) 10-C( 1 1 1) 11-C( 2 1 1) 12-C( 0 2 1)

13-C( 1 2 1) 14-C( 2 2 1)

DIRECT LATTICE VECTORS COMPON. (A.U.) RECIP. LATTICE VECTORS COMPON. (A.U.)

| X          | Y          | Z          | X         | Y         | Z         |
|------------|------------|------------|-----------|-----------|-----------|
| 14.4940244 | -2.5455684 | 0.0000000  | 0.4335018 | 0.0000000 | 0.0167695 |
| 0.0000000  | 26.2745632 | 0.0000000  | 0.0419991 | 0.2391357 | 0.0040736 |
| -1.1786781 | -0.3120350 | 30.4695578 | 0.0000000 | 0.0000000 | 0.2062119 |

DISK SPACE FOR EIGENVECTORS (FTN 10) 86704128 REALS

SYMMETRY ADAPTION OF THE BLOCH FUNCTIONS ENABLED

TTTTTTTTTTTTTTTTTTTTTTTTTTTTTTTTTTT gordsh1 TELAPSE 1.15 TCPU 0.11

MATRIX SIZE: P(G) 1832998, F(G) 322501, P(G) IRR 461439, F(G) IRR 162690

MAX G-VECTOR INDEX FOR 1- AND 2-ELECTRON INTEGRALS 41

TTTTTTTTTTTTTTTTTTTTTTTTTTTTTTTTTTT INPUT TELAPSE 1.60 TCPU 0.55

NEIGHBORS OF THE NON-EQUIVALENT ATOMS

N = NUMBER OF NEIGHBORS AT DISTANCE R

ATOM N R/ANG R/AU NEIGHBORS (ATOM LABELS AND CELL INDICES)

1 I 1 2.1478 4.0588 15 C -1-1 0

1 I 1 2.6466 5.0013 19 H -1-1 0

1 I 1 2.6821 5.0684 17 H -1-1 0

1 I 1 2.9880 5.6465 20 H 0 0 0

1 I 1 3.0063 5.6810 159 O 0 0 0

1 I 1 3.0352 5.7356 13 C -1 0 0

3 I 1 2.1546 4.0716 23 C 1 0 0

3 I 1 2.6666 5.0391 27 H 1 0 0

3 I 1 2.6722 5.0496 25 H 1 0 0

3 I 1 3.0631 5.7884 39 H 1 1 0

3 I 1 3.0639 5.7899 21 C 1 0 0

3 I 1 3.0696 5.8007 17 H 0 0 0

5 O 1 1.2429 2.3487 13 C 0 0 0

5 O 1 1.6927 3.1987 161 H 0 0 0

5 O 1 2.2572 4.2655 33 H 0 0 0

5 O 1 2.2677 4.2854 9 N 0 0 0

|      |   |        |        |       |       |
|------|---|--------|--------|-------|-------|
| 5 O  | 1 | 2.3576 | 4.4552 | 15 C  | 0-1 0 |
| 5 O  | 1 | 2.4478 | 4.6256 | 19 H  | 0-1 0 |
| 7 O  | 1 | 1.2434 | 2.3498 | 21 C  | 0 0 0 |
| 7 O  | 1 | 1.7638 | 3.3330 | 164 H | 0 0 0 |
| 7 O  | 1 | 2.2352 | 4.2240 | 47 H  | 0 0 0 |
| 7 O  | 1 | 2.2619 | 4.2744 | 11 N  | 0 0 0 |
| 7 O  | 1 | 2.3761 | 4.4902 | 23 C  | 0 0 0 |
| 7 O  | 1 | 2.4598 | 4.6484 | 27 H  | 0 0 0 |
| 9 N  | 1 | 1.3437 | 2.5392 | 13 C  | 0 0 0 |
| 9 N  | 1 | 1.4618 | 2.7624 | 51 C  | 0 0 0 |
| 9 N  | 1 | 1.4619 | 2.7626 | 29 C  | 0 0 0 |
| 9 N  | 1 | 2.0767 | 3.9244 | 33 H  | 0 0 0 |
| 9 N  | 1 | 2.0828 | 3.9359 | 55 H  | 0 0 0 |
| 9 N  | 1 | 2.0905 | 3.9504 | 31 H  | 0 0 0 |
| 11 N | 1 | 1.3472 | 2.5458 | 21 C  | 0 0 0 |
| 11 N | 1 | 1.4652 | 2.7688 | 37 C  | 0 0 0 |
| 11 N | 1 | 1.4674 | 2.7730 | 43 C  | 0 0 0 |
| 11 N | 1 | 2.0711 | 3.9139 | 47 H  | 0 0 0 |
| 11 N | 1 | 2.0839 | 3.9381 | 45 H  | 0 0 0 |
| 11 N | 1 | 2.0913 | 3.9519 | 41 H  | 0 0 0 |
| 13 C | 1 | 1.2429 | 2.3487 | 5 O   | 0 0 0 |
| 13 C | 1 | 1.3437 | 2.5392 | 9 N   | 0 0 0 |
| 13 C | 1 | 1.5055 | 2.8450 | 15 C  | 0-1 0 |
| 13 C | 1 | 2.1044 | 3.9766 | 19 H  | 0-1 0 |
| 13 C | 1 | 2.2047 | 4.1662 | 17 H  | 0-1 0 |
| 13 C | 1 | 2.4247 | 4.5821 | 29 C  | 0 0 0 |
| 15 C | 1 | 1.0832 | 2.0470 | 17 H  | 0 0 0 |

|      |   |        |        |      |        |
|------|---|--------|--------|------|--------|
| 15 C | 1 | 1.0852 | 2.0507 | 19 H | 0 0 0  |
| 15 C | 1 | 1.5055 | 2.8450 | 13 C | 0 1 0  |
| 15 C | 1 | 2.1478 | 4.0588 | 1 I  | 1 1 0  |
| 15 C | 1 | 2.3576 | 4.4552 | 5 O  | 0 1 0  |
| 15 C | 1 | 2.4600 | 4.6487 | 53 H | 0 0 0  |
|      |   |        |        |      |        |
| 17 H | 1 | 1.0832 | 2.0470 | 15 C | 0 0 0  |
| 17 H | 1 | 1.7668 | 3.3387 | 19 H | 0 0 0  |
| 17 H | 1 | 1.9814 | 3.7443 | 53 H | 0 0 0  |
| 17 H | 1 | 2.2047 | 4.1662 | 13 C | 0 1 0  |
| 17 H | 1 | 2.5368 | 4.7938 | 47 H | 0 0 0  |
| 17 H | 1 | 2.6821 | 5.0684 | 1 I  | 1 1 0  |
|      |   |        |        |      |        |
| 19 H | 1 | 1.0852 | 2.0507 | 15 C | 0 0 0  |
| 19 H | 1 | 1.7668 | 3.3387 | 17 H | 0 0 0  |
| 19 H | 1 | 2.1044 | 3.9766 | 13 C | 0 1 0  |
| 19 H | 1 | 2.4478 | 4.6256 | 5 O  | 0 1 0  |
| 19 H | 1 | 2.6466 | 5.0013 | 1 I  | 1 1 0  |
| 19 H | 1 | 2.7309 | 5.1607 | 26 H | 0 1 0  |
|      |   |        |        |      |        |
| 21 C | 1 | 1.2434 | 2.3498 | 7 O  | 0 0 0  |
| 21 C | 1 | 1.3472 | 2.5458 | 11 N | 0 0 0  |
| 21 C | 1 | 1.5122 | 2.8576 | 23 C | 0 0 0  |
| 21 C | 1 | 2.1205 | 4.0071 | 27 H | 0 0 0  |
| 21 C | 1 | 2.1878 | 4.1343 | 25 H | 0 0 0  |
| 21 C | 1 | 2.4236 | 4.5799 | 43 C | 0 0 0  |
|      |   |        |        |      |        |
| 23 C | 1 | 1.0839 | 2.0483 | 27 H | 0 0 0  |
| 23 C | 1 | 1.0868 | 2.0537 | 25 H | 0 0 0  |
| 23 C | 1 | 1.5122 | 2.8576 | 21 C | 0 0 0  |
| 23 C | 1 | 2.1546 | 4.0716 | 3 I  | -1 0 0 |
| 23 C | 1 | 2.3761 | 4.4902 | 7 O  | 0 0 0  |



|      |   |        |        |       |        |
|------|---|--------|--------|-------|--------|
| 23 C | 1 | 2.4633 | 4.6550 | 39 H  | 0 1 0  |
| 25 H | 1 | 1.0868 | 2.0537 | 23 C  | 0 0 0  |
| 25 H | 1 | 1.7774 | 3.3588 | 27 H  | 0 0 0  |
| 25 H | 1 | 2.0453 | 3.8650 | 39 H  | 0 1 0  |
| 25 H | 1 | 2.1878 | 4.1343 | 21 C  | 0 0 0  |
| 25 H | 1 | 2.6722 | 5.0496 | 3 I   | -1 0 0 |
| 25 H | 1 | 2.7309 | 5.1607 | 20 H  | 0 1 0  |
| 27 H | 1 | 1.0839 | 2.0483 | 23 C  | 0 0 0  |
| 27 H | 1 | 1.7774 | 3.3588 | 25 H  | 0 0 0  |
| 27 H | 1 | 2.1205 | 4.0071 | 21 C  | 0 0 0  |
| 27 H | 1 | 2.3326 | 4.4079 | 162 H | 0 0 0  |
| 27 H | 1 | 2.4598 | 4.6484 | 7 O   | 0 0 0  |
| 27 H | 1 | 2.5221 | 4.7661 | 6 O   | 0 0 0  |
| 29 C | 1 | 1.0885 | 2.0569 | 33 H  | 0 0 0  |
| 29 C | 1 | 1.0955 | 2.0703 | 31 H  | 0 0 0  |
| 29 C | 1 | 1.4619 | 2.7626 | 9 N   | 0 0 0  |
| 29 C | 1 | 1.5397 | 2.9096 | 35 C  | 0 0 0  |
| 29 C | 1 | 2.4247 | 4.5821 | 13 C  | 0 0 0  |
| 29 C | 1 | 2.4545 | 4.6383 | 51 C  | 0 0 0  |
| 31 H | 1 | 1.0955 | 2.0703 | 29 C  | 0 0 0  |
| 31 H | 1 | 1.7716 | 3.3479 | 33 H  | 0 0 0  |
| 31 H | 1 | 2.0905 | 3.9504 | 9 N   | 0 0 0  |
| 31 H | 1 | 2.1571 | 4.0762 | 35 C  | 0 0 0  |
| 31 H | 1 | 2.4482 | 4.6265 | 59 H  | 0 0 0  |
| 31 H | 1 | 2.5409 | 4.8016 | 75 H  | 0 0 0  |
| 33 H | 1 | 1.0885 | 2.0569 | 29 C  | 0 0 0  |
| 33 H | 1 | 1.7716 | 3.3479 | 31 H  | 0 0 0  |

|      |   |        |        |       |       |
|------|---|--------|--------|-------|-------|
| 33 H | 1 | 2.0767 | 3.9244 | 9 N   | 0 0 0 |
| 33 H | 1 | 2.1813 | 4.1222 | 35 C  | 0 0 0 |
| 33 H | 1 | 2.2572 | 4.2655 | 5 O   | 0 0 0 |
| 33 H | 1 | 2.3534 | 4.4473 | 161 H | 0 0 0 |
|      |   |        |        |       |       |
| 35 C | 1 | 1.5275 | 2.8865 | 57 C  | 0 0 0 |
| 35 C | 1 | 1.5309 | 2.8931 | 73 C  | 0 0 0 |
| 35 C | 1 | 1.5397 | 2.9096 | 29 C  | 0 0 0 |
| 35 C | 1 | 1.5399 | 2.9100 | 37 C  | 0-1 0 |
| 35 C | 1 | 2.1530 | 4.0687 | 41 H  | 0-1 0 |
| 35 C | 1 | 2.1571 | 4.0762 | 31 H  | 0 0 0 |
|      |   |        |        |       |       |
| 37 C | 1 | 1.0881 | 2.0562 | 39 H  | 0 1 0 |
| 37 C | 1 | 1.0966 | 2.0723 | 41 H  | 0 0 0 |
| 37 C | 1 | 1.4652 | 2.7688 | 11 N  | 0 0 0 |
| 37 C | 1 | 1.5399 | 2.9100 | 35 C  | 0 1 0 |
| 37 C | 1 | 2.4854 | 4.6966 | 57 C  | 0 1 0 |
| 37 C | 1 | 2.4864 | 4.6987 | 43 C  | 0 0 0 |
|      |   |        |        |       |       |
| 39 H | 1 | 1.0881 | 2.0562 | 37 C  | 0-1 0 |
| 39 H | 1 | 1.7665 | 3.3382 | 41 H  | 0-1 0 |
| 39 H | 1 | 2.0453 | 3.8650 | 25 H  | 0-1 0 |
| 39 H | 1 | 2.0988 | 3.9662 | 11 N  | 0-1 0 |
| 39 H | 1 | 2.1591 | 4.0801 | 35 C  | 0 0 0 |
| 39 H | 1 | 2.4633 | 4.6550 | 23 C  | 0-1 0 |
|      |   |        |        |       |       |
| 41 H | 1 | 1.0966 | 2.0723 | 37 C  | 0 0 0 |
| 41 H | 1 | 1.7665 | 3.3382 | 39 H  | 0 1 0 |
| 41 H | 1 | 2.0913 | 3.9519 | 11 N  | 0 0 0 |
| 41 H | 1 | 2.1530 | 4.0687 | 35 C  | 0 1 0 |
| 41 H | 1 | 2.4229 | 4.5786 | 63 H  | 0 1 0 |
| 41 H | 1 | 2.5057 | 4.7350 | 77 H  | 0 0 0 |

|      |   |        |        |      |       |
|------|---|--------|--------|------|-------|
| 43 C | 1 | 1.0891 | 2.0581 | 47 H | 0 0 0 |
| 43 C | 1 | 1.0963 | 2.0717 | 45 H | 0 0 0 |
| 43 C | 1 | 1.4674 | 2.7730 | 11 N | 0 0 0 |
| 43 C | 1 | 1.5366 | 2.9037 | 49 C | 0 0 0 |
| 43 C | 1 | 2.4236 | 4.5799 | 21 C | 0 0 0 |
| 43 C | 1 | 2.4864 | 4.6987 | 37 C | 0 0 0 |
|      |   |        |        |      |       |
| 45 H | 1 | 1.0963 | 2.0717 | 43 C | 0 0 0 |
| 45 H | 1 | 1.7674 | 3.3400 | 47 H | 0 0 0 |
| 45 H | 1 | 2.0839 | 3.9381 | 11 N | 0 0 0 |
| 45 H | 1 | 2.1589 | 4.0796 | 49 C | 0 0 0 |
| 45 H | 1 | 2.4421 | 4.6148 | 67 H | 0 0 0 |
| 45 H | 1 | 2.4695 | 4.6667 | 85 O | 0 0 0 |
|      |   |        |        |      |       |
| 47 H | 1 | 1.0891 | 2.0581 | 43 C | 0 0 0 |
| 47 H | 1 | 1.7674 | 3.3400 | 45 H | 0 0 0 |
| 47 H | 1 | 2.0711 | 3.9139 | 11 N | 0 0 0 |
| 47 H | 1 | 2.1810 | 4.1215 | 49 C | 0 0 0 |
| 47 H | 1 | 2.2352 | 4.2240 | 7 O  | 0 0 0 |
| 47 H | 1 | 2.4670 | 4.6619 | 21 C | 0 0 0 |
|      |   |        |        |      |       |
| 49 C | 1 | 1.5271 | 2.8859 | 65 C | 0 0 0 |
| 49 C | 1 | 1.5321 | 2.8953 | 73 C | 0 1 0 |
| 49 C | 1 | 1.5366 | 2.9037 | 43 C | 0 0 0 |
| 49 C | 1 | 1.5383 | 2.9070 | 51 C | 0 1 0 |
| 49 C | 1 | 2.1464 | 4.0562 | 55 H | 0 1 0 |
| 49 C | 1 | 2.1589 | 4.0796 | 45 H | 0 0 0 |
|      |   |        |        |      |       |
| 51 C | 1 | 1.0879 | 2.0559 | 53 H | 0-1 0 |
| 51 C | 1 | 1.0961 | 2.0713 | 55 H | 0 0 0 |
| 51 C | 1 | 1.4618 | 2.7624 | 9 N  | 0 0 0 |

|      |   |        |        |      |       |
|------|---|--------|--------|------|-------|
| 51 C | 1 | 1.5383 | 2.9070 | 49 C | 0-1 0 |
| 51 C | 1 | 2.4545 | 4.6383 | 29 C | 0 0 0 |
| 51 C | 1 | 2.4802 | 4.6869 | 73 C | 0 0 0 |
|      |   |        |        |      |       |
| 53 H | 1 | 1.0879 | 2.0559 | 51 C | 0 1 0 |
| 53 H | 1 | 1.7595 | 3.3249 | 55 H | 0 1 0 |
| 53 H | 1 | 1.9814 | 3.7443 | 17 H | 0 0 0 |
| 53 H | 1 | 2.1015 | 3.9713 | 9 N  | 0 1 0 |
| 53 H | 1 | 2.1799 | 4.1194 | 49 C | 0 0 0 |
| 53 H | 1 | 2.4600 | 4.6487 | 15 C | 0 0 0 |
|      |   |        |        |      |       |
| 55 H | 1 | 1.0961 | 2.0713 | 51 C | 0 0 0 |
| 55 H | 1 | 1.7595 | 3.3249 | 53 H | 0-1 0 |
| 55 H | 1 | 2.0828 | 3.9359 | 9 N  | 0 0 0 |
| 55 H | 1 | 2.1464 | 4.0562 | 49 C | 0-1 0 |
| 55 H | 1 | 2.4390 | 4.6091 | 71 H | 0-1 0 |
| 55 H | 1 | 2.4596 | 4.6479 | 75 H | 0 0 0 |
|      |   |        |        |      |       |
| 57 C | 1 | 1.0928 | 2.0651 | 59 H | 0 0 0 |
| 57 C | 1 | 1.0929 | 2.0652 | 63 H | 0 0 0 |
| 57 C | 1 | 1.0945 | 2.0684 | 61 H | 0 0 0 |
| 57 C | 1 | 1.5275 | 2.8865 | 35 C | 0 0 0 |
| 57 C | 1 | 2.4854 | 4.6966 | 37 C | 0-1 0 |
| 57 C | 1 | 2.4883 | 4.7023 | 29 C | 0 0 0 |
|      |   |        |        |      |       |
| 59 H | 1 | 1.0928 | 2.0651 | 57 C | 0 0 0 |
| 59 H | 1 | 1.7677 | 3.3404 | 63 H | 0 0 0 |
| 59 H | 1 | 1.7693 | 3.3435 | 61 H | 0 0 0 |
| 59 H | 1 | 2.1700 | 4.1008 | 35 C | 0 0 0 |
| 59 H | 1 | 2.4482 | 4.6265 | 31 H | 0 0 0 |
| 59 H | 1 | 2.5728 | 4.8619 | 75 H | 0 0 0 |

|      |   |        |        |      |        |
|------|---|--------|--------|------|--------|
| 61 H | 1 | 1.0945 | 2.0684 | 57 C | 0 0 0  |
| 61 H | 1 | 1.7693 | 3.3435 | 59 H | 0 0 0  |
| 61 H | 1 | 1.7737 | 3.3518 | 63 H | 0 0 0  |
| 61 H | 1 | 2.1744 | 4.1090 | 35 C | 0 0 0  |
| 61 H | 1 | 2.5254 | 4.7723 | 39 H | 0 0 0  |
| 61 H | 1 | 2.5319 | 4.7846 | 53 H | -1-1 0 |
|      |   |        |        |      |        |
| 63 H | 1 | 1.0929 | 2.0652 | 57 C | 0 0 0  |
| 63 H | 1 | 1.7677 | 3.3404 | 59 H | 0 0 0  |
| 63 H | 1 | 1.7737 | 3.3518 | 61 H | 0 0 0  |
| 63 H | 1 | 2.1703 | 4.1013 | 35 C | 0 0 0  |
| 63 H | 1 | 2.4229 | 4.5786 | 41 H | 0-1 0  |
| 63 H | 1 | 2.5587 | 4.8353 | 77 H | 0-1 0  |
|      |   |        |        |      |        |
| 65 C | 1 | 1.0931 | 2.0656 | 67 H | 0 0 0  |
| 65 C | 1 | 1.0935 | 2.0665 | 71 H | 0 0 0  |
| 65 C | 1 | 1.0940 | 2.0673 | 69 H | 0 0 0  |
| 65 C | 1 | 1.5271 | 2.8859 | 49 C | 0 0 0  |
| 65 C | 1 | 2.4904 | 4.7062 | 51 C | 0 1 0  |
| 65 C | 1 | 2.4959 | 4.7166 | 43 C | 0 0 0  |
|      |   |        |        |      |        |
| 67 H | 1 | 1.0931 | 2.0656 | 65 C | 0 0 0  |
| 67 H | 1 | 1.7596 | 3.3251 | 69 H | 0 0 0  |
| 67 H | 1 | 1.7715 | 3.3476 | 71 H | 0 0 0  |
| 67 H | 1 | 2.1675 | 4.0959 | 49 C | 0 0 0  |
| 67 H | 1 | 2.4421 | 4.6148 | 45 H | 0 0 0  |
| 67 H | 1 | 2.5648 | 4.8467 | 77 H | 0 0 0  |
|      |   |        |        |      |        |
| 69 H | 1 | 1.0940 | 2.0673 | 65 C | 0 0 0  |
| 69 H | 1 | 1.7596 | 3.3251 | 67 H | 0 0 0  |
| 69 H | 1 | 1.7736 | 3.3516 | 71 H | 0 0 0  |
| 69 H | 1 | 2.1911 | 4.1405 | 49 C | 0 0 0  |

|      |   |        |        |      |       |
|------|---|--------|--------|------|-------|
| 69 H | 1 | 2.5676 | 4.8521 | 53 H | 0 0 0 |
| 69 H | 1 | 2.6197 | 4.9504 | 47 H | 0 0 0 |
| 71 H | 1 | 1.0935 | 2.0665 | 65 C | 0 0 0 |
| 71 H | 1 | 1.7715 | 3.3476 | 67 H | 0 0 0 |
| 71 H | 1 | 1.7736 | 3.3516 | 69 H | 0 0 0 |
| 71 H | 1 | 2.1624 | 4.0863 | 49 C | 0 0 0 |
| 71 H | 1 | 2.4390 | 4.6091 | 55 H | 0 1 0 |
| 71 H | 1 | 2.5254 | 4.7723 | 75 H | 0 1 0 |
| 73 C | 1 | 1.0950 | 2.0692 | 77 H | 0-1 0 |
| 73 C | 1 | 1.0953 | 2.0698 | 75 H | 0 0 0 |
| 73 C | 1 | 1.5309 | 2.8931 | 35 C | 0 0 0 |
| 73 C | 1 | 1.5321 | 2.8953 | 49 C | 0-1 0 |
| 73 C | 1 | 2.4802 | 4.6869 | 51 C | 0 0 0 |
| 73 C | 1 | 2.4884 | 4.7023 | 37 C | 0-1 0 |
| 75 H | 1 | 1.0953 | 2.0698 | 73 C | 0 0 0 |
| 75 H | 1 | 1.7743 | 3.3529 | 77 H | 0-1 0 |
| 75 H | 1 | 2.1608 | 4.0832 | 49 C | 0-1 0 |
| 75 H | 1 | 2.1680 | 4.0969 | 35 C | 0 0 0 |
| 75 H | 1 | 2.4596 | 4.6479 | 55 H | 0 0 0 |
| 75 H | 1 | 2.5254 | 4.7723 | 71 H | 0-1 0 |
| 77 H | 1 | 1.0950 | 2.0692 | 73 C | 0 1 0 |
| 77 H | 1 | 1.7743 | 3.3529 | 75 H | 0 1 0 |
| 77 H | 1 | 2.1580 | 4.0780 | 35 C | 0 1 0 |
| 77 H | 1 | 2.1669 | 4.0948 | 49 C | 0 0 0 |
| 77 H | 1 | 2.5057 | 4.7350 | 41 H | 0 0 0 |
| 77 H | 1 | 2.5544 | 4.8272 | 45 H | 0 0 0 |
| 79 I | 1 | 2.1497 | 4.0623 | 93 C | 0 0 0 |

|      |   |        |        |       |        |
|------|---|--------|--------|-------|--------|
| 79 I | 1 | 2.6491 | 5.0060 | 97 H  | 0 0 0  |
| 79 I | 1 | 2.6793 | 5.0632 | 95 H  | 0 0 0  |
| 79 I | 1 | 2.8933 | 5.4676 | 165 O | 0 0 0  |
| 79 I | 1 | 3.0677 | 5.7971 | 91 C  | 0 0 0  |
| 79 I | 1 | 3.0871 | 5.8338 | 131 H | 0 0 0  |
|      |   |        |        |       |        |
| 81 I | 1 | 2.1468 | 4.0569 | 101 C | 0 0 0  |
| 81 I | 1 | 2.6333 | 4.9761 | 105 H | 0 0 0  |
| 81 I | 1 | 2.6707 | 5.0468 | 103 H | 0 0 0  |
| 81 I | 1 | 2.9517 | 5.5778 | 95 H  | 0 0 0  |
| 81 I | 1 | 3.0594 | 5.7814 | 99 C  | 1 0 0  |
| 81 I | 1 | 3.1113 | 5.8795 | 117 H | 0 0 0  |
|      |   |        |        |       |        |
| 83 O | 1 | 1.2433 | 2.3496 | 91 C  | 0 0 0  |
| 83 O | 1 | 1.7241 | 3.2582 | 167 H | 0 0 0  |
| 83 O | 1 | 2.2538 | 4.2591 | 111 H | 0 0 0  |
| 83 O | 1 | 2.2679 | 4.2858 | 87 N  | 0 0 0  |
| 83 O | 1 | 2.3601 | 4.4599 | 93 C  | 0 0 0  |
| 83 O | 1 | 2.3961 | 4.5280 | 106 H | 0 0-1  |
|      |   |        |        |       |        |
| 85 O | 1 | 1.2418 | 2.3468 | 99 C  | 0 0 0  |
| 85 O | 1 | 1.7526 | 3.3119 | 172 H | 0 0 0  |
| 85 O | 1 | 2.2658 | 4.2817 | 89 N  | 0 0 0  |
| 85 O | 1 | 2.2725 | 4.2945 | 125 H | 0 0 0  |
| 85 O | 1 | 2.3722 | 4.4828 | 101 C | -1 0 0 |
| 85 O | 1 | 2.4695 | 4.6667 | 45 H  | 0 0 0  |
|      |   |        |        |       |        |
| 87 N | 1 | 1.3435 | 2.5389 | 91 C  | 0 0 0  |
| 87 N | 1 | 1.4610 | 2.7609 | 107 C | 0 0 0  |
| 87 N | 1 | 1.4639 | 2.7664 | 129 C | 0 0 0  |
| 87 N | 1 | 2.0748 | 3.9208 | 111 H | 0 0 0  |
| 87 N | 1 | 2.0858 | 3.9416 | 133 H | 0 0 0  |

87 N 1 2.0890 3.9476 109 H 0 0 0  
  
89 N 1 1.3474 2.5463 99 C 0 0 0  
89 N 1 1.4654 2.7692 121 C 0 0 0  
89 N 1 1.4659 2.7702 115 C 0 0 0  
89 N 1 2.0740 3.9193 125 H 0 0 0  
89 N 1 2.0849 3.9399 119 H -1 0 0  
89 N 1 2.0951 3.9592 123 H 0 0 0  
  
91 C 1 1.2433 2.3496 83 O 0 0 0  
91 C 1 1.3435 2.5389 87 N 0 0 0  
91 C 1 1.5073 2.8484 93 C 0 0 0  
91 C 1 2.1002 3.9688 97 H 0 0 0  
91 C 1 2.1903 4.1391 95 H 0 0 0  
91 C 1 2.4266 4.5857 107 C 0 0 0  
  
93 C 1 1.0845 2.0495 97 H 0 0 0  
93 C 1 1.0862 2.0526 95 H 0 0 0  
93 C 1 1.5073 2.8484 91 C 0 0 0  
93 C 1 2.1497 4.0623 79 I 0 0 0  
93 C 1 2.3601 4.4599 83 O 0 0 0  
93 C 1 2.4573 4.6437 131 H 0 0 0  
  
95 H 1 1.0862 2.0526 93 C 0 0 0  
95 H 1 1.7769 3.3579 97 H 0 0 0  
95 H 1 2.0571 3.8873 131 H 0 0 0  
95 H 1 2.1903 4.1391 91 C 0 0 0  
95 H 1 2.6793 5.0632 79 I 0 0 0  
95 H 1 2.7192 5.1385 125 H 0 0 0  
  
97 H 1 1.0845 2.0495 93 C 0 0 0  
97 H 1 1.7769 3.3579 95 H 0 0 0



|       |   |        |        |       |        |
|-------|---|--------|--------|-------|--------|
| 97 H  | 1 | 2.1002 | 3.9688 | 91 C  | 0 0 0  |
| 97 H  | 1 | 2.4177 | 4.5687 | 83 O  | 0 0 0  |
| 97 H  | 1 | 2.6491 | 5.0060 | 79 I  | 0 0 0  |
| 97 H  | 1 | 2.7295 | 5.1579 | 106 H | 0 0-1  |
| 99 C  | 1 | 1.2418 | 2.3468 | 85 O  | 0 0 0  |
| 99 C  | 1 | 1.3474 | 2.5463 | 89 N  | 0 0 0  |
| 99 C  | 1 | 1.5108 | 2.8549 | 101 C | -1 0 0 |
| 99 C  | 1 | 2.1296 | 4.0244 | 105 H | -1 0 0 |
| 99 C  | 1 | 2.1889 | 4.1364 | 103 H | -1 0 0 |
| 99 C  | 1 | 2.4175 | 4.5685 | 121 C | 0 0 0  |
| 101 C | 1 | 1.0861 | 2.0525 | 105 H | 0 0 0  |
| 101 C | 1 | 1.0870 | 2.0541 | 103 H | 0 0 0  |
| 101 C | 1 | 1.5108 | 2.8549 | 99 C  | 1 0 0  |
| 101 C | 1 | 2.1468 | 4.0569 | 81 I  | 0 0 0  |
| 101 C | 1 | 2.3722 | 4.4828 | 85 O  | 1 0 0  |
| 101 C | 1 | 2.4656 | 4.6593 | 117 H | 0 0 0  |
| 103 H | 1 | 1.0870 | 2.0541 | 101 C | 0 0 0  |
| 103 H | 1 | 1.7820 | 3.3676 | 105 H | 0 0 0  |
| 103 H | 1 | 2.0278 | 3.8320 | 117 H | 0 0 0  |
| 103 H | 1 | 2.1889 | 4.1364 | 99 C  | 1 0 0  |
| 103 H | 1 | 2.6707 | 5.0468 | 81 I  | 0 0 0  |
| 103 H | 1 | 2.7079 | 5.1172 | 89 N  | 1 0 0  |
| 105 H | 1 | 1.0861 | 2.0525 | 101 C | 0 0 0  |
| 105 H | 1 | 1.7820 | 3.3676 | 103 H | 0 0 0  |
| 105 H | 1 | 2.1296 | 4.0244 | 99 C  | 1 0 0  |
| 105 H | 1 | 2.3961 | 4.5280 | 84 O  | 0 0-1  |
| 105 H | 1 | 2.3970 | 4.5297 | 172 H | 1 0 0  |
| 105 H | 1 | 2.4785 | 4.6837 | 85 O  | 1 0 0  |

|       |   |        |        |       |        |
|-------|---|--------|--------|-------|--------|
| 107 C | 1 | 1.0890 | 2.0580 | 111 H | 0 0 0  |
| 107 C | 1 | 1.0944 | 2.0681 | 109 H | 0 0 0  |
| 107 C | 1 | 1.4610 | 2.7609 | 87 N  | 0 0 0  |
| 107 C | 1 | 1.5380 | 2.9065 | 113 C | 0 0 0  |
| 107 C | 1 | 2.4266 | 4.5857 | 91 C  | 0 0 0  |
| 107 C | 1 | 2.4546 | 4.6386 | 129 C | 0 0 0  |
|       |   |        |        |       |        |
| 109 H | 1 | 1.0944 | 2.0681 | 107 C | 0 0 0  |
| 109 H | 1 | 1.7706 | 3.3460 | 111 H | 0 0 0  |
| 109 H | 1 | 2.0890 | 3.9476 | 87 N  | 0 0 0  |
| 109 H | 1 | 2.1581 | 4.0783 | 113 C | 0 0 0  |
| 109 H | 1 | 2.4836 | 4.6933 | 137 H | -1 0 0 |
| 109 H | 1 | 2.5500 | 4.8187 | 153 H | 0 0 0  |
|       |   |        |        |       |        |
| 111 H | 1 | 1.0890 | 2.0580 | 107 C | 0 0 0  |
| 111 H | 1 | 1.7706 | 3.3460 | 109 H | 0 0 0  |
| 111 H | 1 | 2.0748 | 3.9208 | 87 N  | 0 0 0  |
| 111 H | 1 | 2.1785 | 4.1168 | 113 C | 0 0 0  |
| 111 H | 1 | 2.2538 | 4.2591 | 83 O  | 0 0 0  |
| 111 H | 1 | 2.4695 | 4.6667 | 91 C  | 0 0 0  |
|       |   |        |        |       |        |
| 113 C | 1 | 1.5269 | 2.8855 | 135 C | -1 0 0 |
| 113 C | 1 | 1.5330 | 2.8969 | 151 C | 0 0 0  |
| 113 C | 1 | 1.5370 | 2.9044 | 115 C | 0 0 0  |
| 113 C | 1 | 1.5380 | 2.9065 | 107 C | 0 0 0  |
| 113 C | 1 | 2.1515 | 4.0657 | 119 H | -1 0 0 |
| 113 C | 1 | 2.1581 | 4.0782 | 117 H | -1 0 0 |
|       |   |        |        |       |        |
| 115 C | 1 | 1.0889 | 2.0577 | 117 H | -1 0 0 |
| 115 C | 1 | 1.0971 | 2.0731 | 119 H | -1 0 0 |
| 115 C | 1 | 1.4659 | 2.7702 | 89 N  | 0 0 0  |

|       |   |        |        |       |        |
|-------|---|--------|--------|-------|--------|
| 115 C | 1 | 1.5370 | 2.9044 | 113 C | 0 0 0  |
| 115 C | 1 | 2.4843 | 4.6946 | 135 C | -1 0 0 |
| 115 C | 1 | 2.4862 | 4.6983 | 99 C  | 0 0 0  |
|       |   |        |        |       |        |
| 117 H | 1 | 1.0889 | 2.0577 | 115 C | 1 0 0  |
| 117 H | 1 | 1.7627 | 3.3311 | 119 H | 0 0 0  |
| 117 H | 1 | 2.0278 | 3.8320 | 103 H | 0 0 0  |
| 117 H | 1 | 2.1019 | 3.9720 | 89 N  | 1 0 0  |
| 117 H | 1 | 2.1581 | 4.0782 | 113 C | 1 0 0  |
| 117 H | 1 | 2.4656 | 4.6593 | 101 C | 0 0 0  |
|       |   |        |        |       |        |
| 119 H | 1 | 1.0971 | 2.0731 | 115 C | 1 0 0  |
| 119 H | 1 | 1.7627 | 3.3311 | 117 H | 0 0 0  |
| 119 H | 1 | 2.0849 | 3.9399 | 89 N  | 1 0 0  |
| 119 H | 1 | 2.1515 | 4.0657 | 113 C | 1 0 0  |
| 119 H | 1 | 2.4049 | 4.5447 | 141 H | 0 0 0  |
| 119 H | 1 | 2.5570 | 4.8320 | 155 H | 1 0 0  |
|       |   |        |        |       |        |
| 121 C | 1 | 1.0879 | 2.0558 | 125 H | 0 0 0  |
| 121 C | 1 | 1.0942 | 2.0677 | 123 H | 0 0 0  |
| 121 C | 1 | 1.4654 | 2.7692 | 89 N  | 0 0 0  |
| 121 C | 1 | 1.5341 | 2.8991 | 127 C | 0 0 0  |
| 121 C | 1 | 2.4175 | 4.5685 | 99 C  | 0 0 0  |
| 121 C | 1 | 2.4812 | 4.6887 | 143 C | 0 0 0  |
|       |   |        |        |       |        |
| 123 H | 1 | 1.0942 | 2.0677 | 121 C | 0 0 0  |
| 123 H | 1 | 1.7546 | 3.3157 | 125 H | 0 0 0  |
| 123 H | 1 | 2.0951 | 3.9592 | 89 N  | 0 0 0  |
| 123 H | 1 | 2.1491 | 4.0611 | 127 C | 0 0 0  |
| 123 H | 1 | 2.4191 | 4.5715 | 145 H | 0 0 0  |
| 123 H | 1 | 2.5175 | 4.7573 | 155 H | 0 0 0  |

|       |   |        |        |       |       |
|-------|---|--------|--------|-------|-------|
| 125 H | 1 | 1.0879 | 2.0558 | 121 C | 0 0 0 |
| 125 H | 1 | 1.7546 | 3.3157 | 123 H | 0 0 0 |
| 125 H | 1 | 2.0740 | 3.9193 | 89 N  | 0 0 0 |
| 125 H | 1 | 2.1799 | 4.1194 | 127 C | 0 0 0 |
| 125 H | 1 | 2.2725 | 4.2945 | 85 O  | 0 0 0 |
| 125 H | 1 | 2.4779 | 4.6826 | 99 C  | 0 0 0 |
|       |   |        |        |       |       |
| 127 C | 1 | 1.5275 | 2.8866 | 143 C | 0 0 0 |
| 127 C | 1 | 1.5319 | 2.8950 | 151 C | 0 0 0 |
| 127 C | 1 | 1.5341 | 2.8991 | 121 C | 0 0 0 |
| 127 C | 1 | 1.5418 | 2.9135 | 129 C | 0 0 0 |
| 127 C | 1 | 2.1475 | 4.0582 | 133 H | 0 0 0 |
| 127 C | 1 | 2.1491 | 4.0611 | 123 H | 0 0 0 |
|       |   |        |        |       |       |
| 129 C | 1 | 1.0880 | 2.0560 | 131 H | 0 0 0 |
| 129 C | 1 | 1.0965 | 2.0721 | 133 H | 0 0 0 |
| 129 C | 1 | 1.4639 | 2.7664 | 87 N  | 0 0 0 |
| 129 C | 1 | 1.5418 | 2.9135 | 127 C | 0 0 0 |
| 129 C | 1 | 2.4546 | 4.6386 | 107 C | 0 0 0 |
| 129 C | 1 | 2.4862 | 4.6983 | 151 C | 0 0 0 |
|       |   |        |        |       |       |
| 131 H | 1 | 1.0880 | 2.0560 | 129 C | 0 0 0 |
| 131 H | 1 | 1.7646 | 3.3346 | 133 H | 0 0 0 |
| 131 H | 1 | 2.0571 | 3.8873 | 95 H  | 0 0 0 |
| 131 H | 1 | 2.1029 | 3.9739 | 87 N  | 0 0 0 |
| 131 H | 1 | 2.1767 | 4.1134 | 127 C | 0 0 0 |
| 131 H | 1 | 2.4573 | 4.6437 | 93 C  | 0 0 0 |
|       |   |        |        |       |       |
| 133 H | 1 | 1.0965 | 2.0721 | 129 C | 0 0 0 |
| 133 H | 1 | 1.7646 | 3.3346 | 131 H | 0 0 0 |
| 133 H | 1 | 2.0858 | 3.9416 | 87 N  | 0 0 0 |
| 133 H | 1 | 2.1475 | 4.0582 | 127 C | 0 0 0 |

|       |   |        |        |       |       |
|-------|---|--------|--------|-------|-------|
| 133 H | 1 | 2.4346 | 4.6008 | 149 H | 0 0 0 |
| 133 H | 1 | 2.4978 | 4.7201 | 153 H | 0 0 0 |
| 135 C | 1 | 1.0920 | 2.0635 | 137 H | 0 0 0 |
| 135 C | 1 | 1.0929 | 2.0653 | 141 H | 0 0 0 |
| 135 C | 1 | 1.0948 | 2.0689 | 139 H | 0 0 0 |
| 135 C | 1 | 1.5269 | 2.8855 | 113 C | 1 0 0 |
| 135 C | 1 | 2.4843 | 4.6946 | 115 C | 1 0 0 |
| 135 C | 1 | 2.4953 | 4.7154 | 107 C | 1 0 0 |
| 137 H | 1 | 1.0920 | 2.0635 | 135 C | 0 0 0 |
| 137 H | 1 | 1.7640 | 3.3335 | 141 H | 0 0 0 |
| 137 H | 1 | 1.7703 | 3.3454 | 139 H | 0 0 0 |
| 137 H | 1 | 2.1696 | 4.0999 | 113 C | 1 0 0 |
| 137 H | 1 | 2.4836 | 4.6933 | 109 H | 1 0 0 |
| 137 H | 1 | 2.5551 | 4.8285 | 153 H | 1 0 0 |
| 139 H | 1 | 1.0948 | 2.0689 | 135 C | 0 0 0 |
| 139 H | 1 | 1.7654 | 3.3361 | 141 H | 0 0 0 |
| 139 H | 1 | 1.7703 | 3.3454 | 137 H | 0 0 0 |
| 139 H | 1 | 2.1822 | 4.1238 | 113 C | 1 0 0 |
| 139 H | 1 | 2.5541 | 4.8265 | 117 H | 0 0 0 |
| 139 H | 1 | 2.5674 | 4.8517 | 111 H | 1 0 0 |
| 141 H | 1 | 1.0929 | 2.0653 | 135 C | 0 0 0 |
| 141 H | 1 | 1.7640 | 3.3335 | 137 H | 0 0 0 |
| 141 H | 1 | 1.7654 | 3.3361 | 139 H | 0 0 0 |
| 141 H | 1 | 2.1716 | 4.1038 | 113 C | 1 0 0 |
| 141 H | 1 | 2.4049 | 4.5447 | 119 H | 0 0 0 |
| 141 H | 1 | 2.4891 | 4.7037 | 149 H | 0 0 0 |
| 143 C | 1 | 1.0924 | 2.0644 | 149 H | 0 0 0 |

|       |   |        |        |       |       |
|-------|---|--------|--------|-------|-------|
| 143 C | 1 | 1.0928 | 2.0651 | 145 H | 0 0 0 |
| 143 C | 1 | 1.0949 | 2.0692 | 147 H | 0 0 0 |
| 143 C | 1 | 1.5275 | 2.8866 | 127 C | 0 0 0 |
| 143 C | 1 | 2.4812 | 4.6887 | 121 C | 0 0 0 |
| 143 C | 1 | 2.4900 | 4.7055 | 129 C | 0 0 0 |
|       |   |        |        |       |       |
| 145 H | 1 | 1.0928 | 2.0651 | 143 C | 0 0 0 |
| 145 H | 1 | 1.7628 | 3.3312 | 147 H | 0 0 0 |
| 145 H | 1 | 1.7745 | 3.3532 | 149 H | 0 0 0 |
| 145 H | 1 | 2.1748 | 4.1098 | 127 C | 0 0 0 |
| 145 H | 1 | 2.4191 | 4.5715 | 123 H | 0 0 0 |
| 145 H | 1 | 2.5648 | 4.8468 | 150 H | 0 0 0 |
|       |   |        |        |       |       |
| 147 H | 1 | 1.0949 | 2.0692 | 143 C | 0 0 0 |
| 147 H | 1 | 1.7628 | 3.3312 | 145 H | 0 0 0 |
| 147 H | 1 | 1.7781 | 3.3601 | 149 H | 0 0 0 |
| 147 H | 1 | 2.1725 | 4.1053 | 127 C | 0 0 0 |
| 147 H | 1 | 2.5264 | 4.7742 | 131 H | 0 0 0 |
| 147 H | 1 | 2.5538 | 4.8259 | 125 H | 0 0 0 |
|       |   |        |        |       |       |
| 149 H | 1 | 1.0924 | 2.0644 | 143 C | 0 0 0 |
| 149 H | 1 | 1.7745 | 3.3532 | 145 H | 0 0 0 |
| 149 H | 1 | 1.7781 | 3.3601 | 147 H | 0 0 0 |
| 149 H | 1 | 2.1624 | 4.0864 | 127 C | 0 0 0 |
| 149 H | 1 | 2.4346 | 4.6008 | 133 H | 0 0 0 |
| 149 H | 1 | 2.4891 | 4.7037 | 141 H | 0 0 0 |
|       |   |        |        |       |       |
| 151 C | 1 | 1.0960 | 2.0711 | 153 H | 0 0 0 |
| 151 C | 1 | 1.0976 | 2.0742 | 155 H | 0 0 0 |
| 151 C | 1 | 1.5319 | 2.8950 | 127 C | 0 0 0 |
| 151 C | 1 | 1.5330 | 2.8969 | 113 C | 0 0 0 |
| 151 C | 1 | 2.4862 | 4.6983 | 129 C | 0 0 0 |

151 C 1 2.4883 4.7022 121 C 0 0 0  
  
153 H 1 1.0960 2.0711 151 C 0 0 0  
153 H 1 1.7673 3.3397 155 H 0 0 0  
153 H 1 2.1729 4.1062 127 C 0 0 0  
153 H 1 2.1734 4.1071 113 C 0 0 0  
153 H 1 2.4978 4.7201 133 H 0 0 0  
153 H 1 2.5500 4.8187 109 H 0 0 0  
  
155 H 1 1.0976 2.0742 151 C 0 0 0  
155 H 1 1.7673 3.3397 153 H 0 0 0  
155 H 1 2.1640 4.0894 127 C 0 0 0  
155 H 1 2.1654 4.0920 113 C 0 0 0  
155 H 1 2.5175 4.7573 123 H 0 0 0  
155 H 1 2.5570 4.8320 119 H -1 0 0  
  
157 O 1 0.9856 1.8626 161 H 0 0 0  
157 O 1 1.4373 2.7161 159 O 0 0 0  
157 O 1 1.9047 3.5994 163 H 0 0 0  
157 O 1 2.6053 4.9233 28 H 0 0 0  
157 O 1 2.6516 5.0109 133 H 0 0 0  
157 O 1 2.6689 5.0435 5 O 0 0 0  
  
159 O 1 0.9870 1.8651 163 H 0 0 0  
159 O 1 1.4373 2.7161 157 O 0 0 0  
159 O 1 1.8939 3.5790 161 H 0 0 0  
159 O 1 2.5555 4.8292 153 H 0 0 0  
159 O 1 2.7486 5.1941 8 O 0 0 0  
159 O 1 2.8662 5.4163 146 H 0 0 0  
  
161 H 1 0.9856 1.8626 157 O 0 0 0  
161 H 1 1.6927 3.1987 5 O 0 0 0

|       |   |        |        |       |        |
|-------|---|--------|--------|-------|--------|
| 161 H | 1 | 1.8939 | 3.5790 | 159 O | 0 0 0  |
| 161 H | 1 | 2.2924 | 4.3320 | 163 H | 0 0 0  |
| 161 H | 1 | 2.3326 | 4.4079 | 28 H  | 0 0 0  |
| 161 H | 1 | 2.3534 | 4.4473 | 33 H  | 0 0 0  |
|       |   |        |        |       |        |
| 163 H | 1 | 0.9870 | 1.8651 | 159 O | 0 0 0  |
| 163 H | 1 | 1.7638 | 3.3330 | 8 O   | 0 0 0  |
| 163 H | 1 | 1.9047 | 3.5994 | 157 O | 0 0 0  |
| 163 H | 1 | 2.2924 | 4.3320 | 161 H | 0 0 0  |
| 163 H | 1 | 2.5239 | 4.7694 | 28 H  | 0 0 0  |
| 163 H | 1 | 2.6245 | 4.9596 | 146 H | 0 0 0  |
|       |   |        |        |       |        |
| 165 O | 1 | 0.9830 | 1.8575 | 167 H | 1 0 0  |
| 165 O | 1 | 1.4358 | 2.7132 | 169 O | 0 0-1  |
| 165 O | 1 | 1.9128 | 3.6146 | 171 H | 0 0-1  |
| 165 O | 1 | 2.6087 | 4.9298 | 55 H  | 0 0 0  |
| 165 O | 1 | 2.6843 | 5.0725 | 83 O  | 1 0 0  |
| 165 O | 1 | 2.8359 | 5.3591 | 75 H  | 0 0 0  |
|       |   |        |        |       |        |
| 167 H | 1 | 0.9830 | 1.8575 | 165 O | -1 0 0 |
| 167 H | 1 | 1.7241 | 3.2582 | 83 O  | 0 0 0  |
| 167 H | 1 | 1.9053 | 3.6004 | 169 O | -1 0-1 |
| 167 H | 1 | 2.3200 | 4.3842 | 171 H | -1 0-1 |
| 167 H | 1 | 2.5976 | 4.9087 | 111 H | 0 0 0  |
| 167 H | 1 | 2.6359 | 4.9811 | 106 H | 0 0-1  |
|       |   |        |        |       |        |
| 169 O | 1 | 0.9872 | 1.8655 | 171 H | 0 0 0  |
| 169 O | 1 | 1.4358 | 2.7132 | 165 O | 0 0 1  |
| 169 O | 1 | 1.9053 | 3.6004 | 167 H | 1 0 1  |
| 169 O | 1 | 2.5774 | 4.8706 | 78 H  | 0 0 0  |
| 169 O | 1 | 2.6441 | 4.9966 | 42 H  | 0 0 0  |
| 169 O | 1 | 2.7265 | 5.1522 | 86 O  | 0 0 0  |



171 H 1 0.9872 1.8655 169 O 0 0 0  
 171 H 1 1.7526 3.3119 86 O 0 0 0  
 171 H 1 1.9128 3.6146 165 O 0 0 1  
 171 H 1 2.3200 4.3842 167 H 1 0 1  
 171 H 1 2.3970 4.5297 106 H 1 0 0  
 171 H 1 2.5681 4.8530 100 C 0 0 0

SYMMETRY ALLOWED INTERNAL DEGREE(S) OF FREEDOM: 258

TTTTTTTTTTTTTTTTTTTTTTTTTTTTTTTTTTTT SYMM TELAPSE 1.65 TCPU 0.59

TTTTTTTTTTTTTTTTTTTTTTTTTTTTTTTTTTTT INT\_SCREEN TELAPSE 1.71 TCPU 0.64

\*\*\*\*\*

```

*
*
*   FFFF RRRR EEEE QQQ U U EEEE N N CCC Y Y   *
*   F  R R E  Q Q U U E  NN N C  YY   *
*   FFF  RRRR EEEE Q  Q U U EEEE N N N C  Y   *
*   F  R R E  Q QQ U U E  N NN C  Y   *
*   F  R R EEEE QQQ  UUU EEEE N N CCC Y   *

```

\* CALCULATION OF PHONON FREQUENCIES AT THE GAMMA POINT. \*

\* SYMMETRY IS EXPLOITED TO BUILD THE TOTAL HESSIAN MATRIX. \*

\* (F. PASCALE PHD THESIS TURIN-PARIS 2002) \*

\* INTENSITIES COMPUTED VIA THE BERRY PHASE APPROACH \*

```

*
*
* REFERENCES TO BE QUOTED WHEN USING THIS MODULE:
*
* F. Pascale, C.M. Zicovich-Wilson, F. Lopez, B. Civalleri
* R. Orlando, R. Dovesi
* The calculation of the vibration frequencies of crystalline
* compounds and its implementation in the CRYSTAL code
* J. Comput. Chem. 25 (2004) 888-897
*
* C.M. Zicovich-Wilson, F. Pascale, C. Roetti, V.R. Saunders,
* R. Orlando, R. Dovesi
* The calculation of the vibration frequencies of alpha-quartz:
* the effect of hamiltonian and basis set
* J. Comput. Chem. 25 (2004) 1873-1881
*****

```

#### ATOMS ISOTOPIC MASS (AMU) FOR FREQUENCY CALCULATION

```

1 I 126.9044 2 I 126.9044 3 I 126.9044 4 I 126.9044
5 O 15.9949 6 O 15.9949 7 O 15.9949 8 O 15.9949
9 N 14.0031 10 N 14.0031 11 N 14.0031 12 N 14.0031
13 C 12.0000 14 C 12.0000 15 C 12.0000 16 C 12.0000
17 H 1.0078 18 H 1.0078 19 H 1.0078 20 H 1.0078
21 C 12.0000 22 C 12.0000 23 C 12.0000 24 C 12.0000
25 H 1.0078 26 H 1.0078 27 H 1.0078 28 H 1.0078
29 C 12.0000 30 C 12.0000 31 H 1.0078 32 H 1.0078
33 H 1.0078 34 H 1.0078 35 C 12.0000 36 C 12.0000
37 C 12.0000 38 C 12.0000 39 H 1.0078 40 H 1.0078
41 H 1.0078 42 H 1.0078 43 C 12.0000 44 C 12.0000
45 H 1.0078 46 H 1.0078 47 H 1.0078 48 H 1.0078

```

|       |          |       |          |       |          |       |          |
|-------|----------|-------|----------|-------|----------|-------|----------|
| 49 C  | 12.0000  | 50 C  | 12.0000  | 51 C  | 12.0000  | 52 C  | 12.0000  |
| 53 H  | 1.0078   | 54 H  | 1.0078   | 55 H  | 1.0078   | 56 H  | 1.0078   |
| 57 C  | 12.0000  | 58 C  | 12.0000  | 59 H  | 1.0078   | 60 H  | 1.0078   |
| 61 H  | 1.0078   | 62 H  | 1.0078   | 63 H  | 1.0078   | 64 H  | 1.0078   |
| 65 C  | 12.0000  | 66 C  | 12.0000  | 67 H  | 1.0078   | 68 H  | 1.0078   |
| 69 H  | 1.0078   | 70 H  | 1.0078   | 71 H  | 1.0078   | 72 H  | 1.0078   |
| 73 C  | 12.0000  | 74 C  | 12.0000  | 75 H  | 1.0078   | 76 H  | 1.0078   |
| 77 H  | 1.0078   | 78 H  | 1.0078   | 79 I  | 126.9044 | 80 I  | 126.9044 |
| 81 I  | 126.9044 | 82 I  | 126.9044 | 83 O  | 15.9949  | 84 O  | 15.9949  |
| 85 O  | 15.9949  | 86 O  | 15.9949  | 87 N  | 14.0031  | 88 N  | 14.0031  |
| 89 N  | 14.0031  | 90 N  | 14.0031  | 91 C  | 12.0000  | 92 C  | 12.0000  |
| 93 C  | 12.0000  | 94 C  | 12.0000  | 95 H  | 1.0078   | 96 H  | 1.0078   |
| 97 H  | 1.0078   | 98 H  | 1.0078   | 99 C  | 12.0000  | 100 C | 12.0000  |
| 101 C | 12.0000  | 102 C | 12.0000  | 103 H | 1.0078   | 104 H | 1.0078   |
| 105 H | 1.0078   | 106 H | 1.0078   | 107 C | 12.0000  | 108 C | 12.0000  |
| 109 H | 1.0078   | 110 H | 1.0078   | 111 H | 1.0078   | 112 H | 1.0078   |
| 113 C | 12.0000  | 114 C | 12.0000  | 115 C | 12.0000  | 116 C | 12.0000  |
| 117 H | 1.0078   | 118 H | 1.0078   | 119 H | 1.0078   | 120 H | 1.0078   |
| 121 C | 12.0000  | 122 C | 12.0000  | 123 H | 1.0078   | 124 H | 1.0078   |
| 125 H | 1.0078   | 126 H | 1.0078   | 127 C | 12.0000  | 128 C | 12.0000  |
| 129 C | 12.0000  | 130 C | 12.0000  | 131 H | 1.0078   | 132 H | 1.0078   |
| 133 H | 1.0078   | 134 H | 1.0078   | 135 C | 12.0000  | 136 C | 12.0000  |
| 137 H | 1.0078   | 138 H | 1.0078   | 139 H | 1.0078   | 140 H | 1.0078   |
| 141 H | 1.0078   | 142 H | 1.0078   | 143 C | 12.0000  | 144 C | 12.0000  |
| 145 H | 1.0078   | 146 H | 1.0078   | 147 H | 1.0078   | 148 H | 1.0078   |
| 149 H | 1.0078   | 150 H | 1.0078   | 151 C | 12.0000  | 152 C | 12.0000  |
| 153 H | 1.0078   | 154 H | 1.0078   | 155 H | 1.0078   | 156 H | 1.0078   |
| 157 O | 15.9949  | 158 O | 15.9949  | 159 O | 15.9949  | 160 O | 15.9949  |
| 161 H | 1.0078   | 162 H | 1.0078   | 163 H | 1.0078   | 164 H | 1.0078   |
| 165 O | 15.9949  | 166 O | 15.9949  | 167 H | 1.0078   | 168 H | 1.0078   |
| 169 O | 15.9949  | 170 O | 15.9949  | 171 H | 1.0078   | 172 H | 1.0078   |

INFORMATION CONCERNING THE SCF+GRADIENT CALCULATIONS REQUIRED FOR  
 GENERATING FREQUENCIES. IN PRINCIPLE  $3N+1$  SCF + GRADIENT  
 CALCULATIONS ARE REQUIRED;  
 FOR EACH OF THEM THE REMAINING POINT SYMMETRY IS INDICATED.  
 POINT SYMMETRY PERMITS TO GENERATE GRADIENTS FOR DISPLACEMENT B  
 STARTING FROM THE GRADIENT GENERATED BY DISPLACEMENT A.

N LABEL SYMBOL DISPLACEMENT SYM.

1 EQUILIBRIUM GEOMETRY 2

|    |    |   |    |   |
|----|----|---|----|---|
| 2  | 1  | I | DX | 1 |
| 3  | 1  | I | DY | 1 |
| 4  | 1  | I | DZ | 1 |
| 5  | 3  | I | DX | 1 |
| 6  | 3  | I | DY | 1 |
| 7  | 3  | I | DZ | 1 |
| 8  | 5  | O | DX | 1 |
| 9  | 5  | O | DY | 1 |
| 10 | 5  | O | DZ | 1 |
| 11 | 7  | O | DX | 1 |
| 12 | 7  | O | DY | 1 |
| 13 | 7  | O | DZ | 1 |
| 14 | 9  | N | DX | 1 |
| 15 | 9  | N | DY | 1 |
| 16 | 9  | N | DZ | 1 |
| 17 | 11 | N | DX | 1 |
| 18 | 11 | N | DY | 1 |
| 19 | 11 | N | DZ | 1 |
| 20 | 13 | C | DX | 1 |
| 21 | 13 | C | DY | 1 |
| 22 | 13 | C | DZ | 1 |

|    |    |   |    |   |
|----|----|---|----|---|
| 23 | 15 | C | DX | 1 |
| 24 | 15 | C | DY | 1 |
| 25 | 15 | C | DZ | 1 |
| 26 | 17 | H | DX | 1 |
| 27 | 17 | H | DY | 1 |
| 28 | 17 | H | DZ | 1 |
| 29 | 19 | H | DX | 1 |
| 30 | 19 | H | DY | 1 |
| 31 | 19 | H | DZ | 1 |
| 32 | 21 | C | DX | 1 |
| 33 | 21 | C | DY | 1 |
| 34 | 21 | C | DZ | 1 |
| 35 | 23 | C | DX | 1 |
| 36 | 23 | C | DY | 1 |
| 37 | 23 | C | DZ | 1 |
| 38 | 25 | H | DX | 1 |
| 39 | 25 | H | DY | 1 |
| 40 | 25 | H | DZ | 1 |
| 41 | 27 | H | DX | 1 |
| 42 | 27 | H | DY | 1 |
| 43 | 27 | H | DZ | 1 |
| 44 | 29 | C | DX | 1 |
| 45 | 29 | C | DY | 1 |
| 46 | 29 | C | DZ | 1 |
| 47 | 31 | H | DX | 1 |
| 48 | 31 | H | DY | 1 |
| 49 | 31 | H | DZ | 1 |
| 50 | 33 | H | DX | 1 |
| 51 | 33 | H | DY | 1 |
| 52 | 33 | H | DZ | 1 |
| 53 | 35 | C | DX | 1 |
| 54 | 35 | C | DY | 1 |

|    |    |   |    |   |
|----|----|---|----|---|
| 55 | 35 | C | DZ | 1 |
| 56 | 37 | C | DX | 1 |
| 57 | 37 | C | DY | 1 |
| 58 | 37 | C | DZ | 1 |
| 59 | 39 | H | DX | 1 |
| 60 | 39 | H | DY | 1 |
| 61 | 39 | H | DZ | 1 |
| 62 | 41 | H | DX | 1 |
| 63 | 41 | H | DY | 1 |
| 64 | 41 | H | DZ | 1 |
| 65 | 43 | C | DX | 1 |
| 66 | 43 | C | DY | 1 |
| 67 | 43 | C | DZ | 1 |
| 68 | 45 | H | DX | 1 |
| 69 | 45 | H | DY | 1 |
| 70 | 45 | H | DZ | 1 |
| 71 | 47 | H | DX | 1 |
| 72 | 47 | H | DY | 1 |
| 73 | 47 | H | DZ | 1 |
| 74 | 49 | C | DX | 1 |
| 75 | 49 | C | DY | 1 |
| 76 | 49 | C | DZ | 1 |
| 77 | 51 | C | DX | 1 |
| 78 | 51 | C | DY | 1 |
| 79 | 51 | C | DZ | 1 |
| 80 | 53 | H | DX | 1 |
| 81 | 53 | H | DY | 1 |
| 82 | 53 | H | DZ | 1 |
| 83 | 55 | H | DX | 1 |
| 84 | 55 | H | DY | 1 |
| 85 | 55 | H | DZ | 1 |
| 86 | 57 | C | DX | 1 |

|     |    |   |    |   |
|-----|----|---|----|---|
| 87  | 57 | C | DY | 1 |
| 88  | 57 | C | DZ | 1 |
| 89  | 59 | H | DX | 1 |
| 90  | 59 | H | DY | 1 |
| 91  | 59 | H | DZ | 1 |
| 92  | 61 | H | DX | 1 |
| 93  | 61 | H | DY | 1 |
| 94  | 61 | H | DZ | 1 |
| 95  | 63 | H | DX | 1 |
| 96  | 63 | H | DY | 1 |
| 97  | 63 | H | DZ | 1 |
| 98  | 65 | C | DX | 1 |
| 99  | 65 | C | DY | 1 |
| 100 | 65 | C | DZ | 1 |
| 101 | 67 | H | DX | 1 |
| 102 | 67 | H | DY | 1 |
| 103 | 67 | H | DZ | 1 |
| 104 | 69 | H | DX | 1 |
| 105 | 69 | H | DY | 1 |
| 106 | 69 | H | DZ | 1 |
| 107 | 71 | H | DX | 1 |
| 108 | 71 | H | DY | 1 |
| 109 | 71 | H | DZ | 1 |
| 110 | 73 | C | DX | 1 |
| 111 | 73 | C | DY | 1 |
| 112 | 73 | C | DZ | 1 |
| 113 | 75 | H | DX | 1 |
| 114 | 75 | H | DY | 1 |
| 115 | 75 | H | DZ | 1 |
| 116 | 77 | H | DX | 1 |
| 117 | 77 | H | DY | 1 |
| 118 | 77 | H | DZ | 1 |

|     |    |   |    |   |
|-----|----|---|----|---|
| 119 | 79 | I | DX | 1 |
| 120 | 79 | I | DY | 1 |
| 121 | 79 | I | DZ | 1 |
| 122 | 81 | I | DX | 1 |
| 123 | 81 | I | DY | 1 |
| 124 | 81 | I | DZ | 1 |
| 125 | 83 | O | DX | 1 |
| 126 | 83 | O | DY | 1 |
| 127 | 83 | O | DZ | 1 |
| 128 | 85 | O | DX | 1 |
| 129 | 85 | O | DY | 1 |
| 130 | 85 | O | DZ | 1 |
| 131 | 87 | N | DX | 1 |
| 132 | 87 | N | DY | 1 |
| 133 | 87 | N | DZ | 1 |
| 134 | 89 | N | DX | 1 |
| 135 | 89 | N | DY | 1 |
| 136 | 89 | N | DZ | 1 |
| 137 | 91 | C | DX | 1 |
| 138 | 91 | C | DY | 1 |
| 139 | 91 | C | DZ | 1 |
| 140 | 93 | C | DX | 1 |
| 141 | 93 | C | DY | 1 |
| 142 | 93 | C | DZ | 1 |
| 143 | 95 | H | DX | 1 |
| 144 | 95 | H | DY | 1 |
| 145 | 95 | H | DZ | 1 |
| 146 | 97 | H | DX | 1 |
| 147 | 97 | H | DY | 1 |
| 148 | 97 | H | DZ | 1 |
| 149 | 99 | C | DX | 1 |
| 150 | 99 | C | DY | 1 |



|     |     |   |    |   |
|-----|-----|---|----|---|
| 151 | 99  | C | DZ | 1 |
| 152 | 101 | C | DX | 1 |
| 153 | 101 | C | DY | 1 |
| 154 | 101 | C | DZ | 1 |
| 155 | 103 | H | DX | 1 |
| 156 | 103 | H | DY | 1 |
| 157 | 103 | H | DZ | 1 |
| 158 | 105 | H | DX | 1 |
| 159 | 105 | H | DY | 1 |
| 160 | 105 | H | DZ | 1 |
| 161 | 107 | C | DX | 1 |
| 162 | 107 | C | DY | 1 |
| 163 | 107 | C | DZ | 1 |
| 164 | 109 | H | DX | 1 |
| 165 | 109 | H | DY | 1 |
| 166 | 109 | H | DZ | 1 |
| 167 | 111 | H | DX | 1 |
| 168 | 111 | H | DY | 1 |
| 169 | 111 | H | DZ | 1 |
| 170 | 113 | C | DX | 1 |
| 171 | 113 | C | DY | 1 |
| 172 | 113 | C | DZ | 1 |
| 173 | 115 | C | DX | 1 |
| 174 | 115 | C | DY | 1 |
| 175 | 115 | C | DZ | 1 |
| 176 | 117 | H | DX | 1 |
| 177 | 117 | H | DY | 1 |
| 178 | 117 | H | DZ | 1 |
| 179 | 119 | H | DX | 1 |
| 180 | 119 | H | DY | 1 |
| 181 | 119 | H | DZ | 1 |
| 182 | 121 | C | DX | 1 |

|     |     |   |    |   |
|-----|-----|---|----|---|
| 183 | 121 | C | DY | 1 |
| 184 | 121 | C | DZ | 1 |
| 185 | 123 | H | DX | 1 |
| 186 | 123 | H | DY | 1 |
| 187 | 123 | H | DZ | 1 |
| 188 | 125 | H | DX | 1 |
| 189 | 125 | H | DY | 1 |
| 190 | 125 | H | DZ | 1 |
| 191 | 127 | C | DX | 1 |
| 192 | 127 | C | DY | 1 |
| 193 | 127 | C | DZ | 1 |
| 194 | 129 | C | DX | 1 |
| 195 | 129 | C | DY | 1 |
| 196 | 129 | C | DZ | 1 |
| 197 | 131 | H | DX | 1 |
| 198 | 131 | H | DY | 1 |
| 199 | 131 | H | DZ | 1 |
| 200 | 133 | H | DX | 1 |
| 201 | 133 | H | DY | 1 |
| 202 | 133 | H | DZ | 1 |
| 203 | 135 | C | DX | 1 |
| 204 | 135 | C | DY | 1 |
| 205 | 135 | C | DZ | 1 |
| 206 | 137 | H | DX | 1 |
| 207 | 137 | H | DY | 1 |
| 208 | 137 | H | DZ | 1 |
| 209 | 139 | H | DX | 1 |
| 210 | 139 | H | DY | 1 |
| 211 | 139 | H | DZ | 1 |
| 212 | 141 | H | DX | 1 |
| 213 | 141 | H | DY | 1 |
| 214 | 141 | H | DZ | 1 |

|     |     |   |    |   |
|-----|-----|---|----|---|
| 215 | 143 | C | DX | 1 |
| 216 | 143 | C | DY | 1 |
| 217 | 143 | C | DZ | 1 |
| 218 | 145 | H | DX | 1 |
| 219 | 145 | H | DY | 1 |
| 220 | 145 | H | DZ | 1 |
| 221 | 147 | H | DX | 1 |
| 222 | 147 | H | DY | 1 |
| 223 | 147 | H | DZ | 1 |
| 224 | 149 | H | DX | 1 |
| 225 | 149 | H | DY | 1 |
| 226 | 149 | H | DZ | 1 |
| 227 | 151 | C | DX | 1 |
| 228 | 151 | C | DY | 1 |
| 229 | 151 | C | DZ | 1 |
| 230 | 153 | H | DX | 1 |
| 231 | 153 | H | DY | 1 |
| 232 | 153 | H | DZ | 1 |
| 233 | 155 | H | DX | 1 |
| 234 | 155 | H | DY | 1 |
| 235 | 155 | H | DZ | 1 |
| 236 | 157 | O | DX | 1 |
| 237 | 157 | O | DY | 1 |
| 238 | 157 | O | DZ | 1 |
| 239 | 159 | O | DX | 1 |
| 240 | 159 | O | DY | 1 |
| 241 | 159 | O | DZ | 1 |
| 242 | 161 | H | DX | 1 |
| 243 | 161 | H | DY | 1 |
| 244 | 161 | H | DZ | 1 |
| 245 | 163 | H | DX | 1 |
| 246 | 163 | H | DY | 1 |

|     |     |   |    |   |
|-----|-----|---|----|---|
| 247 | 163 | H | DZ | 1 |
| 248 | 165 | O | DX | 1 |
| 249 | 165 | O | DY | 1 |
| 250 | 165 | O | DZ | 1 |
| 251 | 167 | H | DX | 1 |
| 252 | 167 | H | DY | 1 |
| 253 | 167 | H | DZ | 1 |
| 254 | 169 | O | DX | 1 |
| 255 | 169 | O | DY | 1 |
| 256 | 169 | O | DZ | 1 |
| 257 | 171 | H | DX | 1 |
| 258 | 171 | H | DY | 1 |
| 259 | 171 | H | DZ | 1 |

USE OF RESIDUAL SYMMETRY AFTER DISPLACEMENT

NUMERICAL GRADIENT COMPUTED WITH A SINGLE DISPLACEMENT (+DX) FOR EACH  
CARTESIAN COORDINATE WITH RESPECT TO THE EQUILIBRIUM CONFIGURATION

DX= 0.003 ANGSTROM

NUMBER OF IRREDUCIBLE ATOMS           86

NUMBER OF SCF+GRADIENT CALCULATIONS   259

ATOM SYMOP ORDER

|    |   |   |
|----|---|---|
| 1  | 1 | 1 |
| 3  | 1 | 1 |
| 5  | 1 | 1 |
| 7  | 1 | 1 |
| 9  | 1 | 1 |
| 11 | 1 | 1 |
| 13 | 1 | 1 |
| 15 | 1 | 1 |
| 17 | 1 | 1 |
| 19 | 1 | 1 |

|    |   |   |
|----|---|---|
| 21 | 1 | 1 |
| 23 | 1 | 1 |
| 25 | 1 | 1 |
| 27 | 1 | 1 |
| 29 | 1 | 1 |
| 31 | 1 | 1 |
| 33 | 1 | 1 |
| 35 | 1 | 1 |
| 37 | 1 | 1 |
| 39 | 1 | 1 |
| 41 | 1 | 1 |
| 43 | 1 | 1 |
| 45 | 1 | 1 |
| 47 | 1 | 1 |
| 49 | 1 | 1 |
| 51 | 1 | 1 |
| 53 | 1 | 1 |
| 55 | 1 | 1 |
| 57 | 1 | 1 |
| 59 | 1 | 1 |
| 61 | 1 | 1 |
| 63 | 1 | 1 |
| 65 | 1 | 1 |
| 67 | 1 | 1 |
| 69 | 1 | 1 |
| 71 | 1 | 1 |
| 73 | 1 | 1 |
| 75 | 1 | 1 |
| 77 | 1 | 1 |
| 79 | 1 | 1 |
| 81 | 1 | 1 |
| 83 | 1 | 1 |

|     |   |   |
|-----|---|---|
| 85  | 1 | 1 |
| 87  | 1 | 1 |
| 89  | 1 | 1 |
| 91  | 1 | 1 |
| 93  | 1 | 1 |
| 95  | 1 | 1 |
| 97  | 1 | 1 |
| 99  | 1 | 1 |
| 101 | 1 | 1 |
| 103 | 1 | 1 |
| 105 | 1 | 1 |
| 107 | 1 | 1 |
| 109 | 1 | 1 |
| 111 | 1 | 1 |
| 113 | 1 | 1 |
| 115 | 1 | 1 |
| 117 | 1 | 1 |
| 119 | 1 | 1 |
| 121 | 1 | 1 |
| 123 | 1 | 1 |
| 125 | 1 | 1 |
| 127 | 1 | 1 |
| 129 | 1 | 1 |
| 131 | 1 | 1 |
| 133 | 1 | 1 |
| 135 | 1 | 1 |
| 137 | 1 | 1 |
| 139 | 1 | 1 |
| 141 | 1 | 1 |
| 143 | 1 | 1 |
| 145 | 1 | 1 |
| 147 | 1 | 1 |







|         |                                    |
|---------|------------------------------------|
| 7 O DY  | RESTORED FROM A PREV. HESS. MATRIX |
| 7 O DZ  | RESTORED FROM A PREV. HESS. MATRIX |
| 9 N DX  | RESTORED FROM A PREV. HESS. MATRIX |
| 9 N DY  | RESTORED FROM A PREV. HESS. MATRIX |
| 9 N DZ  | RESTORED FROM A PREV. HESS. MATRIX |
| 11 N DX | RESTORED FROM A PREV. HESS. MATRIX |
| 11 N DY | RESTORED FROM A PREV. HESS. MATRIX |
| 11 N DZ | RESTORED FROM A PREV. HESS. MATRIX |
| 13 C DX | RESTORED FROM A PREV. HESS. MATRIX |
| 13 C DY | RESTORED FROM A PREV. HESS. MATRIX |
| 13 C DZ | RESTORED FROM A PREV. HESS. MATRIX |
| 15 C DX | RESTORED FROM A PREV. HESS. MATRIX |
| 15 C DY | RESTORED FROM A PREV. HESS. MATRIX |
| 15 C DZ | RESTORED FROM A PREV. HESS. MATRIX |
| 17 H DX | RESTORED FROM A PREV. HESS. MATRIX |
| 17 H DY | RESTORED FROM A PREV. HESS. MATRIX |
| 17 H DZ | RESTORED FROM A PREV. HESS. MATRIX |
| 19 H DX | RESTORED FROM A PREV. HESS. MATRIX |
| 19 H DY | RESTORED FROM A PREV. HESS. MATRIX |
| 19 H DZ | RESTORED FROM A PREV. HESS. MATRIX |
| 21 C DX | RESTORED FROM A PREV. HESS. MATRIX |
| 21 C DY | RESTORED FROM A PREV. HESS. MATRIX |
| 21 C DZ | RESTORED FROM A PREV. HESS. MATRIX |
| 23 C DX | RESTORED FROM A PREV. HESS. MATRIX |
| 23 C DY | RESTORED FROM A PREV. HESS. MATRIX |
| 23 C DZ | RESTORED FROM A PREV. HESS. MATRIX |
| 25 H DX | RESTORED FROM A PREV. HESS. MATRIX |
| 25 H DY | RESTORED FROM A PREV. HESS. MATRIX |
| 25 H DZ | RESTORED FROM A PREV. HESS. MATRIX |
| 27 H DX | RESTORED FROM A PREV. HESS. MATRIX |
| 27 H DY | RESTORED FROM A PREV. HESS. MATRIX |
| 27 H DZ | RESTORED FROM A PREV. HESS. MATRIX |

|         |                                    |
|---------|------------------------------------|
| 29 C DX | RESTORED FROM A PREV. HESS. MATRIX |
| 29 C DY | RESTORED FROM A PREV. HESS. MATRIX |
| 29 C DZ | RESTORED FROM A PREV. HESS. MATRIX |
| 31 H DX | RESTORED FROM A PREV. HESS. MATRIX |
| 31 H DY | RESTORED FROM A PREV. HESS. MATRIX |
| 31 H DZ | RESTORED FROM A PREV. HESS. MATRIX |
| 33 H DX | RESTORED FROM A PREV. HESS. MATRIX |
| 33 H DY | RESTORED FROM A PREV. HESS. MATRIX |
| 33 H DZ | RESTORED FROM A PREV. HESS. MATRIX |
| 35 C DX | RESTORED FROM A PREV. HESS. MATRIX |
| 35 C DY | RESTORED FROM A PREV. HESS. MATRIX |
| 35 C DZ | RESTORED FROM A PREV. HESS. MATRIX |
| 37 C DX | RESTORED FROM A PREV. HESS. MATRIX |
| 37 C DY | RESTORED FROM A PREV. HESS. MATRIX |
| 37 C DZ | RESTORED FROM A PREV. HESS. MATRIX |
| 39 H DX | RESTORED FROM A PREV. HESS. MATRIX |
| 39 H DY | RESTORED FROM A PREV. HESS. MATRIX |
| 39 H DZ | RESTORED FROM A PREV. HESS. MATRIX |
| 41 H DX | RESTORED FROM A PREV. HESS. MATRIX |
| 41 H DY | RESTORED FROM A PREV. HESS. MATRIX |
| 41 H DZ | RESTORED FROM A PREV. HESS. MATRIX |
| 43 C DX | RESTORED FROM A PREV. HESS. MATRIX |
| 43 C DY | RESTORED FROM A PREV. HESS. MATRIX |
| 43 C DZ | RESTORED FROM A PREV. HESS. MATRIX |
| 45 H DX | RESTORED FROM A PREV. HESS. MATRIX |
| 45 H DY | RESTORED FROM A PREV. HESS. MATRIX |
| 45 H DZ | RESTORED FROM A PREV. HESS. MATRIX |
| 47 H DX | RESTORED FROM A PREV. HESS. MATRIX |
| 47 H DY | RESTORED FROM A PREV. HESS. MATRIX |
| 47 H DZ | RESTORED FROM A PREV. HESS. MATRIX |
| 49 C DX | RESTORED FROM A PREV. HESS. MATRIX |
| 49 C DY | RESTORED FROM A PREV. HESS. MATRIX |

|         |                                    |                     |    |            |   |  |
|---------|------------------------------------|---------------------|----|------------|---|--|
| 49 C DZ | RESTORED FROM A PREV. HESS. MATRIX |                     |    |            |   |  |
| 51 C DX | RESTORED FROM A PREV. HESS. MATRIX |                     |    |            |   |  |
| 51 C DY | RESTORED FROM A PREV. HESS. MATRIX |                     |    |            |   |  |
| 51 C DZ | RESTORED FROM A PREV. HESS. MATRIX |                     |    |            |   |  |
| 53 H DX | RESTORED FROM A PREV. HESS. MATRIX |                     |    |            |   |  |
| 53 H DY | RESTORED FROM A PREV. HESS. MATRIX |                     |    |            |   |  |
| 53 H DZ | RESTORED FROM A PREV. HESS. MATRIX |                     |    |            |   |  |
| 55 H DX | 5.6429E-04                         | -6.039543487358E+03 | 11 | 1.9700E-06 | 1 |  |
| 55 H DY | 1.1772E-03                         | -6.039543485451E+03 | 11 | 3.8771E-06 | 1 |  |
| 55 H DZ | 8.5534E-04                         | -6.039543486806E+03 | 12 | 2.5228E-06 | 1 |  |
| 57 C DX | 3.0350E-03                         | -6.039543480880E+03 | 12 | 8.4486E-06 | 1 |  |
| 57 C DY | 3.1923E-03                         | -6.039543480317E+03 | 12 | 9.0118E-06 | 1 |  |
| 57 C DZ | 3.3002E-03                         | -6.039543480038E+03 | 16 | 9.2900E-06 | 1 |  |
| 59 H DX | 5.3608E-04                         | -6.039543487563E+03 | 12 | 1.7651E-06 | 1 |  |
| 59 H DY | 1.2815E-03                         | -6.039543485287E+03 | 13 | 4.0409E-06 | 1 |  |
| 59 H DZ | 7.2230E-04                         | -6.039543487200E+03 | 12 | 2.1282E-06 | 1 |  |
| 61 H DX | 8.2990E-04                         | -6.039543486971E+03 | 11 | 2.3569E-06 | 1 |  |
| 61 H DY | 4.9549E-04                         | -6.039543487909E+03 | 10 | 1.4196E-06 | 1 |  |
| 61 H DZ | 1.1891E-03                         | -6.039543486003E+03 | 12 | 3.3252E-06 | 1 |  |
| 63 H DX | 8.4989E-04                         | -6.039543486765E+03 | 11 | 2.5633E-06 | 1 |  |
| 63 H DY | 7.7357E-04                         | -6.039543487160E+03 | 13 | 2.1684E-06 | 1 |  |
| 63 H DZ | 9.2317E-04                         | -6.039543486591E+03 | 11 | 2.7370E-06 | 1 |  |
| 65 C DX | 3.1630E-03                         | -6.039543480447E+03 | 12 | 8.8813E-06 | 1 |  |
| 65 C DY | 3.3302E-03                         | -6.039543479688E+03 | 13 | 9.6399E-06 | 1 |  |
| 65 C DZ | 3.0438E-03                         | -6.039543481413E+03 | 12 | 7.9156E-06 | 1 |  |
| 67 H DX | 7.6323E-04                         | -6.039543487256E+03 | 12 | 2.0721E-06 | 1 |  |
| 67 H DY | 8.2870E-04                         | -6.039543487011E+03 | 11 | 2.3168E-06 | 1 |  |
| 67 H DZ | 9.4682E-04                         | -6.039543486468E+03 | 14 | 2.8600E-06 | 1 |  |
| 69 H DX | 1.1823E-03                         | -6.039543485984E+03 | 11 | 3.3443E-06 | 1 |  |
| 69 H DY | 8.0235E-04                         | -6.039543487126E+03 | 11 | 2.2026E-06 | 1 |  |
| 69 H DZ | 5.3382E-04                         | -6.039543487619E+03 | 12 | 1.7095E-06 | 1 |  |
| 71 H DX | 5.6123E-04                         | -6.039543487736E+03 | 11 | 1.5927E-06 | 1 |  |

|         |            |                     |    |             |   |
|---------|------------|---------------------|----|-------------|---|
| 71 H DY | 1.2251E-03 | -6.039543485704E+03 | 12 | 3.6245E-06  | 1 |
| 71 H DZ | 7.5637E-04 | -6.039543486850E+03 | 11 | 2.4784E-06  | 1 |
| 73 C DX | 3.0050E-03 | -6.039543479625E+03 | 12 | 9.7033E-06  | 1 |
| 73 C DY | 3.2996E-03 | -6.039543480295E+03 | 11 | 9.0334E-06  | 1 |
| 73 C DZ | 3.1726E-03 | -6.039543480038E+03 | 12 | 9.2903E-06  | 1 |
| 75 H DX | 5.6804E-04 | -6.039543487682E+03 | 13 | 1.6461E-06  | 1 |
| 75 H DY | 1.2086E-03 | -6.039543485732E+03 | 10 | 3.5961E-06  | 1 |
| 75 H DZ | 7.6803E-04 | -6.039543486849E+03 | 11 | 2.4793E-06  | 1 |
| 77 H DX | 8.2680E-04 | -6.039543487041E+03 | 11 | 2.2877E-06  | 1 |
| 77 H DY | 8.2608E-04 | -6.039543487156E+03 | 10 | 2.1726E-06  | 1 |
| 77 H DZ | 9.2199E-04 | -6.039543486271E+03 | 12 | 3.0572E-06  | 1 |
| 79 I DX | 5.0819E-04 | -6.039543480206E+03 | 20 | 9.1224E-06  | 1 |
| 79 I DY | 5.5501E-04 | -6.039543488645E+03 | 12 | 6.8343E-07  | 1 |
| 79 I DZ | 1.9130E-04 | -6.039543489460E+03 | 8  | -1.3125E-07 | 1 |
| 81 I DX | 5.6454E-04 | -6.039543488650E+03 | 16 | 6.7810E-07  | 1 |
| 81 I DY | 4.1704E-04 | -6.039543487173E+03 | 12 | 2.1556E-06  | 1 |
| 81 I DZ | 1.9480E-04 | -6.039543489118E+03 | 12 | 2.0987E-07  | 1 |
| 83 O DX | 2.9904E-03 | -6.039543481197E+03 | 12 | 8.1316E-06  | 1 |
| 83 O DY | 6.8609E-04 | -6.039543487936E+03 | 14 | 1.3923E-06  | 1 |
| 83 O DZ | 1.6508E-03 | -6.039543485118E+03 | 13 | 4.2106E-06  | 1 |
| 85 O DX | 2.5795E-03 | -6.039543481206E+03 | 13 | 8.1223E-06  | 1 |
| 85 O DY | 1.5860E-03 | -6.039543484918E+03 | 14 | 4.4100E-06  | 1 |
| 85 O DZ | 9.6859E-04 | -6.039543487326E+03 | 11 | 2.0026E-06  | 1 |
| 87 N DX | 3.2526E-03 | -6.039543480438E+03 | 11 | 8.8904E-06  | 1 |
| 87 N DY | 1.0300E-03 | -6.039543486699E+03 | 13 | 2.6296E-06  | 1 |
| 87 N DZ | 4.4654E-03 | -6.039543475828E+03 | 12 | 1.3500E-05  | 1 |
| 89 N DX | 3.1994E-03 | -6.039543479013E+03 | 13 | 1.0316E-05  | 1 |
| 89 N DY | 1.8272E-03 | -6.039543483175E+03 | 14 | 6.1533E-06  | 1 |
| 89 N DZ | 3.6032E-03 | -6.039543478954E+03 | 15 | 1.0374E-05  | 1 |
| 91 C DX | 4.3578E-03 | -6.039543477878E+03 | 13 | 1.1450E-05  | 1 |
| 91 C DY | 1.5493E-03 | -6.039543484998E+03 | 13 | 4.3299E-06  | 1 |
| 91 C DZ | 4.3788E-03 | -6.039543476761E+03 | 13 | 1.2567E-05  | 1 |

|          |            |                     |    |            |   |
|----------|------------|---------------------|----|------------|---|
| 93 C DX  | 2.4106E-03 | -6.039543482674E+03 | 14 | 6.6541E-06 | 1 |
| 93 C DY  | 2.3798E-03 | -6.039543481977E+03 | 18 | 7.3514E-06 | 1 |
| 93 C DZ  | 3.2791E-03 | -6.039543480712E+03 | 14 | 8.6167E-06 | 1 |
| 95 H DX  | 6.7572E-04 | -6.039543485118E+03 | 12 | 4.2102E-06 | 1 |
| 95 H DY  | 1.2974E-03 | -6.039543485408E+03 | 15 | 3.9205E-06 | 1 |
| 95 H DZ  | 6.3760E-04 | -6.039543486907E+03 | 15 | 2.4216E-06 | 1 |
| 97 H DX  | 5.1911E-04 | -6.039543488532E+03 | 12 | 7.9608E-07 | 1 |
| 97 H DY  | 4.0409E-04 | -6.039543487829E+03 | 11 | 1.4995E-06 | 1 |
| 97 H DZ  | 1.8578E-03 | -6.039543483535E+03 | 12 | 5.7933E-06 | 1 |
| 99 C DX  | 4.0872E-03 | -6.039543479019E+03 | 13 | 1.0309E-05 | 1 |
| 99 C DY  | 2.7210E-03 | -6.039543481511E+03 | 13 | 7.8174E-06 | 1 |
| 99 C DZ  | 3.4694E-03 | -6.039543478170E+03 | 13 | 1.1158E-05 | 1 |
| 101 C DX | 2.2152E-03 | -6.039543482583E+03 | 15 | 6.7450E-06 | 1 |
| 101 C DY | 2.8054E-03 | -6.039543482034E+03 | 13 | 7.2943E-06 | 1 |
| 101 C DZ | 2.9873E-03 | -6.039543480569E+03 | 13 | 8.7591E-06 | 1 |
| 103 H DX | 6.3853E-04 | -6.039543487589E+03 | 16 | 1.7397E-06 | 1 |
| 103 H DY | 1.7911E-03 | -6.039543485178E+03 | 14 | 4.1506E-06 | 1 |
| 103 H DZ | 2.9973E-04 | -6.039543488365E+03 | 6  | 9.6379E-07 | 1 |
| 105 H DX | 3.9309E-04 | -6.039543488134E+03 | 14 | 1.1939E-06 | 1 |
| 105 H DY | 5.5719E-04 | -6.039543487223E+03 | 12 | 2.1053E-06 | 1 |
| 105 H DZ | 1.7913E-03 | -6.039543484400E+03 | 12 | 4.9279E-06 | 1 |
| 107 C DX | 3.1380E-03 | -6.039543481002E+03 | 14 | 8.3264E-06 | 1 |
| 107 C DY | 3.1012E-03 | -6.039543479465E+03 | 11 | 9.8629E-06 | 1 |
| 107 C DZ | 3.2950E-03 | -6.039543480371E+03 | 13 | 8.9570E-06 | 1 |
| 109 H DX | 3.7364E-04 | -6.039543488007E+03 | 13 | 1.3211E-06 | 1 |
| 109 H DY | 1.4981E-03 | -6.039543485439E+03 | 12 | 3.8897E-06 | 1 |
| 109 H DZ | 7.2820E-04 | -6.039543486920E+03 | 10 | 2.4085E-06 | 1 |
| 111 H DX | 1.2550E-03 | -6.039543485832E+03 | 11 | 3.4966E-06 | 1 |
| 111 H DY | 3.3621E-04 | -6.039543488539E+03 | 10 | 7.8976E-07 | 1 |
| 111 H DZ | 1.0889E-03 | -6.039543486341E+03 | 11 | 2.9876E-06 | 1 |
| 113 C DX | 3.0684E-03 | -6.039543480404E+03 | 13 | 8.9244E-06 | 1 |
| 113 C DY | 2.9297E-03 | -6.039543481547E+03 | 11 | 7.7818E-06 | 1 |

|          |            |                     |    |            |   |
|----------|------------|---------------------|----|------------|---|
| 113 C DZ | 2.8813E-03 | -6.039543480849E+03 | 13 | 8.4791E-06 | 1 |
| 115 C DX | 3.1970E-03 | -6.039543480478E+03 | 13 | 8.8504E-06 | 1 |
| 115 C DY | 2.8711E-03 | -6.039543481397E+03 | 12 | 7.9315E-06 | 1 |
| 115 C DZ | 3.3728E-03 | -6.039543479493E+03 | 12 | 9.8350E-06 | 1 |
| 117 H DX | 1.1758E-03 | -6.039543485925E+03 | 12 | 3.4033E-06 | 1 |
| 117 H DY | 3.4935E-04 | -6.039543488551E+03 | 10 | 7.7734E-07 | 1 |
| 117 H DZ | 1.1451E-03 | -6.039543486430E+03 | 12 | 2.8980E-06 | 1 |
| 119 H DX | 5.2227E-04 | -6.039543487269E+03 | 11 | 2.0588E-06 | 1 |
| 119 H DY | 1.0093E-03 | -6.039543486365E+03 | 11 | 2.9631E-06 | 1 |
| 119 H DZ | 1.0172E-03 | -6.039543486475E+03 | 16 | 2.8532E-06 | 1 |
| 121 C DX | 3.1026E-03 | -6.039543480493E+03 | 14 | 8.8353E-06 | 1 |
| 121 C DY | 3.0524E-03 | -6.039543481264E+03 | 13 | 8.0646E-06 | 1 |
| 121 C DZ | 3.3743E-03 | -6.039543479115E+03 | 13 | 1.0213E-05 | 1 |
| 123 H DX | 3.4479E-04 | -6.039543488560E+03 | 12 | 7.6846E-07 | 1 |
| 123 H DY | 1.1293E-03 | -6.039543485766E+03 | 11 | 3.5620E-06 | 1 |
| 123 H DZ | 1.1005E-03 | -6.039543486518E+03 | 11 | 2.8103E-06 | 1 |
| 125 H DX | 1.2712E-03 | -6.039543485313E+03 | 12 | 4.0156E-06 | 1 |
| 125 H DY | 4.4443E-04 | -6.039543487343E+03 | 12 | 1.9858E-06 | 1 |
| 125 H DZ | 9.5635E-04 | -6.039543487002E+03 | 13 | 2.3265E-06 | 1 |
| 127 C DX | 3.0684E-03 | -6.039543478603E+03 | 14 | 1.0725E-05 | 1 |
| 127 C DY | 2.9447E-03 | -6.039543480792E+03 | 13 | 8.5359E-06 | 1 |
| 127 C DZ | 2.8701E-03 | -6.039543481702E+03 | 11 | 7.6267E-06 | 1 |
| 129 C DX | 3.3057E-03 | -6.039543480878E+03 | 12 | 8.4504E-06 | 1 |
| 129 C DY | 3.0147E-03 | -6.039543480222E+03 | 13 | 9.1062E-06 | 1 |
| 129 C DZ | 3.1505E-03 | -6.039543480022E+03 | 13 | 9.3066E-06 | 1 |
| 131 H DX | 1.3513E-03 | -6.039543485012E+03 | 11 | 4.3158E-06 | 1 |
| 131 H DY | 3.9988E-04 | -6.039543487562E+03 | 15 | 1.7668E-06 | 1 |
| 131 H DZ | 9.1279E-04 | -6.039543487236E+03 | 11 | 2.0927E-06 | 1 |
| 133 H DX | 4.3182E-04 | -6.039543488226E+03 | 12 | 1.1026E-06 | 1 |
| 133 H DY | 1.3994E-03 | -6.039543485727E+03 | 11 | 3.6014E-06 | 1 |
| 133 H DZ | 7.7248E-04 | -6.039543487130E+03 | 12 | 2.1985E-06 | 1 |
| 135 C DX | 2.9752E-03 | -6.039543481397E+03 | 13 | 7.9314E-06 | 1 |

|          |            |                     |    |            |   |
|----------|------------|---------------------|----|------------|---|
| 135 C DY | 3.3439E-03 | -6.039543479907E+03 | 10 | 9.4209E-06 | 1 |
| 135 C DZ | 3.2109E-03 | -6.039543479467E+03 | 11 | 9.8611E-06 | 1 |
| 137 H DX | 3.6300E-04 | -6.039543488136E+03 | 11 | 1.1921E-06 | 1 |
| 137 H DY | 1.4876E-03 | -6.039543485403E+03 | 12 | 3.9250E-06 | 1 |
| 137 H DZ | 7.3114E-04 | -6.039543487379E+03 | 10 | 1.9493E-06 | 1 |
| 139 H DX | 1.2861E-03 | -6.039543485400E+03 | 11 | 3.9281E-06 | 1 |
| 139 H DY | 3.2103E-04 | -6.039543488376E+03 | 11 | 9.5232E-07 | 1 |
| 139 H DZ | 9.0846E-04 | -6.039543486522E+03 | 12 | 2.8062E-06 | 1 |
| 141 H DX | 4.1265E-04 | -6.039543488001E+03 | 10 | 1.3275E-06 | 1 |
| 141 H DY | 1.1185E-03 | -6.039543485971E+03 | 12 | 3.3569E-06 | 1 |
| 141 H DZ | 9.9288E-04 | -6.039543486717E+03 | 11 | 2.6118E-06 | 1 |
| 143 C DX | 2.9471E-03 | -6.039543480692E+03 | 11 | 8.6362E-06 | 1 |
| 143 C DY | 3.4089E-03 | -6.039543479968E+03 | 13 | 9.3599E-06 | 1 |
| 143 C DZ | 3.1761E-03 | -6.039543480038E+03 | 11 | 9.2902E-06 | 1 |
| 145 H DX | 3.5583E-04 | -6.039543488443E+03 | 11 | 8.8574E-07 | 1 |
| 145 H DY | 1.1415E-03 | -6.039543485849E+03 | 10 | 3.4791E-06 | 1 |
| 145 H DZ | 1.0450E-03 | -6.039543486493E+03 | 8  | 2.8352E-06 | 1 |
| 147 H DX | 1.2978E-03 | -6.039543485373E+03 | 12 | 3.9556E-06 | 1 |
| 147 H DY | 4.1470E-04 | -6.039543488028E+03 | 10 | 1.3007E-06 | 1 |
| 147 H DZ | 7.9258E-04 | -6.039543487007E+03 | 12 | 2.3213E-06 | 1 |
| 149 H DX | 3.9963E-04 | -6.039543488165E+03 | 10 | 1.1634E-06 | 1 |
| 149 H DY | 1.4921E-03 | -6.039543484721E+03 | 11 | 4.6077E-06 | 1 |
| 149 H DZ | 6.8649E-04 | -6.039543487122E+03 | 11 | 2.2064E-06 | 1 |
| 151 C DX | 2.6881E-03 | -6.039543482739E+03 | 13 | 6.5895E-06 | 1 |
| 151 C DY | 3.5296E-03 | -6.039543479439E+03 | 11 | 9.8895E-06 | 1 |
| 151 C DZ | 3.1802E-03 | -6.039543479973E+03 | 11 | 9.3558E-06 | 1 |
| 153 H DX | 4.0410E-04 | -6.039543487843E+03 | 13 | 1.4851E-06 | 1 |
| 153 H DY | 1.4420E-03 | -6.039543485368E+03 | 12 | 3.9608E-06 | 1 |
| 153 H DZ | 7.3031E-04 | -6.039543487567E+03 | 13 | 1.7614E-06 | 1 |
| 155 H DX | 4.0359E-04 | -6.039543487888E+03 | 12 | 1.4407E-06 | 1 |
| 155 H DY | 1.0978E-03 | -6.039543485819E+03 | 11 | 3.5091E-06 | 1 |
| 155 H DZ | 9.8723E-04 | -6.039543486753E+03 | 11 | 2.5752E-06 | 1 |

|          |            |                     |    |            |   |
|----------|------------|---------------------|----|------------|---|
| 157 O DX | 1.4837E-03 | -6.039543485215E+03 | 13 | 4.1131E-06 | 1 |
| 157 O DY | 2.6370E-03 | -6.039543482088E+03 | 18 | 7.2398E-06 | 1 |
| 157 O DZ | 9.7610E-04 | -6.039543486605E+03 | 15 | 2.7238E-06 | 1 |
| 159 O DX | 1.9359E-03 | -6.039543484371E+03 | 12 | 4.9570E-06 | 1 |
| 159 O DY | 5.0695E-04 | -6.039543488191E+03 | 13 | 1.1373E-06 | 1 |
| 159 O DZ | 2.8993E-03 | -6.039543481360E+03 | 15 | 7.9687E-06 | 1 |
| 161 H DX | 4.2361E-04 | -6.039543487617E+03 | 12 | 1.7118E-06 | 1 |
| 161 H DY | 2.2794E-03 | -6.039543483144E+03 | 13 | 6.1841E-06 | 1 |
| 161 H DZ | 6.2945E-04 | -6.039543488542E+03 | 16 | 7.8608E-07 | 1 |
| 163 H DX | 8.9283E-04 | -6.039543487781E+03 | 14 | 1.5478E-06 | 1 |
| 163 H DY | 4.2930E-04 | -6.039543488660E+03 | 6  | 6.6870E-07 | 1 |
| 163 H DZ | 2.1402E-03 | -6.039543482981E+03 | 14 | 6.3477E-06 | 1 |
| 165 O DX | 2.3087E-03 | -6.039543483270E+03 | 12 | 6.0583E-06 | 1 |
| 165 O DY | 9.9208E-04 | -6.039543486447E+03 | 15 | 2.8811E-06 | 1 |
| 165 O DZ | 2.0907E-03 | -6.039543484022E+03 | 14 | 5.3064E-06 | 1 |
| 167 H DX | 1.9280E-03 | -6.039543483842E+03 | 13 | 5.4859E-06 | 1 |
| 167 H DY | 8.9375E-04 | -6.039543487192E+03 | 13 | 2.1361E-06 | 1 |
| 167 H DZ | 6.0651E-04 | -6.039543487203E+03 | 12 | 2.1253E-06 | 1 |
| 169 O DX | 8.8572E-04 | -6.039543487763E+03 | 13 | 1.5652E-06 | 1 |
| 169 O DY | 2.0964E-03 | -6.039543482559E+03 | 18 | 6.7698E-06 | 1 |
| 169 O DZ | 2.3999E-03 | -6.039543481642E+03 | 9  | 7.6867E-06 | 1 |
| 171 H DX | 7.9481E-04 | -6.039543487974E+03 | 11 | 1.3541E-06 | 1 |
| 171 H DY | 1.7273E-03 | -6.039543484428E+03 | 14 | 4.9007E-06 | 1 |
| 171 H DZ | 8.7986E-04 | -6.039543487332E+03 | 13 | 1.9959E-06 | 1 |

GCALCO - MAX INDICES DIRECT LATTICE VECTOR 23 12 11

NO.OF VECTORS CREATED 6999 STARS 3500 RMAX 268.37266 BOHR

CAPPA:IS1 3;IS2 3;IS3 3; K PTS MONK NET 14; SYMMOPS:K SPACE 2;G SPACE 2

TTTTTTTTTTTTTTTTTTTTTTTTTTTTTTTTTTTTTTT gordsh1 TELAPSE 1191166.56 TCPU 1182208.53



MATRIX SIZE: P(G) 1832998, F(G) 322501, P(G) IRR 461439, F(G) IRR 162690

MAX G-VECTOR INDEX FOR 1- AND 2-ELECTRON INTEGRALS 41

TTTTTTTTTTTTTTTTTTTTTTTTTTTTTTTTTTTT INPUT TELAPSE 1191166.97 TCPU 1182208.94

SYMMETRY ALLOWED INTERNAL DEGREE(S) OF FREEDOM: 258

TTTTTTTTTTTTTTTTTTTTTTTTTTTTTTTTTTTT SYMM TELAPSE 1191166.98 TCPU 1182208.95

TTTTTTTTTTTTTTTTTTTTTTTTTTTTTTTTTTTT INT\_SCREEN TELAPSE 1191167.04 TCPU 1182209.01

+++ SYMMETRY ADAPTION OF VIBRATIONAL MODES +++

SYMMETRY INFORMATION:

K-LITTLE GROUP: CLASS TABLE, CHARACTER TABLE.

IRREP-(DIMENSION, NO. IRREDUCIBLE SETS)

[WARNINGS: (1) ONLY ACTIVE IRREPS ARE GENERATED AND LISTED.

(2) ONLY RELEVANT CLASSES ARE CONSIDERED IN THE CHARACTER TABLE

(3) SYMBOLS MAY NOT FULLY COINCIDE WITH THOSE FROM TEXT BOOKS.]

(P, D, RP, RD, STAND FOR PAIRING, DOUBLING, REAL PAIRING AND REAL DOUBLING  
OF THE IRREPS (SEE MANUAL))

CLASS | GROUP OPERATORS (SEE SYMMOPS KEYWORD)

-----

I | 2;

IRREP/CLA E I

-----

MULTIP | 1 1

-----

Ag | 1.00 1.00

Au | 1.00 -1.00



|     |    |            |         |        |      |   |   |       |   |
|-----|----|------------|---------|--------|------|---|---|-------|---|
| 14- | 14 | 0.2880E-07 | 37.2465 | 1.1166 | (Ag) | I | ( | 0.00) | A |
| 15- | 15 | 0.2929E-07 | 37.5633 | 1.1261 | (Au) | A | ( | 0.00) | I |
| 16- | 16 | 0.3141E-07 | 38.8949 | 1.1660 | (Au) | A | ( | 0.00) | I |
| 17- | 17 | 0.3812E-07 | 42.8535 | 1.2847 | (Ag) | I | ( | 0.00) | A |
| 18- | 18 | 0.3818E-07 | 42.8862 | 1.2857 | (Au) | A | ( | 0.00) | I |
| 19- | 19 | 0.4210E-07 | 45.0337 | 1.3501 | (Au) | A | ( | 0.00) | I |
| 20- | 20 | 0.4271E-07 | 45.3599 | 1.3599 | (Ag) | I | ( | 0.00) | A |
| 21- | 21 | 0.4520E-07 | 46.6616 | 1.3989 | (Au) | A | ( | 0.00) | I |
| 22- | 22 | 0.4621E-07 | 47.1790 | 1.4144 | (Ag) | I | ( | 0.00) | A |
| 23- | 23 | 0.5094E-07 | 49.5364 | 1.4851 | (Ag) | I | ( | 0.00) | A |
| 24- | 24 | 0.5651E-07 | 52.1742 | 1.5641 | (Ag) | I | ( | 0.00) | A |
| 25- | 25 | 0.6119E-07 | 54.2906 | 1.6276 | (Au) | A | ( | 0.00) | I |
| 26- | 26 | 0.6675E-07 | 56.7033 | 1.6999 | (Ag) | I | ( | 0.00) | A |
| 27- | 27 | 0.7080E-07 | 58.3964 | 1.7507 | (Au) | A | ( | 0.00) | I |
| 28- | 28 | 0.7905E-07 | 61.7079 | 1.8500 | (Ag) | I | ( | 0.00) | A |
| 29- | 29 | 0.8179E-07 | 62.7671 | 1.8817 | (Au) | A | ( | 0.00) | I |
| 30- | 30 | 0.8596E-07 | 64.3484 | 1.9291 | (Ag) | I | ( | 0.00) | A |
| 31- | 31 | 0.9025E-07 | 65.9322 | 1.9766 | (Au) | A | ( | 0.00) | I |
| 32- | 32 | 0.9563E-07 | 67.8708 | 2.0347 | (Ag) | I | ( | 0.00) | A |
| 33- | 33 | 0.1004E-06 | 69.5460 | 2.0849 | (Ag) | I | ( | 0.00) | A |
| 34- | 34 | 0.1024E-06 | 70.2235 | 2.1052 | (Au) | A | ( | 0.00) | I |
| 35- | 35 | 0.1061E-06 | 71.4811 | 2.1429 | (Au) | A | ( | 0.00) | I |
| 36- | 36 | 0.1131E-06 | 73.8065 | 2.2127 | (Ag) | I | ( | 0.00) | A |
| 37- | 37 | 0.1138E-06 | 74.0333 | 2.2195 | (Au) | A | ( | 0.00) | I |
| 38- | 38 | 0.1187E-06 | 75.6191 | 2.2670 | (Ag) | I | ( | 0.00) | A |
| 39- | 39 | 0.1238E-06 | 77.2356 | 2.3155 | (Au) | A | ( | 0.00) | I |
| 40- | 40 | 0.1329E-06 | 80.0199 | 2.3989 | (Ag) | I | ( | 0.00) | A |
| 41- | 41 | 0.1387E-06 | 81.7343 | 2.4503 | (Au) | A | ( | 0.00) | I |
| 42- | 42 | 0.1400E-06 | 82.1230 | 2.4620 | (Ag) | I | ( | 0.00) | A |
| 43- | 43 | 0.1455E-06 | 83.7306 | 2.5102 | (Au) | A | ( | 0.00) | I |
| 44- | 44 | 0.1465E-06 | 83.9915 | 2.5180 | (Au) | A | ( | 0.00) | I |
| 45- | 45 | 0.1513E-06 | 85.3584 | 2.5590 | (Ag) | I | ( | 0.00) | A |

|     |    |            |          |        |      |   |   |       |   |
|-----|----|------------|----------|--------|------|---|---|-------|---|
| 46- | 46 | 0.1557E-06 | 86.5918  | 2.5960 | (Ag) | I | ( | 0.00) | A |
| 47- | 47 | 0.1617E-06 | 88.2419  | 2.6454 | (Au) | A | ( | 0.00) | I |
| 48- | 48 | 0.1678E-06 | 89.8953  | 2.6950 | (Au) | A | ( | 0.00) | I |
| 49- | 49 | 0.1765E-06 | 92.2038  | 2.7642 | (Ag) | I | ( | 0.00) | A |
| 50- | 50 | 0.1864E-06 | 94.7471  | 2.8404 | (Ag) | I | ( | 0.00) | A |
| 51- | 51 | 0.1891E-06 | 95.4508  | 2.8615 | (Ag) | I | ( | 0.00) | A |
| 52- | 52 | 0.1960E-06 | 97.1756  | 2.9133 | (Au) | A | ( | 0.00) | I |
| 53- | 53 | 0.2181E-06 | 102.4897 | 3.0726 | (Au) | A | ( | 0.00) | I |
| 54- | 54 | 0.2219E-06 | 103.3913 | 3.0996 | (Ag) | I | ( | 0.00) | A |
| 55- | 55 | 0.2287E-06 | 104.9547 | 3.1465 | (Au) | A | ( | 0.00) | I |
| 56- | 56 | 0.2331E-06 | 105.9705 | 3.1769 | (Ag) | I | ( | 0.00) | A |
| 57- | 57 | 0.2745E-06 | 114.9960 | 3.4475 | (Au) | A | ( | 0.00) | I |
| 58- | 58 | 0.2797E-06 | 116.0712 | 3.4797 | (Ag) | I | ( | 0.00) | A |
| 59- | 59 | 0.3190E-06 | 123.9509 | 3.7160 | (Ag) | I | ( | 0.00) | A |
| 60- | 60 | 0.3293E-06 | 125.9416 | 3.7756 | (Au) | A | ( | 0.00) | I |
| 61- | 61 | 0.3421E-06 | 128.3713 | 3.8485 | (Au) | A | ( | 0.00) | I |
| 62- | 62 | 0.3502E-06 | 129.8848 | 3.8938 | (Ag) | I | ( | 0.00) | A |
| 63- | 63 | 0.3917E-06 | 137.3628 | 4.1180 | (Ag) | I | ( | 0.00) | A |
| 64- | 64 | 0.3958E-06 | 138.0847 | 4.1397 | (Au) | A | ( | 0.00) | I |
| 65- | 65 | 0.4113E-06 | 140.7537 | 4.2197 | (Au) | A | ( | 0.00) | I |
| 66- | 66 | 0.4208E-06 | 142.3746 | 4.2683 | (Ag) | I | ( | 0.00) | A |
| 67- | 67 | 0.4385E-06 | 145.3326 | 4.3570 | (Ag) | I | ( | 0.00) | A |
| 68- | 68 | 0.4410E-06 | 145.7538 | 4.3696 | (Au) | A | ( | 0.00) | I |
| 69- | 69 | 0.4963E-06 | 154.6150 | 4.6352 | (Au) | A | ( | 0.00) | I |
| 70- | 70 | 0.4972E-06 | 154.7593 | 4.6396 | (Ag) | I | ( | 0.00) | A |
| 71- | 71 | 0.5165E-06 | 157.7265 | 4.7285 | (Ag) | I | ( | 0.00) | A |
| 72- | 72 | 0.5392E-06 | 161.1677 | 4.8317 | (Au) | A | ( | 0.00) | I |
| 73- | 73 | 0.7653E-06 | 192.0000 | 5.7560 | (Au) | A | ( | 0.00) | I |
| 74- | 74 | 0.8450E-06 | 201.7482 | 6.0483 | (Ag) | I | ( | 0.00) | A |
| 75- | 75 | 0.8696E-06 | 204.6705 | 6.1359 | (Ag) | I | ( | 0.00) | A |
| 76- | 76 | 0.9180E-06 | 210.2844 | 6.3042 | (Au) | A | ( | 0.00) | I |
| 77- | 77 | 0.1001E-05 | 219.6264 | 6.5842 | (Ag) | I | ( | 0.00) | A |

|      |     |            |          |        |      |   |   |       |   |
|------|-----|------------|----------|--------|------|---|---|-------|---|
| 78-  | 78  | 0.1011E-05 | 220.6843 | 6.6159 | (Au) | A | ( | 0.00) | I |
| 79-  | 79  | 0.1019E-05 | 221.5764 | 6.6427 | (Ag) | I | ( | 0.00) | A |
| 80-  | 80  | 0.1049E-05 | 224.8020 | 6.7394 | (Au) | A | ( | 0.00) | I |
| 81-  | 81  | 0.1143E-05 | 234.6630 | 7.0350 | (Au) | A | ( | 0.00) | I |
| 82-  | 82  | 0.1166E-05 | 237.0386 | 7.1062 | (Ag) | I | ( | 0.00) | A |
| 83-  | 83  | 0.1176E-05 | 238.0510 | 7.1366 | (Au) | A | ( | 0.00) | I |
| 84-  | 84  | 0.1203E-05 | 240.7452 | 7.2174 | (Ag) | I | ( | 0.00) | A |
| 85-  | 85  | 0.1231E-05 | 243.5511 | 7.3015 | (Au) | A | ( | 0.00) | I |
| 86-  | 86  | 0.1269E-05 | 247.2639 | 7.4128 | (Au) | A | ( | 0.00) | I |
| 87-  | 87  | 0.1283E-05 | 248.5931 | 7.4526 | (Ag) | I | ( | 0.00) | A |
| 88-  | 88  | 0.1289E-05 | 249.2046 | 7.4710 | (Ag) | I | ( | 0.00) | A |
| 89-  | 89  | 0.1331E-05 | 253.2088 | 7.5910 | (Ag) | I | ( | 0.00) | A |
| 90-  | 90  | 0.1368E-05 | 256.7271 | 7.6965 | (Au) | A | ( | 0.00) | I |
| 91-  | 91  | 0.1396E-05 | 259.3366 | 7.7747 | (Ag) | I | ( | 0.00) | A |
| 92-  | 92  | 0.1409E-05 | 260.5444 | 7.8109 | (Au) | A | ( | 0.00) | I |
| 93-  | 93  | 0.1459E-05 | 265.0635 | 7.9464 | (Au) | A | ( | 0.00) | I |
| 94-  | 94  | 0.1486E-05 | 267.5657 | 8.0214 | (Ag) | I | ( | 0.00) | A |
| 95-  | 95  | 0.1499E-05 | 268.7195 | 8.0560 | (Au) | A | ( | 0.00) | I |
| 96-  | 96  | 0.1507E-05 | 269.4246 | 8.0771 | (Ag) | I | ( | 0.00) | A |
| 97-  | 97  | 0.1527E-05 | 271.2441 | 8.1317 | (Au) | A | ( | 0.00) | I |
| 98-  | 98  | 0.1535E-05 | 271.9039 | 8.1515 | (Ag) | I | ( | 0.00) | A |
| 99-  | 99  | 0.1568E-05 | 274.8336 | 8.2393 | (Au) | A | ( | 0.00) | I |
| 100- | 100 | 0.1575E-05 | 275.4522 | 8.2578 | (Ag) | I | ( | 0.00) | A |
| 101- | 101 | 0.1729E-05 | 288.6174 | 8.6525 | (Ag) | I | ( | 0.00) | A |
| 102- | 102 | 0.1747E-05 | 290.0539 | 8.6956 | (Au) | A | ( | 0.00) | I |
| 103- | 103 | 0.1788E-05 | 293.4789 | 8.7983 | (Ag) | I | ( | 0.00) | A |
| 104- | 104 | 0.2001E-05 | 310.4426 | 9.3068 | (Ag) | I | ( | 0.00) | A |
| 105- | 105 | 0.2008E-05 | 311.0229 | 9.3242 | (Au) | A | ( | 0.00) | I |
| 106- | 106 | 0.2017E-05 | 311.7065 | 9.3447 | (Au) | A | ( | 0.00) | I |
| 107- | 107 | 0.2086E-05 | 317.0229 | 9.5041 | (Ag) | I | ( | 0.00) | A |
| 108- | 108 | 0.2103E-05 | 318.2805 | 9.5418 | (Au) | A | ( | 0.00) | I |
| 109- | 109 | 0.2213E-05 | 326.4870 | 9.7878 | (Ag) | I | ( | 0.00) | A |

|         |            |          |         |      |   |        |   |
|---------|------------|----------|---------|------|---|--------|---|
| 110-110 | 0.2245E-05 | 328.8820 | 9.8596  | (Au) | A | (0.00) | I |
| 111-111 | 0.2250E-05 | 329.1946 | 9.8690  | (Ag) | I | (0.00) | A |
| 112-112 | 0.2309E-05 | 333.4664 | 9.9971  | (Au) | A | (0.00) | I |
| 113-113 | 0.2402E-05 | 340.1786 | 10.1983 | (Au) | A | (0.00) | I |
| 114-114 | 0.2420E-05 | 341.4534 | 10.2365 | (Ag) | I | (0.00) | A |
| 115-115 | 0.2437E-05 | 342.6160 | 10.2714 | (Ag) | I | (0.00) | A |
| 116-116 | 0.2442E-05 | 342.9369 | 10.2810 | (Au) | A | (0.00) | I |
| 117-117 | 0.2796E-05 | 367.0083 | 11.0026 | (Ag) | I | (0.00) | A |
| 118-118 | 0.2829E-05 | 369.1723 | 11.0675 | (Au) | A | (0.00) | I |
| 119-119 | 0.2870E-05 | 371.8039 | 11.1464 | (Au) | A | (0.00) | I |
| 120-120 | 0.2877E-05 | 372.2500 | 11.1598 | (Ag) | I | (0.00) | A |
| 121-121 | 0.2983E-05 | 379.0467 | 11.3635 | (Ag) | I | (0.00) | A |
| 122-122 | 0.3008E-05 | 380.6595 | 11.4119 | (Au) | A | (0.00) | I |
| 123-123 | 0.3100E-05 | 386.4414 | 11.5852 | (Au) | A | (0.00) | I |
| 124-124 | 0.3103E-05 | 386.5939 | 11.5898 | (Ag) | I | (0.00) | A |
| 125-125 | 0.3364E-05 | 402.5272 | 12.0675 | (Ag) | I | (0.00) | A |
| 126-126 | 0.3364E-05 | 402.5301 | 12.0675 | (Au) | A | (0.00) | I |
| 127-127 | 0.3439E-05 | 406.9872 | 12.2012 | (Ag) | I | (0.00) | A |
| 128-128 | 0.3463E-05 | 408.4473 | 12.2449 | (Au) | A | (0.00) | I |
| 129-129 | 0.3543E-05 | 413.1043 | 12.3846 | (Au) | A | (0.00) | I |
| 130-130 | 0.3561E-05 | 414.1689 | 12.4165 | (Ag) | I | (0.00) | A |
| 131-131 | 0.3617E-05 | 417.4262 | 12.5141 | (Ag) | I | (0.00) | A |
| 132-132 | 0.3631E-05 | 418.2344 | 12.5384 | (Au) | A | (0.00) | I |
| 133-133 | 0.3769E-05 | 426.0859 | 12.7737 | (Au) | A | (0.00) | I |
| 134-134 | 0.3785E-05 | 426.9724 | 12.8003 | (Ag) | I | (0.00) | A |
| 135-135 | 0.3825E-05 | 429.2660 | 12.8691 | (Au) | A | (0.00) | I |
| 136-136 | 0.3835E-05 | 429.8003 | 12.8851 | (Ag) | I | (0.00) | A |
| 137-137 | 0.4141E-05 | 446.6294 | 13.3896 | (Au) | A | (0.00) | I |
| 138-138 | 0.4149E-05 | 447.0283 | 13.4016 | (Ag) | I | (0.00) | A |
| 139-139 | 0.4301E-05 | 455.1530 | 13.6451 | (Ag) | I | (0.00) | A |
| 140-140 | 0.4320E-05 | 456.1462 | 13.6749 | (Au) | A | (0.00) | I |
| 141-141 | 0.4864E-05 | 484.0557 | 14.5116 | (Au) | A | (0.00) | I |

|          |            |          |         |       |     |       |   |
|----------|------------|----------|---------|-------|-----|-------|---|
| 142- 142 | 0.4875E-05 | 484.6017 | 14.5280 | (Ag ) | I ( | 0.00) | A |
| 143- 143 | 0.4957E-05 | 488.6554 | 14.6495 | (Ag ) | I ( | 0.00) | A |
| 144- 144 | 0.4964E-05 | 488.9663 | 14.6588 | (Au ) | A ( | 0.00) | I |
| 145- 145 | 0.4977E-05 | 489.6322 | 14.6788 | (Au ) | A ( | 0.00) | I |
| 146- 146 | 0.4981E-05 | 489.8417 | 14.6851 | (Ag ) | I ( | 0.00) | A |
| 147- 147 | 0.5081E-05 | 494.7387 | 14.8319 | (Au ) | A ( | 0.00) | I |
| 148- 148 | 0.5111E-05 | 496.1950 | 14.8756 | (Ag ) | I ( | 0.00) | A |
| 149- 149 | 0.5165E-05 | 498.7886 | 14.9533 | (Au ) | A ( | 0.00) | I |
| 150- 150 | 0.5214E-05 | 501.1749 | 15.0248 | (Ag ) | I ( | 0.00) | A |
| 151- 151 | 0.5294E-05 | 504.9654 | 15.1385 | (Au ) | A ( | 0.00) | I |
| 152- 152 | 0.5366E-05 | 508.3993 | 15.2414 | (Ag ) | I ( | 0.00) | A |
| 153- 153 | 0.5422E-05 | 511.0474 | 15.3208 | (Ag ) | I ( | 0.00) | A |
| 154- 154 | 0.5457E-05 | 512.6943 | 15.3702 | (Au ) | A ( | 0.00) | I |
| 155- 155 | 0.5676E-05 | 522.8784 | 15.6755 | (Ag ) | I ( | 0.00) | A |
| 156- 156 | 0.5725E-05 | 525.1397 | 15.7433 | (Au ) | A ( | 0.00) | I |
| 157- 157 | 0.5756E-05 | 526.5377 | 15.7852 | (Ag ) | I ( | 0.00) | A |
| 158- 158 | 0.5789E-05 | 528.0853 | 15.8316 | (Au ) | A ( | 0.00) | I |
| 159- 159 | 0.5819E-05 | 529.4258 | 15.8718 | (Au ) | A ( | 0.00) | I |
| 160- 160 | 0.5837E-05 | 530.2320 | 15.8960 | (Ag ) | I ( | 0.00) | A |
| 161- 161 | 0.6353E-05 | 553.2087 | 16.5848 | (Au ) | A ( | 0.00) | I |
| 162- 162 | 0.6367E-05 | 553.8026 | 16.6026 | (Au ) | A ( | 0.00) | I |
| 163- 163 | 0.6377E-05 | 554.2430 | 16.6158 | (Ag ) | I ( | 0.00) | A |
| 164- 164 | 0.6411E-05 | 555.7185 | 16.6600 | (Ag ) | I ( | 0.00) | A |
| 165- 165 | 0.6674E-05 | 566.9831 | 16.9977 | (Au ) | A ( | 0.00) | I |
| 166- 166 | 0.6695E-05 | 567.8959 | 17.0251 | (Ag ) | I ( | 0.00) | A |
| 167- 167 | 0.6727E-05 | 569.2372 | 17.0653 | (Au ) | A ( | 0.00) | I |
| 168- 168 | 0.6731E-05 | 569.4104 | 17.0705 | (Ag ) | I ( | 0.00) | A |
| 169- 169 | 0.8939E-05 | 656.1857 | 19.6720 | (Au ) | A ( | 0.00) | I |
| 170- 170 | 0.8974E-05 | 657.4835 | 19.7109 | (Ag ) | I ( | 0.00) | A |
| 171- 171 | 0.8998E-05 | 658.3449 | 19.7367 | (Ag ) | I ( | 0.00) | A |
| 172- 172 | 0.9003E-05 | 658.5320 | 19.7423 | (Au ) | A ( | 0.00) | I |
| 173- 173 | 0.9019E-05 | 659.1168 | 19.7598 | (Au ) | A ( | 0.00) | I |

|          |            |          |         |       |     |       |   |
|----------|------------|----------|---------|-------|-----|-------|---|
| 174- 174 | 0.9054E-05 | 660.3902 | 19.7980 | (Ag ) | I ( | 0.00) | A |
| 175- 175 | 0.9152E-05 | 663.9443 | 19.9045 | (Au ) | A ( | 0.00) | I |
| 176- 176 | 0.9237E-05 | 667.0260 | 19.9969 | (Ag ) | I ( | 0.00) | A |
| 177- 177 | 0.1045E-04 | 709.4372 | 21.2684 | (Ag ) | I ( | 0.00) | A |
| 178- 178 | 0.1056E-04 | 713.1788 | 21.3806 | (Au ) | A ( | 0.00) | I |
| 179- 179 | 0.1071E-04 | 718.3657 | 21.5361 | (Ag ) | I ( | 0.00) | A |
| 180- 180 | 0.1077E-04 | 720.1260 | 21.5888 | (Au ) | A ( | 0.00) | I |
| 181- 181 | 0.1178E-04 | 753.2012 | 22.5804 | (Ag ) | I ( | 0.00) | A |
| 182- 182 | 0.1208E-04 | 762.9525 | 22.8727 | (Au ) | A ( | 0.00) | I |
| 183- 183 | 0.1214E-04 | 764.5705 | 22.9212 | (Ag ) | I ( | 0.00) | A |
| 184- 184 | 0.1230E-04 | 769.7473 | 23.0764 | (Au ) | A ( | 0.00) | I |
| 185- 185 | 0.1242E-04 | 773.5902 | 23.1916 | (Ag ) | I ( | 0.00) | A |
| 186- 186 | 0.1243E-04 | 773.6768 | 23.1942 | (Au ) | A ( | 0.00) | I |
| 187- 187 | 0.1265E-04 | 780.6119 | 23.4022 | (Ag ) | I ( | 0.00) | A |
| 188- 188 | 0.1267E-04 | 781.0682 | 23.4158 | (Au ) | A ( | 0.00) | I |
| 189- 189 | 0.1331E-04 | 800.5929 | 24.0012 | (Ag ) | I ( | 0.00) | A |
| 190- 190 | 0.1355E-04 | 807.7942 | 24.2171 | (Au ) | A ( | 0.00) | I |
| 191- 191 | 0.1376E-04 | 814.2253 | 24.4099 | (Ag ) | I ( | 0.00) | A |
| 192- 192 | 0.1377E-04 | 814.5536 | 24.4197 | (Au ) | A ( | 0.00) | I |
| 193- 193 | 0.1383E-04 | 816.2821 | 24.4715 | (Au ) | A ( | 0.00) | I |
| 194- 194 | 0.1386E-04 | 817.0357 | 24.4941 | (Ag ) | I ( | 0.00) | A |
| 195- 195 | 0.1406E-04 | 823.0331 | 24.6739 | (Ag ) | I ( | 0.00) | A |
| 196- 196 | 0.1408E-04 | 823.6553 | 24.6926 | (Au ) | A ( | 0.00) | I |
| 197- 197 | 0.1416E-04 | 825.9107 | 24.7602 | (Ag ) | I ( | 0.00) | A |
| 198- 198 | 0.1416E-04 | 825.9397 | 24.7611 | (Au ) | A ( | 0.00) | I |
| 199- 199 | 0.1422E-04 | 827.6084 | 24.8111 | (Ag ) | I ( | 0.00) | A |
| 200- 200 | 0.1425E-04 | 828.3801 | 24.8342 | (Au ) | A ( | 0.00) | I |
| 201- 201 | 0.1457E-04 | 837.8212 | 25.1172 | (Au ) | A ( | 0.00) | I |
| 202- 202 | 0.1480E-04 | 844.3438 | 25.3128 | (Ag ) | I ( | 0.00) | A |
| 203- 203 | 0.1483E-04 | 845.2269 | 25.3393 | (Au ) | A ( | 0.00) | I |
| 204- 204 | 0.1493E-04 | 848.1506 | 25.4269 | (Au ) | A ( | 0.00) | I |
| 205- 205 | 0.1504E-04 | 851.1234 | 25.5160 | (Ag ) | I ( | 0.00) | A |



|         |            |          |         |      |   |        |   |
|---------|------------|----------|---------|------|---|--------|---|
| 206-206 | 0.1562E-04 | 867.4483 | 26.0054 | (Ag) | I | (0.00) | A |
| 207-207 | 0.1585E-04 | 873.6918 | 26.1926 | (Ag) | I | (0.00) | A |
| 208-208 | 0.1601E-04 | 878.2241 | 26.3285 | (Au) | A | (0.00) | I |
| 209-209 | 0.1605E-04 | 879.2855 | 26.3603 | (Ag) | I | (0.00) | A |
| 210-210 | 0.1611E-04 | 880.9627 | 26.4106 | (Ag) | I | (0.00) | A |
| 211-211 | 0.1612E-04 | 881.1449 | 26.4161 | (Au) | A | (0.00) | I |
| 212-212 | 0.1615E-04 | 882.0810 | 26.4441 | (Au) | A | (0.00) | I |
| 213-213 | 0.1620E-04 | 883.4985 | 26.4866 | (Au) | A | (0.00) | I |
| 214-214 | 0.1629E-04 | 885.7756 | 26.5549 | (Ag) | I | (0.00) | A |
| 215-215 | 0.1662E-04 | 894.6458 | 26.8208 | (Ag) | I | (0.00) | A |
| 216-216 | 0.1683E-04 | 900.3177 | 26.9908 | (Au) | A | (0.00) | I |
| 217-217 | 0.1772E-04 | 923.9251 | 27.6986 | (Ag) | I | (0.00) | A |
| 218-218 | 0.1772E-04 | 924.0006 | 27.7008 | (Au) | A | (0.00) | I |
| 219-219 | 0.1774E-04 | 924.4754 | 27.7151 | (Ag) | I | (0.00) | A |
| 220-220 | 0.1790E-04 | 928.4704 | 27.8348 | (Au) | A | (0.00) | I |
| 221-221 | 0.1824E-04 | 937.3930 | 28.1023 | (Ag) | I | (0.00) | A |
| 222-222 | 0.1830E-04 | 938.8909 | 28.1472 | (Au) | A | (0.00) | I |
| 223-223 | 0.1843E-04 | 942.0824 | 28.2429 | (Au) | A | (0.00) | I |
| 224-224 | 0.1846E-04 | 943.0469 | 28.2718 | (Ag) | I | (0.00) | A |
| 225-225 | 0.1850E-04 | 943.9283 | 28.2983 | (Ag) | I | (0.00) | A |
| 226-226 | 0.1852E-04 | 944.4631 | 28.3143 | (Au) | A | (0.00) | I |
| 227-227 | 0.1852E-04 | 944.5663 | 28.3174 | (Ag) | I | (0.00) | A |
| 228-228 | 0.1853E-04 | 944.6761 | 28.3207 | (Au) | A | (0.00) | I |
| 229-229 | 0.1882E-04 | 952.1529 | 28.5448 | (Ag) | I | (0.00) | A |
| 230-230 | 0.1886E-04 | 953.2005 | 28.5762 | (Au) | A | (0.00) | I |
| 231-231 | 0.1888E-04 | 953.6119 | 28.5886 | (Au) | A | (0.00) | I |
| 232-232 | 0.1891E-04 | 954.3871 | 28.6118 | (Ag) | I | (0.00) | A |
| 233-233 | 0.1893E-04 | 954.9085 | 28.6274 | (Au) | A | (0.00) | I |
| 234-234 | 0.1894E-04 | 955.2769 | 28.6385 | (Ag) | I | (0.00) | A |
| 235-235 | 0.1896E-04 | 955.5896 | 28.6479 | (Au) | A | (0.00) | I |
| 236-236 | 0.1897E-04 | 955.8795 | 28.6565 | (Ag) | I | (0.00) | A |
| 237-237 | 0.1937E-04 | 965.9264 | 28.9577 | (Au) | A | (0.00) | I |

|          |            |           |         |       |     |       |   |
|----------|------------|-----------|---------|-------|-----|-------|---|
| 238- 238 | 0.1941E-04 | 966.8586  | 28.9857 | (Ag ) | I ( | 0.00) | A |
| 239- 239 | 0.1946E-04 | 968.1760  | 29.0252 | (Ag ) | I ( | 0.00) | A |
| 240- 240 | 0.1957E-04 | 970.9244  | 29.1076 | (Au ) | A ( | 0.00) | I |
| 241- 241 | 0.2031E-04 | 989.0360  | 29.6506 | (Ag ) | I ( | 0.00) | A |
| 242- 242 | 0.2100E-04 | 1005.6592 | 30.1489 | (Au ) | A ( | 0.00) | I |
| 243- 243 | 0.2115E-04 | 1009.2373 | 30.2562 | (Ag ) | I ( | 0.00) | A |
| 244- 244 | 0.2119E-04 | 1010.1835 | 30.2845 | (Au ) | A ( | 0.00) | I |
| 245- 245 | 0.2123E-04 | 1011.2896 | 30.3177 | (Au ) | A ( | 0.00) | I |
| 246- 246 | 0.2126E-04 | 1011.8702 | 30.3351 | (Ag ) | I ( | 0.00) | A |
| 247- 247 | 0.2128E-04 | 1012.3651 | 30.3499 | (Au ) | A ( | 0.00) | I |
| 248- 248 | 0.2130E-04 | 1012.8706 | 30.3651 | (Ag ) | I ( | 0.00) | A |
| 249- 249 | 0.2172E-04 | 1022.7866 | 30.6624 | (Ag ) | I ( | 0.00) | A |
| 250- 250 | 0.2173E-04 | 1022.9762 | 30.6681 | (Au ) | A ( | 0.00) | I |
| 251- 251 | 0.2177E-04 | 1024.0790 | 30.7011 | (Au ) | A ( | 0.00) | I |
| 252- 252 | 0.2180E-04 | 1024.7907 | 30.7225 | (Ag ) | I ( | 0.00) | A |
| 253- 253 | 0.2230E-04 | 1036.3222 | 31.0682 | (Au ) | A ( | 0.00) | I |
| 254- 254 | 0.2234E-04 | 1037.3975 | 31.1004 | (Ag ) | I ( | 0.00) | A |
| 255- 255 | 0.2251E-04 | 1041.2032 | 31.2145 | (Ag ) | I ( | 0.00) | A |
| 256- 256 | 0.2261E-04 | 1043.5959 | 31.2862 | (Au ) | A ( | 0.00) | I |
| 257- 257 | 0.2292E-04 | 1050.6754 | 31.4985 | (Au ) | A ( | 0.00) | I |
| 258- 258 | 0.2313E-04 | 1055.5345 | 31.6441 | (Ag ) | I ( | 0.00) | A |
| 259- 259 | 0.2386E-04 | 1072.0951 | 32.1406 | (Au ) | A ( | 0.00) | I |
| 260- 260 | 0.2389E-04 | 1072.6713 | 32.1579 | (Ag ) | I ( | 0.00) | A |
| 261- 261 | 0.2392E-04 | 1073.4979 | 32.1827 | (Ag ) | I ( | 0.00) | A |
| 262- 262 | 0.2393E-04 | 1073.6874 | 32.1883 | (Au ) | A ( | 0.00) | I |
| 263- 263 | 0.2416E-04 | 1078.7070 | 32.3388 | (Ag ) | I ( | 0.00) | A |
| 264- 264 | 0.2417E-04 | 1079.0934 | 32.3504 | (Au ) | A ( | 0.00) | I |
| 265- 265 | 0.2571E-04 | 1112.8502 | 33.3624 | (Au ) | A ( | 0.00) | I |
| 266- 266 | 0.2638E-04 | 1127.2756 | 33.7949 | (Ag ) | I ( | 0.00) | A |
| 267- 267 | 0.2643E-04 | 1128.2349 | 33.8236 | (Au ) | A ( | 0.00) | I |
| 268- 268 | 0.2651E-04 | 1129.9294 | 33.8744 | (Ag ) | I ( | 0.00) | A |
| 269- 269 | 0.2651E-04 | 1129.9644 | 33.8755 | (Au ) | A ( | 0.00) | I |

|          |            |           |               |           |   |
|----------|------------|-----------|---------------|-----------|---|
| 270- 270 | 0.2690E-04 | 1138.3664 | 34.1274 (Ag ) | I ( 0.00) | A |
| 271- 271 | 0.2718E-04 | 1144.1175 | 34.2998 (Au ) | A ( 0.00) | I |
| 272- 272 | 0.2719E-04 | 1144.3668 | 34.3073 (Ag ) | I ( 0.00) | A |
| 273- 273 | 0.2740E-04 | 1148.7942 | 34.4400 (Ag ) | I ( 0.00) | A |
| 274- 274 | 0.2742E-04 | 1149.1915 | 34.4519 (Au ) | A ( 0.00) | I |
| 275- 275 | 0.2748E-04 | 1150.5599 | 34.4929 (Ag ) | I ( 0.00) | A |
| 276- 276 | 0.2752E-04 | 1151.3090 | 34.5154 (Au ) | A ( 0.00) | I |
| 277- 277 | 0.2757E-04 | 1152.3592 | 34.5469 (Au ) | A ( 0.00) | I |
| 278- 278 | 0.2760E-04 | 1152.9742 | 34.5653 (Ag ) | I ( 0.00) | A |
| 279- 279 | 0.2761E-04 | 1153.1544 | 34.5707 (Au ) | A ( 0.00) | I |
| 280- 280 | 0.2765E-04 | 1154.0867 | 34.5987 (Ag ) | I ( 0.00) | A |
| 281- 281 | 0.2942E-04 | 1190.5121 | 35.6907 (Au ) | A ( 0.00) | I |
| 282- 282 | 0.2944E-04 | 1190.7796 | 35.6987 (Ag ) | I ( 0.00) | A |
| 283- 283 | 0.2955E-04 | 1192.9698 | 35.7643 (Au ) | A ( 0.00) | I |
| 284- 284 | 0.2955E-04 | 1192.9741 | 35.7645 (Ag ) | I ( 0.00) | A |
| 285- 285 | 0.3036E-04 | 1209.3348 | 36.2549 (Au ) | A ( 0.00) | I |
| 286- 286 | 0.3046E-04 | 1211.3108 | 36.3142 (Ag ) | I ( 0.00) | A |
| 287- 287 | 0.3053E-04 | 1212.6567 | 36.3545 (Au ) | A ( 0.00) | I |
| 288- 288 | 0.3054E-04 | 1212.8142 | 36.3593 (Ag ) | I ( 0.00) | A |
| 289- 289 | 0.3082E-04 | 1218.3584 | 36.5255 (Au ) | A ( 0.00) | I |
| 290- 290 | 0.3083E-04 | 1218.5955 | 36.5326 (Ag ) | I ( 0.00) | A |
| 291- 291 | 0.3090E-04 | 1220.0291 | 36.5756 (Au ) | A ( 0.00) | I |
| 292- 292 | 0.3090E-04 | 1220.1024 | 36.5778 (Ag ) | I ( 0.00) | A |
| 293- 293 | 0.3112E-04 | 1224.4329 | 36.7076 (Au ) | A ( 0.00) | I |
| 294- 294 | 0.3134E-04 | 1228.5852 | 36.8321 (Ag ) | I ( 0.00) | A |
| 295- 295 | 0.3166E-04 | 1234.8448 | 37.0197 (Au ) | A ( 0.00) | I |
| 296- 296 | 0.3179E-04 | 1237.4964 | 37.0992 (Ag ) | I ( 0.00) | A |
| 297- 297 | 0.3196E-04 | 1240.7461 | 37.1966 (Au ) | A ( 0.00) | I |
| 298- 298 | 0.3200E-04 | 1241.4526 | 37.2178 (Ag ) | I ( 0.00) | A |
| 299- 299 | 0.3253E-04 | 1251.8290 | 37.5289 (Au ) | A ( 0.00) | I |
| 300- 300 | 0.3258E-04 | 1252.8138 | 37.5584 (Ag ) | I ( 0.00) | A |
| 301- 301 | 0.3326E-04 | 1265.6944 | 37.9446 (Au ) | A ( 0.00) | I |

|         |            |           |         |      |   |   |       |   |
|---------|------------|-----------|---------|------|---|---|-------|---|
| 302-302 | 0.3330E-04 | 1266.5049 | 37.9689 | (Ag) | I | ( | 0.00) | A |
| 303-303 | 0.3345E-04 | 1269.3648 | 38.0546 | (Ag) | I | ( | 0.00) | A |
| 304-304 | 0.3349E-04 | 1270.1968 | 38.0795 | (Au) | A | ( | 0.00) | I |
| 305-305 | 0.3372E-04 | 1274.4319 | 38.2065 | (Au) | A | ( | 0.00) | I |
| 306-306 | 0.3374E-04 | 1274.7678 | 38.2166 | (Ag) | I | ( | 0.00) | A |
| 307-307 | 0.3394E-04 | 1278.7031 | 38.3346 | (Au) | A | ( | 0.00) | I |
| 308-308 | 0.3400E-04 | 1279.7412 | 38.3657 | (Ag) | I | ( | 0.00) | A |
| 309-309 | 0.3436E-04 | 1286.5592 | 38.5701 | (Au) | A | ( | 0.00) | I |
| 310-310 | 0.3440E-04 | 1287.3377 | 38.5934 | (Ag) | I | ( | 0.00) | A |
| 311-311 | 0.3455E-04 | 1289.9691 | 38.6723 | (Ag) | I | ( | 0.00) | A |
| 312-312 | 0.3457E-04 | 1290.4401 | 38.6864 | (Au) | A | ( | 0.00) | I |
| 313-313 | 0.3526E-04 | 1303.2620 | 39.0708 | (Au) | A | ( | 0.00) | I |
| 314-314 | 0.3536E-04 | 1305.0435 | 39.1242 | (Ag) | I | ( | 0.00) | A |
| 315-315 | 0.3541E-04 | 1306.0123 | 39.1533 | (Au) | A | ( | 0.00) | I |
| 316-316 | 0.3555E-04 | 1308.5757 | 39.2301 | (Ag) | I | ( | 0.00) | A |
| 317-317 | 0.3705E-04 | 1335.8660 | 40.0483 | (Ag) | I | ( | 0.00) | A |
| 318-318 | 0.3705E-04 | 1335.9697 | 40.0514 | (Au) | A | ( | 0.00) | I |
| 319-319 | 0.3706E-04 | 1336.0506 | 40.0538 | (Ag) | I | ( | 0.00) | A |
| 320-320 | 0.3710E-04 | 1336.8889 | 40.0789 | (Au) | A | ( | 0.00) | I |
| 321-321 | 0.3715E-04 | 1337.6860 | 40.1028 | (Ag) | I | ( | 0.00) | A |
| 322-322 | 0.3723E-04 | 1339.1893 | 40.1479 | (Ag) | I | ( | 0.00) | A |
| 323-323 | 0.3724E-04 | 1339.3087 | 40.1515 | (Au) | A | ( | 0.00) | I |
| 324-324 | 0.3737E-04 | 1341.5991 | 40.2201 | (Au) | A | ( | 0.00) | I |
| 325-325 | 0.3848E-04 | 1361.4955 | 40.8166 | (Au) | A | ( | 0.00) | I |
| 326-326 | 0.3849E-04 | 1361.6553 | 40.8214 | (Ag) | I | ( | 0.00) | A |
| 327-327 | 0.3881E-04 | 1367.1998 | 40.9876 | (Au) | A | ( | 0.00) | I |
| 328-328 | 0.3881E-04 | 1367.2085 | 40.9879 | (Ag) | I | ( | 0.00) | A |
| 329-329 | 0.3902E-04 | 1371.0016 | 41.1016 | (Au) | A | ( | 0.00) | I |
| 330-330 | 0.3907E-04 | 1371.8221 | 41.1262 | (Ag) | I | ( | 0.00) | A |
| 331-331 | 0.3924E-04 | 1374.9023 | 41.2185 | (Au) | A | ( | 0.00) | I |
| 332-332 | 0.3925E-04 | 1375.0289 | 41.2223 | (Ag) | I | ( | 0.00) | A |
| 333-333 | 0.3926E-04 | 1375.1820 | 41.2269 | (Au) | A | ( | 0.00) | I |

|          |            |           |               |           |   |
|----------|------------|-----------|---------------|-----------|---|
| 334- 334 | 0.3928E-04 | 1375.5440 | 41.2378 (Ag ) | I ( 0.00) | A |
| 335- 335 | 0.3936E-04 | 1376.9897 | 41.2811 (Au ) | A ( 0.00) | I |
| 336- 336 | 0.3937E-04 | 1377.0887 | 41.2841 (Ag ) | I ( 0.00) | A |
| 337- 337 | 0.3960E-04 | 1381.0429 | 41.4026 (Au ) | A ( 0.00) | I |
| 338- 338 | 0.3963E-04 | 1381.6396 | 41.4205 (Ag ) | I ( 0.00) | A |
| 339- 339 | 0.3974E-04 | 1383.5421 | 41.4775 (Ag ) | I ( 0.00) | A |
| 340- 340 | 0.3980E-04 | 1384.5727 | 41.5084 (Au ) | A ( 0.00) | I |
| 341- 341 | 0.4065E-04 | 1399.2836 | 41.9495 (Ag ) | I ( 0.00) | A |
| 342- 342 | 0.4066E-04 | 1399.5404 | 41.9572 (Au ) | A ( 0.00) | I |
| 343- 343 | 0.4075E-04 | 1401.0081 | 42.0012 (Ag ) | I ( 0.00) | A |
| 344- 344 | 0.4084E-04 | 1402.5038 | 42.0460 (Au ) | A ( 0.00) | I |
| 345- 345 | 0.4236E-04 | 1428.5210 | 42.8260 (Ag ) | I ( 0.00) | A |
| 346- 346 | 0.4237E-04 | 1428.5272 | 42.8262 (Au ) | A ( 0.00) | I |
| 347- 347 | 0.4238E-04 | 1428.7885 | 42.8340 (Ag ) | I ( 0.00) | A |
| 348- 348 | 0.4240E-04 | 1429.1492 | 42.8448 (Au ) | A ( 0.00) | I |
| 349- 349 | 0.4250E-04 | 1430.8013 | 42.8943 (Au ) | A ( 0.00) | I |
| 350- 350 | 0.4254E-04 | 1431.5001 | 42.9153 (Ag ) | I ( 0.00) | A |
| 351- 351 | 0.4256E-04 | 1431.7512 | 42.9228 (Ag ) | I ( 0.00) | A |
| 352- 352 | 0.4268E-04 | 1433.8840 | 42.9868 (Au ) | A ( 0.00) | I |
| 353- 353 | 0.4310E-04 | 1440.8329 | 43.1951 (Au ) | A ( 0.00) | I |
| 354- 354 | 0.4314E-04 | 1441.5227 | 43.2158 (Ag ) | I ( 0.00) | A |
| 355- 355 | 0.4317E-04 | 1441.9616 | 43.2289 (Ag ) | I ( 0.00) | A |
| 356- 356 | 0.4321E-04 | 1442.7691 | 43.2531 (Au ) | A ( 0.00) | I |
| 357- 357 | 0.4335E-04 | 1445.0098 | 43.3203 (Ag ) | I ( 0.00) | A |
| 358- 358 | 0.4337E-04 | 1445.4268 | 43.3328 (Ag ) | I ( 0.00) | A |
| 359- 359 | 0.4339E-04 | 1445.7725 | 43.3432 (Au ) | A ( 0.00) | I |
| 360- 360 | 0.4348E-04 | 1447.2049 | 43.3861 (Au ) | A ( 0.00) | I |
| 361- 361 | 0.4471E-04 | 1467.4524 | 43.9931 (Ag ) | I ( 0.00) | A |
| 362- 362 | 0.4488E-04 | 1470.2544 | 44.0771 (Au ) | A ( 0.00) | I |
| 363- 363 | 0.4530E-04 | 1477.2041 | 44.2855 (Au ) | A ( 0.00) | I |
| 364- 364 | 0.4533E-04 | 1477.5994 | 44.2973 (Au ) | A ( 0.00) | I |
| 365- 365 | 0.4538E-04 | 1478.5011 | 44.3243 (Ag ) | I ( 0.00) | A |

|          |            |           |               |           |   |
|----------|------------|-----------|---------------|-----------|---|
| 366- 366 | 0.4543E-04 | 1479.2973 | 44.3482 (Ag ) | I ( 0.00) | A |
| 367- 367 | 0.4561E-04 | 1482.2377 | 44.4364 (Au ) | A ( 0.00) | I |
| 368- 368 | 0.4574E-04 | 1484.4026 | 44.5013 (Ag ) | I ( 0.00) | A |
| 369- 369 | 0.4619E-04 | 1491.5710 | 44.7162 (Ag ) | I ( 0.00) | A |
| 370- 370 | 0.4620E-04 | 1491.7846 | 44.7226 (Au ) | A ( 0.00) | I |
| 371- 371 | 0.4667E-04 | 1499.4051 | 44.9510 (Ag ) | I ( 0.00) | A |
| 372- 372 | 0.4673E-04 | 1500.3771 | 44.9802 (Au ) | A ( 0.00) | I |
| 373- 373 | 0.4680E-04 | 1501.4399 | 45.0120 (Ag ) | I ( 0.00) | A |
| 374- 374 | 0.4685E-04 | 1502.1686 | 45.0339 (Au ) | A ( 0.00) | I |
| 375- 375 | 0.4696E-04 | 1504.0209 | 45.0894 (Au ) | A ( 0.00) | I |
| 376- 376 | 0.4701E-04 | 1504.8207 | 45.1134 (Ag ) | I ( 0.00) | A |
| 377- 377 | 0.4706E-04 | 1505.5913 | 45.1365 (Au ) | A ( 0.00) | I |
| 378- 378 | 0.4714E-04 | 1506.8825 | 45.1752 (Au ) | A ( 0.00) | I |
| 379- 379 | 0.4717E-04 | 1507.2865 | 45.1873 (Ag ) | I ( 0.00) | A |
| 380- 380 | 0.4720E-04 | 1507.7850 | 45.2023 (Au ) | A ( 0.00) | I |
| 381- 381 | 0.4726E-04 | 1508.7493 | 45.2312 (Ag ) | I ( 0.00) | A |
| 382- 382 | 0.4731E-04 | 1509.6522 | 45.2582 (Ag ) | I ( 0.00) | A |
| 383- 383 | 0.4736E-04 | 1510.4128 | 45.2810 (Au ) | A ( 0.00) | I |
| 384- 384 | 0.4742E-04 | 1511.4139 | 45.3110 (Ag ) | I ( 0.00) | A |
| 385- 385 | 0.4746E-04 | 1511.9535 | 45.3272 (Au ) | A ( 0.00) | I |
| 386- 386 | 0.4749E-04 | 1512.5168 | 45.3441 (Ag ) | I ( 0.00) | A |
| 387- 387 | 0.4753E-04 | 1513.0448 | 45.3599 (Ag ) | I ( 0.00) | A |
| 388- 388 | 0.4762E-04 | 1514.5450 | 45.4049 (Au ) | A ( 0.00) | I |
| 389- 389 | 0.4772E-04 | 1516.1870 | 45.4541 (Au ) | A ( 0.00) | I |
| 390- 390 | 0.4789E-04 | 1518.7750 | 45.5317 (Ag ) | I ( 0.00) | A |
| 391- 391 | 0.4791E-04 | 1519.1661 | 45.5435 (Au ) | A ( 0.00) | I |
| 392- 392 | 0.4801E-04 | 1520.7836 | 45.5919 (Au ) | A ( 0.00) | I |
| 393- 393 | 0.4803E-04 | 1521.0136 | 45.5988 (Ag ) | I ( 0.00) | A |
| 394- 394 | 0.4808E-04 | 1521.8918 | 45.6252 (Ag ) | I ( 0.00) | A |
| 395- 395 | 0.4810E-04 | 1522.1680 | 45.6334 (Au ) | A ( 0.00) | I |
| 396- 396 | 0.4813E-04 | 1522.6433 | 45.6477 (Ag ) | I ( 0.00) | A |
| 397- 397 | 0.4819E-04 | 1523.6009 | 45.6764 (Au ) | A ( 0.00) | I |

|          |            |           |               |           |   |
|----------|------------|-----------|---------------|-----------|---|
| 398- 398 | 0.4829E-04 | 1525.1590 | 45.7231 (Au ) | A ( 0.00) | I |
| 399- 399 | 0.4832E-04 | 1525.5476 | 45.7348 (Ag ) | I ( 0.00) | A |
| 400- 400 | 0.4839E-04 | 1526.7665 | 45.7713 (Au ) | A ( 0.00) | I |
| 401- 401 | 0.4845E-04 | 1527.6177 | 45.7968 (Ag ) | I ( 0.00) | A |
| 402- 402 | 0.4859E-04 | 1529.8846 | 45.8648 (Au ) | A ( 0.00) | I |
| 403- 403 | 0.4860E-04 | 1530.0004 | 45.8683 (Ag ) | I ( 0.00) | A |
| 404- 404 | 0.4872E-04 | 1531.9547 | 45.9268 (Ag ) | I ( 0.00) | A |
| 405- 405 | 0.4875E-04 | 1532.3458 | 45.9386 (Au ) | A ( 0.00) | I |
| 406- 406 | 0.4890E-04 | 1534.7431 | 46.0104 (Au ) | A ( 0.00) | I |
| 407- 407 | 0.4902E-04 | 1536.5906 | 46.0658 (Ag ) | I ( 0.00) | A |
| 408- 408 | 0.4903E-04 | 1536.7870 | 46.0717 (Au ) | A ( 0.00) | I |
| 409- 409 | 0.4905E-04 | 1537.0566 | 46.0798 (Ag ) | I ( 0.00) | A |
| 410- 410 | 0.4918E-04 | 1539.0813 | 46.1405 (Ag ) | I ( 0.00) | A |
| 411- 411 | 0.4922E-04 | 1539.7081 | 46.1593 (Au ) | A ( 0.00) | I |
| 412- 412 | 0.4932E-04 | 1541.3790 | 46.2094 (Ag ) | I ( 0.00) | A |
| 413- 413 | 0.4944E-04 | 1543.2583 | 46.2657 (Au ) | A ( 0.00) | I |
| 414- 414 | 0.4952E-04 | 1544.4776 | 46.3023 (Ag ) | I ( 0.00) | A |
| 415- 415 | 0.4956E-04 | 1545.1194 | 46.3215 (Au ) | A ( 0.00) | I |
| 416- 416 | 0.4963E-04 | 1546.2119 | 46.3543 (Ag ) | I ( 0.00) | A |
| 417- 417 | 0.5008E-04 | 1553.1459 | 46.5621 (Au ) | A ( 0.00) | I |
| 418- 418 | 0.5029E-04 | 1556.4450 | 46.6610 (Ag ) | I ( 0.00) | A |
| 419- 419 | 0.5030E-04 | 1556.5654 | 46.6647 (Au ) | A ( 0.00) | I |
| 420- 420 | 0.5044E-04 | 1558.7763 | 46.7309 (Ag ) | I ( 0.00) | A |
| 421- 421 | 0.6027E-04 | 1703.8925 | 51.0814 (Au ) | A ( 0.00) | I |
| 422- 422 | 0.6031E-04 | 1704.4437 | 51.0979 (Ag ) | I ( 0.00) | A |
| 423- 423 | 0.6068E-04 | 1709.6175 | 51.2530 (Ag ) | I ( 0.00) | A |
| 424- 424 | 0.6081E-04 | 1711.5458 | 51.3109 (Au ) | A ( 0.00) | I |
| 425- 425 | 0.6106E-04 | 1715.0571 | 51.4161 (Au ) | A ( 0.00) | I |
| 426- 426 | 0.6120E-04 | 1716.9088 | 51.4716 (Ag ) | I ( 0.00) | A |
| 427- 427 | 0.6274E-04 | 1738.3721 | 52.1151 (Ag ) | I ( 0.00) | A |
| 428- 428 | 0.6293E-04 | 1741.0946 | 52.1967 (Au ) | A ( 0.00) | I |
| 429- 429 | 0.1934E-03 | 3052.3742 | 91.5079 (Au ) | A ( 0.00) | I |

|         |            |           |         |      |   |        |   |
|---------|------------|-----------|---------|------|---|--------|---|
| 430-430 | 0.1935E-03 | 3052.6108 | 91.5150 | (Ag) | I | (0.00) | A |
| 431-431 | 0.1946E-03 | 3062.0216 | 91.7971 | (Au) | A | (0.00) | I |
| 432-432 | 0.1947E-03 | 3062.1964 | 91.8023 | (Ag) | I | (0.00) | A |
| 433-433 | 0.1956E-03 | 3069.5243 | 92.0220 | (Au) | A | (0.00) | I |
| 434-434 | 0.1956E-03 | 3069.8622 | 92.0322 | (Ag) | I | (0.00) | A |
| 435-435 | 0.1957E-03 | 3070.1976 | 92.0422 | (Au) | A | (0.00) | I |
| 436-436 | 0.1959E-03 | 3071.7007 | 92.0873 | (Ag) | I | (0.00) | A |
| 437-437 | 0.1959E-03 | 3071.8122 | 92.0906 | (Ag) | I | (0.00) | A |
| 438-438 | 0.1960E-03 | 3072.3072 | 92.1055 | (Au) | A | (0.00) | I |
| 439-439 | 0.1962E-03 | 3074.0523 | 92.1578 | (Au) | A | (0.00) | I |
| 440-440 | 0.1966E-03 | 3077.2493 | 92.2536 | (Ag) | I | (0.00) | A |
| 441-441 | 0.1966E-03 | 3077.4075 | 92.2584 | (Au) | A | (0.00) | I |
| 442-442 | 0.1968E-03 | 3078.5540 | 92.2927 | (Ag) | I | (0.00) | A |
| 443-443 | 0.1970E-03 | 3080.4987 | 92.3510 | (Au) | A | (0.00) | I |
| 444-444 | 0.1970E-03 | 3080.5375 | 92.3522 | (Ag) | I | (0.00) | A |
| 445-445 | 0.1973E-03 | 3082.6181 | 92.4146 | (Au) | A | (0.00) | I |
| 446-446 | 0.1973E-03 | 3082.6679 | 92.4161 | (Ag) | I | (0.00) | A |
| 447-447 | 0.1975E-03 | 3084.7151 | 92.4774 | (Au) | A | (0.00) | I |
| 448-448 | 0.1975E-03 | 3084.7689 | 92.4790 | (Ag) | I | (0.00) | A |
| 449-449 | 0.1976E-03 | 3085.0608 | 92.4878 | (Au) | A | (0.00) | I |
| 450-450 | 0.1977E-03 | 3085.8539 | 92.5116 | (Ag) | I | (0.00) | A |
| 451-451 | 0.1981E-03 | 3089.2521 | 92.6134 | (Au) | A | (0.00) | I |
| 452-452 | 0.1982E-03 | 3089.9183 | 92.6334 | (Ag) | I | (0.00) | A |
| 453-453 | 0.1993E-03 | 3098.1977 | 92.8816 | (Au) | A | (0.00) | I |
| 454-454 | 0.1993E-03 | 3098.3802 | 92.8871 | (Ag) | I | (0.00) | A |
| 455-455 | 0.2001E-03 | 3104.9561 | 93.0842 | (Au) | A | (0.00) | I |
| 456-456 | 0.2001E-03 | 3104.9691 | 93.0846 | (Ag) | I | (0.00) | A |
| 457-457 | 0.2017E-03 | 3116.8433 | 93.4406 | (Au) | A | (0.00) | I |
| 458-458 | 0.2017E-03 | 3117.2810 | 93.4537 | (Ag) | I | (0.00) | A |
| 459-459 | 0.2037E-03 | 3132.3621 | 93.9059 | (Ag) | I | (0.00) | A |
| 460-460 | 0.2041E-03 | 3135.5765 | 94.0022 | (Au) | A | (0.00) | I |
| 461-461 | 0.2050E-03 | 3142.1030 | 94.1979 | (Au) | A | (0.00) | I |



|          |            |           |               |           |   |
|----------|------------|-----------|---------------|-----------|---|
| 462- 462 | 0.2053E-03 | 3144.7918 | 94.2785 (Au ) | A ( 0.00) | I |
| 463- 463 | 0.2053E-03 | 3144.8395 | 94.2799 (Ag ) | I ( 0.00) | A |
| 464- 464 | 0.2054E-03 | 3145.1147 | 94.2882 (Ag ) | I ( 0.00) | A |
| 465- 465 | 0.2056E-03 | 3147.2294 | 94.3516 (Au ) | A ( 0.00) | I |
| 466- 466 | 0.2057E-03 | 3147.9208 | 94.3723 (Ag ) | I ( 0.00) | A |
| 467- 467 | 0.2057E-03 | 3148.0171 | 94.3752 (Au ) | A ( 0.00) | I |
| 468- 468 | 0.2057E-03 | 3148.0829 | 94.3772 (Ag ) | I ( 0.00) | A |
| 469- 469 | 0.2070E-03 | 3158.0196 | 94.6750 (Ag ) | I ( 0.00) | A |
| 470- 470 | 0.2071E-03 | 3158.5001 | 94.6895 (Ag ) | I ( 0.00) | A |
| 471- 471 | 0.2072E-03 | 3159.1233 | 94.7081 (Au ) | A ( 0.00) | I |
| 472- 472 | 0.2079E-03 | 3164.2468 | 94.8617 (Au ) | A ( 0.00) | I |
| 473- 473 | 0.2080E-03 | 3165.0653 | 94.8863 (Ag ) | I ( 0.00) | A |
| 474- 474 | 0.2084E-03 | 3168.2333 | 94.9812 (Au ) | A ( 0.00) | I |
| 475- 475 | 0.2084E-03 | 3168.5195 | 94.9898 (Au ) | A ( 0.00) | I |
| 476- 476 | 0.2084E-03 | 3168.6678 | 94.9943 (Ag ) | I ( 0.00) | A |
| 477- 477 | 0.2085E-03 | 3169.1668 | 95.0092 (Ag ) | I ( 0.00) | A |
| 478- 478 | 0.2087E-03 | 3170.5873 | 95.0518 (Ag ) | I ( 0.00) | A |
| 479- 479 | 0.2088E-03 | 3171.2481 | 95.0716 (Au ) | A ( 0.00) | I |
| 480- 480 | 0.2093E-03 | 3175.1136 | 95.1875 (Au ) | A ( 0.00) | I |
| 481- 481 | 0.2093E-03 | 3175.3902 | 95.1958 (Ag ) | I ( 0.00) | A |
| 482- 482 | 0.2094E-03 | 3175.8958 | 95.2110 (Au ) | A ( 0.00) | I |
| 483- 483 | 0.2097E-03 | 3178.0095 | 95.2743 (Ag ) | I ( 0.00) | A |
| 484- 484 | 0.2097E-03 | 3178.1822 | 95.2795 (Au ) | A ( 0.00) | I |
| 485- 485 | 0.2103E-03 | 3182.8295 | 95.4188 (Au ) | A ( 0.00) | I |
| 486- 486 | 0.2104E-03 | 3183.5288 | 95.4398 (Ag ) | I ( 0.00) | A |
| 487- 487 | 0.2105E-03 | 3184.2518 | 95.4615 (Ag ) | I ( 0.00) | A |
| 488- 488 | 0.2105E-03 | 3184.5423 | 95.4702 (Au ) | A ( 0.00) | I |
| 489- 489 | 0.2109E-03 | 3187.2929 | 95.5526 (Au ) | A ( 0.00) | I |
| 490- 490 | 0.2109E-03 | 3187.4513 | 95.5574 (Ag ) | I ( 0.00) | A |
| 491- 491 | 0.2110E-03 | 3188.2244 | 95.5806 (Au ) | A ( 0.00) | I |
| 492- 492 | 0.2111E-03 | 3188.7389 | 95.5960 (Ag ) | I ( 0.00) | A |
| 493- 493 | 0.2112E-03 | 3189.2256 | 95.6106 (Ag ) | I ( 0.00) | A |

|          |            |           |          |       |     |       |   |
|----------|------------|-----------|----------|-------|-----|-------|---|
| 494- 494 | 0.2114E-03 | 3191.1352 | 95.6678  | (Au ) | A ( | 0.00) | I |
| 495- 495 | 0.2116E-03 | 3192.7787 | 95.7171  | (Ag ) | I ( | 0.00) | A |
| 496- 496 | 0.2116E-03 | 3192.7798 | 95.7171  | (Au ) | A ( | 0.00) | I |
| 497- 497 | 0.2118E-03 | 3194.2309 | 95.7606  | (Au ) | A ( | 0.00) | I |
| 498- 498 | 0.2118E-03 | 3194.3506 | 95.7642  | (Ag ) | I ( | 0.00) | A |
| 499- 499 | 0.2119E-03 | 3194.6521 | 95.7733  | (Ag ) | I ( | 0.00) | A |
| 500- 500 | 0.2120E-03 | 3195.7262 | 95.8055  | (Au ) | A ( | 0.00) | I |
| 501- 501 | 0.2198E-03 | 3253.7338 | 97.5445  | (Ag ) | I ( | 0.00) | A |
| 502- 502 | 0.2199E-03 | 3254.5677 | 97.5695  | (Au ) | A ( | 0.00) | I |
| 503- 503 | 0.2206E-03 | 3259.4421 | 97.7156  | (Au ) | A ( | 0.00) | I |
| 504- 504 | 0.2206E-03 | 3259.5855 | 97.7199  | (Ag ) | I ( | 0.00) | A |
| 505- 505 | 0.2208E-03 | 3261.1703 | 97.7674  | (Ag ) | I ( | 0.00) | A |
| 506- 506 | 0.2216E-03 | 3266.9047 | 97.9393  | (Au ) | A ( | 0.00) | I |
| 507- 507 | 0.2219E-03 | 3269.6495 | 98.0216  | (Au ) | A ( | 0.00) | I |
| 508- 508 | 0.2220E-03 | 3270.2447 | 98.0395  | (Ag ) | I ( | 0.00) | A |
| 509- 509 | 0.2444E-03 | 3431.3833 | 102.8703 | (Ag ) | I ( | 0.00) | A |
| 510- 510 | 0.2451E-03 | 3436.1411 | 103.0129 | (Au ) | A ( | 0.00) | I |
| 511- 511 | 0.2453E-03 | 3437.6409 | 103.0579 | (Ag ) | I ( | 0.00) | A |
| 512- 512 | 0.2461E-03 | 3443.0922 | 103.2213 | (Au ) | A ( | 0.00) | I |
| 513- 513 | 0.2527E-03 | 3488.6641 | 104.5875 | (Au ) | A ( | 0.00) | I |
| 514- 514 | 0.2537E-03 | 3495.7057 | 104.7986 | (Ag ) | I ( | 0.00) | A |
| 515- 515 | 0.2587E-03 | 3529.9664 | 105.8257 | (Au ) | A ( | 0.00) | I |
| 516- 516 | 0.2591E-03 | 3532.8597 | 105.9125 | (Ag ) | I ( | 0.00) | A |

NORMAL MODES NORMALIZED TO CLASSICAL AMPLITUDES (IN BOHR)

FREQ(CM\*\*-1) -94.96 -80.75 0.00 0.00 0.00 10.56

AT. 1 | X 0.0011 -0.0128 0.0030 -0.0216 0.0009 0.0303

Y 0.0013 0.0018 0.0216 0.0031 0.0009 0.0675

Z 0.0001 0.0002 -0.0010 0.0007 0.0218 0.0220

AT. 2 | X -0.0011 -0.0128 0.0030 -0.0216 0.0009 -0.0303

Y -0.0013 0.0018 0.0216 0.0031 0.0009 -0.0675  
Z -0.0001 0.0002 -0.0010 0.0007 0.0218 -0.0220  
AT. 3 I X -0.0002 -0.0126 0.0030 -0.0216 0.0009 0.0392  
Y -0.0008 0.0001 0.0216 0.0031 0.0009 0.0538  
Z 0.0001 -0.0006 -0.0010 0.0007 0.0218 -0.0392  
AT. 4 I X 0.0002 -0.0126 0.0030 -0.0216 0.0009 -0.0392  
Y 0.0008 0.0001 0.0216 0.0031 0.0009 -0.0538  
Z -0.0001 -0.0006 -0.0010 0.0007 0.0218 0.0392  
AT. 5 O X 0.0011 -0.0111 0.0030 -0.0216 0.0009 0.0202  
Y 0.0074 0.0021 0.0216 0.0031 0.0009 0.0714  
Z -0.0029 -0.0021 -0.0010 0.0007 0.0218 0.0095  
AT. 6 O X -0.0011 -0.0111 0.0030 -0.0216 0.0009 -0.0202  
Y -0.0074 0.0021 0.0216 0.0031 0.0009 -0.0714  
Z 0.0029 -0.0021 -0.0010 0.0007 0.0218 -0.0095  
AT. 7 O X 0.0027 -0.0132 0.0030 -0.0216 0.0009 0.0375  
Y 0.0044 0.0026 0.0216 0.0031 0.0009 0.0806  
Z -0.0027 0.0008 -0.0010 0.0007 0.0218 -0.0145  
AT. 8 O X -0.0027 -0.0132 0.0030 -0.0216 0.0009 -0.0375  
Y -0.0044 0.0026 0.0216 0.0031 0.0009 -0.0806  
Z 0.0027 0.0008 -0.0010 0.0007 0.0218 0.0145  
AT. 9 N X -0.0035 -0.0103 0.0030 -0.0216 0.0009 0.0265  
Y -0.0055 -0.0001 0.0216 0.0031 0.0009 0.0678  
Z -0.0012 -0.0012 -0.0010 0.0007 0.0218 0.0122  
AT. 10 N X 0.0035 -0.0103 0.0030 -0.0216 0.0009 -0.0265  
Y 0.0055 -0.0001 0.0216 0.0031 0.0009 -0.0678  
Z 0.0012 -0.0012 -0.0010 0.0007 0.0218 -0.0122  
AT. 11 N X -0.0042 -0.0128 0.0030 -0.0216 0.0009 0.0358  
Y -0.0035 0.0019 0.0216 0.0031 0.0009 0.0672  
Z -0.0063 0.0002 -0.0010 0.0007 0.0218 -0.0259  
AT. 12 N X 0.0042 -0.0128 0.0030 -0.0216 0.0009 -0.0358  
Y 0.0035 0.0019 0.0216 0.0031 0.0009 -0.0672  
Z 0.0063 0.0002 -0.0010 0.0007 0.0218 0.0259

AT. 13 C X 0.0013 -0.0113 0.0030 -0.0216 0.0009 0.0255  
Y 0.0031 0.0003 0.0216 0.0031 0.0009 0.0728  
Z -0.0045 -0.0012 -0.0010 0.0007 0.0218 0.0131

AT. 14 C X -0.0013 -0.0113 0.0030 -0.0216 0.0009 -0.0255  
Y -0.0031 0.0003 0.0216 0.0031 0.0009 -0.0728  
Z 0.0045 -0.0012 -0.0010 0.0007 0.0218 -0.0131

AT. 15 C X -0.0021 -0.0121 0.0030 -0.0216 0.0009 0.0270  
Y 0.0058 0.0010 0.0216 0.0031 0.0009 0.0754  
Z 0.0043 0.0005 -0.0010 0.0007 0.0218 0.0183

AT. 16 C X 0.0021 -0.0121 0.0030 -0.0216 0.0009 -0.0270  
Y -0.0058 0.0010 0.0216 0.0031 0.0009 -0.0754  
Z -0.0043 0.0005 -0.0010 0.0007 0.0218 -0.0183

AT. 17 H X -0.0041 -0.0111 0.0030 -0.0216 0.0009 0.0250  
Y -0.0021 0.0005 0.0216 0.0031 0.0009 0.0717  
Z 0.0146 0.0012 -0.0010 0.0007 0.0218 0.0209

AT. 18 H X 0.0041 -0.0111 0.0030 -0.0216 0.0009 -0.0250  
Y 0.0021 0.0005 0.0216 0.0031 0.0009 -0.0717  
Z -0.0146 0.0012 -0.0010 0.0007 0.0218 -0.0209

AT. 19 H X -0.0040 -0.0132 0.0030 -0.0216 0.0009 0.0228  
Y 0.0172 0.0014 0.0216 0.0031 0.0009 0.0788  
Z 0.0087 0.0003 -0.0010 0.0007 0.0218 0.0184

AT. 20 H X 0.0040 -0.0132 0.0030 -0.0216 0.0009 -0.0228  
Y -0.0172 0.0014 0.0216 0.0031 0.0009 -0.0788  
Z -0.0087 0.0003 -0.0010 0.0007 0.0218 -0.0184

AT. 21 C X -0.0004 -0.0133 0.0030 -0.0216 0.0009 0.0347  
Y 0.0026 0.0025 0.0216 0.0031 0.0009 0.0742  
Z -0.0061 0.0003 -0.0010 0.0007 0.0218 -0.0223

AT. 22 C X 0.0004 -0.0133 0.0030 -0.0216 0.0009 -0.0347  
Y -0.0026 0.0025 0.0216 0.0031 0.0009 -0.0742  
Z 0.0061 0.0003 -0.0010 0.0007 0.0218 0.0223

AT. 23 C X 0.0006 -0.0135 0.0030 -0.0216 0.0009 0.0266  
Y -0.0020 0.0020 0.0216 0.0031 0.0009 0.0769

Z -0.0030 0.0003 -0.0010 0.0007 0.0218 -0.0330  
AT. 24 C X -0.0006 -0.0135 0.0030 -0.0216 0.0009 -0.0266  
Y 0.0020 0.0020 0.0216 0.0031 0.0009 -0.0769  
Z 0.0030 0.0003 -0.0010 0.0007 0.0218 0.0330  
AT. 25 H X -0.0004 -0.0148 0.0030 -0.0216 0.0009 0.0190  
Y -0.0028 0.0019 0.0216 0.0031 0.0009 0.0791  
Z 0.0033 -0.0002 -0.0010 0.0007 0.0218 -0.0477  
AT. 26 H X 0.0004 -0.0148 0.0030 -0.0216 0.0009 -0.0190  
Y 0.0028 0.0019 0.0216 0.0031 0.0009 -0.0791  
Z -0.0033 -0.0002 -0.0010 0.0007 0.0218 0.0477  
AT. 27 H X 0.0028 -0.0131 0.0030 -0.0216 0.0009 0.0225  
Y -0.0075 0.0022 0.0216 0.0031 0.0009 0.0928  
Z -0.0056 0.0003 -0.0010 0.0007 0.0218 -0.0248  
AT. 28 H X -0.0028 -0.0131 0.0030 -0.0216 0.0009 -0.0225  
Y 0.0075 0.0022 0.0216 0.0031 0.0009 -0.0928  
Z 0.0056 0.0003 -0.0010 0.0007 0.0218 0.0248  
AT. 29 C X -0.0009 -0.0093 0.0030 -0.0216 0.0009 0.0269  
Y -0.0043 0.0005 0.0216 0.0031 0.0009 0.0670  
Z -0.0016 -0.0019 -0.0010 0.0007 0.0218 0.0093  
AT. 30 C X 0.0009 -0.0093 0.0030 -0.0216 0.0009 -0.0269  
Y 0.0043 0.0005 0.0216 0.0031 0.0009 -0.0670  
Z 0.0016 -0.0019 -0.0010 0.0007 0.0218 -0.0093  
AT. 31 H X -0.0016 -0.0090 0.0030 -0.0216 0.0009 0.0275  
Y -0.0031 -0.0003 0.0216 0.0031 0.0009 0.0775  
Z 0.0006 -0.0027 -0.0010 0.0007 0.0218 0.0252  
AT. 32 H X 0.0016 -0.0090 0.0030 -0.0216 0.0009 -0.0275  
Y 0.0031 -0.0003 0.0216 0.0031 0.0009 -0.0775  
Z -0.0006 -0.0027 -0.0010 0.0007 0.0218 -0.0252  
AT. 33 H X -0.0038 -0.0094 0.0030 -0.0216 0.0009 0.0156  
Y -0.0055 0.0011 0.0216 0.0031 0.0009 0.0502  
Z -0.0030 -0.0022 -0.0010 0.0007 0.0218 0.0093  
AT. 34 H X 0.0038 -0.0094 0.0030 -0.0216 0.0009 -0.0156

Y 0.0055 0.0011 0.0216 0.0031 0.0009 -0.0502  
Z 0.0030 -0.0022 -0.0010 0.0007 0.0218 -0.0093  
AT. 35 C X 0.0007 -0.0104 0.0030 -0.0216 0.0009 0.0413  
Y -0.0023 0.0008 0.0216 0.0031 0.0009 0.0749  
Z -0.0033 -0.0014 -0.0010 0.0007 0.0218 -0.0119  
AT. 36 C X -0.0007 -0.0104 0.0030 -0.0216 0.0009 -0.0413  
Y 0.0023 0.0008 0.0216 0.0031 0.0009 -0.0749  
Z 0.0033 -0.0014 -0.0010 0.0007 0.0218 0.0119  
AT. 37 C X -0.0010 -0.0119 0.0030 -0.0216 0.0009 0.0361  
Y -0.0013 0.0025 0.0216 0.0031 0.0009 0.0635  
Z -0.0035 -0.0000 -0.0010 0.0007 0.0218 -0.0339  
AT. 38 C X 0.0010 -0.0119 0.0030 -0.0216 0.0009 -0.0361  
Y 0.0013 0.0025 0.0216 0.0031 0.0009 -0.0635  
Z 0.0035 -0.0000 -0.0010 0.0007 0.0218 0.0339  
AT. 39 H X 0.0019 -0.0111 0.0030 -0.0216 0.0009 0.0176  
Y 0.0002 0.0041 0.0216 0.0031 0.0009 0.0508  
Z -0.0025 -0.0002 -0.0010 0.0007 0.0218 -0.0410  
AT. 40 H X -0.0019 -0.0111 0.0030 -0.0216 0.0009 -0.0176  
Y -0.0002 0.0041 0.0216 0.0031 0.0009 -0.0508  
Z 0.0025 -0.0002 -0.0010 0.0007 0.0218 0.0410  
AT. 41 H X -0.0047 -0.0131 0.0030 -0.0216 0.0009 0.0530  
Y 0.0033 0.0023 0.0216 0.0031 0.0009 0.0636  
Z -0.0016 0.0011 -0.0010 0.0007 0.0218 -0.0514  
AT. 42 H X 0.0047 -0.0131 0.0030 -0.0216 0.0009 -0.0530  
Y -0.0033 0.0023 0.0216 0.0031 0.0009 -0.0636  
Z 0.0016 0.0011 -0.0010 0.0007 0.0218 0.0514  
AT. 43 C X -0.0039 -0.0136 0.0030 -0.0216 0.0009 0.0438  
Y -0.0027 -0.0001 0.0216 0.0031 0.0009 0.0746  
Z -0.0046 0.0003 -0.0010 0.0007 0.0218 -0.0203  
AT. 44 C X 0.0039 -0.0136 0.0030 -0.0216 0.0009 -0.0438  
Y 0.0027 -0.0001 0.0216 0.0031 0.0009 -0.0746  
Z 0.0046 0.0003 -0.0010 0.0007 0.0218 0.0203

AT. 45 H X -0.0022 -0.0152 0.0030 -0.0216 0.0009 0.0488  
Y -0.0018 0.0003 0.0216 0.0031 0.0009 0.0830  
Z -0.0044 0.0010 -0.0010 0.0007 0.0218 -0.0322

AT. 46 H X 0.0022 -0.0152 0.0030 -0.0216 0.0009 -0.0488  
Y 0.0018 0.0003 0.0216 0.0031 0.0009 -0.0830  
Z 0.0044 0.0010 -0.0010 0.0007 0.0218 0.0322

AT. 47 H X -0.0043 -0.0145 0.0030 -0.0216 0.0009 0.0390  
Y -0.0030 -0.0014 0.0216 0.0031 0.0009 0.0693  
Z -0.0049 0.0002 -0.0010 0.0007 0.0218 -0.0186

AT. 48 H X 0.0043 -0.0145 0.0030 -0.0216 0.0009 -0.0390  
Y 0.0030 -0.0014 0.0216 0.0031 0.0009 -0.0693  
Z 0.0049 0.0002 -0.0010 0.0007 0.0218 0.0186

AT. 49 C X -0.0023 -0.0120 0.0030 -0.0216 0.0009 0.0508  
Y -0.0036 -0.0014 0.0216 0.0031 0.0009 0.0836  
Z -0.0019 -0.0003 -0.0010 0.0007 0.0218 -0.0026

AT. 50 C X 0.0023 -0.0120 0.0030 -0.0216 0.0009 -0.0508  
Y 0.0036 -0.0014 0.0216 0.0031 0.0009 -0.0836  
Z 0.0019 -0.0003 -0.0010 0.0007 0.0218 0.0026

AT. 51 C X -0.0037 -0.0112 0.0030 -0.0216 0.0009 0.0391  
Y -0.0059 -0.0022 0.0216 0.0031 0.0009 0.0769  
Z 0.0020 -0.0002 -0.0010 0.0007 0.0218 0.0159

AT. 52 C X 0.0037 -0.0112 0.0030 -0.0216 0.0009 -0.0391  
Y 0.0059 -0.0022 0.0216 0.0031 0.0009 -0.0769  
Z -0.0020 -0.0002 -0.0010 0.0007 0.0218 -0.0159

AT. 53 H X -0.0074 -0.0127 0.0030 -0.0216 0.0009 0.0335  
Y -0.0092 -0.0039 0.0216 0.0031 0.0009 0.0726  
Z 0.0032 0.0004 -0.0010 0.0007 0.0218 0.0222

AT. 54 H X 0.0074 -0.0127 0.0030 -0.0216 0.0009 -0.0335  
Y 0.0092 -0.0039 0.0216 0.0031 0.0009 -0.0726  
Z -0.0032 0.0004 -0.0010 0.0007 0.0218 -0.0222

AT. 55 H X 0.0016 -0.0085 0.0030 -0.0216 0.0009 0.0459  
Y -0.0086 -0.0036 0.0216 0.0031 0.0009 0.0817

Z 0.0038 0.0001 -0.0010 0.0007 0.0218 0.0265  
AT. 56 H X -0.0016 -0.0085 0.0030 -0.0216 0.0009 -0.0459  
Y 0.0086 -0.0036 0.0216 0.0031 0.0009 -0.0817  
Z -0.0038 0.0001 -0.0010 0.0007 0.0218 -0.0265  
AT. 57 C X 0.0017 -0.0081 0.0030 -0.0216 0.0009 0.0426  
Y 0.0003 0.0036 0.0216 0.0031 0.0009 0.0758  
Z -0.0031 -0.0014 -0.0010 0.0007 0.0218 -0.0135  
AT. 58 C X -0.0017 -0.0081 0.0030 -0.0216 0.0009 -0.0426  
Y -0.0003 0.0036 0.0216 0.0031 0.0009 -0.0758  
Z 0.0031 -0.0014 -0.0010 0.0007 0.0218 0.0135  
AT. 59 H X 0.0029 -0.0044 0.0030 -0.0216 0.0009 0.0433  
Y 0.0019 0.0017 0.0216 0.0031 0.0009 0.0814  
Z 0.0011 -0.0024 -0.0010 0.0007 0.0218 -0.0046  
AT. 60 H X -0.0029 -0.0044 0.0030 -0.0216 0.0009 -0.0433  
Y -0.0019 0.0017 0.0216 0.0031 0.0009 -0.0814  
Z -0.0011 -0.0024 -0.0010 0.0007 0.0218 0.0046  
AT. 61 H X 0.0012 -0.0064 0.0030 -0.0216 0.0009 0.0365  
Y -0.0017 0.0072 0.0216 0.0031 0.0009 0.0672  
Z -0.0027 -0.0018 -0.0010 0.0007 0.0218 -0.0137  
AT. 62 H X -0.0012 -0.0064 0.0030 -0.0216 0.0009 -0.0365  
Y 0.0017 0.0072 0.0216 0.0031 0.0009 -0.0672  
Z 0.0027 -0.0018 -0.0010 0.0007 0.0218 0.0137  
AT. 63 H X 0.0019 -0.0107 0.0030 -0.0216 0.0009 0.0483  
Y 0.0049 0.0068 0.0216 0.0031 0.0009 0.0788  
Z -0.0051 -0.0017 -0.0010 0.0007 0.0218 -0.0216  
AT. 64 H X -0.0019 -0.0107 0.0030 -0.0216 0.0009 -0.0483  
Y -0.0049 0.0068 0.0216 0.0031 0.0009 -0.0788  
Z 0.0051 -0.0017 -0.0010 0.0007 0.0218 0.0216  
AT. 65 C X 0.0019 -0.0122 0.0030 -0.0216 0.0009 0.0646  
Y -0.0020 -0.0031 0.0216 0.0031 0.0009 0.0963  
Z 0.0004 0.0005 -0.0010 0.0007 0.0218 0.0024  
AT. 66 C X -0.0019 -0.0122 0.0030 -0.0216 0.0009 -0.0646



Y 0.0020 -0.0031 0.0216 0.0031 0.0009 -0.0963  
Z -0.0004 0.0005 -0.0010 0.0007 0.0218 -0.0024  
AT. 67 H X 0.0077 -0.0122 0.0030 -0.0216 0.0009 0.0739  
Y -0.0056 -0.0029 0.0216 0.0031 0.0009 0.1006  
Z 0.0006 0.0004 -0.0010 0.0007 0.0218 -0.0096  
AT. 68 H X -0.0077 -0.0122 0.0030 -0.0216 0.0009 -0.0739  
Y 0.0056 -0.0029 0.0216 0.0031 0.0009 -0.1006  
Z -0.0006 0.0004 -0.0010 0.0007 0.0218 0.0096  
AT. 69 H X 0.0037 -0.0137 0.0030 -0.0216 0.0009 0.0617  
Y 0.0035 -0.0042 0.0216 0.0031 0.0009 0.0947  
Z 0.0034 0.0015 -0.0010 0.0007 0.0218 0.0073  
AT. 70 H X -0.0037 -0.0137 0.0030 -0.0216 0.0009 -0.0617  
Y -0.0035 -0.0042 0.0216 0.0031 0.0009 -0.0947  
Z -0.0034 0.0015 -0.0010 0.0007 0.0218 -0.0073  
AT. 71 H X -0.0002 -0.0105 0.0030 -0.0216 0.0009 0.0678  
Y -0.0017 -0.0039 0.0216 0.0031 0.0009 0.1036  
Z 0.0011 0.0006 -0.0010 0.0007 0.0218 0.0142  
AT. 72 H X 0.0002 -0.0105 0.0030 -0.0216 0.0009 -0.0678  
Y 0.0017 -0.0039 0.0216 0.0031 0.0009 -0.1036  
Z -0.0011 0.0006 -0.0010 0.0007 0.0218 -0.0142  
AT. 73 C X 0.0004 -0.0115 0.0030 -0.0216 0.0009 0.0560  
Y -0.0020 -0.0011 0.0216 0.0031 0.0009 0.0883  
Z -0.0027 -0.0011 -0.0010 0.0007 0.0218 -0.0075  
AT. 74 C X -0.0004 -0.0115 0.0030 -0.0216 0.0009 -0.0560  
Y 0.0020 -0.0011 0.0216 0.0031 0.0009 -0.0883  
Z 0.0027 -0.0011 -0.0010 0.0007 0.0218 0.0075  
AT. 75 H X 0.0015 -0.0113 0.0030 -0.0216 0.0009 0.0629  
Y -0.0025 -0.0023 0.0216 0.0031 0.0009 0.0942  
Z -0.0004 -0.0023 -0.0010 0.0007 0.0218 0.0053  
AT. 76 H X -0.0015 -0.0113 0.0030 -0.0216 0.0009 -0.0629  
Y 0.0025 -0.0023 0.0216 0.0031 0.0009 -0.0942  
Z 0.0004 -0.0023 -0.0010 0.0007 0.0218 -0.0053

AT. 77 H X 0.0004 -0.0121 0.0030 -0.0216 0.0009 0.0651  
Y 0.0000 -0.0019 0.0216 0.0031 0.0009 0.0933  
Z -0.0029 0.0002 -0.0010 0.0007 0.0218 -0.0210

AT. 78 H X -0.0004 -0.0121 0.0030 -0.0216 0.0009 -0.0651  
Y -0.0000 -0.0019 0.0216 0.0031 0.0009 -0.0933  
Z 0.0029 0.0002 -0.0010 0.0007 0.0218 0.0210

AT. 79 I X 0.0650 0.0635 0.0030 -0.0216 0.0009 -0.0015  
Y 0.0083 0.0056 0.0216 0.0031 0.0009 0.0272  
Z 0.0075 0.0104 -0.0010 0.0007 0.0218 0.0061

AT. 80 I X -0.0650 0.0635 0.0030 -0.0216 0.0009 0.0015  
Y -0.0083 0.0056 0.0216 0.0031 0.0009 -0.0272  
Z -0.0075 0.0104 -0.0010 0.0007 0.0218 -0.0061

AT. 81 I X -0.0003 -0.0120 0.0030 -0.0216 0.0009 0.0427  
Y -0.0000 -0.0053 0.0216 0.0031 0.0009 0.0645  
Z 0.0017 -0.0018 -0.0010 0.0007 0.0218 -0.0368

AT. 82 I X 0.0003 -0.0120 0.0030 -0.0216 0.0009 -0.0427  
Y 0.0000 -0.0053 0.0216 0.0031 0.0009 -0.0645  
Z -0.0017 -0.0018 -0.0010 0.0007 0.0218 0.0368

AT. 83 O X 0.0041 -0.0124 0.0030 -0.0216 0.0009 0.0101  
Y -0.0327 -0.0234 0.0216 0.0031 0.0009 0.0225  
Z -0.0013 0.0130 -0.0010 0.0007 0.0218 0.0200

AT. 84 O X -0.0041 -0.0124 0.0030 -0.0216 0.0009 -0.0101  
Y 0.0327 -0.0234 0.0216 0.0031 0.0009 -0.0225  
Z 0.0013 0.0130 -0.0010 0.0007 0.0218 -0.0200

AT. 85 O X -0.0010 -0.0074 0.0030 -0.0216 0.0009 0.0346  
Y 0.0101 0.0069 0.0216 0.0031 0.0009 0.0519  
Z 0.0044 -0.0026 -0.0010 0.0007 0.0218 -0.0029

AT. 86 O X 0.0010 -0.0074 0.0030 -0.0216 0.0009 -0.0346  
Y -0.0101 0.0069 0.0216 0.0031 0.0009 -0.0519  
Z -0.0044 -0.0026 -0.0010 0.0007 0.0218 0.0029

AT. 87 N X -0.0013 0.0016 0.0030 -0.0216 0.0009 0.0155  
Y -0.0001 0.0044 0.0216 0.0031 0.0009 0.0558

Z -0.0001 0.0024 -0.0010 0.0007 0.0218 0.0157  
AT. 88 N X 0.0013 0.0016 0.0030 -0.0216 0.0009 -0.0155  
Y 0.0001 0.0044 0.0216 0.0031 0.0009 -0.0558  
Z 0.0001 0.0024 -0.0010 0.0007 0.0218 -0.0157  
AT. 89 N X 0.0042 -0.0041 0.0030 -0.0216 0.0009 0.0340  
Y -0.0025 0.0039 0.0216 0.0031 0.0009 0.0635  
Z -0.0022 -0.0021 -0.0010 0.0007 0.0218 0.0072  
AT. 90 N X -0.0042 -0.0041 0.0030 -0.0216 0.0009 -0.0340  
Y 0.0025 0.0039 0.0216 0.0031 0.0009 -0.0635  
Z 0.0022 -0.0021 -0.0010 0.0007 0.0218 -0.0072  
AT. 91 C X 0.0047 -0.0039 0.0030 -0.0216 0.0009 0.0099  
Y -0.0261 -0.0262 0.0216 0.0031 0.0009 0.0380  
Z -0.0022 0.0017 -0.0010 0.0007 0.0218 0.0138  
AT. 92 C X -0.0047 -0.0039 0.0030 -0.0216 0.0009 -0.0099  
Y 0.0261 -0.0262 0.0216 0.0031 0.0009 -0.0380  
Z 0.0022 0.0017 -0.0010 0.0007 0.0218 -0.0138  
AT. 93 C X 0.0059 -0.0032 0.0030 -0.0216 0.0009 0.0070  
Y -0.0392 -0.0491 0.0216 0.0031 0.0009 0.0350  
Z -0.0102 -0.0277 -0.0010 0.0007 0.0218 0.0042  
AT. 94 C X -0.0059 -0.0032 0.0030 -0.0216 0.0009 -0.0070  
Y 0.0392 -0.0491 0.0216 0.0031 0.0009 -0.0350  
Z 0.0102 -0.0277 -0.0010 0.0007 0.0218 -0.0042  
AT. 95 H X -0.0112 -0.0191 0.0030 -0.0216 0.0009 0.0152  
Y -0.0221 -0.0217 0.0216 0.0031 0.0009 0.0340  
Z -0.0232 -0.0601 -0.0010 0.0007 0.0218 -0.0024  
AT. 96 H X 0.0112 -0.0191 0.0030 -0.0216 0.0009 -0.0152  
Y 0.0221 -0.0217 0.0216 0.0031 0.0009 -0.0340  
Z 0.0232 -0.0601 -0.0010 0.0007 0.0218 0.0024  
AT. 97 H X 0.0043 -0.0146 0.0030 -0.0216 0.0009 0.0004  
Y -0.0614 -0.0926 0.0216 0.0031 0.0009 0.0318  
Z -0.0160 -0.0357 -0.0010 0.0007 0.0218 0.0056  
AT. 98 H X -0.0043 -0.0146 0.0030 -0.0216 0.0009 -0.0004

Y 0.0614 -0.0926 0.0216 0.0031 0.0009 -0.0318  
Z 0.0160 -0.0357 -0.0010 0.0007 0.0218 -0.0056  
AT. 99 C X 0.0040 -0.0054 0.0030 -0.0216 0.0009 0.0351  
Y 0.0063 0.0055 0.0216 0.0031 0.0009 0.0533  
Z -0.0024 -0.0031 -0.0010 0.0007 0.0218 0.0014  
AT. 100 C X -0.0040 -0.0054 0.0030 -0.0216 0.0009 -0.0351  
Y -0.0063 0.0055 0.0216 0.0031 0.0009 -0.0533  
Z 0.0024 -0.0031 -0.0010 0.0007 0.0218 -0.0014  
AT. 101 C X -0.0002 -0.0075 0.0030 -0.0216 0.0009 0.0376  
Y 0.0001 0.0020 0.0216 0.0031 0.0009 0.0420  
Z 0.0021 -0.0013 -0.0010 0.0007 0.0218 -0.0016  
AT. 102 C X 0.0002 -0.0075 0.0030 -0.0216 0.0009 -0.0376  
Y -0.0001 0.0020 0.0216 0.0031 0.0009 -0.0420  
Z -0.0021 -0.0013 -0.0010 0.0007 0.0218 0.0016  
AT. 103 H X 0.0034 -0.0019 0.0030 -0.0216 0.0009 0.0322  
Y -0.0030 -0.0005 0.0216 0.0031 0.0009 0.0432  
Z 0.0071 0.0002 -0.0010 0.0007 0.0218 0.0166  
AT. 104 H X -0.0034 -0.0019 0.0030 -0.0216 0.0009 -0.0322  
Y 0.0030 -0.0005 0.0216 0.0031 0.0009 -0.0432  
Z -0.0071 0.0002 -0.0010 0.0007 0.0218 -0.0166  
AT. 105 H X -0.0022 -0.0100 0.0030 -0.0216 0.0009 0.0443  
Y -0.0032 0.0022 0.0216 0.0031 0.0009 0.0180  
Z 0.0003 -0.0017 -0.0010 0.0007 0.0218 -0.0082  
AT. 106 H X 0.0022 -0.0100 0.0030 -0.0216 0.0009 -0.0443  
Y 0.0032 0.0022 0.0216 0.0031 0.0009 -0.0180  
Z -0.0003 -0.0017 -0.0010 0.0007 0.0218 0.0082  
AT. 107 C X -0.0019 0.0049 0.0030 -0.0216 0.0009 0.0180  
Y 0.0005 0.0019 0.0216 0.0031 0.0009 0.0642  
Z 0.0005 0.0093 -0.0010 0.0007 0.0218 0.0235  
AT. 108 C X 0.0019 0.0049 0.0030 -0.0216 0.0009 -0.0180  
Y -0.0005 0.0019 0.0216 0.0031 0.0009 -0.0642  
Z -0.0005 0.0093 -0.0010 0.0007 0.0218 -0.0235

AT.109 H X -0.0014 0.0144 0.0030 -0.0216 0.0009 0.0165  
Y 0.0005 0.0063 0.0216 0.0031 0.0009 0.0667  
Z 0.0003 0.0135 -0.0010 0.0007 0.0218 0.0290

AT.110 H X 0.0014 0.0144 0.0030 -0.0216 0.0009 -0.0165  
Y -0.0005 0.0063 0.0216 0.0031 0.0009 -0.0667  
Z -0.0003 0.0135 -0.0010 0.0007 0.0218 -0.0290

AT.111 H X -0.0022 0.0041 0.0030 -0.0216 0.0009 0.0140  
Y 0.0021 -0.0071 0.0216 0.0031 0.0009 0.0630  
Z 0.0005 0.0122 -0.0010 0.0007 0.0218 0.0281

AT.112 H X 0.0022 0.0041 0.0030 -0.0216 0.0009 -0.0140  
Y -0.0021 -0.0071 0.0216 0.0031 0.0009 -0.0630  
Z -0.0005 0.0122 -0.0010 0.0007 0.0218 -0.0281

AT.113 C X -0.0003 0.0019 0.0030 -0.0216 0.0009 0.0280  
Y 0.0007 0.0042 0.0216 0.0031 0.0009 0.0723  
Z 0.0015 0.0037 -0.0010 0.0007 0.0218 0.0187

AT.114 C X 0.0003 0.0019 0.0030 -0.0216 0.0009 -0.0280  
Y -0.0007 0.0042 0.0216 0.0031 0.0009 -0.0723  
Z -0.0015 0.0037 -0.0010 0.0007 0.0218 -0.0187

AT.115 C X 0.0002 -0.0028 0.0030 -0.0216 0.0009 0.0334  
Y 0.0021 -0.0004 0.0216 0.0031 0.0009 0.0715  
Z 0.0016 -0.0033 -0.0010 0.0007 0.0218 0.0130

AT.116 C X -0.0002 -0.0028 0.0030 -0.0216 0.0009 -0.0334  
Y -0.0021 -0.0004 0.0216 0.0031 0.0009 -0.0715  
Z -0.0016 -0.0033 -0.0010 0.0007 0.0218 -0.0130

AT.117 H X -0.0004 0.0017 0.0030 -0.0216 0.0009 0.0291  
Y 0.0044 -0.0093 0.0216 0.0031 0.0009 0.0736  
Z 0.0011 -0.0062 -0.0010 0.0007 0.0218 0.0170

AT.118 H X 0.0004 0.0017 0.0030 -0.0216 0.0009 -0.0291  
Y -0.0044 -0.0093 0.0216 0.0031 0.0009 -0.0736  
Z -0.0011 -0.0062 -0.0010 0.0007 0.0218 -0.0170

AT.119 H X 0.0055 -0.0105 0.0030 -0.0216 0.0009 0.0399  
Y 0.0059 0.0003 0.0216 0.0031 0.0009 0.0753

Z 0.0012 -0.0080 -0.0010 0.0007 0.0218 0.0128  
AT. 120 H X -0.0055 -0.0105 0.0030 -0.0216 0.0009 -0.0399  
Y -0.0059 0.0003 0.0216 0.0031 0.0009 -0.0753  
Z -0.0012 -0.0080 -0.0010 0.0007 0.0218 -0.0128  
AT. 121 C X 0.0036 -0.0038 0.0030 -0.0216 0.0009 0.0366  
Y 0.0007 0.0078 0.0216 0.0031 0.0009 0.0614  
Z 0.0005 -0.0034 -0.0010 0.0007 0.0218 0.0030  
AT. 122 C X -0.0036 -0.0038 0.0030 -0.0216 0.0009 -0.0366  
Y -0.0007 0.0078 0.0216 0.0031 0.0009 -0.0614  
Z -0.0005 -0.0034 -0.0010 0.0007 0.0218 -0.0030  
AT. 123 H X -0.0013 -0.0050 0.0030 -0.0216 0.0009 0.0442  
Y 0.0007 0.0079 0.0216 0.0031 0.0009 0.0642  
Z 0.0001 -0.0038 -0.0010 0.0007 0.0218 0.0013  
AT. 124 H X 0.0013 -0.0050 0.0030 -0.0216 0.0009 -0.0442  
Y -0.0007 0.0079 0.0216 0.0031 0.0009 -0.0642  
Z -0.0001 -0.0038 -0.0010 0.0007 0.0218 -0.0013  
AT. 125 H X 0.0024 -0.0061 0.0030 -0.0216 0.0009 0.0370  
Y 0.0012 0.0089 0.0216 0.0031 0.0009 0.0536  
Z -0.0003 -0.0058 -0.0010 0.0007 0.0218 -0.0009  
AT. 126 H X -0.0024 -0.0061 0.0030 -0.0216 0.0009 -0.0370  
Y -0.0012 0.0089 0.0216 0.0031 0.0009 -0.0536  
Z 0.0003 -0.0058 -0.0010 0.0007 0.0218 0.0009  
AT. 127 C X 0.0030 0.0012 0.0030 -0.0216 0.0009 0.0312  
Y -0.0017 0.0090 0.0216 0.0031 0.0009 0.0616  
Z 0.0004 -0.0036 -0.0010 0.0007 0.0218 0.0064  
AT. 128 C X -0.0030 0.0012 0.0030 -0.0216 0.0009 -0.0312  
Y 0.0017 0.0090 0.0216 0.0031 0.0009 -0.0616  
Z -0.0004 -0.0036 -0.0010 0.0007 0.0218 -0.0064  
AT. 129 C X 0.0025 0.0050 0.0030 -0.0216 0.0009 0.0207  
Y -0.0003 0.0132 0.0216 0.0031 0.0009 0.0566  
Z -0.0028 -0.0074 -0.0010 0.0007 0.0218 0.0082  
AT. 130 C X -0.0025 0.0050 0.0030 -0.0216 0.0009 -0.0207

Y 0.0003 0.0132 0.0216 0.0031 0.0009 -0.0566  
Z 0.0028 -0.0074 -0.0010 0.0007 0.0218 -0.0082  
AT. 131 H X -0.0008 -0.0035 0.0030 -0.0216 0.0009 0.0190  
Y 0.0052 0.0243 0.0216 0.0031 0.0009 0.0506  
Z -0.0059 -0.0154 -0.0010 0.0007 0.0218 0.0028  
AT. 132 H X 0.0008 -0.0035 0.0030 -0.0216 0.0009 -0.0190  
Y -0.0052 0.0243 0.0216 0.0031 0.0009 -0.0506  
Z 0.0059 -0.0154 -0.0010 0.0007 0.0218 -0.0028  
AT. 133 H X 0.0068 0.0186 0.0030 -0.0216 0.0009 0.0214  
Y -0.0004 0.0153 0.0216 0.0031 0.0009 0.0577  
Z -0.0054 -0.0107 -0.0010 0.0007 0.0218 0.0106  
AT. 134 H X -0.0068 0.0186 0.0030 -0.0216 0.0009 -0.0214  
Y 0.0004 0.0153 0.0216 0.0031 0.0009 -0.0577  
Z 0.0054 -0.0107 -0.0010 0.0007 0.0218 -0.0106  
AT. 135 C X -0.0005 0.0032 0.0030 -0.0216 0.0009 0.0280  
Y 0.0042 0.0063 0.0216 0.0031 0.0009 0.0847  
Z 0.0030 0.0064 -0.0010 0.0007 0.0218 0.0260  
AT. 136 C X 0.0005 0.0032 0.0030 -0.0216 0.0009 -0.0280  
Y -0.0042 0.0063 0.0216 0.0031 0.0009 -0.0847  
Z -0.0030 0.0064 -0.0010 0.0007 0.0218 -0.0260  
AT. 137 H X -0.0018 0.0020 0.0030 -0.0216 0.0009 0.0250  
Y 0.0041 0.0059 0.0216 0.0031 0.0009 0.0884  
Z 0.0036 0.0059 -0.0010 0.0007 0.0218 0.0342  
AT. 138 H X 0.0018 0.0020 0.0030 -0.0216 0.0009 -0.0250  
Y -0.0041 0.0059 0.0216 0.0031 0.0009 -0.0884  
Z -0.0036 0.0059 -0.0010 0.0007 0.0218 -0.0342  
AT. 139 H X -0.0028 0.0013 0.0030 -0.0216 0.0009 0.0253  
Y 0.0073 0.0082 0.0216 0.0031 0.0009 0.0830  
Z 0.0051 0.0080 -0.0010 0.0007 0.0218 0.0300  
AT. 140 H X 0.0028 0.0013 0.0030 -0.0216 0.0009 -0.0253  
Y -0.0073 0.0082 0.0216 0.0031 0.0009 -0.0830  
Z -0.0051 0.0080 -0.0010 0.0007 0.0218 -0.0300

AT. 141 H X 0.0049 0.0066 0.0030 -0.0216 0.0009 0.0339  
Y 0.0071 0.0074 0.0216 0.0031 0.0009 0.0927  
Z 0.0037 0.0067 -0.0010 0.0007 0.0218 0.0203

AT. 142 H X -0.0049 0.0066 0.0030 -0.0216 0.0009 -0.0339  
Y -0.0071 0.0074 0.0216 0.0031 0.0009 -0.0927  
Z -0.0037 0.0067 -0.0010 0.0007 0.0218 -0.0203

AT. 143 C X 0.0028 0.0014 0.0030 -0.0216 0.0009 0.0342  
Y -0.0017 0.0140 0.0216 0.0031 0.0009 0.0570  
Z -0.0002 -0.0054 -0.0010 0.0007 0.0218 0.0034

AT. 144 C X -0.0028 0.0014 0.0030 -0.0216 0.0009 -0.0342  
Y 0.0017 0.0140 0.0216 0.0031 0.0009 -0.0570  
Z 0.0002 -0.0054 -0.0010 0.0007 0.0218 -0.0034

AT. 145 H X 0.0025 -0.0005 0.0030 -0.0216 0.0009 0.0382  
Y -0.0011 0.0155 0.0216 0.0031 0.0009 0.0567  
Z 0.0000 -0.0077 -0.0010 0.0007 0.0218 0.0047

AT. 146 H X -0.0025 -0.0005 0.0030 -0.0216 0.0009 -0.0382  
Y 0.0011 0.0155 0.0216 0.0031 0.0009 -0.0567  
Z -0.0000 -0.0077 -0.0010 0.0007 0.0218 -0.0047

AT. 147 H X 0.0027 0.0003 0.0030 -0.0216 0.0009 0.0345  
Y -0.0013 0.0142 0.0216 0.0031 0.0009 0.0535  
Z -0.0008 -0.0070 -0.0010 0.0007 0.0218 0.0017

AT. 148 H X -0.0027 0.0003 0.0030 -0.0216 0.0009 -0.0345  
Y 0.0013 0.0142 0.0216 0.0031 0.0009 -0.0535  
Z 0.0008 -0.0070 -0.0010 0.0007 0.0218 -0.0017

AT. 149 H X 0.0027 0.0033 0.0030 -0.0216 0.0009 0.0311  
Y -0.0022 0.0160 0.0216 0.0031 0.0009 0.0555  
Z 0.0001 -0.0027 -0.0010 0.0007 0.0218 0.0031

AT. 150 H X -0.0027 0.0033 0.0030 -0.0216 0.0009 -0.0311  
Y 0.0022 0.0160 0.0216 0.0031 0.0009 -0.0555  
Z -0.0001 -0.0027 -0.0010 0.0007 0.0218 -0.0031

AT. 151 C X 0.0011 0.0037 0.0030 -0.0216 0.0009 0.0326  
Y 0.0020 0.0085 0.0216 0.0031 0.0009 0.0710



Z 0.0017 0.0000 -0.0010 0.0007 0.0218 0.0127  
AT. 152 C X -0.0011 0.0037 0.0030 -0.0216 0.0009 -0.0326  
Y -0.0020 0.0085 0.0216 0.0031 0.0009 -0.0710  
Z -0.0017 0.0000 -0.0010 0.0007 0.0218 -0.0127  
AT. 153 H X -0.0004 0.0055 0.0030 -0.0216 0.0009 0.0312  
Y 0.0035 0.0105 0.0216 0.0031 0.0009 0.0715  
Z 0.0049 0.0023 -0.0010 0.0007 0.0218 0.0151  
AT. 154 H X 0.0004 0.0055 0.0030 -0.0216 0.0009 -0.0312  
Y -0.0035 0.0105 0.0216 0.0031 0.0009 -0.0715  
Z -0.0049 0.0023 -0.0010 0.0007 0.0218 -0.0151  
AT. 155 H X 0.0017 0.0052 0.0030 -0.0216 0.0009 0.0398  
Y 0.0061 0.0112 0.0216 0.0031 0.0009 0.0750  
Z -0.0015 -0.0020 -0.0010 0.0007 0.0218 0.0111  
AT. 156 H X -0.0017 0.0052 0.0030 -0.0216 0.0009 -0.0398  
Y -0.0061 0.0112 0.0216 0.0031 0.0009 -0.0750  
Z 0.0015 -0.0020 -0.0010 0.0007 0.0218 -0.0111  
AT. 157 O X 0.0023 -0.0125 0.0030 -0.0216 0.0009 0.0379  
Y 0.0026 0.0017 0.0216 0.0031 0.0009 0.0633  
Z 0.0078 -0.0034 -0.0010 0.0007 0.0218 0.0685  
AT. 158 O X -0.0023 -0.0125 0.0030 -0.0216 0.0009 -0.0379  
Y -0.0026 0.0017 0.0216 0.0031 0.0009 -0.0633  
Z -0.0078 -0.0034 -0.0010 0.0007 0.0218 -0.0685  
AT. 159 O X 0.0001 -0.0112 0.0030 -0.0216 0.0009 0.0202  
Y 0.0020 0.0038 0.0216 0.0031 0.0009 0.0426  
Z 0.0034 -0.0006 -0.0010 0.0007 0.0218 0.0318  
AT. 160 O X -0.0001 -0.0112 0.0030 -0.0216 0.0009 -0.0202  
Y -0.0020 0.0038 0.0216 0.0031 0.0009 -0.0426  
Z -0.0034 -0.0006 -0.0010 0.0007 0.0218 -0.0318  
AT. 161 H X 0.0034 -0.0136 0.0030 -0.0216 0.0009 0.0394  
Y 0.0017 0.0014 0.0216 0.0031 0.0009 0.0736  
Z 0.0094 -0.0033 -0.0010 0.0007 0.0218 0.0393  
AT. 162 H X -0.0034 -0.0136 0.0030 -0.0216 0.0009 -0.0394

Y -0.0017 0.0014 0.0216 0.0031 0.0009 -0.0736  
Z -0.0094 -0.0033 -0.0010 0.0007 0.0218 -0.0393  
AT.163 H X -0.0022 -0.0100 0.0030 -0.0216 0.0009 -0.0018  
Y -0.0009 0.0027 0.0216 0.0031 0.0009 -0.0115  
Z 0.0044 -0.0015 -0.0010 0.0007 0.0218 0.0274  
AT.164 H X 0.0022 -0.0100 0.0030 -0.0216 0.0009 0.0018  
Y 0.0009 0.0027 0.0216 0.0031 0.0009 0.0115  
Z -0.0044 -0.0015 -0.0010 0.0007 0.0218 -0.0274  
AT.165 O X 0.0137 0.0152 0.0030 -0.0216 0.0009 0.0009  
Y -0.0155 -0.0176 0.0216 0.0031 0.0009 0.0218  
Z -0.0076 -0.0120 -0.0010 0.0007 0.0218 0.0292  
AT.166 O X -0.0137 0.0152 0.0030 -0.0216 0.0009 -0.0009  
Y 0.0155 -0.0176 0.0216 0.0031 0.0009 -0.0218  
Z 0.0076 -0.0120 -0.0010 0.0007 0.0218 -0.0292  
AT.167 H X 0.0176 0.0211 0.0030 -0.0216 0.0009 0.0112  
Y -0.0266 -0.0269 0.0216 0.0031 0.0009 0.0188  
Z -0.0015 -0.0135 -0.0010 0.0007 0.0218 0.0045  
AT.168 H X -0.0176 0.0211 0.0030 -0.0216 0.0009 -0.0112  
Y 0.0266 -0.0269 0.0216 0.0031 0.0009 -0.0188  
Z 0.0015 -0.0135 -0.0010 0.0007 0.0218 -0.0045  
AT.169 O X 0.0153 0.0003 0.0030 -0.0216 0.0009 -0.0309  
Y -0.0056 -0.0033 0.0216 0.0031 0.0009 -0.0282  
Z -0.0104 -0.0184 -0.0010 0.0007 0.0218 0.0335  
AT.170 O X -0.0153 0.0003 0.0030 -0.0216 0.0009 0.0309  
Y 0.0056 -0.0033 0.0216 0.0031 0.0009 0.0282  
Z 0.0104 -0.0184 -0.0010 0.0007 0.0218 -0.0335  
AT.171 H X 0.0110 -0.0074 0.0030 -0.0216 0.0009 -0.0304  
Y -0.0047 -0.0002 0.0216 0.0031 0.0009 -0.0382  
Z -0.0026 -0.0073 -0.0010 0.0007 0.0218 0.0165  
AT.172 H X -0.0110 -0.0074 0.0030 -0.0216 0.0009 0.0304  
Y 0.0047 -0.0002 0.0216 0.0031 0.0009 0.0382  
Z 0.0026 -0.0073 -0.0010 0.0007 0.0218 -0.0165

FREQ(CM\*\*-1) 19.92 22.67 27.57 30.88 30.92 36.55

AT. 1 I X 0.0602 0.0004 -0.0306 -0.0393 0.0105 -0.0432

Y -0.0181 -0.0296 -0.0014 -0.0024 -0.0035 0.0075

Z -0.0238 -0.0375 -0.0152 -0.0101 -0.0239 0.0132

AT. 2 I X -0.0602 0.0004 0.0306 -0.0393 -0.0105 0.0432

Y 0.0181 -0.0296 0.0014 -0.0024 0.0035 -0.0075

Z 0.0238 -0.0375 0.0152 -0.0101 0.0239 -0.0132

AT. 3 I X 0.0566 0.0117 -0.0093 -0.0214 0.0089 -0.0035

Y -0.0058 0.0074 -0.0086 0.0070 0.0235 0.0023

Z 0.0379 -0.0526 0.0561 -0.0131 0.0637 0.0034

AT. 4 I X -0.0566 0.0117 0.0093 -0.0214 -0.0089 0.0035

Y 0.0058 0.0074 0.0086 0.0070 -0.0235 -0.0023

Z -0.0379 -0.0526 -0.0561 -0.0131 -0.0637 -0.0034

AT. 5 O X 0.0675 -0.0006 -0.0447 -0.0459 0.0152 -0.0596

Y -0.0037 -0.0310 -0.0191 -0.0018 0.0145 -0.0133

Z -0.0307 -0.0388 0.0036 -0.0031 -0.0159 0.0063

AT. 6 O X -0.0675 -0.0006 0.0447 -0.0459 -0.0152 0.0596

Y 0.0037 -0.0310 0.0191 -0.0018 -0.0145 0.0133

Z 0.0307 -0.0388 -0.0036 -0.0031 0.0159 -0.0063

AT. 7 O X 0.0464 0.0123 -0.0044 -0.0222 0.0004 -0.0102

Y -0.0126 -0.0044 0.0142 0.0329 0.0170 0.0203

Z 0.0179 -0.0481 0.0380 -0.0095 0.0023 0.0044

AT. 8 O X -0.0464 0.0123 0.0044 -0.0222 -0.0004 0.0102

Y 0.0126 -0.0044 -0.0142 0.0329 -0.0170 -0.0203

Z -0.0179 -0.0481 -0.0380 -0.0095 -0.0023 -0.0044

AT. 9 N X 0.0577 0.0152 -0.0335 -0.0384 -0.0008 -0.0218

Y -0.0031 -0.0063 -0.0116 0.0104 0.0017 0.0241

Z -0.0336 -0.0373 0.0064 -0.0031 -0.0184 0.0128

AT. 10 N X -0.0577 0.0152 0.0335 -0.0384 0.0008 0.0218

Y 0.0031 -0.0063 0.0116 0.0104 -0.0017 -0.0241

Z 0.0336 -0.0373 -0.0064 -0.0031 0.0184 -0.0128  
AT. 11 N X 0.0537 0.0127 -0.0212 -0.0345 -0.0097 -0.0104  
Y -0.0079 -0.0012 -0.0169 0.0130 0.0077 0.0199  
Z 0.0178 -0.0455 0.0173 -0.0217 -0.0017 0.0045  
AT. 12 N X -0.0537 0.0127 0.0212 -0.0345 0.0097 0.0104  
Y 0.0079 -0.0012 0.0169 0.0130 -0.0077 -0.0199  
Z -0.0178 -0.0455 -0.0173 -0.0217 0.0017 -0.0045  
AT. 13 C X 0.0616 0.0050 -0.0378 -0.0431 0.0082 -0.0420  
Y -0.0050 -0.0219 -0.0131 0.0041 0.0074 0.0044  
Z -0.0344 -0.0399 0.0066 -0.0037 -0.0189 0.0114  
AT. 14 C X -0.0616 0.0050 0.0378 -0.0431 -0.0082 0.0420  
Y 0.0050 -0.0219 0.0131 0.0041 -0.0074 -0.0044  
Z 0.0344 -0.0399 -0.0066 -0.0037 0.0189 -0.0114  
AT. 15 C X 0.0600 0.0009 -0.0323 -0.0421 0.0058 -0.0416  
Y -0.0115 -0.0271 -0.0071 0.0021 0.0044 0.0060  
Z -0.0412 -0.0432 0.0087 -0.0062 -0.0202 0.0148  
AT. 16 C X -0.0600 0.0009 0.0323 -0.0421 -0.0058 0.0416  
Y 0.0115 -0.0271 0.0071 0.0021 -0.0044 -0.0060  
Z 0.0412 -0.0432 -0.0087 -0.0062 0.0202 -0.0148  
AT. 17 H X 0.0604 0.0019 -0.0357 -0.0456 0.0007 -0.0397  
Y -0.0057 -0.0227 -0.0120 0.0020 0.0029 0.0063  
Z -0.0479 -0.0479 0.0140 -0.0075 -0.0197 0.0147  
AT. 18 H X -0.0604 0.0019 0.0357 -0.0456 -0.0007 0.0397  
Y 0.0057 -0.0227 0.0120 0.0020 -0.0029 -0.0063  
Z 0.0479 -0.0479 -0.0140 -0.0075 0.0197 -0.0147  
AT. 19 H X 0.0591 -0.0003 -0.0255 -0.0416 0.0075 -0.0442  
Y -0.0191 -0.0319 -0.0001 0.0013 0.0064 0.0052  
Z -0.0453 -0.0460 0.0135 -0.0062 -0.0185 0.0138  
AT. 20 H X -0.0591 -0.0003 0.0255 -0.0416 -0.0075 0.0442  
Y 0.0191 -0.0319 0.0001 0.0013 -0.0064 -0.0052  
Z 0.0453 -0.0460 -0.0135 -0.0062 0.0185 -0.0138  
AT. 21 C X 0.0520 0.0127 -0.0121 -0.0283 0.0015 -0.0108

Y -0.0065 -0.0035 0.0022 0.0251 0.0192 0.0196  
Z 0.0187 -0.0471 0.0275 -0.0160 0.0048 0.0046  
AT. 22 C X -0.0520 0.0127 0.0121 -0.0283 -0.0015 0.0108  
Y 0.0065 -0.0035 -0.0022 0.0251 -0.0192 -0.0196  
Z -0.0187 -0.0471 -0.0275 -0.0160 -0.0048 -0.0046  
AT. 23 C X 0.0576 0.0136 -0.0092 -0.0290 0.0170 -0.0115  
Y 0.0042 -0.0030 0.0110 0.0261 0.0382 0.0184  
Z 0.0204 -0.0467 0.0274 -0.0178 0.0145 0.0037  
AT. 24 C X -0.0576 0.0136 0.0092 -0.0290 -0.0170 0.0115  
Y -0.0042 -0.0030 -0.0110 0.0261 -0.0382 -0.0184  
Z -0.0204 -0.0467 -0.0274 -0.0178 -0.0145 -0.0037  
AT. 25 H X 0.0573 0.0189 -0.0150 -0.0369 0.0178 -0.0181  
Y 0.0048 -0.0026 0.0121 0.0263 0.0412 0.0184  
Z 0.0110 -0.0438 0.0095 -0.0268 -0.0055 -0.0025  
AT. 26 H X -0.0573 0.0189 0.0150 -0.0369 -0.0178 0.0181  
Y -0.0048 -0.0026 -0.0121 0.0263 -0.0412 -0.0184  
Z -0.0110 -0.0438 -0.0095 -0.0268 0.0055 0.0025  
AT. 27 H X 0.0582 0.0107 0.0008 -0.0249 0.0312 -0.0069  
Y 0.0132 -0.0065 0.0297 0.0370 0.0595 0.0252  
Z 0.0241 -0.0483 0.0340 -0.0134 0.0212 0.0061  
AT. 28 H X -0.0582 0.0107 -0.0008 -0.0249 -0.0312 0.0069  
Y -0.0132 -0.0065 -0.0297 0.0370 -0.0595 -0.0252  
Z -0.0241 -0.0483 -0.0340 -0.0134 -0.0212 -0.0061  
AT. 29 C X 0.0513 0.0188 -0.0365 -0.0376 -0.0021 -0.0198  
Y -0.0091 -0.0011 -0.0190 0.0119 0.0030 0.0222  
Z -0.0291 -0.0381 0.0017 -0.0032 -0.0137 0.0054  
AT. 30 C X -0.0513 0.0188 0.0365 -0.0376 0.0021 0.0198  
Y 0.0091 -0.0011 0.0190 0.0119 -0.0030 -0.0222  
Z 0.0291 -0.0381 -0.0017 -0.0032 0.0137 -0.0054  
AT. 31 H X 0.0447 0.0233 -0.0390 -0.0359 -0.0035 -0.0162  
Y -0.0179 -0.0019 -0.0199 0.0165 0.0006 0.0209  
Z -0.0460 -0.0361 -0.0008 0.0057 -0.0182 0.0054

AT. 32 H X -0.0447 0.0233 0.0390 -0.0359 0.0035 0.0162  
Y 0.0179 -0.0019 0.0199 0.0165 -0.0006 -0.0209  
Z 0.0460 -0.0361 0.0008 0.0057 0.0182 -0.0054

AT. 33 H X 0.0627 0.0183 -0.0397 -0.0421 0.0036 -0.0252  
Y 0.0030 0.0006 -0.0182 0.0037 0.0073 0.0236  
Z -0.0271 -0.0393 -0.0013 -0.0035 -0.0115 0.0010

AT. 34 H X -0.0627 0.0183 0.0397 -0.0421 -0.0036 0.0252  
Y -0.0030 0.0006 0.0182 0.0037 -0.0073 -0.0236  
Z 0.0271 -0.0393 0.0013 -0.0035 0.0115 -0.0010

AT. 35 C X 0.0395 0.0173 -0.0308 -0.0314 -0.0101 -0.0132  
Y -0.0226 0.0029 -0.0272 0.0173 0.0034 0.0190  
Z -0.0054 -0.0402 0.0038 -0.0138 -0.0070 0.0023

AT. 36 C X -0.0395 0.0173 0.0308 -0.0314 0.0101 0.0132  
Y 0.0226 0.0029 0.0272 0.0173 -0.0034 -0.0190  
Z 0.0054 -0.0402 -0.0038 -0.0138 0.0070 -0.0023

AT. 37 C X 0.0488 0.0147 -0.0263 -0.0342 -0.0102 -0.0120  
Y -0.0131 0.0029 -0.0275 0.0115 0.0069 0.0169  
Z 0.0165 -0.0425 0.0072 -0.0251 -0.0013 0.0010

AT. 38 C X -0.0488 0.0147 0.0263 -0.0342 0.0102 0.0120  
Y 0.0131 0.0029 0.0275 0.0115 -0.0069 -0.0169  
Z -0.0165 -0.0425 -0.0072 -0.0251 0.0013 -0.0010

AT. 39 H X 0.0579 0.0172 -0.0345 -0.0429 -0.0084 -0.0163  
Y -0.0029 0.0029 -0.0280 0.0045 0.0098 0.0149  
Z 0.0180 -0.0410 0.0014 -0.0283 -0.0012 -0.0011

AT. 40 H X -0.0579 0.0172 0.0345 -0.0429 0.0084 0.0163  
Y 0.0029 0.0029 0.0280 0.0045 -0.0098 -0.0149  
Z -0.0180 -0.0410 -0.0014 -0.0283 0.0012 0.0011

AT. 41 H X 0.0416 0.0133 -0.0187 -0.0260 -0.0124 -0.0077  
Y -0.0215 0.0069 -0.0371 0.0124 0.0048 0.0145  
Z 0.0298 -0.0435 0.0066 -0.0336 0.0023 -0.0015

AT. 42 H X -0.0416 0.0133 0.0187 -0.0260 0.0124 0.0077  
Y 0.0215 0.0069 0.0371 0.0124 -0.0048 -0.0145

Z -0.0298 -0.0435 -0.0066 -0.0336 -0.0023 0.0015  
AT. 43 C X 0.0456 0.0117 -0.0180 -0.0291 -0.0174 -0.0059  
Y -0.0189 0.0000 -0.0184 0.0173 0.0006 0.0234  
Z 0.0133 -0.0462 0.0205 -0.0180 -0.0058 0.0076  
AT. 44 C X -0.0456 0.0117 0.0180 -0.0291 0.0174 0.0059  
Y 0.0189 0.0000 0.0184 0.0173 -0.0006 -0.0234  
Z -0.0133 -0.0462 -0.0205 -0.0180 0.0058 -0.0076  
AT. 45 H X 0.0406 0.0117 -0.0153 -0.0238 -0.0241 -0.0008  
Y -0.0319 0.0029 -0.0246 0.0185 0.0004 0.0226  
Z 0.0291 -0.0485 0.0248 -0.0223 -0.0008 0.0049  
AT. 46 H X -0.0406 0.0117 0.0153 -0.0238 0.0241 0.0008  
Y 0.0319 0.0029 0.0246 0.0185 -0.0004 -0.0226  
Z -0.0291 -0.0485 -0.0248 -0.0223 0.0008 -0.0049  
AT. 47 H X 0.0534 0.0103 -0.0158 -0.0304 -0.0168 -0.0060  
Y -0.0083 -0.0021 -0.0121 0.0168 0.0002 0.0252  
Z 0.0139 -0.0472 0.0243 -0.0163 -0.0074 0.0096  
AT. 48 H X -0.0534 0.0103 0.0158 -0.0304 0.0168 0.0060  
Y 0.0083 -0.0021 0.0121 0.0168 -0.0002 -0.0252  
Z -0.0139 -0.0472 -0.0243 -0.0163 0.0074 -0.0096  
AT. 49 C X 0.0333 0.0150 -0.0230 -0.0271 -0.0171 -0.0057  
Y -0.0288 0.0004 -0.0196 0.0214 -0.0042 0.0258  
Z -0.0122 -0.0422 0.0137 -0.0107 -0.0127 0.0112  
AT. 50 C X -0.0333 0.0150 0.0230 -0.0271 0.0171 0.0057  
Y 0.0288 0.0004 0.0196 0.0214 0.0042 -0.0258  
Z 0.0122 -0.0422 -0.0137 -0.0107 0.0127 -0.0112  
AT. 51 C X 0.0446 0.0158 -0.0284 -0.0320 -0.0090 -0.0135  
Y -0.0140 -0.0034 -0.0105 0.0175 -0.0039 0.0288  
Z -0.0375 -0.0390 0.0094 -0.0025 -0.0209 0.0163  
AT. 52 C X -0.0446 0.0158 0.0284 -0.0320 0.0090 0.0135  
Y 0.0140 -0.0034 0.0105 0.0175 0.0039 -0.0288  
Z 0.0375 -0.0390 -0.0094 -0.0025 0.0209 -0.0163  
AT. 53 H X 0.0540 0.0149 -0.0255 -0.0337 -0.0080 -0.0132

Y -0.0042 -0.0057 -0.0032 0.0162 -0.0049 0.0324  
Z -0.0426 -0.0401 0.0127 -0.0012 -0.0239 0.0203  
AT. 54 H X -0.0540 0.0149 0.0255 -0.0337 0.0080 0.0132  
Y 0.0042 -0.0057 0.0032 0.0162 0.0049 -0.0324  
Z 0.0426 -0.0401 -0.0127 -0.0012 0.0239 -0.0203  
AT. 55 H X 0.0314 0.0158 -0.0328 -0.0295 -0.0106 -0.0136  
Y -0.0203 -0.0014 -0.0102 0.0209 -0.0074 0.0313  
Z -0.0544 -0.0361 0.0069 0.0037 -0.0262 0.0193  
AT. 56 H X -0.0314 0.0158 0.0328 -0.0295 0.0106 0.0136  
Y 0.0203 -0.0014 0.0102 0.0209 0.0074 -0.0313  
Z 0.0544 -0.0361 -0.0069 0.0037 0.0262 -0.0193  
AT. 57 C X 0.0311 0.0189 -0.0326 -0.0299 -0.0095 -0.0136  
Y -0.0312 0.0066 -0.0347 0.0188 0.0064 0.0143  
Z -0.0019 -0.0380 -0.0037 -0.0142 -0.0036 -0.0038  
AT. 58 C X -0.0311 0.0189 0.0326 -0.0299 0.0095 0.0136  
Y 0.0312 0.0066 0.0347 0.0188 -0.0064 -0.0143  
Z 0.0019 -0.0380 0.0037 -0.0142 0.0036 0.0038  
AT. 59 H X 0.0222 0.0204 -0.0341 -0.0295 -0.0092 -0.0138  
Y -0.0388 0.0076 -0.0364 0.0212 0.0035 0.0153  
Z -0.0195 -0.0357 -0.0073 -0.0099 -0.0078 -0.0028  
AT. 60 H X -0.0222 0.0204 0.0341 -0.0295 0.0092 0.0138  
Y 0.0388 0.0076 0.0364 0.0212 -0.0035 -0.0153  
Z 0.0195 -0.0357 0.0073 -0.0099 0.0078 0.0028  
AT. 61 H X 0.0430 0.0199 -0.0361 -0.0332 -0.0040 -0.0193  
Y -0.0199 0.0058 -0.0319 0.0146 0.0107 0.0127  
Z 0.0017 -0.0367 -0.0081 -0.0153 -0.0014 -0.0075  
AT. 62 H X -0.0430 0.0199 0.0361 -0.0332 0.0040 0.0193  
Y 0.0199 0.0058 0.0319 0.0146 -0.0107 -0.0127  
Z -0.0017 -0.0367 0.0081 -0.0153 0.0014 0.0075  
AT. 63 H X 0.0220 0.0175 -0.0283 -0.0273 -0.0155 -0.0080  
Y -0.0422 0.0096 -0.0408 0.0211 0.0075 0.0114  
Z 0.0159 -0.0391 -0.0022 -0.0185 0.0009 -0.0066



AT. 64 H X -0.0220 0.0175 0.0283 -0.0273 0.0155 0.0080  
Y 0.0422 0.0096 0.0408 0.0211 -0.0075 -0.0114  
Z -0.0159 -0.0391 0.0022 -0.0185 -0.0009 0.0066

AT. 65 C X 0.0187 0.0151 -0.0199 -0.0228 -0.0246 0.0014  
Y -0.0418 0.0001 -0.0187 0.0255 -0.0108 0.0283  
Z -0.0174 -0.0419 0.0160 -0.0092 -0.0155 0.0159

AT. 66 C X -0.0187 0.0151 0.0199 -0.0228 0.0246 -0.0014  
Y 0.0418 0.0001 0.0187 0.0255 0.0108 -0.0283  
Z 0.0174 -0.0419 -0.0160 -0.0092 0.0155 -0.0159

AT. 67 H X 0.0097 0.0142 -0.0155 -0.0210 -0.0295 0.0060  
Y -0.0509 0.0023 -0.0263 0.0287 -0.0128 0.0278  
Z -0.0016 -0.0430 0.0191 -0.0138 -0.0092 0.0123

AT. 68 H X -0.0097 0.0142 0.0155 -0.0210 0.0295 -0.0060  
Y 0.0509 0.0023 0.0263 0.0287 0.0128 -0.0278  
Z 0.0016 -0.0430 -0.0191 -0.0138 0.0092 -0.0123

AT. 69 H X 0.0256 0.0129 -0.0149 -0.0250 -0.0234 -0.0004  
Y -0.0358 -0.0028 -0.0102 0.0233 -0.0103 0.0287  
Z -0.0221 -0.0418 0.0182 -0.0076 -0.0175 0.0205

AT. 70 H X -0.0256 0.0129 0.0149 -0.0250 0.0234 0.0004  
Y 0.0358 -0.0028 0.0102 0.0233 0.0103 -0.0287  
Z 0.0221 -0.0418 -0.0182 -0.0076 0.0175 -0.0205

AT. 71 H X 0.0093 0.0175 -0.0261 -0.0195 -0.0261 0.0037  
Y -0.0483 -0.0003 -0.0181 0.0273 -0.0145 0.0295  
Z -0.0335 -0.0404 0.0122 -0.0043 -0.0215 0.0190

AT. 72 H X -0.0093 0.0175 0.0261 -0.0195 0.0261 -0.0037  
Y 0.0483 -0.0003 0.0181 0.0273 0.0145 -0.0295  
Z 0.0335 -0.0404 -0.0122 -0.0043 0.0215 -0.0190

AT. 73 C X 0.0245 0.0170 -0.0261 -0.0247 -0.0174 -0.0061  
Y -0.0379 0.0042 -0.0281 0.0239 -0.0025 0.0218  
Z -0.0091 -0.0411 0.0081 -0.0120 -0.0096 0.0062

AT. 74 C X -0.0245 0.0170 0.0261 -0.0247 0.0174 0.0061  
Y 0.0379 0.0042 0.0281 0.0239 0.0025 -0.0218

Z 0.0091 -0.0411 -0.0081 -0.0120 0.0096 -0.0062  
AT. 75 H X 0.0161 0.0189 -0.0291 -0.0217 -0.0178 -0.0064  
Y -0.0460 0.0050 -0.0284 0.0269 -0.0054 0.0231  
Z -0.0262 -0.0386 0.0054 -0.0056 -0.0137 0.0075  
AT. 76 H X -0.0161 0.0189 0.0291 -0.0217 0.0178 0.0064  
Y 0.0460 0.0050 0.0284 0.0269 0.0054 -0.0231  
Z 0.0262 -0.0386 -0.0054 -0.0056 0.0137 -0.0075  
AT. 77 H X 0.0152 0.0162 -0.0221 -0.0204 -0.0224 -0.0010  
Y -0.0471 0.0068 -0.0334 0.0264 -0.0028 0.0194  
Z 0.0076 -0.0425 0.0092 -0.0180 -0.0046 0.0035  
AT. 78 H X -0.0152 0.0162 0.0221 -0.0204 0.0224 0.0010  
Y 0.0471 0.0068 0.0334 0.0264 0.0028 -0.0194  
Z -0.0076 -0.0425 -0.0092 -0.0180 0.0046 -0.0035  
AT. 79 I X 0.0013 0.0040 0.0020 -0.0104 -0.0018 0.0001  
Y -0.0101 0.0382 -0.0130 -0.0346 0.0412 -0.0011  
Z -0.0314 0.0352 0.0258 -0.0087 0.0257 -0.0344  
AT. 80 I X -0.0013 0.0040 -0.0020 -0.0104 0.0018 -0.0001  
Y 0.0101 0.0382 0.0130 -0.0346 -0.0412 0.0011  
Z 0.0314 0.0352 -0.0258 -0.0087 -0.0257 0.0344  
AT. 81 I X 0.0320 -0.0184 0.0376 0.0478 -0.0285 0.0054  
Y -0.0197 -0.0055 0.0125 0.0025 0.0264 0.0067  
Z 0.0252 0.0609 -0.0439 0.0016 0.0432 0.0676  
AT. 82 I X -0.0320 -0.0184 -0.0376 0.0478 0.0285 -0.0054  
Y 0.0197 -0.0055 -0.0125 0.0025 -0.0264 -0.0067  
Z -0.0252 0.0609 0.0439 0.0016 -0.0432 -0.0676  
AT. 83 O X 0.0071 -0.0081 0.0078 0.0295 -0.0144 0.0023  
Y 0.0009 0.0166 0.0171 0.0001 0.0247 -0.0034  
Z 0.0144 0.0325 0.0386 0.0385 -0.0072 0.0097  
AT. 84 O X -0.0071 -0.0081 -0.0078 0.0295 0.0144 -0.0023  
Y -0.0009 0.0166 -0.0171 0.0001 -0.0247 0.0034  
Z -0.0144 0.0325 -0.0386 0.0385 0.0072 -0.0097  
AT. 85 O X 0.0262 -0.0112 0.0231 0.0424 -0.0222 0.0049

Y 0.0024 -0.0009 0.0061 -0.0291 0.0026 0.0183  
Z 0.0172 0.0455 -0.0268 0.0010 0.0039 0.0269  
AT. 86 O X -0.0262 -0.0112 -0.0231 0.0424 0.0222 -0.0049  
Y -0.0024 -0.0009 -0.0061 -0.0291 -0.0026 -0.0183  
Z -0.0172 0.0455 0.0268 0.0010 -0.0039 -0.0269  
AT. 87 N X 0.0342 -0.0072 0.0295 0.0419 -0.0286 0.0214  
Y -0.0080 0.0064 0.0147 0.0006 0.0332 0.0059  
Z 0.0012 0.0331 0.0284 0.0316 -0.0011 -0.0006  
AT. 88 N X -0.0342 -0.0072 -0.0295 0.0419 0.0286 -0.0214  
Y 0.0080 0.0064 -0.0147 0.0006 -0.0332 -0.0059  
Z -0.0012 0.0331 -0.0284 0.0316 0.0011 0.0006  
AT. 89 N X 0.0424 -0.0120 0.0322 0.0416 -0.0345 0.0238  
Y -0.0093 0.0006 0.0187 -0.0010 0.0280 0.0041  
Z 0.0169 0.0476 -0.0085 0.0244 0.0191 0.0248  
AT. 90 N X -0.0424 -0.0120 -0.0322 0.0416 0.0345 -0.0238  
Y 0.0093 0.0006 -0.0187 -0.0010 -0.0280 -0.0041  
Z -0.0169 0.0476 0.0085 0.0244 -0.0191 -0.0248  
AT. 91 C X 0.0161 -0.0085 0.0154 0.0345 -0.0186 0.0083  
Y -0.0033 0.0142 0.0128 0.0024 0.0275 0.0002  
Z 0.0023 0.0334 0.0287 0.0341 -0.0018 -0.0012  
AT. 92 C X -0.0161 -0.0085 -0.0154 0.0345 0.0186 -0.0083  
Y 0.0033 0.0142 -0.0128 0.0024 -0.0275 -0.0002  
Z -0.0023 0.0334 -0.0287 0.0341 0.0018 0.0012  
AT. 93 C X 0.0090 -0.0094 0.0134 0.0284 -0.0167 0.0012  
Y -0.0059 0.0242 -0.0005 -0.0034 0.0304 -0.0016  
Z -0.0149 0.0370 0.0133 0.0235 0.0054 -0.0172  
AT. 94 C X -0.0090 -0.0094 -0.0134 0.0284 0.0167 -0.0012  
Y 0.0059 0.0242 0.0005 -0.0034 -0.0304 0.0016  
Z 0.0149 0.0370 -0.0133 0.0235 -0.0054 0.0172  
AT. 95 H X 0.0225 -0.0195 0.0262 0.0622 -0.0336 0.0080  
Y -0.0096 0.0279 -0.0001 -0.0244 0.0409 -0.0015  
Z -0.0216 0.0415 -0.0003 0.0244 0.0041 -0.0240

AT. 96 H X -0.0225 -0.0195 -0.0262 0.0622 0.0336 -0.0080  
Y 0.0096 0.0279 0.0001 -0.0244 -0.0409 0.0015  
Z 0.0216 0.0415 0.0003 0.0244 -0.0041 0.0240

AT. 97 H X -0.0056 -0.0096 0.0063 0.0186 -0.0098 -0.0126  
Y -0.0043 0.0246 -0.0104 0.0181 0.0202 -0.0019  
Z -0.0102 0.0370 0.0124 0.0315 0.0011 -0.0129

AT. 98 H X 0.0056 -0.0096 -0.0063 0.0186 0.0098 0.0126  
Y 0.0043 0.0246 0.0104 0.0181 -0.0202 0.0019  
Z 0.0102 0.0370 -0.0124 0.0315 -0.0011 0.0129

AT. 99 C X 0.0338 -0.0120 0.0281 0.0392 -0.0304 0.0109  
Y -0.0080 0.0020 0.0038 -0.0186 0.0194 0.0124  
Z 0.0187 0.0474 -0.0172 0.0162 0.0133 0.0307

AT. 100 C X -0.0338 -0.0120 -0.0281 0.0392 0.0304 -0.0109  
Y 0.0080 0.0020 -0.0038 -0.0186 -0.0194 -0.0124  
Z -0.0187 0.0474 0.0172 0.0162 -0.0133 -0.0307

AT. 101 C X 0.0320 -0.0147 0.0284 0.0371 -0.0354 0.0024  
Y -0.0159 0.0050 -0.0118 -0.0207 0.0293 0.0159  
Z 0.0206 0.0498 -0.0166 0.0202 0.0209 0.0410

AT. 102 C X -0.0320 -0.0147 -0.0284 0.0371 0.0354 -0.0024  
Y 0.0159 0.0050 0.0118 -0.0207 -0.0293 -0.0159  
Z -0.0206 0.0498 0.0166 0.0202 -0.0209 -0.0410

AT. 103 H X 0.0370 -0.0111 0.0241 0.0280 -0.0382 0.0048  
Y -0.0181 0.0038 -0.0110 -0.0173 0.0306 0.0150  
Z 0.0221 0.0446 0.0031 0.0323 0.0175 0.0364

AT. 104 H X -0.0370 -0.0111 -0.0241 0.0280 0.0382 -0.0048  
Y 0.0181 0.0038 0.0110 -0.0173 -0.0306 -0.0150  
Z -0.0221 0.0446 -0.0031 0.0323 -0.0175 -0.0364

AT. 105 H X 0.0295 -0.0173 0.0317 0.0392 -0.0414 -0.0065  
Y -0.0159 0.0121 -0.0322 -0.0345 0.0338 0.0235  
Z 0.0194 0.0513 -0.0233 0.0157 0.0214 0.0410

AT. 106 H X -0.0295 -0.0173 -0.0317 0.0392 0.0414 0.0065  
Y 0.0159 0.0121 0.0322 -0.0345 -0.0338 -0.0235

Z -0.0194 0.0513 0.0233 0.0157 -0.0214 -0.0410  
AT. 107 C X 0.0429 -0.0060 0.0354 0.0459 -0.0316 0.0294  
Y -0.0113 -0.0004 0.0212 0.0032 0.0297 0.0011  
Z 0.0143 0.0326 0.0409 0.0381 -0.0071 0.0115  
AT. 108 C X -0.0429 -0.0060 -0.0354 0.0459 0.0316 -0.0294  
Y 0.0113 -0.0004 -0.0212 0.0032 -0.0297 -0.0011  
Z -0.0143 0.0326 -0.0409 0.0381 0.0071 -0.0115  
AT. 109 H X 0.0505 -0.0024 0.0434 0.0460 -0.0357 0.0358  
Y -0.0114 -0.0032 0.0312 0.0047 0.0230 -0.0017  
Z 0.0109 0.0267 0.0552 0.0398 -0.0163 0.0048  
AT. 110 H X -0.0505 -0.0024 -0.0434 0.0460 0.0357 -0.0358  
Y 0.0114 -0.0032 -0.0312 0.0047 -0.0230 0.0017  
Z -0.0109 0.0267 -0.0552 0.0398 0.0163 -0.0048  
AT. 111 H X 0.0353 -0.0062 0.0314 0.0406 -0.0305 0.0219  
Y -0.0121 0.0015 0.0049 0.0012 0.0399 0.0042  
Z 0.0222 0.0322 0.0484 0.0435 -0.0102 0.0188  
AT. 112 H X -0.0353 -0.0062 -0.0314 0.0406 0.0305 -0.0219  
Y 0.0121 0.0015 -0.0049 0.0012 -0.0399 -0.0042  
Z -0.0222 0.0322 -0.0484 0.0435 0.0102 -0.0188  
AT. 113 C X 0.0531 -0.0075 0.0378 0.0506 -0.0323 0.0395  
Y -0.0128 -0.0066 0.0372 0.0058 0.0191 -0.0044  
Z 0.0190 0.0391 0.0233 0.0370 0.0054 0.0216  
AT. 114 C X -0.0531 -0.0075 -0.0378 0.0506 0.0323 -0.0395  
Y 0.0128 -0.0066 -0.0372 0.0058 -0.0191 0.0044  
Z -0.0190 0.0391 -0.0233 0.0370 -0.0054 -0.0216  
AT. 115 C X 0.0474 -0.0109 0.0342 0.0462 -0.0335 0.0311  
Y -0.0124 -0.0040 0.0245 0.0038 0.0273 -0.0011  
Z 0.0230 0.0454 0.0017 0.0352 0.0196 0.0321  
AT. 116 C X -0.0474 -0.0109 -0.0342 0.0462 0.0335 -0.0311  
Y 0.0124 -0.0040 -0.0245 0.0038 -0.0273 0.0011  
Z -0.0230 0.0454 -0.0017 0.0352 -0.0196 -0.0321  
AT. 117 H X 0.0427 -0.0108 0.0347 0.0388 -0.0384 0.0241

Y -0.0117 -0.0032 0.0105 0.0040 0.0363 0.0019  
Z 0.0271 0.0446 0.0042 0.0428 0.0230 0.0383  
AT. 118 H X -0.0427 -0.0108 -0.0347 0.0388 0.0384 -0.0241  
Y 0.0117 -0.0032 -0.0105 0.0040 -0.0363 -0.0019  
Z -0.0271 0.0446 -0.0042 0.0428 -0.0230 -0.0383  
AT. 119 H X 0.0512 -0.0127 0.0323 0.0543 -0.0271 0.0371  
Y -0.0133 -0.0077 0.0348 0.0073 0.0218 -0.0055  
Z 0.0261 0.0483 -0.0097 0.0364 0.0287 0.0398  
AT. 120 H X -0.0512 -0.0127 -0.0323 0.0543 0.0271 -0.0371  
Y 0.0133 -0.0077 -0.0348 0.0073 -0.0218 0.0055  
Z -0.0261 0.0483 0.0097 0.0364 -0.0287 -0.0398  
AT. 121 C X 0.0484 -0.0119 0.0355 0.0444 -0.0349 0.0309  
Y -0.0103 -0.0006 0.0302 0.0040 0.0241 0.0016  
Z 0.0081 0.0479 -0.0144 0.0192 0.0199 0.0145  
AT. 122 C X -0.0484 -0.0119 -0.0355 0.0444 0.0349 -0.0309  
Y 0.0103 -0.0006 -0.0302 0.0040 -0.0241 -0.0016  
Z -0.0081 0.0479 0.0144 0.0192 -0.0199 -0.0145  
AT. 123 H X 0.0539 -0.0143 0.0392 0.0443 -0.0381 0.0362  
Y -0.0134 -0.0046 0.0405 0.0049 0.0181 -0.0041  
Z 0.0121 0.0514 -0.0247 0.0190 0.0258 0.0215  
AT. 124 H X -0.0539 -0.0143 -0.0392 0.0443 0.0381 -0.0362  
Y 0.0134 -0.0046 -0.0405 0.0049 -0.0181 0.0041  
Z -0.0121 0.0514 0.0247 0.0190 -0.0258 -0.0215  
AT. 125 H X 0.0428 -0.0131 0.0333 0.0414 -0.0353 0.0236  
Y -0.0069 0.0056 0.0197 0.0067 0.0298 0.0085  
Z 0.0025 0.0496 -0.0229 0.0164 0.0230 0.0091  
AT. 126 H X -0.0428 -0.0131 -0.0333 0.0414 0.0353 -0.0236  
Y 0.0069 0.0056 -0.0197 0.0067 -0.0298 -0.0085  
Z -0.0025 0.0496 0.0229 0.0164 -0.0230 -0.0091  
AT. 127 C X 0.0545 -0.0085 0.0384 0.0509 -0.0331 0.0401  
Y -0.0137 -0.0030 0.0401 0.0064 0.0198 -0.0034  
Z -0.0019 0.0411 0.0032 0.0210 0.0116 0.0005

AT. 128 C X -0.0545 -0.0085 -0.0384 0.0509 0.0331 -0.0401  
Y 0.0137 -0.0030 -0.0401 0.0064 -0.0198 0.0034  
Z 0.0019 0.0411 -0.0032 0.0210 -0.0116 -0.0005

AT. 129 C X 0.0441 -0.0064 0.0345 0.0451 -0.0308 0.0306  
Y -0.0084 0.0034 0.0265 0.0021 0.0267 0.0043  
Z -0.0116 0.0346 0.0170 0.0244 0.0045 -0.0119

AT. 130 C X -0.0441 -0.0064 -0.0345 0.0451 0.0308 -0.0306  
Y 0.0084 0.0034 -0.0265 0.0021 -0.0267 -0.0043  
Z 0.0116 0.0346 -0.0170 0.0244 -0.0045 0.0119

AT. 131 H X 0.0357 -0.0079 0.0309 0.0439 -0.0296 0.0223  
Y -0.0033 0.0091 0.0195 -0.0010 0.0313 0.0109  
Z -0.0216 0.0350 0.0080 0.0211 0.0092 -0.0206

AT. 132 H X -0.0357 -0.0079 -0.0309 0.0439 0.0296 -0.0223  
Y 0.0033 0.0091 -0.0195 -0.0010 -0.0313 -0.0109  
Z 0.0216 0.0350 -0.0080 0.0211 -0.0092 0.0206

AT. 133 H X 0.0536 -0.0048 0.0375 0.0464 -0.0319 0.0392  
Y -0.0101 -0.0002 0.0340 0.0054 0.0226 0.0015  
Z -0.0193 0.0284 0.0268 0.0282 -0.0006 -0.0204

AT. 134 H X -0.0536 -0.0048 -0.0375 0.0464 0.0319 -0.0392  
Y 0.0101 -0.0002 -0.0340 0.0054 -0.0226 -0.0015  
Z 0.0193 0.0284 -0.0268 0.0282 0.0006 0.0204

AT. 135 C X 0.0597 -0.0051 0.0415 0.0546 -0.0311 0.0470  
Y -0.0119 -0.0140 0.0492 0.0100 0.0082 -0.0060  
Z 0.0309 0.0377 0.0368 0.0481 0.0002 0.0335

AT. 136 C X -0.0597 -0.0051 -0.0415 0.0546 0.0311 -0.0470  
Y 0.0119 -0.0140 -0.0492 0.0100 -0.0082 0.0060  
Z -0.0309 0.0377 -0.0368 0.0481 -0.0002 -0.0335

AT. 137 H X 0.0632 -0.0014 0.0446 0.0587 -0.0281 0.0524  
Y -0.0119 -0.0162 0.0585 0.0162 0.0041 -0.0057  
Z 0.0292 0.0331 0.0514 0.0561 -0.0071 0.0313

AT. 138 H X -0.0632 -0.0014 -0.0446 0.0587 0.0281 -0.0524  
Y 0.0119 -0.0162 -0.0585 0.0162 -0.0041 0.0057

Z -0.0292 0.0331 -0.0514 0.0561 0.0071 -0.0313  
AT. 139 H X 0.0526 -0.0058 0.0378 0.0509 -0.0298 0.0401  
Y -0.0103 -0.0134 0.0373 0.0018 0.0112 -0.0060  
Z 0.0392 0.0382 0.0447 0.0550 -0.0023 0.0418  
AT. 140 H X -0.0526 -0.0058 -0.0378 0.0509 0.0298 -0.0401  
Y 0.0103 -0.0134 -0.0373 0.0018 -0.0112 0.0060  
Z -0.0392 0.0382 -0.0447 0.0550 0.0023 -0.0418  
AT. 141 H X 0.0681 -0.0070 0.0450 0.0575 -0.0349 0.0545  
Y -0.0110 -0.0183 0.0617 0.0176 0.0006 -0.0052  
Z 0.0335 0.0416 0.0254 0.0416 0.0068 0.0361  
AT. 142 H X -0.0681 -0.0070 -0.0450 0.0575 0.0349 -0.0545  
Y 0.0110 -0.0183 -0.0617 0.0176 -0.0006 0.0052  
Z -0.0335 0.0416 -0.0254 0.0416 -0.0068 -0.0361  
AT. 143 C X 0.0634 -0.0090 0.0417 0.0556 -0.0343 0.0492  
Y -0.0198 -0.0053 0.0522 0.0120 0.0161 -0.0104  
Z -0.0113 0.0420 -0.0042 0.0143 0.0135 -0.0092  
AT. 144 C X -0.0634 -0.0090 -0.0417 0.0556 0.0343 -0.0492  
Y 0.0198 -0.0053 -0.0522 0.0120 -0.0161 0.0104  
Z 0.0113 0.0420 0.0042 0.0143 -0.0135 0.0092  
AT. 145 H X 0.0726 -0.0118 0.0440 0.0594 -0.0375 0.0589  
Y -0.0204 -0.0117 0.0585 0.0161 0.0097 -0.0113  
Z -0.0086 0.0479 -0.0103 0.0116 0.0196 -0.0056  
AT. 146 H X -0.0726 -0.0118 -0.0440 0.0594 0.0375 -0.0589  
Y 0.0204 -0.0117 -0.0585 0.0161 -0.0097 0.0113  
Z 0.0086 0.0479 0.0103 0.0116 -0.0196 0.0056  
AT. 147 H X 0.0595 -0.0102 0.0390 0.0532 -0.0353 0.0455  
Y -0.0220 0.0020 0.0474 0.0092 0.0232 -0.0130  
Z -0.0185 0.0444 -0.0111 0.0087 0.0164 -0.0159  
AT. 148 H X -0.0595 -0.0102 -0.0390 0.0532 0.0353 -0.0455  
Y 0.0220 0.0020 -0.0474 0.0092 -0.0232 0.0130  
Z 0.0185 0.0444 0.0111 0.0087 -0.0164 0.0159  
AT. 149 H X 0.0641 -0.0055 0.0465 0.0593 -0.0321 0.0490



Y -0.0217 -0.0090 0.0581 0.0157 0.0125 -0.0128  
Z -0.0154 0.0342 0.0043 0.0184 0.0063 -0.0135  
AT. 150 H X -0.0641 -0.0055 -0.0465 0.0593 0.0321 -0.0490  
Y 0.0217 -0.0090 -0.0581 0.0157 -0.0125 0.0128  
Z 0.0154 0.0342 -0.0043 0.0184 -0.0063 0.0135  
AT. 151 C X 0.0621 -0.0069 0.0414 0.0553 -0.0325 0.0493  
Y -0.0154 -0.0102 0.0529 0.0105 0.0109 -0.0095  
Z 0.0081 0.0394 0.0145 0.0299 0.0078 0.0106  
AT. 152 C X -0.0621 -0.0069 -0.0414 0.0553 0.0325 -0.0493  
Y 0.0154 -0.0102 -0.0529 0.0105 -0.0109 0.0095  
Z -0.0081 0.0394 -0.0145 0.0299 -0.0078 -0.0106  
AT. 153 H X 0.0660 -0.0049 0.0427 0.0568 -0.0309 0.0548  
Y -0.0168 -0.0139 0.0606 0.0136 0.0056 -0.0125  
Z 0.0033 0.0327 0.0266 0.0334 -0.0010 0.0028  
AT. 154 H X -0.0660 -0.0049 -0.0427 0.0568 0.0309 -0.0548  
Y 0.0168 -0.0139 -0.0606 0.0136 -0.0056 0.0125  
Z -0.0033 0.0327 -0.0266 0.0334 0.0010 -0.0028  
AT. 155 H X 0.0697 -0.0076 0.0441 0.0590 -0.0335 0.0568  
Y -0.0166 -0.0150 0.0647 0.0152 0.0034 -0.0135  
Z 0.0120 0.0443 0.0034 0.0270 0.0155 0.0176  
AT. 156 H X -0.0697 -0.0076 -0.0441 0.0590 0.0335 -0.0568  
Y 0.0166 -0.0150 -0.0647 0.0152 -0.0034 0.0135  
Z -0.0120 0.0443 -0.0034 0.0270 -0.0155 -0.0176  
AT. 157 O X 0.0444 -0.0068 -0.0141 -0.0252 -0.0062 -0.0259  
Y -0.0118 -0.0318 -0.0072 0.0012 0.0111 -0.0077  
Z -0.0226 -0.0607 -0.0478 -0.0119 0.0006 -0.0118  
AT. 158 O X -0.0444 -0.0068 0.0141 -0.0252 0.0062 0.0259  
Y 0.0118 -0.0318 0.0072 0.0012 -0.0111 0.0077  
Z 0.0226 -0.0607 0.0478 -0.0119 -0.0006 0.0118  
AT. 159 O X 0.0328 0.0010 -0.0085 -0.0287 -0.0037 -0.0163  
Y -0.0001 -0.0135 0.0158 0.0106 -0.0081 0.0019  
Z -0.0414 -0.0437 -0.0333 -0.0158 0.0008 0.0072

AT.160 O X -0.0328 0.0010 0.0085 -0.0287 0.0037 0.0163  
Y 0.0001 -0.0135 -0.0158 0.0106 0.0081 -0.0019  
Z 0.0414 -0.0437 0.0333 -0.0158 -0.0008 -0.0072

AT.161 H X 0.0416 -0.0139 -0.0261 -0.0302 0.0043 -0.0359  
Y -0.0106 -0.0363 -0.0132 -0.0010 0.0151 -0.0105  
Z -0.0278 -0.0528 -0.0363 -0.0077 -0.0060 -0.0084

AT.162 H X -0.0416 -0.0139 0.0261 -0.0302 -0.0043 0.0359  
Y 0.0106 -0.0363 0.0132 -0.0010 -0.0151 0.0105  
Z 0.0278 -0.0528 0.0363 -0.0077 0.0060 0.0084

AT.163 H X 0.0134 0.0091 -0.0021 -0.0313 -0.0005 -0.0038  
Y 0.0063 -0.0120 0.0014 0.0233 -0.0134 -0.0067  
Z -0.0335 -0.0464 -0.0395 -0.0128 -0.0012 0.0009

AT.164 H X -0.0134 0.0091 0.0021 -0.0313 0.0005 0.0038  
Y -0.0063 -0.0120 -0.0014 0.0233 0.0134 0.0067  
Z 0.0335 -0.0464 0.0395 -0.0128 0.0012 -0.0009

AT.165 O X 0.0140 -0.0097 0.0166 0.0282 -0.0165 0.0069  
Y 0.0031 0.0212 0.0011 -0.0055 0.0212 0.0007  
Z -0.0236 0.0409 0.0434 0.0143 0.0226 -0.0249

AT.166 O X -0.0140 -0.0097 -0.0166 0.0282 0.0165 -0.0069  
Y -0.0031 0.0212 -0.0011 -0.0055 -0.0212 -0.0007  
Z 0.0236 0.0409 -0.0434 0.0143 -0.0226 0.0249

AT.167 H X 0.0111 -0.0049 0.0132 0.0235 -0.0160 0.0042  
Y 0.0043 0.0175 0.0102 -0.0000 0.0224 0.0000  
Z -0.0169 0.0334 0.0401 0.0193 0.0194 -0.0168

AT.168 H X -0.0111 -0.0049 -0.0132 0.0235 0.0160 -0.0042  
Y -0.0043 0.0175 -0.0102 -0.0000 -0.0224 -0.0000  
Z 0.0169 0.0334 -0.0401 0.0193 -0.0194 0.0168

AT.169 O X 0.0224 -0.0168 0.0143 0.0431 -0.0146 0.0209  
Y 0.0106 -0.0046 0.0096 -0.0179 0.0072 -0.0023  
Z -0.0232 0.0445 0.0406 0.0199 0.0258 -0.0211

AT.170 O X -0.0224 -0.0168 -0.0143 0.0431 0.0146 -0.0209  
Y -0.0106 -0.0046 -0.0096 -0.0179 -0.0072 0.0023

Z 0.0232 0.0445 -0.0406 0.0199 -0.0258 0.0211  
 AT. 171 H X 0.0041 -0.0126 -0.0026 0.0432 -0.0046 0.0120  
 Y 0.0031 -0.0078 0.0040 -0.0243 0.0069 -0.0098  
 Z -0.0227 0.0363 0.0439 0.0089 0.0179 -0.0270  
 AT. 172 H X -0.0041 -0.0126 0.0026 0.0432 0.0046 -0.0120  
 Y -0.0031 -0.0078 -0.0040 -0.0243 -0.0069 0.0098  
 Z 0.0227 0.0363 -0.0439 0.0089 -0.0179 0.0270  
  
 FREQ(CM\*\*-1) 36.85 37.25 37.56 38.89 42.85 42.89  
  
 AT. 1 I X -0.0184 -0.0107 -0.0134 0.0291 0.0186 0.0121  
 Y -0.0379 -0.0167 -0.0056 0.0118 0.0344 -0.0001  
 Z 0.0308 -0.0016 0.0018 -0.0100 0.0057 -0.0075  
 AT. 2 I X -0.0184 0.0107 -0.0134 0.0291 -0.0186 0.0121  
 Y -0.0379 0.0167 -0.0056 0.0118 -0.0344 -0.0001  
 Z 0.0308 0.0016 0.0018 -0.0100 -0.0057 -0.0075  
 AT. 3 I X -0.0153 -0.0003 0.0110 -0.0218 -0.0236 -0.0211  
 Y -0.0102 0.0028 -0.0203 0.0076 0.0179 -0.0118  
 Z -0.0465 -0.0264 0.0199 -0.0574 -0.0152 -0.0157  
 AT. 4 I X -0.0153 0.0003 0.0110 -0.0218 0.0236 -0.0211  
 Y -0.0102 -0.0028 -0.0203 0.0076 -0.0179 -0.0118  
 Z -0.0465 0.0264 0.0199 -0.0574 0.0152 -0.0157  
 AT. 5 O X -0.0327 -0.0108 -0.0090 0.0242 0.0247 0.0117  
 Y -0.0298 -0.0127 -0.0272 0.0446 0.0273 0.0365  
 Z 0.0323 -0.0091 0.0078 0.0145 -0.0093 0.0029  
 AT. 6 O X -0.0327 0.0108 -0.0090 0.0242 -0.0247 0.0117  
 Y -0.0298 0.0127 -0.0272 0.0446 -0.0273 0.0365  
 Z 0.0323 0.0091 0.0078 0.0145 0.0093 0.0029  
 AT. 7 O X -0.0124 0.0046 -0.0018 -0.0144 -0.0182 -0.0233  
 Y -0.0235 0.0023 -0.0180 0.0025 0.0255 0.0004  
 Z 0.0071 -0.0205 -0.0323 0.0173 0.0416 0.0316  
 AT. 8 O X -0.0124 -0.0046 -0.0018 -0.0144 0.0182 -0.0233

Y -0.0235 -0.0023 -0.0180 0.0025 -0.0255 0.0004  
Z 0.0071 0.0205 -0.0323 0.0173 -0.0416 0.0316  
AT. 9 N X 0.0094 -0.0014 -0.0108 0.0065 0.0061 0.0019  
Y 0.0063 -0.0158 0.0079 0.0157 -0.0046 0.0121  
Z 0.0401 -0.0055 0.0018 0.0131 -0.0104 0.0034  
AT. 10 N X 0.0094 0.0014 -0.0108 0.0065 -0.0061 0.0019  
Y 0.0063 0.0158 0.0079 0.0157 0.0046 0.0121  
Z 0.0401 0.0055 0.0018 0.0131 0.0104 0.0034  
AT. 11 N X 0.0124 -0.0045 -0.0067 0.0026 -0.0111 -0.0072  
Y 0.0038 -0.0103 0.0067 0.0142 0.0046 0.0109  
Z 0.0200 -0.0275 -0.0066 0.0191 0.0184 0.0332  
AT. 12 N X 0.0124 0.0045 -0.0067 0.0026 0.0111 -0.0072  
Y 0.0038 0.0103 0.0067 0.0142 -0.0046 0.0109  
Z 0.0200 0.0275 -0.0066 0.0191 -0.0184 0.0332  
AT. 13 C X -0.0171 -0.0063 -0.0104 0.0146 0.0181 0.0046  
Y -0.0177 -0.0142 -0.0135 0.0308 0.0157 0.0234  
Z 0.0385 -0.0057 -0.0017 0.0149 -0.0077 0.0052  
AT. 14 C X -0.0171 0.0063 -0.0104 0.0146 -0.0181 0.0046  
Y -0.0177 0.0142 -0.0135 0.0308 -0.0157 0.0234  
Z 0.0385 0.0057 -0.0017 0.0149 0.0077 0.0052  
AT. 15 C X -0.0263 -0.0117 -0.0042 0.0134 0.0232 -0.0015  
Y -0.0252 -0.0132 -0.0165 0.0283 0.0241 0.0182  
Z 0.0410 0.0031 -0.0175 0.0163 -0.0014 0.0098  
AT. 16 C X -0.0263 0.0117 -0.0042 0.0134 -0.0232 -0.0015  
Y -0.0252 0.0132 -0.0165 0.0283 -0.0241 0.0182  
Z 0.0410 -0.0031 -0.0175 0.0163 0.0014 0.0098  
AT. 17 H X -0.0346 -0.0126 0.0026 -0.0024 0.0310 -0.0143  
Y -0.0278 -0.0182 -0.0038 0.0184 0.0228 0.0092  
Z 0.0416 0.0095 -0.0320 0.0232 0.0028 0.0169  
AT. 18 H X -0.0346 0.0126 0.0026 -0.0024 -0.0310 -0.0143  
Y -0.0278 0.0182 -0.0038 0.0184 -0.0228 0.0092  
Z 0.0416 -0.0095 -0.0320 0.0232 -0.0028 0.0169

AT. 19 H X -0.0288 -0.0153 -0.0029 0.0181 0.0216 -0.0011  
Y -0.0212 -0.0050 -0.0363 0.0418 0.0252 0.0315  
Z 0.0419 0.0055 -0.0241 0.0234 -0.0018 0.0151

AT. 20 H X -0.0288 0.0153 -0.0029 0.0181 -0.0216 -0.0011  
Y -0.0212 0.0050 -0.0363 0.0418 -0.0252 0.0315  
Z 0.0419 -0.0055 -0.0241 0.0234 0.0018 0.0151

AT. 21 C X -0.0062 0.0007 0.0002 -0.0118 -0.0184 -0.0197  
Y -0.0166 -0.0028 -0.0078 0.0036 0.0181 0.0031  
Z 0.0094 -0.0240 -0.0138 0.0134 0.0254 0.0295

AT. 22 C X -0.0062 -0.0007 0.0002 -0.0118 0.0184 -0.0197  
Y -0.0166 0.0028 -0.0078 0.0036 -0.0181 0.0031  
Z 0.0094 0.0240 -0.0138 0.0134 -0.0254 0.0295

AT. 23 C X -0.0197 0.0006 0.0128 -0.0295 -0.0317 -0.0324  
Y -0.0324 -0.0016 -0.0133 -0.0125 0.0233 -0.0082  
Z 0.0008 -0.0239 0.0018 0.0006 0.0085 0.0196

AT. 24 C X -0.0197 -0.0006 0.0128 -0.0295 0.0317 -0.0324  
Y -0.0324 0.0016 -0.0133 -0.0125 -0.0233 -0.0082  
Z 0.0008 0.0239 0.0018 0.0006 -0.0085 0.0196

AT. 25 H X -0.0168 0.0023 0.0095 -0.0286 -0.0345 -0.0399  
Y -0.0348 -0.0011 -0.0148 -0.0147 0.0246 -0.0101  
Z 0.0217 -0.0231 0.0063 0.0206 -0.0021 0.0266

AT. 26 H X -0.0168 -0.0023 0.0095 -0.0286 0.0345 -0.0399  
Y -0.0348 0.0011 -0.0148 -0.0147 -0.0246 -0.0101  
Z 0.0217 0.0231 0.0063 0.0206 0.0021 0.0266

AT. 27 H X -0.0356 -0.0003 0.0256 -0.0481 -0.0438 -0.0410  
Y -0.0552 -0.0035 -0.0167 -0.0351 0.0324 -0.0156  
Z -0.0059 -0.0243 -0.0027 -0.0049 0.0159 0.0187

AT. 28 H X -0.0356 0.0003 0.0256 -0.0481 0.0438 -0.0410  
Y -0.0552 0.0035 -0.0167 -0.0351 -0.0324 -0.0156  
Z -0.0059 0.0243 -0.0027 -0.0049 -0.0159 0.0187

AT. 29 C X 0.0176 0.0050 -0.0140 0.0051 0.0041 0.0021  
Y 0.0112 -0.0102 0.0113 0.0137 -0.0069 0.0100

Z 0.0301 -0.0093 0.0133 0.0134 -0.0113 0.0005  
AT. 30 C X 0.0176 -0.0050 -0.0140 0.0051 -0.0041 0.0021  
Y 0.0112 0.0102 0.0113 0.0137 0.0069 0.0100  
Z 0.0301 0.0093 0.0133 0.0134 0.0113 0.0005  
AT. 31 H X 0.0265 0.0103 -0.0164 0.0027 0.0032 0.0020  
Y 0.0077 -0.0088 0.0141 0.0145 -0.0100 0.0023  
Z 0.0299 -0.0040 0.0168 0.0142 -0.0160 -0.0115  
AT. 32 H X 0.0265 -0.0103 -0.0164 0.0027 -0.0032 0.0020  
Y 0.0077 0.0088 0.0141 0.0145 0.0100 0.0023  
Z 0.0299 0.0040 0.0168 0.0142 0.0160 -0.0115  
AT. 33 H X 0.0122 0.0009 -0.0096 0.0051 0.0074 0.0077  
Y 0.0171 -0.0110 0.0059 0.0108 -0.0025 0.0206  
Z 0.0242 -0.0112 0.0178 0.0141 -0.0111 -0.0003  
AT. 34 H X 0.0122 -0.0009 -0.0096 0.0051 -0.0074 0.0077  
Y 0.0171 0.0110 0.0059 0.0108 0.0025 0.0206  
Z 0.0242 0.0112 0.0178 0.0141 0.0111 -0.0003  
AT. 35 C X 0.0217 0.0070 -0.0183 0.0063 -0.0008 -0.0043  
Y 0.0119 -0.0031 0.0166 0.0122 -0.0096 0.0018  
Z 0.0261 -0.0174 0.0124 0.0140 -0.0048 0.0141  
AT. 36 C X 0.0217 -0.0070 -0.0183 0.0063 0.0008 -0.0043  
Y 0.0119 0.0031 0.0166 0.0122 0.0096 0.0018  
Z 0.0261 0.0174 0.0124 0.0140 0.0048 0.0141  
AT. 37 C X 0.0175 0.0000 -0.0114 0.0049 -0.0073 -0.0051  
Y 0.0109 -0.0057 0.0099 0.0149 0.0003 0.0108  
Z 0.0219 -0.0271 0.0082 0.0160 0.0036 0.0281  
AT. 38 C X 0.0175 -0.0000 -0.0114 0.0049 0.0073 -0.0051  
Y 0.0109 0.0057 0.0099 0.0149 -0.0003 0.0108  
Z 0.0219 0.0271 0.0082 0.0160 -0.0036 0.0281  
AT. 39 H X 0.0190 -0.0033 -0.0060 0.0062 -0.0105 0.0002  
Y 0.0107 -0.0091 0.0020 0.0184 0.0105 0.0208  
Z 0.0232 -0.0278 0.0154 0.0154 -0.0033 0.0274  
AT. 40 H X 0.0190 0.0033 -0.0060 0.0062 0.0105 0.0002

Y 0.0107 0.0091 0.0020 0.0184 -0.0105 0.0208  
Z 0.0232 0.0278 0.0154 0.0154 0.0033 0.0274  
AT. 41 H X 0.0155 0.0032 -0.0155 0.0035 -0.0050 -0.0103  
Y 0.0167 -0.0005 0.0135 0.0148 -0.0052 0.0076  
Z 0.0194 -0.0337 0.0094 0.0173 0.0051 0.0354  
AT. 42 H X 0.0155 -0.0032 -0.0155 0.0035 0.0050 -0.0103  
Y 0.0167 0.0005 0.0135 0.0148 0.0052 0.0076  
Z 0.0194 0.0337 0.0094 0.0173 -0.0051 0.0354  
AT. 43 C X 0.0191 -0.0035 -0.0102 0.0062 -0.0108 -0.0084  
Y 0.0091 -0.0092 0.0178 0.0127 -0.0110 0.0013  
Z 0.0238 -0.0260 -0.0150 0.0232 0.0251 0.0356  
AT. 44 C X 0.0191 0.0035 -0.0102 0.0062 0.0108 -0.0084  
Y 0.0091 0.0092 0.0178 0.0127 0.0110 0.0013  
Z 0.0238 0.0260 -0.0150 0.0232 -0.0251 0.0356  
AT. 45 H X 0.0229 -0.0042 -0.0091 0.0090 -0.0128 -0.0099  
Y 0.0138 -0.0007 0.0186 0.0079 -0.0205 -0.0075  
Z 0.0163 -0.0333 -0.0165 0.0253 0.0353 0.0447  
AT. 46 H X 0.0229 0.0042 -0.0091 0.0090 0.0128 -0.0099  
Y 0.0138 0.0007 0.0186 0.0079 0.0205 -0.0075  
Z 0.0163 0.0333 -0.0165 0.0253 -0.0353 0.0447  
AT. 47 H X 0.0148 -0.0094 -0.0045 0.0069 -0.0115 -0.0065  
Y 0.0041 -0.0177 0.0189 0.0166 -0.0042 0.0077  
Z 0.0248 -0.0271 -0.0214 0.0270 0.0332 0.0398  
AT. 48 H X 0.0148 0.0094 -0.0045 0.0069 0.0115 -0.0065  
Y 0.0041 0.0177 0.0189 0.0166 0.0042 0.0077  
Z 0.0248 0.0271 -0.0214 0.0270 -0.0332 0.0398  
AT. 49 C X 0.0251 0.0058 -0.0185 0.0057 -0.0085 -0.0100  
Y 0.0131 -0.0065 0.0251 0.0097 -0.0243 -0.0083  
Z 0.0345 -0.0131 -0.0108 0.0186 0.0067 0.0204  
AT. 50 C X 0.0251 -0.0058 -0.0185 0.0057 0.0085 -0.0100  
Y 0.0131 0.0065 0.0251 0.0097 0.0243 -0.0083  
Z 0.0345 0.0131 -0.0108 0.0186 -0.0067 0.0204

AT. 51 C X 0.0182 0.0028 -0.0150 0.0064 -0.0005 -0.0039  
Y 0.0091 -0.0150 0.0196 0.0109 -0.0167 -0.0008  
Z 0.0454 -0.0017 -0.0085 0.0161 -0.0086 0.0070

AT. 52 C X 0.0182 -0.0028 -0.0150 0.0064 0.0005 -0.0039  
Y 0.0091 0.0150 0.0196 0.0109 0.0167 -0.0008  
Z 0.0454 0.0017 -0.0085 0.0161 0.0086 0.0070

AT. 53 H X 0.0142 -0.0038 -0.0109 0.0045 0.0006 -0.0031  
Y 0.0071 -0.0223 0.0178 0.0101 -0.0142 0.0022  
Z 0.0506 0.0017 -0.0183 0.0189 -0.0075 0.0094

AT. 54 H X 0.0142 0.0038 -0.0109 0.0045 -0.0006 -0.0031  
Y 0.0071 0.0223 0.0178 0.0101 0.0142 0.0022  
Z 0.0506 -0.0017 -0.0183 0.0189 0.0075 0.0094

AT. 55 H X 0.0241 0.0118 -0.0198 0.0094 -0.0026 -0.0047  
Y 0.0117 -0.0144 0.0254 0.0073 -0.0241 -0.0081  
Z 0.0523 0.0053 -0.0041 0.0141 -0.0194 -0.0029

AT. 56 H X 0.0241 -0.0118 -0.0198 0.0094 0.0026 -0.0047  
Y 0.0117 0.0144 0.0254 0.0073 0.0241 -0.0081  
Z 0.0523 -0.0053 -0.0041 0.0141 0.0194 -0.0029

AT. 57 C X 0.0242 0.0115 -0.0219 0.0055 0.0024 -0.0041  
Y 0.0126 0.0030 0.0187 0.0097 -0.0091 -0.0010  
Z 0.0222 -0.0167 0.0232 0.0114 -0.0107 0.0091

AT. 58 C X 0.0242 -0.0115 -0.0219 0.0055 -0.0024 -0.0041  
Y 0.0126 -0.0030 0.0187 0.0097 0.0091 -0.0010  
Z 0.0222 0.0167 0.0232 0.0114 0.0107 0.0091

AT. 59 H X 0.0273 0.0155 -0.0246 0.0038 0.0043 -0.0036  
Y 0.0161 0.0064 0.0218 0.0081 -0.0173 -0.0056  
Z 0.0293 -0.0084 0.0257 0.0086 -0.0214 0.0025

AT. 60 H X 0.0273 -0.0155 -0.0246 0.0038 -0.0043 -0.0036  
Y 0.0161 -0.0064 0.0218 0.0081 0.0173 -0.0056  
Z 0.0293 0.0084 0.0257 0.0086 0.0214 0.0025

AT. 61 H X 0.0178 0.0090 -0.0191 0.0050 0.0071 -0.0026  
Y 0.0076 -0.0015 0.0134 0.0107 0.0028 0.0057



Z 0.0200 -0.0164 0.0273 0.0100 -0.0128 0.0068  
AT. 62 H X 0.0178 -0.0090 -0.0191 0.0050 -0.0071 -0.0026  
Y 0.0076 0.0015 0.0134 0.0107 -0.0028 0.0057  
Z 0.0200 0.0164 0.0273 0.0100 0.0128 0.0068  
AT. 63 H X 0.0296 0.0126 -0.0240 0.0063 -0.0030 -0.0056  
Y 0.0150 0.0094 0.0225 0.0066 -0.0138 -0.0052  
Z 0.0150 -0.0231 0.0216 0.0132 -0.0020 0.0141  
AT. 64 H X 0.0296 -0.0126 -0.0240 0.0063 0.0030 -0.0056  
Y 0.0150 -0.0094 0.0225 0.0066 0.0138 -0.0052  
Z 0.0150 0.0231 0.0216 0.0132 0.0020 0.0141  
AT. 65 C X 0.0337 0.0102 -0.0238 0.0054 -0.0160 -0.0162  
Y 0.0190 -0.0050 0.0350 0.0059 -0.0428 -0.0222  
Z 0.0384 -0.0101 -0.0201 0.0201 0.0102 0.0222  
AT. 66 C X 0.0337 -0.0102 -0.0238 0.0054 0.0160 -0.0162  
Y 0.0190 0.0050 0.0350 0.0059 0.0428 -0.0222  
Z 0.0384 0.0101 -0.0201 0.0201 -0.0102 0.0222  
AT. 67 H X 0.0398 0.0107 -0.0276 0.0046 -0.0224 -0.0209  
Y 0.0198 0.0033 0.0410 0.0053 -0.0477 -0.0275  
Z 0.0321 -0.0181 -0.0224 0.0209 0.0199 0.0308  
AT. 68 H X 0.0398 -0.0107 -0.0276 0.0046 0.0224 -0.0209  
Y 0.0198 -0.0033 0.0410 0.0053 0.0477 -0.0275  
Z 0.0321 0.0181 -0.0224 0.0209 -0.0199 0.0308  
AT. 69 H X 0.0325 0.0027 -0.0219 0.0044 -0.0175 -0.0161  
Y 0.0193 -0.0134 0.0315 0.0056 -0.0424 -0.0201  
Z 0.0417 -0.0076 -0.0291 0.0219 0.0138 0.0250  
AT. 70 H X 0.0325 -0.0027 -0.0219 0.0044 0.0175 -0.0161  
Y 0.0193 0.0134 0.0315 0.0056 0.0424 -0.0201  
Z 0.0417 0.0076 -0.0291 0.0219 -0.0138 0.0250  
AT. 71 H X 0.0353 0.0198 -0.0264 0.0069 -0.0137 -0.0161  
Y 0.0222 -0.0048 0.0401 0.0043 -0.0521 -0.0295  
Z 0.0438 -0.0020 -0.0150 0.0190 -0.0010 0.0122  
AT. 72 H X 0.0353 -0.0198 -0.0264 0.0069 0.0137 -0.0161

Y 0.0222 0.0048 0.0401 0.0043 0.0521 -0.0295  
Z 0.0438 0.0020 -0.0150 0.0190 0.0010 0.0122  
AT. 73 C X 0.0284 0.0117 -0.0246 0.0063 -0.0054 -0.0105  
Y 0.0145 0.0004 0.0263 0.0084 -0.0252 -0.0121  
Z 0.0299 -0.0153 0.0027 0.0159 -0.0005 0.0163  
AT. 74 C X 0.0284 -0.0117 -0.0246 0.0063 0.0054 -0.0105  
Y 0.0145 -0.0004 0.0263 0.0084 0.0252 -0.0121  
Z 0.0299 0.0153 0.0027 0.0159 0.0005 0.0163  
AT. 75 H X 0.0316 0.0173 -0.0308 0.0070 -0.0022 -0.0109  
Y 0.0160 0.0022 0.0312 0.0059 -0.0337 -0.0189  
Z 0.0341 -0.0085 0.0048 0.0131 -0.0098 0.0066  
AT. 76 H X 0.0316 -0.0173 -0.0308 0.0070 0.0022 -0.0109  
Y 0.0160 -0.0022 0.0312 0.0059 0.0337 -0.0189  
Z 0.0341 0.0085 0.0048 0.0131 0.0098 0.0066  
AT. 77 H X 0.0327 0.0144 -0.0276 0.0061 -0.0102 -0.0146  
Y 0.0153 0.0047 0.0289 0.0063 -0.0287 -0.0173  
Z 0.0249 -0.0217 0.0029 0.0177 0.0067 0.0248  
AT. 78 H X 0.0327 -0.0144 -0.0276 0.0061 0.0102 -0.0146  
Y 0.0153 -0.0047 0.0289 0.0063 0.0287 -0.0173  
Z 0.0249 0.0217 0.0029 0.0177 -0.0067 0.0248  
AT. 79 I X 0.0053 -0.0048 0.0166 0.0025 -0.0041 0.0007  
Y 0.0401 0.0541 -0.0122 -0.0538 -0.0274 0.0226  
Z -0.0021 0.0356 -0.0117 0.0214 0.0182 -0.0499  
AT. 80 I X 0.0053 0.0048 0.0166 0.0025 0.0041 0.0007  
Y 0.0401 -0.0541 -0.0122 -0.0538 0.0274 0.0226  
Z -0.0021 -0.0356 -0.0117 0.0214 -0.0182 -0.0499  
AT. 81 I X 0.0188 0.0137 0.0157 -0.0083 -0.0326 -0.0113  
Y 0.0124 -0.0411 0.0476 0.0095 -0.0395 -0.0169  
Z -0.0313 0.0032 0.0440 0.0026 0.0203 0.0535  
AT. 82 I X 0.0188 -0.0137 0.0157 -0.0083 0.0326 -0.0113  
Y 0.0124 0.0411 0.0476 0.0095 0.0395 -0.0169  
Z -0.0313 -0.0032 0.0440 0.0026 -0.0203 0.0535

AT. 83 O X -0.0061 -0.0330 0.0266 0.0224 -0.0020 0.0048  
Y 0.0325 0.0264 0.0395 0.0035 -0.0061 0.0101  
Z -0.0011 0.0450 -0.0378 -0.0068 0.0245 -0.0065

AT. 84 O X -0.0061 0.0330 0.0266 0.0224 0.0020 0.0048  
Y 0.0325 -0.0264 0.0395 0.0035 0.0061 0.0101  
Z -0.0011 -0.0450 -0.0378 -0.0068 -0.0245 -0.0065

AT. 85 O X 0.0131 0.0294 0.0115 -0.0022 -0.0125 -0.0010  
Y 0.0116 -0.0485 -0.0030 0.0022 -0.0010 -0.0088  
Z 0.0119 0.0048 0.0017 0.0138 -0.0156 -0.0136

AT. 86 O X 0.0131 -0.0294 0.0115 -0.0022 0.0125 -0.0010  
Y 0.0116 0.0485 -0.0030 0.0022 0.0010 -0.0088  
Z 0.0119 -0.0048 0.0017 0.0138 0.0156 -0.0136

AT. 87 N X 0.0033 -0.0048 0.0050 -0.0005 0.0089 0.0228  
Y -0.0098 -0.0028 -0.0104 0.0011 0.0178 -0.0046  
Z -0.0041 0.0292 -0.0254 0.0044 0.0180 -0.0160

AT. 88 N X 0.0033 0.0048 0.0050 -0.0005 -0.0089 0.0228  
Y -0.0098 0.0028 -0.0104 0.0011 -0.0178 -0.0046  
Z -0.0041 -0.0292 -0.0254 0.0044 -0.0180 -0.0160

AT. 89 N X 0.0077 0.0146 -0.0084 -0.0148 -0.0026 0.0114  
Y -0.0087 -0.0050 -0.0126 -0.0004 0.0172 -0.0086  
Z -0.0087 0.0335 -0.0185 0.0030 0.0066 -0.0065

AT. 90 N X 0.0077 -0.0146 -0.0084 -0.0148 0.0026 0.0114  
Y -0.0087 0.0050 -0.0126 -0.0004 -0.0172 -0.0086  
Z -0.0087 -0.0335 -0.0185 0.0030 -0.0066 -0.0065

AT. 91 C X -0.0030 -0.0216 0.0230 0.0180 0.0026 0.0104  
Y 0.0171 0.0131 0.0153 -0.0033 -0.0017 0.0085  
Z -0.0014 0.0310 -0.0196 0.0059 0.0163 -0.0141

AT. 92 C X -0.0030 0.0216 0.0230 0.0180 -0.0026 0.0104  
Y 0.0171 -0.0131 0.0153 -0.0033 0.0017 0.0085  
Z -0.0014 -0.0310 -0.0196 0.0059 -0.0163 -0.0141

AT. 93 C X -0.0049 -0.0340 0.0364 0.0296 0.0013 0.0020  
Y 0.0283 0.0258 0.0055 -0.0258 -0.0189 0.0191

Z 0.0018 0.0234 -0.0061 0.0117 0.0018 -0.0213  
AT. 94 C X -0.0049 0.0340 0.0364 0.0296 -0.0013 0.0020  
Y 0.0283 -0.0258 0.0055 -0.0258 0.0189 0.0191  
Z 0.0018 -0.0234 -0.0061 0.0117 -0.0018 -0.0213  
AT. 95 H X -0.0117 -0.0608 0.0612 0.0567 0.0074 0.0090  
Y 0.0294 0.0453 -0.0163 -0.0420 -0.0141 0.0123  
Z 0.0079 0.0158 0.0064 0.0109 -0.0142 -0.0164  
AT. 96 H X -0.0117 0.0608 0.0612 0.0567 -0.0074 0.0090  
Y 0.0294 -0.0453 -0.0163 -0.0420 0.0141 0.0123  
Z 0.0079 -0.0158 0.0064 0.0109 0.0142 -0.0164  
AT. 97 H X -0.0055 -0.0385 0.0465 0.0388 -0.0028 -0.0079  
Y 0.0329 0.0077 0.0273 -0.0180 -0.0343 0.0311  
Z 0.0031 0.0209 -0.0040 0.0103 -0.0011 -0.0149  
AT. 98 H X -0.0055 0.0385 0.0465 0.0388 0.0028 -0.0079  
Y 0.0329 -0.0077 0.0273 -0.0180 0.0343 0.0311  
Z 0.0031 -0.0209 -0.0040 0.0103 0.0011 -0.0149  
AT. 99 C X 0.0132 0.0206 0.0006 -0.0076 -0.0096 0.0005  
Y 0.0035 -0.0279 0.0056 0.0042 0.0027 -0.0053  
Z -0.0026 0.0187 -0.0067 0.0072 -0.0010 -0.0036  
AT. 100 C X 0.0132 -0.0206 0.0006 -0.0076 0.0096 0.0005  
Y 0.0035 0.0279 0.0056 0.0042 -0.0027 -0.0053  
Z -0.0026 -0.0187 -0.0067 0.0072 0.0010 -0.0036  
AT. 101 C X 0.0205 0.0222 -0.0046 -0.0034 -0.0136 -0.0110  
Y 0.0058 -0.0362 0.0459 0.0154 -0.0087 0.0038  
Z -0.0134 0.0193 -0.0047 0.0004 0.0052 0.0111  
AT. 102 C X 0.0205 -0.0222 -0.0046 -0.0034 0.0136 -0.0110  
Y 0.0058 0.0362 0.0459 0.0154 0.0087 0.0038  
Z -0.0134 -0.0193 -0.0047 0.0004 -0.0052 0.0111  
AT. 103 H X 0.0177 0.0270 -0.0183 -0.0046 0.0026 -0.0069  
Y 0.0072 -0.0374 0.0523 0.0162 -0.0153 0.0025  
Z -0.0164 0.0266 -0.0304 -0.0116 0.0012 0.0007  
AT. 104 H X 0.0177 -0.0270 -0.0183 -0.0046 -0.0026 -0.0069

Y 0.0072 0.0374 0.0523 0.0162 0.0153 0.0025  
Z -0.0164 -0.0266 -0.0304 -0.0116 -0.0012 0.0007  
AT. 105 H X 0.0303 0.0247 -0.0044 0.0024 -0.0230 -0.0260  
Y 0.0042 -0.0428 0.0694 0.0240 0.0020 0.0212  
Z -0.0115 0.0182 0.0038 0.0048 0.0064 0.0135  
AT. 106 H X 0.0303 -0.0247 -0.0044 0.0024 0.0230 -0.0260  
Y 0.0042 0.0428 0.0694 0.0240 -0.0020 0.0212  
Z -0.0115 -0.0182 0.0038 0.0048 -0.0064 0.0135  
AT. 107 C X 0.0043 0.0027 -0.0067 -0.0100 0.0143 0.0297  
Y -0.0145 -0.0014 -0.0156 0.0005 0.0180 -0.0123  
Z -0.0045 0.0433 -0.0494 -0.0136 0.0273 -0.0081  
AT. 108 C X 0.0043 -0.0027 -0.0067 -0.0100 -0.0143 0.0297  
Y -0.0145 0.0014 -0.0156 0.0005 -0.0180 -0.0123  
Z -0.0045 -0.0433 -0.0494 -0.0136 -0.0273 -0.0081  
AT. 109 H X 0.0104 0.0091 -0.0172 -0.0206 0.0216 0.0383  
Y -0.0104 0.0002 -0.0196 -0.0026 0.0219 -0.0119  
Z 0.0010 0.0443 -0.0540 -0.0166 0.0316 -0.0105  
AT. 110 H X 0.0104 -0.0091 -0.0172 -0.0206 -0.0216 0.0383  
Y -0.0104 -0.0002 -0.0196 -0.0026 -0.0219 -0.0119  
Z 0.0010 -0.0443 -0.0540 -0.0166 -0.0316 -0.0105  
AT. 111 H X 0.0061 -0.0054 0.0035 -0.0023 0.0107 0.0253  
Y -0.0229 -0.0032 -0.0088 0.0063 0.0100 -0.0158  
Z -0.0044 0.0524 -0.0618 -0.0232 0.0327 -0.0027  
AT. 112 H X 0.0061 0.0054 0.0035 -0.0023 -0.0107 0.0253  
Y -0.0229 0.0032 -0.0088 0.0063 -0.0100 -0.0158  
Z -0.0044 -0.0524 -0.0618 -0.0232 -0.0327 -0.0027  
AT. 113 C X -0.0019 0.0147 -0.0243 -0.0232 0.0150 0.0308  
Y -0.0105 0.0024 -0.0255 -0.0063 0.0221 -0.0155  
Z -0.0117 0.0452 -0.0467 -0.0124 0.0225 -0.0042  
AT. 114 C X -0.0019 -0.0147 -0.0243 -0.0232 -0.0150 0.0308  
Y -0.0105 -0.0024 -0.0255 -0.0063 -0.0221 -0.0155  
Z -0.0117 -0.0452 -0.0467 -0.0124 -0.0225 -0.0042

AT. 115 C X 0.0028 0.0154 -0.0151 -0.0184 0.0042 0.0192  
Y -0.0123 0.0037 -0.0191 -0.0033 0.0143 -0.0166  
Z -0.0189 0.0448 -0.0391 -0.0087 0.0146 -0.0006

AT. 116 C X 0.0028 -0.0154 -0.0151 -0.0184 -0.0042 0.0192  
Y -0.0123 -0.0037 -0.0191 -0.0033 -0.0143 -0.0166  
Z -0.0189 -0.0448 -0.0391 -0.0087 -0.0146 -0.0006

AT. 117 H X 0.0114 0.0072 -0.0048 -0.0129 0.0034 0.0167  
Y -0.0162 0.0080 -0.0145 -0.0008 0.0025 -0.0213  
Z -0.0273 0.0527 -0.0505 -0.0146 0.0184 0.0032

AT. 118 H X 0.0114 -0.0072 -0.0048 -0.0129 -0.0034 0.0167  
Y -0.0162 -0.0080 -0.0145 -0.0008 -0.0025 -0.0213  
Z -0.0273 -0.0527 -0.0505 -0.0146 -0.0184 0.0032

AT. 119 H X -0.0068 0.0283 -0.0268 -0.0248 0.0008 0.0186  
Y -0.0124 0.0084 -0.0270 -0.0073 0.0166 -0.0202  
Z -0.0243 0.0475 -0.0375 -0.0082 0.0104 0.0025

AT. 120 H X -0.0068 -0.0283 -0.0268 -0.0248 -0.0008 0.0186  
Y -0.0124 -0.0084 -0.0270 -0.0073 -0.0166 -0.0202  
Z -0.0243 -0.0475 -0.0375 -0.0082 -0.0104 0.0025

AT. 121 C X 0.0028 0.0152 -0.0152 -0.0210 0.0009 0.0163  
Y -0.0100 -0.0032 -0.0252 -0.0041 0.0276 -0.0054  
Z -0.0006 0.0332 -0.0072 0.0115 -0.0005 -0.0143

AT. 122 C X 0.0028 -0.0152 -0.0152 -0.0210 -0.0009 0.0163  
Y -0.0100 0.0032 -0.0252 -0.0041 -0.0276 -0.0054  
Z -0.0006 -0.0332 -0.0072 0.0115 0.0005 -0.0143

AT. 123 H X -0.0015 0.0105 -0.0182 -0.0255 0.0014 0.0177  
Y -0.0111 -0.0095 -0.0263 -0.0037 0.0308 -0.0076  
Z -0.0003 0.0392 -0.0059 0.0111 -0.0038 -0.0117

AT. 124 H X -0.0015 -0.0105 -0.0182 -0.0255 -0.0014 0.0177  
Y -0.0111 0.0095 -0.0263 -0.0037 -0.0308 -0.0076  
Z -0.0003 -0.0392 -0.0059 0.0111 0.0038 -0.0117

AT. 125 H X 0.0072 0.0132 -0.0067 -0.0150 -0.0047 0.0097  
Y -0.0085 0.0055 -0.0264 -0.0040 0.0275 0.0001

Z 0.0052 0.0357 0.0024 0.0187 -0.0072 -0.0192  
AT. 126 H X 0.0072 -0.0132 -0.0067 -0.0150 0.0047 0.0097  
Y -0.0085 -0.0055 -0.0264 -0.0040 -0.0275 0.0001  
Z 0.0052 -0.0357 0.0024 0.0187 0.0072 -0.0192  
AT. 127 C X -0.0019 0.0189 -0.0267 -0.0263 0.0120 0.0284  
Y -0.0110 -0.0066 -0.0280 -0.0040 0.0334 -0.0049  
Z -0.0007 0.0253 -0.0063 0.0148 0.0047 -0.0190  
AT. 128 C X -0.0019 -0.0189 -0.0267 -0.0263 -0.0120 0.0284  
Y -0.0110 0.0066 -0.0280 -0.0040 -0.0334 -0.0049  
Z -0.0007 -0.0253 -0.0063 0.0148 -0.0047 -0.0190  
AT. 129 C X 0.0014 0.0048 -0.0099 -0.0123 0.0124 0.0265  
Y -0.0099 -0.0070 -0.0219 -0.0016 0.0292 -0.0021  
Z -0.0010 0.0195 -0.0054 0.0178 0.0090 -0.0227  
AT. 130 C X 0.0014 -0.0048 -0.0099 -0.0123 -0.0124 0.0265  
Y -0.0099 0.0070 -0.0219 -0.0016 -0.0292 -0.0021  
Z -0.0010 -0.0195 -0.0054 0.0178 -0.0090 -0.0227  
AT. 131 H X 0.0030 0.0003 0.0018 -0.0048 0.0067 0.0226  
Y -0.0097 -0.0101 -0.0179 0.0025 0.0314 0.0005  
Z 0.0011 0.0125 0.0128 0.0303 0.0019 -0.0269  
AT. 132 H X 0.0030 -0.0003 0.0018 -0.0048 -0.0067 0.0226  
Y -0.0097 0.0101 -0.0179 0.0025 -0.0314 0.0005  
Z 0.0011 -0.0125 0.0128 0.0303 -0.0019 -0.0269  
AT. 133 H X -0.0009 0.0058 -0.0197 -0.0156 0.0210 0.0321  
Y -0.0109 -0.0088 -0.0247 -0.0006 0.0343 -0.0014  
Z -0.0017 0.0167 -0.0061 0.0204 0.0128 -0.0247  
AT. 134 H X -0.0009 -0.0058 -0.0197 -0.0156 -0.0210 0.0321  
Y -0.0109 0.0088 -0.0247 -0.0006 -0.0343 -0.0014  
Z -0.0017 -0.0167 -0.0061 0.0204 -0.0128 -0.0247  
AT. 135 C X -0.0059 0.0205 -0.0377 -0.0317 0.0210 0.0372  
Y -0.0089 0.0093 -0.0318 -0.0113 0.0230 -0.0202  
Z -0.0174 0.0578 -0.0710 -0.0280 0.0326 0.0043  
AT. 136 C X -0.0059 -0.0205 -0.0377 -0.0317 -0.0210 0.0372

Y -0.0089 -0.0093 -0.0318 -0.0113 -0.0230 -0.0202  
Z -0.0174 -0.0578 -0.0710 -0.0280 -0.0326 0.0043  
AT. 137 H X -0.0094 0.0231 -0.0489 -0.0365 0.0276 0.0446  
Y -0.0100 0.0092 -0.0370 -0.0104 0.0288 -0.0169  
Z -0.0178 0.0577 -0.0767 -0.0254 0.0398 0.0062  
AT. 138 H X -0.0094 -0.0231 -0.0489 -0.0365 -0.0276 0.0446  
Y -0.0100 -0.0092 -0.0370 -0.0104 -0.0288 -0.0169  
Z -0.0178 -0.0577 -0.0767 -0.0254 -0.0398 0.0062  
AT. 139 H X -0.0031 0.0123 -0.0260 -0.0217 0.0182 0.0348  
Y -0.0068 0.0115 -0.0240 -0.0132 0.0133 -0.0265  
Z -0.0217 0.0672 -0.0871 -0.0394 0.0389 0.0088  
AT. 140 H X -0.0031 -0.0123 -0.0260 -0.0217 -0.0182 0.0348  
Y -0.0068 -0.0115 -0.0240 -0.0132 -0.0133 -0.0265  
Z -0.0217 -0.0672 -0.0871 -0.0394 -0.0389 0.0088  
AT. 141 H X -0.0075 0.0316 -0.0489 -0.0439 0.0208 0.0374  
Y -0.0095 0.0129 -0.0387 -0.0132 0.0282 -0.0190  
Z -0.0175 0.0594 -0.0690 -0.0315 0.0270 0.0030  
AT. 142 H X -0.0075 -0.0316 -0.0489 -0.0439 -0.0208 0.0374  
Y -0.0095 -0.0129 -0.0387 -0.0132 -0.0282 -0.0190  
Z -0.0175 -0.0594 -0.0690 -0.0315 -0.0270 0.0030  
AT. 143 C X -0.0051 0.0287 -0.0443 -0.0389 0.0151 0.0337  
Y -0.0136 -0.0137 -0.0270 0.0014 0.0436 -0.0009  
Z 0.0042 0.0137 0.0180 0.0313 -0.0021 -0.0268  
AT. 144 C X -0.0051 -0.0287 -0.0443 -0.0389 -0.0151 0.0337  
Y -0.0136 0.0137 -0.0270 0.0014 -0.0436 -0.0009  
Z 0.0042 -0.0137 0.0180 0.0313 0.0021 -0.0268  
AT. 145 H X -0.0067 0.0410 -0.0640 -0.0538 0.0141 0.0380  
Y -0.0142 -0.0096 -0.0317 0.0005 0.0430 0.0011  
Z 0.0041 0.0129 0.0183 0.0290 -0.0020 -0.0278  
AT. 146 H X -0.0067 -0.0410 -0.0640 -0.0538 -0.0141 0.0380  
Y -0.0142 0.0096 -0.0317 0.0005 -0.0430 0.0011  
Z 0.0041 -0.0129 0.0183 0.0290 0.0020 -0.0278



AT. 147 H X -0.0024 0.0258 -0.0340 -0.0321 0.0104 0.0296  
Y -0.0140 -0.0227 -0.0176 0.0079 0.0472 -0.0018  
Z 0.0077 0.0042 0.0380 0.0448 -0.0067 -0.0332

AT. 148 H X -0.0024 -0.0258 -0.0340 -0.0321 -0.0104 0.0296  
Y -0.0140 0.0227 -0.0176 0.0079 -0.0472 -0.0018  
Z 0.0077 -0.0042 0.0380 0.0448 0.0067 -0.0332

AT. 149 H X -0.0085 0.0254 -0.0485 -0.0403 0.0236 0.0372  
Y -0.0147 -0.0149 -0.0274 0.0033 0.0463 0.0011  
Z 0.0041 0.0135 0.0186 0.0349 -0.0015 -0.0255

AT. 150 H X -0.0085 -0.0254 -0.0485 -0.0403 -0.0236 0.0372  
Y -0.0147 0.0149 -0.0274 0.0033 -0.0463 0.0011  
Z 0.0041 -0.0135 0.0186 0.0349 0.0015 -0.0255

AT. 151 C X -0.0063 0.0243 -0.0400 -0.0346 0.0190 0.0356  
Y -0.0095 -0.0037 -0.0297 -0.0061 0.0329 -0.0108  
Z -0.0062 0.0359 -0.0274 0.0008 0.0140 -0.0114

AT. 152 C X -0.0063 -0.0243 -0.0400 -0.0346 -0.0190 0.0356  
Y -0.0095 0.0037 -0.0297 -0.0061 -0.0329 -0.0108  
Z -0.0062 -0.0359 -0.0274 0.0008 -0.0140 -0.0114

AT. 153 H X -0.0100 0.0251 -0.0489 -0.0393 0.0260 0.0424  
Y -0.0092 -0.0070 -0.0294 -0.0046 0.0367 -0.0094  
Z -0.0041 0.0308 -0.0246 0.0043 0.0172 -0.0126

AT. 154 H X -0.0100 -0.0251 -0.0489 -0.0393 -0.0260 0.0424  
Y -0.0092 0.0070 -0.0294 -0.0046 -0.0367 -0.0094  
Z -0.0041 -0.0308 -0.0246 0.0043 -0.0172 -0.0126

AT. 155 H X -0.0090 0.0341 -0.0512 -0.0441 0.0199 0.0369  
Y -0.0084 -0.0043 -0.0303 -0.0062 0.0359 -0.0120  
Z -0.0085 0.0403 -0.0303 -0.0019 0.0113 -0.0096

AT. 156 H X -0.0090 -0.0341 -0.0512 -0.0441 -0.0199 0.0369  
Y -0.0084 0.0043 -0.0303 -0.0062 -0.0359 -0.0120  
Z -0.0085 -0.0403 -0.0303 -0.0019 -0.0113 -0.0096

AT. 157 O X -0.0309 0.0034 -0.0235 0.0140 0.0240 0.0145  
Y -0.0213 -0.0158 -0.0253 0.0387 0.0261 0.0290

Z 0.0008 0.0280 -0.0379 0.0377 -0.0292 0.0503  
AT. 158 O X -0.0309 -0.0034 -0.0235 0.0140 -0.0240 0.0145  
Y -0.0213 0.0158 -0.0253 0.0387 -0.0261 0.0290  
Z 0.0008 -0.0280 -0.0379 0.0377 0.0292 0.0503  
AT. 159 O X -0.0243 -0.0015 -0.0170 0.0059 0.0249 0.0026  
Y -0.0251 -0.0226 -0.0179 0.0139 0.0322 0.0012  
Z 0.0118 0.0184 -0.0252 0.0184 -0.0269 0.0240  
AT. 160 O X -0.0243 0.0015 -0.0170 0.0059 -0.0249 0.0026  
Y -0.0251 0.0226 -0.0179 0.0139 -0.0322 0.0012  
Z 0.0118 -0.0184 -0.0252 0.0184 0.0269 0.0240  
AT. 161 H X -0.0272 0.0016 -0.0185 0.0255 0.0229 0.0239  
Y -0.0234 -0.0126 -0.0308 0.0457 0.0249 0.0377  
Z 0.0098 0.0178 -0.0185 0.0241 -0.0275 0.0304  
AT. 162 H X -0.0272 -0.0016 -0.0185 0.0255 -0.0229 0.0239  
Y -0.0234 0.0126 -0.0308 0.0457 -0.0249 0.0377  
Z 0.0098 -0.0178 -0.0185 0.0241 0.0275 0.0304  
AT. 163 H X -0.0162 -0.0051 -0.0096 -0.0031 0.0248 -0.0105  
Y -0.0258 -0.0184 -0.0203 0.0073 0.0052 0.0006  
Z 0.0092 0.0212 -0.0288 0.0202 -0.0334 0.0285  
AT. 164 H X -0.0162 0.0051 -0.0096 -0.0031 -0.0248 -0.0105  
Y -0.0258 0.0184 -0.0203 0.0073 -0.0052 0.0006  
Z 0.0092 -0.0212 -0.0288 0.0202 0.0334 0.0285  
AT. 165 O X -0.0023 -0.0213 0.0409 0.0367 0.0144 -0.0051  
Y 0.0273 0.0311 0.0027 -0.0248 -0.0201 0.0173  
Z 0.0163 0.0013 -0.0017 0.0102 0.0147 -0.0132  
AT. 166 O X -0.0023 0.0213 0.0409 0.0367 -0.0144 -0.0051  
Y 0.0273 -0.0311 0.0027 -0.0248 0.0201 0.0173  
Z 0.0163 -0.0013 -0.0017 0.0102 -0.0147 -0.0132  
AT. 167 H X -0.0058 -0.0212 0.0365 0.0301 0.0063 -0.0014  
Y 0.0311 0.0262 0.0197 -0.0081 -0.0099 0.0107  
Z 0.0208 0.0062 -0.0125 0.0054 0.0224 -0.0138  
AT. 168 H X -0.0058 0.0212 0.0365 0.0301 -0.0063 -0.0014

|              |     |         |         |         |         |         |         |
|--------------|-----|---------|---------|---------|---------|---------|---------|
|              | Y   | 0.0311  | -0.0262 | 0.0197  | -0.0081 | 0.0099  | 0.0107  |
|              | Z   | 0.0208  | -0.0062 | -0.0125 | 0.0054  | -0.0224 | -0.0138 |
| AT. 169      | O X | 0.0134  | -0.0262 | 0.0339  | 0.0282  | 0.0268  | -0.0020 |
|              | Y   | 0.0225  | 0.0528  | 0.0002  | 0.0025  | 0.0016  | -0.0034 |
|              | Z   | 0.0203  | -0.0042 | -0.0028 | 0.0026  | 0.0127  | -0.0080 |
| AT. 170      | O X | 0.0134  | 0.0262  | 0.0339  | 0.0282  | -0.0268 | -0.0020 |
|              | Y   | 0.0225  | -0.0528 | 0.0002  | 0.0025  | -0.0016 | -0.0034 |
|              | Z   | 0.0203  | 0.0042  | -0.0028 | 0.0026  | -0.0127 | -0.0080 |
| AT. 171      | H X | 0.0137  | -0.0372 | 0.0304  | 0.0151  | 0.0176  | 0.0047  |
|              | Y   | 0.0190  | 0.0543  | -0.0010 | 0.0051  | 0.0016  | -0.0065 |
|              | Z   | 0.0139  | 0.0069  | -0.0023 | 0.0164  | 0.0197  | -0.0184 |
| AT. 172      | H X | 0.0137  | 0.0372  | 0.0304  | 0.0151  | -0.0176 | 0.0047  |
|              | Y   | 0.0190  | -0.0543 | -0.0010 | 0.0051  | -0.0016 | -0.0065 |
|              | Z   | 0.0139  | -0.0069 | -0.0023 | 0.0164  | -0.0197 | -0.0184 |
|              |     |         |         |         |         |         |         |
| FREQ(CM**-1) |     | 45.03   | 45.36   | 46.66   | 47.18   | 49.54   | 52.17   |
|              |     |         |         |         |         |         |         |
| AT. 1        | I X | -0.0304 | 0.0108  | 0.0019  | -0.0172 | 0.0231  | 0.0111  |
|              | Y   | 0.0200  | -0.0304 | -0.0230 | 0.0141  | -0.0096 | 0.0383  |
|              | Z   | 0.0341  | -0.0240 | 0.0284  | 0.0243  | 0.0009  | 0.0354  |
| AT. 2        | I X | -0.0304 | -0.0108 | 0.0019  | 0.0172  | -0.0231 | -0.0111 |
|              | Y   | 0.0200  | 0.0304  | -0.0230 | -0.0141 | 0.0096  | -0.0383 |
|              | Z   | 0.0341  | 0.0240  | 0.0284  | -0.0243 | -0.0009 | -0.0354 |
| AT. 3        | I X | 0.0098  | -0.0058 | 0.0158  | 0.0444  | -0.0100 | -0.0076 |
|              | Y   | 0.0395  | 0.0217  | 0.0066  | -0.0114 | -0.0368 | -0.0186 |
|              | Z   | -0.0040 | 0.0145  | -0.0099 | 0.0134  | -0.0279 | 0.0316  |
| AT. 4        | I X | 0.0098  | 0.0058  | 0.0158  | -0.0444 | 0.0100  | 0.0076  |
|              | Y   | 0.0395  | -0.0217 | 0.0066  | 0.0114  | 0.0368  | 0.0186  |
|              | Z   | -0.0040 | -0.0145 | -0.0099 | -0.0134 | 0.0279  | -0.0316 |
| AT. 5        | O X | -0.0368 | 0.0173  | 0.0048  | -0.0234 | 0.0372  | 0.0406  |
|              | Y   | 0.0031  | 0.0215  | -0.0296 | -0.0051 | -0.0055 | 0.0332  |
|              | Z   | -0.0196 | 0.0176  | 0.0288  | 0.0115  | 0.0184  | 0.0050  |

AT. 6 O X -0.0368 -0.0173 0.0048 0.0234 -0.0372 -0.0406  
Y 0.0031 -0.0215 -0.0296 0.0051 0.0055 -0.0332  
Z -0.0196 -0.0176 0.0288 -0.0115 -0.0184 -0.0050

AT. 7 O X 0.0002 -0.0031 0.0167 0.0383 0.0012 -0.0136  
Y 0.0077 0.0271 0.0105 -0.0178 -0.0148 0.0079  
Z 0.0021 -0.0476 -0.0280 -0.0134 -0.0084 -0.0070

AT. 8 O X 0.0002 0.0031 0.0167 -0.0383 -0.0012 0.0136  
Y 0.0077 -0.0271 0.0105 0.0178 0.0148 -0.0079  
Z 0.0021 0.0476 -0.0280 0.0134 0.0084 0.0070

AT. 9 N X 0.0130 -0.0243 0.0086 0.0009 -0.0056 -0.0095  
Y 0.0069 -0.0053 -0.0030 0.0041 -0.0128 0.0048  
Z -0.0057 0.0086 0.0264 0.0177 0.0063 -0.0056

AT. 10 N X 0.0130 0.0243 0.0086 -0.0009 0.0056 0.0095  
Y 0.0069 0.0053 -0.0030 -0.0041 0.0128 -0.0048  
Z -0.0057 -0.0086 0.0264 -0.0177 -0.0063 0.0056

AT. 11 N X 0.0226 -0.0310 0.0011 0.0318 -0.0120 -0.0257  
Y 0.0035 0.0081 0.0114 -0.0120 -0.0100 0.0117  
Z -0.0137 -0.0501 -0.0183 -0.0046 0.0035 0.0045

AT. 12 N X 0.0226 0.0310 0.0011 -0.0318 0.0120 0.0257  
Y 0.0035 -0.0081 0.0114 0.0120 0.0100 -0.0117  
Z -0.0137 0.0501 -0.0183 0.0046 -0.0035 -0.0045

AT. 13 C X -0.0165 -0.0028 0.0067 -0.0116 0.0195 0.0212  
Y 0.0066 0.0067 -0.0204 0.0008 -0.0090 0.0211  
Z -0.0031 0.0095 0.0241 0.0181 0.0051 -0.0054

AT. 14 C X -0.0165 0.0028 0.0067 0.0116 -0.0195 -0.0212  
Y 0.0066 -0.0067 -0.0204 -0.0008 0.0090 -0.0211  
Z -0.0031 -0.0095 0.0241 -0.0181 -0.0051 0.0054

AT. 15 C X -0.0226 -0.0065 0.0059 -0.0114 0.0261 0.0277  
Y 0.0123 -0.0049 -0.0255 0.0056 -0.0119 0.0234  
Z 0.0197 -0.0029 0.0149 0.0257 -0.0124 -0.0139

AT. 16 C X -0.0226 0.0065 0.0059 0.0114 -0.0261 -0.0277  
Y 0.0123 0.0049 -0.0255 -0.0056 0.0119 -0.0234

Z 0.0197 0.0029 0.0149 -0.0257 0.0124 0.0139  
AT. 17 H X -0.0114 -0.0263 0.0091 -0.0077 0.0281 0.0459  
Y 0.0081 -0.0079 -0.0167 0.0030 -0.0024 0.0374  
Z 0.0286 -0.0056 0.0047 0.0297 -0.0238 -0.0262  
AT. 18 H X -0.0114 0.0263 0.0091 0.0077 -0.0281 -0.0459  
Y 0.0081 0.0079 -0.0167 -0.0030 0.0024 -0.0374  
Z 0.0286 0.0056 0.0047 -0.0297 0.0238 0.0262  
AT. 19 H X -0.0364 0.0010 0.0047 -0.0140 0.0306 0.0205  
Y 0.0180 -0.0004 -0.0386 0.0090 -0.0257 0.0011  
Z 0.0173 0.0016 0.0096 0.0262 -0.0163 -0.0247  
AT. 20 H X -0.0364 -0.0010 0.0047 0.0140 -0.0306 -0.0205  
Y 0.0180 0.0004 -0.0386 -0.0090 0.0257 -0.0011  
Z 0.0173 -0.0016 0.0096 -0.0262 0.0163 0.0247  
AT. 21 C X 0.0111 -0.0115 0.0117 0.0382 -0.0076 -0.0169  
Y 0.0143 0.0206 0.0088 -0.0147 -0.0208 0.0088  
Z -0.0088 -0.0441 -0.0197 -0.0062 -0.0020 0.0031  
AT. 22 C X 0.0111 0.0115 0.0117 -0.0382 0.0076 0.0169  
Y 0.0143 -0.0206 0.0088 0.0147 0.0208 -0.0088  
Z -0.0088 0.0441 -0.0197 0.0062 0.0020 -0.0031  
AT. 23 C X 0.0128 0.0040 0.0173 0.0464 -0.0142 -0.0106  
Y 0.0394 0.0289 0.0029 -0.0114 -0.0456 0.0031  
Z -0.0167 -0.0307 -0.0117 0.0015 0.0003 0.0121  
AT. 24 C X 0.0128 -0.0040 0.0173 -0.0464 0.0142 0.0106  
Y 0.0394 -0.0289 0.0029 0.0114 0.0456 -0.0031  
Z -0.0167 0.0307 -0.0117 -0.0015 -0.0003 -0.0121  
AT. 25 H X 0.0219 0.0051 0.0185 0.0491 -0.0185 -0.0212  
Y 0.0431 0.0306 0.0022 -0.0112 -0.0495 0.0020  
Z -0.0343 -0.0397 -0.0046 0.0008 0.0239 0.0100  
AT. 26 H X 0.0219 -0.0051 0.0185 -0.0491 0.0185 0.0212  
Y 0.0431 -0.0306 0.0022 0.0112 0.0495 -0.0020  
Z -0.0343 0.0397 -0.0046 -0.0008 -0.0239 -0.0100  
AT. 27 H X 0.0069 0.0196 0.0211 0.0513 -0.0174 0.0015

Y 0.0551 0.0401 -0.0040 -0.0109 -0.0671 0.0095  
Z -0.0082 -0.0296 -0.0161 0.0004 -0.0094 0.0122  
AT. 28 H X 0.0069 -0.0196 0.0211 -0.0513 0.0174 -0.0015  
Y 0.0551 -0.0401 -0.0040 0.0109 0.0671 -0.0095  
Z -0.0082 0.0296 -0.0161 -0.0004 0.0094 -0.0122  
AT. 29 C X 0.0215 -0.0232 0.0138 0.0005 -0.0132 -0.0163  
Y 0.0039 0.0060 0.0113 -0.0028 -0.0116 0.0069  
Z -0.0291 0.0217 0.0343 0.0097 0.0248 0.0124  
AT. 30 C X 0.0215 0.0232 0.0138 -0.0005 0.0132 0.0163  
Y 0.0039 -0.0060 0.0113 0.0028 0.0116 -0.0069  
Z -0.0291 -0.0217 0.0343 -0.0097 -0.0248 -0.0124  
AT. 31 H X 0.0307 -0.0229 0.0208 -0.0017 -0.0219 -0.0236  
Y -0.0023 0.0242 0.0190 0.0010 -0.0029 0.0118  
Z -0.0319 0.0489 0.0498 0.0147 0.0325 0.0147  
AT. 32 H X 0.0307 0.0229 0.0208 0.0017 0.0219 0.0236  
Y -0.0023 -0.0242 0.0190 -0.0010 0.0029 -0.0118  
Z -0.0319 -0.0489 0.0498 -0.0147 -0.0325 -0.0147  
AT. 33 H X 0.0100 -0.0281 0.0121 -0.0097 -0.0075 -0.0071  
Y 0.0120 -0.0209 0.0018 -0.0092 -0.0243 0.0000  
Z -0.0405 0.0303 0.0373 0.0057 0.0341 0.0218  
AT. 34 H X 0.0100 0.0281 0.0121 0.0097 0.0075 0.0071  
Y 0.0120 0.0209 0.0018 0.0092 0.0243 -0.0000  
Z -0.0405 -0.0303 0.0373 -0.0057 -0.0341 -0.0218  
AT. 35 C X 0.0341 -0.0172 0.0121 0.0154 -0.0190 -0.0279  
Y -0.0046 0.0313 0.0320 -0.0092 -0.0028 0.0152  
Z -0.0323 -0.0084 0.0163 0.0026 0.0215 0.0150  
AT. 36 C X 0.0341 0.0172 0.0121 -0.0154 0.0190 0.0279  
Y -0.0046 -0.0313 0.0320 0.0092 0.0028 -0.0152  
Z -0.0323 0.0084 0.0163 -0.0026 -0.0215 -0.0150  
AT. 37 C X 0.0279 -0.0277 0.0050 0.0248 -0.0155 -0.0274  
Y 0.0007 0.0142 0.0213 -0.0175 -0.0089 0.0145  
Z -0.0301 -0.0429 -0.0056 -0.0025 0.0144 0.0145

AT. 38 C X 0.0279 0.0277 0.0050 -0.0248 0.0155 0.0274  
Y 0.0007 -0.0142 0.0213 0.0175 0.0089 -0.0145  
Z -0.0301 0.0429 -0.0056 0.0025 -0.0144 -0.0145

AT. 39 H X 0.0193 -0.0423 0.0019 0.0198 -0.0120 -0.0209  
Y 0.0063 -0.0063 0.0087 -0.0255 -0.0157 0.0129  
Z -0.0385 -0.0442 -0.0021 -0.0023 0.0198 0.0199

AT. 40 H X 0.0193 0.0423 0.0019 -0.0198 0.0120 0.0209  
Y 0.0063 0.0063 0.0087 0.0255 0.0157 -0.0129  
Z -0.0385 0.0442 -0.0021 0.0023 -0.0198 -0.0199

AT. 41 H X 0.0349 -0.0141 0.0069 0.0309 -0.0180 -0.0330  
Y -0.0043 0.0265 0.0337 -0.0218 -0.0047 0.0188  
Z -0.0332 -0.0656 -0.0172 -0.0053 0.0136 0.0169

AT. 42 H X 0.0349 0.0141 0.0069 -0.0309 0.0180 0.0330  
Y -0.0043 -0.0265 0.0337 0.0218 0.0047 -0.0188  
Z -0.0332 0.0656 -0.0172 0.0053 -0.0136 -0.0169

AT. 43 C X 0.0315 -0.0314 -0.0030 0.0345 -0.0140 -0.0327  
Y -0.0037 0.0197 0.0211 -0.0005 -0.0012 0.0111  
Z -0.0008 -0.0540 -0.0257 -0.0062 -0.0027 -0.0027

AT. 44 C X 0.0315 0.0314 -0.0030 -0.0345 0.0140 0.0327  
Y -0.0037 -0.0197 0.0211 0.0005 0.0012 -0.0111  
Z -0.0008 0.0540 -0.0257 0.0062 0.0027 0.0027

AT. 45 H X 0.0382 -0.0327 -0.0089 0.0385 -0.0138 -0.0371  
Y -0.0048 0.0397 0.0402 0.0054 -0.0030 0.0096  
Z -0.0045 -0.0718 -0.0402 -0.0151 -0.0011 0.0021

AT. 46 H X 0.0382 0.0327 -0.0089 -0.0385 0.0138 0.0371  
Y -0.0048 -0.0397 0.0402 -0.0054 0.0030 -0.0096  
Z -0.0045 0.0718 -0.0402 0.0151 0.0011 -0.0021

AT. 47 H X 0.0243 -0.0381 -0.0083 0.0351 -0.0082 -0.0290  
Y -0.0040 0.0028 0.0045 -0.0033 0.0030 0.0115  
Z 0.0092 -0.0627 -0.0362 -0.0100 -0.0066 -0.0075

AT. 48 H X 0.0243 0.0381 -0.0083 -0.0351 0.0082 0.0290  
Y -0.0040 -0.0028 0.0045 0.0033 -0.0030 -0.0115

Z 0.0092 0.0627 -0.0362 0.0100 0.0066 0.0075  
AT. 49 C X 0.0424 -0.0187 0.0072 0.0314 -0.0224 -0.0378  
Y -0.0071 0.0331 0.0313 0.0109 0.0024 0.0097  
Z 0.0029 -0.0239 -0.0020 0.0087 -0.0038 -0.0083  
AT. 50 C X 0.0424 0.0187 0.0072 -0.0314 0.0224 0.0378  
Y -0.0071 -0.0331 0.0313 -0.0109 -0.0024 -0.0097  
Z 0.0029 0.0239 -0.0020 -0.0087 0.0038 0.0083  
AT. 51 C X 0.0288 -0.0213 0.0088 0.0153 -0.0150 -0.0246  
Y -0.0011 0.0084 0.0099 0.0116 -0.0025 0.0060  
Z 0.0109 0.0023 0.0185 0.0238 -0.0068 -0.0175  
AT. 52 C X 0.0288 0.0213 0.0088 -0.0153 0.0150 0.0246  
Y -0.0011 -0.0084 0.0099 -0.0116 0.0025 -0.0060  
Z 0.0109 -0.0023 0.0185 -0.0238 0.0068 0.0175  
AT. 53 H X 0.0218 -0.0298 0.0033 0.0129 -0.0095 -0.0197  
Y 0.0014 -0.0073 -0.0037 0.0138 -0.0044 0.0035  
Z 0.0275 -0.0014 0.0121 0.0312 -0.0197 -0.0299  
AT. 54 H X 0.0218 0.0298 0.0033 -0.0129 0.0095 0.0197  
Y 0.0014 0.0073 -0.0037 -0.0138 0.0044 -0.0035  
Z 0.0275 0.0014 0.0121 -0.0312 0.0197 0.0299  
AT. 55 H X 0.0381 -0.0087 0.0173 0.0187 -0.0224 -0.0306  
Y -0.0052 0.0170 0.0179 0.0162 0.0025 0.0061  
Z 0.0124 0.0216 0.0341 0.0321 -0.0056 -0.0218  
AT. 56 H X 0.0381 0.0087 0.0173 -0.0187 0.0224 0.0306  
Y -0.0052 -0.0170 0.0179 -0.0162 -0.0025 -0.0061  
Z 0.0124 -0.0216 0.0341 -0.0321 0.0056 0.0218  
AT. 57 C X 0.0363 -0.0098 0.0170 0.0085 -0.0202 -0.0271  
Y -0.0120 0.0488 0.0466 -0.0205 0.0039 0.0247  
Z -0.0482 0.0031 0.0285 -0.0001 0.0345 0.0281  
AT. 58 C X 0.0363 0.0098 0.0170 -0.0085 0.0202 0.0271  
Y -0.0120 -0.0488 0.0466 0.0205 -0.0039 -0.0247  
Z -0.0482 -0.0031 0.0285 0.0001 -0.0345 -0.0281  
AT. 59 H X 0.0367 -0.0027 0.0219 0.0018 -0.0207 -0.0262



Y -0.0122 0.0584 0.0525 -0.0144 0.0058 0.0224  
Z -0.0475 0.0226 0.0406 0.0046 0.0366 0.0249  
AT. 60 H X 0.0367 0.0027 0.0219 -0.0018 0.0207 0.0262  
Y -0.0122 -0.0584 0.0525 0.0144 -0.0058 -0.0224  
Z -0.0475 -0.0226 0.0406 -0.0046 -0.0366 -0.0249  
AT. 61 H X 0.0269 -0.0127 0.0181 0.0007 -0.0139 -0.0160  
Y -0.0120 0.0342 0.0376 -0.0295 0.0014 0.0284  
Z -0.0555 0.0081 0.0343 -0.0017 0.0405 0.0350  
AT. 62 H X 0.0269 0.0127 0.0181 -0.0007 0.0139 0.0160  
Y -0.0120 -0.0342 0.0376 0.0295 -0.0014 -0.0284  
Z -0.0555 -0.0081 0.0343 0.0017 -0.0405 -0.0350  
AT. 63 H X 0.0452 -0.0093 0.0141 0.0183 -0.0265 -0.0390  
Y -0.0180 0.0665 0.0599 -0.0259 0.0105 0.0314  
Z -0.0510 -0.0127 0.0193 -0.0044 0.0345 0.0333  
AT. 64 H X 0.0452 0.0093 0.0141 -0.0183 0.0265 0.0390  
Y -0.0180 -0.0665 0.0599 0.0259 -0.0105 -0.0314  
Z -0.0510 0.0127 0.0193 0.0044 -0.0345 -0.0333  
AT. 65 C X 0.0583 -0.0109 0.0085 0.0453 -0.0316 -0.0514  
Y -0.0120 0.0489 0.0442 0.0262 0.0086 0.0054  
Z 0.0180 -0.0252 -0.0074 0.0121 -0.0146 -0.0172  
AT. 66 C X 0.0583 0.0109 0.0085 -0.0453 0.0316 0.0514  
Y -0.0120 -0.0489 0.0442 -0.0262 -0.0086 -0.0054  
Z 0.0180 0.0252 -0.0074 -0.0121 0.0146 0.0172  
AT. 67 H X 0.0688 -0.0076 0.0073 0.0544 -0.0368 -0.0616  
Y -0.0171 0.0658 0.0580 0.0301 0.0116 0.0098  
Z 0.0136 -0.0432 -0.0190 0.0005 -0.0130 -0.0126  
AT. 68 H X 0.0688 0.0076 0.0073 -0.0544 0.0368 0.0616  
Y -0.0171 -0.0658 0.0580 -0.0301 -0.0116 -0.0098  
Z 0.0136 0.0432 -0.0190 -0.0005 0.0130 0.0126  
AT. 69 H X 0.0531 -0.0201 0.0035 0.0435 -0.0277 -0.0521  
Y -0.0092 0.0352 0.0329 0.0250 0.0075 -0.0002  
Z 0.0331 -0.0268 -0.0138 0.0145 -0.0245 -0.0245

AT. 70 H X 0.0531 0.0201 0.0035 -0.0435 0.0277 0.0521  
Y -0.0092 -0.0352 0.0329 -0.0250 -0.0075 0.0002  
Z 0.0331 0.0268 -0.0138 -0.0145 0.0245 0.0245

AT. 71 H X 0.0647 0.0018 0.0148 0.0468 -0.0364 -0.0501  
Y -0.0146 0.0568 0.0509 0.0341 0.0116 0.0024  
Z 0.0190 -0.0046 0.0067 0.0240 -0.0140 -0.0202

AT. 72 H X 0.0647 -0.0018 0.0148 -0.0468 0.0364 0.0501  
Y -0.0146 -0.0568 0.0509 -0.0341 -0.0116 -0.0024  
Z 0.0190 0.0046 0.0067 -0.0240 0.0140 0.0202

AT. 73 C X 0.0494 -0.0087 0.0132 0.0280 -0.0275 -0.0406  
Y -0.0114 0.0538 0.0476 0.0045 0.0053 0.0150  
Z -0.0174 -0.0139 0.0089 0.0054 0.0109 0.0050

AT. 74 C X 0.0494 0.0087 0.0132 -0.0280 0.0275 0.0406  
Y -0.0114 -0.0538 0.0476 -0.0045 -0.0053 -0.0150  
Z -0.0174 0.0139 0.0089 -0.0054 -0.0109 -0.0050

AT. 75 H X 0.0565 0.0019 0.0186 0.0245 -0.0323 -0.0431  
Y -0.0155 0.0650 0.0555 0.0114 0.0093 0.0150  
Z -0.0175 0.0093 0.0234 0.0123 0.0128 0.0030

AT. 76 H X 0.0565 -0.0019 0.0186 -0.0245 0.0323 0.0431  
Y -0.0155 -0.0650 0.0555 -0.0114 -0.0093 -0.0150  
Z -0.0175 -0.0093 0.0234 -0.0123 -0.0128 -0.0030

AT. 77 H X 0.0592 -0.0052 0.0125 0.0381 -0.0323 -0.0491  
Y -0.0172 0.0727 0.0612 0.0022 0.0096 0.0189  
Z -0.0211 -0.0339 -0.0034 -0.0020 0.0113 0.0095

AT. 78 H X 0.0592 0.0052 0.0125 -0.0381 0.0323 0.0491  
Y -0.0172 -0.0727 0.0612 -0.0022 -0.0096 -0.0189  
Z -0.0211 0.0339 -0.0034 0.0020 -0.0113 -0.0095

AT. 79 I X 0.0030 -0.0038 -0.0100 -0.0031 -0.0001 -0.0018  
Y -0.0098 -0.0435 -0.0286 -0.0342 -0.0101 0.0082  
Z -0.0196 0.0048 -0.0101 0.0427 0.0314 -0.0024

AT. 80 I X 0.0030 0.0038 -0.0100 0.0031 0.0001 0.0018  
Y -0.0098 0.0435 -0.0286 0.0342 0.0101 -0.0082

Z -0.0196 -0.0048 -0.0101 -0.0427 -0.0314 0.0024  
AT. 81 I X -0.0038 -0.0025 -0.0356 -0.0049 0.0135 0.0210  
Y -0.0312 -0.0076 0.0046 -0.0100 0.0430 -0.0147  
Z 0.0192 -0.0047 0.0127 0.0185 0.0323 -0.0045  
AT. 82 I X -0.0038 0.0025 -0.0356 0.0049 -0.0135 -0.0210  
Y -0.0312 0.0076 0.0046 0.0100 -0.0430 0.0147  
Z 0.0192 0.0047 0.0127 -0.0185 -0.0323 0.0045  
AT. 83 O X 0.0109 0.0059 -0.0090 -0.0047 -0.0005 -0.0064  
Y -0.0045 -0.0193 -0.0216 -0.0124 0.0277 0.0016  
Z -0.0163 0.0094 0.0115 0.0083 0.0116 -0.0049  
AT. 84 O X 0.0109 -0.0059 -0.0090 0.0047 0.0005 0.0064  
Y -0.0045 0.0193 -0.0216 0.0124 -0.0277 -0.0016  
Z -0.0163 -0.0094 0.0115 -0.0083 -0.0116 0.0049  
AT. 85 O X 0.0159 -0.0041 -0.0390 0.0061 -0.0025 0.0242  
Y -0.0206 -0.0240 0.0233 -0.0223 -0.0037 -0.0341  
Z -0.0003 -0.0040 -0.0190 -0.0107 -0.0093 0.0012  
AT. 86 O X 0.0159 0.0041 -0.0390 -0.0061 0.0025 -0.0242  
Y -0.0206 0.0240 0.0233 0.0223 0.0037 0.0341  
Z -0.0003 0.0040 -0.0190 0.0107 0.0093 -0.0012  
AT. 87 N X -0.0038 0.0057 0.0091 -0.0144 0.0093 -0.0092  
Y -0.0048 -0.0020 0.0010 -0.0112 -0.0021 -0.0160  
Z -0.0089 0.0091 0.0009 0.0133 0.0081 -0.0033  
AT. 88 N X -0.0038 -0.0057 0.0091 0.0144 -0.0093 0.0092  
Y -0.0048 0.0020 0.0010 0.0112 0.0021 0.0160  
Z -0.0089 -0.0091 0.0009 -0.0133 -0.0081 0.0033  
AT. 89 N X -0.0041 -0.0028 -0.0041 -0.0063 0.0050 0.0074  
Y -0.0057 -0.0046 0.0057 -0.0058 -0.0024 -0.0158  
Z 0.0018 0.0135 -0.0155 -0.0029 -0.0027 0.0071  
AT. 90 N X -0.0041 0.0028 -0.0041 0.0063 -0.0050 -0.0074  
Y -0.0057 0.0046 0.0057 0.0058 0.0024 0.0158  
Z 0.0018 -0.0135 -0.0155 0.0029 0.0027 -0.0071  
AT. 91 C X 0.0068 0.0060 -0.0031 -0.0068 0.0039 -0.0068

Y -0.0050 -0.0157 -0.0146 -0.0159 0.0118 -0.0052  
Z -0.0083 0.0070 -0.0012 0.0125 0.0098 -0.0024  
AT. 92 C X 0.0068 -0.0060 -0.0031 0.0068 -0.0039 0.0068  
Y -0.0050 0.0157 -0.0146 0.0159 -0.0118 0.0052  
Z -0.0083 -0.0070 -0.0012 -0.0125 -0.0098 0.0024  
AT. 93 C X 0.0103 0.0092 -0.0083 0.0003 0.0078 -0.0062  
Y -0.0055 -0.0288 -0.0241 -0.0262 0.0017 0.0023  
Z -0.0031 0.0030 -0.0149 0.0176 0.0084 0.0047  
AT. 94 C X 0.0103 -0.0092 -0.0083 -0.0003 -0.0078 0.0062  
Y -0.0055 0.0288 -0.0241 0.0262 -0.0017 -0.0023  
Z -0.0031 -0.0030 -0.0149 -0.0176 -0.0084 -0.0047  
AT. 95 H X 0.0200 0.0187 -0.0080 -0.0024 0.0109 -0.0120  
Y -0.0159 -0.0319 -0.0170 -0.0228 0.0036 0.0018  
Z 0.0044 -0.0019 -0.0283 0.0141 0.0026 0.0118  
AT. 96 H X 0.0200 -0.0187 -0.0080 0.0024 -0.0109 0.0120  
Y -0.0159 0.0319 -0.0170 0.0228 -0.0036 -0.0018  
Z 0.0044 0.0019 -0.0283 -0.0141 -0.0026 -0.0118  
AT. 97 H X 0.0114 0.0098 -0.0145 0.0096 0.0113 -0.0033  
Y 0.0079 -0.0308 -0.0381 -0.0352 -0.0055 0.0077  
Z -0.0002 0.0021 -0.0163 0.0121 0.0051 0.0053  
AT. 98 H X 0.0114 -0.0098 -0.0145 -0.0096 -0.0113 0.0033  
Y 0.0079 0.0308 -0.0381 0.0352 0.0055 -0.0077  
Z -0.0002 -0.0021 -0.0163 -0.0121 -0.0051 -0.0053  
AT. 99 C X 0.0077 -0.0047 -0.0270 -0.0009 -0.0026 0.0166  
Y -0.0105 -0.0173 0.0127 -0.0098 0.0016 -0.0232  
Z -0.0009 0.0065 -0.0107 -0.0058 -0.0006 0.0026  
AT. 100 C X 0.0077 0.0047 -0.0270 0.0009 0.0026 -0.0166  
Y -0.0105 0.0173 0.0127 0.0098 -0.0016 0.0232  
Z -0.0009 -0.0065 -0.0107 0.0058 0.0006 -0.0026  
AT. 101 C X 0.0093 -0.0073 -0.0367 -0.0048 -0.0144 0.0185  
Y -0.0028 -0.0217 0.0052 -0.0002 0.0158 -0.0191  
Z -0.0048 0.0095 0.0043 -0.0020 0.0140 -0.0000

AT.102 C X 0.0093 0.0073 -0.0367 0.0048 0.0144 -0.0185  
Y -0.0028 0.0217 0.0052 0.0002 -0.0158 0.0191  
Z -0.0048 -0.0095 0.0043 0.0020 -0.0140 0.0000

AT.103 H X 0.0187 -0.0115 -0.0352 -0.0038 -0.0306 0.0155  
Y -0.0060 -0.0202 0.0041 -0.0004 0.0220 -0.0176  
Z -0.0225 0.0195 0.0141 -0.0095 0.0208 0.0001

AT.104 H X 0.0187 0.0115 -0.0352 0.0038 0.0306 -0.0155  
Y -0.0060 0.0202 0.0041 0.0004 -0.0220 0.0176  
Z -0.0225 -0.0195 0.0141 0.0095 -0.0208 -0.0001

AT.105 H X 0.0069 -0.0054 -0.0481 -0.0092 -0.0211 0.0214  
Y 0.0162 -0.0321 0.0005 0.0097 0.0094 -0.0206  
Z 0.0015 0.0060 -0.0002 0.0006 0.0099 0.0005

AT.106 H X 0.0069 0.0054 -0.0481 0.0092 0.0211 -0.0214  
Y 0.0162 0.0321 0.0005 -0.0097 -0.0094 0.0206  
Z 0.0015 -0.0060 -0.0002 -0.0006 -0.0099 -0.0005

AT.107 C X -0.0098 0.0065 0.0179 -0.0194 0.0107 -0.0124  
Y -0.0073 -0.0010 0.0047 -0.0017 -0.0001 -0.0123  
Z -0.0204 0.0111 0.0176 0.0093 0.0110 -0.0066

AT.108 C X -0.0098 -0.0065 0.0179 0.0194 -0.0107 0.0124  
Y -0.0073 0.0010 0.0047 0.0017 0.0001 0.0123  
Z -0.0204 -0.0111 0.0176 -0.0093 -0.0110 0.0066

AT.109 H X -0.0161 0.0055 0.0272 -0.0268 0.0128 -0.0188  
Y -0.0109 -0.0032 0.0104 -0.0007 0.0020 -0.0157  
Z -0.0244 0.0078 0.0253 0.0134 0.0137 -0.0108

AT.110 H X -0.0161 -0.0055 0.0272 0.0268 -0.0128 0.0188  
Y -0.0109 0.0032 0.0104 0.0007 -0.0020 0.0157  
Z -0.0244 -0.0078 0.0253 -0.0134 -0.0137 0.0108

AT.111 H X -0.0047 0.0053 0.0109 -0.0172 0.0090 -0.0121  
Y -0.0018 0.0023 -0.0047 0.0002 -0.0030 -0.0038  
Z -0.0270 0.0115 0.0270 0.0066 0.0134 -0.0087

AT.112 H X -0.0047 -0.0053 0.0109 0.0172 -0.0090 0.0121  
Y -0.0018 -0.0023 -0.0047 -0.0002 0.0030 0.0038

Z -0.0270 -0.0115 0.0270 -0.0066 -0.0134 0.0087  
AT. 113 C X -0.0167 0.0087 0.0248 -0.0182 0.0117 -0.0069  
Y -0.0131 -0.0049 0.0129 0.0041 0.0027 -0.0146  
Z -0.0168 0.0162 0.0119 0.0037 0.0081 -0.0013  
AT. 114 C X -0.0167 -0.0087 0.0248 0.0182 -0.0117 0.0069  
Y -0.0131 0.0049 0.0129 -0.0041 -0.0027 0.0146  
Z -0.0168 -0.0162 0.0119 -0.0037 -0.0081 0.0013  
AT. 115 C X -0.0089 0.0023 0.0073 -0.0104 0.0078 0.0028  
Y -0.0079 -0.0033 0.0039 0.0023 -0.0001 -0.0088  
Z -0.0107 0.0217 0.0039 -0.0028 0.0050 0.0051  
AT. 116 C X -0.0089 -0.0023 0.0073 0.0104 -0.0078 -0.0028  
Y -0.0079 0.0033 0.0039 -0.0023 0.0001 0.0088  
Z -0.0107 -0.0217 0.0039 0.0028 -0.0050 -0.0051  
AT. 117 H X -0.0038 -0.0049 0.0004 -0.0092 0.0048 -0.0001  
Y -0.0030 -0.0007 -0.0084 0.0019 -0.0034 0.0019  
Z -0.0169 0.0283 0.0140 -0.0036 0.0088 0.0057  
AT. 118 H X -0.0038 0.0049 0.0004 0.0092 -0.0048 0.0001  
Y -0.0030 0.0007 -0.0084 -0.0019 0.0034 -0.0019  
Z -0.0169 -0.0283 0.0140 0.0036 -0.0088 -0.0057  
AT. 119 H X -0.0140 0.0093 0.0106 -0.0097 0.0107 0.0104  
Y -0.0119 -0.0039 0.0073 0.0067 0.0018 -0.0083  
Z -0.0095 0.0263 0.0022 -0.0067 0.0047 0.0090  
AT. 120 H X -0.0140 -0.0093 0.0106 0.0097 -0.0107 -0.0104  
Y -0.0119 0.0039 0.0073 -0.0067 -0.0018 0.0083  
Z -0.0095 -0.0263 0.0022 0.0067 -0.0047 -0.0090  
AT. 121 C X -0.0117 -0.0004 0.0080 -0.0065 0.0107 0.0051  
Y -0.0103 -0.0003 0.0159 -0.0095 -0.0025 -0.0232  
Z 0.0129 0.0089 -0.0343 -0.0022 -0.0107 0.0117  
AT. 122 C X -0.0117 0.0004 0.0080 0.0065 -0.0107 -0.0051  
Y -0.0103 0.0003 0.0159 0.0095 0.0025 0.0232  
Z 0.0129 -0.0089 -0.0343 0.0022 0.0107 -0.0117  
AT. 123 H X -0.0198 -0.0013 0.0189 -0.0018 0.0187 0.0044

Y -0.0153 -0.0017 0.0238 -0.0032 0.0036 -0.0267  
Z 0.0172 0.0104 -0.0409 -0.0079 -0.0158 0.0156  
AT. 124 H X -0.0198 0.0013 0.0189 0.0018 -0.0187 -0.0044  
Y -0.0153 0.0017 0.0238 0.0032 -0.0036 0.0267  
Z 0.0172 -0.0104 -0.0409 0.0079 0.0158 -0.0156  
AT. 125 H X -0.0060 -0.0040 -0.0034 -0.0034 0.0079 0.0085  
Y -0.0046 0.0039 0.0098 -0.0199 -0.0107 -0.0216  
Z 0.0227 0.0067 -0.0508 -0.0035 -0.0182 0.0164  
AT. 126 H X -0.0060 0.0040 -0.0034 0.0034 -0.0079 -0.0085  
Y -0.0046 -0.0039 0.0098 0.0199 0.0107 0.0216  
Z 0.0227 -0.0067 -0.0508 0.0035 0.0182 -0.0164  
AT. 127 C X -0.0177 0.0074 0.0230 -0.0159 0.0121 -0.0028  
Y -0.0156 0.0004 0.0252 -0.0060 0.0030 -0.0287  
Z 0.0061 0.0069 -0.0243 0.0085 -0.0009 0.0052  
AT. 128 C X -0.0177 -0.0074 0.0230 0.0159 -0.0121 0.0028  
Y -0.0156 -0.0004 0.0252 0.0060 -0.0030 0.0287  
Z 0.0061 -0.0069 -0.0243 -0.0085 0.0009 -0.0052  
AT. 129 C X -0.0104 0.0070 0.0167 -0.0169 0.0108 -0.0087  
Y -0.0089 0.0012 0.0140 -0.0139 -0.0030 -0.0261  
Z 0.0006 0.0060 -0.0140 0.0175 0.0062 0.0003  
AT. 130 C X -0.0104 -0.0070 0.0167 0.0169 -0.0108 0.0087  
Y -0.0089 -0.0012 0.0140 0.0139 0.0030 0.0261  
Z 0.0006 -0.0060 -0.0140 -0.0175 -0.0062 -0.0003  
AT. 131 H X -0.0065 0.0046 0.0099 -0.0119 0.0116 -0.0059  
Y -0.0040 0.0032 0.0089 -0.0222 -0.0076 -0.0292  
Z 0.0084 0.0034 -0.0256 0.0208 0.0050 0.0030  
AT. 132 H X -0.0065 -0.0046 0.0099 0.0119 -0.0116 0.0059  
Y -0.0040 -0.0032 0.0089 0.0222 0.0076 0.0292  
Z 0.0084 -0.0034 -0.0256 -0.0208 -0.0050 -0.0030  
AT. 133 H X -0.0130 0.0113 0.0233 -0.0251 0.0087 -0.0149  
Y -0.0115 0.0021 0.0212 -0.0124 -0.0014 -0.0298  
Z -0.0025 0.0056 -0.0058 0.0237 0.0095 -0.0028

AT. 134 H X -0.0130 -0.0113 0.0233 0.0251 -0.0087 0.0149  
Y -0.0115 -0.0021 0.0212 0.0124 0.0014 0.0298  
Z -0.0025 -0.0056 -0.0058 -0.0237 -0.0095 0.0028

AT. 135 C X -0.0253 0.0143 0.0388 -0.0226 0.0152 -0.0114  
Y -0.0150 -0.0112 0.0115 0.0123 0.0033 -0.0090  
Z -0.0314 0.0221 0.0338 0.0013 0.0142 -0.0054

AT. 136 C X -0.0253 -0.0143 0.0388 0.0226 -0.0152 0.0114  
Y -0.0150 0.0112 0.0115 -0.0123 -0.0033 0.0090  
Z -0.0314 -0.0221 0.0338 -0.0013 -0.0142 0.0054

AT. 137 H X -0.0328 0.0216 0.0537 -0.0277 0.0187 -0.0189  
Y -0.0180 -0.0091 0.0178 0.0143 0.0049 -0.0118  
Z -0.0341 0.0228 0.0392 0.0068 0.0158 -0.0075

AT. 138 H X -0.0328 -0.0216 0.0537 0.0277 -0.0187 0.0189  
Y -0.0180 0.0091 0.0178 -0.0143 -0.0049 0.0118  
Z -0.0341 -0.0228 0.0392 -0.0068 -0.0158 0.0075

AT. 139 H X -0.0181 0.0125 0.0294 -0.0207 0.0124 -0.0110  
Y -0.0102 -0.0169 -0.0006 0.0120 0.0006 -0.0010  
Z -0.0415 0.0256 0.0488 -0.0008 0.0186 -0.0082

AT. 140 H X -0.0181 -0.0125 0.0294 0.0207 -0.0124 0.0110  
Y -0.0102 0.0169 -0.0006 -0.0120 -0.0006 0.0010  
Z -0.0415 -0.0256 0.0488 0.0008 -0.0186 0.0082

AT. 141 H X -0.0315 0.0128 0.0442 -0.0224 0.0175 -0.0076  
Y -0.0182 -0.0120 0.0163 0.0169 0.0051 -0.0091  
Z -0.0309 0.0223 0.0314 -0.0035 0.0136 -0.0038

AT. 142 H X -0.0315 -0.0128 0.0442 0.0224 -0.0175 0.0076  
Y -0.0182 0.0120 0.0163 -0.0169 -0.0051 0.0091  
Z -0.0309 -0.0223 0.0314 0.0035 -0.0136 0.0038

AT. 143 C X -0.0257 0.0103 0.0334 -0.0188 0.0128 -0.0016  
Y -0.0218 0.0043 0.0402 -0.0044 0.0102 -0.0399  
Z 0.0188 0.0022 -0.0425 0.0117 -0.0035 0.0064

AT. 144 C X -0.0257 -0.0103 0.0334 0.0188 -0.0128 0.0016  
Y -0.0218 -0.0043 0.0402 0.0044 -0.0102 0.0399



Z 0.0188 -0.0022 -0.0425 -0.0117 0.0035 -0.0064  
AT. 145 H X -0.0323 0.0115 0.0387 -0.0208 0.0110 0.0046  
Y -0.0240 0.0059 0.0425 -0.0010 0.0120 -0.0375  
Z 0.0196 0.0010 -0.0438 0.0076 -0.0056 0.0056  
AT. 146 H X -0.0323 -0.0115 0.0387 0.0208 -0.0110 -0.0046  
Y -0.0240 -0.0059 0.0425 0.0010 -0.0120 0.0375  
Z 0.0196 -0.0010 -0.0438 -0.0076 0.0056 -0.0056  
AT. 147 H X -0.0190 0.0077 0.0227 -0.0161 0.0112 0.0015  
Y -0.0206 0.0039 0.0414 -0.0079 0.0110 -0.0475  
Z 0.0294 -0.0018 -0.0568 0.0138 -0.0055 0.0063  
AT. 148 H X -0.0190 -0.0077 0.0227 0.0161 -0.0112 -0.0015  
Y -0.0206 -0.0039 0.0414 0.0079 -0.0110 0.0475  
Z 0.0294 0.0018 -0.0568 -0.0138 0.0055 -0.0063  
AT. 149 H X -0.0325 0.0131 0.0471 -0.0220 0.0165 -0.0104  
Y -0.0241 0.0060 0.0452 -0.0025 0.0129 -0.0424  
Z 0.0179 0.0039 -0.0401 0.0164 -0.0002 0.0059  
AT. 150 H X -0.0325 -0.0131 0.0471 0.0220 -0.0165 0.0104  
Y -0.0241 -0.0060 0.0452 0.0025 -0.0129 0.0424  
Z 0.0179 -0.0039 -0.0401 -0.0164 0.0002 -0.0059  
AT. 151 C X -0.0243 0.0126 0.0352 -0.0208 0.0138 -0.0065  
Y -0.0202 -0.0048 0.0282 0.0043 0.0081 -0.0262  
Z -0.0061 0.0114 -0.0049 0.0067 0.0040 0.0018  
AT. 152 C X -0.0243 -0.0126 0.0352 0.0208 -0.0138 0.0065  
Y -0.0202 0.0048 0.0282 -0.0043 -0.0081 0.0262  
Z -0.0061 -0.0114 -0.0049 -0.0067 -0.0040 -0.0018  
AT. 153 H X -0.0290 0.0171 0.0455 -0.0264 0.0149 -0.0118  
Y -0.0229 -0.0061 0.0334 0.0066 0.0111 -0.0295  
Z -0.0089 0.0077 -0.0002 0.0129 0.0087 -0.0017  
AT. 154 H X -0.0290 -0.0171 0.0455 0.0264 -0.0149 0.0118  
Y -0.0229 0.0061 0.0334 -0.0066 -0.0111 0.0295  
Z -0.0089 -0.0077 -0.0002 -0.0129 -0.0087 0.0017  
AT. 155 H X -0.0293 0.0144 0.0404 -0.0205 0.0153 -0.0032

Y -0.0242 -0.0079 0.0335 0.0098 0.0125 -0.0281  
Z -0.0037 0.0152 -0.0088 0.0011 0.0003 0.0051  
AT. 156 H X -0.0293 -0.0144 0.0404 0.0205 -0.0153 0.0032  
Y -0.0242 0.0079 0.0335 -0.0098 -0.0125 0.0281  
Z -0.0037 -0.0152 -0.0088 -0.0011 -0.0003 -0.0051  
AT. 157 O X -0.0335 0.0176 -0.0041 -0.0228 0.0245 0.0007  
Y -0.0018 0.0136 -0.0141 -0.0011 -0.0073 0.0220  
Z -0.0052 0.0746 -0.0493 0.0152 0.0116 0.0295  
AT. 158 O X -0.0335 -0.0176 -0.0041 0.0228 -0.0245 -0.0007  
Y -0.0018 -0.0136 -0.0141 0.0011 0.0073 -0.0220  
Z -0.0052 -0.0746 -0.0493 -0.0152 -0.0116 -0.0295  
AT. 159 O X -0.0243 0.0057 0.0053 -0.0255 0.0164 0.0038  
Y 0.0057 -0.0307 0.0041 0.0055 -0.0054 -0.0008  
Z 0.0122 0.0456 -0.0289 0.0114 -0.0019 0.0299  
AT. 160 O X -0.0243 -0.0057 0.0053 0.0255 -0.0164 -0.0038  
Y 0.0057 0.0307 0.0041 -0.0055 0.0054 0.0008  
Z 0.0122 -0.0456 -0.0289 -0.0114 0.0019 -0.0299  
AT. 161 H X -0.0418 0.0333 -0.0032 -0.0270 0.0268 0.0137  
Y -0.0020 0.0256 -0.0240 -0.0014 -0.0080 0.0269  
Z -0.0093 0.0497 -0.0207 0.0141 0.0143 0.0213  
AT. 162 H X -0.0418 -0.0333 -0.0032 0.0270 -0.0268 -0.0137  
Y -0.0020 -0.0256 -0.0240 0.0014 0.0080 -0.0269  
Z -0.0093 -0.0497 -0.0207 -0.0141 -0.0143 -0.0213  
AT. 163 H X -0.0133 -0.0046 0.0153 -0.0293 0.0063 0.0087  
Y 0.0052 -0.0332 0.0110 0.0112 0.0043 -0.0053  
Z 0.0088 0.0489 -0.0310 0.0145 0.0038 0.0285  
AT. 164 H X -0.0133 0.0046 0.0153 0.0293 -0.0063 -0.0087  
Y 0.0052 0.0332 0.0110 -0.0112 -0.0043 0.0053  
Z 0.0088 -0.0489 -0.0310 -0.0145 -0.0038 -0.0285  
AT. 165 O X 0.0150 0.0165 0.0023 0.0031 0.0090 -0.0049  
Y -0.0113 -0.0222 -0.0148 -0.0204 0.0080 0.0054  
Z -0.0094 -0.0194 -0.0311 0.0075 0.0308 -0.0249

AT.166 O X 0.0150 -0.0165 0.0023 -0.0031 -0.0090 0.0049

Y -0.0113 0.0222 -0.0148 0.0204 -0.0080 -0.0054

Z -0.0094 0.0194 -0.0311 -0.0075 -0.0308 0.0249

AT.167 H X 0.0115 0.0133 -0.0035 0.0023 0.0061 -0.0052

Y -0.0060 -0.0197 -0.0132 -0.0159 0.0181 0.0024

Z -0.0071 -0.0150 -0.0178 0.0031 0.0245 -0.0204

AT.168 H X 0.0115 -0.0133 -0.0035 -0.0023 -0.0061 0.0052

Y -0.0060 0.0197 -0.0132 0.0159 -0.0181 -0.0024

Z -0.0071 0.0150 -0.0178 -0.0031 -0.0245 0.0204

AT.169 O X 0.0269 0.0114 0.0089 -0.0156 0.0024 -0.0072

Y -0.0204 0.0086 0.0283 0.0091 0.0123 0.0255

Z -0.0050 -0.0265 -0.0384 -0.0026 0.0282 -0.0294

AT.170 O X 0.0269 -0.0114 0.0089 0.0156 -0.0024 0.0072

Y -0.0204 -0.0086 0.0283 -0.0091 -0.0123 -0.0255

Z -0.0050 0.0265 -0.0384 0.0026 -0.0282 0.0294

AT.171 H X 0.0312 0.0097 -0.0220 -0.0211 -0.0023 -0.0170

Y -0.0222 0.0177 0.0249 0.0175 0.0113 0.0278

Z -0.0113 -0.0101 -0.0213 0.0156 0.0297 -0.0185

AT.172 H X 0.0312 -0.0097 -0.0220 0.0211 0.0023 0.0170

Y -0.0222 -0.0177 0.0249 -0.0175 -0.0113 -0.0278

Z -0.0113 0.0101 -0.0213 -0.0156 -0.0297 0.0185

FREQ(CM\*\*-1) 54.29 56.70 58.40 61.71 62.77 64.35

AT. 1 I X 0.0222 0.0018 -0.0130 -0.0077 -0.0092 -0.0130

Y 0.0006 0.0076 0.0524 -0.0133 -0.0173 0.0040

Z 0.0148 -0.0167 0.0144 0.0222 -0.0397 0.0105

AT. 2 I X 0.0222 -0.0018 -0.0130 0.0077 -0.0092 0.0130

Y 0.0006 -0.0076 0.0524 0.0133 -0.0173 -0.0040

Z 0.0148 0.0167 0.0144 -0.0222 -0.0397 -0.0105

AT. 3 I X -0.0105 -0.0195 0.0156 0.0082 0.0116 0.0088

Y 0.0118 0.0299 -0.0393 0.0172 -0.0040 0.0213

Z 0.0068 -0.0066 -0.0245 -0.0103 0.0184 -0.0083  
AT. 4 I X -0.0105 0.0195 0.0156 -0.0082 0.0116 -0.0088  
Y 0.0118 -0.0299 -0.0393 -0.0172 -0.0040 -0.0213  
Z 0.0068 0.0066 -0.0245 0.0103 0.0184 0.0083  
AT. 5 O X 0.0450 -0.0152 -0.0143 0.0105 -0.0378 0.0093  
Y 0.0004 -0.0050 -0.0236 -0.0326 -0.0031 0.0166  
Z 0.0182 -0.0021 0.0024 -0.0272 0.0142 -0.0378  
AT. 6 O X 0.0450 0.0152 -0.0143 -0.0105 -0.0378 -0.0093  
Y 0.0004 0.0050 -0.0236 0.0326 -0.0031 -0.0166  
Z 0.0182 0.0021 0.0024 0.0272 0.0142 0.0378  
AT. 7 O X -0.0118 -0.0178 0.0214 -0.0037 0.0014 -0.0000  
Y 0.0192 0.0061 -0.0047 0.0122 0.0012 0.0125  
Z -0.0282 0.0266 -0.0092 0.0161 0.0048 -0.0145  
AT. 8 O X -0.0118 0.0178 0.0214 0.0037 0.0014 0.0000  
Y 0.0192 -0.0061 -0.0047 -0.0122 0.0012 -0.0125  
Z -0.0282 -0.0266 -0.0092 -0.0161 0.0048 0.0145  
AT. 9 N X 0.0036 0.0024 -0.0069 0.0269 -0.0087 -0.0032  
Y -0.0021 -0.0055 0.0124 0.0203 0.0312 -0.0171  
Z 0.0060 0.0032 0.0001 -0.0300 0.0173 -0.0368  
AT. 10 N X 0.0036 -0.0024 -0.0069 -0.0269 -0.0087 0.0032  
Y -0.0021 0.0055 0.0124 -0.0203 0.0312 0.0171  
Z 0.0060 -0.0032 0.0001 0.0300 0.0173 0.0368  
AT. 11 N X -0.0282 -0.0005 0.0080 0.0075 0.0127 -0.0116  
Y 0.0228 -0.0031 0.0010 0.0285 0.0162 -0.0081  
Z -0.0166 0.0088 0.0034 0.0245 0.0131 -0.0275  
AT. 12 N X -0.0282 0.0005 0.0080 -0.0075 0.0127 0.0116  
Y 0.0228 0.0031 0.0010 -0.0285 0.0162 0.0081  
Z -0.0166 -0.0088 0.0034 -0.0245 0.0131 0.0275  
AT. 13 C X 0.0268 -0.0065 -0.0045 0.0155 -0.0269 0.0018  
Y -0.0039 -0.0028 -0.0023 -0.0132 0.0113 0.0007  
Z 0.0040 0.0045 -0.0028 -0.0343 0.0151 -0.0338  
AT. 14 C X 0.0268 0.0065 -0.0045 -0.0155 -0.0269 -0.0018

Y -0.0039 0.0028 -0.0023 0.0132 0.0113 -0.0007  
Z 0.0040 -0.0045 -0.0028 0.0343 0.0151 0.0338  
AT. 15 C X 0.0312 -0.0041 0.0130 0.0131 -0.0300 -0.0030  
Y -0.0086 0.0047 0.0128 -0.0226 0.0050 -0.0004  
Z -0.0139 0.0127 -0.0111 -0.0482 0.0107 -0.0250  
AT. 16 C X 0.0312 0.0041 0.0130 -0.0131 -0.0300 0.0030  
Y -0.0086 -0.0047 0.0128 0.0226 0.0050 0.0004  
Z -0.0139 -0.0127 -0.0111 0.0482 0.0107 0.0250  
AT. 17 H X 0.0395 -0.0089 0.0362 0.0353 -0.0546 0.0097  
Y 0.0065 -0.0048 0.0259 0.0029 -0.0066 0.0039  
Z -0.0304 0.0235 -0.0208 -0.0730 0.0169 -0.0261  
AT. 18 H X 0.0395 0.0089 0.0362 -0.0353 -0.0546 -0.0097  
Y 0.0065 0.0048 0.0259 -0.0029 -0.0066 -0.0039  
Z -0.0304 -0.0235 -0.0208 0.0730 0.0169 0.0261  
AT. 19 H X 0.0315 0.0021 0.0159 -0.0012 -0.0180 -0.0156  
Y -0.0314 0.0188 -0.0074 -0.0596 0.0224 -0.0073  
Z -0.0221 0.0202 -0.0179 -0.0675 0.0213 -0.0319  
AT. 20 H X 0.0315 -0.0021 0.0159 0.0012 -0.0180 0.0156  
Y -0.0314 -0.0188 -0.0074 0.0596 0.0224 0.0073  
Z -0.0221 -0.0202 -0.0179 0.0675 0.0213 0.0319  
AT. 21 C X -0.0153 -0.0121 0.0130 0.0027 0.0062 -0.0007  
Y 0.0196 0.0061 -0.0105 0.0202 0.0084 0.0105  
Z -0.0179 0.0135 -0.0021 0.0210 0.0088 -0.0182  
AT. 22 C X -0.0153 0.0121 0.0130 -0.0027 0.0062 0.0007  
Y 0.0196 -0.0061 -0.0105 -0.0202 0.0084 -0.0105  
Z -0.0179 -0.0135 -0.0021 -0.0210 0.0088 0.0182  
AT. 23 C X -0.0070 -0.0180 0.0065 -0.0003 0.0079 0.0079  
Y 0.0141 0.0205 -0.0331 0.0166 0.0090 0.0267  
Z -0.0066 0.0015 -0.0007 0.0182 0.0099 -0.0156  
AT. 24 C X -0.0070 0.0180 0.0065 0.0003 0.0079 -0.0079  
Y 0.0141 -0.0205 -0.0331 -0.0166 0.0090 -0.0267  
Z -0.0066 -0.0015 -0.0007 -0.0182 0.0099 0.0156

AT. 25 H X -0.0088 -0.0097 -0.0027 -0.0007 0.0021 0.0108  
Y 0.0135 0.0231 -0.0363 0.0157 0.0087 0.0290  
Z -0.0021 -0.0090 0.0145 0.0259 0.0049 -0.0281

AT. 26 H X -0.0088 0.0097 -0.0027 0.0007 0.0021 -0.0108  
Y 0.0135 -0.0231 -0.0363 -0.0157 0.0087 -0.0290  
Z -0.0021 0.0090 0.0145 -0.0259 0.0049 0.0281

AT. 27 H X 0.0029 -0.0274 0.0062 -0.0086 0.0108 0.0094  
Y 0.0103 0.0278 -0.0468 0.0089 0.0154 0.0375  
Z -0.0106 0.0074 -0.0073 0.0166 0.0124 -0.0108

AT. 28 H X 0.0029 0.0274 0.0062 0.0086 0.0108 -0.0094  
Y 0.0103 -0.0278 -0.0468 -0.0089 0.0154 -0.0375  
Z -0.0106 -0.0074 -0.0073 -0.0166 0.0124 0.0108

AT. 29 C X 0.0057 0.0049 -0.0152 0.0245 -0.0099 -0.0004  
Y 0.0176 -0.0082 0.0052 0.0240 0.0240 -0.0136  
Z 0.0282 -0.0072 0.0082 -0.0204 0.0110 -0.0391

AT. 30 C X 0.0057 -0.0049 -0.0152 -0.0245 -0.0099 0.0004  
Y 0.0176 0.0082 0.0052 -0.0240 0.0240 0.0136  
Z 0.0282 0.0072 0.0082 0.0204 0.0110 0.0391

AT. 31 H X 0.0099 0.0084 -0.0234 0.0246 -0.0121 0.0026  
Y 0.0242 -0.0107 0.0090 0.0113 0.0243 -0.0174  
Z 0.0403 -0.0082 0.0087 -0.0388 0.0106 -0.0425

AT. 32 H X 0.0099 -0.0084 -0.0234 -0.0246 -0.0121 -0.0026  
Y 0.0242 0.0107 0.0090 -0.0113 0.0243 0.0174  
Z 0.0403 0.0082 0.0087 0.0388 0.0106 0.0425

AT. 33 H X 0.0160 -0.0002 -0.0145 0.0418 -0.0159 0.0032  
Y 0.0090 -0.0048 -0.0008 0.0430 0.0223 -0.0085  
Z 0.0387 -0.0121 0.0113 -0.0173 0.0074 -0.0390

AT. 34 H X 0.0160 0.0002 -0.0145 -0.0418 -0.0159 -0.0032  
Y 0.0090 0.0048 -0.0008 -0.0430 0.0223 0.0085  
Z 0.0387 0.0121 0.0113 0.0173 0.0074 0.0390

AT. 35 C X -0.0119 0.0104 -0.0135 0.0014 0.0012 -0.0055  
Y 0.0446 -0.0123 0.0016 0.0186 0.0147 -0.0129

Z 0.0188 -0.0088 0.0105 0.0064 0.0096 -0.0349  
AT. 36 C X -0.0119 -0.0104 -0.0135 -0.0014 0.0012 0.0055  
Y 0.0446 0.0123 0.0016 -0.0186 0.0147 0.0129  
Z 0.0188 0.0088 0.0105 -0.0064 0.0096 0.0349  
AT. 37 C X -0.0219 0.0038 -0.0013 0.0069 0.0082 -0.0089  
Y 0.0382 -0.0067 -0.0037 0.0325 0.0109 -0.0072  
Z 0.0015 -0.0066 0.0123 0.0318 0.0102 -0.0300  
AT. 38 C X -0.0219 -0.0038 -0.0013 -0.0069 0.0082 0.0089  
Y 0.0382 0.0067 -0.0037 -0.0325 0.0109 0.0072  
Z 0.0015 0.0066 0.0123 -0.0318 0.0102 0.0300  
AT. 39 H X -0.0170 -0.0032 0.0037 0.0276 0.0036 -0.0070  
Y 0.0296 -0.0005 -0.0079 0.0481 0.0073 -0.0016  
Z 0.0088 -0.0143 0.0178 0.0393 0.0086 -0.0314  
AT. 40 H X -0.0170 0.0032 0.0037 -0.0276 0.0036 0.0070  
Y 0.0296 0.0005 -0.0079 -0.0481 0.0073 0.0016  
Z 0.0088 0.0143 0.0178 -0.0393 0.0086 0.0314  
AT. 41 H X -0.0272 0.0094 -0.0041 -0.0116 0.0131 -0.0116  
Y 0.0555 -0.0110 -0.0059 0.0313 0.0055 -0.0079  
Z -0.0065 -0.0091 0.0169 0.0508 0.0094 -0.0269  
AT. 42 H X -0.0272 -0.0094 -0.0041 0.0116 0.0131 0.0116  
Y 0.0555 0.0110 -0.0059 -0.0313 0.0055 0.0079  
Z -0.0065 0.0091 0.0169 -0.0508 0.0094 0.0269  
AT. 43 C X -0.0398 0.0074 0.0083 -0.0061 0.0180 -0.0177  
Y 0.0250 -0.0111 0.0120 0.0141 0.0226 -0.0188  
Z -0.0291 0.0200 -0.0016 0.0158 0.0155 -0.0280  
AT. 44 C X -0.0398 -0.0074 0.0083 0.0061 0.0180 0.0177  
Y 0.0250 0.0111 0.0120 -0.0141 0.0226 0.0188  
Z -0.0291 -0.0200 -0.0016 -0.0158 0.0155 0.0280  
AT. 45 H X -0.0505 0.0136 0.0117 -0.0175 0.0235 -0.0225  
Y 0.0392 -0.0185 0.0083 0.0043 0.0222 -0.0194  
Z -0.0347 0.0228 -0.0005 0.0327 0.0118 -0.0238  
AT. 46 H X -0.0505 -0.0136 0.0117 0.0175 0.0235 0.0225

Y 0.0392 0.0185 0.0083 -0.0043 0.0222 0.0194  
Z -0.0347 -0.0228 -0.0005 -0.0327 0.0118 0.0238  
AT. 47 H X -0.0418 0.0041 0.0156 0.0005 0.0192 -0.0194  
Y 0.0100 -0.0054 0.0177 0.0198 0.0229 -0.0193  
Z -0.0420 0.0309 -0.0058 0.0128 0.0147 -0.0265  
AT. 48 H X -0.0418 -0.0041 0.0156 -0.0005 0.0192 0.0194  
Y 0.0100 0.0054 0.0177 -0.0198 0.0229 0.0193  
Z -0.0420 -0.0309 -0.0058 -0.0128 0.0147 0.0265  
AT. 49 C X -0.0327 0.0124 -0.0056 -0.0154 0.0140 -0.0128  
Y 0.0287 -0.0174 0.0181 0.0010 0.0279 -0.0248  
Z -0.0177 0.0136 -0.0034 -0.0121 0.0196 -0.0319  
AT. 50 C X -0.0327 -0.0124 -0.0056 0.0154 0.0140 0.0128  
Y 0.0287 0.0174 0.0181 -0.0010 0.0279 0.0248  
Z -0.0177 -0.0136 -0.0034 0.0121 0.0196 0.0319  
AT. 51 C X -0.0133 0.0082 -0.0076 0.0056 0.0021 -0.0074  
Y 0.0047 -0.0111 0.0246 0.0113 0.0355 -0.0269  
Z -0.0117 0.0111 -0.0077 -0.0412 0.0231 -0.0348  
AT. 52 C X -0.0133 -0.0082 -0.0076 -0.0056 0.0021 0.0074  
Y 0.0047 0.0111 0.0246 -0.0113 0.0355 0.0269  
Z -0.0117 -0.0111 -0.0077 0.0412 0.0231 0.0348  
AT. 53 H X -0.0164 0.0065 0.0016 0.0178 0.0043 -0.0114  
Y -0.0133 -0.0079 0.0323 0.0187 0.0436 -0.0311  
Z -0.0281 0.0186 -0.0156 -0.0542 0.0290 -0.0325  
AT. 54 H X -0.0164 -0.0065 0.0016 -0.0178 0.0043 0.0114  
Y -0.0133 0.0079 0.0323 -0.0187 0.0436 0.0311  
Z -0.0281 -0.0186 -0.0156 0.0542 0.0290 0.0325  
AT. 55 H X -0.0091 0.0106 -0.0205 -0.0102 -0.0002 -0.0027  
Y 0.0086 -0.0142 0.0305 0.0055 0.0377 -0.0318  
Z -0.0037 0.0087 -0.0093 -0.0593 0.0242 -0.0374  
AT. 56 H X -0.0091 -0.0106 -0.0205 0.0102 -0.0002 0.0027  
Y 0.0086 0.0142 0.0305 -0.0055 0.0377 0.0318  
Z -0.0037 -0.0087 -0.0093 0.0593 0.0242 0.0374



AT. 57 C X -0.0035 0.0147 -0.0211 -0.0036 -0.0042 -0.0040  
Y 0.0700 -0.0148 -0.0045 0.0193 0.0029 -0.0093  
Z 0.0402 -0.0213 0.0172 0.0167 0.0023 -0.0329

AT. 58 C X -0.0035 -0.0147 -0.0211 0.0036 -0.0042 0.0040  
Y 0.0700 0.0148 -0.0045 -0.0193 0.0029 0.0093  
Z 0.0402 0.0213 0.0172 -0.0167 0.0023 0.0329

AT. 59 H X 0.0058 0.0185 -0.0279 -0.0092 -0.0091 -0.0034  
Y 0.0720 -0.0173 -0.0026 0.0082 0.0054 -0.0108  
Z 0.0492 -0.0221 0.0149 -0.0041 0.0028 -0.0344

AT. 60 H X 0.0058 -0.0185 -0.0279 0.0092 -0.0091 0.0034  
Y 0.0720 0.0173 -0.0026 -0.0082 0.0054 0.0108  
Z 0.0492 0.0221 0.0149 0.0041 0.0028 0.0344

AT. 61 H X 0.0073 0.0087 -0.0184 0.0160 -0.0121 0.0004  
Y 0.0668 -0.0113 -0.0069 0.0355 -0.0018 -0.0068  
Z 0.0504 -0.0276 0.0205 0.0241 -0.0021 -0.0307

AT. 62 H X 0.0073 -0.0087 -0.0184 -0.0160 -0.0121 -0.0004  
Y 0.0668 0.0113 -0.0069 -0.0355 -0.0018 0.0068  
Z 0.0504 0.0276 0.0205 -0.0241 -0.0021 0.0307

AT. 63 H X -0.0175 0.0198 -0.0219 -0.0223 0.0052 -0.0088  
Y 0.0905 -0.0185 -0.0076 0.0142 -0.0047 -0.0071  
Z 0.0350 -0.0227 0.0206 0.0379 0.0002 -0.0300

AT. 64 H X -0.0175 -0.0198 -0.0219 0.0223 0.0052 0.0088  
Y 0.0905 0.0185 -0.0076 -0.0142 -0.0047 0.0071  
Z 0.0350 0.0227 0.0206 -0.0379 0.0002 0.0300

AT. 65 C X -0.0490 0.0181 -0.0082 -0.0384 0.0237 -0.0154  
Y 0.0303 -0.0244 0.0239 -0.0173 0.0320 -0.0330  
Z -0.0316 0.0219 -0.0083 -0.0216 0.0253 -0.0294

AT. 66 C X -0.0490 -0.0181 -0.0082 0.0384 0.0237 0.0154  
Y 0.0303 0.0244 0.0239 0.0173 0.0320 0.0330  
Z -0.0316 -0.0219 -0.0083 0.0216 0.0253 0.0294

AT. 67 H X -0.0642 0.0226 -0.0103 -0.0532 0.0295 -0.0160  
Y 0.0467 -0.0314 0.0274 -0.0247 0.0335 -0.0388

Z -0.0338 0.0244 -0.0097 -0.0023 0.0186 -0.0230  
AT. 68 H X -0.0642 -0.0226 -0.0103 0.0532 0.0295 0.0160  
Y 0.0467 0.0314 0.0274 0.0247 0.0335 0.0388  
Z -0.0338 -0.0244 -0.0097 0.0023 0.0186 0.0230  
AT. 69 H X -0.0543 0.0186 -0.0078 -0.0319 0.0200 -0.0146  
Y 0.0141 -0.0186 0.0211 -0.0135 0.0303 -0.0295  
Z -0.0452 0.0298 -0.0129 -0.0292 0.0309 -0.0259  
AT. 70 H X -0.0543 -0.0186 -0.0078 0.0319 0.0200 0.0146  
Y 0.0141 0.0186 0.0211 0.0135 0.0303 0.0295  
Z -0.0452 -0.0298 -0.0129 0.0292 0.0309 0.0259  
AT. 71 H X -0.0423 0.0173 -0.0088 -0.0464 0.0288 -0.0159  
Y 0.0308 -0.0272 0.0263 -0.0266 0.0336 -0.0380  
Z -0.0257 0.0174 -0.0055 -0.0407 0.0311 -0.0361  
AT. 72 H X -0.0423 -0.0173 -0.0088 0.0464 0.0288 0.0159  
Y 0.0308 0.0272 0.0263 0.0266 0.0336 0.0380  
Z -0.0257 -0.0174 -0.0055 0.0407 0.0311 0.0361  
AT. 73 C X -0.0269 0.0170 -0.0160 -0.0234 0.0108 -0.0093  
Y 0.0520 -0.0204 0.0098 -0.0025 0.0196 -0.0210  
Z 0.0033 0.0005 0.0044 -0.0025 0.0141 -0.0337  
AT. 74 C X -0.0269 -0.0170 -0.0160 0.0234 0.0108 0.0093  
Y 0.0520 0.0204 0.0098 0.0025 0.0196 0.0210  
Z 0.0033 -0.0005 0.0044 0.0025 0.0141 0.0337  
AT. 75 H X -0.0212 0.0215 -0.0263 -0.0308 0.0077 -0.0062  
Y 0.0559 -0.0248 0.0141 -0.0134 0.0221 -0.0248  
Z 0.0125 -0.0023 0.0027 -0.0230 0.0150 -0.0361  
AT. 76 H X -0.0212 -0.0215 -0.0263 0.0308 0.0077 0.0062  
Y 0.0559 0.0248 0.0141 0.0134 0.0221 0.0248  
Z 0.0125 0.0023 0.0027 0.0230 0.0150 0.0361  
AT. 77 H X -0.0391 0.0206 -0.0158 -0.0399 0.0178 -0.0126  
Y 0.0692 -0.0245 0.0062 -0.0091 0.0148 -0.0202  
Z -0.0013 0.0010 0.0075 0.0186 0.0120 -0.0309  
AT. 78 H X -0.0391 -0.0206 -0.0158 0.0399 0.0178 0.0126

Y 0.0692 0.0245 0.0062 0.0091 0.0148 0.0202  
Z -0.0013 -0.0010 0.0075 -0.0186 0.0120 0.0309  
AT. 79 I X 0.0045 0.0013 -0.0039 0.0024 -0.0009 0.0016  
Y 0.0123 -0.0190 0.0024 -0.0102 -0.0075 -0.0025  
Z -0.0080 0.0189 0.0161 0.0057 0.0103 -0.0046  
AT. 80 I X 0.0045 -0.0013 -0.0039 -0.0024 -0.0009 -0.0016  
Y 0.0123 0.0190 0.0024 0.0102 -0.0075 0.0025  
Z -0.0080 -0.0189 0.0161 -0.0057 0.0103 0.0046  
AT. 81 I X 0.0004 0.0356 -0.0019 0.0008 -0.0181 0.0187  
Y -0.0389 0.0138 -0.0233 0.0176 -0.0340 0.0034  
Z -0.0135 0.0107 0.0057 -0.0120 -0.0053 0.0176  
AT. 82 I X 0.0004 -0.0356 -0.0019 -0.0008 -0.0181 -0.0187  
Y -0.0389 -0.0138 -0.0233 -0.0176 -0.0340 -0.0034  
Z -0.0135 -0.0107 0.0057 0.0120 -0.0053 -0.0176  
AT. 83 O X 0.0082 0.0012 -0.0125 0.0036 0.0035 0.0100  
Y 0.0095 0.0079 0.0177 -0.0154 0.0550 0.0131  
Z -0.0064 -0.0359 0.0032 0.0272 -0.0103 -0.0028  
AT. 84 O X 0.0082 -0.0012 -0.0125 -0.0036 0.0035 -0.0100  
Y 0.0095 -0.0079 0.0177 0.0154 0.0550 -0.0131  
Z -0.0064 0.0359 0.0032 -0.0272 -0.0103 0.0028  
AT. 85 O X 0.0169 0.0398 0.0076 -0.0080 0.0063 -0.0001  
Y -0.0372 -0.0364 0.0122 -0.0135 0.0346 -0.0260  
Z 0.0038 0.0109 -0.0042 0.0162 0.0177 -0.0545  
AT. 86 O X 0.0169 -0.0398 0.0076 0.0080 0.0063 0.0001  
Y -0.0372 0.0364 0.0122 0.0135 0.0346 0.0260  
Z 0.0038 -0.0109 -0.0042 -0.0162 0.0177 0.0545  
AT. 87 N X 0.0018 -0.0221 -0.0016 -0.0023 0.0122 0.0179  
Y -0.0016 0.0072 -0.0126 -0.0034 0.0136 -0.0239  
Z -0.0027 -0.0229 -0.0008 0.0302 -0.0141 -0.0046  
AT. 88 N X 0.0018 0.0221 -0.0016 0.0023 0.0122 -0.0179  
Y -0.0016 -0.0072 -0.0126 0.0034 0.0136 0.0239  
Z -0.0027 0.0229 -0.0008 -0.0302 -0.0141 0.0046

AT. 89 N X -0.0058 0.0047 0.0160 -0.0133 0.0074 0.0036  
Y -0.0100 0.0033 -0.0059 -0.0044 0.0122 -0.0236  
Z 0.0145 0.0274 -0.0153 0.0208 -0.0022 -0.0490

AT. 90 N X -0.0058 -0.0047 0.0160 0.0133 0.0074 -0.0036  
Y -0.0100 -0.0033 -0.0059 0.0044 0.0122 0.0236  
Z 0.0145 -0.0274 -0.0153 -0.0208 -0.0022 0.0490

AT. 91 C X 0.0063 -0.0054 -0.0078 0.0015 0.0104 0.0123  
Y 0.0069 0.0028 0.0024 -0.0110 0.0304 0.0006  
Z -0.0010 -0.0235 0.0005 0.0288 -0.0106 -0.0016

AT. 92 C X 0.0063 0.0054 -0.0078 -0.0015 0.0104 -0.0123  
Y 0.0069 -0.0028 0.0024 0.0110 0.0304 -0.0006  
Z -0.0010 0.0235 0.0005 -0.0288 -0.0106 0.0016

AT. 93 C X 0.0063 0.0074 -0.0069 0.0031 0.0150 0.0116  
Y 0.0115 -0.0077 0.0008 -0.0117 0.0105 0.0050  
Z 0.0017 -0.0102 0.0022 0.0269 -0.0129 0.0008

AT. 94 C X 0.0063 -0.0074 -0.0069 -0.0031 0.0150 -0.0116  
Y 0.0115 0.0077 0.0008 0.0117 0.0105 -0.0050  
Z 0.0017 0.0102 0.0022 -0.0269 -0.0129 -0.0008

AT. 95 H X 0.0126 0.0049 -0.0135 0.0105 0.0292 0.0175  
Y 0.0044 -0.0065 0.0055 -0.0165 0.0054 -0.0013  
Z 0.0073 -0.0090 0.0012 0.0278 -0.0196 0.0066

AT. 96 H X 0.0126 -0.0049 -0.0135 -0.0105 0.0292 -0.0175  
Y 0.0044 0.0065 0.0055 0.0165 0.0054 0.0013  
Z 0.0073 0.0090 0.0012 -0.0278 -0.0196 -0.0066

AT. 97 H X 0.0053 0.0212 -0.0036 -0.0020 0.0206 0.0114  
Y 0.0217 -0.0140 -0.0049 -0.0045 0.0063 0.0151  
Z 0.0045 -0.0163 -0.0001 0.0297 -0.0157 0.0033

AT. 98 H X 0.0053 -0.0212 -0.0036 0.0020 0.0206 -0.0114  
Y 0.0217 0.0140 -0.0049 0.0045 0.0063 -0.0151  
Z 0.0045 0.0163 -0.0001 -0.0297 -0.0157 -0.0033

AT. 99 C X 0.0082 0.0244 0.0116 -0.0104 0.0092 0.0003  
Y -0.0248 -0.0128 0.0041 -0.0100 0.0221 -0.0233

Z 0.0056 0.0174 -0.0094 0.0174 0.0045 -0.0482  
AT.100 C X 0.0082 -0.0244 0.0116 0.0104 0.0092 -0.0003  
Y -0.0248 0.0128 0.0041 0.0100 0.0221 0.0233  
Z 0.0056 -0.0174 -0.0094 -0.0174 0.0045 0.0482  
AT.101 C X 0.0145 0.0246 0.0116 -0.0089 0.0192 -0.0107  
Y -0.0259 -0.0009 0.0015 -0.0084 0.0146 -0.0075  
Z -0.0038 0.0145 -0.0094 0.0138 -0.0091 -0.0335  
AT.102 C X 0.0145 -0.0246 0.0116 0.0089 0.0192 0.0107  
Y -0.0259 0.0009 0.0015 0.0084 0.0146 0.0075  
Z -0.0038 -0.0145 -0.0094 -0.0138 -0.0091 0.0335  
AT.103 H X 0.0208 0.0158 0.0229 -0.0192 0.0423 -0.0215  
Y -0.0279 0.0024 -0.0028 -0.0047 0.0060 -0.0031  
Z -0.0110 0.0144 -0.0175 0.0222 -0.0300 -0.0368  
AT.104 H X 0.0208 -0.0158 0.0229 0.0192 0.0423 0.0215  
Y -0.0279 -0.0024 -0.0028 0.0047 0.0060 0.0031  
Z -0.0110 -0.0144 -0.0175 -0.0222 -0.0300 0.0368  
AT.105 H X 0.0211 0.0287 0.0061 0.0016 0.0220 -0.0257  
Y -0.0209 -0.0049 0.0134 -0.0220 0.0362 0.0022  
Z -0.0004 0.0141 -0.0063 0.0109 -0.0007 -0.0334  
AT.106 H X 0.0211 -0.0287 0.0061 -0.0016 0.0220 0.0257  
Y -0.0209 0.0049 0.0134 0.0220 0.0362 -0.0022  
Z -0.0004 -0.0141 -0.0063 -0.0109 -0.0007 0.0334  
AT.107 C X -0.0002 -0.0308 -0.0008 -0.0046 0.0129 0.0176  
Y -0.0117 0.0103 -0.0047 -0.0030 0.0059 -0.0235  
Z -0.0107 -0.0362 0.0040 0.0273 -0.0182 -0.0056  
AT.108 C X -0.0002 0.0308 -0.0008 0.0046 0.0129 -0.0176  
Y -0.0117 -0.0103 -0.0047 0.0030 0.0059 0.0235  
Z -0.0107 0.0362 0.0040 -0.0273 -0.0182 0.0056  
AT.109 H X 0.0012 -0.0500 -0.0010 -0.0052 0.0162 0.0247  
Y -0.0142 -0.0067 -0.0011 -0.0016 0.0055 -0.0124  
Z -0.0158 -0.0590 0.0095 0.0298 -0.0204 0.0104  
AT.110 H X 0.0012 0.0500 -0.0010 0.0052 0.0162 -0.0247

Y -0.0142 0.0067 -0.0011 0.0016 0.0055 0.0124  
Z -0.0158 0.0590 0.0095 -0.0298 -0.0204 -0.0104  
AT. 111 H X 0.0033 -0.0299 -0.0030 -0.0016 0.0140 0.0219  
Y -0.0103 0.0421 -0.0076 -0.0056 0.0041 -0.0434  
Z -0.0148 -0.0440 0.0071 0.0243 -0.0188 -0.0059  
AT. 112 H X 0.0033 0.0299 -0.0030 0.0016 0.0140 -0.0219  
Y -0.0103 -0.0421 -0.0076 0.0056 0.0041 0.0434  
Z -0.0148 0.0440 0.0071 -0.0243 -0.0188 0.0059  
AT. 113 C X -0.0100 -0.0180 0.0062 -0.0101 0.0056 0.0036  
Y -0.0207 -0.0093 0.0047 -0.0020 0.0006 -0.0096  
Z -0.0051 -0.0096 -0.0037 0.0243 -0.0168 -0.0271  
AT. 114 C X -0.0100 0.0180 0.0062 0.0101 0.0056 -0.0036  
Y -0.0207 0.0093 0.0047 0.0020 0.0006 0.0096  
Z -0.0051 0.0096 -0.0037 -0.0243 -0.0168 0.0271  
AT. 115 C X -0.0084 -0.0020 0.0129 -0.0128 0.0060 0.0023  
Y -0.0156 0.0119 -0.0004 -0.0040 0.0019 -0.0234  
Z 0.0030 0.0214 -0.0144 0.0213 -0.0146 -0.0505  
AT. 116 C X -0.0084 0.0020 0.0129 0.0128 0.0060 -0.0023  
Y -0.0156 -0.0119 -0.0004 0.0040 0.0019 0.0234  
Z 0.0030 -0.0214 -0.0144 -0.0213 -0.0146 0.0505  
AT. 117 H X -0.0042 -0.0120 0.0156 -0.0121 0.0137 0.0128  
Y -0.0113 0.0430 -0.0048 -0.0067 0.0002 -0.0435  
Z -0.0024 0.0242 -0.0161 0.0208 -0.0221 -0.0564  
AT. 118 H X -0.0042 0.0120 0.0156 0.0121 0.0137 -0.0128  
Y -0.0113 -0.0430 -0.0048 0.0067 0.0002 0.0435  
Z -0.0024 -0.0242 -0.0161 -0.0208 -0.0221 0.0564  
AT. 119 H X -0.0135 0.0169 0.0114 -0.0147 -0.0047 -0.0127  
Y -0.0211 0.0047 0.0052 -0.0028 -0.0034 -0.0160  
Z 0.0057 0.0391 -0.0210 0.0192 -0.0153 -0.0664  
AT. 120 H X -0.0135 -0.0169 0.0114 0.0147 -0.0047 0.0127  
Y -0.0211 -0.0047 0.0052 0.0028 -0.0034 0.0160  
Z 0.0057 -0.0391 -0.0210 -0.0192 -0.0153 0.0664

AT.121 C X -0.0140 0.0011 0.0188 -0.0135 0.0029 0.0011  
Y -0.0093 -0.0177 -0.0098 -0.0002 0.0093 -0.0104  
Z 0.0261 0.0341 -0.0186 0.0206 0.0043 -0.0465

AT.122 C X -0.0140 -0.0011 0.0188 0.0135 0.0029 -0.0011  
Y -0.0093 0.0177 -0.0098 0.0002 0.0093 0.0104  
Z 0.0261 -0.0341 -0.0186 -0.0206 0.0043 0.0465

AT.123 H X -0.0279 0.0005 0.0285 -0.0143 -0.0026 -0.0010  
Y -0.0182 -0.0316 -0.0034 0.0046 0.0027 0.0044  
Z 0.0333 0.0488 -0.0239 0.0156 0.0103 -0.0623

AT.124 H X -0.0279 -0.0005 0.0285 0.0143 -0.0026 0.0010  
Y -0.0182 0.0316 -0.0034 -0.0046 0.0027 -0.0044  
Z 0.0333 -0.0488 -0.0239 -0.0156 0.0103 0.0623

AT.125 H X -0.0101 0.0065 0.0195 -0.0132 0.0052 0.0030  
Y 0.0045 -0.0093 -0.0209 -0.0035 0.0178 -0.0234  
Z 0.0377 0.0445 -0.0234 0.0190 0.0114 -0.0507

AT.126 H X -0.0101 -0.0065 0.0195 0.0132 0.0052 -0.0030  
Y 0.0045 0.0093 -0.0209 0.0035 0.0178 0.0234  
Z 0.0377 -0.0445 -0.0234 -0.0190 0.0114 0.0507

AT.127 C X -0.0129 -0.0118 0.0105 -0.0118 0.0032 0.0000  
Y -0.0150 -0.0352 -0.0074 0.0040 0.0045 0.0030  
Z 0.0147 0.0080 -0.0103 0.0269 -0.0043 -0.0210

AT.128 C X -0.0129 0.0118 0.0105 0.0118 0.0032 -0.0000  
Y -0.0150 0.0352 -0.0074 -0.0040 0.0045 -0.0030  
Z 0.0147 -0.0080 -0.0103 -0.0269 -0.0043 0.0210

AT.129 C X -0.0033 -0.0211 0.0021 -0.0056 0.0091 0.0115  
Y -0.0034 -0.0174 -0.0163 0.0013 0.0115 -0.0112  
Z 0.0046 -0.0143 -0.0031 0.0319 -0.0104 -0.0011

AT.130 C X -0.0033 0.0211 0.0021 0.0056 0.0091 -0.0115  
Y -0.0034 0.0174 -0.0163 -0.0013 0.0115 0.0112  
Z 0.0046 0.0143 -0.0031 -0.0319 -0.0104 0.0011

AT.131 H X -0.0030 -0.0194 0.0040 -0.0048 0.0094 0.0164  
Y 0.0086 -0.0106 -0.0271 0.0022 0.0195 -0.0198

Z 0.0103 -0.0083 -0.0054 0.0328 -0.0061 0.0013  
AT. 132 H X -0.0030 0.0194 0.0040 0.0048 0.0094 -0.0164  
Y 0.0086 0.0106 -0.0271 -0.0022 0.0195 0.0198  
Z 0.0103 0.0083 -0.0054 -0.0328 -0.0061 -0.0013  
AT. 133 H X 0.0005 -0.0261 -0.0054 -0.0053 0.0119 0.0067  
Y -0.0069 -0.0301 -0.0154 0.0037 0.0098 -0.0032  
Z -0.0031 -0.0318 0.0014 0.0352 -0.0147 0.0130  
AT. 134 H X 0.0005 0.0261 -0.0054 0.0053 0.0119 -0.0067  
Y -0.0069 0.0301 -0.0154 -0.0037 0.0098 0.0032  
Z -0.0031 0.0318 0.0014 -0.0352 -0.0147 -0.0130  
AT. 135 C X -0.0148 -0.0240 0.0035 -0.0099 0.0021 -0.0015  
Y -0.0292 -0.0142 0.0201 -0.0054 -0.0047 -0.0038  
Z -0.0178 -0.0226 0.0004 0.0231 -0.0248 -0.0313  
AT. 136 C X -0.0148 0.0240 0.0035 0.0099 0.0021 0.0015  
Y -0.0292 0.0142 0.0201 0.0054 -0.0047 0.0038  
Z -0.0178 0.0226 0.0004 -0.0231 -0.0248 0.0313  
AT. 137 H X -0.0178 -0.0351 -0.0037 -0.0078 0.0009 -0.0036  
Y -0.0331 -0.0293 0.0234 -0.0039 -0.0069 0.0044  
Z -0.0237 -0.0440 0.0081 0.0244 -0.0282 -0.0174  
AT. 138 H X -0.0178 0.0351 -0.0037 0.0078 0.0009 0.0036  
Y -0.0331 0.0293 0.0234 0.0039 -0.0069 -0.0044  
Z -0.0237 0.0440 0.0081 -0.0244 -0.0282 0.0174  
AT. 139 H X -0.0092 -0.0246 0.0015 -0.0081 0.0062 0.0059  
Y -0.0250 0.0113 0.0212 -0.0098 -0.0030 -0.0166  
Z -0.0260 -0.0288 0.0028 0.0222 -0.0302 -0.0372  
AT. 140 H X -0.0092 0.0246 0.0015 0.0081 0.0062 -0.0059  
Y -0.0250 -0.0113 0.0212 0.0098 -0.0030 0.0166  
Z -0.0260 0.0288 0.0028 -0.0222 -0.0302 0.0372  
AT. 141 H X -0.0221 -0.0173 0.0102 -0.0140 -0.0027 -0.0114  
Y -0.0356 -0.0284 0.0288 -0.0051 -0.0087 0.0043  
Z -0.0143 -0.0051 -0.0058 0.0211 -0.0227 -0.0445  
AT. 142 H X -0.0221 0.0173 0.0102 0.0140 -0.0027 0.0114



Y -0.0356 0.0284 0.0288 0.0051 -0.0087 -0.0043  
Z -0.0143 0.0051 -0.0058 -0.0211 -0.0227 0.0445  
AT. 143 C X -0.0191 -0.0081 0.0128 -0.0136 -0.0011 -0.0086  
Y -0.0192 -0.0651 -0.0096 0.0130 0.0013 0.0224  
Z 0.0245 0.0109 -0.0131 0.0267 0.0030 -0.0145  
AT. 144 C X -0.0191 0.0081 0.0128 0.0136 -0.0011 0.0086  
Y -0.0192 0.0651 -0.0096 -0.0130 0.0013 -0.0224  
Z 0.0245 -0.0109 -0.0131 -0.0267 0.0030 0.0145  
AT. 145 H X -0.0254 0.0054 0.0174 -0.0184 -0.0057 -0.0199  
Y -0.0232 -0.0693 -0.0055 0.0128 -0.0015 0.0291  
Z 0.0273 0.0186 -0.0161 0.0255 0.0050 -0.0247  
AT. 146 H X -0.0254 -0.0054 0.0174 0.0184 -0.0057 0.0199  
Y -0.0232 0.0693 -0.0055 -0.0128 -0.0015 -0.0291  
Z 0.0273 -0.0186 -0.0161 -0.0255 0.0050 0.0247  
AT. 147 H X -0.0152 -0.0038 0.0135 -0.0159 0.0021 -0.0059  
Y -0.0143 -0.0715 -0.0166 0.0182 0.0043 0.0213  
Z 0.0326 0.0134 -0.0160 0.0264 0.0094 -0.0110  
AT. 148 H X -0.0152 0.0038 0.0135 0.0159 0.0021 0.0059  
Y -0.0143 0.0715 -0.0166 -0.0182 0.0043 -0.0213  
Z 0.0326 -0.0134 -0.0160 -0.0264 0.0094 0.0110  
AT. 149 H X -0.0211 -0.0219 0.0091 -0.0064 -0.0034 -0.0062  
Y -0.0218 -0.0752 -0.0088 0.0158 -0.0003 0.0307  
Z 0.0207 -0.0011 -0.0101 0.0277 0.0013 -0.0010  
AT. 150 H X -0.0211 0.0219 0.0091 0.0064 -0.0034 0.0062  
Y -0.0218 0.0752 -0.0088 -0.0158 -0.0003 -0.0307  
Z 0.0207 0.0011 -0.0101 -0.0277 0.0013 0.0010  
AT. 151 C X -0.0163 -0.0161 0.0082 -0.0121 0.0006 -0.0046  
Y -0.0259 -0.0430 0.0057 0.0029 -0.0005 0.0113  
Z 0.0039 -0.0028 -0.0064 0.0259 -0.0110 -0.0229  
AT. 152 C X -0.0163 0.0161 0.0082 0.0121 0.0006 0.0046  
Y -0.0259 0.0430 0.0057 -0.0029 -0.0005 -0.0113  
Z 0.0039 0.0028 -0.0064 -0.0259 -0.0110 0.0229

AT. 153 H X -0.0170 -0.0240 0.0040 -0.0115 -0.0007 -0.0047  
Y -0.0295 -0.0564 0.0087 0.0039 -0.0011 0.0211  
Z -0.0022 -0.0221 0.0002 0.0272 -0.0119 -0.0069

AT. 154 H X -0.0170 0.0240 0.0040 0.0115 -0.0007 0.0047  
Y -0.0295 0.0564 0.0087 -0.0039 -0.0011 -0.0211  
Z -0.0022 0.0221 0.0002 -0.0272 -0.0119 0.0069

AT. 155 H X -0.0223 -0.0099 0.0128 -0.0156 -0.0036 -0.0130  
Y -0.0324 -0.0572 0.0128 0.0037 -0.0025 0.0215  
Z 0.0086 0.0143 -0.0123 0.0239 -0.0100 -0.0371

AT. 156 H X -0.0223 0.0099 0.0128 0.0156 -0.0036 0.0130  
Y -0.0324 0.0572 0.0128 -0.0037 -0.0025 -0.0215  
Z 0.0086 -0.0143 -0.0123 -0.0239 -0.0100 0.0371

AT. 157 O X 0.0056 0.0061 -0.0034 -0.0429 -0.0026 -0.0146  
Y -0.0023 0.0004 -0.0157 -0.0448 0.0048 0.0033  
Z -0.0308 -0.0311 -0.0293 -0.0487 0.0116 0.0191

AT. 158 O X 0.0056 -0.0061 -0.0034 0.0429 -0.0026 0.0146  
Y -0.0023 -0.0004 -0.0157 0.0448 0.0048 -0.0033  
Z -0.0308 0.0311 -0.0293 0.0487 0.0116 -0.0191

AT. 159 O X 0.0055 0.0110 0.0087 -0.0230 -0.0089 -0.0130  
Y -0.0012 0.0132 0.0124 -0.0416 0.0052 -0.0190  
Z -0.0315 -0.0202 -0.0022 -0.0140 0.0013 0.0177

AT. 160 O X 0.0055 -0.0110 0.0087 0.0230 -0.0089 0.0130  
Y -0.0012 -0.0132 0.0124 0.0416 0.0052 0.0190  
Z -0.0315 0.0202 -0.0022 0.0140 0.0013 -0.0177

AT. 161 H X 0.0187 0.0005 -0.0175 -0.0351 -0.0058 -0.0065  
Y -0.0071 -0.0037 -0.0231 -0.0496 0.0047 0.0108  
Z -0.0117 -0.0217 -0.0155 -0.0320 0.0118 0.0023

AT. 162 H X 0.0187 -0.0005 -0.0175 0.0351 -0.0058 0.0065  
Y -0.0071 0.0037 -0.0231 0.0496 0.0047 -0.0108  
Z -0.0117 0.0217 -0.0155 0.0320 0.0118 -0.0023

AT. 163 H X 0.0028 0.0162 0.0219 -0.0021 -0.0142 -0.0096  
Y 0.0064 0.0063 0.0047 -0.0250 0.0034 -0.0194

Z -0.0290 -0.0241 -0.0083 -0.0174 0.0021 0.0165  
AT. 164 H X 0.0028 -0.0162 0.0219 0.0021 -0.0142 0.0096  
Y 0.0064 -0.0063 0.0047 0.0250 0.0034 0.0194  
Z -0.0290 0.0241 -0.0083 0.0174 0.0021 -0.0165  
AT. 165 O X 0.0044 0.0016 -0.0072 0.0154 0.0251 0.0041  
Y 0.0075 -0.0074 0.0131 -0.0045 0.0171 0.0111  
Z 0.0274 -0.0121 0.0081 -0.0413 0.0182 0.0411  
AT. 166 O X 0.0044 -0.0016 -0.0072 -0.0154 0.0251 -0.0041  
Y 0.0075 0.0074 0.0131 0.0045 0.0171 -0.0111  
Z 0.0274 0.0121 0.0081 0.0413 0.0182 -0.0411  
AT. 167 H X 0.0045 0.0023 -0.0072 0.0115 0.0168 0.0020  
Y 0.0116 -0.0021 0.0151 -0.0087 0.0363 0.0177  
Z 0.0224 -0.0208 0.0051 -0.0248 0.0139 0.0393  
AT. 168 H X 0.0045 -0.0023 -0.0072 -0.0115 0.0168 -0.0020  
Y 0.0116 0.0021 0.0151 0.0087 0.0363 -0.0177  
Z 0.0224 0.0208 0.0051 0.0248 0.0139 -0.0393  
AT. 169 O X 0.0111 -0.0261 -0.0129 0.0340 0.0227 0.0067  
Y -0.0213 0.0311 0.0139 0.0122 0.0377 0.0138  
Z 0.0346 -0.0259 0.0069 -0.0406 0.0132 0.0406  
AT. 170 O X 0.0111 0.0261 -0.0129 -0.0340 0.0227 -0.0067  
Y -0.0213 -0.0311 0.0139 -0.0122 0.0377 -0.0138  
Z 0.0346 0.0259 0.0069 0.0406 0.0132 -0.0406  
AT. 171 H X 0.0170 -0.0446 -0.0077 0.0232 0.0113 0.0074  
Y -0.0285 0.0371 0.0169 0.0103 0.0382 0.0152  
Z 0.0182 -0.0025 0.0079 -0.0362 0.0219 0.0416  
AT. 172 H X 0.0170 0.0446 -0.0077 -0.0232 0.0113 -0.0074  
Y -0.0285 -0.0371 0.0169 -0.0103 0.0382 -0.0152  
Z 0.0182 0.0025 0.0079 0.0362 0.0219 -0.0416  
  
FREQ(CM\*\*-1) 65.93 67.87 69.55 70.22 71.48 73.81  
  
AT. 11 X -0.0061 0.0122 -0.0014 -0.0027 -0.0038 0.0042

Y 0.0005 -0.0271 -0.0004 -0.0049 -0.0172 -0.0121  
Z -0.0142 0.0103 -0.0120 -0.0056 -0.0017 0.0453  
AT. 2 I X -0.0061 -0.0122 0.0014 -0.0027 -0.0038 -0.0042  
Y 0.0005 0.0271 0.0004 -0.0049 -0.0172 0.0121  
Z -0.0142 -0.0103 0.0120 -0.0056 -0.0017 -0.0453  
AT. 3 I X 0.0257 -0.0176 0.0071 0.0169 0.0154 -0.0129  
Y 0.0047 0.0089 0.0015 -0.0202 0.0186 0.0098  
Z -0.0093 0.0112 -0.0020 0.0006 -0.0049 0.0170  
AT. 4 I X 0.0257 0.0176 -0.0071 0.0169 0.0154 0.0129  
Y 0.0047 -0.0089 -0.0015 -0.0202 0.0186 -0.0098  
Z -0.0093 -0.0112 0.0020 0.0006 -0.0049 -0.0170  
AT. 5 O X -0.0130 0.0084 -0.0117 -0.0019 0.0109 0.0142  
Y -0.0117 0.0281 -0.0626 0.0312 0.0482 -0.0259  
Z 0.0010 0.0239 0.0065 0.0029 -0.0007 0.0122  
AT. 6 O X -0.0130 -0.0084 0.0117 -0.0019 0.0109 -0.0142  
Y -0.0117 -0.0281 0.0626 0.0312 0.0482 0.0259  
Z 0.0010 -0.0239 -0.0065 0.0029 -0.0007 -0.0122  
AT. 7 O X 0.0210 -0.0227 -0.0022 0.0131 0.0088 -0.0182  
Y 0.0113 -0.0062 0.0230 0.0003 0.0193 -0.0057  
Z 0.0179 0.0164 0.0049 -0.0068 0.0038 -0.0078  
AT. 8 O X 0.0210 0.0227 0.0022 0.0131 0.0088 0.0182  
Y 0.0113 0.0062 -0.0230 0.0003 0.0193 0.0057  
Z 0.0179 -0.0164 -0.0049 -0.0068 0.0038 0.0078  
AT. 9 N X 0.0057 0.0124 0.0150 -0.0078 -0.0096 0.0172  
Y 0.0391 0.0199 0.0156 0.0119 0.0146 -0.0364  
Z -0.0007 0.0259 0.0037 0.0038 -0.0018 0.0147  
AT. 10 N X 0.0057 -0.0124 -0.0150 -0.0078 -0.0096 -0.0172  
Y 0.0391 -0.0199 -0.0156 0.0119 0.0146 0.0364  
Z -0.0007 -0.0259 -0.0037 0.0038 -0.0018 -0.0147  
AT. 11 N X 0.0203 0.0071 -0.0047 0.0061 -0.0024 -0.0084  
Y 0.0265 0.0187 0.0317 0.0019 0.0119 -0.0132  
Z 0.0306 0.0245 0.0126 -0.0022 0.0009 -0.0193

AT. 12 N X 0.0203 -0.0071 0.0047 0.0061 -0.0024 0.0084  
Y 0.0265 -0.0187 -0.0317 0.0019 0.0119 0.0132  
Z 0.0306 -0.0245 -0.0126 -0.0022 0.0009 0.0193

AT. 13 C X -0.0045 0.0051 0.0031 -0.0073 -0.0025 0.0160  
Y 0.0095 0.0194 -0.0274 0.0201 0.0278 -0.0298  
Z -0.0050 0.0263 -0.0032 0.0052 -0.0002 0.0155

AT. 14 C X -0.0045 -0.0051 -0.0031 -0.0073 -0.0025 -0.0160  
Y 0.0095 -0.0194 0.0274 0.0201 0.0278 0.0298  
Z -0.0050 -0.0263 0.0032 0.0052 -0.0002 -0.0155

AT. 15 C X -0.0048 -0.0086 0.0135 -0.0146 -0.0186 0.0149  
Y 0.0039 0.0056 -0.0240 0.0127 0.0126 -0.0242  
Z -0.0178 0.0279 -0.0214 0.0093 0.0032 0.0228

AT. 16 C X -0.0048 0.0086 -0.0135 -0.0146 -0.0186 -0.0149  
Y 0.0039 -0.0056 0.0240 0.0127 0.0126 0.0242  
Z -0.0178 -0.0279 0.0214 0.0093 0.0032 -0.0228

AT. 17 H X -0.0065 -0.0279 0.0243 -0.0269 -0.0325 0.0277  
Y 0.0107 -0.0025 -0.0094 0.0049 0.0068 -0.0217  
Z -0.0271 0.0317 -0.0363 0.0147 0.0061 0.0242

AT. 18 H X -0.0065 0.0279 -0.0243 -0.0269 -0.0325 -0.0277  
Y 0.0107 0.0025 0.0094 0.0049 0.0068 0.0217  
Z -0.0271 -0.0317 0.0363 0.0147 0.0061 -0.0242

AT. 19 H X -0.0012 -0.0113 0.0215 -0.0157 -0.0241 0.0064  
Y -0.0052 0.0178 -0.0447 0.0238 0.0221 -0.0275  
Z -0.0203 0.0316 -0.0266 0.0132 0.0048 0.0184

AT. 20 H X -0.0012 0.0113 -0.0215 -0.0157 -0.0241 -0.0064  
Y -0.0052 -0.0178 0.0447 0.0238 0.0221 0.0275  
Z -0.0203 -0.0316 0.0266 0.0132 0.0048 -0.0184

AT. 21 C X 0.0204 -0.0114 -0.0021 0.0104 0.0065 -0.0120  
Y 0.0128 0.0051 0.0253 -0.0007 0.0167 -0.0019  
Z 0.0249 0.0178 0.0101 -0.0033 0.0040 -0.0143

AT. 22 C X 0.0204 0.0114 0.0021 0.0104 0.0065 0.0120  
Y 0.0128 -0.0051 -0.0253 -0.0007 0.0167 0.0019

Z 0.0249 -0.0178 -0.0101 -0.0033 0.0040 0.0143  
AT. 23 C X 0.0159 -0.0163 -0.0035 0.0113 0.0096 -0.0061  
Y 0.0003 0.0065 0.0155 -0.0069 0.0191 0.0167  
Z 0.0234 0.0119 0.0115 -0.0001 0.0054 -0.0145  
AT. 24 C X 0.0159 0.0163 0.0035 0.0113 0.0096 0.0061  
Y 0.0003 -0.0065 -0.0155 -0.0069 0.0191 -0.0167  
Z 0.0234 -0.0119 -0.0115 -0.0001 0.0054 0.0145  
AT. 25 H X 0.0151 -0.0162 -0.0108 0.0031 0.0111 -0.0036  
Y -0.0013 0.0067 0.0136 -0.0083 0.0196 0.0191  
Z 0.0353 0.0098 0.0185 0.0013 0.0058 -0.0309  
AT. 26 H X 0.0151 0.0162 0.0108 0.0031 0.0111 0.0036  
Y -0.0013 -0.0067 -0.0136 -0.0083 0.0196 -0.0191  
Z 0.0353 -0.0098 -0.0185 0.0013 0.0058 0.0309  
AT. 27 H X 0.0078 -0.0191 -0.0032 0.0154 0.0070 -0.0013  
Y -0.0121 0.0088 0.0103 -0.0069 0.0179 0.0339  
Z 0.0192 0.0136 0.0089 -0.0009 0.0052 -0.0074  
AT. 28 H X 0.0078 0.0191 0.0032 0.0154 0.0070 0.0013  
Y -0.0121 -0.0088 -0.0103 -0.0069 0.0179 -0.0339  
Z 0.0192 -0.0136 -0.0089 -0.0009 0.0052 0.0074  
AT. 29 C X -0.0009 0.0165 0.0166 -0.0085 -0.0099 0.0280  
Y 0.0317 0.0217 0.0271 0.0083 0.0136 -0.0215  
Z 0.0047 0.0193 0.0173 0.0003 -0.0016 0.0122  
AT. 30 C X -0.0009 -0.0165 -0.0166 -0.0085 -0.0099 -0.0280  
Y 0.0317 -0.0217 -0.0271 0.0083 0.0136 0.0215  
Z 0.0047 -0.0193 -0.0173 0.0003 -0.0016 -0.0122  
AT. 31 H X -0.0079 0.0206 0.0210 -0.0106 -0.0125 0.0403  
Y 0.0267 0.0189 0.0240 0.0089 0.0142 -0.0185  
Z -0.0078 0.0175 0.0155 -0.0001 -0.0028 0.0243  
AT. 32 H X -0.0079 -0.0206 -0.0210 -0.0106 -0.0125 -0.0403  
Y 0.0267 -0.0189 -0.0240 0.0089 0.0142 0.0185  
Z -0.0078 -0.0175 -0.0155 -0.0001 -0.0028 -0.0243  
AT. 33 H X 0.0058 0.0142 0.0271 -0.0113 -0.0096 0.0240

Y 0.0389 0.0263 0.0326 0.0069 0.0134 -0.0246  
Z 0.0066 0.0158 0.0219 -0.0012 -0.0007 0.0111  
AT. 34 H X 0.0058 -0.0142 -0.0271 -0.0113 -0.0096 -0.0240  
Y 0.0389 -0.0263 -0.0326 0.0069 0.0134 0.0246  
Z 0.0066 -0.0158 -0.0219 -0.0012 -0.0007 -0.0111  
AT. 35 C X -0.0066 0.0183 -0.0002 -0.0028 -0.0100 0.0268  
Y 0.0193 0.0199 0.0386 0.0033 0.0112 -0.0018  
Z 0.0215 0.0190 0.0224 -0.0001 0.0006 -0.0051  
AT. 36 C X -0.0066 -0.0183 0.0002 -0.0028 -0.0100 -0.0268  
Y 0.0193 -0.0199 -0.0386 0.0033 0.0112 0.0018  
Z 0.0215 -0.0190 -0.0224 -0.0001 0.0006 0.0051  
AT. 37 C X 0.0102 0.0125 -0.0023 0.0023 -0.0053 0.0053  
Y 0.0210 0.0224 0.0403 -0.0007 0.0106 -0.0029  
Z 0.0380 0.0194 0.0241 -0.0009 0.0036 -0.0247  
AT. 38 C X 0.0102 -0.0125 0.0023 0.0023 -0.0053 -0.0053  
Y 0.0210 -0.0224 -0.0403 -0.0007 0.0106 0.0029  
Z 0.0380 -0.0194 -0.0241 -0.0009 0.0036 0.0247  
AT. 39 H X 0.0210 0.0102 0.0079 0.0002 -0.0036 -0.0050  
Y 0.0251 0.0248 0.0419 -0.0047 0.0108 -0.0067  
Z 0.0439 0.0170 0.0305 -0.0005 0.0046 -0.0302  
AT. 40 H X 0.0210 -0.0102 -0.0079 0.0002 -0.0036 0.0050  
Y 0.0251 -0.0248 -0.0419 -0.0047 0.0108 0.0067  
Z 0.0439 -0.0170 -0.0305 -0.0005 0.0046 0.0302  
AT. 41 H X 0.0016 0.0133 -0.0126 0.0049 -0.0069 0.0124  
Y 0.0139 0.0239 0.0475 -0.0033 0.0092 0.0078  
Z 0.0513 0.0169 0.0284 -0.0016 0.0060 -0.0399  
AT. 42 H X 0.0016 -0.0133 0.0126 0.0049 -0.0069 -0.0124  
Y 0.0139 -0.0239 -0.0475 -0.0033 0.0092 -0.0078  
Z 0.0513 -0.0169 -0.0284 -0.0016 0.0060 0.0399  
AT. 43 C X 0.0115 0.0109 -0.0140 0.0049 -0.0106 -0.0043  
Y 0.0273 0.0157 0.0291 0.0065 0.0094 -0.0175  
Z 0.0214 0.0288 0.0035 -0.0051 -0.0054 -0.0130

AT. 44 C X 0.0115 -0.0109 0.0140 0.0049 -0.0106 0.0043  
Y 0.0273 -0.0157 -0.0291 0.0065 0.0094 0.0175  
Z 0.0214 -0.0288 -0.0035 -0.0051 -0.0054 0.0130

AT. 45 H X 0.0065 0.0126 -0.0227 0.0039 -0.0167 -0.0057  
Y 0.0216 0.0158 0.0324 0.0112 0.0137 -0.0062  
Z 0.0294 0.0269 0.0066 -0.0094 -0.0055 -0.0225

AT. 46 H X 0.0065 -0.0126 0.0227 0.0039 -0.0167 0.0057  
Y 0.0216 -0.0158 -0.0324 0.0112 0.0137 0.0062  
Z 0.0294 -0.0269 -0.0066 -0.0094 -0.0055 0.0225

AT. 47 H X 0.0204 0.0075 -0.0127 0.0052 -0.0097 -0.0162  
Y 0.0319 0.0139 0.0235 0.0029 0.0050 -0.0290  
Z 0.0142 0.0319 -0.0041 -0.0092 -0.0114 -0.0088

AT. 48 H X 0.0204 -0.0075 0.0127 0.0052 -0.0097 0.0162  
Y 0.0319 -0.0139 -0.0235 0.0029 0.0050 0.0290  
Z 0.0142 -0.0319 0.0041 -0.0092 -0.0114 0.0088

AT. 49 C X -0.0044 0.0167 -0.0143 0.0036 -0.0112 0.0169  
Y 0.0273 0.0138 0.0265 0.0117 0.0111 -0.0186  
Z 0.0084 0.0297 -0.0013 0.0017 -0.0028 0.0017

AT. 50 C X -0.0044 -0.0167 0.0143 0.0036 -0.0112 -0.0169  
Y 0.0273 -0.0138 -0.0265 0.0117 0.0111 0.0186  
Z 0.0084 -0.0297 0.0013 0.0017 -0.0028 -0.0017

AT. 51 C X -0.0013 0.0150 0.0016 -0.0028 -0.0116 0.0198  
Y 0.0401 0.0141 0.0205 0.0116 0.0094 -0.0367  
Z -0.0066 0.0313 -0.0095 0.0079 -0.0005 0.0171

AT. 52 C X -0.0013 -0.0150 -0.0016 -0.0028 -0.0116 -0.0198  
Y 0.0401 -0.0141 -0.0205 0.0116 0.0094 0.0367  
Z -0.0066 -0.0313 0.0095 0.0079 -0.0005 -0.0171

AT. 53 H X 0.0098 0.0123 0.0067 -0.0049 -0.0139 0.0083  
Y 0.0514 0.0141 0.0171 0.0120 0.0076 -0.0519  
Z -0.0132 0.0365 -0.0232 0.0123 0.0015 0.0196

AT. 54 H X 0.0098 -0.0123 -0.0067 -0.0049 -0.0139 -0.0083  
Y 0.0514 -0.0141 -0.0171 0.0120 0.0076 0.0519



Z -0.0132 -0.0365 0.0232 0.0123 0.0015 -0.0196  
AT. 55 H X -0.0162 0.0190 -0.0057 0.0007 -0.0081 0.0349  
Y 0.0400 0.0115 0.0219 0.0118 0.0077 -0.0364  
Z -0.0170 0.0307 -0.0122 0.0105 -0.0007 0.0280  
AT. 56 H X -0.0162 -0.0190 0.0057 0.0007 -0.0081 -0.0349  
Y 0.0400 -0.0115 -0.0219 0.0118 0.0077 0.0364  
Z -0.0170 -0.0307 0.0122 0.0105 -0.0007 -0.0280  
AT. 57 C X -0.0173 0.0220 0.0023 -0.0066 -0.0130 0.0415  
Y 0.0092 0.0198 0.0512 -0.0026 0.0087 0.0172  
Z 0.0273 0.0111 0.0359 -0.0015 0.0024 -0.0055  
AT. 58 C X -0.0173 -0.0220 -0.0023 -0.0066 -0.0130 -0.0415  
Y 0.0092 -0.0198 -0.0512 -0.0026 0.0087 -0.0172  
Z 0.0273 -0.0111 -0.0359 -0.0015 0.0024 0.0055  
AT. 59 H X -0.0271 0.0259 0.0059 -0.0108 -0.0151 0.0555  
Y 0.0057 0.0173 0.0484 -0.0014 0.0084 0.0206  
Z 0.0144 0.0100 0.0338 -0.0026 0.0001 0.0099  
AT. 60 H X -0.0271 -0.0259 -0.0059 -0.0108 -0.0151 -0.0555  
Y 0.0057 -0.0173 -0.0484 -0.0014 0.0084 -0.0206  
Z 0.0144 -0.0100 -0.0338 -0.0026 0.0001 -0.0099  
AT. 61 H X -0.0094 0.0182 0.0135 -0.0087 -0.0115 0.0371  
Y 0.0143 0.0232 0.0548 -0.0043 0.0092 0.0123  
Z 0.0311 0.0065 0.0429 -0.0025 0.0036 -0.0060  
AT. 62 H X -0.0094 -0.0182 -0.0135 -0.0087 -0.0115 -0.0371  
Y 0.0143 -0.0232 -0.0548 -0.0043 0.0092 -0.0123  
Z 0.0311 -0.0065 -0.0429 -0.0025 0.0036 0.0060  
AT. 63 H X -0.0232 0.0248 -0.0103 -0.0035 -0.0141 0.0420  
Y 0.0010 0.0179 0.0601 -0.0064 0.0069 0.0325  
Z 0.0397 0.0097 0.0395 -0.0011 0.0050 -0.0195  
AT. 64 H X -0.0232 -0.0248 0.0103 -0.0035 -0.0141 -0.0420  
Y 0.0010 -0.0179 -0.0601 -0.0064 0.0069 -0.0325  
Z 0.0397 -0.0097 -0.0395 -0.0011 0.0050 0.0195  
AT. 65 C X -0.0122 0.0199 -0.0305 0.0093 -0.0114 0.0204

Y 0.0264 0.0111 0.0203 0.0182 0.0135 -0.0179  
Z 0.0027 0.0333 -0.0116 0.0030 -0.0040 0.0041  
AT. 66 C X -0.0122 -0.0199 0.0305 0.0093 -0.0114 -0.0204  
Y 0.0264 -0.0111 -0.0203 0.0182 0.0135 0.0179  
Z 0.0027 -0.0333 0.0116 0.0030 -0.0040 -0.0041  
AT. 67 H X -0.0167 0.0211 -0.0434 0.0130 -0.0112 0.0210  
Y 0.0241 0.0111 0.0271 0.0196 0.0130 -0.0098  
Z 0.0084 0.0319 -0.0071 -0.0016 -0.0036 -0.0038  
AT. 68 H X -0.0167 -0.0211 0.0434 0.0130 -0.0112 -0.0210  
Y 0.0241 -0.0111 -0.0271 0.0196 0.0130 0.0098  
Z 0.0084 -0.0319 0.0071 -0.0016 -0.0036 0.0038  
AT. 69 H X -0.0086 0.0181 -0.0323 0.0087 -0.0104 0.0148  
Y 0.0281 0.0106 0.0121 0.0178 0.0139 -0.0248  
Z -0.0014 0.0366 -0.0201 0.0043 -0.0051 0.0047  
AT. 70 H X -0.0086 -0.0181 0.0323 0.0087 -0.0104 -0.0148  
Y 0.0281 -0.0106 -0.0121 0.0178 0.0139 0.0248  
Z -0.0014 -0.0366 0.0201 0.0043 -0.0051 -0.0047  
AT. 71 H X -0.0174 0.0219 -0.0280 0.0100 -0.0129 0.0279  
Y 0.0257 0.0105 0.0167 0.0212 0.0143 -0.0164  
Z -0.0023 0.0335 -0.0147 0.0076 -0.0040 0.0120  
AT. 72 H X -0.0174 -0.0219 0.0280 0.0100 -0.0129 -0.0279  
Y 0.0257 -0.0105 -0.0167 0.0212 0.0143 0.0164  
Z -0.0023 -0.0335 0.0147 0.0076 -0.0040 -0.0120  
AT. 73 C X -0.0172 0.0213 -0.0152 0.0020 -0.0117 0.0324  
Y 0.0156 0.0155 0.0353 0.0089 0.0119 0.0000  
Z 0.0153 0.0233 0.0121 0.0008 -0.0008 -0.0019  
AT. 74 C X -0.0172 -0.0213 0.0152 0.0020 -0.0117 -0.0324  
Y 0.0156 -0.0155 -0.0353 0.0089 0.0119 -0.0000  
Z 0.0153 -0.0233 -0.0121 0.0008 -0.0008 0.0019  
AT. 75 H X -0.0296 0.0260 -0.0153 0.0003 -0.0125 0.0477  
Y 0.0133 0.0132 0.0335 0.0118 0.0121 0.0011  
Z 0.0030 0.0231 0.0096 0.0035 -0.0013 0.0110

AT. 76 H X -0.0296 -0.0260 0.0153 0.0003 -0.0125 -0.0477  
Y 0.0133 -0.0132 -0.0335 0.0118 0.0121 -0.0011  
Z 0.0030 -0.0231 -0.0096 0.0035 -0.0013 -0.0110

AT. 77 H X -0.0221 0.0224 -0.0257 0.0064 -0.0129 0.0332  
Y 0.0064 0.0154 0.0406 0.0074 0.0124 0.0130  
Z 0.0277 0.0218 0.0169 -0.0019 -0.0004 -0.0145

AT. 78 H X -0.0221 -0.0224 0.0257 0.0064 -0.0129 -0.0332  
Y 0.0064 -0.0154 -0.0406 0.0074 0.0124 -0.0130  
Z 0.0277 -0.0218 -0.0169 -0.0019 -0.0004 0.0145

AT. 79 I X 0.0041 0.0007 0.0035 0.0005 -0.0020 -0.0005  
Y -0.0007 0.0093 -0.0005 0.0109 0.0036 -0.0011  
Z -0.0201 0.0032 0.0155 -0.0189 0.0287 0.0042

AT. 80 I X 0.0041 -0.0007 -0.0035 0.0005 -0.0020 0.0005  
Y -0.0007 -0.0093 0.0005 0.0109 0.0036 0.0011  
Z -0.0201 -0.0032 -0.0155 -0.0189 0.0287 -0.0042

AT. 81 I X -0.0021 0.0175 -0.0007 -0.0006 0.0178 -0.0094  
Y 0.0077 -0.0077 -0.0226 -0.0040 -0.0039 0.0120  
Z -0.0089 0.0159 0.0045 -0.0041 0.0121 -0.0062

AT. 82 I X -0.0021 -0.0175 0.0007 -0.0006 0.0178 0.0094  
Y 0.0077 0.0077 0.0226 -0.0040 -0.0039 -0.0120  
Z -0.0089 -0.0159 -0.0045 -0.0041 0.0121 0.0062

AT. 83 O X -0.0072 0.0136 -0.0086 0.0174 -0.0224 -0.0115  
Y -0.0676 -0.0346 0.0011 -0.0375 -0.0098 0.0093  
Z -0.0099 0.0278 -0.0251 0.0448 -0.0030 -0.0118

AT. 84 O X -0.0072 -0.0136 0.0086 0.0174 -0.0224 0.0115  
Y -0.0676 0.0346 -0.0011 -0.0375 -0.0098 -0.0093  
Z -0.0099 -0.0278 0.0251 0.0448 -0.0030 0.0118

AT. 85 O X 0.0044 0.0063 0.0190 -0.0088 -0.0036 -0.0145  
Y -0.0114 -0.0085 0.0056 -0.0325 -0.0220 0.0084  
Z 0.0255 -0.0132 -0.0265 -0.0249 -0.0391 0.0004

AT. 86 O X 0.0044 -0.0063 -0.0190 -0.0088 -0.0036 0.0145  
Y -0.0114 0.0085 -0.0056 -0.0325 -0.0220 -0.0084

Z 0.0255 0.0132 0.0265 -0.0249 -0.0391 -0.0004  
AT. 87 N X -0.0289 0.0177 -0.0062 0.0117 -0.0092 -0.0013  
Y 0.0001 -0.0273 0.0000 -0.0158 -0.0427 0.0058  
Z -0.0013 0.0259 -0.0270 0.0470 -0.0072 -0.0174  
AT. 88 N X -0.0289 -0.0177 0.0062 0.0117 -0.0092 0.0013  
Y 0.0001 0.0273 -0.0000 -0.0158 -0.0427 -0.0058  
Z -0.0013 -0.0259 0.0270 0.0470 -0.0072 0.0174  
AT. 89 N X -0.0020 0.0000 0.0177 -0.0191 0.0068 0.0015  
Y 0.0037 -0.0238 0.0060 -0.0151 -0.0350 0.0037  
Z 0.0369 -0.0303 -0.0260 -0.0151 -0.0448 0.0049  
AT. 90 N X -0.0020 -0.0000 -0.0177 -0.0191 0.0068 -0.0015  
Y 0.0037 0.0238 -0.0060 -0.0151 -0.0350 -0.0037  
Z 0.0369 0.0303 0.0260 -0.0151 -0.0448 -0.0049  
AT. 91 C X -0.0175 0.0108 -0.0071 0.0125 -0.0197 -0.0069  
Y -0.0359 -0.0185 -0.0011 -0.0181 -0.0216 0.0040  
Z -0.0069 0.0265 -0.0261 0.0462 -0.0064 -0.0171  
AT. 92 C X -0.0175 -0.0108 0.0071 0.0125 -0.0197 0.0069  
Y -0.0359 0.0185 0.0011 -0.0181 -0.0216 -0.0040  
Z -0.0069 -0.0265 0.0261 0.0462 -0.0064 0.0171  
AT. 93 C X -0.0189 0.0018 -0.0066 0.0033 -0.0198 -0.0075  
Y -0.0236 0.0039 -0.0057 0.0034 -0.0106 -0.0034  
Z -0.0045 0.0262 -0.0261 0.0440 0.0005 -0.0220  
AT. 94 C X -0.0189 -0.0018 0.0066 0.0033 -0.0198 0.0075  
Y -0.0236 -0.0039 0.0057 0.0034 -0.0106 0.0034  
Z -0.0045 -0.0262 0.0261 0.0440 0.0005 0.0220  
AT. 95 H X -0.0363 0.0038 -0.0194 0.0151 -0.0438 -0.0151  
Y -0.0151 -0.0016 0.0067 -0.0117 0.0044 0.0068  
Z -0.0009 0.0341 -0.0351 0.0579 0.0003 -0.0322  
AT. 96 H X -0.0363 -0.0038 0.0194 0.0151 -0.0438 0.0151  
Y -0.0151 0.0016 -0.0067 -0.0117 0.0044 -0.0068  
Z -0.0009 -0.0341 0.0351 0.0579 0.0003 0.0322  
AT. 97 H X -0.0219 -0.0053 0.0002 -0.0121 -0.0131 -0.0054

Y -0.0251 0.0167 -0.0267 0.0322 -0.0252 -0.0205  
Z -0.0037 0.0313 -0.0332 0.0554 -0.0049 -0.0266  
AT. 98 H X -0.0219 0.0053 -0.0002 -0.0121 -0.0131 0.0054  
Y -0.0251 -0.0167 0.0267 0.0322 -0.0252 0.0205  
Z -0.0037 -0.0313 0.0332 0.0554 -0.0049 0.0266  
AT. 99 C X 0.0013 0.0057 0.0177 -0.0135 0.0002 -0.0093  
Y -0.0025 -0.0141 0.0092 -0.0239 -0.0260 0.0054  
Z 0.0312 -0.0247 -0.0248 -0.0208 -0.0401 0.0059  
AT. 100 C X 0.0013 -0.0057 -0.0177 -0.0135 0.0002 0.0093  
Y -0.0025 0.0141 -0.0092 -0.0239 -0.0260 -0.0054  
Z 0.0312 0.0247 0.0248 -0.0208 -0.0401 -0.0059  
AT. 101 C X 0.0010 0.0062 0.0152 -0.0152 -0.0089 -0.0124  
Y -0.0091 0.0003 0.0105 -0.0170 -0.0160 -0.0011  
Z 0.0298 -0.0261 -0.0210 -0.0171 -0.0271 0.0114  
AT. 102 C X 0.0010 -0.0062 -0.0152 -0.0152 -0.0089 0.0124  
Y -0.0091 -0.0003 -0.0105 -0.0170 -0.0160 0.0011  
Z 0.0298 0.0261 0.0210 -0.0171 -0.0271 -0.0114  
AT. 103 H X -0.0034 0.0033 0.0278 -0.0243 -0.0178 -0.0157  
Y -0.0081 0.0020 0.0056 -0.0132 -0.0124 -0.0000  
Z 0.0442 -0.0421 -0.0326 -0.0153 -0.0247 0.0231  
AT. 104 H X -0.0034 -0.0033 -0.0278 -0.0243 -0.0178 0.0157  
Y -0.0081 -0.0020 -0.0056 -0.0132 -0.0124 0.0000  
Z 0.0442 0.0421 0.0326 -0.0153 -0.0247 -0.0231  
AT. 105 H X 0.0079 0.0019 0.0055 -0.0187 -0.0212 -0.0118  
Y -0.0287 0.0196 0.0270 -0.0173 -0.0122 -0.0137  
Z 0.0243 -0.0201 -0.0169 -0.0178 -0.0284 0.0069  
AT. 106 H X 0.0079 -0.0019 -0.0055 -0.0187 -0.0212 0.0118  
Y -0.0287 -0.0196 -0.0270 -0.0173 -0.0122 0.0137  
Z 0.0243 0.0201 0.0169 -0.0178 -0.0284 -0.0069  
AT. 107 C X -0.0330 0.0202 -0.0058 0.0092 -0.0068 0.0036  
Y 0.0096 -0.0328 0.0067 -0.0171 -0.0315 0.0043  
Z -0.0013 0.0260 -0.0238 0.0421 0.0021 -0.0092

AT. 108 C X -0.0330 -0.0202 0.0058 0.0092 -0.0068 -0.0036  
Y 0.0096 0.0328 -0.0067 -0.0171 -0.0315 -0.0043  
Z -0.0013 -0.0260 0.0238 0.0421 0.0021 0.0092

AT. 109 H X -0.0488 0.0350 -0.0095 0.0176 -0.0032 0.0051  
Y -0.0036 -0.0144 0.0063 -0.0009 -0.0223 -0.0010  
Z -0.0184 0.0521 -0.0230 0.0661 0.0165 -0.0175

AT. 110 H X -0.0488 -0.0350 0.0095 0.0176 -0.0032 -0.0051  
Y -0.0036 0.0144 -0.0063 -0.0009 -0.0223 0.0010  
Z -0.0184 -0.0521 0.0230 0.0661 0.0165 0.0175

AT. 111 H X -0.0368 0.0274 -0.0090 0.0189 -0.0088 -0.0032  
Y 0.0364 -0.0671 0.0106 -0.0470 -0.0432 0.0131  
Z -0.0030 0.0255 -0.0209 0.0378 0.0069 -0.0037

AT. 112 H X -0.0368 -0.0274 0.0090 0.0189 -0.0088 0.0032  
Y 0.0364 0.0671 -0.0106 -0.0470 -0.0432 -0.0131  
Z -0.0030 -0.0255 0.0209 0.0378 0.0069 0.0037

AT. 113 C X -0.0111 -0.0040 0.0046 -0.0179 -0.0002 0.0156  
Y -0.0014 -0.0117 0.0105 0.0013 -0.0130 -0.0025  
Z 0.0208 -0.0077 -0.0244 0.0111 -0.0152 0.0037

AT. 114 C X -0.0111 0.0040 -0.0046 -0.0179 -0.0002 -0.0156  
Y -0.0014 0.0117 -0.0105 0.0013 -0.0130 0.0025  
Z 0.0208 0.0077 0.0244 0.0111 -0.0152 -0.0037

AT. 115 C X -0.0028 -0.0053 0.0139 -0.0218 0.0039 0.0085  
Y 0.0151 -0.0324 0.0124 -0.0181 -0.0244 0.0040  
Z 0.0461 -0.0454 -0.0250 -0.0223 -0.0369 0.0176

AT. 116 C X -0.0028 0.0053 -0.0139 -0.0218 0.0039 -0.0085  
Y 0.0151 0.0324 -0.0124 -0.0181 -0.0244 -0.0040  
Z 0.0461 0.0454 0.0250 -0.0223 -0.0369 -0.0176

AT. 117 H X -0.0199 0.0190 0.0130 -0.0046 0.0068 -0.0041  
Y 0.0422 -0.0654 0.0164 -0.0463 -0.0366 0.0134  
Z 0.0569 -0.0626 -0.0247 -0.0328 -0.0370 0.0284

AT. 118 H X -0.0199 -0.0190 -0.0130 -0.0046 0.0068 0.0041  
Y 0.0422 0.0654 -0.0164 -0.0463 -0.0366 -0.0134

Z 0.0569 0.0626 0.0247 -0.0328 -0.0370 -0.0284  
AT. 119 H X 0.0229 -0.0386 0.0185 -0.0465 0.0023 0.0232  
Y 0.0118 -0.0248 0.0152 -0.0099 -0.0125 0.0008  
Z 0.0639 -0.0717 -0.0254 -0.0441 -0.0498 0.0291  
AT. 120 H X 0.0229 0.0386 -0.0185 -0.0465 0.0023 -0.0232  
Y 0.0118 0.0248 -0.0152 -0.0099 -0.0125 -0.0008  
Z 0.0639 0.0717 0.0254 -0.0441 -0.0498 -0.0291  
AT. 121 C X 0.0039 -0.0115 0.0190 -0.0272 0.0103 0.0090  
Y -0.0133 -0.0039 -0.0014 0.0066 -0.0290 0.0005  
Z 0.0303 -0.0152 -0.0267 -0.0054 -0.0498 -0.0055  
AT. 122 C X 0.0039 0.0115 -0.0190 -0.0272 0.0103 -0.0090  
Y -0.0133 0.0039 0.0014 0.0066 -0.0290 -0.0005  
Z 0.0303 0.0152 0.0267 -0.0054 -0.0498 0.0055  
AT. 123 H X 0.0148 -0.0265 0.0254 -0.0389 0.0199 0.0149  
Y -0.0203 0.0079 -0.0004 0.0228 -0.0130 -0.0049  
Z 0.0395 -0.0300 -0.0266 -0.0242 -0.0647 0.0011  
AT. 124 H X 0.0148 0.0265 -0.0254 -0.0389 0.0199 -0.0149  
Y -0.0203 -0.0079 0.0004 0.0228 -0.0130 0.0049  
Z 0.0395 0.0300 0.0266 -0.0242 -0.0647 -0.0011  
AT. 125 H X 0.0025 -0.0051 0.0201 -0.0223 0.0097 0.0023  
Y -0.0130 -0.0092 -0.0070 -0.0038 -0.0483 0.0059  
Z 0.0283 -0.0099 -0.0280 -0.0045 -0.0602 -0.0108  
AT. 126 H X 0.0025 0.0051 -0.0201 -0.0223 0.0097 -0.0023  
Y -0.0130 0.0092 0.0070 -0.0038 -0.0483 -0.0059  
Z 0.0283 0.0099 0.0280 -0.0045 -0.0602 0.0108  
AT. 127 C X -0.0034 -0.0117 0.0097 -0.0260 0.0031 0.0173  
Y -0.0255 0.0107 -0.0055 0.0259 -0.0191 -0.0044  
Z 0.0120 0.0094 -0.0285 0.0284 -0.0291 -0.0170  
AT. 128 C X -0.0034 0.0117 -0.0097 -0.0260 0.0031 -0.0173  
Y -0.0255 -0.0107 0.0055 0.0259 -0.0191 0.0044  
Z 0.0120 -0.0094 0.0285 0.0284 -0.0291 0.0170  
AT. 129 C X -0.0208 0.0077 -0.0013 -0.0017 -0.0057 0.0067

Y -0.0160 -0.0020 -0.0073 0.0092 -0.0375 0.0003  
Z -0.0042 0.0294 -0.0303 0.0544 -0.0116 -0.0257  
AT. 130 C X -0.0208 -0.0077 0.0013 -0.0017 -0.0057 -0.0067  
Y -0.0160 0.0020 0.0073 0.0092 -0.0375 -0.0003  
Z -0.0042 -0.0294 0.0303 0.0544 -0.0116 0.0257  
AT. 131 H X -0.0237 0.0106 -0.0017 0.0045 -0.0033 0.0012  
Y -0.0165 -0.0036 -0.0125 0.0050 -0.0563 0.0024  
Z -0.0085 0.0321 -0.0325 0.0600 -0.0165 -0.0317  
AT. 132 H X -0.0237 -0.0106 0.0017 0.0045 -0.0033 -0.0012  
Y -0.0165 0.0036 0.0125 0.0050 -0.0563 -0.0024  
Z -0.0085 -0.0321 0.0325 0.0600 -0.0165 0.0317  
AT. 133 H X -0.0232 0.0101 -0.0052 -0.0022 -0.0151 0.0107  
Y -0.0251 0.0096 -0.0098 0.0224 -0.0317 -0.0029  
Z -0.0165 0.0455 -0.0321 0.0748 0.0015 -0.0324  
AT. 134 H X -0.0232 -0.0101 0.0052 -0.0022 -0.0151 -0.0107  
Y -0.0251 -0.0096 0.0098 0.0224 -0.0317 0.0029  
Z -0.0165 -0.0455 0.0321 0.0748 0.0015 0.0324  
AT. 135 C X -0.0078 -0.0121 0.0025 -0.0247 0.0004 0.0251  
Y -0.0016 -0.0046 0.0205 0.0056 0.0022 -0.0078  
Z 0.0254 -0.0165 -0.0225 0.0031 -0.0065 0.0157  
AT. 136 C X -0.0078 0.0121 -0.0025 -0.0247 0.0004 -0.0251  
Y -0.0016 0.0046 -0.0205 0.0056 0.0022 0.0078  
Z 0.0254 0.0165 0.0225 0.0031 -0.0065 -0.0157  
AT. 137 H X -0.0100 -0.0129 -0.0050 -0.0232 -0.0004 0.0313  
Y -0.0110 0.0075 0.0160 0.0204 0.0083 -0.0125  
Z 0.0110 0.0040 -0.0267 0.0269 0.0046 0.0057  
AT. 138 H X -0.0100 0.0129 0.0050 -0.0232 -0.0004 -0.0313  
Y -0.0110 -0.0075 -0.0160 0.0204 0.0083 0.0125  
Z 0.0110 -0.0040 0.0267 0.0269 0.0046 -0.0057  
AT. 139 H X -0.0161 -0.0001 -0.0017 -0.0122 -0.0017 0.0157  
Y 0.0148 -0.0242 0.0316 -0.0191 -0.0038 -0.0014  
Z 0.0309 -0.0261 -0.0201 -0.0056 -0.0026 0.0256



AT. 140 H X -0.0161 0.0001 0.0017 -0.0122 -0.0017 -0.0157  
Y 0.0148 0.0242 -0.0316 -0.0191 -0.0038 0.0014  
Z 0.0309 0.0261 0.0201 -0.0056 -0.0026 -0.0256

AT. 141 H X 0.0060 -0.0292 0.0133 -0.0450 0.0047 0.0356  
Y -0.0086 0.0065 0.0208 0.0181 0.0122 -0.0130  
Z 0.0389 -0.0359 -0.0182 -0.0189 -0.0154 0.0258

AT. 142 H X 0.0060 0.0292 -0.0133 -0.0450 0.0047 -0.0356  
Y -0.0086 -0.0065 -0.0208 0.0181 0.0122 0.0130  
Z 0.0389 0.0359 0.0182 -0.0189 -0.0154 -0.0258

AT. 143 C X 0.0069 -0.0247 0.0130 -0.0442 0.0089 0.0271  
Y -0.0506 0.0346 -0.0188 0.0594 -0.0143 -0.0119  
Z 0.0044 0.0200 -0.0294 0.0438 -0.0390 -0.0279

AT. 144 C X 0.0069 0.0247 -0.0130 -0.0442 0.0089 -0.0271  
Y -0.0506 -0.0346 0.0188 0.0594 -0.0143 0.0119  
Z 0.0044 -0.0200 0.0294 0.0438 -0.0390 0.0279

AT. 145 H X 0.0253 -0.0438 0.0237 -0.0731 0.0192 0.0380  
Y -0.0521 0.0376 -0.0142 0.0614 -0.0030 -0.0130  
Z 0.0105 0.0116 -0.0312 0.0345 -0.0487 -0.0238

AT. 146 H X 0.0253 0.0438 -0.0237 -0.0731 0.0192 -0.0380  
Y -0.0521 -0.0376 0.0142 0.0614 -0.0030 0.0130  
Z 0.0105 -0.0116 0.0312 0.0345 -0.0487 0.0238

AT. 147 H X 0.0069 -0.0225 0.0174 -0.0411 0.0068 0.0227  
Y -0.0601 0.0414 -0.0321 0.0727 -0.0289 -0.0148  
Z -0.0011 0.0271 -0.0304 0.0556 -0.0499 -0.0358

AT. 148 H X 0.0069 0.0225 -0.0174 -0.0411 0.0068 -0.0227  
Y -0.0601 -0.0414 0.0321 0.0727 -0.0289 0.0148  
Z -0.0011 -0.0271 0.0304 0.0556 -0.0499 0.0358

AT. 149 H X -0.0041 -0.0175 0.0011 -0.0322 0.0050 0.0274  
Y -0.0587 0.0428 -0.0210 0.0700 -0.0093 -0.0148  
Z -0.0046 0.0307 -0.0269 0.0571 -0.0287 -0.0327

AT. 150 H X -0.0041 0.0175 -0.0011 -0.0322 0.0050 -0.0274  
Y -0.0587 -0.0428 0.0210 0.0700 -0.0093 0.0148

Z -0.0046 -0.0307 0.0269 0.0571 -0.0287 0.0327  
AT. 151 C X -0.0003 -0.0191 0.0079 -0.0340 0.0024 0.0262  
Y -0.0285 0.0183 0.0027 0.0343 -0.0022 -0.0103  
Z 0.0151 0.0028 -0.0266 0.0215 -0.0205 -0.0073  
AT. 152 C X -0.0003 0.0191 -0.0079 -0.0340 0.0024 -0.0262  
Y -0.0285 -0.0183 -0.0027 0.0343 -0.0022 0.0103  
Z 0.0151 -0.0028 0.0266 0.0215 -0.0205 0.0073  
AT. 153 H X -0.0030 -0.0199 0.0033 -0.0338 0.0003 0.0319  
Y -0.0401 0.0310 0.0008 0.0490 0.0046 -0.0149  
Z -0.0022 0.0240 -0.0275 0.0457 -0.0081 -0.0172  
AT. 154 H X -0.0030 0.0199 -0.0033 -0.0338 0.0003 -0.0319  
Y -0.0401 -0.0310 -0.0008 0.0490 0.0046 0.0149  
Z -0.0022 -0.0240 0.0275 0.0457 -0.0081 0.0172  
AT. 155 H X 0.0127 -0.0344 0.0143 -0.0508 0.0055 0.0343  
Y -0.0391 0.0317 0.0039 0.0497 0.0087 -0.0163  
Z 0.0306 -0.0170 -0.0256 -0.0005 -0.0317 0.0019  
AT. 156 H X 0.0127 0.0344 -0.0143 -0.0508 0.0055 -0.0343  
Y -0.0391 -0.0317 -0.0039 0.0497 0.0087 0.0163  
Z 0.0306 0.0170 0.0256 -0.0005 -0.0317 -0.0019  
AT. 157 O X -0.0164 -0.0065 -0.0020 0.0023 -0.0035 0.0085  
Y -0.0179 0.0311 -0.0547 0.0356 0.0416 -0.0253  
Z 0.0190 -0.0171 -0.0364 0.0075 0.0267 -0.0127  
AT. 158 O X -0.0164 0.0065 0.0020 0.0023 -0.0035 -0.0085  
Y -0.0179 -0.0311 0.0547 0.0356 0.0416 0.0253  
Z 0.0190 0.0171 0.0364 0.0075 0.0267 0.0127  
AT. 159 O X -0.0108 -0.0000 0.0062 0.0014 -0.0074 0.0178  
Y -0.0332 0.0154 -0.0212 0.0349 0.0147 -0.0219  
Z 0.0255 -0.0095 -0.0146 0.0062 0.0143 0.0048  
AT. 160 O X -0.0108 0.0000 -0.0062 0.0014 -0.0074 -0.0178  
Y -0.0332 -0.0154 0.0212 0.0349 0.0147 0.0219  
Z 0.0255 0.0095 0.0146 0.0062 0.0143 -0.0048  
AT. 161 H X -0.0095 0.0076 -0.0150 0.0004 0.0093 0.0089

Y -0.0164 0.0303 -0.0650 0.0373 0.0478 -0.0286  
Z 0.0182 -0.0088 -0.0130 0.0019 0.0135 -0.0027  
AT. 162 H X -0.0095 -0.0076 0.0150 0.0004 0.0093 -0.0089  
Y -0.0164 -0.0303 0.0650 0.0373 0.0478 0.0286  
Z 0.0182 0.0088 0.0130 0.0019 0.0135 0.0027  
AT. 163 H X -0.0019 0.0084 0.0131 0.0028 -0.0086 0.0282  
Y -0.0228 0.0135 -0.0165 0.0197 0.0130 -0.0118  
Z 0.0253 -0.0132 -0.0159 0.0020 0.0147 0.0038  
AT. 164 H X -0.0019 -0.0084 -0.0131 0.0028 -0.0086 -0.0282  
Y -0.0228 -0.0135 0.0165 0.0197 0.0130 0.0118  
Z 0.0253 0.0132 0.0159 0.0020 0.0147 -0.0038  
AT. 165 O X -0.0252 -0.0121 -0.0142 0.0082 -0.0268 -0.0081  
Y -0.0305 0.0023 -0.0112 0.0031 0.0022 -0.0071  
Z -0.0132 0.0006 0.0299 -0.0280 0.0033 0.0188  
AT. 166 O X -0.0252 0.0121 0.0142 0.0082 -0.0268 0.0081  
Y -0.0305 -0.0023 0.0112 0.0031 0.0022 0.0071  
Z -0.0132 -0.0006 -0.0299 -0.0280 0.0033 -0.0188  
AT. 167 H X -0.0199 -0.0021 -0.0074 0.0078 -0.0211 -0.0068  
Y -0.0459 -0.0156 -0.0096 -0.0096 -0.0037 -0.0026  
Z -0.0050 -0.0012 0.0092 -0.0086 -0.0038 0.0088  
AT. 168 H X -0.0199 0.0021 0.0074 0.0078 -0.0211 0.0068  
Y -0.0459 0.0156 0.0096 -0.0096 -0.0037 0.0026  
Z -0.0050 0.0012 -0.0092 -0.0086 -0.0038 -0.0088  
AT. 169 O X -0.0172 -0.0240 -0.0454 0.0392 -0.0417 -0.0206  
Y -0.0366 -0.0077 -0.0252 -0.0081 -0.0056 -0.0146  
Z -0.0099 0.0002 0.0261 -0.0190 0.0021 0.0178  
AT. 170 O X -0.0172 0.0240 0.0454 0.0392 -0.0417 0.0206  
Y -0.0366 0.0077 0.0252 -0.0081 -0.0056 0.0146  
Z -0.0099 -0.0002 -0.0261 -0.0190 0.0021 -0.0178  
AT. 171 H X 0.0025 -0.0158 -0.0354 0.0246 -0.0326 -0.0035  
Y -0.0280 -0.0040 -0.0199 -0.0226 -0.0032 -0.0077  
Z -0.0103 0.0002 0.0284 -0.0321 -0.0005 0.0172

AT. 172 H X 0.0025 0.0158 0.0354 0.0246 -0.0326 0.0035  
Y -0.0280 0.0040 0.0199 -0.0226 -0.0032 0.0077  
Z -0.0103 -0.0002 -0.0284 -0.0321 -0.0005 -0.0172

FREQ(CM\*\*-1) 74.03 75.62 77.24 80.02 81.73 82.12

AT. 1 I X -0.0098 -0.0001 0.0008 0.0049 0.0032 0.0005  
Y -0.0110 -0.0239 -0.0023 0.0173 -0.0124 0.0007  
Z 0.0215 0.0162 -0.0069 -0.0050 0.0052 0.0081

AT. 2 I X -0.0098 0.0001 0.0008 -0.0049 0.0032 -0.0005  
Y -0.0110 0.0239 -0.0023 -0.0173 -0.0124 -0.0007  
Z 0.0215 -0.0162 -0.0069 0.0050 0.0052 -0.0081

AT. 3 I X 0.0129 0.0017 -0.0098 -0.0035 0.0053 -0.0116  
Y 0.0040 0.0079 0.0164 -0.0103 0.0145 0.0096  
Z -0.0037 -0.0030 -0.0001 0.0060 -0.0102 0.0012

AT. 4 I X 0.0129 -0.0017 -0.0098 0.0035 0.0053 0.0116  
Y 0.0040 -0.0079 0.0164 0.0103 0.0145 -0.0096  
Z -0.0037 0.0030 -0.0001 -0.0060 -0.0102 -0.0012

AT. 5 O X 0.0318 0.0188 -0.0056 -0.0143 0.0138 0.0104  
Y 0.0465 0.0530 -0.0607 -0.0523 0.0230 -0.0242  
Z -0.0389 -0.0043 -0.0150 0.0123 0.0209 -0.0018

AT. 6 O X 0.0318 -0.0188 -0.0056 0.0143 0.0138 -0.0104  
Y 0.0465 -0.0530 -0.0607 0.0523 0.0230 0.0242  
Z -0.0389 0.0043 -0.0150 -0.0123 0.0209 0.0018

AT. 7 O X 0.0077 0.0042 -0.0144 -0.0065 0.0323 0.0020  
Y -0.0230 -0.0059 -0.0086 0.0255 -0.0243 -0.0364  
Z 0.0002 0.0041 0.0186 -0.0009 -0.0107 -0.0274

AT. 8 O X 0.0077 -0.0042 -0.0144 0.0065 0.0323 -0.0020  
Y -0.0230 0.0059 -0.0086 -0.0255 -0.0243 0.0364  
Z 0.0002 -0.0041 0.0186 0.0009 -0.0107 0.0274

AT. 9 N X 0.0126 -0.0073 0.0275 0.0015 -0.0295 -0.0021  
Y 0.0201 0.0261 0.0094 -0.0109 -0.0171 -0.0168

Z -0.0413 -0.0088 -0.0154 0.0111 0.0138 -0.0072  
AT. 10 N X 0.0126 0.0073 0.0275 -0.0015 -0.0295 0.0021  
Y 0.0201 -0.0261 0.0094 0.0109 -0.0171 0.0168  
Z -0.0413 0.0088 -0.0154 -0.0111 0.0138 0.0072  
AT. 11 N X 0.0168 0.0103 0.0076 -0.0069 -0.0006 0.0022  
Y 0.0074 0.0080 0.0170 0.0028 -0.0361 -0.0226  
Z 0.0222 0.0149 0.0314 -0.0217 -0.0047 -0.0136  
AT. 12 N X 0.0168 -0.0103 0.0076 0.0069 -0.0006 -0.0022  
Y 0.0074 -0.0080 0.0170 -0.0028 -0.0361 0.0226  
Z 0.0222 -0.0149 0.0314 0.0217 -0.0047 0.0136  
AT. 13 C X 0.0144 0.0015 0.0108 -0.0017 -0.0046 0.0068  
Y 0.0255 0.0350 -0.0285 -0.0272 0.0045 -0.0191  
Z -0.0402 -0.0074 -0.0203 0.0094 0.0157 -0.0078  
AT. 14 C X 0.0144 -0.0015 0.0108 0.0017 -0.0046 -0.0068  
Y 0.0255 -0.0350 -0.0285 0.0272 0.0045 0.0191  
Z -0.0402 0.0074 -0.0203 -0.0094 0.0157 0.0078  
AT. 15 C X -0.0041 -0.0134 0.0189 0.0177 -0.0052 0.0143  
Y 0.0045 0.0138 -0.0248 -0.0125 0.0008 -0.0153  
Z -0.0385 -0.0125 -0.0332 -0.0009 0.0108 -0.0171  
AT. 16 C X -0.0041 0.0134 0.0189 -0.0177 -0.0052 -0.0143  
Y 0.0045 -0.0138 -0.0248 0.0125 0.0008 0.0153  
Z -0.0385 0.0125 -0.0332 0.0009 0.0108 0.0171  
AT. 17 H X 0.0047 -0.0232 0.0358 0.0280 -0.0134 0.0282  
Y 0.0165 0.0181 -0.0084 -0.0059 -0.0008 -0.0029  
Z -0.0509 -0.0216 -0.0481 -0.0059 0.0101 -0.0283  
AT. 18 H X 0.0047 0.0232 0.0358 -0.0280 -0.0134 -0.0282  
Y 0.0165 -0.0181 -0.0084 0.0059 -0.0008 0.0029  
Z -0.0509 0.0216 -0.0481 0.0059 0.0101 0.0283  
AT. 19 H X -0.0273 -0.0263 0.0204 0.0291 -0.0029 0.0144  
Y -0.0123 0.0065 -0.0474 -0.0226 0.0027 -0.0332  
Z -0.0523 -0.0197 -0.0415 -0.0014 0.0126 -0.0238  
AT. 20 H X -0.0273 0.0263 0.0204 -0.0291 -0.0029 -0.0144

Y -0.0123 -0.0065 -0.0474 0.0226 0.0027 0.0332  
Z -0.0523 0.0197 -0.0415 0.0014 0.0126 0.0238  
AT. 21 C X 0.0143 0.0058 -0.0049 -0.0090 0.0188 0.0030  
Y -0.0108 -0.0024 0.0030 0.0176 -0.0349 -0.0314  
Z 0.0131 0.0094 0.0246 -0.0144 -0.0046 -0.0189  
AT. 22 C X 0.0143 -0.0058 -0.0049 0.0090 0.0188 -0.0030  
Y -0.0108 0.0024 0.0030 -0.0176 -0.0349 0.0314  
Z 0.0131 -0.0094 0.0246 0.0144 -0.0046 0.0189  
AT. 23 C X 0.0158 0.0042 -0.0088 -0.0107 0.0241 0.0102  
Y -0.0196 -0.0080 0.0003 0.0267 -0.0447 -0.0320  
Z 0.0177 0.0095 0.0207 -0.0200 0.0062 -0.0090  
AT. 24 C X 0.0158 -0.0042 -0.0088 0.0107 0.0241 -0.0102  
Y -0.0196 0.0080 0.0003 -0.0267 -0.0447 0.0320  
Z 0.0177 -0.0095 0.0207 0.0200 0.0062 0.0090  
AT. 25 H X 0.0241 0.0085 -0.0018 -0.0234 0.0491 0.0301  
Y -0.0211 -0.0085 0.0002 0.0275 -0.0450 -0.0317  
Z 0.0378 0.0188 0.0283 -0.0425 0.0375 0.0100  
AT. 26 H X 0.0241 -0.0085 -0.0018 0.0234 0.0491 -0.0301  
Y -0.0211 0.0085 0.0002 -0.0275 -0.0450 0.0317  
Z 0.0378 -0.0188 0.0283 0.0425 0.0375 -0.0100  
AT. 27 H X 0.0088 -0.0005 -0.0177 -0.0017 0.0157 0.0082  
Y -0.0425 -0.0172 -0.0091 0.0519 -0.0796 -0.0519  
Z 0.0082 0.0061 0.0181 -0.0102 -0.0088 -0.0182  
AT. 28 H X 0.0088 0.0005 -0.0177 0.0017 0.0157 -0.0082  
Y -0.0425 0.0172 -0.0091 -0.0519 -0.0796 0.0519  
Z 0.0082 -0.0061 0.0181 0.0102 -0.0088 0.0182  
AT. 29 C X 0.0084 -0.0162 0.0267 0.0009 -0.0376 -0.0066  
Y 0.0159 0.0138 0.0131 -0.0078 -0.0249 -0.0178  
Z -0.0382 -0.0073 -0.0081 0.0144 0.0212 0.0018  
AT. 30 C X 0.0084 0.0162 0.0267 -0.0009 -0.0376 0.0066  
Y 0.0159 -0.0138 0.0131 0.0078 -0.0249 0.0178  
Z -0.0382 0.0073 -0.0081 -0.0144 0.0212 -0.0018

AT. 31 H X 0.0030 -0.0277 0.0286 0.0030 -0.0491 -0.0119  
Y -0.0008 0.0138 0.0010 0.0042 -0.0154 -0.0132  
Z -0.0655 -0.0141 -0.0247 0.0337 0.0278 0.0054

AT. 32 H X 0.0030 0.0277 0.0286 -0.0030 -0.0491 0.0119  
Y -0.0008 -0.0138 0.0010 -0.0042 -0.0154 0.0132  
Z -0.0655 0.0141 -0.0247 -0.0337 0.0278 -0.0054

AT. 33 H X 0.0261 -0.0149 0.0419 -0.0074 -0.0412 -0.0045  
Y 0.0391 0.0127 0.0313 -0.0260 -0.0386 -0.0250  
Z -0.0369 -0.0060 -0.0058 0.0161 0.0249 0.0064

AT. 34 H X 0.0261 0.0149 0.0419 0.0074 -0.0412 0.0045  
Y 0.0391 -0.0127 0.0313 0.0260 -0.0386 0.0250  
Z -0.0369 0.0060 -0.0058 -0.0161 0.0249 -0.0064

AT. 35 C X -0.0097 -0.0127 0.0065 0.0103 -0.0283 -0.0070  
Y -0.0051 -0.0014 0.0090 0.0078 -0.0284 -0.0156  
Z -0.0008 0.0031 0.0149 -0.0099 0.0159 0.0004

AT. 36 C X -0.0097 0.0127 0.0065 -0.0103 -0.0283 0.0070  
Y -0.0051 0.0014 0.0090 -0.0078 -0.0284 0.0156  
Z -0.0008 -0.0031 0.0149 0.0099 0.0159 -0.0004

AT. 37 C X 0.0097 0.0015 0.0095 -0.0032 -0.0115 -0.0006  
Y 0.0088 -0.0008 0.0221 -0.0016 -0.0407 -0.0202  
Z 0.0367 0.0153 0.0371 -0.0360 0.0093 -0.0024

AT. 38 C X 0.0097 -0.0015 0.0095 0.0032 -0.0115 0.0006  
Y 0.0088 0.0008 0.0221 0.0016 -0.0407 0.0202  
Z 0.0367 -0.0153 0.0371 0.0360 0.0093 0.0024

AT. 39 H X 0.0388 0.0050 0.0278 -0.0268 -0.0095 0.0055  
Y 0.0263 0.0014 0.0369 -0.0142 -0.0520 -0.0244  
Z 0.0493 0.0168 0.0434 -0.0473 0.0157 0.0038

AT. 40 H X 0.0388 -0.0050 0.0278 0.0268 -0.0095 -0.0055  
Y 0.0263 -0.0014 0.0369 0.0142 -0.0520 0.0244  
Z 0.0493 -0.0168 0.0434 0.0473 0.0157 -0.0038

AT. 41 H X -0.0159 -0.0011 -0.0084 0.0180 -0.0118 -0.0060  
Y 0.0032 -0.0100 0.0220 -0.0005 -0.0417 -0.0168

Z 0.0666 0.0244 0.0544 -0.0584 0.0105 0.0006  
AT. 42 H X -0.0159 0.0011 -0.0084 -0.0180 -0.0118 0.0060  
Y 0.0032 0.0100 0.0220 0.0005 -0.0417 0.0168  
Z 0.0666 -0.0244 0.0544 0.0584 0.0105 -0.0006  
AT. 43 C X 0.0004 0.0095 -0.0003 0.0056 -0.0015 0.0052  
Y -0.0019 0.0100 0.0051 0.0069 -0.0179 -0.0120  
Z 0.0092 0.0131 0.0273 -0.0110 -0.0127 -0.0159  
AT. 44 C X 0.0004 -0.0095 -0.0003 -0.0056 -0.0015 -0.0052  
Y -0.0019 -0.0100 0.0051 -0.0069 -0.0179 0.0120  
Z 0.0092 -0.0131 0.0273 0.0110 -0.0127 0.0159  
AT. 45 H X -0.0100 0.0123 -0.0060 0.0152 0.0025 0.0114  
Y -0.0146 -0.0004 -0.0072 0.0079 -0.0150 -0.0161  
Z 0.0285 0.0211 0.0429 -0.0184 -0.0177 -0.0152  
AT. 46 H X -0.0100 -0.0123 -0.0060 -0.0152 0.0025 -0.0114  
Y -0.0146 0.0004 -0.0072 -0.0079 -0.0150 0.0161  
Z 0.0285 -0.0211 0.0429 0.0184 -0.0177 0.0152  
AT. 47 H X 0.0130 0.0179 0.0057 0.0004 0.0063 0.0107  
Y 0.0083 0.0200 0.0132 0.0066 -0.0156 -0.0056  
Z 0.0029 0.0122 0.0278 -0.0039 -0.0214 -0.0170  
AT. 48 H X 0.0130 -0.0179 0.0057 -0.0004 0.0063 -0.0107  
Y 0.0083 -0.0200 0.0132 -0.0066 -0.0156 0.0056  
Z 0.0029 -0.0122 0.0278 0.0039 -0.0214 0.0170  
AT. 49 C X -0.0188 -0.0053 -0.0082 0.0143 -0.0157 -0.0044  
Y -0.0109 0.0101 -0.0074 0.0097 -0.0030 -0.0062  
Z -0.0179 0.0018 0.0019 -0.0025 -0.0006 -0.0145  
AT. 50 C X -0.0188 0.0053 -0.0082 -0.0143 -0.0157 0.0044  
Y -0.0109 -0.0101 -0.0074 -0.0097 -0.0030 0.0062  
Z -0.0179 -0.0018 0.0019 0.0025 -0.0006 0.0145  
AT. 51 C X -0.0044 -0.0087 0.0103 0.0090 -0.0253 -0.0038  
Y 0.0026 0.0242 0.0027 0.0049 -0.0050 -0.0072  
Z -0.0444 -0.0094 -0.0247 0.0071 0.0097 -0.0146  
AT. 52 C X -0.0044 0.0087 0.0103 -0.0090 -0.0253 0.0038



Y 0.0026 -0.0242 0.0027 -0.0049 -0.0050 0.0072  
Z -0.0444 0.0094 -0.0247 -0.0071 0.0097 0.0146  
AT. 53 H X 0.0028 -0.0010 0.0213 0.0100 -0.0234 0.0009  
Y 0.0096 0.0359 0.0099 0.0043 -0.0040 -0.0058  
Z -0.0485 -0.0093 -0.0360 0.0042 0.0071 -0.0216  
AT. 54 H X 0.0028 0.0010 0.0213 -0.0100 -0.0234 -0.0009  
Y 0.0096 -0.0359 0.0099 -0.0043 -0.0040 0.0058  
Z -0.0485 0.0093 -0.0360 -0.0042 0.0071 0.0216  
AT. 55 H X -0.0144 -0.0193 -0.0043 0.0073 -0.0276 -0.0106  
Y -0.0070 0.0236 -0.0020 0.0133 0.0027 -0.0017  
Z -0.0627 -0.0177 -0.0406 0.0162 0.0173 -0.0124  
AT. 56 H X -0.0144 0.0193 -0.0043 -0.0073 -0.0276 0.0106  
Y -0.0070 -0.0236 -0.0020 -0.0133 0.0027 0.0017  
Z -0.0627 0.0177 -0.0406 -0.0162 0.0173 0.0124  
AT. 57 C X -0.0254 -0.0233 0.0045 0.0215 -0.0400 -0.0122  
Y -0.0213 -0.0158 0.0110 0.0209 -0.0383 -0.0162  
Z 0.0058 0.0020 0.0217 -0.0128 0.0250 0.0102  
AT. 58 C X -0.0254 0.0233 0.0045 -0.0215 -0.0400 0.0122  
Y -0.0213 0.0158 0.0110 -0.0209 -0.0383 0.0162  
Z 0.0058 -0.0020 0.0217 0.0128 0.0250 -0.0102  
AT. 59 H X -0.0409 -0.0334 0.0027 0.0328 -0.0509 -0.0177  
Y -0.0281 -0.0165 0.0026 0.0257 -0.0304 -0.0125  
Z -0.0153 -0.0064 0.0077 0.0023 0.0287 0.0117  
AT. 60 H X -0.0409 0.0334 0.0027 -0.0328 -0.0509 0.0177  
Y -0.0281 0.0165 0.0026 -0.0257 -0.0304 0.0125  
Z -0.0153 0.0064 0.0077 -0.0023 0.0287 -0.0117  
AT. 61 H X -0.0128 -0.0228 0.0186 0.0142 -0.0420 -0.0085  
Y -0.0115 -0.0151 0.0237 0.0142 -0.0498 -0.0211  
Z 0.0103 0.0018 0.0266 -0.0153 0.0290 0.0155  
AT. 62 H X -0.0128 0.0228 0.0186 -0.0142 -0.0420 0.0085  
Y -0.0115 0.0151 0.0237 -0.0142 -0.0498 0.0211  
Z 0.0103 -0.0018 0.0266 0.0153 0.0290 -0.0155

AT. 63 H X -0.0335 -0.0213 -0.0089 0.0260 -0.0349 -0.0142  
Y -0.0371 -0.0265 0.0086 0.0332 -0.0415 -0.0150  
Z 0.0269 0.0094 0.0358 -0.0276 0.0232 0.0110

AT. 64 H X -0.0335 0.0213 -0.0089 -0.0260 -0.0349 0.0142  
Y -0.0371 0.0265 0.0086 -0.0332 -0.0415 0.0150  
Z 0.0269 -0.0094 0.0358 0.0276 0.0232 -0.0110

AT. 65 C X -0.0389 -0.0062 -0.0288 0.0232 -0.0108 -0.0079  
Y -0.0229 0.0089 -0.0263 0.0137 0.0174 0.0003  
Z -0.0281 0.0016 -0.0052 0.0028 -0.0066 -0.0209

AT. 66 C X -0.0389 0.0062 -0.0288 -0.0232 -0.0108 0.0079  
Y -0.0229 -0.0089 -0.0263 -0.0137 0.0174 -0.0003  
Z -0.0281 -0.0016 -0.0052 -0.0028 -0.0066 0.0209

AT. 67 H X -0.0526 -0.0050 -0.0431 0.0295 -0.0067 -0.0100  
Y -0.0266 0.0013 -0.0296 0.0171 0.0232 0.0028  
Z -0.0130 0.0076 0.0100 -0.0056 -0.0151 -0.0213

AT. 68 H X -0.0526 0.0050 -0.0431 -0.0295 -0.0067 0.0100  
Y -0.0266 -0.0013 -0.0296 -0.0171 0.0232 -0.0028  
Z -0.0130 -0.0076 0.0100 0.0056 -0.0151 0.0213

AT. 69 H X -0.0327 -0.0020 -0.0266 0.0189 -0.0086 -0.0058  
Y -0.0208 0.0154 -0.0267 0.0110 0.0159 -0.0007  
Z -0.0381 0.0031 -0.0105 0.0075 -0.0130 -0.0267

AT. 70 H X -0.0327 0.0020 -0.0266 -0.0189 -0.0086 0.0058  
Y -0.0208 -0.0154 -0.0267 -0.0110 0.0159 0.0007  
Z -0.0381 -0.0031 -0.0105 -0.0075 -0.0130 0.0267

AT. 71 H X -0.0464 -0.0118 -0.0310 0.0291 -0.0143 -0.0110  
Y -0.0290 0.0074 -0.0358 0.0163 0.0274 0.0033  
Z -0.0422 -0.0049 -0.0200 0.0106 0.0045 -0.0189

AT. 72 H X -0.0464 0.0118 -0.0310 -0.0291 -0.0143 0.0110  
Y -0.0290 -0.0074 -0.0358 -0.0163 0.0274 -0.0033  
Z -0.0422 0.0049 -0.0200 -0.0106 0.0045 0.0189

AT. 73 C X -0.0329 -0.0152 -0.0140 0.0219 -0.0250 -0.0098  
Y -0.0235 -0.0032 -0.0100 0.0175 -0.0089 -0.0074

Z -0.0090 0.0020 0.0085 -0.0063 0.0092 -0.0058  
AT. 74 C X -0.0329 0.0152 -0.0140 -0.0219 -0.0250 0.0098  
Y -0.0235 0.0032 -0.0100 -0.0175 -0.0089 0.0074  
Z -0.0090 -0.0020 0.0085 0.0063 0.0092 0.0058  
AT. 75 H X -0.0468 -0.0254 -0.0189 0.0299 -0.0347 -0.0146  
Y -0.0318 -0.0044 -0.0190 0.0219 0.0010 -0.0031  
Z -0.0306 -0.0071 -0.0077 0.0053 0.0156 -0.0031  
AT. 76 H X -0.0468 0.0254 -0.0189 -0.0299 -0.0347 0.0146  
Y -0.0318 0.0044 -0.0190 -0.0219 0.0010 0.0031  
Z -0.0306 0.0071 -0.0077 -0.0053 0.0156 0.0031  
AT. 77 H X -0.0458 -0.0153 -0.0275 0.0275 -0.0204 -0.0105  
Y -0.0351 -0.0123 -0.0145 0.0257 -0.0087 -0.0057  
Z 0.0138 0.0102 0.0251 -0.0194 0.0048 -0.0062  
AT. 78 H X -0.0458 0.0153 -0.0275 -0.0275 -0.0204 0.0105  
Y -0.0351 0.0123 -0.0145 -0.0257 -0.0087 0.0057  
Z 0.0138 -0.0102 0.0251 0.0194 0.0048 0.0062  
AT. 79 I X 0.0009 0.0058 -0.0047 0.0062 -0.0003 -0.0035  
Y -0.0087 -0.0054 -0.0022 -0.0009 0.0021 -0.0051  
Z -0.0018 0.0147 0.0034 0.0007 -0.0023 -0.0076  
AT. 80 I X 0.0009 -0.0058 -0.0047 -0.0062 -0.0003 0.0035  
Y -0.0087 0.0054 -0.0022 0.0009 0.0021 0.0051  
Z -0.0018 -0.0147 0.0034 -0.0007 -0.0023 0.0076  
AT. 81 I X -0.0115 -0.0033 0.0114 0.0010 0.0106 0.0135  
Y -0.0001 -0.0150 -0.0128 -0.0067 -0.0143 -0.0109  
Z -0.0121 -0.0051 0.0094 0.0015 0.0107 0.0099  
AT. 82 I X -0.0115 0.0033 0.0114 -0.0010 0.0106 -0.0135  
Y -0.0001 0.0150 -0.0128 0.0067 -0.0143 0.0109  
Z -0.0121 0.0051 0.0094 -0.0015 0.0107 -0.0099  
AT. 83 O X 0.0180 0.0095 -0.0042 0.0217 0.0012 0.0177  
Y 0.0263 0.0650 -0.0044 0.0556 0.0025 -0.0499  
Z 0.0076 -0.0226 0.0184 0.0101 -0.0170 0.0038  
AT. 84 O X 0.0180 -0.0095 -0.0042 -0.0217 0.0012 -0.0177

Y 0.0263 -0.0650 -0.0044 -0.0556 0.0025 0.0499  
Z 0.0076 0.0226 0.0184 -0.0101 -0.0170 -0.0038  
AT. 85 O X -0.0145 0.0029 0.0138 -0.0067 0.0276 0.0258  
Y 0.0254 0.0452 0.0136 0.0255 -0.0029 0.0583  
Z 0.0202 0.0387 -0.0218 0.0318 -0.0124 0.0385  
AT. 86 O X -0.0145 -0.0029 0.0138 0.0067 0.0276 -0.0258  
Y 0.0254 -0.0452 0.0136 -0.0255 -0.0029 -0.0583  
Z 0.0202 -0.0387 -0.0218 -0.0318 -0.0124 -0.0385  
AT. 87 N X 0.0272 0.0150 -0.0038 0.0239 -0.0135 -0.0027  
Y 0.0064 0.0175 -0.0084 -0.0046 0.0379 0.0205  
Z 0.0029 -0.0221 0.0186 0.0132 -0.0106 0.0121  
AT. 88 N X 0.0272 -0.0150 -0.0038 -0.0239 -0.0135 0.0027  
Y 0.0064 -0.0175 -0.0084 0.0046 0.0379 -0.0205  
Z 0.0029 0.0221 0.0186 -0.0132 -0.0106 -0.0121  
AT. 89 N X -0.0020 0.0102 0.0118 -0.0026 0.0040 0.0141  
Y -0.0004 0.0119 0.0046 -0.0097 0.0365 0.0293  
Z 0.0031 0.0167 -0.0285 0.0056 0.0112 0.0083  
AT. 90 N X -0.0020 -0.0102 0.0118 0.0026 0.0040 -0.0141  
Y -0.0004 -0.0119 0.0046 0.0097 0.0365 -0.0293  
Z 0.0031 -0.0167 -0.0285 -0.0056 0.0112 -0.0083  
AT. 91 C X 0.0226 0.0136 -0.0040 0.0235 -0.0035 0.0066  
Y 0.0182 0.0382 -0.0065 0.0289 0.0142 -0.0118  
Z 0.0061 -0.0191 0.0178 0.0168 -0.0134 0.0080  
AT. 92 C X 0.0226 -0.0136 -0.0040 -0.0235 -0.0035 -0.0066  
Y 0.0182 -0.0382 -0.0065 -0.0289 0.0142 0.0118  
Z 0.0061 0.0191 0.0178 -0.0168 -0.0134 -0.0080  
AT. 93 C X 0.0207 0.0236 -0.0041 0.0318 0.0009 0.0024  
Y 0.0096 0.0168 -0.0039 0.0206 0.0058 -0.0020  
Z -0.0006 -0.0169 0.0201 0.0213 -0.0118 0.0081  
AT. 94 C X 0.0207 -0.0236 -0.0041 -0.0318 0.0009 -0.0024  
Y 0.0096 -0.0168 -0.0039 -0.0206 0.0058 0.0020  
Z -0.0006 0.0169 0.0201 -0.0213 -0.0118 -0.0081

AT. 95 H X 0.0420 0.0375 -0.0049 0.0593 -0.0009 0.0049  
Y -0.0018 0.0114 -0.0062 -0.0005 0.0086 -0.0059  
Z -0.0033 -0.0212 0.0249 0.0314 -0.0153 0.0120

AT. 96 H X 0.0420 -0.0375 -0.0049 -0.0593 -0.0009 -0.0049  
Y -0.0018 -0.0114 -0.0062 0.0005 0.0086 0.0059  
Z -0.0033 0.0212 0.0249 -0.0314 -0.0153 -0.0120

AT. 97 H X 0.0174 0.0317 -0.0055 0.0309 0.0052 -0.0018  
Y 0.0166 0.0120 0.0030 0.0444 -0.0007 0.0043  
Z 0.0019 -0.0210 0.0221 0.0267 -0.0146 0.0108

AT. 98 H X 0.0174 -0.0317 -0.0055 -0.0309 0.0052 0.0018  
Y 0.0166 -0.0120 0.0030 -0.0444 -0.0007 -0.0043  
Z 0.0019 0.0210 0.0221 -0.0267 -0.0146 -0.0108

AT. 99 C X -0.0079 0.0117 0.0151 0.0006 0.0189 0.0278  
Y 0.0096 0.0243 0.0094 0.0048 0.0136 0.0419  
Z 0.0106 0.0235 -0.0262 0.0139 -0.0027 0.0155

AT. 100 C X -0.0079 -0.0117 0.0151 -0.0006 0.0189 -0.0278  
Y 0.0096 -0.0243 0.0094 -0.0048 0.0136 -0.0419  
Z 0.0106 -0.0235 -0.0262 -0.0139 -0.0027 -0.0155

AT. 101 C X -0.0012 0.0217 0.0154 0.0078 0.0209 0.0428  
Y 0.0047 0.0089 0.0108 0.0011 0.0089 0.0357  
Z 0.0025 0.0095 -0.0254 0.0020 -0.0050 -0.0048

AT. 102 C X -0.0012 -0.0217 0.0154 -0.0078 0.0209 -0.0428  
Y 0.0047 -0.0089 0.0108 -0.0011 0.0089 -0.0357  
Z 0.0025 -0.0095 -0.0254 -0.0020 -0.0050 0.0048

AT. 103 H X 0.0023 0.0379 0.0238 0.0136 0.0319 0.0636  
Y 0.0036 0.0024 0.0075 -0.0012 0.0042 0.0277  
Z -0.0018 0.0024 -0.0362 -0.0071 -0.0110 -0.0291

AT. 104 H X 0.0023 -0.0379 0.0238 -0.0136 0.0319 -0.0636  
Y 0.0036 -0.0024 0.0075 0.0012 0.0042 -0.0277  
Z -0.0018 -0.0024 -0.0362 0.0071 -0.0110 0.0291

AT. 105 H X 0.0058 0.0254 0.0054 0.0118 0.0162 0.0457  
Y 0.0067 0.0131 0.0271 0.0068 0.0176 0.0606

Z 0.0048 0.0117 -0.0215 0.0046 -0.0028 0.0050  
AT.106 H X 0.0058 -0.0254 0.0054 -0.0118 0.0162 -0.0457  
Y 0.0067 -0.0131 0.0271 -0.0068 0.0176 -0.0606  
Z 0.0048 -0.0117 -0.0215 -0.0046 -0.0028 -0.0050  
AT.107 C X 0.0315 0.0164 -0.0074 0.0206 -0.0165 -0.0050  
Y -0.0088 0.0021 0.0054 -0.0185 0.0399 0.0202  
Z 0.0017 -0.0282 0.0185 -0.0002 -0.0146 0.0071  
AT.108 C X 0.0315 -0.0164 -0.0074 -0.0206 -0.0165 0.0050  
Y -0.0088 -0.0021 0.0054 0.0185 0.0399 -0.0202  
Z 0.0017 0.0282 0.0185 0.0002 -0.0146 -0.0071  
AT.109 H X 0.0435 0.0213 -0.0098 0.0279 -0.0247 -0.0072  
Y -0.0047 -0.0039 0.0162 -0.0144 0.0326 0.0233  
Z 0.0047 -0.0395 0.0377 0.0030 -0.0228 0.0139  
AT.110 H X 0.0435 -0.0213 -0.0098 -0.0279 -0.0247 0.0072  
Y -0.0047 0.0039 0.0162 0.0144 0.0326 -0.0233  
Z 0.0047 0.0395 0.0377 -0.0030 -0.0228 -0.0139  
AT.111 H X 0.0331 0.0176 -0.0037 0.0303 -0.0165 -0.0002  
Y -0.0217 0.0074 -0.0086 -0.0311 0.0533 0.0144  
Z 0.0026 -0.0306 0.0176 -0.0081 -0.0174 0.0033  
AT.112 H X 0.0331 -0.0176 -0.0037 -0.0303 -0.0165 0.0002  
Y -0.0217 -0.0074 -0.0086 0.0311 0.0533 -0.0144  
Z 0.0026 0.0306 0.0176 0.0081 -0.0174 -0.0033  
AT.113 C X 0.0146 0.0104 -0.0100 -0.0047 -0.0092 -0.0109  
Y -0.0124 -0.0131 0.0262 -0.0213 0.0327 0.0264  
Z -0.0019 -0.0156 -0.0055 -0.0091 -0.0038 -0.0031  
AT.114 C X 0.0146 -0.0104 -0.0100 0.0047 -0.0092 0.0109  
Y -0.0124 0.0131 0.0262 0.0213 0.0327 -0.0264  
Z -0.0019 0.0156 -0.0055 0.0091 -0.0038 0.0031  
AT.115 C X 0.0028 0.0099 0.0030 -0.0057 -0.0002 0.0037  
Y -0.0163 -0.0039 0.0140 -0.0264 0.0412 0.0246  
Z -0.0044 0.0011 -0.0329 -0.0167 0.0077 -0.0135  
AT.116 C X 0.0028 -0.0099 0.0030 0.0057 -0.0002 -0.0037

Y -0.0163 0.0039 0.0140 0.0264 0.0412 -0.0246  
Z -0.0044 -0.0011 -0.0329 0.0167 0.0077 0.0135  
AT. 117 H X 0.0103 0.0146 0.0145 0.0124 -0.0036 0.0193  
Y -0.0270 0.0035 -0.0009 -0.0393 0.0537 0.0193  
Z -0.0096 -0.0060 -0.0408 -0.0328 0.0085 -0.0285  
AT. 118 H X 0.0103 -0.0146 0.0145 -0.0124 -0.0036 -0.0193  
Y -0.0270 -0.0035 -0.0009 0.0393 0.0537 -0.0193  
Z -0.0096 0.0060 -0.0408 0.0328 0.0085 0.0285  
AT. 119 H X -0.0118 0.0022 -0.0082 -0.0321 0.0073 -0.0138  
Y -0.0220 -0.0160 0.0261 -0.0320 0.0395 0.0250  
Z -0.0067 0.0088 -0.0514 -0.0258 0.0136 -0.0237  
AT. 120 H X -0.0118 -0.0022 -0.0082 0.0321 0.0073 0.0138  
Y -0.0220 0.0160 0.0261 0.0320 0.0395 -0.0250  
Z -0.0067 -0.0088 -0.0514 0.0258 0.0136 0.0237  
AT. 121 C X -0.0050 0.0055 0.0064 -0.0118 -0.0010 -0.0005  
Y 0.0083 0.0044 0.0085 -0.0044 0.0291 0.0263  
Z 0.0061 0.0233 -0.0210 0.0177 0.0177 0.0286  
AT. 122 C X -0.0050 -0.0055 0.0064 0.0118 -0.0010 0.0005  
Y 0.0083 -0.0044 0.0085 0.0044 0.0291 -0.0263  
Z 0.0061 -0.0233 -0.0210 -0.0177 0.0177 -0.0286  
AT. 123 H X -0.0146 -0.0007 0.0079 -0.0214 -0.0080 -0.0150  
Y 0.0051 -0.0094 0.0212 -0.0026 0.0177 0.0178  
Z 0.0079 0.0363 -0.0342 0.0143 0.0279 0.0344  
AT. 124 H X -0.0146 0.0007 0.0079 0.0214 -0.0080 0.0150  
Y 0.0051 0.0094 0.0212 0.0026 0.0177 -0.0178  
Z 0.0079 -0.0363 -0.0342 -0.0143 0.0279 -0.0344  
AT. 125 H X -0.0061 0.0073 0.0136 -0.0059 0.0025 0.0104  
Y 0.0186 0.0198 -0.0080 -0.0023 0.0385 0.0354  
Z 0.0100 0.0326 -0.0206 0.0251 0.0269 0.0462  
AT. 126 H X -0.0061 -0.0073 0.0136 0.0059 0.0025 -0.0104  
Y 0.0186 -0.0198 -0.0080 0.0023 0.0385 -0.0354  
Z 0.0100 -0.0326 -0.0206 -0.0251 0.0269 -0.0462

AT. 127 C X 0.0071 0.0074 -0.0077 -0.0123 -0.0062 -0.0113  
Y 0.0109 -0.0073 0.0167 -0.0016 0.0200 0.0203  
Z 0.0049 0.0011 0.0016 0.0229 0.0033 0.0213

AT. 128 C X 0.0071 -0.0074 -0.0077 0.0123 -0.0062 0.0113  
Y 0.0109 0.0073 0.0167 0.0016 0.0200 -0.0203  
Z 0.0049 -0.0011 0.0016 -0.0229 0.0033 -0.0213

AT. 129 C X 0.0217 0.0135 -0.0073 0.0114 -0.0115 -0.0068  
Y 0.0158 0.0113 -0.0015 0.0026 0.0293 0.0257  
Z 0.0044 -0.0175 0.0210 0.0261 -0.0091 0.0160

AT. 130 C X 0.0217 -0.0135 -0.0073 -0.0114 -0.0115 0.0068  
Y 0.0158 -0.0113 -0.0015 -0.0026 0.0293 -0.0257  
Z 0.0044 0.0175 0.0210 -0.0261 -0.0091 -0.0160

AT. 131 H X 0.0204 0.0107 -0.0007 0.0157 -0.0127 -0.0065  
Y 0.0271 0.0282 -0.0176 0.0131 0.0342 0.0317  
Z 0.0077 -0.0138 0.0225 0.0356 -0.0083 0.0189

AT. 132 H X 0.0204 -0.0107 -0.0007 -0.0157 -0.0127 0.0065  
Y 0.0271 -0.0282 -0.0176 -0.0131 0.0342 -0.0317  
Z 0.0077 0.0138 0.0225 -0.0356 -0.0083 -0.0189

AT. 133 H X 0.0296 0.0199 -0.0175 0.0137 -0.0114 -0.0035  
Y 0.0190 0.0043 0.0048 0.0038 0.0236 0.0243  
Z 0.0049 -0.0320 0.0361 0.0262 -0.0174 0.0133

AT. 134 H X 0.0296 -0.0199 -0.0175 -0.0137 -0.0114 0.0035  
Y 0.0190 -0.0043 0.0048 -0.0038 0.0236 -0.0243  
Z 0.0049 0.0320 0.0361 -0.0262 -0.0174 -0.0133

AT. 135 C X 0.0152 0.0072 -0.0188 -0.0156 -0.0122 -0.0234  
Y -0.0241 -0.0287 0.0462 -0.0298 0.0322 0.0354  
Z -0.0063 -0.0290 -0.0079 -0.0309 -0.0091 -0.0179

AT. 136 C X 0.0152 -0.0072 -0.0188 0.0156 -0.0122 0.0234  
Y -0.0241 0.0287 0.0462 0.0298 0.0322 -0.0354  
Z -0.0063 0.0290 -0.0079 0.0309 -0.0091 0.0179

AT. 137 H X 0.0217 0.0059 -0.0294 -0.0204 -0.0190 -0.0380  
Y -0.0201 -0.0383 0.0510 -0.0260 0.0224 0.0307



Z -0.0029 -0.0450 0.0052 -0.0243 -0.0217 -0.0193  
AT. 138 H X 0.0217 -0.0059 -0.0294 0.0204 -0.0190 0.0380  
Y -0.0201 0.0383 0.0510 0.0260 0.0224 -0.0307  
Z -0.0029 0.0450 0.0052 0.0243 -0.0217 0.0193  
AT. 139 H X 0.0215 0.0119 -0.0160 -0.0000 -0.0143 -0.0175  
Y -0.0354 -0.0180 0.0438 -0.0390 0.0486 0.0453  
Z -0.0111 -0.0383 -0.0103 -0.0478 -0.0110 -0.0279  
AT. 140 H X 0.0215 -0.0119 -0.0160 0.0000 -0.0143 0.0175  
Y -0.0354 0.0180 0.0438 0.0390 0.0486 -0.0453  
Z -0.0111 0.0383 -0.0103 0.0478 -0.0110 0.0279  
AT. 141 H X 0.0028 0.0019 -0.0173 -0.0373 -0.0054 -0.0244  
Y -0.0250 -0.0424 0.0573 -0.0309 0.0243 0.0350  
Z -0.0106 -0.0171 -0.0189 -0.0396 0.0023 -0.0179  
AT. 142 H X 0.0028 -0.0019 -0.0173 0.0373 -0.0054 0.0244  
Y -0.0250 0.0424 0.0573 0.0309 0.0243 -0.0350  
Z -0.0106 0.0171 -0.0189 0.0396 0.0023 0.0179  
AT. 143 C X 0.0014 0.0056 -0.0146 -0.0257 -0.0058 -0.0180  
Y 0.0240 -0.0196 0.0218 0.0103 0.0047 0.0104  
Z 0.0098 0.0075 0.0090 0.0379 0.0067 0.0328  
AT. 144 C X 0.0014 -0.0056 -0.0146 0.0257 -0.0058 0.0180  
Y 0.0240 0.0196 0.0218 -0.0103 0.0047 -0.0104  
Z 0.0098 -0.0075 0.0090 -0.0379 0.0067 -0.0328  
AT. 145 H X -0.0104 0.0037 -0.0195 -0.0421 -0.0016 -0.0207  
Y 0.0206 -0.0289 0.0260 0.0071 0.0019 0.0095  
Z 0.0104 0.0166 0.0030 0.0368 0.0109 0.0331  
AT. 146 H X -0.0104 -0.0037 -0.0195 0.0421 -0.0016 0.0207  
Y 0.0206 0.0289 0.0260 -0.0071 0.0019 -0.0095  
Z 0.0104 -0.0166 0.0030 -0.0368 0.0109 -0.0331  
AT. 147 H X 0.0003 0.0070 -0.0087 -0.0223 -0.0021 -0.0106  
Y 0.0355 -0.0116 0.0158 0.0214 0.0021 0.0080  
Z 0.0146 0.0138 0.0144 0.0489 0.0107 0.0422  
AT. 148 H X 0.0003 -0.0070 -0.0087 0.0223 -0.0021 0.0106

Y 0.0355 0.0116 0.0158 -0.0214 0.0021 -0.0080  
Z 0.0146 -0.0138 0.0144 -0.0489 0.0107 -0.0422  
AT. 149 H X 0.0101 0.0035 -0.0194 -0.0196 -0.0142 -0.0271  
Y 0.0268 -0.0265 0.0249 0.0129 -0.0008 0.0073  
Z 0.0105 -0.0041 0.0176 0.0391 0.0013 0.0320  
AT. 150 H X 0.0101 -0.0035 -0.0194 0.0196 -0.0142 0.0271  
Y 0.0268 0.0265 0.0249 -0.0129 -0.0008 -0.0073  
Z 0.0105 0.0041 0.0176 -0.0391 0.0013 -0.0320  
AT. 151 C X 0.0088 0.0069 -0.0166 -0.0203 -0.0081 -0.0202  
Y 0.0004 -0.0238 0.0365 -0.0098 0.0166 0.0219  
Z 0.0017 -0.0087 -0.0007 0.0069 -0.0014 0.0092  
AT. 152 C X 0.0088 -0.0069 -0.0166 0.0203 -0.0081 0.0202  
Y 0.0004 0.0238 0.0365 0.0098 0.0166 -0.0219  
Z 0.0017 0.0087 -0.0007 -0.0069 -0.0014 -0.0092  
AT. 153 H X 0.0143 0.0076 -0.0249 -0.0208 -0.0118 -0.0283  
Y 0.0038 -0.0302 0.0428 -0.0062 0.0096 0.0195  
Z 0.0042 -0.0203 0.0143 0.0126 -0.0108 0.0095  
AT. 154 H X 0.0143 -0.0076 -0.0249 0.0208 -0.0118 0.0283  
Y 0.0038 0.0302 0.0428 0.0062 0.0096 -0.0195  
Z 0.0042 0.0203 0.0143 -0.0126 -0.0108 -0.0095  
AT. 155 H X -0.0005 0.0027 -0.0180 -0.0366 -0.0044 -0.0244  
Y -0.0002 -0.0348 0.0488 -0.0097 0.0099 0.0213  
Z -0.0005 0.0013 -0.0143 0.0010 0.0072 0.0083  
AT. 156 H X -0.0005 -0.0027 -0.0180 0.0366 -0.0044 0.0244  
Y -0.0002 0.0348 0.0488 0.0097 0.0099 -0.0213  
Z -0.0005 -0.0013 -0.0143 -0.0010 0.0072 -0.0083  
AT. 157 O X -0.0405 -0.0376 -0.0020 0.0126 -0.0196 0.0035  
Y 0.0229 0.0391 -0.0622 -0.0472 0.0280 -0.0284  
Z 0.0045 0.0035 -0.0014 -0.0233 -0.0230 0.0223  
AT. 158 O X -0.0405 0.0376 -0.0020 -0.0126 -0.0196 -0.0035  
Y 0.0229 -0.0391 -0.0622 0.0472 0.0280 0.0284  
Z 0.0045 -0.0035 -0.0014 0.0233 -0.0230 -0.0223

AT.159 O X -0.0280 -0.0308 -0.0015 0.0180 -0.0024 -0.0009  
Y -0.0285 -0.0017 -0.0464 -0.0212 0.0056 -0.0237  
Z 0.0155 0.0062 0.0029 -0.0087 0.0025 0.0161

AT.160 O X -0.0280 0.0308 -0.0015 -0.0180 -0.0024 0.0009  
Y -0.0285 0.0017 -0.0464 0.0212 0.0056 0.0237  
Z 0.0155 -0.0062 0.0029 0.0087 0.0025 -0.0161

AT.161 H X -0.0091 -0.0106 -0.0112 -0.0016 -0.0014 -0.0009  
Y 0.0324 0.0455 -0.0647 -0.0535 0.0277 -0.0277  
Z -0.0075 -0.0021 0.0027 -0.0108 -0.0132 0.0183

AT.162 H X -0.0091 0.0106 -0.0112 0.0016 -0.0014 0.0009  
Y 0.0324 -0.0455 -0.0647 0.0535 0.0277 0.0277  
Z -0.0075 0.0021 0.0027 0.0108 -0.0132 -0.0183

AT.163 H X -0.0108 -0.0218 -0.0025 0.0211 0.0181 -0.0049  
Y -0.0285 0.0044 -0.0310 -0.0216 -0.0045 -0.0030  
Z 0.0095 0.0043 0.0069 -0.0104 -0.0068 0.0225

AT.164 H X -0.0108 0.0218 -0.0025 -0.0211 0.0181 0.0049  
Y -0.0285 -0.0044 -0.0310 0.0216 -0.0045 0.0030  
Z 0.0095 -0.0043 0.0069 0.0104 -0.0068 -0.0225

AT.165 O X 0.0101 0.0256 0.0037 0.0394 0.0014 -0.0192  
Y 0.0231 0.0273 0.0041 0.0354 -0.0075 -0.0048  
Z 0.0301 0.0378 -0.0393 0.0124 -0.0248 0.0062

AT.166 O X 0.0101 -0.0256 0.0037 -0.0394 0.0014 0.0192  
Y 0.0231 -0.0273 0.0041 -0.0354 -0.0075 0.0048  
Z 0.0301 -0.0378 -0.0393 -0.0124 -0.0248 -0.0062

AT.167 H X 0.0142 0.0217 0.0001 0.0321 0.0024 -0.0072  
Y 0.0260 0.0476 -0.0003 0.0496 -0.0104 -0.0234  
Z 0.0161 0.0210 -0.0239 0.0137 -0.0251 0.0008

AT.168 H X 0.0142 -0.0217 0.0001 -0.0321 0.0024 0.0072  
Y 0.0260 -0.0476 -0.0003 -0.0496 -0.0104 0.0234  
Z 0.0161 -0.0210 -0.0239 -0.0137 -0.0251 -0.0008

AT.169 O X -0.0154 0.0191 0.0204 0.0566 0.0018 -0.0289  
Y 0.0260 0.0031 0.0210 0.0227 -0.0161 -0.0343

Z 0.0241 0.0411 -0.0388 0.0183 -0.0227 0.0106  
 AT. 170 O X -0.0154 -0.0191 0.0204 -0.0566 0.0018 0.0289  
 Y 0.0260 -0.0031 0.0210 -0.0227 -0.0161 0.0343  
 Z 0.0241 -0.0411 -0.0388 -0.0183 -0.0227 -0.0106  
 AT. 171 H X -0.0199 0.0039 0.0178 0.0331 0.0184 -0.0276  
 Y 0.0281 -0.0138 0.0229 0.0033 -0.0102 -0.0428  
 Z 0.0304 0.0243 -0.0343 0.0025 -0.0253 -0.0040  
 AT. 172 H X -0.0199 -0.0039 0.0178 -0.0331 0.0184 0.0276  
 Y 0.0281 0.0138 0.0229 -0.0033 -0.0102 0.0428  
 Z 0.0304 -0.0243 -0.0343 -0.0025 -0.0253 0.0040

FREQ(CM\*\*-1) 83.73 83.99 85.36 86.59 88.24 89.90

AT. 1 I X 0.0073 -0.0014 -0.0035 0.0050 0.0070 0.0039  
 Y -0.0081 -0.0116 -0.0076 -0.0099 0.0095 -0.0019  
 Z 0.0090 0.0094 -0.0046 0.0077 -0.0078 -0.0033  
 AT. 2 I X 0.0073 -0.0014 0.0035 -0.0050 0.0070 0.0039  
 Y -0.0081 -0.0116 0.0076 0.0099 0.0095 -0.0019  
 Z 0.0090 0.0094 0.0046 -0.0077 -0.0078 -0.0033  
 AT. 3 I X -0.0125 0.0131 -0.0035 0.0137 -0.0129 -0.0095  
 Y -0.0114 -0.0259 -0.0373 -0.0137 0.0088 -0.0181  
 Z 0.0081 -0.0038 0.0013 -0.0085 0.0098 0.0079  
 AT. 4 I X -0.0125 0.0131 0.0035 -0.0137 -0.0129 -0.0095  
 Y -0.0114 -0.0259 0.0373 0.0137 0.0088 -0.0181  
 Z 0.0081 -0.0038 -0.0013 0.0085 0.0098 0.0079  
 AT. 5 O X 0.0272 0.0211 0.0072 0.0191 0.0109 0.0086  
 Y 0.0428 0.0229 0.0314 0.0091 0.0219 0.0200  
 Z -0.0064 -0.0114 -0.0311 0.0225 -0.0009 -0.0049  
 AT. 6 O X 0.0272 0.0211 -0.0072 -0.0191 0.0109 0.0086  
 Y 0.0428 0.0229 -0.0314 -0.0091 0.0219 0.0200  
 Z -0.0064 -0.0114 0.0311 -0.0225 -0.0009 -0.0049  
 AT. 7 O X -0.0117 -0.0025 -0.0256 0.0187 -0.0119 -0.0215

Y -0.0032 0.0508 0.0378 0.0414 -0.0617 -0.0200  
Z -0.0178 0.0251 0.0103 0.0222 -0.0316 -0.0131  
AT. 8 O X -0.0117 -0.0025 0.0256 -0.0187 -0.0119 -0.0215  
Y -0.0032 0.0508 -0.0378 -0.0414 -0.0617 -0.0200  
Z -0.0178 0.0251 -0.0103 -0.0222 -0.0316 -0.0131  
AT. 9 N X -0.0009 0.0083 0.0136 -0.0111 0.0078 0.0216  
Y 0.0104 -0.0070 0.0104 -0.0229 0.0161 0.0174  
Z -0.0097 -0.0113 -0.0257 0.0176 -0.0010 -0.0009  
AT. 10 N X -0.0009 0.0083 -0.0136 0.0111 0.0078 0.0216  
Y 0.0104 -0.0070 -0.0104 0.0229 0.0161 0.0174  
Z -0.0097 -0.0113 0.0257 -0.0176 -0.0010 -0.0009  
AT. 11 N X 0.0006 -0.0157 -0.0088 -0.0169 0.0205 0.0110  
Y 0.0053 0.0155 0.0247 -0.0087 -0.0050 0.0172  
Z -0.0161 -0.0025 -0.0090 -0.0079 0.0055 0.0079  
AT. 12 N X 0.0006 -0.0157 0.0088 0.0169 0.0205 0.0110  
Y 0.0053 0.0155 -0.0247 0.0087 -0.0050 0.0172  
Z -0.0161 -0.0025 0.0090 0.0079 0.0055 0.0079  
AT. 13 C X 0.0117 0.0102 0.0049 0.0042 0.0077 0.0091  
Y 0.0240 0.0049 0.0177 -0.0069 0.0172 0.0140  
Z -0.0085 -0.0092 -0.0240 0.0192 -0.0012 -0.0007  
AT. 14 C X 0.0117 0.0102 -0.0049 -0.0042 0.0077 0.0091  
Y 0.0240 0.0049 -0.0177 0.0069 0.0172 0.0140  
Z -0.0085 -0.0092 0.0240 -0.0192 -0.0012 -0.0007  
AT. 15 C X 0.0006 -0.0012 -0.0091 0.0031 0.0037 -0.0014  
Y 0.0112 -0.0047 0.0078 -0.0095 0.0136 0.0059  
Z -0.0086 -0.0030 -0.0123 0.0160 -0.0025 0.0039  
AT. 16 C X 0.0006 -0.0012 0.0091 -0.0031 0.0037 -0.0014  
Y 0.0112 -0.0047 -0.0078 0.0095 0.0136 0.0059  
Z -0.0086 -0.0030 0.0123 -0.0160 -0.0025 0.0039  
AT. 17 H X -0.0041 -0.0036 -0.0146 -0.0037 -0.0010 -0.0090  
Y 0.0129 -0.0071 0.0021 -0.0128 0.0124 0.0013  
Z -0.0124 -0.0004 -0.0065 0.0184 -0.0028 0.0070

AT. 18 H X -0.0041 -0.0036 0.0146 0.0037 -0.0010 -0.0090  
Y 0.0129 -0.0071 -0.0021 0.0128 0.0124 0.0013  
Z -0.0124 -0.0004 0.0065 -0.0184 -0.0028 0.0070

AT. 19 H X -0.0081 -0.0103 -0.0201 0.0056 0.0047 -0.0046  
Y 0.0084 -0.0012 0.0167 -0.0054 0.0161 0.0133  
Z -0.0125 -0.0048 -0.0128 0.0181 -0.0011 0.0057

AT. 20 H X -0.0081 -0.0103 0.0201 -0.0056 0.0047 -0.0046  
Y 0.0084 -0.0012 -0.0167 0.0054 0.0161 0.0133  
Z -0.0125 -0.0048 0.0128 -0.0181 -0.0011 0.0057

AT. 21 C X -0.0081 -0.0088 -0.0212 0.0021 0.0041 -0.0084  
Y -0.0006 0.0383 0.0362 0.0186 -0.0378 -0.0028  
Z -0.0191 0.0099 -0.0031 0.0064 -0.0113 -0.0027

AT. 22 C X -0.0081 -0.0088 0.0212 -0.0021 0.0041 -0.0084  
Y -0.0006 0.0383 -0.0362 -0.0186 -0.0378 -0.0028  
Z -0.0191 0.0099 0.0031 -0.0064 -0.0113 -0.0027

AT. 23 C X -0.0083 -0.0160 -0.0301 -0.0029 0.0117 -0.0094  
Y 0.0011 0.0402 0.0432 0.0169 -0.0398 -0.0065  
Z -0.0188 -0.0007 -0.0164 0.0002 -0.0003 -0.0021

AT. 24 C X -0.0083 -0.0160 0.0301 0.0029 0.0117 -0.0094  
Y 0.0011 0.0402 -0.0432 -0.0169 -0.0398 -0.0065  
Z -0.0188 -0.0007 0.0164 -0.0002 -0.0003 -0.0021

AT. 25 H X -0.0143 -0.0475 -0.0684 -0.0187 0.0342 -0.0166  
Y 0.0013 0.0394 0.0429 0.0163 -0.0399 -0.0078  
Z -0.0265 -0.0286 -0.0569 -0.0128 0.0236 -0.0015

AT. 26 H X -0.0143 -0.0475 0.0684 0.0187 0.0342 -0.0166  
Y 0.0013 0.0394 -0.0429 -0.0163 -0.0399 -0.0078  
Z -0.0265 -0.0286 0.0569 0.0128 0.0236 -0.0015

AT. 27 H X -0.0002 -0.0090 -0.0170 -0.0007 0.0085 -0.0055  
Y 0.0105 0.0704 0.0873 0.0334 -0.0667 -0.0077  
Z -0.0162 0.0123 0.0022 0.0075 -0.0127 -0.0038

AT. 28 H X -0.0002 -0.0090 0.0170 0.0007 0.0085 -0.0055  
Y 0.0105 0.0704 -0.0873 -0.0334 -0.0667 -0.0077

Z -0.0162 0.0123 -0.0022 -0.0075 -0.0127 -0.0038  
AT. 29 C X -0.0054 0.0148 0.0193 -0.0083 0.0051 0.0284  
Y 0.0051 0.0021 0.0123 -0.0159 0.0097 0.0210  
Z -0.0079 -0.0128 -0.0367 0.0208 -0.0027 -0.0097  
AT. 30 C X -0.0054 0.0148 -0.0193 0.0083 0.0051 0.0284  
Y 0.0051 0.0021 -0.0123 0.0159 0.0097 0.0210  
Z -0.0079 -0.0128 0.0367 -0.0208 -0.0027 -0.0097  
AT. 31 H X -0.0117 0.0219 0.0265 -0.0056 0.0006 0.0357  
Y 0.0119 -0.0011 0.0056 -0.0081 0.0067 0.0114  
Z -0.0021 -0.0130 -0.0417 0.0337 -0.0101 -0.0192  
AT. 32 H X -0.0117 0.0219 -0.0265 0.0056 0.0006 0.0357  
Y 0.0119 -0.0011 -0.0056 0.0081 0.0067 0.0114  
Z -0.0021 -0.0130 0.0417 -0.0337 -0.0101 -0.0192  
AT. 33 H X -0.0096 0.0184 0.0190 -0.0121 0.0058 0.0302  
Y -0.0044 0.0076 0.0225 -0.0263 0.0144 0.0360  
Z -0.0063 -0.0128 -0.0414 0.0226 -0.0041 -0.0151  
AT. 34 H X -0.0096 0.0184 -0.0190 0.0121 0.0058 0.0302  
Y -0.0044 0.0076 -0.0225 0.0263 0.0144 0.0360  
Z -0.0063 -0.0128 0.0414 -0.0226 -0.0041 -0.0151  
AT. 35 C X 0.0011 0.0067 0.0173 -0.0049 0.0073 0.0233  
Y 0.0052 0.0104 0.0115 -0.0026 -0.0017 0.0168  
Z -0.0151 -0.0135 -0.0349 0.0048 0.0066 -0.0008  
AT. 36 C X 0.0011 0.0067 -0.0173 0.0049 0.0073 0.0233  
Y 0.0052 0.0104 -0.0115 0.0026 -0.0017 0.0168  
Z -0.0151 -0.0135 0.0349 -0.0048 0.0066 -0.0008  
AT. 37 C X -0.0002 -0.0081 0.0002 -0.0142 0.0177 0.0174  
Y 0.0011 0.0170 0.0224 -0.0096 -0.0011 0.0245  
Z -0.0218 -0.0142 -0.0309 -0.0134 0.0167 0.0077  
AT. 38 C X -0.0002 -0.0081 -0.0002 0.0142 0.0177 0.0174  
Y 0.0011 0.0170 -0.0224 0.0096 -0.0011 0.0245  
Z -0.0218 -0.0142 0.0309 0.0134 0.0167 0.0077  
AT. 39 H X -0.0091 -0.0143 -0.0100 -0.0280 0.0300 0.0235

Y -0.0038 0.0226 0.0318 -0.0180 0.0008 0.0313  
Z -0.0257 -0.0212 -0.0423 -0.0197 0.0248 0.0093  
AT. 40 H X -0.0091 -0.0143 0.0100 0.0280 0.0300 0.0235  
Y -0.0038 0.0226 -0.0318 0.0180 0.0008 0.0313  
Z -0.0257 -0.0212 0.0423 0.0197 0.0248 0.0093  
AT. 41 H X 0.0072 -0.0038 0.0080 -0.0020 0.0067 0.0113  
Y -0.0012 0.0177 0.0185 -0.0063 -0.0001 0.0280  
Z -0.0277 -0.0192 -0.0358 -0.0281 0.0266 0.0109  
AT. 42 H X 0.0072 -0.0038 -0.0080 0.0020 0.0067 0.0113  
Y -0.0012 0.0177 -0.0185 0.0063 -0.0001 0.0280  
Z -0.0277 -0.0192 0.0358 0.0281 0.0266 0.0109  
AT. 43 C X 0.0085 -0.0210 -0.0029 -0.0183 0.0210 0.0130  
Y 0.0098 -0.0011 0.0068 -0.0092 0.0033 0.0111  
Z -0.0107 -0.0004 0.0043 -0.0079 0.0017 0.0115  
AT. 44 C X 0.0085 -0.0210 0.0029 0.0183 0.0210 0.0130  
Y 0.0098 -0.0011 -0.0068 0.0092 0.0033 0.0111  
Z -0.0107 -0.0004 -0.0043 0.0079 0.0017 0.0115  
AT. 45 H X 0.0162 -0.0303 -0.0021 -0.0220 0.0239 0.0134  
Y 0.0048 0.0023 0.0005 0.0014 0.0029 0.0086  
Z -0.0106 0.0030 0.0101 -0.0152 -0.0007 0.0131  
AT. 46 H X 0.0162 -0.0303 0.0021 0.0220 0.0239 0.0134  
Y 0.0048 0.0023 -0.0005 -0.0014 0.0029 0.0086  
Z -0.0106 0.0030 -0.0101 0.0152 -0.0007 0.0131  
AT. 47 H X 0.0089 -0.0281 -0.0111 -0.0237 0.0248 0.0100  
Y 0.0150 -0.0078 0.0085 -0.0185 0.0051 0.0108  
Z -0.0059 0.0022 0.0175 -0.0104 -0.0018 0.0154  
AT. 48 H X 0.0089 -0.0281 0.0111 0.0237 0.0248 0.0100  
Y 0.0150 -0.0078 -0.0085 0.0185 0.0051 0.0108  
Z -0.0059 0.0022 -0.0175 0.0104 -0.0018 0.0154  
AT. 49 C X 0.0065 -0.0070 0.0110 -0.0080 0.0133 0.0182  
Y 0.0115 -0.0125 -0.0087 -0.0067 0.0086 0.0054  
Z -0.0102 -0.0059 -0.0073 0.0039 0.0032 0.0080



AT. 50 C X 0.0065 -0.0070 -0.0110 0.0080 0.0133 0.0182  
Y 0.0115 -0.0125 0.0087 0.0067 0.0086 0.0054  
Z -0.0102 -0.0059 0.0073 -0.0039 0.0032 0.0080

AT. 51 C X 0.0017 0.0026 0.0140 -0.0090 0.0090 0.0205  
Y 0.0139 -0.0191 -0.0038 -0.0193 0.0149 0.0075  
Z -0.0093 -0.0086 -0.0161 0.0168 0.0008 0.0043

AT. 52 C X 0.0017 0.0026 -0.0140 0.0090 0.0090 0.0205  
Y 0.0139 -0.0191 0.0038 0.0193 0.0149 0.0075  
Z -0.0093 -0.0086 0.0161 -0.0168 0.0008 0.0043

AT. 53 H X 0.0038 -0.0040 0.0107 -0.0154 0.0121 0.0182  
Y 0.0176 -0.0270 -0.0023 -0.0284 0.0207 0.0072  
Z -0.0087 -0.0061 -0.0080 0.0170 0.0023 0.0084

AT. 54 H X 0.0038 -0.0040 -0.0107 0.0154 0.0121 0.0182  
Y 0.0176 -0.0270 0.0023 0.0284 0.0207 0.0072  
Z -0.0087 -0.0061 0.0080 -0.0170 0.0023 0.0084

AT. 55 H X -0.0006 0.0120 0.0183 -0.0002 0.0055 0.0234  
Y 0.0158 -0.0259 -0.0123 -0.0163 0.0144 0.0024  
Z -0.0089 -0.0105 -0.0235 0.0265 -0.0025 0.0001

AT. 56 H X -0.0006 0.0120 -0.0183 0.0002 0.0055 0.0234  
Y 0.0158 -0.0259 0.0123 0.0163 0.0144 0.0024  
Z -0.0089 -0.0105 0.0235 -0.0265 -0.0025 0.0001

AT. 57 C X 0.0023 0.0173 0.0289 0.0025 -0.0011 0.0262  
Y 0.0050 0.0228 0.0167 0.0086 -0.0125 0.0177  
Z -0.0181 -0.0164 -0.0506 0.0070 0.0069 -0.0058

AT. 58 C X 0.0023 0.0173 -0.0289 -0.0025 -0.0011 0.0262  
Y 0.0050 0.0228 -0.0167 -0.0086 -0.0125 0.0177  
Z -0.0181 -0.0164 0.0506 -0.0070 0.0069 -0.0058

AT. 59 H X 0.0035 0.0278 0.0391 0.0097 -0.0085 0.0284  
Y 0.0051 0.0181 0.0076 0.0131 -0.0121 0.0135  
Z -0.0172 -0.0158 -0.0565 0.0186 0.0022 -0.0105

AT. 60 H X 0.0035 0.0278 -0.0391 -0.0097 -0.0085 0.0284  
Y 0.0051 0.0181 -0.0076 -0.0131 -0.0121 0.0135

Z -0.0172 -0.0158 0.0565 -0.0186 0.0022 -0.0105  
AT. 61 H X 0.0001 0.0198 0.0277 -0.0012 -0.0011 0.0278  
Y 0.0051 0.0295 0.0299 0.0022 -0.0132 0.0240  
Z -0.0198 -0.0177 -0.0581 0.0073 0.0073 -0.0075  
AT. 62 H X 0.0001 0.0198 -0.0277 0.0012 -0.0011 0.0278  
Y 0.0051 0.0295 -0.0299 -0.0022 -0.0132 0.0240  
Z -0.0198 -0.0177 0.0581 -0.0073 0.0073 -0.0075  
AT. 63 H X 0.0042 0.0118 0.0273 0.0041 0.0011 0.0238  
Y 0.0048 0.0304 0.0157 0.0192 -0.0196 0.0158  
Z -0.0197 -0.0179 -0.0481 -0.0036 0.0112 -0.0020  
AT. 64 H X 0.0042 0.0118 -0.0273 -0.0041 0.0011 0.0238  
Y 0.0048 0.0304 -0.0157 -0.0192 -0.0196 0.0158  
Z -0.0197 -0.0179 0.0481 0.0036 0.0112 -0.0020  
AT. 65 C X 0.0105 -0.0136 0.0117 -0.0045 0.0166 0.0191  
Y 0.0135 -0.0274 -0.0301 -0.0022 0.0150 -0.0030  
Z -0.0080 -0.0038 0.0046 0.0046 0.0023 0.0128  
AT. 66 C X 0.0105 -0.0136 -0.0117 0.0045 0.0166 0.0191  
Y 0.0135 -0.0274 0.0301 0.0022 0.0150 -0.0030  
Z -0.0080 -0.0038 -0.0046 -0.0046 0.0023 0.0128  
AT. 67 H X 0.0132 -0.0192 0.0117 -0.0029 0.0195 0.0197  
Y 0.0147 -0.0298 -0.0393 0.0039 0.0154 -0.0070  
Z -0.0113 0.0030 0.0131 -0.0023 -0.0005 0.0157  
AT. 68 H X 0.0132 -0.0192 -0.0117 0.0029 0.0195 0.0197  
Y 0.0147 -0.0298 0.0393 -0.0039 0.0154 -0.0070  
Z -0.0113 0.0030 -0.0131 0.0023 -0.0005 0.0157  
AT. 69 H X 0.0087 -0.0159 0.0087 -0.0081 0.0177 0.0177  
Y 0.0125 -0.0283 -0.0258 -0.0069 0.0160 -0.0016  
Z -0.0058 -0.0007 0.0168 0.0047 0.0022 0.0177  
AT. 70 H X 0.0087 -0.0159 -0.0087 0.0081 0.0177 0.0177  
Y 0.0125 -0.0283 0.0258 0.0069 0.0160 -0.0016  
Z -0.0058 -0.0007 -0.0168 -0.0047 0.0022 0.0177  
AT. 71 H X 0.0128 -0.0102 0.0158 0.0003 0.0151 0.0207

Y 0.0147 -0.0351 -0.0410 0.0005 0.0184 -0.0074  
Z -0.0048 -0.0117 -0.0073 0.0121 0.0058 0.0080  
AT. 72 H X 0.0128 -0.0102 -0.0158 -0.0003 0.0151 0.0207  
Y 0.0147 -0.0351 0.0410 -0.0005 0.0184 -0.0074  
Z -0.0048 -0.0117 0.0073 -0.0121 0.0058 0.0080  
AT. 73 C X 0.0069 0.0038 0.0213 0.0007 0.0065 0.0203  
Y 0.0100 -0.0009 -0.0061 0.0057 0.0004 0.0047  
Z -0.0129 -0.0103 -0.0234 0.0048 0.0049 0.0026  
AT. 74 C X 0.0069 0.0038 -0.0213 -0.0007 0.0065 0.0203  
Y 0.0100 -0.0009 0.0061 -0.0057 0.0004 0.0047  
Z -0.0129 -0.0103 0.0234 -0.0048 0.0049 0.0026  
AT. 75 H X 0.0077 0.0149 0.0315 0.0097 -0.0006 0.0220  
Y 0.0120 -0.0064 -0.0150 0.0100 0.0024 -0.0018  
Z -0.0096 -0.0098 -0.0279 0.0172 0.0022 -0.0048  
AT. 76 H X 0.0077 0.0149 -0.0315 -0.0097 -0.0006 0.0220  
Y 0.0120 -0.0064 0.0150 -0.0100 0.0024 -0.0018  
Z -0.0096 -0.0098 0.0279 -0.0172 0.0022 -0.0048  
AT. 77 H X 0.0108 -0.0002 0.0215 0.0030 0.0082 0.0174  
Y 0.0105 0.0046 -0.0079 0.0160 -0.0051 0.0010  
Z -0.0170 -0.0114 -0.0216 -0.0066 0.0086 0.0078  
AT. 78 H X 0.0108 -0.0002 -0.0215 -0.0030 0.0082 0.0174  
Y 0.0105 0.0046 0.0079 -0.0160 -0.0051 0.0010  
Z -0.0170 -0.0114 0.0216 0.0066 0.0086 0.0078  
AT. 79 I X -0.0039 -0.0006 -0.0040 0.0043 -0.0003 -0.0012  
Y 0.0023 0.0001 -0.0083 -0.0008 0.0035 -0.0072  
Z -0.0014 0.0069 0.0042 -0.0171 0.0032 0.0028  
AT. 80 I X -0.0039 -0.0006 0.0040 -0.0043 -0.0003 -0.0012  
Y 0.0023 0.0001 0.0083 0.0008 0.0035 -0.0072  
Z -0.0014 0.0069 -0.0042 0.0171 0.0032 0.0028  
AT. 81 I X 0.0038 -0.0046 -0.0015 0.0077 -0.0058 0.0126  
Y -0.0060 -0.0009 0.0022 -0.0073 0.0041 -0.0036  
Z 0.0017 -0.0001 0.0000 0.0037 -0.0032 0.0072

AT. 82 I X 0.0038 -0.0046 0.0015 -0.0077 -0.0058 0.0126  
Y -0.0060 -0.0009 -0.0022 0.0073 0.0041 -0.0036  
Z 0.0017 -0.0001 -0.0000 -0.0037 -0.0032 0.0072

AT. 83 O X -0.0091 -0.0186 0.0014 0.0227 -0.0273 0.0174  
Y -0.0269 0.0534 -0.0265 -0.0130 0.0429 -0.0518  
Z 0.0089 -0.0098 0.0004 -0.0216 0.0122 -0.0174

AT. 84 O X -0.0091 -0.0186 -0.0014 -0.0227 -0.0273 0.0174  
Y -0.0269 0.0534 0.0265 0.0130 0.0429 -0.0518  
Z 0.0089 -0.0098 -0.0004 0.0216 0.0122 -0.0174

AT. 85 O X 0.0042 0.0202 0.0093 0.0171 -0.0039 0.0104  
Y 0.0844 -0.0368 0.0285 -0.0514 -0.0433 -0.0160  
Z 0.0617 -0.0303 0.0221 -0.0351 -0.0233 -0.0225

AT. 86 O X 0.0042 0.0202 -0.0093 -0.0171 -0.0039 0.0104  
Y 0.0844 -0.0368 -0.0285 0.0514 -0.0433 -0.0160  
Z 0.0617 -0.0303 -0.0221 0.0351 -0.0233 -0.0225

AT. 87 N X -0.0106 -0.0224 -0.0088 -0.0009 -0.0115 -0.0042  
Y -0.0232 0.0211 -0.0042 0.0478 -0.0176 0.0256  
Z 0.0100 -0.0076 0.0052 -0.0105 0.0053 -0.0077

AT. 88 N X -0.0106 -0.0224 0.0088 0.0009 -0.0115 -0.0042  
Y -0.0232 0.0211 0.0042 -0.0478 -0.0176 0.0256  
Z 0.0100 -0.0076 -0.0052 0.0105 0.0053 -0.0077

AT. 89 N X 0.0267 -0.0014 0.0102 -0.0174 -0.0038 -0.0044  
Y -0.0023 0.0234 0.0069 0.0319 -0.0172 0.0188  
Z 0.0011 0.0108 0.0040 0.0205 -0.0013 0.0003

AT. 90 N X 0.0267 -0.0014 -0.0102 0.0174 -0.0038 -0.0044  
Y -0.0023 0.0234 -0.0069 -0.0319 -0.0172 0.0188  
Z 0.0011 0.0108 -0.0040 -0.0205 -0.0013 0.0003

AT. 91 C X -0.0114 -0.0141 -0.0033 0.0124 -0.0169 0.0049  
Y -0.0219 0.0251 -0.0142 0.0150 0.0055 -0.0105  
Z 0.0090 -0.0072 0.0040 -0.0145 0.0079 -0.0118

AT. 92 C X -0.0114 -0.0141 0.0033 -0.0124 -0.0169 0.0049  
Y -0.0219 0.0251 0.0142 -0.0150 0.0055 -0.0105

Z 0.0090 -0.0072 -0.0040 0.0145 0.0079 -0.0118  
AT. 93 C X -0.0127 -0.0018 -0.0038 0.0150 -0.0109 0.0018  
Y -0.0097 0.0031 -0.0089 0.0101 -0.0052 -0.0029  
Z 0.0150 -0.0032 0.0071 -0.0149 0.0071 -0.0106  
AT. 94 C X -0.0127 -0.0018 0.0038 -0.0150 -0.0109 0.0018  
Y -0.0097 0.0031 0.0089 -0.0101 -0.0052 -0.0029  
Z 0.0150 -0.0032 -0.0071 0.0149 0.0071 -0.0106  
AT. 95 H X -0.0217 0.0008 -0.0057 0.0237 -0.0122 -0.0024  
Y -0.0091 0.0035 -0.0096 0.0057 -0.0031 0.0010  
Z 0.0241 -0.0065 0.0103 -0.0165 0.0056 -0.0134  
AT. 96 H X -0.0217 0.0008 0.0057 -0.0237 -0.0122 -0.0024  
Y -0.0091 0.0035 0.0096 -0.0057 -0.0031 0.0010  
Z 0.0241 -0.0065 -0.0103 0.0165 0.0056 -0.0134  
AT. 97 H X -0.0124 0.0063 -0.0030 0.0137 -0.0103 0.0028  
Y -0.0028 -0.0008 -0.0066 0.0121 -0.0059 -0.0101  
Z 0.0168 -0.0067 0.0072 -0.0142 0.0067 -0.0127  
AT. 98 H X -0.0124 0.0063 0.0030 -0.0137 -0.0103 0.0028  
Y -0.0028 -0.0008 0.0066 -0.0121 -0.0059 -0.0101  
Z 0.0168 -0.0067 -0.0072 0.0142 0.0067 -0.0127  
AT. 99 C X 0.0213 0.0058 0.0107 0.0011 -0.0094 0.0046  
Y 0.0425 -0.0037 0.0205 -0.0152 -0.0262 -0.0030  
Z 0.0261 -0.0056 0.0120 -0.0078 -0.0069 -0.0122  
AT. 100 C X 0.0213 0.0058 -0.0107 -0.0011 -0.0094 0.0046  
Y 0.0425 -0.0037 -0.0205 0.0152 -0.0262 -0.0030  
Z 0.0261 -0.0056 -0.0120 0.0078 -0.0069 -0.0122  
AT. 101 C X 0.0346 -0.0014 0.0156 -0.0029 -0.0195 0.0031  
Y 0.0300 0.0015 0.0210 -0.0162 -0.0188 -0.0055  
Z 0.0082 0.0024 0.0043 -0.0023 0.0056 -0.0088  
AT. 102 C X 0.0346 -0.0014 -0.0156 0.0029 -0.0195 0.0031  
Y 0.0300 0.0015 -0.0210 0.0162 -0.0188 -0.0055  
Z 0.0082 0.0024 -0.0043 0.0023 0.0056 -0.0088  
AT. 103 H X 0.0533 -0.0002 0.0234 -0.0067 -0.0295 0.0016

Y 0.0227 0.0007 0.0179 -0.0154 -0.0149 -0.0053  
Z -0.0068 0.0048 -0.0060 0.0047 0.0175 -0.0041  
AT. 104 H X 0.0533 -0.0002 -0.0234 0.0067 -0.0295 0.0016  
Y 0.0227 0.0007 -0.0179 0.0154 -0.0149 -0.0053  
Z -0.0068 0.0048 0.0060 -0.0047 0.0175 -0.0041  
AT. 105 H X 0.0387 -0.0039 0.0192 -0.0073 -0.0206 -0.0023  
Y 0.0431 0.0002 0.0297 -0.0213 -0.0302 -0.0078  
Z 0.0139 0.0013 0.0082 -0.0053 0.0010 -0.0106  
AT. 106 H X 0.0387 -0.0039 -0.0192 0.0073 -0.0206 -0.0023  
Y 0.0431 0.0002 -0.0297 0.0213 -0.0302 -0.0078  
Z 0.0139 0.0013 -0.0082 0.0053 0.0010 -0.0106  
AT. 107 C X -0.0128 -0.0292 -0.0115 -0.0024 -0.0129 -0.0028  
Y -0.0111 0.0352 0.0036 0.0353 -0.0041 0.0213  
Z 0.0112 -0.0109 0.0040 -0.0186 0.0115 -0.0077  
AT. 108 C X -0.0128 -0.0292 0.0115 0.0024 -0.0129 -0.0028  
Y -0.0111 0.0352 -0.0036 -0.0353 -0.0041 0.0213  
Z 0.0112 -0.0109 -0.0040 0.0186 0.0115 -0.0077  
AT. 109 H X -0.0190 -0.0456 -0.0188 -0.0043 -0.0183 -0.0033  
Y -0.0074 0.0247 0.0032 0.0261 -0.0065 0.0187  
Z 0.0193 -0.0226 0.0057 -0.0324 0.0085 -0.0112  
AT. 110 H X -0.0190 -0.0456 0.0188 0.0043 -0.0183 -0.0033  
Y -0.0074 0.0247 -0.0032 -0.0261 -0.0065 0.0187  
Z 0.0193 -0.0226 -0.0057 0.0324 0.0085 -0.0112  
AT. 111 H X -0.0126 -0.0321 -0.0117 0.0003 -0.0182 -0.0031  
Y -0.0114 0.0588 0.0078 0.0461 0.0051 0.0241  
Z 0.0110 -0.0127 0.0033 -0.0240 0.0152 -0.0081  
AT. 112 H X -0.0126 -0.0321 0.0117 -0.0003 -0.0182 -0.0031  
Y -0.0114 0.0588 -0.0078 -0.0461 0.0051 0.0241  
Z 0.0110 -0.0127 -0.0033 0.0240 0.0152 -0.0081  
AT. 113 C X -0.0032 -0.0111 -0.0048 -0.0088 0.0023 -0.0025  
Y 0.0019 0.0279 0.0082 0.0176 -0.0021 0.0175  
Z 0.0004 0.0052 0.0016 -0.0018 0.0168 -0.0033

AT. 114 C X -0.0032 -0.0111 0.0048 0.0088 0.0023 -0.0025  
Y 0.0019 0.0279 -0.0082 -0.0176 -0.0021 0.0175  
Z 0.0004 0.0052 -0.0016 0.0018 0.0168 -0.0033

AT. 115 C X 0.0160 -0.0024 0.0054 -0.0145 -0.0003 -0.0040  
Y 0.0004 0.0395 0.0095 0.0272 -0.0015 0.0188  
Z -0.0108 0.0227 -0.0009 0.0181 0.0192 0.0003

AT. 116 C X 0.0160 -0.0024 -0.0054 0.0145 -0.0003 -0.0040  
Y 0.0004 0.0395 -0.0095 -0.0272 -0.0015 0.0188  
Z -0.0108 0.0227 0.0009 -0.0181 0.0192 0.0003

AT. 117 H X 0.0254 -0.0178 0.0079 -0.0197 -0.0143 -0.0057  
Y 0.0003 0.0613 0.0128 0.0380 0.0046 0.0206  
Z -0.0210 0.0337 -0.0045 0.0210 0.0320 0.0019

AT. 118 H X 0.0254 -0.0178 -0.0079 0.0197 -0.0143 -0.0057  
Y 0.0003 0.0613 -0.0128 -0.0380 0.0046 0.0206  
Z -0.0210 0.0337 0.0045 -0.0210 0.0320 0.0019

AT. 119 H X 0.0085 0.0219 0.0044 -0.0095 0.0194 -0.0022  
Y 0.0046 0.0400 0.0104 0.0184 0.0054 0.0178  
Z -0.0192 0.0359 -0.0023 0.0295 0.0234 0.0021

AT. 120 H X 0.0085 0.0219 -0.0044 0.0095 0.0194 -0.0022  
Y 0.0046 0.0400 -0.0104 -0.0184 0.0054 0.0178  
Z -0.0192 0.0359 0.0023 -0.0295 0.0234 0.0021

AT. 121 C X 0.0239 0.0078 0.0116 -0.0215 0.0066 -0.0082  
Y -0.0165 0.0065 -0.0039 0.0356 -0.0206 0.0245  
Z 0.0078 -0.0005 0.0041 0.0240 -0.0153 0.0040

AT. 122 C X 0.0239 0.0078 -0.0116 0.0215 0.0066 -0.0082  
Y -0.0165 0.0065 0.0039 -0.0356 -0.0206 0.0245  
Z 0.0078 -0.0005 -0.0041 -0.0240 -0.0153 0.0040

AT. 123 H X 0.0338 0.0255 0.0220 -0.0344 0.0198 -0.0173  
Y -0.0139 0.0082 -0.0005 0.0246 -0.0146 0.0186  
Z 0.0068 0.0010 0.0026 0.0330 -0.0197 0.0079

AT. 124 H X 0.0338 0.0255 -0.0220 0.0344 0.0198 -0.0173  
Y -0.0139 0.0082 0.0005 -0.0246 -0.0146 0.0186

Z 0.0068 0.0010 -0.0026 -0.0330 -0.0197 0.0079  
AT. 125 H X 0.0314 0.0059 0.0147 -0.0226 0.0009 -0.0085  
Y -0.0266 -0.0049 -0.0133 0.0502 -0.0296 0.0334  
Z 0.0111 -0.0085 0.0027 0.0301 -0.0263 0.0085  
AT. 126 H X 0.0314 0.0059 -0.0147 0.0226 0.0009 -0.0085  
Y -0.0266 -0.0049 0.0133 -0.0502 -0.0296 0.0334  
Z 0.0111 -0.0085 -0.0027 -0.0301 -0.0263 0.0085  
AT. 127 C X 0.0031 -0.0026 -0.0008 -0.0130 0.0082 -0.0041  
Y -0.0221 0.0012 -0.0066 0.0304 -0.0166 0.0230  
Z 0.0080 -0.0033 0.0049 0.0092 -0.0079 -0.0029  
AT. 128 C X 0.0031 -0.0026 0.0008 0.0130 0.0082 -0.0041  
Y -0.0221 0.0012 0.0066 -0.0304 -0.0166 0.0230  
Z 0.0080 -0.0033 -0.0049 -0.0092 -0.0079 -0.0029  
AT. 129 C X -0.0084 -0.0181 -0.0082 -0.0034 -0.0053 -0.0034  
Y -0.0287 -0.0009 -0.0100 0.0478 -0.0280 0.0298  
Z 0.0106 -0.0056 0.0066 -0.0067 0.0010 -0.0095  
AT. 130 C X -0.0084 -0.0181 0.0082 0.0034 -0.0053 -0.0034  
Y -0.0287 -0.0009 0.0100 -0.0478 -0.0280 0.0298  
Z 0.0106 -0.0056 -0.0066 0.0067 0.0010 -0.0095  
AT. 131 H X -0.0047 -0.0135 -0.0050 -0.0078 -0.0030 -0.0074  
Y -0.0411 -0.0124 -0.0176 0.0668 -0.0441 0.0379  
Z 0.0100 -0.0041 0.0076 -0.0044 -0.0030 -0.0111  
AT. 132 H X -0.0047 -0.0135 0.0050 0.0078 -0.0030 -0.0074  
Y -0.0411 -0.0124 0.0176 -0.0668 -0.0441 0.0379  
Z 0.0100 -0.0041 -0.0076 0.0044 -0.0030 -0.0111  
AT. 133 H X -0.0188 -0.0317 -0.0157 0.0069 -0.0171 0.0027  
Y -0.0294 -0.0067 -0.0109 0.0425 -0.0273 0.0286  
Z 0.0141 -0.0079 0.0087 -0.0193 0.0070 -0.0141  
AT. 134 H X -0.0188 -0.0317 0.0157 -0.0069 -0.0171 0.0027  
Y -0.0294 -0.0067 0.0109 -0.0425 -0.0273 0.0286  
Z 0.0141 -0.0079 -0.0087 0.0193 0.0070 -0.0141  
AT. 135 C X -0.0121 -0.0090 -0.0089 -0.0079 0.0109 -0.0017



Y 0.0210 0.0300 0.0176 -0.0019 0.0031 0.0134  
Z -0.0032 0.0100 0.0007 -0.0112 0.0339 -0.0041  
AT. 136 C X -0.0121 -0.0090 0.0089 0.0079 0.0109 -0.0017  
Y 0.0210 0.0300 -0.0176 0.0019 0.0031 0.0134  
Z -0.0032 0.0100 -0.0007 0.0112 0.0339 -0.0041  
AT. 137 H X -0.0268 -0.0132 -0.0164 -0.0041 0.0168 -0.0002  
Y 0.0164 0.0192 0.0145 -0.0091 0.0057 0.0113  
Z -0.0044 -0.0055 -0.0010 -0.0246 0.0362 -0.0078  
AT. 138 H X -0.0268 -0.0132 0.0164 0.0041 0.0168 -0.0002  
Y 0.0164 0.0192 -0.0145 0.0091 0.0057 0.0113  
Z -0.0044 -0.0055 0.0010 0.0246 0.0362 -0.0078  
AT. 139 H X -0.0134 -0.0177 -0.0105 -0.0048 0.0015 -0.0018  
Y 0.0351 0.0494 0.0262 0.0033 0.0012 0.0152  
Z -0.0057 0.0157 0.0004 -0.0167 0.0460 -0.0045  
AT. 140 H X -0.0134 -0.0177 0.0105 0.0048 0.0015 -0.0018  
Y 0.0351 0.0494 -0.0262 -0.0033 0.0012 0.0152  
Z -0.0057 0.0157 -0.0004 0.0167 0.0460 -0.0045  
AT. 141 H X -0.0016 0.0071 -0.0020 -0.0148 0.0219 -0.0018  
Y 0.0244 0.0230 0.0187 -0.0145 0.0080 0.0108  
Z -0.0024 0.0246 0.0025 -0.0006 0.0335 -0.0012  
AT. 142 H X -0.0016 0.0071 0.0020 0.0148 0.0219 -0.0018  
Y 0.0244 0.0230 -0.0187 0.0145 0.0080 0.0108  
Z -0.0024 0.0246 -0.0025 0.0006 0.0335 -0.0012  
AT. 143 C X 0.0047 0.0040 -0.0001 -0.0171 0.0190 -0.0035  
Y -0.0417 -0.0127 -0.0159 0.0311 -0.0157 0.0223  
Z 0.0113 -0.0085 0.0067 0.0144 -0.0230 -0.0039  
AT. 144 C X 0.0047 0.0040 0.0001 0.0171 0.0190 -0.0035  
Y -0.0417 -0.0127 0.0159 -0.0311 -0.0157 0.0223  
Z 0.0113 -0.0085 -0.0067 -0.0144 -0.0230 -0.0039  
AT. 145 H X 0.0172 0.0176 0.0061 -0.0270 0.0324 -0.0033  
Y -0.0356 -0.0092 -0.0115 0.0199 -0.0093 0.0210  
Z 0.0081 -0.0085 0.0038 0.0239 -0.0267 -0.0025

AT. 146 H X 0.0172 0.0176 -0.0061 0.0270 0.0324 -0.0033  
Y -0.0356 -0.0092 0.0115 -0.0199 -0.0093 0.0210  
Z 0.0081 -0.0085 -0.0038 -0.0239 -0.0267 -0.0025

AT. 147 H X 0.0121 0.0053 0.0040 -0.0189 0.0132 -0.0045  
Y -0.0591 -0.0243 -0.0259 0.0474 -0.0250 0.0239  
Z 0.0122 -0.0132 0.0069 0.0210 -0.0363 -0.0044

AT. 148 H X 0.0121 0.0053 -0.0040 0.0189 0.0132 -0.0045  
Y -0.0591 -0.0243 0.0259 -0.0474 -0.0250 0.0239  
Z 0.0122 -0.0132 -0.0069 -0.0210 -0.0363 -0.0044

AT. 149 H X -0.0143 -0.0052 -0.0100 -0.0086 0.0196 -0.0020  
Y -0.0457 -0.0153 -0.0172 0.0275 -0.0135 0.0215  
Z 0.0130 -0.0089 0.0090 0.0043 -0.0200 -0.0057

AT. 150 H X -0.0143 -0.0052 0.0100 0.0086 0.0196 -0.0020  
Y -0.0457 -0.0153 0.0172 -0.0275 -0.0135 0.0215  
Z 0.0130 -0.0089 -0.0090 -0.0043 -0.0200 -0.0057

AT. 151 C X -0.0051 -0.0031 -0.0052 -0.0107 0.0134 -0.0022  
Y -0.0062 0.0094 0.0025 0.0109 -0.0062 0.0166  
Z 0.0048 0.0004 0.0035 0.0021 0.0051 -0.0035

AT. 152 C X -0.0051 -0.0031 0.0052 0.0107 0.0134 -0.0022  
Y -0.0062 0.0094 -0.0025 -0.0109 -0.0062 0.0166  
Z 0.0048 0.0004 -0.0035 -0.0021 0.0051 -0.0035

AT. 153 H X -0.0167 -0.0090 -0.0117 -0.0055 0.0126 0.0001  
Y -0.0066 0.0040 0.0020 0.0048 -0.0063 0.0147  
Z 0.0091 -0.0057 0.0054 -0.0100 0.0052 -0.0074

AT. 154 H X -0.0167 -0.0090 0.0117 0.0055 0.0126 0.0001  
Y -0.0066 0.0040 -0.0020 -0.0048 -0.0063 0.0147  
Z 0.0091 -0.0057 -0.0054 0.0100 0.0052 -0.0074

AT. 155 H X -0.0004 0.0081 -0.0020 -0.0159 0.0242 -0.0034  
Y -0.0004 0.0077 0.0056 -0.0006 -0.0027 0.0133  
Z 0.0001 0.0065 0.0015 0.0127 0.0051 -0.0003

AT. 156 H X -0.0004 0.0081 0.0020 0.0159 0.0242 -0.0034  
Y -0.0004 0.0077 -0.0056 0.0006 -0.0027 0.0133

Z 0.0001 0.0065 -0.0015 -0.0127 0.0051 -0.0003  
AT. 157 O X -0.0185 -0.0252 -0.0251 -0.0380 -0.0506 -0.0630  
Y 0.0302 0.0103 0.0192 0.0078 0.0122 0.0156  
Z 0.0011 0.0252 0.0009 -0.0334 -0.0298 -0.0518  
AT. 158 O X -0.0185 -0.0252 0.0251 0.0380 -0.0506 -0.0630  
Y 0.0302 0.0103 -0.0192 -0.0078 0.0122 0.0156  
Z 0.0011 0.0252 -0.0009 0.0334 -0.0298 -0.0518  
AT. 159 O X -0.0187 -0.0247 -0.0129 -0.0275 -0.0352 -0.0416  
Y 0.0042 -0.0139 -0.0175 -0.0131 -0.0184 0.0032  
Z -0.0057 0.0207 0.0143 -0.0207 -0.0108 -0.0181  
AT. 160 O X -0.0187 -0.0247 0.0129 0.0275 -0.0352 -0.0416  
Y 0.0042 -0.0139 0.0175 0.0131 -0.0184 0.0032  
Z -0.0057 0.0207 -0.0143 0.0207 -0.0108 -0.0181  
AT. 161 H X 0.0005 -0.0094 -0.0060 -0.0124 -0.0219 -0.0411  
Y 0.0347 0.0155 0.0263 0.0056 0.0124 0.0114  
Z -0.0047 0.0181 -0.0099 -0.0151 -0.0178 -0.0307  
AT. 162 H X 0.0005 -0.0094 0.0060 0.0124 -0.0219 -0.0411  
Y 0.0347 0.0155 -0.0263 -0.0056 0.0124 0.0114  
Z -0.0047 0.0181 0.0099 0.0151 -0.0178 -0.0307  
AT. 163 H X -0.0187 -0.0220 0.0039 -0.0183 -0.0190 -0.0209  
Y -0.0006 0.0105 -0.0287 -0.0201 -0.0345 0.0000  
Z -0.0065 0.0255 0.0063 -0.0259 -0.0195 -0.0262  
AT. 164 H X -0.0187 -0.0220 -0.0039 0.0183 -0.0190 -0.0209  
Y -0.0006 0.0105 0.0287 0.0201 -0.0345 0.0000  
Z -0.0065 0.0255 -0.0063 0.0259 -0.0195 -0.0262  
AT. 165 O X -0.0058 0.0282 -0.0180 -0.0028 0.0276 -0.0350  
Y -0.0142 -0.0087 -0.0042 0.0046 -0.0088 0.0040  
Z -0.0464 -0.0181 0.0072 0.0066 -0.0092 0.0263  
AT. 166 O X -0.0058 0.0282 0.0180 0.0028 0.0276 -0.0350  
Y -0.0142 -0.0087 0.0042 -0.0046 -0.0088 0.0040  
Z -0.0464 -0.0181 -0.0072 -0.0066 -0.0092 0.0263  
AT. 167 H X -0.0101 0.0131 -0.0098 0.0029 0.0068 -0.0165

Y -0.0210 0.0140 -0.0138 -0.0028 0.0174 -0.0185  
Z -0.0264 -0.0111 -0.0007 0.0024 0.0098 0.0098  
AT. 168 H X -0.0101 0.0131 0.0098 -0.0029 0.0068 -0.0165  
Y -0.0210 0.0140 0.0138 0.0028 0.0174 -0.0185  
Z -0.0264 -0.0111 0.0007 -0.0024 0.0098 0.0098  
AT. 169 O X 0.0063 0.0570 -0.0333 -0.0223 0.0768 -0.0690  
Y 0.0332 -0.0143 -0.0211 0.0301 -0.0036 -0.0204  
Z -0.0536 -0.0110 0.0078 -0.0030 -0.0003 0.0246  
AT. 170 O X 0.0063 0.0570 0.0333 0.0223 0.0768 -0.0690  
Y 0.0332 -0.0143 0.0211 -0.0301 -0.0036 -0.0204  
Z -0.0536 -0.0110 -0.0078 0.0030 -0.0003 0.0246  
AT. 171 H X 0.0071 0.0428 -0.0238 -0.0227 0.0394 -0.0327  
Y 0.0506 -0.0277 -0.0204 0.0415 -0.0281 -0.0072  
Z -0.0261 -0.0227 0.0018 0.0159 -0.0126 0.0198  
AT. 172 H X 0.0071 0.0428 0.0238 0.0227 0.0394 -0.0327  
Y 0.0506 -0.0277 0.0204 -0.0415 -0.0281 -0.0072  
Z -0.0261 -0.0227 -0.0018 -0.0159 -0.0126 0.0198

FREQ(CM\*\*-1) 92.20 94.75 95.45 97.18 102.49 103.39

AT. 1 I X 0.0004 0.0049 -0.0175 -0.0184 -0.0002 0.0036  
Y -0.0113 -0.0059 -0.0136 -0.0083 0.0021 -0.0074  
Z 0.0038 0.0035 0.0110 0.0067 -0.0088 0.0050  
AT. 2 I X -0.0004 -0.0049 0.0175 -0.0184 -0.0002 -0.0036  
Y 0.0113 0.0059 0.0136 -0.0083 0.0021 0.0074  
Z -0.0038 -0.0035 -0.0110 0.0067 -0.0088 -0.0050  
AT. 3 I X -0.0038 0.0172 0.0120 -0.0041 0.0090 -0.0063  
Y -0.0040 0.0113 -0.0050 -0.0036 0.0057 0.0018  
Z 0.0012 -0.0084 -0.0014 0.0023 -0.0015 0.0026  
AT. 4 I X 0.0038 -0.0172 -0.0120 -0.0041 0.0090 0.0063  
Y 0.0040 -0.0113 0.0050 -0.0036 0.0057 -0.0018  
Z -0.0012 0.0084 0.0014 0.0023 -0.0015 -0.0026

AT. 5 O X 0.0070 0.0145 -0.0188 -0.0112 0.0080 -0.0100  
Y 0.0063 0.0101 -0.0035 0.0145 0.0099 -0.0097  
Z 0.0028 0.0249 -0.0152 -0.0238 0.0095 -0.0014

AT. 6 O X -0.0070 -0.0145 0.0188 -0.0112 0.0080 0.0100  
Y -0.0063 -0.0101 0.0035 0.0145 0.0099 0.0097  
Z -0.0028 -0.0249 0.0152 -0.0238 0.0095 0.0014

AT. 7 O X -0.0080 0.0290 0.0020 -0.0207 0.0021 -0.0039  
Y -0.0069 0.0579 0.0159 -0.0481 -0.0012 -0.0066  
Z -0.0051 0.0362 0.0100 -0.0301 -0.0016 0.0012

AT. 8 O X 0.0080 -0.0290 -0.0020 -0.0207 0.0021 0.0039  
Y 0.0069 -0.0579 -0.0159 -0.0481 -0.0012 0.0066  
Z 0.0051 -0.0362 -0.0100 -0.0301 -0.0016 -0.0012

AT. 9 N X 0.0063 -0.0252 0.0057 0.0186 -0.0006 0.0019  
Y -0.0052 -0.0288 -0.0013 0.0133 -0.0271 0.0172  
Z 0.0040 0.0186 -0.0068 -0.0132 0.0115 -0.0014

AT. 10 N X -0.0063 0.0252 -0.0057 0.0186 -0.0006 -0.0019  
Y 0.0052 0.0288 0.0013 0.0133 -0.0271 -0.0172  
Z -0.0040 -0.0186 0.0068 -0.0132 0.0115 0.0014

AT. 11 N X -0.0011 -0.0234 -0.0058 0.0106 -0.0121 0.0094  
Y -0.0003 -0.0142 0.0108 0.0109 -0.0113 0.0073  
Z -0.0021 -0.0065 0.0097 0.0100 -0.0031 0.0091

AT. 12 N X 0.0011 0.0234 0.0058 0.0106 -0.0121 -0.0094  
Y 0.0003 0.0142 -0.0108 0.0109 -0.0113 -0.0073  
Z 0.0021 0.0065 -0.0097 0.0100 -0.0031 -0.0091

AT. 13 C X 0.0040 -0.0013 -0.0105 -0.0041 0.0009 -0.0026  
Y -0.0015 -0.0068 -0.0051 0.0075 -0.0082 0.0044  
Z 0.0048 0.0202 -0.0061 -0.0127 0.0141 -0.0034

AT. 14 C X -0.0040 0.0013 0.0105 -0.0041 0.0009 0.0026  
Y 0.0015 0.0068 0.0051 0.0075 -0.0082 -0.0044  
Z -0.0048 -0.0202 0.0061 -0.0127 0.0141 0.0034

AT. 15 C X -0.0025 0.0008 -0.0188 -0.0203 -0.0024 -0.0001  
Y -0.0058 -0.0046 -0.0081 -0.0011 -0.0051 0.0029

Z 0.0082 0.0187 0.0072 0.0034 0.0238 -0.0084  
AT. 16 C X 0.0025 -0.0008 0.0188 -0.0203 -0.0024 0.0001  
Y 0.0058 0.0046 0.0081 -0.0011 -0.0051 -0.0029  
Z -0.0082 -0.0187 -0.0072 0.0034 0.0238 0.0084  
AT. 17 H X -0.0066 -0.0056 -0.0149 -0.0171 -0.0097 0.0007  
Y -0.0088 -0.0101 -0.0115 -0.0041 -0.0175 0.0078  
Z 0.0107 0.0240 0.0129 0.0081 0.0374 -0.0146  
AT. 18 H X 0.0066 0.0056 0.0149 -0.0171 -0.0097 -0.0007  
Y 0.0088 0.0101 0.0115 -0.0041 -0.0175 -0.0078  
Z -0.0107 -0.0240 -0.0129 0.0081 0.0374 0.0146  
AT. 19 H X -0.0046 0.0054 -0.0285 -0.0321 0.0024 -0.0024  
Y -0.0008 0.0025 -0.0022 0.0059 0.0140 -0.0047  
Z 0.0094 0.0229 0.0060 0.0021 0.0326 -0.0121  
AT. 20 H X 0.0046 -0.0054 0.0285 -0.0321 0.0024 0.0024  
Y 0.0008 -0.0025 0.0022 0.0059 0.0140 0.0047  
Z -0.0094 -0.0229 -0.0060 0.0021 0.0326 0.0121  
AT. 21 C X -0.0044 0.0055 -0.0003 -0.0031 -0.0002 -0.0004  
Y -0.0026 0.0257 0.0141 -0.0209 -0.0019 -0.0018  
Z -0.0034 0.0142 0.0118 -0.0064 0.0009 0.0040  
AT. 22 C X 0.0044 -0.0055 0.0003 -0.0031 -0.0002 0.0004  
Y 0.0026 -0.0257 -0.0141 -0.0209 -0.0019 0.0018  
Z 0.0034 -0.0142 -0.0118 -0.0064 0.0009 -0.0040  
AT. 23 C X -0.0036 0.0016 -0.0001 0.0052 0.0066 -0.0028  
Y -0.0010 0.0299 0.0106 -0.0258 0.0010 -0.0058  
Z -0.0030 0.0064 0.0118 0.0046 0.0062 0.0031  
AT. 24 C X 0.0036 -0.0016 0.0001 0.0052 0.0066 0.0028  
Y 0.0010 -0.0299 -0.0106 -0.0258 0.0010 0.0058  
Z 0.0030 -0.0064 -0.0118 0.0046 0.0062 -0.0031  
AT. 25 H X -0.0052 -0.0059 -0.0074 0.0144 0.0101 0.0002  
Y -0.0009 0.0311 0.0096 -0.0271 0.0010 -0.0063  
Z -0.0053 -0.0077 0.0109 0.0230 0.0102 0.0093  
AT. 26 H X 0.0052 0.0059 0.0074 0.0144 0.0101 -0.0002

Y 0.0009 -0.0311 -0.0096 -0.0271 0.0010 0.0063  
Z 0.0053 0.0077 -0.0109 0.0230 0.0102 -0.0093  
AT. 27 H X -0.0020 -0.0012 -0.0005 0.0055 0.0058 -0.0043  
Y 0.0015 0.0450 0.0085 -0.0430 -0.0050 -0.0129  
Z -0.0022 0.0141 0.0108 -0.0038 0.0035 0.0000  
AT. 28 H X 0.0020 0.0012 0.0005 0.0055 0.0058 0.0043  
Y -0.0015 -0.0450 -0.0085 -0.0430 -0.0050 0.0129  
Z 0.0022 -0.0141 -0.0108 -0.0038 0.0035 -0.0000  
AT. 29 C X 0.0113 -0.0268 0.0135 0.0286 0.0121 -0.0040  
Y -0.0001 -0.0261 0.0083 0.0225 -0.0119 0.0087  
Z 0.0015 0.0251 -0.0112 -0.0209 0.0064 -0.0013  
AT. 30 C X -0.0113 0.0268 -0.0135 0.0286 0.0121 0.0040  
Y 0.0001 0.0261 -0.0083 0.0225 -0.0119 -0.0087  
Z -0.0015 -0.0251 0.0112 -0.0209 0.0064 0.0013  
AT. 31 H X 0.0161 -0.0291 0.0233 0.0395 0.0253 -0.0099  
Y -0.0018 -0.0136 -0.0032 0.0039 -0.0180 0.0094  
Z 0.0017 0.0418 -0.0220 -0.0417 0.0056 -0.0037  
AT. 32 H X -0.0161 0.0291 -0.0233 0.0395 0.0253 0.0099  
Y 0.0018 0.0136 0.0032 0.0039 -0.0180 -0.0094  
Z -0.0017 -0.0418 0.0220 -0.0417 0.0056 0.0037  
AT. 33 H X 0.0114 -0.0327 0.0217 0.0400 0.0145 -0.0058  
Y 0.0034 -0.0435 0.0244 0.0495 -0.0026 0.0061  
Z 0.0002 0.0288 -0.0126 -0.0248 0.0039 -0.0015  
AT. 34 H X -0.0114 0.0327 -0.0217 0.0400 0.0145 0.0058  
Y -0.0034 0.0435 -0.0244 0.0495 -0.0026 -0.0061  
Z -0.0002 -0.0288 0.0126 -0.0248 0.0039 0.0015  
AT. 35 C X 0.0087 -0.0205 0.0005 0.0120 0.0045 0.0001  
Y 0.0037 -0.0126 0.0084 0.0146 -0.0026 0.0010  
Z 0.0006 0.0058 0.0017 0.0039 0.0063 0.0015  
AT. 36 C X -0.0087 0.0205 -0.0005 0.0120 0.0045 -0.0001  
Y -0.0037 0.0126 -0.0084 0.0146 -0.0026 -0.0010  
Z -0.0006 -0.0058 -0.0017 0.0039 0.0063 -0.0015

AT. 37 C X 0.0033 -0.0255 -0.0022 0.0155 -0.0043 0.0055  
Y 0.0048 -0.0215 0.0169 0.0264 0.0008 0.0010  
Z -0.0018 -0.0136 0.0138 0.0271 0.0048 0.0055

AT. 38 C X -0.0033 0.0255 0.0022 0.0155 -0.0043 -0.0055  
Y -0.0048 0.0215 -0.0169 0.0264 0.0008 -0.0010  
Z 0.0018 0.0136 -0.0138 0.0271 0.0048 -0.0055

AT. 39 H X 0.0033 -0.0417 0.0084 0.0415 0.0031 0.0035  
Y 0.0051 -0.0311 0.0260 0.0399 0.0040 0.0008  
Z -0.0018 -0.0211 0.0172 0.0397 0.0084 0.0043

AT. 40 H X -0.0033 0.0417 -0.0084 0.0415 0.0031 -0.0035  
Y -0.0051 0.0311 -0.0260 0.0399 0.0040 -0.0008  
Z 0.0018 0.0211 -0.0172 0.0397 0.0084 -0.0043

AT. 41 H X 0.0032 -0.0106 -0.0127 -0.0093 -0.0121 0.0076  
Y 0.0093 -0.0229 0.0193 0.0335 0.0106 -0.0047  
Z -0.0049 -0.0269 0.0224 0.0463 0.0056 0.0072

AT. 42 H X -0.0032 0.0106 0.0127 -0.0093 -0.0121 -0.0076  
Y -0.0093 0.0229 -0.0193 0.0335 0.0106 0.0047  
Z 0.0049 0.0269 -0.0224 0.0463 0.0056 -0.0072

AT. 43 C X -0.0006 -0.0254 -0.0172 -0.0010 -0.0209 0.0148  
Y -0.0026 -0.0140 -0.0012 0.0043 -0.0179 0.0100  
Z -0.0009 -0.0067 0.0038 0.0003 -0.0080 0.0128

AT. 44 C X 0.0006 0.0254 0.0172 -0.0010 -0.0209 -0.0148  
Y 0.0026 0.0140 0.0012 0.0043 -0.0179 -0.0100  
Z 0.0009 0.0067 -0.0038 0.0003 -0.0080 -0.0128

AT. 45 H X -0.0008 -0.0286 -0.0286 -0.0107 -0.0309 0.0208  
Y -0.0016 -0.0064 0.0019 0.0064 -0.0061 0.0019  
Z -0.0017 -0.0108 0.0091 0.0051 -0.0115 0.0159

AT. 46 H X 0.0008 0.0286 0.0286 -0.0107 -0.0309 -0.0208  
Y 0.0016 0.0064 -0.0019 0.0064 -0.0061 -0.0019  
Z 0.0017 0.0108 -0.0091 0.0051 -0.0115 -0.0159

AT. 47 H X -0.0032 -0.0286 -0.0189 0.0000 -0.0272 0.0184  
Y -0.0048 -0.0197 -0.0071 -0.0006 -0.0306 0.0178



Z 0.0002 -0.0085 -0.0001 -0.0064 -0.0131 0.0160  
AT. 48 H X 0.0032 0.0286 0.0189 0.0000 -0.0272 -0.0184  
Y 0.0048 0.0197 0.0071 -0.0006 -0.0306 -0.0178  
Z -0.0002 0.0085 0.0001 -0.0064 -0.0131 -0.0160  
AT. 49 C X 0.0044 -0.0197 -0.0117 -0.0005 -0.0079 0.0070  
Y -0.0038 -0.0103 -0.0087 -0.0004 -0.0192 0.0098  
Z 0.0020 0.0037 -0.0013 -0.0040 0.0032 0.0053  
AT. 50 C X -0.0044 0.0197 0.0117 -0.0005 -0.0079 -0.0070  
Y 0.0038 0.0103 0.0087 -0.0004 -0.0192 -0.0098  
Z -0.0020 -0.0037 0.0013 -0.0040 0.0032 -0.0053  
AT. 51 C X 0.0059 -0.0224 -0.0008 0.0108 -0.0018 0.0032  
Y -0.0089 -0.0217 -0.0149 -0.0046 -0.0370 0.0219  
Z 0.0059 0.0163 -0.0043 -0.0089 0.0156 -0.0028  
AT. 52 C X -0.0059 0.0224 0.0008 0.0108 -0.0018 -0.0032  
Y 0.0089 0.0217 0.0149 -0.0046 -0.0370 -0.0219  
Z -0.0059 -0.0163 0.0043 -0.0089 0.0156 0.0028  
AT. 53 H X 0.0014 -0.0276 -0.0079 0.0038 -0.0162 0.0112  
Y -0.0144 -0.0298 -0.0236 -0.0125 -0.0546 0.0327  
Z 0.0076 0.0157 -0.0014 -0.0050 0.0203 -0.0045  
AT. 54 H X -0.0014 0.0276 0.0079 0.0038 -0.0162 -0.0112  
Y 0.0144 0.0298 0.0236 -0.0125 -0.0546 -0.0327  
Z -0.0076 -0.0157 0.0014 -0.0050 0.0203 0.0045  
AT. 55 H X 0.0130 -0.0155 0.0087 0.0202 0.0170 -0.0085  
Y -0.0109 -0.0171 -0.0218 -0.0137 -0.0405 0.0238  
Z 0.0081 0.0266 -0.0061 -0.0134 0.0244 -0.0084  
AT. 56 H X -0.0130 0.0155 -0.0087 0.0202 0.0170 0.0085  
Y 0.0109 0.0171 0.0218 -0.0137 -0.0405 -0.0238  
Z -0.0081 -0.0266 0.0061 -0.0134 0.0244 0.0084  
AT. 57 C X 0.0127 -0.0154 0.0019 0.0079 0.0108 -0.0035  
Y 0.0084 -0.0042 0.0122 0.0125 0.0076 -0.0058  
Z -0.0001 0.0086 0.0045 0.0084 0.0094 -0.0018  
AT. 58 C X -0.0127 0.0154 -0.0019 0.0079 0.0108 0.0035

Y -0.0084 0.0042 -0.0122 0.0125 0.0076 0.0058  
Z 0.0001 -0.0086 -0.0045 0.0084 0.0094 0.0018  
AT. 59 H X 0.0172 -0.0104 0.0029 0.0043 0.0175 -0.0068  
Y 0.0073 0.0005 0.0078 0.0078 0.0078 -0.0078  
Z 0.0014 0.0192 -0.0014 -0.0014 0.0144 -0.0070  
AT. 60 H X -0.0172 0.0104 -0.0029 0.0043 0.0175 0.0068  
Y -0.0073 -0.0005 -0.0078 0.0078 0.0078 0.0078  
Z -0.0014 -0.0192 0.0014 -0.0014 0.0144 0.0070  
AT. 61 H X 0.0132 -0.0193 0.0085 0.0164 0.0121 -0.0035  
Y 0.0099 -0.0111 0.0185 0.0193 0.0073 -0.0030  
Z -0.0003 0.0090 0.0067 0.0118 0.0107 -0.0033  
AT. 62 H X -0.0132 0.0193 -0.0085 0.0164 0.0121 0.0035  
Y -0.0099 0.0111 -0.0185 0.0193 0.0073 0.0030  
Z 0.0003 -0.0090 -0.0067 0.0118 0.0107 0.0033  
AT. 63 H X 0.0113 -0.0127 -0.0054 0.0002 0.0080 -0.0028  
Y 0.0116 0.0039 0.0129 0.0092 0.0151 -0.0110  
Z -0.0016 -0.0010 0.0105 0.0182 0.0054 0.0023  
AT. 64 H X -0.0113 0.0127 0.0054 0.0002 0.0080 0.0028  
Y -0.0116 -0.0039 -0.0129 0.0092 0.0151 0.0110  
Z 0.0016 0.0010 -0.0105 0.0182 0.0054 -0.0023  
AT. 65 C X 0.0050 -0.0174 -0.0209 -0.0099 -0.0099 0.0097  
Y -0.0044 -0.0034 -0.0183 -0.0068 -0.0194 0.0087  
Z 0.0029 0.0025 -0.0038 -0.0087 0.0018 0.0080  
AT. 66 C X -0.0050 0.0174 0.0209 -0.0099 -0.0099 -0.0097  
Y 0.0044 0.0034 0.0183 -0.0068 -0.0194 -0.0087  
Z -0.0029 -0.0025 0.0038 -0.0087 0.0018 -0.0080  
AT. 67 H X 0.0039 -0.0168 -0.0280 -0.0172 -0.0126 0.0140  
Y 0.0002 0.0033 -0.0195 -0.0060 -0.0158 0.0010  
Z -0.0005 -0.0042 0.0034 -0.0033 0.0008 0.0116  
AT. 68 H X -0.0039 0.0168 0.0280 -0.0172 -0.0126 -0.0140  
Y -0.0002 -0.0033 0.0195 -0.0060 -0.0158 -0.0010  
Z 0.0005 0.0042 -0.0034 -0.0033 0.0008 -0.0116

AT. 69 H X 0.0011 -0.0201 -0.0207 -0.0095 -0.0114 0.0128  
Y -0.0096 -0.0083 -0.0192 -0.0090 -0.0230 0.0156  
Z 0.0023 0.0001 -0.0059 -0.0129 -0.0011 0.0124

AT. 70 H X -0.0011 0.0201 0.0207 -0.0095 -0.0114 -0.0128  
Y 0.0096 0.0083 0.0192 -0.0090 -0.0230 -0.0156  
Z -0.0023 -0.0001 0.0059 -0.0129 -0.0011 -0.0124

AT. 71 H X 0.0101 -0.0137 -0.0211 -0.0106 -0.0078 0.0054  
Y -0.0043 -0.0001 -0.0234 -0.0099 -0.0197 0.0078  
Z 0.0069 0.0099 -0.0109 -0.0133 0.0032 0.0035

AT. 72 H X -0.0101 0.0137 0.0211 -0.0106 -0.0078 -0.0054  
Y 0.0043 0.0001 0.0234 -0.0099 -0.0197 -0.0078  
Z -0.0069 -0.0099 0.0109 -0.0133 0.0032 -0.0035

AT. 73 C X 0.0080 -0.0133 -0.0088 -0.0020 0.0016 0.0008  
Y 0.0009 -0.0004 -0.0032 0.0007 -0.0049 -0.0006  
Z 0.0015 0.0057 0.0004 0.0000 0.0054 0.0026

AT. 74 C X -0.0080 0.0133 0.0088 -0.0020 0.0016 -0.0008  
Y -0.0009 0.0004 0.0032 0.0007 -0.0049 0.0006  
Z -0.0015 -0.0057 -0.0004 0.0000 0.0054 -0.0026

AT. 75 H X 0.0114 -0.0063 -0.0062 -0.0044 0.0103 -0.0059  
Y -0.0008 0.0056 -0.0087 -0.0051 -0.0051 -0.0016  
Z 0.0014 0.0188 -0.0053 -0.0098 0.0115 -0.0034

AT. 76 H X -0.0114 0.0063 0.0062 -0.0044 0.0103 0.0059  
Y 0.0008 -0.0056 0.0087 -0.0051 -0.0051 0.0016  
Z -0.0014 -0.0188 0.0053 -0.0098 0.0115 0.0034

AT. 77 H X 0.0059 -0.0098 -0.0154 -0.0104 -0.0022 0.0025  
Y 0.0039 0.0097 -0.0026 -0.0022 0.0042 -0.0083  
Z -0.0000 -0.0067 0.0060 0.0104 0.0008 0.0078

AT. 78 H X -0.0059 0.0098 0.0154 -0.0104 -0.0022 -0.0025  
Y -0.0039 -0.0097 0.0026 -0.0022 0.0042 0.0083  
Z 0.0000 0.0067 -0.0060 0.0104 0.0008 -0.0078

AT. 79 I X -0.0046 -0.0041 -0.0001 0.0001 0.0101 0.0109  
Y 0.0047 0.0042 -0.0020 -0.0036 -0.0098 -0.0099

Z -0.0008 -0.0030 0.0013 -0.0001 -0.0217 -0.0229  
AT. 80 I X 0.0046 0.0041 0.0001 0.0001 0.0101 -0.0109  
Y -0.0047 -0.0042 0.0020 -0.0036 -0.0098 0.0099  
Z 0.0008 0.0030 -0.0013 -0.0001 -0.0217 0.0229  
AT. 81 I X 0.0060 -0.0039 0.0022 0.0015 -0.0070 -0.0061  
Y -0.0050 0.0020 -0.0019 -0.0009 0.0026 -0.0019  
Z 0.0062 -0.0008 -0.0003 0.0011 -0.0014 0.0001  
AT. 82 I X -0.0060 0.0039 -0.0022 0.0015 -0.0070 0.0061  
Y 0.0050 -0.0020 0.0019 -0.0009 0.0026 0.0019  
Z -0.0062 0.0008 0.0003 0.0011 -0.0014 -0.0001  
AT. 83 O X -0.0285 -0.0111 0.0104 -0.0080 -0.0126 -0.0043  
Y 0.0537 -0.0098 -0.0006 0.0003 0.0203 0.0252  
Z -0.0011 0.0125 -0.0070 -0.0073 0.0168 0.0059  
AT. 84 O X 0.0285 0.0111 -0.0104 -0.0080 -0.0126 0.0043  
Y -0.0537 0.0098 0.0006 0.0003 0.0203 -0.0252  
Z 0.0011 -0.0125 0.0070 -0.0073 0.0168 -0.0059  
AT. 85 O X 0.0200 -0.0025 0.0048 0.0123 0.0142 0.0076  
Y 0.0055 0.0437 0.0001 -0.0091 0.0137 -0.0258  
Z -0.0239 0.0337 0.0048 -0.0041 0.0042 -0.0205  
AT. 86 O X -0.0200 0.0025 -0.0048 0.0123 0.0142 -0.0076  
Y -0.0055 -0.0437 -0.0001 -0.0091 0.0137 0.0258  
Z 0.0239 -0.0337 -0.0048 -0.0041 0.0042 0.0205  
AT. 87 N X -0.0213 -0.0118 0.0024 -0.0146 -0.0125 -0.0219  
Y 0.0064 -0.0338 0.0122 0.0069 -0.0223 -0.0099  
Z -0.0052 0.0135 -0.0026 -0.0040 0.0172 0.0164  
AT. 88 N X 0.0213 0.0118 -0.0024 -0.0146 -0.0125 0.0219  
Y -0.0064 0.0338 -0.0122 0.0069 -0.0223 0.0099  
Z 0.0052 -0.0135 0.0026 -0.0040 0.0172 -0.0164  
AT. 89 N X 0.0113 0.0157 -0.0054 0.0016 0.0163 0.0042  
Y 0.0174 -0.0141 0.0096 0.0094 -0.0034 0.0013  
Z -0.0186 -0.0073 0.0082 0.0062 -0.0114 0.0036  
AT. 90 N X -0.0113 -0.0157 0.0054 0.0016 0.0163 -0.0042

Y -0.0174 0.0141 -0.0096 0.0094 -0.0034 -0.0013  
Z 0.0186 0.0073 -0.0082 0.0062 -0.0114 -0.0036  
AT. 91 C X -0.0195 -0.0109 0.0064 -0.0092 -0.0065 -0.0049  
Y 0.0187 -0.0186 0.0068 -0.0014 -0.0100 -0.0019  
Z -0.0036 0.0148 -0.0035 -0.0054 0.0187 0.0163  
AT. 92 C X 0.0195 0.0109 -0.0064 -0.0092 -0.0065 0.0049  
Y -0.0187 0.0186 -0.0068 -0.0014 -0.0100 0.0019  
Z 0.0036 -0.0148 0.0035 -0.0054 0.0187 -0.0163  
AT. 93 C X -0.0109 -0.0112 0.0079 -0.0054 -0.0004 0.0076  
Y 0.0007 -0.0066 0.0059 -0.0068 -0.0212 -0.0146  
Z -0.0027 0.0216 -0.0013 -0.0040 0.0170 0.0235  
AT. 94 C X 0.0109 0.0112 -0.0079 -0.0054 -0.0004 -0.0076  
Y -0.0007 0.0066 -0.0059 -0.0068 -0.0212 0.0146  
Z 0.0027 -0.0216 0.0013 -0.0040 0.0170 -0.0235  
AT. 95 H X -0.0135 -0.0135 0.0114 -0.0094 0.0080 0.0223  
Y 0.0036 -0.0117 0.0032 -0.0034 -0.0302 -0.0307  
Z -0.0051 0.0334 -0.0004 -0.0057 0.0242 0.0371  
AT. 96 H X 0.0135 0.0135 -0.0114 -0.0094 0.0080 -0.0223  
Y -0.0036 0.0117 -0.0032 -0.0034 -0.0302 0.0307  
Z 0.0051 -0.0334 0.0004 -0.0057 0.0242 -0.0371  
AT. 97 H X -0.0057 -0.0119 0.0096 -0.0032 -0.0076 0.0051  
Y -0.0032 0.0081 0.0073 -0.0108 -0.0024 0.0141  
Z -0.0050 0.0255 -0.0016 -0.0056 0.0236 0.0310  
AT. 98 H X 0.0057 0.0119 -0.0096 -0.0032 -0.0076 -0.0051  
Y 0.0032 -0.0081 -0.0073 -0.0108 -0.0024 -0.0141  
Z 0.0050 -0.0255 0.0016 -0.0056 0.0236 -0.0310  
AT. 99 C X 0.0150 0.0071 0.0021 0.0065 0.0124 0.0029  
Y 0.0138 0.0194 0.0032 0.0017 0.0130 -0.0090  
Z -0.0201 0.0125 0.0044 0.0015 -0.0010 -0.0036  
AT. 100 C X -0.0150 -0.0071 -0.0021 0.0065 0.0124 -0.0029  
Y -0.0138 -0.0194 -0.0032 0.0017 0.0130 0.0090  
Z 0.0201 -0.0125 -0.0044 0.0015 -0.0010 0.0036

AT.101 C X 0.0128 0.0128 0.0053 0.0052 0.0104 -0.0070  
Y 0.0168 0.0202 0.0023 0.0032 0.0225 -0.0078  
Z -0.0164 0.0040 -0.0003 0.0024 -0.0012 0.0073

AT.102 C X -0.0128 -0.0128 -0.0053 0.0052 0.0104 0.0070  
Y -0.0168 -0.0202 -0.0023 0.0032 0.0225 0.0078  
Z 0.0164 -0.0040 0.0003 0.0024 -0.0012 -0.0073

AT.103 H X 0.0218 0.0206 0.0072 0.0071 0.0177 -0.0081  
Y 0.0134 0.0175 0.0016 0.0023 0.0197 -0.0080  
Z -0.0227 -0.0076 -0.0037 0.0028 -0.0118 0.0164

AT.104 H X -0.0218 -0.0206 -0.0072 0.0071 0.0177 0.0081  
Y -0.0134 -0.0175 -0.0016 0.0023 0.0197 0.0080  
Z 0.0227 0.0076 0.0037 0.0028 -0.0118 -0.0164

AT.105 H X 0.0043 0.0171 0.0069 0.0049 0.0108 -0.0118  
Y 0.0267 0.0302 0.0049 0.0024 0.0320 -0.0163  
Z -0.0142 0.0087 0.0010 0.0021 0.0024 0.0029

AT.106 H X -0.0043 -0.0171 -0.0069 0.0049 0.0108 0.0118  
Y -0.0267 -0.0302 -0.0049 0.0024 0.0320 0.0163  
Z 0.0142 -0.0087 -0.0010 0.0021 0.0024 -0.0029

AT.107 C X -0.0281 -0.0165 0.0016 -0.0181 -0.0225 -0.0370  
Y 0.0270 -0.0165 0.0049 0.0155 0.0052 0.0206  
Z -0.0059 0.0135 -0.0080 -0.0044 0.0148 0.0080

AT.108 C X 0.0281 0.0165 -0.0016 -0.0181 -0.0225 0.0370  
Y -0.0270 0.0165 -0.0049 0.0155 0.0052 -0.0206  
Z 0.0059 -0.0135 0.0080 -0.0044 0.0148 -0.0080

AT.109 H X -0.0412 -0.0260 0.0029 -0.0273 -0.0395 -0.0655  
Y 0.0266 -0.0125 0.0035 0.0101 0.0076 0.0124  
Z -0.0018 0.0225 -0.0102 -0.0099 0.0234 0.0030

AT.110 H X 0.0412 0.0260 -0.0029 -0.0273 -0.0395 0.0655  
Y -0.0266 0.0125 -0.0035 0.0101 0.0076 -0.0124  
Z 0.0018 -0.0225 0.0102 -0.0099 0.0234 -0.0030

AT.111 H X -0.0292 -0.0169 0.0049 -0.0199 -0.0226 -0.0374  
Y 0.0358 -0.0158 0.0041 0.0278 0.0113 0.0463

Z -0.0063 0.0138 -0.0113 -0.0050 0.0137 0.0029  
AT. 112 H X 0.0292 0.0169 -0.0049 -0.0199 -0.0226 0.0374  
Y -0.0358 0.0158 -0.0041 0.0278 0.0113 -0.0463  
Z 0.0063 -0.0138 0.0113 -0.0050 0.0137 -0.0029  
AT. 113 C X -0.0141 -0.0069 -0.0062 -0.0067 -0.0099 -0.0165  
Y 0.0359 -0.0023 -0.0004 0.0132 0.0199 0.0236  
Z -0.0098 0.0023 -0.0059 0.0030 0.0044 0.0149  
AT. 114 C X 0.0141 0.0069 0.0062 -0.0067 -0.0099 0.0165  
Y -0.0359 0.0023 0.0004 0.0132 0.0199 -0.0236  
Z 0.0098 -0.0023 0.0059 0.0030 0.0044 -0.0149  
AT. 115 C X 0.0035 0.0083 -0.0064 -0.0004 0.0079 -0.0005  
Y 0.0365 -0.0055 0.0020 0.0186 0.0166 0.0301  
Z -0.0147 -0.0097 -0.0015 0.0105 -0.0076 0.0214  
AT. 116 C X -0.0035 -0.0083 0.0064 -0.0004 0.0079 0.0005  
Y -0.0365 0.0055 -0.0020 0.0186 0.0166 -0.0301  
Z 0.0147 0.0097 0.0015 0.0105 -0.0076 -0.0214  
AT. 117 H X 0.0003 0.0126 -0.0018 -0.0074 0.0076 -0.0169  
Y 0.0442 -0.0058 0.0027 0.0295 0.0195 0.0497  
Z -0.0125 -0.0142 -0.0064 0.0151 -0.0080 0.0338  
AT. 118 H X -0.0003 -0.0126 0.0018 -0.0074 0.0076 0.0169  
Y -0.0442 0.0058 -0.0027 0.0295 0.0195 -0.0497  
Z 0.0125 0.0142 0.0064 0.0151 -0.0080 -0.0338  
AT. 119 H X 0.0143 0.0069 -0.0134 0.0114 0.0145 0.0277  
Y 0.0452 0.0014 -0.0034 0.0199 0.0278 0.0398  
Z -0.0173 -0.0172 -0.0001 0.0158 -0.0148 0.0278  
AT. 120 H X -0.0143 -0.0069 0.0134 0.0114 0.0145 -0.0277  
Y -0.0452 -0.0014 0.0034 0.0199 0.0278 -0.0398  
Z 0.0173 0.0172 0.0001 0.0158 -0.0148 -0.0278  
AT. 121 C X 0.0141 0.0199 -0.0105 0.0034 0.0237 0.0154  
Y 0.0051 -0.0274 0.0101 0.0011 -0.0197 -0.0166  
Z -0.0215 -0.0104 0.0153 0.0042 -0.0193 -0.0101  
AT. 122 C X -0.0141 -0.0199 0.0105 0.0034 0.0237 -0.0154

Y -0.0051 0.0274 -0.0101 0.0011 -0.0197 0.0166  
Z 0.0215 0.0104 -0.0153 0.0042 -0.0193 0.0101  
AT. 123 H X 0.0287 0.0391 -0.0186 0.0081 0.0488 0.0427  
Y 0.0123 -0.0147 0.0041 -0.0015 -0.0026 -0.0020  
Z -0.0267 -0.0194 0.0200 0.0071 -0.0324 -0.0205  
AT. 124 H X -0.0287 -0.0391 0.0186 0.0081 0.0488 -0.0427  
Y -0.0123 0.0147 -0.0041 -0.0015 -0.0026 0.0020  
Z 0.0267 0.0194 -0.0200 0.0071 -0.0324 0.0205  
AT. 125 H X 0.0179 0.0241 -0.0082 0.0038 0.0274 0.0161  
Y -0.0122 -0.0502 0.0178 0.0004 -0.0499 -0.0454  
Z -0.0255 -0.0175 0.0219 0.0046 -0.0303 -0.0240  
AT. 126 H X -0.0179 -0.0241 0.0082 0.0038 0.0274 -0.0161  
Y 0.0122 0.0502 -0.0178 0.0004 -0.0499 0.0454  
Z 0.0255 0.0175 -0.0219 0.0046 -0.0303 0.0240  
AT. 127 C X -0.0048 -0.0001 -0.0095 -0.0020 0.0004 -0.0049  
Y 0.0047 -0.0263 0.0068 -0.0029 -0.0152 -0.0147  
Z -0.0122 0.0028 0.0081 -0.0009 0.0020 0.0075  
AT. 128 C X 0.0048 0.0001 0.0095 -0.0020 0.0004 0.0049  
Y -0.0047 0.0263 -0.0068 -0.0029 -0.0152 0.0147  
Z 0.0122 -0.0028 -0.0081 -0.0009 0.0020 -0.0075  
AT. 129 C X -0.0188 -0.0118 -0.0013 -0.0109 -0.0125 -0.0215  
Y -0.0081 -0.0421 0.0156 -0.0018 -0.0367 -0.0333  
Z -0.0031 0.0163 0.0011 -0.0049 0.0214 0.0235  
AT. 130 C X 0.0188 0.0118 0.0013 -0.0109 -0.0125 0.0215  
Y 0.0081 0.0421 -0.0156 -0.0018 -0.0367 0.0333  
Z 0.0031 -0.0163 -0.0011 -0.0049 0.0214 -0.0235  
AT. 131 H X -0.0116 -0.0033 -0.0029 -0.0113 -0.0012 -0.0087  
Y -0.0276 -0.0641 0.0267 -0.0045 -0.0646 -0.0624  
Z -0.0017 0.0182 0.0038 -0.0066 0.0238 0.0274  
AT. 132 H X 0.0116 0.0033 0.0029 -0.0113 -0.0012 0.0087  
Y 0.0276 0.0641 -0.0267 -0.0045 -0.0646 0.0624  
Z 0.0017 -0.0182 -0.0038 -0.0066 0.0238 -0.0274



AT.133 H X -0.0361 -0.0298 0.0073 -0.0124 -0.0365 -0.0483  
Y -0.0089 -0.0399 0.0141 -0.0048 -0.0339 -0.0343  
Z 0.0042 0.0277 -0.0049 -0.0085 0.0364 0.0345

AT.134 H X 0.0361 0.0298 -0.0073 -0.0124 -0.0365 0.0483  
Y 0.0089 0.0399 -0.0141 -0.0048 -0.0339 0.0343  
Z -0.0042 -0.0277 0.0049 -0.0085 0.0364 -0.0345

AT.135 C X -0.0195 -0.0129 -0.0096 -0.0059 -0.0167 -0.0183  
Y 0.0543 0.0173 -0.0072 0.0184 0.0450 0.0399  
Z -0.0083 0.0039 -0.0163 0.0058 0.0082 0.0216

AT.136 C X 0.0195 0.0129 0.0096 -0.0059 -0.0167 0.0183  
Y -0.0543 -0.0173 0.0072 0.0184 0.0450 -0.0399  
Z 0.0083 -0.0039 0.0163 0.0058 0.0082 -0.0216

AT.137 H X -0.0329 -0.0247 -0.0115 -0.0107 -0.0325 -0.0282  
Y 0.0481 0.0161 -0.0095 0.0135 0.0430 0.0353  
Z -0.0118 0.0069 -0.0195 -0.0001 0.0116 0.0186

AT.138 H X 0.0329 0.0247 0.0115 -0.0107 -0.0325 0.0282  
Y -0.0481 -0.0161 0.0095 0.0135 0.0430 -0.0353  
Z 0.0118 -0.0069 0.0195 -0.0001 0.0116 -0.0186

AT.139 H X -0.0249 -0.0160 -0.0045 -0.0115 -0.0222 -0.0270  
Y 0.0713 0.0268 -0.0056 0.0298 0.0587 0.0552  
Z -0.0058 0.0053 -0.0228 0.0100 0.0118 0.0289

AT.140 H X 0.0249 0.0160 0.0045 -0.0115 -0.0222 0.0270  
Y -0.0713 -0.0268 0.0056 0.0298 0.0587 -0.0552  
Z 0.0058 -0.0053 0.0228 0.0100 0.0118 -0.0289

AT.141 H X -0.0038 -0.0021 -0.0173 0.0039 -0.0002 -0.0004  
Y 0.0567 0.0235 -0.0129 0.0161 0.0537 0.0432  
Z -0.0039 0.0019 -0.0139 0.0124 0.0063 0.0262

AT.142 H X 0.0038 0.0021 0.0173 0.0039 -0.0002 0.0004  
Y -0.0567 -0.0235 0.0129 0.0161 0.0537 -0.0432  
Z 0.0039 -0.0019 0.0139 0.0124 0.0063 -0.0262

AT.143 C X -0.0037 0.0016 -0.0136 0.0017 -0.0003 -0.0019  
Y -0.0065 -0.0351 0.0051 -0.0131 -0.0197 -0.0225

Z -0.0109 0.0029 0.0141 -0.0033 0.0043 0.0053  
AT. 144 C X 0.0037 -0.0016 0.0136 0.0017 -0.0003 0.0019  
Y 0.0065 0.0351 -0.0051 -0.0131 -0.0197 0.0225  
Z 0.0109 -0.0029 -0.0141 -0.0033 0.0043 -0.0053  
AT. 145 H X 0.0050 0.0120 -0.0188 0.0068 0.0060 0.0093  
Y 0.0012 -0.0254 -0.0008 -0.0137 -0.0092 -0.0123  
Z -0.0166 -0.0047 0.0188 -0.0012 -0.0051 -0.0025  
AT. 146 H X -0.0050 -0.0120 0.0188 0.0068 0.0060 -0.0093  
Y -0.0012 0.0254 0.0008 -0.0137 -0.0092 0.0123  
Z 0.0166 0.0047 -0.0188 -0.0012 -0.0051 0.0025  
AT. 147 H X 0.0024 0.0070 -0.0129 0.0016 0.0061 0.0025  
Y -0.0229 -0.0527 0.0128 -0.0156 -0.0365 -0.0404  
Z -0.0109 0.0007 0.0192 -0.0046 0.0042 0.0017  
AT. 148 H X -0.0024 -0.0070 0.0129 0.0016 0.0061 -0.0025  
Y 0.0229 0.0527 -0.0128 -0.0156 -0.0365 0.0404  
Z 0.0109 -0.0007 -0.0192 -0.0046 0.0042 -0.0017  
AT. 149 H X -0.0184 -0.0119 -0.0111 -0.0024 -0.0133 -0.0141  
Y -0.0069 -0.0343 0.0024 -0.0163 -0.0172 -0.0210  
Z -0.0043 0.0102 0.0081 -0.0073 0.0144 0.0134  
AT. 150 H X 0.0184 0.0119 0.0111 -0.0024 -0.0133 0.0141  
Y 0.0069 0.0343 -0.0024 -0.0163 -0.0172 0.0210  
Z 0.0043 -0.0102 -0.0081 -0.0073 0.0144 -0.0134  
AT. 151 C X -0.0118 -0.0076 -0.0114 -0.0021 -0.0093 -0.0109  
Y 0.0261 -0.0045 -0.0017 0.0008 0.0156 0.0099  
Z -0.0107 0.0037 0.0006 0.0004 0.0043 0.0115  
AT. 152 C X 0.0118 0.0076 0.0114 -0.0021 -0.0093 0.0109  
Y -0.0261 0.0045 0.0017 0.0008 0.0156 -0.0099  
Z 0.0107 -0.0037 -0.0006 0.0004 0.0043 -0.0115  
AT. 153 H X -0.0232 -0.0182 -0.0099 -0.0054 -0.0243 -0.0229  
Y 0.0261 -0.0013 -0.0033 -0.0028 0.0202 0.0098  
Z -0.0051 0.0132 -0.0026 -0.0040 0.0181 0.0167  
AT. 154 H X 0.0232 0.0182 0.0099 -0.0054 -0.0243 0.0229

Y -0.0261 0.0013 0.0033 -0.0028 0.0202 -0.0098  
Z 0.0051 -0.0132 0.0026 -0.0040 0.0181 -0.0167  
AT. 155 H X -0.0023 -0.0026 -0.0166 0.0044 -0.0005 0.0006  
Y 0.0337 0.0056 -0.0062 -0.0009 0.0304 0.0182  
Z -0.0154 -0.0053 0.0034 0.0046 -0.0079 0.0072  
AT. 156 H X 0.0023 0.0026 0.0166 0.0044 -0.0005 -0.0006  
Y -0.0337 -0.0056 0.0062 -0.0009 0.0304 -0.0182  
Z 0.0154 0.0053 -0.0034 0.0046 -0.0079 -0.0072  
AT. 157 O X -0.0076 0.0021 0.1186 0.0968 -0.0181 0.0175  
Y 0.0067 0.0133 0.0117 0.0267 0.0100 -0.0124  
Z 0.0070 -0.0250 0.0420 0.0124 -0.0185 0.0135  
AT. 158 O X 0.0076 -0.0021 -0.1186 0.0968 -0.0181 -0.0175  
Y -0.0067 -0.0133 -0.0117 0.0267 0.0100 0.0124  
Z -0.0070 0.0250 -0.0420 0.0124 -0.0185 -0.0135  
AT. 159 O X -0.0055 -0.0002 0.0797 0.0652 -0.0105 0.0104  
Y -0.0015 0.0096 0.0467 0.0570 0.0102 -0.0011  
Z 0.0091 -0.0306 -0.0166 -0.0354 -0.0057 0.0034  
AT. 160 O X 0.0055 0.0002 -0.0797 0.0652 -0.0105 -0.0104  
Y 0.0015 -0.0096 -0.0467 0.0570 0.0102 0.0011  
Z -0.0091 0.0306 0.0166 -0.0354 -0.0057 -0.0034  
AT. 161 H X -0.0019 0.0122 0.0761 0.0651 -0.0106 0.0063  
Y 0.0079 0.0111 0.0164 0.0292 0.0072 -0.0122  
Z 0.0066 -0.0148 0.0087 -0.0109 -0.0075 0.0078  
AT. 162 H X 0.0019 -0.0122 -0.0761 0.0651 -0.0106 -0.0063  
Y -0.0079 -0.0111 -0.0164 0.0292 0.0072 0.0122  
Z -0.0066 0.0148 -0.0087 -0.0109 -0.0075 -0.0078  
AT. 163 H X -0.0016 -0.0058 0.0366 0.0279 -0.0030 0.0036  
Y 0.0010 -0.0148 0.0233 0.0138 0.0086 0.0008  
Z 0.0084 -0.0343 -0.0079 -0.0332 -0.0090 0.0063  
AT. 164 H X 0.0016 0.0058 -0.0366 0.0279 -0.0030 -0.0036  
Y -0.0010 0.0148 -0.0233 0.0138 0.0086 -0.0008  
Z -0.0084 0.0343 0.0079 -0.0332 -0.0090 -0.0063

AT.165 O X 0.0505 -0.0125 0.0056 0.0004 -0.0188 -0.0103  
Y -0.0416 -0.0028 0.0001 -0.0090 0.0405 0.0492  
Z -0.0408 0.0051 -0.0015 0.0071 0.0531 0.0546

AT.166 O X -0.0505 0.0125 -0.0056 0.0004 -0.0188 0.0103  
Y 0.0416 0.0028 -0.0001 -0.0090 0.0405 -0.0492  
Z 0.0408 -0.0051 0.0015 0.0071 0.0531 -0.0546

AT.167 H X 0.0189 -0.0147 0.0063 -0.0050 -0.0154 -0.0099  
Y -0.0019 -0.0042 0.0000 -0.0019 0.0391 0.0529  
Z -0.0145 0.0136 -0.0032 0.0121 0.0495 0.0527

AT.168 H X -0.0189 0.0147 -0.0063 -0.0050 -0.0154 0.0099  
Y 0.0019 0.0042 -0.0000 -0.0019 0.0391 -0.0529  
Z 0.0145 -0.0136 0.0032 0.0121 0.0495 -0.0527

AT.169 O X 0.1071 0.0099 0.0022 0.0139 -0.0193 -0.0077  
Y 0.0011 -0.0201 0.0023 -0.0046 0.0258 0.0440  
Z -0.0384 0.0133 -0.0027 0.0089 0.0559 0.0559

AT.170 O X -0.1071 -0.0099 -0.0022 0.0139 -0.0193 0.0077  
Y -0.0011 0.0201 -0.0023 -0.0046 0.0258 -0.0440  
Z 0.0384 -0.0133 0.0027 0.0089 0.0559 -0.0559

AT.171 H X 0.0501 0.0091 -0.0018 0.0133 -0.0071 -0.0110  
Y -0.0194 -0.0306 0.0012 -0.0062 0.0248 0.0387  
Z -0.0296 -0.0029 -0.0014 0.0069 0.0451 0.0492

AT.172 H X -0.0501 -0.0091 0.0018 0.0133 -0.0071 0.0110  
Y 0.0194 0.0306 -0.0012 -0.0062 0.0248 -0.0387  
Z 0.0296 0.0029 0.0014 0.0069 0.0451 -0.0492

FREQ(CM\*\*-1) 104.95 105.97 115.00 116.07 123.95 125.94

AT. 1 I X -0.0087 -0.0080 -0.0093 0.0065 0.0032 0.0013  
Y 0.0093 0.0099 0.0104 0.0010 -0.0003 -0.0012  
Z -0.0126 -0.0139 -0.0060 0.0010 0.0010 0.0013

AT. 2 I X -0.0087 0.0080 -0.0093 -0.0065 -0.0032 0.0013  
Y 0.0093 -0.0099 0.0104 -0.0010 0.0003 -0.0012

Z -0.0126 0.0139 -0.0060 -0.0010 -0.0010 0.0013  
AT. 3 I X 0.0123 0.0078 0.0075 -0.0018 0.0010 -0.0029  
Y 0.0028 0.0028 -0.0005 0.0015 -0.0023 -0.0007  
Z -0.0038 -0.0022 -0.0013 -0.0004 -0.0006 -0.0000  
AT. 4 I X 0.0123 -0.0078 0.0075 0.0018 -0.0010 -0.0029  
Y 0.0028 -0.0028 -0.0005 -0.0015 0.0023 -0.0007  
Z -0.0038 0.0022 -0.0013 0.0004 0.0006 -0.0000  
AT. 5 O X 0.0016 0.0082 0.0139 -0.0171 -0.0088 0.0003  
Y 0.0145 0.0159 0.0096 -0.0173 -0.0057 -0.0036  
Z 0.0027 0.0054 0.0081 0.0053 -0.0016 -0.0042  
AT. 6 O X 0.0016 -0.0082 0.0139 0.0171 0.0088 0.0003  
Y 0.0145 -0.0159 0.0096 0.0173 0.0057 -0.0036  
Z 0.0027 -0.0054 0.0081 -0.0053 0.0016 -0.0042  
AT. 7 O X -0.0012 -0.0153 -0.0290 0.0211 -0.0052 0.0110  
Y 0.0005 -0.0265 -0.0513 0.0403 -0.0029 0.0115  
Z 0.0038 -0.0111 -0.0385 0.0389 -0.0028 0.0053  
AT. 8 O X -0.0012 0.0153 -0.0290 -0.0211 0.0052 0.0110  
Y 0.0005 0.0265 -0.0513 -0.0403 0.0029 0.0115  
Z 0.0038 0.0111 -0.0385 -0.0389 0.0028 0.0053  
AT. 9 N X 0.0094 0.0222 0.0030 -0.0021 -0.0002 -0.0032  
Y -0.0259 -0.0268 -0.0209 0.0059 0.0102 -0.0004  
Z 0.0103 0.0146 0.0087 0.0070 -0.0010 -0.0053  
AT. 10 N X 0.0094 -0.0222 0.0030 0.0021 0.0002 -0.0032  
Y -0.0259 0.0268 -0.0209 -0.0059 -0.0102 -0.0004  
Z 0.0103 -0.0146 0.0087 -0.0070 0.0010 -0.0053  
AT. 11 N X -0.0158 -0.0095 -0.0040 -0.0008 0.0034 -0.0011  
Y -0.0012 0.0017 -0.0112 0.0051 0.0061 -0.0040  
Z 0.0127 0.0134 -0.0210 0.0247 0.0010 -0.0041  
AT. 12 N X -0.0158 0.0095 -0.0040 0.0008 -0.0034 -0.0011  
Y -0.0012 -0.0017 -0.0112 -0.0051 -0.0061 -0.0040  
Z 0.0127 -0.0134 -0.0210 -0.0247 -0.0010 -0.0041  
AT. 13 C X -0.0007 0.0052 0.0036 -0.0052 -0.0025 0.0008

Y -0.0072 -0.0095 -0.0085 -0.0019 0.0033 -0.0006  
Z 0.0140 0.0186 0.0105 0.0064 -0.0020 -0.0058  
AT. 14 C X -0.0007 -0.0052 0.0036 0.0052 0.0025 0.0008  
Y -0.0072 0.0095 -0.0085 0.0019 -0.0033 -0.0006  
Z 0.0140 -0.0186 0.0105 -0.0064 0.0020 -0.0058  
AT. 15 C X -0.0096 -0.0066 -0.0013 0.0026 0.0000 0.0025  
Y -0.0033 -0.0083 -0.0087 0.0060 0.0053 0.0002  
Z 0.0334 0.0383 0.0139 0.0056 -0.0025 -0.0079  
AT. 16 C X -0.0096 0.0066 -0.0013 -0.0026 -0.0000 0.0025  
Y -0.0033 0.0083 -0.0087 -0.0060 -0.0053 0.0002  
Z 0.0334 -0.0383 0.0139 -0.0056 0.0025 -0.0079  
AT. 17 H X -0.0177 -0.0154 -0.0030 0.0008 0.0001 0.0048  
Y -0.0226 -0.0271 -0.0142 0.0047 0.0058 0.0028  
Z 0.0556 0.0596 0.0203 0.0066 -0.0033 -0.0102  
AT. 18 H X -0.0177 0.0154 -0.0030 -0.0008 -0.0001 0.0048  
Y -0.0226 0.0271 -0.0142 -0.0047 -0.0058 0.0028  
Z 0.0556 -0.0596 0.0203 -0.0066 0.0033 -0.0102  
AT. 19 H X -0.0054 -0.0001 0.0028 0.0047 -0.0004 0.0018  
Y 0.0272 0.0213 0.0002 0.0061 0.0041 -0.0037  
Z 0.0461 0.0519 0.0187 0.0065 -0.0030 -0.0097  
AT. 20 H X -0.0054 0.0001 0.0028 -0.0047 0.0004 0.0018  
Y 0.0272 -0.0213 0.0002 -0.0061 -0.0041 -0.0037  
Z 0.0461 -0.0519 0.0187 -0.0065 0.0030 -0.0097  
AT. 21 C X -0.0031 -0.0055 -0.0063 0.0032 -0.0011 0.0036  
Y 0.0028 -0.0089 -0.0235 0.0199 0.0015 0.0014  
Z 0.0144 0.0075 -0.0267 0.0308 -0.0011 -0.0010  
AT. 22 C X -0.0031 0.0055 -0.0063 -0.0032 0.0011 0.0036  
Y 0.0028 0.0089 -0.0235 -0.0199 -0.0015 0.0014  
Z 0.0144 -0.0075 -0.0267 -0.0308 0.0011 -0.0010  
AT. 23 C X 0.0038 0.0051 0.0111 -0.0094 -0.0011 -0.0003  
Y -0.0008 -0.0097 -0.0034 0.0045 0.0040 -0.0026  
Z 0.0211 0.0175 -0.0152 0.0221 -0.0021 -0.0030

AT. 24 C X 0.0038 -0.0051 0.0111 0.0094 0.0011 -0.0003  
Y -0.0008 0.0097 -0.0034 -0.0045 -0.0040 -0.0026  
Z 0.0211 -0.0175 -0.0152 -0.0221 0.0021 -0.0030

AT. 25 H X 0.0053 0.0108 0.0182 -0.0147 -0.0033 -0.0008  
Y -0.0020 -0.0106 -0.0018 0.0031 0.0043 -0.0027  
Z 0.0329 0.0297 -0.0219 0.0295 -0.0068 -0.0018

AT. 26 H X 0.0053 -0.0108 0.0182 0.0147 0.0033 -0.0008  
Y -0.0020 0.0106 -0.0018 -0.0031 -0.0043 -0.0027  
Z 0.0329 -0.0297 -0.0219 -0.0295 0.0068 -0.0018

AT. 27 H X 0.0004 0.0028 0.0151 -0.0146 -0.0003 -0.0004  
Y -0.0154 -0.0242 0.0041 -0.0061 0.0086 -0.0026  
Z 0.0146 0.0109 -0.0121 0.0181 0.0001 -0.0031

AT. 28 H X 0.0004 -0.0028 0.0151 0.0146 0.0003 -0.0004  
Y -0.0154 0.0242 0.0041 0.0061 -0.0086 -0.0026  
Z 0.0146 -0.0109 -0.0121 -0.0181 -0.0001 -0.0031

AT. 29 C X 0.0307 0.0501 0.0154 -0.0081 -0.0031 -0.0066  
Y -0.0020 0.0057 -0.0031 -0.0043 0.0058 -0.0033  
Z -0.0001 0.0039 0.0110 0.0047 -0.0013 -0.0030

AT. 30 C X 0.0307 -0.0501 0.0154 0.0081 0.0031 -0.0066  
Y -0.0020 -0.0057 -0.0031 0.0043 -0.0058 -0.0033  
Z -0.0001 -0.0039 0.0110 -0.0047 0.0013 -0.0030

AT. 31 H X 0.0538 0.0794 0.0258 -0.0137 -0.0054 -0.0101  
Y -0.0207 -0.0175 -0.0030 -0.0030 0.0065 -0.0012  
Z -0.0139 -0.0124 0.0176 0.0031 -0.0020 -0.0023

AT. 32 H X 0.0538 -0.0794 0.0258 0.0137 0.0054 -0.0101  
Y -0.0207 0.0175 -0.0030 0.0030 -0.0065 -0.0012  
Z -0.0139 0.0124 0.0176 -0.0031 0.0020 -0.0023

AT. 33 H X 0.0416 0.0649 0.0182 -0.0108 -0.0045 -0.0066  
Y 0.0281 0.0413 -0.0033 -0.0074 0.0051 -0.0062  
Z -0.0058 -0.0015 0.0132 0.0047 -0.0018 -0.0014

AT. 34 H X 0.0416 -0.0649 0.0182 0.0108 0.0045 -0.0066  
Y 0.0281 -0.0413 -0.0033 0.0074 -0.0051 -0.0062

Z -0.0058 0.0015 0.0132 -0.0047 0.0018 -0.0014  
AT. 35 C X 0.0094 0.0220 0.0099 -0.0027 -0.0015 -0.0049  
Y 0.0064 0.0180 0.0118 -0.0120 0.0037 -0.0044  
Z 0.0145 0.0220 0.0042 0.0055 -0.0016 -0.0038  
AT. 36 C X 0.0094 -0.0220 0.0099 0.0027 0.0015 -0.0049  
Y 0.0064 -0.0180 0.0118 0.0120 -0.0037 -0.0044  
Z 0.0145 -0.0220 0.0042 -0.0055 0.0016 -0.0038  
AT. 37 C X -0.0026 0.0081 0.0044 -0.0037 0.0010 -0.0027  
Y 0.0198 0.0318 0.0061 -0.0055 0.0022 -0.0051  
Z 0.0275 0.0350 -0.0076 0.0136 -0.0023 -0.0030  
AT. 38 C X -0.0026 -0.0081 0.0044 0.0037 -0.0010 -0.0027  
Y 0.0198 -0.0318 0.0061 0.0055 -0.0022 -0.0051  
Z 0.0275 -0.0350 -0.0076 -0.0136 0.0023 -0.0030  
AT. 39 H X 0.0190 0.0347 0.0077 -0.0057 -0.0035 -0.0006  
Y 0.0340 0.0463 0.0004 0.0009 -0.0001 -0.0045  
Z 0.0363 0.0472 -0.0030 0.0096 -0.0044 -0.0018  
AT. 40 H X 0.0190 -0.0347 0.0077 0.0057 0.0035 -0.0006  
Y 0.0340 -0.0463 0.0004 -0.0009 0.0001 -0.0045  
Z 0.0363 -0.0472 -0.0030 -0.0096 0.0044 -0.0018  
AT. 41 H X -0.0255 -0.0200 -0.0004 -0.0009 0.0059 -0.0051  
Y 0.0330 0.0512 0.0196 -0.0142 -0.0019 -0.0046  
Z 0.0401 0.0478 -0.0131 0.0175 -0.0045 -0.0005  
AT. 42 H X -0.0255 0.0200 -0.0004 0.0009 -0.0059 -0.0051  
Y 0.0330 -0.0512 0.0196 0.0142 0.0019 -0.0046  
Z 0.0401 -0.0478 -0.0131 -0.0175 0.0045 -0.0005  
AT. 43 C X -0.0371 -0.0345 -0.0131 0.0063 0.0045 0.0007  
Y -0.0200 -0.0175 -0.0084 -0.0008 0.0066 -0.0005  
Z 0.0011 -0.0024 -0.0306 0.0343 0.0018 -0.0043  
AT. 44 C X -0.0371 0.0345 -0.0131 -0.0063 -0.0045 0.0007  
Y -0.0200 0.0175 -0.0084 0.0008 -0.0066 -0.0005  
Z 0.0011 0.0024 -0.0306 -0.0343 -0.0018 -0.0043  
AT. 45 H X -0.0604 -0.0613 -0.0204 0.0104 0.0056 0.0027



Y -0.0023 0.0032 0.0074 -0.0110 0.0040 -0.0006  
Z 0.0011 -0.0029 -0.0403 0.0409 0.0027 -0.0051  
AT. 46 H X -0.0604 0.0613 -0.0204 -0.0104 -0.0056 0.0027  
Y -0.0023 -0.0032 0.0074 0.0110 -0.0040 -0.0006  
Z 0.0011 0.0029 -0.0403 -0.0409 -0.0027 -0.0051  
AT. 47 H X -0.0465 -0.0442 -0.0172 0.0063 0.0056 0.0019  
Y -0.0412 -0.0426 -0.0237 0.0084 0.0088 0.0015  
Z -0.0089 -0.0158 -0.0406 0.0437 0.0028 -0.0041  
AT. 48 H X -0.0465 0.0442 -0.0172 -0.0063 -0.0056 0.0019  
Y -0.0412 0.0426 -0.0237 -0.0084 -0.0088 0.0015  
Z -0.0089 0.0158 -0.0406 -0.0437 -0.0028 -0.0041  
AT. 49 C X -0.0164 -0.0115 -0.0025 0.0041 0.0021 -0.0018  
Y -0.0290 -0.0256 -0.0004 -0.0090 0.0075 0.0007  
Z 0.0094 0.0087 -0.0105 0.0216 0.0007 -0.0049  
AT. 50 C X -0.0164 0.0115 -0.0025 -0.0041 -0.0021 -0.0018  
Y -0.0290 0.0256 -0.0004 0.0090 -0.0075 0.0007  
Z 0.0094 -0.0087 -0.0105 -0.0216 -0.0007 -0.0049  
AT. 51 C X 0.0005 0.0106 0.0021 0.0002 0.0002 -0.0025  
Y -0.0525 -0.0568 -0.0244 0.0059 0.0115 0.0020  
Z 0.0182 0.0216 0.0097 0.0098 -0.0012 -0.0064  
AT. 52 C X 0.0005 -0.0106 0.0021 -0.0002 -0.0002 -0.0025  
Y -0.0525 0.0568 -0.0244 -0.0059 -0.0115 0.0020  
Z 0.0182 -0.0216 0.0097 -0.0098 0.0012 -0.0064  
AT. 53 H X -0.0210 -0.0157 -0.0124 0.0072 0.0023 -0.0009  
Y -0.0784 -0.0906 -0.0449 0.0178 0.0143 0.0042  
Z 0.0261 0.0287 0.0112 0.0116 -0.0015 -0.0070  
AT. 54 H X -0.0210 0.0157 -0.0124 -0.0072 -0.0023 -0.0009  
Y -0.0784 0.0906 -0.0449 -0.0178 -0.0143 0.0042  
Z 0.0261 -0.0287 0.0112 -0.0116 0.0015 -0.0070  
AT. 55 H X 0.0301 0.0460 0.0223 -0.0093 -0.0029 -0.0053  
Y -0.0652 -0.0703 -0.0247 0.0041 0.0107 0.0022  
Z 0.0229 0.0296 0.0236 0.0010 -0.0038 -0.0076

AT. 56 H X 0.0301 -0.0460 0.0223 0.0093 0.0029 -0.0053  
Y -0.0652 0.0703 -0.0247 -0.0041 -0.0107 0.0022  
Z 0.0229 -0.0296 0.0236 -0.0010 0.0038 -0.0076

AT. 57 C X 0.0177 0.0317 0.0147 -0.0020 -0.0028 -0.0073  
Y 0.0209 0.0378 0.0256 -0.0204 0.0008 -0.0076  
Z 0.0199 0.0327 0.0154 -0.0081 -0.0032 -0.0041

AT. 58 C X 0.0177 -0.0317 0.0147 0.0020 0.0028 -0.0073  
Y 0.0209 -0.0378 0.0256 0.0204 -0.0008 -0.0076  
Z 0.0199 -0.0327 0.0154 0.0081 0.0032 -0.0041

AT. 59 H X 0.0258 0.0419 0.0203 -0.0018 -0.0053 -0.0109  
Y 0.0183 0.0341 0.0305 -0.0253 -0.0001 -0.0075  
Z 0.0217 0.0344 0.0267 -0.0148 -0.0064 -0.0066

AT. 60 H X 0.0258 -0.0419 0.0203 0.0018 0.0053 -0.0109  
Y 0.0183 -0.0341 0.0305 0.0253 0.0001 -0.0075  
Z 0.0217 -0.0344 0.0267 0.0148 0.0064 -0.0066

AT. 61 H X 0.0239 0.0423 0.0168 -0.0070 -0.0030 -0.0076  
Y 0.0246 0.0426 0.0183 -0.0139 0.0019 -0.0076  
Z 0.0232 0.0389 0.0208 -0.0153 -0.0040 -0.0040

AT. 62 H X 0.0239 -0.0423 0.0168 0.0070 0.0030 -0.0076  
Y 0.0246 -0.0426 0.0183 0.0139 -0.0019 -0.0076  
Z 0.0232 -0.0389 0.0208 0.0153 0.0040 -0.0040

AT. 63 H X 0.0089 0.0180 0.0109 0.0033 -0.0025 -0.0067  
Y 0.0306 0.0515 0.0390 -0.0297 -0.0019 -0.0103  
Z 0.0192 0.0330 0.0071 -0.0048 -0.0013 -0.0021

AT. 64 H X 0.0089 -0.0180 0.0109 -0.0033 0.0025 -0.0067  
Y 0.0306 -0.0515 0.0390 0.0297 0.0019 -0.0103  
Z 0.0192 -0.0330 0.0071 0.0048 0.0013 -0.0021

AT. 65 C X -0.0260 -0.0259 -0.0037 0.0068 0.0043 -0.0028  
Y -0.0395 -0.0341 0.0116 -0.0213 0.0087 0.0023  
Z 0.0071 0.0011 -0.0177 0.0304 0.0020 -0.0067

AT. 66 C X -0.0260 0.0259 -0.0037 -0.0068 -0.0043 -0.0028  
Y -0.0395 0.0341 0.0116 0.0213 -0.0087 0.0023

Z 0.0071 -0.0011 -0.0177 -0.0304 -0.0020 -0.0067  
AT. 67 H X -0.0344 -0.0389 -0.0066 0.0101 0.0057 -0.0041  
Y -0.0366 -0.0256 0.0235 -0.0336 0.0102 0.0040  
Z 0.0117 0.0042 -0.0263 0.0387 -0.0008 -0.0071  
AT. 68 H X -0.0344 0.0389 -0.0066 -0.0101 -0.0057 -0.0041  
Y -0.0366 0.0256 0.0235 0.0336 -0.0102 0.0040  
Z 0.0117 -0.0042 -0.0263 -0.0387 0.0008 -0.0071  
AT. 69 H X -0.0290 -0.0297 -0.0061 0.0087 0.0021 -0.0023  
Y -0.0445 -0.0441 0.0025 -0.0120 0.0066 0.0016  
Z 0.0049 -0.0073 -0.0267 0.0404 0.0032 -0.0083  
AT. 70 H X -0.0290 0.0297 -0.0061 -0.0087 -0.0021 -0.0023  
Y -0.0445 0.0441 0.0025 0.0120 -0.0066 0.0016  
Z 0.0049 0.0073 -0.0267 -0.0404 -0.0032 -0.0083  
AT. 71 H X -0.0218 -0.0209 -0.0009 0.0044 0.0072 -0.0029  
Y -0.0448 -0.0384 0.0180 -0.0281 0.0093 0.0037  
Z 0.0033 -0.0009 -0.0063 0.0192 0.0051 -0.0048  
AT. 72 H X -0.0218 0.0209 -0.0009 -0.0044 -0.0072 -0.0029  
Y -0.0448 0.0384 0.0180 0.0281 -0.0093 0.0037  
Z 0.0033 0.0009 -0.0063 -0.0192 -0.0051 -0.0048  
AT. 73 C X -0.0029 0.0037 0.0069 0.0012 -0.0003 -0.0028  
Y -0.0086 0.0007 0.0192 -0.0204 0.0037 -0.0003  
Z 0.0124 0.0164 -0.0014 0.0121 -0.0006 -0.0041  
AT. 74 C X -0.0029 -0.0037 0.0069 -0.0012 0.0003 -0.0028  
Y -0.0086 -0.0007 0.0192 0.0204 -0.0037 -0.0003  
Z 0.0124 -0.0164 -0.0014 -0.0121 0.0006 -0.0041  
AT. 75 H X 0.0094 0.0174 0.0163 -0.0024 -0.0025 -0.0029  
Y -0.0144 -0.0066 0.0230 -0.0246 0.0029 0.0026  
Z 0.0132 0.0163 0.0105 0.0037 -0.0033 -0.0002  
AT. 76 H X 0.0094 -0.0174 0.0163 0.0024 0.0025 -0.0029  
Y -0.0144 0.0066 0.0230 0.0246 -0.0029 0.0026  
Z 0.0132 -0.0163 0.0105 -0.0037 0.0033 -0.0002  
AT. 77 H X -0.0130 -0.0111 0.0034 0.0033 0.0001 -0.0007

Y 0.0016 0.0139 0.0336 -0.0293 0.0011 0.0002  
Z 0.0125 0.0175 -0.0115 0.0183 0.0004 -0.0055  
AT. 78 H X -0.0130 0.0111 0.0034 -0.0033 -0.0001 -0.0007  
Y 0.0016 -0.0139 0.0336 0.0293 -0.0011 0.0002  
Z 0.0125 -0.0175 -0.0115 -0.0183 -0.0004 -0.0055  
AT. 79 I X -0.0077 0.0021 -0.0008 -0.0016 -0.0082 -0.0052  
Y 0.0067 -0.0055 0.0010 0.0024 0.0075 0.0065  
Z 0.0074 -0.0053 0.0024 0.0015 0.0017 0.0014  
AT. 80 I X -0.0077 -0.0021 -0.0008 0.0016 0.0082 -0.0052  
Y 0.0067 0.0055 0.0010 -0.0024 -0.0075 0.0065  
Z 0.0074 0.0053 0.0024 -0.0015 -0.0017 0.0014  
AT. 81 I X 0.0070 0.0047 0.0023 -0.0003 0.0136 -0.0016  
Y -0.0004 -0.0005 -0.0020 0.0008 -0.0031 0.0003  
Z -0.0007 -0.0004 0.0018 -0.0001 0.0001 0.0036  
AT. 82 I X 0.0070 -0.0047 0.0023 0.0003 -0.0136 -0.0016  
Y -0.0004 0.0005 -0.0020 -0.0008 0.0031 0.0003  
Z -0.0007 0.0004 0.0018 0.0001 -0.0001 0.0036  
AT. 83 O X 0.0037 0.0001 0.0119 0.0023 0.0118 0.0123  
Y -0.0164 0.0184 -0.0151 -0.0040 -0.0713 -0.0762  
Z -0.0055 0.0069 -0.0043 -0.0033 -0.0162 -0.0166  
AT. 84 O X 0.0037 -0.0001 0.0119 -0.0023 -0.0118 0.0123  
Y -0.0164 -0.0184 -0.0151 0.0040 0.0713 -0.0762  
Z -0.0055 -0.0069 -0.0043 0.0033 0.0162 -0.0166  
AT. 85 O X -0.0174 -0.0117 -0.0055 -0.0021 -0.0243 0.0064  
Y 0.0249 0.0140 0.0057 -0.0006 0.0042 0.0085  
Z 0.0242 0.0146 -0.0029 -0.0044 0.0028 0.0015  
AT. 86 O X -0.0174 0.0117 -0.0055 0.0021 0.0243 0.0064  
Y 0.0249 -0.0140 0.0057 0.0006 -0.0042 0.0085  
Z 0.0242 -0.0146 -0.0029 0.0044 -0.0028 0.0015  
AT. 87 N X 0.0061 0.0013 0.0039 0.0035 -0.0129 -0.0059  
Y 0.0006 -0.0009 0.0091 0.0014 0.0032 0.0019  
Z -0.0064 0.0071 -0.0009 -0.0042 -0.0055 -0.0085

AT. 88 N X 0.0061 -0.0013 0.0039 -0.0035 0.0129 -0.0059  
Y 0.0006 0.0009 0.0091 -0.0014 -0.0032 0.0019  
Z -0.0064 -0.0071 -0.0009 0.0042 0.0055 -0.0085

AT. 89 N X -0.0031 0.0001 -0.0007 -0.0006 -0.0110 -0.0003  
Y -0.0053 -0.0021 0.0047 0.0004 -0.0019 0.0047  
Z 0.0067 0.0094 -0.0002 -0.0030 0.0104 -0.0099

AT. 90 N X -0.0031 -0.0001 -0.0007 0.0006 0.0110 -0.0003  
Y -0.0053 0.0021 0.0047 -0.0004 0.0019 0.0047  
Z 0.0067 -0.0094 -0.0002 0.0030 -0.0104 -0.0099

AT. 91 C X 0.0007 0.0024 0.0069 0.0016 -0.0038 -0.0026  
Y -0.0012 0.0057 0.0004 0.0005 -0.0257 -0.0280  
Z -0.0070 0.0074 -0.0018 -0.0046 -0.0081 -0.0128

AT. 92 C X 0.0007 -0.0024 0.0069 -0.0016 0.0038 -0.0026  
Y -0.0012 -0.0057 0.0004 -0.0005 0.0257 -0.0280  
Z -0.0070 -0.0074 -0.0018 0.0046 0.0081 -0.0128

AT. 93 C X -0.0036 0.0057 0.0050 -0.0003 -0.0133 -0.0129  
Y 0.0099 -0.0014 0.0056 0.0037 0.0002 -0.0027  
Z -0.0050 0.0076 -0.0001 -0.0034 -0.0047 -0.0113

AT. 94 C X -0.0036 -0.0057 0.0050 0.0003 0.0133 -0.0129  
Y 0.0099 0.0014 0.0056 -0.0037 -0.0002 -0.0027  
Z -0.0050 -0.0076 -0.0001 0.0034 0.0047 -0.0113

AT. 95 H X -0.0090 0.0117 0.0077 -0.0029 -0.0267 -0.0296  
Y 0.0133 -0.0067 0.0034 0.0047 0.0072 0.0079  
Z -0.0052 0.0107 0.0008 -0.0028 -0.0035 -0.0123

AT. 96 H X -0.0090 -0.0117 0.0077 0.0029 0.0267 -0.0296  
Y 0.0133 0.0067 0.0034 -0.0047 -0.0072 0.0079  
Z -0.0052 -0.0107 0.0008 0.0028 0.0035 -0.0123

AT. 97 H X -0.0009 0.0047 0.0059 0.0017 -0.0144 -0.0148  
Y 0.0038 0.0067 0.0067 0.0024 -0.0074 -0.0147  
Z -0.0072 0.0098 -0.0001 -0.0041 -0.0058 -0.0134

AT. 98 H X -0.0009 -0.0047 0.0059 -0.0017 0.0144 -0.0148  
Y 0.0038 -0.0067 0.0067 -0.0024 0.0074 -0.0147

Z -0.0072 -0.0098 -0.0001 0.0041 0.0058 -0.0134  
AT. 99 C X -0.0063 -0.0031 -0.0020 -0.0016 -0.0128 0.0027  
Y 0.0037 0.0016 0.0018 -0.0001 -0.0083 0.0087  
Z 0.0119 0.0109 -0.0016 -0.0035 0.0048 -0.0067  
AT. 100 C X -0.0063 0.0031 -0.0020 0.0016 0.0128 0.0027  
Y 0.0037 -0.0016 0.0018 0.0001 0.0083 0.0087  
Z 0.0119 -0.0109 -0.0016 0.0035 -0.0048 -0.0067  
AT. 101 C X 0.0010 -0.0002 -0.0013 -0.0023 -0.0084 0.0042  
Y -0.0087 -0.0095 -0.0040 -0.0010 -0.0261 0.0124  
Z 0.0049 0.0086 -0.0008 -0.0018 0.0041 -0.0088  
AT. 102 C X 0.0010 0.0002 -0.0013 0.0023 0.0084 0.0042  
Y -0.0087 0.0095 -0.0040 0.0010 0.0261 0.0124  
Z 0.0049 -0.0086 -0.0008 0.0018 -0.0041 -0.0088  
AT. 103 H X 0.0000 -0.0006 -0.0015 -0.0034 -0.0155 0.0062  
Y -0.0082 -0.0095 -0.0040 -0.0005 -0.0231 0.0114  
Z 0.0091 0.0157 0.0023 -0.0000 0.0192 -0.0136  
AT. 104 H X 0.0000 0.0006 -0.0015 0.0034 0.0155 0.0062  
Y -0.0082 0.0095 -0.0040 0.0005 0.0231 0.0114  
Z 0.0091 -0.0157 0.0023 0.0000 -0.0192 -0.0136  
AT. 105 H X 0.0047 0.0017 -0.0027 -0.0041 -0.0080 0.0023  
Y -0.0141 -0.0171 -0.0065 -0.0015 -0.0354 0.0141  
Z 0.0037 0.0061 -0.0021 -0.0022 0.0008 -0.0085  
AT. 106 H X 0.0047 -0.0017 -0.0027 0.0041 0.0080 0.0023  
Y -0.0141 0.0171 -0.0065 0.0015 0.0354 0.0141  
Z 0.0037 -0.0061 -0.0021 0.0022 -0.0008 -0.0085  
AT. 107 C X 0.0119 -0.0005 0.0039 0.0050 -0.0117 -0.0020  
Y -0.0129 0.0003 0.0063 -0.0021 -0.0002 -0.0004  
Z -0.0043 0.0049 -0.0025 -0.0037 -0.0045 -0.0030  
AT. 108 C X 0.0119 0.0005 0.0039 -0.0050 0.0117 -0.0020  
Y -0.0129 -0.0003 0.0063 0.0021 0.0002 -0.0004  
Z -0.0043 -0.0049 -0.0025 0.0037 0.0045 -0.0030  
AT. 109 H X 0.0216 -0.0026 0.0031 0.0075 -0.0158 0.0015

Y -0.0124 -0.0014 0.0049 -0.0016 -0.0069 0.0019  
Z -0.0067 0.0023 -0.0046 -0.0033 -0.0142 0.0005  
AT. 110 H X 0.0216 0.0026 0.0031 -0.0075 0.0158 0.0015  
Y -0.0124 0.0014 0.0049 0.0016 0.0069 0.0019  
Z -0.0067 -0.0023 -0.0046 0.0033 0.0142 0.0005  
AT. 111 H X 0.0117 0.0000 0.0046 0.0052 -0.0151 -0.0040  
Y -0.0186 0.0030 0.0075 -0.0043 0.0106 -0.0054  
Z -0.0030 0.0037 -0.0034 -0.0033 -0.0030 0.0005  
AT. 112 H X 0.0117 -0.0000 0.0046 -0.0052 0.0151 -0.0040  
Y -0.0186 -0.0030 0.0075 0.0043 -0.0106 -0.0054  
Z -0.0030 -0.0037 -0.0034 0.0033 0.0030 0.0005  
AT. 113 C X 0.0056 -0.0009 0.0023 0.0027 -0.0050 -0.0003  
Y -0.0177 -0.0023 0.0039 -0.0028 -0.0077 0.0048  
Z -0.0021 0.0078 -0.0004 -0.0038 0.0072 -0.0078  
AT. 114 C X 0.0056 0.0009 0.0023 -0.0027 0.0050 -0.0003  
Y -0.0177 0.0023 0.0039 0.0028 0.0077 0.0048  
Z -0.0021 -0.0078 -0.0004 0.0038 -0.0072 -0.0078  
AT. 115 C X -0.0008 0.0003 0.0008 0.0009 -0.0072 -0.0014  
Y -0.0178 -0.0007 0.0045 -0.0021 -0.0011 0.0009  
Z 0.0004 0.0108 0.0017 -0.0025 0.0190 -0.0144  
AT. 116 C X -0.0008 -0.0003 0.0008 -0.0009 0.0072 -0.0014  
Y -0.0178 0.0007 0.0045 0.0021 0.0011 0.0009  
Z 0.0004 -0.0108 0.0017 0.0025 -0.0190 -0.0144  
AT. 117 H X 0.0033 -0.0022 -0.0015 0.0003 -0.0183 0.0041  
Y -0.0216 0.0025 0.0054 -0.0021 0.0091 -0.0058  
Z -0.0030 0.0125 0.0041 -0.0017 0.0283 -0.0187  
AT. 118 H X 0.0033 0.0022 -0.0015 -0.0003 0.0183 0.0041  
Y -0.0216 -0.0025 0.0054 0.0021 -0.0091 -0.0058  
Z -0.0030 -0.0125 0.0041 0.0017 -0.0283 -0.0187  
AT. 119 H X -0.0090 0.0034 0.0030 0.0011 0.0057 -0.0088  
Y -0.0231 -0.0010 0.0040 -0.0035 -0.0037 0.0016  
Z 0.0011 0.0131 0.0035 -0.0009 0.0289 -0.0196

AT.120 H X -0.0090 -0.0034 0.0030 -0.0011 -0.0057 -0.0088  
Y -0.0231 0.0010 0.0040 0.0035 0.0037 0.0016  
Z 0.0011 -0.0131 0.0035 0.0009 -0.0289 -0.0196

AT.121 C X -0.0071 0.0001 -0.0031 -0.0014 -0.0137 -0.0025  
Y 0.0011 -0.0031 0.0084 0.0029 0.0025 0.0087  
Z 0.0117 0.0092 0.0023 -0.0024 0.0127 -0.0072

AT.122 C X -0.0071 -0.0001 -0.0031 0.0014 0.0137 -0.0025  
Y 0.0011 0.0031 0.0084 -0.0029 -0.0025 0.0087  
Z 0.0117 -0.0092 0.0023 0.0024 -0.0127 -0.0072

AT.123 H X -0.0169 0.0020 -0.0089 -0.0036 -0.0212 -0.0075  
Y -0.0062 -0.0032 0.0052 0.0018 -0.0064 0.0068  
Z 0.0174 0.0094 0.0041 -0.0011 0.0207 -0.0063

AT.124 H X -0.0169 -0.0020 -0.0089 0.0036 0.0212 -0.0075  
Y -0.0062 0.0032 0.0052 -0.0018 0.0064 0.0068  
Z 0.0174 -0.0094 0.0041 0.0011 -0.0207 -0.0063

AT.125 H X -0.0078 0.0006 -0.0030 -0.0016 -0.0149 -0.0028  
Y 0.0137 -0.0035 0.0152 0.0044 0.0156 0.0122  
Z 0.0170 0.0093 0.0061 -0.0019 0.0175 -0.0054

AT.126 H X -0.0078 -0.0006 -0.0030 0.0016 0.0149 -0.0028  
Y 0.0137 0.0035 0.0152 -0.0044 -0.0156 0.0122  
Z 0.0170 -0.0093 0.0061 0.0019 -0.0175 -0.0054

AT.127 C X 0.0009 -0.0007 0.0008 0.0013 -0.0067 -0.0010  
Y -0.0019 -0.0038 0.0082 0.0027 -0.0028 0.0087  
Z 0.0010 0.0095 0.0005 -0.0032 0.0003 -0.0111

AT.128 C X 0.0009 0.0007 0.0008 -0.0013 0.0067 -0.0010  
Y -0.0019 0.0038 0.0082 -0.0027 0.0028 0.0087  
Z 0.0010 -0.0095 0.0005 0.0032 -0.0003 -0.0111

AT.129 C X 0.0064 0.0001 0.0026 0.0031 -0.0108 -0.0034  
Y 0.0078 -0.0040 0.0108 0.0038 0.0052 0.0108  
Z -0.0082 0.0098 -0.0010 -0.0043 -0.0090 -0.0139

AT.130 C X 0.0064 -0.0001 0.0026 -0.0031 0.0108 -0.0034  
Y 0.0078 0.0040 0.0108 -0.0038 -0.0052 0.0108



Z -0.0082 -0.0098 -0.0010 0.0043 0.0090 -0.0139  
AT. 131 H X 0.0011 0.0021 0.0024 0.0028 -0.0151 -0.0084  
Y 0.0201 -0.0054 0.0133 0.0052 0.0112 0.0139  
Z -0.0097 0.0116 0.0000 -0.0039 -0.0114 -0.0192  
AT. 132 H X 0.0011 -0.0021 0.0024 -0.0028 0.0151 -0.0084  
Y 0.0201 0.0054 0.0133 -0.0052 -0.0112 0.0139  
Z -0.0097 -0.0116 0.0000 0.0039 0.0114 -0.0192  
AT. 133 H X 0.0163 -0.0028 0.0054 0.0053 -0.0042 0.0034  
Y 0.0068 -0.0046 0.0105 0.0035 0.0030 0.0114  
Z -0.0147 0.0102 -0.0022 -0.0049 -0.0150 -0.0156  
AT. 134 H X 0.0163 0.0028 0.0054 -0.0053 0.0042 0.0034  
Y 0.0068 0.0046 0.0105 -0.0035 -0.0030 0.0114  
Z -0.0147 -0.0102 -0.0022 0.0049 0.0150 -0.0156  
AT. 135 C X 0.0068 -0.0018 0.0024 0.0035 0.0005 -0.0000  
Y -0.0266 -0.0031 0.0021 -0.0060 -0.0143 0.0080  
Z -0.0054 0.0065 -0.0006 -0.0041 0.0122 -0.0061  
AT. 136 C X 0.0068 0.0018 0.0024 -0.0035 -0.0005 -0.0000  
Y -0.0266 0.0031 0.0021 0.0060 0.0143 0.0080  
Z -0.0054 -0.0065 -0.0006 0.0041 -0.0122 -0.0061  
AT. 137 H X 0.0116 -0.0020 0.0037 0.0079 0.0071 -0.0007  
Y -0.0249 -0.0025 0.0027 -0.0033 -0.0156 0.0078  
Z -0.0051 0.0072 -0.0003 -0.0011 0.0077 -0.0057  
AT. 138 H X 0.0116 0.0020 0.0037 -0.0079 -0.0071 -0.0007  
Y -0.0249 0.0025 0.0027 0.0033 0.0156 0.0078  
Z -0.0051 -0.0072 -0.0003 0.0011 -0.0077 -0.0057  
AT. 139 H X 0.0105 -0.0006 0.0034 0.0057 -0.0031 -0.0011  
Y -0.0330 -0.0040 0.0003 -0.0128 -0.0145 0.0088  
Z -0.0087 0.0051 -0.0015 -0.0051 0.0168 -0.0052  
AT. 140 H X 0.0105 0.0006 0.0034 -0.0057 0.0031 -0.0011  
Y -0.0330 0.0040 0.0003 0.0128 0.0145 0.0088  
Z -0.0087 -0.0051 -0.0015 0.0051 -0.0168 -0.0052  
AT. 141 H X -0.0016 -0.0031 0.0012 -0.0012 0.0023 0.0023

Y -0.0288 -0.0025 0.0021 -0.0052 -0.0179 0.0090  
Z -0.0069 0.0054 -0.0011 -0.0067 0.0167 -0.0061  
AT. 142 H X -0.0016 0.0031 0.0012 0.0012 -0.0023 0.0023  
Y -0.0288 0.0025 0.0021 0.0052 0.0179 0.0090  
Z -0.0069 -0.0054 -0.0011 0.0067 -0.0167 -0.0061  
AT. 143 C X 0.0013 -0.0020 0.0005 -0.0001 -0.0015 0.0037  
Y -0.0021 -0.0039 0.0077 0.0057 -0.0099 0.0061  
Z 0.0006 0.0113 0.0010 -0.0019 -0.0051 -0.0175  
AT. 144 C X 0.0013 0.0020 0.0005 0.0001 0.0015 0.0037  
Y -0.0021 0.0039 0.0077 -0.0057 0.0099 0.0061  
Z 0.0006 -0.0113 0.0010 0.0019 0.0051 -0.0175  
AT. 145 H X -0.0002 -0.0038 0.0004 -0.0010 0.0040 0.0104  
Y -0.0052 -0.0038 0.0052 0.0122 -0.0135 0.0069  
Z 0.0035 0.0107 0.0035 -0.0083 0.0001 -0.0168  
AT. 146 H X -0.0002 0.0038 0.0004 0.0010 -0.0040 0.0104  
Y -0.0052 0.0038 0.0052 -0.0122 0.0135 0.0069  
Z 0.0035 -0.0107 0.0035 0.0083 -0.0001 -0.0168  
AT. 147 H X -0.0006 -0.0010 0.0003 0.0024 -0.0043 0.0010  
Y 0.0030 -0.0036 0.0104 -0.0008 -0.0084 0.0027  
Z 0.0007 0.0129 0.0023 -0.0019 -0.0081 -0.0231  
AT. 148 H X -0.0006 0.0010 0.0003 -0.0024 0.0043 0.0010  
Y 0.0030 0.0036 0.0104 0.0008 0.0084 0.0027  
Z 0.0007 -0.0129 0.0023 0.0019 0.0081 -0.0231  
AT. 149 H X 0.0046 -0.0032 0.0007 -0.0040 -0.0008 0.0037  
Y -0.0037 -0.0039 0.0070 0.0085 -0.0134 0.0054  
Z -0.0039 0.0117 -0.0001 0.0057 -0.0115 -0.0183  
AT. 150 H X 0.0046 0.0032 0.0007 0.0040 0.0008 0.0037  
Y -0.0037 0.0039 0.0070 -0.0085 0.0134 0.0054  
Z -0.0039 -0.0117 -0.0001 -0.0057 0.0115 -0.0183  
AT. 151 C X 0.0042 -0.0013 0.0020 0.0024 -0.0002 0.0009  
Y -0.0148 -0.0040 0.0040 -0.0016 -0.0148 0.0071  
Z -0.0009 0.0087 0.0001 -0.0036 0.0031 -0.0092

AT. 152 C X 0.0042 0.0013 0.0020 -0.0024 0.0002 0.0009  
Y -0.0148 0.0040 0.0040 0.0016 0.0148 0.0071  
Z -0.0009 -0.0087 0.0001 0.0036 -0.0031 -0.0092

AT. 153 H X 0.0101 -0.0020 0.0034 0.0046 0.0060 0.0025  
Y -0.0161 -0.0043 0.0030 -0.0031 -0.0199 0.0067  
Z -0.0059 0.0085 -0.0019 -0.0060 -0.0078 -0.0099

AT. 154 H X 0.0101 0.0020 0.0034 -0.0046 -0.0060 0.0025  
Y -0.0161 0.0043 0.0030 0.0031 0.0199 0.0067  
Z -0.0059 -0.0085 -0.0019 0.0060 0.0078 -0.0099

AT. 155 H X -0.0005 -0.0014 0.0007 0.0013 0.0015 0.0010  
Y -0.0204 -0.0043 0.0017 -0.0043 -0.0237 0.0062  
Z 0.0030 0.0090 0.0021 -0.0011 0.0130 -0.0087

AT. 156 H X -0.0005 0.0014 0.0007 -0.0013 -0.0015 0.0010  
Y -0.0204 0.0043 0.0017 0.0043 0.0237 0.0062  
Z 0.0030 -0.0090 0.0021 0.0011 -0.0130 -0.0087

AT. 157 O X -0.0286 -0.0292 0.0058 0.0138 -0.0001 -0.0039  
Y 0.0204 0.0152 -0.0020 -0.0333 -0.0031 -0.0036  
Z -0.0533 0.0312 0.1002 0.0999 -0.0077 0.0099

AT. 158 O X -0.0286 0.0292 0.0058 -0.0138 0.0001 -0.0039  
Y 0.0204 -0.0152 -0.0020 0.0333 0.0031 -0.0036  
Z -0.0533 -0.0312 0.1002 -0.0999 0.0077 0.0099

AT. 159 O X -0.0081 -0.0284 -0.0350 -0.0263 0.0055 -0.0018  
Y 0.0290 -0.0032 -0.0595 -0.0819 0.0033 -0.0032  
Z -0.0161 0.0281 0.0156 0.0188 0.0037 0.0138

AT. 160 O X -0.0081 0.0284 -0.0350 0.0263 -0.0055 -0.0018  
Y 0.0290 0.0032 -0.0595 0.0819 -0.0033 -0.0032  
Z -0.0161 -0.0281 0.0156 -0.0188 -0.0037 0.0138

AT. 161 H X -0.0219 -0.0161 0.0317 0.0279 -0.0046 -0.0061  
Y 0.0129 0.0194 0.0162 -0.0169 -0.0051 -0.0029  
Z -0.0299 0.0269 0.0639 0.0625 -0.0043 0.0071

AT. 162 H X -0.0219 0.0161 0.0317 -0.0279 0.0046 -0.0061  
Y 0.0129 -0.0194 0.0162 0.0169 0.0051 -0.0029

Z -0.0299 -0.0269 0.0639 -0.0625 0.0043 0.0071  
AT. 163 H X 0.0104 -0.0240 -0.0719 -0.0620 0.0115 0.0021  
Y 0.0242 0.0053 -0.0701 -0.0858 0.0038 0.0018  
Z -0.0242 0.0291 0.0266 0.0319 0.0021 0.0141  
AT. 164 H X 0.0104 0.0240 -0.0719 0.0620 -0.0115 0.0021  
Y 0.0242 -0.0053 -0.0701 0.0858 -0.0038 0.0018  
Z -0.0242 -0.0291 0.0266 -0.0319 -0.0021 0.0141  
AT. 165 O X 0.0111 0.0047 -0.0035 0.0022 0.0019 -0.0044  
Y -0.0383 0.0090 -0.0007 -0.0099 -0.0520 -0.0358  
Z -0.0256 0.0274 -0.0031 -0.0033 0.0539 0.0554  
AT. 166 O X 0.0111 -0.0047 -0.0035 -0.0022 -0.0019 -0.0044  
Y -0.0383 -0.0090 -0.0007 0.0099 0.0520 -0.0358  
Z -0.0256 -0.0274 -0.0031 0.0033 -0.0539 0.0554  
AT. 167 H X -0.0005 0.0040 -0.0001 0.0011 -0.0205 -0.0300  
Y -0.0303 0.0147 -0.0073 -0.0096 -0.0331 -0.0193  
Z -0.0079 0.0221 -0.0029 -0.0022 0.0911 0.1052  
AT. 168 H X -0.0005 -0.0040 -0.0001 -0.0011 0.0205 -0.0300  
Y -0.0303 -0.0147 -0.0073 0.0096 0.0331 -0.0193  
Z -0.0079 -0.0221 -0.0029 0.0022 -0.0911 0.1052  
AT. 169 O X 0.0311 0.0062 -0.0097 0.0041 0.0799 0.0902  
Y 0.0157 -0.0090 0.0095 -0.0066 -0.0028 0.0367  
Z -0.0332 0.0313 -0.0065 -0.0035 0.0584 0.0583  
AT. 170 O X 0.0311 -0.0062 -0.0097 -0.0041 -0.0799 0.0902  
Y 0.0157 0.0090 0.0095 0.0066 0.0028 0.0367  
Z -0.0332 -0.0313 -0.0065 0.0035 -0.0584 0.0583  
AT. 171 H X 0.0019 0.0137 -0.0129 0.0024 0.0543 0.0459  
Y 0.0164 -0.0131 0.0117 -0.0067 -0.0159 0.0188  
Z -0.0101 0.0203 -0.0009 -0.0015 0.0595 0.0641  
AT. 172 H X 0.0019 -0.0137 -0.0129 -0.0024 -0.0543 0.0459  
Y 0.0164 0.0131 0.0117 0.0067 0.0159 0.0188  
Z -0.0101 -0.0203 -0.0009 0.0015 -0.0595 0.0641

FREQ(CM\*\*-1) 128.37 129.88 137.36 138.08 140.75 142.37

AT. 1 I X 0.0017 -0.0018 -0.0227 0.0027 0.0071 -0.0013

Y 0.0003 0.0007 0.0062 -0.0004 -0.0031 -0.0004

Z 0.0002 -0.0016 -0.0059 -0.0024 0.0010 -0.0001

AT. 2 I X 0.0017 0.0018 0.0227 0.0027 0.0071 0.0013

Y 0.0003 -0.0007 -0.0062 -0.0004 -0.0031 0.0004

Z 0.0002 0.0016 0.0059 -0.0024 0.0010 0.0001

AT. 3 I X -0.0005 0.0012 -0.0069 -0.0035 -0.0062 -0.0109

Y -0.0029 0.0022 -0.0005 -0.0004 0.0006 -0.0018

Z -0.0003 0.0006 0.0020 0.0016 0.0017 0.0028

AT. 4 I X -0.0005 -0.0012 0.0069 -0.0035 -0.0062 0.0109

Y -0.0029 -0.0022 0.0005 -0.0004 0.0006 0.0018

Z -0.0003 -0.0006 -0.0020 0.0016 0.0017 -0.0028

AT. 5 O X 0.0005 0.0055 0.0611 -0.0075 -0.0343 -0.0028

Y -0.0036 0.0031 0.0478 -0.0211 -0.0321 -0.0092

Z -0.0024 0.0033 0.0111 -0.0074 -0.0142 -0.0084

AT. 6 O X 0.0005 -0.0055 -0.0611 -0.0075 -0.0343 0.0028

Y -0.0036 -0.0031 -0.0478 -0.0211 -0.0321 0.0092

Z -0.0024 -0.0033 -0.0111 -0.0074 -0.0142 0.0084

AT. 7 O X 0.0110 -0.0082 0.0159 0.0190 0.0138 0.0475

Y 0.0097 -0.0115 0.0017 0.0031 -0.0000 0.0416

Z 0.0029 -0.0043 0.0054 -0.0030 -0.0056 0.0136

AT. 8 O X 0.0110 0.0082 -0.0159 0.0190 0.0138 -0.0475

Y 0.0097 0.0115 -0.0017 0.0031 -0.0000 -0.0416

Z 0.0029 0.0043 -0.0054 -0.0030 -0.0056 -0.0136

AT. 9 N X 0.0024 0.0041 0.0087 0.0124 0.0060 0.0119

Y 0.0024 -0.0047 -0.0001 -0.0041 -0.0034 -0.0025

Z -0.0022 0.0035 0.0015 -0.0038 -0.0060 -0.0042

AT. 10 N X 0.0024 -0.0041 -0.0087 0.0124 0.0060 -0.0119

Y 0.0024 0.0047 0.0001 -0.0041 -0.0034 0.0025

Z -0.0022 -0.0035 -0.0015 -0.0038 -0.0060 0.0042

AT. 11 N X 0.0034 -0.0000 0.0131 0.0078 0.0017 0.0053  
Y 0.0002 -0.0003 -0.0048 -0.0040 -0.0046 -0.0020  
Z -0.0029 0.0024 -0.0021 -0.0069 -0.0066 -0.0050

AT. 12 N X 0.0034 0.0000 -0.0131 0.0078 0.0017 -0.0053  
Y 0.0002 0.0003 0.0048 -0.0040 -0.0046 0.0020  
Z -0.0029 -0.0024 0.0021 -0.0069 -0.0066 0.0050

AT. 13 C X 0.0025 0.0021 0.0221 0.0035 -0.0102 0.0049  
Y -0.0003 -0.0023 0.0086 -0.0111 -0.0114 -0.0062  
Z -0.0028 0.0046 0.0008 -0.0041 -0.0053 -0.0050

AT. 14 C X 0.0025 -0.0021 -0.0221 0.0035 -0.0102 -0.0049  
Y -0.0003 0.0023 -0.0086 -0.0111 -0.0114 0.0062  
Z -0.0028 -0.0046 -0.0008 -0.0041 -0.0053 0.0050

AT. 15 C X 0.0030 0.0001 -0.0014 0.0066 0.0007 0.0023  
Y 0.0001 -0.0042 -0.0155 -0.0070 0.0008 -0.0037  
Z -0.0039 0.0048 -0.0089 -0.0033 0.0027 0.0011

AT. 16 C X 0.0030 -0.0001 0.0014 0.0066 0.0007 -0.0023  
Y 0.0001 0.0042 0.0155 -0.0070 0.0008 0.0037  
Z -0.0039 -0.0048 0.0089 -0.0033 0.0027 -0.0011

AT. 17 H X 0.0046 -0.0006 0.0008 0.0101 0.0019 0.0036  
Y 0.0017 -0.0047 -0.0068 -0.0054 -0.0028 -0.0061  
Z -0.0052 0.0051 -0.0186 -0.0040 0.0074 0.0052

AT. 18 H X 0.0046 0.0006 -0.0008 0.0101 0.0019 -0.0036  
Y 0.0017 0.0047 0.0068 -0.0054 -0.0028 0.0061  
Z -0.0052 -0.0051 0.0186 -0.0040 0.0074 -0.0052

AT. 19 H X 0.0029 0.0016 -0.0059 0.0084 0.0017 0.0004  
Y -0.0021 -0.0028 -0.0242 -0.0090 0.0040 0.0002  
Z -0.0049 0.0057 -0.0135 -0.0037 0.0044 0.0021

AT. 20 H X 0.0029 -0.0016 0.0059 0.0084 0.0017 -0.0004  
Y -0.0021 0.0028 0.0242 -0.0090 0.0040 -0.0002  
Z -0.0049 -0.0057 0.0135 -0.0037 0.0044 -0.0021

AT. 21 C X 0.0052 -0.0025 0.0108 0.0112 0.0066 0.0182  
Y 0.0018 -0.0041 -0.0068 -0.0064 -0.0071 0.0077

Z -0.0015 0.0004 -0.0025 -0.0074 -0.0072 0.0005  
AT. 22 C X 0.0052 0.0025 -0.0108 0.0112 0.0066 -0.0182  
Y 0.0018 0.0041 0.0068 -0.0064 -0.0071 -0.0077  
Z -0.0015 -0.0004 0.0025 -0.0074 -0.0072 -0.0005  
AT. 23 C X 0.0013 0.0010 0.0032 0.0072 0.0046 0.0030  
Y -0.0026 -0.0001 -0.0124 -0.0156 -0.0174 -0.0201  
Z -0.0033 0.0020 -0.0062 -0.0066 -0.0042 -0.0021  
AT. 24 C X 0.0013 -0.0010 -0.0032 0.0072 0.0046 -0.0030  
Y -0.0026 0.0001 0.0124 -0.0156 -0.0174 0.0201  
Z -0.0033 -0.0020 0.0062 -0.0066 -0.0042 0.0021  
AT. 25 H X -0.0000 0.0033 0.0049 0.0119 0.0105 0.0029  
Y -0.0029 0.0002 -0.0127 -0.0162 -0.0186 -0.0222  
Z -0.0023 0.0011 0.0003 0.0035 0.0097 0.0185  
AT. 26 H X -0.0000 -0.0033 -0.0049 0.0119 0.0105 -0.0029  
Y -0.0029 -0.0002 0.0127 -0.0162 -0.0186 0.0222  
Z -0.0023 -0.0011 -0.0003 0.0035 0.0097 -0.0185  
AT. 27 H X 0.0019 0.0003 0.0005 0.0072 0.0044 0.0037  
Y -0.0022 -0.0001 -0.0154 -0.0229 -0.0285 -0.0368  
Z -0.0034 0.0020 -0.0074 -0.0105 -0.0098 -0.0099  
AT. 28 H X 0.0019 -0.0003 -0.0005 0.0072 0.0044 -0.0037  
Y -0.0022 0.0001 0.0154 -0.0229 -0.0285 0.0368  
Z -0.0034 -0.0020 0.0074 -0.0105 -0.0098 0.0099  
AT. 29 C X 0.0008 0.0077 0.0071 0.0163 0.0114 0.0149  
Y 0.0010 -0.0000 0.0010 0.0009 0.0022 -0.0001  
Z -0.0009 0.0025 0.0103 -0.0026 -0.0095 -0.0035  
AT. 30 C X 0.0008 -0.0077 -0.0071 0.0163 0.0114 -0.0149  
Y 0.0010 0.0000 -0.0010 0.0009 0.0022 0.0001  
Z -0.0009 -0.0025 -0.0103 -0.0026 -0.0095 0.0035  
AT. 31 H X -0.0010 0.0115 0.0001 0.0204 0.0192 0.0166  
Y 0.0024 -0.0024 0.0074 -0.0039 -0.0076 -0.0042  
Z -0.0003 0.0013 0.0153 -0.0077 -0.0187 -0.0087  
AT. 32 H X -0.0010 -0.0115 -0.0001 0.0204 0.0192 -0.0166

Y 0.0024 0.0024 -0.0074 -0.0039 -0.0076 0.0042  
Z -0.0003 -0.0013 -0.0153 -0.0077 -0.0187 0.0087  
AT. 33 H X 0.0005 0.0097 0.0079 0.0214 0.0175 0.0185  
Y -0.0007 0.0036 -0.0079 0.0090 0.0158 0.0073  
Z -0.0000 0.0022 0.0151 -0.0025 -0.0121 -0.0041  
AT. 34 H X 0.0005 -0.0097 -0.0079 0.0214 0.0175 -0.0185  
Y -0.0007 -0.0036 0.0079 0.0090 0.0158 -0.0073  
Z -0.0000 -0.0022 -0.0151 -0.0025 -0.0121 0.0041  
AT. 35 C X 0.0018 0.0039 0.0093 0.0075 0.0014 0.0072  
Y 0.0007 0.0023 0.0020 0.0043 0.0029 0.0024  
Z -0.0016 0.0041 0.0074 0.0034 0.0006 0.0021  
AT. 36 C X 0.0018 -0.0039 -0.0093 0.0075 0.0014 -0.0072  
Y 0.0007 -0.0023 -0.0020 0.0043 0.0029 -0.0024  
Z -0.0016 -0.0041 -0.0074 0.0034 0.0006 -0.0021  
AT. 37 C X 0.0025 0.0019 0.0121 0.0085 0.0036 0.0058  
Y -0.0004 0.0027 -0.0046 0.0018 0.0036 0.0010  
Z -0.0022 0.0031 0.0001 0.0019 0.0050 0.0008  
AT. 38 C X 0.0025 -0.0019 -0.0121 0.0085 0.0036 -0.0058  
Y -0.0004 -0.0027 0.0046 0.0018 0.0036 -0.0010  
Z -0.0022 -0.0031 -0.0001 0.0019 0.0050 -0.0008  
AT. 39 H X 0.0031 0.0014 0.0083 0.0137 0.0147 0.0098  
Y -0.0008 0.0021 -0.0112 -0.0004 0.0050 -0.0007  
Z -0.0016 0.0030 0.0005 0.0066 0.0121 0.0047  
AT. 40 H X 0.0031 -0.0014 -0.0083 0.0137 0.0147 -0.0098  
Y -0.0008 -0.0021 0.0112 -0.0004 0.0050 0.0007  
Z -0.0016 -0.0030 -0.0005 0.0066 0.0121 -0.0047  
AT. 41 H X 0.0017 0.0028 0.0154 0.0040 -0.0071 0.0031  
Y -0.0000 0.0042 -0.0025 0.0077 0.0101 0.0055  
Z -0.0015 0.0005 -0.0050 0.0018 0.0107 0.0004  
AT. 42 H X 0.0017 -0.0028 -0.0154 0.0040 -0.0071 -0.0031  
Y -0.0000 -0.0042 0.0025 0.0077 0.0101 -0.0055  
Z -0.0015 -0.0005 0.0050 0.0018 0.0107 -0.0004



AT. 43 C X 0.0029 -0.0021 0.0152 0.0050 -0.0030 0.0051  
Y 0.0019 -0.0027 0.0016 0.0002 -0.0017 0.0020  
Z -0.0044 0.0014 -0.0037 -0.0124 -0.0130 -0.0080

AT. 44 C X 0.0029 0.0021 -0.0152 0.0050 -0.0030 -0.0051  
Y 0.0019 0.0027 -0.0016 0.0002 -0.0017 -0.0020  
Z -0.0044 -0.0014 0.0037 -0.0124 -0.0130 0.0080

AT. 45 H X 0.0017 -0.0038 0.0172 0.0024 -0.0074 0.0022  
Y 0.0038 -0.0019 0.0012 0.0035 0.0024 0.0053  
Z -0.0056 0.0021 -0.0049 -0.0134 -0.0141 -0.0088

AT. 46 H X 0.0017 0.0038 -0.0172 0.0024 -0.0074 -0.0022  
Y 0.0038 0.0019 -0.0012 0.0035 0.0024 -0.0053  
Z -0.0056 -0.0021 0.0049 -0.0134 -0.0141 0.0088

AT. 47 H X 0.0030 -0.0027 0.0179 0.0067 -0.0017 0.0052  
Y 0.0006 -0.0041 0.0035 -0.0018 -0.0053 0.0002  
Z -0.0057 0.0005 -0.0052 -0.0171 -0.0184 -0.0106

AT. 48 H X 0.0030 0.0027 -0.0179 0.0067 -0.0017 -0.0052  
Y 0.0006 0.0041 -0.0035 -0.0018 -0.0053 -0.0002  
Z -0.0057 -0.0005 0.0052 -0.0171 -0.0184 0.0106

AT. 49 C X 0.0031 -0.0006 0.0103 0.0028 -0.0036 0.0049  
Y 0.0034 -0.0037 0.0061 0.0031 0.0007 0.0026  
Z -0.0031 0.0017 -0.0025 -0.0100 -0.0104 -0.0066

AT. 50 C X 0.0031 0.0006 -0.0103 0.0028 -0.0036 -0.0049  
Y 0.0034 0.0037 -0.0061 0.0031 0.0007 -0.0026  
Z -0.0031 -0.0017 0.0025 -0.0100 -0.0104 0.0066

AT. 51 C X 0.0024 0.0023 0.0082 0.0090 0.0034 0.0094  
Y 0.0039 -0.0080 0.0040 -0.0045 -0.0073 -0.0033  
Z -0.0030 0.0035 -0.0009 -0.0071 -0.0066 -0.0045

AT. 52 C X 0.0024 -0.0023 -0.0082 0.0090 0.0034 -0.0094  
Y 0.0039 0.0080 -0.0040 -0.0045 -0.0073 0.0033  
Z -0.0030 -0.0035 0.0009 -0.0071 -0.0066 0.0045

AT. 53 H X 0.0038 -0.0006 0.0104 0.0055 -0.0023 0.0059  
Y 0.0054 -0.0124 0.0052 -0.0121 -0.0165 -0.0099

Z -0.0038 0.0035 -0.0036 -0.0098 -0.0068 -0.0058  
AT. 54 H X 0.0038 0.0006 -0.0104 0.0055 -0.0023 -0.0059  
Y 0.0054 0.0124 -0.0052 -0.0121 -0.0165 0.0099  
Z -0.0038 -0.0035 0.0036 -0.0098 -0.0068 0.0058  
AT. 55 H X 0.0007 0.0065 0.0058 0.0131 0.0108 0.0141  
Y 0.0050 -0.0090 0.0074 -0.0046 -0.0091 -0.0045  
Z -0.0032 0.0050 0.0016 -0.0040 -0.0036 -0.0025  
AT. 56 H X 0.0007 -0.0065 -0.0058 0.0131 0.0108 -0.0141  
Y 0.0050 0.0090 -0.0074 -0.0046 -0.0091 0.0045  
Z -0.0032 -0.0050 -0.0016 -0.0040 -0.0036 0.0025  
AT. 57 C X 0.0012 0.0054 0.0066 0.0074 -0.0012 0.0079  
Y 0.0001 0.0059 0.0031 0.0115 0.0047 0.0089  
Z -0.0015 0.0068 0.0148 0.0146 0.0087 0.0110  
AT. 58 C X 0.0012 -0.0054 -0.0066 0.0074 -0.0012 -0.0079  
Y 0.0001 -0.0059 -0.0031 0.0115 0.0047 -0.0089  
Z -0.0015 -0.0068 -0.0148 0.0146 0.0087 -0.0110  
AT. 59 H X 0.0015 0.0057 0.0041 0.0090 -0.0044 0.0084  
Y 0.0006 0.0048 0.0062 0.0119 0.0060 0.0084  
Z -0.0008 0.0053 0.0176 0.0159 0.0084 0.0109  
AT. 60 H X 0.0015 -0.0057 -0.0041 0.0090 -0.0044 -0.0084  
Y 0.0006 -0.0048 -0.0062 0.0119 0.0060 -0.0084  
Z -0.0008 -0.0053 -0.0176 0.0159 0.0084 -0.0109  
AT. 61 H X 0.0006 0.0087 0.0091 0.0150 0.0035 0.0154  
Y -0.0005 0.0076 -0.0014 0.0112 0.0028 0.0094  
Z -0.0015 0.0087 0.0191 0.0210 0.0131 0.0168  
AT. 62 H X 0.0006 -0.0087 -0.0091 0.0150 0.0035 -0.0154  
Y -0.0005 -0.0076 0.0014 0.0112 0.0028 -0.0094  
Z -0.0015 -0.0087 -0.0191 0.0210 0.0131 -0.0168  
AT. 63 H X 0.0024 0.0013 0.0047 -0.0009 -0.0049 -0.0002  
Y -0.0001 0.0078 0.0060 0.0188 0.0064 0.0147  
Z -0.0023 0.0087 0.0139 0.0159 0.0105 0.0137  
AT. 64 H X 0.0024 -0.0013 -0.0047 -0.0009 -0.0049 0.0002

Y -0.0001 -0.0078 -0.0060 0.0188 0.0064 -0.0147  
Z -0.0023 -0.0087 -0.0139 0.0159 0.0105 -0.0137  
AT. 65 C X 0.0029 -0.0023 0.0099 -0.0041 -0.0113 -0.0001  
Y 0.0046 -0.0038 0.0147 0.0086 0.0046 0.0051  
Z -0.0038 0.0003 -0.0075 -0.0188 -0.0190 -0.0124  
AT. 66 C X 0.0029 0.0023 -0.0099 -0.0041 -0.0113 0.0001  
Y 0.0046 0.0038 -0.0147 0.0086 0.0046 -0.0051  
Z -0.0038 -0.0003 0.0075 -0.0188 -0.0190 0.0124  
AT. 67 H X 0.0026 -0.0038 0.0098 -0.0097 -0.0184 -0.0045  
Y 0.0061 -0.0013 0.0201 0.0147 0.0113 0.0111  
Z -0.0049 -0.0008 -0.0125 -0.0195 -0.0192 -0.0140  
AT. 68 H X 0.0026 0.0038 -0.0098 -0.0097 -0.0184 0.0045  
Y 0.0061 0.0013 -0.0201 0.0147 0.0113 -0.0111  
Z -0.0049 0.0008 0.0125 -0.0195 -0.0192 0.0140  
AT. 69 H X 0.0030 -0.0037 0.0105 -0.0032 -0.0103 -0.0011  
Y 0.0037 -0.0066 0.0116 0.0036 -0.0005 -0.0000  
Z -0.0053 -0.0013 -0.0130 -0.0281 -0.0290 -0.0185  
AT. 70 H X 0.0030 0.0037 -0.0105 -0.0032 -0.0103 0.0011  
Y 0.0037 0.0066 -0.0116 0.0036 -0.0005 0.0000  
Z -0.0053 0.0013 0.0130 -0.0281 -0.0290 0.0185  
AT. 71 H X 0.0035 -0.0009 0.0092 -0.0061 -0.0128 0.0009  
Y 0.0051 -0.0032 0.0197 0.0121 0.0068 0.0066  
Z -0.0027 0.0020 -0.0012 -0.0154 -0.0169 -0.0094  
AT. 72 H X 0.0035 0.0009 -0.0092 -0.0061 -0.0128 -0.0009  
Y 0.0051 0.0032 -0.0197 0.0121 0.0068 -0.0066  
Z -0.0027 -0.0020 0.0012 -0.0154 -0.0169 0.0094  
AT. 73 C X 0.0029 0.0009 0.0084 0.0005 -0.0052 0.0025  
Y 0.0037 -0.0004 0.0084 0.0063 0.0034 0.0034  
Z -0.0022 0.0030 0.0034 -0.0024 -0.0040 -0.0016  
AT. 74 C X 0.0029 -0.0009 -0.0084 0.0005 -0.0052 -0.0025  
Y 0.0037 0.0004 -0.0084 0.0063 0.0034 -0.0034  
Z -0.0022 -0.0030 -0.0034 -0.0024 -0.0040 0.0016

AT. 75 H X 0.0028 0.0024 0.0077 -0.0019 -0.0070 -0.0002  
Y 0.0058 -0.0022 0.0113 0.0071 0.0040 0.0037  
Z 0.0005 0.0016 0.0068 -0.0031 -0.0046 -0.0029

AT. 76 H X 0.0028 -0.0024 -0.0077 -0.0019 -0.0070 0.0002  
Y 0.0058 0.0022 -0.0113 0.0071 0.0040 -0.0037  
Z 0.0005 -0.0016 -0.0068 -0.0031 -0.0046 0.0029

AT. 77 H X 0.0037 -0.0017 0.0077 -0.0030 -0.0081 0.0008  
Y 0.0051 0.0006 0.0116 0.0077 0.0048 0.0030  
Z -0.0038 0.0038 0.0008 -0.0009 -0.0026 -0.0001

AT. 78 H X 0.0037 0.0017 -0.0077 -0.0030 -0.0081 -0.0008  
Y 0.0051 -0.0006 -0.0116 0.0077 0.0048 -0.0030  
Z -0.0038 -0.0038 -0.0008 -0.0009 -0.0026 0.0001

AT. 79 I X 0.0049 -0.0045 0.0004 -0.0037 0.0026 -0.0002  
Y -0.0095 0.0051 0.0002 -0.0015 0.0007 -0.0064  
Z -0.0096 0.0052 -0.0008 -0.0052 0.0045 -0.0025

AT. 80 I X 0.0049 0.0045 -0.0004 -0.0037 0.0026 0.0002  
Y -0.0095 -0.0051 -0.0002 -0.0015 0.0007 0.0064  
Z -0.0096 -0.0052 0.0008 -0.0052 0.0045 0.0025

AT. 81 I X 0.0260 -0.0212 0.0007 0.0017 -0.0040 0.0028  
Y -0.0058 0.0075 0.0001 0.0025 -0.0011 0.0021  
Z 0.0054 -0.0037 0.0003 0.0009 -0.0013 -0.0007

AT. 82 I X 0.0260 0.0212 -0.0007 0.0017 -0.0040 -0.0028  
Y -0.0058 -0.0075 -0.0001 0.0025 -0.0011 -0.0021  
Z 0.0054 0.0037 -0.0003 0.0009 -0.0013 0.0007

AT. 83 O X -0.0398 0.0405 -0.0056 -0.0432 0.0357 -0.0465  
Y 0.0299 -0.0599 -0.0011 0.0357 -0.0213 0.0025  
Z 0.0076 -0.0132 0.0017 0.0240 -0.0208 0.0195

AT. 84 O X -0.0398 -0.0405 0.0056 -0.0432 0.0357 0.0465  
Y 0.0299 0.0599 0.0011 0.0357 -0.0213 -0.0025  
Z 0.0076 0.0132 -0.0017 0.0240 -0.0208 -0.0195

AT. 85 O X -0.0417 0.0485 -0.0016 0.0178 -0.0082 0.0084  
Y 0.0174 -0.0218 -0.0017 0.0099 -0.0099 0.0092

Z 0.0130 -0.0089 -0.0005 0.0191 -0.0153 0.0193  
AT. 86 O X -0.0417 -0.0485 0.0016 0.0178 -0.0082 -0.0084  
Y 0.0174 0.0218 0.0017 0.0099 -0.0099 -0.0092  
Z 0.0130 0.0089 0.0005 0.0191 -0.0153 -0.0193  
AT. 87 N X -0.0187 0.0173 -0.0027 0.0017 0.0019 -0.0070  
Y 0.0095 -0.0036 -0.0023 -0.0020 0.0011 -0.0018  
Z -0.0047 -0.0011 -0.0002 0.0004 -0.0026 -0.0063  
AT. 88 N X -0.0187 -0.0173 0.0027 0.0017 0.0019 0.0070  
Y 0.0095 0.0036 0.0023 -0.0020 0.0011 0.0018  
Z -0.0047 0.0011 0.0002 0.0004 -0.0026 0.0063  
AT. 89 N X -0.0248 0.0223 -0.0010 0.0007 0.0045 -0.0081  
Y -0.0013 0.0060 -0.0022 0.0005 -0.0006 0.0009  
Z 0.0106 -0.0023 -0.0006 -0.0036 0.0035 -0.0025  
AT. 90 N X -0.0248 -0.0223 0.0010 0.0007 0.0045 0.0081  
Y -0.0013 -0.0060 0.0022 0.0005 -0.0006 -0.0009  
Z 0.0106 0.0023 0.0006 -0.0036 0.0035 0.0025  
AT. 91 C X -0.0260 0.0229 -0.0038 -0.0221 0.0201 -0.0267  
Y 0.0036 -0.0152 -0.0030 0.0067 -0.0020 -0.0111  
Z -0.0059 -0.0025 -0.0002 0.0003 -0.0020 -0.0064  
AT. 92 C X -0.0260 -0.0229 0.0038 -0.0221 0.0201 0.0267  
Y 0.0036 0.0152 0.0030 0.0067 -0.0020 0.0111  
Z -0.0059 0.0025 0.0002 0.0003 -0.0020 0.0064  
AT. 93 C X -0.0216 0.0150 -0.0049 -0.0246 0.0223 -0.0365  
Y -0.0243 0.0156 -0.0043 -0.0140 0.0134 -0.0307  
Z -0.0219 0.0079 -0.0032 -0.0209 0.0157 -0.0331  
AT. 94 C X -0.0216 -0.0150 0.0049 -0.0246 0.0223 0.0365  
Y -0.0243 -0.0156 0.0043 -0.0140 0.0134 0.0307  
Z -0.0219 -0.0079 0.0032 -0.0209 0.0157 0.0331  
AT. 95 H X -0.0319 0.0167 -0.0074 -0.0328 0.0284 -0.0553  
Y -0.0063 0.0070 -0.0008 0.0034 -0.0010 -0.0023  
Z -0.0421 0.0210 -0.0068 -0.0421 0.0336 -0.0641  
AT. 96 H X -0.0319 -0.0167 0.0074 -0.0328 0.0284 0.0553

Y -0.0063 -0.0070 0.0008 0.0034 -0.0010 0.0023  
Z -0.0421 -0.0210 0.0068 -0.0421 0.0336 0.0641  
AT. 97 H X -0.0263 0.0153 -0.0066 -0.0313 0.0289 -0.0445  
Y -0.0489 0.0276 -0.0090 -0.0396 0.0348 -0.0721  
Z -0.0264 0.0106 -0.0039 -0.0248 0.0186 -0.0403  
AT. 98 H X -0.0263 -0.0153 0.0066 -0.0313 0.0289 0.0445  
Y -0.0489 -0.0276 0.0090 -0.0396 0.0348 0.0721  
Z -0.0264 -0.0106 0.0039 -0.0248 0.0186 0.0403  
AT. 99 C X -0.0236 0.0275 -0.0013 0.0098 -0.0036 0.0017  
Y -0.0097 0.0097 -0.0019 0.0107 -0.0072 0.0091  
Z 0.0033 0.0010 -0.0007 0.0023 -0.0000 0.0016  
AT. 100 C X -0.0236 -0.0275 0.0013 0.0098 -0.0036 -0.0017  
Y -0.0097 -0.0097 0.0019 0.0107 -0.0072 -0.0091  
Z 0.0033 -0.0010 0.0007 0.0023 -0.0000 -0.0016  
AT. 101 C X -0.0133 0.0181 -0.0015 0.0153 -0.0096 0.0106  
Y -0.0406 0.0433 -0.0019 0.0231 -0.0138 0.0175  
Z -0.0021 0.0030 -0.0001 -0.0075 0.0090 -0.0090  
AT. 102 C X -0.0133 -0.0181 0.0015 0.0153 -0.0096 -0.0106  
Y -0.0406 -0.0433 0.0019 0.0231 -0.0138 -0.0175  
Z -0.0021 -0.0030 0.0001 -0.0075 0.0090 0.0090  
AT. 103 H X -0.0196 0.0247 -0.0023 0.0223 -0.0142 0.0146  
Y -0.0382 0.0408 -0.0016 0.0207 -0.0122 0.0167  
Z 0.0203 -0.0238 0.0007 -0.0248 0.0204 -0.0233  
AT. 104 H X -0.0196 -0.0247 0.0023 0.0223 -0.0142 -0.0146  
Y -0.0382 -0.0408 0.0016 0.0207 -0.0122 -0.0167  
Z 0.0203 0.0238 -0.0007 -0.0248 0.0204 0.0233  
AT. 105 H X -0.0126 0.0183 -0.0014 0.0166 -0.0105 0.0150  
Y -0.0585 0.0665 -0.0024 0.0400 -0.0253 0.0318  
Z -0.0087 0.0116 -0.0003 -0.0007 0.0043 -0.0019  
AT. 106 H X -0.0126 -0.0183 0.0014 0.0166 -0.0105 -0.0150  
Y -0.0585 -0.0665 0.0024 0.0400 -0.0253 -0.0318  
Z -0.0087 -0.0116 0.0003 -0.0007 0.0043 0.0019

AT.107 C X -0.0131 0.0154 -0.0028 0.0133 -0.0079 0.0068  
Y 0.0018 -0.0025 -0.0013 -0.0126 0.0101 -0.0143  
Z 0.0044 -0.0068 0.0007 0.0159 -0.0158 0.0117

AT.108 C X -0.0131 -0.0154 0.0028 0.0133 -0.0079 -0.0068  
Y 0.0018 0.0025 0.0013 -0.0126 0.0101 0.0143  
Z 0.0044 0.0068 -0.0007 0.0159 -0.0158 -0.0117

AT.109 H X -0.0013 0.0092 -0.0032 0.0399 -0.0301 0.0336  
Y 0.0004 -0.0017 -0.0015 0.0012 -0.0016 -0.0014  
Z -0.0011 -0.0036 0.0004 0.0314 -0.0290 0.0258

AT.110 H X -0.0013 -0.0092 0.0032 0.0399 -0.0301 -0.0336  
Y 0.0004 0.0017 0.0015 0.0012 -0.0016 0.0014  
Z -0.0011 0.0036 -0.0004 0.0314 -0.0290 -0.0258

AT.111 H X -0.0170 0.0183 -0.0034 0.0115 -0.0063 0.0020  
Y 0.0000 -0.0028 -0.0006 -0.0421 0.0349 -0.0422  
Z 0.0094 -0.0100 0.0013 0.0247 -0.0232 0.0238

AT.112 H X -0.0170 -0.0183 0.0034 0.0115 -0.0063 -0.0020  
Y 0.0000 0.0028 0.0006 -0.0421 0.0349 0.0422  
Z 0.0094 0.0100 -0.0013 0.0247 -0.0232 -0.0238

AT.113 C X -0.0126 0.0135 -0.0011 0.0018 0.0017 -0.0031  
Y -0.0052 0.0012 -0.0010 -0.0022 0.0006 -0.0062  
Z 0.0118 -0.0121 0.0010 -0.0015 -0.0006 -0.0022

AT.114 C X -0.0126 -0.0135 0.0011 0.0018 0.0017 0.0031  
Y -0.0052 -0.0012 0.0010 -0.0022 0.0006 0.0062  
Z 0.0118 0.0121 -0.0010 -0.0015 -0.0006 0.0022

AT.115 C X -0.0213 0.0195 -0.0007 -0.0029 0.0069 -0.0102  
Y -0.0056 0.0033 -0.0006 -0.0138 0.0117 -0.0148  
Z 0.0151 -0.0125 0.0012 -0.0217 0.0183 -0.0178

AT.116 C X -0.0213 -0.0195 0.0007 -0.0029 0.0069 0.0102  
Y -0.0056 -0.0033 0.0006 -0.0138 0.0117 0.0148  
Z 0.0151 0.0125 -0.0012 -0.0217 0.0183 0.0178

AT.117 H X -0.0248 0.0258 -0.0021 0.0180 -0.0110 0.0072  
Y -0.0075 0.0042 -0.0001 -0.0362 0.0333 -0.0341

Z 0.0192 -0.0198 0.0025 -0.0384 0.0321 -0.0310  
AT. 118 H X -0.0248 -0.0258 0.0021 0.0180 -0.0110 -0.0072  
Y -0.0075 -0.0042 0.0001 -0.0362 0.0333 0.0341  
Z 0.0192 0.0198 -0.0025 -0.0384 0.0321 0.0310  
AT. 119 H X -0.0193 0.0119 0.0013 -0.0315 0.0325 -0.0342  
Y -0.0063 -0.0004 0.0001 -0.0138 0.0114 -0.0165  
Z 0.0170 -0.0133 0.0015 -0.0379 0.0332 -0.0297  
AT. 120 H X -0.0193 -0.0119 -0.0013 -0.0315 0.0325 0.0342  
Y -0.0063 0.0004 -0.0001 -0.0138 0.0114 0.0165  
Z 0.0170 0.0133 -0.0015 -0.0379 0.0332 0.0297  
AT. 121 C X -0.0292 0.0231 -0.0015 -0.0064 0.0116 -0.0176  
Y 0.0115 -0.0055 -0.0018 0.0084 -0.0098 0.0110  
Z 0.0130 0.0000 -0.0001 0.0063 -0.0058 0.0103  
AT. 122 C X -0.0292 -0.0231 0.0015 -0.0064 0.0116 0.0176  
Y 0.0115 0.0055 0.0018 0.0084 -0.0098 -0.0110  
Z 0.0130 -0.0000 0.0001 0.0063 -0.0058 -0.0103  
AT. 123 H X -0.0413 0.0269 -0.0025 -0.0208 0.0254 -0.0402  
Y 0.0018 -0.0043 -0.0025 0.0022 -0.0046 -0.0028  
Z 0.0208 -0.0008 0.0006 0.0099 -0.0085 0.0214  
AT. 124 H X -0.0413 -0.0269 0.0025 -0.0208 0.0254 0.0402  
Y 0.0018 0.0043 0.0025 0.0022 -0.0046 0.0028  
Z 0.0208 0.0008 -0.0006 0.0099 -0.0085 -0.0214  
AT. 125 H X -0.0328 0.0267 -0.0014 -0.0052 0.0107 -0.0173  
Y 0.0283 -0.0112 -0.0009 0.0199 -0.0208 0.0333  
Z 0.0167 0.0019 0.0005 0.0141 -0.0128 0.0225  
AT. 126 H X -0.0328 -0.0267 0.0014 -0.0052 0.0107 0.0173  
Y 0.0283 0.0112 0.0009 0.0199 -0.0208 -0.0333  
Z 0.0167 -0.0019 -0.0005 0.0141 -0.0128 -0.0225  
AT. 127 C X -0.0155 0.0145 -0.0007 -0.0010 0.0047 -0.0066  
Y 0.0082 -0.0067 -0.0021 0.0085 -0.0104 0.0069  
Z -0.0008 0.0013 -0.0010 -0.0008 0.0004 -0.0063  
AT. 128 C X -0.0155 -0.0145 0.0007 -0.0010 0.0047 0.0066



Y 0.0082 0.0067 0.0021 0.0085 -0.0104 -0.0069  
Z -0.0008 -0.0013 0.0010 -0.0008 0.0004 0.0063  
AT. 129 C X -0.0140 0.0151 -0.0013 0.0057 -0.0014 -0.0016  
Y 0.0171 -0.0049 -0.0017 0.0138 -0.0150 0.0170  
Z -0.0124 0.0017 -0.0020 -0.0081 0.0059 -0.0196  
AT. 130 C X -0.0140 -0.0151 0.0013 0.0057 -0.0014 0.0016  
Y 0.0171 0.0049 0.0017 0.0138 -0.0150 -0.0170  
Z -0.0124 -0.0017 0.0020 -0.0081 0.0059 0.0196  
AT. 131 H X -0.0243 0.0175 -0.0030 -0.0045 0.0086 -0.0161  
Y 0.0311 -0.0057 -0.0005 0.0287 -0.0289 0.0382  
Z -0.0204 0.0046 -0.0037 -0.0160 0.0138 -0.0295  
AT. 132 H X -0.0243 -0.0175 0.0030 -0.0045 0.0086 0.0161  
Y 0.0311 0.0057 0.0005 0.0287 -0.0289 -0.0382  
Z -0.0204 -0.0046 0.0037 -0.0160 0.0138 0.0295  
AT. 133 H X 0.0014 0.0122 0.0008 0.0221 -0.0180 0.0227  
Y 0.0165 -0.0064 -0.0014 0.0158 -0.0177 0.0198  
Z -0.0203 0.0007 -0.0026 -0.0127 0.0095 -0.0264  
AT. 134 H X 0.0014 -0.0122 -0.0008 0.0221 -0.0180 -0.0227  
Y 0.0165 0.0064 0.0014 0.0158 -0.0177 -0.0198  
Z -0.0203 -0.0007 0.0026 -0.0127 0.0095 0.0264  
AT. 135 C X -0.0044 0.0057 -0.0009 0.0004 0.0020 -0.0014  
Y -0.0145 0.0049 0.0019 -0.0001 -0.0031 -0.0056  
Z 0.0194 -0.0225 0.0026 -0.0027 -0.0015 0.0005  
AT. 136 C X -0.0044 -0.0057 0.0009 0.0004 0.0020 0.0014  
Y -0.0145 -0.0049 -0.0019 -0.0001 -0.0031 0.0056  
Z 0.0194 0.0225 -0.0026 -0.0027 -0.0015 -0.0005  
AT. 137 H X 0.0060 -0.0040 -0.0030 0.0010 0.0013 0.0028  
Y -0.0140 0.0011 0.0011 0.0035 -0.0073 -0.0021  
Z 0.0164 -0.0253 0.0019 0.0033 -0.0085 0.0052  
AT. 138 H X 0.0060 0.0040 0.0030 0.0010 0.0013 -0.0028  
Y -0.0140 -0.0011 -0.0011 0.0035 -0.0073 0.0021  
Z 0.0164 0.0253 -0.0019 0.0033 -0.0085 -0.0052

AT. 139 H X -0.0083 0.0104 -0.0023 0.0034 0.0002 -0.0010  
Y -0.0191 0.0125 0.0049 -0.0068 0.0032 -0.0125  
Z 0.0254 -0.0307 0.0035 -0.0049 -0.0007 0.0018

AT. 140 H X -0.0083 -0.0104 0.0023 0.0034 0.0002 0.0010  
Y -0.0191 -0.0125 -0.0049 -0.0068 0.0032 0.0125  
Z 0.0254 0.0307 -0.0035 -0.0049 -0.0007 -0.0018

AT. 141 H X -0.0043 0.0041 0.0024 -0.0040 0.0049 -0.0033  
Y -0.0176 0.0030 0.0028 0.0034 -0.0078 -0.0025  
Z 0.0227 -0.0215 0.0031 -0.0083 0.0047 -0.0034

AT. 142 H X -0.0043 -0.0041 -0.0024 -0.0040 0.0049 0.0033  
Y -0.0176 -0.0030 -0.0028 0.0034 -0.0078 0.0025  
Z 0.0227 0.0215 -0.0031 -0.0083 0.0047 0.0034

AT. 143 C X -0.0099 0.0119 -0.0012 -0.0011 0.0033 -0.0042  
Y 0.0090 -0.0137 -0.0008 0.0102 -0.0128 0.0052  
Z -0.0097 0.0076 -0.0007 -0.0014 0.0038 -0.0098

AT. 144 C X -0.0099 -0.0119 0.0012 -0.0011 0.0033 0.0042  
Y 0.0090 0.0137 0.0008 0.0102 -0.0128 -0.0052  
Z -0.0097 -0.0076 0.0007 -0.0014 0.0038 0.0098

AT. 145 H X -0.0072 0.0134 -0.0049 -0.0037 0.0011 -0.0030  
Y 0.0054 -0.0125 -0.0014 0.0089 -0.0117 0.0028  
Z -0.0054 0.0065 -0.0007 -0.0009 0.0027 -0.0065

AT. 146 H X -0.0072 -0.0134 0.0049 -0.0037 0.0011 0.0030  
Y 0.0054 0.0125 0.0014 0.0089 -0.0117 -0.0028  
Z -0.0054 -0.0065 0.0007 -0.0009 0.0027 0.0065

AT. 147 H X -0.0165 0.0167 -0.0018 -0.0027 0.0062 -0.0065  
Y 0.0146 -0.0190 0.0017 0.0130 -0.0144 0.0077  
Z -0.0160 0.0116 -0.0001 -0.0020 0.0070 -0.0117

AT. 148 H X -0.0165 -0.0167 0.0018 -0.0027 0.0062 0.0065  
Y 0.0146 0.0190 -0.0017 0.0130 -0.0144 -0.0077  
Z -0.0160 -0.0116 0.0001 -0.0020 0.0070 0.0117

AT. 149 H X -0.0021 0.0035 -0.0000 0.0009 -0.0002 -0.0021  
Y 0.0080 -0.0156 -0.0007 0.0102 -0.0126 0.0038

Z -0.0151 0.0081 -0.0012 -0.0020 0.0055 -0.0128  
AT. 150 H X -0.0021 -0.0035 0.0000 0.0009 -0.0002 0.0021  
Y 0.0080 0.0156 0.0007 0.0102 -0.0126 -0.0038  
Z -0.0151 -0.0081 0.0012 -0.0020 0.0055 0.0128  
AT. 151 C X -0.0068 0.0087 0.0003 -0.0009 0.0032 -0.0034  
Y -0.0055 -0.0030 -0.0035 0.0078 -0.0078 0.0014  
Z 0.0049 -0.0053 -0.0003 -0.0005 -0.0006 -0.0036  
AT. 152 C X -0.0068 -0.0087 -0.0003 -0.0009 0.0032 0.0034  
Y -0.0055 0.0030 0.0035 0.0078 -0.0078 -0.0014  
Z 0.0049 0.0053 0.0003 -0.0005 -0.0006 0.0036  
AT. 153 H X 0.0022 0.0027 0.0008 -0.0006 0.0016 -0.0004  
Y -0.0088 -0.0039 -0.0059 0.0112 -0.0080 0.0024  
Z -0.0038 -0.0044 -0.0042 0.0052 -0.0012 -0.0030  
AT. 154 H X 0.0022 -0.0027 -0.0008 -0.0006 0.0016 0.0004  
Y -0.0088 0.0039 0.0059 0.0112 -0.0080 -0.0024  
Z -0.0038 0.0044 0.0042 0.0052 -0.0012 0.0030  
AT. 155 H X -0.0054 0.0076 0.0020 -0.0029 0.0047 -0.0037  
Y -0.0128 -0.0025 -0.0056 0.0116 -0.0085 0.0019  
Z 0.0128 -0.0064 0.0025 -0.0057 0.0010 -0.0041  
AT. 156 H X -0.0054 -0.0076 -0.0020 -0.0029 0.0047 0.0037  
Y -0.0128 0.0025 0.0056 0.0116 -0.0085 -0.0019  
Z 0.0128 0.0064 -0.0025 -0.0057 0.0010 0.0041  
AT. 157 O X 0.0011 -0.0045 0.0292 -0.0205 -0.0264 -0.0078  
Y -0.0007 0.0028 0.0174 0.0000 -0.0041 0.0018  
Z 0.0074 0.0050 -0.0131 0.0274 0.0227 0.0139  
AT. 158 O X 0.0011 0.0045 -0.0292 -0.0205 -0.0264 0.0078  
Y -0.0007 -0.0028 -0.0174 0.0000 -0.0041 -0.0018  
Z 0.0074 -0.0050 0.0131 0.0274 0.0227 -0.0139  
AT. 159 O X 0.0030 -0.0028 0.0160 -0.0173 -0.0207 -0.0207  
Y 0.0056 -0.0026 -0.0819 0.0541 0.0792 0.0359  
Z 0.0121 0.0067 -0.0584 0.0450 0.0512 -0.0018  
AT. 160 O X 0.0030 0.0028 -0.0160 -0.0173 -0.0207 0.0207

Y 0.0056 0.0026 0.0819 0.0541 0.0792 -0.0359  
Z 0.0121 -0.0067 0.0584 0.0450 0.0512 0.0018  
AT. 161 H X -0.0049 -0.0015 0.0911 -0.0526 -0.0762 -0.0245  
Y -0.0006 0.0042 0.0290 -0.0041 -0.0117 -0.0006  
Z 0.0043 0.0030 -0.0201 0.0259 0.0245 0.0122  
AT. 162 H X -0.0049 0.0015 -0.0911 -0.0526 -0.0762 0.0245  
Y -0.0006 -0.0042 -0.0290 -0.0041 -0.0117 0.0006  
Z 0.0043 -0.0030 0.0201 0.0259 0.0245 -0.0122  
AT. 163 H X 0.0061 -0.0001 -0.0029 -0.0082 -0.0085 -0.0351  
Y 0.0047 0.0023 -0.0488 0.0307 0.0463 0.0072  
Z 0.0112 0.0068 -0.0463 0.0379 0.0410 -0.0028  
AT. 164 H X 0.0061 0.0001 0.0029 -0.0082 -0.0085 0.0351  
Y 0.0047 -0.0023 0.0488 0.0307 0.0463 -0.0072  
Z 0.0112 -0.0068 0.0463 0.0379 0.0410 0.0028  
AT. 165 O X -0.0166 -0.0054 -0.0017 0.0111 -0.0041 -0.0326  
Y 0.0324 0.0076 -0.0024 -0.0508 0.0374 0.0207  
Z 0.0027 0.0019 0.0061 0.0157 -0.0167 0.0043  
AT. 166 O X -0.0166 0.0054 0.0017 0.0111 -0.0041 0.0326  
Y 0.0324 -0.0076 0.0024 -0.0508 0.0374 -0.0207  
Z 0.0027 -0.0019 -0.0061 0.0157 -0.0167 -0.0043  
AT. 167 H X -0.0270 -0.0117 -0.0045 0.0040 0.0046 -0.0454  
Y 0.0389 -0.0017 0.0006 -0.0263 0.0181 0.0232  
Z 0.0227 0.0344 0.0098 -0.0029 -0.0111 0.0361  
AT. 168 H X -0.0270 0.0117 0.0045 0.0040 0.0046 0.0454  
Y 0.0389 0.0017 -0.0006 -0.0263 0.0181 -0.0232  
Z 0.0227 -0.0344 -0.0098 -0.0029 -0.0111 -0.0361  
AT. 169 O X 0.0130 0.0337 0.0061 -0.0127 -0.0009 0.0205  
Y 0.0692 0.0758 0.0031 -0.0558 0.0317 0.0545  
Z 0.0011 -0.0049 0.0065 0.0116 -0.0146 0.0083  
AT. 170 O X 0.0130 -0.0337 -0.0061 -0.0127 -0.0009 -0.0205  
Y 0.0692 -0.0758 -0.0031 -0.0558 0.0317 -0.0545  
Z 0.0011 0.0049 -0.0065 0.0116 -0.0146 -0.0083

AT. 171 H X -0.0300 -0.0238 0.0025 0.0102 -0.0101 -0.0110

Y 0.0547 0.0619 0.0015 -0.0427 0.0255 0.0396

Z 0.0065 0.0128 0.0067 0.0194 -0.0203 0.0053

AT. 172 H X -0.0300 0.0238 -0.0025 0.0102 -0.0101 0.0110

Y 0.0547 -0.0619 -0.0015 -0.0427 0.0255 -0.0396

Z 0.0065 -0.0128 -0.0067 0.0194 -0.0203 -0.0053

FREQ(CM\*\*-1) 145.33 145.75 154.61 154.76 157.73 161.17

AT. 1 I X -0.0067 -0.0190 0.0162 -0.0086 -0.0116 0.0055

Y -0.0009 0.0023 -0.0007 -0.0005 0.0001 0.0008

Z -0.0002 -0.0075 0.0055 -0.0026 -0.0042 0.0009

AT. 2 I X 0.0067 -0.0190 0.0162 0.0086 0.0116 0.0055

Y 0.0009 0.0023 -0.0007 0.0005 -0.0001 0.0008

Z 0.0002 -0.0075 0.0055 0.0026 0.0042 0.0009

AT. 3 I X -0.0163 -0.0185 -0.0034 0.0036 0.0045 0.0033

Y -0.0007 -0.0016 -0.0023 0.0009 0.0015 -0.0003

Z 0.0041 0.0049 0.0023 -0.0013 -0.0013 -0.0001

AT. 4 I X 0.0163 -0.0185 -0.0034 -0.0036 -0.0045 0.0033

Y 0.0007 -0.0016 -0.0023 -0.0009 -0.0015 -0.0003

Z -0.0041 0.0049 0.0023 0.0013 0.0013 -0.0001

AT. 5 O X 0.0132 0.0350 -0.0711 0.0349 0.0511 -0.0151

Y -0.0068 0.0225 0.0052 -0.0072 -0.0119 0.0010

Z -0.0048 0.0020 -0.0284 0.0186 0.0238 -0.0064

AT. 6 O X -0.0132 0.0350 -0.0711 -0.0349 -0.0511 -0.0151

Y 0.0068 0.0225 0.0052 0.0072 0.0119 0.0010

Z 0.0048 0.0020 -0.0284 -0.0186 -0.0238 -0.0064

AT. 7 O X 0.0576 0.0709 0.0303 -0.0206 -0.0248 -0.0042

Y 0.0469 0.0528 0.0190 -0.0069 -0.0080 -0.0059

Z 0.0167 0.0192 -0.0091 0.0068 0.0095 -0.0054

AT. 8 O X -0.0576 0.0709 0.0303 0.0206 0.0248 -0.0042

Y -0.0469 0.0528 0.0190 0.0069 0.0080 -0.0059

Z -0.0167 0.0192 -0.0091 -0.0068 -0.0095 -0.0054  
AT. 9 N X 0.0142 0.0150 -0.0051 0.0012 0.0007 -0.0011  
Y -0.0051 -0.0089 0.0066 -0.0041 -0.0028 0.0001  
Z -0.0059 0.0004 -0.0049 0.0057 0.0043 -0.0007  
AT. 10 N X -0.0142 0.0150 -0.0051 -0.0012 -0.0007 -0.0011  
Y 0.0051 -0.0089 0.0066 0.0041 0.0028 0.0001  
Z 0.0059 0.0004 -0.0049 -0.0057 -0.0043 -0.0007  
AT. 11 N X 0.0093 0.0102 -0.0063 0.0009 0.0025 -0.0029  
Y -0.0054 -0.0093 0.0015 0.0025 0.0031 0.0004  
Z -0.0063 -0.0075 -0.0075 0.0061 0.0083 -0.0005  
AT. 12 N X -0.0093 0.0102 -0.0063 -0.0009 -0.0025 -0.0029  
Y 0.0054 -0.0093 0.0015 -0.0025 -0.0031 0.0004  
Z 0.0063 -0.0075 -0.0075 -0.0061 -0.0083 -0.0005  
AT. 13 C X 0.0091 0.0151 -0.0296 0.0137 0.0210 -0.0049  
Y -0.0093 -0.0031 0.0191 -0.0124 -0.0166 0.0042  
Z -0.0051 0.0007 -0.0009 0.0037 -0.0001 0.0002  
AT. 14 C X -0.0091 0.0151 -0.0296 -0.0137 -0.0210 -0.0049  
Y 0.0093 -0.0031 0.0191 0.0124 0.0166 0.0042  
Z 0.0051 0.0007 -0.0009 -0.0037 0.0001 0.0002  
AT. 15 C X 0.0067 -0.0015 -0.0239 0.0126 0.0200 -0.0039  
Y -0.0152 -0.0165 0.0440 -0.0250 -0.0344 0.0108  
Z -0.0113 -0.0011 0.0412 -0.0201 -0.0355 0.0105  
AT. 16 C X -0.0067 -0.0015 -0.0239 -0.0126 -0.0200 -0.0039  
Y 0.0152 -0.0165 0.0440 0.0250 0.0344 0.0108  
Z 0.0113 -0.0011 0.0412 0.0201 0.0355 0.0105  
AT. 17 H X 0.0120 -0.0014 -0.0422 0.0222 0.0357 -0.0077  
Y -0.0070 -0.0148 0.0088 -0.0060 -0.0055 0.0024  
Z -0.0195 -0.0022 0.0792 -0.0408 -0.0665 0.0199  
AT. 18 H X -0.0120 -0.0014 -0.0422 -0.0222 -0.0357 -0.0077  
Y 0.0070 -0.0148 0.0088 0.0060 0.0055 0.0024  
Z 0.0195 -0.0022 0.0792 0.0408 0.0665 0.0199  
AT. 19 H X 0.0062 -0.0034 -0.0298 0.0174 0.0261 -0.0046

Y -0.0261 -0.0154 0.0906 -0.0505 -0.0736 0.0226  
Z -0.0161 -0.0017 0.0569 -0.0281 -0.0482 0.0146  
AT. 20 H X -0.0062 -0.0034 -0.0298 -0.0174 -0.0261 -0.0046  
Y 0.0261 -0.0154 0.0906 0.0505 0.0736 0.0226  
Z 0.0161 -0.0017 0.0569 0.0281 0.0482 0.0146  
AT. 21 C X 0.0224 0.0283 0.0102 -0.0089 -0.0104 -0.0016  
Y 0.0057 0.0033 0.0008 0.0043 0.0056 -0.0023  
Z 0.0004 -0.0000 -0.0066 0.0063 0.0086 -0.0014  
AT. 22 C X -0.0224 0.0283 0.0102 0.0089 0.0104 -0.0016  
Y -0.0057 0.0033 0.0008 -0.0043 -0.0056 -0.0023  
Z -0.0004 -0.0000 -0.0066 -0.0063 -0.0086 -0.0014  
AT. 23 C X 0.0037 0.0064 0.0079 -0.0068 -0.0083 0.0019  
Y -0.0278 -0.0379 -0.0247 0.0192 0.0243 -0.0001  
Z -0.0033 -0.0029 0.0015 0.0015 0.0022 0.0009  
AT. 24 C X -0.0037 0.0064 0.0079 0.0068 0.0083 0.0019  
Y 0.0278 -0.0379 -0.0247 -0.0192 -0.0243 -0.0001  
Z 0.0033 -0.0029 0.0015 -0.0015 -0.0022 0.0009  
AT. 25 H X 0.0065 0.0105 0.0121 -0.0109 -0.0135 0.0030  
Y -0.0305 -0.0410 -0.0276 0.0205 0.0261 0.0000  
Z 0.0234 0.0315 0.0304 -0.0135 -0.0169 0.0010  
AT. 26 H X -0.0065 0.0105 0.0121 0.0109 0.0135 0.0030  
Y 0.0305 -0.0410 -0.0276 -0.0205 -0.0261 0.0000  
Z -0.0234 0.0315 0.0304 0.0135 0.0169 0.0010  
AT. 27 H X 0.0033 0.0066 0.0092 -0.0088 -0.0111 0.0020  
Y -0.0495 -0.0670 -0.0485 0.0330 0.0420 -0.0001  
Z -0.0139 -0.0169 -0.0106 0.0085 0.0114 0.0006  
AT. 28 H X -0.0033 0.0066 0.0092 0.0088 0.0111 0.0020  
Y 0.0495 -0.0670 -0.0485 -0.0330 -0.0420 -0.0001  
Z 0.0139 -0.0169 -0.0106 -0.0085 -0.0114 0.0006  
AT. 29 C X 0.0153 0.0199 0.0081 -0.0057 -0.0115 0.0016  
Y -0.0018 -0.0014 0.0142 -0.0079 -0.0112 0.0016  
Z -0.0022 0.0048 -0.0264 0.0165 0.0213 -0.0053

AT. 30 C X -0.0153 0.0199 0.0081 0.0057 0.0115 0.0016  
Y 0.0018 -0.0014 0.0142 0.0079 0.0112 0.0016  
Z 0.0022 0.0048 -0.0264 -0.0165 -0.0213 -0.0053

AT. 31 H X 0.0158 0.0216 0.0275 -0.0154 -0.0282 0.0055  
Y -0.0036 -0.0030 -0.0084 0.0056 0.0089 -0.0024  
Z -0.0044 0.0034 -0.0479 0.0307 0.0407 -0.0094

AT. 32 H X -0.0158 0.0216 0.0275 0.0154 0.0282 0.0055  
Y 0.0036 -0.0030 -0.0084 -0.0056 -0.0089 -0.0024  
Z 0.0044 0.0034 -0.0479 -0.0307 -0.0407 -0.0094

AT. 33 H X 0.0202 0.0251 0.0142 -0.0105 -0.0186 0.0024  
Y 0.0003 0.0018 0.0469 -0.0276 -0.0402 0.0085  
Z -0.0002 0.0071 -0.0370 0.0222 0.0297 -0.0074

AT. 34 H X -0.0202 0.0251 0.0142 0.0105 0.0186 0.0024  
Y -0.0003 0.0018 0.0469 0.0276 0.0402 0.0085  
Z 0.0002 0.0071 -0.0370 -0.0222 -0.0297 -0.0074

AT. 35 C X 0.0097 0.0141 -0.0028 0.0019 0.0001 -0.0007  
Y 0.0004 0.0027 0.0075 -0.0031 -0.0062 0.0009  
Z 0.0016 0.0077 -0.0078 0.0035 0.0035 -0.0020

AT. 36 C X -0.0097 0.0141 -0.0028 -0.0019 -0.0001 -0.0007  
Y -0.0004 0.0027 0.0075 0.0031 0.0062 0.0009  
Z -0.0016 0.0077 -0.0078 -0.0035 -0.0035 -0.0020

AT. 37 C X 0.0093 0.0120 -0.0024 -0.0007 -0.0015 -0.0016  
Y -0.0027 -0.0025 0.0151 -0.0059 -0.0109 0.0034  
Z -0.0005 0.0022 0.0091 -0.0058 -0.0088 0.0019

AT. 38 C X -0.0093 0.0120 -0.0024 0.0007 0.0015 -0.0016  
Y 0.0027 -0.0025 0.0151 0.0059 0.0109 0.0034  
Z 0.0005 0.0022 0.0091 0.0058 0.0088 0.0019

AT. 39 H X 0.0130 0.0165 0.0200 -0.0144 -0.0209 0.0030  
Y -0.0054 -0.0074 0.0250 -0.0106 -0.0178 0.0069  
Z 0.0037 0.0080 0.0206 -0.0134 -0.0194 0.0036

AT. 40 H X -0.0130 0.0165 0.0200 0.0144 0.0209 0.0030  
Y 0.0054 -0.0074 0.0250 0.0106 0.0178 0.0069



Z -0.0037 0.0080 0.0206 0.0134 0.0194 0.0036  
AT. 41 H X 0.0058 0.0080 -0.0232 0.0123 0.0169 -0.0064  
Y 0.0028 0.0067 0.0236 -0.0117 -0.0203 0.0051  
Z -0.0012 -0.0008 0.0236 -0.0144 -0.0202 0.0052  
AT. 42 H X -0.0058 0.0080 -0.0232 -0.0123 -0.0169 -0.0064  
Y -0.0028 0.0067 0.0236 0.0117 0.0203 0.0051  
Z 0.0012 -0.0008 0.0236 0.0144 0.0202 0.0052  
AT. 43 C X 0.0101 0.0095 -0.0189 0.0081 0.0143 -0.0066  
Y 0.0004 -0.0012 -0.0003 0.0009 0.0031 -0.0016  
Z -0.0103 -0.0139 -0.0192 0.0141 0.0205 -0.0028  
AT. 44 C X -0.0101 0.0095 -0.0189 -0.0081 -0.0143 -0.0066  
Y -0.0004 -0.0012 -0.0003 -0.0009 -0.0031 -0.0016  
Z 0.0103 -0.0139 -0.0192 -0.0141 -0.0205 -0.0028  
AT. 45 H X 0.0074 0.0042 -0.0331 0.0154 0.0273 -0.0098  
Y 0.0030 0.0074 0.0171 -0.0080 -0.0133 0.0020  
Z -0.0112 -0.0184 -0.0257 0.0174 0.0269 -0.0037  
AT. 46 H X -0.0074 0.0042 -0.0331 -0.0154 -0.0273 -0.0098  
Y -0.0030 0.0074 0.0171 0.0080 0.0133 0.0020  
Z 0.0112 -0.0184 -0.0257 -0.0174 -0.0269 -0.0037  
AT. 47 H X 0.0119 0.0094 -0.0239 0.0093 0.0176 -0.0086  
Y -0.0003 -0.0071 -0.0171 0.0093 0.0182 -0.0060  
Z -0.0137 -0.0205 -0.0305 0.0216 0.0320 -0.0052  
AT. 48 H X -0.0119 0.0094 -0.0239 -0.0093 -0.0176 -0.0086  
Y 0.0003 -0.0071 -0.0171 -0.0093 -0.0182 -0.0060  
Z 0.0137 -0.0205 -0.0305 -0.0216 -0.0320 -0.0052  
AT. 49 C X 0.0084 0.0110 -0.0073 0.0042 0.0057 -0.0029  
Y 0.0019 0.0027 0.0008 -0.0014 -0.0000 -0.0022  
Z -0.0106 -0.0073 -0.0049 0.0060 0.0070 -0.0001  
AT. 50 C X -0.0084 0.0110 -0.0073 -0.0042 -0.0057 -0.0029  
Y -0.0019 0.0027 0.0008 0.0014 0.0000 -0.0022  
Z 0.0106 -0.0073 -0.0049 -0.0060 -0.0070 -0.0001  
AT. 51 C X 0.0128 0.0144 -0.0022 0.0003 -0.0006 -0.0014

Y -0.0032 -0.0091 -0.0158 0.0092 0.0170 -0.0051  
Z -0.0096 0.0001 0.0103 -0.0026 -0.0073 0.0022  
AT. 52 C X -0.0128 0.0144 -0.0022 -0.0003 0.0006 -0.0014  
Y 0.0032 -0.0091 -0.0158 -0.0092 -0.0170 -0.0051  
Z 0.0096 0.0001 0.0103 0.0026 0.0073 0.0022  
AT. 53 H X 0.0122 0.0087 -0.0267 0.0151 0.0210 -0.0056  
Y -0.0066 -0.0181 -0.0391 0.0237 0.0386 -0.0089  
Z -0.0125 -0.0004 0.0277 -0.0124 -0.0213 0.0054  
AT. 54 H X -0.0122 0.0087 -0.0267 -0.0151 -0.0210 -0.0056  
Y 0.0066 -0.0181 -0.0391 -0.0237 -0.0386 -0.0089  
Z 0.0125 -0.0004 0.0277 0.0124 0.0213 0.0054  
AT. 55 H X 0.0132 0.0223 0.0296 -0.0187 -0.0287 0.0041  
Y -0.0013 -0.0078 -0.0283 0.0172 0.0265 -0.0072  
Z -0.0068 0.0071 0.0171 -0.0064 -0.0147 0.0028  
AT. 56 H X -0.0132 0.0223 0.0296 0.0187 0.0287 0.0041  
Y 0.0013 -0.0078 -0.0283 -0.0172 -0.0265 -0.0072  
Z 0.0068 0.0071 0.0171 0.0064 0.0147 0.0028  
AT. 57 C X 0.0088 0.0148 -0.0052 0.0059 0.0041 -0.0000  
Y 0.0051 0.0104 0.0032 -0.0002 -0.0042 0.0012  
Z 0.0110 0.0186 -0.0105 0.0007 -0.0007 -0.0032  
AT. 58 C X -0.0088 0.0148 -0.0052 -0.0059 -0.0041 -0.0000  
Y -0.0051 0.0104 0.0032 0.0002 0.0042 0.0012  
Z -0.0110 0.0186 -0.0105 -0.0007 0.0007 -0.0032  
AT. 59 H X 0.0079 0.0160 -0.0074 0.0091 0.0086 0.0008  
Y 0.0076 0.0134 0.0031 -0.0019 -0.0059 0.0004  
Z 0.0138 0.0238 -0.0122 0.0006 0.0001 -0.0040  
AT. 60 H X -0.0079 0.0160 -0.0074 -0.0091 -0.0086 0.0008  
Y -0.0076 0.0134 0.0031 0.0019 0.0059 0.0004  
Z -0.0138 0.0238 -0.0122 -0.0006 -0.0001 -0.0040  
AT. 61 H X 0.0138 0.0199 -0.0073 0.0054 0.0023 0.0001  
Y 0.0020 0.0063 0.0028 0.0025 -0.0015 0.0026  
Z 0.0165 0.0248 -0.0120 -0.0010 -0.0034 -0.0034

AT. 62 H X -0.0138 0.0199 -0.0073 -0.0054 -0.0023 0.0001  
Y -0.0020 0.0063 0.0028 -0.0025 0.0015 0.0026  
Z -0.0165 0.0248 -0.0120 0.0010 0.0034 -0.0034

AT. 63 H X 0.0043 0.0097 -0.0027 0.0055 0.0049 -0.0003  
Y 0.0104 0.0186 -0.0005 0.0009 -0.0029 0.0008  
Z 0.0106 0.0162 -0.0096 0.0001 -0.0022 -0.0026

AT. 64 H X -0.0043 0.0097 -0.0027 -0.0055 -0.0049 -0.0003  
Y -0.0104 0.0186 -0.0005 -0.0009 0.0029 0.0008  
Z -0.0106 0.0162 -0.0096 -0.0001 0.0022 -0.0026

AT. 65 C X 0.0025 0.0075 -0.0062 0.0049 0.0078 -0.0032  
Y 0.0058 0.0114 0.0051 -0.0066 -0.0064 -0.0035  
Z -0.0180 -0.0150 -0.0063 0.0093 0.0121 0.0004

AT. 66 C X -0.0025 0.0075 -0.0062 -0.0049 -0.0078 -0.0032  
Y -0.0058 0.0114 0.0051 0.0066 0.0064 -0.0035  
Z 0.0180 -0.0150 -0.0063 -0.0093 -0.0121 0.0004

AT. 67 H X -0.0018 0.0047 -0.0066 0.0066 0.0105 -0.0032  
Y 0.0092 0.0186 0.0093 -0.0125 -0.0123 -0.0057  
Z -0.0176 -0.0192 -0.0098 0.0133 0.0152 0.0025

AT. 68 H X 0.0018 0.0047 -0.0066 -0.0066 -0.0105 -0.0032  
Y -0.0092 0.0186 0.0093 0.0125 0.0123 -0.0057  
Z 0.0176 -0.0192 -0.0098 -0.0133 -0.0152 0.0025

AT. 69 H X 0.0050 0.0084 -0.0075 0.0065 0.0076 -0.0023  
Y 0.0037 0.0067 0.0017 -0.0020 -0.0021 -0.0018  
Z -0.0259 -0.0236 -0.0089 0.0131 0.0190 0.0012

AT. 70 H X -0.0050 0.0084 -0.0075 -0.0065 -0.0076 -0.0023  
Y -0.0037 0.0067 0.0017 0.0020 0.0021 -0.0018  
Z 0.0259 -0.0236 -0.0089 -0.0131 -0.0190 0.0012

AT. 71 H X -0.0009 0.0061 -0.0048 0.0034 0.0081 -0.0047  
Y 0.0085 0.0166 0.0075 -0.0097 -0.0098 -0.0047  
Z -0.0169 -0.0087 -0.0018 0.0035 0.0080 -0.0026

AT. 72 H X 0.0009 0.0061 -0.0048 -0.0034 -0.0081 -0.0047  
Y -0.0085 0.0166 0.0075 0.0097 0.0098 -0.0047

Z 0.0169 -0.0087 -0.0018 -0.0035 -0.0080 -0.0026  
AT. 73 C X 0.0063 0.0108 -0.0043 0.0038 0.0036 -0.0006  
Y 0.0047 0.0095 0.0036 -0.0033 -0.0049 -0.0001  
Z -0.0034 0.0016 -0.0063 0.0043 0.0047 -0.0012  
AT. 74 C X -0.0063 0.0108 -0.0043 -0.0038 -0.0036 -0.0006  
Y -0.0047 0.0095 0.0036 0.0033 0.0049 -0.0001  
Z 0.0034 0.0016 -0.0063 -0.0043 -0.0047 -0.0012  
AT. 75 H X 0.0049 0.0107 -0.0040 0.0042 0.0029 0.0013  
Y 0.0074 0.0136 0.0032 -0.0044 -0.0055 0.0001  
Z -0.0007 0.0070 -0.0067 0.0030 0.0036 0.0002  
AT. 76 H X -0.0049 0.0107 -0.0040 -0.0042 -0.0029 0.0013  
Y -0.0074 0.0136 0.0032 0.0044 0.0055 0.0001  
Z 0.0007 0.0070 -0.0067 -0.0030 -0.0036 0.0002  
AT. 77 H X 0.0048 0.0091 -0.0030 0.0029 0.0034 -0.0002  
Y 0.0077 0.0154 0.0023 -0.0037 -0.0057 0.0013  
Z -0.0046 -0.0024 -0.0064 0.0052 0.0057 -0.0024  
AT. 78 H X -0.0048 0.0091 -0.0030 -0.0029 -0.0034 -0.0002  
Y -0.0077 0.0154 0.0023 0.0037 0.0057 0.0013  
Z 0.0046 -0.0024 -0.0064 -0.0052 -0.0057 -0.0024  
AT. 79 I X -0.0014 0.0002 0.0002 0.0004 0.0020 -0.0023  
Y 0.0039 -0.0013 0.0006 -0.0018 0.0021 -0.0050  
Z 0.0025 0.0019 -0.0008 0.0064 -0.0053 0.0050  
AT. 80 I X 0.0014 0.0002 0.0002 -0.0004 -0.0020 -0.0023  
Y -0.0039 -0.0013 0.0006 0.0018 -0.0021 -0.0050  
Z -0.0025 0.0019 -0.0008 -0.0064 0.0053 0.0050  
AT. 81 I X -0.0018 -0.0034 0.0018 0.0085 -0.0045 -0.0076  
Y -0.0012 0.0011 -0.0012 -0.0048 0.0032 0.0063  
Z 0.0016 0.0004 0.0007 0.0015 -0.0014 -0.0004  
AT. 82 I X 0.0018 -0.0034 0.0018 -0.0085 0.0045 -0.0076  
Y 0.0012 0.0011 -0.0012 0.0048 -0.0032 0.0063  
Z -0.0016 0.0004 0.0007 -0.0015 0.0014 -0.0004  
AT. 83 O X 0.0376 0.0064 -0.0006 0.0192 -0.0207 -0.0269

Y -0.0084 -0.0051 0.0080 -0.0234 0.0165 -0.0129  
Z -0.0176 -0.0012 0.0014 -0.0243 0.0186 0.0193  
AT. 84 O X -0.0376 0.0064 -0.0006 -0.0192 0.0207 -0.0269  
Y 0.0084 -0.0051 0.0080 0.0234 -0.0165 -0.0129  
Z 0.0176 -0.0012 0.0014 0.0243 -0.0186 0.0193  
AT. 85 O X -0.0073 0.0053 -0.0051 -0.0312 0.0172 0.0426  
Y -0.0087 -0.0103 0.0067 0.0309 -0.0187 -0.0334  
Z -0.0137 -0.0080 0.0020 0.0134 -0.0063 -0.0160  
AT. 86 O X 0.0073 0.0053 -0.0051 0.0312 -0.0172 0.0426  
Y 0.0087 -0.0103 0.0067 -0.0309 0.0187 -0.0334  
Z 0.0137 -0.0080 0.0020 -0.0134 0.0063 -0.0160  
AT. 87 N X 0.0050 0.0035 -0.0010 -0.0099 0.0049 0.0079  
Y -0.0013 -0.0018 -0.0005 0.0046 -0.0017 0.0005  
Z 0.0032 0.0003 0.0020 -0.0076 0.0034 -0.0012  
AT. 88 N X -0.0050 0.0035 -0.0010 0.0099 -0.0049 0.0079  
Y 0.0013 -0.0018 -0.0005 -0.0046 0.0017 0.0005  
Z -0.0032 0.0003 0.0020 0.0076 -0.0034 -0.0012  
AT. 89 N X 0.0058 0.0028 -0.0004 -0.0099 0.0025 0.0109  
Y -0.0021 -0.0005 -0.0007 -0.0010 0.0007 0.0080  
Z 0.0029 0.0003 -0.0028 -0.0076 0.0052 0.0085  
AT. 90 N X -0.0058 0.0028 -0.0004 0.0099 -0.0025 0.0109  
Y 0.0021 -0.0005 -0.0007 0.0010 -0.0007 0.0080  
Z -0.0029 0.0003 -0.0028 0.0076 -0.0052 0.0085  
AT. 91 C X 0.0207 0.0046 0.0001 0.0045 -0.0079 -0.0143  
Y 0.0052 -0.0017 0.0032 -0.0043 0.0019 -0.0099  
Z 0.0032 0.0003 0.0025 -0.0089 0.0042 -0.0033  
AT. 92 C X -0.0207 0.0046 0.0001 -0.0045 0.0079 -0.0143  
Y -0.0052 -0.0017 0.0032 0.0043 -0.0019 -0.0099  
Z -0.0032 0.0003 0.0025 0.0089 -0.0042 -0.0033  
AT. 93 C X 0.0272 0.0038 0.0019 0.0095 -0.0118 -0.0237  
Y 0.0233 0.0011 0.0017 0.0059 -0.0086 -0.0186  
Z 0.0255 0.0023 0.0030 0.0082 -0.0110 -0.0224

AT. 94 C X -0.0272 0.0038 0.0019 -0.0095 0.0118 -0.0237  
Y -0.0233 0.0011 0.0017 -0.0059 0.0086 -0.0186  
Z -0.0255 0.0023 0.0030 -0.0082 0.0110 -0.0224

AT. 95 H X 0.0391 0.0022 0.0066 0.0096 -0.0121 -0.0423  
Y 0.0020 0.0007 -0.0019 -0.0008 -0.0013 0.0064  
Z 0.0507 0.0044 0.0046 0.0200 -0.0234 -0.0462

AT. 96 H X -0.0391 0.0022 0.0066 -0.0096 0.0121 -0.0423  
Y -0.0020 0.0007 -0.0019 0.0008 0.0013 0.0064  
Z -0.0507 0.0044 0.0046 -0.0200 0.0234 -0.0462

AT. 97 H X 0.0345 0.0043 0.0021 0.0188 -0.0185 -0.0307  
Y 0.0554 0.0029 0.0059 0.0166 -0.0212 -0.0532  
Z 0.0308 0.0026 0.0039 0.0079 -0.0118 -0.0285

AT. 98 H X -0.0345 0.0043 0.0021 -0.0188 0.0185 -0.0307  
Y -0.0554 0.0029 0.0059 -0.0166 0.0212 -0.0532  
Z -0.0308 0.0026 0.0039 -0.0079 0.0118 -0.0285

AT. 99 C X -0.0021 0.0027 -0.0024 -0.0179 0.0089 0.0251  
Y -0.0083 -0.0031 0.0015 0.0041 -0.0028 -0.0005  
Z -0.0003 -0.0018 -0.0011 -0.0023 0.0014 0.0001

AT. 100 C X 0.0021 0.0027 -0.0024 0.0179 -0.0089 0.0251  
Y 0.0083 -0.0031 0.0015 -0.0041 0.0028 -0.0005  
Z 0.0003 -0.0018 -0.0011 0.0023 -0.0014 0.0001

AT. 101 C X -0.0092 -0.0012 -0.0007 -0.0096 0.0049 0.0154  
Y -0.0148 0.0009 -0.0012 -0.0151 0.0078 0.0228  
Z 0.0085 0.0020 -0.0022 -0.0074 0.0037 0.0050

AT. 102 C X 0.0092 -0.0012 -0.0007 0.0096 -0.0049 0.0154  
Y 0.0148 0.0009 -0.0012 0.0151 -0.0078 0.0228  
Z -0.0085 0.0020 -0.0022 0.0074 -0.0037 0.0050

AT. 103 H X -0.0131 -0.0023 0.0002 -0.0098 0.0045 0.0165  
Y -0.0137 0.0014 -0.0016 -0.0152 0.0082 0.0224  
Z 0.0200 0.0015 -0.0018 0.0036 -0.0020 -0.0093

AT. 104 H X 0.0131 -0.0023 0.0002 0.0098 -0.0045 0.0165  
Y 0.0137 0.0014 -0.0016 0.0152 -0.0082 0.0224

Z -0.0200 0.0015 -0.0018 -0.0036 0.0020 -0.0093  
AT. 105 H X -0.0130 -0.0022 -0.0008 -0.0120 0.0065 0.0146  
Y -0.0258 0.0011 -0.0007 -0.0209 0.0108 0.0323  
Z 0.0030 0.0018 -0.0021 -0.0102 0.0054 0.0086  
AT. 106 H X 0.0130 -0.0022 -0.0008 0.0120 -0.0065 0.0146  
Y 0.0258 0.0011 -0.0007 0.0209 -0.0108 0.0323  
Z -0.0030 0.0018 -0.0021 0.0102 -0.0054 0.0086  
AT. 107 C X -0.0049 0.0024 -0.0025 -0.0128 0.0100 0.0209  
Y 0.0073 -0.0019 0.0020 0.0092 -0.0082 -0.0151  
Z -0.0101 -0.0022 0.0009 -0.0102 0.0093 0.0115  
AT. 108 C X 0.0049 0.0024 -0.0025 0.0128 -0.0100 0.0209  
Y -0.0073 -0.0019 0.0020 -0.0092 0.0082 -0.0151  
Z 0.0101 -0.0022 0.0009 0.0102 -0.0093 0.0115  
AT. 109 H X -0.0247 0.0005 -0.0049 -0.0231 0.0230 0.0468  
Y -0.0024 -0.0024 0.0018 0.0020 -0.0015 -0.0025  
Z -0.0207 -0.0027 0.0013 -0.0192 0.0167 0.0255  
AT. 110 H X 0.0247 0.0005 -0.0049 0.0231 -0.0230 0.0468  
Y 0.0024 -0.0024 0.0018 -0.0020 0.0015 -0.0025  
Z 0.0207 -0.0027 0.0013 0.0192 -0.0167 0.0255  
AT. 111 H X -0.0016 0.0037 -0.0023 -0.0149 0.0099 0.0208  
Y 0.0280 -0.0009 0.0036 0.0238 -0.0229 -0.0443  
Z -0.0187 -0.0037 0.0003 -0.0115 0.0130 0.0185  
AT. 112 H X 0.0016 0.0037 -0.0023 0.0149 -0.0099 0.0208  
Y -0.0280 -0.0009 0.0036 -0.0238 0.0229 -0.0443  
Z 0.0187 -0.0037 0.0003 0.0115 -0.0130 0.0185  
AT. 113 C X 0.0023 0.0014 -0.0016 -0.0020 0.0011 0.0071  
Y 0.0011 -0.0026 0.0030 0.0057 -0.0054 -0.0087  
Z 0.0006 -0.0020 0.0003 -0.0005 0.0019 -0.0038  
AT. 114 C X -0.0023 0.0014 -0.0016 0.0020 -0.0011 0.0071  
Y -0.0011 -0.0026 0.0030 -0.0057 0.0054 -0.0087  
Z -0.0006 -0.0020 0.0003 0.0005 -0.0019 -0.0038  
AT. 115 C X 0.0073 0.0029 -0.0007 -0.0067 0.0010 0.0076

Y 0.0082 -0.0007 0.0020 0.0045 -0.0064 -0.0102  
Z 0.0138 0.0003 -0.0012 0.0025 -0.0027 -0.0120  
AT. 116 C X -0.0073 0.0029 -0.0007 0.0067 -0.0010 0.0076  
Y -0.0082 -0.0007 0.0020 -0.0045 0.0064 -0.0102  
Z -0.0138 0.0003 -0.0012 -0.0025 0.0027 -0.0120  
AT. 117 H X -0.0053 0.0024 -0.0012 -0.0144 0.0081 0.0247  
Y 0.0236 0.0013 0.0015 0.0069 -0.0117 -0.0221  
Z 0.0231 0.0004 -0.0005 0.0100 -0.0088 -0.0273  
AT. 118 H X 0.0053 0.0024 -0.0012 0.0144 -0.0081 0.0247  
Y -0.0236 0.0013 0.0015 -0.0069 0.0117 -0.0221  
Z -0.0231 0.0004 -0.0005 -0.0100 0.0088 -0.0273  
AT. 119 H X 0.0254 0.0041 0.0006 0.0026 -0.0089 -0.0165  
Y 0.0087 -0.0016 0.0040 0.0075 -0.0090 -0.0172  
Z 0.0233 0.0017 -0.0024 0.0048 -0.0055 -0.0188  
AT. 120 H X -0.0254 0.0041 0.0006 -0.0026 0.0089 -0.0165  
Y -0.0087 -0.0016 0.0040 -0.0075 0.0090 -0.0172  
Z -0.0233 0.0017 -0.0024 -0.0048 0.0055 -0.0188  
AT. 121 C X 0.0137 0.0026 0.0002 -0.0037 -0.0027 -0.0010  
Y -0.0101 -0.0022 -0.0001 0.0028 0.0014 0.0097  
Z -0.0081 0.0009 -0.0042 -0.0191 0.0143 0.0285  
AT. 122 C X -0.0137 0.0026 0.0002 0.0037 0.0027 -0.0010  
Y 0.0101 -0.0022 -0.0001 -0.0028 -0.0014 0.0097  
Z 0.0081 0.0009 -0.0042 0.0191 -0.0143 0.0285  
AT. 123 H X 0.0309 0.0017 0.0023 0.0073 -0.0136 -0.0268  
Y 0.0002 -0.0021 0.0026 0.0088 -0.0052 -0.0077  
Z -0.0153 0.0014 -0.0064 -0.0236 0.0193 0.0416  
AT. 124 H X -0.0309 0.0017 0.0023 -0.0073 0.0136 -0.0268  
Y -0.0002 -0.0021 0.0026 -0.0088 0.0052 -0.0077  
Z 0.0153 0.0014 -0.0064 0.0236 -0.0193 0.0416  
AT. 125 H X 0.0129 0.0035 0.0003 -0.0090 -0.0003 0.0041  
Y -0.0281 -0.0038 -0.0036 -0.0041 0.0109 0.0333  
Z -0.0189 0.0010 -0.0060 -0.0290 0.0223 0.0469



AT.126 H X -0.0129 0.0035 0.0003 0.0090 0.0003 0.0041  
Y 0.0281 -0.0038 -0.0036 0.0041 -0.0109 0.0333  
Z 0.0189 0.0010 -0.0060 0.0290 -0.0223 0.0469

AT.127 C X 0.0047 0.0013 -0.0010 -0.0006 -0.0008 0.0033  
Y -0.0077 -0.0028 0.0014 0.0069 -0.0018 0.0003  
Z 0.0041 0.0019 -0.0004 -0.0147 0.0079 0.0085

AT.128 C X -0.0047 0.0013 -0.0010 0.0006 0.0008 0.0033  
Y 0.0077 -0.0028 0.0014 -0.0069 0.0018 0.0003  
Z -0.0041 0.0019 -0.0004 0.0147 -0.0079 0.0085

AT.129 C X 0.0004 0.0025 -0.0018 -0.0097 0.0057 0.0134  
Y -0.0153 -0.0022 -0.0019 -0.0010 0.0051 0.0201  
Z 0.0137 0.0017 0.0032 -0.0069 0.0006 -0.0129

AT.130 C X -0.0004 0.0025 -0.0018 0.0097 -0.0057 0.0134  
Y 0.0153 -0.0022 -0.0019 0.0010 -0.0051 0.0201  
Z -0.0137 0.0017 0.0032 0.0069 -0.0006 -0.0129

AT.131 H X 0.0120 0.0034 0.0004 -0.0047 0.0001 -0.0042  
Y -0.0323 -0.0022 -0.0060 -0.0151 0.0176 0.0514  
Z 0.0218 0.0028 0.0044 -0.0058 -0.0017 -0.0234

AT.132 H X -0.0120 0.0034 0.0004 0.0047 -0.0001 -0.0042  
Y 0.0323 -0.0022 -0.0060 0.0151 -0.0176 0.0514  
Z -0.0218 0.0028 0.0044 0.0058 0.0017 -0.0234

AT.133 H X -0.0184 0.0016 -0.0054 -0.0196 0.0161 0.0430  
Y -0.0174 -0.0021 -0.0010 -0.0003 0.0050 0.0187  
Z 0.0192 0.0022 0.0062 -0.0007 -0.0045 -0.0290

AT.134 H X 0.0184 0.0016 -0.0054 0.0196 -0.0161 0.0430  
Y 0.0174 -0.0021 -0.0010 0.0003 -0.0050 0.0187  
Z -0.0192 0.0022 0.0062 0.0007 0.0045 -0.0290

AT.135 C X 0.0012 -0.0011 -0.0013 0.0065 -0.0028 -0.0003  
Y -0.0015 -0.0025 0.0052 0.0067 -0.0068 -0.0122  
Z -0.0020 -0.0059 0.0021 0.0137 -0.0050 -0.0188

AT.136 C X -0.0012 -0.0011 -0.0013 -0.0065 0.0028 -0.0003  
Y 0.0015 -0.0025 0.0052 -0.0067 0.0068 -0.0122

Z 0.0020 -0.0059 0.0021 -0.0137 0.0050 -0.0188  
AT. 137 H X -0.0006 -0.0045 -0.0006 0.0128 -0.0051 -0.0050  
Y -0.0043 -0.0035 0.0065 0.0082 -0.0058 -0.0145  
Z -0.0064 -0.0066 0.0042 0.0139 -0.0027 -0.0207  
AT. 138 H X 0.0006 -0.0045 -0.0006 -0.0128 0.0051 -0.0050  
Y 0.0043 -0.0035 0.0065 -0.0082 0.0058 -0.0145  
Z 0.0064 -0.0066 0.0042 -0.0139 0.0027 -0.0207  
AT. 139 H X 0.0015 0.0012 -0.0019 -0.0021 0.0022 0.0090  
Y 0.0024 -0.0004 0.0041 0.0051 -0.0097 -0.0115  
Z -0.0034 -0.0094 0.0033 0.0251 -0.0107 -0.0315  
AT. 140 H X -0.0015 0.0012 -0.0019 0.0021 -0.0022 0.0090  
Y -0.0024 -0.0004 0.0041 -0.0051 0.0097 -0.0115  
Z 0.0034 -0.0094 0.0033 -0.0251 0.0107 -0.0315  
AT. 141 H X 0.0014 -0.0028 -0.0005 0.0155 -0.0094 -0.0113  
Y -0.0046 -0.0033 0.0070 0.0087 -0.0067 -0.0163  
Z 0.0013 -0.0058 0.0006 0.0156 -0.0079 -0.0194  
AT. 142 H X -0.0014 -0.0028 -0.0005 -0.0155 0.0094 -0.0113  
Y 0.0046 -0.0033 0.0070 -0.0087 0.0067 -0.0163  
Z -0.0013 -0.0058 0.0006 -0.0156 0.0079 -0.0194  
AT. 143 C X 0.0040 -0.0005 -0.0015 0.0067 -0.0041 0.0000  
Y -0.0086 -0.0040 0.0032 0.0128 -0.0060 -0.0158  
Z 0.0057 0.0047 -0.0004 -0.0266 0.0134 0.0173  
AT. 144 C X -0.0040 -0.0005 -0.0015 -0.0067 0.0041 0.0000  
Y 0.0086 -0.0040 0.0032 -0.0128 0.0060 -0.0158  
Z -0.0057 0.0047 -0.0004 0.0266 -0.0134 0.0173  
AT. 145 H X 0.0064 -0.0012 -0.0016 0.0131 -0.0065 0.0007  
Y -0.0060 -0.0038 0.0038 0.0154 -0.0089 -0.0219  
Z 0.0034 0.0045 -0.0011 -0.0278 0.0158 0.0237  
AT. 146 H X -0.0064 -0.0012 -0.0016 -0.0131 0.0065 0.0007  
Y 0.0060 -0.0038 0.0038 -0.0154 0.0089 -0.0219  
Z -0.0034 0.0045 -0.0011 0.0278 -0.0158 0.0237  
AT. 147 H X 0.0064 0.0016 -0.0012 0.0000 -0.0012 0.0058

Y -0.0137 -0.0053 0.0026 0.0112 -0.0039 -0.0156  
Z 0.0062 0.0069 -0.0003 -0.0370 0.0185 0.0256  
AT. 148 H X -0.0064 0.0016 -0.0012 -0.0000 0.0012 0.0058  
Y 0.0137 -0.0053 0.0026 -0.0112 0.0039 -0.0156  
Z -0.0062 0.0069 -0.0003 0.0370 -0.0185 0.0256  
AT. 149 H X 0.0006 -0.0033 -0.0013 0.0138 -0.0072 -0.0105  
Y -0.0077 -0.0043 0.0041 0.0158 -0.0087 -0.0239  
Z 0.0085 0.0053 0.0011 -0.0245 0.0104 0.0088  
AT. 150 H X -0.0006 -0.0033 -0.0013 -0.0138 0.0072 -0.0105  
Y 0.0077 -0.0043 0.0041 -0.0158 0.0087 -0.0239  
Z -0.0085 0.0053 0.0011 0.0245 -0.0104 0.0088  
AT. 151 C X 0.0019 0.0002 -0.0015 0.0041 -0.0023 0.0025  
Y -0.0029 -0.0044 0.0038 0.0091 -0.0044 -0.0120  
Z 0.0021 -0.0001 0.0000 -0.0079 0.0054 0.0021  
AT. 152 C X -0.0019 0.0002 -0.0015 -0.0041 0.0023 0.0025  
Y 0.0029 -0.0044 0.0038 -0.0091 0.0044 -0.0120  
Z -0.0021 -0.0001 0.0000 0.0079 -0.0054 0.0021  
AT. 153 H X -0.0003 0.0004 -0.0021 0.0078 -0.0028 0.0031  
Y -0.0019 -0.0055 0.0040 0.0114 -0.0043 -0.0171  
Z 0.0040 -0.0019 0.0008 -0.0058 0.0059 -0.0060  
AT. 154 H X 0.0003 0.0004 -0.0021 -0.0078 0.0028 0.0031  
Y 0.0019 -0.0055 0.0040 -0.0114 0.0043 -0.0171  
Z -0.0040 -0.0019 0.0008 0.0058 -0.0059 -0.0060  
AT. 155 H X 0.0011 -0.0007 -0.0013 0.0055 -0.0034 0.0011  
Y -0.0018 -0.0062 0.0048 0.0107 -0.0045 -0.0188  
Z 0.0006 0.0015 -0.0008 -0.0090 0.0051 0.0084  
AT. 156 H X -0.0011 -0.0007 -0.0013 -0.0055 0.0034 0.0011  
Y 0.0018 -0.0062 0.0048 -0.0107 0.0045 -0.0188  
Z -0.0006 0.0015 -0.0008 0.0090 -0.0051 0.0084  
AT. 157 O X -0.0079 0.0040 0.0049 -0.0026 -0.0053 -0.0007  
Y 0.0025 0.0163 -0.0120 0.0052 0.0047 -0.0013  
Z 0.0194 -0.0066 -0.0038 0.0157 0.0207 -0.0003

AT.158 O X 0.0079 0.0040 0.0049 0.0026 0.0053 -0.0007  
Y -0.0025 0.0163 -0.0120 -0.0052 -0.0047 -0.0013  
Z -0.0194 -0.0066 -0.0038 -0.0157 -0.0207 -0.0003

AT.159 O X -0.0274 0.0236 0.0115 -0.0026 -0.0036 -0.0009  
Y 0.0532 -0.0349 -0.0561 0.0227 0.0404 -0.0056  
Z -0.0046 0.0178 -0.0019 0.0201 0.0322 -0.0021

AT.160 O X 0.0274 0.0236 0.0115 0.0026 0.0036 -0.0009  
Y -0.0532 -0.0349 -0.0561 -0.0227 -0.0404 -0.0056  
Z 0.0046 0.0178 -0.0019 -0.0201 -0.0322 -0.0021

AT.161 H X -0.0305 0.0312 0.0163 -0.0085 -0.0200 -0.0012  
Y -0.0007 0.0221 -0.0060 0.0036 0.0011 -0.0003  
Z 0.0183 -0.0097 -0.0153 0.0194 0.0256 -0.0044

AT.162 H X 0.0305 0.0312 0.0163 0.0085 0.0200 -0.0012  
Y 0.0007 0.0221 -0.0060 -0.0036 -0.0011 -0.0003  
Z -0.0183 -0.0097 -0.0153 -0.0194 -0.0256 -0.0044

AT.163 H X -0.0495 0.0479 0.0208 0.0014 0.0039 -0.0016  
Y 0.0190 -0.0061 -0.0330 0.0154 0.0278 -0.0088  
Z -0.0052 0.0163 0.0003 0.0175 0.0279 -0.0023

AT.164 H X 0.0495 0.0479 0.0208 -0.0014 -0.0039 -0.0016  
Y -0.0190 -0.0061 -0.0330 -0.0154 -0.0278 -0.0088  
Z 0.0052 0.0163 0.0003 -0.0175 -0.0279 -0.0023

AT.165 O X 0.0242 -0.0053 0.0083 -0.0297 0.0165 -0.0486  
Y -0.0116 0.0174 -0.0214 0.0711 -0.0489 0.0619  
Z 0.0000 -0.0087 0.0070 -0.0322 0.0231 -0.0296

AT.166 O X -0.0242 -0.0053 0.0083 0.0297 -0.0165 -0.0486  
Y 0.0116 0.0174 -0.0214 -0.0711 0.0489 0.0619  
Z -0.0000 -0.0087 0.0070 0.0322 -0.0231 -0.0296

AT.167 H X 0.0323 -0.0011 0.0072 -0.0215 0.0097 -0.0482  
Y -0.0135 0.0088 -0.0139 0.0409 -0.0279 0.0374  
Z -0.0192 -0.0075 -0.0015 -0.0094 0.0099 0.0050

AT.168 H X -0.0323 -0.0011 0.0072 0.0215 -0.0097 -0.0482  
Y 0.0135 0.0088 -0.0139 -0.0409 0.0279 0.0374

Z 0.0192 -0.0075 -0.0015 0.0094 -0.0099 0.0050  
AT. 169 O X -0.0067 -0.0025 -0.0111 0.0197 -0.0145 0.0248  
Y -0.0346 0.0024 -0.0032 0.0180 -0.0064 0.0114  
Z -0.0016 -0.0047 -0.0011 -0.0099 0.0072 -0.0028  
AT. 170 O X 0.0067 -0.0025 -0.0111 -0.0197 0.0145 0.0248  
Y 0.0346 0.0024 -0.0032 -0.0180 0.0064 0.0114  
Z 0.0016 -0.0047 -0.0011 0.0099 -0.0072 -0.0028  
AT. 171 H X 0.0130 0.0028 -0.0144 0.0376 -0.0289 0.0463  
Y -0.0263 0.0006 0.0028 0.0063 0.0017 -0.0018  
Z -0.0010 -0.0127 0.0116 -0.0458 0.0333 -0.0428  
AT. 172 H X -0.0130 0.0028 -0.0144 -0.0376 0.0289 0.0463  
Y 0.0263 0.0006 0.0028 -0.0063 -0.0017 -0.0018  
Z 0.0010 -0.0127 0.0116 0.0458 -0.0333 -0.0428

FREQ(CM\*\*-1) 192.00 201.75 204.67 210.28 219.63 220.68

AT. 1 I X 0.0000 0.0003 0.0009 0.0001 0.0004 -0.0015  
Y 0.0004 0.0000 -0.0007 0.0003 -0.0002 -0.0007  
Z -0.0001 0.0001 -0.0002 0.0009 0.0005 -0.0014  
AT. 2 I X 0.0000 -0.0003 -0.0009 0.0001 -0.0004 -0.0015  
Y 0.0004 -0.0000 0.0007 0.0003 0.0002 -0.0007  
Z -0.0001 -0.0001 0.0002 0.0009 -0.0005 -0.0014  
AT. 3 I X 0.0001 -0.0006 -0.0015 0.0014 -0.0001 0.0020  
Y -0.0001 -0.0006 -0.0020 0.0019 0.0004 0.0000  
Z -0.0001 -0.0004 -0.0008 0.0005 0.0001 0.0003  
AT. 4 I X 0.0001 0.0006 0.0015 0.0014 0.0001 0.0020  
Y -0.0001 0.0006 0.0020 0.0019 -0.0004 0.0000  
Z -0.0001 0.0004 0.0008 0.0005 -0.0001 0.0003  
AT. 5 O X -0.0066 -0.0101 -0.0195 0.0139 0.0008 0.0050  
Y -0.0001 -0.0012 -0.0041 -0.0106 -0.0001 0.0038  
Z -0.0033 -0.0085 -0.0162 0.0165 0.0001 0.0045  
AT. 6 O X -0.0066 0.0101 0.0195 0.0139 -0.0008 0.0050

Y -0.0001 0.0012 0.0041 -0.0106 0.0001 0.0038  
Z -0.0033 0.0085 0.0162 0.0165 -0.0001 0.0045  
AT. 7 O X 0.0012 -0.0100 -0.0261 0.0264 -0.0034 -0.0271  
Y 0.0017 -0.0037 -0.0086 0.0085 -0.0053 -0.0268  
Z 0.0020 0.0105 0.0265 -0.0286 -0.0037 -0.0065  
AT. 8 O X 0.0012 0.0100 0.0261 0.0264 0.0034 -0.0271  
Y 0.0017 0.0037 0.0086 0.0085 0.0053 -0.0268  
Z 0.0020 -0.0105 -0.0265 -0.0286 0.0037 -0.0065  
AT. 9 N X 0.0016 0.0064 0.0129 -0.0142 -0.0007 -0.0065  
Y -0.0023 -0.0022 -0.0067 0.0067 0.0028 0.0025  
Z -0.0001 -0.0024 -0.0033 0.0030 -0.0009 0.0006  
AT. 10 N X 0.0016 -0.0064 -0.0129 -0.0142 0.0007 -0.0065  
Y -0.0023 0.0022 0.0067 0.0067 -0.0028 0.0025  
Z -0.0001 0.0024 0.0033 0.0030 0.0009 0.0006  
AT. 11 N X 0.0005 0.0095 0.0208 -0.0230 -0.0007 -0.0071  
Y -0.0004 -0.0021 -0.0086 0.0087 0.0024 0.0004  
Z 0.0006 0.0011 0.0004 -0.0008 0.0004 -0.0027  
AT. 12 N X 0.0005 -0.0095 -0.0208 -0.0230 0.0007 -0.0071  
Y -0.0004 0.0021 0.0086 0.0087 -0.0024 0.0004  
Z 0.0006 -0.0011 -0.0004 -0.0008 -0.0004 -0.0027  
AT. 13 C X -0.0025 -0.0021 -0.0019 0.0007 0.0001 -0.0017  
Y -0.0004 -0.0007 -0.0034 -0.0034 0.0012 0.0026  
Z 0.0006 -0.0009 -0.0017 0.0002 -0.0013 -0.0001  
AT. 14 C X -0.0025 0.0021 0.0019 0.0007 -0.0001 -0.0017  
Y -0.0004 0.0007 0.0034 -0.0034 -0.0012 0.0026  
Z 0.0006 0.0009 0.0017 0.0002 0.0013 -0.0001  
AT. 15 C X -0.0027 -0.0030 -0.0058 0.0097 0.0005 -0.0010  
Y 0.0022 0.0024 0.0047 -0.0091 0.0004 0.0003  
Z 0.0062 0.0073 0.0185 -0.0255 -0.0033 -0.0060  
AT. 16 C X -0.0027 0.0030 0.0058 0.0097 -0.0005 -0.0010  
Y 0.0022 -0.0024 -0.0047 -0.0091 -0.0004 0.0003  
Z 0.0062 -0.0073 -0.0185 -0.0255 0.0033 -0.0060

AT. 17 H X -0.0042 -0.0046 -0.0093 0.0169 0.0009 -0.0010  
Y -0.0019 -0.0027 -0.0079 0.0087 0.0017 0.0023  
Z 0.0108 0.0131 0.0331 -0.0456 -0.0049 -0.0087

AT. 18 H X -0.0042 0.0046 0.0093 0.0169 -0.0009 -0.0010  
Y -0.0019 0.0027 0.0079 0.0087 -0.0017 0.0023  
Z 0.0108 -0.0131 -0.0331 -0.0456 0.0049 -0.0087

AT. 19 H X -0.0033 -0.0043 -0.0092 0.0146 0.0002 0.0013  
Y 0.0080 0.0102 0.0241 -0.0363 -0.0015 -0.0009  
Z 0.0082 0.0097 0.0249 -0.0340 -0.0042 -0.0058

AT. 20 H X -0.0033 0.0043 0.0092 0.0146 -0.0002 0.0013  
Y 0.0080 -0.0102 -0.0241 -0.0363 0.0015 -0.0009  
Z 0.0082 -0.0097 -0.0249 -0.0340 0.0042 -0.0058

AT. 21 C X 0.0003 -0.0011 -0.0036 0.0030 -0.0010 -0.0097  
Y 0.0006 0.0016 0.0043 -0.0047 -0.0018 -0.0099  
Z 0.0007 0.0023 0.0055 -0.0064 -0.0014 -0.0042

AT. 22 C X 0.0003 0.0011 0.0036 0.0030 0.0010 -0.0097  
Y 0.0006 -0.0016 -0.0043 -0.0047 0.0018 -0.0099  
Z 0.0007 -0.0023 -0.0055 -0.0064 0.0014 -0.0042

AT. 23 C X -0.0004 -0.0046 -0.0126 0.0127 0.0007 -0.0018  
Y 0.0006 0.0167 0.0441 -0.0463 -0.0024 0.0064  
Z -0.0001 -0.0068 -0.0173 0.0180 0.0005 -0.0022

AT. 24 C X -0.0004 0.0046 0.0126 0.0127 -0.0007 -0.0018  
Y 0.0006 -0.0167 -0.0441 -0.0463 0.0024 0.0064  
Z -0.0001 0.0068 0.0173 0.0180 -0.0005 -0.0022

AT. 25 H X -0.0006 -0.0089 -0.0247 0.0255 0.0017 -0.0007  
Y 0.0006 0.0182 0.0483 -0.0504 -0.0026 0.0075  
Z -0.0006 -0.0259 -0.0668 0.0671 0.0030 -0.0105

AT. 26 H X -0.0006 0.0089 0.0247 0.0255 -0.0017 -0.0007  
Y 0.0006 -0.0182 -0.0483 -0.0504 0.0026 0.0075  
Z -0.0006 0.0259 0.0668 0.0671 -0.0030 -0.0105

AT. 27 H X -0.0009 -0.0060 -0.0155 0.0173 0.0013 0.0015  
Y 0.0012 0.0343 0.0907 -0.0938 -0.0058 0.0095

Z 0.0003 0.0019 0.0061 -0.0058 -0.0014 -0.0019  
AT. 28 H X -0.0009 0.0060 0.0155 0.0173 -0.0013 0.0015  
Y 0.0012 -0.0343 -0.0907 -0.0938 0.0058 0.0095  
Z 0.0003 -0.0019 -0.0061 -0.0058 0.0014 -0.0019  
AT. 29 C X 0.0029 0.0055 0.0103 -0.0133 -0.0012 -0.0052  
Y -0.0012 -0.0030 -0.0099 0.0088 0.0021 0.0045  
Z -0.0008 -0.0011 0.0006 0.0018 -0.0007 0.0011  
AT. 30 C X 0.0029 -0.0055 -0.0103 -0.0133 0.0012 -0.0052  
Y -0.0012 0.0030 0.0099 0.0088 -0.0021 0.0045  
Z -0.0008 0.0011 -0.0006 0.0018 0.0007 0.0011  
AT. 31 H X 0.0045 0.0045 0.0059 -0.0107 -0.0018 -0.0041  
Y -0.0033 -0.0057 -0.0133 0.0149 0.0030 0.0081  
Z -0.0029 -0.0055 -0.0073 0.0125 0.0003 0.0071  
AT. 32 H X 0.0045 -0.0045 -0.0059 -0.0107 0.0018 -0.0041  
Y -0.0033 0.0057 0.0133 0.0149 -0.0030 0.0081  
Z -0.0029 0.0055 0.0073 0.0125 -0.0003 0.0071  
AT. 33 H X 0.0047 0.0103 0.0180 -0.0218 -0.0018 -0.0090  
Y 0.0017 0.0004 -0.0046 -0.0007 0.0009 -0.0004  
Z -0.0011 0.0003 0.0030 0.0008 -0.0005 0.0008  
AT. 34 H X 0.0047 -0.0103 -0.0180 -0.0218 0.0018 -0.0090  
Y 0.0017 -0.0004 0.0046 -0.0007 -0.0009 -0.0004  
Z -0.0011 -0.0003 -0.0030 0.0008 0.0005 0.0008  
AT. 35 C X 0.0001 0.0008 0.0027 -0.0035 -0.0005 -0.0007  
Y -0.0001 -0.0026 -0.0086 0.0083 0.0021 0.0069  
Z 0.0015 0.0040 0.0093 -0.0097 -0.0016 -0.0052  
AT. 36 C X 0.0001 -0.0008 -0.0027 -0.0035 0.0005 -0.0007  
Y -0.0001 0.0026 0.0086 0.0083 -0.0021 0.0069  
Z 0.0015 -0.0040 -0.0093 -0.0097 0.0016 -0.0052  
AT. 37 C X -0.0001 0.0063 0.0158 -0.0178 -0.0014 -0.0043  
Y -0.0019 -0.0103 -0.0243 0.0253 0.0019 0.0063  
Z -0.0013 -0.0061 -0.0122 0.0127 -0.0015 -0.0049  
AT. 38 C X -0.0001 -0.0063 -0.0158 -0.0178 0.0014 -0.0043



Y -0.0019 0.0103 0.0243 0.0253 -0.0019 0.0063  
Z -0.0013 0.0061 0.0122 0.0127 0.0015 -0.0049  
AT. 39 H X -0.0035 -0.0078 -0.0118 0.0118 -0.0030 -0.0052  
Y -0.0042 -0.0195 -0.0428 0.0453 0.0016 0.0079  
Z -0.0027 -0.0124 -0.0245 0.0258 -0.0023 -0.0062  
AT. 40 H X -0.0035 0.0078 0.0118 0.0118 0.0030 -0.0052  
Y -0.0042 0.0195 0.0428 0.0453 -0.0016 0.0079  
Z -0.0027 0.0124 0.0245 0.0258 0.0023 -0.0062  
AT. 41 H X 0.0044 0.0204 0.0404 -0.0446 0.0020 -0.0042  
Y -0.0033 -0.0153 -0.0314 0.0330 0.0000 0.0079  
Z -0.0048 -0.0168 -0.0316 0.0340 -0.0033 -0.0063  
AT. 42 H X 0.0044 -0.0204 -0.0404 -0.0446 -0.0020 -0.0042  
Y -0.0033 0.0153 0.0314 0.0330 -0.0000 0.0079  
Z -0.0048 0.0168 0.0316 0.0340 0.0033 -0.0063  
AT. 43 C X 0.0002 0.0122 0.0301 -0.0303 -0.0034 -0.0118  
Y -0.0007 -0.0016 -0.0053 0.0062 0.0014 0.0003  
Z 0.0007 0.0029 0.0061 -0.0048 -0.0012 -0.0060  
AT. 44 C X 0.0002 -0.0122 -0.0301 -0.0303 0.0034 -0.0118  
Y -0.0007 0.0016 0.0053 0.0062 -0.0014 0.0003  
Z 0.0007 -0.0029 -0.0061 -0.0048 0.0012 -0.0060  
AT. 45 H X 0.0002 0.0169 0.0430 -0.0415 -0.0066 -0.0150  
Y -0.0018 -0.0108 -0.0263 0.0262 0.0048 0.0079  
Z 0.0022 0.0088 0.0169 -0.0159 -0.0021 -0.0110  
AT. 46 H X 0.0002 -0.0169 -0.0430 -0.0415 0.0066 -0.0150  
Y -0.0018 0.0108 0.0263 0.0262 -0.0048 0.0079  
Z 0.0022 -0.0088 -0.0169 -0.0159 0.0021 -0.0110  
AT. 47 H X 0.0015 0.0187 0.0432 -0.0441 -0.0042 -0.0154  
Y 0.0008 0.0088 0.0182 -0.0166 -0.0016 -0.0083  
Z 0.0006 0.0054 0.0141 -0.0112 -0.0031 -0.0098  
AT. 48 H X 0.0015 -0.0187 -0.0432 -0.0441 0.0042 -0.0154  
Y 0.0008 -0.0088 -0.0182 -0.0166 0.0016 -0.0083  
Z 0.0006 -0.0054 -0.0141 -0.0112 0.0031 -0.0098

AT. 49 C X -0.0012 0.0014 0.0065 -0.0060 -0.0014 -0.0044  
Y -0.0009 0.0010 0.0028 -0.0030 0.0008 0.0011  
Z -0.0007 -0.0044 -0.0082 0.0085 -0.0001 0.0000

AT. 50 C X -0.0012 -0.0014 -0.0065 -0.0060 0.0014 -0.0044  
Y -0.0009 -0.0010 -0.0028 -0.0030 -0.0008 0.0011  
Z -0.0007 0.0044 0.0082 0.0085 0.0001 0.0000

AT. 51 C X 0.0015 0.0064 0.0143 -0.0155 -0.0018 -0.0070  
Y -0.0037 -0.0044 -0.0061 0.0110 0.0013 0.0019  
Z 0.0001 -0.0026 -0.0043 0.0013 -0.0005 0.0010

AT. 52 C X 0.0015 -0.0064 -0.0143 -0.0155 0.0018 -0.0070  
Y -0.0037 0.0044 0.0061 0.0110 -0.0013 0.0019  
Z 0.0001 0.0026 0.0043 0.0013 0.0005 0.0010

AT. 53 H X -0.0012 0.0012 0.0065 -0.0020 -0.0014 -0.0055  
Y -0.0074 -0.0114 -0.0174 0.0284 0.0020 0.0043  
Z 0.0009 -0.0009 -0.0026 -0.0034 -0.0005 0.0008

AT. 54 H X -0.0012 -0.0012 -0.0065 -0.0020 0.0014 -0.0055  
Y -0.0074 0.0114 0.0174 0.0284 -0.0020 0.0043  
Z 0.0009 0.0009 0.0026 -0.0034 0.0005 0.0008

AT. 55 H X 0.0047 0.0126 0.0230 -0.0318 -0.0020 -0.0080  
Y -0.0038 -0.0057 -0.0056 0.0128 -0.0000 0.0020  
Z 0.0019 0.0007 0.0028 -0.0081 -0.0017 0.0001

AT. 56 H X 0.0047 -0.0126 -0.0230 -0.0318 0.0020 -0.0080  
Y -0.0038 0.0057 0.0056 0.0128 0.0000 0.0020  
Z 0.0019 -0.0007 -0.0028 -0.0081 0.0017 0.0001

AT. 57 C X -0.0001 -0.0071 -0.0171 0.0179 0.0019 0.0086  
Y 0.0029 -0.0008 -0.0090 0.0096 0.0044 0.0130  
Z 0.0067 0.0233 0.0503 -0.0533 -0.0035 -0.0161

AT. 58 C X -0.0001 0.0071 0.0171 0.0179 -0.0019 0.0086  
Y 0.0029 0.0008 0.0090 0.0096 -0.0044 0.0130  
Z 0.0067 -0.0233 -0.0503 -0.0533 0.0035 -0.0161

AT. 59 H X -0.0009 -0.0166 -0.0413 0.0438 0.0050 0.0210  
Y 0.0033 0.0034 0.0014 -0.0008 0.0025 0.0105

Z 0.0066 0.0224 0.0485 -0.0499 -0.0042 -0.0110  
AT. 60 H X -0.0009 0.0166 0.0413 0.0438 -0.0050 0.0210  
Y 0.0033 -0.0034 -0.0014 -0.0008 -0.0025 0.0105  
Z 0.0066 -0.0224 -0.0485 -0.0499 0.0042 -0.0110  
AT. 61 H X 0.0039 0.0053 0.0079 -0.0083 0.0025 0.0014  
Y 0.0025 -0.0067 -0.0240 0.0249 0.0073 0.0170  
Z 0.0100 0.0360 0.0775 -0.0817 -0.0044 -0.0238  
AT. 62 H X 0.0039 -0.0053 -0.0079 -0.0083 -0.0025 0.0014  
Y 0.0025 0.0067 0.0240 0.0249 -0.0073 0.0170  
Z 0.0100 -0.0360 -0.0775 -0.0817 0.0044 -0.0238  
AT. 63 H X -0.0043 -0.0178 -0.0368 0.0385 0.0007 0.0130  
Y 0.0058 0.0035 -0.0035 0.0050 0.0055 0.0175  
Z 0.0081 0.0294 0.0639 -0.0682 -0.0032 -0.0240  
AT. 64 H X -0.0043 0.0178 0.0368 0.0385 -0.0007 0.0130  
Y 0.0058 -0.0035 0.0035 0.0050 -0.0055 0.0175  
Z 0.0081 -0.0294 -0.0639 -0.0682 0.0032 -0.0240  
AT. 65 C X -0.0057 -0.0095 -0.0176 0.0192 0.0017 0.0014  
Y -0.0018 0.0088 0.0235 -0.0277 -0.0012 0.0004  
Z -0.0040 -0.0180 -0.0399 0.0424 0.0036 0.0053  
AT. 66 C X -0.0057 0.0095 0.0176 0.0192 -0.0017 0.0014  
Y -0.0018 -0.0088 -0.0235 -0.0277 0.0012 0.0004  
Z -0.0040 0.0180 0.0399 0.0424 -0.0036 0.0053  
AT. 67 H X -0.0096 -0.0197 -0.0390 0.0427 0.0041 0.0063  
Y -0.0015 0.0198 0.0457 -0.0559 -0.0028 -0.0025  
Z -0.0010 -0.0196 -0.0424 0.0482 0.0030 0.0038  
AT. 68 H X -0.0096 0.0197 0.0390 0.0427 -0.0041 0.0063  
Y -0.0015 -0.0198 -0.0457 -0.0559 0.0028 -0.0025  
Z -0.0010 0.0196 0.0424 0.0482 -0.0030 0.0038  
AT. 69 H X -0.0044 -0.0078 -0.0103 0.0129 0.0004 0.0003  
Y -0.0023 0.0005 0.0083 -0.0082 -0.0001 0.0030  
Z -0.0072 -0.0337 -0.0777 0.0845 0.0081 0.0113  
AT. 70 H X -0.0044 0.0078 0.0103 0.0129 -0.0004 0.0003

Y -0.0023 -0.0005 -0.0083 -0.0082 0.0001 0.0030  
Z -0.0072 0.0337 0.0777 0.0845 -0.0081 0.0113  
AT. 71 H X -0.0078 -0.0127 -0.0284 0.0292 0.0034 0.0032  
Y -0.0027 0.0144 0.0365 -0.0441 -0.0022 -0.0003  
Z -0.0070 -0.0126 -0.0300 0.0270 0.0037 0.0055  
AT. 72 H X -0.0078 0.0127 0.0284 0.0292 -0.0034 0.0032  
Y -0.0027 -0.0144 -0.0365 -0.0441 0.0022 -0.0003  
Z -0.0070 0.0126 0.0300 0.0270 -0.0037 0.0055  
AT. 73 C X -0.0014 -0.0018 -0.0022 0.0022 -0.0004 0.0019  
Y 0.0004 0.0027 0.0039 -0.0058 0.0012 0.0062  
Z 0.0005 0.0008 0.0031 -0.0028 -0.0015 -0.0030  
AT. 74 C X -0.0014 0.0018 0.0022 0.0022 0.0004 0.0019  
Y 0.0004 -0.0027 -0.0039 -0.0058 -0.0012 0.0062  
Z 0.0005 -0.0008 -0.0031 -0.0028 0.0015 -0.0030  
AT. 75 H X -0.0012 -0.0018 -0.0040 0.0040 0.0006 0.0075  
Y 0.0004 0.0036 0.0069 -0.0096 0.0004 0.0061  
Z 0.0004 0.0022 0.0060 -0.0063 -0.0017 0.0009  
AT. 76 H X -0.0012 0.0018 0.0040 0.0040 -0.0006 0.0075  
Y 0.0004 -0.0036 -0.0069 -0.0096 -0.0004 0.0061  
Z 0.0004 -0.0022 -0.0060 -0.0063 0.0017 0.0009  
AT. 77 H X -0.0016 -0.0013 -0.0001 0.0003 -0.0007 0.0017  
Y 0.0007 0.0032 0.0046 -0.0072 0.0007 0.0107  
Z 0.0004 -0.0000 0.0009 0.0003 -0.0008 -0.0069  
AT. 78 H X -0.0016 0.0013 0.0001 0.0003 0.0007 0.0017  
Y 0.0007 -0.0032 -0.0046 -0.0072 -0.0007 0.0107  
Z 0.0004 0.0000 -0.0009 0.0003 0.0008 -0.0069  
AT. 79 I X 0.0016 0.0018 0.0003 -0.0001 0.0007 -0.0007  
Y -0.0024 0.0010 -0.0000 -0.0005 0.0004 -0.0003  
Z 0.0020 -0.0027 0.0008 0.0000 -0.0000 0.0001  
AT. 80 I X 0.0016 -0.0018 -0.0003 -0.0001 -0.0007 -0.0007  
Y -0.0024 -0.0010 0.0000 -0.0005 -0.0004 -0.0003  
Z 0.0020 0.0027 -0.0008 0.0000 0.0000 0.0001

AT. 81 I X 0.0024 0.0027 -0.0012 0.0000 0.0023 0.0002  
Y -0.0024 -0.0024 0.0008 -0.0001 -0.0014 -0.0002  
Z -0.0004 0.0002 0.0001 -0.0002 0.0001 -0.0001

AT. 82 I X 0.0024 -0.0027 0.0012 0.0000 -0.0023 0.0002  
Y -0.0024 0.0024 -0.0008 -0.0001 0.0014 -0.0002  
Z -0.0004 -0.0002 -0.0001 -0.0002 -0.0001 -0.0001

AT. 83 O X 0.0152 0.0142 -0.0067 0.0017 -0.0046 0.0003  
Y -0.0097 0.0129 -0.0043 -0.0001 0.0126 -0.0015  
Z -0.0205 -0.0203 0.0089 -0.0019 0.0080 -0.0014

AT. 84 O X 0.0152 -0.0142 0.0067 0.0017 0.0046 0.0003  
Y -0.0097 -0.0129 0.0043 -0.0001 -0.0126 -0.0015  
Z -0.0205 0.0203 -0.0089 -0.0019 -0.0080 -0.0014

AT. 85 O X 0.0072 0.0037 -0.0047 0.0032 -0.0308 -0.0010  
Y 0.0148 0.0142 -0.0047 -0.0006 0.0285 0.0040  
Z 0.0378 0.0333 -0.0148 0.0022 0.0096 0.0021

AT. 86 O X 0.0072 -0.0037 0.0047 0.0032 0.0308 -0.0010  
Y 0.0148 -0.0142 0.0047 -0.0006 -0.0285 0.0040  
Z 0.0378 -0.0333 0.0148 0.0022 -0.0096 0.0021

AT. 87 N X -0.0156 -0.0113 0.0054 -0.0011 0.0126 0.0000  
Y -0.0043 -0.0024 0.0013 -0.0001 0.0031 0.0001  
Z -0.0020 -0.0016 0.0002 -0.0002 0.0001 -0.0009

AT. 88 N X -0.0156 0.0113 -0.0054 -0.0011 -0.0126 0.0000  
Y -0.0043 0.0024 -0.0013 -0.0001 -0.0031 0.0001  
Z -0.0020 0.0016 -0.0002 -0.0002 -0.0001 -0.0009

AT. 89 N X -0.0224 -0.0187 0.0083 -0.0016 0.0094 0.0009  
Y -0.0006 -0.0038 0.0013 0.0002 -0.0022 -0.0010  
Z 0.0005 -0.0016 0.0003 0.0002 -0.0021 -0.0019

AT. 90 N X -0.0224 0.0187 -0.0083 -0.0016 -0.0094 0.0009  
Y -0.0006 0.0038 -0.0013 0.0002 0.0022 -0.0010  
Z 0.0005 0.0016 -0.0003 0.0002 0.0021 -0.0019

AT. 91 C X 0.0017 0.0028 -0.0011 0.0005 0.0025 -0.0001  
Y -0.0043 0.0083 -0.0033 0.0001 0.0074 -0.0011

Z -0.0015 -0.0013 0.0001 -0.0001 -0.0006 -0.0011  
AT. 92 C X 0.0017 -0.0028 0.0011 0.0005 -0.0025 -0.0001  
Y -0.0043 -0.0083 0.0033 0.0001 -0.0074 -0.0011  
Z -0.0015 0.0013 -0.0001 -0.0001 0.0006 -0.0011  
AT. 93 C X 0.0096 0.0162 -0.0069 0.0013 0.0019 -0.0010  
Y 0.0028 0.0135 -0.0063 0.0007 0.0033 -0.0008  
Z 0.0182 0.0179 -0.0086 0.0019 -0.0060 -0.0015  
AT. 94 C X 0.0096 -0.0162 0.0069 0.0013 -0.0019 -0.0010  
Y 0.0028 -0.0135 0.0063 0.0007 -0.0033 -0.0008  
Z 0.0182 -0.0179 0.0086 0.0019 0.0060 -0.0015  
AT. 95 H X 0.0102 0.0289 -0.0126 0.0018 0.0043 -0.0045  
Y -0.0069 -0.0055 0.0021 -0.0007 0.0030 0.0015  
Z 0.0339 0.0387 -0.0177 0.0036 -0.0075 -0.0020  
AT. 96 H X 0.0102 -0.0289 0.0126 0.0018 -0.0043 -0.0045  
Y -0.0069 0.0055 -0.0021 -0.0007 -0.0030 0.0015  
Z 0.0339 -0.0387 0.0177 0.0036 0.0075 -0.0020  
AT. 97 H X 0.0179 0.0247 -0.0105 0.0023 0.0018 -0.0014  
Y 0.0209 0.0411 -0.0186 0.0030 0.0006 -0.0028  
Z 0.0199 0.0218 -0.0104 0.0021 -0.0066 -0.0019  
AT. 98 H X 0.0179 -0.0247 0.0105 0.0023 -0.0018 -0.0014  
Y 0.0209 -0.0411 0.0186 0.0030 -0.0006 -0.0028  
Z 0.0199 -0.0218 0.0104 0.0021 0.0066 -0.0019  
AT. 99 C X -0.0043 -0.0050 0.0005 0.0012 -0.0137 -0.0002  
Y 0.0122 0.0094 -0.0045 0.0010 0.0036 0.0016  
Z 0.0081 0.0065 -0.0030 0.0004 0.0050 -0.0003  
AT. 100 C X -0.0043 0.0050 -0.0005 0.0012 0.0137 -0.0002  
Y 0.0122 -0.0094 0.0045 0.0010 -0.0036 0.0016  
Z 0.0081 -0.0065 0.0030 0.0004 -0.0050 -0.0003  
AT. 101 C X 0.0137 0.0099 -0.0064 0.0026 -0.0150 0.0004  
Y 0.0248 0.0192 -0.0114 0.0039 -0.0245 0.0009  
Z -0.0151 -0.0131 0.0066 -0.0017 0.0123 -0.0009  
AT. 102 C X 0.0137 -0.0099 0.0064 0.0026 0.0150 0.0004

Y 0.0248 -0.0192 0.0114 0.0039 0.0245 0.0009  
Z -0.0151 0.0131 -0.0066 -0.0017 -0.0123 -0.0009  
AT. 103 H X 0.0208 0.0169 -0.0100 0.0033 -0.0150 0.0012  
Y 0.0224 0.0165 -0.0101 0.0037 -0.0250 0.0005  
Z -0.0392 -0.0320 0.0180 -0.0055 0.0400 -0.0005  
AT. 104 H X 0.0208 -0.0169 0.0100 0.0033 0.0150 0.0012  
Y 0.0224 -0.0165 0.0101 0.0037 0.0250 0.0005  
Z -0.0392 0.0320 -0.0180 -0.0055 -0.0400 -0.0005  
AT. 105 H X 0.0224 0.0150 -0.0096 0.0037 -0.0224 0.0000  
Y 0.0470 0.0371 -0.0217 0.0072 -0.0459 0.0010  
Z -0.0048 -0.0053 0.0021 -0.0002 0.0023 -0.0009  
AT. 106 H X 0.0224 -0.0150 0.0096 0.0037 0.0224 0.0000  
Y 0.0470 -0.0371 0.0217 0.0072 0.0459 0.0010  
Z -0.0048 0.0053 -0.0021 -0.0002 -0.0023 -0.0009  
AT. 107 C X -0.0155 -0.0142 0.0064 -0.0009 0.0086 -0.0009  
Y -0.0051 -0.0012 0.0012 -0.0009 0.0115 0.0008  
Z -0.0014 -0.0033 0.0007 0.0002 -0.0060 -0.0013  
AT. 108 C X -0.0155 0.0142 -0.0064 -0.0009 -0.0086 -0.0009  
Y -0.0051 0.0012 -0.0012 -0.0009 -0.0115 0.0008  
Z -0.0014 0.0033 -0.0007 0.0002 0.0060 -0.0013  
AT. 109 H X -0.0179 -0.0195 0.0084 -0.0004 -0.0010 -0.0022  
Y -0.0092 -0.0072 0.0038 -0.0011 0.0095 -0.0003  
Z -0.0079 -0.0124 0.0046 -0.0002 -0.0061 -0.0027  
AT. 110 H X -0.0179 0.0195 -0.0084 -0.0004 0.0010 -0.0022  
Y -0.0092 0.0072 -0.0038 -0.0011 -0.0095 -0.0003  
Z -0.0079 0.0124 -0.0046 -0.0002 0.0061 -0.0027  
AT. 111 H X -0.0188 -0.0166 0.0076 -0.0011 0.0113 -0.0007  
Y 0.0023 0.0108 -0.0037 -0.0008 0.0177 0.0028  
Z -0.0000 -0.0039 0.0008 0.0004 -0.0098 -0.0020  
AT. 112 H X -0.0188 0.0166 -0.0076 -0.0011 -0.0113 -0.0007  
Y 0.0023 -0.0108 0.0037 -0.0008 -0.0177 0.0028  
Z -0.0000 0.0039 -0.0008 0.0004 0.0098 -0.0020

AT. 113 C X -0.0063 -0.0050 0.0022 -0.0004 0.0037 0.0008  
Y -0.0048 -0.0027 0.0013 -0.0006 0.0064 0.0003  
Z 0.0043 0.0045 -0.0022 0.0004 -0.0041 -0.0001

AT. 114 C X -0.0063 0.0050 -0.0022 -0.0004 -0.0037 0.0008  
Y -0.0048 0.0027 -0.0013 -0.0006 -0.0064 0.0003  
Z 0.0043 -0.0045 0.0022 0.0004 0.0041 -0.0001

AT. 115 C X -0.0226 -0.0195 0.0090 -0.0020 0.0132 0.0014  
Y -0.0143 -0.0118 0.0061 -0.0018 0.0163 0.0007  
Z -0.0100 -0.0080 0.0050 -0.0019 0.0173 0.0003

AT. 116 C X -0.0226 0.0195 -0.0090 -0.0020 -0.0132 0.0014  
Y -0.0143 0.0118 -0.0061 -0.0018 -0.0163 0.0007  
Z -0.0100 0.0080 -0.0050 -0.0019 -0.0173 0.0003

AT. 117 H X -0.0076 -0.0078 0.0017 0.0006 -0.0094 -0.0004  
Y -0.0364 -0.0300 0.0166 -0.0050 0.0437 0.0016  
Z -0.0212 -0.0168 0.0106 -0.0039 0.0348 0.0019

AT. 118 H X -0.0076 0.0078 -0.0017 0.0006 0.0094 -0.0004  
Y -0.0364 0.0300 -0.0166 -0.0050 -0.0437 0.0016  
Z -0.0212 0.0168 -0.0106 -0.0039 -0.0348 0.0019

AT. 119 H X -0.0460 -0.0376 0.0200 -0.0056 0.0465 0.0037  
Y -0.0147 -0.0104 0.0054 -0.0017 0.0173 0.0015  
Z -0.0229 -0.0198 0.0121 -0.0040 0.0352 0.0009

AT. 120 H X -0.0460 0.0376 -0.0200 -0.0056 -0.0465 0.0037  
Y -0.0147 0.0104 -0.0054 -0.0017 -0.0173 0.0015  
Z -0.0229 0.0198 -0.0121 -0.0040 -0.0352 0.0009

AT. 121 C X -0.0245 -0.0150 0.0084 -0.0032 0.0249 0.0012  
Y 0.0021 -0.0040 0.0009 0.0008 -0.0083 -0.0006  
Z -0.0009 -0.0102 0.0021 0.0019 -0.0248 -0.0024

AT. 122 C X -0.0245 0.0150 -0.0084 -0.0032 -0.0249 0.0012  
Y 0.0021 0.0040 -0.0009 0.0008 0.0083 -0.0006  
Z -0.0009 0.0102 -0.0021 0.0019 0.0248 -0.0024

AT. 123 H X -0.0301 -0.0071 0.0091 -0.0076 0.0616 0.0031  
Y -0.0063 -0.0014 0.0024 -0.0023 0.0188 0.0008



Z 0.0070 -0.0116 0.0006 0.0045 -0.0467 -0.0038  
AT. 124 H X -0.0301 0.0071 -0.0091 -0.0076 -0.0616 0.0031  
Y -0.0063 0.0014 -0.0024 -0.0023 -0.0188 0.0008  
Z 0.0070 0.0116 -0.0006 0.0045 0.0467 -0.0038  
AT. 125 H X -0.0297 -0.0207 0.0105 -0.0033 0.0229 0.0013  
Y 0.0176 -0.0046 -0.0031 0.0060 -0.0501 -0.0023  
Z 0.0015 -0.0170 0.0024 0.0046 -0.0490 -0.0030  
AT. 126 H X -0.0297 0.0207 -0.0105 -0.0033 -0.0229 0.0013  
Y 0.0176 0.0046 0.0031 0.0060 0.0501 -0.0023  
Z 0.0015 0.0170 -0.0024 0.0046 0.0490 -0.0030  
AT. 127 C X -0.0078 -0.0054 0.0026 -0.0007 0.0059 0.0009  
Y 0.0046 0.0027 -0.0014 0.0005 0.0001 0.0001  
Z -0.0118 -0.0093 0.0038 -0.0005 0.0017 -0.0014  
AT. 128 C X -0.0078 0.0054 -0.0026 -0.0007 -0.0059 0.0009  
Y 0.0046 -0.0027 0.0014 0.0005 -0.0001 0.0001  
Z -0.0118 0.0093 -0.0038 -0.0005 -0.0017 -0.0014  
AT. 129 C X -0.0173 -0.0138 0.0064 -0.0014 0.0112 0.0013  
Y -0.0044 -0.0099 0.0033 0.0002 -0.0058 -0.0005  
Z -0.0028 0.0035 -0.0012 -0.0003 0.0081 -0.0007  
AT. 130 C X -0.0173 0.0138 -0.0064 -0.0014 -0.0112 0.0013  
Y -0.0044 0.0099 -0.0033 0.0002 0.0058 -0.0005  
Z -0.0028 -0.0035 0.0012 -0.0003 -0.0081 -0.0007  
AT. 131 H X -0.0122 -0.0040 0.0028 -0.0009 0.0169 0.0012  
Y -0.0201 -0.0307 0.0117 -0.0008 -0.0099 -0.0015  
Z -0.0018 0.0079 -0.0025 0.0000 0.0132 -0.0014  
AT. 132 H X -0.0122 0.0040 -0.0028 -0.0009 -0.0169 0.0012  
Y -0.0201 0.0307 -0.0117 -0.0008 0.0099 -0.0015  
Z -0.0018 -0.0079 0.0025 0.0000 -0.0132 -0.0014  
AT. 133 H X -0.0254 -0.0306 0.0125 -0.0017 0.0013 -0.0007  
Y -0.0005 -0.0080 0.0023 0.0006 -0.0079 -0.0006  
Z 0.0073 0.0144 -0.0056 0.0006 0.0095 0.0000  
AT. 134 H X -0.0254 0.0306 -0.0125 -0.0017 -0.0013 -0.0007

Y -0.0005 0.0080 -0.0023 0.0006 0.0079 -0.0006  
Z 0.0073 -0.0144 0.0056 0.0006 -0.0095 0.0000  
AT. 135 C X 0.0131 0.0163 -0.0074 0.0016 -0.0122 0.0017  
Y -0.0055 -0.0044 0.0007 0.0001 -0.0045 0.0031  
Z 0.0361 0.0388 -0.0184 0.0043 -0.0368 0.0025  
AT. 136 C X 0.0131 -0.0163 0.0074 0.0016 0.0122 0.0017  
Y -0.0055 0.0044 -0.0007 0.0001 0.0045 0.0031  
Z 0.0361 -0.0388 0.0184 0.0043 0.0368 0.0025  
AT. 137 H X 0.0345 0.0427 -0.0167 0.0035 -0.0238 -0.0012  
Y 0.0023 0.0090 -0.0021 0.0013 -0.0076 0.0003  
Z 0.0409 0.0509 -0.0195 0.0056 -0.0377 -0.0010  
AT. 138 H X 0.0345 -0.0427 0.0167 0.0035 0.0238 -0.0012  
Y 0.0023 -0.0090 0.0021 0.0013 0.0076 0.0003  
Z 0.0409 -0.0509 0.0195 0.0056 0.0377 -0.0010  
AT. 139 H X -0.0043 -0.0004 0.0025 -0.0006 0.0105 -0.0020  
Y -0.0184 -0.0273 0.0048 -0.0014 -0.0055 0.0098  
Z 0.0621 0.0666 -0.0323 0.0077 -0.0655 0.0053  
AT. 140 H X -0.0043 0.0004 -0.0025 -0.0006 -0.0105 -0.0020  
Y -0.0184 0.0273 -0.0048 -0.0014 0.0055 0.0098  
Z 0.0621 -0.0666 0.0323 0.0077 0.0655 0.0053  
AT. 141 H X 0.0280 0.0269 -0.0169 0.0039 -0.0402 0.0082  
Y 0.0008 0.0057 -0.0022 0.0013 -0.0122 0.0023  
Z 0.0360 0.0328 -0.0195 0.0040 -0.0410 0.0062  
AT. 142 H X 0.0280 -0.0269 0.0169 0.0039 0.0402 0.0082  
Y 0.0008 -0.0057 0.0022 0.0013 0.0122 0.0023  
Z 0.0360 -0.0328 0.0195 0.0040 0.0410 0.0062  
AT. 143 C X 0.0127 0.0055 -0.0037 0.0015 -0.0090 -0.0035  
Y 0.0217 0.0221 -0.0089 0.0007 0.0116 0.0050  
Z -0.0454 -0.0301 0.0147 -0.0035 0.0195 0.0031  
AT. 144 C X 0.0127 -0.0055 0.0037 0.0015 0.0090 -0.0035  
Y 0.0217 -0.0221 0.0089 0.0007 -0.0116 0.0050  
Z -0.0454 0.0301 -0.0147 -0.0035 -0.0195 0.0031

AT. 145 H X 0.0298 0.0097 -0.0072 0.0036 -0.0327 -0.0172  
Y 0.0278 0.0253 -0.0084 0.0003 0.0073 -0.0018  
Z -0.0474 -0.0324 0.0134 -0.0025 0.0176 0.0066

AT. 146 H X 0.0298 -0.0097 0.0072 0.0036 0.0327 -0.0172  
Y 0.0278 -0.0253 0.0084 0.0003 -0.0073 -0.0018  
Z -0.0474 0.0324 -0.0134 -0.0025 -0.0176 0.0066

AT. 147 H X -0.0093 -0.0101 0.0045 -0.0004 -0.0024 -0.0046  
Y 0.0227 0.0283 -0.0131 0.0011 0.0242 0.0179  
Z -0.0762 -0.0490 0.0240 -0.0060 0.0359 0.0087

AT. 148 H X -0.0093 0.0101 -0.0045 -0.0004 0.0024 -0.0046  
Y 0.0227 -0.0283 0.0131 0.0011 -0.0242 0.0179  
Z -0.0762 0.0490 -0.0240 -0.0060 -0.0359 0.0087

AT. 149 H X 0.0379 0.0275 -0.0150 0.0033 -0.0067 0.0031  
Y 0.0301 0.0302 -0.0116 0.0008 0.0141 0.0043  
Z -0.0436 -0.0268 0.0156 -0.0042 0.0225 -0.0012

AT. 150 H X 0.0379 -0.0275 0.0150 0.0033 0.0067 0.0031  
Y 0.0301 -0.0302 0.0116 0.0008 -0.0141 0.0043  
Z -0.0436 0.0268 -0.0156 -0.0042 -0.0225 -0.0012

AT. 151 C X 0.0008 0.0005 -0.0004 0.0001 -0.0010 0.0021  
Y 0.0050 0.0084 -0.0032 0.0002 0.0068 -0.0022  
Z -0.0030 -0.0031 0.0011 -0.0000 0.0002 -0.0015

AT. 152 C X 0.0008 -0.0005 0.0004 0.0001 0.0010 0.0021  
Y 0.0050 -0.0084 0.0032 0.0002 -0.0068 -0.0022  
Z -0.0030 0.0031 -0.0011 -0.0000 -0.0002 -0.0015

AT. 153 H X 0.0036 0.0014 -0.0009 0.0002 -0.0013 0.0037  
Y 0.0077 0.0134 -0.0050 0.0005 0.0101 -0.0034  
Z 0.0002 0.0044 -0.0015 0.0003 0.0056 -0.0035

AT. 154 H X 0.0036 -0.0014 0.0009 0.0002 0.0013 0.0037  
Y 0.0077 -0.0134 0.0050 0.0005 -0.0101 -0.0034  
Z 0.0002 -0.0044 0.0015 0.0003 -0.0056 -0.0035

AT. 155 H X -0.0008 -0.0014 0.0005 -0.0003 -0.0015 0.0029  
Y 0.0071 0.0139 -0.0050 0.0004 0.0115 -0.0043

Z -0.0058 -0.0096 0.0034 -0.0003 -0.0048 0.0010  
AT. 156 H X -0.0008 0.0014 -0.0005 -0.0003 0.0015 0.0029  
Y 0.0071 -0.0139 0.0050 0.0004 -0.0115 -0.0043  
Z -0.0058 0.0096 -0.0034 -0.0003 0.0048 0.0010  
AT. 157 O X 0.0003 0.0003 -0.0021 0.0020 0.0028 -0.0120  
Y 0.0010 0.0041 0.0132 -0.0041 -0.0049 0.0043  
Z 0.0017 0.0072 0.0137 0.0175 0.0052 -0.0345  
AT. 158 O X 0.0003 -0.0003 0.0021 0.0020 -0.0028 -0.0120  
Y 0.0010 -0.0041 -0.0132 -0.0041 0.0049 0.0043  
Z 0.0017 -0.0072 -0.0137 0.0175 -0.0052 -0.0345  
AT. 159 O X -0.0020 -0.0048 -0.0085 -0.0106 -0.0097 0.0574  
Y -0.0022 -0.0027 -0.0026 0.0074 0.0052 -0.0183  
Z -0.0031 -0.0035 -0.0015 -0.0024 -0.0151 0.0855  
AT. 160 O X -0.0020 0.0048 0.0085 -0.0106 0.0097 0.0574  
Y -0.0022 0.0027 0.0026 0.0074 -0.0052 -0.0183  
Z -0.0031 0.0035 0.0015 -0.0024 0.0151 0.0855  
AT. 161 H X 0.0014 0.0036 0.0050 -0.0003 -0.0003 -0.0134  
Y 0.0017 0.0063 0.0178 -0.0048 -0.0057 0.0039  
Z 0.0002 0.0041 0.0063 0.0201 0.0054 -0.0325  
AT. 162 H X 0.0014 -0.0036 -0.0050 -0.0003 0.0003 -0.0134  
Y 0.0017 -0.0063 -0.0178 -0.0048 0.0057 0.0039  
Z 0.0002 -0.0041 -0.0063 0.0201 -0.0054 -0.0325  
AT. 163 H X -0.0042 -0.0084 -0.0101 -0.0181 -0.0229 0.1284  
Y 0.0020 -0.0048 -0.0075 0.0006 0.0079 -0.0331  
Z -0.0018 -0.0029 -0.0019 -0.0016 -0.0108 0.0625  
AT. 164 H X -0.0042 0.0084 0.0101 -0.0181 0.0229 0.1284  
Y 0.0020 0.0048 0.0075 0.0006 -0.0079 -0.0331  
Z -0.0018 0.0029 0.0019 -0.0016 0.0108 0.0625  
AT. 165 O X 0.0031 0.0206 -0.0083 0.0013 -0.0447 0.0045  
Y 0.0583 -0.0457 0.0163 0.0019 -0.0475 0.0057  
Z -0.0166 0.0159 -0.0068 -0.0011 -0.0015 -0.0000  
AT. 166 O X 0.0031 -0.0206 0.0083 0.0013 0.0447 0.0045

|                                                        |     |         |         |         |         |         |         |
|--------------------------------------------------------|-----|---------|---------|---------|---------|---------|---------|
|                                                        | Y   | 0.0583  | 0.0457  | -0.0163 | 0.0019  | 0.0475  | 0.0057  |
|                                                        | Z   | -0.0166 | -0.0159 | 0.0068  | -0.0011 | 0.0015  | -0.0000 |
| AT. 167                                                | H X | 0.0151  | 0.0161  | -0.0064 | 0.0025  | -0.0597 | 0.0063  |
|                                                        | Y   | 0.0426  | -0.0299 | 0.0104  | 0.0010  | -0.0436 | 0.0051  |
|                                                        | Z   | -0.0237 | 0.0043  | -0.0033 | -0.0029 | 0.0293  | -0.0034 |
| AT. 168                                                | H X | 0.0151  | -0.0161 | 0.0064  | 0.0025  | 0.0597  | 0.0063  |
|                                                        | Y   | 0.0426  | 0.0299  | -0.0104 | 0.0010  | 0.0436  | 0.0051  |
|                                                        | Z   | -0.0237 | -0.0043 | 0.0033  | -0.0029 | -0.0293 | -0.0034 |
| AT. 169                                                | O X | 0.0191  | -0.0259 | 0.0074  | -0.0017 | -0.0095 | 0.0006  |
|                                                        | Y   | -0.0492 | 0.0418  | -0.0165 | -0.0016 | 0.0429  | -0.0058 |
|                                                        | Z   | 0.0099  | -0.0127 | 0.0036  | -0.0009 | -0.0135 | 0.0016  |
| AT. 170                                                | O X | 0.0191  | 0.0259  | -0.0074 | -0.0017 | 0.0095  | 0.0006  |
|                                                        | Y   | -0.0492 | -0.0418 | 0.0165  | -0.0016 | -0.0429 | -0.0058 |
|                                                        | Z   | 0.0099  | 0.0127  | -0.0036 | -0.0009 | 0.0135  | 0.0016  |
| AT. 171                                                | H X | 0.0580  | -0.0550 | 0.0209  | 0.0018  | -0.0120 | 0.0030  |
|                                                        | Y   | -0.0589 | 0.0552  | -0.0198 | -0.0002 | 0.0607  | -0.0070 |
|                                                        | Z   | -0.0336 | 0.0297  | -0.0116 | -0.0013 | 0.0142  | -0.0016 |
| AT. 172                                                | H X | 0.0580  | 0.0550  | -0.0209 | 0.0018  | 0.0120  | 0.0030  |
|                                                        | Y   | -0.0589 | -0.0552 | 0.0198  | -0.0002 | -0.0607 | -0.0070 |
|                                                        | Z   | -0.0336 | -0.0297 | 0.0116  | -0.0013 | -0.0142 | -0.0016 |
| FREQ(CM**-1) 221.58 224.80 234.66 237.04 238.05 240.75 |     |         |         |         |         |         |         |
| AT. 1                                                  | I X | -0.0026 | -0.0005 | 0.0004  | -0.0003 | 0.0001  | 0.0001  |
|                                                        | Y   | -0.0005 | 0.0003  | 0.0001  | -0.0002 | -0.0003 | -0.0003 |
|                                                        | Z   | -0.0023 | -0.0002 | -0.0002 | 0.0002  | 0.0002  | 0.0001  |
| AT. 2                                                  | I X | 0.0026  | -0.0005 | 0.0004  | 0.0003  | 0.0001  | -0.0001 |
|                                                        | Y   | 0.0005  | 0.0003  | 0.0001  | 0.0002  | -0.0003 | 0.0003  |
|                                                        | Z   | 0.0023  | -0.0002 | -0.0002 | -0.0002 | 0.0002  | -0.0001 |
| AT. 3                                                  | I X | -0.0020 | 0.0000  | 0.0004  | -0.0002 | 0.0002  | 0.0002  |
|                                                        | Y   | 0.0000  | -0.0002 | -0.0002 | 0.0001  | -0.0001 | 0.0001  |
|                                                        | Z   | -0.0004 | 0.0001  | -0.0002 | -0.0001 | 0.0001  | -0.0001 |

AT. 4 I X 0.0020 0.0000 0.0004 0.0002 0.0002 -0.0002  
Y -0.0000 -0.0002 -0.0002 -0.0001 -0.0001 -0.0001  
Z 0.0004 0.0001 -0.0002 0.0001 0.0001 0.0001

AT. 5 O X 0.0007 0.0022 -0.0006 0.0011 0.0003 0.0005  
Y 0.0039 -0.0001 -0.0001 0.0003 0.0015 -0.0001  
Z -0.0012 0.0012 -0.0003 0.0003 -0.0009 0.0005

AT. 6 O X -0.0007 0.0022 -0.0006 -0.0011 0.0003 -0.0005  
Y -0.0039 -0.0001 -0.0001 -0.0003 0.0015 0.0001  
Z 0.0012 0.0012 -0.0003 -0.0003 -0.0009 -0.0005

AT. 7 O X 0.0268 -0.0032 -0.0001 0.0008 0.0008 -0.0001  
Y 0.0253 -0.0002 0.0005 0.0004 0.0010 -0.0010  
Z 0.0055 0.0024 0.0016 -0.0006 0.0006 -0.0003

AT. 8 O X -0.0268 -0.0032 -0.0001 -0.0008 0.0008 0.0001  
Y -0.0253 -0.0002 0.0005 -0.0004 0.0010 0.0010  
Z -0.0055 0.0024 0.0016 0.0006 0.0006 0.0003

AT. 9 N X 0.0047 -0.0008 -0.0000 0.0001 0.0007 -0.0002  
Y -0.0020 -0.0016 -0.0011 -0.0001 -0.0002 -0.0002  
Z 0.0011 0.0001 0.0001 0.0001 -0.0002 0.0004

AT. 10 N X -0.0047 -0.0008 -0.0000 -0.0001 0.0007 0.0002  
Y 0.0020 -0.0016 -0.0011 0.0001 -0.0002 0.0002  
Z -0.0011 0.0001 0.0001 -0.0001 -0.0002 -0.0004

AT. 11 N X 0.0058 0.0002 0.0001 -0.0004 -0.0005 -0.0017  
Y -0.0010 -0.0013 -0.0009 -0.0006 -0.0009 -0.0003  
Z 0.0029 -0.0012 0.0002 -0.0007 -0.0001 0.0003

AT. 12 N X -0.0058 0.0002 0.0001 0.0004 -0.0005 0.0017  
Y 0.0010 -0.0013 -0.0009 0.0006 -0.0009 0.0003  
Z -0.0029 -0.0012 0.0002 0.0007 -0.0001 -0.0003

AT. 13 C X 0.0008 -0.0002 0.0000 0.0007 0.0011 0.0010  
Y -0.0002 -0.0012 -0.0002 -0.0000 0.0009 -0.0001  
Z 0.0023 0.0003 0.0000 0.0002 -0.0001 -0.0002

AT. 14 C X -0.0008 -0.0002 0.0000 -0.0007 0.0011 -0.0010  
Y 0.0002 -0.0012 -0.0002 0.0000 0.0009 0.0001

Z -0.0023 0.0003 0.0000 -0.0002 -0.0001 0.0002  
AT. 15 C X -0.0022 0.0006 -0.0001 0.0003 -0.0003 -0.0001  
Y -0.0014 -0.0018 0.0003 -0.0004 0.0010 0.0006  
Z 0.0054 -0.0010 0.0010 -0.0002 0.0015 0.0014  
AT. 16 C X 0.0022 0.0006 -0.0001 -0.0003 -0.0003 0.0001  
Y 0.0014 -0.0018 0.0003 0.0004 0.0010 -0.0006  
Z -0.0054 -0.0010 0.0010 0.0002 0.0015 -0.0014  
AT. 17 H X -0.0034 0.0012 -0.0003 0.0004 -0.0008 -0.0003  
Y -0.0036 -0.0012 -0.0004 0.0001 0.0001 -0.0004  
Z 0.0081 -0.0017 0.0019 -0.0007 0.0025 0.0027  
AT. 18 H X 0.0034 0.0012 -0.0003 -0.0004 -0.0008 0.0003  
Y 0.0036 -0.0012 -0.0004 -0.0001 0.0001 0.0004  
Z -0.0081 -0.0017 0.0019 0.0007 0.0025 -0.0027  
AT. 19 H X -0.0015 0.0009 0.0003 0.0002 -0.0010 -0.0006  
Y 0.0008 -0.0029 0.0017 -0.0011 0.0025 0.0026  
Z 0.0064 -0.0012 0.0016 -0.0005 0.0017 0.0022  
AT. 20 H X 0.0015 0.0009 0.0003 -0.0002 -0.0010 0.0006  
Y -0.0008 -0.0029 0.0017 0.0011 0.0025 -0.0026  
Z -0.0064 -0.0012 0.0016 0.0005 0.0017 -0.0022  
AT. 21 C X 0.0095 -0.0011 0.0000 0.0003 0.0001 -0.0003  
Y 0.0085 0.0008 0.0001 -0.0001 -0.0001 -0.0008  
Z 0.0041 0.0003 0.0009 -0.0005 0.0004 0.0002  
AT. 22 C X -0.0095 -0.0011 0.0000 -0.0003 0.0001 0.0003  
Y -0.0085 0.0008 0.0001 0.0001 -0.0001 0.0008  
Z -0.0041 0.0003 0.0009 0.0005 0.0004 -0.0002  
AT. 23 C X 0.0021 -0.0014 -0.0002 0.0003 -0.0001 0.0002  
Y -0.0079 0.0048 0.0016 -0.0006 0.0001 -0.0014  
Z 0.0026 -0.0012 0.0002 -0.0003 0.0001 0.0009  
AT. 24 C X -0.0021 -0.0014 -0.0002 -0.0003 -0.0001 -0.0002  
Y 0.0079 0.0048 0.0016 0.0006 0.0001 0.0014  
Z -0.0026 -0.0012 0.0002 0.0003 0.0001 -0.0009  
AT. 25 H X 0.0015 -0.0029 -0.0007 0.0003 -0.0002 0.0002

Y -0.0090 0.0050 0.0017 -0.0007 0.0002 -0.0013  
Z 0.0116 -0.0051 -0.0016 0.0005 -0.0006 0.0018  
AT. 26 H X -0.0015 -0.0029 -0.0007 -0.0003 -0.0002 -0.0002  
Y 0.0090 0.0050 0.0017 0.0007 0.0002 0.0013  
Z -0.0116 -0.0051 -0.0016 -0.0005 -0.0006 -0.0018  
AT. 27 H X -0.0011 -0.0010 -0.0008 0.0001 -0.0002 0.0001  
Y -0.0116 0.0085 0.0033 -0.0010 0.0009 -0.0025  
Z 0.0019 0.0006 0.0011 -0.0004 0.0004 0.0005  
AT. 28 H X 0.0011 -0.0010 -0.0008 -0.0001 -0.0002 -0.0001  
Y 0.0116 0.0085 0.0033 0.0010 0.0009 0.0025  
Z -0.0019 0.0006 0.0011 0.0004 0.0004 -0.0005  
AT. 29 C X 0.0050 -0.0001 0.0006 -0.0001 0.0000 -0.0004  
Y -0.0029 0.0000 -0.0004 -0.0003 -0.0012 -0.0008  
Z -0.0008 -0.0002 -0.0002 0.0001 0.0003 0.0007  
AT. 30 C X -0.0050 -0.0001 0.0006 0.0001 0.0000 0.0004  
Y 0.0029 0.0000 -0.0004 0.0003 -0.0012 0.0008  
Z 0.0008 -0.0002 -0.0002 -0.0001 0.0003 -0.0007  
AT. 31 H X 0.0053 0.0009 0.0016 -0.0005 -0.0009 -0.0006  
Y -0.0075 -0.0005 -0.0010 -0.0003 -0.0007 -0.0007  
Z -0.0077 0.0001 -0.0007 -0.0003 0.0001 0.0007  
AT. 32 H X -0.0053 0.0009 0.0016 0.0005 -0.0009 0.0006  
Y 0.0075 -0.0005 -0.0010 0.0003 -0.0007 0.0007  
Z 0.0077 0.0001 -0.0007 0.0003 0.0001 -0.0007  
AT. 33 H X 0.0083 0.0002 0.0009 -0.0001 -0.0001 -0.0011  
Y 0.0045 0.0000 0.0006 -0.0001 -0.0015 -0.0007  
Z -0.0019 -0.0003 -0.0004 -0.0000 0.0006 0.0004  
AT. 34 H X -0.0083 0.0002 0.0009 0.0001 -0.0001 0.0011  
Y -0.0045 0.0000 0.0006 0.0001 -0.0015 0.0007  
Z 0.0019 -0.0003 -0.0004 0.0000 0.0006 -0.0004  
AT. 35 C X 0.0010 0.0001 0.0002 -0.0000 -0.0001 -0.0006  
Y -0.0059 -0.0001 -0.0005 -0.0003 -0.0008 -0.0003  
Z 0.0059 -0.0004 0.0003 0.0001 0.0002 0.0000



AT. 36 C X -0.0010 0.0001 0.0002 0.0000 -0.0001 0.0006  
Y 0.0059 -0.0001 -0.0005 0.0003 -0.0008 0.0003  
Z -0.0059 -0.0004 0.0003 -0.0001 0.0002 -0.0000

AT. 37 C X 0.0038 0.0013 0.0007 -0.0000 -0.0004 -0.0019  
Y -0.0050 0.0005 -0.0005 0.0002 -0.0015 0.0000  
Z 0.0062 0.0008 0.0006 0.0006 -0.0009 -0.0000

AT. 38 C X -0.0038 0.0013 0.0007 0.0000 -0.0004 0.0019  
Y 0.0050 0.0005 -0.0005 -0.0002 -0.0015 -0.0000  
Z -0.0062 0.0008 0.0006 -0.0006 -0.0009 0.0000

AT. 39 H X 0.0057 0.0037 0.0009 0.0015 -0.0019 -0.0016  
Y -0.0059 0.0015 -0.0001 0.0008 -0.0021 0.0005  
Z 0.0078 0.0020 0.0006 0.0014 -0.0018 0.0002

AT. 40 H X -0.0057 0.0037 0.0009 -0.0015 -0.0019 0.0016  
Y 0.0059 0.0015 -0.0001 -0.0008 -0.0021 -0.0005  
Z -0.0078 0.0020 0.0006 -0.0014 -0.0018 -0.0002

AT. 41 H X 0.0030 -0.0030 0.0000 -0.0017 0.0010 -0.0015  
Y -0.0058 0.0027 0.0002 0.0012 -0.0014 -0.0006  
Z 0.0076 0.0036 0.0008 0.0016 -0.0023 0.0000

AT. 42 H X -0.0030 -0.0030 0.0000 0.0017 0.0010 0.0015  
Y 0.0058 0.0027 0.0002 -0.0012 -0.0014 0.0006  
Z -0.0076 0.0036 0.0008 -0.0016 -0.0023 -0.0000

AT. 43 C X 0.0081 0.0024 -0.0000 0.0001 -0.0006 -0.0017  
Y -0.0013 -0.0006 -0.0008 -0.0004 -0.0006 0.0002  
Z 0.0042 0.0000 -0.0000 -0.0004 -0.0000 0.0003

AT. 44 C X -0.0081 0.0024 -0.0000 -0.0001 -0.0006 0.0017  
Y 0.0013 -0.0006 -0.0008 0.0004 -0.0006 -0.0002  
Z -0.0042 0.0000 -0.0000 0.0004 -0.0000 -0.0003

AT. 45 H X 0.0079 0.0062 0.0000 0.0007 -0.0006 -0.0027  
Y -0.0037 -0.0048 -0.0009 -0.0008 -0.0004 0.0023  
Z 0.0066 0.0012 -0.0001 -0.0004 -0.0002 -0.0009

AT. 46 H X -0.0079 0.0062 0.0000 -0.0007 -0.0006 0.0027  
Y 0.0037 -0.0048 -0.0009 0.0008 -0.0004 -0.0023

Z -0.0066 0.0012 -0.0001 0.0004 -0.0002 0.0009  
AT. 47 H X 0.0096 0.0035 0.0001 -0.0001 -0.0006 -0.0028  
Y 0.0024 0.0026 -0.0007 -0.0002 -0.0007 -0.0013  
Z 0.0054 0.0022 -0.0001 -0.0002 -0.0002 0.0003  
AT. 48 H X -0.0096 0.0035 0.0001 0.0001 -0.0006 0.0028  
Y -0.0024 0.0026 -0.0007 0.0002 -0.0007 0.0013  
Z -0.0054 0.0022 -0.0001 0.0002 -0.0002 -0.0003  
AT. 49 C X 0.0042 0.0003 0.0001 0.0000 -0.0001 -0.0002  
Y -0.0016 0.0003 -0.0005 -0.0002 -0.0007 -0.0001  
Z 0.0018 -0.0010 0.0000 -0.0001 0.0001 0.0013  
AT. 50 C X -0.0042 0.0003 0.0001 -0.0000 -0.0001 0.0002  
Y 0.0016 0.0003 -0.0005 0.0002 -0.0007 0.0001  
Z -0.0018 -0.0010 0.0000 0.0001 0.0001 -0.0013  
AT. 51 C X 0.0054 -0.0001 0.0003 -0.0001 0.0005 -0.0001  
Y -0.0033 -0.0012 -0.0004 -0.0002 -0.0003 0.0012  
Z 0.0025 0.0005 -0.0002 0.0000 -0.0006 -0.0001  
AT. 52 C X -0.0054 -0.0001 0.0003 0.0001 0.0005 0.0001  
Y 0.0033 -0.0012 -0.0004 0.0002 -0.0003 -0.0012  
Z -0.0025 0.0005 -0.0002 -0.0000 -0.0006 0.0001  
AT. 53 H X 0.0029 -0.0012 0.0004 -0.0001 0.0004 0.0012  
Y -0.0060 -0.0026 -0.0004 -0.0001 -0.0003 0.0025  
Z 0.0038 0.0008 -0.0002 -0.0001 -0.0005 -0.0008  
AT. 54 H X -0.0029 -0.0012 0.0004 0.0001 0.0004 -0.0012  
Y 0.0060 -0.0026 -0.0004 0.0001 -0.0003 -0.0025  
Z -0.0038 0.0008 -0.0002 0.0001 -0.0005 0.0008  
AT. 55 H X 0.0085 0.0014 -0.0000 -0.0001 0.0003 -0.0019  
Y -0.0041 -0.0016 0.0000 -0.0002 -0.0003 0.0018  
Z 0.0037 0.0017 -0.0003 0.0001 -0.0010 -0.0011  
AT. 56 H X -0.0085 0.0014 -0.0000 0.0001 0.0003 0.0019  
Y 0.0041 -0.0016 0.0000 0.0002 -0.0003 -0.0018  
Z -0.0037 0.0017 -0.0003 -0.0001 -0.0010 0.0011  
AT. 57 C X -0.0082 -0.0015 -0.0009 0.0001 -0.0004 0.0016

Y -0.0123 -0.0036 -0.0018 -0.0005 0.0004 0.0010  
Z 0.0161 -0.0024 0.0007 -0.0004 0.0025 -0.0022  
AT. 58 C X 0.0082 -0.0015 -0.0009 -0.0001 -0.0004 -0.0016  
Y 0.0123 -0.0036 -0.0018 0.0005 0.0004 -0.0010  
Z -0.0161 -0.0024 0.0007 0.0004 0.0025 0.0022  
AT. 59 H X -0.0203 -0.0035 -0.0022 0.0003 -0.0007 0.0042  
Y -0.0092 -0.0013 -0.0016 0.0001 0.0004 -0.0033  
Z 0.0119 -0.0002 0.0001 0.0006 0.0023 -0.0068  
AT. 60 H X 0.0203 -0.0035 -0.0022 -0.0003 -0.0007 -0.0042  
Y 0.0092 -0.0013 -0.0016 -0.0001 0.0004 0.0033  
Z -0.0119 -0.0002 0.0001 -0.0006 0.0023 0.0068  
AT. 61 H X -0.0019 -0.0060 -0.0010 -0.0008 0.0016 0.0038  
Y -0.0170 -0.0076 -0.0021 -0.0013 0.0005 0.0076  
Z 0.0233 -0.0043 0.0007 -0.0007 0.0041 -0.0037  
AT. 62 H X 0.0019 -0.0060 -0.0010 0.0008 0.0016 -0.0038  
Y 0.0170 -0.0076 -0.0021 0.0013 0.0005 -0.0076  
Z -0.0233 -0.0043 0.0007 0.0007 0.0041 0.0037  
AT. 63 H X -0.0117 0.0037 -0.0008 0.0011 -0.0026 -0.0015  
Y -0.0167 -0.0060 -0.0025 -0.0005 0.0018 0.0005  
Z 0.0231 -0.0053 0.0012 -0.0014 0.0034 0.0012  
AT. 64 H X 0.0117 0.0037 -0.0008 -0.0011 -0.0026 0.0015  
Y 0.0167 -0.0060 -0.0025 0.0005 0.0018 -0.0005  
Z -0.0231 -0.0053 0.0012 0.0014 0.0034 -0.0012  
AT. 65 C X 0.0020 -0.0004 -0.0000 0.0002 -0.0003 -0.0015  
Y 0.0001 0.0054 0.0004 -0.0001 -0.0021 -0.0015  
Z -0.0011 -0.0042 -0.0005 -0.0000 0.0008 0.0011  
AT. 66 C X -0.0020 -0.0004 -0.0000 -0.0002 -0.0003 0.0015  
Y -0.0001 0.0054 0.0004 0.0001 -0.0021 0.0015  
Z 0.0011 -0.0042 -0.0005 0.0000 0.0008 -0.0011  
AT. 67 H X 0.0005 -0.0016 0.0003 0.0009 0.0002 -0.0058  
Y 0.0010 0.0114 0.0012 -0.0016 -0.0038 0.0086  
Z -0.0009 -0.0087 -0.0014 0.0008 0.0020 -0.0047

AT. 68 H X -0.0005 -0.0016 0.0003 -0.0009 0.0002 0.0058  
Y -0.0010 0.0114 0.0012 0.0016 -0.0038 -0.0086  
Z 0.0009 -0.0087 -0.0014 -0.0008 0.0020 0.0047

AT. 69 H X 0.0033 -0.0016 -0.0003 0.0011 -0.0003 -0.0081  
Y -0.0003 0.0010 -0.0001 0.0013 -0.0011 -0.0113  
Z -0.0042 -0.0089 -0.0008 0.0003 0.0024 -0.0008

AT. 70 H X -0.0033 -0.0016 -0.0003 -0.0011 -0.0003 0.0081  
Y 0.0003 0.0010 -0.0001 -0.0013 -0.0011 0.0113  
Z 0.0042 -0.0089 -0.0008 -0.0003 0.0024 0.0008

AT. 71 H X 0.0001 0.0009 0.0005 -0.0009 -0.0001 0.0075  
Y 0.0014 0.0091 0.0011 -0.0002 -0.0031 -0.0019  
Z -0.0009 0.0020 0.0008 -0.0010 -0.0004 0.0073

AT. 72 H X -0.0001 0.0009 0.0005 0.0009 -0.0001 -0.0075  
Y -0.0014 0.0091 0.0011 0.0002 -0.0031 0.0019  
Z 0.0009 0.0020 0.0008 0.0010 -0.0004 -0.0073

AT. 73 C X -0.0007 0.0002 0.0005 -0.0001 0.0005 -0.0006  
Y -0.0052 0.0004 0.0000 -0.0004 0.0003 -0.0013  
Z 0.0040 0.0001 0.0003 0.0001 0.0000 0.0007

AT. 74 C X 0.0007 0.0002 0.0005 0.0001 0.0005 0.0006  
Y 0.0052 0.0004 0.0000 0.0004 0.0003 0.0013  
Z -0.0040 0.0001 0.0003 -0.0001 0.0000 -0.0007

AT. 75 H X -0.0049 0.0003 0.0008 -0.0003 0.0013 -0.0012  
Y -0.0048 0.0003 0.0005 -0.0003 0.0011 -0.0017  
Z 0.0014 0.0003 0.0010 0.0000 0.0013 -0.0007

AT. 76 H X 0.0049 0.0003 0.0008 0.0003 0.0013 0.0012  
Y 0.0048 0.0003 0.0005 0.0003 0.0011 0.0017  
Z -0.0014 0.0003 0.0010 -0.0000 0.0013 0.0007

AT. 77 H X -0.0001 0.0001 0.0008 -0.0001 0.0010 -0.0006  
Y -0.0089 0.0010 0.0013 -0.0002 0.0019 -0.0028  
Z 0.0067 -0.0005 -0.0011 0.0000 -0.0018 0.0018

AT. 78 H X 0.0001 0.0001 0.0008 0.0001 0.0010 0.0006  
Y 0.0089 0.0010 0.0013 0.0002 0.0019 0.0028

Z -0.0067 -0.0005 -0.0011 -0.0000 -0.0018 -0.0018  
AT. 79 I X 0.0003 0.0033 -0.0036 0.0008 -0.0034 -0.0052  
Y 0.0001 -0.0006 0.0014 -0.0006 0.0014 0.0032  
Z -0.0002 -0.0015 -0.0008 0.0002 -0.0001 -0.0002  
AT. 80 I X -0.0003 0.0033 -0.0036 -0.0008 -0.0034 0.0052  
Y -0.0001 -0.0006 0.0014 0.0006 0.0014 -0.0032  
Z 0.0002 -0.0015 -0.0008 -0.0002 -0.0001 0.0002  
AT. 81 I X 0.0005 -0.0028 -0.0011 -0.0001 -0.0003 0.0018  
Y -0.0004 0.0008 0.0014 -0.0003 0.0007 -0.0006  
Z 0.0001 -0.0006 0.0001 -0.0001 0.0002 0.0001  
AT. 82 I X -0.0005 -0.0028 -0.0011 0.0001 -0.0003 -0.0018  
Y 0.0004 0.0008 0.0014 0.0003 0.0007 0.0006  
Z -0.0001 -0.0006 0.0001 0.0001 0.0002 -0.0001  
AT. 83 O X 0.0012 0.0095 0.0027 -0.0022 -0.0015 -0.0068  
Y 0.0027 0.0143 -0.0157 0.0032 -0.0164 -0.0271  
Z 0.0014 -0.0141 0.0034 -0.0033 -0.0051 0.0137  
AT. 84 O X -0.0012 0.0095 0.0027 0.0022 -0.0015 0.0068  
Y -0.0027 0.0143 -0.0157 -0.0032 -0.0164 0.0271  
Z -0.0014 -0.0141 0.0034 0.0033 -0.0051 -0.0137  
AT. 85 O X -0.0067 0.0344 -0.0010 0.0110 -0.0001 -0.0133  
Y 0.0053 -0.0314 -0.0070 -0.0048 0.0020 0.0139  
Z 0.0015 -0.0091 -0.0111 -0.0032 -0.0080 0.0121  
AT. 86 O X 0.0067 0.0344 -0.0010 -0.0110 -0.0001 0.0133  
Y -0.0053 -0.0314 -0.0070 0.0048 0.0020 -0.0139  
Z -0.0015 -0.0091 -0.0111 0.0032 -0.0080 -0.0121  
AT. 87 N X 0.0026 -0.0089 -0.0025 -0.0029 -0.0055 0.0020  
Y 0.0010 -0.0010 -0.0048 0.0046 0.0056 -0.0052  
Z 0.0010 0.0002 0.0032 -0.0023 -0.0047 0.0008  
AT. 88 N X -0.0026 -0.0089 -0.0025 0.0029 -0.0055 -0.0020  
Y -0.0010 -0.0010 -0.0048 -0.0046 0.0056 0.0052  
Z -0.0010 0.0002 0.0032 0.0023 -0.0047 -0.0008  
AT. 89 N X 0.0005 -0.0092 0.0009 0.0007 0.0046 -0.0002

Y -0.0001 0.0004 -0.0005 0.0029 -0.0035 -0.0016  
Z -0.0008 0.0025 0.0003 -0.0002 -0.0072 -0.0019  
AT. 90 N X -0.0005 -0.0092 0.0009 -0.0007 0.0046 0.0002  
Y 0.0001 0.0004 -0.0005 -0.0029 -0.0035 0.0016  
Z 0.0008 0.0025 0.0003 0.0002 -0.0072 0.0019  
AT. 91 C X 0.0019 0.0018 -0.0003 -0.0018 -0.0040 -0.0013  
Y 0.0018 0.0090 -0.0085 0.0021 -0.0068 -0.0190  
Z 0.0011 0.0011 0.0037 -0.0028 -0.0063 0.0015  
AT. 92 C X -0.0019 0.0018 -0.0003 0.0018 -0.0040 0.0013  
Y -0.0018 0.0090 -0.0085 -0.0021 -0.0068 0.0190  
Z -0.0011 0.0011 0.0037 0.0028 -0.0063 -0.0015  
AT. 93 C X 0.0019 0.0143 -0.0059 -0.0002 -0.0105 -0.0203  
Y 0.0014 0.0113 -0.0026 -0.0008 -0.0059 -0.0164  
Z 0.0002 0.0178 -0.0004 -0.0015 -0.0147 -0.0203  
AT. 94 C X -0.0019 0.0143 -0.0059 0.0002 -0.0105 0.0203  
Y -0.0014 0.0113 -0.0026 0.0008 -0.0059 0.0164  
Z -0.0002 0.0178 -0.0004 0.0015 -0.0147 0.0203  
AT. 95 H X 0.0013 0.0283 -0.0085 -0.0019 -0.0184 -0.0352  
Y 0.0015 -0.0069 0.0018 -0.0004 0.0057 0.0041  
Z 0.0005 0.0348 -0.0054 -0.0006 -0.0268 -0.0416  
AT. 96 H X -0.0013 0.0283 -0.0085 0.0019 -0.0184 0.0352  
Y -0.0015 -0.0069 0.0018 0.0004 0.0057 -0.0041  
Z -0.0005 0.0348 -0.0054 0.0006 -0.0268 0.0416  
AT. 97 H X 0.0010 0.0237 -0.0122 0.0020 -0.0166 -0.0357  
Y 0.0016 0.0369 -0.0074 -0.0012 -0.0232 -0.0450  
Z 0.0004 0.0211 0.0005 -0.0022 -0.0169 -0.0221  
AT. 98 H X -0.0010 0.0237 -0.0122 -0.0020 -0.0166 0.0357  
Y -0.0016 0.0369 -0.0074 0.0012 -0.0232 0.0450  
Z -0.0004 0.0211 0.0005 0.0022 -0.0169 0.0221  
AT. 99 C X -0.0036 0.0153 0.0017 0.0056 0.0025 -0.0086  
Y 0.0004 -0.0043 -0.0063 0.0028 -0.0008 0.0045  
Z 0.0003 -0.0035 -0.0040 -0.0015 -0.0070 0.0037

AT.100 C X 0.0036 0.0153 0.0017 -0.0056 0.0025 0.0086  
Y -0.0004 -0.0043 -0.0063 -0.0028 -0.0008 -0.0045  
Z -0.0003 -0.0035 -0.0040 0.0015 -0.0070 -0.0037

AT.101 C X -0.0036 0.0179 -0.0028 0.0065 -0.0001 -0.0057  
Y -0.0046 0.0283 -0.0055 0.0102 0.0014 -0.0076  
Z 0.0012 -0.0128 -0.0004 -0.0033 -0.0054 0.0047

AT.102 C X 0.0036 0.0179 -0.0028 -0.0065 -0.0001 0.0057  
Y 0.0046 0.0283 -0.0055 -0.0102 0.0014 0.0076  
Z -0.0012 -0.0128 -0.0004 0.0033 -0.0054 -0.0047

AT.103 H X -0.0036 0.0190 -0.0071 0.0089 -0.0013 -0.0056  
Y -0.0048 0.0285 -0.0037 0.0091 0.0018 -0.0076  
Z 0.0059 -0.0451 0.0001 -0.0100 -0.0067 0.0168

AT.104 H X 0.0036 0.0190 -0.0071 -0.0089 -0.0013 0.0056  
Y 0.0048 0.0285 -0.0037 -0.0091 0.0018 0.0076  
Z -0.0059 -0.0451 0.0001 0.0100 -0.0067 -0.0168

AT.105 H X -0.0047 0.0286 -0.0055 0.0075 -0.0035 -0.0052  
Y -0.0082 0.0535 -0.0060 0.0162 0.0038 -0.0169  
Z -0.0005 -0.0009 -0.0014 -0.0008 -0.0054 0.0018

AT.106 H X 0.0047 0.0286 -0.0055 -0.0075 -0.0035 0.0052  
Y 0.0082 0.0535 -0.0060 -0.0162 0.0038 0.0169  
Z 0.0005 -0.0009 -0.0014 0.0008 -0.0054 -0.0018

AT.107 C X 0.0015 -0.0074 0.0017 -0.0041 -0.0036 -0.0023  
Y 0.0027 -0.0078 -0.0131 0.0087 0.0005 0.0052  
Z -0.0011 0.0011 0.0106 -0.0048 0.0007 -0.0008

AT.108 C X -0.0015 -0.0074 0.0017 0.0041 -0.0036 0.0023  
Y -0.0027 -0.0078 -0.0131 -0.0087 0.0005 -0.0052  
Z 0.0011 0.0011 0.0106 0.0048 0.0007 0.0008

AT.109 H X -0.0011 -0.0053 0.0171 -0.0134 0.0012 -0.0101  
Y 0.0019 -0.0105 -0.0048 0.0029 0.0006 0.0054  
Z -0.0017 -0.0048 0.0196 -0.0112 -0.0002 0.0023

AT.110 H X 0.0011 -0.0053 0.0171 0.0134 0.0012 0.0101  
Y -0.0019 -0.0105 -0.0048 -0.0029 0.0006 -0.0054

Z 0.0017 -0.0048 0.0196 0.0112 -0.0002 -0.0023  
AT. 111 H X 0.0021 -0.0107 0.0020 -0.0053 -0.0044 0.0000  
Y 0.0046 -0.0038 -0.0313 0.0209 -0.0017 0.0077  
Z -0.0022 0.0032 0.0139 -0.0060 0.0020 -0.0035  
AT. 112 H X -0.0021 -0.0107 0.0020 0.0053 -0.0044 -0.0000  
Y -0.0046 -0.0038 -0.0313 -0.0209 -0.0017 -0.0077  
Z 0.0022 0.0032 0.0139 0.0060 0.0020 0.0035  
AT. 113 C X 0.0005 -0.0022 -0.0000 -0.0020 -0.0019 -0.0027  
Y 0.0013 -0.0077 -0.0036 0.0034 0.0024 0.0054  
Z -0.0005 0.0051 0.0011 0.0008 0.0002 -0.0016  
AT. 114 C X -0.0005 -0.0022 -0.0000 0.0020 -0.0019 0.0027  
Y -0.0013 -0.0077 -0.0036 -0.0034 0.0024 -0.0054  
Z 0.0005 0.0051 0.0011 -0.0008 0.0002 0.0016  
AT. 115 C X 0.0018 -0.0132 0.0009 -0.0031 -0.0009 0.0023  
Y 0.0026 -0.0162 -0.0122 0.0078 -0.0013 0.0127  
Z 0.0028 -0.0141 -0.0142 0.0053 -0.0085 0.0127  
AT. 116 C X -0.0018 -0.0132 0.0009 0.0031 -0.0009 -0.0023  
Y -0.0026 -0.0162 -0.0122 -0.0078 -0.0013 -0.0127  
Z -0.0028 -0.0141 -0.0142 -0.0053 -0.0085 -0.0127  
AT. 117 H X -0.0017 0.0073 0.0168 -0.0098 0.0018 -0.0153  
Y 0.0062 -0.0410 -0.0331 0.0192 -0.0039 0.0326  
Z 0.0057 -0.0301 -0.0254 0.0090 -0.0108 0.0267  
AT. 118 H X 0.0017 0.0073 0.0168 0.0098 0.0018 0.0153  
Y -0.0062 -0.0410 -0.0331 -0.0192 -0.0039 -0.0326  
Z -0.0057 -0.0301 -0.0254 -0.0090 -0.0108 -0.0267  
AT. 119 H X 0.0067 -0.0431 -0.0238 0.0098 -0.0013 0.0285  
Y 0.0029 -0.0168 -0.0126 0.0092 0.0038 0.0137  
Z 0.0053 -0.0305 -0.0276 0.0106 -0.0143 0.0266  
AT. 120 H X -0.0067 -0.0431 -0.0238 -0.0098 -0.0013 -0.0285  
Y -0.0029 -0.0168 -0.0126 -0.0092 0.0038 -0.0137  
Z -0.0053 -0.0305 -0.0276 -0.0106 -0.0143 -0.0266  
AT. 121 C X 0.0034 -0.0213 -0.0157 0.0072 0.0025 0.0067



Y -0.0010 0.0023 0.0098 -0.0016 0.0031 -0.0032  
Z -0.0054 0.0197 0.0253 -0.0074 0.0012 -0.0135  
AT. 122 C X -0.0034 -0.0213 -0.0157 -0.0072 0.0025 -0.0067  
Y 0.0010 0.0023 0.0098 0.0016 0.0031 0.0032  
Z 0.0054 0.0197 0.0253 0.0074 0.0012 0.0135  
AT. 123 H X 0.0096 -0.0486 -0.0541 0.0203 -0.0069 0.0229  
Y 0.0049 -0.0182 -0.0151 0.0070 0.0015 0.0074  
Z -0.0103 0.0367 0.0445 -0.0142 0.0010 -0.0217  
AT. 124 H X -0.0096 -0.0486 -0.0541 -0.0203 -0.0069 -0.0229  
Y -0.0049 -0.0182 -0.0151 -0.0070 0.0015 -0.0074  
Z 0.0103 0.0367 0.0445 0.0142 0.0010 0.0217  
AT. 125 H X 0.0031 -0.0195 -0.0112 0.0061 0.0045 0.0046  
Y -0.0099 0.0347 0.0486 -0.0160 0.0070 -0.0200  
Z -0.0105 0.0389 0.0505 -0.0159 0.0055 -0.0244  
AT. 126 H X -0.0031 -0.0195 -0.0112 -0.0061 0.0045 -0.0046  
Y 0.0099 0.0347 0.0486 0.0160 0.0070 0.0200  
Z 0.0105 0.0389 0.0505 0.0159 0.0055 0.0244  
AT. 127 C X 0.0006 -0.0054 -0.0013 -0.0018 -0.0014 0.0002  
Y 0.0015 -0.0023 -0.0006 0.0009 0.0003 0.0005  
Z 0.0009 0.0016 0.0025 0.0003 -0.0007 -0.0049  
AT. 128 C X -0.0006 -0.0054 -0.0013 0.0018 -0.0014 -0.0002  
Y -0.0015 -0.0023 -0.0006 -0.0009 0.0003 -0.0005  
Z -0.0009 0.0016 0.0025 -0.0003 -0.0007 0.0049  
AT. 129 C X 0.0014 -0.0111 -0.0009 -0.0040 -0.0011 0.0030  
Y -0.0008 -0.0031 0.0104 -0.0028 0.0086 -0.0010  
Z 0.0034 0.0018 -0.0077 0.0027 -0.0099 -0.0028  
AT. 130 C X -0.0014 -0.0111 -0.0009 0.0040 -0.0011 -0.0030  
Y 0.0008 -0.0031 0.0104 0.0028 0.0086 0.0010  
Z -0.0034 0.0018 -0.0077 -0.0027 -0.0099 0.0028  
AT. 131 H X 0.0035 -0.0067 -0.0115 0.0003 -0.0086 -0.0014  
Y -0.0034 -0.0105 0.0248 -0.0079 0.0204 0.0035  
Z 0.0050 0.0055 -0.0154 0.0062 -0.0151 -0.0072

AT. 132 H X -0.0035 -0.0067 -0.0115 -0.0003 -0.0086 0.0014  
Y 0.0034 -0.0105 0.0248 0.0079 0.0204 -0.0035  
Z -0.0050 0.0055 -0.0154 -0.0062 -0.0151 0.0072

AT. 133 H X -0.0031 -0.0159 0.0179 -0.0110 0.0102 0.0087  
Y -0.0003 -0.0020 0.0125 -0.0045 0.0059 0.0008  
Z 0.0060 0.0057 -0.0133 0.0034 -0.0194 -0.0025

AT. 134 H X 0.0031 -0.0159 0.0179 0.0110 0.0102 -0.0087  
Y 0.0003 -0.0020 0.0125 0.0045 0.0059 -0.0008  
Z -0.0060 0.0057 -0.0133 -0.0034 -0.0194 0.0025

AT. 135 C X -0.0049 0.0202 -0.0120 0.0155 0.0188 -0.0139  
Y -0.0008 -0.0034 0.0299 -0.0278 0.0034 -0.0017  
Z -0.0104 0.0451 0.0012 0.0116 0.0336 -0.0238

AT. 136 C X 0.0049 0.0202 -0.0120 -0.0155 0.0188 0.0139  
Y 0.0008 -0.0034 0.0299 0.0278 0.0034 0.0017  
Z 0.0104 0.0451 0.0012 -0.0116 0.0336 0.0238

AT. 137 H X -0.0119 0.0478 -0.0849 0.1244 0.0955 -0.0084  
Y -0.0052 0.0122 -0.0533 0.1104 0.1059 0.0207  
Z -0.0153 0.0604 -0.1082 0.1985 0.1746 0.0113

AT. 138 H X 0.0119 0.0478 -0.0849 -0.1244 0.0955 0.0084  
Y 0.0052 0.0122 -0.0533 -0.1104 0.1059 -0.0207  
Z 0.0153 0.0604 -0.1082 -0.1985 0.1746 -0.0113

AT. 139 H X 0.0003 -0.0011 -0.0600 0.0850 0.0492 0.0157  
Y 0.0058 -0.0270 0.1951 -0.2900 -0.1783 -0.0464  
Z -0.0190 0.0795 0.0161 -0.0033 0.0460 -0.0490

AT. 140 H X -0.0003 -0.0011 -0.0600 -0.0850 0.0492 -0.0157  
Y -0.0058 -0.0270 0.1951 0.2900 -0.1783 0.0464  
Z 0.0190 0.0795 0.0161 0.0033 0.0460 0.0490

AT. 141 H X -0.0095 0.0376 0.1001 -0.1482 -0.0686 -0.0613  
Y -0.0053 0.0109 -0.0168 0.0613 0.0813 0.0117  
Z -0.0079 0.0378 0.0998 -0.1547 -0.0871 -0.0588

AT. 142 H X 0.0095 0.0376 0.1001 0.1482 -0.0686 0.0613  
Y 0.0053 0.0109 -0.0168 -0.0613 0.0813 -0.0117

Z 0.0079 0.0378 0.0998 0.1547 -0.0871 0.0588  
AT. 143 C X 0.0014 0.0017 0.0135 -0.0086 -0.0177 0.0013  
Y 0.0048 -0.0010 -0.0183 -0.0088 -0.0318 0.0065  
Z -0.0008 -0.0086 -0.0126 0.0112 0.0290 -0.0083  
AT. 144 C X -0.0014 0.0017 0.0135 0.0086 -0.0177 -0.0013  
Y -0.0048 -0.0010 -0.0183 0.0088 -0.0318 -0.0065  
Z 0.0008 -0.0086 -0.0126 -0.0112 0.0290 0.0083  
AT. 145 H X 0.0062 0.0076 0.0406 -0.0050 -0.0208 0.0054  
Y 0.0099 -0.0015 -0.0134 0.0026 -0.0334 0.0176  
Z -0.0052 -0.0062 -0.0106 0.0002 0.0300 -0.0190  
AT. 146 H X -0.0062 0.0076 0.0406 0.0050 -0.0208 -0.0054  
Y -0.0099 -0.0015 -0.0134 -0.0026 -0.0334 -0.0176  
Z 0.0052 -0.0062 -0.0106 -0.0002 0.0300 0.0190  
AT. 147 H X 0.0016 -0.0051 0.0095 0.0058 0.0090 0.0023  
Y -0.0011 0.0013 -0.0352 -0.0306 -0.0489 -0.0058  
Z -0.0036 -0.0171 -0.0278 0.0199 0.0582 -0.0136  
AT. 148 H X -0.0016 -0.0051 0.0095 -0.0058 0.0090 -0.0023  
Y 0.0011 0.0013 -0.0352 0.0306 -0.0489 0.0058  
Z 0.0036 -0.0171 -0.0278 -0.0199 0.0582 0.0136  
AT. 149 H X -0.0003 0.0095 0.0063 -0.0335 -0.0590 -0.0029  
Y 0.0073 -0.0002 -0.0228 -0.0085 -0.0443 0.0123  
Z 0.0043 -0.0115 -0.0171 0.0243 0.0283 0.0041  
AT. 150 H X 0.0003 0.0095 0.0063 0.0335 -0.0590 0.0029  
Y -0.0073 -0.0002 -0.0228 0.0085 -0.0443 -0.0123  
Z -0.0043 -0.0115 -0.0171 -0.0243 0.0283 -0.0041  
AT. 151 C X -0.0004 0.0002 0.0020 -0.0042 -0.0020 -0.0015  
Y 0.0018 -0.0045 -0.0111 0.0105 0.0038 0.0024  
Z 0.0013 0.0014 0.0029 -0.0009 -0.0068 -0.0010  
AT. 152 C X 0.0004 0.0002 0.0020 0.0042 -0.0020 0.0015  
Y -0.0018 -0.0045 -0.0111 -0.0105 0.0038 -0.0024  
Z -0.0013 0.0014 0.0029 0.0009 -0.0068 0.0010  
AT. 153 H X 0.0009 -0.0007 0.0015 -0.0050 -0.0031 -0.0003

Y 0.0026 -0.0046 -0.0162 0.0130 0.0029 0.0016  
Z 0.0024 0.0011 -0.0052 0.0034 -0.0077 -0.0027  
AT. 154 H X -0.0009 -0.0007 0.0015 0.0050 -0.0031 0.0003  
Y -0.0026 -0.0046 -0.0162 -0.0130 0.0029 -0.0016  
Z -0.0024 0.0011 -0.0052 -0.0034 -0.0077 0.0027  
AT. 155 H X -0.0014 -0.0021 0.0034 -0.0049 0.0007 0.0023  
Y 0.0019 -0.0056 -0.0173 0.0138 0.0030 0.0025  
Z 0.0008 0.0021 0.0096 -0.0043 -0.0051 0.0003  
AT. 156 H X 0.0014 -0.0021 0.0034 0.0049 0.0007 -0.0023  
Y -0.0019 -0.0056 -0.0173 -0.0138 0.0030 -0.0025  
Z -0.0008 0.0021 0.0096 0.0043 -0.0051 -0.0003  
AT. 157 O X -0.0131 -0.0005 -0.0001 -0.0002 0.0001 0.0002  
Y 0.0132 0.0003 0.0004 0.0005 -0.0013 -0.0002  
Z -0.0350 -0.0029 -0.0003 -0.0027 0.0000 -0.0002  
AT. 158 O X 0.0131 -0.0005 -0.0001 0.0002 0.0001 -0.0002  
Y -0.0132 0.0003 0.0004 -0.0005 -0.0013 0.0002  
Z 0.0350 -0.0029 -0.0003 0.0027 0.0000 0.0002  
AT. 159 O X 0.0568 0.0043 -0.0004 0.0026 -0.0011 -0.0013  
Y -0.0222 0.0009 0.0015 -0.0008 0.0009 0.0002  
Z 0.0829 0.0061 -0.0009 0.0020 -0.0020 -0.0025  
AT. 160 O X -0.0568 0.0043 -0.0004 -0.0026 -0.0011 0.0013  
Y 0.0222 0.0009 0.0015 0.0008 0.0009 -0.0002  
Z -0.0829 0.0061 -0.0009 -0.0020 -0.0020 0.0025  
AT. 161 H X -0.0071 -0.0011 0.0001 0.0012 -0.0004 0.0008  
Y 0.0145 -0.0000 -0.0002 0.0001 -0.0017 -0.0008  
Z -0.0335 -0.0017 0.0013 -0.0008 -0.0001 0.0012  
AT. 162 H X 0.0071 -0.0011 0.0001 -0.0012 -0.0004 -0.0008  
Y -0.0145 -0.0000 -0.0002 -0.0001 -0.0017 0.0008  
Z 0.0335 -0.0017 0.0013 0.0008 -0.0001 -0.0012  
AT. 163 H X 0.1281 0.0090 -0.0012 0.0053 -0.0027 -0.0027  
Y -0.0337 0.0006 0.0026 -0.0013 -0.0011 -0.0014  
Z 0.0604 0.0046 -0.0003 0.0011 -0.0018 -0.0022

AT.164 H X -0.1281 0.0090 -0.0012 -0.0053 -0.0027 0.0027

Y 0.0337 0.0006 0.0026 0.0013 -0.0011 0.0014

Z -0.0604 0.0046 -0.0003 -0.0011 -0.0018 0.0022

AT.165 O X -0.0052 -0.0194 0.0651 -0.0145 0.0536 0.0820

Y -0.0081 -0.0413 0.0171 0.0018 0.0208 0.0237

Z -0.0000 0.0019 0.0107 -0.0033 0.0082 0.0130

AT.166 O X 0.0052 -0.0194 0.0651 0.0145 0.0536 -0.0820

Y 0.0081 -0.0413 0.0171 -0.0018 0.0208 -0.0237

Z 0.0000 0.0019 0.0107 0.0033 0.0082 -0.0130

AT.167 H X -0.0070 -0.0295 0.0794 -0.0174 0.0661 0.1015

Y -0.0073 -0.0333 0.0186 0.0016 0.0214 0.0213

Z 0.0033 0.0151 -0.0291 0.0052 -0.0250 -0.0356

AT.168 H X 0.0070 -0.0295 0.0794 0.0174 0.0661 -0.1015

Y 0.0073 -0.0333 0.0186 -0.0016 0.0214 -0.0213

Z -0.0033 0.0151 -0.0291 -0.0052 -0.0250 0.0356

AT.169 O X -0.0037 -0.0197 -0.0187 0.0081 -0.0109 -0.0254

Y 0.0086 0.0496 0.0123 -0.0096 0.0024 0.0219

Z -0.0033 -0.0174 -0.0054 0.0037 -0.0009 -0.0082

AT.170 O X 0.0037 -0.0197 -0.0187 -0.0081 -0.0109 0.0254

Y -0.0086 0.0496 0.0123 0.0096 0.0024 -0.0219

Z 0.0033 -0.0174 -0.0054 -0.0037 -0.0009 0.0082

AT.171 H X -0.0036 -0.0202 -0.0241 0.0052 -0.0109 -0.0270

Y 0.0130 0.0731 0.0187 -0.0167 0.0053 0.0337

Z 0.0031 0.0181 0.0099 -0.0055 0.0054 0.0135

AT.172 H X 0.0036 -0.0202 -0.0241 -0.0052 -0.0109 0.0270

Y -0.0130 0.0731 0.0187 0.0167 0.0053 -0.0337

Z -0.0031 0.0181 0.0099 0.0055 0.0054 -0.0135

FREQ(CM\*\*-1) 243.55 247.26 248.59 249.20 253.21 256.73

AT. 1 I X 0.0000 0.0005 0.0002 0.0003 0.0003 0.0015

Y -0.0001 -0.0004 -0.0000 -0.0002 0.0006 0.0004

Z 0.0000 0.0003 0.0001 -0.0000 0.0002 0.0006  
AT. 2 I X 0.0000 0.0005 -0.0002 -0.0003 -0.0003 0.0015  
Y -0.0001 -0.0004 0.0000 0.0002 -0.0006 0.0004  
Z 0.0000 0.0003 -0.0001 0.0000 -0.0002 0.0006  
AT. 3 I X -0.0003 0.0009 -0.0002 0.0008 0.0002 0.0018  
Y 0.0003 0.0002 0.0005 0.0003 0.0004 0.0011  
Z 0.0000 0.0000 0.0001 -0.0001 0.0002 0.0004  
AT. 4 I X -0.0003 0.0009 0.0002 -0.0008 -0.0002 0.0018  
Y 0.0003 0.0002 -0.0005 -0.0003 -0.0004 0.0011  
Z 0.0000 0.0000 -0.0001 0.0001 -0.0002 0.0004  
AT. 5 O X 0.0023 -0.0117 -0.0037 -0.0112 -0.0067 -0.0294  
Y 0.0041 0.0001 -0.0047 0.0000 -0.0091 -0.0254  
Z -0.0001 -0.0167 -0.0010 -0.0132 -0.0006 -0.0048  
AT. 6 O X 0.0023 -0.0117 0.0037 0.0112 0.0067 -0.0294  
Y 0.0041 0.0001 0.0047 -0.0000 0.0091 -0.0254  
Z -0.0001 -0.0167 0.0010 0.0132 0.0006 -0.0048  
AT. 7 O X 0.0026 0.0038 0.0028 0.0037 0.0006 0.0042  
Y 0.0023 0.0029 0.0022 0.0012 -0.0006 -0.0012  
Z -0.0000 -0.0071 -0.0005 -0.0066 -0.0016 -0.0038  
AT. 8 O X 0.0026 0.0038 -0.0028 -0.0037 -0.0006 0.0042  
Y 0.0023 0.0029 -0.0022 -0.0012 0.0006 -0.0012  
Z -0.0000 -0.0071 0.0005 0.0066 0.0016 -0.0038  
AT. 9 N X 0.0005 0.0047 0.0001 0.0028 -0.0011 -0.0012  
Y 0.0010 0.0105 -0.0007 0.0080 -0.0029 -0.0063  
Z -0.0002 -0.0097 -0.0001 -0.0071 0.0007 0.0023  
AT. 10 N X 0.0005 0.0047 -0.0001 -0.0028 0.0011 -0.0012  
Y 0.0010 0.0105 0.0007 -0.0080 0.0029 -0.0063  
Z -0.0002 -0.0097 0.0001 0.0071 -0.0007 0.0023  
AT. 11 N X 0.0010 -0.0113 -0.0010 -0.0103 -0.0013 0.0007  
Y 0.0011 -0.0131 -0.0004 -0.0120 -0.0007 0.0020  
Z 0.0006 -0.0132 -0.0004 -0.0114 -0.0008 0.0034  
AT. 12 N X 0.0010 -0.0113 0.0010 0.0103 0.0013 0.0007

Y 0.0011 -0.0131 0.0004 0.0120 0.0007 0.0020  
Z 0.0006 -0.0132 0.0004 0.0114 0.0008 0.0034  
AT. 13 C X 0.0011 -0.0018 -0.0009 -0.0023 -0.0024 -0.0107  
Y 0.0025 0.0057 -0.0025 0.0048 -0.0056 -0.0137  
Z -0.0002 -0.0112 -0.0004 -0.0083 0.0005 0.0033  
AT. 14 C X 0.0011 -0.0018 0.0009 0.0023 0.0024 -0.0107  
Y 0.0025 0.0057 0.0025 -0.0048 0.0056 -0.0137  
Z -0.0002 -0.0112 0.0004 0.0083 -0.0005 0.0033  
AT. 15 C X -0.0008 -0.0008 0.0007 -0.0011 0.0014 0.0011  
Y 0.0015 0.0064 -0.0009 0.0060 -0.0024 -0.0035  
Z 0.0014 -0.0132 -0.0010 -0.0097 -0.0012 -0.0005  
AT. 16 C X -0.0008 -0.0008 -0.0007 0.0011 -0.0014 0.0011  
Y 0.0015 0.0064 0.0009 -0.0060 0.0024 -0.0035  
Z 0.0014 -0.0132 0.0010 0.0097 0.0012 -0.0005  
AT. 17 H X -0.0020 0.0012 0.0022 -0.0000 0.0044 0.0076  
Y 0.0001 0.0116 0.0006 0.0103 0.0004 0.0047  
Z 0.0028 -0.0193 -0.0025 -0.0151 -0.0038 -0.0092  
AT. 18 H X -0.0020 0.0012 -0.0022 0.0000 -0.0044 0.0076  
Y 0.0001 0.0116 -0.0006 -0.0103 -0.0004 0.0047  
Z 0.0028 -0.0193 0.0025 0.0151 0.0038 -0.0092  
AT. 19 H X -0.0019 -0.0029 0.0013 -0.0027 0.0032 0.0076  
Y 0.0035 -0.0023 -0.0034 -0.0006 -0.0064 -0.0164  
Z 0.0018 -0.0172 -0.0016 -0.0127 -0.0020 -0.0031  
AT. 20 H X -0.0019 -0.0029 -0.0013 0.0027 -0.0032 0.0076  
Y 0.0035 -0.0023 0.0034 0.0006 0.0064 -0.0164  
Z 0.0018 -0.0172 0.0016 0.0127 0.0020 -0.0031  
AT. 21 C X 0.0013 -0.0025 0.0007 -0.0020 -0.0005 -0.0008  
Y 0.0012 -0.0043 0.0003 -0.0051 -0.0014 -0.0038  
Z 0.0002 -0.0092 -0.0002 -0.0081 -0.0009 0.0011  
AT. 22 C X 0.0013 -0.0025 -0.0007 0.0020 0.0005 -0.0008  
Y 0.0012 -0.0043 -0.0003 0.0051 0.0014 -0.0038  
Z 0.0002 -0.0092 0.0002 0.0081 0.0009 0.0011

AT. 23 C X 0.0005 0.0013 0.0006 0.0018 0.0005 0.0023  
Y -0.0007 0.0011 -0.0015 -0.0014 -0.0034 -0.0140  
Z 0.0001 -0.0088 0.0004 -0.0065 0.0007 0.0060

AT. 24 C X 0.0005 0.0013 -0.0006 -0.0018 -0.0005 0.0023  
Y -0.0007 0.0011 0.0015 0.0014 0.0034 -0.0140  
Z 0.0001 -0.0088 -0.0004 0.0065 -0.0007 0.0060

AT. 25 H X 0.0002 0.0036 0.0010 0.0046 0.0025 0.0085  
Y -0.0008 0.0022 -0.0015 -0.0005 -0.0034 -0.0144  
Z 0.0011 -0.0156 0.0018 -0.0106 0.0040 0.0168

AT. 26 H X 0.0002 0.0036 -0.0010 -0.0046 -0.0025 0.0085  
Y -0.0008 0.0022 0.0015 0.0005 0.0034 -0.0144  
Z 0.0011 -0.0156 -0.0018 0.0106 -0.0040 0.0168

AT. 27 H X 0.0004 0.0033 0.0007 0.0041 0.0012 0.0022  
Y -0.0010 0.0077 -0.0024 0.0024 -0.0062 -0.0287  
Z -0.0000 -0.0063 -0.0000 -0.0051 -0.0008 -0.0010

AT. 28 H X 0.0004 0.0033 -0.0007 -0.0041 -0.0012 0.0022  
Y -0.0010 0.0077 0.0024 -0.0024 0.0062 -0.0287  
Z -0.0000 -0.0063 0.0000 0.0051 0.0008 -0.0010

AT. 29 C X 0.0003 -0.0002 -0.0004 -0.0010 -0.0018 -0.0093  
Y 0.0006 -0.0030 -0.0018 -0.0048 -0.0036 -0.0148  
Z -0.0004 -0.0053 0.0010 -0.0032 0.0032 0.0142

AT. 30 C X 0.0003 -0.0002 0.0004 0.0010 0.0018 -0.0093  
Y 0.0006 -0.0030 0.0018 0.0048 0.0036 -0.0148  
Z -0.0004 -0.0053 -0.0010 0.0032 -0.0032 0.0142

AT. 31 H X -0.0000 -0.0107 -0.0015 -0.0108 -0.0035 -0.0209  
Y 0.0005 -0.0019 -0.0005 -0.0025 -0.0002 0.0018  
Z -0.0006 -0.0104 0.0022 -0.0059 0.0072 0.0317

AT. 32 H X -0.0000 -0.0107 0.0015 0.0108 0.0035 -0.0209  
Y 0.0005 -0.0019 0.0005 0.0025 0.0002 0.0018  
Z -0.0006 -0.0104 -0.0022 0.0059 -0.0072 0.0317

AT. 33 H X 0.0006 0.0007 -0.0011 -0.0021 -0.0039 -0.0166  
Y 0.0009 -0.0044 -0.0035 -0.0080 -0.0088 -0.0405



Z -0.0004 -0.0045 0.0014 -0.0029 0.0041 0.0201  
AT. 34 H X 0.0006 0.0007 0.0011 0.0021 0.0039 -0.0166  
Y 0.0009 -0.0044 0.0035 0.0080 0.0088 -0.0405  
Z -0.0004 -0.0045 -0.0014 0.0029 -0.0041 0.0201  
AT. 35 C X 0.0001 -0.0033 -0.0004 -0.0033 -0.0004 -0.0013  
Y 0.0001 -0.0030 -0.0007 -0.0033 -0.0005 -0.0031  
Z 0.0002 0.0002 -0.0000 0.0001 -0.0005 -0.0015  
AT. 36 C X 0.0001 -0.0033 0.0004 0.0033 0.0004 -0.0013  
Y 0.0001 -0.0030 0.0007 0.0033 0.0005 -0.0031  
Z 0.0002 0.0002 0.0000 -0.0001 0.0005 -0.0015  
AT. 37 C X 0.0003 -0.0067 -0.0014 -0.0072 -0.0020 -0.0079  
Y -0.0003 -0.0116 -0.0009 -0.0110 -0.0007 -0.0117  
Z -0.0002 -0.0151 -0.0011 -0.0137 -0.0017 -0.0170  
AT. 38 C X 0.0003 -0.0067 0.0014 0.0072 0.0020 -0.0079  
Y -0.0003 -0.0116 0.0009 0.0110 0.0007 -0.0117  
Z -0.0002 -0.0151 0.0011 0.0137 0.0017 -0.0170  
AT. 39 H X -0.0008 -0.0186 -0.0021 -0.0184 -0.0024 -0.0313  
Y -0.0008 -0.0222 -0.0015 -0.0211 -0.0017 -0.0258  
Z -0.0007 -0.0189 -0.0012 -0.0171 -0.0015 -0.0266  
AT. 40 H X -0.0008 -0.0186 0.0021 0.0184 0.0024 -0.0313  
Y -0.0008 -0.0222 0.0015 0.0211 0.0017 -0.0258  
Z -0.0007 -0.0189 0.0012 0.0171 0.0015 -0.0266  
AT. 41 H X 0.0020 0.0034 -0.0003 0.0027 -0.0021 0.0164  
Y -0.0014 -0.0058 -0.0011 -0.0065 -0.0004 -0.0216  
Z -0.0010 -0.0296 -0.0018 -0.0270 -0.0017 -0.0338  
AT. 42 H X 0.0020 0.0034 0.0003 -0.0027 0.0021 0.0164  
Y -0.0014 -0.0058 0.0011 0.0065 0.0004 -0.0216  
Z -0.0010 -0.0296 0.0018 0.0270 0.0017 -0.0338  
AT. 43 C X -0.0003 -0.0038 0.0010 -0.0018 0.0053 0.0238  
Y 0.0005 -0.0041 0.0004 -0.0031 0.0014 0.0070  
Z -0.0001 -0.0043 0.0014 -0.0025 0.0047 0.0251  
AT. 44 C X -0.0003 -0.0038 -0.0010 0.0018 -0.0053 0.0238

Y 0.0005 -0.0041 -0.0004 0.0031 -0.0014 0.0070  
Z -0.0001 -0.0043 -0.0014 0.0025 -0.0047 0.0251  
AT. 45 H X -0.0021 0.0065 0.0029 0.0092 0.0135 0.0514  
Y 0.0020 -0.0047 -0.0015 -0.0062 -0.0077 -0.0278  
Z -0.0003 -0.0109 0.0019 -0.0072 0.0077 0.0389  
AT. 46 H X -0.0021 0.0065 -0.0029 -0.0092 -0.0135 0.0514  
Y 0.0020 -0.0047 0.0015 0.0062 0.0077 -0.0278  
Z -0.0003 -0.0109 -0.0019 0.0072 -0.0077 0.0389  
AT. 47 H X -0.0004 -0.0047 0.0012 -0.0016 0.0074 0.0351  
Y -0.0007 -0.0016 0.0025 0.0018 0.0098 0.0428  
Z -0.0012 -0.0006 0.0032 0.0023 0.0105 0.0468  
AT. 48 H X -0.0004 -0.0047 -0.0012 0.0016 -0.0074 0.0351  
Y -0.0007 -0.0016 -0.0025 -0.0018 -0.0098 0.0428  
Z -0.0012 -0.0006 -0.0032 -0.0023 -0.0105 0.0468  
AT. 49 C X 0.0002 -0.0028 0.0001 -0.0026 0.0005 0.0024  
Y 0.0002 -0.0029 -0.0003 -0.0023 0.0004 0.0007  
Z 0.0002 0.0004 0.0002 -0.0008 -0.0001 0.0012  
AT. 50 C X 0.0002 -0.0028 -0.0001 0.0026 -0.0005 0.0024  
Y 0.0002 -0.0029 0.0003 0.0023 -0.0004 0.0007  
Z 0.0002 0.0004 -0.0002 0.0008 0.0001 0.0012  
AT. 51 C X 0.0004 -0.0040 -0.0001 -0.0052 -0.0001 0.0033  
Y -0.0006 0.0082 0.0018 0.0095 0.0039 0.0149  
Z 0.0007 -0.0103 -0.0015 -0.0100 -0.0026 -0.0105  
AT. 52 C X 0.0004 -0.0040 0.0001 0.0052 0.0001 0.0033  
Y -0.0006 0.0082 -0.0018 -0.0095 -0.0039 0.0149  
Z 0.0007 -0.0103 0.0015 0.0100 0.0026 -0.0105  
AT. 53 H X -0.0008 0.0041 0.0023 0.0042 0.0047 0.0208  
Y -0.0016 0.0169 0.0039 0.0186 0.0081 0.0313  
Z 0.0017 -0.0148 -0.0032 -0.0160 -0.0062 -0.0210  
AT. 54 H X -0.0008 0.0041 -0.0023 -0.0042 -0.0047 0.0208  
Y -0.0016 0.0169 -0.0039 -0.0186 -0.0081 0.0313  
Z 0.0017 -0.0148 0.0032 0.0160 0.0062 -0.0210

AT. 55 H X 0.0021 -0.0138 -0.0034 -0.0170 -0.0068 -0.0216  
Y -0.0014 0.0050 0.0029 0.0087 0.0075 0.0266  
Z 0.0008 -0.0212 -0.0025 -0.0194 -0.0029 -0.0132

AT. 56 H X 0.0021 -0.0138 0.0034 0.0170 0.0068 -0.0216  
Y -0.0014 0.0050 -0.0029 -0.0087 -0.0075 0.0266  
Z 0.0008 -0.0212 0.0025 0.0194 0.0029 -0.0132

AT. 57 C X -0.0015 -0.0123 0.0017 -0.0065 0.0074 0.0306  
Y -0.0009 0.0308 0.0032 0.0352 0.0072 0.0330  
Z 0.0019 0.0678 0.0019 0.0636 -0.0044 -0.0103

AT. 58 C X -0.0015 -0.0123 -0.0017 0.0065 -0.0074 0.0306  
Y -0.0009 0.0308 -0.0032 -0.0352 -0.0072 0.0330  
Z 0.0019 0.0678 -0.0019 -0.0636 0.0044 -0.0103

AT. 59 H X -0.0036 -0.0240 0.0041 -0.0103 0.0173 0.0709  
Y 0.0013 0.0320 0.0008 0.0219 -0.0002 0.0042  
Z 0.0037 0.0607 0.0001 0.0405 -0.0083 -0.0247

AT. 60 H X -0.0036 -0.0240 -0.0041 0.0103 -0.0173 0.0709  
Y 0.0013 0.0320 -0.0008 -0.0219 0.0002 0.0042  
Z 0.0037 0.0607 -0.0001 -0.0405 0.0083 -0.0247

AT. 61 H X -0.0022 0.0503 0.0059 0.0664 0.0115 0.0526  
Y -0.0043 0.0323 0.0068 0.0574 0.0184 0.0776  
Z 0.0030 0.1168 0.0034 0.1104 -0.0067 -0.0149

AT. 62 H X -0.0022 0.0503 -0.0059 -0.0664 -0.0115 0.0526  
Y -0.0043 0.0323 -0.0068 -0.0574 -0.0184 0.0776  
Z 0.0030 0.1168 -0.0034 -0.1104 0.0067 -0.0149

AT. 63 H X -0.0003 -0.0729 -0.0032 -0.0792 0.0012 -0.0001  
Y -0.0010 0.0642 0.0058 0.0665 0.0112 0.0545  
Z 0.0008 0.0961 0.0042 0.1049 -0.0020 -0.0002

AT. 64 H X -0.0003 -0.0729 0.0032 0.0792 -0.0012 -0.0001  
Y -0.0010 0.0642 -0.0058 -0.0665 -0.0112 0.0545  
Z 0.0008 0.0961 -0.0042 -0.1049 0.0020 -0.0002

AT. 65 C X 0.0005 0.0365 0.0002 0.0384 -0.0049 -0.0286  
Y -0.0009 -0.0300 -0.0032 -0.0291 -0.0017 -0.0168

Z 0.0010 0.0471 0.0018 0.0458 -0.0033 -0.0153  
AT. 66 C X 0.0005 0.0365 -0.0002 -0.0384 0.0049 -0.0286  
Y -0.0009 -0.0300 0.0032 0.0291 0.0017 -0.0168  
Z 0.0010 0.0471 -0.0018 -0.0458 0.0033 -0.0153  
AT. 67 H X 0.0009 0.0805 0.0001 0.0880 -0.0093 -0.0607  
Y -0.0030 -0.0882 -0.0041 -0.1048 -0.0028 -0.0035  
Z 0.0027 0.0640 0.0028 0.0736 0.0014 -0.0009  
AT. 68 H X 0.0009 0.0805 -0.0001 -0.0880 0.0093 -0.0607  
Y -0.0030 -0.0882 0.0041 0.1048 0.0028 -0.0035  
Z 0.0027 0.0640 -0.0028 -0.0736 -0.0014 -0.0009  
AT. 69 H X 0.0014 0.0409 -0.0008 0.0542 -0.0030 -0.0319  
Y 0.0008 0.0169 -0.0031 0.0344 -0.0013 -0.0344  
Z 0.0020 0.1104 0.0039 0.1118 -0.0068 -0.0361  
AT. 70 H X 0.0014 0.0409 0.0008 -0.0542 0.0030 -0.0319  
Y 0.0008 0.0169 0.0031 -0.0344 0.0013 -0.0344  
Z 0.0020 0.1104 -0.0039 -0.1118 0.0068 -0.0361  
AT. 71 H X -0.0006 0.0335 0.0017 0.0204 -0.0077 -0.0254  
Y -0.0018 -0.0499 -0.0051 -0.0499 -0.0033 -0.0269  
Z -0.0011 0.0173 0.0003 0.0026 -0.0076 -0.0267  
AT. 72 H X -0.0006 0.0335 -0.0017 -0.0204 0.0077 -0.0254  
Y -0.0018 -0.0499 0.0051 0.0499 0.0033 -0.0269  
Z -0.0011 0.0173 -0.0003 -0.0026 0.0076 -0.0267  
AT. 73 C X 0.0002 -0.0066 -0.0010 -0.0090 -0.0012 -0.0022  
Y 0.0004 -0.0039 -0.0017 -0.0065 -0.0024 -0.0068  
Z -0.0000 -0.0109 -0.0003 -0.0120 0.0005 0.0023  
AT. 74 C X 0.0002 -0.0066 0.0010 0.0090 0.0012 -0.0022  
Y 0.0004 -0.0039 0.0017 0.0065 0.0024 -0.0068  
Z -0.0000 -0.0109 0.0003 0.0120 -0.0005 0.0023  
AT. 75 H X 0.0001 -0.0053 -0.0018 -0.0123 -0.0027 -0.0040  
Y 0.0004 -0.0056 -0.0023 -0.0089 -0.0035 -0.0105  
Z 0.0001 -0.0117 -0.0019 -0.0177 -0.0021 -0.0042  
AT. 76 H X 0.0001 -0.0053 0.0018 0.0123 0.0027 -0.0040

Y 0.0004 -0.0056 0.0023 0.0089 0.0035 -0.0105  
Z 0.0001 -0.0117 0.0019 0.0177 0.0021 -0.0042  
AT. 77 H X 0.0003 -0.0079 -0.0015 -0.0125 -0.0019 -0.0034  
Y -0.0001 -0.0053 -0.0029 -0.0108 -0.0036 -0.0112  
Z 0.0002 -0.0082 0.0012 -0.0049 0.0023 0.0073  
AT. 78 H X 0.0003 -0.0079 0.0015 0.0125 0.0019 -0.0034  
Y -0.0001 -0.0053 0.0029 0.0108 0.0036 -0.0112  
Z 0.0002 -0.0082 -0.0012 0.0049 -0.0023 0.0073  
AT. 79 I X 0.0003 0.0002 -0.0018 -0.0006 0.0003 0.0001  
Y -0.0007 -0.0001 0.0007 0.0001 0.0001 -0.0000  
Z 0.0011 -0.0002 0.0005 0.0001 0.0003 0.0000  
AT. 80 I X 0.0003 0.0002 0.0018 0.0006 -0.0003 0.0001  
Y -0.0007 -0.0001 -0.0007 -0.0001 -0.0001 -0.0000  
Z 0.0011 -0.0002 -0.0005 -0.0001 -0.0003 0.0000  
AT. 81 I X 0.0002 -0.0002 -0.0002 -0.0001 0.0005 -0.0003  
Y 0.0001 0.0004 0.0000 0.0003 -0.0011 0.0002  
Z 0.0000 -0.0001 -0.0003 -0.0001 -0.0003 -0.0001  
AT. 82 I X 0.0002 -0.0002 0.0002 0.0001 -0.0005 -0.0003  
Y 0.0001 0.0004 -0.0000 -0.0003 0.0011 0.0002  
Z 0.0000 -0.0001 0.0003 0.0001 0.0003 -0.0001  
AT. 83 O X 0.0034 0.0011 0.0001 0.0005 -0.0098 0.0003  
Y 0.0041 0.0013 -0.0046 -0.0005 0.0008 0.0009  
Z -0.0138 -0.0008 -0.0084 0.0004 0.0099 -0.0009  
AT. 84 O X 0.0034 0.0011 -0.0001 -0.0005 0.0098 0.0003  
Y 0.0041 0.0013 0.0046 0.0005 -0.0008 0.0009  
Z -0.0138 -0.0008 0.0084 -0.0004 -0.0099 -0.0009  
AT. 85 O X -0.0108 0.0011 -0.0019 0.0001 0.0276 -0.0012  
Y 0.0108 -0.0013 0.0058 -0.0006 -0.0148 0.0002  
Z 0.0040 -0.0006 0.0022 -0.0004 0.0071 -0.0006  
AT. 86 O X -0.0108 0.0011 0.0019 -0.0001 -0.0276 -0.0012  
Y 0.0108 -0.0013 -0.0058 0.0006 0.0148 0.0002  
Z 0.0040 -0.0006 -0.0022 0.0004 -0.0071 -0.0006

AT. 87 N X 0.0017 -0.0001 0.0016 -0.0001 -0.0002 0.0001  
Y 0.0100 -0.0002 0.0073 -0.0005 -0.0108 -0.0004  
Z -0.0096 0.0002 -0.0090 0.0006 0.0029 -0.0003

AT. 88 N X 0.0017 -0.0001 -0.0016 0.0001 0.0002 0.0001  
Y 0.0100 -0.0002 -0.0073 0.0005 0.0108 -0.0004  
Z -0.0096 0.0002 0.0090 -0.0006 -0.0029 -0.0003

AT. 89 N X 0.0045 -0.0003 0.0071 -0.0003 -0.0060 0.0018  
Y -0.0137 0.0001 -0.0151 0.0008 0.0037 -0.0039  
Z -0.0123 0.0002 -0.0135 0.0008 0.0050 -0.0023

AT. 90 N X 0.0045 -0.0003 -0.0071 0.0003 0.0060 0.0018  
Y -0.0137 0.0001 0.0151 -0.0008 -0.0037 -0.0039  
Z -0.0123 0.0002 0.0135 -0.0008 -0.0050 -0.0023

AT. 91 C X 0.0015 0.0006 0.0007 0.0000 -0.0031 0.0001  
Y 0.0073 0.0008 -0.0003 0.0000 -0.0081 0.0004  
Z -0.0113 0.0002 -0.0108 0.0007 0.0034 -0.0003

AT. 92 C X 0.0015 0.0006 -0.0007 -0.0000 0.0031 0.0001  
Y 0.0073 0.0008 0.0003 -0.0000 0.0081 0.0004  
Z -0.0113 0.0002 0.0108 -0.0007 -0.0034 -0.0003

AT. 93 C X 0.0024 0.0014 -0.0060 0.0002 -0.0069 0.0005  
Y 0.0040 0.0011 -0.0029 0.0008 -0.0096 0.0005  
Z -0.0132 0.0016 -0.0214 0.0013 0.0007 -0.0001

AT. 94 C X 0.0024 0.0014 0.0060 -0.0002 0.0069 0.0005  
Y 0.0040 0.0011 0.0029 -0.0008 0.0096 0.0005  
Z -0.0132 0.0016 0.0214 -0.0013 -0.0007 -0.0001

AT. 95 H X 0.0030 0.0016 -0.0138 0.0004 -0.0134 0.0011  
Y 0.0070 -0.0000 0.0093 0.0003 -0.0058 0.0001  
Z -0.0192 0.0034 -0.0351 0.0019 0.0006 -0.0001

AT. 96 H X 0.0030 0.0016 0.0138 -0.0004 0.0134 0.0011  
Y 0.0070 -0.0000 -0.0093 -0.0003 0.0058 0.0001  
Z -0.0192 0.0034 0.0351 -0.0019 -0.0006 -0.0001

AT. 97 H X 0.0043 0.0021 -0.0106 0.0002 -0.0082 0.0006  
Y -0.0050 0.0033 -0.0234 0.0017 -0.0118 0.0008

Z -0.0161 0.0020 -0.0248 0.0015 0.0007 -0.0001  
AT. 98 H X 0.0043 0.0021 0.0106 -0.0002 0.0082 0.0006  
Y -0.0050 0.0033 0.0234 -0.0017 0.0118 0.0008  
Z -0.0161 0.0020 0.0248 -0.0015 -0.0007 -0.0001  
AT. 99 C X -0.0045 0.0005 0.0007 -0.0001 0.0100 0.0001  
Y -0.0024 -0.0002 -0.0014 0.0000 0.0063 -0.0017  
Z -0.0045 -0.0001 -0.0050 0.0003 0.0046 -0.0011  
AT. 100 C X -0.0045 0.0005 -0.0007 0.0001 -0.0100 0.0001  
Y -0.0024 -0.0002 0.0014 -0.0000 -0.0063 -0.0017  
Z -0.0045 -0.0001 0.0050 -0.0003 -0.0046 -0.0011  
AT. 101 C X -0.0044 0.0005 0.0002 -0.0002 0.0160 -0.0012  
Y -0.0033 0.0011 0.0024 -0.0000 0.0239 -0.0021  
Z -0.0049 -0.0003 -0.0043 0.0004 -0.0030 0.0003  
AT. 102 C X -0.0044 0.0005 -0.0002 0.0002 -0.0160 -0.0012  
Y -0.0033 0.0011 -0.0024 0.0000 -0.0239 -0.0021  
Z -0.0049 -0.0003 0.0043 -0.0004 0.0030 0.0003  
AT. 103 H X -0.0060 0.0005 -0.0004 -0.0002 0.0222 -0.0017  
Y -0.0025 0.0011 0.0029 -0.0000 0.0214 -0.0018  
Z -0.0051 -0.0016 -0.0059 0.0002 -0.0169 0.0016  
AT. 104 H X -0.0060 0.0005 0.0004 0.0002 -0.0222 -0.0017  
Y -0.0025 0.0011 -0.0029 0.0000 -0.0214 -0.0018  
Z -0.0051 -0.0016 0.0059 -0.0002 0.0169 0.0016  
AT. 105 H X -0.0049 0.0012 -0.0006 0.0001 0.0218 -0.0017  
Y -0.0025 0.0019 0.0053 -0.0002 0.0359 -0.0032  
Z -0.0047 0.0002 -0.0033 0.0004 0.0030 -0.0003  
AT. 106 H X -0.0049 0.0012 0.0006 -0.0001 -0.0218 -0.0017  
Y -0.0025 0.0019 -0.0053 0.0002 -0.0359 -0.0032  
Z -0.0047 0.0002 0.0033 -0.0004 -0.0030 -0.0003  
AT. 107 C X 0.0018 -0.0000 -0.0035 0.0004 -0.0118 -0.0005  
Y -0.0016 -0.0002 0.0020 -0.0002 0.0079 -0.0007  
Z -0.0072 0.0001 -0.0114 0.0011 -0.0119 -0.0006  
AT. 108 C X 0.0018 -0.0000 0.0035 -0.0004 0.0118 -0.0005

Y -0.0016 -0.0002 -0.0020 0.0002 -0.0079 -0.0007  
Z -0.0072 0.0001 0.0114 -0.0011 0.0119 -0.0006  
AT. 109 H X 0.0101 0.0002 -0.0053 0.0011 -0.0394 -0.0013  
Y -0.0028 0.0003 -0.0032 0.0009 -0.0039 -0.0012  
Z -0.0120 0.0008 -0.0197 0.0027 -0.0236 -0.0012  
AT. 110 H X 0.0101 0.0002 0.0053 -0.0011 0.0394 -0.0013  
Y -0.0028 0.0003 0.0032 -0.0009 0.0039 -0.0012  
Z -0.0120 0.0008 0.0197 -0.0027 0.0236 -0.0012  
AT. 111 H X 0.0017 -0.0002 -0.0014 0.0002 -0.0091 -0.0003  
Y -0.0037 -0.0007 0.0096 -0.0019 0.0366 0.0002  
Z -0.0067 0.0004 -0.0151 0.0016 -0.0205 -0.0011  
AT. 112 H X 0.0017 -0.0002 0.0014 -0.0002 0.0091 -0.0003  
Y -0.0037 -0.0007 -0.0096 0.0019 -0.0366 0.0002  
Z -0.0067 0.0004 0.0151 -0.0016 0.0205 -0.0011  
AT. 113 C X 0.0032 -0.0001 0.0008 -0.0000 -0.0010 0.0003  
Y -0.0034 -0.0001 -0.0026 0.0004 -0.0030 -0.0007  
Z -0.0026 0.0001 -0.0033 0.0002 0.0015 -0.0001  
AT. 114 C X 0.0032 -0.0001 -0.0008 0.0000 0.0010 0.0003  
Y -0.0034 -0.0001 0.0026 -0.0004 0.0030 -0.0007  
Z -0.0026 0.0001 0.0033 -0.0002 -0.0015 -0.0001  
AT. 115 C X 0.0028 -0.0005 0.0044 -0.0002 -0.0021 0.0016  
Y -0.0092 -0.0005 -0.0013 0.0001 0.0154 -0.0007  
Z -0.0099 -0.0006 -0.0020 -0.0001 0.0274 -0.0003  
AT. 116 C X 0.0028 -0.0005 -0.0044 0.0002 0.0021 0.0016  
Y -0.0092 -0.0005 0.0013 -0.0001 -0.0154 -0.0007  
Z -0.0099 -0.0006 0.0020 0.0001 -0.0274 -0.0003  
AT. 117 H X 0.0060 0.0004 -0.0036 0.0005 -0.0262 -0.0002  
Y -0.0169 -0.0016 0.0056 -0.0007 0.0445 0.0002  
Z -0.0113 -0.0013 0.0048 -0.0007 0.0447 0.0015  
AT. 118 H X 0.0060 0.0004 0.0036 -0.0005 0.0262 -0.0002  
Y -0.0169 -0.0016 -0.0056 0.0007 -0.0445 0.0002  
Z -0.0113 -0.0013 -0.0048 0.0007 -0.0447 0.0015



AT.119 H X -0.0011 -0.0019 0.0186 -0.0014 0.0325 0.0046  
Y -0.0037 -0.0005 0.0053 -0.0003 0.0117 0.0010  
Z -0.0174 -0.0013 -0.0006 -0.0005 0.0506 -0.0002

AT.120 H X -0.0011 -0.0019 -0.0186 0.0014 -0.0325 0.0046  
Y -0.0037 -0.0005 -0.0053 0.0003 -0.0117 0.0010  
Z -0.0174 -0.0013 0.0006 0.0005 -0.0506 -0.0002

AT.121 C X 0.0071 -0.0009 0.0104 -0.0007 0.0033 -0.0010  
Y -0.0082 -0.0001 -0.0129 0.0006 -0.0139 -0.0010  
Z -0.0134 0.0010 -0.0165 0.0014 -0.0157 0.0014

AT.122 C X 0.0071 -0.0009 -0.0104 0.0007 -0.0033 -0.0010  
Y -0.0082 -0.0001 0.0129 -0.0006 0.0139 -0.0010  
Z -0.0134 0.0010 0.0165 -0.0014 0.0157 0.0014

AT.123 H X 0.0110 -0.0023 0.0200 -0.0020 0.0335 -0.0068  
Y 0.0022 -0.0012 0.0019 -0.0009 0.0001 -0.0026  
Z -0.0235 0.0020 -0.0300 0.0027 -0.0246 0.0021

AT.124 H X 0.0110 -0.0023 -0.0200 0.0020 -0.0335 -0.0068  
Y 0.0022 -0.0012 -0.0019 0.0009 -0.0001 -0.0026  
Z -0.0235 0.0020 0.0300 -0.0027 0.0246 0.0021

AT.125 H X 0.0076 -0.0008 0.0126 -0.0008 0.0008 0.0004  
Y -0.0197 0.0016 -0.0324 0.0026 -0.0398 0.0025  
Z -0.0186 0.0020 -0.0237 0.0022 -0.0312 0.0051

AT.126 H X 0.0076 -0.0008 -0.0126 0.0008 -0.0008 0.0004  
Y -0.0197 0.0016 0.0324 -0.0026 0.0398 0.0025  
Z -0.0186 0.0020 0.0237 -0.0022 0.0312 0.0051

AT.127 C X 0.0031 -0.0001 0.0013 0.0001 0.0000 0.0002  
Y -0.0037 -0.0003 -0.0066 0.0000 -0.0047 -0.0011  
Z -0.0025 0.0003 -0.0018 -0.0000 -0.0031 0.0009

AT.128 C X 0.0031 -0.0001 -0.0013 -0.0001 -0.0000 0.0002  
Y -0.0037 -0.0003 0.0066 -0.0000 0.0047 -0.0011  
Z -0.0025 0.0003 0.0018 0.0000 0.0031 0.0009

AT.129 C X 0.0085 -0.0004 0.0094 -0.0004 0.0001 0.0008  
Y 0.0034 -0.0006 0.0001 0.0001 -0.0191 0.0007

Z -0.0092 0.0006 -0.0079 -0.0000 0.0105 -0.0010  
AT. 130 C X 0.0085 -0.0004 -0.0094 0.0004 -0.0001 0.0008  
Y 0.0034 -0.0006 -0.0001 -0.0001 0.0191 0.0007  
Z -0.0092 0.0006 0.0079 0.0000 -0.0105 -0.0010  
AT. 131 H X 0.0054 0.0002 0.0055 -0.0006 0.0082 -0.0007  
Y 0.0109 -0.0014 0.0084 0.0002 -0.0380 0.0031  
Z -0.0104 0.0011 -0.0101 -0.0001 0.0124 -0.0018  
AT. 132 H X 0.0054 0.0002 -0.0055 0.0006 -0.0082 -0.0007  
Y 0.0109 -0.0014 -0.0084 -0.0002 0.0380 0.0031  
Z -0.0104 0.0011 0.0101 0.0001 -0.0124 -0.0018  
AT. 133 H X 0.0104 -0.0013 0.0113 0.0001 -0.0176 0.0029  
Y -0.0021 -0.0005 -0.0057 0.0004 -0.0174 0.0006  
Z -0.0188 0.0011 -0.0180 0.0001 0.0214 -0.0025  
AT. 134 H X 0.0104 -0.0013 -0.0113 -0.0001 0.0176 0.0029  
Y -0.0021 -0.0005 0.0057 -0.0004 0.0174 0.0006  
Z -0.0188 0.0011 0.0180 -0.0001 -0.0214 -0.0025  
AT. 135 C X 0.0244 0.0004 0.0256 -0.0012 0.0013 0.0007  
Y 0.0240 -0.0004 0.0159 -0.0002 -0.0380 0.0046  
Z 0.0458 0.0006 0.0460 -0.0020 -0.0145 0.0034  
AT. 136 C X 0.0244 0.0004 -0.0256 0.0012 -0.0013 0.0007  
Y 0.0240 -0.0004 -0.0159 0.0002 0.0380 0.0046  
Z 0.0458 0.0006 -0.0460 0.0020 0.0145 0.0034  
AT. 137 H X 0.0011 -0.0001 0.0375 -0.0014 0.0051 -0.0011  
Y -0.0278 -0.0025 0.0122 0.0009 -0.0664 0.0038  
Z -0.0303 -0.0027 0.0360 -0.0002 -0.0631 0.0031  
AT. 138 H X 0.0011 -0.0001 -0.0375 0.0014 -0.0051 -0.0011  
Y -0.0278 -0.0025 -0.0122 -0.0009 0.0664 0.0038  
Z -0.0303 -0.0027 -0.0360 0.0002 0.0631 0.0031  
AT. 139 H X -0.0426 -0.0011 -0.0155 0.0012 0.0022 -0.0021  
Y 0.1332 0.0033 0.0349 -0.0025 -0.0068 0.0088  
Z 0.1009 0.0014 0.0934 -0.0045 -0.0248 0.0056  
AT. 140 H X -0.0426 -0.0011 0.0155 -0.0012 -0.0022 -0.0021

Y 0.1332 0.0033 -0.0349 0.0025 0.0068 0.0088  
Z 0.1009 0.0014 -0.0934 0.0045 0.0248 0.0056  
AT. 141 H X 0.1386 0.0031 0.0822 -0.0047 -0.0007 0.0071  
Y -0.0007 -0.0021 0.0230 0.0003 -0.0768 0.0068  
Z 0.1225 0.0036 0.0639 -0.0041 0.0258 0.0039  
AT. 142 H X 0.1386 0.0031 -0.0822 0.0047 0.0007 0.0071  
Y -0.0007 -0.0021 -0.0230 -0.0003 0.0768 0.0068  
Z 0.1225 0.0036 -0.0639 0.0041 -0.0258 0.0039  
AT. 143 C X -0.0373 0.0007 -0.0473 0.0028 -0.0026 -0.0027  
Y -0.0020 -0.0001 0.0043 -0.0016 0.0572 -0.0000  
Z 0.0515 -0.0010 0.0592 -0.0032 -0.0162 0.0045  
AT. 144 C X -0.0373 0.0007 0.0473 -0.0028 0.0026 -0.0027  
Y -0.0020 -0.0001 -0.0043 0.0016 -0.0572 -0.0000  
Z 0.0515 -0.0010 -0.0592 0.0032 0.0162 0.0045  
AT. 145 H X -0.1027 0.0020 -0.1378 0.0077 -0.0557 -0.0036  
Y -0.0388 0.0006 -0.0570 0.0010 0.0206 0.0042  
Z 0.0732 -0.0013 0.0999 -0.0047 0.0084 -0.0001  
AT. 146 H X -0.1027 0.0020 0.1378 -0.0077 0.0557 -0.0036  
Y -0.0388 0.0006 0.0570 -0.0010 -0.0206 0.0042  
Z 0.0732 -0.0013 -0.0999 0.0047 -0.0084 -0.0001  
AT. 147 H X -0.0173 0.0001 -0.0346 0.0021 -0.0404 0.0008  
Y 0.0520 -0.0008 0.0979 -0.0063 0.1454 -0.0045  
Z 0.1102 -0.0023 0.1293 -0.0068 -0.0220 0.0071  
AT. 148 H X -0.0173 0.0001 0.0346 -0.0021 0.0404 0.0008  
Y 0.0520 -0.0008 -0.0979 0.0063 -0.1454 -0.0045  
Z 0.1102 -0.0023 -0.1293 0.0068 0.0220 0.0071  
AT. 149 H X -0.0343 0.0010 -0.0214 0.0010 0.0821 -0.0074  
Y -0.0142 0.0003 -0.0137 -0.0012 0.0669 0.0018  
Z 0.0296 -0.0006 0.0148 -0.0018 -0.0418 0.0098  
AT. 150 H X -0.0343 0.0010 0.0214 -0.0010 -0.0821 -0.0074  
Y -0.0142 0.0003 0.0137 0.0012 -0.0669 0.0018  
Z 0.0296 -0.0006 -0.0148 0.0018 0.0418 0.0098

AT. 151 C X 0.0042 -0.0001 0.0023 0.0000 0.0042 0.0007  
Y -0.0064 -0.0003 -0.0115 0.0004 -0.0132 -0.0036  
Z -0.0133 0.0003 -0.0143 0.0007 0.0018 -0.0004

AT. 152 C X 0.0042 -0.0001 -0.0023 -0.0000 -0.0042 0.0007  
Y -0.0064 -0.0003 0.0115 -0.0004 0.0132 -0.0036  
Z -0.0133 0.0003 0.0143 -0.0007 -0.0018 -0.0004

AT. 153 H X 0.0047 -0.0004 0.0033 -0.0004 0.0095 0.0006  
Y -0.0069 -0.0004 -0.0148 0.0003 -0.0175 -0.0054  
Z -0.0144 0.0003 -0.0199 0.0006 -0.0074 -0.0035

AT. 154 H X 0.0047 -0.0004 -0.0033 0.0004 -0.0095 0.0006  
Y -0.0069 -0.0004 0.0148 -0.0003 0.0175 -0.0054  
Z -0.0144 0.0003 0.0199 -0.0006 0.0074 -0.0035

AT. 155 H X 0.0058 -0.0002 0.0058 0.0002 0.0052 0.0011  
Y -0.0083 -0.0003 -0.0168 0.0006 -0.0205 -0.0060  
Z -0.0108 0.0003 -0.0075 0.0005 0.0099 0.0023

AT. 156 H X 0.0058 -0.0002 -0.0058 -0.0002 -0.0052 0.0011  
Y -0.0083 -0.0003 0.0168 -0.0006 0.0205 -0.0060  
Z -0.0108 0.0003 0.0075 -0.0005 -0.0099 0.0023

AT. 157 O X 0.0007 -0.0007 -0.0016 0.0001 -0.0010 -0.0054  
Y -0.0074 0.0079 0.0088 0.0078 0.0181 0.0619  
Z 0.0024 0.0006 -0.0017 -0.0010 0.0010 0.0016

AT. 158 O X 0.0007 -0.0007 0.0016 -0.0001 0.0010 -0.0054  
Y -0.0074 0.0079 -0.0088 -0.0078 -0.0181 0.0619  
Z 0.0024 0.0006 0.0017 0.0010 -0.0010 0.0016

AT. 159 O X -0.0046 0.0019 0.0028 -0.0014 0.0001 -0.0001  
Y 0.0027 -0.0035 -0.0019 -0.0014 -0.0032 -0.0163  
Z -0.0047 0.0029 0.0040 -0.0056 -0.0014 -0.0056

AT. 160 O X -0.0046 0.0019 -0.0028 0.0014 -0.0001 -0.0001  
Y 0.0027 -0.0035 0.0019 0.0014 0.0032 -0.0163  
Z -0.0047 0.0029 -0.0040 0.0056 0.0014 -0.0056

AT. 161 H X -0.0044 0.0019 0.0046 0.0040 0.0097 0.0356  
Y -0.0080 0.0106 0.0092 0.0094 0.0208 0.0721

Z 0.0011 -0.0057 0.0001 -0.0038 -0.0012 -0.0050  
AT.162 H X -0.0044 0.0019 -0.0046 -0.0040 -0.0097 0.0356  
Y -0.0080 0.0106 -0.0092 -0.0094 -0.0208 0.0721  
Z 0.0011 -0.0057 -0.0001 0.0038 0.0012 -0.0050  
AT.163 H X -0.0099 0.0056 0.0077 -0.0038 0.0012 0.0060  
Y -0.0023 -0.0028 0.0046 -0.0013 -0.0001 -0.0138  
Z -0.0042 0.0021 0.0040 -0.0050 -0.0010 -0.0068  
AT.164 H X -0.0099 0.0056 -0.0077 0.0038 -0.0012 0.0060  
Y -0.0023 -0.0028 -0.0046 0.0013 0.0001 -0.0138  
Z -0.0042 0.0021 -0.0040 0.0050 0.0010 -0.0068  
AT.165 O X -0.0231 -0.0018 0.0120 0.0014 -0.0089 -0.0021  
Y 0.0009 -0.0032 0.0056 0.0007 0.0070 -0.0029  
Z -0.0053 0.0011 0.0010 -0.0006 -0.0009 0.0013  
AT.166 O X -0.0231 -0.0018 -0.0120 -0.0014 0.0089 -0.0021  
Y 0.0009 -0.0032 -0.0056 -0.0007 -0.0070 -0.0029  
Z -0.0053 0.0011 -0.0010 0.0006 0.0009 0.0013  
AT.167 H X -0.0277 -0.0031 0.0150 0.0022 -0.0104 -0.0030  
Y 0.0008 -0.0020 0.0051 0.0003 0.0075 -0.0028  
Z 0.0075 0.0030 -0.0064 -0.0022 0.0038 0.0037  
AT.168 H X -0.0277 -0.0031 -0.0150 -0.0022 0.0104 -0.0030  
Y 0.0008 -0.0020 -0.0051 -0.0003 -0.0075 -0.0028  
Z 0.0075 0.0030 0.0064 0.0022 -0.0038 0.0037  
AT.169 O X 0.0123 -0.0003 -0.0030 -0.0004 0.0112 0.0010  
Y -0.0151 0.0052 0.0040 -0.0033 -0.0198 0.0024  
Z 0.0052 -0.0004 -0.0017 -0.0000 0.0087 0.0008  
AT.170 O X 0.0123 -0.0003 0.0030 0.0004 -0.0112 0.0010  
Y -0.0151 0.0052 -0.0040 0.0033 0.0198 0.0024  
Z 0.0052 -0.0004 0.0017 0.0000 -0.0087 0.0008  
AT.171 H X 0.0122 -0.0020 -0.0048 0.0007 -0.0004 0.0008  
Y -0.0236 0.0061 0.0046 -0.0034 -0.0354 0.0033  
Z -0.0081 0.0022 0.0006 -0.0007 -0.0066 0.0024  
AT.172 H X 0.0122 -0.0020 0.0048 -0.0007 0.0004 0.0008

Y -0.0236 0.0061 -0.0046 0.0034 0.0354 0.0033  
Z -0.0081 0.0022 -0.0006 0.0007 0.0066 0.0024

FREQ(CM\*\*-1) 259.34 260.54 265.06 267.57 268.72 269.42

AT. 1 I X 0.0010 0.0002 0.0003 0.0022 -0.0004 0.0000

Y 0.0002 0.0004 0.0001 0.0007 0.0007 0.0008

Z 0.0004 0.0001 0.0000 0.0010 -0.0002 -0.0000

AT. 2 I X -0.0010 0.0002 0.0003 -0.0022 -0.0004 -0.0000

Y -0.0002 0.0004 0.0001 -0.0007 0.0007 -0.0008

Z -0.0004 0.0001 0.0000 -0.0010 -0.0002 0.0000

AT. 3 I X 0.0014 0.0002 0.0004 0.0001 -0.0001 0.0001

Y 0.0013 0.0001 -0.0001 -0.0004 0.0005 0.0003

Z 0.0001 0.0001 -0.0002 -0.0003 -0.0000 0.0001

AT. 4 I X -0.0014 0.0002 0.0004 -0.0001 -0.0001 -0.0001

Y -0.0013 0.0001 -0.0001 0.0004 0.0005 -0.0003

Z -0.0001 0.0001 -0.0002 0.0003 -0.0000 -0.0001

AT. 5 O X -0.0216 0.0001 0.0039 -0.0112 -0.0011 -0.0004

Y -0.0166 0.0007 0.0025 -0.0258 0.0014 -0.0007

Z -0.0011 -0.0008 0.0042 -0.0008 -0.0007 0.0008

AT. 6 O X 0.0216 0.0001 0.0039 0.0112 -0.0011 0.0004

Y 0.0166 0.0007 0.0025 0.0258 0.0014 0.0007

Z 0.0011 -0.0008 0.0042 0.0008 -0.0007 -0.0008

AT. 7 O X 0.0087 0.0007 -0.0033 -0.0056 0.0003 -0.0024

Y -0.0037 0.0012 0.0023 0.0017 -0.0023 -0.0006

Z -0.0067 0.0003 0.0045 0.0087 -0.0020 0.0019

AT. 8 O X -0.0087 0.0007 -0.0033 0.0056 0.0003 0.0024

Y 0.0037 0.0012 0.0023 -0.0017 -0.0023 0.0006

Z 0.0067 0.0003 0.0045 -0.0087 -0.0020 -0.0019

AT. 9 N X -0.0033 -0.0002 -0.0055 -0.0045 -0.0002 -0.0031

Y -0.0051 -0.0016 -0.0070 -0.0118 0.0005 -0.0050

Z 0.0034 -0.0001 0.0022 0.0002 -0.0000 0.0009

AT. 10 N X 0.0033 -0.0002 -0.0055 0.0045 -0.0002 0.0031  
Y 0.0051 -0.0016 -0.0070 0.0118 0.0005 0.0050  
Z -0.0034 -0.0001 0.0022 -0.0002 -0.0000 -0.0009

AT. 11 N X 0.0004 -0.0010 -0.0063 -0.0072 0.0010 -0.0021  
Y 0.0011 -0.0015 -0.0066 -0.0086 0.0007 -0.0032  
Z 0.0027 -0.0007 -0.0040 -0.0042 0.0008 -0.0015

AT. 12 N X -0.0004 -0.0010 -0.0063 0.0072 0.0010 0.0021  
Y -0.0011 -0.0015 -0.0066 0.0086 0.0007 0.0032  
Z -0.0027 -0.0007 -0.0040 0.0042 0.0008 0.0015

AT. 13 C X -0.0086 0.0008 -0.0012 -0.0065 -0.0002 -0.0015  
Y -0.0086 0.0000 -0.0016 -0.0192 0.0012 -0.0025  
Z 0.0047 -0.0001 0.0023 -0.0005 0.0000 0.0009

AT. 14 C X 0.0086 0.0008 -0.0012 0.0065 -0.0002 0.0015  
Y 0.0086 0.0000 -0.0016 0.0192 0.0012 0.0025  
Z -0.0047 -0.0001 0.0023 0.0005 0.0000 -0.0009

AT. 15 C X -0.0004 0.0001 0.0008 0.0084 -0.0010 0.0005  
Y -0.0010 0.0008 -0.0019 -0.0142 0.0019 -0.0013  
Z 0.0024 0.0013 -0.0015 -0.0157 0.0016 -0.0004

AT. 16 C X 0.0004 0.0001 0.0008 -0.0084 -0.0010 -0.0005  
Y 0.0010 0.0008 -0.0019 0.0142 0.0019 0.0013  
Z -0.0024 0.0013 -0.0015 0.0157 0.0016 0.0004

AT. 17 H X 0.0032 0.0002 0.0017 0.0205 -0.0013 0.0021  
Y 0.0047 0.0002 0.0010 0.0009 0.0008 0.0003  
Z -0.0039 0.0022 -0.0048 -0.0310 0.0028 -0.0019

AT. 18 H X -0.0032 0.0002 0.0017 -0.0205 -0.0013 -0.0021  
Y -0.0047 0.0002 0.0010 -0.0009 0.0008 -0.0003  
Z 0.0039 0.0022 -0.0048 0.0310 0.0028 0.0019

AT. 19 H X 0.0046 0.0000 0.0030 0.0163 -0.0011 0.0020  
Y -0.0087 0.0020 -0.0058 -0.0374 0.0037 -0.0035  
Z 0.0012 0.0017 -0.0022 -0.0217 0.0022 -0.0007

AT. 20 H X -0.0046 0.0000 0.0030 -0.0163 -0.0011 -0.0020  
Y 0.0087 0.0020 -0.0058 0.0374 0.0037 0.0035

Z -0.0012 0.0017 -0.0022 0.0217 0.0022 0.0007  
AT. 21 C X 0.0018 -0.0003 -0.0029 -0.0033 0.0004 -0.0015  
Y -0.0070 -0.0003 0.0008 0.0011 -0.0014 -0.0001  
Z -0.0010 -0.0001 0.0003 0.0015 -0.0002 0.0002  
AT. 22 C X -0.0018 -0.0003 -0.0029 0.0033 0.0004 0.0015  
Y 0.0070 -0.0003 0.0008 -0.0011 -0.0014 0.0001  
Z 0.0010 -0.0001 0.0003 -0.0015 -0.0002 -0.0002  
AT. 23 C X 0.0052 -0.0000 -0.0020 -0.0030 0.0008 -0.0009  
Y -0.0205 -0.0004 0.0035 0.0067 -0.0030 0.0004  
Z 0.0056 0.0001 0.0009 0.0012 0.0005 0.0008  
AT. 24 C X -0.0052 -0.0000 -0.0020 0.0030 0.0008 0.0009  
Y 0.0205 -0.0004 0.0035 -0.0067 -0.0030 -0.0004  
Z -0.0056 0.0001 0.0009 -0.0012 0.0005 -0.0008  
AT. 25 H X 0.0134 0.0005 -0.0028 -0.0037 0.0024 -0.0002  
Y -0.0212 -0.0003 0.0033 0.0064 -0.0030 0.0003  
Z 0.0208 0.0004 0.0012 0.0018 0.0025 0.0028  
AT. 26 H X -0.0134 0.0005 -0.0028 0.0037 0.0024 0.0002  
Y 0.0212 -0.0003 0.0033 -0.0064 -0.0030 -0.0003  
Z -0.0208 0.0004 0.0012 -0.0018 0.0025 -0.0028  
AT. 27 H X 0.0059 -0.0000 -0.0011 -0.0024 0.0010 -0.0006  
Y -0.0353 -0.0003 0.0040 0.0097 -0.0050 -0.0009  
Z -0.0018 0.0000 0.0009 0.0023 -0.0006 0.0001  
AT. 28 H X -0.0059 -0.0000 -0.0011 0.0024 0.0010 0.0006  
Y 0.0353 -0.0003 0.0040 -0.0097 -0.0050 0.0009  
Z 0.0018 0.0000 0.0009 -0.0023 -0.0006 -0.0001  
AT. 29 C X -0.0115 0.0003 0.0041 0.0110 -0.0023 0.0021  
Y -0.0134 -0.0014 -0.0026 -0.0008 -0.0012 -0.0024  
Z 0.0151 -0.0001 -0.0090 -0.0116 0.0027 -0.0036  
AT. 30 C X 0.0115 0.0003 0.0041 -0.0110 -0.0023 -0.0021  
Y 0.0134 -0.0014 -0.0026 0.0008 -0.0012 0.0024  
Z -0.0151 -0.0001 -0.0090 0.0116 0.0027 0.0036  
AT. 31 H X -0.0239 0.0007 0.0134 0.0305 -0.0051 0.0079



Y 0.0050 -0.0016 -0.0110 -0.0193 0.0023 -0.0073  
Z 0.0348 -0.0005 -0.0162 -0.0271 0.0061 -0.0074  
AT. 32 H X 0.0239 0.0007 0.0134 -0.0305 -0.0051 -0.0079  
Y -0.0050 -0.0016 -0.0110 0.0193 0.0023 0.0073  
Z -0.0348 -0.0005 -0.0162 0.0271 0.0061 0.0074  
AT. 33 H X -0.0205 0.0001 0.0027 0.0151 -0.0035 0.0020  
Y -0.0415 -0.0006 0.0106 0.0258 -0.0064 0.0051  
Z 0.0209 -0.0002 -0.0155 -0.0199 0.0042 -0.0067  
AT. 34 H X 0.0205 0.0001 0.0027 -0.0151 -0.0035 -0.0020  
Y 0.0415 -0.0006 0.0106 -0.0258 -0.0064 -0.0051  
Z -0.0209 -0.0002 -0.0155 0.0199 0.0042 0.0067  
AT. 35 C X -0.0016 -0.0003 -0.0023 -0.0015 -0.0001 -0.0015  
Y -0.0019 -0.0009 -0.0041 -0.0028 0.0002 -0.0022  
Z -0.0022 0.0001 -0.0018 0.0010 -0.0002 -0.0003  
AT. 36 C X 0.0016 -0.0003 -0.0023 0.0015 -0.0001 0.0015  
Y 0.0019 -0.0009 -0.0041 0.0028 0.0002 0.0022  
Z 0.0022 0.0001 -0.0018 -0.0010 -0.0002 0.0003  
AT. 37 C X -0.0088 -0.0004 -0.0044 -0.0024 -0.0002 -0.0022  
Y -0.0100 -0.0004 0.0058 0.0132 -0.0022 0.0026  
Z -0.0157 0.0007 0.0114 0.0228 -0.0033 0.0060  
AT. 38 C X 0.0088 -0.0004 -0.0044 0.0024 -0.0002 0.0022  
Y 0.0100 -0.0004 0.0058 -0.0132 -0.0022 -0.0026  
Z 0.0157 0.0007 0.0114 -0.0228 -0.0033 -0.0060  
AT. 39 H X -0.0302 0.0013 0.0153 0.0384 -0.0053 0.0092  
Y -0.0237 0.0005 0.0137 0.0319 -0.0049 0.0067  
Z -0.0239 0.0016 0.0216 0.0425 -0.0055 0.0120  
AT. 40 H X 0.0302 0.0013 0.0153 -0.0384 -0.0053 -0.0092  
Y 0.0237 0.0005 0.0137 -0.0319 -0.0049 -0.0067  
Z 0.0239 0.0016 0.0216 -0.0425 -0.0055 -0.0120  
AT. 41 H X 0.0142 -0.0030 -0.0230 -0.0411 0.0047 -0.0128  
Y -0.0198 0.0012 0.0131 0.0275 -0.0042 0.0061  
Z -0.0310 0.0021 0.0251 0.0509 -0.0067 0.0142

AT. 42 H X -0.0142 -0.0030 -0.0230 0.0411 0.0047 0.0128  
Y 0.0198 0.0012 0.0131 -0.0275 -0.0042 -0.0061  
Z 0.0310 0.0021 0.0251 -0.0509 -0.0067 -0.0142

AT. 43 C X 0.0219 0.0013 -0.0001 -0.0023 0.0024 0.0031  
Y 0.0067 -0.0008 -0.0088 -0.0093 0.0013 -0.0037  
Z 0.0222 0.0010 -0.0023 -0.0061 0.0026 0.0010

AT. 44 C X -0.0219 0.0013 -0.0001 0.0023 0.0024 -0.0031  
Y -0.0067 -0.0008 -0.0088 0.0093 0.0013 0.0037  
Z -0.0222 0.0010 -0.0023 0.0061 0.0026 -0.0010

AT. 45 H X 0.0468 0.0046 0.0049 -0.0001 0.0046 0.0079  
Y -0.0240 -0.0041 -0.0113 -0.0087 -0.0022 -0.0088  
Z 0.0341 0.0022 -0.0031 -0.0076 0.0044 0.0027

AT. 46 H X -0.0468 0.0046 0.0049 0.0001 0.0046 -0.0079  
Y 0.0240 -0.0041 -0.0113 0.0087 -0.0022 0.0088  
Z -0.0341 0.0022 -0.0031 0.0076 0.0044 -0.0027

AT. 47 H X 0.0321 0.0018 -0.0030 -0.0058 0.0039 0.0032  
Y 0.0387 0.0020 -0.0059 -0.0095 0.0046 0.0014  
Z 0.0414 0.0030 0.0047 -0.0012 0.0038 0.0063

AT. 48 H X -0.0321 0.0018 -0.0030 0.0058 0.0039 -0.0032  
Y -0.0387 0.0020 -0.0059 0.0095 0.0046 -0.0014  
Z -0.0414 0.0030 0.0047 0.0012 0.0038 -0.0063

AT. 49 C X 0.0020 -0.0000 -0.0016 -0.0035 0.0003 -0.0009  
Y 0.0014 -0.0008 -0.0051 -0.0045 0.0005 -0.0019  
Z 0.0018 0.0000 0.0006 -0.0040 0.0002 -0.0007

AT. 50 C X -0.0020 -0.0000 -0.0016 0.0035 0.0003 0.0009  
Y -0.0014 -0.0008 -0.0051 0.0045 0.0005 0.0019  
Z -0.0018 0.0000 0.0006 0.0040 0.0002 0.0007

AT. 51 C X 0.0021 -0.0000 -0.0070 -0.0096 0.0007 -0.0036  
Y 0.0151 0.0000 -0.0017 -0.0010 0.0016 -0.0000  
Z -0.0087 -0.0009 0.0017 -0.0043 -0.0009 -0.0007

AT. 52 C X -0.0021 -0.0000 -0.0070 0.0096 0.0007 0.0036  
Y -0.0151 0.0000 -0.0017 0.0010 0.0016 0.0000

Z 0.0087 -0.0009 0.0017 0.0043 -0.0009 0.0007  
AT. 53 H X 0.0191 0.0008 0.0011 -0.0012 0.0013 -0.0003  
Y 0.0320 0.0008 0.0045 0.0023 0.0026 0.0018  
Z -0.0178 -0.0015 -0.0049 -0.0163 -0.0005 -0.0045  
AT. 54 H X -0.0191 0.0008 0.0011 0.0012 0.0013 0.0003  
Y -0.0320 0.0008 0.0045 -0.0023 0.0026 -0.0018  
Z 0.0178 -0.0015 -0.0049 0.0163 -0.0005 0.0045  
AT. 55 H X -0.0219 -0.0016 -0.0159 -0.0205 -0.0005 -0.0081  
Y 0.0265 0.0011 0.0031 0.0048 0.0021 0.0030  
Z -0.0112 -0.0010 0.0014 -0.0048 -0.0012 -0.0002  
AT. 56 H X 0.0219 -0.0016 -0.0159 0.0205 -0.0005 0.0081  
Y -0.0265 0.0011 0.0031 -0.0048 0.0021 -0.0030  
Z 0.0112 -0.0010 0.0014 0.0048 -0.0012 0.0002  
AT. 57 C X 0.0358 0.0008 0.0096 0.0081 0.0024 0.0074  
Y 0.0355 0.0008 0.0094 0.0058 0.0031 0.0071  
Z -0.0211 0.0006 -0.0060 -0.0039 -0.0008 -0.0039  
AT. 58 C X -0.0358 0.0008 0.0096 -0.0081 0.0024 -0.0074  
Y -0.0355 0.0008 0.0094 -0.0058 0.0031 -0.0071  
Z 0.0211 0.0006 -0.0060 0.0039 -0.0008 0.0039  
AT. 59 H X 0.0828 0.0024 0.0214 0.0222 0.0059 0.0186  
Y -0.0247 -0.0006 -0.1157 0.0607 0.0092 -0.0018  
Z -0.0776 -0.0004 -0.1844 0.0881 0.0107 -0.0093  
AT. 60 H X -0.0828 0.0024 0.0214 -0.0222 0.0059 -0.0186  
Y 0.0247 -0.0006 -0.1157 -0.0607 0.0092 0.0018  
Z 0.0776 -0.0004 -0.1844 -0.0881 0.0107 0.0093  
AT. 61 H X 0.0817 0.0026 0.1381 -0.0554 -0.0047 0.0133  
Y 0.1251 0.0032 0.1911 -0.0728 -0.0054 0.0209  
Z -0.0294 0.0010 0.0051 -0.0149 -0.0021 -0.0059  
AT. 62 H X -0.0817 0.0026 0.1381 0.0554 -0.0047 -0.0133  
Y -0.1251 0.0032 0.1911 0.0728 -0.0054 -0.0209  
Z 0.0294 0.0010 0.0051 0.0149 -0.0021 0.0059  
AT. 63 H X -0.0206 -0.0016 -0.1226 0.0696 0.0087 -0.0010

Y 0.0434 0.0021 -0.0378 0.0407 0.0091 0.0122  
Z 0.0247 0.0017 0.1585 -0.0912 -0.0119 -0.0002  
AT. 64 H X 0.0206 -0.0016 -0.1226 -0.0696 0.0087 0.0010  
Y -0.0434 0.0021 -0.0378 -0.0407 0.0091 -0.0122  
Z -0.0247 0.0017 0.1585 0.0912 -0.0119 0.0002  
AT. 65 C X -0.0322 0.0000 0.0199 0.0288 -0.0053 0.0073  
Y -0.0134 0.0001 0.0313 0.0378 -0.0055 0.0166  
Z -0.0182 -0.0003 -0.0006 0.0003 -0.0012 -0.0035  
AT. 66 C X 0.0322 0.0000 0.0199 -0.0288 -0.0053 -0.0073  
Y 0.0134 0.0001 0.0313 -0.0378 -0.0055 -0.0166  
Z 0.0182 -0.0003 -0.0006 -0.0003 -0.0012 0.0035  
AT. 67 H X -0.0650 0.0007 0.0276 0.0714 -0.0098 0.0208  
Y -0.0103 0.0003 0.1027 0.0134 -0.0105 0.0038  
Z 0.0065 -0.0009 -0.0726 -0.0127 0.0072 -0.0030  
AT. 68 H X 0.0650 0.0007 0.0276 -0.0714 -0.0098 -0.0208  
Y 0.0103 0.0003 0.1027 -0.0134 -0.0105 -0.0038  
Z -0.0065 -0.0009 -0.0726 0.0127 0.0072 0.0030  
AT. 69 H X -0.0256 -0.0002 -0.0194 0.0561 -0.0027 0.0232  
Y -0.0208 0.0001 -0.0268 0.0770 -0.0026 0.0352  
Z -0.0430 -0.0001 -0.0106 0.0068 -0.0021 -0.0064  
AT. 70 H X 0.0256 -0.0002 -0.0194 -0.0561 -0.0027 -0.0232  
Y 0.0208 0.0001 -0.0268 -0.0770 -0.0026 -0.0352  
Z 0.0430 -0.0001 -0.0106 -0.0068 -0.0021 0.0064  
AT. 71 H X -0.0429 0.0001 0.0718 -0.0047 -0.0091 -0.0132  
Y -0.0230 0.0009 0.0586 0.0660 -0.0096 0.0282  
Z -0.0396 0.0007 0.0770 0.0137 -0.0098 -0.0031  
AT. 72 H X 0.0429 0.0001 0.0718 0.0047 -0.0091 0.0132  
Y 0.0230 0.0009 0.0586 -0.0660 -0.0096 -0.0282  
Z 0.0396 0.0007 0.0770 -0.0137 -0.0098 0.0031  
AT. 73 C X -0.0019 -0.0003 -0.0137 -0.0192 0.0018 -0.0083  
Y -0.0067 -0.0011 -0.0229 -0.0250 0.0024 -0.0120  
Z 0.0036 0.0002 -0.0007 -0.0022 0.0003 -0.0001

AT. 74 C X 0.0019 -0.0003 -0.0137 0.0192 0.0018 0.0083  
Y 0.0067 -0.0011 -0.0229 0.0250 0.0024 0.0120  
Z -0.0036 0.0002 -0.0007 0.0022 0.0003 0.0001

AT. 75 H X -0.0033 -0.0004 -0.0278 -0.0383 0.0039 -0.0163  
Y -0.0108 -0.0009 -0.0315 -0.0361 0.0033 -0.0171  
Z -0.0027 0.0002 -0.0224 -0.0314 0.0031 -0.0128

AT. 76 H X 0.0033 -0.0004 -0.0278 0.0383 0.0039 0.0163  
Y 0.0108 -0.0009 -0.0315 0.0361 0.0033 0.0171  
Z 0.0027 0.0002 -0.0224 0.0314 0.0031 0.0128

AT. 77 H X -0.0026 -0.0002 -0.0183 -0.0300 0.0025 -0.0119  
Y -0.0112 -0.0004 -0.0405 -0.0454 0.0049 -0.0215  
Z 0.0083 -0.0004 0.0195 0.0261 -0.0026 0.0118

AT. 78 H X 0.0026 -0.0002 -0.0183 0.0300 0.0025 0.0119  
Y 0.0112 -0.0004 -0.0405 0.0454 0.0049 0.0215  
Z -0.0083 -0.0004 0.0195 -0.0261 -0.0026 -0.0118

AT. 79 I X 0.0007 -0.0038 -0.0003 0.0000 -0.0007 -0.0002  
Y -0.0002 0.0023 0.0000 -0.0001 0.0001 0.0001  
Z -0.0002 0.0002 0.0001 -0.0000 -0.0002 0.0000

AT. 80 I X -0.0007 -0.0038 -0.0003 -0.0000 -0.0007 0.0002  
Y 0.0002 0.0023 0.0000 0.0001 0.0001 -0.0001  
Z 0.0002 0.0002 0.0001 0.0000 -0.0002 -0.0000

AT. 81 I X -0.0004 0.0006 0.0002 -0.0005 0.0018 0.0018  
Y 0.0004 -0.0007 -0.0002 -0.0001 -0.0010 -0.0012  
Z -0.0001 -0.0000 0.0001 0.0002 -0.0002 -0.0002

AT. 82 I X 0.0004 0.0006 0.0002 0.0005 0.0018 -0.0018  
Y -0.0004 -0.0007 -0.0002 0.0001 -0.0010 0.0012  
Z 0.0001 -0.0000 0.0001 -0.0002 -0.0002 0.0002

AT. 83 O X 0.0028 -0.0133 0.0002 0.0016 -0.0036 -0.0038  
Y 0.0014 -0.0122 -0.0001 0.0012 -0.0083 -0.0073  
Z -0.0020 0.0105 -0.0005 -0.0010 0.0027 0.0032

AT. 84 O X -0.0028 -0.0133 0.0002 -0.0016 -0.0036 0.0038  
Y -0.0014 -0.0122 -0.0001 -0.0012 -0.0083 0.0073

Z 0.0020 0.0105 -0.0005 0.0010 0.0027 -0.0032  
AT. 85 O X -0.0063 0.0268 -0.0006 -0.0029 0.0038 -0.0004  
Y 0.0025 -0.0111 0.0001 0.0028 -0.0073 -0.0049  
Z -0.0026 0.0060 0.0001 0.0011 -0.0031 -0.0020  
AT. 86 O X 0.0063 0.0268 -0.0006 0.0029 0.0038 0.0004  
Y -0.0025 -0.0111 0.0001 -0.0028 -0.0073 0.0049  
Z 0.0026 0.0060 0.0001 -0.0011 -0.0031 0.0020  
AT. 87 N X 0.0001 -0.0010 0.0000 0.0002 -0.0037 -0.0027  
Y 0.0009 -0.0106 0.0013 -0.0033 0.0170 0.0185  
Z 0.0004 0.0009 -0.0005 0.0007 -0.0012 -0.0018  
AT. 88 N X -0.0001 -0.0010 0.0000 -0.0002 -0.0037 0.0027  
Y -0.0009 -0.0106 0.0013 0.0033 0.0170 -0.0185  
Z -0.0004 0.0009 -0.0005 -0.0007 -0.0012 0.0018  
AT. 89 N X 0.0021 -0.0015 -0.0014 0.0032 -0.0125 -0.0118  
Y -0.0014 -0.0027 0.0020 -0.0040 0.0212 0.0194  
Z -0.0009 -0.0012 0.0013 -0.0022 0.0146 0.0134  
AT. 90 N X -0.0021 -0.0015 -0.0014 -0.0032 -0.0125 0.0118  
Y 0.0014 -0.0027 0.0020 0.0040 0.0212 -0.0194  
Z 0.0009 -0.0012 0.0013 0.0022 0.0146 -0.0134  
AT. 91 C X 0.0010 -0.0068 0.0002 0.0006 -0.0031 -0.0025  
Y 0.0017 -0.0141 0.0001 0.0001 0.0017 0.0029  
Z 0.0002 -0.0002 -0.0006 0.0007 -0.0018 -0.0022  
AT. 92 C X -0.0010 -0.0068 0.0002 -0.0006 -0.0031 0.0025  
Y -0.0017 -0.0141 0.0001 -0.0001 0.0017 -0.0029  
Z -0.0002 -0.0002 -0.0006 -0.0007 -0.0018 0.0022  
AT. 93 C X 0.0032 -0.0169 0.0001 0.0015 -0.0040 -0.0036  
Y 0.0025 -0.0142 0.0002 0.0014 -0.0015 -0.0016  
Z 0.0033 -0.0131 -0.0004 0.0027 -0.0044 -0.0063  
AT. 94 C X -0.0032 -0.0169 0.0001 -0.0015 -0.0040 0.0036  
Y -0.0025 -0.0142 0.0002 -0.0014 -0.0015 0.0016  
Z -0.0033 -0.0131 -0.0004 -0.0027 -0.0044 0.0063  
AT. 95 H X 0.0053 -0.0257 0.0001 0.0019 -0.0062 -0.0027

Y -0.0003 -0.0012 0.0000 0.0002 0.0002 -0.0003  
Z 0.0060 -0.0256 -0.0002 0.0043 -0.0052 -0.0094  
AT. 96 H X -0.0053 -0.0257 0.0001 -0.0019 -0.0062 0.0027  
Y 0.0003 -0.0012 0.0000 -0.0002 0.0002 0.0003  
Z -0.0060 -0.0256 -0.0002 -0.0043 -0.0052 0.0094  
AT. 97 H X 0.0048 -0.0258 0.0004 0.0021 -0.0037 -0.0036  
Y 0.0068 -0.0321 0.0003 0.0036 -0.0044 -0.0061  
Z 0.0037 -0.0145 -0.0004 0.0030 -0.0052 -0.0074  
AT. 98 H X -0.0048 -0.0258 0.0004 -0.0021 -0.0037 0.0036  
Y -0.0068 -0.0321 0.0003 -0.0036 -0.0044 0.0061  
Z -0.0037 -0.0145 -0.0004 -0.0030 -0.0052 0.0074  
AT. 99 C X -0.0018 0.0118 -0.0008 0.0001 -0.0038 -0.0058  
Y -0.0024 0.0053 0.0007 -0.0014 0.0060 0.0052  
Z -0.0013 0.0013 0.0004 -0.0002 0.0039 0.0040  
AT. 100 C X 0.0018 0.0118 -0.0008 -0.0001 -0.0038 0.0058  
Y 0.0024 0.0053 0.0007 0.0014 0.0060 -0.0052  
Z 0.0013 0.0013 0.0004 0.0002 0.0039 -0.0040  
AT. 101 C X -0.0044 0.0154 -0.0001 -0.0017 0.0026 0.0005  
Y -0.0075 0.0228 0.0005 -0.0041 0.0091 0.0062  
Z 0.0017 -0.0042 -0.0005 0.0020 -0.0038 -0.0034  
AT. 102 C X 0.0044 0.0154 -0.0001 0.0017 0.0026 -0.0005  
Y 0.0075 0.0228 0.0005 0.0041 0.0091 -0.0062  
Z -0.0017 -0.0042 -0.0005 -0.0020 -0.0038 0.0034  
AT. 103 H X -0.0060 0.0208 0.0002 -0.0024 0.0056 0.0031  
Y -0.0070 0.0203 0.0004 -0.0038 0.0080 0.0054  
Z 0.0066 -0.0151 -0.0014 0.0055 -0.0141 -0.0126  
AT. 104 H X 0.0060 0.0208 0.0002 0.0024 0.0056 -0.0031  
Y 0.0070 0.0203 0.0004 0.0038 0.0080 -0.0054  
Z -0.0066 -0.0151 -0.0014 -0.0055 -0.0141 0.0126  
AT. 105 H X -0.0064 0.0170 0.0004 -0.0034 0.0084 0.0070  
Y -0.0119 0.0336 0.0011 -0.0070 0.0163 0.0126  
Z -0.0005 0.0003 -0.0002 0.0004 0.0004 0.0006

AT.106 H X 0.0064 0.0170 0.0004 0.0034 0.0084 -0.0070  
Y 0.0119 0.0336 0.0011 0.0070 0.0163 -0.0126  
Z 0.0005 0.0003 -0.0002 -0.0004 0.0004 -0.0006

AT.107 C X 0.0026 -0.0146 0.0015 -0.0013 0.0105 0.0118  
Y -0.0020 0.0061 0.0007 -0.0023 0.0061 0.0061  
Z 0.0035 -0.0129 0.0008 0.0001 0.0086 0.0086

AT.108 C X -0.0026 -0.0146 0.0015 0.0013 0.0105 -0.0118  
Y 0.0020 0.0061 0.0007 0.0023 0.0061 -0.0061  
Z -0.0035 -0.0129 0.0008 -0.0001 0.0086 -0.0086

AT.109 H X 0.0074 -0.0410 0.0042 -0.0045 0.0350 0.0379  
Y 0.0008 -0.0062 0.0026 -0.0035 0.0152 0.0159  
Z 0.0068 -0.0256 0.0033 -0.0011 0.0173 0.0181

AT.110 H X -0.0074 -0.0410 0.0042 0.0045 0.0350 -0.0379  
Y -0.0008 -0.0062 0.0026 0.0035 0.0152 -0.0159  
Z -0.0068 -0.0256 0.0033 0.0011 0.0173 -0.0181

AT.111 H X 0.0020 -0.0098 0.0009 -0.0006 0.0047 0.0062  
Y -0.0080 0.0346 -0.0028 0.0005 -0.0173 -0.0192  
Z 0.0052 -0.0238 0.0021 -0.0015 0.0200 0.0202

AT.112 H X -0.0020 -0.0098 0.0009 0.0006 0.0047 -0.0062  
Y 0.0080 0.0346 -0.0028 -0.0005 -0.0173 0.0192  
Z -0.0052 -0.0238 0.0021 0.0015 0.0200 -0.0202

AT.113 C X 0.0007 -0.0017 -0.0003 0.0012 -0.0042 -0.0041  
Y 0.0009 -0.0039 0.0007 -0.0007 0.0056 0.0058  
Z 0.0001 0.0007 -0.0001 -0.0002 0.0026 0.0021

AT.114 C X -0.0007 -0.0017 -0.0003 -0.0012 -0.0042 0.0041  
Y -0.0009 -0.0039 0.0007 0.0007 0.0056 -0.0058  
Z -0.0001 0.0007 -0.0001 0.0002 0.0026 -0.0021

AT.115 C X 0.0016 0.0010 -0.0019 0.0041 -0.0185 -0.0177  
Y -0.0029 0.0145 -0.0001 -0.0011 -0.0008 -0.0013  
Z -0.0053 0.0251 -0.0007 -0.0010 -0.0042 -0.0051

AT.116 C X -0.0016 0.0010 -0.0019 -0.0041 -0.0185 0.0177  
Y 0.0029 0.0145 -0.0001 0.0011 -0.0008 0.0013



Z 0.0053 0.0251 -0.0007 0.0010 -0.0042 0.0051  
AT. 117 H X 0.0060 -0.0264 0.0005 0.0018 0.0059 0.0063  
Y -0.0090 0.0462 -0.0019 -0.0004 -0.0181 -0.0187  
Z -0.0083 0.0450 -0.0027 0.0013 -0.0257 -0.0260  
AT. 118 H X -0.0060 -0.0264 0.0005 -0.0018 0.0059 -0.0063  
Y 0.0090 0.0462 -0.0019 0.0004 -0.0181 0.0187  
Z 0.0083 0.0450 -0.0027 -0.0013 -0.0257 0.0260  
AT. 119 H X -0.0048 0.0415 -0.0053 0.0071 -0.0525 -0.0511  
Y -0.0017 0.0144 -0.0009 0.0005 -0.0090 -0.0088  
Z -0.0101 0.0481 -0.0018 -0.0008 -0.0154 -0.0167  
AT. 120 H X 0.0048 0.0415 -0.0053 -0.0071 -0.0525 0.0511  
Y 0.0017 0.0144 -0.0009 -0.0005 -0.0090 0.0088  
Z 0.0101 0.0481 -0.0018 0.0008 -0.0154 0.0167  
AT. 121 C X -0.0026 0.0045 0.0016 -0.0038 0.0204 0.0206  
Y 0.0040 -0.0157 0.0002 0.0014 -0.0005 -0.0007  
Z 0.0068 -0.0165 -0.0020 0.0066 -0.0238 -0.0240  
AT. 122 C X 0.0026 0.0045 0.0016 0.0038 0.0204 -0.0206  
Y -0.0040 -0.0157 0.0002 -0.0014 -0.0005 0.0007  
Z -0.0068 -0.0165 -0.0020 -0.0066 -0.0238 0.0240  
AT. 123 H X -0.0149 0.0285 0.0070 -0.0180 0.0844 0.0829  
Y -0.0026 -0.0009 0.0026 -0.0059 0.0316 0.0313  
Z 0.0114 -0.0276 -0.0037 0.0118 -0.0467 -0.0470  
AT. 124 H X 0.0149 0.0285 0.0070 0.0180 0.0844 -0.0829  
Y 0.0026 -0.0009 0.0026 0.0059 0.0316 -0.0313  
Z -0.0114 -0.0276 -0.0037 -0.0118 -0.0467 0.0470  
AT. 125 H X -0.0012 0.0048 0.0003 -0.0014 0.0076 0.0080  
Y 0.0153 -0.0414 -0.0042 0.0140 -0.0557 -0.0550  
Z 0.0141 -0.0286 -0.0058 0.0159 -0.0675 -0.0670  
AT. 126 H X 0.0012 0.0048 0.0003 0.0014 0.0076 -0.0080  
Y -0.0153 -0.0414 -0.0042 -0.0140 -0.0557 0.0550  
Z -0.0141 -0.0286 -0.0058 -0.0159 -0.0675 0.0670  
AT. 127 C X 0.0004 -0.0005 -0.0002 0.0010 -0.0032 -0.0028

Y 0.0009 -0.0063 0.0005 -0.0008 0.0068 0.0063  
Z 0.0013 -0.0032 -0.0004 0.0005 0.0002 -0.0001  
AT. 128 C X -0.0004 -0.0005 -0.0002 -0.0010 -0.0032 0.0028  
Y -0.0009 -0.0063 0.0005 0.0008 0.0068 -0.0063  
Z -0.0013 -0.0032 -0.0004 -0.0005 0.0002 0.0001  
AT. 129 C X -0.0002 0.0044 -0.0005 0.0011 -0.0100 -0.0084  
Y 0.0043 -0.0132 0.0000 0.0015 -0.0028 -0.0010  
Z -0.0020 0.0034 0.0002 -0.0020 0.0093 0.0073  
AT. 130 C X 0.0002 0.0044 -0.0005 -0.0011 -0.0100 0.0084  
Y -0.0043 -0.0132 0.0000 -0.0015 -0.0028 0.0010  
Z 0.0020 0.0034 0.0002 0.0020 0.0093 -0.0073  
AT. 131 H X -0.0024 0.0036 0.0005 -0.0018 0.0039 0.0039  
Y 0.0087 -0.0196 -0.0007 0.0047 -0.0172 -0.0119  
Z -0.0029 -0.0017 0.0012 -0.0044 0.0213 0.0188  
AT. 132 H X 0.0024 0.0036 0.0005 0.0018 0.0039 -0.0039  
Y -0.0087 -0.0196 -0.0007 -0.0047 -0.0172 0.0119  
Z 0.0029 -0.0017 0.0012 0.0044 0.0213 -0.0188  
AT. 133 H X 0.0047 -0.0006 -0.0019 0.0065 -0.0342 -0.0296  
Y 0.0048 -0.0131 -0.0003 0.0029 -0.0081 -0.0064  
Z -0.0040 0.0058 0.0004 -0.0028 0.0135 0.0097  
AT. 134 H X -0.0047 -0.0006 -0.0019 -0.0065 -0.0342 0.0296  
Y -0.0048 -0.0131 -0.0003 -0.0029 -0.0081 0.0064  
Z 0.0040 0.0058 0.0004 0.0028 0.0135 -0.0097  
AT. 135 C X -0.0029 0.0070 0.0020 -0.0048 0.0175 0.0168  
Y 0.0101 -0.0268 -0.0043 0.0132 -0.0532 -0.0474  
Z -0.0006 0.0016 0.0008 -0.0018 0.0033 0.0048  
AT. 136 C X 0.0029 0.0070 0.0020 0.0048 0.0175 -0.0168  
Y -0.0101 -0.0268 -0.0043 -0.0132 -0.0532 0.0474  
Z 0.0006 0.0016 0.0008 0.0018 0.0033 -0.0048  
AT. 137 H X -0.0052 0.0154 0.0045 -0.0101 0.0404 0.0373  
Y 0.0189 -0.0472 -0.0080 0.0250 -0.1009 -0.0930  
Z 0.0150 -0.0353 -0.0062 0.0199 -0.0844 -0.0784

AT. 138 H X 0.0052 0.0154 0.0045 0.0101 0.0404 -0.0373  
Y -0.0189 -0.0472 -0.0080 -0.0250 -0.1009 0.0930  
Z -0.0150 -0.0353 -0.0062 -0.0199 -0.0844 0.0784

AT. 139 H X 0.0020 -0.0019 -0.0002 0.0021 -0.0028 -0.0044  
Y -0.0009 -0.0030 -0.0002 -0.0006 -0.0000 0.0053  
Z -0.0038 0.0059 0.0026 -0.0068 0.0138 0.0166

AT. 140 H X -0.0020 -0.0019 -0.0002 -0.0021 -0.0028 0.0044  
Y 0.0009 -0.0030 -0.0002 0.0006 -0.0000 -0.0053  
Z 0.0038 0.0059 0.0026 0.0068 0.0138 -0.0166

AT. 141 H X -0.0084 0.0168 0.0042 -0.0118 0.0372 0.0392  
Y 0.0214 -0.0536 -0.0094 0.0290 -0.1179 -0.1075  
Z -0.0150 0.0346 0.0073 -0.0216 0.0806 0.0785

AT. 142 H X 0.0084 0.0168 0.0042 0.0118 0.0372 -0.0392  
Y -0.0214 -0.0536 -0.0094 -0.0290 -0.1179 0.1075  
Z 0.0150 0.0346 0.0073 0.0216 0.0806 -0.0785

AT. 143 C X 0.0047 -0.0186 -0.0003 0.0027 0.0013 -0.0013  
Y -0.0122 0.0540 -0.0039 0.0019 -0.0320 -0.0351  
Z -0.0007 0.0040 0.0010 -0.0025 0.0047 0.0087

AT. 144 C X -0.0047 -0.0186 -0.0003 -0.0027 0.0013 0.0013  
Y 0.0122 0.0540 -0.0039 -0.0019 -0.0320 0.0351  
Z 0.0007 0.0040 0.0010 0.0025 0.0047 -0.0087

AT. 145 H X 0.0215 -0.0873 0.0017 0.0046 0.0269 0.0243  
Y 0.0001 0.0185 -0.0041 0.0065 -0.0308 -0.0299  
Z -0.0093 0.0229 0.0018 -0.0069 0.0102 0.0098

AT. 146 H X -0.0215 -0.0873 0.0017 -0.0046 0.0269 -0.0243  
Y -0.0001 0.0185 -0.0041 -0.0065 -0.0308 0.0299  
Z 0.0093 0.0229 0.0018 0.0069 0.0102 -0.0098

AT. 147 H X 0.0113 -0.0427 0.0015 0.0018 0.0139 0.0164  
Y -0.0371 0.1412 -0.0062 -0.0026 -0.0579 -0.0677  
Z -0.0049 0.0175 0.0023 -0.0063 0.0086 0.0161

AT. 148 H X -0.0113 -0.0427 0.0015 -0.0018 0.0139 -0.0164  
Y 0.0371 0.1412 -0.0062 0.0026 -0.0579 0.0677

Z 0.0049 0.0175 0.0023 0.0063 0.0086 -0.0161  
AT. 149 H X -0.0148 0.0533 -0.0041 0.0021 -0.0310 -0.0411  
Y -0.0124 0.0636 -0.0056 0.0048 -0.0465 -0.0490  
Z 0.0083 -0.0147 -0.0002 0.0025 -0.0039 0.0049  
AT. 150 H X 0.0148 0.0533 -0.0041 -0.0021 -0.0310 0.0411  
Y 0.0124 0.0636 -0.0056 -0.0048 -0.0465 0.0490  
Z -0.0083 -0.0147 -0.0002 -0.0025 -0.0039 -0.0049  
AT. 151 C X -0.0000 0.0054 -0.0012 0.0027 -0.0148 -0.0147  
Y 0.0013 -0.0219 0.0041 -0.0071 0.0460 0.0450  
Z 0.0011 -0.0034 -0.0003 0.0003 0.0033 0.0020  
AT. 152 C X 0.0000 0.0054 -0.0012 -0.0027 -0.0148 0.0147  
Y -0.0013 -0.0219 0.0041 0.0071 0.0460 -0.0450  
Z -0.0011 -0.0034 -0.0003 -0.0003 0.0033 -0.0020  
AT. 153 H X -0.0014 0.0123 -0.0020 0.0033 -0.0224 -0.0227  
Y 0.0009 -0.0317 0.0062 -0.0113 0.0710 0.0695  
Z 0.0009 -0.0220 0.0035 -0.0070 0.0478 0.0457  
AT. 154 H X 0.0014 0.0123 -0.0020 -0.0033 -0.0224 0.0227  
Y -0.0009 -0.0317 0.0062 0.0113 0.0710 -0.0695  
Z -0.0009 -0.0220 0.0035 0.0070 0.0478 -0.0457  
AT. 155 H X 0.0001 0.0093 -0.0017 0.0040 -0.0233 -0.0224  
Y 0.0014 -0.0367 0.0071 -0.0126 0.0809 0.0793  
Z 0.0010 0.0133 -0.0036 0.0066 -0.0366 -0.0369  
AT. 156 H X -0.0001 0.0093 -0.0017 -0.0040 -0.0233 0.0224  
Y -0.0014 -0.0367 0.0071 0.0126 0.0809 -0.0793  
Z -0.0010 0.0133 -0.0036 -0.0066 -0.0366 0.0369  
AT. 157 O X -0.0038 0.0004 0.0008 -0.0033 0.0008 0.0007  
Y 0.0437 0.0005 -0.0038 0.0500 -0.0011 0.0038  
Z -0.0020 0.0020 -0.0000 0.0039 -0.0008 0.0010  
AT. 158 O X 0.0038 0.0004 0.0008 0.0033 0.0008 -0.0007  
Y -0.0437 0.0005 -0.0038 -0.0500 -0.0011 -0.0038  
Z 0.0020 0.0020 -0.0000 -0.0039 -0.0008 -0.0010  
AT. 159 O X 0.0018 -0.0036 -0.0000 -0.0013 0.0021 0.0010

Y -0.0132 -0.0004 0.0007 -0.0108 -0.0013 -0.0034  
Z -0.0041 -0.0053 -0.0005 -0.0053 0.0015 -0.0000  
AT.160 O X -0.0018 -0.0036 -0.0000 0.0013 0.0021 -0.0010  
Y 0.0132 -0.0004 0.0007 0.0108 -0.0013 0.0034  
Z 0.0041 -0.0053 -0.0005 0.0053 0.0015 0.0000  
AT.161 H X 0.0255 0.0010 -0.0013 0.0305 0.0003 0.0044  
Y 0.0507 0.0007 -0.0045 0.0577 -0.0011 0.0050  
Z -0.0065 0.0010 0.0005 0.0005 -0.0015 -0.0005  
AT.162 H X -0.0255 0.0010 -0.0013 -0.0305 0.0003 -0.0044  
Y -0.0507 0.0007 -0.0045 -0.0577 -0.0011 -0.0050  
Z 0.0065 0.0010 0.0005 -0.0005 -0.0015 0.0005  
AT.163 H X 0.0059 -0.0079 -0.0014 0.0017 0.0035 0.0017  
Y -0.0081 -0.0016 0.0022 -0.0111 -0.0039 -0.0034  
Z -0.0039 -0.0042 0.0002 -0.0058 0.0006 -0.0002  
AT.164 H X -0.0059 -0.0079 -0.0014 -0.0017 0.0035 -0.0017  
Y 0.0081 -0.0016 0.0022 0.0111 -0.0039 0.0034  
Z 0.0039 -0.0042 0.0002 0.0058 0.0006 0.0002  
AT.165 O X -0.0011 0.0326 0.0005 0.0003 0.0111 0.0057  
Y -0.0039 0.0073 0.0020 -0.0030 0.0020 0.0040  
Z -0.0000 0.0049 -0.0005 0.0009 0.0020 0.0005  
AT.166 O X 0.0011 0.0326 0.0005 -0.0003 0.0111 -0.0057  
Y 0.0039 0.0073 0.0020 0.0030 0.0020 -0.0040  
Z 0.0000 0.0049 -0.0005 -0.0009 0.0020 -0.0005  
AT.167 H X -0.0013 0.0399 0.0006 0.0003 0.0137 0.0079  
Y -0.0040 0.0060 0.0021 -0.0033 0.0012 0.0020  
Z 0.0004 -0.0135 -0.0009 0.0008 -0.0040 -0.0024  
AT.168 H X 0.0013 0.0399 0.0006 -0.0003 0.0137 -0.0079  
Y 0.0040 0.0060 0.0021 0.0033 0.0012 -0.0020  
Z -0.0004 -0.0135 -0.0009 -0.0008 -0.0040 0.0024  
AT.169 O X -0.0022 -0.0131 0.0009 -0.0021 -0.0044 0.0001  
Y 0.0025 0.0171 -0.0004 0.0037 0.0059 -0.0021  
Z -0.0015 -0.0062 0.0000 -0.0011 -0.0019 0.0007

AT.170 O X 0.0022 -0.0131 0.0009 0.0021 -0.0044 -0.0001

Y -0.0025 0.0171 -0.0004 -0.0037 0.0059 0.0021

Z 0.0015 -0.0062 0.0000 0.0011 -0.0019 -0.0007

AT.171 H X -0.0006 -0.0021 0.0010 -0.0018 -0.0025 -0.0004

Y 0.0054 0.0309 -0.0010 0.0056 0.0095 -0.0031

Z 0.0016 0.0081 -0.0010 0.0016 0.0027 -0.0004

AT.172 H X 0.0006 -0.0021 0.0010 0.0018 -0.0025 0.0004

Y -0.0054 0.0309 -0.0010 -0.0056 0.0095 0.0031

Z -0.0016 0.0081 -0.0010 -0.0016 0.0027 0.0004

FREQ(CM\*\*-1) 271.24 271.90 274.83 275.45 288.62 290.05

AT. 1 I X 0.0023 -0.0006 -0.0008 0.0014 0.0000 -0.0000

Y 0.0011 -0.0006 -0.0008 0.0009 0.0002 0.0003

Z 0.0008 -0.0004 -0.0003 0.0008 0.0001 -0.0000

AT. 2 I X 0.0023 0.0006 -0.0008 -0.0014 -0.0000 -0.0000

Y 0.0011 0.0006 -0.0008 -0.0009 -0.0002 0.0003

Z 0.0008 0.0004 -0.0003 -0.0008 -0.0001 -0.0000

AT. 3 I X -0.0004 0.0006 0.0018 -0.0020 -0.0013 -0.0013

Y -0.0007 -0.0002 0.0006 -0.0009 -0.0003 -0.0003

Z -0.0001 -0.0001 -0.0001 -0.0001 0.0001 -0.0000

AT. 4 I X -0.0004 -0.0006 0.0018 0.0020 0.0013 -0.0013

Y -0.0007 0.0002 0.0006 0.0009 0.0003 -0.0003

Z -0.0001 0.0001 -0.0001 0.0001 -0.0001 -0.0000

AT. 5 O X -0.0092 0.0134 0.0061 -0.0041 0.0017 0.0016

Y -0.0277 0.0203 0.0235 -0.0265 -0.0043 -0.0040

Z 0.0010 0.0058 -0.0031 0.0072 0.0040 0.0034

AT. 6 O X -0.0092 -0.0134 0.0061 0.0041 -0.0017 0.0016

Y -0.0277 -0.0203 0.0235 0.0265 0.0043 -0.0040

Z 0.0010 -0.0058 -0.0031 -0.0072 -0.0040 0.0034

AT. 7 O X -0.0095 -0.0048 -0.0007 -0.0013 0.0014 -0.0000

Y 0.0050 0.0032 -0.0007 -0.0002 -0.0026 -0.0033

Z 0.0095 0.0072 0.0062 -0.0012 -0.0039 -0.0003  
AT. 8 O X -0.0095 0.0048 -0.0007 0.0013 -0.0014 -0.0000  
Y 0.0050 -0.0032 -0.0007 0.0002 0.0026 -0.0033  
Z 0.0095 -0.0072 0.0062 0.0012 0.0039 -0.0003  
AT. 9 N X -0.0023 -0.0074 -0.0074 0.0014 0.0005 -0.0008  
Y -0.0123 -0.0098 -0.0072 -0.0006 -0.0040 -0.0044  
Z 0.0008 0.0032 -0.0005 0.0025 0.0023 0.0016  
AT. 10 N X -0.0023 0.0074 -0.0074 -0.0014 -0.0005 -0.0008  
Y -0.0123 0.0098 -0.0072 0.0006 0.0040 -0.0044  
Z 0.0008 -0.0032 -0.0005 -0.0025 -0.0023 0.0016  
AT. 11 N X -0.0041 -0.0037 -0.0074 0.0043 0.0133 0.0128  
Y -0.0040 -0.0065 -0.0122 0.0062 0.0153 0.0134  
Z -0.0033 -0.0034 -0.0034 0.0004 0.0077 0.0090  
AT. 12 N X -0.0041 0.0037 -0.0074 -0.0043 -0.0133 0.0128  
Y -0.0040 0.0065 -0.0122 -0.0062 -0.0153 0.0134  
Z -0.0033 0.0034 -0.0034 -0.0004 -0.0077 0.0090  
AT. 13 C X -0.0057 0.0019 0.0007 -0.0025 0.0008 0.0002  
Y -0.0214 0.0067 0.0110 -0.0160 -0.0049 -0.0046  
Z 0.0001 0.0041 0.0000 0.0021 0.0034 0.0024  
AT. 14 C X -0.0057 -0.0019 0.0007 0.0025 -0.0008 0.0002  
Y -0.0214 -0.0067 0.0110 0.0160 0.0049 -0.0046  
Z 0.0001 -0.0041 0.0000 -0.0021 -0.0034 0.0024  
AT. 15 C X 0.0094 -0.0040 -0.0062 0.0081 -0.0000 0.0001  
Y -0.0171 0.0045 0.0107 -0.0149 -0.0034 -0.0033  
Z -0.0151 0.0099 0.0087 -0.0109 0.0088 0.0064  
AT. 16 C X 0.0094 0.0040 -0.0062 -0.0081 0.0000 0.0001  
Y -0.0171 -0.0045 0.0107 0.0149 0.0034 -0.0033  
Z -0.0151 -0.0099 0.0087 0.0109 -0.0088 0.0064  
AT. 17 H X 0.0223 -0.0097 -0.0124 0.0166 -0.0009 -0.0004  
Y -0.0024 -0.0020 0.0043 -0.0053 -0.0092 -0.0079  
Z -0.0295 0.0164 0.0146 -0.0201 0.0158 0.0122  
AT. 18 H X 0.0223 0.0097 -0.0124 -0.0166 0.0009 -0.0004

Y -0.0024 0.0020 0.0043 0.0053 0.0092 -0.0079  
Z -0.0295 -0.0164 0.0146 0.0201 -0.0158 0.0122  
AT. 19 H X 0.0184 -0.0055 -0.0099 0.0144 -0.0002 0.0002  
Y -0.0407 0.0146 0.0215 -0.0293 0.0054 0.0039  
Z -0.0211 0.0132 0.0116 -0.0142 0.0120 0.0092  
AT. 20 H X 0.0184 0.0055 -0.0099 -0.0144 0.0002 0.0002  
Y -0.0407 -0.0146 0.0215 0.0293 -0.0054 0.0039  
Z -0.0211 -0.0132 0.0116 0.0142 -0.0120 0.0092  
AT. 21 C X -0.0039 -0.0033 -0.0038 0.0033 0.0056 0.0050  
Y 0.0065 0.0017 -0.0052 0.0043 0.0036 0.0032  
Z 0.0023 0.0013 0.0013 -0.0013 0.0010 0.0036  
AT. 22 C X -0.0039 0.0033 -0.0038 -0.0033 -0.0056 0.0050  
Y 0.0065 -0.0017 -0.0052 -0.0043 -0.0036 0.0032  
Z 0.0023 -0.0013 0.0013 0.0013 -0.0010 0.0036  
AT. 23 C X -0.0054 -0.0031 -0.0007 -0.0000 0.0017 0.0011  
Y 0.0159 0.0058 -0.0076 0.0101 0.0018 0.0016  
Z -0.0011 0.0005 0.0051 -0.0055 -0.0019 0.0010  
AT. 24 C X -0.0054 0.0031 -0.0007 0.0000 -0.0017 0.0011  
Y 0.0159 -0.0058 -0.0076 -0.0101 -0.0018 0.0016  
Z -0.0011 -0.0005 0.0051 0.0055 0.0019 0.0010  
AT. 25 H X -0.0103 -0.0055 0.0032 -0.0037 -0.0007 -0.0013  
Y 0.0159 0.0056 -0.0081 0.0104 0.0018 0.0014  
Z -0.0084 -0.0013 0.0136 -0.0122 -0.0045 -0.0003  
AT. 26 H X -0.0103 0.0055 0.0032 0.0037 0.0007 -0.0013  
Y 0.0159 -0.0056 -0.0081 -0.0104 -0.0018 0.0014  
Z -0.0084 0.0013 0.0136 0.0122 0.0045 -0.0003  
AT. 27 H X -0.0050 -0.0027 0.0002 -0.0010 0.0001 -0.0010  
Y 0.0222 0.0072 -0.0145 0.0198 0.0044 0.0022  
Z 0.0020 0.0012 0.0014 -0.0008 -0.0003 0.0018  
AT. 28 H X -0.0050 0.0027 0.0002 0.0010 -0.0001 -0.0010  
Y 0.0222 -0.0072 -0.0145 -0.0198 -0.0044 0.0022  
Z 0.0020 -0.0012 0.0014 0.0008 0.0003 0.0018



AT. 29 C X 0.0147 0.0045 -0.0009 0.0044 -0.0025 -0.0035  
Y 0.0018 -0.0047 -0.0098 0.0079 -0.0012 -0.0026  
Z -0.0142 -0.0111 -0.0061 -0.0008 0.0067 0.0051

AT. 30 C X 0.0147 -0.0045 -0.0009 -0.0044 0.0025 -0.0035  
Y 0.0018 0.0047 -0.0098 -0.0079 0.0012 -0.0026  
Z -0.0142 0.0111 -0.0061 0.0008 -0.0067 0.0051

AT. 31 H X 0.0371 0.0173 0.0053 0.0085 -0.0046 -0.0071  
Y -0.0199 -0.0173 -0.0174 0.0070 0.0057 0.0055  
Z -0.0328 -0.0221 -0.0137 0.0002 0.0158 0.0148

AT. 32 H X 0.0371 -0.0173 0.0053 -0.0085 0.0046 -0.0071  
Y -0.0199 0.0173 -0.0174 -0.0070 -0.0057 0.0055  
Z -0.0328 0.0221 -0.0137 -0.0002 -0.0158 0.0148

AT. 33 H X 0.0207 0.0041 -0.0019 0.0051 -0.0036 -0.0059  
Y 0.0332 0.0157 0.0033 0.0077 -0.0117 -0.0147  
Z -0.0231 -0.0200 -0.0126 0.0001 0.0105 0.0087

AT. 34 H X 0.0207 -0.0041 -0.0019 -0.0051 0.0036 -0.0059  
Y 0.0332 -0.0157 0.0033 -0.0077 0.0117 -0.0147  
Z -0.0231 0.0200 -0.0126 -0.0001 -0.0105 0.0087

AT. 35 C X -0.0000 -0.0046 -0.0068 0.0044 0.0005 -0.0001  
Y -0.0022 -0.0063 -0.0076 0.0047 0.0030 0.0011  
Z 0.0011 -0.0016 -0.0006 -0.0003 -0.0013 -0.0021

AT. 36 C X -0.0000 0.0046 -0.0068 -0.0044 -0.0005 -0.0001  
Y -0.0022 0.0063 -0.0076 -0.0047 -0.0030 0.0011  
Z 0.0011 0.0016 -0.0006 0.0003 0.0013 -0.0021

AT. 37 C X 0.0022 -0.0053 -0.0118 0.0094 0.0062 0.0055  
Y 0.0155 0.0033 -0.0046 0.0115 0.0006 -0.0004  
Z 0.0251 0.0113 0.0022 0.0119 -0.0022 -0.0007

AT. 38 C X 0.0022 0.0053 -0.0118 -0.0094 -0.0062 0.0055  
Y 0.0155 -0.0033 -0.0046 -0.0115 -0.0006 -0.0004  
Z 0.0251 -0.0113 0.0022 -0.0119 0.0022 -0.0007

AT. 39 H X 0.0437 0.0145 -0.0006 0.0221 -0.0048 -0.0054  
Y 0.0368 0.0098 -0.0055 0.0225 -0.0012 -0.0020

Z 0.0440 0.0221 0.0104 0.0157 -0.0091 -0.0074  
AT. 40 H X 0.0437 -0.0145 -0.0006 -0.0221 0.0048 -0.0054  
Y 0.0368 -0.0098 -0.0055 -0.0225 0.0012 -0.0020  
Z 0.0440 -0.0221 0.0104 -0.0157 0.0091 -0.0074  
AT. 41 H X -0.0381 -0.0236 -0.0211 -0.0034 0.0180 0.0173  
Y 0.0294 0.0090 -0.0001 0.0139 -0.0115 -0.0132  
Z 0.0550 0.0259 0.0084 0.0231 -0.0052 -0.0029  
AT. 42 H X -0.0381 0.0236 -0.0211 0.0034 -0.0180 0.0173  
Y 0.0294 -0.0090 -0.0001 -0.0139 0.0115 -0.0132  
Z 0.0550 -0.0259 0.0084 -0.0231 0.0052 -0.0029  
AT. 43 C X -0.0076 0.0074 0.0199 -0.0206 -0.0040 -0.0061  
Y -0.0085 -0.0098 -0.0081 0.0010 0.0080 0.0039  
Z -0.0111 0.0020 0.0158 -0.0212 -0.0046 -0.0057  
AT. 44 C X -0.0076 -0.0074 0.0199 0.0206 0.0040 -0.0061  
Y -0.0085 0.0098 -0.0081 -0.0010 -0.0080 0.0039  
Z -0.0111 -0.0020 0.0158 0.0212 0.0046 -0.0057  
AT. 45 H X -0.0148 0.0168 0.0489 -0.0499 -0.0242 -0.0288  
Y 0.0012 -0.0199 -0.0400 0.0348 0.0200 0.0181  
Z -0.0150 0.0056 0.0265 -0.0332 -0.0020 -0.0033  
AT. 46 H X -0.0148 -0.0168 0.0489 0.0499 0.0242 -0.0288  
Y 0.0012 0.0199 -0.0400 -0.0348 -0.0200 0.0181  
Z -0.0150 -0.0056 0.0265 0.0332 0.0020 -0.0033  
AT. 47 H X -0.0142 0.0071 0.0278 -0.0312 -0.0043 -0.0075  
Y -0.0191 0.0009 0.0260 -0.0348 -0.0063 -0.0126  
Z -0.0127 0.0140 0.0410 -0.0442 -0.0189 -0.0208  
AT. 48 H X -0.0142 -0.0071 0.0278 0.0312 0.0043 -0.0075  
Y -0.0191 -0.0009 0.0260 0.0348 0.0063 -0.0126  
Z -0.0127 -0.0140 0.0410 0.0442 0.0189 -0.0208  
AT. 49 C X -0.0021 -0.0020 -0.0038 0.0016 0.0000 -0.0011  
Y -0.0038 -0.0048 -0.0050 0.0024 0.0048 0.0019  
Z -0.0046 -0.0002 0.0001 -0.0025 -0.0057 -0.0054  
AT. 50 C X -0.0021 0.0020 -0.0038 -0.0016 -0.0000 -0.0011

Y -0.0038 0.0048 -0.0050 -0.0024 -0.0048 0.0019  
Z -0.0046 0.0002 0.0001 0.0025 0.0057 -0.0054  
AT. 51 C X -0.0069 -0.0075 -0.0089 0.0013 0.0031 0.0006  
Y -0.0063 -0.0049 0.0045 -0.0059 -0.0059 -0.0071  
Z -0.0005 0.0037 -0.0054 0.0057 0.0023 0.0024  
AT. 52 C X -0.0069 0.0075 -0.0089 -0.0013 -0.0031 0.0006  
Y -0.0063 0.0049 0.0045 0.0059 0.0059 -0.0071  
Z -0.0005 -0.0037 -0.0054 -0.0057 -0.0023 0.0024  
AT. 53 H X -0.0046 -0.0060 -0.0004 -0.0027 -0.0097 -0.0094  
Y -0.0092 -0.0061 0.0105 -0.0100 -0.0199 -0.0181  
Z -0.0094 0.0002 -0.0126 0.0071 0.0082 0.0070  
AT. 54 H X -0.0046 0.0060 -0.0004 0.0027 0.0097 -0.0094  
Y -0.0092 0.0061 0.0105 0.0100 0.0199 -0.0181  
Z -0.0094 -0.0002 -0.0126 -0.0071 -0.0082 0.0070  
AT. 55 H X -0.0093 -0.0087 -0.0216 0.0092 0.0196 0.0148  
Y -0.0031 -0.0011 0.0111 -0.0086 -0.0088 -0.0100  
Z 0.0016 0.0074 -0.0063 0.0079 0.0102 0.0086  
AT. 56 H X -0.0093 0.0087 -0.0216 -0.0092 -0.0196 0.0148  
Y -0.0031 0.0011 0.0111 0.0086 0.0088 -0.0100  
Z 0.0016 -0.0074 -0.0063 -0.0079 -0.0102 0.0086  
AT. 57 C X -0.0067 0.0151 0.0328 -0.0230 -0.0072 -0.0042  
Y -0.0118 0.0144 0.0422 -0.0344 -0.0121 -0.0084  
Z 0.0013 -0.0102 -0.0041 -0.0052 -0.0089 -0.0092  
AT. 58 C X -0.0067 -0.0151 0.0328 0.0230 0.0072 -0.0042  
Y -0.0118 -0.0144 0.0422 0.0344 0.0121 -0.0084  
Z 0.0013 0.0102 -0.0041 0.0052 0.0089 -0.0092  
AT. 59 H X -0.0151 0.0386 0.0857 -0.0614 -0.0162 -0.0103  
Y 0.0334 -0.0753 0.0680 -0.1214 0.0002 -0.0684  
Z 0.0628 -0.1274 0.0719 -0.1622 0.0033 -0.1031  
AT. 60 H X -0.0151 -0.0386 0.0857 0.0614 0.0162 -0.0103  
Y 0.0334 0.0753 0.0680 0.1214 -0.0002 -0.0684  
Z 0.0628 0.1274 0.0719 0.1622 -0.0033 -0.1031

AT. 61 H X -0.0552 0.1022 0.0013 0.0652 -0.0288 0.0526  
Y -0.0780 0.1461 0.0089 0.0887 -0.0322 0.0784  
Z -0.0041 -0.0069 -0.0120 0.0029 -0.0161 -0.0076

AT. 62 H X -0.0552 -0.1022 0.0013 -0.0652 0.0288 0.0526  
Y -0.0780 -0.1461 0.0089 -0.0887 0.0322 0.0784  
Z -0.0041 0.0069 -0.0120 -0.0029 0.0161 -0.0076

AT. 63 H X 0.0439 -0.0775 0.0538 -0.1040 0.0157 -0.0599  
Y -0.0000 -0.0077 0.1043 -0.1148 -0.0198 -0.0455  
Z -0.0559 0.0957 -0.0768 0.1396 -0.0236 0.0748

AT. 64 H X 0.0439 0.0775 0.0538 0.1040 -0.0157 -0.0599  
Y -0.0000 0.0077 0.1043 0.1148 0.0198 -0.0455  
Z -0.0559 -0.0957 -0.0768 -0.1396 0.0236 0.0748

AT. 65 C X 0.0321 0.0149 0.0070 0.0109 -0.0113 -0.0037  
Y 0.0378 0.0449 0.0315 -0.0006 -0.0059 0.0039  
Z 0.0016 -0.0120 -0.0101 0.0067 -0.0095 -0.0089

AT. 66 C X 0.0321 -0.0149 0.0070 -0.0109 0.0113 -0.0037  
Y 0.0378 -0.0449 0.0315 0.0006 0.0059 0.0039  
Z 0.0016 0.0120 -0.0101 -0.0067 0.0095 -0.0089

AT. 67 H X 0.0775 0.0473 0.0386 0.0123 0.0293 0.0434  
Y 0.0020 0.0026 -0.0326 0.0156 -0.2011 -0.1760  
Z -0.0033 0.0001 0.0224 -0.0093 0.1357 0.1168

AT. 68 H X 0.0775 -0.0473 0.0386 -0.0123 -0.0293 0.0434  
Y 0.0020 -0.0026 -0.0326 -0.0156 0.2011 -0.1760  
Z -0.0033 -0.0001 0.0224 0.0093 -0.1357 0.1168

AT. 69 H X 0.0653 0.0650 0.0697 -0.0088 0.1259 0.1261  
Y 0.0870 0.1017 0.1079 -0.0199 0.1833 0.1824  
Z 0.0115 -0.0241 -0.0177 0.0166 0.0066 0.0056

AT. 70 H X 0.0653 -0.0650 0.0697 0.0088 -0.1259 0.1261  
Y 0.0870 -0.1017 0.1079 0.0199 -0.1833 0.1824  
Z 0.0115 0.0241 -0.0177 -0.0166 -0.0066 0.0056

AT. 71 H X -0.0093 -0.0513 -0.0742 0.0361 -0.1910 -0.1739  
Y 0.0639 0.0749 0.0534 -0.0040 -0.0186 0.0009

Z 0.0057 -0.0214 -0.0420 0.0213 -0.1647 -0.1436  
AT. 72 H X -0.0093 0.0513 -0.0742 -0.0361 0.1910 -0.1739  
Y 0.0639 -0.0749 0.0534 0.0040 0.0186 0.0009  
Z 0.0057 0.0214 -0.0420 -0.0213 0.1647 -0.1436  
AT. 73 C X -0.0146 -0.0195 -0.0241 0.0108 0.0062 0.0051  
Y -0.0190 -0.0292 -0.0327 0.0148 0.0145 0.0115  
Z -0.0028 0.0009 0.0007 -0.0020 -0.0020 -0.0024  
AT. 74 C X -0.0146 0.0195 -0.0241 -0.0108 -0.0062 0.0051  
Y -0.0190 0.0292 -0.0327 -0.0148 -0.0145 0.0115  
Z -0.0028 -0.0009 0.0007 0.0020 0.0020 -0.0024  
AT. 75 H X -0.0298 -0.0377 -0.0423 0.0180 0.0106 0.0154  
Y -0.0261 -0.0405 -0.0466 0.0233 0.0218 0.0202  
Z -0.0236 -0.0275 -0.0313 0.0149 0.0110 0.0171  
AT. 76 H X -0.0298 0.0377 -0.0423 -0.0180 -0.0106 0.0154  
Y -0.0261 0.0405 -0.0466 -0.0233 -0.0218 0.0202  
Z -0.0236 0.0275 -0.0313 -0.0149 -0.0110 0.0171  
AT. 77 H X -0.0224 -0.0256 -0.0333 0.0148 0.0096 0.0086  
Y -0.0342 -0.0520 -0.0562 0.0271 0.0237 0.0270  
Z 0.0181 0.0272 0.0302 -0.0169 -0.0135 -0.0200  
AT. 78 H X -0.0224 0.0256 -0.0333 -0.0148 -0.0096 0.0086  
Y -0.0342 0.0520 -0.0562 -0.0271 -0.0237 0.0270  
Z 0.0181 -0.0272 0.0302 0.0169 0.0135 -0.0200  
AT. 79 I X -0.0001 -0.0006 -0.0002 0.0009 -0.0004 0.0001  
Y -0.0000 0.0000 -0.0003 0.0002 0.0003 0.0001  
Z 0.0002 0.0002 -0.0000 -0.0001 -0.0000 -0.0001  
AT. 80 I X -0.0001 0.0006 -0.0002 -0.0009 0.0004 0.0001  
Y -0.0000 -0.0000 -0.0003 -0.0002 -0.0003 0.0001  
Z 0.0002 -0.0002 -0.0000 0.0001 0.0000 -0.0001  
AT. 81 I X 0.0002 -0.0004 -0.0002 0.0001 0.0000 -0.0001  
Y -0.0004 -0.0004 -0.0004 0.0001 -0.0004 -0.0004  
Z 0.0002 0.0002 -0.0000 0.0001 0.0000 0.0001  
AT. 82 I X 0.0002 0.0004 -0.0002 -0.0001 -0.0000 -0.0001

Y -0.0004 0.0004 -0.0004 -0.0001 0.0004 -0.0004  
Z 0.0002 -0.0002 -0.0000 -0.0001 -0.0000 0.0001  
AT. 83 O X -0.0009 0.0006 0.0008 0.0001 -0.0011 0.0002  
Y -0.0013 0.0020 -0.0002 0.0011 -0.0015 0.0008  
Z -0.0000 -0.0010 -0.0001 -0.0004 0.0009 -0.0003  
AT. 84 O X -0.0009 -0.0006 0.0008 -0.0001 0.0011 0.0002  
Y -0.0013 -0.0020 -0.0002 -0.0011 0.0015 0.0008  
Z -0.0000 0.0010 -0.0001 0.0004 -0.0009 -0.0003  
AT. 85 O X -0.0006 0.0009 -0.0011 -0.0004 -0.0003 0.0004  
Y 0.0009 0.0010 0.0003 0.0001 -0.0001 -0.0001  
Z 0.0020 0.0004 -0.0011 0.0005 0.0006 -0.0002  
AT. 86 O X -0.0006 -0.0009 -0.0011 0.0004 0.0003 0.0004  
Y 0.0009 -0.0010 0.0003 -0.0001 0.0001 -0.0001  
Z 0.0020 -0.0004 -0.0011 -0.0005 -0.0006 -0.0002  
AT. 87 N X -0.0007 0.0009 0.0004 -0.0002 -0.0003 0.0001  
Y 0.0017 -0.0042 -0.0001 -0.0004 0.0002 -0.0005  
Z -0.0004 -0.0001 0.0002 -0.0001 -0.0000 -0.0000  
AT. 88 N X -0.0007 -0.0009 0.0004 0.0002 0.0003 0.0001  
Y 0.0017 0.0042 -0.0001 0.0004 -0.0002 -0.0005  
Z -0.0004 0.0001 0.0002 0.0001 0.0000 -0.0000  
AT. 89 N X 0.0001 0.0020 -0.0002 -0.0002 -0.0003 0.0000  
Y -0.0009 -0.0041 0.0003 0.0015 0.0005 0.0004  
Z 0.0001 -0.0033 -0.0002 0.0016 0.0007 0.0003  
AT. 90 N X 0.0001 -0.0020 -0.0002 0.0002 0.0003 0.0000  
Y -0.0009 0.0041 0.0003 -0.0015 -0.0005 0.0004  
Z 0.0001 0.0033 -0.0002 -0.0016 -0.0007 0.0003  
AT. 91 C X -0.0008 0.0005 0.0004 0.0001 -0.0008 0.0002  
Y -0.0000 -0.0008 0.0003 -0.0002 -0.0005 -0.0002  
Z -0.0006 -0.0000 0.0003 -0.0001 0.0000 -0.0000  
AT. 92 C X -0.0008 -0.0005 0.0004 -0.0001 0.0008 0.0002  
Y -0.0000 0.0008 0.0003 0.0002 0.0005 -0.0002  
Z -0.0006 0.0000 0.0003 0.0001 -0.0000 -0.0000

AT. 93 C X -0.0011 0.0004 0.0005 0.0008 -0.0013 0.0004  
Y -0.0008 0.0005 0.0006 -0.0002 -0.0006 -0.0000  
Z -0.0016 0.0006 0.0006 0.0012 -0.0012 0.0006

AT. 94 C X -0.0011 -0.0004 0.0005 -0.0008 0.0013 0.0004  
Y -0.0008 -0.0005 0.0006 0.0002 0.0006 -0.0000  
Z -0.0016 -0.0006 0.0006 -0.0012 0.0012 0.0006

AT. 95 H X -0.0008 0.0000 0.0003 0.0010 0.0006 0.0001  
Y -0.0000 0.0004 0.0004 -0.0010 -0.0007 -0.0003  
Z -0.0031 0.0012 0.0010 0.0026 -0.0027 0.0014

AT. 96 H X -0.0008 -0.0000 0.0003 -0.0010 -0.0006 0.0001  
Y -0.0000 -0.0004 0.0004 0.0010 0.0007 -0.0003  
Z -0.0031 -0.0012 0.0010 -0.0026 0.0027 0.0014

AT. 97 H X -0.0014 0.0005 0.0006 0.0015 -0.0020 0.0005  
Y -0.0026 0.0011 0.0010 0.0019 -0.0018 0.0010  
Z -0.0020 0.0008 0.0007 0.0015 -0.0014 0.0008

AT. 98 H X -0.0014 -0.0005 0.0006 -0.0015 0.0020 0.0005  
Y -0.0026 -0.0011 0.0010 -0.0019 0.0018 0.0010  
Z -0.0020 -0.0008 0.0007 -0.0015 0.0014 0.0008

AT. 99 C X -0.0005 0.0014 -0.0005 -0.0002 -0.0004 0.0003  
Y 0.0003 -0.0006 -0.0002 0.0003 -0.0001 0.0000  
Z 0.0007 -0.0012 -0.0006 0.0010 0.0005 0.0001

AT. 100 C X -0.0005 -0.0014 -0.0005 0.0002 0.0004 0.0003  
Y 0.0003 0.0006 -0.0002 -0.0003 0.0001 0.0000  
Z 0.0007 0.0012 -0.0006 -0.0010 -0.0005 0.0001

AT. 101 C X 0.0002 0.0006 -0.0008 -0.0001 -0.0001 0.0003  
Y 0.0006 -0.0001 -0.0014 -0.0004 -0.0004 0.0002  
Z -0.0001 -0.0002 -0.0002 0.0009 0.0003 -0.0000

AT. 102 C X 0.0002 -0.0006 -0.0008 0.0001 0.0001 0.0003  
Y 0.0006 0.0001 -0.0014 0.0004 0.0004 0.0002  
Z -0.0001 0.0002 -0.0002 -0.0009 -0.0003 -0.0000

AT. 103 H X 0.0005 0.0005 -0.0008 -0.0002 0.0001 0.0005  
Y 0.0005 -0.0001 -0.0015 -0.0004 -0.0005 0.0001

Z -0.0010 0.0010 0.0010 0.0009 0.0004 -0.0004  
AT.104 H X 0.0005 -0.0005 -0.0008 0.0002 -0.0001 0.0005  
Y 0.0005 0.0001 -0.0015 0.0004 0.0005 0.0001  
Z -0.0010 -0.0010 0.0010 -0.0009 -0.0004 -0.0004  
AT.105 H X 0.0007 -0.0006 -0.0011 0.0000 0.0003 0.0006  
Y 0.0012 -0.0007 -0.0023 -0.0007 -0.0006 0.0004  
Z 0.0003 -0.0007 -0.0005 0.0008 0.0003 0.0001  
AT.106 H X 0.0007 0.0006 -0.0011 -0.0000 -0.0003 0.0006  
Y 0.0012 0.0007 -0.0023 0.0007 0.0006 0.0004  
Z 0.0003 0.0007 -0.0005 -0.0008 -0.0003 0.0001  
AT.107 C X 0.0002 -0.0028 0.0004 0.0008 0.0002 -0.0001  
Y 0.0002 -0.0007 0.0000 -0.0006 -0.0003 -0.0000  
Z 0.0001 -0.0029 0.0003 0.0011 0.0007 -0.0002  
AT.108 C X 0.0002 0.0028 0.0004 -0.0008 -0.0002 -0.0001  
Y 0.0002 0.0007 0.0000 0.0006 0.0003 -0.0000  
Z 0.0001 0.0029 0.0003 -0.0011 -0.0007 -0.0002  
AT.109 H X 0.0018 -0.0092 0.0003 0.0025 0.0013 -0.0005  
Y 0.0000 -0.0028 0.0001 0.0010 0.0001 0.0002  
Z -0.0005 -0.0046 0.0004 0.0033 0.0012 0.0003  
AT.110 H X 0.0018 0.0092 0.0003 -0.0025 -0.0013 -0.0005  
Y 0.0000 0.0028 0.0001 -0.0010 -0.0001 0.0002  
Z -0.0005 0.0046 0.0004 -0.0033 -0.0012 0.0003  
AT.111 H X -0.0001 -0.0014 0.0004 0.0004 0.0001 -0.0001  
Y -0.0007 0.0054 -0.0000 -0.0033 -0.0016 0.0000  
Z 0.0007 -0.0058 0.0002 0.0021 0.0011 -0.0003  
AT.112 H X -0.0001 0.0014 0.0004 -0.0004 -0.0001 -0.0001  
Y -0.0007 -0.0054 -0.0000 0.0033 0.0016 0.0000  
Z 0.0007 0.0058 0.0002 -0.0021 -0.0011 -0.0003  
AT.113 C X -0.0004 0.0008 0.0001 -0.0000 -0.0003 0.0001  
Y -0.0000 -0.0016 0.0001 0.0005 0.0001 0.0000  
Z 0.0001 -0.0006 0.0002 -0.0003 0.0000 -0.0002  
AT.114 C X -0.0004 -0.0008 0.0001 0.0000 0.0003 0.0001



Y -0.0000 0.0016 0.0001 -0.0005 -0.0001 0.0000  
Z 0.0001 0.0006 0.0002 0.0003 -0.0000 -0.0002  
AT. 115 C X -0.0008 0.0034 0.0002 -0.0006 -0.0002 0.0000  
Y -0.0006 0.0008 0.0000 -0.0005 0.0000 0.0001  
Z -0.0004 0.0021 -0.0001 -0.0013 0.0001 -0.0000  
AT. 116 C X -0.0008 -0.0034 0.0002 0.0006 0.0002 0.0000  
Y -0.0006 -0.0008 0.0000 0.0005 -0.0000 0.0001  
Z -0.0004 -0.0021 -0.0001 0.0013 -0.0001 -0.0000  
AT. 117 H X 0.0004 -0.0031 -0.0000 0.0020 0.0001 0.0001  
Y -0.0011 0.0060 -0.0002 -0.0025 0.0000 0.0002  
Z -0.0015 0.0077 0.0002 -0.0035 -0.0003 -0.0001  
AT. 118 H X 0.0004 0.0031 -0.0000 -0.0020 -0.0001 0.0001  
Y -0.0011 -0.0060 -0.0002 0.0025 -0.0000 0.0002  
Z -0.0015 -0.0077 0.0002 0.0035 0.0003 -0.0001  
AT. 119 H X -0.0019 0.0126 0.0002 -0.0044 -0.0008 -0.0001  
Y -0.0004 0.0023 -0.0000 -0.0012 -0.0003 -0.0001  
Z -0.0013 0.0059 -0.0000 -0.0027 0.0000 0.0001  
AT. 120 H X -0.0019 -0.0126 0.0002 0.0044 0.0008 -0.0001  
Y -0.0004 -0.0023 -0.0000 0.0012 0.0003 -0.0001  
Z -0.0013 -0.0059 -0.0000 0.0027 -0.0000 0.0001  
AT. 121 C X 0.0029 -0.0047 -0.0013 0.0009 0.0007 -0.0002  
Y -0.0014 -0.0003 0.0010 0.0006 -0.0003 0.0002  
Z -0.0031 0.0041 0.0013 0.0005 -0.0008 0.0006  
AT. 122 C X 0.0029 0.0047 -0.0013 -0.0009 -0.0007 -0.0002  
Y -0.0014 0.0003 0.0010 -0.0006 0.0003 0.0002  
Z -0.0031 -0.0041 0.0013 -0.0005 0.0008 0.0006  
AT. 123 H X 0.0090 -0.0171 -0.0040 0.0029 0.0032 -0.0007  
Y 0.0034 -0.0066 -0.0010 0.0008 0.0008 -0.0004  
Z -0.0071 0.0086 0.0029 0.0007 -0.0015 0.0011  
AT. 124 H X 0.0090 0.0171 -0.0040 -0.0029 -0.0032 -0.0007  
Y 0.0034 0.0066 -0.0010 -0.0008 -0.0008 -0.0004  
Z -0.0071 -0.0086 0.0029 -0.0007 0.0015 0.0011

AT. 125 H X 0.0021 -0.0019 -0.0010 0.0001 0.0003 -0.0001  
Y -0.0083 0.0101 0.0038 0.0001 -0.0022 0.0011  
Z -0.0076 0.0128 0.0031 -0.0008 -0.0023 0.0011

AT. 126 H X 0.0021 0.0019 -0.0010 -0.0001 -0.0003 -0.0001  
Y -0.0083 -0.0101 0.0038 -0.0001 0.0022 0.0011  
Z -0.0076 -0.0128 0.0031 0.0008 0.0023 0.0011

AT. 127 C X -0.0002 0.0003 0.0000 0.0003 -0.0000 0.0001  
Y 0.0000 -0.0014 0.0003 -0.0000 -0.0002 -0.0001  
Z 0.0005 -0.0003 -0.0001 -0.0003 -0.0005 -0.0000

AT. 128 C X -0.0002 -0.0003 0.0000 -0.0003 0.0000 0.0001  
Y 0.0000 0.0014 0.0003 0.0000 0.0002 -0.0001  
Z 0.0005 0.0003 -0.0001 0.0003 0.0005 -0.0000

AT. 129 C X -0.0006 0.0023 0.0003 -0.0006 -0.0001 0.0001  
Y 0.0002 -0.0003 0.0006 -0.0003 0.0002 -0.0003  
Z 0.0001 -0.0015 -0.0002 -0.0003 -0.0008 0.0001

AT. 130 C X -0.0006 -0.0023 0.0003 0.0006 0.0001 0.0001  
Y 0.0002 0.0003 0.0006 0.0003 -0.0002 -0.0003  
Z 0.0001 0.0015 -0.0002 0.0003 0.0008 0.0001

AT. 131 H X -0.0005 -0.0001 0.0000 -0.0001 -0.0006 0.0002  
Y 0.0007 0.0017 0.0010 -0.0009 0.0010 -0.0008  
Z 0.0004 -0.0038 -0.0003 0.0001 -0.0011 0.0001

AT. 132 H X -0.0005 0.0001 0.0000 0.0001 0.0006 0.0002  
Y 0.0007 -0.0017 0.0010 0.0009 -0.0010 -0.0008  
Z 0.0004 0.0038 -0.0003 -0.0001 0.0011 0.0001

AT. 133 H X -0.0014 0.0064 0.0011 -0.0011 0.0006 -0.0002  
Y -0.0004 0.0008 0.0008 -0.0000 0.0001 -0.0002  
Z -0.0009 -0.0016 -0.0000 0.0001 -0.0013 0.0004

AT. 134 H X -0.0014 -0.0064 0.0011 0.0011 -0.0006 -0.0002  
Y -0.0004 -0.0008 0.0008 0.0000 -0.0001 -0.0002  
Z -0.0009 0.0016 -0.0000 -0.0001 0.0013 0.0004

AT. 135 C X 0.0023 -0.0022 -0.0013 -0.0000 -0.0010 0.0003  
Y -0.0029 0.0080 0.0014 0.0000 0.0007 -0.0001

Z 0.0026 0.0002 -0.0012 -0.0007 -0.0007 0.0001  
AT. 136 C X 0.0023 0.0022 -0.0013 0.0000 0.0010 0.0003  
Y -0.0029 -0.0080 0.0014 -0.0000 -0.0007 -0.0001  
Z 0.0026 -0.0002 -0.0012 0.0007 0.0007 0.0001  
AT. 137 H X 0.0048 -0.0059 -0.0026 0.0009 -0.0014 0.0007  
Y -0.0069 0.0159 0.0037 0.0005 0.0018 0.0001  
Z -0.0048 0.0146 0.0029 -0.0001 0.0012 0.0002  
AT. 138 H X 0.0048 0.0059 -0.0026 -0.0009 0.0014 0.0007  
Y -0.0069 -0.0159 0.0037 -0.0005 -0.0018 0.0001  
Z -0.0048 -0.0146 0.0029 0.0001 -0.0012 0.0002  
AT. 139 H X -0.0006 -0.0002 0.0002 0.0011 0.0002 0.0003  
Y 0.0026 -0.0005 -0.0016 -0.0012 -0.0008 -0.0004  
Z 0.0045 0.0003 -0.0022 -0.0019 -0.0017 0.0003  
AT. 140 H X -0.0006 0.0002 0.0002 -0.0011 -0.0002 0.0003  
Y 0.0026 0.0005 -0.0016 0.0012 0.0008 -0.0004  
Z 0.0045 -0.0003 -0.0022 0.0019 0.0017 0.0003  
AT. 141 H X 0.0066 -0.0044 -0.0038 -0.0013 -0.0023 0.0004  
Y -0.0070 0.0185 0.0036 0.0003 0.0019 0.0000  
Z 0.0089 -0.0118 -0.0047 -0.0015 -0.0025 -0.0000  
AT. 142 H X 0.0066 0.0044 -0.0038 0.0013 0.0023 0.0004  
Y -0.0070 -0.0185 0.0036 -0.0003 -0.0019 0.0000  
Z 0.0089 0.0118 -0.0047 0.0015 0.0025 -0.0000  
AT. 143 C X -0.0023 -0.0018 0.0014 0.0012 0.0001 -0.0001  
Y -0.0027 0.0102 -0.0004 -0.0032 -0.0008 0.0004  
Z 0.0040 -0.0006 -0.0018 -0.0007 -0.0006 0.0001  
AT. 144 C X -0.0023 0.0018 0.0014 -0.0012 -0.0001 -0.0001  
Y -0.0027 -0.0102 -0.0004 0.0032 0.0008 0.0004  
Z 0.0040 0.0006 -0.0018 0.0007 0.0006 0.0001  
AT. 145 H X 0.0011 -0.0105 0.0017 0.0015 -0.0025 -0.0010  
Y 0.0041 0.0078 -0.0031 -0.0061 -0.0066 -0.0003  
Z -0.0023 -0.0004 0.0010 0.0023 0.0048 0.0006  
AT. 146 H X 0.0011 0.0105 0.0017 -0.0015 0.0025 -0.0010

Y 0.0041 -0.0078 -0.0031 0.0061 0.0066 -0.0003  
Z -0.0023 0.0004 0.0010 -0.0023 -0.0048 0.0006  
AT. 147 H X 0.0031 -0.0056 -0.0003 0.0004 -0.0021 -0.0005  
Y -0.0133 0.0204 0.0024 -0.0009 0.0069 0.0017  
Z 0.0058 -0.0005 -0.0028 -0.0007 0.0004 0.0003  
AT. 148 H X 0.0031 0.0056 -0.0003 -0.0004 0.0021 -0.0005  
Y -0.0133 -0.0204 0.0024 0.0009 -0.0069 0.0017  
Z 0.0058 0.0005 -0.0028 0.0007 -0.0004 0.0003  
AT. 149 H X -0.0117 0.0091 0.0038 0.0015 0.0046 0.0008  
Y -0.0013 0.0135 -0.0017 -0.0052 -0.0031 0.0004  
Z 0.0109 -0.0001 -0.0051 -0.0045 -0.0068 -0.0004  
AT. 150 H X -0.0117 -0.0091 0.0038 -0.0015 -0.0046 0.0008  
Y -0.0013 -0.0135 -0.0017 0.0052 0.0031 0.0004  
Z 0.0109 0.0001 -0.0051 0.0045 0.0068 -0.0004  
AT. 151 C X -0.0014 0.0034 0.0004 -0.0006 -0.0002 0.0001  
Y 0.0031 -0.0108 -0.0006 0.0023 0.0005 -0.0004  
Z -0.0002 -0.0011 0.0003 -0.0001 -0.0002 -0.0002  
AT. 152 C X -0.0014 -0.0034 0.0004 0.0006 0.0002 0.0001  
Y 0.0031 0.0108 -0.0006 -0.0023 -0.0005 -0.0004  
Z -0.0002 0.0011 0.0003 0.0001 0.0002 -0.0002  
AT. 153 H X -0.0023 0.0059 0.0008 -0.0017 -0.0004 0.0001  
Y 0.0049 -0.0165 -0.0009 0.0034 0.0008 -0.0006  
Z 0.0030 -0.0114 -0.0005 0.0021 0.0005 -0.0006  
AT. 154 H X -0.0023 -0.0059 0.0008 0.0017 0.0004 0.0001  
Y 0.0049 0.0165 -0.0009 -0.0034 -0.0008 -0.0006  
Z 0.0030 0.0114 -0.0005 -0.0021 -0.0005 -0.0006  
AT. 155 H X -0.0021 0.0051 0.0006 -0.0006 0.0002 0.0002  
Y 0.0057 -0.0191 -0.0011 0.0042 0.0012 -0.0007  
Z -0.0032 0.0082 0.0010 -0.0022 -0.0007 0.0001  
AT. 156 H X -0.0021 -0.0051 0.0006 0.0006 -0.0002 0.0002  
Y 0.0057 0.0191 -0.0011 -0.0042 -0.0012 -0.0007  
Z -0.0032 -0.0082 0.0010 0.0022 0.0007 0.0001

AT.157 O X -0.0038 0.0023 0.0033 -0.0022 -0.0006 -0.0006  
Y 0.0536 -0.0358 -0.0359 0.0382 0.0040 0.0036  
Z 0.0009 -0.0008 -0.0011 0.0037 -0.0001 -0.0001

AT.158 O X -0.0038 -0.0023 0.0033 0.0022 0.0006 -0.0006  
Y 0.0536 0.0358 -0.0359 -0.0382 -0.0040 0.0036  
Z 0.0009 0.0008 -0.0011 -0.0037 0.0001 -0.0001

AT.159 O X 0.0008 0.0012 -0.0017 -0.0028 -0.0005 -0.0002  
Y -0.0125 0.0085 0.0085 -0.0076 -0.0010 -0.0003  
Z -0.0050 0.0065 -0.0007 -0.0069 -0.0010 -0.0002

AT.160 O X 0.0008 -0.0012 -0.0017 0.0028 0.0005 -0.0002  
Y -0.0125 -0.0085 0.0085 0.0076 0.0010 -0.0003  
Z -0.0050 -0.0065 -0.0007 0.0069 0.0010 -0.0002

AT.161 H X 0.0327 -0.0219 -0.0211 0.0251 0.0036 0.0022  
Y 0.0617 -0.0414 -0.0413 0.0436 0.0041 0.0040  
Z -0.0030 0.0024 0.0008 0.0034 0.0021 0.0005

AT.162 H X 0.0327 0.0219 -0.0211 -0.0251 -0.0036 0.0022  
Y 0.0617 0.0414 -0.0413 -0.0436 -0.0041 0.0040  
Z -0.0030 -0.0024 0.0008 -0.0034 -0.0021 0.0005

AT.163 H X 0.0039 0.0010 -0.0072 -0.0032 -0.0006 0.0001  
Y -0.0052 0.0036 0.0078 -0.0046 0.0025 -0.0022  
Z -0.0040 0.0053 0.0005 -0.0059 -0.0002 -0.0007

AT.164 H X 0.0039 -0.0010 -0.0072 0.0032 0.0006 0.0001  
Y -0.0052 -0.0036 0.0078 0.0046 -0.0025 -0.0022  
Z -0.0040 -0.0053 0.0005 0.0059 0.0002 -0.0007

AT.165 O X 0.0009 -0.0014 -0.0001 0.0002 0.0033 0.0004  
Y 0.0031 -0.0010 -0.0003 -0.0005 -0.0003 -0.0012  
Z -0.0008 -0.0002 0.0003 0.0007 0.0007 0.0003

AT.166 O X 0.0009 0.0014 -0.0001 -0.0002 -0.0033 0.0004  
Y 0.0031 0.0010 -0.0003 0.0005 0.0003 -0.0012  
Z -0.0008 0.0002 0.0003 -0.0007 -0.0007 0.0003

AT.167 H X 0.0019 -0.0017 -0.0003 -0.0002 0.0040 0.0001  
Y 0.0019 -0.0002 -0.0008 0.0001 -0.0012 -0.0007

Z -0.0013 -0.0001 0.0016 0.0009 -0.0002 0.0004  
 AT.168 H X 0.0019 0.0017 -0.0003 0.0002 -0.0040 0.0001  
 Y 0.0019 0.0002 -0.0008 -0.0001 0.0012 -0.0007  
 Z -0.0013 0.0001 0.0016 -0.0009 0.0002 0.0004  
 AT.169 O X 0.0014 -0.0007 0.0018 -0.0002 -0.0000 -0.0004  
 Y -0.0027 -0.0006 0.0018 0.0013 0.0021 0.0009  
 Z 0.0005 -0.0002 0.0001 0.0002 -0.0004 -0.0003  
 AT.170 O X 0.0014 0.0007 0.0018 0.0002 0.0000 -0.0004  
 Y -0.0027 0.0006 0.0018 -0.0013 -0.0021 0.0009  
 Z 0.0005 0.0002 0.0001 -0.0002 0.0004 -0.0003  
 AT.171 H X 0.0022 -0.0005 0.0012 0.0012 -0.0001 -0.0020  
 Y -0.0036 -0.0006 0.0018 0.0024 0.0030 0.0008  
 Z -0.0013 -0.0006 0.0006 0.0011 0.0014 0.0005  
 AT.172 H X 0.0022 0.0005 0.0012 -0.0012 0.0001 -0.0020  
 Y -0.0036 0.0006 0.0018 -0.0024 -0.0030 0.0008  
 Z -0.0013 0.0006 0.0006 -0.0011 -0.0014 0.0005  
  
 FREQ(CM\*\*-1) 293.48 310.44 311.02 311.71 317.02 318.28  
  
 AT. 1 I X 0.0000 -0.0001 0.0003 0.0001 -0.0012 0.0007  
 Y -0.0001 0.0003 -0.0003 0.0003 -0.0003 0.0004  
 Z -0.0002 -0.0001 0.0001 -0.0001 -0.0002 -0.0003  
 AT. 2 I X -0.0000 0.0001 0.0003 0.0001 0.0012 0.0007  
 Y 0.0001 -0.0003 -0.0003 0.0003 0.0003 0.0004  
 Z 0.0002 0.0001 0.0001 -0.0001 0.0002 -0.0003  
 AT. 3 I X -0.0002 0.0000 -0.0002 -0.0004 0.0021 -0.0020  
 Y 0.0001 -0.0003 0.0003 -0.0002 0.0007 -0.0006  
 Z -0.0000 -0.0001 0.0002 -0.0001 -0.0004 0.0003  
 AT. 4 I X 0.0002 -0.0000 -0.0002 -0.0004 -0.0021 -0.0020  
 Y -0.0001 0.0003 0.0003 -0.0002 -0.0007 -0.0006  
 Z 0.0000 0.0001 0.0002 -0.0001 0.0004 0.0003  
 AT. 5 O X -0.0003 -0.0002 -0.0009 -0.0008 -0.0081 0.0092

Y 0.0014 -0.0004 -0.0007 -0.0011 -0.0023 0.0040  
Z -0.0001 0.0003 -0.0008 0.0010 -0.0171 0.0144  
AT. 6 O X 0.0003 0.0002 -0.0009 -0.0008 0.0081 0.0092  
Y -0.0014 0.0004 -0.0007 -0.0011 0.0023 0.0040  
Z 0.0001 -0.0003 -0.0008 0.0010 0.0171 0.0144  
AT. 7 O X 0.0007 0.0005 -0.0003 0.0004 -0.0041 0.0028  
Y 0.0007 -0.0001 0.0002 0.0004 -0.0014 -0.0002  
Z -0.0001 0.0004 -0.0003 -0.0013 0.0205 -0.0192  
AT. 8 O X -0.0007 -0.0005 -0.0003 0.0004 0.0041 0.0028  
Y -0.0007 0.0001 0.0002 0.0004 0.0014 -0.0002  
Z 0.0001 -0.0004 -0.0003 -0.0013 -0.0205 -0.0192  
AT. 9 N X 0.0000 0.0003 -0.0002 -0.0008 0.0258 -0.0263  
Y 0.0002 0.0007 -0.0014 -0.0015 0.0390 -0.0407  
Z 0.0001 0.0001 -0.0001 0.0008 -0.0091 0.0075  
AT. 10 N X -0.0000 -0.0003 -0.0002 -0.0008 -0.0258 -0.0263  
Y -0.0002 -0.0007 -0.0014 -0.0015 -0.0390 -0.0407  
Z -0.0001 -0.0001 -0.0001 0.0008 0.0091 0.0075  
AT. 11 N X 0.0000 -0.0001 0.0011 0.0014 -0.0276 0.0286  
Y -0.0001 -0.0006 0.0020 0.0020 -0.0387 0.0410  
Z 0.0002 0.0001 0.0011 0.0005 -0.0089 0.0121  
AT. 12 N X -0.0000 0.0001 0.0011 0.0014 0.0276 0.0286  
Y 0.0001 0.0006 0.0020 0.0020 0.0387 0.0410  
Z -0.0002 -0.0001 0.0011 0.0005 0.0089 0.0121  
AT. 13 C X -0.0002 0.0000 -0.0003 -0.0009 0.0074 -0.0069  
Y 0.0010 0.0002 -0.0011 -0.0014 0.0146 -0.0146  
Z 0.0003 -0.0000 0.0000 0.0010 -0.0129 0.0112  
AT. 14 C X 0.0002 -0.0000 -0.0003 -0.0009 -0.0074 -0.0069  
Y -0.0010 -0.0002 -0.0011 -0.0014 -0.0146 -0.0146  
Z -0.0003 0.0000 0.0000 0.0010 0.0129 0.0112  
AT. 15 C X -0.0005 0.0001 0.0001 0.0001 0.0026 -0.0027  
Y 0.0008 0.0001 -0.0007 -0.0011 0.0074 -0.0072  
Z 0.0005 -0.0004 0.0003 0.0002 -0.0208 0.0204

AT. 16 C X 0.0005 -0.0001 0.0001 0.0001 -0.0026 -0.0027  
Y -0.0008 -0.0001 -0.0007 -0.0011 -0.0074 -0.0072  
Z -0.0005 0.0004 0.0003 0.0002 0.0208 0.0204

AT. 17 H X -0.0010 0.0004 0.0004 0.0010 0.0020 -0.0027  
Y 0.0008 0.0006 -0.0006 -0.0001 0.0155 -0.0167  
Z 0.0004 -0.0009 0.0003 -0.0008 -0.0313 0.0326

AT. 18 H X 0.0010 -0.0004 0.0004 0.0010 -0.0020 -0.0027  
Y -0.0008 -0.0006 -0.0006 -0.0001 -0.0155 -0.0167  
Z -0.0004 0.0009 0.0003 -0.0008 0.0313 0.0326

AT. 19 H X -0.0007 0.0002 0.0002 0.0011 -0.0026 0.0018  
Y 0.0004 -0.0005 -0.0011 -0.0028 -0.0063 0.0086  
Z 0.0003 -0.0006 0.0002 -0.0001 -0.0280 0.0281

AT. 20 H X 0.0007 -0.0002 0.0002 0.0011 0.0026 0.0018  
Y -0.0004 0.0005 -0.0011 -0.0028 0.0063 0.0086  
Z -0.0003 0.0006 0.0002 -0.0001 0.0280 0.0281

AT. 21 C X 0.0003 0.0004 0.0002 0.0008 -0.0104 0.0103  
Y 0.0004 -0.0002 0.0009 0.0012 -0.0138 0.0140  
Z 0.0004 0.0003 0.0007 -0.0001 0.0067 -0.0041

AT. 22 C X -0.0003 -0.0004 0.0002 0.0008 0.0104 0.0103  
Y -0.0004 0.0002 0.0009 0.0012 0.0138 0.0140  
Z -0.0004 -0.0003 0.0007 -0.0001 -0.0067 -0.0041

AT. 23 C X 0.0001 0.0001 -0.0001 0.0002 -0.0049 0.0050  
Y 0.0001 0.0002 -0.0002 0.0009 -0.0042 0.0015  
Z 0.0003 -0.0000 0.0009 -0.0004 0.0093 -0.0046

AT. 24 C X -0.0001 -0.0001 -0.0001 0.0002 0.0049 0.0050  
Y -0.0001 -0.0002 -0.0002 0.0009 0.0042 0.0015  
Z -0.0003 0.0000 0.0009 -0.0004 -0.0093 -0.0046

AT. 25 H X -0.0002 -0.0001 -0.0001 -0.0006 0.0019 -0.0014  
Y 0.0001 0.0003 -0.0004 0.0009 -0.0029 -0.0001  
Z 0.0001 -0.0008 0.0020 -0.0010 0.0071 0.0028

AT. 26 H X 0.0002 0.0001 -0.0001 -0.0006 -0.0019 -0.0014  
Y -0.0001 -0.0003 -0.0004 0.0009 0.0029 -0.0001



Z -0.0001 0.0008 0.0020 -0.0010 -0.0071 0.0028  
AT. 27 H X 0.0003 -0.0004 -0.0001 0.0004 -0.0054 0.0056  
Y 0.0004 0.0010 -0.0014 0.0016 -0.0041 -0.0043  
Z 0.0003 0.0005 0.0003 -0.0000 0.0096 -0.0076  
AT. 28 H X -0.0003 0.0004 -0.0001 0.0004 0.0054 0.0056  
Y -0.0004 -0.0010 -0.0014 0.0016 0.0041 -0.0043  
Z -0.0003 -0.0005 0.0003 -0.0000 -0.0096 -0.0076  
AT. 29 C X -0.0000 0.0005 -0.0004 0.0004 -0.0015 -0.0001  
Y -0.0004 0.0007 -0.0015 -0.0005 0.0104 -0.0129  
Z -0.0004 -0.0002 0.0002 -0.0004 0.0102 -0.0103  
AT. 30 C X 0.0000 -0.0005 -0.0004 0.0004 0.0015 -0.0001  
Y 0.0004 -0.0007 -0.0015 -0.0005 -0.0104 -0.0129  
Z 0.0004 0.0002 0.0002 -0.0004 -0.0102 -0.0103  
AT. 31 H X 0.0000 0.0008 -0.0007 0.0019 -0.0345 0.0313  
Y -0.0010 -0.0001 -0.0006 -0.0013 0.0186 -0.0188  
Z -0.0013 -0.0011 0.0014 -0.0005 0.0023 0.0001  
AT. 32 H X -0.0000 -0.0008 -0.0007 0.0019 0.0345 0.0313  
Y 0.0010 0.0001 -0.0006 -0.0013 -0.0186 -0.0188  
Z 0.0013 0.0011 0.0014 -0.0005 -0.0023 0.0001  
AT. 33 H X 0.0002 0.0008 -0.0009 -0.0000 0.0071 -0.0093  
Y 0.0004 0.0020 -0.0033 0.0005 -0.0029 -0.0029  
Z -0.0006 -0.0005 0.0006 -0.0011 0.0213 -0.0203  
AT. 34 H X -0.0002 -0.0008 -0.0009 -0.0000 -0.0071 -0.0093  
Y -0.0004 -0.0020 -0.0033 0.0005 0.0029 -0.0029  
Z 0.0006 0.0005 0.0006 -0.0011 -0.0213 -0.0203  
AT. 35 C X -0.0003 0.0003 -0.0003 -0.0001 0.0047 -0.0055  
Y -0.0006 0.0001 -0.0004 -0.0000 -0.0054 0.0046  
Z 0.0001 0.0005 -0.0008 -0.0005 0.0207 -0.0227  
AT. 36 C X 0.0003 -0.0003 -0.0003 -0.0001 -0.0047 -0.0055  
Y 0.0006 -0.0001 -0.0004 -0.0000 0.0054 0.0046  
Z -0.0001 -0.0005 -0.0008 -0.0005 -0.0207 -0.0227  
AT. 37 C X -0.0005 0.0001 0.0001 0.0004 -0.0116 0.0109

Y -0.0006 -0.0003 0.0001 0.0008 -0.0182 0.0163  
Z -0.0001 -0.0002 -0.0000 0.0005 -0.0046 0.0022  
AT. 38 C X 0.0005 -0.0001 0.0001 0.0004 0.0116 0.0109  
Y 0.0006 0.0003 0.0001 0.0008 0.0182 0.0163  
Z 0.0001 0.0002 -0.0000 0.0005 0.0046 0.0022  
AT. 39 H X -0.0008 -0.0008 -0.0002 0.0012 -0.0268 0.0212  
Y -0.0010 -0.0010 0.0005 0.0014 -0.0338 0.0313  
Z -0.0001 -0.0005 -0.0005 0.0008 -0.0085 0.0031  
AT. 40 H X 0.0008 0.0008 -0.0002 0.0012 0.0268 0.0212  
Y 0.0010 0.0010 0.0005 0.0014 0.0338 0.0313  
Z 0.0001 0.0005 -0.0005 0.0008 0.0085 0.0031  
AT. 41 H X -0.0000 0.0013 0.0004 0.0002 -0.0006 0.0050  
Y -0.0008 -0.0003 -0.0014 -0.0000 0.0006 -0.0066  
Z -0.0004 -0.0014 0.0008 0.0014 -0.0298 0.0253  
AT. 42 H X 0.0000 -0.0013 0.0004 0.0002 0.0006 0.0050  
Y 0.0008 0.0003 -0.0014 -0.0000 -0.0006 -0.0066  
Z 0.0004 0.0014 0.0008 0.0014 0.0298 0.0253  
AT. 43 C X 0.0010 -0.0004 0.0001 0.0010 -0.0236 0.0210  
Y -0.0005 -0.0002 0.0006 0.0011 -0.0225 0.0235  
Z 0.0012 -0.0004 0.0005 0.0005 -0.0138 0.0133  
AT. 44 C X -0.0010 0.0004 0.0001 0.0010 0.0236 0.0210  
Y 0.0005 0.0002 0.0006 0.0011 0.0225 0.0235  
Z -0.0012 0.0004 0.0005 0.0005 0.0138 0.0133  
AT. 45 H X 0.0019 -0.0013 -0.0009 0.0005 -0.0310 0.0236  
Y -0.0019 0.0016 -0.0002 0.0005 0.0165 -0.0122  
Z 0.0017 -0.0014 0.0018 0.0013 -0.0455 0.0452  
AT. 46 H X -0.0019 0.0013 -0.0009 0.0005 0.0310 0.0236  
Y 0.0019 -0.0016 -0.0002 0.0005 -0.0165 -0.0122  
Z -0.0017 0.0014 0.0018 0.0013 0.0455 0.0452  
AT. 47 H X 0.0013 -0.0006 0.0003 0.0015 -0.0422 0.0393  
Y 0.0011 -0.0012 0.0007 0.0021 -0.0589 0.0562  
Z 0.0024 -0.0012 0.0003 0.0008 -0.0263 0.0223

AT. 48 H X -0.0013 0.0006 0.0003 0.0015 0.0422 0.0393  
Y -0.0011 0.0012 0.0007 0.0021 0.0589 0.0562  
Z -0.0024 0.0012 0.0003 0.0008 0.0263 0.0223

AT. 49 C X -0.0000 -0.0000 0.0000 0.0001 0.0023 -0.0025  
Y -0.0006 0.0000 -0.0000 0.0003 -0.0066 0.0070  
Z 0.0004 0.0003 -0.0007 -0.0007 0.0194 -0.0202

AT. 50 C X 0.0000 0.0000 0.0000 0.0001 -0.0023 -0.0025  
Y 0.0006 -0.0000 -0.0000 0.0003 0.0066 0.0070  
Z -0.0004 -0.0003 -0.0007 -0.0007 -0.0194 -0.0202

AT. 51 C X -0.0001 0.0001 -0.0001 -0.0005 0.0122 -0.0120  
Y -0.0000 0.0002 -0.0005 0.0003 0.0023 -0.0044  
Z 0.0001 0.0001 -0.0004 -0.0001 0.0023 -0.0021

AT. 52 C X 0.0001 -0.0001 -0.0001 -0.0005 -0.0122 -0.0120  
Y 0.0000 -0.0002 -0.0005 0.0003 -0.0023 -0.0044  
Z -0.0001 -0.0001 -0.0004 -0.0001 -0.0023 -0.0021

AT. 53 H X 0.0003 0.0003 -0.0002 -0.0000 0.0139 -0.0162  
Y 0.0005 0.0004 -0.0009 0.0002 0.0135 -0.0181  
Z -0.0000 -0.0000 -0.0007 -0.0011 0.0116 -0.0100

AT. 54 H X -0.0003 -0.0003 -0.0002 -0.0000 -0.0139 -0.0162  
Y -0.0005 -0.0004 -0.0009 0.0002 -0.0135 -0.0181  
Z 0.0000 0.0000 -0.0007 -0.0011 -0.0116 -0.0100

AT. 55 H X -0.0008 -0.0001 -0.0000 -0.0012 0.0134 -0.0097  
Y 0.0000 0.0000 -0.0001 0.0014 -0.0190 0.0159  
Z -0.0004 -0.0002 0.0000 0.0008 -0.0234 0.0248

AT. 56 H X 0.0008 0.0001 -0.0000 -0.0012 -0.0134 -0.0097  
Y -0.0000 -0.0000 -0.0001 0.0014 0.0190 0.0159  
Z 0.0004 0.0002 0.0000 0.0008 0.0234 0.0248

AT. 57 C X 0.0010 0.0004 -0.0002 -0.0007 0.0200 -0.0206  
Y 0.0013 -0.0001 0.0004 -0.0002 -0.0041 0.0064  
Z 0.0005 0.0002 0.0003 0.0007 -0.0039 0.0057

AT. 58 C X -0.0010 -0.0004 -0.0002 -0.0007 -0.0200 -0.0206  
Y -0.0013 0.0001 0.0004 -0.0002 0.0041 0.0064

Z -0.0005 -0.0002 0.0003 0.0007 0.0039 0.0057  
AT. 59 H X 0.0027 0.0009 -0.0004 -0.0014 0.0388 -0.0387  
Y 0.0026 0.0013 0.0008 0.0022 -0.0172 0.0210  
Z 0.0035 0.0026 0.0007 0.0038 -0.0098 0.0143  
AT. 60 H X -0.0027 -0.0009 -0.0004 -0.0014 -0.0388 -0.0387  
Y -0.0026 -0.0013 0.0008 0.0022 0.0172 0.0210  
Z -0.0035 -0.0026 0.0007 0.0038 0.0098 0.0143  
AT. 61 H X -0.0000 -0.0014 0.0002 -0.0023 0.0111 -0.0098  
Y -0.0005 -0.0020 -0.0004 -0.0037 0.0152 -0.0150  
Z 0.0005 -0.0003 0.0011 0.0012 -0.0204 0.0247  
AT. 62 H X 0.0000 0.0014 0.0002 -0.0023 -0.0111 -0.0098  
Y 0.0005 0.0020 -0.0004 -0.0037 -0.0152 -0.0150  
Z -0.0005 0.0003 0.0011 0.0012 0.0204 0.0247  
AT. 63 H X 0.0018 0.0023 -0.0009 0.0012 0.0252 -0.0278  
Y 0.0038 0.0006 0.0013 0.0007 -0.0065 0.0127  
Z -0.0024 -0.0021 0.0001 -0.0019 -0.0068 0.0070  
AT. 64 H X -0.0018 -0.0023 -0.0009 0.0012 -0.0252 -0.0278  
Y -0.0038 -0.0006 0.0013 0.0007 0.0065 0.0127  
Z 0.0024 0.0021 0.0001 -0.0019 0.0068 0.0070  
AT. 65 C X -0.0000 -0.0004 0.0012 0.0004 -0.0069 0.0098  
Y 0.0007 -0.0004 0.0008 -0.0006 0.0191 -0.0169  
Z -0.0002 0.0002 -0.0002 -0.0000 -0.0005 0.0015  
AT. 66 C X 0.0000 0.0004 0.0012 0.0004 0.0069 0.0098  
Y -0.0007 0.0004 0.0008 -0.0006 -0.0191 -0.0169  
Z 0.0002 -0.0002 -0.0002 -0.0000 0.0005 0.0015  
AT. 67 H X -0.0016 -0.0006 0.0022 -0.0001 -0.0047 0.0131  
Y 0.0076 -0.0018 0.0019 0.0007 0.0036 -0.0112  
Z -0.0052 0.0016 -0.0021 -0.0009 0.0118 -0.0065  
AT. 68 H X 0.0016 0.0006 0.0022 -0.0001 0.0047 0.0131  
Y -0.0076 0.0018 0.0019 0.0007 -0.0036 -0.0112  
Z 0.0052 -0.0016 -0.0021 -0.0009 -0.0118 -0.0065  
AT. 69 H X -0.0039 0.0007 0.0003 -0.0011 0.0243 -0.0143

Y -0.0055 0.0010 0.0000 -0.0023 0.0442 -0.0312  
Z -0.0020 0.0000 0.0004 0.0005 -0.0241 0.0277  
AT. 70 H X 0.0039 -0.0007 0.0003 -0.0011 -0.0243 -0.0143  
Y 0.0055 -0.0010 0.0000 -0.0023 -0.0442 -0.0312  
Z 0.0020 -0.0000 0.0004 0.0005 0.0241 0.0277  
AT. 71 H X 0.0051 -0.0020 0.0024 0.0025 -0.0483 0.0421  
Y 0.0019 -0.0006 0.0014 -0.0013 0.0354 -0.0319  
Z 0.0053 -0.0013 0.0016 0.0007 -0.0095 0.0055  
AT. 72 H X -0.0051 0.0020 0.0024 0.0025 0.0483 0.0421  
Y -0.0019 0.0006 0.0014 -0.0013 -0.0354 -0.0319  
Z -0.0053 0.0013 0.0016 0.0007 0.0095 0.0055  
AT. 73 C X -0.0010 -0.0000 0.0000 -0.0014 0.0164 -0.0143  
Y -0.0019 -0.0000 0.0000 -0.0015 0.0108 -0.0078  
Z 0.0003 0.0004 -0.0010 -0.0009 0.0268 -0.0289  
AT. 74 C X 0.0010 0.0000 0.0000 -0.0014 -0.0164 -0.0143  
Y 0.0019 0.0000 0.0000 -0.0015 -0.0108 -0.0078  
Z -0.0003 -0.0004 -0.0010 -0.0009 -0.0268 -0.0289  
AT. 75 H X -0.0018 -0.0001 0.0001 -0.0032 0.0306 -0.0257  
Y -0.0028 -0.0002 0.0003 -0.0025 0.0220 -0.0165  
Z -0.0015 0.0000 -0.0006 -0.0036 0.0519 -0.0489  
AT. 76 H X 0.0018 0.0001 0.0001 -0.0032 -0.0306 -0.0257  
Y 0.0028 0.0002 0.0003 -0.0025 -0.0220 -0.0165  
Z 0.0015 -0.0000 -0.0006 -0.0036 -0.0519 -0.0489  
AT. 77 H X -0.0014 -0.0003 0.0004 -0.0022 0.0238 -0.0184  
Y -0.0034 -0.0004 0.0003 -0.0039 0.0310 -0.0254  
Z 0.0020 0.0009 -0.0015 0.0018 0.0015 -0.0089  
AT. 78 H X 0.0014 0.0003 0.0004 -0.0022 -0.0238 -0.0184  
Y 0.0034 0.0004 0.0003 -0.0039 -0.0310 -0.0254  
Z -0.0020 -0.0009 -0.0015 0.0018 -0.0015 -0.0089  
AT. 79 I X 0.0003 0.0002 0.0000 0.0008 0.0001 -0.0001  
Y -0.0002 0.0005 -0.0005 0.0003 -0.0000 0.0001  
Z -0.0001 -0.0001 -0.0001 0.0000 0.0000 0.0000

AT. 80 I X -0.0003 -0.0002 0.0000 0.0008 -0.0001 -0.0001  
Y 0.0002 -0.0005 -0.0005 0.0003 0.0000 0.0001  
Z 0.0001 0.0001 -0.0001 0.0000 -0.0000 0.0000

AT. 81 I X 0.0004 0.0015 -0.0003 0.0015 0.0000 0.0000  
Y -0.0000 -0.0007 0.0002 -0.0007 -0.0001 0.0001  
Z -0.0000 0.0004 -0.0003 -0.0002 0.0001 -0.0001

AT. 82 I X -0.0004 -0.0015 -0.0003 0.0015 -0.0000 0.0000  
Y 0.0000 0.0007 0.0002 -0.0007 0.0001 0.0001  
Z 0.0000 -0.0004 -0.0003 -0.0002 -0.0001 -0.0001

AT. 83 O X -0.0007 -0.0041 0.0032 -0.0041 0.0002 -0.0004  
Y -0.0015 0.0040 -0.0030 0.0043 0.0001 -0.0007  
Z -0.0037 0.0203 -0.0178 0.0087 -0.0010 0.0013

AT. 84 O X 0.0007 0.0041 0.0032 -0.0041 -0.0002 -0.0004  
Y 0.0015 -0.0040 -0.0030 0.0043 -0.0001 -0.0007  
Z 0.0037 -0.0203 -0.0178 0.0087 0.0010 0.0013

AT. 85 O X -0.0051 -0.0098 0.0044 -0.0087 0.0003 0.0000  
Y -0.0009 0.0187 -0.0156 0.0094 -0.0000 -0.0000  
Z -0.0064 -0.0259 0.0132 -0.0234 0.0005 0.0000

AT. 86 O X 0.0051 0.0098 0.0044 -0.0087 -0.0003 0.0000  
Y 0.0009 -0.0187 -0.0156 0.0094 0.0000 -0.0000  
Z 0.0064 0.0259 0.0132 -0.0234 -0.0005 0.0000

AT. 87 N X -0.0044 0.0102 -0.0086 0.0051 -0.0002 -0.0001  
Y -0.0030 -0.0426 0.0239 -0.0384 0.0000 0.0018  
Z -0.0006 0.0101 -0.0089 0.0046 -0.0004 0.0005

AT. 88 N X 0.0044 -0.0102 -0.0086 0.0051 0.0002 -0.0001  
Y 0.0030 0.0426 0.0239 -0.0384 -0.0000 0.0018  
Z 0.0006 -0.0101 -0.0089 0.0046 0.0004 0.0005

AT. 89 N X -0.0026 -0.0051 -0.0011 -0.0083 -0.0001 0.0004  
Y 0.0203 0.0354 -0.0020 0.0480 0.0009 -0.0030  
Z 0.0158 0.0008 0.0174 0.0191 0.0011 -0.0024

AT. 90 N X 0.0026 0.0051 -0.0011 -0.0083 0.0001 0.0004  
Y -0.0203 -0.0354 -0.0020 0.0480 -0.0009 -0.0030

Z -0.0158 -0.0008 0.0174 0.0191 -0.0011 -0.0024  
AT. 91 C X -0.0035 0.0033 -0.0034 -0.0003 -0.0000 -0.0002  
Y -0.0012 -0.0159 0.0093 -0.0134 -0.0001 0.0006  
Z -0.0000 0.0147 -0.0116 0.0084 -0.0004 0.0005  
AT. 92 C X 0.0035 -0.0033 -0.0034 -0.0003 0.0000 -0.0002  
Y 0.0012 0.0159 0.0093 -0.0134 0.0001 0.0006  
Z 0.0000 -0.0147 -0.0116 0.0084 0.0004 0.0005  
AT. 93 C X 0.0014 0.0017 0.0001 0.0025 0.0001 -0.0006  
Y 0.0017 -0.0054 0.0051 -0.0031 -0.0003 -0.0000  
Z 0.0086 0.0236 -0.0115 0.0219 -0.0006 -0.0007  
AT. 94 C X -0.0014 -0.0017 0.0001 0.0025 -0.0001 -0.0006  
Y -0.0017 0.0054 0.0051 -0.0031 0.0003 -0.0000  
Z -0.0086 -0.0236 -0.0115 0.0219 0.0006 -0.0007  
AT. 95 H X 0.0049 -0.0010 0.0003 0.0027 -0.0000 0.0007  
Y -0.0054 -0.0126 0.0069 -0.0139 -0.0001 0.0002  
Z 0.0178 0.0391 -0.0152 0.0408 -0.0008 -0.0023  
AT. 96 H X -0.0049 0.0010 0.0003 0.0027 0.0000 0.0007  
Y 0.0054 0.0126 0.0069 -0.0139 0.0001 0.0002  
Z -0.0178 -0.0391 -0.0152 0.0408 0.0008 -0.0023  
AT. 97 H X 0.0065 0.0028 0.0036 0.0074 -0.0001 -0.0013  
Y 0.0135 0.0155 -0.0013 0.0209 -0.0005 -0.0013  
Z 0.0099 0.0285 -0.0142 0.0264 -0.0007 -0.0008  
AT. 98 H X -0.0065 -0.0028 0.0036 0.0074 0.0001 -0.0013  
Y -0.0135 -0.0155 -0.0013 0.0209 0.0005 -0.0013  
Z -0.0099 -0.0285 -0.0142 0.0264 0.0007 -0.0008  
AT. 99 C X -0.0026 -0.0046 0.0008 -0.0055 0.0001 0.0001  
Y 0.0030 0.0191 -0.0087 0.0179 0.0005 -0.0012  
Z 0.0063 -0.0124 0.0166 -0.0002 0.0010 -0.0015  
AT. 100 C X 0.0026 0.0046 0.0008 -0.0055 -0.0001 0.0001  
Y -0.0030 -0.0191 -0.0087 0.0179 -0.0005 -0.0012  
Z -0.0063 0.0124 0.0166 -0.0002 -0.0010 -0.0015  
AT. 101 C X -0.0045 -0.0041 -0.0002 -0.0058 0.0004 0.0001

Y -0.0099 0.0036 -0.0095 -0.0050 0.0006 0.0002  
Z 0.0105 -0.0112 0.0187 0.0044 0.0008 -0.0019  
AT. 102 C X 0.0045 0.0041 -0.0002 -0.0058 -0.0004 0.0001  
Y 0.0099 -0.0036 -0.0095 -0.0050 -0.0006 0.0002  
Z -0.0105 0.0112 0.0187 0.0044 -0.0008 -0.0019  
AT. 103 H X -0.0045 0.0026 -0.0039 0.0001 0.0007 -0.0005  
Y -0.0099 0.0004 -0.0077 -0.0077 0.0004 0.0004  
Z 0.0186 -0.0034 0.0204 0.0177 0.0003 -0.0026  
AT. 104 H X 0.0045 -0.0026 -0.0039 0.0001 -0.0007 -0.0005  
Y 0.0099 -0.0004 -0.0077 -0.0077 -0.0004 0.0004  
Z -0.0186 0.0034 0.0204 0.0177 -0.0003 -0.0026  
AT. 105 H X -0.0053 -0.0102 0.0047 -0.0101 0.0007 0.0000  
Y -0.0193 0.0005 -0.0166 -0.0162 0.0008 0.0012  
Z 0.0067 -0.0136 0.0171 -0.0007 0.0009 -0.0015  
AT. 106 H X 0.0053 0.0102 0.0047 -0.0101 -0.0007 0.0000  
Y 0.0193 -0.0005 -0.0166 -0.0162 -0.0008 0.0012  
Z -0.0067 0.0136 0.0171 -0.0007 -0.0009 -0.0015  
AT. 107 C X 0.0051 -0.0103 0.0109 -0.0040 0.0001 -0.0001  
Y -0.0095 -0.0054 -0.0063 -0.0152 -0.0004 0.0015  
Z 0.0102 -0.0103 0.0120 -0.0025 0.0000 0.0001  
AT. 108 C X -0.0051 0.0103 0.0109 -0.0040 -0.0001 -0.0001  
Y 0.0095 0.0054 -0.0063 -0.0152 0.0004 0.0015  
Z -0.0102 0.0103 0.0120 -0.0025 -0.0000 0.0001  
AT. 109 H X 0.0221 -0.0497 0.0500 -0.0205 0.0008 -0.0007  
Y 0.0008 -0.0074 0.0031 -0.0084 -0.0001 0.0007  
Z 0.0227 -0.0026 0.0167 0.0134 0.0003 -0.0011  
AT. 110 H X -0.0221 0.0497 0.0500 -0.0205 -0.0008 -0.0007  
Y -0.0008 0.0074 0.0031 -0.0084 0.0001 0.0007  
Z -0.0227 0.0026 0.0167 0.0134 -0.0003 -0.0011  
AT. 111 H X 0.0013 -0.0001 0.0021 0.0009 -0.0002 -0.0001  
Y -0.0305 0.0144 -0.0358 -0.0171 -0.0012 0.0029  
Z 0.0186 -0.0251 0.0274 -0.0072 0.0005 -0.0002



AT. 112 H X -0.0013 0.0001 0.0021 0.0009 0.0002 -0.0001  
Y 0.0305 -0.0144 -0.0358 -0.0171 0.0012 0.0029  
Z -0.0186 0.0251 0.0274 -0.0072 -0.0005 -0.0002

AT. 113 C X 0.0010 0.0030 -0.0011 0.0036 0.0000 -0.0002  
Y 0.0008 0.0036 -0.0039 0.0004 -0.0001 0.0002  
Z -0.0020 -0.0188 0.0087 -0.0183 -0.0002 0.0012

AT. 114 C X -0.0010 -0.0030 -0.0011 0.0036 -0.0000 -0.0002  
Y -0.0008 -0.0036 -0.0039 0.0004 0.0001 0.0002  
Z 0.0020 0.0188 0.0087 -0.0183 0.0002 0.0012

AT. 115 C X -0.0021 -0.0000 -0.0030 -0.0025 -0.0002 0.0004  
Y -0.0058 0.0214 -0.0194 0.0105 -0.0004 0.0002  
Z -0.0106 0.0045 -0.0102 -0.0033 -0.0004 0.0007

AT. 116 C X 0.0021 0.0000 -0.0030 -0.0025 0.0002 0.0004  
Y 0.0058 -0.0214 -0.0194 0.0105 0.0004 0.0002  
Z 0.0106 -0.0045 -0.0102 -0.0033 0.0004 0.0007

AT. 117 H X 0.0207 -0.0148 0.0269 0.0059 0.0012 -0.0018  
Y -0.0247 0.0456 -0.0501 0.0151 -0.0014 0.0012  
Z -0.0294 0.0146 -0.0339 -0.0124 -0.0016 0.0027

AT. 118 H X -0.0207 0.0148 0.0269 0.0059 -0.0012 -0.0018  
Y 0.0247 -0.0456 -0.0501 0.0151 0.0014 0.0012  
Z 0.0294 -0.0146 -0.0339 -0.0124 0.0016 0.0027

AT. 119 H X -0.0386 0.0186 -0.0481 -0.0207 -0.0022 0.0038  
Y -0.0158 0.0083 -0.0227 -0.0121 -0.0010 0.0021  
Z -0.0216 0.0279 -0.0325 0.0084 -0.0010 0.0009

AT. 120 H X 0.0386 -0.0186 -0.0481 -0.0207 0.0022 0.0038  
Y 0.0158 -0.0083 -0.0227 -0.0121 0.0010 0.0021  
Z 0.0216 -0.0279 -0.0325 0.0084 0.0010 0.0009

AT. 121 C X 0.0067 -0.0114 0.0150 -0.0012 0.0007 -0.0010  
Y 0.0064 0.0282 -0.0156 0.0249 -0.0005 -0.0006  
Z 0.0049 0.0147 -0.0074 0.0127 -0.0003 -0.0003

AT. 122 C X -0.0067 0.0114 0.0150 -0.0012 -0.0007 -0.0010  
Y -0.0064 -0.0282 -0.0156 0.0249 0.0005 -0.0006

Z -0.0049 -0.0147 -0.0074 0.0127 0.0003 -0.0003  
AT. 123 H X 0.0277 -0.0390 0.0596 0.0044 0.0025 -0.0036  
Y 0.0053 -0.0066 0.0083 -0.0007 -0.0002 0.0001  
Z 0.0097 0.0459 -0.0245 0.0401 -0.0003 -0.0014  
AT. 124 H X -0.0277 0.0390 0.0596 0.0044 -0.0025 -0.0036  
Y -0.0053 0.0066 0.0083 -0.0007 0.0002 0.0001  
Z -0.0097 -0.0459 -0.0245 0.0401 0.0003 -0.0014  
AT. 125 H X 0.0009 -0.0106 0.0078 -0.0075 0.0003 -0.0001  
Y -0.0008 0.0723 -0.0557 0.0476 -0.0019 0.0003  
Z -0.0061 0.0378 -0.0366 0.0162 -0.0016 0.0013  
AT. 126 H X -0.0009 0.0106 0.0078 -0.0075 -0.0003 -0.0001  
Y 0.0008 -0.0723 -0.0557 0.0476 0.0019 0.0003  
Z 0.0061 -0.0378 -0.0366 0.0162 0.0016 0.0013  
AT. 127 C X 0.0017 -0.0001 0.0019 0.0017 0.0002 -0.0003  
Y -0.0005 0.0076 -0.0076 0.0040 -0.0003 0.0001  
Z -0.0044 -0.0156 0.0051 -0.0179 0.0000 0.0007  
AT. 128 C X -0.0017 0.0001 0.0019 0.0017 -0.0002 -0.0003  
Y 0.0005 -0.0076 -0.0076 0.0040 0.0003 0.0001  
Z 0.0044 0.0156 0.0051 -0.0179 -0.0000 0.0007  
AT. 129 C X -0.0052 0.0054 -0.0053 0.0018 -0.0002 0.0001  
Y -0.0040 -0.0062 -0.0023 -0.0114 -0.0007 0.0014  
Z -0.0027 0.0013 -0.0035 -0.0022 0.0002 -0.0001  
AT. 130 C X 0.0052 -0.0054 -0.0053 0.0018 0.0002 0.0001  
Y 0.0040 0.0062 -0.0023 -0.0114 0.0007 0.0014  
Z 0.0027 -0.0013 -0.0035 -0.0022 -0.0002 -0.0001  
AT. 131 H X 0.0003 0.0039 0.0007 0.0054 0.0004 -0.0008  
Y -0.0145 -0.0205 -0.0026 -0.0325 -0.0015 0.0032  
Z 0.0003 -0.0066 0.0042 -0.0060 0.0006 -0.0005  
AT. 132 H X -0.0003 -0.0039 0.0007 0.0054 -0.0004 -0.0008  
Y 0.0145 0.0205 -0.0026 -0.0325 0.0015 0.0032  
Z -0.0003 0.0066 0.0042 -0.0060 -0.0006 -0.0005  
AT. 133 H X -0.0142 0.0133 -0.0194 -0.0010 -0.0013 0.0015

Y -0.0036 0.0126 -0.0146 0.0038 -0.0008 0.0010  
Z 0.0020 0.0261 -0.0154 0.0219 0.0005 -0.0013  
AT. 134 H X 0.0142 -0.0133 -0.0194 -0.0010 0.0013 0.0015  
Y 0.0036 -0.0126 -0.0146 0.0038 0.0008 0.0010  
Z -0.0020 -0.0261 -0.0154 0.0219 -0.0005 -0.0013  
AT. 135 C X -0.0078 0.0257 -0.0211 0.0153 -0.0002 -0.0005  
Y 0.0114 -0.0197 0.0255 -0.0025 0.0006 -0.0011  
Z -0.0106 0.0012 -0.0050 -0.0039 -0.0002 0.0001  
AT. 136 C X 0.0078 -0.0257 -0.0211 0.0153 0.0002 -0.0005  
Y -0.0114 0.0197 0.0255 -0.0025 -0.0006 -0.0011  
Z 0.0106 -0.0012 -0.0050 -0.0039 0.0002 0.0001  
AT. 137 H X -0.0096 0.0556 -0.0448 0.0315 -0.0006 -0.0005  
Y 0.0337 -0.0280 0.0468 0.0042 0.0003 -0.0013  
Z 0.0269 -0.0238 0.0391 0.0010 -0.0005 -0.0003  
AT. 138 H X 0.0096 -0.0556 -0.0448 0.0315 0.0006 -0.0005  
Y -0.0337 0.0280 0.0468 0.0042 -0.0003 -0.0013  
Z -0.0269 0.0238 0.0391 0.0010 0.0005 -0.0003  
AT. 139 H X 0.0097 0.0093 -0.0028 0.0093 -0.0003 0.0002  
Y -0.0230 -0.0195 0.0054 -0.0171 0.0013 -0.0014  
Z -0.0232 0.0219 -0.0225 0.0079 -0.0002 -0.0007  
AT. 140 H X -0.0097 -0.0093 -0.0028 0.0093 0.0003 0.0002  
Y 0.0230 0.0195 0.0054 -0.0171 -0.0013 -0.0014  
Z 0.0232 -0.0219 -0.0225 0.0079 0.0002 -0.0007  
AT. 141 H X -0.0320 0.0357 -0.0361 0.0171 0.0006 -0.0021  
Y 0.0334 -0.0395 0.0578 -0.0001 0.0007 -0.0019  
Z -0.0449 0.0268 -0.0460 -0.0058 0.0000 0.0003  
AT. 142 H X 0.0320 -0.0357 -0.0361 0.0171 -0.0006 -0.0021  
Y -0.0334 0.0395 0.0578 -0.0001 -0.0007 -0.0019  
Z 0.0449 -0.0268 -0.0460 -0.0058 -0.0000 0.0003  
AT. 143 C X 0.0109 -0.0108 0.0088 -0.0074 -0.0003 0.0007  
Y -0.0153 -0.0184 0.0076 -0.0139 0.0012 -0.0008  
Z -0.0131 0.0049 -0.0083 -0.0018 0.0003 -0.0005

AT. 144 C X -0.0109 0.0108 0.0088 -0.0074 0.0003 0.0007  
Y 0.0153 0.0184 0.0076 -0.0139 -0.0012 -0.0008  
Z 0.0131 -0.0049 -0.0083 -0.0018 -0.0003 -0.0005

AT. 145 H X -0.0533 -0.0130 -0.0459 -0.0585 -0.0012 0.0037  
Y -0.1720 -0.0291 -0.0913 -0.1080 0.0012 0.0022  
Z 0.1355 0.0156 0.0814 0.0839 -0.0000 -0.0029

AT. 146 H X 0.0533 0.0130 -0.0459 -0.0585 0.0012 0.0037  
Y 0.1720 0.0291 -0.0913 -0.1080 -0.0012 0.0022  
Z -0.1355 -0.0156 0.0814 0.0839 0.0000 -0.0029

AT. 147 H X -0.0538 0.0049 -0.0447 -0.0312 -0.0005 0.0016  
Y 0.1943 -0.0205 0.1599 0.1099 0.0022 -0.0060  
Z 0.0091 0.0263 -0.0015 0.0321 0.0005 -0.0022

AT. 148 H X 0.0538 -0.0049 -0.0447 -0.0312 0.0005 0.0016  
Y -0.1943 0.0205 0.1599 0.1099 -0.0022 -0.0060  
Z -0.0091 -0.0263 -0.0015 0.0321 -0.0005 -0.0022

AT. 149 H X 0.1374 -0.0332 0.1140 0.0518 0.0008 -0.0023  
Y -0.0775 -0.0318 -0.0216 -0.0533 0.0017 -0.0001  
Z -0.1855 -0.0069 -0.1124 -0.0998 0.0006 0.0023

AT. 150 H X -0.1374 0.0332 0.1140 0.0518 -0.0008 -0.0023  
Y 0.0775 0.0318 -0.0216 -0.0533 -0.0017 -0.0001  
Z 0.1855 0.0069 -0.1124 -0.0998 -0.0006 0.0023

AT. 151 C X -0.0012 0.0055 -0.0040 0.0041 -0.0002 0.0002  
Y 0.0109 -0.0103 0.0118 -0.0022 0.0004 -0.0009  
Z -0.0007 -0.0243 0.0118 -0.0232 -0.0001 0.0012

AT. 152 C X 0.0012 -0.0055 -0.0040 0.0041 0.0002 0.0002  
Y -0.0109 0.0103 0.0118 -0.0022 -0.0004 -0.0009  
Z 0.0007 0.0243 0.0118 -0.0232 0.0001 0.0012

AT. 153 H X -0.0056 0.0117 -0.0110 0.0067 -0.0004 0.0007  
Y 0.0184 -0.0210 0.0243 -0.0041 0.0008 -0.0017  
Z 0.0137 -0.0443 0.0353 -0.0275 0.0008 -0.0001

AT. 154 H X 0.0056 -0.0117 -0.0110 0.0067 0.0004 0.0007  
Y -0.0184 0.0210 0.0243 -0.0041 -0.0008 -0.0017

Z -0.0137 0.0443 0.0353 -0.0275 -0.0008 -0.0001  
AT. 155 H X -0.0011 0.0057 -0.0040 0.0034 -0.0003 0.0007  
Y 0.0234 -0.0287 0.0324 -0.0074 0.0010 -0.0019  
Z -0.0139 -0.0049 -0.0101 -0.0181 -0.0008 0.0025  
AT. 156 H X 0.0011 -0.0057 -0.0040 0.0034 0.0003 0.0007  
Y -0.0234 0.0287 0.0324 -0.0074 -0.0010 -0.0019  
Z 0.0139 0.0049 -0.0101 -0.0181 0.0008 0.0025  
AT. 157 O X -0.0003 -0.0006 -0.0002 -0.0007 -0.0004 -0.0004  
Y -0.0029 0.0006 0.0028 0.0038 0.0018 -0.0045  
Z 0.0009 -0.0012 0.0008 0.0006 0.0011 0.0006  
AT. 158 O X 0.0003 0.0006 -0.0002 -0.0007 0.0004 -0.0004  
Y 0.0029 -0.0006 0.0028 0.0038 -0.0018 -0.0045  
Z -0.0009 0.0012 0.0008 0.0006 -0.0011 0.0006  
AT. 159 O X 0.0003 0.0004 -0.0007 -0.0008 0.0023 0.0026  
Y -0.0025 -0.0002 -0.0008 -0.0002 -0.0010 -0.0004  
Z 0.0016 0.0004 -0.0006 -0.0002 0.0054 0.0068  
AT. 160 O X -0.0003 -0.0004 -0.0007 -0.0008 -0.0023 0.0026  
Y 0.0025 0.0002 -0.0008 -0.0002 0.0010 -0.0004  
Z -0.0016 -0.0004 -0.0006 -0.0002 -0.0054 0.0068  
AT. 161 H X 0.0004 0.0011 0.0012 0.0012 -0.0028 -0.0033  
Y -0.0036 -0.0002 0.0037 0.0046 0.0040 -0.0049  
Z 0.0034 0.0017 -0.0010 -0.0010 -0.0058 0.0005  
AT. 162 H X -0.0004 -0.0011 0.0012 0.0012 0.0028 -0.0033  
Y 0.0036 0.0002 0.0037 0.0046 -0.0040 -0.0049  
Z -0.0034 -0.0017 -0.0010 -0.0010 0.0058 0.0005  
AT. 163 H X 0.0017 0.0015 -0.0014 -0.0011 0.0069 0.0070  
Y 0.0103 0.0021 -0.0074 -0.0080 -0.0070 -0.0069  
Z 0.0038 0.0006 -0.0016 -0.0016 0.0031 0.0042  
AT. 164 H X -0.0017 -0.0015 -0.0014 -0.0011 -0.0069 0.0070  
Y -0.0103 -0.0021 -0.0074 -0.0080 0.0070 -0.0069  
Z -0.0038 -0.0006 -0.0016 -0.0016 -0.0031 0.0042  
AT. 165 O X 0.0031 0.0018 0.0051 -0.0014 -0.0001 0.0002

|                                                        |     |         |         |         |         |         |         |
|--------------------------------------------------------|-----|---------|---------|---------|---------|---------|---------|
|                                                        | Y   | 0.0001  | -0.0020 | 0.0018  | -0.0017 | 0.0001  | 0.0003  |
|                                                        | Z   | 0.0004  | -0.0013 | -0.0013 | 0.0025  | 0.0000  | -0.0000 |
| AT. 166                                                | O X | -0.0031 | -0.0018 | 0.0051  | -0.0014 | 0.0001  | 0.0002  |
|                                                        | Y   | -0.0001 | 0.0020  | 0.0018  | -0.0017 | -0.0001 | 0.0003  |
|                                                        | Z   | -0.0004 | 0.0013  | -0.0013 | 0.0025  | -0.0000 | -0.0000 |
| AT. 167                                                | H X | 0.0035  | 0.0027  | 0.0062  | -0.0025 | 0.0002  | 0.0003  |
|                                                        | Y   | 0.0008  | -0.0049 | 0.0012  | 0.0004  | -0.0007 | -0.0001 |
|                                                        | Z   | -0.0018 | -0.0007 | -0.0039 | 0.0027  | 0.0009  | 0.0002  |
| AT. 168                                                | H X | -0.0035 | -0.0027 | 0.0062  | -0.0025 | -0.0002 | 0.0003  |
|                                                        | Y   | -0.0008 | 0.0049  | 0.0012  | 0.0004  | 0.0007  | -0.0001 |
|                                                        | Z   | 0.0018  | 0.0007  | -0.0039 | 0.0027  | -0.0009 | 0.0002  |
| AT. 169                                                | O X | -0.0016 | -0.0052 | -0.0029 | 0.0024  | 0.0005  | 0.0006  |
|                                                        | Y   | 0.0016  | 0.0111  | 0.0074  | -0.0064 | 0.0000  | 0.0004  |
|                                                        | Z   | -0.0009 | -0.0053 | -0.0040 | 0.0041  | 0.0003  | 0.0001  |
| AT. 170                                                | O X | 0.0016  | 0.0052  | -0.0029 | 0.0024  | -0.0005 | 0.0006  |
|                                                        | Y   | -0.0016 | -0.0111 | 0.0074  | -0.0064 | -0.0000 | 0.0004  |
|                                                        | Z   | 0.0009  | 0.0053  | -0.0040 | 0.0041  | -0.0003 | 0.0001  |
| AT. 171                                                | H X | 0.0034  | -0.0036 | -0.0050 | -0.0027 | 0.0030  | 0.0030  |
|                                                        | Y   | 0.0053  | 0.0175  | 0.0095  | -0.0118 | 0.0011  | 0.0014  |
|                                                        | Z   | 0.0014  | 0.0028  | 0.0002  | -0.0005 | 0.0002  | 0.0001  |
| AT. 172                                                | H X | -0.0034 | 0.0036  | -0.0050 | -0.0027 | -0.0030 | 0.0030  |
|                                                        | Y   | -0.0053 | -0.0175 | 0.0095  | -0.0118 | -0.0011 | 0.0014  |
|                                                        | Z   | -0.0014 | -0.0028 | 0.0002  | -0.0005 | -0.0002 | 0.0001  |
| FREQ(CM**-1) 326.49 328.88 329.19 333.47 340.18 341.45 |     |         |         |         |         |         |         |
| AT. 11                                                 | I X | 0.0000  | 0.0002  | 0.0001  | 0.0002  | 0.0011  | 0.0005  |
|                                                        | Y   | 0.0001  | 0.0000  | -0.0001 | -0.0002 | -0.0002 | -0.0003 |
|                                                        | Z   | 0.0001  | -0.0002 | -0.0001 | -0.0001 | 0.0006  | 0.0002  |
| AT. 21                                                 | I X | -0.0000 | 0.0002  | -0.0001 | 0.0002  | 0.0011  | -0.0005 |
|                                                        | Y   | -0.0001 | 0.0000  | 0.0001  | -0.0002 | -0.0002 | 0.0003  |
|                                                        | Z   | -0.0001 | -0.0002 | 0.0001  | -0.0001 | 0.0006  | -0.0002 |

AT. 3 I X 0.0004 -0.0012 -0.0002 0.0000 -0.0044 -0.0044  
Y 0.0006 -0.0008 0.0003 0.0003 -0.0016 -0.0018  
Z -0.0002 0.0000 0.0000 0.0001 -0.0005 -0.0005

AT. 4 I X -0.0004 -0.0012 0.0002 0.0000 -0.0044 0.0044  
Y -0.0006 -0.0008 -0.0003 0.0003 -0.0016 0.0018  
Z 0.0002 0.0000 -0.0000 0.0001 -0.0005 0.0005

AT. 5 O X -0.0009 0.0010 -0.0001 0.0005 -0.0103 -0.0083  
Y 0.0029 -0.0006 0.0004 0.0005 0.0025 0.0031  
Z -0.0244 0.0272 -0.0009 0.0008 0.0114 0.0124

AT. 6 O X 0.0009 0.0010 0.0001 0.0005 -0.0103 0.0083  
Y -0.0029 -0.0006 -0.0004 0.0005 0.0025 -0.0031  
Z 0.0244 0.0272 0.0009 0.0008 0.0114 -0.0124

AT. 7 O X -0.0112 0.0127 -0.0008 -0.0002 0.0109 0.0112  
Y -0.0095 0.0081 -0.0017 -0.0008 -0.0163 -0.0156  
Z 0.0132 -0.0142 -0.0004 -0.0011 0.0210 0.0198

AT. 8 O X 0.0112 0.0127 0.0008 -0.0002 0.0109 -0.0112  
Y 0.0095 0.0081 0.0017 -0.0008 -0.0163 0.0156  
Z -0.0132 -0.0142 0.0004 -0.0011 0.0210 -0.0198

AT. 9 N X -0.0018 -0.0036 -0.0010 -0.0011 -0.0182 -0.0177  
Y -0.0179 0.0124 -0.0014 -0.0008 0.0078 0.0096  
Z -0.0132 0.0148 -0.0005 0.0002 0.0044 0.0047

AT. 10 N X 0.0018 -0.0036 0.0010 -0.0011 -0.0182 0.0177  
Y 0.0179 0.0124 0.0014 -0.0008 0.0078 -0.0096  
Z 0.0132 0.0148 0.0005 0.0002 0.0044 -0.0047

AT. 11 N X 0.0152 -0.0090 0.0022 0.0009 0.0391 0.0386  
Y 0.0296 -0.0249 0.0022 0.0002 0.0027 0.0014  
Z 0.0327 -0.0301 0.0018 -0.0005 0.0144 0.0122

AT. 12 N X -0.0152 -0.0090 -0.0022 0.0009 0.0391 -0.0386  
Y -0.0296 -0.0249 -0.0022 0.0002 0.0027 -0.0014  
Z -0.0327 -0.0301 -0.0018 -0.0005 0.0144 -0.0122

AT. 13 C X 0.0028 -0.0053 -0.0001 -0.0003 -0.0113 -0.0101  
Y -0.0059 0.0052 -0.0003 0.0000 0.0102 0.0112

Z -0.0146 0.0168 -0.0005 0.0004 0.0040 0.0042  
AT. 14 C X -0.0028 -0.0053 0.0001 -0.0003 -0.0113 0.0101  
Y 0.0059 0.0052 0.0003 0.0000 0.0102 -0.0112  
Z 0.0146 0.0168 0.0005 0.0004 0.0040 -0.0042  
AT. 15 C X 0.0008 -0.0019 -0.0001 -0.0002 -0.0033 -0.0035  
Y -0.0011 0.0011 0.0002 0.0002 0.0097 0.0106  
Z -0.0017 0.0029 0.0003 0.0005 -0.0160 -0.0142  
AT. 16 C X -0.0008 -0.0019 0.0001 -0.0002 -0.0033 0.0035  
Y 0.0011 0.0011 -0.0002 0.0002 0.0097 -0.0106  
Z 0.0017 0.0029 -0.0003 0.0005 -0.0160 0.0142  
AT. 17 H X 0.0035 -0.0043 -0.0001 -0.0005 -0.0037 -0.0057  
Y -0.0085 0.0093 -0.0006 -0.0005 0.0244 0.0227  
Z 0.0088 -0.0086 0.0013 0.0012 -0.0351 -0.0307  
AT. 18 H X -0.0035 -0.0043 0.0001 -0.0005 -0.0037 0.0057  
Y 0.0085 0.0093 0.0006 -0.0005 0.0244 -0.0227  
Z -0.0088 -0.0086 -0.0013 0.0012 -0.0351 0.0307  
AT. 19 H X -0.0044 0.0054 -0.0001 -0.0001 0.0042 0.0025  
Y 0.0091 -0.0115 0.0014 0.0012 -0.0148 -0.0094  
Z 0.0003 0.0007 0.0008 0.0010 -0.0226 -0.0196  
AT. 20 H X 0.0044 0.0054 0.0001 -0.0001 0.0042 -0.0025  
Y -0.0091 -0.0115 -0.0014 0.0012 -0.0148 0.0094  
Z -0.0003 0.0007 -0.0008 0.0010 -0.0226 0.0196  
AT. 21 C X -0.0004 0.0037 0.0005 0.0001 0.0256 0.0257  
Y 0.0058 -0.0046 0.0002 -0.0001 -0.0046 -0.0044  
Z 0.0248 -0.0243 0.0008 -0.0009 0.0115 0.0096  
AT. 22 C X 0.0004 0.0037 -0.0005 0.0001 0.0256 -0.0257  
Y -0.0058 -0.0046 -0.0002 -0.0001 -0.0046 0.0044  
Z -0.0248 -0.0243 -0.0008 -0.0009 0.0115 -0.0096  
AT. 23 C X -0.0027 0.0043 0.0002 0.0002 0.0082 0.0084  
Y -0.0191 0.0209 -0.0014 -0.0006 0.0193 0.0210  
Z 0.0354 -0.0361 0.0013 -0.0008 -0.0130 -0.0155  
AT. 24 C X 0.0027 0.0043 -0.0002 0.0002 0.0082 -0.0084



Y 0.0191 0.0209 0.0014 -0.0006 0.0193 -0.0210  
Z -0.0354 -0.0361 -0.0013 -0.0008 -0.0130 0.0155  
AT. 25 H X -0.0015 0.0009 0.0010 0.0011 -0.0003 -0.0003  
Y -0.0223 0.0242 -0.0015 -0.0007 0.0223 0.0240  
Z 0.0653 -0.0699 0.0035 0.0004 -0.0504 -0.0531  
AT. 26 H X 0.0015 0.0009 -0.0010 0.0011 -0.0003 0.0003  
Y 0.0223 0.0242 0.0015 -0.0007 0.0223 -0.0240  
Z -0.0653 -0.0699 -0.0035 0.0004 -0.0504 0.0531  
AT. 27 H X -0.0060 0.0070 0.0003 0.0005 -0.0058 -0.0051  
Y -0.0539 0.0588 -0.0035 -0.0015 0.0557 0.0583  
Z 0.0198 -0.0184 0.0002 -0.0013 0.0080 0.0058  
AT. 28 H X 0.0060 0.0070 -0.0003 0.0005 -0.0058 0.0051  
Y 0.0539 0.0588 0.0035 -0.0015 0.0557 -0.0583  
Z -0.0198 -0.0184 -0.0002 -0.0013 0.0080 -0.0058  
AT. 29 C X -0.0119 0.0108 -0.0015 -0.0002 -0.0165 -0.0166  
Y -0.0240 0.0227 -0.0016 0.0002 0.0060 0.0075  
Z 0.0016 -0.0023 0.0006 0.0000 0.0113 0.0122  
AT. 30 C X 0.0119 0.0108 0.0015 -0.0002 -0.0165 0.0166  
Y 0.0240 0.0227 0.0016 0.0002 0.0060 -0.0075  
Z -0.0016 -0.0023 -0.0006 0.0000 0.0113 -0.0122  
AT. 31 H X -0.0257 0.0286 -0.0025 0.0005 -0.0257 -0.0263  
Y -0.0052 0.0040 0.0004 0.0004 0.0242 0.0258  
Z 0.0214 -0.0196 0.0030 0.0008 0.0328 0.0334  
AT. 32 H X 0.0257 0.0286 0.0025 0.0005 -0.0257 0.0263  
Y 0.0052 0.0040 -0.0004 0.0004 0.0242 -0.0258  
Z -0.0214 -0.0196 -0.0030 0.0008 0.0328 -0.0334  
AT. 33 H X -0.0135 0.0099 -0.0023 -0.0007 -0.0346 -0.0343  
Y -0.0523 0.0509 -0.0047 -0.0001 -0.0223 -0.0206  
Z 0.0119 -0.0142 0.0013 -0.0002 0.0117 0.0128  
AT. 34 H X 0.0135 0.0099 0.0023 -0.0007 -0.0346 0.0343  
Y 0.0523 0.0509 0.0047 -0.0001 -0.0223 0.0206  
Z -0.0119 -0.0142 -0.0013 -0.0002 0.0117 -0.0128

AT. 35 C X -0.0074 0.0073 -0.0004 0.0002 0.0086 0.0088  
Y -0.0084 0.0090 -0.0005 0.0006 0.0018 0.0024  
Z -0.0119 0.0093 -0.0010 -0.0006 -0.0009 0.0002

AT. 36 C X 0.0074 0.0073 0.0004 0.0002 0.0086 -0.0088  
Y 0.0084 0.0090 0.0005 0.0006 0.0018 -0.0024  
Z 0.0119 0.0093 0.0010 -0.0006 -0.0009 -0.0002

AT. 37 C X -0.0050 0.0085 0.0005 0.0009 0.0287 0.0289  
Y -0.0123 0.0140 -0.0004 0.0007 -0.0034 -0.0029  
Z -0.0106 0.0123 -0.0000 0.0001 0.0118 0.0120

AT. 38 C X 0.0050 0.0085 -0.0005 0.0009 0.0287 -0.0289  
Y 0.0123 0.0140 0.0004 0.0007 -0.0034 0.0029  
Z 0.0106 0.0123 0.0000 0.0001 0.0118 -0.0120

AT. 39 H X -0.0407 0.0458 -0.0004 0.0020 0.0292 0.0307  
Y -0.0137 0.0175 -0.0001 0.0009 -0.0017 -0.0020  
Z -0.0336 0.0354 -0.0007 0.0007 0.0102 0.0117

AT. 40 H X 0.0407 0.0458 0.0004 0.0020 0.0292 -0.0307  
Y 0.0137 0.0175 0.0001 0.0009 -0.0017 0.0020  
Z 0.0336 0.0354 0.0007 0.0007 0.0102 -0.0117

AT. 41 H X 0.0334 -0.0309 0.0016 -0.0003 0.0302 0.0289  
Y -0.0497 0.0478 -0.0027 0.0009 -0.0181 -0.0157  
Z -0.0214 0.0269 0.0007 0.0011 0.0213 0.0216

AT. 42 H X -0.0334 -0.0309 -0.0016 -0.0003 0.0302 -0.0289  
Y 0.0497 0.0478 0.0027 0.0009 -0.0181 0.0157  
Z 0.0214 0.0269 -0.0007 0.0011 0.0213 -0.0216

AT. 43 C X -0.0190 0.0213 -0.0001 0.0017 -0.0133 -0.0117  
Y 0.0110 -0.0100 0.0005 0.0001 -0.0208 -0.0216  
Z -0.0011 0.0015 -0.0001 0.0005 -0.0248 -0.0245

AT. 44 C X 0.0190 0.0213 0.0001 0.0017 -0.0133 0.0117  
Y -0.0110 -0.0100 -0.0005 0.0001 -0.0208 0.0216  
Z 0.0011 0.0015 0.0001 0.0005 -0.0248 0.0245

AT. 45 H X -0.0621 0.0617 -0.0026 0.0032 -0.0657 -0.0613  
Y 0.0328 -0.0344 0.0006 -0.0025 0.0182 0.0154

Z 0.0075 -0.0029 0.0015 0.0018 -0.0258 -0.0257  
AT. 46 H X 0.0621 0.0617 0.0026 0.0032 -0.0657 0.0613  
Y -0.0328 -0.0344 -0.0006 -0.0025 0.0182 -0.0154  
Z -0.0075 -0.0029 -0.0015 0.0018 -0.0258 0.0257  
AT. 47 H X -0.0196 0.0245 0.0004 0.0026 -0.0137 -0.0119  
Y -0.0165 0.0196 -0.0002 0.0024 -0.0612 -0.0598  
Z -0.0291 0.0282 -0.0015 0.0017 -0.0660 -0.0636  
AT. 48 H X 0.0196 0.0245 -0.0004 0.0026 -0.0137 0.0119  
Y 0.0165 0.0196 0.0002 0.0024 -0.0612 0.0598  
Z 0.0291 0.0282 0.0015 0.0017 -0.0660 0.0636  
AT. 49 C X -0.0022 0.0013 -0.0003 0.0000 -0.0092 -0.0093  
Y 0.0026 -0.0031 -0.0001 0.0000 -0.0141 -0.0145  
Z -0.0113 0.0083 -0.0014 -0.0007 -0.0101 -0.0094  
AT. 50 C X 0.0022 0.0013 0.0003 0.0000 -0.0092 0.0093  
Y -0.0026 -0.0031 0.0001 0.0000 -0.0141 0.0145  
Z 0.0113 0.0083 0.0014 -0.0007 -0.0101 0.0094  
AT. 51 C X 0.0018 -0.0050 -0.0007 -0.0006 -0.0261 -0.0263  
Y -0.0172 0.0156 -0.0006 0.0003 0.0012 0.0021  
Z -0.0041 0.0045 -0.0007 -0.0002 -0.0034 -0.0034  
AT. 52 C X -0.0018 -0.0050 0.0007 -0.0006 -0.0261 0.0263  
Y 0.0172 0.0156 0.0006 0.0003 0.0012 -0.0021  
Z 0.0041 0.0045 0.0007 -0.0002 -0.0034 0.0034  
AT. 53 H X -0.0150 0.0116 -0.0011 -0.0003 -0.0116 -0.0113  
Y -0.0368 0.0343 -0.0012 0.0005 0.0202 0.0221  
Z 0.0026 -0.0031 -0.0006 -0.0003 -0.0078 -0.0074  
AT. 54 H X 0.0150 0.0116 0.0011 -0.0003 -0.0116 0.0113  
Y 0.0368 0.0343 0.0012 0.0005 0.0202 -0.0221  
Z -0.0026 -0.0031 0.0006 -0.0003 -0.0078 0.0074  
AT. 55 H X 0.0246 -0.0276 -0.0002 -0.0011 -0.0428 -0.0437  
Y -0.0214 0.0225 -0.0004 0.0009 0.0035 0.0041  
Z 0.0068 -0.0028 -0.0000 0.0002 -0.0120 -0.0129  
AT. 56 H X -0.0246 -0.0276 0.0002 -0.0011 -0.0428 0.0437

Y 0.0214 0.0225 0.0004 0.0009 0.0035 -0.0041  
Z -0.0068 -0.0028 0.0000 0.0002 -0.0120 0.0129  
AT. 57 C X 0.0029 -0.0029 0.0004 -0.0003 0.0229 0.0230  
Y 0.0136 -0.0115 0.0013 0.0006 0.0193 0.0181  
Z -0.0001 -0.0008 -0.0000 0.0001 0.0000 -0.0013  
AT. 58 C X -0.0029 -0.0029 -0.0004 -0.0003 0.0229 -0.0230  
Y -0.0136 -0.0115 -0.0013 0.0006 0.0193 -0.0181  
Z 0.0001 -0.0008 0.0000 0.0001 0.0000 0.0013  
AT. 59 H X 0.0173 -0.0166 0.0020 -0.0006 0.0480 0.0478  
Y 0.0117 -0.0188 0.0016 0.0010 0.0197 0.0156  
Z 0.0072 -0.0214 0.0015 0.0005 0.0182 0.0124  
AT. 60 H X -0.0173 -0.0166 -0.0020 -0.0006 0.0480 -0.0478  
Y -0.0117 -0.0188 -0.0016 0.0010 0.0197 -0.0156  
Z -0.0072 -0.0214 -0.0015 0.0005 0.0182 -0.0124  
AT. 61 H X 0.0151 -0.0035 0.0009 0.0001 0.0214 0.0226  
Y 0.0181 -0.0019 0.0010 0.0000 0.0213 0.0244  
Z 0.0073 -0.0061 0.0005 0.0006 -0.0019 -0.0045  
AT. 62 H X -0.0151 -0.0035 -0.0009 0.0001 0.0214 -0.0226  
Y -0.0181 -0.0019 -0.0010 0.0000 0.0213 -0.0244  
Z -0.0073 -0.0061 -0.0005 0.0006 -0.0019 0.0045  
AT. 63 H X -0.0120 0.0005 -0.0002 -0.0004 0.0197 0.0188  
Y 0.0339 -0.0343 0.0034 0.0008 0.0433 0.0390  
Z -0.0034 0.0154 -0.0011 0.0000 -0.0175 -0.0152  
AT. 64 H X 0.0120 0.0005 0.0002 -0.0004 0.0197 -0.0188  
Y -0.0339 -0.0343 -0.0034 0.0008 0.0433 -0.0390  
Z 0.0034 0.0154 0.0011 0.0000 -0.0175 0.0152  
AT. 65 C X 0.0244 -0.0241 0.0013 -0.0001 0.0010 -0.0010  
Y 0.0245 -0.0257 0.0004 -0.0011 -0.0112 -0.0123  
Z -0.0016 -0.0002 -0.0004 -0.0002 -0.0046 -0.0051  
AT. 66 C X -0.0244 -0.0241 -0.0013 -0.0001 0.0010 0.0010  
Y -0.0245 -0.0257 -0.0004 -0.0011 -0.0112 0.0123  
Z 0.0016 -0.0002 0.0004 -0.0002 -0.0046 0.0051

AT. 67 H X 0.0507 -0.0469 0.0025 -0.0003 0.0024 0.0000  
Y 0.0396 -0.0510 0.0017 -0.0017 0.0009 -0.0052  
Z -0.0373 0.0419 -0.0026 0.0006 -0.0171 -0.0126

AT. 68 H X -0.0507 -0.0469 -0.0025 -0.0003 0.0024 -0.0000  
Y -0.0396 -0.0510 -0.0017 -0.0017 0.0009 0.0052  
Z 0.0373 0.0419 0.0026 0.0006 -0.0171 0.0126

AT. 69 H X 0.0166 -0.0100 0.0000 -0.0004 -0.0114 -0.0095  
Y 0.0200 -0.0114 -0.0006 -0.0010 -0.0238 -0.0202  
Z 0.0076 -0.0067 0.0007 0.0006 0.0004 -0.0008

AT. 70 H X -0.0166 -0.0100 -0.0000 -0.0004 -0.0114 0.0095  
Y -0.0200 -0.0114 0.0006 -0.0010 -0.0238 0.0202  
Z -0.0076 -0.0067 -0.0007 0.0006 0.0004 0.0008

AT. 71 H X 0.0372 -0.0447 0.0032 0.0003 0.0168 0.0098  
Y 0.0437 -0.0458 0.0009 -0.0020 -0.0118 -0.0136  
Z 0.0344 -0.0434 0.0016 -0.0011 0.0068 0.0016

AT. 72 H X -0.0372 -0.0447 -0.0032 0.0003 0.0168 -0.0098  
Y -0.0437 -0.0458 -0.0009 -0.0020 -0.0118 0.0136  
Z -0.0344 -0.0434 -0.0016 -0.0011 0.0068 -0.0016

AT. 73 C X 0.0092 -0.0103 0.0000 -0.0001 -0.0011 -0.0022  
Y 0.0183 -0.0185 0.0006 0.0000 -0.0025 -0.0040  
Z -0.0142 0.0110 -0.0014 -0.0008 -0.0075 -0.0060

AT. 74 C X -0.0092 -0.0103 -0.0000 -0.0001 -0.0011 0.0022  
Y -0.0183 -0.0185 -0.0006 0.0000 -0.0025 0.0040  
Z 0.0142 0.0110 0.0014 -0.0008 -0.0075 0.0060

AT. 75 H X 0.0224 -0.0223 0.0005 0.0001 0.0075 0.0057  
Y 0.0361 -0.0359 0.0013 -0.0004 -0.0067 -0.0095  
Z 0.0198 -0.0215 -0.0000 -0.0012 -0.0067 -0.0076

AT. 76 H X -0.0224 -0.0223 -0.0005 0.0001 0.0075 -0.0057  
Y -0.0361 -0.0359 -0.0013 -0.0004 -0.0067 0.0095  
Z -0.0198 -0.0215 0.0000 -0.0012 -0.0067 0.0076

AT. 77 H X 0.0238 -0.0254 0.0004 -0.0004 -0.0145 -0.0171  
Y 0.0381 -0.0367 0.0016 0.0001 0.0092 0.0066

Z -0.0452 0.0410 -0.0026 -0.0005 -0.0059 -0.0019  
AT. 78 H X -0.0238 -0.0254 -0.0004 -0.0004 -0.0145 0.0171  
Y -0.0381 -0.0367 -0.0016 0.0001 0.0092 -0.0066  
Z 0.0452 0.0410 0.0026 -0.0005 -0.0059 0.0019  
AT. 79 I X -0.0002 0.0001 0.0001 -0.0013 -0.0000 0.0001  
Y -0.0000 0.0001 0.0005 0.0008 -0.0001 -0.0000  
Z -0.0001 0.0001 0.0005 0.0006 -0.0001 -0.0001  
AT. 80 I X 0.0002 0.0001 -0.0001 -0.0013 -0.0000 -0.0001  
Y 0.0000 0.0001 -0.0005 0.0008 -0.0001 0.0000  
Z 0.0001 0.0001 -0.0005 0.0006 -0.0001 0.0001  
AT. 81 I X 0.0000 -0.0001 0.0016 0.0023 -0.0002 -0.0003  
Y -0.0002 0.0002 -0.0009 -0.0013 0.0005 0.0005  
Z 0.0001 -0.0000 -0.0006 -0.0005 0.0001 0.0002  
AT. 82 I X -0.0000 -0.0001 -0.0016 0.0023 -0.0002 0.0003  
Y 0.0002 0.0002 0.0009 -0.0013 0.0005 -0.0005  
Z -0.0001 -0.0000 0.0006 -0.0005 0.0001 -0.0002  
AT. 83 O X -0.0004 -0.0003 0.0010 0.0044 -0.0001 -0.0021  
Y -0.0005 -0.0003 0.0020 0.0005 0.0003 -0.0004  
Z 0.0011 0.0001 -0.0116 -0.0004 -0.0027 -0.0033  
AT. 84 O X 0.0004 -0.0003 -0.0010 0.0044 -0.0001 0.0021  
Y 0.0005 -0.0003 -0.0020 0.0005 0.0003 0.0004  
Z -0.0011 0.0001 0.0116 -0.0004 -0.0027 0.0033  
AT. 85 O X 0.0001 -0.0003 0.0057 0.0049 0.0011 0.0009  
Y 0.0007 -0.0002 -0.0149 -0.0179 0.0003 0.0021  
Z -0.0008 0.0010 0.0018 0.0093 -0.0006 -0.0022  
AT. 86 O X -0.0001 -0.0003 -0.0057 0.0049 0.0011 -0.0009  
Y -0.0007 -0.0002 0.0149 -0.0179 0.0003 -0.0021  
Z 0.0008 0.0010 -0.0018 0.0093 -0.0006 0.0022  
AT. 87 N X -0.0005 -0.0002 0.0047 0.0130 -0.0016 -0.0039  
Y 0.0014 0.0010 -0.0243 -0.0189 -0.0008 0.0009  
Z 0.0006 -0.0002 -0.0070 -0.0037 -0.0009 -0.0013  
AT. 88 N X 0.0005 -0.0002 -0.0047 0.0130 -0.0016 0.0039

Y -0.0014 0.0010 0.0243 -0.0189 -0.0008 -0.0009  
Z -0.0006 -0.0002 0.0070 -0.0037 -0.0009 0.0013  
AT. 89 N X 0.0008 0.0001 -0.0162 -0.0245 0.0025 0.0051  
Y -0.0015 -0.0016 0.0440 0.0348 0.0003 -0.0009  
Z -0.0020 -0.0005 0.0404 0.0345 0.0006 -0.0014  
AT. 90 N X -0.0008 0.0001 0.0162 -0.0245 0.0025 -0.0051  
Y 0.0015 -0.0016 -0.0440 0.0348 0.0003 0.0009  
Z 0.0020 -0.0005 -0.0404 0.0345 0.0006 0.0014  
AT. 91 C X -0.0002 -0.0002 -0.0000 0.0067 -0.0009 -0.0029  
Y 0.0002 0.0004 -0.0066 -0.0029 -0.0006 -0.0007  
Z 0.0007 -0.0003 -0.0074 -0.0032 -0.0015 -0.0015  
AT. 92 C X 0.0002 -0.0002 0.0000 0.0067 -0.0009 0.0029  
Y -0.0002 0.0004 0.0066 -0.0029 -0.0006 0.0007  
Z -0.0007 -0.0003 0.0074 -0.0032 -0.0015 0.0015  
AT. 93 C X -0.0002 -0.0002 0.0004 0.0013 -0.0003 -0.0017  
Y -0.0000 -0.0000 -0.0015 0.0008 -0.0002 -0.0013  
Z 0.0005 -0.0008 -0.0051 -0.0118 0.0003 0.0004  
AT. 94 C X 0.0002 -0.0002 -0.0004 0.0013 -0.0003 0.0017  
Y 0.0000 -0.0000 0.0015 0.0008 -0.0002 0.0013  
Z -0.0005 -0.0008 0.0051 -0.0118 0.0003 -0.0004  
AT. 95 H X 0.0002 0.0009 0.0017 0.0059 -0.0031 -0.0013  
Y -0.0002 -0.0001 -0.0022 0.0044 0.0003 -0.0025  
Z 0.0004 -0.0017 -0.0048 -0.0224 0.0022 0.0023  
AT. 96 H X -0.0002 0.0009 -0.0017 0.0059 -0.0031 0.0013  
Y 0.0002 -0.0001 0.0022 0.0044 0.0003 0.0025  
Z -0.0004 -0.0017 0.0048 -0.0224 0.0022 -0.0023  
AT. 97 H X -0.0005 -0.0004 0.0008 -0.0048 0.0009 0.0001  
Y 0.0003 -0.0007 -0.0017 -0.0095 0.0005 0.0005  
Z 0.0006 -0.0009 -0.0053 -0.0124 0.0001 0.0003  
AT. 98 H X 0.0005 -0.0004 -0.0008 -0.0048 0.0009 -0.0001  
Y -0.0003 -0.0007 0.0017 -0.0095 0.0005 -0.0005  
Z -0.0006 -0.0009 0.0053 -0.0124 0.0001 -0.0003

AT. 99 C X 0.0005 -0.0003 -0.0044 -0.0094 0.0017 0.0028  
Y -0.0005 -0.0005 0.0100 0.0074 0.0001 0.0002  
Z -0.0014 0.0001 0.0231 0.0206 0.0009 -0.0002

AT. 100 C X -0.0005 -0.0003 0.0044 -0.0094 0.0017 -0.0028  
Y 0.0005 -0.0005 -0.0100 0.0074 0.0001 -0.0002  
Z 0.0014 0.0001 -0.0231 0.0206 0.0009 0.0002

AT. 101 C X 0.0007 -0.0005 -0.0017 -0.0010 0.0005 0.0007  
Y 0.0011 -0.0005 -0.0073 0.0018 -0.0009 -0.0013  
Z -0.0020 0.0003 0.0266 0.0147 0.0027 0.0029

AT. 102 C X -0.0007 -0.0005 0.0017 -0.0010 0.0005 -0.0007  
Y -0.0011 -0.0005 0.0073 0.0018 -0.0009 0.0013  
Z 0.0020 0.0003 -0.0266 0.0147 0.0027 -0.0029

AT. 103 H X 0.0004 -0.0007 0.0025 0.0031 0.0003 0.0004  
Y 0.0013 -0.0004 -0.0092 0.0001 -0.0008 -0.0011  
Z -0.0036 0.0004 0.0394 0.0150 0.0043 0.0057

AT. 104 H X -0.0004 -0.0007 -0.0025 0.0031 0.0003 -0.0004  
Y -0.0013 -0.0004 0.0092 0.0001 -0.0008 0.0011  
Z 0.0036 0.0004 -0.0394 0.0150 0.0043 -0.0057

AT. 105 H X 0.0007 -0.0005 0.0021 0.0078 -0.0005 -0.0013  
Y 0.0029 -0.0006 -0.0255 -0.0039 -0.0028 -0.0039  
Z -0.0014 0.0002 0.0209 0.0148 0.0017 0.0014

AT. 106 H X -0.0007 -0.0005 -0.0021 0.0078 -0.0005 0.0013  
Y -0.0029 -0.0006 0.0255 -0.0039 -0.0028 0.0039  
Z 0.0014 0.0002 -0.0209 0.0148 0.0017 -0.0014

AT. 107 C X -0.0006 0.0003 0.0068 0.0102 -0.0015 -0.0024  
Y 0.0015 0.0004 -0.0255 -0.0173 -0.0008 -0.0011  
Z -0.0001 0.0005 0.0016 0.0012 -0.0013 -0.0008

AT. 108 C X 0.0006 0.0003 -0.0068 0.0102 -0.0015 0.0024  
Y -0.0015 0.0004 0.0255 -0.0173 -0.0008 0.0011  
Z 0.0001 0.0005 -0.0016 0.0012 -0.0013 0.0008

AT. 109 H X -0.0015 0.0012 0.0211 0.0208 -0.0026 -0.0021  
Y 0.0007 0.0006 -0.0115 -0.0044 -0.0018 -0.0024



Z -0.0011 0.0005 0.0205 0.0193 -0.0026 -0.0031  
AT. 110 H X 0.0015 0.0012 -0.0211 0.0208 -0.0026 0.0021  
Y -0.0007 0.0006 0.0115 -0.0044 -0.0018 0.0024  
Z 0.0011 0.0005 -0.0205 0.0193 -0.0026 0.0031  
AT. 111 H X -0.0006 0.0001 0.0074 0.0154 -0.0022 -0.0043  
Y 0.0029 -0.0002 -0.0512 -0.0416 0.0014 0.0014  
Z -0.0004 0.0008 0.0062 0.0009 -0.0011 0.0007  
AT. 112 H X 0.0006 0.0001 -0.0074 0.0154 -0.0022 0.0043  
Y -0.0029 -0.0002 0.0512 -0.0416 0.0014 -0.0014  
Z 0.0004 0.0008 -0.0062 0.0009 -0.0011 -0.0007  
AT. 113 C X 0.0001 -0.0002 0.0004 -0.0034 0.0008 0.0014  
Y 0.0006 0.0002 -0.0095 -0.0057 -0.0007 -0.0014  
Z 0.0006 0.0006 -0.0126 -0.0103 -0.0007 0.0003  
AT. 114 C X -0.0001 -0.0002 -0.0004 -0.0034 0.0008 -0.0014  
Y -0.0006 0.0002 0.0095 -0.0057 -0.0007 0.0014  
Z -0.0006 0.0006 0.0126 -0.0103 -0.0007 -0.0003  
AT. 115 C X 0.0004 -0.0001 -0.0088 -0.0163 0.0018 0.0041  
Y 0.0006 -0.0004 -0.0070 -0.0020 -0.0013 -0.0019  
Z 0.0000 -0.0001 -0.0012 0.0055 -0.0018 -0.0023  
AT. 116 C X -0.0004 -0.0001 0.0088 -0.0163 0.0018 -0.0041  
Y -0.0006 -0.0004 0.0070 -0.0020 -0.0013 0.0019  
Z -0.0000 -0.0001 0.0012 0.0055 -0.0018 0.0023  
AT. 117 H X -0.0007 -0.0001 0.0165 -0.0015 0.0040 0.0057  
Y 0.0010 -0.0009 -0.0160 -0.0047 -0.0027 -0.0030  
Z 0.0012 -0.0000 -0.0249 -0.0093 -0.0037 -0.0035  
AT. 118 H X 0.0007 -0.0001 -0.0165 -0.0015 0.0040 -0.0057  
Y -0.0010 -0.0009 0.0160 -0.0047 -0.0027 0.0030  
Z -0.0012 -0.0000 0.0249 -0.0093 -0.0037 0.0035  
AT. 119 H X 0.0027 -0.0001 -0.0533 -0.0449 -0.0010 0.0026  
Y 0.0021 0.0002 -0.0369 -0.0274 -0.0014 -0.0008  
Z -0.0002 -0.0007 0.0028 0.0141 -0.0033 -0.0043  
AT. 120 H X -0.0027 -0.0001 0.0533 -0.0449 -0.0010 -0.0026

Y -0.0021 0.0002 0.0369 -0.0274 -0.0014 0.0008  
Z 0.0002 -0.0007 -0.0028 0.0141 -0.0033 0.0043  
AT. 121 C X -0.0008 0.0002 0.0136 0.0074 0.0014 0.0020  
Y -0.0000 -0.0009 0.0023 -0.0056 0.0011 0.0022  
Z 0.0007 -0.0008 -0.0059 -0.0129 0.0019 0.0024  
AT. 122 C X 0.0008 0.0002 -0.0136 0.0074 0.0014 -0.0020  
Y 0.0000 -0.0009 -0.0023 -0.0056 0.0011 -0.0022  
Z -0.0007 -0.0008 0.0059 -0.0129 0.0019 -0.0024  
AT. 123 H X -0.0043 0.0008 0.0764 0.0711 -0.0006 -0.0031  
Y -0.0009 0.0003 0.0090 0.0060 0.0003 0.0012  
Z 0.0009 -0.0017 -0.0027 -0.0145 0.0024 0.0026  
AT. 124 H X 0.0043 0.0008 -0.0764 0.0711 -0.0006 0.0031  
Y 0.0009 0.0003 -0.0090 0.0060 0.0003 -0.0012  
Z -0.0009 -0.0017 0.0027 -0.0145 0.0024 -0.0026  
AT. 125 H X 0.0001 0.0002 -0.0026 -0.0100 0.0021 0.0041  
Y 0.0022 -0.0024 -0.0271 -0.0386 0.0019 0.0038  
Z 0.0029 -0.0015 -0.0409 -0.0507 0.0031 0.0057  
AT. 126 H X -0.0001 0.0002 0.0026 -0.0100 0.0021 -0.0041  
Y -0.0022 -0.0024 0.0271 -0.0386 0.0019 -0.0038  
Z -0.0029 -0.0015 0.0409 -0.0507 0.0031 -0.0057  
AT. 127 C X 0.0001 -0.0002 0.0013 0.0005 0.0003 0.0000  
Y -0.0000 -0.0002 -0.0034 -0.0067 0.0008 0.0018  
Z 0.0007 0.0002 -0.0157 -0.0157 0.0011 0.0019  
AT. 128 C X -0.0001 -0.0002 -0.0013 0.0005 0.0003 -0.0000  
Y 0.0000 -0.0002 0.0034 -0.0067 0.0008 -0.0018  
Z -0.0007 0.0002 0.0157 -0.0157 0.0011 -0.0019  
AT. 129 C X -0.0002 -0.0002 0.0059 0.0148 -0.0021 -0.0043  
Y 0.0006 0.0006 -0.0134 -0.0085 -0.0014 -0.0009  
Z 0.0002 -0.0005 -0.0073 -0.0090 0.0014 0.0017  
AT. 130 C X 0.0002 -0.0002 -0.0059 0.0148 -0.0021 0.0043  
Y -0.0006 0.0006 0.0134 -0.0085 -0.0014 0.0009  
Z -0.0002 -0.0005 0.0073 -0.0090 0.0014 -0.0017

AT. 131 H X -0.0004 -0.0006 0.0067 0.0088 -0.0001 -0.0015  
Y 0.0009 0.0018 -0.0211 -0.0002 -0.0053 -0.0065  
Z 0.0001 -0.0005 -0.0094 -0.0137 0.0023 0.0030

AT. 132 H X 0.0004 -0.0006 -0.0067 0.0088 -0.0001 0.0015  
Y -0.0009 0.0018 0.0211 -0.0002 -0.0053 0.0065  
Z -0.0001 -0.0005 0.0094 -0.0137 0.0023 -0.0030

AT. 133 H X -0.0001 0.0006 0.0040 0.0260 -0.0058 -0.0100  
Y 0.0002 0.0003 -0.0075 -0.0033 -0.0015 -0.0014  
Z -0.0005 -0.0013 0.0025 -0.0068 0.0030 0.0038

AT. 134 H X 0.0001 0.0006 -0.0040 0.0260 -0.0058 0.0100  
Y -0.0002 0.0003 0.0075 -0.0033 -0.0015 0.0014  
Z 0.0005 -0.0013 -0.0025 -0.0068 0.0030 -0.0038

AT. 135 C X 0.0005 -0.0008 -0.0035 -0.0076 0.0014 0.0018  
Y -0.0014 0.0005 0.0252 0.0281 -0.0007 -0.0036  
Z -0.0001 -0.0000 0.0017 0.0042 -0.0001 -0.0006

AT. 136 C X -0.0005 -0.0008 0.0035 -0.0076 0.0014 -0.0018  
Y 0.0014 0.0005 -0.0252 0.0281 -0.0007 0.0036  
Z 0.0001 -0.0000 -0.0017 0.0042 -0.0001 0.0006

AT. 137 H X 0.0022 -0.0008 -0.0198 -0.0262 0.0027 0.0033  
Y -0.0015 0.0011 0.0393 0.0404 -0.0006 -0.0050  
Z -0.0010 0.0009 0.0312 0.0317 -0.0005 -0.0036

AT. 138 H X -0.0022 -0.0008 0.0198 -0.0262 0.0027 -0.0033  
Y 0.0015 0.0011 -0.0393 0.0404 -0.0006 0.0050  
Z 0.0010 0.0009 -0.0312 0.0317 -0.0005 0.0036

AT. 139 H X 0.0012 -0.0001 -0.0097 -0.0149 0.0010 0.0017  
Y -0.0027 -0.0002 0.0216 0.0288 -0.0012 -0.0027  
Z -0.0006 -0.0007 0.0108 0.0138 0.0004 -0.0007

AT. 140 H X -0.0012 -0.0001 0.0097 -0.0149 0.0010 -0.0017  
Y 0.0027 -0.0002 -0.0216 0.0288 -0.0012 0.0027  
Z 0.0006 -0.0007 -0.0108 0.0138 0.0004 0.0007

AT. 141 H X -0.0013 -0.0016 0.0129 0.0114 0.0015 0.0011  
Y -0.0025 0.0012 0.0545 0.0567 -0.0009 -0.0065

Z 0.0004 -0.0011 -0.0221 -0.0177 0.0002 0.0022  
AT. 142 H X 0.0013 -0.0016 -0.0129 0.0114 0.0015 -0.0011  
Y 0.0025 0.0012 -0.0545 0.0567 -0.0009 0.0065  
Z -0.0004 -0.0011 0.0221 -0.0177 0.0002 -0.0022  
AT. 143 C X 0.0009 0.0003 -0.0177 -0.0159 0.0001 0.0002  
Y -0.0010 -0.0008 0.0226 0.0140 0.0035 0.0044  
Z 0.0000 -0.0004 0.0013 -0.0012 0.0010 0.0014  
AT. 144 C X -0.0009 0.0003 0.0177 -0.0159 0.0001 -0.0002  
Y 0.0010 -0.0008 -0.0226 0.0140 0.0035 -0.0044  
Z -0.0000 -0.0004 -0.0013 -0.0012 0.0010 -0.0014  
AT. 145 H X 0.0008 -0.0009 -0.0269 -0.0000 0.0004 -0.0009  
Y -0.0039 -0.0048 0.0733 0.0943 0.0079 0.0063  
Z 0.0030 0.0036 -0.0548 -0.0819 -0.0036 -0.0009  
AT. 146 H X -0.0008 -0.0009 0.0269 -0.0000 0.0004 0.0009  
Y 0.0039 -0.0048 -0.0733 0.0943 0.0079 -0.0063  
Z -0.0030 0.0036 0.0548 -0.0819 -0.0036 0.0009  
AT. 147 H X -0.0004 -0.0016 0.0058 0.0206 0.0008 -0.0003  
Y 0.0023 0.0045 -0.0283 -0.0869 -0.0007 0.0042  
Z 0.0001 -0.0003 0.0072 -0.0040 -0.0001 0.0005  
AT. 148 H X 0.0004 -0.0016 -0.0058 0.0206 0.0008 0.0003  
Y -0.0023 0.0045 0.0283 -0.0869 -0.0007 -0.0042  
Z -0.0001 -0.0003 -0.0072 -0.0040 -0.0001 -0.0005  
AT. 149 H X 0.0027 0.0037 -0.0475 -0.0768 -0.0010 0.0016  
Y -0.0025 -0.0024 0.0527 0.0511 0.0063 0.0062  
Z -0.0036 -0.0049 0.0686 0.0937 0.0065 0.0040  
AT. 150 H X -0.0027 0.0037 0.0475 -0.0768 -0.0010 -0.0016  
Y 0.0025 -0.0024 -0.0527 0.0511 0.0063 -0.0062  
Z 0.0036 -0.0049 -0.0686 0.0937 0.0065 -0.0040  
AT. 151 C X 0.0004 -0.0004 -0.0001 -0.0004 -0.0002 0.0000  
Y -0.0008 0.0006 0.0003 -0.0046 0.0012 0.0013  
Z 0.0008 0.0007 -0.0187 -0.0182 0.0004 0.0017  
AT. 152 C X -0.0004 -0.0004 0.0001 -0.0004 -0.0002 -0.0000

Y 0.0008 0.0006 -0.0003 -0.0046 0.0012 -0.0013  
Z -0.0008 0.0007 0.0187 -0.0182 0.0004 -0.0017  
AT. 153 H X 0.0004 -0.0007 0.0020 -0.0003 -0.0002 0.0013  
Y -0.0017 0.0011 0.0064 -0.0040 0.0021 0.0027  
Z -0.0007 0.0017 -0.0099 -0.0176 0.0018 0.0034  
AT. 154 H X -0.0004 -0.0007 -0.0020 -0.0003 -0.0002 -0.0013  
Y 0.0017 0.0011 -0.0064 -0.0040 0.0021 -0.0027  
Z 0.0007 0.0017 0.0099 -0.0176 0.0018 -0.0034  
AT. 155 H X 0.0008 -0.0001 -0.0024 0.0040 -0.0022 -0.0030  
Y -0.0019 0.0015 0.0060 -0.0036 0.0018 0.0019  
Z 0.0021 -0.0002 -0.0256 -0.0177 -0.0011 -0.0001  
AT. 156 H X -0.0008 -0.0001 0.0024 0.0040 -0.0022 0.0030  
Y 0.0019 0.0015 -0.0060 -0.0036 0.0018 -0.0019  
Z -0.0021 -0.0002 0.0256 -0.0177 -0.0011 0.0001  
AT. 157 O X -0.0011 0.0004 -0.0002 0.0002 0.0015 0.0004  
Y 0.0014 -0.0005 -0.0003 -0.0015 -0.0011 -0.0058  
Z 0.0006 0.0000 -0.0009 0.0002 -0.0011 0.0001  
AT. 158 O X 0.0011 0.0004 0.0002 0.0002 0.0015 -0.0004  
Y -0.0014 -0.0005 0.0003 -0.0015 -0.0011 0.0058  
Z -0.0006 0.0000 0.0009 0.0002 -0.0011 -0.0001  
AT. 159 O X 0.0012 0.0026 0.0007 0.0002 -0.0028 0.0037  
Y -0.0016 -0.0024 0.0005 -0.0004 0.0017 -0.0013  
Z 0.0041 0.0035 0.0009 0.0005 -0.0081 0.0069  
AT. 160 O X -0.0012 0.0026 -0.0007 0.0002 -0.0028 -0.0037  
Y 0.0016 -0.0024 -0.0005 -0.0004 0.0017 0.0013  
Z -0.0041 0.0035 -0.0009 0.0005 -0.0081 -0.0069  
AT. 161 H X -0.0035 0.0016 -0.0007 -0.0005 -0.0006 -0.0033  
Y 0.0042 -0.0022 -0.0005 -0.0017 -0.0022 -0.0072  
Z -0.0089 0.0054 -0.0006 0.0007 -0.0005 0.0032  
AT. 162 H X 0.0035 0.0016 0.0007 -0.0005 -0.0006 0.0033  
Y -0.0042 -0.0022 0.0005 -0.0017 -0.0022 0.0072  
Z 0.0089 0.0054 0.0006 0.0007 -0.0005 -0.0032

AT.163 H X 0.0049 0.0057 0.0011 0.0009 -0.0089 0.0087  
           Y 0.0013 0.0012 -0.0029 0.0050 0.0001 0.0003  
           Z 0.0037 0.0036 0.0000 0.0014 -0.0070 0.0060  
 AT.164 H X -0.0049 0.0057 -0.0011 0.0009 -0.0089 -0.0087  
           Y -0.0013 0.0012 0.0029 0.0050 0.0001 -0.0003  
           Z -0.0037 0.0036 -0.0000 0.0014 -0.0070 -0.0060  
 AT.165 O X 0.0001 0.0005 -0.0018 0.0008 0.0007 0.0014  
           Y 0.0015 0.0005 0.0008 -0.0004 0.0001 0.0006  
           Z -0.0008 -0.0009 0.0001 -0.0012 0.0003 -0.0000  
 AT.166 O X -0.0001 0.0005 0.0018 0.0008 0.0007 -0.0014  
           Y -0.0015 0.0005 -0.0008 -0.0004 0.0001 -0.0006  
           Z 0.0008 -0.0009 -0.0001 -0.0012 0.0003 0.0000  
 AT.167 H X 0.0007 0.0009 -0.0037 0.0015 0.0006 0.0022  
           Y 0.0003 -0.0003 0.0056 -0.0027 0.0005 -0.0006  
           Z -0.0006 -0.0008 -0.0012 -0.0011 -0.0001 -0.0003  
 AT.168 H X -0.0007 0.0009 0.0037 0.0015 0.0006 -0.0022  
           Y -0.0003 -0.0003 -0.0056 -0.0027 0.0005 0.0006  
           Z 0.0006 -0.0008 0.0012 -0.0011 -0.0001 0.0003  
 AT.169 O X -0.0000 0.0006 0.0027 -0.0025 0.0003 -0.0007  
           Y -0.0012 -0.0005 -0.0054 0.0061 0.0005 0.0006  
           Z -0.0002 -0.0006 0.0022 -0.0031 0.0002 -0.0004  
 AT.170 O X 0.0000 0.0006 -0.0027 -0.0025 0.0003 0.0007  
           Y 0.0012 -0.0005 0.0054 0.0061 0.0005 -0.0006  
           Z 0.0002 -0.0006 -0.0022 -0.0031 0.0002 0.0004  
 AT.171 H X 0.0026 0.0026 0.0043 -0.0009 -0.0045 0.0044  
           Y -0.0003 0.0006 -0.0066 0.0093 -0.0019 0.0035  
           Z -0.0004 0.0000 -0.0004 0.0000 -0.0004 0.0008  
 AT.172 H X -0.0026 0.0026 -0.0043 -0.0009 -0.0045 -0.0044  
           Y 0.0003 0.0006 0.0066 0.0093 -0.0019 -0.0035  
           Z 0.0004 0.0000 0.0004 0.0000 -0.0004 -0.0008

FREQ(CM\*\*-1) 342.62 342.94 367.01 369.17 371.80 372.25

AT. 1 I X 0.0003 -0.0004 -0.0002 0.0001 -0.0017 -0.0017  
Y -0.0002 0.0001 -0.0003 0.0002 -0.0005 -0.0006  
Z 0.0001 -0.0002 0.0001 -0.0001 -0.0008 -0.0006

AT. 2 I X -0.0003 -0.0004 0.0002 0.0001 -0.0017 0.0017  
Y 0.0002 0.0001 0.0003 0.0002 -0.0005 0.0006  
Z -0.0001 -0.0002 -0.0001 -0.0001 -0.0008 0.0006

AT. 3 I X -0.0006 0.0002 -0.0002 -0.0002 -0.0017 -0.0017  
Y -0.0002 0.0001 -0.0000 0.0000 -0.0006 -0.0006  
Z -0.0001 0.0000 -0.0001 0.0000 -0.0003 -0.0004

AT. 4 I X 0.0006 0.0002 0.0002 -0.0002 -0.0017 0.0017  
Y 0.0002 0.0001 0.0000 0.0000 -0.0006 0.0006  
Z 0.0001 0.0000 0.0001 0.0000 -0.0003 0.0004

AT. 5 O X -0.0018 0.0016 0.0004 -0.0004 -0.0012 -0.0001  
Y 0.0010 0.0001 -0.0002 0.0001 0.0003 -0.0006  
Z 0.0020 -0.0008 -0.0037 0.0020 -0.0237 -0.0232

AT. 6 O X 0.0018 0.0016 -0.0004 -0.0004 -0.0012 0.0001  
Y -0.0010 0.0001 0.0002 0.0001 0.0003 0.0006  
Z -0.0020 -0.0008 0.0037 0.0020 -0.0237 0.0232

AT. 7 O X 0.0016 -0.0010 0.0008 -0.0001 0.0033 0.0040  
Y -0.0014 0.0008 0.0003 -0.0006 0.0026 0.0021  
Z 0.0037 -0.0037 -0.0021 0.0014 -0.0182 -0.0188

AT. 8 O X -0.0016 -0.0010 -0.0008 -0.0001 0.0033 -0.0040  
Y 0.0014 0.0008 -0.0003 -0.0006 0.0026 -0.0021  
Z -0.0037 -0.0037 0.0021 0.0014 -0.0182 0.0188

AT. 9 N X -0.0038 0.0020 0.0031 -0.0021 0.0211 0.0235  
Y 0.0008 -0.0006 0.0001 0.0002 0.0022 0.0045  
Z 0.0008 -0.0000 -0.0010 0.0005 -0.0064 -0.0064

AT. 10 N X 0.0038 0.0020 -0.0031 -0.0021 0.0211 -0.0235  
Y -0.0008 -0.0006 -0.0001 0.0002 0.0022 -0.0045  
Z -0.0008 -0.0000 0.0010 0.0005 -0.0064 0.0064

AT. 11 N X 0.0051 -0.0029 0.0000 0.0005 0.0012 0.0006

Y -0.0010 0.0008 0.0021 -0.0013 0.0138 0.0145  
Z 0.0012 -0.0014 0.0001 0.0002 -0.0019 -0.0006  
AT. 12 N X -0.0051 -0.0029 -0.0000 0.0005 0.0012 -0.0006  
Y 0.0010 0.0008 -0.0021 -0.0013 0.0138 -0.0145  
Z -0.0012 -0.0014 -0.0001 0.0002 -0.0019 0.0006  
AT. 13 C X -0.0027 0.0019 0.0029 -0.0018 0.0151 0.0167  
Y 0.0017 -0.0006 -0.0007 0.0004 -0.0021 -0.0016  
Z 0.0012 0.0001 -0.0014 0.0006 -0.0068 -0.0074  
AT. 14 C X 0.0027 0.0019 -0.0029 -0.0018 0.0151 -0.0167  
Y -0.0017 -0.0006 0.0007 0.0004 -0.0021 0.0016  
Z -0.0012 0.0001 0.0014 0.0006 -0.0068 0.0074  
AT. 15 C X -0.0005 0.0000 0.0000 -0.0001 -0.0004 0.0001  
Y 0.0011 -0.0002 0.0001 0.0002 0.0019 0.0020  
Z -0.0041 0.0037 0.0045 -0.0027 0.0259 0.0266  
AT. 16 C X 0.0005 0.0000 -0.0000 -0.0001 -0.0004 -0.0001  
Y -0.0011 -0.0002 -0.0001 0.0002 0.0019 -0.0020  
Z 0.0041 0.0037 -0.0045 -0.0027 0.0259 -0.0266  
AT. 17 H X -0.0004 -0.0006 -0.0010 0.0004 -0.0075 -0.0073  
Y 0.0048 -0.0032 -0.0039 0.0024 -0.0206 -0.0216  
Z -0.0088 0.0073 0.0092 -0.0054 0.0515 0.0535  
AT. 18 H X 0.0004 -0.0006 0.0010 0.0004 -0.0075 0.0073  
Y -0.0048 -0.0032 0.0039 0.0024 -0.0206 0.0216  
Z 0.0088 0.0073 -0.0092 -0.0054 0.0515 -0.0535  
AT. 19 H X 0.0013 -0.0008 -0.0024 0.0012 -0.0130 -0.0132  
Y -0.0052 0.0051 0.0067 -0.0037 0.0392 0.0413  
Z -0.0060 0.0054 0.0062 -0.0037 0.0357 0.0369  
AT. 20 H X -0.0013 -0.0008 0.0024 0.0012 -0.0130 0.0132  
Y 0.0052 0.0051 -0.0067 -0.0037 0.0392 -0.0413  
Z 0.0060 0.0054 -0.0062 -0.0037 0.0357 -0.0369  
AT. 21 C X 0.0031 -0.0018 0.0007 0.0002 0.0050 0.0051  
Y -0.0009 0.0007 0.0005 -0.0002 0.0075 0.0069  
Z 0.0017 -0.0019 -0.0009 0.0009 -0.0086 -0.0081



AT. 22 C X -0.0031 -0.0018 -0.0007 0.0002 0.0050 -0.0051  
Y 0.0009 0.0007 -0.0005 -0.0002 0.0075 -0.0069  
Z -0.0017 -0.0019 0.0009 0.0009 -0.0086 0.0081

AT. 23 C X 0.0008 -0.0002 0.0004 0.0000 0.0030 0.0034  
Y 0.0027 -0.0011 0.0028 -0.0009 0.0188 0.0177  
Z -0.0019 0.0003 -0.0021 0.0012 -0.0146 -0.0137

AT. 24 C X -0.0008 -0.0002 -0.0004 0.0000 0.0030 -0.0034  
Y -0.0027 -0.0011 -0.0028 -0.0009 0.0188 -0.0177  
Z 0.0019 0.0003 0.0021 0.0012 -0.0146 0.0137

AT. 25 H X -0.0000 0.0003 -0.0007 0.0000 -0.0033 -0.0033  
Y 0.0030 -0.0013 0.0031 -0.0011 0.0197 0.0190  
Z -0.0068 0.0029 -0.0061 0.0022 -0.0310 -0.0340

AT. 26 H X 0.0000 0.0003 0.0007 0.0000 -0.0033 0.0033  
Y -0.0030 -0.0013 -0.0031 -0.0011 0.0197 -0.0190  
Z 0.0068 0.0029 0.0061 0.0022 -0.0310 0.0340

AT. 27 H X -0.0009 0.0010 -0.0001 -0.0003 0.0018 0.0028  
Y 0.0075 -0.0032 0.0068 -0.0022 0.0385 0.0386  
Z 0.0008 -0.0011 0.0001 0.0008 -0.0051 -0.0033

AT. 28 H X 0.0009 0.0010 0.0001 -0.0003 0.0018 -0.0028  
Y -0.0075 -0.0032 -0.0068 -0.0022 0.0385 -0.0386  
Z -0.0008 -0.0011 -0.0001 0.0008 -0.0051 0.0033

AT. 29 C X -0.0023 0.0011 -0.0021 0.0005 -0.0168 -0.0155  
Y 0.0020 -0.0013 -0.0038 0.0021 -0.0254 -0.0251  
Z 0.0011 -0.0003 0.0044 -0.0020 0.0332 0.0317

AT. 30 C X 0.0023 0.0011 0.0021 0.0005 -0.0168 0.0155  
Y -0.0020 -0.0013 0.0038 0.0021 -0.0254 0.0251  
Z -0.0011 -0.0003 -0.0044 -0.0020 0.0332 -0.0317

AT. 31 H X -0.0024 0.0011 -0.0085 0.0033 -0.0629 -0.0615  
Y 0.0039 -0.0021 0.0021 -0.0004 0.0174 0.0157  
Z 0.0039 -0.0017 0.0094 -0.0040 0.0691 0.0646

AT. 32 H X 0.0024 0.0011 0.0085 0.0033 -0.0629 0.0615  
Y -0.0039 -0.0021 -0.0021 -0.0004 0.0174 -0.0157

Z -0.0039 -0.0017 -0.0094 -0.0040 0.0691 -0.0646  
AT. 33 H X -0.0049 0.0024 -0.0029 0.0005 -0.0205 -0.0179  
Y -0.0012 0.0003 -0.0124 0.0056 -0.0898 -0.0860  
Z 0.0007 0.0000 0.0075 -0.0034 0.0574 0.0553  
AT. 34 H X 0.0049 0.0024 0.0029 0.0005 -0.0205 0.0179  
Y 0.0012 0.0003 0.0124 0.0056 -0.0898 0.0860  
Z -0.0007 0.0000 -0.0075 -0.0034 0.0574 -0.0553  
AT. 35 C X 0.0016 -0.0012 -0.0011 0.0006 -0.0064 -0.0068  
Y 0.0009 -0.0007 -0.0022 0.0012 -0.0150 -0.0156  
Z -0.0004 0.0003 0.0020 -0.0011 0.0166 0.0164  
AT. 36 C X -0.0016 -0.0012 0.0011 0.0006 -0.0064 0.0068  
Y -0.0009 -0.0007 0.0022 0.0012 -0.0150 0.0156  
Z 0.0004 0.0003 -0.0020 -0.0011 0.0166 -0.0164  
AT. 37 C X 0.0048 -0.0029 -0.0022 0.0016 -0.0137 -0.0150  
Y -0.0003 0.0007 0.0008 -0.0007 0.0074 0.0058  
Z 0.0013 0.0000 0.0037 -0.0019 0.0285 0.0265  
AT. 38 C X -0.0048 -0.0029 0.0022 0.0016 -0.0137 0.0150  
Y 0.0003 0.0007 -0.0008 -0.0007 0.0074 -0.0058  
Z -0.0013 0.0000 -0.0037 -0.0019 0.0285 -0.0265  
AT. 39 H X 0.0053 -0.0014 0.0025 -0.0012 0.0242 0.0179  
Y -0.0002 0.0013 0.0037 -0.0024 0.0271 0.0237  
Z 0.0014 0.0009 0.0057 -0.0031 0.0453 0.0407  
AT. 40 H X -0.0053 -0.0014 -0.0025 -0.0012 0.0242 -0.0179  
Y 0.0002 0.0013 -0.0037 -0.0024 0.0271 -0.0237  
Z -0.0014 0.0009 -0.0057 -0.0031 0.0453 -0.0407  
AT. 41 H X 0.0039 -0.0040 -0.0064 0.0042 -0.0474 -0.0440  
Y -0.0011 0.0018 0.0007 -0.0009 0.0095 0.0061  
Z 0.0027 0.0004 0.0081 -0.0043 0.0609 0.0555  
AT. 42 H X -0.0039 -0.0040 0.0064 0.0042 -0.0474 0.0440  
Y 0.0011 0.0018 -0.0007 -0.0009 0.0095 -0.0061  
Z -0.0027 0.0004 -0.0081 -0.0043 0.0609 -0.0555  
AT. 43 C X -0.0008 0.0014 -0.0011 0.0002 -0.0068 -0.0080

Y -0.0042 0.0026 0.0023 -0.0018 0.0113 0.0119  
Z -0.0026 0.0018 -0.0012 0.0003 -0.0103 -0.0096  
AT. 44 C X 0.0008 0.0014 0.0011 0.0002 -0.0068 0.0080  
Y 0.0042 0.0026 -0.0023 -0.0018 0.0113 -0.0119  
Z 0.0026 0.0018 0.0012 0.0003 -0.0103 0.0096  
AT. 45 H X -0.0053 0.0052 -0.0032 0.0005 -0.0212 -0.0236  
Y -0.0016 -0.0002 0.0052 -0.0028 0.0310 0.0326  
Z -0.0020 0.0019 -0.0027 0.0011 -0.0191 -0.0186  
AT. 46 H X 0.0053 0.0052 0.0032 0.0005 -0.0212 0.0236  
Y 0.0016 -0.0002 -0.0052 -0.0028 0.0310 -0.0326  
Z 0.0020 0.0019 0.0027 0.0011 -0.0191 0.0186  
AT. 47 H X -0.0000 0.0013 -0.0030 0.0013 -0.0206 -0.0221  
Y -0.0072 0.0059 -0.0011 -0.0006 -0.0121 -0.0126  
Z -0.0066 0.0052 -0.0022 0.0002 -0.0164 -0.0167  
AT. 48 H X 0.0000 0.0013 0.0030 0.0013 -0.0206 0.0221  
Y 0.0072 0.0059 0.0011 -0.0006 -0.0121 0.0126  
Z 0.0066 0.0052 0.0022 0.0002 -0.0164 0.0167  
AT. 49 C X -0.0014 0.0008 0.0012 -0.0011 0.0098 0.0088  
Y -0.0028 0.0016 0.0012 -0.0010 0.0036 0.0041  
Z -0.0012 0.0004 -0.0005 0.0003 -0.0045 -0.0034  
AT. 50 C X 0.0014 0.0008 -0.0012 -0.0011 0.0098 -0.0088  
Y 0.0028 0.0016 -0.0012 -0.0010 0.0036 -0.0041  
Z 0.0012 0.0004 0.0005 0.0003 -0.0045 0.0034  
AT. 51 C X -0.0043 0.0022 0.0022 -0.0019 0.0155 0.0162  
Y -0.0005 0.0007 0.0020 -0.0013 0.0104 0.0099  
Z 0.0002 -0.0003 -0.0021 0.0013 -0.0152 -0.0147  
AT. 52 C X 0.0043 0.0022 -0.0022 -0.0019 0.0155 -0.0162  
Y 0.0005 0.0007 -0.0020 -0.0013 0.0104 -0.0099  
Z -0.0002 -0.0003 0.0021 0.0013 -0.0152 0.0147  
AT. 53 H X -0.0023 0.0014 0.0031 -0.0024 0.0224 0.0218  
Y 0.0027 -0.0008 0.0024 -0.0015 0.0163 0.0140  
Z -0.0000 -0.0003 -0.0026 0.0017 -0.0171 -0.0163

AT. 54 H X 0.0023 0.0014 -0.0031 -0.0024 0.0224 -0.0218  
Y -0.0027 -0.0008 -0.0024 -0.0015 0.0163 -0.0140  
Z 0.0000 -0.0003 0.0026 0.0017 -0.0171 0.0163

AT. 55 H X -0.0064 0.0029 0.0008 -0.0010 0.0038 0.0063  
Y -0.0001 0.0010 0.0023 -0.0019 0.0117 0.0096  
Z -0.0007 0.0004 -0.0028 0.0012 -0.0218 -0.0219

AT. 56 H X 0.0064 0.0029 -0.0008 -0.0010 0.0038 -0.0063  
Y 0.0001 0.0010 -0.0023 -0.0019 0.0117 -0.0096  
Z 0.0007 0.0004 0.0028 0.0012 -0.0218 0.0219

AT. 57 C X 0.0031 -0.0020 0.0013 -0.0004 0.0097 0.0099  
Y 0.0029 -0.0019 -0.0012 0.0009 -0.0097 -0.0099  
Z -0.0002 0.0001 -0.0004 0.0001 -0.0004 -0.0012

AT. 58 C X -0.0031 -0.0020 -0.0013 -0.0004 0.0097 -0.0099  
Y -0.0029 -0.0019 0.0012 0.0009 -0.0097 0.0099  
Z 0.0002 0.0001 0.0004 0.0001 -0.0004 0.0012

AT. 59 H X 0.0058 -0.0034 0.0038 -0.0013 0.0257 0.0266  
Y 0.0029 -0.0024 -0.0022 0.0015 -0.0158 -0.0161  
Z 0.0017 -0.0018 -0.0000 0.0004 0.0022 0.0018

AT. 60 H X -0.0058 -0.0034 -0.0038 -0.0013 0.0257 -0.0266  
Y -0.0029 -0.0024 0.0022 0.0015 -0.0158 0.0161  
Z -0.0017 -0.0018 0.0000 0.0004 0.0022 -0.0018

AT. 61 H X 0.0035 -0.0017 -0.0003 0.0002 -0.0020 -0.0026  
Y 0.0035 -0.0015 0.0003 -0.0001 -0.0009 -0.0009  
Z -0.0002 0.0003 -0.0025 0.0010 -0.0140 -0.0155

AT. 62 H X -0.0035 -0.0017 0.0003 0.0002 -0.0020 0.0026  
Y -0.0035 -0.0015 -0.0003 -0.0001 -0.0009 0.0009  
Z 0.0002 0.0003 0.0025 0.0010 -0.0140 0.0155

AT. 63 H X 0.0023 -0.0021 0.0025 -0.0008 0.0181 0.0189  
Y 0.0056 -0.0037 -0.0012 0.0014 -0.0097 -0.0097  
Z -0.0020 0.0018 -0.0015 0.0001 -0.0083 -0.0098

AT. 64 H X -0.0023 -0.0021 -0.0025 -0.0008 0.0181 -0.0189  
Y -0.0056 -0.0037 0.0012 0.0014 -0.0097 0.0097

Z 0.0020 0.0018 0.0015 0.0001 -0.0083 0.0098  
AT. 65 C X -0.0005 0.0000 0.0014 -0.0008 0.0108 0.0102  
Y -0.0013 0.0002 -0.0005 0.0003 -0.0063 -0.0045  
Z -0.0014 0.0006 0.0004 -0.0001 -0.0010 0.0004  
AT. 66 C X 0.0005 0.0000 -0.0014 -0.0008 0.0108 -0.0102  
Y 0.0013 0.0002 0.0005 0.0003 -0.0063 0.0045  
Z 0.0014 0.0006 -0.0004 -0.0001 -0.0010 -0.0004  
AT. 67 H X -0.0007 -0.0003 0.0016 -0.0008 0.0119 0.0108  
Y 0.0008 -0.0004 -0.0005 0.0005 -0.0055 0.0013  
Z -0.0033 0.0015 0.0002 -0.0004 -0.0026 -0.0054  
AT. 68 H X 0.0007 -0.0003 -0.0016 -0.0008 0.0119 -0.0108  
Y -0.0008 -0.0004 0.0005 0.0005 -0.0055 -0.0013  
Z 0.0033 0.0015 -0.0002 -0.0004 -0.0026 0.0054  
AT. 69 H X -0.0019 0.0001 0.0002 -0.0002 0.0030 -0.0006  
Y -0.0032 0.0006 -0.0009 0.0006 -0.0103 -0.0130  
Z -0.0017 0.0010 0.0020 -0.0009 0.0084 0.0088  
AT. 70 H X 0.0019 0.0001 -0.0002 -0.0002 0.0030 0.0006  
Y 0.0032 0.0006 0.0009 0.0006 -0.0103 0.0130  
Z 0.0017 0.0010 -0.0020 -0.0009 0.0084 -0.0088  
AT. 71 H X 0.0011 0.0001 0.0031 -0.0017 0.0218 0.0247  
Y -0.0008 -0.0006 -0.0016 0.0011 -0.0122 -0.0092  
Z 0.0006 -0.0005 0.0001 0.0003 -0.0009 0.0048  
AT. 72 H X -0.0011 0.0001 -0.0031 -0.0017 0.0218 -0.0247  
Y 0.0008 -0.0006 0.0016 0.0011 -0.0122 0.0092  
Z -0.0006 -0.0005 -0.0001 0.0003 -0.0009 -0.0048  
AT. 73 C X 0.0008 -0.0014 -0.0018 0.0009 -0.0099 -0.0109  
Y 0.0003 -0.0013 -0.0021 0.0012 -0.0144 -0.0152  
Z -0.0008 0.0004 0.0014 -0.0007 0.0119 0.0117  
AT. 74 C X -0.0008 -0.0014 0.0018 0.0009 -0.0099 0.0109  
Y -0.0003 -0.0013 0.0021 0.0012 -0.0144 0.0152  
Z 0.0008 0.0004 -0.0014 -0.0007 0.0119 -0.0117  
AT. 75 H X 0.0038 -0.0043 -0.0063 0.0038 -0.0384 -0.0400

Y -0.0002 -0.0015 -0.0015 0.0008 -0.0097 -0.0112  
Z 0.0007 -0.0020 -0.0013 0.0009 -0.0022 -0.0040  
AT. 76 H X -0.0038 -0.0043 0.0063 0.0038 -0.0384 0.0400  
Y 0.0002 -0.0015 0.0015 0.0008 -0.0097 0.0112  
Z -0.0007 -0.0020 0.0013 0.0009 -0.0022 0.0040  
AT. 77 H X -0.0009 -0.0008 -0.0021 0.0009 -0.0136 -0.0142  
Y 0.0038 -0.0044 -0.0048 0.0032 -0.0293 -0.0314  
Z -0.0023 0.0026 0.0040 -0.0025 0.0284 0.0291  
AT. 78 H X 0.0009 -0.0008 0.0021 0.0009 -0.0136 0.0142  
Y -0.0038 -0.0044 0.0048 0.0032 -0.0293 0.0314  
Z 0.0023 0.0026 -0.0040 -0.0025 0.0284 -0.0291  
AT. 79 I X 0.0003 0.0011 -0.0020 0.0025 0.0002 0.0002  
Y 0.0004 -0.0006 0.0017 -0.0018 -0.0001 -0.0004  
Z 0.0005 -0.0005 0.0008 -0.0009 -0.0003 -0.0004  
AT. 80 I X -0.0003 0.0011 0.0020 0.0025 0.0002 -0.0002  
Y -0.0004 -0.0006 -0.0017 -0.0018 -0.0001 0.0004  
Z -0.0005 -0.0005 -0.0008 -0.0009 -0.0003 0.0004  
AT. 81 I X 0.0023 -0.0019 -0.0005 0.0004 0.0001 0.0002  
Y -0.0016 0.0014 0.0006 -0.0007 -0.0001 -0.0001  
Z -0.0001 -0.0001 0.0000 -0.0002 -0.0000 -0.0000  
AT. 82 I X -0.0023 -0.0019 0.0005 0.0004 0.0001 -0.0002  
Y 0.0016 0.0014 -0.0006 -0.0007 -0.0001 0.0001  
Z 0.0001 -0.0001 -0.0000 -0.0002 -0.0000 0.0000  
AT. 83 O X 0.0114 -0.0096 0.0061 -0.0018 0.0010 0.0014  
Y 0.0002 0.0037 0.0013 0.0012 0.0004 0.0012  
Z 0.0256 -0.0296 0.0151 -0.0198 -0.0011 -0.0033  
AT. 84 O X -0.0114 -0.0096 -0.0061 -0.0018 0.0010 -0.0014  
Y -0.0002 0.0037 -0.0013 0.0012 0.0004 -0.0012  
Z -0.0256 -0.0296 -0.0151 -0.0198 -0.0011 0.0033  
AT. 85 O X -0.0038 0.0045 -0.0026 0.0012 -0.0003 0.0004  
Y -0.0123 0.0072 -0.0047 0.0039 0.0000 -0.0001  
Z 0.0134 -0.0125 0.0070 -0.0070 -0.0002 0.0002

AT. 86 O X 0.0038 0.0045 0.0026 0.0012 -0.0003 -0.0004  
Y 0.0123 0.0072 0.0047 0.0039 0.0000 0.0001  
Z -0.0134 -0.0125 -0.0070 -0.0070 -0.0002 -0.0002

AT. 87 N X 0.0258 -0.0238 0.0196 -0.0177 -0.0003 -0.0008  
Y 0.0020 -0.0047 -0.0055 0.0031 0.0009 -0.0002  
Z 0.0089 -0.0106 -0.0004 -0.0007 0.0005 -0.0002

AT. 88 N X -0.0258 -0.0238 -0.0196 -0.0177 -0.0003 0.0008  
Y -0.0020 -0.0047 0.0055 0.0031 0.0009 0.0002  
Z -0.0089 -0.0106 0.0004 -0.0007 0.0005 0.0002

AT. 89 N X -0.0336 0.0270 -0.0028 0.0012 -0.0013 -0.0011  
Y 0.0036 0.0079 -0.0047 0.0047 0.0005 0.0001  
Z 0.0046 0.0070 0.0057 -0.0057 -0.0005 -0.0012

AT. 90 N X 0.0336 0.0270 0.0028 0.0012 -0.0013 0.0011  
Y -0.0036 0.0079 0.0047 0.0047 0.0005 -0.0001  
Z -0.0046 0.0070 -0.0057 -0.0057 -0.0005 0.0012

AT. 91 C X 0.0186 -0.0175 0.0182 -0.0152 -0.0001 -0.0007  
Y 0.0060 -0.0050 -0.0040 0.0028 0.0004 0.0006  
Z 0.0110 -0.0133 -0.0015 0.0001 0.0004 -0.0003

AT. 92 C X -0.0186 -0.0175 -0.0182 -0.0152 -0.0001 0.0007  
Y -0.0060 -0.0050 0.0040 0.0028 0.0004 -0.0006  
Z -0.0110 -0.0133 0.0015 0.0001 0.0004 0.0003

AT. 93 C X 0.0087 -0.0058 -0.0021 0.0039 0.0009 0.0014  
Y 0.0051 -0.0036 -0.0098 0.0094 0.0014 0.0029  
Z -0.0092 0.0088 -0.0322 0.0319 0.0029 0.0054

AT. 94 C X -0.0087 -0.0058 0.0021 0.0039 0.0009 -0.0014  
Y -0.0051 -0.0036 0.0098 0.0094 0.0014 -0.0029  
Z 0.0092 0.0088 0.0322 0.0319 0.0029 -0.0054

AT. 95 H X 0.0136 -0.0160 -0.0149 0.0069 -0.0024 -0.0038  
Y 0.0133 -0.0102 0.0140 -0.0101 0.0015 0.0019  
Z -0.0290 0.0311 -0.0602 0.0613 0.0056 0.0116

AT. 96 H X -0.0136 -0.0160 0.0149 0.0069 -0.0024 0.0038  
Y -0.0133 -0.0102 -0.0140 -0.0101 0.0015 -0.0019

Z 0.0290 0.0311 0.0602 0.0613 0.0056 -0.0116  
AT. 97 H X -0.0064 0.0106 -0.0226 0.0237 0.0019 0.0049  
Y -0.0128 0.0154 -0.0504 0.0476 0.0038 0.0088  
Z -0.0092 0.0087 -0.0357 0.0352 0.0032 0.0059  
AT. 98 H X 0.0064 0.0106 0.0226 0.0237 0.0019 -0.0049  
Y 0.0128 0.0154 0.0504 0.0476 0.0038 -0.0088  
Z 0.0092 0.0087 0.0357 0.0352 0.0032 -0.0059  
AT. 99 C X -0.0179 0.0158 0.0001 -0.0018 -0.0009 -0.0009  
Y -0.0003 0.0020 -0.0073 0.0068 0.0005 0.0009  
Z 0.0006 0.0056 0.0065 -0.0066 -0.0009 -0.0015  
AT. 100 C X 0.0179 0.0158 -0.0001 -0.0018 -0.0009 0.0009  
Y 0.0003 0.0020 0.0073 0.0068 0.0005 -0.0009  
Z -0.0006 0.0056 -0.0065 -0.0066 -0.0009 0.0015  
AT. 101 C X -0.0005 -0.0001 -0.0029 0.0030 0.0002 0.0005  
Y 0.0219 -0.0224 -0.0134 0.0147 0.0025 0.0033  
Z -0.0260 0.0299 0.0104 -0.0128 -0.0028 -0.0034  
AT. 102 C X 0.0005 -0.0001 0.0029 0.0030 0.0002 -0.0005  
Y -0.0219 -0.0224 0.0134 0.0147 0.0025 -0.0033  
Z 0.0260 0.0299 -0.0104 -0.0128 -0.0028 0.0034  
AT. 103 H X 0.0021 -0.0012 -0.0069 0.0065 0.0006 0.0010  
Y 0.0211 -0.0223 -0.0113 0.0130 0.0023 0.0031  
Z -0.0582 0.0609 0.0164 -0.0221 -0.0056 -0.0058  
AT. 104 H X -0.0021 -0.0012 0.0069 0.0065 0.0006 -0.0010  
Y -0.0211 -0.0223 0.0113 0.0130 0.0023 -0.0031  
Z 0.0582 0.0609 -0.0164 -0.0221 -0.0056 0.0058  
AT. 105 H X 0.0164 -0.0132 -0.0026 0.0060 0.0015 0.0010  
Y 0.0508 -0.0521 -0.0215 0.0256 0.0051 0.0060  
Z -0.0115 0.0156 0.0075 -0.0082 -0.0016 -0.0022  
AT. 106 H X -0.0164 -0.0132 0.0026 0.0060 0.0015 -0.0010  
Y -0.0508 -0.0521 0.0215 0.0256 0.0051 -0.0060  
Z 0.0115 0.0156 -0.0075 -0.0082 -0.0016 0.0022  
AT. 107 C X 0.0139 -0.0119 -0.0081 0.0112 0.0013 0.0032



Y 0.0127 -0.0182 0.0251 -0.0259 -0.0010 -0.0034  
Z 0.0034 -0.0036 -0.0299 0.0317 0.0024 0.0048  
AT. 108 C X -0.0139 -0.0119 0.0081 0.0112 0.0013 -0.0032  
Y -0.0127 -0.0182 -0.0251 -0.0259 -0.0010 0.0034  
Z -0.0034 -0.0036 0.0299 0.0317 0.0024 -0.0048  
AT. 109 H X 0.0100 -0.0034 -0.0591 0.0644 0.0051 0.0114  
Y 0.0181 -0.0212 0.0027 -0.0014 0.0005 0.0007  
Z 0.0134 -0.0113 -0.0525 0.0572 0.0039 0.0094  
AT. 110 H X -0.0100 -0.0034 0.0591 0.0644 0.0051 -0.0114  
Y -0.0181 -0.0212 -0.0027 -0.0014 0.0005 -0.0007  
Z -0.0134 -0.0113 0.0525 0.0572 0.0039 -0.0094  
AT. 111 H X 0.0275 -0.0244 0.0027 -0.0009 0.0009 0.0015  
Y 0.0019 -0.0128 0.0765 -0.0810 -0.0050 -0.0127  
Z -0.0084 0.0080 -0.0516 0.0555 0.0036 0.0083  
AT. 112 H X -0.0275 -0.0244 -0.0027 -0.0009 0.0009 -0.0015  
Y -0.0019 -0.0128 -0.0765 -0.0810 -0.0050 0.0127  
Z 0.0084 0.0080 0.0516 0.0555 0.0036 -0.0083  
AT. 113 C X -0.0095 0.0094 0.0005 0.0005 -0.0001 0.0002  
Y 0.0098 -0.0131 0.0138 -0.0133 -0.0005 -0.0014  
Z 0.0006 -0.0026 -0.0144 0.0156 0.0015 0.0023  
AT. 114 C X 0.0095 0.0094 -0.0005 0.0005 -0.0001 -0.0002  
Y -0.0098 -0.0131 -0.0138 -0.0133 -0.0005 0.0014  
Z -0.0006 -0.0026 0.0144 0.0156 0.0015 -0.0023  
AT. 115 C X -0.0276 0.0239 -0.0153 0.0149 0.0001 0.0014  
Y 0.0124 -0.0154 -0.0034 0.0044 0.0007 0.0016  
Z 0.0145 -0.0137 -0.0240 0.0267 0.0025 0.0052  
AT. 116 C X 0.0276 0.0239 0.0153 0.0149 0.0001 -0.0014  
Y -0.0124 -0.0154 0.0034 0.0044 0.0007 -0.0016  
Z -0.0145 -0.0137 0.0240 0.0267 0.0025 -0.0052  
AT. 117 H X -0.0388 0.0425 0.0137 -0.0169 -0.0025 -0.0053  
Y 0.0176 -0.0248 -0.0352 0.0382 0.0026 0.0082  
Z 0.0234 -0.0296 -0.0456 0.0507 0.0045 0.0104

AT. 118 H X 0.0388 0.0425 -0.0137 -0.0169 -0.0025 0.0053  
Y -0.0176 -0.0248 0.0352 0.0382 0.0026 -0.0082  
Z -0.0234 -0.0296 0.0456 0.0507 0.0045 -0.0104

AT. 119 H X -0.0152 -0.0017 -0.0549 0.0583 0.0033 0.0104  
Y 0.0093 -0.0204 -0.0007 0.0015 0.0005 0.0012  
Z 0.0248 -0.0237 -0.0489 0.0540 0.0045 0.0108

AT. 120 H X 0.0152 -0.0017 0.0549 0.0583 0.0033 -0.0104  
Y -0.0093 -0.0204 0.0007 0.0015 0.0005 -0.0012  
Z -0.0248 -0.0237 0.0489 0.0540 0.0045 -0.0108

AT. 121 C X -0.0132 0.0170 -0.0089 0.0069 -0.0001 -0.0002  
Y -0.0186 0.0169 -0.0050 0.0054 -0.0001 0.0008  
Z -0.0168 0.0135 0.0194 -0.0182 -0.0017 -0.0026

AT. 122 C X 0.0132 0.0170 0.0089 0.0069 -0.0001 0.0002  
Y 0.0186 0.0169 0.0050 0.0054 -0.0001 -0.0008  
Z 0.0168 0.0135 -0.0194 -0.0182 -0.0017 0.0026

AT. 123 H X 0.0187 0.0065 -0.0338 0.0292 0.0025 0.0018  
Y -0.0077 0.0112 -0.0261 0.0246 0.0019 0.0029  
Z -0.0228 0.0174 0.0370 -0.0341 -0.0034 -0.0043

AT. 124 H X -0.0187 0.0065 0.0338 0.0292 0.0025 -0.0018  
Y 0.0077 0.0112 0.0261 0.0246 0.0019 -0.0029  
Z 0.0228 0.0174 -0.0370 -0.0341 -0.0034 0.0043

AT. 125 H X -0.0250 0.0237 -0.0123 0.0101 -0.0004 -0.0002  
Y -0.0364 0.0219 0.0299 -0.0260 -0.0027 -0.0019  
Z -0.0396 0.0236 0.0331 -0.0304 -0.0033 -0.0039

AT. 126 H X 0.0250 0.0237 0.0123 0.0101 -0.0004 0.0002  
Y 0.0364 0.0219 -0.0299 -0.0260 -0.0027 0.0019  
Z 0.0396 0.0236 -0.0331 -0.0304 -0.0033 0.0039

AT. 127 C X 0.0003 0.0006 0.0093 -0.0095 -0.0004 -0.0012  
Y -0.0135 0.0119 -0.0068 0.0068 0.0001 0.0009  
Z -0.0082 0.0056 0.0091 -0.0087 -0.0004 -0.0014

AT. 128 C X -0.0003 0.0006 -0.0093 -0.0095 -0.0004 0.0012  
Y 0.0135 0.0119 0.0068 0.0068 0.0001 -0.0009

Z 0.0082 0.0056 -0.0091 -0.0087 -0.0004 0.0014  
AT. 129 C X 0.0292 -0.0255 0.0080 -0.0080 0.0006 0.0001  
Y 0.0049 -0.0076 -0.0264 0.0242 0.0017 0.0030  
Z -0.0076 0.0065 0.0251 -0.0235 -0.0013 -0.0028  
AT. 130 C X -0.0292 -0.0255 -0.0080 -0.0080 0.0006 -0.0001  
Y -0.0049 -0.0076 0.0264 0.0242 0.0017 -0.0030  
Z 0.0076 0.0065 -0.0251 -0.0235 -0.0013 0.0028  
AT. 131 H X 0.0126 -0.0093 0.0303 -0.0276 -0.0010 -0.0021  
Y 0.0408 -0.0440 -0.0587 0.0541 0.0044 0.0070  
Z -0.0150 0.0128 0.0384 -0.0342 -0.0021 -0.0036  
AT. 132 H X -0.0126 -0.0093 -0.0303 -0.0276 -0.0010 0.0021  
Y -0.0408 -0.0440 0.0587 0.0541 0.0044 -0.0070  
Z 0.0150 0.0128 -0.0384 -0.0342 -0.0021 0.0036  
AT. 133 H X 0.0607 -0.0577 -0.0320 0.0288 0.0033 0.0046  
Y 0.0056 -0.0085 -0.0268 0.0254 0.0014 0.0031  
Z -0.0220 0.0209 0.0441 -0.0398 -0.0030 -0.0047  
AT. 134 H X -0.0607 -0.0577 0.0320 0.0288 0.0033 -0.0046  
Y -0.0056 -0.0085 0.0268 0.0254 0.0014 -0.0031  
Z 0.0220 0.0209 -0.0441 -0.0398 -0.0030 0.0047  
AT. 135 C X -0.0129 0.0101 0.0142 -0.0147 -0.0015 -0.0021  
Y 0.0199 -0.0113 0.0084 -0.0070 0.0002 -0.0002  
Z 0.0032 -0.0023 -0.0011 0.0005 -0.0001 -0.0001  
AT. 136 C X 0.0129 0.0101 -0.0142 -0.0147 -0.0015 0.0021  
Y -0.0199 -0.0113 -0.0084 -0.0070 0.0002 0.0002  
Z -0.0032 -0.0023 0.0011 0.0005 -0.0001 0.0001  
AT. 137 H X -0.0234 0.0130 0.0283 -0.0312 -0.0033 -0.0055  
Y 0.0273 -0.0144 0.0121 -0.0108 -0.0003 -0.0011  
Z 0.0193 -0.0085 -0.0002 0.0003 -0.0001 -0.0003  
AT. 138 H X 0.0234 0.0130 -0.0283 -0.0312 -0.0033 0.0055  
Y -0.0273 -0.0144 -0.0121 -0.0108 -0.0003 0.0011  
Z -0.0193 -0.0085 0.0002 0.0003 -0.0001 0.0003  
AT. 139 H X -0.0123 0.0084 0.0040 -0.0034 -0.0004 -0.0008

Y 0.0178 -0.0093 0.0014 0.0012 0.0010 0.0022  
Z 0.0033 -0.0012 0.0139 -0.0162 -0.0017 -0.0025  
AT. 140 H X 0.0123 0.0084 -0.0040 -0.0034 -0.0004 0.0008  
Y -0.0178 -0.0093 -0.0014 0.0012 0.0010 -0.0022  
Z -0.0033 -0.0012 -0.0139 -0.0162 -0.0017 0.0025  
AT. 141 H X -0.0090 0.0109 0.0226 -0.0234 -0.0022 -0.0024  
Y 0.0342 -0.0159 0.0104 -0.0083 0.0002 -0.0003  
Z -0.0102 0.0029 0.0006 -0.0018 -0.0004 0.0000  
AT. 142 H X 0.0090 0.0109 -0.0226 -0.0234 -0.0022 0.0024  
Y -0.0342 -0.0159 -0.0104 -0.0083 0.0002 0.0003  
Z 0.0102 0.0029 -0.0006 -0.0018 -0.0004 -0.0000  
AT. 143 C X 0.0020 -0.0057 0.0161 -0.0157 -0.0006 -0.0021  
Y -0.0252 0.0329 0.0036 -0.0048 -0.0012 -0.0018  
Z -0.0093 0.0103 0.0017 -0.0016 -0.0001 -0.0003  
AT. 144 C X -0.0020 -0.0057 -0.0161 -0.0157 -0.0006 0.0021  
Y 0.0252 0.0329 -0.0036 -0.0048 -0.0012 0.0018  
Z 0.0093 0.0103 -0.0017 -0.0016 -0.0001 0.0003  
AT. 145 H X 0.0115 -0.0075 0.0198 -0.0194 -0.0001 -0.0021  
Y -0.0393 0.0780 0.0040 -0.0077 -0.0012 -0.0024  
Z 0.0077 -0.0377 0.0023 0.0006 0.0000 0.0005  
AT. 146 H X -0.0115 -0.0075 -0.0198 -0.0194 -0.0001 0.0021  
Y 0.0393 0.0780 -0.0040 -0.0077 -0.0012 0.0024  
Z -0.0077 -0.0377 -0.0023 0.0006 0.0000 -0.0005  
AT. 147 H X 0.0004 0.0085 0.0057 -0.0059 0.0002 -0.0003  
Y -0.0193 -0.0122 0.0088 -0.0074 -0.0024 -0.0029  
Z -0.0084 0.0060 -0.0105 0.0111 0.0005 0.0017  
AT. 148 H X -0.0004 0.0085 -0.0057 -0.0059 0.0002 0.0003  
Y 0.0193 -0.0122 -0.0088 -0.0074 -0.0024 0.0029  
Z 0.0084 0.0060 0.0105 0.0111 0.0005 -0.0017  
AT. 149 H X -0.0004 -0.0252 0.0300 -0.0285 -0.0024 -0.0051  
Y -0.0380 0.0604 0.0070 -0.0095 -0.0018 -0.0031  
Z -0.0306 0.0682 0.0006 -0.0034 -0.0003 -0.0010

AT. 150 H X 0.0004 -0.0252 -0.0300 -0.0285 -0.0024 0.0051  
Y 0.0380 0.0604 -0.0070 -0.0095 -0.0018 0.0031  
Z 0.0306 0.0682 -0.0006 -0.0034 -0.0003 0.0010

AT. 151 C X 0.0013 0.0000 -0.0060 0.0057 0.0009 0.0009  
Y -0.0153 0.0107 0.0166 -0.0138 -0.0021 -0.0013  
Z -0.0072 0.0033 -0.0034 0.0057 0.0007 0.0010

AT. 152 C X -0.0013 0.0000 0.0060 0.0057 0.0009 -0.0009  
Y 0.0153 0.0107 -0.0166 -0.0138 -0.0021 0.0013  
Z 0.0072 0.0033 0.0034 0.0057 0.0007 -0.0010

AT. 153 H X -0.0060 0.0090 -0.0305 0.0294 0.0026 0.0039  
Y -0.0290 0.0227 0.0221 -0.0176 -0.0035 -0.0017  
Z -0.0265 0.0191 0.0162 -0.0107 -0.0022 -0.0009

AT. 154 H X 0.0060 0.0090 0.0305 0.0294 0.0026 -0.0039  
Y 0.0290 0.0227 -0.0221 -0.0176 -0.0035 0.0017  
Z 0.0265 0.0191 -0.0162 -0.0107 -0.0022 0.0009

AT. 155 H X 0.0233 -0.0214 -0.0114 0.0110 0.0022 0.0020  
Y -0.0251 0.0174 0.0323 -0.0267 -0.0042 -0.0025  
Z 0.0110 -0.0119 -0.0220 0.0213 0.0034 0.0028

AT. 156 H X -0.0233 -0.0214 0.0114 0.0110 0.0022 -0.0020  
Y 0.0251 0.0174 -0.0323 -0.0267 -0.0042 0.0025  
Z -0.0110 -0.0119 0.0220 0.0213 0.0034 -0.0028

AT. 157 O X -0.0001 0.0004 -0.0001 0.0002 -0.0015 -0.0009  
Y -0.0005 -0.0015 0.0001 -0.0002 0.0000 -0.0006  
Z 0.0013 0.0008 0.0004 0.0001 0.0002 -0.0012

AT. 158 O X 0.0001 0.0004 0.0001 0.0002 -0.0015 0.0009  
Y 0.0005 -0.0015 -0.0001 -0.0002 0.0000 0.0006  
Z -0.0013 0.0008 -0.0004 0.0001 0.0002 0.0012

AT. 159 O X -0.0001 0.0000 -0.0006 -0.0004 0.0007 -0.0019  
Y -0.0002 -0.0011 0.0002 0.0004 -0.0004 0.0017  
Z 0.0013 0.0002 -0.0005 -0.0006 0.0041 -0.0027

AT. 160 O X 0.0001 0.0000 0.0006 -0.0004 0.0007 0.0019  
Y 0.0002 -0.0011 -0.0002 0.0004 -0.0004 -0.0017

Z -0.0013 0.0002 0.0005 -0.0006 0.0041 0.0027  
AT.161 H X -0.0025 0.0011 -0.0012 0.0002 -0.0045 -0.0005  
Y 0.0008 -0.0021 0.0010 -0.0005 0.0027 0.0000  
Z -0.0033 0.0032 -0.0033 0.0012 -0.0085 -0.0020  
AT.162 H X 0.0025 0.0011 0.0012 0.0002 -0.0045 0.0005  
Y -0.0008 -0.0021 -0.0010 -0.0005 0.0027 -0.0000  
Z 0.0033 0.0032 0.0033 0.0012 -0.0085 0.0020  
AT.163 H X 0.0005 0.0002 -0.0010 -0.0011 0.0043 -0.0042  
Y 0.0015 0.0037 -0.0015 -0.0005 -0.0038 0.0040  
Z 0.0014 0.0013 -0.0007 -0.0005 0.0026 -0.0018  
AT.164 H X -0.0005 0.0002 0.0010 -0.0011 0.0043 0.0042  
Y -0.0015 0.0037 0.0015 -0.0005 -0.0038 -0.0040  
Z -0.0014 0.0013 0.0007 -0.0005 0.0026 0.0018  
AT.165 O X -0.0075 0.0062 -0.0051 0.0031 -0.0001 0.0000  
Y -0.0022 0.0023 -0.0010 -0.0007 -0.0002 -0.0009  
Z -0.0009 0.0019 -0.0005 0.0014 0.0001 0.0004  
AT.166 O X 0.0075 0.0062 0.0051 0.0031 -0.0001 -0.0000  
Y 0.0022 0.0023 0.0010 -0.0007 -0.0002 0.0009  
Z 0.0009 0.0019 0.0005 0.0014 0.0001 -0.0004  
AT.167 H X -0.0062 0.0052 -0.0043 0.0006 -0.0003 -0.0009  
Y -0.0094 0.0083 -0.0054 0.0072 0.0007 0.0010  
Z 0.0058 -0.0030 0.0029 -0.0023 -0.0004 0.0002  
AT.168 H X 0.0062 0.0052 0.0043 0.0006 -0.0003 0.0009  
Y 0.0094 0.0083 0.0054 0.0072 0.0007 -0.0010  
Z -0.0058 -0.0030 -0.0029 -0.0023 -0.0004 -0.0002  
AT.169 O X 0.0028 0.0006 0.0015 -0.0008 -0.0003 -0.0001  
Y -0.0054 -0.0018 -0.0019 -0.0006 -0.0003 0.0004  
Z 0.0016 0.0015 0.0011 0.0006 0.0001 0.0000  
AT.170 O X -0.0028 0.0006 -0.0015 -0.0008 -0.0003 0.0001  
Y 0.0054 -0.0018 0.0019 -0.0006 -0.0003 -0.0004  
Z -0.0016 0.0015 -0.0011 0.0006 0.0001 -0.0000  
AT.171 H X -0.0019 -0.0063 0.0056 0.0037 -0.0006 -0.0007

|              |   |         |         |         |         |         |         |
|--------------|---|---------|---------|---------|---------|---------|---------|
|              | Y | -0.0101 | -0.0063 | -0.0012 | 0.0015  | -0.0004 | 0.0004  |
|              | Z | -0.0026 | -0.0002 | -0.0007 | 0.0010  | 0.0004  | 0.0006  |
| AT. 172 H X  |   | 0.0019  | -0.0063 | -0.0056 | 0.0037  | -0.0006 | 0.0007  |
|              | Y | 0.0101  | -0.0063 | 0.0012  | 0.0015  | -0.0004 | -0.0004 |
|              | Z | 0.0026  | -0.0002 | 0.0007  | 0.0010  | 0.0004  | -0.0006 |
|              |   |         |         |         |         |         |         |
| FREQ(CM**-1) |   | 379.05  | 380.66  | 386.44  | 386.59  | 402.53  | 402.53  |
|              |   |         |         |         |         |         |         |
| AT. 1 I X    |   | 0.0000  | -0.0000 | -0.0010 | 0.0008  | 0.0000  | 0.0000  |
|              | Y | 0.0000  | 0.0000  | 0.0000  | -0.0001 | 0.0000  | 0.0000  |
|              | Z | -0.0000 | -0.0000 | -0.0002 | -0.0000 | -0.0000 | -0.0000 |
| AT. 2 I X    |   | -0.0000 | -0.0000 | -0.0010 | -0.0008 | -0.0000 | 0.0000  |
|              | Y | -0.0000 | 0.0000  | 0.0000  | 0.0001  | -0.0000 | 0.0000  |
|              | Z | 0.0000  | -0.0000 | -0.0002 | 0.0000  | 0.0000  | -0.0000 |
| AT. 3 I X    |   | 0.0001  | 0.0001  | -0.0025 | 0.0022  | 0.0001  | 0.0002  |
|              | Y | -0.0001 | -0.0001 | -0.0004 | 0.0003  | 0.0000  | 0.0000  |
|              | Z | -0.0000 | -0.0000 | -0.0006 | 0.0005  | 0.0000  | 0.0000  |
| AT. 4 I X    |   | -0.0001 | 0.0001  | -0.0025 | -0.0022 | -0.0001 | 0.0002  |
|              | Y | 0.0001  | -0.0001 | -0.0004 | -0.0003 | -0.0000 | 0.0000  |
|              | Z | 0.0000  | -0.0000 | -0.0006 | -0.0005 | -0.0000 | 0.0000  |
| AT. 5 O X    |   | 0.0003  | -0.0001 | 0.0067  | -0.0067 | 0.0013  | -0.0003 |
|              | Y | 0.0002  | 0.0011  | -0.0130 | 0.0144  | -0.0013 | -0.0003 |
|              | Z | 0.0001  | -0.0020 | 0.0138  | -0.0141 | -0.0007 | 0.0014  |
| AT. 6 O X    |   | -0.0003 | -0.0001 | 0.0067  | 0.0067  | -0.0013 | -0.0003 |
|              | Y | -0.0002 | 0.0011  | -0.0130 | -0.0144 | 0.0013  | -0.0003 |
|              | Z | -0.0001 | -0.0020 | 0.0138  | 0.0141  | 0.0007  | 0.0014  |
| AT. 7 O X    |   | 0.0001  | -0.0007 | 0.0139  | -0.0136 | 0.0009  | -0.0008 |
|              | Y | -0.0002 | 0.0002  | -0.0036 | 0.0042  | -0.0012 | 0.0008  |
|              | Z | 0.0020  | 0.0025  | -0.0267 | 0.0239  | 0.0031  | 0.0007  |
| AT. 8 O X    |   | -0.0001 | -0.0007 | 0.0139  | 0.0136  | -0.0009 | -0.0008 |
|              | Y | 0.0002  | 0.0002  | -0.0036 | -0.0042 | 0.0012  | 0.0008  |
|              | Z | -0.0020 | 0.0025  | -0.0267 | -0.0239 | -0.0031 | 0.0007  |

AT. 9 N X -0.0017 -0.0021 0.0248 -0.0243 -0.0004 -0.0001  
Y -0.0008 -0.0032 0.0305 -0.0305 -0.0009 0.0001  
Z -0.0004 -0.0009 0.0045 -0.0046 -0.0007 0.0007

AT. 10 N X 0.0017 -0.0021 0.0248 0.0243 0.0004 -0.0001  
Y 0.0008 -0.0032 0.0305 0.0305 0.0009 0.0001  
Z 0.0004 -0.0009 0.0045 0.0046 0.0007 0.0007

AT. 11 N X 0.0005 -0.0013 0.0145 -0.0144 -0.0002 -0.0005  
Y -0.0011 -0.0022 0.0267 -0.0249 -0.0025 -0.0001  
Z 0.0003 -0.0007 0.0127 -0.0129 0.0001 -0.0003

AT. 12 N X -0.0005 -0.0013 0.0145 0.0144 0.0002 -0.0005  
Y 0.0011 -0.0022 0.0267 0.0249 0.0025 -0.0001  
Z -0.0003 -0.0007 0.0127 0.0129 -0.0001 -0.0003

AT. 13 C X -0.0004 -0.0002 0.0082 -0.0080 0.0009 -0.0000  
Y 0.0000 -0.0007 0.0041 -0.0027 -0.0017 0.0003  
Z -0.0005 -0.0009 0.0051 -0.0048 -0.0014 0.0009

AT. 14 C X 0.0004 -0.0002 0.0082 0.0080 -0.0009 -0.0000  
Y -0.0000 -0.0007 0.0041 0.0027 0.0017 0.0003  
Z 0.0005 -0.0009 0.0051 0.0048 0.0014 0.0009

AT. 15 C X 0.0000 -0.0003 0.0035 -0.0040 0.0002 -0.0000  
Y 0.0003 0.0001 -0.0028 0.0040 -0.0006 0.0004  
Z -0.0010 0.0005 0.0050 -0.0042 0.0019 0.0004

AT. 16 C X -0.0000 -0.0003 0.0035 0.0040 -0.0002 -0.0000  
Y -0.0003 0.0001 -0.0028 -0.0040 0.0006 0.0004  
Z 0.0010 0.0005 0.0050 0.0042 -0.0019 0.0004

AT. 17 H X 0.0002 -0.0003 0.0004 -0.0019 0.0006 -0.0002  
Y 0.0006 -0.0005 -0.0078 0.0085 -0.0035 0.0009  
Z -0.0013 0.0013 0.0107 -0.0096 0.0059 -0.0002

AT. 18 H X -0.0002 -0.0003 0.0004 0.0019 -0.0006 -0.0002  
Y -0.0006 -0.0005 -0.0078 -0.0085 0.0035 0.0009  
Z 0.0013 0.0013 0.0107 0.0096 -0.0059 -0.0002

AT. 19 H X 0.0000 -0.0006 0.0005 -0.0018 -0.0009 0.0004  
Y -0.0004 0.0013 0.0047 -0.0033 0.0042 -0.0001



Z -0.0012 0.0008 0.0066 -0.0061 0.0035 0.0003  
AT. 20 H X -0.0000 -0.0006 0.0005 0.0018 0.0009 0.0004  
Y 0.0004 0.0013 0.0047 0.0033 -0.0042 -0.0001  
Z 0.0012 0.0008 0.0066 0.0061 -0.0035 0.0003  
AT. 21 C X 0.0003 -0.0006 0.0121 -0.0117 0.0005 -0.0010  
Y -0.0006 -0.0008 0.0053 -0.0042 -0.0023 0.0001  
Z 0.0009 0.0004 -0.0014 0.0006 0.0006 0.0000  
AT. 22 C X -0.0003 -0.0006 0.0121 0.0117 -0.0005 -0.0010  
Y 0.0006 -0.0008 0.0053 0.0042 0.0023 0.0001  
Z -0.0009 0.0004 -0.0014 -0.0006 -0.0006 0.0000  
AT. 23 C X -0.0000 -0.0006 0.0094 -0.0087 -0.0001 -0.0007  
Y 0.0001 0.0000 0.0091 -0.0072 -0.0004 -0.0008  
Z 0.0005 0.0003 -0.0072 0.0067 -0.0008 0.0007  
AT. 24 C X 0.0000 -0.0006 0.0094 0.0087 0.0001 -0.0007  
Y -0.0001 0.0000 0.0091 0.0072 0.0004 -0.0008  
Z -0.0005 0.0003 -0.0072 -0.0067 0.0008 0.0007  
AT. 25 H X -0.0005 -0.0008 0.0040 -0.0046 0.0006 -0.0004  
Y 0.0002 -0.0000 0.0113 -0.0094 0.0000 -0.0009  
Z -0.0003 0.0004 -0.0311 0.0287 -0.0033 0.0024  
AT. 26 H X 0.0005 -0.0008 0.0040 0.0046 -0.0006 -0.0004  
Y -0.0002 -0.0000 0.0113 0.0094 -0.0000 -0.0009  
Z 0.0003 0.0004 -0.0311 -0.0287 0.0033 0.0024  
AT. 27 H X -0.0006 -0.0006 0.0039 -0.0028 -0.0009 -0.0002  
Y 0.0007 0.0001 0.0291 -0.0261 0.0021 -0.0023  
Z 0.0010 0.0003 0.0039 -0.0037 0.0006 -0.0001  
AT. 28 H X 0.0006 -0.0006 0.0039 0.0028 0.0009 -0.0002  
Y -0.0007 0.0001 0.0291 0.0261 -0.0021 -0.0023  
Z -0.0010 0.0003 0.0039 0.0037 -0.0006 -0.0001  
AT. 29 C X -0.0002 -0.0012 0.0104 -0.0119 0.0015 0.0005  
Y 0.0009 -0.0008 0.0032 -0.0054 0.0020 -0.0002  
Z -0.0009 0.0012 -0.0131 0.0146 -0.0009 -0.0006  
AT. 30 C X 0.0002 -0.0012 0.0104 0.0119 -0.0015 0.0005

Y -0.0009 -0.0008 0.0032 0.0054 -0.0020 -0.0002  
Z 0.0009 0.0012 -0.0131 -0.0146 0.0009 -0.0006  
AT. 31 H X 0.0011 -0.0011 0.0045 -0.0088 0.0041 0.0009  
Y 0.0000 0.0009 -0.0159 0.0163 -0.0004 -0.0001  
Z -0.0014 0.0038 -0.0451 0.0488 -0.0029 -0.0003  
AT. 32 H X -0.0011 -0.0011 0.0045 0.0088 -0.0041 0.0009  
Y -0.0000 0.0009 -0.0159 -0.0163 0.0004 -0.0001  
Z 0.0014 0.0038 -0.0451 -0.0488 0.0029 -0.0003  
AT. 33 H X 0.0000 -0.0013 0.0191 -0.0213 0.0030 -0.0007  
Y 0.0027 -0.0030 0.0334 -0.0393 0.0054 -0.0003  
Z -0.0015 0.0020 -0.0197 0.0222 -0.0013 -0.0011  
AT. 34 H X -0.0000 -0.0013 0.0191 0.0213 -0.0030 -0.0007  
Y -0.0027 -0.0030 0.0334 0.0393 -0.0054 -0.0003  
Z 0.0015 0.0020 -0.0197 -0.0222 0.0013 -0.0011  
AT. 35 C X -0.0001 -0.0001 -0.0097 0.0093 -0.0008 0.0010  
Y 0.0007 0.0004 -0.0075 0.0058 0.0023 -0.0003  
Z -0.0005 0.0001 0.0026 -0.0022 0.0002 -0.0011  
AT. 36 C X 0.0001 -0.0001 -0.0097 -0.0093 0.0008 0.0010  
Y -0.0007 0.0004 -0.0075 -0.0058 -0.0023 -0.0003  
Z 0.0005 0.0001 0.0026 0.0022 -0.0002 -0.0011  
AT. 37 C X 0.0010 0.0003 -0.0105 0.0094 0.0007 0.0005  
Y -0.0004 0.0014 -0.0196 0.0206 -0.0005 0.0006  
Z -0.0004 0.0023 -0.0219 0.0241 -0.0007 -0.0002  
AT. 38 C X -0.0010 0.0003 -0.0105 -0.0094 -0.0007 0.0005  
Y 0.0004 0.0014 -0.0196 -0.0206 0.0005 0.0006  
Z 0.0004 0.0023 -0.0219 -0.0241 0.0007 -0.0002  
AT. 39 H X 0.0006 0.0056 -0.0722 0.0752 -0.0013 0.0018  
Y -0.0006 0.0043 -0.0514 0.0549 -0.0025 0.0021  
Z -0.0006 0.0048 -0.0511 0.0550 -0.0013 0.0002  
AT. 40 H X -0.0006 0.0056 -0.0722 -0.0752 0.0013 0.0018  
Y 0.0006 0.0043 -0.0514 -0.0549 0.0025 0.0021  
Z 0.0006 0.0048 -0.0511 -0.0550 0.0013 0.0002

AT. 41 H X 0.0012 -0.0052 0.0510 -0.0558 0.0026 -0.0009  
Y -0.0004 0.0037 -0.0504 0.0515 0.0000 0.0013  
Z -0.0006 0.0061 -0.0611 0.0670 -0.0029 0.0006

AT. 42 H X -0.0012 -0.0052 0.0510 0.0558 -0.0026 -0.0009  
Y 0.0004 0.0037 -0.0504 -0.0515 -0.0000 0.0013  
Z 0.0006 0.0061 -0.0611 -0.0670 0.0029 0.0006

AT. 43 C X 0.0005 0.0010 -0.0134 0.0132 0.0012 -0.0003  
Y -0.0007 0.0007 0.0003 0.0001 0.0005 0.0001  
Z 0.0003 -0.0000 0.0029 -0.0031 0.0006 -0.0005

AT. 44 C X -0.0005 0.0010 -0.0134 -0.0132 -0.0012 -0.0003  
Y 0.0007 0.0007 0.0003 -0.0001 -0.0005 0.0001  
Z -0.0003 -0.0000 0.0029 0.0031 -0.0006 -0.0005

AT. 45 H X 0.0014 0.0039 -0.0425 0.0414 0.0043 -0.0007  
Y -0.0019 -0.0012 0.0180 -0.0165 -0.0031 0.0010  
Z 0.0008 -0.0001 0.0056 -0.0062 0.0019 -0.0011

AT. 46 H X -0.0014 0.0039 -0.0425 -0.0414 -0.0043 -0.0007  
Y 0.0019 -0.0012 0.0180 0.0165 0.0031 0.0010  
Z -0.0008 -0.0001 0.0056 0.0062 -0.0019 -0.0011

AT. 47 H X 0.0015 0.0018 -0.0195 0.0176 0.0045 -0.0008  
Y 0.0006 0.0028 -0.0210 0.0196 0.0052 -0.0008  
Z 0.0003 0.0012 -0.0125 0.0128 0.0011 -0.0007

AT. 48 H X -0.0015 0.0018 -0.0195 -0.0176 -0.0045 -0.0008  
Y -0.0006 0.0028 -0.0210 -0.0196 -0.0052 -0.0008  
Z -0.0003 0.0012 -0.0125 -0.0128 -0.0011 -0.0007

AT. 49 C X -0.0006 0.0006 -0.0119 0.0136 -0.0027 0.0008  
Y -0.0003 0.0007 -0.0034 0.0027 0.0017 0.0001  
Z -0.0002 -0.0012 0.0128 -0.0125 -0.0008 -0.0004

AT. 50 C X 0.0006 0.0006 -0.0119 -0.0136 0.0027 0.0008  
Y 0.0003 0.0007 -0.0034 -0.0027 -0.0017 0.0001  
Z 0.0002 -0.0012 0.0128 0.0125 0.0008 -0.0004

AT. 51 C X -0.0012 -0.0001 0.0019 -0.0004 -0.0017 0.0002  
Y -0.0009 0.0005 -0.0116 0.0117 -0.0002 0.0013

Z 0.0004 -0.0012 0.0116 -0.0116 -0.0009 -0.0003  
AT. 52 C X 0.0012 -0.0001 0.0019 0.0004 0.0017 0.0002  
Y 0.0009 0.0005 -0.0116 -0.0117 0.0002 0.0013  
Z -0.0004 -0.0012 0.0116 0.0116 0.0009 -0.0003  
AT. 53 H X -0.0019 0.0007 -0.0166 0.0182 -0.0029 0.0018  
Y -0.0015 0.0015 -0.0340 0.0349 -0.0026 0.0029  
Z 0.0009 -0.0015 0.0173 -0.0166 -0.0014 -0.0012  
AT. 54 H X 0.0019 0.0007 -0.0166 -0.0182 0.0029 0.0018  
Y 0.0015 0.0015 -0.0340 -0.0349 0.0026 0.0029  
Z -0.0009 -0.0015 0.0173 0.0166 0.0014 -0.0012  
AT. 55 H X 0.0000 -0.0015 0.0290 -0.0279 -0.0001 -0.0020  
Y -0.0012 0.0022 -0.0344 0.0345 -0.0005 0.0024  
Z 0.0010 -0.0002 0.0023 -0.0026 -0.0002 -0.0006  
AT. 56 H X -0.0000 -0.0015 0.0290 0.0279 0.0001 -0.0020  
Y 0.0012 0.0022 -0.0344 -0.0345 0.0005 0.0024  
Z -0.0010 -0.0002 0.0023 0.0026 0.0002 -0.0006  
AT. 57 C X -0.0002 -0.0003 -0.0001 0.0013 -0.0010 -0.0001  
Y 0.0009 0.0000 0.0012 -0.0018 0.0009 -0.0007  
Z -0.0004 -0.0002 -0.0043 0.0044 -0.0026 0.0008  
AT. 58 C X 0.0002 -0.0003 -0.0001 -0.0013 0.0010 -0.0001  
Y -0.0009 0.0000 0.0012 0.0018 -0.0009 -0.0007  
Z 0.0004 -0.0002 -0.0043 -0.0044 0.0026 0.0008  
AT. 59 H X 0.0006 0.0002 0.0111 -0.0087 -0.0002 -0.0017  
Y 0.0015 0.0001 0.0010 -0.0001 -0.0001 0.0007  
Z 0.0011 0.0004 0.0035 -0.0002 -0.0036 0.0016  
AT. 60 H X -0.0006 0.0002 0.0111 0.0087 0.0002 -0.0017  
Y -0.0015 0.0001 0.0010 0.0001 0.0001 0.0007  
Z -0.0011 0.0004 0.0035 0.0002 0.0036 0.0016  
AT. 61 H X -0.0004 -0.0005 -0.0081 0.0077 -0.0034 0.0005  
Y 0.0004 0.0001 0.0008 -0.0033 0.0023 -0.0025  
Z -0.0003 -0.0004 -0.0105 0.0104 -0.0051 0.0023  
AT. 62 H X 0.0004 -0.0005 -0.0081 -0.0077 0.0034 0.0005

Y -0.0004 0.0001 0.0008 0.0033 -0.0023 -0.0025  
Z 0.0003 -0.0004 -0.0105 -0.0104 0.0051 0.0023  
AT. 63 H X 0.0003 0.0003 0.0050 -0.0029 0.0012 -0.0004  
Y 0.0017 -0.0001 0.0079 -0.0067 -0.0009 -0.0004  
Z -0.0015 -0.0006 -0.0149 0.0127 -0.0030 0.0009  
AT. 64 H X -0.0003 0.0003 0.0050 0.0029 -0.0012 -0.0004  
Y -0.0017 -0.0001 0.0079 0.0067 0.0009 -0.0004  
Z 0.0015 -0.0006 -0.0149 -0.0127 0.0030 0.0009  
AT. 65 C X -0.0001 0.0008 -0.0090 0.0093 -0.0004 -0.0001  
Y 0.0001 -0.0010 0.0120 -0.0127 0.0002 -0.0004  
Z 0.0001 -0.0004 0.0126 -0.0141 0.0026 -0.0012  
AT. 66 C X 0.0001 0.0008 -0.0090 -0.0093 0.0004 -0.0001  
Y -0.0001 -0.0010 0.0120 0.0127 -0.0002 -0.0004  
Z -0.0001 -0.0004 0.0126 0.0141 -0.0026 -0.0012  
AT. 67 H X 0.0008 0.0012 -0.0043 0.0038 0.0023 -0.0013  
Y -0.0005 -0.0018 0.0195 -0.0233 -0.0020 -0.0004  
Z -0.0000 0.0000 0.0017 0.0002 0.0024 -0.0001  
AT. 68 H X -0.0008 0.0012 -0.0043 -0.0038 -0.0023 -0.0013  
Y 0.0005 -0.0018 0.0195 0.0233 0.0020 -0.0004  
Z 0.0000 0.0000 0.0017 -0.0002 -0.0024 -0.0001  
AT. 69 H X 0.0002 0.0001 -0.0087 0.0121 -0.0017 0.0003  
Y 0.0009 -0.0008 0.0094 -0.0069 0.0015 -0.0006  
Z 0.0007 0.0013 0.0080 -0.0109 0.0071 -0.0023  
AT. 70 H X -0.0002 0.0001 -0.0087 -0.0121 0.0017 0.0003  
Y -0.0009 -0.0008 0.0094 0.0069 -0.0015 -0.0006  
Z -0.0007 0.0013 0.0080 0.0109 -0.0071 -0.0023  
AT. 71 H X -0.0003 0.0018 -0.0094 0.0056 0.0015 -0.0009  
Y 0.0003 -0.0021 0.0213 -0.0219 -0.0011 -0.0005  
Z 0.0001 -0.0011 0.0251 -0.0298 0.0023 -0.0020  
AT. 72 H X 0.0003 0.0018 -0.0094 -0.0056 -0.0015 -0.0009  
Y -0.0003 -0.0021 0.0213 0.0219 0.0011 -0.0005  
Z -0.0001 -0.0011 0.0251 0.0298 -0.0023 -0.0020

AT. 73 C X 0.0006 0.0014 -0.0219 0.0222 -0.0017 0.0007  
Y 0.0015 0.0027 -0.0248 0.0226 0.0032 -0.0006  
Z -0.0004 -0.0003 0.0057 -0.0046 -0.0007 -0.0012

AT. 74 C X -0.0006 0.0014 -0.0219 -0.0222 0.0017 0.0007  
Y -0.0015 0.0027 -0.0248 -0.0226 -0.0032 -0.0006  
Z 0.0004 -0.0003 0.0057 0.0046 0.0007 -0.0012

AT. 75 H X 0.0025 0.0027 -0.0380 0.0367 -0.0003 0.0003  
Y 0.0020 0.0045 -0.0384 0.0370 0.0035 -0.0009  
Z 0.0017 0.0031 -0.0245 0.0253 0.0006 -0.0020

AT. 76 H X -0.0025 0.0027 -0.0380 -0.0367 0.0003 0.0003  
Y -0.0020 0.0045 -0.0384 -0.0370 -0.0035 -0.0009  
Z -0.0017 0.0031 -0.0245 -0.0253 -0.0006 -0.0020

AT. 77 H X 0.0010 0.0021 -0.0251 0.0264 -0.0024 0.0007  
Y 0.0036 0.0054 -0.0505 0.0469 0.0049 -0.0015  
Z -0.0026 -0.0034 0.0319 -0.0304 -0.0016 -0.0005

AT. 78 H X -0.0010 0.0021 -0.0251 -0.0264 0.0024 0.0007  
Y -0.0036 0.0054 -0.0505 -0.0469 -0.0049 -0.0015  
Z 0.0026 -0.0034 0.0319 0.0304 0.0016 -0.0005

AT. 79 I X -0.0011 -0.0010 -0.0003 -0.0005 -0.0004 -0.0011  
Y 0.0007 0.0012 0.0001 0.0000 0.0003 0.0009  
Z 0.0003 0.0004 0.0001 -0.0001 0.0002 0.0005

AT. 80 I X 0.0011 -0.0010 -0.0003 0.0005 0.0004 -0.0011  
Y -0.0007 0.0012 0.0001 -0.0000 -0.0003 0.0009  
Z -0.0003 0.0004 0.0001 0.0001 -0.0002 0.0005

AT. 81 I X -0.0013 -0.0016 -0.0001 -0.0000 0.0016 0.0015  
Y 0.0006 0.0008 -0.0000 0.0000 -0.0009 -0.0007  
Z 0.0003 0.0004 0.0001 -0.0000 -0.0004 -0.0001

AT. 82 I X 0.0013 -0.0016 -0.0001 0.0000 -0.0016 0.0015  
Y -0.0006 0.0008 -0.0000 -0.0000 0.0009 -0.0007  
Z -0.0003 0.0004 0.0001 0.0000 0.0004 -0.0001

AT. 83 O X 0.0113 0.0092 0.0018 -0.0005 0.0065 0.0067  
Y 0.0115 0.0107 0.0007 -0.0005 0.0035 0.0027

Z -0.0206 -0.0192 -0.0016 0.0000 -0.0240 -0.0240  
AT. 84 O X -0.0113 0.0092 0.0018 0.0005 -0.0065 0.0067  
Y -0.0115 0.0107 0.0007 0.0005 -0.0035 0.0027  
Z 0.0206 -0.0192 -0.0016 -0.0000 0.0240 -0.0240  
AT. 85 O X 0.0131 0.0131 0.0021 -0.0010 -0.0133 -0.0128  
Y -0.0093 -0.0090 -0.0011 0.0010 0.0089 0.0090  
Z 0.0241 0.0246 0.0013 -0.0005 -0.0209 -0.0197  
AT. 86 O X -0.0131 0.0131 0.0021 0.0010 0.0133 -0.0128  
Y 0.0093 -0.0090 -0.0011 -0.0010 -0.0089 0.0090  
Z -0.0241 0.0246 0.0013 0.0005 0.0209 -0.0197  
AT. 87 N X 0.0140 0.0128 0.0015 -0.0006 0.0029 0.0051  
Y -0.0435 -0.0440 -0.0036 0.0002 -0.0014 -0.0069  
Z -0.0076 -0.0079 -0.0004 -0.0000 -0.0118 -0.0110  
AT. 88 N X -0.0140 0.0128 0.0015 0.0006 -0.0029 0.0051  
Y 0.0435 -0.0440 -0.0036 -0.0002 0.0014 -0.0069  
Z 0.0076 -0.0079 -0.0004 0.0000 0.0118 -0.0110  
AT. 89 N X 0.0037 0.0059 0.0002 0.0005 -0.0093 -0.0092  
Y -0.0259 -0.0263 -0.0016 0.0003 0.0156 0.0150  
Z -0.0082 -0.0068 -0.0005 -0.0002 -0.0016 -0.0004  
AT. 90 N X -0.0037 0.0059 0.0002 -0.0005 0.0093 -0.0092  
Y 0.0259 -0.0263 -0.0016 -0.0003 -0.0156 0.0150  
Z 0.0082 -0.0068 -0.0005 0.0002 0.0016 -0.0004  
AT. 91 C X 0.0080 0.0069 0.0013 -0.0007 0.0024 0.0027  
Y -0.0114 -0.0119 -0.0009 0.0004 0.0000 -0.0019  
Z -0.0085 -0.0089 -0.0007 0.0001 -0.0161 -0.0163  
AT. 92 C X -0.0080 0.0069 0.0013 0.0007 -0.0024 0.0027  
Y 0.0114 -0.0119 -0.0009 -0.0004 -0.0000 -0.0019  
Z 0.0085 -0.0089 -0.0007 -0.0001 0.0161 -0.0163  
AT. 93 C X 0.0043 0.0031 0.0002 -0.0005 -0.0017 -0.0026  
Y -0.0033 -0.0054 -0.0005 0.0007 -0.0025 -0.0050  
Z -0.0094 -0.0118 -0.0023 0.0001 -0.0231 -0.0287  
AT. 94 C X -0.0043 0.0031 0.0002 0.0005 0.0017 -0.0026

Y 0.0033 -0.0054 -0.0005 -0.0007 0.0025 -0.0050  
Z 0.0094 -0.0118 -0.0023 -0.0001 0.0231 -0.0287  
AT. 95 H X -0.0061 -0.0026 -0.0009 0.0008 -0.0160 -0.0094  
Y 0.0059 0.0032 0.0016 -0.0001 0.0096 0.0080  
Z -0.0154 -0.0208 -0.0048 0.0002 -0.0296 -0.0430  
AT. 96 H X 0.0061 -0.0026 -0.0009 -0.0008 0.0160 -0.0094  
Y -0.0059 0.0032 0.0016 0.0001 -0.0096 0.0080  
Z 0.0154 -0.0208 -0.0048 -0.0002 0.0296 -0.0430  
AT. 97 H X -0.0011 -0.0032 -0.0016 -0.0005 -0.0037 -0.0093  
Y -0.0136 -0.0174 -0.0038 0.0010 -0.0215 -0.0307  
Z -0.0101 -0.0127 -0.0025 0.0001 -0.0269 -0.0329  
AT. 98 H X 0.0011 -0.0032 -0.0016 0.0005 0.0037 -0.0093  
Y 0.0136 -0.0174 -0.0038 -0.0010 0.0215 -0.0307  
Z 0.0101 -0.0127 -0.0025 -0.0001 0.0269 -0.0329  
AT. 99 C X 0.0063 0.0077 0.0011 -0.0003 -0.0101 -0.0090  
Y -0.0102 -0.0115 -0.0008 0.0005 0.0109 0.0098  
Z 0.0041 0.0055 0.0004 -0.0002 -0.0104 -0.0096  
AT. 100 C X -0.0063 0.0077 0.0011 0.0003 0.0101 -0.0090  
Y 0.0102 -0.0115 -0.0008 -0.0005 -0.0109 0.0098  
Z -0.0041 0.0055 0.0004 0.0002 0.0104 -0.0096  
AT. 101 C X 0.0040 0.0039 0.0012 -0.0008 -0.0029 -0.0025  
Y -0.0072 -0.0107 0.0005 -0.0008 0.0190 0.0177  
Z 0.0089 0.0119 0.0003 0.0004 -0.0225 -0.0224  
AT. 102 C X -0.0040 0.0039 0.0012 0.0008 0.0029 -0.0025  
Y 0.0072 -0.0107 0.0005 0.0008 -0.0190 0.0177  
Z -0.0089 0.0119 0.0003 -0.0004 0.0225 -0.0224  
AT. 103 H X 0.0013 0.0007 0.0012 -0.0007 0.0010 0.0010  
Y -0.0064 -0.0099 0.0005 -0.0008 0.0177 0.0163  
Z 0.0224 0.0272 0.0005 0.0014 -0.0428 -0.0421  
AT. 104 H X -0.0013 0.0007 0.0012 0.0007 -0.0010 0.0010  
Y 0.0064 -0.0099 0.0005 0.0008 -0.0177 0.0163  
Z -0.0224 0.0272 0.0005 -0.0014 0.0428 -0.0421



AT.105 H X -0.0014 -0.0012 0.0011 -0.0012 0.0040 0.0052  
Y -0.0178 -0.0231 0.0000 -0.0013 0.0396 0.0370  
Z 0.0039 0.0059 0.0001 0.0001 -0.0129 -0.0135

AT.106 H X 0.0014 -0.0012 0.0011 0.0012 -0.0040 0.0052  
Y 0.0178 -0.0231 0.0000 0.0013 -0.0396 0.0370  
Z -0.0039 0.0059 0.0001 -0.0001 0.0129 -0.0135

AT.107 C X 0.0105 0.0075 0.0008 -0.0004 0.0230 0.0213  
Y -0.0083 -0.0082 -0.0009 -0.0002 -0.0055 -0.0041  
Z 0.0094 0.0066 0.0009 -0.0002 0.0189 0.0180

AT.108 C X -0.0105 0.0075 0.0008 0.0004 -0.0230 0.0213  
Y 0.0083 -0.0082 -0.0009 0.0002 0.0055 -0.0041  
Z -0.0094 0.0066 0.0009 0.0002 -0.0189 0.0180

AT.109 H X 0.0095 0.0026 0.0009 -0.0006 0.0606 0.0520  
Y 0.0084 0.0060 0.0006 -0.0006 0.0118 0.0114  
Z 0.0377 0.0317 0.0033 -0.0009 0.0379 0.0358

AT.110 H X -0.0095 0.0026 0.0009 0.0006 -0.0606 0.0520  
Y -0.0084 0.0060 0.0006 0.0006 -0.0118 0.0114  
Z -0.0377 0.0317 0.0033 0.0009 -0.0379 0.0358

AT.111 H X 0.0078 0.0054 0.0008 -0.0006 0.0066 0.0062  
Y -0.0308 -0.0254 -0.0033 0.0008 -0.0428 -0.0362  
Z 0.0163 0.0118 0.0014 -0.0003 0.0442 0.0407

AT.112 H X -0.0078 0.0054 0.0008 0.0006 -0.0066 0.0062  
Y 0.0308 -0.0254 -0.0033 -0.0008 0.0428 -0.0362  
Z -0.0163 0.0118 0.0014 0.0003 -0.0442 0.0407

AT.113 C X -0.0033 -0.0036 -0.0008 0.0004 0.0139 0.0134  
Y 0.0090 0.0083 0.0006 -0.0004 0.0029 0.0045  
Z -0.0027 -0.0042 0.0000 0.0000 0.0155 0.0154

AT.114 C X 0.0033 -0.0036 -0.0008 -0.0004 -0.0139 0.0134  
Y -0.0090 0.0083 0.0006 0.0004 -0.0029 0.0045  
Z 0.0027 -0.0042 0.0000 -0.0000 -0.0155 0.0154

AT.115 C X -0.0004 0.0005 -0.0003 0.0007 0.0045 0.0032  
Y 0.0175 0.0159 0.0016 -0.0005 0.0065 0.0072

Z 0.0201 0.0178 0.0020 -0.0005 0.0147 0.0142  
AT. 116 C X 0.0004 0.0005 -0.0003 -0.0007 -0.0045 0.0032  
Y -0.0175 0.0159 0.0016 0.0005 -0.0065 0.0072  
Z -0.0201 0.0178 0.0020 0.0005 -0.0147 0.0142  
AT. 117 H X -0.0391 -0.0351 -0.0036 0.0011 -0.0075 -0.0073  
Y 0.0628 0.0597 0.0058 -0.0012 0.0048 0.0042  
Z 0.0500 0.0448 0.0045 -0.0007 0.0267 0.0248  
AT. 118 H X 0.0391 -0.0351 -0.0036 -0.0011 0.0075 -0.0073  
Y -0.0628 0.0597 0.0058 0.0012 -0.0048 0.0042  
Z -0.0500 0.0448 0.0045 0.0007 -0.0267 0.0248  
AT. 119 H X 0.0610 0.0579 0.0052 -0.0001 0.0144 0.0112  
Y 0.0249 0.0232 0.0023 -0.0008 0.0033 0.0046  
Z 0.0477 0.0433 0.0044 -0.0008 0.0238 0.0216  
AT. 120 H X -0.0610 0.0579 0.0052 0.0001 -0.0144 0.0112  
Y -0.0249 0.0232 0.0023 0.0008 -0.0033 0.0046  
Z -0.0477 0.0433 0.0044 0.0008 -0.0238 0.0216  
AT. 121 C X -0.0112 -0.0093 -0.0008 0.0002 -0.0148 -0.0149  
Y 0.0074 0.0082 -0.0002 0.0006 -0.0060 -0.0065  
Z 0.0034 0.0047 0.0004 0.0000 0.0137 0.0154  
AT. 122 C X 0.0112 -0.0093 -0.0008 -0.0002 0.0148 -0.0149  
Y -0.0074 0.0082 -0.0002 -0.0006 0.0060 -0.0065  
Z -0.0034 0.0047 0.0004 -0.0000 -0.0137 0.0154  
AT. 123 H X -0.0470 -0.0451 -0.0027 -0.0000 -0.0316 -0.0320  
Y -0.0044 -0.0035 -0.0004 0.0004 -0.0271 -0.0276  
Z 0.0100 0.0110 0.0003 0.0001 0.0330 0.0343  
AT. 124 H X 0.0470 -0.0451 -0.0027 0.0000 0.0316 -0.0320  
Y 0.0044 -0.0035 -0.0004 -0.0004 0.0271 -0.0276  
Z -0.0100 0.0110 0.0003 -0.0001 -0.0330 0.0343  
AT. 125 H X -0.0106 -0.0086 -0.0004 0.0004 -0.0082 -0.0084  
Y 0.0351 0.0355 0.0008 0.0005 0.0183 0.0177  
Z 0.0197 0.0207 0.0015 0.0001 0.0337 0.0352  
AT. 126 H X 0.0106 -0.0086 -0.0004 -0.0004 0.0082 -0.0084

Y -0.0351 0.0355 0.0008 -0.0005 -0.0183 0.0177  
Z -0.0197 0.0207 0.0015 -0.0001 -0.0337 0.0352  
AT. 127 C X -0.0087 -0.0083 -0.0013 -0.0000 -0.0026 -0.0025  
Y 0.0092 0.0098 0.0001 0.0005 -0.0152 -0.0154  
Z -0.0089 -0.0084 -0.0001 0.0000 0.0100 0.0117  
AT. 128 C X 0.0087 -0.0083 -0.0013 0.0000 0.0026 -0.0025  
Y -0.0092 0.0098 0.0001 -0.0005 0.0152 -0.0154  
Z 0.0089 -0.0084 -0.0001 -0.0000 -0.0100 0.0117  
AT. 129 C X 0.0023 0.0010 0.0003 -0.0008 -0.0071 -0.0057  
Y 0.0059 0.0059 0.0003 0.0001 -0.0330 -0.0335  
Z -0.0086 -0.0084 -0.0003 0.0002 0.0171 0.0185  
AT. 130 C X -0.0023 0.0010 0.0003 0.0008 0.0071 -0.0057  
Y -0.0059 0.0059 0.0003 -0.0001 0.0330 -0.0335  
Z 0.0086 -0.0084 -0.0003 -0.0002 -0.0171 0.0185  
AT. 131 H X -0.0061 -0.0075 -0.0007 -0.0004 0.0233 0.0227  
Y 0.0252 0.0239 0.0030 -0.0010 -0.0685 -0.0661  
Z -0.0113 -0.0119 -0.0006 0.0003 0.0413 0.0409  
AT. 132 H X 0.0061 -0.0075 -0.0007 0.0004 -0.0233 0.0227  
Y -0.0252 0.0239 0.0030 0.0010 0.0685 -0.0661  
Z 0.0113 -0.0119 -0.0006 -0.0003 -0.0413 0.0409  
AT. 133 H X 0.0296 0.0279 0.0032 -0.0017 -0.0595 -0.0546  
Y 0.0209 0.0208 0.0014 0.0001 -0.0407 -0.0401  
Z 0.0008 0.0012 -0.0001 0.0007 0.0314 0.0326  
AT. 134 H X -0.0296 0.0279 0.0032 0.0017 0.0595 -0.0546  
Y -0.0209 0.0208 0.0014 -0.0001 0.0407 -0.0401  
Z -0.0008 0.0012 -0.0001 -0.0007 -0.0314 0.0326  
AT. 135 C X 0.0014 0.0022 -0.0003 0.0003 0.0028 0.0032  
Y 0.0021 0.0021 0.0002 -0.0002 0.0044 0.0045  
Z 0.0005 0.0007 0.0008 -0.0001 -0.0025 -0.0021  
AT. 136 C X -0.0014 0.0022 -0.0003 -0.0003 -0.0028 0.0032  
Y -0.0021 0.0021 0.0002 0.0002 -0.0044 0.0045  
Z -0.0005 0.0007 0.0008 0.0001 0.0025 -0.0021

AT.137 H X 0.0045 0.0063 0.0004 0.0002 -0.0096 -0.0077  
Y -0.0022 -0.0016 -0.0003 0.0002 0.0035 0.0036  
Z -0.0077 -0.0068 -0.0003 0.0006 0.0008 0.0006

AT.138 H X -0.0045 0.0063 0.0004 -0.0002 0.0096 -0.0077  
Y 0.0022 -0.0016 -0.0003 -0.0002 -0.0035 0.0036  
Z 0.0077 -0.0068 -0.0003 -0.0006 -0.0008 0.0006

AT.139 H X -0.0037 -0.0040 -0.0011 0.0004 0.0133 0.0134  
Y 0.0088 0.0080 0.0009 -0.0007 0.0076 0.0068  
Z 0.0052 0.0069 0.0018 -0.0002 -0.0170 -0.0159

AT.140 H X 0.0037 -0.0040 -0.0011 -0.0004 -0.0133 0.0134  
Y -0.0088 0.0080 0.0009 0.0007 -0.0076 0.0068  
Z -0.0052 0.0069 0.0018 0.0002 0.0170 -0.0159

AT.141 H X 0.0074 0.0092 0.0012 -0.0004 -0.0068 -0.0069  
Y -0.0034 -0.0029 -0.0003 -0.0000 0.0053 0.0044  
Z 0.0091 0.0092 0.0020 -0.0008 -0.0075 -0.0063

AT.142 H X -0.0074 0.0092 0.0012 0.0004 0.0068 -0.0069  
Y 0.0034 -0.0029 -0.0003 0.0000 -0.0053 0.0044  
Z -0.0091 0.0092 0.0020 0.0008 0.0075 -0.0063

AT.143 C X -0.0103 -0.0099 -0.0008 -0.0001 -0.0028 -0.0013  
Y -0.0066 -0.0047 -0.0002 0.0000 0.0023 0.0034  
Z -0.0071 -0.0066 -0.0012 0.0002 0.0065 0.0069

AT.144 C X 0.0103 -0.0099 -0.0008 0.0001 0.0028 -0.0013  
Y 0.0066 -0.0047 -0.0002 -0.0000 -0.0023 0.0034  
Z 0.0071 -0.0066 -0.0012 -0.0002 -0.0065 0.0069

AT.145 H X -0.0106 -0.0122 0.0000 -0.0004 -0.0123 -0.0089  
Y -0.0201 -0.0198 -0.0001 -0.0013 0.0076 0.0096  
Z 0.0072 0.0088 -0.0011 0.0015 -0.0015 -0.0017

AT.146 H X 0.0106 -0.0122 0.0000 0.0004 0.0123 -0.0089  
Y 0.0201 -0.0198 -0.0001 0.0013 -0.0076 0.0096  
Z -0.0072 0.0088 -0.0011 -0.0015 0.0015 -0.0017

AT.147 H X -0.0093 -0.0106 -0.0013 -0.0004 -0.0041 -0.0038  
Y 0.0036 0.0097 -0.0005 0.0017 0.0041 0.0041

Z 0.0000 0.0004 -0.0021 0.0007 0.0058 0.0039  
AT. 148 H X 0.0093 -0.0106 -0.0013 0.0004 0.0041 -0.0038  
Y -0.0036 0.0097 -0.0005 -0.0017 -0.0041 0.0041  
Z -0.0000 0.0004 -0.0021 -0.0007 -0.0058 0.0039  
AT. 149 H X -0.0123 -0.0084 -0.0006 0.0006 0.0036 0.0063  
Y -0.0166 -0.0146 -0.0001 -0.0007 0.0104 0.0122  
Z -0.0234 -0.0244 -0.0012 -0.0014 0.0174 0.0185  
AT. 150 H X 0.0123 -0.0084 -0.0006 -0.0006 -0.0036 0.0063  
Y 0.0166 -0.0146 -0.0001 0.0007 -0.0104 0.0122  
Z 0.0234 -0.0244 -0.0012 0.0014 -0.0174 0.0185  
AT. 151 C X -0.0134 -0.0143 -0.0017 0.0003 0.0049 0.0038  
Y 0.0392 0.0404 0.0026 -0.0003 -0.0020 -0.0001  
Z -0.0019 -0.0030 0.0005 -0.0000 0.0276 0.0285  
AT. 152 C X 0.0134 -0.0143 -0.0017 -0.0003 -0.0049 0.0038  
Y -0.0392 0.0404 0.0026 0.0003 0.0020 -0.0001  
Z 0.0019 -0.0030 0.0005 0.0000 -0.0276 0.0285  
AT. 153 H X -0.0209 -0.0222 -0.0027 0.0011 -0.0017 -0.0049  
Y 0.0638 0.0662 0.0045 -0.0004 -0.0002 0.0022  
Z 0.0414 0.0424 0.0039 -0.0004 0.0334 0.0360  
AT. 154 H X 0.0209 -0.0222 -0.0027 -0.0011 0.0017 -0.0049  
Y -0.0638 0.0662 0.0045 0.0004 0.0002 0.0022  
Z -0.0414 0.0424 0.0039 0.0004 -0.0334 0.0360  
AT. 155 H X -0.0184 -0.0214 -0.0021 -0.0002 0.0111 0.0098  
Y 0.0743 0.0766 0.0054 -0.0009 0.0069 0.0102  
Z -0.0406 -0.0437 -0.0026 0.0003 0.0206 0.0197  
AT. 156 H X 0.0184 -0.0214 -0.0021 0.0002 -0.0111 0.0098  
Y -0.0743 0.0766 0.0054 0.0009 -0.0069 0.0102  
Z 0.0406 -0.0437 -0.0026 -0.0003 -0.0206 0.0197  
AT. 157 O X -0.0002 -0.0002 -0.0005 -0.0002 -0.0001 0.0002  
Y -0.0005 -0.0006 0.0044 -0.0057 0.0008 0.0006  
Z -0.0004 -0.0005 0.0014 -0.0000 -0.0003 -0.0000  
AT. 158 O X 0.0002 -0.0002 -0.0005 0.0002 0.0001 0.0002

Y 0.0005 -0.0006 0.0044 0.0057 -0.0008 0.0006  
Z 0.0004 -0.0005 0.0014 0.0000 0.0003 -0.0000  
AT. 159 O X 0.0006 0.0002 0.0009 0.0009 0.0001 -0.0000  
Y -0.0011 -0.0006 -0.0013 0.0011 0.0001 -0.0001  
Z 0.0009 0.0002 0.0028 0.0032 -0.0002 -0.0007  
AT. 160 O X -0.0006 0.0002 0.0009 -0.0009 -0.0001 -0.0000  
Y 0.0011 -0.0006 -0.0013 -0.0011 -0.0001 -0.0001  
Z -0.0009 0.0002 0.0028 -0.0032 0.0002 -0.0007  
AT. 161 H X 0.0002 -0.0005 0.0028 -0.0052 0.0025 0.0016  
Y -0.0006 -0.0003 0.0045 -0.0054 -0.0004 -0.0001  
Z 0.0005 -0.0014 0.0033 -0.0034 0.0038 0.0022  
AT. 162 H X -0.0002 -0.0005 0.0028 0.0052 -0.0025 0.0016  
Y 0.0006 -0.0003 0.0045 0.0054 0.0004 -0.0001  
Z -0.0005 -0.0014 0.0033 0.0034 -0.0038 0.0022  
AT. 163 H X 0.0021 0.0004 0.0049 0.0043 0.0004 -0.0005  
Y 0.0008 -0.0024 -0.0090 -0.0074 -0.0003 0.0010  
Z 0.0008 -0.0003 0.0002 0.0003 -0.0000 -0.0002  
AT. 164 H X -0.0021 0.0004 0.0049 -0.0043 -0.0004 -0.0005  
Y -0.0008 -0.0024 -0.0090 0.0074 0.0003 0.0010  
Z -0.0008 -0.0003 0.0002 -0.0003 0.0000 -0.0002  
AT. 165 O X -0.0033 -0.0007 0.0007 0.0003 0.0012 -0.0009  
Y -0.0012 -0.0005 0.0000 -0.0013 0.0009 0.0002  
Z 0.0001 -0.0017 0.0006 0.0010 -0.0016 0.0002  
AT. 166 O X 0.0033 -0.0007 0.0007 -0.0003 -0.0012 -0.0009  
Y 0.0012 -0.0005 0.0000 0.0013 -0.0009 0.0002  
Z -0.0001 -0.0017 0.0006 -0.0010 0.0016 0.0002  
AT. 167 H X -0.0078 -0.0024 0.0001 -0.0011 0.0000 -0.0042  
Y 0.0086 0.0025 0.0008 0.0010 0.0032 0.0084  
Z -0.0010 -0.0020 0.0005 0.0013 -0.0020 -0.0020  
AT. 168 H X 0.0078 -0.0024 0.0001 0.0011 -0.0000 -0.0042  
Y -0.0086 0.0025 0.0008 -0.0010 -0.0032 0.0084  
Z 0.0010 -0.0020 0.0005 -0.0013 0.0020 -0.0020

AT. 169 O X 0.0022 -0.0020 0.0004 0.0006 -0.0015 0.0017  
Y -0.0048 0.0038 0.0028 0.0031 0.0033 -0.0038  
Z 0.0019 -0.0028 -0.0003 0.0000 -0.0026 0.0015

AT. 170 O X -0.0022 -0.0020 0.0004 -0.0006 0.0015 0.0017  
Y 0.0048 0.0038 0.0028 -0.0031 -0.0033 -0.0038  
Z -0.0019 -0.0028 -0.0003 -0.0000 0.0026 0.0015

AT. 171 H X -0.0054 0.0030 -0.0042 -0.0047 -0.0007 -0.0022  
Y -0.0111 0.0087 0.0008 0.0011 0.0057 -0.0078  
Z -0.0018 0.0003 0.0002 0.0007 0.0001 -0.0013

AT. 172 H X 0.0054 0.0030 -0.0042 0.0047 0.0007 -0.0022  
Y 0.0111 0.0087 0.0008 -0.0011 -0.0057 -0.0078  
Z 0.0018 0.0003 0.0002 -0.0007 -0.0001 -0.0013

FREQ(CM\*\*-1) 406.99 408.45 413.10 414.17 417.43 418.23

AT. 1 I X 0.0004 0.0008 -0.0001 -0.0001 0.0003 0.0003  
Y 0.0003 0.0003 -0.0000 -0.0001 -0.0003 -0.0006  
Z 0.0003 0.0004 0.0000 0.0000 0.0002 0.0003

AT. 2 I X -0.0004 0.0008 -0.0001 0.0001 -0.0003 0.0003  
Y -0.0003 0.0003 -0.0000 0.0001 0.0003 -0.0006  
Z -0.0003 0.0004 0.0000 -0.0000 -0.0002 0.0003

AT. 3 I X -0.0015 -0.0016 -0.0000 0.0002 -0.0015 -0.0009  
Y -0.0003 -0.0004 -0.0000 0.0000 -0.0007 -0.0005  
Z -0.0004 -0.0004 -0.0001 0.0001 -0.0004 -0.0002

AT. 4 I X 0.0015 -0.0016 -0.0000 -0.0002 0.0015 -0.0009  
Y 0.0003 -0.0004 -0.0000 -0.0000 0.0007 -0.0005  
Z 0.0004 -0.0004 -0.0001 -0.0001 0.0004 -0.0002

AT. 5 O X 0.0048 0.0013 0.0006 0.0012 -0.0101 -0.0108  
Y 0.0002 0.0022 -0.0002 -0.0006 0.0068 0.0092  
Z -0.0253 -0.0270 0.0014 0.0016 -0.0092 -0.0035

AT. 6 O X -0.0048 0.0013 0.0006 -0.0012 0.0101 -0.0108  
Y -0.0002 0.0022 -0.0002 0.0006 -0.0068 0.0092

Z 0.0253 -0.0270 0.0014 -0.0016 0.0092 -0.0035  
AT. 7 O X 0.0154 0.0159 0.0006 -0.0005 0.0081 0.0043  
Y -0.0100 -0.0075 -0.0005 -0.0002 0.0057 0.0073  
Z 0.0064 -0.0016 0.0016 0.0040 -0.0316 -0.0297  
AT. 8 O X -0.0154 0.0159 0.0006 0.0005 -0.0081 0.0043  
Y 0.0100 -0.0075 -0.0005 0.0002 -0.0057 0.0073  
Z -0.0064 -0.0016 0.0016 -0.0040 0.0316 -0.0297  
AT. 9 N X -0.0037 -0.0071 0.0007 0.0007 -0.0149 -0.0153  
Y -0.0122 -0.0136 -0.0000 0.0005 -0.0083 -0.0084  
Z -0.0119 -0.0127 0.0008 0.0007 -0.0053 -0.0022  
AT. 10 N X 0.0037 -0.0071 0.0007 -0.0007 0.0149 -0.0153  
Y 0.0122 -0.0136 -0.0000 -0.0005 0.0083 -0.0084  
Z 0.0119 -0.0127 0.0008 -0.0007 0.0053 -0.0022  
AT. 11 N X 0.0036 0.0058 -0.0004 -0.0003 0.0033 0.0014  
Y -0.0145 -0.0075 -0.0005 -0.0018 0.0179 0.0198  
Z 0.0009 0.0014 0.0009 0.0002 0.0006 0.0014  
AT. 12 N X -0.0036 0.0058 -0.0004 0.0003 -0.0033 0.0014  
Y 0.0145 -0.0075 -0.0005 0.0018 -0.0179 0.0198  
Z -0.0009 0.0014 0.0009 -0.0002 -0.0006 0.0014  
AT. 13 C X 0.0041 0.0010 0.0004 0.0007 -0.0082 -0.0094  
Y -0.0122 -0.0100 -0.0002 -0.0004 0.0084 0.0116  
Z -0.0162 -0.0175 0.0011 0.0009 -0.0088 -0.0042  
AT. 14 C X -0.0041 0.0010 0.0004 -0.0007 0.0082 -0.0094  
Y 0.0122 -0.0100 -0.0002 0.0004 -0.0084 0.0116  
Z 0.0162 -0.0175 0.0011 -0.0009 0.0088 -0.0042  
AT. 15 C X 0.0010 0.0013 -0.0000 -0.0003 0.0042 0.0038  
Y -0.0081 -0.0067 -0.0003 -0.0002 0.0075 0.0097  
Z 0.0030 -0.0069 0.0017 0.0033 -0.0386 -0.0397  
AT. 16 C X -0.0010 0.0013 -0.0000 0.0003 -0.0042 0.0038  
Y 0.0081 -0.0067 -0.0003 0.0002 -0.0075 0.0097  
Z -0.0030 -0.0069 0.0017 -0.0033 0.0386 -0.0397  
AT. 17 H X 0.0064 0.0090 -0.0004 -0.0011 0.0104 0.0083



Y -0.0230 -0.0141 -0.0007 -0.0023 0.0312 0.0383  
Z 0.0246 0.0061 0.0019 0.0056 -0.0655 -0.0738  
AT. 18 H X -0.0064 0.0090 -0.0004 0.0011 -0.0104 0.0083  
Y 0.0230 -0.0141 -0.0007 0.0023 -0.0312 0.0383  
Z -0.0246 0.0061 0.0019 -0.0056 0.0655 -0.0738  
AT. 19 H X -0.0068 -0.0042 0.0000 -0.0010 0.0112 0.0141  
Y 0.0147 0.0025 0.0005 0.0035 -0.0348 -0.0405  
Z 0.0090 -0.0054 0.0020 0.0045 -0.0523 -0.0552  
AT. 20 H X 0.0068 -0.0042 0.0000 0.0010 -0.0112 0.0141  
Y -0.0147 0.0025 0.0005 -0.0035 0.0348 -0.0405  
Z -0.0090 -0.0054 0.0020 -0.0045 0.0523 -0.0552  
AT. 21 C X 0.0115 0.0117 0.0002 -0.0005 0.0041 0.0009  
Y -0.0136 -0.0093 -0.0013 -0.0016 0.0114 0.0126  
Z 0.0014 -0.0008 0.0009 0.0010 -0.0076 -0.0068  
AT. 22 C X -0.0115 0.0117 0.0002 0.0005 -0.0041 0.0009  
Y 0.0136 -0.0093 -0.0013 0.0016 -0.0114 0.0126  
Z -0.0014 -0.0008 0.0009 -0.0010 0.0076 -0.0068  
AT. 23 C X 0.0067 0.0074 -0.0002 -0.0011 0.0062 0.0033  
Y 0.0110 0.0126 0.0005 -0.0008 0.0106 0.0063  
Z -0.0152 -0.0168 -0.0002 0.0002 -0.0061 -0.0028  
AT. 24 C X -0.0067 0.0074 -0.0002 0.0011 -0.0062 0.0033  
Y -0.0110 0.0126 0.0005 0.0008 -0.0106 0.0063  
Z 0.0152 -0.0168 -0.0002 -0.0002 0.0061 -0.0028  
AT. 25 H X 0.0066 0.0063 -0.0000 -0.0004 0.0000 -0.0020  
Y 0.0156 0.0167 0.0009 -0.0007 0.0105 0.0055  
Z -0.0557 -0.0545 -0.0032 -0.0002 -0.0120 -0.0026  
AT. 26 H X -0.0066 0.0063 -0.0000 0.0004 -0.0000 -0.0020  
Y -0.0156 0.0167 0.0009 0.0007 -0.0105 0.0055  
Z 0.0557 -0.0545 -0.0032 0.0002 0.0120 -0.0026  
AT. 27 H X -0.0028 -0.0013 -0.0008 -0.0014 0.0068 0.0057  
Y 0.0494 0.0493 0.0033 -0.0005 0.0179 0.0070  
Z 0.0058 0.0028 0.0013 0.0004 -0.0027 -0.0031

AT. 28 H X 0.0028 -0.0013 -0.0008 0.0014 -0.0068 0.0057  
Y -0.0494 0.0493 0.0033 0.0005 -0.0179 0.0070  
Z -0.0058 0.0028 0.0013 -0.0004 0.0027 -0.0031

AT. 29 C X 0.0007 -0.0031 0.0016 0.0018 -0.0154 -0.0144  
Y 0.0131 0.0123 -0.0011 0.0000 -0.0050 -0.0103  
Z 0.0082 0.0100 -0.0026 -0.0019 0.0046 0.0003

AT. 30 C X -0.0007 -0.0031 0.0016 -0.0018 0.0154 -0.0144  
Y -0.0131 0.0123 -0.0011 -0.0000 0.0050 -0.0103  
Z -0.0082 0.0100 -0.0026 0.0019 -0.0046 0.0003

AT. 31 H X 0.0085 0.0022 0.0040 0.0039 -0.0225 -0.0205  
Y 0.0062 0.0087 -0.0050 -0.0029 0.0056 -0.0013  
Z 0.0025 0.0079 -0.0071 -0.0050 0.0164 0.0104

AT. 32 H X -0.0085 0.0022 0.0040 -0.0039 0.0225 -0.0205  
Y -0.0062 0.0087 -0.0050 0.0029 -0.0056 -0.0013  
Z -0.0025 0.0079 -0.0071 0.0050 -0.0164 0.0104

AT. 33 H X 0.0232 0.0192 0.0022 0.0018 -0.0139 -0.0175  
Y 0.0227 0.0163 0.0048 0.0044 -0.0219 -0.0242  
Z 0.0186 0.0226 -0.0046 -0.0037 0.0127 0.0042

AT. 34 H X -0.0232 0.0192 0.0022 -0.0018 0.0139 -0.0175  
Y -0.0227 0.0163 0.0048 -0.0044 0.0219 -0.0242  
Z -0.0186 0.0226 -0.0046 0.0037 -0.0127 0.0042

AT. 35 C X -0.0142 -0.0151 -0.0007 0.0003 -0.0055 -0.0025  
Y 0.0186 0.0188 -0.0018 -0.0007 -0.0009 -0.0073  
Z 0.0182 0.0191 -0.0007 -0.0009 0.0030 -0.0020

AT. 36 C X 0.0142 -0.0151 -0.0007 -0.0003 0.0055 -0.0025  
Y -0.0186 0.0188 -0.0018 0.0007 0.0009 -0.0073  
Z -0.0182 0.0191 -0.0007 0.0009 -0.0030 -0.0020

AT. 37 C X 0.0008 -0.0001 -0.0011 0.0003 -0.0049 -0.0060  
Y -0.0037 -0.0013 -0.0016 -0.0014 0.0096 0.0095  
Z 0.0068 0.0072 -0.0001 -0.0005 0.0077 0.0074

AT. 38 C X -0.0008 -0.0001 -0.0011 -0.0003 0.0049 -0.0060  
Y 0.0037 -0.0013 -0.0016 0.0014 -0.0096 0.0095

Z -0.0068 0.0072 -0.0001 0.0005 -0.0077 0.0074  
AT. 39 H X -0.0109 -0.0117 -0.0020 -0.0003 0.0085 0.0123  
Y -0.0248 -0.0230 -0.0009 -0.0010 0.0156 0.0234  
Z 0.0070 0.0078 -0.0011 -0.0011 0.0143 0.0141  
AT. 40 H X 0.0109 -0.0117 -0.0020 0.0003 -0.0085 0.0123  
Y 0.0248 -0.0230 -0.0009 0.0010 -0.0156 0.0234  
Z -0.0070 0.0078 -0.0011 0.0011 -0.0143 0.0141  
AT. 41 H X 0.0115 0.0111 -0.0005 0.0005 -0.0156 -0.0214  
Y -0.0004 -0.0001 -0.0026 -0.0013 0.0064 0.0055  
Z -0.0061 -0.0048 0.0000 -0.0008 0.0209 0.0259  
AT. 42 H X -0.0115 0.0111 -0.0005 -0.0005 0.0156 -0.0214  
Y 0.0004 -0.0001 -0.0026 0.0013 -0.0064 0.0055  
Z 0.0061 -0.0048 0.0000 0.0008 -0.0209 0.0259  
AT. 43 C X 0.0164 0.0175 -0.0014 -0.0010 0.0078 0.0032  
Y -0.0013 -0.0044 0.0021 0.0017 -0.0102 -0.0070  
Z 0.0134 0.0172 -0.0009 -0.0020 0.0184 0.0144  
AT. 44 C X -0.0164 0.0175 -0.0014 0.0010 -0.0078 0.0032  
Y 0.0013 -0.0044 0.0021 -0.0017 0.0102 -0.0070  
Z -0.0134 0.0172 -0.0009 0.0020 -0.0184 0.0144  
AT. 45 H X 0.0487 0.0478 -0.0027 -0.0018 0.0112 -0.0016  
Y -0.0450 -0.0491 0.0051 0.0043 -0.0215 -0.0052  
Z 0.0328 0.0390 -0.0031 -0.0040 0.0269 0.0160  
AT. 46 H X -0.0487 0.0478 -0.0027 0.0018 -0.0112 -0.0016  
Y 0.0450 -0.0491 0.0051 -0.0043 0.0215 -0.0052  
Z -0.0328 0.0390 -0.0031 0.0040 -0.0269 0.0160  
AT. 47 H X 0.0443 0.0413 -0.0018 -0.0004 -0.0035 -0.0150  
Y 0.0487 0.0447 -0.0008 -0.0004 -0.0043 -0.0155  
Z 0.0282 0.0363 -0.0035 -0.0049 0.0390 0.0292  
AT. 48 H X -0.0443 0.0413 -0.0018 0.0004 0.0035 -0.0150  
Y -0.0487 0.0447 -0.0008 0.0004 0.0043 -0.0155  
Z -0.0282 0.0363 -0.0035 0.0049 -0.0390 0.0292  
AT. 49 C X -0.0218 -0.0179 -0.0001 -0.0006 0.0134 0.0197

Y 0.0049 -0.0013 0.0024 0.0027 -0.0202 -0.0180  
Z -0.0009 0.0038 -0.0002 -0.0016 0.0202 0.0200  
AT. 50 C X 0.0218 -0.0179 -0.0001 0.0006 -0.0134 0.0197  
Y -0.0049 -0.0013 0.0024 -0.0027 0.0202 -0.0180  
Z 0.0009 0.0038 -0.0002 0.0016 -0.0202 0.0200  
AT. 51 C X -0.0104 -0.0090 0.0008 -0.0002 0.0067 0.0109  
Y -0.0197 -0.0268 0.0025 0.0035 -0.0269 -0.0202  
Z -0.0027 0.0033 -0.0005 -0.0018 0.0233 0.0242  
AT. 52 C X 0.0104 -0.0090 0.0008 0.0002 -0.0067 0.0109  
Y 0.0197 -0.0268 0.0025 -0.0035 0.0269 -0.0202  
Z 0.0027 0.0033 -0.0005 0.0018 -0.0233 0.0242  
AT. 53 H X -0.0342 -0.0368 0.0020 0.0017 -0.0107 -0.0003  
Y -0.0488 -0.0560 0.0027 0.0041 -0.0297 -0.0164  
Z 0.0054 0.0171 -0.0022 -0.0041 0.0470 0.0446  
AT. 54 H X 0.0342 -0.0368 0.0020 -0.0017 0.0107 -0.0003  
Y 0.0488 -0.0560 0.0027 -0.0041 0.0297 -0.0164  
Z -0.0054 0.0171 -0.0022 0.0041 -0.0470 0.0446  
AT. 55 H X 0.0209 0.0285 -0.0012 -0.0031 0.0329 0.0287  
Y -0.0307 -0.0411 0.0039 0.0053 -0.0396 -0.0279  
Z 0.0058 0.0119 -0.0002 -0.0016 0.0262 0.0272  
AT. 56 H X -0.0209 0.0285 -0.0012 0.0031 -0.0329 0.0287  
Y 0.0307 -0.0411 0.0039 -0.0053 0.0396 -0.0279  
Z -0.0058 0.0119 -0.0002 0.0016 -0.0262 0.0272  
AT. 57 C X -0.0063 -0.0078 0.0005 0.0007 -0.0054 -0.0024  
Y 0.0101 0.0107 -0.0000 -0.0002 0.0045 0.0020  
Z -0.0218 -0.0194 -0.0004 -0.0007 0.0102 0.0148  
AT. 58 C X 0.0063 -0.0078 0.0005 -0.0007 0.0054 -0.0024  
Y -0.0101 0.0107 -0.0000 0.0002 -0.0045 0.0020  
Z 0.0218 -0.0194 -0.0004 0.0007 -0.0102 0.0148  
AT. 59 H X 0.0140 0.0105 0.0024 0.0017 -0.0084 -0.0077  
Y -0.0095 -0.0054 -0.0000 -0.0002 0.0095 0.0107  
Z -0.0368 -0.0307 0.0009 0.0001 0.0155 0.0242

AT. 60 H X -0.0140 0.0105 0.0024 -0.0017 0.0084 -0.0077  
Y 0.0095 -0.0054 -0.0000 0.0002 -0.0095 0.0107  
Z 0.0368 -0.0307 0.0009 -0.0001 -0.0155 0.0242

AT. 61 H X -0.0296 -0.0309 0.0002 -0.0002 0.0047 0.0140  
Y 0.0368 0.0325 0.0001 -0.0004 -0.0015 -0.0088  
Z -0.0537 -0.0486 -0.0007 -0.0013 0.0214 0.0333

AT. 62 H X 0.0296 -0.0309 0.0002 0.0002 -0.0047 0.0140  
Y -0.0368 0.0325 0.0001 0.0004 0.0015 -0.0088  
Z 0.0537 -0.0486 -0.0007 0.0013 -0.0214 0.0333

AT. 63 H X 0.0137 0.0119 0.0004 0.0013 -0.0152 -0.0179  
Y -0.0083 -0.0055 0.0020 0.0006 0.0135 0.0170  
Z -0.0248 -0.0239 -0.0020 -0.0020 0.0117 0.0165

AT. 64 H X -0.0137 0.0119 0.0004 -0.0013 0.0152 -0.0179  
Y 0.0083 -0.0055 0.0020 -0.0006 -0.0135 0.0170  
Z 0.0248 -0.0239 -0.0020 0.0020 -0.0117 0.0165

AT. 65 C X 0.0017 0.0027 -0.0011 -0.0006 0.0003 -0.0020  
Y 0.0048 0.0058 -0.0002 -0.0007 0.0052 0.0049  
Z 0.0255 0.0231 0.0006 0.0002 -0.0040 -0.0110

AT. 66 C X -0.0017 0.0027 -0.0011 0.0006 -0.0003 -0.0020  
Y -0.0048 0.0058 -0.0002 0.0007 -0.0052 0.0049  
Z -0.0255 0.0231 0.0006 -0.0002 0.0040 -0.0110

AT. 67 H X 0.0324 0.0311 -0.0023 -0.0009 -0.0092 -0.0219  
Y -0.0074 -0.0007 -0.0003 -0.0017 0.0142 0.0178  
Z 0.0116 0.0057 0.0017 0.0014 -0.0045 -0.0063

AT. 68 H X -0.0324 0.0311 -0.0023 0.0009 0.0092 -0.0219  
Y 0.0074 -0.0007 -0.0003 0.0017 -0.0142 0.0178  
Z -0.0116 0.0057 0.0017 -0.0014 0.0045 -0.0063

AT. 69 H X -0.0099 -0.0069 -0.0023 -0.0022 0.0179 0.0174  
Y 0.0146 0.0123 -0.0009 -0.0010 0.0063 0.0015  
Z 0.0640 0.0528 0.0018 0.0028 -0.0374 -0.0550

AT. 70 H X 0.0099 -0.0069 -0.0023 0.0022 -0.0179 0.0174  
Y -0.0146 0.0123 -0.0009 0.0010 -0.0063 0.0015

Z -0.0640 0.0528 0.0018 -0.0028 0.0374 -0.0550  
AT. 71 H X 0.0207 0.0188 0.0002 0.0014 -0.0243 -0.0300  
Y 0.0014 0.0074 -0.0018 -0.0031 0.0237 0.0226  
Z 0.0356 0.0376 -0.0006 -0.0016 0.0027 -0.0077  
AT. 72 H X -0.0207 0.0188 0.0002 -0.0014 0.0243 -0.0300  
Y -0.0014 0.0074 -0.0018 0.0031 -0.0237 0.0226  
Z -0.0356 0.0376 -0.0006 0.0016 -0.0027 -0.0077  
AT. 73 C X -0.0141 -0.0097 -0.0007 -0.0012 0.0185 0.0228  
Y 0.0272 0.0238 0.0002 0.0008 -0.0074 -0.0116  
Z 0.0148 0.0215 -0.0014 -0.0026 0.0239 0.0193  
AT. 74 C X 0.0141 -0.0097 -0.0007 0.0012 -0.0185 0.0228  
Y -0.0272 0.0238 0.0002 -0.0008 0.0074 -0.0116  
Z -0.0148 0.0215 -0.0014 0.0026 -0.0239 0.0193  
AT. 75 H X 0.0009 0.0084 -0.0024 -0.0031 0.0348 0.0339  
Y 0.0353 0.0303 0.0011 0.0013 -0.0063 -0.0096  
Z 0.0362 0.0435 -0.0013 -0.0033 0.0370 0.0299  
AT. 76 H X -0.0009 0.0084 -0.0024 0.0031 -0.0348 0.0339  
Y -0.0353 0.0303 0.0011 -0.0013 0.0063 -0.0096  
Z -0.0362 0.0435 -0.0013 0.0033 -0.0370 0.0299  
AT. 77 H X -0.0198 -0.0139 0.0008 -0.0013 0.0307 0.0384  
Y 0.0528 0.0495 -0.0011 -0.0001 -0.0001 -0.0102  
Z -0.0034 0.0019 -0.0016 -0.0016 0.0061 0.0037  
AT. 78 H X 0.0198 -0.0139 0.0008 0.0013 -0.0307 0.0384  
Y -0.0528 0.0495 -0.0011 0.0001 0.0001 -0.0102  
Z 0.0034 0.0019 -0.0016 0.0016 -0.0061 0.0037  
AT. 79 I X -0.0000 0.0000 0.0008 0.0009 -0.0002 -0.0001  
Y -0.0002 0.0000 -0.0002 -0.0004 0.0002 0.0001  
Z -0.0000 0.0000 -0.0001 -0.0001 0.0000 0.0000  
AT. 80 I X 0.0000 0.0000 0.0008 -0.0009 0.0002 -0.0001  
Y 0.0002 0.0000 -0.0002 0.0004 -0.0002 0.0001  
Z 0.0000 0.0000 -0.0001 0.0001 -0.0000 0.0000  
AT. 81 I X -0.0001 0.0001 0.0000 0.0002 0.0001 0.0000

Y 0.0001 -0.0000 0.0001 0.0001 -0.0000 -0.0000  
Z -0.0000 -0.0001 -0.0000 0.0000 -0.0000 0.0000  
AT. 82 I X 0.0001 0.0001 0.0000 -0.0002 -0.0001 0.0000  
Y -0.0001 -0.0000 0.0001 -0.0001 0.0000 -0.0000  
Z 0.0000 -0.0001 -0.0000 -0.0000 0.0000 0.0000  
AT. 83 O X -0.0006 -0.0007 -0.0142 -0.0156 -0.0019 -0.0011  
Y -0.0004 -0.0002 -0.0031 -0.0036 -0.0008 -0.0005  
Z 0.0020 -0.0009 -0.0102 -0.0079 -0.0018 -0.0001  
AT. 84 O X 0.0006 -0.0007 -0.0142 0.0156 0.0019 -0.0011  
Y 0.0004 -0.0002 -0.0031 0.0036 0.0008 -0.0005  
Z -0.0020 -0.0009 -0.0102 0.0079 0.0018 -0.0001  
AT. 85 O X 0.0004 -0.0014 -0.0034 -0.0030 -0.0015 0.0000  
Y -0.0008 0.0002 -0.0143 -0.0136 -0.0009 -0.0007  
Z 0.0014 -0.0009 0.0204 0.0205 0.0010 0.0012  
AT. 86 O X -0.0004 -0.0014 -0.0034 0.0030 0.0015 0.0000  
Y 0.0008 0.0002 -0.0143 0.0136 0.0009 -0.0007  
Z -0.0014 -0.0009 0.0204 -0.0205 -0.0010 0.0012  
AT. 87 N X -0.0007 -0.0004 -0.0076 -0.0081 -0.0012 -0.0005  
Y 0.0011 0.0003 0.0030 0.0057 -0.0005 -0.0002  
Z 0.0010 -0.0006 -0.0057 -0.0058 -0.0013 -0.0005  
AT. 88 N X 0.0007 -0.0004 -0.0076 0.0081 0.0012 -0.0005  
Y -0.0011 0.0003 0.0030 -0.0057 0.0005 -0.0002  
Z -0.0010 -0.0006 -0.0057 0.0058 0.0013 -0.0005  
AT. 89 N X 0.0005 -0.0007 -0.0122 -0.0110 -0.0011 -0.0002  
Y -0.0007 0.0010 -0.0109 -0.0113 -0.0004 -0.0008  
Z 0.0002 0.0003 0.0041 0.0034 0.0005 0.0001  
AT. 90 N X -0.0005 -0.0007 -0.0122 0.0110 0.0011 -0.0002  
Y 0.0007 0.0010 -0.0109 0.0113 0.0004 -0.0008  
Z -0.0002 0.0003 0.0041 -0.0034 -0.0005 0.0001  
AT. 91 C X -0.0004 -0.0006 -0.0148 -0.0153 -0.0020 -0.0008  
Y 0.0001 -0.0001 -0.0095 -0.0078 -0.0009 -0.0004  
Z 0.0013 -0.0008 -0.0059 -0.0051 -0.0015 -0.0004

AT. 92 C X 0.0004 -0.0006 -0.0148 0.0153 0.0020 -0.0008  
Y -0.0001 -0.0001 -0.0095 0.0078 0.0009 -0.0004  
Z -0.0013 -0.0008 -0.0059 0.0051 0.0015 -0.0004

AT. 93 C X 0.0000 -0.0004 -0.0017 -0.0016 -0.0008 -0.0004  
Y 0.0006 -0.0003 -0.0030 -0.0011 -0.0006 -0.0004  
Z 0.0029 -0.0005 0.0254 0.0272 0.0001 -0.0000

AT. 94 C X -0.0000 -0.0004 -0.0017 0.0016 0.0008 -0.0004  
Y -0.0006 -0.0003 -0.0030 0.0011 0.0006 -0.0004  
Z -0.0029 -0.0005 0.0254 -0.0272 -0.0001 -0.0000

AT. 95 H X -0.0005 0.0006 -0.0075 -0.0046 0.0016 0.0017  
Y -0.0003 -0.0012 -0.0229 -0.0239 -0.0031 -0.0020  
Z 0.0049 0.0002 0.0667 0.0704 0.0025 0.0007

AT. 96 H X 0.0005 0.0006 -0.0075 0.0046 -0.0016 0.0017  
Y 0.0003 -0.0012 -0.0229 0.0239 0.0031 -0.0020  
Z -0.0049 0.0002 0.0667 -0.0704 -0.0025 0.0007

AT. 97 H X 0.0010 0.0003 0.0220 0.0246 0.0007 0.0001  
Y 0.0031 0.0005 0.0417 0.0464 0.0024 0.0010  
Z 0.0033 -0.0005 0.0294 0.0311 0.0004 0.0002

AT. 98 H X -0.0010 0.0003 0.0220 -0.0246 -0.0007 0.0001  
Y -0.0031 0.0005 0.0417 -0.0464 -0.0024 0.0010  
Z -0.0033 -0.0005 0.0294 -0.0311 -0.0004 0.0002

AT. 99 C X 0.0002 -0.0011 -0.0091 -0.0087 -0.0015 -0.0002  
Y -0.0008 0.0002 -0.0129 -0.0120 -0.0012 -0.0009  
Z 0.0005 -0.0005 0.0047 0.0050 -0.0001 0.0002

AT. 100 C X -0.0002 -0.0011 -0.0091 0.0087 0.0015 -0.0002  
Y 0.0008 0.0002 -0.0129 0.0120 0.0012 -0.0009  
Z -0.0005 -0.0005 0.0047 -0.0050 0.0001 0.0002

AT. 101 C X -0.0004 -0.0008 -0.0014 -0.0020 -0.0004 0.0001  
Y -0.0020 0.0001 0.0023 0.0018 0.0008 -0.0003  
Z 0.0015 -0.0013 -0.0099 -0.0075 -0.0024 -0.0004

AT. 102 C X 0.0004 -0.0008 -0.0014 0.0020 0.0004 0.0001  
Y 0.0020 0.0001 0.0023 -0.0018 -0.0008 -0.0003



Z -0.0015 -0.0013 -0.0099 0.0075 0.0024 -0.0004  
AT. 103 H X -0.0007 -0.0007 -0.0064 -0.0064 -0.0010 -0.0004  
Y -0.0019 0.0001 0.0049 0.0042 0.0011 -0.0001  
Z 0.0034 -0.0023 -0.0310 -0.0260 -0.0062 -0.0011  
AT. 104 H X 0.0007 -0.0007 -0.0064 0.0064 0.0010 -0.0004  
Y 0.0019 0.0001 0.0049 -0.0042 -0.0011 -0.0001  
Z -0.0034 -0.0023 -0.0310 0.0260 0.0062 -0.0011  
AT. 105 H X -0.0009 -0.0002 0.0110 0.0084 0.0015 0.0005  
Y -0.0036 0.0013 0.0189 0.0163 0.0043 0.0003  
Z 0.0008 -0.0007 -0.0010 0.0003 -0.0007 -0.0001  
AT. 106 H X 0.0009 -0.0002 0.0110 -0.0084 -0.0015 0.0005  
Y 0.0036 0.0013 0.0189 -0.0163 -0.0043 0.0003  
Z -0.0008 -0.0007 -0.0010 -0.0003 0.0007 -0.0001  
AT. 107 C X -0.0020 0.0006 0.0001 0.0007 0.0004 -0.0001  
Y 0.0006 0.0004 0.0207 0.0205 0.0015 0.0007  
Z -0.0018 0.0006 0.0079 0.0075 0.0013 0.0001  
AT. 108 C X 0.0020 0.0006 0.0001 -0.0007 -0.0004 -0.0001  
Y -0.0006 0.0004 0.0207 -0.0205 -0.0015 0.0007  
Z 0.0018 0.0006 0.0079 -0.0075 -0.0013 0.0001  
AT. 109 H X -0.0052 0.0015 -0.0052 -0.0020 0.0006 -0.0004  
Y -0.0014 0.0005 0.0198 0.0205 0.0016 0.0008  
Z -0.0042 0.0007 0.0085 0.0089 0.0014 0.0002  
AT. 110 H X 0.0052 0.0015 -0.0052 0.0020 -0.0006 -0.0004  
Y 0.0014 0.0005 0.0198 -0.0205 -0.0016 0.0008  
Z 0.0042 0.0007 0.0085 -0.0089 -0.0014 0.0002  
AT. 111 H X -0.0009 -0.0005 -0.0094 -0.0087 -0.0018 -0.0008  
Y 0.0045 0.0001 0.0265 0.0239 0.0021 0.0014  
Z -0.0038 0.0018 0.0166 0.0167 0.0034 0.0007  
AT. 112 H X 0.0009 -0.0005 -0.0094 0.0087 0.0018 -0.0008  
Y -0.0045 0.0001 0.0265 -0.0239 -0.0021 0.0014  
Z 0.0038 0.0018 0.0166 -0.0167 -0.0034 0.0007  
AT. 113 C X -0.0006 0.0014 0.0135 0.0129 0.0028 0.0010

Y -0.0006 0.0005 0.0195 0.0193 0.0017 0.0007  
Z -0.0010 0.0009 0.0085 0.0071 0.0017 0.0003  
AT. 114 C X 0.0006 0.0014 0.0135 -0.0129 -0.0028 0.0010  
Y 0.0006 0.0005 0.0195 -0.0193 -0.0017 0.0007  
Z 0.0010 0.0009 0.0085 -0.0071 -0.0017 0.0003  
AT. 115 C X -0.0001 0.0002 -0.0120 -0.0113 0.0000 0.0000  
Y -0.0012 -0.0002 -0.0011 -0.0008 -0.0002 -0.0001  
Z -0.0014 0.0001 -0.0018 -0.0026 0.0006 0.0001  
AT. 116 C X 0.0001 0.0002 -0.0120 0.0113 -0.0000 0.0000  
Y 0.0012 -0.0002 -0.0011 0.0008 0.0002 -0.0001  
Z 0.0014 0.0001 -0.0018 0.0026 -0.0006 0.0001  
AT. 117 H X 0.0015 0.0009 0.0032 0.0032 0.0009 0.0002  
Y -0.0022 -0.0022 -0.0337 -0.0318 -0.0035 -0.0011  
Z -0.0027 -0.0002 -0.0105 -0.0109 0.0003 0.0001  
AT. 118 H X -0.0015 0.0009 0.0032 -0.0032 -0.0009 0.0002  
Y 0.0022 -0.0022 -0.0337 0.0318 0.0035 -0.0011  
Z 0.0027 -0.0002 -0.0105 0.0109 -0.0003 0.0001  
AT. 119 H X -0.0023 -0.0016 -0.0362 -0.0344 -0.0021 -0.0005  
Y -0.0013 -0.0005 0.0054 0.0057 0.0001 0.0001  
Z -0.0025 -0.0006 -0.0213 -0.0215 -0.0008 -0.0004  
AT. 120 H X 0.0023 -0.0016 -0.0362 0.0344 0.0021 -0.0005  
Y 0.0013 -0.0005 0.0054 -0.0057 -0.0001 0.0001  
Z 0.0025 -0.0006 -0.0213 0.0215 0.0008 -0.0004  
AT. 121 C X 0.0015 -0.0006 -0.0084 -0.0082 -0.0015 -0.0006  
Y 0.0009 -0.0002 0.0002 -0.0001 0.0006 0.0006  
Z -0.0017 0.0007 0.0028 0.0028 0.0015 0.0005  
AT. 122 C X -0.0015 -0.0006 -0.0084 0.0082 0.0015 -0.0006  
Y -0.0009 -0.0002 0.0002 0.0001 -0.0006 0.0006  
Z 0.0017 0.0007 0.0028 -0.0028 -0.0015 0.0005  
AT. 123 H X 0.0036 -0.0013 -0.0359 -0.0371 -0.0058 -0.0028  
Y 0.0028 -0.0017 -0.0272 -0.0286 -0.0032 -0.0009  
Z -0.0033 0.0022 0.0262 0.0272 0.0048 0.0017

AT. 124 H X -0.0036 -0.0013 -0.0359 0.0371 0.0058 -0.0028  
Y -0.0028 -0.0017 -0.0272 0.0286 0.0032 -0.0009  
Z 0.0033 0.0022 0.0262 -0.0272 -0.0048 0.0017

AT. 125 H X 0.0008 -0.0006 -0.0248 -0.0240 -0.0025 -0.0012  
Y -0.0019 0.0013 0.0508 0.0519 0.0075 0.0039  
Z -0.0039 0.0014 0.0096 0.0110 0.0038 0.0016

AT. 126 H X -0.0008 -0.0006 -0.0248 0.0240 0.0025 -0.0012  
Y 0.0019 0.0013 0.0508 -0.0519 -0.0075 0.0039  
Z 0.0039 0.0014 0.0096 -0.0110 -0.0038 0.0016

AT. 127 C X 0.0008 0.0008 0.0278 0.0274 0.0026 0.0010  
Y 0.0017 -0.0008 -0.0027 -0.0035 -0.0005 0.0003  
Z -0.0009 0.0002 -0.0187 -0.0195 -0.0014 -0.0011

AT. 128 C X -0.0008 0.0008 0.0278 -0.0274 -0.0026 0.0010  
Y -0.0017 -0.0008 -0.0027 0.0035 0.0005 0.0003  
Z 0.0009 0.0002 -0.0187 0.0195 0.0014 -0.0011

AT. 129 C X 0.0004 -0.0003 0.0118 0.0117 -0.0003 -0.0001  
Y 0.0027 -0.0020 -0.0145 -0.0146 -0.0034 -0.0010  
Z -0.0012 0.0005 -0.0167 -0.0172 -0.0005 -0.0005

AT. 130 C X -0.0004 -0.0003 0.0118 -0.0117 0.0003 -0.0001  
Y -0.0027 -0.0020 -0.0145 0.0146 0.0034 -0.0010  
Z 0.0012 0.0005 -0.0167 0.0172 0.0005 -0.0005

AT. 131 H X -0.0015 0.0014 0.0167 0.0173 0.0023 0.0008  
Y 0.0041 -0.0050 -0.0425 -0.0431 -0.0096 -0.0036  
Z -0.0029 0.0016 -0.0211 -0.0207 0.0003 -0.0004

AT. 132 H X 0.0015 0.0014 0.0167 -0.0173 -0.0023 0.0008  
Y -0.0041 -0.0050 -0.0425 0.0431 0.0096 -0.0036  
Z 0.0029 0.0016 -0.0211 0.0207 -0.0003 -0.0004

AT. 133 H X 0.0032 -0.0037 -0.0073 -0.0088 -0.0059 -0.0022  
Y 0.0032 -0.0026 -0.0173 -0.0181 -0.0039 -0.0009  
Z -0.0018 0.0013 -0.0118 -0.0127 0.0016 0.0008

AT. 134 H X -0.0032 -0.0037 -0.0073 0.0088 0.0059 -0.0022  
Y -0.0032 -0.0026 -0.0173 0.0181 0.0039 -0.0009

Z 0.0018 0.0013 -0.0118 0.0127 -0.0016 0.0008  
AT. 135 C X -0.0002 0.0005 0.0050 0.0056 0.0012 0.0005  
Y -0.0003 0.0004 0.0036 0.0033 0.0005 0.0003  
Z -0.0003 -0.0009 -0.0227 -0.0223 -0.0027 -0.0012  
AT. 136 C X 0.0002 0.0005 0.0050 -0.0056 -0.0012 0.0005  
Y 0.0003 0.0004 0.0036 -0.0033 -0.0005 0.0003  
Z 0.0003 -0.0009 -0.0227 0.0223 0.0027 -0.0012  
AT. 137 H X -0.0002 -0.0004 -0.0094 -0.0070 -0.0015 -0.0003  
Y -0.0002 0.0004 -0.0057 -0.0054 -0.0005 -0.0000  
Z -0.0001 -0.0005 -0.0331 -0.0324 -0.0035 -0.0014  
AT. 138 H X 0.0002 -0.0004 -0.0094 0.0070 0.0015 -0.0003  
Y 0.0002 0.0004 -0.0057 0.0054 0.0005 -0.0000  
Z 0.0001 -0.0005 -0.0331 0.0324 0.0035 -0.0014  
AT. 139 H X -0.0004 0.0020 0.0308 0.0302 0.0045 0.0016  
Y -0.0005 0.0002 0.0086 0.0074 0.0016 0.0006  
Z 0.0001 -0.0028 -0.0578 -0.0555 -0.0074 -0.0026  
AT. 140 H X 0.0004 0.0020 0.0308 -0.0302 -0.0045 0.0016  
Y 0.0005 0.0002 0.0086 -0.0074 -0.0016 0.0006  
Z -0.0001 -0.0028 -0.0578 0.0555 0.0074 -0.0026  
AT. 141 H X -0.0000 -0.0012 -0.0278 -0.0257 -0.0028 -0.0010  
Y -0.0001 0.0005 -0.0106 -0.0104 -0.0008 -0.0004  
Z -0.0004 -0.0017 -0.0220 -0.0215 -0.0030 -0.0012  
AT. 142 H X 0.0000 -0.0012 -0.0278 0.0257 0.0028 -0.0010  
Y 0.0001 0.0005 -0.0106 0.0104 0.0008 -0.0004  
Z 0.0004 -0.0017 -0.0220 0.0215 0.0030 -0.0012  
AT. 143 C X 0.0005 0.0002 0.0008 -0.0010 -0.0002 -0.0002  
Y -0.0002 0.0003 0.0027 0.0020 0.0005 0.0004  
Z 0.0001 0.0012 0.0216 0.0216 0.0027 0.0006  
AT. 144 C X -0.0005 0.0002 0.0008 0.0010 0.0002 -0.0002  
Y 0.0002 0.0003 0.0027 -0.0020 -0.0005 0.0004  
Z -0.0001 0.0012 0.0216 -0.0216 -0.0027 0.0006  
AT. 145 H X 0.0011 -0.0012 -0.0387 -0.0425 -0.0049 -0.0020

Y -0.0007 0.0007 0.0045 0.0025 0.0016 0.0013  
Z 0.0007 0.0004 0.0093 0.0099 0.0003 -0.0008  
AT. 146 H X -0.0011 -0.0012 -0.0387 0.0425 0.0049 -0.0020  
Y 0.0007 0.0007 0.0045 -0.0025 -0.0016 0.0013  
Z -0.0007 0.0004 0.0093 -0.0099 -0.0003 -0.0008  
AT. 147 H X 0.0013 0.0010 0.0303 0.0284 0.0033 0.0016  
Y -0.0008 0.0002 0.0021 0.0044 -0.0006 -0.0010  
Z 0.0009 0.0023 0.0642 0.0655 0.0072 0.0025  
AT. 148 H X -0.0013 0.0010 0.0303 -0.0284 -0.0033 0.0016  
Y 0.0008 0.0002 0.0021 -0.0044 0.0006 -0.0010  
Z -0.0009 0.0023 0.0642 -0.0655 -0.0072 0.0025  
AT. 149 H X -0.0011 -0.0003 -0.0262 -0.0266 -0.0036 -0.0024  
Y -0.0012 0.0009 0.0056 0.0045 0.0016 0.0010  
Z -0.0008 0.0025 0.0409 0.0392 0.0063 0.0028  
AT. 150 H X 0.0011 -0.0003 -0.0262 0.0266 0.0036 -0.0024  
Y 0.0012 0.0009 0.0056 -0.0045 -0.0016 0.0010  
Z 0.0008 0.0025 0.0409 -0.0392 -0.0063 0.0028  
AT. 151 C X 0.0005 0.0013 0.0287 0.0279 0.0034 0.0014  
Y -0.0003 -0.0001 0.0143 0.0139 0.0017 0.0010  
Z -0.0023 0.0011 -0.0084 -0.0100 0.0007 -0.0003  
AT. 152 C X -0.0005 0.0013 0.0287 -0.0279 -0.0034 0.0014  
Y 0.0003 -0.0001 0.0143 -0.0139 -0.0017 0.0010  
Z 0.0023 0.0011 -0.0084 0.0100 -0.0007 -0.0003  
AT. 153 H X 0.0019 0.0009 0.0213 0.0201 0.0029 0.0014  
Y -0.0008 -0.0003 0.0147 0.0146 0.0022 0.0014  
Z -0.0036 0.0010 -0.0045 -0.0055 0.0017 0.0004  
AT. 154 H X -0.0019 0.0009 0.0213 -0.0201 -0.0029 0.0014  
Y 0.0008 -0.0003 0.0147 -0.0146 -0.0022 0.0014  
Z 0.0036 0.0010 -0.0045 0.0055 -0.0017 0.0004  
AT. 155 H X -0.0000 0.0021 0.0538 0.0527 0.0055 0.0020  
Y -0.0019 0.0001 0.0248 0.0248 0.0033 0.0018  
Z -0.0008 0.0011 -0.0105 -0.0124 -0.0002 -0.0009

AT.156 H X 0.0000 0.0021 0.0538 -0.0527 -0.0055 0.0020  
Y 0.0019 0.0001 0.0248 -0.0248 -0.0033 0.0018  
Z 0.0008 0.0011 -0.0105 0.0124 0.0002 -0.0009

AT.157 O X -0.0009 -0.0004 0.0001 -0.0002 0.0010 0.0004  
Y 0.0000 0.0012 0.0000 -0.0007 -0.0013 -0.0037  
Z 0.0004 0.0000 0.0004 -0.0005 -0.0014 0.0004

AT.158 O X 0.0009 -0.0004 0.0001 0.0002 -0.0010 0.0004  
Y -0.0000 0.0012 0.0000 0.0007 0.0013 -0.0037  
Z -0.0004 0.0000 0.0004 0.0005 0.0014 0.0004

AT.159 O X 0.0007 -0.0010 -0.0005 0.0005 -0.0012 0.0020  
Y 0.0002 0.0010 -0.0002 -0.0001 0.0011 -0.0002  
Z 0.0029 -0.0010 -0.0005 0.0009 -0.0048 0.0040

AT.160 O X -0.0007 -0.0010 -0.0005 -0.0005 0.0012 0.0020  
Y -0.0002 0.0010 -0.0002 0.0001 -0.0011 -0.0002  
Z -0.0029 -0.0010 -0.0005 -0.0009 0.0048 0.0040

AT.161 H X 0.0008 0.0011 -0.0000 0.0015 -0.0001 -0.0040  
Y 0.0011 0.0022 0.0002 -0.0020 -0.0018 -0.0035  
Z -0.0005 -0.0023 -0.0002 0.0043 -0.0011 -0.0018

AT.162 H X -0.0008 0.0011 -0.0000 -0.0015 0.0001 -0.0040  
Y -0.0011 0.0022 0.0002 0.0020 0.0018 -0.0035  
Z 0.0005 -0.0023 -0.0002 -0.0043 0.0011 -0.0018

AT.163 H X 0.0025 -0.0012 -0.0011 0.0015 -0.0061 0.0064  
Y 0.0011 -0.0015 -0.0017 0.0007 0.0085 -0.0067  
Z 0.0028 -0.0015 -0.0007 0.0008 -0.0020 0.0015

AT.164 H X -0.0025 -0.0012 -0.0011 -0.0015 0.0061 0.0064  
Y -0.0011 -0.0015 -0.0017 -0.0007 -0.0085 -0.0067  
Z -0.0028 -0.0015 -0.0007 -0.0008 0.0020 0.0015

AT.165 O X 0.0003 0.0001 0.0046 0.0039 0.0010 0.0005  
Y 0.0007 0.0006 0.0014 0.0013 0.0010 0.0009  
Z 0.0002 -0.0002 0.0001 0.0020 0.0001 -0.0003

AT.166 O X -0.0003 0.0001 0.0046 -0.0039 -0.0010 0.0005  
Y -0.0007 0.0006 0.0014 -0.0013 -0.0010 0.0009

Z -0.0002 -0.0002 0.0001 -0.0020 -0.0001 -0.0003  
 AT.167 H X 0.0000 0.0004 0.0043 0.0038 0.0012 0.0013  
 Y 0.0016 0.0001 0.0040 0.0039 0.0008 -0.0002  
 Z -0.0007 -0.0000 -0.0027 -0.0004 -0.0004 -0.0008  
 AT.168 H X -0.0000 0.0004 0.0043 -0.0038 -0.0012 0.0013  
 Y -0.0016 0.0001 0.0040 -0.0039 -0.0008 -0.0002  
 Z 0.0007 -0.0000 -0.0027 0.0004 0.0004 -0.0008  
 AT.169 O X -0.0001 -0.0001 -0.0020 0.0006 0.0002 -0.0005  
 Y 0.0001 -0.0010 0.0040 -0.0026 0.0004 -0.0004  
 Z 0.0001 0.0002 -0.0015 0.0021 0.0000 -0.0002  
 AT.170 O X 0.0001 -0.0001 -0.0020 -0.0006 -0.0002 -0.0005  
 Y -0.0001 -0.0010 0.0040 0.0026 -0.0004 -0.0004  
 Z -0.0001 0.0002 -0.0015 -0.0021 -0.0000 -0.0002  
 AT.171 H X -0.0050 0.0054 -0.0003 -0.0007 -0.0018 0.0006  
 Y -0.0026 0.0012 0.0070 -0.0051 -0.0008 0.0001  
 Z -0.0002 -0.0004 0.0018 -0.0000 -0.0003 -0.0004  
 AT.172 H X 0.0050 0.0054 -0.0003 0.0007 0.0018 0.0006  
 Y 0.0026 0.0012 0.0070 0.0051 0.0008 0.0001  
 Z 0.0002 -0.0004 0.0018 0.0000 0.0003 -0.0004  
  
 FREQ(CM\*\*-1) 426.09 426.97 429.27 429.80 446.63 447.03  
  
 AT. 1 I X -0.0005 0.0004 -0.0001 0.0001 0.0000 -0.0001  
 Y -0.0002 0.0001 0.0000 -0.0000 -0.0001 -0.0002  
 Z -0.0001 0.0000 -0.0000 0.0000 0.0000 -0.0000  
 AT. 2 I X -0.0005 -0.0004 -0.0001 -0.0001 0.0000 0.0001  
 Y -0.0002 -0.0001 0.0000 0.0000 -0.0001 0.0002  
 Z -0.0001 -0.0000 -0.0000 -0.0000 0.0000 0.0000  
 AT. 3 I X 0.0011 -0.0013 0.0000 -0.0001 -0.0000 0.0001  
 Y 0.0002 -0.0003 0.0000 -0.0001 -0.0001 0.0000  
 Z 0.0005 -0.0006 0.0000 -0.0001 -0.0000 0.0000  
 AT. 4 I X 0.0011 0.0013 0.0000 0.0001 -0.0000 -0.0001

Y 0.0002 0.0003 0.0000 0.0001 -0.0001 -0.0000  
Z 0.0005 0.0006 0.0000 0.0001 -0.0000 -0.0000  
AT. 5 O X 0.0020 -0.0024 0.0001 0.0000 -0.0001 0.0005  
Y -0.0099 0.0100 -0.0005 0.0004 0.0001 -0.0011  
Z 0.0014 -0.0004 0.0001 0.0001 0.0002 0.0011  
AT. 6 O X 0.0020 0.0024 0.0001 -0.0000 -0.0001 -0.0005  
Y -0.0099 -0.0100 -0.0005 -0.0004 0.0001 0.0011  
Z 0.0014 0.0004 0.0001 -0.0001 0.0002 -0.0011  
AT. 7 O X -0.0102 0.0104 -0.0003 -0.0002 0.0004 0.0000  
Y 0.0115 -0.0110 0.0010 -0.0010 -0.0004 -0.0003  
Z -0.0080 0.0050 0.0003 -0.0004 0.0000 0.0011  
AT. 8 O X -0.0102 -0.0104 -0.0003 0.0002 0.0004 -0.0000  
Y 0.0115 0.0110 0.0010 0.0010 -0.0004 0.0003  
Z -0.0080 -0.0050 0.0003 0.0004 0.0000 -0.0011  
AT. 9 N X 0.0084 -0.0102 0.0005 -0.0002 0.0005 -0.0001  
Y 0.0224 -0.0221 0.0012 -0.0006 0.0000 0.0008  
Z -0.0030 0.0032 -0.0003 0.0005 0.0001 -0.0003  
AT. 10 N X 0.0084 0.0102 0.0005 0.0002 0.0005 0.0001  
Y 0.0224 0.0221 0.0012 0.0006 0.0000 -0.0008  
Z -0.0030 -0.0032 -0.0003 -0.0005 0.0001 0.0003  
AT. 11 N X 0.0046 -0.0040 0.0004 -0.0005 -0.0002 -0.0000  
Y 0.0060 -0.0045 0.0006 -0.0005 -0.0003 -0.0006  
Z -0.0086 0.0084 -0.0004 0.0002 0.0002 0.0000  
AT. 12 N X 0.0046 0.0040 0.0004 0.0005 -0.0002 0.0000  
Y 0.0060 0.0045 0.0006 0.0005 -0.0003 0.0006  
Z -0.0086 -0.0084 -0.0004 -0.0002 0.0002 -0.0000  
AT. 13 C X 0.0051 -0.0057 0.0002 -0.0002 -0.0001 0.0005  
Y 0.0024 -0.0012 0.0004 -0.0007 0.0000 0.0008  
Z -0.0040 0.0036 -0.0003 0.0006 0.0003 -0.0004  
AT. 14 C X 0.0051 0.0057 0.0002 0.0002 -0.0001 -0.0005  
Y 0.0024 0.0012 0.0004 0.0007 0.0000 -0.0008  
Z -0.0040 -0.0036 -0.0003 -0.0006 0.0003 0.0004



AT. 15 C X -0.0011 0.0015 0.0000 -0.0003 -0.0001 0.0006  
Y 0.0033 -0.0021 0.0005 -0.0009 -0.0002 0.0011  
Z 0.0092 -0.0125 0.0002 0.0006 0.0003 -0.0004

AT. 16 C X -0.0011 -0.0015 0.0000 0.0003 -0.0001 -0.0006  
Y 0.0033 0.0021 0.0005 0.0009 -0.0002 -0.0011  
Z 0.0092 0.0125 0.0002 -0.0006 0.0003 0.0004

AT. 17 H X -0.0037 0.0037 -0.0002 -0.0001 -0.0005 0.0000  
Y -0.0113 0.0141 -0.0002 -0.0006 -0.0001 0.0002  
Z 0.0273 -0.0325 0.0010 0.0002 -0.0000 0.0006

AT. 18 H X -0.0037 -0.0037 -0.0002 0.0001 -0.0005 -0.0000  
Y -0.0113 -0.0141 -0.0002 0.0006 -0.0001 -0.0002  
Z 0.0273 0.0325 0.0010 -0.0002 -0.0000 -0.0006

AT. 19 H X -0.0093 0.0099 -0.0004 0.0001 -0.0003 0.0001  
Y 0.0271 -0.0280 0.0014 -0.0011 -0.0004 0.0020  
Z 0.0152 -0.0192 0.0004 0.0006 0.0002 -0.0001

AT. 20 H X -0.0093 -0.0099 -0.0004 -0.0001 -0.0003 -0.0001  
Y 0.0271 0.0280 0.0014 0.0011 -0.0004 -0.0020  
Z 0.0152 0.0192 0.0004 -0.0006 0.0002 0.0001

AT. 21 C X -0.0082 0.0086 -0.0005 0.0002 0.0004 0.0001  
Y 0.0128 -0.0111 0.0004 -0.0001 -0.0002 -0.0005  
Z -0.0064 0.0059 -0.0004 0.0005 0.0004 0.0002

AT. 22 C X -0.0082 -0.0086 -0.0005 -0.0002 0.0004 -0.0001  
Y 0.0128 0.0111 0.0004 0.0001 -0.0002 0.0005  
Z -0.0064 -0.0059 -0.0004 -0.0005 0.0004 -0.0002

AT. 23 C X -0.0035 0.0044 -0.0004 0.0005 0.0004 -0.0002  
Y -0.0128 0.0143 -0.0004 0.0001 0.0007 -0.0001  
Z 0.0084 -0.0079 0.0000 0.0009 0.0004 -0.0004

AT. 24 C X -0.0035 -0.0044 -0.0004 -0.0005 0.0004 0.0002  
Y -0.0128 -0.0143 -0.0004 -0.0001 0.0007 0.0001  
Z 0.0084 0.0079 0.0000 -0.0009 0.0004 0.0004

AT. 25 H X -0.0030 0.0028 -0.0007 0.0004 0.0001 0.0001  
Y -0.0175 0.0188 -0.0007 0.0002 0.0008 0.0000

Z 0.0500 -0.0485 0.0014 0.0005 -0.0010 -0.0005  
AT. 26 H X -0.0030 -0.0028 -0.0007 -0.0004 0.0001 -0.0001  
Y -0.0175 -0.0188 -0.0007 -0.0002 0.0008 -0.0000  
Z 0.0500 0.0485 0.0014 -0.0005 -0.0010 0.0005  
AT. 27 H X 0.0068 -0.0057 0.0002 0.0006 0.0002 -0.0005  
Y -0.0516 0.0525 -0.0017 0.0004 0.0017 0.0003  
Z -0.0129 0.0131 -0.0007 0.0011 0.0011 -0.0001  
AT. 28 H X 0.0068 0.0057 0.0002 -0.0006 0.0002 0.0005  
Y -0.0516 -0.0525 -0.0017 -0.0004 0.0017 -0.0003  
Z -0.0129 -0.0131 -0.0007 -0.0011 0.0011 0.0001  
AT. 29 C X -0.0103 0.0089 -0.0009 0.0009 0.0006 -0.0002  
Y 0.0185 -0.0190 0.0007 -0.0003 -0.0004 -0.0005  
Z 0.0256 -0.0262 0.0016 -0.0009 -0.0004 -0.0018  
AT. 30 C X -0.0103 -0.0089 -0.0009 -0.0009 0.0006 0.0002  
Y 0.0185 0.0190 0.0007 0.0003 -0.0004 0.0005  
Z 0.0256 0.0262 0.0016 0.0009 -0.0004 0.0018  
AT. 31 H X -0.0415 0.0400 -0.0029 0.0022 0.0008 -0.0002  
Y 0.0646 -0.0650 0.0036 -0.0020 -0.0010 -0.0013  
Z 0.0752 -0.0758 0.0046 -0.0026 -0.0010 -0.0028  
AT. 32 H X -0.0415 -0.0400 -0.0029 -0.0022 0.0008 0.0002  
Y 0.0646 0.0650 0.0036 0.0020 -0.0010 0.0013  
Z 0.0752 0.0758 0.0046 0.0026 -0.0010 0.0028  
AT. 33 H X -0.0292 0.0268 -0.0017 0.0007 0.0010 -0.0001  
Y -0.0522 0.0518 -0.0041 0.0026 0.0002 0.0007  
Z 0.0436 -0.0448 0.0031 -0.0023 -0.0005 -0.0021  
AT. 34 H X -0.0292 -0.0268 -0.0017 -0.0007 0.0010 0.0001  
Y -0.0522 -0.0518 -0.0041 -0.0026 0.0002 -0.0007  
Z 0.0436 0.0448 0.0031 0.0023 -0.0005 0.0021  
AT. 35 C X 0.0167 -0.0163 0.0006 0.0002 0.0000 -0.0007  
Y 0.0213 -0.0225 0.0011 -0.0007 -0.0006 -0.0009  
Z -0.0032 0.0026 -0.0002 -0.0001 0.0000 -0.0012  
AT. 36 C X 0.0167 0.0163 0.0006 -0.0002 0.0000 0.0007

Y 0.0213 0.0225 0.0011 0.0007 -0.0006 0.0009  
Z -0.0032 -0.0026 -0.0002 0.0001 0.0000 0.0012  
AT. 37 C X 0.0190 -0.0188 0.0009 -0.0003 -0.0003 -0.0002  
Y 0.0155 -0.0151 0.0011 -0.0009 -0.0006 -0.0005  
Z -0.0150 0.0153 -0.0003 -0.0005 -0.0000 0.0004  
AT. 38 C X 0.0190 0.0188 0.0009 0.0003 -0.0003 0.0002  
Y 0.0155 0.0151 0.0011 0.0009 -0.0006 0.0005  
Z -0.0150 -0.0153 -0.0003 0.0005 -0.0000 -0.0004  
AT. 39 H X 0.0101 -0.0081 0.0012 -0.0014 -0.0008 0.0017  
Y 0.0033 -0.0016 0.0009 -0.0011 -0.0006 0.0012  
Z -0.0149 0.0159 0.0000 -0.0011 -0.0004 0.0010  
AT. 40 H X 0.0101 0.0081 0.0012 0.0014 -0.0008 -0.0017  
Y 0.0033 0.0016 0.0009 0.0011 -0.0006 -0.0012  
Z -0.0149 -0.0159 0.0000 0.0011 -0.0004 -0.0010  
AT. 41 H X 0.0261 -0.0275 0.0007 0.0006 -0.0000 -0.0021  
Y 0.0237 -0.0236 0.0015 -0.0011 -0.0009 -0.0006  
Z -0.0283 0.0305 -0.0004 -0.0011 -0.0001 0.0025  
AT. 42 H X 0.0261 0.0275 0.0007 -0.0006 -0.0000 0.0021  
Y 0.0237 0.0236 0.0015 0.0011 -0.0009 0.0006  
Z -0.0283 -0.0305 -0.0004 0.0011 -0.0001 -0.0025  
AT. 43 C X 0.0080 -0.0080 0.0004 -0.0006 -0.0004 -0.0000  
Y -0.0279 0.0265 -0.0011 0.0007 0.0006 0.0006  
Z 0.0074 -0.0067 0.0001 -0.0003 -0.0002 -0.0002  
AT. 44 C X 0.0080 0.0080 0.0004 0.0006 -0.0004 0.0000  
Y -0.0279 -0.0265 -0.0011 -0.0007 0.0006 -0.0006  
Z 0.0074 0.0067 0.0001 0.0003 -0.0002 0.0002  
AT. 45 H X 0.0190 -0.0204 0.0006 -0.0007 -0.0004 0.0004  
Y -0.0630 0.0631 -0.0024 0.0017 0.0009 0.0009  
Z 0.0334 -0.0334 0.0013 -0.0013 -0.0006 -0.0007  
AT. 46 H X 0.0190 0.0204 0.0006 0.0007 -0.0004 -0.0004  
Y -0.0630 -0.0631 -0.0024 -0.0017 0.0009 -0.0009  
Z 0.0334 0.0334 0.0013 0.0013 -0.0006 0.0007

AT. 47 H X 0.0171 -0.0193 0.0008 -0.0008 -0.0003 0.0002  
Y 0.0067 -0.0104 0.0004 -0.0004 0.0001 0.0003  
Z 0.0307 -0.0296 0.0011 -0.0013 -0.0009 -0.0007

AT. 48 H X 0.0171 0.0193 0.0008 0.0008 -0.0003 -0.0002  
Y 0.0067 0.0104 0.0004 0.0004 0.0001 -0.0003  
Z 0.0307 0.0296 0.0011 0.0013 -0.0009 0.0007

AT. 49 C X -0.0123 0.0142 -0.0005 0.0000 -0.0003 0.0001  
Y -0.0289 0.0268 -0.0013 0.0010 0.0006 0.0008  
Z -0.0061 0.0081 -0.0005 0.0000 -0.0003 0.0002

AT. 50 C X -0.0123 -0.0142 -0.0005 -0.0000 -0.0003 -0.0001  
Y -0.0289 -0.0268 -0.0013 -0.0010 0.0006 -0.0008  
Z -0.0061 -0.0081 -0.0005 -0.0000 -0.0003 -0.0002

AT. 51 C X -0.0195 0.0197 -0.0007 -0.0001 0.0002 0.0004  
Y -0.0166 0.0162 -0.0015 0.0018 0.0005 -0.0001  
Z -0.0074 0.0095 -0.0000 -0.0004 -0.0004 0.0009

AT. 52 C X -0.0195 -0.0197 -0.0007 0.0001 0.0002 -0.0004  
Y -0.0166 -0.0162 -0.0015 -0.0018 0.0005 0.0001  
Z -0.0074 -0.0095 -0.0000 0.0004 -0.0004 -0.0009

AT. 53 H X -0.0227 0.0236 -0.0020 0.0018 0.0005 -0.0012  
Y -0.0150 0.0171 -0.0026 0.0032 0.0002 -0.0016  
Z 0.0008 0.0027 0.0010 -0.0020 -0.0010 0.0019

AT. 54 H X -0.0227 -0.0236 -0.0020 -0.0018 0.0005 0.0012  
Y -0.0150 -0.0171 -0.0026 -0.0032 0.0002 0.0016  
Z 0.0008 -0.0027 0.0010 0.0020 -0.0010 -0.0019

AT. 55 H X -0.0129 0.0124 0.0013 -0.0027 -0.0002 0.0027  
Y -0.0339 0.0333 -0.0029 0.0033 0.0007 -0.0010  
Z -0.0238 0.0252 -0.0004 -0.0005 -0.0004 0.0014

AT. 56 H X -0.0129 -0.0124 0.0013 0.0027 -0.0002 -0.0027  
Y -0.0339 -0.0333 -0.0029 -0.0033 0.0007 0.0010  
Z -0.0238 -0.0252 -0.0004 0.0005 -0.0004 -0.0014

AT. 57 C X -0.0074 0.0077 -0.0006 0.0007 0.0005 -0.0001  
Y -0.0044 0.0048 -0.0002 -0.0003 -0.0001 0.0008

Z 0.0035 -0.0009 -0.0001 0.0003 -0.0001 -0.0002  
AT. 58 C X -0.0074 -0.0077 -0.0006 -0.0007 0.0005 0.0001  
Y -0.0044 -0.0048 -0.0002 0.0003 -0.0001 -0.0008  
Z 0.0035 0.0009 -0.0001 -0.0003 -0.0001 0.0002  
AT. 59 H X -0.0409 0.0403 -0.0021 0.0012 0.0009 0.0008  
Y 0.0066 -0.0026 0.0007 -0.0009 -0.0009 0.0005  
Z -0.0039 0.0111 0.0001 -0.0002 -0.0009 -0.0001  
AT. 60 H X -0.0409 -0.0403 -0.0021 -0.0012 0.0009 -0.0008  
Y 0.0066 0.0026 0.0007 0.0009 -0.0009 -0.0005  
Z -0.0039 -0.0111 0.0001 0.0002 -0.0009 0.0001  
AT. 61 H X -0.0112 0.0115 -0.0015 0.0015 0.0008 0.0015  
Y -0.0237 0.0188 -0.0017 0.0005 0.0008 0.0014  
Z 0.0101 -0.0049 -0.0001 0.0005 -0.0004 0.0007  
AT. 62 H X -0.0112 -0.0115 -0.0015 -0.0015 0.0008 -0.0015  
Y -0.0237 -0.0188 -0.0017 -0.0005 0.0008 -0.0014  
Z 0.0101 0.0049 -0.0001 -0.0005 -0.0004 -0.0007  
AT. 63 H X 0.0018 -0.0015 0.0007 -0.0003 -0.0001 -0.0020  
Y -0.0268 0.0307 -0.0012 -0.0001 -0.0001 0.0025  
Z 0.0140 -0.0144 -0.0004 0.0010 0.0005 0.0002  
AT. 64 H X 0.0018 0.0015 0.0007 0.0003 -0.0001 0.0020  
Y -0.0268 -0.0307 -0.0012 0.0001 -0.0001 -0.0025  
Z 0.0140 0.0144 -0.0004 -0.0010 0.0005 -0.0002  
AT. 65 C X 0.0097 -0.0103 0.0007 -0.0005 -0.0002 -0.0007  
Y 0.0031 -0.0031 0.0000 0.0001 0.0001 -0.0000  
Z -0.0089 0.0077 -0.0005 0.0002 0.0003 0.0001  
AT. 66 C X 0.0097 0.0103 0.0007 0.0005 -0.0002 0.0007  
Y 0.0031 0.0031 0.0000 -0.0001 0.0001 0.0000  
Z -0.0089 -0.0077 -0.0005 -0.0002 0.0003 -0.0001  
AT. 67 H X 0.0312 -0.0351 0.0018 -0.0011 0.0001 -0.0016  
Y 0.0059 -0.0032 0.0002 -0.0002 -0.0003 0.0003  
Z -0.0293 0.0283 -0.0016 0.0009 0.0004 0.0007  
AT. 68 H X 0.0312 0.0351 0.0018 0.0011 0.0001 0.0016

Y 0.0059 0.0032 0.0002 0.0002 -0.0003 -0.0003  
Z -0.0293 -0.0283 -0.0016 -0.0009 0.0004 -0.0007  
AT. 69 H X 0.0182 -0.0178 0.0011 -0.0008 -0.0005 -0.0010  
Y 0.0117 -0.0137 0.0004 -0.0000 0.0001 -0.0006  
Z -0.0126 0.0062 -0.0005 0.0005 0.0010 -0.0002  
AT. 70 H X 0.0182 0.0178 0.0011 0.0008 -0.0005 0.0010  
Y 0.0117 0.0137 0.0004 0.0000 0.0001 0.0006  
Z -0.0126 -0.0062 -0.0005 -0.0005 0.0010 0.0002  
AT. 71 H X -0.0005 -0.0020 0.0005 -0.0004 0.0002 -0.0004  
Y 0.0252 -0.0235 0.0009 -0.0005 -0.0003 -0.0006  
Z 0.0142 -0.0146 0.0005 -0.0005 0.0001 -0.0004  
AT. 72 H X -0.0005 0.0020 0.0005 0.0004 0.0002 0.0004  
Y 0.0252 0.0235 0.0009 0.0005 -0.0003 0.0006  
Z 0.0142 0.0146 0.0005 0.0005 0.0001 0.0004  
AT. 73 C X -0.0021 0.0044 -0.0003 -0.0001 -0.0004 0.0004  
Y -0.0115 0.0094 -0.0007 0.0002 0.0001 0.0003  
Z -0.0043 0.0055 -0.0002 -0.0005 -0.0004 -0.0008  
AT. 74 C X -0.0021 -0.0044 -0.0003 0.0001 -0.0004 -0.0004  
Y -0.0115 -0.0094 -0.0007 -0.0002 0.0001 -0.0003  
Z -0.0043 -0.0055 -0.0002 0.0005 -0.0004 0.0008  
AT. 75 H X 0.0163 -0.0131 0.0000 -0.0008 -0.0009 0.0006  
Y -0.0353 0.0332 -0.0020 0.0006 0.0003 0.0010  
Z -0.0234 0.0254 -0.0017 -0.0004 -0.0004 0.0004  
AT. 76 H X 0.0163 0.0131 0.0000 0.0008 -0.0009 -0.0006  
Y -0.0353 -0.0332 -0.0020 -0.0006 0.0003 -0.0010  
Z -0.0234 -0.0254 -0.0017 0.0004 -0.0004 -0.0004  
AT. 77 H X -0.0307 0.0344 -0.0019 0.0004 -0.0002 0.0019  
Y -0.0030 0.0006 -0.0008 -0.0001 -0.0000 0.0003  
Z 0.0136 -0.0136 0.0012 -0.0007 -0.0004 -0.0022  
AT. 78 H X -0.0307 -0.0344 -0.0019 -0.0004 -0.0002 -0.0019  
Y -0.0030 -0.0006 -0.0008 0.0001 -0.0000 -0.0003  
Z 0.0136 0.0136 0.0012 0.0007 -0.0004 0.0022

AT. 79 I X -0.0000 0.0003 0.0011 -0.0005 0.0020 0.0022  
Y 0.0001 0.0001 -0.0012 0.0010 -0.0018 -0.0023  
Z -0.0000 0.0001 -0.0001 0.0000 0.0001 -0.0001

AT. 80 I X -0.0000 -0.0003 0.0011 0.0005 0.0020 -0.0022  
Y 0.0001 -0.0001 -0.0012 -0.0010 -0.0018 0.0023  
Z -0.0000 -0.0001 -0.0001 -0.0000 0.0001 0.0001

AT. 81 I X -0.0000 0.0000 -0.0007 0.0007 -0.0002 -0.0004  
Y 0.0000 -0.0000 0.0002 -0.0002 0.0001 0.0003  
Z -0.0000 0.0000 0.0002 -0.0003 0.0001 0.0002

AT. 82 I X -0.0000 -0.0000 -0.0007 -0.0007 -0.0002 0.0004  
Y 0.0000 0.0000 0.0002 0.0002 0.0001 -0.0003  
Z -0.0000 -0.0000 0.0002 0.0003 0.0001 -0.0002

AT. 83 O X -0.0011 0.0008 -0.0069 0.0050 -0.0191 -0.0180  
Y -0.0001 0.0002 -0.0084 0.0089 -0.0154 -0.0143  
Z -0.0003 -0.0002 0.0092 -0.0092 0.0234 0.0233

AT. 84 O X -0.0011 -0.0008 -0.0069 -0.0050 -0.0191 0.0180  
Y -0.0001 -0.0002 -0.0084 -0.0089 -0.0154 0.0143  
Z -0.0003 0.0002 0.0092 0.0092 0.0234 -0.0233

AT. 85 O X -0.0009 0.0008 0.0109 -0.0116 0.0028 0.0039  
Y -0.0014 0.0007 0.0108 -0.0117 -0.0080 -0.0077  
Z 0.0021 -0.0010 -0.0062 0.0069 0.0145 0.0149

AT. 86 O X -0.0009 -0.0008 0.0109 0.0116 0.0028 -0.0039  
Y -0.0014 -0.0007 0.0108 0.0117 -0.0080 0.0077  
Z 0.0021 0.0010 -0.0062 -0.0069 0.0145 -0.0149

AT. 87 N X -0.0005 0.0002 0.0013 -0.0023 0.0005 0.0021  
Y -0.0012 0.0004 0.0222 -0.0205 0.0250 0.0262  
Z -0.0003 0.0003 -0.0039 0.0023 -0.0081 -0.0078

AT. 88 N X -0.0005 -0.0002 0.0013 0.0023 0.0005 -0.0021  
Y -0.0012 -0.0004 0.0222 0.0205 0.0250 -0.0262  
Z -0.0003 -0.0003 -0.0039 -0.0023 -0.0081 0.0078

AT. 89 N X -0.0006 0.0002 0.0038 -0.0039 -0.0037 -0.0033  
Y -0.0013 0.0007 -0.0014 0.0005 -0.0056 -0.0054

Z 0.0004 -0.0002 -0.0095 0.0092 -0.0014 -0.0012  
AT. 90 N X -0.0006 -0.0002 0.0038 0.0039 -0.0037 0.0033  
Y -0.0013 -0.0007 -0.0014 -0.0005 -0.0056 0.0054  
Z 0.0004 0.0002 -0.0095 -0.0092 -0.0014 0.0012  
AT. 91 C X -0.0009 0.0005 -0.0035 0.0025 -0.0064 -0.0056  
Y -0.0009 0.0000 0.0082 -0.0072 0.0143 0.0149  
Z -0.0002 0.0003 -0.0018 0.0008 -0.0045 -0.0044  
AT. 92 C X -0.0009 -0.0005 -0.0035 -0.0025 -0.0064 0.0056  
Y -0.0009 -0.0000 0.0082 0.0072 0.0143 -0.0149  
Z -0.0002 -0.0003 -0.0018 -0.0008 -0.0045 0.0044  
AT. 93 C X -0.0005 0.0006 0.0025 -0.0019 -0.0043 -0.0040  
Y -0.0007 -0.0009 0.0120 -0.0112 0.0176 0.0203  
Z 0.0007 -0.0006 0.0086 -0.0074 -0.0014 0.0017  
AT. 94 C X -0.0005 -0.0006 0.0025 0.0019 -0.0043 0.0040  
Y -0.0007 0.0009 0.0120 0.0112 0.0176 -0.0203  
Z 0.0007 0.0006 0.0086 0.0074 -0.0014 -0.0017  
AT. 95 H X 0.0007 0.0016 0.0061 -0.0045 0.0088 -0.0016  
Y -0.0020 -0.0004 -0.0018 -0.0003 -0.0028 0.0032  
Z 0.0019 -0.0023 0.0292 -0.0240 0.0222 0.0297  
AT. 96 H X 0.0007 -0.0016 0.0061 0.0045 0.0088 0.0016  
Y -0.0020 0.0004 -0.0018 0.0003 -0.0028 -0.0032  
Z 0.0019 0.0023 0.0292 0.0240 0.0222 -0.0297  
AT. 97 H X -0.0000 -0.0002 0.0160 -0.0125 0.0122 0.0147  
Y 0.0012 -0.0024 0.0347 -0.0292 0.0407 0.0441  
Z 0.0010 -0.0008 0.0100 -0.0085 -0.0009 0.0019  
AT. 98 H X -0.0000 0.0002 0.0160 0.0125 0.0122 -0.0147  
Y 0.0012 0.0024 0.0347 0.0292 0.0407 -0.0441  
Z 0.0010 0.0008 0.0100 0.0085 -0.0009 -0.0019  
AT. 99 C X -0.0012 0.0009 0.0125 -0.0135 -0.0038 -0.0024  
Y -0.0016 0.0008 0.0094 -0.0101 -0.0068 -0.0066  
Z 0.0006 -0.0003 -0.0019 0.0022 0.0004 0.0005  
AT. 100 C X -0.0012 -0.0009 0.0125 0.0135 -0.0038 0.0024



Y -0.0016 -0.0008 0.0094 0.0101 -0.0068 0.0066  
Z 0.0006 0.0003 -0.0019 -0.0022 0.0004 -0.0005  
AT. 101 C X 0.0000 0.0002 -0.0005 0.0004 0.0009 0.0008  
Y 0.0009 -0.0005 -0.0168 0.0178 0.0018 -0.0013  
Z -0.0016 0.0010 0.0225 -0.0229 -0.0075 -0.0057  
AT. 102 C X 0.0000 -0.0002 -0.0005 -0.0004 0.0009 -0.0008  
Y 0.0009 0.0005 -0.0168 -0.0178 0.0018 0.0013  
Z -0.0016 -0.0010 0.0225 0.0229 -0.0075 0.0057  
AT. 103 H X -0.0006 0.0005 0.0035 -0.0037 -0.0020 -0.0013  
Y 0.0013 -0.0007 -0.0194 0.0206 0.0029 -0.0006  
Z -0.0055 0.0032 0.0663 -0.0702 -0.0146 -0.0078  
AT. 104 H X -0.0006 -0.0005 0.0035 0.0037 -0.0020 0.0013  
Y 0.0013 0.0007 -0.0194 -0.0206 0.0029 0.0006  
Z -0.0055 -0.0032 0.0663 0.0702 -0.0146 0.0078  
AT. 105 H X 0.0021 -0.0011 -0.0222 0.0230 0.0044 0.0035  
Y 0.0041 -0.0025 -0.0538 0.0577 0.0092 0.0026  
Z 0.0001 -0.0001 0.0037 -0.0027 -0.0038 -0.0039  
AT. 106 H X 0.0021 0.0011 -0.0222 -0.0230 0.0044 -0.0035  
Y 0.0041 0.0025 -0.0538 -0.0577 0.0092 -0.0026  
Z 0.0001 0.0001 0.0037 0.0027 -0.0038 0.0039  
AT. 107 C X -0.0012 0.0004 0.0195 -0.0181 0.0131 0.0141  
Y 0.0006 -0.0000 0.0093 -0.0103 -0.0175 -0.0175  
Z -0.0008 0.0008 0.0163 -0.0161 -0.0174 -0.0182  
AT. 108 C X -0.0012 -0.0004 0.0195 0.0181 0.0131 -0.0141  
Y 0.0006 0.0000 0.0093 0.0103 -0.0175 0.0175  
Z -0.0008 -0.0008 0.0163 0.0161 -0.0174 0.0182  
AT. 109 H X -0.0044 0.0018 0.0723 -0.0670 0.0430 0.0463  
Y -0.0012 0.0008 0.0437 -0.0435 -0.0127 -0.0107  
Z -0.0029 0.0018 0.0596 -0.0587 -0.0180 -0.0159  
AT. 110 H X -0.0044 -0.0018 0.0723 0.0670 0.0430 -0.0463  
Y -0.0012 -0.0008 0.0437 0.0435 -0.0127 0.0107  
Z -0.0029 -0.0018 0.0596 0.0587 -0.0180 0.0159

AT.111 H X -0.0018 0.0007 0.0201 -0.0204 0.0134 0.0166  
Y 0.0045 -0.0016 -0.0651 0.0614 -0.0362 -0.0407  
Z -0.0009 0.0008 0.0323 -0.0297 -0.0125 -0.0146

AT.112 H X -0.0018 -0.0007 0.0201 0.0204 0.0134 -0.0166  
Y 0.0045 0.0016 -0.0651 -0.0614 -0.0362 0.0407  
Z -0.0009 -0.0008 0.0323 0.0297 -0.0125 0.0146

AT.113 C X 0.0017 -0.0010 -0.0147 0.0162 0.0074 0.0047  
Y 0.0001 0.0001 0.0203 -0.0211 -0.0203 -0.0196  
Z 0.0004 0.0003 -0.0097 0.0095 -0.0197 -0.0225

AT.114 C X 0.0017 0.0010 -0.0147 -0.0162 0.0074 -0.0047  
Y 0.0001 -0.0001 0.0203 0.0211 -0.0203 0.0196  
Z 0.0004 -0.0003 -0.0097 -0.0095 -0.0197 0.0225

AT.115 C X 0.0001 -0.0003 -0.0113 0.0126 0.0100 0.0082  
Y -0.0009 0.0003 0.0218 -0.0220 -0.0028 -0.0013  
Z 0.0006 -0.0004 -0.0106 0.0122 0.0155 0.0140

AT.116 C X 0.0001 0.0003 -0.0113 -0.0126 0.0100 -0.0082  
Y -0.0009 -0.0003 0.0218 0.0220 -0.0028 0.0013  
Z 0.0006 0.0004 -0.0106 -0.0122 0.0155 -0.0140

AT.117 H X 0.0003 0.0000 -0.0161 0.0147 -0.0277 -0.0291  
Y -0.0019 0.0001 0.0274 -0.0248 0.0494 0.0527  
Z 0.0006 -0.0006 -0.0051 0.0088 0.0420 0.0397

AT.118 H X 0.0003 -0.0000 -0.0161 -0.0147 -0.0277 0.0291  
Y -0.0019 -0.0001 0.0274 0.0248 0.0494 -0.0527  
Z 0.0006 0.0006 -0.0051 -0.0088 0.0420 -0.0397

AT.119 H X -0.0003 -0.0008 0.0010 0.0038 0.0619 0.0605  
Y -0.0008 0.0005 0.0307 -0.0315 -0.0174 -0.0159  
Z 0.0003 -0.0008 -0.0123 0.0165 0.0592 0.0580

AT.120 H X -0.0003 0.0008 0.0010 -0.0038 0.0619 -0.0605  
Y -0.0008 -0.0005 0.0307 0.0315 -0.0174 0.0159  
Z 0.0003 0.0008 -0.0123 -0.0165 0.0592 -0.0580

AT.121 C X -0.0003 0.0003 -0.0109 0.0100 -0.0066 -0.0056  
Y 0.0016 -0.0009 -0.0227 0.0238 0.0132 0.0119

Z 0.0003 -0.0005 0.0073 -0.0071 -0.0022 -0.0021  
AT.122 C X -0.0003 -0.0003 -0.0109 -0.0100 -0.0066 0.0056  
Y 0.0016 0.0009 -0.0227 -0.0238 0.0132 -0.0119  
Z 0.0003 0.0005 0.0073 0.0071 -0.0022 0.0021  
AT.123 H X -0.0023 0.0016 -0.0335 0.0289 -0.0242 -0.0209  
Y 0.0008 -0.0003 -0.0489 0.0473 0.0050 0.0054  
Z 0.0007 -0.0009 0.0310 -0.0284 0.0037 0.0023  
AT.124 H X -0.0023 -0.0016 -0.0335 -0.0289 -0.0242 0.0209  
Y 0.0008 0.0003 -0.0489 -0.0473 0.0050 -0.0054  
Z 0.0007 0.0009 0.0310 0.0284 0.0037 -0.0023  
AT.125 H X -0.0014 0.0006 -0.0036 0.0022 -0.0099 -0.0088  
Y 0.0041 -0.0024 0.0100 -0.0042 0.0314 0.0271  
Z 0.0004 -0.0010 0.0326 -0.0304 0.0040 0.0027  
AT.126 H X -0.0014 -0.0006 -0.0036 -0.0022 -0.0099 0.0088  
Y 0.0041 0.0024 0.0100 0.0042 0.0314 -0.0271  
Z 0.0004 0.0010 0.0326 0.0304 0.0040 -0.0027  
AT.127 C X 0.0019 -0.0009 -0.0039 0.0044 -0.0012 -0.0017  
Y 0.0016 -0.0008 -0.0278 0.0282 0.0131 0.0124  
Z -0.0009 0.0001 -0.0091 0.0072 -0.0067 -0.0054  
AT.128 C X 0.0019 0.0009 -0.0039 -0.0044 -0.0012 0.0017  
Y 0.0016 0.0008 -0.0278 -0.0282 0.0131 -0.0124  
Z -0.0009 -0.0001 -0.0091 -0.0072 -0.0067 0.0054  
AT.129 C X -0.0001 0.0003 0.0096 -0.0111 -0.0139 -0.0117  
Y -0.0000 0.0003 -0.0160 0.0143 -0.0101 -0.0089  
Z -0.0005 -0.0001 -0.0103 0.0099 0.0168 0.0174  
AT.130 C X -0.0001 -0.0003 0.0096 0.0111 -0.0139 0.0117  
Y -0.0000 -0.0003 -0.0160 -0.0143 -0.0101 0.0089  
Z -0.0005 0.0001 -0.0103 -0.0099 0.0168 -0.0174  
AT.131 H X 0.0004 -0.0005 0.0136 -0.0117 0.0272 0.0285  
Y -0.0027 0.0023 -0.0108 0.0031 -0.0757 -0.0712  
Z -0.0010 -0.0003 -0.0018 0.0036 0.0430 0.0437  
AT.132 H X 0.0004 0.0005 0.0136 0.0117 0.0272 -0.0285

Y -0.0027 -0.0023 -0.0108 -0.0031 -0.0757 0.0712  
Z -0.0010 0.0003 -0.0018 -0.0036 0.0430 -0.0437  
AT. 133 H X -0.0013 0.0018 0.0001 -0.0077 -0.0862 -0.0821  
Y 0.0005 0.0002 -0.0279 0.0258 -0.0137 -0.0132  
Z 0.0010 -0.0010 -0.0237 0.0257 0.0472 0.0459  
AT. 134 H X -0.0013 -0.0018 0.0001 0.0077 -0.0862 0.0821  
Y 0.0005 -0.0002 -0.0279 -0.0258 -0.0137 0.0132  
Z 0.0010 0.0010 -0.0237 -0.0257 0.0472 -0.0459  
AT. 135 C X 0.0005 -0.0006 0.0053 -0.0045 0.0092 0.0092  
Y 0.0006 -0.0006 -0.0070 0.0079 0.0138 0.0138  
Z -0.0019 0.0011 0.0058 -0.0070 -0.0056 -0.0045  
AT. 136 C X 0.0005 0.0006 0.0053 0.0045 0.0092 -0.0092  
Y 0.0006 0.0006 -0.0070 -0.0079 0.0138 -0.0138  
Z -0.0019 -0.0011 0.0058 0.0070 -0.0056 0.0045  
AT. 137 H X -0.0020 0.0002 0.0422 -0.0438 -0.0087 -0.0044  
Y 0.0000 -0.0006 -0.0066 0.0072 0.0229 0.0239  
Z -0.0021 0.0008 -0.0069 0.0063 0.0158 0.0172  
AT. 138 H X -0.0020 -0.0002 0.0422 0.0438 -0.0087 0.0044  
Y 0.0000 0.0006 -0.0066 -0.0072 0.0229 -0.0239  
Z -0.0021 -0.0008 -0.0069 -0.0063 0.0158 -0.0172  
AT. 139 H X 0.0023 -0.0014 -0.0060 0.0074 -0.0033 -0.0063  
Y 0.0019 -0.0007 -0.0238 0.0261 0.0217 0.0195  
Z -0.0047 0.0021 0.0253 -0.0277 0.0083 0.0138  
AT. 140 H X 0.0023 0.0014 -0.0060 -0.0074 -0.0033 0.0063  
Y 0.0019 0.0007 -0.0238 -0.0261 0.0217 -0.0195  
Z -0.0047 -0.0021 0.0253 0.0277 0.0083 -0.0138  
AT. 141 H X -0.0010 -0.0003 0.0043 -0.0032 0.0369 0.0394  
Y 0.0005 -0.0011 -0.0218 0.0235 0.0396 0.0398  
Z -0.0024 0.0018 0.0214 -0.0232 -0.0207 -0.0187  
AT. 142 H X -0.0010 0.0003 0.0043 0.0032 0.0369 -0.0394  
Y 0.0005 0.0011 -0.0218 -0.0235 0.0396 -0.0398  
Z -0.0024 -0.0018 0.0214 0.0232 -0.0207 0.0187

AT. 143 C X 0.0008 -0.0005 -0.0133 0.0114 -0.0022 -0.0010  
Y -0.0003 0.0002 0.0051 -0.0055 -0.0050 -0.0045  
Z 0.0019 -0.0010 -0.0142 0.0151 -0.0035 -0.0047

AT. 144 C X 0.0008 0.0005 -0.0133 -0.0114 -0.0022 0.0010  
Y -0.0003 -0.0002 0.0051 0.0055 -0.0050 0.0045  
Z 0.0019 0.0010 -0.0142 -0.0151 -0.0035 0.0047

AT. 145 H X -0.0010 0.0001 -0.0277 0.0239 0.0071 0.0109  
Y -0.0016 0.0009 0.0189 -0.0179 -0.0105 -0.0088  
Z 0.0029 -0.0015 -0.0328 0.0316 0.0050 0.0031

AT. 146 H X -0.0010 -0.0001 -0.0277 -0.0239 0.0071 -0.0109  
Y -0.0016 -0.0009 0.0189 0.0179 -0.0105 0.0088  
Z 0.0029 0.0015 -0.0328 -0.0316 0.0050 -0.0031

AT. 147 H X 0.0028 -0.0014 -0.0206 0.0217 0.0027 0.0016  
Y 0.0003 0.0002 0.0088 -0.0116 -0.0104 -0.0112  
Z 0.0051 -0.0024 -0.0224 0.0265 0.0005 -0.0047

AT. 148 H X 0.0028 0.0014 -0.0206 -0.0217 0.0027 -0.0016  
Y 0.0003 -0.0002 0.0088 0.0116 -0.0104 0.0112  
Z 0.0051 0.0024 -0.0224 -0.0265 0.0005 0.0047

AT. 149 H X -0.0016 0.0005 0.0057 -0.0111 -0.0138 -0.0107  
Y -0.0015 0.0007 0.0236 -0.0235 -0.0142 -0.0128  
Z 0.0010 -0.0007 0.0077 -0.0045 -0.0132 -0.0138

AT. 150 H X -0.0016 -0.0005 0.0057 0.0111 -0.0138 0.0107  
Y -0.0015 -0.0007 0.0236 0.0235 -0.0142 0.0128  
Z 0.0010 0.0007 0.0077 0.0045 -0.0132 0.0138

AT. 151 C X 0.0022 -0.0008 -0.0119 0.0129 -0.0025 -0.0052  
Y 0.0018 -0.0009 -0.0056 0.0072 0.0057 0.0043  
Z -0.0004 0.0003 -0.0113 0.0104 -0.0165 -0.0182

AT. 152 C X 0.0022 0.0008 -0.0119 -0.0129 -0.0025 0.0052  
Y 0.0018 0.0009 -0.0056 -0.0072 0.0057 -0.0043  
Z -0.0004 -0.0003 -0.0113 -0.0104 -0.0165 0.0182

AT. 153 H X 0.0029 -0.0010 -0.0384 0.0400 0.0082 0.0037  
Y 0.0027 -0.0014 -0.0148 0.0179 0.0196 0.0163

Z 0.0008 -0.0004 -0.0151 0.0163 0.0011 -0.0029  
AT. 154 H X 0.0029 0.0010 -0.0384 -0.0400 0.0082 -0.0037  
Y 0.0027 0.0014 -0.0148 -0.0179 0.0196 -0.0163  
Z 0.0008 0.0004 -0.0151 -0.0163 0.0011 0.0029  
AT. 155 H X 0.0019 -0.0003 0.0136 -0.0129 -0.0289 -0.0315  
Y 0.0027 -0.0013 -0.0006 0.0039 0.0112 0.0079  
Z -0.0015 0.0009 -0.0075 0.0047 -0.0318 -0.0317  
AT. 156 H X 0.0019 0.0003 0.0136 0.0129 -0.0289 0.0315  
Y 0.0027 0.0013 -0.0006 -0.0039 0.0112 -0.0079  
Z -0.0015 -0.0009 -0.0075 -0.0047 -0.0318 0.0317  
AT. 157 O X -0.0007 0.0008 0.0000 0.0002 0.0001 -0.0001  
Y 0.0014 -0.0030 0.0002 -0.0003 -0.0000 0.0003  
Z -0.0000 0.0011 -0.0002 0.0011 -0.0004 -0.0007  
AT. 158 O X -0.0007 -0.0008 0.0000 -0.0002 0.0001 0.0001  
Y 0.0014 0.0030 0.0002 0.0003 -0.0000 -0.0003  
Z -0.0000 -0.0011 -0.0002 -0.0011 -0.0004 0.0007  
AT. 159 O X 0.0008 0.0008 0.0003 -0.0006 0.0002 0.0004  
Y -0.0007 -0.0002 -0.0001 -0.0000 0.0001 -0.0003  
Z 0.0020 0.0016 0.0003 -0.0003 -0.0001 -0.0002  
AT. 160 O X 0.0008 -0.0008 0.0003 0.0006 0.0002 -0.0004  
Y -0.0007 0.0002 -0.0001 0.0000 0.0001 0.0003  
Z 0.0020 -0.0016 0.0003 0.0003 -0.0001 0.0002  
AT. 161 H X 0.0021 -0.0034 0.0023 -0.0038 0.0020 0.0043  
Y 0.0010 -0.0020 -0.0010 0.0020 -0.0009 -0.0018  
Z 0.0039 -0.0038 0.0047 -0.0079 0.0032 0.0079  
AT. 162 H X 0.0021 0.0034 0.0023 0.0038 0.0020 -0.0043  
Y 0.0010 0.0020 -0.0010 -0.0020 -0.0009 0.0018  
Z 0.0039 0.0038 0.0047 0.0079 0.0032 -0.0079  
AT. 163 H X 0.0027 0.0013 0.0005 -0.0011 0.0002 0.0008  
Y 0.0037 0.0023 0.0022 -0.0017 -0.0001 0.0031  
Z 0.0026 0.0021 0.0007 -0.0005 -0.0003 0.0004  
AT. 164 H X 0.0027 -0.0013 0.0005 0.0011 0.0002 -0.0008

|                                                        |     |         |         |         |         |         |         |
|--------------------------------------------------------|-----|---------|---------|---------|---------|---------|---------|
|                                                        | Y   | 0.0037  | -0.0023 | 0.0022  | 0.0017  | -0.0001 | -0.0031 |
|                                                        | Z   | 0.0026  | -0.0021 | 0.0007  | 0.0005  | -0.0003 | -0.0004 |
| AT. 165                                                | O X | 0.0005  | -0.0005 | 0.0018  | -0.0014 | 0.0023  | 0.0018  |
|                                                        | Y   | 0.0007  | -0.0005 | 0.0009  | -0.0006 | 0.0020  | 0.0014  |
|                                                        | Z   | -0.0000 | -0.0001 | 0.0007  | 0.0002  | -0.0001 | 0.0011  |
| AT. 166                                                | O X | 0.0005  | 0.0005  | 0.0018  | 0.0014  | 0.0023  | -0.0018 |
|                                                        | Y   | 0.0007  | 0.0005  | 0.0009  | 0.0006  | 0.0020  | -0.0014 |
|                                                        | Z   | -0.0000 | 0.0001  | 0.0007  | -0.0002 | -0.0001 | -0.0011 |
| AT. 167                                                | H X | 0.0010  | -0.0011 | 0.0041  | -0.0019 | 0.0062  | 0.0048  |
|                                                        | Y   | -0.0007 | 0.0004  | -0.0037 | 0.0001  | -0.0059 | -0.0041 |
|                                                        | Z   | 0.0006  | 0.0003  | 0.0016  | 0.0012  | 0.0002  | 0.0013  |
| AT. 168                                                | H X | 0.0010  | 0.0011  | 0.0041  | 0.0019  | 0.0062  | -0.0048 |
|                                                        | Y   | -0.0007 | -0.0004 | -0.0037 | -0.0001 | -0.0059 | 0.0041  |
|                                                        | Z   | 0.0006  | -0.0003 | 0.0016  | -0.0012 | 0.0002  | -0.0013 |
| AT. 169                                                | O X | 0.0003  | 0.0007  | 0.0003  | 0.0005  | -0.0007 | 0.0012  |
|                                                        | Y   | 0.0001  | 0.0003  | -0.0013 | -0.0016 | 0.0021  | -0.0018 |
|                                                        | Z   | 0.0001  | -0.0001 | 0.0008  | 0.0006  | -0.0005 | 0.0016  |
| AT. 170                                                | O X | 0.0003  | -0.0007 | 0.0003  | -0.0005 | -0.0007 | -0.0012 |
|                                                        | Y   | 0.0001  | -0.0003 | -0.0013 | 0.0016  | 0.0021  | 0.0018  |
|                                                        | Z   | 0.0001  | 0.0001  | 0.0008  | -0.0006 | -0.0005 | -0.0016 |
| AT. 171                                                | H X | 0.0025  | 0.0025  | 0.0012  | -0.0005 | 0.0049  | -0.0015 |
|                                                        | Y   | 0.0012  | 0.0015  | -0.0016 | -0.0029 | 0.0058  | -0.0045 |
|                                                        | Z   | 0.0005  | 0.0005  | -0.0004 | -0.0010 | 0.0014  | -0.0003 |
| AT. 172                                                | H X | 0.0025  | -0.0025 | 0.0012  | 0.0005  | 0.0049  | 0.0015  |
|                                                        | Y   | 0.0012  | -0.0015 | -0.0016 | 0.0029  | 0.0058  | 0.0045  |
|                                                        | Z   | 0.0005  | -0.0005 | -0.0004 | 0.0010  | 0.0014  | 0.0003  |
| FREQ(CM**-1) 455.15 456.15 484.06 484.60 488.66 488.97 |     |         |         |         |         |         |         |
| AT. 11                                                 | I X | -0.0013 | 0.0011  | -0.0002 | 0.0003  | 0.0003  | 0.0015  |
|                                                        | Y   | -0.0005 | 0.0005  | -0.0001 | 0.0003  | 0.0002  | 0.0010  |
|                                                        | Z   | -0.0000 | -0.0001 | -0.0001 | 0.0001  | 0.0001  | 0.0003  |

AT. 2 I X 0.0013 0.0011 -0.0002 -0.0003 -0.0003 0.0015  
Y 0.0005 0.0005 -0.0001 -0.0003 -0.0002 0.0010  
Z 0.0000 -0.0001 -0.0001 -0.0001 -0.0001 0.0003

AT. 3 I X 0.0010 -0.0005 -0.0039 -0.0036 0.0001 -0.0003  
Y 0.0003 -0.0002 -0.0014 -0.0013 0.0002 0.0000  
Z 0.0004 -0.0003 -0.0016 -0.0014 0.0001 -0.0001

AT. 4 I X -0.0010 -0.0005 -0.0039 0.0036 -0.0001 -0.0003  
Y -0.0003 -0.0002 -0.0014 0.0013 -0.0002 0.0000  
Z -0.0004 -0.0003 -0.0016 0.0014 -0.0001 -0.0001

AT. 5 O X 0.0154 -0.0151 0.0051 0.0107 0.0024 0.0091  
Y -0.0227 0.0227 -0.0046 -0.0069 -0.0003 -0.0015  
Z 0.0178 -0.0171 -0.0004 -0.0005 -0.0015 -0.0049

AT. 6 O X -0.0154 -0.0151 0.0051 -0.0107 -0.0024 0.0091  
Y 0.0227 0.0227 -0.0046 0.0069 0.0003 -0.0015  
Z -0.0178 -0.0171 -0.0004 0.0005 0.0015 -0.0049

AT. 7 O X -0.0033 0.0019 0.0224 0.0214 -0.0009 0.0004  
Y -0.0027 0.0035 -0.0108 -0.0107 0.0002 -0.0013  
Z 0.0182 -0.0170 -0.0207 -0.0184 0.0018 0.0014

AT. 8 O X 0.0033 0.0019 0.0224 -0.0214 0.0009 0.0004  
Y 0.0027 0.0035 -0.0108 0.0107 -0.0002 -0.0013  
Z -0.0182 -0.0170 -0.0207 0.0184 -0.0018 0.0014

AT. 9 N X 0.0061 -0.0066 0.0026 -0.0018 -0.0027 -0.0087  
Y 0.0298 -0.0300 0.0039 0.0055 -0.0007 -0.0006  
Z -0.0080 0.0079 -0.0016 -0.0038 -0.0017 -0.0059

AT. 10 N X -0.0061 -0.0066 0.0026 0.0018 0.0027 -0.0087  
Y -0.0298 -0.0300 0.0039 -0.0055 0.0007 -0.0006  
Z 0.0080 0.0079 -0.0016 0.0038 0.0017 -0.0059

AT. 11 N X 0.0025 -0.0013 -0.0217 -0.0192 0.0021 0.0029  
Y -0.0081 0.0098 -0.0133 -0.0118 0.0010 0.0007  
Z -0.0048 0.0048 0.0091 0.0089 -0.0004 -0.0003

AT. 12 N X -0.0025 -0.0013 -0.0217 0.0192 -0.0021 0.0029  
Y 0.0081 0.0098 -0.0133 0.0118 -0.0010 0.0007



Z 0.0048 0.0048 0.0091 -0.0089 0.0004 -0.0003  
AT. 13 C X 0.0068 -0.0068 0.0036 0.0030 -0.0009 -0.0038  
Y 0.0065 -0.0059 -0.0032 -0.0084 -0.0028 -0.0115  
Z -0.0074 0.0075 -0.0016 -0.0057 -0.0025 -0.0085  
AT. 14 C X -0.0068 -0.0068 0.0036 -0.0030 0.0009 -0.0038  
Y -0.0065 -0.0059 -0.0032 0.0084 0.0028 -0.0115  
Z 0.0074 0.0075 -0.0016 0.0057 0.0025 -0.0085  
AT. 15 C X 0.0043 -0.0042 -0.0004 -0.0037 -0.0020 -0.0090  
Y 0.0068 -0.0058 -0.0018 -0.0074 -0.0033 -0.0140  
Z 0.0029 -0.0031 0.0124 0.0174 0.0015 0.0080  
AT. 16 C X -0.0043 -0.0042 -0.0004 0.0037 0.0020 -0.0090  
Y -0.0068 -0.0058 -0.0018 0.0074 0.0033 -0.0140  
Z -0.0029 -0.0031 0.0124 -0.0174 -0.0015 0.0080  
AT. 17 H X -0.0001 -0.0005 -0.0008 -0.0039 -0.0015 -0.0066  
Y -0.0188 0.0197 -0.0137 -0.0296 -0.0076 -0.0312  
Z 0.0351 -0.0354 0.0272 0.0452 0.0072 0.0307  
AT. 18 H X 0.0001 -0.0005 -0.0008 0.0039 0.0015 -0.0066  
Y 0.0188 0.0197 -0.0137 0.0296 0.0076 -0.0312  
Z -0.0351 -0.0354 0.0272 -0.0452 -0.0072 0.0307  
AT. 19 H X -0.0086 0.0088 -0.0059 -0.0122 -0.0034 -0.0143  
Y 0.0424 -0.0412 0.0193 0.0309 0.0042 0.0165  
Z 0.0116 -0.0118 0.0185 0.0290 0.0039 0.0177  
AT. 20 H X 0.0086 0.0088 -0.0059 0.0122 0.0034 -0.0143  
Y -0.0424 -0.0412 0.0193 -0.0309 -0.0042 0.0165  
Z -0.0116 -0.0118 0.0185 -0.0290 -0.0039 0.0177  
AT. 21 C X -0.0000 -0.0009 0.0105 0.0103 0.0001 0.0025  
Y -0.0073 0.0078 -0.0044 -0.0048 0.0001 0.0009  
Z -0.0021 0.0010 0.0165 0.0153 -0.0011 -0.0001  
AT. 22 C X 0.0000 -0.0009 0.0105 -0.0103 -0.0001 0.0025  
Y 0.0073 0.0078 -0.0044 0.0048 -0.0001 0.0009  
Z 0.0021 0.0010 0.0165 -0.0153 0.0011 -0.0001  
AT. 23 C X -0.0034 0.0016 0.0184 0.0173 -0.0005 0.0027

Y -0.0044 0.0022 0.0236 0.0208 -0.0014 0.0005  
Z -0.0091 0.0071 0.0207 0.0185 -0.0017 0.0003  
AT. 24 C X 0.0034 0.0016 0.0184 -0.0173 0.0005 0.0027  
Y 0.0044 0.0022 0.0236 -0.0208 0.0014 0.0005  
Z 0.0091 0.0071 0.0207 -0.0185 0.0017 0.0003  
AT. 25 H X 0.0010 -0.0015 0.0090 0.0084 -0.0002 0.0020  
Y -0.0042 0.0016 0.0282 0.0253 -0.0017 0.0001  
Z -0.0076 0.0096 -0.0280 -0.0292 0.0008 0.0026  
AT. 26 H X -0.0010 -0.0015 0.0090 -0.0084 0.0002 0.0020  
Y 0.0042 0.0016 0.0282 -0.0253 0.0017 0.0001  
Z 0.0076 0.0096 -0.0280 0.0292 -0.0008 0.0026  
AT. 27 H X -0.0035 0.0020 0.0032 0.0029 -0.0001 0.0020  
Y -0.0027 -0.0024 0.0613 0.0575 -0.0034 -0.0021  
Z -0.0086 0.0047 0.0429 0.0401 -0.0028 -0.0008  
AT. 28 H X 0.0035 0.0020 0.0032 -0.0029 0.0001 0.0020  
Y 0.0027 -0.0024 0.0613 -0.0575 0.0034 -0.0021  
Z 0.0086 0.0047 0.0429 -0.0401 0.0028 -0.0008  
AT. 29 C X -0.0222 0.0224 0.0003 -0.0038 -0.0018 -0.0065  
Y -0.0049 0.0050 -0.0061 -0.0015 0.0026 0.0086  
Z -0.0157 0.0153 -0.0082 -0.0115 -0.0009 -0.0046  
AT. 30 C X 0.0222 0.0224 0.0003 0.0038 0.0018 -0.0065  
Y 0.0049 0.0050 -0.0061 0.0015 -0.0026 0.0086  
Z 0.0157 0.0153 -0.0082 0.0115 0.0009 -0.0046  
AT. 31 H X -0.0491 0.0499 -0.0046 -0.0059 0.0004 -0.0005  
Y 0.0118 -0.0130 0.0055 0.0074 0.0001 0.0033  
Z -0.0064 0.0045 0.0062 0.0007 -0.0032 -0.0087  
AT. 32 H X 0.0491 0.0499 -0.0046 0.0059 -0.0004 -0.0005  
Y -0.0118 -0.0130 0.0055 -0.0074 -0.0001 0.0033  
Z 0.0064 0.0045 0.0062 -0.0007 0.0032 -0.0087  
AT. 33 H X -0.0319 0.0330 -0.0173 -0.0206 0.0008 -0.0017  
Y -0.0295 0.0318 -0.0239 -0.0155 0.0061 0.0158  
Z -0.0106 0.0099 -0.0124 -0.0166 -0.0007 -0.0045

AT. 34 H X 0.0319 0.0330 -0.0173 0.0206 -0.0008 -0.0017  
Y 0.0295 0.0318 -0.0239 0.0155 -0.0061 0.0158  
Z 0.0106 0.0099 -0.0124 0.0166 0.0007 -0.0045

AT. 35 C X -0.0156 0.0150 0.0144 0.0108 -0.0029 -0.0067  
Y -0.0099 0.0098 -0.0065 -0.0040 0.0020 0.0059  
Z -0.0219 0.0225 -0.0212 -0.0232 0.0008 -0.0015

AT. 36 C X 0.0156 0.0150 0.0144 -0.0108 0.0029 -0.0067  
Y 0.0099 0.0098 -0.0065 0.0040 -0.0020 0.0059  
Z 0.0219 0.0225 -0.0212 0.0232 -0.0008 -0.0015

AT. 37 C X -0.0043 0.0040 0.0023 0.0021 -0.0005 -0.0009  
Y 0.0024 -0.0025 0.0074 0.0081 -0.0002 0.0008  
Z 0.0126 -0.0128 -0.0010 -0.0019 -0.0001 -0.0016

AT. 38 C X 0.0043 0.0040 0.0023 -0.0021 0.0005 -0.0009  
Y -0.0024 -0.0025 0.0074 -0.0081 0.0002 0.0008  
Z -0.0126 -0.0128 -0.0010 0.0019 0.0001 -0.0016

AT. 39 H X 0.0485 -0.0501 0.0191 0.0176 -0.0025 -0.0059  
Y 0.0347 -0.0361 0.0410 0.0391 -0.0039 -0.0067  
Z 0.0348 -0.0353 -0.0043 -0.0049 0.0001 -0.0018

AT. 40 H X -0.0485 -0.0501 0.0191 -0.0176 0.0025 -0.0059  
Y -0.0347 -0.0361 0.0410 -0.0391 0.0039 -0.0067  
Z -0.0348 -0.0353 -0.0043 0.0049 -0.0001 -0.0018

AT. 41 H X -0.0516 0.0528 -0.0185 -0.0169 0.0021 0.0050  
Y 0.0023 -0.0034 0.0135 0.0121 -0.0014 -0.0024  
Z 0.0610 -0.0620 0.0158 0.0147 -0.0018 -0.0051

AT. 42 H X 0.0516 0.0528 -0.0185 0.0169 -0.0021 0.0050  
Y -0.0023 -0.0034 0.0135 -0.0121 0.0014 -0.0024  
Z -0.0610 -0.0620 0.0158 -0.0147 0.0018 -0.0051

AT. 43 C X 0.0107 -0.0108 -0.0107 -0.0111 0.0007 -0.0006  
Y 0.0037 -0.0036 -0.0039 -0.0076 -0.0015 -0.0073  
Z -0.0028 0.0022 0.0197 0.0184 -0.0011 -0.0014

AT. 44 C X -0.0107 -0.0108 -0.0107 0.0111 -0.0007 -0.0006  
Y -0.0037 -0.0036 -0.0039 0.0076 0.0015 -0.0073

Z 0.0028 0.0022 0.0197 -0.0184 0.0011 -0.0014  
AT. 45 H X 0.0241 -0.0264 0.0092 0.0013 -0.0037 -0.0129  
Y -0.0068 0.0086 -0.0261 -0.0190 0.0049 0.0127  
Z -0.0018 0.0011 0.0272 0.0207 -0.0045 -0.0124  
AT. 46 H X -0.0241 -0.0264 0.0092 -0.0013 0.0037 -0.0129  
Y 0.0068 0.0086 -0.0261 0.0190 -0.0049 0.0127  
Z 0.0018 0.0011 0.0272 -0.0207 0.0045 -0.0124  
AT. 47 H X 0.0177 -0.0189 -0.0015 -0.0090 -0.0032 -0.0139  
Y 0.0167 -0.0188 0.0196 0.0038 -0.0084 -0.0293  
Z 0.0024 -0.0037 0.0307 0.0264 -0.0031 -0.0064  
AT. 48 H X -0.0177 -0.0189 -0.0015 0.0090 0.0032 -0.0139  
Y -0.0167 -0.0188 0.0196 -0.0038 0.0084 -0.0293  
Z -0.0024 -0.0037 0.0307 -0.0264 0.0031 -0.0064  
AT. 49 C X 0.0042 -0.0033 -0.0131 -0.0072 0.0038 0.0114  
Y 0.0077 -0.0082 -0.0059 -0.0095 -0.0011 -0.0062  
Z -0.0016 0.0015 0.0078 0.0123 0.0024 0.0098  
AT. 50 C X -0.0042 -0.0033 -0.0131 0.0072 -0.0038 0.0114  
Y -0.0077 -0.0082 -0.0059 0.0095 0.0011 -0.0062  
Z 0.0016 0.0015 0.0078 -0.0123 -0.0024 0.0098  
AT. 51 C X 0.0106 -0.0103 -0.0109 -0.0099 0.0015 0.0028  
Y -0.0156 0.0157 0.0092 0.0134 0.0019 0.0088  
Z 0.0179 -0.0177 -0.0100 -0.0089 0.0009 0.0009  
AT. 52 C X -0.0106 -0.0103 -0.0109 0.0099 -0.0015 0.0028  
Y 0.0156 0.0157 0.0092 -0.0134 -0.0019 0.0088  
Z -0.0179 -0.0177 -0.0100 0.0089 -0.0009 0.0009  
AT. 53 H X -0.0424 0.0431 0.0096 0.0156 0.0035 0.0149  
Y -0.0628 0.0637 0.0284 0.0439 0.0072 0.0326  
Z 0.0552 -0.0549 -0.0223 -0.0160 0.0039 0.0091  
AT. 54 H X 0.0424 0.0431 0.0096 -0.0156 -0.0035 0.0149  
Y 0.0628 0.0637 0.0284 -0.0439 -0.0072 0.0326  
Z -0.0552 -0.0549 -0.0223 0.0160 -0.0039 0.0091  
AT. 55 H X 0.0832 -0.0834 -0.0393 -0.0455 -0.0014 -0.0144

Y -0.0462 0.0465 0.0121 0.0172 0.0026 0.0119  
Z 0.0311 -0.0311 -0.0264 -0.0294 -0.0003 -0.0075  
AT. 56 H X -0.0832 -0.0834 -0.0393 0.0455 0.0014 -0.0144  
Y 0.0462 0.0465 0.0121 -0.0172 -0.0026 0.0119  
Z -0.0311 -0.0311 -0.0264 0.0294 0.0003 -0.0075  
AT. 57 C X -0.0109 0.0109 0.0060 0.0000 -0.0034 -0.0104  
Y 0.0197 -0.0194 -0.0055 0.0001 0.0032 0.0097  
Z -0.0048 0.0048 0.0057 0.0056 -0.0009 -0.0014  
AT. 58 C X 0.0109 0.0109 0.0060 -0.0000 0.0034 -0.0104  
Y -0.0197 -0.0194 -0.0055 -0.0001 -0.0032 0.0097  
Z 0.0048 0.0048 0.0057 -0.0056 0.0009 -0.0014  
AT. 59 H X 0.0055 -0.0052 -0.0093 -0.0159 -0.0022 -0.0109  
Y 0.0223 -0.0214 0.0059 0.0130 0.0031 0.0124  
Z 0.0107 -0.0094 0.0120 0.0135 -0.0001 0.0021  
AT. 60 H X -0.0055 -0.0052 -0.0093 0.0159 0.0022 -0.0109  
Y -0.0223 -0.0214 0.0059 -0.0130 -0.0031 0.0124  
Z -0.0107 -0.0094 0.0120 -0.0135 0.0001 0.0021  
AT. 61 H X 0.0071 -0.0080 0.0207 0.0191 -0.0030 -0.0060  
Y 0.0191 -0.0197 -0.0211 -0.0168 0.0036 0.0071  
Z 0.0097 -0.0099 0.0252 0.0291 -0.0008 0.0032  
AT. 62 H X -0.0071 -0.0080 0.0207 -0.0191 0.0030 -0.0060  
Y -0.0191 -0.0197 -0.0211 0.0168 -0.0036 0.0071  
Z -0.0097 -0.0099 0.0252 -0.0291 0.0008 0.0032  
AT. 63 H X -0.0323 0.0328 -0.0059 -0.0160 -0.0039 -0.0148  
Y 0.0509 -0.0499 0.0022 0.0120 0.0044 0.0153  
Z -0.0112 0.0101 0.0104 0.0105 -0.0013 -0.0020  
AT. 64 H X 0.0323 0.0328 -0.0059 0.0160 0.0039 -0.0148  
Y -0.0509 -0.0499 0.0022 -0.0120 -0.0044 0.0153  
Z 0.0112 0.0101 0.0104 -0.0105 0.0013 -0.0020  
AT. 65 C X -0.0019 0.0025 -0.0105 -0.0096 0.0009 0.0011  
Y -0.0040 0.0032 0.0154 0.0138 -0.0013 -0.0015  
Z -0.0026 0.0017 0.0068 0.0046 -0.0007 -0.0026

AT. 66 C X 0.0019 0.0025 -0.0105 0.0096 -0.0009 0.0011  
Y 0.0040 0.0032 0.0154 -0.0138 0.0013 -0.0015  
Z 0.0026 0.0017 0.0068 -0.0046 0.0007 -0.0026

AT. 67 H X -0.0136 0.0139 -0.0039 -0.0077 -0.0024 -0.0091  
Y -0.0016 0.0006 0.0227 0.0212 0.0001 0.0040  
Z 0.0050 -0.0054 -0.0052 -0.0038 0.0008 0.0007

AT. 68 H X 0.0136 0.0139 -0.0039 0.0077 0.0024 -0.0091  
Y 0.0016 0.0006 0.0227 -0.0212 -0.0001 0.0040  
Z -0.0050 -0.0054 -0.0052 0.0038 -0.0008 0.0007

AT. 69 H X -0.0067 0.0074 0.0013 0.0065 0.0013 0.0063  
Y -0.0116 0.0109 0.0205 0.0197 -0.0028 -0.0050  
Z -0.0050 0.0037 -0.0092 -0.0189 -0.0039 -0.0183

AT. 70 H X 0.0067 0.0074 0.0013 -0.0065 -0.0013 0.0063  
Y 0.0116 0.0109 0.0205 -0.0197 0.0028 -0.0050  
Z 0.0050 0.0037 -0.0092 0.0189 0.0039 -0.0183

AT. 71 H X 0.0030 -0.0026 -0.0258 -0.0307 -0.0001 -0.0065  
Y -0.0124 0.0115 0.0348 0.0342 -0.0016 0.0018  
Z -0.0103 0.0092 0.0217 0.0165 -0.0018 -0.0038

AT. 72 H X -0.0030 -0.0026 -0.0258 0.0307 0.0001 -0.0065  
Y 0.0124 0.0115 0.0348 -0.0342 0.0016 0.0018  
Z 0.0103 0.0092 0.0217 -0.0165 0.0018 -0.0038

AT. 73 C X 0.0028 -0.0030 0.0179 0.0211 0.0009 0.0066  
Y 0.0018 -0.0027 0.0071 0.0033 -0.0016 -0.0054  
Z -0.0147 0.0158 -0.0196 -0.0150 0.0041 0.0105

AT. 74 C X -0.0028 -0.0030 0.0179 -0.0211 -0.0009 0.0066  
Y -0.0018 -0.0027 0.0071 -0.0033 0.0016 -0.0054  
Z 0.0147 0.0158 -0.0196 0.0150 -0.0041 0.0105

AT. 75 H X 0.0042 -0.0050 0.0509 0.0550 -0.0002 0.0089  
Y 0.0105 -0.0109 0.0120 0.0058 -0.0030 -0.0102  
Z -0.0018 0.0031 0.0109 0.0131 0.0015 0.0056

AT. 76 H X -0.0042 -0.0050 0.0509 -0.0550 0.0002 0.0089  
Y -0.0105 -0.0109 0.0120 -0.0058 0.0030 -0.0102

Z 0.0018 0.0031 0.0109 -0.0131 -0.0015 0.0056  
AT. 77 H X 0.0235 -0.0236 0.0287 0.0345 0.0019 0.0111  
Y -0.0034 0.0023 0.0294 0.0226 -0.0042 -0.0106  
Z -0.0286 0.0300 -0.0493 -0.0442 0.0055 0.0109  
AT. 78 H X -0.0235 -0.0236 0.0287 -0.0345 -0.0019 0.0111  
Y 0.0034 0.0023 0.0294 -0.0226 0.0042 -0.0106  
Z 0.0286 0.0300 -0.0493 0.0442 -0.0055 0.0109  
AT. 79 I X -0.0002 -0.0000 0.0001 0.0001 0.0012 0.0011  
Y -0.0000 0.0001 -0.0001 -0.0002 -0.0014 -0.0011  
Z -0.0001 0.0000 -0.0000 -0.0001 -0.0000 0.0001  
AT. 80 I X 0.0002 -0.0000 0.0001 -0.0001 -0.0012 0.0011  
Y 0.0000 0.0001 -0.0001 0.0002 0.0014 -0.0011  
Z 0.0001 0.0000 -0.0000 0.0001 0.0000 0.0001  
AT. 81 I X 0.0000 0.0000 0.0001 0.0002 0.0031 0.0032  
Y 0.0000 -0.0000 -0.0002 -0.0002 -0.0024 -0.0026  
Z -0.0000 -0.0000 -0.0001 -0.0001 -0.0015 -0.0016  
AT. 82 I X -0.0000 0.0000 0.0001 -0.0002 -0.0031 0.0032  
Y -0.0000 -0.0000 -0.0002 0.0002 0.0024 -0.0026  
Z 0.0000 -0.0000 -0.0001 0.0001 0.0015 -0.0016  
AT. 83 O X 0.0016 -0.0002 0.0001 0.0005 -0.0144 -0.0105  
Y 0.0009 -0.0000 0.0006 0.0003 -0.0061 -0.0067  
Z -0.0010 0.0000 -0.0005 -0.0001 0.0034 0.0051  
AT. 84 O X -0.0016 -0.0002 0.0001 -0.0005 0.0144 -0.0105  
Y -0.0009 -0.0000 0.0006 -0.0003 0.0061 -0.0067  
Z 0.0010 0.0000 -0.0005 0.0001 -0.0034 0.0051  
AT. 85 O X -0.0002 0.0005 -0.0007 -0.0006 -0.0238 -0.0204  
Y 0.0002 0.0000 0.0003 0.0000 -0.0034 -0.0028  
Z -0.0004 0.0001 -0.0002 -0.0006 -0.0204 -0.0200  
AT. 86 O X 0.0002 0.0005 -0.0007 0.0006 0.0238 -0.0204  
Y -0.0002 0.0000 0.0003 -0.0000 0.0034 -0.0028  
Z 0.0004 0.0001 -0.0002 0.0006 0.0204 -0.0200  
AT. 87 N X -0.0001 0.0000 0.0004 -0.0000 0.0041 0.0015

Y -0.0010 0.0002 0.0001 0.0005 -0.0067 -0.0036  
Z 0.0008 -0.0001 0.0000 0.0003 -0.0068 -0.0045  
AT. 88 N X 0.0001 0.0000 0.0004 0.0000 -0.0041 0.0015  
Y 0.0010 0.0002 0.0001 -0.0005 0.0067 -0.0036  
Z -0.0008 -0.0001 0.0000 -0.0003 0.0068 -0.0045  
AT. 89 N X 0.0000 0.0001 0.0002 0.0005 0.0088 0.0083  
Y 0.0005 -0.0003 -0.0002 -0.0006 -0.0090 -0.0094  
Z 0.0000 -0.0002 -0.0001 -0.0002 0.0065 0.0041  
AT. 90 N X -0.0000 0.0001 0.0002 -0.0005 -0.0088 0.0083  
Y -0.0005 -0.0003 -0.0002 0.0006 0.0090 -0.0094  
Z -0.0000 -0.0002 -0.0001 0.0002 -0.0065 0.0041  
AT. 91 C X 0.0007 0.0000 0.0001 0.0002 -0.0091 -0.0063  
Y -0.0005 -0.0003 -0.0002 0.0004 0.0018 0.0029  
Z 0.0006 -0.0001 -0.0000 0.0003 -0.0063 -0.0032  
AT. 92 C X -0.0007 0.0000 0.0001 -0.0002 0.0091 -0.0063  
Y 0.0005 -0.0003 -0.0002 -0.0004 -0.0018 0.0029  
Z -0.0006 -0.0001 -0.0000 -0.0003 0.0063 -0.0032  
AT. 93 C X -0.0001 0.0002 0.0001 -0.0001 -0.0038 -0.0025  
Y -0.0006 -0.0006 -0.0002 0.0010 0.0146 0.0122  
Z 0.0004 -0.0001 0.0005 0.0011 0.0090 0.0053  
AT. 94 C X 0.0001 0.0002 0.0001 0.0001 0.0038 -0.0025  
Y 0.0006 -0.0006 -0.0002 -0.0010 -0.0146 0.0122  
Z -0.0004 -0.0001 0.0005 -0.0011 -0.0090 0.0053  
AT. 95 H X -0.0032 0.0014 -0.0022 -0.0036 0.0020 0.0086  
Y 0.0018 -0.0012 0.0007 0.0024 -0.0041 -0.0037  
Z -0.0009 -0.0002 0.0012 0.0018 0.0362 0.0222  
AT. 96 H X 0.0032 0.0014 -0.0022 0.0036 -0.0020 0.0086  
Y -0.0018 -0.0012 0.0007 -0.0024 0.0041 -0.0037  
Z 0.0009 -0.0002 0.0012 -0.0018 -0.0362 0.0222  
AT. 97 H X -0.0010 0.0002 0.0004 0.0003 0.0144 0.0101  
Y -0.0027 -0.0002 -0.0001 0.0005 0.0456 0.0333  
Z 0.0003 -0.0001 0.0005 0.0009 0.0112 0.0067



AT. 98 H X 0.0010 0.0002 0.0004 -0.0003 -0.0144 0.0101  
Y 0.0027 -0.0002 -0.0001 -0.0005 -0.0456 0.0333  
Z -0.0003 -0.0001 0.0005 -0.0009 -0.0112 0.0067

AT. 99 C X -0.0002 0.0003 -0.0004 -0.0005 -0.0120 -0.0109  
Y 0.0005 0.0000 0.0006 0.0009 0.0034 0.0055  
Z -0.0003 0.0002 0.0002 0.0007 0.0138 0.0135

AT. 100 C X 0.0002 0.0003 -0.0004 0.0005 0.0120 -0.0109  
Y -0.0005 0.0000 0.0006 -0.0009 -0.0034 0.0055  
Z 0.0003 0.0002 0.0002 -0.0007 -0.0138 0.0135

AT. 101 C X -0.0004 0.0003 -0.0007 -0.0007 -0.0089 -0.0088  
Y -0.0001 0.0001 0.0002 0.0013 0.0329 0.0331  
Z 0.0001 0.0005 0.0007 0.0017 0.0103 0.0140

AT. 102 C X 0.0004 0.0003 -0.0007 0.0007 0.0089 -0.0088  
Y 0.0001 0.0001 0.0002 -0.0013 -0.0329 0.0331  
Z -0.0001 0.0005 0.0007 -0.0017 -0.0103 0.0140

AT. 103 H X -0.0003 0.0004 0.0000 0.0000 -0.0041 -0.0042  
Y -0.0001 0.0001 -0.0001 0.0010 0.0323 0.0324  
Z 0.0006 0.0009 0.0009 0.0015 -0.0383 -0.0262

AT. 104 H X 0.0003 0.0004 0.0000 -0.0000 0.0041 -0.0042  
Y 0.0001 0.0001 -0.0001 -0.0010 -0.0323 0.0324  
Z -0.0006 0.0009 0.0009 -0.0015 0.0383 -0.0262

AT. 105 H X -0.0008 0.0002 -0.0003 -0.0002 0.0180 0.0142  
Y -0.0004 -0.0005 0.0000 0.0009 0.0630 0.0560  
Z -0.0000 0.0003 0.0008 0.0018 0.0278 0.0280

AT. 106 H X 0.0008 0.0002 -0.0003 0.0002 -0.0180 0.0142  
Y 0.0004 -0.0005 0.0000 -0.0009 -0.0630 0.0560  
Z 0.0000 0.0003 0.0008 -0.0018 -0.0278 0.0280

AT. 107 C X -0.0012 0.0003 0.0003 -0.0000 -0.0018 -0.0034  
Y 0.0004 0.0004 0.0002 0.0001 -0.0033 -0.0032  
Z 0.0002 0.0003 -0.0001 0.0000 -0.0134 -0.0103

AT. 108 C X 0.0012 0.0003 0.0003 0.0000 0.0018 -0.0034  
Y -0.0004 0.0004 0.0002 -0.0001 0.0033 -0.0032

Z -0.0002 0.0003 -0.0001 -0.0000 0.0134 -0.0103  
AT. 109 H X -0.0035 0.0006 0.0008 0.0005 -0.0151 -0.0148  
Y -0.0005 0.0004 0.0007 0.0004 -0.0092 -0.0101  
Z -0.0005 0.0003 0.0008 0.0005 -0.0198 -0.0190  
AT. 110 H X 0.0035 0.0006 0.0008 -0.0005 0.0151 -0.0148  
Y 0.0005 0.0004 0.0007 -0.0004 0.0092 -0.0101  
Z 0.0005 0.0003 0.0008 -0.0005 0.0198 -0.0190  
AT. 111 H X -0.0011 0.0002 0.0007 0.0003 0.0030 0.0000  
Y 0.0025 0.0002 -0.0012 -0.0010 0.0092 0.0101  
Z -0.0004 0.0004 -0.0002 -0.0001 -0.0211 -0.0167  
AT. 112 H X 0.0011 0.0002 0.0007 -0.0003 -0.0030 0.0000  
Y -0.0025 0.0002 -0.0012 0.0010 -0.0092 0.0101  
Z 0.0004 0.0004 -0.0002 0.0001 0.0211 -0.0167  
AT. 113 C X -0.0002 -0.0001 -0.0005 -0.0007 -0.0057 -0.0051  
Y 0.0002 0.0003 0.0005 0.0001 -0.0051 -0.0063  
Z 0.0008 0.0003 -0.0007 -0.0003 -0.0105 -0.0059  
AT. 114 C X 0.0002 -0.0001 -0.0005 0.0007 0.0057 -0.0051  
Y -0.0002 0.0003 0.0005 -0.0001 0.0051 -0.0063  
Z -0.0008 0.0003 -0.0007 0.0003 0.0105 -0.0059  
AT. 115 C X -0.0002 -0.0001 -0.0003 -0.0002 0.0015 0.0023  
Y -0.0004 0.0001 0.0005 0.0001 0.0017 -0.0009  
Z -0.0007 -0.0001 -0.0005 -0.0003 0.0027 0.0031  
AT. 116 C X 0.0002 -0.0001 -0.0003 0.0002 -0.0015 0.0023  
Y 0.0004 0.0001 0.0005 -0.0001 -0.0017 -0.0009  
Z 0.0007 -0.0001 -0.0005 0.0003 -0.0027 0.0031  
AT. 117 H X 0.0016 -0.0000 -0.0001 -0.0001 -0.0031 -0.0023  
Y -0.0029 -0.0003 0.0006 0.0005 0.0248 0.0182  
Z -0.0018 -0.0001 -0.0007 -0.0004 0.0013 0.0030  
AT. 118 H X -0.0016 -0.0000 -0.0001 0.0001 0.0031 -0.0023  
Y 0.0029 -0.0003 0.0006 -0.0005 -0.0248 0.0182  
Z 0.0018 -0.0001 -0.0007 0.0004 -0.0013 0.0030  
AT. 119 H X -0.0028 -0.0000 -0.0005 0.0001 0.0153 0.0151

Y -0.0001 0.0005 0.0005 0.0003 -0.0023 -0.0031  
Z -0.0024 -0.0005 -0.0006 -0.0003 0.0144 0.0125  
AT. 120 H X 0.0028 -0.0000 -0.0005 -0.0001 -0.0153 0.0151  
Y 0.0001 0.0005 0.0005 -0.0003 0.0023 -0.0031  
Z 0.0024 -0.0005 -0.0006 0.0003 -0.0144 0.0125  
AT. 121 C X 0.0007 -0.0003 0.0002 0.0003 0.0075 0.0055  
Y 0.0002 -0.0002 -0.0004 -0.0004 -0.0145 -0.0111  
Z -0.0006 0.0001 0.0000 0.0001 0.0155 0.0124  
AT. 122 C X -0.0007 -0.0003 0.0002 -0.0003 -0.0075 0.0055  
Y -0.0002 -0.0002 -0.0004 0.0004 0.0145 -0.0111  
Z 0.0006 0.0001 0.0000 -0.0001 -0.0155 0.0124  
AT. 123 H X 0.0024 -0.0011 0.0007 -0.0007 -0.0021 -0.0092  
Y 0.0015 -0.0006 0.0006 -0.0007 -0.0214 -0.0221  
Z -0.0016 0.0005 -0.0009 0.0003 0.0210 0.0213  
AT. 124 H X -0.0024 -0.0011 0.0007 0.0007 0.0021 -0.0092  
Y -0.0015 -0.0006 0.0006 0.0007 0.0214 -0.0221  
Z 0.0016 0.0005 -0.0009 -0.0003 -0.0210 0.0213  
AT. 125 H X 0.0006 -0.0002 0.0004 0.0003 0.0105 0.0072  
Y -0.0022 0.0010 -0.0014 0.0005 -0.0058 0.0049  
Z -0.0020 0.0008 -0.0002 0.0005 0.0227 0.0219  
AT. 126 H X -0.0006 -0.0002 0.0004 -0.0003 -0.0105 0.0072  
Y 0.0022 0.0010 -0.0014 -0.0005 0.0058 0.0049  
Z 0.0020 0.0008 -0.0002 -0.0005 -0.0227 0.0219  
AT. 127 C X 0.0002 -0.0002 -0.0002 0.0004 0.0049 0.0057  
Y 0.0006 -0.0003 -0.0002 -0.0004 -0.0162 -0.0134  
Z 0.0006 -0.0006 0.0008 -0.0001 0.0133 0.0065  
AT. 128 C X -0.0002 -0.0002 -0.0002 -0.0004 -0.0049 0.0057  
Y -0.0006 -0.0003 -0.0002 0.0004 0.0162 -0.0134  
Z -0.0006 -0.0006 0.0008 0.0001 -0.0133 0.0065  
AT. 129 C X 0.0004 0.0001 0.0005 0.0005 0.0107 0.0083  
Y 0.0012 -0.0003 0.0002 0.0000 0.0048 0.0024  
Z -0.0001 -0.0004 0.0005 -0.0004 -0.0125 -0.0124

AT. 130 C X -0.0004 0.0001 0.0005 -0.0005 -0.0107 0.0083  
Y -0.0012 -0.0003 0.0002 -0.0000 -0.0048 0.0024  
Z 0.0001 -0.0004 0.0005 0.0004 0.0125 -0.0124

AT. 131 H X -0.0014 0.0002 0.0004 0.0001 -0.0102 -0.0087  
Y 0.0036 -0.0004 0.0011 0.0006 0.0511 0.0362  
Z -0.0014 -0.0003 0.0007 -0.0006 -0.0194 -0.0196

AT. 132 H X 0.0014 0.0002 0.0004 -0.0001 0.0102 -0.0087  
Y -0.0036 -0.0004 0.0011 -0.0006 -0.0511 0.0362  
Z 0.0014 -0.0003 0.0007 0.0006 0.0194 -0.0196

AT. 133 H X 0.0034 -0.0000 0.0007 0.0011 0.0505 0.0391  
Y 0.0016 -0.0002 -0.0001 -0.0001 -0.0018 -0.0024  
Z -0.0010 -0.0001 -0.0001 -0.0009 -0.0426 -0.0353

AT. 134 H X -0.0034 -0.0000 0.0007 -0.0011 -0.0505 0.0391  
Y -0.0016 -0.0002 -0.0001 0.0001 0.0018 -0.0024  
Z 0.0010 -0.0001 -0.0001 0.0009 0.0426 -0.0353

AT. 135 C X -0.0006 -0.0002 0.0003 -0.0003 -0.0000 -0.0034  
Y -0.0004 -0.0002 0.0001 -0.0003 0.0015 -0.0001  
Z 0.0002 0.0001 0.0002 0.0003 0.0035 0.0039

AT. 136 C X 0.0006 -0.0002 0.0003 0.0003 0.0000 -0.0034  
Y 0.0004 -0.0002 0.0001 0.0003 -0.0015 -0.0001  
Z -0.0002 0.0001 0.0002 -0.0003 -0.0035 0.0039

AT. 137 H X -0.0004 -0.0001 0.0015 0.0002 0.0053 -0.0025  
Y -0.0010 -0.0000 0.0003 -0.0003 0.0068 0.0035  
Z -0.0008 0.0004 0.0001 0.0001 0.0102 0.0094

AT. 138 H X 0.0004 -0.0001 0.0015 -0.0002 -0.0053 -0.0025  
Y 0.0010 -0.0000 0.0003 0.0003 -0.0068 0.0035  
Z 0.0008 0.0004 0.0001 -0.0001 -0.0102 0.0094

AT. 139 H X -0.0001 0.0000 -0.0004 -0.0006 -0.0116 -0.0107  
Y -0.0002 -0.0007 -0.0007 -0.0005 -0.0009 -0.0006  
Z -0.0005 -0.0001 0.0012 0.0007 0.0193 0.0136

AT. 140 H X 0.0001 0.0000 -0.0004 0.0006 0.0116 -0.0107  
Y 0.0002 -0.0007 -0.0007 0.0005 0.0009 -0.0006

Z 0.0005 -0.0001 0.0012 -0.0007 -0.0193 0.0136  
AT. 141 H X -0.0010 -0.0011 0.0008 -0.0001 0.0151 0.0070  
Y -0.0012 -0.0004 0.0002 -0.0005 0.0100 0.0066  
Z 0.0010 -0.0002 0.0003 0.0006 0.0012 0.0013  
AT. 142 H X 0.0010 -0.0011 0.0008 0.0001 -0.0151 0.0070  
Y 0.0012 -0.0004 0.0002 0.0005 -0.0100 0.0066  
Z -0.0010 -0.0002 0.0003 -0.0006 -0.0012 0.0013  
AT. 143 C X 0.0008 -0.0006 0.0006 0.0003 0.0127 0.0085  
Y -0.0002 0.0002 0.0002 0.0002 0.0089 0.0070  
Z 0.0006 -0.0006 -0.0000 -0.0001 0.0053 0.0036  
AT. 144 C X -0.0008 -0.0006 0.0006 -0.0003 -0.0127 0.0085  
Y 0.0002 0.0002 0.0002 -0.0002 -0.0089 0.0070  
Z -0.0006 -0.0006 -0.0000 0.0001 -0.0053 0.0036  
AT. 145 H X 0.0012 -0.0012 0.0015 0.0000 0.0079 0.0004  
Y -0.0008 0.0011 0.0009 0.0008 0.0187 0.0148  
Z 0.0015 -0.0017 -0.0006 -0.0008 -0.0063 -0.0066  
AT. 146 H X -0.0012 -0.0012 0.0015 -0.0000 -0.0079 0.0004  
Y 0.0008 0.0011 0.0009 -0.0008 -0.0187 0.0148  
Z -0.0015 -0.0017 -0.0006 0.0008 0.0063 -0.0066  
AT. 147 H X 0.0006 -0.0001 -0.0000 0.0002 -0.0017 -0.0001  
Y 0.0003 -0.0008 -0.0005 -0.0001 0.0171 0.0138  
Z 0.0006 -0.0004 -0.0013 -0.0004 -0.0114 -0.0052  
AT. 148 H X -0.0006 -0.0001 -0.0000 -0.0002 0.0017 -0.0001  
Y -0.0003 -0.0008 -0.0005 0.0001 -0.0171 0.0138  
Z -0.0006 -0.0004 -0.0013 0.0004 0.0114 -0.0052  
AT. 149 H X 0.0007 -0.0013 0.0009 0.0003 0.0379 0.0261  
Y -0.0009 0.0008 0.0006 0.0007 0.0234 0.0191  
Z -0.0006 0.0009 0.0006 0.0007 0.0173 0.0152  
AT. 150 H X -0.0007 -0.0013 0.0009 -0.0003 -0.0379 0.0261  
Y 0.0009 0.0008 0.0006 -0.0007 -0.0234 0.0191  
Z 0.0006 0.0009 0.0006 -0.0007 -0.0173 0.0152  
AT. 151 C X 0.0005 0.0001 -0.0007 -0.0003 -0.0171 -0.0120

Y -0.0006 0.0002 -0.0006 0.0001 0.0148 0.0144  
Z 0.0007 0.0000 -0.0001 -0.0006 0.0023 0.0003  
AT. 152 C X -0.0005 0.0001 -0.0007 0.0003 0.0171 -0.0120  
Y 0.0006 0.0002 -0.0006 -0.0001 -0.0148 0.0144  
Z -0.0007 0.0000 -0.0001 0.0006 -0.0023 0.0003  
AT. 153 H X 0.0011 0.0001 -0.0013 -0.0008 -0.0430 -0.0313  
Y -0.0015 0.0003 -0.0015 0.0002 0.0387 0.0379  
Z -0.0010 0.0003 -0.0011 -0.0002 0.0519 0.0462  
AT. 154 H X -0.0011 0.0001 -0.0013 0.0008 0.0430 -0.0313  
Y 0.0015 0.0003 -0.0015 -0.0002 -0.0387 0.0379  
Z 0.0010 0.0003 -0.0011 0.0002 -0.0519 0.0462  
AT. 155 H X 0.0008 0.0007 -0.0008 -0.0001 -0.0304 -0.0212  
Y -0.0019 0.0006 -0.0015 0.0005 0.0537 0.0507  
Z 0.0023 -0.0002 0.0008 -0.0009 -0.0434 -0.0411  
AT. 156 H X -0.0008 0.0007 -0.0008 0.0001 0.0304 -0.0212  
Y 0.0019 0.0006 -0.0015 -0.0005 -0.0537 0.0507  
Z -0.0023 -0.0002 0.0008 0.0009 0.0434 -0.0411  
AT. 157 O X -0.0007 0.0000 -0.0006 0.0000 -0.0002 -0.0001  
Y 0.0050 -0.0058 0.0012 0.0014 0.0001 0.0007  
Z 0.0006 0.0001 0.0008 0.0002 -0.0001 0.0002  
AT. 158 O X 0.0007 0.0000 -0.0006 -0.0000 0.0002 -0.0001  
Y -0.0050 -0.0058 0.0012 -0.0014 -0.0001 0.0007  
Z -0.0006 0.0001 0.0008 -0.0002 0.0001 0.0002  
AT. 159 O X 0.0007 0.0010 -0.0005 0.0000 0.0001 -0.0001  
Y -0.0009 0.0005 0.0003 -0.0005 -0.0002 -0.0003  
Z 0.0019 0.0028 0.0007 -0.0003 0.0005 0.0002  
AT. 160 O X -0.0007 0.0010 -0.0005 -0.0000 -0.0001 -0.0001  
Y 0.0009 0.0005 0.0003 0.0005 0.0002 -0.0003  
Z -0.0019 0.0028 0.0007 0.0003 -0.0005 0.0002  
AT. 161 H X 0.0046 -0.0051 -0.0002 -0.0020 0.0001 0.0019  
Y 0.0039 -0.0050 0.0017 0.0034 0.0001 0.0008  
Z 0.0071 -0.0049 -0.0010 -0.0062 0.0001 0.0010

AT.162 H X -0.0046 -0.0051 -0.0002 0.0020 -0.0001 0.0019  
Y -0.0039 -0.0050 0.0017 -0.0034 -0.0001 0.0008  
Z -0.0071 -0.0049 -0.0010 0.0062 -0.0001 0.0010

AT.163 H X 0.0039 0.0033 0.0025 -0.0025 0.0008 0.0001  
Y -0.0062 -0.0082 -0.0111 0.0075 -0.0044 0.0019  
Z -0.0001 0.0001 -0.0031 0.0026 -0.0007 0.0005

AT.164 H X -0.0039 0.0033 0.0025 0.0025 -0.0008 0.0001  
Y 0.0062 -0.0082 -0.0111 -0.0075 0.0044 0.0019  
Z 0.0001 0.0001 -0.0031 -0.0026 0.0007 0.0005

AT.165 O X 0.0001 -0.0002 -0.0003 0.0000 0.0024 0.0011  
Y 0.0001 -0.0007 -0.0001 -0.0003 0.0011 0.0007  
Z 0.0001 0.0002 -0.0001 0.0002 0.0001 0.0007

AT.166 O X -0.0001 -0.0002 -0.0003 -0.0000 -0.0024 0.0011  
Y -0.0001 -0.0007 -0.0001 0.0003 -0.0011 0.0007  
Z -0.0001 0.0002 -0.0001 -0.0002 -0.0001 0.0007

AT.167 H X -0.0013 -0.0002 0.0002 -0.0004 0.0052 0.0009  
Y 0.0027 -0.0013 -0.0014 0.0002 -0.0047 0.0023  
Z -0.0003 0.0011 0.0009 0.0007 0.0008 -0.0013

AT.168 H X 0.0013 -0.0002 0.0002 0.0004 -0.0052 0.0009  
Y -0.0027 -0.0013 -0.0014 -0.0002 0.0047 0.0023  
Z 0.0003 0.0011 0.0009 -0.0007 -0.0008 -0.0013

AT.169 O X 0.0002 0.0005 -0.0003 0.0002 -0.0013 0.0013  
Y 0.0007 0.0008 -0.0009 0.0006 0.0015 -0.0012  
Z -0.0001 -0.0000 0.0003 0.0000 -0.0005 0.0011

AT.170 O X -0.0002 0.0005 -0.0003 -0.0002 0.0013 0.0013  
Y -0.0007 0.0008 -0.0009 -0.0006 -0.0015 -0.0012  
Z 0.0001 -0.0000 0.0003 -0.0000 0.0005 0.0011

AT.171 H X -0.0021 -0.0022 0.0037 -0.0021 0.0125 -0.0106  
Y -0.0006 -0.0003 0.0011 -0.0003 0.0092 -0.0081  
Z -0.0002 0.0004 0.0002 0.0003 0.0016 -0.0010

AT.172 H X 0.0021 -0.0022 0.0037 0.0021 -0.0125 -0.0106  
Y 0.0006 -0.0003 0.0011 0.0003 -0.0092 -0.0081

Z 0.0002 0.0004 0.0002 -0.0003 -0.0016 -0.0010

FREQ(CM\*\*-1) 489.63 489.84 494.74 496.19 498.79 501.17

AT. 1 I X 0.0026 0.0030 -0.0003 0.0001 -0.0002 0.0001

Y 0.0018 0.0019 -0.0002 0.0001 -0.0001 0.0000

Z 0.0006 0.0008 0.0000 -0.0000 -0.0001 0.0000

AT. 2 I X 0.0026 -0.0030 -0.0003 -0.0001 -0.0002 -0.0001

Y 0.0018 -0.0019 -0.0002 -0.0001 -0.0001 -0.0000

Z 0.0006 -0.0008 0.0000 0.0000 -0.0001 -0.0000

AT. 3 I X -0.0004 0.0007 0.0001 0.0000 0.0000 -0.0001

Y -0.0000 0.0005 0.0001 0.0001 0.0000 -0.0000

Z -0.0000 0.0004 0.0001 0.0000 0.0000 -0.0000

AT. 4 I X -0.0004 -0.0007 0.0001 -0.0000 0.0000 0.0001

Y -0.0000 -0.0005 0.0001 -0.0001 0.0000 0.0000

Z -0.0000 -0.0004 0.0001 -0.0000 0.0000 0.0000

AT. 5 O X 0.0151 0.0151 0.0004 -0.0009 0.0002 -0.0005

Y -0.0026 -0.0006 -0.0010 0.0011 -0.0007 0.0005

Z -0.0087 -0.0110 0.0003 -0.0003 0.0005 -0.0003

AT. 6 O X 0.0151 -0.0151 0.0004 0.0009 0.0002 0.0005

Y -0.0026 0.0006 -0.0010 -0.0011 -0.0007 -0.0005

Z -0.0087 0.0110 0.0003 0.0003 0.0005 0.0003

AT. 7 O X 0.0005 -0.0039 -0.0006 0.0000 -0.0004 -0.0001

Y -0.0018 0.0001 0.0004 0.0000 0.0001 0.0000

Z 0.0028 0.0087 -0.0001 0.0004 -0.0005 0.0005

AT. 8 O X 0.0005 0.0039 -0.0006 -0.0000 -0.0004 0.0001

Y -0.0018 -0.0001 0.0004 -0.0000 0.0001 -0.0000

Z 0.0028 -0.0087 -0.0001 -0.0004 -0.0005 -0.0005

AT. 9 N X -0.0142 -0.0163 -0.0009 0.0010 -0.0007 0.0006

Y 0.0001 -0.0023 -0.0009 0.0004 -0.0009 0.0004

Z -0.0096 -0.0104 -0.0001 0.0007 -0.0000 0.0002

AT. 10 N X -0.0142 0.0163 -0.0009 -0.0010 -0.0007 -0.0006



Y 0.0001 0.0023 -0.0009 -0.0004 -0.0009 -0.0004  
Z -0.0096 0.0104 -0.0001 -0.0007 -0.0000 -0.0002  
AT. 11 N X 0.0051 0.0102 0.0007 -0.0002 0.0004 -0.0001  
Y 0.0014 0.0051 0.0011 -0.0002 0.0006 -0.0003  
Z -0.0003 -0.0017 0.0002 0.0000 -0.0000 -0.0002  
AT. 12 N X 0.0051 -0.0102 0.0007 0.0002 0.0004 0.0001  
Y 0.0014 -0.0051 0.0011 0.0002 0.0006 0.0003  
Z -0.0003 0.0017 0.0002 -0.0000 -0.0000 0.0002  
AT. 13 C X -0.0064 -0.0078 0.0011 -0.0006 0.0008 -0.0004  
Y -0.0204 -0.0219 0.0006 -0.0002 0.0007 -0.0001  
Z -0.0143 -0.0155 -0.0003 0.0008 -0.0000 0.0002  
AT. 14 C X -0.0064 0.0078 0.0011 0.0006 0.0008 0.0004  
Y -0.0204 0.0219 0.0006 0.0002 0.0007 0.0001  
Z -0.0143 0.0155 -0.0003 -0.0008 -0.0000 -0.0002  
AT. 15 C X -0.0159 -0.0173 0.0012 -0.0005 0.0011 -0.0005  
Y -0.0252 -0.0275 0.0020 -0.0012 0.0021 -0.0010  
Z 0.0140 0.0124 0.0006 -0.0008 0.0003 -0.0004  
AT. 16 C X -0.0159 0.0173 0.0012 0.0005 0.0011 0.0005  
Y -0.0252 0.0275 0.0020 0.0012 0.0021 0.0010  
Z 0.0140 -0.0124 0.0006 0.0008 0.0003 0.0004  
AT. 17 H X -0.0105 -0.0115 0.0007 -0.0001 0.0007 -0.0003  
Y -0.0539 -0.0557 0.0008 0.0009 0.0014 0.0000  
Z 0.0523 0.0502 0.0020 -0.0032 0.0010 -0.0016  
AT. 18 H X -0.0105 0.0115 0.0007 0.0001 0.0007 0.0003  
Y -0.0539 0.0557 0.0008 -0.0009 0.0014 -0.0000  
Z 0.0523 -0.0502 0.0020 0.0032 0.0010 0.0016  
AT. 19 H X -0.0243 -0.0246 0.0003 0.0006 0.0009 -0.0001  
Y 0.0260 0.0229 0.0037 -0.0042 0.0030 -0.0025  
Z 0.0304 0.0289 0.0008 -0.0016 0.0005 -0.0009  
AT. 20 H X -0.0243 0.0246 0.0003 -0.0006 0.0009 0.0001  
Y 0.0260 -0.0229 0.0037 0.0042 0.0030 0.0025  
Z 0.0304 -0.0289 0.0008 0.0016 0.0005 0.0009

AT. 21 C X 0.0033 0.0008 -0.0006 -0.0003 -0.0004 0.0003  
Y 0.0004 -0.0000 -0.0001 -0.0005 0.0001 0.0002  
Z -0.0004 -0.0044 -0.0008 -0.0001 -0.0006 0.0003

AT. 22 C X 0.0033 -0.0008 -0.0006 0.0003 -0.0004 -0.0003  
Y 0.0004 0.0000 -0.0001 0.0005 0.0001 -0.0002  
Z -0.0004 0.0044 -0.0008 0.0001 -0.0006 -0.0003

AT. 23 C X 0.0028 -0.0022 -0.0010 -0.0002 -0.0004 0.0007  
Y -0.0003 -0.0080 -0.0013 -0.0002 -0.0005 0.0005  
Z -0.0016 -0.0076 -0.0016 -0.0002 -0.0006 0.0008

AT. 24 C X 0.0028 0.0022 -0.0010 0.0002 -0.0004 -0.0007  
Y -0.0003 0.0080 -0.0013 0.0002 -0.0005 -0.0005  
Z -0.0016 0.0076 -0.0016 0.0002 -0.0006 -0.0008

AT. 25 H X 0.0030 -0.0001 -0.0002 -0.0000 0.0000 0.0002  
Y -0.0006 -0.0090 -0.0013 -0.0001 -0.0005 0.0003  
Z 0.0013 0.0030 -0.0004 -0.0008 0.0001 0.0011

AT. 26 H X 0.0030 0.0001 -0.0002 0.0000 0.0000 -0.0002  
Y -0.0006 0.0090 -0.0013 0.0001 -0.0005 -0.0003  
Z 0.0013 -0.0030 -0.0004 0.0008 0.0001 -0.0011

AT. 27 H X 0.0023 -0.0001 -0.0004 0.0001 -0.0000 0.0007  
Y -0.0030 -0.0161 -0.0018 0.0004 -0.0008 -0.0002  
Z -0.0029 -0.0121 -0.0021 0.0000 -0.0009 0.0005

AT. 28 H X 0.0023 0.0001 -0.0004 -0.0001 -0.0000 -0.0007  
Y -0.0030 0.0161 -0.0018 -0.0004 -0.0008 0.0002  
Z -0.0029 0.0121 -0.0021 -0.0000 -0.0009 -0.0005

AT. 29 C X -0.0108 -0.0116 0.0001 0.0003 0.0003 -0.0001  
Y 0.0143 0.0176 0.0001 -0.0006 0.0002 -0.0001  
Z -0.0082 -0.0055 -0.0006 0.0007 -0.0003 0.0005

AT. 30 C X -0.0108 0.0116 0.0001 -0.0003 0.0003 0.0001  
Y 0.0143 -0.0176 0.0001 0.0006 0.0002 0.0001  
Z -0.0082 0.0055 -0.0006 -0.0007 -0.0003 -0.0005

AT. 31 H X -0.0014 0.0000 0.0017 -0.0010 0.0020 -0.0011  
Y 0.0064 0.0077 -0.0016 0.0011 -0.0018 0.0013

Z -0.0143 -0.0133 -0.0024 0.0024 -0.0025 0.0020  
AT. 32 H X -0.0014 -0.0000 0.0017 0.0010 0.0020 0.0011  
Y 0.0064 -0.0077 -0.0016 -0.0011 -0.0018 -0.0013  
Z -0.0143 0.0133 -0.0024 -0.0024 -0.0025 -0.0020  
AT. 33 H X -0.0045 -0.0002 0.0010 -0.0008 0.0016 -0.0006  
Y 0.0254 0.0317 0.0032 -0.0032 0.0033 -0.0020  
Z -0.0085 -0.0038 -0.0011 0.0010 -0.0007 0.0009  
AT. 34 H X -0.0045 0.0002 0.0010 0.0008 0.0016 0.0006  
Y 0.0254 -0.0317 0.0032 0.0032 0.0033 0.0020  
Z -0.0085 0.0038 -0.0011 -0.0010 -0.0007 -0.0009  
AT. 35 C X -0.0106 -0.0146 -0.0008 0.0007 -0.0006 0.0002  
Y 0.0095 0.0139 -0.0000 -0.0001 0.0001 0.0002  
Z -0.0037 0.0010 0.0004 -0.0003 0.0008 -0.0002  
AT. 36 C X -0.0106 0.0146 -0.0008 -0.0007 -0.0006 -0.0002  
Y 0.0095 -0.0139 -0.0000 0.0001 0.0001 -0.0002  
Z -0.0037 -0.0010 0.0004 0.0003 0.0008 0.0002  
AT. 37 C X -0.0008 -0.0015 -0.0004 0.0003 -0.0003 0.0002  
Y 0.0015 0.0009 -0.0002 0.0003 -0.0002 -0.0000  
Z -0.0028 -0.0036 0.0000 -0.0001 0.0003 -0.0004  
AT. 38 C X -0.0008 0.0015 -0.0004 -0.0003 -0.0003 -0.0002  
Y 0.0015 -0.0009 -0.0002 -0.0003 -0.0002 0.0000  
Z -0.0028 0.0036 0.0000 0.0001 0.0003 0.0004  
AT. 39 H X -0.0081 -0.0162 -0.0010 0.0007 -0.0005 -0.0003  
Y -0.0095 -0.0202 -0.0008 0.0009 -0.0009 -0.0004  
Z -0.0030 -0.0045 -0.0001 -0.0001 0.0005 -0.0007  
AT. 40 H X -0.0081 0.0162 -0.0010 -0.0007 -0.0005 0.0003  
Y -0.0095 0.0202 -0.0008 -0.0009 -0.0009 0.0004  
Z -0.0030 0.0045 -0.0001 0.0001 0.0005 0.0007  
AT. 41 H X 0.0077 0.0152 0.0003 -0.0001 0.0001 0.0006  
Y -0.0038 -0.0065 -0.0008 0.0005 -0.0005 0.0003  
Z -0.0071 -0.0147 -0.0002 0.0001 0.0001 -0.0011  
AT. 42 H X 0.0077 -0.0152 0.0003 0.0001 0.0001 -0.0006

Y -0.0038 0.0065 -0.0008 -0.0005 -0.0005 -0.0003  
Z -0.0071 0.0147 -0.0002 -0.0001 0.0001 0.0011  
AT. 43 C X -0.0021 -0.0004 -0.0004 0.0003 0.0003 0.0001  
Y -0.0129 -0.0125 -0.0008 0.0009 -0.0006 0.0005  
Z -0.0020 -0.0064 0.0002 0.0001 0.0003 -0.0005  
AT. 44 C X -0.0021 0.0004 -0.0004 -0.0003 0.0003 -0.0001  
Y -0.0129 0.0125 -0.0008 -0.0009 -0.0006 -0.0005  
Z -0.0020 0.0064 0.0002 -0.0001 0.0003 0.0005  
AT. 45 H X -0.0227 -0.0286 -0.0016 0.0011 -0.0000 0.0001  
Y 0.0210 0.0312 -0.0004 0.0001 -0.0012 0.0014  
Z -0.0202 -0.0287 0.0006 0.0002 0.0009 -0.0013  
AT. 46 H X -0.0227 0.0286 -0.0016 -0.0011 -0.0000 -0.0001  
Y 0.0210 -0.0312 -0.0004 -0.0001 -0.0012 -0.0014  
Z -0.0202 0.0287 0.0006 -0.0002 0.0009 0.0013  
AT. 47 H X -0.0244 -0.0277 -0.0012 0.0012 0.0002 0.0001  
Y -0.0501 -0.0603 -0.0016 0.0021 -0.0000 -0.0001  
Z -0.0106 -0.0191 0.0004 0.0001 0.0009 -0.0012  
AT. 48 H X -0.0244 0.0277 -0.0012 -0.0012 0.0002 -0.0001  
Y -0.0501 0.0603 -0.0016 -0.0021 -0.0000 0.0001  
Z -0.0106 0.0191 0.0004 -0.0001 0.0009 0.0012  
AT. 49 C X 0.0177 0.0230 0.0002 -0.0007 0.0003 -0.0000  
Y -0.0110 -0.0105 -0.0011 0.0009 -0.0009 0.0008  
Z 0.0174 0.0176 0.0006 -0.0004 -0.0000 -0.0002  
AT. 50 C X 0.0177 -0.0230 0.0002 0.0007 0.0003 0.0000  
Y -0.0110 0.0105 -0.0011 -0.0009 -0.0009 -0.0008  
Z 0.0174 -0.0176 0.0006 0.0004 -0.0000 0.0002  
AT. 51 C X 0.0031 0.0066 -0.0005 0.0002 -0.0003 0.0006  
Y 0.0148 0.0142 0.0004 -0.0008 0.0002 -0.0005  
Z 0.0015 0.0039 -0.0004 0.0005 -0.0006 0.0006  
AT. 52 C X 0.0031 -0.0066 -0.0005 -0.0002 -0.0003 -0.0006  
Y 0.0148 -0.0142 0.0004 0.0008 0.0002 0.0005  
Z 0.0015 -0.0039 -0.0004 -0.0005 -0.0006 -0.0006

AT. 53 H X 0.0245 0.0254 0.0015 -0.0014 0.0014 -0.0011  
Y 0.0558 0.0547 0.0029 -0.0032 0.0023 -0.0025  
Z 0.0144 0.0208 -0.0009 0.0002 -0.0012 0.0012

AT. 54 H X 0.0245 -0.0254 0.0015 0.0014 0.0014 0.0011  
Y 0.0558 -0.0547 0.0029 0.0032 0.0023 0.0025  
Z 0.0144 -0.0208 -0.0009 -0.0002 -0.0012 -0.0012

AT. 55 H X -0.0270 -0.0202 -0.0033 0.0024 -0.0029 0.0032  
Y 0.0199 0.0193 0.0013 -0.0013 0.0010 -0.0010  
Z -0.0139 -0.0090 -0.0015 0.0014 -0.0015 0.0018

AT. 56 H X -0.0270 0.0202 -0.0033 -0.0024 -0.0029 -0.0032  
Y 0.0199 -0.0193 0.0013 0.0013 0.0010 0.0010  
Z -0.0139 0.0090 -0.0015 -0.0014 -0.0015 -0.0018

AT. 57 C X -0.0173 -0.0215 -0.0006 0.0005 -0.0003 -0.0001  
Y 0.0160 0.0193 0.0002 -0.0005 0.0002 -0.0000  
Z -0.0023 -0.0042 0.0001 -0.0002 -0.0001 -0.0003

AT. 58 C X -0.0173 0.0215 -0.0006 -0.0005 -0.0003 0.0001  
Y 0.0160 -0.0193 0.0002 0.0005 0.0002 0.0000  
Z -0.0023 0.0042 0.0001 0.0002 -0.0001 0.0003

AT. 59 H X -0.0186 -0.0214 0.0002 -0.0004 0.0002 -0.0009  
Y 0.0214 0.0232 0.0003 -0.0004 0.0001 -0.0002  
Z 0.0045 0.0014 0.0007 -0.0008 0.0002 -0.0010

AT. 60 H X -0.0186 0.0214 0.0002 0.0004 0.0002 0.0009  
Y 0.0214 -0.0232 0.0003 0.0004 0.0001 0.0002  
Z 0.0045 -0.0014 0.0007 0.0008 0.0002 0.0010

AT. 61 H X -0.0099 -0.0181 -0.0009 0.0004 -0.0011 0.0003  
Y 0.0103 0.0152 0.0001 -0.0004 0.0002 0.0006  
Z 0.0064 0.0004 0.0000 -0.0002 -0.0006 -0.0004

AT. 62 H X -0.0099 0.0181 -0.0009 -0.0004 -0.0011 -0.0003  
Y 0.0103 -0.0152 0.0001 0.0004 0.0002 -0.0006  
Z 0.0064 -0.0004 0.0000 0.0002 -0.0006 0.0004

AT. 63 H X -0.0249 -0.0256 -0.0005 0.0007 0.0002 -0.0004  
Y 0.0259 0.0266 0.0009 -0.0014 0.0004 -0.0008

Z -0.0036 -0.0066 -0.0007 0.0005 -0.0008 0.0006  
AT. 64 H X -0.0249 0.0256 -0.0005 -0.0007 0.0002 0.0004  
Y 0.0259 -0.0266 0.0009 0.0014 0.0004 0.0008  
Z -0.0036 0.0066 -0.0007 -0.0005 -0.0008 -0.0006  
AT. 65 C X 0.0004 0.0041 0.0000 -0.0005 0.0006 -0.0003  
Y -0.0015 -0.0055 0.0000 0.0003 -0.0003 -0.0001  
Z -0.0034 -0.0044 -0.0002 0.0005 -0.0005 0.0001  
AT. 66 C X 0.0004 -0.0041 0.0000 0.0005 0.0006 0.0003  
Y -0.0015 0.0055 0.0000 -0.0003 -0.0003 0.0001  
Z -0.0034 0.0044 -0.0002 -0.0005 -0.0005 -0.0001  
AT. 67 H X -0.0163 -0.0156 0.0002 -0.0003 0.0009 -0.0007  
Y 0.0081 0.0041 0.0005 0.0000 -0.0002 -0.0001  
Z 0.0016 0.0029 -0.0007 0.0006 -0.0008 0.0004  
AT. 68 H X -0.0163 0.0156 0.0002 0.0003 0.0009 0.0007  
Y 0.0081 -0.0041 0.0005 -0.0000 -0.0002 0.0001  
Z 0.0016 -0.0029 -0.0007 -0.0006 -0.0008 -0.0004  
AT. 69 H X 0.0097 0.0108 0.0003 -0.0011 0.0006 -0.0009  
Y -0.0072 -0.0133 -0.0000 0.0001 -0.0003 -0.0005  
Z -0.0306 -0.0298 -0.0008 0.0013 -0.0005 0.0005  
AT. 70 H X 0.0097 -0.0108 0.0003 0.0011 0.0006 0.0009  
Y -0.0072 0.0133 -0.0000 -0.0001 -0.0003 0.0005  
Z -0.0306 0.0298 -0.0008 -0.0013 -0.0005 -0.0005  
AT. 71 H X -0.0133 -0.0071 -0.0003 0.0002 0.0005 0.0004  
Y 0.0052 -0.0027 0.0008 -0.0002 0.0001 -0.0009  
Z -0.0046 -0.0090 0.0006 0.0003 0.0001 -0.0004  
AT. 72 H X -0.0133 0.0071 -0.0003 -0.0002 0.0005 -0.0004  
Y 0.0052 0.0027 0.0008 0.0002 0.0001 0.0009  
Z -0.0046 0.0090 0.0006 -0.0003 0.0001 0.0004  
AT. 73 C X 0.0116 0.0082 0.0005 -0.0008 0.0004 -0.0009  
Y -0.0091 -0.0122 0.0001 -0.0001 0.0005 -0.0007  
Z 0.0169 0.0233 0.0011 -0.0010 0.0011 -0.0004  
AT. 74 C X 0.0116 -0.0082 0.0005 0.0008 0.0004 0.0009

Y -0.0091 0.0122 0.0001 0.0001 0.0005 0.0007  
Z 0.0169 -0.0233 0.0011 0.0010 0.0011 0.0004  
AT. 75 H X 0.0173 0.0057 0.0017 -0.0018 0.0014 -0.0025  
Y -0.0172 -0.0248 0.0007 -0.0007 0.0014 -0.0017  
Z 0.0097 0.0042 0.0027 -0.0024 0.0030 -0.0029  
AT. 76 H X 0.0173 -0.0057 0.0017 0.0018 0.0014 0.0025  
Y -0.0172 0.0248 0.0007 0.0007 0.0014 0.0017  
Z 0.0097 -0.0042 0.0027 0.0024 0.0030 0.0029  
AT. 77 H X 0.0194 0.0133 0.0011 -0.0014 0.0007 -0.0015  
Y -0.0164 -0.0279 0.0015 -0.0014 0.0022 -0.0026  
Z 0.0163 0.0328 -0.0007 0.0007 -0.0007 0.0019  
AT. 78 H X 0.0194 -0.0133 0.0011 0.0014 0.0007 0.0015  
Y -0.0164 0.0279 0.0015 0.0014 0.0022 0.0026  
Z 0.0163 -0.0328 -0.0007 -0.0007 -0.0007 -0.0019  
AT. 79 I X -0.0005 -0.0001 -0.0000 0.0002 -0.0008 0.0018  
Y 0.0005 0.0000 0.0005 -0.0007 0.0011 -0.0021  
Z -0.0000 -0.0000 0.0001 -0.0002 -0.0001 -0.0001  
AT. 80 I X -0.0005 0.0001 -0.0000 -0.0002 -0.0008 -0.0018  
Y 0.0005 -0.0000 0.0005 0.0007 0.0011 0.0021  
Z -0.0000 0.0000 0.0001 0.0002 -0.0001 0.0001  
AT. 81 I X -0.0019 -0.0004 -0.0010 0.0001 -0.0023 0.0027  
Y 0.0016 0.0004 0.0008 -0.0002 0.0021 -0.0026  
Z 0.0010 0.0002 0.0006 -0.0002 0.0013 -0.0016  
AT. 82 I X -0.0019 0.0004 -0.0010 -0.0001 -0.0023 -0.0027  
Y 0.0016 -0.0004 0.0008 0.0002 0.0021 0.0026  
Z 0.0010 -0.0002 0.0006 0.0002 0.0013 0.0016  
AT. 83 O X 0.0062 0.0029 -0.0201 0.0188 0.0043 0.0021  
Y 0.0036 0.0013 0.0008 0.0009 0.0051 -0.0072  
Z -0.0028 -0.0007 -0.0061 0.0005 -0.0123 0.0150  
AT. 84 O X 0.0062 -0.0029 -0.0201 -0.0188 0.0043 -0.0021  
Y 0.0036 -0.0013 0.0008 -0.0009 0.0051 0.0072  
Z -0.0028 0.0007 -0.0061 -0.0005 -0.0123 -0.0150

AT. 85 O X 0.0123 0.0039 0.0003 -0.0077 -0.0127 0.0094  
Y 0.0017 0.0002 -0.0022 0.0015 -0.0004 0.0008  
Z 0.0118 0.0030 0.0084 -0.0072 0.0069 -0.0124

AT. 86 O X 0.0123 -0.0039 0.0003 0.0077 -0.0127 -0.0094  
Y 0.0017 -0.0002 -0.0022 -0.0015 -0.0004 -0.0008  
Z 0.0118 -0.0030 0.0084 0.0072 0.0069 0.0124

AT. 87 N X -0.0010 -0.0006 0.0126 -0.0121 -0.0049 0.0020  
Y 0.0020 0.0016 -0.0088 0.0098 0.0080 -0.0047  
Z 0.0027 0.0013 -0.0141 0.0139 0.0044 0.0012

AT. 88 N X -0.0010 0.0006 0.0126 0.0121 -0.0049 -0.0020  
Y 0.0020 -0.0016 -0.0088 -0.0098 0.0080 0.0047  
Z 0.0027 -0.0013 -0.0141 -0.0139 0.0044 -0.0012

AT. 89 N X -0.0047 -0.0012 -0.0069 0.0100 0.0078 -0.0042  
Y 0.0055 0.0009 0.0065 -0.0067 0.0010 -0.0049  
Z -0.0025 -0.0012 0.0028 0.0031 0.0122 -0.0115

AT. 90 N X -0.0047 0.0012 -0.0069 -0.0100 0.0078 0.0042  
Y 0.0055 -0.0009 0.0065 0.0067 0.0010 0.0049  
Z -0.0025 0.0012 0.0028 -0.0031 0.0122 0.0115

AT. 91 C X 0.0036 0.0018 -0.0078 0.0051 -0.0018 0.0030  
Y -0.0008 0.0001 -0.0184 0.0155 -0.0064 0.0153  
Z 0.0019 0.0012 -0.0164 0.0141 0.0017 0.0036

AT. 92 C X 0.0036 -0.0018 -0.0078 -0.0051 -0.0018 -0.0030  
Y -0.0008 -0.0001 -0.0184 -0.0155 -0.0064 -0.0153  
Z 0.0019 -0.0012 -0.0164 -0.0141 0.0017 -0.0036

AT. 93 C X 0.0012 0.0003 0.0016 -0.0028 -0.0008 -0.0026  
Y -0.0057 -0.0015 -0.0102 0.0084 -0.0159 0.0266  
Z -0.0034 -0.0008 0.0182 -0.0134 0.0041 -0.0098

AT. 94 C X 0.0012 -0.0003 0.0016 0.0028 -0.0008 0.0026  
Y -0.0057 0.0015 -0.0102 -0.0084 -0.0159 -0.0266  
Z -0.0034 0.0008 0.0182 0.0134 0.0041 0.0098

AT. 95 H X -0.0059 -0.0045 -0.0168 0.0027 -0.0102 0.0047  
Y 0.0041 0.0033 -0.0321 0.0326 -0.0079 0.0294



Z -0.0135 -0.0048 0.0755 -0.0622 -0.0005 -0.0222  
AT. 96 H X -0.0059 0.0045 -0.0168 -0.0027 -0.0102 -0.0047  
Y 0.0041 -0.0033 -0.0321 -0.0326 -0.0079 -0.0294  
Z -0.0135 0.0048 0.0755 0.0622 -0.0005 0.0222  
AT. 97 H X -0.0061 -0.0024 0.0332 -0.0305 -0.0041 -0.0094  
Y -0.0190 -0.0075 0.0487 -0.0449 -0.0210 0.0101  
Z -0.0045 -0.0014 0.0235 -0.0184 0.0040 -0.0120  
AT. 98 H X -0.0061 0.0024 0.0332 0.0305 -0.0041 0.0094  
Y -0.0190 0.0075 0.0487 0.0449 -0.0210 -0.0101  
Z -0.0045 0.0014 0.0235 0.0184 0.0040 0.0120  
AT. 99 C X 0.0066 0.0018 -0.0018 0.0013 0.0015 -0.0015  
Y -0.0032 -0.0001 -0.0046 -0.0043 -0.0221 0.0230  
Z -0.0079 -0.0017 -0.0043 0.0040 -0.0029 0.0058  
AT. 100 C X 0.0066 -0.0018 -0.0018 -0.0013 0.0015 0.0015  
Y -0.0032 0.0001 -0.0046 0.0043 -0.0221 -0.0230  
Z -0.0079 0.0017 -0.0043 -0.0040 -0.0029 -0.0058  
AT. 101 C X 0.0054 0.0013 0.0002 0.0033 0.0109 -0.0109  
Y -0.0192 -0.0038 -0.0102 0.0069 -0.0143 0.0210  
Z -0.0081 -0.0007 -0.0130 0.0005 -0.0306 0.0344  
AT. 102 C X 0.0054 -0.0013 0.0002 -0.0033 0.0109 0.0109  
Y -0.0192 0.0038 -0.0102 -0.0069 -0.0143 -0.0210  
Z -0.0081 0.0007 -0.0130 -0.0005 -0.0306 -0.0344  
AT. 103 H X 0.0028 0.0008 -0.0030 0.0025 0.0000 0.0014  
Y -0.0188 -0.0038 -0.0090 0.0079 -0.0088 0.0150  
Z 0.0155 0.0065 -0.0125 -0.0211 -0.0692 0.0662  
AT. 104 H X 0.0028 -0.0008 -0.0030 -0.0025 0.0000 -0.0014  
Y -0.0188 0.0038 -0.0090 -0.0079 -0.0088 -0.0150  
Z 0.0155 -0.0065 -0.0125 0.0211 -0.0692 -0.0662  
AT. 105 H X -0.0084 -0.0028 -0.0007 0.0129 0.0260 -0.0206  
Y -0.0328 -0.0087 -0.0068 0.0230 0.0249 -0.0155  
Z -0.0165 -0.0034 -0.0121 0.0086 -0.0129 0.0186  
AT. 106 H X -0.0084 0.0028 -0.0007 -0.0129 0.0260 0.0206

Y -0.0328 0.0087 -0.0068 -0.0230 0.0249 0.0155  
Z -0.0165 0.0034 -0.0121 -0.0086 -0.0129 -0.0186  
AT.107 C X 0.0019 0.0003 0.0156 -0.0149 -0.0017 -0.0047  
Y 0.0018 0.0001 0.0087 -0.0131 -0.0115 0.0061  
Z 0.0063 0.0021 -0.0127 0.0112 0.0030 -0.0008  
AT.108 C X 0.0019 -0.0003 0.0156 0.0149 -0.0017 0.0047  
Y 0.0018 -0.0001 0.0087 0.0131 -0.0115 -0.0061  
Z 0.0063 -0.0021 -0.0127 -0.0112 0.0030 0.0008  
AT.109 H X 0.0090 0.0032 0.0052 0.0070 0.0330 -0.0349  
Y 0.0062 0.0015 0.0083 -0.0029 0.0144 -0.0189  
Z 0.0120 0.0038 -0.0097 0.0217 0.0370 -0.0348  
AT.110 H X 0.0090 -0.0032 0.0052 -0.0070 0.0330 0.0349  
Y 0.0062 -0.0015 0.0083 0.0029 0.0144 0.0189  
Z 0.0120 -0.0038 -0.0097 -0.0217 0.0370 0.0348  
AT.111 H X -0.0001 -0.0000 0.0128 -0.0066 0.0090 -0.0104  
Y -0.0070 -0.0032 0.0145 -0.0396 -0.0669 0.0570  
Z 0.0103 0.0032 -0.0106 0.0077 0.0032 -0.0055  
AT.112 H X -0.0001 0.0000 0.0128 0.0066 0.0090 0.0104  
Y -0.0070 0.0032 0.0145 0.0396 -0.0669 -0.0570  
Z 0.0103 -0.0032 -0.0106 -0.0077 0.0032 0.0055  
AT.113 C X 0.0028 0.0001 0.0159 -0.0256 -0.0241 0.0136  
Y 0.0037 0.0005 0.0089 -0.0080 0.0017 -0.0067  
Z 0.0035 0.0013 -0.0128 0.0019 -0.0216 0.0227  
AT.114 C X 0.0028 -0.0001 0.0159 0.0256 -0.0241 -0.0136  
Y 0.0037 -0.0005 0.0089 0.0080 0.0017 0.0067  
Z 0.0035 -0.0013 -0.0128 -0.0019 -0.0216 -0.0227  
AT.115 C X -0.0014 -0.0006 0.0004 -0.0040 -0.0071 0.0048  
Y 0.0007 -0.0002 0.0058 0.0011 0.0150 -0.0158  
Z -0.0019 -0.0004 -0.0032 0.0026 -0.0026 0.0046  
AT.116 C X -0.0014 0.0006 0.0004 0.0040 -0.0071 -0.0048  
Y 0.0007 0.0002 0.0058 -0.0011 0.0150 0.0158  
Z -0.0019 0.0004 -0.0032 -0.0026 -0.0026 -0.0046

AT.117 H X 0.0012 -0.0003 0.0012 -0.0065 -0.0093 0.0048  
Y -0.0103 -0.0028 -0.0026 0.0281 0.0552 -0.0441  
Z -0.0018 -0.0000 -0.0022 -0.0015 -0.0105 0.0117

AT.118 H X 0.0012 0.0003 0.0012 0.0065 -0.0093 -0.0048  
Y -0.0103 0.0028 -0.0026 -0.0281 0.0552 0.0441  
Z -0.0018 0.0000 -0.0022 0.0015 -0.0105 -0.0117

AT.119 H X -0.0086 -0.0018 -0.0071 0.0119 0.0095 -0.0036  
Y 0.0021 0.0005 -0.0006 0.0043 0.0091 -0.0086  
Z -0.0073 -0.0018 -0.0008 0.0081 0.0126 -0.0075

AT.120 H X -0.0086 0.0018 -0.0071 -0.0119 0.0095 0.0036  
Y 0.0021 -0.0005 -0.0006 -0.0043 0.0091 0.0086  
Z -0.0073 0.0018 -0.0008 -0.0081 0.0126 0.0075

AT.121 C X -0.0032 -0.0010 -0.0034 0.0112 0.0184 -0.0148  
Y 0.0067 0.0026 -0.0129 0.0119 0.0036 0.0001  
Z -0.0072 -0.0026 0.0018 0.0047 0.0119 -0.0098

AT.122 C X -0.0032 0.0010 -0.0034 -0.0112 0.0184 0.0148  
Y 0.0067 -0.0026 -0.0129 -0.0119 0.0036 -0.0001  
Z -0.0072 0.0026 0.0018 -0.0047 0.0119 0.0098

AT.123 H X 0.0049 -0.0003 0.0317 -0.0209 0.0210 -0.0323  
Y 0.0127 0.0033 0.0185 -0.0176 0.0029 -0.0123  
Z -0.0120 -0.0032 -0.0251 0.0297 0.0125 0.0005

AT.124 H X 0.0049 0.0003 0.0317 0.0209 0.0210 0.0323  
Y 0.0127 -0.0033 0.0185 0.0176 0.0029 0.0123  
Z -0.0120 0.0032 -0.0251 -0.0297 0.0125 -0.0005

AT.125 H X -0.0044 -0.0018 0.0056 0.0006 0.0127 -0.0135  
Y -0.0020 0.0021 -0.0649 0.0612 0.0058 0.0200  
Z -0.0126 -0.0038 -0.0138 0.0168 0.0057 0.0022

AT.126 H X -0.0044 0.0018 0.0056 -0.0006 0.0127 0.0135  
Y -0.0020 -0.0021 -0.0649 -0.0612 0.0058 -0.0200  
Z -0.0126 0.0038 -0.0138 -0.0168 0.0057 -0.0022

AT.127 C X -0.0032 -0.0001 -0.0188 0.0253 0.0184 -0.0080  
Y 0.0079 0.0030 -0.0051 0.0032 -0.0005 0.0011

Z -0.0042 -0.0023 0.0278 -0.0195 0.0106 -0.0186  
AT. 128 C X -0.0032 0.0001 -0.0188 -0.0253 0.0184 0.0080  
Y 0.0079 -0.0030 -0.0051 -0.0032 -0.0005 -0.0011  
Z -0.0042 0.0023 0.0278 0.0195 0.0106 0.0186  
AT. 129 C X -0.0050 -0.0013 -0.0004 0.0061 0.0089 -0.0043  
Y -0.0018 -0.0007 0.0136 -0.0125 -0.0012 -0.0040  
Z 0.0074 0.0022 0.0058 -0.0046 0.0030 -0.0047  
AT. 130 C X -0.0050 0.0013 -0.0004 -0.0061 0.0089 0.0043  
Y -0.0018 0.0007 0.0136 0.0125 -0.0012 0.0040  
Z 0.0074 -0.0022 0.0058 0.0046 0.0030 0.0047  
AT. 131 H X 0.0055 0.0024 -0.0038 0.0064 0.0063 -0.0023  
Y -0.0231 -0.0093 0.0578 -0.0525 -0.0090 -0.0105  
Z 0.0117 0.0033 0.0224 -0.0234 -0.0042 -0.0055  
AT. 132 H X 0.0055 -0.0024 -0.0038 -0.0064 0.0063 0.0023  
Y -0.0231 0.0093 0.0578 0.0525 -0.0090 0.0105  
Z 0.0117 -0.0033 0.0224 0.0234 -0.0042 0.0055  
AT. 133 H X -0.0241 -0.0085 0.0228 -0.0146 0.0028 -0.0053  
Y 0.0012 0.0004 0.0084 -0.0106 -0.0065 0.0019  
Z 0.0216 0.0077 -0.0138 0.0086 -0.0024 0.0050  
AT. 134 H X -0.0241 0.0085 0.0228 0.0146 0.0028 0.0053  
Y 0.0012 -0.0004 0.0084 0.0106 -0.0065 -0.0019  
Z 0.0216 -0.0077 -0.0138 -0.0086 -0.0024 -0.0050  
AT. 135 C X 0.0018 -0.0008 0.0306 -0.0325 -0.0093 -0.0050  
Y -0.0001 -0.0004 0.0143 -0.0149 -0.0053 -0.0004  
Z -0.0021 -0.0000 -0.0107 0.0131 0.0064 -0.0002  
AT. 136 C X 0.0018 0.0008 0.0306 0.0325 -0.0093 0.0050  
Y -0.0001 0.0004 0.0143 0.0149 -0.0053 0.0004  
Z -0.0021 0.0000 -0.0107 -0.0131 0.0064 0.0002  
AT. 137 H X 0.0011 -0.0017 0.0386 -0.0289 0.0159 -0.0307  
Y -0.0022 -0.0011 0.0199 -0.0171 -0.0001 -0.0062  
Z -0.0052 -0.0008 -0.0043 0.0084 0.0061 -0.0006  
AT. 138 H X 0.0011 0.0017 0.0386 0.0289 0.0159 0.0307

Y -0.0022 0.0011 0.0199 0.0171 -0.0001 0.0062  
Z -0.0052 0.0008 -0.0043 -0.0084 0.0061 0.0006  
AT. 139 H X 0.0063 0.0009 0.0194 -0.0301 -0.0260 0.0119  
Y -0.0004 -0.0007 0.0102 -0.0170 -0.0179 0.0126  
Z -0.0079 -0.0021 0.0048 0.0108 0.0314 -0.0259  
AT. 140 H X 0.0063 -0.0009 0.0194 0.0301 -0.0260 -0.0119  
Y -0.0004 0.0007 0.0102 0.0170 -0.0179 -0.0126  
Z -0.0079 0.0021 0.0048 -0.0108 0.0314 0.0259  
AT. 141 H X -0.0046 -0.0029 0.0453 -0.0393 0.0030 -0.0183  
Y -0.0039 -0.0012 0.0217 -0.0206 -0.0059 -0.0005  
Z -0.0009 -0.0001 -0.0121 0.0162 0.0123 -0.0059  
AT. 142 H X -0.0046 0.0029 0.0453 0.0393 0.0030 0.0183  
Y -0.0039 0.0012 0.0217 0.0206 -0.0059 0.0005  
Z -0.0009 0.0001 -0.0121 -0.0162 0.0123 0.0059  
AT. 143 C X -0.0051 -0.0013 0.0014 0.0122 0.0296 -0.0246  
Y -0.0041 -0.0014 0.0001 0.0052 0.0109 -0.0090  
Z -0.0022 -0.0005 -0.0004 0.0071 0.0141 -0.0121  
AT. 144 C X -0.0051 0.0013 0.0014 -0.0122 0.0296 0.0246  
Y -0.0041 0.0014 0.0001 -0.0052 0.0109 0.0090  
Z -0.0022 0.0005 -0.0004 -0.0071 0.0141 0.0121  
AT. 145 H X -0.0006 -0.0004 0.0255 -0.0087 0.0316 -0.0353  
Y -0.0089 -0.0033 0.0059 0.0027 0.0165 -0.0154  
Z 0.0040 0.0018 -0.0003 0.0042 0.0088 -0.0082  
AT. 146 H X -0.0006 0.0004 0.0255 0.0087 0.0316 0.0353  
Y -0.0089 0.0033 0.0059 -0.0027 0.0165 0.0154  
Z 0.0040 -0.0018 -0.0003 -0.0042 0.0088 0.0082  
AT. 147 H X 0.0001 0.0010 -0.0172 0.0237 0.0195 -0.0102  
Y -0.0079 -0.0024 -0.0049 0.0117 0.0143 -0.0101  
Z 0.0034 0.0024 -0.0301 0.0272 0.0008 0.0088  
AT. 148 H X 0.0001 -0.0010 -0.0172 -0.0237 0.0195 0.0102  
Y -0.0079 0.0024 -0.0049 -0.0117 0.0143 0.0101  
Z 0.0034 -0.0024 -0.0301 -0.0272 0.0008 -0.0088

AT.149 H X -0.0155 -0.0055 0.0183 0.0053 0.0449 -0.0430  
Y -0.0113 -0.0041 0.0029 0.0065 0.0179 -0.0156  
Z -0.0090 -0.0031 -0.0040 0.0127 0.0185 -0.0140

AT.150 H X -0.0155 0.0055 0.0183 -0.0053 0.0449 0.0430  
Y -0.0113 0.0041 0.0029 -0.0065 0.0179 0.0156  
Z -0.0090 0.0031 -0.0040 -0.0127 0.0185 0.0140

AT.151 C X 0.0072 0.0027 -0.0136 0.0055 -0.0122 0.0137  
Y -0.0086 -0.0024 -0.0071 0.0064 -0.0041 0.0084  
Z -0.0006 -0.0013 0.0210 -0.0282 -0.0222 0.0114

AT.152 C X 0.0072 -0.0027 -0.0136 -0.0055 -0.0122 -0.0137  
Y -0.0086 0.0024 -0.0071 -0.0064 -0.0041 -0.0084  
Z -0.0006 0.0013 0.0210 0.0282 -0.0222 -0.0114

AT.153 H X 0.0187 0.0070 -0.0278 0.0097 -0.0277 0.0304  
Y -0.0225 -0.0063 -0.0168 0.0146 -0.0112 0.0222  
Z -0.0279 -0.0094 0.0117 -0.0169 -0.0270 0.0265

AT.154 H X 0.0187 -0.0070 -0.0278 -0.0097 -0.0277 -0.0304  
Y -0.0225 0.0063 -0.0168 -0.0146 -0.0112 -0.0222  
Z -0.0279 0.0094 0.0117 0.0169 -0.0270 -0.0265

AT.155 H X 0.0129 0.0047 -0.0292 0.0158 -0.0179 0.0227  
Y -0.0302 -0.0090 -0.0160 0.0144 -0.0128 0.0248  
Z 0.0242 0.0063 0.0245 -0.0330 -0.0153 -0.0026

AT.156 H X 0.0129 -0.0047 -0.0292 -0.0158 -0.0179 -0.0227  
Y -0.0302 0.0090 -0.0160 -0.0144 -0.0128 -0.0248  
Z 0.0242 -0.0063 0.0245 0.0330 -0.0153 0.0026

AT.157 O X -0.0002 -0.0006 -0.0003 0.0003 -0.0000 -0.0000  
Y 0.0017 0.0011 -0.0002 0.0000 0.0001 0.0000  
Z 0.0008 0.0009 0.0001 0.0004 0.0001 0.0001

AT.158 O X -0.0002 0.0006 -0.0003 -0.0003 -0.0000 0.0000  
Y 0.0017 -0.0011 -0.0002 -0.0000 0.0001 -0.0000  
Z 0.0008 -0.0009 0.0001 -0.0004 0.0001 -0.0001

AT.159 O X -0.0007 -0.0003 -0.0003 0.0002 0.0002 -0.0000  
Y 0.0006 0.0004 -0.0001 0.0001 -0.0002 -0.0003

Z -0.0002 0.0012 0.0002 0.0000 0.0001 -0.0001  
AT.160 O X -0.0007 0.0003 -0.0003 -0.0002 0.0002 0.0000  
Y 0.0006 -0.0004 -0.0001 -0.0001 -0.0002 0.0003  
Z -0.0002 -0.0012 0.0002 -0.0000 0.0001 0.0001  
AT.161 H X 0.0000 0.0015 -0.0008 -0.0020 0.0011 -0.0008  
Y 0.0035 0.0021 -0.0002 0.0013 -0.0006 0.0006  
Z -0.0056 -0.0020 -0.0005 -0.0046 0.0025 -0.0019  
AT.162 H X 0.0000 -0.0015 -0.0008 0.0020 0.0011 0.0008  
Y 0.0035 -0.0021 -0.0002 -0.0013 -0.0006 -0.0006  
Z -0.0056 0.0020 -0.0005 0.0046 0.0025 0.0019  
AT.163 H X -0.0017 0.0010 -0.0001 0.0001 0.0004 0.0002  
Y -0.0028 -0.0045 0.0026 -0.0011 0.0046 0.0032  
Z -0.0005 -0.0003 0.0008 -0.0003 0.0011 0.0005  
AT.164 H X -0.0017 -0.0010 -0.0001 -0.0001 0.0004 -0.0002  
Y -0.0028 0.0045 0.0026 0.0011 0.0046 -0.0032  
Z -0.0005 0.0003 0.0008 0.0003 0.0011 -0.0005  
AT.165 O X -0.0006 -0.0005 0.0025 -0.0020 -0.0007 -0.0003  
Y -0.0008 -0.0005 0.0009 -0.0012 -0.0007 0.0004  
Z -0.0003 -0.0001 0.0006 -0.0007 -0.0001 -0.0007  
AT.166 O X -0.0006 0.0005 0.0025 0.0020 -0.0007 0.0003  
Y -0.0008 0.0005 0.0009 0.0012 -0.0007 -0.0004  
Z -0.0003 0.0001 0.0006 0.0007 -0.0001 0.0007  
AT.167 H X -0.0012 -0.0010 0.0015 -0.0016 -0.0052 0.0013  
Y -0.0003 0.0003 0.0047 -0.0033 0.0101 -0.0039  
Z 0.0005 0.0001 -0.0021 0.0018 -0.0031 0.0008  
AT.168 H X -0.0012 0.0010 0.0015 0.0016 -0.0052 -0.0013  
Y -0.0003 -0.0003 0.0047 0.0033 0.0101 0.0039  
Z 0.0005 -0.0001 -0.0021 -0.0018 -0.0031 -0.0008  
AT.169 O X -0.0008 0.0002 -0.0006 -0.0005 0.0003 0.0001  
Y 0.0010 -0.0006 0.0012 0.0004 0.0001 -0.0001  
Z -0.0007 0.0002 0.0001 -0.0009 -0.0002 -0.0004  
AT.170 O X -0.0008 -0.0002 -0.0006 0.0005 0.0003 -0.0001

Y 0.0010 0.0006 0.0012 -0.0004 0.0001 0.0001  
 Z -0.0007 -0.0002 0.0001 0.0009 -0.0002 0.0004  
 AT. 171 H X 0.0017 0.0020 0.0009 0.0057 -0.0079 -0.0008  
 Y 0.0029 0.0001 0.0023 0.0040 -0.0033 0.0002  
 Z 0.0004 0.0001 0.0010 -0.0001 0.0003 0.0004  
 AT. 172 H X 0.0017 -0.0020 0.0009 -0.0057 -0.0079 0.0008  
 Y 0.0029 -0.0001 0.0023 -0.0040 -0.0033 -0.0002  
 Z 0.0004 -0.0001 0.0010 0.0001 0.0003 -0.0004  
  
 FREQ(CM\*\*-1) 504.97 508.40 511.05 512.69 522.88 525.14

AT. 1 I X -0.0020 -0.0020 -0.0003 0.0000 -0.0038 -0.0046  
 Y -0.0014 -0.0013 -0.0002 -0.0000 -0.0023 -0.0028  
 Z -0.0002 -0.0003 -0.0001 0.0000 -0.0006 -0.0007  
 AT. 2 I X -0.0020 0.0020 0.0003 0.0000 0.0038 -0.0046  
 Y -0.0014 0.0013 0.0002 -0.0000 0.0023 -0.0028  
 Z -0.0002 0.0003 0.0001 0.0000 0.0006 -0.0007  
 AT. 3 I X -0.0037 -0.0033 0.0007 -0.0004 0.0038 0.0025  
 Y -0.0018 -0.0016 0.0002 -0.0001 0.0018 0.0012  
 Z -0.0016 -0.0014 0.0003 -0.0002 0.0015 0.0011  
 AT. 4 I X -0.0037 0.0033 -0.0007 -0.0004 -0.0038 0.0025  
 Y -0.0018 0.0016 -0.0002 -0.0001 -0.0018 0.0012  
 Z -0.0016 0.0014 -0.0003 -0.0002 -0.0015 0.0011  
 AT. 5 O X 0.0041 0.0056 -0.0010 0.0000 0.0047 0.0041  
 Y -0.0131 -0.0135 0.0004 -0.0003 -0.0159 -0.0167  
 Z 0.0165 0.0170 -0.0024 0.0012 0.0068 0.0045  
 AT. 6 O X 0.0041 -0.0056 0.0010 0.0000 -0.0047 0.0041  
 Y -0.0131 0.0135 -0.0004 -0.0003 0.0159 -0.0167  
 Z 0.0165 -0.0170 0.0024 0.0012 -0.0068 0.0045  
 AT. 7 O X -0.0062 -0.0064 0.0008 -0.0001 0.0035 0.0037  
 Y -0.0021 -0.0010 0.0002 -0.0004 0.0057 0.0016  
 Z -0.0130 -0.0122 0.0023 -0.0014 0.0026 0.0042



AT. 8 O X -0.0062 0.0064 -0.0008 -0.0001 -0.0035 0.0037  
Y -0.0021 0.0010 -0.0002 -0.0004 -0.0057 0.0016  
Z -0.0130 0.0122 -0.0023 -0.0014 -0.0026 0.0042

AT. 9 N X -0.0056 -0.0055 -0.0002 0.0000 -0.0059 -0.0060  
Y -0.0004 0.0005 -0.0027 0.0007 -0.0115 -0.0154  
Z -0.0034 -0.0032 0.0004 -0.0001 -0.0034 -0.0026

AT. 10 N X -0.0056 0.0055 0.0002 0.0000 0.0059 -0.0060  
Y -0.0004 -0.0005 0.0027 0.0007 0.0115 -0.0154  
Z -0.0034 0.0032 -0.0004 -0.0001 0.0034 -0.0026

AT. 11 N X -0.0008 0.0002 0.0002 -0.0008 0.0048 0.0035  
Y -0.0043 -0.0028 0.0010 -0.0008 0.0150 0.0097  
Z -0.0075 -0.0070 0.0011 -0.0005 0.0100 0.0076

AT. 12 N X -0.0008 -0.0002 -0.0002 -0.0008 -0.0048 0.0035  
Y -0.0043 0.0028 -0.0010 -0.0008 -0.0150 0.0097  
Z -0.0075 0.0070 -0.0011 -0.0005 -0.0100 0.0076

AT. 13 C X 0.0038 0.0042 0.0017 -0.0006 0.0133 0.0177  
Y 0.0102 0.0091 0.0006 0.0003 0.0101 0.0119  
Z -0.0005 -0.0004 -0.0003 0.0001 -0.0024 -0.0018

AT. 14 C X 0.0038 -0.0042 -0.0017 -0.0006 -0.0133 0.0177  
Y 0.0102 -0.0091 -0.0006 0.0003 -0.0101 0.0119  
Z -0.0005 0.0004 0.0003 0.0001 0.0024 -0.0018

AT. 15 C X 0.0084 0.0080 0.0026 -0.0005 0.0219 0.0287  
Y 0.0229 0.0220 0.0022 0.0003 0.0340 0.0392  
Z 0.0035 0.0067 -0.0013 0.0000 0.0085 0.0098

AT. 16 C X 0.0084 -0.0080 -0.0026 -0.0005 -0.0219 0.0287  
Y 0.0229 -0.0220 -0.0022 0.0003 -0.0340 0.0392  
Z 0.0035 -0.0067 0.0013 0.0000 -0.0085 0.0098

AT. 17 H X 0.0013 0.0008 0.0023 -0.0005 0.0109 0.0166  
Y 0.0115 0.0083 0.0037 0.0001 0.0180 0.0230  
Z 0.0154 0.0215 -0.0033 0.0002 0.0246 0.0259

AT. 18 H X 0.0013 -0.0008 -0.0023 -0.0005 -0.0109 0.0166  
Y 0.0115 -0.0083 -0.0037 0.0001 -0.0180 0.0230

Z 0.0154 -0.0215 0.0033 0.0002 -0.0246 0.0259  
AT. 19 H X 0.0016 0.0001 0.0025 -0.0007 0.0096 0.0154  
Y 0.0372 0.0389 -0.0007 0.0005 0.0530 0.0551  
Z 0.0064 0.0103 -0.0023 0.0001 0.0114 0.0111  
AT. 20 H X 0.0016 -0.0001 -0.0025 -0.0007 -0.0096 0.0154  
Y 0.0372 -0.0389 0.0007 0.0005 -0.0530 0.0551  
Z 0.0064 -0.0103 0.0023 0.0001 -0.0114 0.0111  
AT. 21 C X 0.0095 0.0088 -0.0013 0.0008 -0.0105 -0.0061  
Y 0.0209 0.0208 -0.0033 0.0016 -0.0132 -0.0120  
Z 0.0068 0.0058 -0.0011 0.0009 -0.0088 -0.0056  
AT. 22 C X 0.0095 -0.0088 0.0013 0.0008 0.0105 -0.0061  
Y 0.0209 -0.0208 0.0033 0.0016 0.0132 -0.0120  
Z 0.0068 -0.0058 0.0011 0.0009 0.0088 -0.0056  
AT. 23 C X 0.0215 0.0193 -0.0035 0.0020 -0.0245 -0.0165  
Y 0.0215 0.0193 -0.0038 0.0022 -0.0208 -0.0150  
Z 0.0343 0.0311 -0.0057 0.0035 -0.0358 -0.0271  
AT. 24 C X 0.0215 -0.0193 0.0035 0.0020 0.0245 -0.0165  
Y 0.0215 -0.0193 0.0038 0.0022 0.0208 -0.0150  
Z 0.0343 -0.0311 0.0057 0.0035 0.0358 -0.0271  
AT. 25 H X 0.0089 0.0083 -0.0019 0.0013 -0.0131 -0.0085  
Y 0.0170 0.0148 -0.0031 0.0019 -0.0174 -0.0121  
Z 0.0600 0.0589 -0.0097 0.0050 -0.0544 -0.0457  
AT. 26 H X 0.0089 -0.0083 0.0019 0.0013 0.0131 -0.0085  
Y 0.0170 -0.0148 0.0031 0.0019 0.0174 -0.0121  
Z 0.0600 -0.0589 0.0097 0.0050 0.0544 -0.0457  
AT. 27 H X 0.0214 0.0191 -0.0035 0.0019 -0.0220 -0.0164  
Y -0.0118 -0.0145 0.0013 -0.0001 0.0077 0.0099  
Z 0.0187 0.0148 -0.0032 0.0024 -0.0229 -0.0152  
AT. 28 H X 0.0214 -0.0191 0.0035 0.0019 0.0220 -0.0164  
Y -0.0118 0.0145 -0.0013 -0.0001 -0.0077 0.0099  
Z 0.0187 -0.0148 0.0032 0.0024 0.0229 -0.0152  
AT. 29 C X -0.0002 -0.0002 0.0008 -0.0000 0.0040 0.0042

Y 0.0078 0.0087 -0.0017 0.0006 -0.0031 -0.0027  
Z -0.0048 -0.0054 0.0013 -0.0002 -0.0064 -0.0042  
AT. 30 C X -0.0002 0.0002 -0.0008 -0.0000 -0.0040 0.0042  
Y 0.0078 -0.0087 0.0017 0.0006 0.0031 -0.0027  
Z -0.0048 0.0054 -0.0013 -0.0002 0.0064 -0.0042  
AT. 31 H X 0.0127 0.0136 0.0007 -0.0001 0.0190 0.0205  
Y -0.0214 -0.0226 0.0025 -0.0008 -0.0214 -0.0150  
Z -0.0410 -0.0441 0.0073 -0.0022 -0.0250 -0.0131  
AT. 32 H X 0.0127 -0.0136 -0.0007 -0.0001 -0.0190 0.0205  
Y -0.0214 0.0226 -0.0025 -0.0008 0.0214 -0.0150  
Z -0.0410 0.0441 -0.0073 -0.0022 0.0250 -0.0131  
AT. 33 H X 0.0224 0.0226 -0.0019 0.0009 0.0142 0.0120  
Y 0.0522 0.0560 -0.0080 0.0029 0.0245 0.0157  
Z -0.0082 -0.0097 0.0022 -0.0006 -0.0110 -0.0066  
AT. 34 H X 0.0224 -0.0226 0.0019 0.0009 -0.0142 0.0120  
Y 0.0522 -0.0560 0.0080 0.0029 -0.0245 0.0157  
Z -0.0082 0.0097 -0.0022 -0.0006 0.0110 -0.0066  
AT. 35 C X -0.0147 -0.0157 0.0023 -0.0004 -0.0034 -0.0041  
Y -0.0020 -0.0022 0.0015 -0.0005 -0.0027 0.0034  
Z 0.0186 0.0190 -0.0028 0.0013 0.0028 -0.0012  
AT. 36 C X -0.0147 0.0157 -0.0023 -0.0004 0.0034 -0.0041  
Y -0.0020 0.0022 -0.0015 -0.0005 0.0027 0.0034  
Z 0.0186 -0.0190 0.0028 0.0013 -0.0028 -0.0012  
AT. 37 C X -0.0108 -0.0114 0.0019 -0.0008 -0.0046 -0.0023  
Y -0.0107 -0.0108 0.0023 -0.0009 0.0015 0.0037  
Z 0.0061 0.0065 -0.0016 0.0005 0.0038 0.0009  
AT. 38 C X -0.0108 0.0114 -0.0019 -0.0008 0.0046 -0.0023  
Y -0.0107 0.0108 -0.0023 -0.0009 -0.0015 0.0037  
Z 0.0061 -0.0065 0.0016 0.0005 -0.0038 0.0009  
AT. 39 H X -0.0152 -0.0164 0.0013 -0.0010 -0.0096 -0.0076  
Y -0.0316 -0.0323 0.0046 -0.0018 0.0057 0.0054  
Z 0.0125 0.0129 -0.0030 0.0008 -0.0019 -0.0039

AT. 40 H X -0.0152 0.0164 -0.0013 -0.0010 0.0096 -0.0076  
Y -0.0316 0.0323 -0.0046 -0.0018 -0.0057 0.0054  
Z 0.0125 -0.0129 0.0030 0.0008 0.0019 -0.0039

AT. 41 H X -0.0053 -0.0051 0.0024 -0.0007 0.0015 0.0035  
Y -0.0088 -0.0099 0.0020 -0.0005 -0.0070 -0.0029  
Z -0.0012 -0.0008 -0.0018 0.0001 0.0040 -0.0001

AT. 42 H X -0.0053 0.0051 -0.0024 -0.0007 -0.0015 0.0035  
Y -0.0088 0.0099 -0.0020 -0.0005 0.0070 -0.0029  
Z -0.0012 0.0008 0.0018 0.0001 -0.0040 -0.0001

AT. 43 C X 0.0097 0.0093 -0.0014 0.0004 -0.0084 -0.0072  
Y -0.0088 -0.0101 0.0013 -0.0002 -0.0056 -0.0061  
Z -0.0072 -0.0066 0.0014 -0.0006 0.0108 0.0084

AT. 44 C X 0.0097 -0.0093 0.0014 0.0004 0.0084 -0.0072  
Y -0.0088 0.0101 -0.0013 -0.0002 0.0056 -0.0061  
Z -0.0072 0.0066 -0.0014 -0.0006 -0.0108 0.0084

AT. 45 H X 0.0169 0.0148 -0.0030 0.0016 -0.0223 -0.0199  
Y -0.0214 -0.0223 0.0038 -0.0019 -0.0052 0.0009  
Z 0.0003 0.0017 -0.0002 0.0004 0.0197 0.0102

AT. 46 H X 0.0169 -0.0148 0.0030 0.0016 0.0223 -0.0199  
Y -0.0214 0.0223 -0.0038 -0.0019 0.0052 0.0009  
Z 0.0003 -0.0017 0.0002 0.0004 -0.0197 0.0102

AT. 47 H X 0.0103 0.0091 -0.0023 0.0010 -0.0133 -0.0143  
Y 0.0030 0.0009 -0.0015 0.0016 -0.0101 -0.0161  
Z 0.0042 0.0050 -0.0005 0.0005 0.0124 0.0074

AT. 48 H X 0.0103 -0.0091 0.0023 0.0010 0.0133 -0.0143  
Y 0.0030 -0.0009 0.0015 0.0016 0.0101 -0.0161  
Z 0.0042 -0.0050 0.0005 0.0005 -0.0124 0.0074

AT. 49 C X 0.0097 0.0095 -0.0012 0.0004 -0.0033 -0.0005  
Y -0.0083 -0.0102 0.0012 -0.0002 -0.0161 -0.0126  
Z -0.0163 -0.0155 0.0030 -0.0018 0.0049 0.0079

AT. 50 C X 0.0097 -0.0095 0.0012 0.0004 0.0033 -0.0005  
Y -0.0083 0.0102 -0.0012 -0.0002 0.0161 -0.0126

Z -0.0163 0.0155 -0.0030 -0.0018 -0.0049 0.0079  
AT. 51 C X 0.0019 0.0007 0.0000 -0.0000 -0.0077 -0.0028  
Y -0.0001 0.0010 -0.0002 -0.0001 0.0038 0.0045  
Z -0.0092 -0.0101 0.0013 -0.0007 -0.0130 -0.0099  
AT. 52 C X 0.0019 -0.0007 -0.0000 -0.0000 0.0077 -0.0028  
Y -0.0001 -0.0010 0.0002 -0.0001 -0.0038 0.0045  
Z -0.0092 0.0101 -0.0013 -0.0007 0.0130 -0.0099  
AT. 53 H X 0.0069 0.0089 0.0001 -0.0003 0.0234 0.0258  
Y 0.0102 0.0154 -0.0013 -0.0003 0.0379 0.0357  
Z -0.0052 -0.0068 -0.0002 -0.0005 -0.0266 -0.0224  
AT. 54 H X 0.0069 -0.0089 -0.0001 -0.0003 -0.0234 0.0258  
Y 0.0102 -0.0154 0.0013 -0.0003 -0.0379 0.0357  
Z -0.0052 0.0068 0.0002 -0.0005 0.0266 -0.0224  
AT. 55 H X -0.0062 -0.0119 -0.0001 0.0005 -0.0516 -0.0438  
Y 0.0048 0.0063 -0.0000 0.0000 0.0140 0.0156  
Z -0.0085 -0.0120 0.0013 -0.0001 -0.0312 -0.0252  
AT. 56 H X -0.0062 0.0119 0.0001 0.0005 0.0516 -0.0438  
Y 0.0048 -0.0063 0.0000 0.0000 -0.0140 0.0156  
Z -0.0085 0.0120 -0.0013 -0.0001 0.0312 -0.0252  
AT. 57 C X -0.0025 -0.0027 -0.0005 0.0008 -0.0006 -0.0078  
Y 0.0045 0.0047 -0.0005 -0.0003 -0.0007 0.0041  
Z -0.0016 -0.0027 0.0002 0.0001 0.0017 -0.0019  
AT. 58 C X -0.0025 0.0027 0.0005 0.0008 0.0006 -0.0078  
Y 0.0045 -0.0047 0.0005 -0.0003 0.0007 0.0041  
Z -0.0016 0.0027 -0.0002 0.0001 -0.0017 -0.0019  
AT. 59 H X 0.0173 0.0183 -0.0046 0.0017 0.0015 -0.0114  
Y -0.0051 -0.0054 0.0013 -0.0010 -0.0005 0.0068  
Z -0.0021 -0.0028 0.0000 -0.0002 0.0036 -0.0005  
AT. 60 H X 0.0173 -0.0183 0.0046 0.0017 -0.0015 -0.0114  
Y -0.0051 0.0054 -0.0013 -0.0010 0.0005 0.0068  
Z -0.0021 0.0028 -0.0000 -0.0002 -0.0036 -0.0005  
AT. 61 H X -0.0110 -0.0117 0.0001 0.0006 0.0009 -0.0071

Y 0.0193 0.0205 -0.0039 0.0014 0.0000 0.0010  
Z -0.0158 -0.0177 0.0024 -0.0009 0.0025 0.0003  
AT. 62 H X -0.0110 0.0117 -0.0001 0.0006 -0.0009 -0.0071  
Y 0.0193 -0.0205 0.0039 0.0014 -0.0000 0.0010  
Z -0.0158 0.0177 -0.0024 -0.0009 -0.0025 0.0003  
AT. 63 H X 0.0025 0.0022 -0.0003 0.0007 -0.0021 -0.0079  
Y 0.0076 0.0080 -0.0018 -0.0006 0.0023 0.0039  
Z -0.0089 -0.0100 0.0012 0.0004 0.0007 -0.0017  
AT. 64 H X 0.0025 -0.0022 0.0003 0.0007 0.0021 -0.0079  
Y 0.0076 -0.0080 0.0018 -0.0006 -0.0023 0.0039  
Z -0.0089 0.0100 -0.0012 0.0004 -0.0007 -0.0017  
AT. 65 C X 0.0218 0.0217 -0.0032 0.0017 0.0022 0.0002  
Y -0.0157 -0.0157 0.0027 -0.0011 0.0031 0.0037  
Z -0.0207 -0.0208 0.0035 -0.0017 -0.0004 0.0015  
AT. 66 C X 0.0218 -0.0217 0.0032 0.0017 -0.0022 0.0002  
Y -0.0157 0.0157 -0.0027 -0.0011 -0.0031 0.0037  
Z -0.0207 0.0208 -0.0035 -0.0017 0.0004 0.0015  
AT. 67 H X 0.0279 0.0285 -0.0041 0.0023 0.0131 0.0058  
Y -0.0193 -0.0196 0.0029 -0.0017 0.0067 0.0088  
Z -0.0225 -0.0227 0.0040 -0.0017 -0.0126 -0.0077  
AT. 68 H X 0.0279 -0.0285 0.0041 0.0023 -0.0131 0.0058  
Y -0.0193 0.0196 -0.0029 -0.0017 -0.0067 0.0088  
Z -0.0225 0.0227 -0.0040 -0.0017 0.0126 -0.0077  
AT. 69 H X 0.0159 0.0177 -0.0021 0.0012 0.0114 0.0076  
Y -0.0161 -0.0142 0.0030 -0.0010 0.0099 0.0067  
Z -0.0091 -0.0104 0.0016 -0.0005 -0.0084 -0.0087  
AT. 70 H X 0.0159 -0.0177 0.0021 0.0012 -0.0114 0.0076  
Y -0.0161 0.0142 -0.0030 -0.0010 -0.0099 0.0067  
Z -0.0091 0.0104 -0.0016 -0.0005 0.0084 -0.0087  
AT. 71 H X 0.0308 0.0282 -0.0050 0.0024 -0.0086 -0.0090  
Y -0.0206 -0.0189 0.0036 -0.0016 0.0193 0.0170  
Z -0.0205 -0.0203 0.0034 -0.0017 0.0139 0.0129

AT. 72 H X 0.0308 -0.0282 0.0050 0.0024 0.0086 -0.0090  
Y -0.0206 0.0189 -0.0036 -0.0016 -0.0193 0.0170  
Z -0.0205 0.0203 -0.0034 -0.0017 -0.0139 0.0129

AT. 73 C X -0.0007 -0.0001 0.0001 -0.0001 0.0099 0.0081  
Y 0.0097 0.0095 -0.0016 0.0009 0.0045 0.0019  
Z 0.0139 0.0150 -0.0015 0.0003 0.0085 0.0075

AT. 74 C X -0.0007 0.0001 -0.0001 -0.0001 -0.0099 0.0081  
Y 0.0097 -0.0095 0.0016 0.0009 -0.0045 0.0019  
Z 0.0139 -0.0150 0.0015 0.0003 -0.0085 0.0075

AT. 75 H X -0.0007 0.0025 -0.0001 -0.0004 0.0348 0.0272  
Y 0.0283 0.0292 -0.0053 0.0024 0.0158 0.0049  
Z 0.0391 0.0437 -0.0069 0.0022 0.0422 0.0254

AT. 76 H X -0.0007 -0.0025 0.0001 -0.0004 -0.0348 0.0272  
Y 0.0283 -0.0292 0.0053 0.0024 -0.0158 0.0049  
Z 0.0391 -0.0437 0.0069 0.0022 -0.0422 0.0254

AT. 77 H X -0.0006 0.0013 -0.0005 -0.0005 0.0175 0.0139  
Y 0.0329 0.0357 -0.0060 0.0026 0.0333 0.0178  
Z -0.0071 -0.0100 0.0030 -0.0010 -0.0241 -0.0120

AT. 78 H X -0.0006 -0.0013 0.0005 -0.0005 -0.0175 0.0139  
Y 0.0329 -0.0357 0.0060 0.0026 -0.0333 0.0178  
Z -0.0071 0.0100 -0.0030 -0.0010 0.0241 -0.0120

AT. 79 I X -0.0002 -0.0003 -0.0027 0.0033 0.0003 0.0018  
Y 0.0002 0.0003 0.0031 -0.0037 -0.0007 -0.0020  
Z 0.0001 0.0000 0.0000 -0.0001 -0.0001 -0.0003

AT. 80 I X -0.0002 0.0003 0.0027 0.0033 -0.0003 0.0018  
Y 0.0002 -0.0003 -0.0031 -0.0037 0.0007 -0.0020  
Z 0.0001 -0.0000 -0.0000 -0.0001 0.0001 -0.0003

AT. 81 I X 0.0002 0.0005 0.0039 -0.0036 -0.0001 0.0005  
Y -0.0002 -0.0004 -0.0033 0.0031 0.0001 -0.0006  
Z -0.0001 -0.0003 -0.0019 0.0018 0.0001 -0.0003

AT. 82 I X 0.0002 -0.0005 -0.0039 -0.0036 0.0001 0.0005  
Y -0.0002 0.0004 0.0033 0.0031 -0.0001 -0.0006

Z -0.0001 0.0003 0.0019 0.0018 -0.0001 -0.0003  
AT. 83 O X 0.0007 0.0016 0.0056 -0.0049 0.0012 0.0012  
Y 0.0008 0.0015 0.0118 -0.0118 -0.0004 -0.0024  
Z -0.0004 -0.0011 -0.0097 0.0105 0.0000 -0.0031  
AT. 84 O X 0.0007 -0.0016 -0.0056 -0.0049 -0.0012 0.0012  
Y 0.0008 -0.0015 -0.0118 -0.0118 0.0004 -0.0024  
Z -0.0004 0.0011 0.0097 0.0105 -0.0000 -0.0031  
AT. 85 O X 0.0004 -0.0005 -0.0020 0.0016 0.0009 0.0003  
Y -0.0004 -0.0011 -0.0086 0.0087 0.0003 -0.0025  
Z 0.0002 -0.0007 -0.0056 0.0044 0.0001 0.0013  
AT. 86 O X 0.0004 0.0005 0.0020 0.0016 -0.0009 0.0003  
Y -0.0004 0.0011 0.0086 0.0087 -0.0003 -0.0025  
Z 0.0002 0.0007 0.0056 0.0044 -0.0001 0.0013  
AT. 87 N X 0.0001 -0.0003 -0.0010 0.0012 0.0002 -0.0004  
Y 0.0011 0.0026 0.0180 -0.0177 -0.0022 -0.0090  
Z 0.0001 0.0008 0.0025 -0.0018 0.0005 0.0013  
AT. 88 N X 0.0001 0.0003 0.0010 0.0012 -0.0002 -0.0004  
Y 0.0011 -0.0026 -0.0180 -0.0177 0.0022 -0.0090  
Z 0.0001 -0.0008 -0.0025 -0.0018 -0.0005 0.0013  
AT. 89 N X -0.0004 0.0001 -0.0009 0.0013 -0.0003 -0.0011  
Y -0.0013 -0.0027 -0.0161 0.0159 0.0010 -0.0033  
Z -0.0011 -0.0015 -0.0101 0.0095 -0.0002 -0.0023  
AT. 90 N X -0.0004 -0.0001 0.0009 0.0013 0.0003 -0.0011  
Y -0.0013 0.0027 0.0161 0.0159 -0.0010 -0.0033  
Z -0.0011 0.0015 0.0101 0.0095 0.0002 -0.0023  
AT. 91 C X 0.0007 0.0011 0.0060 -0.0057 0.0000 -0.0038  
Y -0.0011 -0.0018 -0.0189 0.0201 0.0025 0.0085  
Z 0.0002 0.0004 0.0003 0.0007 0.0005 0.0002  
AT. 92 C X 0.0007 -0.0011 -0.0060 -0.0057 -0.0000 -0.0038  
Y -0.0011 0.0018 0.0189 0.0201 -0.0025 0.0085  
Z 0.0002 -0.0004 -0.0003 0.0007 -0.0005 0.0002  
AT. 93 C X 0.0008 0.0010 0.0086 -0.0098 -0.0023 -0.0075



Y -0.0030 -0.0049 -0.0411 0.0450 0.0061 0.0195  
Z -0.0000 0.0006 0.0109 -0.0089 -0.0007 -0.0037  
AT. 94 C X 0.0008 -0.0010 -0.0086 -0.0098 0.0023 -0.0075  
Y -0.0030 0.0049 0.0411 0.0450 -0.0061 0.0195  
Z -0.0000 -0.0006 -0.0109 -0.0089 0.0007 -0.0037  
AT. 95 H X 0.0008 -0.0020 -0.0156 0.0072 -0.0063 -0.0146  
Y -0.0026 -0.0027 -0.0316 0.0380 0.0093 0.0261  
Z -0.0008 -0.0005 0.0175 -0.0138 -0.0028 -0.0082  
AT. 96 H X 0.0008 0.0020 0.0156 0.0072 0.0063 -0.0146  
Y -0.0026 0.0027 0.0316 0.0380 -0.0093 0.0261  
Z -0.0008 0.0005 -0.0175 -0.0138 0.0028 -0.0082  
AT. 97 H X 0.0002 -0.0000 0.0082 -0.0085 -0.0028 -0.0086  
Y -0.0034 -0.0063 -0.0326 0.0360 0.0009 0.0061  
Z 0.0000 0.0007 0.0135 -0.0118 -0.0017 -0.0066  
AT. 98 H X 0.0002 0.0000 -0.0082 -0.0085 0.0028 -0.0086  
Y -0.0034 0.0063 0.0326 0.0360 -0.0009 0.0061  
Z 0.0000 -0.0007 -0.0135 -0.0118 0.0017 -0.0066  
AT. 99 C X -0.0005 -0.0015 -0.0109 0.0096 0.0004 -0.0025  
Y 0.0013 0.0023 0.0149 -0.0129 0.0004 0.0025  
Z 0.0009 0.0020 0.0127 -0.0121 -0.0010 0.0018  
AT. 100 C X -0.0005 0.0015 0.0109 0.0096 -0.0004 -0.0025  
Y 0.0013 -0.0023 -0.0149 -0.0129 -0.0004 0.0025  
Z 0.0009 -0.0020 -0.0127 -0.0121 0.0010 0.0018  
AT. 101 C X -0.0011 -0.0025 -0.0180 0.0168 0.0004 -0.0048  
Y 0.0015 0.0045 0.0316 -0.0291 -0.0013 0.0046  
Z 0.0030 0.0054 0.0364 -0.0345 -0.0008 0.0061  
AT. 102 C X -0.0011 0.0025 0.0180 0.0168 -0.0004 -0.0048  
Y 0.0015 -0.0045 -0.0316 -0.0291 0.0013 0.0046  
Z 0.0030 -0.0054 -0.0364 -0.0345 0.0008 0.0061  
AT. 103 H X -0.0003 -0.0009 -0.0071 0.0064 0.0004 -0.0029  
Y 0.0012 0.0039 0.0275 -0.0249 -0.0012 0.0038  
Z 0.0047 0.0058 0.0398 -0.0380 0.0016 0.0081

AT.104 H X -0.0003 0.0009 0.0071 0.0064 -0.0004 -0.0029  
Y 0.0012 -0.0039 -0.0275 -0.0249 0.0012 0.0038  
Z 0.0047 -0.0058 -0.0398 -0.0380 -0.0016 0.0081

AT.105 H X -0.0014 -0.0018 -0.0137 0.0114 -0.0010 -0.0048  
Y -0.0007 0.0021 0.0134 -0.0126 -0.0025 0.0004  
Z 0.0022 0.0047 0.0312 -0.0297 -0.0014 0.0045

AT.106 H X -0.0014 0.0018 0.0137 0.0114 0.0010 -0.0048  
Y -0.0007 -0.0021 -0.0134 -0.0126 0.0025 0.0004  
Z 0.0022 -0.0047 -0.0312 -0.0297 0.0014 0.0045

AT.107 C X 0.0007 0.0006 0.0077 -0.0084 -0.0015 -0.0029  
Y 0.0007 0.0001 0.0002 -0.0006 -0.0004 -0.0013  
Z 0.0006 0.0006 0.0003 -0.0011 0.0001 0.0035

AT.108 C X 0.0007 -0.0006 -0.0077 -0.0084 0.0015 -0.0029  
Y 0.0007 -0.0001 -0.0002 -0.0006 0.0004 -0.0013  
Z 0.0006 -0.0006 -0.0003 -0.0011 -0.0001 0.0035

AT.109 H X 0.0020 0.0042 0.0318 -0.0348 -0.0047 -0.0036  
Y 0.0014 0.0020 0.0123 -0.0144 -0.0018 0.0041  
Z 0.0014 0.0029 0.0145 -0.0176 -0.0012 0.0129

AT.110 H X 0.0020 -0.0042 -0.0318 -0.0348 0.0047 -0.0036  
Y 0.0014 -0.0020 -0.0123 -0.0144 0.0018 0.0041  
Z 0.0014 -0.0029 -0.0145 -0.0176 0.0012 0.0129

AT.111 H X 0.0005 0.0013 0.0111 -0.0111 -0.0012 -0.0026  
Y -0.0005 -0.0043 -0.0283 0.0314 0.0031 -0.0081  
Z 0.0011 0.0008 0.0027 -0.0049 -0.0009 0.0045

AT.112 H X 0.0005 -0.0013 -0.0111 -0.0111 0.0012 -0.0026  
Y -0.0005 0.0043 0.0283 0.0314 -0.0031 -0.0081  
Z 0.0011 -0.0008 -0.0027 -0.0049 0.0009 0.0045

AT.113 C X 0.0003 -0.0012 -0.0037 0.0030 -0.0004 -0.0013  
Y 0.0006 0.0002 0.0008 -0.0021 -0.0002 0.0056  
Z 0.0003 -0.0008 -0.0101 0.0105 0.0013 -0.0021

AT.114 C X 0.0003 0.0012 0.0037 0.0030 0.0004 -0.0013  
Y 0.0006 -0.0002 -0.0008 -0.0021 0.0002 0.0056

Z 0.0003 0.0008 0.0101 0.0105 -0.0013 -0.0021  
AT. 115 C X -0.0004 -0.0010 -0.0047 0.0050 -0.0004 -0.0040  
Y -0.0003 -0.0000 0.0006 -0.0014 -0.0004 0.0035  
Z -0.0005 -0.0007 -0.0034 0.0033 -0.0002 -0.0027  
AT. 116 C X -0.0004 0.0010 0.0047 0.0050 0.0004 -0.0040  
Y -0.0003 0.0000 -0.0006 -0.0014 0.0004 0.0035  
Z -0.0005 0.0007 0.0034 0.0033 0.0002 -0.0027  
AT. 117 H X -0.0005 -0.0019 -0.0143 0.0143 0.0007 -0.0027  
Y -0.0019 0.0006 0.0089 -0.0092 -0.0020 0.0004  
Z 0.0001 0.0002 0.0052 -0.0049 -0.0009 -0.0033  
AT. 118 H X -0.0005 0.0019 0.0143 0.0143 -0.0007 -0.0027  
Y -0.0019 -0.0006 -0.0089 -0.0092 0.0020 0.0004  
Z 0.0001 -0.0002 -0.0052 -0.0049 0.0009 -0.0033  
AT. 119 H X -0.0007 0.0008 0.0112 -0.0103 -0.0020 -0.0050  
Y 0.0004 0.0007 0.0029 -0.0039 0.0001 0.0060  
Z -0.0013 -0.0003 0.0033 -0.0029 -0.0016 -0.0057  
AT. 120 H X -0.0007 -0.0008 -0.0112 -0.0103 0.0020 -0.0050  
Y 0.0004 -0.0007 -0.0029 -0.0039 -0.0001 0.0060  
Z -0.0013 0.0003 -0.0033 -0.0029 0.0016 -0.0057  
AT. 121 C X -0.0011 -0.0007 -0.0055 0.0059 0.0003 -0.0004  
Y 0.0007 0.0011 0.0035 -0.0041 0.0005 0.0020  
Z -0.0009 -0.0009 -0.0076 0.0076 -0.0006 -0.0019  
AT. 122 C X -0.0011 0.0007 0.0055 0.0059 -0.0003 -0.0004  
Y 0.0007 -0.0011 -0.0035 -0.0041 -0.0005 0.0020  
Z -0.0009 0.0009 0.0076 0.0076 0.0006 -0.0019  
AT. 123 H X -0.0016 -0.0033 -0.0190 0.0181 0.0010 -0.0004  
Y 0.0021 0.0019 0.0095 -0.0113 0.0001 0.0074  
Z -0.0023 -0.0020 -0.0158 0.0169 -0.0001 -0.0077  
AT. 124 H X -0.0016 0.0033 0.0190 0.0181 -0.0010 -0.0004  
Y 0.0021 -0.0019 -0.0095 -0.0113 -0.0001 0.0074  
Z -0.0023 0.0020 0.0158 0.0169 0.0001 -0.0077  
AT. 125 H X -0.0013 -0.0014 -0.0076 0.0080 0.0002 -0.0014

Y 0.0009 0.0031 0.0062 -0.0051 -0.0001 -0.0030  
Z -0.0010 -0.0006 -0.0084 0.0093 -0.0010 -0.0054  
AT. 126 H X -0.0013 0.0014 0.0076 0.0080 -0.0002 -0.0014  
Y 0.0009 -0.0031 -0.0062 -0.0051 0.0001 -0.0030  
Z -0.0010 0.0006 0.0084 0.0093 0.0010 -0.0054  
AT. 127 C X -0.0004 0.0010 0.0020 -0.0012 0.0006 0.0014  
Y 0.0012 0.0019 0.0129 -0.0137 0.0004 0.0052  
Z -0.0007 -0.0006 0.0017 -0.0019 -0.0002 0.0034  
AT. 128 C X -0.0004 -0.0010 -0.0020 -0.0012 -0.0006 0.0014  
Y 0.0012 -0.0019 -0.0129 -0.0137 -0.0004 0.0052  
Z -0.0007 0.0006 -0.0017 -0.0019 0.0002 0.0034  
AT. 129 C X -0.0005 -0.0000 -0.0012 0.0023 0.0005 -0.0022  
Y -0.0002 -0.0001 0.0055 -0.0051 0.0001 0.0011  
Z 0.0010 0.0016 0.0110 -0.0121 -0.0003 0.0041  
AT. 130 C X -0.0005 0.0000 0.0012 0.0023 -0.0005 -0.0022  
Y -0.0002 0.0001 -0.0055 -0.0051 -0.0001 0.0011  
Z 0.0010 -0.0016 -0.0110 -0.0121 0.0003 0.0041  
AT. 131 H X 0.0014 0.0024 0.0133 -0.0140 -0.0010 -0.0019  
Y -0.0033 -0.0054 -0.0186 0.0216 0.0012 -0.0045  
Z 0.0022 0.0025 0.0204 -0.0223 -0.0017 0.0014  
AT. 132 H X 0.0014 -0.0024 -0.0133 -0.0140 0.0010 -0.0019  
Y -0.0033 0.0054 0.0186 0.0216 -0.0012 -0.0045  
Z 0.0022 -0.0025 -0.0204 -0.0223 0.0017 0.0014  
AT. 133 H X -0.0038 -0.0051 -0.0283 0.0324 0.0026 -0.0035  
Y 0.0001 0.0000 0.0047 -0.0044 0.0009 0.0036  
Z 0.0030 0.0042 0.0235 -0.0260 -0.0001 0.0085  
AT. 134 H X -0.0038 0.0051 0.0283 0.0324 -0.0026 -0.0035  
Y 0.0001 -0.0000 -0.0047 -0.0044 -0.0009 0.0036  
Z 0.0030 -0.0042 -0.0235 -0.0260 0.0001 0.0085  
AT. 135 C X 0.0003 -0.0008 0.0031 -0.0047 -0.0015 0.0022  
Y 0.0002 -0.0002 0.0024 -0.0030 -0.0007 0.0002  
Z -0.0003 0.0000 -0.0027 0.0036 0.0005 -0.0020

AT. 136 C X 0.0003 0.0008 -0.0031 -0.0047 0.0015 0.0022  
Y 0.0002 0.0002 -0.0024 -0.0030 0.0007 0.0002  
Z -0.0003 -0.0000 0.0027 0.0036 -0.0005 -0.0020

AT. 137 H X 0.0005 0.0001 0.0078 -0.0100 -0.0016 0.0085  
Y 0.0001 -0.0002 0.0043 -0.0048 -0.0011 -0.0008  
Z -0.0007 -0.0003 -0.0011 0.0024 -0.0001 -0.0057

AT. 138 H X 0.0005 -0.0001 -0.0078 -0.0100 0.0016 0.0085  
Y 0.0001 0.0002 -0.0043 -0.0048 0.0011 -0.0008  
Z -0.0007 0.0003 0.0011 0.0024 0.0001 -0.0057

AT. 139 H X 0.0007 -0.0012 -0.0026 0.0010 -0.0008 0.0025  
Y 0.0003 -0.0000 0.0005 -0.0008 -0.0003 -0.0022  
Z -0.0009 0.0004 0.0051 -0.0042 -0.0006 -0.0019

AT. 140 H X 0.0007 0.0012 0.0026 0.0010 0.0008 0.0025  
Y 0.0003 0.0000 -0.0005 -0.0008 0.0003 -0.0022  
Z -0.0009 -0.0004 -0.0051 -0.0042 0.0006 -0.0019

AT. 141 H X -0.0003 -0.0003 0.0097 -0.0111 -0.0026 -0.0010  
Y -0.0000 -0.0004 0.0047 -0.0048 -0.0014 -0.0044  
Z -0.0003 0.0005 -0.0022 0.0027 0.0009 0.0014

AT. 142 H X -0.0003 0.0003 -0.0097 -0.0111 0.0026 -0.0010  
Y -0.0000 0.0004 -0.0047 -0.0048 0.0014 -0.0044  
Z -0.0003 -0.0005 0.0022 0.0027 -0.0009 0.0014

AT. 143 C X -0.0007 0.0012 0.0071 -0.0066 0.0006 0.0051  
Y -0.0008 -0.0005 -0.0025 0.0026 -0.0001 0.0003  
Z -0.0003 0.0004 0.0028 -0.0026 0.0006 0.0043

AT. 144 C X -0.0007 -0.0012 -0.0071 -0.0066 -0.0006 0.0051  
Y -0.0008 0.0005 0.0025 0.0026 0.0001 0.0003  
Z -0.0003 -0.0004 -0.0028 -0.0026 -0.0006 0.0043

AT. 145 H X -0.0000 0.0022 0.0212 -0.0209 0.0003 0.0096  
Y -0.0017 -0.0012 -0.0082 0.0089 -0.0008 -0.0026  
Z 0.0008 0.0015 0.0127 -0.0131 0.0014 0.0085

AT. 146 H X -0.0000 -0.0022 -0.0212 -0.0209 -0.0003 0.0096  
Y -0.0017 0.0012 0.0082 0.0089 0.0008 -0.0026

Z 0.0008 -0.0015 -0.0127 -0.0131 -0.0014 0.0085  
AT. 147 H X -0.0001 0.0021 0.0084 -0.0075 0.0010 0.0050  
Y -0.0008 -0.0013 -0.0082 0.0078 0.0003 -0.0001  
Z 0.0006 0.0011 0.0013 -0.0010 0.0014 0.0039  
AT. 148 H X -0.0001 -0.0021 -0.0084 -0.0075 -0.0010 0.0050  
Y -0.0008 0.0013 0.0082 0.0078 -0.0003 -0.0001  
Z 0.0006 -0.0011 -0.0013 -0.0010 -0.0014 0.0039  
AT. 149 H X -0.0019 -0.0007 -0.0019 0.0024 -0.0001 0.0030  
Y -0.0020 -0.0017 -0.0125 0.0131 -0.0008 -0.0036  
Z -0.0018 -0.0007 -0.0096 0.0107 -0.0002 -0.0012  
AT. 150 H X -0.0019 0.0007 0.0019 0.0024 0.0001 0.0030  
Y -0.0020 0.0017 0.0125 0.0131 0.0008 -0.0036  
Z -0.0018 0.0007 0.0096 0.0107 0.0002 -0.0012  
AT. 151 C X 0.0009 0.0006 0.0001 -0.0005 0.0006 0.0013  
Y -0.0010 -0.0011 -0.0067 0.0076 0.0002 -0.0030  
Z -0.0003 -0.0021 -0.0112 0.0112 0.0007 -0.0011  
AT. 152 C X 0.0009 -0.0006 -0.0001 -0.0005 -0.0006 0.0013  
Y -0.0010 0.0011 0.0067 0.0076 -0.0002 -0.0030  
Z -0.0003 0.0021 0.0112 0.0112 -0.0007 -0.0011  
AT. 153 H X 0.0022 0.0017 0.0067 -0.0076 0.0015 0.0025  
Y -0.0029 -0.0034 -0.0205 0.0234 0.0002 -0.0129  
Z -0.0040 -0.0062 -0.0362 0.0395 0.0005 -0.0175  
AT. 154 H X 0.0022 -0.0017 -0.0067 -0.0076 -0.0015 0.0025  
Y -0.0029 0.0034 0.0205 0.0234 -0.0002 -0.0129  
Z -0.0040 0.0062 0.0362 0.0395 -0.0005 -0.0175  
AT. 155 H X 0.0017 0.0009 -0.0045 0.0039 0.0012 0.0024  
Y -0.0037 -0.0047 -0.0305 0.0343 0.0003 -0.0168  
Z 0.0028 0.0019 0.0120 -0.0151 0.0010 0.0136  
AT. 156 H X 0.0017 -0.0009 0.0045 0.0039 -0.0012 0.0024  
Y -0.0037 0.0047 0.0305 0.0343 -0.0003 -0.0168  
Z 0.0028 -0.0019 -0.0120 -0.0151 -0.0010 0.0136  
AT. 157 O X -0.0006 -0.0000 -0.0001 -0.0000 -0.0006 -0.0004

Y 0.0023 0.0029 -0.0001 0.0001 0.0029 0.0034  
Z -0.0002 -0.0008 -0.0002 0.0001 -0.0004 -0.0000  
AT. 158 O X -0.0006 0.0000 0.0001 -0.0000 0.0006 -0.0004  
Y 0.0023 -0.0029 0.0001 0.0001 -0.0029 0.0034  
Z -0.0002 0.0008 0.0002 0.0001 0.0004 -0.0000  
AT. 159 O X 0.0003 -0.0001 -0.0000 -0.0000 -0.0002 -0.0005  
Y -0.0006 -0.0005 0.0002 -0.0002 -0.0003 -0.0008  
Z 0.0007 -0.0014 -0.0000 0.0001 -0.0003 -0.0009  
AT. 160 O X 0.0003 0.0001 0.0000 -0.0000 0.0002 -0.0005  
Y -0.0006 0.0005 -0.0002 -0.0002 0.0003 -0.0008  
Z 0.0007 0.0014 0.0000 0.0001 0.0003 -0.0009  
AT. 161 H X 0.0093 0.0063 0.0017 -0.0006 0.0088 0.0039  
Y -0.0023 -0.0003 -0.0011 0.0004 -0.0013 0.0019  
Z 0.0188 0.0113 0.0034 -0.0008 0.0168 0.0063  
AT. 162 H X 0.0093 -0.0063 -0.0017 -0.0006 -0.0088 0.0039  
Y -0.0023 0.0003 0.0011 0.0004 0.0013 0.0019  
Z 0.0188 -0.0113 -0.0034 -0.0008 -0.0168 0.0063  
AT. 163 H X 0.0028 -0.0019 0.0004 0.0005 0.0009 -0.0010  
Y 0.0050 0.0061 0.0001 -0.0014 -0.0028 0.0115  
Z 0.0009 0.0007 -0.0001 -0.0005 -0.0012 0.0019  
AT. 164 H X 0.0028 0.0019 -0.0004 0.0005 -0.0009 -0.0010  
Y 0.0050 -0.0061 -0.0001 -0.0014 0.0028 0.0115  
Z 0.0009 -0.0007 0.0001 -0.0005 0.0012 0.0019  
AT. 165 O X -0.0004 -0.0004 -0.0016 0.0011 -0.0001 0.0004  
Y -0.0001 -0.0004 -0.0013 0.0012 -0.0001 -0.0002  
Z -0.0001 -0.0001 0.0001 -0.0001 -0.0002 -0.0001  
AT. 166 O X -0.0004 0.0004 0.0016 0.0011 0.0001 0.0004  
Y -0.0001 0.0004 0.0013 0.0012 0.0001 -0.0002  
Z -0.0001 0.0001 -0.0001 -0.0001 0.0002 -0.0001  
AT. 167 H X -0.0002 -0.0018 -0.0077 0.0043 0.0001 0.0002  
Y -0.0006 0.0027 0.0128 -0.0060 -0.0010 -0.0002  
Z 0.0003 -0.0006 -0.0030 0.0016 0.0008 0.0006

AT.168 H X -0.0002 0.0018 0.0077 0.0043 -0.0001 0.0002

Y -0.0006 -0.0027 -0.0128 -0.0060 0.0010 -0.0002

Z 0.0003 0.0006 0.0030 0.0016 -0.0008 0.0006

AT.169 O X -0.0001 0.0001 0.0001 0.0003 0.0001 -0.0003

Y -0.0001 0.0002 -0.0003 -0.0010 0.0001 0.0001

Z -0.0000 -0.0000 0.0002 0.0003 -0.0000 -0.0002

AT.170 O X -0.0001 -0.0001 -0.0001 0.0003 -0.0001 -0.0003

Y -0.0001 -0.0002 0.0003 -0.0010 -0.0001 0.0001

Z -0.0000 0.0000 -0.0002 0.0003 0.0000 -0.0002

AT.171 H X 0.0021 -0.0028 -0.0015 0.0036 -0.0016 0.0007

Y 0.0011 -0.0013 -0.0008 0.0006 -0.0007 0.0008

Z 0.0003 -0.0002 0.0004 0.0002 0.0005 -0.0002

AT.172 H X 0.0021 0.0028 0.0015 0.0036 0.0016 0.0007

Y 0.0011 0.0013 0.0008 0.0006 0.0007 0.0008

Z 0.0003 0.0002 -0.0004 0.0002 -0.0005 -0.0002

FREQ(CM\*\*-1) 526.54 528.09 529.43 530.23 553.21 553.80

AT. 1 I X -0.0042 -0.0015 -0.0029 -0.0010 -0.0007 -0.0010

Y -0.0026 -0.0009 -0.0020 -0.0007 -0.0004 -0.0005

Z -0.0008 -0.0003 -0.0005 -0.0002 -0.0000 -0.0001

AT. 2 I X 0.0042 -0.0015 -0.0029 0.0010 -0.0007 -0.0010

Y 0.0026 -0.0009 -0.0020 0.0007 -0.0004 -0.0005

Z 0.0008 -0.0003 -0.0005 0.0002 -0.0000 -0.0001

AT. 3 I X -0.0019 -0.0028 -0.0006 -0.0003 -0.0006 -0.0004

Y -0.0009 -0.0013 -0.0002 -0.0000 -0.0005 -0.0004

Z -0.0007 -0.0011 -0.0002 -0.0001 -0.0000 0.0000

AT. 4 I X 0.0019 -0.0028 -0.0006 0.0003 -0.0006 -0.0004

Y 0.0009 -0.0013 -0.0002 0.0000 -0.0005 -0.0004

Z 0.0007 -0.0011 -0.0002 0.0001 -0.0000 0.0000

AT. 5 O X -0.0023 -0.0051 -0.0009 -0.0006 0.0032 0.0039

Y -0.0075 0.0023 -0.0067 -0.0020 -0.0029 -0.0038



Z -0.0078 -0.0105 -0.0043 -0.0010 -0.0084 -0.0084  
AT. 6 O X 0.0023 -0.0051 -0.0009 0.0006 0.0032 0.0039  
Y 0.0075 0.0023 -0.0067 0.0020 -0.0029 -0.0038  
Z 0.0078 -0.0105 -0.0043 0.0010 -0.0084 -0.0084  
AT. 7 O X 0.0023 -0.0001 0.0028 0.0015 -0.0129 -0.0134  
Y -0.0102 -0.0098 -0.0061 -0.0022 0.0074 0.0077  
Z 0.0099 0.0071 0.0068 0.0025 -0.0047 -0.0042  
AT. 8 O X -0.0023 -0.0001 0.0028 -0.0015 -0.0129 -0.0134  
Y 0.0102 -0.0098 -0.0061 0.0022 0.0074 0.0077  
Z -0.0099 0.0071 0.0068 -0.0025 -0.0047 -0.0042  
AT. 9 N X -0.0044 -0.0001 -0.0026 -0.0005 -0.0053 -0.0047  
Y -0.0223 -0.0127 -0.0150 -0.0046 -0.0022 -0.0030  
Z 0.0004 0.0020 -0.0005 -0.0001 -0.0010 -0.0013  
AT. 10 N X 0.0044 -0.0001 -0.0026 0.0005 -0.0053 -0.0047  
Y 0.0223 -0.0127 -0.0150 0.0046 -0.0022 -0.0030  
Z -0.0004 0.0020 -0.0005 0.0001 -0.0010 -0.0013  
AT. 11 N X -0.0044 -0.0046 -0.0019 -0.0014 0.0135 0.0149  
Y -0.0112 -0.0141 -0.0051 -0.0019 0.0001 0.0003  
Z -0.0033 -0.0067 -0.0004 0.0002 -0.0108 -0.0112  
AT. 12 N X 0.0044 -0.0046 -0.0019 0.0014 0.0135 0.0149  
Y 0.0112 -0.0141 -0.0051 0.0019 0.0001 0.0003  
Z 0.0033 -0.0067 -0.0004 -0.0002 -0.0108 -0.0112  
AT. 13 C X 0.0179 0.0075 0.0127 0.0040 0.0052 0.0062  
Y 0.0108 0.0032 0.0075 0.0029 -0.0023 -0.0019  
Z -0.0009 0.0006 -0.0008 0.0004 -0.0054 -0.0055  
AT. 14 C X -0.0179 0.0075 0.0127 -0.0040 0.0052 0.0062  
Y -0.0108 0.0032 0.0075 -0.0029 -0.0023 -0.0019  
Z 0.0009 0.0006 -0.0008 -0.0004 -0.0054 -0.0055  
AT. 15 C X 0.0308 0.0135 0.0221 0.0072 0.0068 0.0092  
Y 0.0324 0.0084 0.0237 0.0079 0.0020 0.0040  
Z -0.0005 -0.0051 0.0016 0.0006 0.0013 0.0025  
AT. 16 C X -0.0308 0.0135 0.0221 -0.0072 0.0068 0.0092

Y -0.0324 0.0084 0.0237 -0.0079 0.0020 0.0040  
Z 0.0005 -0.0051 0.0016 -0.0006 0.0013 0.0025  
AT. 17 H X 0.0220 0.0125 0.0153 0.0045 0.0061 0.0074  
Y 0.0287 0.0149 0.0189 0.0070 -0.0077 -0.0072  
Z 0.0009 -0.0138 0.0050 0.0007 0.0135 0.0160  
AT. 18 H X -0.0220 0.0125 0.0153 -0.0045 0.0061 0.0074  
Y -0.0287 0.0149 0.0189 -0.0070 -0.0077 -0.0072  
Z -0.0009 -0.0138 0.0050 -0.0007 0.0135 0.0160  
AT. 19 H X 0.0230 0.0145 0.0157 0.0052 0.0017 0.0028  
Y 0.0272 -0.0063 0.0231 0.0068 0.0161 0.0195  
Z -0.0051 -0.0103 -0.0007 -0.0005 0.0048 0.0063  
AT. 20 H X -0.0230 0.0145 0.0157 -0.0052 0.0017 0.0028  
Y -0.0272 -0.0063 0.0231 -0.0068 0.0161 0.0195  
Z 0.0051 -0.0103 -0.0007 0.0005 0.0048 0.0063  
AT. 21 C X 0.0095 0.0111 0.0047 0.0016 0.0012 0.0015  
Y -0.0016 0.0039 -0.0038 -0.0019 0.0172 0.0180  
Z 0.0072 0.0083 0.0033 0.0017 -0.0075 -0.0084  
AT. 22 C X -0.0095 0.0111 0.0047 -0.0016 0.0012 0.0015  
Y 0.0016 0.0039 -0.0038 0.0019 0.0172 0.0180  
Z -0.0072 0.0083 0.0033 -0.0017 -0.0075 -0.0084  
AT. 23 C X 0.0148 0.0205 0.0058 0.0022 0.0046 0.0041  
Y 0.0060 0.0119 0.0011 0.0005 0.0035 0.0024  
Z 0.0136 0.0232 0.0025 0.0016 0.0039 0.0020  
AT. 24 C X -0.0148 0.0205 0.0058 -0.0022 0.0046 0.0041  
Y -0.0060 0.0119 0.0011 -0.0005 0.0035 0.0024  
Z -0.0136 0.0232 0.0025 -0.0016 0.0039 0.0020  
AT. 25 H X 0.0124 0.0144 0.0058 0.0027 0.0020 0.0016  
Y 0.0062 0.0106 0.0019 0.0010 -0.0020 -0.0035  
Z 0.0091 0.0283 -0.0053 -0.0024 0.0492 0.0504  
AT. 26 H X -0.0124 0.0144 0.0058 -0.0027 0.0020 0.0016  
Y -0.0062 0.0106 0.0019 -0.0010 -0.0020 -0.0035  
Z -0.0091 0.0283 -0.0053 0.0024 0.0492 0.0504

AT. 27 H X 0.0096 0.0154 0.0020 0.0010 0.0126 0.0132  
Y 0.0040 -0.0015 0.0063 0.0034 -0.0392 -0.0423  
Z 0.0140 0.0180 0.0060 0.0032 -0.0188 -0.0219

AT. 28 H X -0.0096 0.0154 0.0020 -0.0010 0.0126 0.0132  
Y -0.0040 -0.0015 0.0063 -0.0034 -0.0392 -0.0423  
Z -0.0140 0.0180 0.0060 -0.0032 -0.0188 -0.0219

AT. 29 C X 0.0049 0.0027 0.0034 0.0009 -0.0023 -0.0020  
Y -0.0006 0.0003 -0.0008 0.0002 -0.0058 -0.0072  
Z 0.0083 0.0097 0.0044 0.0018 -0.0060 -0.0069

AT. 30 C X -0.0049 0.0027 0.0034 -0.0009 -0.0023 -0.0020  
Y 0.0006 0.0003 -0.0008 -0.0002 -0.0058 -0.0072  
Z -0.0083 0.0097 0.0044 -0.0018 -0.0060 -0.0069

AT. 31 H X 0.0150 0.0035 0.0114 0.0037 0.0018 0.0028  
Y 0.0164 0.0224 0.0082 0.0035 -0.0132 -0.0158  
Z 0.0399 0.0432 0.0228 0.0083 -0.0150 -0.0165

AT. 32 H X -0.0150 0.0035 0.0114 -0.0037 0.0018 0.0028  
Y -0.0164 0.0224 0.0082 -0.0035 -0.0132 -0.0158  
Z -0.0399 0.0432 0.0228 -0.0083 -0.0150 -0.0165

AT. 33 H X 0.0014 -0.0044 0.0026 0.0012 -0.0038 -0.0028  
Y -0.0263 -0.0325 -0.0153 -0.0053 0.0049 0.0043  
Z 0.0168 0.0188 0.0098 0.0044 -0.0116 -0.0128

AT. 34 H X -0.0014 -0.0044 0.0026 -0.0012 -0.0038 -0.0028  
Y 0.0263 -0.0325 -0.0153 0.0053 0.0049 0.0043  
Z -0.0168 0.0188 0.0098 -0.0044 -0.0116 -0.0128

AT. 35 C X 0.0020 0.0032 0.0002 -0.0004 0.0012 0.0007  
Y 0.0214 0.0178 0.0136 0.0053 -0.0090 -0.0096  
Z -0.0110 -0.0099 -0.0074 -0.0026 -0.0004 -0.0010

AT. 36 C X -0.0020 0.0032 0.0002 0.0004 0.0012 0.0007  
Y -0.0214 0.0178 0.0136 -0.0053 -0.0090 -0.0096  
Z 0.0110 -0.0099 -0.0074 0.0026 -0.0004 -0.0010

AT. 37 C X 0.0075 0.0082 0.0040 0.0004 0.0132 0.0138  
Y 0.0093 0.0069 0.0066 0.0026 -0.0061 -0.0064

Z -0.0117 -0.0109 -0.0065 -0.0022 0.0014 0.0017  
AT. 38 C X -0.0075 0.0082 0.0040 -0.0004 0.0132 0.0138  
Y -0.0093 0.0069 0.0066 -0.0026 -0.0061 -0.0064  
Z 0.0117 -0.0109 -0.0065 0.0022 0.0014 0.0017  
AT. 39 H X -0.0039 0.0012 -0.0028 -0.0022 0.0316 0.0345  
Y -0.0003 -0.0025 0.0017 0.0010 -0.0046 -0.0044  
Z -0.0152 -0.0114 -0.0092 -0.0032 0.0137 0.0153  
AT. 40 H X 0.0039 0.0012 -0.0028 0.0022 0.0316 0.0345  
Y 0.0003 -0.0025 0.0017 -0.0010 -0.0046 -0.0044  
Z 0.0152 -0.0114 -0.0092 0.0032 0.0137 0.0153  
AT. 41 H X 0.0168 0.0133 0.0100 0.0028 -0.0022 -0.0031  
Y 0.0132 0.0131 0.0075 0.0029 -0.0042 -0.0054  
Z -0.0236 -0.0203 -0.0129 -0.0047 0.0153 0.0179  
AT. 42 H X -0.0168 0.0133 0.0100 -0.0028 -0.0022 -0.0031  
Y -0.0132 0.0131 0.0075 -0.0029 -0.0042 -0.0054  
Z 0.0236 -0.0203 -0.0129 0.0047 0.0153 0.0179  
AT. 43 C X -0.0014 0.0022 -0.0022 -0.0008 0.0063 0.0065  
Y 0.0010 0.0032 -0.0009 -0.0006 -0.0059 -0.0069  
Z -0.0044 -0.0078 -0.0009 -0.0001 -0.0079 -0.0078  
AT. 44 C X 0.0014 0.0022 -0.0022 0.0008 0.0063 0.0065  
Y -0.0010 0.0032 -0.0009 0.0006 -0.0059 -0.0069  
Z 0.0044 -0.0078 -0.0009 0.0001 -0.0079 -0.0078  
AT. 45 H X -0.0049 0.0043 -0.0068 -0.0021 0.0061 0.0054  
Y 0.0274 0.0245 0.0165 0.0045 -0.0000 -0.0006  
Z -0.0271 -0.0296 -0.0143 -0.0041 -0.0133 -0.0135  
AT. 46 H X 0.0049 0.0043 -0.0068 0.0021 0.0061 0.0054  
Y -0.0274 0.0245 0.0165 -0.0045 -0.0000 -0.0006  
Z 0.0271 -0.0296 -0.0143 0.0041 -0.0133 -0.0135  
AT. 47 H X -0.0121 -0.0044 -0.0099 -0.0035 0.0096 0.0100  
Y -0.0237 -0.0152 -0.0177 -0.0056 -0.0071 -0.0085  
Z -0.0150 -0.0174 -0.0076 -0.0015 -0.0137 -0.0141  
AT. 48 H X 0.0121 -0.0044 -0.0099 0.0035 0.0096 0.0100

Y 0.0237 -0.0152 -0.0177 0.0056 -0.0071 -0.0085  
Z 0.0150 -0.0174 -0.0076 0.0015 -0.0137 -0.0141  
AT. 49 C X 0.0087 0.0074 0.0052 0.0024 -0.0087 -0.0096  
Y 0.0089 0.0137 0.0026 0.0002 0.0054 0.0052  
Z 0.0121 0.0083 0.0090 0.0023 0.0107 0.0122  
AT. 50 C X -0.0087 0.0074 0.0052 -0.0024 -0.0087 -0.0096  
Y -0.0089 0.0137 0.0026 -0.0002 0.0054 0.0052  
Z -0.0121 0.0083 0.0090 -0.0023 0.0107 0.0122  
AT. 51 C X 0.0145 0.0145 0.0087 0.0035 -0.0087 -0.0086  
Y 0.0030 0.0006 0.0027 0.0005 0.0035 0.0045  
Z 0.0071 0.0110 0.0021 0.0003 0.0045 0.0036  
AT. 52 C X -0.0145 0.0145 0.0087 -0.0035 -0.0087 -0.0086  
Y -0.0030 0.0006 0.0027 -0.0005 0.0035 0.0045  
Z -0.0071 0.0110 0.0021 -0.0003 0.0045 0.0036  
AT. 53 H X 0.0141 0.0018 0.0139 0.0050 -0.0062 -0.0031  
Y 0.0011 -0.0151 0.0075 0.0022 0.0054 0.0090  
Z 0.0054 0.0142 -0.0010 -0.0003 0.0023 -0.0006  
AT. 54 H X -0.0141 0.0018 0.0139 -0.0050 -0.0062 -0.0031  
Y -0.0011 -0.0151 0.0075 -0.0022 0.0054 0.0090  
Z -0.0054 0.0142 -0.0010 0.0003 0.0023 -0.0006  
AT. 55 H X 0.0127 0.0309 -0.0001 0.0005 -0.0120 -0.0163  
Y 0.0099 0.0017 0.0084 0.0025 0.0024 0.0038  
Z 0.0141 0.0236 0.0028 0.0007 0.0003 -0.0029  
AT. 56 H X -0.0127 0.0309 -0.0001 -0.0005 -0.0120 -0.0163  
Y -0.0099 0.0017 0.0084 -0.0025 0.0024 0.0038  
Z -0.0141 0.0236 0.0028 -0.0007 0.0003 -0.0029  
AT. 57 C X -0.0205 -0.0156 -0.0142 -0.0060 0.0107 0.0108  
Y 0.0117 0.0089 0.0085 0.0036 -0.0057 -0.0053  
Z -0.0089 -0.0080 -0.0060 -0.0022 0.0033 0.0029  
AT. 58 C X 0.0205 -0.0156 -0.0142 0.0060 0.0107 0.0108  
Y -0.0117 0.0089 0.0085 -0.0036 -0.0057 -0.0053  
Z 0.0089 -0.0080 -0.0060 0.0022 0.0033 0.0029

AT. 59 H X -0.0439 -0.0349 -0.0287 -0.0111 0.0212 0.0216  
Y 0.0192 0.0142 0.0131 0.0051 -0.0085 -0.0080  
Z -0.0145 -0.0141 -0.0096 -0.0038 0.0066 0.0068

AT. 60 H X 0.0439 -0.0349 -0.0287 0.0111 0.0212 0.0216  
Y -0.0192 0.0142 0.0131 -0.0051 -0.0085 -0.0080  
Z 0.0145 -0.0141 -0.0096 0.0038 0.0066 0.0068

AT. 61 H X -0.0216 -0.0165 -0.0143 -0.0063 0.0140 0.0141  
Y -0.0010 0.0000 0.0004 0.0003 -0.0005 -0.0002  
Z -0.0036 -0.0044 -0.0023 -0.0009 0.0035 0.0029

AT. 62 H X 0.0216 -0.0165 -0.0143 0.0063 0.0140 0.0141  
Y 0.0010 0.0000 0.0004 -0.0003 -0.0005 -0.0002  
Z 0.0036 -0.0044 -0.0023 0.0009 0.0035 0.0029

AT. 63 H X -0.0156 -0.0115 -0.0119 -0.0050 0.0062 0.0063  
Y -0.0030 -0.0047 -0.0000 0.0006 0.0024 0.0036  
Z -0.0010 -0.0004 -0.0010 -0.0006 0.0007 -0.0004

AT. 64 H X 0.0156 -0.0115 -0.0119 0.0050 0.0062 0.0063  
Y 0.0030 -0.0047 -0.0000 -0.0006 0.0024 0.0036  
Z 0.0010 -0.0004 -0.0010 0.0006 0.0007 -0.0004

AT. 65 C X -0.0065 -0.0075 -0.0040 0.0001 -0.0184 -0.0200  
Y 0.0036 0.0023 0.0029 0.0003 0.0082 0.0093  
Z 0.0083 0.0079 0.0052 0.0005 0.0206 0.0228

AT. 66 C X 0.0065 -0.0075 -0.0040 -0.0001 -0.0184 -0.0200  
Y -0.0036 0.0023 0.0029 -0.0003 0.0082 0.0093  
Z -0.0083 0.0079 0.0052 -0.0005 0.0206 0.0228

AT. 67 H X -0.0199 -0.0216 -0.0105 -0.0021 -0.0227 -0.0241  
Y 0.0057 -0.0001 0.0040 0.0011 0.0072 0.0085  
Z 0.0175 0.0218 0.0096 0.0015 0.0251 0.0268

AT. 68 H X 0.0199 -0.0216 -0.0105 0.0021 -0.0227 -0.0241  
Y -0.0057 -0.0001 0.0040 -0.0011 0.0072 0.0085  
Z -0.0175 0.0218 0.0096 -0.0015 0.0251 0.0268

AT. 69 H X -0.0064 -0.0088 -0.0012 0.0009 -0.0212 -0.0225  
Y -0.0015 -0.0013 0.0018 -0.0004 0.0064 0.0077

Z 0.0001 0.0052 -0.0021 -0.0021 0.0233 0.0252  
AT. 70 H X 0.0064 -0.0088 -0.0012 -0.0009 -0.0212 -0.0225  
Y 0.0015 -0.0013 0.0018 0.0004 0.0064 0.0077  
Z -0.0001 0.0052 -0.0021 0.0021 0.0233 0.0252  
AT. 71 H X -0.0087 -0.0070 -0.0084 -0.0014 -0.0156 -0.0175  
Y -0.0015 -0.0083 0.0027 0.0007 0.0031 0.0046  
Z -0.0004 -0.0064 0.0015 -0.0003 0.0158 0.0184  
AT. 72 H X 0.0087 -0.0070 -0.0084 0.0014 -0.0156 -0.0175  
Y 0.0015 -0.0083 0.0027 -0.0007 0.0031 0.0046  
Z 0.0004 -0.0064 0.0015 0.0003 0.0158 0.0184  
AT. 73 C X -0.0038 -0.0078 -0.0007 -0.0001 0.0001 0.0007  
Y -0.0103 -0.0108 -0.0062 -0.0020 0.0023 0.0030  
Z -0.0006 -0.0039 0.0007 0.0000 0.0029 0.0034  
AT. 74 C X 0.0038 -0.0078 -0.0007 0.0001 0.0001 0.0007  
Y 0.0103 -0.0108 -0.0062 0.0020 0.0023 0.0030  
Z 0.0006 -0.0039 0.0007 -0.0000 0.0029 0.0034  
AT. 75 H X -0.0213 -0.0317 -0.0070 -0.0022 0.0077 0.0108  
Y -0.0396 -0.0384 -0.0231 -0.0079 0.0065 0.0079  
Z -0.0532 -0.0589 -0.0269 -0.0096 0.0142 0.0176  
AT. 76 H X 0.0213 -0.0317 -0.0070 0.0022 0.0077 0.0108  
Y 0.0396 -0.0384 -0.0231 0.0079 0.0065 0.0079  
Z 0.0532 -0.0589 -0.0269 0.0096 0.0142 0.0176  
AT. 77 H X -0.0111 -0.0160 -0.0034 -0.0014 0.0075 0.0098  
Y -0.0515 -0.0554 -0.0281 -0.0093 0.0070 0.0092  
Z 0.0431 0.0435 0.0227 0.0077 -0.0078 -0.0105  
AT. 78 H X 0.0111 -0.0160 -0.0034 0.0014 0.0075 0.0098  
Y 0.0515 -0.0554 -0.0281 0.0093 0.0070 0.0092  
Z -0.0431 0.0435 0.0227 -0.0077 -0.0078 -0.0105  
AT. 79 I X 0.0010 0.0018 -0.0028 -0.0033 0.0005 -0.0005  
Y -0.0011 -0.0020 0.0031 0.0034 -0.0007 0.0006  
Z -0.0002 -0.0002 0.0003 0.0003 -0.0000 0.0000  
AT. 80 I X -0.0010 0.0018 -0.0028 0.0033 0.0005 -0.0005

Y 0.0011 -0.0020 0.0031 -0.0034 -0.0007 0.0006  
Z 0.0002 -0.0002 0.0003 -0.0003 -0.0000 0.0000  
AT. 81 I X -0.0000 0.0007 -0.0013 -0.0014 -0.0003 0.0002  
Y -0.0000 -0.0007 0.0013 0.0013 0.0000 0.0001  
Z 0.0000 -0.0004 0.0007 0.0008 0.0002 -0.0002  
AT. 82 I X 0.0000 0.0007 -0.0013 0.0014 -0.0003 0.0002  
Y 0.0000 -0.0007 0.0013 -0.0013 0.0000 0.0001  
Z -0.0000 -0.0004 0.0007 -0.0008 0.0002 -0.0002  
AT. 83 O X 0.0001 -0.0003 0.0000 0.0002 -0.0071 0.0062  
Y -0.0014 -0.0035 0.0052 0.0067 0.0001 -0.0000  
Z -0.0022 -0.0052 0.0078 0.0089 -0.0072 0.0072  
AT. 84 O X -0.0001 -0.0003 0.0000 -0.0002 -0.0071 0.0062  
Y 0.0014 -0.0035 0.0052 -0.0067 0.0001 -0.0000  
Z 0.0022 -0.0052 0.0078 -0.0089 -0.0072 0.0072  
AT. 85 O X 0.0002 -0.0010 0.0020 0.0029 0.0146 -0.0141  
Y -0.0014 -0.0046 0.0071 0.0096 0.0092 -0.0082  
Z 0.0023 0.0040 -0.0047 -0.0073 -0.0062 0.0051  
AT. 86 O X -0.0002 -0.0010 0.0020 -0.0029 0.0146 -0.0141  
Y 0.0014 -0.0046 0.0071 -0.0096 0.0092 -0.0082  
Z -0.0023 0.0040 -0.0047 0.0073 -0.0062 0.0051  
AT. 87 N X -0.0001 -0.0011 0.0020 0.0040 0.0079 -0.0059  
Y -0.0064 -0.0129 0.0190 0.0244 -0.0017 0.0020  
Z 0.0001 0.0007 -0.0014 -0.0019 -0.0039 0.0030  
AT. 88 N X 0.0001 -0.0011 0.0020 -0.0040 0.0079 -0.0059  
Y 0.0064 -0.0129 0.0190 -0.0244 -0.0017 0.0020  
Z -0.0001 0.0007 -0.0014 0.0019 -0.0039 0.0030  
AT. 89 N X -0.0006 -0.0009 0.0010 0.0009 -0.0135 0.0134  
Y -0.0007 -0.0053 0.0083 0.0093 0.0034 -0.0035  
Z -0.0002 -0.0018 0.0035 0.0035 -0.0091 0.0087  
AT. 90 N X 0.0006 -0.0009 0.0010 -0.0009 -0.0135 0.0134  
Y 0.0007 -0.0053 0.0083 -0.0093 0.0034 -0.0035  
Z 0.0002 -0.0018 0.0035 -0.0035 -0.0091 0.0087



AT. 91 C X -0.0024 -0.0061 0.0091 0.0111 -0.0049 0.0050  
Y 0.0045 0.0089 -0.0140 -0.0175 -0.0039 0.0031  
Z -0.0001 -0.0006 0.0004 -0.0007 -0.0080 0.0067

AT. 92 C X 0.0024 -0.0061 0.0091 -0.0111 -0.0049 0.0050  
Y -0.0045 0.0089 -0.0140 0.0175 -0.0039 0.0031  
Z 0.0001 -0.0006 0.0004 0.0007 -0.0080 0.0067

AT. 93 C X -0.0051 -0.0095 0.0145 0.0181 -0.0043 0.0044  
Y 0.0115 0.0211 -0.0324 -0.0374 0.0042 -0.0034  
Z -0.0018 -0.0052 0.0080 0.0118 0.0031 -0.0027

AT. 94 C X 0.0051 -0.0095 0.0145 -0.0181 -0.0043 0.0044  
Y -0.0115 0.0211 -0.0324 0.0374 0.0042 -0.0034  
Z 0.0018 -0.0052 0.0080 -0.0118 0.0031 -0.0027

AT. 95 H X -0.0081 -0.0099 0.0140 0.0057 -0.0198 0.0156  
Y 0.0140 0.0242 -0.0370 -0.0394 0.0001 0.0007  
Z -0.0035 -0.0103 0.0165 0.0277 0.0262 -0.0216

AT. 96 H X 0.0081 -0.0099 0.0140 -0.0057 -0.0198 0.0156  
Y -0.0140 0.0242 -0.0370 0.0394 0.0001 0.0007  
Z 0.0035 -0.0103 0.0165 -0.0277 0.0262 -0.0216

AT. 97 H X -0.0050 -0.0106 0.0163 0.0229 0.0087 -0.0064  
Y 0.0055 0.0086 -0.0127 -0.0133 0.0210 -0.0177  
Z -0.0032 -0.0080 0.0123 0.0163 0.0037 -0.0032

AT. 98 H X 0.0050 -0.0106 0.0163 -0.0229 0.0087 -0.0064  
Y -0.0055 0.0086 -0.0127 0.0133 0.0210 -0.0177  
Z 0.0032 -0.0080 0.0123 -0.0163 0.0037 -0.0032

AT. 99 C X -0.0008 -0.0038 0.0066 0.0082 0.0058 -0.0050  
Y -0.0004 0.0005 -0.0019 -0.0004 0.0151 -0.0144  
Z 0.0001 0.0034 -0.0053 -0.0063 -0.0094 0.0088

AT. 100 C X 0.0008 -0.0038 0.0066 -0.0082 0.0058 -0.0050  
Y 0.0004 0.0005 -0.0019 0.0004 0.0151 -0.0144  
Z -0.0001 0.0034 -0.0053 0.0063 -0.0094 0.0088

AT. 101 C X -0.0008 -0.0056 0.0100 0.0111 -0.0001 0.0004  
Y -0.0003 0.0055 -0.0097 -0.0100 -0.0044 0.0042

Z -0.0002 0.0062 -0.0112 -0.0119 0.0025 -0.0024  
AT.102 C X 0.0008 -0.0056 0.0100 -0.0111 -0.0001 0.0004  
Y 0.0003 0.0055 -0.0097 0.0100 -0.0044 0.0042  
Z 0.0002 0.0062 -0.0112 0.0119 0.0025 -0.0024  
AT.103 H X -0.0012 -0.0048 0.0080 0.0095 0.0060 -0.0054  
Y -0.0001 0.0053 -0.0089 -0.0095 -0.0084 0.0080  
Z -0.0003 0.0034 -0.0079 -0.0054 0.0475 -0.0455  
AT.104 H X 0.0012 -0.0048 0.0080 -0.0095 0.0060 -0.0054  
Y 0.0001 0.0053 -0.0089 0.0095 -0.0084 0.0080  
Z 0.0003 0.0034 -0.0079 0.0054 0.0475 -0.0455  
AT.105 H X -0.0005 -0.0029 0.0061 0.0045 -0.0228 0.0219  
Y -0.0007 0.0040 -0.0066 -0.0084 -0.0382 0.0369  
Z -0.0002 0.0062 -0.0110 -0.0129 -0.0153 0.0147  
AT.106 H X 0.0005 -0.0029 0.0061 -0.0045 -0.0228 0.0219  
Y 0.0007 0.0040 -0.0066 0.0084 -0.0382 0.0369  
Z 0.0002 0.0062 -0.0110 0.0129 -0.0153 0.0147  
AT.107 C X -0.0015 -0.0027 0.0046 0.0059 0.0019 -0.0009  
Y -0.0005 -0.0010 0.0019 0.0019 -0.0045 0.0052  
Z 0.0019 0.0052 -0.0079 -0.0112 -0.0076 0.0067  
AT.108 C X 0.0015 -0.0027 0.0046 -0.0059 0.0019 -0.0009  
Y 0.0005 -0.0010 0.0019 -0.0019 -0.0045 0.0052  
Z -0.0019 0.0052 -0.0079 0.0112 -0.0076 0.0067  
AT.109 H X -0.0023 -0.0005 0.0015 0.0012 -0.0058 0.0057  
Y 0.0032 0.0100 -0.0147 -0.0203 -0.0132 0.0123  
Z 0.0084 0.0233 -0.0351 -0.0473 -0.0202 0.0170  
AT.110 H X 0.0023 -0.0005 0.0015 -0.0012 -0.0058 0.0057  
Y -0.0032 0.0100 -0.0147 0.0203 -0.0132 0.0123  
Z -0.0084 0.0233 -0.0351 0.0473 -0.0202 0.0170  
AT.111 H X -0.0018 -0.0035 0.0057 0.0092 0.0074 -0.0055  
Y -0.0045 -0.0166 0.0259 0.0335 0.0083 -0.0054  
Z 0.0029 0.0092 -0.0142 -0.0214 -0.0166 0.0142  
AT.112 H X 0.0018 -0.0035 0.0057 -0.0092 0.0074 -0.0055

Y 0.0045 -0.0166 0.0259 -0.0335 0.0083 -0.0054  
Z -0.0029 0.0092 -0.0142 0.0214 -0.0166 0.0142  
AT. 113 C X -0.0009 -0.0013 0.0020 0.0006 -0.0067 0.0054  
Y 0.0039 0.0102 -0.0152 -0.0206 -0.0103 0.0092  
Z -0.0015 -0.0054 0.0085 0.0109 0.0039 -0.0023  
AT. 114 C X 0.0009 -0.0013 0.0020 -0.0006 -0.0067 0.0054  
Y -0.0039 0.0102 -0.0152 0.0206 -0.0103 0.0092  
Z 0.0015 -0.0054 0.0085 -0.0109 0.0039 -0.0023  
AT. 115 C X -0.0026 -0.0055 0.0080 0.0087 -0.0149 0.0141  
Y 0.0026 0.0067 -0.0102 -0.0134 -0.0039 0.0032  
Z -0.0021 -0.0048 0.0073 0.0101 0.0042 -0.0036  
AT. 116 C X 0.0026 -0.0055 0.0080 -0.0087 -0.0149 0.0141  
Y -0.0026 0.0067 -0.0102 0.0134 -0.0039 0.0032  
Z 0.0021 -0.0048 0.0073 -0.0101 0.0042 -0.0036  
AT. 117 H X -0.0003 -0.0027 0.0046 0.0024 -0.0288 0.0280  
Y -0.0001 0.0027 -0.0049 -0.0041 0.0016 -0.0025  
Z -0.0038 -0.0067 0.0095 0.0143 0.0175 -0.0169  
AT. 118 H X 0.0003 -0.0027 0.0046 -0.0024 -0.0288 0.0280  
Y 0.0001 0.0027 -0.0049 0.0041 0.0016 -0.0025  
Z 0.0038 -0.0067 0.0095 -0.0143 0.0175 -0.0169  
AT. 119 H X -0.0053 -0.0080 0.0105 0.0154 0.0009 -0.0013  
Y 0.0038 0.0099 -0.0150 -0.0192 -0.0043 0.0043  
Z -0.0046 -0.0090 0.0131 0.0191 0.0130 -0.0129  
AT. 120 H X 0.0053 -0.0080 0.0105 -0.0154 0.0009 -0.0013  
Y -0.0038 0.0099 -0.0150 0.0192 -0.0043 0.0043  
Z 0.0046 -0.0090 0.0131 -0.0191 0.0130 -0.0129  
AT. 121 C X 0.0009 0.0004 -0.0003 -0.0010 -0.0091 0.0088  
Y 0.0010 0.0022 -0.0030 -0.0039 -0.0012 0.0020  
Z -0.0006 -0.0015 0.0023 0.0029 -0.0067 0.0070  
AT. 122 C X -0.0009 0.0004 -0.0003 0.0010 -0.0091 0.0088  
Y -0.0010 0.0022 -0.0030 0.0039 -0.0012 0.0020  
Z 0.0006 -0.0015 0.0023 -0.0029 -0.0067 0.0070

AT. 123 H X 0.0042 0.0037 -0.0032 -0.0074 -0.0103 0.0092  
Y 0.0063 0.0140 -0.0192 -0.0256 0.0021 -0.0016  
Z -0.0056 -0.0133 0.0186 0.0242 -0.0105 0.0111

AT. 124 H X -0.0042 0.0037 -0.0032 0.0074 -0.0103 0.0092  
Y -0.0063 0.0140 -0.0192 0.0256 0.0021 -0.0016  
Z 0.0056 -0.0133 0.0186 -0.0242 -0.0105 0.0111

AT. 125 H X 0.0002 -0.0007 0.0009 -0.0000 -0.0144 0.0136  
Y -0.0050 -0.0093 0.0125 0.0187 0.0027 0.0001  
Z -0.0044 -0.0085 0.0113 0.0152 -0.0110 0.0118

AT. 126 H X -0.0002 -0.0007 0.0009 0.0000 -0.0144 0.0136  
Y 0.0050 -0.0093 0.0125 -0.0187 0.0027 0.0001  
Z 0.0044 -0.0085 0.0113 -0.0152 -0.0110 0.0118

AT. 127 C X 0.0008 0.0011 -0.0019 -0.0011 0.0115 -0.0110  
Y 0.0023 0.0069 -0.0104 -0.0127 0.0037 -0.0036  
Z 0.0032 0.0072 -0.0107 -0.0135 0.0062 -0.0071

AT. 128 C X -0.0008 0.0011 -0.0019 0.0011 0.0115 -0.0110  
Y -0.0023 0.0069 -0.0104 0.0127 0.0037 -0.0036  
Z -0.0032 0.0072 -0.0107 0.0135 0.0062 -0.0071

AT. 129 C X -0.0011 -0.0045 0.0070 0.0114 0.0141 -0.0119  
Y 0.0009 0.0024 -0.0037 -0.0047 -0.0006 -0.0002  
Z 0.0017 0.0058 -0.0086 -0.0103 0.0035 -0.0034

AT. 130 C X 0.0011 -0.0045 0.0070 -0.0114 0.0141 -0.0119  
Y -0.0009 0.0024 -0.0037 0.0047 -0.0006 -0.0002  
Z -0.0017 0.0058 -0.0086 0.0103 0.0035 -0.0034

AT. 131 H X -0.0022 -0.0043 0.0068 0.0118 0.0166 -0.0127  
Y 0.0010 -0.0028 0.0043 0.0038 -0.0041 0.0013  
Z 0.0002 0.0034 -0.0047 -0.0055 0.0050 -0.0036

AT. 132 H X 0.0022 -0.0043 0.0068 -0.0118 0.0166 -0.0127  
Y -0.0010 -0.0028 0.0043 -0.0038 -0.0041 0.0013  
Z -0.0002 0.0034 -0.0047 0.0055 0.0050 -0.0036

AT. 133 H X 0.0007 -0.0050 0.0074 0.0102 0.0079 -0.0083  
Y 0.0023 0.0055 -0.0087 -0.0113 -0.0031 0.0023

Z 0.0030 0.0107 -0.0163 -0.0196 0.0025 -0.0011  
AT. 134 H X -0.0007 -0.0050 0.0074 -0.0102 0.0079 -0.0083  
Y -0.0023 0.0055 -0.0087 0.0113 -0.0031 0.0023  
Z -0.0030 0.0107 -0.0163 0.0196 0.0025 -0.0011  
AT. 135 C X 0.0016 0.0067 -0.0102 -0.0158 -0.0178 0.0144  
Y -0.0000 0.0012 -0.0018 -0.0027 -0.0032 0.0024  
Z -0.0013 -0.0043 0.0067 0.0100 0.0095 -0.0074  
AT. 136 C X -0.0016 0.0067 -0.0102 0.0158 -0.0178 0.0144  
Y 0.0000 0.0012 -0.0018 0.0027 -0.0032 0.0024  
Z 0.0013 -0.0043 0.0067 -0.0100 0.0095 -0.0074  
AT. 137 H X 0.0063 0.0183 -0.0274 -0.0388 -0.0301 0.0253  
Y -0.0004 0.0003 -0.0001 -0.0005 -0.0018 0.0011  
Z -0.0034 -0.0099 0.0156 0.0220 0.0165 -0.0137  
AT. 138 H X -0.0063 0.0183 -0.0274 0.0388 -0.0301 0.0253  
Y 0.0004 0.0003 -0.0001 0.0005 -0.0018 0.0011  
Z 0.0034 -0.0099 0.0156 -0.0220 0.0165 -0.0137  
AT. 139 H X 0.0012 0.0056 -0.0087 -0.0145 -0.0191 0.0156  
Y -0.0015 -0.0044 0.0068 0.0085 0.0032 -0.0032  
Z -0.0004 -0.0016 0.0024 0.0052 0.0092 -0.0074  
AT. 140 H X -0.0012 0.0056 -0.0087 0.0145 -0.0191 0.0156  
Y 0.0015 -0.0044 0.0068 -0.0085 0.0032 -0.0032  
Z 0.0004 -0.0016 0.0024 -0.0052 0.0092 -0.0074  
AT. 141 H X -0.0002 0.0026 -0.0045 -0.0072 -0.0111 0.0081  
Y -0.0030 -0.0056 0.0089 0.0117 0.0052 -0.0052  
Z 0.0012 0.0011 -0.0020 -0.0015 0.0035 -0.0021  
AT. 142 H X 0.0002 0.0026 -0.0045 0.0072 -0.0111 0.0081  
Y 0.0030 -0.0056 0.0089 -0.0117 0.0052 -0.0052  
Z -0.0012 0.0011 -0.0020 0.0015 0.0035 -0.0021  
AT. 143 C X 0.0039 0.0084 -0.0129 -0.0144 0.0211 -0.0211  
Y 0.0007 0.0012 -0.0020 -0.0024 0.0007 -0.0010  
Z 0.0029 0.0062 -0.0095 -0.0115 0.0152 -0.0152  
AT. 144 C X -0.0039 0.0084 -0.0129 0.0144 0.0211 -0.0211

Y -0.0007 0.0012 -0.0020 0.0024 0.0007 -0.0010  
Z -0.0029 0.0062 -0.0095 0.0115 0.0152 -0.0152  
AT. 145 H X 0.0066 0.0158 -0.0237 -0.0283 0.0263 -0.0266  
Y 0.0002 -0.0008 0.0012 0.0008 -0.0036 0.0028  
Z 0.0041 0.0103 -0.0158 -0.0189 0.0211 -0.0207  
AT. 146 H X -0.0066 0.0158 -0.0237 0.0283 0.0263 -0.0266  
Y -0.0002 -0.0008 0.0012 -0.0008 -0.0036 0.0028  
Z -0.0041 0.0103 -0.0158 0.0189 0.0211 -0.0207  
AT. 147 H X 0.0032 0.0067 -0.0107 -0.0117 0.0238 -0.0235  
Y 0.0001 -0.0005 0.0010 0.0014 -0.0013 0.0015  
Z 0.0015 0.0028 -0.0044 -0.0053 0.0176 -0.0171  
AT. 148 H X -0.0032 0.0067 -0.0107 0.0117 0.0238 -0.0235  
Y -0.0001 -0.0005 0.0010 -0.0014 -0.0013 0.0015  
Z -0.0015 0.0028 -0.0044 0.0053 0.0176 -0.0171  
AT. 149 H X 0.0036 0.0071 -0.0106 -0.0121 0.0143 -0.0146  
Y -0.0005 -0.0026 0.0037 0.0041 -0.0057 0.0049  
Z 0.0012 0.0005 -0.0012 -0.0017 0.0080 -0.0089  
AT. 150 H X -0.0036 0.0071 -0.0106 0.0121 0.0143 -0.0146  
Y 0.0005 -0.0026 0.0037 -0.0041 -0.0057 0.0049  
Z -0.0012 0.0005 -0.0012 0.0017 0.0080 -0.0089  
AT. 151 C X 0.0002 0.0006 -0.0009 -0.0017 0.0013 -0.0013  
Y -0.0024 -0.0058 0.0082 0.0114 0.0027 -0.0022  
Z 0.0003 -0.0014 0.0025 0.0024 0.0030 -0.0028  
AT. 152 C X -0.0002 0.0006 -0.0009 0.0017 0.0013 -0.0013  
Y 0.0024 -0.0058 0.0082 -0.0114 0.0027 -0.0022  
Z -0.0003 -0.0014 0.0025 -0.0024 0.0030 -0.0028  
AT. 153 H X -0.0001 0.0004 -0.0004 -0.0010 0.0010 -0.0002  
Y -0.0089 -0.0228 0.0331 0.0448 0.0102 -0.0087  
Z -0.0101 -0.0286 0.0423 0.0560 0.0157 -0.0140  
AT. 154 H X 0.0001 0.0004 -0.0004 0.0010 0.0010 -0.0002  
Y 0.0089 -0.0228 0.0331 -0.0448 0.0102 -0.0087  
Z 0.0101 -0.0286 0.0423 -0.0560 0.0157 -0.0140

AT.155 H X 0.0008 0.0014 -0.0017 -0.0034 -0.0041 0.0050  
Y -0.0109 -0.0286 0.0419 0.0562 0.0107 -0.0087  
Z 0.0095 0.0228 -0.0332 -0.0455 -0.0076 0.0065

AT.156 H X -0.0008 0.0014 -0.0017 0.0034 -0.0041 0.0050  
Y 0.0109 -0.0286 0.0419 -0.0562 0.0107 -0.0087  
Z -0.0095 0.0228 -0.0332 0.0455 -0.0076 0.0065

AT.157 O X -0.0004 -0.0002 -0.0001 -0.0001 -0.0002 0.0000  
Y 0.0011 -0.0006 0.0015 0.0004 0.0007 0.0005  
Z -0.0004 -0.0005 -0.0005 -0.0004 0.0003 0.0006

AT.158 O X 0.0004 -0.0002 -0.0001 0.0001 -0.0002 0.0000  
Y -0.0011 -0.0006 0.0015 -0.0004 0.0007 0.0005  
Z 0.0004 -0.0005 -0.0005 0.0004 0.0003 0.0006

AT.159 O X 0.0006 -0.0006 -0.0004 0.0003 0.0003 0.0002  
Y -0.0005 0.0007 -0.0003 -0.0005 -0.0005 -0.0003  
Z 0.0010 -0.0009 -0.0011 0.0002 0.0006 0.0008

AT.160 O X -0.0006 -0.0006 -0.0004 -0.0003 0.0003 0.0002  
Y 0.0005 0.0007 -0.0003 0.0005 -0.0005 -0.0003  
Z -0.0010 -0.0009 -0.0011 -0.0002 0.0006 0.0008

AT.161 H X 0.0028 0.0009 0.0044 0.0025 0.0004 -0.0005  
Y -0.0001 -0.0011 -0.0002 -0.0007 0.0009 0.0017  
Z 0.0059 0.0016 0.0073 0.0049 0.0001 -0.0020

AT.162 H X -0.0028 0.0009 0.0044 -0.0025 0.0004 -0.0005  
Y 0.0001 -0.0011 -0.0002 0.0007 0.0009 0.0017  
Z -0.0059 0.0016 0.0073 -0.0049 0.0001 -0.0020

AT.163 H X 0.0019 -0.0009 -0.0006 0.0009 0.0008 0.0007  
Y 0.0028 0.0001 0.0049 0.0024 0.0051 0.0045  
Z 0.0016 -0.0012 -0.0002 0.0007 0.0019 0.0018

AT.164 H X -0.0019 -0.0009 -0.0006 -0.0009 0.0008 0.0007  
Y -0.0028 0.0001 0.0049 -0.0024 0.0051 0.0045  
Z -0.0016 -0.0012 -0.0002 -0.0007 0.0019 0.0018

AT.165 O X 0.0002 0.0009 -0.0013 -0.0012 0.0010 -0.0010  
Y -0.0001 0.0003 -0.0005 -0.0006 0.0002 -0.0001

Z 0.0001 -0.0002 0.0003 -0.0001 0.0005 -0.0006  
 AT.166 O X -0.0002 0.0009 -0.0013 0.0012 0.0010 -0.0010  
 Y 0.0001 0.0003 -0.0005 0.0006 0.0002 -0.0001  
 Z -0.0001 -0.0002 0.0003 0.0001 0.0005 -0.0006  
 AT.167 H X -0.0007 -0.0004 -0.0021 -0.0008 0.0015 -0.0008  
 Y 0.0021 0.0033 0.0017 -0.0019 -0.0004 -0.0008  
 Z -0.0005 -0.0012 -0.0008 -0.0002 0.0006 -0.0003  
 AT.168 H X 0.0007 -0.0004 -0.0021 0.0008 0.0015 -0.0008  
 Y -0.0021 0.0033 0.0017 0.0019 -0.0004 -0.0008  
 Z 0.0005 -0.0012 -0.0008 0.0002 0.0006 -0.0003  
 AT.169 O X -0.0000 -0.0001 0.0005 -0.0003 -0.0003 0.0002  
 Y -0.0006 0.0009 -0.0004 0.0013 -0.0006 0.0001  
 Z 0.0001 -0.0006 0.0005 -0.0002 0.0005 -0.0003  
 AT.170 O X 0.0000 -0.0001 0.0005 0.0003 -0.0003 0.0002  
 Y 0.0006 0.0009 -0.0004 -0.0013 -0.0006 0.0001  
 Z -0.0001 -0.0006 0.0005 0.0002 0.0005 -0.0003  
 AT.171 H X 0.0027 -0.0036 -0.0034 0.0008 0.0064 -0.0067  
 Y 0.0006 -0.0004 -0.0027 0.0024 0.0020 -0.0027  
 Z -0.0003 0.0003 -0.0001 0.0002 -0.0001 -0.0001  
 AT.172 H X -0.0027 -0.0036 -0.0034 -0.0008 0.0064 -0.0067  
 Y -0.0006 -0.0004 -0.0027 -0.0024 0.0020 -0.0027  
 Z 0.0003 0.0003 -0.0001 -0.0002 -0.0001 -0.0001  
  
 FREQ(CM\*\*-1) 554.24 555.72 566.98 567.90 569.24 569.41  
  
 AT. 1 I X -0.0008 -0.0007 0.0000 0.0002 0.0004 -0.0004  
 Y -0.0004 -0.0004 0.0001 0.0002 0.0005 -0.0003  
 Z -0.0001 -0.0001 0.0000 -0.0003 -0.0005 0.0002  
 AT. 2 I X 0.0008 0.0007 0.0000 -0.0002 0.0004 0.0004  
 Y 0.0004 0.0004 0.0001 -0.0002 0.0005 0.0003  
 Z 0.0001 0.0001 0.0000 0.0003 -0.0005 -0.0002  
 AT. 3 I X -0.0006 -0.0003 -0.0000 -0.0004 -0.0005 0.0002



Y -0.0005 -0.0003 -0.0000 -0.0002 -0.0003 0.0002  
Z -0.0000 0.0000 0.0000 -0.0000 -0.0000 0.0000  
AT. 4 I X 0.0006 0.0003 -0.0000 0.0004 -0.0005 -0.0002  
Y 0.0005 0.0003 -0.0000 0.0002 -0.0003 -0.0002  
Z 0.0000 -0.0000 0.0000 0.0000 -0.0000 -0.0000  
AT. 5 O X 0.0041 0.0013 -0.0006 -0.0109 -0.0142 0.0096  
Y -0.0032 -0.0013 0.0003 0.0103 0.0138 -0.0089  
Z -0.0105 -0.0057 0.0004 0.0019 0.0021 -0.0023  
AT. 6 O X -0.0041 -0.0013 -0.0006 0.0109 -0.0142 -0.0096  
Y 0.0032 0.0013 0.0003 -0.0103 0.0138 0.0089  
Z 0.0105 0.0057 0.0004 -0.0019 0.0021 0.0023  
AT. 7 O X -0.0167 -0.0093 0.0004 -0.0027 -0.0050 0.0013  
Y 0.0095 0.0050 -0.0003 -0.0012 -0.0004 0.0017  
Z -0.0054 -0.0017 0.0002 0.0047 0.0052 -0.0042  
AT. 8 O X 0.0167 0.0093 0.0004 0.0027 -0.0050 -0.0013  
Y -0.0095 -0.0050 -0.0003 0.0012 -0.0004 -0.0017  
Z 0.0054 0.0017 0.0002 -0.0047 0.0052 0.0042  
AT. 9 N X -0.0051 0.0003 0.0007 0.0233 0.0304 -0.0200  
Y -0.0029 -0.0021 0.0006 0.0032 0.0058 -0.0034  
Z -0.0014 0.0004 0.0004 0.0098 0.0132 -0.0082  
AT. 10 N X 0.0051 -0.0003 0.0007 -0.0233 0.0304 0.0200  
Y 0.0029 0.0021 0.0006 -0.0032 0.0058 0.0034  
Z 0.0014 -0.0004 0.0004 -0.0098 0.0132 0.0082  
AT. 11 N X 0.0180 0.0111 -0.0007 0.0076 0.0107 -0.0050  
Y 0.0006 0.0003 -0.0001 0.0021 0.0027 -0.0017  
Z -0.0140 -0.0080 0.0005 -0.0034 -0.0055 0.0019  
AT. 12 N X -0.0180 -0.0111 -0.0007 -0.0076 0.0107 0.0050  
Y -0.0006 -0.0003 -0.0001 -0.0021 0.0027 0.0017  
Z 0.0140 0.0080 0.0005 0.0034 -0.0055 -0.0019  
AT. 13 C X 0.0065 0.0050 -0.0002 0.0028 0.0035 -0.0017  
Y -0.0030 -0.0007 0.0000 0.0031 0.0032 -0.0026  
Z -0.0067 -0.0008 0.0006 0.0176 0.0227 -0.0147

AT. 14 C X -0.0065 -0.0050 -0.0002 -0.0028 0.0035 0.0017  
Y 0.0030 0.0007 0.0000 -0.0031 0.0032 0.0026  
Z 0.0067 0.0008 0.0006 -0.0176 0.0227 0.0147

AT. 15 C X 0.0078 0.0068 -0.0008 0.0003 -0.0005 0.0013  
Y 0.0020 0.0020 -0.0008 -0.0087 -0.0130 0.0083  
Z 0.0031 0.0036 -0.0000 0.0052 0.0065 -0.0039

AT. 16 C X -0.0078 -0.0068 -0.0008 -0.0003 -0.0005 -0.0013  
Y -0.0020 -0.0020 -0.0008 0.0087 -0.0130 -0.0083  
Z -0.0031 -0.0036 -0.0000 -0.0052 0.0065 0.0039

AT. 17 H X 0.0074 0.0060 -0.0003 0.0029 0.0032 -0.0014  
Y -0.0097 -0.0018 0.0008 0.0211 0.0262 -0.0179  
Z 0.0179 0.0079 -0.0017 -0.0328 -0.0433 0.0293

AT. 18 H X -0.0074 -0.0060 -0.0003 -0.0029 0.0032 0.0014  
Y 0.0097 0.0018 0.0008 -0.0211 0.0262 0.0179  
Z -0.0179 -0.0079 -0.0017 0.0328 -0.0433 -0.0293

AT. 19 H X 0.0009 0.0038 -0.0003 0.0122 0.0154 -0.0090  
Y 0.0183 0.0066 -0.0028 -0.0505 -0.0676 0.0447  
Z 0.0070 0.0042 -0.0007 -0.0063 -0.0081 0.0060

AT. 20 H X -0.0009 -0.0038 -0.0003 -0.0122 0.0154 0.0090  
Y -0.0183 -0.0066 -0.0028 0.0505 -0.0676 -0.0447  
Z -0.0070 -0.0042 -0.0007 0.0063 -0.0081 -0.0060

AT. 21 C X 0.0018 0.0014 -0.0002 0.0046 0.0062 -0.0039  
Y 0.0225 0.0120 -0.0008 0.0032 0.0069 -0.0018  
Z -0.0103 -0.0060 0.0003 -0.0028 -0.0040 0.0018

AT. 22 C X -0.0018 -0.0014 -0.0002 -0.0046 0.0062 0.0039  
Y -0.0225 -0.0120 -0.0008 -0.0032 0.0069 0.0018  
Z 0.0103 0.0060 0.0003 0.0028 -0.0040 -0.0018

AT. 23 C X 0.0057 0.0034 -0.0006 0.0055 0.0072 -0.0038  
Y 0.0032 0.0011 -0.0005 0.0004 0.0002 0.0004  
Z 0.0041 0.0007 -0.0005 -0.0034 -0.0030 0.0035

AT. 24 C X -0.0057 -0.0034 -0.0006 -0.0055 0.0072 0.0038  
Y -0.0032 -0.0011 -0.0005 -0.0004 0.0002 -0.0004

Z -0.0041 -0.0007 -0.0005 0.0034 -0.0030 -0.0035  
AT. 25 H X 0.0022 0.0020 -0.0006 0.0051 0.0059 -0.0034  
Y -0.0040 -0.0029 -0.0002 -0.0010 -0.0025 0.0013  
Z 0.0631 0.0331 -0.0028 0.0078 0.0177 -0.0032  
AT. 26 H X -0.0022 -0.0020 -0.0006 -0.0051 0.0059 0.0034  
Y 0.0040 0.0029 -0.0002 0.0010 -0.0025 -0.0013  
Z -0.0631 -0.0331 -0.0028 -0.0078 0.0177 0.0032  
AT. 27 H X 0.0170 0.0096 -0.0011 0.0064 0.0089 -0.0042  
Y -0.0521 -0.0290 0.0017 -0.0100 -0.0187 0.0060  
Z -0.0254 -0.0154 0.0006 -0.0087 -0.0129 0.0064  
AT. 28 H X -0.0170 -0.0096 -0.0011 -0.0064 0.0089 0.0042  
Y 0.0521 0.0290 0.0017 0.0100 -0.0187 -0.0060  
Z 0.0254 0.0154 0.0006 0.0087 -0.0129 -0.0064  
AT. 29 C X -0.0021 -0.0002 0.0001 0.0076 0.0095 -0.0065  
Y -0.0087 -0.0065 0.0002 -0.0133 -0.0176 0.0107  
Z -0.0078 -0.0042 0.0003 0.0012 0.0009 -0.0013  
AT. 30 C X 0.0021 0.0002 0.0001 -0.0076 0.0095 0.0065  
Y 0.0087 0.0065 0.0002 0.0133 -0.0176 -0.0107  
Z 0.0078 0.0042 0.0003 -0.0012 0.0009 0.0013  
AT. 31 H X 0.0024 0.0026 -0.0004 0.0040 0.0044 -0.0026  
Y -0.0178 -0.0111 0.0008 -0.0112 -0.0163 0.0083  
Z -0.0187 -0.0092 0.0008 0.0026 0.0004 -0.0031  
AT. 32 H X -0.0024 -0.0026 -0.0004 -0.0040 0.0044 0.0026  
Y 0.0178 0.0111 0.0008 0.0112 -0.0163 -0.0083  
Z 0.0187 0.0092 0.0008 -0.0026 0.0004 0.0031  
AT. 33 H X -0.0037 -0.0002 -0.0003 0.0106 0.0131 -0.0088  
Y 0.0043 -0.0001 -0.0002 -0.0138 -0.0155 0.0116  
Z -0.0146 -0.0073 0.0004 0.0029 0.0019 -0.0029  
AT. 34 H X 0.0037 0.0002 -0.0003 -0.0106 0.0131 0.0088  
Y -0.0043 0.0001 -0.0002 0.0138 -0.0155 -0.0116  
Z 0.0146 0.0073 0.0004 -0.0029 0.0019 0.0029  
AT. 35 C X 0.0008 -0.0022 -0.0004 -0.0148 -0.0194 0.0121

Y -0.0111 -0.0052 0.0003 0.0018 0.0009 -0.0017  
Z -0.0013 -0.0024 -0.0002 -0.0094 -0.0118 0.0078  
AT. 36 C X -0.0008 0.0022 -0.0004 0.0148 -0.0194 -0.0121  
Y 0.0111 0.0052 0.0003 -0.0018 0.0009 0.0017  
Z 0.0013 0.0024 -0.0002 0.0094 -0.0118 -0.0078  
AT. 37 C X 0.0169 0.0087 -0.0008 -0.0043 -0.0052 0.0047  
Y -0.0073 -0.0038 0.0002 -0.0001 -0.0011 -0.0003  
Z 0.0016 0.0011 0.0000 0.0012 0.0019 -0.0010  
AT. 38 C X -0.0169 -0.0087 -0.0008 0.0043 -0.0052 -0.0047  
Y 0.0073 0.0038 0.0002 0.0001 -0.0011 0.0003  
Z -0.0016 -0.0011 0.0000 -0.0012 0.0019 0.0010  
AT. 39 H X 0.0417 0.0252 -0.0012 0.0163 0.0240 -0.0115  
Y -0.0052 -0.0021 0.0005 0.0058 0.0070 -0.0057  
Z 0.0180 0.0117 -0.0004 0.0128 0.0186 -0.0098  
AT. 40 H X -0.0417 -0.0252 -0.0012 -0.0163 0.0240 0.0115  
Y 0.0052 0.0021 0.0005 -0.0058 0.0070 0.0057  
Z -0.0180 -0.0117 -0.0004 -0.0128 0.0186 0.0098  
AT. 41 H X -0.0034 -0.0046 -0.0004 -0.0201 -0.0274 0.0169  
Y -0.0057 -0.0042 0.0000 -0.0072 -0.0103 0.0059  
Z 0.0208 0.0147 -0.0002 0.0228 0.0318 -0.0183  
AT. 42 H X 0.0034 0.0046 -0.0004 0.0201 -0.0274 -0.0169  
Y 0.0057 0.0042 0.0000 0.0072 -0.0103 -0.0059  
Z -0.0208 -0.0147 -0.0002 -0.0228 0.0318 0.0183  
AT. 43 C X 0.0081 0.0047 -0.0002 0.0022 0.0041 -0.0015  
Y -0.0088 -0.0071 0.0001 -0.0141 -0.0191 0.0110  
Z -0.0097 -0.0051 0.0005 -0.0000 -0.0008 -0.0009  
AT. 44 C X -0.0081 -0.0047 -0.0002 -0.0022 0.0041 0.0015  
Y 0.0088 0.0071 0.0001 0.0141 -0.0191 -0.0110  
Z 0.0097 0.0051 0.0005 0.0000 -0.0008 0.0009  
AT. 45 H X 0.0068 0.0033 -0.0000 0.0014 0.0036 -0.0011  
Y -0.0009 -0.0023 -0.0008 -0.0182 -0.0261 0.0158  
Z -0.0165 -0.0092 0.0012 0.0044 0.0062 -0.0057

AT. 46 H X -0.0068 -0.0033 -0.0000 -0.0014 0.0036 0.0011  
Y 0.0009 0.0023 -0.0008 0.0182 -0.0261 -0.0158  
Z 0.0165 0.0092 0.0012 -0.0044 0.0062 0.0057

AT. 47 H X 0.0117 0.0065 0.0001 0.0024 0.0054 -0.0020  
Y -0.0111 -0.0088 0.0010 -0.0106 -0.0123 0.0069  
Z -0.0170 -0.0091 0.0011 0.0038 0.0050 -0.0049

AT. 48 H X -0.0117 -0.0065 0.0001 -0.0024 0.0054 0.0020  
Y 0.0111 0.0088 0.0010 0.0106 -0.0123 -0.0069  
Z 0.0170 0.0091 0.0011 -0.0038 0.0050 0.0049

AT. 49 C X -0.0112 -0.0064 0.0001 -0.0043 -0.0064 0.0033  
Y 0.0057 0.0018 -0.0004 -0.0099 -0.0126 0.0085  
Z 0.0148 0.0092 -0.0006 0.0045 0.0057 -0.0027

AT. 50 C X 0.0112 0.0064 0.0001 0.0043 -0.0064 -0.0033  
Y -0.0057 -0.0018 -0.0004 0.0099 -0.0126 -0.0085  
Z -0.0148 -0.0092 -0.0006 -0.0045 0.0057 0.0027

AT. 51 C X -0.0103 -0.0039 0.0003 0.0074 0.0082 -0.0065  
Y 0.0051 0.0033 -0.0004 -0.0001 -0.0001 0.0006  
Z 0.0047 0.0012 -0.0001 -0.0074 -0.0089 0.0064

AT. 52 C X 0.0103 0.0039 0.0003 -0.0074 0.0082 0.0065  
Y -0.0051 -0.0033 -0.0004 0.0001 -0.0001 -0.0006  
Z -0.0047 -0.0012 -0.0001 0.0074 -0.0089 -0.0064

AT. 53 H X -0.0039 0.0045 -0.0001 0.0354 0.0441 -0.0290  
Y 0.0104 0.0102 -0.0009 0.0199 0.0252 -0.0150  
Z -0.0004 -0.0052 -0.0002 -0.0329 -0.0419 0.0274

AT. 54 H X 0.0039 -0.0045 -0.0001 -0.0354 0.0441 0.0290  
Y -0.0104 -0.0102 -0.0009 -0.0199 0.0252 0.0150  
Z 0.0004 0.0052 -0.0002 0.0329 -0.0419 -0.0274

AT. 55 H X -0.0191 -0.0152 0.0009 -0.0290 -0.0380 0.0225  
Y 0.0039 0.0041 -0.0004 0.0055 0.0064 -0.0038  
Z -0.0034 -0.0061 0.0002 -0.0259 -0.0330 0.0211

AT. 56 H X 0.0191 0.0152 0.0009 0.0290 -0.0380 -0.0225  
Y -0.0039 -0.0041 -0.0004 -0.0055 0.0064 0.0038

Z 0.0034 0.0061 0.0002 0.0259 -0.0330 -0.0211  
AT. 57 C X 0.0118 0.0019 -0.0010 -0.0240 -0.0298 0.0202  
Y -0.0060 -0.0004 0.0003 0.0148 0.0183 -0.0122  
Z 0.0044 0.0000 -0.0003 -0.0125 -0.0158 0.0103  
AT. 58 C X -0.0118 -0.0019 -0.0010 0.0240 -0.0298 -0.0202  
Y 0.0060 0.0004 0.0003 -0.0148 0.0183 0.0122  
Z -0.0044 -0.0000 -0.0003 0.0125 -0.0158 -0.0103  
AT. 59 H X 0.0242 0.0085 -0.0009 -0.0235 -0.0269 0.0197  
Y -0.0090 -0.0016 0.0006 0.0154 0.0187 -0.0129  
Z 0.0090 0.0028 0.0001 -0.0118 -0.0135 0.0091  
AT. 60 H X -0.0242 -0.0085 -0.0009 0.0235 -0.0269 -0.0197  
Y 0.0090 0.0016 0.0006 -0.0154 0.0187 0.0129  
Z -0.0090 -0.0028 0.0001 0.0118 -0.0135 -0.0091  
AT. 61 H X 0.0160 0.0040 -0.0013 -0.0246 -0.0310 0.0209  
Y -0.0010 0.0021 0.0003 0.0146 0.0185 -0.0119  
Z 0.0053 0.0004 -0.0005 -0.0132 -0.0172 0.0110  
AT. 62 H X -0.0160 -0.0040 -0.0013 0.0246 -0.0310 -0.0209  
Y 0.0010 -0.0021 0.0003 -0.0146 0.0185 0.0119  
Z -0.0053 -0.0004 -0.0005 0.0132 -0.0172 -0.0110  
AT. 63 H X 0.0064 -0.0007 -0.0005 -0.0241 -0.0297 0.0197  
Y 0.0048 0.0056 0.0003 0.0164 0.0217 -0.0134  
Z 0.0003 -0.0027 -0.0007 -0.0139 -0.0189 0.0118  
AT. 64 H X -0.0064 0.0007 -0.0005 0.0241 -0.0297 -0.0197  
Y -0.0048 -0.0056 0.0003 -0.0164 0.0217 0.0134  
Z -0.0003 0.0027 -0.0007 0.0139 -0.0189 -0.0118  
AT. 65 C X -0.0237 -0.0133 0.0008 -0.0007 -0.0017 -0.0008  
Y 0.0108 0.0061 -0.0004 0.0007 0.0011 -0.0000  
Z 0.0270 0.0155 -0.0011 0.0030 0.0044 -0.0010  
AT. 66 C X 0.0237 0.0133 0.0008 0.0007 -0.0017 0.0008  
Y -0.0108 -0.0061 -0.0004 -0.0007 0.0011 0.0000  
Z -0.0270 -0.0155 -0.0011 -0.0030 0.0044 0.0010  
AT. 67 H X -0.0285 -0.0153 0.0013 0.0065 0.0075 -0.0073

Y 0.0090 0.0057 -0.0004 0.0008 0.0023 -0.0001  
Z 0.0326 0.0176 -0.0014 -0.0031 -0.0042 0.0045  
AT. 68 H X 0.0285 0.0153 0.0013 -0.0065 0.0075 0.0073  
Y -0.0090 -0.0057 -0.0004 -0.0008 0.0023 0.0001  
Z -0.0326 -0.0176 -0.0014 0.0031 -0.0042 -0.0045  
AT. 69 H X -0.0259 -0.0140 0.0009 0.0028 0.0011 -0.0040  
Y 0.0098 0.0058 -0.0002 0.0045 0.0042 -0.0036  
Z 0.0295 0.0165 -0.0010 0.0020 0.0035 -0.0001  
AT. 70 H X 0.0259 0.0140 0.0009 -0.0028 0.0011 0.0040  
Y -0.0098 -0.0058 -0.0002 -0.0045 0.0042 0.0036  
Z -0.0295 -0.0165 -0.0010 -0.0020 0.0035 0.0001  
AT. 71 H X -0.0215 -0.0125 0.0008 -0.0044 -0.0045 0.0027  
Y 0.0051 0.0041 -0.0000 0.0073 0.0090 -0.0060  
Z 0.0211 0.0134 -0.0006 0.0093 0.0132 -0.0067  
AT. 72 H X 0.0215 0.0125 0.0008 0.0044 -0.0045 -0.0027  
Y -0.0051 -0.0041 -0.0000 -0.0073 0.0090 0.0060  
Z -0.0211 -0.0134 -0.0006 -0.0093 0.0132 0.0067  
AT. 73 C X 0.0006 0.0003 -0.0002 0.0004 0.0007 -0.0005  
Y 0.0030 0.0019 0.0000 0.0039 0.0062 -0.0034  
Z 0.0041 0.0023 -0.0004 -0.0014 -0.0017 0.0018  
AT. 74 C X -0.0006 -0.0003 -0.0002 -0.0004 0.0007 0.0005  
Y -0.0030 -0.0019 0.0000 -0.0039 0.0062 0.0034  
Z -0.0041 -0.0023 -0.0004 0.0014 -0.0017 -0.0018  
AT. 75 H X 0.0126 0.0099 -0.0001 0.0221 0.0303 -0.0184  
Y 0.0088 0.0054 0.0001 0.0104 0.0159 -0.0089  
Z 0.0209 0.0140 -0.0002 0.0232 0.0330 -0.0189  
AT. 76 H X -0.0126 -0.0099 -0.0001 -0.0221 0.0303 0.0184  
Y -0.0088 -0.0054 0.0001 -0.0104 0.0159 0.0089  
Z -0.0209 -0.0140 -0.0002 -0.0232 0.0330 0.0189  
AT. 77 H X 0.0112 0.0084 -0.0003 0.0139 0.0187 -0.0113  
Y 0.0106 0.0073 0.0003 0.0198 0.0289 -0.0169  
Z -0.0123 -0.0100 -0.0005 -0.0279 -0.0385 0.0237

AT. 78 H X -0.0112 -0.0084 -0.0003 -0.0139 0.0187 0.0113  
Y -0.0106 -0.0073 0.0003 -0.0198 0.0289 0.0169  
Z 0.0123 0.0100 -0.0005 0.0279 -0.0385 -0.0237

AT. 79 I X -0.0005 -0.0002 0.0004 0.0000 0.0001 -0.0005  
Y -0.0006 0.0007 -0.0003 0.0003 -0.0000 0.0001  
Z -0.0001 0.0000 0.0004 -0.0002 -0.0000 -0.0004

AT. 80 I X 0.0005 0.0002 0.0004 -0.0000 0.0001 0.0005  
Y 0.0006 -0.0007 -0.0003 -0.0003 -0.0000 -0.0001  
Z 0.0001 -0.0000 0.0004 0.0002 -0.0000 0.0004

AT. 81 I X -0.0003 0.0002 -0.0003 0.0001 -0.0000 0.0001  
Y 0.0001 0.0000 0.0002 -0.0001 0.0000 -0.0001  
Z 0.0002 -0.0003 -0.0001 0.0001 0.0000 0.0000

AT. 82 I X 0.0003 -0.0002 -0.0003 -0.0001 -0.0000 -0.0001  
Y -0.0001 -0.0000 0.0002 0.0001 0.0000 0.0001  
Z -0.0002 0.0003 -0.0001 -0.0001 0.0000 -0.0000

AT. 83 O X -0.0033 0.0074 -0.0156 0.0097 0.0000 0.0150  
Y 0.0001 0.0015 -0.0027 0.0011 0.0002 0.0030  
Z -0.0054 0.0095 0.0017 -0.0004 -0.0002 0.0006

AT. 84 O X 0.0033 -0.0074 -0.0156 -0.0097 0.0000 -0.0150  
Y -0.0001 -0.0015 -0.0027 -0.0011 0.0002 -0.0030  
Z 0.0054 -0.0095 0.0017 0.0004 -0.0002 -0.0006

AT. 85 O X 0.0100 -0.0182 -0.0090 0.0054 0.0003 0.0034  
Y 0.0059 -0.0099 -0.0009 0.0007 0.0004 -0.0010  
Z -0.0030 0.0049 -0.0029 0.0015 -0.0003 0.0030

AT. 86 O X -0.0100 0.0182 -0.0090 -0.0054 0.0003 -0.0034  
Y -0.0059 0.0099 -0.0009 -0.0007 0.0004 0.0010  
Z 0.0030 -0.0049 -0.0029 -0.0015 -0.0003 -0.0030

AT. 87 N X 0.0039 -0.0042 0.0235 -0.0154 0.0000 -0.0186  
Y -0.0011 0.0039 -0.0113 0.0073 0.0001 0.0113  
Z -0.0021 0.0029 -0.0159 0.0105 0.0002 0.0136

AT. 88 N X -0.0039 0.0042 0.0235 0.0154 0.0000 0.0186  
Y 0.0011 -0.0039 -0.0113 -0.0073 0.0001 -0.0113



Z 0.0021 -0.0029 -0.0159 -0.0105 0.0002 -0.0136  
AT. 89 N X -0.0093 0.0183 0.0149 -0.0096 -0.0003 -0.0080  
Y 0.0035 -0.0057 -0.0078 0.0045 0.0002 0.0053  
Z -0.0062 0.0115 0.0051 -0.0031 -0.0003 -0.0014  
AT. 90 N X 0.0093 -0.0183 0.0149 0.0096 -0.0003 0.0080  
Y -0.0035 0.0057 -0.0078 -0.0045 0.0002 -0.0053  
Z 0.0062 -0.0115 0.0051 0.0031 -0.0003 0.0014  
AT. 91 C X -0.0026 0.0072 0.0020 -0.0015 -0.0001 0.0010  
Y -0.0028 0.0025 -0.0112 0.0075 0.0001 0.0084  
Z -0.0041 0.0062 -0.0212 0.0137 0.0002 0.0179  
AT. 92 C X 0.0026 -0.0072 0.0020 0.0015 -0.0001 -0.0010  
Y 0.0028 -0.0025 -0.0112 -0.0075 0.0001 -0.0084  
Z 0.0041 -0.0062 -0.0212 -0.0137 0.0002 -0.0179  
AT. 93 C X -0.0046 0.0078 0.0045 -0.0021 -0.0001 -0.0029  
Y 0.0032 -0.0048 0.0068 -0.0046 0.0002 -0.0050  
Z 0.0030 -0.0021 -0.0052 0.0023 0.0003 0.0053  
AT. 94 C X 0.0046 -0.0078 0.0045 0.0021 -0.0001 0.0029  
Y -0.0032 0.0048 0.0068 0.0046 0.0002 0.0050  
Z -0.0030 0.0021 -0.0052 -0.0023 0.0003 -0.0053  
AT. 95 H X -0.0162 0.0106 -0.0119 0.0098 -0.0013 -0.0026  
Y 0.0021 0.0033 -0.0139 0.0087 0.0009 0.0195  
Z 0.0161 -0.0191 0.0490 -0.0334 0.0003 -0.0396  
AT. 96 H X 0.0162 -0.0106 -0.0119 -0.0098 -0.0013 0.0026  
Y -0.0021 -0.0033 -0.0139 -0.0087 0.0009 -0.0195  
Z -0.0161 0.0191 0.0490 0.0334 0.0003 0.0396  
AT. 97 H X 0.0035 -0.0042 0.0326 -0.0205 -0.0002 -0.0267  
Y 0.0119 -0.0198 0.0551 -0.0355 -0.0003 -0.0489  
Z 0.0030 -0.0024 -0.0014 0.0000 0.0002 0.0015  
AT. 98 H X -0.0035 0.0042 0.0326 0.0205 -0.0002 0.0267  
Y -0.0119 0.0198 0.0551 0.0355 -0.0003 0.0489  
Z -0.0030 0.0024 -0.0014 -0.0000 0.0002 -0.0015  
AT. 99 C X 0.0033 -0.0052 0.0027 -0.0018 0.0001 -0.0030

Y 0.0100 -0.0184 -0.0100 0.0062 0.0006 0.0044  
Z -0.0073 0.0123 0.0059 -0.0034 -0.0004 -0.0025  
AT.100 C X -0.0033 0.0052 0.0027 0.0018 0.0001 0.0030  
Y -0.0100 0.0184 -0.0100 -0.0062 0.0006 -0.0044  
Z 0.0073 -0.0123 0.0059 0.0034 -0.0004 0.0025  
AT.101 C X 0.0000 0.0010 0.0055 -0.0037 -0.0003 -0.0037  
Y -0.0041 0.0062 0.0032 -0.0013 -0.0002 -0.0012  
Z -0.0001 -0.0008 0.0030 -0.0017 0.0001 -0.0032  
AT.102 C X -0.0000 -0.0010 0.0055 0.0037 -0.0003 0.0037  
Y 0.0041 -0.0062 0.0032 0.0013 -0.0002 0.0012  
Z 0.0001 0.0008 0.0030 0.0017 0.0001 0.0032  
AT.103 H X 0.0030 -0.0048 0.0019 -0.0019 -0.0000 -0.0026  
Y -0.0062 0.0104 0.0057 -0.0028 -0.0003 -0.0021  
Z 0.0318 -0.0587 -0.0263 0.0162 0.0018 0.0085  
AT.104 H X -0.0030 0.0048 0.0019 0.0019 -0.0000 0.0026  
Y 0.0062 -0.0104 0.0057 0.0028 -0.0003 0.0021  
Z -0.0318 0.0587 -0.0263 -0.0162 0.0018 -0.0085  
AT.105 H X -0.0159 0.0291 0.0181 -0.0113 -0.0011 -0.0081  
Y -0.0275 0.0499 0.0253 -0.0150 -0.0012 -0.0101  
Z -0.0122 0.0216 0.0142 -0.0087 -0.0005 -0.0075  
AT.106 H X 0.0159 -0.0291 0.0181 0.0113 -0.0011 0.0081  
Y 0.0275 -0.0499 0.0253 0.0150 -0.0012 0.0101  
Z 0.0122 -0.0216 0.0142 0.0087 -0.0005 0.0075  
AT.107 C X 0.0007 0.0009 0.0142 -0.0096 -0.0002 -0.0109  
Y -0.0035 0.0083 0.0163 -0.0106 -0.0003 -0.0111  
Z -0.0048 0.0072 -0.0032 0.0022 -0.0003 0.0034  
AT.108 C X -0.0007 -0.0009 0.0142 0.0096 -0.0002 0.0109  
Y 0.0035 -0.0083 0.0163 0.0106 -0.0003 0.0111  
Z 0.0048 -0.0072 -0.0032 -0.0022 -0.0003 -0.0034  
AT.109 H X -0.0046 0.0087 0.0102 -0.0067 -0.0006 -0.0069  
Y -0.0088 0.0152 0.0155 -0.0101 -0.0007 -0.0107  
Z -0.0123 0.0170 -0.0035 0.0022 -0.0010 0.0031

AT.110 H X 0.0046 -0.0087 0.0102 0.0067 -0.0006 0.0069  
Y 0.0088 -0.0152 0.0155 0.0101 -0.0007 0.0107  
Z 0.0123 -0.0170 -0.0035 -0.0022 -0.0010 -0.0031

AT.111 H X 0.0035 -0.0030 0.0181 -0.0120 -0.0001 -0.0134  
Y 0.0046 -0.0027 0.0141 -0.0094 0.0003 -0.0090  
Z -0.0098 0.0142 -0.0062 0.0042 -0.0006 0.0052

AT.112 H X -0.0035 0.0030 0.0181 0.0120 -0.0001 0.0134  
Y -0.0046 0.0027 0.0141 0.0094 0.0003 0.0090  
Z 0.0098 -0.0142 -0.0062 -0.0042 -0.0006 -0.0052

AT.113 C X -0.0037 0.0050 -0.0157 0.0103 0.0000 0.0127  
Y -0.0065 0.0103 0.0055 -0.0035 -0.0004 -0.0035  
Z 0.0019 -0.0007 0.0154 -0.0099 -0.0001 -0.0115

AT.114 C X 0.0037 -0.0050 -0.0157 -0.0103 0.0000 -0.0127  
Y 0.0065 -0.0103 0.0055 0.0035 -0.0004 0.0035  
Z -0.0019 0.0007 0.0154 0.0099 -0.0001 0.0115

AT.115 C X -0.0096 0.0180 0.0006 -0.0003 -0.0002 0.0033  
Y -0.0022 0.0028 0.0017 -0.0012 -0.0001 -0.0017  
Z 0.0019 -0.0034 -0.0010 0.0010 0.0001 0.0007

AT.116 C X 0.0096 -0.0180 0.0006 0.0003 -0.0002 -0.0033  
Y 0.0022 -0.0028 0.0017 0.0012 -0.0001 0.0017  
Z -0.0019 0.0034 -0.0010 -0.0010 0.0001 -0.0007

AT.117 H X -0.0186 0.0367 0.0269 -0.0178 -0.0010 -0.0136  
Y 0.0007 -0.0043 -0.0165 0.0111 0.0004 0.0116  
Z 0.0110 -0.0217 -0.0244 0.0164 0.0009 0.0151

AT.118 H X 0.0186 -0.0367 0.0269 0.0178 -0.0010 0.0136  
Y -0.0007 0.0043 -0.0165 -0.0111 0.0004 -0.0116  
Z -0.0110 0.0217 -0.0244 -0.0164 0.0009 -0.0151

AT.119 H X -0.0000 -0.0017 -0.0242 0.0165 0.0008 0.0189  
Y -0.0031 0.0056 0.0172 -0.0112 -0.0003 -0.0136  
Z 0.0080 -0.0167 -0.0304 0.0203 0.0009 0.0214

AT.120 H X 0.0000 0.0017 -0.0242 -0.0165 0.0008 -0.0189  
Y 0.0031 -0.0056 0.0172 0.0112 -0.0003 0.0136

Z -0.0080 0.0167 -0.0304 -0.0203 0.0009 -0.0214  
AT. 121 C X -0.0058 0.0116 0.0125 -0.0084 -0.0005 -0.0071  
Y -0.0012 0.0039 0.0180 -0.0115 -0.0002 -0.0133  
Z -0.0043 0.0087 0.0009 -0.0002 0.0002 0.0011  
AT. 122 C X 0.0058 -0.0116 0.0125 0.0084 -0.0005 0.0071  
Y 0.0012 -0.0039 0.0180 0.0115 -0.0002 0.0133  
Z 0.0043 -0.0087 0.0009 0.0002 0.0002 -0.0011  
AT. 123 H X -0.0048 0.0100 0.0115 -0.0087 -0.0009 -0.0071  
Y 0.0020 -0.0029 0.0221 -0.0147 -0.0004 -0.0193  
Z -0.0074 0.0156 -0.0036 0.0029 0.0002 0.0072  
AT. 124 H X 0.0048 -0.0100 0.0115 0.0087 -0.0009 0.0071  
Y -0.0020 0.0029 0.0221 0.0147 -0.0004 0.0193  
Z 0.0074 -0.0156 -0.0036 -0.0029 0.0002 -0.0072  
AT. 125 H X -0.0090 0.0176 0.0131 -0.0088 -0.0004 -0.0067  
Y -0.0003 0.0040 0.0125 -0.0073 0.0000 -0.0074  
Z -0.0074 0.0157 -0.0016 0.0017 0.0004 0.0049  
AT. 126 H X 0.0090 -0.0176 0.0131 0.0088 -0.0004 0.0067  
Y 0.0003 -0.0040 0.0125 0.0073 0.0000 0.0074  
Z 0.0074 -0.0157 -0.0016 -0.0017 0.0004 -0.0049  
AT. 127 C X 0.0080 -0.0150 -0.0069 0.0044 0.0003 0.0025  
Y 0.0016 -0.0034 0.0138 -0.0088 -0.0002 -0.0119  
Z 0.0053 -0.0116 -0.0080 0.0048 0.0002 0.0031  
AT. 128 C X -0.0080 0.0150 -0.0069 -0.0044 0.0003 -0.0025  
Y -0.0016 0.0034 0.0138 0.0088 -0.0002 0.0119  
Z -0.0053 0.0116 -0.0080 -0.0048 0.0002 -0.0031  
AT. 129 C X 0.0085 -0.0123 0.0091 -0.0060 0.0005 -0.0078  
Y -0.0001 -0.0007 -0.0012 0.0006 -0.0000 0.0005  
Z 0.0016 -0.0032 0.0063 -0.0039 -0.0000 -0.0054  
AT. 130 C X -0.0085 0.0123 0.0091 0.0060 0.0005 0.0078  
Y 0.0001 0.0007 -0.0012 -0.0006 -0.0000 -0.0005  
Z -0.0016 0.0032 0.0063 0.0039 -0.0000 0.0054  
AT. 131 H X 0.0082 -0.0094 0.0401 -0.0260 -0.0000 -0.0316

Y 0.0010 -0.0040 -0.0348 0.0212 0.0006 0.0261  
Z 0.0016 -0.0007 0.0330 -0.0217 -0.0005 -0.0259  
AT. 132 H X -0.0082 0.0094 0.0401 0.0260 -0.0000 0.0316  
Y -0.0010 0.0040 -0.0348 -0.0212 0.0006 -0.0261  
Z -0.0016 0.0007 0.0330 0.0217 -0.0005 0.0259  
AT. 133 H X 0.0080 -0.0141 -0.0301 0.0186 0.0012 0.0216  
Y -0.0020 0.0027 0.0067 -0.0047 -0.0003 -0.0053  
Z -0.0012 0.0033 0.0378 -0.0241 -0.0007 -0.0287  
AT. 134 H X -0.0080 0.0141 -0.0301 -0.0186 0.0012 -0.0216  
Y 0.0020 -0.0027 0.0067 0.0047 -0.0003 0.0053  
Z 0.0012 -0.0033 0.0378 0.0241 -0.0007 0.0287  
AT. 135 C X -0.0103 0.0141 -0.0292 0.0191 -0.0001 0.0243  
Y -0.0020 0.0023 -0.0084 0.0056 0.0000 0.0068  
Z 0.0054 -0.0066 0.0204 -0.0134 -0.0000 -0.0165  
AT. 136 C X 0.0103 -0.0141 -0.0292 -0.0191 -0.0001 -0.0243  
Y 0.0020 -0.0023 -0.0084 -0.0056 0.0000 -0.0068  
Z -0.0054 0.0066 0.0204 0.0134 -0.0000 0.0165  
AT. 137 H X -0.0176 0.0260 -0.0250 0.0160 -0.0004 0.0224  
Y -0.0012 0.0007 -0.0093 0.0060 0.0000 0.0073  
Z 0.0096 -0.0137 0.0178 -0.0119 0.0000 -0.0152  
AT. 138 H X 0.0176 -0.0260 -0.0250 -0.0160 -0.0004 -0.0224  
Y 0.0012 -0.0007 -0.0093 -0.0060 0.0000 -0.0073  
Z -0.0096 0.0137 0.0178 0.0119 0.0000 0.0152  
AT. 139 H X -0.0110 0.0156 -0.0300 0.0198 -0.0003 0.0253  
Y 0.0018 -0.0036 -0.0095 0.0064 0.0002 0.0070  
Z 0.0053 -0.0068 0.0218 -0.0146 0.0002 -0.0182  
AT. 140 H X 0.0110 -0.0156 -0.0300 -0.0198 -0.0003 -0.0253  
Y -0.0018 0.0036 -0.0095 -0.0064 0.0002 -0.0070  
Z -0.0053 0.0068 0.0218 0.0146 0.0002 0.0182  
AT. 141 H X -0.0060 0.0071 -0.0316 0.0206 0.0005 0.0250  
Y 0.0033 -0.0063 -0.0117 0.0075 0.0002 0.0086  
Z 0.0018 -0.0006 0.0233 -0.0152 0.0001 -0.0185

AT. 142 H X 0.0060 -0.0071 -0.0316 -0.0206 0.0005 -0.0250  
Y -0.0033 0.0063 -0.0117 -0.0075 0.0002 -0.0086  
Z -0.0018 0.0006 0.0233 0.0152 0.0001 0.0185

AT. 143 C X 0.0152 -0.0299 -0.0107 0.0062 0.0006 0.0012  
Y 0.0006 -0.0018 -0.0012 0.0007 0.0002 0.0001  
Z 0.0112 -0.0226 -0.0100 0.0063 0.0002 0.0025

AT. 144 C X -0.0152 0.0299 -0.0107 -0.0062 0.0006 -0.0012  
Y -0.0006 0.0018 -0.0012 -0.0007 0.0002 -0.0001  
Z -0.0112 0.0226 -0.0100 -0.0063 0.0002 -0.0025

AT. 145 H X 0.0179 -0.0358 -0.0015 -0.0001 0.0003 -0.0077  
Y -0.0016 0.0020 -0.0046 0.0027 0.0006 0.0033  
Z 0.0144 -0.0285 -0.0042 0.0025 -0.0002 -0.0032

AT. 146 H X -0.0179 0.0358 -0.0015 0.0001 0.0003 0.0077  
Y 0.0016 -0.0020 -0.0046 -0.0027 0.0006 -0.0033  
Z -0.0144 0.0285 -0.0042 -0.0025 -0.0002 0.0032

AT. 147 H X 0.0167 -0.0326 -0.0096 0.0057 0.0008 -0.0002  
Y -0.0006 0.0007 -0.0053 0.0036 -0.0006 0.0043  
Z 0.0125 -0.0249 -0.0106 0.0071 0.0001 0.0028

AT. 148 H X -0.0167 0.0326 -0.0096 -0.0057 0.0008 0.0002  
Y 0.0006 -0.0007 -0.0053 -0.0036 -0.0006 -0.0043  
Z -0.0125 0.0249 -0.0106 -0.0071 0.0001 -0.0028

AT. 149 H X 0.0116 -0.0231 -0.0169 0.0101 0.0001 0.0074  
Y -0.0029 0.0046 -0.0071 0.0043 0.0005 0.0058  
Z 0.0073 -0.0154 -0.0172 0.0106 0.0010 0.0093

AT. 150 H X -0.0116 0.0231 -0.0169 -0.0101 0.0001 -0.0074  
Y 0.0029 -0.0046 -0.0071 -0.0043 0.0005 -0.0058  
Z -0.0073 0.0154 -0.0172 -0.0106 0.0010 -0.0093

AT. 151 C X 0.0008 -0.0018 -0.0019 0.0014 -0.0001 0.0009  
Y 0.0014 -0.0025 -0.0053 0.0038 0.0003 0.0042  
Z 0.0027 -0.0043 0.0015 -0.0014 0.0001 -0.0022

AT. 152 C X -0.0008 0.0018 -0.0019 -0.0014 -0.0001 -0.0009  
Y -0.0014 0.0025 -0.0053 -0.0038 0.0003 -0.0042

Z -0.0027 0.0043 0.0015 0.0014 0.0001 0.0022  
AT. 153 H X -0.0009 0.0027 0.0189 -0.0119 -0.0004 -0.0141  
Y 0.0060 -0.0096 -0.0233 0.0157 0.0011 0.0184  
Z 0.0110 -0.0180 -0.0361 0.0234 0.0016 0.0269  
AT. 154 H X 0.0009 -0.0027 0.0189 0.0119 -0.0004 0.0141  
Y -0.0060 0.0096 -0.0233 -0.0157 0.0011 -0.0184  
Z -0.0110 0.0180 -0.0361 -0.0234 0.0016 -0.0269  
AT. 155 H X -0.0034 0.0079 0.0155 -0.0098 -0.0006 -0.0106  
Y 0.0068 -0.0104 -0.0333 0.0222 0.0014 0.0267  
Z -0.0044 0.0075 0.0374 -0.0251 -0.0013 -0.0303  
AT. 156 H X 0.0034 -0.0079 0.0155 0.0098 -0.0006 0.0106  
Y -0.0068 0.0104 -0.0333 -0.0222 0.0014 -0.0267  
Z 0.0044 -0.0075 0.0374 0.0251 -0.0013 0.0303  
AT. 157 O X -0.0003 0.0000 0.0000 0.0003 0.0005 -0.0002  
Y 0.0014 0.0004 0.0002 -0.0022 -0.0029 0.0016  
Z -0.0007 0.0004 0.0001 0.0004 0.0002 0.0001  
AT. 158 O X 0.0003 -0.0000 0.0000 -0.0003 0.0005 0.0002  
Y -0.0014 -0.0004 0.0002 0.0022 -0.0029 -0.0016  
Z 0.0007 -0.0004 0.0001 -0.0004 0.0002 -0.0001  
AT. 159 O X -0.0006 -0.0003 -0.0000 0.0000 0.0002 -0.0004  
Y 0.0005 0.0003 0.0002 -0.0000 0.0003 0.0000  
Z -0.0013 -0.0002 -0.0004 0.0004 -0.0000 -0.0000  
AT. 160 O X 0.0006 0.0003 -0.0000 -0.0000 0.0002 0.0004  
Y -0.0005 -0.0003 0.0002 0.0000 0.0003 -0.0000  
Z 0.0013 0.0002 -0.0004 -0.0004 -0.0000 0.0000  
AT. 161 H X 0.0040 -0.0028 -0.0005 -0.0065 -0.0093 0.0022  
Y -0.0001 0.0023 0.0004 0.0004 0.0004 0.0013  
Z 0.0048 -0.0068 -0.0014 -0.0097 -0.0138 0.0020  
AT. 162 H X -0.0040 0.0028 -0.0005 0.0065 -0.0093 -0.0022  
Y 0.0001 -0.0023 0.0004 -0.0004 0.0004 -0.0013  
Z -0.0048 0.0068 -0.0014 0.0097 -0.0138 -0.0020  
AT. 163 H X -0.0008 -0.0005 -0.0005 0.0005 -0.0011 -0.0006

|              |     |         |         |         |         |         |         |
|--------------|-----|---------|---------|---------|---------|---------|---------|
|              | Y   | -0.0041 | -0.0024 | -0.0016 | -0.0022 | -0.0116 | -0.0014 |
|              | Z   | -0.0022 | -0.0010 | -0.0005 | -0.0003 | -0.0020 | -0.0002 |
| AT. 164      | H X | 0.0008  | 0.0005  | -0.0005 | -0.0005 | -0.0011 | 0.0006  |
|              | Y   | 0.0041  | 0.0024  | -0.0016 | 0.0022  | -0.0116 | 0.0014  |
|              | Z   | 0.0022  | 0.0010  | -0.0005 | 0.0003  | -0.0020 | 0.0002  |
| AT. 165      | O X | 0.0007  | -0.0009 | 0.0011  | -0.0009 | -0.0001 | -0.0013 |
|              | Y   | 0.0003  | -0.0006 | 0.0010  | -0.0007 | -0.0001 | -0.0010 |
|              | Z   | -0.0001 | 0.0002  | 0.0001  | -0.0002 | -0.0000 | -0.0001 |
| AT. 166      | O X | -0.0007 | 0.0009  | 0.0011  | 0.0009  | -0.0001 | 0.0013  |
|              | Y   | -0.0003 | 0.0006  | 0.0010  | 0.0007  | -0.0001 | 0.0010  |
|              | Z   | 0.0001  | -0.0002 | 0.0001  | 0.0002  | -0.0000 | 0.0001  |
| AT. 167      | H X | -0.0004 | 0.0025  | 0.0002  | -0.0027 | -0.0004 | -0.0023 |
|              | Y   | 0.0027  | -0.0094 | 0.0038  | 0.0030  | 0.0006  | 0.0009  |
|              | Z   | -0.0011 | 0.0038  | -0.0020 | -0.0002 | 0.0002  | 0.0003  |
| AT. 168      | H X | 0.0004  | -0.0025 | 0.0002  | 0.0027  | -0.0004 | 0.0023  |
|              | Y   | -0.0027 | 0.0094  | 0.0038  | -0.0030 | 0.0006  | -0.0009 |
|              | Z   | 0.0011  | -0.0038 | -0.0020 | 0.0002  | 0.0002  | -0.0003 |
| AT. 169      | O X | 0.0003  | -0.0004 | 0.0006  | 0.0002  | -0.0001 | 0.0001  |
|              | Y   | 0.0006  | -0.0005 | -0.0002 | -0.0000 | -0.0004 | -0.0005 |
|              | Z   | -0.0002 | 0.0001  | 0.0004  | -0.0002 | 0.0002  | -0.0001 |
| AT. 170      | O X | -0.0003 | 0.0004  | 0.0006  | -0.0002 | -0.0001 | -0.0001 |
|              | Y   | -0.0006 | 0.0005  | -0.0002 | 0.0000  | -0.0004 | 0.0005  |
|              | Z   | 0.0002  | -0.0001 | 0.0004  | 0.0002  | 0.0002  | 0.0001  |
| AT. 171      | H X | -0.0055 | 0.0120  | -0.0073 | -0.0065 | 0.0020  | -0.0025 |
|              | Y   | -0.0017 | 0.0051  | -0.0042 | -0.0031 | 0.0007  | -0.0018 |
|              | Z   | 0.0009  | -0.0001 | -0.0000 | -0.0003 | -0.0002 | -0.0004 |
| AT. 172      | H X | 0.0055  | -0.0120 | -0.0073 | 0.0065  | 0.0020  | 0.0025  |
|              | Y   | 0.0017  | -0.0051 | -0.0042 | 0.0031  | 0.0007  | 0.0018  |
|              | Z   | -0.0009 | 0.0001  | -0.0000 | 0.0003  | -0.0002 | 0.0004  |
| FREQ(CM**-1) |     | 656.19  | 657.48  | 658.34  | 658.53  | 659.12  | 660.39  |



AT. 1 I X 0.0011 0.0005 -0.0005 -0.0006 -0.0017 -0.0020  
Y 0.0006 0.0003 -0.0003 -0.0003 -0.0008 -0.0011  
Z 0.0004 0.0001 -0.0001 -0.0002 -0.0005 -0.0005

AT. 2 I X 0.0011 -0.0005 0.0005 -0.0006 -0.0017 0.0020  
Y 0.0006 -0.0003 0.0003 -0.0003 -0.0008 0.0011  
Z 0.0004 -0.0001 0.0001 -0.0002 -0.0005 0.0005

AT. 3 I X -0.0007 -0.0016 -0.0014 -0.0019 0.0005 0.0001  
Y -0.0004 -0.0008 -0.0007 -0.0009 0.0003 0.0001  
Z -0.0002 -0.0004 -0.0003 -0.0005 0.0002 -0.0000

AT. 4 I X -0.0007 0.0016 0.0014 -0.0019 0.0005 -0.0001  
Y -0.0004 0.0008 0.0007 -0.0009 0.0003 -0.0001  
Z -0.0002 0.0004 0.0003 -0.0005 0.0002 0.0000

AT. 5 O X 0.0043 0.0008 0.0001 -0.0022 -0.0048 -0.0073  
Y -0.0059 -0.0010 0.0009 0.0030 0.0073 0.0101  
Z 0.0167 0.0040 -0.0049 -0.0098 -0.0203 -0.0278

AT. 6 O X 0.0043 -0.0008 -0.0001 -0.0022 -0.0048 0.0073  
Y -0.0059 0.0010 -0.0009 0.0030 0.0073 -0.0101  
Z 0.0167 -0.0040 0.0049 -0.0098 -0.0203 0.0278

AT. 7 O X -0.0039 -0.0076 -0.0068 -0.0091 0.0028 0.0006  
Y -0.0035 -0.0077 -0.0060 -0.0090 0.0011 -0.0002  
Z 0.0109 0.0242 0.0202 0.0291 -0.0061 -0.0007

AT. 8 O X -0.0039 0.0076 0.0068 -0.0091 0.0028 -0.0006  
Y -0.0035 0.0077 0.0060 -0.0090 0.0011 0.0002  
Z 0.0109 -0.0242 -0.0202 0.0291 -0.0061 0.0007

AT. 9 N X 0.0028 0.0001 -0.0025 -0.0031 -0.0031 -0.0041  
Y -0.0087 -0.0002 0.0034 0.0075 0.0110 0.0154  
Z -0.0099 -0.0018 0.0016 0.0056 0.0115 0.0165

AT. 10 N X 0.0028 -0.0001 0.0025 -0.0031 -0.0031 0.0041  
Y -0.0087 0.0002 -0.0034 0.0075 0.0110 -0.0154  
Z -0.0099 0.0018 -0.0016 0.0056 0.0115 -0.0165

AT. 11 N X -0.0012 -0.0055 -0.0048 -0.0072 -0.0001 -0.0008  
Y 0.0045 0.0117 0.0106 0.0153 -0.0019 0.0022

Z -0.0034 -0.0055 -0.0043 -0.0058 0.0027 0.0018  
AT. 12 N X -0.0012 0.0055 0.0048 -0.0072 -0.0001 0.0008  
Y 0.0045 -0.0117 -0.0106 0.0153 -0.0019 -0.0022  
Z -0.0034 0.0055 0.0043 -0.0058 0.0027 -0.0018  
AT. 13 C X -0.0101 -0.0023 0.0014 0.0048 0.0106 0.0155  
Y 0.0053 0.0014 -0.0020 -0.0036 -0.0072 -0.0089  
Z -0.0066 -0.0024 0.0012 0.0026 0.0080 0.0106  
AT. 14 C X -0.0101 0.0023 -0.0014 0.0048 0.0106 -0.0155  
Y 0.0053 -0.0014 0.0020 -0.0036 -0.0072 0.0089  
Z -0.0066 0.0024 -0.0012 0.0026 0.0080 -0.0106  
AT. 15 C X -0.0234 -0.0086 0.0079 0.0134 0.0319 0.0407  
Y 0.0079 0.0005 -0.0014 -0.0045 -0.0084 -0.0127  
Z -0.0083 -0.0034 0.0026 0.0046 0.0114 0.0142  
AT. 16 C X -0.0234 0.0086 -0.0079 0.0134 0.0319 -0.0407  
Y 0.0079 -0.0005 0.0014 -0.0045 -0.0084 0.0127  
Z -0.0083 0.0034 -0.0026 0.0046 0.0114 -0.0142  
AT. 17 H X -0.0284 -0.0077 0.0096 0.0187 0.0370 0.0493  
Y 0.0013 -0.0001 -0.0036 -0.0030 -0.0026 -0.0032  
Z -0.0012 -0.0021 0.0058 0.0042 0.0050 0.0043  
AT. 18 H X -0.0284 0.0077 -0.0096 0.0187 0.0370 -0.0493  
Y 0.0013 0.0001 0.0036 -0.0030 -0.0026 0.0032  
Z -0.0012 0.0021 -0.0058 0.0042 0.0050 -0.0043  
AT. 19 H X -0.0271 -0.0091 0.0084 0.0149 0.0350 0.0455  
Y 0.0229 0.0038 0.0002 -0.0101 -0.0256 -0.0361  
Z -0.0041 -0.0022 0.0031 0.0033 0.0068 0.0079  
AT. 20 H X -0.0271 0.0091 -0.0084 0.0149 0.0350 -0.0455  
Y 0.0229 -0.0038 -0.0002 -0.0101 -0.0256 0.0361  
Z -0.0041 0.0022 -0.0031 0.0033 0.0068 -0.0079  
AT. 21 C X 0.0062 0.0136 0.0103 0.0153 -0.0028 -0.0015  
Y 0.0018 0.0027 0.0014 0.0020 -0.0005 -0.0018  
Z -0.0059 -0.0104 -0.0096 -0.0127 0.0040 0.0005  
AT. 22 C X 0.0062 -0.0136 -0.0103 0.0153 -0.0028 0.0015

Y 0.0018 -0.0027 -0.0014 0.0020 -0.0005 0.0018  
Z -0.0059 0.0104 0.0096 -0.0127 0.0040 -0.0005  
AT. 23 C X 0.0161 0.0340 0.0297 0.0414 -0.0103 -0.0022  
Y -0.0005 -0.0000 -0.0005 -0.0003 0.0001 -0.0011  
Z -0.0075 -0.0146 -0.0126 -0.0176 0.0033 0.0008  
AT. 24 C X 0.0161 -0.0340 -0.0297 0.0414 -0.0103 0.0022  
Y -0.0005 0.0000 0.0005 -0.0003 0.0001 0.0011  
Z -0.0075 0.0146 0.0126 -0.0176 0.0033 -0.0008  
AT. 25 H X 0.0180 0.0405 0.0360 0.0504 -0.0117 -0.0012  
Y -0.0019 -0.0019 -0.0020 -0.0023 0.0007 -0.0001  
Z 0.0041 0.0083 0.0038 0.0065 -0.0033 -0.0063  
AT. 26 H X 0.0180 -0.0405 -0.0360 0.0504 -0.0117 0.0012  
Y -0.0019 0.0019 0.0020 -0.0023 0.0007 0.0001  
Z 0.0041 -0.0083 -0.0038 0.0065 -0.0033 0.0063  
AT. 27 H X 0.0177 0.0339 0.0302 0.0410 -0.0120 -0.0016  
Y -0.0141 -0.0281 -0.0221 -0.0310 0.0082 0.0057  
Z -0.0145 -0.0290 -0.0240 -0.0336 0.0077 0.0043  
AT. 28 H X 0.0177 -0.0339 -0.0302 0.0410 -0.0120 0.0016  
Y -0.0141 0.0281 0.0221 -0.0310 0.0082 -0.0057  
Z -0.0145 0.0290 0.0240 -0.0336 0.0077 -0.0043  
AT. 29 C X 0.0050 0.0024 -0.0020 -0.0028 -0.0064 -0.0082  
Y -0.0081 -0.0020 0.0034 0.0055 0.0098 0.0127  
Z -0.0005 0.0008 -0.0001 0.0008 0.0002 0.0011  
AT. 30 C X 0.0050 -0.0024 0.0020 -0.0028 -0.0064 0.0082  
Y -0.0081 0.0020 -0.0034 0.0055 0.0098 -0.0127  
Z -0.0005 -0.0008 0.0001 0.0008 0.0002 -0.0011  
AT. 31 H X -0.0036 -0.0003 0.0004 0.0021 0.0039 0.0062  
Y 0.0025 -0.0019 -0.0020 -0.0050 -0.0045 -0.0078  
Z 0.0109 -0.0008 -0.0069 -0.0122 -0.0144 -0.0208  
AT. 32 H X -0.0036 0.0003 -0.0004 0.0021 0.0039 -0.0062  
Y 0.0025 0.0019 0.0020 -0.0050 -0.0045 0.0078  
Z 0.0109 0.0008 0.0069 -0.0122 -0.0144 0.0208

AT. 33 H X 0.0104 0.0026 -0.0035 -0.0064 -0.0122 -0.0160  
Y -0.0237 -0.0013 0.0102 0.0204 0.0291 0.0415  
Z 0.0097 0.0010 -0.0045 -0.0082 -0.0130 -0.0173

AT. 34 H X 0.0104 -0.0026 0.0035 -0.0064 -0.0122 0.0160  
Y -0.0237 0.0013 -0.0102 0.0204 0.0291 -0.0415  
Z 0.0097 -0.0010 0.0045 -0.0082 -0.0130 0.0173

AT. 35 C X 0.0022 0.0035 0.0029 0.0036 -0.0018 -0.0016  
Y 0.0019 -0.0005 -0.0020 -0.0033 -0.0030 -0.0048  
Z 0.0008 0.0010 0.0009 0.0008 -0.0010 -0.0012

AT. 36 C X 0.0022 -0.0035 -0.0029 0.0036 -0.0018 0.0016  
Y 0.0019 0.0005 0.0020 -0.0033 -0.0030 0.0048  
Z 0.0008 -0.0010 -0.0009 0.0008 -0.0010 0.0012

AT. 37 C X -0.0045 -0.0173 -0.0160 -0.0240 -0.0001 -0.0055  
Y 0.0062 0.0106 0.0087 0.0117 -0.0044 -0.0027  
Z -0.0030 -0.0057 -0.0039 -0.0058 0.0023 0.0013

AT. 38 C X -0.0045 0.0173 0.0160 -0.0240 -0.0001 0.0055  
Y 0.0062 -0.0106 -0.0087 0.0117 -0.0044 0.0027  
Z -0.0030 0.0057 0.0039 -0.0058 0.0023 -0.0013

AT. 39 H X -0.0070 -0.0227 -0.0198 -0.0291 0.0021 -0.0027  
Y 0.0040 0.0103 0.0096 0.0136 -0.0017 0.0019  
Z -0.0037 -0.0090 -0.0068 -0.0100 0.0025 0.0012

AT. 40 H X -0.0070 0.0227 0.0198 -0.0291 0.0021 0.0027  
Y 0.0040 -0.0103 -0.0096 0.0136 -0.0017 -0.0019  
Z -0.0037 0.0090 0.0068 -0.0100 0.0025 -0.0012

AT. 41 H X -0.0008 -0.0101 -0.0099 -0.0160 -0.0026 -0.0079  
Y 0.0061 0.0088 0.0070 0.0088 -0.0060 -0.0053  
Z -0.0064 -0.0112 -0.0086 -0.0112 0.0058 0.0056

AT. 42 H X -0.0008 0.0101 0.0099 -0.0160 -0.0026 0.0079  
Y 0.0061 -0.0088 -0.0070 0.0088 -0.0060 0.0053  
Z -0.0064 0.0112 0.0086 -0.0112 0.0058 -0.0056

AT. 43 C X -0.0027 -0.0059 -0.0045 -0.0069 0.0009 0.0001  
Y 0.0037 0.0089 0.0079 0.0111 -0.0019 -0.0000

Z 0.0024 0.0048 0.0038 0.0054 -0.0016 -0.0010  
AT. 44 C X -0.0027 0.0059 0.0045 -0.0069 0.0009 -0.0001  
Y 0.0037 -0.0089 -0.0079 0.0111 -0.0019 0.0000  
Z 0.0024 -0.0048 -0.0038 0.0054 -0.0016 0.0010  
AT. 45 H X 0.0004 0.0042 0.0037 0.0058 -0.0006 0.0010  
Y 0.0025 -0.0055 -0.0052 -0.0099 -0.0042 -0.0080  
Z 0.0014 0.0117 0.0106 0.0168 0.0017 0.0062  
AT. 46 H X 0.0004 -0.0042 -0.0037 0.0058 -0.0006 -0.0010  
Y 0.0025 0.0055 0.0052 -0.0099 -0.0042 0.0080  
Z 0.0014 -0.0117 -0.0106 0.0168 0.0017 -0.0062  
AT. 47 H X -0.0051 -0.0093 -0.0067 -0.0100 0.0028 0.0020  
Y 0.0031 0.0185 0.0177 0.0263 0.0003 0.0069  
Z 0.0061 0.0206 0.0182 0.0270 -0.0021 0.0037  
AT. 48 H X -0.0051 0.0093 0.0067 -0.0100 0.0028 -0.0020  
Y 0.0031 -0.0185 -0.0177 0.0263 0.0003 -0.0069  
Z 0.0061 -0.0206 -0.0182 0.0270 -0.0021 -0.0037  
AT. 49 C X -0.0027 -0.0017 -0.0007 -0.0005 0.0026 0.0028  
Y -0.0013 -0.0043 -0.0036 -0.0057 0.0001 -0.0014  
Z 0.0033 0.0009 -0.0001 -0.0011 -0.0034 -0.0045  
AT. 50 C X -0.0027 0.0017 0.0007 -0.0005 0.0026 -0.0028  
Y -0.0013 0.0043 0.0036 -0.0057 0.0001 0.0014  
Z 0.0033 -0.0009 0.0001 -0.0011 -0.0034 0.0045  
AT. 51 C X 0.0109 -0.0030 -0.0081 -0.0146 -0.0146 -0.0221  
Y -0.0055 -0.0031 -0.0007 0.0000 0.0066 0.0079  
Z -0.0133 -0.0031 0.0019 0.0063 0.0152 0.0207  
AT. 52 C X 0.0109 0.0030 0.0081 -0.0146 -0.0146 0.0221  
Y -0.0055 0.0031 0.0007 0.0000 0.0066 -0.0079  
Z -0.0133 0.0031 -0.0019 0.0063 0.0152 -0.0207  
AT. 53 H X 0.0181 0.0002 -0.0085 -0.0156 -0.0209 -0.0298  
Y -0.0007 0.0002 0.0013 0.0021 0.0034 0.0041  
Z -0.0195 -0.0052 0.0047 0.0098 0.0218 0.0288  
AT. 54 H X 0.0181 -0.0002 0.0085 -0.0156 -0.0209 0.0298

Y -0.0007 -0.0002 -0.0013 0.0021 0.0034 -0.0041  
Z -0.0195 0.0052 -0.0047 0.0098 0.0218 -0.0288  
AT. 55 H X -0.0024 -0.0074 -0.0070 -0.0109 -0.0017 -0.0054  
Y -0.0025 -0.0038 -0.0025 -0.0034 0.0024 0.0022  
Z -0.0184 -0.0068 0.0004 0.0045 0.0189 0.0251  
AT. 56 H X -0.0024 0.0074 0.0070 -0.0109 -0.0017 0.0054  
Y -0.0025 0.0038 0.0025 -0.0034 0.0024 -0.0022  
Z -0.0184 0.0068 -0.0004 0.0045 0.0189 -0.0251  
AT. 57 C X 0.0024 0.0064 0.0069 0.0090 -0.0007 0.0008  
Y -0.0026 -0.0067 -0.0065 -0.0088 0.0014 -0.0002  
Z 0.0015 0.0045 0.0049 0.0066 -0.0002 0.0007  
AT. 58 C X 0.0024 -0.0064 -0.0069 0.0090 -0.0007 -0.0008  
Y -0.0026 0.0067 0.0065 -0.0088 0.0014 0.0002  
Z 0.0015 -0.0045 -0.0049 0.0066 -0.0002 -0.0007  
AT. 59 H X -0.0043 -0.0049 -0.0000 -0.0016 0.0050 0.0049  
Y -0.0010 -0.0030 -0.0037 -0.0045 0.0002 -0.0004  
Z -0.0002 0.0025 0.0044 0.0058 0.0021 0.0035  
AT. 60 H X -0.0043 0.0049 0.0000 -0.0016 0.0050 -0.0049  
Y -0.0010 0.0030 0.0037 -0.0045 0.0002 0.0004  
Z -0.0002 -0.0025 -0.0044 0.0058 0.0021 -0.0035  
AT. 61 H X 0.0007 0.0079 0.0099 0.0134 0.0024 0.0052  
Y -0.0066 -0.0133 -0.0114 -0.0160 0.0042 0.0013  
Z 0.0017 0.0091 0.0099 0.0139 0.0006 0.0036  
AT. 62 H X 0.0007 -0.0079 -0.0099 0.0134 0.0024 -0.0052  
Y -0.0066 0.0133 0.0114 -0.0160 0.0042 -0.0013  
Z 0.0017 -0.0091 -0.0099 0.0139 0.0006 -0.0036  
AT. 63 H X 0.0064 0.0064 0.0052 0.0058 -0.0052 -0.0058  
Y -0.0091 -0.0123 -0.0088 -0.0112 0.0080 0.0077  
Z 0.0033 0.0094 0.0083 0.0118 -0.0017 0.0003  
AT. 64 H X 0.0064 -0.0064 -0.0052 0.0058 -0.0052 0.0058  
Y -0.0091 0.0123 0.0088 -0.0112 0.0080 -0.0077  
Z 0.0033 -0.0094 -0.0083 0.0118 -0.0017 -0.0003

AT. 65 C X -0.0054 -0.0007 0.0008 0.0029 0.0062 0.0082  
Y 0.0051 0.0011 -0.0006 -0.0024 -0.0057 -0.0076  
Z 0.0086 0.0007 -0.0017 -0.0054 -0.0098 -0.0134

AT. 66 C X -0.0054 0.0007 -0.0008 0.0029 0.0062 -0.0082  
Y 0.0051 -0.0011 0.0006 -0.0024 -0.0057 0.0076  
Z 0.0086 -0.0007 0.0017 -0.0054 -0.0098 0.0134

AT. 67 H X 0.0028 0.0035 0.0004 0.0011 -0.0029 -0.0035  
Y 0.0043 0.0018 0.0014 0.0008 -0.0040 -0.0050  
Z 0.0027 -0.0032 -0.0033 -0.0068 -0.0042 -0.0065

AT. 68 H X 0.0028 -0.0035 -0.0004 0.0011 -0.0029 0.0035  
Y 0.0043 -0.0018 -0.0014 0.0008 -0.0040 0.0050  
Z 0.0027 0.0032 0.0033 -0.0068 -0.0042 0.0065

AT. 69 H X -0.0039 0.0030 0.0038 0.0073 0.0060 0.0089  
Y 0.0093 0.0042 -0.0001 -0.0024 -0.0103 -0.0131  
Z 0.0120 -0.0023 -0.0068 -0.0142 -0.0164 -0.0231

AT. 70 H X -0.0039 -0.0030 -0.0038 0.0073 0.0060 -0.0089  
Y 0.0093 -0.0042 0.0001 -0.0024 -0.0103 0.0131  
Z 0.0120 0.0023 0.0068 -0.0142 -0.0164 0.0231

AT. 71 H X -0.0063 -0.0052 -0.0036 -0.0038 0.0050 0.0053  
Y 0.0099 0.0071 0.0039 0.0034 -0.0093 -0.0111  
Z 0.0146 0.0057 0.0010 -0.0025 -0.0156 -0.0204

AT. 72 H X -0.0063 0.0052 0.0036 -0.0038 0.0050 -0.0053  
Y 0.0099 -0.0071 -0.0039 0.0034 -0.0093 0.0111  
Z 0.0146 -0.0057 -0.0010 -0.0025 -0.0156 0.0204

AT. 73 C X 0.0004 0.0036 0.0041 0.0061 0.0012 0.0028  
Y 0.0001 -0.0030 -0.0034 -0.0050 -0.0010 -0.0025  
Z 0.0050 0.0030 0.0009 0.0001 -0.0056 -0.0070

AT. 74 C X 0.0004 -0.0036 -0.0041 0.0061 0.0012 -0.0028  
Y 0.0001 0.0030 0.0034 -0.0050 -0.0010 0.0025  
Z 0.0050 -0.0030 -0.0009 0.0001 -0.0056 0.0070

AT. 75 H X 0.0028 0.0078 0.0078 0.0112 0.0008 0.0037  
Y -0.0018 -0.0016 -0.0009 -0.0010 0.0019 0.0023

Z 0.0044 0.0082 0.0069 0.0092 -0.0019 0.0004  
AT. 76 H X 0.0028 -0.0078 -0.0078 0.0112 0.0008 -0.0037  
Y -0.0018 0.0016 0.0009 -0.0010 0.0019 -0.0023  
Z 0.0044 -0.0082 -0.0069 0.0092 -0.0019 -0.0004  
AT. 77 H X 0.0007 0.0033 0.0043 0.0060 0.0015 0.0035  
Y -0.0000 0.0028 0.0017 0.0038 0.0014 0.0029  
Z 0.0047 -0.0018 -0.0039 -0.0077 -0.0081 -0.0126  
AT. 78 H X 0.0007 -0.0033 -0.0043 0.0060 0.0015 -0.0035  
Y -0.0000 -0.0028 -0.0017 0.0038 0.0014 -0.0029  
Z 0.0047 0.0018 0.0039 -0.0077 -0.0081 0.0126  
AT. 79 I X -0.0012 0.0007 -0.0008 0.0002 -0.0011 0.0003  
Y 0.0014 -0.0010 0.0009 -0.0002 0.0011 -0.0002  
Z 0.0004 -0.0003 0.0003 -0.0001 0.0004 -0.0000  
AT. 80 I X -0.0012 -0.0007 0.0008 0.0002 -0.0011 -0.0003  
Y 0.0014 0.0010 -0.0009 -0.0002 0.0011 0.0002  
Z 0.0004 0.0003 -0.0003 -0.0001 0.0004 0.0000  
AT. 81 I X -0.0002 0.0008 -0.0010 0.0000 -0.0001 0.0004  
Y 0.0001 -0.0006 0.0009 -0.0000 0.0001 -0.0003  
Z 0.0001 -0.0003 0.0004 -0.0000 0.0000 -0.0002  
AT. 82 I X -0.0002 -0.0008 0.0010 0.0000 -0.0001 -0.0004  
Y 0.0001 0.0006 -0.0009 -0.0000 0.0001 0.0003  
Z 0.0001 0.0003 -0.0004 -0.0000 0.0000 0.0002  
AT. 83 O X -0.0051 0.0036 -0.0031 0.0010 -0.0041 0.0004  
Y -0.0031 0.0022 -0.0018 0.0006 -0.0021 0.0003  
Z 0.0201 -0.0117 0.0104 -0.0038 0.0186 -0.0021  
AT. 84 O X -0.0051 -0.0036 0.0031 0.0010 -0.0041 -0.0004  
Y -0.0031 -0.0022 0.0018 0.0006 -0.0021 -0.0003  
Z 0.0201 0.0117 -0.0104 -0.0038 0.0186 0.0021  
AT. 85 O X 0.0003 0.0040 -0.0060 -0.0002 0.0005 0.0025  
Y 0.0018 -0.0065 0.0082 -0.0003 0.0011 -0.0026  
Z -0.0022 0.0126 -0.0169 -0.0001 -0.0009 0.0059  
AT. 86 O X 0.0003 -0.0040 0.0060 -0.0002 0.0005 -0.0025



Y 0.0018 0.0065 -0.0082 -0.0003 0.0011 0.0026  
Z -0.0022 -0.0126 0.0169 -0.0001 -0.0009 -0.0059  
AT. 87 N X -0.0082 0.0054 -0.0051 0.0015 -0.0076 0.0011  
Y -0.0096 0.0060 -0.0056 0.0019 -0.0078 0.0013  
Z -0.0118 0.0057 -0.0051 0.0022 -0.0105 0.0009  
AT. 88 N X -0.0082 -0.0054 0.0051 0.0015 -0.0076 -0.0011  
Y -0.0096 -0.0060 0.0056 0.0019 -0.0078 -0.0013  
Z -0.0118 -0.0057 0.0051 0.0022 -0.0105 -0.0009  
AT. 89 N X -0.0028 0.0049 -0.0060 0.0004 -0.0020 0.0019  
Y -0.0018 0.0088 -0.0114 0.0002 -0.0011 0.0040  
Z -0.0018 -0.0022 0.0034 0.0005 -0.0017 -0.0015  
AT. 90 N X -0.0028 -0.0049 0.0060 0.0004 -0.0020 -0.0019  
Y -0.0018 -0.0088 0.0114 0.0002 -0.0011 -0.0040  
Z -0.0018 0.0022 -0.0034 0.0005 -0.0017 0.0015  
AT. 91 C X 0.0123 -0.0051 0.0045 -0.0023 0.0118 -0.0008  
Y -0.0006 -0.0015 0.0016 0.0002 -0.0013 -0.0006  
Z -0.0092 0.0060 -0.0051 0.0017 -0.0088 0.0008  
AT. 92 C X 0.0123 0.0051 -0.0045 -0.0023 0.0118 0.0008  
Y -0.0006 0.0015 -0.0016 0.0002 -0.0013 0.0006  
Z -0.0092 -0.0060 0.0051 0.0017 -0.0088 -0.0008  
AT. 93 C X 0.0283 -0.0197 0.0178 -0.0053 0.0260 -0.0035  
Y -0.0040 0.0041 -0.0038 0.0006 -0.0031 0.0009  
Z -0.0135 0.0092 -0.0079 0.0026 -0.0116 0.0016  
AT. 94 C X 0.0283 0.0197 -0.0178 -0.0053 0.0260 0.0035  
Y -0.0040 -0.0041 0.0038 0.0006 -0.0031 -0.0009  
Z -0.0135 -0.0092 0.0079 0.0026 -0.0116 -0.0016  
AT. 95 H X 0.0458 -0.0338 0.0305 -0.0085 0.0343 -0.0072  
Y -0.0220 0.0154 -0.0135 0.0040 -0.0154 0.0030  
Z -0.0004 0.0029 -0.0029 -0.0000 0.0010 0.0017  
AT. 96 H X 0.0458 0.0338 -0.0305 -0.0085 0.0343 0.0072  
Y -0.0220 -0.0154 0.0135 0.0040 -0.0154 -0.0030  
Z -0.0004 -0.0029 0.0029 -0.0000 0.0010 -0.0017

AT. 97 H X 0.0372 -0.0227 0.0201 -0.0070 0.0337 -0.0036  
Y 0.0241 -0.0119 0.0096 -0.0046 0.0203 -0.0010  
Z -0.0098 0.0068 -0.0059 0.0019 -0.0086 0.0013

AT. 98 H X 0.0372 0.0227 -0.0201 -0.0070 0.0337 0.0036  
Y 0.0241 0.0119 -0.0096 -0.0046 0.0203 0.0010  
Z -0.0098 -0.0068 0.0059 0.0019 -0.0086 -0.0013

AT. 99 C X 0.0009 -0.0079 0.0103 -0.0000 -0.0000 -0.0035  
Y 0.0002 0.0020 -0.0033 -0.0002 0.0007 0.0013  
Z 0.0005 -0.0064 0.0088 0.0001 -0.0002 -0.0033

AT. 100 C X 0.0009 0.0079 -0.0103 -0.0000 -0.0000 0.0035  
Y 0.0002 -0.0020 0.0033 -0.0002 0.0007 -0.0013  
Z 0.0005 0.0064 -0.0088 0.0001 -0.0002 0.0033

AT. 101 C X 0.0041 -0.0192 0.0267 -0.0002 0.0013 -0.0099  
Y -0.0017 0.0034 -0.0050 0.0002 -0.0010 0.0019  
Z 0.0012 -0.0061 0.0077 -0.0002 0.0004 -0.0026

AT. 102 C X 0.0041 0.0192 -0.0267 -0.0002 0.0013 0.0099  
Y -0.0017 -0.0034 0.0050 0.0002 -0.0010 -0.0019  
Z 0.0012 0.0061 -0.0077 -0.0002 0.0004 0.0026

AT. 103 H X 0.0039 -0.0228 0.0308 -0.0003 0.0019 -0.0111  
Y -0.0015 0.0046 -0.0062 0.0002 -0.0012 0.0021  
Z 0.0040 0.0020 -0.0049 -0.0009 0.0033 0.0031

AT. 104 H X 0.0039 0.0228 -0.0308 -0.0003 0.0019 0.0111  
Y -0.0015 -0.0046 0.0062 0.0002 -0.0012 -0.0021  
Z 0.0040 -0.0020 0.0049 -0.0009 0.0033 -0.0031

AT. 105 H X 0.0030 -0.0235 0.0336 0.0002 0.0002 -0.0128  
Y -0.0034 -0.0055 0.0084 0.0007 -0.0028 -0.0039  
Z 0.0005 -0.0101 0.0142 0.0001 -0.0003 -0.0055

AT. 106 H X 0.0030 0.0235 -0.0336 0.0002 0.0002 0.0128  
Y -0.0034 0.0055 -0.0084 0.0007 -0.0028 0.0039  
Z 0.0005 0.0101 -0.0142 0.0001 -0.0003 0.0055

AT. 107 C X -0.0063 0.0042 -0.0036 0.0013 -0.0058 0.0008  
Y -0.0055 0.0036 -0.0032 0.0010 -0.0051 0.0007

Z 0.0002 -0.0007 0.0006 -0.0000 0.0001 -0.0001  
AT. 108 C X -0.0063 -0.0042 0.0036 0.0013 -0.0058 -0.0008  
Y -0.0055 -0.0036 0.0032 0.0010 -0.0051 -0.0007  
Z 0.0002 0.0007 -0.0006 -0.0000 0.0001 0.0001  
AT. 109 H X 0.0110 -0.0069 0.0068 -0.0019 0.0106 -0.0009  
Y 0.0068 -0.0045 0.0050 -0.0014 0.0060 -0.0011  
Z 0.0155 -0.0111 0.0113 -0.0030 0.0138 -0.0027  
AT. 110 H X 0.0110 0.0069 -0.0068 -0.0019 0.0106 0.0009  
Y 0.0068 0.0045 -0.0050 -0.0014 0.0060 0.0011  
Z 0.0155 0.0111 -0.0113 -0.0030 0.0138 0.0027  
AT. 111 H X -0.0180 0.0106 -0.0098 0.0035 -0.0161 0.0022  
Y -0.0258 0.0171 -0.0164 0.0046 -0.0243 0.0028  
Z 0.0180 -0.0110 0.0105 -0.0034 0.0160 -0.0022  
AT. 112 H X -0.0180 -0.0106 0.0098 0.0035 -0.0161 -0.0022  
Y -0.0258 -0.0171 0.0164 0.0046 -0.0243 -0.0028  
Z 0.0180 0.0110 -0.0105 -0.0034 0.0160 0.0022  
AT. 113 C X -0.0000 -0.0017 0.0025 0.0000 -0.0002 -0.0009  
Y 0.0040 -0.0023 0.0022 -0.0008 0.0034 -0.0006  
Z 0.0009 0.0003 -0.0007 -0.0001 0.0007 0.0003  
AT. 114 C X -0.0000 0.0017 -0.0025 0.0000 -0.0002 0.0009  
Y 0.0040 0.0023 -0.0022 -0.0008 0.0034 0.0006  
Z 0.0009 -0.0003 0.0007 -0.0001 0.0007 -0.0003  
AT. 115 C X -0.0059 0.0127 -0.0162 0.0008 -0.0042 0.0054  
Y 0.0033 0.0009 -0.0019 -0.0008 0.0032 0.0010  
Z -0.0009 -0.0041 0.0057 0.0004 -0.0010 -0.0020  
AT. 116 C X -0.0059 -0.0127 0.0162 0.0008 -0.0042 -0.0054  
Y 0.0033 -0.0009 0.0019 -0.0008 0.0032 -0.0010  
Z -0.0009 0.0041 -0.0057 0.0004 -0.0010 0.0020  
AT. 117 H X -0.0062 0.0166 -0.0207 0.0009 -0.0044 0.0067  
Y -0.0009 0.0006 -0.0013 -0.0000 -0.0001 0.0007  
Z 0.0008 -0.0078 0.0099 0.0000 0.0002 -0.0031  
AT. 118 H X -0.0062 -0.0166 0.0207 0.0009 -0.0044 -0.0067

Y -0.0009 -0.0006 0.0013 -0.0000 -0.0001 -0.0007  
Z 0.0008 0.0078 -0.0099 0.0000 0.0002 0.0031  
AT. 119 H X -0.0062 0.0065 -0.0081 0.0011 -0.0047 0.0028  
Y 0.0063 -0.0011 0.0006 -0.0011 0.0055 0.0002  
Z -0.0040 -0.0054 0.0073 0.0008 -0.0035 -0.0026  
AT. 120 H X -0.0062 -0.0065 0.0081 0.0011 -0.0047 -0.0028  
Y 0.0063 0.0011 -0.0006 -0.0011 0.0055 -0.0002  
Z -0.0040 0.0054 -0.0073 0.0008 -0.0035 0.0026  
AT. 121 C X -0.0020 0.0061 -0.0076 0.0003 -0.0011 0.0025  
Y -0.0003 0.0044 -0.0057 0.0000 -0.0003 0.0019  
Z -0.0013 0.0017 -0.0020 0.0004 -0.0007 0.0007  
AT. 122 C X -0.0020 -0.0061 0.0076 0.0003 -0.0011 -0.0025  
Y -0.0003 -0.0044 0.0057 0.0000 -0.0003 -0.0019  
Z -0.0013 -0.0017 0.0020 0.0004 -0.0007 -0.0007  
AT. 123 H X 0.0018 0.0003 -0.0001 -0.0004 0.0014 -0.0002  
Y 0.0077 -0.0042 0.0050 -0.0013 0.0058 -0.0017  
Z -0.0086 0.0099 -0.0119 0.0015 -0.0063 0.0039  
AT. 124 H X 0.0018 -0.0003 0.0001 -0.0004 0.0014 0.0002  
Y 0.0077 0.0042 -0.0050 -0.0013 0.0058 0.0017  
Z -0.0086 -0.0099 0.0119 0.0015 -0.0063 -0.0039  
AT. 125 H X -0.0034 0.0111 -0.0139 0.0005 -0.0019 0.0047  
Y -0.0072 0.0100 -0.0135 0.0007 -0.0052 0.0044  
Z -0.0067 0.0113 -0.0144 0.0010 -0.0043 0.0050  
AT. 126 H X -0.0034 -0.0111 0.0139 0.0005 -0.0019 -0.0047  
Y -0.0072 -0.0100 0.0135 0.0007 -0.0052 -0.0044  
Z -0.0067 -0.0113 0.0144 0.0010 -0.0043 -0.0050  
AT. 127 C X 0.0034 -0.0020 0.0017 -0.0006 0.0031 -0.0003  
Y 0.0016 -0.0037 0.0046 -0.0003 0.0008 -0.0016  
Z 0.0030 -0.0011 0.0006 -0.0007 0.0028 0.0000  
AT. 128 C X 0.0034 0.0020 -0.0017 -0.0006 0.0031 0.0003  
Y 0.0016 0.0037 -0.0046 -0.0003 0.0008 0.0016  
Z 0.0030 0.0011 -0.0006 -0.0007 0.0028 -0.0000

AT. 129 C X -0.0221 0.0146 -0.0144 0.0041 -0.0198 0.0033  
Y 0.0003 -0.0023 0.0032 -0.0001 0.0000 -0.0012  
Z -0.0123 0.0049 -0.0039 0.0023 -0.0112 0.0005

AT. 130 C X -0.0221 -0.0146 0.0144 0.0041 -0.0198 -0.0033  
Y 0.0003 0.0023 -0.0032 -0.0001 0.0000 0.0012  
Z -0.0123 -0.0049 0.0039 0.0023 -0.0112 -0.0005

AT. 131 H X -0.0245 0.0151 -0.0140 0.0048 -0.0223 0.0033  
Y 0.0026 0.0010 -0.0015 -0.0010 0.0021 -0.0001  
Z -0.0135 0.0069 -0.0055 0.0026 -0.0126 0.0010

AT. 132 H X -0.0245 -0.0151 0.0140 0.0048 -0.0223 -0.0033  
Y 0.0026 -0.0010 0.0015 -0.0010 0.0021 0.0001  
Z -0.0135 -0.0069 0.0055 0.0026 -0.0126 -0.0010

AT. 133 H X -0.0121 0.0114 -0.0126 0.0019 -0.0106 0.0031  
Y 0.0020 -0.0039 0.0053 -0.0003 0.0013 -0.0018  
Z -0.0150 0.0042 -0.0017 0.0031 -0.0141 -0.0003

AT. 134 H X -0.0121 -0.0114 0.0126 0.0019 -0.0106 -0.0031  
Y 0.0020 0.0039 -0.0053 -0.0003 0.0013 0.0018  
Z -0.0150 -0.0042 0.0017 0.0031 -0.0141 0.0003

AT. 135 C X -0.0012 -0.0037 0.0055 0.0002 -0.0011 -0.0021  
Y -0.0005 -0.0023 0.0031 0.0002 -0.0006 -0.0012  
Z 0.0001 0.0032 -0.0045 -0.0000 0.0002 0.0017

AT. 136 C X -0.0012 0.0037 -0.0055 0.0002 -0.0011 0.0021  
Y -0.0005 0.0023 -0.0031 0.0002 -0.0006 0.0012  
Z 0.0001 -0.0032 0.0045 -0.0000 0.0002 -0.0017

AT. 137 H X 0.0003 0.0014 -0.0024 0.0000 0.0001 0.0003  
Y -0.0012 -0.0016 0.0024 0.0003 -0.0013 -0.0011  
Z -0.0020 0.0031 -0.0034 0.0002 -0.0017 0.0011

AT. 138 H X 0.0003 -0.0014 0.0024 0.0000 0.0001 -0.0003  
Y -0.0012 0.0016 -0.0024 0.0003 -0.0013 0.0011  
Z -0.0020 -0.0031 0.0034 0.0002 -0.0017 -0.0011

AT. 139 H X 0.0014 -0.0074 0.0098 -0.0002 0.0010 -0.0034  
Y -0.0021 -0.0041 0.0065 0.0004 -0.0021 -0.0023

Z -0.0024 0.0085 -0.0110 0.0003 -0.0017 0.0038  
AT. 140 H X 0.0014 0.0074 -0.0098 -0.0002 0.0010 0.0034  
Y -0.0021 0.0041 -0.0065 0.0004 -0.0021 0.0023  
Z -0.0024 -0.0085 0.0110 0.0003 -0.0017 -0.0038  
AT. 141 H X -0.0071 0.0003 0.0019 0.0012 -0.0060 -0.0011  
Y -0.0039 -0.0021 0.0041 0.0009 -0.0038 -0.0020  
Z 0.0011 0.0051 -0.0074 -0.0003 0.0016 0.0031  
AT. 142 H X -0.0071 -0.0003 -0.0019 0.0012 -0.0060 0.0011  
Y -0.0039 0.0021 -0.0041 0.0009 -0.0038 0.0020  
Z 0.0011 -0.0051 0.0074 -0.0003 0.0016 -0.0031  
AT. 143 C X 0.0117 -0.0057 0.0047 -0.0024 0.0105 -0.0008  
Y 0.0031 -0.0017 0.0013 -0.0007 0.0031 -0.0002  
Z 0.0105 -0.0059 0.0052 -0.0020 0.0089 -0.0009  
AT. 144 C X 0.0117 0.0057 -0.0047 -0.0024 0.0105 0.0008  
Y 0.0031 0.0017 -0.0013 -0.0007 0.0031 0.0002  
Z 0.0105 0.0059 -0.0052 -0.0020 0.0089 0.0009  
AT. 145 H X 0.0034 -0.0028 0.0028 -0.0006 0.0017 -0.0006  
Y 0.0035 -0.0005 -0.0004 -0.0008 0.0039 0.0004  
Z 0.0086 -0.0063 0.0064 -0.0015 0.0063 -0.0015  
AT. 146 H X 0.0034 0.0028 -0.0028 -0.0006 0.0017 0.0006  
Y 0.0035 0.0005 0.0004 -0.0008 0.0039 -0.0004  
Z 0.0086 0.0063 -0.0064 -0.0015 0.0063 0.0015  
AT. 147 H X 0.0157 -0.0097 0.0090 -0.0031 0.0141 -0.0021  
Y 0.0072 -0.0018 0.0012 -0.0012 0.0057 0.0003  
Z 0.0183 -0.0118 0.0115 -0.0033 0.0155 -0.0025  
AT. 148 H X 0.0157 0.0097 -0.0090 -0.0031 0.0141 0.0021  
Y 0.0072 0.0018 -0.0012 -0.0012 0.0057 -0.0003  
Z 0.0183 0.0118 -0.0115 -0.0033 0.0155 0.0025  
AT. 149 H X 0.0110 -0.0010 -0.0012 -0.0022 0.0096 0.0014  
Y 0.0053 -0.0005 -0.0011 -0.0013 0.0060 0.0007  
Z 0.0143 -0.0060 0.0039 -0.0031 0.0143 -0.0004  
AT. 150 H X 0.0110 0.0010 0.0012 -0.0022 0.0096 -0.0014

Y 0.0053 0.0005 0.0011 -0.0013 0.0060 -0.0007  
Z 0.0143 0.0060 -0.0039 -0.0031 0.0143 0.0004  
AT. 151 C X 0.0045 -0.0053 0.0061 -0.0007 0.0036 -0.0018  
Y 0.0004 -0.0020 0.0024 -0.0000 0.0004 -0.0008  
Z 0.0046 0.0005 -0.0017 -0.0010 0.0043 0.0007  
AT. 152 C X 0.0045 0.0053 -0.0061 -0.0007 0.0036 0.0018  
Y 0.0004 0.0020 -0.0024 -0.0000 0.0004 0.0008  
Z 0.0046 -0.0005 0.0017 -0.0010 0.0043 -0.0007  
AT. 153 H X 0.0042 -0.0066 0.0081 -0.0004 0.0029 -0.0025  
Y -0.0050 0.0021 -0.0022 0.0010 -0.0038 0.0007  
Z -0.0046 0.0079 -0.0102 0.0007 -0.0026 0.0035  
AT. 154 H X 0.0042 0.0066 -0.0081 -0.0004 0.0029 0.0025  
Y -0.0050 -0.0021 0.0022 0.0010 -0.0038 -0.0007  
Z -0.0046 -0.0079 0.0102 0.0007 -0.0026 -0.0035  
AT. 155 H X 0.0054 -0.0050 0.0058 -0.0006 0.0041 -0.0016  
Y -0.0068 0.0047 -0.0053 0.0014 -0.0053 0.0015  
Z 0.0133 -0.0064 0.0062 -0.0026 0.0110 -0.0017  
AT. 156 H X 0.0054 0.0050 -0.0058 -0.0006 0.0041 0.0016  
Y -0.0068 -0.0047 0.0053 0.0014 -0.0053 -0.0015  
Z 0.0133 0.0064 -0.0062 -0.0026 0.0110 0.0017  
AT. 157 O X -0.0000 -0.0005 -0.0000 0.0004 0.0003 0.0002  
Y 0.0005 -0.0001 -0.0003 -0.0002 -0.0009 -0.0010  
Z -0.0010 -0.0003 0.0008 -0.0001 0.0008 0.0006  
AT. 158 O X -0.0000 0.0005 0.0000 0.0004 0.0003 -0.0002  
Y 0.0005 0.0001 0.0003 -0.0002 -0.0009 0.0010  
Z -0.0010 0.0003 -0.0008 -0.0001 0.0008 -0.0006  
AT. 159 O X 0.0000 0.0006 0.0003 -0.0007 -0.0000 -0.0002  
Y -0.0006 -0.0001 0.0005 0.0000 0.0007 0.0003  
Z -0.0006 0.0015 0.0013 -0.0018 0.0007 -0.0002  
AT. 160 O X 0.0000 -0.0006 -0.0003 -0.0007 -0.0000 0.0002  
Y -0.0006 0.0001 -0.0005 0.0000 0.0007 -0.0003  
Z -0.0006 -0.0015 -0.0013 -0.0018 0.0007 0.0002

AT.161 H X 0.0086 0.0063 -0.0064 -0.0023 -0.0111 -0.0059  
Y -0.0040 -0.0036 0.0037 0.0012 0.0055 0.0031  
Z 0.0178 0.0127 -0.0129 -0.0051 -0.0224 -0.0135

AT.162 H X 0.0086 -0.0063 0.0064 -0.0023 -0.0111 0.0059  
Y -0.0040 0.0036 -0.0037 0.0012 0.0055 -0.0031  
Z 0.0178 -0.0127 0.0129 -0.0051 -0.0224 0.0135

AT.163 H X -0.0004 0.0036 0.0021 -0.0041 0.0003 -0.0002  
Y 0.0232 -0.0019 -0.0179 0.0076 -0.0196 -0.0037  
Z 0.0044 0.0000 -0.0036 0.0015 -0.0041 -0.0009

AT.164 H X -0.0004 -0.0036 -0.0021 -0.0041 0.0003 0.0002  
Y 0.0232 0.0019 0.0179 0.0076 -0.0196 0.0037  
Z 0.0044 -0.0000 0.0036 0.0015 -0.0041 0.0009

AT.165 O X -0.0008 0.0003 -0.0003 0.0003 -0.0006 0.0002  
Y 0.0006 -0.0009 0.0011 -0.0001 0.0010 -0.0000  
Z -0.0002 0.0004 -0.0005 -0.0000 -0.0001 0.0002

AT.166 O X -0.0008 -0.0003 0.0003 0.0003 -0.0006 -0.0002  
Y 0.0006 0.0009 -0.0011 -0.0001 0.0010 0.0000  
Z -0.0002 -0.0004 0.0005 -0.0000 -0.0001 -0.0002

AT.167 H X 0.0036 -0.0110 0.0121 0.0006 0.0079 -0.0012  
Y -0.0088 0.0254 -0.0278 -0.0011 -0.0184 0.0033  
Z 0.0007 -0.0054 0.0065 0.0006 0.0038 -0.0008

AT.168 H X 0.0036 0.0110 -0.0121 0.0006 0.0079 0.0012  
Y -0.0088 -0.0254 0.0278 -0.0011 -0.0184 -0.0033  
Z 0.0007 0.0054 -0.0065 0.0006 0.0038 0.0008

AT.169 O X 0.0003 0.0009 -0.0011 -0.0001 0.0000 0.0004  
Y -0.0002 -0.0008 0.0009 0.0001 -0.0002 -0.0003  
Z 0.0002 0.0002 -0.0002 -0.0001 0.0004 0.0002

AT.170 O X 0.0003 -0.0009 0.0011 -0.0001 0.0000 -0.0004  
Y -0.0002 0.0008 -0.0009 0.0001 -0.0002 0.0003  
Z 0.0002 -0.0002 0.0002 -0.0001 0.0004 -0.0002

AT.171 H X 0.0012 -0.0230 0.0292 0.0006 0.0094 -0.0094  
Y -0.0000 -0.0130 0.0166 0.0004 0.0043 -0.0054



Z -0.0005 -0.0018 0.0024 -0.0000 0.0007 -0.0006  
 AT. 172 H X 0.0012 0.0230 -0.0292 0.0006 0.0094 0.0094  
 Y -0.0000 0.0130 -0.0166 0.0004 0.0043 0.0054  
 Z -0.0005 0.0018 -0.0024 -0.0000 0.0007 0.0006  
  
 FREQ(CM\*\*-1) 663.94 667.03 709.44 713.18 718.37 720.13  
  
 AT. 1 I X -0.0001 0.0000 0.0003 -0.0000 0.0001 -0.0000  
 Y -0.0000 0.0000 0.0003 0.0002 0.0000 0.0000  
 Z -0.0000 0.0000 -0.0001 -0.0000 0.0000 -0.0000  
 AT. 2 I X -0.0001 -0.0000 -0.0003 -0.0000 -0.0001 -0.0000  
 Y -0.0000 -0.0000 -0.0003 0.0002 -0.0000 0.0000  
 Z -0.0000 -0.0000 0.0001 -0.0000 -0.0000 -0.0000  
 AT. 3 I X 0.0000 -0.0002 0.0002 -0.0000 0.0000 -0.0000  
 Y 0.0000 -0.0001 0.0001 0.0000 0.0000 -0.0000  
 Z 0.0000 -0.0001 0.0002 -0.0002 0.0000 -0.0000  
 AT. 4 I X 0.0000 0.0002 -0.0002 -0.0000 -0.0000 -0.0000  
 Y 0.0000 0.0001 -0.0001 0.0000 -0.0000 -0.0000  
 Z 0.0000 0.0001 -0.0002 -0.0002 -0.0000 -0.0000  
 AT. 5 O X -0.0003 0.0012 -0.0027 -0.0037 -0.0004 -0.0008  
 Y 0.0004 -0.0010 0.0006 0.0039 0.0002 0.0007  
 Z -0.0010 0.0016 -0.0045 -0.0065 -0.0005 -0.0010  
 AT. 6 O X -0.0003 -0.0012 0.0027 -0.0037 0.0004 -0.0008  
 Y 0.0004 0.0010 -0.0006 0.0039 -0.0002 0.0007  
 Z -0.0010 -0.0016 0.0045 -0.0065 0.0005 -0.0010  
 AT. 7 O X 0.0003 -0.0012 0.0012 0.0002 0.0000 0.0000  
 Y 0.0002 -0.0005 -0.0001 -0.0015 -0.0005 0.0001  
 Z -0.0007 0.0030 0.0032 -0.0041 -0.0001 -0.0007  
 AT. 8 O X 0.0003 0.0012 -0.0012 0.0002 -0.0000 0.0000  
 Y 0.0002 0.0005 0.0001 -0.0015 0.0005 0.0001  
 Z -0.0007 -0.0030 -0.0032 -0.0041 0.0001 -0.0007  
 AT. 9 N X -0.0001 -0.0007 -0.0004 0.0017 -0.0002 -0.0004

Y 0.0006 -0.0013 0.0005 0.0020 0.0005 0.0007  
Z 0.0006 -0.0021 0.0005 0.0034 0.0011 0.0009  
AT. 10 N X -0.0001 0.0007 0.0004 0.0017 0.0002 -0.0004  
Y 0.0006 0.0013 -0.0005 0.0020 -0.0005 0.0007  
Z 0.0006 0.0021 -0.0005 0.0034 -0.0011 0.0009  
AT. 11 N X -0.0001 -0.0004 -0.0024 0.0026 0.0003 -0.0004  
Y -0.0003 0.0012 -0.0019 0.0016 0.0002 -0.0001  
Z 0.0002 -0.0008 -0.0008 0.0018 -0.0001 0.0005  
AT. 12 N X -0.0001 0.0004 0.0024 0.0026 -0.0003 -0.0004  
Y -0.0003 -0.0012 0.0019 0.0016 -0.0002 -0.0001  
Z 0.0002 0.0008 0.0008 0.0018 0.0001 0.0005  
AT. 13 C X 0.0005 -0.0018 0.0049 0.0022 0.0012 0.0007  
Y -0.0004 0.0004 0.0034 0.0001 0.0002 -0.0003  
Z 0.0004 -0.0007 -0.0010 0.0010 -0.0003 0.0004  
AT. 14 C X 0.0005 0.0018 -0.0049 0.0022 -0.0012 0.0007  
Y -0.0004 -0.0004 -0.0034 0.0001 -0.0002 -0.0003  
Z 0.0004 0.0007 0.0010 0.0010 0.0003 0.0004  
AT. 15 C X 0.0013 -0.0016 -0.0031 0.0019 -0.0007 0.0010  
Y -0.0006 0.0015 -0.0046 -0.0065 -0.0008 -0.0013  
Z 0.0005 -0.0003 0.0032 -0.0003 -0.0006 0.0007  
AT. 16 C X 0.0013 0.0016 0.0031 0.0019 0.0007 0.0010  
Y -0.0006 -0.0015 0.0046 -0.0065 0.0008 -0.0013  
Z 0.0005 0.0003 -0.0032 -0.0003 0.0006 0.0007  
AT. 17 H X 0.0016 -0.0026 0.0008 -0.0010 -0.0003 0.0021  
Y -0.0001 -0.0011 0.0029 -0.0063 0.0002 -0.0000  
Z -0.0000 0.0026 -0.0053 -0.0017 -0.0016 -0.0005  
AT. 18 H X 0.0016 0.0026 -0.0008 -0.0010 0.0003 0.0021  
Y -0.0001 0.0011 -0.0029 -0.0063 -0.0002 -0.0000  
Z -0.0000 -0.0026 0.0053 -0.0017 0.0016 -0.0005  
AT. 19 H X 0.0018 -0.0024 -0.0099 0.0047 -0.0006 0.0017  
Y -0.0014 0.0053 -0.0168 -0.0035 -0.0015 -0.0026  
Z 0.0004 0.0006 -0.0029 0.0019 -0.0006 0.0003

AT. 20 H X 0.0018 0.0024 0.0099 0.0047 0.0006 0.0017  
Y -0.0014 -0.0053 0.0168 -0.0035 0.0015 -0.0026  
Z 0.0004 -0.0006 0.0029 0.0019 0.0006 0.0003

AT. 21 C X -0.0003 0.0012 0.0068 -0.0059 0.0010 -0.0009  
Y 0.0001 0.0000 0.0067 -0.0052 0.0007 -0.0003  
Z 0.0002 -0.0014 0.0042 -0.0033 0.0006 -0.0007

AT. 22 C X -0.0003 -0.0012 -0.0068 -0.0059 -0.0010 -0.0009  
Y 0.0001 -0.0000 -0.0067 -0.0052 -0.0007 -0.0003  
Z 0.0002 0.0014 -0.0042 -0.0033 -0.0006 -0.0007

AT. 23 C X -0.0010 0.0047 -0.0047 0.0012 -0.0010 0.0004  
Y -0.0001 0.0002 0.0003 -0.0004 -0.0004 0.0002  
Z 0.0002 -0.0019 -0.0041 0.0035 -0.0002 0.0003

AT. 24 C X -0.0010 -0.0047 0.0047 0.0012 0.0010 0.0004  
Y -0.0001 -0.0002 -0.0003 -0.0004 0.0004 0.0002  
Z 0.0002 0.0019 0.0041 0.0035 0.0002 0.0003

AT. 25 H X -0.0019 0.0067 -0.0063 0.0021 -0.0022 0.0007  
Y -0.0001 -0.0001 -0.0012 0.0013 -0.0005 0.0004  
Z -0.0009 0.0015 0.0107 -0.0103 0.0002 -0.0003

AT. 26 H X -0.0019 -0.0067 0.0063 0.0021 0.0022 0.0007  
Y -0.0001 0.0001 0.0012 0.0013 0.0005 0.0004  
Z -0.0009 -0.0015 -0.0107 -0.0103 -0.0002 -0.0003

AT. 27 H X -0.0011 0.0046 -0.0061 0.0009 -0.0012 0.0001  
Y 0.0012 -0.0042 -0.0096 0.0098 -0.0001 0.0001  
Z 0.0009 -0.0043 -0.0097 0.0101 0.0002 0.0003

AT. 28 H X -0.0011 -0.0046 0.0061 0.0009 0.0012 0.0001  
Y 0.0012 0.0042 0.0096 0.0098 0.0001 0.0001  
Z 0.0009 0.0043 0.0097 0.0101 -0.0002 0.0003

AT. 29 C X -0.0003 -0.0002 -0.0010 -0.0001 0.0006 -0.0007  
Y 0.0004 -0.0000 0.0014 0.0007 -0.0010 0.0005  
Z -0.0000 -0.0006 0.0017 0.0032 0.0004 0.0003

AT. 30 C X -0.0003 0.0002 0.0010 -0.0001 -0.0006 -0.0007  
Y 0.0004 0.0000 -0.0014 0.0007 0.0010 0.0005

Z -0.0000 0.0006 -0.0017 0.0032 -0.0004 0.0003  
AT. 31 H X 0.0002 -0.0009 0.0016 0.0035 0.0010 0.0003  
Y -0.0004 0.0013 -0.0023 -0.0042 -0.0022 -0.0010  
Z -0.0009 0.0010 -0.0022 -0.0015 -0.0011 -0.0015  
AT. 32 H X 0.0002 0.0009 -0.0016 0.0035 -0.0010 0.0003  
Y -0.0004 -0.0013 0.0023 -0.0042 0.0022 -0.0010  
Z -0.0009 -0.0010 0.0022 -0.0015 0.0011 -0.0015  
AT. 33 H X -0.0006 0.0012 0.0073 0.0078 -0.0008 -0.0009  
Y 0.0016 -0.0023 0.0090 0.0094 0.0015 0.0031  
Z -0.0007 0.0012 0.0049 0.0049 -0.0015 -0.0007  
AT. 34 H X -0.0006 -0.0012 -0.0073 0.0078 0.0008 -0.0009  
Y 0.0016 0.0023 -0.0090 0.0094 -0.0015 0.0031  
Z -0.0007 -0.0012 -0.0049 0.0049 0.0015 -0.0007  
AT. 35 C X -0.0002 0.0008 0.0000 -0.0010 0.0002 0.0000  
Y -0.0003 0.0001 -0.0010 -0.0019 -0.0001 -0.0006  
Z -0.0001 0.0002 -0.0016 -0.0018 -0.0001 -0.0000  
AT. 36 C X -0.0002 -0.0008 -0.0000 -0.0010 -0.0002 0.0000  
Y -0.0003 -0.0001 0.0010 -0.0019 0.0001 -0.0006  
Z -0.0001 -0.0002 0.0016 -0.0018 0.0001 -0.0000  
AT. 37 C X 0.0001 -0.0013 -0.0025 0.0005 0.0004 -0.0001  
Y -0.0002 0.0014 -0.0007 -0.0025 -0.0003 0.0001  
Z 0.0004 -0.0007 -0.0010 0.0008 -0.0009 0.0006  
AT. 38 C X 0.0001 0.0013 0.0025 0.0005 -0.0004 -0.0001  
Y -0.0002 -0.0014 0.0007 -0.0025 0.0003 0.0001  
Z 0.0004 0.0007 0.0010 0.0008 0.0009 0.0006  
AT. 39 H X 0.0008 -0.0025 0.0004 0.0058 -0.0002 0.0008  
Y 0.0004 0.0008 0.0025 0.0021 -0.0005 0.0013  
Z 0.0006 -0.0013 -0.0003 0.0022 -0.0012 0.0007  
AT. 40 H X 0.0008 0.0025 -0.0004 0.0058 0.0002 0.0008  
Y 0.0004 -0.0008 -0.0025 0.0021 0.0005 0.0013  
Z 0.0006 0.0013 0.0003 0.0022 0.0012 0.0007  
AT. 41 H X -0.0001 -0.0002 -0.0044 -0.0038 -0.0005 0.0005

Y -0.0002 0.0015 -0.0012 -0.0058 -0.0002 -0.0002  
Z 0.0006 -0.0021 0.0017 0.0076 -0.0001 0.0005  
AT. 42 H X -0.0001 0.0002 0.0044 -0.0038 0.0005 0.0005  
Y -0.0002 -0.0015 0.0012 -0.0058 0.0002 -0.0002  
Z 0.0006 0.0021 -0.0017 0.0076 0.0001 0.0005  
AT. 43 C X 0.0005 -0.0010 -0.0010 0.0002 -0.0012 0.0007  
Y -0.0004 0.0012 0.0008 -0.0008 -0.0002 -0.0008  
Z 0.0001 0.0004 0.0001 -0.0003 -0.0005 0.0010  
AT. 44 C X 0.0005 0.0010 0.0010 0.0002 0.0012 0.0007  
Y -0.0004 -0.0012 -0.0008 -0.0008 0.0002 -0.0008  
Z 0.0001 -0.0004 -0.0001 -0.0003 0.0005 0.0010  
AT. 45 H X 0.0001 0.0001 0.0017 -0.0031 -0.0008 -0.0002  
Y -0.0007 0.0011 -0.0018 -0.0004 -0.0013 -0.0014  
Z 0.0007 -0.0004 0.0012 0.0016 0.0003 0.0022  
AT. 46 H X 0.0001 -0.0001 -0.0017 -0.0031 0.0008 -0.0002  
Y -0.0007 -0.0011 0.0018 -0.0004 0.0013 -0.0014  
Z 0.0007 0.0004 -0.0012 0.0016 -0.0003 0.0022  
AT. 47 H X 0.0010 -0.0016 -0.0003 0.0013 -0.0022 0.0021  
Y 0.0006 0.0009 0.0034 -0.0020 -0.0025 0.0031  
Z 0.0004 0.0012 0.0019 -0.0028 -0.0018 0.0030  
AT. 48 H X 0.0010 0.0016 0.0003 0.0013 0.0022 0.0021  
Y 0.0006 -0.0009 -0.0034 -0.0020 0.0025 0.0031  
Z 0.0004 -0.0012 -0.0019 -0.0028 0.0018 0.0030  
AT. 49 C X -0.0000 -0.0003 0.0003 -0.0001 -0.0000 -0.0006  
Y 0.0000 -0.0002 0.0004 -0.0003 -0.0002 -0.0003  
Z -0.0002 0.0006 -0.0001 -0.0002 0.0000 -0.0005  
AT. 50 C X -0.0000 0.0003 -0.0003 -0.0001 0.0000 -0.0006  
Y 0.0000 0.0002 -0.0004 -0.0003 0.0002 -0.0003  
Z -0.0002 -0.0006 0.0001 -0.0002 -0.0000 -0.0005  
AT. 51 C X -0.0008 0.0014 -0.0021 -0.0030 -0.0010 -0.0011  
Y 0.0003 -0.0008 0.0008 0.0015 0.0012 0.0005  
Z 0.0006 -0.0023 0.0018 0.0035 0.0013 -0.0002

AT. 52 C X -0.0008 -0.0014 0.0021 -0.0030 0.0010 -0.0011  
Y 0.0003 0.0008 -0.0008 0.0015 -0.0012 0.0005  
Z 0.0006 0.0023 -0.0018 0.0035 -0.0013 -0.0002

AT. 53 H X -0.0013 0.0017 -0.0025 -0.0007 -0.0017 -0.0031  
Y -0.0001 0.0000 0.0003 0.0029 0.0003 -0.0017  
Z 0.0009 -0.0015 0.0019 0.0013 0.0013 0.0008

AT. 54 H X -0.0013 -0.0017 0.0025 -0.0007 0.0017 -0.0031  
Y -0.0001 -0.0000 -0.0003 0.0029 -0.0003 -0.0017  
Z 0.0009 0.0015 -0.0019 0.0013 -0.0013 0.0008

AT. 55 H X 0.0001 0.0003 -0.0008 -0.0048 0.0014 0.0028  
Y 0.0001 -0.0004 0.0001 0.0020 0.0003 -0.0002  
Z 0.0009 -0.0026 0.0023 0.0031 0.0015 0.0013

AT. 56 H X 0.0001 -0.0003 0.0008 -0.0048 -0.0014 0.0028  
Y 0.0001 0.0004 -0.0001 0.0020 -0.0003 -0.0002  
Z 0.0009 0.0026 -0.0023 0.0031 -0.0015 0.0013

AT. 57 C X -0.0001 0.0015 0.0002 -0.0018 0.0005 0.0006  
Y 0.0001 -0.0012 -0.0005 0.0011 0.0000 -0.0002  
Z -0.0001 0.0009 -0.0003 -0.0012 -0.0000 0.0001

AT. 58 C X -0.0001 -0.0015 -0.0002 -0.0018 -0.0005 0.0006  
Y 0.0001 0.0012 0.0005 0.0011 -0.0000 -0.0002  
Z -0.0001 -0.0009 0.0003 -0.0012 0.0000 0.0001

AT. 59 H X 0.0002 0.0003 -0.0001 0.0003 -0.0026 -0.0016  
Y 0.0000 -0.0006 0.0002 0.0011 0.0009 0.0005  
Z -0.0000 0.0009 0.0012 0.0004 -0.0004 -0.0001

AT. 60 H X 0.0002 -0.0003 0.0001 0.0003 0.0026 -0.0016  
Y 0.0000 0.0006 -0.0002 0.0011 -0.0009 0.0005  
Z -0.0000 -0.0009 -0.0012 0.0004 0.0004 -0.0001

AT. 61 H X -0.0001 0.0019 0.0032 0.0003 -0.0002 -0.0001  
Y 0.0004 -0.0019 -0.0016 0.0019 -0.0004 0.0001  
Z -0.0002 0.0015 0.0025 -0.0001 -0.0005 -0.0006

AT. 62 H X -0.0001 -0.0019 -0.0032 0.0003 0.0002 -0.0001  
Y 0.0004 0.0019 0.0016 0.0019 0.0004 0.0001

Z -0.0002 -0.0015 -0.0025 -0.0001 0.0005 -0.0006  
AT. 63 H X -0.0004 0.0018 -0.0025 -0.0042 0.0001 -0.0003  
Y 0.0007 -0.0019 0.0020 0.0042 0.0007 0.0014  
Z -0.0002 0.0011 0.0007 -0.0018 -0.0000 -0.0001  
AT. 64 H X -0.0004 -0.0018 0.0025 -0.0042 -0.0001 -0.0003  
Y 0.0007 0.0019 -0.0020 0.0042 -0.0007 0.0014  
Z -0.0002 -0.0011 -0.0007 -0.0018 0.0000 -0.0001  
AT. 65 C X 0.0003 -0.0013 0.0000 0.0005 0.0000 0.0003  
Y -0.0002 0.0010 0.0000 -0.0005 -0.0002 -0.0003  
Z -0.0004 0.0016 -0.0006 -0.0008 -0.0007 -0.0007  
AT. 66 C X 0.0003 0.0013 -0.0000 0.0005 -0.0000 0.0003  
Y -0.0002 -0.0010 -0.0000 -0.0005 0.0002 -0.0003  
Z -0.0004 -0.0016 0.0006 -0.0008 0.0007 -0.0007  
AT. 67 H X -0.0002 -0.0003 -0.0017 -0.0022 0.0007 -0.0002  
Y -0.0002 0.0012 0.0010 0.0005 -0.0012 -0.0006  
Z -0.0000 0.0005 0.0005 0.0002 -0.0003 -0.0000  
AT. 68 H X -0.0002 0.0003 0.0017 -0.0022 -0.0007 -0.0002  
Y -0.0002 -0.0012 -0.0010 0.0005 0.0012 -0.0006  
Z -0.0000 -0.0005 -0.0005 0.0002 0.0003 -0.0000  
AT. 69 H X 0.0003 -0.0011 0.0002 0.0010 0.0003 0.0005  
Y -0.0004 0.0014 -0.0005 -0.0018 0.0002 0.0003  
Z -0.0007 0.0021 -0.0022 -0.0038 -0.0009 -0.0000  
AT. 70 H X 0.0003 0.0011 -0.0002 0.0010 -0.0003 0.0005  
Y -0.0004 -0.0014 0.0005 -0.0018 -0.0002 0.0003  
Z -0.0007 -0.0021 0.0022 -0.0038 0.0009 -0.0000  
AT. 71 H X 0.0004 -0.0014 -0.0006 -0.0008 0.0001 0.0012  
Y -0.0005 0.0020 -0.0004 -0.0005 -0.0008 0.0001  
Z -0.0007 0.0028 -0.0009 -0.0018 -0.0013 0.0003  
AT. 72 H X 0.0004 0.0014 0.0006 -0.0008 -0.0001 0.0012  
Y -0.0005 -0.0020 0.0004 -0.0005 0.0008 0.0001  
Z -0.0007 -0.0028 0.0009 -0.0018 0.0013 0.0003  
AT. 73 C X 0.0001 0.0004 0.0018 0.0010 -0.0003 0.0002

Y 0.0002 -0.0006 -0.0010 -0.0009 -0.0005 0.0001  
Z -0.0004 0.0009 -0.0024 -0.0042 0.0005 -0.0006  
AT. 74 C X 0.0001 -0.0004 -0.0018 0.0010 0.0003 0.0002  
Y 0.0002 0.0006 0.0010 -0.0009 0.0005 0.0001  
Z -0.0004 -0.0009 0.0024 -0.0042 -0.0005 -0.0006  
AT. 75 H X 0.0004 0.0005 0.0021 0.0029 -0.0009 0.0015  
Y 0.0009 -0.0012 -0.0017 -0.0007 -0.0007 0.0020  
Z 0.0008 0.0000 -0.0023 -0.0025 -0.0000 0.0027  
AT. 76 H X 0.0004 -0.0005 -0.0021 0.0029 0.0009 0.0015  
Y 0.0009 0.0012 0.0017 -0.0007 0.0007 0.0020  
Z 0.0008 -0.0000 0.0023 -0.0025 0.0000 0.0027  
AT. 77 H X 0.0004 0.0002 0.0030 0.0030 -0.0017 0.0011  
Y 0.0005 -0.0009 -0.0020 -0.0009 0.0017 0.0010  
Z -0.0009 0.0014 -0.0022 -0.0060 -0.0003 -0.0021  
AT. 78 H X 0.0004 -0.0002 -0.0030 0.0030 0.0017 0.0011  
Y 0.0005 0.0009 0.0020 -0.0009 -0.0017 0.0010  
Z -0.0009 -0.0014 0.0022 -0.0060 0.0003 -0.0021  
AT. 79 I X 0.0003 -0.0013 -0.0002 -0.0000 0.0007 0.0004  
Y -0.0002 0.0014 -0.0001 0.0001 -0.0005 -0.0003  
Z -0.0001 0.0004 -0.0001 0.0000 -0.0001 -0.0000  
AT. 80 I X 0.0003 0.0013 0.0002 -0.0000 -0.0007 0.0004  
Y -0.0002 -0.0014 0.0001 0.0001 0.0005 -0.0003  
Z -0.0001 -0.0004 0.0001 0.0000 0.0001 -0.0000  
AT. 81 I X -0.0019 0.0013 -0.0002 -0.0000 -0.0004 0.0002  
Y 0.0017 -0.0012 0.0002 0.0000 0.0005 -0.0004  
Z 0.0007 -0.0005 0.0001 0.0000 0.0002 -0.0001  
AT. 82 I X -0.0019 -0.0013 0.0002 -0.0000 0.0004 0.0002  
Y 0.0017 0.0012 -0.0002 0.0000 -0.0005 -0.0004  
Z 0.0007 0.0005 -0.0001 0.0000 -0.0002 -0.0001  
AT. 83 O X 0.0010 -0.0043 0.0024 -0.0003 0.0026 0.0017  
Y -0.0001 -0.0029 0.0011 -0.0006 0.0010 -0.0006  
Z -0.0023 0.0239 0.0025 -0.0010 0.0083 0.0063



AT. 84 O X 0.0010 0.0043 -0.0024 -0.0003 -0.0026 0.0017  
Y -0.0001 0.0029 -0.0011 -0.0006 -0.0010 -0.0006  
Z -0.0023 -0.0239 -0.0025 -0.0010 -0.0083 0.0063

AT. 85 O X -0.0125 0.0091 -0.0021 -0.0001 -0.0064 0.0056  
Y 0.0121 -0.0066 -0.0009 -0.0002 0.0010 -0.0007  
Z -0.0275 0.0169 -0.0013 0.0005 -0.0070 0.0062

AT. 86 O X -0.0125 -0.0091 0.0021 -0.0001 0.0064 0.0056  
Y 0.0121 0.0066 0.0009 -0.0002 -0.0010 -0.0007  
Z -0.0275 -0.0169 0.0013 0.0005 0.0070 0.0062

AT. 87 N X -0.0004 -0.0084 -0.0012 0.0006 -0.0027 -0.0021  
Y -0.0005 -0.0069 -0.0005 -0.0014 0.0026 0.0030  
Z 0.0018 -0.0119 -0.0009 -0.0003 -0.0032 -0.0007

AT. 88 N X -0.0004 0.0084 0.0012 0.0006 0.0027 -0.0021  
Y -0.0005 0.0069 0.0005 -0.0014 -0.0026 0.0030  
Z 0.0018 0.0119 0.0009 -0.0003 0.0032 -0.0007

AT. 89 N X -0.0072 0.0027 0.0000 -0.0003 0.0004 -0.0007  
Y -0.0178 0.0095 -0.0014 0.0008 -0.0043 0.0032  
Z 0.0074 -0.0056 0.0004 -0.0007 0.0008 -0.0005

AT. 90 N X -0.0072 -0.0027 -0.0000 -0.0003 -0.0004 -0.0007  
Y -0.0178 -0.0095 0.0014 0.0008 0.0043 0.0032  
Z 0.0074 0.0056 -0.0004 -0.0007 -0.0008 -0.0005

AT. 91 C X -0.0016 0.0147 0.0027 -0.0014 0.0110 0.0070  
Y 0.0005 -0.0020 -0.0001 0.0030 -0.0151 -0.0117  
Z 0.0022 -0.0114 -0.0007 0.0013 -0.0024 -0.0019

AT. 92 C X -0.0016 -0.0147 -0.0027 -0.0014 -0.0110 0.0070  
Y 0.0005 0.0020 0.0001 0.0030 0.0151 -0.0117  
Z 0.0022 0.0114 0.0007 0.0013 0.0024 -0.0019

AT. 93 C X -0.0047 0.0354 -0.0004 -0.0009 0.0015 0.0028  
Y 0.0013 -0.0033 0.0003 -0.0016 0.0103 0.0077  
Z 0.0012 -0.0144 0.0005 -0.0003 0.0005 -0.0018

AT. 94 C X -0.0047 -0.0354 0.0004 -0.0009 -0.0015 0.0028  
Y 0.0013 0.0033 -0.0003 -0.0016 -0.0103 0.0077

Z 0.0012 0.0144 -0.0005 -0.0003 -0.0005 -0.0018  
AT. 95 H X -0.0048 0.0320 -0.0069 0.0102 -0.0303 -0.0167  
Y 0.0041 -0.0098 0.0055 -0.0069 0.0251 0.0160  
Z -0.0034 0.0010 -0.0027 -0.0026 0.0070 0.0042  
AT. 96 H X -0.0048 -0.0320 0.0069 0.0102 0.0303 -0.0167  
Y 0.0041 0.0098 -0.0055 -0.0069 -0.0251 0.0160  
Z -0.0034 -0.0010 0.0027 -0.0026 -0.0070 0.0042  
AT. 97 H X -0.0061 0.0435 0.0000 -0.0008 -0.0006 0.0016  
Y -0.0043 0.0189 -0.0056 0.0008 -0.0002 0.0032  
Z 0.0004 -0.0121 -0.0006 0.0003 -0.0011 -0.0025  
AT. 98 H X -0.0061 -0.0435 -0.0000 -0.0008 0.0006 0.0016  
Y -0.0043 -0.0189 0.0056 0.0008 0.0002 0.0032  
Z 0.0004 0.0121 0.0006 0.0003 0.0011 -0.0025  
AT. 99 C X 0.0158 -0.0092 -0.0003 -0.0004 -0.0020 0.0023  
Y -0.0053 0.0036 0.0011 -0.0009 0.0033 -0.0030  
Z 0.0150 -0.0093 0.0018 0.0002 0.0037 -0.0040  
AT. 100 C X 0.0158 0.0092 0.0003 -0.0004 0.0020 0.0023  
Y -0.0053 -0.0036 -0.0011 -0.0009 -0.0033 -0.0030  
Z 0.0150 0.0093 -0.0018 0.0002 -0.0037 -0.0040  
AT. 101 C X 0.0470 -0.0309 0.0048 0.0005 0.0082 -0.0060  
Y -0.0097 0.0075 -0.0012 -0.0007 -0.0072 0.0069  
Z 0.0117 -0.0071 0.0006 0.0006 0.0011 -0.0018  
AT. 102 C X 0.0470 0.0309 -0.0048 0.0005 -0.0082 -0.0060  
Y -0.0097 -0.0075 0.0012 -0.0007 0.0072 0.0069  
Z 0.0117 0.0071 -0.0006 0.0006 -0.0011 -0.0018  
AT. 103 H X 0.0529 -0.0344 0.0062 -0.0004 0.0153 -0.0124  
Y -0.0107 0.0077 -0.0012 -0.0001 -0.0092 0.0089  
Z -0.0141 0.0146 -0.0031 -0.0025 -0.0116 0.0137  
AT. 104 H X 0.0529 0.0344 -0.0062 -0.0004 -0.0153 -0.0124  
Y -0.0107 -0.0077 0.0012 -0.0001 0.0092 0.0089  
Z -0.0141 -0.0146 0.0031 -0.0025 0.0116 0.0137  
AT. 105 H X 0.0610 -0.0421 0.0061 0.0015 0.0162 -0.0144

Y 0.0177 -0.0149 0.0040 0.0019 0.0119 -0.0134  
Z 0.0257 -0.0191 0.0035 0.0019 0.0114 -0.0121  
AT. 106 H X 0.0610 0.0421 -0.0061 0.0015 -0.0162 -0.0144  
Y 0.0177 0.0149 -0.0040 0.0019 -0.0119 -0.0134  
Z 0.0257 0.0191 -0.0035 0.0019 -0.0114 -0.0121  
AT. 107 C X 0.0009 -0.0088 -0.0012 0.0003 -0.0016 -0.0028  
Y 0.0007 -0.0065 -0.0014 0.0004 -0.0003 -0.0011  
Z -0.0002 0.0006 -0.0010 0.0002 -0.0022 -0.0006  
AT. 108 C X 0.0009 0.0088 0.0012 0.0003 0.0016 -0.0028  
Y 0.0007 0.0065 0.0014 0.0004 0.0003 -0.0011  
Z -0.0002 -0.0006 0.0010 0.0002 0.0022 -0.0006  
AT. 109 H X 0.0004 0.0113 0.0001 -0.0016 0.0072 0.0020  
Y 0.0027 0.0035 -0.0006 -0.0002 0.0029 -0.0007  
Z 0.0034 0.0114 0.0003 -0.0008 0.0010 -0.0013  
AT. 110 H X 0.0004 -0.0113 -0.0001 -0.0016 -0.0072 0.0020  
Y 0.0027 -0.0035 0.0006 -0.0002 -0.0029 -0.0007  
Z 0.0034 -0.0114 -0.0003 -0.0008 -0.0010 -0.0013  
AT. 111 H X 0.0003 -0.0182 -0.0017 -0.0004 -0.0036 -0.0029  
Y -0.0015 -0.0253 -0.0014 0.0031 -0.0091 -0.0050  
Z 0.0009 0.0157 0.0002 0.0006 0.0026 0.0008  
AT. 112 H X 0.0003 0.0182 0.0017 -0.0004 0.0036 -0.0029  
Y -0.0015 0.0253 0.0014 0.0031 0.0091 -0.0050  
Z 0.0009 -0.0157 -0.0002 0.0006 -0.0026 0.0008  
AT. 113 C X 0.0040 -0.0023 -0.0001 0.0005 0.0002 0.0001  
Y 0.0003 0.0032 0.0006 0.0004 0.0005 -0.0001  
Z -0.0018 0.0021 -0.0001 0.0006 0.0002 0.0004  
AT. 114 C X 0.0040 0.0023 0.0001 0.0005 -0.0002 0.0001  
Y 0.0003 -0.0032 -0.0006 0.0004 -0.0005 -0.0001  
Z -0.0018 -0.0021 0.0001 0.0006 -0.0002 0.0004  
AT. 115 C X -0.0230 0.0106 -0.0013 0.0007 -0.0041 0.0013  
Y -0.0065 0.0067 0.0002 -0.0001 -0.0007 0.0005  
Z 0.0097 -0.0063 -0.0003 -0.0005 0.0015 -0.0005

AT.116 C X -0.0230 -0.0106 0.0013 0.0007 0.0041 0.0013  
Y -0.0065 -0.0067 -0.0002 -0.0001 0.0007 0.0005  
Z 0.0097 0.0063 0.0003 -0.0005 -0.0015 -0.0005

AT.117 H X -0.0279 0.0132 0.0000 0.0008 -0.0023 0.0014  
Y -0.0042 0.0027 -0.0007 -0.0010 -0.0028 -0.0006  
Z 0.0140 -0.0080 -0.0011 -0.0001 0.0002 -0.0004

AT.118 H X -0.0279 -0.0132 -0.0000 0.0008 0.0023 0.0014  
Y -0.0042 -0.0027 0.0007 -0.0010 0.0028 -0.0006  
Z 0.0140 0.0080 0.0011 -0.0001 -0.0002 -0.0004

AT.119 H X -0.0119 0.0037 -0.0020 0.0003 -0.0050 0.0003  
Y -0.0045 0.0076 0.0006 0.0004 0.0006 0.0002  
Z 0.0134 -0.0107 -0.0007 -0.0013 -0.0004 -0.0009

AT.120 H X -0.0119 -0.0037 0.0020 0.0003 0.0050 0.0003  
Y -0.0045 -0.0076 -0.0006 0.0004 -0.0006 0.0002  
Z 0.0134 0.0107 0.0007 -0.0013 0.0004 -0.0009

AT.121 C X -0.0103 0.0056 -0.0003 -0.0004 0.0003 0.0012  
Y -0.0086 0.0047 0.0007 0.0008 -0.0009 0.0009  
Z -0.0031 0.0023 -0.0008 -0.0011 0.0004 0.0004

AT.122 C X -0.0103 -0.0056 0.0003 -0.0004 -0.0003 0.0012  
Y -0.0086 -0.0047 -0.0007 0.0008 0.0009 0.0009  
Z -0.0031 -0.0023 0.0008 -0.0011 -0.0004 0.0004

AT.123 H X 0.0016 -0.0004 0.0006 0.0003 0.0021 0.0011  
Y 0.0040 0.0016 0.0029 0.0007 0.0014 0.0002  
Z -0.0140 0.0042 -0.0024 -0.0008 -0.0015 0.0008

AT.124 H X 0.0016 0.0004 -0.0006 0.0003 -0.0021 0.0011  
Y 0.0040 -0.0016 -0.0029 0.0007 -0.0014 0.0002  
Z -0.0140 -0.0042 0.0024 -0.0008 0.0015 0.0008

AT.125 H X -0.0200 0.0109 -0.0015 -0.0002 -0.0013 0.0019  
Y -0.0177 0.0068 -0.0010 0.0004 -0.0030 0.0011  
Z -0.0207 0.0103 -0.0029 -0.0008 -0.0028 0.0018

AT.126 H X -0.0200 -0.0109 0.0015 -0.0002 0.0013 0.0019  
Y -0.0177 -0.0068 0.0010 0.0004 0.0030 0.0011

Z -0.0207 -0.0103 0.0029 -0.0008 0.0028 0.0018  
AT. 127 C X -0.0006 0.0034 0.0003 -0.0006 0.0006 0.0003  
Y 0.0069 -0.0039 0.0005 0.0003 0.0005 -0.0010  
Z -0.0015 0.0030 0.0005 -0.0005 0.0001 0.0001  
AT. 128 C X -0.0006 -0.0034 -0.0003 -0.0006 -0.0006 0.0003  
Y 0.0069 0.0039 -0.0005 0.0003 -0.0005 -0.0010  
Z -0.0015 -0.0030 -0.0005 -0.0005 -0.0001 0.0001  
AT. 129 C X -0.0033 -0.0187 -0.0018 0.0006 -0.0065 -0.0019  
Y 0.0058 -0.0040 -0.0004 -0.0005 0.0007 -0.0008  
Z 0.0045 -0.0144 -0.0013 -0.0001 -0.0038 -0.0019  
AT. 130 C X -0.0033 0.0187 0.0018 0.0006 0.0065 -0.0019  
Y 0.0058 0.0040 0.0004 -0.0005 -0.0007 -0.0008  
Z 0.0045 0.0144 0.0013 -0.0001 0.0038 -0.0019  
AT. 131 H X -0.0002 -0.0242 -0.0048 0.0001 -0.0068 -0.0039  
Y -0.0017 0.0019 0.0040 0.0015 0.0009 0.0009  
Z 0.0052 -0.0189 -0.0033 0.0003 -0.0036 -0.0039  
AT. 132 H X -0.0002 0.0242 0.0048 0.0001 0.0068 -0.0039  
Y -0.0017 -0.0019 -0.0040 0.0015 -0.0009 0.0009  
Z 0.0052 0.0189 0.0033 0.0003 0.0036 -0.0039  
AT. 133 H X -0.0088 -0.0065 0.0022 0.0016 -0.0063 -0.0002  
Y 0.0086 -0.0060 -0.0011 -0.0007 0.0002 -0.0024  
Z 0.0115 -0.0235 -0.0040 -0.0011 -0.0045 -0.0049  
AT. 134 H X -0.0088 0.0065 -0.0022 0.0016 0.0063 -0.0002  
Y 0.0086 0.0060 0.0011 -0.0007 -0.0002 -0.0024  
Z 0.0115 0.0235 0.0040 -0.0011 0.0045 -0.0049  
AT. 135 C X 0.0099 -0.0065 0.0004 -0.0007 0.0013 -0.0000  
Y 0.0057 -0.0036 0.0005 -0.0001 0.0008 0.0000  
Z -0.0078 0.0046 -0.0013 -0.0000 -0.0011 0.0000  
AT. 136 C X 0.0099 0.0065 -0.0004 -0.0007 -0.0013 -0.0000  
Y 0.0057 0.0036 -0.0005 -0.0001 -0.0008 0.0000  
Z -0.0078 -0.0046 0.0013 -0.0000 0.0011 0.0000  
AT. 137 H X -0.0030 0.0027 0.0032 0.0016 -0.0002 0.0011

Y 0.0054 -0.0043 0.0003 -0.0002 0.0007 -0.0003  
Z -0.0039 0.0000 -0.0019 -0.0011 -0.0004 -0.0007  
AT. 138 H X -0.0030 -0.0027 -0.0032 0.0016 0.0002 0.0011  
Y 0.0054 0.0043 -0.0003 -0.0002 -0.0007 -0.0003  
Z -0.0039 -0.0000 0.0019 -0.0011 0.0004 -0.0007  
AT. 139 H X 0.0143 -0.0063 -0.0006 -0.0012 0.0022 0.0004  
Y 0.0124 -0.0095 -0.0008 -0.0011 0.0016 -0.0010  
Z -0.0155 0.0062 0.0005 0.0013 -0.0026 -0.0003  
AT. 140 H X 0.0143 0.0063 0.0006 -0.0012 -0.0022 0.0004  
Y 0.0124 0.0095 0.0008 -0.0011 -0.0016 -0.0010  
Z -0.0155 -0.0062 -0.0005 0.0013 0.0026 -0.0003  
AT. 141 H X 0.0100 -0.0126 0.0013 -0.0001 0.0008 -0.0010  
Y 0.0109 -0.0106 0.0000 -0.0004 0.0017 -0.0008  
Z -0.0134 0.0092 0.0004 0.0005 -0.0021 0.0005  
AT. 142 H X 0.0100 0.0126 -0.0013 -0.0001 -0.0008 -0.0010  
Y 0.0109 0.0106 -0.0000 -0.0004 -0.0017 -0.0008  
Z -0.0134 -0.0092 -0.0004 0.0005 0.0021 0.0005  
AT. 143 C X -0.0026 0.0105 0.0018 -0.0013 0.0008 0.0001  
Y -0.0009 0.0036 0.0008 -0.0008 0.0005 0.0002  
Z -0.0015 0.0095 -0.0004 0.0013 0.0008 0.0005  
AT. 144 C X -0.0026 -0.0105 -0.0018 -0.0013 -0.0008 0.0001  
Y -0.0009 -0.0036 -0.0008 -0.0008 -0.0005 0.0002  
Z -0.0015 -0.0095 0.0004 0.0013 -0.0008 0.0005  
AT. 145 H X 0.0018 -0.0016 -0.0038 0.0041 -0.0030 -0.0015  
Y -0.0040 0.0060 0.0017 -0.0011 0.0009 0.0006  
Z 0.0028 0.0037 -0.0020 0.0032 -0.0004 -0.0005  
AT. 146 H X 0.0018 0.0016 0.0038 0.0041 0.0030 -0.0015  
Y -0.0040 -0.0060 -0.0017 -0.0011 -0.0009 0.0006  
Z 0.0028 -0.0037 0.0020 0.0032 0.0004 -0.0005  
AT. 147 H X 0.0010 0.0118 0.0049 -0.0030 0.0019 0.0001  
Y -0.0048 0.0097 -0.0047 0.0043 0.0017 0.0014  
Z 0.0017 0.0146 0.0009 0.0015 0.0030 0.0011

AT. 148 H X 0.0010 -0.0118 -0.0049 -0.0030 -0.0019 0.0001  
Y -0.0048 -0.0097 0.0047 0.0043 -0.0017 0.0014  
Z 0.0017 -0.0146 -0.0009 0.0015 -0.0030 0.0011

AT. 149 H X -0.0120 0.0160 -0.0021 0.0022 -0.0002 0.0008  
Y -0.0067 0.0102 0.0031 -0.0042 0.0011 0.0007  
Z -0.0066 0.0178 0.0065 -0.0065 0.0025 0.0011

AT. 150 H X -0.0120 -0.0160 0.0021 0.0022 0.0002 0.0008  
Y -0.0067 -0.0102 -0.0031 -0.0042 -0.0011 0.0007  
Z -0.0066 -0.0178 -0.0065 -0.0065 -0.0025 0.0011

AT. 151 C X 0.0058 0.0006 0.0004 0.0002 0.0016 0.0004  
Y 0.0030 -0.0006 0.0007 0.0001 0.0008 0.0001  
Z -0.0056 0.0070 0.0027 0.0004 0.0013 0.0014

AT. 152 C X 0.0058 -0.0006 -0.0004 0.0002 -0.0016 0.0004  
Y 0.0030 0.0006 -0.0007 0.0001 -0.0008 0.0001  
Z -0.0056 -0.0070 -0.0027 0.0004 -0.0013 0.0014

AT. 153 H X 0.0103 -0.0032 0.0004 0.0010 0.0025 -0.0001  
Y -0.0014 -0.0007 -0.0020 -0.0011 -0.0004 0.0011  
Z -0.0147 0.0084 -0.0007 -0.0020 -0.0008 0.0035

AT. 154 H X 0.0103 0.0032 -0.0004 0.0010 -0.0025 -0.0001  
Y -0.0014 0.0007 0.0020 -0.0011 0.0004 0.0011  
Z -0.0147 -0.0084 0.0007 -0.0020 0.0008 0.0035

AT. 155 H X 0.0048 0.0017 -0.0000 0.0015 0.0017 0.0003  
Y -0.0055 0.0010 -0.0009 -0.0003 -0.0007 0.0021  
Z 0.0028 0.0059 0.0049 0.0013 0.0029 -0.0010

AT. 156 H X 0.0048 -0.0017 0.0000 0.0015 -0.0017 0.0003  
Y -0.0055 -0.0010 0.0009 -0.0003 0.0007 0.0021  
Z 0.0028 -0.0059 -0.0049 0.0013 -0.0029 -0.0010

AT. 157 O X -0.0000 -0.0002 -0.0035 -0.0036 0.0001 -0.0004  
Y -0.0001 0.0001 0.0009 0.0005 -0.0001 0.0001  
Z 0.0001 -0.0002 -0.0060 -0.0056 0.0000 -0.0003

AT. 158 O X -0.0000 0.0002 0.0035 -0.0036 -0.0001 -0.0004  
Y -0.0001 -0.0001 -0.0009 0.0005 0.0001 0.0001

Z 0.0001 0.0002 0.0060 -0.0056 -0.0000 -0.0003  
AT.159 O X -0.0001 0.0003 0.0009 0.0014 -0.0001 0.0001  
Y -0.0001 -0.0001 -0.0069 -0.0070 0.0002 -0.0007  
Z 0.0001 0.0003 0.0002 0.0004 0.0000 0.0001  
AT.160 O X -0.0001 -0.0003 -0.0009 0.0014 0.0001 0.0001  
Y -0.0001 0.0001 0.0069 -0.0070 -0.0002 -0.0007  
Z 0.0001 -0.0003 -0.0002 0.0004 -0.0000 0.0001  
AT.161 H X 0.0003 0.0017 0.0874 0.0834 -0.0010 0.0057  
Y -0.0002 -0.0005 -0.0403 -0.0374 0.0000 -0.0028  
Z 0.0004 0.0035 0.1595 0.1509 -0.0016 0.0104  
AT.162 H X 0.0003 -0.0017 -0.0874 0.0834 0.0010 0.0057  
Y -0.0002 0.0005 0.0403 -0.0374 -0.0000 -0.0028  
Z 0.0004 -0.0035 -0.1595 0.1509 0.0016 0.0104  
AT.163 H X -0.0000 0.0005 0.0053 0.0063 0.0001 0.0005  
Y 0.0018 0.0034 0.1983 0.2067 -0.0047 0.0174  
Z 0.0005 0.0006 0.0417 0.0422 -0.0009 0.0035  
AT.164 H X -0.0000 -0.0005 -0.0053 0.0063 -0.0001 0.0005  
Y 0.0018 -0.0034 -0.1983 0.2067 0.0047 0.0174  
Z 0.0005 -0.0006 -0.0417 0.0422 0.0009 0.0035  
AT.165 O X 0.0002 -0.0008 -0.0003 -0.0004 0.0016 0.0017  
Y -0.0008 0.0002 0.0002 0.0008 -0.0078 -0.0080  
Z 0.0008 0.0003 -0.0003 -0.0003 0.0014 0.0015  
AT.166 O X 0.0002 0.0008 0.0003 -0.0004 -0.0016 0.0017  
Y -0.0008 -0.0002 -0.0002 0.0008 0.0078 -0.0080  
Z 0.0008 -0.0003 0.0003 -0.0003 -0.0014 0.0015  
AT.167 H X -0.0110 0.0003 0.0030 0.0069 -0.0815 -0.0851  
Y 0.0259 -0.0011 -0.0095 -0.0157 0.1874 0.1960  
Z -0.0073 -0.0014 0.0029 0.0041 -0.0517 -0.0543  
AT.168 H X -0.0110 -0.0003 -0.0030 0.0069 0.0815 -0.0851  
Y 0.0259 0.0011 0.0095 -0.0157 -0.1874 0.1960  
Z -0.0073 0.0014 -0.0029 0.0041 0.0517 -0.0543  
AT.169 O X 0.0019 0.0012 0.0000 -0.0002 0.0031 0.0032



|                           |     |         |         |         |         |         |         |
|---------------------------|-----|---------|---------|---------|---------|---------|---------|
|                           | Y   | -0.0017 | -0.0011 | 0.0001  | -0.0000 | 0.0017  | 0.0016  |
|                           | Z   | 0.0007  | 0.0007  | 0.0003  | 0.0001  | -0.0013 | -0.0012 |
| AT. 170                   | O X | 0.0019  | -0.0012 | -0.0000 | -0.0002 | -0.0031 | 0.0032  |
|                           | Y   | -0.0017 | 0.0011  | -0.0001 | -0.0000 | -0.0017 | 0.0016  |
|                           | Z   | 0.0007  | -0.0007 | -0.0003 | 0.0001  | 0.0013  | -0.0012 |
| AT. 171                   | H X | -0.0380 | -0.0137 | 0.0021  | 0.0080  | -0.1330 | -0.1368 |
|                           | Y   | -0.0223 | -0.0090 | 0.0003  | 0.0040  | -0.0667 | -0.0687 |
|                           | Z   | -0.0039 | -0.0021 | 0.0004  | 0.0010  | -0.0103 | -0.0110 |
| AT. 172                   | H X | -0.0380 | 0.0137  | -0.0021 | 0.0080  | 0.1330  | -0.1368 |
|                           | Y   | -0.0223 | 0.0090  | -0.0003 | 0.0040  | 0.0667  | -0.0687 |
|                           | Z   | -0.0039 | 0.0021  | -0.0004 | 0.0010  | 0.0103  | -0.0110 |
|                           |     |         |         |         |         |         |         |
| FREQ(CM** <sup>-1</sup> ) |     | 753.20  | 762.95  | 764.57  | 769.75  | 773.59  | 773.68  |
|                           |     |         |         |         |         |         |         |
| AT. 1                     | I X | -0.0004 | -0.0001 | 0.0000  | -0.0005 | -0.0000 | 0.0002  |
|                           | Y   | -0.0003 | -0.0001 | -0.0000 | -0.0007 | -0.0000 | 0.0003  |
|                           | Z   | -0.0001 | -0.0000 | -0.0000 | -0.0001 | -0.0000 | 0.0000  |
| AT. 2                     | I X | 0.0004  | -0.0001 | -0.0000 | -0.0005 | 0.0000  | 0.0002  |
|                           | Y   | 0.0003  | -0.0001 | 0.0000  | -0.0007 | 0.0000  | 0.0003  |
|                           | Z   | 0.0001  | -0.0000 | 0.0000  | -0.0001 | 0.0000  | 0.0000  |
| AT. 3                     | I X | -0.0002 | -0.0010 | -0.0009 | -0.0001 | -0.0000 | -0.0000 |
|                           | Y   | -0.0002 | -0.0007 | -0.0006 | -0.0002 | -0.0000 | 0.0000  |
|                           | Z   | -0.0002 | -0.0010 | -0.0010 | -0.0002 | -0.0000 | 0.0000  |
| AT. 4                     | I X | 0.0002  | -0.0010 | 0.0009  | -0.0001 | 0.0000  | -0.0000 |
|                           | Y   | 0.0002  | -0.0007 | 0.0006  | -0.0002 | 0.0000  | 0.0000  |
|                           | Z   | 0.0002  | -0.0010 | 0.0010  | -0.0002 | 0.0000  | 0.0000  |
| AT. 5                     | O X | 0.0010  | 0.0003  | 0.0001  | 0.0023  | -0.0000 | -0.0011 |
|                           | Y   | 0.0026  | 0.0003  | 0.0006  | 0.0081  | 0.0002  | -0.0036 |
|                           | Z   | 0.0016  | 0.0002  | 0.0005  | 0.0045  | 0.0001  | -0.0021 |
| AT. 6                     | O X | -0.0010 | 0.0003  | -0.0001 | 0.0023  | 0.0000  | -0.0011 |
|                           | Y   | -0.0026 | 0.0003  | -0.0006 | 0.0081  | -0.0002 | -0.0036 |
|                           | Z   | -0.0016 | 0.0002  | -0.0005 | 0.0045  | -0.0001 | -0.0021 |

AT. 7 O X -0.0004 0.0000 0.0004 0.0004 0.0001 -0.0002  
Y 0.0046 0.0196 0.0199 0.0050 0.0010 -0.0004  
Z 0.0012 0.0035 0.0041 0.0008 0.0002 0.0000

AT. 8 O X 0.0004 0.0000 -0.0004 0.0004 -0.0001 -0.0002  
Y -0.0046 0.0196 -0.0199 0.0050 -0.0010 -0.0004  
Z -0.0012 0.0035 -0.0041 0.0008 -0.0002 0.0000

AT. 9 N X -0.0004 0.0004 0.0012 0.0035 0.0000 -0.0017  
Y 0.0005 0.0003 0.0008 0.0043 0.0002 -0.0020  
Z -0.0034 -0.0000 0.0004 -0.0035 -0.0001 0.0015

AT. 10 N X 0.0004 0.0004 -0.0012 0.0035 -0.0000 -0.0017  
Y -0.0005 0.0003 -0.0008 0.0043 -0.0002 -0.0020  
Z 0.0034 -0.0000 -0.0004 -0.0035 0.0001 0.0015

AT. 11 N X 0.0018 0.0097 0.0100 0.0025 0.0002 -0.0002  
Y 0.0013 0.0095 0.0098 0.0019 0.0002 0.0001  
Z 0.0006 0.0039 0.0038 0.0011 0.0001 -0.0000

AT. 12 N X -0.0018 0.0097 -0.0100 0.0025 -0.0002 -0.0002  
Y -0.0013 0.0095 -0.0098 0.0019 -0.0002 0.0001  
Z -0.0006 0.0039 -0.0038 0.0011 -0.0001 -0.0000

AT. 13 C X -0.0089 -0.0006 -0.0010 -0.0215 -0.0005 0.0099  
Y -0.0066 -0.0013 -0.0019 -0.0192 -0.0006 0.0089  
Z 0.0013 0.0002 -0.0005 -0.0001 -0.0001 0.0002

AT. 14 C X 0.0089 -0.0006 0.0010 -0.0215 0.0005 0.0099  
Y 0.0066 -0.0013 0.0019 -0.0192 0.0006 0.0089  
Z -0.0013 0.0002 0.0005 -0.0001 0.0001 0.0002

AT. 15 C X 0.0081 0.0005 0.0002 0.0137 0.0003 -0.0055  
Y 0.0032 0.0016 0.0017 0.0094 0.0003 -0.0045  
Z 0.0046 0.0005 0.0001 0.0045 0.0003 -0.0015

AT. 16 C X -0.0081 0.0005 -0.0002 0.0137 -0.0003 -0.0055  
Y -0.0032 0.0016 -0.0017 0.0094 -0.0003 -0.0045  
Z -0.0046 0.0005 -0.0001 0.0045 -0.0003 -0.0015

AT. 17 H X 0.0143 0.0015 0.0007 0.0301 0.0013 -0.0132  
Y 0.0033 0.0029 0.0027 0.0119 0.0008 -0.0051

Z 0.0060 -0.0006 -0.0009 0.0065 0.0001 -0.0031  
AT. 18 H X -0.0143 0.0015 -0.0007 0.0301 -0.0013 -0.0132  
Y -0.0033 0.0029 -0.0027 0.0119 -0.0008 -0.0051  
Z -0.0060 -0.0006 0.0009 0.0065 -0.0001 -0.0031  
AT. 19 H X 0.0125 0.0000 0.0005 0.0271 0.0005 -0.0122  
Y -0.0026 -0.0011 -0.0013 -0.0052 -0.0008 0.0012  
Z 0.0034 -0.0009 -0.0007 0.0041 -0.0000 -0.0018  
AT. 20 H X -0.0125 0.0000 -0.0005 0.0271 -0.0005 -0.0122  
Y 0.0026 -0.0011 0.0013 -0.0052 0.0008 0.0012  
Z -0.0034 -0.0009 0.0007 0.0041 0.0000 -0.0018  
AT. 21 C X -0.0073 -0.0397 -0.0404 -0.0103 -0.0016 0.0011  
Y -0.0062 -0.0369 -0.0375 -0.0093 -0.0012 0.0009  
Z -0.0037 -0.0205 -0.0211 -0.0057 -0.0009 0.0007  
AT. 22 C X 0.0073 -0.0397 0.0404 -0.0103 0.0016 0.0011  
Y 0.0062 -0.0369 0.0375 -0.0093 0.0012 0.0009  
Z 0.0037 -0.0205 0.0211 -0.0057 0.0009 0.0007  
AT. 23 C X 0.0053 0.0233 0.0236 0.0059 0.0009 -0.0006  
Y 0.0014 0.0077 0.0078 0.0023 0.0002 -0.0003  
Z 0.0023 0.0200 0.0202 0.0048 0.0008 -0.0007  
AT. 24 C X -0.0053 0.0233 -0.0236 0.0059 -0.0009 -0.0006  
Y -0.0014 0.0077 -0.0078 0.0023 -0.0002 -0.0003  
Z -0.0023 0.0200 -0.0202 0.0048 -0.0008 -0.0007  
AT. 25 H X 0.0130 0.0562 0.0561 0.0129 0.0020 -0.0008  
Y 0.0027 0.0171 0.0173 0.0042 0.0006 -0.0004  
Z -0.0030 -0.0223 -0.0228 -0.0047 -0.0008 0.0003  
AT. 26 H X -0.0130 0.0562 -0.0561 0.0129 -0.0020 -0.0008  
Y -0.0027 0.0171 -0.0173 0.0042 -0.0006 -0.0004  
Z 0.0030 -0.0223 0.0228 -0.0047 0.0008 0.0003  
AT. 27 H X 0.0092 0.0419 0.0429 0.0112 0.0024 -0.0016  
Y 0.0029 0.0271 0.0280 0.0060 0.0014 -0.0010  
Z 0.0015 0.0248 0.0254 0.0056 0.0009 -0.0009  
AT. 28 H X -0.0092 0.0419 -0.0429 0.0112 -0.0024 -0.0016

Y -0.0029 0.0271 -0.0280 0.0060 -0.0014 -0.0010  
Z -0.0015 0.0248 -0.0254 0.0056 -0.0009 -0.0009  
AT. 29 C X -0.0049 -0.0005 -0.0001 -0.0035 -0.0001 0.0010  
Y 0.0036 -0.0018 -0.0023 0.0017 0.0001 -0.0009  
Z -0.0031 -0.0008 -0.0003 -0.0036 0.0001 0.0013  
AT. 30 C X 0.0049 -0.0005 0.0001 -0.0035 0.0001 0.0010  
Y -0.0036 -0.0018 0.0023 0.0017 -0.0001 -0.0009  
Z 0.0031 -0.0008 0.0003 -0.0036 -0.0001 0.0013  
AT. 31 H X -0.0073 -0.0014 -0.0008 -0.0113 -0.0000 0.0045  
Y 0.0059 -0.0019 -0.0032 0.0070 -0.0001 -0.0036  
Z -0.0008 -0.0018 -0.0020 0.0008 -0.0002 -0.0011  
AT. 32 H X 0.0073 -0.0014 0.0008 -0.0113 0.0000 0.0045  
Y -0.0059 -0.0019 0.0032 0.0070 0.0001 -0.0036  
Z 0.0008 -0.0018 0.0020 0.0008 0.0002 -0.0011  
AT. 33 H X -0.0033 -0.0005 0.0006 -0.0048 0.0002 0.0015  
Y -0.0022 -0.0007 -0.0002 -0.0076 0.0005 0.0034  
Z 0.0000 -0.0009 -0.0006 -0.0011 0.0001 -0.0000  
AT. 34 H X 0.0033 -0.0005 -0.0006 -0.0048 -0.0002 0.0015  
Y 0.0022 -0.0007 0.0002 -0.0076 -0.0005 0.0034  
Z -0.0000 -0.0009 0.0006 -0.0011 -0.0001 -0.0000  
AT. 35 C X 0.0001 -0.0013 -0.0014 -0.0003 -0.0000 -0.0001  
Y -0.0003 -0.0007 -0.0009 -0.0004 -0.0000 -0.0001  
Z 0.0001 0.0006 0.0006 0.0002 0.0000 -0.0000  
AT. 36 C X -0.0001 -0.0013 0.0014 -0.0003 0.0000 -0.0001  
Y 0.0003 -0.0007 0.0009 -0.0004 0.0000 -0.0001  
Z -0.0001 0.0006 -0.0006 0.0002 -0.0000 -0.0000  
AT. 37 C X 0.0026 0.0085 0.0083 0.0034 0.0003 -0.0005  
Y 0.0000 -0.0015 -0.0016 -0.0000 -0.0002 -0.0000  
Z 0.0005 0.0014 0.0014 0.0007 0.0001 -0.0002  
AT. 38 C X -0.0026 0.0085 -0.0083 0.0034 -0.0003 -0.0005  
Y -0.0000 -0.0015 0.0016 -0.0000 0.0002 -0.0000  
Z -0.0005 0.0014 -0.0014 0.0007 -0.0001 -0.0002

AT. 39 H X 0.0006 0.0093 0.0099 0.0021 0.0007 -0.0003  
Y -0.0011 -0.0006 -0.0003 -0.0012 0.0000 0.0004  
Z -0.0006 0.0016 0.0021 0.0003 0.0003 -0.0003

AT. 40 H X -0.0006 0.0093 -0.0099 0.0021 -0.0007 -0.0003  
Y 0.0011 -0.0006 0.0003 -0.0012 -0.0000 0.0004  
Z 0.0006 0.0016 -0.0021 0.0003 -0.0003 -0.0003

AT. 41 H X 0.0032 0.0063 0.0058 0.0048 0.0002 -0.0009  
Y 0.0005 -0.0027 -0.0033 -0.0007 -0.0004 0.0002  
Z -0.0012 0.0041 0.0050 -0.0001 0.0005 0.0000

AT. 42 H X -0.0032 0.0063 -0.0058 0.0048 -0.0002 -0.0009  
Y -0.0005 -0.0027 0.0033 -0.0007 0.0004 0.0002  
Z 0.0012 0.0041 -0.0050 -0.0001 -0.0005 0.0000

AT. 43 C X -0.0004 0.0027 0.0029 0.0007 0.0003 -0.0004  
Y 0.0007 -0.0003 -0.0003 0.0006 0.0001 -0.0005  
Z -0.0004 -0.0009 -0.0009 0.0000 0.0001 -0.0000

AT. 44 C X 0.0004 0.0027 -0.0029 0.0007 -0.0003 -0.0004  
Y -0.0007 -0.0003 0.0003 0.0006 -0.0001 -0.0005  
Z 0.0004 -0.0009 0.0009 0.0000 -0.0001 -0.0000

AT. 45 H X -0.0025 -0.0082 -0.0084 -0.0039 -0.0005 0.0005  
Y 0.0051 0.0086 0.0083 0.0055 0.0012 -0.0024  
Z -0.0034 -0.0020 -0.0016 -0.0018 -0.0002 0.0011

AT. 46 H X 0.0025 -0.0082 0.0084 -0.0039 0.0005 0.0005  
Y -0.0051 0.0086 -0.0083 0.0055 -0.0012 -0.0024  
Z 0.0034 -0.0020 0.0016 -0.0018 0.0002 0.0011

AT. 47 H X -0.0012 0.0022 0.0027 0.0003 0.0001 -0.0001  
Y -0.0042 -0.0076 -0.0070 -0.0028 -0.0005 0.0007  
Z -0.0041 -0.0082 -0.0078 -0.0026 -0.0003 0.0008

AT. 48 H X 0.0012 0.0022 -0.0027 0.0003 -0.0001 -0.0001  
Y 0.0042 -0.0076 0.0070 -0.0028 0.0005 0.0007  
Z 0.0041 -0.0082 0.0078 -0.0026 0.0003 0.0008

AT. 49 C X -0.0001 0.0000 -0.0001 -0.0003 -0.0001 0.0001  
Y -0.0000 -0.0006 -0.0008 -0.0003 -0.0001 0.0000

Z 0.0002 0.0003 0.0003 0.0000 0.0000 -0.0001  
AT. 50 C X 0.0001 0.0000 0.0001 -0.0003 0.0001 0.0001  
Y 0.0000 -0.0006 0.0008 -0.0003 0.0001 0.0000  
Z -0.0002 0.0003 -0.0003 0.0000 -0.0000 -0.0001  
AT. 51 C X 0.0050 -0.0011 -0.0013 0.0055 -0.0002 -0.0021  
Y -0.0017 -0.0010 -0.0009 -0.0022 -0.0001 0.0012  
Z -0.0060 -0.0002 0.0001 -0.0069 -0.0004 0.0030  
AT. 52 C X -0.0050 -0.0011 0.0013 0.0055 0.0002 -0.0021  
Y 0.0017 -0.0010 0.0009 -0.0022 0.0001 0.0012  
Z 0.0060 -0.0002 -0.0001 -0.0069 0.0004 0.0030  
AT. 53 H X 0.0024 0.0001 0.0007 0.0044 -0.0005 -0.0019  
Y -0.0033 0.0001 0.0007 -0.0041 -0.0005 0.0018  
Z -0.0026 -0.0013 -0.0018 -0.0065 -0.0003 0.0031  
AT. 54 H X -0.0024 0.0001 -0.0007 0.0044 0.0005 -0.0019  
Y 0.0033 0.0001 -0.0007 -0.0041 0.0005 0.0018  
Z 0.0026 -0.0013 0.0018 -0.0065 0.0003 0.0031  
AT. 55 H X 0.0066 -0.0026 -0.0039 0.0062 0.0003 -0.0019  
Y -0.0024 -0.0010 -0.0009 -0.0044 -0.0004 0.0019  
Z -0.0057 -0.0015 -0.0017 -0.0085 -0.0004 0.0037  
AT. 56 H X -0.0066 -0.0026 0.0039 0.0062 -0.0003 -0.0019  
Y 0.0024 -0.0010 0.0009 -0.0044 0.0004 0.0019  
Z 0.0057 -0.0015 0.0017 -0.0085 0.0004 0.0037  
AT. 57 C X 0.0019 -0.0017 -0.0019 0.0010 -0.0000 -0.0003  
Y -0.0012 0.0009 0.0013 -0.0002 0.0001 0.0000  
Z 0.0009 -0.0007 -0.0008 0.0003 -0.0000 -0.0001  
AT. 58 C X -0.0019 -0.0017 0.0019 0.0010 0.0000 -0.0003  
Y 0.0012 0.0009 -0.0013 -0.0002 -0.0001 0.0000  
Z -0.0009 -0.0007 0.0008 0.0003 0.0000 -0.0001  
AT. 59 H X 0.0033 0.0039 0.0033 0.0025 -0.0001 -0.0007  
Y -0.0006 -0.0007 -0.0006 -0.0003 0.0000 -0.0001  
Z 0.0024 0.0005 0.0001 0.0019 -0.0001 -0.0006  
AT. 60 H X -0.0033 0.0039 -0.0033 0.0025 0.0001 -0.0007

Y 0.0006 -0.0007 0.0006 -0.0003 -0.0000 -0.0001  
Z -0.0024 0.0005 -0.0001 0.0019 0.0001 -0.0006  
AT. 61 H X 0.0042 -0.0022 -0.0026 0.0023 -0.0002 -0.0009  
Y -0.0002 0.0039 0.0040 0.0005 0.0001 0.0002  
Z 0.0022 -0.0023 -0.0028 0.0003 -0.0001 -0.0005  
AT. 62 H X -0.0042 -0.0022 0.0026 0.0023 0.0002 -0.0009  
Y 0.0002 0.0039 -0.0040 0.0005 -0.0001 0.0002  
Z -0.0022 -0.0023 0.0028 0.0003 0.0001 -0.0005  
AT. 63 H X -0.0000 -0.0018 -0.0017 -0.0002 -0.0002 -0.0000  
Y 0.0017 0.0036 0.0036 0.0021 0.0005 -0.0003  
Z 0.0001 -0.0029 -0.0028 -0.0006 -0.0002 -0.0001  
AT. 64 H X 0.0000 -0.0018 0.0017 -0.0002 0.0002 -0.0000  
Y -0.0017 0.0036 -0.0036 0.0021 -0.0005 -0.0003  
Z -0.0001 -0.0029 0.0028 -0.0006 0.0002 -0.0001  
AT. 65 C X -0.0023 -0.0002 0.0001 -0.0012 0.0000 0.0005  
Y 0.0013 -0.0001 -0.0002 0.0009 -0.0000 -0.0004  
Z 0.0026 0.0002 0.0001 0.0018 0.0001 -0.0008  
AT. 66 C X 0.0023 -0.0002 -0.0001 -0.0012 -0.0000 0.0005  
Y -0.0013 -0.0001 0.0002 0.0009 0.0000 -0.0004  
Z -0.0026 0.0002 -0.0001 0.0018 -0.0001 -0.0008  
AT. 67 H X 0.0011 0.0005 0.0004 0.0030 -0.0001 -0.0011  
Y 0.0011 -0.0003 -0.0003 0.0001 0.0001 -0.0003  
Z -0.0002 -0.0001 -0.0000 -0.0010 -0.0000 0.0004  
AT. 68 H X -0.0011 0.0005 -0.0004 0.0030 0.0001 -0.0011  
Y -0.0011 -0.0003 0.0003 0.0001 -0.0001 -0.0003  
Z 0.0002 -0.0001 0.0000 -0.0010 0.0000 0.0004  
AT. 69 H X -0.0026 -0.0009 -0.0004 -0.0012 0.0002 0.0004  
Y 0.0026 -0.0001 -0.0002 0.0030 0.0001 -0.0011  
Z 0.0057 0.0016 0.0009 0.0049 -0.0002 -0.0016  
AT. 70 H X 0.0026 -0.0009 0.0004 -0.0012 -0.0002 0.0004  
Y -0.0026 -0.0001 0.0002 0.0030 -0.0001 -0.0011  
Z -0.0057 0.0016 -0.0009 0.0049 0.0002 -0.0016

AT. 71 H X -0.0011 0.0008 0.0007 0.0000 -0.0001 0.0002  
Y 0.0030 -0.0004 -0.0006 0.0024 0.0000 -0.0010  
Z 0.0055 0.0005 0.0002 0.0048 0.0001 -0.0018

AT. 72 H X 0.0011 0.0008 -0.0007 0.0000 0.0001 0.0002  
Y -0.0030 -0.0004 0.0006 0.0024 -0.0000 -0.0010  
Z -0.0055 0.0005 -0.0002 0.0048 -0.0001 -0.0018

AT. 73 C X 0.0003 -0.0014 -0.0014 -0.0003 0.0001 -0.0001  
Y -0.0009 0.0003 0.0004 0.0002 -0.0000 -0.0001  
Z 0.0023 0.0021 0.0018 0.0032 0.0000 -0.0011

AT. 74 C X -0.0003 -0.0014 0.0014 -0.0003 -0.0001 -0.0001  
Y 0.0009 0.0003 -0.0004 0.0002 0.0000 -0.0001  
Z -0.0023 0.0021 -0.0018 0.0032 -0.0000 -0.0011

AT. 75 H X -0.0007 -0.0006 0.0001 -0.0001 0.0005 -0.0003  
Y -0.0016 0.0010 0.0012 0.0007 -0.0001 -0.0001  
Z 0.0004 0.0037 0.0042 0.0044 0.0002 -0.0012

AT. 76 H X 0.0007 -0.0006 -0.0001 -0.0001 -0.0005 -0.0003  
Y 0.0016 0.0010 -0.0012 0.0007 0.0001 -0.0001  
Z -0.0004 0.0037 -0.0042 0.0044 -0.0002 -0.0012

AT. 77 H X -0.0004 -0.0014 -0.0008 0.0003 0.0001 -0.0004  
Y -0.0016 0.0020 0.0023 0.0003 0.0001 0.0003  
Z 0.0034 0.0007 -0.0004 0.0025 -0.0000 -0.0012

AT. 78 H X 0.0004 -0.0014 0.0008 0.0003 -0.0001 -0.0004  
Y 0.0016 0.0020 -0.0023 0.0003 -0.0001 0.0003  
Z -0.0034 0.0007 0.0004 0.0025 0.0000 -0.0012

AT. 79 I X -0.0008 0.0002 0.0003 -0.0005 0.0001 0.0002  
Y 0.0017 -0.0005 -0.0004 0.0012 -0.0002 -0.0003  
Z 0.0003 -0.0001 -0.0000 0.0001 0.0001 0.0000

AT. 80 I X 0.0008 0.0002 -0.0003 -0.0005 -0.0001 0.0002  
Y -0.0017 -0.0005 0.0004 0.0012 0.0002 -0.0003  
Z -0.0003 -0.0001 0.0000 0.0001 -0.0001 0.0000

AT. 81 I X 0.0002 -0.0000 -0.0001 -0.0001 0.0005 -0.0005  
Y -0.0001 -0.0000 0.0001 0.0003 -0.0010 0.0010



Z -0.0001 -0.0001 0.0001 0.0003 -0.0009 0.0009  
AT. 82 I X -0.0002 -0.0000 0.0001 -0.0001 -0.0005 -0.0005  
Y 0.0001 -0.0000 -0.0001 0.0003 0.0010 0.0010  
Z 0.0001 -0.0001 -0.0001 0.0003 0.0009 0.0009  
AT. 83 O X -0.0069 0.0011 0.0015 -0.0032 0.0013 0.0001  
Y -0.0152 0.0049 0.0036 -0.0130 0.0025 0.0031  
Z -0.0092 0.0032 0.0016 -0.0070 0.0008 0.0021  
AT. 84 O X 0.0069 0.0011 -0.0015 -0.0032 -0.0013 0.0001  
Y 0.0152 0.0049 -0.0036 -0.0130 -0.0025 0.0031  
Z 0.0092 0.0032 -0.0016 -0.0070 -0.0008 0.0021  
AT. 85 O X -0.0003 -0.0006 -0.0005 0.0007 0.0004 -0.0005  
Y 0.0026 0.0010 -0.0017 -0.0067 0.0195 -0.0187  
Z -0.0011 -0.0008 -0.0002 0.0010 0.0024 -0.0025  
AT. 86 O X 0.0003 -0.0006 0.0005 0.0007 -0.0004 -0.0005  
Y -0.0026 0.0010 0.0017 -0.0067 -0.0195 -0.0187  
Z 0.0011 -0.0008 0.0002 0.0010 -0.0024 -0.0025  
AT. 87 N X 0.0052 -0.0022 -0.0011 0.0056 -0.0009 -0.0017  
Y -0.0086 0.0039 0.0023 -0.0104 0.0022 0.0034  
Z 0.0057 -0.0004 -0.0007 0.0001 0.0009 -0.0000  
AT. 88 N X -0.0052 -0.0022 0.0011 0.0056 0.0009 -0.0017  
Y 0.0086 0.0039 -0.0023 -0.0104 -0.0022 0.0034  
Z -0.0057 -0.0004 0.0007 0.0001 -0.0009 -0.0000  
AT. 89 N X -0.0003 0.0001 0.0004 0.0012 -0.0048 0.0045  
Y 0.0012 -0.0004 -0.0002 0.0002 0.0075 -0.0075  
Z 0.0016 0.0010 -0.0005 -0.0034 0.0077 -0.0072  
AT. 90 N X 0.0003 0.0001 -0.0004 0.0012 0.0048 0.0045  
Y -0.0012 -0.0004 0.0002 0.0002 -0.0075 -0.0075  
Z -0.0016 0.0010 0.0005 -0.0034 -0.0077 -0.0072  
AT. 91 C X -0.0245 0.0075 0.0054 -0.0186 0.0033 0.0058  
Y 0.0388 -0.0146 -0.0099 0.0385 -0.0087 -0.0123  
Z 0.0043 -0.0032 -0.0010 0.0066 0.0003 -0.0026  
AT. 92 C X 0.0245 0.0075 -0.0054 -0.0186 -0.0033 0.0058

Y -0.0388 -0.0146 0.0099 0.0385 0.0087 -0.0123  
Z -0.0043 -0.0032 0.0010 0.0066 -0.0003 -0.0026  
AT. 93 C X 0.0118 0.0000 -0.0038 0.0035 -0.0049 0.0000  
Y -0.0221 0.0081 0.0053 -0.0210 0.0045 0.0065  
Z -0.0085 0.0004 0.0007 -0.0002 -0.0018 -0.0013  
AT. 94 C X -0.0118 0.0000 0.0038 0.0035 0.0049 0.0000  
Y 0.0221 0.0081 -0.0053 -0.0210 -0.0045 0.0065  
Z 0.0085 0.0004 -0.0007 -0.0002 0.0018 -0.0013  
AT. 95 H X 0.0884 -0.0296 -0.0161 0.0656 -0.0014 -0.0183  
Y -0.0630 0.0236 0.0107 -0.0531 -0.0002 0.0152  
Z -0.0147 0.0047 0.0040 -0.0108 0.0034 0.0036  
AT. 96 H X -0.0884 -0.0296 0.0161 0.0656 0.0014 -0.0183  
Y 0.0630 0.0236 -0.0107 -0.0531 0.0002 0.0152  
Z 0.0147 0.0047 -0.0040 -0.0108 -0.0034 0.0036  
AT. 97 H X 0.0256 -0.0042 -0.0073 0.0170 -0.0092 -0.0032  
Y 0.0108 -0.0028 0.0017 0.0024 0.0096 0.0014  
Z -0.0057 -0.0009 0.0012 0.0010 0.0010 -0.0014  
AT. 98 H X -0.0256 -0.0042 0.0073 0.0170 0.0092 -0.0032  
Y -0.0108 -0.0028 -0.0017 0.0024 -0.0096 0.0014  
Z 0.0057 -0.0009 -0.0012 0.0010 -0.0010 -0.0014  
AT. 99 C X 0.0029 0.0012 -0.0022 -0.0095 0.0309 -0.0298  
Y -0.0039 -0.0011 0.0030 0.0120 -0.0448 0.0436  
Z -0.0010 -0.0011 0.0018 0.0088 -0.0277 0.0265  
AT. 100 C X -0.0029 0.0012 0.0022 -0.0095 -0.0309 -0.0298  
Y 0.0039 -0.0011 -0.0030 0.0120 0.0448 0.0436  
Z 0.0010 -0.0011 -0.0018 0.0088 0.0277 0.0265  
AT. 101 C X -0.0052 -0.0011 0.0023 0.0063 -0.0150 0.0140  
Y -0.0006 0.0005 -0.0013 -0.0053 0.0188 -0.0178  
Z 0.0022 0.0005 -0.0008 -0.0046 0.0179 -0.0174  
AT. 102 C X 0.0052 -0.0011 -0.0023 0.0063 0.0150 0.0140  
Y 0.0006 0.0005 0.0013 -0.0053 -0.0188 -0.0178  
Z -0.0022 0.0005 0.0008 -0.0046 -0.0179 -0.0174

AT.103 H X -0.0071 -0.0001 0.0052 0.0124 -0.0517 0.0510  
Y -0.0001 0.0001 -0.0024 -0.0080 0.0347 -0.0338  
Z -0.0081 -0.0025 0.0001 0.0047 -0.0028 0.0021

AT.104 H X 0.0071 -0.0001 -0.0052 0.0124 0.0517 0.0510  
Y 0.0001 0.0001 0.0024 -0.0080 -0.0347 -0.0338  
Z 0.0081 -0.0025 -0.0001 0.0047 0.0028 0.0021

AT.105 H X -0.0042 -0.0013 0.0035 0.0113 -0.0336 0.0324  
Y 0.0091 0.0044 -0.0008 -0.0132 0.0226 -0.0212  
Z 0.0051 0.0020 -0.0001 -0.0065 0.0148 -0.0141

AT.106 H X 0.0042 -0.0013 -0.0035 0.0113 0.0336 0.0324  
Y -0.0091 0.0044 0.0008 -0.0132 -0.0226 -0.0212  
Z -0.0051 0.0020 0.0001 -0.0065 -0.0148 -0.0141

AT.107 C X -0.0016 -0.0021 -0.0000 0.0045 0.0000 -0.0027  
Y 0.0005 -0.0012 -0.0003 0.0021 -0.0019 0.0013  
Z 0.0050 0.0000 -0.0008 -0.0004 -0.0009 0.0016

AT.108 C X 0.0016 -0.0021 0.0000 0.0045 -0.0000 -0.0027  
Y -0.0005 -0.0012 0.0003 0.0021 0.0019 0.0013  
Z -0.0050 0.0000 0.0008 -0.0004 0.0009 0.0016

AT.109 H X -0.0200 0.0044 0.0032 -0.0113 0.0018 0.0015  
Y -0.0054 0.0003 0.0007 -0.0013 -0.0018 0.0024  
Z -0.0012 0.0012 0.0003 -0.0030 -0.0011 0.0025

AT.110 H X 0.0200 0.0044 -0.0032 -0.0113 -0.0018 0.0015  
Y 0.0054 0.0003 -0.0007 -0.0013 0.0018 0.0024  
Z 0.0012 0.0012 -0.0003 -0.0030 0.0011 0.0025

AT.111 H X 0.0020 -0.0020 -0.0006 0.0044 0.0000 -0.0026  
Y 0.0126 -0.0046 -0.0023 0.0099 -0.0025 -0.0014  
Z -0.0023 0.0008 0.0004 -0.0023 -0.0007 0.0023

AT.112 H X -0.0020 -0.0020 0.0006 0.0044 -0.0000 -0.0026  
Y -0.0126 -0.0046 0.0023 0.0099 0.0025 -0.0014  
Z 0.0023 0.0008 -0.0004 -0.0023 0.0007 0.0023

AT.113 C X 0.0006 -0.0003 -0.0003 0.0002 0.0012 -0.0014  
Y 0.0002 -0.0003 0.0001 0.0012 -0.0018 0.0014

Z -0.0001 0.0001 -0.0001 -0.0005 0.0005 -0.0005  
AT. 114 C X -0.0006 -0.0003 0.0003 0.0002 -0.0012 -0.0014  
Y -0.0002 -0.0003 -0.0001 0.0012 0.0018 0.0014  
Z 0.0001 0.0001 0.0001 -0.0005 -0.0005 -0.0005  
AT. 115 C X 0.0031 -0.0016 0.0005 0.0070 -0.0136 0.0129  
Y -0.0004 -0.0007 0.0002 0.0023 -0.0002 -0.0008  
Z 0.0000 0.0013 -0.0005 -0.0042 0.0055 -0.0047  
AT. 116 C X -0.0031 -0.0016 -0.0005 0.0070 0.0136 0.0129  
Y 0.0004 -0.0007 -0.0002 0.0023 0.0002 -0.0008  
Z -0.0000 0.0013 0.0005 -0.0042 -0.0055 -0.0047  
AT. 117 H X 0.0006 -0.0011 0.0013 0.0070 -0.0132 0.0122  
Y 0.0032 -0.0003 -0.0002 0.0015 -0.0002 -0.0002  
Z 0.0010 0.0004 -0.0011 -0.0035 0.0053 -0.0044  
AT. 118 H X -0.0006 -0.0011 -0.0013 0.0070 0.0132 0.0122  
Y -0.0032 -0.0003 0.0002 0.0015 0.0002 -0.0002  
Z -0.0010 0.0004 0.0011 -0.0035 -0.0053 -0.0044  
AT. 119 H X 0.0039 -0.0012 0.0000 0.0048 -0.0123 0.0124  
Y -0.0017 -0.0011 0.0003 0.0035 -0.0017 0.0001  
Z 0.0018 0.0018 -0.0007 -0.0063 0.0073 -0.0055  
AT. 120 H X -0.0039 -0.0012 -0.0000 0.0048 0.0123 0.0124  
Y 0.0017 -0.0011 -0.0003 0.0035 0.0017 0.0001  
Z -0.0018 0.0018 0.0007 -0.0063 -0.0073 -0.0055  
AT. 121 C X -0.0035 0.0011 0.0007 -0.0021 -0.0004 0.0008  
Y -0.0031 -0.0008 0.0002 0.0001 -0.0012 0.0010  
Z -0.0004 0.0006 -0.0010 -0.0035 0.0036 -0.0031  
AT. 122 C X 0.0035 0.0011 -0.0007 -0.0021 0.0004 0.0008  
Y 0.0031 -0.0008 -0.0002 0.0001 0.0012 0.0010  
Z 0.0004 0.0006 0.0010 -0.0035 -0.0036 -0.0031  
AT. 123 H X -0.0042 0.0004 -0.0018 -0.0081 0.0172 -0.0162  
Y -0.0057 -0.0019 -0.0011 -0.0022 0.0056 -0.0058  
Z 0.0020 0.0013 -0.0000 -0.0014 -0.0007 0.0012  
AT. 124 H X 0.0042 0.0004 0.0018 -0.0081 -0.0172 -0.0162

Y 0.0057 -0.0019 0.0011 -0.0022 -0.0056 -0.0058  
Z -0.0020 0.0013 0.0000 -0.0014 0.0007 0.0012  
AT. 125 H X -0.0030 0.0008 0.0007 -0.0003 -0.0034 0.0034  
Y 0.0002 -0.0012 0.0006 0.0044 -0.0120 0.0118  
Z 0.0014 -0.0001 -0.0007 0.0009 -0.0058 0.0058  
AT. 126 H X 0.0030 0.0008 -0.0007 -0.0003 0.0034 0.0034  
Y -0.0002 -0.0012 -0.0006 0.0044 0.0120 0.0118  
Z -0.0014 -0.0001 0.0007 0.0009 0.0058 0.0058  
AT. 127 C X -0.0008 0.0003 0.0001 -0.0007 0.0002 0.0001  
Y 0.0003 0.0004 0.0003 -0.0000 -0.0001 0.0000  
Z -0.0004 0.0002 0.0001 -0.0004 -0.0001 0.0002  
AT. 128 C X 0.0008 0.0003 -0.0001 -0.0007 -0.0002 0.0001  
Y -0.0003 0.0004 -0.0003 -0.0000 0.0001 0.0000  
Z 0.0004 0.0002 -0.0001 -0.0004 0.0001 0.0002  
AT. 129 C X 0.0103 -0.0017 -0.0019 0.0033 -0.0016 0.0009  
Y 0.0018 0.0005 0.0001 0.0003 0.0012 -0.0012  
Z 0.0103 -0.0005 -0.0014 0.0020 0.0005 -0.0006  
AT. 130 C X -0.0103 -0.0017 0.0019 0.0033 0.0016 0.0009  
Y -0.0018 0.0005 -0.0001 0.0003 -0.0012 -0.0012  
Z -0.0103 -0.0005 0.0014 0.0020 -0.0005 -0.0006  
AT. 131 H X 0.0118 -0.0031 -0.0025 0.0071 -0.0017 -0.0010  
Y 0.0011 0.0004 0.0009 0.0006 0.0007 0.0004  
Z 0.0106 -0.0027 -0.0016 0.0077 0.0002 -0.0027  
AT. 132 H X -0.0118 -0.0031 0.0025 0.0071 0.0017 -0.0010  
Y -0.0011 0.0004 -0.0009 0.0006 -0.0007 0.0004  
Z -0.0106 -0.0027 0.0016 0.0077 -0.0002 -0.0027  
AT. 133 H X 0.0097 -0.0017 -0.0011 0.0034 -0.0016 0.0016  
Y 0.0037 -0.0006 -0.0003 0.0035 0.0015 -0.0027  
Z 0.0124 -0.0018 -0.0020 0.0059 0.0010 -0.0031  
AT. 134 H X -0.0097 -0.0017 0.0011 0.0034 0.0016 0.0016  
Y -0.0037 -0.0006 0.0003 0.0035 -0.0015 -0.0027  
Z -0.0124 -0.0018 0.0020 0.0059 -0.0010 -0.0031

AT. 135 C X -0.0003 0.0011 -0.0001 -0.0037 0.0032 -0.0019  
Y -0.0004 0.0007 -0.0000 -0.0016 0.0010 -0.0005  
Z 0.0006 -0.0007 -0.0001 0.0023 -0.0018 0.0010

AT. 136 C X 0.0003 0.0011 0.0001 -0.0037 -0.0032 -0.0019  
Y 0.0004 0.0007 0.0000 -0.0016 -0.0010 -0.0005  
Z -0.0006 -0.0007 0.0001 0.0023 0.0018 0.0010

AT. 137 H X -0.0017 0.0006 0.0010 0.0006 -0.0070 0.0078  
Y -0.0013 0.0003 0.0001 -0.0011 0.0009 -0.0007  
Z -0.0012 -0.0009 -0.0001 0.0010 0.0014 -0.0024

AT. 138 H X 0.0017 0.0006 -0.0010 0.0006 0.0070 0.0078  
Y 0.0013 0.0003 -0.0001 -0.0011 -0.0009 -0.0007  
Z 0.0012 -0.0009 0.0001 0.0010 -0.0014 -0.0024

AT. 139 H X 0.0013 0.0020 -0.0006 -0.0061 0.0060 -0.0038  
Y -0.0007 0.0007 -0.0005 -0.0042 0.0062 -0.0053  
Z -0.0011 -0.0022 0.0006 0.0070 -0.0070 0.0048

AT. 140 H X -0.0013 0.0020 0.0006 -0.0061 -0.0060 -0.0038  
Y 0.0007 0.0007 0.0005 -0.0042 -0.0062 -0.0053  
Z 0.0011 -0.0022 -0.0006 0.0070 0.0070 0.0048

AT. 141 H X -0.0029 0.0002 0.0005 -0.0025 0.0033 -0.0026  
Y -0.0025 0.0007 0.0001 -0.0033 0.0053 -0.0048  
Z 0.0012 -0.0011 0.0003 0.0047 -0.0063 0.0052

AT. 142 H X 0.0029 0.0002 -0.0005 -0.0025 -0.0033 -0.0026  
Y 0.0025 0.0007 -0.0001 -0.0033 -0.0053 -0.0048  
Z -0.0012 -0.0011 -0.0003 0.0047 0.0063 0.0052

AT. 143 C X -0.0020 -0.0005 0.0008 0.0020 -0.0015 0.0010  
Y -0.0010 0.0004 0.0003 -0.0005 -0.0004 0.0005  
Z -0.0018 -0.0003 0.0001 0.0006 -0.0011 0.0009

AT. 144 C X 0.0020 -0.0005 -0.0008 0.0020 0.0015 0.0010  
Y 0.0010 0.0004 -0.0003 -0.0005 0.0004 0.0005  
Z 0.0018 -0.0003 -0.0001 0.0006 0.0011 0.0009

AT. 145 H X 0.0053 -0.0016 -0.0012 0.0037 -0.0035 0.0022  
Y -0.0022 0.0002 0.0002 -0.0012 0.0006 -0.0003

Z 0.0009 -0.0007 -0.0000 0.0025 -0.0027 0.0019  
AT. 146 H X -0.0053 -0.0016 0.0012 0.0037 0.0035 0.0022  
Y 0.0022 0.0002 -0.0002 -0.0012 -0.0006 -0.0003  
Z -0.0009 -0.0007 0.0000 0.0025 0.0027 0.0019  
AT. 147 H X -0.0031 -0.0002 0.0020 0.0030 -0.0012 0.0006  
Y -0.0043 -0.0005 -0.0005 -0.0004 -0.0002 -0.0000  
Z -0.0050 -0.0003 0.0013 0.0021 -0.0006 -0.0001  
AT. 148 H X 0.0031 -0.0002 -0.0020 0.0030 0.0012 0.0006  
Y 0.0043 -0.0005 0.0005 -0.0004 0.0002 -0.0000  
Z 0.0050 -0.0003 -0.0013 0.0021 0.0006 -0.0001  
AT. 149 H X -0.0020 -0.0017 -0.0007 0.0020 -0.0019 0.0011  
Y -0.0026 0.0003 0.0006 -0.0007 0.0007 -0.0005  
Z -0.0050 0.0004 0.0015 -0.0002 0.0008 -0.0007  
AT. 150 H X 0.0020 -0.0017 0.0007 0.0020 0.0019 0.0011  
Y 0.0026 0.0003 -0.0006 -0.0007 -0.0007 -0.0005  
Z 0.0050 0.0004 -0.0015 -0.0002 -0.0008 -0.0007  
AT. 151 C X 0.0003 0.0005 -0.0003 -0.0016 0.0037 -0.0034  
Y -0.0001 0.0006 0.0002 -0.0011 0.0009 -0.0008  
Z -0.0059 -0.0002 0.0014 0.0009 -0.0012 0.0008  
AT. 152 C X -0.0003 0.0005 0.0003 -0.0016 -0.0037 -0.0034  
Y 0.0001 0.0006 -0.0002 -0.0011 -0.0009 -0.0008  
Z 0.0059 -0.0002 -0.0014 0.0009 0.0012 0.0008  
AT. 153 H X -0.0007 0.0013 0.0002 -0.0019 0.0045 -0.0043  
Y 0.0019 0.0007 -0.0009 -0.0022 0.0019 -0.0012  
Z -0.0030 0.0000 -0.0003 -0.0016 0.0002 0.0007  
AT. 154 H X 0.0007 0.0013 -0.0002 -0.0019 -0.0045 -0.0043  
Y -0.0019 0.0007 0.0009 -0.0022 -0.0019 -0.0012  
Z 0.0030 0.0000 0.0003 -0.0016 -0.0002 0.0007  
AT. 155 H X 0.0008 -0.0002 -0.0008 -0.0004 0.0043 -0.0049  
Y 0.0017 0.0006 -0.0010 -0.0029 0.0022 -0.0010  
Z -0.0077 -0.0007 0.0025 0.0041 -0.0023 0.0002  
AT. 156 H X -0.0008 -0.0002 0.0008 -0.0004 -0.0043 -0.0049

Y -0.0017 0.0006 0.0010 -0.0029 -0.0022 -0.0010  
Z 0.0077 -0.0007 -0.0025 0.0041 0.0023 0.0002  
AT. 157 O X -0.0003 -0.0001 -0.0002 0.0005 -0.0000 -0.0002  
Y -0.0000 -0.0001 0.0001 -0.0009 -0.0000 0.0004  
Z 0.0001 0.0002 -0.0003 0.0003 -0.0000 -0.0002  
AT. 158 O X 0.0003 -0.0001 0.0002 0.0005 0.0000 -0.0002  
Y 0.0000 -0.0001 -0.0001 -0.0009 0.0000 0.0004  
Z -0.0001 0.0002 0.0003 0.0003 0.0000 -0.0002  
AT. 159 O X 0.0001 -0.0001 -0.0000 -0.0001 -0.0001 0.0001  
Y -0.0015 0.0009 -0.0015 0.0001 -0.0005 0.0001  
Z 0.0000 0.0000 -0.0002 0.0002 -0.0000 -0.0000  
AT. 160 O X -0.0001 -0.0001 0.0000 -0.0001 0.0001 0.0001  
Y 0.0015 0.0009 0.0015 0.0001 0.0005 0.0001  
Z -0.0000 0.0000 0.0002 0.0002 0.0000 -0.0000  
AT. 161 H X 0.0044 -0.0037 0.0071 -0.0066 0.0023 0.0031  
Y -0.0009 0.0015 -0.0035 0.0029 -0.0011 -0.0012  
Z 0.0067 -0.0071 0.0131 -0.0121 0.0039 0.0054  
AT. 162 H X -0.0044 -0.0037 -0.0071 -0.0066 -0.0023 0.0031  
Y 0.0009 0.0015 0.0035 0.0029 0.0011 -0.0012  
Z -0.0067 -0.0071 -0.0131 -0.0121 -0.0039 0.0054  
AT. 163 H X 0.0003 -0.0008 0.0010 0.0005 0.0001 -0.0003  
Y 0.0357 -0.0235 0.0384 -0.0014 0.0126 -0.0027  
Z 0.0070 -0.0044 0.0076 -0.0006 0.0027 -0.0004  
AT. 164 H X -0.0003 -0.0008 -0.0010 0.0005 -0.0001 -0.0003  
Y -0.0357 -0.0235 -0.0384 -0.0014 -0.0126 -0.0027  
Z -0.0070 -0.0044 -0.0076 -0.0006 -0.0027 -0.0004  
AT. 165 O X 0.0012 -0.0003 -0.0003 0.0009 0.0005 0.0004  
Y -0.0014 0.0001 0.0003 -0.0006 -0.0015 -0.0013  
Z 0.0004 -0.0000 -0.0002 0.0003 0.0001 0.0000  
AT. 166 O X -0.0012 -0.0003 0.0003 0.0009 -0.0005 0.0004  
Y 0.0014 0.0001 -0.0003 -0.0006 0.0015 -0.0013  
Z -0.0004 -0.0000 0.0002 0.0003 -0.0001 0.0000



AT.167 H X -0.0219 0.0042 0.0042 -0.0128 -0.0116 -0.0103

Y 0.0542 -0.0106 -0.0105 0.0319 0.0260 0.0229

Z -0.0180 0.0037 0.0033 -0.0105 -0.0066 -0.0053

AT.168 H X 0.0219 0.0042 -0.0042 -0.0128 0.0116 -0.0103

Y -0.0542 -0.0106 0.0105 0.0319 -0.0260 0.0229

Z 0.0180 0.0037 -0.0033 -0.0105 0.0066 -0.0053

AT.169 O X 0.0017 -0.0004 -0.0001 0.0009 -0.0010 -0.0012

Y 0.0008 -0.0003 -0.0001 0.0006 0.0003 0.0003

Z -0.0002 0.0001 0.0000 -0.0001 -0.0003 -0.0003

AT.170 O X -0.0017 -0.0004 0.0001 0.0009 0.0010 -0.0012

Y -0.0008 -0.0003 0.0001 0.0006 -0.0003 0.0003

Z 0.0002 0.0001 -0.0000 -0.0001 0.0003 -0.0003

AT.171 H X -0.0638 0.0156 0.0069 -0.0361 0.0121 0.0170

Y -0.0324 0.0079 0.0035 -0.0182 0.0064 0.0090

Z -0.0058 0.0013 0.0010 -0.0036 -0.0004 0.0003

AT.172 H X 0.0638 0.0156 -0.0069 -0.0361 -0.0121 0.0170

Y 0.0324 0.0079 -0.0035 -0.0182 -0.0064 0.0090

Z 0.0058 0.0013 -0.0010 -0.0036 0.0004 0.0003

FREQ(CM\*\*-1) 780.61 781.07 800.59 807.79 814.23 814.55

AT. 1 I X 0.0008 0.0006 0.0000 0.0001 0.0000 0.0000

Y 0.0012 0.0010 0.0002 0.0002 0.0000 -0.0000

Z 0.0001 0.0001 -0.0001 -0.0001 0.0003 0.0004

AT. 2 I X -0.0008 0.0006 -0.0000 0.0001 -0.0000 0.0000

Y -0.0012 0.0010 -0.0002 0.0002 -0.0000 -0.0000

Z -0.0001 0.0001 0.0001 -0.0001 -0.0003 0.0004

AT. 3 I X -0.0001 -0.0001 -0.0000 0.0000 0.0002 -0.0002

Y -0.0000 -0.0001 0.0000 -0.0001 0.0006 -0.0005

Z -0.0001 -0.0001 0.0000 -0.0000 -0.0001 0.0001

AT. 4 I X 0.0001 -0.0001 0.0000 0.0000 -0.0002 -0.0002

Y 0.0000 -0.0001 -0.0000 -0.0001 -0.0006 -0.0005

Z 0.0001 -0.0001 -0.0000 -0.0000 0.0001 0.0001  
AT. 5 O X -0.0048 -0.0041 -0.0016 -0.0014 0.0040 0.0029  
Y -0.0155 -0.0135 -0.0030 -0.0025 -0.0005 0.0012  
Z -0.0083 -0.0073 -0.0005 -0.0007 -0.0029 -0.0019  
AT. 6 O X 0.0048 -0.0041 0.0016 -0.0014 -0.0040 0.0029  
Y 0.0155 -0.0135 0.0030 -0.0025 0.0005 0.0012  
Z 0.0083 -0.0073 0.0005 -0.0007 0.0029 -0.0019  
AT. 7 O X 0.0002 0.0003 -0.0004 0.0001 0.0027 -0.0021  
Y 0.0015 0.0038 -0.0001 0.0014 -0.0053 0.0047  
Z -0.0003 0.0011 -0.0002 -0.0000 0.0059 -0.0052  
AT. 8 O X -0.0002 0.0003 0.0004 0.0001 -0.0027 -0.0021  
Y -0.0015 0.0038 0.0001 0.0014 0.0053 0.0047  
Z 0.0003 0.0011 0.0002 -0.0000 -0.0059 -0.0052  
AT. 9 N X -0.0066 -0.0058 -0.0030 -0.0018 0.0062 0.0024  
Y -0.0082 -0.0070 -0.0029 -0.0021 0.0059 0.0009  
Z 0.0060 0.0048 -0.0011 -0.0002 0.0056 0.0060  
AT. 10 N X 0.0066 -0.0058 0.0030 -0.0018 -0.0062 0.0024  
Y 0.0082 -0.0070 0.0029 -0.0021 -0.0059 0.0009  
Z -0.0060 0.0048 0.0011 -0.0002 -0.0056 0.0060  
AT. 11 N X 0.0011 0.0016 -0.0010 -0.0003 0.0071 -0.0042  
Y 0.0014 0.0018 -0.0011 -0.0009 0.0125 -0.0079  
Z 0.0012 0.0012 0.0001 0.0009 -0.0073 0.0080  
AT. 12 N X -0.0011 0.0016 0.0010 -0.0003 -0.0071 -0.0042  
Y -0.0014 0.0018 0.0011 -0.0009 -0.0125 -0.0079  
Z -0.0012 0.0012 -0.0001 0.0009 0.0073 0.0080  
AT. 13 C X 0.0414 0.0359 0.0081 0.0072 -0.0058 -0.0069  
Y 0.0384 0.0333 0.0091 0.0079 -0.0078 -0.0082  
Z 0.0014 0.0010 0.0022 0.0010 -0.0041 -0.0040  
AT. 14 C X -0.0414 0.0359 -0.0081 0.0072 0.0058 -0.0069  
Y -0.0384 0.0333 -0.0091 0.0079 0.0078 -0.0082  
Z -0.0014 0.0010 -0.0022 0.0010 0.0041 -0.0040  
AT. 15 C X -0.0204 -0.0168 -0.0012 -0.0005 -0.0032 -0.0009

Y -0.0194 -0.0163 -0.0054 -0.0045 0.0075 0.0061  
Z -0.0072 -0.0043 0.0027 0.0013 -0.0139 -0.0178  
AT. 16 C X 0.0204 -0.0168 0.0012 -0.0005 0.0032 -0.0009  
Y 0.0194 -0.0163 0.0054 -0.0045 -0.0075 0.0061  
Z 0.0072 -0.0043 -0.0027 0.0013 0.0139 -0.0178  
AT. 17 H X -0.0591 -0.0472 -0.0056 -0.0069 -0.0204 -0.0248  
Y -0.0280 -0.0209 -0.0023 -0.0041 -0.0201 -0.0300  
Z -0.0091 -0.0088 -0.0030 -0.0019 0.0164 0.0211  
AT. 18 H X 0.0591 -0.0472 0.0056 -0.0069 0.0204 -0.0248  
Y 0.0280 -0.0209 0.0023 -0.0041 0.0201 -0.0300  
Z 0.0091 -0.0088 0.0030 -0.0019 -0.0164 0.0211  
AT. 19 H X -0.0479 -0.0438 -0.0071 -0.0071 0.0016 0.0100  
Y 0.0121 0.0048 -0.0071 -0.0038 0.0472 0.0584  
Z -0.0052 -0.0058 -0.0002 -0.0003 0.0020 0.0049  
AT. 20 H X 0.0479 -0.0438 0.0071 -0.0071 -0.0016 0.0100  
Y -0.0121 0.0048 0.0071 -0.0038 -0.0472 0.0584  
Z 0.0052 -0.0058 0.0002 -0.0003 -0.0020 0.0049  
AT. 21 C X -0.0046 -0.0072 0.0011 -0.0022 0.0053 -0.0044  
Y -0.0039 -0.0061 0.0017 -0.0010 -0.0016 0.0012  
Z -0.0022 -0.0035 0.0007 -0.0013 0.0034 -0.0027  
AT. 22 C X 0.0046 -0.0072 -0.0011 -0.0022 -0.0053 -0.0044  
Y 0.0039 -0.0061 -0.0017 -0.0010 0.0016 0.0012  
Z 0.0022 -0.0035 -0.0007 -0.0013 -0.0034 -0.0027  
AT. 23 C X 0.0025 0.0038 0.0001 0.0017 -0.0076 0.0075  
Y 0.0001 0.0011 -0.0000 0.0014 -0.0133 0.0121  
Z 0.0020 0.0025 -0.0020 -0.0015 0.0186 -0.0177  
AT. 24 C X -0.0025 0.0038 -0.0001 0.0017 0.0076 0.0075  
Y -0.0001 0.0011 0.0000 0.0014 0.0133 0.0121  
Z -0.0020 0.0025 0.0020 -0.0015 -0.0186 -0.0177  
AT. 25 H X 0.0073 0.0115 0.0014 0.0065 -0.0482 0.0452  
Y 0.0014 0.0029 -0.0005 0.0014 -0.0111 0.0101  
Z -0.0040 -0.0054 0.0021 0.0027 -0.0479 0.0437

AT. 26 H X -0.0073 0.0115 -0.0014 0.0065 0.0482 0.0452  
Y -0.0014 0.0029 0.0005 0.0014 0.0111 0.0101  
Z 0.0040 -0.0054 -0.0021 0.0027 0.0479 0.0437

AT. 27 H X 0.0037 0.0073 -0.0004 0.0023 0.0026 -0.0038  
Y 0.0030 0.0041 -0.0033 -0.0043 0.0565 -0.0517  
Z 0.0030 0.0032 -0.0038 -0.0042 0.0508 -0.0471

AT. 28 H X -0.0037 0.0073 0.0004 0.0023 -0.0026 -0.0038  
Y -0.0030 0.0041 0.0033 -0.0043 -0.0565 -0.0517  
Z -0.0030 0.0032 0.0038 -0.0042 -0.0508 -0.0471

AT. 29 C X 0.0043 0.0031 -0.0032 -0.0015 0.0100 0.0129  
Y -0.0044 -0.0036 0.0024 0.0006 -0.0161 -0.0020  
Z 0.0049 0.0040 -0.0017 -0.0007 0.0046 0.0081

AT. 30 C X -0.0043 0.0031 0.0032 -0.0015 -0.0100 0.0129  
Y 0.0044 -0.0036 -0.0024 0.0006 0.0161 -0.0020  
Z -0.0049 0.0040 0.0017 -0.0007 -0.0046 0.0081

AT. 31 H X 0.0194 0.0161 -0.0011 0.0005 0.0115 0.0157  
Y -0.0163 -0.0144 0.0014 -0.0012 -0.0232 0.0028  
Z -0.0043 -0.0044 -0.0020 -0.0014 -0.0052 0.0170

AT. 32 H X -0.0194 0.0161 0.0011 0.0005 -0.0115 0.0157  
Y 0.0163 -0.0144 -0.0014 -0.0012 0.0232 0.0028  
Z 0.0043 -0.0044 0.0020 -0.0014 0.0052 0.0170

AT. 33 H X 0.0061 0.0051 -0.0031 -0.0012 0.0120 0.0103  
Y 0.0118 0.0106 0.0024 0.0012 -0.0034 -0.0081  
Z -0.0013 -0.0014 -0.0018 -0.0016 -0.0003 0.0087

AT. 34 H X -0.0061 0.0051 0.0031 -0.0012 -0.0120 0.0103  
Y -0.0118 0.0106 -0.0024 0.0012 0.0034 -0.0081  
Z 0.0013 -0.0014 0.0018 -0.0016 0.0003 0.0087

AT. 35 C X -0.0001 -0.0003 -0.0000 -0.0001 0.0002 0.0003  
Y 0.0000 -0.0002 0.0001 -0.0000 0.0007 0.0001  
Z 0.0003 0.0004 0.0000 0.0002 -0.0003 0.0018

AT. 36 C X 0.0001 -0.0003 0.0000 -0.0001 -0.0002 0.0003  
Y -0.0000 -0.0002 -0.0001 -0.0000 -0.0007 0.0001

Z -0.0003 0.0004 -0.0000 0.0002 0.0003 0.0018  
AT. 37 C X -0.0000 0.0006 0.0014 0.0029 -0.0208 0.0106  
Y -0.0005 -0.0007 0.0001 -0.0012 0.0165 -0.0160  
Z 0.0003 0.0006 0.0006 0.0012 -0.0123 0.0110  
AT. 38 C X 0.0000 0.0006 -0.0014 0.0029 0.0208 0.0106  
Y 0.0005 -0.0007 -0.0001 -0.0012 -0.0165 -0.0160  
Z -0.0003 0.0006 -0.0006 0.0012 0.0123 0.0110  
AT. 39 H X 0.0014 0.0023 -0.0007 0.0016 -0.0072 0.0053  
Y 0.0009 0.0006 -0.0013 -0.0025 0.0270 -0.0213  
Z 0.0006 0.0011 -0.0004 0.0007 -0.0069 0.0095  
AT. 40 H X -0.0014 0.0023 0.0007 0.0016 0.0072 0.0053  
Y -0.0009 0.0006 0.0013 -0.0025 -0.0270 -0.0213  
Z -0.0006 0.0011 0.0004 0.0007 0.0069 0.0095  
AT. 41 H X -0.0013 -0.0005 0.0030 0.0042 -0.0306 0.0141  
Y -0.0016 -0.0016 0.0008 -0.0016 0.0173 -0.0199  
Z 0.0023 0.0025 -0.0018 0.0003 -0.0022 0.0098  
AT. 42 H X 0.0013 -0.0005 -0.0030 0.0042 0.0306 0.0141  
Y 0.0016 -0.0016 -0.0008 -0.0016 -0.0173 -0.0199  
Z -0.0023 0.0025 0.0018 0.0003 0.0022 0.0098  
AT. 43 C X -0.0001 0.0001 -0.0010 -0.0018 0.0163 -0.0155  
Y -0.0023 -0.0016 0.0005 0.0002 -0.0094 -0.0047  
Z 0.0005 0.0007 0.0011 0.0025 -0.0209 0.0188  
AT. 44 C X 0.0001 0.0001 0.0010 -0.0018 -0.0163 -0.0155  
Y 0.0023 -0.0016 -0.0005 0.0002 0.0094 -0.0047  
Z -0.0005 0.0007 -0.0011 0.0025 0.0209 0.0188  
AT. 45 H X -0.0006 -0.0011 -0.0006 -0.0033 0.0230 -0.0206  
Y -0.0051 -0.0030 0.0014 0.0015 -0.0206 -0.0067  
Z 0.0036 0.0027 -0.0001 0.0021 -0.0144 0.0238  
AT. 46 H X 0.0006 -0.0011 0.0006 -0.0033 -0.0230 -0.0206  
Y 0.0051 -0.0030 -0.0014 0.0015 0.0206 -0.0067  
Z -0.0036 0.0027 0.0001 0.0021 0.0144 0.0238  
AT. 47 H X 0.0009 0.0012 -0.0013 -0.0024 0.0238 -0.0192

Y -0.0008 -0.0002 -0.0005 -0.0016 0.0059 -0.0079  
Z 0.0007 0.0007 0.0006 0.0018 -0.0142 0.0198  
AT. 48 H X -0.0009 0.0012 0.0013 -0.0024 -0.0238 -0.0192  
Y 0.0008 -0.0002 0.0005 -0.0016 -0.0059 -0.0079  
Z -0.0007 0.0007 -0.0006 0.0018 0.0142 0.0198  
AT. 49 C X 0.0000 0.0000 0.0000 -0.0001 0.0004 -0.0010  
Y -0.0001 -0.0002 0.0000 -0.0002 0.0003 -0.0005  
Z -0.0001 -0.0000 -0.0001 0.0001 -0.0007 0.0013  
AT. 50 C X -0.0000 0.0000 -0.0000 -0.0001 -0.0004 -0.0010  
Y 0.0001 -0.0002 -0.0000 -0.0002 -0.0003 -0.0005  
Z 0.0001 -0.0000 0.0001 0.0001 0.0007 0.0013  
AT. 51 C X -0.0097 -0.0088 0.0016 0.0008 -0.0138 0.0057  
Y 0.0048 0.0040 -0.0004 0.0009 0.0011 0.0111  
Z 0.0121 0.0100 -0.0020 0.0003 0.0111 0.0151  
AT. 52 C X 0.0097 -0.0088 -0.0016 0.0008 0.0138 0.0057  
Y -0.0048 0.0040 0.0004 0.0009 -0.0011 0.0111  
Z -0.0121 0.0100 0.0020 0.0003 -0.0111 0.0151  
AT. 53 H X -0.0073 -0.0070 -0.0003 0.0003 -0.0012 0.0064  
Y 0.0087 0.0068 -0.0018 0.0007 0.0146 0.0156  
Z 0.0121 0.0099 0.0002 0.0013 0.0038 0.0191  
AT. 54 H X 0.0073 -0.0070 0.0003 0.0003 0.0012 0.0064  
Y -0.0087 0.0068 0.0018 0.0007 -0.0146 0.0156  
Z -0.0121 0.0099 -0.0002 0.0013 -0.0038 0.0191  
AT. 55 H X -0.0113 -0.0097 0.0035 0.0013 -0.0287 0.0046  
Y 0.0079 0.0061 -0.0004 0.0006 0.0038 0.0167  
Z 0.0143 0.0117 -0.0009 0.0007 0.0037 0.0209  
AT. 56 H X 0.0113 -0.0097 -0.0035 0.0013 0.0287 0.0046  
Y -0.0079 0.0061 0.0004 0.0006 -0.0038 0.0167  
Z -0.0143 0.0117 0.0009 0.0007 -0.0037 0.0209  
AT. 57 C X -0.0015 -0.0013 0.0007 -0.0001 0.0027 -0.0059  
Y 0.0012 0.0012 -0.0006 0.0004 -0.0012 0.0045  
Z -0.0007 -0.0006 0.0006 0.0001 0.0012 -0.0020

AT. 58 C X 0.0015 -0.0013 -0.0007 -0.0001 -0.0027 -0.0059  
Y -0.0012 0.0012 0.0006 0.0004 0.0012 0.0045  
Z 0.0007 -0.0006 -0.0006 0.0001 -0.0012 -0.0020

AT. 59 H X -0.0031 -0.0026 0.0029 0.0024 -0.0194 0.0063  
Y 0.0001 0.0001 -0.0008 -0.0010 0.0037 -0.0039  
Z -0.0036 -0.0030 0.0015 0.0003 -0.0069 -0.0063

AT. 60 H X 0.0031 -0.0026 -0.0029 0.0024 0.0194 0.0063  
Y -0.0001 0.0001 0.0008 -0.0010 -0.0037 -0.0039  
Z 0.0036 -0.0030 -0.0015 0.0003 0.0069 -0.0063

AT. 61 H X -0.0046 -0.0037 0.0017 -0.0006 -0.0013 -0.0185  
Y 0.0020 0.0022 0.0000 0.0016 -0.0136 0.0165  
Z -0.0036 -0.0033 0.0011 -0.0015 0.0042 -0.0180

AT. 62 H X 0.0046 -0.0037 -0.0017 -0.0006 0.0013 -0.0185  
Y -0.0020 0.0022 -0.0000 0.0016 0.0136 0.0165  
Z 0.0036 -0.0033 -0.0011 -0.0015 -0.0042 -0.0180

AT. 63 H X 0.0012 0.0007 -0.0000 0.0006 0.0086 0.0044  
Y -0.0030 -0.0021 0.0015 0.0010 -0.0194 0.0009  
Z 0.0001 0.0003 -0.0006 -0.0011 0.0109 -0.0088

AT. 64 H X -0.0012 0.0007 0.0000 0.0006 -0.0086 0.0044  
Y 0.0030 -0.0021 -0.0015 0.0010 0.0194 0.0009  
Z -0.0001 0.0003 0.0006 -0.0011 -0.0109 -0.0088

AT. 65 C X 0.0025 0.0023 -0.0004 0.0007 -0.0020 0.0061  
Y -0.0020 -0.0018 0.0002 -0.0005 0.0014 -0.0043  
Z -0.0032 -0.0027 0.0004 -0.0005 0.0022 -0.0062

AT. 66 C X -0.0025 0.0023 0.0004 0.0007 0.0020 0.0061  
Y 0.0020 -0.0018 -0.0002 -0.0005 -0.0014 -0.0043  
Z 0.0032 -0.0027 -0.0004 -0.0005 -0.0022 -0.0062

AT. 67 H X -0.0044 -0.0039 0.0007 0.0011 -0.0133 0.0033  
Y -0.0004 -0.0002 0.0004 0.0004 -0.0036 0.0027  
Z 0.0009 0.0008 -0.0007 -0.0018 0.0159 -0.0106

AT. 68 H X 0.0044 -0.0039 -0.0007 0.0011 0.0133 0.0033  
Y 0.0004 -0.0002 -0.0004 0.0004 0.0036 0.0027

Z -0.0009 0.0008 0.0007 -0.0018 -0.0159 -0.0106  
AT. 69 H X 0.0029 0.0028 -0.0003 0.0019 -0.0103 0.0141  
Y -0.0052 -0.0045 0.0007 -0.0002 -0.0052 -0.0047  
Z -0.0089 -0.0080 0.0011 -0.0024 0.0087 -0.0226  
AT. 70 H X -0.0029 0.0028 0.0003 0.0019 0.0103 0.0141  
Y 0.0052 -0.0045 -0.0007 -0.0002 0.0052 -0.0047  
Z 0.0089 -0.0080 -0.0011 -0.0024 -0.0087 -0.0226  
AT. 71 H X 0.0006 0.0005 -0.0003 -0.0006 0.0057 -0.0041  
Y -0.0040 -0.0032 0.0014 0.0009 -0.0136 0.0043  
Z -0.0074 -0.0061 0.0018 0.0004 -0.0124 -0.0025  
AT. 72 H X -0.0006 0.0005 0.0003 -0.0006 -0.0057 -0.0041  
Y 0.0040 -0.0032 -0.0014 0.0009 0.0136 0.0043  
Z 0.0074 -0.0061 -0.0018 0.0004 0.0124 -0.0025  
AT. 73 C X -0.0010 -0.0006 0.0003 -0.0005 -0.0007 -0.0074  
Y 0.0005 0.0004 0.0000 0.0008 -0.0022 0.0067  
Z -0.0049 -0.0040 0.0003 -0.0012 0.0074 -0.0211  
AT. 74 C X 0.0010 -0.0006 -0.0003 -0.0005 0.0007 -0.0074  
Y -0.0005 0.0004 -0.0000 0.0008 0.0022 0.0067  
Z 0.0049 -0.0040 -0.0003 -0.0012 -0.0074 -0.0211  
AT. 75 H X 0.0004 0.0012 -0.0004 -0.0005 0.0036 -0.0090  
Y 0.0011 0.0011 -0.0006 0.0006 0.0021 0.0074  
Z -0.0031 -0.0016 -0.0012 -0.0014 0.0162 -0.0217  
AT. 76 H X -0.0004 0.0012 0.0004 -0.0005 -0.0036 -0.0090  
Y -0.0011 0.0011 0.0006 0.0006 -0.0021 0.0074  
Z 0.0031 -0.0016 0.0012 -0.0014 -0.0162 -0.0217  
AT. 77 H X -0.0019 -0.0009 -0.0002 -0.0010 0.0020 -0.0108  
Y 0.0024 0.0019 -0.0011 0.0004 0.0048 0.0064  
Z -0.0058 -0.0051 0.0017 -0.0005 -0.0014 -0.0181  
AT. 78 H X 0.0019 -0.0009 0.0002 -0.0010 -0.0020 -0.0108  
Y -0.0024 0.0019 0.0011 0.0004 -0.0048 0.0064  
Z 0.0058 -0.0051 -0.0017 -0.0005 0.0014 -0.0181  
AT. 79 I X -0.0004 -0.0004 0.0003 -0.0000 -0.0000 -0.0000



Y 0.0004 0.0008 -0.0000 0.0003 0.0001 0.0000  
Z -0.0001 -0.0002 0.0008 0.0009 0.0001 -0.0000  
AT. 80 I X 0.0004 -0.0004 -0.0003 -0.0000 0.0000 -0.0000  
Y -0.0004 0.0008 0.0000 0.0003 -0.0001 0.0000  
Z 0.0001 -0.0002 -0.0008 0.0009 -0.0001 -0.0000  
AT. 81 I X 0.0000 0.0000 0.0000 0.0000 0.0000 0.0000  
Y -0.0001 -0.0001 0.0000 0.0001 0.0000 -0.0000  
Z -0.0001 -0.0000 0.0000 -0.0000 -0.0000 0.0000  
AT. 82 I X -0.0000 0.0000 -0.0000 0.0000 -0.0000 0.0000  
Y 0.0001 -0.0001 -0.0000 0.0001 -0.0000 -0.0000  
Z 0.0001 -0.0000 -0.0000 -0.0000 0.0000 0.0000  
AT. 83 O X -0.0011 -0.0014 -0.0036 -0.0012 -0.0011 -0.0002  
Y -0.0047 -0.0092 0.0064 0.0026 -0.0003 -0.0003  
Z -0.0009 -0.0023 -0.0045 -0.0064 -0.0009 -0.0001  
AT. 84 O X 0.0011 -0.0014 0.0036 -0.0012 0.0011 -0.0002  
Y 0.0047 -0.0092 -0.0064 0.0026 0.0003 -0.0003  
Z 0.0009 -0.0023 0.0045 -0.0064 0.0009 -0.0001  
AT. 85 O X -0.0001 0.0004 0.0004 -0.0012 0.0000 0.0008  
Y 0.0014 0.0009 -0.0013 -0.0002 0.0003 0.0004  
Z -0.0002 0.0010 -0.0000 0.0024 -0.0001 -0.0008  
AT. 86 O X 0.0001 0.0004 -0.0004 -0.0012 -0.0000 0.0008  
Y -0.0014 0.0009 0.0013 -0.0002 -0.0003 0.0004  
Z 0.0002 0.0010 0.0000 0.0024 0.0001 -0.0008  
AT. 87 N X 0.0017 0.0039 -0.0050 -0.0028 -0.0002 0.0003  
Y -0.0039 -0.0083 0.0107 0.0064 0.0005 -0.0006  
Z -0.0007 -0.0022 0.0126 0.0114 0.0013 -0.0000  
AT. 88 N X -0.0017 0.0039 0.0050 -0.0028 0.0002 0.0003  
Y 0.0039 -0.0083 -0.0107 0.0064 -0.0005 -0.0006  
Z 0.0007 -0.0022 -0.0126 0.0114 -0.0013 -0.0000  
AT. 89 N X -0.0000 -0.0002 -0.0014 -0.0031 -0.0001 0.0007  
Y 0.0001 0.0010 0.0036 0.0092 0.0006 -0.0016  
Z 0.0005 -0.0000 0.0012 0.0000 0.0003 0.0004

AT. 90 N X 0.0000 -0.0002 0.0014 -0.0031 0.0001 0.0007  
Y -0.0001 0.0010 -0.0036 0.0092 -0.0006 -0.0016  
Z -0.0005 -0.0000 -0.0012 0.0000 -0.0003 0.0004

AT. 91 C X -0.0062 -0.0123 0.0060 0.0017 -0.0007 -0.0005  
Y 0.0145 0.0294 -0.0261 -0.0095 0.0004 0.0009  
Z 0.0009 0.0035 -0.0057 -0.0007 -0.0009 -0.0003

AT. 92 C X 0.0062 -0.0123 -0.0060 0.0017 0.0007 -0.0005  
Y -0.0145 0.0294 0.0261 -0.0095 -0.0004 0.0009  
Z -0.0009 0.0035 0.0057 -0.0007 0.0009 -0.0003

AT. 93 C X 0.0054 0.0067 -0.0018 -0.0084 0.0022 0.0007  
Y -0.0073 -0.0149 0.0100 0.0000 -0.0005 -0.0004  
Z 0.0023 0.0059 -0.0321 -0.0325 -0.0035 0.0003

AT. 94 C X -0.0054 0.0067 0.0018 -0.0084 -0.0022 0.0007  
Y 0.0073 -0.0149 -0.0100 0.0000 0.0005 -0.0004  
Z -0.0023 0.0059 0.0321 -0.0325 0.0035 0.0003

AT. 95 H X 0.0095 0.0231 0.0394 0.0645 0.0035 -0.0011  
Y -0.0050 -0.0152 -0.0529 -0.0869 -0.0058 0.0010  
Z -0.0068 -0.0128 0.0386 0.0440 0.0046 -0.0002

AT. 96 H X -0.0095 0.0231 -0.0394 0.0645 -0.0035 -0.0011  
Y 0.0050 -0.0152 0.0529 -0.0869 0.0058 0.0010  
Z 0.0068 -0.0128 -0.0386 0.0440 -0.0046 -0.0002

AT. 97 H X 0.0108 0.0167 0.0015 -0.0001 0.0050 0.0013  
Y -0.0123 -0.0220 0.1056 0.1231 0.0104 -0.0016  
Z -0.0009 0.0006 -0.0093 -0.0041 -0.0017 -0.0003

AT. 98 H X -0.0108 0.0167 -0.0015 -0.0001 -0.0050 0.0013  
Y 0.0123 -0.0220 -0.1056 0.1231 -0.0104 -0.0016  
Z 0.0009 0.0006 0.0093 -0.0041 0.0017 -0.0003

AT. 99 C X 0.0018 0.0022 -0.0021 0.0009 0.0001 -0.0001  
Y -0.0024 -0.0038 0.0026 -0.0063 -0.0001 0.0017  
Z -0.0014 -0.0018 0.0025 -0.0008 0.0000 0.0001

AT. 100 C X -0.0018 0.0022 0.0021 0.0009 -0.0001 -0.0001  
Y 0.0024 -0.0038 -0.0026 -0.0063 0.0001 0.0017

Z 0.0014 -0.0018 -0.0025 -0.0008 -0.0000 0.0001  
AT.101 C X -0.0015 -0.0003 0.0000 0.0035 -0.0007 -0.0013  
Y 0.0003 0.0017 -0.0012 -0.0010 -0.0006 0.0008  
Z 0.0013 0.0014 -0.0014 0.0062 0.0004 -0.0024  
AT.102 C X 0.0015 -0.0003 -0.0000 0.0035 0.0007 -0.0013  
Y -0.0003 0.0017 0.0012 -0.0010 0.0006 0.0008  
Z -0.0013 0.0014 0.0014 0.0062 -0.0004 -0.0024  
AT.103 H X -0.0034 -0.0050 0.0041 -0.0007 -0.0001 -0.0020  
Y 0.0011 0.0037 -0.0032 0.0016 -0.0009 0.0008  
Z -0.0022 0.0018 -0.0017 -0.0082 -0.0021 0.0046  
AT.104 H X 0.0034 -0.0050 -0.0041 -0.0007 0.0001 -0.0020  
Y -0.0011 0.0037 0.0032 0.0016 0.0009 0.0008  
Z 0.0022 0.0018 0.0017 -0.0082 0.0021 0.0046  
AT.105 H X -0.0022 -0.0021 0.0021 0.0068 -0.0004 -0.0029  
Y 0.0032 -0.0018 0.0001 0.0081 0.0024 -0.0053  
Z 0.0021 -0.0004 -0.0010 0.0103 0.0014 -0.0051  
AT.106 H X 0.0022 -0.0021 -0.0021 0.0068 0.0004 -0.0029  
Y -0.0032 -0.0018 -0.0001 0.0081 -0.0024 -0.0053  
Z -0.0021 -0.0004 0.0010 0.0103 -0.0014 -0.0051  
AT.107 C X 0.0013 0.0046 -0.0186 -0.0144 -0.0026 0.0005  
Y -0.0003 0.0002 -0.0024 -0.0039 -0.0009 0.0007  
Z -0.0009 -0.0032 0.0180 0.0148 0.0023 0.0002  
AT.108 C X -0.0013 0.0046 0.0186 -0.0144 0.0026 0.0005  
Y 0.0003 0.0002 0.0024 -0.0039 0.0009 0.0007  
Z 0.0009 -0.0032 -0.0180 0.0148 -0.0023 0.0002  
AT.109 H X -0.0018 -0.0024 -0.0246 -0.0267 -0.0040 0.0003  
Y -0.0013 -0.0016 -0.0039 -0.0068 -0.0015 0.0010  
Z -0.0019 -0.0047 0.0167 0.0125 0.0017 0.0009  
AT.110 H X 0.0018 -0.0024 0.0246 -0.0267 0.0040 0.0003  
Y 0.0013 -0.0016 0.0039 -0.0068 0.0015 0.0010  
Z 0.0019 -0.0047 -0.0167 0.0125 -0.0017 0.0009  
AT.111 H X 0.0020 0.0052 -0.0200 -0.0173 -0.0027 0.0005

Y 0.0015 0.0033 0.0054 0.0073 0.0007 0.0004  
Z -0.0021 -0.0046 0.0171 0.0145 0.0019 0.0002  
AT. 112 H X -0.0020 0.0052 0.0200 -0.0173 0.0027 0.0005  
Y -0.0015 0.0033 -0.0054 0.0073 -0.0007 0.0004  
Z 0.0021 -0.0046 -0.0171 0.0145 -0.0019 0.0002  
AT. 113 C X 0.0002 0.0003 0.0000 0.0005 0.0000 0.0001  
Y 0.0002 0.0006 -0.0004 0.0001 0.0000 -0.0001  
Z 0.0003 -0.0000 0.0002 -0.0005 0.0001 0.0003  
AT. 114 C X -0.0002 0.0003 -0.0000 0.0005 -0.0000 0.0001  
Y -0.0002 0.0006 0.0004 0.0001 -0.0000 -0.0001  
Z -0.0003 -0.0000 -0.0002 -0.0005 -0.0001 0.0003  
AT. 115 C X -0.0012 -0.0012 0.0112 0.0137 0.0010 -0.0021  
Y 0.0008 0.0025 -0.0064 -0.0015 -0.0004 -0.0011  
Z 0.0003 -0.0008 -0.0012 -0.0059 -0.0001 0.0015  
AT. 116 C X 0.0012 -0.0012 -0.0112 0.0137 -0.0010 -0.0021  
Y -0.0008 0.0025 0.0064 -0.0015 0.0004 -0.0011  
Z -0.0003 -0.0008 0.0012 -0.0059 0.0001 0.0015  
AT. 117 H X -0.0006 0.0004 0.0031 0.0054 0.0004 -0.0018  
Y 0.0002 0.0006 0.0035 0.0095 0.0006 -0.0018  
Z -0.0003 -0.0018 0.0047 0.0010 0.0003 0.0013  
AT. 118 H X 0.0006 0.0004 -0.0031 0.0054 -0.0004 -0.0018  
Y -0.0002 0.0006 -0.0035 0.0095 -0.0006 -0.0018  
Z 0.0003 -0.0018 -0.0047 0.0010 -0.0003 0.0013  
AT. 119 H X -0.0019 -0.0032 0.0179 0.0208 0.0020 -0.0027  
Y 0.0013 0.0039 -0.0127 -0.0072 -0.0007 -0.0011  
Z -0.0007 -0.0033 0.0089 0.0042 0.0007 0.0012  
AT. 120 H X 0.0019 -0.0032 -0.0179 0.0208 -0.0020 -0.0027  
Y -0.0013 0.0039 0.0127 -0.0072 0.0007 -0.0011  
Z 0.0007 -0.0033 -0.0089 0.0042 -0.0007 0.0012  
AT. 121 C X -0.0001 -0.0004 -0.0050 -0.0099 -0.0007 0.0023  
Y -0.0004 0.0008 -0.0078 -0.0079 -0.0014 -0.0015  
Z 0.0005 -0.0004 -0.0026 -0.0073 -0.0002 0.0025

AT.122 C X 0.0001 -0.0004 0.0050 -0.0099 0.0007 0.0023  
Y 0.0004 0.0008 0.0078 -0.0079 0.0014 -0.0015  
Z -0.0005 -0.0004 0.0026 -0.0073 0.0002 0.0025

AT.123 H X 0.0010 0.0008 -0.0089 -0.0120 -0.0010 0.0024  
Y 0.0001 0.0024 -0.0164 -0.0159 -0.0022 -0.0021  
Z 0.0001 -0.0017 0.0057 0.0014 0.0006 0.0030

AT.124 H X -0.0010 0.0008 0.0089 -0.0120 0.0010 0.0024  
Y -0.0001 0.0024 0.0164 -0.0159 0.0022 -0.0021  
Z -0.0001 -0.0017 -0.0057 0.0014 -0.0006 0.0030

AT.125 H X 0.0000 -0.0002 -0.0047 -0.0102 -0.0006 0.0032  
Y -0.0015 -0.0012 0.0029 0.0034 -0.0004 -0.0023  
Z 0.0000 -0.0012 0.0034 -0.0014 0.0004 0.0031

AT.126 H X -0.0000 -0.0002 0.0047 -0.0102 0.0006 0.0032  
Y 0.0015 -0.0012 -0.0029 0.0034 0.0004 -0.0023  
Z -0.0000 -0.0012 -0.0034 -0.0014 -0.0004 0.0031

AT.127 C X -0.0002 -0.0003 0.0000 -0.0000 0.0000 0.0001  
Y 0.0002 0.0001 -0.0008 -0.0012 -0.0000 -0.0001  
Z -0.0001 -0.0002 0.0001 -0.0009 0.0001 0.0001

AT.128 C X 0.0002 -0.0003 -0.0000 -0.0000 -0.0000 0.0001  
Y -0.0002 0.0001 0.0008 -0.0012 0.0000 -0.0001  
Z 0.0001 -0.0002 -0.0001 -0.0009 -0.0001 0.0001

AT.129 C X 0.0004 -0.0002 0.0125 0.0100 0.0020 -0.0012  
Y 0.0002 -0.0004 0.0052 0.0049 0.0010 0.0016  
Z 0.0004 -0.0010 0.0172 0.0150 0.0027 0.0008

AT.130 C X -0.0004 -0.0002 -0.0125 0.0100 -0.0020 -0.0012  
Y -0.0002 -0.0004 -0.0052 0.0049 -0.0010 0.0016  
Z -0.0004 -0.0010 -0.0172 0.0150 -0.0027 0.0008

AT.131 H X 0.0016 0.0027 0.0052 0.0041 0.0016 0.0002  
Y -0.0011 -0.0024 0.0190 0.0217 0.0026 -0.0001  
Z 0.0013 0.0023 0.0123 0.0145 0.0026 0.0018

AT.132 H X -0.0016 0.0027 -0.0052 0.0041 -0.0016 0.0002  
Y 0.0011 -0.0024 -0.0190 0.0217 -0.0026 -0.0001

Z -0.0013 0.0023 -0.0123 0.0145 -0.0026 0.0018  
AT. 133 H X -0.0009 -0.0021 0.0257 0.0267 0.0035 -0.0026  
Y 0.0006 0.0009 0.0066 0.0085 0.0014 0.0024  
Z 0.0015 0.0014 0.0126 0.0115 0.0025 0.0028  
AT. 134 H X 0.0009 -0.0021 -0.0257 0.0267 -0.0035 -0.0026  
Y -0.0006 0.0009 -0.0066 0.0085 -0.0014 0.0024  
Z -0.0015 0.0014 -0.0126 0.0115 -0.0025 0.0028  
AT. 135 C X -0.0005 -0.0020 0.0040 0.0009 0.0005 0.0004  
Y -0.0002 -0.0007 0.0013 0.0001 0.0002 -0.0001  
Z 0.0004 0.0011 -0.0018 -0.0004 -0.0000 0.0002  
AT. 136 C X 0.0005 -0.0020 -0.0040 0.0009 -0.0005 0.0004  
Y 0.0002 -0.0007 -0.0013 0.0001 -0.0002 -0.0001  
Z -0.0004 0.0011 0.0018 -0.0004 0.0000 0.0002  
AT. 137 H X -0.0014 -0.0017 0.0076 0.0087 0.0006 -0.0033  
Y -0.0001 0.0001 -0.0031 -0.0036 -0.0005 -0.0003  
Z 0.0008 0.0022 -0.0108 -0.0097 -0.0014 0.0011  
AT. 138 H X 0.0014 -0.0017 -0.0076 0.0087 -0.0006 -0.0033  
Y 0.0001 0.0001 0.0031 -0.0036 0.0005 -0.0003  
Z -0.0008 0.0022 0.0108 -0.0097 0.0014 0.0011  
AT. 139 H X -0.0004 -0.0036 0.0123 0.0063 0.0022 0.0019  
Y 0.0008 -0.0003 -0.0022 -0.0054 -0.0003 0.0019  
Z -0.0001 0.0033 -0.0115 -0.0051 -0.0020 -0.0025  
AT. 140 H X 0.0004 -0.0036 -0.0123 0.0063 -0.0022 0.0019  
Y -0.0008 -0.0003 0.0022 -0.0054 0.0003 0.0019  
Z 0.0001 0.0033 0.0115 -0.0051 0.0020 -0.0025  
AT. 141 H X -0.0009 -0.0004 -0.0087 -0.0099 -0.0018 -0.0007  
Y -0.0002 -0.0002 -0.0084 -0.0105 -0.0013 0.0009  
Z 0.0003 0.0013 0.0024 0.0059 0.0004 -0.0014  
AT. 142 H X 0.0009 -0.0004 0.0087 -0.0099 0.0018 -0.0007  
Y 0.0002 -0.0002 0.0084 -0.0105 0.0013 0.0009  
Z -0.0003 0.0013 -0.0024 0.0059 -0.0004 -0.0014  
AT. 143 C X -0.0004 0.0010 -0.0025 0.0006 -0.0002 -0.0010

Y -0.0001 -0.0001 -0.0009 -0.0010 -0.0000 -0.0001  
Z -0.0000 0.0001 -0.0017 -0.0004 -0.0005 -0.0002  
AT. 144 C X 0.0004 0.0010 0.0025 0.0006 0.0002 -0.0010  
Y 0.0001 -0.0001 0.0009 -0.0010 0.0000 -0.0001  
Z 0.0000 0.0001 0.0017 -0.0004 0.0005 -0.0002  
AT. 145 H X 0.0006 -0.0011 0.0104 0.0095 0.0006 0.0002  
Y -0.0002 -0.0002 -0.0025 -0.0038 -0.0004 0.0006  
Z 0.0003 0.0000 0.0030 0.0054 -0.0000 -0.0007  
AT. 146 H X -0.0006 -0.0011 -0.0104 0.0095 -0.0006 0.0002  
Y 0.0002 -0.0002 0.0025 -0.0038 0.0004 0.0006  
Z -0.0003 0.0000 -0.0030 0.0054 0.0000 -0.0007  
AT. 147 H X -0.0006 0.0024 -0.0065 0.0006 -0.0001 -0.0026  
Y 0.0005 -0.0001 -0.0058 -0.0047 -0.0017 0.0009  
Z 0.0000 0.0021 -0.0101 -0.0025 -0.0011 -0.0019  
AT. 148 H X 0.0006 0.0024 0.0065 0.0006 0.0001 -0.0026  
Y -0.0005 -0.0001 0.0058 -0.0047 0.0017 0.0009  
Z -0.0000 0.0021 0.0101 -0.0025 0.0011 -0.0019  
AT. 149 H X -0.0001 0.0001 -0.0016 -0.0018 -0.0010 0.0010  
Y -0.0005 0.0010 -0.0049 -0.0052 -0.0002 -0.0001  
Z -0.0009 0.0022 -0.0093 -0.0069 -0.0005 -0.0011  
AT. 150 H X 0.0001 0.0001 0.0016 -0.0018 0.0010 0.0010  
Y 0.0005 0.0010 0.0049 -0.0052 0.0002 -0.0001  
Z 0.0009 0.0022 0.0093 -0.0069 0.0005 -0.0011  
AT. 151 C X 0.0007 0.0003 -0.0000 0.0012 0.0002 0.0008  
Y 0.0003 -0.0001 -0.0004 -0.0011 0.0001 0.0008  
Z 0.0000 0.0025 -0.0148 -0.0095 -0.0019 -0.0027  
AT. 152 C X -0.0007 0.0003 0.0000 0.0012 -0.0002 0.0008  
Y -0.0003 -0.0001 0.0004 -0.0011 -0.0001 0.0008  
Z -0.0000 0.0025 0.0148 -0.0095 0.0019 -0.0027  
AT. 153 H X 0.0012 0.0009 -0.0024 -0.0005 -0.0003 0.0012  
Y 0.0002 -0.0011 0.0044 0.0031 0.0006 0.0006  
Z -0.0004 0.0004 -0.0067 -0.0033 -0.0010 -0.0032

AT.154 H X -0.0012 0.0009 0.0024 -0.0005 0.0003 0.0012  
Y -0.0002 -0.0011 -0.0044 0.0031 -0.0006 0.0006  
Z 0.0004 0.0004 0.0067 -0.0033 0.0010 -0.0032

AT.155 H X 0.0016 0.0017 -0.0025 0.0007 -0.0001 0.0016  
Y -0.0001 -0.0016 0.0045 0.0033 0.0008 0.0003  
Z 0.0007 0.0050 -0.0213 -0.0136 -0.0029 -0.0020

AT.156 H X -0.0016 0.0017 0.0025 0.0007 0.0001 0.0016  
Y 0.0001 -0.0016 -0.0045 0.0033 -0.0008 0.0003  
Z -0.0007 0.0050 0.0213 -0.0136 0.0029 -0.0020

AT.157 O X 0.0000 -0.0000 0.0000 0.0003 0.0005 0.0013  
Y 0.0014 0.0012 0.0003 0.0002 -0.0001 -0.0003  
Z -0.0002 -0.0005 0.0004 -0.0002 0.0015 0.0024

AT.158 O X -0.0000 -0.0000 -0.0000 0.0003 -0.0005 0.0013  
Y -0.0014 0.0012 -0.0003 0.0002 0.0001 -0.0003  
Z 0.0002 -0.0005 -0.0004 -0.0002 -0.0015 0.0024

AT.159 O X -0.0001 0.0000 -0.0001 -0.0000 0.0001 -0.0003  
Y 0.0010 0.0013 -0.0006 0.0004 -0.0020 -0.0019  
Z 0.0001 0.0004 -0.0001 0.0004 -0.0001 -0.0005

AT.160 O X 0.0001 0.0000 0.0001 -0.0000 -0.0001 -0.0003  
Y -0.0010 0.0013 0.0006 0.0004 0.0020 -0.0019  
Z -0.0001 0.0004 0.0001 0.0004 0.0001 -0.0005

AT.161 H X 0.0022 0.0039 -0.0031 0.0001 -0.0133 -0.0269  
Y 0.0001 -0.0007 0.0020 0.0005 0.0059 0.0114  
Z 0.0036 0.0064 -0.0057 0.0001 -0.0218 -0.0454

AT.162 H X -0.0022 0.0039 0.0031 0.0001 0.0133 -0.0269  
Y -0.0001 -0.0007 -0.0020 0.0005 -0.0059 0.0114  
Z -0.0036 0.0064 0.0057 0.0001 0.0218 -0.0454

AT.163 H X -0.0008 -0.0010 0.0000 0.0002 0.0023 0.0021  
Y -0.0292 -0.0372 0.0104 -0.0104 0.0399 0.0386  
Z -0.0057 -0.0073 0.0020 -0.0022 0.0075 0.0073

AT.164 H X 0.0008 -0.0010 -0.0000 0.0002 -0.0023 0.0021  
Y 0.0292 -0.0372 -0.0104 -0.0104 -0.0399 0.0386



Z 0.0057 -0.0073 -0.0020 -0.0022 -0.0075 0.0073  
AT. 165 O X 0.0003 0.0005 -0.0006 -0.0007 -0.0000 0.0001  
Y -0.0001 -0.0001 0.0004 0.0010 0.0004 -0.0000  
Z 0.0001 0.0003 -0.0002 -0.0005 0.0000 0.0002  
AT. 166 O X -0.0003 0.0005 0.0006 -0.0007 0.0000 0.0001  
Y 0.0001 -0.0001 -0.0004 0.0010 -0.0004 -0.0000  
Z -0.0001 0.0003 0.0002 -0.0005 -0.0000 0.0002  
AT. 167 H X -0.0020 -0.0045 0.0012 0.0035 0.0028 0.0001  
Y 0.0053 0.0116 -0.0020 -0.0071 -0.0058 -0.0002  
Z -0.0021 -0.0043 -0.0009 -0.0005 0.0012 0.0000  
AT. 168 H X 0.0020 -0.0045 -0.0012 0.0035 -0.0028 0.0001  
Y -0.0053 0.0116 0.0020 -0.0071 0.0058 -0.0002  
Z 0.0021 -0.0043 0.0009 -0.0005 -0.0012 0.0000  
AT. 169 O X 0.0004 0.0008 0.0003 0.0010 0.0004 0.0000  
Y 0.0003 0.0003 -0.0003 -0.0001 0.0001 0.0000  
Z 0.0000 0.0001 -0.0001 -0.0002 -0.0000 -0.0000  
AT. 170 O X -0.0004 0.0008 -0.0003 0.0010 -0.0004 0.0000  
Y -0.0003 0.0003 0.0003 -0.0001 -0.0001 0.0000  
Z -0.0000 0.0001 0.0001 -0.0002 0.0000 -0.0000  
AT. 171 H X -0.0142 -0.0256 0.0024 -0.0161 -0.0094 0.0003  
Y -0.0071 -0.0129 0.0007 -0.0083 -0.0046 0.0000  
Z -0.0010 -0.0019 -0.0008 -0.0010 -0.0006 -0.0004  
AT. 172 H X 0.0142 -0.0256 -0.0024 -0.0161 0.0094 0.0003  
Y 0.0071 -0.0129 -0.0007 -0.0083 0.0046 0.0000  
Z 0.0010 -0.0019 0.0008 -0.0010 0.0006 -0.0004  
  
FREQ(CM\*\*-1) 816.28 817.04 823.03 823.66 825.91 825.94  
  
AT. 1 I X 0.0000 -0.0001 -0.0001 -0.0001 -0.0000 0.0000  
Y -0.0001 -0.0001 0.0000 0.0001 -0.0000 0.0001  
Z 0.0006 0.0005 0.0000 0.0000 0.0000 -0.0000  
AT. 2 I X 0.0000 0.0001 0.0001 -0.0001 0.0000 0.0000

Y -0.0001 0.0001 -0.0000 0.0001 0.0000 0.0001  
Z 0.0006 -0.0005 -0.0000 0.0000 -0.0000 -0.0000  
AT. 3 I X 0.0001 -0.0001 -0.0002 -0.0001 -0.0000 0.0000  
Y 0.0004 -0.0003 0.0001 0.0002 0.0000 0.0000  
Z -0.0001 0.0001 -0.0000 -0.0000 -0.0000 -0.0000  
AT. 4 I X 0.0001 0.0001 0.0002 -0.0001 0.0000 0.0000  
Y 0.0004 0.0003 -0.0001 0.0002 -0.0000 0.0000  
Z -0.0001 -0.0001 0.0000 -0.0000 0.0000 -0.0000  
AT. 5 O X 0.0057 0.0050 -0.0002 -0.0013 0.0004 -0.0007  
Y 0.0006 0.0031 0.0009 0.0010 0.0001 -0.0009  
Z -0.0052 -0.0050 -0.0003 -0.0001 -0.0004 0.0007  
AT. 6 O X 0.0057 -0.0050 0.0002 -0.0013 -0.0004 -0.0007  
Y 0.0006 -0.0031 -0.0009 0.0010 -0.0001 -0.0009  
Z -0.0052 0.0050 0.0003 -0.0001 0.0004 0.0007  
AT. 7 O X 0.0028 -0.0014 -0.0019 0.0002 -0.0001 0.0013  
Y -0.0038 0.0030 0.0010 -0.0020 0.0006 -0.0012  
Z 0.0038 -0.0034 0.0012 0.0018 -0.0000 -0.0001  
AT. 8 O X 0.0028 0.0014 0.0019 0.0002 0.0001 0.0013  
Y -0.0038 -0.0030 -0.0010 -0.0020 -0.0006 -0.0012  
Z 0.0038 0.0034 -0.0012 0.0018 0.0000 -0.0001  
AT. 9 N X 0.0085 0.0063 -0.0029 -0.0027 0.0004 -0.0001  
Y 0.0070 0.0040 0.0015 0.0019 0.0003 -0.0008  
Z 0.0086 0.0085 0.0002 -0.0001 0.0007 -0.0006  
AT. 10 N X 0.0085 -0.0063 0.0029 -0.0027 -0.0004 -0.0001  
Y 0.0070 -0.0040 -0.0015 0.0019 -0.0003 -0.0008  
Z 0.0086 -0.0085 -0.0002 -0.0001 -0.0007 -0.0006  
AT. 11 N X 0.0067 -0.0008 -0.0041 -0.0023 -0.0002 0.0010  
Y 0.0104 -0.0032 0.0002 0.0031 -0.0003 0.0006  
Z -0.0040 0.0055 0.0011 -0.0003 0.0006 -0.0006  
AT. 12 N X 0.0067 0.0008 0.0041 -0.0023 0.0002 0.0010  
Y 0.0104 0.0032 -0.0002 0.0031 0.0003 0.0006  
Z -0.0040 -0.0055 -0.0011 -0.0003 -0.0006 -0.0006

AT. 13 C X -0.0103 -0.0134 -0.0000 0.0016 -0.0008 0.0025  
Y -0.0130 -0.0157 0.0011 0.0033 -0.0011 0.0027  
Z -0.0070 -0.0074 0.0007 0.0017 -0.0006 0.0012

AT. 14 C X -0.0103 0.0134 0.0000 0.0016 0.0008 0.0025  
Y -0.0130 0.0157 -0.0011 0.0033 0.0011 0.0027  
Z -0.0070 0.0074 -0.0007 0.0017 0.0006 0.0012

AT. 15 C X -0.0041 -0.0019 0.0052 0.0055 -0.0002 -0.0009  
Y 0.0119 0.0119 -0.0047 -0.0070 0.0008 -0.0013  
Z -0.0226 -0.0239 -0.0010 0.0003 -0.0016 0.0016

AT. 16 C X -0.0041 0.0019 -0.0052 0.0055 0.0002 -0.0009  
Y 0.0119 -0.0119 0.0047 -0.0070 -0.0008 -0.0013  
Z -0.0226 0.0239 0.0010 0.0003 0.0016 0.0016

AT. 17 H X -0.0312 -0.0305 0.0001 -0.0003 -0.0020 -0.0004  
Y -0.0339 -0.0375 -0.0127 -0.0133 -0.0026 0.0029  
Z 0.0278 0.0306 0.0073 0.0060 0.0022 -0.0037

AT. 18 H X -0.0312 0.0305 -0.0001 -0.0003 0.0020 -0.0004  
Y -0.0339 0.0375 0.0127 -0.0133 0.0026 0.0029  
Z 0.0278 -0.0306 -0.0073 0.0060 -0.0022 -0.0037

AT. 19 H X 0.0057 0.0109 0.0070 0.0080 0.0003 -0.0016  
Y 0.0761 0.0799 0.0052 0.0015 0.0054 -0.0057  
Z 0.0039 0.0051 0.0034 0.0044 0.0002 -0.0002

AT. 20 H X 0.0057 -0.0109 -0.0070 0.0080 -0.0003 -0.0016  
Y 0.0761 -0.0799 -0.0052 0.0015 -0.0054 -0.0057  
Z 0.0039 -0.0051 -0.0034 0.0044 -0.0002 -0.0002

AT. 21 C X 0.0024 -0.0027 0.0017 0.0018 -0.0005 -0.0002  
Y -0.0033 0.0011 0.0048 0.0017 0.0002 -0.0018  
Z 0.0016 -0.0018 0.0019 0.0021 -0.0003 -0.0003

AT. 22 C X 0.0024 0.0027 -0.0017 0.0018 0.0005 -0.0002  
Y -0.0033 -0.0011 -0.0048 0.0017 -0.0002 -0.0018  
Z 0.0016 0.0018 -0.0019 0.0021 0.0003 -0.0003

AT. 23 C X -0.0058 0.0042 0.0078 0.0048 0.0007 -0.0026  
Y -0.0072 0.0076 -0.0073 -0.0082 0.0001 0.0014

Z 0.0134 -0.0105 -0.0057 0.0008 -0.0009 0.0030  
AT. 24 C X -0.0058 -0.0042 -0.0078 0.0048 -0.0007 -0.0026  
Y -0.0072 -0.0076 0.0073 -0.0082 -0.0001 0.0014  
Z 0.0134 0.0105 0.0057 0.0008 0.0009 0.0030  
AT. 25 H X -0.0298 0.0273 -0.0025 -0.0092 0.0018 -0.0010  
Y -0.0055 0.0064 -0.0074 -0.0073 0.0000 0.0017  
Z -0.0289 0.0263 -0.0200 -0.0253 0.0007 0.0034  
AT. 26 H X -0.0298 -0.0273 0.0025 -0.0092 -0.0018 -0.0010  
Y -0.0055 -0.0064 0.0074 -0.0073 -0.0000 0.0017  
Z -0.0289 -0.0263 0.0200 -0.0253 -0.0007 0.0034  
AT. 27 H X -0.0009 -0.0028 0.0130 0.0067 0.0016 -0.0054  
Y 0.0373 -0.0320 0.0075 0.0180 -0.0014 0.0007  
Z 0.0343 -0.0286 0.0001 0.0128 -0.0019 0.0033  
AT. 28 H X -0.0009 0.0028 -0.0130 0.0067 -0.0016 -0.0054  
Y 0.0373 0.0320 -0.0075 0.0180 0.0014 0.0007  
Z 0.0343 0.0286 -0.0001 0.0128 0.0019 0.0033  
AT. 29 C X 0.0185 0.0200 -0.0109 -0.0129 0.0011 0.0001  
Y -0.0164 -0.0049 -0.0191 -0.0213 -0.0009 0.0030  
Z 0.0113 0.0150 -0.0157 -0.0178 0.0008 0.0006  
AT. 30 C X 0.0185 -0.0200 0.0109 -0.0129 -0.0011 0.0001  
Y -0.0164 0.0049 0.0191 -0.0213 0.0009 0.0030  
Z 0.0113 -0.0150 0.0157 -0.0178 -0.0008 0.0006  
AT. 31 H X 0.0222 0.0251 -0.0164 -0.0190 0.0014 0.0002  
Y -0.0228 -0.0041 -0.0188 -0.0226 -0.0010 0.0035  
Z 0.0040 0.0193 -0.0180 -0.0226 0.0008 0.0013  
AT. 32 H X 0.0222 -0.0251 0.0164 -0.0190 -0.0014 0.0002  
Y -0.0228 0.0041 0.0188 -0.0226 0.0010 0.0035  
Z 0.0040 -0.0193 0.0180 -0.0226 -0.0008 0.0013  
AT. 33 H X 0.0234 0.0262 -0.0209 -0.0232 0.0015 -0.0006  
Y -0.0037 -0.0028 -0.0194 -0.0192 -0.0003 0.0021  
Z 0.0084 0.0181 -0.0226 -0.0259 0.0007 0.0005  
AT. 34 H X 0.0234 -0.0262 0.0209 -0.0232 -0.0015 -0.0006

Y -0.0037 0.0028 0.0194 -0.0192 0.0003 0.0021  
Z 0.0084 -0.0181 0.0226 -0.0259 -0.0007 0.0005  
AT. 35 C X 0.0004 0.0003 -0.0007 -0.0003 -0.0000 0.0002  
Y 0.0004 -0.0008 0.0023 0.0025 -0.0001 -0.0001  
Z 0.0000 0.0008 0.0019 0.0009 0.0001 -0.0004  
AT. 36 C X 0.0004 -0.0003 0.0007 -0.0003 0.0000 0.0002  
Y 0.0004 0.0008 -0.0023 0.0025 0.0001 -0.0001  
Z 0.0000 -0.0008 -0.0019 0.0009 -0.0001 -0.0004  
AT. 37 C X -0.0204 -0.0002 0.0170 0.0133 0.0005 -0.0037  
Y 0.0084 -0.0145 0.0172 0.0231 -0.0006 -0.0004  
Z -0.0075 0.0078 -0.0085 -0.0125 0.0005 0.0004  
AT. 38 C X -0.0204 0.0002 -0.0170 0.0133 -0.0005 -0.0037  
Y 0.0084 0.0145 -0.0172 0.0231 0.0006 -0.0004  
Z -0.0075 -0.0078 0.0085 -0.0125 -0.0005 0.0004  
AT. 39 H X -0.0053 0.0051 0.0056 0.0031 0.0005 -0.0033  
Y 0.0187 -0.0127 0.0165 0.0247 -0.0005 -0.0010  
Z -0.0011 0.0106 -0.0162 -0.0201 0.0004 0.0011  
AT. 40 H X -0.0053 -0.0051 -0.0056 0.0031 -0.0005 -0.0033  
Y 0.0187 0.0127 -0.0165 0.0247 0.0005 -0.0010  
Z -0.0011 -0.0106 0.0162 -0.0201 -0.0004 0.0011  
AT. 41 H X -0.0309 -0.0046 0.0245 0.0201 0.0007 -0.0033  
Y 0.0060 -0.0205 0.0235 0.0297 -0.0010 -0.0009  
Z 0.0058 0.0165 -0.0206 -0.0239 0.0006 0.0005  
AT. 42 H X -0.0309 0.0046 -0.0245 0.0201 -0.0007 -0.0033  
Y 0.0060 0.0205 -0.0235 0.0297 0.0010 -0.0009  
Z 0.0058 -0.0165 0.0206 -0.0239 -0.0006 0.0005  
AT. 43 C X 0.0121 -0.0091 -0.0103 -0.0053 -0.0009 0.0037  
Y -0.0101 -0.0064 -0.0235 -0.0232 -0.0012 0.0048  
Z -0.0157 0.0101 0.0112 0.0049 0.0010 -0.0041  
AT. 44 C X 0.0121 0.0091 0.0103 -0.0053 0.0009 0.0037  
Y -0.0101 0.0064 0.0235 -0.0232 0.0012 0.0048  
Z -0.0157 -0.0101 -0.0112 0.0049 -0.0010 -0.0041

AT. 45 H X 0.0165 -0.0119 -0.0127 -0.0069 -0.0013 0.0043  
Y -0.0220 -0.0129 -0.0320 -0.0323 -0.0019 0.0067  
Z -0.0068 0.0181 0.0204 0.0145 0.0020 -0.0061

AT. 46 H X 0.0165 0.0119 0.0127 -0.0069 0.0013 0.0043  
Y -0.0220 0.0129 0.0320 -0.0323 0.0019 0.0067  
Z -0.0068 -0.0181 -0.0204 0.0145 -0.0020 -0.0061

AT. 47 H X 0.0195 -0.0090 -0.0154 -0.0084 -0.0007 0.0051  
Y 0.0050 -0.0037 -0.0192 -0.0173 -0.0005 0.0042  
Z -0.0093 0.0126 0.0227 0.0156 0.0013 -0.0066

AT. 48 H X 0.0195 0.0090 0.0154 -0.0084 0.0007 0.0051  
Y 0.0050 0.0037 0.0192 -0.0173 0.0005 0.0042  
Z -0.0093 -0.0126 -0.0227 0.0156 -0.0013 -0.0066

AT. 49 C X 0.0003 -0.0005 -0.0026 -0.0027 -0.0001 0.0005  
Y 0.0002 -0.0003 -0.0002 0.0002 -0.0001 0.0001  
Z -0.0001 0.0012 -0.0007 -0.0013 0.0001 -0.0001

AT. 50 C X 0.0003 0.0005 0.0026 -0.0027 0.0001 0.0005  
Y 0.0002 0.0003 0.0002 0.0002 0.0001 0.0001  
Z -0.0001 -0.0012 0.0007 -0.0013 -0.0001 -0.0001

AT. 51 C X -0.0158 -0.0023 0.0219 0.0190 0.0003 -0.0043  
Y 0.0050 0.0110 0.0151 0.0129 0.0012 -0.0040  
Z 0.0182 0.0197 0.0133 0.0111 0.0019 -0.0041

AT. 52 C X -0.0158 0.0023 -0.0219 0.0190 -0.0003 -0.0043  
Y 0.0050 -0.0110 -0.0151 0.0129 -0.0012 -0.0040  
Z 0.0182 -0.0197 -0.0133 0.0111 -0.0019 -0.0041

AT. 53 H X -0.0014 0.0042 0.0190 0.0172 0.0008 -0.0036  
Y 0.0213 0.0211 0.0204 0.0182 0.0022 -0.0054  
Z 0.0108 0.0197 0.0255 0.0212 0.0022 -0.0070

AT. 54 H X -0.0014 -0.0042 -0.0190 0.0172 -0.0008 -0.0036  
Y 0.0213 -0.0211 -0.0204 0.0182 -0.0022 -0.0054  
Z 0.0108 -0.0197 -0.0255 0.0212 -0.0022 -0.0070

AT. 55 H X -0.0325 -0.0098 0.0247 0.0206 -0.0001 -0.0051  
Y 0.0098 0.0179 0.0178 0.0148 0.0017 -0.0051

Z 0.0121 0.0226 0.0179 0.0137 0.0021 -0.0058  
AT. 56 H X -0.0325 0.0098 -0.0247 0.0206 0.0001 -0.0051  
Y 0.0098 -0.0179 -0.0178 0.0148 -0.0017 -0.0051  
Z 0.0121 -0.0226 -0.0179 0.0137 -0.0021 -0.0058  
AT. 57 C X -0.0005 -0.0063 0.0057 0.0072 -0.0004 -0.0004  
Y 0.0011 0.0045 -0.0040 -0.0049 0.0002 0.0003  
Z -0.0003 -0.0026 0.0041 0.0045 -0.0000 -0.0005  
AT. 58 C X -0.0005 0.0063 -0.0057 0.0072 0.0004 -0.0004  
Y 0.0011 -0.0045 0.0040 -0.0049 -0.0002 0.0003  
Z -0.0003 0.0026 -0.0041 0.0045 0.0000 -0.0005  
AT. 59 H X -0.0202 -0.0022 0.0149 0.0101 0.0005 -0.0033  
Y 0.0033 -0.0014 -0.0117 -0.0094 -0.0006 0.0025  
Z -0.0106 -0.0089 -0.0005 0.0002 -0.0006 0.0008  
AT. 60 H X -0.0202 0.0022 -0.0149 0.0101 -0.0005 -0.0033  
Y 0.0033 0.0014 0.0117 -0.0094 0.0006 0.0025  
Z -0.0106 0.0089 0.0005 0.0002 0.0006 0.0008  
AT. 61 H X -0.0085 -0.0181 -0.0048 -0.0005 -0.0017 0.0028  
Y -0.0072 0.0119 0.0032 -0.0027 0.0013 -0.0023  
Z -0.0025 -0.0157 -0.0081 -0.0031 -0.0016 0.0033  
AT. 62 H X -0.0085 0.0181 0.0048 -0.0005 0.0017 0.0028  
Y -0.0072 -0.0119 -0.0032 -0.0027 -0.0013 -0.0023  
Z -0.0025 0.0157 0.0081 -0.0031 0.0016 0.0033  
AT. 63 H X 0.0083 0.0038 0.0184 0.0177 0.0008 -0.0033  
Y -0.0188 -0.0032 -0.0130 -0.0149 -0.0004 0.0016  
Z 0.0081 -0.0057 0.0001 0.0034 -0.0007 0.0011  
AT. 64 H X 0.0083 -0.0038 -0.0184 0.0177 -0.0008 -0.0033  
Y -0.0188 0.0032 0.0130 -0.0149 0.0004 0.0016  
Z 0.0081 0.0057 -0.0001 0.0034 0.0007 0.0011  
AT. 65 C X 0.0001 0.0046 0.0041 0.0028 0.0005 -0.0012  
Y 0.0000 -0.0032 -0.0033 -0.0024 -0.0004 0.0009  
Z 0.0003 -0.0046 -0.0074 -0.0062 -0.0005 0.0016  
AT. 66 C X 0.0001 -0.0046 -0.0041 0.0028 -0.0005 -0.0012

Y 0.0000 0.0032 0.0033 -0.0024 0.0004 0.0009  
Z 0.0003 0.0046 0.0074 -0.0062 0.0005 0.0016  
AT. 67 H X -0.0158 -0.0057 0.0180 0.0177 -0.0001 -0.0028  
Y -0.0012 0.0035 -0.0105 -0.0121 -0.0000 0.0011  
Z 0.0143 -0.0024 -0.0126 -0.0098 -0.0004 0.0030  
AT. 68 H X -0.0158 0.0057 -0.0180 0.0177 0.0001 -0.0028  
Y -0.0012 -0.0035 0.0105 -0.0121 0.0000 0.0011  
Z 0.0143 0.0024 0.0126 -0.0098 0.0004 0.0030  
AT. 69 H X -0.0051 0.0107 0.0007 -0.0042 0.0009 -0.0016  
Y -0.0085 -0.0073 0.0006 0.0013 -0.0006 0.0004  
Z -0.0025 -0.0230 0.0062 0.0142 -0.0019 0.0015  
AT. 70 H X -0.0051 -0.0107 -0.0007 -0.0042 -0.0009 -0.0016  
Y -0.0085 0.0073 -0.0006 0.0013 0.0006 0.0004  
Z -0.0025 0.0230 -0.0062 0.0142 0.0019 0.0015  
AT. 71 H X 0.0029 -0.0046 0.0137 0.0163 -0.0002 -0.0015  
Y -0.0122 0.0004 -0.0063 -0.0095 -0.0000 0.0005  
Z -0.0144 -0.0068 -0.0046 -0.0060 -0.0005 0.0010  
AT. 72 H X 0.0029 0.0046 -0.0137 0.0163 0.0002 -0.0015  
Y -0.0122 -0.0004 0.0063 -0.0095 0.0000 0.0005  
Z -0.0144 0.0068 0.0046 -0.0060 0.0005 0.0010  
AT. 73 C X -0.0009 -0.0042 -0.0253 -0.0239 -0.0009 0.0048  
Y -0.0013 0.0036 0.0173 0.0156 0.0008 -0.0036  
Z -0.0028 -0.0227 0.0039 0.0104 -0.0017 0.0027  
AT. 74 C X -0.0009 0.0042 0.0253 -0.0239 0.0009 0.0048  
Y -0.0013 -0.0036 -0.0173 0.0156 -0.0008 -0.0036  
Z -0.0028 0.0227 -0.0039 0.0104 0.0017 0.0027  
AT. 75 H X 0.0048 -0.0026 -0.0370 -0.0346 -0.0010 0.0069  
Y 0.0023 0.0046 0.0260 0.0246 0.0012 -0.0047  
Z 0.0063 -0.0204 0.0071 0.0150 -0.0013 0.0026  
AT. 76 H X 0.0048 0.0026 0.0370 -0.0346 0.0010 0.0069  
Y 0.0023 -0.0046 -0.0260 0.0246 -0.0012 -0.0047  
Z 0.0063 0.0204 -0.0071 0.0150 0.0013 0.0026



AT. 77 H X 0.0020 -0.0048 -0.0387 -0.0367 -0.0012 0.0074  
Y 0.0048 0.0041 0.0275 0.0266 0.0010 -0.0048  
Z -0.0110 -0.0227 0.0066 0.0122 -0.0017 0.0015

AT. 78 H X 0.0020 0.0048 0.0387 -0.0367 0.0012 0.0074  
Y 0.0048 -0.0041 -0.0275 0.0266 -0.0010 -0.0048  
Z -0.0110 0.0227 -0.0066 0.0122 0.0017 0.0015

AT. 79 I X -0.0000 -0.0003 0.0000 0.0000 -0.0001 -0.0001  
Y 0.0001 0.0001 -0.0000 0.0000 0.0000 0.0001  
Z 0.0001 0.0001 -0.0000 0.0000 0.0000 0.0001

AT. 80 I X -0.0000 0.0003 -0.0000 0.0000 0.0001 -0.0001  
Y 0.0001 -0.0001 0.0000 0.0000 -0.0000 0.0001  
Z 0.0001 -0.0001 0.0000 0.0000 -0.0000 0.0001

AT. 81 I X -0.0000 0.0000 -0.0000 0.0000 0.0001 0.0002  
Y 0.0000 0.0000 0.0000 -0.0000 -0.0004 -0.0003  
Z 0.0000 -0.0000 -0.0000 -0.0000 0.0002 0.0001

AT. 82 I X -0.0000 -0.0000 0.0000 0.0000 -0.0001 0.0002  
Y 0.0000 -0.0000 -0.0000 -0.0000 0.0004 -0.0003  
Z 0.0000 0.0000 0.0000 -0.0000 -0.0002 0.0001

AT. 83 O X -0.0004 -0.0007 0.0000 -0.0001 0.0008 -0.0006  
Y -0.0002 -0.0003 0.0002 -0.0002 -0.0000 0.0000  
Z -0.0008 -0.0007 0.0000 -0.0001 -0.0005 -0.0015

AT. 84 O X -0.0004 0.0007 -0.0000 -0.0001 -0.0008 -0.0006  
Y -0.0002 0.0003 -0.0002 -0.0002 0.0000 0.0000  
Z -0.0008 0.0007 -0.0000 -0.0001 0.0005 -0.0015

AT. 85 O X 0.0000 -0.0006 0.0000 0.0006 0.0059 0.0056  
Y -0.0003 -0.0002 0.0002 0.0009 0.0032 0.0023  
Z 0.0005 0.0003 0.0001 -0.0009 -0.0057 -0.0039

AT. 86 O X 0.0000 0.0006 -0.0000 0.0006 -0.0059 0.0056  
Y -0.0003 0.0002 -0.0002 0.0009 -0.0032 0.0023  
Z 0.0005 -0.0003 -0.0001 -0.0009 0.0057 -0.0039

AT. 87 N X -0.0001 -0.0004 -0.0001 0.0004 0.0023 0.0027  
Y 0.0004 0.0008 0.0000 -0.0005 -0.0043 -0.0025

Z 0.0012 0.0015 -0.0003 0.0001 -0.0002 0.0016  
AT. 88 N X -0.0001 0.0004 0.0001 0.0004 -0.0023 0.0027  
Y 0.0004 -0.0008 -0.0000 -0.0005 0.0043 -0.0025  
Z 0.0012 -0.0015 0.0003 0.0001 0.0002 0.0016  
AT. 89 N X -0.0002 -0.0005 -0.0002 0.0008 0.0058 0.0056  
Y 0.0011 0.0019 0.0002 -0.0016 -0.0156 -0.0109  
Z -0.0001 -0.0001 -0.0003 0.0006 0.0045 0.0038  
AT. 90 N X -0.0002 0.0005 0.0002 0.0008 -0.0058 0.0056  
Y 0.0011 -0.0019 -0.0002 -0.0016 0.0156 -0.0109  
Z -0.0001 0.0001 0.0003 0.0006 -0.0045 0.0038  
AT. 91 C X -0.0004 -0.0006 0.0001 -0.0002 0.0000 -0.0008  
Y 0.0004 0.0009 -0.0006 0.0003 0.0008 0.0028  
Z -0.0002 -0.0011 0.0003 -0.0001 -0.0000 -0.0022  
AT. 92 C X -0.0004 0.0006 -0.0001 -0.0002 -0.0000 -0.0008  
Y 0.0004 -0.0009 0.0006 0.0003 -0.0008 0.0028  
Z -0.0002 0.0011 -0.0003 -0.0001 0.0000 -0.0022  
AT. 93 C X -0.0001 0.0017 -0.0001 -0.0000 -0.0030 -0.0004  
Y -0.0007 -0.0009 0.0005 -0.0004 -0.0015 -0.0034  
Z -0.0036 -0.0042 0.0011 -0.0005 -0.0014 -0.0058  
AT. 94 C X -0.0001 -0.0017 0.0001 -0.0000 0.0030 -0.0004  
Y -0.0007 0.0009 -0.0005 -0.0004 0.0015 -0.0034  
Z -0.0036 0.0042 -0.0011 -0.0005 0.0014 -0.0058  
AT. 95 H X 0.0066 0.0050 -0.0011 0.0004 0.0002 0.0014  
Y -0.0096 -0.0080 0.0026 -0.0014 -0.0067 -0.0160  
Z 0.0051 0.0048 -0.0015 0.0010 0.0045 0.0140  
AT. 96 H X 0.0066 -0.0050 0.0011 0.0004 -0.0002 0.0014  
Y -0.0096 0.0080 -0.0026 -0.0014 0.0067 -0.0160  
Z 0.0051 -0.0048 0.0015 0.0010 -0.0045 0.0140  
AT. 97 H X 0.0019 0.0054 -0.0015 0.0006 -0.0012 0.0059  
Y 0.0130 0.0120 -0.0032 0.0014 0.0071 0.0217  
Z -0.0007 -0.0021 0.0006 -0.0002 0.0003 -0.0013  
AT. 98 H X 0.0019 -0.0054 0.0015 0.0006 0.0012 0.0059

Y 0.0130 -0.0120 0.0032 0.0014 -0.0071 0.0217  
Z -0.0007 0.0021 -0.0006 -0.0002 -0.0003 -0.0013  
AT. 99 C X -0.0002 0.0002 0.0001 0.0003 -0.0008 -0.0012  
Y -0.0004 -0.0013 -0.0004 0.0013 0.0135 0.0126  
Z 0.0003 -0.0002 -0.0003 -0.0002 0.0018 0.0023  
AT. 100 C X -0.0002 -0.0002 -0.0001 0.0003 0.0008 -0.0012  
Y -0.0004 0.0013 0.0004 0.0013 -0.0135 0.0126  
Z 0.0003 0.0002 0.0003 -0.0002 -0.0018 0.0023  
AT. 101 C X 0.0004 0.0003 0.0002 -0.0023 -0.0099 -0.0122  
Y -0.0000 -0.0012 -0.0001 0.0000 0.0086 0.0040  
Z 0.0003 0.0023 0.0008 -0.0021 -0.0243 -0.0196  
AT. 102 C X 0.0004 -0.0003 -0.0002 -0.0023 0.0099 -0.0122  
Y -0.0000 0.0012 0.0001 0.0000 -0.0086 0.0040  
Z 0.0003 -0.0023 -0.0008 -0.0021 0.0243 -0.0196  
AT. 103 H X -0.0003 0.0025 0.0011 -0.0034 -0.0311 -0.0228  
Y 0.0003 -0.0017 -0.0005 0.0003 0.0144 0.0063  
Z -0.0004 -0.0062 -0.0007 0.0022 0.0490 0.0261  
AT. 104 H X -0.0003 -0.0025 -0.0011 -0.0034 0.0311 -0.0228  
Y 0.0003 0.0017 0.0005 0.0003 -0.0144 0.0063  
Z -0.0004 0.0062 0.0007 0.0022 -0.0490 0.0261  
AT. 105 H X 0.0009 0.0015 0.0004 -0.0038 -0.0243 -0.0226  
Y -0.0002 0.0072 0.0012 -0.0023 -0.0567 -0.0364  
Z 0.0003 0.0057 0.0013 -0.0034 -0.0522 -0.0373  
AT. 106 H X 0.0009 -0.0015 -0.0004 -0.0038 0.0243 -0.0226  
Y -0.0002 -0.0072 -0.0012 -0.0023 0.0567 -0.0364  
Z 0.0003 -0.0057 -0.0013 -0.0034 0.0522 -0.0373  
AT. 107 C X -0.0017 -0.0033 0.0009 0.0002 0.0027 -0.0011  
Y -0.0010 -0.0025 0.0010 -0.0002 0.0058 -0.0049  
Z 0.0016 0.0021 0.0000 -0.0005 -0.0005 -0.0024  
AT. 108 C X -0.0017 0.0033 -0.0009 0.0002 -0.0027 -0.0011  
Y -0.0010 0.0025 -0.0010 -0.0002 -0.0058 -0.0049  
Z 0.0016 -0.0021 -0.0000 -0.0005 0.0005 -0.0024

AT.109 H X -0.0035 -0.0051 0.0010 0.0006 0.0051 -0.0001  
Y -0.0016 -0.0036 0.0010 0.0003 0.0112 -0.0021  
Z 0.0008 0.0006 0.0001 0.0004 0.0083 0.0022

AT.110 H X -0.0035 0.0051 -0.0010 0.0006 -0.0051 -0.0001  
Y -0.0016 0.0036 -0.0010 0.0003 -0.0112 -0.0021  
Z 0.0008 -0.0006 -0.0001 0.0004 -0.0083 0.0022

AT.111 H X -0.0019 -0.0032 0.0006 0.0002 0.0022 0.0005  
Y 0.0011 0.0010 0.0010 -0.0012 -0.0034 -0.0096  
Z 0.0012 0.0011 0.0002 -0.0003 0.0024 -0.0032

AT.112 H X -0.0019 0.0032 -0.0006 0.0002 -0.0022 0.0005  
Y 0.0011 -0.0010 -0.0010 -0.0012 0.0034 -0.0096  
Z 0.0012 -0.0011 -0.0002 -0.0003 -0.0024 -0.0032

AT.113 C X 0.0001 0.0000 -0.0000 0.0002 0.0006 0.0009  
Y 0.0001 0.0003 -0.0002 -0.0001 -0.0007 0.0002  
Z 0.0000 0.0001 -0.0002 0.0003 0.0019 0.0020

AT.114 C X 0.0001 -0.0000 0.0000 0.0002 -0.0006 0.0009  
Y 0.0001 -0.0003 0.0002 -0.0001 0.0007 0.0002  
Z 0.0000 -0.0001 0.0002 0.0003 -0.0019 0.0020

AT.115 C X 0.0017 0.0025 0.0004 -0.0030 -0.0214 -0.0186  
Y 0.0002 0.0008 -0.0003 -0.0003 -0.0092 -0.0002  
Z -0.0008 -0.0017 -0.0001 0.0015 0.0148 0.0079

AT.116 C X 0.0017 -0.0025 -0.0004 -0.0030 0.0214 -0.0186  
Y 0.0002 -0.0008 0.0003 -0.0003 0.0092 -0.0002  
Z -0.0008 0.0017 0.0001 0.0015 -0.0148 0.0079

AT.117 H X 0.0010 0.0011 -0.0000 -0.0021 -0.0145 -0.0120  
Y 0.0012 0.0037 -0.0000 -0.0017 -0.0241 -0.0089  
Z -0.0003 -0.0008 0.0003 0.0007 0.0103 0.0026

AT.118 H X 0.0010 -0.0011 0.0000 -0.0021 0.0145 -0.0120  
Y 0.0012 -0.0037 0.0000 -0.0017 0.0241 -0.0089  
Z -0.0003 0.0008 -0.0003 0.0007 -0.0103 0.0026

AT.119 H X 0.0026 0.0039 0.0011 -0.0038 -0.0300 -0.0248  
Y 0.0000 -0.0002 -0.0002 0.0004 -0.0065 0.0029

Z -0.0001 0.0002 0.0001 0.0003 0.0066 0.0012  
AT. 120 H X 0.0026 -0.0039 -0.0011 -0.0038 0.0300 -0.0248  
Y 0.0000 0.0002 0.0002 0.0004 0.0065 0.0029  
Z -0.0001 -0.0002 -0.0001 0.0003 -0.0066 0.0012  
AT. 121 C X -0.0011 -0.0024 -0.0007 0.0025 0.0234 0.0184  
Y -0.0012 -0.0021 0.0016 -0.0025 -0.0091 -0.0190  
Z -0.0008 -0.0015 -0.0005 0.0032 0.0218 0.0201  
AT. 122 C X -0.0011 0.0024 0.0007 0.0025 -0.0234 0.0184  
Y -0.0012 0.0021 -0.0016 -0.0025 0.0091 -0.0190  
Z -0.0008 0.0015 0.0005 0.0032 -0.0218 0.0201  
AT. 123 H X -0.0018 -0.0030 -0.0003 0.0037 0.0267 0.0203  
Y -0.0022 -0.0040 0.0029 -0.0027 -0.0093 -0.0245  
Z 0.0002 0.0005 -0.0017 0.0035 0.0219 0.0255  
AT. 124 H X -0.0018 0.0030 0.0003 0.0037 -0.0267 0.0203  
Y -0.0022 0.0040 -0.0029 -0.0027 0.0093 -0.0245  
Z 0.0002 -0.0005 0.0017 0.0035 -0.0219 0.0255  
AT. 125 H X -0.0009 -0.0023 -0.0008 0.0037 0.0292 0.0260  
Y 0.0001 0.0001 0.0004 -0.0044 -0.0188 -0.0232  
Z 0.0001 -0.0000 -0.0013 0.0037 0.0231 0.0266  
AT. 126 H X -0.0009 0.0023 0.0008 0.0037 -0.0292 0.0260  
Y 0.0001 -0.0001 -0.0004 -0.0044 0.0188 -0.0232  
Z 0.0001 0.0000 0.0013 0.0037 -0.0231 0.0266  
AT. 127 C X -0.0001 -0.0001 -0.0000 0.0002 0.0009 0.0017  
Y -0.0001 0.0001 0.0001 -0.0002 -0.0015 -0.0018  
Z -0.0000 -0.0000 0.0000 0.0001 0.0012 0.0007  
AT. 128 C X -0.0001 0.0001 0.0000 0.0002 -0.0009 0.0017  
Y -0.0001 -0.0001 -0.0001 -0.0002 0.0015 -0.0018  
Z -0.0000 0.0000 -0.0000 0.0001 -0.0012 0.0007  
AT. 129 C X 0.0013 0.0026 0.0001 -0.0017 -0.0117 -0.0112  
Y 0.0007 0.0009 -0.0013 0.0027 0.0141 0.0203  
Z 0.0020 0.0033 -0.0017 0.0019 0.0075 0.0161  
AT. 130 C X 0.0013 -0.0026 -0.0001 -0.0017 0.0117 -0.0112

Y 0.0007 -0.0009 0.0013 0.0027 -0.0141 0.0203  
Z 0.0020 -0.0033 0.0017 0.0019 -0.0075 0.0161  
AT. 131 H X 0.0008 0.0010 0.0002 -0.0003 -0.0037 -0.0035  
Y 0.0027 0.0047 -0.0026 0.0018 0.0071 0.0195  
Z 0.0021 0.0027 -0.0021 0.0034 0.0157 0.0264  
AT. 132 H X 0.0008 -0.0010 -0.0002 -0.0003 0.0037 -0.0035  
Y 0.0027 -0.0047 0.0026 0.0018 -0.0071 0.0195  
Z 0.0021 -0.0027 0.0021 0.0034 -0.0157 0.0264  
AT. 133 H X 0.0033 0.0055 -0.0006 -0.0027 -0.0182 -0.0136  
Y 0.0010 0.0009 -0.0015 0.0035 0.0189 0.0260  
Z 0.0014 0.0018 -0.0016 0.0036 0.0182 0.0260  
AT. 134 H X 0.0033 -0.0055 0.0006 -0.0027 0.0182 -0.0136  
Y 0.0010 -0.0009 0.0015 0.0035 -0.0189 0.0260  
Z 0.0014 -0.0018 0.0016 0.0036 -0.0182 0.0260  
AT. 135 C X 0.0000 -0.0001 0.0001 0.0002 0.0037 0.0011  
Y -0.0000 0.0002 -0.0001 -0.0001 0.0006 0.0000  
Z 0.0002 0.0001 -0.0000 0.0002 -0.0008 0.0014  
AT. 136 C X 0.0000 0.0001 -0.0001 0.0002 -0.0037 0.0011  
Y -0.0000 -0.0002 0.0001 -0.0001 -0.0006 0.0000  
Z 0.0002 -0.0001 0.0000 0.0002 0.0008 0.0014  
AT. 137 H X 0.0008 0.0023 -0.0002 -0.0040 -0.0213 -0.0218  
Y -0.0007 -0.0010 0.0003 -0.0006 -0.0009 -0.0044  
Z -0.0012 -0.0025 0.0008 0.0008 0.0053 0.0023  
AT. 138 H X 0.0008 -0.0023 0.0002 -0.0040 0.0213 -0.0218  
Y -0.0007 0.0010 -0.0003 -0.0006 0.0009 -0.0044  
Z -0.0012 0.0025 -0.0008 0.0008 -0.0053 0.0023  
AT. 139 H X 0.0011 0.0013 -0.0008 0.0021 0.0137 0.0148  
Y -0.0008 -0.0016 0.0000 0.0019 0.0139 0.0108  
Z -0.0009 -0.0012 0.0011 -0.0028 -0.0177 -0.0198  
AT. 140 H X 0.0011 -0.0013 0.0008 0.0021 -0.0137 0.0148  
Y -0.0008 0.0016 -0.0000 0.0019 -0.0139 0.0108  
Z -0.0009 0.0012 -0.0011 -0.0028 0.0177 -0.0198

AT. 141 H X -0.0018 -0.0035 0.0016 -0.0010 0.0000 -0.0114  
Y -0.0015 -0.0028 0.0008 0.0009 0.0098 0.0024  
Z 0.0009 0.0019 -0.0004 -0.0013 -0.0122 -0.0064

AT. 142 H X -0.0018 0.0035 -0.0016 -0.0010 -0.0000 -0.0114  
Y -0.0015 0.0028 -0.0008 0.0009 -0.0098 0.0024  
Z 0.0009 -0.0019 0.0004 -0.0013 0.0122 -0.0064

AT. 143 C X -0.0000 -0.0005 0.0008 -0.0012 -0.0064 -0.0080  
Y -0.0001 -0.0001 0.0002 -0.0003 -0.0018 -0.0022  
Z -0.0002 -0.0001 0.0003 -0.0007 -0.0046 -0.0060

AT. 144 C X -0.0000 0.0005 -0.0008 -0.0012 0.0064 -0.0080  
Y -0.0001 0.0001 -0.0002 -0.0003 0.0018 -0.0022  
Z -0.0002 0.0001 -0.0003 -0.0007 0.0046 -0.0060

AT. 145 H X 0.0013 0.0026 -0.0003 -0.0015 -0.0138 -0.0154  
Y -0.0006 -0.0012 0.0002 0.0006 0.0063 0.0030  
Z 0.0008 0.0020 0.0000 -0.0018 -0.0154 -0.0138

AT. 146 H X 0.0013 -0.0026 0.0003 -0.0015 0.0138 -0.0154  
Y -0.0006 0.0012 -0.0002 0.0006 -0.0063 0.0030  
Z 0.0008 -0.0020 -0.0000 -0.0018 0.0154 -0.0138

AT. 147 H X 0.0002 -0.0004 0.0014 -0.0024 -0.0162 -0.0143  
Y -0.0009 -0.0012 -0.0006 0.0008 0.0053 0.0033  
Z -0.0003 -0.0007 0.0008 -0.0017 -0.0147 -0.0116

AT. 148 H X 0.0002 0.0004 -0.0014 -0.0024 0.0162 -0.0143  
Y -0.0009 0.0012 0.0006 0.0008 -0.0053 0.0033  
Z -0.0003 0.0007 -0.0008 -0.0017 0.0147 -0.0116

AT. 149 H X -0.0006 -0.0017 0.0002 0.0004 0.0089 0.0009  
Y -0.0007 -0.0022 0.0007 0.0003 0.0088 0.0045  
Z -0.0010 -0.0030 0.0014 -0.0005 0.0052 0.0003

AT. 150 H X -0.0006 0.0017 -0.0002 0.0004 -0.0089 0.0009  
Y -0.0007 0.0022 -0.0007 0.0003 -0.0088 0.0045  
Z -0.0010 0.0030 -0.0014 -0.0005 -0.0052 0.0003

AT. 151 C X 0.0003 0.0013 -0.0014 0.0023 0.0070 0.0170  
Y 0.0001 0.0004 -0.0006 0.0011 0.0053 0.0078

Z -0.0011 -0.0010 0.0009 -0.0029 -0.0194 -0.0186  
AT. 152 C X 0.0003 -0.0013 0.0014 0.0023 -0.0070 0.0170  
Y 0.0001 -0.0004 0.0006 0.0011 -0.0053 0.0078  
Z -0.0011 0.0010 -0.0009 -0.0029 0.0194 -0.0186  
AT. 153 H X 0.0003 0.0018 -0.0024 0.0035 0.0114 0.0249  
Y 0.0003 0.0009 -0.0007 0.0013 0.0035 0.0085  
Z -0.0009 -0.0004 0.0011 -0.0030 -0.0245 -0.0212  
AT. 154 H X 0.0003 -0.0018 0.0024 0.0035 -0.0114 0.0249  
Y 0.0003 -0.0009 0.0007 0.0013 -0.0035 0.0085  
Z -0.0009 0.0004 -0.0011 -0.0030 0.0245 -0.0212  
AT. 155 H X 0.0005 0.0022 -0.0026 0.0038 0.0125 0.0286  
Y 0.0002 0.0010 -0.0004 0.0012 0.0010 0.0072  
Z -0.0011 -0.0012 0.0003 -0.0026 -0.0132 -0.0142  
AT. 156 H X 0.0005 -0.0022 0.0026 0.0038 -0.0125 0.0286  
Y 0.0002 -0.0010 0.0004 0.0012 -0.0010 0.0072  
Z -0.0011 0.0012 -0.0003 -0.0026 0.0132 -0.0142  
AT. 157 O X 0.0004 -0.0006 0.0006 0.0004 -0.0000 0.0006  
Y 0.0002 -0.0000 -0.0000 0.0000 -0.0000 -0.0001  
Z -0.0000 -0.0015 0.0012 0.0006 -0.0001 0.0011  
AT. 158 O X 0.0004 0.0006 -0.0006 0.0004 0.0000 0.0006  
Y 0.0002 0.0000 0.0000 0.0000 0.0000 -0.0001  
Z -0.0000 0.0015 -0.0012 0.0006 0.0001 0.0011  
AT. 159 O X -0.0003 0.0001 -0.0000 -0.0000 -0.0001 -0.0002  
Y 0.0007 0.0013 -0.0019 -0.0014 -0.0005 -0.0014  
Z -0.0003 0.0004 -0.0004 -0.0003 0.0000 -0.0003  
AT. 160 O X -0.0003 -0.0001 0.0000 -0.0000 0.0001 -0.0002  
Y 0.0007 -0.0013 0.0019 -0.0014 0.0005 -0.0014  
Z -0.0003 -0.0004 0.0004 -0.0003 -0.0000 -0.0003  
AT. 161 H X -0.0030 0.0178 -0.0141 -0.0089 0.0012 -0.0132  
Y 0.0024 -0.0065 0.0056 0.0032 -0.0006 0.0054  
Z -0.0087 0.0264 -0.0224 -0.0136 0.0019 -0.0219  
AT. 162 H X -0.0030 -0.0178 0.0141 -0.0089 -0.0012 -0.0132



Y 0.0024 0.0065 -0.0056 0.0032 0.0006 0.0054  
Z -0.0087 -0.0264 0.0224 -0.0136 -0.0019 -0.0219  
AT. 163 H X -0.0006 -0.0009 0.0017 0.0005 0.0001 0.0010  
Y -0.0096 -0.0176 0.0374 0.0270 0.0122 0.0279  
Z -0.0021 -0.0032 0.0069 0.0054 0.0025 0.0053  
AT. 164 H X -0.0006 0.0009 -0.0017 0.0005 -0.0001 0.0010  
Y -0.0096 0.0176 -0.0374 0.0270 -0.0122 0.0279  
Z -0.0021 0.0032 -0.0069 0.0054 -0.0025 0.0053  
AT. 165 O X 0.0000 -0.0001 -0.0001 0.0002 0.0002 -0.0002  
Y 0.0001 0.0003 0.0002 -0.0007 -0.0006 0.0003  
Z -0.0001 -0.0002 0.0000 0.0001 -0.0002 0.0001  
AT. 166 O X 0.0000 0.0001 0.0001 0.0002 -0.0002 -0.0002  
Y 0.0001 -0.0003 -0.0002 -0.0007 0.0006 0.0003  
Z -0.0001 0.0002 -0.0000 0.0001 0.0002 0.0001  
AT. 167 H X 0.0002 0.0018 0.0027 -0.0051 -0.0053 0.0030  
Y -0.0002 -0.0040 -0.0057 0.0109 0.0116 -0.0066  
Z -0.0005 0.0006 0.0009 -0.0022 -0.0033 0.0016  
AT. 168 H X 0.0002 -0.0018 -0.0027 -0.0051 0.0053 0.0030  
Y -0.0002 0.0040 0.0057 0.0109 -0.0116 -0.0066  
Z -0.0005 -0.0006 -0.0009 -0.0022 0.0033 0.0016  
AT. 169 O X 0.0003 0.0004 -0.0000 -0.0006 -0.0004 0.0003  
Y 0.0001 0.0001 0.0001 -0.0003 0.0001 -0.0000  
Z -0.0000 0.0000 -0.0000 -0.0001 -0.0000 0.0000  
AT. 170 O X 0.0003 -0.0004 0.0000 -0.0006 0.0004 0.0003  
Y 0.0001 -0.0001 -0.0001 -0.0003 -0.0001 -0.0000  
Z -0.0000 -0.0000 0.0000 -0.0001 0.0000 0.0000  
AT. 171 H X -0.0088 -0.0097 -0.0014 0.0189 0.0085 -0.0048  
Y -0.0043 -0.0049 -0.0005 0.0093 0.0048 -0.0028  
Z -0.0003 -0.0004 0.0001 0.0009 0.0016 -0.0010  
AT. 172 H X -0.0088 0.0097 0.0014 0.0189 -0.0085 -0.0048  
Y -0.0043 0.0049 0.0005 0.0093 -0.0048 -0.0028  
Z -0.0003 0.0004 -0.0001 0.0009 -0.0016 -0.0010

FREQ(CM\*\*-1) 827.61 828.38 837.82 844.34 845.23 848.15

AT. 1 I X -0.0000 -0.0000 -0.0000 -0.0000 -0.0000 -0.0000

Y -0.0000 -0.0000 0.0000 -0.0000 0.0000 -0.0002

Z -0.0000 0.0000 -0.0000 0.0000 -0.0000 -0.0001

AT. 2 I X 0.0000 -0.0000 -0.0000 0.0000 -0.0000 -0.0000

Y 0.0000 -0.0000 0.0000 0.0000 0.0000 -0.0002

Z 0.0000 0.0000 -0.0000 -0.0000 -0.0000 -0.0001

AT. 3 I X -0.0000 -0.0000 -0.0000 0.0000 -0.0000 -0.0002

Y -0.0000 -0.0000 -0.0000 -0.0000 -0.0001 0.0003

Z 0.0000 0.0000 0.0000 -0.0000 0.0000 -0.0001

AT. 4 I X 0.0000 -0.0000 -0.0000 -0.0000 -0.0000 -0.0002

Y 0.0000 -0.0000 -0.0000 0.0000 -0.0001 0.0003

Z -0.0000 0.0000 0.0000 0.0000 0.0000 -0.0001

AT. 5 O X -0.0004 0.0004 0.0000 -0.0011 -0.0003 0.0033

Y 0.0002 0.0005 0.0002 0.0015 0.0002 0.0010

Z 0.0005 -0.0003 0.0002 -0.0004 0.0010 -0.0032

AT. 6 O X 0.0004 0.0004 0.0000 0.0011 -0.0003 0.0033

Y -0.0002 0.0005 0.0002 -0.0015 0.0002 0.0010

Z -0.0005 -0.0003 0.0002 0.0004 0.0010 -0.0032

AT. 7 O X 0.0001 -0.0007 0.0001 0.0017 0.0010 -0.0067

Y -0.0006 0.0006 -0.0006 -0.0012 -0.0014 0.0052

Z 0.0001 -0.0001 -0.0002 -0.0001 -0.0005 0.0006

AT. 8 O X -0.0001 -0.0007 0.0001 -0.0017 0.0010 -0.0067

Y 0.0006 0.0006 -0.0006 0.0012 -0.0014 0.0052

Z -0.0001 -0.0001 -0.0002 0.0001 -0.0005 0.0006

AT. 9 N X -0.0004 0.0001 -0.0001 0.0004 0.0002 -0.0002

Y -0.0003 0.0001 -0.0001 0.0011 0.0005 -0.0000

Z -0.0007 0.0001 0.0002 0.0008 -0.0002 -0.0006

AT. 10 N X 0.0004 0.0001 -0.0001 -0.0004 0.0002 -0.0002

Y 0.0003 0.0001 -0.0001 -0.0011 0.0005 -0.0000

Z 0.0007 0.0001 0.0002 -0.0008 -0.0002 -0.0006  
AT. 11 N X -0.0001 -0.0002 0.0005 0.0004 -0.0011 -0.0012  
Y 0.0002 -0.0004 0.0002 0.0012 -0.0007 -0.0004  
Z -0.0003 0.0001 -0.0002 0.0006 0.0002 -0.0005  
AT. 12 N X 0.0001 -0.0002 0.0005 -0.0004 -0.0011 -0.0012  
Y -0.0002 -0.0004 0.0002 -0.0012 -0.0007 -0.0004  
Z 0.0003 0.0001 -0.0002 -0.0006 0.0002 -0.0005  
AT. 13 C X 0.0003 -0.0016 -0.0005 -0.0009 0.0002 -0.0060  
Y 0.0006 -0.0018 -0.0010 -0.0008 0.0000 -0.0082  
Z 0.0005 -0.0008 0.0001 -0.0005 0.0011 -0.0053  
AT. 14 C X -0.0003 -0.0016 -0.0005 0.0009 0.0002 -0.0060  
Y -0.0006 -0.0018 -0.0010 0.0008 0.0000 -0.0082  
Z -0.0005 -0.0008 0.0001 0.0005 0.0011 -0.0053  
AT. 15 C X 0.0006 0.0002 -0.0007 0.0016 -0.0001 -0.0026  
Y -0.0008 0.0013 0.0006 -0.0013 -0.0008 0.0076  
Z 0.0016 -0.0004 -0.0001 -0.0009 0.0002 0.0039  
AT. 16 C X -0.0006 0.0002 -0.0007 -0.0016 -0.0001 -0.0026  
Y 0.0008 0.0013 0.0006 0.0013 -0.0008 0.0076  
Z -0.0016 -0.0004 -0.0001 0.0009 0.0002 0.0039  
AT. 17 H X 0.0028 0.0012 0.0013 -0.0001 0.0009 0.0183  
Y 0.0024 0.0005 0.0019 -0.0041 0.0007 0.0199  
Z -0.0018 0.0010 -0.0009 0.0021 -0.0012 -0.0044  
AT. 18 H X -0.0028 0.0012 0.0013 0.0001 0.0009 0.0183  
Y -0.0024 0.0005 0.0019 0.0041 0.0007 0.0199  
Z 0.0018 0.0010 -0.0009 -0.0021 -0.0012 -0.0044  
AT. 19 H X 0.0003 0.0002 0.0010 0.0040 0.0037 -0.0119  
Y -0.0055 0.0012 -0.0005 0.0033 -0.0011 -0.0160  
Z -0.0002 -0.0004 -0.0001 0.0018 0.0011 -0.0080  
AT. 20 H X -0.0003 0.0002 0.0010 -0.0040 0.0037 -0.0119  
Y 0.0055 0.0012 -0.0005 -0.0033 -0.0011 -0.0160  
Z 0.0002 -0.0004 -0.0001 -0.0018 0.0011 -0.0080  
AT. 21 C X 0.0008 0.0007 0.0007 -0.0012 0.0005 0.0021

Y 0.0003 0.0014 -0.0003 -0.0020 -0.0009 0.0099  
Z 0.0005 0.0003 0.0005 -0.0010 0.0005 0.0009  
AT. 22 C X -0.0008 0.0007 0.0007 0.0012 0.0005 0.0021  
Y -0.0003 0.0014 -0.0003 0.0020 -0.0009 0.0099  
Z -0.0005 0.0003 0.0005 0.0010 0.0005 0.0009  
AT. 23 C X -0.0003 0.0007 -0.0013 -0.0008 -0.0015 0.0089  
Y -0.0002 -0.0003 0.0010 0.0008 0.0020 -0.0119  
Z 0.0002 -0.0016 0.0002 0.0025 0.0003 -0.0046  
AT. 24 C X 0.0003 0.0007 -0.0013 0.0008 -0.0015 0.0089  
Y 0.0002 -0.0003 0.0010 -0.0008 0.0020 -0.0119  
Z -0.0002 -0.0016 0.0002 -0.0025 0.0003 -0.0046  
AT. 25 H X -0.0015 -0.0008 0.0013 0.0005 0.0032 -0.0212  
Y -0.0003 -0.0007 0.0010 0.0013 0.0020 -0.0129  
Z -0.0004 -0.0001 0.0040 0.0005 0.0072 -0.0359  
AT. 26 H X 0.0015 -0.0008 0.0013 -0.0005 0.0032 -0.0212  
Y 0.0003 -0.0007 0.0010 -0.0013 0.0020 -0.0129  
Z 0.0004 -0.0001 0.0040 -0.0005 0.0072 -0.0359  
AT. 27 H X -0.0010 0.0020 -0.0032 -0.0046 -0.0071 0.0309  
Y 0.0006 -0.0013 -0.0025 0.0011 -0.0052 0.0235  
Z 0.0008 -0.0022 -0.0012 0.0034 -0.0023 0.0082  
AT. 28 H X 0.0010 0.0020 -0.0032 0.0046 -0.0071 0.0309  
Y -0.0006 -0.0013 -0.0025 -0.0011 -0.0052 0.0235  
Z -0.0008 -0.0022 -0.0012 -0.0034 -0.0023 0.0082  
AT. 29 C X -0.0017 0.0007 0.0006 -0.0019 -0.0016 0.0011  
Y -0.0000 0.0007 0.0017 -0.0031 -0.0023 0.0044  
Z -0.0017 0.0011 0.0012 -0.0005 -0.0034 0.0061  
AT. 30 C X 0.0017 0.0007 0.0006 0.0019 -0.0016 0.0011  
Y 0.0000 0.0007 0.0017 0.0031 -0.0023 0.0044  
Z 0.0017 0.0011 0.0012 0.0005 -0.0034 0.0061  
AT. 31 H X -0.0028 0.0011 0.0008 -0.0008 -0.0039 0.0043  
Y 0.0007 0.0007 0.0019 -0.0065 0.0002 0.0010  
Z -0.0012 0.0013 0.0012 -0.0048 -0.0017 0.0029

AT. 32 H X 0.0028 0.0011 0.0008 0.0008 -0.0039 0.0043  
Y -0.0007 0.0007 0.0019 0.0065 0.0002 0.0010  
Z 0.0012 0.0013 0.0012 0.0048 -0.0017 0.0029

AT. 33 H X -0.0022 0.0025 0.0001 0.0006 -0.0060 0.0149  
Y -0.0010 0.0011 0.0021 0.0028 -0.0050 0.0118  
Z -0.0016 0.0023 0.0010 -0.0011 -0.0047 0.0128

AT. 34 H X 0.0022 0.0025 0.0001 -0.0006 -0.0060 0.0149  
Y 0.0010 0.0011 0.0021 -0.0028 -0.0050 0.0118  
Z 0.0016 0.0023 0.0010 0.0011 -0.0047 0.0128

AT. 35 C X -0.0001 -0.0001 0.0003 -0.0001 0.0002 -0.0020  
Y 0.0002 -0.0002 -0.0000 -0.0001 0.0005 -0.0018  
Z -0.0001 -0.0000 -0.0003 -0.0002 0.0001 0.0003

AT. 36 C X 0.0001 -0.0001 0.0003 0.0001 0.0002 -0.0020  
Y -0.0002 -0.0002 -0.0000 0.0001 0.0005 -0.0018  
Z 0.0001 -0.0000 -0.0003 0.0002 0.0001 0.0003

AT. 37 C X 0.0006 0.0004 -0.0016 -0.0011 0.0012 0.0031  
Y 0.0013 -0.0019 -0.0015 0.0047 0.0037 -0.0077  
Z -0.0009 0.0006 0.0000 -0.0020 -0.0007 0.0015

AT. 38 C X -0.0006 0.0004 -0.0016 0.0011 0.0012 0.0031  
Y -0.0013 -0.0019 -0.0015 -0.0047 0.0037 -0.0077  
Z 0.0009 0.0006 0.0000 0.0020 -0.0007 0.0015

AT. 39 H X -0.0002 0.0015 -0.0012 -0.0003 -0.0023 0.0129  
Y 0.0012 -0.0015 -0.0017 0.0070 0.0026 -0.0014  
Z -0.0014 0.0011 0.0004 -0.0024 -0.0024 0.0051

AT. 40 H X 0.0002 0.0015 -0.0012 0.0003 -0.0023 0.0129  
Y -0.0012 -0.0015 -0.0017 -0.0070 0.0026 -0.0014  
Z 0.0014 0.0011 0.0004 0.0024 -0.0024 0.0051

AT. 41 H X 0.0008 -0.0010 -0.0035 0.0009 0.0056 -0.0067  
Y 0.0019 -0.0021 -0.0016 0.0041 0.0051 -0.0087  
Z -0.0016 0.0021 0.0017 -0.0030 -0.0060 0.0119

AT. 42 H X -0.0008 -0.0010 -0.0035 -0.0009 0.0056 -0.0067  
Y -0.0019 -0.0021 -0.0016 -0.0041 0.0051 -0.0087

Z 0.0016 0.0021 0.0017 0.0030 -0.0060 0.0119  
AT. 43 C X -0.0003 -0.0017 -0.0002 0.0027 0.0017 -0.0074  
Y -0.0005 -0.0008 0.0017 -0.0040 0.0006 -0.0085  
Z -0.0003 0.0013 -0.0014 -0.0008 -0.0000 0.0069  
AT. 44 C X 0.0003 -0.0017 -0.0002 -0.0027 0.0017 -0.0074  
Y 0.0005 -0.0008 0.0017 0.0040 0.0006 -0.0085  
Z 0.0003 0.0013 -0.0014 0.0008 -0.0000 0.0069  
AT. 45 H X 0.0003 -0.0014 0.0014 -0.0008 0.0008 -0.0070  
Y -0.0013 -0.0020 0.0006 -0.0027 0.0028 -0.0139  
Z 0.0001 0.0021 -0.0013 0.0004 -0.0014 0.0114  
AT. 46 H X -0.0003 -0.0014 0.0014 0.0008 0.0008 -0.0070  
Y 0.0013 -0.0020 0.0006 0.0027 0.0028 -0.0139  
Z -0.0001 0.0021 -0.0013 -0.0004 -0.0014 0.0114  
AT. 47 H X -0.0006 -0.0023 -0.0007 0.0043 0.0024 -0.0097  
Y -0.0005 -0.0009 -0.0003 -0.0002 0.0027 -0.0051  
Z 0.0003 0.0020 -0.0030 0.0011 0.0009 0.0138  
AT. 48 H X 0.0006 -0.0023 -0.0007 -0.0043 0.0024 -0.0097  
Y 0.0005 -0.0009 -0.0003 0.0002 0.0027 -0.0051  
Z -0.0003 0.0020 -0.0030 -0.0011 0.0009 0.0138  
AT. 49 C X 0.0000 0.0000 0.0002 -0.0007 -0.0002 0.0002  
Y 0.0001 -0.0000 -0.0001 -0.0000 0.0005 -0.0001  
Z -0.0001 0.0001 -0.0002 -0.0005 0.0001 0.0004  
AT. 50 C X -0.0000 0.0000 0.0002 0.0007 -0.0002 0.0002  
Y -0.0001 -0.0000 -0.0001 0.0000 0.0005 -0.0001  
Z 0.0001 0.0001 -0.0002 0.0005 0.0001 0.0004  
AT. 51 C X 0.0016 0.0012 -0.0010 0.0008 -0.0004 0.0084  
Y -0.0001 0.0011 -0.0007 0.0012 -0.0016 0.0064  
Z -0.0007 0.0010 -0.0013 0.0002 -0.0010 0.0062  
AT. 52 C X -0.0016 0.0012 -0.0010 -0.0008 -0.0004 0.0084  
Y 0.0001 0.0011 -0.0007 -0.0012 -0.0016 0.0064  
Z 0.0007 0.0010 -0.0013 -0.0002 -0.0010 0.0062  
AT. 53 H X 0.0014 0.0008 -0.0021 -0.0000 0.0003 0.0060

Y -0.0003 0.0012 -0.0023 0.0004 -0.0014 0.0073  
Z -0.0004 0.0019 -0.0015 0.0008 -0.0022 0.0118  
AT. 54 H X -0.0014 0.0008 -0.0021 0.0000 0.0003 0.0060  
Y 0.0003 0.0012 -0.0023 -0.0004 -0.0014 0.0073  
Z 0.0004 0.0019 -0.0015 -0.0008 -0.0022 0.0118  
AT. 55 H X 0.0016 0.0019 0.0008 0.0025 -0.0020 0.0122  
Y -0.0003 0.0013 -0.0011 0.0010 -0.0011 0.0078  
Z -0.0009 0.0016 -0.0009 0.0011 -0.0017 0.0107  
AT. 56 H X -0.0016 0.0019 0.0008 -0.0025 -0.0020 0.0122  
Y 0.0003 0.0013 -0.0011 -0.0010 -0.0011 0.0078  
Z 0.0009 0.0016 -0.0009 -0.0011 -0.0017 0.0107  
AT. 57 C X 0.0006 -0.0001 0.0001 0.0014 -0.0001 0.0000  
Y -0.0005 0.0001 0.0001 -0.0008 -0.0002 -0.0015  
Z 0.0002 -0.0001 -0.0004 0.0005 0.0000 0.0007  
AT. 58 C X -0.0006 -0.0001 0.0001 -0.0014 -0.0001 0.0000  
Y 0.0005 0.0001 0.0001 0.0008 -0.0002 -0.0015  
Z -0.0002 -0.0001 -0.0004 -0.0005 0.0000 0.0007  
AT. 59 H X 0.0012 0.0007 -0.0036 -0.0020 0.0011 0.0119  
Y -0.0004 -0.0005 0.0021 -0.0002 -0.0001 -0.0060  
Z 0.0007 -0.0004 -0.0001 -0.0006 0.0005 0.0022  
AT. 60 H X -0.0012 0.0007 -0.0036 0.0020 0.0011 0.0119  
Y 0.0004 -0.0005 0.0021 0.0002 -0.0001 -0.0060  
Z -0.0007 -0.0004 -0.0001 0.0006 0.0005 0.0022  
AT. 61 H X 0.0016 -0.0005 0.0015 0.0007 0.0003 -0.0021  
Y -0.0010 0.0008 -0.0013 -0.0018 -0.0004 0.0069  
Z 0.0012 -0.0008 0.0015 0.0004 0.0009 -0.0053  
AT. 62 H X -0.0016 -0.0005 0.0015 -0.0007 0.0003 -0.0021  
Y 0.0010 0.0008 -0.0013 0.0018 -0.0004 0.0069  
Z -0.0012 -0.0008 0.0015 -0.0004 0.0009 -0.0053  
AT. 63 H X -0.0001 -0.0003 -0.0018 0.0015 0.0001 0.0010  
Y -0.0001 0.0009 0.0010 -0.0014 -0.0011 0.0031  
Z 0.0006 -0.0005 0.0007 0.0012 0.0006 -0.0043

AT. 64 H X 0.0001 -0.0003 -0.0018 -0.0015 0.0001 0.0010  
Y 0.0001 0.0009 0.0010 0.0014 -0.0011 0.0031  
Z -0.0006 -0.0005 0.0007 -0.0012 0.0006 -0.0043

AT. 65 C X -0.0002 0.0001 -0.0008 -0.0002 0.0005 0.0006  
Y 0.0002 -0.0001 0.0005 0.0000 -0.0002 -0.0004  
Z -0.0000 -0.0002 0.0002 0.0000 -0.0005 0.0002

AT. 66 C X 0.0002 0.0001 -0.0008 0.0002 0.0005 0.0006  
Y -0.0002 -0.0001 0.0005 -0.0000 -0.0002 -0.0004  
Z 0.0000 -0.0002 0.0002 -0.0000 -0.0005 0.0002

AT. 67 H X 0.0013 0.0001 -0.0004 0.0003 0.0014 -0.0013  
Y -0.0007 0.0004 -0.0002 -0.0010 -0.0009 0.0023  
Z -0.0005 -0.0007 0.0005 0.0008 -0.0004 -0.0011

AT. 68 H X -0.0013 0.0001 -0.0004 -0.0003 0.0014 -0.0013  
Y 0.0007 0.0004 -0.0002 0.0010 -0.0009 0.0023  
Z 0.0005 -0.0007 0.0005 -0.0008 -0.0004 -0.0011

AT. 69 H X -0.0010 0.0007 -0.0015 -0.0005 -0.0002 0.0036  
Y 0.0007 0.0001 0.0009 0.0007 -0.0002 -0.0009  
Z 0.0023 -0.0010 0.0021 0.0018 0.0011 -0.0065

AT. 70 H X 0.0010 0.0007 -0.0015 0.0005 -0.0002 0.0036  
Y -0.0007 0.0001 0.0009 -0.0007 -0.0002 -0.0009  
Z -0.0023 -0.0010 0.0021 -0.0018 0.0011 -0.0065

AT. 71 H X 0.0010 -0.0006 -0.0006 0.0023 0.0022 -0.0029  
Y -0.0002 0.0006 0.0006 -0.0020 -0.0014 0.0023  
Z 0.0003 0.0002 0.0007 -0.0006 -0.0010 0.0009

AT. 72 H X -0.0010 -0.0006 -0.0006 -0.0023 0.0022 -0.0029  
Y 0.0002 0.0006 0.0006 0.0020 -0.0014 0.0023  
Z -0.0003 0.0002 0.0007 0.0006 -0.0010 0.0009

AT. 73 C X -0.0008 -0.0004 0.0020 -0.0019 -0.0014 -0.0043  
Y 0.0005 0.0004 -0.0018 0.0012 0.0009 0.0046  
Z 0.0016 -0.0021 0.0007 0.0011 0.0036 -0.0131

AT. 74 C X 0.0008 -0.0004 0.0020 0.0019 -0.0014 -0.0043  
Y -0.0005 0.0004 -0.0018 -0.0012 0.0009 0.0046



Z -0.0016 -0.0021 0.0007 -0.0011 0.0036 -0.0131  
AT. 75 H X -0.0019 -0.0010 0.0017 -0.0010 -0.0016 -0.0074  
Y 0.0006 0.0000 -0.0034 0.0034 0.0027 0.0043  
Z 0.0009 -0.0031 -0.0017 0.0049 0.0057 -0.0159  
AT. 76 H X 0.0019 -0.0010 0.0017 0.0010 -0.0016 -0.0074  
Y -0.0006 0.0000 -0.0034 -0.0034 0.0027 0.0043  
Z -0.0009 -0.0031 -0.0017 -0.0049 0.0057 -0.0159  
AT. 77 H X -0.0013 -0.0008 0.0014 -0.0013 -0.0004 -0.0061  
Y 0.0005 0.0001 -0.0013 0.0025 0.0006 0.0013  
Z 0.0021 -0.0015 0.0008 -0.0004 0.0033 -0.0089  
AT. 78 H X 0.0013 -0.0008 0.0014 0.0013 -0.0004 -0.0061  
Y -0.0005 0.0001 -0.0013 -0.0025 0.0006 0.0013  
Z -0.0021 -0.0015 0.0008 0.0004 0.0033 -0.0089  
AT. 79 I X 0.0002 0.0003 -0.0004 -0.0000 -0.0004 -0.0002  
Y -0.0001 -0.0001 0.0004 0.0002 -0.0001 0.0000  
Z 0.0001 0.0000 -0.0003 -0.0000 -0.0005 -0.0001  
AT. 80 I X -0.0002 0.0003 -0.0004 0.0000 -0.0004 -0.0002  
Y 0.0001 -0.0001 0.0004 -0.0002 -0.0001 0.0000  
Z -0.0001 0.0000 -0.0003 0.0000 -0.0005 -0.0001  
AT. 81 I X 0.0002 0.0001 0.0000 -0.0002 -0.0002 -0.0000  
Y 0.0001 0.0002 0.0001 -0.0001 0.0000 -0.0001  
Z -0.0001 -0.0001 -0.0002 0.0002 0.0001 0.0001  
AT. 82 I X -0.0002 0.0001 0.0000 0.0002 -0.0002 -0.0000  
Y -0.0001 0.0002 0.0001 0.0001 0.0000 -0.0001  
Z 0.0001 -0.0001 -0.0002 -0.0002 0.0001 0.0001  
AT. 83 O X 0.0016 0.0027 -0.0114 -0.0028 -0.0097 -0.0031  
Y 0.0022 0.0014 -0.0069 -0.0042 -0.0009 -0.0006  
Z -0.0006 0.0006 -0.0025 -0.0003 -0.0023 -0.0009  
AT. 84 O X -0.0016 0.0027 -0.0114 0.0028 -0.0097 -0.0031  
Y -0.0022 0.0014 -0.0069 0.0042 -0.0009 -0.0006  
Z 0.0006 0.0006 -0.0025 0.0003 -0.0023 -0.0009  
AT. 85 O X -0.0007 -0.0034 -0.0013 -0.0015 -0.0007 0.0015

Y -0.0021 -0.0030 0.0025 -0.0044 -0.0037 0.0003  
Z 0.0023 0.0035 -0.0019 0.0041 0.0039 -0.0006  
AT. 86 O X 0.0007 -0.0034 -0.0013 0.0015 -0.0007 0.0015  
Y 0.0021 -0.0030 0.0025 0.0044 -0.0037 0.0003  
Z -0.0023 0.0035 -0.0019 -0.0041 0.0039 -0.0006  
AT. 87 N X 0.0026 0.0022 -0.0010 0.0002 -0.0016 -0.0001  
Y 0.0025 0.0030 0.0017 0.0017 0.0052 0.0005  
Z 0.0001 -0.0017 0.0018 0.0004 0.0006 0.0006  
AT. 88 N X -0.0026 0.0022 -0.0010 -0.0002 -0.0016 -0.0001  
Y -0.0025 0.0030 0.0017 -0.0017 0.0052 0.0005  
Z -0.0001 -0.0017 0.0018 -0.0004 0.0006 0.0006  
AT. 89 N X 0.0027 0.0012 -0.0006 -0.0003 -0.0007 0.0008  
Y 0.0037 0.0068 0.0021 0.0024 0.0045 -0.0025  
Z -0.0008 -0.0021 0.0014 -0.0006 -0.0007 0.0007  
AT. 90 N X -0.0027 0.0012 -0.0006 0.0003 -0.0007 0.0008  
Y -0.0037 0.0068 0.0021 -0.0024 0.0045 -0.0025  
Z 0.0008 -0.0021 0.0014 0.0006 -0.0007 0.0007  
AT. 91 C X 0.0016 0.0021 -0.0064 -0.0024 -0.0030 -0.0009  
Y -0.0005 -0.0019 0.0068 0.0037 -0.0008 0.0008  
Z 0.0007 0.0032 -0.0093 -0.0011 -0.0098 -0.0036  
AT. 92 C X -0.0016 0.0021 -0.0064 0.0024 -0.0030 -0.0009  
Y 0.0005 -0.0019 0.0068 -0.0037 -0.0008 0.0008  
Z -0.0007 0.0032 -0.0093 0.0011 -0.0098 -0.0036  
AT. 93 C X -0.0090 -0.0114 0.0281 0.0058 0.0216 0.0077  
Y -0.0030 -0.0015 0.0006 -0.0010 0.0042 0.0006  
Z -0.0004 0.0046 -0.0009 -0.0006 0.0049 -0.0008  
AT. 94 C X 0.0090 -0.0114 0.0281 -0.0058 0.0216 0.0077  
Y 0.0030 -0.0015 0.0006 0.0010 0.0042 0.0006  
Z 0.0004 0.0046 -0.0009 0.0006 0.0049 -0.0008  
AT. 95 H X -0.0022 -0.0017 -0.0288 -0.0013 -0.0425 -0.0112  
Y -0.0143 -0.0057 0.0407 0.0051 0.0527 0.0117  
Z 0.0120 0.0021 -0.0121 -0.0042 -0.0131 -0.0009

AT. 96 H X 0.0022 -0.0017 -0.0288 0.0013 -0.0425 -0.0112  
Y 0.0143 -0.0057 0.0407 -0.0051 0.0527 0.0117  
Z -0.0120 0.0021 -0.0121 0.0042 -0.0131 -0.0009

AT. 97 H X -0.0092 -0.0178 0.0529 0.0137 0.0378 0.0155  
Y 0.0143 -0.0021 -0.0357 -0.0082 -0.0468 -0.0074  
Z 0.0043 0.0067 -0.0182 -0.0048 -0.0132 -0.0053

AT. 98 H X 0.0092 -0.0178 0.0529 -0.0137 0.0378 0.0155  
Y -0.0143 -0.0021 -0.0357 0.0082 -0.0468 -0.0074  
Z -0.0043 0.0067 -0.0182 0.0048 -0.0132 -0.0053

AT. 99 C X -0.0017 -0.0013 0.0022 -0.0020 -0.0015 -0.0004  
Y 0.0018 -0.0028 -0.0024 -0.0009 -0.0006 0.0026  
Z 0.0024 0.0019 -0.0029 0.0032 0.0025 0.0008

AT. 100 C X 0.0017 -0.0013 0.0022 0.0020 -0.0015 -0.0004  
Y -0.0018 -0.0028 -0.0024 0.0009 -0.0006 0.0026  
Z -0.0024 0.0019 -0.0029 -0.0032 0.0025 0.0008

AT. 101 C X -0.0065 -0.0017 -0.0045 0.0084 0.0036 -0.0016  
Y -0.0079 -0.0090 -0.0059 0.0072 0.0021 0.0022  
Z 0.0030 0.0096 0.0060 -0.0048 0.0005 -0.0052

AT. 102 C X 0.0065 -0.0017 -0.0045 -0.0084 0.0036 -0.0016  
Y 0.0079 -0.0090 -0.0059 -0.0072 0.0021 0.0022  
Z -0.0030 0.0096 0.0060 0.0048 0.0005 -0.0052

AT. 103 H X 0.0083 0.0145 0.0051 -0.0048 0.0092 -0.0056  
Y -0.0128 -0.0138 -0.0088 0.0118 -0.0003 0.0032  
Z -0.0333 -0.0401 -0.0235 0.0243 -0.0037 0.0090

AT. 104 H X -0.0083 0.0145 0.0051 0.0048 0.0092 -0.0056  
Y 0.0128 -0.0138 -0.0088 -0.0118 -0.0003 0.0032  
Z 0.0333 -0.0401 -0.0235 -0.0243 -0.0037 0.0090

AT. 105 H X -0.0001 0.0094 -0.0006 0.0090 0.0077 -0.0045  
Y 0.0268 0.0376 0.0308 -0.0324 -0.0046 -0.0124  
Z 0.0170 0.0292 0.0202 -0.0186 -0.0007 -0.0113

AT. 106 H X 0.0001 0.0094 -0.0006 -0.0090 0.0077 -0.0045  
Y -0.0268 0.0376 0.0308 0.0324 -0.0046 -0.0124

Z -0.0170 0.0292 0.0202 0.0186 -0.0007 -0.0113  
AT. 107 C X 0.0020 0.0053 -0.0156 -0.0052 -0.0120 -0.0053  
Y -0.0253 -0.0243 -0.0058 -0.0093 -0.0152 -0.0025  
Z -0.0169 -0.0197 0.0101 -0.0022 0.0023 0.0027  
AT. 108 C X -0.0020 0.0053 -0.0156 0.0052 -0.0120 -0.0053  
Y 0.0253 -0.0243 -0.0058 0.0093 -0.0152 -0.0025  
Z 0.0169 -0.0197 0.0101 0.0022 0.0023 0.0027  
AT. 109 H X 0.0068 0.0113 -0.0195 -0.0060 -0.0116 -0.0052  
Y -0.0288 -0.0289 -0.0083 -0.0117 -0.0193 -0.0018  
Z -0.0241 -0.0293 0.0067 -0.0064 -0.0044 0.0037  
AT. 110 H X -0.0068 0.0113 -0.0195 0.0060 -0.0116 -0.0052  
Y 0.0288 -0.0289 -0.0083 0.0117 -0.0193 -0.0018  
Z 0.0241 -0.0293 0.0067 0.0064 -0.0044 0.0037  
AT. 111 H X 0.0102 0.0141 -0.0173 -0.0030 -0.0101 -0.0057  
Y -0.0236 -0.0228 0.0008 -0.0071 -0.0064 -0.0011  
Z -0.0265 -0.0298 0.0102 -0.0050 -0.0023 0.0029  
AT. 112 H X -0.0102 0.0141 -0.0173 0.0030 -0.0101 -0.0057  
Y 0.0236 -0.0228 0.0008 0.0071 -0.0064 -0.0011  
Z 0.0265 -0.0298 0.0102 0.0050 -0.0023 0.0029  
AT. 113 C X 0.0007 0.0005 -0.0002 -0.0004 -0.0009 -0.0003  
Y 0.0021 0.0022 0.0003 0.0018 0.0017 0.0004  
Z -0.0003 -0.0012 0.0022 0.0000 0.0012 0.0008  
AT. 114 C X -0.0007 0.0005 -0.0002 0.0004 -0.0009 -0.0003  
Y -0.0021 0.0022 0.0003 -0.0018 0.0017 0.0004  
Z 0.0003 -0.0012 0.0022 -0.0000 0.0012 0.0008  
AT. 115 C X -0.0059 -0.0006 0.0024 0.0042 0.0059 -0.0039  
Y 0.0260 0.0285 -0.0029 0.0072 0.0080 -0.0024  
Z -0.0134 -0.0167 0.0008 -0.0056 -0.0071 0.0025  
AT. 116 C X 0.0059 -0.0006 0.0024 -0.0042 0.0059 -0.0039  
Y -0.0260 0.0285 -0.0029 -0.0072 0.0080 -0.0024  
Z 0.0134 -0.0167 0.0008 0.0056 -0.0071 0.0025  
AT. 117 H X 0.0009 0.0056 -0.0003 0.0054 0.0047 -0.0037

Y 0.0314 0.0355 0.0010 0.0080 0.0153 -0.0040  
Z -0.0214 -0.0243 0.0025 -0.0068 -0.0076 0.0025  
AT. 118 H X -0.0009 0.0056 -0.0003 -0.0054 0.0047 -0.0037  
Y -0.0314 0.0355 0.0010 -0.0080 0.0153 -0.0040  
Z 0.0214 -0.0243 0.0025 0.0068 -0.0076 0.0025  
AT. 119 H X -0.0080 -0.0024 0.0057 0.0026 0.0097 -0.0034  
Y 0.0315 0.0340 -0.0054 0.0087 0.0082 -0.0018  
Z -0.0191 -0.0222 0.0050 -0.0076 -0.0049 0.0020  
AT. 120 H X 0.0080 -0.0024 0.0057 -0.0026 0.0097 -0.0034  
Y -0.0315 0.0340 -0.0054 -0.0087 0.0082 -0.0018  
Z 0.0191 -0.0222 0.0050 0.0076 -0.0049 0.0020  
AT. 121 C X -0.0027 -0.0089 -0.0031 -0.0022 -0.0053 0.0046  
Y -0.0227 -0.0157 -0.0049 -0.0021 -0.0053 -0.0017  
Z 0.0040 -0.0026 -0.0005 -0.0021 -0.0032 0.0041  
AT. 122 C X 0.0027 -0.0089 -0.0031 0.0022 -0.0053 0.0046  
Y 0.0227 -0.0157 -0.0049 0.0021 -0.0053 -0.0017  
Z -0.0040 -0.0026 -0.0005 0.0021 -0.0032 0.0041  
AT. 123 H X -0.0028 -0.0089 -0.0026 -0.0048 -0.0094 0.0044  
Y -0.0305 -0.0205 -0.0081 -0.0045 -0.0099 -0.0019  
Z 0.0120 0.0024 0.0028 -0.0000 0.0004 0.0042  
AT. 124 H X 0.0028 -0.0089 -0.0026 0.0048 -0.0094 0.0044  
Y 0.0305 -0.0205 -0.0081 0.0045 -0.0099 -0.0019  
Z -0.0120 0.0024 0.0028 0.0000 0.0004 0.0042  
AT. 125 H X 0.0031 -0.0057 -0.0029 -0.0018 -0.0046 0.0059  
Y -0.0187 -0.0116 -0.0022 0.0018 0.0010 -0.0029  
Z 0.0134 0.0039 0.0013 0.0007 0.0014 0.0049  
AT. 126 H X -0.0031 -0.0057 -0.0029 0.0018 -0.0046 0.0059  
Y 0.0187 -0.0116 -0.0022 -0.0018 0.0010 -0.0029  
Z -0.0134 0.0039 0.0013 -0.0007 0.0014 0.0049  
AT. 127 C X 0.0026 0.0020 -0.0006 0.0002 0.0001 0.0003  
Y -0.0012 -0.0005 0.0016 0.0002 0.0015 -0.0000  
Z -0.0014 -0.0018 0.0022 0.0004 0.0017 0.0011

AT.128 C X -0.0026 0.0020 -0.0006 -0.0002 0.0001 0.0003  
Y 0.0012 -0.0005 0.0016 -0.0002 0.0015 -0.0000  
Z 0.0014 -0.0018 0.0022 -0.0004 0.0017 0.0011

AT.129 C X -0.0111 -0.0095 0.0179 0.0066 0.0151 0.0038  
Y 0.0173 0.0101 0.0022 0.0008 0.0009 0.0030  
Z 0.0137 0.0061 0.0144 0.0055 0.0115 0.0066

AT.130 C X 0.0111 -0.0095 0.0179 -0.0066 0.0151 0.0038  
Y -0.0173 0.0101 0.0022 -0.0008 0.0009 0.0030  
Z -0.0137 0.0061 0.0144 -0.0055 0.0115 0.0066

AT.131 H X -0.0070 -0.0071 0.0152 0.0046 0.0113 0.0027  
Y 0.0227 0.0135 0.0111 0.0074 0.0105 0.0082  
Z 0.0219 0.0112 0.0132 0.0054 0.0091 0.0071

AT.132 H X 0.0070 -0.0071 0.0152 -0.0046 0.0113 0.0027  
Y -0.0227 0.0135 0.0111 -0.0074 0.0105 0.0082  
Z -0.0219 0.0112 0.0132 -0.0054 0.0091 0.0071

AT.133 H X -0.0099 -0.0097 0.0190 0.0092 0.0173 0.0055  
Y 0.0192 0.0096 0.0014 -0.0005 -0.0014 0.0029  
Z 0.0158 0.0051 0.0123 0.0021 0.0069 0.0055

AT.134 H X 0.0099 -0.0097 0.0190 -0.0092 0.0173 0.0055  
Y -0.0192 0.0096 0.0014 0.0005 -0.0014 0.0029  
Z -0.0158 0.0051 0.0123 -0.0021 0.0069 0.0055

AT.135 C X -0.0079 -0.0092 0.0038 -0.0013 0.0003 0.0017  
Y -0.0023 -0.0025 0.0021 0.0008 0.0017 0.0015  
Z 0.0057 0.0057 -0.0008 0.0005 0.0009 -0.0010

AT.136 C X 0.0079 -0.0092 0.0038 0.0013 0.0003 0.0017  
Y 0.0023 -0.0025 0.0021 -0.0008 0.0017 0.0015  
Z -0.0057 0.0057 -0.0008 -0.0005 0.0009 -0.0010

AT.137 H X -0.0105 -0.0040 0.0042 0.0079 0.0094 0.0022  
Y -0.0062 -0.0044 -0.0031 -0.0014 -0.0035 -0.0004  
Z 0.0007 0.0014 -0.0092 -0.0060 -0.0103 -0.0044

AT.138 H X 0.0105 -0.0040 0.0042 -0.0079 0.0094 0.0022  
Y 0.0062 -0.0044 -0.0031 0.0014 -0.0035 -0.0004

Z -0.0007 0.0014 -0.0092 0.0060 -0.0103 -0.0044  
AT. 139 H X -0.0022 -0.0096 0.0135 -0.0002 0.0070 0.0058  
Y -0.0036 -0.0075 0.0004 -0.0055 -0.0053 0.0007  
Z -0.0018 0.0073 -0.0133 0.0008 -0.0064 -0.0061  
AT. 140 H X 0.0022 -0.0096 0.0135 0.0002 0.0070 0.0058  
Y 0.0036 -0.0075 0.0004 0.0055 -0.0053 0.0007  
Z 0.0018 0.0073 -0.0133 -0.0008 -0.0064 -0.0061  
AT. 141 H X -0.0208 -0.0165 -0.0098 -0.0076 -0.0144 -0.0034  
Y -0.0099 -0.0101 -0.0064 -0.0073 -0.0115 -0.0015  
Z 0.0086 0.0110 0.0021 0.0066 0.0086 -0.0002  
AT. 142 H X 0.0208 -0.0165 -0.0098 0.0076 -0.0144 -0.0034  
Y 0.0099 -0.0101 -0.0064 0.0073 -0.0115 -0.0015  
Z -0.0086 0.0110 0.0021 -0.0066 0.0086 -0.0002  
AT. 143 C X -0.0044 -0.0015 -0.0048 -0.0025 -0.0050 -0.0023  
Y -0.0015 -0.0007 -0.0000 -0.0003 0.0004 -0.0006  
Z -0.0053 -0.0033 -0.0018 -0.0018 -0.0022 -0.0025  
AT. 144 C X 0.0044 -0.0015 -0.0048 0.0025 -0.0050 -0.0023  
Y 0.0015 -0.0007 -0.0000 0.0003 0.0004 -0.0006  
Z 0.0053 -0.0033 -0.0018 0.0018 -0.0022 -0.0025  
AT. 145 H X -0.0212 -0.0183 0.0133 0.0013 0.0091 -0.0040  
Y -0.0055 -0.0067 -0.0021 -0.0026 -0.0044 -0.0000  
Z -0.0059 -0.0017 0.0048 0.0019 0.0061 -0.0038  
AT. 146 H X 0.0212 -0.0183 0.0133 -0.0013 0.0091 -0.0040  
Y 0.0055 -0.0067 -0.0021 0.0026 -0.0044 -0.0000  
Z 0.0059 -0.0017 0.0048 -0.0019 0.0061 -0.0038  
AT. 147 H X 0.0063 0.0125 -0.0100 -0.0007 -0.0046 -0.0046  
Y 0.0003 -0.0003 -0.0074 -0.0022 -0.0071 -0.0025  
Z 0.0118 0.0177 -0.0134 -0.0001 -0.0057 -0.0069  
AT. 148 H X -0.0063 0.0125 -0.0100 0.0007 -0.0046 -0.0046  
Y -0.0003 -0.0003 -0.0074 0.0022 -0.0071 -0.0025  
Z -0.0118 0.0177 -0.0134 0.0001 -0.0057 -0.0069  
AT. 149 H X -0.0178 -0.0188 -0.0059 -0.0070 -0.0127 -0.0008

Y -0.0036 -0.0041 -0.0072 -0.0047 -0.0095 0.0022  
Z -0.0022 -0.0004 -0.0133 -0.0068 -0.0148 0.0012  
AT. 150 H X 0.0178 -0.0188 -0.0059 0.0070 -0.0127 -0.0008  
Y 0.0036 -0.0041 -0.0072 0.0047 -0.0095 0.0022  
Z 0.0022 -0.0004 -0.0133 0.0068 -0.0148 0.0012  
AT. 151 C X 0.0291 0.0246 0.0008 0.0049 0.0060 0.0021  
Y 0.0077 0.0052 0.0008 0.0011 0.0019 0.0013  
Z 0.0069 0.0162 -0.0084 0.0046 0.0023 -0.0045  
AT. 152 C X -0.0291 0.0246 0.0008 -0.0049 0.0060 0.0021  
Y -0.0077 0.0052 0.0008 -0.0011 0.0019 0.0013  
Z -0.0069 0.0162 -0.0084 -0.0046 0.0023 -0.0045  
AT. 153 H X 0.0410 0.0344 0.0009 0.0072 0.0085 0.0033  
Y 0.0119 0.0091 0.0032 0.0019 0.0036 0.0012  
Z 0.0089 0.0188 -0.0044 0.0052 0.0047 -0.0055  
AT. 154 H X -0.0410 0.0344 0.0009 -0.0072 0.0085 0.0033  
Y -0.0119 0.0091 0.0032 -0.0019 0.0036 0.0012  
Z -0.0089 0.0188 -0.0044 -0.0052 0.0047 -0.0055  
AT. 155 H X 0.0472 0.0399 -0.0002 0.0089 0.0095 0.0033  
Y 0.0148 0.0129 0.0031 0.0029 0.0050 0.0002  
Z 0.0062 0.0139 -0.0116 0.0044 -0.0000 -0.0031  
AT. 156 H X -0.0472 0.0399 -0.0002 -0.0089 0.0095 0.0033  
Y -0.0148 0.0129 0.0031 -0.0029 0.0050 0.0002  
Z -0.0062 0.0139 -0.0116 -0.0044 -0.0000 -0.0031  
AT. 157 O X -0.0001 -0.0004 -0.0000 -0.0009 0.0005 -0.0034  
Y -0.0002 -0.0000 -0.0000 0.0000 -0.0001 0.0002  
Z -0.0001 -0.0008 0.0004 -0.0019 0.0015 -0.0056  
AT. 158 O X 0.0001 -0.0004 -0.0000 0.0009 0.0005 -0.0034  
Y 0.0002 -0.0000 -0.0000 -0.0000 -0.0001 0.0002  
Z 0.0001 -0.0008 0.0004 0.0019 0.0015 -0.0056  
AT. 159 O X 0.0001 0.0001 -0.0000 0.0000 -0.0000 0.0006  
Y 0.0003 0.0010 -0.0005 0.0021 -0.0018 0.0066  
Z -0.0000 0.0001 -0.0002 0.0005 -0.0006 0.0018



AT.160 O X -0.0001 0.0001 -0.0000 -0.0000 -0.0000 0.0006  
Y -0.0003 0.0010 -0.0005 -0.0021 -0.0018 0.0066  
Z 0.0000 0.0001 -0.0002 -0.0005 -0.0006 0.0018

AT.161 H X 0.0007 0.0107 -0.0036 0.0267 -0.0183 0.0772  
Y -0.0004 -0.0041 0.0012 -0.0110 0.0069 -0.0303  
Z 0.0009 0.0168 -0.0058 0.0433 -0.0291 0.1236

AT.162 H X -0.0007 0.0107 -0.0036 -0.0267 -0.0183 0.0772  
Y 0.0004 -0.0041 0.0012 0.0110 0.0069 -0.0303  
Z -0.0009 0.0168 -0.0058 -0.0433 -0.0291 0.1236

AT.163 H X -0.0001 -0.0007 0.0002 -0.0017 0.0011 -0.0051  
Y -0.0060 -0.0170 0.0097 -0.0387 0.0335 -0.1220  
Z -0.0013 -0.0033 0.0020 -0.0069 0.0065 -0.0230

AT.164 H X 0.0001 -0.0007 0.0002 0.0017 0.0011 -0.0051  
Y 0.0060 -0.0170 0.0097 0.0387 0.0335 -0.1220  
Z 0.0013 -0.0033 0.0020 0.0069 0.0065 -0.0230

AT.165 O X -0.0008 0.0002 0.0027 0.0029 -0.0014 -0.0004  
Y 0.0012 -0.0017 -0.0044 -0.0066 0.0052 0.0011  
Z -0.0000 0.0002 0.0005 0.0005 -0.0005 -0.0001

AT.166 O X 0.0008 0.0002 0.0027 -0.0029 -0.0014 -0.0004  
Y -0.0012 -0.0017 -0.0044 0.0066 0.0052 0.0011  
Z 0.0000 0.0002 0.0005 -0.0005 -0.0005 -0.0001

AT.167 H X 0.0110 -0.0125 -0.0395 -0.0558 0.0435 0.0091  
Y -0.0247 0.0276 0.0890 0.1236 -0.0951 -0.0196  
Z 0.0053 -0.0070 -0.0185 -0.0268 0.0203 0.0041

AT.168 H X -0.0110 -0.0125 -0.0395 0.0558 0.0435 0.0091  
Y 0.0247 0.0276 0.0890 -0.1236 -0.0951 -0.0196  
Z -0.0053 -0.0070 -0.0185 0.0268 0.0203 0.0041

AT.169 O X 0.0011 -0.0012 -0.0051 -0.0066 0.0049 0.0010  
Y 0.0001 -0.0002 -0.0013 -0.0019 0.0019 0.0003  
Z -0.0000 -0.0001 0.0004 0.0004 0.0003 0.0001

AT.170 O X -0.0011 -0.0012 -0.0051 0.0066 0.0049 0.0010  
Y -0.0001 -0.0002 -0.0013 0.0019 0.0019 0.0003

Z 0.0000 -0.0001 0.0004 -0.0004 0.0003 0.0001  
AT. 171 H X -0.0223 0.0309 0.1203 0.1603 -0.1247 -0.0249  
Y -0.0111 0.0156 0.0592 0.0780 -0.0606 -0.0123  
Z -0.0010 0.0016 0.0056 0.0066 -0.0039 -0.0008  
AT. 172 H X 0.0223 0.0309 0.1203 -0.1603 -0.1247 -0.0249  
Y 0.0111 0.0156 0.0592 -0.0780 -0.0606 -0.0123  
Z 0.0010 0.0016 0.0056 -0.0066 -0.0039 -0.0008

FREQ(CM\*\*-1) 851.12 867.45 873.69 878.22 879.29 880.96

AT. 1 I X -0.0001 0.0002 0.0002 0.0004 -0.0004 0.0002  
Y -0.0001 -0.0001 -0.0001 -0.0000 0.0001 -0.0001  
Z 0.0001 -0.0002 -0.0003 -0.0005 0.0005 -0.0003  
AT. 2 I X 0.0001 -0.0002 -0.0002 0.0004 0.0004 -0.0002  
Y 0.0001 0.0001 0.0001 -0.0000 -0.0001 0.0001  
Z -0.0001 0.0002 0.0003 -0.0005 -0.0005 0.0003  
AT. 3 I X 0.0001 0.0001 -0.0003 0.0000 -0.0003 0.0001  
Y -0.0002 -0.0001 0.0005 0.0000 0.0005 -0.0002  
Z 0.0000 0.0001 -0.0003 -0.0001 -0.0002 0.0001  
AT. 4 I X -0.0001 -0.0001 0.0003 0.0000 0.0003 -0.0001  
Y 0.0002 0.0001 -0.0005 0.0000 -0.0005 0.0002  
Z -0.0000 -0.0001 0.0003 -0.0001 0.0002 -0.0001  
AT. 5 O X -0.0031 0.0030 0.0042 0.0072 -0.0107 0.0056  
Y 0.0045 -0.0013 -0.0032 -0.0062 0.0074 -0.0037  
Z 0.0002 -0.0012 -0.0019 -0.0030 0.0057 -0.0030  
AT. 6 O X 0.0031 -0.0030 -0.0042 0.0072 0.0107 -0.0056  
Y -0.0045 0.0013 0.0032 -0.0062 -0.0074 0.0037  
Z -0.0002 0.0012 0.0019 -0.0030 -0.0057 0.0030  
AT. 7 O X 0.0060 0.0020 -0.0085 0.0004 -0.0087 0.0022  
Y -0.0057 -0.0010 0.0043 -0.0003 0.0039 -0.0010  
Z 0.0001 0.0002 -0.0011 -0.0007 -0.0009 0.0001  
AT. 8 O X -0.0060 -0.0020 0.0085 0.0004 0.0087 -0.0022

Y 0.0057 0.0010 -0.0043 -0.0003 -0.0039 0.0010  
Z -0.0001 -0.0002 0.0011 -0.0007 0.0009 -0.0001  
AT. 9 N X 0.0006 0.0017 -0.0050 -0.0056 0.0005 0.0007  
Y 0.0014 0.0024 -0.0065 -0.0063 -0.0009 0.0015  
Z -0.0003 -0.0002 -0.0028 -0.0037 0.0023 -0.0009  
AT. 10 N X -0.0006 -0.0017 0.0050 -0.0056 -0.0005 -0.0007  
Y -0.0014 -0.0024 0.0065 -0.0063 0.0009 -0.0015  
Z 0.0003 0.0002 0.0028 -0.0037 -0.0023 0.0009  
AT. 11 N X 0.0026 -0.0008 0.0035 0.0058 -0.0034 0.0003  
Y 0.0047 -0.0010 0.0059 0.0081 -0.0041 0.0002  
Z 0.0010 0.0000 -0.0004 0.0025 -0.0033 0.0010  
AT. 12 N X -0.0026 0.0008 -0.0035 0.0058 0.0034 -0.0003  
Y -0.0047 0.0010 -0.0059 0.0081 0.0041 -0.0002  
Z -0.0010 -0.0000 0.0004 0.0025 0.0033 -0.0010  
AT. 13 C X -0.0029 -0.0006 0.0006 0.0026 -0.0008 0.0001  
Y -0.0013 -0.0035 -0.0024 -0.0012 0.0053 -0.0032  
Z -0.0001 -0.0025 -0.0045 -0.0047 0.0069 -0.0033  
AT. 14 C X 0.0029 0.0006 -0.0006 0.0026 0.0008 -0.0001  
Y 0.0013 0.0035 0.0024 -0.0012 -0.0053 0.0032  
Z 0.0001 0.0025 0.0045 -0.0047 -0.0069 0.0033  
AT. 15 C X 0.0046 -0.0050 -0.0078 -0.0117 0.0150 -0.0079  
Y -0.0039 0.0048 0.0065 0.0087 -0.0138 0.0073  
Z 0.0004 0.0056 0.0111 0.0155 -0.0162 0.0078  
AT. 16 C X -0.0046 0.0050 0.0078 -0.0117 -0.0150 0.0079  
Y 0.0039 -0.0048 -0.0065 0.0087 0.0138 -0.0073  
Z -0.0004 -0.0056 -0.0111 0.0155 0.0162 -0.0078  
AT. 17 H X 0.0037 0.0175 0.0304 0.0388 -0.0433 0.0214  
Y -0.0057 0.0252 0.0439 0.0592 -0.0680 0.0344  
Z 0.0021 -0.0126 -0.0236 -0.0317 0.0329 -0.0167  
AT. 18 H X -0.0037 -0.0175 -0.0304 0.0388 0.0433 -0.0214  
Y 0.0057 -0.0252 -0.0439 0.0592 0.0680 -0.0344  
Z -0.0021 0.0126 0.0236 -0.0317 -0.0329 0.0167

AT. 19 H X 0.0107 -0.0129 -0.0240 -0.0352 0.0461 -0.0228  
Y -0.0014 -0.0242 -0.0453 -0.0611 0.0637 -0.0308  
Z 0.0039 -0.0075 -0.0134 -0.0183 0.0233 -0.0115

AT. 20 H X -0.0107 0.0129 0.0240 -0.0352 -0.0461 0.0228  
Y 0.0014 0.0242 0.0453 -0.0611 -0.0637 0.0308  
Z -0.0039 0.0075 0.0134 -0.0183 -0.0233 0.0115

AT. 21 C X -0.0018 -0.0004 0.0010 -0.0011 0.0020 -0.0008  
Y -0.0082 -0.0025 0.0091 -0.0016 0.0102 -0.0029  
Z -0.0009 -0.0002 -0.0005 -0.0013 0.0011 -0.0002

AT. 22 C X 0.0018 0.0004 -0.0010 -0.0011 -0.0020 0.0008  
Y 0.0082 0.0025 -0.0091 -0.0016 -0.0102 0.0029  
Z 0.0009 0.0002 0.0005 -0.0013 -0.0011 0.0002

AT. 23 C X -0.0055 -0.0024 0.0122 0.0002 0.0110 -0.0026  
Y 0.0062 0.0046 -0.0193 -0.0013 -0.0170 0.0047  
Z 0.0065 -0.0008 0.0040 0.0030 0.0027 -0.0014

AT. 24 C X 0.0055 0.0024 -0.0122 0.0002 -0.0110 0.0026  
Y -0.0062 -0.0046 0.0193 -0.0013 0.0170 -0.0047  
Z -0.0065 0.0008 -0.0040 0.0030 -0.0027 0.0014

AT. 25 H X 0.0122 0.0090 -0.0411 -0.0021 -0.0363 0.0113  
Y 0.0082 0.0047 -0.0193 -0.0004 -0.0174 0.0048  
Z 0.0144 0.0150 -0.0636 -0.0080 -0.0538 0.0149

AT. 26 H X -0.0122 -0.0090 0.0411 -0.0021 0.0363 -0.0113  
Y -0.0082 -0.0047 0.0193 -0.0004 0.0174 -0.0048  
Z -0.0144 -0.0150 0.0636 -0.0080 0.0538 -0.0149

AT. 27 H X -0.0229 -0.0081 0.0373 -0.0017 0.0353 -0.0093  
Y -0.0073 -0.0124 0.0552 0.0085 0.0444 -0.0131  
Z 0.0034 -0.0074 0.0339 0.0078 0.0264 -0.0083

AT. 28 H X 0.0229 0.0081 -0.0373 -0.0017 -0.0353 0.0093  
Y 0.0073 0.0124 -0.0552 0.0085 -0.0444 0.0131  
Z -0.0034 0.0074 -0.0339 0.0078 -0.0264 0.0083

AT. 29 C X -0.0069 0.0003 0.0023 0.0039 -0.0041 0.0021  
Y -0.0038 -0.0065 0.0217 0.0171 0.0049 -0.0048

Z -0.0035 -0.0022 0.0099 0.0056 0.0004 -0.0007  
AT. 30 C X 0.0069 -0.0003 -0.0023 0.0039 0.0041 -0.0021  
Y 0.0038 0.0065 -0.0217 0.0171 -0.0049 0.0048  
Z 0.0035 0.0022 -0.0099 0.0056 -0.0004 0.0007  
AT. 31 H X -0.0073 -0.0025 0.0085 0.0070 -0.0035 0.0011  
Y -0.0080 -0.0066 0.0227 0.0233 0.0030 -0.0047  
Z -0.0096 -0.0040 0.0147 0.0161 -0.0020 -0.0012  
AT. 32 H X 0.0073 0.0025 -0.0085 0.0070 0.0035 -0.0011  
Y 0.0080 0.0066 -0.0227 0.0233 -0.0030 0.0047  
Z 0.0096 0.0040 -0.0147 0.0161 0.0020 0.0012  
AT. 33 H X 0.0007 -0.0017 0.0119 0.0050 -0.0036 0.0019  
Y 0.0052 -0.0047 0.0194 0.0065 0.0075 -0.0049  
Z -0.0015 -0.0043 0.0181 0.0113 -0.0000 -0.0010  
AT. 34 H X -0.0007 0.0017 -0.0119 0.0050 0.0036 -0.0019  
Y -0.0052 0.0047 -0.0194 0.0065 -0.0075 0.0049  
Z 0.0015 0.0043 -0.0181 0.0113 0.0000 0.0010  
AT. 35 C X -0.0001 0.0006 -0.0033 -0.0020 -0.0009 0.0006  
Y 0.0006 0.0003 -0.0008 0.0022 -0.0029 0.0009  
Z -0.0026 0.0005 -0.0018 -0.0021 0.0004 0.0006  
AT. 36 C X 0.0001 -0.0006 0.0033 -0.0020 0.0009 -0.0006  
Y -0.0006 -0.0003 0.0008 0.0022 0.0029 -0.0009  
Z 0.0026 -0.0005 0.0018 -0.0021 -0.0004 -0.0006  
AT. 37 C X -0.0045 0.0041 -0.0130 -0.0223 0.0124 -0.0010  
Y 0.0107 0.0028 -0.0133 -0.0049 -0.0065 0.0021  
Z -0.0079 -0.0015 0.0032 0.0023 0.0015 -0.0003  
AT. 38 C X 0.0045 -0.0041 0.0130 -0.0223 -0.0124 0.0010  
Y -0.0107 -0.0028 0.0133 -0.0049 0.0065 -0.0021  
Z 0.0079 0.0015 -0.0032 0.0023 -0.0015 0.0003  
AT. 39 H X -0.0019 0.0013 0.0056 -0.0131 0.0153 -0.0034  
Y 0.0180 0.0016 -0.0037 -0.0008 -0.0055 0.0010  
Z -0.0087 -0.0028 0.0118 0.0075 0.0024 -0.0013  
AT. 40 H X 0.0019 -0.0013 -0.0056 -0.0131 -0.0153 0.0034

Y -0.0180 -0.0016 0.0037 -0.0008 0.0055 -0.0010  
Z 0.0087 0.0028 -0.0118 0.0075 -0.0024 0.0013  
AT. 41 H X -0.0056 0.0062 -0.0295 -0.0279 0.0070 0.0013  
Y 0.0090 0.0042 -0.0194 -0.0125 -0.0035 0.0021  
Z -0.0047 -0.0044 0.0243 0.0139 0.0044 -0.0025  
AT. 42 H X 0.0056 -0.0062 0.0295 -0.0279 -0.0070 -0.0013  
Y -0.0090 -0.0042 0.0194 -0.0125 0.0035 -0.0021  
Z 0.0047 0.0044 -0.0243 0.0139 -0.0044 0.0025  
AT. 43 C X 0.0037 -0.0008 -0.0018 0.0036 -0.0035 0.0003  
Y -0.0084 0.0033 -0.0191 -0.0243 0.0122 -0.0016  
Z -0.0053 0.0008 0.0007 -0.0040 0.0033 -0.0002  
AT. 44 C X -0.0037 0.0008 0.0018 0.0036 0.0035 -0.0003  
Y 0.0084 -0.0033 0.0191 -0.0243 -0.0122 0.0016  
Z 0.0053 -0.0008 -0.0007 -0.0040 -0.0033 0.0002  
AT. 45 H X 0.0015 -0.0003 -0.0044 -0.0015 -0.0005 -0.0000  
Y -0.0130 0.0041 -0.0278 -0.0325 0.0151 -0.0017  
Z 0.0012 -0.0003 0.0107 0.0075 -0.0016 0.0001  
AT. 46 H X -0.0015 0.0003 0.0044 -0.0015 0.0005 0.0000  
Y 0.0130 -0.0041 0.0278 -0.0325 -0.0151 0.0017  
Z -0.0012 0.0003 -0.0107 0.0075 0.0016 -0.0001  
AT. 47 H X 0.0063 -0.0015 -0.0044 0.0029 -0.0046 -0.0000  
Y -0.0048 0.0020 -0.0129 -0.0165 0.0075 -0.0018  
Z -0.0047 0.0003 0.0114 0.0060 -0.0007 0.0001  
AT. 48 H X -0.0063 0.0015 0.0044 0.0029 0.0046 0.0000  
Y 0.0048 -0.0020 0.0129 -0.0165 -0.0075 0.0018  
Z 0.0047 -0.0003 -0.0114 0.0060 0.0007 -0.0001  
AT. 49 C X -0.0008 0.0003 0.0017 0.0022 -0.0016 0.0010  
Y 0.0004 0.0007 -0.0002 0.0003 -0.0012 0.0009  
Z -0.0018 0.0013 -0.0020 -0.0025 -0.0006 0.0012  
AT. 50 C X 0.0008 -0.0003 -0.0017 0.0022 0.0016 -0.0010  
Y -0.0004 -0.0007 0.0002 0.0003 0.0012 -0.0009  
Z 0.0018 -0.0013 0.0020 -0.0025 0.0006 -0.0012

AT. 51 C X 0.0069 -0.0058 0.0160 0.0130 0.0043 -0.0053  
Y 0.0009 -0.0004 0.0074 0.0096 -0.0068 0.0018  
Z -0.0003 0.0029 0.0031 0.0065 -0.0114 0.0055

AT. 52 C X -0.0069 0.0058 -0.0160 0.0130 -0.0043 0.0053  
Y -0.0009 0.0004 -0.0074 0.0096 0.0068 -0.0018  
Z 0.0003 -0.0029 -0.0031 0.0065 0.0114 -0.0055

AT. 53 H X 0.0087 -0.0042 0.0083 0.0044 0.0060 -0.0046  
Y 0.0032 0.0006 0.0034 0.0058 -0.0091 0.0038  
Z -0.0004 0.0003 0.0126 0.0174 -0.0159 0.0059

AT. 54 H X -0.0087 0.0042 -0.0083 0.0044 -0.0060 0.0046  
Y -0.0032 -0.0006 -0.0034 0.0058 0.0091 -0.0038  
Z 0.0004 -0.0003 -0.0126 0.0174 0.0159 -0.0059

AT. 55 H X 0.0035 -0.0060 0.0277 0.0273 -0.0030 -0.0037  
Y 0.0020 -0.0020 0.0083 0.0094 -0.0051 0.0006  
Z -0.0009 0.0007 0.0123 0.0157 -0.0137 0.0048

AT. 56 H X -0.0035 0.0060 -0.0277 0.0273 0.0030 0.0037  
Y -0.0020 0.0020 -0.0083 0.0094 0.0051 -0.0006  
Z 0.0009 -0.0007 -0.0123 0.0157 0.0137 -0.0048

AT. 57 C X 0.0042 -0.0012 0.0050 0.0080 -0.0040 0.0002  
Y -0.0032 0.0013 -0.0055 -0.0055 0.0004 0.0010  
Z 0.0008 -0.0005 0.0024 0.0033 -0.0019 0.0004

AT. 58 C X -0.0042 0.0012 -0.0050 0.0080 0.0040 -0.0002  
Y 0.0032 -0.0013 0.0055 -0.0055 -0.0004 -0.0010  
Z -0.0008 0.0005 -0.0024 0.0033 0.0019 -0.0004

AT. 59 H X -0.0017 -0.0022 0.0128 0.0023 0.0102 -0.0037  
Y 0.0003 0.0009 -0.0068 -0.0036 -0.0012 0.0004  
Z 0.0027 -0.0015 0.0060 0.0022 0.0058 -0.0034

AT. 60 H X 0.0017 0.0022 -0.0128 0.0023 -0.0102 0.0037  
Y -0.0003 -0.0009 0.0068 -0.0036 0.0012 -0.0004  
Z -0.0027 0.0015 -0.0060 0.0022 -0.0058 0.0034

AT. 61 H X 0.0095 -0.0030 0.0082 0.0079 0.0029 -0.0041  
Y -0.0091 0.0011 -0.0008 -0.0084 0.0074 -0.0004

Z 0.0079 -0.0018 0.0027 0.0048 0.0001 -0.0023  
AT. 62 H X -0.0095 0.0030 -0.0082 0.0079 -0.0029 0.0041  
Y 0.0091 -0.0011 0.0008 -0.0084 -0.0074 0.0004  
Z -0.0079 0.0018 -0.0027 0.0048 -0.0001 0.0023  
AT. 63 H X 0.0015 0.0007 0.0006 0.0079 -0.0119 0.0044  
Y -0.0043 -0.0018 0.0034 -0.0083 0.0155 -0.0058  
Z 0.0048 0.0005 -0.0011 0.0056 -0.0072 0.0021  
AT. 64 H X -0.0015 -0.0007 -0.0006 0.0079 0.0119 -0.0044  
Y 0.0043 0.0018 -0.0034 -0.0083 -0.0155 0.0058  
Z -0.0048 -0.0005 0.0011 0.0056 0.0072 -0.0021  
AT. 65 C X -0.0023 0.0026 -0.0049 -0.0048 -0.0011 0.0020  
Y 0.0016 -0.0011 0.0034 0.0040 -0.0010 -0.0003  
Z 0.0003 -0.0023 0.0057 0.0059 -0.0002 -0.0009  
AT. 66 C X 0.0023 -0.0026 0.0049 -0.0048 0.0011 -0.0020  
Y -0.0016 0.0011 -0.0034 0.0040 0.0010 0.0003  
Z -0.0003 0.0023 -0.0057 0.0059 0.0002 0.0009  
AT. 67 H X 0.0043 -0.0007 -0.0060 -0.0094 0.0108 -0.0055  
Y -0.0049 -0.0007 0.0037 0.0022 -0.0006 0.0008  
Z 0.0013 0.0000 0.0064 0.0112 -0.0101 0.0042  
AT. 68 H X -0.0043 0.0007 0.0060 -0.0094 -0.0108 0.0055  
Y 0.0049 0.0007 -0.0037 0.0022 0.0006 -0.0008  
Z -0.0013 -0.0000 -0.0064 0.0112 0.0101 -0.0042  
AT. 69 H X -0.0085 0.0024 -0.0049 -0.0085 0.0024 0.0012  
Y 0.0030 -0.0029 0.0025 0.0006 0.0059 -0.0045  
Z 0.0148 -0.0048 0.0040 0.0081 0.0031 -0.0057  
AT. 70 H X 0.0085 -0.0024 0.0049 -0.0085 -0.0024 -0.0012  
Y -0.0030 0.0029 -0.0025 0.0006 -0.0059 0.0045  
Z -0.0148 0.0048 -0.0040 0.0081 -0.0031 0.0057  
AT. 71 H X 0.0065 0.0017 -0.0045 -0.0008 -0.0035 0.0009  
Y -0.0043 -0.0026 0.0021 -0.0031 0.0082 -0.0034  
Z -0.0005 -0.0048 0.0043 -0.0009 0.0108 -0.0062  
AT. 72 H X -0.0065 -0.0017 0.0045 -0.0008 0.0035 -0.0009



Y 0.0043 0.0026 -0.0021 -0.0031 -0.0082 0.0034  
Z 0.0005 0.0048 -0.0043 -0.0009 -0.0108 0.0062  
AT. 73 C X -0.0039 -0.0008 -0.0018 -0.0038 0.0040 -0.0012  
Y 0.0025 0.0008 0.0036 0.0035 -0.0028 0.0013  
Z 0.0058 0.0043 -0.0207 -0.0180 0.0046 -0.0004  
AT. 74 C X 0.0039 0.0008 0.0018 -0.0038 -0.0040 0.0012  
Y -0.0025 -0.0008 -0.0036 0.0035 0.0028 -0.0013  
Z -0.0058 -0.0043 0.0207 -0.0180 -0.0046 0.0004  
AT. 75 H X -0.0068 -0.0023 -0.0032 -0.0026 0.0044 -0.0027  
Y 0.0030 0.0009 0.0018 0.0043 -0.0054 0.0018  
Z 0.0050 0.0035 -0.0248 -0.0168 0.0016 -0.0009  
AT. 76 H X 0.0068 0.0023 0.0032 -0.0026 -0.0044 0.0027  
Y -0.0030 -0.0009 -0.0018 0.0043 0.0054 -0.0018  
Z -0.0050 -0.0035 0.0248 -0.0168 -0.0016 0.0009  
AT. 77 H X -0.0069 -0.0017 -0.0031 -0.0043 0.0053 -0.0023  
Y 0.0044 0.0008 -0.0001 0.0047 -0.0058 0.0013  
Z 0.0071 0.0052 -0.0166 -0.0191 0.0062 0.0006  
AT. 78 H X 0.0069 0.0017 0.0031 -0.0043 -0.0053 0.0023  
Y -0.0044 -0.0008 0.0001 0.0047 0.0058 -0.0013  
Z -0.0071 -0.0052 0.0166 -0.0191 -0.0062 -0.0006  
AT. 79 I X -0.0000 -0.0004 0.0001 0.0000 -0.0003 -0.0004  
Y -0.0000 -0.0001 -0.0000 -0.0000 -0.0000 0.0001  
Z 0.0000 -0.0007 -0.0001 -0.0000 -0.0001 0.0002  
AT. 80 I X 0.0000 0.0004 -0.0001 0.0000 0.0003 0.0004  
Y 0.0000 0.0001 0.0000 -0.0000 0.0000 -0.0001  
Z -0.0000 0.0007 0.0001 -0.0000 0.0001 -0.0002  
AT. 81 I X 0.0000 0.0000 -0.0000 -0.0000 -0.0000 -0.0001  
Y 0.0000 0.0000 0.0000 0.0001 -0.0001 -0.0001  
Z -0.0001 -0.0001 -0.0000 -0.0000 0.0000 0.0001  
AT. 82 I X -0.0000 -0.0000 0.0000 -0.0000 0.0000 0.0001  
Y -0.0000 -0.0000 -0.0000 0.0001 0.0001 0.0001  
Z 0.0001 0.0001 0.0000 -0.0000 -0.0000 -0.0001

AT. 83 O X 0.0026 -0.0169 -0.0019 -0.0000 -0.0036 0.0026  
Y 0.0014 -0.0030 -0.0003 0.0001 -0.0001 -0.0000  
Z 0.0013 -0.0049 -0.0005 -0.0000 -0.0011 0.0005

AT. 84 O X -0.0026 0.0169 0.0019 -0.0000 0.0036 -0.0026  
Y -0.0014 0.0030 0.0003 0.0001 0.0001 0.0000  
Z -0.0013 0.0049 0.0005 -0.0000 0.0011 -0.0005

AT. 85 O X -0.0004 0.0007 0.0000 -0.0001 -0.0007 -0.0023  
Y 0.0011 0.0016 0.0001 0.0001 -0.0002 -0.0013  
Z -0.0012 -0.0005 -0.0000 0.0004 -0.0004 -0.0005

AT. 86 O X 0.0004 -0.0007 -0.0000 -0.0001 0.0007 0.0023  
Y -0.0011 -0.0016 -0.0001 0.0001 0.0002 0.0013  
Z 0.0012 0.0005 0.0000 0.0004 0.0004 0.0005

AT. 87 N X -0.0007 -0.0013 -0.0004 0.0008 -0.0019 -0.0032  
Y -0.0007 0.0036 0.0007 -0.0026 0.0051 0.0091  
Z -0.0002 -0.0017 -0.0002 -0.0008 0.0007 0.0034

AT. 88 N X 0.0007 0.0013 0.0004 0.0008 0.0019 0.0032  
Y 0.0007 -0.0036 -0.0007 -0.0026 -0.0051 -0.0091  
Z 0.0002 0.0017 0.0002 -0.0008 -0.0007 -0.0034

AT. 89 N X 0.0000 0.0002 0.0000 -0.0011 0.0015 0.0031  
Y -0.0011 0.0016 0.0001 0.0037 -0.0043 -0.0102  
Z 0.0005 0.0006 -0.0002 0.0008 -0.0012 -0.0029

AT. 90 N X -0.0000 -0.0002 -0.0000 -0.0011 -0.0015 -0.0031  
Y 0.0011 -0.0016 -0.0001 0.0037 0.0043 0.0102  
Z -0.0005 -0.0006 0.0002 0.0008 0.0012 0.0029

AT. 91 C X 0.0017 -0.0040 -0.0004 -0.0002 -0.0003 0.0006  
Y 0.0009 -0.0059 -0.0011 -0.0007 -0.0027 0.0043  
Z -0.0006 -0.0119 -0.0014 -0.0000 -0.0023 0.0010

AT. 92 C X -0.0017 0.0040 0.0004 -0.0002 0.0003 -0.0006  
Y -0.0009 0.0059 0.0011 -0.0007 0.0027 -0.0043  
Z 0.0006 0.0119 0.0014 -0.0000 0.0023 -0.0010

AT. 93 C X -0.0029 0.0293 0.0033 -0.0007 0.0060 -0.0010  
Y -0.0009 0.0108 0.0017 0.0008 0.0026 -0.0049

Z -0.0025 0.0116 0.0015 0.0022 0.0010 -0.0087  
AT. 94 C X 0.0029 -0.0293 -0.0033 -0.0007 -0.0060 0.0010  
Y 0.0009 -0.0108 -0.0017 0.0008 -0.0026 0.0049  
Z 0.0025 -0.0116 -0.0015 0.0022 -0.0010 0.0087  
AT. 95 H X 0.0016 -0.0456 -0.0045 0.0002 -0.0072 0.0013  
Y -0.0082 0.0833 0.0103 0.0043 0.0148 -0.0244  
Z 0.0049 -0.0370 -0.0054 -0.0045 -0.0065 0.0219  
AT. 96 H X -0.0016 0.0456 0.0045 0.0002 0.0072 -0.0013  
Y 0.0082 -0.0833 -0.0103 0.0043 -0.0148 0.0244  
Z -0.0049 0.0370 0.0054 -0.0045 0.0065 -0.0219  
AT. 97 H X -0.0011 0.0486 0.0054 -0.0027 0.0105 0.0052  
Y 0.0098 -0.0875 -0.0113 -0.0082 -0.0137 0.0381  
Z 0.0001 -0.0195 -0.0025 0.0005 -0.0045 0.0004  
AT. 98 H X 0.0011 -0.0486 -0.0054 -0.0027 -0.0105 -0.0052  
Y -0.0098 0.0875 0.0113 -0.0082 0.0137 -0.0381  
Z -0.0001 0.0195 0.0025 0.0005 0.0045 -0.0004  
AT. 99 C X 0.0012 0.0011 0.0000 0.0004 -0.0004 -0.0013  
Y -0.0007 -0.0002 -0.0001 -0.0010 0.0004 -0.0001  
Z -0.0016 -0.0023 -0.0002 -0.0006 0.0004 0.0016  
AT. 100 C X -0.0012 -0.0011 -0.0000 0.0004 0.0004 0.0013  
Y 0.0007 0.0002 0.0001 -0.0010 -0.0004 0.0001  
Z 0.0016 0.0023 0.0002 -0.0006 -0.0004 -0.0016  
AT. 101 C X -0.0011 -0.0030 -0.0002 -0.0001 0.0007 0.0042  
Y -0.0005 -0.0023 -0.0001 -0.0010 0.0011 0.0046  
Z 0.0008 0.0017 0.0001 0.0019 -0.0011 -0.0031  
AT. 102 C X 0.0011 0.0030 0.0002 -0.0001 -0.0007 -0.0042  
Y 0.0005 0.0023 0.0001 -0.0010 -0.0011 -0.0046  
Z -0.0008 -0.0017 -0.0001 0.0019 0.0011 0.0031  
AT. 103 H X -0.0021 0.0011 -0.0003 0.0035 -0.0034 -0.0081  
Y 0.0003 -0.0031 0.0000 -0.0022 0.0026 0.0087  
Z -0.0018 -0.0126 -0.0006 -0.0069 0.0078 0.0284  
AT. 104 H X 0.0021 -0.0011 0.0003 0.0035 0.0034 0.0081

Y -0.0003 0.0031 -0.0000 -0.0022 -0.0026 -0.0087  
Z 0.0018 0.0126 0.0006 -0.0069 -0.0078 -0.0284  
AT. 105 H X -0.0034 -0.0047 -0.0007 0.0007 -0.0007 0.0029  
Y 0.0068 0.0133 0.0011 0.0070 -0.0059 -0.0243  
Z 0.0033 0.0074 0.0005 0.0050 -0.0038 -0.0140  
AT. 106 H X 0.0034 0.0047 0.0007 0.0007 0.0007 -0.0029  
Y -0.0068 -0.0133 -0.0011 0.0070 0.0059 0.0243  
Z -0.0033 -0.0074 -0.0005 0.0050 0.0038 0.0140  
AT. 107 C X -0.0016 -0.0131 -0.0017 0.0032 -0.0061 -0.0090  
Y 0.0027 -0.0074 -0.0011 0.0066 -0.0110 -0.0229  
Z 0.0018 0.0073 0.0009 0.0013 -0.0009 -0.0044  
AT. 108 C X 0.0016 0.0131 0.0017 0.0032 0.0061 0.0090  
Y -0.0027 0.0074 0.0011 0.0066 0.0110 0.0229  
Z -0.0018 -0.0073 -0.0009 0.0013 0.0009 0.0044  
AT. 109 H X 0.0002 -0.0151 -0.0019 0.0023 -0.0051 -0.0074  
Y 0.0049 -0.0093 -0.0015 0.0078 -0.0137 -0.0284  
Z 0.0051 0.0046 0.0004 0.0037 -0.0057 -0.0143  
AT. 110 H X -0.0002 0.0151 0.0019 0.0023 0.0051 0.0074  
Y -0.0049 0.0093 0.0015 0.0078 0.0137 0.0284  
Z -0.0051 -0.0046 -0.0004 0.0037 0.0057 0.0143  
AT. 111 H X -0.0032 -0.0178 -0.0021 0.0020 -0.0050 -0.0037  
Y 0.0017 0.0003 0.0002 0.0050 -0.0064 -0.0163  
Z 0.0043 0.0103 0.0011 0.0030 -0.0033 -0.0125  
AT. 112 H X 0.0032 0.0178 0.0021 0.0020 0.0050 0.0037  
Y -0.0017 -0.0003 -0.0002 0.0050 0.0064 0.0163  
Z -0.0043 -0.0103 -0.0011 0.0030 0.0033 0.0125  
AT. 113 C X -0.0001 0.0001 0.0000 0.0009 -0.0012 -0.0031  
Y -0.0001 0.0005 0.0000 -0.0000 -0.0000 -0.0002  
Z 0.0005 0.0030 0.0004 -0.0010 0.0019 0.0032  
AT. 114 C X 0.0001 -0.0001 -0.0000 0.0009 0.0012 0.0031  
Y 0.0001 -0.0005 -0.0000 -0.0000 0.0000 0.0002  
Z -0.0005 -0.0030 -0.0004 -0.0010 -0.0019 -0.0032

AT. 115 C X -0.0013 -0.0011 -0.0004 0.0075 -0.0094 -0.0207  
Y -0.0047 -0.0019 -0.0001 -0.0027 0.0049 0.0125  
Z 0.0030 0.0009 -0.0000 -0.0013 0.0008 0.0012

AT. 116 C X 0.0013 0.0011 0.0004 0.0075 0.0094 0.0207  
Y 0.0047 0.0019 0.0001 -0.0027 -0.0049 -0.0125  
Z -0.0030 -0.0009 0.0000 -0.0013 -0.0008 -0.0012

AT. 117 H X -0.0019 -0.0026 -0.0006 0.0047 -0.0059 -0.0120  
Y -0.0061 -0.0003 -0.0000 0.0010 0.0009 0.0029  
Z 0.0040 0.0025 0.0003 0.0008 -0.0020 -0.0060

AT. 118 H X 0.0019 0.0026 0.0006 0.0047 0.0059 0.0120  
Y 0.0061 0.0003 0.0000 0.0010 -0.0009 -0.0029  
Z -0.0040 -0.0025 -0.0003 0.0008 0.0020 0.0060

AT. 119 H X -0.0018 0.0022 0.0006 0.0099 -0.0118 -0.0284  
Y -0.0062 -0.0032 0.0004 -0.0056 0.0090 0.0219  
Z 0.0044 0.0041 0.0000 0.0029 -0.0045 -0.0124

AT. 120 H X 0.0018 -0.0022 -0.0006 0.0099 0.0118 0.0284  
Y 0.0062 0.0032 -0.0004 -0.0056 -0.0090 -0.0219  
Z -0.0044 -0.0041 -0.0000 0.0029 0.0045 0.0124

AT. 121 C X 0.0020 0.0011 0.0001 -0.0051 0.0055 0.0122  
Y 0.0011 -0.0073 -0.0003 -0.0067 0.0083 0.0236  
Z 0.0007 0.0023 0.0006 -0.0013 0.0017 0.0017

AT. 122 C X -0.0020 -0.0011 -0.0001 -0.0051 -0.0055 -0.0122  
Y -0.0011 0.0073 0.0003 -0.0067 -0.0083 -0.0236  
Z -0.0007 -0.0023 -0.0006 -0.0013 -0.0017 -0.0017

AT. 123 H X 0.0029 0.0007 0.0011 -0.0033 0.0048 0.0081  
Y -0.0000 -0.0108 0.0001 -0.0087 0.0112 0.0315  
Z 0.0022 0.0061 0.0005 0.0011 -0.0012 -0.0072

AT. 124 H X -0.0029 -0.0007 -0.0011 -0.0033 -0.0048 -0.0081  
Y 0.0000 0.0108 -0.0001 -0.0087 -0.0112 -0.0315  
Z -0.0022 -0.0061 -0.0005 0.0011 0.0012 0.0072

AT. 125 H X 0.0017 0.0039 0.0007 -0.0039 0.0046 0.0079  
Y 0.0006 -0.0058 -0.0017 -0.0062 0.0062 0.0197

Z 0.0002 0.0068 0.0008 0.0007 -0.0008 -0.0063  
AT. 126 H X -0.0017 -0.0039 -0.0007 -0.0039 -0.0046 -0.0079  
Y -0.0006 0.0058 0.0017 -0.0062 -0.0062 -0.0197  
Z -0.0002 -0.0068 -0.0008 0.0007 0.0008 0.0063  
AT. 127 C X -0.0005 -0.0008 -0.0001 -0.0007 0.0006 0.0023  
Y 0.0002 0.0021 0.0002 -0.0001 0.0009 0.0006  
Z 0.0001 0.0035 0.0005 -0.0014 0.0025 0.0036  
AT. 128 C X 0.0005 0.0008 0.0001 -0.0007 -0.0006 -0.0023  
Y -0.0002 -0.0021 -0.0002 -0.0001 -0.0009 -0.0006  
Z -0.0001 -0.0035 -0.0005 -0.0014 -0.0025 -0.0036  
AT. 129 C X -0.0004 0.0177 0.0026 -0.0052 0.0114 0.0175  
Y -0.0010 0.0044 0.0001 0.0039 -0.0058 -0.0153  
Z -0.0003 0.0160 0.0017 -0.0002 0.0018 -0.0040  
AT. 130 C X 0.0004 -0.0177 -0.0026 -0.0052 -0.0114 -0.0175  
Y 0.0010 -0.0044 -0.0001 0.0039 0.0058 0.0153  
Z 0.0003 -0.0160 -0.0017 -0.0002 -0.0018 0.0040  
AT. 131 H X -0.0028 0.0179 0.0024 -0.0017 0.0069 0.0073  
Y 0.0030 0.0149 0.0012 -0.0016 0.0014 -0.0053  
Z -0.0016 0.0200 0.0018 0.0023 -0.0017 -0.0141  
AT. 132 H X 0.0028 -0.0179 -0.0024 -0.0017 -0.0069 -0.0073  
Y -0.0030 -0.0149 -0.0012 -0.0016 -0.0014 0.0053  
Z 0.0016 -0.0200 -0.0018 0.0023 0.0017 0.0141  
AT. 133 H X 0.0030 0.0153 0.0021 -0.0093 0.0150 0.0285  
Y -0.0017 0.0042 -0.0000 0.0057 -0.0084 -0.0205  
Z -0.0028 0.0167 0.0017 0.0047 -0.0039 -0.0173  
AT. 134 H X -0.0030 -0.0153 -0.0021 -0.0093 -0.0150 -0.0285  
Y 0.0017 -0.0042 0.0000 0.0057 0.0084 0.0205  
Z 0.0028 -0.0167 -0.0017 0.0047 0.0039 0.0173  
AT. 135 C X 0.0008 0.0032 0.0005 -0.0033 0.0051 0.0108  
Y 0.0008 0.0022 0.0003 -0.0016 0.0022 0.0044  
Z -0.0015 0.0005 -0.0001 0.0018 -0.0021 -0.0051  
AT. 136 C X -0.0008 -0.0032 -0.0005 -0.0033 -0.0051 -0.0108

Y -0.0008 -0.0022 -0.0003 -0.0016 -0.0022 -0.0044  
Z 0.0015 -0.0005 0.0001 0.0018 0.0021 0.0051  
AT. 137 H X 0.0030 0.0004 0.0000 -0.0026 0.0025 0.0073  
Y 0.0009 -0.0044 -0.0005 -0.0008 -0.0001 0.0020  
Z -0.0017 -0.0090 -0.0010 0.0031 -0.0048 -0.0079  
AT. 138 H X -0.0030 -0.0004 -0.0000 -0.0026 -0.0025 -0.0073  
Y -0.0009 0.0044 0.0005 -0.0008 0.0001 -0.0020  
Z 0.0017 0.0090 0.0010 0.0031 0.0048 0.0079  
AT. 139 H X 0.0001 0.0165 0.0021 -0.0052 0.0096 0.0158  
Y 0.0005 0.0020 0.0005 -0.0014 0.0027 0.0052  
Z -0.0004 -0.0170 -0.0022 0.0041 -0.0083 -0.0120  
AT. 140 H X -0.0001 -0.0165 -0.0021 -0.0052 -0.0096 -0.0158  
Y -0.0005 -0.0020 -0.0005 -0.0014 -0.0027 -0.0052  
Z 0.0004 0.0170 0.0022 0.0041 0.0083 0.0120  
AT. 141 H X 0.0021 -0.0139 -0.0016 -0.0012 -0.0009 0.0039  
Y 0.0006 -0.0069 -0.0009 -0.0005 -0.0007 0.0013  
Z -0.0005 0.0028 0.0002 0.0016 -0.0016 -0.0050  
AT. 142 H X -0.0021 0.0139 0.0016 -0.0012 0.0009 -0.0039  
Y -0.0006 0.0069 0.0009 -0.0005 0.0007 -0.0013  
Z 0.0005 -0.0028 -0.0002 0.0016 0.0016 0.0050  
AT. 143 C X -0.0011 -0.0058 -0.0010 0.0032 -0.0057 -0.0100  
Y -0.0002 0.0002 -0.0000 0.0009 -0.0008 -0.0022  
Z 0.0008 -0.0021 -0.0003 0.0023 -0.0030 -0.0060  
AT. 144 C X 0.0011 0.0058 0.0010 0.0032 0.0057 0.0100  
Y 0.0002 -0.0002 0.0000 0.0009 0.0008 0.0022  
Z -0.0008 0.0021 0.0003 0.0023 0.0030 0.0060  
AT. 145 H X 0.0053 0.0149 0.0024 0.0038 0.0017 -0.0056  
Y 0.0011 -0.0011 -0.0001 -0.0002 -0.0002 -0.0001  
Z 0.0019 0.0049 0.0007 0.0036 -0.0015 -0.0072  
AT. 146 H X -0.0053 -0.0149 -0.0024 0.0038 -0.0017 0.0056  
Y -0.0011 0.0011 0.0001 -0.0002 0.0002 0.0001  
Z -0.0019 -0.0049 -0.0007 0.0036 0.0015 0.0072

AT.147 H X -0.0050 -0.0130 -0.0021 0.0050 -0.0095 -0.0144  
Y 0.0025 -0.0085 -0.0008 0.0008 -0.0028 -0.0018  
Z -0.0036 -0.0173 -0.0024 0.0049 -0.0096 -0.0122

AT.148 H X 0.0050 0.0130 0.0021 0.0050 0.0095 0.0144  
Y -0.0025 0.0085 0.0008 0.0008 0.0028 0.0018  
Z 0.0036 0.0173 0.0024 0.0049 0.0096 0.0122

AT.149 H X 0.0036 -0.0056 -0.0005 0.0003 -0.0027 -0.0035  
Y -0.0016 -0.0070 -0.0011 -0.0014 -0.0017 0.0003  
Z -0.0033 -0.0144 -0.0023 -0.0001 -0.0060 -0.0052

AT.150 H X -0.0036 0.0056 0.0005 0.0003 0.0027 0.0035  
Y 0.0016 0.0070 0.0011 -0.0014 0.0017 -0.0003  
Z 0.0033 0.0144 0.0023 -0.0001 0.0060 0.0052

AT.151 C X -0.0012 0.0029 0.0005 0.0000 0.0003 -0.0016  
Y 0.0006 0.0028 0.0002 -0.0000 0.0003 -0.0016  
Z -0.0027 -0.0098 -0.0010 -0.0050 0.0063 0.0200

AT.152 C X 0.0012 -0.0029 -0.0005 0.0000 -0.0003 0.0016  
Y -0.0006 -0.0028 -0.0002 -0.0000 -0.0003 0.0016  
Z 0.0027 0.0098 0.0010 -0.0050 -0.0063 -0.0200

AT.153 H X 0.0006 0.0060 0.0007 -0.0010 0.0022 -0.0009  
Y -0.0006 0.0027 0.0005 0.0012 -0.0010 -0.0039  
Z -0.0051 -0.0112 -0.0006 -0.0027 0.0040 0.0171

AT.154 H X -0.0006 -0.0060 -0.0007 -0.0010 -0.0022 0.0009  
Y 0.0006 -0.0027 -0.0005 0.0012 0.0010 0.0039  
Z 0.0051 0.0112 0.0006 -0.0027 -0.0040 -0.0171

AT.155 H X -0.0011 0.0041 0.0008 -0.0001 0.0007 -0.0021  
Y -0.0024 0.0010 0.0003 0.0020 -0.0020 -0.0046  
Z 0.0008 -0.0075 -0.0011 -0.0075 0.0092 0.0238

AT.156 H X 0.0011 -0.0041 -0.0008 -0.0001 -0.0007 0.0021  
Y 0.0024 -0.0010 -0.0003 0.0020 0.0020 0.0046  
Z -0.0008 0.0075 0.0011 -0.0075 -0.0092 -0.0238

AT.157 O X -0.0031 0.0000 -0.0004 0.0010 -0.0002 0.0002  
Y -0.0002 0.0001 0.0001 0.0004 -0.0006 0.0002



Z -0.0063 -0.0001 -0.0007 0.0023 -0.0009 0.0004  
AT. 158 O X 0.0031 -0.0000 0.0004 0.0010 0.0002 -0.0002  
Y 0.0002 -0.0001 -0.0001 0.0004 0.0006 -0.0002  
Z 0.0063 0.0001 0.0007 0.0023 0.0009 -0.0004  
AT. 159 O X 0.0006 -0.0002 -0.0003 -0.0002 0.0002 -0.0001  
Y 0.0077 0.0001 0.0016 -0.0028 0.0007 -0.0000  
Z 0.0020 0.0000 0.0001 -0.0004 0.0001 0.0001  
AT. 160 O X -0.0006 0.0002 0.0003 -0.0002 -0.0002 0.0001  
Y -0.0077 -0.0001 -0.0016 -0.0028 -0.0007 0.0000  
Z -0.0020 -0.0000 -0.0001 -0.0004 -0.0001 -0.0001  
AT. 161 H X 0.0829 0.0005 0.0136 -0.0319 0.0139 -0.0078  
Y -0.0340 -0.0004 -0.0048 0.0130 -0.0067 0.0037  
Z 0.1356 0.0005 0.0203 -0.0513 0.0240 -0.0132  
AT. 162 H X -0.0829 -0.0005 -0.0136 -0.0319 -0.0139 0.0078  
Y 0.0340 0.0004 0.0048 0.0130 0.0067 -0.0037  
Z -0.1356 -0.0005 -0.0203 -0.0513 -0.0240 0.0132  
AT. 163 H X -0.0058 -0.0000 -0.0012 0.0021 0.0001 -0.0001  
Y -0.1419 -0.0010 -0.0273 0.0489 -0.0114 -0.0010  
Z -0.0262 0.0002 -0.0054 0.0094 -0.0027 -0.0002  
AT. 164 H X 0.0058 0.0000 0.0012 0.0021 -0.0001 0.0001  
Y 0.1419 0.0010 0.0273 0.0489 0.0114 0.0010  
Z 0.0262 -0.0002 0.0054 0.0094 0.0027 0.0002  
AT. 165 O X -0.0011 0.0007 -0.0000 0.0000 -0.0003 -0.0007  
Y 0.0019 0.0018 0.0002 0.0001 0.0009 0.0007  
Z -0.0005 -0.0001 -0.0001 0.0001 -0.0001 0.0001  
AT. 166 O X 0.0011 -0.0007 0.0000 0.0000 0.0003 0.0007  
Y -0.0019 -0.0018 -0.0002 0.0001 -0.0009 -0.0007  
Z 0.0005 0.0001 0.0001 0.0001 0.0001 -0.0001  
AT. 167 H X 0.0159 0.0118 0.0011 0.0015 0.0066 0.0064  
Y -0.0370 -0.0241 -0.0025 -0.0033 -0.0142 -0.0138  
Z 0.0083 0.0065 0.0005 0.0005 0.0032 0.0019  
AT. 168 H X -0.0159 -0.0118 -0.0011 0.0015 -0.0066 -0.0064

|             |         |         |         |         |         |         |
|-------------|---------|---------|---------|---------|---------|---------|
| Y           | 0.0370  | 0.0241  | 0.0025  | -0.0033 | 0.0142  | 0.0138  |
| Z           | -0.0083 | -0.0065 | -0.0005 | 0.0005  | -0.0032 | -0.0019 |
| AT. 169 O X | 0.0020  | 0.0006  | 0.0002  | 0.0002  | 0.0007  | 0.0012  |
| Y           | 0.0006  | 0.0005  | 0.0001  | 0.0001  | 0.0002  | 0.0002  |
| Z           | 0.0002  | 0.0005  | 0.0001  | 0.0000  | 0.0001  | -0.0002 |
| AT. 170 O X | -0.0020 | -0.0006 | -0.0002 | 0.0002  | -0.0007 | -0.0012 |
| Y           | -0.0006 | -0.0005 | -0.0001 | 0.0001  | -0.0002 | -0.0002 |
| Z           | -0.0002 | -0.0005 | -0.0001 | 0.0000  | -0.0001 | 0.0002  |
| AT. 171 H X | -0.0483 | -0.0196 | -0.0027 | -0.0054 | -0.0167 | -0.0243 |
| Y           | -0.0243 | -0.0092 | -0.0012 | -0.0027 | -0.0082 | -0.0118 |
| Z           | -0.0022 | 0.0005  | 0.0004  | -0.0007 | -0.0005 | -0.0012 |
| AT. 172 H X | 0.0483  | 0.0196  | 0.0027  | -0.0054 | 0.0167  | 0.0243  |
| Y           | 0.0243  | 0.0092  | 0.0012  | -0.0027 | 0.0082  | 0.0118  |
| Z           | 0.0022  | -0.0005 | -0.0004 | -0.0007 | 0.0005  | 0.0012  |

FREQ(CM\*\*-1) 881.14 882.08 883.50 885.78 894.65 900.32

|           |         |         |         |         |         |         |
|-----------|---------|---------|---------|---------|---------|---------|
| AT. 1 I X | 0.0000  | -0.0004 | -0.0004 | -0.0003 | 0.0000  | 0.0000  |
| Y         | 0.0000  | 0.0001  | 0.0000  | 0.0001  | -0.0000 | -0.0000 |
| Z         | -0.0000 | 0.0005  | 0.0003  | 0.0002  | -0.0000 | 0.0000  |
| AT. 2 I X | 0.0000  | -0.0004 | -0.0004 | 0.0003  | -0.0000 | 0.0000  |
| Y         | 0.0000  | 0.0001  | 0.0000  | -0.0001 | 0.0000  | -0.0000 |
| Z         | -0.0000 | 0.0005  | 0.0003  | -0.0002 | 0.0000  | 0.0000  |
| AT. 3 I X | -0.0001 | -0.0003 | 0.0003  | 0.0003  | -0.0000 | 0.0000  |
| Y         | 0.0001  | 0.0006  | -0.0004 | -0.0003 | 0.0000  | 0.0000  |
| Z         | -0.0001 | -0.0003 | 0.0002  | 0.0002  | -0.0000 | 0.0000  |
| AT. 4 I X | -0.0001 | -0.0003 | 0.0003  | -0.0003 | 0.0000  | 0.0000  |
| Y         | 0.0001  | 0.0006  | -0.0004 | 0.0003  | -0.0000 | 0.0000  |
| Z         | -0.0001 | -0.0003 | 0.0002  | -0.0002 | 0.0000  | 0.0000  |
| AT. 5 O X | -0.0002 | -0.0099 | -0.0089 | -0.0074 | 0.0003  | -0.0001 |
| Y         | -0.0006 | 0.0055  | 0.0061  | 0.0036  | -0.0001 | 0.0001  |
| Z         | 0.0006  | 0.0058  | 0.0049  | 0.0049  | -0.0003 | 0.0001  |

AT. 6 O X -0.0002 -0.0099 -0.0089 0.0074 -0.0003 -0.0001  
Y -0.0006 0.0055 0.0061 -0.0036 0.0001 0.0001  
Z 0.0006 0.0058 0.0049 -0.0049 0.0003 0.0001

AT. 7 O X -0.0024 -0.0100 0.0103 0.0077 -0.0001 0.0000  
Y 0.0012 0.0048 -0.0044 -0.0029 0.0001 0.0000  
Z -0.0006 -0.0012 0.0022 0.0014 -0.0001 0.0000

AT. 8 O X -0.0024 -0.0100 0.0103 -0.0077 0.0001 0.0000  
Y 0.0012 0.0048 -0.0044 0.0029 -0.0001 0.0000  
Z -0.0006 -0.0012 0.0022 -0.0014 0.0001 0.0000

AT. 9 N X -0.0025 -0.0037 -0.0041 -0.0062 0.0003 -0.0000  
Y -0.0031 -0.0059 -0.0045 -0.0072 0.0004 -0.0001  
Z -0.0010 0.0003 -0.0001 -0.0012 0.0001 -0.0001

AT. 10 N X -0.0025 -0.0037 -0.0041 0.0062 -0.0003 -0.0000  
Y -0.0031 -0.0059 -0.0045 0.0072 -0.0004 -0.0001  
Z -0.0010 0.0003 -0.0001 0.0012 -0.0001 -0.0001

AT. 11 N X 0.0015 -0.0002 0.0060 0.0066 -0.0004 -0.0001  
Y 0.0021 0.0003 0.0065 0.0071 -0.0003 0.0000  
Z 0.0003 -0.0025 0.0034 0.0036 0.0002 0.0001

AT. 12 N X 0.0015 -0.0002 0.0060 -0.0066 0.0004 -0.0001  
Y 0.0021 0.0003 0.0065 -0.0071 0.0003 0.0000  
Z 0.0003 -0.0025 0.0034 -0.0036 -0.0002 0.0001

AT. 13 C X 0.0012 0.0014 -0.0002 0.0019 -0.0002 0.0000  
Y 0.0019 0.0084 0.0053 0.0079 -0.0003 0.0002  
Z 0.0006 0.0070 0.0039 0.0050 -0.0003 0.0001

AT. 14 C X 0.0012 0.0014 -0.0002 -0.0019 0.0002 0.0000  
Y 0.0019 0.0084 0.0053 -0.0079 0.0003 0.0002  
Z 0.0006 0.0070 0.0039 -0.0050 0.0003 0.0001

AT. 15 C X -0.0001 0.0139 0.0139 0.0119 -0.0004 0.0002  
Y -0.0010 -0.0140 -0.0117 -0.0112 0.0004 -0.0002  
Z 0.0013 -0.0131 -0.0092 -0.0071 0.0003 -0.0000

AT. 16 C X -0.0001 0.0139 0.0139 -0.0119 0.0004 0.0002  
Y -0.0010 -0.0140 -0.0117 0.0112 -0.0004 -0.0002

Z 0.0013 -0.0131 -0.0092 0.0071 -0.0003 -0.0000  
AT. 17 H X 0.0009 -0.0397 -0.0268 -0.0255 0.0010 -0.0002  
Y 0.0018 -0.0626 -0.0493 -0.0435 0.0015 -0.0005  
Z -0.0021 0.0302 0.0245 0.0210 -0.0006 0.0002  
AT. 18 H X 0.0009 -0.0397 -0.0268 0.0255 -0.0010 -0.0002  
Y 0.0018 -0.0626 -0.0493 0.0435 -0.0015 -0.0005  
Z -0.0021 0.0302 0.0245 -0.0210 0.0006 0.0002  
AT. 19 H X 0.0003 0.0412 0.0323 0.0279 -0.0013 0.0005  
Y -0.0043 0.0537 0.0384 0.0315 -0.0010 0.0001  
Z 0.0001 0.0211 0.0158 0.0142 -0.0006 0.0002  
AT. 20 H X 0.0003 0.0412 0.0323 -0.0279 0.0013 0.0005  
Y -0.0043 0.0537 0.0384 -0.0315 0.0010 0.0001  
Z 0.0001 0.0211 0.0158 -0.0142 0.0006 0.0002  
AT. 21 C X -0.0004 0.0018 -0.0026 -0.0024 -0.0002 -0.0001  
Y 0.0019 0.0110 -0.0123 -0.0097 0.0002 -0.0000  
Z -0.0006 0.0001 -0.0021 -0.0020 -0.0001 -0.0001  
AT. 22 C X -0.0004 0.0018 -0.0026 0.0024 0.0002 -0.0001  
Y 0.0019 0.0110 -0.0123 0.0097 -0.0002 -0.0000  
Z -0.0006 0.0001 -0.0021 0.0020 0.0001 -0.0001  
AT. 23 C X 0.0035 0.0130 -0.0142 -0.0113 0.0004 0.0001  
Y -0.0056 -0.0209 0.0194 0.0149 -0.0005 -0.0000  
Z 0.0020 0.0044 -0.0016 -0.0009 0.0001 -0.0000  
AT. 24 C X 0.0035 0.0130 -0.0142 0.0113 -0.0004 0.0001  
Y -0.0056 -0.0209 0.0194 -0.0149 0.0005 -0.0000  
Z 0.0020 0.0044 -0.0016 0.0009 -0.0001 -0.0000  
AT. 25 H X -0.0114 -0.0472 0.0402 0.0322 -0.0009 0.0001  
Y -0.0054 -0.0215 0.0203 0.0159 -0.0005 -0.0000  
Z -0.0191 -0.0672 0.0597 0.0456 -0.0016 -0.0002  
AT. 26 H X -0.0114 -0.0472 0.0402 -0.0322 0.0009 0.0001  
Y -0.0054 -0.0215 0.0203 -0.0159 0.0005 -0.0000  
Z -0.0191 -0.0672 0.0597 -0.0456 0.0016 -0.0002  
AT. 27 H X 0.0102 0.0416 -0.0397 -0.0308 0.0009 -0.0002

Y 0.0172 0.0587 -0.0487 -0.0369 0.0013 0.0001  
Z 0.0112 0.0357 -0.0278 -0.0209 0.0008 0.0001  
AT. 28 H X 0.0102 0.0416 -0.0397 0.0308 -0.0009 -0.0002  
Y 0.0172 0.0587 -0.0487 0.0369 -0.0013 0.0001  
Z 0.0112 0.0357 -0.0278 0.0209 -0.0008 0.0001  
AT. 29 C X 0.0010 -0.0015 -0.0051 -0.0013 -0.0000 -0.0000  
Y 0.0087 0.0176 0.0125 0.0183 -0.0012 0.0001  
Z 0.0021 0.0036 0.0000 0.0005 0.0002 -0.0002  
AT. 30 C X 0.0010 -0.0015 -0.0051 0.0013 0.0000 -0.0000  
Y 0.0087 0.0176 0.0125 -0.0183 0.0012 0.0001  
Z 0.0021 0.0036 0.0000 -0.0005 -0.0002 -0.0002  
AT. 31 H X 0.0019 0.0006 -0.0025 -0.0001 0.0004 -0.0001  
Y 0.0118 0.0215 0.0153 0.0280 -0.0023 0.0006  
Z 0.0070 0.0103 0.0056 0.0151 -0.0012 0.0004  
AT. 32 H X 0.0019 0.0006 -0.0025 0.0001 -0.0004 -0.0001  
Y 0.0118 0.0215 0.0153 -0.0280 0.0023 0.0006  
Z 0.0070 0.0103 0.0056 -0.0151 0.0012 0.0004  
AT. 33 H X 0.0002 -0.0033 -0.0049 -0.0081 0.0009 -0.0001  
Y 0.0028 0.0098 0.0081 0.0016 0.0006 -0.0005  
Z 0.0042 0.0061 0.0026 0.0034 0.0001 0.0001  
AT. 34 H X 0.0002 -0.0033 -0.0049 0.0081 -0.0009 -0.0001  
Y 0.0028 0.0098 0.0081 -0.0016 -0.0006 -0.0005  
Z 0.0042 0.0061 0.0026 -0.0034 -0.0001 0.0001  
AT. 35 C X -0.0010 -0.0021 -0.0002 -0.0004 -0.0000 -0.0002  
Y 0.0003 -0.0018 0.0025 0.0030 -0.0001 -0.0000  
Z -0.0007 -0.0007 -0.0049 -0.0048 0.0004 0.0001  
AT. 36 C X -0.0010 -0.0021 -0.0002 0.0004 0.0000 -0.0002  
Y 0.0003 -0.0018 0.0025 -0.0030 0.0001 -0.0000  
Z -0.0007 -0.0007 -0.0049 0.0048 -0.0004 0.0001  
AT. 37 C X -0.0060 -0.0005 -0.0202 -0.0244 0.0005 -0.0002  
Y -0.0042 -0.0113 0.0039 -0.0001 0.0009 0.0006  
Z 0.0021 0.0044 -0.0025 0.0011 0.0002 0.0003

AT. 38 C X -0.0060 -0.0005 -0.0202 0.0244 -0.0005 -0.0002  
Y -0.0042 -0.0113 0.0039 0.0001 -0.0009 0.0006  
Z 0.0021 0.0044 -0.0025 -0.0011 -0.0002 0.0003

AT. 39 H X -0.0027 0.0070 -0.0152 -0.0209 -0.0004 -0.0011  
Y -0.0035 -0.0099 0.0084 0.0007 0.0006 -0.0000  
Z 0.0042 0.0086 -0.0004 0.0039 -0.0003 -0.0000

AT. 40 H X -0.0027 0.0070 -0.0152 0.0209 0.0004 -0.0011  
Y -0.0035 -0.0099 0.0084 -0.0007 -0.0006 -0.0000  
Z 0.0042 0.0086 -0.0004 -0.0039 0.0003 -0.0000

AT. 41 H X -0.0088 -0.0087 -0.0200 -0.0231 0.0021 0.0013  
Y -0.0067 -0.0124 -0.0029 -0.0080 0.0008 0.0004  
Z 0.0067 0.0131 0.0028 0.0059 -0.0012 -0.0009

AT. 42 H X -0.0088 -0.0087 -0.0200 0.0231 -0.0021 0.0013  
Y -0.0067 -0.0124 -0.0029 0.0080 -0.0008 0.0004  
Z 0.0067 0.0131 0.0028 -0.0059 0.0012 -0.0009

AT. 43 C X 0.0009 -0.0013 0.0046 0.0058 0.0006 0.0005  
Y -0.0063 -0.0001 -0.0147 -0.0175 -0.0001 -0.0004  
Z -0.0007 0.0013 -0.0063 -0.0066 0.0002 -0.0001

AT. 44 C X 0.0009 -0.0013 0.0046 -0.0058 -0.0006 0.0005  
Y -0.0063 -0.0001 -0.0147 0.0175 0.0001 -0.0004  
Z -0.0007 0.0013 -0.0063 0.0066 -0.0002 -0.0001

AT. 45 H X -0.0009 -0.0009 0.0016 0.0015 -0.0009 -0.0005  
Y -0.0080 -0.0010 -0.0235 -0.0250 0.0018 0.0005  
Z 0.0021 0.0017 0.0042 0.0036 -0.0006 -0.0003

AT. 46 H X -0.0009 -0.0009 0.0016 -0.0015 0.0009 -0.0005  
Y -0.0080 -0.0010 -0.0235 0.0250 -0.0018 0.0005  
Z 0.0021 0.0017 0.0042 -0.0036 0.0006 -0.0003

AT. 47 H X -0.0000 -0.0031 0.0108 0.0101 0.0005 0.0005  
Y -0.0056 -0.0010 -0.0054 -0.0096 0.0003 0.0005  
Z 0.0014 0.0025 -0.0044 -0.0036 0.0011 0.0012

AT. 48 H X -0.0000 -0.0031 0.0108 -0.0101 -0.0005 0.0005  
Y -0.0056 -0.0010 -0.0054 0.0096 -0.0003 0.0005

Z 0.0014 0.0025 -0.0044 0.0036 -0.0011 0.0012  
AT. 49 C X 0.0005 -0.0008 -0.0019 -0.0012 0.0000 0.0000  
Y -0.0003 -0.0019 -0.0018 -0.0019 0.0001 -0.0000  
Z -0.0012 -0.0025 -0.0052 -0.0055 0.0002 0.0001  
AT. 50 C X 0.0005 -0.0008 -0.0019 0.0012 -0.0000 0.0000  
Y -0.0003 -0.0019 -0.0018 0.0019 -0.0001 -0.0000  
Z -0.0012 -0.0025 -0.0052 0.0055 -0.0002 0.0001  
AT. 51 C X 0.0062 0.0136 0.0196 0.0205 -0.0011 0.0002  
Y 0.0021 -0.0021 0.0021 0.0040 0.0002 -0.0000  
Z -0.0007 -0.0108 -0.0062 -0.0056 -0.0000 -0.0001  
AT. 52 C X 0.0062 0.0136 0.0196 -0.0205 0.0011 0.0002  
Y 0.0021 -0.0021 0.0021 -0.0040 -0.0002 -0.0000  
Z -0.0007 -0.0108 -0.0062 0.0056 0.0000 -0.0001  
AT. 53 H X 0.0028 0.0094 0.0167 0.0140 -0.0019 0.0001  
Y -0.0004 -0.0079 0.0005 -0.0006 -0.0007 -0.0002  
Z 0.0027 -0.0086 -0.0011 0.0022 0.0002 0.0000  
AT. 54 H X 0.0028 0.0094 0.0167 -0.0140 0.0019 0.0001  
Y -0.0004 -0.0079 0.0005 0.0006 0.0007 -0.0002  
Z 0.0027 -0.0086 -0.0011 -0.0022 -0.0002 0.0000  
AT. 55 H X 0.0105 0.0142 0.0189 0.0250 0.0002 0.0003  
Y 0.0021 -0.0001 0.0055 0.0066 -0.0002 0.0000  
Z 0.0022 -0.0077 -0.0023 0.0005 0.0005 0.0000  
AT. 56 H X 0.0105 0.0142 0.0189 -0.0250 -0.0002 0.0003  
Y 0.0021 -0.0001 0.0055 -0.0066 0.0002 0.0000  
Z 0.0022 -0.0077 -0.0023 -0.0005 -0.0005 0.0000  
AT. 57 C X 0.0022 0.0004 0.0083 0.0091 -0.0003 -0.0000  
Y -0.0019 -0.0027 -0.0052 -0.0056 0.0002 -0.0002  
Z 0.0008 -0.0001 0.0012 0.0016 0.0001 0.0002  
AT. 58 C X 0.0022 0.0004 0.0083 -0.0091 0.0003 -0.0000  
Y -0.0019 -0.0027 -0.0052 0.0056 -0.0002 -0.0002  
Z 0.0008 -0.0001 0.0012 -0.0016 -0.0001 0.0002  
AT. 59 H X 0.0026 0.0120 -0.0071 -0.0066 -0.0000 0.0010

Y -0.0013 -0.0029 0.0039 0.0035 -0.0004 -0.0006  
Z 0.0018 0.0077 0.0041 0.0040 -0.0006 0.0002  
AT. 60 H X 0.0026 0.0120 -0.0071 0.0066 0.0000 0.0010  
Y -0.0013 -0.0029 0.0039 -0.0035 0.0004 -0.0006  
Z 0.0018 0.0077 0.0041 -0.0040 0.0006 0.0002  
AT. 61 H X 0.0038 0.0077 0.0182 0.0184 -0.0016 -0.0003  
Y -0.0020 0.0024 -0.0182 -0.0183 0.0010 0.0004  
Z 0.0021 0.0033 0.0155 0.0155 -0.0013 -0.0003  
AT. 62 H X 0.0038 0.0077 0.0182 -0.0184 0.0016 -0.0003  
Y -0.0020 0.0024 -0.0182 0.0183 -0.0010 0.0004  
Z 0.0021 0.0033 0.0155 -0.0155 0.0013 -0.0003  
AT. 63 H X 0.0001 -0.0083 0.0007 0.0014 0.0006 0.0003  
Y 0.0006 0.0128 -0.0051 -0.0054 -0.0002 -0.0000  
Z 0.0007 -0.0052 0.0084 0.0085 -0.0003 -0.0002  
AT. 64 H X 0.0001 -0.0083 0.0007 -0.0014 -0.0006 0.0003  
Y 0.0006 0.0128 -0.0051 0.0054 0.0002 -0.0000  
Z 0.0007 -0.0052 0.0084 -0.0085 0.0003 -0.0002  
AT. 65 C X -0.0024 -0.0049 -0.0079 -0.0089 0.0004 0.0000  
Y 0.0014 0.0014 0.0039 0.0045 -0.0002 -0.0000  
Z 0.0024 0.0038 0.0043 0.0056 0.0000 0.0002  
AT. 66 C X -0.0024 -0.0049 -0.0079 0.0089 -0.0004 0.0000  
Y 0.0014 0.0014 0.0039 -0.0045 0.0002 -0.0000  
Z 0.0024 0.0038 0.0043 -0.0056 -0.0000 0.0002  
AT. 67 H X -0.0010 0.0077 0.0096 0.0073 -0.0012 -0.0004  
Y 0.0009 0.0008 -0.0053 -0.0042 0.0008 0.0006  
Z 0.0018 -0.0058 -0.0016 0.0002 0.0004 0.0000  
AT. 68 H X -0.0010 0.0077 0.0096 -0.0073 0.0012 -0.0004  
Y 0.0009 0.0008 -0.0053 0.0042 -0.0008 0.0006  
Z 0.0018 -0.0058 -0.0016 -0.0002 -0.0004 0.0000  
AT. 69 H X -0.0028 -0.0023 -0.0137 -0.0143 0.0014 0.0007  
Y 0.0019 0.0085 0.0109 0.0111 -0.0003 0.0001  
Z 0.0040 0.0092 0.0267 0.0265 -0.0020 -0.0006



AT. 70 H X -0.0028 -0.0023 -0.0137 0.0143 -0.0014 0.0007  
Y 0.0019 0.0085 0.0109 -0.0111 0.0003 0.0001  
Z 0.0040 0.0092 0.0267 -0.0265 0.0020 -0.0006

AT. 71 H X -0.0016 -0.0052 0.0038 0.0024 -0.0001 -0.0000  
Y 0.0012 0.0089 0.0011 0.0014 -0.0002 -0.0000  
Z 0.0028 0.0140 0.0095 0.0099 -0.0004 0.0001

AT. 72 H X -0.0016 -0.0052 0.0038 -0.0024 0.0001 -0.0000  
Y 0.0012 0.0089 0.0011 -0.0014 0.0002 -0.0000  
Z 0.0028 0.0140 0.0095 -0.0099 0.0004 0.0001

AT. 73 C X -0.0003 0.0028 -0.0012 -0.0012 -0.0001 -0.0003  
Y 0.0003 -0.0021 0.0008 -0.0002 -0.0001 -0.0000  
Z -0.0061 -0.0059 -0.0032 -0.0074 -0.0004 -0.0005

AT. 74 C X -0.0003 0.0028 -0.0012 0.0012 0.0001 -0.0003  
Y 0.0003 -0.0021 0.0008 0.0002 0.0001 -0.0000  
Z -0.0061 -0.0059 -0.0032 0.0074 0.0004 -0.0005

AT. 75 H X 0.0008 0.0059 0.0012 0.0040 0.0006 0.0004  
Y 0.0002 -0.0038 -0.0004 0.0003 0.0007 0.0008  
Z -0.0058 -0.0061 -0.0033 -0.0035 0.0012 0.0012

AT. 76 H X 0.0008 0.0059 0.0012 -0.0040 -0.0006 0.0004  
Y 0.0002 -0.0038 -0.0004 -0.0003 -0.0007 0.0008  
Z -0.0058 -0.0061 -0.0033 0.0035 -0.0012 0.0012

AT. 77 H X -0.0000 0.0051 -0.0029 -0.0014 0.0007 0.0006  
Y 0.0008 -0.0032 0.0034 0.0052 -0.0000 0.0003  
Z -0.0070 -0.0073 -0.0044 -0.0126 -0.0010 -0.0016

AT. 78 H X -0.0000 0.0051 -0.0029 0.0014 -0.0007 0.0006  
Y 0.0008 -0.0032 0.0034 -0.0052 0.0000 0.0003  
Z -0.0070 -0.0073 -0.0044 0.0126 0.0010 -0.0016

AT. 79 I X -0.0000 0.0000 0.0000 0.0001 -0.0002 -0.0001  
Y 0.0001 -0.0000 -0.0000 -0.0000 0.0001 0.0000  
Z 0.0002 -0.0001 -0.0000 -0.0001 0.0001 0.0001

AT. 80 I X -0.0000 0.0000 0.0000 -0.0001 0.0002 -0.0001  
Y 0.0001 -0.0000 -0.0000 0.0000 -0.0001 0.0000

Z 0.0002 -0.0001 -0.0000 0.0001 -0.0001 0.0001  
AT. 81 I X -0.0001 0.0000 -0.0000 0.0000 0.0006 0.0006  
Y -0.0001 0.0000 -0.0000 0.0000 0.0005 0.0005  
Z 0.0001 -0.0000 0.0000 0.0000 -0.0004 -0.0005  
AT. 82 I X -0.0001 0.0000 -0.0000 -0.0000 -0.0006 0.0006  
Y -0.0001 0.0000 -0.0000 -0.0000 -0.0005 0.0005  
Z 0.0001 -0.0000 0.0000 -0.0000 0.0004 -0.0005  
AT. 83 O X 0.0026 -0.0011 -0.0006 -0.0042 0.0009 0.0013  
Y -0.0003 0.0001 0.0002 0.0001 -0.0002 -0.0003  
Z 0.0006 -0.0003 -0.0002 -0.0016 0.0002 0.0000  
AT. 84 O X 0.0026 -0.0011 -0.0006 0.0042 -0.0009 0.0013  
Y -0.0003 0.0001 0.0002 -0.0001 0.0002 -0.0003  
Z 0.0006 -0.0003 -0.0002 0.0016 -0.0002 0.0000  
AT. 85 O X -0.0011 0.0001 0.0001 0.0007 0.0161 0.0156  
Y -0.0010 0.0001 0.0001 0.0002 0.0049 0.0050  
Z -0.0004 0.0002 -0.0001 -0.0003 -0.0014 -0.0014  
AT. 86 O X -0.0011 0.0001 0.0001 -0.0007 -0.0161 0.0156  
Y -0.0010 0.0001 0.0001 -0.0002 -0.0049 0.0050  
Z -0.0004 0.0002 -0.0001 0.0003 0.0014 -0.0014  
AT. 87 N X -0.0032 0.0007 -0.0001 -0.0009 -0.0008 -0.0006  
Y 0.0093 -0.0019 0.0004 0.0028 0.0005 -0.0002  
Z 0.0035 -0.0008 -0.0001 0.0004 0.0011 0.0008  
AT. 88 N X -0.0032 0.0007 -0.0001 0.0009 0.0008 -0.0006  
Y 0.0093 -0.0019 0.0004 -0.0028 -0.0005 -0.0002  
Z 0.0035 -0.0008 -0.0001 -0.0004 -0.0011 0.0008  
AT. 89 N X 0.0033 -0.0009 0.0002 0.0009 0.0022 0.0018  
Y -0.0106 0.0028 -0.0005 -0.0020 -0.0039 -0.0022  
Z -0.0036 0.0007 0.0000 -0.0007 -0.0059 -0.0055  
AT. 90 N X 0.0033 -0.0009 0.0002 -0.0009 -0.0022 0.0018  
Y -0.0106 0.0028 -0.0005 0.0020 0.0039 -0.0022  
Z -0.0036 0.0007 0.0000 0.0007 0.0059 -0.0055  
AT. 91 C X 0.0005 -0.0003 0.0001 -0.0009 0.0001 0.0002

Y 0.0045 -0.0019 -0.0009 -0.0053 0.0002 0.0017  
Z 0.0012 -0.0003 -0.0005 -0.0008 0.0011 0.0006  
AT. 92 C X 0.0005 -0.0003 0.0001 0.0009 -0.0001 0.0002  
Y 0.0045 -0.0019 -0.0009 0.0053 -0.0002 0.0017  
Z 0.0012 -0.0003 -0.0005 0.0008 -0.0011 0.0006  
AT. 93 C X -0.0011 0.0007 0.0009 0.0049 -0.0002 -0.0001  
Y -0.0049 0.0019 0.0008 0.0043 -0.0007 -0.0017  
Z -0.0087 0.0029 0.0005 0.0034 -0.0030 -0.0030  
AT. 94 C X -0.0011 0.0007 0.0009 -0.0049 0.0002 -0.0001  
Y -0.0049 0.0019 0.0008 -0.0043 0.0007 -0.0017  
Z -0.0087 0.0029 0.0005 -0.0034 0.0030 -0.0030  
AT. 95 H X 0.0021 -0.0002 -0.0010 -0.0009 0.0046 -0.0000  
Y -0.0246 0.0087 0.0032 0.0178 -0.0072 -0.0076  
Z 0.0212 -0.0076 -0.0018 -0.0133 0.0034 0.0069  
AT. 96 H X 0.0021 -0.0002 -0.0010 0.0009 -0.0046 -0.0000  
Y -0.0246 0.0087 0.0032 -0.0178 0.0072 -0.0076  
Z 0.0212 -0.0076 -0.0018 0.0133 -0.0034 0.0069  
AT. 97 H X 0.0045 -0.0013 0.0014 0.0029 -0.0009 0.0010  
Y 0.0383 -0.0132 -0.0035 -0.0208 0.0107 0.0124  
Z 0.0006 -0.0004 -0.0007 -0.0026 0.0001 0.0003  
AT. 98 H X 0.0045 -0.0013 0.0014 -0.0029 0.0009 0.0010  
Y 0.0383 -0.0132 -0.0035 0.0208 -0.0107 0.0124  
Z 0.0006 -0.0004 -0.0007 0.0026 -0.0001 0.0003  
AT. 99 C X -0.0013 0.0003 -0.0001 -0.0002 0.0019 0.0022  
Y 0.0011 -0.0004 0.0001 0.0009 0.0138 0.0127  
Z 0.0017 -0.0003 0.0002 0.0007 0.0030 0.0025  
AT. 100 C X -0.0013 0.0003 -0.0001 0.0002 -0.0019 0.0022  
Y 0.0011 -0.0004 0.0001 -0.0009 -0.0138 0.0127  
Z 0.0017 -0.0003 0.0002 -0.0007 -0.0030 0.0025  
AT. 101 C X 0.0026 -0.0004 0.0002 -0.0012 -0.0251 -0.0253  
Y 0.0035 -0.0009 0.0007 -0.0004 -0.0218 -0.0229  
Z -0.0031 0.0011 -0.0008 -0.0005 0.0062 0.0081

AT.102 C X 0.0026 -0.0004 0.0002 0.0012 0.0251 -0.0253  
Y 0.0035 -0.0009 0.0007 0.0004 0.0218 -0.0229  
Z -0.0031 0.0011 -0.0008 0.0005 -0.0062 0.0081

AT.103 H X -0.0069 0.0024 -0.0016 0.0003 0.0464 0.0482  
Y 0.0066 -0.0018 0.0012 -0.0011 -0.0482 -0.0497  
Z 0.0229 -0.0058 0.0030 -0.0008 -0.1099 -0.1171

AT.104 H X -0.0069 0.0024 -0.0016 -0.0003 -0.0464 0.0482  
Y 0.0066 -0.0018 0.0012 0.0011 0.0482 -0.0497  
Z 0.0229 -0.0058 0.0030 0.0008 0.1099 -0.1171

AT.105 H X 0.0013 0.0002 -0.0006 -0.0014 -0.0349 -0.0320  
Y -0.0206 0.0055 -0.0032 -0.0002 0.0943 0.1022  
Z -0.0121 0.0036 -0.0024 -0.0006 0.0458 0.0515

AT.106 H X 0.0013 0.0002 -0.0006 0.0014 0.0349 -0.0320  
Y -0.0206 0.0055 -0.0032 0.0002 -0.0943 0.1022  
Z -0.0121 0.0036 -0.0024 0.0006 -0.0458 0.0515

AT.107 C X -0.0088 0.0025 -0.0004 -0.0008 0.0015 0.0020  
Y -0.0231 0.0052 -0.0008 -0.0046 0.0021 0.0032  
Z -0.0042 0.0011 0.0001 -0.0005 0.0040 0.0051

AT.108 C X -0.0088 0.0025 -0.0004 0.0008 -0.0015 0.0020  
Y -0.0231 0.0052 -0.0008 0.0046 -0.0021 0.0032  
Z -0.0042 0.0011 0.0001 0.0005 -0.0040 0.0051

AT.109 H X -0.0081 0.0016 -0.0007 -0.0022 -0.0041 -0.0045  
Y -0.0294 0.0059 -0.0011 -0.0074 -0.0034 -0.0026  
Z -0.0153 0.0026 -0.0004 -0.0049 -0.0037 -0.0029

AT.110 H X -0.0081 0.0016 -0.0007 0.0022 0.0041 -0.0045  
Y -0.0294 0.0059 -0.0011 0.0074 0.0034 -0.0026  
Z -0.0153 0.0026 -0.0004 0.0049 0.0037 -0.0029

AT.111 H X -0.0037 0.0014 -0.0005 -0.0001 -0.0014 -0.0018  
Y -0.0153 0.0045 0.0004 -0.0004 0.0124 0.0153  
Z -0.0124 0.0025 -0.0000 -0.0025 0.0050 0.0065

AT.112 H X -0.0037 0.0014 -0.0005 0.0001 0.0014 -0.0018  
Y -0.0153 0.0045 0.0004 0.0004 -0.0124 0.0153

Z -0.0124 0.0025 -0.0000 0.0025 -0.0050 0.0065  
AT. 113 C X -0.0030 0.0008 -0.0002 -0.0003 0.0011 0.0013  
Y -0.0005 -0.0000 0.0002 -0.0005 -0.0044 -0.0044  
Z 0.0037 -0.0008 0.0000 0.0007 0.0027 0.0025  
AT. 114 C X -0.0030 0.0008 -0.0002 0.0003 -0.0011 0.0013  
Y -0.0005 -0.0000 0.0002 0.0005 0.0044 -0.0044  
Z 0.0037 -0.0008 0.0000 -0.0007 -0.0027 0.0025  
AT. 115 C X -0.0222 0.0060 -0.0014 -0.0050 -0.0173 -0.0152  
Y 0.0126 -0.0022 -0.0003 0.0030 -0.0044 -0.0053  
Z 0.0016 -0.0009 0.0003 -0.0002 0.0034 0.0021  
AT. 116 C X -0.0222 0.0060 -0.0014 0.0050 0.0173 -0.0152  
Y 0.0126 -0.0022 -0.0003 -0.0030 0.0044 -0.0053  
Z 0.0016 -0.0009 0.0003 0.0002 -0.0034 0.0021  
AT. 117 H X -0.0135 0.0040 -0.0016 -0.0038 -0.0239 -0.0237  
Y 0.0025 0.0003 -0.0000 0.0027 0.0039 0.0068  
Z -0.0056 0.0006 0.0005 -0.0014 0.0073 0.0073  
AT. 118 H X -0.0135 0.0040 -0.0016 0.0038 0.0239 -0.0237  
Y 0.0025 0.0003 -0.0000 -0.0027 -0.0039 0.0068  
Z -0.0056 0.0006 0.0005 0.0014 -0.0073 0.0073  
AT. 119 H X -0.0292 0.0080 -0.0013 -0.0051 -0.0019 0.0028  
Y 0.0228 -0.0039 -0.0006 0.0047 -0.0025 -0.0047  
Z -0.0124 0.0019 0.0007 -0.0019 0.0094 0.0111  
AT. 120 H X -0.0292 0.0080 -0.0013 0.0051 0.0019 0.0028  
Y 0.0228 -0.0039 -0.0006 -0.0047 0.0025 -0.0047  
Z -0.0124 0.0019 0.0007 0.0019 -0.0094 0.0111  
AT. 121 C X 0.0130 -0.0042 0.0015 0.0025 0.0095 0.0079  
Y 0.0243 -0.0058 0.0006 0.0033 0.0073 0.0050  
Z 0.0023 -0.0006 0.0004 0.0012 0.0031 0.0021  
AT. 122 C X 0.0130 -0.0042 0.0015 -0.0025 -0.0095 0.0079  
Y 0.0243 -0.0058 0.0006 -0.0033 -0.0073 0.0050  
Z 0.0023 -0.0006 0.0004 -0.0012 -0.0031 0.0021  
AT. 123 H X 0.0090 -0.0017 0.0002 0.0016 0.0031 0.0013

Y 0.0328 -0.0069 0.0001 0.0054 0.0090 0.0050  
Z -0.0072 0.0011 0.0005 -0.0013 0.0001 0.0008  
AT. 124 H X 0.0090 -0.0017 0.0002 -0.0016 -0.0031 0.0013  
Y 0.0328 -0.0069 0.0001 -0.0054 -0.0090 0.0050  
Z -0.0072 0.0011 0.0005 0.0013 -0.0001 0.0008  
AT. 125 H X 0.0092 -0.0031 0.0016 0.0028 0.0127 0.0109  
Y 0.0195 -0.0061 0.0011 0.0013 0.0051 0.0048  
Z -0.0055 0.0008 0.0007 0.0004 0.0056 0.0055  
AT. 126 H X 0.0092 -0.0031 0.0016 -0.0028 -0.0127 0.0109  
Y 0.0195 -0.0061 0.0011 -0.0013 -0.0051 0.0048  
Z -0.0055 0.0008 0.0007 -0.0004 -0.0056 0.0055  
AT. 127 C X 0.0022 -0.0006 0.0001 0.0003 -0.0003 -0.0005  
Y 0.0006 -0.0001 0.0001 0.0008 0.0002 0.0001  
Z 0.0039 -0.0010 0.0002 0.0011 0.0018 0.0014  
AT. 128 C X 0.0022 -0.0006 0.0001 -0.0003 0.0003 -0.0005  
Y 0.0006 -0.0001 0.0001 -0.0008 -0.0002 0.0001  
Z 0.0039 -0.0010 0.0002 -0.0011 -0.0018 0.0014  
AT. 129 C X 0.0179 -0.0037 0.0007 0.0052 0.0011 -0.0004  
Y -0.0159 0.0035 -0.0001 -0.0022 -0.0047 -0.0037  
Z -0.0046 0.0004 0.0007 0.0003 -0.0031 -0.0026  
AT. 130 C X 0.0179 -0.0037 0.0007 -0.0052 -0.0011 -0.0004  
Y -0.0159 0.0035 -0.0001 0.0022 0.0047 -0.0037  
Z -0.0046 0.0004 0.0007 -0.0003 0.0031 -0.0026  
AT. 131 H X 0.0078 -0.0006 -0.0000 0.0048 -0.0016 -0.0030  
Y -0.0062 -0.0009 0.0017 -0.0030 -0.0030 -0.0006  
Z -0.0148 0.0029 0.0006 -0.0009 -0.0058 -0.0044  
AT. 132 H X 0.0078 -0.0006 -0.0000 -0.0048 0.0016 -0.0030  
Y -0.0062 -0.0009 0.0017 0.0030 0.0030 -0.0006  
Z -0.0148 0.0029 0.0006 0.0009 0.0058 -0.0044  
AT. 133 H X 0.0287 -0.0080 0.0014 0.0032 0.0035 0.0030  
Y -0.0210 0.0050 -0.0004 -0.0028 -0.0059 -0.0046  
Z -0.0176 0.0048 -0.0001 0.0003 -0.0061 -0.0055

AT. 134 H X 0.0287 -0.0080 0.0014 -0.0032 -0.0035 0.0030  
Y -0.0210 0.0050 -0.0004 0.0028 0.0059 -0.0046  
Z -0.0176 0.0048 -0.0001 -0.0003 0.0061 -0.0055

AT. 135 C X 0.0114 -0.0028 0.0004 0.0022 0.0056 0.0048  
Y 0.0043 -0.0012 0.0004 0.0005 -0.0010 -0.0015  
Z -0.0052 0.0015 -0.0004 -0.0005 -0.0016 -0.0010

AT. 136 C X 0.0114 -0.0028 0.0004 -0.0022 -0.0056 0.0048  
Y 0.0043 -0.0012 0.0004 -0.0005 0.0010 -0.0015  
Z -0.0052 0.0015 -0.0004 0.0005 0.0016 -0.0010

AT. 137 H X 0.0053 -0.0021 0.0011 -0.0016 -0.0170 -0.0176  
Y 0.0017 -0.0008 0.0003 -0.0002 -0.0003 -0.0007  
Z -0.0073 0.0020 -0.0009 -0.0005 0.0075 0.0080

AT. 138 H X 0.0053 -0.0021 0.0011 0.0016 0.0170 -0.0176  
Y 0.0017 -0.0008 0.0003 0.0002 0.0003 -0.0007  
Z -0.0073 0.0020 -0.0009 0.0005 -0.0075 0.0080

AT. 139 H X 0.0174 -0.0041 0.0007 0.0042 0.0092 0.0083  
Y 0.0063 -0.0015 -0.0001 0.0020 0.0128 0.0124  
Z -0.0137 0.0033 -0.0005 -0.0036 -0.0101 -0.0095

AT. 140 H X 0.0174 -0.0041 0.0007 -0.0042 -0.0092 0.0083  
Y 0.0063 -0.0015 -0.0001 -0.0020 -0.0128 0.0124  
Z -0.0137 0.0033 -0.0005 0.0036 0.0101 -0.0095

AT. 141 H X 0.0040 -0.0014 0.0000 0.0002 0.0107 0.0099  
Y 0.0020 -0.0005 -0.0003 0.0009 0.0115 0.0109  
Z -0.0059 0.0014 0.0001 -0.0019 -0.0128 -0.0121

AT. 142 H X 0.0040 -0.0014 0.0000 -0.0002 -0.0107 0.0099  
Y 0.0020 -0.0005 -0.0003 -0.0009 -0.0115 0.0109  
Z -0.0059 0.0014 0.0001 0.0019 0.0128 -0.0121

AT. 143 C X -0.0106 0.0025 -0.0003 -0.0023 -0.0024 -0.0013  
Y -0.0023 0.0007 -0.0002 -0.0001 -0.0009 -0.0007  
Z -0.0058 0.0016 -0.0006 -0.0014 -0.0003 0.0003

AT. 144 C X -0.0106 0.0025 -0.0003 0.0023 0.0024 -0.0013  
Y -0.0023 0.0007 -0.0002 0.0001 0.0009 -0.0007

Z -0.0058 0.0016 -0.0006 0.0014 0.0003 0.0003  
AT. 145 H X -0.0039 0.0025 -0.0019 0.0002 0.0008 0.0009  
Y 0.0006 -0.0002 -0.0001 -0.0002 0.0030 0.0028  
Z -0.0071 0.0026 -0.0011 -0.0010 -0.0035 -0.0027  
AT. 146 H X -0.0039 0.0025 -0.0019 -0.0002 -0.0008 0.0009  
Y 0.0006 -0.0002 -0.0001 0.0002 -0.0030 0.0028  
Z -0.0071 0.0026 -0.0011 0.0010 0.0035 -0.0027  
AT. 147 H X -0.0158 0.0041 -0.0006 -0.0033 -0.0092 -0.0070  
Y -0.0018 0.0002 -0.0003 -0.0019 0.0013 0.0013  
Z -0.0132 0.0036 -0.0011 -0.0038 -0.0088 -0.0069  
AT. 148 H X -0.0158 0.0041 -0.0006 0.0033 0.0092 -0.0070  
Y -0.0018 0.0002 -0.0003 0.0019 -0.0013 0.0013  
Z -0.0132 0.0036 -0.0011 0.0038 0.0088 -0.0069  
AT. 149 H X -0.0026 0.0001 -0.0000 -0.0022 0.0067 0.0065  
Y -0.0002 -0.0009 0.0010 -0.0004 0.0030 0.0028  
Z -0.0064 0.0003 0.0012 -0.0021 0.0016 0.0022  
AT. 150 H X -0.0026 0.0001 -0.0000 0.0022 -0.0067 0.0065  
Y -0.0002 -0.0009 0.0010 0.0004 -0.0030 0.0028  
Z -0.0064 0.0003 0.0012 0.0021 -0.0016 0.0022  
AT. 151 C X -0.0018 0.0003 -0.0000 -0.0001 -0.0032 -0.0031  
Y -0.0016 -0.0000 0.0005 -0.0001 0.0007 0.0013  
Z 0.0199 -0.0045 0.0003 0.0031 -0.0002 -0.0014  
AT. 152 C X -0.0018 0.0003 -0.0000 0.0001 0.0032 -0.0031  
Y -0.0016 -0.0000 0.0005 0.0001 -0.0007 0.0013  
Z 0.0199 -0.0045 0.0003 -0.0031 0.0002 -0.0014  
AT. 153 H X -0.0012 -0.0004 0.0007 0.0003 -0.0014 -0.0011  
Y -0.0041 0.0012 -0.0006 -0.0006 -0.0032 -0.0035  
Z 0.0169 -0.0023 -0.0019 0.0021 -0.0071 -0.0099  
AT. 154 H X -0.0012 -0.0004 0.0007 -0.0003 0.0014 -0.0011  
Y -0.0041 0.0012 -0.0006 0.0006 0.0032 -0.0035  
Z 0.0169 -0.0023 -0.0019 -0.0021 0.0071 -0.0099  
AT. 155 H X -0.0027 0.0004 0.0004 -0.0003 -0.0056 -0.0053



Y -0.0046 0.0020 -0.0015 -0.0008 -0.0066 -0.0073  
Z 0.0236 -0.0068 0.0026 0.0038 0.0067 0.0067  
AT. 156 H X -0.0027 0.0004 0.0004 0.0003 0.0056 -0.0053  
Y -0.0046 0.0020 -0.0015 0.0008 0.0066 -0.0073  
Z 0.0236 -0.0068 0.0026 -0.0038 -0.0067 0.0067  
AT. 157 O X 0.0008 0.0011 -0.0009 0.0010 -0.0001 0.0001  
Y 0.0000 -0.0001 -0.0005 -0.0001 0.0000 -0.0000  
Z 0.0012 0.0012 -0.0021 0.0016 -0.0003 -0.0000  
AT. 158 O X 0.0008 0.0011 -0.0009 -0.0010 0.0001 0.0001  
Y 0.0000 -0.0001 -0.0005 0.0001 -0.0000 -0.0000  
Z 0.0012 0.0012 -0.0021 -0.0016 0.0003 -0.0000  
AT. 159 O X -0.0002 0.0000 0.0000 -0.0000 -0.0001 -0.0000  
Y -0.0015 -0.0015 0.0028 -0.0024 0.0003 0.0000  
Z -0.0002 -0.0003 0.0003 -0.0004 0.0001 0.0000  
AT. 160 O X -0.0002 0.0000 0.0000 0.0000 0.0001 -0.0000  
Y -0.0015 -0.0015 0.0028 0.0024 -0.0003 0.0000  
Z -0.0002 -0.0003 0.0003 0.0004 -0.0001 0.0000  
AT. 161 H X -0.0192 -0.0236 0.0313 -0.0251 0.0043 -0.0003  
Y 0.0075 0.0082 -0.0127 0.0091 -0.0016 0.0000  
Z -0.0309 -0.0370 0.0492 -0.0392 0.0069 -0.0001  
AT. 162 H X -0.0192 -0.0236 0.0313 0.0251 -0.0043 -0.0003  
Y 0.0075 0.0082 -0.0127 -0.0091 0.0016 0.0000  
Z -0.0309 -0.0370 0.0492 0.0392 -0.0069 -0.0001  
AT. 163 H X 0.0010 0.0009 -0.0022 0.0021 -0.0004 -0.0000  
Y 0.0256 0.0209 -0.0494 0.0412 -0.0042 -0.0010  
Z 0.0051 0.0042 -0.0100 0.0079 -0.0007 -0.0002  
AT. 164 H X 0.0010 0.0009 -0.0022 -0.0021 0.0004 -0.0000  
Y 0.0256 0.0209 -0.0494 -0.0412 0.0042 -0.0010  
Z 0.0051 0.0042 -0.0100 -0.0079 0.0007 -0.0002  
AT. 165 O X -0.0002 0.0000 -0.0002 0.0001 0.0009 -0.0006  
Y -0.0004 0.0002 0.0002 0.0003 -0.0016 0.0008  
Z -0.0000 0.0000 -0.0000 0.0001 -0.0001 0.0001

AT.166 O X -0.0002 0.0000 -0.0002 -0.0001 -0.0009 -0.0006

Y -0.0004 0.0002 0.0002 -0.0003 0.0016 0.0008

Z -0.0000 0.0000 -0.0000 -0.0001 0.0001 0.0001

AT.167 H X -0.0027 0.0016 0.0023 0.0017 -0.0140 0.0067

Y 0.0055 -0.0033 -0.0050 -0.0027 0.0298 -0.0140

Z -0.0011 0.0008 0.0010 0.0003 -0.0045 0.0009

AT.168 H X -0.0027 0.0016 0.0023 -0.0017 0.0140 0.0067

Y 0.0055 -0.0033 -0.0050 0.0027 -0.0298 -0.0140

Z -0.0011 0.0008 0.0010 -0.0003 0.0045 0.0009

AT.169 O X -0.0005 0.0002 0.0002 0.0000 -0.0024 0.0018

Y -0.0002 0.0001 0.0001 0.0000 -0.0010 0.0008

Z -0.0001 0.0001 0.0000 -0.0000 0.0000 0.0000

AT.170 O X -0.0005 0.0002 0.0002 -0.0000 0.0024 0.0018

Y -0.0002 0.0001 0.0001 -0.0000 0.0010 0.0008

Z -0.0001 0.0001 0.0000 0.0000 -0.0000 0.0000

AT.171 H X 0.0145 -0.0052 -0.0039 -0.0003 0.0592 -0.0456

Y 0.0070 -0.0026 -0.0020 0.0003 0.0290 -0.0226

Z 0.0004 -0.0004 -0.0005 0.0008 0.0020 -0.0020

AT.172 H X 0.0145 -0.0052 -0.0039 0.0003 -0.0592 -0.0456

Y 0.0070 -0.0026 -0.0020 -0.0003 -0.0290 -0.0226

Z 0.0004 -0.0004 -0.0005 -0.0008 -0.0020 -0.0020

FREQ(CM\*\*-1) 923.93 924.00 924.48 928.47 937.39 938.89

AT. 1 I X 0.0000 -0.0000 0.0000 0.0001 -0.0000 -0.0000

Y 0.0000 -0.0000 0.0000 0.0000 0.0000 -0.0000

Z 0.0000 -0.0000 -0.0000 -0.0000 -0.0000 0.0000

AT. 2 I X -0.0000 -0.0000 -0.0000 0.0001 0.0000 -0.0000

Y -0.0000 -0.0000 -0.0000 0.0000 -0.0000 -0.0000

Z -0.0000 -0.0000 0.0000 -0.0000 0.0000 0.0000

AT. 3 I X 0.0000 -0.0000 -0.0000 0.0000 -0.0000 -0.0000

Y -0.0001 0.0000 0.0000 -0.0000 0.0000 -0.0000

Z 0.0000 -0.0000 0.0000 0.0000 -0.0000 0.0000  
AT. 4 I X -0.0000 -0.0000 0.0000 0.0000 0.0000 -0.0000  
Y 0.0001 0.0000 -0.0000 -0.0000 -0.0000 -0.0000  
Z -0.0000 -0.0000 -0.0000 0.0000 0.0000 0.0000  
AT. 5 O X 0.0010 0.0001 0.0003 0.0019 0.0003 -0.0001  
Y -0.0008 -0.0001 -0.0003 -0.0013 -0.0003 0.0001  
Z -0.0014 0.0001 -0.0002 -0.0023 -0.0003 0.0001  
AT. 6 O X -0.0010 0.0001 -0.0003 0.0019 -0.0003 -0.0001  
Y 0.0008 -0.0001 0.0003 -0.0013 0.0003 0.0001  
Z 0.0014 0.0001 0.0002 -0.0023 0.0003 0.0001  
AT. 7 O X 0.0018 -0.0004 0.0001 0.0014 0.0001 -0.0001  
Y -0.0014 0.0001 -0.0002 -0.0016 0.0000 -0.0002  
Z 0.0014 -0.0001 0.0003 0.0015 -0.0001 0.0001  
AT. 8 O X -0.0018 -0.0004 -0.0001 0.0014 -0.0001 -0.0001  
Y 0.0014 0.0001 0.0002 -0.0016 -0.0000 -0.0002  
Z -0.0014 -0.0001 -0.0003 0.0015 0.0001 0.0001  
AT. 9 N X 0.0022 -0.0002 0.0002 0.0022 0.0003 -0.0001  
Y 0.0022 -0.0000 0.0004 0.0017 0.0005 -0.0002  
Z 0.0024 -0.0003 0.0003 0.0032 -0.0001 -0.0002  
AT. 10 N X -0.0022 -0.0002 -0.0002 0.0022 -0.0003 -0.0001  
Y -0.0022 -0.0000 -0.0004 0.0017 -0.0005 -0.0002  
Z -0.0024 -0.0003 -0.0003 0.0032 0.0001 -0.0002  
AT. 11 N X 0.0034 -0.0001 0.0007 0.0034 -0.0003 0.0002  
Y 0.0042 -0.0002 0.0009 0.0044 -0.0003 0.0001  
Z -0.0008 -0.0001 -0.0003 -0.0017 0.0003 -0.0006  
AT. 12 N X -0.0034 -0.0001 -0.0007 0.0034 0.0003 0.0002  
Y -0.0042 -0.0002 -0.0009 0.0044 0.0003 0.0001  
Z 0.0008 -0.0001 0.0003 -0.0017 -0.0003 -0.0006  
AT. 13 C X 0.0007 0.0000 0.0002 0.0010 -0.0002 -0.0000  
Y -0.0010 0.0002 -0.0000 -0.0018 0.0000 0.0001  
Z -0.0010 0.0000 -0.0001 -0.0012 -0.0002 0.0001  
AT. 14 C X -0.0007 0.0000 -0.0002 0.0010 0.0002 -0.0000

Y 0.0010 0.0002 0.0000 -0.0018 -0.0000 0.0001  
Z 0.0010 0.0000 0.0001 -0.0012 0.0002 0.0001  
AT. 15 C X -0.0015 -0.0001 -0.0004 -0.0031 -0.0003 0.0002  
Y 0.0011 -0.0000 0.0002 0.0023 0.0002 -0.0002  
Z -0.0009 0.0004 0.0000 -0.0007 0.0003 0.0000  
AT. 16 C X 0.0015 -0.0001 0.0004 -0.0031 0.0003 0.0002  
Y -0.0011 -0.0000 -0.0002 0.0023 -0.0002 -0.0002  
Z 0.0009 0.0004 -0.0000 -0.0007 -0.0003 0.0000  
AT. 17 H X -0.0017 0.0008 0.0003 -0.0003 0.0007 -0.0002  
Y 0.0001 0.0007 0.0006 0.0045 0.0008 -0.0003  
Z 0.0003 -0.0003 -0.0002 -0.0023 -0.0001 0.0001  
AT. 18 H X 0.0017 0.0008 -0.0003 -0.0003 -0.0007 -0.0002  
Y -0.0001 0.0007 -0.0006 0.0045 -0.0008 -0.0003  
Z -0.0003 -0.0003 0.0002 -0.0023 0.0001 0.0001  
AT. 19 H X -0.0023 -0.0004 -0.0008 -0.0050 -0.0014 0.0006  
Y 0.0048 -0.0012 0.0001 0.0028 -0.0004 0.0001  
Z 0.0001 -0.0002 -0.0002 -0.0014 -0.0005 0.0002  
AT. 20 H X 0.0023 -0.0004 0.0008 -0.0050 0.0014 0.0006  
Y -0.0048 -0.0012 -0.0001 0.0028 0.0004 0.0001  
Z -0.0001 -0.0002 0.0002 -0.0014 0.0005 0.0002  
AT. 21 C X 0.0006 0.0002 0.0005 0.0010 -0.0004 0.0005  
Y -0.0029 0.0007 -0.0001 -0.0026 -0.0001 0.0003  
Z 0.0003 0.0002 0.0004 0.0002 -0.0001 0.0001  
AT. 22 C X -0.0006 0.0002 -0.0005 0.0010 0.0004 0.0005  
Y 0.0029 0.0007 0.0001 -0.0026 0.0001 0.0003  
Z -0.0003 0.0002 -0.0004 0.0002 0.0001 0.0001  
AT. 23 C X -0.0026 0.0004 -0.0004 -0.0020 0.0002 -0.0001  
Y 0.0025 -0.0007 0.0002 0.0010 -0.0003 0.0000  
Z 0.0007 -0.0000 -0.0000 0.0023 0.0000 0.0002  
AT. 24 C X 0.0026 0.0004 0.0004 -0.0020 -0.0002 -0.0001  
Y -0.0025 -0.0007 -0.0002 0.0010 0.0003 0.0000  
Z -0.0007 -0.0000 0.0000 0.0023 -0.0000 0.0002

AT. 25 H X 0.0046 -0.0014 0.0004 -0.0007 0.0013 -0.0019  
Y 0.0026 -0.0007 0.0002 0.0012 -0.0001 -0.0002  
Z 0.0087 -0.0017 0.0011 0.0027 -0.0008 -0.0000

AT. 26 H X -0.0046 -0.0014 -0.0004 -0.0007 -0.0013 -0.0019  
Y -0.0026 -0.0007 -0.0002 0.0012 0.0001 -0.0002  
Z -0.0087 -0.0017 -0.0011 0.0027 0.0008 -0.0000

AT. 27 H X -0.0070 0.0016 -0.0008 -0.0047 0.0000 -0.0007  
Y -0.0062 0.0017 -0.0006 -0.0004 0.0006 0.0002  
Z -0.0022 0.0008 -0.0003 0.0022 0.0004 0.0004

AT. 28 H X 0.0070 0.0016 0.0008 -0.0047 -0.0000 -0.0007  
Y 0.0062 0.0017 0.0006 -0.0004 -0.0006 0.0002  
Z 0.0022 0.0008 0.0003 0.0022 -0.0004 0.0004

AT. 29 C X -0.0142 0.0007 -0.0026 -0.0136 -0.0007 -0.0002  
Y -0.0025 -0.0000 -0.0005 -0.0000 -0.0018 0.0008  
Z 0.0060 -0.0004 0.0009 0.0073 0.0000 -0.0000

AT. 30 C X 0.0142 0.0007 0.0026 -0.0136 0.0007 -0.0002  
Y 0.0025 -0.0000 0.0005 -0.0000 0.0018 0.0008  
Z -0.0060 -0.0004 -0.0009 0.0073 -0.0000 -0.0000

AT. 31 H X -0.0032 0.0004 -0.0004 -0.0011 -0.0003 -0.0006  
Y -0.0350 0.0013 -0.0066 -0.0322 -0.0037 0.0011  
Z -0.0360 0.0013 -0.0070 -0.0333 -0.0024 0.0001

AT. 32 H X 0.0032 0.0004 0.0004 -0.0011 0.0003 -0.0006  
Y 0.0350 0.0013 0.0066 -0.0322 0.0037 0.0011  
Z 0.0360 0.0013 0.0070 -0.0333 0.0024 0.0001

AT. 33 H X 0.0042 -0.0003 0.0004 0.0046 0.0012 0.0000  
Y 0.0467 -0.0026 0.0082 0.0483 0.0012 0.0001  
Z -0.0029 -0.0000 -0.0008 -0.0013 -0.0001 0.0005

AT. 34 H X -0.0042 -0.0003 -0.0004 0.0046 -0.0012 0.0000  
Y -0.0467 -0.0026 -0.0082 0.0483 -0.0012 0.0001  
Z 0.0029 -0.0000 0.0008 -0.0013 0.0001 0.0005

AT. 35 C X 0.0020 0.0001 0.0006 0.0018 0.0000 -0.0006  
Y 0.0031 0.0000 0.0008 0.0020 0.0001 0.0002

Z -0.0013 0.0001 -0.0004 -0.0026 0.0013 0.0001  
AT. 36 C X -0.0020 0.0001 -0.0006 0.0018 -0.0000 -0.0006  
Y -0.0031 0.0000 -0.0008 0.0020 -0.0001 0.0002  
Z 0.0013 0.0001 0.0004 -0.0026 -0.0013 0.0001  
AT. 37 C X 0.0004 -0.0000 -0.0001 0.0025 0.0006 -0.0003  
Y -0.0137 -0.0000 -0.0032 -0.0147 0.0013 0.0001  
Z -0.0110 0.0005 -0.0021 -0.0125 0.0009 -0.0008  
AT. 38 C X -0.0004 -0.0000 0.0001 0.0025 -0.0006 -0.0003  
Y 0.0137 -0.0000 0.0032 -0.0147 -0.0013 0.0001  
Z 0.0110 0.0005 0.0021 -0.0125 -0.0009 -0.0008  
AT. 39 H X 0.0492 -0.0013 0.0102 0.0549 -0.0034 0.0015  
Y 0.0241 -0.0014 0.0042 0.0259 -0.0010 0.0008  
Z 0.0059 0.0002 0.0016 0.0056 -0.0008 0.0003  
AT. 40 H X -0.0492 -0.0013 -0.0102 0.0549 0.0034 0.0015  
Y -0.0241 -0.0014 -0.0042 0.0259 0.0010 0.0008  
Z -0.0059 0.0002 -0.0016 0.0056 0.0008 0.0003  
AT. 41 H X -0.0418 0.0009 -0.0091 -0.0432 0.0041 -0.0020  
Y -0.0171 0.0001 -0.0038 -0.0178 0.0015 0.0007  
Z 0.0346 -0.0006 0.0075 0.0364 -0.0027 0.0004  
AT. 42 H X 0.0418 0.0009 0.0091 -0.0432 -0.0041 -0.0020  
Y 0.0171 0.0001 0.0038 -0.0178 -0.0015 0.0007  
Z -0.0346 -0.0006 -0.0075 0.0364 0.0027 0.0004  
AT. 43 C X -0.0150 0.0003 -0.0034 -0.0170 0.0002 0.0009  
Y 0.0006 -0.0001 0.0000 0.0027 -0.0001 0.0004  
Z -0.0026 0.0002 -0.0006 -0.0034 -0.0007 0.0007  
AT. 44 C X 0.0150 0.0003 0.0034 -0.0170 -0.0002 0.0009  
Y -0.0006 -0.0001 -0.0000 0.0027 0.0001 0.0004  
Z 0.0026 0.0002 0.0006 -0.0034 0.0007 0.0007  
AT. 45 H X 0.0039 -0.0002 0.0010 0.0048 0.0005 0.0002  
Y -0.0429 0.0012 -0.0094 -0.0454 -0.0010 0.0040  
Z 0.0260 -0.0008 0.0054 0.0277 0.0002 -0.0023  
AT. 46 H X -0.0039 -0.0002 -0.0010 0.0048 -0.0005 0.0002

Y 0.0429 0.0012 0.0094 -0.0454 0.0010 0.0040  
Z -0.0260 -0.0008 -0.0054 0.0277 -0.0002 -0.0023  
AT. 47 H X 0.0094 -0.0004 0.0020 0.0103 0.0005 -0.0009  
Y 0.0458 -0.0014 0.0100 0.0528 0.0005 -0.0027  
Z 0.0110 -0.0003 0.0025 0.0114 -0.0006 -0.0001  
AT. 48 H X -0.0094 -0.0004 -0.0020 0.0103 -0.0005 -0.0009  
Y -0.0458 -0.0014 -0.0100 0.0528 -0.0005 -0.0027  
Z -0.0110 -0.0003 -0.0025 0.0114 0.0006 -0.0001  
AT. 49 C X 0.0002 -0.0001 -0.0001 -0.0010 0.0006 0.0005  
Y 0.0006 -0.0000 0.0001 0.0003 0.0002 -0.0008  
Z -0.0003 -0.0000 -0.0002 -0.0009 0.0001 0.0010  
AT. 50 C X -0.0002 -0.0001 0.0001 -0.0010 -0.0006 0.0005  
Y -0.0006 -0.0000 -0.0001 0.0003 -0.0002 -0.0008  
Z 0.0003 -0.0000 0.0002 -0.0009 -0.0001 0.0010  
AT. 51 C X 0.0046 -0.0004 0.0009 0.0063 -0.0010 0.0003  
Y -0.0143 0.0008 -0.0026 -0.0139 -0.0002 -0.0009  
Z 0.0026 -0.0002 0.0005 0.0046 -0.0001 0.0000  
AT. 52 C X -0.0046 -0.0004 -0.0009 0.0063 0.0010 0.0003  
Y 0.0143 0.0008 0.0026 -0.0139 0.0002 -0.0009  
Z -0.0026 -0.0002 -0.0005 0.0046 0.0001 0.0000  
AT. 53 H X 0.0404 -0.0025 0.0076 0.0446 -0.0013 0.0019  
Y 0.0302 -0.0015 0.0060 0.0337 -0.0003 0.0012  
Z -0.0073 0.0007 -0.0010 -0.0058 0.0001 -0.0003  
AT. 54 H X -0.0404 -0.0025 -0.0076 0.0446 0.0013 0.0019  
Y -0.0302 -0.0015 -0.0060 0.0337 0.0003 0.0012  
Z 0.0073 0.0007 0.0010 -0.0058 -0.0001 -0.0003  
AT. 55 H X -0.0409 0.0022 -0.0076 -0.0416 -0.0009 -0.0017  
Y -0.0089 0.0005 -0.0015 -0.0068 -0.0003 -0.0010  
Z -0.0226 0.0013 -0.0041 -0.0203 -0.0002 -0.0015  
AT. 56 H X 0.0409 0.0022 0.0076 -0.0416 0.0009 -0.0017  
Y 0.0089 0.0005 0.0015 -0.0068 0.0003 -0.0010  
Z 0.0226 0.0013 0.0041 -0.0203 0.0002 -0.0015

AT. 57 C X 0.0024 -0.0000 0.0006 0.0020 -0.0007 0.0004  
Y 0.0006 0.0003 0.0003 -0.0001 0.0006 -0.0006  
Z -0.0001 -0.0000 -0.0001 -0.0011 0.0007 0.0006

AT. 58 C X -0.0024 -0.0000 -0.0006 0.0020 0.0007 0.0004  
Y -0.0006 0.0003 -0.0003 -0.0001 -0.0006 -0.0006  
Z 0.0001 -0.0000 0.0001 -0.0011 -0.0007 0.0006

AT. 59 H X -0.0072 -0.0008 -0.0026 -0.0057 0.0011 0.0026  
Y 0.0032 0.0002 0.0012 0.0040 -0.0014 -0.0018  
Z -0.0031 -0.0006 -0.0012 -0.0006 -0.0011 0.0003

AT. 60 H X 0.0072 -0.0008 0.0026 -0.0057 -0.0011 0.0026  
Y -0.0032 0.0002 -0.0012 0.0040 0.0014 -0.0018  
Z 0.0031 -0.0006 0.0012 -0.0006 0.0011 0.0003

AT. 61 H X 0.0047 -0.0005 0.0010 0.0090 -0.0041 -0.0007  
Y -0.0032 -0.0003 -0.0014 -0.0045 0.0029 0.0009  
Z 0.0035 -0.0001 0.0011 0.0066 -0.0032 -0.0009

AT. 62 H X -0.0047 -0.0005 -0.0010 0.0090 0.0041 -0.0007  
Y 0.0032 -0.0003 0.0014 -0.0045 -0.0029 0.0009  
Z -0.0035 -0.0001 -0.0011 0.0066 0.0032 -0.0009

AT. 63 H X 0.0016 -0.0000 0.0002 -0.0037 0.0027 0.0015  
Y -0.0047 -0.0002 -0.0013 0.0007 -0.0018 -0.0006  
Z 0.0051 0.0004 0.0017 0.0036 -0.0005 -0.0004

AT. 64 H X -0.0016 -0.0000 -0.0002 -0.0037 -0.0027 0.0015  
Y 0.0047 -0.0002 0.0013 0.0007 0.0018 -0.0006  
Z -0.0051 0.0004 -0.0017 0.0036 0.0005 -0.0004

AT. 65 C X 0.0001 -0.0000 -0.0001 -0.0011 0.0003 0.0005  
Y 0.0005 -0.0000 0.0001 -0.0006 0.0002 -0.0006  
Z -0.0007 -0.0001 -0.0003 -0.0019 0.0006 0.0007

AT. 66 C X -0.0001 -0.0000 0.0001 -0.0011 -0.0003 0.0005  
Y -0.0005 -0.0000 -0.0001 -0.0006 -0.0002 -0.0006  
Z 0.0007 -0.0001 0.0003 -0.0019 -0.0006 0.0007

AT. 67 H X 0.0050 0.0001 0.0014 0.0117 -0.0036 -0.0015  
Y -0.0027 -0.0001 -0.0009 -0.0063 0.0016 0.0019



Z -0.0018 -0.0001 -0.0006 -0.0070 0.0026 0.0000  
AT. 68 H X -0.0050 0.0001 -0.0014 0.0117 0.0036 -0.0015  
Y 0.0027 -0.0001 0.0009 -0.0063 -0.0016 0.0019  
Z 0.0018 -0.0001 0.0006 -0.0070 -0.0026 0.0000  
AT. 69 H X -0.0005 -0.0002 -0.0004 0.0010 0.0005 0.0028  
Y 0.0029 -0.0001 0.0008 0.0088 -0.0016 -0.0011  
Z 0.0042 0.0001 0.0015 0.0083 -0.0025 -0.0046  
AT. 70 H X 0.0005 -0.0002 0.0004 0.0010 -0.0005 0.0028  
Y -0.0029 -0.0001 -0.0008 0.0088 0.0016 -0.0011  
Z -0.0042 0.0001 -0.0015 0.0083 0.0025 -0.0046  
AT. 71 H X 0.0013 0.0001 0.0006 0.0012 -0.0011 -0.0030  
Y 0.0006 -0.0001 -0.0000 0.0022 -0.0002 0.0018  
Z 0.0002 -0.0000 0.0000 0.0036 -0.0011 0.0013  
AT. 72 H X -0.0013 0.0001 -0.0006 0.0012 0.0011 -0.0030  
Y -0.0006 -0.0001 0.0000 0.0022 0.0002 0.0018  
Z -0.0002 -0.0000 -0.0000 0.0036 0.0011 0.0013  
AT. 73 C X 0.0141 -0.0002 0.0030 0.0129 0.0011 -0.0016  
Y 0.0224 -0.0007 0.0045 0.0204 -0.0004 0.0009  
Z 0.0047 0.0002 0.0014 0.0066 -0.0014 -0.0015  
AT. 74 C X -0.0141 -0.0002 -0.0030 0.0129 -0.0011 -0.0016  
Y -0.0224 -0.0007 -0.0045 0.0204 0.0004 0.0009  
Z -0.0047 0.0002 -0.0014 0.0066 0.0014 -0.0015  
AT. 75 H X -0.0341 0.0016 -0.0067 -0.0358 0.0007 -0.0012  
Y -0.0183 0.0002 -0.0041 -0.0167 -0.0006 0.0014  
Z -0.0863 0.0027 -0.0175 -0.0795 -0.0020 -0.0004  
AT. 76 H X 0.0341 0.0016 0.0067 -0.0358 -0.0007 -0.0012  
Y 0.0183 0.0002 0.0041 -0.0167 0.0006 0.0014  
Z 0.0863 0.0027 0.0175 -0.0795 0.0020 -0.0004  
AT. 77 H X -0.0150 0.0003 -0.0032 -0.0129 0.0014 -0.0021  
Y -0.0401 0.0014 -0.0082 -0.0407 -0.0016 0.0020  
Z 0.0870 -0.0022 0.0184 0.0846 -0.0006 -0.0020  
AT. 78 H X 0.0150 0.0003 0.0032 -0.0129 -0.0014 -0.0021

Y 0.0401 0.0014 0.0082 -0.0407 0.0016 0.0020  
Z -0.0870 -0.0022 -0.0184 0.0846 0.0006 -0.0020  
AT. 79 I X -0.0000 0.0000 0.0001 0.0000 -0.0001 0.0001  
Y 0.0000 0.0000 0.0000 -0.0000 0.0001 -0.0000  
Z 0.0000 -0.0000 -0.0000 0.0000 0.0000 -0.0000  
AT. 80 I X 0.0000 0.0000 -0.0001 0.0000 0.0001 0.0001  
Y -0.0000 0.0000 -0.0000 -0.0000 -0.0001 -0.0000  
Z -0.0000 -0.0000 0.0000 0.0000 -0.0000 -0.0000  
AT. 81 I X 0.0000 -0.0001 -0.0001 -0.0000 0.0001 -0.0001  
Y -0.0000 -0.0001 -0.0001 -0.0000 -0.0001 0.0001  
Z -0.0000 0.0001 0.0001 -0.0000 0.0000 -0.0000  
AT. 82 I X -0.0000 -0.0001 0.0001 -0.0000 -0.0001 -0.0001  
Y 0.0000 -0.0001 0.0001 -0.0000 0.0001 0.0001  
Z 0.0000 0.0001 -0.0001 -0.0000 -0.0000 -0.0000  
AT. 83 O X 0.0005 -0.0030 -0.0016 0.0005 -0.0029 0.0007  
Y -0.0001 -0.0002 -0.0003 -0.0000 0.0005 -0.0002  
Z 0.0004 -0.0021 -0.0015 0.0003 -0.0023 0.0009  
AT. 84 O X -0.0005 -0.0030 0.0016 0.0005 0.0029 0.0007  
Y 0.0001 -0.0002 0.0003 -0.0000 -0.0005 -0.0002  
Z -0.0004 -0.0021 0.0015 0.0003 0.0023 0.0009  
AT. 85 O X 0.0008 -0.0026 -0.0022 0.0002 -0.0001 0.0002  
Y 0.0004 -0.0016 -0.0015 0.0000 -0.0001 0.0002  
Z -0.0003 0.0015 0.0015 0.0000 -0.0017 0.0015  
AT. 86 O X -0.0008 -0.0026 0.0022 0.0002 0.0001 0.0002  
Y -0.0004 -0.0016 0.0015 0.0000 0.0001 0.0002  
Z 0.0003 0.0015 -0.0015 0.0000 0.0017 0.0015  
AT. 87 N X 0.0003 -0.0008 -0.0008 0.0001 -0.0004 -0.0003  
Y -0.0006 0.0028 0.0023 0.0000 0.0006 -0.0004  
Z -0.0005 0.0030 0.0028 -0.0001 0.0047 -0.0031  
AT. 88 N X -0.0003 -0.0008 0.0008 0.0001 0.0004 -0.0003  
Y 0.0006 0.0028 -0.0023 0.0000 -0.0006 -0.0004  
Z 0.0005 0.0030 -0.0028 -0.0001 -0.0047 -0.0031

AT. 89 N X 0.0006 -0.0029 -0.0027 -0.0000 -0.0004 0.0008  
Y -0.0011 0.0063 0.0064 0.0004 -0.0032 0.0027  
Z -0.0002 0.0005 0.0005 -0.0000 0.0024 -0.0020

AT. 90 N X -0.0006 -0.0029 0.0027 -0.0000 0.0004 0.0008  
Y 0.0011 0.0063 -0.0064 0.0004 0.0032 0.0027  
Z 0.0002 0.0005 -0.0005 -0.0000 -0.0024 -0.0020

AT. 91 C X 0.0002 -0.0018 -0.0015 0.0001 -0.0028 0.0015  
Y 0.0005 -0.0025 -0.0007 0.0007 -0.0065 0.0020  
Z 0.0004 -0.0011 -0.0013 -0.0001 0.0024 -0.0015

AT. 92 C X -0.0002 -0.0018 0.0015 0.0001 0.0028 0.0015  
Y -0.0005 -0.0025 0.0007 0.0007 0.0065 0.0020  
Z -0.0004 -0.0011 0.0013 -0.0001 -0.0024 -0.0015

AT. 93 C X -0.0006 0.0033 0.0024 -0.0003 0.0066 -0.0047  
Y -0.0004 0.0019 0.0005 -0.0005 0.0044 -0.0013  
Z 0.0001 -0.0002 -0.0012 -0.0002 -0.0026 0.0033

AT. 94 C X 0.0006 0.0033 -0.0024 -0.0003 -0.0066 -0.0047  
Y 0.0004 0.0019 -0.0005 -0.0005 -0.0044 -0.0013  
Z -0.0001 -0.0002 0.0012 -0.0002 0.0026 0.0033

AT. 95 H X -0.0005 0.0036 0.0001 -0.0018 0.0159 -0.0047  
Y -0.0010 0.0051 0.0013 -0.0008 0.0050 -0.0004  
Z 0.0010 -0.0058 -0.0002 0.0018 -0.0122 0.0017

AT. 96 H X 0.0005 0.0036 -0.0001 -0.0018 -0.0159 -0.0047  
Y 0.0010 0.0051 -0.0013 -0.0008 -0.0050 -0.0004  
Z -0.0010 -0.0058 0.0002 0.0018 0.0122 0.0017

AT. 97 H X -0.0011 0.0049 0.0044 0.0000 0.0019 -0.0051  
Y 0.0009 -0.0043 0.0021 0.0017 -0.0036 -0.0046  
Z 0.0006 -0.0024 -0.0015 0.0003 -0.0035 0.0028

AT. 98 H X 0.0011 0.0049 -0.0044 0.0000 -0.0019 -0.0051  
Y -0.0009 -0.0043 -0.0021 0.0017 0.0036 -0.0046  
Z -0.0006 -0.0024 0.0015 0.0003 0.0035 0.0028

AT. 99 C X 0.0002 -0.0013 -0.0011 -0.0000 0.0011 -0.0008  
Y 0.0007 -0.0035 -0.0031 -0.0001 0.0020 -0.0019

Z 0.0002 0.0001 0.0002 0.0001 0.0043 -0.0035  
AT.100 C X -0.0002 -0.0013 0.0011 -0.0000 -0.0011 -0.0008  
Y -0.0007 -0.0035 0.0031 -0.0001 -0.0020 -0.0019  
Z -0.0002 0.0001 -0.0002 0.0001 -0.0043 -0.0035  
AT.101 C X -0.0011 0.0045 0.0036 -0.0002 -0.0034 0.0030  
Y -0.0005 0.0024 0.0021 -0.0000 0.0011 -0.0010  
Z -0.0001 0.0008 0.0006 0.0002 -0.0039 0.0035  
AT.102 C X 0.0011 0.0045 -0.0036 -0.0002 0.0034 0.0030  
Y 0.0005 0.0024 -0.0021 -0.0000 -0.0011 -0.0010  
Z 0.0001 0.0008 -0.0006 0.0002 0.0039 0.0035  
AT.103 H X 0.0021 -0.0054 -0.0049 0.0011 -0.0106 0.0095  
Y -0.0018 0.0062 0.0054 -0.0005 0.0035 -0.0034  
Z -0.0033 0.0138 0.0109 -0.0008 0.0045 -0.0044  
AT.104 H X -0.0021 -0.0054 0.0049 0.0011 0.0106 0.0095  
Y 0.0018 0.0062 -0.0054 -0.0005 -0.0035 -0.0034  
Z 0.0033 0.0138 -0.0109 -0.0008 -0.0045 -0.0044  
AT.105 H X -0.0016 0.0066 0.0073 0.0001 -0.0013 0.0011  
Y 0.0023 -0.0110 -0.0097 0.0005 -0.0101 0.0096  
Z 0.0007 -0.0035 -0.0026 0.0004 -0.0077 0.0070  
AT.106 H X 0.0016 0.0066 -0.0073 0.0001 0.0013 0.0011  
Y -0.0023 -0.0110 0.0097 0.0005 0.0101 0.0096  
Z -0.0007 -0.0035 0.0026 0.0004 0.0077 0.0070  
AT.107 C X -0.0028 0.0145 0.0141 0.0002 0.0003 0.0009  
Y 0.0009 -0.0045 -0.0038 -0.0002 0.0064 -0.0042  
Z -0.0010 0.0046 0.0050 -0.0001 0.0148 -0.0160  
AT.108 C X 0.0028 0.0145 -0.0141 0.0002 -0.0003 0.0009  
Y -0.0009 -0.0045 0.0038 -0.0002 -0.0064 -0.0042  
Z 0.0010 0.0046 -0.0050 -0.0001 -0.0148 -0.0160  
AT.109 H X 0.0025 -0.0150 -0.0147 -0.0004 -0.0252 0.0277  
Y 0.0061 -0.0313 -0.0300 -0.0008 -0.0063 0.0110  
Z 0.0063 -0.0326 -0.0314 -0.0009 0.0002 0.0024  
AT.110 H X -0.0025 -0.0150 0.0147 -0.0004 0.0252 0.0277

Y -0.0061 -0.0313 0.0300 -0.0008 0.0063 0.0110  
Z -0.0063 -0.0326 0.0314 -0.0009 -0.0002 0.0024  
AT. 111 H X -0.0019 0.0104 0.0099 0.0002 0.0005 0.0023  
Y -0.0099 0.0479 0.0474 0.0004 0.0366 -0.0395  
Z 0.0004 -0.0030 -0.0021 -0.0001 0.0074 -0.0093  
AT. 112 H X 0.0019 0.0104 -0.0099 0.0002 -0.0005 0.0023  
Y 0.0099 0.0479 -0.0474 0.0004 -0.0366 -0.0395  
Z -0.0004 -0.0030 0.0021 -0.0001 -0.0074 -0.0093  
AT. 113 C X 0.0001 -0.0011 -0.0010 -0.0001 -0.0043 0.0038  
Y -0.0006 0.0027 0.0025 0.0001 -0.0039 0.0023  
Z 0.0004 -0.0023 -0.0022 0.0001 -0.0117 0.0101  
AT. 114 C X -0.0001 -0.0011 0.0010 -0.0001 0.0043 0.0038  
Y 0.0006 0.0027 -0.0025 0.0001 0.0039 0.0023  
Z -0.0004 -0.0023 0.0022 0.0001 0.0117 0.0101  
AT. 115 C X 0.0010 -0.0057 -0.0055 -0.0002 -0.0051 0.0042  
Y 0.0027 -0.0141 -0.0140 -0.0006 -0.0066 0.0080  
Z 0.0023 -0.0114 -0.0114 -0.0001 -0.0215 0.0225  
AT. 116 C X -0.0010 -0.0057 0.0055 -0.0002 0.0051 0.0042  
Y -0.0027 -0.0141 0.0140 -0.0006 0.0066 0.0080  
Z -0.0023 -0.0114 0.0114 -0.0001 0.0215 0.0225  
AT. 117 H X 0.0078 -0.0407 -0.0402 -0.0012 -0.0453 0.0482  
Y -0.0081 0.0417 0.0415 0.0010 0.0620 -0.0634  
Z -0.0023 0.0118 0.0116 0.0004 0.0041 -0.0065  
AT. 118 H X -0.0078 -0.0407 0.0402 -0.0012 0.0453 0.0482  
Y 0.0081 0.0417 -0.0415 0.0010 -0.0620 -0.0634  
Z 0.0023 0.0118 -0.0116 0.0004 -0.0041 -0.0065  
AT. 119 H X -0.0079 0.0412 0.0413 0.0013 0.0512 -0.0566  
Y 0.0059 -0.0295 -0.0291 -0.0010 -0.0215 0.0233  
Z -0.0058 0.0299 0.0296 0.0010 0.0249 -0.0268  
AT. 120 H X 0.0079 0.0412 -0.0413 0.0013 -0.0512 -0.0566  
Y -0.0059 -0.0295 0.0291 -0.0010 0.0215 0.0233  
Z 0.0058 0.0299 -0.0296 0.0010 -0.0249 -0.0268

AT. 121 C X -0.0027 0.0147 0.0143 0.0007 -0.0043 0.0055  
Y 0.0008 -0.0045 -0.0051 -0.0004 -0.0001 0.0004  
Z 0.0012 -0.0062 -0.0058 -0.0005 0.0198 -0.0222

AT. 122 C X 0.0027 0.0147 -0.0143 0.0007 0.0043 0.0055  
Y -0.0008 -0.0045 0.0051 -0.0004 0.0001 0.0004  
Z -0.0012 -0.0062 0.0058 -0.0005 -0.0198 -0.0222

AT. 123 H X 0.0021 -0.0143 -0.0140 -0.0017 0.0398 -0.0439  
Y 0.0079 -0.0406 -0.0406 -0.0026 0.0376 -0.0427  
Z -0.0053 0.0260 0.0258 0.0013 -0.0120 0.0142

AT. 124 H X -0.0021 -0.0143 0.0140 -0.0017 -0.0398 -0.0439  
Y -0.0079 -0.0406 0.0406 -0.0026 -0.0376 -0.0427  
Z 0.0053 0.0260 -0.0258 0.0013 0.0120 0.0142

AT. 125 H X -0.0007 0.0062 0.0066 0.0009 -0.0013 0.0010  
Y -0.0101 0.0488 0.0467 0.0020 -0.0611 0.0703  
Z -0.0018 0.0107 0.0113 0.0010 -0.0081 0.0082

AT. 126 H X 0.0007 0.0062 -0.0066 0.0009 0.0013 0.0010  
Y 0.0101 0.0488 -0.0467 0.0020 0.0611 0.0703  
Z 0.0018 0.0107 -0.0113 0.0010 0.0081 0.0082

AT. 127 C X 0.0001 0.0002 -0.0001 -0.0000 0.0052 -0.0041  
Y 0.0002 -0.0006 -0.0001 0.0003 0.0036 -0.0035  
Z -0.0002 -0.0003 -0.0001 -0.0002 -0.0021 0.0008

AT. 128 C X -0.0001 0.0002 0.0001 -0.0000 -0.0052 -0.0041  
Y -0.0002 -0.0006 0.0001 0.0003 -0.0036 -0.0035  
Z 0.0002 -0.0003 0.0001 -0.0002 0.0021 0.0008

AT. 129 C X 0.0020 -0.0094 -0.0096 -0.0002 0.0063 -0.0072  
Y 0.0025 -0.0108 -0.0113 -0.0005 0.0068 -0.0063  
Z -0.0016 0.0060 0.0049 -0.0004 -0.0120 0.0142

AT. 130 C X -0.0020 -0.0094 0.0096 -0.0002 -0.0063 -0.0072  
Y -0.0025 -0.0108 0.0113 -0.0005 -0.0068 -0.0063  
Z 0.0016 0.0060 -0.0049 -0.0004 0.0120 0.0142

AT. 131 H X 0.0075 -0.0320 -0.0323 -0.0006 0.0286 -0.0322  
Y -0.0109 0.0452 0.0437 0.0001 -0.0539 0.0571

Z -0.0002 0.0010 -0.0006 -0.0007 -0.0096 0.0090  
AT. 132 H X -0.0075 -0.0320 0.0323 -0.0006 -0.0286 -0.0322  
Y 0.0109 0.0452 -0.0437 0.0001 0.0539 0.0571  
Z 0.0002 0.0010 0.0006 -0.0007 0.0096 0.0090  
AT. 133 H X -0.0074 0.0310 0.0309 0.0008 -0.0354 0.0375  
Y 0.0045 -0.0183 -0.0189 -0.0006 0.0154 -0.0148  
Z 0.0060 -0.0256 -0.0267 -0.0010 0.0220 -0.0212  
AT. 134 H X 0.0074 0.0310 -0.0309 0.0008 0.0354 0.0375  
Y -0.0045 -0.0183 0.0189 -0.0006 -0.0154 -0.0148  
Z -0.0060 -0.0256 0.0267 -0.0010 -0.0220 -0.0212  
AT. 135 C X 0.0006 -0.0028 -0.0027 0.0001 -0.0049 0.0046  
Y -0.0000 0.0009 0.0003 0.0001 -0.0038 0.0022  
Z -0.0000 -0.0003 -0.0002 -0.0000 -0.0087 0.0071  
AT. 136 C X -0.0006 -0.0028 0.0027 0.0001 0.0049 0.0046  
Y 0.0000 0.0009 -0.0003 0.0001 0.0038 0.0022  
Z 0.0000 -0.0003 0.0002 -0.0000 0.0087 0.0071  
AT. 137 H X -0.0007 0.0069 0.0048 0.0002 0.0193 -0.0208  
Y -0.0001 0.0011 0.0008 0.0000 0.0112 -0.0088  
Z 0.0003 -0.0034 -0.0021 -0.0002 0.0070 -0.0018  
AT. 138 H X 0.0007 0.0069 -0.0048 0.0002 -0.0193 -0.0208  
Y 0.0001 0.0011 -0.0008 0.0000 -0.0112 -0.0088  
Z -0.0003 -0.0034 0.0021 -0.0002 -0.0070 -0.0018  
AT. 139 H X 0.0016 -0.0080 -0.0086 0.0002 -0.0406 0.0332  
Y -0.0001 -0.0023 -0.0008 -0.0000 -0.0112 0.0119  
Z -0.0013 0.0075 0.0079 -0.0001 0.0399 -0.0329  
AT. 140 H X -0.0016 -0.0080 0.0086 0.0002 0.0406 0.0332  
Y 0.0001 -0.0023 0.0008 -0.0000 0.0112 0.0119  
Z 0.0013 0.0075 -0.0079 -0.0001 -0.0399 -0.0329  
AT. 141 H X 0.0002 0.0013 0.0027 0.0002 0.0388 -0.0278  
Y 0.0006 -0.0028 -0.0015 -0.0001 0.0102 -0.0046  
Z -0.0009 0.0056 0.0041 0.0003 -0.0046 0.0001  
AT. 142 H X -0.0002 0.0013 -0.0027 0.0002 -0.0388 -0.0278

Y -0.0006 -0.0028 0.0015 -0.0001 -0.0102 -0.0046  
Z 0.0009 0.0056 -0.0041 0.0003 0.0046 0.0001  
AT. 143 C X 0.0001 0.0006 0.0002 0.0000 -0.0028 0.0034  
Y 0.0002 -0.0008 0.0003 0.0003 0.0001 -0.0004  
Z 0.0000 -0.0013 -0.0008 0.0000 -0.0077 0.0066  
AT. 144 C X -0.0001 0.0006 -0.0002 0.0000 0.0028 0.0034  
Y -0.0002 -0.0008 -0.0003 0.0003 -0.0001 -0.0004  
Z -0.0000 -0.0013 0.0008 0.0000 0.0077 0.0066  
AT. 145 H X 0.0009 -0.0118 -0.0066 0.0007 -0.0232 0.0168  
Y -0.0001 -0.0011 -0.0013 -0.0004 -0.0059 0.0045  
Z 0.0004 -0.0042 -0.0010 0.0009 -0.0070 0.0049  
AT. 146 H X -0.0009 -0.0118 0.0066 0.0007 0.0232 0.0168  
Y 0.0001 -0.0011 0.0013 -0.0004 0.0059 0.0045  
Z -0.0004 -0.0042 0.0010 0.0009 0.0070 0.0049  
AT. 147 H X 0.0008 0.0022 0.0020 0.0007 0.0151 -0.0107  
Y -0.0013 0.0066 0.0049 -0.0002 0.0006 0.0008  
Z 0.0002 0.0052 0.0043 0.0007 0.0190 -0.0137  
AT. 148 H X -0.0008 0.0022 -0.0020 0.0007 -0.0151 -0.0107  
Y 0.0013 0.0066 -0.0049 -0.0002 -0.0006 0.0008  
Z -0.0002 0.0052 -0.0043 0.0007 -0.0190 -0.0137  
AT. 149 H X -0.0013 0.0028 0.0003 -0.0011 -0.0232 0.0204  
Y -0.0005 0.0030 0.0014 -0.0006 -0.0024 0.0024  
Z -0.0004 0.0039 0.0010 -0.0010 -0.0017 0.0029  
AT. 150 H X 0.0013 0.0028 -0.0003 -0.0011 0.0232 0.0204  
Y 0.0005 0.0030 -0.0014 -0.0006 0.0024 0.0024  
Z 0.0004 0.0039 -0.0010 -0.0010 0.0017 0.0029  
AT. 151 C X 0.0006 -0.0050 -0.0048 -0.0007 0.0098 -0.0096  
Y -0.0050 0.0247 0.0245 0.0010 -0.0022 0.0008  
Z -0.0003 0.0049 0.0044 0.0006 0.0169 -0.0139  
AT. 152 C X -0.0006 -0.0050 0.0048 -0.0007 -0.0098 -0.0096  
Y 0.0050 0.0247 -0.0245 0.0010 0.0022 0.0008  
Z 0.0003 0.0049 -0.0044 0.0006 -0.0169 -0.0139



AT. 153 H X -0.0034 0.0134 0.0140 0.0002 0.0006 0.0015  
Y 0.0049 -0.0259 -0.0253 -0.0012 0.0005 0.0003  
Z 0.0173 -0.0844 -0.0837 -0.0031 0.0257 -0.0199

AT. 154 H X 0.0034 0.0134 -0.0140 0.0002 -0.0006 0.0015  
Y -0.0049 -0.0259 0.0253 -0.0012 -0.0005 0.0003  
Z -0.0173 -0.0844 0.0837 -0.0031 -0.0257 -0.0199

AT. 155 H X -0.0039 0.0166 0.0165 -0.0003 0.0248 -0.0268  
Y 0.0089 -0.0455 -0.0448 -0.0022 0.0117 -0.0114  
Z -0.0167 0.0871 0.0855 0.0041 0.0079 -0.0074

AT. 156 H X 0.0039 0.0166 -0.0165 -0.0003 -0.0248 -0.0268  
Y -0.0089 -0.0455 0.0448 -0.0022 -0.0117 -0.0114  
Z 0.0167 0.0871 -0.0855 0.0041 -0.0079 -0.0074

AT. 157 O X 0.0002 0.0001 0.0002 0.0007 -0.0004 -0.0000  
Y 0.0002 0.0001 0.0001 0.0002 -0.0000 -0.0000  
Z 0.0006 0.0001 0.0003 0.0005 -0.0001 -0.0000

AT. 158 O X -0.0002 0.0001 -0.0002 0.0007 0.0004 -0.0000  
Y -0.0002 0.0001 -0.0001 0.0002 0.0000 -0.0000  
Z -0.0006 0.0001 -0.0003 0.0005 0.0001 -0.0000

AT. 159 O X 0.0000 -0.0001 -0.0001 -0.0005 0.0003 -0.0000  
Y -0.0005 -0.0001 -0.0001 -0.0005 0.0003 0.0000  
Z 0.0000 0.0002 0.0001 -0.0002 -0.0000 0.0001

AT. 160 O X -0.0000 -0.0001 0.0001 -0.0005 -0.0003 -0.0000  
Y 0.0005 -0.0001 0.0001 -0.0005 -0.0003 0.0000  
Z -0.0000 0.0002 -0.0001 -0.0002 0.0000 0.0001

AT. 161 H X -0.0070 -0.0024 -0.0047 -0.0089 0.0044 -0.0006  
Y 0.0031 0.0010 0.0019 0.0038 -0.0013 0.0002  
Z -0.0124 -0.0035 -0.0075 -0.0156 0.0061 -0.0007

AT. 162 H X 0.0070 -0.0024 0.0047 -0.0089 -0.0044 -0.0006  
Y -0.0031 0.0010 -0.0019 0.0038 0.0013 0.0002  
Z 0.0124 -0.0035 0.0075 -0.0156 -0.0061 -0.0007

AT. 163 H X 0.0004 0.0003 0.0003 0.0003 -0.0004 -0.0001  
Y 0.0072 0.0017 0.0026 0.0088 -0.0050 -0.0008

Z 0.0012 0.0003 0.0004 0.0019 -0.0010 -0.0001  
 AT.164 H X -0.0004 0.0003 -0.0003 0.0003 0.0004 -0.0001  
 Y -0.0072 0.0017 -0.0026 0.0088 0.0050 -0.0008  
 Z -0.0012 0.0003 -0.0004 0.0019 0.0010 -0.0001  
 AT.165 O X 0.0001 0.0005 0.0003 0.0000 0.0001 -0.0001  
 Y -0.0002 -0.0001 0.0001 0.0001 0.0003 -0.0000  
 Z -0.0001 -0.0005 0.0002 0.0003 -0.0002 0.0001  
 AT.166 O X -0.0001 0.0005 -0.0003 0.0000 -0.0001 -0.0001  
 Y 0.0002 -0.0001 -0.0001 0.0001 -0.0003 -0.0000  
 Z 0.0001 -0.0005 -0.0002 0.0003 0.0002 0.0001  
 AT.167 H X -0.0018 -0.0023 -0.0003 -0.0001 0.0009 0.0007  
 Y 0.0039 0.0049 0.0008 0.0005 -0.0016 -0.0014  
 Z -0.0007 -0.0006 -0.0002 0.0002 0.0004 -0.0006  
 AT.168 H X 0.0018 -0.0023 0.0003 -0.0001 -0.0009 0.0007  
 Y -0.0039 0.0049 -0.0008 0.0005 0.0016 -0.0014  
 Z 0.0007 -0.0006 0.0002 0.0002 -0.0004 -0.0006  
 AT.169 O X -0.0002 -0.0005 0.0001 0.0001 0.0001 0.0002  
 Y -0.0000 0.0000 -0.0000 -0.0000 0.0001 0.0001  
 Z 0.0000 0.0003 0.0000 -0.0002 0.0001 -0.0000  
 AT.170 O X 0.0002 -0.0005 -0.0001 0.0001 -0.0001 0.0002  
 Y 0.0000 0.0000 0.0000 -0.0000 -0.0001 0.0001  
 Z -0.0000 0.0003 -0.0000 -0.0002 -0.0001 -0.0000  
 AT.171 H X 0.0061 0.0085 -0.0039 -0.0038 -0.0054 -0.0032  
 Y 0.0033 0.0043 -0.0022 -0.0021 -0.0028 -0.0014  
 Z 0.0009 0.0013 -0.0011 -0.0009 -0.0004 -0.0000  
 AT.172 H X -0.0061 0.0085 0.0039 -0.0038 0.0054 -0.0032  
 Y -0.0033 0.0043 0.0022 -0.0021 0.0028 -0.0014  
 Z -0.0009 0.0013 0.0011 -0.0009 0.0004 -0.0000  
  
 FREQ(CM\*\*-1) 942.08 943.05 943.93 944.46 944.57 944.68  
  
 AT. 11 X -0.0001 -0.0000 0.0001 -0.0000 -0.0001 -0.0000

Y -0.0000 -0.0000 0.0000 -0.0000 0.0000 0.0000  
Z -0.0000 0.0000 0.0000 -0.0000 0.0000 0.0000  
AT. 2 I X -0.0001 0.0000 -0.0001 -0.0000 0.0001 -0.0000  
Y -0.0000 0.0000 -0.0000 -0.0000 -0.0000 0.0000  
Z -0.0000 -0.0000 -0.0000 -0.0000 -0.0000 0.0000  
AT. 3 I X 0.0001 0.0000 -0.0001 0.0000 -0.0000 -0.0000  
Y 0.0001 0.0001 -0.0001 -0.0000 -0.0001 -0.0001  
Z -0.0000 -0.0000 0.0000 -0.0000 0.0000 0.0000  
AT. 4 I X 0.0001 -0.0000 0.0001 0.0000 0.0000 -0.0000  
Y 0.0001 -0.0001 0.0001 -0.0000 0.0001 -0.0001  
Z -0.0000 0.0000 -0.0000 -0.0000 -0.0000 0.0000  
AT. 5 O X -0.0024 -0.0008 0.0018 -0.0005 -0.0029 -0.0018  
Y 0.0009 0.0002 -0.0006 0.0004 0.0019 0.0015  
Z 0.0027 0.0009 -0.0022 0.0006 0.0035 0.0022  
AT. 6 O X -0.0024 0.0008 -0.0018 -0.0005 0.0029 -0.0018  
Y 0.0009 -0.0002 0.0006 0.0004 -0.0019 0.0015  
Z 0.0027 -0.0009 0.0022 0.0006 -0.0035 0.0022  
AT. 7 O X 0.0015 0.0005 -0.0004 0.0002 0.0008 0.0013  
Y -0.0014 -0.0007 0.0004 -0.0000 -0.0007 -0.0013  
Z 0.0017 0.0008 -0.0012 0.0001 -0.0009 -0.0007  
AT. 8 O X 0.0015 -0.0005 0.0004 0.0002 -0.0008 0.0013  
Y -0.0014 0.0007 -0.0004 -0.0000 0.0007 -0.0013  
Z 0.0017 -0.0008 0.0012 0.0001 0.0009 -0.0007  
AT. 9 N X -0.0002 -0.0000 0.0003 -0.0001 -0.0005 -0.0001  
Y 0.0007 -0.0001 -0.0002 0.0004 0.0017 0.0015  
Z -0.0045 -0.0017 0.0044 -0.0009 -0.0031 -0.0008  
AT. 10 N X -0.0002 0.0000 -0.0003 -0.0001 0.0005 -0.0001  
Y 0.0007 0.0001 0.0002 0.0004 -0.0017 0.0015  
Z -0.0045 0.0017 -0.0044 -0.0009 0.0031 -0.0008  
AT. 11 N X 0.0009 0.0004 -0.0003 0.0000 0.0010 0.0012  
Y 0.0019 0.0008 -0.0016 0.0001 -0.0014 -0.0012  
Z -0.0040 -0.0021 0.0030 -0.0002 0.0012 0.0008

AT. 12 N X 0.0009 -0.0004 0.0003 0.0000 -0.0010 0.0012  
Y 0.0019 -0.0008 0.0016 0.0001 0.0014 -0.0012  
Z -0.0040 0.0021 -0.0030 -0.0002 -0.0012 0.0008

AT. 13 C X -0.0010 -0.0003 0.0010 -0.0004 -0.0012 -0.0006  
Y 0.0043 0.0016 -0.0042 0.0007 0.0020 -0.0000  
Z -0.0008 -0.0004 0.0009 0.0000 0.0015 0.0015

AT. 14 C X -0.0010 0.0003 -0.0010 -0.0004 0.0012 -0.0006  
Y 0.0043 -0.0016 0.0042 0.0007 -0.0020 -0.0000  
Z -0.0008 0.0004 -0.0009 0.0000 -0.0015 0.0015

AT. 15 C X 0.0052 0.0019 -0.0048 0.0010 0.0030 0.0007  
Y -0.0052 -0.0019 0.0048 -0.0009 -0.0031 -0.0008  
Z 0.0023 0.0008 -0.0025 0.0005 0.0001 -0.0009

AT. 16 C X 0.0052 -0.0019 0.0048 0.0010 -0.0030 0.0007  
Y -0.0052 0.0019 -0.0048 -0.0009 0.0031 -0.0008  
Z 0.0023 -0.0008 0.0025 0.0005 -0.0001 -0.0009

AT. 17 H X 0.0049 0.0018 -0.0062 0.0005 -0.0037 -0.0056  
Y -0.0074 -0.0027 0.0060 -0.0012 -0.0077 -0.0041  
Z 0.0045 0.0017 -0.0042 0.0006 0.0033 0.0010

AT. 18 H X 0.0049 -0.0018 0.0062 0.0005 0.0037 -0.0056  
Y -0.0074 0.0027 -0.0060 -0.0012 0.0077 -0.0041  
Z 0.0045 -0.0017 0.0042 0.0006 -0.0033 0.0010

AT. 19 H X 0.0066 0.0022 -0.0052 0.0016 0.0099 0.0063  
Y -0.0027 -0.0008 0.0036 -0.0008 0.0024 0.0037  
Z 0.0039 0.0014 -0.0032 0.0008 0.0045 0.0027

AT. 20 H X 0.0066 -0.0022 0.0052 0.0016 -0.0099 0.0063  
Y -0.0027 0.0008 -0.0036 -0.0008 -0.0024 0.0037  
Z 0.0039 -0.0014 0.0032 0.0008 -0.0045 0.0027

AT. 21 C X 0.0014 0.0009 -0.0010 -0.0002 -0.0005 -0.0003  
Y -0.0021 -0.0007 0.0014 -0.0003 0.0009 0.0005  
Z -0.0034 -0.0016 0.0031 -0.0005 0.0019 0.0021

AT. 22 C X 0.0014 -0.0009 0.0010 -0.0002 0.0005 -0.0003  
Y -0.0021 0.0007 -0.0014 -0.0003 -0.0009 0.0005

Z -0.0034 0.0016 -0.0031 -0.0005 -0.0019 0.0021  
AT. 23 C X -0.0042 -0.0018 0.0030 -0.0004 0.0013 0.0012  
Y 0.0012 0.0004 -0.0001 0.0002 0.0004 0.0006  
Z 0.0043 0.0020 -0.0037 0.0003 -0.0018 -0.0015  
AT. 24 C X -0.0042 0.0018 -0.0030 -0.0004 -0.0013 0.0012  
Y 0.0012 -0.0004 0.0001 0.0002 -0.0004 0.0006  
Z 0.0043 -0.0020 0.0037 0.0003 0.0018 -0.0015  
AT. 25 H X -0.0080 -0.0051 0.0083 0.0003 0.0064 0.0066  
Y 0.0009 0.0002 0.0000 0.0002 0.0007 0.0010  
Z 0.0032 0.0013 0.0001 0.0006 0.0009 0.0016  
AT. 26 H X -0.0080 0.0051 -0.0083 0.0003 -0.0064 0.0066  
Y 0.0009 -0.0002 -0.0000 0.0002 -0.0007 0.0010  
Z 0.0032 -0.0013 -0.0001 0.0006 -0.0009 0.0016  
AT. 27 H X -0.0029 -0.0013 0.0000 -0.0001 -0.0024 -0.0036  
Y 0.0040 0.0022 -0.0064 0.0001 -0.0042 -0.0051  
Z 0.0056 0.0029 -0.0061 0.0002 -0.0033 -0.0033  
AT. 28 H X -0.0029 0.0013 -0.0000 -0.0001 0.0024 -0.0036  
Y 0.0040 -0.0022 0.0064 0.0001 0.0042 -0.0051  
Z 0.0056 -0.0029 0.0061 0.0002 0.0033 -0.0033  
AT. 29 C X -0.0095 -0.0026 0.0051 -0.0020 -0.0060 -0.0060  
Y -0.0039 0.0001 0.0023 -0.0017 -0.0060 -0.0038  
Z -0.0084 -0.0042 0.0129 -0.0007 0.0085 0.0142  
AT. 30 C X -0.0095 0.0026 -0.0051 -0.0020 0.0060 -0.0060  
Y -0.0039 -0.0001 -0.0023 -0.0017 0.0060 -0.0038  
Z -0.0084 0.0042 -0.0129 -0.0007 -0.0085 0.0142  
AT. 31 H X -0.0209 -0.0086 0.0210 -0.0030 0.0000 0.0073  
Y -0.0021 0.0050 -0.0137 -0.0039 -0.0324 -0.0389  
Z -0.0121 -0.0003 -0.0016 -0.0045 -0.0277 -0.0306  
AT. 32 H X -0.0209 0.0086 -0.0210 -0.0030 -0.0000 0.0073  
Y -0.0021 -0.0050 0.0137 -0.0039 0.0324 -0.0389  
Z -0.0121 0.0003 0.0016 -0.0045 0.0277 -0.0306  
AT. 33 H X -0.0065 -0.0034 0.0103 0.0000 0.0103 0.0144

Y -0.0069 -0.0075 0.0272 0.0015 0.0366 0.0519  
Z -0.0049 -0.0014 0.0055 -0.0007 0.0012 0.0040  
AT. 34 H X -0.0065 0.0034 -0.0103 0.0000 -0.0103 0.0144  
Y -0.0069 0.0075 -0.0272 0.0015 -0.0366 0.0519  
Z -0.0049 0.0014 -0.0055 -0.0007 -0.0012 0.0040  
AT. 35 C X -0.0045 -0.0022 0.0028 -0.0003 -0.0016 -0.0019  
Y 0.0064 0.0021 -0.0052 0.0012 0.0055 0.0030  
Z 0.0135 0.0046 -0.0109 0.0025 0.0037 0.0006  
AT. 36 C X -0.0045 0.0022 -0.0028 -0.0003 0.0016 -0.0019  
Y 0.0064 -0.0021 0.0052 0.0012 -0.0055 0.0030  
Z 0.0135 -0.0046 0.0109 0.0025 -0.0037 0.0006  
AT. 37 C X -0.0026 -0.0011 0.0024 -0.0003 -0.0069 -0.0043  
Y 0.0075 0.0029 -0.0057 0.0013 0.0009 -0.0002  
Z 0.0097 0.0041 -0.0154 0.0016 -0.0143 -0.0209  
AT. 38 C X -0.0026 0.0011 -0.0024 -0.0003 0.0069 -0.0043  
Y 0.0075 -0.0029 0.0057 0.0013 -0.0009 -0.0002  
Z 0.0097 -0.0041 0.0154 0.0016 0.0143 -0.0209  
AT. 39 H X -0.0334 -0.0142 0.0459 -0.0053 0.0320 0.0506  
Y -0.0224 -0.0099 0.0324 -0.0031 0.0276 0.0403  
Z 0.0019 0.0008 -0.0024 0.0002 0.0011 -0.0005  
AT. 40 H X -0.0334 0.0142 -0.0459 -0.0053 -0.0320 0.0506  
Y -0.0224 0.0099 -0.0324 -0.0031 -0.0276 0.0403  
Z 0.0019 -0.0008 0.0024 0.0002 -0.0011 -0.0005  
AT. 41 H X 0.0243 0.0103 -0.0352 0.0041 -0.0404 -0.0516  
Y 0.0124 0.0049 -0.0088 0.0019 0.0034 0.0022  
Z -0.0213 -0.0091 0.0254 -0.0032 0.0185 0.0263  
AT. 42 H X 0.0243 -0.0103 0.0352 0.0041 0.0404 -0.0516  
Y 0.0124 -0.0049 0.0088 0.0019 -0.0034 0.0022  
Z -0.0213 0.0091 -0.0254 -0.0032 -0.0185 0.0263  
AT. 43 C X 0.0047 0.0022 -0.0014 0.0006 0.0159 0.0138  
Y 0.0054 0.0034 -0.0054 -0.0001 -0.0068 -0.0062  
Z -0.0077 -0.0035 0.0118 -0.0008 0.0181 0.0204

AT. 44 C X 0.0047 -0.0022 0.0014 0.0006 -0.0159 0.0138  
Y 0.0054 -0.0034 0.0054 -0.0001 0.0068 -0.0062  
Z -0.0077 0.0035 -0.0118 -0.0008 -0.0181 0.0204

AT. 45 H X 0.0166 0.0076 -0.0200 0.0016 -0.0197 -0.0236  
Y -0.0015 0.0009 0.0170 -0.0010 0.0630 0.0646  
Z -0.0089 -0.0047 0.0027 -0.0006 -0.0245 -0.0221

AT. 46 H X 0.0166 -0.0076 0.0200 0.0016 0.0197 -0.0236  
Y -0.0015 -0.0009 -0.0170 -0.0010 -0.0630 0.0646  
Z -0.0089 0.0047 -0.0027 -0.0006 0.0245 -0.0221

AT. 47 H X 0.0066 0.0033 -0.0119 0.0002 -0.0238 -0.0257  
Y 0.0139 0.0072 -0.0304 0.0003 -0.0829 -0.0835  
Z -0.0008 -0.0008 -0.0004 0.0002 -0.0064 -0.0058

AT. 48 H X 0.0066 -0.0033 0.0119 0.0002 0.0238 -0.0257  
Y 0.0139 -0.0072 0.0304 0.0003 0.0829 -0.0835  
Z -0.0008 0.0008 0.0004 0.0002 0.0064 -0.0058

AT. 49 C X 0.0095 0.0036 -0.0073 0.0017 0.0099 0.0070  
Y -0.0082 -0.0041 0.0067 -0.0005 0.0012 0.0018  
Z 0.0094 0.0043 -0.0065 0.0010 0.0098 0.0079

AT. 50 C X 0.0095 -0.0036 0.0073 0.0017 -0.0099 0.0070  
Y -0.0082 0.0041 -0.0067 -0.0005 -0.0012 0.0018  
Z 0.0094 -0.0043 0.0065 0.0010 -0.0098 0.0079

AT. 51 C X 0.0025 0.0015 -0.0027 -0.0002 -0.0100 -0.0084  
Y -0.0157 -0.0068 0.0137 -0.0017 -0.0038 -0.0009  
Z 0.0029 0.0029 -0.0074 -0.0009 -0.0195 -0.0200

AT. 52 C X 0.0025 -0.0015 0.0027 -0.0002 0.0100 -0.0084  
Y -0.0157 0.0068 -0.0137 -0.0017 0.0038 -0.0009  
Z 0.0029 -0.0029 0.0074 -0.0009 0.0195 -0.0200

AT. 53 H X 0.0377 0.0193 -0.0419 0.0019 -0.0370 -0.0418  
Y 0.0297 0.0158 -0.0361 0.0012 -0.0383 -0.0436  
Z -0.0046 -0.0014 0.0021 -0.0010 -0.0127 -0.0115

AT. 54 H X 0.0377 -0.0193 0.0419 0.0019 0.0370 -0.0418  
Y 0.0297 -0.0158 0.0361 0.0012 0.0383 -0.0436

Z -0.0046 0.0014 -0.0021 -0.0010 0.0127 -0.0115  
AT. 55 H X -0.0419 -0.0206 0.0460 -0.0030 0.0222 0.0318  
Y -0.0146 -0.0053 0.0097 -0.0024 -0.0158 -0.0127  
Z -0.0268 -0.0107 0.0219 -0.0037 -0.0114 -0.0059  
AT. 56 H X -0.0419 0.0206 -0.0460 -0.0030 -0.0222 0.0318  
Y -0.0146 0.0053 -0.0097 -0.0024 0.0158 -0.0127  
Z -0.0268 0.0107 -0.0219 -0.0037 0.0114 -0.0059  
AT. 57 C X 0.0012 0.0005 -0.0005 0.0001 0.0050 0.0040  
Y 0.0010 -0.0005 -0.0015 0.0009 0.0016 -0.0005  
Z 0.0129 0.0052 -0.0102 0.0020 0.0071 0.0041  
AT. 58 C X 0.0012 -0.0005 0.0005 0.0001 -0.0050 0.0040  
Y 0.0010 0.0005 0.0015 0.0009 -0.0016 -0.0005  
Z 0.0129 -0.0052 0.0102 0.0020 -0.0071 0.0041  
AT. 59 H X 0.0246 0.0126 -0.0177 0.0017 -0.0021 0.0002  
Y -0.0256 -0.0112 0.0190 -0.0033 -0.0094 -0.0070  
Z -0.0101 -0.0021 0.0083 -0.0031 -0.0142 -0.0080  
AT. 60 H X 0.0246 -0.0126 0.0177 0.0017 0.0021 0.0002  
Y -0.0256 0.0112 -0.0190 -0.0033 0.0094 -0.0070  
Z -0.0101 0.0021 -0.0083 -0.0031 0.0142 -0.0080  
AT. 61 H X -0.0438 -0.0154 0.0355 -0.0081 -0.0214 -0.0085  
Y 0.0307 0.0123 -0.0239 0.0046 0.0049 0.0017  
Z -0.0378 -0.0139 0.0296 -0.0063 -0.0155 -0.0071  
AT. 62 H X -0.0438 0.0154 -0.0355 -0.0081 0.0214 -0.0085  
Y 0.0307 -0.0123 0.0239 0.0046 -0.0049 0.0017  
Z -0.0378 0.0139 -0.0296 -0.0063 0.0155 -0.0071  
AT. 63 H X 0.0453 0.0168 -0.0361 0.0076 0.0321 0.0172  
Y -0.0304 -0.0097 0.0232 -0.0060 -0.0311 -0.0185  
Z -0.0018 -0.0023 0.0022 0.0007 0.0093 0.0070  
AT. 64 H X 0.0453 -0.0168 0.0361 0.0076 -0.0321 0.0172  
Y -0.0304 0.0097 -0.0232 -0.0060 0.0311 -0.0185  
Z -0.0018 0.0023 -0.0022 0.0007 -0.0093 0.0070  
AT. 65 C X 0.0048 0.0020 -0.0031 0.0007 0.0089 0.0073



Y -0.0038 -0.0021 0.0023 0.0000 0.0003 -0.0003  
Z 0.0137 0.0054 -0.0109 0.0021 0.0069 0.0039  
AT. 66 C X 0.0048 -0.0020 0.0031 0.0007 -0.0089 0.0073  
Y -0.0038 0.0021 -0.0023 0.0000 -0.0003 -0.0003  
Z 0.0137 -0.0054 0.0109 0.0021 -0.0069 0.0039  
AT. 67 H X -0.0380 -0.0143 0.0311 -0.0069 -0.0392 -0.0255  
Y 0.0302 0.0122 -0.0230 0.0045 0.0223 0.0154  
Z 0.0178 0.0057 -0.0159 0.0043 0.0263 0.0166  
AT. 68 H X -0.0380 0.0143 -0.0311 -0.0069 0.0392 -0.0255  
Y 0.0302 -0.0122 0.0230 0.0045 -0.0223 0.0154  
Z 0.0178 -0.0057 0.0159 0.0043 -0.0263 0.0166  
AT. 69 H X 0.0327 0.0148 -0.0242 0.0036 0.0185 0.0135  
Y -0.0161 -0.0065 0.0127 -0.0027 -0.0218 -0.0158  
Z -0.0612 -0.0272 0.0477 -0.0080 -0.0461 -0.0321  
AT. 70 H X 0.0327 -0.0148 0.0242 0.0036 -0.0185 0.0135  
Y -0.0161 0.0065 -0.0127 -0.0027 0.0218 -0.0158  
Z -0.0612 0.0272 -0.0477 -0.0080 0.0461 -0.0321  
AT. 71 H X -0.0434 -0.0188 0.0334 -0.0053 -0.0150 -0.0085  
Y 0.0215 0.0102 -0.0162 0.0019 -0.0001 -0.0010  
Z 0.0118 0.0067 -0.0087 0.0002 -0.0120 -0.0094  
AT. 72 H X -0.0434 0.0188 -0.0334 -0.0053 0.0150 -0.0085  
Y 0.0215 -0.0102 0.0162 0.0019 0.0001 -0.0010  
Z 0.0118 -0.0067 0.0087 0.0002 0.0120 -0.0094  
AT. 73 C X -0.0025 -0.0029 0.0010 0.0009 -0.0066 -0.0066  
Y 0.0090 0.0034 -0.0056 0.0012 0.0113 0.0097  
Z -0.0276 -0.0114 0.0223 -0.0041 -0.0131 -0.0068  
AT. 74 C X -0.0025 0.0029 -0.0010 0.0009 0.0066 -0.0066  
Y 0.0090 -0.0034 0.0056 0.0012 -0.0113 0.0097  
Z -0.0276 0.0114 -0.0223 -0.0041 0.0131 -0.0068  
AT. 75 H X -0.0121 -0.0056 0.0110 -0.0009 -0.0043 -0.0025  
Y 0.0058 0.0049 -0.0074 -0.0005 0.0018 -0.0010  
Z -0.0394 -0.0114 0.0273 -0.0079 -0.0249 -0.0187

AT. 76 H X -0.0121 0.0056 -0.0110 -0.0009 0.0043 -0.0025  
Y 0.0058 -0.0049 0.0074 -0.0005 -0.0018 -0.0010  
Z -0.0394 0.0114 -0.0273 -0.0079 0.0249 -0.0187

AT. 77 H X -0.0044 -0.0029 -0.0019 0.0003 -0.0234 -0.0243  
Y -0.0040 0.0011 0.0057 -0.0021 0.0119 0.0123  
Z -0.0145 -0.0094 0.0148 -0.0006 0.0016 0.0068

AT. 78 H X -0.0044 0.0029 0.0019 0.0003 0.0234 -0.0243  
Y -0.0040 -0.0011 -0.0057 -0.0021 -0.0119 0.0123  
Z -0.0145 0.0094 -0.0148 -0.0006 -0.0016 0.0068

AT. 79 I X -0.0000 -0.0001 -0.0001 0.0001 0.0001 -0.0000  
Y 0.0000 0.0000 0.0000 -0.0000 -0.0000 0.0000  
Z -0.0000 -0.0000 -0.0000 0.0000 -0.0000 -0.0000

AT. 80 I X -0.0000 0.0001 0.0001 0.0001 -0.0001 -0.0000  
Y 0.0000 -0.0000 -0.0000 -0.0000 0.0000 0.0000  
Z -0.0000 0.0000 0.0000 0.0000 0.0000 -0.0000

AT. 81 I X -0.0000 -0.0000 -0.0000 0.0000 0.0000 0.0000  
Y -0.0000 0.0000 0.0000 -0.0000 0.0000 0.0000  
Z 0.0000 -0.0000 0.0000 0.0000 0.0000 0.0000

AT. 82 I X -0.0000 0.0000 0.0000 0.0000 -0.0000 0.0000  
Y -0.0000 -0.0000 -0.0000 -0.0000 -0.0000 0.0000  
Z 0.0000 0.0000 -0.0000 0.0000 -0.0000 0.0000

AT. 83 O X -0.0017 -0.0045 -0.0012 0.0041 -0.0004 -0.0003  
Y -0.0002 -0.0007 -0.0004 0.0007 0.0002 0.0000  
Z -0.0010 -0.0032 -0.0011 0.0032 -0.0001 -0.0002

AT. 84 O X -0.0017 0.0045 0.0012 0.0041 0.0004 -0.0003  
Y -0.0002 0.0007 0.0004 0.0007 -0.0002 0.0000  
Z -0.0010 0.0032 0.0011 0.0032 0.0001 -0.0002

AT. 85 O X -0.0001 0.0003 0.0001 -0.0005 -0.0001 -0.0000  
Y -0.0001 0.0001 0.0000 -0.0002 -0.0001 -0.0001  
Z 0.0001 0.0008 0.0004 -0.0007 -0.0001 0.0000

AT. 86 O X -0.0001 -0.0003 -0.0001 -0.0005 0.0001 -0.0000  
Y -0.0001 -0.0001 -0.0000 -0.0002 0.0001 -0.0001

Z 0.0001 -0.0008 -0.0004 -0.0007 0.0001 0.0000  
AT. 87 N X -0.0003 -0.0007 0.0002 0.0006 -0.0000 0.0000  
Y -0.0001 -0.0022 -0.0012 0.0026 0.0004 0.0001  
Z 0.0010 0.0042 0.0018 -0.0048 -0.0000 0.0003  
AT. 88 N X -0.0003 0.0007 -0.0002 0.0006 0.0000 0.0000  
Y -0.0001 0.0022 0.0012 0.0026 -0.0004 0.0001  
Z 0.0010 -0.0042 -0.0018 -0.0048 0.0000 0.0003  
AT. 89 N X 0.0000 -0.0001 -0.0002 0.0000 0.0002 0.0000  
Y -0.0000 0.0013 0.0008 -0.0011 -0.0003 -0.0001  
Z -0.0002 -0.0010 -0.0006 0.0006 0.0002 0.0001  
AT. 90 N X 0.0000 0.0001 0.0002 0.0000 -0.0002 0.0000  
Y -0.0000 -0.0013 -0.0008 -0.0011 0.0003 -0.0001  
Z -0.0002 0.0010 0.0006 0.0006 -0.0002 0.0001  
AT. 91 C X -0.0009 -0.0028 -0.0009 0.0028 -0.0000 -0.0002  
Y -0.0018 -0.0027 0.0007 0.0018 -0.0011 -0.0004  
Z 0.0003 -0.0004 -0.0007 0.0003 0.0004 0.0001  
AT. 92 C X -0.0009 0.0028 0.0009 0.0028 0.0000 -0.0002  
Y -0.0018 0.0027 -0.0007 0.0018 0.0011 -0.0004  
Z 0.0003 0.0004 0.0007 0.0003 -0.0004 0.0001  
AT. 93 C X 0.0019 0.0055 0.0023 -0.0058 0.0000 0.0005  
Y 0.0016 0.0029 -0.0002 -0.0022 0.0007 0.0003  
Z 0.0001 -0.0017 -0.0018 0.0029 0.0006 -0.0001  
AT. 94 C X 0.0019 -0.0055 -0.0023 -0.0058 -0.0000 0.0005  
Y 0.0016 -0.0029 0.0002 -0.0022 -0.0007 0.0003  
Z 0.0001 0.0017 0.0018 0.0029 -0.0006 -0.0001  
AT. 95 H X 0.0050 0.0027 -0.0055 0.0002 0.0034 0.0006  
Y 0.0029 0.0074 0.0016 -0.0058 0.0010 0.0006  
Z -0.0052 -0.0063 0.0030 0.0027 -0.0031 -0.0007  
AT. 96 H X 0.0050 -0.0027 0.0055 0.0002 -0.0034 0.0006  
Y 0.0029 -0.0074 -0.0016 -0.0058 -0.0010 0.0006  
Z -0.0052 0.0063 -0.0030 0.0027 0.0031 -0.0007  
AT. 97 H X 0.0017 0.0088 0.0065 -0.0114 -0.0021 0.0005

Y -0.0044 -0.0055 0.0025 0.0012 -0.0024 -0.0006  
Z -0.0014 -0.0050 -0.0024 0.0057 0.0004 -0.0004  
AT. 98 H X 0.0017 -0.0088 -0.0065 -0.0114 0.0021 0.0005  
Y -0.0044 0.0055 -0.0025 0.0012 0.0024 -0.0006  
Z -0.0014 0.0050 0.0024 0.0057 -0.0004 -0.0004  
AT. 99 C X -0.0001 -0.0005 -0.0003 0.0003 -0.0000 -0.0000  
Y -0.0002 -0.0012 -0.0004 0.0009 0.0003 0.0003  
Z 0.0001 -0.0013 -0.0009 0.0008 0.0003 0.0001  
AT. 100 C X -0.0001 0.0005 0.0003 0.0003 0.0000 -0.0000  
Y -0.0002 0.0012 0.0004 0.0009 -0.0003 0.0003  
Z 0.0001 0.0013 0.0009 0.0008 -0.0003 0.0001  
AT. 101 C X 0.0002 0.0015 0.0008 -0.0009 -0.0000 0.0000  
Y 0.0001 -0.0002 -0.0002 0.0003 0.0000 -0.0001  
Z 0.0000 0.0016 0.0009 -0.0012 -0.0004 -0.0002  
AT. 102 C X 0.0002 -0.0015 -0.0008 -0.0009 0.0000 0.0000  
Y 0.0001 0.0002 0.0002 0.0003 -0.0000 -0.0001  
Z 0.0000 -0.0016 -0.0009 -0.0012 0.0004 -0.0002  
AT. 103 H X -0.0005 0.0038 0.0025 -0.0032 -0.0018 -0.0006  
Y 0.0004 -0.0011 -0.0008 0.0012 0.0006 0.0001  
Z 0.0010 -0.0002 -0.0002 0.0006 0.0005 -0.0000  
AT. 104 H X -0.0005 -0.0038 -0.0025 -0.0032 0.0018 -0.0006  
Y 0.0004 0.0011 0.0008 0.0012 -0.0006 0.0001  
Z 0.0010 0.0002 0.0002 0.0006 -0.0005 -0.0000  
AT. 105 H X 0.0005 0.0001 -0.0003 0.0003 0.0001 -0.0003  
Y -0.0010 0.0025 0.0015 -0.0019 -0.0006 0.0000  
Z -0.0003 0.0023 0.0013 -0.0017 -0.0006 -0.0002  
AT. 106 H X 0.0005 -0.0001 0.0003 0.0003 -0.0001 -0.0003  
Y -0.0010 -0.0025 -0.0015 -0.0019 0.0006 0.0000  
Z -0.0003 -0.0023 -0.0013 -0.0017 0.0006 -0.0002  
AT. 107 C X -0.0006 -0.0056 -0.0032 0.0073 0.0015 0.0002  
Y 0.0023 0.0116 0.0047 -0.0130 -0.0013 0.0001  
Z 0.0003 -0.0032 0.0006 0.0008 -0.0001 0.0008

AT.108 C X -0.0006 0.0056 0.0032 0.0073 -0.0015 0.0002  
Y 0.0023 -0.0116 -0.0047 -0.0130 0.0013 0.0001  
Z 0.0003 0.0032 -0.0006 0.0008 0.0001 0.0008

AT.109 H X -0.0003 0.0091 0.0006 -0.0055 -0.0006 -0.0017  
Y 0.0047 0.0331 0.0127 -0.0348 -0.0039 -0.0008  
Z 0.0043 0.0296 0.0131 -0.0330 -0.0039 -0.0002

AT.110 H X -0.0003 -0.0091 -0.0006 -0.0055 0.0006 -0.0017  
Y 0.0047 -0.0331 -0.0127 -0.0348 0.0039 -0.0008  
Z 0.0043 -0.0296 -0.0131 -0.0330 0.0039 -0.0002

AT.111 H X -0.0007 -0.0035 -0.0026 0.0052 0.0016 0.0002  
Y -0.0019 -0.0284 -0.0091 0.0265 0.0034 0.0021  
Z 0.0013 0.0035 0.0030 -0.0057 -0.0012 0.0004

AT.112 H X -0.0007 0.0035 0.0026 0.0052 -0.0016 0.0002  
Y -0.0019 0.0284 0.0091 0.0265 -0.0034 0.0021  
Z 0.0013 -0.0035 -0.0030 -0.0057 0.0012 0.0004

AT.113 C X -0.0007 -0.0048 -0.0026 0.0061 0.0006 -0.0002  
Y -0.0014 -0.0062 -0.0028 0.0072 0.0004 -0.0004  
Z -0.0020 -0.0083 -0.0037 0.0104 0.0009 -0.0004

AT.114 C X -0.0007 0.0048 0.0026 0.0061 -0.0006 -0.0002  
Y -0.0014 0.0062 0.0028 0.0072 -0.0004 -0.0004  
Z -0.0020 0.0083 0.0037 0.0104 -0.0009 -0.0004

AT.115 C X -0.0016 -0.0063 -0.0032 0.0073 0.0005 -0.0004  
Y -0.0003 -0.0015 -0.0013 0.0025 0.0011 0.0002  
Z -0.0007 0.0068 0.0019 -0.0045 -0.0002 -0.0008

AT.116 C X -0.0016 0.0063 0.0032 0.0073 -0.0005 -0.0004  
Y -0.0003 0.0015 0.0013 0.0025 -0.0011 0.0002  
Z -0.0007 -0.0068 -0.0019 -0.0045 0.0002 -0.0008

AT.117 H X -0.0026 0.0048 -0.0010 0.0006 0.0013 -0.0015  
Y 0.0023 -0.0147 -0.0035 0.0079 0.0004 0.0023  
Z -0.0002 -0.0021 -0.0001 0.0018 -0.0008 -0.0002

AT.118 H X -0.0026 -0.0048 0.0010 0.0006 -0.0013 -0.0015  
Y 0.0023 0.0147 0.0035 0.0079 -0.0004 0.0023

Z -0.0002 0.0021 0.0001 0.0018 0.0008 -0.0002  
AT.119 H X 0.0000 -0.0208 -0.0061 0.0156 -0.0005 0.0011  
Y -0.0010 -0.0014 -0.0021 0.0044 0.0015 -0.0004  
Z 0.0009 -0.0019 0.0008 -0.0012 -0.0011 0.0007  
AT.120 H X 0.0000 0.0208 0.0061 0.0156 0.0005 0.0011  
Y -0.0010 0.0014 0.0021 0.0044 -0.0015 -0.0004  
Z 0.0009 0.0019 -0.0008 -0.0012 0.0011 0.0007  
AT.121 C X 0.0018 0.0134 0.0062 -0.0138 -0.0009 0.0003  
Y 0.0007 0.0023 0.0008 -0.0015 -0.0004 -0.0001  
Z -0.0008 -0.0152 -0.0058 0.0134 0.0006 0.0003  
AT.122 C X 0.0018 -0.0134 -0.0062 -0.0138 0.0009 0.0003  
Y 0.0007 -0.0023 -0.0008 -0.0015 0.0004 -0.0001  
Z -0.0008 0.0152 0.0058 0.0134 -0.0006 0.0003  
AT.123 H X -0.0006 -0.0237 -0.0085 0.0197 0.0007 0.0009  
Y -0.0021 -0.0364 -0.0151 0.0352 0.0014 -0.0000  
Z 0.0016 0.0183 0.0080 -0.0184 -0.0009 0.0003  
AT.124 H X -0.0006 0.0237 0.0085 0.0197 -0.0007 0.0009  
Y -0.0021 0.0364 0.0151 0.0352 -0.0014 -0.0000  
Z 0.0016 -0.0183 -0.0080 -0.0184 0.0009 0.0003  
AT.125 H X 0.0009 0.0045 0.0022 -0.0051 -0.0011 -0.0004  
Y 0.0052 0.0638 0.0259 -0.0590 -0.0026 0.0000  
Z 0.0003 0.0048 0.0019 -0.0048 -0.0007 -0.0005  
AT.126 H X 0.0009 -0.0045 -0.0022 -0.0051 0.0011 -0.0004  
Y 0.0052 -0.0638 -0.0259 -0.0590 0.0026 0.0000  
Z 0.0003 -0.0048 -0.0019 -0.0048 0.0007 -0.0005  
AT.127 C X 0.0014 0.0085 0.0044 -0.0102 -0.0008 0.0004  
Y -0.0005 -0.0044 -0.0022 0.0038 0.0003 -0.0001  
Z -0.0011 -0.0091 -0.0047 0.0108 0.0006 -0.0004  
AT.128 C X 0.0014 -0.0085 -0.0044 -0.0102 0.0008 0.0004  
Y -0.0005 0.0044 0.0022 0.0038 -0.0003 -0.0001  
Z -0.0011 0.0091 0.0047 0.0108 -0.0006 -0.0004  
AT.129 C X 0.0002 -0.0035 -0.0013 0.0023 -0.0003 0.0000

Y 0.0014 0.0094 0.0060 -0.0122 -0.0008 0.0008  
Z 0.0022 0.0172 0.0068 -0.0159 -0.0011 -0.0002  
AT. 130 C X 0.0002 0.0035 0.0013 0.0023 0.0003 0.0000  
Y 0.0014 -0.0094 -0.0060 -0.0122 0.0008 0.0008  
Z 0.0022 -0.0172 -0.0068 -0.0159 0.0011 -0.0002  
AT. 131 H X -0.0003 -0.0126 -0.0018 0.0066 -0.0000 0.0013  
Y 0.0025 0.0322 0.0097 -0.0233 -0.0021 -0.0022  
Z 0.0020 0.0148 0.0077 -0.0146 -0.0014 0.0003  
AT. 132 H X -0.0003 0.0126 0.0018 0.0066 0.0000 0.0013  
Y 0.0025 -0.0322 -0.0097 -0.0233 0.0021 -0.0022  
Z 0.0020 -0.0148 -0.0077 -0.0146 0.0014 0.0003  
AT. 133 H X 0.0012 0.0156 0.0026 -0.0090 -0.0012 -0.0018  
Y 0.0023 0.0128 0.0087 -0.0177 -0.0012 0.0015  
Z 0.0031 0.0130 0.0090 -0.0187 -0.0014 0.0017  
AT. 134 H X 0.0012 -0.0156 -0.0026 -0.0090 0.0012 -0.0018  
Y 0.0023 -0.0128 -0.0087 -0.0177 0.0012 0.0015  
Z 0.0031 -0.0130 -0.0090 -0.0187 0.0014 0.0017  
AT. 135 C X -0.0004 -0.0002 0.0002 0.0007 0.0002 0.0000  
Y -0.0013 -0.0049 -0.0019 0.0055 0.0002 -0.0003  
Z -0.0020 -0.0108 -0.0052 0.0132 0.0011 -0.0004  
AT. 136 C X -0.0004 0.0002 -0.0002 0.0007 -0.0002 0.0000  
Y -0.0013 0.0049 0.0019 0.0055 -0.0002 -0.0003  
Z -0.0020 0.0108 0.0052 0.0132 -0.0011 -0.0004  
AT. 137 H X 0.0009 0.0098 0.0065 -0.0150 -0.0024 0.0002  
Y 0.0025 0.0142 0.0066 -0.0172 -0.0014 0.0005  
Z 0.0037 0.0165 0.0064 -0.0182 -0.0007 0.0008  
AT. 138 H X 0.0009 -0.0098 -0.0065 -0.0150 0.0024 0.0002  
Y 0.0025 -0.0142 -0.0066 -0.0172 0.0014 0.0005  
Z 0.0037 -0.0165 -0.0064 -0.0182 0.0007 0.0008  
AT. 139 H X -0.0078 -0.0364 -0.0163 0.0449 0.0036 -0.0015  
Y -0.0006 -0.0034 -0.0021 0.0058 0.0009 -0.0001  
Z 0.0076 0.0361 0.0165 -0.0446 -0.0036 0.0015

AT. 140 H X -0.0078 0.0364 0.0163 0.0449 -0.0036 -0.0015  
Y -0.0006 0.0034 0.0021 0.0058 -0.0009 -0.0001  
Z 0.0076 -0.0361 -0.0165 -0.0446 0.0036 0.0015

AT. 141 H X 0.0106 0.0519 0.0236 -0.0620 -0.0040 0.0026  
Y 0.0046 0.0225 0.0097 -0.0255 -0.0013 0.0011  
Z -0.0035 -0.0172 -0.0073 0.0190 0.0009 -0.0007

AT. 142 H X 0.0106 -0.0519 -0.0236 -0.0620 0.0040 0.0026  
Y 0.0046 -0.0225 -0.0097 -0.0255 0.0013 0.0011  
Z -0.0035 0.0172 0.0073 0.0190 -0.0009 -0.0007

AT. 143 C X 0.0000 0.0041 0.0023 -0.0038 -0.0001 0.0001  
Y -0.0008 -0.0047 -0.0023 0.0043 0.0003 -0.0002  
Z -0.0017 -0.0088 -0.0045 0.0109 0.0009 -0.0004

AT. 144 C X 0.0000 -0.0041 -0.0023 -0.0038 0.0001 0.0001  
Y -0.0008 0.0047 0.0023 0.0043 -0.0003 -0.0002  
Z -0.0017 0.0088 0.0045 0.0109 -0.0009 -0.0004

AT. 145 H X -0.0081 -0.0512 -0.0267 0.0567 0.0041 -0.0023  
Y -0.0011 -0.0070 -0.0034 0.0090 0.0007 -0.0003  
Z -0.0036 -0.0215 -0.0114 0.0226 0.0016 -0.0010

AT. 146 H X -0.0081 0.0512 0.0267 0.0567 -0.0041 -0.0023  
Y -0.0011 0.0070 0.0034 0.0090 -0.0007 -0.0003  
Z -0.0036 0.0215 0.0114 0.0226 -0.0016 -0.0010

AT. 147 H X 0.0036 0.0260 0.0136 -0.0321 -0.0021 0.0012  
Y 0.0018 0.0148 0.0076 -0.0144 -0.0010 0.0006  
Z 0.0049 0.0340 0.0176 -0.0410 -0.0027 0.0016

AT. 148 H X 0.0036 -0.0260 -0.0136 -0.0321 0.0021 0.0012  
Y 0.0018 -0.0148 -0.0076 -0.0144 0.0010 0.0006  
Z 0.0049 -0.0340 -0.0176 -0.0410 0.0027 0.0016

AT. 149 H X -0.0022 -0.0092 -0.0046 0.0159 0.0015 -0.0005  
Y 0.0009 0.0063 0.0035 -0.0057 -0.0002 0.0003  
Z 0.0022 0.0167 0.0091 -0.0164 -0.0009 0.0006

AT. 150 H X -0.0022 0.0092 0.0046 0.0159 -0.0015 -0.0005  
Y 0.0009 -0.0063 -0.0035 -0.0057 0.0002 0.0003



Z 0.0022 -0.0167 -0.0091 -0.0164 0.0009 0.0006  
AT. 151 C X 0.0012 0.0004 -0.0004 -0.0014 -0.0005 -0.0001  
Y -0.0014 -0.0095 -0.0050 0.0111 0.0008 -0.0004  
Z 0.0036 0.0184 0.0090 -0.0231 -0.0017 0.0010  
AT. 152 C X 0.0012 -0.0004 0.0004 -0.0014 0.0005 -0.0001  
Y -0.0014 0.0095 0.0050 0.0111 -0.0008 -0.0004  
Z 0.0036 -0.0184 -0.0090 -0.0231 0.0017 0.0010  
AT. 153 H X 0.0017 0.0044 -0.0010 -0.0031 -0.0006 -0.0007  
Y 0.0006 0.0022 0.0004 -0.0025 -0.0004 -0.0002  
Z 0.0068 0.0365 0.0184 -0.0454 -0.0037 0.0016  
AT. 154 H X 0.0017 -0.0044 0.0010 -0.0031 0.0006 -0.0007  
Y 0.0006 -0.0022 -0.0004 -0.0025 0.0004 -0.0002  
Z 0.0068 -0.0365 -0.0184 -0.0454 0.0037 0.0016  
AT. 155 H X 0.0004 -0.0106 -0.0044 0.0092 -0.0000 0.0003  
Y 0.0015 0.0048 0.0030 -0.0077 -0.0010 0.0003  
Z 0.0002 -0.0007 -0.0010 0.0008 0.0004 0.0004  
AT. 156 H X 0.0004 0.0106 0.0044 0.0092 0.0000 0.0003  
Y 0.0015 -0.0048 -0.0030 -0.0077 0.0010 0.0003  
Z 0.0002 0.0007 0.0010 0.0008 -0.0004 0.0004  
AT. 157 O X 0.0001 -0.0002 0.0002 -0.0003 0.0002 0.0003  
Y 0.0000 0.0000 0.0001 -0.0002 -0.0001 -0.0001  
Z -0.0002 -0.0001 0.0003 -0.0000 0.0001 0.0004  
AT. 158 O X 0.0001 0.0002 -0.0002 -0.0003 -0.0002 0.0003  
Y 0.0000 -0.0000 -0.0001 -0.0002 0.0001 -0.0001  
Z -0.0002 0.0001 -0.0003 -0.0000 -0.0001 0.0004  
AT. 159 O X -0.0001 0.0002 -0.0000 0.0003 -0.0001 -0.0001  
Y -0.0000 0.0002 -0.0001 0.0005 -0.0002 -0.0002  
Z -0.0000 0.0000 -0.0001 0.0001 -0.0000 -0.0001  
AT. 160 O X -0.0001 -0.0002 0.0000 0.0003 0.0001 -0.0001  
Y -0.0000 -0.0002 0.0001 0.0005 0.0002 -0.0002  
Z -0.0000 -0.0000 0.0001 0.0001 0.0000 -0.0001  
AT. 161 H X 0.0011 0.0015 -0.0048 0.0023 -0.0021 -0.0046

Y -0.0008 -0.0009 0.0021 -0.0008 0.0007 0.0018  
Z 0.0024 0.0031 -0.0084 0.0036 -0.0033 -0.0077  
AT.162 H X 0.0011 -0.0015 0.0048 0.0023 0.0021 -0.0046  
Y -0.0008 0.0009 -0.0021 -0.0008 -0.0007 0.0018  
Z 0.0024 -0.0031 0.0084 0.0036 0.0033 -0.0077  
AT.163 H X -0.0003 0.0002 0.0002 -0.0001 -0.0001 0.0003  
Y -0.0009 -0.0049 0.0019 -0.0073 0.0030 0.0024  
Z -0.0002 -0.0011 0.0004 -0.0017 0.0007 0.0003  
AT.164 H X -0.0003 -0.0002 -0.0002 -0.0001 0.0001 0.0003  
Y -0.0009 0.0049 -0.0019 -0.0073 -0.0030 0.0024  
Z -0.0002 0.0011 -0.0004 -0.0017 -0.0007 0.0003  
AT.165 O X 0.0003 0.0002 -0.0000 -0.0001 -0.0001 0.0000  
Y -0.0001 0.0002 0.0002 -0.0002 0.0002 0.0001  
Z -0.0001 -0.0001 -0.0000 0.0002 -0.0000 0.0002  
AT.166 O X 0.0003 -0.0002 0.0000 -0.0001 0.0001 0.0000  
Y -0.0001 -0.0002 -0.0002 -0.0002 -0.0002 0.0001  
Z -0.0001 0.0001 0.0000 0.0002 0.0000 0.0002  
AT.167 H X -0.0018 0.0006 0.0012 -0.0012 0.0013 0.0006  
Y 0.0043 -0.0008 -0.0027 0.0021 -0.0028 -0.0009  
Z -0.0008 0.0001 0.0003 -0.0002 0.0010 -0.0000  
AT.168 H X -0.0018 -0.0006 -0.0012 -0.0012 -0.0013 0.0006  
Y 0.0043 0.0008 0.0027 0.0021 0.0028 -0.0009  
Z -0.0008 -0.0001 -0.0003 -0.0002 -0.0010 -0.0000  
AT.169 O X -0.0002 0.0000 -0.0000 -0.0000 0.0003 -0.0001  
Y -0.0001 0.0000 -0.0000 -0.0001 0.0001 -0.0000  
Z -0.0000 0.0003 -0.0001 -0.0002 0.0001 -0.0003  
AT.170 O X -0.0002 -0.0000 0.0000 -0.0000 -0.0003 -0.0001  
Y -0.0001 -0.0000 0.0000 -0.0001 -0.0001 -0.0000  
Z -0.0000 -0.0003 0.0001 -0.0002 -0.0001 -0.0003  
AT.171 H X 0.0036 -0.0013 0.0023 0.0015 -0.0045 0.0008  
Y 0.0020 -0.0008 0.0015 0.0007 -0.0024 0.0005  
Z 0.0011 -0.0004 0.0010 -0.0003 -0.0007 0.0003

AT. 172 H X 0.0036 0.0013 -0.0023 0.0015 0.0045 0.0008  
Y 0.0020 0.0008 -0.0015 0.0007 0.0024 0.0005  
Z 0.0011 0.0004 -0.0010 -0.0003 0.0007 0.0003

FREQ(CM\*\*-1) 952.15 953.20 953.61 954.39 954.91 955.28

AT. 1 I X 0.0001 -0.0000 -0.0000 0.0001 0.0000 0.0000  
Y 0.0000 0.0000 0.0000 0.0000 0.0000 -0.0000  
Z -0.0000 0.0000 0.0000 -0.0000 -0.0000 0.0000

AT. 2 I X -0.0001 -0.0000 -0.0000 -0.0001 0.0000 -0.0000  
Y -0.0000 0.0000 0.0000 -0.0000 0.0000 0.0000  
Z 0.0000 0.0000 0.0000 0.0000 -0.0000 -0.0000

AT. 3 I X 0.0001 -0.0000 -0.0001 0.0000 0.0000 0.0000  
Y -0.0000 0.0000 -0.0000 -0.0000 -0.0000 -0.0000  
Z 0.0001 -0.0000 -0.0000 0.0000 0.0000 -0.0000

AT. 4 I X -0.0001 -0.0000 -0.0001 -0.0000 0.0000 -0.0000  
Y 0.0000 0.0000 -0.0000 0.0000 -0.0000 0.0000  
Z -0.0001 -0.0000 -0.0000 -0.0000 0.0000 0.0000

AT. 5 O X 0.0023 -0.0002 -0.0012 0.0016 0.0004 0.0004  
Y -0.0016 0.0001 0.0015 -0.0003 -0.0001 -0.0004  
Z -0.0032 0.0002 0.0018 -0.0019 -0.0006 -0.0005

AT. 6 O X -0.0023 -0.0002 -0.0012 -0.0016 0.0004 -0.0004  
Y 0.0016 0.0001 0.0015 0.0003 -0.0001 0.0004  
Z 0.0032 0.0002 0.0018 0.0019 -0.0006 0.0005

AT. 7 O X 0.0049 -0.0001 -0.0023 0.0022 0.0007 0.0005  
Y -0.0054 -0.0003 0.0028 -0.0020 -0.0008 -0.0003  
Z 0.0040 -0.0001 -0.0020 0.0018 0.0006 0.0002

AT. 8 O X -0.0049 -0.0001 -0.0023 -0.0022 0.0007 -0.0005  
Y 0.0054 -0.0003 0.0028 0.0020 -0.0008 0.0003  
Z -0.0040 -0.0001 -0.0020 -0.0018 0.0006 -0.0002

AT. 9 N X 0.0013 0.0003 -0.0016 -0.0004 -0.0001 0.0002  
Y -0.0029 -0.0008 0.0034 0.0014 0.0002 -0.0003

Z 0.0042 -0.0000 -0.0012 0.0029 0.0009 0.0004  
AT. 10 N X -0.0013 0.0003 -0.0016 0.0004 -0.0001 -0.0002  
Y 0.0029 -0.0008 0.0034 -0.0014 0.0002 0.0003  
Z -0.0042 -0.0000 -0.0012 -0.0029 0.0009 -0.0004  
AT. 11 N X 0.0023 -0.0000 -0.0018 -0.0005 -0.0002 0.0004  
Y 0.0023 -0.0002 -0.0006 0.0016 0.0006 -0.0000  
Z -0.0092 -0.0004 0.0055 -0.0026 -0.0014 -0.0003  
AT. 12 N X -0.0023 -0.0000 -0.0018 0.0005 -0.0002 -0.0004  
Y -0.0023 -0.0002 -0.0006 -0.0016 0.0006 0.0000  
Z 0.0092 -0.0004 0.0055 0.0026 -0.0014 0.0003  
AT. 13 C X 0.0017 0.0002 -0.0013 0.0000 0.0001 0.0003  
Y -0.0030 -0.0002 0.0003 -0.0029 -0.0008 -0.0003  
Z -0.0002 0.0003 0.0006 0.0004 -0.0000 0.0000  
AT. 14 C X -0.0017 0.0002 -0.0013 -0.0000 0.0001 -0.0003  
Y 0.0030 -0.0002 0.0003 0.0029 -0.0008 0.0003  
Z 0.0002 0.0003 0.0006 -0.0004 -0.0000 -0.0000  
AT. 15 C X -0.0039 0.0000 0.0013 -0.0031 -0.0010 -0.0005  
Y 0.0043 -0.0001 -0.0016 0.0031 0.0008 0.0006  
Z -0.0017 -0.0003 0.0002 -0.0013 -0.0004 -0.0002  
AT. 16 C X 0.0039 0.0000 0.0013 0.0031 -0.0010 0.0005  
Y -0.0043 -0.0001 -0.0016 -0.0031 0.0008 -0.0006  
Z 0.0017 -0.0003 0.0002 0.0013 -0.0004 0.0002  
AT. 17 H X -0.0045 -0.0004 0.0005 -0.0037 -0.0001 -0.0014  
Y 0.0059 -0.0008 -0.0031 0.0041 0.0015 0.0008  
Z -0.0037 0.0004 0.0017 -0.0025 -0.0008 -0.0007  
AT. 18 H X 0.0045 -0.0004 0.0005 0.0037 -0.0001 0.0014  
Y -0.0059 -0.0008 -0.0031 -0.0041 0.0015 -0.0008  
Z 0.0037 0.0004 0.0017 0.0025 -0.0008 0.0007  
AT. 19 H X -0.0070 0.0022 0.0036 -0.0047 -0.0005 -0.0012  
Y 0.0032 0.0015 -0.0011 0.0013 0.0001 0.0006  
Z -0.0033 0.0008 0.0012 -0.0028 -0.0005 -0.0005  
AT. 20 H X 0.0070 0.0022 0.0036 0.0047 -0.0005 0.0012

Y -0.0032 0.0015 -0.0011 -0.0013 0.0001 -0.0006  
Z 0.0033 0.0008 0.0012 0.0028 -0.0005 0.0005  
AT. 21 C X 0.0038 0.0006 -0.0023 0.0010 0.0008 -0.0001  
Y -0.0045 0.0002 0.0020 -0.0021 -0.0005 -0.0005  
Z -0.0041 0.0003 0.0024 -0.0012 -0.0005 -0.0002  
AT. 22 C X -0.0038 0.0006 -0.0023 -0.0010 0.0008 0.0001  
Y 0.0045 0.0002 0.0020 0.0021 -0.0005 0.0005  
Z 0.0041 0.0003 0.0024 0.0012 -0.0005 0.0002  
AT. 23 C X -0.0078 -0.0004 0.0040 -0.0030 -0.0012 -0.0006  
Y 0.0040 0.0000 -0.0020 0.0015 0.0006 0.0003  
Z 0.0074 0.0002 -0.0044 0.0022 0.0010 0.0004  
AT. 24 C X 0.0078 -0.0004 0.0040 0.0030 -0.0012 0.0006  
Y -0.0040 0.0000 -0.0020 -0.0015 0.0006 -0.0003  
Z -0.0074 0.0002 -0.0044 -0.0022 0.0010 -0.0004  
AT. 25 H X -0.0088 -0.0007 0.0071 -0.0006 -0.0019 0.0007  
Y 0.0035 -0.0000 -0.0015 0.0015 0.0004 0.0004  
Z 0.0139 0.0007 -0.0067 0.0055 0.0020 0.0015  
AT. 26 H X 0.0088 -0.0007 0.0071 0.0006 -0.0019 -0.0007  
Y -0.0035 -0.0000 -0.0015 -0.0015 0.0004 -0.0004  
Z -0.0139 0.0007 -0.0067 -0.0055 0.0020 -0.0015  
AT. 27 H X -0.0114 0.0004 0.0049 -0.0060 -0.0019 -0.0003  
Y -0.0023 0.0002 -0.0001 -0.0022 -0.0003 -0.0007  
Z 0.0058 -0.0000 -0.0039 0.0012 0.0007 -0.0002  
AT. 28 H X 0.0114 0.0004 0.0049 0.0060 -0.0019 0.0003  
Y 0.0023 0.0002 -0.0001 0.0022 -0.0003 0.0007  
Z -0.0058 -0.0000 -0.0039 -0.0012 0.0007 0.0002  
AT. 29 C X 0.0013 0.0021 -0.0100 -0.0106 -0.0027 0.0012  
Y 0.0163 0.0037 -0.0176 -0.0059 -0.0009 0.0021  
Z 0.0080 -0.0025 0.0049 0.0143 0.0038 0.0002  
AT. 30 C X -0.0013 0.0021 -0.0100 0.0106 -0.0027 -0.0012  
Y -0.0163 0.0037 -0.0176 0.0059 -0.0009 -0.0021  
Z -0.0080 -0.0025 0.0049 -0.0143 0.0038 -0.0002

AT. 31 H X 0.0078 -0.0015 -0.0019 0.0065 0.0017 0.0014  
Y 0.0155 0.0128 -0.0485 -0.0443 -0.0101 0.0040  
Z 0.0108 0.0085 -0.0363 -0.0324 -0.0071 0.0031

AT. 32 H X -0.0078 -0.0015 -0.0019 -0.0065 0.0017 -0.0014  
Y -0.0155 0.0128 -0.0485 0.0443 -0.0101 -0.0040  
Z -0.0108 0.0085 -0.0363 0.0324 -0.0071 -0.0031

AT. 33 H X 0.0063 -0.0027 0.0025 0.0117 0.0033 -0.0000  
Y 0.0152 -0.0100 0.0323 0.0535 0.0138 -0.0017  
Z 0.0122 0.0006 -0.0083 0.0037 0.0015 0.0011

AT. 34 H X -0.0063 -0.0027 0.0025 -0.0117 0.0033 0.0000  
Y -0.0152 -0.0100 0.0323 -0.0535 0.0138 0.0017  
Z -0.0122 0.0006 -0.0083 -0.0037 0.0015 -0.0011

AT. 35 C X -0.0092 -0.0009 0.0054 -0.0034 -0.0014 -0.0004  
Y -0.0071 -0.0002 0.0040 -0.0041 -0.0016 -0.0005  
Z -0.0064 -0.0027 0.0130 0.0109 0.0029 -0.0021

AT. 36 C X 0.0092 -0.0009 0.0054 0.0034 -0.0014 0.0004  
Y 0.0071 -0.0002 0.0040 0.0041 -0.0016 0.0005  
Z 0.0064 -0.0027 0.0130 -0.0109 0.0029 0.0021

AT. 37 C X 0.0062 -0.0011 0.0003 0.0084 0.0030 -0.0003  
Y 0.0030 -0.0011 0.0050 0.0124 0.0039 -0.0010  
Z -0.0190 -0.0011 0.0121 -0.0023 -0.0007 -0.0026

AT. 38 C X -0.0062 -0.0011 0.0003 -0.0084 0.0030 0.0003  
Y -0.0030 -0.0011 0.0050 -0.0124 0.0039 0.0010  
Z 0.0190 -0.0011 0.0121 0.0023 -0.0007 0.0026

AT. 39 H X 0.0430 0.0024 -0.0319 -0.0046 -0.0015 0.0071  
Y 0.0273 0.0014 -0.0155 0.0056 0.0009 0.0044  
Z -0.0045 0.0003 -0.0009 -0.0082 -0.0025 0.0001

AT. 40 H X -0.0430 0.0024 -0.0319 0.0046 -0.0015 -0.0071  
Y -0.0273 0.0014 -0.0155 -0.0056 0.0009 -0.0044  
Z 0.0045 0.0003 -0.0009 0.0082 -0.0025 -0.0001

AT. 41 H X -0.0258 -0.0043 0.0280 0.0189 0.0065 -0.0065  
Y 0.0093 -0.0006 0.0033 0.0171 0.0057 -0.0012

Z 0.0088 0.0018 -0.0146 -0.0164 -0.0057 0.0038  
AT. 42 H X 0.0258 -0.0043 0.0280 -0.0189 0.0065 0.0065  
Y -0.0093 -0.0006 0.0033 -0.0171 0.0057 0.0012  
Z -0.0088 0.0018 -0.0146 0.0164 -0.0057 -0.0038  
AT. 43 C X 0.0029 0.0021 -0.0053 -0.0046 -0.0015 0.0009  
Y 0.0191 0.0018 -0.0159 -0.0006 0.0007 0.0019  
Z 0.0027 0.0010 -0.0037 -0.0041 -0.0014 0.0010  
AT. 44 C X -0.0029 0.0021 -0.0053 0.0046 -0.0015 -0.0009  
Y -0.0191 0.0018 -0.0159 0.0006 0.0007 -0.0019  
Z -0.0027 0.0010 -0.0037 0.0041 -0.0014 -0.0010  
AT. 45 H X 0.0027 -0.0000 -0.0001 0.0054 0.0024 -0.0012  
Y 0.0368 0.0084 -0.0382 -0.0166 -0.0044 0.0062  
Z -0.0145 -0.0036 0.0143 0.0041 0.0008 -0.0018  
AT. 46 H X -0.0027 -0.0000 -0.0001 -0.0054 0.0024 0.0012  
Y -0.0368 0.0084 -0.0382 0.0166 -0.0044 -0.0062  
Z 0.0145 -0.0036 0.0143 -0.0041 0.0008 0.0018  
AT. 47 H X -0.0045 -0.0016 0.0044 0.0033 0.0006 -0.0005  
Y 0.0003 -0.0051 0.0075 0.0163 0.0060 -0.0025  
Z -0.0068 -0.0013 0.0077 0.0028 0.0012 -0.0017  
AT. 48 H X 0.0045 -0.0016 0.0044 -0.0033 0.0006 0.0005  
Y -0.0003 -0.0051 0.0075 -0.0163 0.0060 0.0025  
Z 0.0068 -0.0013 0.0077 -0.0028 0.0012 0.0017  
AT. 49 C X -0.0033 0.0009 0.0014 -0.0020 -0.0008 -0.0004  
Y -0.0119 -0.0006 0.0072 -0.0033 -0.0015 -0.0007  
Z 0.0085 0.0028 -0.0111 -0.0063 -0.0015 0.0012  
AT. 50 C X 0.0033 0.0009 0.0014 0.0020 -0.0008 0.0004  
Y 0.0119 -0.0006 0.0072 0.0033 -0.0015 0.0007  
Z -0.0085 0.0028 -0.0111 0.0063 -0.0015 -0.0012  
AT. 51 C X 0.0089 -0.0006 -0.0012 0.0076 0.0027 -0.0001  
Y -0.0064 -0.0035 0.0107 0.0083 0.0023 -0.0012  
Z 0.0092 0.0016 -0.0126 -0.0051 -0.0008 0.0013  
AT. 52 C X -0.0089 -0.0006 -0.0012 -0.0076 0.0027 0.0001

Y 0.0064 -0.0035 0.0107 -0.0083 0.0023 0.0012  
Z -0.0092 0.0016 -0.0126 0.0051 -0.0008 -0.0013  
AT. 53 H X 0.0339 0.0080 -0.0387 -0.0146 -0.0025 0.0037  
Y 0.0245 0.0056 -0.0325 -0.0149 -0.0030 0.0033  
Z 0.0027 -0.0028 0.0018 0.0071 0.0022 -0.0000  
AT. 54 H X -0.0339 0.0080 -0.0387 0.0146 -0.0025 -0.0037  
Y -0.0245 0.0056 -0.0325 0.0149 -0.0030 -0.0033  
Z -0.0027 -0.0028 0.0018 -0.0071 0.0022 0.0000  
AT. 55 H X -0.0214 -0.0109 0.0438 0.0340 0.0087 -0.0046  
Y 0.0008 -0.0016 0.0013 0.0044 0.0017 -0.0002  
Z -0.0028 -0.0034 0.0070 0.0086 0.0027 -0.0005  
AT. 56 H X 0.0214 -0.0109 0.0438 -0.0340 0.0087 0.0046  
Y -0.0008 -0.0016 0.0013 -0.0044 0.0017 0.0002  
Z 0.0028 -0.0034 0.0070 -0.0086 0.0027 0.0005  
AT. 57 C X -0.0004 0.0015 -0.0047 -0.0081 -0.0024 0.0006  
Y -0.0139 -0.0025 0.0124 0.0009 -0.0003 -0.0016  
Z 0.0001 -0.0006 0.0035 0.0045 0.0012 -0.0007  
AT. 58 C X 0.0004 0.0015 -0.0047 0.0081 -0.0024 -0.0006  
Y 0.0139 -0.0025 0.0124 -0.0009 -0.0003 0.0016  
Z -0.0001 -0.0006 0.0035 -0.0045 0.0012 0.0007  
AT. 59 H X 0.0469 0.0032 -0.0227 0.0260 0.0095 0.0019  
Y -0.0190 -0.0002 0.0039 -0.0170 -0.0055 0.0002  
Z 0.0261 0.0039 -0.0222 0.0018 0.0018 0.0028  
AT. 60 H X -0.0469 0.0032 -0.0227 -0.0260 0.0095 -0.0019  
Y 0.0190 -0.0002 0.0039 0.0170 -0.0055 -0.0002  
Z -0.0261 0.0039 -0.0222 -0.0018 0.0018 -0.0028  
AT. 61 H X 0.0255 0.0074 -0.0377 -0.0230 -0.0056 0.0058  
Y 0.0086 -0.0031 0.0125 0.0280 0.0080 -0.0023  
Z 0.0091 0.0047 -0.0225 -0.0209 -0.0055 0.0037  
AT. 62 H X -0.0255 0.0074 -0.0377 0.0230 -0.0056 -0.0058  
Y -0.0086 -0.0031 0.0125 -0.0280 0.0080 0.0023  
Z -0.0091 0.0047 -0.0225 0.0209 -0.0055 -0.0037



AT. 63 H X -0.0268 -0.0039 0.0279 0.0039 -0.0007 -0.0039  
Y 0.0373 0.0041 -0.0306 0.0058 0.0039 0.0039  
Z -0.0182 -0.0010 0.0090 -0.0112 -0.0039 -0.0011

AT. 64 H X 0.0268 -0.0039 0.0279 -0.0039 -0.0007 0.0039  
Y -0.0373 0.0041 -0.0306 -0.0058 0.0039 -0.0039  
Z 0.0182 -0.0010 0.0090 0.0112 -0.0039 0.0011

AT. 65 C X 0.0010 0.0022 -0.0064 -0.0073 -0.0020 0.0006  
Y -0.0123 -0.0011 0.0099 0.0003 -0.0003 -0.0013  
Z 0.0006 0.0002 0.0016 0.0032 0.0009 -0.0007

AT. 66 C X -0.0010 0.0022 -0.0064 0.0073 -0.0020 -0.0006  
Y 0.0123 -0.0011 0.0099 -0.0003 -0.0003 0.0013  
Z -0.0006 0.0002 0.0016 -0.0032 0.0009 0.0007

AT. 67 H X 0.0222 -0.0036 -0.0087 0.0106 0.0040 0.0026  
Y 0.0055 0.0026 -0.0054 -0.0005 0.0000 -0.0003  
Z -0.0330 0.0017 0.0176 -0.0107 -0.0043 -0.0033

AT. 68 H X -0.0222 -0.0036 -0.0087 -0.0106 0.0040 -0.0026  
Y -0.0055 0.0026 -0.0054 0.0005 0.0000 0.0003  
Z 0.0330 0.0017 0.0176 0.0107 -0.0043 0.0033

AT. 69 H X 0.0306 0.0047 -0.0258 -0.0031 0.0000 0.0026  
Y 0.0049 -0.0037 0.0057 0.0111 0.0032 0.0001  
Z -0.0321 -0.0087 0.0334 0.0110 0.0021 -0.0024

AT. 70 H X -0.0306 0.0047 -0.0258 0.0031 0.0000 -0.0026  
Y -0.0049 -0.0037 0.0057 -0.0111 0.0032 -0.0001  
Z 0.0321 -0.0087 0.0334 -0.0110 0.0021 0.0024

AT. 71 H X -0.0310 -0.0027 0.0185 -0.0084 -0.0034 -0.0012  
Y 0.0322 0.0006 -0.0162 0.0120 0.0045 0.0018  
Z 0.0374 -0.0012 -0.0153 0.0185 0.0065 0.0022

AT. 72 H X 0.0310 -0.0027 0.0185 0.0084 -0.0034 0.0012  
Y -0.0322 0.0006 -0.0162 -0.0120 0.0045 -0.0018  
Z -0.0374 -0.0012 -0.0153 -0.0185 0.0065 -0.0022

AT. 73 C X -0.0211 -0.0056 0.0262 0.0121 0.0024 -0.0030  
Y 0.0013 0.0028 -0.0081 -0.0117 -0.0038 0.0013

Z -0.0012 0.0006 -0.0065 -0.0104 -0.0029 0.0016  
AT. 74 C X 0.0211 -0.0056 0.0262 -0.0121 0.0024 0.0030  
Y -0.0013 0.0028 -0.0081 0.0117 -0.0038 -0.0013  
Z 0.0012 0.0006 -0.0065 0.0104 -0.0029 -0.0016  
AT. 75 H X -0.0097 -0.0077 0.0247 0.0246 0.0070 -0.0031  
Y 0.0171 0.0070 -0.0269 -0.0153 -0.0031 0.0025  
Z 0.0292 0.0047 -0.0337 -0.0059 0.0014 0.0031  
AT. 76 H X 0.0097 -0.0077 0.0247 -0.0246 0.0070 0.0031  
Y -0.0171 0.0070 -0.0269 0.0153 -0.0031 -0.0025  
Z -0.0292 0.0047 -0.0337 0.0059 0.0014 -0.0031  
AT. 77 H X -0.0212 -0.0057 0.0266 0.0162 0.0047 -0.0041  
Y 0.0273 0.0057 -0.0301 -0.0099 -0.0012 0.0033  
Z -0.0252 -0.0019 0.0132 -0.0157 -0.0073 0.0007  
AT. 78 H X 0.0212 -0.0057 0.0266 -0.0162 0.0047 0.0041  
Y -0.0273 0.0057 -0.0301 0.0099 -0.0012 -0.0033  
Z 0.0252 -0.0019 0.0132 0.0157 -0.0073 -0.0007  
AT. 79 I X -0.0000 0.0002 0.0001 -0.0000 -0.0001 -0.0000  
Y -0.0000 -0.0001 -0.0000 0.0001 0.0000 0.0000  
Z 0.0000 0.0000 -0.0000 0.0000 0.0000 0.0000  
AT. 80 I X 0.0000 0.0002 0.0001 0.0000 -0.0001 0.0000  
Y 0.0000 -0.0001 -0.0000 -0.0001 0.0000 -0.0000  
Z -0.0000 0.0000 -0.0000 -0.0000 0.0000 -0.0000  
AT. 81 I X 0.0000 0.0001 0.0000 -0.0001 0.0000 -0.0001  
Y -0.0000 -0.0000 0.0000 -0.0000 -0.0000 0.0000  
Z 0.0000 -0.0001 -0.0000 0.0001 -0.0000 0.0000  
AT. 82 I X -0.0000 0.0001 0.0000 0.0001 0.0000 0.0001  
Y 0.0000 -0.0000 0.0000 0.0000 -0.0000 -0.0000  
Z -0.0000 -0.0001 -0.0000 -0.0001 -0.0000 -0.0000  
AT. 83 O X 0.0010 0.0075 0.0009 -0.0039 0.0004 -0.0014  
Y -0.0000 0.0000 0.0000 0.0004 0.0008 -0.0007  
Z 0.0005 0.0053 0.0007 -0.0030 0.0002 -0.0010  
AT. 84 O X -0.0010 0.0075 0.0009 0.0039 0.0004 0.0014

Y 0.0000 0.0000 0.0000 -0.0004 0.0008 0.0007  
Z -0.0005 0.0053 0.0007 0.0030 0.0002 0.0010  
AT. 85 O X -0.0000 0.0053 0.0010 -0.0035 0.0013 -0.0028  
Y 0.0000 0.0048 0.0009 -0.0030 0.0016 -0.0030  
Z -0.0001 -0.0043 -0.0007 0.0026 -0.0009 0.0021  
AT. 86 O X 0.0000 0.0053 0.0010 0.0035 0.0013 0.0028  
Y -0.0000 0.0048 0.0009 0.0030 0.0016 0.0030  
Z 0.0001 -0.0043 -0.0007 -0.0026 -0.0009 -0.0021  
AT. 87 N X 0.0006 0.0010 -0.0003 -0.0004 0.0032 -0.0031  
Y 0.0004 -0.0006 -0.0004 0.0007 0.0019 -0.0018  
Z -0.0002 -0.0062 -0.0011 0.0050 0.0007 0.0010  
AT. 88 N X -0.0006 0.0010 -0.0003 0.0004 0.0032 0.0031  
Y -0.0004 -0.0006 -0.0004 -0.0007 0.0019 0.0018  
Z 0.0002 -0.0062 -0.0011 -0.0050 0.0007 -0.0010  
AT. 89 N X -0.0001 -0.0002 0.0000 0.0004 0.0014 -0.0016  
Y -0.0000 -0.0034 -0.0005 0.0019 -0.0005 0.0014  
Z 0.0004 0.0084 0.0011 -0.0045 0.0035 -0.0056  
AT. 90 N X 0.0001 -0.0002 0.0000 -0.0004 0.0014 0.0016  
Y 0.0000 -0.0034 -0.0005 -0.0019 -0.0005 -0.0014  
Z -0.0004 0.0084 0.0011 0.0045 0.0035 0.0056  
AT. 91 C X 0.0003 0.0043 0.0007 -0.0032 0.0002 -0.0012  
Y 0.0012 0.0097 0.0015 -0.0068 -0.0011 -0.0004  
Z -0.0002 -0.0023 -0.0004 0.0021 0.0005 0.0001  
AT. 92 C X -0.0003 0.0043 0.0007 0.0032 0.0002 0.0012  
Y -0.0012 0.0097 0.0015 0.0068 -0.0011 0.0004  
Z 0.0002 -0.0023 -0.0004 -0.0021 0.0005 -0.0001  
AT. 93 C X -0.0005 -0.0091 -0.0016 0.0057 0.0012 0.0008  
Y -0.0009 -0.0074 -0.0010 0.0045 -0.0002 0.0011  
Z -0.0006 0.0013 0.0005 -0.0016 -0.0011 0.0001  
AT. 94 C X 0.0005 -0.0091 -0.0016 -0.0057 0.0012 -0.0008  
Y 0.0009 -0.0074 -0.0010 -0.0045 -0.0002 -0.0011  
Z 0.0006 0.0013 0.0005 0.0016 -0.0011 -0.0001

AT. 95 H X -0.0036 -0.0273 -0.0039 0.0190 -0.0016 0.0053  
Y -0.0018 -0.0095 -0.0011 0.0046 0.0005 0.0007  
Z 0.0039 0.0232 0.0032 -0.0144 0.0009 -0.0038

AT. 96 H X 0.0036 -0.0273 -0.0039 -0.0190 -0.0016 -0.0053  
Y 0.0018 -0.0095 -0.0011 -0.0046 0.0005 -0.0007  
Z -0.0039 0.0232 0.0032 0.0144 0.0009 0.0038

AT. 97 H X 0.0012 -0.0058 -0.0015 -0.0008 0.0016 -0.0012  
Y 0.0031 0.0141 0.0015 -0.0059 -0.0000 -0.0002  
Z -0.0000 0.0063 0.0012 -0.0027 -0.0011 0.0003

AT. 98 H X -0.0012 -0.0058 -0.0015 0.0008 0.0016 0.0012  
Y -0.0031 0.0141 0.0015 0.0059 -0.0000 0.0002  
Z 0.0000 0.0063 0.0012 0.0027 -0.0011 -0.0003

AT. 99 C X 0.0002 0.0050 0.0007 -0.0028 0.0020 -0.0033  
Y 0.0001 0.0033 0.0005 -0.0021 0.0004 -0.0013  
Z 0.0001 0.0028 0.0004 -0.0011 0.0013 -0.0022

AT. 100 C X -0.0002 0.0050 0.0007 0.0028 0.0020 0.0033  
Y -0.0001 0.0033 0.0005 0.0021 0.0004 0.0013  
Z -0.0001 0.0028 0.0004 0.0011 0.0013 0.0022

AT. 101 C X -0.0003 -0.0090 -0.0014 0.0052 -0.0031 0.0055  
Y 0.0000 -0.0018 -0.0004 0.0014 -0.0005 0.0011  
Z -0.0003 -0.0056 -0.0008 0.0029 -0.0026 0.0041

AT. 102 C X 0.0003 -0.0090 -0.0014 -0.0052 -0.0031 -0.0055  
Y -0.0000 -0.0018 -0.0004 -0.0014 -0.0005 -0.0011  
Z 0.0003 -0.0056 -0.0008 -0.0029 -0.0026 -0.0041

AT. 103 H X -0.0000 -0.0064 -0.0008 0.0023 -0.0059 0.0085  
Y -0.0001 -0.0031 -0.0007 0.0025 0.0005 -0.0000  
Z -0.0004 -0.0146 -0.0028 0.0100 -0.0035 0.0073

AT. 104 H X 0.0000 -0.0064 -0.0008 -0.0023 -0.0059 -0.0085  
Y 0.0001 -0.0031 -0.0007 -0.0025 0.0005 0.0000  
Z 0.0004 -0.0146 -0.0028 -0.0100 -0.0035 -0.0073

AT. 105 H X -0.0001 -0.0130 -0.0023 0.0100 -0.0030 0.0072  
Y -0.0005 0.0089 0.0021 -0.0074 -0.0002 -0.0021

Z -0.0004 -0.0029 -0.0001 0.0008 -0.0026 0.0036  
AT. 106 H X 0.0001 -0.0130 -0.0023 -0.0100 -0.0030 -0.0072  
Y 0.0005 0.0089 0.0021 0.0074 -0.0002 0.0021  
Z 0.0004 -0.0029 -0.0001 -0.0008 -0.0026 -0.0036  
AT. 107 C X 0.0008 -0.0145 -0.0035 0.0126 0.0048 -0.0004  
Y -0.0030 -0.0032 0.0014 -0.0008 -0.0173 0.0172  
Z 0.0025 -0.0141 -0.0045 0.0094 0.0094 -0.0054  
AT. 108 C X -0.0008 -0.0145 -0.0035 -0.0126 0.0048 0.0004  
Y 0.0030 -0.0032 0.0014 0.0008 -0.0173 -0.0172  
Z -0.0025 -0.0141 -0.0045 -0.0094 0.0094 0.0054  
AT. 109 H X -0.0062 0.0213 0.0086 -0.0160 -0.0292 0.0230  
Y -0.0093 0.0226 0.0113 -0.0233 -0.0468 0.0382  
Z -0.0063 0.0192 0.0088 -0.0203 -0.0312 0.0239  
AT. 110 H X 0.0062 0.0213 0.0086 0.0160 -0.0292 -0.0230  
Y 0.0093 0.0226 0.0113 0.0233 -0.0468 -0.0382  
Z 0.0063 0.0192 0.0088 0.0203 -0.0312 -0.0239  
AT. 111 H X 0.0008 -0.0083 -0.0028 0.0111 0.0081 -0.0045  
Y 0.0095 -0.0561 -0.0180 0.0440 0.0413 -0.0245  
Z -0.0004 -0.0090 -0.0010 0.0009 -0.0079 0.0088  
AT. 112 H X -0.0008 -0.0083 -0.0028 -0.0111 0.0081 0.0045  
Y -0.0095 -0.0561 -0.0180 -0.0440 0.0413 0.0245  
Z 0.0004 -0.0090 -0.0010 -0.0009 -0.0079 -0.0088  
AT. 113 C X -0.0001 -0.0086 -0.0015 0.0055 -0.0030 0.0053  
Y 0.0008 0.0119 0.0017 -0.0073 0.0027 -0.0054  
Z 0.0017 -0.0054 -0.0022 0.0056 0.0105 -0.0084  
AT. 114 C X 0.0001 -0.0086 -0.0015 -0.0055 -0.0030 -0.0053  
Y -0.0008 0.0119 0.0017 0.0073 0.0027 0.0054  
Z -0.0017 -0.0054 -0.0022 -0.0056 0.0105 0.0084  
AT. 115 C X -0.0000 0.0102 0.0017 -0.0058 -0.0008 -0.0012  
Y 0.0002 -0.0201 -0.0040 0.0154 0.0063 -0.0007  
Z -0.0012 0.0121 0.0031 -0.0062 0.0069 -0.0102  
AT. 116 C X 0.0000 0.0102 0.0017 0.0058 -0.0008 0.0012

Y -0.0002 -0.0201 -0.0040 -0.0154 0.0063 0.0007  
Z 0.0012 0.0121 0.0031 0.0062 0.0069 0.0102  
AT. 117 H X -0.0022 0.0110 0.0032 -0.0011 0.0152 -0.0173  
Y 0.0033 -0.0256 -0.0072 0.0135 -0.0135 0.0202  
Z 0.0004 0.0122 0.0023 -0.0106 -0.0050 0.0016  
AT. 118 H X 0.0022 0.0110 0.0032 0.0011 0.0152 0.0173  
Y -0.0033 -0.0256 -0.0072 -0.0135 -0.0135 -0.0202  
Z -0.0004 0.0122 0.0023 0.0106 -0.0050 -0.0016  
AT. 119 H X 0.0027 0.0053 -0.0008 -0.0094 -0.0215 0.0205  
Y -0.0005 -0.0273 -0.0048 0.0212 0.0097 -0.0023  
Z 0.0011 0.0162 0.0023 -0.0136 -0.0078 0.0033  
AT. 120 H X -0.0027 0.0053 -0.0008 0.0094 -0.0215 -0.0205  
Y 0.0005 -0.0273 -0.0048 -0.0212 0.0097 0.0023  
Z -0.0011 0.0162 0.0023 0.0136 -0.0078 -0.0033  
AT. 121 C X -0.0004 -0.0041 -0.0003 0.0024 0.0037 -0.0033  
Y -0.0014 -0.0107 -0.0009 0.0050 -0.0149 0.0180  
Z 0.0014 0.0021 -0.0007 -0.0036 -0.0050 0.0044  
AT. 122 C X 0.0004 -0.0041 -0.0003 -0.0024 0.0037 0.0033  
Y 0.0014 -0.0107 -0.0009 -0.0050 -0.0149 -0.0180  
Z -0.0014 0.0021 -0.0007 0.0036 -0.0050 -0.0044  
AT. 123 H X 0.0024 0.0026 -0.0015 -0.0066 -0.0110 0.0103  
Y 0.0007 -0.0135 -0.0031 0.0018 -0.0366 0.0413  
Z -0.0004 0.0062 0.0015 -0.0021 0.0147 -0.0173  
AT. 124 H X -0.0024 0.0026 -0.0015 0.0066 -0.0110 -0.0103  
Y -0.0007 -0.0135 -0.0031 -0.0018 -0.0366 -0.0413  
Z 0.0004 0.0062 0.0015 0.0021 0.0147 0.0173  
AT. 125 H X -0.0002 -0.0063 -0.0006 0.0026 0.0017 -0.0012  
Y -0.0050 -0.0087 0.0022 0.0114 0.0152 -0.0137  
Z -0.0003 0.0004 0.0006 -0.0000 0.0079 -0.0092  
AT. 126 H X 0.0002 -0.0063 -0.0006 -0.0026 0.0017 0.0012  
Y 0.0050 -0.0087 0.0022 -0.0114 0.0152 0.0137  
Z 0.0003 0.0004 0.0006 0.0000 0.0079 0.0092

AT.127 C X -0.0000 0.0017 0.0003 -0.0011 0.0033 -0.0037  
Y 0.0003 0.0095 0.0015 -0.0057 0.0035 -0.0066  
Z -0.0009 -0.0016 0.0005 -0.0011 -0.0149 0.0151

AT.128 C X 0.0000 0.0017 0.0003 0.0011 0.0033 0.0037  
Y -0.0003 0.0095 0.0015 0.0057 0.0035 0.0066  
Z 0.0009 -0.0016 0.0005 0.0011 -0.0149 -0.0151

AT.129 C X 0.0004 0.0088 0.0015 -0.0079 0.0005 -0.0037  
Y 0.0018 -0.0037 -0.0022 0.0035 0.0183 -0.0167  
Z -0.0033 -0.0034 0.0019 -0.0001 -0.0118 0.0119

AT.130 C X -0.0004 0.0088 0.0015 0.0079 0.0005 0.0037  
Y -0.0018 -0.0037 -0.0022 -0.0035 0.0183 0.0167  
Z 0.0033 -0.0034 0.0019 0.0001 -0.0118 -0.0119

AT.131 H X 0.0063 0.0079 -0.0032 -0.0053 0.0344 -0.0360  
Y -0.0101 -0.0055 0.0068 -0.0029 -0.0515 0.0506  
Z -0.0005 -0.0063 -0.0006 0.0008 0.0025 -0.0013

AT.132 H X -0.0063 0.0079 -0.0032 0.0053 0.0344 0.0360  
Y 0.0101 -0.0055 0.0068 0.0029 -0.0515 -0.0506  
Z 0.0005 -0.0063 -0.0006 -0.0008 0.0025 0.0013

AT.133 H X -0.0088 0.0079 0.0089 -0.0116 -0.0527 0.0478  
Y 0.0030 -0.0054 -0.0033 0.0047 0.0271 -0.0251  
Z 0.0032 -0.0057 -0.0036 0.0037 0.0279 -0.0262

AT.134 H X 0.0088 0.0079 0.0089 0.0116 -0.0527 -0.0478  
Y -0.0030 -0.0054 -0.0033 -0.0047 0.0271 0.0251  
Z -0.0032 -0.0057 -0.0036 -0.0037 0.0279 0.0262

AT.135 C X 0.0011 -0.0055 -0.0018 0.0048 0.0092 -0.0076  
Y 0.0014 0.0123 0.0014 -0.0069 0.0080 -0.0106  
Z 0.0007 -0.0050 -0.0013 0.0038 -0.0012 0.0031

AT.136 C X -0.0011 -0.0055 -0.0018 -0.0048 0.0092 0.0076  
Y -0.0014 0.0123 0.0014 0.0069 0.0080 0.0106  
Z -0.0007 -0.0050 -0.0013 -0.0038 -0.0012 -0.0031

AT.137 H X 0.0021 0.0687 0.0113 -0.0438 0.0205 -0.0377  
Y -0.0012 0.0096 0.0025 -0.0068 -0.0003 -0.0028

Z -0.0039 -0.0356 -0.0040 0.0211 -0.0190 0.0267  
AT. 138 H X -0.0021 0.0687 0.0113 0.0438 0.0205 0.0377  
Y 0.0012 0.0096 0.0025 0.0068 -0.0003 0.0028  
Z 0.0039 -0.0356 -0.0040 -0.0211 -0.0190 -0.0267  
AT. 139 H X 0.0056 -0.0155 -0.0065 0.0149 0.0239 -0.0173  
Y 0.0001 -0.0324 -0.0060 0.0216 -0.0011 0.0090  
Z -0.0049 0.0208 0.0070 -0.0175 -0.0176 0.0097  
AT. 140 H X -0.0056 -0.0155 -0.0065 -0.0149 0.0239 0.0173  
Y -0.0001 -0.0324 -0.0060 -0.0216 -0.0011 -0.0090  
Z 0.0049 0.0208 0.0070 0.0175 -0.0176 -0.0097  
AT. 141 H X -0.0061 -0.0194 0.0005 0.0092 -0.0150 0.0169  
Y -0.0034 -0.0277 -0.0029 0.0163 -0.0113 0.0169  
Z 0.0026 0.0313 0.0042 -0.0190 0.0086 -0.0154  
AT. 142 H X 0.0061 -0.0194 0.0005 -0.0092 -0.0150 -0.0169  
Y 0.0034 -0.0277 -0.0029 -0.0163 -0.0113 -0.0169  
Z -0.0026 0.0313 0.0042 0.0190 0.0086 0.0154  
AT. 143 C X 0.0009 -0.0021 -0.0012 0.0034 0.0111 -0.0098  
Y 0.0003 0.0068 0.0011 -0.0040 0.0034 -0.0059  
Z 0.0001 -0.0037 -0.0008 0.0029 -0.0029 0.0041  
AT. 144 C X -0.0009 -0.0021 -0.0012 -0.0034 0.0111 0.0098  
Y -0.0003 0.0068 0.0011 0.0040 0.0034 0.0059  
Z -0.0001 -0.0037 -0.0008 -0.0029 -0.0029 -0.0041  
AT. 145 H X -0.0001 0.0113 0.0026 -0.0087 -0.0179 0.0124  
Y -0.0000 -0.0105 -0.0019 0.0061 -0.0077 0.0110  
Z 0.0003 0.0179 0.0033 -0.0110 0.0011 -0.0078  
AT. 146 H X 0.0001 0.0113 0.0026 0.0087 -0.0179 -0.0124  
Y 0.0000 -0.0105 -0.0019 -0.0061 -0.0077 -0.0110  
Z -0.0003 0.0179 0.0033 0.0110 0.0011 0.0078  
AT. 147 H X 0.0021 0.0165 0.0012 -0.0059 0.0391 -0.0434  
Y 0.0003 -0.0103 -0.0023 0.0085 0.0060 -0.0016  
Z 0.0018 0.0140 0.0009 -0.0038 0.0392 -0.0422  
AT. 148 H X -0.0021 0.0165 0.0012 0.0059 0.0391 0.0434



Y -0.0003 -0.0103 -0.0023 -0.0085 0.0060 0.0016  
Z -0.0018 0.0140 0.0009 0.0038 0.0392 0.0422  
AT. 149 H X -0.0006 -0.0382 -0.0067 0.0242 -0.0204 0.0333  
Y 0.0001 -0.0168 -0.0033 0.0109 -0.0027 0.0085  
Z 0.0005 -0.0252 -0.0053 0.0177 0.0030 0.0063  
AT. 150 H X 0.0006 -0.0382 -0.0067 -0.0242 -0.0204 -0.0333  
Y -0.0001 -0.0168 -0.0033 -0.0109 -0.0027 -0.0085  
Z -0.0005 -0.0252 -0.0053 -0.0177 0.0030 -0.0063  
AT. 151 C X -0.0030 0.0007 0.0024 -0.0052 -0.0277 0.0266  
Y 0.0001 0.0109 0.0020 -0.0073 -0.0050 0.0019  
Z -0.0004 0.0120 0.0025 -0.0079 0.0053 -0.0091  
AT. 152 C X 0.0030 0.0007 0.0024 0.0052 -0.0277 -0.0266  
Y -0.0001 0.0109 0.0020 0.0073 -0.0050 -0.0019  
Z 0.0004 0.0120 0.0025 0.0079 0.0053 0.0091  
AT. 153 H X -0.0063 0.0081 0.0063 -0.0109 -0.0425 0.0376  
Y -0.0025 -0.0056 0.0008 0.0010 -0.0163 0.0171  
Z -0.0032 -0.0176 -0.0011 0.0078 -0.0066 0.0107  
AT. 154 H X 0.0063 0.0081 0.0063 0.0109 -0.0425 -0.0376  
Y 0.0025 -0.0056 0.0008 -0.0010 -0.0163 -0.0171  
Z 0.0032 -0.0176 -0.0011 -0.0078 -0.0066 -0.0107  
AT. 155 H X -0.0011 0.0074 0.0021 -0.0108 -0.0300 0.0278  
Y -0.0017 -0.0109 -0.0009 0.0035 -0.0147 0.0178  
Z 0.0021 0.0376 0.0056 -0.0217 0.0149 -0.0257  
AT. 156 H X 0.0011 0.0074 0.0021 0.0108 -0.0300 -0.0278  
Y 0.0017 -0.0109 -0.0009 -0.0035 -0.0147 -0.0178  
Z -0.0021 0.0376 0.0056 0.0217 0.0149 0.0257  
AT. 157 O X -0.0001 -0.0004 -0.0001 -0.0002 -0.0002 0.0003  
Y 0.0000 -0.0000 -0.0000 0.0000 -0.0001 0.0003  
Z 0.0005 0.0003 0.0002 0.0002 0.0000 -0.0000  
AT. 158 O X 0.0001 -0.0004 -0.0001 0.0002 -0.0002 -0.0003  
Y -0.0000 -0.0000 -0.0000 -0.0000 -0.0001 -0.0003  
Z -0.0005 0.0003 0.0002 -0.0002 0.0000 0.0000

AT.159 O X 0.0003 0.0004 0.0002 0.0001 0.0002 -0.0003  
Y -0.0002 0.0000 -0.0001 0.0002 0.0000 -0.0003  
Z 0.0001 -0.0002 0.0000 0.0001 -0.0001 0.0002

AT.160 O X -0.0003 0.0004 0.0002 -0.0001 0.0002 0.0003  
Y 0.0002 0.0000 -0.0001 -0.0002 0.0000 0.0003  
Z -0.0001 -0.0002 0.0000 -0.0001 -0.0001 -0.0002

AT.161 H X -0.0039 -0.0005 -0.0019 0.0014 0.0008 -0.0021  
Y 0.0021 0.0001 0.0005 0.0004 -0.0001 0.0008  
Z -0.0076 -0.0009 -0.0024 0.0002 0.0004 -0.0030

AT.162 H X 0.0039 -0.0005 -0.0019 -0.0014 0.0008 0.0021  
Y -0.0021 0.0001 0.0005 -0.0004 -0.0001 -0.0008  
Z 0.0076 -0.0009 -0.0024 -0.0002 0.0004 0.0030

AT.163 H X 0.0005 0.0000 0.0001 -0.0002 -0.0005 0.0002  
Y 0.0035 0.0016 0.0016 -0.0015 0.0025 0.0038  
Z 0.0006 0.0003 0.0003 -0.0004 0.0006 0.0008

AT.164 H X -0.0005 0.0000 0.0001 0.0002 -0.0005 -0.0002  
Y -0.0035 0.0016 0.0016 0.0015 0.0025 -0.0038  
Z -0.0006 0.0003 0.0003 0.0004 0.0006 -0.0008

AT.165 O X 0.0001 -0.0005 -0.0002 0.0000 -0.0001 0.0001  
Y -0.0001 -0.0003 0.0001 0.0003 0.0000 0.0000  
Z -0.0001 0.0006 0.0001 0.0002 0.0000 0.0001

AT.166 O X -0.0001 -0.0005 -0.0002 -0.0000 -0.0001 -0.0001  
Y 0.0001 -0.0003 0.0001 -0.0003 0.0000 -0.0000  
Z 0.0001 0.0006 0.0001 -0.0002 0.0000 -0.0001

AT.167 H X -0.0012 0.0001 0.0018 0.0011 -0.0001 0.0000  
Y 0.0023 -0.0008 -0.0043 -0.0016 0.0002 0.0001  
Z -0.0000 -0.0001 0.0009 0.0003 0.0002 0.0001

AT.168 H X 0.0012 0.0001 0.0018 -0.0011 -0.0001 -0.0000  
Y -0.0023 -0.0008 -0.0043 0.0016 0.0002 -0.0001  
Z 0.0000 -0.0001 0.0009 -0.0003 0.0002 -0.0001

AT.169 O X -0.0001 0.0003 0.0001 0.0002 0.0000 0.0000  
Y -0.0000 -0.0002 -0.0000 -0.0001 -0.0001 -0.0001

Z 0.0002 -0.0005 0.0000 -0.0001 -0.0000 0.0000  
AT. 170 O X 0.0001 0.0003 0.0001 -0.0002 0.0000 -0.0000  
Y 0.0000 -0.0002 -0.0000 0.0001 -0.0001 0.0001  
Z -0.0002 -0.0005 0.0000 0.0001 -0.0000 -0.0000  
AT. 171 H X 0.0022 -0.0010 -0.0006 -0.0032 0.0005 0.0003  
Y 0.0009 -0.0006 -0.0003 -0.0019 0.0002 -0.0000  
Z -0.0003 -0.0004 -0.0003 -0.0008 -0.0001 -0.0003  
AT. 172 H X -0.0022 -0.0010 -0.0006 0.0032 0.0005 -0.0003  
Y -0.0009 -0.0006 -0.0003 0.0019 0.0002 0.0000  
Z 0.0003 -0.0004 -0.0003 0.0008 -0.0001 0.0003

FREQ(CM\*\*-1) 955.59 955.88 965.93 966.86 968.18 970.92

AT. 1 I X 0.0001 0.0000 0.0000 -0.0000 0.0000 0.0000  
Y 0.0000 0.0000 0.0000 -0.0000 0.0000 0.0000  
Z 0.0000 0.0000 0.0001 -0.0000 0.0001 0.0000  
AT. 2 I X 0.0001 -0.0000 0.0000 0.0000 -0.0000 0.0000  
Y 0.0000 -0.0000 0.0000 0.0000 -0.0000 0.0000  
Z 0.0000 -0.0000 0.0001 0.0000 -0.0001 0.0000  
AT. 3 I X 0.0001 0.0000 -0.0000 0.0000 -0.0000 0.0000  
Y -0.0000 -0.0000 -0.0001 0.0001 -0.0001 0.0000  
Z 0.0001 0.0000 0.0000 -0.0000 0.0000 -0.0000  
AT. 4 I X 0.0001 -0.0000 -0.0000 -0.0000 0.0000 0.0000  
Y -0.0000 0.0000 -0.0001 -0.0001 0.0001 0.0000  
Z 0.0001 -0.0000 0.0000 0.0000 -0.0000 -0.0000  
AT. 5 O X 0.0030 0.0008 -0.0005 -0.0010 -0.0004 0.0002  
Y -0.0013 0.0001 0.0002 0.0010 0.0002 0.0000  
Z -0.0039 -0.0009 0.0003 0.0012 0.0001 -0.0001  
AT. 6 O X 0.0030 -0.0008 -0.0005 0.0010 0.0004 0.0002  
Y -0.0013 -0.0001 0.0002 -0.0010 -0.0002 0.0000  
Z -0.0039 0.0009 0.0003 -0.0012 -0.0001 -0.0001  
AT. 7 O X 0.0047 0.0022 0.0002 -0.0000 0.0008 0.0000

Y -0.0048 -0.0020 0.0003 0.0000 -0.0001 -0.0000  
Z 0.0040 0.0019 -0.0005 0.0003 -0.0001 -0.0001  
AT. 8 O X 0.0047 -0.0022 0.0002 0.0000 -0.0008 0.0000  
Y -0.0048 0.0020 0.0003 -0.0000 0.0001 -0.0000  
Z 0.0040 -0.0019 -0.0005 -0.0003 0.0001 -0.0001  
AT. 9 N X 0.0004 -0.0009 0.0052 -0.0022 0.0048 -0.0002  
Y -0.0010 0.0006 -0.0027 0.0010 -0.0028 0.0002  
Z 0.0062 0.0027 0.0012 -0.0008 0.0015 0.0003  
AT. 10 N X 0.0004 0.0009 0.0052 0.0022 -0.0048 -0.0002  
Y -0.0010 -0.0006 -0.0027 -0.0010 0.0028 0.0002  
Z 0.0062 -0.0027 0.0012 0.0008 -0.0015 0.0003  
AT. 11 N X 0.0000 -0.0000 -0.0052 0.0020 -0.0047 0.0002  
Y 0.0031 0.0018 0.0018 -0.0003 0.0020 -0.0002  
Z -0.0078 -0.0032 0.0052 -0.0019 0.0042 0.0000  
AT. 12 N X 0.0000 0.0000 -0.0052 -0.0020 0.0047 0.0002  
Y 0.0031 -0.0018 0.0018 0.0003 -0.0020 -0.0002  
Z -0.0078 0.0032 0.0052 0.0019 -0.0042 0.0000  
AT. 13 C X 0.0016 0.0005 0.0010 -0.0005 0.0011 0.0000  
Y -0.0056 -0.0026 -0.0015 0.0009 -0.0018 -0.0003  
Z 0.0006 0.0007 0.0016 -0.0006 0.0018 0.0002  
AT. 14 C X 0.0016 -0.0005 0.0010 0.0005 -0.0011 0.0000  
Y -0.0056 0.0026 -0.0015 -0.0009 0.0018 -0.0003  
Z 0.0006 -0.0007 0.0016 0.0006 -0.0018 0.0002  
AT. 15 C X -0.0063 -0.0024 -0.0012 0.0016 -0.0014 -0.0004  
Y 0.0063 0.0023 0.0014 -0.0019 0.0016 0.0001  
Z -0.0032 -0.0017 -0.0023 0.0005 -0.0024 -0.0002  
AT. 16 C X -0.0063 0.0024 -0.0012 -0.0016 0.0014 -0.0004  
Y 0.0063 -0.0023 0.0014 0.0019 -0.0016 0.0001  
Z -0.0032 0.0017 -0.0023 -0.0005 0.0024 -0.0002  
AT. 17 H X -0.0076 -0.0042 -0.0127 0.0053 -0.0131 0.0002  
Y 0.0085 0.0023 -0.0027 -0.0017 -0.0020 0.0005  
Z -0.0059 -0.0021 -0.0008 0.0015 -0.0017 -0.0003

AT. 18 H X -0.0076 0.0042 -0.0127 -0.0053 0.0131 0.0002  
Y 0.0085 -0.0023 -0.0027 0.0017 0.0020 0.0005  
Z -0.0059 0.0021 -0.0008 -0.0015 0.0017 -0.0003

AT. 19 H X -0.0070 -0.0013 0.0054 0.0023 0.0056 0.0010  
Y 0.0043 0.0018 0.0094 -0.0030 0.0087 0.0002  
Z -0.0044 -0.0015 0.0027 0.0007 0.0026 0.0003

AT. 20 H X -0.0070 0.0013 0.0054 -0.0023 -0.0056 0.0010  
Y 0.0043 -0.0018 0.0094 0.0030 -0.0087 0.0002  
Z -0.0044 0.0015 0.0027 -0.0007 -0.0026 0.0003

AT. 21 C X 0.0031 0.0012 -0.0017 0.0004 -0.0014 -0.0001  
Y -0.0045 -0.0022 0.0006 -0.0006 0.0001 -0.0002  
Z -0.0036 -0.0018 0.0037 -0.0020 0.0029 -0.0001

AT. 22 C X 0.0031 -0.0012 -0.0017 -0.0004 0.0014 -0.0001  
Y -0.0045 0.0022 0.0006 0.0006 -0.0001 -0.0002  
Z -0.0036 0.0018 0.0037 0.0020 -0.0029 -0.0001

AT. 23 C X -0.0066 -0.0031 0.0027 -0.0011 0.0018 -0.0002  
Y 0.0030 0.0017 -0.0003 0.0001 0.0003 -0.0001  
Z 0.0067 0.0023 -0.0044 0.0018 -0.0036 0.0003

AT. 24 C X -0.0066 0.0031 0.0027 0.0011 -0.0018 -0.0002  
Y 0.0030 -0.0017 -0.0003 -0.0001 -0.0003 -0.0001  
Z 0.0067 -0.0023 -0.0044 -0.0018 0.0036 0.0003

AT. 25 H X -0.0068 -0.0008 0.0156 -0.0060 0.0153 0.0001  
Y 0.0030 0.0018 0.0010 -0.0002 0.0016 -0.0000  
Z 0.0101 0.0063 -0.0013 0.0002 0.0006 0.0001

AT. 26 H X -0.0068 0.0008 0.0156 0.0060 -0.0153 0.0001  
Y 0.0030 -0.0018 0.0010 0.0002 -0.0016 -0.0000  
Z 0.0101 -0.0063 -0.0013 -0.0002 -0.0006 0.0001

AT. 27 H X -0.0112 -0.0058 -0.0047 0.0021 -0.0058 0.0005  
Y -0.0013 -0.0023 -0.0074 0.0034 -0.0080 0.0006  
Z 0.0059 0.0014 -0.0064 0.0030 -0.0059 0.0003

AT. 28 H X -0.0112 0.0058 -0.0047 -0.0021 0.0058 0.0005  
Y -0.0013 0.0023 -0.0074 -0.0034 0.0080 0.0006

Z 0.0059 -0.0014 -0.0064 -0.0030 0.0059 0.0003  
AT. 29 C X -0.0086 -0.0095 0.0015 -0.0018 0.0010 -0.0008  
Y 0.0055 -0.0035 0.0095 -0.0041 0.0099 -0.0006  
Z 0.0198 0.0134 0.0035 -0.0016 0.0047 0.0000  
AT. 30 C X -0.0086 0.0095 0.0015 0.0018 -0.0010 -0.0008  
Y 0.0055 0.0035 0.0095 0.0041 -0.0099 -0.0006  
Z 0.0198 -0.0134 0.0035 0.0016 -0.0047 0.0000  
AT. 31 H X 0.0130 0.0055 0.0024 -0.0034 0.0028 -0.0006  
Y -0.0319 -0.0379 0.0127 -0.0061 0.0109 -0.0017  
Z -0.0228 -0.0289 0.0090 -0.0056 0.0075 -0.0017  
AT. 32 H X 0.0130 -0.0055 0.0024 0.0034 -0.0028 -0.0006  
Y -0.0319 0.0379 0.0127 0.0061 -0.0109 -0.0017  
Z -0.0228 0.0289 0.0090 0.0056 -0.0075 -0.0017  
AT. 33 H X 0.0141 0.0081 0.0074 -0.0048 0.0074 -0.0011  
Y 0.0617 0.0497 0.0028 0.0011 0.0067 0.0019  
Z 0.0113 0.0025 0.0106 -0.0057 0.0107 -0.0011  
AT. 34 H X 0.0141 -0.0081 0.0074 0.0048 -0.0074 -0.0011  
Y 0.0617 -0.0497 0.0028 -0.0011 -0.0067 0.0019  
Z 0.0113 -0.0025 0.0106 0.0057 -0.0107 -0.0011  
AT. 35 C X -0.0094 -0.0034 -0.0081 0.0032 -0.0087 0.0004  
Y -0.0105 -0.0032 -0.0115 0.0051 -0.0117 0.0006  
Z 0.0068 0.0096 -0.0016 0.0021 -0.0011 0.0004  
AT. 36 C X -0.0094 0.0034 -0.0081 -0.0032 0.0087 0.0004  
Y -0.0105 0.0032 -0.0115 -0.0051 0.0117 0.0006  
Z 0.0068 -0.0096 -0.0016 -0.0021 0.0011 0.0004  
AT. 37 C X 0.0137 0.0067 0.0061 -0.0028 0.0064 -0.0004  
Y 0.0160 0.0104 0.0135 -0.0047 0.0140 -0.0002  
Z -0.0119 -0.0029 -0.0004 0.0019 -0.0014 0.0002  
AT. 38 C X 0.0137 -0.0067 0.0061 0.0028 -0.0064 -0.0004  
Y 0.0160 -0.0104 0.0135 0.0047 -0.0140 -0.0002  
Z -0.0119 0.0029 -0.0004 -0.0019 0.0014 0.0002  
AT. 39 H X 0.0147 -0.0016 -0.0187 0.0023 -0.0166 -0.0002

Y 0.0194 0.0050 0.0147 -0.0089 0.0153 -0.0006  
Z -0.0128 -0.0062 -0.0177 0.0072 -0.0175 0.0005  
AT. 40 H X 0.0147 0.0016 -0.0187 -0.0023 0.0166 -0.0002  
Y 0.0194 -0.0050 0.0147 0.0089 -0.0153 -0.0006  
Z -0.0128 0.0062 -0.0177 -0.0072 0.0175 0.0005  
AT. 41 H X 0.0117 0.0133 0.0246 -0.0059 0.0235 -0.0003  
Y 0.0243 0.0149 0.0128 -0.0048 0.0138 -0.0003  
Z -0.0160 -0.0129 -0.0187 0.0053 -0.0186 0.0002  
AT. 42 H X 0.0117 -0.0133 0.0246 0.0059 -0.0235 -0.0003  
Y 0.0243 -0.0149 0.0128 0.0048 -0.0138 -0.0003  
Z -0.0160 0.0129 -0.0187 -0.0053 0.0186 0.0002  
AT. 43 C X -0.0040 -0.0035 -0.0030 0.0007 -0.0025 0.0005  
Y 0.0092 -0.0001 -0.0160 0.0044 -0.0143 0.0006  
Z -0.0034 -0.0025 -0.0008 -0.0001 -0.0007 -0.0002  
AT. 44 C X -0.0040 0.0035 -0.0030 -0.0007 0.0025 0.0005  
Y 0.0092 0.0001 -0.0160 -0.0044 0.0143 0.0006  
Z -0.0034 0.0025 -0.0008 0.0001 0.0007 -0.0002  
AT. 45 H X 0.0073 0.0040 0.0002 0.0002 0.0005 0.0000  
Y -0.0009 -0.0108 -0.0307 0.0071 -0.0270 0.0013  
Z -0.0019 0.0024 0.0114 -0.0025 0.0097 -0.0005  
AT. 46 H X 0.0073 -0.0040 0.0002 -0.0002 -0.0005 0.0000  
Y -0.0009 0.0108 -0.0307 -0.0071 0.0270 0.0013  
Z -0.0019 -0.0024 0.0114 0.0025 -0.0097 -0.0005  
AT. 47 H X 0.0007 0.0006 -0.0032 0.0010 -0.0033 0.0008  
Y 0.0195 0.0104 -0.0022 0.0020 -0.0025 0.0004  
Z 0.0007 0.0030 0.0143 -0.0033 0.0131 -0.0010  
AT. 48 H X 0.0007 -0.0006 -0.0032 -0.0010 0.0033 0.0008  
Y 0.0195 -0.0104 -0.0022 -0.0020 0.0025 0.0004  
Z 0.0007 -0.0030 0.0143 0.0033 -0.0131 -0.0010  
AT. 49 C X -0.0051 -0.0018 0.0101 -0.0030 0.0092 -0.0004  
Y -0.0093 -0.0039 0.0141 -0.0050 0.0124 -0.0007  
Z -0.0036 -0.0052 -0.0001 -0.0005 -0.0000 -0.0002

AT. 50 C X -0.0051 0.0018 0.0101 0.0030 -0.0092 -0.0004  
Y -0.0093 0.0039 0.0141 0.0050 -0.0124 -0.0007  
Z -0.0036 0.0052 -0.0001 0.0005 0.0000 -0.0002

AT. 51 C X 0.0140 0.0083 -0.0082 0.0040 -0.0065 0.0008  
Y 0.0070 0.0077 -0.0120 0.0043 -0.0106 0.0003  
Z 0.0001 -0.0057 -0.0053 0.0002 -0.0052 0.0001

AT. 52 C X 0.0140 -0.0083 -0.0082 -0.0040 0.0065 0.0008  
Y 0.0070 -0.0077 -0.0120 -0.0043 0.0106 0.0003  
Z 0.0001 0.0057 -0.0053 -0.0002 0.0052 0.0001

AT. 53 H X 0.0018 -0.0135 0.0078 -0.0035 0.0069 0.0003  
Y -0.0047 -0.0154 -0.0063 -0.0003 -0.0070 0.0002  
Z 0.0086 0.0058 -0.0267 0.0079 -0.0247 0.0008

AT. 54 H X 0.0018 0.0135 0.0078 0.0035 -0.0069 0.0003  
Y -0.0047 0.0154 -0.0063 0.0003 0.0070 0.0002  
Z 0.0086 -0.0058 -0.0267 -0.0079 0.0247 0.0008

AT. 55 H X 0.0284 0.0344 -0.0270 0.0129 -0.0223 0.0013  
Y 0.0072 0.0031 -0.0085 0.0019 -0.0077 0.0003  
Z 0.0107 0.0070 -0.0142 0.0034 -0.0127 0.0004

AT. 56 H X 0.0284 -0.0344 -0.0270 -0.0129 0.0223 0.0013  
Y 0.0072 -0.0031 -0.0085 -0.0019 0.0077 0.0003  
Z 0.0107 -0.0070 -0.0142 -0.0034 0.0127 0.0004

AT. 57 C X -0.0100 -0.0066 -0.0086 0.0030 -0.0084 0.0003  
Y -0.0083 0.0002 -0.0140 0.0058 -0.0136 0.0007  
Z 0.0032 0.0044 -0.0020 0.0016 -0.0014 0.0003

AT. 58 C X -0.0100 0.0066 -0.0086 -0.0030 0.0084 0.0003  
Y -0.0083 -0.0002 -0.0140 -0.0058 0.0136 0.0007  
Z 0.0032 -0.0044 -0.0020 -0.0016 0.0014 0.0003

AT. 59 H X 0.0586 0.0241 0.0621 -0.0232 0.0628 -0.0026  
Y -0.0281 -0.0159 -0.0226 0.0073 -0.0231 0.0008  
Z 0.0223 0.0020 0.0353 -0.0145 0.0351 -0.0018

AT. 60 H X 0.0586 -0.0241 0.0621 0.0232 -0.0628 -0.0026  
Y -0.0281 0.0159 -0.0226 -0.0073 0.0231 0.0008



Z 0.0223 -0.0020 0.0353 0.0145 -0.0351 -0.0018  
AT. 61 H X -0.0046 -0.0202 0.0243 -0.0123 0.0206 -0.0019  
Y 0.0326 0.0250 0.0231 -0.0052 0.0214 -0.0005  
Z -0.0131 -0.0187 0.0055 -0.0051 0.0041 -0.0007  
AT. 62 H X -0.0046 0.0202 0.0243 0.0123 -0.0206 -0.0019  
Y 0.0326 -0.0250 0.0231 0.0052 -0.0214 -0.0005  
Z -0.0131 0.0187 0.0055 0.0051 -0.0041 -0.0007  
AT. 63 H X -0.0200 0.0047 -0.0442 0.0198 -0.0421 0.0025  
Y 0.0376 0.0044 0.0590 -0.0252 0.0583 -0.0032  
Z -0.0262 -0.0099 -0.0302 0.0120 -0.0305 0.0015  
AT. 64 H X -0.0200 -0.0047 -0.0442 -0.0198 0.0421 0.0025  
Y 0.0376 -0.0044 0.0590 0.0252 -0.0583 -0.0032  
Z -0.0262 0.0099 -0.0302 -0.0120 0.0305 0.0015  
AT. 65 C X -0.0079 -0.0068 0.0096 -0.0037 0.0083 -0.0008  
Y -0.0054 -0.0004 0.0140 -0.0041 0.0122 -0.0007  
Z 0.0025 0.0032 0.0025 0.0001 0.0027 0.0000  
AT. 66 C X -0.0079 0.0068 0.0096 0.0037 -0.0083 -0.0008  
Y -0.0054 0.0004 0.0140 0.0041 -0.0122 -0.0007  
Z 0.0025 -0.0032 0.0025 -0.0001 -0.0027 0.0000  
AT. 67 H X 0.0272 0.0114 -0.0578 0.0181 -0.0509 0.0033  
Y -0.0004 0.0001 0.0086 -0.0020 0.0084 -0.0005  
Z -0.0307 -0.0120 0.0626 -0.0197 0.0548 -0.0035  
AT. 68 H X 0.0272 -0.0114 -0.0578 -0.0181 0.0509 0.0033  
Y -0.0004 -0.0001 0.0086 0.0020 -0.0084 -0.0005  
Z -0.0307 0.0120 0.0626 0.0197 -0.0548 -0.0035  
AT. 69 H X 0.0079 -0.0008 -0.0198 0.0069 -0.0177 0.0008  
Y 0.0157 0.0109 -0.0268 0.0101 -0.0248 0.0019  
Z 0.0028 0.0080 -0.0009 0.0002 -0.0019 0.0007  
AT. 70 H X 0.0079 0.0008 -0.0198 -0.0069 0.0177 0.0008  
Y 0.0157 -0.0109 -0.0268 -0.0101 0.0248 0.0019  
Z 0.0028 -0.0080 -0.0009 -0.0002 0.0019 0.0007  
AT. 71 H X -0.0204 -0.0100 0.0281 -0.0104 0.0232 -0.0016

Y 0.0271 0.0134 -0.0435 0.0149 -0.0371 0.0025  
Z 0.0379 0.0198 -0.0628 0.0216 -0.0541 0.0037  
AT. 72 H X -0.0204 0.0100 0.0281 0.0104 -0.0232 -0.0016  
Y 0.0271 -0.0134 -0.0435 -0.0149 0.0371 0.0025  
Z 0.0379 -0.0198 -0.0628 -0.0216 0.0541 0.0037  
AT. 73 C X 0.0011 0.0097 0.0022 0.0011 0.0016 0.0004  
Y -0.0146 -0.0103 0.0040 -0.0015 0.0028 -0.0002  
Z -0.0091 -0.0103 -0.0004 -0.0019 -0.0014 -0.0004  
AT. 74 C X 0.0011 -0.0097 0.0022 -0.0011 -0.0016 0.0004  
Y -0.0146 0.0103 0.0040 0.0015 -0.0028 -0.0002  
Z -0.0091 0.0103 -0.0004 0.0019 0.0014 -0.0004  
AT. 75 H X 0.0233 0.0230 -0.0313 0.0130 -0.0287 0.0016  
Y -0.0053 -0.0133 0.0169 -0.0081 0.0170 -0.0013  
Z 0.0203 -0.0047 -0.0071 -0.0022 -0.0040 -0.0011  
AT. 76 H X 0.0233 -0.0230 -0.0313 -0.0130 0.0287 0.0016  
Y -0.0053 0.0133 0.0169 0.0081 -0.0170 -0.0013  
Z 0.0203 0.0047 -0.0071 0.0022 0.0040 -0.0011  
AT. 77 H X 0.0103 0.0124 0.0218 -0.0065 0.0220 -0.0008  
Y 0.0063 -0.0061 -0.0219 0.0061 -0.0200 0.0003  
Z -0.0367 -0.0168 0.0054 -0.0019 0.0008 0.0002  
AT. 78 H X 0.0103 -0.0124 0.0218 0.0065 -0.0220 -0.0008  
Y 0.0063 0.0061 -0.0219 -0.0061 0.0200 0.0003  
Z -0.0367 0.0168 0.0054 0.0019 -0.0008 0.0002  
AT. 79 I X 0.0000 0.0000 -0.0000 0.0000 0.0001 0.0001  
Y -0.0000 -0.0001 -0.0000 -0.0001 -0.0000 -0.0001  
Z 0.0000 -0.0000 -0.0000 -0.0001 -0.0000 -0.0001  
AT. 80 I X 0.0000 -0.0000 -0.0000 -0.0000 -0.0001 0.0001  
Y -0.0000 0.0001 -0.0000 0.0001 0.0000 -0.0001  
Z 0.0000 0.0000 -0.0000 0.0001 0.0000 -0.0001  
AT. 81 I X -0.0000 0.0001 -0.0000 -0.0001 -0.0000 -0.0000  
Y -0.0000 0.0000 0.0000 0.0001 0.0001 0.0001  
Z -0.0000 -0.0001 -0.0000 -0.0000 -0.0000 -0.0000

AT. 82 I X -0.0000 -0.0001 -0.0000 0.0001 0.0000 -0.0000  
Y -0.0000 -0.0000 0.0000 -0.0001 -0.0001 0.0001  
Z -0.0000 0.0001 -0.0000 0.0000 0.0000 -0.0000

AT. 83 O X 0.0010 0.0033 0.0004 0.0031 0.0008 0.0007  
Y -0.0002 -0.0003 -0.0002 -0.0004 -0.0003 0.0001  
Z 0.0006 0.0026 0.0002 0.0021 0.0005 0.0004

AT. 84 O X 0.0010 -0.0033 0.0004 -0.0031 -0.0008 0.0007  
Y -0.0002 0.0003 -0.0002 0.0004 0.0003 0.0001  
Z 0.0006 -0.0026 0.0002 -0.0021 -0.0005 0.0004

AT. 85 O X -0.0002 0.0038 -0.0005 -0.0017 -0.0004 -0.0006  
Y -0.0001 0.0034 -0.0003 -0.0019 -0.0004 -0.0012  
Z 0.0000 -0.0029 0.0004 0.0021 0.0006 0.0012

AT. 86 O X -0.0002 -0.0038 -0.0005 0.0017 0.0004 -0.0006  
Y -0.0001 -0.0034 -0.0003 0.0019 0.0004 -0.0012  
Z 0.0000 0.0029 0.0004 -0.0021 -0.0006 0.0012

AT. 87 N X -0.0006 -0.0005 0.0003 0.0057 0.0021 0.0054  
Y -0.0004 -0.0004 -0.0001 -0.0009 -0.0001 0.0000  
Z -0.0004 -0.0049 0.0002 -0.0047 -0.0014 -0.0023

AT. 88 N X -0.0006 0.0005 0.0003 -0.0057 -0.0021 0.0054  
Y -0.0004 0.0004 -0.0001 0.0009 0.0001 0.0000  
Z -0.0004 0.0049 0.0002 0.0047 0.0014 -0.0023

AT. 89 N X -0.0003 -0.0000 -0.0004 -0.0065 -0.0025 -0.0067  
Y 0.0000 -0.0024 0.0005 0.0031 0.0009 0.0010  
Z 0.0001 0.0051 -0.0007 -0.0067 -0.0024 -0.0060

AT. 90 N X -0.0003 0.0000 -0.0004 0.0065 0.0025 -0.0067  
Y 0.0000 0.0024 0.0005 -0.0031 -0.0009 0.0010  
Z 0.0001 -0.0051 -0.0007 0.0067 0.0024 -0.0060

AT. 91 C X 0.0003 0.0029 -0.0001 0.0035 0.0009 0.0014  
Y 0.0018 0.0056 0.0007 0.0084 0.0024 0.0021  
Z -0.0004 -0.0016 -0.0003 -0.0047 -0.0015 -0.0023

AT. 92 C X 0.0003 -0.0029 -0.0001 -0.0035 -0.0009 0.0014  
Y 0.0018 -0.0056 0.0007 -0.0084 -0.0024 0.0021

Z -0.0004 0.0016 -0.0003 0.0047 0.0015 -0.0023  
AT. 93 C X -0.0011 -0.0057 -0.0001 -0.0042 -0.0014 -0.0031  
Y -0.0010 -0.0036 -0.0004 -0.0053 -0.0013 -0.0016  
Z -0.0001 0.0024 -0.0003 0.0009 0.0008 0.0020  
AT. 94 C X -0.0011 0.0057 -0.0001 0.0042 0.0014 -0.0031  
Y -0.0010 0.0036 -0.0004 0.0053 0.0013 -0.0016  
Z -0.0001 -0.0024 -0.0003 -0.0009 -0.0008 0.0020  
AT. 95 H X -0.0037 -0.0134 -0.0024 -0.0361 -0.0097 -0.0135  
Y -0.0016 -0.0040 -0.0003 0.0013 0.0009 0.0026  
Z 0.0034 0.0103 0.0018 0.0210 0.0051 0.0058  
AT. 96 H X -0.0037 0.0134 -0.0024 0.0361 0.0097 -0.0135  
Y -0.0016 0.0040 -0.0003 -0.0013 -0.0009 0.0026  
Z 0.0034 -0.0103 0.0018 -0.0210 -0.0051 0.0058  
AT. 97 H X -0.0002 -0.0024 0.0013 0.0114 0.0030 0.0012  
Y 0.0031 0.0033 0.0011 0.0027 -0.0011 -0.0054  
Z 0.0007 0.0035 -0.0003 -0.0012 -0.0003 -0.0000  
AT. 98 H X -0.0002 0.0024 0.0013 -0.0114 -0.0030 0.0012  
Y 0.0031 -0.0033 0.0011 -0.0027 0.0011 -0.0054  
Z 0.0007 -0.0035 -0.0003 0.0012 0.0003 -0.0000  
AT. 99 C X 0.0001 0.0031 -0.0004 -0.0037 -0.0012 -0.0029  
Y -0.0001 0.0022 -0.0005 -0.0017 -0.0006 -0.0010  
Z -0.0002 0.0016 -0.0006 -0.0064 -0.0022 -0.0049  
AT. 100 C X 0.0001 -0.0031 -0.0004 0.0037 0.0012 -0.0029  
Y -0.0001 -0.0022 -0.0005 0.0017 0.0006 -0.0010  
Z -0.0002 -0.0016 -0.0006 0.0064 0.0022 -0.0049  
AT. 101 C X 0.0002 -0.0058 0.0009 0.0063 0.0020 0.0047  
Y 0.0002 -0.0014 0.0002 -0.0002 -0.0001 -0.0004  
Z 0.0002 -0.0034 0.0007 0.0068 0.0024 0.0059  
AT. 102 C X 0.0002 0.0058 0.0009 -0.0063 -0.0020 0.0047  
Y 0.0002 0.0014 0.0002 0.0002 0.0001 -0.0004  
Z 0.0002 0.0034 0.0007 -0.0068 -0.0024 0.0059  
AT. 103 H X 0.0007 -0.0039 0.0014 0.0212 0.0076 0.0211

Y -0.0000 -0.0022 -0.0000 -0.0056 -0.0022 -0.0067  
Z 0.0005 -0.0097 0.0012 0.0007 -0.0000 -0.0013  
AT. 104 H X 0.0007 0.0039 0.0014 -0.0212 -0.0076 0.0211  
Y -0.0000 0.0022 -0.0000 0.0056 0.0022 -0.0067  
Z 0.0005 0.0097 0.0012 -0.0007 0.0000 -0.0013  
AT. 105 H X 0.0004 -0.0098 0.0008 0.0010 -0.0001 -0.0002  
Y -0.0002 0.0062 0.0002 0.0106 0.0042 0.0118  
Z 0.0001 -0.0017 0.0007 0.0103 0.0037 0.0095  
AT. 106 H X 0.0004 0.0098 0.0008 -0.0010 0.0001 -0.0002  
Y -0.0002 -0.0062 0.0002 -0.0106 -0.0042 0.0118  
Z 0.0001 0.0017 0.0007 -0.0103 -0.0037 0.0095  
AT. 107 C X -0.0018 -0.0126 0.0005 -0.0047 -0.0013 -0.0008  
Y 0.0030 0.0018 -0.0001 -0.0060 -0.0025 -0.0068  
Z -0.0025 -0.0129 0.0006 0.0020 -0.0006 -0.0034  
AT. 108 C X -0.0018 0.0126 0.0005 0.0047 0.0013 -0.0008  
Y 0.0030 -0.0018 -0.0001 0.0060 0.0025 -0.0068  
Z -0.0025 0.0129 0.0006 -0.0020 0.0006 -0.0034  
AT. 109 H X 0.0065 0.0224 -0.0013 -0.0055 -0.0010 0.0012  
Y 0.0101 0.0298 -0.0014 -0.0094 -0.0031 -0.0085  
Z 0.0074 0.0242 -0.0011 -0.0039 -0.0018 -0.0072  
AT. 110 H X 0.0065 -0.0224 -0.0013 0.0055 0.0010 0.0012  
Y 0.0101 -0.0298 -0.0014 0.0094 0.0031 -0.0085  
Z 0.0074 -0.0242 -0.0011 0.0039 0.0018 -0.0072  
AT. 111 H X -0.0021 -0.0106 0.0006 -0.0051 -0.0002 0.0053  
Y -0.0107 -0.0534 0.0023 0.0021 -0.0016 -0.0052  
Z 0.0009 -0.0027 -0.0001 0.0005 -0.0020 -0.0105  
AT. 112 H X -0.0021 0.0106 0.0006 0.0051 0.0002 0.0053  
Y -0.0107 0.0534 0.0023 -0.0021 0.0016 -0.0052  
Z 0.0009 0.0027 -0.0001 -0.0005 0.0020 -0.0105  
AT. 113 C X -0.0000 -0.0053 0.0002 -0.0019 -0.0009 -0.0022  
Y 0.0000 0.0074 -0.0000 0.0099 0.0045 0.0124  
Z -0.0024 -0.0067 0.0004 0.0027 0.0009 0.0023

AT.114 C X -0.0000 0.0053 0.0002 0.0019 0.0009 -0.0022  
Y 0.0000 -0.0074 -0.0000 -0.0099 -0.0045 0.0124  
Z -0.0024 0.0067 0.0004 -0.0027 -0.0009 0.0023

AT.115 C X 0.0009 0.0066 -0.0003 -0.0006 0.0002 0.0016  
Y -0.0023 -0.0154 -0.0000 -0.0143 -0.0061 -0.0143  
Z -0.0011 0.0075 -0.0007 -0.0046 -0.0010 -0.0009

AT.116 C X 0.0009 -0.0066 -0.0003 0.0006 -0.0002 0.0016  
Y -0.0023 0.0154 -0.0000 0.0143 0.0061 -0.0143  
Z -0.0011 -0.0075 -0.0007 0.0046 0.0010 -0.0009

AT.117 H X -0.0026 0.0046 -0.0018 -0.0300 -0.0107 -0.0225  
Y 0.0027 -0.0165 0.0011 0.0019 -0.0011 -0.0074  
Z 0.0013 0.0097 0.0006 0.0223 0.0091 0.0222

AT.118 H X -0.0026 -0.0046 -0.0018 0.0300 0.0107 -0.0225  
Y 0.0027 0.0165 0.0011 -0.0019 0.0011 -0.0074  
Z 0.0013 -0.0097 0.0006 -0.0223 -0.0091 0.0222

AT.119 H X 0.0053 0.0066 0.0015 0.0307 0.0113 0.0246  
Y -0.0038 -0.0207 0.0001 -0.0184 -0.0075 -0.0170  
Z 0.0028 0.0125 0.0002 0.0168 0.0066 0.0143

AT.120 H X 0.0053 -0.0066 0.0015 -0.0307 -0.0113 0.0246  
Y -0.0038 0.0207 0.0001 0.0184 0.0075 -0.0170  
Z 0.0028 -0.0125 0.0002 -0.0168 -0.0066 0.0143

AT.121 C X -0.0011 -0.0033 0.0005 0.0046 0.0015 0.0021  
Y 0.0020 -0.0044 0.0012 0.0148 0.0062 0.0192  
Z 0.0011 0.0031 -0.0003 0.0024 0.0007 0.0006

AT.122 C X -0.0011 0.0033 0.0005 -0.0046 -0.0015 0.0021  
Y 0.0020 0.0044 0.0012 -0.0148 -0.0062 0.0192  
Z 0.0011 -0.0031 -0.0003 -0.0024 -0.0007 0.0006

AT.123 H X 0.0022 0.0049 -0.0003 0.0108 0.0035 0.0088  
Y 0.0060 -0.0010 0.0010 0.0258 0.0105 0.0326  
Z -0.0025 0.0013 -0.0003 -0.0082 -0.0035 -0.0126

AT.124 H X 0.0022 -0.0049 -0.0003 -0.0108 -0.0035 0.0088  
Y 0.0060 0.0010 0.0010 -0.0258 -0.0105 0.0326

Z -0.0025 -0.0013 -0.0003 0.0082 0.0035 -0.0126  
AT. 125 H X -0.0010 -0.0033 0.0002 0.0007 -0.0003 -0.0046  
Y -0.0038 -0.0111 0.0017 0.0012 0.0013 0.0048  
Z -0.0017 -0.0002 -0.0003 -0.0093 -0.0041 -0.0152  
AT. 126 H X -0.0010 0.0033 0.0002 -0.0007 0.0003 -0.0046  
Y -0.0038 0.0111 0.0017 -0.0012 -0.0013 0.0048  
Z -0.0017 0.0002 -0.0003 0.0093 0.0041 -0.0152  
AT. 127 C X -0.0005 0.0003 0.0002 0.0038 0.0016 0.0043  
Y 0.0001 0.0068 -0.0013 -0.0156 -0.0061 -0.0183  
Z 0.0029 0.0029 -0.0001 0.0007 0.0003 0.0008  
AT. 128 C X -0.0005 -0.0003 0.0002 -0.0038 -0.0016 0.0043  
Y 0.0001 -0.0068 -0.0013 0.0156 0.0061 -0.0183  
Z 0.0029 -0.0029 -0.0001 -0.0007 -0.0003 0.0008  
AT. 129 C X 0.0004 0.0083 -0.0009 -0.0031 -0.0014 -0.0056  
Y -0.0043 -0.0076 0.0007 0.0126 0.0042 0.0117  
Z 0.0017 0.0014 0.0004 0.0056 0.0025 0.0074  
AT. 130 C X 0.0004 -0.0083 -0.0009 0.0031 0.0014 -0.0056  
Y -0.0043 0.0076 0.0007 -0.0126 -0.0042 0.0117  
Z 0.0017 -0.0014 0.0004 -0.0056 -0.0025 0.0074  
AT. 131 H X -0.0064 -0.0008 -0.0004 0.0131 0.0036 0.0061  
Y 0.0089 0.0097 0.0010 0.0073 0.0042 0.0109  
Z -0.0017 -0.0035 0.0013 0.0256 0.0093 0.0230  
AT. 132 H X -0.0064 0.0008 -0.0004 -0.0131 -0.0036 0.0061  
Y 0.0089 -0.0097 0.0010 -0.0073 -0.0042 0.0109  
Z -0.0017 0.0035 0.0013 -0.0256 -0.0093 0.0230  
AT. 133 H X 0.0113 0.0216 -0.0009 -0.0166 -0.0048 -0.0146  
Y -0.0060 -0.0103 0.0009 0.0144 0.0048 0.0121  
Z -0.0064 -0.0096 0.0007 0.0154 0.0052 0.0129  
AT. 134 H X 0.0113 -0.0216 -0.0009 0.0166 0.0048 -0.0146  
Y -0.0060 0.0103 0.0009 -0.0144 -0.0048 0.0121  
Z -0.0064 0.0096 0.0007 -0.0154 -0.0052 0.0129  
AT. 135 C X -0.0020 -0.0058 0.0002 -0.0018 -0.0010 -0.0034

Y -0.0010 0.0063 0.0001 0.0119 0.0053 0.0142  
Z -0.0000 -0.0035 0.0004 0.0037 0.0016 0.0043  
AT. 136 C X -0.0020 0.0058 0.0002 0.0018 0.0010 -0.0034  
Y -0.0010 -0.0063 0.0001 -0.0119 -0.0053 0.0142  
Z -0.0000 0.0035 0.0004 -0.0037 -0.0016 0.0043  
AT. 137 H X -0.0008 0.0420 -0.0011 0.0381 0.0173 0.0469  
Y 0.0005 0.0069 -0.0006 -0.0035 -0.0012 -0.0027  
Z 0.0021 -0.0195 -0.0002 -0.0353 -0.0155 -0.0409  
AT. 138 H X -0.0008 -0.0420 -0.0011 -0.0381 -0.0173 0.0469  
Y 0.0005 -0.0069 -0.0006 0.0035 0.0012 -0.0027  
Z 0.0021 0.0195 -0.0002 0.0353 0.0155 -0.0409  
AT. 139 H X -0.0055 -0.0170 0.0017 0.0188 0.0072 0.0177  
Y -0.0013 -0.0217 0.0005 -0.0185 -0.0086 -0.0239  
Z 0.0045 0.0192 -0.0017 -0.0144 -0.0052 -0.0123  
AT. 140 H X -0.0055 0.0170 0.0017 -0.0188 -0.0072 0.0177  
Y -0.0013 0.0217 0.0005 0.0185 0.0086 -0.0239  
Z 0.0045 -0.0192 -0.0017 0.0144 0.0052 -0.0123  
AT. 141 H X 0.0024 -0.0082 -0.0015 -0.0476 -0.0206 -0.0552  
Y 0.0010 -0.0155 -0.0004 -0.0327 -0.0143 -0.0387  
Z -0.0003 0.0186 0.0001 0.0311 0.0138 0.0378  
AT. 142 H X 0.0024 0.0082 -0.0015 0.0476 0.0206 -0.0552  
Y 0.0010 0.0155 -0.0004 0.0327 0.0143 -0.0387  
Z -0.0003 -0.0186 0.0001 -0.0311 -0.0138 0.0378  
AT. 143 C X -0.0025 -0.0049 0.0005 0.0033 0.0013 0.0040  
Y -0.0000 0.0049 -0.0010 -0.0139 -0.0056 -0.0162  
Z 0.0004 -0.0023 0.0000 -0.0022 -0.0010 -0.0021  
AT. 144 C X -0.0025 0.0049 0.0005 -0.0033 -0.0013 0.0040  
Y -0.0000 -0.0049 -0.0010 0.0139 0.0056 -0.0162  
Z 0.0004 0.0023 0.0000 0.0022 0.0010 -0.0021  
AT. 145 H X 0.0054 0.0160 -0.0041 -0.0548 -0.0223 -0.0639  
Y 0.0007 -0.0062 0.0008 0.0103 0.0039 0.0120  
Z 0.0017 0.0150 -0.0032 -0.0433 -0.0173 -0.0505



AT. 146 H X 0.0054 -0.0160 -0.0041 0.0548 0.0223 -0.0639  
Y 0.0007 0.0062 0.0008 -0.0103 -0.0039 0.0120  
Z 0.0017 -0.0150 -0.0032 0.0433 0.0173 -0.0505

AT. 147 H X -0.0067 0.0024 -0.0006 -0.0120 -0.0045 -0.0134  
Y -0.0022 -0.0117 0.0020 0.0268 0.0108 0.0294  
Z -0.0068 -0.0006 0.0001 -0.0019 -0.0003 -0.0020

AT. 148 H X -0.0067 -0.0024 -0.0006 0.0120 0.0045 -0.0134  
Y -0.0022 0.0117 0.0020 -0.0268 -0.0108 0.0294  
Z -0.0068 0.0006 0.0001 0.0019 0.0003 -0.0020

AT. 149 H X 0.0008 -0.0260 0.0039 0.0469 0.0184 0.0555  
Y -0.0011 -0.0132 0.0022 0.0281 0.0112 0.0336  
Z -0.0032 -0.0223 0.0038 0.0471 0.0188 0.0562

AT. 150 H X 0.0008 0.0260 0.0039 -0.0469 -0.0184 0.0555  
Y -0.0011 0.0132 0.0022 -0.0281 -0.0112 0.0336  
Z -0.0032 0.0223 0.0038 -0.0471 -0.0188 0.0562

AT. 151 C X 0.0054 0.0078 -0.0003 0.0011 0.0005 0.0019  
Y 0.0019 0.0091 -0.0006 -0.0049 -0.0014 -0.0054  
Z -0.0001 0.0076 -0.0005 -0.0029 -0.0009 -0.0031

AT. 152 C X 0.0054 -0.0078 -0.0003 -0.0011 -0.0005 0.0019  
Y 0.0019 -0.0091 -0.0006 0.0049 0.0014 -0.0054  
Z -0.0001 -0.0076 -0.0005 0.0029 0.0009 -0.0031

AT. 153 H X 0.0091 0.0180 -0.0022 -0.0289 -0.0113 -0.0334  
Y 0.0026 0.0006 -0.0003 -0.0047 -0.0022 -0.0047  
Z -0.0005 -0.0105 0.0007 0.0104 0.0029 0.0131

AT. 154 H X 0.0091 -0.0180 -0.0022 0.0289 0.0113 -0.0334  
Y 0.0026 -0.0006 -0.0003 0.0047 0.0022 -0.0047  
Z -0.0005 0.0105 0.0007 -0.0104 -0.0029 0.0131

AT. 155 H X 0.0062 0.0119 0.0007 0.0241 0.0100 0.0299  
Y 0.0016 -0.0045 0.0007 0.0141 0.0050 0.0177  
Z 0.0005 0.0237 -0.0015 -0.0148 -0.0041 -0.0177

AT. 156 H X 0.0062 -0.0119 0.0007 -0.0241 -0.0100 0.0299  
Y 0.0016 0.0045 0.0007 -0.0141 -0.0050 0.0177

Z 0.0005 -0.0237 -0.0015 0.0148 0.0041 -0.0177  
AT. 157 O X 0.0007 0.0005 0.0000 -0.0002 0.0002 0.0000  
Y 0.0002 0.0001 -0.0000 -0.0002 -0.0000 -0.0000  
Z 0.0003 0.0007 0.0001 0.0002 0.0002 0.0002  
AT. 158 O X 0.0007 -0.0005 0.0000 0.0002 -0.0002 0.0000  
Y 0.0002 -0.0001 -0.0000 0.0002 0.0000 -0.0000  
Z 0.0003 -0.0007 0.0001 -0.0002 -0.0002 0.0002  
AT. 159 O X -0.0007 -0.0002 0.0000 0.0004 -0.0000 0.0000  
Y -0.0002 -0.0006 0.0000 0.0000 -0.0002 -0.0004  
Z -0.0001 -0.0000 -0.0000 -0.0002 -0.0000 -0.0003  
AT. 160 O X -0.0007 0.0002 0.0000 -0.0004 0.0000 0.0000  
Y -0.0002 0.0006 0.0000 -0.0000 0.0002 -0.0004  
Z -0.0001 0.0000 -0.0000 0.0002 0.0000 -0.0003  
AT. 161 H X -0.0070 -0.0096 -0.0006 -0.0030 -0.0048 -0.0028  
Y 0.0035 0.0038 0.0004 0.0002 0.0017 0.0010  
Z -0.0138 -0.0161 -0.0016 -0.0028 -0.0076 -0.0043  
AT. 162 H X -0.0070 0.0096 -0.0006 0.0030 0.0048 -0.0028  
Y 0.0035 -0.0038 0.0004 -0.0002 -0.0017 0.0010  
Z -0.0138 0.0161 -0.0016 0.0028 0.0076 -0.0043  
AT. 163 H X 0.0001 0.0009 0.0000 0.0003 0.0004 -0.0000  
Y 0.0050 0.0085 -0.0003 -0.0002 0.0037 0.0059  
Z 0.0011 0.0016 -0.0001 -0.0002 0.0007 0.0013  
AT. 164 H X 0.0001 -0.0009 0.0000 -0.0003 -0.0004 -0.0000  
Y 0.0050 -0.0085 -0.0003 0.0002 -0.0037 0.0059  
Z 0.0011 -0.0016 -0.0001 0.0002 -0.0007 0.0013  
AT. 165 O X -0.0002 -0.0004 0.0001 -0.0001 -0.0000 -0.0000  
Y 0.0000 0.0000 -0.0002 -0.0000 -0.0001 -0.0001  
Z -0.0001 0.0004 -0.0003 0.0003 0.0004 -0.0002  
AT. 166 O X -0.0002 0.0004 0.0001 0.0001 0.0000 -0.0000  
Y 0.0000 -0.0000 -0.0002 0.0000 0.0001 -0.0001  
Z -0.0001 -0.0004 -0.0003 -0.0003 -0.0004 -0.0002  
AT. 167 H X 0.0003 0.0014 -0.0014 0.0002 -0.0007 0.0003

Y -0.0007 -0.0030 0.0027 -0.0013 0.0015 -0.0009  
Z -0.0001 0.0002 -0.0004 0.0015 -0.0002 -0.0001  
AT. 168 H X 0.0003 -0.0014 -0.0014 -0.0002 0.0007 0.0003  
Y -0.0007 0.0030 0.0027 0.0013 -0.0015 -0.0009  
Z -0.0001 -0.0002 -0.0004 -0.0015 0.0002 -0.0001  
AT. 169 O X 0.0001 0.0001 -0.0002 -0.0000 0.0001 0.0000  
Y -0.0001 0.0001 0.0001 -0.0002 -0.0000 0.0002  
Z 0.0000 -0.0005 0.0003 -0.0002 -0.0003 0.0001  
AT. 170 O X 0.0001 -0.0001 -0.0002 0.0000 -0.0001 0.0000  
Y -0.0001 -0.0001 0.0001 0.0002 0.0000 0.0002  
Z 0.0000 0.0005 0.0003 0.0002 0.0003 0.0001  
AT. 171 H X -0.0005 -0.0005 0.0029 0.0028 -0.0005 -0.0023  
Y -0.0000 0.0002 0.0015 0.0015 -0.0003 -0.0010  
Z 0.0005 0.0003 0.0001 0.0001 -0.0003 0.0005  
AT. 172 H X -0.0005 0.0005 0.0029 -0.0028 0.0005 -0.0023  
Y -0.0000 -0.0002 0.0015 -0.0015 0.0003 -0.0010  
Z 0.0005 -0.0003 0.0001 -0.0001 0.0003 0.0005  
  
FREQ(CM\*\*-1) 989.04 1005.66 1009.24 1010.18 1011.29 1011.87

AT. 1 I X -0.0000 0.0000 -0.0001 -0.0001 0.0001 -0.0000  
Y -0.0000 -0.0000 -0.0001 -0.0000 0.0001 -0.0000  
Z -0.0000 -0.0000 -0.0000 -0.0000 0.0001 -0.0000  
AT. 2 I X 0.0000 0.0000 0.0001 -0.0001 0.0001 0.0000  
Y 0.0000 -0.0000 0.0001 -0.0000 0.0001 0.0000  
Z 0.0000 -0.0000 0.0000 -0.0000 0.0001 0.0000  
AT. 3 I X -0.0000 0.0001 0.0001 0.0000 -0.0001 0.0001  
Y -0.0000 0.0000 0.0001 0.0000 -0.0001 0.0001  
Z 0.0000 0.0000 0.0000 0.0000 -0.0000 0.0000  
AT. 4 I X 0.0000 0.0001 -0.0001 0.0000 -0.0001 -0.0001  
Y 0.0000 0.0000 -0.0001 0.0000 -0.0001 -0.0001  
Z -0.0000 0.0000 -0.0000 0.0000 -0.0000 -0.0000

AT. 5 O X 0.0022 -0.0008 -0.0026 -0.0006 0.0046 -0.0032  
Y -0.0017 0.0001 0.0012 0.0001 -0.0025 0.0018  
Z -0.0024 0.0016 0.0040 0.0012 -0.0069 0.0047

AT. 6 O X -0.0022 -0.0008 0.0026 -0.0006 0.0046 0.0032  
Y 0.0017 0.0001 -0.0012 0.0001 -0.0025 -0.0018  
Z 0.0024 0.0016 -0.0040 0.0012 -0.0069 -0.0047

AT. 7 O X -0.0007 0.0018 0.0025 0.0009 -0.0045 0.0032  
Y 0.0005 -0.0014 -0.0026 -0.0009 0.0048 -0.0033  
Z -0.0008 0.0014 0.0025 0.0009 -0.0047 0.0033

AT. 8 O X 0.0007 0.0018 -0.0025 0.0009 -0.0045 -0.0032  
Y -0.0005 -0.0014 0.0026 -0.0009 0.0048 0.0033  
Z 0.0008 0.0014 -0.0025 0.0009 -0.0047 -0.0033

AT. 9 N X 0.0005 -0.0013 -0.0033 -0.0011 0.0058 -0.0038  
Y 0.0006 -0.0003 -0.0005 -0.0000 0.0009 -0.0007  
Z 0.0007 -0.0035 -0.0068 -0.0025 0.0116 -0.0077

AT. 10 N X -0.0005 -0.0013 0.0033 -0.0011 0.0058 0.0038  
Y -0.0006 -0.0003 0.0005 -0.0000 0.0009 0.0007  
Z -0.0007 -0.0035 0.0068 -0.0025 0.0116 0.0077

AT. 11 N X -0.0004 0.0014 0.0027 0.0008 -0.0051 0.0035  
Y -0.0013 0.0024 0.0048 0.0012 -0.0084 0.0057  
Z 0.0014 -0.0025 -0.0059 -0.0011 0.0106 -0.0071

AT. 12 N X 0.0004 0.0014 -0.0027 0.0008 -0.0051 -0.0035  
Y 0.0013 0.0024 -0.0048 0.0012 -0.0084 -0.0057  
Z -0.0014 -0.0025 0.0059 -0.0011 0.0106 0.0071

AT. 13 C X -0.0001 -0.0013 -0.0027 -0.0010 0.0046 -0.0031  
Y -0.0004 0.0034 0.0052 0.0021 -0.0084 0.0057  
Z 0.0004 -0.0014 -0.0020 -0.0007 0.0033 -0.0025

AT. 14 C X 0.0001 -0.0013 0.0027 -0.0010 0.0046 0.0031  
Y 0.0004 0.0034 -0.0052 0.0021 -0.0084 -0.0057  
Z -0.0004 -0.0014 0.0020 -0.0007 0.0033 0.0025

AT. 15 C X -0.0017 0.0023 0.0040 0.0014 -0.0069 0.0048  
Y 0.0020 -0.0022 -0.0047 -0.0016 0.0081 -0.0054

Z 0.0005 0.0017 0.0019 0.0006 -0.0035 0.0023  
AT. 16 C X 0.0017 0.0023 -0.0040 0.0014 -0.0069 -0.0048  
Y -0.0020 -0.0022 0.0047 -0.0016 0.0081 0.0054  
Z -0.0005 0.0017 -0.0019 0.0006 -0.0035 -0.0023  
AT. 17 H X -0.0017 0.0068 0.0165 0.0052 -0.0278 0.0185  
Y 0.0034 -0.0020 -0.0059 -0.0021 0.0093 -0.0070  
Z -0.0014 0.0025 0.0074 0.0025 -0.0116 0.0085  
AT. 18 H X 0.0017 0.0068 -0.0165 0.0052 -0.0278 -0.0185  
Y -0.0034 -0.0020 0.0059 -0.0021 0.0093 0.0070  
Z 0.0014 0.0025 -0.0074 0.0025 -0.0116 -0.0085  
AT. 19 H X -0.0070 -0.0036 0.0013 -0.0008 -0.0028 0.0021  
Y 0.0001 -0.0045 -0.0049 -0.0015 0.0090 -0.0059  
Z -0.0027 -0.0006 0.0012 0.0001 -0.0021 0.0015  
AT. 20 H X 0.0070 -0.0036 -0.0013 -0.0008 -0.0028 -0.0021  
Y -0.0001 -0.0045 0.0049 -0.0015 0.0090 0.0059  
Z 0.0027 -0.0006 -0.0012 0.0001 -0.0021 -0.0015  
AT. 21 C X -0.0006 0.0006 0.0027 0.0003 -0.0048 0.0031  
Y 0.0008 -0.0018 -0.0030 -0.0007 0.0052 -0.0035  
Z 0.0017 -0.0028 -0.0049 -0.0011 0.0086 -0.0057  
AT. 22 C X 0.0006 0.0006 -0.0027 0.0003 -0.0048 -0.0031  
Y -0.0008 -0.0018 0.0030 -0.0007 0.0052 0.0035  
Z -0.0017 -0.0028 0.0049 -0.0011 0.0086 0.0057  
AT. 23 C X 0.0013 -0.0020 -0.0041 -0.0010 0.0074 -0.0048  
Y -0.0007 0.0011 0.0017 0.0005 -0.0032 0.0021  
Z -0.0012 0.0021 0.0045 0.0010 -0.0078 0.0054  
AT. 24 C X -0.0013 -0.0020 0.0041 -0.0010 0.0074 0.0048  
Y 0.0007 0.0011 -0.0017 0.0005 -0.0032 -0.0021  
Z 0.0012 0.0021 -0.0045 0.0010 -0.0078 -0.0054  
AT. 25 H X 0.0045 -0.0061 -0.0124 -0.0028 0.0215 -0.0157  
Y -0.0005 0.0003 0.0006 0.0003 -0.0012 0.0007  
Z -0.0028 0.0039 0.0067 0.0013 -0.0128 0.0070  
AT. 26 H X -0.0045 -0.0061 0.0124 -0.0028 0.0215 0.0157

Y 0.0005 0.0003 -0.0006 0.0003 -0.0012 -0.0007  
Z 0.0028 0.0039 -0.0067 0.0013 -0.0128 -0.0070  
AT. 27 H X -0.0014 -0.0002 -0.0031 -0.0002 0.0053 -0.0028  
Y -0.0004 0.0004 0.0023 -0.0001 -0.0030 0.0026  
Z -0.0009 0.0017 0.0049 0.0006 -0.0077 0.0055  
AT. 28 H X 0.0014 -0.0002 0.0031 -0.0002 0.0053 0.0028  
Y 0.0004 0.0004 -0.0023 -0.0001 -0.0030 -0.0026  
Z 0.0009 0.0017 -0.0049 0.0006 -0.0077 -0.0055  
AT. 29 C X -0.0002 0.0051 0.0096 0.0033 -0.0166 0.0112  
Y -0.0011 -0.0006 -0.0015 -0.0005 0.0030 -0.0017  
Z 0.0001 0.0003 -0.0013 0.0001 0.0027 -0.0016  
AT. 30 C X 0.0002 0.0051 -0.0096 0.0033 -0.0166 -0.0112  
Y 0.0011 -0.0006 0.0015 -0.0005 0.0030 0.0017  
Z -0.0001 0.0003 0.0013 0.0001 0.0027 0.0016  
AT. 31 H X 0.0027 0.0018 -0.0005 0.0001 0.0011 -0.0005  
Y -0.0030 0.0036 0.0107 0.0025 -0.0187 0.0127  
Z -0.0009 0.0052 0.0103 0.0027 -0.0181 0.0125  
AT. 32 H X -0.0027 0.0018 0.0005 0.0001 0.0011 0.0005  
Y 0.0030 0.0036 -0.0107 0.0025 -0.0187 -0.0127  
Z 0.0009 0.0052 -0.0103 0.0027 -0.0181 -0.0125  
AT. 33 H X 0.0029 0.0088 0.0135 0.0061 -0.0216 0.0145  
Y -0.0006 -0.0091 -0.0193 -0.0056 0.0339 -0.0224  
Z 0.0015 0.0055 0.0090 0.0040 -0.0141 0.0096  
AT. 34 H X -0.0029 0.0088 -0.0135 0.0061 -0.0216 -0.0145  
Y 0.0006 -0.0091 0.0193 -0.0056 0.0339 0.0224  
Z -0.0015 0.0055 -0.0090 0.0040 -0.0141 -0.0096  
AT. 35 C X 0.0008 -0.0007 -0.0008 -0.0005 0.0010 -0.0008  
Y -0.0001 -0.0010 -0.0009 -0.0005 0.0014 -0.0012  
Z -0.0011 0.0006 0.0018 0.0006 -0.0034 0.0022  
AT. 36 C X -0.0008 -0.0007 0.0008 -0.0005 0.0010 0.0008  
Y 0.0001 -0.0010 0.0009 -0.0005 0.0014 0.0012  
Z 0.0011 0.0006 -0.0018 0.0006 -0.0034 -0.0022

AT. 37 C X -0.0001 0.0015 0.0026 0.0005 -0.0044 0.0032  
Y -0.0002 -0.0019 -0.0045 -0.0008 0.0077 -0.0052  
Z -0.0006 -0.0032 -0.0055 -0.0023 0.0093 -0.0067

AT. 38 C X 0.0001 0.0015 -0.0026 0.0005 -0.0044 -0.0032  
Y 0.0002 -0.0019 0.0045 -0.0008 0.0077 0.0052  
Z 0.0006 -0.0032 0.0055 -0.0023 0.0093 0.0067

AT. 39 H X 0.0018 0.0115 0.0214 0.0068 -0.0364 0.0258  
Y 0.0036 0.0019 0.0005 0.0027 -0.0000 0.0009  
Z -0.0011 0.0018 0.0049 0.0004 -0.0088 0.0058

AT. 40 H X -0.0018 0.0115 -0.0214 0.0068 -0.0364 -0.0258  
Y -0.0036 0.0019 -0.0005 0.0027 -0.0000 -0.0009  
Z 0.0011 0.0018 -0.0049 0.0004 -0.0088 -0.0058

AT. 41 H X -0.0020 -0.0064 -0.0126 -0.0046 0.0215 -0.0151  
Y -0.0005 -0.0012 -0.0008 -0.0002 0.0015 -0.0010  
Z 0.0012 0.0043 0.0070 0.0025 -0.0119 0.0085

AT. 42 H X 0.0020 -0.0064 0.0126 -0.0046 0.0215 0.0151  
Y 0.0005 -0.0012 0.0008 -0.0002 0.0015 0.0010  
Z -0.0012 0.0043 -0.0070 0.0025 -0.0119 -0.0085

AT. 43 C X 0.0017 -0.0053 -0.0110 -0.0026 0.0197 -0.0136  
Y 0.0016 -0.0003 -0.0002 0.0000 -0.0001 0.0001  
Z -0.0003 0.0004 0.0006 -0.0002 -0.0004 0.0001

AT. 44 C X -0.0017 -0.0053 0.0110 -0.0026 0.0197 0.0136  
Y -0.0016 -0.0003 0.0002 0.0000 -0.0001 -0.0001  
Z 0.0003 0.0004 -0.0006 -0.0002 -0.0004 -0.0001

AT. 45 H X -0.0002 0.0002 0.0022 0.0003 -0.0049 0.0032  
Y 0.0059 -0.0099 -0.0205 -0.0054 0.0377 -0.0263  
Z -0.0031 0.0057 0.0106 0.0030 -0.0188 0.0134

AT. 46 H X 0.0002 0.0002 -0.0022 0.0003 -0.0049 -0.0032  
Y -0.0059 -0.0099 0.0205 -0.0054 0.0377 0.0263  
Z 0.0031 0.0057 -0.0106 0.0030 -0.0188 -0.0134

AT. 47 H X 0.0035 -0.0040 -0.0093 -0.0010 0.0155 -0.0103  
Y -0.0015 0.0079 0.0183 0.0052 -0.0347 0.0242

Z -0.0059 0.0077 0.0178 0.0031 -0.0311 0.0210  
AT. 48 H X -0.0035 -0.0040 0.0093 -0.0010 0.0155 0.0103  
Y 0.0015 0.0079 -0.0183 0.0052 -0.0347 -0.0242  
Z 0.0059 0.0077 -0.0178 0.0031 -0.0311 -0.0210  
AT. 49 C X -0.0013 0.0000 0.0009 0.0000 -0.0016 0.0009  
Y -0.0004 0.0006 0.0007 -0.0000 -0.0008 0.0008  
Z -0.0000 0.0003 0.0008 0.0001 -0.0016 0.0009  
AT. 50 C X 0.0013 0.0000 -0.0009 0.0000 -0.0016 -0.0009  
Y 0.0004 0.0006 -0.0007 -0.0000 -0.0008 -0.0008  
Z 0.0000 0.0003 -0.0008 0.0001 -0.0016 -0.0009  
AT. 51 C X -0.0011 -0.0021 -0.0032 -0.0011 0.0054 -0.0034  
Y -0.0003 0.0036 0.0071 0.0021 -0.0132 0.0087  
Z 0.0029 -0.0004 -0.0028 -0.0002 0.0056 -0.0036  
AT. 52 C X 0.0011 -0.0021 0.0032 -0.0011 0.0054 0.0034  
Y 0.0003 0.0036 -0.0071 0.0021 -0.0132 -0.0087  
Z -0.0029 -0.0004 0.0028 -0.0002 0.0056 0.0036  
AT. 53 H X 0.0025 -0.0093 -0.0205 -0.0053 0.0379 -0.0249  
Y 0.0055 -0.0015 -0.0064 0.0000 0.0134 -0.0089  
Z 0.0035 0.0063 0.0112 0.0047 -0.0191 0.0127  
AT. 54 H X -0.0025 -0.0093 0.0205 -0.0053 0.0379 0.0249  
Y -0.0055 -0.0015 0.0064 0.0000 0.0134 0.0089  
Z -0.0035 0.0063 -0.0112 0.0047 -0.0191 -0.0127  
AT. 55 H X -0.0058 0.0063 0.0171 0.0038 -0.0324 0.0216  
Y 0.0021 0.0000 0.0001 -0.0001 -0.0002 0.0002  
Z 0.0024 0.0012 0.0023 0.0005 -0.0043 0.0028  
AT. 56 H X 0.0058 0.0063 -0.0171 0.0038 -0.0324 -0.0216  
Y -0.0021 0.0000 -0.0001 -0.0001 -0.0002 -0.0002  
Z -0.0024 0.0012 -0.0023 0.0005 -0.0043 -0.0028  
AT. 57 C X 0.0004 -0.0017 -0.0025 -0.0013 0.0045 -0.0030  
Y 0.0005 -0.0003 0.0004 -0.0005 -0.0009 0.0007  
Z -0.0009 0.0009 0.0023 0.0009 -0.0038 0.0027  
AT. 58 C X -0.0004 -0.0017 0.0025 -0.0013 0.0045 0.0030



Y -0.0005 -0.0003 -0.0004 -0.0005 -0.0009 -0.0007  
Z 0.0009 0.0009 -0.0023 0.0009 -0.0038 -0.0027  
AT. 59 H X -0.0042 0.0074 0.0094 0.0062 -0.0149 0.0104  
Y 0.0026 -0.0050 -0.0075 -0.0041 0.0120 -0.0084  
Z -0.0014 0.0010 -0.0011 0.0010 0.0020 -0.0015  
AT. 60 H X 0.0042 0.0074 -0.0094 0.0062 -0.0149 -0.0104  
Y -0.0026 -0.0050 0.0075 -0.0041 0.0120 0.0084  
Z 0.0014 0.0010 0.0011 0.0010 0.0020 0.0015  
AT. 61 H X 0.0025 -0.0034 -0.0107 -0.0032 0.0183 -0.0127  
Y -0.0037 0.0053 0.0100 0.0048 -0.0179 0.0117  
Z 0.0029 -0.0039 -0.0090 -0.0034 0.0157 -0.0106  
AT. 62 H X -0.0025 -0.0034 0.0107 -0.0032 0.0183 0.0127  
Y 0.0037 0.0053 -0.0100 0.0048 -0.0179 -0.0117  
Z -0.0029 -0.0039 0.0090 -0.0034 0.0157 0.0106  
AT. 63 H X -0.0013 -0.0004 0.0050 0.0003 -0.0085 0.0061  
Y -0.0005 0.0032 -0.0005 0.0020 0.0018 -0.0011  
Z 0.0013 -0.0034 -0.0040 -0.0027 0.0062 -0.0045  
AT. 64 H X 0.0013 -0.0004 -0.0050 0.0003 -0.0085 -0.0061  
Y 0.0005 0.0032 0.0005 0.0020 0.0018 0.0011  
Z -0.0013 -0.0034 0.0040 -0.0027 0.0062 0.0045  
AT. 65 C X -0.0007 0.0017 0.0038 0.0005 -0.0070 0.0049  
Y -0.0013 0.0005 0.0006 -0.0002 -0.0005 0.0005  
Z -0.0014 0.0002 0.0017 0.0003 -0.0040 0.0026  
AT. 66 C X 0.0007 0.0017 -0.0038 0.0005 -0.0070 -0.0049  
Y 0.0013 0.0005 -0.0006 -0.0002 -0.0005 -0.0005  
Z 0.0014 0.0002 -0.0017 0.0003 -0.0040 -0.0026  
AT. 67 H X 0.0060 -0.0053 -0.0140 -0.0015 0.0262 -0.0178  
Y -0.0026 0.0019 0.0071 0.0011 -0.0142 0.0095  
Z -0.0058 0.0045 0.0103 0.0007 -0.0186 0.0128  
AT. 68 H X -0.0060 -0.0053 0.0140 -0.0015 0.0262 0.0178  
Y 0.0026 0.0019 -0.0071 0.0011 -0.0142 -0.0095  
Z 0.0058 0.0045 -0.0103 0.0007 -0.0186 -0.0128

AT. 69 H X -0.0002 0.0011 0.0049 0.0014 -0.0114 0.0071  
Y 0.0022 -0.0035 -0.0081 -0.0010 0.0154 -0.0105  
Z 0.0032 -0.0047 -0.0138 -0.0027 0.0292 -0.0188

AT. 70 H X 0.0002 0.0011 -0.0049 0.0014 -0.0114 -0.0071  
Y -0.0022 -0.0035 0.0081 -0.0010 0.0154 0.0105  
Z -0.0032 -0.0047 0.0138 -0.0027 0.0292 0.0188

AT. 71 H X 0.0004 0.0001 -0.0033 -0.0012 0.0090 -0.0054  
Y 0.0021 -0.0024 -0.0026 0.0003 0.0023 -0.0025  
Z 0.0039 -0.0049 -0.0081 -0.0004 0.0124 -0.0096

AT. 72 H X -0.0004 0.0001 0.0033 -0.0012 0.0090 0.0054  
Y -0.0021 -0.0024 0.0026 0.0003 0.0023 0.0025  
Z -0.0039 -0.0049 0.0081 -0.0004 0.0124 0.0096

AT. 73 C X -0.0008 0.0008 0.0007 0.0008 -0.0012 0.0007  
Y 0.0002 -0.0006 -0.0016 -0.0000 0.0030 -0.0024  
Z 0.0017 0.0020 0.0035 0.0010 -0.0062 0.0045

AT. 74 C X 0.0008 0.0008 -0.0007 0.0008 -0.0012 -0.0007  
Y -0.0002 -0.0006 0.0016 -0.0000 0.0030 0.0024  
Z -0.0017 0.0020 -0.0035 0.0010 -0.0062 -0.0045

AT. 75 H X 0.0003 0.0003 -0.0007 -0.0002 0.0009 -0.0005  
Y -0.0006 -0.0004 0.0007 -0.0007 -0.0019 0.0011  
Z 0.0012 0.0023 0.0057 -0.0004 -0.0114 0.0086

AT. 76 H X -0.0003 0.0003 0.0007 -0.0002 0.0009 0.0005  
Y 0.0006 -0.0004 -0.0007 -0.0007 -0.0019 -0.0011  
Z -0.0012 0.0023 -0.0057 -0.0004 -0.0114 -0.0086

AT. 77 H X -0.0027 0.0025 0.0039 0.0013 -0.0047 0.0043  
Y 0.0010 -0.0021 -0.0023 -0.0019 0.0022 -0.0019  
Z 0.0026 0.0017 0.0012 0.0021 -0.0023 0.0008

AT. 78 H X 0.0027 0.0025 -0.0039 0.0013 -0.0047 -0.0043  
Y -0.0010 -0.0021 0.0023 -0.0019 0.0022 0.0019  
Z -0.0026 0.0017 -0.0012 0.0021 -0.0023 -0.0008

AT. 79 I X -0.0001 -0.0003 -0.0000 -0.0001 -0.0001 0.0000  
Y 0.0002 0.0002 0.0000 0.0001 0.0000 0.0000

Z 0.0001 0.0001 0.0000 0.0000 0.0000 0.0000  
AT. 80 I X 0.0001 -0.0003 0.0000 -0.0001 -0.0001 -0.0000  
Y -0.0002 0.0002 -0.0000 0.0001 0.0000 -0.0000  
Z -0.0001 0.0001 -0.0000 0.0000 0.0000 -0.0000  
AT. 81 I X 0.0001 0.0001 -0.0000 0.0000 0.0000 0.0000  
Y -0.0001 -0.0001 -0.0000 -0.0000 -0.0000 -0.0000  
Z -0.0000 -0.0001 -0.0000 -0.0000 -0.0000 -0.0000  
AT. 82 I X -0.0001 0.0001 0.0000 0.0000 0.0000 -0.0000  
Y 0.0001 -0.0001 0.0000 -0.0000 -0.0000 0.0000  
Z 0.0000 -0.0001 0.0000 -0.0000 -0.0000 0.0000  
AT. 83 O X -0.0104 -0.0119 -0.0001 -0.0029 -0.0022 0.0003  
Y 0.0008 -0.0006 -0.0001 -0.0002 -0.0001 0.0001  
Z -0.0077 -0.0090 -0.0002 -0.0024 -0.0020 -0.0001  
AT. 84 O X 0.0104 -0.0119 0.0001 -0.0029 -0.0022 -0.0003  
Y -0.0008 -0.0006 0.0001 -0.0002 -0.0001 -0.0001  
Z 0.0077 -0.0090 0.0002 -0.0024 -0.0020 0.0001  
AT. 85 O X 0.0056 0.0064 0.0001 0.0017 0.0018 0.0002  
Y 0.0045 0.0055 0.0001 0.0015 0.0017 0.0001  
Z -0.0047 -0.0051 -0.0002 -0.0014 -0.0016 -0.0002  
AT. 86 O X -0.0056 0.0064 -0.0001 0.0017 0.0018 -0.0002  
Y -0.0045 0.0055 -0.0001 0.0015 0.0017 -0.0001  
Z 0.0047 -0.0051 0.0002 -0.0014 -0.0016 0.0002  
AT. 87 N X -0.0021 -0.0037 -0.0003 -0.0011 -0.0010 -0.0001  
Y 0.0041 0.0043 0.0001 0.0012 0.0012 0.0002  
Z 0.0117 0.0118 0.0005 0.0039 0.0039 0.0009  
AT. 88 N X 0.0021 -0.0037 0.0003 -0.0011 -0.0010 0.0001  
Y -0.0041 0.0043 -0.0001 0.0012 0.0012 -0.0002  
Z -0.0117 0.0118 -0.0005 0.0039 0.0039 -0.0009  
AT. 89 N X 0.0009 0.0034 0.0002 0.0010 0.0012 0.0002  
Y -0.0099 -0.0104 -0.0004 -0.0031 -0.0033 -0.0007  
Z 0.0063 0.0070 0.0003 0.0021 0.0026 0.0006  
AT. 90 N X -0.0009 0.0034 -0.0002 0.0010 0.0012 -0.0002

Y 0.0099 -0.0104 0.0004 -0.0031 -0.0033 0.0007  
Z -0.0063 0.0070 -0.0003 0.0021 0.0026 -0.0006  
AT. 91 C X -0.0084 -0.0078 -0.0003 -0.0023 -0.0021 -0.0003  
Y -0.0183 -0.0142 -0.0000 -0.0033 -0.0026 0.0003  
Z 0.0090 0.0088 -0.0000 0.0022 0.0019 0.0000  
AT. 92 C X 0.0084 -0.0078 0.0003 -0.0023 -0.0021 0.0003  
Y 0.0183 -0.0142 0.0000 -0.0033 -0.0026 -0.0003  
Z -0.0090 0.0088 0.0000 0.0022 0.0019 -0.0000  
AT. 93 C X 0.0096 0.0124 0.0002 0.0037 0.0033 0.0003  
Y 0.0114 0.0102 0.0000 0.0023 0.0017 -0.0002  
Z -0.0003 -0.0023 -0.0002 -0.0013 -0.0017 -0.0008  
AT. 94 C X -0.0096 0.0124 -0.0002 0.0037 0.0033 -0.0003  
Y -0.0114 0.0102 -0.0000 0.0023 0.0017 0.0002  
Z 0.0003 -0.0023 0.0002 -0.0013 -0.0017 0.0008  
AT. 95 H X 0.0738 0.0650 0.0001 0.0141 0.0094 -0.0023  
Y 0.0013 -0.0000 0.0000 0.0000 0.0000 -0.0003  
Z -0.0467 -0.0398 -0.0001 -0.0084 -0.0052 0.0020  
AT. 96 H X -0.0738 0.0650 -0.0001 0.0141 0.0094 0.0023  
Y -0.0013 -0.0000 -0.0000 0.0000 0.0000 0.0003  
Z 0.0467 -0.0398 0.0001 -0.0084 -0.0052 -0.0020  
AT. 97 H X -0.0196 -0.0011 0.0006 0.0014 0.0023 0.0022  
Y -0.0156 -0.0103 0.0004 -0.0004 0.0014 0.0020  
Z 0.0005 -0.0044 -0.0002 -0.0016 -0.0017 -0.0008  
AT. 98 H X 0.0196 -0.0011 -0.0006 0.0014 0.0023 -0.0022  
Y 0.0156 -0.0103 -0.0004 -0.0004 0.0014 -0.0020  
Z -0.0005 -0.0044 0.0002 -0.0016 -0.0017 0.0008  
AT. 99 C X 0.0051 0.0058 0.0002 0.0017 0.0020 0.0004  
Y 0.0033 0.0033 0.0001 0.0009 0.0011 0.0002  
Z 0.0077 0.0077 0.0001 0.0021 0.0024 0.0002  
AT. 100 C X -0.0051 0.0058 -0.0002 0.0017 0.0020 -0.0004  
Y -0.0033 0.0033 -0.0001 0.0009 0.0011 -0.0002  
Z -0.0077 0.0077 -0.0001 0.0021 0.0024 -0.0002

AT. 101 C X -0.0084 -0.0090 -0.0003 -0.0024 -0.0027 -0.0005  
Y -0.0013 -0.0025 0.0000 -0.0007 -0.0008 -0.0000  
Z -0.0060 -0.0066 -0.0002 -0.0018 -0.0022 -0.0003

AT. 102 C X 0.0084 -0.0090 0.0003 -0.0024 -0.0027 0.0005  
Y 0.0013 -0.0025 -0.0000 -0.0007 -0.0008 0.0000  
Z 0.0060 -0.0066 0.0002 -0.0018 -0.0022 0.0003

AT. 103 H X -0.0156 -0.0230 -0.0003 -0.0064 -0.0081 -0.0008  
Y 0.0008 0.0032 0.0000 0.0010 0.0014 0.0001  
Z -0.0096 -0.0126 -0.0002 -0.0035 -0.0037 -0.0006

AT. 104 H X 0.0156 -0.0230 0.0003 -0.0064 -0.0081 0.0008  
Y -0.0008 0.0032 -0.0000 0.0010 0.0014 -0.0001  
Z 0.0096 -0.0126 0.0002 -0.0035 -0.0037 0.0006

AT. 105 H X -0.0074 -0.0113 -0.0003 -0.0031 -0.0029 -0.0006  
Y 0.0002 0.0017 -0.0002 0.0005 0.0003 0.0000  
Z -0.0065 -0.0062 -0.0003 -0.0017 -0.0020 -0.0003

AT. 106 H X 0.0074 -0.0113 0.0003 -0.0031 -0.0029 0.0006  
Y -0.0002 0.0017 0.0002 0.0005 0.0003 -0.0000  
Z 0.0065 -0.0062 0.0003 -0.0017 -0.0020 0.0003

AT. 107 C X 0.0171 0.0147 0.0004 0.0049 0.0051 0.0010  
Y -0.0061 -0.0057 0.0002 -0.0017 -0.0019 -0.0006  
Z -0.0109 -0.0045 -0.0002 -0.0004 0.0003 0.0006

AT. 108 C X -0.0171 0.0147 -0.0004 0.0049 0.0051 -0.0010  
Y 0.0061 -0.0057 -0.0002 -0.0017 -0.0019 0.0006  
Z 0.0109 -0.0045 0.0002 -0.0004 0.0003 -0.0006

AT. 109 H X 0.0034 -0.0101 0.0003 -0.0047 -0.0055 -0.0018  
Y -0.0131 -0.0151 0.0003 -0.0059 -0.0072 -0.0022  
Z -0.0191 -0.0134 0.0002 -0.0046 -0.0056 -0.0011

AT. 110 H X -0.0034 -0.0101 -0.0003 -0.0047 -0.0055 0.0018  
Y 0.0131 -0.0151 -0.0003 -0.0059 -0.0072 0.0022  
Z 0.0191 -0.0134 -0.0002 -0.0046 -0.0056 0.0011

AT. 111 H X 0.0374 0.0272 0.0008 0.0090 0.0089 0.0019  
Y 0.0015 0.0121 0.0000 0.0065 0.0082 0.0032

Z -0.0353 -0.0227 -0.0007 -0.0068 -0.0062 -0.0013  
AT. 112 H X -0.0374 0.0272 -0.0008 0.0090 0.0089 -0.0019  
Y -0.0015 0.0121 -0.0000 0.0065 0.0082 -0.0032  
Z 0.0353 -0.0227 0.0007 -0.0068 -0.0062 0.0013  
AT. 113 C X -0.0026 -0.0022 0.0001 -0.0007 -0.0006 -0.0004  
Y 0.0090 0.0043 -0.0001 0.0010 0.0006 0.0001  
Z -0.0027 -0.0037 -0.0002 -0.0013 -0.0009 -0.0002  
AT. 114 C X 0.0026 -0.0022 -0.0001 -0.0007 -0.0006 0.0004  
Y -0.0090 0.0043 0.0001 0.0010 0.0006 -0.0001  
Z 0.0027 -0.0037 0.0002 -0.0013 -0.0009 0.0002  
AT. 115 C X 0.0066 0.0053 0.0002 0.0015 0.0021 0.0005  
Y -0.0007 0.0037 0.0002 0.0015 0.0023 0.0006  
Z 0.0117 0.0131 0.0003 0.0042 0.0040 0.0009  
AT. 116 C X -0.0066 0.0053 -0.0002 0.0015 0.0021 -0.0005  
Y 0.0007 0.0037 -0.0002 0.0015 0.0023 -0.0006  
Z -0.0117 0.0131 -0.0003 0.0042 0.0040 -0.0009  
AT. 117 H X 0.0244 0.0323 0.0012 0.0104 0.0121 0.0030  
Y -0.0248 -0.0268 -0.0006 -0.0083 -0.0075 -0.0015  
Z -0.0016 -0.0071 -0.0005 -0.0027 -0.0039 -0.0011  
AT. 118 H X -0.0244 0.0323 -0.0012 0.0104 0.0121 -0.0030  
Y 0.0248 -0.0268 0.0006 -0.0083 -0.0075 0.0015  
Z 0.0016 -0.0071 0.0005 -0.0027 -0.0039 0.0011  
AT. 119 H X -0.0189 -0.0292 -0.0009 -0.0099 -0.0100 -0.0026  
Y 0.0010 0.0068 0.0003 0.0023 0.0034 0.0005  
Z -0.0042 -0.0089 -0.0004 -0.0029 -0.0037 -0.0007  
AT. 120 H X 0.0189 -0.0292 0.0009 -0.0099 -0.0100 0.0026  
Y -0.0010 0.0068 -0.0003 0.0023 0.0034 -0.0005  
Z 0.0042 -0.0089 0.0004 -0.0029 -0.0037 0.0007  
AT. 121 C X -0.0115 -0.0136 -0.0007 -0.0039 -0.0051 -0.0010  
Y 0.0104 0.0060 0.0005 0.0021 0.0014 0.0007  
Z -0.0013 0.0015 0.0003 -0.0001 0.0002 -0.0001  
AT. 122 C X 0.0115 -0.0136 0.0007 -0.0039 -0.0051 0.0010

Y -0.0104 0.0060 -0.0005 0.0021 0.0014 -0.0007  
Z 0.0013 0.0015 -0.0003 -0.0001 0.0002 0.0001  
AT. 123 H X 0.0035 0.0088 0.0007 0.0016 0.0028 0.0001  
Y 0.0274 0.0274 0.0017 0.0076 0.0080 0.0020  
Z -0.0161 -0.0155 -0.0007 -0.0046 -0.0050 -0.0012  
AT. 124 H X -0.0035 0.0088 -0.0007 0.0016 0.0028 -0.0001  
Y -0.0274 0.0274 -0.0017 0.0076 0.0080 -0.0020  
Z 0.0161 -0.0155 0.0007 -0.0046 -0.0050 0.0012  
AT. 125 H X -0.0219 -0.0202 -0.0005 -0.0063 -0.0084 -0.0017  
Y -0.0047 -0.0188 -0.0018 -0.0039 -0.0048 -0.0013  
Z -0.0223 -0.0194 -0.0007 -0.0061 -0.0071 -0.0019  
AT. 126 H X 0.0219 -0.0202 0.0005 -0.0063 -0.0084 0.0017  
Y 0.0047 -0.0188 0.0018 -0.0039 -0.0048 0.0013  
Z 0.0223 -0.0194 0.0007 -0.0061 -0.0071 0.0019  
AT. 127 C X 0.0013 0.0004 0.0001 0.0002 0.0000 0.0000  
Y -0.0044 -0.0004 0.0001 -0.0006 -0.0003 -0.0003  
Z -0.0006 -0.0011 0.0001 -0.0002 -0.0006 -0.0001  
AT. 128 C X -0.0013 0.0004 -0.0001 0.0002 0.0000 -0.0000  
Y 0.0044 -0.0004 -0.0001 -0.0006 -0.0003 0.0003  
Z 0.0006 -0.0011 -0.0001 -0.0002 -0.0006 0.0001  
AT. 129 C X -0.0071 -0.0027 -0.0002 -0.0016 -0.0021 -0.0007  
Y -0.0058 -0.0078 -0.0009 -0.0023 -0.0026 -0.0005  
Z 0.0042 0.0038 0.0005 0.0010 0.0009 0.0001  
AT. 130 C X 0.0071 -0.0027 0.0002 -0.0016 -0.0021 0.0007  
Y 0.0058 -0.0078 0.0009 -0.0023 -0.0026 0.0005  
Z -0.0042 0.0038 -0.0005 0.0010 0.0009 -0.0001  
AT. 131 H X -0.0237 -0.0189 -0.0022 -0.0070 -0.0076 -0.0018  
Y 0.0093 0.0108 0.0022 0.0037 0.0039 0.0009  
Z -0.0119 -0.0090 -0.0008 -0.0033 -0.0035 -0.0007  
AT. 132 H X 0.0237 -0.0189 0.0022 -0.0070 -0.0076 0.0018  
Y -0.0093 0.0108 -0.0022 0.0037 0.0039 -0.0009  
Z 0.0119 -0.0090 0.0008 -0.0033 -0.0035 0.0007

AT.133 H X 0.0113 0.0188 0.0027 0.0056 0.0059 0.0010  
Y -0.0066 -0.0045 -0.0009 -0.0014 -0.0019 -0.0004  
Z -0.0062 -0.0021 -0.0008 -0.0011 -0.0019 -0.0006

AT.134 H X -0.0113 0.0188 -0.0027 0.0056 0.0059 -0.0010  
Y 0.0066 -0.0045 0.0009 -0.0014 -0.0019 0.0004  
Z 0.0062 -0.0021 0.0008 -0.0011 -0.0019 0.0006

AT.135 C X -0.0069 -0.0062 -0.0000 -0.0021 -0.0020 -0.0006  
Y 0.0091 0.0041 -0.0001 0.0009 0.0004 0.0001  
Z -0.0015 -0.0058 0.0001 -0.0025 -0.0025 -0.0010

AT.136 C X 0.0069 -0.0062 0.0000 -0.0021 -0.0020 0.0006  
Y -0.0091 0.0041 0.0001 0.0009 0.0004 -0.0001  
Z 0.0015 -0.0058 -0.0001 -0.0025 -0.0025 0.0010

AT.137 H X 0.0458 0.0373 -0.0006 0.0125 0.0102 0.0038  
Y 0.0071 0.0108 -0.0001 0.0042 0.0039 0.0015  
Z -0.0241 -0.0110 0.0003 -0.0025 -0.0012 -0.0003

AT.138 H X -0.0458 0.0373 0.0006 0.0125 0.0102 -0.0038  
Y -0.0071 0.0108 0.0001 0.0042 0.0039 -0.0015  
Z 0.0241 -0.0110 -0.0003 -0.0025 -0.0012 0.0003

AT.139 H X -0.0131 -0.0254 0.0001 -0.0105 -0.0103 -0.0036  
Y -0.0250 -0.0200 0.0004 -0.0066 -0.0056 -0.0017  
Z 0.0169 0.0272 -0.0002 0.0108 0.0104 0.0035

AT.140 H X 0.0131 -0.0254 -0.0001 -0.0105 -0.0103 0.0036  
Y 0.0250 -0.0200 -0.0004 -0.0066 -0.0056 0.0017  
Z -0.0169 0.0272 0.0002 0.0108 0.0104 -0.0035

AT.141 H X -0.0193 0.0064 -0.0000 0.0054 0.0068 0.0023  
Y -0.0226 -0.0089 0.0003 -0.0014 -0.0002 -0.0001  
Z 0.0265 0.0136 -0.0003 0.0033 0.0021 0.0005

AT.142 H X 0.0193 0.0064 0.0000 0.0054 0.0068 -0.0023  
Y 0.0226 -0.0089 -0.0003 -0.0014 -0.0002 0.0001  
Z -0.0265 0.0136 0.0003 0.0033 0.0021 -0.0005

AT.143 C X 0.0027 0.0022 0.0002 0.0003 0.0010 0.0001  
Y -0.0067 -0.0033 0.0002 -0.0011 -0.0010 -0.0005



Z -0.0013 -0.0017 -0.0005 0.0001 -0.0001 0.0002  
AT. 144 C X -0.0027 0.0022 -0.0002 0.0003 0.0010 -0.0001  
Y 0.0067 -0.0033 -0.0002 -0.0011 -0.0010 0.0005  
Z 0.0013 -0.0017 0.0005 0.0001 -0.0001 -0.0002  
AT. 145 H X -0.0273 -0.0144 -0.0014 -0.0027 -0.0043 -0.0009  
Y 0.0023 -0.0006 -0.0005 0.0008 0.0003 0.0004  
Z -0.0191 -0.0082 -0.0002 -0.0026 -0.0027 -0.0010  
AT. 146 H X 0.0273 -0.0144 0.0014 -0.0027 -0.0043 0.0009  
Y -0.0023 -0.0006 0.0005 0.0008 0.0003 -0.0004  
Z 0.0191 -0.0082 0.0002 -0.0026 -0.0027 0.0010  
AT. 147 H X 0.0003 0.0052 0.0015 -0.0008 0.0014 -0.0006  
Y 0.0138 0.0060 0.0000 0.0020 0.0022 0.0008  
Z 0.0068 0.0080 0.0013 0.0002 0.0023 -0.0002  
AT. 148 H X -0.0003 0.0052 -0.0015 -0.0008 0.0014 0.0006  
Y -0.0138 0.0060 -0.0000 0.0020 0.0022 -0.0008  
Z -0.0068 0.0080 -0.0013 0.0002 0.0023 0.0002  
AT. 149 H X 0.0189 0.0054 -0.0018 0.0038 0.0027 0.0021  
Y 0.0127 0.0054 -0.0002 0.0018 0.0017 0.0009  
Z 0.0230 0.0108 0.0000 0.0032 0.0037 0.0016  
AT. 150 H X -0.0189 0.0054 0.0018 0.0038 0.0027 -0.0021  
Y -0.0127 0.0054 0.0002 0.0018 0.0017 -0.0009  
Z -0.0230 0.0108 -0.0000 0.0032 0.0037 -0.0016  
AT. 151 C X 0.0018 0.0021 0.0001 0.0012 0.0005 0.0004  
Y 0.0016 0.0031 0.0001 0.0008 0.0011 0.0000  
Z -0.0015 -0.0028 -0.0004 -0.0011 -0.0016 -0.0004  
AT. 152 C X -0.0018 0.0021 -0.0001 0.0012 0.0005 -0.0004  
Y -0.0016 0.0031 -0.0001 0.0008 0.0011 -0.0000  
Z 0.0015 -0.0028 0.0004 -0.0011 -0.0016 0.0004  
AT. 153 H X -0.0072 0.0027 -0.0005 0.0009 0.0014 0.0011  
Y -0.0019 0.0003 -0.0001 0.0003 0.0002 0.0005  
Z -0.0038 -0.0087 -0.0004 -0.0018 -0.0037 -0.0001  
AT. 154 H X 0.0072 0.0027 0.0005 0.0009 0.0014 -0.0011

Y 0.0019 0.0003 0.0001 0.0003 0.0002 -0.0005  
Z 0.0038 -0.0087 0.0004 -0.0018 -0.0037 0.0001  
AT. 155 H X 0.0162 0.0126 -0.0005 0.0057 0.0042 0.0017  
Y 0.0036 0.0010 -0.0001 0.0014 0.0004 0.0007  
Z 0.0017 0.0042 -0.0003 0.0001 0.0007 -0.0006  
AT. 156 H X -0.0162 0.0126 0.0005 0.0057 0.0042 -0.0017  
Y -0.0036 0.0010 0.0001 0.0014 0.0004 -0.0007  
Z -0.0017 0.0042 0.0003 0.0001 0.0007 0.0006  
AT. 157 O X -0.0011 0.0112 -0.0319 -0.0352 -0.0025 0.0162  
Y -0.0000 0.0014 -0.0045 -0.0049 -0.0001 0.0020  
Z 0.0002 -0.0062 0.0181 0.0201 0.0016 -0.0092  
AT. 158 O X 0.0011 0.0112 0.0319 -0.0352 -0.0025 -0.0162  
Y 0.0000 0.0014 0.0045 -0.0049 -0.0001 -0.0020  
Z -0.0002 -0.0062 -0.0181 0.0201 0.0016 0.0092  
AT. 159 O X 0.0008 -0.0113 0.0326 0.0359 0.0025 -0.0164  
Y 0.0006 -0.0014 0.0037 0.0042 0.0004 -0.0021  
Z -0.0001 0.0060 -0.0173 -0.0193 -0.0009 0.0090  
AT. 160 O X -0.0008 -0.0113 -0.0326 0.0359 0.0025 0.0164  
Y -0.0006 -0.0014 -0.0037 0.0042 0.0004 0.0021  
Z 0.0001 0.0060 0.0173 -0.0193 -0.0009 -0.0090  
AT. 161 H X 0.0072 -0.0012 -0.0022 -0.0036 0.0020 -0.0017  
Y -0.0007 -0.0018 0.0081 0.0101 0.0011 -0.0044  
Z 0.0080 -0.0038 0.0036 0.0007 -0.0001 -0.0022  
AT. 162 H X -0.0072 -0.0012 0.0022 -0.0036 0.0020 0.0017  
Y 0.0007 -0.0018 -0.0081 0.0101 0.0011 0.0044  
Z -0.0080 -0.0038 -0.0036 0.0007 -0.0001 0.0022  
AT. 163 H X -0.0011 0.0007 -0.0005 -0.0008 0.0006 0.0010  
Y -0.0066 0.0005 0.0009 0.0021 0.0002 -0.0014  
Z -0.0015 0.0033 -0.0099 -0.0105 -0.0011 0.0043  
AT. 164 H X 0.0011 0.0007 0.0005 -0.0008 0.0006 -0.0010  
Y 0.0066 0.0005 -0.0009 0.0021 0.0002 0.0014  
Z 0.0015 0.0033 0.0099 -0.0105 -0.0011 -0.0043

AT.165 O X 0.0005 0.0000 0.0010 -0.0002 0.0035 0.0059

Y -0.0000 0.0007 -0.0010 0.0004 -0.0032 -0.0057

Z -0.0017 0.0013 -0.0047 0.0016 -0.0155 -0.0274

AT.166 O X -0.0005 0.0000 -0.0010 -0.0002 0.0035 -0.0059

Y 0.0000 0.0007 0.0010 0.0004 -0.0032 0.0057

Z 0.0017 0.0013 0.0047 0.0016 -0.0155 0.0274

AT.167 H X 0.0001 0.0012 -0.0011 0.0005 -0.0035 -0.0050

Y 0.0017 0.0007 -0.0005 0.0004 -0.0013 -0.0050

Z -0.0035 -0.0021 -0.0010 -0.0004 -0.0021 -0.0039

AT.168 H X -0.0001 0.0012 0.0011 0.0005 -0.0035 0.0050

Y -0.0017 0.0007 0.0005 0.0004 -0.0013 0.0050

Z 0.0035 -0.0021 0.0010 -0.0004 -0.0021 0.0039

AT.169 O X -0.0004 0.0004 -0.0010 0.0003 -0.0032 -0.0055

Y 0.0005 -0.0004 0.0011 -0.0004 0.0034 0.0062

Z 0.0017 -0.0007 0.0047 -0.0014 0.0156 0.0275

AT.170 O X 0.0004 0.0004 0.0010 0.0003 -0.0032 0.0055

Y -0.0005 -0.0004 -0.0011 -0.0004 0.0034 -0.0062

Z -0.0017 -0.0007 -0.0047 -0.0014 0.0156 -0.0275

AT.171 H X -0.0006 -0.0006 0.0010 -0.0001 0.0005 -0.0009

Y -0.0006 -0.0008 -0.0005 0.0001 -0.0034 -0.0064

Z 0.0003 -0.0021 0.0015 -0.0010 0.0035 0.0071

AT.172 H X 0.0006 -0.0006 -0.0010 -0.0001 0.0005 0.0009

Y 0.0006 -0.0008 0.0005 0.0001 -0.0034 0.0064

Z -0.0003 -0.0021 -0.0015 -0.0010 0.0035 -0.0071

FREQ(CM\*\*-1) 1012.37 1012.87 1022.79 1022.98 1024.08 1024.79

AT. 1 I X 0.0000 -0.0000 0.0000 0.0000 -0.0000 -0.0000

Y 0.0000 -0.0000 0.0000 0.0000 -0.0000 -0.0000

Z 0.0000 -0.0001 0.0000 0.0000 -0.0001 -0.0000

AT. 2 I X 0.0000 0.0000 -0.0000 0.0000 -0.0000 0.0000

Y 0.0000 0.0000 -0.0000 0.0000 -0.0000 0.0000

Z 0.0000 0.0001 -0.0000 0.0000 -0.0001 0.0000  
AT. 3 I X -0.0000 0.0001 -0.0000 -0.0000 -0.0000 -0.0000  
Y -0.0000 0.0001 0.0000 0.0000 -0.0000 -0.0000  
Z -0.0000 0.0000 -0.0000 -0.0000 0.0000 0.0000  
AT. 4 I X -0.0000 -0.0001 0.0000 -0.0000 -0.0000 0.0000  
Y -0.0000 -0.0001 -0.0000 0.0000 -0.0000 0.0000  
Z -0.0000 -0.0000 0.0000 -0.0000 0.0000 -0.0000  
AT. 5 O X 0.0019 -0.0032 0.0002 0.0002 -0.0008 -0.0009  
Y -0.0010 0.0017 -0.0001 0.0000 -0.0001 -0.0000  
Z -0.0029 0.0048 -0.0003 -0.0003 0.0012 0.0014  
AT. 6 O X 0.0019 0.0032 -0.0002 0.0002 -0.0008 0.0009  
Y -0.0010 -0.0017 0.0001 0.0000 -0.0001 0.0000  
Z -0.0029 -0.0048 0.0003 -0.0003 0.0012 -0.0014  
AT. 7 O X -0.0020 0.0032 -0.0003 -0.0001 0.0001 0.0000  
Y 0.0021 -0.0034 0.0003 0.0001 -0.0005 -0.0004  
Z -0.0020 0.0033 -0.0001 0.0001 -0.0004 -0.0005  
AT. 8 O X -0.0020 -0.0032 0.0003 -0.0001 0.0001 -0.0000  
Y 0.0021 0.0034 -0.0003 0.0001 -0.0005 0.0004  
Z -0.0020 -0.0033 0.0001 0.0001 -0.0004 0.0005  
AT. 9 N X 0.0025 -0.0041 0.0003 0.0002 -0.0012 -0.0014  
Y 0.0004 -0.0005 -0.0002 -0.0002 0.0006 0.0008  
Z 0.0051 -0.0082 0.0008 0.0006 -0.0032 -0.0037  
AT. 10 N X 0.0025 0.0041 -0.0003 0.0002 -0.0012 0.0014  
Y 0.0004 0.0005 0.0002 -0.0002 0.0006 -0.0008  
Z 0.0051 0.0082 -0.0008 0.0006 -0.0032 0.0037  
AT. 11 N X -0.0021 0.0035 -0.0000 0.0003 -0.0015 -0.0016  
Y -0.0036 0.0058 -0.0001 0.0001 -0.0001 -0.0001  
Z 0.0045 -0.0072 -0.0001 -0.0004 0.0016 0.0020  
AT. 12 N X -0.0021 -0.0035 0.0000 0.0003 -0.0015 0.0016  
Y -0.0036 -0.0058 0.0001 0.0001 -0.0001 0.0001  
Z 0.0045 0.0072 0.0001 -0.0004 0.0016 -0.0020  
AT. 13 C X 0.0020 -0.0034 0.0004 0.0003 -0.0012 -0.0014

Y -0.0038 0.0063 -0.0007 -0.0007 0.0036 0.0040  
Z 0.0015 -0.0029 0.0004 0.0005 -0.0024 -0.0025  
AT. 14 C X 0.0020 0.0034 -0.0004 0.0003 -0.0012 0.0014  
Y -0.0038 -0.0063 0.0007 -0.0007 0.0036 -0.0040  
Z 0.0015 0.0029 -0.0004 0.0005 -0.0024 0.0025  
AT. 15 C X -0.0030 0.0051 -0.0006 -0.0006 0.0028 0.0029  
Y 0.0035 -0.0058 0.0005 0.0005 -0.0027 -0.0030  
Z -0.0016 0.0026 -0.0004 -0.0004 0.0019 0.0021  
AT. 16 C X -0.0030 -0.0051 0.0006 -0.0006 0.0028 -0.0029  
Y 0.0035 0.0058 -0.0005 0.0005 -0.0027 0.0030  
Z -0.0016 -0.0026 0.0004 -0.0004 0.0019 -0.0021  
AT. 17 H X -0.0121 0.0207 -0.0019 -0.0022 0.0127 0.0137  
Y 0.0040 -0.0073 0.0006 0.0005 -0.0024 -0.0025  
Z -0.0051 0.0094 -0.0009 -0.0008 0.0045 0.0048  
AT. 18 H X -0.0121 -0.0207 0.0019 -0.0022 0.0127 -0.0137  
Y 0.0040 0.0073 -0.0006 0.0005 -0.0024 0.0025  
Z -0.0051 -0.0094 0.0009 -0.0008 0.0045 -0.0048  
AT. 19 H X -0.0008 0.0010 0.0004 0.0009 -0.0034 -0.0028  
Y 0.0040 -0.0063 0.0008 0.0006 -0.0037 -0.0043  
Z -0.0008 0.0013 0.0000 0.0001 -0.0003 -0.0002  
AT. 20 H X -0.0008 -0.0010 -0.0004 0.0009 -0.0034 0.0028  
Y 0.0040 0.0063 -0.0008 0.0006 -0.0037 0.0043  
Z -0.0008 -0.0013 -0.0000 0.0001 -0.0003 0.0002  
AT. 21 C X -0.0020 0.0032 0.0000 0.0002 -0.0005 -0.0007  
Y 0.0022 -0.0036 0.0003 0.0000 0.0009 0.0010  
Z 0.0037 -0.0060 0.0002 -0.0002 0.0026 0.0029  
AT. 22 C X -0.0020 -0.0032 -0.0000 0.0002 -0.0005 0.0007  
Y 0.0022 0.0036 -0.0003 0.0000 0.0009 -0.0010  
Z 0.0037 0.0060 -0.0002 -0.0002 0.0026 -0.0029  
AT. 23 C X 0.0031 -0.0049 0.0002 -0.0003 0.0013 0.0016  
Y -0.0014 0.0021 -0.0002 -0.0000 -0.0001 -0.0002  
Z -0.0033 0.0056 -0.0001 0.0003 -0.0016 -0.0018

AT. 24 C X 0.0031 0.0049 -0.0002 -0.0003 0.0013 -0.0016  
Y -0.0014 -0.0021 0.0002 -0.0000 -0.0001 0.0002  
Z -0.0033 -0.0056 0.0001 0.0003 -0.0016 0.0018

AT. 25 H X 0.0092 -0.0165 0.0003 -0.0019 0.0077 0.0081  
Y -0.0005 0.0006 -0.0001 -0.0002 0.0006 0.0006  
Z -0.0055 0.0072 -0.0006 0.0003 -0.0009 -0.0020

AT. 26 H X 0.0092 0.0165 -0.0003 -0.0019 0.0077 -0.0081  
Y -0.0005 -0.0006 0.0001 -0.0002 0.0006 -0.0006  
Z -0.0055 -0.0072 0.0006 0.0003 -0.0009 0.0020

AT. 27 H X 0.0022 -0.0031 -0.0002 0.0016 -0.0029 -0.0031  
Y -0.0011 0.0027 0.0002 0.0008 -0.0030 -0.0029  
Z -0.0032 0.0057 0.0002 0.0002 -0.0021 -0.0020

AT. 28 H X 0.0022 0.0031 0.0002 0.0016 -0.0029 0.0031  
Y -0.0011 -0.0027 -0.0002 0.0008 -0.0030 0.0029  
Z -0.0032 -0.0057 -0.0002 0.0002 -0.0021 0.0020

AT. 29 C X -0.0071 0.0121 -0.0013 -0.0013 0.0069 0.0076  
Y 0.0011 -0.0019 0.0001 -0.0006 0.0042 0.0036  
Z 0.0012 -0.0018 0.0007 0.0012 -0.0078 -0.0080

AT. 30 C X -0.0071 -0.0121 0.0013 -0.0013 0.0069 -0.0076  
Y 0.0011 0.0019 -0.0001 -0.0006 0.0042 -0.0036  
Z 0.0012 0.0018 -0.0007 0.0012 -0.0078 0.0080

AT. 31 H X 0.0009 -0.0003 0.0008 0.0018 -0.0118 -0.0118  
Y -0.0084 0.0137 -0.0024 -0.0041 0.0264 0.0265  
Z -0.0077 0.0134 -0.0017 -0.0023 0.0138 0.0142

AT. 32 H X 0.0009 0.0003 -0.0008 0.0018 -0.0118 0.0118  
Y -0.0084 -0.0137 0.0024 -0.0041 0.0264 -0.0265  
Z -0.0077 -0.0134 0.0017 -0.0023 0.0138 -0.0142

AT. 33 H X -0.0097 0.0162 -0.0019 -0.0010 0.0041 0.0053  
Y 0.0147 -0.0247 0.0039 0.0051 -0.0304 -0.0320  
Z -0.0064 0.0107 -0.0014 -0.0010 0.0053 0.0059

AT. 34 H X -0.0097 -0.0162 0.0019 -0.0010 0.0041 -0.0053  
Y 0.0147 0.0247 -0.0039 0.0051 -0.0304 0.0320

Z -0.0064 -0.0107 0.0014 -0.0010 0.0053 -0.0059  
AT. 35 C X 0.0007 -0.0008 0.0002 0.0007 -0.0044 -0.0043  
Y 0.0004 -0.0011 -0.0000 -0.0001 0.0007 0.0006  
Z -0.0015 0.0021 -0.0003 -0.0005 0.0035 0.0038  
AT. 36 C X 0.0007 0.0008 -0.0002 0.0007 -0.0044 0.0043  
Y 0.0004 0.0011 0.0000 -0.0001 0.0007 -0.0006  
Z -0.0015 -0.0021 0.0003 -0.0005 0.0035 -0.0038  
AT. 37 C X -0.0017 0.0031 0.0002 0.0006 -0.0030 -0.0034  
Y 0.0035 -0.0056 0.0004 0.0003 -0.0016 -0.0013  
Z 0.0048 -0.0073 0.0013 0.0019 -0.0119 -0.0118  
AT. 38 C X -0.0017 -0.0031 -0.0002 0.0006 -0.0030 0.0034  
Y 0.0035 0.0056 -0.0004 0.0003 -0.0016 0.0013  
Z 0.0048 0.0073 -0.0013 0.0019 -0.0119 0.0118  
AT. 39 H X -0.0174 0.0273 -0.0031 -0.0043 0.0263 0.0254  
Y -0.0011 0.0015 -0.0023 -0.0037 0.0213 0.0223  
Z -0.0038 0.0059 0.0001 0.0003 -0.0016 -0.0022  
AT. 40 H X -0.0174 -0.0273 0.0031 -0.0043 0.0263 -0.0254  
Y -0.0011 -0.0015 0.0023 -0.0037 0.0213 -0.0223  
Z -0.0038 -0.0059 -0.0001 0.0003 -0.0016 0.0022  
AT. 41 H X 0.0107 -0.0163 0.0030 0.0049 -0.0295 -0.0296  
Y 0.0008 -0.0015 -0.0002 -0.0009 0.0067 0.0071  
Z -0.0058 0.0092 -0.0012 -0.0016 0.0090 0.0087  
AT. 42 H X 0.0107 0.0163 -0.0030 0.0049 -0.0295 0.0296  
Y 0.0008 0.0015 0.0002 -0.0009 0.0067 -0.0071  
Z -0.0058 -0.0092 0.0012 -0.0016 0.0090 -0.0087  
AT. 43 C X 0.0080 -0.0136 -0.0002 -0.0015 0.0082 0.0088  
Y -0.0002 0.0002 -0.0002 -0.0003 0.0016 0.0013  
Z -0.0009 0.0005 -0.0005 -0.0014 0.0084 0.0082  
AT. 44 C X 0.0080 0.0136 0.0002 -0.0015 0.0082 -0.0088  
Y -0.0002 -0.0002 0.0002 -0.0003 0.0016 -0.0013  
Z -0.0009 -0.0005 0.0005 -0.0014 0.0084 -0.0082  
AT. 45 H X -0.0011 0.0029 0.0012 0.0027 -0.0148 -0.0147

Y 0.0137 -0.0252 -0.0014 -0.0055 0.0319 0.0323  
Z -0.0076 0.0131 -0.0004 0.0006 -0.0048 -0.0053  
AT. 46 H X -0.0011 -0.0029 -0.0012 0.0027 -0.0148 0.0147  
Y 0.0137 0.0252 0.0014 -0.0055 0.0319 -0.0323  
Z -0.0076 -0.0131 0.0004 0.0006 -0.0048 0.0053  
AT. 47 H X 0.0073 -0.0106 0.0004 0.0009 -0.0050 -0.0040  
Y -0.0127 0.0238 0.0015 0.0058 -0.0318 -0.0325  
Z -0.0131 0.0213 0.0005 0.0017 -0.0084 -0.0096  
AT. 48 H X 0.0073 0.0106 -0.0004 0.0009 -0.0050 0.0040  
Y -0.0127 -0.0238 -0.0015 0.0058 -0.0318 0.0325  
Z -0.0131 -0.0213 -0.0005 0.0017 -0.0084 0.0096  
AT. 49 C X -0.0005 0.0009 0.0002 0.0004 -0.0019 -0.0019  
Y -0.0005 0.0007 -0.0002 -0.0003 0.0021 0.0020  
Z -0.0007 0.0012 0.0000 0.0001 -0.0008 -0.0010  
AT. 50 C X -0.0005 -0.0009 -0.0002 0.0004 -0.0019 0.0019  
Y -0.0005 -0.0007 0.0002 -0.0003 0.0021 -0.0020  
Z -0.0007 -0.0012 -0.0000 0.0001 -0.0008 0.0010  
AT. 51 C X 0.0023 -0.0040 0.0006 0.0006 -0.0030 -0.0035  
Y -0.0050 0.0088 0.0000 0.0012 -0.0076 -0.0072  
Z 0.0017 -0.0032 -0.0007 -0.0017 0.0100 0.0101  
AT. 52 C X 0.0023 0.0040 -0.0006 0.0006 -0.0030 0.0035  
Y -0.0050 -0.0088 -0.0000 0.0012 -0.0076 0.0072  
Z 0.0017 0.0032 0.0007 -0.0017 0.0100 -0.0101  
AT. 53 H X 0.0143 -0.0249 -0.0001 -0.0038 0.0228 0.0212  
Y 0.0039 -0.0071 -0.0019 -0.0045 0.0257 0.0259  
Z -0.0086 0.0142 -0.0016 -0.0009 0.0037 0.0052  
AT. 54 H X 0.0143 0.0249 0.0001 -0.0038 0.0228 -0.0212  
Y 0.0039 0.0071 0.0019 -0.0045 0.0257 -0.0259  
Z -0.0086 -0.0142 0.0016 -0.0009 0.0037 -0.0052  
AT. 55 H X -0.0118 0.0200 0.0016 0.0058 -0.0348 -0.0341  
Y 0.0002 0.0005 -0.0001 -0.0002 0.0020 0.0021  
Z -0.0014 0.0030 -0.0002 0.0001 -0.0005 -0.0001



AT. 56 H X -0.0118 -0.0200 -0.0016 0.0058 -0.0348 0.0341  
Y 0.0002 -0.0005 0.0001 -0.0002 0.0020 -0.0021  
Z -0.0014 -0.0030 0.0002 0.0001 -0.0005 0.0001

AT. 57 C X 0.0020 -0.0030 0.0007 0.0011 -0.0064 -0.0069  
Y -0.0005 0.0006 0.0000 0.0002 -0.0007 -0.0011  
Z -0.0024 0.0030 -0.0014 -0.0029 0.0178 0.0176

AT. 58 C X 0.0020 0.0030 -0.0007 0.0011 -0.0064 0.0069  
Y -0.0005 -0.0006 -0.0000 0.0002 -0.0007 0.0011  
Z -0.0024 -0.0030 0.0014 -0.0029 0.0178 -0.0176

AT. 59 H X -0.0080 0.0111 -0.0043 -0.0086 0.0511 0.0535  
Y 0.0068 -0.0092 0.0035 0.0070 -0.0425 -0.0433  
Z 0.0014 -0.0018 0.0003 0.0005 -0.0041 -0.0027

AT. 60 H X -0.0080 -0.0111 0.0043 -0.0086 0.0511 -0.0535  
Y 0.0068 0.0092 -0.0035 0.0070 -0.0425 0.0433  
Z 0.0014 0.0018 -0.0003 0.0005 -0.0041 0.0027

AT. 61 H X 0.0102 -0.0137 0.0045 0.0088 -0.0542 -0.0547  
Y -0.0093 0.0123 -0.0044 -0.0085 0.0509 0.0531  
Z 0.0087 -0.0114 0.0039 0.0076 -0.0465 -0.0480

AT. 62 H X 0.0102 0.0137 -0.0045 0.0088 -0.0542 0.0547  
Y -0.0093 -0.0123 0.0044 -0.0085 0.0509 -0.0531  
Z 0.0087 0.0114 -0.0039 0.0076 -0.0465 0.0480

AT. 63 H X -0.0061 0.0067 -0.0034 -0.0069 0.0423 0.0409  
Y 0.0023 -0.0010 0.0012 0.0024 -0.0157 -0.0146  
Z 0.0029 -0.0048 0.0015 0.0028 -0.0153 -0.0159

AT. 64 H X -0.0061 -0.0067 0.0034 -0.0069 0.0423 -0.0409  
Y 0.0023 0.0010 -0.0012 0.0024 -0.0157 0.0146  
Z 0.0029 0.0048 -0.0015 0.0028 -0.0153 0.0159

AT. 65 C X -0.0025 0.0049 0.0006 0.0017 -0.0098 -0.0102  
Y -0.0006 0.0003 -0.0003 -0.0010 0.0065 0.0060  
Z -0.0008 0.0021 0.0010 0.0025 -0.0144 -0.0144

AT. 66 C X -0.0025 -0.0049 -0.0006 0.0017 -0.0098 0.0102  
Y -0.0006 -0.0003 0.0003 -0.0010 0.0065 -0.0060

Z -0.0008 -0.0021 -0.0010 0.0025 -0.0144 0.0144  
AT. 67 H X 0.0088 -0.0168 -0.0027 -0.0072 0.0399 0.0416  
Y -0.0041 0.0089 0.0023 0.0061 -0.0354 -0.0357  
Z -0.0068 0.0119 0.0013 0.0033 -0.0169 -0.0186  
AT. 68 H X 0.0088 0.0168 0.0027 -0.0072 0.0399 -0.0416  
Y -0.0041 -0.0089 -0.0023 0.0061 -0.0354 0.0357  
Z -0.0068 -0.0119 -0.0013 0.0033 -0.0169 0.0186  
AT. 69 H X -0.0025 0.0070 0.0024 0.0066 -0.0392 -0.0392  
Y 0.0052 -0.0101 -0.0014 -0.0042 0.0237 0.0242  
Z 0.0083 -0.0181 -0.0044 -0.0121 0.0713 0.0717  
AT. 70 H X -0.0025 -0.0070 -0.0024 0.0066 -0.0392 0.0392  
Y 0.0052 0.0101 0.0014 -0.0042 0.0237 -0.0242  
Z 0.0083 0.0181 0.0044 -0.0121 0.0713 -0.0717  
AT. 71 H X 0.0010 -0.0052 -0.0029 -0.0077 0.0468 0.0457  
Y 0.0024 -0.0022 0.0012 0.0033 -0.0211 -0.0195  
Z 0.0062 -0.0091 0.0004 0.0011 -0.0088 -0.0065  
AT. 72 H X 0.0010 0.0052 0.0029 -0.0077 0.0468 -0.0457  
Y 0.0024 0.0022 -0.0012 0.0033 -0.0211 0.0195  
Z 0.0062 0.0091 -0.0004 0.0011 -0.0088 0.0065  
AT. 73 C X -0.0005 0.0005 -0.0006 -0.0012 0.0067 0.0075  
Y 0.0014 -0.0019 0.0001 0.0003 -0.0028 -0.0022  
Z -0.0023 0.0048 -0.0002 0.0004 -0.0028 -0.0028  
AT. 74 C X -0.0005 -0.0005 0.0006 -0.0012 0.0067 -0.0075  
Y 0.0014 0.0019 -0.0001 0.0003 -0.0028 0.0022  
Z -0.0023 -0.0048 0.0002 0.0004 -0.0028 0.0028  
AT. 75 H X -0.0010 -0.0013 -0.0016 -0.0039 0.0240 0.0237  
Y 0.0002 0.0013 0.0015 0.0033 -0.0187 -0.0193  
Z -0.0042 0.0080 0.0009 0.0024 -0.0119 -0.0144  
AT. 76 H X -0.0010 0.0013 0.0016 -0.0039 0.0240 -0.0237  
Y 0.0002 -0.0013 -0.0015 0.0033 -0.0187 0.0193  
Z -0.0042 -0.0080 -0.0009 0.0024 -0.0119 0.0144  
AT. 77 H X -0.0033 0.0047 -0.0020 -0.0045 0.0276 0.0270

Y 0.0024 -0.0025 0.0018 0.0038 -0.0217 -0.0226  
Z -0.0008 0.0017 -0.0005 0.0003 -0.0047 -0.0020  
AT. 78 H X -0.0033 -0.0047 0.0020 -0.0045 0.0276 -0.0270  
Y 0.0024 0.0025 -0.0018 0.0038 -0.0217 0.0226  
Z -0.0008 -0.0017 0.0005 0.0003 -0.0047 0.0020  
AT. 79 I X -0.0000 -0.0001 -0.0000 -0.0000 -0.0000 -0.0000  
Y -0.0000 0.0000 -0.0000 -0.0000 0.0000 0.0000  
Z 0.0000 0.0000 0.0000 0.0000 0.0000 0.0000  
AT. 80 I X -0.0000 0.0001 0.0000 -0.0000 -0.0000 0.0000  
Y -0.0000 -0.0000 0.0000 -0.0000 0.0000 -0.0000  
Z 0.0000 -0.0000 -0.0000 0.0000 0.0000 -0.0000  
AT. 81 I X 0.0000 0.0000 -0.0000 -0.0000 -0.0000 0.0000  
Y -0.0000 -0.0000 0.0001 0.0001 0.0000 0.0000  
Z 0.0000 -0.0000 -0.0000 -0.0000 0.0000 0.0000  
AT. 82 I X 0.0000 -0.0000 0.0000 -0.0000 -0.0000 -0.0000  
Y -0.0000 0.0000 -0.0001 0.0001 0.0000 -0.0000  
Z 0.0000 0.0000 0.0000 -0.0000 0.0000 -0.0000  
AT. 83 O X -0.0007 -0.0011 0.0012 0.0013 0.0002 0.0003  
Y -0.0002 -0.0002 0.0005 0.0005 0.0000 -0.0000  
Z -0.0004 -0.0008 0.0008 0.0009 0.0002 0.0002  
AT. 84 O X -0.0007 0.0011 -0.0012 0.0013 0.0002 -0.0003  
Y -0.0002 0.0002 -0.0005 0.0005 0.0000 0.0000  
Z -0.0004 0.0008 -0.0008 0.0009 0.0002 -0.0002  
AT. 85 O X 0.0004 0.0006 -0.0009 -0.0014 -0.0005 -0.0003  
Y 0.0003 0.0006 -0.0007 -0.0012 -0.0004 -0.0002  
Z -0.0004 -0.0005 0.0015 0.0020 0.0006 0.0003  
AT. 86 O X 0.0004 -0.0006 0.0009 -0.0014 -0.0005 0.0003  
Y 0.0003 -0.0006 0.0007 -0.0012 -0.0004 0.0002  
Z -0.0004 0.0005 -0.0015 0.0020 0.0006 -0.0003  
AT. 87 N X -0.0002 -0.0004 0.0002 0.0003 0.0001 0.0000  
Y 0.0004 0.0002 -0.0000 -0.0004 -0.0002 -0.0001  
Z 0.0007 0.0014 -0.0000 -0.0006 -0.0005 -0.0002

AT. 88 N X -0.0002 0.0004 -0.0002 0.0003 0.0001 -0.0000  
Y 0.0004 -0.0002 0.0000 -0.0004 -0.0002 0.0001  
Z 0.0007 -0.0014 0.0000 -0.0006 -0.0005 0.0002

AT. 89 N X 0.0004 0.0002 -0.0024 -0.0029 -0.0007 -0.0003  
Y -0.0014 -0.0007 0.0024 0.0035 0.0010 0.0004  
Z 0.0014 0.0003 -0.0036 -0.0046 -0.0011 -0.0004

AT. 90 N X 0.0004 -0.0002 0.0024 -0.0029 -0.0007 0.0003  
Y -0.0014 0.0007 -0.0024 0.0035 0.0010 -0.0004  
Z 0.0014 -0.0003 0.0036 -0.0046 -0.0011 0.0004

AT. 91 C X -0.0003 -0.0010 0.0003 0.0005 0.0001 -0.0000  
Y -0.0001 -0.0011 0.0002 -0.0002 -0.0001 0.0001  
Z 0.0001 0.0008 0.0004 0.0005 0.0002 -0.0000

AT. 92 C X -0.0003 0.0010 -0.0003 0.0005 0.0001 0.0000  
Y -0.0001 0.0011 -0.0002 -0.0002 -0.0001 -0.0001  
Z 0.0001 -0.0008 -0.0004 0.0005 0.0002 0.0000

AT. 93 C X 0.0010 0.0014 0.0007 0.0002 -0.0002 -0.0002  
Y 0.0001 0.0007 -0.0006 -0.0004 0.0001 -0.0000  
Z -0.0005 -0.0005 -0.0013 -0.0008 0.0003 0.0001

AT. 94 C X 0.0010 -0.0014 -0.0007 0.0002 -0.0002 0.0002  
Y 0.0001 -0.0007 0.0006 -0.0004 0.0001 0.0000  
Z -0.0005 0.0005 0.0013 -0.0008 0.0003 -0.0001

AT. 95 H X -0.0006 0.0053 -0.0050 -0.0016 0.0022 0.0006  
Y 0.0010 0.0003 -0.0001 -0.0007 -0.0006 -0.0003  
Z -0.0003 -0.0035 0.0035 0.0016 -0.0011 -0.0002

AT. 96 H X -0.0006 -0.0053 0.0050 -0.0016 0.0022 -0.0006  
Y 0.0010 -0.0003 0.0001 -0.0007 -0.0006 0.0003  
Z -0.0003 0.0035 -0.0035 0.0016 -0.0011 0.0002

AT. 97 H X 0.0010 -0.0008 0.0016 -0.0010 -0.0011 -0.0002  
Y 0.0005 -0.0000 0.0028 0.0017 -0.0007 -0.0004  
Z -0.0004 -0.0001 -0.0006 0.0002 0.0003 -0.0000

AT. 98 H X 0.0010 0.0008 -0.0016 -0.0010 -0.0011 0.0002  
Y 0.0005 0.0000 -0.0028 0.0017 -0.0007 0.0004

Z -0.0004 0.0001 0.0006 0.0002 0.0003 0.0000  
AT. 99 C X 0.0010 0.0003 -0.0023 -0.0031 -0.0007 -0.0003  
Y 0.0006 0.0001 -0.0013 -0.0017 -0.0003 -0.0000  
Z 0.0010 0.0007 -0.0049 -0.0055 -0.0013 -0.0006  
AT. 100 C X 0.0010 -0.0003 0.0023 -0.0031 -0.0007 0.0003  
Y 0.0006 -0.0001 0.0013 -0.0017 -0.0003 0.0000  
Z 0.0010 -0.0007 0.0049 -0.0055 -0.0013 0.0006  
AT. 101 C X -0.0010 -0.0006 0.0034 0.0042 0.0010 0.0005  
Y -0.0002 -0.0000 0.0001 0.0002 0.0000 0.0000  
Z -0.0008 -0.0005 0.0031 0.0039 0.0009 0.0004  
AT. 102 C X -0.0010 0.0006 -0.0034 0.0042 0.0010 -0.0005  
Y -0.0002 0.0000 -0.0001 0.0002 0.0000 -0.0000  
Z -0.0008 0.0005 -0.0031 0.0039 0.0009 -0.0004  
AT. 103 H X -0.0041 -0.0007 0.0147 0.0174 0.0035 0.0019  
Y 0.0010 -0.0001 -0.0043 -0.0050 -0.0009 -0.0006  
Z -0.0015 -0.0005 0.0023 0.0030 0.0009 0.0004  
AT. 104 H X -0.0041 0.0007 -0.0147 0.0174 0.0035 -0.0019  
Y 0.0010 0.0001 0.0043 -0.0050 -0.0009 0.0006  
Z -0.0015 0.0005 -0.0023 0.0030 0.0009 -0.0004  
AT. 105 H X -0.0006 -0.0003 -0.0015 -0.0008 -0.0001 -0.0004  
Y -0.0003 -0.0003 0.0053 0.0058 0.0012 0.0006  
Z -0.0008 -0.0006 0.0041 0.0049 0.0011 0.0004  
AT. 106 H X -0.0006 0.0003 0.0015 -0.0008 -0.0001 0.0004  
Y -0.0003 0.0003 -0.0053 0.0058 0.0012 -0.0006  
Z -0.0008 0.0006 -0.0041 0.0049 0.0011 -0.0004  
AT. 107 C X 0.0013 0.0020 0.0023 0.0020 -0.0004 -0.0002  
Y -0.0005 -0.0005 -0.0074 -0.0065 -0.0009 -0.0005  
Z 0.0009 -0.0000 0.0088 0.0080 0.0008 0.0005  
AT. 108 C X 0.0013 -0.0020 -0.0023 0.0020 -0.0004 0.0002  
Y -0.0005 0.0005 0.0074 -0.0065 -0.0009 0.0005  
Z 0.0009 0.0000 -0.0088 0.0080 0.0008 -0.0005  
AT. 109 H X -0.0022 -0.0015 -0.0238 -0.0212 -0.0026 -0.0014

Y -0.0030 -0.0024 -0.0223 -0.0201 -0.0020 -0.0011  
Z -0.0024 -0.0021 -0.0092 -0.0084 -0.0003 -0.0002  
AT. 110 H X -0.0022 0.0015 0.0238 -0.0212 -0.0026 0.0014  
Y -0.0030 0.0024 0.0223 -0.0201 -0.0020 0.0011  
Z -0.0024 0.0021 0.0092 -0.0084 -0.0003 0.0002  
AT. 111 H X 0.0014 0.0041 0.0040 0.0037 -0.0004 -0.0000  
Y 0.0041 0.0029 0.0267 0.0242 0.0023 0.0015  
Z -0.0003 -0.0032 -0.0010 -0.0010 0.0001 -0.0002  
AT. 112 H X 0.0014 -0.0041 -0.0040 0.0037 -0.0004 0.0000  
Y 0.0041 -0.0029 -0.0267 0.0242 0.0023 -0.0015  
Z -0.0003 0.0032 0.0010 -0.0010 0.0001 0.0002  
AT. 113 C X -0.0001 -0.0003 -0.0035 -0.0031 -0.0005 -0.0003  
Y -0.0001 0.0005 0.0011 0.0012 0.0002 0.0001  
Z -0.0001 -0.0004 -0.0012 -0.0010 -0.0000 0.0000  
AT. 114 C X -0.0001 0.0003 0.0035 -0.0031 -0.0005 0.0003  
Y -0.0001 -0.0005 -0.0011 0.0012 0.0002 -0.0001  
Z -0.0001 0.0004 0.0012 -0.0010 -0.0000 -0.0000  
AT. 115 C X 0.0012 0.0003 -0.0008 -0.0020 -0.0008 -0.0003  
Y 0.0012 0.0003 0.0022 0.0011 -0.0004 -0.0001  
Z 0.0005 0.0017 0.0113 0.0099 0.0009 0.0003  
AT. 116 C X 0.0012 -0.0003 0.0008 -0.0020 -0.0008 0.0003  
Y 0.0012 -0.0003 -0.0022 0.0011 -0.0004 0.0001  
Z 0.0005 -0.0017 -0.0113 0.0099 0.0009 -0.0003  
AT. 117 H X 0.0043 0.0031 0.0144 0.0088 -0.0010 -0.0006  
Y 0.0003 -0.0036 -0.0291 -0.0268 -0.0031 -0.0010  
Z -0.0025 -0.0004 0.0026 0.0048 0.0017 0.0007  
AT. 118 H X 0.0043 -0.0031 -0.0144 0.0088 -0.0010 0.0006  
Y 0.0003 0.0036 0.0291 -0.0268 -0.0031 0.0010  
Z -0.0025 0.0004 -0.0026 0.0048 0.0017 -0.0007  
AT. 119 H X -0.0023 -0.0034 -0.0277 -0.0241 -0.0023 -0.0010  
Y 0.0009 0.0010 0.0018 0.0003 -0.0010 -0.0006  
Z -0.0010 -0.0011 -0.0036 -0.0019 0.0007 0.0004

AT.120 H X -0.0023 0.0034 0.0277 -0.0241 -0.0023 0.0010  
Y 0.0009 -0.0010 -0.0018 0.0003 -0.0010 0.0006  
Z -0.0010 0.0011 0.0036 -0.0019 0.0007 -0.0004

AT.121 C X -0.0023 -0.0008 0.0074 0.0098 0.0026 0.0012  
Y 0.0008 0.0008 -0.0037 -0.0042 -0.0012 -0.0006  
Z -0.0002 -0.0002 -0.0082 -0.0084 -0.0013 -0.0007

AT.122 C X -0.0023 0.0008 -0.0074 0.0098 0.0026 -0.0012  
Y 0.0008 -0.0008 0.0037 -0.0042 -0.0012 0.0006  
Z -0.0002 0.0002 0.0082 -0.0084 -0.0013 0.0007

AT.123 H X 0.0014 -0.0010 -0.0233 -0.0245 -0.0040 -0.0017  
Y 0.0031 0.0020 -0.0213 -0.0248 -0.0058 -0.0028  
Z -0.0018 -0.0016 0.0045 0.0068 0.0023 0.0011

AT.124 H X 0.0014 0.0010 0.0233 -0.0245 -0.0040 0.0017  
Y 0.0031 -0.0020 0.0213 -0.0248 -0.0058 0.0028  
Z -0.0018 0.0016 -0.0045 0.0068 0.0023 -0.0011

AT.125 H X -0.0050 -0.0008 0.0121 0.0160 0.0039 0.0015  
Y -0.0007 -0.0011 0.0255 0.0284 0.0059 0.0031  
Z -0.0042 -0.0011 0.0128 0.0161 0.0038 0.0015

AT.126 H X -0.0050 0.0008 -0.0121 0.0160 0.0039 -0.0015  
Y -0.0007 0.0011 -0.0255 0.0284 0.0059 -0.0031  
Z -0.0042 0.0011 -0.0128 0.0161 0.0038 -0.0015

AT.127 C X 0.0002 -0.0001 -0.0044 -0.0046 -0.0007 -0.0003  
Y -0.0005 -0.0003 -0.0026 -0.0022 -0.0001 -0.0001  
Z -0.0003 -0.0000 0.0039 0.0042 0.0008 0.0004

AT.128 C X 0.0002 0.0001 0.0044 -0.0046 -0.0007 0.0003  
Y -0.0005 0.0003 0.0026 -0.0022 -0.0001 0.0001  
Z -0.0003 0.0000 -0.0039 0.0042 0.0008 -0.0004

AT.129 C X -0.0006 -0.0007 -0.0001 -0.0001 0.0006 0.0003  
Y -0.0008 -0.0003 0.0086 0.0091 0.0020 0.0010  
Z 0.0010 0.0001 -0.0106 -0.0111 -0.0023 -0.0012

AT.130 C X -0.0006 0.0007 0.0001 -0.0001 0.0006 -0.0003  
Y -0.0008 0.0003 -0.0086 0.0091 0.0020 -0.0010

Z 0.0010 -0.0001 0.0106 -0.0111 -0.0023 0.0012  
AT. 131 H X -0.0025 -0.0022 0.0204 0.0213 0.0054 0.0026  
Y 0.0033 -0.0002 -0.0317 -0.0336 -0.0073 -0.0037  
Z 0.0003 -0.0017 -0.0006 -0.0012 -0.0000 -0.0002  
AT. 132 H X -0.0025 0.0022 -0.0204 0.0213 0.0054 -0.0026  
Y 0.0033 0.0002 0.0317 -0.0336 -0.0073 0.0037  
Z 0.0003 0.0017 0.0006 -0.0012 -0.0000 0.0002  
AT. 133 H X 0.0025 0.0002 -0.0347 -0.0366 -0.0077 -0.0039  
Y -0.0010 -0.0004 0.0072 0.0074 0.0018 0.0009  
Z -0.0009 -0.0004 0.0043 0.0043 0.0014 0.0007  
AT. 134 H X 0.0025 -0.0002 0.0347 -0.0366 -0.0077 0.0039  
Y -0.0010 0.0004 -0.0072 0.0074 0.0018 -0.0009  
Z -0.0009 0.0004 -0.0043 0.0043 0.0014 -0.0007  
AT. 135 C X -0.0003 -0.0010 -0.0081 -0.0076 -0.0009 -0.0004  
Y -0.0007 0.0006 0.0010 0.0019 0.0005 0.0002  
Z -0.0006 -0.0011 -0.0166 -0.0152 -0.0020 -0.0009  
AT. 136 C X -0.0003 0.0010 0.0081 -0.0076 -0.0009 0.0004  
Y -0.0007 -0.0006 -0.0010 0.0019 0.0005 -0.0002  
Z -0.0006 0.0011 0.0166 -0.0152 -0.0020 0.0009  
AT. 137 H X -0.0002 0.0062 0.0545 0.0532 0.0077 0.0036  
Y 0.0008 0.0020 0.0229 0.0213 0.0028 0.0013  
Z 0.0017 -0.0014 -0.0030 -0.0051 -0.0014 -0.0006  
AT. 138 H X -0.0002 -0.0062 -0.0545 0.0532 0.0077 -0.0036  
Y 0.0008 -0.0020 -0.0229 0.0213 0.0028 -0.0013  
Z 0.0017 0.0014 0.0030 -0.0051 -0.0014 0.0006  
AT. 139 H X -0.0028 -0.0047 -0.0563 -0.0514 -0.0061 -0.0028  
Y 0.0000 -0.0031 -0.0273 -0.0267 -0.0037 -0.0016  
Z 0.0025 0.0048 0.0551 0.0507 0.0062 0.0028  
AT. 140 H X -0.0028 0.0047 0.0563 -0.0514 -0.0061 0.0028  
Y 0.0000 0.0031 0.0273 -0.0267 -0.0037 0.0016  
Z 0.0025 -0.0048 -0.0551 0.0507 0.0062 -0.0028  
AT. 141 H X 0.0039 0.0018 0.0460 0.0398 0.0041 0.0019



Y 0.0017 -0.0011 0.0033 0.0010 -0.0006 -0.0002  
Z -0.0013 0.0018 0.0046 0.0063 0.0013 0.0005  
AT. 142 H X 0.0039 -0.0018 -0.0460 0.0398 0.0041 -0.0019  
Y 0.0017 0.0011 -0.0033 0.0010 -0.0006 0.0002  
Z -0.0013 -0.0018 -0.0046 0.0063 0.0013 -0.0005  
AT. 143 C X 0.0008 -0.0000 -0.0095 -0.0099 -0.0021 -0.0010  
Y -0.0010 -0.0004 -0.0032 -0.0023 -0.0001 -0.0000  
Z -0.0003 0.0004 0.0167 0.0168 0.0029 0.0014  
AT. 144 C X 0.0008 0.0000 0.0095 -0.0099 -0.0021 0.0010  
Y -0.0010 0.0004 0.0032 -0.0023 -0.0001 0.0000  
Z -0.0003 -0.0004 -0.0167 0.0168 0.0029 -0.0014  
AT. 145 H X -0.0051 -0.0000 0.0562 0.0600 0.0120 0.0058  
Y 0.0002 0.0006 0.0225 0.0221 0.0037 0.0018  
Z -0.0032 -0.0007 0.0074 0.0101 0.0028 0.0013  
AT. 146 H X -0.0051 0.0000 -0.0562 0.0600 0.0120 -0.0058  
Y 0.0002 -0.0006 -0.0225 0.0221 0.0037 -0.0018  
Z -0.0032 0.0007 -0.0074 0.0101 0.0028 -0.0013  
AT. 147 H X 0.0012 -0.0014 -0.0639 -0.0642 -0.0115 -0.0056  
Y 0.0023 0.0005 -0.0109 -0.0124 -0.0029 -0.0015  
Z 0.0021 -0.0010 -0.0676 -0.0686 -0.0125 -0.0061  
AT. 148 H X 0.0012 0.0014 0.0639 -0.0642 -0.0115 0.0056  
Y 0.0023 -0.0005 0.0109 -0.0124 -0.0029 0.0015  
Z 0.0021 0.0010 0.0676 -0.0686 -0.0125 0.0061  
AT. 149 H X 0.0024 0.0024 0.0552 0.0526 0.0081 0.0039  
Y 0.0018 0.0008 0.0058 0.0042 0.0000 -0.0000  
Z 0.0037 0.0013 -0.0011 -0.0043 -0.0022 -0.0011  
AT. 150 H X 0.0024 -0.0024 -0.0552 0.0526 0.0081 -0.0039  
Y 0.0018 -0.0008 -0.0058 0.0042 0.0000 0.0000  
Z 0.0037 -0.0013 0.0011 -0.0043 -0.0022 0.0011  
AT. 151 C X -0.0002 0.0006 0.0084 0.0082 0.0012 0.0006  
Y 0.0009 -0.0001 0.0024 0.0011 -0.0000 -0.0000  
Z -0.0006 -0.0004 -0.0012 -0.0008 0.0004 0.0003

AT. 152 C X -0.0002 -0.0006 -0.0084 0.0082 0.0012 -0.0006  
Y 0.0009 0.0001 -0.0024 0.0011 -0.0000 0.0000  
Z -0.0006 0.0004 0.0012 -0.0008 0.0004 -0.0003

AT. 153 H X -0.0001 0.0009 0.0282 0.0282 0.0044 0.0019  
Y -0.0007 0.0006 0.0089 0.0095 0.0015 0.0006  
Z -0.0032 0.0006 0.0009 0.0044 0.0015 0.0008

AT. 154 H X -0.0001 -0.0009 -0.0282 0.0282 0.0044 -0.0019  
Y -0.0007 -0.0006 -0.0089 0.0095 0.0015 -0.0006  
Z -0.0032 -0.0006 -0.0009 0.0044 0.0015 -0.0008

AT. 155 H X 0.0010 0.0025 0.0401 0.0376 0.0056 0.0027  
Y -0.0009 0.0013 0.0130 0.0132 0.0020 0.0011  
Z 0.0017 -0.0013 -0.0010 -0.0029 -0.0001 -0.0001

AT. 156 H X 0.0010 -0.0025 -0.0401 0.0376 0.0056 -0.0027  
Y -0.0009 -0.0013 -0.0130 0.0132 0.0020 -0.0011  
Z 0.0017 0.0013 0.0010 -0.0029 -0.0001 0.0001

AT. 157 O X 0.0000 0.0097 -0.0014 0.0012 0.0009 0.0002  
Y 0.0001 0.0012 -0.0001 0.0002 0.0001 0.0000  
Z 0.0000 -0.0056 0.0010 -0.0006 -0.0006 -0.0002

AT. 158 O X 0.0000 -0.0097 0.0014 0.0012 0.0009 -0.0002  
Y 0.0001 -0.0012 0.0001 0.0002 0.0001 -0.0000  
Z 0.0000 0.0056 -0.0010 -0.0006 -0.0006 0.0002

AT. 159 O X -0.0001 -0.0098 0.0015 -0.0011 -0.0009 -0.0003  
Y 0.0000 -0.0012 -0.0002 0.0000 -0.0001 -0.0001  
Z 0.0002 0.0055 -0.0010 0.0007 0.0005 0.0001

AT. 160 O X -0.0001 0.0098 -0.0015 -0.0011 -0.0009 0.0003  
Y 0.0000 0.0012 0.0002 0.0000 -0.0001 0.0001  
Z 0.0002 -0.0055 0.0010 0.0007 0.0005 -0.0001

AT. 161 H X 0.0011 0.0006 -0.0025 -0.0010 0.0005 -0.0002  
Y 0.0000 -0.0034 0.0013 -0.0000 -0.0008 -0.0004  
Z 0.0002 0.0017 -0.0034 -0.0013 0.0020 0.0011

AT. 162 H X 0.0011 -0.0006 0.0025 -0.0010 0.0005 0.0002  
Y 0.0000 0.0034 -0.0013 -0.0000 -0.0008 0.0004

Z 0.0002 -0.0017 0.0034 -0.0013 0.0020 -0.0011  
AT.163 H X 0.0003 0.0006 0.0002 0.0005 0.0002 -0.0001  
Y 0.0003 -0.0017 0.0059 -0.0043 -0.0017 -0.0000  
Z -0.0001 0.0024 0.0008 -0.0008 -0.0002 0.0002  
AT.164 H X 0.0003 -0.0006 -0.0002 0.0005 0.0002 0.0001  
Y 0.0003 0.0017 -0.0059 -0.0043 -0.0017 0.0000  
Z -0.0001 -0.0024 -0.0008 -0.0008 -0.0002 -0.0002  
AT.165 O X -0.0081 -0.0065 0.0001 -0.0002 -0.0004 0.0002  
Y 0.0080 0.0063 -0.0001 0.0001 0.0003 -0.0002  
Z 0.0379 0.0301 -0.0005 0.0005 0.0020 -0.0006  
AT.166 O X -0.0081 0.0065 -0.0001 -0.0002 -0.0004 -0.0002  
Y 0.0080 -0.0063 0.0001 0.0001 0.0003 0.0002  
Z 0.0379 -0.0301 0.0005 0.0005 0.0020 0.0006  
AT.167 H X 0.0070 0.0055 -0.0004 0.0001 -0.0004 -0.0013  
Y 0.0066 0.0056 0.0001 -0.0000 0.0022 0.0024  
Z 0.0057 0.0036 0.0004 0.0002 -0.0001 -0.0007  
AT.168 H X 0.0070 -0.0055 0.0004 0.0001 -0.0004 0.0013  
Y 0.0066 -0.0056 -0.0001 -0.0000 0.0022 -0.0024  
Z 0.0057 -0.0036 -0.0004 0.0002 -0.0001 0.0007  
AT.169 O X 0.0076 0.0060 -0.0001 0.0001 0.0003 -0.0001  
Y -0.0086 -0.0068 0.0000 -0.0001 -0.0004 0.0001  
Z -0.0381 -0.0303 0.0006 -0.0007 -0.0020 0.0006  
AT.170 O X 0.0076 -0.0060 0.0001 0.0001 0.0003 0.0001  
Y -0.0086 0.0068 -0.0000 -0.0001 -0.0004 -0.0001  
Z -0.0381 0.0303 -0.0006 -0.0007 -0.0020 -0.0006  
AT.171 H X 0.0029 0.0035 0.0010 -0.0008 -0.0000 0.0010  
Y 0.0099 0.0086 0.0003 -0.0001 0.0002 0.0004  
Z -0.0093 -0.0070 -0.0001 0.0003 -0.0010 0.0006  
AT.172 H X 0.0029 -0.0035 -0.0010 -0.0008 -0.0000 -0.0010  
Y 0.0099 -0.0086 -0.0003 -0.0001 0.0002 -0.0004  
Z -0.0093 0.0070 0.0001 0.0003 -0.0010 -0.0006

FREQ(CM\*\*-1) 1036.32 1037.40 1041.20 1043.60 1050.68 1055.53

AT. 1 I X 0.0000 -0.0000 0.0000 -0.0001 -0.0000 -0.0000

Y -0.0000 -0.0000 0.0001 -0.0001 0.0000 -0.0000

Z -0.0000 -0.0000 0.0001 -0.0001 0.0000 -0.0000

AT. 2 I X 0.0000 0.0000 -0.0000 -0.0001 -0.0000 0.0000

Y -0.0000 0.0000 -0.0001 -0.0001 0.0000 0.0000

Z -0.0000 0.0000 -0.0001 -0.0001 0.0000 0.0000

AT. 3 I X 0.0000 -0.0000 0.0001 -0.0001 -0.0000 -0.0000

Y 0.0000 -0.0000 0.0001 -0.0001 -0.0000 -0.0000

Z -0.0000 0.0000 -0.0000 0.0000 -0.0000 0.0000

AT. 4 I X 0.0000 0.0000 -0.0001 -0.0001 -0.0000 0.0000

Y 0.0000 0.0000 -0.0001 -0.0001 -0.0000 0.0000

Z -0.0000 -0.0000 0.0000 0.0000 -0.0000 -0.0000

AT. 5 O X 0.0004 0.0001 0.0033 -0.0036 -0.0006 0.0008

Y -0.0006 -0.0003 -0.0019 0.0020 0.0008 -0.0009

Z -0.0002 0.0003 -0.0054 0.0058 0.0006 -0.0008

AT. 6 O X 0.0004 -0.0001 -0.0033 -0.0036 -0.0006 -0.0008

Y -0.0006 0.0003 0.0019 0.0020 0.0008 0.0009

Z -0.0002 -0.0003 0.0054 0.0058 0.0006 0.0008

AT. 7 O X -0.0003 -0.0008 0.0031 -0.0034 -0.0004 -0.0003

Y 0.0007 0.0007 -0.0033 0.0036 0.0001 0.0002

Z -0.0005 -0.0007 0.0032 -0.0036 -0.0003 -0.0004

AT. 8 O X -0.0003 0.0008 -0.0031 -0.0034 -0.0004 0.0003

Y 0.0007 -0.0007 0.0033 0.0036 0.0001 -0.0002

Z -0.0005 0.0007 -0.0032 -0.0036 -0.0003 0.0004

AT. 9 N X 0.0004 -0.0008 0.0035 -0.0038 -0.0006 -0.0005

Y 0.0003 0.0006 -0.0031 0.0034 0.0002 -0.0001

Z -0.0004 -0.0022 0.0096 -0.0101 -0.0003 -0.0009

AT. 10 N X 0.0004 0.0008 -0.0035 -0.0038 -0.0006 0.0005

Y 0.0003 -0.0006 0.0031 0.0034 0.0002 0.0001

Z -0.0004 0.0022 -0.0096 -0.0101 -0.0003 0.0009

AT. 11 N X -0.0007 -0.0003 0.0019 -0.0023 0.0002 -0.0002  
Y -0.0014 -0.0007 0.0028 -0.0031 0.0004 -0.0002  
Z 0.0022 0.0018 -0.0090 0.0099 0.0000 0.0010

AT. 12 N X -0.0007 0.0003 -0.0019 -0.0023 0.0002 0.0002  
Y -0.0014 0.0007 -0.0028 -0.0031 0.0004 0.0002  
Z 0.0022 -0.0018 0.0090 0.0099 0.0000 -0.0010

AT. 13 C X -0.0004 -0.0012 0.0042 -0.0047 0.0002 -0.0009  
Y 0.0013 0.0019 -0.0073 0.0079 -0.0010 0.0011  
Z -0.0008 -0.0006 0.0040 -0.0046 0.0007 -0.0001

AT. 14 C X -0.0004 0.0012 -0.0042 -0.0047 0.0002 0.0009  
Y 0.0013 -0.0019 0.0073 0.0079 -0.0010 -0.0011  
Z -0.0008 0.0006 -0.0040 -0.0046 0.0007 0.0001

AT. 15 C X 0.0008 0.0008 -0.0054 0.0061 -0.0005 0.0002  
Y -0.0001 -0.0009 0.0061 -0.0066 -0.0002 0.0001  
Z 0.0006 0.0009 -0.0031 0.0032 -0.0005 0.0007

AT. 16 C X 0.0008 -0.0008 0.0054 0.0061 -0.0005 -0.0002  
Y -0.0001 0.0009 -0.0061 -0.0066 -0.0002 -0.0001  
Z 0.0006 -0.0009 0.0031 0.0032 -0.0005 -0.0007

AT. 17 H X -0.0000 0.0058 -0.0271 0.0305 0.0016 0.0016  
Y -0.0005 -0.0009 0.0063 -0.0075 0.0001 -0.0001  
Z 0.0004 0.0025 -0.0102 0.0123 0.0003 0.0013

AT. 18 H X -0.0000 -0.0058 0.0271 0.0305 0.0016 -0.0016  
Y -0.0005 0.0009 -0.0063 -0.0075 0.0001 0.0001  
Z 0.0004 -0.0025 0.0102 0.0123 0.0003 -0.0013

AT. 19 H X -0.0066 -0.0037 0.0021 -0.0054 0.0066 -0.0051  
Y -0.0018 -0.0018 0.0099 -0.0099 0.0010 -0.0002  
Z -0.0020 -0.0012 0.0004 -0.0015 0.0020 -0.0017

AT. 20 H X -0.0066 0.0037 -0.0021 -0.0054 0.0066 0.0051  
Y -0.0018 0.0018 -0.0099 -0.0099 0.0010 0.0002  
Z -0.0020 0.0012 -0.0004 -0.0015 0.0020 0.0017

AT. 21 C X -0.0015 -0.0007 0.0035 -0.0038 0.0006 -0.0004  
Y 0.0009 0.0010 -0.0031 0.0035 -0.0000 0.0005

Z 0.0013 0.0023 -0.0072 0.0086 0.0007 0.0023  
AT. 22 C X -0.0015 0.0007 -0.0035 -0.0038 0.0006 0.0004  
Y 0.0009 -0.0010 0.0031 0.0035 -0.0000 -0.0005  
Z 0.0013 -0.0023 0.0072 0.0086 0.0007 -0.0023  
AT. 23 C X 0.0012 0.0012 -0.0048 0.0051 -0.0003 0.0005  
Y -0.0004 -0.0008 0.0021 -0.0023 -0.0001 -0.0006  
Z -0.0014 -0.0013 0.0052 -0.0062 -0.0000 -0.0009  
AT. 24 C X 0.0012 -0.0012 0.0048 0.0051 -0.0003 -0.0005  
Y -0.0004 0.0008 -0.0021 -0.0023 -0.0001 0.0006  
Z -0.0014 0.0013 -0.0052 -0.0062 -0.0000 0.0009  
AT. 25 H X 0.0035 0.0063 -0.0198 0.0269 0.0022 0.0064  
Y -0.0003 -0.0002 -0.0001 0.0007 0.0004 0.0000  
Z -0.0023 -0.0028 0.0092 -0.0091 0.0007 -0.0021  
AT. 26 H X 0.0035 -0.0063 0.0198 0.0269 0.0022 -0.0064  
Y -0.0003 0.0002 0.0001 0.0007 0.0004 -0.0000  
Z -0.0023 0.0028 -0.0092 -0.0091 0.0007 0.0021  
AT. 27 H X 0.0026 -0.0018 0.0021 -0.0044 -0.0016 -0.0020  
Y -0.0007 -0.0007 0.0041 -0.0055 -0.0002 -0.0005  
Z -0.0016 -0.0009 0.0049 -0.0059 -0.0002 -0.0007  
AT. 28 H X 0.0026 0.0018 -0.0021 -0.0044 -0.0016 0.0020  
Y -0.0007 0.0007 -0.0041 -0.0055 -0.0002 0.0005  
Z -0.0016 0.0009 -0.0049 -0.0059 -0.0002 0.0007  
AT. 29 C X -0.0002 0.0031 -0.0143 0.0146 0.0017 0.0004  
Y -0.0010 -0.0023 0.0104 -0.0101 -0.0004 0.0001  
Z 0.0025 0.0006 -0.0013 0.0022 -0.0024 0.0010  
AT. 30 C X -0.0002 -0.0031 0.0143 0.0146 0.0017 -0.0004  
Y -0.0010 0.0023 -0.0104 -0.0101 -0.0004 -0.0001  
Z 0.0025 -0.0006 0.0013 0.0022 -0.0024 -0.0010  
AT. 31 H X 0.0035 0.0025 -0.0055 0.0054 -0.0021 0.0011  
Y -0.0064 -0.0013 0.0019 -0.0022 0.0058 -0.0012  
Z -0.0023 0.0016 -0.0081 0.0077 0.0031 -0.0004  
AT. 32 H X 0.0035 -0.0025 0.0055 0.0054 -0.0021 -0.0011

Y -0.0064 0.0013 -0.0019 -0.0022 0.0058 0.0012  
Z -0.0023 -0.0016 0.0081 0.0077 0.0031 0.0004  
AT. 33 H X 0.0050 0.0088 -0.0307 0.0330 -0.0021 0.0053  
Y 0.0047 -0.0043 0.0198 -0.0185 -0.0070 0.0005  
Z 0.0025 0.0050 -0.0162 0.0180 -0.0011 0.0036  
AT. 34 H X 0.0050 -0.0088 0.0307 0.0330 -0.0021 -0.0053  
Y 0.0047 0.0043 -0.0198 -0.0185 -0.0070 -0.0005  
Z 0.0025 -0.0050 0.0162 0.0180 -0.0011 -0.0036  
AT. 35 C X 0.0000 0.0005 -0.0010 0.0009 0.0002 0.0004  
Y -0.0008 -0.0009 0.0028 -0.0034 0.0003 -0.0008  
Z -0.0007 -0.0000 -0.0009 0.0010 0.0005 0.0000  
AT. 36 C X 0.0000 -0.0005 0.0010 0.0009 0.0002 -0.0004  
Y -0.0008 0.0009 -0.0028 -0.0034 0.0003 0.0008  
Z -0.0007 0.0000 0.0009 0.0010 0.0005 -0.0000  
AT. 37 C X -0.0005 -0.0006 0.0070 -0.0064 -0.0011 0.0015  
Y 0.0020 0.0008 -0.0066 0.0066 -0.0004 -0.0010  
Z 0.0011 -0.0007 -0.0033 0.0017 -0.0003 -0.0028  
AT. 38 C X -0.0005 0.0006 -0.0070 -0.0064 -0.0011 -0.0015  
Y 0.0020 -0.0008 0.0066 0.0066 -0.0004 0.0010  
Z 0.0011 0.0007 0.0033 0.0017 -0.0003 0.0028  
AT. 39 H X -0.0056 -0.0006 0.0248 -0.0212 -0.0002 0.0082  
Y 0.0023 0.0057 -0.0169 0.0209 0.0015 0.0061  
Z -0.0026 -0.0028 0.0128 -0.0141 -0.0004 -0.0014  
AT. 40 H X -0.0056 0.0006 -0.0248 -0.0212 -0.0002 -0.0082  
Y 0.0023 -0.0057 0.0169 0.0209 0.0015 -0.0061  
Z -0.0026 0.0028 -0.0128 -0.0141 -0.0004 0.0014  
AT. 41 H X 0.0040 -0.0012 -0.0056 0.0031 -0.0025 -0.0047  
Y -0.0008 0.0004 -0.0036 0.0039 0.0016 -0.0005  
Z -0.0011 0.0001 0.0067 -0.0055 -0.0005 0.0029  
AT. 42 H X 0.0040 0.0012 0.0056 0.0031 -0.0025 0.0047  
Y -0.0008 -0.0004 0.0036 0.0039 0.0016 0.0005  
Z -0.0011 -0.0001 -0.0067 -0.0055 -0.0005 -0.0029

AT. 43 C X 0.0029 0.0013 -0.0122 0.0123 0.0003 -0.0019  
Y -0.0004 -0.0003 0.0054 -0.0052 -0.0006 0.0011  
Z -0.0011 -0.0023 0.0078 -0.0081 -0.0006 -0.0018

AT. 44 C X 0.0029 -0.0013 0.0122 0.0123 0.0003 0.0019  
Y -0.0004 0.0003 -0.0054 -0.0052 -0.0006 -0.0011  
Z -0.0011 0.0023 -0.0078 -0.0081 -0.0006 0.0018

AT. 45 H X -0.0009 0.0015 -0.0055 0.0051 0.0016 0.0015  
Y 0.0035 -0.0009 -0.0049 0.0048 -0.0014 -0.0045  
Z -0.0023 -0.0019 0.0123 -0.0119 -0.0006 0.0011

AT. 46 H X -0.0009 -0.0015 0.0055 0.0051 0.0016 -0.0015  
Y 0.0035 0.0009 0.0049 0.0048 -0.0014 0.0045  
Z -0.0023 0.0019 -0.0123 -0.0119 -0.0006 -0.0011

AT. 47 H X 0.0054 0.0067 -0.0256 0.0277 0.0008 0.0040  
Y -0.0031 0.0030 0.0070 -0.0059 0.0010 0.0086  
Z -0.0069 -0.0063 0.0282 -0.0303 -0.0002 -0.0023

AT. 48 H X 0.0054 -0.0067 0.0256 0.0277 0.0008 -0.0040  
Y -0.0031 -0.0030 -0.0070 -0.0059 0.0010 -0.0086  
Z -0.0069 0.0063 -0.0282 -0.0303 -0.0002 0.0023

AT. 49 C X -0.0006 -0.0004 0.0011 -0.0010 0.0003 -0.0003  
Y -0.0002 -0.0006 0.0036 -0.0033 -0.0003 0.0001  
Z -0.0004 -0.0001 0.0007 -0.0010 0.0003 -0.0004

AT. 50 C X -0.0006 0.0004 -0.0011 -0.0010 0.0003 0.0003  
Y -0.0002 0.0006 -0.0036 -0.0033 -0.0003 -0.0001  
Z -0.0004 0.0001 -0.0007 -0.0010 0.0003 0.0004

AT. 51 C X -0.0004 -0.0020 0.0084 -0.0083 -0.0009 0.0003  
Y -0.0001 0.0024 -0.0095 0.0084 0.0013 0.0003  
Z 0.0012 0.0003 0.0004 0.0001 -0.0015 0.0010

AT. 52 C X -0.0004 0.0020 -0.0084 -0.0083 -0.0009 -0.0003  
Y -0.0001 -0.0024 0.0095 0.0084 0.0013 -0.0003  
Z 0.0012 -0.0003 -0.0004 0.0001 -0.0015 -0.0010

AT. 53 H X 0.0016 -0.0067 0.0292 -0.0265 -0.0057 0.0007  
Y 0.0034 0.0017 -0.0039 0.0073 -0.0036 0.0032



Z 0.0021 0.0077 -0.0282 0.0295 0.0008 0.0038  
AT. 54 H X 0.0016 0.0067 -0.0292 -0.0265 -0.0057 -0.0007  
Y 0.0034 -0.0017 0.0039 0.0073 -0.0036 -0.0032  
Z 0.0021 -0.0077 0.0282 0.0295 0.0008 -0.0038  
AT. 55 H X -0.0027 0.0034 -0.0169 0.0136 0.0050 -0.0011  
Y -0.0006 0.0008 -0.0003 0.0001 0.0011 0.0006  
Z -0.0005 0.0019 -0.0056 0.0047 0.0019 0.0001  
AT. 56 H X -0.0027 -0.0034 0.0169 0.0136 0.0050 0.0011  
Y -0.0006 -0.0008 0.0003 0.0001 0.0011 -0.0006  
Z -0.0005 -0.0019 0.0056 0.0047 0.0019 -0.0001  
AT. 57 C X -0.0001 -0.0015 0.0084 -0.0083 -0.0012 0.0003  
Y -0.0012 -0.0012 0.0100 -0.0093 -0.0006 0.0018  
Z -0.0021 -0.0011 0.0047 -0.0040 0.0013 0.0002  
AT. 58 C X -0.0001 0.0015 -0.0084 -0.0083 -0.0012 -0.0003  
Y -0.0012 0.0012 -0.0100 -0.0093 -0.0006 -0.0018  
Z -0.0021 0.0011 -0.0047 -0.0040 0.0013 -0.0002  
AT. 59 H X -0.0000 0.0039 -0.0352 0.0349 0.0063 -0.0054  
Y 0.0021 -0.0008 0.0110 -0.0114 -0.0040 0.0020  
Z 0.0035 0.0029 -0.0246 0.0232 0.0008 -0.0039  
AT. 60 H X -0.0000 -0.0039 0.0352 0.0349 0.0063 0.0054  
Y 0.0021 0.0008 -0.0110 -0.0114 -0.0040 -0.0020  
Z 0.0035 -0.0029 0.0246 0.0232 0.0008 0.0039  
AT. 61 H X 0.0085 0.0037 -0.0216 0.0173 -0.0044 -0.0030  
Y -0.0042 0.0011 -0.0138 0.0132 0.0057 -0.0017  
Z 0.0056 0.0019 -0.0073 0.0052 -0.0037 -0.0008  
AT. 62 H X 0.0085 -0.0037 0.0216 0.0173 -0.0044 0.0030  
Y -0.0042 -0.0011 0.0138 0.0132 0.0057 0.0017  
Z 0.0056 -0.0019 0.0073 0.0052 -0.0037 0.0008  
AT. 63 H X -0.0086 -0.0063 0.0387 -0.0359 0.0015 0.0042  
Y 0.0075 0.0067 -0.0441 0.0424 0.0008 -0.0051  
Z -0.0015 -0.0033 0.0219 -0.0219 -0.0023 0.0020  
AT. 64 H X -0.0086 0.0063 -0.0387 -0.0359 0.0015 -0.0042

Y 0.0075 -0.0067 0.0441 0.0424 0.0008 0.0051  
Z -0.0015 0.0033 -0.0219 -0.0219 -0.0023 -0.0020  
AT. 65 C X -0.0008 -0.0002 0.0061 -0.0066 -0.0005 0.0016  
Y -0.0012 -0.0026 0.0131 -0.0130 -0.0016 0.0006  
Z 0.0002 0.0012 -0.0037 0.0033 0.0006 0.0007  
AT. 66 C X -0.0008 0.0002 -0.0061 -0.0066 -0.0005 -0.0016  
Y -0.0012 0.0026 -0.0131 -0.0130 -0.0016 -0.0006  
Z 0.0002 -0.0012 0.0037 0.0033 0.0006 -0.0007  
AT. 67 H X 0.0036 0.0017 -0.0278 0.0287 0.0022 -0.0067  
Y -0.0003 0.0028 -0.0046 0.0034 0.0012 0.0025  
Z -0.0044 -0.0053 0.0401 -0.0404 -0.0039 0.0056  
AT. 68 H X 0.0036 -0.0017 0.0278 0.0287 0.0022 0.0067  
Y -0.0003 -0.0028 0.0046 0.0034 0.0012 -0.0025  
Z -0.0044 0.0053 -0.0401 -0.0404 -0.0039 -0.0056  
AT. 69 H X 0.0018 0.0063 -0.0250 0.0249 0.0037 0.0006  
Y 0.0019 0.0005 -0.0140 0.0168 0.0014 -0.0039  
Z -0.0003 -0.0069 0.0175 -0.0144 -0.0033 -0.0039  
AT. 70 H X 0.0018 -0.0063 0.0250 0.0249 0.0037 -0.0006  
Y 0.0019 -0.0005 0.0140 0.0168 0.0014 0.0039  
Z -0.0003 0.0069 -0.0175 -0.0144 -0.0033 0.0039  
AT. 71 H X -0.0027 -0.0080 0.0355 -0.0340 -0.0047 -0.0003  
Y 0.0029 0.0068 -0.0364 0.0357 0.0046 -0.0019  
Z 0.0045 0.0080 -0.0495 0.0495 0.0058 -0.0045  
AT. 72 H X -0.0027 0.0080 -0.0355 -0.0340 -0.0047 0.0003  
Y 0.0029 -0.0068 0.0364 0.0357 0.0046 0.0019  
Z 0.0045 -0.0080 0.0495 0.0495 0.0058 0.0045  
AT. 73 C X 0.0003 0.0009 -0.0100 0.0100 0.0014 -0.0019  
Y 0.0014 0.0019 -0.0160 0.0154 0.0018 -0.0029  
Z -0.0002 0.0015 -0.0021 0.0022 0.0008 0.0014  
AT. 74 C X 0.0003 -0.0009 0.0100 0.0100 0.0014 0.0019  
Y 0.0014 -0.0019 0.0160 0.0154 0.0018 0.0029  
Z -0.0002 -0.0015 0.0021 0.0022 0.0008 -0.0014

AT. 75 H X -0.0019 -0.0033 0.0185 -0.0222 -0.0025 0.0011  
Y 0.0001 0.0000 0.0050 -0.0028 -0.0004 0.0016  
Z -0.0033 -0.0043 0.0476 -0.0463 -0.0055 0.0097

AT. 76 H X -0.0019 0.0033 -0.0185 -0.0222 -0.0025 -0.0011  
Y 0.0001 -0.0000 -0.0050 -0.0028 -0.0004 -0.0016  
Z -0.0033 0.0043 -0.0476 -0.0463 -0.0055 -0.0097

AT. 77 H X -0.0019 -0.0031 0.0128 -0.0083 -0.0002 0.0001  
Y -0.0002 -0.0010 0.0135 -0.0170 -0.0025 0.0026  
Z 0.0031 0.0078 -0.0495 0.0481 0.0064 -0.0053

AT. 78 H X -0.0019 0.0031 -0.0128 -0.0083 -0.0002 -0.0001  
Y -0.0002 0.0010 -0.0135 -0.0170 -0.0025 -0.0026  
Z 0.0031 -0.0078 0.0495 0.0481 0.0064 0.0053

AT. 79 I X -0.0002 0.0000 0.0000 0.0000 0.0001 0.0000  
Y 0.0002 0.0001 0.0000 -0.0000 -0.0002 0.0001  
Z 0.0001 0.0001 0.0000 -0.0000 -0.0001 0.0001

AT. 80 I X -0.0002 -0.0000 -0.0000 0.0000 0.0001 -0.0000  
Y 0.0002 -0.0001 -0.0000 -0.0000 -0.0002 -0.0001  
Z 0.0001 -0.0001 -0.0000 -0.0000 -0.0001 -0.0001

AT. 81 I X -0.0000 -0.0000 -0.0000 0.0000 -0.0000 0.0000  
Y 0.0001 0.0001 -0.0000 0.0000 0.0000 -0.0001  
Z -0.0000 0.0000 -0.0000 0.0000 -0.0000 0.0000

AT. 82 I X -0.0000 0.0000 0.0000 0.0000 -0.0000 -0.0000  
Y 0.0001 -0.0001 0.0000 0.0000 0.0000 0.0001  
Z -0.0000 -0.0000 0.0000 0.0000 -0.0000 -0.0000

AT. 83 O X -0.0095 -0.0040 -0.0010 0.0009 0.0061 -0.0021  
Y -0.0005 0.0002 0.0000 0.0000 -0.0000 0.0009  
Z -0.0067 -0.0033 -0.0009 0.0008 0.0026 -0.0005

AT. 84 O X -0.0095 0.0040 0.0010 0.0009 0.0061 0.0021  
Y -0.0005 -0.0002 -0.0000 0.0000 -0.0000 -0.0009  
Z -0.0067 0.0033 0.0009 0.0008 0.0026 0.0005

AT. 85 O X -0.0016 -0.0034 -0.0004 0.0002 -0.0021 0.0012  
Y -0.0022 -0.0037 -0.0005 0.0002 -0.0015 0.0009

Z 0.0028 0.0037 0.0005 -0.0003 0.0009 -0.0011  
AT. 86 O X -0.0016 0.0034 0.0004 0.0002 -0.0021 -0.0012  
Y -0.0022 0.0037 0.0005 0.0002 -0.0015 -0.0009  
Z 0.0028 -0.0037 -0.0005 -0.0003 0.0009 0.0011  
AT. 87 N X -0.0024 -0.0014 -0.0004 0.0004 0.0004 0.0003  
Y -0.0013 -0.0028 -0.0003 0.0000 -0.0003 -0.0021  
Z 0.0048 0.0056 0.0018 -0.0015 0.0068 -0.0040  
AT. 88 N X -0.0024 0.0014 0.0004 0.0004 0.0004 -0.0003  
Y -0.0013 0.0028 0.0003 0.0000 -0.0003 0.0021  
Z 0.0048 -0.0056 -0.0018 -0.0015 0.0068 0.0040  
AT. 89 N X -0.0028 -0.0038 -0.0004 0.0001 0.0005 -0.0014  
Y 0.0058 0.0071 0.0009 -0.0003 -0.0017 0.0027  
Z -0.0088 -0.0088 -0.0015 0.0009 -0.0009 0.0035  
AT. 90 N X -0.0028 0.0038 0.0004 0.0001 0.0005 0.0014  
Y 0.0058 -0.0071 -0.0009 -0.0003 -0.0017 -0.0027  
Z -0.0088 0.0088 0.0015 0.0009 -0.0009 -0.0035  
AT. 91 C X -0.0051 -0.0047 -0.0011 0.0008 -0.0001 -0.0015  
Y -0.0126 -0.0080 -0.0014 0.0010 0.0096 -0.0083  
Z 0.0100 0.0064 0.0012 -0.0009 -0.0076 0.0067  
AT. 92 C X -0.0051 0.0047 0.0011 0.0008 -0.0001 0.0015  
Y -0.0126 0.0080 0.0014 0.0010 0.0096 0.0083  
Z 0.0100 -0.0064 -0.0012 -0.0009 -0.0076 -0.0067  
AT. 93 C X 0.0074 0.0049 0.0014 -0.0012 -0.0005 -0.0001  
Y 0.0090 0.0045 0.0008 -0.0006 -0.0073 0.0047  
Z 0.0011 -0.0011 -0.0007 0.0006 -0.0068 0.0044  
AT. 94 C X 0.0074 -0.0049 -0.0014 -0.0012 -0.0005 0.0001  
Y 0.0090 -0.0045 -0.0008 -0.0006 -0.0073 -0.0047  
Z 0.0011 0.0011 0.0007 0.0006 -0.0068 -0.0044  
AT. 95 H X 0.0770 0.0425 0.0059 -0.0037 -0.0800 0.0629  
Y -0.0081 -0.0048 -0.0005 0.0001 0.0123 -0.0107  
Z -0.0433 -0.0230 -0.0031 0.0022 0.0442 -0.0339  
AT. 96 H X 0.0770 -0.0425 -0.0059 -0.0037 -0.0800 -0.0629

Y -0.0081 0.0048 0.0005 0.0001 0.0123 0.0107  
Z -0.0433 0.0230 0.0031 0.0022 0.0442 0.0339  
AT. 97 H X -0.0166 -0.0175 -0.0015 -0.0003 0.0299 -0.0380  
Y -0.0109 0.0010 0.0015 -0.0010 0.0217 -0.0097  
Z 0.0025 0.0041 0.0002 0.0003 -0.0080 0.0116  
AT. 98 H X -0.0166 0.0175 0.0015 -0.0003 0.0299 0.0380  
Y -0.0109 -0.0010 -0.0015 -0.0010 0.0217 0.0097  
Z 0.0025 -0.0041 -0.0002 0.0003 -0.0080 -0.0116  
AT. 99 C X -0.0051 -0.0056 -0.0008 0.0005 -0.0003 0.0016  
Y -0.0021 -0.0026 -0.0004 0.0002 -0.0001 -0.0004  
Z -0.0046 -0.0054 -0.0007 0.0006 -0.0024 0.0055  
AT. 100 C X -0.0051 0.0056 0.0008 0.0005 -0.0003 -0.0016  
Y -0.0021 0.0026 0.0004 0.0002 -0.0001 0.0004  
Z -0.0046 0.0054 0.0007 0.0006 -0.0024 -0.0055  
AT. 101 C X 0.0048 0.0060 0.0008 -0.0005 0.0016 -0.0021  
Y -0.0002 0.0013 0.0002 -0.0000 0.0010 0.0000  
Z 0.0045 0.0052 0.0007 -0.0004 0.0010 -0.0019  
AT. 102 C X 0.0048 -0.0060 -0.0008 -0.0005 0.0016 0.0021  
Y -0.0002 -0.0013 -0.0002 -0.0000 0.0010 -0.0000  
Z 0.0045 -0.0052 -0.0007 -0.0004 0.0010 0.0019  
AT. 103 H X 0.0145 0.0221 0.0032 -0.0023 0.0120 -0.0141  
Y -0.0037 -0.0055 -0.0008 0.0006 -0.0035 0.0043  
Z 0.0038 0.0080 0.0011 -0.0006 0.0031 -0.0016  
AT. 104 H X 0.0145 -0.0221 -0.0032 -0.0023 0.0120 0.0141  
Y -0.0037 0.0055 0.0008 0.0006 -0.0035 -0.0043  
Z 0.0038 -0.0080 -0.0011 -0.0006 0.0031 0.0016  
AT. 105 H X -0.0008 0.0048 0.0006 0.0006 -0.0014 0.0070  
Y 0.0051 0.0020 0.0004 -0.0007 0.0024 -0.0070  
Z 0.0052 0.0050 0.0007 -0.0004 0.0009 -0.0032  
AT. 106 H X -0.0008 -0.0048 -0.0006 0.0006 -0.0014 -0.0070  
Y 0.0051 -0.0020 -0.0004 -0.0007 0.0024 0.0070  
Z 0.0052 -0.0050 -0.0007 -0.0004 0.0009 0.0032

AT.107 C X 0.0058 0.0078 0.0027 -0.0023 0.0158 -0.0129  
Y 0.0052 0.0067 0.0011 -0.0005 0.0007 0.0032  
Z -0.0114 -0.0089 -0.0012 0.0005 0.0117 -0.0138

AT.108 C X 0.0058 -0.0078 -0.0027 -0.0023 0.0158 0.0129  
Y 0.0052 -0.0067 -0.0011 -0.0005 0.0007 -0.0032  
Z -0.0114 0.0089 0.0012 0.0005 0.0117 0.0138

AT.109 H X 0.0146 0.0158 0.0016 -0.0001 -0.0144 0.0237  
Y 0.0169 0.0140 0.0009 0.0004 -0.0240 0.0288  
Z 0.0053 0.0013 -0.0011 0.0014 -0.0200 0.0181

AT.110 H X 0.0146 -0.0158 -0.0016 -0.0001 -0.0144 -0.0237  
Y 0.0169 -0.0140 -0.0009 0.0004 -0.0240 -0.0288  
Z 0.0053 -0.0013 0.0011 0.0014 -0.0200 -0.0181

AT.111 H X 0.0134 0.0210 0.0057 -0.0043 0.0266 -0.0128  
Y -0.0216 -0.0142 -0.0001 -0.0015 0.0462 -0.0495  
Z -0.0139 -0.0186 -0.0042 0.0028 -0.0099 -0.0023

AT.112 H X 0.0134 -0.0210 -0.0057 -0.0043 0.0266 0.0128  
Y -0.0216 0.0142 0.0001 -0.0015 0.0462 0.0495  
Z -0.0139 0.0186 0.0042 0.0028 -0.0099 0.0023

AT.113 C X 0.0023 0.0018 0.0004 -0.0002 -0.0011 0.0001  
Y 0.0034 0.0027 0.0005 -0.0003 -0.0008 0.0012  
Z -0.0018 -0.0014 -0.0004 0.0003 -0.0002 0.0003

AT.114 C X 0.0023 -0.0018 -0.0004 -0.0002 -0.0011 -0.0001  
Y 0.0034 -0.0027 -0.0005 -0.0003 -0.0008 -0.0012  
Z -0.0018 0.0014 0.0004 0.0003 -0.0002 -0.0003

AT.115 C X -0.0106 -0.0108 -0.0020 0.0013 -0.0039 0.0028  
Y -0.0085 -0.0081 -0.0011 0.0005 0.0028 -0.0052  
Z -0.0037 -0.0060 -0.0006 -0.0000 0.0009 -0.0071

AT.116 C X -0.0106 0.0108 0.0020 0.0013 -0.0039 -0.0028  
Y -0.0085 0.0081 0.0011 0.0005 0.0028 0.0052  
Z -0.0037 0.0060 0.0006 -0.0000 0.0009 0.0071

AT.117 H X -0.0356 -0.0393 -0.0061 0.0031 -0.0027 -0.0084  
Y -0.0054 0.0020 -0.0006 0.0017 -0.0037 0.0241

Z 0.0217 0.0202 0.0033 -0.0021 0.0004 -0.0027  
AT. 118 H X -0.0356 0.0393 0.0061 0.0031 -0.0027 0.0084  
Y -0.0054 -0.0020 0.0006 0.0017 -0.0037 -0.0241  
Z 0.0217 -0.0202 -0.0033 -0.0021 0.0004 0.0027  
AT. 119 H X 0.0121 0.0163 0.0018 -0.0001 -0.0070 0.0210  
Y -0.0097 -0.0109 -0.0013 0.0004 0.0021 -0.0081  
Z 0.0098 0.0113 0.0015 -0.0006 -0.0005 0.0062  
AT. 120 H X 0.0121 -0.0163 -0.0018 -0.0001 -0.0070 -0.0210  
Y -0.0097 0.0109 0.0013 0.0004 0.0021 0.0081  
Z 0.0098 -0.0113 -0.0015 -0.0006 -0.0005 -0.0062  
AT. 121 C X 0.0176 0.0202 0.0031 -0.0017 0.0026 0.0011  
Y -0.0025 -0.0025 0.0001 -0.0003 0.0035 -0.0037  
Z 0.0030 -0.0002 0.0004 -0.0008 0.0028 -0.0096  
AT. 122 C X 0.0176 -0.0202 -0.0031 -0.0017 0.0026 -0.0011  
Y -0.0025 0.0025 -0.0001 -0.0003 0.0035 0.0037  
Z 0.0030 0.0002 -0.0004 -0.0008 0.0028 0.0096  
AT. 123 H X 0.0012 -0.0066 -0.0006 -0.0006 0.0076 -0.0200  
Y -0.0170 -0.0249 -0.0025 0.0003 0.0031 -0.0171  
Z 0.0153 0.0175 0.0024 -0.0012 0.0032 0.0005  
AT. 124 H X 0.0012 0.0066 0.0006 -0.0006 0.0076 0.0200  
Y -0.0170 0.0249 0.0025 0.0003 0.0031 0.0171  
Z 0.0153 -0.0175 -0.0024 -0.0012 0.0032 -0.0005  
AT. 125 H X 0.0352 0.0356 0.0062 -0.0040 0.0053 -0.0094  
Y 0.0069 0.0199 0.0013 0.0013 -0.0034 0.0293  
Z 0.0291 0.0297 0.0046 -0.0028 0.0025 -0.0059  
AT. 126 H X 0.0352 -0.0356 -0.0062 -0.0040 0.0053 0.0094  
Y 0.0069 -0.0199 -0.0013 0.0013 -0.0034 -0.0293  
Z 0.0291 -0.0297 -0.0046 -0.0028 0.0025 0.0059  
AT. 127 C X -0.0004 0.0000 0.0001 0.0000 0.0003 0.0012  
Y 0.0050 0.0041 0.0008 -0.0006 0.0012 -0.0016  
Z 0.0013 0.0019 0.0003 -0.0000 -0.0019 0.0025  
AT. 128 C X -0.0004 -0.0000 -0.0001 0.0000 0.0003 -0.0012

Y 0.0050 -0.0041 -0.0008 -0.0006 0.0012 0.0016  
Z 0.0013 -0.0019 -0.0003 -0.0000 -0.0019 -0.0025  
AT. 129 C X 0.0005 -0.0049 -0.0017 0.0014 -0.0174 0.0119  
Y -0.0001 0.0010 -0.0008 0.0011 -0.0104 0.0129  
Z -0.0023 -0.0035 -0.0001 -0.0003 0.0064 -0.0086  
AT. 130 C X 0.0005 0.0049 0.0017 0.0014 -0.0174 -0.0119  
Y -0.0001 -0.0010 0.0008 0.0011 -0.0104 -0.0129  
Z -0.0023 0.0035 0.0001 -0.0003 0.0064 0.0086  
AT. 131 H X -0.0022 -0.0099 -0.0047 0.0045 -0.0465 0.0382  
Y -0.0150 -0.0190 -0.0014 -0.0009 0.0309 -0.0428  
Z -0.0120 -0.0194 -0.0045 0.0029 -0.0140 0.0005  
AT. 132 H X -0.0022 0.0099 0.0047 0.0045 -0.0465 -0.0382  
Y -0.0150 0.0190 0.0014 -0.0009 0.0309 0.0428  
Z -0.0120 0.0194 0.0045 0.0029 -0.0140 -0.0005  
AT. 133 H X -0.0023 -0.0082 0.0010 -0.0025 0.0252 -0.0347  
Y 0.0048 0.0018 -0.0005 0.0007 -0.0155 0.0145  
Z 0.0057 -0.0009 -0.0010 0.0009 -0.0210 0.0161  
AT. 134 H X -0.0023 0.0082 -0.0010 -0.0025 0.0252 0.0347  
Y 0.0048 -0.0018 0.0005 0.0007 -0.0155 -0.0145  
Z 0.0057 0.0009 0.0010 0.0009 -0.0210 -0.0161  
AT. 135 C X -0.0009 -0.0015 -0.0006 0.0007 -0.0057 0.0071  
Y 0.0109 0.0113 0.0024 -0.0017 0.0076 -0.0052  
Z 0.0079 0.0077 0.0011 -0.0005 -0.0037 0.0078  
AT. 136 C X -0.0009 0.0015 0.0006 0.0007 -0.0057 -0.0071  
Y 0.0109 -0.0113 -0.0024 -0.0017 0.0076 0.0052  
Z 0.0079 -0.0077 -0.0011 -0.0005 -0.0037 -0.0078  
AT. 137 H X 0.0164 0.0190 0.0052 -0.0048 0.0418 -0.0448  
Y -0.0072 -0.0065 -0.0007 0.0001 0.0076 -0.0124  
Z -0.0283 -0.0288 -0.0060 0.0045 -0.0196 0.0137  
AT. 138 H X 0.0164 -0.0190 -0.0052 -0.0048 0.0418 0.0448  
Y -0.0072 0.0065 0.0007 0.0001 0.0076 0.0124  
Z -0.0283 0.0288 0.0060 0.0045 -0.0196 -0.0137



AT. 139 H X 0.0258 0.0243 0.0032 -0.0010 -0.0153 0.0285  
Y -0.0112 -0.0129 -0.0037 0.0032 -0.0218 0.0237  
Z -0.0200 -0.0189 -0.0021 0.0002 0.0168 -0.0286

AT. 140 H X 0.0258 -0.0243 -0.0032 -0.0010 -0.0153 -0.0285  
Y -0.0112 0.0129 0.0037 0.0032 -0.0218 -0.0237  
Z -0.0200 0.0189 0.0021 0.0002 0.0168 0.0286

AT. 141 H X -0.0517 -0.0510 -0.0089 0.0054 -0.0063 -0.0106  
Y -0.0276 -0.0279 -0.0056 0.0038 -0.0150 0.0094  
Z 0.0266 0.0276 0.0059 -0.0043 0.0201 -0.0157

AT. 142 H X -0.0517 0.0510 0.0089 0.0054 -0.0063 0.0106  
Y -0.0276 0.0279 0.0056 0.0038 -0.0150 -0.0094  
Z 0.0266 -0.0276 -0.0059 -0.0043 0.0201 0.0157

AT. 143 C X -0.0056 -0.0068 -0.0009 0.0003 0.0021 -0.0051  
Y 0.0111 0.0122 0.0025 -0.0018 0.0118 -0.0111  
Z -0.0009 0.0015 -0.0002 0.0005 -0.0029 0.0063

AT. 144 C X -0.0056 0.0068 0.0009 0.0003 0.0021 0.0051  
Y 0.0111 -0.0122 -0.0025 -0.0018 0.0118 0.0111  
Z -0.0009 -0.0015 0.0002 0.0005 -0.0029 -0.0063

AT. 145 H X 0.0399 0.0466 0.0072 -0.0039 0.0135 -0.0009  
Y -0.0076 -0.0054 -0.0018 0.0018 -0.0124 0.0158  
Z 0.0320 0.0343 0.0065 -0.0045 0.0249 -0.0214

AT. 146 H X 0.0399 -0.0466 -0.0072 -0.0039 0.0135 0.0009  
Y -0.0076 0.0054 0.0018 0.0018 -0.0124 -0.0158  
Z 0.0320 -0.0343 -0.0065 -0.0045 0.0249 0.0214

AT. 147 H X 0.0055 -0.0006 0.0021 -0.0032 0.0285 -0.0411  
Y -0.0204 -0.0247 -0.0045 0.0026 -0.0131 0.0102  
Z -0.0021 -0.0097 0.0003 -0.0022 0.0220 -0.0346

AT. 148 H X 0.0055 0.0006 -0.0021 -0.0032 0.0285 0.0411  
Y -0.0204 0.0247 0.0045 0.0026 -0.0131 -0.0102  
Z -0.0021 0.0097 -0.0003 -0.0022 0.0220 0.0346

AT. 149 H X -0.0364 -0.0336 -0.0081 0.0070 -0.0458 0.0510  
Y -0.0197 -0.0206 -0.0041 0.0030 -0.0181 0.0162

Z -0.0385 -0.0411 -0.0077 0.0052 -0.0282 0.0232  
AT. 150 H X -0.0364 0.0336 0.0081 0.0070 -0.0458 -0.0510  
Y -0.0197 0.0206 0.0041 0.0030 -0.0181 -0.0162  
Z -0.0385 0.0411 0.0077 0.0052 -0.0282 -0.0232  
AT. 151 C X 0.0027 0.0043 0.0010 -0.0006 0.0048 -0.0035  
Y -0.0125 -0.0161 -0.0033 0.0022 -0.0160 0.0102  
Z 0.0046 0.0046 0.0002 0.0003 -0.0080 0.0114  
AT. 152 C X 0.0027 -0.0043 -0.0010 -0.0006 0.0048 0.0035  
Y -0.0125 0.0161 0.0033 0.0022 -0.0160 -0.0102  
Z 0.0046 -0.0046 -0.0002 0.0003 -0.0080 -0.0114  
AT. 153 H X -0.0059 -0.0068 -0.0015 0.0009 -0.0031 -0.0012  
Y 0.0054 0.0074 0.0016 -0.0011 0.0091 -0.0078  
Z 0.0362 0.0471 0.0092 -0.0057 0.0369 -0.0187  
AT. 154 H X -0.0059 0.0068 0.0015 0.0009 -0.0031 0.0012  
Y 0.0054 -0.0074 -0.0016 -0.0011 0.0091 0.0078  
Z 0.0362 -0.0471 -0.0092 -0.0057 0.0369 0.0187  
AT. 155 H X -0.0138 -0.0129 -0.0027 0.0019 -0.0076 0.0062  
Y 0.0096 0.0158 0.0034 -0.0023 0.0206 -0.0140  
Z -0.0237 -0.0355 -0.0082 0.0060 -0.0524 0.0407  
AT. 156 H X -0.0138 0.0129 0.0027 0.0019 -0.0076 -0.0062  
Y 0.0096 -0.0158 -0.0034 -0.0023 0.0206 0.0140  
Z -0.0237 0.0355 0.0082 0.0060 -0.0524 -0.0407  
AT. 157 O X -0.0010 0.0001 -0.0002 0.0012 0.0012 0.0001  
Y -0.0003 -0.0000 0.0002 -0.0001 0.0002 0.0001  
Z 0.0007 -0.0002 0.0001 -0.0008 -0.0009 -0.0003  
AT. 158 O X -0.0010 -0.0001 0.0002 0.0012 0.0012 -0.0001  
Y -0.0003 0.0000 -0.0002 -0.0001 0.0002 -0.0001  
Z 0.0007 0.0002 -0.0001 -0.0008 -0.0009 0.0003  
AT. 159 O X 0.0012 -0.0003 0.0002 -0.0011 -0.0014 -0.0002  
Y 0.0003 -0.0001 0.0000 -0.0003 -0.0002 0.0001  
Z -0.0004 0.0001 0.0003 0.0008 0.0006 0.0002  
AT. 160 O X 0.0012 0.0003 -0.0002 -0.0011 -0.0014 0.0002

Y 0.0003 0.0001 -0.0000 -0.0003 -0.0002 -0.0001  
Z -0.0004 -0.0001 -0.0003 0.0008 0.0006 -0.0002  
AT.161 H X -0.0005 0.0036 0.0030 -0.0020 0.0016 0.0036  
Y 0.0013 -0.0003 -0.0001 -0.0005 -0.0016 -0.0003  
Z -0.0018 0.0027 0.0012 0.0001 0.0024 0.0041  
AT.162 H X -0.0005 -0.0036 -0.0030 -0.0020 0.0016 -0.0036  
Y 0.0013 0.0003 0.0001 -0.0005 -0.0016 0.0003  
Z -0.0018 -0.0027 -0.0012 0.0001 0.0024 -0.0041  
AT.163 H X 0.0004 -0.0010 0.0001 0.0002 -0.0002 -0.0015  
Y -0.0030 0.0015 0.0009 0.0005 0.0009 -0.0012  
Z -0.0014 0.0007 -0.0000 0.0002 0.0010 0.0000  
AT.164 H X 0.0004 0.0010 -0.0001 0.0002 -0.0002 0.0015  
Y -0.0030 -0.0015 -0.0009 0.0005 0.0009 0.0012  
Z -0.0014 -0.0007 0.0000 0.0002 0.0010 -0.0000  
AT.165 O X -0.0003 0.0002 0.0001 0.0001 0.0002 -0.0003  
Y 0.0007 -0.0001 0.0000 -0.0001 -0.0001 -0.0002  
Z 0.0015 -0.0007 0.0002 -0.0006 0.0004 -0.0003  
AT.166 O X -0.0003 -0.0002 -0.0001 0.0001 0.0002 0.0003  
Y 0.0007 0.0001 -0.0000 -0.0001 -0.0001 0.0002  
Z 0.0015 0.0007 -0.0002 -0.0006 0.0004 0.0003  
AT.167 H X 0.0009 0.0003 -0.0002 -0.0004 -0.0012 0.0011  
Y 0.0019 0.0003 0.0004 0.0005 -0.0003 -0.0000  
Z -0.0030 -0.0023 -0.0001 -0.0001 0.0028 -0.0031  
AT.168 H X 0.0009 -0.0003 0.0002 -0.0004 -0.0012 -0.0011  
Y 0.0019 -0.0003 -0.0004 0.0005 -0.0003 0.0000  
Z -0.0030 0.0023 0.0001 -0.0001 0.0028 0.0031  
AT.169 O X 0.0003 -0.0000 0.0000 -0.0001 -0.0001 0.0001  
Y -0.0002 0.0001 -0.0000 0.0001 -0.0001 0.0002  
Z -0.0015 0.0012 -0.0002 0.0006 -0.0005 0.0004  
AT.170 O X 0.0003 0.0000 -0.0000 -0.0001 -0.0001 -0.0001  
Y -0.0002 -0.0001 0.0000 0.0001 -0.0001 -0.0002  
Z -0.0015 -0.0012 0.0002 0.0006 -0.0005 -0.0004

AT.171 H X 0.0002 -0.0007 0.0013 0.0005 0.0006 -0.0017  
Y 0.0005 -0.0012 0.0008 0.0002 0.0007 -0.0012  
Z 0.0003 -0.0020 -0.0001 0.0003 0.0006 -0.0011

AT.172 H X 0.0002 0.0007 -0.0013 0.0005 0.0006 0.0017  
Y 0.0005 0.0012 -0.0008 0.0002 0.0007 0.0012  
Z 0.0003 0.0020 0.0001 0.0003 0.0006 0.0011

FREQ(CM\*\*-1) 1072.10 1072.67 1073.50 1073.69 1078.71 1079.09

AT. 1 I X -0.0000 0.0000 -0.0000 -0.0000 0.0000 0.0000  
Y -0.0000 0.0001 -0.0001 -0.0001 0.0001 0.0001  
Z -0.0000 0.0001 -0.0001 -0.0002 0.0002 0.0002

AT. 2 I X -0.0000 -0.0000 0.0000 -0.0000 -0.0000 0.0000  
Y -0.0000 -0.0001 0.0001 -0.0001 -0.0001 0.0001  
Z -0.0000 -0.0001 0.0001 -0.0002 -0.0002 0.0002

AT. 3 I X -0.0000 0.0001 -0.0001 -0.0001 -0.0001 -0.0001  
Y -0.0000 0.0002 -0.0002 -0.0003 -0.0002 -0.0002  
Z 0.0000 -0.0000 0.0000 0.0001 0.0000 0.0000

AT. 4 I X -0.0000 -0.0001 0.0001 -0.0001 0.0001 -0.0001  
Y -0.0000 -0.0002 0.0002 -0.0003 0.0002 -0.0002  
Z 0.0000 0.0000 -0.0000 0.0001 -0.0000 0.0000

AT. 5 O X -0.0005 0.0020 -0.0029 -0.0033 0.0045 0.0045  
Y 0.0003 -0.0010 0.0017 0.0020 -0.0022 -0.0023  
Z 0.0008 -0.0031 0.0043 0.0051 -0.0066 -0.0065

AT. 6 O X -0.0005 -0.0020 0.0029 -0.0033 -0.0045 0.0045  
Y 0.0003 0.0010 -0.0017 0.0020 0.0022 -0.0023  
Z 0.0008 0.0031 -0.0043 0.0051 0.0066 -0.0065

AT. 7 O X -0.0008 0.0034 -0.0038 -0.0049 -0.0028 -0.0029  
Y 0.0008 -0.0032 0.0037 0.0045 0.0025 0.0027  
Z -0.0008 0.0035 -0.0038 -0.0049 -0.0028 -0.0028

AT. 8 O X -0.0008 -0.0034 0.0038 -0.0049 0.0028 -0.0029  
Y 0.0008 0.0032 -0.0037 0.0045 -0.0025 0.0027

Z -0.0008 -0.0035 0.0038 -0.0049 0.0028 -0.0028  
AT. 9 N X -0.0007 0.0033 -0.0038 -0.0048 0.0036 0.0036  
Y 0.0001 -0.0008 0.0011 0.0011 -0.0061 -0.0060  
Z -0.0009 0.0045 -0.0051 -0.0060 0.0089 0.0086  
AT. 10 N X -0.0007 -0.0033 0.0038 -0.0048 -0.0036 0.0036  
Y 0.0001 0.0008 -0.0011 0.0011 0.0061 -0.0060  
Z -0.0009 -0.0045 0.0051 -0.0060 -0.0089 0.0086  
AT. 11 N X -0.0008 0.0035 -0.0040 -0.0052 -0.0001 -0.0002  
Y -0.0003 0.0023 -0.0023 -0.0030 0.0008 0.0006  
Z 0.0019 -0.0086 0.0096 0.0120 0.0080 0.0083  
AT. 12 N X -0.0008 -0.0035 0.0040 -0.0052 0.0001 -0.0002  
Y -0.0003 -0.0023 0.0023 -0.0030 -0.0008 0.0006  
Z 0.0019 0.0086 -0.0096 0.0120 -0.0080 0.0083  
AT. 13 C X -0.0008 0.0031 -0.0036 -0.0049 0.0068 0.0068  
Y 0.0013 -0.0056 0.0066 0.0081 -0.0117 -0.0116  
Z -0.0013 0.0052 -0.0068 -0.0081 0.0101 0.0101  
AT. 14 C X -0.0008 -0.0031 0.0036 -0.0049 -0.0068 0.0068  
Y 0.0013 0.0056 -0.0066 0.0081 0.0117 -0.0116  
Z -0.0013 -0.0052 0.0068 -0.0081 -0.0101 0.0101  
AT. 15 C X 0.0008 -0.0031 0.0038 0.0051 -0.0068 -0.0065  
Y -0.0010 0.0041 -0.0053 -0.0064 0.0088 0.0089  
Z 0.0003 -0.0015 0.0015 0.0018 -0.0019 -0.0019  
AT. 16 C X 0.0008 0.0031 -0.0038 0.0051 0.0068 -0.0065  
Y -0.0010 -0.0041 0.0053 -0.0064 -0.0088 0.0089  
Z 0.0003 0.0015 -0.0015 0.0018 0.0019 -0.0019  
AT. 17 H X 0.0078 -0.0312 0.0398 0.0500 -0.0700 -0.0721  
Y -0.0015 0.0052 -0.0065 -0.0091 0.0137 0.0124  
Z 0.0032 -0.0120 0.0149 0.0202 -0.0291 -0.0282  
AT. 18 H X 0.0078 0.0312 -0.0398 0.0500 0.0700 -0.0721  
Y -0.0015 -0.0052 0.0065 -0.0091 -0.0137 0.0124  
Z 0.0032 0.0120 -0.0149 0.0202 0.0291 -0.0282  
AT. 19 H X -0.0033 0.0110 -0.0119 -0.0206 0.0281 0.0274

Y -0.0006 0.0035 -0.0041 -0.0039 0.0041 0.0039  
Z -0.0009 0.0029 -0.0029 -0.0056 0.0076 0.0073  
AT. 20 H X -0.0033 -0.0110 0.0119 -0.0206 -0.0281 0.0274  
Y -0.0006 -0.0035 0.0041 -0.0039 -0.0041 0.0039  
Z -0.0009 -0.0029 0.0029 -0.0056 -0.0076 0.0073  
AT. 21 C X -0.0009 0.0041 -0.0046 -0.0056 -0.0033 -0.0036  
Y 0.0007 -0.0031 0.0034 0.0044 0.0029 0.0029  
Z 0.0032 -0.0132 0.0144 0.0187 0.0108 0.0113  
AT. 22 C X -0.0009 -0.0041 0.0046 -0.0056 0.0033 -0.0036  
Y 0.0007 0.0031 -0.0034 0.0044 -0.0029 0.0029  
Z 0.0032 0.0132 -0.0144 0.0187 -0.0108 0.0113  
AT. 23 C X 0.0012 -0.0050 0.0057 0.0069 0.0038 0.0042  
Y -0.0008 0.0034 -0.0037 -0.0050 -0.0030 -0.0030  
Z -0.0014 0.0063 -0.0070 -0.0087 -0.0048 -0.0052  
AT. 24 C X 0.0012 0.0050 -0.0057 0.0069 -0.0038 0.0042  
Y -0.0008 -0.0034 0.0037 -0.0050 0.0030 -0.0030  
Z -0.0014 -0.0063 0.0070 -0.0087 0.0048 -0.0052  
AT. 25 H X 0.0109 -0.0464 0.0508 0.0674 0.0421 0.0414  
Y 0.0007 -0.0029 0.0032 0.0044 0.0029 0.0027  
Z -0.0039 0.0151 -0.0170 -0.0223 -0.0136 -0.0140  
AT. 26 H X 0.0109 0.0464 -0.0508 0.0674 -0.0421 0.0414  
Y 0.0007 0.0029 -0.0032 0.0044 -0.0029 0.0027  
Z -0.0039 -0.0151 0.0170 -0.0223 0.0136 -0.0140  
AT. 27 H X -0.0033 0.0143 -0.0162 -0.0211 -0.0135 -0.0136  
Y -0.0011 0.0048 -0.0055 -0.0065 -0.0039 -0.0042  
Z -0.0006 0.0029 -0.0030 -0.0034 -0.0015 -0.0019  
AT. 28 H X -0.0033 -0.0143 0.0162 -0.0211 0.0135 -0.0136  
Y -0.0011 -0.0048 0.0055 -0.0065 0.0039 -0.0042  
Z -0.0006 -0.0029 0.0030 -0.0034 0.0015 -0.0019  
AT. 29 C X 0.0000 -0.0010 0.0011 0.0009 -0.0027 -0.0027  
Y 0.0003 -0.0008 0.0007 0.0015 0.0097 0.0097  
Z 0.0017 -0.0076 0.0091 0.0112 -0.0152 -0.0148

AT. 30 C X 0.0000 0.0010 -0.0011 0.0009 0.0027 -0.0027  
Y 0.0003 0.0008 -0.0007 0.0015 -0.0097 0.0097  
Z 0.0017 0.0076 -0.0091 0.0112 0.0152 -0.0148

AT. 31 H X 0.0001 -0.0002 -0.0000 0.0000 -0.0073 -0.0071  
Y -0.0017 0.0079 -0.0098 -0.0117 0.0311 0.0305  
Z -0.0013 0.0064 -0.0078 -0.0097 0.0145 0.0142

AT. 32 H X 0.0001 0.0002 0.0000 0.0000 0.0073 -0.0071  
Y -0.0017 -0.0079 0.0098 -0.0117 -0.0311 0.0305  
Z -0.0013 -0.0064 0.0078 -0.0097 -0.0145 0.0142

AT. 33 H X 0.0027 -0.0145 0.0157 0.0193 -0.0379 -0.0369  
Y 0.0038 -0.0140 0.0175 0.0218 -0.0263 -0.0256  
Z 0.0021 -0.0111 0.0121 0.0152 -0.0235 -0.0229

AT. 34 H X 0.0027 0.0145 -0.0157 0.0193 0.0379 -0.0369  
Y 0.0038 0.0140 -0.0175 0.0218 0.0263 -0.0256  
Z 0.0021 0.0111 -0.0121 0.0152 0.0235 -0.0229

AT. 35 C X 0.0004 -0.0012 0.0015 0.0021 0.0011 0.0008  
Y -0.0008 0.0036 -0.0040 -0.0051 0.0009 0.0006  
Z 0.0002 -0.0011 0.0014 0.0018 -0.0020 -0.0020

AT. 36 C X 0.0004 0.0012 -0.0015 0.0021 -0.0011 0.0008  
Y -0.0008 -0.0036 0.0040 -0.0051 -0.0009 0.0006  
Z 0.0002 0.0011 -0.0014 0.0018 0.0020 -0.0020

AT. 37 C X 0.0012 -0.0040 0.0045 0.0063 -0.0034 -0.0033  
Y -0.0006 0.0011 -0.0011 -0.0022 -0.0045 -0.0041  
Z -0.0019 0.0083 -0.0085 -0.0118 -0.0086 -0.0087

AT. 38 C X 0.0012 0.0040 -0.0045 0.0063 0.0034 -0.0033  
Y -0.0006 -0.0011 0.0011 -0.0022 0.0045 -0.0041  
Z -0.0019 -0.0083 0.0085 -0.0118 0.0086 -0.0087

AT. 39 H X 0.0046 -0.0174 0.0177 0.0260 0.0163 0.0159  
Y 0.0063 -0.0277 0.0298 0.0389 0.0263 0.0270  
Z -0.0025 0.0115 -0.0128 -0.0160 -0.0084 -0.0090

AT. 40 H X 0.0046 0.0174 -0.0177 0.0260 -0.0163 0.0159  
Y 0.0063 0.0277 -0.0298 0.0389 -0.0263 0.0270

Z -0.0025 -0.0115 0.0128 -0.0160 0.0084 -0.0090  
AT. 41 H X -0.0028 0.0116 -0.0115 -0.0165 -0.0238 -0.0236  
Y -0.0006 0.0017 -0.0020 -0.0028 -0.0046 -0.0044  
Z 0.0022 -0.0080 0.0085 0.0119 0.0125 0.0123  
AT. 42 H X -0.0028 -0.0116 0.0115 -0.0165 0.0238 -0.0236  
Y -0.0006 -0.0017 0.0020 -0.0028 0.0046 -0.0044  
Z 0.0022 0.0080 -0.0085 0.0119 -0.0125 0.0123  
AT. 43 C X -0.0004 -0.0008 0.0010 0.0005 -0.0018 -0.0016  
Y 0.0007 -0.0032 0.0033 0.0053 -0.0036 -0.0036  
Z -0.0025 0.0100 -0.0110 -0.0145 -0.0119 -0.0120  
AT. 44 C X -0.0004 0.0008 -0.0010 0.0005 0.0018 -0.0016  
Y 0.0007 0.0032 -0.0033 0.0053 0.0036 -0.0036  
Z -0.0025 -0.0100 0.0110 -0.0145 0.0119 -0.0120  
AT. 45 H X 0.0019 -0.0036 0.0046 0.0055 0.0093 0.0096  
Y -0.0037 0.0102 -0.0116 -0.0154 -0.0256 -0.0254  
Z 0.0004 -0.0013 0.0014 0.0026 0.0021 0.0016  
AT. 46 H X 0.0019 0.0036 -0.0046 0.0055 -0.0093 0.0096  
Y -0.0037 -0.0102 0.0116 -0.0154 0.0256 -0.0254  
Z 0.0004 0.0013 -0.0014 0.0026 -0.0021 0.0016  
AT. 47 H X 0.0053 -0.0233 0.0254 0.0323 0.0284 0.0293  
Y 0.0069 -0.0240 0.0261 0.0361 0.0279 0.0278  
Z -0.0042 0.0200 -0.0218 -0.0274 -0.0211 -0.0221  
AT. 48 H X 0.0053 0.0233 -0.0254 0.0323 -0.0284 0.0293  
Y 0.0069 0.0240 -0.0261 0.0361 -0.0279 0.0278  
Z -0.0042 -0.0200 0.0218 -0.0274 0.0211 -0.0221  
AT. 49 C X -0.0001 -0.0001 0.0003 -0.0000 -0.0046 -0.0044  
Y -0.0005 0.0016 -0.0022 -0.0029 0.0029 0.0030  
Z -0.0005 0.0024 -0.0027 -0.0035 0.0015 0.0016  
AT. 50 C X -0.0001 0.0001 -0.0003 -0.0000 0.0046 -0.0044  
Y -0.0005 -0.0016 0.0022 -0.0029 -0.0029 0.0030  
Z -0.0005 -0.0024 0.0027 -0.0035 -0.0015 0.0016  
AT. 51 C X 0.0016 -0.0050 0.0062 0.0085 -0.0002 -0.0003



Y -0.0008 0.0033 -0.0041 -0.0052 0.0096 0.0093  
Z 0.0006 -0.0027 0.0030 0.0041 -0.0054 -0.0055  
AT. 52 C X 0.0016 0.0050 -0.0062 0.0085 0.0002 -0.0003  
Y -0.0008 -0.0033 0.0041 -0.0052 -0.0096 0.0093  
Z 0.0006 0.0027 -0.0030 0.0041 0.0054 -0.0055  
AT. 53 H X 0.0040 -0.0147 0.0178 0.0235 -0.0205 -0.0202  
Y 0.0038 -0.0176 0.0202 0.0252 -0.0366 -0.0360  
Z 0.0019 -0.0106 0.0114 0.0139 -0.0239 -0.0235  
AT. 54 H X 0.0040 0.0147 -0.0178 0.0235 0.0205 -0.0202  
Y 0.0038 0.0176 -0.0202 0.0252 0.0366 -0.0360  
Z 0.0019 0.0106 -0.0114 0.0139 0.0239 -0.0235  
AT. 55 H X -0.0018 0.0087 -0.0102 -0.0130 0.0258 0.0250  
Y -0.0005 0.0034 -0.0042 -0.0047 0.0087 0.0082  
Z -0.0015 0.0071 -0.0086 -0.0107 0.0119 0.0111  
AT. 56 H X -0.0018 -0.0087 0.0102 -0.0130 -0.0258 0.0250  
Y -0.0005 -0.0034 0.0042 -0.0047 -0.0087 0.0082  
Z -0.0015 -0.0071 0.0086 -0.0107 -0.0119 0.0111  
AT. 57 C X 0.0002 -0.0007 0.0008 0.0011 -0.0036 -0.0034  
Y 0.0014 -0.0051 0.0055 0.0078 0.0017 0.0017  
Z -0.0000 0.0001 -0.0006 -0.0003 0.0117 0.0115  
AT. 58 C X 0.0002 0.0007 -0.0008 0.0011 0.0036 -0.0034  
Y 0.0014 0.0051 -0.0055 0.0078 -0.0017 0.0017  
Z -0.0000 -0.0001 0.0006 -0.0003 -0.0117 0.0115  
AT. 59 H X -0.0046 0.0166 -0.0192 -0.0263 0.0245 0.0244  
Y 0.0019 -0.0066 0.0082 0.0106 -0.0241 -0.0236  
Z -0.0026 0.0102 -0.0106 -0.0156 -0.0070 -0.0068  
AT. 60 H X -0.0046 -0.0166 0.0192 -0.0263 -0.0245 0.0244  
Y 0.0019 0.0066 -0.0082 0.0106 0.0241 -0.0236  
Z -0.0026 -0.0102 0.0106 -0.0156 0.0070 -0.0068  
AT. 61 H X -0.0023 0.0089 -0.0087 -0.0130 -0.0348 -0.0352  
Y -0.0009 0.0045 -0.0055 -0.0062 0.0289 0.0283  
Z -0.0009 0.0028 -0.0025 -0.0044 -0.0271 -0.0274

AT. 62 H X -0.0023 -0.0089 0.0087 -0.0130 0.0348 -0.0352  
Y -0.0009 -0.0045 0.0055 -0.0062 -0.0289 0.0283  
Z -0.0009 -0.0028 0.0025 -0.0044 0.0271 -0.0274

AT. 63 H X 0.0026 -0.0089 0.0083 0.0136 0.0295 0.0292  
Y -0.0036 0.0125 -0.0127 -0.0197 -0.0133 -0.0135  
Z 0.0019 -0.0067 0.0076 0.0109 -0.0068 -0.0064

AT. 64 H X 0.0026 0.0089 -0.0083 0.0136 -0.0295 0.0292  
Y -0.0036 -0.0125 0.0127 -0.0197 0.0133 -0.0135  
Z 0.0019 0.0067 -0.0076 0.0109 0.0068 -0.0064

AT. 65 C X 0.0009 -0.0024 0.0024 0.0042 0.0056 0.0054  
Y 0.0010 -0.0024 0.0032 0.0050 -0.0082 -0.0081  
Z 0.0009 -0.0033 0.0036 0.0049 0.0051 0.0051

AT. 66 C X 0.0009 0.0024 -0.0024 0.0042 -0.0056 0.0054  
Y 0.0010 0.0024 -0.0032 0.0050 0.0082 -0.0081  
Z 0.0009 0.0033 -0.0036 0.0049 -0.0051 0.0051

AT. 67 H X -0.0051 0.0162 -0.0176 -0.0265 -0.0087 -0.0085  
Y 0.0016 -0.0063 0.0063 0.0093 0.0158 0.0155  
Z 0.0053 -0.0149 0.0172 0.0260 -0.0054 -0.0054

AT. 68 H X -0.0051 -0.0162 0.0176 -0.0265 0.0087 -0.0085  
Y 0.0016 0.0063 -0.0063 0.0093 -0.0158 0.0155  
Z 0.0053 0.0149 -0.0172 0.0260 0.0054 -0.0054

AT. 69 H X -0.0007 -0.0001 -0.0012 -0.0032 0.0279 0.0277  
Y -0.0031 0.0071 -0.0078 -0.0140 -0.0085 -0.0085  
Z -0.0022 0.0070 -0.0064 -0.0098 -0.0401 -0.0402

AT. 70 H X -0.0007 0.0001 0.0012 -0.0032 -0.0279 0.0277  
Y -0.0031 -0.0071 0.0078 -0.0140 0.0085 -0.0085  
Z -0.0022 -0.0070 0.0064 -0.0098 0.0401 -0.0402

AT. 71 H X -0.0002 0.0020 -0.0015 -0.0008 -0.0269 -0.0268  
Y -0.0016 0.0042 -0.0053 -0.0089 0.0153 0.0154  
Z -0.0036 0.0091 -0.0108 -0.0178 0.0124 0.0126

AT. 72 H X -0.0002 -0.0020 0.0015 -0.0008 0.0269 -0.0268  
Y -0.0016 -0.0042 0.0053 -0.0089 -0.0153 0.0154

Z -0.0036 -0.0091 0.0108 -0.0178 -0.0124 0.0126  
AT. 73 C X -0.0017 0.0061 -0.0068 -0.0097 0.0028 0.0029  
Y -0.0024 0.0088 -0.0096 -0.0141 -0.0010 -0.0012  
Z 0.0003 -0.0009 0.0004 0.0010 0.0112 0.0108  
AT. 74 C X -0.0017 -0.0061 0.0068 -0.0097 -0.0028 0.0029  
Y -0.0024 -0.0088 0.0096 -0.0141 0.0010 -0.0012  
Z 0.0003 0.0009 -0.0004 0.0010 -0.0112 0.0108  
AT. 75 H X 0.0018 -0.0027 0.0028 0.0090 0.0077 0.0065  
Y 0.0011 -0.0059 0.0065 0.0069 -0.0071 -0.0060  
Z 0.0077 -0.0277 0.0297 0.0439 0.0066 0.0070  
AT. 76 H X 0.0018 0.0027 -0.0028 0.0090 -0.0077 0.0065  
Y 0.0011 0.0059 -0.0065 0.0069 0.0071 -0.0060  
Z 0.0077 0.0277 -0.0297 0.0439 -0.0066 0.0070  
AT. 77 H X -0.0009 0.0006 -0.0013 -0.0042 0.0039 0.0047  
Y 0.0036 -0.0101 0.0118 0.0197 -0.0046 -0.0056  
Z -0.0059 0.0212 -0.0240 -0.0346 0.0137 0.0134  
AT. 78 H X -0.0009 -0.0006 0.0013 -0.0042 -0.0039 0.0047  
Y 0.0036 0.0101 -0.0118 0.0197 0.0046 -0.0056  
Z -0.0059 -0.0212 0.0240 -0.0346 -0.0137 0.0134  
AT. 79 I X 0.0000 0.0001 0.0001 0.0000 0.0001 -0.0000  
Y -0.0000 -0.0000 -0.0001 -0.0000 -0.0000 0.0000  
Z -0.0000 -0.0000 -0.0001 -0.0000 -0.0000 0.0000  
AT. 80 I X 0.0000 -0.0001 -0.0001 0.0000 -0.0001 -0.0000  
Y -0.0000 0.0000 0.0001 -0.0000 0.0000 0.0000  
Z -0.0000 0.0000 0.0001 -0.0000 0.0000 0.0000  
AT. 81 I X 0.0000 0.0000 0.0000 -0.0000 -0.0000 -0.0000  
Y -0.0003 -0.0002 -0.0002 0.0001 -0.0000 0.0000  
Z 0.0001 0.0001 0.0000 -0.0000 -0.0000 -0.0000  
AT. 82 I X 0.0000 -0.0000 -0.0000 -0.0000 0.0000 -0.0000  
Y -0.0003 0.0002 0.0002 0.0001 0.0000 0.0000  
Z 0.0001 -0.0001 -0.0000 -0.0000 0.0000 -0.0000  
AT. 83 O X 0.0009 0.0017 0.0024 0.0003 0.0004 -0.0009

Y 0.0003 0.0002 0.0002 0.0000 -0.0000 -0.0001  
Z 0.0013 0.0017 0.0023 0.0001 0.0004 -0.0008  
AT. 84 O X 0.0009 -0.0017 -0.0024 0.0003 -0.0004 -0.0009  
Y 0.0003 -0.0002 -0.0002 0.0000 0.0000 -0.0001  
Z 0.0013 -0.0017 -0.0023 0.0001 -0.0004 -0.0008  
AT. 85 O X 0.0063 0.0048 0.0041 -0.0012 0.0001 0.0002  
Y 0.0057 0.0043 0.0037 -0.0010 0.0001 0.0001  
Z -0.0062 -0.0047 -0.0039 0.0010 -0.0001 0.0000  
AT. 86 O X 0.0063 -0.0048 -0.0041 -0.0012 -0.0001 0.0002  
Y 0.0057 -0.0043 -0.0037 -0.0010 -0.0001 0.0001  
Z -0.0062 0.0047 0.0039 0.0010 0.0001 0.0000  
AT. 87 N X 0.0019 0.0018 0.0023 -0.0002 0.0002 -0.0005  
Y -0.0023 -0.0014 -0.0005 0.0005 0.0002 -0.0001  
Z -0.0031 -0.0035 -0.0047 0.0005 -0.0010 0.0009  
AT. 88 N X 0.0019 -0.0018 -0.0023 -0.0002 -0.0002 -0.0005  
Y -0.0023 0.0014 0.0005 0.0005 -0.0002 -0.0001  
Z -0.0031 0.0035 0.0047 0.0005 0.0010 0.0009  
AT. 89 N X 0.0050 0.0041 0.0040 -0.0007 0.0002 -0.0002  
Y -0.0044 -0.0035 -0.0038 0.0003 -0.0002 0.0003  
Z 0.0147 0.0108 0.0091 -0.0021 0.0002 -0.0002  
AT. 90 N X 0.0050 -0.0041 -0.0040 -0.0007 -0.0002 -0.0002  
Y -0.0044 0.0035 0.0038 0.0003 0.0002 0.0003  
Z 0.0147 -0.0108 -0.0091 -0.0021 -0.0002 -0.0002  
AT. 91 C X 0.0014 0.0021 0.0034 0.0000 0.0006 -0.0009  
Y 0.0007 0.0018 0.0038 0.0005 0.0005 -0.0012  
Z -0.0024 -0.0039 -0.0060 -0.0004 -0.0010 0.0017  
AT. 92 C X 0.0014 -0.0021 -0.0034 0.0000 -0.0006 -0.0009  
Y 0.0007 -0.0018 -0.0038 0.0005 -0.0005 -0.0012  
Z -0.0024 0.0039 0.0060 -0.0004 0.0010 0.0017  
AT. 93 C X -0.0023 -0.0033 -0.0047 -0.0001 -0.0010 0.0012  
Y -0.0004 -0.0009 -0.0020 -0.0004 -0.0002 0.0009  
Z 0.0023 0.0022 0.0026 -0.0005 0.0006 -0.0003

AT. 94 C X -0.0023 0.0033 0.0047 -0.0001 0.0010 0.0012  
Y -0.0004 0.0009 0.0020 -0.0004 0.0002 0.0009  
Z 0.0023 -0.0022 -0.0026 -0.0005 -0.0006 -0.0003

AT. 95 H X -0.0006 -0.0072 -0.0200 -0.0054 -0.0014 0.0089  
Y 0.0004 0.0003 0.0023 0.0008 -0.0000 -0.0014  
Z -0.0008 0.0042 0.0109 0.0031 0.0007 -0.0047

AT. 96 H X -0.0006 0.0072 0.0200 -0.0054 0.0014 0.0089  
Y 0.0004 -0.0003 -0.0023 0.0008 0.0000 -0.0014  
Z -0.0008 -0.0042 -0.0109 0.0031 -0.0007 -0.0047

AT. 97 H X -0.0019 0.0025 0.0081 0.0020 0.0008 -0.0019  
Y -0.0054 -0.0057 -0.0066 0.0013 -0.0018 0.0005  
Z 0.0010 -0.0005 -0.0020 -0.0006 -0.0003 0.0004

AT. 98 H X -0.0019 -0.0025 -0.0081 0.0020 -0.0008 -0.0019  
Y -0.0054 0.0057 0.0066 0.0013 0.0018 0.0005  
Z 0.0010 0.0005 0.0020 -0.0006 0.0003 0.0004

AT. 99 C X 0.0111 0.0084 0.0072 -0.0017 0.0002 -0.0001  
Y 0.0017 0.0014 0.0013 -0.0003 -0.0000 -0.0002  
Z 0.0209 0.0158 0.0129 -0.0036 0.0003 0.0001

AT. 100 C X 0.0111 -0.0084 -0.0072 -0.0017 -0.0002 -0.0001  
Y 0.0017 -0.0014 -0.0013 -0.0003 0.0000 -0.0002  
Z 0.0209 -0.0158 -0.0129 -0.0036 -0.0003 0.0001

AT. 101 C X -0.0108 -0.0081 -0.0069 0.0017 -0.0002 -0.0000  
Y -0.0038 -0.0031 -0.0026 0.0008 0.0000 -0.0001  
Z -0.0098 -0.0073 -0.0061 0.0016 -0.0001 0.0001

AT. 102 C X -0.0108 0.0081 0.0069 0.0017 0.0002 -0.0000  
Y -0.0038 0.0031 0.0026 0.0008 -0.0000 -0.0001  
Z -0.0098 0.0073 0.0061 0.0016 0.0001 0.0001

AT. 103 H X -0.0846 -0.0659 -0.0546 0.0159 -0.0009 -0.0006  
Y 0.0265 0.0207 0.0171 -0.0051 0.0003 0.0002  
Z -0.0202 -0.0164 -0.0141 0.0037 -0.0003 -0.0003

AT. 104 H X -0.0846 0.0659 0.0546 0.0159 0.0009 -0.0006  
Y 0.0265 -0.0207 -0.0171 -0.0051 -0.0003 0.0002

Z -0.0202 0.0164 0.0141 0.0037 0.0003 -0.0003  
AT. 105 H X 0.0236 0.0180 0.0146 -0.0046 0.0002 0.0004  
Y -0.0166 -0.0115 -0.0094 0.0027 -0.0003 -0.0002  
Z -0.0068 -0.0045 -0.0037 0.0009 -0.0001 0.0001  
AT. 106 H X 0.0236 -0.0180 -0.0146 -0.0046 -0.0002 0.0004  
Y -0.0166 0.0115 0.0094 0.0027 0.0003 -0.0002  
Z -0.0068 0.0045 0.0037 0.0009 0.0001 0.0001  
AT. 107 C X 0.0014 0.0012 0.0014 0.0002 -0.0002 -0.0001  
Y 0.0046 0.0029 0.0014 -0.0010 -0.0004 0.0002  
Z 0.0026 0.0046 0.0076 0.0004 0.0011 -0.0019  
AT. 108 C X 0.0014 -0.0012 -0.0014 0.0002 0.0002 -0.0001  
Y 0.0046 -0.0029 -0.0014 -0.0010 0.0004 0.0002  
Z 0.0026 -0.0046 -0.0076 0.0004 -0.0011 -0.0019  
AT. 109 H X 0.0040 -0.0001 -0.0049 -0.0018 -0.0009 0.0014  
Y 0.0022 -0.0022 -0.0078 -0.0019 -0.0016 0.0029  
Z -0.0025 -0.0038 -0.0062 -0.0005 -0.0008 0.0022  
AT. 110 H X 0.0040 0.0001 0.0049 -0.0018 0.0009 0.0014  
Y 0.0022 0.0022 0.0078 -0.0019 0.0016 0.0029  
Z -0.0025 0.0038 0.0062 -0.0005 0.0008 0.0022  
AT. 111 H X -0.0010 -0.0031 -0.0059 0.0009 -0.0020 0.0010  
Y 0.0068 0.0117 0.0193 0.0012 0.0031 -0.0042  
Z 0.0049 0.0075 0.0117 -0.0009 0.0024 -0.0022  
AT. 112 H X -0.0010 0.0031 0.0059 0.0009 0.0020 0.0010  
Y 0.0068 -0.0117 -0.0193 0.0012 -0.0031 -0.0042  
Z 0.0049 -0.0075 -0.0117 -0.0009 -0.0024 -0.0022  
AT. 113 C X -0.0032 -0.0024 -0.0023 0.0003 -0.0000 0.0002  
Y -0.0027 -0.0027 -0.0029 0.0005 -0.0003 0.0003  
Z 0.0008 0.0009 0.0012 -0.0001 0.0004 -0.0003  
AT. 114 C X -0.0032 0.0024 0.0023 0.0003 0.0000 0.0002  
Y -0.0027 0.0027 0.0029 0.0005 0.0003 0.0003  
Z 0.0008 -0.0009 -0.0012 -0.0001 -0.0004 -0.0003  
AT. 115 C X -0.0054 -0.0048 -0.0044 0.0011 -0.0003 0.0002

Y -0.0025 -0.0012 0.0002 0.0008 0.0004 -0.0004  
Z -0.0125 -0.0091 -0.0067 0.0022 -0.0001 0.0001  
AT. 116 C X -0.0054 0.0048 0.0044 0.0011 0.0003 0.0002  
Y -0.0025 0.0012 -0.0002 0.0008 -0.0004 -0.0004  
Z -0.0125 0.0091 0.0067 0.0022 0.0001 0.0001  
AT. 117 H X -0.0124 -0.0092 -0.0055 0.0029 0.0001 -0.0002  
Y 0.0552 0.0405 0.0322 -0.0088 0.0006 -0.0009  
Z -0.0184 -0.0141 -0.0127 0.0025 -0.0005 0.0007  
AT. 118 H X -0.0124 0.0092 0.0055 0.0029 -0.0001 -0.0002  
Y 0.0552 -0.0405 -0.0322 -0.0088 -0.0006 -0.0009  
Z -0.0184 0.0141 0.0127 0.0025 0.0005 0.0007  
AT. 119 H X 0.0222 0.0155 0.0093 -0.0047 -0.0005 0.0003  
Y -0.0107 -0.0068 -0.0045 0.0015 0.0004 -0.0002  
Z 0.0111 0.0077 0.0055 -0.0017 -0.0002 -0.0000  
AT. 120 H X 0.0222 -0.0155 -0.0093 -0.0047 0.0005 0.0003  
Y -0.0107 0.0068 0.0045 0.0015 -0.0004 -0.0002  
Z 0.0111 -0.0077 -0.0055 -0.0017 0.0002 -0.0000  
AT. 121 C X -0.0020 -0.0015 -0.0023 -0.0001 -0.0002 0.0001  
Y 0.0025 0.0024 0.0029 -0.0002 0.0002 -0.0005  
Z -0.0193 -0.0140 -0.0107 0.0032 -0.0000 -0.0000  
AT. 122 C X -0.0020 0.0015 0.0023 -0.0001 0.0002 0.0001  
Y 0.0025 -0.0024 -0.0029 -0.0002 -0.0002 -0.0005  
Z -0.0193 0.0140 0.0107 0.0032 0.0000 -0.0000  
AT. 123 H X -0.0214 -0.0154 -0.0089 0.0045 0.0004 -0.0007  
Y -0.0187 -0.0130 -0.0075 0.0038 0.0005 -0.0002  
Z 0.0001 0.0001 -0.0004 -0.0002 -0.0002 -0.0004  
AT. 124 H X -0.0214 0.0154 0.0089 0.0045 -0.0004 -0.0007  
Y -0.0187 0.0130 0.0075 0.0038 -0.0005 -0.0002  
Z 0.0001 -0.0001 0.0004 -0.0002 0.0002 -0.0004  
AT. 125 H X -0.0326 -0.0238 -0.0206 0.0044 -0.0003 0.0009  
Y 0.0570 0.0410 0.0310 -0.0092 -0.0000 -0.0003  
Z -0.0296 -0.0221 -0.0191 0.0043 -0.0003 0.0010

AT.126 H X -0.0326 0.0238 0.0206 0.0044 0.0003 0.0009  
Y 0.0570 -0.0410 -0.0310 -0.0092 0.0000 -0.0003  
Z -0.0296 0.0221 0.0191 0.0043 0.0003 0.0010

AT.127 C X 0.0008 0.0002 -0.0006 -0.0001 -0.0003 0.0002  
Y -0.0018 -0.0013 -0.0013 0.0002 -0.0001 0.0002  
Z -0.0009 -0.0009 -0.0015 0.0001 -0.0003 0.0001

AT.128 C X 0.0008 -0.0002 0.0006 -0.0001 0.0003 0.0002  
Y -0.0018 0.0013 0.0013 0.0002 0.0001 0.0002  
Z -0.0009 0.0009 0.0015 0.0001 0.0003 0.0001

AT.129 C X -0.0048 -0.0045 -0.0053 0.0001 -0.0002 0.0010  
Y 0.0031 0.0011 -0.0013 -0.0010 -0.0003 0.0007  
Z 0.0008 0.0017 0.0035 0.0003 0.0006 -0.0008

AT.130 C X -0.0048 0.0045 0.0053 0.0001 0.0002 0.0010  
Y 0.0031 -0.0011 0.0013 -0.0010 0.0003 0.0007  
Z 0.0008 -0.0017 -0.0035 0.0003 -0.0006 -0.0008

AT.131 H X -0.0025 -0.0040 -0.0072 -0.0016 -0.0003 0.0020  
Y 0.0045 0.0099 0.0199 0.0012 0.0033 -0.0044  
Z 0.0048 0.0067 0.0108 -0.0010 0.0021 -0.0017

AT.132 H X -0.0025 0.0040 0.0072 -0.0016 0.0003 0.0020  
Y 0.0045 -0.0099 -0.0199 0.0012 -0.0033 -0.0044  
Z 0.0048 -0.0067 -0.0108 -0.0010 -0.0021 -0.0017

AT.133 H X -0.0062 -0.0015 0.0048 0.0025 0.0009 -0.0018  
Y 0.0007 -0.0015 -0.0045 -0.0009 -0.0009 0.0018  
Z -0.0022 -0.0039 -0.0065 -0.0006 -0.0008 0.0021

AT.134 H X -0.0062 0.0015 -0.0048 0.0025 -0.0009 -0.0018  
Y 0.0007 0.0015 0.0045 -0.0009 0.0009 0.0018  
Z -0.0022 0.0039 0.0065 -0.0006 0.0008 0.0021

AT.135 C X 0.0034 0.0019 0.0006 -0.0007 -0.0001 0.0004  
Y 0.0060 0.0051 0.0046 -0.0009 0.0002 -0.0002  
Z 0.0041 0.0018 -0.0004 -0.0011 -0.0005 0.0007

AT.136 C X 0.0034 -0.0019 -0.0006 -0.0007 0.0001 0.0004  
Y 0.0060 -0.0051 -0.0046 -0.0009 -0.0002 -0.0002



Z 0.0041 -0.0018 0.0004 -0.0011 0.0005 0.0007  
AT. 137 H X 0.0056 0.0095 0.0153 0.0007 0.0015 -0.0032  
Y -0.0054 -0.0023 0.0006 0.0016 0.0005 -0.0011  
Z -0.0154 -0.0130 -0.0119 0.0026 -0.0006 0.0004  
AT. 138 H X 0.0056 -0.0095 -0.0153 0.0007 -0.0015 -0.0032  
Y -0.0054 0.0023 -0.0006 0.0016 -0.0005 -0.0011  
Z -0.0154 0.0130 0.0119 0.0026 0.0006 0.0004  
AT. 139 H X 0.0226 0.0135 0.0053 -0.0050 -0.0010 0.0022  
Y -0.0015 -0.0041 -0.0067 -0.0002 -0.0009 0.0011  
Z -0.0189 -0.0107 -0.0033 0.0042 0.0011 -0.0020  
AT. 140 H X 0.0226 -0.0135 -0.0053 -0.0050 0.0010 0.0022  
Y -0.0015 0.0041 0.0067 -0.0002 0.0009 0.0011  
Z -0.0189 0.0107 0.0033 0.0042 -0.0011 -0.0020  
AT. 141 H X -0.0251 -0.0163 -0.0088 0.0049 0.0010 -0.0017  
Y -0.0113 -0.0094 -0.0076 0.0016 -0.0001 0.0002  
Z 0.0098 0.0090 0.0083 -0.0012 0.0003 -0.0006  
AT. 142 H X -0.0251 0.0163 0.0088 0.0049 -0.0010 -0.0017  
Y -0.0113 0.0094 0.0076 0.0016 0.0001 0.0002  
Z 0.0098 -0.0090 -0.0083 -0.0012 -0.0003 -0.0006  
AT. 143 C X -0.0051 -0.0033 -0.0014 0.0010 0.0004 -0.0004  
Y -0.0001 0.0011 0.0024 0.0003 0.0003 -0.0006  
Z 0.0083 0.0058 0.0039 -0.0015 -0.0001 0.0002  
AT. 144 C X -0.0051 0.0033 0.0014 0.0010 -0.0004 -0.0004  
Y -0.0001 -0.0011 -0.0024 0.0003 -0.0003 -0.0006  
Z 0.0083 -0.0058 -0.0039 -0.0015 0.0001 0.0002  
AT. 145 H X 0.0313 0.0243 0.0192 -0.0056 -0.0001 -0.0002  
Y 0.0090 0.0053 0.0019 -0.0020 -0.0005 0.0007  
Z 0.0086 0.0088 0.0101 -0.0009 0.0007 -0.0011  
AT. 146 H X 0.0313 -0.0243 -0.0192 -0.0056 0.0001 -0.0002  
Y 0.0090 -0.0053 -0.0019 -0.0020 0.0005 0.0007  
Z 0.0086 -0.0088 -0.0101 -0.0009 -0.0007 -0.0011  
AT. 147 H X -0.0277 -0.0170 -0.0069 0.0057 0.0016 -0.0021

Y -0.0083 -0.0078 -0.0074 0.0012 -0.0002 0.0005  
Z -0.0299 -0.0195 -0.0099 0.0058 0.0014 -0.0017  
AT. 148 H X -0.0277 0.0170 0.0069 0.0057 -0.0016 -0.0021  
Y -0.0083 0.0078 0.0074 0.0012 0.0002 0.0005  
Z -0.0299 0.0195 0.0099 0.0058 -0.0014 -0.0017  
AT. 149 H X 0.0199 0.0104 0.0015 -0.0047 -0.0013 0.0024  
Y -0.0013 -0.0026 -0.0042 -0.0002 -0.0004 0.0008  
Z -0.0067 -0.0074 -0.0086 0.0006 -0.0005 0.0011  
AT. 150 H X 0.0199 -0.0104 -0.0015 -0.0047 0.0013 0.0024  
Y -0.0013 0.0026 0.0042 -0.0002 0.0004 0.0008  
Z -0.0067 0.0074 0.0086 0.0006 0.0005 0.0011  
AT. 151 C X 0.0038 0.0035 0.0035 -0.0004 0.0000 -0.0003  
Y -0.0122 -0.0104 -0.0100 0.0016 -0.0005 0.0009  
Z 0.0054 0.0028 0.0002 -0.0013 -0.0005 0.0008  
AT. 152 C X 0.0038 -0.0035 -0.0035 -0.0004 -0.0000 -0.0003  
Y -0.0122 0.0104 0.0100 0.0016 0.0005 0.0009  
Z 0.0054 -0.0028 -0.0002 -0.0013 0.0005 0.0008  
AT. 153 H X -0.0000 0.0011 0.0021 -0.0005 0.0003 -0.0003  
Y 0.0045 0.0045 0.0050 -0.0005 0.0003 -0.0006  
Z 0.0346 0.0283 0.0254 -0.0048 0.0007 -0.0017  
AT. 154 H X -0.0000 -0.0011 -0.0021 -0.0005 -0.0003 -0.0003  
Y 0.0045 -0.0045 -0.0050 -0.0005 -0.0003 -0.0006  
Z 0.0346 -0.0283 -0.0254 -0.0048 -0.0007 -0.0017  
AT. 155 H X 0.0046 0.0023 0.0021 -0.0003 -0.0002 -0.0002  
Y 0.0126 0.0111 0.0114 -0.0014 0.0006 -0.0013  
Z -0.0205 -0.0203 -0.0230 0.0018 -0.0017 0.0033  
AT. 156 H X 0.0046 -0.0023 -0.0021 -0.0003 0.0002 -0.0002  
Y 0.0126 -0.0111 -0.0114 -0.0014 -0.0006 -0.0013  
Z -0.0205 0.0203 0.0230 0.0018 0.0017 0.0033  
AT. 157 O X 0.0002 -0.0001 -0.0001 0.0004 -0.0005 -0.0003  
Y -0.0000 -0.0000 -0.0001 -0.0001 0.0001 0.0001  
Z -0.0001 -0.0001 0.0003 0.0001 -0.0000 -0.0002

AT.158 O X 0.0002 0.0001 0.0001 0.0004 0.0005 -0.0003  
Y -0.0000 0.0000 0.0001 -0.0001 -0.0001 0.0001  
Z -0.0001 0.0001 -0.0003 0.0001 0.0000 -0.0002

AT.159 O X -0.0001 0.0001 0.0001 -0.0002 0.0003 0.0001  
Y -0.0000 0.0000 -0.0002 -0.0003 0.0003 0.0003  
Z 0.0001 0.0001 -0.0005 0.0003 -0.0002 0.0002

AT.160 O X -0.0001 -0.0001 -0.0001 -0.0002 -0.0003 0.0001  
Y -0.0000 -0.0000 0.0002 -0.0003 -0.0003 0.0003  
Z 0.0001 -0.0001 0.0005 0.0003 0.0002 0.0002

AT.161 H X -0.0006 0.0032 -0.0048 -0.0043 0.0059 0.0069  
Y 0.0000 -0.0007 0.0009 0.0009 -0.0011 -0.0013  
Z -0.0008 0.0036 -0.0057 -0.0054 0.0065 0.0074

AT.162 H X -0.0006 -0.0032 0.0048 -0.0043 -0.0059 0.0069  
Y 0.0000 0.0007 -0.0009 0.0009 0.0011 -0.0013  
Z -0.0008 -0.0036 0.0057 -0.0054 -0.0065 0.0074

AT.163 H X -0.0000 0.0001 0.0001 0.0004 -0.0003 0.0000  
Y -0.0009 0.0013 0.0019 0.0030 -0.0013 -0.0019  
Z -0.0002 0.0004 0.0004 0.0005 -0.0000 -0.0005

AT.164 H X -0.0000 -0.0001 -0.0001 0.0004 0.0003 0.0000  
Y -0.0009 -0.0013 -0.0019 0.0030 0.0013 -0.0019  
Z -0.0002 -0.0004 -0.0004 0.0005 0.0000 -0.0005

AT.165 O X 0.0002 -0.0000 -0.0000 -0.0000 -0.0001 -0.0000  
Y -0.0001 -0.0000 -0.0000 0.0000 -0.0000 -0.0000  
Z -0.0003 0.0001 0.0002 0.0001 0.0003 -0.0002

AT.166 O X 0.0002 0.0000 0.0000 -0.0000 0.0001 -0.0000  
Y -0.0001 0.0000 0.0000 0.0000 0.0000 -0.0000  
Z -0.0003 -0.0001 -0.0002 0.0001 -0.0003 -0.0002

AT.167 H X -0.0007 -0.0001 -0.0003 0.0003 -0.0001 0.0002  
Y 0.0007 -0.0000 -0.0003 -0.0006 0.0003 0.0001  
Z 0.0007 -0.0001 0.0012 -0.0001 -0.0003 -0.0012

AT.168 H X -0.0007 0.0001 0.0003 0.0003 0.0001 0.0002  
Y 0.0007 0.0000 0.0003 -0.0006 -0.0003 0.0001

Z 0.0007 0.0001 -0.0012 -0.0001 0.0003 -0.0012  
AT. 169 O X -0.0001 0.0000 -0.0000 0.0000 0.0000 0.0000  
Y -0.0003 0.0002 0.0002 -0.0000 -0.0000 0.0000  
Z 0.0004 -0.0002 -0.0004 -0.0001 -0.0003 0.0003  
AT. 170 O X -0.0001 -0.0000 0.0000 0.0000 -0.0000 0.0000  
Y -0.0003 -0.0002 -0.0002 -0.0000 0.0000 0.0000  
Z 0.0004 0.0002 0.0004 -0.0001 0.0003 0.0003  
AT. 171 H X 0.0031 -0.0028 -0.0011 -0.0008 0.0007 -0.0002  
Y 0.0013 -0.0013 -0.0003 -0.0002 0.0003 -0.0000  
Z -0.0002 0.0002 0.0002 0.0002 0.0000 0.0005  
AT. 172 H X 0.0031 0.0028 0.0011 -0.0008 -0.0007 -0.0002  
Y 0.0013 0.0013 0.0003 -0.0002 -0.0003 -0.0000  
Z -0.0002 -0.0002 -0.0002 0.0002 -0.0000 0.0005

FREQ(CM\*\*-1) 1112.85 1127.28 1128.23 1129.93 1129.96 1138.37

AT. 1 I X 0.0000 0.0000 -0.0000 -0.0000 -0.0000 0.0000  
Y -0.0000 0.0000 0.0000 0.0000 0.0000 -0.0000  
Z -0.0000 -0.0000 -0.0000 0.0001 0.0001 -0.0000  
AT. 2 I X 0.0000 -0.0000 -0.0000 0.0000 -0.0000 -0.0000  
Y -0.0000 -0.0000 0.0000 -0.0000 0.0000 0.0000  
Z -0.0000 0.0000 -0.0000 -0.0001 0.0001 0.0000  
AT. 3 I X -0.0000 -0.0000 -0.0000 0.0000 0.0000 -0.0000  
Y -0.0000 -0.0000 -0.0000 0.0000 0.0000 -0.0000  
Z -0.0000 0.0000 0.0000 0.0000 0.0000 0.0000  
AT. 4 I X -0.0000 0.0000 -0.0000 -0.0000 0.0000 0.0000  
Y -0.0000 0.0000 -0.0000 -0.0000 0.0000 0.0000  
Z -0.0000 -0.0000 0.0000 -0.0000 0.0000 -0.0000  
AT. 5 O X -0.0008 -0.0003 0.0001 0.0018 0.0018 -0.0020  
Y 0.0007 0.0003 -0.0001 -0.0015 -0.0015 0.0017  
Z 0.0006 0.0003 -0.0000 -0.0028 -0.0027 0.0015  
AT. 6 O X -0.0008 0.0003 0.0001 -0.0018 0.0018 0.0020

Y 0.0007 -0.0003 -0.0001 0.0015 -0.0015 -0.0017  
Z 0.0006 -0.0003 -0.0000 0.0028 -0.0027 -0.0015  
AT. 7 O X -0.0004 -0.0002 -0.0000 0.0014 0.0015 -0.0004  
Y 0.0000 0.0001 0.0001 -0.0021 -0.0021 0.0004  
Z -0.0000 -0.0001 -0.0000 0.0015 0.0015 -0.0002  
AT. 8 O X -0.0004 0.0002 -0.0000 -0.0014 0.0015 0.0004  
Y 0.0000 -0.0001 0.0001 0.0021 -0.0021 -0.0004  
Z -0.0000 0.0001 -0.0000 -0.0015 0.0015 0.0002  
AT. 9 N X -0.0005 -0.0000 0.0002 -0.0037 -0.0037 0.0003  
Y 0.0006 -0.0000 -0.0002 0.0024 0.0024 -0.0003  
Z 0.0003 0.0003 -0.0002 0.0020 0.0017 0.0034  
AT. 10 N X -0.0005 0.0000 0.0002 0.0037 -0.0037 -0.0003  
Y 0.0006 0.0000 -0.0002 -0.0024 0.0024 0.0003  
Z 0.0003 -0.0003 -0.0002 -0.0020 0.0017 -0.0034  
AT. 11 N X -0.0000 -0.0002 0.0002 -0.0055 -0.0055 -0.0009  
Y 0.0006 0.0002 -0.0002 0.0054 0.0052 0.0009  
Z -0.0012 0.0002 0.0002 -0.0008 -0.0005 0.0007  
AT. 12 N X -0.0000 0.0002 0.0002 0.0055 -0.0055 0.0009  
Y 0.0006 -0.0002 -0.0002 -0.0054 0.0052 -0.0009  
Z -0.0012 -0.0002 0.0002 0.0008 -0.0005 -0.0007  
AT. 13 C X 0.0000 0.0002 -0.0001 0.0015 0.0016 0.0013  
Y -0.0002 -0.0001 0.0002 -0.0019 -0.0019 -0.0006  
Z -0.0003 -0.0003 -0.0001 0.0023 0.0021 -0.0014  
AT. 14 C X 0.0000 -0.0002 -0.0001 -0.0015 0.0016 -0.0013  
Y -0.0002 0.0001 0.0002 0.0019 -0.0019 0.0006  
Z -0.0003 0.0003 -0.0001 -0.0023 0.0021 0.0014  
AT. 15 C X -0.0004 -0.0000 0.0000 -0.0007 -0.0007 -0.0005  
Y -0.0006 -0.0002 0.0000 0.0018 0.0018 -0.0008  
Z -0.0007 -0.0002 0.0002 0.0012 0.0014 -0.0024  
AT. 16 C X -0.0004 0.0000 0.0000 0.0007 -0.0007 0.0005  
Y -0.0006 0.0002 0.0000 -0.0018 0.0018 0.0008  
Z -0.0007 0.0002 0.0002 -0.0012 0.0014 0.0024

AT. 17 H X 0.0103 0.0024 -0.0014 -0.0228 -0.0254 0.0232  
Y -0.0009 -0.0003 0.0002 0.0048 0.0050 -0.0030  
Z 0.0038 0.0008 -0.0006 -0.0102 -0.0111 0.0090

AT. 18 H X 0.0103 -0.0024 -0.0014 0.0228 -0.0254 -0.0232  
Y -0.0009 0.0003 0.0002 -0.0048 0.0050 0.0030  
Z 0.0038 -0.0008 -0.0006 0.0102 -0.0111 -0.0090

AT. 19 H X -0.0002 0.0000 0.0006 0.0121 0.0141 -0.0112  
Y 0.0021 0.0003 -0.0005 -0.0033 -0.0042 0.0054  
Z -0.0000 0.0001 0.0003 0.0035 0.0041 -0.0030

AT. 20 H X -0.0002 -0.0000 0.0006 -0.0121 0.0141 0.0112  
Y 0.0021 -0.0003 -0.0005 0.0033 -0.0042 -0.0054  
Z -0.0000 -0.0001 0.0003 -0.0035 0.0041 0.0030

AT. 21 C X 0.0010 -0.0000 -0.0002 0.0012 0.0009 -0.0001  
Y 0.0000 0.0001 -0.0000 -0.0002 -0.0003 0.0002  
Z 0.0001 0.0004 0.0001 -0.0017 -0.0016 0.0009

AT. 22 C X 0.0010 0.0000 -0.0002 -0.0012 0.0009 0.0001  
Y 0.0000 -0.0001 -0.0000 0.0002 -0.0003 -0.0002  
Z 0.0001 -0.0004 0.0001 0.0017 -0.0016 -0.0009

AT. 23 C X -0.0004 0.0001 0.0002 -0.0006 -0.0003 0.0002  
Y -0.0003 -0.0001 0.0001 0.0008 0.0009 -0.0004  
Z 0.0005 -0.0001 -0.0001 0.0008 0.0006 -0.0003

AT. 24 C X -0.0004 -0.0001 0.0002 0.0006 -0.0003 -0.0002  
Y -0.0003 0.0001 0.0001 -0.0008 0.0009 0.0004  
Z 0.0005 0.0001 -0.0001 -0.0008 0.0006 0.0003

AT. 25 H X 0.0042 0.0016 -0.0011 -0.0034 -0.0051 0.0062  
Y 0.0006 0.0002 -0.0002 0.0003 0.0001 0.0010  
Z -0.0010 -0.0008 -0.0000 0.0020 0.0024 -0.0018

AT. 26 H X 0.0042 -0.0016 -0.0011 0.0034 -0.0051 -0.0062  
Y 0.0006 -0.0002 -0.0002 -0.0003 0.0001 -0.0010  
Z -0.0010 0.0008 -0.0000 -0.0020 0.0024 0.0018

AT. 27 H X -0.0040 -0.0009 0.0006 -0.0024 -0.0017 -0.0019  
Y 0.0010 -0.0001 -0.0003 -0.0013 -0.0018 0.0001

Z 0.0017 0.0002 -0.0003 0.0002 -0.0004 0.0009  
AT. 28 H X -0.0040 0.0009 0.0006 0.0024 -0.0017 0.0019  
Y 0.0010 0.0001 -0.0003 0.0013 -0.0018 -0.0001  
Z 0.0017 -0.0002 -0.0003 -0.0002 -0.0004 -0.0009  
AT. 29 C X 0.0005 -0.0001 -0.0002 0.0034 0.0034 -0.0007  
Y -0.0006 0.0002 -0.0000 0.0033 0.0034 0.0010  
Z -0.0003 -0.0000 0.0002 -0.0045 -0.0043 -0.0007  
AT. 30 C X 0.0005 0.0001 -0.0002 -0.0034 0.0034 0.0007  
Y -0.0006 -0.0002 -0.0000 -0.0033 0.0034 -0.0010  
Z -0.0003 0.0000 0.0002 0.0045 -0.0043 0.0007  
AT. 31 H X -0.0006 -0.0003 0.0006 -0.0163 -0.0165 0.0011  
Y 0.0013 0.0004 -0.0007 0.0114 0.0112 0.0023  
Z 0.0010 0.0002 -0.0002 -0.0046 -0.0049 0.0026  
AT. 32 H X -0.0006 0.0003 0.0006 0.0163 -0.0165 -0.0011  
Y 0.0013 -0.0004 -0.0007 -0.0114 0.0112 -0.0023  
Z 0.0010 -0.0002 -0.0002 0.0046 -0.0049 -0.0026  
AT. 33 H X -0.0016 -0.0017 0.0014 -0.0235 -0.0228 -0.0154  
Y -0.0000 0.0004 0.0006 -0.0160 -0.0155 0.0018  
Z -0.0011 -0.0011 0.0010 -0.0146 -0.0141 -0.0104  
AT. 34 H X -0.0016 0.0017 0.0014 0.0235 -0.0228 0.0154  
Y -0.0000 -0.0004 0.0006 0.0160 -0.0155 -0.0018  
Z -0.0011 0.0011 0.0010 0.0146 -0.0141 0.0104  
AT. 35 C X 0.0009 0.0002 -0.0010 0.0242 0.0240 0.0028  
Y -0.0002 -0.0001 0.0006 -0.0178 -0.0179 -0.0006  
Z 0.0006 0.0000 -0.0006 0.0145 0.0145 0.0001  
AT. 36 C X 0.0009 -0.0002 -0.0010 -0.0242 0.0240 -0.0028  
Y -0.0002 0.0001 0.0006 0.0178 -0.0179 0.0006  
Z 0.0006 -0.0000 -0.0006 -0.0145 0.0145 -0.0001  
AT. 37 C X 0.0001 -0.0000 0.0000 -0.0003 -0.0003 -0.0008  
Y -0.0005 -0.0002 0.0003 -0.0059 -0.0057 -0.0011  
Z 0.0006 0.0001 0.0000 -0.0033 -0.0034 0.0005  
AT. 38 C X 0.0001 0.0000 0.0000 0.0003 -0.0003 0.0008

Y -0.0005 0.0002 0.0003 0.0059 -0.0057 0.0011  
Z 0.0006 -0.0001 0.0000 0.0033 -0.0034 -0.0005  
AT. 39 H X -0.0004 -0.0004 -0.0004 0.0141 0.0139 -0.0019  
Y -0.0023 0.0003 -0.0001 0.0156 0.0163 0.0020  
Z 0.0011 -0.0003 -0.0001 -0.0030 -0.0035 -0.0013  
AT. 40 H X -0.0004 0.0004 -0.0004 -0.0141 0.0139 0.0019  
Y -0.0023 -0.0003 -0.0001 -0.0156 0.0163 -0.0020  
Z 0.0011 0.0003 -0.0001 0.0030 -0.0035 0.0013  
AT. 41 H X 0.0000 -0.0000 0.0005 -0.0142 -0.0142 -0.0006  
Y 0.0021 -0.0001 -0.0009 0.0162 0.0162 -0.0003  
Z -0.0015 0.0001 0.0005 -0.0062 -0.0061 0.0001  
AT. 42 H X 0.0000 0.0000 0.0005 0.0142 -0.0142 0.0006  
Y 0.0021 0.0001 -0.0009 -0.0162 0.0162 0.0003  
Z -0.0015 -0.0001 0.0005 0.0062 -0.0061 -0.0001  
AT. 43 C X -0.0001 0.0001 -0.0003 0.0051 0.0052 0.0013  
Y 0.0001 -0.0002 -0.0001 0.0014 0.0013 -0.0007  
Z 0.0005 -0.0003 -0.0002 0.0026 0.0026 -0.0014  
AT. 44 C X -0.0001 -0.0001 -0.0003 -0.0051 0.0052 -0.0013  
Y 0.0001 0.0002 -0.0001 -0.0014 0.0013 0.0007  
Z 0.0005 0.0003 -0.0002 -0.0026 0.0026 0.0014  
AT. 45 H X 0.0013 0.0008 0.0008 -0.0159 -0.0161 0.0010  
Y 0.0009 -0.0005 -0.0004 0.0065 0.0066 -0.0007  
Z -0.0012 -0.0005 -0.0005 0.0121 0.0122 -0.0009  
AT. 46 H X 0.0013 -0.0008 0.0008 0.0159 -0.0161 -0.0010  
Y 0.0009 0.0005 -0.0004 -0.0065 0.0066 0.0007  
Z -0.0012 0.0005 -0.0005 -0.0121 0.0122 0.0009  
AT. 47 H X -0.0041 0.0001 0.0015 -0.0230 -0.0221 -0.0004  
Y -0.0013 0.0003 0.0012 -0.0219 -0.0221 -0.0007  
Z 0.0043 0.0002 -0.0012 0.0176 0.0165 0.0008  
AT. 48 H X -0.0041 -0.0001 0.0015 0.0230 -0.0221 0.0004  
Y -0.0013 -0.0003 0.0012 0.0219 -0.0221 0.0007  
Z 0.0043 -0.0002 -0.0012 -0.0176 0.0165 -0.0008



AT. 49 C X 0.0014 0.0001 -0.0010 0.0200 0.0199 0.0003  
Y -0.0007 -0.0001 0.0004 -0.0116 -0.0115 -0.0004  
Z -0.0007 -0.0000 0.0010 -0.0251 -0.0250 -0.0007

AT. 50 C X 0.0014 -0.0001 -0.0010 -0.0200 0.0199 -0.0003  
Y -0.0007 0.0001 0.0004 0.0116 -0.0115 0.0004  
Z -0.0007 0.0000 0.0010 0.0251 -0.0250 0.0007

AT. 51 C X 0.0001 0.0003 0.0000 -0.0020 -0.0019 0.0019  
Y -0.0006 -0.0001 0.0003 -0.0041 -0.0042 -0.0005  
Z -0.0007 -0.0002 0.0002 0.0008 0.0009 -0.0015

AT. 52 C X 0.0001 -0.0003 0.0000 0.0020 -0.0019 -0.0019  
Y -0.0006 0.0001 0.0003 0.0041 -0.0042 0.0005  
Z -0.0007 0.0002 0.0002 -0.0008 0.0009 0.0015

AT. 53 H X -0.0002 0.0004 -0.0001 0.0056 0.0061 0.0019  
Y 0.0001 -0.0007 -0.0003 0.0160 0.0168 -0.0075  
Z 0.0005 -0.0012 -0.0002 0.0117 0.0122 -0.0100

AT. 54 H X -0.0002 -0.0004 -0.0001 -0.0056 0.0061 -0.0019  
Y 0.0001 0.0007 -0.0003 -0.0160 0.0168 0.0075  
Z 0.0005 0.0012 -0.0002 -0.0117 0.0122 0.0100

AT. 55 H X 0.0003 0.0002 0.0000 -0.0040 -0.0043 0.0009  
Y 0.0005 0.0000 -0.0003 0.0078 0.0074 0.0014  
Z 0.0004 -0.0000 -0.0005 0.0143 0.0139 0.0006

AT. 56 H X 0.0003 -0.0002 0.0000 0.0040 -0.0043 -0.0009  
Y 0.0005 -0.0000 -0.0003 -0.0078 0.0074 -0.0014  
Z 0.0004 0.0000 -0.0005 -0.0143 0.0139 -0.0006

AT. 57 C X -0.0004 -0.0001 0.0005 -0.0126 -0.0125 -0.0017  
Y 0.0003 0.0000 -0.0004 0.0091 0.0091 0.0003  
Z -0.0005 0.0001 0.0003 -0.0060 -0.0060 0.0006

AT. 58 C X -0.0004 0.0001 0.0005 0.0126 -0.0125 0.0017  
Y 0.0003 -0.0000 -0.0004 -0.0091 0.0091 -0.0003  
Z -0.0005 -0.0001 0.0003 0.0060 -0.0060 -0.0006

AT. 59 H X -0.0011 0.0002 0.0008 -0.0189 -0.0190 0.0028  
Y 0.0011 -0.0002 -0.0006 0.0123 0.0123 -0.0022

Z -0.0003 0.0000 0.0004 -0.0071 -0.0072 0.0003  
AT. 60 H X -0.0011 -0.0002 0.0008 0.0189 -0.0190 -0.0028  
Y 0.0011 0.0002 -0.0006 -0.0123 0.0123 0.0022  
Z -0.0003 -0.0000 0.0004 0.0071 -0.0072 -0.0003  
AT. 61 H X -0.0003 -0.0006 0.0008 -0.0173 -0.0180 -0.0040  
Y -0.0001 0.0006 -0.0004 0.0144 0.0145 0.0049  
Z 0.0004 -0.0006 0.0003 -0.0117 -0.0125 -0.0035  
AT. 62 H X -0.0003 0.0006 0.0008 0.0173 -0.0180 0.0040  
Y -0.0001 -0.0006 -0.0004 -0.0144 0.0145 -0.0049  
Z 0.0004 0.0006 0.0003 0.0117 -0.0125 0.0035  
AT. 63 H X -0.0004 0.0001 0.0005 -0.0186 -0.0181 0.0003  
Y -0.0002 0.0002 -0.0003 0.0176 0.0170 0.0019  
Z 0.0000 -0.0002 0.0002 -0.0086 -0.0082 -0.0025  
AT. 64 H X -0.0004 -0.0001 0.0005 0.0186 -0.0181 -0.0003  
Y -0.0002 -0.0002 -0.0003 -0.0176 0.0170 -0.0019  
Z 0.0000 0.0002 0.0002 0.0086 -0.0082 0.0025  
AT. 65 C X -0.0008 -0.0000 0.0005 -0.0106 -0.0106 -0.0001  
Y 0.0004 0.0000 -0.0002 0.0058 0.0057 -0.0001  
Z 0.0003 0.0001 -0.0005 0.0123 0.0124 0.0010  
AT. 66 C X -0.0008 0.0000 0.0005 0.0106 -0.0106 0.0001  
Y 0.0004 -0.0000 -0.0002 -0.0058 0.0057 0.0001  
Z 0.0003 -0.0001 -0.0005 -0.0123 0.0124 -0.0010  
AT. 67 H X 0.0002 0.0001 0.0004 -0.0157 -0.0157 -0.0006  
Y -0.0002 0.0001 -0.0004 0.0089 0.0091 0.0013  
Z 0.0003 0.0000 -0.0003 0.0147 0.0144 0.0004  
AT. 68 H X 0.0002 -0.0001 0.0004 0.0157 -0.0157 0.0006  
Y -0.0002 -0.0001 -0.0004 -0.0089 0.0091 -0.0013  
Z 0.0003 -0.0000 -0.0003 -0.0147 0.0144 -0.0004  
AT. 69 H X -0.0012 0.0001 0.0004 -0.0128 -0.0129 0.0012  
Y 0.0011 0.0001 -0.0006 0.0094 0.0096 0.0002  
Z 0.0022 -0.0003 -0.0010 0.0201 0.0207 -0.0018  
AT. 70 H X -0.0012 -0.0001 0.0004 0.0128 -0.0129 -0.0012

Y 0.0011 -0.0001 -0.0006 -0.0094 0.0096 -0.0002  
Z 0.0022 0.0003 -0.0010 -0.0201 0.0207 0.0018  
AT. 71 H X -0.0000 -0.0003 0.0007 -0.0156 -0.0159 -0.0022  
Y 0.0006 0.0001 -0.0007 0.0130 0.0130 0.0008  
Z 0.0013 0.0001 -0.0011 0.0194 0.0192 0.0010  
AT. 72 H X -0.0000 0.0003 0.0007 0.0156 -0.0159 0.0022  
Y 0.0006 -0.0001 -0.0007 -0.0130 0.0130 -0.0008  
Z 0.0013 -0.0001 -0.0011 -0.0194 0.0192 -0.0010  
AT. 73 C X -0.0001 -0.0000 -0.0000 0.0011 0.0011 0.0000  
Y 0.0003 0.0000 -0.0000 0.0002 0.0001 0.0003  
Z -0.0004 -0.0000 0.0000 -0.0001 -0.0005 0.0005  
AT. 74 C X -0.0001 0.0000 -0.0000 -0.0011 0.0011 -0.0000  
Y 0.0003 -0.0000 -0.0000 -0.0002 0.0001 -0.0003  
Z -0.0004 0.0000 0.0000 0.0001 -0.0005 -0.0005  
AT. 75 H X -0.0027 0.0001 0.0022 -0.0439 -0.0443 0.0011  
Y 0.0018 -0.0000 -0.0016 0.0312 0.0318 -0.0007  
Z -0.0005 -0.0000 -0.0004 0.0096 0.0099 0.0002  
AT. 76 H X -0.0027 -0.0001 0.0022 0.0439 -0.0443 -0.0011  
Y 0.0018 0.0000 -0.0016 -0.0312 0.0318 0.0007  
Z -0.0005 0.0000 -0.0004 -0.0096 0.0099 -0.0002  
AT. 77 H X -0.0015 -0.0004 0.0014 -0.0420 -0.0413 -0.0044  
Y 0.0012 0.0005 -0.0010 0.0295 0.0288 0.0038  
Z 0.0002 -0.0000 -0.0004 0.0123 0.0119 0.0014  
AT. 78 H X -0.0015 0.0004 0.0014 0.0420 -0.0413 0.0044  
Y 0.0012 -0.0005 -0.0010 -0.0295 0.0288 -0.0038  
Z 0.0002 0.0000 -0.0004 -0.0123 0.0119 -0.0014  
AT. 79 I X -0.0002 -0.0000 0.0001 -0.0000 -0.0000 -0.0001  
Y -0.0001 -0.0000 0.0000 0.0000 0.0000 -0.0001  
Z -0.0000 -0.0000 0.0000 0.0000 0.0000 -0.0002  
AT. 80 I X -0.0002 0.0000 0.0001 0.0000 -0.0000 0.0001  
Y -0.0001 0.0000 0.0000 -0.0000 0.0000 0.0001  
Z -0.0000 0.0000 0.0000 -0.0000 0.0000 0.0002

AT. 81 I X 0.0000 0.0000 -0.0000 0.0000 0.0000 -0.0000  
Y 0.0001 -0.0000 -0.0000 -0.0000 -0.0000 0.0000  
Z -0.0000 -0.0000 -0.0000 0.0000 0.0000 -0.0000

AT. 82 I X 0.0000 -0.0000 -0.0000 -0.0000 0.0000 0.0000  
Y 0.0001 0.0000 -0.0000 0.0000 -0.0000 -0.0000  
Z -0.0000 0.0000 -0.0000 -0.0000 0.0000 0.0000

AT. 83 O X 0.0013 0.0018 0.0014 -0.0000 -0.0002 0.0005  
Y 0.0000 0.0004 0.0004 0.0000 0.0000 -0.0003  
Z -0.0028 0.0013 0.0024 0.0001 0.0000 -0.0034

AT. 84 O X 0.0013 -0.0018 0.0014 0.0000 -0.0002 -0.0005  
Y 0.0000 -0.0004 0.0004 -0.0000 0.0000 0.0003  
Z -0.0028 -0.0013 0.0024 -0.0001 0.0000 0.0034

AT. 85 O X -0.0012 0.0013 0.0016 0.0000 0.0002 0.0006  
Y -0.0003 0.0020 0.0020 -0.0000 0.0001 0.0005  
Z 0.0001 -0.0015 -0.0014 0.0000 -0.0000 -0.0002

AT. 86 O X -0.0012 -0.0013 0.0016 -0.0000 0.0002 -0.0006  
Y -0.0003 -0.0020 0.0020 0.0000 0.0001 -0.0005  
Z 0.0001 0.0015 -0.0014 -0.0000 -0.0000 0.0002

AT. 87 N X -0.0055 -0.0044 -0.0029 0.0001 -0.0001 -0.0039  
Y -0.0044 -0.0013 -0.0000 0.0001 0.0001 -0.0030  
Z 0.0216 0.0006 -0.0072 -0.0007 -0.0008 0.0213

AT. 88 N X -0.0055 0.0044 -0.0029 -0.0001 -0.0001 0.0039  
Y -0.0044 0.0013 -0.0000 -0.0001 0.0001 0.0030  
Z 0.0216 -0.0006 -0.0072 0.0007 -0.0008 -0.0213

AT. 89 N X -0.0027 -0.0071 -0.0071 -0.0001 -0.0002 0.0019  
Y 0.0005 -0.0034 -0.0035 0.0000 0.0001 0.0015  
Z 0.0040 0.0022 0.0003 -0.0002 -0.0004 0.0030

AT. 90 N X -0.0027 0.0071 -0.0071 0.0001 -0.0002 -0.0019  
Y 0.0005 0.0034 -0.0035 -0.0000 0.0001 -0.0015  
Z 0.0040 -0.0022 0.0003 0.0002 -0.0004 -0.0030

AT. 91 C X -0.0094 0.0004 0.0031 0.0002 0.0002 -0.0064  
Y 0.0009 0.0013 0.0004 -0.0001 -0.0003 0.0028

Z 0.0067 -0.0011 -0.0027 -0.0001 0.0001 0.0041  
AT. 92 C X -0.0094 -0.0004 0.0031 -0.0002 0.0002 0.0064  
Y 0.0009 -0.0013 0.0004 0.0001 -0.0003 -0.0028  
Z 0.0067 0.0011 -0.0027 0.0001 0.0001 -0.0041  
AT. 93 C X 0.0107 -0.0001 -0.0028 -0.0002 -0.0001 0.0059  
Y -0.0026 -0.0011 -0.0002 0.0001 0.0002 -0.0019  
Z -0.0142 -0.0016 0.0032 0.0004 0.0005 -0.0128  
AT. 94 C X 0.0107 0.0001 -0.0028 0.0002 -0.0001 -0.0059  
Y -0.0026 0.0011 -0.0002 -0.0001 0.0002 0.0019  
Z -0.0142 0.0016 0.0032 -0.0004 0.0005 0.0128  
AT. 95 H X -0.0624 -0.0167 0.0109 0.0026 0.0046 -0.0804  
Y 0.0171 0.0027 -0.0041 -0.0006 -0.0010 0.0188  
Z 0.0313 0.0093 -0.0052 -0.0013 -0.0024 0.0438  
AT. 96 H X -0.0624 0.0167 0.0109 -0.0026 0.0046 0.0804  
Y 0.0171 -0.0027 -0.0041 0.0006 -0.0010 -0.0188  
Z 0.0313 -0.0093 -0.0052 0.0013 -0.0024 -0.0438  
AT. 97 H X 0.0361 0.0115 -0.0108 -0.0022 -0.0025 0.0794  
Y 0.0330 0.0025 -0.0058 -0.0006 -0.0008 0.0147  
Z -0.0128 -0.0041 0.0042 0.0008 0.0009 -0.0303  
AT. 98 H X 0.0361 -0.0115 -0.0108 0.0022 -0.0025 -0.0794  
Y 0.0330 -0.0025 -0.0058 0.0006 -0.0008 -0.0147  
Z -0.0128 0.0041 0.0042 -0.0008 0.0009 0.0303  
AT. 99 C X 0.0004 0.0018 0.0015 -0.0000 0.0000 0.0002  
Y -0.0001 -0.0001 -0.0002 -0.0000 0.0000 0.0012  
Z -0.0029 0.0011 0.0021 0.0001 0.0004 -0.0020  
AT. 100 C X 0.0004 -0.0018 0.0015 0.0000 0.0000 -0.0002  
Y -0.0001 0.0001 -0.0002 0.0000 0.0000 -0.0012  
Z -0.0029 -0.0011 0.0021 -0.0001 0.0004 0.0020  
AT. 101 C X 0.0002 -0.0006 -0.0006 0.0001 0.0000 0.0002  
Y 0.0017 -0.0009 -0.0014 -0.0000 -0.0003 -0.0010  
Z -0.0001 -0.0006 -0.0003 0.0000 0.0000 -0.0001  
AT. 102 C X 0.0002 0.0006 -0.0006 -0.0001 0.0000 -0.0002

Y 0.0017 0.0009 -0.0014 0.0000 -0.0003 0.0010  
Z -0.0001 0.0006 -0.0003 -0.0000 0.0000 0.0001  
AT. 103 H X 0.0220 -0.0064 -0.0121 -0.0004 -0.0038 -0.0088  
Y -0.0077 0.0016 0.0036 0.0001 0.0013 0.0036  
Z 0.0053 -0.0026 -0.0042 0.0000 -0.0011 -0.0034  
AT. 104 H X 0.0220 0.0064 -0.0121 0.0004 -0.0038 0.0088  
Y -0.0077 -0.0016 0.0036 -0.0001 0.0013 -0.0036  
Z 0.0053 0.0026 -0.0042 -0.0000 -0.0011 0.0034  
AT. 105 H X -0.0104 -0.0028 0.0024 -0.0002 0.0016 0.0010  
Y 0.0014 0.0025 0.0017 0.0002 -0.0000 0.0017  
Z -0.0028 0.0003 0.0015 -0.0000 0.0005 0.0023  
AT. 106 H X -0.0104 0.0028 0.0024 0.0002 0.0016 -0.0010  
Y 0.0014 -0.0025 0.0017 -0.0002 -0.0000 -0.0017  
Z -0.0028 -0.0003 0.0015 0.0000 0.0005 -0.0023  
AT. 107 C X 0.0084 0.0034 0.0005 -0.0003 -0.0002 0.0081  
Y 0.0058 -0.0015 -0.0036 -0.0001 -0.0002 0.0045  
Z -0.0111 0.0044 0.0073 0.0003 0.0003 -0.0085  
AT. 108 C X 0.0084 -0.0034 0.0005 0.0003 -0.0002 -0.0081  
Y 0.0058 0.0015 -0.0036 0.0001 -0.0002 -0.0045  
Z -0.0111 -0.0044 0.0073 -0.0003 0.0003 0.0085  
AT. 109 H X 0.0022 -0.0189 -0.0179 0.0005 -0.0003 -0.0059  
Y 0.0190 -0.0024 -0.0084 -0.0005 -0.0005 0.0151  
Z 0.0153 0.0098 0.0042 -0.0007 -0.0002 0.0158  
AT. 110 H X 0.0022 0.0189 -0.0179 -0.0005 -0.0003 0.0059  
Y 0.0190 0.0024 -0.0084 0.0005 -0.0005 -0.0151  
Z 0.0153 -0.0098 0.0042 0.0007 -0.0002 -0.0158  
AT. 111 H X 0.0500 -0.0080 -0.0265 -0.0018 -0.0028 0.0519  
Y -0.0234 0.0205 0.0275 0.0006 0.0012 -0.0206  
Z -0.0502 0.0122 0.0303 0.0018 0.0028 -0.0510  
AT. 112 H X 0.0500 0.0080 -0.0265 0.0018 -0.0028 -0.0519  
Y -0.0234 -0.0205 0.0275 -0.0006 0.0012 0.0206  
Z -0.0502 -0.0122 0.0303 -0.0018 0.0028 0.0510

AT. 113 C X -0.0013 0.0250 0.0279 0.0003 0.0014 -0.0125  
Y 0.0026 0.0053 0.0056 -0.0001 0.0001 0.0005  
Z -0.0068 -0.0185 -0.0171 0.0002 -0.0005 -0.0006

AT. 114 C X -0.0013 -0.0250 0.0279 -0.0003 0.0014 0.0125  
Y 0.0026 -0.0053 0.0056 0.0001 0.0001 -0.0005  
Z -0.0068 0.0185 -0.0171 -0.0002 -0.0005 0.0006

AT. 115 C X 0.0071 0.0020 -0.0002 -0.0002 -0.0004 0.0050  
Y -0.0022 0.0070 0.0080 0.0001 0.0003 -0.0051  
Z -0.0003 0.0015 0.0016 -0.0001 0.0001 0.0013

AT. 116 C X 0.0071 -0.0020 -0.0002 0.0002 -0.0004 -0.0050  
Y -0.0022 -0.0070 0.0080 -0.0001 0.0003 0.0051  
Z -0.0003 -0.0015 0.0016 0.0001 0.0001 -0.0013

AT. 117 H X 0.0106 0.0083 0.0038 -0.0005 -0.0006 0.0112  
Y 0.0053 -0.0158 -0.0197 -0.0003 -0.0017 0.0074  
Z -0.0061 0.0007 0.0043 0.0004 0.0009 -0.0074

AT. 118 H X 0.0106 -0.0083 0.0038 0.0005 -0.0006 -0.0112  
Y 0.0053 0.0158 -0.0197 0.0003 -0.0017 -0.0074  
Z -0.0061 -0.0007 0.0043 -0.0004 0.0009 0.0074

AT. 119 H X 0.0030 -0.0171 -0.0181 0.0001 -0.0005 0.0057  
Y -0.0079 -0.0100 -0.0080 0.0004 0.0003 -0.0036  
Z 0.0034 0.0079 0.0073 -0.0002 0.0000 0.0004

AT. 120 H X 0.0030 0.0171 -0.0181 -0.0001 -0.0005 -0.0057  
Y -0.0079 0.0100 -0.0080 -0.0004 0.0003 0.0036  
Z 0.0034 -0.0079 0.0073 0.0002 0.0000 -0.0004

AT. 121 C X -0.0016 0.0038 0.0052 0.0002 0.0004 -0.0050  
Y -0.0062 -0.0057 -0.0035 0.0001 -0.0000 -0.0035  
Z -0.0030 -0.0023 -0.0016 0.0001 0.0001 -0.0016

AT. 122 C X -0.0016 -0.0038 0.0052 -0.0002 0.0004 0.0050  
Y -0.0062 0.0057 -0.0035 -0.0001 -0.0000 0.0035  
Z -0.0030 0.0023 -0.0016 -0.0001 0.0001 0.0016

AT. 123 H X -0.0116 -0.0200 -0.0182 -0.0003 -0.0010 0.0001  
Y -0.0068 -0.0021 -0.0002 0.0000 0.0002 -0.0002

Z -0.0045 -0.0100 -0.0090 0.0000 -0.0004 -0.0035  
AT. 124 H X -0.0116 0.0200 -0.0182 0.0003 -0.0010 -0.0001  
Y -0.0068 0.0021 -0.0002 -0.0000 0.0002 0.0002  
Z -0.0045 0.0100 -0.0090 -0.0000 -0.0004 0.0035  
AT. 125 H X -0.0155 -0.0169 -0.0109 0.0006 0.0010 -0.0128  
Y 0.0120 0.0240 0.0219 -0.0002 -0.0001 -0.0009  
Z -0.0108 -0.0128 -0.0086 0.0004 0.0007 -0.0096  
AT. 126 H X -0.0155 0.0169 -0.0109 -0.0006 0.0010 0.0128  
Y 0.0120 -0.0240 0.0219 0.0002 -0.0001 0.0009  
Z -0.0108 0.0128 -0.0086 -0.0004 0.0007 0.0096  
AT. 127 C X 0.0142 0.0248 0.0212 -0.0003 0.0001 0.0080  
Y 0.0041 0.0085 0.0069 -0.0000 0.0002 0.0008  
Z 0.0074 0.0222 0.0211 -0.0000 0.0005 -0.0006  
AT. 128 C X 0.0142 -0.0248 0.0212 0.0003 0.0001 -0.0080  
Y 0.0041 -0.0085 0.0069 0.0000 0.0002 -0.0008  
Z 0.0074 -0.0222 0.0211 0.0000 0.0005 0.0006  
AT. 129 C X -0.0039 0.0003 0.0021 0.0002 0.0005 -0.0057  
Y 0.0057 0.0030 0.0019 -0.0001 -0.0000 0.0028  
Z -0.0075 -0.0033 -0.0012 0.0002 0.0000 -0.0039  
AT. 130 C X -0.0039 -0.0003 0.0021 -0.0002 0.0005 0.0057  
Y 0.0057 -0.0030 0.0019 0.0001 -0.0000 -0.0028  
Z -0.0075 0.0033 -0.0012 -0.0002 0.0000 0.0039  
AT. 131 H X -0.0187 -0.0001 0.0081 0.0008 0.0014 -0.0243  
Y -0.0564 -0.0219 -0.0054 0.0013 0.0011 -0.0382  
Z -0.0556 -0.0152 0.0033 0.0015 0.0018 -0.0462  
AT. 132 H X -0.0187 0.0001 0.0081 -0.0008 0.0014 0.0243  
Y -0.0564 0.0219 -0.0054 -0.0013 0.0011 0.0382  
Z -0.0556 0.0152 0.0033 -0.0015 0.0018 0.0462  
AT. 133 H X -0.0078 -0.0089 -0.0097 -0.0003 -0.0005 0.0073  
Y 0.0135 -0.0063 -0.0118 -0.0006 -0.0007 0.0190  
Z 0.0082 -0.0129 -0.0171 -0.0005 -0.0006 0.0166  
AT. 134 H X -0.0078 0.0089 -0.0097 0.0003 -0.0005 -0.0073



Y 0.0135 0.0063 -0.0118 0.0006 -0.0007 -0.0190  
Z 0.0082 0.0129 -0.0171 0.0005 -0.0006 -0.0166  
AT. 135 C X 0.0023 -0.0137 -0.0156 -0.0002 -0.0007 0.0072  
Y -0.0027 -0.0021 -0.0018 0.0001 0.0001 -0.0016  
Z 0.0085 0.0086 0.0066 -0.0002 0.0001 0.0037  
AT. 136 C X 0.0023 0.0137 -0.0156 0.0002 -0.0007 -0.0072  
Y -0.0027 0.0021 -0.0018 -0.0001 0.0001 0.0016  
Z 0.0085 -0.0086 0.0066 0.0002 0.0001 -0.0037  
AT. 137 H X -0.0293 -0.0134 -0.0063 0.0007 0.0005 -0.0183  
Y -0.0109 -0.0057 -0.0026 0.0003 0.0001 -0.0074  
Z 0.0069 0.0042 0.0033 -0.0001 -0.0002 0.0035  
AT. 138 H X -0.0293 0.0134 -0.0063 -0.0007 0.0005 0.0183  
Y -0.0109 0.0057 -0.0026 -0.0003 0.0001 0.0074  
Z 0.0069 -0.0042 0.0033 0.0001 -0.0002 -0.0035  
AT. 139 H X 0.0193 -0.0162 -0.0239 -0.0007 -0.0014 0.0227  
Y 0.0138 -0.0110 -0.0159 -0.0005 -0.0012 0.0162  
Z -0.0199 0.0135 0.0210 0.0007 0.0014 -0.0221  
AT. 140 H X 0.0193 0.0162 -0.0239 0.0007 -0.0014 -0.0227  
Y 0.0138 0.0110 -0.0159 0.0005 -0.0012 -0.0162  
Z -0.0199 -0.0135 0.0210 -0.0007 0.0014 0.0221  
AT. 141 H X -0.0163 -0.0276 -0.0237 0.0003 -0.0008 -0.0025  
Y 0.0033 -0.0144 -0.0160 -0.0003 -0.0009 0.0091  
Z -0.0058 0.0166 0.0191 0.0004 0.0011 -0.0118  
AT. 142 H X -0.0163 0.0276 -0.0237 -0.0003 -0.0008 0.0025  
Y 0.0033 0.0144 -0.0160 0.0003 -0.0009 -0.0091  
Z -0.0058 -0.0166 0.0191 -0.0004 0.0011 0.0118  
AT. 143 C X -0.0087 -0.0130 -0.0108 0.0002 -0.0001 -0.0046  
Y -0.0060 -0.0059 -0.0040 0.0001 -0.0001 -0.0019  
Z 0.0006 -0.0102 -0.0110 -0.0001 -0.0004 0.0034  
AT. 144 C X -0.0087 0.0130 -0.0108 -0.0002 -0.0001 0.0046  
Y -0.0060 0.0059 -0.0040 -0.0001 -0.0001 0.0019  
Z 0.0006 0.0102 -0.0110 0.0001 -0.0004 -0.0034

AT. 145 H X -0.0077 -0.0305 -0.0297 -0.0003 -0.0010 0.0076  
Y 0.0081 -0.0010 -0.0040 -0.0002 -0.0003 0.0066  
Z -0.0152 -0.0211 -0.0169 0.0001 -0.0004 -0.0021

AT. 146 H X -0.0077 0.0305 -0.0297 0.0003 -0.0010 -0.0076  
Y 0.0081 0.0010 -0.0040 0.0002 -0.0003 -0.0066  
Z -0.0152 0.0211 -0.0169 -0.0001 -0.0004 0.0021

AT. 147 H X -0.0315 -0.0221 -0.0124 0.0008 0.0005 -0.0206  
Y 0.0016 0.0023 0.0013 0.0001 0.0002 -0.0029  
Z -0.0280 -0.0176 -0.0089 0.0008 0.0006 -0.0207

AT. 148 H X -0.0315 0.0221 -0.0124 -0.0008 0.0005 0.0206  
Y 0.0016 -0.0023 0.0013 -0.0001 0.0002 0.0029  
Z -0.0280 0.0176 -0.0089 -0.0008 0.0006 0.0207

AT. 149 H X 0.0165 -0.0121 -0.0184 -0.0004 -0.0007 0.0118  
Y 0.0035 -0.0016 -0.0027 0.0000 0.0001 -0.0003  
Z 0.0037 -0.0046 -0.0061 0.0001 0.0001 -0.0020

AT. 150 H X 0.0165 0.0121 -0.0184 0.0004 -0.0007 -0.0118  
Y 0.0035 0.0016 -0.0027 -0.0000 0.0001 0.0003  
Z 0.0037 0.0046 -0.0061 -0.0001 0.0001 0.0020

AT. 151 C X -0.0006 0.0020 0.0021 -0.0000 0.0000 -0.0006  
Y 0.0035 0.0004 -0.0005 -0.0001 -0.0000 0.0016  
Z 0.0071 -0.0002 -0.0024 -0.0002 -0.0003 0.0054

AT. 152 C X -0.0006 -0.0020 0.0021 0.0000 0.0000 0.0006  
Y 0.0035 -0.0004 -0.0005 0.0001 -0.0000 -0.0016  
Z 0.0071 0.0002 -0.0024 0.0002 -0.0003 -0.0054

AT. 153 H X -0.0146 -0.0214 -0.0217 0.0005 0.0002 -0.0138  
Y -0.0061 -0.0065 -0.0060 0.0002 0.0001 -0.0047  
Z -0.0013 -0.0013 -0.0015 -0.0001 -0.0003 0.0018

AT. 154 H X -0.0146 0.0214 -0.0217 -0.0005 0.0002 0.0138  
Y -0.0061 0.0065 -0.0060 -0.0002 0.0001 0.0047  
Z -0.0013 0.0013 -0.0015 0.0001 -0.0003 -0.0018

AT. 155 H X -0.0105 -0.0787 -0.0773 -0.0006 -0.0032 0.0245  
Y -0.0065 -0.0233 -0.0218 -0.0001 -0.0009 0.0056

Z 0.0137 -0.0043 -0.0088 -0.0004 -0.0005 0.0108  
AT. 156 H X -0.0105 0.0787 -0.0773 0.0006 -0.0032 -0.0245  
Y -0.0065 0.0233 -0.0218 0.0001 -0.0009 -0.0056  
Z 0.0137 0.0043 -0.0088 0.0004 -0.0005 -0.0108  
AT. 157 O X 0.0003 0.0001 0.0000 -0.0001 -0.0001 -0.0002  
Y -0.0000 -0.0001 0.0000 0.0001 0.0001 -0.0001  
Z -0.0005 -0.0001 0.0000 -0.0001 -0.0001 0.0001  
AT. 158 O X 0.0003 -0.0001 0.0000 0.0001 -0.0001 0.0002  
Y -0.0000 0.0001 0.0000 -0.0001 0.0001 0.0001  
Z -0.0005 0.0001 0.0000 0.0001 -0.0001 -0.0001  
AT. 159 O X -0.0005 -0.0000 0.0000 0.0000 0.0001 0.0001  
Y 0.0000 0.0001 -0.0001 0.0000 0.0001 0.0000  
Z 0.0002 0.0000 -0.0000 0.0001 -0.0001 -0.0002  
AT. 160 O X -0.0005 0.0000 0.0000 -0.0000 0.0001 -0.0001  
Y 0.0000 -0.0001 -0.0001 -0.0000 0.0001 -0.0000  
Z 0.0002 -0.0000 -0.0000 -0.0001 -0.0001 0.0002  
AT. 161 H X 0.0036 0.0003 -0.0007 0.0018 0.0020 0.0007  
Y -0.0017 -0.0004 0.0003 -0.0005 -0.0005 -0.0014  
Z 0.0044 0.0005 -0.0010 0.0027 0.0029 0.0017  
AT. 162 H X 0.0036 -0.0003 -0.0007 -0.0018 0.0020 -0.0007  
Y -0.0017 0.0004 0.0003 0.0005 -0.0005 0.0014  
Z 0.0044 -0.0005 -0.0010 -0.0027 0.0029 -0.0017  
AT. 163 H X -0.0006 0.0002 -0.0000 -0.0000 -0.0002 0.0007  
Y 0.0000 -0.0007 0.0010 -0.0001 -0.0011 0.0013  
Z 0.0005 -0.0001 0.0002 -0.0000 -0.0002 0.0003  
AT. 164 H X -0.0006 -0.0002 -0.0000 0.0000 -0.0002 -0.0007  
Y 0.0000 0.0007 0.0010 0.0001 -0.0011 -0.0013  
Z 0.0005 0.0001 0.0002 0.0000 -0.0002 -0.0003  
AT. 165 O X 0.0002 0.0001 0.0000 -0.0000 0.0000 0.0002  
Y 0.0002 0.0000 -0.0001 -0.0000 -0.0000 0.0003  
Z 0.0002 -0.0000 -0.0001 0.0000 -0.0001 0.0004  
AT. 166 O X 0.0002 -0.0001 0.0000 0.0000 0.0000 -0.0002

Y 0.0002 -0.0000 -0.0001 0.0000 -0.0000 -0.0003  
Z 0.0002 0.0000 -0.0001 -0.0000 -0.0001 -0.0004  
AT. 167 H X 0.0006 -0.0004 -0.0005 -0.0000 0.0001 0.0002  
Y -0.0024 -0.0001 0.0007 0.0003 -0.0002 -0.0023  
Z 0.0008 0.0014 0.0008 -0.0004 -0.0001 0.0020

AT. 168 H X 0.0006 0.0004 -0.0005 0.0000 0.0001 -0.0002  
Y -0.0024 0.0001 0.0007 -0.0003 -0.0002 0.0023  
Z 0.0008 -0.0014 0.0008 0.0004 -0.0001 -0.0020

AT. 169 O X 0.0001 -0.0001 -0.0001 -0.0000 0.0000 -0.0000  
Y -0.0000 0.0000 -0.0000 0.0000 0.0000 -0.0001  
Z -0.0001 -0.0002 0.0001 0.0000 0.0001 -0.0003

AT. 170 O X 0.0001 0.0001 -0.0001 0.0000 0.0000 0.0000  
Y -0.0000 -0.0000 -0.0000 -0.0000 0.0000 0.0001  
Z -0.0001 0.0002 0.0001 -0.0000 0.0001 0.0003

AT. 171 H X 0.0001 0.0000 0.0000 0.0009 -0.0008 0.0015  
Y 0.0004 0.0002 -0.0003 0.0004 -0.0005 0.0013  
Z 0.0005 0.0007 -0.0006 -0.0000 -0.0001 0.0018

AT. 172 H X 0.0001 -0.0000 0.0000 -0.0009 -0.0008 -0.0015  
Y 0.0004 -0.0002 -0.0003 -0.0004 -0.0005 -0.0013  
Z 0.0005 -0.0007 -0.0006 0.0000 -0.0001 -0.0018

FREQ(CM\*\*-1) 1144.12 1144.37 1148.79 1149.19 1150.56 1151.31

AT. 1 I X 0.0002 0.0001 -0.0000 0.0000 0.0000 0.0000  
Y -0.0001 -0.0001 0.0000 -0.0000 -0.0000 -0.0000  
Z -0.0003 -0.0003 0.0000 -0.0000 -0.0001 -0.0000

AT. 2 I X 0.0002 -0.0001 0.0000 0.0000 -0.0000 0.0000  
Y -0.0001 0.0001 -0.0000 -0.0000 0.0000 -0.0000  
Z -0.0003 0.0003 -0.0000 -0.0000 0.0001 -0.0000

AT. 3 I X 0.0000 0.0000 0.0000 -0.0000 -0.0000 0.0000  
Y 0.0001 0.0002 0.0000 -0.0001 -0.0001 -0.0001  
Z -0.0000 -0.0000 -0.0000 0.0000 0.0000 0.0000

AT. 4 I X 0.0000 -0.0000 -0.0000 -0.0000 0.0000 0.0000  
Y 0.0001 -0.0002 -0.0000 -0.0001 0.0001 -0.0001  
Z -0.0000 0.0000 0.0000 0.0000 -0.0000 0.0000

AT. 5 O X -0.0034 -0.0031 0.0002 -0.0006 -0.0007 -0.0001  
Y 0.0027 0.0024 -0.0002 0.0004 0.0007 0.0002  
Z 0.0001 0.0001 -0.0002 -0.0002 0.0000 -0.0000

AT. 6 O X -0.0034 0.0031 -0.0002 -0.0006 0.0007 -0.0001  
Y 0.0027 -0.0024 0.0002 0.0004 -0.0007 0.0002  
Z 0.0001 -0.0001 0.0002 -0.0002 -0.0000 -0.0000

AT. 7 O X 0.0007 0.0014 0.0002 -0.0004 -0.0011 -0.0008  
Y -0.0003 -0.0002 -0.0001 0.0001 0.0001 0.0001  
Z 0.0004 0.0002 0.0000 0.0001 0.0003 0.0002

AT. 8 O X 0.0007 -0.0014 -0.0002 -0.0004 0.0011 -0.0008  
Y -0.0003 0.0002 0.0001 0.0001 -0.0001 0.0001  
Z 0.0004 -0.0002 -0.0000 0.0001 -0.0003 0.0002

AT. 9 N X 0.0032 0.0024 -0.0000 -0.0014 0.0010 0.0007  
Y -0.0022 -0.0019 -0.0000 0.0011 -0.0001 -0.0001  
Z 0.0178 0.0159 -0.0002 0.0030 0.0039 0.0011

AT. 10 N X 0.0032 -0.0024 0.0000 -0.0014 -0.0010 0.0007  
Y -0.0022 0.0019 0.0000 0.0011 0.0001 -0.0001  
Z 0.0178 -0.0159 0.0002 0.0030 -0.0039 0.0011

AT. 11 N X 0.0002 0.0001 0.0002 0.0027 0.0008 -0.0001  
Y 0.0011 -0.0006 -0.0003 0.0002 0.0026 0.0018  
Z 0.0016 0.0046 0.0004 -0.0040 -0.0046 -0.0030

AT. 12 N X 0.0002 -0.0001 -0.0002 0.0027 -0.0008 -0.0001  
Y 0.0011 0.0006 0.0003 0.0002 -0.0026 0.0018  
Z 0.0016 -0.0046 -0.0004 -0.0040 0.0046 -0.0030

AT. 13 C X 0.0020 0.0017 -0.0001 0.0009 0.0008 0.0002  
Y 0.0004 0.0004 0.0001 -0.0004 -0.0004 -0.0003  
Z -0.0004 -0.0000 0.0001 0.0005 0.0003 0.0002

AT. 14 C X 0.0020 -0.0017 0.0001 0.0009 -0.0008 0.0002  
Y 0.0004 -0.0004 -0.0001 -0.0004 0.0004 -0.0003

Z -0.0004 0.0000 -0.0001 0.0005 -0.0003 0.0002  
AT. 15 C X -0.0019 -0.0008 0.0001 -0.0002 -0.0008 -0.0000  
Y -0.0012 -0.0011 0.0001 0.0002 -0.0001 0.0001  
Z -0.0112 -0.0104 0.0002 -0.0015 -0.0025 -0.0006  
AT. 16 C X -0.0019 0.0008 -0.0001 -0.0002 0.0008 -0.0000  
Y -0.0012 0.0011 -0.0001 0.0002 0.0001 0.0001  
Z -0.0112 0.0104 -0.0002 -0.0015 0.0025 -0.0006  
AT. 17 H X 0.1200 0.1103 -0.0018 0.0127 0.0242 0.0041  
Y -0.0169 -0.0180 0.0002 -0.0022 -0.0033 -0.0009  
Z 0.0518 0.0502 -0.0007 0.0061 0.0105 0.0022  
AT. 18 H X 0.1200 -0.1103 0.0018 0.0127 -0.0242 0.0041  
Y -0.0169 0.0180 -0.0002 -0.0022 0.0033 -0.0009  
Z 0.0518 -0.0502 0.0007 0.0061 -0.0105 0.0022  
AT. 19 H X -0.1040 -0.1036 0.0008 -0.0142 -0.0214 -0.0060  
Y 0.0355 0.0324 -0.0004 0.0054 0.0080 0.0020  
Z -0.0319 -0.0324 0.0002 -0.0042 -0.0065 -0.0019  
AT. 20 H X -0.1040 0.1036 -0.0008 -0.0142 0.0214 -0.0060  
Y 0.0355 -0.0324 0.0004 0.0054 -0.0080 0.0020  
Z -0.0319 0.0324 -0.0002 -0.0042 0.0065 -0.0019  
AT. 21 C X 0.0003 -0.0013 -0.0002 0.0010 0.0021 0.0014  
Y -0.0010 -0.0024 -0.0003 0.0011 0.0014 0.0012  
Z -0.0034 -0.0032 -0.0002 0.0010 0.0011 0.0005  
AT. 22 C X 0.0003 0.0013 0.0002 0.0010 -0.0021 0.0014  
Y -0.0010 0.0024 0.0003 0.0011 -0.0014 0.0012  
Z -0.0034 0.0032 0.0002 0.0010 -0.0011 0.0005  
AT. 23 C X 0.0004 0.0024 -0.0000 -0.0017 -0.0023 -0.0016  
Y 0.0015 0.0036 0.0004 -0.0023 -0.0028 -0.0020  
Z 0.0002 -0.0017 -0.0001 0.0015 0.0019 0.0014  
AT. 24 C X 0.0004 -0.0024 0.0000 -0.0017 0.0023 -0.0016  
Y 0.0015 -0.0036 -0.0004 -0.0023 0.0028 -0.0020  
Z 0.0002 0.0017 0.0001 0.0015 -0.0019 0.0014  
AT. 25 H X -0.0257 -0.0541 -0.0050 0.0320 0.0414 0.0296

Y -0.0028 -0.0063 -0.0006 0.0037 0.0049 0.0035  
Z 0.0061 0.0155 0.0018 -0.0093 -0.0117 -0.0083  
AT. 26 H X -0.0257 0.0541 0.0050 0.0320 -0.0414 0.0296  
Y -0.0028 0.0063 0.0006 0.0037 -0.0049 0.0035  
Z 0.0061 -0.0155 -0.0018 -0.0093 0.0117 -0.0083  
AT. 27 H X 0.0093 0.0229 0.0044 -0.0173 -0.0222 -0.0163  
Y -0.0017 -0.0076 -0.0004 0.0045 0.0068 0.0048  
Z -0.0035 -0.0121 -0.0016 0.0086 0.0114 0.0083  
AT. 28 H X 0.0093 -0.0229 -0.0044 -0.0173 0.0222 -0.0163  
Y -0.0017 0.0076 0.0004 0.0045 -0.0068 0.0048  
Z -0.0035 0.0121 0.0016 0.0086 -0.0114 0.0083  
AT. 29 C X -0.0038 -0.0034 0.0000 0.0045 -0.0003 -0.0006  
Y 0.0037 0.0037 0.0001 0.0068 0.0004 -0.0008  
Z -0.0041 -0.0032 0.0001 0.0044 -0.0010 -0.0011  
AT. 30 C X -0.0038 0.0034 -0.0000 0.0045 0.0003 -0.0006  
Y 0.0037 -0.0037 -0.0001 0.0068 -0.0004 -0.0008  
Z -0.0041 0.0032 -0.0001 0.0044 0.0010 -0.0011  
AT. 31 H X 0.0156 0.0140 -0.0003 0.0044 0.0046 0.0013  
Y 0.0052 0.0043 -0.0000 0.0096 0.0015 -0.0003  
Z 0.0113 0.0093 -0.0003 0.0085 0.0040 0.0010  
AT. 32 H X 0.0156 -0.0140 0.0003 0.0044 -0.0046 0.0013  
Y 0.0052 -0.0043 0.0000 0.0096 -0.0015 -0.0003  
Z 0.0113 -0.0093 0.0003 0.0085 -0.0040 0.0010  
AT. 33 H X -0.0515 -0.0456 0.0014 -0.0035 -0.0099 -0.0028  
Y -0.0035 -0.0023 -0.0001 0.0016 -0.0019 -0.0013  
Z -0.0336 -0.0296 0.0010 0.0014 -0.0066 -0.0025  
AT. 34 H X -0.0515 0.0456 -0.0014 -0.0035 0.0099 -0.0028  
Y -0.0035 0.0023 0.0001 0.0016 0.0019 -0.0013  
Z -0.0336 0.0296 -0.0010 0.0014 0.0066 -0.0025  
AT. 35 C X 0.0103 0.0099 -0.0001 -0.0111 -0.0005 0.0004  
Y -0.0034 -0.0036 -0.0004 -0.0134 -0.0001 0.0019  
Z -0.0012 -0.0014 0.0001 -0.0022 -0.0002 0.0003

AT. 36 C X 0.0103 -0.0099 0.0001 -0.0111 0.0005 0.0004  
Y -0.0034 0.0036 0.0004 -0.0134 0.0001 0.0019  
Z -0.0012 0.0014 -0.0001 -0.0022 0.0002 0.0003

AT. 37 C X -0.0047 -0.0051 -0.0000 0.0055 0.0007 0.0003  
Y -0.0020 -0.0010 0.0003 0.0068 -0.0009 -0.0015  
Z 0.0017 0.0005 -0.0003 -0.0030 0.0015 0.0014

AT. 38 C X -0.0047 0.0051 0.0000 0.0055 -0.0007 0.0003  
Y -0.0020 0.0010 -0.0003 0.0068 0.0009 -0.0015  
Z 0.0017 -0.0005 0.0003 -0.0030 -0.0015 0.0014

AT. 39 H X -0.0051 -0.0051 0.0002 0.0019 -0.0003 0.0002  
Y 0.0066 0.0138 0.0010 -0.0041 -0.0111 -0.0078  
Z -0.0024 -0.0060 -0.0004 -0.0007 0.0052 0.0041

AT. 40 H X -0.0051 0.0051 -0.0002 0.0019 0.0003 0.0002  
Y 0.0066 -0.0138 -0.0010 -0.0041 0.0111 -0.0078  
Z -0.0024 0.0060 0.0004 -0.0007 -0.0052 0.0041

AT. 41 H X -0.0020 -0.0022 -0.0000 0.0090 0.0002 -0.0007  
Y 0.0005 -0.0011 -0.0000 0.0051 0.0036 0.0015  
Z -0.0028 -0.0022 -0.0001 -0.0054 -0.0019 -0.0002

AT. 42 H X -0.0020 0.0022 0.0000 0.0090 -0.0002 -0.0007  
Y 0.0005 0.0011 0.0000 0.0051 -0.0036 0.0015  
Z -0.0028 0.0022 0.0001 -0.0054 0.0019 -0.0002

AT. 43 C X 0.0017 0.0018 -0.0002 -0.0044 -0.0010 -0.0001  
Y -0.0033 -0.0030 -0.0001 -0.0077 -0.0011 0.0006  
Z 0.0001 -0.0005 0.0001 0.0043 0.0010 0.0002

AT. 44 C X 0.0017 -0.0018 0.0002 -0.0044 0.0010 -0.0001  
Y -0.0033 0.0030 0.0001 -0.0077 0.0011 0.0006  
Z 0.0001 0.0005 -0.0001 0.0043 -0.0010 0.0002

AT. 45 H X -0.0027 -0.0056 -0.0005 0.0052 0.0069 0.0034  
Y 0.0020 0.0012 -0.0003 -0.0094 0.0010 0.0018  
Z -0.0018 0.0008 0.0005 -0.0010 -0.0069 -0.0035

AT. 46 H X -0.0027 0.0056 0.0005 0.0052 -0.0069 0.0034  
Y 0.0020 -0.0012 0.0003 -0.0094 -0.0010 0.0018



Z -0.0018 -0.0008 -0.0005 -0.0010 0.0069 -0.0035  
AT. 47 H X 0.0012 0.0093 0.0011 -0.0114 -0.0131 -0.0079  
Y -0.0051 -0.0017 0.0005 -0.0072 -0.0043 -0.0024  
Z -0.0013 -0.0098 -0.0010 0.0152 0.0149 0.0081  
AT. 48 H X 0.0012 -0.0093 -0.0011 -0.0114 0.0131 -0.0079  
Y -0.0051 0.0017 -0.0005 -0.0072 0.0043 -0.0024  
Z -0.0013 0.0098 0.0010 0.0152 -0.0149 0.0081  
AT. 49 C X -0.0042 -0.0051 -0.0001 0.0112 0.0022 0.0004  
Y 0.0030 0.0032 0.0002 0.0126 0.0009 -0.0014  
Z -0.0012 -0.0010 -0.0001 0.0016 0.0001 -0.0002  
AT. 50 C X -0.0042 0.0051 0.0001 0.0112 -0.0022 0.0004  
Y 0.0030 -0.0032 -0.0002 0.0126 -0.0009 -0.0014  
Z -0.0012 0.0010 0.0001 0.0016 -0.0001 -0.0002  
AT. 51 C X 0.0050 0.0054 -0.0001 -0.0061 -0.0008 -0.0001  
Y -0.0009 -0.0011 0.0000 -0.0055 -0.0006 0.0005  
Z -0.0050 -0.0045 0.0002 -0.0058 -0.0019 -0.0001  
AT. 52 C X 0.0050 -0.0054 0.0001 -0.0061 0.0008 -0.0001  
Y -0.0009 0.0011 -0.0000 -0.0055 0.0006 0.0005  
Z -0.0050 0.0045 -0.0002 -0.0058 0.0019 -0.0001  
AT. 53 H X 0.0030 0.0043 0.0000 -0.0055 -0.0023 -0.0010  
Y -0.0348 -0.0303 0.0005 -0.0071 -0.0082 -0.0023  
Z -0.0414 -0.0367 0.0006 -0.0090 -0.0084 -0.0019  
AT. 54 H X 0.0030 -0.0043 -0.0000 -0.0055 0.0023 -0.0010  
Y -0.0348 0.0303 -0.0005 -0.0071 0.0082 -0.0023  
Z -0.0414 0.0367 -0.0006 -0.0090 0.0084 -0.0019  
AT. 55 H X -0.0039 -0.0043 -0.0004 -0.0086 -0.0008 0.0009  
Y 0.0175 0.0155 0.0002 -0.0012 0.0038 0.0015  
Z 0.0130 0.0104 0.0002 -0.0018 0.0038 0.0020  
AT. 56 H X -0.0039 0.0043 0.0004 -0.0086 0.0008 0.0009  
Y 0.0175 -0.0155 -0.0002 -0.0012 -0.0038 0.0015  
Z 0.0130 -0.0104 -0.0002 -0.0018 -0.0038 0.0020  
AT. 57 C X -0.0063 -0.0060 0.0001 0.0073 0.0002 -0.0004

Y 0.0009 0.0012 0.0002 0.0092 0.0000 -0.0013  
Z 0.0027 0.0028 -0.0000 0.0012 -0.0000 -0.0004  
AT. 58 C X -0.0063 0.0060 -0.0001 0.0073 -0.0002 -0.0004  
Y 0.0009 -0.0012 -0.0002 0.0092 -0.0000 -0.0013  
Z 0.0027 -0.0028 0.0000 0.0012 0.0000 -0.0004  
AT. 59 H X 0.0110 0.0102 -0.0008 -0.0332 -0.0000 0.0037  
Y -0.0090 -0.0087 0.0004 0.0127 0.0001 -0.0011  
Z -0.0003 -0.0011 -0.0005 -0.0217 -0.0001 0.0028  
AT. 60 H X 0.0110 -0.0102 0.0008 -0.0332 0.0000 0.0037  
Y -0.0090 0.0087 -0.0004 0.0127 -0.0001 -0.0011  
Z -0.0003 0.0011 0.0005 -0.0217 0.0001 0.0028  
AT. 61 H X -0.0140 -0.0145 -0.0003 -0.0135 0.0003 0.0028  
Y 0.0180 0.0172 -0.0004 -0.0193 -0.0004 0.0010  
Z -0.0121 -0.0120 -0.0000 -0.0011 0.0003 0.0010  
AT. 62 H X -0.0140 0.0145 0.0003 -0.0135 -0.0003 0.0028  
Y 0.0180 -0.0172 0.0004 -0.0193 0.0004 0.0010  
Z -0.0121 0.0120 0.0000 -0.0011 -0.0003 0.0010  
AT. 63 H X 0.0014 0.0026 0.0002 0.0230 0.0001 -0.0032  
Y 0.0071 0.0054 -0.0005 -0.0316 -0.0005 0.0038  
Z -0.0100 -0.0091 0.0005 0.0204 0.0004 -0.0019  
AT. 64 H X 0.0014 -0.0026 -0.0002 0.0230 -0.0001 -0.0032  
Y 0.0071 -0.0054 0.0005 -0.0316 0.0005 0.0038  
Z -0.0100 0.0091 -0.0005 0.0204 -0.0004 -0.0019  
AT. 65 C X 0.0024 0.0033 0.0001 -0.0075 -0.0015 -0.0002  
Y -0.0026 -0.0023 -0.0001 -0.0096 -0.0011 0.0008  
Z 0.0019 0.0018 0.0000 -0.0008 -0.0000 -0.0000  
AT. 66 C X 0.0024 -0.0033 -0.0001 -0.0075 0.0015 -0.0002  
Y -0.0026 0.0023 0.0001 -0.0096 0.0011 0.0008  
Z 0.0019 -0.0018 -0.0000 -0.0008 0.0000 -0.0000  
AT. 67 H X -0.0033 -0.0056 -0.0000 0.0279 0.0040 -0.0006  
Y 0.0061 0.0063 0.0002 -0.0038 -0.0006 -0.0006  
Z -0.0014 0.0010 -0.0002 -0.0345 -0.0049 0.0016

AT. 68 H X -0.0033 0.0056 0.0000 0.0279 -0.0040 -0.0006  
Y 0.0061 -0.0063 -0.0002 -0.0038 0.0006 -0.0006  
Z -0.0014 -0.0010 0.0002 -0.0345 0.0049 0.0016

AT. 69 H X 0.0091 0.0091 0.0003 0.0134 0.0011 -0.0020  
Y -0.0037 -0.0055 -0.0001 0.0205 0.0034 -0.0001  
Z -0.0133 -0.0148 -0.0004 0.0033 0.0019 0.0020

AT. 70 H X 0.0091 -0.0091 -0.0003 0.0134 -0.0011 -0.0020  
Y -0.0037 0.0055 0.0001 0.0205 -0.0034 -0.0001  
Z -0.0133 0.0148 0.0004 0.0033 -0.0019 0.0020

AT. 71 H X -0.0092 -0.0083 -0.0003 -0.0140 -0.0013 0.0015  
Y 0.0042 0.0031 0.0002 0.0217 0.0028 -0.0011  
Z 0.0023 0.0000 0.0002 0.0368 0.0053 -0.0012

AT. 72 H X -0.0092 0.0083 0.0003 -0.0140 0.0013 0.0015  
Y 0.0042 -0.0031 -0.0002 0.0217 -0.0028 -0.0011  
Z 0.0023 -0.0000 -0.0002 0.0368 -0.0053 -0.0012

AT. 73 C X 0.0018 0.0013 0.0001 0.0001 0.0004 0.0002  
Y 0.0012 0.0004 -0.0001 0.0009 0.0012 0.0007  
Z 0.0048 0.0051 0.0001 -0.0006 -0.0002 -0.0004

AT. 74 C X 0.0018 -0.0013 -0.0001 0.0001 -0.0004 0.0002  
Y 0.0012 -0.0004 0.0001 0.0009 -0.0012 0.0007  
Z 0.0048 -0.0051 -0.0001 -0.0006 0.0002 -0.0004

AT. 75 H X 0.0019 0.0032 -0.0013 -0.0905 -0.0065 0.0073  
Y -0.0022 -0.0024 0.0009 0.0644 0.0041 -0.0054  
Z 0.0004 0.0028 0.0005 0.0205 -0.0013 -0.0036

AT. 76 H X 0.0019 -0.0032 0.0013 -0.0905 0.0065 0.0073  
Y -0.0022 0.0024 -0.0009 0.0644 -0.0041 -0.0054  
Z 0.0004 -0.0028 -0.0005 0.0205 0.0013 -0.0036

AT. 77 H X -0.0097 -0.0088 0.0012 0.0859 0.0043 -0.0078  
Y 0.0051 0.0048 -0.0009 -0.0602 -0.0036 0.0052  
Z 0.0120 0.0104 -0.0002 -0.0229 0.0007 0.0027

AT. 78 H X -0.0097 0.0088 -0.0012 0.0859 -0.0043 -0.0078  
Y 0.0051 -0.0048 0.0009 -0.0602 0.0036 0.0052

Z 0.0120 -0.0104 0.0002 -0.0229 -0.0007 0.0027  
AT. 79 I X -0.0000 -0.0000 -0.0000 0.0000 -0.0001 0.0000  
Y 0.0000 0.0000 0.0000 0.0000 0.0000 0.0000  
Z 0.0000 0.0000 0.0000 0.0000 0.0000 0.0000  
AT. 80 I X -0.0000 0.0000 0.0000 0.0000 0.0001 0.0000  
Y 0.0000 -0.0000 -0.0000 0.0000 -0.0000 0.0000  
Z 0.0000 -0.0000 -0.0000 0.0000 -0.0000 0.0000  
AT. 81 I X -0.0000 -0.0000 0.0000 -0.0000 0.0001 -0.0000  
Y -0.0000 -0.0000 0.0001 -0.0000 0.0003 -0.0000  
Z 0.0000 0.0000 -0.0000 -0.0000 -0.0001 0.0000  
AT. 82 I X -0.0000 0.0000 -0.0000 -0.0000 -0.0001 -0.0000  
Y -0.0000 0.0000 -0.0001 -0.0000 -0.0003 -0.0000  
Z 0.0000 -0.0000 0.0000 -0.0000 0.0001 0.0000  
AT. 83 O X -0.0001 -0.0001 0.0002 -0.0003 -0.0008 0.0002  
Y 0.0000 0.0001 0.0002 0.0000 -0.0005 0.0003  
Z 0.0000 0.0005 0.0013 -0.0001 -0.0001 0.0010  
AT. 84 O X -0.0001 0.0001 -0.0002 -0.0003 0.0008 0.0002  
Y 0.0000 -0.0001 -0.0002 0.0000 0.0005 0.0003  
Z 0.0000 -0.0005 -0.0013 -0.0001 0.0001 0.0010  
AT. 85 O X 0.0002 0.0004 0.0002 0.0000 -0.0045 0.0013  
Y 0.0000 -0.0000 0.0005 0.0001 -0.0005 0.0005  
Z -0.0000 0.0001 -0.0006 -0.0001 -0.0005 -0.0003  
AT. 86 O X 0.0002 -0.0004 -0.0002 0.0000 0.0045 0.0013  
Y 0.0000 0.0000 -0.0005 0.0001 0.0005 0.0005  
Z -0.0000 -0.0001 0.0006 -0.0001 0.0005 -0.0003  
AT. 87 N X -0.0001 0.0005 -0.0040 -0.0001 0.0019 -0.0046  
Y 0.0003 0.0007 -0.0009 0.0000 -0.0008 -0.0007  
Z -0.0004 -0.0034 -0.0043 -0.0005 -0.0030 -0.0021  
AT. 88 N X -0.0001 -0.0005 0.0040 -0.0001 -0.0019 -0.0046  
Y 0.0003 -0.0007 0.0009 0.0000 0.0008 -0.0007  
Z -0.0004 0.0034 0.0043 -0.0005 0.0030 -0.0021  
AT. 89 N X -0.0000 -0.0004 0.0005 0.0002 0.0008 0.0009

Y 0.0003 0.0006 -0.0024 -0.0002 -0.0086 0.0002  
Z -0.0008 -0.0020 0.0027 0.0001 0.0142 -0.0009  
AT. 90 N X -0.0000 0.0004 -0.0005 0.0002 -0.0008 0.0009  
Y 0.0003 -0.0006 0.0024 -0.0002 0.0086 0.0002  
Z -0.0008 0.0020 -0.0027 0.0001 -0.0142 -0.0009  
AT. 91 C X 0.0001 0.0008 0.0021 0.0002 0.0019 0.0012  
Y -0.0002 -0.0006 -0.0001 -0.0002 0.0005 -0.0001  
Z -0.0000 -0.0001 -0.0016 0.0001 -0.0005 -0.0009  
AT. 92 C X 0.0001 -0.0008 -0.0021 0.0002 -0.0019 0.0012  
Y -0.0002 0.0006 0.0001 -0.0002 -0.0005 -0.0001  
Z -0.0000 0.0001 0.0016 0.0001 0.0005 -0.0009  
AT. 93 C X -0.0003 -0.0004 -0.0013 0.0001 -0.0012 -0.0006  
Y 0.0002 0.0004 -0.0001 0.0002 0.0000 -0.0002  
Z 0.0004 0.0018 0.0020 0.0003 0.0018 0.0007  
AT. 94 C X -0.0003 0.0004 0.0013 0.0001 0.0012 -0.0006  
Y 0.0002 -0.0004 0.0001 0.0002 -0.0000 -0.0002  
Z 0.0004 -0.0018 -0.0020 0.0003 -0.0018 0.0007  
AT. 95 H X 0.0037 0.0147 0.0097 0.0032 0.0049 0.0038  
Y -0.0011 -0.0035 -0.0027 -0.0007 -0.0000 -0.0014  
Z -0.0016 -0.0078 -0.0056 -0.0017 -0.0047 -0.0022  
AT. 96 H X 0.0037 -0.0147 -0.0097 0.0032 -0.0049 0.0038  
Y -0.0011 0.0035 0.0027 -0.0007 0.0000 -0.0014  
Z -0.0016 0.0078 0.0056 -0.0017 0.0047 -0.0022  
AT. 97 H X -0.0005 -0.0149 -0.0119 -0.0024 -0.0057 -0.0040  
Y -0.0010 -0.0010 -0.0024 -0.0002 -0.0033 -0.0010  
Z 0.0001 0.0057 0.0046 0.0009 0.0022 0.0015  
AT. 98 H X -0.0005 0.0149 0.0119 -0.0024 0.0057 -0.0040  
Y -0.0010 0.0010 0.0024 -0.0002 0.0033 -0.0010  
Z 0.0001 -0.0057 -0.0046 0.0009 -0.0022 0.0015  
AT. 99 C X -0.0002 -0.0005 0.0006 0.0001 0.0036 -0.0003  
Y 0.0002 -0.0001 -0.0007 -0.0000 -0.0037 0.0005  
Z 0.0003 0.0009 0.0002 0.0001 -0.0033 0.0007

AT.100 C X -0.0002 0.0005 -0.0006 0.0001 -0.0036 -0.0003  
Y 0.0002 0.0001 0.0007 -0.0000 0.0037 0.0005  
Z 0.0003 -0.0009 -0.0002 0.0001 0.0033 0.0007

AT.101 C X 0.0003 0.0002 -0.0006 -0.0001 -0.0031 0.0002  
Y -0.0005 -0.0007 0.0015 0.0000 0.0097 -0.0011  
Z 0.0003 0.0005 -0.0011 -0.0001 -0.0057 0.0004

AT.102 C X 0.0003 -0.0002 0.0006 -0.0001 0.0031 0.0002  
Y -0.0005 0.0007 -0.0015 0.0000 -0.0097 -0.0011  
Z 0.0003 -0.0005 0.0011 -0.0001 0.0057 0.0004

AT.103 H X -0.0065 -0.0099 0.0199 0.0002 0.1253 -0.0142  
Y 0.0023 0.0035 -0.0074 -0.0001 -0.0454 0.0051  
Z -0.0016 -0.0027 0.0055 0.0002 0.0355 -0.0042

AT.104 H X -0.0065 0.0099 -0.0199 0.0002 -0.1253 -0.0142  
Y 0.0023 -0.0035 0.0074 -0.0001 0.0454 0.0051  
Z -0.0016 0.0027 -0.0055 0.0002 -0.0355 -0.0042

AT.105 H X 0.0034 0.0088 -0.0174 -0.0007 -0.0951 0.0083  
Y 0.0003 -0.0008 0.0024 -0.0000 0.0048 0.0010  
Z 0.0013 0.0023 -0.0050 -0.0003 -0.0297 0.0031

AT.106 H X 0.0034 -0.0088 0.0174 -0.0007 0.0951 0.0083  
Y 0.0003 0.0008 -0.0024 -0.0000 -0.0048 0.0010  
Z 0.0013 -0.0023 0.0050 -0.0003 0.0297 0.0031

AT.107 C X -0.0002 -0.0014 0.0022 -0.0000 0.0004 0.0026  
Y -0.0003 -0.0013 -0.0085 -0.0003 0.0032 -0.0087  
Z 0.0001 0.0007 -0.0036 -0.0000 0.0034 -0.0050

AT.108 C X -0.0002 0.0014 -0.0022 -0.0000 -0.0004 0.0026  
Y -0.0003 0.0013 0.0085 -0.0003 -0.0032 -0.0087  
Z 0.0001 -0.0007 0.0036 -0.0000 -0.0034 -0.0050

AT.109 H X -0.0002 0.0005 -0.0030 0.0000 0.0043 -0.0043  
Y 0.0001 -0.0019 -0.0120 -0.0006 -0.0019 -0.0100  
Z 0.0007 -0.0012 -0.0083 -0.0006 -0.0068 -0.0053

AT.110 H X -0.0002 -0.0005 0.0030 0.0000 -0.0043 -0.0043  
Y 0.0001 0.0019 0.0120 -0.0006 0.0019 -0.0100

Z 0.0007 0.0012 0.0083 -0.0006 0.0068 -0.0053  
AT. 111 H X -0.0013 -0.0081 -0.0136 -0.0016 -0.0021 -0.0093  
Y 0.0005 0.0022 0.0068 0.0005 0.0066 0.0034  
Z 0.0011 0.0072 0.0102 0.0015 0.0055 0.0052  
AT. 112 H X -0.0013 0.0081 0.0136 -0.0016 0.0021 -0.0093  
Y 0.0005 -0.0022 -0.0068 0.0005 -0.0066 0.0034  
Z 0.0011 -0.0072 -0.0102 0.0015 -0.0055 0.0052  
AT. 113 C X 0.0006 0.0025 0.0037 0.0004 -0.0059 0.0032  
Y -0.0003 0.0007 0.0175 0.0007 -0.0055 0.0182  
Z 0.0002 0.0002 -0.0025 -0.0002 0.0006 -0.0023  
AT. 114 C X 0.0006 -0.0025 -0.0037 0.0004 0.0059 0.0032  
Y -0.0003 -0.0007 -0.0175 0.0007 0.0055 0.0182  
Z 0.0002 -0.0002 0.0025 -0.0002 -0.0006 -0.0023  
AT. 115 C X -0.0004 -0.0011 0.0033 -0.0001 0.0036 0.0023  
Y 0.0003 0.0004 -0.0055 -0.0001 0.0032 -0.0068  
Z 0.0001 0.0004 0.0030 0.0001 -0.0057 0.0045  
AT. 116 C X -0.0004 0.0011 -0.0033 -0.0001 -0.0036 0.0023  
Y 0.0003 -0.0004 0.0055 -0.0001 -0.0032 -0.0068  
Z 0.0001 -0.0004 -0.0030 0.0001 0.0057 0.0045  
AT. 117 H X -0.0009 -0.0031 0.0030 -0.0001 0.0110 0.0004  
Y -0.0015 -0.0051 -0.0050 -0.0000 0.0372 -0.0132  
Z 0.0011 0.0036 0.0032 0.0001 -0.0216 0.0081  
AT. 118 H X -0.0009 0.0031 -0.0030 -0.0001 -0.0110 0.0004  
Y -0.0015 0.0051 0.0050 -0.0000 -0.0372 -0.0132  
Z 0.0011 -0.0036 -0.0032 0.0001 0.0216 0.0081  
AT. 119 H X -0.0004 0.0002 0.0028 -0.0005 -0.0048 0.0040  
Y 0.0007 0.0021 -0.0092 -0.0009 -0.0091 -0.0074  
Z -0.0003 -0.0008 0.0065 0.0006 0.0029 0.0059  
AT. 120 H X -0.0004 -0.0002 -0.0028 -0.0005 0.0048 0.0040  
Y 0.0007 -0.0021 0.0092 -0.0009 0.0091 -0.0074  
Z -0.0003 0.0008 -0.0065 0.0006 -0.0029 0.0059  
AT. 121 C X 0.0002 0.0010 -0.0004 0.0000 -0.0021 -0.0002

Y -0.0000 0.0008 0.0085 0.0004 -0.0010 0.0076  
Z 0.0003 0.0005 -0.0038 -0.0002 -0.0018 -0.0032  
AT. 122 C X 0.0002 -0.0010 0.0004 0.0000 0.0021 -0.0002  
Y -0.0000 -0.0008 -0.0085 0.0004 0.0010 0.0076  
Z 0.0003 -0.0005 0.0038 -0.0002 0.0018 -0.0032  
AT. 123 H X 0.0001 -0.0012 0.0036 0.0002 0.0158 -0.0007  
Y 0.0002 0.0012 0.0083 0.0002 -0.0115 0.0102  
Z 0.0000 -0.0006 -0.0028 0.0001 0.0127 -0.0058  
AT. 124 H X 0.0001 0.0012 -0.0036 0.0002 -0.0158 -0.0007  
Y 0.0002 -0.0012 -0.0083 0.0002 0.0115 0.0102  
Z 0.0000 0.0006 0.0028 0.0001 -0.0127 -0.0058  
AT. 125 H X 0.0020 0.0059 -0.0126 -0.0003 -0.0355 -0.0020  
Y -0.0016 -0.0023 0.0166 0.0006 0.0237 0.0085  
Z 0.0018 0.0048 -0.0151 -0.0004 -0.0307 -0.0053  
AT. 126 H X 0.0020 -0.0059 0.0126 -0.0003 0.0355 -0.0020  
Y -0.0016 0.0023 -0.0166 0.0006 -0.0237 0.0085  
Z 0.0018 -0.0048 0.0151 -0.0004 0.0307 -0.0053  
AT. 127 C X -0.0008 -0.0022 0.0117 0.0002 0.0037 0.0095  
Y 0.0003 -0.0005 -0.0136 -0.0005 0.0021 -0.0126  
Z -0.0001 0.0000 0.0026 0.0000 -0.0019 0.0024  
AT. 128 C X -0.0008 0.0022 -0.0117 0.0002 -0.0037 0.0095  
Y 0.0003 0.0005 0.0136 -0.0005 -0.0021 -0.0126  
Z -0.0001 -0.0000 -0.0026 0.0000 0.0019 0.0024  
AT. 129 C X 0.0005 0.0013 -0.0023 0.0001 -0.0025 -0.0016  
Y -0.0004 -0.0005 0.0075 0.0002 -0.0003 0.0069  
Z -0.0002 0.0004 0.0074 0.0003 0.0015 0.0063  
AT. 130 C X 0.0005 -0.0013 0.0023 0.0001 0.0025 -0.0016  
Y -0.0004 0.0005 -0.0075 0.0002 0.0003 0.0069  
Z -0.0002 -0.0004 -0.0074 0.0003 -0.0015 0.0063  
AT. 131 H X 0.0009 0.0046 -0.0020 0.0005 -0.0033 -0.0027  
Y 0.0008 0.0060 0.0053 0.0011 0.0086 0.0010  
Z 0.0009 0.0075 0.0066 0.0013 0.0045 0.0022



AT. 132 H X 0.0009 -0.0046 0.0020 0.0005 0.0033 -0.0027  
Y 0.0008 -0.0060 -0.0053 0.0011 -0.0086 0.0010  
Z 0.0009 -0.0075 -0.0066 0.0013 -0.0045 0.0022

AT. 133 H X 0.0005 -0.0017 -0.0069 -0.0003 0.0003 -0.0052  
Y 0.0002 -0.0028 0.0001 -0.0001 -0.0040 0.0026  
Z 0.0007 -0.0021 -0.0021 -0.0000 -0.0058 0.0013

AT. 134 H X 0.0005 0.0017 0.0069 -0.0003 -0.0003 -0.0052  
Y 0.0002 0.0028 -0.0001 -0.0001 0.0040 0.0026  
Z 0.0007 0.0021 0.0021 -0.0000 0.0058 0.0013

AT. 135 C X -0.0003 -0.0013 -0.0007 -0.0001 0.0028 -0.0003  
Y 0.0003 -0.0001 -0.0115 -0.0003 0.0037 -0.0120  
Z -0.0002 -0.0007 0.0010 -0.0000 0.0008 0.0006

AT. 136 C X -0.0003 0.0013 0.0007 -0.0001 -0.0028 -0.0003  
Y 0.0003 0.0001 0.0115 -0.0003 -0.0037 -0.0120  
Z -0.0002 0.0007 -0.0010 -0.0000 -0.0008 0.0006

AT. 137 H X 0.0013 0.0019 -0.0347 -0.0009 0.0074 -0.0359  
Y 0.0005 0.0013 -0.0021 0.0001 -0.0015 -0.0017  
Z -0.0004 0.0004 0.0282 0.0009 -0.0096 0.0297

AT. 138 H X 0.0013 -0.0019 0.0347 -0.0009 -0.0074 -0.0359  
Y 0.0005 -0.0013 0.0021 0.0001 0.0015 -0.0017  
Z -0.0004 -0.0004 -0.0282 0.0009 0.0096 0.0297

AT. 139 H X -0.0008 -0.0048 -0.0117 -0.0008 0.0113 -0.0126  
Y -0.0007 -0.0023 0.0173 0.0002 -0.0015 0.0186  
Z 0.0008 0.0046 0.0067 0.0006 -0.0088 0.0074

AT. 140 H X -0.0008 0.0048 0.0117 -0.0008 -0.0113 -0.0126  
Y -0.0007 0.0023 -0.0173 0.0002 0.0015 0.0186  
Z 0.0008 -0.0046 -0.0067 0.0006 0.0088 0.0074

AT. 141 H X -0.0007 0.0011 0.0196 0.0003 -0.0083 0.0213  
Y -0.0012 -0.0008 0.0176 0.0002 -0.0041 0.0188  
Z 0.0011 0.0011 -0.0205 -0.0003 0.0038 -0.0219

AT. 142 H X -0.0007 -0.0011 -0.0196 0.0003 0.0083 0.0213  
Y -0.0012 0.0008 -0.0176 0.0002 0.0041 0.0188

Z 0.0011 -0.0011 0.0205 -0.0003 -0.0038 -0.0219  
AT. 143 C X 0.0004 0.0012 -0.0065 -0.0001 -0.0026 -0.0054  
Y -0.0003 0.0004 0.0113 0.0004 -0.0006 0.0109  
Z -0.0001 -0.0006 -0.0017 -0.0001 0.0020 -0.0015  
AT. 144 C X 0.0004 -0.0012 0.0065 -0.0001 0.0026 -0.0054  
Y -0.0003 -0.0004 -0.0113 0.0004 0.0006 0.0109  
Z -0.0001 0.0006 0.0017 -0.0001 -0.0020 -0.0015  
AT. 145 H X -0.0012 -0.0015 0.0277 0.0011 0.0068 0.0273  
Y -0.0000 -0.0012 -0.0079 -0.0004 0.0035 -0.0077  
Z -0.0008 0.0003 0.0272 0.0012 0.0001 0.0267  
AT. 146 H X -0.0012 0.0015 -0.0277 0.0011 -0.0068 0.0273  
Y -0.0000 0.0012 0.0079 -0.0004 -0.0035 -0.0077  
Z -0.0008 -0.0003 -0.0272 0.0012 -0.0001 0.0267  
AT. 147 H X 0.0006 0.0046 0.0049 0.0005 -0.0100 0.0061  
Y 0.0010 0.0010 -0.0242 -0.0009 -0.0019 -0.0213  
Z 0.0008 0.0047 -0.0044 0.0001 -0.0098 -0.0023  
AT. 148 H X 0.0006 -0.0046 -0.0049 0.0005 0.0100 0.0061  
Y 0.0010 -0.0010 0.0242 -0.0009 0.0019 -0.0213  
Z 0.0008 -0.0047 0.0044 0.0001 0.0098 -0.0023  
AT. 149 H X 0.0007 -0.0023 -0.0352 -0.0013 0.0065 -0.0346  
Y 0.0007 0.0001 -0.0181 -0.0006 0.0001 -0.0181  
Z 0.0015 0.0007 -0.0369 -0.0013 -0.0016 -0.0356  
AT. 150 H X 0.0007 0.0023 0.0352 -0.0013 -0.0065 -0.0346  
Y 0.0007 -0.0001 0.0181 -0.0006 -0.0001 -0.0181  
Z 0.0015 -0.0007 0.0369 -0.0013 0.0016 -0.0356  
AT. 151 C X 0.0000 0.0000 -0.0024 -0.0000 0.0005 -0.0024  
Y 0.0002 0.0001 -0.0024 -0.0002 -0.0027 -0.0014  
Z -0.0003 -0.0011 -0.0006 -0.0000 0.0028 -0.0008  
AT. 152 C X 0.0000 -0.0000 0.0024 -0.0000 -0.0005 -0.0024  
Y 0.0002 -0.0001 0.0024 -0.0002 0.0027 -0.0014  
Z -0.0003 0.0011 0.0006 -0.0000 -0.0028 -0.0008  
AT. 153 H X 0.0031 0.0005 -0.1148 -0.0038 0.0191 -0.1131

Y 0.0010 0.0002 -0.0328 -0.0010 0.0057 -0.0328  
Z -0.0004 -0.0014 -0.0022 0.0001 0.0088 -0.0048  
AT. 154 H X 0.0031 -0.0005 0.1148 -0.0038 -0.0191 -0.1131  
Y 0.0010 -0.0002 0.0328 -0.0010 -0.0057 -0.0328  
Z -0.0004 0.0014 0.0022 0.0001 -0.0088 -0.0048  
AT. 155 H X -0.0033 -0.0016 0.0938 0.0030 -0.0144 0.0965  
Y -0.0012 -0.0004 0.0281 0.0009 -0.0034 0.0284  
Z -0.0000 -0.0013 0.0020 -0.0000 -0.0017 0.0039  
AT. 156 H X -0.0033 0.0016 -0.0938 0.0030 0.0144 0.0965  
Y -0.0012 0.0004 -0.0281 0.0009 0.0034 0.0284  
Z -0.0000 0.0013 -0.0020 -0.0000 0.0017 0.0039  
AT. 157 O X -0.0003 -0.0003 0.0002 -0.0001 -0.0000 0.0002  
Y -0.0001 -0.0000 0.0001 -0.0000 -0.0001 0.0000  
Z 0.0001 -0.0000 -0.0001 0.0000 0.0000 -0.0002  
AT. 158 O X -0.0003 0.0003 -0.0002 -0.0001 0.0000 0.0002  
Y -0.0001 0.0000 -0.0001 -0.0000 0.0001 0.0000  
Z 0.0001 0.0000 0.0001 0.0000 -0.0000 -0.0002  
AT. 159 O X -0.0000 0.0001 -0.0000 0.0001 -0.0001 0.0000  
Y 0.0000 0.0001 -0.0000 0.0000 -0.0000 0.0001  
Z 0.0000 0.0002 0.0001 0.0000 0.0001 0.0002  
AT. 160 O X -0.0000 -0.0001 0.0000 0.0001 0.0001 0.0000  
Y 0.0000 -0.0001 0.0000 0.0000 0.0000 0.0001  
Z 0.0000 -0.0002 -0.0001 0.0000 -0.0001 0.0002  
AT. 161 H X 0.0026 0.0028 -0.0004 0.0004 0.0008 0.0001  
Y -0.0006 -0.0004 -0.0001 0.0002 -0.0002 -0.0004  
Z 0.0010 0.0007 0.0005 -0.0008 0.0006 0.0013  
AT. 162 H X 0.0026 -0.0028 0.0004 0.0004 -0.0008 0.0001  
Y -0.0006 0.0004 0.0001 0.0002 0.0002 -0.0004  
Z 0.0010 -0.0007 -0.0005 -0.0008 -0.0006 0.0013  
AT. 163 H X 0.0001 -0.0012 -0.0005 -0.0005 0.0004 -0.0005  
Y 0.0004 -0.0001 -0.0002 -0.0001 0.0006 -0.0024  
Z 0.0000 0.0004 0.0002 0.0003 -0.0003 -0.0001

AT.164 H X 0.0001 0.0012 0.0005 -0.0005 -0.0004 -0.0005  
Y 0.0004 0.0001 0.0002 -0.0001 -0.0006 -0.0024  
Z 0.0000 -0.0004 -0.0002 0.0003 0.0003 -0.0001

AT.165 O X -0.0000 -0.0001 -0.0000 -0.0000 0.0001 -0.0001  
Y -0.0001 -0.0001 -0.0000 0.0000 0.0002 -0.0000  
Z -0.0001 -0.0001 -0.0001 0.0000 -0.0000 -0.0000

AT.166 O X -0.0000 0.0001 0.0000 -0.0000 -0.0001 -0.0001  
Y -0.0001 0.0001 0.0000 0.0000 -0.0002 -0.0000  
Z -0.0001 0.0001 0.0001 0.0000 0.0000 -0.0000

AT.167 H X 0.0003 0.0005 -0.0000 0.0003 -0.0003 0.0000  
Y -0.0004 -0.0004 0.0003 -0.0004 0.0004 0.0001  
Z -0.0008 -0.0005 -0.0001 -0.0005 0.0003 -0.0001

AT.168 H X 0.0003 -0.0005 0.0000 0.0003 0.0003 0.0000  
Y -0.0004 0.0004 -0.0003 -0.0004 -0.0004 0.0001  
Z -0.0008 0.0005 0.0001 -0.0005 -0.0003 -0.0001

AT.169 O X 0.0000 0.0001 0.0000 -0.0000 0.0001 0.0000  
Y 0.0001 0.0000 -0.0000 -0.0000 -0.0002 -0.0000  
Z 0.0001 0.0002 0.0000 -0.0000 -0.0003 0.0000

AT.170 O X 0.0000 -0.0001 -0.0000 -0.0000 -0.0001 0.0000  
Y 0.0001 -0.0000 0.0000 -0.0000 0.0002 -0.0000  
Z 0.0001 -0.0002 -0.0000 -0.0000 0.0003 0.0000

AT.171 H X 0.0005 -0.0011 -0.0009 0.0010 -0.0037 -0.0010  
Y 0.0001 -0.0006 -0.0004 0.0005 -0.0010 -0.0004  
Z -0.0003 -0.0007 0.0002 0.0000 0.0024 0.0002

AT.172 H X 0.0005 0.0011 0.0009 0.0010 0.0037 -0.0010  
Y 0.0001 0.0006 0.0004 0.0005 0.0010 -0.0004  
Z -0.0003 0.0007 -0.0002 0.0000 -0.0024 0.0002

FREQ(CM\*\*-1) 1152.36 1152.97 1153.15 1154.09 1190.51 1190.78

AT. 1 I X 0.0000 0.0000 0.0000 0.0001 0.0000 -0.0000  
Y 0.0000 -0.0000 -0.0000 -0.0000 0.0000 0.0000

Z -0.0000 -0.0000 -0.0000 -0.0001 0.0000 -0.0000  
AT. 2 I X 0.0000 -0.0000 0.0000 -0.0001 0.0000 0.0000  
Y 0.0000 0.0000 -0.0000 0.0000 0.0000 -0.0000  
Z -0.0000 0.0000 -0.0000 0.0001 0.0000 0.0000  
AT. 3 I X -0.0000 -0.0000 -0.0000 0.0000 -0.0000 0.0000  
Y -0.0002 -0.0000 -0.0004 -0.0004 0.0000 -0.0000  
Z 0.0000 0.0000 0.0000 0.0001 -0.0000 -0.0000  
AT. 4 I X -0.0000 0.0000 -0.0000 -0.0000 -0.0000 -0.0000  
Y -0.0002 0.0000 -0.0004 0.0004 0.0000 0.0000  
Z 0.0000 -0.0000 0.0000 -0.0001 -0.0000 0.0000  
AT. 5 O X -0.0001 -0.0005 -0.0004 -0.0012 0.0001 -0.0000  
Y 0.0003 0.0002 0.0008 0.0012 0.0001 -0.0000  
Z -0.0002 -0.0003 0.0002 0.0002 -0.0002 0.0001  
AT. 6 O X -0.0001 0.0005 -0.0004 0.0012 0.0001 0.0000  
Y 0.0003 -0.0002 0.0008 -0.0012 0.0001 0.0000  
Z -0.0002 0.0003 0.0002 -0.0002 -0.0002 -0.0001  
AT. 7 O X -0.0014 0.0001 -0.0036 -0.0036 0.0003 -0.0003  
Y 0.0000 0.0001 0.0004 0.0004 -0.0002 0.0001  
Z 0.0004 -0.0001 0.0006 0.0008 0.0002 -0.0002  
AT. 8 O X -0.0014 -0.0001 -0.0036 0.0036 0.0003 0.0003  
Y 0.0000 -0.0001 0.0004 -0.0004 -0.0002 -0.0001  
Z 0.0004 0.0001 0.0006 -0.0008 0.0002 0.0002  
AT. 9 N X 0.0016 -0.0020 0.0018 0.0024 -0.0018 0.0018  
Y -0.0003 0.0014 0.0004 0.0001 0.0014 -0.0013  
Z 0.0021 0.0027 0.0026 0.0060 0.0004 -0.0005  
AT. 10 N X 0.0016 0.0020 0.0018 -0.0024 -0.0018 -0.0018  
Y -0.0003 -0.0014 0.0004 -0.0001 0.0014 0.0013  
Z 0.0021 -0.0027 0.0026 -0.0060 0.0004 0.0005  
AT. 11 N X 0.0002 0.0030 -0.0001 0.0003 -0.0010 0.0011  
Y 0.0034 -0.0013 0.0071 0.0076 0.0007 -0.0008  
Z -0.0059 -0.0016 -0.0129 -0.0136 0.0003 -0.0004  
AT. 12 N X 0.0002 -0.0030 -0.0001 -0.0003 -0.0010 -0.0011

Y 0.0034 0.0013 0.0071 -0.0076 0.0007 0.0008  
Z -0.0059 0.0016 -0.0129 0.0136 0.0003 0.0004  
AT. 13 C X 0.0003 0.0009 0.0006 0.0015 0.0001 -0.0002  
Y -0.0008 -0.0004 -0.0015 -0.0009 -0.0006 0.0004  
Z 0.0006 0.0004 0.0010 0.0000 0.0004 -0.0001  
AT. 14 C X 0.0003 -0.0009 0.0006 -0.0015 0.0001 0.0002  
Y -0.0008 0.0004 -0.0015 0.0009 -0.0006 -0.0004  
Z 0.0006 -0.0004 0.0010 -0.0000 0.0004 0.0001  
AT. 15 C X 0.0003 -0.0002 0.0000 -0.0016 0.0003 -0.0001  
Y 0.0004 0.0002 0.0004 -0.0001 0.0002 -0.0001  
Z -0.0011 -0.0011 -0.0016 -0.0037 0.0001 -0.0001  
AT. 16 C X 0.0003 0.0002 0.0000 0.0016 0.0003 0.0001  
Y 0.0004 -0.0002 0.0004 0.0001 0.0002 0.0001  
Z -0.0011 0.0011 -0.0016 0.0037 0.0001 0.0001  
AT. 17 H X 0.0045 0.0102 0.0076 0.0356 -0.0026 0.0017  
Y -0.0021 -0.0014 -0.0025 -0.0039 -0.0001 -0.0002  
Z 0.0035 0.0047 0.0049 0.0144 -0.0006 0.0006  
AT. 18 H X 0.0045 -0.0102 0.0076 -0.0356 -0.0026 -0.0017  
Y -0.0021 0.0014 -0.0025 0.0039 -0.0001 0.0002  
Z 0.0035 -0.0047 0.0049 -0.0144 -0.0006 -0.0006  
AT. 19 H X -0.0141 -0.0110 -0.0157 -0.0293 -0.0018 -0.0001  
Y 0.0035 0.0041 0.0054 0.0123 -0.0007 0.0009  
Z -0.0046 -0.0032 -0.0051 -0.0084 -0.0010 0.0002  
AT. 20 H X -0.0141 0.0110 -0.0157 0.0293 -0.0018 0.0001  
Y 0.0035 -0.0041 0.0054 -0.0123 -0.0007 -0.0009  
Z -0.0046 0.0032 -0.0051 0.0084 -0.0010 -0.0002  
AT. 21 C X 0.0026 -0.0001 0.0063 0.0067 -0.0001 0.0003  
Y 0.0024 0.0002 0.0052 0.0053 -0.0000 -0.0000  
Z 0.0015 0.0002 0.0033 0.0031 -0.0001 0.0003  
AT. 22 C X 0.0026 0.0001 0.0063 -0.0067 -0.0001 -0.0003  
Y 0.0024 -0.0002 0.0052 -0.0053 -0.0000 0.0000  
Z 0.0015 -0.0002 0.0033 -0.0031 -0.0001 -0.0003

AT. 23 C X -0.0034 -0.0004 -0.0072 -0.0074 -0.0003 -0.0001  
Y -0.0039 -0.0007 -0.0087 -0.0090 0.0001 -0.0001  
Z 0.0026 0.0004 0.0057 0.0061 0.0000 0.0001

AT. 24 C X -0.0034 0.0004 -0.0072 0.0074 -0.0003 0.0001  
Y -0.0039 0.0007 -0.0087 0.0090 0.0001 0.0001  
Z 0.0026 -0.0004 0.0057 -0.0061 0.0000 -0.0001

AT. 25 H X 0.0585 0.0083 0.1304 0.1349 0.0002 0.0008  
Y 0.0069 0.0009 0.0155 0.0160 0.0002 0.0000  
Z -0.0164 -0.0023 -0.0365 -0.0378 0.0007 -0.0006

AT. 26 H X 0.0585 -0.0083 0.1304 -0.1349 0.0002 -0.0008  
Y 0.0069 -0.0009 0.0155 -0.0160 0.0002 -0.0000  
Z -0.0164 0.0023 -0.0365 0.0378 0.0007 0.0006

AT. 27 H X -0.0284 -0.0046 -0.0679 -0.0724 0.0017 -0.0000  
Y 0.0098 0.0008 0.0207 0.0213 -0.0001 0.0005  
Z 0.0155 0.0022 0.0348 0.0365 -0.0006 0.0003

AT. 28 H X -0.0284 0.0046 -0.0679 0.0724 0.0017 0.0000  
Y 0.0098 -0.0008 0.0207 -0.0213 -0.0001 -0.0005  
Z 0.0155 -0.0022 0.0348 -0.0365 -0.0006 -0.0003

AT. 29 C X -0.0011 0.0049 -0.0011 -0.0012 0.0014 -0.0013  
Y -0.0010 0.0065 -0.0031 -0.0020 -0.0008 0.0006  
Z -0.0020 0.0046 -0.0030 -0.0032 0.0014 -0.0016

AT. 30 C X -0.0011 -0.0049 -0.0011 0.0012 0.0014 0.0013  
Y -0.0010 -0.0065 -0.0031 0.0020 -0.0008 -0.0006  
Z -0.0020 -0.0046 -0.0030 0.0032 0.0014 0.0016

AT. 31 H X 0.0018 0.0048 0.0052 0.0098 0.0069 -0.0073  
Y -0.0002 0.0091 -0.0010 0.0004 -0.0015 0.0018  
Z 0.0016 0.0083 0.0042 0.0076 0.0035 -0.0035

AT. 32 H X 0.0018 -0.0048 0.0052 -0.0098 0.0069 0.0073  
Y -0.0002 -0.0091 -0.0010 -0.0004 -0.0015 -0.0018  
Z 0.0016 -0.0083 0.0042 -0.0076 0.0035 0.0035

AT. 33 H X -0.0050 -0.0043 -0.0063 -0.0151 -0.0052 0.0068  
Y -0.0031 0.0018 -0.0042 -0.0050 0.0019 -0.0024

Z -0.0042 0.0007 -0.0060 -0.0114 -0.0041 0.0051  
AT. 34 H X -0.0050 0.0043 -0.0063 0.0151 -0.0052 -0.0068  
Y -0.0031 -0.0018 -0.0042 0.0050 0.0019 0.0024  
Z -0.0042 -0.0007 -0.0060 0.0114 -0.0041 -0.0051  
AT. 35 C X 0.0002 -0.0099 -0.0017 -0.0012 0.0003 -0.0007  
Y 0.0028 -0.0136 0.0068 0.0048 0.0002 0.0001  
Z 0.0008 -0.0023 0.0006 0.0000 -0.0024 0.0024  
AT. 36 C X 0.0002 0.0099 -0.0017 0.0012 0.0003 0.0007  
Y 0.0028 0.0136 0.0068 -0.0048 0.0002 -0.0001  
Z 0.0008 0.0023 0.0006 -0.0000 -0.0024 -0.0024  
AT. 37 C X 0.0007 0.0041 0.0026 0.0025 0.0005 -0.0005  
Y -0.0024 0.0074 -0.0051 -0.0048 -0.0008 0.0007  
Z 0.0022 -0.0035 0.0050 0.0052 0.0011 -0.0011  
AT. 38 C X 0.0007 -0.0041 0.0026 -0.0025 0.0005 0.0005  
Y -0.0024 -0.0074 -0.0051 0.0048 -0.0008 -0.0007  
Z 0.0022 0.0035 0.0050 -0.0052 0.0011 0.0011  
AT. 39 H X 0.0007 0.0009 0.0016 0.0008 -0.0023 0.0026  
Y -0.0155 0.0011 -0.0330 -0.0337 0.0026 -0.0030  
Z 0.0079 -0.0030 0.0166 0.0167 -0.0023 0.0027  
AT. 40 H X 0.0007 -0.0009 0.0016 -0.0008 -0.0023 -0.0026  
Y -0.0155 -0.0011 -0.0330 0.0337 0.0026 0.0030  
Z 0.0079 0.0030 0.0166 -0.0167 -0.0023 -0.0027  
AT. 41 H X -0.0015 0.0083 -0.0013 -0.0006 0.0028 -0.0031  
Y 0.0035 0.0040 0.0070 0.0081 -0.0055 0.0060  
Z -0.0006 -0.0052 -0.0012 -0.0026 0.0022 -0.0025  
AT. 42 H X -0.0015 -0.0083 -0.0013 0.0006 0.0028 0.0031  
Y 0.0035 -0.0040 0.0070 -0.0081 -0.0055 -0.0060  
Z -0.0006 0.0052 -0.0012 0.0026 0.0022 0.0025  
AT. 43 C X -0.0004 -0.0040 -0.0009 -0.0012 0.0002 -0.0004  
Y 0.0006 -0.0080 0.0021 0.0007 0.0003 -0.0002  
Z 0.0006 0.0042 0.0010 0.0014 -0.0016 0.0017  
AT. 44 C X -0.0004 0.0040 -0.0009 0.0012 0.0002 0.0004



Y 0.0006 0.0080 0.0021 -0.0007 0.0003 0.0002  
Z 0.0006 -0.0042 0.0010 -0.0014 -0.0016 -0.0017  
AT. 45 H X 0.0069 0.0017 0.0163 0.0178 0.0050 -0.0047  
Y 0.0029 -0.0098 0.0056 0.0054 -0.0012 0.0013  
Z -0.0071 0.0019 -0.0149 -0.0168 -0.0034 0.0031  
AT. 46 H X 0.0069 -0.0017 0.0163 -0.0178 0.0050 0.0047  
Y 0.0029 0.0098 0.0056 -0.0054 -0.0012 -0.0013  
Z -0.0071 -0.0019 -0.0149 0.0168 -0.0034 -0.0031  
AT. 47 H X -0.0159 -0.0039 -0.0342 -0.0366 -0.0031 0.0026  
Y -0.0050 -0.0056 -0.0095 -0.0113 0.0020 -0.0017  
Z 0.0168 0.0071 0.0355 0.0387 0.0046 -0.0040  
AT. 48 H X -0.0159 0.0039 -0.0342 0.0366 -0.0031 -0.0026  
Y -0.0050 0.0056 -0.0095 0.0113 0.0020 0.0017  
Z 0.0168 -0.0071 0.0355 -0.0387 0.0046 0.0040  
AT. 49 C X 0.0014 0.0102 0.0036 0.0037 0.0014 -0.0011  
Y -0.0020 0.0130 -0.0046 -0.0026 -0.0013 0.0010  
Z -0.0008 0.0016 0.0002 0.0005 0.0015 -0.0016  
AT. 50 C X 0.0014 -0.0102 0.0036 -0.0037 0.0014 0.0011  
Y -0.0020 -0.0130 -0.0046 0.0026 -0.0013 -0.0010  
Z -0.0008 -0.0016 0.0002 -0.0005 0.0015 0.0016  
AT. 51 C X -0.0008 -0.0058 -0.0017 -0.0017 0.0005 -0.0007  
Y 0.0007 -0.0054 0.0010 0.0004 -0.0005 0.0005  
Z -0.0003 -0.0058 -0.0013 -0.0025 -0.0020 0.0019  
AT. 52 C X -0.0008 0.0058 -0.0017 0.0017 0.0005 0.0007  
Y 0.0007 0.0054 0.0010 -0.0004 -0.0005 -0.0005  
Z -0.0003 0.0058 -0.0013 0.0025 -0.0020 -0.0019  
AT. 53 H X -0.0021 -0.0054 -0.0055 -0.0058 -0.0019 0.0015  
Y -0.0047 -0.0056 -0.0055 -0.0127 0.0033 -0.0028  
Z -0.0042 -0.0071 -0.0024 -0.0107 0.0067 -0.0058  
AT. 54 H X -0.0021 0.0054 -0.0055 0.0058 -0.0019 -0.0015  
Y -0.0047 0.0056 -0.0055 0.0127 0.0033 0.0028  
Z -0.0042 0.0071 -0.0024 0.0107 0.0067 0.0058

AT. 55 H X 0.0009 -0.0079 0.0036 0.0016 0.0035 -0.0032  
Y 0.0031 -0.0022 0.0030 0.0068 -0.0055 0.0057  
Z 0.0042 -0.0030 0.0050 0.0083 -0.0063 0.0066

AT. 56 H X 0.0009 0.0079 0.0036 -0.0016 0.0035 0.0032  
Y 0.0031 0.0022 0.0030 -0.0068 -0.0055 -0.0057  
Z 0.0042 0.0030 0.0050 -0.0083 -0.0063 -0.0066

AT. 57 C X -0.0004 0.0066 0.0003 0.0000 -0.0002 0.0004  
Y -0.0019 0.0092 -0.0043 -0.0033 -0.0001 -0.0000  
Z -0.0007 0.0015 -0.0014 -0.0009 0.0009 -0.0009

AT. 58 C X -0.0004 -0.0066 0.0003 -0.0000 -0.0002 -0.0004  
Y -0.0019 -0.0092 -0.0043 0.0033 -0.0001 0.0000  
Z -0.0007 -0.0015 -0.0014 0.0009 0.0009 0.0009

AT. 59 H X 0.0048 -0.0332 0.0097 0.0083 0.0024 -0.0023  
Y -0.0011 0.0121 -0.0019 -0.0021 -0.0022 0.0022  
Z 0.0044 -0.0219 0.0088 0.0067 -0.0005 0.0006

AT. 60 H X 0.0048 0.0332 0.0097 -0.0083 0.0024 0.0023  
Y -0.0011 -0.0121 -0.0019 0.0021 -0.0022 -0.0022  
Z 0.0044 0.0219 0.0088 -0.0067 -0.0005 -0.0006

AT. 61 H X 0.0050 -0.0137 0.0116 0.0082 -0.0021 0.0026  
Y 0.0006 -0.0154 -0.0008 0.0003 0.0021 -0.0024  
Z 0.0021 -0.0023 0.0059 0.0039 -0.0017 0.0021

AT. 62 H X 0.0050 0.0137 0.0116 -0.0082 -0.0021 -0.0026  
Y 0.0006 0.0154 -0.0008 -0.0003 0.0021 0.0024  
Z 0.0021 0.0023 0.0059 -0.0039 -0.0017 -0.0021

AT. 63 H X -0.0053 0.0240 -0.0091 -0.0067 0.0022 -0.0021  
Y 0.0056 -0.0321 0.0093 0.0074 -0.0008 0.0006  
Z -0.0025 0.0196 -0.0037 -0.0034 -0.0009 0.0009

AT. 64 H X -0.0053 -0.0240 -0.0091 0.0067 0.0022 0.0021  
Y 0.0056 0.0321 0.0093 -0.0074 -0.0008 -0.0006  
Z -0.0025 -0.0196 -0.0037 0.0034 -0.0009 -0.0009

AT. 65 C X -0.0010 -0.0075 -0.0023 -0.0025 -0.0004 0.0004  
Y 0.0009 -0.0104 0.0021 0.0007 0.0005 -0.0004

Z 0.0001 -0.0007 -0.0007 -0.0007 -0.0004 0.0005  
AT. 66 C X -0.0010 0.0075 -0.0023 0.0025 -0.0004 -0.0004  
Y 0.0009 0.0104 0.0021 -0.0007 0.0005 0.0004  
Z 0.0001 0.0007 -0.0007 0.0007 -0.0004 -0.0005  
AT. 67 H X -0.0002 0.0303 0.0022 0.0044 0.0008 -0.0013  
Y -0.0008 -0.0031 -0.0042 -0.0037 -0.0014 0.0015  
Z 0.0010 -0.0378 0.0016 -0.0020 0.0004 -0.0001  
AT. 68 H X -0.0002 -0.0303 0.0022 -0.0044 0.0008 0.0013  
Y -0.0008 0.0031 -0.0042 0.0037 -0.0014 -0.0015  
Z 0.0010 0.0378 0.0016 0.0020 0.0004 0.0001  
AT. 69 H X -0.0026 0.0148 -0.0074 -0.0048 -0.0019 0.0017  
Y 0.0013 0.0200 0.0029 0.0040 0.0007 -0.0007  
Z 0.0041 0.0009 0.0108 0.0090 0.0029 -0.0025  
AT. 70 H X -0.0026 -0.0148 -0.0074 0.0048 -0.0019 -0.0017  
Y 0.0013 -0.0200 0.0029 -0.0040 0.0007 0.0007  
Z 0.0041 -0.0009 0.0108 -0.0090 0.0029 0.0025  
AT. 71 H X 0.0017 -0.0158 0.0058 0.0031 0.0021 -0.0020  
Y -0.0010 0.0240 -0.0022 0.0002 -0.0009 0.0009  
Z -0.0003 0.0400 -0.0003 0.0029 -0.0003 0.0004  
AT. 72 H X 0.0017 0.0158 0.0058 -0.0031 0.0021 0.0020  
Y -0.0010 -0.0240 -0.0022 -0.0002 -0.0009 -0.0009  
Z -0.0003 -0.0400 -0.0003 -0.0029 -0.0003 -0.0004  
AT. 73 C X 0.0006 0.0008 0.0001 0.0004 -0.0014 0.0014  
Y 0.0012 0.0015 0.0027 0.0029 0.0009 -0.0009  
Z -0.0008 -0.0000 -0.0023 -0.0015 0.0005 -0.0005  
AT. 74 C X 0.0006 -0.0008 0.0001 -0.0004 -0.0014 -0.0014  
Y 0.0012 -0.0015 0.0027 -0.0029 0.0009 0.0009  
Z -0.0008 0.0000 -0.0023 0.0015 0.0005 0.0005  
AT. 75 H X 0.0089 -0.0944 0.0180 0.0107 -0.0008 0.0011  
Y -0.0070 0.0653 -0.0135 -0.0083 0.0005 -0.0007  
Z -0.0060 0.0181 -0.0119 -0.0097 0.0004 -0.0006  
AT. 76 H X 0.0089 0.0944 0.0180 -0.0107 -0.0008 -0.0011

Y -0.0070 -0.0653 -0.0135 0.0083 0.0005 0.0007  
Z -0.0060 -0.0181 -0.0119 0.0097 0.0004 0.0006  
AT. 77 H X -0.0106 0.0873 -0.0180 -0.0114 -0.0004 0.0000  
Y 0.0069 -0.0635 0.0119 0.0074 0.0005 -0.0002  
Z 0.0041 -0.0195 0.0056 0.0050 -0.0000 0.0001  
AT. 78 H X -0.0106 -0.0873 -0.0180 0.0114 -0.0004 -0.0000  
Y 0.0069 0.0635 0.0119 -0.0074 0.0005 0.0002  
Z 0.0041 0.0195 0.0056 -0.0050 -0.0000 -0.0001  
AT. 79 I X -0.0000 0.0000 0.0000 0.0000 0.0000 -0.0000  
Y 0.0000 -0.0000 -0.0000 0.0000 -0.0001 0.0000  
Z 0.0000 -0.0000 -0.0000 0.0000 0.0001 -0.0000  
AT. 80 I X -0.0000 -0.0000 0.0000 -0.0000 0.0000 0.0000  
Y 0.0000 0.0000 -0.0000 -0.0000 -0.0001 -0.0000  
Z 0.0000 0.0000 -0.0000 -0.0000 0.0001 0.0000  
AT. 81 I X 0.0001 -0.0000 -0.0001 -0.0000 -0.0000 0.0000  
Y 0.0003 -0.0000 -0.0001 -0.0001 -0.0000 0.0000  
Z -0.0002 0.0000 0.0001 0.0000 -0.0000 0.0000  
AT. 82 I X 0.0001 0.0000 -0.0001 0.0000 -0.0000 -0.0000  
Y 0.0003 0.0000 -0.0001 0.0001 -0.0000 -0.0000  
Z -0.0002 -0.0000 0.0001 -0.0000 -0.0000 -0.0000  
AT. 83 O X -0.0015 0.0000 0.0002 0.0001 0.0017 -0.0016  
Y -0.0005 0.0001 0.0001 0.0001 -0.0002 0.0001  
Z -0.0003 -0.0001 -0.0002 0.0002 0.0021 -0.0018  
AT. 84 O X -0.0015 -0.0000 0.0002 -0.0001 0.0017 0.0016  
Y -0.0005 -0.0001 0.0001 -0.0001 -0.0002 -0.0001  
Z -0.0003 0.0001 -0.0002 -0.0002 0.0021 0.0018  
AT. 85 O X -0.0038 0.0005 0.0014 0.0014 0.0008 -0.0010  
Y -0.0001 0.0001 -0.0001 0.0001 0.0007 -0.0008  
Z -0.0008 0.0000 0.0005 0.0003 -0.0008 0.0009  
AT. 86 O X -0.0038 -0.0005 0.0014 -0.0014 0.0008 0.0010  
Y -0.0001 -0.0001 -0.0001 -0.0001 0.0007 0.0008  
Z -0.0008 -0.0000 0.0005 -0.0003 -0.0008 -0.0009

AT. 87 N X 0.0014 -0.0002 0.0008 -0.0005 -0.0156 0.0156  
Y -0.0002 0.0001 0.0006 0.0005 -0.0057 0.0055  
Z -0.0054 0.0005 0.0019 -0.0009 -0.0016 0.0008

AT. 88 N X 0.0014 0.0002 0.0008 0.0005 -0.0156 -0.0156  
Y -0.0002 -0.0001 0.0006 -0.0005 -0.0057 -0.0055  
Z -0.0054 -0.0005 0.0019 0.0009 -0.0016 -0.0008

AT. 89 N X 0.0009 0.0000 -0.0004 -0.0002 -0.0086 0.0085  
Y -0.0089 0.0010 0.0037 0.0026 -0.0031 0.0034  
Z 0.0136 -0.0015 -0.0063 -0.0051 -0.0015 0.0012

AT. 90 N X 0.0009 -0.0000 -0.0004 0.0002 -0.0086 -0.0085  
Y -0.0089 -0.0010 0.0037 -0.0026 -0.0031 -0.0034  
Z 0.0136 0.0015 -0.0063 0.0051 -0.0015 -0.0012

AT. 91 C X 0.0020 -0.0003 -0.0010 -0.0003 -0.0006 0.0006  
Y -0.0003 -0.0001 -0.0001 -0.0006 0.0013 -0.0011  
Z -0.0010 0.0002 0.0010 0.0000 0.0000 -0.0002

AT. 92 C X 0.0020 0.0003 -0.0010 0.0003 -0.0006 -0.0006  
Y -0.0003 0.0001 -0.0001 0.0006 0.0013 0.0011  
Z -0.0010 -0.0002 0.0010 -0.0000 0.0000 0.0002

AT. 93 C X -0.0002 0.0002 0.0003 0.0004 0.0032 -0.0022  
Y 0.0011 0.0000 -0.0001 0.0002 -0.0017 0.0012  
Z 0.0030 -0.0004 -0.0009 0.0005 -0.0017 0.0018

AT. 94 C X -0.0002 -0.0002 0.0003 -0.0004 0.0032 0.0022  
Y 0.0011 -0.0000 -0.0001 -0.0002 -0.0017 -0.0012  
Z 0.0030 0.0004 -0.0009 -0.0005 -0.0017 -0.0018

AT. 95 H X 0.0242 -0.0013 -0.0053 0.0071 -0.0115 0.0105  
Y -0.0065 0.0002 0.0018 -0.0016 0.0065 -0.0044  
Z -0.0110 0.0011 0.0021 -0.0036 0.0002 -0.0020

AT. 96 H X 0.0242 0.0013 -0.0053 -0.0071 -0.0115 -0.0105  
Y -0.0065 -0.0002 0.0018 0.0016 0.0065 0.0044  
Z -0.0110 -0.0011 0.0021 0.0036 0.0002 0.0020

AT. 97 H X -0.0228 0.0017 0.0067 -0.0081 -0.0196 0.0081  
Y -0.0039 0.0004 0.0013 0.0011 0.0159 -0.0125

Z 0.0084 -0.0007 -0.0025 0.0032 0.0095 -0.0047  
AT. 98 H X -0.0228 -0.0017 0.0067 0.0081 -0.0196 -0.0081  
Y -0.0039 -0.0004 0.0013 -0.0011 0.0159 0.0125  
Z 0.0084 0.0007 -0.0025 -0.0032 0.0095 0.0047  
AT. 99 C X 0.0035 -0.0003 -0.0015 -0.0012 0.0001 -0.0001  
Y -0.0039 0.0004 0.0020 0.0015 0.0005 -0.0006  
Z -0.0022 0.0003 0.0008 0.0010 0.0007 -0.0008  
AT. 100 C X 0.0035 0.0003 -0.0015 0.0012 0.0001 0.0001  
Y -0.0039 -0.0004 0.0020 -0.0015 0.0005 0.0006  
Z -0.0022 -0.0003 0.0008 -0.0010 0.0007 0.0008  
AT. 101 C X -0.0031 0.0003 0.0015 0.0012 0.0003 -0.0005  
Y 0.0092 -0.0011 -0.0041 -0.0032 -0.0011 0.0014  
Z -0.0058 0.0006 0.0026 0.0020 0.0005 -0.0004  
AT. 102 C X -0.0031 -0.0003 0.0015 -0.0012 0.0003 0.0005  
Y 0.0092 0.0011 -0.0041 0.0032 -0.0011 -0.0014  
Z -0.0058 -0.0006 0.0026 -0.0020 0.0005 0.0004  
AT. 103 H X 0.1196 -0.0143 -0.0535 -0.0422 -0.0118 0.0137  
Y -0.0434 0.0052 0.0195 0.0153 0.0041 -0.0048  
Z 0.0334 -0.0038 -0.0147 -0.0117 -0.0027 0.0026  
AT. 104 H X 0.1196 0.0143 -0.0535 0.0422 -0.0118 -0.0137  
Y -0.0434 -0.0052 0.0195 -0.0153 0.0041 0.0048  
Z 0.0334 0.0038 -0.0147 0.0117 -0.0027 -0.0026  
AT. 105 H X -0.0953 0.0110 0.0420 0.0324 0.0047 -0.0021  
Y 0.0058 -0.0007 -0.0027 -0.0017 0.0040 -0.0054  
Z -0.0291 0.0033 0.0129 0.0100 0.0036 -0.0035  
AT. 106 H X -0.0953 -0.0110 0.0420 -0.0324 0.0047 0.0021  
Y 0.0058 0.0007 -0.0027 0.0017 0.0040 0.0054  
Z -0.0291 -0.0033 0.0129 -0.0100 0.0036 0.0035  
AT. 107 C X -0.0004 -0.0000 -0.0009 -0.0008 0.0080 -0.0082  
Y 0.0011 -0.0002 0.0012 -0.0016 0.0031 -0.0031  
Z 0.0032 -0.0004 0.0001 -0.0010 -0.0127 0.0128  
AT. 108 C X -0.0004 0.0000 -0.0009 0.0008 0.0080 0.0082

Y 0.0011 0.0002 0.0012 0.0016 0.0031 0.0031  
Z 0.0032 0.0004 0.0001 0.0010 -0.0127 -0.0128  
AT. 109 H X 0.0012 -0.0005 -0.0004 -0.0008 0.0573 -0.0554  
Y -0.0038 0.0005 0.0035 -0.0002 -0.0056 0.0047  
Z -0.0062 0.0009 0.0041 0.0014 -0.0416 0.0397  
AT. 110 H X 0.0012 0.0005 -0.0004 0.0008 0.0573 0.0554  
Y -0.0038 -0.0005 0.0035 0.0002 -0.0056 -0.0047  
Z -0.0062 -0.0009 0.0041 -0.0014 -0.0416 -0.0397  
AT. 111 H X -0.0109 0.0009 0.0046 -0.0041 -0.0412 0.0407  
Y 0.0084 -0.0011 -0.0037 -0.0013 0.0003 0.0001  
Z 0.0132 -0.0011 -0.0047 0.0026 0.0422 -0.0418  
AT. 112 H X -0.0109 -0.0009 0.0046 0.0041 -0.0412 -0.0407  
Y 0.0084 0.0011 -0.0037 0.0013 0.0003 -0.0001  
Z 0.0132 0.0011 -0.0047 -0.0026 0.0422 0.0418  
AT. 113 C X -0.0033 0.0005 0.0013 0.0031 0.0095 -0.0095  
Y -0.0029 0.0004 -0.0029 0.0023 -0.0015 0.0016  
Z -0.0005 -0.0001 0.0005 -0.0002 0.0162 -0.0157  
AT. 114 C X -0.0033 -0.0005 0.0013 -0.0031 0.0095 0.0095  
Y -0.0029 -0.0004 -0.0029 -0.0023 -0.0015 -0.0016  
Z -0.0005 0.0001 0.0005 0.0002 0.0162 0.0157  
AT. 115 C X 0.0030 -0.0004 -0.0023 -0.0016 0.0030 -0.0030  
Y 0.0028 -0.0004 0.0006 -0.0008 0.0054 -0.0054  
Z -0.0049 0.0006 0.0013 0.0019 -0.0094 0.0094  
AT. 116 C X 0.0030 0.0004 -0.0023 0.0016 0.0030 0.0030  
Y 0.0028 0.0004 0.0006 0.0008 0.0054 0.0054  
Z -0.0049 -0.0006 0.0013 -0.0019 -0.0094 -0.0094  
AT. 117 H X 0.0098 -0.0011 -0.0051 -0.0046 -0.0220 0.0218  
Y 0.0328 -0.0037 -0.0123 -0.0127 -0.0147 0.0150  
Z -0.0189 0.0021 0.0072 0.0079 0.0215 -0.0216  
AT. 118 H X 0.0098 0.0011 -0.0051 0.0046 -0.0220 -0.0218  
Y 0.0328 0.0037 -0.0123 0.0127 -0.0147 -0.0150  
Z -0.0189 -0.0021 0.0072 -0.0079 0.0215 0.0216

AT.119 H X -0.0056 0.0003 -0.0006 0.0001 0.0281 -0.0281  
Y -0.0095 0.0007 0.0044 0.0016 0.0308 -0.0308  
Z 0.0037 -0.0001 -0.0018 0.0002 -0.0197 0.0198

AT.120 H X -0.0056 -0.0003 -0.0006 -0.0001 0.0281 0.0281  
Y -0.0095 -0.0007 0.0044 -0.0016 0.0308 0.0308  
Z 0.0037 0.0001 -0.0018 -0.0002 -0.0197 -0.0198

AT.121 C X -0.0016 0.0002 0.0010 0.0011 0.0034 -0.0032  
Y 0.0006 0.0000 -0.0018 0.0011 -0.0025 0.0026  
Z -0.0021 0.0001 0.0019 0.0006 0.0106 -0.0107

AT.122 C X -0.0016 -0.0002 0.0010 -0.0011 0.0034 0.0032  
Y 0.0006 -0.0000 -0.0018 -0.0011 -0.0025 -0.0026  
Z -0.0021 -0.0001 0.0019 -0.0006 0.0106 0.0107

AT.123 H X 0.0162 -0.0018 -0.0069 -0.0049 0.0427 -0.0446  
Y -0.0089 0.0011 0.0018 0.0041 -0.0100 0.0102  
Z 0.0118 -0.0013 -0.0035 -0.0037 0.0244 -0.0253

AT.124 H X 0.0162 0.0018 -0.0069 0.0049 0.0427 0.0446  
Y -0.0089 -0.0011 0.0018 -0.0041 -0.0100 -0.0102  
Z 0.0118 0.0013 -0.0035 0.0037 0.0244 0.0253

AT.125 H X -0.0344 0.0039 0.0171 0.0127 -0.0310 0.0325  
Y 0.0245 -0.0026 -0.0135 -0.0075 0.0038 -0.0039  
Z -0.0305 0.0034 0.0158 0.0106 -0.0287 0.0301

AT.126 H X -0.0344 -0.0039 0.0171 -0.0127 -0.0310 -0.0325  
Y 0.0245 0.0026 -0.0135 0.0075 0.0038 0.0039  
Z -0.0305 -0.0034 0.0158 -0.0106 -0.0287 -0.0301

AT.127 C X 0.0042 -0.0004 -0.0052 -0.0019 0.0076 -0.0081  
Y -0.0002 -0.0001 0.0029 -0.0015 0.0041 -0.0043  
Z -0.0017 0.0002 -0.0001 0.0004 -0.0133 0.0138

AT.128 C X 0.0042 0.0004 -0.0052 0.0019 0.0076 0.0081  
Y -0.0002 0.0001 0.0029 0.0015 0.0041 0.0043  
Z -0.0017 -0.0002 -0.0001 -0.0004 -0.0133 -0.0138

AT.129 C X -0.0014 0.0002 0.0014 0.0014 0.0075 -0.0073  
Y 0.0004 -0.0000 -0.0021 0.0003 0.0028 -0.0027



Z 0.0024 -0.0003 -0.0026 0.0001 0.0124 -0.0122  
AT. 130 C X -0.0014 -0.0002 0.0014 -0.0014 0.0075 0.0073  
Y 0.0004 0.0000 -0.0021 -0.0003 0.0028 0.0027  
Z 0.0024 0.0003 -0.0026 -0.0001 0.0124 0.0122  
AT. 131 H X 0.0019 0.0002 0.0017 0.0035 -0.0223 0.0228  
Y 0.0136 -0.0011 -0.0035 0.0006 -0.0137 0.0140  
Z 0.0130 -0.0008 -0.0028 0.0029 -0.0362 0.0365  
AT. 132 H X 0.0019 -0.0002 0.0017 -0.0035 -0.0223 -0.0228  
Y 0.0136 0.0011 -0.0035 -0.0006 -0.0137 -0.0140  
Z 0.0130 0.0008 -0.0028 -0.0029 -0.0362 -0.0365  
AT. 133 H X -0.0003 -0.0001 0.0009 -0.0014 0.0344 -0.0358  
Y -0.0036 0.0005 0.0003 0.0001 0.0259 -0.0275  
Z -0.0048 0.0007 0.0015 0.0011 0.0351 -0.0368  
AT. 134 H X -0.0003 0.0001 0.0009 0.0014 0.0344 0.0358  
Y -0.0036 -0.0005 0.0003 -0.0001 0.0259 0.0275  
Z -0.0048 -0.0007 0.0015 -0.0011 0.0351 0.0368  
AT. 135 C X 0.0018 -0.0002 -0.0010 -0.0014 -0.0043 0.0042  
Y 0.0023 -0.0003 0.0021 -0.0017 0.0012 -0.0013  
Z 0.0007 -0.0000 -0.0007 -0.0002 -0.0057 0.0054  
AT. 136 C X 0.0018 0.0002 -0.0010 0.0014 -0.0043 -0.0042  
Y 0.0023 0.0003 0.0021 0.0017 0.0012 0.0013  
Z 0.0007 0.0000 -0.0007 0.0002 -0.0057 -0.0054  
AT. 137 H X 0.0039 -0.0008 0.0078 -0.0035 0.0205 -0.0203  
Y -0.0013 0.0000 0.0015 0.0005 0.0096 -0.0092  
Z -0.0062 0.0008 -0.0046 0.0041 -0.0001 0.0005  
AT. 138 H X 0.0039 0.0008 0.0078 0.0035 0.0205 0.0203  
Y -0.0013 -0.0000 0.0015 -0.0005 0.0096 0.0092  
Z -0.0062 -0.0008 -0.0046 -0.0041 -0.0001 -0.0005  
AT. 139 H X 0.0073 -0.0009 -0.0013 -0.0053 -0.0190 0.0183  
Y -0.0011 0.0002 -0.0052 0.0006 -0.0120 0.0119  
Z -0.0053 0.0007 0.0018 0.0042 0.0180 -0.0175  
AT. 140 H X 0.0073 0.0009 -0.0013 0.0053 -0.0190 -0.0183

Y -0.0011 -0.0002 -0.0052 -0.0006 -0.0120 -0.0119  
Z -0.0053 -0.0007 0.0018 -0.0042 0.0180 0.0175  
AT. 141 H X -0.0067 0.0005 -0.0025 0.0035 0.0159 -0.0151  
Y -0.0034 0.0005 -0.0041 0.0023 -0.0022 0.0023  
Z 0.0030 -0.0005 0.0052 -0.0023 0.0070 -0.0072  
AT. 142 H X -0.0067 -0.0005 -0.0025 -0.0035 0.0159 0.0151  
Y -0.0034 -0.0005 -0.0041 -0.0023 -0.0022 -0.0023  
Z 0.0030 0.0005 0.0052 0.0023 0.0070 0.0072  
AT. 143 C X -0.0031 0.0003 0.0032 0.0012 -0.0029 0.0033  
Y 0.0011 -0.0000 -0.0028 0.0009 -0.0022 0.0022  
Z 0.0014 -0.0002 -0.0003 -0.0009 0.0045 -0.0048  
AT. 144 C X -0.0031 -0.0003 0.0032 -0.0012 -0.0029 -0.0033  
Y 0.0011 0.0000 -0.0028 -0.0009 -0.0022 -0.0022  
Z 0.0014 0.0002 -0.0003 0.0009 0.0045 0.0048  
AT. 145 H X 0.0111 -0.0009 -0.0115 -0.0018 0.0119 -0.0135  
Y 0.0019 -0.0002 0.0003 -0.0021 0.0081 -0.0086  
Z 0.0046 -0.0003 -0.0074 0.0015 -0.0027 0.0023  
AT. 146 H X 0.0111 0.0009 -0.0115 0.0018 0.0119 0.0135  
Y 0.0019 0.0002 0.0003 0.0021 0.0081 0.0086  
Z 0.0046 0.0003 -0.0074 -0.0015 -0.0027 -0.0023  
AT. 147 H X -0.0072 0.0008 0.0035 0.0056 -0.0179 0.0190  
Y -0.0050 0.0004 0.0070 -0.0003 -0.0016 0.0020  
Z -0.0082 0.0009 0.0055 0.0049 -0.0176 0.0186  
AT. 148 H X -0.0072 -0.0008 0.0035 -0.0056 -0.0179 -0.0190  
Y -0.0050 -0.0004 0.0070 0.0003 -0.0016 -0.0020  
Z -0.0082 -0.0009 0.0055 -0.0049 -0.0176 -0.0186  
AT. 149 H X 0.0008 -0.0003 0.0073 -0.0040 0.0190 -0.0199  
Y -0.0025 0.0001 0.0056 -0.0004 0.0021 -0.0020  
Z -0.0069 0.0005 0.0119 -0.0003 0.0002 0.0003  
AT. 150 H X 0.0008 0.0003 0.0073 0.0040 0.0190 0.0199  
Y -0.0025 -0.0001 0.0056 0.0004 0.0021 0.0020  
Z -0.0069 -0.0005 0.0119 0.0003 0.0002 -0.0003

AT.151 C X 0.0002 0.0000 0.0007 -0.0003 -0.0120 0.0120  
Y -0.0029 0.0003 0.0015 0.0008 -0.0027 0.0027  
Z 0.0025 -0.0002 -0.0011 -0.0012 -0.0017 0.0012

AT.152 C X 0.0002 -0.0000 0.0007 0.0003 -0.0120 -0.0120  
Y -0.0029 -0.0003 0.0015 -0.0008 -0.0027 -0.0027  
Z 0.0025 0.0002 -0.0011 0.0012 -0.0017 -0.0012

AT.153 H X 0.0045 -0.0013 0.0261 -0.0098 -0.0024 0.0024  
Y 0.0014 -0.0004 0.0077 -0.0029 -0.0009 0.0010  
Z 0.0075 -0.0008 -0.0020 -0.0035 -0.0028 0.0026

AT.154 H X 0.0045 0.0013 0.0261 0.0098 -0.0024 -0.0024  
Y 0.0014 0.0004 0.0077 0.0029 -0.0009 -0.0010  
Z 0.0075 0.0008 -0.0020 0.0035 -0.0028 -0.0026

AT.155 H X -0.0039 0.0009 -0.0218 0.0074 -0.0096 0.0106  
Y -0.0006 0.0002 -0.0066 0.0020 -0.0036 0.0040  
Z -0.0009 0.0002 -0.0008 0.0003 -0.0001 -0.0006

AT.156 H X -0.0039 -0.0009 -0.0218 -0.0074 -0.0096 -0.0106  
Y -0.0006 -0.0002 -0.0066 -0.0020 -0.0036 -0.0040  
Z -0.0009 -0.0002 -0.0008 -0.0003 -0.0001 0.0006

AT.157 O X -0.0002 -0.0000 -0.0003 0.0001 0.0000 0.0001  
Y -0.0001 -0.0000 -0.0001 -0.0000 0.0000 -0.0000  
Z -0.0001 0.0000 -0.0001 0.0001 0.0001 -0.0001

AT.158 O X -0.0002 0.0000 -0.0003 -0.0001 0.0000 -0.0001  
Y -0.0001 0.0000 -0.0001 0.0000 0.0000 0.0000  
Z -0.0001 -0.0000 -0.0001 -0.0001 0.0001 0.0001

AT.159 O X 0.0002 -0.0000 0.0003 -0.0004 -0.0001 -0.0000  
Y 0.0002 0.0000 0.0001 -0.0001 0.0000 0.0001  
Z 0.0000 0.0000 -0.0000 0.0001 -0.0000 0.0000

AT.160 O X 0.0002 0.0000 0.0003 0.0004 -0.0001 0.0000  
Y 0.0002 -0.0000 0.0001 0.0001 0.0000 -0.0001  
Z 0.0000 -0.0000 -0.0000 -0.0001 -0.0000 -0.0000

AT.161 H X 0.0025 0.0003 0.0018 0.0002 -0.0001 0.0005  
Y 0.0001 -0.0001 0.0003 -0.0007 -0.0002 0.0001

Z 0.0009 0.0000 -0.0006 0.0020 -0.0000 0.0006  
AT.162 H X 0.0025 -0.0003 0.0018 -0.0002 -0.0001 -0.0005  
Y 0.0001 0.0001 0.0003 0.0007 -0.0002 -0.0001  
Z 0.0009 -0.0000 -0.0006 -0.0020 -0.0000 -0.0006  
AT.163 H X -0.0008 0.0002 -0.0023 0.0021 0.0008 -0.0001  
Y -0.0010 0.0002 -0.0005 0.0014 -0.0011 -0.0017  
Z 0.0002 -0.0000 0.0014 -0.0012 -0.0004 -0.0004  
AT.164 H X -0.0008 -0.0002 -0.0023 -0.0021 0.0008 0.0001  
Y -0.0010 -0.0002 -0.0005 -0.0014 -0.0011 0.0017  
Z 0.0002 0.0000 0.0014 0.0012 -0.0004 0.0004  
AT.165 O X -0.0000 0.0000 -0.0000 -0.0000 0.0001 -0.0001  
Y -0.0002 -0.0000 0.0002 -0.0002 -0.0000 0.0000  
Z -0.0001 -0.0001 -0.0000 0.0000 -0.0002 0.0002  
AT.166 O X -0.0000 -0.0000 -0.0000 0.0000 0.0001 0.0001  
Y -0.0002 0.0000 0.0002 0.0002 -0.0000 -0.0000  
Z -0.0001 0.0001 -0.0000 -0.0000 -0.0002 -0.0002  
AT.167 H X -0.0003 0.0003 0.0001 -0.0002 -0.0005 0.0006  
Y 0.0013 -0.0007 -0.0004 0.0006 -0.0003 0.0001  
Z -0.0007 -0.0003 0.0003 -0.0006 0.0024 -0.0026  
AT.168 H X -0.0003 -0.0003 0.0001 0.0002 -0.0005 -0.0006  
Y 0.0013 0.0007 -0.0004 -0.0006 -0.0003 -0.0001  
Z -0.0007 0.0003 0.0003 0.0006 0.0024 0.0026  
AT.169 O X -0.0001 0.0001 0.0001 -0.0001 -0.0000 0.0001  
Y 0.0002 0.0000 -0.0001 0.0001 -0.0001 0.0000  
Z 0.0003 0.0001 -0.0001 0.0001 -0.0000 0.0001  
AT.170 O X -0.0001 -0.0001 0.0001 0.0001 -0.0000 -0.0001  
Y 0.0002 -0.0000 -0.0001 -0.0001 -0.0001 -0.0000  
Z 0.0003 -0.0001 -0.0001 -0.0001 -0.0000 -0.0001  
AT.171 H X 0.0038 -0.0008 -0.0038 0.0030 -0.0009 -0.0003  
Y 0.0011 -0.0005 -0.0012 0.0008 -0.0004 -0.0001  
Z -0.0022 0.0002 0.0014 -0.0014 -0.0001 -0.0002  
AT.172 H X 0.0038 0.0008 -0.0038 -0.0030 -0.0009 0.0003

Y 0.0011 0.0005 -0.0012 -0.0008 -0.0004 0.0001  
Z -0.0022 -0.0002 0.0014 0.0014 -0.0001 0.0002

FREQ(CM\*\*-1) 1192.97 1192.97 1209.33 1211.31 1212.66 1212.81

AT. 1 I X 0.0000 -0.0000 0.0000 -0.0000 -0.0000 -0.0000

Y 0.0000 -0.0000 0.0000 -0.0000 -0.0001 -0.0001

Z 0.0000 -0.0000 -0.0000 0.0000 0.0000 0.0000

AT. 2 I X 0.0000 0.0000 0.0000 0.0000 -0.0000 0.0000

Y 0.0000 0.0000 0.0000 0.0000 -0.0001 0.0001

Z 0.0000 0.0000 -0.0000 -0.0000 0.0000 -0.0000

AT. 3 I X 0.0000 -0.0000 -0.0000 0.0000 0.0000 0.0000

Y 0.0000 -0.0000 -0.0000 0.0000 0.0001 0.0001

Z 0.0000 -0.0000 -0.0000 0.0000 0.0001 0.0001

AT. 4 I X 0.0000 0.0000 -0.0000 -0.0000 0.0000 -0.0000

Y 0.0000 0.0000 -0.0000 -0.0000 0.0001 -0.0001

Z 0.0000 0.0000 -0.0000 -0.0000 0.0001 -0.0001

AT. 5 O X 0.0015 -0.0016 0.0003 -0.0006 -0.0021 -0.0019

Y -0.0007 0.0007 -0.0002 0.0003 0.0008 0.0007

Z -0.0028 0.0028 -0.0004 0.0007 0.0028 0.0025

AT. 6 O X 0.0015 0.0016 0.0003 0.0006 -0.0021 0.0019

Y -0.0007 -0.0007 -0.0002 -0.0003 0.0008 -0.0007

Z -0.0028 -0.0028 -0.0004 -0.0007 0.0028 -0.0025

AT. 7 O X 0.0011 -0.0011 0.0002 0.0002 0.0029 0.0030

Y -0.0010 0.0010 -0.0001 -0.0001 -0.0022 -0.0023

Z 0.0010 -0.0010 0.0001 0.0002 0.0017 0.0017

AT. 8 O X 0.0011 0.0011 0.0002 -0.0002 0.0029 -0.0030

Y -0.0010 -0.0010 -0.0001 0.0001 -0.0022 0.0023

Z 0.0010 0.0010 0.0001 -0.0002 0.0017 -0.0017

AT. 9 N X -0.0117 0.0117 -0.0010 0.0020 0.0128 0.0126

Y 0.0093 -0.0093 0.0008 -0.0016 -0.0079 -0.0078

Z 0.0040 -0.0038 0.0004 -0.0007 -0.0038 -0.0036

AT. 10 N X -0.0117 -0.0117 -0.0010 -0.0020 0.0128 -0.0126  
Y 0.0093 0.0093 0.0008 0.0016 -0.0079 0.0078  
Z 0.0040 0.0038 0.0004 0.0007 -0.0038 0.0036

AT. 11 N X -0.0085 0.0086 0.0008 -0.0023 -0.0143 -0.0141  
Y 0.0059 -0.0059 -0.0006 0.0017 0.0098 0.0096  
Z 0.0029 -0.0030 -0.0003 0.0008 0.0039 0.0040

AT. 12 N X -0.0085 -0.0086 0.0008 0.0023 -0.0143 0.0141  
Y 0.0059 0.0059 -0.0006 -0.0017 0.0098 -0.0096  
Z 0.0029 0.0030 -0.0003 -0.0008 0.0039 -0.0040

AT. 13 C X 0.0005 -0.0003 -0.0005 0.0004 0.0014 0.0011  
Y -0.0012 0.0015 -0.0001 0.0003 0.0011 0.0012  
Z 0.0014 -0.0018 -0.0002 -0.0003 0.0005 0.0008

AT. 14 C X 0.0005 0.0003 -0.0005 -0.0004 0.0014 -0.0011  
Y -0.0012 -0.0015 -0.0001 -0.0003 0.0011 -0.0012  
Z 0.0014 0.0018 -0.0002 0.0003 0.0005 -0.0008

AT. 15 C X -0.0000 -0.0007 0.0014 -0.0012 -0.0038 -0.0035  
Y 0.0010 -0.0011 0.0002 -0.0003 -0.0005 -0.0004  
Z 0.0010 -0.0012 0.0006 -0.0006 -0.0028 -0.0027

AT. 16 C X -0.0000 0.0007 0.0014 0.0012 -0.0038 0.0035  
Y 0.0010 0.0011 0.0002 0.0003 -0.0005 0.0004  
Z 0.0010 0.0012 0.0006 0.0006 -0.0028 0.0027

AT. 17 H X -0.0122 0.0164 -0.0077 0.0068 0.0260 0.0243  
Y 0.0018 -0.0016 -0.0007 0.0005 0.0003 -0.0000  
Z -0.0044 0.0055 -0.0016 0.0013 0.0068 0.0068

AT. 18 H X -0.0122 -0.0164 -0.0077 -0.0068 0.0260 -0.0243  
Y 0.0018 0.0016 -0.0007 -0.0005 0.0003 0.0000  
Z -0.0044 -0.0055 -0.0016 -0.0013 0.0068 -0.0068

AT. 19 H X 0.0017 0.0012 -0.0064 0.0069 0.0133 0.0118  
Y -0.0059 0.0064 -0.0023 0.0019 0.0107 0.0105  
Z -0.0009 0.0021 -0.0026 0.0030 0.0068 0.0061

AT. 20 H X 0.0017 -0.0012 -0.0064 -0.0069 0.0133 -0.0118  
Y -0.0059 -0.0064 -0.0023 -0.0019 0.0107 -0.0105

Z -0.0009 -0.0021 -0.0026 -0.0030 0.0068 -0.0061  
AT. 21 C X -0.0008 0.0008 0.0001 -0.0004 -0.0030 -0.0030  
Y -0.0008 0.0008 0.0005 -0.0005 -0.0021 -0.0021  
Z -0.0007 0.0006 -0.0006 0.0004 0.0016 0.0014  
AT. 22 C X -0.0008 -0.0008 0.0001 0.0004 -0.0030 0.0030  
Y -0.0008 -0.0008 0.0005 0.0005 -0.0021 0.0021  
Z -0.0007 -0.0006 -0.0006 -0.0004 0.0016 -0.0014  
AT. 23 C X 0.0015 -0.0013 -0.0011 0.0014 0.0048 0.0047  
Y 0.0013 -0.0013 -0.0003 0.0004 0.0024 0.0025  
Z -0.0007 0.0007 0.0004 -0.0005 -0.0025 -0.0023  
AT. 24 C X 0.0015 0.0013 -0.0011 -0.0014 0.0048 -0.0047  
Y 0.0013 0.0013 -0.0003 -0.0004 0.0024 -0.0025  
Z -0.0007 -0.0007 0.0004 0.0005 -0.0025 0.0023  
AT. 25 H X -0.0167 0.0164 0.0057 -0.0072 -0.0318 -0.0326  
Y -0.0016 0.0016 0.0007 -0.0008 -0.0036 -0.0035  
Z 0.0022 -0.0027 0.0002 -0.0004 0.0029 0.0028  
AT. 26 H X -0.0167 -0.0164 0.0057 0.0072 -0.0318 0.0326  
Y -0.0016 -0.0016 0.0007 0.0008 -0.0036 0.0035  
Z 0.0022 0.0027 0.0002 0.0004 0.0029 -0.0028  
AT. 27 H X -0.0013 -0.0003 0.0045 -0.0052 -0.0122 -0.0106  
Y -0.0070 0.0065 0.0025 -0.0036 -0.0150 -0.0154  
Z -0.0042 0.0045 0.0006 -0.0008 -0.0074 -0.0079  
AT. 28 H X -0.0013 0.0003 0.0045 0.0052 -0.0122 0.0106  
Y -0.0070 -0.0065 0.0025 0.0036 -0.0150 0.0154  
Z -0.0042 -0.0045 0.0006 0.0008 -0.0074 0.0079  
AT. 29 C X 0.0082 -0.0082 0.0006 -0.0012 -0.0072 -0.0070  
Y -0.0055 0.0057 -0.0005 0.0013 0.0061 0.0063  
Z 0.0108 -0.0107 0.0008 -0.0006 -0.0042 -0.0039  
AT. 30 C X 0.0082 0.0082 0.0006 0.0012 -0.0072 0.0070  
Y -0.0055 -0.0057 -0.0005 -0.0013 0.0061 -0.0063  
Z 0.0108 0.0107 0.0008 0.0006 -0.0042 0.0039  
AT. 31 H X 0.0591 -0.0585 0.0055 -0.0079 -0.0356 -0.0352

Y -0.0150 0.0149 -0.0017 0.0019 0.0081 0.0081  
Z 0.0282 -0.0279 0.0024 -0.0041 -0.0192 -0.0190  
AT. 32 H X 0.0591 0.0585 0.0055 0.0079 -0.0356 0.0352  
Y -0.0150 -0.0149 -0.0017 -0.0019 0.0081 -0.0081  
Z 0.0282 0.0279 0.0024 0.0041 -0.0192 0.0190  
AT. 33 H X -0.0445 0.0433 -0.0053 0.0069 0.0490 0.0485  
Y 0.0155 -0.0152 0.0002 0.0006 0.0009 0.0011  
Z -0.0340 0.0333 -0.0038 0.0053 0.0362 0.0359  
AT. 34 H X -0.0445 -0.0433 -0.0053 -0.0069 0.0490 -0.0485  
Y 0.0155 0.0152 0.0002 -0.0006 0.0009 -0.0011  
Z -0.0340 -0.0333 -0.0038 -0.0053 0.0362 -0.0359  
AT. 35 C X 0.0048 -0.0045 0.0011 -0.0011 -0.0107 -0.0108  
Y -0.0000 -0.0004 -0.0002 -0.0005 0.0005 0.0002  
Z -0.0180 0.0179 -0.0003 -0.0002 -0.0052 -0.0053  
AT. 36 C X 0.0048 0.0045 0.0011 0.0011 -0.0107 0.0108  
Y -0.0000 0.0004 -0.0002 0.0005 0.0005 -0.0002  
Z -0.0180 -0.0179 -0.0003 0.0002 -0.0052 0.0053  
AT. 37 C X 0.0038 -0.0039 -0.0008 0.0018 0.0124 0.0124  
Y -0.0059 0.0059 0.0004 -0.0009 -0.0053 -0.0051  
Z 0.0086 -0.0085 -0.0000 0.0005 0.0033 0.0032  
AT. 38 C X 0.0038 0.0039 -0.0008 -0.0018 0.0124 -0.0124  
Y -0.0059 -0.0059 0.0004 0.0009 -0.0053 0.0051  
Z 0.0086 0.0085 -0.0000 -0.0005 0.0033 -0.0032  
AT. 39 H X -0.0192 0.0188 -0.0003 -0.0009 -0.0042 -0.0042  
Y 0.0220 -0.0220 -0.0023 0.0063 0.0356 0.0356  
Z -0.0194 0.0193 0.0015 -0.0044 -0.0259 -0.0259  
AT. 40 H X -0.0192 -0.0188 -0.0003 0.0009 -0.0042 0.0042  
Y 0.0220 0.0220 -0.0023 -0.0063 0.0356 -0.0356  
Z -0.0194 -0.0193 0.0015 0.0044 -0.0259 0.0259  
AT. 41 H X 0.0223 -0.0220 -0.0006 0.0033 0.0227 0.0228  
Y -0.0421 0.0423 0.0007 -0.0059 -0.0461 -0.0461  
Z 0.0171 -0.0173 -0.0004 0.0030 0.0236 0.0236



AT. 42 H X 0.0223 0.0220 -0.0006 -0.0033 0.0227 -0.0228  
Y -0.0421 -0.0423 0.0007 0.0059 -0.0461 0.0461  
Z 0.0171 0.0173 -0.0004 -0.0030 0.0236 -0.0236

AT. 43 C X 0.0030 -0.0030 -0.0005 0.0012 0.0057 0.0055  
Y 0.0015 -0.0016 0.0003 -0.0008 -0.0037 -0.0038  
Z -0.0123 0.0124 0.0007 -0.0020 -0.0122 -0.0119

AT. 44 C X 0.0030 0.0030 -0.0005 -0.0012 0.0057 -0.0055  
Y 0.0015 0.0016 0.0003 0.0008 -0.0037 0.0038  
Z -0.0123 -0.0124 0.0007 0.0020 -0.0122 0.0119

AT. 45 H X 0.0377 -0.0376 -0.0025 0.0059 0.0392 0.0387  
Y -0.0065 0.0067 -0.0002 -0.0005 -0.0056 -0.0059  
Z -0.0281 0.0277 0.0026 -0.0055 -0.0331 -0.0325

AT. 46 H X 0.0377 0.0376 -0.0025 -0.0059 0.0392 -0.0387  
Y -0.0065 -0.0067 -0.0002 0.0005 -0.0056 0.0059  
Z -0.0281 -0.0277 0.0026 0.0055 -0.0331 0.0325

AT. 47 H X -0.0239 0.0238 0.0028 -0.0067 -0.0464 -0.0459  
Y 0.0097 -0.0100 0.0005 -0.0017 -0.0080 -0.0078  
Z 0.0341 -0.0339 -0.0034 0.0082 0.0563 0.0559

AT. 48 H X -0.0239 -0.0238 0.0028 0.0067 -0.0464 0.0459  
Y 0.0097 0.0100 0.0005 0.0017 -0.0080 0.0078  
Z 0.0341 0.0339 -0.0034 -0.0082 0.0563 -0.0559

AT. 49 C X 0.0096 -0.0098 -0.0008 0.0014 0.0112 0.0114  
Y -0.0079 0.0082 -0.0001 0.0006 0.0004 0.0007  
Z 0.0110 -0.0109 0.0001 0.0001 -0.0041 -0.0041

AT. 50 C X 0.0096 0.0098 -0.0008 -0.0014 0.0112 -0.0114  
Y -0.0079 -0.0082 -0.0001 -0.0006 0.0004 -0.0007  
Z 0.0110 0.0109 0.0001 -0.0001 -0.0041 0.0041

AT. 51 C X 0.0032 -0.0031 0.0008 -0.0014 -0.0097 -0.0096  
Y -0.0034 0.0033 -0.0002 0.0005 0.0035 0.0033  
Z -0.0135 0.0135 -0.0007 0.0013 0.0070 0.0069

AT. 52 C X 0.0032 0.0031 0.0008 0.0014 -0.0097 0.0096  
Y -0.0034 -0.0033 -0.0002 -0.0005 0.0035 -0.0033

Z -0.0135 -0.0135 -0.0007 -0.0013 0.0070 -0.0069  
AT. 53 H X -0.0130 0.0133 0.0002 -0.0001 -0.0055 -0.0053  
Y 0.0185 -0.0191 0.0019 -0.0047 -0.0221 -0.0220  
Z 0.0413 -0.0423 0.0030 -0.0071 -0.0311 -0.0310  
AT. 54 H X -0.0130 -0.0133 0.0002 0.0001 -0.0055 0.0053  
Y 0.0185 0.0191 0.0019 0.0047 -0.0221 0.0220  
Z 0.0413 0.0423 0.0030 0.0071 -0.0311 0.0310  
AT. 55 H X 0.0215 -0.0218 0.0009 -0.0023 -0.0118 -0.0120  
Y -0.0373 0.0377 -0.0028 0.0044 0.0277 0.0273  
Z -0.0433 0.0437 -0.0037 0.0056 0.0360 0.0355  
AT. 56 H X 0.0215 0.0218 0.0009 0.0023 -0.0118 0.0120  
Y -0.0373 -0.0377 -0.0028 -0.0044 0.0277 -0.0273  
Z -0.0433 -0.0437 -0.0037 -0.0056 0.0360 -0.0355  
AT. 57 C X -0.0028 0.0026 -0.0006 0.0007 0.0052 0.0053  
Y 0.0000 0.0001 0.0000 0.0005 0.0020 0.0022  
Z 0.0066 -0.0065 0.0001 0.0001 0.0020 0.0021  
AT. 58 C X -0.0028 -0.0026 -0.0006 -0.0007 0.0052 -0.0053  
Y 0.0000 -0.0001 0.0000 -0.0005 0.0020 -0.0022  
Z 0.0066 0.0065 0.0001 -0.0001 0.0020 -0.0021  
AT. 59 H X 0.0172 -0.0175 0.0007 -0.0016 -0.0033 -0.0044  
Y -0.0163 0.0160 -0.0005 0.0007 0.0002 0.0006  
Z -0.0041 0.0034 0.0002 -0.0011 -0.0061 -0.0066  
AT. 60 H X 0.0172 0.0175 0.0007 0.0016 -0.0033 0.0044  
Y -0.0163 -0.0160 -0.0005 -0.0007 0.0002 -0.0006  
Z -0.0041 -0.0034 0.0002 0.0011 -0.0061 0.0066  
AT. 61 H X -0.0169 0.0167 -0.0005 -0.0005 -0.0013 -0.0012  
Y 0.0166 -0.0164 0.0010 -0.0012 -0.0097 -0.0093  
Z -0.0136 0.0137 -0.0006 -0.0000 0.0024 0.0024  
AT. 62 H X -0.0169 -0.0167 -0.0005 0.0005 -0.0013 0.0012  
Y 0.0166 0.0164 0.0010 0.0012 -0.0097 0.0093  
Z -0.0136 -0.0137 -0.0006 0.0000 0.0024 -0.0024  
AT. 63 H X 0.0173 -0.0169 -0.0001 0.0011 0.0128 0.0137

Y -0.0058 0.0060 0.0005 -0.0015 -0.0140 -0.0150  
Z -0.0077 0.0071 -0.0008 0.0014 0.0085 0.0088  
AT. 64 H X 0.0173 0.0169 -0.0001 -0.0011 0.0128 -0.0137  
Y -0.0058 -0.0060 0.0005 0.0015 -0.0140 0.0150  
Z -0.0077 -0.0071 -0.0008 -0.0014 0.0085 -0.0088  
AT. 65 C X -0.0033 0.0033 0.0004 -0.0008 -0.0053 -0.0055  
Y 0.0029 -0.0031 0.0003 -0.0007 -0.0028 -0.0030  
Z -0.0032 0.0033 -0.0000 -0.0000 0.0016 0.0016  
AT. 66 C X -0.0033 -0.0033 0.0004 0.0008 -0.0053 0.0055  
Y 0.0029 0.0031 0.0003 0.0007 -0.0028 0.0030  
Z -0.0032 -0.0033 -0.0000 0.0000 0.0016 -0.0016  
AT. 67 H X 0.0085 -0.0080 -0.0003 0.0018 0.0048 0.0050  
Y -0.0104 0.0107 -0.0001 -0.0004 -0.0007 -0.0006  
Z -0.0003 -0.0006 0.0007 -0.0023 -0.0079 -0.0084  
AT. 68 H X 0.0085 0.0080 -0.0003 -0.0018 0.0048 -0.0050  
Y -0.0104 -0.0107 -0.0001 0.0004 -0.0007 0.0006  
Z -0.0003 0.0006 0.0007 0.0023 -0.0079 0.0084  
AT. 69 H X -0.0119 0.0124 -0.0003 0.0008 0.0011 0.0019  
Y 0.0067 -0.0064 -0.0009 0.0020 0.0099 0.0109  
Z 0.0203 -0.0206 -0.0005 0.0007 0.0076 0.0076  
AT. 70 H X -0.0119 -0.0124 -0.0003 -0.0008 0.0011 -0.0019  
Y 0.0067 0.0064 -0.0009 -0.0020 0.0099 -0.0109  
Z 0.0203 0.0206 -0.0005 -0.0007 0.0076 -0.0076  
AT. 71 H X 0.0150 -0.0153 0.0003 -0.0006 -0.0066 -0.0066  
Y -0.0060 0.0059 -0.0006 0.0011 0.0092 0.0094  
Z -0.0009 0.0009 -0.0013 0.0027 0.0173 0.0180  
AT. 72 H X 0.0150 0.0153 0.0003 0.0006 -0.0066 0.0066  
Y -0.0060 -0.0059 -0.0006 -0.0011 0.0092 -0.0094  
Z -0.0009 -0.0009 -0.0013 -0.0027 0.0173 -0.0180  
AT. 73 C X -0.0102 0.0103 -0.0000 -0.0002 -0.0013 -0.0014  
Y 0.0063 -0.0063 0.0001 0.0000 0.0003 0.0002  
Z 0.0038 -0.0039 0.0002 -0.0001 0.0016 0.0017

AT. 74 C X -0.0102 -0.0103 -0.0000 0.0002 -0.0013 0.0014  
Y 0.0063 0.0063 0.0001 -0.0000 0.0003 -0.0002  
Z 0.0038 0.0039 0.0002 0.0001 0.0016 -0.0017

AT. 75 H X -0.0062 0.0055 -0.0026 0.0038 0.0221 0.0205  
Y 0.0048 -0.0041 0.0020 -0.0027 -0.0167 -0.0153  
Z 0.0047 -0.0043 0.0011 -0.0009 -0.0048 -0.0041

AT. 76 H X -0.0062 -0.0055 -0.0026 -0.0038 0.0221 -0.0205  
Y 0.0048 0.0041 0.0020 0.0027 -0.0167 0.0153  
Z 0.0047 0.0043 0.0011 0.0009 -0.0048 0.0041

AT. 77 H X -0.0037 0.0040 0.0020 -0.0034 -0.0225 -0.0206  
Y 0.0032 -0.0036 -0.0017 0.0028 0.0172 0.0161  
Z 0.0007 -0.0005 -0.0000 0.0003 0.0052 0.0045

AT. 78 H X -0.0037 -0.0040 0.0020 0.0034 -0.0225 0.0206  
Y 0.0032 0.0036 -0.0017 -0.0028 0.0172 -0.0161  
Z 0.0007 0.0005 -0.0000 -0.0003 0.0052 -0.0045

AT. 79 I X 0.0000 -0.0000 -0.0001 -0.0000 -0.0000 0.0000  
Y -0.0000 -0.0000 0.0002 -0.0001 0.0000 0.0000  
Z 0.0000 -0.0000 -0.0002 0.0001 -0.0000 -0.0000

AT. 80 I X 0.0000 0.0000 -0.0001 0.0000 -0.0000 -0.0000  
Y -0.0000 0.0000 0.0002 0.0001 0.0000 -0.0000  
Z 0.0000 0.0000 -0.0002 -0.0001 -0.0000 0.0000

AT. 81 I X -0.0000 0.0000 0.0000 -0.0000 -0.0000 -0.0000  
Y 0.0000 -0.0000 -0.0000 0.0000 -0.0000 -0.0000  
Z -0.0000 0.0000 -0.0001 0.0001 -0.0000 -0.0000

AT. 82 I X -0.0000 -0.0000 0.0000 0.0000 -0.0000 0.0000  
Y 0.0000 0.0000 -0.0000 -0.0000 -0.0000 0.0000  
Z -0.0000 -0.0000 -0.0001 -0.0001 -0.0000 0.0000

AT. 83 O X -0.0005 0.0004 -0.0001 0.0017 -0.0002 -0.0004  
Y -0.0001 0.0000 0.0010 -0.0004 0.0000 0.0000  
Z -0.0004 0.0003 -0.0012 0.0020 -0.0002 -0.0004

AT. 84 O X -0.0005 -0.0004 -0.0001 -0.0017 -0.0002 0.0004  
Y -0.0001 -0.0000 0.0010 0.0004 0.0000 -0.0000

Z -0.0004 -0.0003 -0.0012 -0.0020 -0.0002 0.0004  
AT. 85 O X -0.0003 0.0002 0.0027 -0.0027 0.0003 0.0005  
Y -0.0001 0.0002 0.0020 -0.0019 0.0002 0.0004  
Z 0.0001 -0.0001 -0.0018 0.0019 -0.0002 -0.0003  
AT. 86 O X -0.0003 -0.0002 0.0027 0.0027 0.0003 -0.0005  
Y -0.0001 -0.0002 0.0020 0.0019 0.0002 -0.0004  
Z 0.0001 0.0001 -0.0018 -0.0019 -0.0002 0.0003  
AT. 87 N X 0.0020 -0.0020 0.0125 -0.0148 0.0011 0.0024  
Y 0.0007 -0.0007 0.0051 -0.0054 0.0004 0.0008  
Z -0.0001 0.0003 0.0041 -0.0025 0.0003 0.0003  
AT. 88 N X 0.0020 0.0020 0.0125 0.0148 0.0011 -0.0024  
Y 0.0007 0.0007 0.0051 0.0054 0.0004 -0.0008  
Z -0.0001 -0.0003 0.0041 0.0025 0.0003 -0.0003  
AT. 89 N X 0.0013 -0.0013 -0.0133 0.0153 -0.0014 -0.0026  
Y 0.0004 -0.0005 -0.0060 0.0063 -0.0005 -0.0009  
Z 0.0004 -0.0003 -0.0016 0.0022 -0.0002 -0.0004  
AT. 90 N X 0.0013 0.0013 -0.0133 -0.0153 -0.0014 0.0026  
Y 0.0004 0.0005 -0.0060 -0.0063 -0.0005 0.0009  
Z 0.0004 0.0003 -0.0016 -0.0022 -0.0002 0.0004  
AT. 91 C X 0.0001 -0.0001 0.0013 -0.0004 0.0001 -0.0000  
Y -0.0000 0.0001 -0.0029 0.0020 -0.0002 -0.0003  
Z 0.0002 -0.0000 -0.0007 0.0003 0.0000 0.0000  
AT. 92 C X 0.0001 0.0001 0.0013 0.0004 0.0001 0.0000  
Y -0.0000 -0.0001 -0.0029 -0.0020 -0.0002 0.0003  
Z 0.0002 0.0000 -0.0007 -0.0003 0.0000 -0.0000  
AT. 93 C X 0.0004 -0.0002 -0.0116 0.0046 -0.0005 -0.0005  
Y 0.0001 -0.0001 0.0042 -0.0022 0.0002 0.0003  
Z 0.0002 -0.0004 0.0026 -0.0022 0.0002 0.0003  
AT. 94 C X 0.0004 0.0002 -0.0116 -0.0046 -0.0005 0.0005  
Y 0.0001 0.0001 0.0042 0.0022 0.0002 -0.0003  
Z 0.0002 0.0004 0.0026 0.0022 0.0002 -0.0003  
AT. 95 H X 0.0023 -0.0030 0.0220 -0.0171 0.0019 0.0029

Y -0.0002 0.0003 -0.0200 0.0099 -0.0011 -0.0014  
Z -0.0014 0.0021 0.0077 0.0002 -0.0001 -0.0004  
AT. 96 H X 0.0023 0.0030 0.0220 0.0171 0.0019 -0.0029  
Y -0.0002 -0.0003 -0.0200 -0.0099 -0.0011 0.0014  
Z -0.0014 -0.0021 0.0077 -0.0002 -0.0001 0.0004  
AT. 97 H X -0.0039 0.0038 0.0824 -0.0264 0.0036 0.0021  
Y 0.0002 0.0001 -0.0398 0.0203 -0.0020 -0.0025  
Z 0.0015 -0.0015 -0.0365 0.0129 -0.0016 -0.0012  
AT. 98 H X -0.0039 -0.0038 0.0824 0.0264 0.0036 -0.0021  
Y 0.0002 -0.0001 -0.0398 -0.0203 -0.0020 0.0025  
Z 0.0015 0.0015 -0.0365 -0.0129 -0.0016 0.0012  
AT. 99 C X 0.0000 -0.0000 -0.0011 0.0012 -0.0002 -0.0002  
Y -0.0002 0.0002 0.0008 -0.0010 0.0000 0.0001  
Z -0.0001 0.0001 0.0002 -0.0006 -0.0001 -0.0000  
AT. 100 C X 0.0000 0.0000 -0.0011 -0.0012 -0.0002 0.0002  
Y -0.0002 -0.0002 0.0008 0.0010 0.0000 -0.0001  
Z -0.0001 -0.0001 0.0002 0.0006 -0.0001 0.0000  
AT. 101 C X -0.0000 0.0001 0.0020 -0.0028 0.0002 0.0002  
Y 0.0003 -0.0003 -0.0023 0.0025 -0.0002 -0.0003  
Z -0.0002 0.0001 0.0009 -0.0015 0.0001 0.0003  
AT. 102 C X -0.0000 -0.0001 0.0020 0.0028 0.0002 -0.0002  
Y 0.0003 0.0003 -0.0023 -0.0025 -0.0002 0.0003  
Z -0.0002 -0.0001 0.0009 0.0015 0.0001 -0.0003  
AT. 103 H X 0.0037 -0.0032 -0.0163 0.0216 -0.0017 -0.0031  
Y -0.0013 0.0011 0.0056 -0.0078 0.0006 0.0011  
Z 0.0013 -0.0007 -0.0007 0.0024 -0.0002 -0.0007  
AT. 104 H X 0.0037 0.0032 -0.0163 -0.0216 -0.0017 0.0031  
Y -0.0013 -0.0011 0.0056 0.0078 0.0006 -0.0011  
Z 0.0013 0.0007 -0.0007 -0.0024 -0.0002 0.0007  
AT. 105 H X -0.0026 0.0006 -0.0075 0.0075 0.0006 0.0015  
Y -0.0004 0.0010 0.0135 -0.0144 0.0009 0.0012  
Z -0.0011 0.0007 0.0046 -0.0052 0.0007 0.0012

AT.106 H X -0.0026 -0.0006 -0.0075 -0.0075 0.0006 -0.0015  
Y -0.0004 -0.0010 0.0135 0.0144 0.0009 -0.0012  
Z -0.0011 -0.0007 0.0046 0.0052 0.0007 -0.0012

AT.107 C X -0.0010 0.0011 -0.0073 0.0091 -0.0007 -0.0015  
Y -0.0005 0.0005 -0.0052 0.0059 -0.0005 -0.0009  
Z 0.0017 -0.0017 0.0026 -0.0041 0.0002 0.0006

AT.108 C X -0.0010 -0.0011 -0.0073 -0.0091 -0.0007 0.0015  
Y -0.0005 -0.0005 -0.0052 -0.0059 -0.0005 0.0009  
Z 0.0017 0.0017 0.0026 0.0041 0.0002 -0.0006

AT.109 H X -0.0077 0.0073 -0.0317 0.0359 -0.0024 -0.0050  
Y 0.0006 -0.0004 0.0068 -0.0068 0.0007 0.0011  
Z 0.0055 -0.0051 0.0302 -0.0335 0.0026 0.0050

AT.110 H X -0.0077 -0.0073 -0.0317 -0.0359 -0.0024 0.0050  
Y 0.0006 0.0004 0.0068 0.0068 0.0007 -0.0011  
Z 0.0055 0.0051 0.0302 0.0335 0.0026 -0.0050

AT.111 H X 0.0046 -0.0044 0.0276 -0.0348 0.0028 0.0056  
Y 0.0006 -0.0007 -0.0163 0.0179 -0.0016 -0.0031  
Z -0.0048 0.0046 -0.0336 0.0417 -0.0034 -0.0068

AT.112 H X 0.0046 0.0044 0.0276 0.0348 0.0028 -0.0056  
Y 0.0006 0.0007 -0.0163 -0.0179 -0.0016 0.0031  
Z -0.0048 -0.0046 -0.0336 -0.0417 -0.0034 0.0068

AT.113 C X -0.0012 0.0011 0.0002 0.0000 -0.0002 -0.0001  
Y 0.0002 -0.0002 0.0066 -0.0074 0.0006 0.0012  
Z -0.0022 0.0021 0.0021 -0.0024 0.0004 0.0007

AT.114 C X -0.0012 -0.0011 0.0002 -0.0000 -0.0002 0.0001  
Y 0.0002 0.0002 0.0066 0.0074 0.0006 -0.0012  
Z -0.0022 -0.0021 0.0021 0.0024 0.0004 -0.0007

AT.115 C X -0.0005 0.0006 0.0094 -0.0105 0.0009 0.0017  
Y -0.0007 0.0007 0.0019 -0.0021 0.0001 0.0003  
Z 0.0012 -0.0013 -0.0056 0.0061 -0.0006 -0.0011

AT.116 C X -0.0005 -0.0006 0.0094 0.0105 0.0009 -0.0017  
Y -0.0007 -0.0007 0.0019 0.0021 0.0001 -0.0003

Z 0.0012 0.0013 -0.0056 -0.0061 -0.0006 0.0011  
AT. 117 H X 0.0031 -0.0029 -0.0165 0.0184 -0.0019 -0.0036  
Y 0.0027 -0.0026 -0.0369 0.0417 -0.0040 -0.0073  
Z -0.0033 0.0032 0.0308 -0.0343 0.0034 0.0062  
AT. 118 H X 0.0031 0.0029 -0.0165 -0.0184 -0.0019 0.0036  
Y 0.0027 0.0026 -0.0369 -0.0417 -0.0040 0.0073  
Z -0.0033 -0.0032 0.0308 0.0343 0.0034 -0.0062  
AT. 119 H X -0.0039 0.0040 0.0297 -0.0338 0.0036 0.0064  
Y -0.0044 0.0045 0.0307 -0.0345 0.0038 0.0066  
Z 0.0029 -0.0030 -0.0220 0.0244 -0.0027 -0.0046  
AT. 120 H X -0.0039 -0.0040 0.0297 0.0338 0.0036 -0.0064  
Y -0.0044 -0.0045 0.0307 0.0345 0.0038 -0.0066  
Z 0.0029 0.0030 -0.0220 -0.0244 -0.0027 0.0046  
AT. 121 C X -0.0004 0.0004 0.0069 -0.0083 0.0008 0.0015  
Y 0.0004 -0.0005 0.0021 -0.0030 0.0002 0.0005  
Z -0.0016 0.0016 0.0103 -0.0106 0.0011 0.0019  
AT. 122 C X -0.0004 -0.0004 0.0069 0.0083 0.0008 -0.0015  
Y 0.0004 0.0005 0.0021 0.0030 0.0002 -0.0005  
Z -0.0016 -0.0016 0.0103 0.0106 0.0011 -0.0019  
AT. 123 H X -0.0064 0.0069 0.0533 -0.0547 0.0053 0.0093  
Y 0.0014 -0.0015 -0.0124 0.0136 -0.0012 -0.0022  
Z -0.0035 0.0037 0.0331 -0.0352 0.0034 0.0060  
AT. 124 H X -0.0064 -0.0069 0.0533 0.0547 0.0053 -0.0093  
Y 0.0014 0.0015 -0.0124 -0.0136 -0.0012 0.0022  
Z -0.0035 -0.0037 0.0331 0.0352 0.0034 -0.0060  
AT. 125 H X 0.0044 -0.0051 -0.0449 0.0466 -0.0047 -0.0081  
Y -0.0004 0.0008 0.0228 -0.0262 0.0021 0.0042  
Z 0.0039 -0.0045 -0.0432 0.0454 -0.0047 -0.0080  
AT. 126 H X 0.0044 0.0051 -0.0449 -0.0466 -0.0047 0.0081  
Y -0.0004 -0.0008 0.0228 0.0262 0.0021 -0.0042  
Z 0.0039 0.0045 -0.0432 -0.0454 -0.0047 0.0080  
AT. 127 C X -0.0012 0.0014 0.0047 -0.0030 0.0005 0.0006



Y -0.0007 0.0007 -0.0042 0.0057 -0.0004 -0.0009  
Z 0.0018 -0.0019 -0.0072 0.0062 -0.0006 -0.0009  
AT. 128 C X -0.0012 -0.0014 0.0047 0.0030 0.0005 -0.0006  
Y -0.0007 -0.0007 -0.0042 -0.0057 -0.0004 0.0009  
Z 0.0018 0.0019 -0.0072 -0.0062 -0.0006 0.0009  
AT. 129 C X -0.0008 0.0007 -0.0095 0.0101 -0.0008 -0.0016  
Y -0.0002 0.0002 -0.0008 0.0007 -0.0001 -0.0002  
Z -0.0015 0.0015 -0.0042 0.0052 -0.0004 -0.0008  
AT. 130 C X -0.0008 -0.0007 -0.0095 -0.0101 -0.0008 0.0016  
Y -0.0002 -0.0002 -0.0008 -0.0007 -0.0001 0.0002  
Z -0.0015 -0.0015 -0.0042 -0.0052 -0.0004 0.0008  
AT. 131 H X 0.0038 -0.0039 0.0030 -0.0088 0.0004 0.0015  
Y 0.0022 -0.0021 0.0177 -0.0243 0.0021 0.0043  
Z 0.0058 -0.0058 0.0218 -0.0319 0.0023 0.0054  
AT. 132 H X 0.0038 0.0039 0.0030 0.0088 0.0004 -0.0015  
Y 0.0022 0.0021 0.0177 0.0243 0.0021 -0.0043  
Z 0.0058 0.0058 0.0218 0.0319 0.0023 -0.0054  
AT. 133 H X -0.0051 0.0053 -0.0117 0.0217 -0.0013 -0.0036  
Y -0.0038 0.0040 -0.0079 0.0160 -0.0009 -0.0027  
Z -0.0050 0.0053 -0.0143 0.0236 -0.0014 -0.0038  
AT. 134 H X -0.0051 -0.0053 -0.0117 -0.0217 -0.0013 0.0036  
Y -0.0038 -0.0040 -0.0079 -0.0160 -0.0009 0.0027  
Z -0.0050 -0.0053 -0.0143 -0.0236 -0.0014 0.0038  
AT. 135 C X 0.0006 -0.0005 0.0011 -0.0011 0.0001 0.0002  
Y -0.0001 0.0001 -0.0046 0.0053 -0.0005 -0.0009  
Z 0.0008 -0.0007 -0.0006 0.0008 -0.0001 -0.0002  
AT. 136 C X 0.0006 0.0005 0.0011 0.0011 0.0001 -0.0002  
Y -0.0001 -0.0001 -0.0046 -0.0053 -0.0005 0.0009  
Z 0.0008 0.0007 -0.0006 -0.0008 -0.0001 0.0002  
AT. 137 H X -0.0027 0.0026 -0.0098 0.0108 -0.0006 -0.0013  
Y -0.0013 0.0011 -0.0003 0.0001 0.0001 0.0001  
Z -0.0001 -0.0001 0.0100 -0.0115 0.0010 0.0019

AT. 138 H X -0.0027 -0.0026 -0.0098 -0.0108 -0.0006 0.0013  
Y -0.0013 -0.0011 -0.0003 -0.0001 0.0001 -0.0001  
Z -0.0001 0.0001 0.0100 0.0115 0.0010 -0.0019

AT. 139 H X 0.0025 -0.0023 -0.0036 0.0046 -0.0004 -0.0009  
Y 0.0015 -0.0014 0.0074 -0.0085 0.0008 0.0015  
Z -0.0023 0.0021 0.0023 -0.0027 0.0002 0.0005

AT. 140 H X 0.0025 0.0023 -0.0036 -0.0046 -0.0004 0.0009  
Y 0.0015 0.0014 0.0074 0.0085 0.0008 -0.0015  
Z -0.0023 -0.0021 0.0023 0.0027 0.0002 -0.0005

AT. 141 H X -0.0025 0.0023 0.0086 -0.0101 0.0012 0.0023  
Y 0.0001 0.0001 0.0059 -0.0068 0.0008 0.0014  
Z -0.0008 0.0006 -0.0082 0.0095 -0.0009 -0.0017

AT. 142 H X -0.0025 -0.0023 0.0086 0.0101 0.0012 -0.0023  
Y 0.0001 -0.0001 0.0059 0.0068 0.0008 -0.0014  
Z -0.0008 -0.0006 -0.0082 -0.0095 -0.0009 0.0017

AT. 143 C X 0.0005 -0.0006 -0.0032 0.0024 -0.0003 -0.0004  
Y 0.0004 -0.0003 0.0038 -0.0047 0.0004 0.0008  
Z -0.0006 0.0007 0.0031 -0.0026 0.0002 0.0004

AT. 144 C X 0.0005 0.0006 -0.0032 -0.0024 -0.0003 0.0004  
Y 0.0004 0.0003 0.0038 0.0047 0.0004 -0.0008  
Z -0.0006 -0.0007 0.0031 0.0026 0.0002 -0.0004

AT. 145 H X -0.0015 0.0019 0.0193 -0.0173 0.0017 0.0028  
Y -0.0012 0.0013 0.0028 -0.0010 0.0001 0.0001  
Z 0.0005 -0.0004 0.0104 -0.0115 0.0011 0.0019

AT. 146 H X -0.0015 -0.0019 0.0193 0.0173 0.0017 -0.0028  
Y -0.0012 -0.0013 0.0028 0.0010 0.0001 -0.0001  
Z 0.0005 0.0004 0.0104 0.0115 0.0011 -0.0019

AT. 147 H X 0.0027 -0.0030 -0.0057 0.0018 -0.0005 -0.0003  
Y 0.0002 -0.0003 -0.0092 0.0101 -0.0009 -0.0017  
Z 0.0027 -0.0029 -0.0082 0.0051 -0.0007 -0.0009

AT. 148 H X 0.0027 0.0030 -0.0057 -0.0018 -0.0005 0.0003  
Y 0.0002 0.0003 -0.0092 -0.0101 -0.0009 0.0017

Z 0.0027 0.0029 -0.0082 -0.0051 -0.0007 0.0009  
AT. 149 H X -0.0028 0.0029 0.0006 0.0023 -0.0001 -0.0005  
Y -0.0004 0.0003 -0.0037 0.0037 -0.0003 -0.0006  
Z -0.0001 -0.0001 -0.0117 0.0116 -0.0011 -0.0020  
AT. 150 H X -0.0028 -0.0029 0.0006 -0.0023 -0.0001 0.0005  
Y -0.0004 -0.0003 -0.0037 -0.0037 -0.0003 0.0006  
Z -0.0001 0.0001 -0.0117 -0.0116 -0.0011 0.0020  
AT. 151 C X 0.0016 -0.0016 -0.0023 0.0015 -0.0002 -0.0003  
Y 0.0003 -0.0003 -0.0004 0.0003 -0.0000 -0.0000  
Z 0.0002 -0.0001 0.0023 -0.0015 0.0001 0.0002  
AT. 152 C X 0.0016 0.0016 -0.0023 -0.0015 -0.0002 0.0003  
Y 0.0003 0.0003 -0.0004 -0.0003 -0.0000 0.0000  
Z 0.0002 0.0001 0.0023 0.0015 0.0001 -0.0002  
AT. 153 H X 0.0000 0.0000 0.0187 -0.0244 0.0022 0.0041  
Y -0.0000 -0.0001 0.0050 -0.0069 0.0006 0.0012  
Z 0.0003 -0.0003 0.0018 -0.0020 0.0002 0.0002  
AT. 154 H X 0.0000 -0.0000 0.0187 0.0244 0.0022 -0.0041  
Y -0.0000 0.0001 0.0050 0.0069 0.0006 -0.0012  
Z 0.0003 0.0003 0.0018 0.0020 0.0002 -0.0002  
AT. 155 H X 0.0019 -0.0020 -0.0285 0.0322 -0.0028 -0.0054  
Y 0.0007 -0.0007 -0.0089 0.0095 -0.0009 -0.0016  
Z -0.0001 0.0002 0.0021 0.0000 0.0001 -0.0001  
AT. 156 H X 0.0019 0.0020 -0.0285 -0.0322 -0.0028 0.0054  
Y 0.0007 0.0007 -0.0089 -0.0095 -0.0009 0.0016  
Z -0.0001 -0.0002 0.0021 -0.0000 0.0001 0.0001  
AT. 157 O X -0.0001 0.0001 -0.0000 0.0000 0.0001 0.0001  
Y 0.0001 -0.0001 0.0000 -0.0000 -0.0002 -0.0001  
Z -0.0001 0.0001 0.0000 0.0001 0.0001 0.0000  
AT. 158 O X -0.0001 -0.0001 -0.0000 -0.0000 0.0001 -0.0001  
Y 0.0001 0.0001 0.0000 0.0000 -0.0002 0.0001  
Z -0.0001 -0.0001 0.0000 -0.0001 0.0001 -0.0000  
AT. 159 O X 0.0001 -0.0001 0.0001 -0.0001 -0.0001 -0.0000

Y 0.0001 -0.0001 0.0000 0.0000 0.0001 -0.0001  
Z -0.0000 -0.0001 -0.0000 -0.0000 -0.0001 0.0001  
AT.160 O X 0.0001 0.0001 0.0001 0.0001 -0.0001 0.0000  
Y 0.0001 0.0001 0.0000 -0.0000 0.0001 0.0001  
Z -0.0000 0.0001 -0.0000 0.0000 -0.0001 -0.0001  
AT.161 H X 0.0023 -0.0022 -0.0007 -0.0009 -0.0008 -0.0030  
Y -0.0008 0.0007 0.0002 -0.0001 0.0008 0.0010  
Z 0.0036 -0.0032 0.0000 -0.0008 -0.0026 -0.0039  
AT.162 H X 0.0023 0.0022 -0.0007 0.0009 -0.0008 0.0030  
Y -0.0008 -0.0007 0.0002 0.0001 0.0008 -0.0010  
Z 0.0036 0.0032 0.0000 0.0008 -0.0026 0.0039  
AT.163 H X -0.0003 0.0002 0.0007 0.0009 0.0002 0.0001  
Y -0.0001 0.0011 -0.0010 -0.0002 -0.0008 0.0014  
Z 0.0001 0.0001 -0.0007 -0.0003 -0.0002 0.0002  
AT.164 H X -0.0003 -0.0002 0.0007 -0.0009 0.0002 -0.0001  
Y -0.0001 -0.0011 -0.0010 0.0002 -0.0008 -0.0014  
Z 0.0001 -0.0001 -0.0007 0.0003 -0.0002 -0.0002  
AT.165 O X -0.0001 0.0001 -0.0002 0.0001 0.0000 0.0000  
Y 0.0001 -0.0000 0.0001 -0.0000 0.0000 -0.0001  
Z 0.0000 0.0001 0.0002 -0.0002 0.0001 0.0000  
AT.166 O X -0.0001 -0.0001 -0.0002 -0.0001 0.0000 -0.0000  
Y 0.0001 0.0000 0.0001 0.0000 0.0000 0.0001  
Z 0.0000 -0.0001 0.0002 0.0002 0.0001 -0.0000  
AT.167 H X 0.0004 -0.0004 0.0008 -0.0007 -0.0001 -0.0001  
Y -0.0004 0.0006 -0.0006 -0.0000 0.0004 0.0005  
Z -0.0001 0.0004 -0.0025 0.0027 -0.0003 -0.0008  
AT.168 H X 0.0004 0.0004 0.0008 0.0007 -0.0001 0.0001  
Y -0.0004 -0.0006 -0.0006 0.0000 0.0004 -0.0005  
Z -0.0001 -0.0004 -0.0025 -0.0027 -0.0003 0.0008  
AT.169 O X 0.0000 -0.0000 0.0001 -0.0000 0.0000 -0.0000  
Y -0.0000 -0.0000 0.0001 -0.0001 -0.0000 0.0000  
Z -0.0000 -0.0000 0.0001 -0.0000 0.0000 0.0000

AT.170 O X 0.0000 0.0000 0.0001 0.0000 0.0000 0.0000

Y -0.0000 0.0000 0.0001 0.0001 -0.0000 -0.0000

Z -0.0000 0.0000 0.0001 0.0000 0.0000 -0.0000

AT.171 H X 0.0003 0.0003 -0.0006 -0.0012 -0.0003 0.0006

Y 0.0002 0.0000 -0.0003 -0.0007 -0.0002 0.0002

Z -0.0001 -0.0002 -0.0000 0.0000 0.0002 -0.0001

AT.172 H X 0.0003 -0.0003 -0.0006 0.0012 -0.0003 -0.0006

Y 0.0002 -0.0000 -0.0003 0.0007 -0.0002 -0.0002

Z -0.0001 0.0002 -0.0000 -0.0000 0.0002 0.0001

FREQ(CM\*\*-1) 1218.36 1218.60 1220.03 1220.10 1224.43 1228.59

AT. 1 I X -0.0000 0.0001 0.0001 0.0000 -0.0000 -0.0002

Y -0.0000 0.0002 0.0001 0.0000 -0.0001 -0.0004

Z 0.0000 -0.0001 -0.0001 0.0000 0.0000 0.0001

AT. 2 I X -0.0000 -0.0001 0.0001 -0.0000 -0.0000 0.0002

Y -0.0000 -0.0002 0.0001 -0.0000 -0.0001 0.0004

Z 0.0000 0.0001 -0.0001 -0.0000 0.0000 -0.0001

AT. 3 I X 0.0000 -0.0000 -0.0000 0.0000 0.0000 -0.0000

Y -0.0000 0.0000 0.0000 -0.0000 0.0000 0.0000

Z 0.0000 -0.0000 -0.0000 0.0000 -0.0000 -0.0000

AT. 4 I X 0.0000 0.0000 -0.0000 -0.0000 0.0000 0.0000

Y -0.0000 -0.0000 0.0000 0.0000 0.0000 -0.0000

Z 0.0000 0.0000 -0.0000 -0.0000 -0.0000 0.0000

AT. 5 O X 0.0002 -0.0014 -0.0008 0.0000 0.0001 0.0017

Y -0.0003 0.0020 0.0012 0.0000 -0.0004 -0.0026

Z -0.0001 0.0004 -0.0004 0.0001 -0.0005 -0.0026

AT. 6 O X 0.0002 0.0014 -0.0008 -0.0000 0.0001 -0.0017

Y -0.0003 -0.0020 0.0012 -0.0000 -0.0004 0.0026

Z -0.0001 -0.0004 -0.0004 -0.0001 -0.0005 0.0026

AT. 7 O X -0.0003 0.0004 0.0005 -0.0002 -0.0002 -0.0001

Y 0.0003 -0.0000 0.0001 0.0001 0.0005 0.0007

Z -0.0000 -0.0009 -0.0010 0.0000 -0.0004 -0.0007  
AT. 8 O X -0.0003 -0.0004 0.0005 0.0002 -0.0002 0.0001  
Y 0.0003 0.0000 0.0001 -0.0001 0.0005 -0.0007  
Z -0.0000 0.0009 -0.0010 -0.0000 -0.0004 0.0007  
AT. 9 N X -0.0008 0.0026 0.0025 -0.0004 0.0001 0.0012  
Y -0.0007 0.0046 0.0049 -0.0003 0.0008 0.0021  
Z -0.0005 0.0028 0.0037 -0.0002 0.0007 0.0030  
AT. 10 N X -0.0008 -0.0026 0.0025 0.0004 0.0001 -0.0012  
Y -0.0007 -0.0046 0.0049 0.0003 0.0008 -0.0021  
Z -0.0005 -0.0028 0.0037 0.0002 0.0007 -0.0030  
AT. 11 N X 0.0010 -0.0016 -0.0012 0.0003 0.0007 0.0014  
Y 0.0007 -0.0060 -0.0070 0.0004 -0.0016 -0.0046  
Z -0.0004 0.0011 0.0014 -0.0002 0.0001 0.0003  
AT. 12 N X 0.0010 0.0016 -0.0012 -0.0003 0.0007 -0.0014  
Y 0.0007 0.0060 -0.0070 -0.0004 -0.0016 0.0046  
Z -0.0004 -0.0011 0.0014 0.0002 0.0001 -0.0003  
AT. 13 C X 0.0002 0.0011 0.0017 -0.0002 0.0016 0.0039  
Y 0.0012 -0.0061 -0.0042 0.0000 0.0012 0.0070  
Z -0.0007 0.0047 0.0046 -0.0002 0.0005 -0.0006  
AT. 14 C X 0.0002 -0.0011 0.0017 0.0002 0.0016 -0.0039  
Y 0.0012 0.0061 -0.0042 -0.0000 0.0012 -0.0070  
Z -0.0007 -0.0047 0.0046 0.0002 0.0005 0.0006  
AT. 15 C X -0.0029 0.0094 0.0043 0.0004 -0.0060 -0.0215  
Y -0.0004 0.0017 0.0014 -0.0000 -0.0003 -0.0012  
Z -0.0003 -0.0003 -0.0016 0.0002 -0.0017 -0.0052  
AT. 16 C X -0.0029 -0.0094 0.0043 -0.0004 -0.0060 0.0215  
Y -0.0004 -0.0017 0.0014 0.0000 -0.0003 0.0012  
Z -0.0003 0.0003 -0.0016 -0.0002 -0.0017 0.0052  
AT. 17 H X 0.0121 -0.0337 -0.0105 -0.0020 0.0272 0.0947  
Y 0.0028 -0.0096 -0.0056 -0.0003 0.0048 0.0172  
Z 0.0011 -0.0012 0.0022 -0.0003 0.0040 0.0134  
AT. 18 H X 0.0121 0.0337 -0.0105 0.0020 0.0272 -0.0947

Y 0.0028 0.0096 -0.0056 0.0003 0.0048 -0.0172  
Z 0.0011 0.0012 0.0022 0.0003 0.0040 -0.0134  
AT. 19 H X 0.0210 -0.0789 -0.0504 -0.0004 0.0321 0.1217  
Y 0.0015 -0.0012 0.0032 -0.0007 0.0056 0.0176  
Z 0.0081 -0.0303 -0.0189 -0.0003 0.0127 0.0484  
AT. 20 H X 0.0210 0.0789 -0.0504 0.0004 0.0321 -0.1217  
Y 0.0015 0.0012 0.0032 0.0007 0.0056 -0.0176  
Z 0.0081 0.0303 -0.0189 0.0003 0.0127 -0.0484  
AT. 21 C X 0.0006 -0.0030 -0.0030 0.0003 -0.0003 -0.0008  
Y -0.0001 -0.0001 -0.0004 -0.0000 -0.0004 -0.0004  
Z -0.0005 0.0041 0.0041 -0.0003 0.0010 0.0014  
AT. 22 C X 0.0006 0.0030 -0.0030 -0.0003 -0.0003 0.0008  
Y -0.0001 0.0001 -0.0004 0.0000 -0.0004 0.0004  
Z -0.0005 -0.0041 0.0041 0.0003 0.0010 -0.0014  
AT. 23 C X 0.0001 0.0013 0.0010 0.0002 0.0005 -0.0012  
Y -0.0001 0.0003 0.0007 -0.0001 0.0001 0.0003  
Z 0.0003 -0.0022 -0.0024 0.0002 -0.0005 -0.0006  
AT. 24 C X 0.0001 -0.0013 0.0010 -0.0002 0.0005 0.0012  
Y -0.0001 -0.0003 0.0007 0.0001 0.0001 -0.0003  
Z 0.0003 0.0022 -0.0024 -0.0002 -0.0005 0.0006  
AT. 25 H X 0.0010 -0.0054 -0.0095 -0.0001 -0.0023 0.0005  
Y 0.0002 -0.0012 -0.0016 0.0000 -0.0004 0.0003  
Z -0.0005 0.0025 0.0044 -0.0008 0.0012 0.0024  
AT. 26 H X 0.0010 0.0054 -0.0095 0.0001 -0.0023 -0.0005  
Y 0.0002 0.0012 -0.0016 -0.0000 -0.0004 -0.0003  
Z -0.0005 -0.0025 0.0044 0.0008 0.0012 -0.0024  
AT. 27 H X -0.0056 0.0131 0.0191 -0.0035 0.0011 0.0169  
Y -0.0001 -0.0001 -0.0002 -0.0004 -0.0000 0.0018  
Z 0.0016 -0.0052 -0.0072 0.0009 -0.0009 -0.0039  
AT. 28 H X -0.0056 -0.0131 0.0191 0.0035 0.0011 -0.0169  
Y -0.0001 0.0001 -0.0002 0.0004 -0.0000 -0.0018  
Z 0.0016 0.0052 -0.0072 -0.0009 -0.0009 0.0039

AT. 29 C X 0.0000 0.0008 0.0008 0.0001 0.0002 -0.0002  
Y 0.0007 -0.0052 -0.0057 0.0004 -0.0013 -0.0032  
Z 0.0003 -0.0030 -0.0026 0.0001 -0.0003 0.0011

AT. 30 C X 0.0000 -0.0008 0.0008 -0.0001 0.0002 0.0002  
Y 0.0007 0.0052 -0.0057 -0.0004 -0.0013 0.0032  
Z 0.0003 0.0030 -0.0026 -0.0001 -0.0003 -0.0011

AT. 31 H X -0.0040 0.0186 0.0251 -0.0023 0.0059 0.0295  
Y 0.0005 0.0007 -0.0003 0.0003 -0.0000 -0.0050  
Z -0.0029 0.0169 0.0205 -0.0016 0.0046 0.0171

AT. 32 H X -0.0040 -0.0186 0.0251 0.0023 0.0059 -0.0295  
Y 0.0005 -0.0007 -0.0003 -0.0003 -0.0000 0.0050  
Z -0.0029 -0.0169 0.0205 0.0016 0.0046 -0.0171

AT. 33 H X -0.0023 0.0100 0.0042 -0.0002 -0.0034 -0.0211  
Y 0.0004 -0.0037 -0.0022 -0.0001 0.0009 0.0056  
Z -0.0009 0.0026 -0.0016 0.0002 -0.0032 -0.0167

AT. 34 H X -0.0023 -0.0100 0.0042 0.0002 -0.0034 0.0211  
Y 0.0004 0.0037 -0.0022 0.0001 0.0009 -0.0056  
Z -0.0009 -0.0026 -0.0016 -0.0002 -0.0032 0.0167

AT. 35 C X 0.0039 -0.0226 -0.0231 0.0017 -0.0033 -0.0075  
Y -0.0031 0.0193 0.0205 -0.0016 0.0037 0.0098  
Z 0.0025 -0.0103 -0.0117 0.0011 -0.0016 -0.0077

AT. 36 C X 0.0039 0.0226 -0.0231 -0.0017 -0.0033 0.0075  
Y -0.0031 -0.0193 0.0205 0.0016 0.0037 -0.0098  
Z 0.0025 0.0103 -0.0117 -0.0011 -0.0016 0.0077

AT. 37 C X -0.0010 0.0033 0.0027 -0.0003 -0.0003 -0.0013  
Y -0.0001 0.0016 0.0019 -0.0000 0.0004 0.0010  
Z 0.0002 -0.0030 -0.0030 0.0001 -0.0006 -0.0006

AT. 38 C X -0.0010 -0.0033 0.0027 0.0003 -0.0003 0.0013  
Y -0.0001 -0.0016 0.0019 0.0000 0.0004 -0.0010  
Z 0.0002 0.0030 -0.0030 -0.0001 -0.0006 0.0006

AT. 39 H X -0.0004 0.0080 0.0077 -0.0005 0.0016 0.0011  
Y 0.0024 -0.0253 -0.0269 0.0016 -0.0063 -0.0160



Z -0.0005 0.0122 0.0132 -0.0007 0.0037 0.0087  
AT. 40 H X -0.0004 -0.0080 0.0077 0.0005 0.0016 -0.0011  
Y 0.0024 0.0253 -0.0269 -0.0016 -0.0063 0.0160  
Z -0.0005 -0.0122 0.0132 0.0007 0.0037 -0.0087  
AT. 41 H X -0.0010 -0.0034 -0.0038 -0.0000 -0.0023 -0.0030  
Y 0.0048 -0.0069 -0.0067 0.0014 0.0032 0.0016  
Z -0.0035 0.0099 0.0097 -0.0012 -0.0009 0.0006  
AT. 42 H X -0.0010 0.0034 -0.0038 0.0000 -0.0023 0.0030  
Y 0.0048 0.0069 -0.0067 -0.0014 0.0032 -0.0016  
Z -0.0035 -0.0099 0.0097 0.0012 -0.0009 -0.0006  
AT. 43 C X -0.0003 -0.0004 -0.0007 -0.0000 -0.0005 -0.0007  
Y -0.0009 0.0056 0.0059 -0.0005 0.0011 0.0024  
Z 0.0003 0.0023 0.0027 0.0000 0.0009 0.0026  
AT. 44 C X -0.0003 0.0004 -0.0007 0.0000 -0.0005 0.0007  
Y -0.0009 -0.0056 0.0059 0.0005 0.0011 -0.0024  
Z 0.0003 -0.0023 0.0027 -0.0000 0.0009 -0.0026  
AT. 45 H X 0.0038 -0.0318 -0.0349 0.0020 -0.0066 -0.0212  
Y 0.0010 -0.0043 -0.0044 0.0006 -0.0003 -0.0002  
Z -0.0043 0.0331 0.0358 -0.0023 0.0064 0.0192  
AT. 46 H X 0.0038 0.0318 -0.0349 -0.0020 -0.0066 0.0212  
Y 0.0010 0.0043 -0.0044 -0.0006 -0.0003 0.0002  
Z -0.0043 -0.0331 0.0358 0.0023 0.0064 -0.0192  
AT. 47 H X 0.0016 0.0041 0.0060 0.0005 0.0029 0.0066  
Y 0.0011 -0.0016 -0.0011 0.0003 0.0008 -0.0006  
Z -0.0006 -0.0116 -0.0140 0.0001 -0.0045 -0.0108  
AT. 48 H X 0.0016 -0.0041 0.0060 -0.0005 0.0029 -0.0066  
Y 0.0011 0.0016 -0.0011 -0.0003 0.0008 0.0006  
Z -0.0006 0.0116 -0.0140 -0.0001 -0.0045 0.0108  
AT. 49 C X -0.0032 0.0155 0.0162 -0.0015 0.0022 0.0062  
Y 0.0021 -0.0118 -0.0124 0.0010 -0.0021 -0.0050  
Z 0.0041 -0.0247 -0.0262 0.0020 -0.0039 -0.0127  
AT. 50 C X -0.0032 -0.0155 0.0162 0.0015 0.0022 -0.0062

Y 0.0021 0.0118 -0.0124 -0.0010 -0.0021 0.0050  
Z 0.0041 0.0247 -0.0262 -0.0020 -0.0039 0.0127  
AT. 51 C X 0.0009 -0.0035 -0.0033 0.0004 -0.0003 -0.0006  
Y -0.0001 -0.0002 -0.0004 -0.0000 -0.0002 -0.0008  
Z 0.0002 -0.0017 -0.0019 0.0000 -0.0004 -0.0004  
AT. 52 C X 0.0009 0.0035 -0.0033 -0.0004 -0.0003 0.0006  
Y -0.0001 0.0002 -0.0004 0.0000 -0.0002 0.0008  
Z 0.0002 0.0017 -0.0019 -0.0000 -0.0004 0.0004  
AT. 53 H X 0.0012 -0.0043 -0.0038 0.0005 -0.0003 0.0013  
Y -0.0023 0.0171 0.0172 -0.0010 0.0032 0.0062  
Z -0.0031 0.0209 0.0205 -0.0013 0.0036 0.0043  
AT. 54 H X 0.0012 0.0043 -0.0038 -0.0005 -0.0003 -0.0013  
Y -0.0023 -0.0171 0.0172 0.0010 0.0032 -0.0062  
Z -0.0031 -0.0209 0.0205 0.0013 0.0036 -0.0043  
AT. 55 H X -0.0007 0.0063 0.0064 -0.0003 0.0017 0.0019  
Y -0.0011 0.0060 0.0067 -0.0008 0.0010 0.0056  
Z -0.0024 0.0126 0.0135 -0.0014 0.0022 0.0092  
AT. 56 H X -0.0007 -0.0063 0.0064 0.0003 0.0017 -0.0019  
Y -0.0011 -0.0060 0.0067 0.0008 0.0010 -0.0056  
Z -0.0024 -0.0126 0.0135 0.0014 0.0022 -0.0092  
AT. 57 C X -0.0012 0.0070 0.0070 -0.0005 0.0009 0.0015  
Y 0.0009 -0.0064 -0.0068 0.0005 -0.0014 -0.0036  
Z -0.0010 0.0047 0.0053 -0.0004 0.0008 0.0035  
AT. 58 C X -0.0012 -0.0070 0.0070 0.0005 0.0009 -0.0015  
Y 0.0009 0.0064 -0.0068 -0.0005 -0.0014 0.0036  
Z -0.0010 -0.0047 0.0053 0.0004 0.0008 -0.0035  
AT. 59 H X -0.0041 0.0211 0.0236 -0.0021 0.0042 0.0152  
Y 0.0025 -0.0120 -0.0137 0.0013 -0.0022 -0.0098  
Z -0.0010 0.0075 0.0081 -0.0005 0.0018 0.0044  
AT. 60 H X -0.0041 -0.0211 0.0236 0.0021 0.0042 -0.0152  
Y 0.0025 0.0120 -0.0137 -0.0013 -0.0022 0.0098  
Z -0.0010 -0.0075 0.0081 0.0005 0.0018 -0.0044

AT. 61 H X -0.0017 0.0134 0.0130 -0.0009 0.0023 0.0036  
Y 0.0016 -0.0087 -0.0070 0.0008 -0.0003 0.0020  
Z -0.0013 0.0100 0.0091 -0.0009 0.0015 0.0018

AT. 62 H X -0.0017 -0.0134 0.0130 0.0009 0.0023 -0.0036  
Y 0.0016 0.0087 -0.0070 -0.0008 -0.0003 -0.0020  
Z -0.0013 -0.0100 0.0091 0.0009 0.0015 -0.0018

AT. 63 H X -0.0032 0.0145 0.0162 -0.0015 0.0024 0.0088  
Y 0.0031 -0.0136 -0.0145 0.0015 -0.0019 -0.0048  
Z -0.0011 0.0048 0.0043 -0.0004 0.0001 -0.0017

AT. 64 H X -0.0032 -0.0145 0.0162 0.0015 0.0024 -0.0088  
Y 0.0031 0.0136 -0.0145 -0.0015 -0.0019 0.0048  
Z -0.0011 -0.0048 0.0043 0.0004 0.0001 0.0017

AT. 65 C X 0.0009 -0.0039 -0.0041 0.0004 -0.0004 -0.0013  
Y -0.0006 0.0037 0.0039 -0.0003 0.0007 0.0013  
Z -0.0016 0.0096 0.0103 -0.0008 0.0015 0.0048

AT. 66 C X 0.0009 0.0039 -0.0041 -0.0004 -0.0004 0.0013  
Y -0.0006 -0.0037 0.0039 0.0003 0.0007 -0.0013  
Z -0.0016 -0.0096 0.0103 0.0008 0.0015 -0.0048

AT. 67 H X 0.0032 -0.0222 -0.0232 0.0018 -0.0038 -0.0111  
Y -0.0017 0.0118 0.0128 -0.0009 0.0020 0.0064  
Z -0.0026 0.0181 0.0187 -0.0014 0.0033 0.0086

AT. 68 H X 0.0032 0.0222 -0.0232 -0.0018 -0.0038 0.0111  
Y -0.0017 -0.0118 0.0128 0.0009 0.0020 -0.0064  
Z -0.0026 -0.0181 0.0187 0.0014 0.0033 -0.0086

AT. 69 H X 0.0012 -0.0065 -0.0064 0.0006 -0.0011 -0.0019  
Y -0.0008 0.0017 0.0016 -0.0003 -0.0001 -0.0002  
Z -0.0022 0.0092 0.0089 -0.0010 0.0012 0.0022

AT. 70 H X 0.0012 0.0065 -0.0064 -0.0006 -0.0011 0.0019  
Y -0.0008 -0.0017 0.0016 0.0003 -0.0001 0.0002  
Z -0.0022 -0.0092 0.0089 0.0010 0.0012 -0.0022

AT. 71 H X 0.0027 -0.0167 -0.0180 0.0015 -0.0028 -0.0097  
Y -0.0021 0.0114 0.0120 -0.0011 0.0019 0.0063

Z -0.0025 0.0115 0.0118 -0.0012 0.0015 0.0057  
AT. 72 H X 0.0027 0.0167 -0.0180 -0.0015 -0.0028 0.0097  
Y -0.0021 -0.0114 0.0120 0.0011 0.0019 -0.0063  
Z -0.0025 -0.0115 0.0118 0.0012 0.0015 -0.0057  
AT. 73 C X -0.0001 0.0019 0.0020 -0.0001 0.0004 0.0006  
Y 0.0002 -0.0019 -0.0022 0.0002 -0.0005 -0.0011  
Z -0.0013 0.0063 0.0072 -0.0006 0.0010 0.0046  
AT. 74 C X -0.0001 -0.0019 0.0020 0.0001 0.0004 -0.0006  
Y 0.0002 0.0019 -0.0022 -0.0002 -0.0005 0.0011  
Z -0.0013 -0.0063 0.0072 0.0006 0.0010 -0.0046  
AT. 75 H X 0.0004 -0.0047 -0.0076 0.0004 -0.0024 -0.0078  
Y 0.0003 -0.0011 0.0004 0.0001 0.0009 0.0037  
Z -0.0007 0.0018 0.0030 -0.0003 0.0005 0.0047  
AT. 76 H X 0.0004 0.0047 -0.0076 -0.0004 -0.0024 0.0078  
Y 0.0003 0.0011 0.0004 -0.0001 0.0009 -0.0037  
Z -0.0007 -0.0018 0.0030 0.0003 0.0005 -0.0047  
AT. 77 H X -0.0004 0.0086 0.0098 -0.0004 0.0026 0.0077  
Y -0.0003 -0.0018 -0.0019 -0.0001 -0.0008 -0.0029  
Z -0.0004 -0.0003 -0.0007 -0.0001 -0.0007 -0.0004  
AT. 78 H X -0.0004 -0.0086 0.0098 0.0004 0.0026 -0.0077  
Y -0.0003 0.0018 -0.0019 0.0001 -0.0008 0.0029  
Z -0.0004 0.0003 -0.0007 0.0001 -0.0007 0.0004  
AT. 79 I X 0.0001 0.0001 0.0000 0.0000 0.0000 0.0000  
Y -0.0002 0.0000 -0.0000 -0.0001 -0.0001 -0.0001  
Z 0.0003 -0.0000 0.0000 0.0001 0.0001 0.0001  
AT. 80 I X 0.0001 -0.0001 0.0000 -0.0000 0.0000 -0.0000  
Y -0.0002 -0.0000 -0.0000 0.0001 -0.0001 0.0001  
Z 0.0003 0.0000 0.0000 -0.0001 0.0001 -0.0001  
AT. 81 I X -0.0000 -0.0000 -0.0000 -0.0001 0.0000 -0.0000  
Y -0.0001 -0.0000 -0.0000 -0.0000 -0.0000 -0.0000  
Z -0.0000 0.0000 -0.0000 0.0001 -0.0001 0.0000  
AT. 82 I X -0.0000 0.0000 -0.0000 0.0001 0.0000 0.0000

Y -0.0001 0.0000 -0.0000 0.0000 -0.0000 0.0000  
Z -0.0000 -0.0000 -0.0000 -0.0001 -0.0001 -0.0000  
AT. 83 O X -0.0054 0.0005 -0.0008 -0.0030 -0.0002 -0.0014  
Y -0.0018 0.0001 -0.0003 -0.0010 -0.0005 -0.0006  
Z -0.0028 0.0004 -0.0004 -0.0008 -0.0008 -0.0008  
AT. 84 O X -0.0054 -0.0005 -0.0008 0.0030 -0.0002 0.0014  
Y -0.0018 -0.0001 -0.0003 0.0010 -0.0005 0.0006  
Z -0.0028 -0.0004 -0.0004 0.0008 -0.0008 0.0008  
AT. 85 O X 0.0015 0.0000 0.0004 0.0022 -0.0014 0.0003  
Y 0.0007 -0.0001 0.0001 0.0011 -0.0005 0.0002  
Z -0.0006 0.0001 -0.0000 0.0002 -0.0005 -0.0001  
AT. 86 O X 0.0015 -0.0000 0.0004 -0.0022 -0.0014 -0.0003  
Y 0.0007 0.0001 0.0001 -0.0011 -0.0005 -0.0002  
Z -0.0006 -0.0001 -0.0000 -0.0002 -0.0005 0.0001  
AT. 87 N X 0.0073 -0.0003 0.0014 0.0041 -0.0016 -0.0004  
Y -0.0004 -0.0006 -0.0005 -0.0042 0.0045 0.0002  
Z -0.0031 -0.0001 -0.0008 -0.0043 0.0029 -0.0003  
AT. 88 N X 0.0073 0.0003 0.0014 -0.0041 -0.0016 0.0004  
Y -0.0004 0.0006 -0.0005 0.0042 0.0045 -0.0002  
Z -0.0031 0.0001 -0.0008 0.0043 0.0029 0.0003  
AT. 89 N X -0.0086 0.0003 -0.0014 -0.0052 0.0012 0.0000  
Y -0.0005 0.0008 0.0006 0.0040 -0.0053 -0.0009  
Z -0.0017 -0.0001 -0.0004 -0.0017 0.0011 0.0000  
AT. 90 N X -0.0086 -0.0003 -0.0014 0.0052 0.0012 -0.0000  
Y -0.0005 -0.0008 0.0006 -0.0040 -0.0053 0.0009  
Z -0.0017 0.0001 -0.0004 0.0017 0.0011 -0.0000  
AT. 91 C X -0.0005 0.0003 0.0002 0.0021 -0.0033 -0.0003  
Y 0.0032 -0.0000 0.0005 0.0020 0.0020 0.0013  
Z -0.0005 -0.0009 -0.0006 -0.0037 0.0025 0.0004  
AT. 92 C X -0.0005 -0.0003 0.0002 -0.0021 -0.0033 0.0003  
Y 0.0032 0.0000 0.0005 -0.0020 0.0020 -0.0013  
Z -0.0005 0.0009 -0.0006 0.0037 0.0025 -0.0004

AT. 93 C X 0.0164 -0.0014 0.0021 0.0064 0.0089 0.0053  
Y -0.0051 0.0002 -0.0007 -0.0027 -0.0034 -0.0019  
Z -0.0006 0.0004 0.0003 0.0020 -0.0039 -0.0009

AT. 94 C X 0.0164 0.0014 0.0021 -0.0064 0.0089 -0.0053  
Y -0.0051 -0.0002 -0.0007 0.0027 -0.0034 0.0019  
Z -0.0006 -0.0004 0.0003 -0.0020 -0.0039 0.0009

AT. 95 H X -0.0186 0.0006 -0.0014 -0.0009 -0.0335 -0.0108  
Y 0.0272 -0.0015 0.0034 0.0104 0.0198 0.0099  
Z -0.0185 0.0014 -0.0032 -0.0133 0.0032 -0.0044

AT. 96 H X -0.0186 -0.0006 -0.0014 0.0009 -0.0335 0.0108  
Y 0.0272 0.0015 0.0034 -0.0104 0.0198 -0.0099  
Z -0.0185 -0.0014 -0.0032 0.0133 0.0032 0.0044

AT. 97 H X -0.1259 0.0068 -0.0188 -0.0684 -0.0431 -0.0342  
Y 0.0470 -0.0037 0.0059 0.0215 0.0274 0.0172  
Z 0.0550 -0.0030 0.0082 0.0305 0.0194 0.0158

AT. 98 H X -0.1259 -0.0068 -0.0188 0.0684 -0.0431 0.0342  
Y 0.0470 0.0037 0.0059 -0.0215 0.0274 -0.0172  
Z 0.0550 0.0030 0.0082 -0.0305 0.0194 -0.0158

AT. 99 C X -0.0021 -0.0003 -0.0007 -0.0038 0.0035 0.0000  
Y 0.0019 0.0000 0.0003 0.0007 -0.0001 0.0001  
Z -0.0013 -0.0003 -0.0005 -0.0052 0.0045 -0.0005

AT. 100 C X -0.0021 0.0003 -0.0007 0.0038 0.0035 -0.0000  
Y 0.0019 -0.0000 0.0003 -0.0007 -0.0001 -0.0001  
Z -0.0013 0.0003 -0.0005 0.0052 0.0045 0.0005

AT. 101 C X 0.0044 -0.0001 0.0007 -0.0014 0.0014 -0.0004  
Y -0.0029 0.0000 -0.0005 -0.0005 -0.0002 -0.0001  
Z 0.0022 0.0001 0.0006 0.0026 -0.0020 0.0000

AT. 102 C X 0.0044 0.0001 0.0007 0.0014 0.0014 0.0004  
Y -0.0029 -0.0000 -0.0005 0.0005 -0.0002 0.0001  
Z 0.0022 -0.0001 0.0006 -0.0026 -0.0020 -0.0000

AT. 103 H X -0.0291 0.0003 -0.0051 -0.0026 -0.0058 -0.0005  
Y 0.0115 -0.0001 0.0020 0.0004 0.0025 0.0001

Z -0.0030 -0.0003 -0.0010 -0.0060 0.0038 -0.0008  
AT. 104 H X -0.0291 -0.0003 -0.0051 0.0026 -0.0058 0.0005  
Y 0.0115 0.0001 0.0020 -0.0004 0.0025 -0.0001  
Z -0.0030 0.0003 -0.0010 0.0060 0.0038 0.0008  
AT. 105 H X -0.0043 0.0022 0.0013 0.0387 -0.0273 0.0037  
Y 0.0131 -0.0010 0.0014 -0.0103 0.0109 -0.0009  
Z 0.0062 0.0003 0.0015 0.0086 -0.0047 0.0009  
AT. 106 H X -0.0043 -0.0022 0.0013 -0.0387 -0.0273 -0.0037  
Y 0.0131 0.0010 0.0014 0.0103 0.0109 0.0009  
Z 0.0062 -0.0003 0.0015 -0.0086 -0.0047 -0.0009  
AT. 107 C X -0.0033 0.0005 -0.0004 0.0003 -0.0018 0.0002  
Y -0.0010 0.0006 0.0002 0.0032 -0.0044 -0.0004  
Z 0.0044 -0.0000 0.0010 0.0032 -0.0006 0.0004  
AT. 108 C X -0.0033 -0.0005 -0.0004 -0.0003 -0.0018 -0.0002  
Y -0.0010 -0.0006 0.0002 -0.0032 -0.0044 0.0004  
Z 0.0044 0.0000 0.0010 -0.0032 -0.0006 -0.0004  
AT. 109 H X -0.0141 0.0033 -0.0006 0.0112 -0.0251 -0.0060  
Y -0.0005 -0.0011 -0.0009 -0.0066 0.0076 0.0015  
Z 0.0087 -0.0037 -0.0009 -0.0165 0.0274 0.0058  
AT. 110 H X -0.0141 -0.0033 -0.0006 -0.0112 -0.0251 0.0060  
Y -0.0005 0.0011 -0.0009 0.0066 0.0076 -0.0015  
Z 0.0087 0.0037 -0.0009 0.0165 0.0274 -0.0058  
AT. 111 H X 0.0301 -0.0011 0.0052 0.0150 0.0064 0.0049  
Y -0.0074 0.0002 -0.0012 -0.0035 0.0011 0.0014  
Z -0.0309 0.0018 -0.0049 -0.0116 -0.0106 -0.0050  
AT. 112 H X 0.0301 0.0011 0.0052 -0.0150 0.0064 -0.0049  
Y -0.0074 -0.0002 -0.0012 0.0035 0.0011 -0.0014  
Z -0.0309 -0.0018 -0.0049 0.0116 -0.0106 0.0050  
AT. 113 C X -0.0130 -0.0024 -0.0047 -0.0263 0.0240 0.0008  
Y -0.0003 -0.0012 -0.0012 -0.0092 0.0114 0.0006  
Z 0.0078 0.0019 0.0030 0.0179 -0.0178 -0.0019  
AT. 114 C X -0.0130 0.0024 -0.0047 0.0263 0.0240 -0.0008

Y -0.0003 0.0012 -0.0012 0.0092 0.0114 -0.0006  
Z 0.0078 -0.0019 0.0030 -0.0179 -0.0178 0.0019  
AT. 115 C X 0.0075 0.0000 0.0015 0.0064 -0.0029 0.0003  
Y -0.0003 -0.0002 -0.0003 -0.0015 0.0014 0.0001  
Z -0.0021 0.0002 -0.0001 0.0001 -0.0011 0.0002  
AT. 116 C X 0.0075 -0.0000 0.0015 -0.0064 -0.0029 -0.0003  
Y -0.0003 0.0002 -0.0003 0.0015 0.0014 -0.0001  
Z -0.0021 -0.0002 -0.0001 -0.0001 -0.0011 -0.0002  
AT. 117 H X -0.0031 0.0013 0.0008 0.0071 -0.0096 0.0008  
Y -0.0147 0.0026 -0.0003 0.0071 -0.0179 -0.0016  
Z 0.0122 -0.0018 0.0005 -0.0031 0.0106 0.0002  
AT. 118 H X -0.0031 -0.0013 0.0008 -0.0071 -0.0096 -0.0008  
Y -0.0147 -0.0026 -0.0003 -0.0071 -0.0179 0.0016  
Z 0.0122 0.0018 0.0005 0.0031 0.0106 -0.0002  
AT. 119 H X 0.0195 -0.0003 0.0032 0.0110 -0.0012 -0.0005  
Y 0.0228 0.0006 0.0048 0.0210 -0.0120 -0.0009  
Z -0.0176 -0.0007 -0.0040 -0.0187 0.0123 0.0007  
AT. 120 H X 0.0195 0.0003 0.0032 -0.0110 -0.0012 0.0005  
Y 0.0228 -0.0006 0.0048 -0.0210 -0.0120 0.0009  
Z -0.0176 0.0007 -0.0040 0.0187 0.0123 -0.0007  
AT. 121 C X 0.0038 -0.0004 0.0003 0.0005 0.0014 -0.0002  
Y 0.0001 -0.0006 -0.0004 -0.0038 0.0044 0.0004  
Z 0.0043 -0.0003 0.0005 0.0025 -0.0001 0.0004  
AT. 122 C X 0.0038 0.0004 0.0003 -0.0005 0.0014 0.0002  
Y 0.0001 0.0006 -0.0004 0.0038 0.0044 -0.0004  
Z 0.0043 0.0003 0.0005 -0.0025 -0.0001 -0.0004  
AT. 123 H X 0.0131 -0.0043 -0.0012 -0.0117 0.0241 0.0068  
Y -0.0012 0.0019 0.0016 0.0107 -0.0150 -0.0023  
Z 0.0070 -0.0035 -0.0018 -0.0143 0.0231 0.0045  
AT. 124 H X 0.0131 0.0043 -0.0012 0.0117 0.0241 -0.0068  
Y -0.0012 -0.0019 0.0016 -0.0107 -0.0150 0.0023  
Z 0.0070 0.0035 -0.0018 0.0143 0.0231 -0.0045



AT. 125 H X -0.0237 0.0016 -0.0032 -0.0151 0.0010 -0.0045  
Y 0.0156 -0.0010 0.0024 0.0085 -0.0004 0.0017  
Z -0.0217 0.0020 -0.0025 -0.0106 -0.0029 -0.0042

AT. 126 H X -0.0237 -0.0016 -0.0032 0.0151 0.0010 0.0045  
Y 0.0156 0.0010 0.0024 -0.0085 -0.0004 -0.0017  
Z -0.0217 -0.0020 -0.0025 0.0106 -0.0029 0.0042

AT. 127 C X 0.0094 0.0025 0.0040 0.0241 -0.0239 -0.0010  
Y -0.0018 0.0009 0.0002 0.0036 -0.0054 -0.0008  
Z 0.0086 0.0022 0.0039 0.0208 -0.0207 -0.0016

AT. 128 C X 0.0094 -0.0025 0.0040 -0.0241 -0.0239 0.0010  
Y -0.0018 -0.0009 0.0002 -0.0036 -0.0054 0.0008  
Z 0.0086 -0.0022 0.0039 -0.0208 -0.0207 0.0016

AT. 129 C X -0.0050 -0.0002 -0.0012 -0.0050 0.0036 0.0002  
Y 0.0009 0.0002 0.0004 0.0017 -0.0012 0.0001  
Z -0.0021 0.0005 -0.0003 0.0009 -0.0016 -0.0001

AT. 130 C X -0.0050 0.0002 -0.0012 0.0050 0.0036 -0.0002  
Y 0.0009 -0.0002 0.0004 -0.0017 -0.0012 -0.0001  
Z -0.0021 -0.0005 -0.0003 -0.0009 -0.0016 0.0001

AT. 131 H X 0.0078 -0.0022 0.0005 -0.0054 0.0102 0.0020  
Y 0.0156 -0.0030 0.0011 -0.0025 0.0129 0.0040  
Z 0.0218 -0.0038 0.0024 -0.0018 0.0138 0.0042

AT. 132 H X 0.0078 0.0022 0.0005 0.0054 0.0102 -0.0020  
Y 0.0156 0.0030 0.0011 0.0025 0.0129 -0.0040  
Z 0.0218 0.0038 0.0024 0.0018 0.0138 -0.0042

AT. 133 H X -0.0236 0.0018 -0.0041 -0.0097 -0.0036 -0.0027  
Y -0.0205 0.0001 -0.0045 -0.0161 0.0065 -0.0005  
Z -0.0264 -0.0005 -0.0064 -0.0241 0.0136 0.0003

AT. 134 H X -0.0236 -0.0018 -0.0041 0.0097 -0.0036 0.0027  
Y -0.0205 -0.0001 -0.0045 0.0161 0.0065 0.0005  
Z -0.0264 0.0005 -0.0064 0.0241 0.0136 -0.0003

AT. 135 C X 0.0044 0.0007 0.0015 0.0081 -0.0071 -0.0002  
Y -0.0015 0.0005 0.0001 0.0025 -0.0043 -0.0003

Z -0.0031 -0.0008 -0.0013 -0.0074 0.0075 0.0009  
AT. 136 C X 0.0044 -0.0007 0.0015 -0.0081 -0.0071 0.0002  
Y -0.0015 -0.0005 0.0001 -0.0025 -0.0043 0.0003  
Z -0.0031 0.0008 -0.0013 0.0074 0.0075 -0.0009  
AT. 137 H X 0.0040 0.0027 0.0030 0.0230 -0.0269 -0.0022  
Y 0.0017 0.0007 0.0009 0.0060 -0.0067 -0.0011  
Z 0.0016 -0.0013 -0.0007 -0.0084 0.0120 0.0006  
AT. 138 H X 0.0040 -0.0027 0.0030 -0.0230 -0.0269 0.0022  
Y 0.0017 -0.0007 0.0009 -0.0060 -0.0067 0.0011  
Z 0.0016 0.0013 -0.0007 0.0084 0.0120 -0.0006  
AT. 139 H X 0.0041 0.0010 0.0019 0.0109 -0.0102 0.0007  
Y 0.0073 -0.0005 0.0014 0.0045 -0.0001 0.0013  
Z -0.0050 -0.0007 -0.0019 -0.0102 0.0084 -0.0009  
AT. 140 H X 0.0041 -0.0010 0.0019 -0.0109 -0.0102 -0.0007  
Y 0.0073 0.0005 0.0014 -0.0045 -0.0001 -0.0013  
Z -0.0050 0.0007 -0.0019 0.0102 0.0084 0.0009  
AT. 141 H X 0.0145 0.0023 0.0046 0.0243 -0.0209 -0.0026  
Y 0.0086 0.0005 0.0021 0.0105 -0.0069 -0.0001  
Z -0.0098 -0.0002 -0.0022 -0.0099 0.0054 -0.0003  
AT. 142 H X 0.0145 -0.0023 0.0046 -0.0243 -0.0209 0.0026  
Y 0.0086 -0.0005 0.0021 -0.0105 -0.0069 0.0001  
Z -0.0098 0.0002 -0.0022 0.0099 0.0054 0.0003  
AT. 143 C X -0.0030 -0.0007 -0.0012 -0.0074 0.0074 0.0003  
Y 0.0023 -0.0004 0.0002 0.0000 0.0010 0.0002  
Z -0.0035 -0.0009 -0.0016 -0.0086 0.0087 0.0007  
AT. 144 C X -0.0030 0.0007 -0.0012 0.0074 0.0074 -0.0003  
Y 0.0023 0.0004 0.0002 -0.0000 0.0010 -0.0002  
Z -0.0035 0.0009 -0.0016 0.0086 0.0087 -0.0007  
AT. 145 H X -0.0063 -0.0030 -0.0038 -0.0227 0.0223 0.0024  
Y -0.0035 -0.0003 -0.0012 -0.0050 0.0048 0.0006  
Z 0.0011 -0.0016 -0.0010 -0.0085 0.0093 0.0011  
AT. 146 H X -0.0063 0.0030 -0.0038 0.0227 0.0223 -0.0024

Y -0.0035 0.0003 -0.0012 0.0050 0.0048 -0.0006  
Z 0.0011 0.0016 -0.0010 0.0085 0.0093 -0.0011  
AT. 147 H X 0.0001 -0.0010 -0.0005 -0.0067 0.0075 -0.0002  
Y -0.0046 0.0002 -0.0008 -0.0038 0.0022 -0.0003  
Z -0.0021 -0.0009 -0.0008 -0.0079 0.0078 -0.0003  
AT. 148 H X 0.0001 0.0010 -0.0005 0.0067 0.0075 0.0002  
Y -0.0046 -0.0002 -0.0008 0.0038 0.0022 0.0003  
Z -0.0021 0.0009 -0.0008 0.0079 0.0078 0.0003  
AT. 149 H X -0.0159 -0.0019 -0.0054 -0.0255 0.0229 0.0013  
Y -0.0051 -0.0005 -0.0016 -0.0076 0.0063 0.0000  
Z -0.0094 -0.0007 -0.0027 -0.0132 0.0110 0.0000  
AT. 150 H X -0.0159 0.0019 -0.0054 0.0255 0.0229 -0.0013  
Y -0.0051 0.0005 -0.0016 0.0076 0.0063 -0.0000  
Z -0.0094 0.0007 -0.0027 0.0132 0.0110 -0.0000  
AT. 151 C X 0.0011 -0.0000 0.0003 0.0005 0.0001 0.0002  
Y 0.0005 0.0000 0.0002 0.0009 -0.0009 0.0001  
Z -0.0035 -0.0008 -0.0014 -0.0078 0.0077 0.0009  
AT. 152 C X 0.0011 0.0000 0.0003 -0.0005 0.0001 -0.0002  
Y 0.0005 -0.0000 0.0002 -0.0009 -0.0009 -0.0001  
Z -0.0035 0.0008 -0.0014 0.0078 0.0077 -0.0009  
AT. 153 H X 0.0150 -0.0018 0.0012 0.0027 0.0078 0.0026  
Y 0.0062 0.0000 0.0012 0.0052 -0.0023 0.0002  
Z 0.0003 -0.0001 -0.0002 -0.0013 0.0022 0.0003  
AT. 154 H X 0.0150 0.0018 0.0012 -0.0027 0.0078 -0.0026  
Y 0.0062 -0.0000 0.0012 -0.0052 -0.0023 -0.0002  
Z 0.0003 0.0001 -0.0002 0.0013 0.0022 -0.0003  
AT. 155 H X -0.0117 0.0017 -0.0008 0.0009 -0.0093 -0.0024  
Y -0.0042 0.0001 -0.0009 -0.0034 0.0018 -0.0003  
Z -0.0032 -0.0002 -0.0006 -0.0024 0.0001 0.0003  
AT. 156 H X -0.0117 -0.0017 -0.0008 -0.0009 -0.0093 0.0024  
Y -0.0042 -0.0001 -0.0009 0.0034 0.0018 0.0003  
Z -0.0032 0.0002 -0.0006 0.0024 0.0001 -0.0003

AT.157 O X -0.0000 -0.0000 0.0001 -0.0000 0.0001 -0.0001  
Y 0.0000 -0.0001 -0.0000 -0.0000 0.0000 0.0001  
Z -0.0000 -0.0001 0.0000 -0.0000 -0.0001 -0.0001

AT.158 O X -0.0000 0.0000 0.0001 0.0000 0.0001 0.0001  
Y 0.0000 0.0001 -0.0000 0.0000 0.0000 -0.0001  
Z -0.0000 0.0001 0.0000 0.0000 -0.0001 0.0001

AT.159 O X -0.0000 0.0001 -0.0001 -0.0000 -0.0001 -0.0000  
Y 0.0000 0.0002 -0.0001 0.0001 0.0000 -0.0001  
Z -0.0000 0.0001 0.0001 0.0000 0.0000 -0.0001

AT.160 O X -0.0000 -0.0001 -0.0001 0.0000 -0.0001 0.0000  
Y 0.0000 -0.0002 -0.0001 -0.0001 0.0000 0.0001  
Z -0.0000 -0.0001 0.0001 -0.0000 0.0000 0.0001

AT.161 H X 0.0005 0.0008 -0.0001 0.0008 0.0008 0.0007  
Y -0.0003 0.0002 0.0000 -0.0001 -0.0005 -0.0005  
Z 0.0008 -0.0006 0.0002 0.0006 0.0012 0.0022

AT.162 H X 0.0005 -0.0008 -0.0001 -0.0008 0.0008 -0.0007  
Y -0.0003 -0.0002 0.0000 0.0001 -0.0005 0.0005  
Z 0.0008 0.0006 0.0002 -0.0006 0.0012 -0.0022

AT.163 H X -0.0003 -0.0008 0.0007 0.0002 -0.0000 0.0000  
Y -0.0007 -0.0017 0.0018 -0.0001 -0.0010 0.0010  
Z 0.0001 0.0003 0.0001 -0.0002 -0.0001 0.0002

AT.164 H X -0.0003 0.0008 0.0007 -0.0002 -0.0000 -0.0000  
Y -0.0007 0.0017 0.0018 0.0001 -0.0010 -0.0010  
Z 0.0001 -0.0003 0.0001 0.0002 -0.0001 -0.0002

AT.165 O X -0.0000 0.0000 -0.0000 -0.0000 0.0000 -0.0000  
Y -0.0001 -0.0000 -0.0000 -0.0002 -0.0001 0.0000  
Z -0.0001 0.0000 0.0000 0.0000 -0.0001 -0.0000

AT.166 O X -0.0000 -0.0000 -0.0000 0.0000 0.0000 0.0000  
Y -0.0001 0.0000 -0.0000 0.0002 -0.0001 -0.0000  
Z -0.0001 -0.0000 0.0000 -0.0000 -0.0001 0.0000

AT.167 H X 0.0010 -0.0002 0.0003 0.0002 0.0002 0.0001  
Y -0.0000 0.0003 -0.0000 0.0007 -0.0005 -0.0001

Z -0.0027 -0.0001 -0.0010 -0.0016 0.0005 0.0000  
 AT.168 H X 0.0010 0.0002 0.0003 -0.0002 0.0002 -0.0001  
 Y -0.0000 -0.0003 -0.0000 -0.0007 -0.0005 0.0001  
 Z -0.0027 0.0001 -0.0010 0.0016 0.0005 -0.0000  
 AT.169 O X 0.0002 -0.0001 0.0001 0.0000 0.0000 0.0000  
 Y 0.0001 -0.0000 0.0000 0.0001 0.0000 -0.0000  
 Z 0.0002 -0.0000 0.0001 0.0002 0.0001 -0.0000  
 AT.170 O X 0.0002 0.0001 0.0001 -0.0000 0.0000 -0.0000  
 Y 0.0001 0.0000 0.0000 -0.0001 0.0000 0.0000  
 Z 0.0002 0.0000 0.0001 -0.0002 0.0001 0.0000  
 AT.171 H X -0.0016 0.0007 -0.0008 0.0017 0.0006 0.0002  
 Y -0.0010 0.0005 -0.0007 0.0002 0.0002 0.0002  
 Z -0.0005 0.0004 -0.0006 -0.0015 -0.0005 0.0005  
 AT.172 H X -0.0016 -0.0007 -0.0008 -0.0017 0.0006 -0.0002  
 Y -0.0010 -0.0005 -0.0007 -0.0002 0.0002 -0.0002  
 Z -0.0005 -0.0004 -0.0006 0.0015 -0.0005 -0.0005

FREQ(CM\*\*-1) 1234.84 1237.50 1240.75 1241.45 1251.83 1252.81

AT. 1 I X -0.0002 -0.0001 0.0000 -0.0000 0.0000 0.0000  
 Y -0.0004 -0.0001 0.0000 -0.0000 -0.0000 -0.0000  
 Z 0.0001 0.0000 -0.0000 0.0000 0.0000 -0.0000  
 AT. 2 I X -0.0002 0.0001 0.0000 0.0000 0.0000 -0.0000  
 Y -0.0004 0.0001 0.0000 0.0000 -0.0000 0.0000  
 Z 0.0001 -0.0000 -0.0000 -0.0000 0.0000 0.0000  
 AT. 3 I X 0.0000 0.0000 0.0000 0.0000 -0.0002 -0.0002  
 Y -0.0000 0.0000 0.0000 0.0000 -0.0001 -0.0001  
 Z -0.0000 0.0000 0.0000 -0.0000 -0.0004 -0.0004  
 AT. 4 I X 0.0000 -0.0000 0.0000 -0.0000 -0.0002 0.0002  
 Y -0.0000 -0.0000 0.0000 -0.0000 -0.0001 0.0001  
 Z -0.0000 -0.0000 0.0000 0.0000 -0.0004 0.0004  
 AT. 5 O X 0.0019 0.0016 -0.0002 0.0001 -0.0006 -0.0006

Y -0.0031 -0.0018 0.0004 -0.0001 0.0002 0.0006  
Z -0.0026 -0.0021 0.0002 -0.0002 0.0008 0.0012  
AT. 6 O X 0.0019 -0.0016 -0.0002 -0.0001 -0.0006 0.0006  
Y -0.0031 0.0018 0.0004 0.0001 0.0002 -0.0006  
Z -0.0026 0.0021 0.0002 0.0002 0.0008 -0.0012  
AT. 7 O X -0.0007 -0.0003 0.0000 -0.0001 0.0029 0.0028  
Y 0.0011 0.0005 0.0001 0.0002 -0.0039 -0.0038  
Z -0.0006 -0.0001 -0.0000 -0.0001 0.0005 0.0004  
AT. 8 O X -0.0007 0.0003 0.0000 0.0001 0.0029 -0.0028  
Y 0.0011 -0.0005 0.0001 -0.0002 -0.0039 0.0038  
Z -0.0006 0.0001 -0.0000 0.0001 0.0005 -0.0004  
AT. 9 N X 0.0010 -0.0001 -0.0003 -0.0001 0.0025 0.0022  
Y 0.0008 0.0004 0.0000 0.0002 -0.0020 -0.0021  
Z 0.0018 0.0009 -0.0000 0.0001 -0.0011 -0.0012  
AT. 10 N X 0.0010 0.0001 -0.0003 0.0001 0.0025 -0.0022  
Y 0.0008 -0.0004 0.0000 -0.0002 -0.0020 0.0021  
Z 0.0018 -0.0009 -0.0000 -0.0001 -0.0011 0.0012  
AT. 11 N X 0.0020 0.0009 0.0004 0.0007 0.0020 0.0023  
Y -0.0026 -0.0006 -0.0000 -0.0004 -0.0038 -0.0040  
Z -0.0008 -0.0007 0.0002 -0.0000 0.0010 0.0008  
AT. 12 N X 0.0020 -0.0009 0.0004 -0.0007 0.0020 -0.0023  
Y -0.0026 0.0006 -0.0000 0.0004 -0.0038 0.0040  
Z -0.0008 0.0007 0.0002 0.0000 0.0010 -0.0008  
AT. 13 C X 0.0038 0.0001 -0.0002 -0.0001 -0.0002 0.0001  
Y 0.0080 0.0030 -0.0011 0.0002 0.0007 -0.0003  
Z -0.0013 0.0010 0.0006 0.0001 -0.0011 -0.0006  
AT. 14 C X 0.0038 -0.0001 -0.0002 0.0001 -0.0002 -0.0001  
Y 0.0080 -0.0030 -0.0011 -0.0002 0.0007 0.0003  
Z -0.0013 -0.0010 0.0006 -0.0001 -0.0011 0.0006  
AT. 15 C X -0.0228 -0.0065 0.0024 -0.0003 -0.0004 0.0002  
Y -0.0016 -0.0001 0.0002 0.0000 -0.0003 -0.0000  
Z -0.0048 -0.0014 0.0003 -0.0001 -0.0001 -0.0003

AT. 16 C X -0.0228 0.0065 0.0024 0.0003 -0.0004 -0.0002  
Y -0.0016 0.0001 0.0002 -0.0000 -0.0003 0.0000  
Z -0.0048 0.0014 0.0003 0.0001 -0.0001 0.0003

AT. 17 H X 0.0982 0.0288 -0.0098 0.0007 0.0033 0.0018  
Y 0.0188 0.0048 -0.0022 0.0001 0.0002 -0.0010  
Z 0.0129 0.0049 -0.0010 0.0002 0.0009 0.0016

AT. 18 H X 0.0982 -0.0288 -0.0098 -0.0007 0.0033 -0.0018  
Y 0.0188 -0.0048 -0.0022 -0.0001 0.0002 0.0010  
Z 0.0129 -0.0049 -0.0010 -0.0002 0.0009 -0.0016

AT. 19 H X 0.1346 0.0333 -0.0160 0.0013 0.0049 -0.0049  
Y 0.0173 0.0063 -0.0014 0.0002 0.0002 0.0006  
Z 0.0534 0.0133 -0.0063 0.0005 0.0018 -0.0019

AT. 20 H X 0.1346 -0.0333 -0.0160 -0.0013 0.0049 0.0049  
Y 0.0173 -0.0063 -0.0014 -0.0002 0.0002 -0.0006  
Z 0.0534 -0.0133 -0.0063 -0.0005 0.0018 0.0019

AT. 21 C X -0.0003 0.0002 -0.0003 -0.0002 0.0027 0.0028  
Y -0.0002 -0.0005 -0.0001 -0.0000 0.0052 0.0053  
Z 0.0010 -0.0005 0.0002 0.0001 0.0000 -0.0000

AT. 22 C X -0.0003 -0.0002 -0.0003 0.0002 0.0027 -0.0028  
Y -0.0002 0.0005 -0.0001 0.0000 0.0052 -0.0053  
Z 0.0010 0.0005 0.0002 -0.0001 0.0000 0.0000

AT. 23 C X -0.0000 0.0012 0.0007 0.0004 -0.0233 -0.0233  
Y -0.0006 0.0002 0.0001 -0.0000 -0.0022 -0.0022  
Z -0.0002 0.0003 -0.0001 0.0000 0.0013 0.0014

AT. 24 C X -0.0000 -0.0012 0.0007 -0.0004 -0.0233 0.0233  
Y -0.0006 -0.0002 0.0001 0.0000 -0.0022 0.0022  
Z -0.0002 -0.0003 -0.0001 -0.0000 0.0013 -0.0014

AT. 25 H X 0.0073 -0.0054 -0.0033 -0.0014 0.0788 0.0798  
Y 0.0006 -0.0009 -0.0005 -0.0003 0.0106 0.0108  
Z -0.0015 -0.0019 -0.0001 -0.0006 0.0233 0.0226

AT. 26 H X 0.0073 0.0054 -0.0033 0.0014 0.0788 -0.0798  
Y 0.0006 0.0009 -0.0005 0.0003 0.0106 -0.0108

Z -0.0015 0.0019 -0.0001 0.0006 0.0233 -0.0226  
AT. 27 H X -0.0035 -0.0116 -0.0033 -0.0025 0.1633 0.1624  
Y 0.0022 -0.0028 -0.0012 -0.0005 0.0431 0.0427  
Z 0.0021 0.0014 0.0001 0.0004 -0.0194 -0.0192  
AT. 28 H X -0.0035 0.0116 -0.0033 0.0025 0.1633 -0.1624  
Y 0.0022 0.0028 -0.0012 0.0005 0.0431 -0.0427  
Z 0.0021 -0.0014 0.0001 -0.0004 -0.0194 0.0192  
AT. 29 C X -0.0005 -0.0002 0.0002 -0.0001 -0.0012 -0.0009  
Y -0.0019 -0.0007 0.0000 -0.0003 0.0025 0.0028  
Z 0.0016 0.0005 -0.0003 -0.0000 0.0011 0.0008  
AT. 30 C X -0.0005 0.0002 0.0002 0.0001 -0.0012 0.0009  
Y -0.0019 0.0007 0.0000 0.0003 0.0025 -0.0028  
Z 0.0016 -0.0005 -0.0003 0.0000 0.0011 -0.0008  
AT. 31 H X 0.0246 0.0097 -0.0030 0.0011 -0.0046 -0.0074  
Y -0.0058 -0.0029 0.0007 -0.0005 0.0006 0.0013  
Z 0.0120 0.0034 -0.0015 0.0003 -0.0040 -0.0056  
AT. 32 H X 0.0246 -0.0097 -0.0030 -0.0011 -0.0046 0.0074  
Y -0.0058 0.0029 0.0007 0.0005 0.0006 -0.0013  
Z 0.0120 -0.0034 -0.0015 -0.0003 -0.0040 0.0056  
AT. 33 H X -0.0222 -0.0036 0.0019 -0.0008 0.0079 0.0108  
Y 0.0047 -0.0003 -0.0010 -0.0002 0.0038 0.0021  
Z -0.0163 -0.0024 0.0014 -0.0006 0.0068 0.0089  
AT. 34 H X -0.0222 0.0036 0.0019 0.0008 0.0079 -0.0108  
Y 0.0047 0.0003 -0.0010 0.0002 0.0038 -0.0021  
Z -0.0163 0.0024 0.0014 0.0006 0.0068 -0.0089  
AT. 35 C X -0.0023 0.0003 0.0003 0.0005 0.0014 0.0011  
Y 0.0054 0.0009 -0.0001 0.0004 -0.0046 -0.0055  
Z -0.0046 -0.0017 0.0009 0.0002 -0.0052 -0.0047  
AT. 36 C X -0.0023 -0.0003 0.0003 -0.0005 0.0014 -0.0011  
Y 0.0054 -0.0009 -0.0001 -0.0004 -0.0046 0.0055  
Z -0.0046 0.0017 0.0009 -0.0002 -0.0052 0.0047  
AT. 37 C X -0.0018 -0.0006 -0.0002 -0.0005 -0.0018 -0.0017



Y 0.0004 0.0000 0.0001 0.0001 0.0031 0.0035  
Z 0.0000 0.0005 -0.0003 -0.0001 0.0010 0.0010  
AT. 38 C X -0.0018 0.0006 -0.0002 0.0005 -0.0018 0.0017  
Y 0.0004 -0.0000 0.0001 -0.0001 0.0031 -0.0035  
Z 0.0000 -0.0005 -0.0003 0.0001 0.0010 -0.0010  
AT. 39 H X 0.0008 -0.0004 0.0007 0.0005 -0.0108 -0.0112  
Y -0.0131 -0.0021 0.0001 -0.0011 0.0199 0.0215  
Z 0.0078 0.0014 0.0004 0.0011 -0.0121 -0.0131  
AT. 40 H X 0.0008 0.0004 0.0007 -0.0005 -0.0108 0.0112  
Y -0.0131 0.0021 0.0001 0.0011 0.0199 -0.0215  
Z 0.0078 -0.0014 0.0004 -0.0011 -0.0121 0.0131  
AT. 41 H X -0.0032 -0.0001 -0.0006 -0.0006 0.0114 0.0121  
Y 0.0053 0.0004 0.0007 0.0007 -0.0208 -0.0215  
Z -0.0025 -0.0008 -0.0003 -0.0004 0.0064 0.0065  
AT. 42 H X -0.0032 0.0001 -0.0006 0.0006 0.0114 -0.0121  
Y 0.0053 -0.0004 0.0007 -0.0007 -0.0208 0.0215  
Z -0.0025 0.0008 -0.0003 0.0004 0.0064 -0.0065  
AT. 43 C X -0.0008 -0.0006 -0.0002 -0.0003 -0.0012 -0.0014  
Y 0.0011 0.0003 -0.0003 -0.0002 0.0007 0.0010  
Z 0.0022 0.0009 -0.0001 0.0002 -0.0006 -0.0005  
AT. 44 C X -0.0008 0.0006 -0.0002 0.0003 -0.0012 0.0014  
Y 0.0011 -0.0003 -0.0003 0.0002 0.0007 -0.0010  
Z 0.0022 -0.0009 -0.0001 -0.0002 -0.0006 0.0005  
AT. 45 H X -0.0128 -0.0010 0.0006 -0.0008 0.0072 0.0078  
Y 0.0014 0.0015 0.0011 0.0014 -0.0016 -0.0011  
Z 0.0099 -0.0001 -0.0020 -0.0010 -0.0044 -0.0051  
AT. 46 H X -0.0128 0.0010 0.0006 0.0008 0.0072 -0.0078  
Y 0.0014 -0.0015 0.0011 -0.0014 -0.0016 0.0011  
Z 0.0099 0.0001 -0.0020 0.0010 -0.0044 0.0051  
AT. 47 H X 0.0045 -0.0002 -0.0001 0.0000 -0.0087 -0.0086  
Y -0.0004 -0.0003 0.0015 0.0012 0.0010 0.0014  
Z -0.0066 -0.0002 0.0018 0.0014 0.0101 0.0100

AT. 48 H X 0.0045 0.0002 -0.0001 -0.0000 -0.0087 0.0086  
Y -0.0004 0.0003 0.0015 -0.0012 0.0010 -0.0014  
Z -0.0066 0.0002 0.0018 -0.0014 0.0101 -0.0100

AT. 49 C X 0.0026 0.0000 0.0003 0.0005 0.0012 0.0009  
Y -0.0021 -0.0003 0.0004 0.0003 -0.0012 -0.0017  
Z -0.0066 -0.0010 0.0007 0.0002 0.0002 0.0006

AT. 50 C X 0.0026 -0.0000 0.0003 -0.0005 0.0012 -0.0009  
Y -0.0021 0.0003 0.0004 -0.0003 -0.0012 0.0017  
Z -0.0066 0.0010 0.0007 -0.0002 0.0002 -0.0006

AT. 51 C X -0.0003 -0.0002 0.0000 -0.0002 -0.0013 -0.0013  
Y -0.0006 -0.0003 -0.0001 -0.0002 0.0010 0.0012  
Z -0.0000 -0.0004 -0.0003 -0.0002 0.0013 0.0010

AT. 52 C X -0.0003 0.0002 0.0000 0.0002 -0.0013 0.0013  
Y -0.0006 0.0003 -0.0001 0.0002 0.0010 -0.0012  
Z -0.0000 0.0004 -0.0003 0.0002 0.0013 -0.0010

AT. 53 H X 0.0013 -0.0006 -0.0003 -0.0002 -0.0015 -0.0024  
Y 0.0036 0.0016 -0.0001 0.0003 -0.0035 -0.0026  
Z 0.0018 0.0028 0.0003 0.0005 -0.0039 -0.0017

AT. 54 H X 0.0013 0.0006 -0.0003 0.0002 -0.0015 0.0024  
Y 0.0036 -0.0016 -0.0001 -0.0003 -0.0035 0.0026  
Z 0.0018 -0.0028 0.0003 -0.0005 -0.0039 0.0017

AT. 55 H X 0.0009 -0.0004 0.0003 -0.0001 -0.0013 -0.0005  
Y 0.0032 0.0018 -0.0013 -0.0004 0.0047 0.0038  
Z 0.0056 0.0019 -0.0017 -0.0004 0.0060 0.0048

AT. 56 H X 0.0009 0.0004 0.0003 0.0001 -0.0013 0.0005  
Y 0.0032 -0.0018 -0.0013 0.0004 0.0047 -0.0038  
Z 0.0056 -0.0019 -0.0017 0.0004 0.0060 -0.0048

AT. 57 C X -0.0001 -0.0003 -0.0001 -0.0003 -0.0005 -0.0004  
Y -0.0021 -0.0002 0.0001 -0.0002 0.0017 0.0020  
Z 0.0019 0.0005 -0.0003 -0.0001 0.0023 0.0021

AT. 58 C X -0.0001 0.0003 -0.0001 0.0003 -0.0005 0.0004  
Y -0.0021 0.0002 0.0001 0.0002 0.0017 -0.0020

Z 0.0019 -0.0005 -0.0003 0.0001 0.0023 -0.0021  
AT. 59 H X 0.0098 0.0028 -0.0005 0.0006 0.0001 -0.0010  
Y -0.0064 -0.0018 0.0005 0.0000 -0.0035 -0.0028  
Z 0.0027 -0.0001 -0.0000 0.0007 -0.0051 -0.0056  
AT. 60 H X 0.0098 -0.0028 -0.0005 -0.0006 0.0001 0.0010  
Y -0.0064 0.0018 0.0005 -0.0000 -0.0035 0.0028  
Z 0.0027 0.0001 -0.0000 -0.0007 -0.0051 0.0056  
AT. 61 H X 0.0017 0.0001 0.0005 0.0006 -0.0082 -0.0082  
Y 0.0028 0.0004 -0.0005 0.0004 0.0030 0.0020  
Z 0.0004 0.0004 0.0006 0.0003 -0.0047 -0.0045  
AT. 62 H X 0.0017 -0.0001 0.0005 -0.0006 -0.0082 0.0082  
Y 0.0028 -0.0004 -0.0005 -0.0004 0.0030 -0.0020  
Z 0.0004 -0.0004 0.0006 -0.0003 -0.0047 0.0045  
AT. 63 H X 0.0042 0.0013 -0.0009 -0.0004 0.0070 0.0067  
Y -0.0012 -0.0007 0.0006 0.0003 -0.0037 -0.0040  
Z -0.0026 -0.0009 -0.0000 -0.0003 -0.0005 0.0001  
AT. 64 H X 0.0042 -0.0013 -0.0009 0.0004 0.0070 -0.0067  
Y -0.0012 0.0007 0.0006 -0.0003 -0.0037 0.0040  
Z -0.0026 0.0009 -0.0000 0.0003 -0.0005 -0.0001  
AT. 65 C X -0.0005 0.0002 -0.0002 -0.0002 -0.0003 -0.0003  
Y 0.0005 0.0001 -0.0000 -0.0000 0.0002 0.0004  
Z 0.0024 0.0002 -0.0002 -0.0001 -0.0001 -0.0004  
AT. 66 C X -0.0005 -0.0002 -0.0002 0.0002 -0.0003 0.0003  
Y 0.0005 -0.0001 -0.0000 0.0000 0.0002 -0.0004  
Z 0.0024 -0.0002 -0.0002 0.0001 -0.0001 0.0004  
AT. 67 H X -0.0054 -0.0018 0.0007 -0.0001 -0.0003 -0.0003  
Y 0.0037 0.0007 0.0000 0.0002 -0.0004 -0.0011  
Z 0.0036 0.0011 -0.0010 -0.0004 0.0004 0.0011  
AT. 68 H X -0.0054 0.0018 0.0007 0.0001 -0.0003 0.0003  
Y 0.0037 -0.0007 0.0000 -0.0002 -0.0004 0.0011  
Z 0.0036 -0.0011 -0.0010 0.0004 0.0004 -0.0011  
AT. 69 H X -0.0003 -0.0003 0.0004 0.0004 -0.0008 -0.0013

Y -0.0002 -0.0006 0.0010 0.0009 0.0007 0.0006  
Z 0.0005 0.0005 0.0004 0.0004 0.0017 0.0019  
AT. 70 H X -0.0003 0.0003 0.0004 -0.0004 -0.0008 0.0013  
Y -0.0002 0.0006 0.0010 -0.0009 0.0007 -0.0006  
Z 0.0005 -0.0005 0.0004 -0.0004 0.0017 -0.0019  
AT. 71 H X -0.0053 -0.0006 0.0015 0.0011 0.0007 0.0019  
Y 0.0031 0.0007 -0.0011 -0.0005 -0.0002 -0.0007  
Z 0.0027 0.0002 -0.0004 0.0002 0.0003 -0.0002  
AT. 72 H X -0.0053 0.0006 0.0015 -0.0011 0.0007 -0.0019  
Y 0.0031 -0.0007 -0.0011 0.0005 -0.0002 0.0007  
Z 0.0027 -0.0002 -0.0004 -0.0002 0.0003 0.0002  
AT. 73 C X 0.0003 -0.0001 -0.0001 -0.0001 -0.0002 -0.0001  
Y -0.0007 -0.0000 -0.0001 -0.0001 0.0008 0.0011  
Z 0.0027 0.0009 -0.0005 -0.0002 0.0017 0.0015  
AT. 74 C X 0.0003 0.0001 -0.0001 0.0001 -0.0002 0.0001  
Y -0.0007 0.0000 -0.0001 0.0001 0.0008 -0.0011  
Z 0.0027 -0.0009 -0.0005 0.0002 0.0017 -0.0015  
AT. 75 H X -0.0064 -0.0014 0.0008 0.0002 -0.0007 -0.0003  
Y 0.0039 0.0012 -0.0004 0.0004 -0.0003 -0.0009  
Z 0.0039 0.0015 -0.0002 0.0007 -0.0001 -0.0013  
AT. 76 H X -0.0064 0.0014 0.0008 -0.0002 -0.0007 0.0003  
Y 0.0039 -0.0012 -0.0004 -0.0004 -0.0003 0.0009  
Z 0.0039 -0.0015 -0.0002 -0.0007 -0.0001 0.0013  
AT. 77 H X 0.0056 0.0005 -0.0010 -0.0007 -0.0123 -0.0130  
Y -0.0024 -0.0008 0.0009 0.0005 0.0077 0.0080  
Z -0.0006 0.0011 -0.0005 -0.0002 0.0063 0.0069  
AT. 78 H X 0.0056 -0.0005 -0.0010 0.0007 -0.0123 0.0130  
Y -0.0024 0.0008 0.0009 -0.0005 0.0077 -0.0080  
Z -0.0006 -0.0011 -0.0005 0.0002 0.0063 -0.0069  
AT. 79 I X -0.0000 -0.0001 -0.0000 -0.0001 0.0000 -0.0000  
Y 0.0001 0.0003 -0.0000 0.0001 -0.0000 0.0000  
Z -0.0000 -0.0002 0.0000 -0.0001 0.0000 -0.0000

AT. 80 I X -0.0000 0.0001 -0.0000 0.0001 0.0000 0.0000  
Y 0.0001 -0.0003 -0.0000 -0.0001 -0.0000 -0.0000  
Z -0.0000 0.0002 0.0000 0.0001 0.0000 0.0000

AT. 81 I X -0.0000 0.0001 -0.0002 -0.0002 -0.0000 -0.0000  
Y 0.0000 -0.0000 0.0002 0.0002 -0.0000 -0.0000  
Z 0.0001 -0.0000 0.0004 0.0004 0.0000 -0.0000

AT. 82 I X -0.0000 -0.0001 -0.0002 0.0002 -0.0000 0.0000  
Y 0.0000 0.0000 0.0002 -0.0002 -0.0000 0.0000  
Z 0.0001 0.0000 0.0004 -0.0004 0.0000 0.0000

AT. 83 O X -0.0001 0.0045 -0.0020 0.0009 -0.0001 0.0004  
Y 0.0002 0.0022 -0.0006 0.0003 -0.0001 0.0002  
Z -0.0000 0.0028 -0.0013 0.0001 0.0000 0.0003

AT. 84 O X -0.0001 -0.0045 -0.0020 -0.0009 -0.0001 -0.0004  
Y 0.0002 -0.0022 -0.0006 -0.0003 -0.0001 -0.0002  
Z -0.0000 -0.0028 -0.0013 -0.0001 0.0000 -0.0003

AT. 85 O X 0.0008 -0.0009 0.0033 0.0030 0.0004 0.0002  
Y 0.0006 -0.0008 0.0033 0.0030 0.0000 0.0000  
Z 0.0000 0.0002 -0.0003 -0.0001 0.0002 0.0001

AT. 86 O X 0.0008 0.0009 0.0033 -0.0030 0.0004 -0.0002  
Y 0.0006 0.0008 0.0033 -0.0030 0.0000 -0.0000  
Z 0.0000 -0.0002 -0.0003 0.0001 0.0002 -0.0001

AT. 87 N X 0.0004 0.0031 0.0023 0.0019 -0.0002 0.0002  
Y -0.0009 -0.0011 0.0008 0.0015 -0.0002 -0.0003  
Z -0.0010 -0.0008 -0.0000 0.0007 -0.0002 -0.0004

AT. 88 N X 0.0004 -0.0031 0.0023 -0.0019 -0.0002 -0.0002  
Y -0.0009 0.0011 0.0008 -0.0015 -0.0002 0.0003  
Z -0.0010 0.0008 -0.0000 -0.0007 -0.0002 0.0004

AT. 89 N X 0.0003 -0.0021 0.0030 0.0042 -0.0000 -0.0003  
Y 0.0010 0.0038 -0.0004 0.0005 -0.0008 -0.0002  
Z -0.0002 -0.0004 -0.0003 -0.0005 -0.0011 -0.0007

AT. 90 N X 0.0003 0.0021 0.0030 -0.0042 -0.0000 0.0003  
Y 0.0010 -0.0038 -0.0004 -0.0005 -0.0008 0.0002

Z -0.0002 0.0004 -0.0003 0.0005 -0.0011 0.0007  
AT. 91 C X 0.0008 0.0008 0.0003 0.0002 0.0000 -0.0001  
Y -0.0015 -0.0063 0.0004 -0.0007 0.0003 -0.0006  
Z 0.0010 -0.0005 0.0027 -0.0015 -0.0004 0.0002  
AT. 92 C X 0.0008 -0.0008 0.0003 -0.0002 0.0000 0.0001  
Y -0.0015 0.0063 0.0004 0.0007 0.0003 0.0006  
Z 0.0010 0.0005 0.0027 0.0015 -0.0004 -0.0002  
AT. 93 C X -0.0036 -0.0191 0.0028 -0.0038 0.0006 -0.0014  
Y 0.0019 0.0080 -0.0008 0.0013 -0.0003 0.0007  
Z 0.0012 0.0045 -0.0008 0.0011 -0.0000 0.0003  
AT. 94 C X -0.0036 0.0191 0.0028 0.0038 0.0006 0.0014  
Y 0.0019 -0.0080 -0.0008 -0.0013 -0.0003 -0.0007  
Z 0.0012 -0.0045 -0.0008 -0.0011 -0.0000 -0.0003  
AT. 95 H X 0.0188 0.0621 -0.0043 0.0074 -0.0021 0.0054  
Y -0.0105 -0.0433 0.0053 -0.0074 0.0015 -0.0036  
Z -0.0026 0.0058 -0.0037 0.0041 0.0000 0.0003  
AT. 96 H X 0.0188 -0.0621 -0.0043 -0.0074 -0.0021 -0.0054  
Y -0.0105 0.0433 0.0053 0.0074 0.0015 0.0036  
Z -0.0026 -0.0058 -0.0037 -0.0041 0.0000 -0.0003  
AT. 97 H X 0.0226 0.1147 -0.0185 0.0234 -0.0055 0.0087  
Y -0.0119 -0.0642 0.0103 -0.0142 0.0017 -0.0051  
Z -0.0102 -0.0541 0.0083 -0.0109 0.0023 -0.0042  
AT. 98 H X 0.0226 -0.1147 -0.0185 -0.0234 -0.0055 -0.0087  
Y -0.0119 0.0642 0.0103 0.0142 0.0017 0.0051  
Z -0.0102 0.0541 0.0083 0.0109 0.0023 0.0042  
AT. 99 C X -0.0007 0.0000 0.0009 0.0011 -0.0009 -0.0005  
Y -0.0009 -0.0007 -0.0053 -0.0056 0.0006 0.0002  
Z -0.0013 0.0029 -0.0053 -0.0046 -0.0018 -0.0007  
AT. 100 C X -0.0007 -0.0000 0.0009 -0.0011 -0.0009 0.0005  
Y -0.0009 0.0007 -0.0053 0.0056 0.0006 -0.0002  
Z -0.0013 -0.0029 -0.0053 0.0046 -0.0018 0.0007  
AT. 101 C X -0.0032 0.0017 -0.0219 -0.0226 0.0002 0.0000

Y 0.0013 0.0002 0.0085 0.0086 -0.0003 -0.0001  
Z 0.0002 -0.0001 0.0004 -0.0004 0.0010 0.0005  
AT. 102 C X -0.0032 -0.0017 -0.0219 0.0226 0.0002 -0.0000  
Y 0.0013 -0.0002 0.0085 -0.0086 -0.0003 0.0001  
Z 0.0002 0.0001 0.0004 0.0004 0.0010 -0.0005  
AT. 103 H X 0.0135 0.0007 0.0806 0.0851 -0.0024 -0.0003  
Y -0.0057 0.0000 -0.0345 -0.0367 0.0010 0.0001  
Z -0.0027 0.0029 -0.0220 -0.0189 -0.0018 -0.0007  
AT. 104 H X 0.0135 -0.0007 0.0806 -0.0851 -0.0024 0.0003  
Y -0.0057 -0.0000 -0.0345 0.0367 0.0010 -0.0001  
Z -0.0027 -0.0029 -0.0220 0.0189 -0.0018 0.0007  
AT. 105 H X 0.0214 -0.0159 0.1451 0.1454 0.0070 0.0038  
Y -0.0124 0.0043 -0.0806 -0.0792 -0.0016 -0.0012  
Z 0.0009 -0.0036 0.0066 0.0064 0.0021 0.0009  
AT. 106 H X 0.0214 0.0159 0.1451 -0.1454 0.0070 -0.0038  
Y -0.0124 -0.0043 -0.0806 0.0792 -0.0016 0.0012  
Z 0.0009 0.0036 0.0066 -0.0064 0.0021 -0.0009  
AT. 107 C X 0.0004 -0.0018 -0.0015 -0.0014 0.0001 0.0001  
Y 0.0010 0.0011 -0.0011 -0.0012 0.0007 0.0005  
Z -0.0008 -0.0024 0.0006 0.0001 0.0006 0.0000  
AT. 108 C X 0.0004 0.0018 -0.0015 0.0014 0.0001 -0.0001  
Y 0.0010 -0.0011 -0.0011 0.0012 0.0007 -0.0005  
Z -0.0008 0.0024 0.0006 -0.0001 0.0006 -0.0000  
AT. 109 H X 0.0074 0.0276 -0.0061 -0.0049 -0.0009 0.0038  
Y -0.0007 -0.0051 0.0013 0.0014 0.0006 -0.0008  
Z -0.0062 -0.0226 0.0060 0.0055 0.0009 -0.0035  
AT. 110 H X 0.0074 -0.0276 -0.0061 0.0049 -0.0009 -0.0038  
Y -0.0007 0.0051 0.0013 -0.0014 0.0006 0.0008  
Z -0.0062 0.0226 0.0060 -0.0055 0.0009 0.0035  
AT. 111 H X -0.0062 -0.0195 0.0058 -0.0010 -0.0001 -0.0035  
Y -0.0002 -0.0051 -0.0017 -0.0013 0.0013 0.0008  
Z 0.0067 0.0183 -0.0070 -0.0003 0.0007 0.0038

AT.112 H X -0.0062 0.0195 0.0058 0.0010 -0.0001 0.0035  
Y -0.0002 0.0051 -0.0017 0.0013 0.0013 -0.0008  
Z 0.0067 -0.0183 -0.0070 0.0003 0.0007 -0.0038

AT.113 C X -0.0044 -0.0058 0.0036 0.0043 -0.0004 -0.0013  
Y -0.0029 -0.0032 0.0025 0.0016 -0.0019 -0.0013  
Z 0.0044 0.0127 -0.0014 -0.0012 -0.0018 0.0004

AT.114 C X -0.0044 0.0058 0.0036 -0.0043 -0.0004 0.0013  
Y -0.0029 0.0032 0.0025 -0.0016 -0.0019 0.0013  
Z 0.0044 -0.0127 -0.0014 0.0012 -0.0018 -0.0004

AT.115 C X 0.0001 0.0002 -0.0019 -0.0029 0.0003 0.0003  
Y -0.0002 -0.0003 -0.0010 -0.0009 0.0010 0.0007  
Z 0.0002 -0.0020 0.0010 0.0013 0.0011 0.0004

AT.116 C X 0.0001 -0.0002 -0.0019 0.0029 0.0003 -0.0003  
Y -0.0002 0.0003 -0.0010 0.0009 0.0010 -0.0007  
Z 0.0002 0.0020 0.0010 -0.0013 0.0011 -0.0004

AT.117 H X 0.0012 -0.0060 -0.0032 -0.0037 0.0057 0.0030  
Y 0.0045 0.0056 -0.0065 -0.0045 0.0039 0.0031  
Z -0.0021 0.0024 0.0034 0.0025 -0.0053 -0.0030

AT.118 H X 0.0012 0.0060 -0.0032 0.0037 0.0057 -0.0030  
Y 0.0045 -0.0056 -0.0065 0.0045 0.0039 -0.0031  
Z -0.0021 -0.0024 0.0034 -0.0025 -0.0053 0.0030

AT.119 H X 0.0001 0.0074 0.0024 0.0003 -0.0076 -0.0046  
Y 0.0037 0.0115 0.0016 0.0007 -0.0071 -0.0042  
Z -0.0034 -0.0091 0.0006 0.0011 0.0047 0.0026

AT.120 H X 0.0001 -0.0074 0.0024 -0.0003 -0.0076 0.0046  
Y 0.0037 -0.0115 0.0016 -0.0007 -0.0071 0.0042  
Z -0.0034 0.0091 0.0006 -0.0011 0.0047 -0.0026

AT.121 C X -0.0006 0.0017 -0.0017 -0.0025 -0.0005 -0.0001  
Y -0.0009 -0.0017 0.0008 0.0001 0.0003 -0.0002  
Z 0.0003 -0.0016 0.0019 0.0016 0.0005 0.0000

AT.122 C X -0.0006 -0.0017 -0.0017 0.0025 -0.0005 0.0001  
Y -0.0009 0.0017 0.0008 -0.0001 0.0003 0.0002



Z 0.0003 0.0016 0.0019 -0.0016 0.0005 -0.0000  
AT. 123 H X -0.0019 -0.0278 0.0220 0.0165 0.0052 0.0001  
Y 0.0031 0.0100 -0.0051 -0.0026 -0.0005 0.0006  
Z -0.0037 -0.0191 0.0123 0.0078 0.0023 -0.0008  
AT. 124 H X -0.0019 0.0278 0.0220 -0.0165 0.0052 -0.0001  
Y 0.0031 -0.0100 -0.0051 0.0026 -0.0005 -0.0006  
Z -0.0037 0.0191 0.0123 -0.0078 0.0023 0.0008  
AT. 125 H X -0.0025 0.0170 -0.0200 -0.0137 -0.0016 0.0011  
Y 0.0010 -0.0029 0.0071 0.0022 0.0007 0.0006  
Z -0.0011 0.0162 -0.0175 -0.0113 -0.0006 0.0019  
AT. 126 H X -0.0025 -0.0170 -0.0200 0.0137 -0.0016 -0.0011  
Y 0.0010 0.0029 0.0071 -0.0022 0.0007 -0.0006  
Z -0.0011 -0.0162 -0.0175 0.0113 -0.0006 -0.0019  
AT. 127 C X 0.0055 0.0064 -0.0000 0.0012 0.0007 0.0009  
Y 0.0010 0.0035 -0.0022 -0.0006 -0.0010 0.0002  
Z 0.0040 0.0108 -0.0039 -0.0051 -0.0008 0.0008  
AT. 128 C X 0.0055 -0.0064 -0.0000 -0.0012 0.0007 -0.0009  
Y 0.0010 -0.0035 -0.0022 0.0006 -0.0010 -0.0002  
Z 0.0040 -0.0108 -0.0039 0.0051 -0.0008 -0.0008  
AT. 129 C X -0.0007 -0.0013 -0.0016 -0.0016 -0.0001 -0.0001  
Y 0.0003 -0.0003 0.0006 -0.0002 0.0005 0.0001  
Z 0.0004 -0.0003 -0.0003 0.0006 0.0004 0.0002  
AT. 130 C X -0.0007 0.0013 -0.0016 0.0016 -0.0001 0.0001  
Y 0.0003 0.0003 0.0006 0.0002 0.0005 -0.0001  
Z 0.0004 0.0003 -0.0003 -0.0006 0.0004 -0.0002  
AT. 131 H X -0.0016 -0.0050 0.0030 -0.0027 0.0003 -0.0005  
Y -0.0018 -0.0135 0.0083 0.0018 0.0005 -0.0009  
Z -0.0017 -0.0119 0.0095 -0.0001 0.0008 -0.0008  
AT. 132 H X -0.0016 0.0050 0.0030 0.0027 0.0003 0.0005  
Y -0.0018 0.0135 0.0083 -0.0018 0.0005 0.0009  
Z -0.0017 0.0119 0.0095 0.0001 0.0008 0.0008  
AT. 133 H X 0.0011 0.0048 -0.0074 0.0040 -0.0004 0.0005

Y -0.0010 -0.0038 -0.0053 0.0026 0.0001 -0.0005  
Z -0.0026 -0.0088 -0.0069 0.0022 -0.0001 -0.0011  
AT. 134 H X 0.0011 -0.0048 -0.0074 -0.0040 -0.0004 -0.0005  
Y -0.0010 0.0038 -0.0053 -0.0026 0.0001 0.0005  
Z -0.0026 0.0088 -0.0069 -0.0022 -0.0001 0.0011  
AT. 135 C X 0.0011 0.0014 -0.0010 -0.0012 0.0001 0.0005  
Y 0.0012 0.0011 -0.0006 -0.0003 0.0004 0.0008  
Z -0.0017 -0.0053 0.0004 0.0002 0.0010 -0.0004  
AT. 136 C X 0.0011 -0.0014 -0.0010 0.0012 0.0001 -0.0005  
Y 0.0012 -0.0011 -0.0006 0.0003 0.0004 -0.0008  
Z -0.0017 0.0053 0.0004 -0.0002 0.0010 0.0004  
AT. 137 H X 0.0077 0.0146 -0.0026 -0.0017 -0.0004 0.0017  
Y 0.0017 0.0065 0.0001 0.0004 -0.0014 0.0005  
Z -0.0036 -0.0022 0.0023 0.0016 -0.0018 -0.0014  
AT. 138 H X 0.0077 -0.0146 -0.0026 0.0017 -0.0004 -0.0017  
Y 0.0017 -0.0065 0.0001 -0.0004 -0.0014 -0.0005  
Z -0.0036 0.0022 0.0023 -0.0016 -0.0018 0.0014  
AT. 139 H X 0.0016 -0.0037 -0.0028 -0.0033 0.0029 0.0005  
Y -0.0005 -0.0025 -0.0002 -0.0013 0.0004 -0.0016  
Z -0.0013 0.0036 0.0023 0.0031 -0.0027 0.0002  
AT. 140 H X 0.0016 0.0037 -0.0028 0.0033 0.0029 -0.0005  
Y -0.0005 0.0025 -0.0002 0.0013 0.0004 0.0016  
Z -0.0013 -0.0036 0.0023 -0.0031 -0.0027 -0.0002  
AT. 141 H X 0.0043 0.0151 -0.0014 -0.0015 -0.0023 -0.0005  
Y 0.0016 0.0027 -0.0011 -0.0017 0.0003 -0.0013  
Z -0.0010 -0.0016 0.0009 0.0017 -0.0001 0.0013  
AT. 142 H X 0.0043 -0.0151 -0.0014 0.0015 -0.0023 0.0005  
Y 0.0016 -0.0027 -0.0011 0.0017 0.0003 0.0013  
Z -0.0010 0.0016 0.0009 -0.0017 -0.0001 -0.0013  
AT. 143 C X -0.0018 -0.0015 -0.0004 -0.0010 -0.0002 -0.0002  
Y -0.0001 -0.0009 0.0011 0.0001 0.0003 -0.0001  
Z -0.0017 -0.0048 0.0016 0.0019 0.0003 -0.0003

AT. 144 C X -0.0018 0.0015 -0.0004 0.0010 -0.0002 0.0002  
Y -0.0001 0.0009 0.0011 -0.0001 0.0003 0.0001  
Z -0.0017 0.0048 0.0016 -0.0019 0.0003 0.0003

AT. 145 H X -0.0033 -0.0138 0.0072 0.0073 0.0013 -0.0011  
Y -0.0008 -0.0036 0.0012 0.0024 0.0004 0.0001  
Z -0.0013 -0.0058 0.0035 0.0018 0.0006 -0.0008

AT. 146 H X -0.0033 0.0138 0.0072 -0.0073 0.0013 0.0011  
Y -0.0008 0.0036 0.0012 -0.0024 0.0004 -0.0001  
Z -0.0013 0.0058 0.0035 -0.0018 0.0006 0.0008

AT. 147 H X -0.0021 0.0019 -0.0011 -0.0033 -0.0004 -0.0001  
Y -0.0011 0.0022 -0.0027 -0.0021 -0.0007 0.0002  
Z -0.0023 0.0030 -0.0018 -0.0032 -0.0006 0.0000

AT. 148 H X -0.0021 -0.0019 -0.0011 0.0033 -0.0004 0.0001  
Y -0.0011 -0.0022 -0.0027 0.0021 -0.0007 -0.0002  
Z -0.0023 -0.0030 -0.0018 0.0032 -0.0006 -0.0000

AT. 149 H X -0.0045 -0.0105 0.0027 0.0064 -0.0002 -0.0011  
Y -0.0015 -0.0010 -0.0005 0.0005 -0.0008 -0.0006  
Z -0.0031 -0.0011 -0.0025 -0.0013 -0.0015 -0.0008

AT. 150 H X -0.0045 0.0105 0.0027 -0.0064 -0.0002 0.0011  
Y -0.0015 0.0010 -0.0005 -0.0005 -0.0008 0.0006  
Z -0.0031 0.0011 -0.0025 0.0013 -0.0015 0.0008

AT. 151 C X -0.0003 -0.0009 -0.0002 -0.0008 -0.0001 -0.0001  
Y 0.0003 -0.0000 0.0001 -0.0001 0.0007 0.0002  
Z -0.0017 -0.0058 0.0012 0.0017 0.0008 -0.0002

AT. 152 C X -0.0003 0.0009 -0.0002 0.0008 -0.0001 0.0001  
Y 0.0003 0.0000 0.0001 0.0001 0.0007 -0.0002  
Z -0.0017 0.0058 0.0012 -0.0017 0.0008 0.0002

AT. 153 H X -0.0024 -0.0089 0.0026 -0.0030 -0.0007 -0.0000  
Y 0.0002 0.0003 -0.0000 -0.0016 -0.0006 0.0001  
Z -0.0011 -0.0023 -0.0002 0.0000 -0.0009 -0.0003

AT. 154 H X -0.0024 0.0089 0.0026 0.0030 -0.0007 0.0000  
Y 0.0002 -0.0003 -0.0000 0.0016 -0.0006 -0.0001

Z -0.0011 0.0023 -0.0002 -0.0000 -0.0009 0.0003  
AT. 155 H X 0.0014 0.0073 -0.0119 -0.0099 0.0022 0.0017  
Y -0.0009 0.0006 -0.0036 -0.0030 -0.0004 0.0001  
Z 0.0007 -0.0032 0.0005 0.0014 0.0027 0.0006  
AT. 156 H X 0.0014 -0.0073 -0.0119 0.0099 0.0022 -0.0017  
Y -0.0009 -0.0006 -0.0036 0.0030 -0.0004 -0.0001  
Z 0.0007 0.0032 0.0005 -0.0014 0.0027 -0.0006  
AT. 157 O X -0.0002 0.0001 0.0000 -0.0001 0.0002 -0.0001  
Y 0.0000 0.0001 -0.0000 -0.0001 0.0003 -0.0004  
Z -0.0000 -0.0001 0.0000 -0.0000 0.0002 -0.0002  
AT. 158 O X -0.0002 -0.0001 0.0000 0.0001 0.0002 0.0001  
Y 0.0000 -0.0001 -0.0000 0.0001 0.0003 0.0004  
Z -0.0000 0.0001 0.0000 0.0000 0.0002 0.0002  
AT. 159 O X -0.0001 -0.0000 0.0000 -0.0000 -0.0002 0.0002  
Y 0.0002 -0.0001 0.0000 0.0001 -0.0003 0.0003  
Z -0.0000 0.0000 0.0000 0.0001 -0.0002 0.0002  
AT. 160 O X -0.0001 0.0000 0.0000 0.0000 -0.0002 -0.0002  
Y 0.0002 0.0001 0.0000 -0.0001 -0.0003 -0.0003  
Z -0.0000 -0.0000 0.0000 -0.0001 -0.0002 -0.0002  
AT. 161 H X 0.0026 -0.0022 0.0006 0.0022 -0.0061 0.0043  
Y -0.0004 0.0007 0.0001 -0.0002 -0.0005 0.0010  
Z 0.0031 -0.0006 0.0001 0.0013 -0.0006 -0.0017  
AT. 162 H X 0.0026 0.0022 0.0006 -0.0022 -0.0061 -0.0043  
Y -0.0004 -0.0007 0.0001 0.0002 -0.0005 -0.0010  
Z 0.0031 0.0006 0.0001 -0.0013 -0.0006 0.0017  
AT. 163 H X 0.0004 -0.0002 -0.0002 -0.0002 0.0029 -0.0028  
Y -0.0040 0.0002 -0.0002 0.0001 0.0041 -0.0041  
Z -0.0016 -0.0004 0.0003 -0.0000 -0.0009 0.0008  
AT. 164 H X 0.0004 0.0002 -0.0002 0.0002 0.0029 0.0028  
Y -0.0040 -0.0002 -0.0002 -0.0001 0.0041 0.0041  
Z -0.0016 0.0004 0.0003 0.0000 -0.0009 -0.0008  
AT. 165 O X -0.0000 -0.0001 0.0003 -0.0003 0.0000 -0.0000

Y 0.0001 -0.0000 0.0002 -0.0002 -0.0000 0.0000  
Z -0.0000 0.0001 -0.0002 0.0003 0.0000 -0.0000  
AT. 166 O X -0.0000 0.0001 0.0003 0.0003 0.0000 0.0000

Y 0.0001 0.0000 0.0002 0.0002 -0.0000 -0.0000  
Z -0.0000 -0.0001 -0.0002 -0.0003 0.0000 0.0000

AT. 167 H X -0.0002 0.0003 -0.0014 0.0014 0.0001 -0.0001  
Y 0.0005 -0.0002 0.0016 -0.0012 -0.0002 0.0002  
Z 0.0001 -0.0015 0.0021 -0.0031 -0.0003 0.0000

AT. 168 H X -0.0002 -0.0003 -0.0014 -0.0014 0.0001 0.0001  
Y 0.0005 0.0002 0.0016 0.0012 -0.0002 -0.0002  
Z 0.0001 0.0015 0.0021 0.0031 -0.0003 -0.0000

AT. 169 O X -0.0000 -0.0000 -0.0001 0.0001 0.0000 -0.0000  
Y -0.0001 0.0000 -0.0005 0.0005 0.0001 -0.0001  
Z -0.0000 0.0001 -0.0002 0.0003 0.0001 -0.0000

AT. 170 O X -0.0000 0.0000 -0.0001 -0.0001 0.0000 0.0000  
Y -0.0001 -0.0000 -0.0005 -0.0005 0.0001 0.0001  
Z -0.0000 -0.0001 -0.0002 -0.0003 0.0001 0.0000

AT. 171 H X 0.0001 -0.0009 0.0012 -0.0010 -0.0007 0.0004  
Y 0.0002 -0.0007 0.0016 -0.0015 -0.0007 0.0005  
Z 0.0006 -0.0015 0.0023 -0.0028 -0.0010 0.0005

AT. 172 H X 0.0001 0.0009 0.0012 0.0010 -0.0007 -0.0004  
Y 0.0002 0.0007 0.0016 0.0015 -0.0007 -0.0005  
Z 0.0006 0.0015 0.0023 0.0028 -0.0010 -0.0005

FREQ(CM\*\*-1) 1265.69 1266.50 1269.36 1270.20 1274.43 1274.77

AT. 1 I X -0.0000 0.0000 -0.0000 -0.0000 -0.0000 -0.0000  
Y 0.0000 0.0000 0.0000 0.0000 0.0001 0.0001  
Z 0.0000 -0.0000 0.0000 -0.0000 0.0000 0.0000

AT. 2 I X -0.0000 -0.0000 0.0000 -0.0000 -0.0000 0.0000  
Y 0.0000 -0.0000 -0.0000 0.0000 0.0001 -0.0001  
Z 0.0000 0.0000 -0.0000 -0.0000 0.0000 -0.0000

AT. 3 I X -0.0000 0.0000 -0.0001 -0.0001 0.0000 0.0000  
Y -0.0000 -0.0000 0.0000 0.0001 -0.0000 -0.0000  
Z -0.0000 -0.0000 -0.0001 -0.0001 0.0000 0.0000

AT. 4 I X -0.0000 -0.0000 0.0001 -0.0001 0.0000 -0.0000  
Y -0.0000 0.0000 -0.0000 0.0001 -0.0000 0.0000  
Z -0.0000 0.0000 0.0001 -0.0001 0.0000 -0.0000

AT. 5 O X -0.0001 -0.0003 0.0015 0.0011 0.0036 0.0036  
Y 0.0000 0.0002 -0.0011 -0.0008 -0.0030 -0.0030  
Z 0.0002 0.0005 -0.0013 -0.0014 -0.0019 -0.0019

AT. 6 O X -0.0001 0.0003 -0.0015 0.0011 0.0036 -0.0036  
Y 0.0000 -0.0002 0.0011 -0.0008 -0.0030 0.0030  
Z 0.0002 -0.0005 0.0013 -0.0014 -0.0019 0.0019

AT. 7 O X -0.0002 -0.0004 0.0044 0.0045 -0.0000 -0.0006  
Y -0.0001 0.0001 -0.0037 -0.0037 -0.0004 0.0002  
Z 0.0001 0.0002 0.0000 0.0000 0.0011 0.0009

AT. 8 O X -0.0002 0.0004 -0.0044 0.0045 -0.0000 0.0006  
Y -0.0001 -0.0001 0.0037 -0.0037 -0.0004 -0.0002  
Z 0.0001 -0.0002 -0.0000 0.0000 0.0011 -0.0009

AT. 9 N X 0.0005 0.0003 -0.0045 -0.0041 -0.0102 -0.0108  
Y -0.0005 -0.0003 0.0061 0.0051 0.0125 0.0127  
Z -0.0003 -0.0004 0.0015 0.0020 0.0001 0.0000

AT. 10 N X 0.0005 -0.0003 0.0045 -0.0041 -0.0102 0.0108  
Y -0.0005 0.0003 -0.0061 0.0051 0.0125 -0.0127  
Z -0.0003 0.0004 -0.0015 0.0020 0.0001 -0.0000

AT. 11 N X 0.0005 -0.0001 -0.0058 -0.0063 -0.0023 -0.0007  
Y -0.0014 -0.0012 0.0118 0.0124 0.0009 -0.0013  
Z -0.0006 -0.0008 0.0068 0.0071 -0.0023 -0.0031

AT. 12 N X 0.0005 0.0001 0.0058 -0.0063 -0.0023 0.0007  
Y -0.0014 0.0012 -0.0118 0.0124 0.0009 0.0013  
Z -0.0006 0.0008 -0.0068 0.0071 -0.0023 0.0031

AT. 13 C X -0.0001 -0.0002 -0.0024 -0.0013 -0.0091 -0.0093  
Y 0.0002 0.0000 0.0025 0.0015 0.0090 0.0089

Z -0.0005 -0.0009 -0.0033 -0.0013 -0.0139 -0.0135  
AT. 14 C X -0.0001 0.0002 0.0024 -0.0013 -0.0091 0.0093  
Y 0.0002 -0.0000 -0.0025 0.0015 0.0090 -0.0089  
Z -0.0005 0.0009 0.0033 -0.0013 -0.0139 0.0135  
AT. 15 C X 0.0001 0.0006 0.0018 0.0008 0.0068 0.0075  
Y -0.0001 -0.0002 -0.0015 -0.0011 -0.0040 -0.0039  
Z 0.0001 0.0003 0.0024 0.0014 0.0084 0.0085  
AT. 16 C X 0.0001 -0.0006 -0.0018 0.0008 0.0068 -0.0075  
Y -0.0001 0.0002 0.0015 -0.0011 -0.0040 0.0039  
Z 0.0001 -0.0003 -0.0024 0.0014 0.0084 -0.0085  
AT. 17 H X -0.0001 -0.0024 -0.0084 -0.0026 -0.0342 -0.0357  
Y -0.0002 -0.0004 0.0005 0.0015 -0.0001 -0.0007  
Z 0.0001 -0.0006 -0.0039 -0.0032 -0.0121 -0.0120  
AT. 18 H X -0.0001 0.0024 0.0084 -0.0026 -0.0342 0.0357  
Y -0.0002 0.0004 -0.0005 0.0015 -0.0001 0.0007  
Z 0.0001 0.0006 0.0039 -0.0032 -0.0121 0.0120  
AT. 19 H X 0.0007 -0.0008 0.0034 0.0014 0.0166 0.0118  
Y -0.0004 -0.0012 -0.0031 0.0003 -0.0203 -0.0204  
Z 0.0002 -0.0005 0.0025 0.0022 0.0062 0.0044  
AT. 20 H X 0.0007 0.0008 -0.0034 0.0014 0.0166 -0.0118  
Y -0.0004 0.0012 0.0031 0.0003 -0.0203 0.0204  
Z 0.0002 0.0005 -0.0025 0.0022 0.0062 -0.0044  
AT. 21 C X 0.0012 0.0013 -0.0071 -0.0076 0.0025 0.0034  
Y 0.0008 0.0007 -0.0013 -0.0015 0.0010 0.0012  
Z -0.0015 -0.0022 0.0139 0.0148 -0.0059 -0.0075  
AT. 22 C X 0.0012 -0.0013 0.0071 -0.0076 0.0025 -0.0034  
Y 0.0008 -0.0007 0.0013 -0.0015 0.0010 -0.0012  
Z -0.0015 0.0022 -0.0139 0.0148 -0.0059 0.0075  
AT. 23 C X -0.0027 -0.0017 -0.0001 0.0004 -0.0012 -0.0018  
Y -0.0004 -0.0004 0.0017 0.0018 -0.0005 -0.0009  
Z 0.0009 0.0011 -0.0070 -0.0074 0.0024 0.0029  
AT. 24 C X -0.0027 0.0017 0.0001 0.0004 -0.0012 0.0018

Y -0.0004 0.0004 -0.0017 0.0018 -0.0005 0.0009  
Z 0.0009 -0.0011 0.0070 -0.0074 0.0024 -0.0029  
AT. 25 H X 0.0109 0.0083 -0.0086 -0.0109 0.0059 0.0087  
Y 0.0017 0.0014 -0.0020 -0.0023 0.0014 0.0014  
Z 0.0006 -0.0009 0.0140 0.0143 -0.0037 -0.0025  
AT. 26 H X 0.0109 -0.0083 0.0086 -0.0109 0.0059 -0.0087  
Y 0.0017 -0.0014 0.0020 -0.0023 0.0014 -0.0014  
Z 0.0006 0.0009 -0.0140 0.0143 -0.0037 0.0025  
AT. 27 H X 0.0114 0.0018 0.0561 0.0557 -0.0130 -0.0146  
Y 0.0045 0.0027 0.0024 0.0015 0.0012 0.0037  
Z 0.0002 0.0020 -0.0201 -0.0208 0.0060 0.0083  
AT. 28 H X 0.0114 -0.0018 -0.0561 0.0557 -0.0130 0.0146  
Y 0.0045 -0.0027 -0.0024 0.0015 0.0012 -0.0037  
Z 0.0002 -0.0020 0.0201 -0.0208 0.0060 -0.0083  
AT. 29 C X -0.0001 0.0001 0.0002 0.0005 0.0037 0.0041  
Y 0.0008 0.0008 -0.0083 -0.0075 -0.0060 -0.0054  
Z 0.0006 0.0007 -0.0019 -0.0028 0.0074 0.0080  
AT. 30 C X -0.0001 -0.0001 -0.0002 0.0005 0.0037 -0.0041  
Y 0.0008 -0.0008 0.0083 -0.0075 -0.0060 0.0054  
Z 0.0006 -0.0007 0.0019 -0.0028 0.0074 -0.0080  
AT. 31 H X -0.0006 -0.0009 0.0149 0.0116 0.0273 0.0246  
Y 0.0000 0.0003 -0.0077 -0.0052 -0.0125 -0.0122  
Z -0.0010 -0.0006 0.0085 0.0079 0.0119 0.0099  
AT. 32 H X -0.0006 0.0009 -0.0149 0.0116 0.0273 -0.0246  
Y 0.0000 -0.0003 0.0077 -0.0052 -0.0125 0.0122  
Z -0.0010 0.0006 -0.0085 0.0079 0.0119 -0.0099  
AT. 33 H X 0.0022 0.0017 -0.0203 -0.0205 -0.0050 -0.0017  
Y 0.0010 0.0016 -0.0034 -0.0057 0.0104 0.0111  
Z 0.0020 0.0016 -0.0177 -0.0177 -0.0056 -0.0030  
AT. 34 H X 0.0022 -0.0017 0.0203 -0.0205 -0.0050 0.0017  
Y 0.0010 -0.0016 0.0034 -0.0057 0.0104 -0.0111  
Z 0.0020 -0.0016 0.0177 -0.0177 -0.0056 0.0030



AT. 35 C X 0.0002 0.0000 0.0025 0.0009 0.0048 0.0052  
Y -0.0018 -0.0020 0.0178 0.0166 0.0036 0.0017  
Z -0.0020 -0.0021 0.0138 0.0155 -0.0089 -0.0108

AT. 36 C X 0.0002 -0.0000 -0.0025 0.0009 0.0048 -0.0052  
Y -0.0018 0.0020 -0.0178 0.0166 0.0036 -0.0017  
Z -0.0020 0.0021 -0.0138 0.0155 -0.0089 0.0108

AT. 37 C X -0.0004 -0.0001 0.0026 0.0033 -0.0005 -0.0015  
Y 0.0011 0.0010 -0.0112 -0.0112 -0.0012 0.0006  
Z 0.0009 0.0011 -0.0063 -0.0069 0.0039 0.0047

AT. 38 C X -0.0004 0.0001 -0.0026 0.0033 -0.0005 0.0015  
Y 0.0011 -0.0010 0.0112 -0.0112 -0.0012 -0.0006  
Z 0.0009 -0.0011 0.0063 -0.0069 0.0039 -0.0047

AT. 39 H X -0.0048 -0.0052 0.0400 0.0421 -0.0099 -0.0163  
Y 0.0057 0.0057 -0.0407 -0.0423 0.0060 0.0134  
Z -0.0041 -0.0044 0.0324 0.0335 -0.0057 -0.0111

AT. 40 H X -0.0048 0.0052 -0.0400 0.0421 -0.0099 0.0163  
Y 0.0057 -0.0057 0.0407 -0.0423 0.0060 -0.0134  
Z -0.0041 0.0044 -0.0324 0.0335 -0.0057 0.0111

AT. 41 H X 0.0046 0.0052 -0.0360 -0.0375 0.0099 0.0152  
Y -0.0074 -0.0082 0.0563 0.0613 -0.0247 -0.0345  
Z 0.0024 0.0030 -0.0197 -0.0219 0.0113 0.0148

AT. 42 H X 0.0046 -0.0052 0.0360 -0.0375 0.0099 -0.0152  
Y -0.0074 0.0082 -0.0563 0.0613 -0.0247 0.0345  
Z 0.0024 -0.0030 0.0197 -0.0219 0.0113 -0.0148

AT. 43 C X 0.0002 0.0007 0.0004 0.0009 0.0024 0.0017  
Y 0.0005 0.0005 -0.0062 -0.0054 -0.0056 -0.0051  
Z 0.0007 0.0008 -0.0084 -0.0092 0.0036 0.0050

AT. 44 C X 0.0002 -0.0007 -0.0004 0.0009 0.0024 -0.0017  
Y 0.0005 -0.0005 0.0062 -0.0054 -0.0056 0.0051  
Z 0.0007 -0.0008 0.0084 -0.0092 0.0036 -0.0050

AT. 45 H X -0.0032 -0.0058 0.0266 0.0273 -0.0093 -0.0104  
Y 0.0006 0.0005 -0.0107 -0.0101 0.0008 0.0017

Z 0.0028 0.0052 -0.0214 -0.0223 0.0052 0.0062  
AT. 46 H X -0.0032 0.0058 -0.0266 0.0273 -0.0093 0.0104  
Y 0.0006 -0.0005 0.0107 -0.0101 0.0008 -0.0017  
Z 0.0028 -0.0052 0.0214 -0.0223 0.0052 -0.0062  
AT. 47 H X 0.0002 0.0012 -0.0192 -0.0176 -0.0154 -0.0144  
Y -0.0014 -0.0023 0.0028 0.0043 -0.0192 -0.0195  
Z -0.0013 -0.0029 0.0284 0.0267 0.0141 0.0123  
AT. 48 H X 0.0002 -0.0012 0.0192 -0.0176 -0.0154 0.0144  
Y -0.0014 0.0023 -0.0028 0.0043 -0.0192 0.0195  
Z -0.0013 0.0029 -0.0284 0.0267 0.0141 -0.0123  
AT. 49 C X -0.0007 -0.0012 0.0080 0.0080 -0.0073 -0.0078  
Y -0.0005 -0.0005 0.0129 0.0103 0.0169 0.0165  
Z -0.0005 -0.0008 0.0039 0.0054 -0.0139 -0.0146  
AT. 50 C X -0.0007 0.0012 -0.0080 0.0080 -0.0073 0.0078  
Y -0.0005 0.0005 -0.0129 0.0103 0.0169 -0.0165  
Z -0.0005 0.0008 -0.0039 0.0054 -0.0139 0.0146  
AT. 51 C X -0.0000 0.0003 -0.0004 -0.0006 0.0075 0.0080  
Y 0.0003 0.0003 -0.0065 -0.0052 -0.0111 -0.0112  
Z 0.0005 0.0007 -0.0020 -0.0027 0.0040 0.0042  
AT. 52 C X -0.0000 -0.0003 0.0004 -0.0006 0.0075 -0.0080  
Y 0.0003 -0.0003 0.0065 -0.0052 -0.0111 0.0112  
Z 0.0005 -0.0007 0.0020 -0.0027 0.0040 -0.0042  
AT. 53 H X 0.0000 0.0006 0.0085 0.0049 0.0336 0.0348  
Y -0.0002 -0.0005 -0.0122 -0.0100 -0.0238 -0.0241  
Z -0.0003 -0.0010 -0.0246 -0.0183 -0.0578 -0.0589  
AT. 54 H X 0.0000 -0.0006 -0.0085 0.0049 0.0336 -0.0348  
Y -0.0002 0.0005 0.0122 -0.0100 -0.0238 0.0241  
Z -0.0003 0.0010 0.0246 -0.0183 -0.0578 0.0589  
AT. 55 H X -0.0003 -0.0004 -0.0112 -0.0070 -0.0314 -0.0319  
Y 0.0012 0.0012 0.0066 0.0016 0.0421 0.0433  
Z 0.0014 0.0013 0.0072 0.0016 0.0446 0.0456  
AT. 56 H X -0.0003 0.0004 0.0112 -0.0070 -0.0314 0.0319

Y 0.0012 -0.0012 -0.0066 0.0016 0.0421 -0.0433  
Z 0.0014 -0.0013 -0.0072 0.0016 0.0446 -0.0456  
AT. 57 C X -0.0001 -0.0001 -0.0008 -0.0002 -0.0027 -0.0030  
Y 0.0007 0.0007 -0.0065 -0.0061 -0.0011 -0.0005  
Z 0.0008 0.0008 -0.0057 -0.0064 0.0032 0.0041  
AT. 58 C X -0.0001 0.0001 0.0008 -0.0002 -0.0027 0.0030  
Y 0.0007 -0.0007 0.0065 -0.0061 -0.0011 0.0005  
Z 0.0008 -0.0008 0.0057 -0.0064 0.0032 -0.0041  
AT. 59 H X -0.0001 -0.0004 0.0058 0.0039 0.0099 0.0097  
Y -0.0012 -0.0010 0.0062 0.0076 -0.0089 -0.0102  
Z -0.0019 -0.0019 0.0177 0.0170 0.0003 -0.0019  
AT. 60 H X -0.0001 0.0004 -0.0058 0.0039 0.0099 -0.0097  
Y -0.0012 0.0010 -0.0062 0.0076 -0.0089 0.0102  
Z -0.0019 0.0019 -0.0177 0.0170 0.0003 0.0019  
AT. 61 H X -0.0028 -0.0030 0.0236 0.0237 -0.0043 -0.0069  
Y 0.0009 0.0008 0.0004 -0.0033 0.0105 0.0116  
Z -0.0015 -0.0017 0.0109 0.0120 -0.0045 -0.0058  
AT. 62 H X -0.0028 0.0030 -0.0236 0.0237 -0.0043 0.0069  
Y 0.0009 -0.0008 -0.0004 -0.0033 0.0105 -0.0116  
Z -0.0015 0.0017 -0.0109 0.0120 -0.0045 0.0058  
AT. 63 H X 0.0027 0.0030 -0.0206 -0.0221 0.0074 0.0103  
Y -0.0016 -0.0020 0.0155 0.0154 0.0007 -0.0009  
Z -0.0000 0.0002 -0.0048 -0.0031 -0.0077 -0.0080  
AT. 64 H X 0.0027 -0.0030 0.0206 -0.0221 0.0074 -0.0103  
Y -0.0016 0.0020 -0.0155 0.0154 0.0007 0.0009  
Z -0.0000 -0.0002 0.0048 -0.0031 -0.0077 0.0080  
AT. 65 C X 0.0003 0.0005 -0.0036 -0.0038 0.0029 0.0032  
Y 0.0002 0.0001 -0.0050 -0.0040 -0.0064 -0.0061  
Z 0.0001 0.0003 -0.0006 -0.0013 0.0053 0.0054  
AT. 66 C X 0.0003 -0.0005 0.0036 -0.0038 0.0029 -0.0032  
Y 0.0002 -0.0001 0.0050 -0.0040 -0.0064 0.0061  
Z 0.0001 -0.0003 0.0006 -0.0013 0.0053 -0.0054

AT. 67 H X -0.0009 -0.0012 0.0124 0.0134 -0.0065 -0.0084  
Y 0.0003 0.0005 -0.0006 -0.0036 0.0164 0.0165  
Z 0.0009 0.0013 -0.0172 -0.0154 -0.0079 -0.0059

AT. 68 H X -0.0009 0.0012 -0.0124 0.0134 -0.0065 0.0084  
Y 0.0003 -0.0005 0.0006 -0.0036 0.0164 -0.0165  
Z 0.0009 -0.0013 0.0172 -0.0154 -0.0079 0.0059

AT. 69 H X -0.0001 0.0001 0.0084 0.0056 0.0183 0.0185  
Y -0.0007 -0.0012 0.0110 0.0098 -0.0017 -0.0019  
Z -0.0004 -0.0012 0.0002 0.0017 -0.0201 -0.0205

AT. 70 H X -0.0001 -0.0001 -0.0084 0.0056 0.0183 -0.0185  
Y -0.0007 0.0012 -0.0110 0.0098 -0.0017 0.0019  
Z -0.0004 0.0012 -0.0002 0.0017 -0.0201 0.0205

AT. 71 H X -0.0002 -0.0007 -0.0032 -0.0004 -0.0227 -0.0219  
Y -0.0002 0.0000 0.0062 0.0055 0.0106 0.0102  
Z -0.0007 -0.0007 0.0142 0.0138 0.0083 0.0077

AT. 72 H X -0.0002 0.0007 0.0032 -0.0004 -0.0227 0.0219  
Y -0.0002 -0.0000 -0.0062 0.0055 0.0106 -0.0102  
Z -0.0007 0.0007 -0.0142 0.0138 0.0083 -0.0077

AT. 73 C X 0.0003 0.0004 -0.0047 -0.0046 -0.0002 0.0001  
Y 0.0004 0.0005 -0.0054 -0.0046 -0.0043 -0.0039  
Z 0.0008 0.0010 -0.0054 -0.0063 0.0081 0.0087

AT. 74 C X 0.0003 -0.0004 0.0047 -0.0046 -0.0002 -0.0001  
Y 0.0004 -0.0005 0.0054 -0.0046 -0.0043 0.0039  
Z 0.0008 -0.0010 0.0054 -0.0063 0.0081 -0.0087

AT. 75 H X -0.0006 -0.0006 0.0163 0.0145 0.0208 0.0210  
Y -0.0002 -0.0004 -0.0039 -0.0030 -0.0135 -0.0133  
Z -0.0005 -0.0007 0.0110 0.0089 0.0107 0.0110

AT. 76 H X -0.0006 0.0006 -0.0163 0.0145 0.0208 -0.0210  
Y -0.0002 0.0004 0.0039 -0.0030 -0.0135 0.0133  
Z -0.0005 0.0007 -0.0110 0.0089 0.0107 -0.0110

AT. 77 H X -0.0029 -0.0020 0.0212 0.0224 0.0072 0.0023  
Y 0.0015 0.0008 -0.0077 -0.0087 -0.0011 0.0004

Z 0.0027 0.0028 -0.0258 -0.0263 -0.0010 0.0032  
AT. 78 H X -0.0029 0.0020 -0.0212 0.0224 0.0072 -0.0023  
Y 0.0015 -0.0008 0.0077 -0.0087 -0.0011 -0.0004  
Z 0.0027 -0.0028 0.0258 -0.0263 -0.0010 -0.0032  
AT. 79 I X 0.0000 0.0001 0.0000 0.0000 0.0001 -0.0000  
Y 0.0000 -0.0001 0.0000 0.0000 -0.0000 0.0000  
Z 0.0000 0.0000 0.0000 -0.0000 0.0000 0.0000  
AT. 80 I X 0.0000 -0.0001 -0.0000 0.0000 0.0001 0.0000  
Y 0.0000 0.0001 -0.0000 0.0000 -0.0000 -0.0000  
Z 0.0000 -0.0000 -0.0000 -0.0000 0.0000 -0.0000  
AT. 81 I X 0.0000 0.0000 -0.0000 -0.0000 -0.0000 -0.0000  
Y 0.0001 0.0000 -0.0000 -0.0000 0.0000 0.0000  
Z -0.0000 -0.0000 -0.0000 -0.0000 0.0000 0.0000  
AT. 82 I X 0.0000 -0.0000 0.0000 -0.0000 -0.0000 0.0000  
Y 0.0001 -0.0000 0.0000 -0.0000 0.0000 -0.0000  
Z -0.0000 0.0000 0.0000 -0.0000 0.0000 -0.0000  
AT. 83 O X -0.0015 -0.0027 -0.0002 -0.0002 -0.0013 0.0000  
Y -0.0003 -0.0009 -0.0000 -0.0000 -0.0005 -0.0000  
Z -0.0011 -0.0014 -0.0000 -0.0002 -0.0001 0.0002  
AT. 84 O X -0.0015 0.0027 0.0002 -0.0002 -0.0013 -0.0000  
Y -0.0003 0.0009 0.0000 -0.0000 -0.0005 0.0000  
Z -0.0011 0.0014 0.0000 -0.0002 -0.0001 -0.0002  
AT. 85 O X -0.0042 -0.0042 -0.0006 -0.0006 0.0003 0.0006  
Y -0.0021 -0.0023 -0.0004 -0.0004 0.0001 0.0005  
Z 0.0002 0.0004 0.0002 0.0003 0.0001 -0.0003  
AT. 86 O X -0.0042 0.0042 0.0006 -0.0006 0.0003 -0.0006  
Y -0.0021 0.0023 0.0004 -0.0004 0.0001 -0.0005  
Z 0.0002 -0.0004 -0.0002 0.0003 0.0001 0.0003  
AT. 87 N X 0.0048 0.0048 0.0006 0.0007 0.0021 -0.0003  
Y 0.0031 0.0043 0.0004 0.0003 0.0022 0.0002  
Z 0.0013 0.0009 -0.0001 0.0001 -0.0009 -0.0004  
AT. 88 N X 0.0048 -0.0048 -0.0006 0.0007 0.0021 0.0003

Y 0.0031 -0.0043 -0.0004 0.0003 0.0022 -0.0002  
Z 0.0013 -0.0009 0.0001 0.0001 -0.0009 0.0004  
AT. 89 N X 0.0117 0.0125 0.0016 0.0018 -0.0004 -0.0025  
Y 0.0105 0.0102 0.0011 0.0011 -0.0001 -0.0010  
Z 0.0068 0.0064 0.0005 0.0004 -0.0007 -0.0003  
AT. 90 N X 0.0117 -0.0125 -0.0016 0.0018 -0.0004 0.0025  
Y 0.0105 -0.0102 -0.0011 0.0011 -0.0001 0.0010  
Z 0.0068 -0.0064 -0.0005 0.0004 -0.0007 0.0003  
AT. 91 C X 0.0009 0.0031 0.0003 0.0001 0.0030 0.0006  
Y 0.0004 0.0027 0.0000 -0.0001 0.0018 0.0002  
Z -0.0006 -0.0044 -0.0005 0.0001 -0.0053 -0.0009  
AT. 92 C X 0.0009 -0.0031 -0.0003 0.0001 0.0030 -0.0006  
Y 0.0004 -0.0027 -0.0000 -0.0001 0.0018 -0.0002  
Z -0.0006 0.0044 0.0005 0.0001 -0.0053 0.0009  
AT. 93 C X -0.0003 0.0013 -0.0003 -0.0002 -0.0009 -0.0005  
Y -0.0004 -0.0023 0.0000 0.0001 -0.0008 0.0000  
Z 0.0008 0.0018 0.0004 0.0001 0.0024 0.0005  
AT. 94 C X -0.0003 -0.0013 0.0003 -0.0002 -0.0009 0.0005  
Y -0.0004 0.0023 -0.0000 0.0001 -0.0008 -0.0000  
Z 0.0008 -0.0018 -0.0004 0.0001 0.0024 -0.0005  
AT. 95 H X 0.0011 -0.0115 0.0020 0.0016 0.0015 0.0020  
Y -0.0001 0.0083 -0.0008 -0.0008 0.0005 -0.0010  
Z -0.0013 -0.0025 -0.0009 -0.0003 -0.0026 -0.0005  
AT. 96 H X 0.0011 0.0115 -0.0020 0.0016 0.0015 -0.0020  
Y -0.0001 -0.0083 0.0008 -0.0008 0.0005 0.0010  
Z -0.0013 0.0025 0.0009 -0.0003 -0.0026 0.0005  
AT. 97 H X -0.0015 -0.0220 -0.0002 0.0010 -0.0129 -0.0007  
Y 0.0009 0.0093 -0.0007 -0.0006 -0.0004 -0.0011  
Z 0.0016 0.0118 0.0002 -0.0004 0.0062 0.0002  
AT. 98 H X -0.0015 0.0220 0.0002 0.0010 -0.0129 0.0007  
Y 0.0009 -0.0093 0.0007 -0.0006 -0.0004 0.0011  
Z 0.0016 -0.0118 -0.0002 -0.0004 0.0062 -0.0002

AT. 99 C X 0.0081 0.0073 0.0008 0.0006 -0.0008 -0.0004  
Y -0.0045 -0.0038 0.0000 0.0000 0.0002 -0.0002  
Z 0.0132 0.0117 0.0009 0.0007 -0.0013 -0.0003  
AT. 100 C X 0.0081 -0.0073 -0.0008 0.0006 -0.0008 0.0004  
Y -0.0045 0.0038 -0.0000 0.0000 0.0002 0.0002  
Z 0.0132 -0.0117 -0.0009 0.0007 -0.0013 0.0003  
AT. 101 C X -0.0055 -0.0045 -0.0001 -0.0001 0.0002 0.0000  
Y 0.0037 0.0032 0.0001 0.0002 -0.0002 -0.0001  
Z -0.0072 -0.0068 -0.0005 -0.0005 0.0006 0.0003  
AT. 102 C X -0.0055 0.0045 0.0001 -0.0001 0.0002 -0.0000  
Y 0.0037 -0.0032 -0.0001 0.0002 -0.0002 0.0001  
Z -0.0072 0.0068 0.0005 -0.0005 0.0006 -0.0003  
AT. 103 H X 0.0287 0.0243 0.0002 0.0005 -0.0010 0.0000  
Y -0.0116 -0.0096 -0.0000 -0.0001 0.0004 -0.0001  
Z 0.0087 0.0085 0.0009 0.0010 -0.0011 -0.0005  
AT. 104 H X 0.0287 -0.0243 -0.0002 0.0005 -0.0010 -0.0000  
Y -0.0116 0.0096 0.0000 -0.0001 0.0004 0.0001  
Z 0.0087 -0.0085 -0.0009 0.0010 -0.0011 0.0005  
AT. 105 H X -0.0233 -0.0250 -0.0030 -0.0030 0.0044 0.0017  
Y -0.0038 -0.0010 0.0009 0.0008 -0.0008 -0.0005  
Z -0.0146 -0.0134 -0.0010 -0.0010 0.0014 0.0005  
AT. 106 H X -0.0233 0.0250 0.0030 -0.0030 0.0044 -0.0017  
Y -0.0038 0.0010 -0.0009 0.0008 -0.0008 0.0005  
Z -0.0146 0.0134 0.0010 -0.0010 0.0014 -0.0005  
AT. 107 C X -0.0031 -0.0022 -0.0003 -0.0004 -0.0001 0.0004  
Y -0.0074 -0.0083 -0.0009 -0.0006 -0.0013 0.0000  
Z -0.0036 -0.0017 -0.0003 -0.0004 0.0023 0.0004  
AT. 108 C X -0.0031 0.0022 0.0003 -0.0004 -0.0001 -0.0004  
Y -0.0074 0.0083 0.0009 -0.0006 -0.0013 -0.0000  
Z -0.0036 0.0017 0.0003 -0.0004 0.0023 -0.0004  
AT. 109 H X -0.0065 -0.0176 -0.0007 -0.0002 -0.0102 -0.0013  
Y -0.0014 -0.0013 -0.0006 -0.0001 -0.0005 0.0001

Z 0.0078 0.0149 0.0003 0.0003 0.0066 0.0010  
AT. 110 H X -0.0065 0.0176 0.0007 -0.0002 -0.0102 0.0013  
Y -0.0014 0.0013 0.0006 -0.0001 -0.0005 -0.0001  
Z 0.0078 -0.0149 -0.0003 0.0003 0.0066 -0.0010  
AT. 111 H X 0.0142 0.0208 0.0012 0.0008 0.0030 -0.0006  
Y -0.0138 -0.0102 -0.0014 -0.0018 0.0037 0.0021  
Z -0.0210 -0.0264 -0.0018 -0.0014 -0.0024 0.0010  
AT. 112 H X 0.0142 -0.0208 -0.0012 0.0008 0.0030 0.0006  
Y -0.0138 0.0102 0.0014 -0.0018 0.0037 -0.0021  
Z -0.0210 0.0264 0.0018 -0.0014 -0.0024 -0.0010  
AT. 113 C X 0.0065 0.0053 0.0003 0.0006 -0.0020 -0.0010  
Y 0.0175 0.0190 0.0020 0.0013 0.0014 -0.0006  
Z 0.0163 0.0128 0.0019 0.0017 -0.0030 -0.0015  
AT. 114 C X 0.0065 -0.0053 -0.0003 0.0006 -0.0020 0.0010  
Y 0.0175 -0.0190 -0.0020 0.0013 0.0014 0.0006  
Z 0.0163 -0.0128 -0.0019 0.0017 -0.0030 0.0015  
AT. 115 C X -0.0080 -0.0076 -0.0009 -0.0011 0.0008 0.0014  
Y -0.0097 -0.0102 -0.0011 -0.0009 -0.0004 0.0008  
Z -0.0064 -0.0052 -0.0006 -0.0005 0.0012 0.0003  
AT. 116 C X -0.0080 0.0076 0.0009 -0.0011 0.0008 -0.0014  
Y -0.0097 0.0102 0.0011 -0.0009 -0.0004 -0.0008  
Z -0.0064 0.0052 0.0006 -0.0005 0.0012 -0.0003  
AT. 117 H X -0.0488 -0.0461 -0.0055 -0.0048 0.0035 0.0043  
Y -0.0292 -0.0300 -0.0032 -0.0024 0.0004 0.0019  
Z 0.0413 0.0401 0.0047 0.0038 -0.0019 -0.0030  
AT. 118 H X -0.0488 0.0461 0.0055 -0.0048 0.0035 -0.0043  
Y -0.0292 0.0300 0.0032 -0.0024 0.0004 -0.0019  
Z 0.0413 -0.0401 -0.0047 0.0038 -0.0019 0.0030  
AT. 119 H X 0.0524 0.0492 0.0048 0.0041 -0.0043 -0.0033  
Y 0.0460 0.0418 0.0039 0.0037 -0.0051 -0.0033  
Z -0.0281 -0.0253 -0.0023 -0.0021 0.0030 0.0017  
AT. 120 H X 0.0524 -0.0492 -0.0048 0.0041 -0.0043 0.0033



Y 0.0460 -0.0418 -0.0039 0.0037 -0.0051 0.0033  
Z -0.0281 0.0253 0.0023 -0.0021 0.0030 -0.0017  
AT. 121 C X -0.0044 -0.0053 -0.0007 -0.0009 -0.0003 0.0014  
Y -0.0046 -0.0055 -0.0005 -0.0002 -0.0015 -0.0001  
Z -0.0089 -0.0080 -0.0009 -0.0008 0.0014 0.0009  
AT. 122 C X -0.0044 0.0053 0.0007 -0.0009 -0.0003 -0.0014  
Y -0.0046 0.0055 0.0005 -0.0002 -0.0015 0.0001  
Z -0.0089 0.0080 0.0009 -0.0008 0.0014 -0.0009  
AT. 123 H X -0.0327 -0.0270 -0.0019 -0.0009 0.0009 -0.0019  
Y 0.0008 -0.0015 -0.0004 -0.0002 -0.0003 0.0009  
Z -0.0186 -0.0150 -0.0010 -0.0007 0.0002 -0.0009  
AT. 124 H X -0.0327 0.0270 0.0019 -0.0009 0.0009 0.0019  
Y 0.0008 0.0015 0.0004 -0.0002 -0.0003 -0.0009  
Z -0.0186 0.0150 0.0010 -0.0007 0.0002 0.0009  
AT. 125 H X 0.0191 0.0180 0.0021 0.0009 0.0035 0.0010  
Y -0.0036 -0.0071 -0.0011 -0.0007 -0.0061 -0.0001  
Z 0.0204 0.0199 0.0024 0.0012 0.0038 0.0004  
AT. 126 H X 0.0191 -0.0180 -0.0021 0.0009 0.0035 -0.0010  
Y -0.0036 0.0071 0.0011 -0.0007 -0.0061 0.0001  
Z 0.0204 -0.0199 -0.0024 0.0012 0.0038 -0.0004  
AT. 127 C X -0.0038 -0.0026 0.0000 0.0001 0.0027 -0.0001  
Y 0.0114 0.0138 0.0017 0.0008 0.0041 0.0002  
Z 0.0062 0.0026 0.0007 0.0007 -0.0043 -0.0007  
AT. 128 C X -0.0038 0.0026 -0.0000 0.0001 0.0027 0.0001  
Y 0.0114 -0.0138 -0.0017 0.0008 0.0041 -0.0002  
Z 0.0062 -0.0026 -0.0007 0.0007 -0.0043 0.0007  
AT. 129 C X -0.0008 -0.0016 -0.0002 -0.0002 -0.0020 0.0000  
Y -0.0047 -0.0060 -0.0007 -0.0003 -0.0023 -0.0003  
Z -0.0026 -0.0009 -0.0001 -0.0003 0.0021 0.0005  
AT. 130 C X -0.0008 0.0016 0.0002 -0.0002 -0.0020 -0.0000  
Y -0.0047 0.0060 0.0007 -0.0003 -0.0023 0.0003  
Z -0.0026 0.0009 0.0001 -0.0003 0.0021 -0.0005

AT. 131 H X -0.0084 -0.0173 -0.0018 -0.0006 -0.0139 -0.0018  
Y -0.0065 -0.0081 -0.0011 -0.0003 -0.0043 -0.0008  
Z -0.0138 -0.0231 -0.0026 -0.0008 -0.0152 -0.0023

AT. 132 H X -0.0084 0.0173 0.0018 -0.0006 -0.0139 0.0018  
Y -0.0065 0.0081 0.0011 -0.0003 -0.0043 0.0008  
Z -0.0138 0.0231 0.0026 -0.0008 -0.0152 0.0023

AT. 133 H X 0.0057 0.0151 0.0017 0.0002 0.0159 0.0029  
Y -0.0014 0.0052 0.0002 -0.0002 0.0101 0.0021  
Z -0.0005 0.0085 0.0004 -0.0003 0.0128 0.0028

AT. 134 H X 0.0057 -0.0151 -0.0017 0.0002 0.0159 -0.0029  
Y -0.0014 -0.0052 -0.0002 -0.0002 0.0101 -0.0021  
Z -0.0005 -0.0085 -0.0004 -0.0003 0.0128 -0.0028

AT. 135 C X -0.0025 -0.0019 -0.0001 -0.0003 0.0009 0.0004  
Y -0.0063 -0.0069 -0.0006 -0.0005 -0.0005 0.0002  
Z -0.0064 -0.0052 -0.0009 -0.0007 0.0010 0.0006

AT. 136 C X -0.0025 0.0019 0.0001 -0.0003 0.0009 -0.0004  
Y -0.0063 0.0069 0.0006 -0.0005 -0.0005 -0.0002  
Z -0.0064 0.0052 0.0009 -0.0007 0.0010 -0.0006

AT. 137 H X 0.0013 -0.0037 0.0003 0.0005 -0.0037 -0.0009  
Y 0.0095 0.0076 0.0013 0.0010 -0.0018 -0.0009  
Z 0.0179 0.0191 0.0020 0.0015 0.0005 -0.0007

AT. 138 H X 0.0013 0.0037 -0.0003 0.0005 -0.0037 0.0009  
Y 0.0095 -0.0076 -0.0013 0.0010 -0.0018 0.0009  
Z 0.0179 -0.0191 -0.0020 0.0015 0.0005 0.0007

AT. 139 H X -0.0215 -0.0190 -0.0024 -0.0019 0.0024 0.0017  
Y 0.0059 0.0082 0.0005 0.0006 0.0024 0.0006  
Z 0.0159 0.0136 0.0019 0.0013 -0.0021 -0.0013

AT. 140 H X -0.0215 0.0190 0.0024 -0.0019 0.0024 -0.0017  
Y 0.0059 -0.0082 -0.0005 0.0006 0.0024 -0.0006  
Z 0.0159 -0.0136 -0.0019 0.0013 -0.0021 0.0013

AT. 141 H X 0.0253 0.0226 0.0028 0.0025 -0.0025 -0.0021  
Y 0.0077 0.0084 0.0006 0.0008 0.0009 -0.0001

Z -0.0082 -0.0096 -0.0007 -0.0008 -0.0019 -0.0003  
AT. 142 H X 0.0253 -0.0226 -0.0028 0.0025 -0.0025 0.0021  
Y 0.0077 -0.0084 -0.0006 0.0008 0.0009 0.0001  
Z -0.0082 0.0096 0.0007 -0.0008 -0.0019 0.0003  
AT. 143 C X 0.0021 0.0016 0.0001 0.0001 -0.0011 -0.0001  
Y -0.0047 -0.0056 -0.0007 -0.0003 -0.0016 -0.0000  
Z -0.0018 -0.0003 -0.0002 -0.0002 0.0017 0.0002  
AT. 144 C X 0.0021 -0.0016 -0.0001 0.0001 -0.0011 0.0001  
Y -0.0047 0.0056 0.0007 -0.0003 -0.0016 0.0000  
Z -0.0018 0.0003 0.0002 -0.0002 0.0017 -0.0002  
AT. 145 H X -0.0156 -0.0125 -0.0019 -0.0015 0.0027 0.0009  
Y 0.0006 0.0035 0.0001 -0.0001 0.0040 0.0004  
Z -0.0120 -0.0134 -0.0015 -0.0008 -0.0033 -0.0001  
AT. 146 H X -0.0156 0.0125 0.0019 -0.0015 0.0027 -0.0009  
Y 0.0006 -0.0035 -0.0001 -0.0001 0.0040 -0.0004  
Z -0.0120 0.0134 0.0015 -0.0008 -0.0033 0.0001  
AT. 147 H X -0.0002 -0.0051 -0.0004 -0.0001 -0.0064 -0.0003  
Y 0.0106 0.0118 0.0012 0.0006 0.0014 0.0002  
Z 0.0038 -0.0003 0.0001 0.0000 -0.0048 -0.0001  
AT. 148 H X -0.0002 0.0051 0.0004 -0.0001 -0.0064 0.0003  
Y 0.0106 -0.0118 -0.0012 0.0006 0.0014 -0.0002  
Z 0.0038 0.0003 -0.0001 0.0000 -0.0048 0.0001  
AT. 149 H X 0.0047 0.0098 0.0008 0.0001 0.0079 0.0006  
Y 0.0051 0.0052 0.0007 0.0004 0.0011 0.0001  
Z 0.0129 0.0133 0.0015 0.0009 0.0014 -0.0001  
AT. 150 H X 0.0047 -0.0098 -0.0008 0.0001 0.0079 -0.0006  
Y 0.0051 -0.0052 -0.0007 0.0004 0.0011 -0.0001  
Z 0.0129 -0.0133 -0.0015 0.0009 0.0014 0.0001  
AT. 151 C X 0.0020 0.0021 0.0002 0.0002 -0.0001 -0.0003  
Y -0.0056 -0.0066 -0.0008 -0.0003 -0.0013 -0.0001  
Z -0.0069 -0.0047 -0.0007 -0.0007 0.0025 0.0007  
AT. 152 C X 0.0020 -0.0021 -0.0002 0.0002 -0.0001 0.0003

Y -0.0056 0.0066 0.0008 -0.0003 -0.0013 0.0001  
Z -0.0069 0.0047 0.0007 -0.0007 0.0025 -0.0007  
AT. 153 H X -0.0128 -0.0146 -0.0018 -0.0022 -0.0040 0.0016  
Y 0.0009 0.0002 0.0001 -0.0002 -0.0011 0.0003  
Z 0.0089 0.0124 0.0015 0.0005 0.0043 0.0005  
AT. 154 H X -0.0128 0.0146 0.0018 -0.0022 -0.0040 -0.0016  
Y 0.0009 -0.0002 -0.0001 -0.0002 -0.0011 -0.0003  
Z 0.0089 -0.0124 -0.0015 0.0005 0.0043 -0.0005  
AT. 155 H X -0.0282 -0.0281 -0.0033 -0.0032 -0.0003 0.0038  
Y -0.0002 0.0007 -0.0001 -0.0005 0.0008 0.0010  
Z -0.0230 -0.0226 -0.0026 -0.0017 0.0004 0.0010  
AT. 156 H X -0.0282 0.0281 0.0033 -0.0032 -0.0003 -0.0038  
Y -0.0002 -0.0007 0.0001 -0.0005 0.0008 -0.0010  
Z -0.0230 0.0226 0.0026 -0.0017 0.0004 -0.0010  
AT. 157 O X -0.0000 0.0000 -0.0001 0.0000 0.0001 0.0001  
Y 0.0001 0.0000 0.0001 0.0001 0.0004 0.0004  
Z 0.0000 0.0001 -0.0002 0.0002 -0.0000 0.0002  
AT. 158 O X -0.0000 -0.0000 0.0001 0.0000 0.0001 -0.0001  
Y 0.0001 -0.0000 -0.0001 0.0001 0.0004 -0.0004  
Z 0.0000 -0.0001 0.0002 0.0002 -0.0000 -0.0002  
AT. 159 O X 0.0001 -0.0000 0.0002 -0.0002 0.0002 0.0000  
Y -0.0001 -0.0000 0.0001 -0.0001 -0.0002 -0.0003  
Z -0.0000 -0.0001 0.0002 -0.0003 -0.0001 -0.0002  
AT. 160 O X 0.0001 0.0000 -0.0002 -0.0002 0.0002 -0.0000  
Y -0.0001 0.0000 -0.0001 -0.0001 -0.0002 0.0003  
Z -0.0000 0.0001 -0.0002 -0.0003 -0.0001 0.0002  
AT. 161 H X -0.0012 -0.0005 0.0021 -0.0015 -0.0038 -0.0055  
Y -0.0001 -0.0004 -0.0003 -0.0007 -0.0005 -0.0004  
Z -0.0004 0.0005 0.0015 0.0023 -0.0003 -0.0008  
AT. 162 H X -0.0012 0.0005 -0.0021 -0.0015 -0.0038 0.0055  
Y -0.0001 0.0004 0.0003 -0.0007 -0.0005 0.0004  
Z -0.0004 -0.0005 -0.0015 0.0023 -0.0003 0.0008

AT.163 H X -0.0003 0.0008 -0.0022 0.0022 -0.0006 0.0012  
Y 0.0008 -0.0005 -0.0031 0.0024 -0.0011 0.0015  
Z 0.0004 -0.0002 0.0004 -0.0005 -0.0001 -0.0003  
AT.164 H X -0.0003 -0.0008 0.0022 0.0022 -0.0006 -0.0012  
Y 0.0008 0.0005 0.0031 0.0024 -0.0011 -0.0015  
Z 0.0004 0.0002 -0.0004 -0.0005 -0.0001 0.0003  
AT.165 O X -0.0001 -0.0000 0.0000 -0.0001 0.0001 -0.0000  
Y -0.0000 -0.0000 -0.0001 0.0001 -0.0001 -0.0000  
Z 0.0000 0.0001 0.0001 -0.0001 0.0001 -0.0000  
AT.166 O X -0.0001 0.0000 -0.0000 -0.0001 0.0001 0.0000  
Y -0.0000 0.0000 0.0001 0.0001 -0.0001 0.0000  
Z 0.0000 -0.0001 -0.0001 -0.0001 0.0001 0.0000  
AT.167 H X 0.0000 0.0009 -0.0002 0.0000 -0.0002 -0.0001  
Y 0.0007 -0.0005 0.0003 0.0004 0.0010 0.0003  
Z -0.0011 -0.0023 0.0001 -0.0008 -0.0019 -0.0001  
AT.168 H X 0.0000 -0.0009 0.0002 0.0000 -0.0002 0.0001  
Y 0.0007 0.0005 -0.0003 0.0004 0.0010 -0.0003  
Z -0.0011 0.0023 -0.0001 -0.0008 -0.0019 0.0001  
AT.169 O X -0.0001 0.0002 -0.0001 0.0001 -0.0000 0.0001  
Y 0.0000 0.0001 0.0001 -0.0001 0.0001 -0.0000  
Z -0.0001 0.0003 0.0000 -0.0000 0.0001 0.0000  
AT.170 O X -0.0001 -0.0002 0.0001 0.0001 -0.0000 -0.0001  
Y 0.0000 -0.0001 -0.0001 -0.0001 0.0001 0.0000  
Z -0.0001 -0.0003 -0.0000 -0.0000 0.0001 -0.0000  
AT.171 H X 0.0041 -0.0036 0.0009 -0.0008 0.0007 -0.0010  
Y 0.0024 -0.0022 -0.0006 0.0008 -0.0000 -0.0001  
Z 0.0015 -0.0012 -0.0019 0.0024 -0.0005 0.0003  
AT.172 H X 0.0041 0.0036 -0.0009 -0.0008 0.0007 0.0010  
Y 0.0024 0.0022 0.0006 0.0008 -0.0000 0.0001  
Z 0.0015 0.0012 0.0019 0.0024 -0.0005 -0.0003

FREQ(CM\*\*-1) 1278.70 1279.74 1286.56 1287.34 1289.97 1290.44

AT. 1 I X 0.0000 0.0000 0.0000 -0.0000 0.0000 -0.0000  
Y 0.0000 0.0000 0.0000 0.0000 0.0000 0.0000  
Z 0.0000 0.0000 0.0000 0.0000 0.0000 -0.0000

AT. 2 I X 0.0000 -0.0000 0.0000 0.0000 -0.0000 -0.0000  
Y 0.0000 -0.0000 0.0000 -0.0000 -0.0000 0.0000  
Z 0.0000 -0.0000 0.0000 -0.0000 -0.0000 -0.0000

AT. 3 I X 0.0000 0.0000 0.0000 0.0000 0.0000 -0.0000  
Y -0.0000 -0.0000 0.0000 0.0000 0.0000 0.0000  
Z -0.0000 -0.0000 0.0000 0.0000 0.0000 0.0000

AT. 4 I X 0.0000 -0.0000 0.0000 -0.0000 -0.0000 -0.0000  
Y -0.0000 0.0000 0.0000 -0.0000 -0.0000 0.0000  
Z -0.0000 0.0000 0.0000 -0.0000 -0.0000 0.0000

AT. 5 O X 0.0010 -0.0002 0.0002 0.0005 -0.0009 -0.0003  
Y -0.0007 0.0002 -0.0001 -0.0005 0.0003 0.0001  
Z -0.0008 0.0003 -0.0003 -0.0006 0.0023 0.0016

AT. 6 O X 0.0010 0.0002 0.0002 -0.0005 0.0009 -0.0003  
Y -0.0007 -0.0002 -0.0001 0.0005 -0.0003 0.0001  
Z -0.0008 -0.0003 -0.0003 0.0006 -0.0023 0.0016

AT. 7 O X -0.0000 0.0001 -0.0001 -0.0004 -0.0040 -0.0039  
Y -0.0001 -0.0003 0.0000 0.0006 0.0061 0.0061  
Z 0.0002 0.0003 0.0001 -0.0005 -0.0053 -0.0054

AT. 8 O X -0.0000 -0.0001 -0.0001 0.0004 0.0040 -0.0039  
Y -0.0001 0.0003 0.0000 -0.0006 -0.0061 0.0061  
Z 0.0002 -0.0003 0.0001 0.0005 0.0053 -0.0054

AT. 9 N X -0.0046 -0.0013 -0.0013 -0.0009 0.0069 0.0049  
Y 0.0044 0.0009 0.0009 0.0009 -0.0022 -0.0006  
Z 0.0007 0.0002 0.0003 0.0002 -0.0036 -0.0028

AT. 10 N X -0.0046 0.0013 -0.0013 0.0009 -0.0069 0.0049  
Y 0.0044 -0.0009 0.0009 -0.0009 0.0022 -0.0006  
Z 0.0007 -0.0002 0.0003 -0.0002 0.0036 -0.0028

AT. 11 N X -0.0006 -0.0016 -0.0003 0.0029 0.0254 0.0259

Y 0.0001 0.0006 0.0001 -0.0017 -0.0162 -0.0161  
Z -0.0006 -0.0000 -0.0004 -0.0003 0.0006 0.0006  
AT. 12 N X -0.0006 0.0016 -0.0003 -0.0029 -0.0254 0.0259  
Y 0.0001 -0.0006 0.0001 0.0017 0.0162 -0.0161  
Z -0.0006 0.0000 -0.0004 0.0003 -0.0006 0.0006  
AT. 13 C X -0.0021 0.0000 -0.0001 -0.0005 -0.0022 -0.0025  
Y 0.0019 -0.0001 0.0000 0.0006 0.0021 0.0024  
Z -0.0032 -0.0012 -0.0001 0.0001 -0.0040 -0.0039  
AT. 14 C X -0.0021 -0.0000 -0.0001 0.0005 0.0022 -0.0025  
Y 0.0019 0.0001 0.0000 -0.0006 -0.0021 0.0024  
Z -0.0032 0.0012 -0.0001 -0.0001 0.0040 -0.0039  
AT. 15 C X 0.0020 0.0007 0.0002 0.0001 0.0025 0.0026  
Y -0.0010 -0.0003 -0.0000 -0.0001 -0.0011 -0.0013  
Z 0.0022 0.0005 0.0002 0.0003 0.0015 0.0017  
AT. 16 C X 0.0020 -0.0007 0.0002 -0.0001 -0.0025 0.0026  
Y -0.0010 0.0003 -0.0000 0.0001 0.0011 -0.0013  
Z 0.0022 -0.0005 0.0002 -0.0003 -0.0015 0.0017  
AT. 17 H X -0.0092 -0.0035 -0.0013 -0.0004 -0.0092 -0.0089  
Y 0.0001 -0.0001 0.0001 0.0001 -0.0016 -0.0012  
Z -0.0033 -0.0011 -0.0004 -0.0001 -0.0024 -0.0029  
AT. 18 H X -0.0092 0.0035 -0.0013 0.0004 0.0092 -0.0089  
Y 0.0001 0.0001 0.0001 -0.0001 0.0016 -0.0012  
Z -0.0033 0.0011 -0.0004 0.0001 0.0024 -0.0029  
AT. 19 H X 0.0022 0.0000 0.0002 0.0007 -0.0020 -0.0023  
Y -0.0048 -0.0018 -0.0007 -0.0003 -0.0034 -0.0031  
Z 0.0009 -0.0000 0.0000 0.0003 -0.0007 -0.0004  
AT. 20 H X 0.0022 -0.0000 0.0002 -0.0007 0.0020 -0.0023  
Y -0.0048 0.0018 -0.0007 0.0003 0.0034 -0.0031  
Z 0.0009 0.0000 0.0000 -0.0003 0.0007 -0.0004  
AT. 21 C X 0.0010 0.0004 0.0002 -0.0003 -0.0037 -0.0041  
Y 0.0002 0.0003 -0.0000 -0.0003 -0.0023 -0.0025  
Z -0.0016 -0.0009 -0.0006 0.0007 0.0087 0.0096

AT. 22 C X 0.0010 -0.0004 0.0002 0.0003 0.0037 -0.0041  
Y 0.0002 -0.0003 -0.0000 0.0003 0.0023 -0.0025  
Z -0.0016 0.0009 -0.0006 -0.0007 -0.0087 0.0096

AT. 23 C X -0.0010 -0.0007 0.0004 0.0007 0.0046 0.0048  
Y -0.0001 -0.0001 0.0000 0.0001 -0.0002 -0.0001  
Z 0.0007 0.0002 0.0003 -0.0000 -0.0017 -0.0019

AT. 24 C X -0.0010 0.0007 0.0004 -0.0007 -0.0046 0.0048  
Y -0.0001 0.0001 0.0000 -0.0001 0.0002 -0.0001  
Z 0.0007 -0.0002 0.0003 0.0000 0.0017 -0.0019

AT. 25 H X 0.0039 0.0036 -0.0011 -0.0029 -0.0144 -0.0156  
Y 0.0007 0.0007 -0.0001 -0.0005 -0.0031 -0.0032  
Z 0.0001 0.0004 -0.0006 -0.0005 -0.0042 -0.0045

AT. 26 H X 0.0039 -0.0036 -0.0011 0.0029 0.0144 -0.0156  
Y 0.0007 -0.0007 -0.0001 0.0005 0.0031 -0.0032  
Z 0.0001 -0.0004 -0.0006 0.0005 0.0042 -0.0045

AT. 27 H X 0.0009 0.0015 -0.0051 -0.0031 -0.0100 -0.0092  
Y 0.0015 0.0013 -0.0008 -0.0014 -0.0084 -0.0095  
Z 0.0010 0.0006 0.0011 -0.0000 -0.0024 -0.0033

AT. 28 H X 0.0009 -0.0015 -0.0051 0.0031 0.0100 -0.0092  
Y 0.0015 -0.0013 -0.0008 0.0014 0.0084 -0.0095  
Z 0.0010 -0.0006 0.0011 0.0000 0.0024 -0.0033

AT. 29 C X 0.0022 0.0009 0.0008 0.0003 -0.0060 -0.0048  
Y -0.0017 -0.0001 -0.0001 -0.0003 -0.0008 -0.0014  
Z 0.0019 0.0006 0.0003 0.0002 0.0009 0.0009

AT. 30 C X 0.0022 -0.0009 0.0008 -0.0003 0.0060 -0.0048  
Y -0.0017 0.0001 -0.0001 0.0003 0.0008 -0.0014  
Z 0.0019 -0.0006 0.0003 -0.0002 -0.0009 0.0009

AT. 31 H X 0.0034 -0.0009 -0.0011 0.0006 0.0070 0.0062  
Y -0.0023 -0.0002 0.0003 -0.0006 -0.0081 -0.0075  
Z 0.0010 -0.0009 -0.0005 -0.0001 -0.0019 -0.0015

AT. 32 H X 0.0034 0.0009 -0.0011 -0.0006 -0.0070 0.0062  
Y -0.0023 0.0002 0.0003 0.0006 0.0081 -0.0075



Z 0.0010 0.0009 -0.0005 0.0001 0.0019 -0.0015  
AT. 33 H X 0.0017 -0.0011 0.0012 0.0019 -0.0002 0.0003  
Y 0.0009 -0.0000 -0.0007 -0.0002 0.0103 0.0089  
Z 0.0008 -0.0005 0.0009 0.0012 -0.0002 -0.0003  
AT. 34 H X 0.0017 0.0011 0.0012 -0.0019 0.0002 0.0003  
Y 0.0009 0.0000 -0.0007 0.0002 -0.0103 0.0089  
Z 0.0008 0.0005 0.0009 -0.0012 0.0002 -0.0003  
AT. 35 C X 0.0006 -0.0006 -0.0004 0.0007 0.0096 0.0088  
Y 0.0007 -0.0001 -0.0006 0.0000 0.0073 0.0073  
Z -0.0020 -0.0003 -0.0003 -0.0008 -0.0054 -0.0045  
AT. 36 C X 0.0006 0.0006 -0.0004 -0.0007 -0.0096 0.0088  
Y 0.0007 0.0001 -0.0006 -0.0000 -0.0073 0.0073  
Z -0.0020 0.0003 -0.0003 0.0008 0.0054 -0.0045  
AT. 37 C X 0.0000 0.0007 0.0003 -0.0014 -0.0141 -0.0140  
Y -0.0001 -0.0003 0.0002 0.0012 0.0084 0.0086  
Z 0.0010 0.0003 0.0003 -0.0001 -0.0027 -0.0030  
AT. 38 C X 0.0000 -0.0007 0.0003 0.0014 0.0141 -0.0140  
Y -0.0001 0.0003 0.0002 -0.0012 -0.0084 0.0086  
Z 0.0010 -0.0003 0.0003 0.0001 0.0027 -0.0030  
AT. 39 H X -0.0031 -0.0004 -0.0014 -0.0026 -0.0128 -0.0124  
Y 0.0036 0.0007 0.0015 0.0022 0.0038 0.0038  
Z -0.0028 -0.0008 -0.0015 -0.0014 0.0005 0.0004  
AT. 40 H X -0.0031 0.0004 -0.0014 0.0026 0.0128 -0.0124  
Y 0.0036 -0.0007 0.0015 -0.0022 -0.0038 0.0038  
Z -0.0028 0.0008 -0.0015 0.0014 -0.0005 0.0004  
AT. 41 H X 0.0034 0.0014 0.0013 0.0007 -0.0035 -0.0042  
Y -0.0078 -0.0022 -0.0022 -0.0028 -0.0119 -0.0111  
Z 0.0034 0.0012 0.0011 0.0010 0.0040 0.0038  
AT. 42 H X 0.0034 -0.0014 0.0013 -0.0007 0.0035 -0.0042  
Y -0.0078 0.0022 -0.0022 0.0028 0.0119 -0.0111  
Z 0.0034 -0.0012 0.0011 -0.0010 -0.0040 0.0038  
AT. 43 C X 0.0007 0.0013 0.0004 -0.0020 -0.0192 -0.0196

Y -0.0016 -0.0005 -0.0000 0.0003 0.0031 0.0029  
Z 0.0010 -0.0001 0.0003 0.0010 0.0054 0.0055  
AT. 44 C X 0.0007 -0.0013 0.0004 0.0020 0.0192 -0.0196  
Y -0.0016 0.0005 -0.0000 -0.0003 -0.0031 0.0029  
Z 0.0010 0.0001 0.0003 -0.0010 -0.0054 0.0055  
AT. 45 H X -0.0018 -0.0047 -0.0010 0.0068 0.0500 0.0542  
Y 0.0004 -0.0000 0.0005 0.0002 -0.0071 -0.0066  
Z 0.0007 0.0037 0.0007 -0.0053 -0.0340 -0.0378  
AT. 46 H X -0.0018 0.0047 -0.0010 -0.0068 -0.0500 0.0542  
Y 0.0004 0.0000 0.0005 -0.0002 0.0071 -0.0066  
Z 0.0007 -0.0037 0.0007 0.0053 0.0340 -0.0378  
AT. 47 H X -0.0049 0.0004 -0.0004 -0.0028 -0.0119 -0.0144  
Y -0.0053 -0.0023 -0.0015 0.0010 0.0231 0.0225  
Z 0.0047 -0.0009 -0.0002 0.0030 0.0172 0.0199  
AT. 48 H X -0.0049 -0.0004 -0.0004 0.0028 0.0119 -0.0144  
Y -0.0053 0.0023 -0.0015 -0.0010 -0.0231 0.0225  
Z 0.0047 0.0009 -0.0002 -0.0030 -0.0172 0.0199  
AT. 49 C X -0.0024 -0.0012 -0.0013 0.0006 0.0178 0.0175  
Y 0.0047 0.0009 0.0003 0.0005 0.0016 0.0020  
Z -0.0040 -0.0013 -0.0010 -0.0005 0.0049 0.0046  
AT. 50 C X -0.0024 0.0012 -0.0013 -0.0006 -0.0178 0.0175  
Y 0.0047 -0.0009 0.0003 -0.0005 -0.0016 0.0020  
Z -0.0040 0.0013 -0.0010 0.0005 -0.0049 0.0046  
AT. 51 C X 0.0029 0.0011 0.0009 0.0002 -0.0067 -0.0057  
Y -0.0035 -0.0006 -0.0005 -0.0009 -0.0016 -0.0025  
Z 0.0006 0.0003 0.0000 -0.0001 0.0009 0.0006  
AT. 52 C X 0.0029 -0.0011 0.0009 -0.0002 0.0067 -0.0057  
Y -0.0035 0.0006 -0.0005 0.0009 0.0016 -0.0025  
Z 0.0006 -0.0003 0.0000 0.0001 -0.0009 0.0006  
AT. 53 H X 0.0102 0.0027 0.0018 0.0016 -0.0034 -0.0009  
Y -0.0075 -0.0018 -0.0006 -0.0015 -0.0108 -0.0137  
Z -0.0172 -0.0041 -0.0017 -0.0033 -0.0160 -0.0212

AT. 54 H X 0.0102 -0.0027 0.0018 -0.0016 0.0034 -0.0009  
Y -0.0075 0.0018 -0.0006 0.0015 0.0108 -0.0137  
Z -0.0172 0.0041 -0.0017 0.0033 0.0160 -0.0212

AT. 55 H X -0.0087 -0.0013 -0.0009 -0.0019 -0.0073 -0.0089  
Y 0.0121 0.0013 0.0014 0.0035 0.0127 0.0153  
Z 0.0123 0.0010 0.0011 0.0038 0.0186 0.0210

AT. 56 H X -0.0087 0.0013 -0.0009 0.0019 0.0073 -0.0089  
Y 0.0121 -0.0013 0.0014 -0.0035 -0.0127 0.0153  
Z 0.0123 -0.0010 0.0011 -0.0038 -0.0186 0.0210

AT. 57 C X -0.0005 0.0001 0.0001 -0.0003 -0.0035 -0.0033  
Y -0.0002 0.0001 0.0002 -0.0001 -0.0035 -0.0035  
Z 0.0007 0.0001 0.0001 0.0004 0.0029 0.0027

AT. 58 C X -0.0005 -0.0001 0.0001 0.0003 0.0035 -0.0033  
Y -0.0002 -0.0001 0.0002 0.0001 0.0035 -0.0035  
Z 0.0007 -0.0001 0.0001 -0.0004 -0.0029 0.0027

AT. 59 H X 0.0025 0.0003 -0.0004 0.0009 0.0125 0.0122  
Y -0.0023 -0.0005 -0.0001 -0.0011 -0.0089 -0.0085  
Z -0.0006 -0.0005 -0.0007 -0.0003 0.0053 0.0053

AT. 60 H X 0.0025 -0.0003 -0.0004 -0.0009 -0.0125 0.0122  
Y -0.0023 0.0005 -0.0001 0.0011 0.0089 -0.0085  
Z -0.0006 0.0005 -0.0007 0.0003 -0.0053 0.0053

AT. 61 H X -0.0014 -0.0006 -0.0007 -0.0007 -0.0011 -0.0009  
Y 0.0014 -0.0005 -0.0004 0.0011 0.0148 0.0133  
Z -0.0006 -0.0001 -0.0002 -0.0006 -0.0046 -0.0041

AT. 62 H X -0.0014 0.0006 -0.0007 0.0007 0.0011 -0.0009  
Y 0.0014 0.0005 -0.0004 -0.0011 -0.0148 0.0133  
Z -0.0006 0.0001 -0.0002 0.0006 0.0046 -0.0041

AT. 63 H X 0.0018 0.0003 0.0006 0.0007 0.0012 0.0002  
Y -0.0001 -0.0002 -0.0006 0.0004 0.0075 0.0080  
Z -0.0014 0.0002 0.0003 -0.0010 -0.0106 -0.0102

AT. 64 H X 0.0018 -0.0003 0.0006 -0.0007 -0.0012 0.0002  
Y -0.0001 0.0002 -0.0006 -0.0004 -0.0075 0.0080

Z -0.0014 -0.0002 0.0003 0.0010 0.0106 -0.0102  
AT. 65 C X 0.0010 0.0004 0.0005 -0.0001 -0.0053 -0.0053  
Y -0.0017 -0.0004 -0.0001 -0.0001 0.0001 -0.0001  
Z 0.0016 0.0006 0.0004 0.0000 -0.0032 -0.0028  
AT. 66 C X 0.0010 -0.0004 0.0005 0.0001 0.0053 -0.0053  
Y -0.0017 0.0004 -0.0001 0.0001 -0.0001 -0.0001  
Z 0.0016 -0.0006 0.0004 -0.0000 0.0032 -0.0028  
AT. 67 H X -0.0020 -0.0008 -0.0012 -0.0004 0.0079 0.0089  
Y 0.0049 0.0013 0.0012 0.0004 -0.0082 -0.0071  
Z -0.0020 0.0000 0.0005 -0.0002 -0.0053 -0.0071  
AT. 68 H X -0.0020 0.0008 -0.0012 0.0004 -0.0079 0.0089  
Y 0.0049 -0.0013 0.0012 -0.0004 0.0082 -0.0071  
Z -0.0020 -0.0000 0.0005 0.0002 0.0053 -0.0071  
AT. 69 H X 0.0051 0.0014 0.0007 0.0002 -0.0046 -0.0048  
Y -0.0008 -0.0007 -0.0010 0.0004 0.0133 0.0126  
Z -0.0058 -0.0023 -0.0014 0.0004 0.0164 0.0163  
AT. 70 H X 0.0051 -0.0014 0.0007 -0.0002 0.0046 -0.0048  
Y -0.0008 0.0007 -0.0010 -0.0004 -0.0133 0.0126  
Z -0.0058 0.0023 -0.0014 -0.0004 -0.0164 0.0163  
AT. 71 H X -0.0065 -0.0019 -0.0014 -0.0004 0.0088 0.0069  
Y 0.0027 0.0005 0.0002 0.0005 0.0031 0.0035  
Z 0.0017 0.0001 -0.0006 0.0005 0.0120 0.0117  
AT. 72 H X -0.0065 0.0019 -0.0014 0.0004 -0.0088 0.0069  
Y 0.0027 -0.0005 0.0002 -0.0005 -0.0031 0.0035  
Z 0.0017 -0.0001 -0.0006 -0.0005 -0.0120 0.0117  
AT. 73 C X 0.0000 0.0001 0.0002 0.0001 -0.0006 -0.0005  
Y -0.0010 0.0001 0.0002 -0.0005 -0.0067 -0.0067  
Z 0.0022 0.0005 0.0005 0.0003 -0.0019 -0.0024  
AT. 74 C X 0.0000 -0.0001 0.0002 -0.0001 0.0006 -0.0005  
Y -0.0010 -0.0001 0.0002 0.0005 0.0067 -0.0067  
Z 0.0022 -0.0005 0.0005 -0.0003 0.0019 -0.0024  
AT. 75 H X 0.0078 0.0028 0.0017 0.0002 -0.0200 -0.0174

Y -0.0055 -0.0022 -0.0017 0.0001 0.0192 0.0186  
Z 0.0016 -0.0005 -0.0009 0.0011 0.0185 0.0192  
AT. 76 H X 0.0078 -0.0028 0.0017 -0.0002 0.0200 -0.0174  
Y -0.0055 0.0022 -0.0017 -0.0001 -0.0192 0.0186  
Z 0.0016 0.0005 -0.0009 -0.0011 -0.0185 0.0192  
AT. 77 H X 0.0018 0.0022 0.0008 -0.0038 -0.0390 -0.0391  
Y -0.0002 -0.0016 -0.0008 0.0029 0.0341 0.0331  
Z 0.0000 0.0001 0.0009 0.0007 -0.0036 -0.0031  
AT. 78 H X 0.0018 -0.0022 0.0008 0.0038 0.0390 -0.0391  
Y -0.0002 0.0016 -0.0008 -0.0029 -0.0341 0.0331  
Z 0.0000 -0.0001 0.0009 -0.0007 0.0036 -0.0031  
AT. 79 I X -0.0001 -0.0001 -0.0000 -0.0000 0.0000 0.0000  
Y -0.0000 -0.0001 -0.0000 0.0000 -0.0000 0.0000  
Z -0.0000 -0.0000 -0.0000 0.0000 0.0000 -0.0000  
AT. 80 I X -0.0001 0.0001 -0.0000 0.0000 -0.0000 0.0000  
Y -0.0000 0.0001 -0.0000 -0.0000 0.0000 0.0000  
Z -0.0000 0.0000 -0.0000 -0.0000 -0.0000 -0.0000  
AT. 81 I X 0.0000 -0.0000 0.0000 0.0000 -0.0000 -0.0000  
Y 0.0000 0.0000 -0.0000 -0.0000 -0.0000 -0.0000  
Z -0.0000 -0.0000 -0.0001 -0.0001 -0.0000 -0.0000  
AT. 82 I X 0.0000 0.0000 0.0000 -0.0000 0.0000 -0.0000  
Y 0.0000 -0.0000 -0.0000 0.0000 0.0000 -0.0000  
Z -0.0000 0.0000 -0.0001 0.0001 0.0000 -0.0000  
AT. 83 O X 0.0060 0.0045 0.0003 -0.0024 0.0007 0.0002  
Y 0.0016 0.0012 0.0003 -0.0002 0.0001 0.0000  
Z 0.0021 0.0011 -0.0005 -0.0022 0.0007 0.0002  
AT. 84 O X 0.0060 -0.0045 0.0003 0.0024 -0.0007 0.0002  
Y 0.0016 -0.0012 0.0003 0.0002 -0.0001 0.0000  
Z 0.0021 -0.0011 -0.0005 0.0022 -0.0007 0.0002  
AT. 85 O X 0.0000 -0.0019 -0.0044 -0.0038 -0.0000 -0.0002  
Y 0.0006 -0.0016 -0.0062 -0.0058 0.0001 -0.0003  
Z -0.0010 0.0009 0.0053 0.0051 -0.0002 0.0002

AT. 86 O X 0.0000 0.0019 -0.0044 0.0038 0.0000 -0.0002  
Y 0.0006 0.0016 -0.0062 0.0058 -0.0001 -0.0003  
Z -0.0010 -0.0009 0.0053 -0.0051 0.0002 0.0002

AT. 87 N X -0.0144 -0.0145 0.0018 0.0124 -0.0036 -0.0008  
Y -0.0088 -0.0088 -0.0019 0.0021 -0.0008 -0.0002  
Z 0.0022 0.0025 0.0012 0.0010 -0.0003 -0.0002

AT. 88 N X -0.0144 0.0145 0.0018 -0.0124 0.0036 -0.0008  
Y -0.0088 0.0088 -0.0019 -0.0021 0.0008 -0.0002  
Z 0.0022 -0.0025 0.0012 -0.0010 0.0003 -0.0002

AT. 89 N X -0.0031 0.0114 0.0305 0.0269 -0.0009 0.0010  
Y -0.0014 0.0041 0.0095 0.0083 -0.0002 0.0003  
Z 0.0027 0.0022 -0.0052 -0.0062 0.0007 -0.0000

AT. 90 N X -0.0031 -0.0114 0.0305 -0.0269 0.0009 0.0010  
Y -0.0014 -0.0041 0.0095 -0.0083 0.0002 0.0003  
Z 0.0027 -0.0022 -0.0052 0.0062 -0.0007 -0.0000

AT. 91 C X -0.0097 -0.0091 -0.0022 0.0004 -0.0002 -0.0001  
Y -0.0043 -0.0036 -0.0012 -0.0011 0.0002 -0.0001  
Z 0.0145 0.0152 0.0028 0.0005 -0.0002 0.0000

AT. 92 C X -0.0097 0.0091 -0.0022 -0.0004 0.0002 -0.0001  
Y -0.0043 0.0036 -0.0012 0.0011 -0.0002 -0.0001  
Z 0.0145 -0.0152 0.0028 -0.0005 0.0002 0.0000

AT. 93 C X 0.0039 0.0061 0.0015 -0.0010 0.0003 -0.0001  
Y 0.0014 0.0007 0.0003 0.0009 -0.0002 0.0001  
Z -0.0085 -0.0090 -0.0016 0.0017 -0.0004 -0.0001

AT. 94 C X 0.0039 -0.0061 0.0015 0.0010 -0.0003 -0.0001  
Y 0.0014 -0.0007 0.0003 -0.0009 0.0002 0.0001  
Z -0.0085 0.0090 -0.0016 -0.0017 0.0004 -0.0001

AT. 95 H X -0.0207 -0.0280 -0.0048 0.0159 -0.0032 0.0008  
Y 0.0052 0.0105 0.0021 -0.0059 0.0012 -0.0005  
Z 0.0131 0.0120 0.0026 -0.0052 0.0011 -0.0001

AT. 96 H X -0.0207 0.0280 -0.0048 -0.0159 0.0032 0.0008  
Y 0.0052 -0.0105 0.0021 0.0059 -0.0012 -0.0005

Z 0.0131 -0.0120 0.0026 0.0052 -0.0011 -0.0001  
AT. 97 H X 0.0312 0.0215 0.0019 0.0001 -0.0008 0.0011  
Y 0.0065 0.0126 0.0010 -0.0054 0.0012 -0.0005  
Z -0.0155 -0.0107 -0.0016 -0.0004 0.0003 -0.0006  
AT. 98 H X 0.0312 -0.0215 0.0019 -0.0001 0.0008 0.0011  
Y 0.0065 -0.0126 0.0010 0.0054 -0.0012 -0.0005  
Z -0.0155 0.0107 -0.0016 0.0004 -0.0003 -0.0006  
AT. 99 C X 0.0029 0.0023 -0.0045 -0.0053 0.0006 -0.0001  
Y -0.0015 -0.0008 0.0043 0.0046 0.0001 0.0005  
Z 0.0046 0.0031 -0.0067 -0.0078 0.0005 -0.0004  
AT. 100 C X 0.0029 -0.0023 -0.0045 0.0053 -0.0006 -0.0001  
Y -0.0015 0.0008 0.0043 -0.0046 -0.0001 0.0005  
Z 0.0046 -0.0031 -0.0067 0.0078 -0.0005 -0.0004  
AT. 101 C X -0.0018 -0.0021 0.0054 0.0063 -0.0000 0.0006  
Y 0.0010 0.0014 -0.0013 -0.0018 -0.0000 -0.0002  
Z -0.0018 -0.0022 0.0011 0.0021 -0.0002 0.0001  
AT. 102 C X -0.0018 0.0021 0.0054 -0.0063 0.0000 0.0006  
Y 0.0010 -0.0014 -0.0013 0.0018 0.0000 -0.0002  
Z -0.0018 0.0022 0.0011 -0.0021 0.0002 0.0001  
AT. 103 H X 0.0072 0.0093 -0.0177 -0.0211 -0.0007 -0.0026  
Y -0.0032 -0.0034 0.0088 0.0101 0.0003 0.0012  
Z 0.0015 0.0014 0.0049 0.0040 -0.0000 0.0003  
AT. 104 H X 0.0072 -0.0093 -0.0177 0.0211 0.0007 -0.0026  
Y -0.0032 0.0034 0.0088 -0.0101 -0.0003 0.0012  
Z 0.0015 -0.0014 0.0049 -0.0040 0.0000 0.0003  
AT. 105 H X -0.0068 -0.0036 -0.0120 -0.0111 -0.0015 -0.0021  
Y -0.0017 -0.0035 0.0137 0.0142 0.0005 0.0018  
Z -0.0040 -0.0042 0.0026 0.0038 -0.0003 0.0002  
AT. 106 H X -0.0068 0.0036 -0.0120 0.0111 0.0015 -0.0021  
Y -0.0017 0.0035 0.0137 -0.0142 -0.0005 0.0018  
Z -0.0040 0.0042 0.0026 -0.0038 0.0003 0.0002  
AT. 107 C X 0.0042 0.0046 -0.0020 -0.0068 0.0019 0.0004

Y 0.0043 0.0036 0.0026 0.0015 -0.0003 -0.0001  
Z -0.0075 -0.0079 -0.0003 0.0022 -0.0006 -0.0002  
AT. 108 C X 0.0042 -0.0046 -0.0020 0.0068 -0.0019 0.0004  
Y 0.0043 -0.0036 0.0026 -0.0015 0.0003 -0.0001  
Z -0.0075 0.0079 -0.0003 -0.0022 0.0006 -0.0002  
AT. 109 H X 0.0260 0.0182 0.0042 0.0076 -0.0031 -0.0005  
Y 0.0027 0.0050 0.0048 0.0026 0.0001 0.0001  
Z -0.0156 -0.0082 0.0020 -0.0007 0.0018 0.0005  
AT. 110 H X 0.0260 -0.0182 0.0042 -0.0076 0.0031 -0.0005  
Y 0.0027 -0.0050 0.0048 -0.0026 -0.0001 0.0001  
Z -0.0156 0.0082 0.0020 0.0007 -0.0018 0.0005  
AT. 111 H X -0.0025 0.0025 -0.0005 -0.0091 0.0033 0.0003  
Y -0.0064 -0.0081 -0.0048 -0.0054 0.0012 0.0005  
Z 0.0024 -0.0028 -0.0001 0.0065 -0.0026 -0.0003  
AT. 112 H X -0.0025 -0.0025 -0.0005 0.0091 -0.0033 0.0003  
Y -0.0064 0.0081 -0.0048 0.0054 -0.0012 0.0005  
Z 0.0024 0.0028 -0.0001 -0.0065 0.0026 -0.0003  
AT. 113 C X 0.0055 0.0068 0.0051 0.0041 -0.0006 -0.0002  
Y -0.0039 -0.0034 -0.0085 -0.0086 0.0014 0.0003  
Z 0.0065 0.0086 0.0020 0.0014 0.0002 0.0003  
AT. 114 C X 0.0055 -0.0068 0.0051 -0.0041 0.0006 -0.0002  
Y -0.0039 0.0034 -0.0085 0.0086 -0.0014 0.0003  
Z 0.0065 -0.0086 0.0020 -0.0014 -0.0002 0.0003  
AT. 115 C X -0.0001 -0.0077 -0.0161 -0.0140 0.0005 -0.0004  
Y 0.0021 -0.0022 -0.0053 -0.0041 -0.0003 -0.0003  
Z -0.0040 -0.0021 0.0064 0.0068 -0.0006 0.0000  
AT. 116 C X -0.0001 0.0077 -0.0161 0.0140 -0.0005 -0.0004  
Y 0.0021 0.0022 -0.0053 0.0041 0.0003 -0.0003  
Z -0.0040 0.0021 0.0064 -0.0068 0.0006 0.0000  
AT. 117 H X -0.0074 -0.0194 -0.0114 -0.0046 -0.0024 -0.0014  
Y -0.0035 -0.0101 -0.0003 0.0068 -0.0030 -0.0009  
Z 0.0050 0.0125 0.0002 -0.0059 0.0031 0.0012



AT. 118 H X -0.0074 0.0194 -0.0114 0.0046 0.0024 -0.0014  
Y -0.0035 0.0101 -0.0003 -0.0068 0.0030 -0.0009  
Z 0.0050 -0.0125 0.0002 0.0059 -0.0031 0.0012

AT. 119 H X 0.0139 0.0223 -0.0001 -0.0096 0.0032 0.0006  
Y 0.0156 0.0276 0.0122 0.0014 0.0023 0.0006  
Z -0.0094 -0.0154 -0.0040 0.0021 -0.0016 -0.0003

AT. 120 H X 0.0139 -0.0223 -0.0001 0.0096 -0.0032 0.0006  
Y 0.0156 -0.0276 0.0122 -0.0014 -0.0023 0.0006  
Z -0.0094 0.0154 -0.0040 -0.0021 0.0016 -0.0003

AT. 121 C X 0.0042 -0.0051 -0.0207 -0.0194 0.0010 -0.0005  
Y 0.0051 0.0046 0.0029 0.0015 -0.0000 0.0001  
Z -0.0036 -0.0061 -0.0036 -0.0016 -0.0003 -0.0001

AT. 122 C X 0.0042 0.0051 -0.0207 0.0194 -0.0010 -0.0005  
Y 0.0051 -0.0046 0.0029 -0.0015 0.0000 0.0001  
Z -0.0036 0.0061 -0.0036 0.0016 0.0003 -0.0001

AT. 123 H X -0.0075 0.0110 0.0546 0.0495 -0.0019 0.0020  
Y 0.0008 -0.0039 -0.0116 -0.0088 -0.0004 -0.0007  
Z -0.0012 0.0065 0.0257 0.0217 -0.0003 0.0012

AT. 124 H X -0.0075 -0.0110 0.0546 -0.0495 0.0019 0.0020  
Y 0.0008 0.0039 -0.0116 0.0088 0.0004 -0.0007  
Z -0.0012 -0.0065 0.0257 -0.0217 0.0003 0.0012

AT. 125 H X -0.0123 -0.0220 -0.0244 -0.0145 -0.0006 -0.0013  
Y 0.0235 0.0195 -0.0103 -0.0185 0.0025 0.0001  
Z -0.0144 -0.0193 -0.0155 -0.0066 -0.0010 -0.0011

AT. 126 H X -0.0123 0.0220 -0.0244 0.0145 0.0006 -0.0013  
Y 0.0235 -0.0195 -0.0103 0.0185 -0.0025 0.0001  
Z -0.0144 0.0193 -0.0155 0.0066 0.0010 -0.0011

AT. 127 C X -0.0127 -0.0066 0.0147 0.0187 -0.0022 -0.0001  
Y -0.0142 -0.0142 -0.0092 -0.0046 0.0002 -0.0001  
Z 0.0141 0.0125 -0.0060 -0.0103 0.0018 0.0005

AT. 128 C X -0.0127 0.0066 0.0147 -0.0187 0.0022 -0.0001  
Y -0.0142 0.0142 -0.0092 0.0046 -0.0002 -0.0001

Z 0.0141 -0.0125 -0.0060 0.0103 -0.0018 0.0005  
AT. 129 C X 0.0103 0.0093 -0.0031 -0.0088 0.0021 0.0004  
Y 0.0083 0.0090 0.0056 0.0020 0.0003 0.0001  
Z -0.0054 -0.0052 0.0011 0.0018 -0.0001 -0.0000  
AT. 130 C X 0.0103 -0.0093 -0.0031 0.0088 -0.0021 0.0004  
Y 0.0083 -0.0090 0.0056 -0.0020 -0.0003 0.0001  
Z -0.0054 0.0052 0.0011 -0.0018 0.0001 -0.0000  
AT. 131 H X 0.0498 0.0510 0.0094 -0.0102 0.0043 0.0013  
Y 0.0133 0.0184 0.0111 0.0051 0.0005 0.0004  
Z 0.0507 0.0563 0.0204 0.0009 0.0030 0.0013  
AT. 132 H X 0.0498 -0.0510 0.0094 0.0102 -0.0043 0.0013  
Y 0.0133 -0.0184 0.0111 -0.0051 -0.0005 0.0004  
Z 0.0507 -0.0563 0.0204 -0.0009 -0.0030 0.0013  
AT. 133 H X -0.0520 -0.0546 -0.0185 -0.0009 -0.0022 -0.0008  
Y -0.0329 -0.0340 -0.0120 -0.0012 -0.0015 -0.0005  
Z -0.0398 -0.0417 -0.0188 -0.0069 -0.0009 -0.0004  
AT. 134 H X -0.0520 0.0546 -0.0185 0.0009 0.0022 -0.0008  
Y -0.0329 0.0340 -0.0120 0.0012 0.0015 -0.0005  
Z -0.0398 0.0417 -0.0188 0.0069 0.0009 -0.0004  
AT. 135 C X -0.0025 -0.0030 -0.0019 -0.0011 0.0001 0.0001  
Y 0.0014 0.0018 0.0042 0.0040 -0.0005 0.0000  
Z -0.0020 -0.0032 -0.0019 -0.0018 0.0001 -0.0002  
AT. 136 C X -0.0025 0.0030 -0.0019 0.0011 -0.0001 0.0001  
Y 0.0014 -0.0018 0.0042 -0.0040 0.0005 0.0000  
Z -0.0020 0.0032 -0.0019 0.0018 -0.0001 -0.0002  
AT. 137 H X 0.0094 0.0123 0.0102 0.0090 -0.0006 0.0000  
Y 0.0039 0.0054 0.0027 0.0024 -0.0000 0.0003  
Z -0.0016 -0.0020 -0.0078 -0.0075 0.0010 0.0003  
AT. 138 H X 0.0094 -0.0123 0.0102 -0.0090 0.0006 0.0000  
Y 0.0039 -0.0054 0.0027 -0.0024 0.0000 0.0003  
Z -0.0016 0.0020 -0.0078 0.0075 -0.0010 0.0003  
AT. 139 H X -0.0064 -0.0089 -0.0029 -0.0021 -0.0001 -0.0004

Y -0.0063 -0.0078 -0.0114 -0.0103 0.0014 0.0001  
Z 0.0056 0.0080 0.0042 0.0038 -0.0002 0.0004  
AT. 140 H X -0.0064 0.0089 -0.0029 0.0021 0.0001 -0.0004  
Y -0.0063 0.0078 -0.0114 0.0103 -0.0014 0.0001  
Z 0.0056 -0.0080 0.0042 -0.0038 0.0002 0.0004  
AT. 141 H X 0.0040 0.0055 -0.0020 -0.0026 0.0007 0.0001  
Y -0.0029 -0.0036 -0.0066 -0.0065 0.0009 -0.0003  
Z 0.0053 0.0065 0.0093 0.0084 -0.0011 0.0001  
AT. 142 H X 0.0040 -0.0055 -0.0020 0.0026 -0.0007 0.0001  
Y -0.0029 0.0036 -0.0066 0.0065 -0.0009 -0.0003  
Z 0.0053 -0.0065 0.0093 -0.0084 0.0011 0.0001  
AT. 143 C X 0.0050 0.0031 -0.0044 -0.0062 0.0008 0.0001  
Y 0.0054 0.0048 0.0020 0.0006 -0.0000 0.0000  
Z -0.0057 -0.0043 0.0035 0.0048 -0.0008 -0.0002  
AT. 144 C X 0.0050 -0.0031 -0.0044 0.0062 -0.0008 0.0001  
Y 0.0054 -0.0048 0.0020 -0.0006 0.0000 0.0000  
Z -0.0057 0.0043 0.0035 -0.0048 0.0008 -0.0002  
AT. 145 H X -0.0097 -0.0078 0.0120 0.0156 -0.0024 -0.0006  
Y -0.0142 -0.0109 0.0041 0.0072 -0.0015 -0.0005  
Z 0.0110 0.0093 0.0049 0.0026 0.0000 0.0002  
AT. 146 H X -0.0097 0.0078 0.0120 -0.0156 0.0024 -0.0006  
Y -0.0142 0.0109 0.0041 -0.0072 0.0015 -0.0005  
Z 0.0110 -0.0093 0.0049 -0.0026 -0.0000 0.0002  
AT. 147 H X 0.0242 0.0174 -0.0113 -0.0174 0.0024 0.0003  
Y -0.0035 -0.0059 -0.0112 -0.0102 0.0009 -0.0001  
Z 0.0189 0.0118 -0.0143 -0.0184 0.0023 0.0001  
AT. 148 H X 0.0242 -0.0174 -0.0113 0.0174 -0.0024 0.0003  
Y -0.0035 0.0059 -0.0112 0.0102 -0.0009 -0.0001  
Z 0.0189 -0.0118 -0.0143 0.0184 -0.0023 0.0001  
AT. 149 H X -0.0260 -0.0226 0.0019 0.0096 -0.0017 -0.0004  
Y -0.0025 -0.0043 -0.0064 -0.0044 0.0007 0.0002  
Z -0.0021 -0.0054 -0.0141 -0.0124 0.0018 0.0003

AT. 150 H X -0.0260 0.0226 0.0019 -0.0096 0.0017 -0.0004  
Y -0.0025 0.0043 -0.0064 0.0044 -0.0007 0.0002  
Z -0.0021 0.0054 -0.0141 0.0124 -0.0018 0.0003

AT. 151 C X -0.0002 0.0011 0.0027 0.0024 -0.0001 0.0002  
Y 0.0036 0.0045 0.0066 0.0058 -0.0006 0.0000  
Z -0.0074 -0.0072 0.0019 0.0038 -0.0007 -0.0002

AT. 152 C X -0.0002 -0.0011 0.0027 -0.0024 0.0001 0.0002  
Y 0.0036 -0.0045 0.0066 -0.0058 0.0006 0.0000  
Z -0.0074 0.0072 0.0019 -0.0038 0.0007 -0.0002

AT. 153 H X 0.0261 0.0180 -0.0231 -0.0362 0.0057 0.0008  
Y 0.0070 0.0047 -0.0094 -0.0130 0.0021 0.0004  
Z -0.0128 -0.0137 -0.0122 -0.0095 0.0011 0.0001

AT. 154 H X 0.0261 -0.0180 -0.0231 0.0362 -0.0057 0.0008  
Y 0.0070 -0.0047 -0.0094 0.0130 -0.0021 0.0004  
Z -0.0128 0.0137 -0.0122 0.0095 -0.0011 0.0001

AT. 155 H X 0.0085 -0.0135 -0.0449 -0.0433 0.0026 -0.0010  
Y 0.0004 -0.0070 -0.0202 -0.0197 0.0015 -0.0004  
Z -0.0019 -0.0010 0.0124 0.0138 -0.0019 -0.0002

AT. 156 H X 0.0085 0.0135 -0.0449 0.0433 -0.0026 -0.0010  
Y 0.0004 0.0070 -0.0202 0.0197 -0.0015 -0.0004  
Z -0.0019 0.0010 0.0124 -0.0138 0.0019 -0.0002

AT. 157 O X 0.0001 -0.0000 0.0001 0.0001 -0.0000 0.0001  
Y 0.0001 0.0000 0.0000 0.0001 0.0001 -0.0000  
Z 0.0000 0.0001 -0.0000 -0.0001 -0.0001 0.0002

AT. 158 O X 0.0001 0.0000 0.0001 -0.0001 0.0000 0.0001  
Y 0.0001 -0.0000 0.0000 -0.0001 -0.0001 -0.0000  
Z 0.0000 -0.0001 -0.0000 0.0001 0.0001 0.0002

AT. 159 O X 0.0001 -0.0000 -0.0000 0.0001 0.0001 -0.0001  
Y -0.0001 0.0000 0.0001 -0.0001 0.0000 -0.0001  
Z -0.0001 -0.0001 0.0000 0.0000 -0.0001 0.0000

AT. 160 O X 0.0001 0.0000 -0.0000 -0.0001 -0.0001 -0.0001  
Y -0.0001 -0.0000 0.0001 0.0001 -0.0000 -0.0001

Z -0.0001 0.0001 0.0000 -0.0000 0.0001 0.0000  
AT.161 H X -0.0010 0.0002 -0.0008 -0.0018 -0.0004 -0.0012  
Y -0.0001 -0.0002 -0.0000 0.0003 -0.0003 0.0001  
Z -0.0003 -0.0002 0.0000 -0.0007 0.0001 -0.0006  
AT.162 H X -0.0010 -0.0002 -0.0008 0.0018 0.0004 -0.0012  
Y -0.0001 0.0002 -0.0000 -0.0003 0.0003 0.0001  
Z -0.0003 0.0002 0.0000 0.0007 -0.0001 -0.0006  
AT.163 H X -0.0008 0.0007 0.0004 -0.0009 -0.0016 0.0019  
Y 0.0008 0.0000 -0.0009 0.0006 -0.0013 0.0014  
Z 0.0006 -0.0001 -0.0004 0.0003 0.0002 -0.0002  
AT.164 H X -0.0008 -0.0007 0.0004 0.0009 0.0016 0.0019  
Y 0.0008 -0.0000 -0.0009 -0.0006 0.0013 0.0014  
Z 0.0006 0.0001 -0.0004 -0.0003 -0.0002 -0.0002  
AT.165 O X -0.0000 -0.0001 -0.0001 0.0001 -0.0001 -0.0001  
Y 0.0001 0.0002 0.0000 -0.0000 -0.0001 0.0000  
Z -0.0002 -0.0002 0.0000 -0.0000 0.0001 -0.0000  
AT.166 O X -0.0000 0.0001 -0.0001 -0.0001 0.0001 -0.0001  
Y 0.0001 -0.0002 0.0000 0.0000 0.0001 0.0000  
Z -0.0002 0.0002 0.0000 0.0000 -0.0001 -0.0000  
AT.167 H X -0.0000 0.0004 0.0008 -0.0006 0.0002 0.0002  
Y -0.0016 -0.0023 -0.0011 0.0012 -0.0001 -0.0001  
Z 0.0028 0.0027 -0.0009 0.0003 -0.0012 -0.0008  
AT.168 H X -0.0000 -0.0004 0.0008 0.0006 -0.0002 0.0002  
Y -0.0016 0.0023 -0.0011 -0.0012 0.0001 -0.0001  
Z 0.0028 -0.0027 -0.0009 -0.0003 0.0012 -0.0008  
AT.169 O X -0.0001 0.0000 0.0001 -0.0001 -0.0000 0.0001  
Y -0.0001 -0.0001 0.0002 -0.0002 0.0001 -0.0000  
Z -0.0001 -0.0001 -0.0000 0.0000 0.0000 0.0000  
AT.170 O X -0.0001 -0.0000 0.0001 0.0001 0.0000 0.0001  
Y -0.0001 0.0001 0.0002 0.0002 -0.0001 -0.0000  
Z -0.0001 0.0001 -0.0000 -0.0000 -0.0000 0.0000  
AT.171 H X 0.0012 -0.0016 -0.0028 0.0033 0.0017 -0.0019

Y 0.0012 -0.0000 -0.0013 0.0015 0.0006 -0.0005  
Z 0.0015 0.0017 -0.0004 0.0001 -0.0005 0.0011  
AT. 172 H X 0.0012 0.0016 -0.0028 -0.0033 -0.0017 -0.0019  
Y 0.0012 0.0000 -0.0013 -0.0015 -0.0006 -0.0005  
Z 0.0015 -0.0017 -0.0004 -0.0001 0.0005 0.0011  
  
FREQ(CM\*\*-1) 1303.26 1305.04 1306.01 1308.58 1335.87 1335.97

AT. 1 I X 0.0000 -0.0000 -0.0000 -0.0000 -0.0000 0.0000  
Y -0.0000 -0.0000 -0.0000 -0.0000 0.0000 0.0000  
Z 0.0000 -0.0000 -0.0000 -0.0000 0.0000 -0.0000  
AT. 2 I X 0.0000 0.0000 -0.0000 0.0000 0.0000 0.0000  
Y -0.0000 0.0000 -0.0000 0.0000 -0.0000 0.0000  
Z 0.0000 0.0000 -0.0000 0.0000 -0.0000 -0.0000  
AT. 3 I X 0.0000 -0.0000 -0.0000 -0.0000 -0.0000 0.0000  
Y -0.0000 0.0000 -0.0000 -0.0000 0.0000 -0.0000  
Z 0.0000 0.0000 0.0000 -0.0000 0.0000 -0.0000  
AT. 4 I X 0.0000 0.0000 -0.0000 0.0000 0.0000 0.0000  
Y -0.0000 -0.0000 -0.0000 0.0000 -0.0000 -0.0000  
Z 0.0000 -0.0000 0.0000 0.0000 -0.0000 -0.0000  
AT. 5 O X 0.0021 0.0031 0.0024 0.0005 -0.0004 -0.0001  
Y -0.0013 -0.0019 -0.0016 -0.0004 0.0001 0.0001  
Z -0.0052 -0.0079 -0.0062 -0.0002 0.0025 0.0002  
AT. 6 O X 0.0021 -0.0031 0.0024 -0.0005 0.0004 -0.0001  
Y -0.0013 0.0019 -0.0016 0.0004 -0.0001 0.0001  
Z -0.0052 0.0079 -0.0062 0.0002 -0.0025 0.0002  
AT. 7 O X -0.0006 -0.0008 -0.0004 0.0004 0.0007 -0.0000  
Y 0.0012 0.0018 0.0011 -0.0006 0.0003 0.0000  
Z -0.0012 -0.0020 -0.0012 0.0005 -0.0013 -0.0001  
AT. 8 O X -0.0006 0.0008 -0.0004 -0.0004 -0.0007 -0.0000  
Y 0.0012 -0.0018 0.0011 0.0006 -0.0003 0.0000  
Z -0.0012 0.0020 -0.0012 -0.0005 0.0013 -0.0001

AT. 9 N X -0.0164 -0.0241 -0.0184 0.0021 0.0097 0.0008  
Y 0.0097 0.0142 0.0105 -0.0012 -0.0047 -0.0006  
Z 0.0086 0.0137 0.0106 -0.0009 -0.0020 -0.0003

AT. 10 N X -0.0164 0.0241 -0.0184 -0.0021 -0.0097 0.0008  
Y 0.0097 -0.0142 0.0105 0.0012 0.0047 -0.0006  
Z 0.0086 -0.0137 0.0106 0.0009 0.0020 -0.0003

AT. 11 N X 0.0055 0.0092 0.0057 -0.0018 0.0067 0.0006  
Y -0.0043 -0.0067 -0.0045 0.0017 0.0007 -0.0001  
Z -0.0001 0.0002 -0.0000 -0.0003 -0.0015 -0.0001

AT. 12 N X 0.0055 -0.0092 0.0057 0.0018 -0.0067 0.0006  
Y -0.0043 0.0067 -0.0045 -0.0017 -0.0007 -0.0001  
Z -0.0001 -0.0002 -0.0000 0.0003 0.0015 -0.0001

AT. 13 C X 0.0033 0.0052 0.0042 -0.0009 -0.0042 -0.0001  
Y -0.0027 -0.0042 -0.0033 0.0009 0.0039 0.0001  
Z 0.0059 0.0089 0.0076 0.0003 -0.0086 -0.0003

AT. 14 C X 0.0033 -0.0052 0.0042 0.0009 0.0042 -0.0001  
Y -0.0027 0.0042 -0.0033 -0.0009 -0.0039 0.0001  
Z 0.0059 -0.0089 0.0076 -0.0003 0.0086 -0.0003

AT. 15 C X -0.0026 -0.0042 -0.0037 -0.0001 0.0029 0.0002  
Y 0.0006 0.0011 0.0010 0.0001 -0.0010 -0.0000  
Z -0.0010 -0.0016 -0.0016 -0.0001 0.0021 0.0001

AT. 16 C X -0.0026 0.0042 -0.0037 0.0001 -0.0029 0.0002  
Y 0.0006 -0.0011 0.0010 -0.0001 0.0010 -0.0000  
Z -0.0010 0.0016 -0.0016 0.0001 -0.0021 0.0001

AT. 17 H X 0.0102 0.0157 0.0142 0.0008 -0.0134 -0.0006  
Y 0.0040 0.0066 0.0050 -0.0004 -0.0028 -0.0001  
Z -0.0000 -0.0006 0.0004 0.0007 -0.0022 -0.0001

AT. 18 H X 0.0102 -0.0157 0.0142 -0.0008 0.0134 -0.0006  
Y 0.0040 -0.0066 0.0050 0.0004 0.0028 -0.0001  
Z -0.0000 0.0006 0.0004 -0.0007 0.0022 -0.0001

AT. 19 H X 0.0004 0.0017 0.0016 0.0002 0.0036 -0.0007  
Y 0.0082 0.0130 0.0107 -0.0001 -0.0103 -0.0004

Z 0.0026 0.0045 0.0036 -0.0003 -0.0008 -0.0004  
AT. 20 H X 0.0004 -0.0017 0.0016 -0.0002 -0.0036 -0.0007  
Y 0.0082 -0.0130 0.0107 0.0001 0.0103 -0.0004  
Z 0.0026 -0.0045 0.0036 0.0003 0.0008 -0.0004  
AT. 21 C X -0.0012 -0.0027 -0.0019 0.0003 -0.0047 -0.0002  
Y -0.0006 -0.0010 -0.0005 0.0001 -0.0022 -0.0002  
Z 0.0027 0.0056 0.0035 -0.0005 0.0105 0.0006  
AT. 22 C X -0.0012 0.0027 -0.0019 -0.0003 0.0047 -0.0002  
Y -0.0006 0.0010 -0.0005 -0.0001 0.0022 -0.0002  
Z 0.0027 -0.0056 0.0035 0.0005 -0.0105 0.0006  
AT. 23 C X 0.0006 0.0015 0.0006 -0.0004 0.0027 0.0001  
Y -0.0000 0.0003 0.0000 0.0001 0.0006 0.0001  
Z -0.0004 -0.0009 -0.0006 0.0001 -0.0031 -0.0001  
AT. 24 C X 0.0006 -0.0015 0.0006 0.0004 -0.0027 0.0001  
Y -0.0000 -0.0003 0.0000 -0.0001 -0.0006 0.0001  
Z -0.0004 0.0009 -0.0006 -0.0001 0.0031 -0.0001  
AT. 25 H X -0.0019 -0.0057 -0.0019 0.0004 -0.0120 -0.0001  
Y -0.0005 -0.0008 -0.0005 0.0000 -0.0024 -0.0000  
Z -0.0005 -0.0030 -0.0009 0.0007 0.0029 0.0002  
AT. 26 H X -0.0019 0.0057 -0.0019 -0.0004 0.0120 -0.0001  
Y -0.0005 0.0008 -0.0005 -0.0000 0.0024 -0.0000  
Z -0.0005 0.0030 -0.0009 -0.0007 -0.0029 0.0002  
AT. 27 H X 0.0030 0.0035 0.0045 0.0006 0.0076 0.0006  
Y -0.0022 -0.0069 -0.0029 0.0007 -0.0052 -0.0003  
Z -0.0021 -0.0049 -0.0029 -0.0000 -0.0072 -0.0005  
AT. 28 H X 0.0030 -0.0035 0.0045 -0.0006 -0.0076 0.0006  
Y -0.0022 0.0069 -0.0029 -0.0007 0.0052 -0.0003  
Z -0.0021 0.0049 -0.0029 0.0000 0.0072 -0.0005  
AT. 29 C X 0.0114 0.0172 0.0133 -0.0015 -0.0010 0.0000  
Y -0.0024 -0.0035 -0.0024 0.0005 0.0047 0.0003  
Z -0.0027 -0.0047 -0.0038 0.0001 0.0021 0.0001  
AT. 30 C X 0.0114 -0.0172 0.0133 0.0015 0.0010 0.0000



Y -0.0024 0.0035 -0.0024 -0.0005 -0.0047 0.0003  
Z -0.0027 0.0047 -0.0038 -0.0001 -0.0021 0.0001  
AT. 31 H X -0.0324 -0.0482 -0.0379 0.0066 0.0388 0.0008  
Y 0.0123 0.0197 0.0154 -0.0014 0.0008 0.0003  
Z -0.0090 -0.0119 -0.0095 0.0027 0.0227 0.0007  
AT. 32 H X -0.0324 0.0482 -0.0379 -0.0066 -0.0388 0.0008  
Y 0.0123 -0.0197 0.0154 0.0014 -0.0008 0.0003  
Z -0.0090 0.0119 -0.0095 -0.0027 -0.0227 0.0007  
AT. 33 H X 0.0187 0.0261 0.0194 -0.0012 -0.0431 -0.0035  
Y -0.0196 -0.0311 -0.0245 0.0013 0.0025 0.0004  
Z 0.0102 0.0137 0.0100 -0.0004 -0.0254 -0.0023  
AT. 34 H X 0.0187 -0.0261 0.0194 0.0012 0.0431 -0.0035  
Y -0.0196 0.0311 -0.0245 -0.0013 -0.0025 0.0004  
Z 0.0102 -0.0137 0.0100 0.0004 0.0254 -0.0023  
AT. 35 C X -0.0086 -0.0144 -0.0114 0.0006 -0.0090 -0.0003  
Y -0.0030 -0.0049 -0.0044 -0.0009 -0.0121 -0.0005  
Z 0.0070 0.0123 0.0098 -0.0006 0.0023 0.0003  
AT. 36 C X -0.0086 0.0144 -0.0114 -0.0006 0.0090 -0.0003  
Y -0.0030 0.0049 -0.0044 0.0009 0.0121 -0.0005  
Z 0.0070 -0.0123 0.0098 0.0006 -0.0023 0.0003  
AT. 37 C X -0.0002 -0.0003 0.0004 0.0009 0.0002 -0.0001  
Y 0.0049 0.0078 0.0058 -0.0011 0.0021 0.0001  
Z -0.0026 -0.0048 -0.0035 0.0006 -0.0007 -0.0000  
AT. 38 C X -0.0002 0.0003 0.0004 -0.0009 -0.0002 -0.0001  
Y 0.0049 -0.0078 0.0058 0.0011 -0.0021 0.0001  
Z -0.0026 0.0048 -0.0035 -0.0006 0.0007 -0.0000  
AT. 39 H X -0.0040 -0.0040 -0.0032 0.0011 0.0012 -0.0001  
Y 0.0165 0.0224 0.0186 -0.0020 0.0011 0.0014  
Z -0.0100 -0.0132 -0.0112 0.0010 0.0003 -0.0005  
AT. 40 H X -0.0040 0.0040 -0.0032 -0.0011 -0.0012 -0.0001  
Y 0.0165 -0.0224 0.0186 0.0020 -0.0011 0.0014  
Z -0.0100 0.0132 -0.0112 -0.0010 -0.0003 -0.0005

AT. 41 H X 0.0051 0.0056 0.0055 -0.0005 -0.0025 0.0001  
Y -0.0133 -0.0161 -0.0142 0.0038 0.0299 0.0011  
Z 0.0065 0.0084 0.0073 -0.0021 -0.0194 -0.0009

AT. 42 H X 0.0051 -0.0056 0.0055 0.0005 0.0025 0.0001  
Y -0.0133 0.0161 -0.0142 -0.0038 -0.0299 0.0011  
Z 0.0065 -0.0084 0.0073 0.0021 0.0194 -0.0009

AT. 43 C X -0.0035 -0.0061 -0.0036 0.0013 -0.0009 -0.0002  
Y 0.0017 0.0032 0.0025 -0.0003 0.0019 0.0000  
Z 0.0012 0.0014 0.0009 -0.0002 0.0030 0.0004

AT. 44 C X -0.0035 0.0061 -0.0036 -0.0013 0.0009 -0.0002  
Y 0.0017 -0.0032 0.0025 0.0003 -0.0019 0.0000  
Z 0.0012 -0.0014 0.0009 0.0002 -0.0030 0.0004

AT. 45 H X 0.0185 0.0332 0.0219 -0.0021 0.0503 0.0042  
Y 0.0029 0.0048 0.0042 0.0017 0.0218 0.0016  
Z -0.0157 -0.0282 -0.0192 0.0002 -0.0532 -0.0043

AT. 46 H X 0.0185 -0.0332 0.0219 0.0021 -0.0503 0.0042  
Y 0.0029 -0.0048 0.0042 -0.0017 -0.0218 0.0016  
Z -0.0157 0.0282 -0.0192 -0.0002 0.0532 -0.0043

AT. 47 H X -0.0092 -0.0144 -0.0095 0.0007 -0.0300 -0.0027  
Y 0.0021 0.0055 0.0032 -0.0017 -0.0108 -0.0011  
Z 0.0096 0.0155 0.0101 -0.0008 0.0297 0.0027

AT. 48 H X -0.0092 0.0144 -0.0095 -0.0007 0.0300 -0.0027  
Y 0.0021 -0.0055 0.0032 0.0017 0.0108 -0.0011  
Z 0.0096 -0.0155 0.0101 0.0008 -0.0297 0.0027

AT. 49 C X -0.0004 0.0002 -0.0008 -0.0020 -0.0163 -0.0014  
Y -0.0031 -0.0068 -0.0058 -0.0002 -0.0093 -0.0002  
Z -0.0015 -0.0012 -0.0009 -0.0002 -0.0115 -0.0013

AT. 50 C X -0.0004 -0.0002 -0.0008 0.0020 0.0163 -0.0014  
Y -0.0031 0.0068 -0.0058 0.0002 0.0093 -0.0002  
Z -0.0015 0.0012 -0.0009 0.0002 0.0115 -0.0013

AT. 51 C X 0.0068 0.0096 0.0074 -0.0006 0.0003 -0.0001  
Y -0.0044 -0.0060 -0.0042 0.0005 0.0009 -0.0001

Z -0.0056 -0.0090 -0.0070 0.0004 0.0014 0.0000  
AT. 52 C X 0.0068 -0.0096 0.0074 0.0006 -0.0003 -0.0001  
Y -0.0044 0.0060 -0.0042 -0.0005 -0.0009 -0.0001  
Z -0.0056 0.0090 -0.0070 -0.0004 -0.0014 0.0000  
AT. 53 H X 0.0087 0.0111 0.0080 -0.0012 0.0022 0.0004  
Y -0.0106 -0.0152 -0.0100 0.0043 0.0264 0.0042  
Z -0.0158 -0.0213 -0.0138 0.0060 0.0284 0.0043  
AT. 54 H X 0.0087 -0.0111 0.0080 0.0012 -0.0022 0.0004  
Y -0.0106 0.0152 -0.0100 -0.0043 -0.0264 0.0042  
Z -0.0158 0.0213 -0.0138 -0.0060 -0.0284 0.0043  
AT. 55 H X 0.0001 0.0022 0.0029 0.0007 0.0060 0.0009  
Y 0.0063 0.0091 0.0054 -0.0000 0.0198 0.0010  
Z 0.0041 0.0066 0.0034 0.0004 0.0291 0.0020  
AT. 56 H X 0.0001 -0.0022 0.0029 -0.0007 -0.0060 0.0009  
Y 0.0063 -0.0091 0.0054 0.0000 -0.0198 0.0010  
Z 0.0041 -0.0066 0.0034 -0.0004 -0.0291 0.0020  
AT. 57 C X 0.0023 0.0040 0.0031 -0.0001 0.0028 0.0001  
Y 0.0005 0.0008 0.0009 0.0005 0.0035 0.0001  
Z -0.0025 -0.0045 -0.0037 0.0001 -0.0005 -0.0001  
AT. 58 C X 0.0023 -0.0040 0.0031 0.0001 -0.0028 0.0001  
Y 0.0005 -0.0008 0.0009 -0.0005 -0.0035 0.0001  
Z -0.0025 0.0045 -0.0037 -0.0001 0.0005 -0.0001  
AT. 59 H X -0.0063 -0.0111 -0.0096 -0.0008 -0.0078 -0.0008  
Y 0.0062 0.0112 0.0096 0.0004 0.0032 0.0006  
Z 0.0004 0.0015 0.0014 -0.0008 -0.0072 0.0001  
AT. 60 H X -0.0063 0.0111 -0.0096 0.0008 0.0078 -0.0008  
Y 0.0062 -0.0112 0.0096 -0.0004 -0.0032 0.0006  
Z 0.0004 -0.0015 0.0014 0.0008 0.0072 0.0001  
AT. 61 H X 0.0040 0.0072 0.0061 -0.0004 -0.0085 -0.0000  
Y -0.0098 -0.0168 -0.0129 -0.0001 -0.0126 -0.0000  
Z 0.0045 0.0077 0.0060 0.0000 -0.0011 -0.0001  
AT. 62 H X 0.0040 -0.0072 0.0061 0.0004 0.0085 -0.0000

Y -0.0098 0.0168 -0.0129 0.0001 0.0126 -0.0000  
Z 0.0045 -0.0077 0.0060 -0.0000 0.0011 -0.0001  
AT. 63 H X -0.0046 -0.0084 -0.0063 0.0011 -0.0005 -0.0000  
Y -0.0028 -0.0048 -0.0046 -0.0011 -0.0072 -0.0002  
Z 0.0069 0.0120 0.0097 0.0001 0.0111 0.0003  
AT. 64 H X -0.0046 0.0084 -0.0063 -0.0011 0.0005 -0.0000  
Y -0.0028 0.0048 -0.0046 0.0011 0.0072 -0.0002  
Z 0.0069 -0.0120 0.0097 -0.0001 -0.0111 0.0003  
AT. 65 C X 0.0005 0.0004 0.0005 0.0006 0.0050 0.0005  
Y 0.0017 0.0032 0.0028 -0.0001 0.0028 0.0001  
Z 0.0007 0.0008 0.0005 0.0001 0.0035 0.0004  
AT. 66 C X 0.0005 -0.0004 0.0005 -0.0006 -0.0050 0.0005  
Y 0.0017 -0.0032 0.0028 0.0001 -0.0028 0.0001  
Z 0.0007 -0.0008 0.0005 -0.0001 -0.0035 0.0004  
AT. 67 H X -0.0025 -0.0030 -0.0031 -0.0011 -0.0098 -0.0009  
Y -0.0002 -0.0008 -0.0018 0.0009 0.0070 0.0008  
Z 0.0047 0.0070 0.0073 0.0003 0.0101 0.0008  
AT. 68 H X -0.0025 0.0030 -0.0031 0.0011 0.0098 -0.0009  
Y -0.0002 0.0008 -0.0018 -0.0009 -0.0070 0.0008  
Z 0.0047 -0.0070 0.0073 -0.0003 -0.0101 0.0008  
AT. 69 H X -0.0023 -0.0057 -0.0044 0.0003 -0.0050 -0.0001  
Y -0.0025 -0.0037 -0.0037 -0.0012 -0.0169 -0.0014  
Z 0.0000 0.0027 0.0008 -0.0010 -0.0083 -0.0011  
AT. 70 H X -0.0023 0.0057 -0.0044 -0.0003 0.0050 -0.0001  
Y -0.0025 0.0037 -0.0037 0.0012 0.0169 -0.0014  
Z 0.0000 -0.0027 0.0008 0.0010 0.0083 -0.0011  
AT. 71 H X 0.0008 0.0022 0.0029 -0.0006 -0.0120 -0.0015  
Y -0.0013 -0.0033 -0.0027 -0.0004 -0.0032 0.0001  
Z -0.0030 -0.0065 -0.0048 -0.0015 -0.0171 -0.0010  
AT. 72 H X 0.0008 -0.0022 0.0029 0.0006 0.0120 -0.0015  
Y -0.0013 0.0033 -0.0027 0.0004 0.0032 0.0001  
Z -0.0030 0.0065 -0.0048 0.0015 0.0171 -0.0010

AT. 73 C X 0.0009 0.0014 0.0012 0.0001 0.0031 -0.0000  
Y 0.0025 0.0042 0.0039 0.0004 0.0068 0.0005  
Z -0.0014 -0.0033 -0.0024 0.0005 0.0030 0.0004

AT. 74 C X 0.0009 -0.0014 0.0012 -0.0001 -0.0031 -0.0000  
Y 0.0025 -0.0042 0.0039 -0.0004 -0.0068 0.0005  
Z -0.0014 0.0033 -0.0024 -0.0005 -0.0030 0.0004

AT. 75 H X 0.0183 0.0265 0.0207 -0.0015 0.0087 0.0015  
Y -0.0154 -0.0222 -0.0179 0.0009 -0.0124 -0.0015  
Z -0.0132 -0.0208 -0.0178 -0.0001 -0.0181 -0.0011

AT. 76 H X 0.0183 -0.0265 0.0207 0.0015 -0.0087 0.0015  
Y -0.0154 0.0222 -0.0179 -0.0009 0.0124 -0.0015  
Z -0.0132 0.0208 -0.0178 0.0001 0.0181 -0.0011

AT. 77 H X -0.0034 -0.0049 -0.0022 0.0028 0.0213 0.0034  
Y 0.0003 0.0002 -0.0021 -0.0028 -0.0215 -0.0026  
Z 0.0041 0.0054 0.0055 0.0008 0.0112 -0.0000

AT. 78 H X -0.0034 0.0049 -0.0022 -0.0028 -0.0213 0.0034  
Y 0.0003 -0.0002 -0.0021 0.0028 0.0215 -0.0026  
Z 0.0041 -0.0054 0.0055 -0.0008 -0.0112 -0.0000

AT. 79 I X -0.0001 0.0001 0.0001 0.0000 -0.0000 -0.0000  
Y -0.0000 -0.0000 0.0000 0.0001 -0.0000 0.0000  
Z 0.0000 -0.0000 -0.0000 -0.0000 0.0000 0.0000

AT. 80 I X -0.0001 -0.0001 0.0001 -0.0000 0.0000 -0.0000  
Y -0.0000 0.0000 0.0000 -0.0001 0.0000 0.0000  
Z 0.0000 0.0000 -0.0000 0.0000 -0.0000 0.0000

AT. 81 I X 0.0000 -0.0000 -0.0000 0.0000 -0.0000 0.0000  
Y -0.0000 -0.0000 0.0000 -0.0000 -0.0000 0.0000  
Z -0.0000 -0.0000 -0.0000 -0.0000 -0.0000 -0.0000

AT. 82 I X 0.0000 0.0000 -0.0000 -0.0000 0.0000 0.0000  
Y -0.0000 0.0000 0.0000 0.0000 0.0000 0.0000  
Z -0.0000 0.0000 -0.0000 0.0000 0.0000 -0.0000

AT. 83 O X -0.0038 0.0004 0.0024 0.0049 -0.0008 -0.0023  
Y -0.0006 0.0001 0.0004 0.0010 -0.0001 -0.0004

Z -0.0056 0.0006 0.0043 0.0075 -0.0013 -0.0020  
AT. 84 O X -0.0038 -0.0004 0.0024 -0.0049 0.0008 -0.0023  
Y -0.0006 -0.0001 0.0004 -0.0010 0.0001 -0.0004  
Z -0.0056 -0.0006 0.0043 -0.0075 0.0013 -0.0020  
AT. 85 O X 0.0002 -0.0000 -0.0000 -0.0007 -0.0003 -0.0013  
Y 0.0007 -0.0000 -0.0005 -0.0019 -0.0006 -0.0015  
Z -0.0008 0.0000 0.0006 0.0019 0.0007 0.0011  
AT. 86 O X 0.0002 0.0000 -0.0000 0.0007 0.0003 -0.0013  
Y 0.0007 0.0000 -0.0005 0.0019 0.0006 -0.0015  
Z -0.0008 -0.0000 0.0006 -0.0019 -0.0007 0.0011  
AT. 87 N X 0.0239 -0.0022 -0.0183 -0.0265 0.0064 0.0123  
Y 0.0044 -0.0004 -0.0029 -0.0045 0.0015 0.0041  
Z 0.0068 -0.0006 -0.0063 -0.0101 0.0009 0.0026  
AT. 88 N X 0.0239 0.0022 -0.0183 0.0265 -0.0064 0.0123  
Y 0.0044 0.0004 -0.0029 0.0045 -0.0015 0.0041  
Z 0.0068 0.0006 -0.0063 0.0101 -0.0009 0.0026  
AT. 89 N X -0.0052 0.0000 0.0038 0.0089 0.0046 0.0094  
Y -0.0027 -0.0000 0.0021 0.0042 0.0002 0.0040  
Z 0.0007 0.0003 -0.0005 -0.0033 0.0002 -0.0009  
AT. 90 N X -0.0052 -0.0000 0.0038 -0.0089 -0.0046 0.0094  
Y -0.0027 0.0000 0.0021 -0.0042 -0.0002 0.0040  
Z 0.0007 -0.0003 -0.0005 0.0033 -0.0002 -0.0009  
AT. 91 C X -0.0041 0.0004 0.0041 0.0059 -0.0008 0.0017  
Y -0.0019 0.0002 0.0013 0.0012 -0.0004 0.0008  
Z 0.0080 -0.0009 -0.0066 -0.0117 0.0022 -0.0028  
AT. 92 C X -0.0041 -0.0004 0.0041 -0.0059 0.0008 0.0017  
Y -0.0019 -0.0002 0.0013 -0.0012 0.0004 0.0008  
Z 0.0080 0.0009 -0.0066 0.0117 -0.0022 -0.0028  
AT. 93 C X 0.0031 -0.0003 -0.0032 -0.0070 0.0007 -0.0004  
Y -0.0002 -0.0001 0.0006 0.0019 -0.0003 -0.0010  
Z -0.0016 0.0001 0.0021 0.0042 -0.0003 0.0019  
AT. 94 C X 0.0031 0.0003 -0.0032 0.0070 -0.0007 -0.0004

Y -0.0002 0.0001 0.0006 -0.0019 0.0003 -0.0010  
Z -0.0016 -0.0001 0.0021 -0.0042 0.0003 0.0019  
AT. 95 H X -0.0089 -0.0005 0.0155 0.0352 -0.0035 -0.0002  
Y 0.0071 -0.0001 -0.0095 -0.0213 0.0025 0.0020  
Z -0.0001 0.0004 -0.0025 -0.0037 -0.0003 -0.0030  
AT. 96 H X -0.0089 0.0005 0.0155 -0.0352 0.0035 -0.0002  
Y 0.0071 0.0001 -0.0095 0.0213 -0.0025 0.0020  
Z -0.0001 -0.0004 -0.0025 0.0037 0.0003 -0.0030  
AT. 97 H X 0.0034 -0.0003 -0.0008 0.0031 0.0010 -0.0051  
Y 0.0082 -0.0005 -0.0093 -0.0221 0.0033 0.0023  
Z 0.0004 0.0001 -0.0011 -0.0051 0.0006 0.0042  
AT. 98 H X 0.0034 0.0003 -0.0008 -0.0031 -0.0010 -0.0051  
Y 0.0082 0.0005 -0.0093 0.0221 -0.0033 0.0023  
Z 0.0004 -0.0001 -0.0011 0.0051 -0.0006 0.0042  
AT. 99 C X 0.0015 0.0001 -0.0014 -0.0035 -0.0011 0.0006  
Y -0.0004 0.0003 0.0005 0.0016 0.0014 -0.0004  
Z 0.0015 -0.0003 -0.0017 -0.0038 -0.0029 0.0016  
AT. 100 C X 0.0015 -0.0001 -0.0014 0.0035 0.0011 0.0006  
Y -0.0004 -0.0003 0.0005 -0.0016 -0.0014 -0.0004  
Z 0.0015 0.0003 -0.0017 0.0038 0.0029 0.0016  
AT. 101 C X -0.0001 -0.0000 0.0003 0.0024 0.0005 -0.0006  
Y 0.0001 -0.0000 -0.0002 -0.0007 -0.0003 0.0002  
Z -0.0000 0.0000 0.0001 0.0010 0.0004 -0.0015  
AT. 102 C X -0.0001 0.0000 0.0003 -0.0024 -0.0005 -0.0006  
Y 0.0001 0.0000 -0.0002 0.0007 0.0003 0.0002  
Z -0.0000 -0.0000 0.0001 -0.0010 -0.0004 -0.0015  
AT. 103 H X -0.0001 -0.0005 -0.0006 -0.0066 -0.0029 0.0021  
Y -0.0001 0.0002 0.0003 0.0030 0.0013 -0.0009  
Z -0.0009 -0.0001 0.0008 0.0029 0.0001 0.0037  
AT. 104 H X -0.0001 0.0005 -0.0006 0.0066 0.0029 0.0021  
Y -0.0001 -0.0002 0.0003 -0.0030 -0.0013 -0.0009  
Z -0.0009 0.0001 0.0008 -0.0029 -0.0001 0.0037

AT.105 H X -0.0035 0.0010 0.0029 0.0003 0.0042 -0.0016  
Y -0.0017 0.0002 0.0019 0.0075 0.0018 0.0043  
Z -0.0015 0.0004 0.0015 0.0031 0.0021 -0.0003

AT.106 H X -0.0035 -0.0010 0.0029 -0.0003 -0.0042 -0.0016  
Y -0.0017 -0.0002 0.0019 -0.0075 -0.0018 0.0043  
Z -0.0015 -0.0004 0.0015 -0.0031 -0.0021 -0.0003

AT.107 C X -0.0150 0.0014 0.0122 0.0175 -0.0015 -0.0005  
Y 0.0014 -0.0004 -0.0018 -0.0018 -0.0013 -0.0009  
Z -0.0009 0.0002 0.0012 0.0029 -0.0005 -0.0008

AT.108 C X -0.0150 -0.0014 0.0122 -0.0175 0.0015 -0.0005  
Y 0.0014 0.0004 -0.0018 0.0018 0.0013 -0.0009  
Z -0.0009 -0.0002 0.0012 -0.0029 0.0005 -0.0008

AT.109 H X 0.0421 -0.0035 -0.0355 -0.0513 0.0073 -0.0173  
Y 0.0006 -0.0010 -0.0020 -0.0030 -0.0022 0.0096  
Z -0.0205 0.0007 0.0156 0.0220 -0.0053 0.0217

AT.110 H X 0.0421 0.0035 -0.0355 0.0513 -0.0073 -0.0173  
Y 0.0006 0.0010 -0.0020 0.0030 0.0022 0.0096  
Z -0.0205 -0.0007 0.0156 -0.0220 0.0053 0.0217

AT.111 H X -0.0242 0.0030 0.0178 0.0255 -0.0188 -0.0388  
Y -0.0171 0.0016 0.0152 0.0230 0.0053 0.0147  
Z 0.0143 -0.0020 -0.0094 -0.0126 0.0172 0.0382

AT.112 H X -0.0242 -0.0030 0.0178 -0.0255 0.0188 -0.0388  
Y -0.0171 -0.0016 0.0152 -0.0230 -0.0053 0.0147  
Z 0.0143 0.0020 -0.0094 0.0126 -0.0172 0.0382

AT.113 C X 0.0113 -0.0014 -0.0110 -0.0163 -0.0006 0.0014  
Y -0.0052 0.0019 0.0060 0.0056 0.0021 -0.0106  
Z 0.0081 -0.0009 -0.0075 -0.0123 -0.0032 -0.0125

AT.114 C X 0.0113 0.0014 -0.0110 0.0163 0.0006 0.0014  
Y -0.0052 -0.0019 0.0060 -0.0056 -0.0021 -0.0106  
Z 0.0081 0.0009 -0.0075 0.0123 0.0032 -0.0125

AT.115 C X 0.0004 0.0004 0.0003 -0.0012 -0.0011 -0.0037  
Y 0.0048 -0.0006 -0.0043 -0.0063 0.0002 0.0026



Z -0.0033 0.0000 0.0028 0.0060 0.0002 0.0012  
AT. 116 C X 0.0004 -0.0004 0.0003 0.0012 0.0011 -0.0037  
Y 0.0048 0.0006 -0.0043 0.0063 -0.0002 0.0026  
Z -0.0033 -0.0000 0.0028 -0.0060 -0.0002 0.0012  
AT. 117 H X 0.0071 -0.0015 -0.0059 -0.0065 -0.0057 -0.0187  
Y 0.0191 -0.0029 -0.0166 -0.0227 -0.0130 -0.0479  
Z -0.0133 0.0025 0.0120 0.0145 0.0081 0.0284  
AT. 118 H X 0.0071 0.0015 -0.0059 0.0065 0.0057 -0.0187  
Y 0.0191 0.0029 -0.0166 0.0227 0.0130 -0.0479  
Z -0.0133 -0.0025 0.0120 -0.0145 -0.0081 0.0284  
AT. 119 H X -0.0106 0.0013 0.0078 0.0078 -0.0006 0.0134  
Y -0.0152 0.0001 0.0107 0.0158 -0.0042 0.0274  
Z 0.0110 -0.0001 -0.0082 -0.0119 0.0044 -0.0156  
AT. 120 H X -0.0106 -0.0013 0.0078 -0.0078 0.0006 0.0134  
Y -0.0152 -0.0001 0.0107 -0.0158 0.0042 0.0274  
Z 0.0110 0.0001 -0.0082 0.0119 -0.0044 -0.0156  
AT. 121 C X 0.0032 0.0002 -0.0023 -0.0064 -0.0004 -0.0012  
Y 0.0014 -0.0005 -0.0021 -0.0017 -0.0014 -0.0008  
Z 0.0003 -0.0000 0.0001 0.0005 -0.0009 -0.0018  
AT. 122 C X 0.0032 -0.0002 -0.0023 0.0064 0.0004 -0.0012  
Y 0.0014 0.0005 -0.0021 0.0017 0.0014 -0.0008  
Z 0.0003 0.0000 0.0001 -0.0005 0.0009 -0.0018  
AT. 123 H X -0.0171 0.0014 0.0142 0.0317 0.0161 0.0155  
Y 0.0084 -0.0017 -0.0075 -0.0133 -0.0113 -0.0061  
Z -0.0111 0.0016 0.0093 0.0195 0.0131 0.0080  
AT. 124 H X -0.0171 -0.0014 0.0142 -0.0317 -0.0161 0.0155  
Y 0.0084 0.0017 -0.0075 0.0133 0.0113 -0.0061  
Z -0.0111 -0.0016 0.0093 -0.0195 -0.0131 0.0080  
AT. 125 H X 0.0105 -0.0008 -0.0073 -0.0116 -0.0199 -0.0371  
Y -0.0036 0.0010 0.0021 -0.0017 0.0157 0.0300  
Z 0.0069 -0.0005 -0.0040 -0.0062 -0.0162 -0.0304  
AT. 126 H X 0.0105 0.0008 -0.0073 0.0116 0.0199 -0.0371

Y -0.0036 -0.0010 0.0021 0.0017 -0.0157 0.0300  
Z 0.0069 0.0005 -0.0040 0.0062 0.0162 -0.0304  
AT. 127 C X -0.0003 -0.0010 0.0007 0.0046 -0.0058 -0.0076  
Y -0.0043 0.0017 0.0063 0.0068 0.0031 -0.0053  
Z -0.0016 0.0006 0.0010 -0.0014 0.0078 0.0149  
AT. 128 C X -0.0003 0.0010 0.0007 -0.0046 0.0058 -0.0076  
Y -0.0043 -0.0017 0.0063 -0.0068 -0.0031 -0.0053  
Z -0.0016 -0.0006 0.0010 0.0014 -0.0078 0.0149  
AT. 129 C X -0.0103 0.0012 0.0078 0.0107 -0.0007 -0.0023  
Y -0.0020 -0.0001 0.0006 0.0024 0.0003 0.0044  
Z -0.0051 0.0005 0.0044 0.0083 -0.0006 0.0019  
AT. 130 C X -0.0103 -0.0012 0.0078 -0.0107 0.0007 -0.0023  
Y -0.0020 0.0001 0.0006 -0.0024 -0.0003 0.0044  
Z -0.0051 -0.0005 0.0044 -0.0083 0.0006 0.0019  
AT. 131 H X -0.0146 0.0006 0.0085 0.0118 -0.0095 -0.0272  
Y -0.0066 -0.0004 0.0049 0.0065 -0.0206 -0.0591  
Z -0.0124 -0.0005 0.0068 0.0102 -0.0220 -0.0606  
AT. 132 H X -0.0146 -0.0006 0.0085 -0.0118 0.0095 -0.0272  
Y -0.0066 0.0004 0.0049 -0.0065 0.0206 -0.0591  
Z -0.0124 0.0005 0.0068 -0.0102 0.0220 -0.0606  
AT. 133 H X 0.0001 0.0005 0.0035 0.0040 0.0016 0.0108  
Y 0.0043 -0.0009 -0.0023 -0.0066 -0.0039 0.0008  
Z 0.0008 -0.0005 0.0009 -0.0042 -0.0076 -0.0081  
AT. 134 H X 0.0001 -0.0005 0.0035 -0.0040 -0.0016 0.0108  
Y 0.0043 0.0009 -0.0023 0.0066 0.0039 0.0008  
Z 0.0008 0.0005 0.0009 0.0042 0.0076 -0.0081  
AT. 135 C X -0.0032 0.0003 0.0032 0.0048 0.0004 0.0004  
Y 0.0011 -0.0007 -0.0015 -0.0009 -0.0005 0.0033  
Z -0.0032 0.0005 0.0030 0.0044 0.0010 0.0039  
AT. 136 C X -0.0032 -0.0003 0.0032 -0.0048 -0.0004 0.0004  
Y 0.0011 0.0007 -0.0015 0.0009 0.0005 0.0033  
Z -0.0032 -0.0005 0.0030 -0.0044 -0.0010 0.0039

AT.137 H X 0.0091 -0.0019 -0.0091 -0.0127 -0.0030 -0.0040  
Y 0.0056 -0.0007 -0.0053 -0.0080 -0.0018 -0.0076  
Z 0.0008 0.0010 -0.0000 -0.0025 -0.0002 -0.0121

AT.138 H X 0.0091 0.0019 -0.0091 0.0127 0.0030 -0.0040  
Y 0.0056 0.0007 -0.0053 0.0080 0.0018 -0.0076  
Z 0.0008 -0.0010 -0.0000 0.0025 0.0002 -0.0121

AT.139 H X -0.0091 0.0010 0.0088 0.0136 0.0004 0.0081  
Y -0.0097 0.0022 0.0102 0.0119 0.0022 -0.0073  
Z 0.0082 -0.0014 -0.0082 -0.0118 -0.0003 -0.0043

AT.140 H X -0.0091 -0.0010 0.0088 -0.0136 -0.0004 0.0081  
Y -0.0097 -0.0022 0.0102 -0.0119 -0.0022 -0.0073  
Z 0.0082 0.0014 -0.0082 0.0118 0.0003 -0.0043

AT.141 H X 0.0067 0.0003 -0.0054 -0.0099 -0.0034 -0.0139  
Y -0.0052 0.0015 0.0058 0.0067 0.0012 -0.0034  
Z 0.0080 -0.0018 -0.0086 -0.0105 -0.0025 0.0037

AT.142 H X 0.0067 -0.0003 -0.0054 0.0099 0.0034 -0.0139  
Y -0.0052 -0.0015 0.0058 -0.0067 -0.0012 -0.0034  
Z 0.0080 0.0018 -0.0086 0.0105 0.0025 0.0037

AT.143 C X 0.0002 0.0003 -0.0005 -0.0019 0.0022 0.0033  
Y 0.0023 -0.0006 -0.0028 -0.0034 -0.0008 0.0019  
Z 0.0010 -0.0003 -0.0007 -0.0000 -0.0024 -0.0052

AT.144 C X 0.0002 -0.0003 -0.0005 0.0019 -0.0022 0.0033  
Y 0.0023 0.0006 -0.0028 0.0034 0.0008 0.0019  
Z 0.0010 0.0003 -0.0007 0.0000 0.0024 -0.0052

AT.145 H X 0.0035 -0.0014 -0.0032 -0.0002 -0.0085 -0.0128  
Y -0.0008 -0.0001 0.0018 0.0038 -0.0042 -0.0132  
Z 0.0049 -0.0011 -0.0059 -0.0073 -0.0010 0.0070

AT.146 H X 0.0035 0.0014 -0.0032 0.0002 0.0085 -0.0128  
Y -0.0008 0.0001 0.0018 -0.0038 0.0042 -0.0132  
Z 0.0049 0.0011 -0.0059 0.0073 0.0010 0.0070

AT.147 H X 0.0017 0.0002 -0.0030 -0.0067 0.0040 0.0119  
Y -0.0043 0.0015 0.0052 0.0050 0.0054 0.0005

Z -0.0005 0.0007 -0.0001 -0.0028 0.0045 0.0087  
AT. 148 H X 0.0017 -0.0002 -0.0030 0.0067 -0.0040 0.0119  
Y -0.0043 -0.0015 0.0052 -0.0050 -0.0054 0.0005  
Z -0.0005 -0.0007 -0.0001 0.0028 -0.0045 0.0087  
AT. 149 H X -0.0026 0.0006 0.0042 0.0076 -0.0068 -0.0178  
Y -0.0021 0.0009 0.0025 0.0023 0.0023 0.0022  
Z -0.0049 0.0020 0.0055 0.0042 0.0075 0.0071  
AT. 150 H X -0.0026 -0.0006 0.0042 -0.0076 0.0068 -0.0178  
Y -0.0021 -0.0009 0.0025 -0.0023 -0.0023 0.0022  
Z -0.0049 -0.0020 0.0055 -0.0042 -0.0075 0.0071  
AT. 151 C X -0.0005 0.0001 0.0005 0.0011 -0.0025 -0.0107  
Y 0.0031 -0.0010 -0.0037 -0.0036 -0.0023 0.0004  
Z -0.0023 0.0001 0.0024 0.0049 -0.0015 -0.0015  
AT. 152 C X -0.0005 -0.0001 0.0005 -0.0011 0.0025 -0.0107  
Y 0.0031 0.0010 -0.0037 0.0036 0.0023 0.0004  
Z -0.0023 -0.0001 0.0024 -0.0049 0.0015 -0.0015  
AT. 153 H X -0.0295 0.0037 0.0237 0.0298 0.0171 0.0509  
Y -0.0098 0.0015 0.0083 0.0099 0.0056 0.0136  
Z -0.0106 0.0025 0.0116 0.0142 0.0028 -0.0061  
AT. 154 H X -0.0295 -0.0037 0.0237 -0.0298 -0.0171 0.0509  
Y -0.0098 -0.0015 0.0083 -0.0099 -0.0056 0.0136  
Z -0.0106 -0.0025 0.0116 -0.0142 -0.0028 -0.0061  
AT. 155 H X 0.0001 0.0016 0.0017 -0.0036 0.0251 0.0714  
Y -0.0029 0.0017 0.0038 0.0017 0.0095 0.0189  
Z 0.0035 -0.0020 -0.0042 -0.0018 -0.0036 0.0082  
AT. 156 H X 0.0001 -0.0016 0.0017 0.0036 -0.0251 0.0714  
Y -0.0029 -0.0017 0.0038 -0.0017 -0.0095 0.0189  
Z 0.0035 0.0020 -0.0042 0.0018 0.0036 0.0082  
AT. 157 O X 0.0000 -0.0001 -0.0001 0.0001 -0.0002 -0.0001  
Y -0.0000 -0.0001 -0.0002 0.0001 0.0002 -0.0000  
Z -0.0000 -0.0002 -0.0000 -0.0001 -0.0001 -0.0000  
AT. 158 O X 0.0000 0.0001 -0.0001 -0.0001 0.0002 -0.0001

Y -0.0000 0.0001 -0.0002 -0.0001 -0.0002 -0.0000  
Z -0.0000 0.0002 -0.0000 0.0001 0.0001 -0.0000  
AT. 159 O X -0.0001 -0.0000 -0.0001 0.0001 0.0002 0.0000  
Y 0.0001 0.0002 0.0001 -0.0001 -0.0000 -0.0000  
Z 0.0001 0.0001 0.0000 0.0000 0.0002 -0.0000  
AT. 160 O X -0.0001 0.0000 -0.0001 -0.0001 -0.0002 0.0000  
Y 0.0001 -0.0002 0.0001 0.0001 0.0000 -0.0000  
Z 0.0001 -0.0001 0.0000 -0.0000 -0.0002 -0.0000  
AT. 161 H X 0.0010 0.0042 0.0027 -0.0035 0.0022 0.0005  
Y 0.0003 0.0006 0.0008 0.0004 -0.0012 0.0001  
Z 0.0003 0.0009 0.0003 -0.0012 0.0019 0.0000  
AT. 162 H X 0.0010 -0.0042 0.0027 0.0035 -0.0022 0.0005  
Y 0.0003 -0.0006 0.0008 -0.0004 0.0012 0.0001  
Z 0.0003 -0.0009 0.0003 0.0012 -0.0019 0.0000  
AT. 163 H X 0.0006 -0.0012 0.0009 -0.0006 -0.0016 -0.0001  
Y 0.0001 -0.0011 0.0005 0.0002 -0.0017 0.0012  
Z -0.0000 0.0003 -0.0003 -0.0001 -0.0002 0.0003  
AT. 164 H X 0.0006 0.0012 0.0009 0.0006 0.0016 -0.0001  
Y 0.0001 0.0011 0.0005 -0.0002 0.0017 0.0012  
Z -0.0000 -0.0003 -0.0003 0.0001 0.0002 0.0003  
AT. 165 O X 0.0002 0.0000 -0.0001 -0.0001 0.0002 0.0002  
Y 0.0001 -0.0000 -0.0001 -0.0003 -0.0000 0.0000  
Z -0.0001 0.0000 0.0000 0.0001 0.0000 -0.0001  
AT. 166 O X 0.0002 -0.0000 -0.0001 0.0001 -0.0002 0.0002  
Y 0.0001 0.0000 -0.0001 0.0003 0.0000 0.0000  
Z -0.0001 -0.0000 0.0000 -0.0001 -0.0000 -0.0001  
AT. 167 H X -0.0003 -0.0002 0.0001 -0.0001 -0.0008 -0.0011  
Y -0.0001 0.0001 0.0002 0.0011 0.0004 0.0010  
Z 0.0026 0.0000 -0.0012 -0.0030 0.0028 0.0026  
AT. 168 H X -0.0003 0.0002 0.0001 0.0001 0.0008 -0.0011  
Y -0.0001 -0.0001 0.0002 -0.0011 -0.0004 0.0010  
Z 0.0026 -0.0000 -0.0012 0.0030 -0.0028 0.0026

AT. 169 O X -0.0000 -0.0001 0.0000 -0.0000 -0.0001 -0.0001  
Y -0.0000 -0.0000 0.0001 0.0001 0.0000 -0.0001  
Z -0.0001 -0.0000 0.0001 0.0002 -0.0000 -0.0002

AT. 170 O X -0.0000 0.0001 0.0000 0.0000 0.0001 -0.0001  
Y -0.0000 0.0000 0.0001 -0.0001 -0.0000 -0.0001  
Z -0.0001 0.0000 0.0001 -0.0002 0.0000 -0.0002

AT. 171 H X 0.0000 0.0009 -0.0010 0.0022 0.0013 -0.0002  
Y 0.0001 0.0005 -0.0007 0.0001 -0.0002 0.0001  
Z 0.0001 0.0002 -0.0005 -0.0024 -0.0013 0.0005

AT. 172 H X 0.0000 -0.0009 -0.0010 -0.0022 -0.0013 -0.0002  
Y 0.0001 -0.0005 -0.0007 -0.0001 0.0002 0.0001  
Z 0.0001 -0.0002 -0.0005 0.0024 0.0013 0.0005

FREQ(CM\*\*-1) 1336.05 1336.89 1337.69 1339.19 1339.31 1341.60

AT. 1 I X 0.0000 -0.0000 0.0000 0.0000 0.0000 0.0000  
Y 0.0000 0.0000 -0.0000 -0.0000 -0.0000 -0.0000  
Z 0.0000 -0.0000 -0.0000 -0.0000 -0.0000 -0.0000

AT. 2 I X -0.0000 -0.0000 -0.0000 -0.0000 0.0000 0.0000  
Y -0.0000 0.0000 0.0000 0.0000 -0.0000 -0.0000  
Z -0.0000 -0.0000 0.0000 0.0000 -0.0000 -0.0000

AT. 3 I X -0.0000 -0.0000 0.0000 0.0000 0.0000 0.0000  
Y 0.0000 0.0000 -0.0000 -0.0000 -0.0000 -0.0000  
Z 0.0000 0.0000 0.0000 0.0000 -0.0000 0.0000

AT. 4 I X 0.0000 -0.0000 -0.0000 -0.0000 0.0000 0.0000  
Y -0.0000 0.0000 0.0000 0.0000 -0.0000 -0.0000  
Z -0.0000 0.0000 -0.0000 -0.0000 -0.0000 0.0000

AT. 5 O X -0.0001 -0.0012 -0.0017 -0.0002 -0.0012 -0.0006  
Y 0.0000 0.0008 0.0012 0.0003 0.0009 0.0004  
Z 0.0008 0.0028 0.0013 -0.0005 0.0000 -0.0005

AT. 6 O X 0.0001 -0.0012 0.0017 0.0002 -0.0012 -0.0006  
Y -0.0000 0.0008 -0.0012 -0.0003 0.0009 0.0004

Z -0.0008 0.0028 -0.0013 0.0005 0.0000 -0.0005  
AT. 7 O X 0.0003 -0.0001 -0.0014 -0.0003 -0.0015 -0.0006  
Y 0.0001 0.0010 0.0016 -0.0001 0.0012 0.0002  
Z -0.0004 -0.0016 -0.0009 0.0006 -0.0002 0.0006  
AT. 8 O X -0.0003 -0.0001 0.0014 0.0003 -0.0015 -0.0006  
Y -0.0001 0.0010 -0.0016 0.0001 0.0012 0.0002  
Z 0.0004 -0.0016 0.0009 -0.0006 -0.0002 0.0006  
AT. 9 N X 0.0030 0.0116 0.0060 -0.0024 0.0004 -0.0024  
Y -0.0014 -0.0072 -0.0058 0.0008 -0.0023 0.0002  
Z -0.0006 -0.0037 -0.0039 -0.0001 -0.0022 -0.0008  
AT. 10 N X -0.0030 0.0116 -0.0060 0.0024 0.0004 -0.0024  
Y 0.0014 -0.0072 0.0058 -0.0008 -0.0023 0.0002  
Z 0.0006 -0.0037 0.0039 0.0001 -0.0022 -0.0008  
AT. 11 N X 0.0020 0.0095 0.0066 -0.0024 0.0023 -0.0021  
Y 0.0002 -0.0034 -0.0071 -0.0003 -0.0061 -0.0019  
Z -0.0004 -0.0010 0.0004 0.0004 0.0012 0.0008  
AT. 12 N X -0.0020 0.0095 -0.0066 0.0024 0.0023 -0.0021  
Y -0.0002 -0.0034 0.0071 0.0003 -0.0061 -0.0019  
Z 0.0004 -0.0010 -0.0004 -0.0004 0.0012 0.0008  
AT. 13 C X -0.0013 -0.0014 0.0040 0.0021 0.0049 0.0035  
Y 0.0012 0.0011 -0.0038 -0.0020 -0.0045 -0.0033  
Z -0.0029 -0.0033 0.0068 0.0037 0.0086 0.0063  
AT. 14 C X 0.0013 -0.0014 -0.0040 -0.0021 0.0049 0.0035  
Y -0.0012 0.0011 0.0038 0.0020 -0.0045 -0.0033  
Z 0.0029 -0.0033 -0.0068 -0.0037 0.0086 0.0063  
AT. 15 C X 0.0009 0.0012 -0.0023 -0.0012 -0.0028 -0.0020  
Y -0.0003 0.0002 0.0019 0.0006 0.0020 0.0013  
Z 0.0007 0.0001 -0.0030 -0.0011 -0.0032 -0.0020  
AT. 16 C X -0.0009 0.0012 0.0023 0.0012 -0.0028 -0.0020  
Y 0.0003 0.0002 -0.0019 -0.0006 0.0020 0.0013  
Z -0.0007 0.0001 0.0030 0.0011 -0.0032 -0.0020  
AT. 17 H X -0.0045 -0.0058 0.0097 0.0049 0.0120 0.0080

Y -0.0010 -0.0025 -0.0001 0.0007 0.0002 0.0003  
Z -0.0007 0.0005 0.0040 0.0013 0.0048 0.0032  
AT. 18 H X 0.0045 -0.0058 -0.0097 -0.0049 0.0120 0.0080  
Y 0.0010 -0.0025 0.0001 -0.0007 0.0002 0.0003  
Z 0.0007 0.0005 -0.0040 -0.0013 0.0048 0.0032  
AT. 19 H X 0.0013 -0.0013 -0.0055 -0.0021 -0.0061 -0.0034  
Y -0.0034 -0.0059 0.0049 0.0034 0.0072 0.0051  
Z -0.0002 -0.0030 -0.0032 -0.0004 -0.0025 -0.0013  
AT. 20 H X -0.0013 -0.0013 0.0055 0.0021 -0.0061 -0.0034  
Y 0.0034 -0.0059 -0.0049 -0.0034 0.0072 0.0051  
Z 0.0002 -0.0030 0.0032 0.0004 -0.0025 -0.0013  
AT. 21 C X -0.0015 -0.0031 0.0017 0.0018 0.0032 0.0028  
Y -0.0006 -0.0011 0.0012 0.0010 0.0018 0.0015  
Z 0.0031 0.0065 -0.0045 -0.0045 -0.0077 -0.0068  
AT. 22 C X 0.0015 -0.0031 -0.0017 -0.0018 0.0032 0.0028  
Y 0.0006 -0.0011 -0.0012 -0.0010 0.0018 0.0015  
Z -0.0031 0.0065 0.0045 0.0045 -0.0077 -0.0068  
AT. 23 C X 0.0010 0.0016 -0.0012 -0.0007 -0.0020 -0.0015  
Y 0.0001 0.0003 -0.0004 -0.0002 -0.0006 -0.0004  
Z -0.0010 -0.0011 0.0025 0.0014 0.0027 0.0019  
AT. 24 C X -0.0010 0.0016 0.0012 0.0007 -0.0020 -0.0015  
Y -0.0001 0.0003 0.0004 0.0002 -0.0006 -0.0004  
Z 0.0010 -0.0011 -0.0025 -0.0014 0.0027 0.0019  
AT. 25 H X -0.0042 -0.0071 0.0054 0.0035 0.0094 0.0066  
Y -0.0009 -0.0010 0.0014 0.0008 0.0016 0.0011  
Z 0.0008 -0.0028 -0.0064 -0.0014 -0.0030 -0.0002  
AT. 26 H X 0.0042 -0.0071 -0.0054 -0.0035 0.0094 0.0066  
Y 0.0009 -0.0010 -0.0014 -0.0008 0.0016 0.0011  
Z -0.0008 -0.0028 0.0064 0.0014 -0.0030 -0.0002  
AT. 27 H X 0.0014 0.0047 -0.0049 -0.0062 -0.0064 -0.0061  
Y -0.0016 -0.0070 -0.0026 0.0015 0.0022 0.0038  
Z -0.0019 -0.0055 0.0023 0.0036 0.0053 0.0052



AT. 28 H X -0.0014 0.0047 0.0049 0.0062 -0.0064 -0.0061  
Y 0.0016 -0.0070 0.0026 -0.0015 0.0022 0.0038  
Z 0.0019 -0.0055 -0.0023 -0.0036 0.0053 0.0052

AT. 29 C X -0.0004 0.0002 0.0017 0.0001 0.0019 0.0005  
Y 0.0015 0.0043 0.0005 -0.0014 -0.0017 -0.0020  
Z 0.0007 0.0020 0.0007 -0.0004 -0.0001 -0.0002

AT. 30 C X 0.0004 0.0002 -0.0017 -0.0001 0.0019 0.0005  
Y -0.0015 0.0043 -0.0005 0.0014 -0.0017 -0.0020  
Z -0.0007 0.0020 -0.0007 0.0004 -0.0001 -0.0002

AT. 31 H X 0.0130 0.0134 -0.0358 -0.0170 -0.0450 -0.0310  
Y -0.0001 -0.0011 -0.0034 -0.0017 -0.0032 -0.0034  
Z 0.0072 0.0036 -0.0286 -0.0120 -0.0324 -0.0229

AT. 32 H X -0.0130 0.0134 0.0358 0.0170 -0.0450 -0.0310  
Y 0.0001 -0.0011 0.0034 0.0017 -0.0032 -0.0034  
Z -0.0072 0.0036 0.0286 0.0120 -0.0324 -0.0229

AT. 33 H X -0.0137 -0.0557 -0.0351 0.0117 -0.0093 0.0103  
Y 0.0006 -0.0006 -0.0039 -0.0005 -0.0039 -0.0016  
Z -0.0079 -0.0338 -0.0226 0.0071 -0.0071 0.0061

AT. 34 H X 0.0137 -0.0557 0.0351 -0.0117 -0.0093 0.0103  
Y -0.0006 -0.0006 0.0039 0.0005 -0.0039 -0.0016  
Z 0.0079 -0.0338 0.0226 -0.0071 -0.0071 0.0061

AT. 35 C X -0.0029 -0.0039 0.0069 0.0047 0.0096 0.0081  
Y -0.0038 -0.0049 0.0100 0.0056 0.0133 0.0100  
Z 0.0008 0.0082 0.0111 -0.0008 0.0076 0.0009

AT. 36 C X 0.0029 -0.0039 -0.0069 -0.0047 0.0096 0.0081  
Y 0.0038 -0.0049 -0.0100 -0.0056 0.0133 0.0100  
Z -0.0008 0.0082 -0.0111 0.0008 0.0076 0.0009

AT. 37 C X 0.0001 -0.0022 -0.0044 -0.0004 -0.0036 -0.0014  
Y 0.0007 0.0018 0.0001 -0.0008 -0.0008 -0.0010  
Z -0.0003 -0.0012 -0.0011 0.0003 -0.0007 0.0001

AT. 38 C X -0.0001 -0.0022 0.0044 0.0004 -0.0036 -0.0014  
Y -0.0007 0.0018 -0.0001 0.0008 -0.0008 -0.0010

Z 0.0003 -0.0012 0.0011 -0.0003 -0.0007 0.0001  
AT. 39 H X 0.0005 -0.0032 -0.0079 -0.0015 -0.0061 -0.0035  
Y 0.0002 0.0278 0.0480 0.0010 0.0363 0.0097  
Z 0.0002 -0.0131 -0.0241 -0.0012 -0.0182 -0.0058  
AT. 40 H X -0.0005 -0.0032 0.0079 0.0015 -0.0061 -0.0035  
Y -0.0002 0.0278 -0.0480 -0.0010 0.0363 0.0097  
Z -0.0002 -0.0131 0.0241 0.0012 -0.0182 -0.0058  
AT. 41 H X -0.0007 0.0018 0.0072 0.0017 0.0065 0.0031  
Y 0.0090 0.0046 -0.0384 -0.0162 -0.0422 -0.0290  
Z -0.0059 -0.0065 0.0186 0.0102 0.0223 0.0175  
AT. 42 H X 0.0007 0.0018 -0.0072 -0.0017 0.0065 0.0031  
Y -0.0090 0.0046 0.0384 0.0162 -0.0422 -0.0290  
Z 0.0059 -0.0065 -0.0186 -0.0102 0.0223 0.0175  
AT. 43 C X -0.0002 -0.0016 -0.0014 0.0002 -0.0008 0.0001  
Y 0.0006 0.0008 -0.0017 -0.0017 -0.0019 -0.0024  
Z 0.0008 0.0034 0.0016 -0.0002 -0.0005 -0.0006  
AT. 44 C X 0.0002 -0.0016 0.0014 -0.0002 -0.0008 0.0001  
Y -0.0006 0.0008 0.0017 0.0017 -0.0019 -0.0024  
Z -0.0008 0.0034 -0.0016 0.0002 -0.0005 -0.0006  
AT. 45 H X 0.0144 0.0414 -0.0024 -0.0174 -0.0249 -0.0264  
Y 0.0066 0.0156 -0.0058 -0.0066 -0.0155 -0.0121  
Z -0.0155 -0.0423 0.0057 0.0172 0.0294 0.0276  
AT. 46 H X -0.0144 0.0414 0.0024 0.0174 -0.0249 -0.0264  
Y -0.0066 0.0156 0.0058 0.0066 -0.0155 -0.0121  
Z 0.0155 -0.0423 -0.0057 -0.0172 0.0294 0.0276  
AT. 47 H X -0.0087 -0.0420 -0.0288 0.0099 -0.0096 0.0075  
Y -0.0030 -0.0155 -0.0117 0.0030 -0.0039 0.0017  
Z 0.0087 0.0423 0.0293 -0.0089 0.0101 -0.0063  
AT. 48 H X 0.0087 -0.0420 0.0288 -0.0099 -0.0096 0.0075  
Y 0.0030 -0.0155 0.0117 -0.0030 -0.0039 0.0017  
Z -0.0087 0.0423 -0.0293 0.0089 0.0101 -0.0063  
AT. 49 C X -0.0047 -0.0146 -0.0007 0.0049 0.0076 0.0076

Y -0.0030 0.0013 0.0170 0.0057 0.0174 0.0117  
Z -0.0033 -0.0158 -0.0106 0.0019 -0.0025 0.0014  
AT. 50 C X 0.0047 -0.0146 0.0007 -0.0049 0.0076 0.0076  
Y 0.0030 0.0013 -0.0170 -0.0057 0.0174 0.0117  
Z 0.0033 -0.0158 0.0106 -0.0019 -0.0025 0.0014  
AT. 51 C X 0.0001 -0.0023 -0.0046 -0.0005 -0.0039 -0.0017  
Y 0.0003 -0.0027 -0.0061 -0.0009 -0.0053 -0.0025  
Z 0.0004 -0.0010 -0.0036 -0.0004 -0.0035 -0.0013  
AT. 52 C X -0.0001 -0.0023 0.0046 0.0005 -0.0039 -0.0017  
Y -0.0003 -0.0027 0.0061 0.0009 -0.0053 -0.0025  
Z -0.0004 -0.0010 0.0036 0.0004 -0.0035 -0.0013  
AT. 53 H X 0.0005 0.0034 0.0033 0.0000 0.0014 0.0002  
Y 0.0072 0.0585 0.0641 -0.0008 0.0363 0.0088  
Z 0.0079 0.0615 0.0654 -0.0013 0.0362 0.0085  
AT. 54 H X -0.0005 0.0034 -0.0033 -0.0000 0.0014 0.0002  
Y -0.0072 0.0585 -0.0641 0.0008 0.0363 0.0088  
Z -0.0079 0.0615 -0.0654 0.0013 0.0362 0.0085  
AT. 55 H X 0.0017 0.0106 0.0096 -0.0013 0.0041 -0.0011  
Y 0.0061 0.0082 -0.0161 -0.0102 -0.0195 -0.0168  
Z 0.0089 0.0205 -0.0081 -0.0130 -0.0171 -0.0196  
AT. 56 H X -0.0017 0.0106 -0.0096 0.0013 0.0041 -0.0011  
Y -0.0061 0.0082 0.0161 0.0102 -0.0195 -0.0168  
Z -0.0089 0.0205 0.0081 0.0130 -0.0171 -0.0196  
AT. 57 C X 0.0009 0.0015 -0.0015 -0.0012 -0.0026 -0.0021  
Y 0.0012 0.0011 -0.0036 -0.0018 -0.0043 -0.0032  
Z -0.0002 -0.0025 -0.0037 0.0004 -0.0027 -0.0002  
AT. 58 C X -0.0009 0.0015 0.0015 0.0012 -0.0026 -0.0021  
Y -0.0012 0.0011 0.0036 0.0018 -0.0043 -0.0032  
Z 0.0002 -0.0025 0.0037 -0.0004 -0.0027 -0.0002  
AT. 59 H X -0.0020 -0.0061 0.0008 0.0033 0.0049 0.0053  
Y 0.0008 0.0068 0.0071 -0.0017 0.0037 -0.0014  
Z -0.0024 0.0013 0.0134 0.0032 0.0137 0.0068

AT. 60 H X 0.0020 -0.0061 -0.0008 -0.0033 0.0049 0.0053  
Y -0.0008 0.0068 -0.0071 0.0017 0.0037 -0.0014  
Z 0.0024 0.0013 -0.0134 -0.0032 0.0137 0.0068

AT. 61 H X -0.0030 0.0000 0.0124 0.0027 0.0133 0.0061  
Y -0.0045 -0.0074 0.0062 0.0065 0.0095 0.0093  
Z -0.0003 0.0013 0.0034 -0.0007 0.0035 0.0001

AT. 62 H X 0.0030 0.0000 -0.0124 -0.0027 0.0133 0.0061  
Y 0.0045 -0.0074 -0.0062 -0.0065 0.0095 0.0093  
Z 0.0003 0.0013 -0.0034 0.0007 0.0035 0.0001

AT. 63 H X -0.0005 -0.0068 -0.0119 -0.0009 -0.0092 -0.0036  
Y -0.0023 -0.0018 0.0088 0.0048 0.0101 0.0086  
Z 0.0039 0.0080 -0.0032 -0.0052 -0.0074 -0.0081

AT. 64 H X 0.0005 -0.0068 0.0119 0.0009 -0.0092 -0.0036  
Y 0.0023 -0.0018 -0.0088 -0.0048 0.0101 0.0086  
Z -0.0039 0.0080 0.0032 0.0052 -0.0074 -0.0081

AT. 65 C X 0.0015 0.0049 0.0009 -0.0015 -0.0020 -0.0021  
Y 0.0009 -0.0005 -0.0053 -0.0017 -0.0053 -0.0037  
Z 0.0010 0.0049 0.0040 -0.0005 0.0012 -0.0002

AT. 66 C X -0.0015 0.0049 -0.0009 0.0015 -0.0020 -0.0021  
Y -0.0009 -0.0005 0.0053 0.0017 -0.0053 -0.0037  
Z -0.0010 0.0049 -0.0040 0.0005 0.0012 -0.0002

AT. 67 H X -0.0031 -0.0115 -0.0031 0.0025 0.0036 0.0039  
Y 0.0021 0.0140 0.0170 0.0005 0.0074 0.0035  
Z 0.0032 0.0037 -0.0131 -0.0052 -0.0142 -0.0109

AT. 68 H X 0.0031 -0.0115 0.0031 -0.0025 0.0036 0.0039  
Y -0.0021 0.0140 -0.0170 -0.0005 0.0074 0.0035  
Z -0.0032 0.0037 0.0131 0.0052 -0.0142 -0.0109

AT. 69 H X -0.0015 0.0043 0.0148 0.0040 0.0131 0.0083  
Y -0.0048 -0.0110 0.0063 0.0063 0.0117 0.0105  
Z -0.0023 -0.0127 -0.0088 0.0009 -0.0040 0.0006

AT. 70 H X 0.0015 0.0043 -0.0148 -0.0040 0.0131 0.0083  
Y 0.0048 -0.0110 -0.0063 -0.0063 0.0117 0.0105

Z 0.0023 -0.0127 0.0088 -0.0009 -0.0040 0.0006  
AT. 71 H X -0.0032 -0.0172 -0.0148 0.0017 -0.0052 -0.0007  
Y -0.0011 0.0003 0.0042 0.0014 0.0062 0.0038  
Z -0.0051 -0.0112 0.0035 0.0058 0.0132 0.0104  
AT. 72 H X 0.0032 -0.0172 0.0148 -0.0017 -0.0052 -0.0007  
Y 0.0011 0.0003 -0.0042 -0.0014 0.0062 0.0038  
Z 0.0051 -0.0112 -0.0035 -0.0058 0.0132 0.0104  
AT. 73 C X 0.0010 -0.0032 -0.0108 -0.0018 -0.0102 -0.0049  
Y 0.0021 0.0058 -0.0001 -0.0029 -0.0032 -0.0044  
Z 0.0008 0.0044 0.0021 -0.0004 0.0005 -0.0002  
AT. 74 C X -0.0010 -0.0032 0.0108 0.0018 -0.0102 -0.0049  
Y -0.0021 0.0058 0.0001 0.0029 -0.0032 -0.0044  
Z -0.0008 0.0044 -0.0021 0.0004 0.0005 -0.0002  
AT. 75 H X 0.0029 0.0348 0.0513 0.0001 0.0361 0.0102  
Y -0.0039 -0.0294 -0.0304 0.0027 -0.0186 -0.0020  
Z -0.0057 -0.0156 0.0051 0.0082 0.0120 0.0132  
AT. 76 H X -0.0029 0.0348 -0.0513 -0.0001 0.0361 0.0102  
Y 0.0039 -0.0294 0.0304 -0.0027 -0.0186 -0.0020  
Z 0.0057 -0.0156 -0.0051 -0.0082 0.0120 0.0132  
AT. 77 H X 0.0056 0.0448 0.0462 -0.0031 0.0270 0.0039  
Y -0.0061 -0.0332 -0.0299 0.0049 -0.0122 0.0025  
Z 0.0037 -0.0042 -0.0216 -0.0057 -0.0240 -0.0136  
AT. 78 H X -0.0056 0.0448 -0.0462 0.0031 0.0270 0.0039  
Y 0.0061 -0.0332 0.0299 -0.0049 -0.0122 0.0025  
Z -0.0037 -0.0042 0.0216 0.0057 -0.0240 -0.0136  
AT. 79 I X -0.0000 -0.0000 0.0000 -0.0000 0.0000 -0.0001  
Y -0.0000 -0.0000 0.0000 -0.0000 0.0000 -0.0000  
Z -0.0000 -0.0000 -0.0000 -0.0000 0.0000 -0.0000  
AT. 80 I X 0.0000 -0.0000 -0.0000 0.0000 0.0000 -0.0001  
Y 0.0000 -0.0000 -0.0000 0.0000 0.0000 -0.0000  
Z 0.0000 -0.0000 0.0000 0.0000 0.0000 -0.0000  
AT. 81 I X -0.0000 -0.0000 0.0000 -0.0000 0.0000 -0.0000

Y -0.0000 -0.0000 -0.0000 -0.0000 0.0000 -0.0000  
Z 0.0000 -0.0000 0.0000 -0.0000 0.0000 -0.0000  
AT. 82 I X 0.0000 -0.0000 -0.0000 0.0000 0.0000 -0.0000  
Y 0.0000 -0.0000 0.0000 0.0000 0.0000 -0.0000  
Z -0.0000 -0.0000 -0.0000 0.0000 0.0000 -0.0000  
AT. 83 O X 0.0022 0.0002 0.0000 0.0000 -0.0002 0.0004  
Y 0.0004 0.0001 0.0000 0.0001 -0.0001 0.0002  
Z 0.0014 -0.0002 0.0002 -0.0017 0.0008 -0.0013  
AT. 84 O X -0.0022 0.0002 -0.0000 -0.0000 -0.0002 0.0004  
Y -0.0004 0.0001 -0.0000 -0.0001 -0.0001 0.0002  
Z -0.0014 -0.0002 -0.0002 0.0017 0.0008 -0.0013  
AT. 85 O X 0.0014 0.0002 0.0000 0.0011 -0.0004 0.0010  
Y 0.0013 -0.0001 0.0001 -0.0004 0.0003 -0.0004  
Z -0.0008 0.0003 -0.0002 0.0012 -0.0008 0.0010  
AT. 86 O X -0.0014 0.0002 -0.0000 -0.0011 -0.0004 0.0010  
Y -0.0013 -0.0001 -0.0001 0.0004 0.0003 -0.0004  
Z 0.0008 0.0003 0.0002 -0.0012 -0.0008 0.0010  
AT. 87 N X -0.0097 0.0009 -0.0011 0.0084 -0.0038 0.0062  
Y -0.0038 -0.0002 -0.0000 0.0005 0.0001 0.0000  
Z -0.0027 -0.0003 0.0001 -0.0010 0.0006 -0.0010  
AT. 88 N X 0.0097 0.0009 0.0011 -0.0084 -0.0038 0.0062  
Y 0.0038 -0.0002 0.0000 -0.0005 0.0001 0.0000  
Z 0.0027 -0.0003 -0.0001 0.0010 0.0006 -0.0010  
AT. 89 N X -0.0076 0.0009 -0.0008 0.0063 -0.0033 0.0049  
Y -0.0047 -0.0012 0.0002 -0.0029 0.0019 -0.0029  
Z 0.0011 0.0003 0.0000 0.0002 -0.0002 0.0001  
AT. 90 N X 0.0076 0.0009 0.0008 -0.0063 -0.0033 0.0049  
Y 0.0047 -0.0012 -0.0002 0.0029 0.0019 -0.0029  
Z -0.0011 0.0003 -0.0000 -0.0002 -0.0002 0.0001  
AT. 91 C X -0.0028 -0.0013 0.0005 -0.0046 0.0027 -0.0044  
Y -0.0013 -0.0007 0.0003 -0.0025 0.0014 -0.0024  
Z 0.0056 0.0026 -0.0013 0.0105 -0.0058 0.0091

AT. 92 C X 0.0028 -0.0013 -0.0005 0.0046 0.0027 -0.0044  
Y 0.0013 -0.0007 -0.0003 0.0025 0.0014 -0.0024  
Z -0.0056 0.0026 0.0013 -0.0105 -0.0058 0.0091

AT. 93 C X 0.0011 0.0006 -0.0002 0.0023 -0.0013 0.0019  
Y 0.0009 0.0002 -0.0000 0.0004 -0.0004 0.0007  
Z -0.0026 -0.0008 0.0003 -0.0025 0.0015 -0.0023

AT. 94 C X -0.0011 0.0006 0.0002 -0.0023 -0.0013 0.0019  
Y -0.0009 0.0002 0.0000 -0.0004 -0.0004 0.0007  
Z 0.0026 -0.0008 -0.0003 0.0025 0.0015 -0.0023

AT. 95 H X -0.0032 -0.0015 0.0007 -0.0043 0.0020 -0.0011  
Y 0.0001 0.0007 -0.0006 0.0028 -0.0011 0.0009  
Z 0.0031 0.0007 0.0002 0.0005 -0.0009 0.0006

AT. 96 H X 0.0032 -0.0015 -0.0007 0.0043 0.0020 -0.0011  
Y -0.0001 0.0007 0.0006 -0.0028 -0.0011 0.0009  
Z -0.0031 0.0007 -0.0002 -0.0005 -0.0009 0.0006

AT. 97 H X 0.0079 0.0028 -0.0016 0.0104 -0.0055 0.0096  
Y 0.0003 0.0012 -0.0009 0.0061 -0.0028 0.0038  
Z -0.0048 -0.0012 0.0005 -0.0036 0.0023 -0.0039

AT. 98 H X -0.0079 0.0028 0.0016 -0.0104 -0.0055 0.0096  
Y -0.0003 0.0012 0.0009 -0.0061 -0.0028 0.0038  
Z 0.0048 -0.0012 -0.0005 0.0036 0.0023 -0.0039

AT. 99 C X -0.0016 -0.0013 0.0004 -0.0058 0.0031 -0.0053  
Y 0.0016 0.0014 -0.0004 0.0041 -0.0026 0.0036  
Z -0.0042 -0.0031 0.0011 -0.0106 0.0063 -0.0092

AT. 100 C X 0.0016 -0.0013 -0.0004 0.0058 0.0031 -0.0053  
Y -0.0016 0.0014 0.0004 -0.0041 -0.0026 0.0036  
Z 0.0042 -0.0031 -0.0011 0.0106 0.0063 -0.0092

AT. 101 C X 0.0011 0.0010 -0.0001 0.0029 -0.0019 0.0033  
Y -0.0006 -0.0004 0.0001 -0.0015 0.0008 -0.0013  
Z 0.0022 0.0009 -0.0003 0.0031 -0.0018 0.0027

AT. 102 C X -0.0011 0.0010 0.0001 -0.0029 -0.0019 0.0033  
Y 0.0006 -0.0004 -0.0001 0.0015 0.0008 -0.0013

Z -0.0022 0.0009 0.0003 -0.0031 -0.0018 0.0027  
AT. 103 H X -0.0049 -0.0042 0.0005 -0.0134 0.0076 -0.0130  
Y 0.0021 0.0019 -0.0002 0.0059 -0.0034 0.0059  
Z -0.0047 -0.0007 0.0004 -0.0022 0.0009 -0.0008  
AT. 104 H X 0.0049 -0.0042 -0.0005 0.0134 0.0076 -0.0130  
Y -0.0021 0.0019 0.0002 -0.0059 -0.0034 0.0059  
Z 0.0047 -0.0007 -0.0004 0.0022 0.0009 -0.0008  
AT. 105 H X 0.0059 0.0023 -0.0020 0.0125 -0.0045 0.0043  
Y -0.0038 0.0011 -0.0001 0.0038 -0.0029 0.0055  
Z 0.0022 0.0019 -0.0008 0.0074 -0.0039 0.0057  
AT. 106 H X -0.0059 0.0023 0.0020 -0.0125 -0.0045 0.0043  
Y 0.0038 0.0011 0.0001 -0.0038 -0.0029 0.0055  
Z -0.0022 0.0019 0.0008 -0.0074 -0.0039 0.0057  
AT. 107 C X -0.0004 -0.0009 0.0005 -0.0023 0.0018 -0.0020  
Y 0.0000 -0.0008 0.0003 -0.0038 0.0018 -0.0031  
Z 0.0006 -0.0001 -0.0001 -0.0004 -0.0000 -0.0001  
AT. 108 C X 0.0004 -0.0009 -0.0005 0.0023 0.0018 -0.0020  
Y -0.0000 -0.0008 -0.0003 0.0038 0.0018 -0.0031  
Z -0.0006 -0.0001 0.0001 0.0004 -0.0000 -0.0001  
AT. 109 H X 0.0260 0.0114 -0.0055 0.0347 -0.0237 0.0326  
Y -0.0135 -0.0054 0.0022 -0.0185 0.0114 -0.0176  
Z -0.0304 -0.0120 0.0053 -0.0384 0.0249 -0.0369  
AT. 110 H X -0.0260 0.0114 0.0055 -0.0347 -0.0237 0.0326  
Y 0.0135 -0.0054 -0.0022 0.0185 0.0114 -0.0176  
Z 0.0304 -0.0120 -0.0053 0.0384 0.0249 -0.0369  
AT. 111 H X 0.0312 -0.0020 0.0037 -0.0296 0.0127 -0.0231  
Y -0.0127 -0.0004 -0.0011 0.0093 -0.0032 0.0068  
Z -0.0316 0.0010 -0.0033 0.0266 -0.0107 0.0207  
AT. 112 H X -0.0312 -0.0020 -0.0037 0.0296 0.0127 -0.0231  
Y 0.0127 -0.0004 0.0011 -0.0093 -0.0032 0.0068  
Z 0.0316 0.0010 0.0033 -0.0266 -0.0107 0.0207  
AT. 113 C X -0.0026 -0.0012 0.0008 -0.0067 0.0036 -0.0062



Y 0.0145 0.0056 -0.0017 0.0175 -0.0107 0.0163  
Z 0.0121 0.0015 0.0005 -0.0025 -0.0001 -0.0013  
AT. 114 C X 0.0026 -0.0012 -0.0008 0.0067 0.0036 -0.0062  
Y -0.0145 0.0056 0.0017 -0.0175 -0.0107 0.0163  
Z -0.0121 0.0015 -0.0005 0.0025 -0.0001 -0.0013  
AT. 115 C X 0.0037 0.0003 -0.0000 0.0003 -0.0003 0.0005  
Y -0.0031 -0.0009 0.0003 -0.0033 0.0018 -0.0033  
Z -0.0011 -0.0001 -0.0002 0.0016 -0.0006 0.0016  
AT. 116 C X -0.0037 0.0003 0.0000 -0.0003 -0.0003 0.0005  
Y 0.0031 -0.0009 -0.0003 0.0033 0.0018 -0.0033  
Z 0.0011 -0.0001 0.0002 -0.0016 -0.0006 0.0016  
AT. 117 H X 0.0180 0.0020 0.0002 0.0029 -0.0024 0.0050  
Y 0.0467 0.0062 0.0011 0.0030 -0.0053 0.0080  
Z -0.0275 -0.0034 -0.0006 -0.0025 0.0032 -0.0057  
AT. 118 H X -0.0180 0.0020 -0.0002 -0.0029 -0.0024 0.0050  
Y -0.0467 0.0062 -0.0011 -0.0030 -0.0053 0.0080  
Z 0.0275 -0.0034 0.0006 0.0025 0.0032 -0.0057  
AT. 119 H X -0.0162 -0.0056 0.0011 -0.0133 0.0091 -0.0127  
Y -0.0353 -0.0134 0.0032 -0.0335 0.0225 -0.0311  
Z 0.0215 0.0093 -0.0024 0.0239 -0.0160 0.0218  
AT. 120 H X 0.0162 -0.0056 -0.0011 0.0133 0.0091 -0.0127  
Y 0.0353 -0.0134 -0.0032 0.0335 0.0225 -0.0311  
Z -0.0215 0.0093 0.0024 -0.0239 -0.0160 0.0218  
AT. 121 C X 0.0010 -0.0001 0.0001 -0.0020 0.0009 -0.0020  
Y -0.0003 -0.0009 0.0004 -0.0042 0.0020 -0.0034  
Z 0.0013 -0.0002 0.0001 -0.0019 0.0008 -0.0018  
AT. 122 C X -0.0010 -0.0001 -0.0001 0.0020 0.0009 -0.0020  
Y 0.0003 -0.0009 -0.0004 0.0042 0.0020 -0.0034  
Z -0.0013 -0.0002 -0.0001 0.0019 0.0008 -0.0018  
AT. 123 H X -0.0037 0.0097 -0.0048 0.0514 -0.0265 0.0452  
Y -0.0031 -0.0081 0.0036 -0.0381 0.0203 -0.0340  
Z 0.0024 0.0093 -0.0042 0.0441 -0.0236 0.0392

AT. 124 H X 0.0037 0.0097 0.0048 -0.0514 -0.0265 0.0452  
Y 0.0031 -0.0081 -0.0036 0.0381 0.0203 -0.0340  
Z -0.0024 0.0093 0.0042 -0.0441 -0.0236 0.0392

AT. 125 H X 0.0289 -0.0042 0.0035 -0.0278 0.0139 -0.0198  
Y -0.0233 0.0030 -0.0023 0.0225 -0.0103 0.0161  
Z 0.0241 -0.0032 0.0028 -0.0199 0.0105 -0.0133

AT. 126 H X -0.0289 -0.0042 -0.0035 0.0278 0.0139 -0.0198  
Y 0.0233 0.0030 0.0023 -0.0225 -0.0103 0.0161  
Z -0.0241 -0.0032 -0.0028 0.0199 0.0105 -0.0133

AT. 127 C X 0.0047 -0.0022 0.0010 -0.0098 0.0054 -0.0078  
Y 0.0099 0.0046 -0.0018 0.0191 -0.0101 0.0173  
Z -0.0116 0.0014 -0.0011 0.0101 -0.0049 0.0073

AT. 128 C X -0.0047 -0.0022 -0.0010 0.0098 0.0054 -0.0078  
Y -0.0099 0.0046 0.0018 -0.0191 -0.0101 0.0173  
Z 0.0116 0.0014 0.0011 -0.0101 -0.0049 0.0073

AT. 129 C X 0.0022 0.0003 0.0000 0.0003 -0.0004 0.0005  
Y -0.0052 -0.0012 0.0003 -0.0031 0.0020 -0.0029  
Z -0.0028 -0.0011 0.0003 -0.0023 0.0017 -0.0020

AT. 130 C X -0.0022 0.0003 -0.0000 -0.0003 -0.0004 0.0005  
Y 0.0052 -0.0012 -0.0003 0.0031 0.0020 -0.0029  
Z 0.0028 -0.0011 -0.0003 0.0023 0.0017 -0.0020

AT. 131 H X 0.0254 0.0015 0.0007 -0.0044 0.0005 -0.0008  
Y 0.0556 0.0031 0.0010 -0.0089 0.0012 -0.0030  
Z 0.0561 0.0026 0.0015 -0.0113 0.0025 -0.0039

AT. 132 H X -0.0254 0.0015 -0.0007 0.0044 0.0005 -0.0008  
Y -0.0556 0.0031 -0.0010 0.0089 0.0012 -0.0030  
Z -0.0561 0.0026 -0.0015 0.0113 0.0025 -0.0039

AT. 133 H X -0.0124 -0.0026 0.0006 -0.0077 0.0042 -0.0077  
Y -0.0056 -0.0041 0.0017 -0.0221 0.0103 -0.0204  
Z 0.0018 -0.0043 0.0022 -0.0283 0.0125 -0.0256

AT. 134 H X 0.0124 -0.0026 -0.0006 0.0077 0.0042 -0.0077  
Y 0.0056 -0.0041 -0.0017 0.0221 0.0103 -0.0204

Z -0.0018 -0.0043 -0.0022 0.0283 0.0125 -0.0256  
AT. 135 C X 0.0002 0.0004 -0.0002 0.0017 -0.0011 0.0015  
Y -0.0046 -0.0016 0.0005 -0.0052 0.0032 -0.0049  
Z -0.0040 -0.0006 -0.0001 0.0008 0.0002 0.0005  
AT. 136 C X -0.0002 0.0004 0.0002 -0.0017 -0.0011 0.0015  
Y 0.0046 -0.0016 -0.0005 0.0052 0.0032 -0.0049  
Z 0.0040 -0.0006 0.0001 -0.0008 0.0002 0.0005  
AT. 137 H X 0.0017 -0.0017 0.0008 -0.0072 0.0039 -0.0055  
Y 0.0077 0.0013 0.0004 -0.0007 -0.0006 -0.0002  
Z 0.0150 0.0045 -0.0006 0.0101 -0.0069 0.0093  
AT. 138 H X -0.0017 -0.0017 -0.0008 0.0072 0.0039 -0.0055  
Y -0.0077 0.0013 -0.0004 0.0007 -0.0006 -0.0002  
Z -0.0150 0.0045 0.0006 -0.0101 -0.0069 0.0093  
AT. 139 H X -0.0095 -0.0026 0.0004 -0.0024 0.0034 -0.0030  
Y 0.0113 0.0048 -0.0018 0.0181 -0.0107 0.0170  
Z 0.0052 0.0015 -0.0002 -0.0011 -0.0014 -0.0002  
AT. 140 H X 0.0095 -0.0026 -0.0004 0.0024 0.0034 -0.0030  
Y -0.0113 0.0048 0.0018 -0.0181 -0.0107 0.0170  
Z -0.0052 0.0015 0.0002 0.0011 -0.0014 -0.0002  
AT. 141 H X 0.0136 0.0016 0.0005 0.0004 -0.0004 0.0009  
Y 0.0050 0.0018 -0.0012 0.0091 -0.0047 0.0086  
Z -0.0068 -0.0033 0.0019 -0.0141 0.0082 -0.0133  
AT. 142 H X -0.0136 0.0016 -0.0005 -0.0004 -0.0004 0.0009  
Y -0.0050 0.0018 0.0012 -0.0091 -0.0047 0.0086  
Z 0.0068 -0.0033 -0.0019 0.0141 0.0082 -0.0133  
AT. 143 C X -0.0026 0.0006 -0.0003 0.0032 -0.0016 0.0023  
Y -0.0031 -0.0013 0.0005 -0.0057 0.0030 -0.0054  
Z 0.0038 -0.0004 0.0003 -0.0027 0.0014 -0.0021  
AT. 144 C X 0.0026 0.0006 0.0003 -0.0032 -0.0016 0.0023  
Y 0.0031 -0.0013 -0.0005 0.0057 0.0030 -0.0054  
Z -0.0038 -0.0004 -0.0003 0.0027 0.0014 -0.0021  
AT. 145 H X 0.0100 -0.0025 0.0013 -0.0123 0.0067 -0.0095

Y 0.0110 0.0004 0.0001 0.0009 0.0002 0.0015  
Z -0.0079 -0.0028 0.0010 -0.0125 0.0059 -0.0115  
AT. 146 H X -0.0100 -0.0025 -0.0013 0.0123 0.0067 -0.0095  
Y -0.0110 0.0004 -0.0001 -0.0009 0.0002 0.0015  
Z 0.0079 -0.0028 -0.0010 0.0125 0.0059 -0.0115  
AT. 147 H X -0.0110 -0.0008 0.0000 -0.0020 0.0010 -0.0027  
Y 0.0046 0.0044 -0.0019 0.0214 -0.0105 0.0187  
Z -0.0061 0.0007 -0.0006 0.0056 -0.0025 0.0045  
AT. 148 H X 0.0110 -0.0008 -0.0000 0.0020 0.0010 -0.0027  
Y -0.0046 0.0044 0.0019 -0.0214 -0.0105 0.0187  
Z 0.0061 0.0007 0.0006 -0.0056 -0.0025 0.0045  
AT. 149 H X 0.0163 0.0005 0.0003 -0.0033 0.0004 0.0000  
Y 0.0010 0.0018 -0.0008 0.0063 -0.0045 0.0067  
Z 0.0001 0.0049 -0.0021 0.0201 -0.0120 0.0187  
AT. 150 H X -0.0163 0.0005 -0.0003 0.0033 0.0004 0.0000  
Y -0.0010 0.0018 0.0008 -0.0063 -0.0045 0.0067  
Z -0.0001 0.0049 0.0021 -0.0201 -0.0120 0.0187  
AT. 151 C X 0.0108 0.0017 -0.0003 0.0023 -0.0024 0.0033  
Y -0.0026 -0.0021 0.0009 -0.0089 0.0047 -0.0078  
Z 0.0008 -0.0007 0.0001 -0.0017 0.0011 -0.0011  
AT. 152 C X -0.0108 0.0017 0.0003 -0.0023 -0.0024 0.0033  
Y 0.0026 -0.0021 -0.0009 0.0089 0.0047 -0.0078  
Z -0.0008 -0.0007 -0.0001 0.0017 0.0011 -0.0011  
AT. 153 H X -0.0485 -0.0034 -0.0012 0.0065 -0.0003 0.0007  
Y -0.0120 0.0000 -0.0006 0.0052 -0.0021 0.0031  
Z 0.0101 0.0046 -0.0017 0.0181 -0.0101 0.0164  
AT. 154 H X 0.0485 -0.0034 0.0012 -0.0065 -0.0003 0.0007  
Y 0.0120 0.0000 0.0006 -0.0052 -0.0021 0.0031  
Z -0.0101 0.0046 0.0017 -0.0181 -0.0101 0.0164  
AT. 155 H X -0.0643 -0.0042 -0.0017 0.0166 -0.0013 0.0060  
Y -0.0143 0.0013 -0.0015 0.0146 -0.0058 0.0106  
Z -0.0132 -0.0059 0.0020 -0.0199 0.0117 -0.0183

AT.156 H X 0.0643 -0.0042 0.0017 -0.0166 -0.0013 0.0060  
Y 0.0143 0.0013 0.0015 -0.0146 -0.0058 0.0106  
Z 0.0132 -0.0059 -0.0020 0.0199 0.0117 -0.0183

AT.157 O X 0.0000 -0.0001 -0.0000 0.0000 0.0000 -0.0000  
Y 0.0001 0.0000 -0.0002 -0.0001 -0.0002 -0.0001  
Z 0.0000 0.0001 -0.0001 0.0000 -0.0002 -0.0001

AT.158 O X -0.0000 -0.0001 0.0000 -0.0000 0.0000 -0.0000  
Y -0.0001 0.0000 0.0002 0.0001 -0.0002 -0.0001  
Z -0.0000 0.0001 0.0001 -0.0000 -0.0002 -0.0001

AT.159 O X 0.0001 -0.0000 -0.0001 -0.0000 0.0000 0.0001  
Y -0.0001 -0.0000 0.0001 0.0000 0.0001 0.0000  
Z 0.0000 -0.0001 -0.0001 -0.0001 0.0003 0.0001

AT.160 O X -0.0001 -0.0000 0.0001 0.0000 0.0000 0.0001  
Y 0.0001 -0.0000 -0.0001 -0.0000 0.0001 0.0000  
Z -0.0000 -0.0001 0.0001 0.0001 0.0003 0.0001

AT.161 H X -0.0001 0.0010 0.0022 -0.0004 0.0021 0.0015  
Y -0.0006 -0.0009 0.0000 0.0005 0.0003 0.0006  
Z 0.0007 0.0019 0.0014 -0.0005 0.0006 -0.0004

AT.162 H X 0.0001 0.0010 -0.0022 0.0004 0.0021 0.0015  
Y 0.0006 -0.0009 -0.0000 -0.0005 0.0003 0.0006  
Z -0.0007 0.0019 -0.0014 0.0005 0.0006 -0.0004

AT.163 H X -0.0007 0.0013 -0.0001 0.0005 -0.0010 -0.0016  
Y 0.0002 0.0010 0.0002 0.0006 -0.0013 -0.0008  
Z 0.0002 -0.0002 0.0004 0.0001 -0.0002 0.0004

AT.164 H X 0.0007 0.0013 0.0001 -0.0005 -0.0010 -0.0016  
Y -0.0002 0.0010 -0.0002 -0.0006 -0.0013 -0.0008  
Z -0.0002 -0.0002 -0.0004 -0.0001 -0.0002 0.0004

AT.165 O X -0.0002 0.0000 0.0000 0.0002 -0.0000 0.0001  
Y 0.0001 0.0000 0.0001 0.0003 -0.0001 0.0000  
Z -0.0000 -0.0000 -0.0000 -0.0005 0.0002 -0.0001

AT.166 O X 0.0002 0.0000 -0.0000 -0.0002 -0.0000 0.0001  
Y -0.0001 0.0000 -0.0001 -0.0003 -0.0001 0.0000

Z 0.0000 -0.0000 0.0000 0.0005 0.0002 -0.0001  
AT. 167 H X 0.0005 -0.0001 -0.0003 -0.0022 -0.0002 -0.0002  
Y -0.0007 -0.0000 0.0003 0.0010 0.0010 -0.0008  
Z -0.0004 0.0008 0.0005 0.0085 -0.0017 0.0037  
AT. 168 H X -0.0005 -0.0001 0.0003 0.0022 -0.0002 -0.0002  
Y 0.0007 -0.0000 -0.0003 -0.0010 0.0010 -0.0008  
Z 0.0004 0.0008 -0.0005 -0.0085 -0.0017 0.0037  
AT. 169 O X 0.0000 0.0000 0.0001 -0.0002 -0.0001 -0.0001  
Y -0.0000 -0.0000 -0.0001 -0.0004 0.0001 0.0001  
Z -0.0001 -0.0000 -0.0000 -0.0006 -0.0000 0.0001  
AT. 170 O X -0.0000 0.0000 -0.0001 0.0002 -0.0001 -0.0001  
Y 0.0000 -0.0000 0.0001 0.0004 0.0001 0.0001  
Z 0.0001 -0.0000 0.0000 0.0006 -0.0000 0.0001  
AT. 171 H X 0.0007 -0.0010 -0.0013 0.0016 0.0029 -0.0024  
Y 0.0010 -0.0002 0.0000 0.0030 0.0009 -0.0023  
Z 0.0020 0.0003 0.0010 0.0057 -0.0005 -0.0033  
AT. 172 H X -0.0007 -0.0010 0.0013 -0.0016 0.0029 -0.0024  
Y -0.0010 -0.0002 -0.0000 -0.0030 0.0009 -0.0023  
Z -0.0020 0.0003 -0.0010 -0.0057 -0.0005 -0.0033  
  
FREQ(CM\*\*-1) 1361.50 1361.66 1367.20 1367.21 1371.00 1371.82  
  
AT. 1 I X -0.0000 0.0000 -0.0000 -0.0000 0.0000 0.0000  
Y 0.0000 -0.0000 0.0000 0.0000 0.0000 0.0000  
Z 0.0000 -0.0000 -0.0000 -0.0000 0.0000 0.0000  
AT. 2 I X -0.0000 -0.0000 -0.0000 0.0000 0.0000 -0.0000  
Y 0.0000 0.0000 0.0000 -0.0000 0.0000 -0.0000  
Z 0.0000 0.0000 -0.0000 0.0000 0.0000 -0.0000  
AT. 3 I X -0.0000 0.0000 -0.0000 -0.0000 0.0000 0.0000  
Y -0.0000 0.0000 -0.0000 -0.0000 -0.0000 -0.0000  
Z 0.0000 -0.0000 -0.0000 -0.0000 0.0000 -0.0000  
AT. 4 I X -0.0000 -0.0000 -0.0000 0.0000 0.0000 -0.0000

Y -0.0000 -0.0000 -0.0000 0.0000 -0.0000 0.0000  
Z 0.0000 0.0000 -0.0000 0.0000 0.0000 0.0000  
AT. 5 O X 0.0001 -0.0001 0.0002 0.0001 0.0013 0.0013  
Y -0.0002 0.0001 -0.0002 -0.0001 -0.0013 -0.0013  
Z 0.0005 -0.0005 0.0000 -0.0000 0.0007 0.0008  
AT. 6 O X 0.0001 0.0001 0.0002 -0.0001 0.0013 -0.0013  
Y -0.0002 -0.0001 -0.0002 0.0001 -0.0013 0.0013  
Z 0.0005 0.0005 0.0000 0.0000 0.0007 -0.0008  
AT. 7 O X -0.0017 0.0017 0.0001 0.0001 -0.0006 -0.0006  
Y 0.0019 -0.0018 -0.0001 -0.0001 0.0000 0.0001  
Z -0.0014 0.0014 0.0001 0.0000 0.0011 0.0010  
AT. 8 O X -0.0017 -0.0017 0.0001 -0.0001 -0.0006 0.0006  
Y 0.0019 0.0018 -0.0001 0.0001 0.0000 -0.0001  
Z -0.0014 -0.0014 0.0001 -0.0000 0.0011 -0.0010  
AT. 9 N X 0.0011 -0.0009 0.0007 0.0002 0.0069 0.0070  
Y 0.0007 -0.0006 -0.0003 -0.0002 -0.0025 -0.0027  
Z 0.0001 0.0000 -0.0000 -0.0001 -0.0005 -0.0006  
AT. 10 N X 0.0011 0.0009 0.0007 -0.0002 0.0069 -0.0070  
Y 0.0007 0.0006 -0.0003 0.0002 -0.0025 0.0027  
Z 0.0001 -0.0000 -0.0000 0.0001 -0.0005 0.0006  
AT. 11 N X 0.0094 -0.0095 -0.0003 -0.0001 -0.0067 -0.0063  
Y -0.0084 0.0083 -0.0001 0.0001 0.0002 0.0000  
Z -0.0007 0.0007 -0.0000 -0.0001 0.0004 0.0006  
AT. 12 N X 0.0094 0.0095 -0.0003 0.0001 -0.0067 0.0063  
Y -0.0084 -0.0083 -0.0001 -0.0001 0.0002 -0.0000  
Z -0.0007 -0.0007 -0.0000 0.0001 0.0004 -0.0006  
AT. 13 C X -0.0020 0.0018 -0.0009 -0.0004 -0.0069 -0.0069  
Y 0.0020 -0.0017 0.0009 0.0004 0.0069 0.0069  
Z -0.0036 0.0032 -0.0011 -0.0004 -0.0093 -0.0092  
AT. 14 C X -0.0020 -0.0018 -0.0009 0.0004 -0.0069 0.0069  
Y 0.0020 0.0017 0.0009 -0.0004 0.0069 -0.0069  
Z -0.0036 -0.0032 -0.0011 0.0004 -0.0093 0.0092

AT. 15 C X 0.0012 -0.0011 0.0005 0.0003 0.0030 0.0031  
Y -0.0007 0.0007 -0.0002 -0.0001 -0.0014 -0.0014  
Z 0.0011 -0.0010 0.0004 0.0002 0.0028 0.0028

AT. 16 C X 0.0012 0.0011 0.0005 -0.0003 0.0030 -0.0031  
Y -0.0007 -0.0007 -0.0002 0.0001 -0.0014 0.0014  
Z 0.0011 0.0010 0.0004 -0.0002 0.0028 -0.0028

AT. 17 H X -0.0048 0.0043 -0.0020 -0.0012 -0.0107 -0.0110  
Y -0.0010 0.0006 -0.0006 -0.0004 -0.0048 -0.0049  
Z -0.0009 0.0013 -0.0001 -0.0000 0.0015 0.0013

AT. 18 H X -0.0048 -0.0043 -0.0020 0.0012 -0.0107 0.0110  
Y -0.0010 -0.0006 -0.0006 0.0004 -0.0048 0.0049  
Z -0.0009 -0.0013 -0.0001 0.0000 0.0015 -0.0013

AT. 19 H X 0.0018 -0.0012 0.0003 -0.0002 0.0071 0.0056  
Y -0.0031 0.0024 -0.0017 -0.0008 -0.0136 -0.0134  
Z 0.0006 -0.0006 -0.0002 -0.0002 -0.0001 -0.0005

AT. 20 H X 0.0018 0.0012 0.0003 0.0002 0.0071 -0.0056  
Y -0.0031 -0.0024 -0.0017 0.0008 -0.0136 0.0134  
Z 0.0006 0.0006 -0.0002 0.0002 -0.0001 0.0005

AT. 21 C X 0.0005 -0.0003 -0.0001 -0.0003 0.0039 0.0036  
Y -0.0002 0.0002 0.0002 0.0001 0.0003 0.0003  
Z 0.0006 -0.0008 -0.0002 0.0003 -0.0067 -0.0063

AT. 22 C X 0.0005 0.0003 -0.0001 0.0003 0.0039 -0.0036  
Y -0.0002 -0.0002 0.0002 -0.0001 0.0003 -0.0003  
Z 0.0006 0.0008 -0.0002 -0.0003 -0.0067 0.0063

AT. 23 C X 0.0004 -0.0005 0.0001 0.0001 -0.0017 -0.0017  
Y 0.0002 -0.0001 0.0000 0.0000 -0.0001 -0.0002  
Z 0.0012 -0.0010 0.0001 -0.0001 0.0020 0.0016

AT. 24 C X 0.0004 0.0005 0.0001 -0.0001 -0.0017 0.0017  
Y 0.0002 0.0001 0.0000 -0.0000 -0.0001 0.0002  
Z 0.0012 0.0010 0.0001 0.0001 0.0020 -0.0016

AT. 25 H X -0.0011 0.0014 0.0000 0.0001 0.0042 0.0047  
Y 0.0005 -0.0003 -0.0000 -0.0000 0.0013 0.0010



Z -0.0053 0.0045 0.0003 0.0004 -0.0009 0.0012  
AT. 26 H X -0.0011 -0.0014 0.0000 -0.0001 0.0042 -0.0047  
Y 0.0005 0.0003 -0.0000 0.0000 0.0013 -0.0010  
Z -0.0053 -0.0045 0.0003 -0.0004 -0.0009 -0.0012  
AT. 27 H X -0.0026 0.0026 -0.0014 -0.0001 -0.0030 -0.0026  
Y -0.0056 0.0050 0.0000 0.0002 0.0012 0.0035  
Z -0.0009 0.0007 0.0004 0.0000 0.0031 0.0038  
AT. 28 H X -0.0026 -0.0026 -0.0014 0.0001 -0.0030 0.0026  
Y -0.0056 -0.0050 0.0000 -0.0002 0.0012 -0.0035  
Z -0.0009 -0.0007 0.0004 -0.0000 0.0031 -0.0038  
AT. 29 C X -0.0018 0.0018 0.0010 0.0006 0.0058 0.0059  
Y 0.0017 -0.0018 0.0004 0.0004 0.0012 0.0016  
Z -0.0001 0.0001 0.0007 0.0006 0.0036 0.0037  
AT. 30 C X -0.0018 -0.0018 0.0010 -0.0006 0.0058 -0.0059  
Y 0.0017 0.0018 0.0004 -0.0004 0.0012 -0.0016  
Z -0.0001 -0.0001 0.0007 -0.0006 0.0036 -0.0037  
AT. 31 H X 0.0348 -0.0356 -0.0011 -0.0017 -0.0036 -0.0026  
Y 0.0019 -0.0021 -0.0002 -0.0001 -0.0022 -0.0023  
Z 0.0243 -0.0249 -0.0014 -0.0016 -0.0063 -0.0063  
AT. 32 H X 0.0348 0.0356 -0.0011 0.0017 -0.0036 0.0026  
Y 0.0019 0.0021 -0.0002 0.0001 -0.0022 0.0023  
Z 0.0243 0.0249 -0.0014 0.0016 -0.0063 0.0063  
AT. 33 H X 0.0004 -0.0009 -0.0079 -0.0030 -0.0695 -0.0703  
Y 0.0026 -0.0026 -0.0010 -0.0004 -0.0063 -0.0067  
Z 0.0013 -0.0017 -0.0048 -0.0016 -0.0444 -0.0445  
AT. 34 H X 0.0004 0.0009 -0.0079 0.0030 -0.0695 0.0703  
Y 0.0026 0.0026 -0.0010 0.0004 -0.0063 0.0067  
Z 0.0013 0.0017 -0.0048 0.0016 -0.0444 0.0445  
AT. 35 C X -0.0063 0.0067 -0.0010 -0.0004 -0.0055 -0.0058  
Y -0.0126 0.0131 -0.0006 -0.0008 0.0033 0.0026  
Z -0.0004 0.0006 0.0012 -0.0001 0.0153 0.0151  
AT. 36 C X -0.0063 -0.0067 -0.0010 0.0004 -0.0055 0.0058

Y -0.0126 -0.0131 -0.0006 0.0008 0.0033 -0.0026  
Z -0.0004 -0.0006 0.0012 0.0001 0.0153 -0.0151  
AT. 37 C X -0.0027 0.0026 0.0004 0.0002 0.0036 0.0034  
Y -0.0051 0.0049 0.0006 0.0003 0.0033 0.0035  
Z 0.0054 -0.0053 -0.0005 -0.0001 -0.0044 -0.0045  
AT. 38 C X -0.0027 -0.0026 0.0004 -0.0002 0.0036 -0.0034  
Y -0.0051 -0.0049 0.0006 -0.0003 0.0033 -0.0035  
Z 0.0054 0.0053 -0.0005 0.0001 -0.0044 0.0045  
AT. 39 H X -0.0046 0.0046 0.0000 -0.0000 -0.0009 -0.0005  
Y 0.0497 -0.0480 -0.0003 -0.0019 0.0156 0.0145  
Z -0.0206 0.0200 -0.0003 0.0008 -0.0121 -0.0113  
AT. 40 H X -0.0046 -0.0046 0.0000 0.0000 -0.0009 0.0005  
Y 0.0497 0.0480 -0.0003 0.0019 0.0156 -0.0145  
Z -0.0206 -0.0200 -0.0003 -0.0008 -0.0121 0.0113  
AT. 41 H X -0.0026 0.0031 0.0003 -0.0003 0.0079 0.0077  
Y 0.0691 -0.0705 -0.0027 0.0012 -0.0517 -0.0496  
Z -0.0516 0.0521 0.0021 -0.0003 0.0343 0.0329  
AT. 42 H X -0.0026 -0.0031 0.0003 0.0003 0.0079 -0.0077  
Y 0.0691 0.0705 -0.0027 -0.0012 -0.0517 0.0496  
Z -0.0516 -0.0521 0.0021 0.0003 0.0343 -0.0329  
AT. 43 C X 0.0015 -0.0015 -0.0001 0.0001 -0.0025 -0.0026  
Y 0.0071 -0.0068 0.0004 0.0002 0.0009 0.0008  
Z -0.0080 0.0078 -0.0003 -0.0003 0.0000 -0.0000  
AT. 44 C X 0.0015 0.0015 -0.0001 -0.0001 -0.0025 0.0026  
Y 0.0071 0.0068 0.0004 -0.0002 0.0009 -0.0008  
Z -0.0080 -0.0078 -0.0003 0.0003 0.0000 0.0000  
AT. 45 H X -0.0543 0.0540 -0.0010 -0.0006 -0.0092 -0.0086  
Y -0.0311 0.0310 -0.0004 -0.0000 -0.0051 -0.0052  
Z 0.0678 -0.0673 0.0011 0.0005 0.0112 0.0107  
AT. 46 H X -0.0543 -0.0540 -0.0010 0.0006 -0.0092 0.0086  
Y -0.0311 -0.0310 -0.0004 0.0000 -0.0051 0.0052  
Z 0.0678 0.0673 0.0011 -0.0005 0.0112 -0.0107

AT. 47 H X -0.0235 0.0242 0.0027 0.0005 0.0416 0.0401  
Y -0.0009 0.0015 0.0018 0.0007 0.0183 0.0179  
Z 0.0203 -0.0211 -0.0027 -0.0003 -0.0432 -0.0415

AT. 48 H X -0.0235 -0.0242 0.0027 -0.0005 0.0416 -0.0401  
Y -0.0009 -0.0015 0.0018 -0.0007 0.0183 -0.0179  
Z 0.0203 0.0211 -0.0027 0.0003 -0.0432 0.0415

AT. 49 C X 0.0148 -0.0146 0.0009 0.0002 0.0110 0.0110  
Y 0.0012 -0.0026 -0.0019 -0.0008 -0.0132 -0.0125  
Z 0.0061 -0.0058 0.0013 0.0006 0.0115 0.0113

AT. 50 C X 0.0148 0.0146 0.0009 -0.0002 0.0110 -0.0110  
Y 0.0012 0.0026 -0.0019 0.0008 -0.0132 0.0125  
Z 0.0061 0.0058 0.0013 -0.0006 0.0115 -0.0113

AT. 51 C X -0.0026 0.0026 -0.0004 -0.0002 -0.0042 -0.0042  
Y 0.0014 -0.0013 0.0001 0.0000 -0.0001 -0.0001  
Z 0.0003 -0.0004 -0.0005 -0.0002 -0.0042 -0.0040

AT. 52 C X -0.0026 -0.0026 -0.0004 0.0002 -0.0042 0.0042  
Y 0.0014 0.0013 0.0001 -0.0000 -0.0001 0.0001  
Z 0.0003 0.0004 -0.0005 0.0002 -0.0042 0.0040

AT. 53 H X -0.0057 0.0052 -0.0007 -0.0001 -0.0071 -0.0070  
Y -0.0227 0.0207 -0.0023 -0.0008 -0.0188 -0.0180  
Z -0.0229 0.0212 -0.0027 -0.0012 -0.0202 -0.0194

AT. 54 H X -0.0057 -0.0052 -0.0007 0.0001 -0.0071 0.0070  
Y -0.0227 -0.0207 -0.0023 0.0008 -0.0188 0.0180  
Z -0.0229 -0.0212 -0.0027 0.0012 -0.0202 0.0194

AT. 55 H X -0.0037 0.0036 0.0004 0.0003 0.0012 0.0010  
Y -0.0018 0.0048 0.0057 0.0027 0.0472 0.0458  
Z -0.0045 0.0081 0.0075 0.0036 0.0611 0.0595

AT. 56 H X -0.0037 -0.0036 0.0004 -0.0003 0.0012 -0.0010  
Y -0.0018 -0.0048 0.0057 -0.0027 0.0472 -0.0458  
Z -0.0045 -0.0081 0.0075 -0.0036 0.0611 -0.0595

AT. 57 C X 0.0030 -0.0031 0.0002 0.0001 0.0014 0.0015  
Y 0.0034 -0.0036 0.0000 0.0001 -0.0013 -0.0010

Z -0.0008 0.0007 -0.0005 -0.0001 -0.0058 -0.0056  
AT. 58 C X 0.0030 0.0031 0.0002 -0.0001 0.0014 -0.0015  
Y 0.0034 0.0036 0.0000 -0.0001 -0.0013 0.0010  
Z -0.0008 -0.0007 -0.0005 0.0001 -0.0058 0.0056  
AT. 59 H X -0.0089 0.0095 -0.0012 -0.0011 -0.0004 -0.0004  
Y 0.0019 -0.0019 0.0017 0.0007 0.0123 0.0117  
Z -0.0103 0.0109 0.0011 -0.0001 0.0140 0.0129  
AT. 60 H X -0.0089 -0.0095 -0.0012 0.0011 -0.0004 0.0004  
Y 0.0019 0.0019 0.0017 -0.0007 0.0123 -0.0117  
Z -0.0103 -0.0109 0.0011 0.0001 0.0140 -0.0129  
AT. 61 H X -0.0075 0.0078 0.0015 0.0006 0.0109 0.0095  
Y -0.0141 0.0140 -0.0004 0.0001 -0.0068 -0.0081  
Z -0.0000 0.0002 0.0007 0.0003 0.0060 0.0057  
AT. 62 H X -0.0075 -0.0078 0.0015 -0.0006 0.0109 -0.0095  
Y -0.0141 -0.0140 -0.0004 -0.0001 -0.0068 0.0081  
Z -0.0000 -0.0002 0.0007 -0.0003 0.0060 -0.0057  
AT. 63 H X -0.0016 0.0009 -0.0003 0.0009 -0.0141 -0.0144  
Y -0.0041 0.0047 -0.0009 -0.0007 -0.0021 -0.0020  
Z 0.0086 -0.0088 0.0007 -0.0002 0.0106 0.0111  
AT. 64 H X -0.0016 -0.0009 -0.0003 -0.0009 -0.0141 0.0144  
Y -0.0041 -0.0047 -0.0009 0.0007 -0.0021 0.0020  
Z 0.0086 0.0088 0.0007 0.0002 0.0106 -0.0111  
AT. 65 C X -0.0036 0.0034 -0.0002 -0.0001 -0.0027 -0.0026  
Y -0.0014 0.0021 0.0005 0.0002 0.0039 0.0035  
Z -0.0017 0.0016 -0.0005 -0.0002 -0.0042 -0.0039  
AT. 66 C X -0.0036 -0.0034 -0.0002 0.0001 -0.0027 0.0026  
Y -0.0014 -0.0021 0.0005 -0.0002 0.0039 -0.0035  
Z -0.0017 -0.0016 -0.0005 0.0002 -0.0042 0.0039  
AT. 67 H X 0.0031 -0.0021 -0.0000 -0.0001 0.0024 0.0028  
Y -0.0072 0.0037 -0.0023 -0.0006 -0.0202 -0.0172  
Z -0.0006 0.0031 0.0019 0.0006 0.0141 0.0112  
AT. 68 H X 0.0031 0.0021 -0.0000 0.0001 0.0024 -0.0028

Y -0.0072 -0.0037 -0.0023 0.0006 -0.0202 0.0172  
Z -0.0006 -0.0031 0.0019 -0.0006 0.0141 -0.0112  
AT. 69 H X 0.0032 -0.0047 -0.0012 -0.0003 -0.0106 -0.0106  
Y 0.0106 -0.0130 -0.0000 0.0001 0.0003 0.0006  
Z 0.0041 -0.0059 0.0010 0.0004 0.0089 0.0104  
AT. 70 H X 0.0032 0.0047 -0.0012 0.0003 -0.0106 0.0106  
Y 0.0106 0.0130 -0.0000 -0.0001 0.0003 -0.0006  
Z 0.0041 0.0059 0.0010 -0.0004 0.0089 -0.0104  
AT. 71 H X 0.0093 -0.0077 0.0023 0.0009 0.0179 0.0154  
Y 0.0048 -0.0043 -0.0001 -0.0003 0.0010 0.0003  
Z 0.0165 -0.0153 0.0008 -0.0000 0.0092 0.0068  
AT. 72 H X 0.0093 0.0077 0.0023 -0.0009 0.0179 -0.0154  
Y 0.0048 0.0043 -0.0001 0.0003 0.0010 -0.0003  
Z 0.0165 0.0153 0.0008 0.0000 0.0092 -0.0068  
AT. 73 C X -0.0117 0.0113 -0.0006 -0.0003 -0.0053 -0.0051  
Y 0.0093 -0.0087 0.0010 0.0006 0.0052 0.0052  
Z 0.0011 -0.0010 -0.0005 -0.0000 -0.0059 -0.0056  
AT. 74 C X -0.0117 -0.0113 -0.0006 0.0003 -0.0053 0.0051  
Y 0.0093 0.0087 0.0010 -0.0006 0.0052 -0.0052  
Z 0.0011 0.0010 -0.0005 0.0000 -0.0059 0.0056  
AT. 75 H X 0.0610 -0.0625 0.0017 0.0011 0.0082 0.0093  
Y -0.0442 0.0444 -0.0013 -0.0011 -0.0037 -0.0058  
Z -0.0191 0.0180 -0.0019 -0.0013 -0.0082 -0.0099  
AT. 76 H X 0.0610 0.0625 0.0017 -0.0011 0.0082 -0.0093  
Y -0.0442 -0.0444 -0.0013 0.0011 -0.0037 0.0058  
Z -0.0191 -0.0180 -0.0019 0.0013 -0.0082 0.0099  
AT. 77 H X 0.0001 0.0027 0.0015 0.0003 0.0174 0.0156  
Y -0.0014 -0.0003 -0.0018 -0.0004 -0.0157 -0.0132  
Z 0.0000 -0.0009 0.0000 0.0004 -0.0074 -0.0077  
AT. 78 H X 0.0001 -0.0027 0.0015 -0.0003 0.0174 -0.0156  
Y -0.0014 0.0003 -0.0018 0.0004 -0.0157 0.0132  
Z 0.0000 0.0009 0.0000 -0.0004 -0.0074 0.0077

AT. 79 I X -0.0000 -0.0000 0.0000 0.0000 -0.0000 -0.0001  
Y -0.0000 0.0000 0.0000 0.0000 0.0000 0.0000  
Z -0.0000 0.0000 0.0000 0.0000 0.0000 -0.0000

AT. 80 I X -0.0000 0.0000 0.0000 -0.0000 -0.0000 0.0001  
Y -0.0000 -0.0000 0.0000 -0.0000 0.0000 -0.0000  
Z -0.0000 -0.0000 0.0000 -0.0000 0.0000 0.0000

AT. 81 I X -0.0000 0.0000 -0.0000 -0.0000 -0.0000 0.0000  
Y -0.0000 0.0000 -0.0000 -0.0000 0.0000 0.0000  
Z -0.0000 -0.0000 0.0000 0.0000 -0.0000 -0.0000

AT. 82 I X -0.0000 -0.0000 -0.0000 0.0000 -0.0000 -0.0000  
Y -0.0000 -0.0000 -0.0000 0.0000 0.0000 -0.0000  
Z -0.0000 0.0000 0.0000 -0.0000 -0.0000 0.0000

AT. 83 O X 0.0001 -0.0000 -0.0004 -0.0002 -0.0003 0.0005  
Y 0.0000 -0.0000 -0.0000 -0.0000 -0.0001 0.0002  
Z -0.0002 0.0002 0.0003 0.0005 -0.0001 -0.0004

AT. 84 O X 0.0001 0.0000 -0.0004 0.0002 -0.0003 -0.0005  
Y 0.0000 0.0000 -0.0000 0.0000 -0.0001 -0.0002  
Z -0.0002 -0.0002 0.0003 -0.0005 -0.0001 0.0004

AT. 85 O X 0.0002 -0.0002 0.0018 0.0018 0.0001 -0.0002  
Y 0.0001 -0.0001 0.0016 0.0015 -0.0001 0.0001  
Z -0.0001 0.0001 -0.0012 -0.0012 0.0002 -0.0003

AT. 86 O X 0.0002 0.0002 0.0018 -0.0018 0.0001 0.0002  
Y 0.0001 0.0001 0.0016 -0.0015 -0.0001 -0.0001  
Z -0.0001 -0.0001 -0.0012 0.0012 0.0002 0.0003

AT. 87 N X 0.0008 -0.0008 -0.0001 -0.0003 -0.0003 0.0023  
Y -0.0001 0.0001 0.0014 0.0013 -0.0000 -0.0001  
Z -0.0000 0.0001 0.0001 0.0002 0.0003 -0.0003

AT. 88 N X 0.0008 0.0008 -0.0001 0.0003 -0.0003 -0.0023  
Y -0.0001 -0.0001 0.0014 -0.0013 -0.0000 0.0001  
Z -0.0000 -0.0001 0.0001 -0.0002 0.0003 0.0003

AT. 89 N X -0.0002 0.0003 -0.0107 -0.0104 0.0021 -0.0015  
Y -0.0000 0.0000 -0.0058 -0.0059 0.0001 0.0008

Z -0.0001 0.0000 0.0004 0.0003 -0.0003 0.0000  
AT. 90 N X -0.0002 -0.0003 -0.0107 0.0104 0.0021 0.0015  
Y -0.0000 -0.0000 -0.0058 0.0059 0.0001 -0.0008  
Z -0.0001 -0.0000 0.0004 -0.0003 -0.0003 -0.0000  
AT. 91 C X -0.0005 0.0005 0.0019 0.0019 0.0006 -0.0023  
Y -0.0002 0.0003 0.0007 0.0008 0.0003 -0.0012  
Z 0.0009 -0.0011 -0.0028 -0.0032 -0.0008 0.0035  
AT. 92 C X -0.0005 -0.0005 0.0019 -0.0019 0.0006 0.0023  
Y -0.0002 -0.0003 0.0007 -0.0008 0.0003 0.0012  
Z 0.0009 0.0011 -0.0028 0.0032 -0.0008 -0.0035  
AT. 93 C X 0.0002 -0.0001 -0.0007 -0.0008 -0.0001 0.0008  
Y 0.0000 -0.0000 -0.0003 -0.0005 -0.0001 0.0002  
Z -0.0003 0.0002 0.0010 0.0010 0.0002 -0.0009  
AT. 94 C X 0.0002 0.0001 -0.0007 0.0008 -0.0001 -0.0008  
Y 0.0000 0.0000 -0.0003 0.0005 -0.0001 -0.0002  
Z -0.0003 -0.0002 0.0010 -0.0010 0.0002 0.0009  
AT. 95 H X -0.0006 0.0001 0.0029 0.0009 -0.0001 -0.0003  
Y 0.0004 -0.0002 -0.0015 -0.0006 -0.0001 0.0009  
Z 0.0001 0.0003 -0.0013 -0.0006 0.0002 -0.0009  
AT. 96 H X -0.0006 -0.0001 0.0029 -0.0009 -0.0001 0.0003  
Y 0.0004 0.0002 -0.0015 0.0006 -0.0001 -0.0009  
Z 0.0001 -0.0003 -0.0013 0.0006 0.0002 0.0009  
AT. 97 H X 0.0012 -0.0012 -0.0023 -0.0025 -0.0015 0.0033  
Y 0.0007 -0.0007 -0.0010 -0.0009 -0.0002 0.0023  
Z -0.0004 0.0004 0.0013 0.0015 0.0006 -0.0012  
AT. 98 H X 0.0012 0.0012 -0.0023 0.0025 -0.0015 -0.0033  
Y 0.0007 0.0007 -0.0010 0.0009 -0.0002 -0.0023  
Z -0.0004 -0.0004 0.0013 -0.0015 0.0006 0.0012  
AT. 99 C X -0.0002 0.0002 -0.0013 -0.0013 -0.0010 0.0011  
Y -0.0002 0.0003 0.0002 0.0003 0.0002 -0.0008  
Z 0.0001 -0.0002 -0.0011 -0.0013 -0.0011 0.0019  
AT. 100 C X -0.0002 -0.0002 -0.0013 0.0013 -0.0010 -0.0011

Y -0.0002 -0.0003 0.0002 -0.0003 0.0002 0.0008  
Z 0.0001 0.0002 -0.0011 0.0013 -0.0011 -0.0019  
AT. 101 C X 0.0001 -0.0000 0.0005 0.0005 0.0003 -0.0007  
Y 0.0000 -0.0000 0.0001 0.0001 -0.0001 0.0002  
Z -0.0000 0.0000 0.0018 0.0017 0.0003 -0.0006  
AT. 102 C X 0.0001 0.0000 0.0005 -0.0005 0.0003 0.0007  
Y 0.0000 0.0000 0.0001 -0.0001 -0.0001 -0.0002  
Z -0.0000 -0.0000 0.0018 -0.0017 0.0003 0.0006  
AT. 103 H X -0.0003 0.0002 -0.0008 -0.0011 -0.0005 0.0024  
Y 0.0002 -0.0001 0.0007 0.0008 0.0003 -0.0011  
Z 0.0001 -0.0000 -0.0050 -0.0044 0.0001 0.0005  
AT. 104 H X -0.0003 -0.0002 -0.0008 0.0011 -0.0005 -0.0024  
Y 0.0002 0.0001 0.0007 -0.0008 0.0003 0.0011  
Z 0.0001 0.0000 -0.0050 0.0044 0.0001 -0.0005  
AT. 105 H X -0.0003 0.0003 0.0005 0.0008 0.0009 -0.0005  
Y 0.0002 -0.0000 -0.0063 -0.0057 0.0005 -0.0003  
Z -0.0000 0.0001 -0.0005 -0.0003 0.0007 -0.0008  
AT. 106 H X -0.0003 -0.0003 0.0005 -0.0008 0.0009 0.0005  
Y 0.0002 0.0000 -0.0063 0.0057 0.0005 0.0003  
Z -0.0000 -0.0001 -0.0005 0.0003 0.0007 0.0008  
AT. 107 C X -0.0001 0.0000 0.0036 0.0034 -0.0010 0.0003  
Y -0.0001 0.0001 -0.0020 -0.0018 -0.0002 0.0001  
Z 0.0003 -0.0003 -0.0061 -0.0060 0.0005 0.0002  
AT. 108 C X -0.0001 -0.0000 0.0036 -0.0034 -0.0010 -0.0003  
Y -0.0001 -0.0001 -0.0020 0.0018 -0.0002 -0.0001  
Z 0.0003 0.0003 -0.0061 0.0060 0.0005 -0.0002  
AT. 109 H X 0.0046 -0.0039 -0.0490 -0.0487 0.0073 0.0065  
Y -0.0024 0.0022 0.0252 0.0253 -0.0021 -0.0029  
Z -0.0054 0.0049 0.0580 0.0580 -0.0055 -0.0073  
AT. 110 H X 0.0046 0.0039 -0.0490 0.0487 0.0073 -0.0065  
Y -0.0024 -0.0022 0.0252 -0.0253 -0.0021 0.0029  
Z -0.0054 -0.0049 0.0580 -0.0580 -0.0055 0.0073



AT. 111 H X -0.0042 0.0049 -0.0008 0.0009 0.0045 -0.0143  
Y 0.0018 -0.0021 0.0002 -0.0006 -0.0019 0.0066  
Z 0.0043 -0.0051 -0.0008 -0.0025 -0.0053 0.0148

AT. 112 H X -0.0042 -0.0049 -0.0008 -0.0009 0.0045 0.0143  
Y 0.0018 0.0021 0.0002 0.0006 -0.0019 -0.0066  
Z 0.0043 0.0051 -0.0008 0.0025 -0.0053 -0.0148

AT. 113 C X -0.0014 0.0015 0.0083 0.0089 0.0004 -0.0035  
Y 0.0010 -0.0007 -0.0100 -0.0100 0.0027 -0.0015  
Z -0.0016 0.0019 0.0088 0.0092 0.0017 -0.0055

AT. 114 C X -0.0014 -0.0015 0.0083 -0.0089 0.0004 0.0035  
Y 0.0010 0.0007 -0.0100 0.0100 0.0027 0.0015  
Z -0.0016 -0.0019 0.0088 -0.0092 0.0017 0.0055

AT. 115 C X 0.0003 -0.0003 -0.0000 -0.0001 -0.0005 0.0010  
Y -0.0005 0.0005 -0.0055 -0.0054 0.0005 -0.0005  
Z 0.0006 -0.0007 0.0030 0.0030 -0.0006 0.0014

AT. 116 C X 0.0003 0.0003 -0.0000 0.0001 -0.0005 -0.0010  
Y -0.0005 -0.0005 -0.0055 0.0054 0.0005 0.0005  
Z 0.0006 0.0007 0.0030 -0.0030 -0.0006 -0.0014

AT. 117 H X 0.0004 -0.0004 0.0235 0.0238 -0.0004 -0.0015  
Y -0.0019 0.0023 0.0638 0.0650 0.0002 -0.0110  
Z 0.0007 -0.0010 -0.0383 -0.0392 -0.0005 0.0062

AT. 118 H X 0.0004 0.0004 0.0235 -0.0238 -0.0004 0.0015  
Y -0.0019 -0.0023 0.0638 -0.0650 0.0002 0.0110  
Z 0.0007 0.0010 -0.0383 0.0392 -0.0005 -0.0062

AT. 119 H X 0.0012 -0.0017 0.0106 0.0098 -0.0052 0.0070  
Y 0.0024 -0.0038 0.0425 0.0409 -0.0132 0.0159  
Z -0.0019 0.0030 -0.0373 -0.0361 0.0103 -0.0119

AT. 120 H X 0.0012 0.0017 0.0106 -0.0098 -0.0052 -0.0070  
Y 0.0024 0.0038 0.0425 -0.0409 -0.0132 -0.0159  
Z -0.0019 -0.0030 -0.0373 0.0361 0.0103 0.0119

AT. 121 C X -0.0002 0.0002 -0.0019 -0.0019 0.0002 -0.0005  
Y 0.0004 -0.0004 0.0059 0.0060 -0.0002 -0.0003

Z -0.0003 0.0003 -0.0066 -0.0067 0.0004 -0.0000  
AT. 122 C X -0.0002 -0.0002 -0.0019 0.0019 0.0002 0.0005  
Y 0.0004 0.0004 0.0059 -0.0060 -0.0002 0.0003  
Z -0.0003 -0.0003 -0.0066 0.0067 0.0004 0.0000  
AT. 123 H X 0.0018 -0.0017 0.0506 0.0511 -0.0016 -0.0010  
Y -0.0025 0.0025 -0.0442 -0.0444 0.0026 0.0000  
Z 0.0030 -0.0030 0.0544 0.0547 -0.0027 -0.0006  
AT. 124 H X 0.0018 0.0017 0.0506 -0.0511 -0.0016 0.0010  
Y -0.0025 -0.0025 -0.0442 0.0444 0.0026 -0.0000  
Z 0.0030 0.0030 0.0544 -0.0547 -0.0027 0.0006  
AT. 125 H X 0.0003 -0.0010 0.0297 0.0286 -0.0090 0.0079  
Y -0.0011 0.0016 -0.0128 -0.0121 0.0061 -0.0063  
Z -0.0003 -0.0003 0.0238 0.0229 -0.0078 0.0073  
AT. 126 H X 0.0003 0.0010 0.0297 -0.0286 -0.0090 -0.0079  
Y -0.0011 -0.0016 -0.0128 0.0121 0.0061 0.0063  
Z -0.0003 0.0003 0.0238 -0.0229 -0.0078 -0.0073  
AT. 127 C X 0.0001 -0.0002 -0.0074 -0.0078 -0.0012 0.0025  
Y 0.0002 -0.0004 0.0092 0.0086 -0.0031 0.0032  
Z -0.0000 0.0002 0.0053 0.0056 0.0017 -0.0029  
AT. 128 C X 0.0001 0.0002 -0.0074 0.0078 -0.0012 -0.0025  
Y 0.0002 0.0004 0.0092 -0.0086 -0.0031 -0.0032  
Z -0.0000 -0.0002 0.0053 -0.0056 0.0017 0.0029  
AT. 129 C X -0.0002 0.0002 0.0026 0.0027 0.0001 -0.0010  
Y 0.0001 -0.0001 0.0029 0.0031 0.0003 -0.0008  
Z -0.0000 -0.0000 0.0038 0.0039 -0.0006 -0.0002  
AT. 130 C X -0.0002 -0.0002 0.0026 -0.0027 0.0001 0.0010  
Y 0.0001 0.0001 0.0029 -0.0031 0.0003 0.0008  
Z -0.0000 0.0000 0.0038 -0.0039 -0.0006 0.0002  
AT. 131 H X -0.0001 0.0002 -0.0068 -0.0072 -0.0009 0.0017  
Y -0.0000 -0.0002 -0.0255 -0.0273 -0.0041 0.0092  
Z -0.0000 -0.0002 -0.0225 -0.0241 -0.0038 0.0080  
AT. 132 H X -0.0001 -0.0002 -0.0068 0.0072 -0.0009 -0.0017

Y -0.0000 0.0002 -0.0255 0.0273 -0.0041 -0.0092  
Z -0.0000 0.0002 -0.0225 0.0241 -0.0038 -0.0080  
AT. 133 H X -0.0008 0.0010 -0.0061 -0.0059 0.0035 -0.0058  
Y -0.0012 0.0017 -0.0255 -0.0253 0.0070 -0.0076  
Z -0.0018 0.0023 -0.0367 -0.0366 0.0087 -0.0088  
AT. 134 H X -0.0008 -0.0010 -0.0061 0.0059 0.0035 0.0058  
Y -0.0012 -0.0017 -0.0255 0.0253 0.0070 0.0076  
Z -0.0018 -0.0023 -0.0367 0.0366 0.0087 0.0088  
AT. 135 C X 0.0004 -0.0004 -0.0027 -0.0029 0.0001 0.0011  
Y -0.0003 0.0002 0.0035 0.0035 -0.0008 0.0004  
Z 0.0005 -0.0006 -0.0030 -0.0031 -0.0007 0.0018  
AT. 136 C X 0.0004 0.0004 -0.0027 0.0029 0.0001 -0.0011  
Y -0.0003 -0.0002 0.0035 -0.0035 -0.0008 -0.0004  
Z 0.0005 0.0006 -0.0030 0.0031 -0.0007 -0.0018  
AT. 137 H X -0.0011 0.0009 0.0087 0.0091 -0.0000 -0.0025  
Y -0.0011 0.0013 0.0057 0.0060 0.0017 -0.0046  
Z -0.0005 0.0009 -0.0019 -0.0016 0.0034 -0.0054  
AT. 138 H X -0.0011 -0.0009 0.0087 -0.0091 -0.0000 0.0025  
Y -0.0011 -0.0013 0.0057 -0.0060 0.0017 0.0046  
Z -0.0005 -0.0009 -0.0019 0.0016 0.0034 0.0054  
AT. 139 H X 0.0002 -0.0006 -0.0026 -0.0029 -0.0025 0.0033  
Y 0.0018 -0.0017 -0.0150 -0.0152 0.0028 0.0005  
Z -0.0001 0.0005 0.0036 0.0037 0.0017 -0.0019  
AT. 140 H X 0.0002 0.0006 -0.0026 0.0029 -0.0025 -0.0033  
Y 0.0018 0.0017 -0.0150 0.0152 0.0028 -0.0005  
Z -0.0001 -0.0005 0.0036 -0.0037 0.0017 0.0019  
AT. 141 H X -0.0019 0.0019 0.0070 0.0075 0.0006 -0.0056  
Y 0.0011 -0.0012 -0.0093 -0.0096 -0.0001 0.0025  
Z -0.0021 0.0020 0.0143 0.0148 -0.0009 -0.0037  
AT. 142 H X -0.0019 -0.0019 0.0070 -0.0075 0.0006 0.0056  
Y 0.0011 0.0012 -0.0093 0.0096 -0.0001 -0.0025  
Z -0.0021 -0.0020 0.0143 -0.0148 -0.0009 0.0037

AT. 143 C X -0.0001 0.0001 0.0020 0.0021 0.0004 -0.0009  
Y -0.0001 0.0002 -0.0032 -0.0032 0.0010 -0.0011  
Z 0.0001 -0.0001 -0.0017 -0.0019 -0.0006 0.0011

AT. 144 C X -0.0001 -0.0001 0.0020 -0.0021 0.0004 0.0009  
Y -0.0001 -0.0002 -0.0032 0.0032 0.0010 0.0011  
Z 0.0001 0.0001 -0.0017 0.0019 -0.0006 -0.0011

AT. 145 H X 0.0001 -0.0003 -0.0062 -0.0059 -0.0006 0.0028  
Y 0.0000 -0.0003 -0.0007 -0.0009 -0.0032 0.0045  
Z -0.0000 0.0003 -0.0055 -0.0053 0.0034 -0.0038

AT. 146 H X 0.0001 0.0003 -0.0062 0.0059 -0.0006 -0.0028  
Y 0.0000 0.0003 -0.0007 0.0009 -0.0032 -0.0045  
Z -0.0000 -0.0003 -0.0055 0.0053 0.0034 0.0038

AT. 147 H X -0.0004 0.0005 0.0000 0.0005 0.0023 -0.0038  
Y 0.0002 -0.0003 0.0112 0.0121 -0.0022 0.0027  
Z -0.0004 0.0003 0.0040 0.0048 0.0008 -0.0017

AT. 148 H X -0.0004 -0.0005 0.0000 -0.0005 0.0023 0.0038  
Y 0.0002 0.0003 0.0112 -0.0121 -0.0022 -0.0027  
Z -0.0004 -0.0003 0.0040 -0.0048 0.0008 0.0017

AT. 149 H X 0.0003 -0.0006 -0.0000 -0.0009 -0.0030 0.0036  
Y 0.0002 -0.0002 0.0055 0.0055 0.0002 -0.0008  
Z 0.0005 -0.0003 0.0133 0.0136 0.0001 -0.0011

AT. 150 H X 0.0003 0.0006 -0.0000 0.0009 -0.0030 -0.0036  
Y 0.0002 0.0002 0.0055 -0.0055 0.0002 0.0008  
Z 0.0005 0.0003 0.0133 -0.0136 0.0001 0.0011

AT. 151 C X 0.0006 -0.0006 0.0039 0.0039 0.0001 0.0006  
Y -0.0002 0.0002 0.0013 0.0015 0.0001 -0.0003  
Z 0.0004 -0.0006 -0.0032 -0.0035 -0.0009 0.0021

AT. 152 C X 0.0006 0.0006 0.0039 -0.0039 0.0001 -0.0006  
Y -0.0002 -0.0002 0.0013 -0.0015 0.0001 0.0003  
Z 0.0004 0.0006 -0.0032 0.0035 -0.0009 -0.0021

AT. 153 H X 0.0014 -0.0009 -0.0525 -0.0521 0.0088 -0.0055  
Y 0.0003 -0.0001 -0.0142 -0.0140 0.0027 -0.0022

Z 0.0009 -0.0009 -0.0045 -0.0048 -0.0003 0.0016  
AT. 154 H X 0.0014 0.0009 -0.0525 0.0521 0.0088 0.0055  
Y 0.0003 0.0001 -0.0142 0.0140 0.0027 0.0022  
Z 0.0009 0.0009 -0.0045 0.0048 -0.0003 -0.0016  
AT. 155 H X -0.0015 0.0010 0.0148 0.0146 -0.0067 0.0043  
Y -0.0000 -0.0001 0.0038 0.0034 -0.0020 0.0017  
Z -0.0005 0.0003 -0.0019 -0.0016 -0.0012 0.0014  
AT. 156 H X -0.0015 -0.0010 0.0148 -0.0146 -0.0067 -0.0043  
Y -0.0000 0.0001 0.0038 -0.0034 -0.0020 -0.0017  
Z -0.0005 -0.0003 -0.0019 0.0016 -0.0012 -0.0014  
AT. 157 O X 0.0000 -0.0000 0.0001 0.0001 0.0000 0.0001  
Y 0.0000 -0.0001 0.0001 0.0001 0.0003 0.0003  
Z 0.0001 0.0001 -0.0000 -0.0001 -0.0002 0.0000  
AT. 158 O X 0.0000 0.0000 0.0001 -0.0001 0.0000 -0.0001  
Y 0.0000 0.0001 0.0001 -0.0001 0.0003 -0.0003  
Z 0.0001 -0.0001 -0.0000 0.0001 -0.0002 -0.0000  
AT. 159 O X -0.0000 -0.0001 0.0001 0.0001 0.0003 0.0001  
Y -0.0000 0.0001 -0.0001 -0.0001 -0.0002 -0.0002  
Z -0.0001 0.0000 -0.0000 0.0000 -0.0001 -0.0002  
AT. 160 O X -0.0000 0.0001 0.0001 -0.0001 0.0003 -0.0001  
Y -0.0000 -0.0001 -0.0001 0.0001 -0.0002 0.0002  
Z -0.0001 -0.0000 -0.0000 -0.0000 -0.0001 0.0002  
AT. 161 H X -0.0013 0.0016 -0.0017 -0.0028 -0.0024 -0.0028  
Y -0.0002 0.0004 -0.0003 -0.0004 -0.0018 -0.0019  
Z 0.0001 -0.0001 0.0007 0.0006 0.0042 0.0043  
AT. 162 H X -0.0013 -0.0016 -0.0017 0.0028 -0.0024 0.0028  
Y -0.0002 -0.0004 -0.0003 0.0004 -0.0018 0.0019  
Z 0.0001 0.0001 0.0007 -0.0006 0.0042 -0.0043  
AT. 163 H X 0.0014 0.0013 -0.0000 -0.0006 -0.0018 0.0010  
Y 0.0001 -0.0000 -0.0002 -0.0001 -0.0008 0.0004  
Z -0.0005 -0.0004 -0.0001 0.0002 0.0005 -0.0005  
AT. 164 H X 0.0014 -0.0013 -0.0000 0.0006 -0.0018 -0.0010

|                                                              |     |         |         |         |         |         |         |
|--------------------------------------------------------------|-----|---------|---------|---------|---------|---------|---------|
|                                                              | Y   | 0.0001  | 0.0000  | -0.0002 | 0.0001  | -0.0008 | -0.0004 |
|                                                              | Z   | -0.0005 | 0.0004  | -0.0001 | -0.0002 | 0.0005  | 0.0005  |
| AT. 165                                                      | O X | 0.0001  | -0.0000 | -0.0000 | -0.0001 | -0.0002 | -0.0000 |
|                                                              | Y   | 0.0000  | -0.0001 | -0.0001 | -0.0001 | -0.0002 | 0.0001  |
|                                                              | Z   | -0.0001 | 0.0000  | 0.0000  | 0.0001  | 0.0003  | -0.0002 |
| AT. 166                                                      | O X | 0.0001  | 0.0000  | -0.0000 | 0.0001  | -0.0002 | 0.0000  |
|                                                              | Y   | 0.0000  | 0.0001  | -0.0001 | 0.0001  | -0.0002 | -0.0001 |
|                                                              | Z   | -0.0001 | -0.0000 | 0.0000  | -0.0001 | 0.0003  | 0.0002  |
| AT. 167                                                      | H X | -0.0006 | 0.0002  | 0.0001  | 0.0004  | 0.0017  | 0.0000  |
|                                                              | Y   | 0.0000  | -0.0001 | 0.0003  | 0.0001  | -0.0010 | -0.0004 |
|                                                              | Z   | 0.0023  | -0.0014 | -0.0008 | -0.0018 | -0.0042 | -0.0000 |
| AT. 168                                                      | H X | -0.0006 | -0.0002 | 0.0001  | -0.0004 | 0.0017  | -0.0000 |
|                                                              | Y   | 0.0000  | 0.0001  | 0.0003  | -0.0001 | -0.0010 | 0.0004  |
|                                                              | Z   | 0.0023  | 0.0014  | -0.0008 | 0.0018  | -0.0042 | 0.0000  |
| AT. 169                                                      | O X | -0.0000 | 0.0001  | 0.0000  | 0.0000  | 0.0000  | 0.0001  |
|                                                              | Y   | -0.0001 | 0.0000  | 0.0000  | 0.0001  | 0.0004  | -0.0002 |
|                                                              | Z   | -0.0001 | 0.0001  | 0.0000  | 0.0001  | 0.0003  | -0.0001 |
| AT. 170                                                      | O X | -0.0000 | -0.0001 | 0.0000  | -0.0000 | 0.0000  | -0.0001 |
|                                                              | Y   | -0.0001 | -0.0000 | 0.0000  | -0.0001 | 0.0004  | 0.0002  |
|                                                              | Z   | -0.0001 | -0.0001 | 0.0000  | -0.0001 | 0.0003  | 0.0001  |
| AT. 171                                                      | H X | -0.0003 | 0.0001  | 0.0005  | 0.0002  | 0.0016  | -0.0016 |
|                                                              | Y   | 0.0001  | 0.0001  | -0.0001 | -0.0003 | -0.0016 | 0.0008  |
|                                                              | Z   | 0.0001  | 0.0001  | -0.0004 | -0.0008 | -0.0050 | 0.0035  |
| AT. 172                                                      | H X | -0.0003 | -0.0001 | 0.0005  | -0.0002 | 0.0016  | 0.0016  |
|                                                              | Y   | 0.0001  | -0.0001 | -0.0001 | 0.0003  | -0.0016 | -0.0008 |
|                                                              | Z   | 0.0001  | -0.0001 | -0.0004 | 0.0008  | -0.0050 | -0.0035 |
| FREQ(CM**-1) 1374.90 1375.03 1375.18 1375.54 1376.99 1377.09 |     |         |         |         |         |         |         |
| AT. 11                                                       | X   | -0.0000 | -0.0000 | 0.0000  | 0.0000  | 0.0000  | -0.0000 |
|                                                              | Y   | 0.0000  | 0.0000  | 0.0000  | -0.0000 | 0.0000  | -0.0000 |
|                                                              | Z   | -0.0000 | -0.0000 | -0.0000 | -0.0000 | 0.0000  | -0.0000 |

AT. 2 I X -0.0000 0.0000 0.0000 -0.0000 0.0000 0.0000  
Y 0.0000 -0.0000 0.0000 0.0000 0.0000 0.0000  
Z -0.0000 0.0000 -0.0000 0.0000 0.0000 0.0000

AT. 3 I X -0.0000 -0.0000 0.0000 -0.0000 0.0000 0.0000  
Y 0.0000 0.0000 0.0000 0.0000 -0.0000 0.0000  
Z 0.0000 0.0000 0.0000 0.0000 0.0000 -0.0000

AT. 4 I X -0.0000 0.0000 0.0000 0.0000 0.0000 -0.0000  
Y 0.0000 -0.0000 0.0000 -0.0000 -0.0000 -0.0000  
Z 0.0000 -0.0000 0.0000 -0.0000 0.0000 0.0000

AT. 5 O X -0.0000 0.0003 -0.0001 -0.0005 0.0006 -0.0007  
Y 0.0000 -0.0004 -0.0000 0.0005 -0.0002 0.0003  
Z -0.0004 -0.0001 0.0001 0.0002 0.0003 -0.0002

AT. 6 O X -0.0000 -0.0003 -0.0001 0.0005 0.0006 0.0007  
Y 0.0000 0.0004 -0.0000 -0.0005 -0.0002 -0.0003  
Z -0.0004 0.0001 0.0001 -0.0002 0.0003 0.0002

AT. 7 O X -0.0000 -0.0001 0.0001 0.0003 -0.0002 0.0002  
Y 0.0000 -0.0000 -0.0000 0.0000 0.0002 -0.0002  
Z -0.0001 0.0003 0.0000 -0.0003 0.0001 -0.0001

AT. 8 O X -0.0000 0.0001 0.0001 -0.0003 -0.0002 -0.0002  
Y 0.0000 0.0000 -0.0000 -0.0000 0.0002 0.0002  
Z -0.0001 -0.0003 0.0000 0.0003 0.0001 0.0001

AT. 9 N X -0.0015 0.0011 0.0005 -0.0013 0.0012 -0.0011  
Y 0.0007 -0.0004 -0.0004 0.0002 0.0000 -0.0002  
Z 0.0004 -0.0003 -0.0003 0.0001 -0.0001 0.0001

AT. 10 N X -0.0015 -0.0011 0.0005 0.0013 0.0012 0.0011  
Y 0.0007 0.0004 -0.0004 -0.0002 0.0000 0.0002  
Z 0.0004 0.0003 -0.0003 -0.0001 -0.0001 -0.0001

AT. 11 N X 0.0011 -0.0016 -0.0005 0.0016 0.0008 -0.0008  
Y -0.0008 0.0010 0.0011 0.0000 -0.0039 0.0040  
Z -0.0003 -0.0001 0.0001 0.0001 0.0001 -0.0001

AT. 12 N X 0.0011 0.0016 -0.0005 -0.0016 0.0008 0.0008  
Y -0.0008 -0.0010 0.0011 -0.0000 -0.0039 -0.0040

Z -0.0003 0.0001 0.0001 -0.0001 0.0001 0.0001  
AT. 13 C X 0.0010 -0.0011 -0.0002 0.0015 -0.0022 0.0024  
Y -0.0009 0.0012 0.0002 -0.0015 0.0017 -0.0018  
Z 0.0015 -0.0009 -0.0004 0.0012 -0.0025 0.0023  
AT. 14 C X 0.0010 0.0011 -0.0002 -0.0015 -0.0022 -0.0024  
Y -0.0009 -0.0012 0.0002 0.0015 0.0017 0.0018  
Z 0.0015 0.0009 -0.0004 -0.0012 -0.0025 -0.0023  
AT. 15 C X -0.0008 0.0004 0.0003 -0.0004 0.0006 -0.0007  
Y 0.0003 -0.0001 -0.0001 0.0002 -0.0006 0.0007  
Z -0.0005 0.0003 0.0001 -0.0004 0.0007 -0.0007  
AT. 16 C X -0.0008 -0.0004 0.0003 0.0004 0.0006 0.0007  
Y 0.0003 0.0001 -0.0001 -0.0002 -0.0006 -0.0007  
Z -0.0005 -0.0003 0.0001 0.0004 0.0007 0.0007  
AT. 17 H X 0.0019 -0.0014 -0.0007 0.0014 -0.0023 0.0022  
Y 0.0005 -0.0011 -0.0000 0.0011 -0.0013 0.0008  
Z 0.0003 0.0008 -0.0003 -0.0007 0.0004 0.0004  
AT. 18 H X 0.0019 0.0014 -0.0007 -0.0014 -0.0023 -0.0022  
Y 0.0005 0.0011 -0.0000 -0.0011 -0.0013 -0.0008  
Z 0.0003 -0.0008 -0.0003 0.0007 0.0004 -0.0004  
AT. 19 H X 0.0010 0.0007 -0.0006 -0.0009 0.0023 -0.0014  
Y 0.0017 -0.0021 -0.0002 0.0023 -0.0033 0.0024  
Z 0.0006 -0.0003 -0.0002 0.0002 0.0004 -0.0005  
AT. 20 H X 0.0010 -0.0007 -0.0006 0.0009 0.0023 0.0014  
Y 0.0017 0.0021 -0.0002 -0.0023 -0.0033 -0.0024  
Z 0.0006 0.0003 -0.0002 -0.0002 0.0004 0.0005  
AT. 21 C X -0.0003 0.0008 -0.0003 -0.0014 0.0009 -0.0010  
Y 0.0001 -0.0003 -0.0003 -0.0000 0.0010 -0.0010  
Z 0.0002 -0.0010 0.0007 0.0021 -0.0031 0.0033  
AT. 22 C X -0.0003 -0.0008 -0.0003 0.0014 0.0009 0.0010  
Y 0.0001 0.0003 -0.0003 0.0000 0.0010 0.0010  
Z 0.0002 0.0010 0.0007 -0.0021 -0.0031 -0.0033  
AT. 23 C X 0.0003 0.0000 0.0004 0.0007 -0.0010 0.0011



Y 0.0000 -0.0001 -0.0001 0.0000 0.0000 -0.0000  
Z 0.0002 0.0000 -0.0005 -0.0007 0.0018 -0.0019  
AT. 24 C X 0.0003 -0.0000 0.0004 -0.0007 -0.0010 -0.0011  
Y 0.0000 0.0001 -0.0001 -0.0000 0.0000 0.0000  
Z 0.0002 -0.0000 -0.0005 0.0007 0.0018 0.0019  
AT. 25 H X -0.0015 -0.0010 -0.0016 -0.0017 0.0031 -0.0031  
Y -0.0001 -0.0004 -0.0006 -0.0003 0.0014 -0.0014  
Z -0.0022 0.0018 0.0017 -0.0003 -0.0056 0.0062  
AT. 26 H X -0.0015 0.0010 -0.0016 0.0017 0.0031 0.0031  
Y -0.0001 0.0004 -0.0006 0.0003 0.0014 0.0014  
Z -0.0022 -0.0018 0.0017 0.0003 -0.0056 -0.0062  
AT. 27 H X -0.0011 -0.0015 -0.0003 0.0004 -0.0004 0.0002  
Y -0.0019 0.0018 0.0013 -0.0010 -0.0046 0.0046  
Z -0.0004 0.0013 0.0003 -0.0011 -0.0006 0.0006  
AT. 28 H X -0.0011 0.0015 -0.0003 -0.0004 -0.0004 -0.0002  
Y -0.0019 -0.0018 0.0013 0.0010 -0.0046 -0.0046  
Z -0.0004 -0.0013 0.0003 0.0011 -0.0006 -0.0006  
AT. 29 C X -0.0013 0.0026 0.0023 -0.0002 -0.0058 0.0062  
Y -0.0006 0.0012 0.0014 0.0003 -0.0027 0.0029  
Z -0.0017 0.0030 0.0034 0.0005 -0.0089 0.0093  
AT. 30 C X -0.0013 -0.0026 0.0023 0.0002 -0.0058 -0.0062  
Y -0.0006 -0.0012 0.0014 -0.0003 -0.0027 -0.0029  
Z -0.0017 -0.0030 0.0034 -0.0005 -0.0089 -0.0093  
AT. 31 H X 0.0066 -0.0148 -0.0194 -0.0064 0.0702 -0.0722  
Y 0.0017 -0.0023 -0.0035 -0.0013 0.0077 -0.0079  
Z 0.0071 -0.0135 -0.0182 -0.0062 0.0562 -0.0581  
AT. 32 H X 0.0066 0.0148 -0.0194 0.0064 0.0702 0.0722  
Y 0.0017 0.0023 -0.0035 0.0013 0.0077 0.0079  
Z 0.0071 0.0135 -0.0182 0.0062 0.0562 0.0581  
AT. 33 H X 0.0110 -0.0105 -0.0037 0.0108 -0.0134 0.0117  
Y 0.0003 -0.0008 -0.0004 0.0002 -0.0040 0.0037  
Z 0.0062 -0.0053 -0.0001 0.0081 -0.0126 0.0119

AT. 34 H X 0.0110 0.0105 -0.0037 -0.0108 -0.0134 -0.0117  
Y 0.0003 0.0008 -0.0004 -0.0002 -0.0040 -0.0037  
Z 0.0062 0.0053 -0.0001 -0.0081 -0.0126 -0.0119

AT. 35 C X -0.0004 0.0004 0.0018 0.0016 -0.0095 0.0093  
Y -0.0004 -0.0021 -0.0019 -0.0006 0.0053 -0.0054  
Z 0.0001 -0.0021 -0.0053 -0.0045 0.0207 -0.0209

AT. 36 C X -0.0004 -0.0004 0.0018 -0.0016 -0.0095 -0.0093  
Y -0.0004 0.0021 -0.0019 0.0006 0.0053 0.0054  
Z 0.0001 0.0021 -0.0053 0.0045 0.0207 0.0209

AT. 37 C X -0.0003 0.0006 -0.0001 -0.0009 0.0014 -0.0014  
Y -0.0006 0.0000 -0.0000 -0.0002 0.0010 -0.0008  
Z 0.0004 0.0009 0.0013 0.0008 -0.0054 0.0053

AT. 38 C X -0.0003 -0.0006 -0.0001 0.0009 0.0014 0.0014  
Y -0.0006 -0.0000 -0.0000 0.0002 0.0010 0.0008  
Z 0.0004 -0.0009 0.0013 -0.0008 -0.0054 -0.0053

AT. 39 H X -0.0009 -0.0004 0.0003 0.0004 -0.0007 0.0007  
Y 0.0057 -0.0065 -0.0144 -0.0095 0.0495 -0.0512  
Z -0.0028 0.0029 0.0076 0.0056 -0.0271 0.0279

AT. 40 H X -0.0009 0.0004 0.0003 -0.0004 -0.0007 -0.0007  
Y 0.0057 0.0065 -0.0144 0.0095 0.0495 0.0512  
Z -0.0028 -0.0029 0.0076 -0.0056 -0.0271 -0.0279

AT. 41 H X -0.0006 0.0001 -0.0016 -0.0023 0.0057 -0.0059  
Y 0.0048 0.0052 0.0119 0.0118 -0.0442 0.0448  
Z -0.0035 -0.0029 -0.0068 -0.0071 0.0267 -0.0268

AT. 42 H X -0.0006 -0.0001 -0.0016 0.0023 0.0057 0.0059  
Y 0.0048 -0.0052 0.0119 -0.0118 -0.0442 -0.0448  
Z -0.0035 0.0029 -0.0068 0.0071 0.0267 0.0268

AT. 43 C X 0.0007 -0.0013 -0.0010 0.0005 0.0028 -0.0028  
Y 0.0002 -0.0003 -0.0000 0.0002 0.0010 -0.0012  
Z -0.0005 0.0000 0.0000 -0.0002 -0.0008 0.0008

AT. 44 C X 0.0007 0.0013 -0.0010 -0.0005 0.0028 0.0028  
Y 0.0002 0.0003 -0.0000 -0.0002 0.0010 0.0012

Z -0.0005 -0.0000 0.0000 0.0002 -0.0008 -0.0008  
AT. 45 H X -0.0048 -0.0050 0.0012 0.0045 -0.0064 0.0069  
Y -0.0016 -0.0028 -0.0007 0.0013 -0.0004 0.0003  
Z 0.0050 0.0053 -0.0008 -0.0042 0.0068 -0.0072  
AT. 46 H X -0.0048 0.0050 0.0012 -0.0045 -0.0064 -0.0069  
Y -0.0016 0.0028 -0.0007 -0.0013 -0.0004 -0.0003  
Z 0.0050 -0.0053 -0.0008 0.0042 0.0068 0.0072  
AT. 47 H X -0.0068 0.0147 0.0072 -0.0097 -0.0184 0.0179  
Y -0.0029 0.0071 0.0040 -0.0040 -0.0100 0.0096  
Z 0.0070 -0.0145 -0.0073 0.0095 0.0176 -0.0172  
AT. 48 H X -0.0068 -0.0147 0.0072 0.0097 -0.0184 -0.0179  
Y -0.0029 -0.0071 0.0040 0.0040 -0.0100 -0.0096  
Z 0.0070 0.0145 -0.0073 -0.0095 0.0176 0.0172  
AT. 49 C X -0.0005 0.0047 0.0020 -0.0027 -0.0042 0.0040  
Y 0.0027 -0.0026 -0.0023 0.0016 0.0044 -0.0037  
Z -0.0012 0.0035 0.0015 -0.0025 -0.0021 0.0022  
AT. 50 C X -0.0005 -0.0047 0.0020 0.0027 -0.0042 -0.0040  
Y 0.0027 0.0026 -0.0023 -0.0016 0.0044 0.0037  
Z -0.0012 -0.0035 0.0015 0.0025 -0.0021 -0.0022  
AT. 51 C X 0.0007 -0.0018 -0.0010 0.0009 0.0023 -0.0024  
Y 0.0008 -0.0017 -0.0017 -0.0001 0.0061 -0.0066  
Z 0.0014 -0.0032 -0.0027 0.0006 0.0093 -0.0096  
AT. 52 C X 0.0007 0.0018 -0.0010 -0.0009 0.0023 0.0024  
Y 0.0008 0.0017 -0.0017 0.0001 0.0061 0.0066  
Z 0.0014 0.0032 -0.0027 -0.0006 0.0093 0.0096  
AT. 53 H X 0.0004 -0.0008 0.0002 0.0015 -0.0025 0.0026  
Y -0.0014 0.0011 0.0039 0.0044 -0.0213 0.0236  
Z -0.0010 -0.0010 0.0023 0.0046 -0.0166 0.0189  
AT. 54 H X 0.0004 0.0008 0.0002 -0.0015 -0.0025 -0.0026  
Y -0.0014 -0.0011 0.0039 -0.0044 -0.0213 -0.0236  
Z -0.0010 0.0010 0.0023 -0.0046 -0.0166 -0.0189  
AT. 55 H X -0.0012 0.0026 0.0027 0.0003 -0.0103 0.0105

Y -0.0127 0.0184 0.0155 -0.0063 -0.0398 0.0404  
Z -0.0171 0.0258 0.0219 -0.0079 -0.0587 0.0597  
AT. 56 H X -0.0012 -0.0026 0.0027 -0.0003 -0.0103 -0.0105  
Y -0.0127 -0.0184 0.0155 0.0063 -0.0398 -0.0404  
Z -0.0171 -0.0258 0.0219 0.0079 -0.0587 -0.0597  
AT. 57 C X -0.0000 0.0000 -0.0003 -0.0003 0.0018 -0.0017  
Y 0.0002 0.0003 0.0002 0.0000 -0.0004 0.0004  
Z 0.0000 0.0001 0.0013 0.0016 -0.0056 0.0058  
AT. 58 C X -0.0000 -0.0000 -0.0003 0.0003 0.0018 0.0017  
Y 0.0002 -0.0003 0.0002 -0.0000 -0.0004 -0.0004  
Z 0.0000 -0.0001 0.0013 -0.0016 -0.0056 -0.0058  
AT. 59 H X -0.0009 -0.0018 -0.0012 -0.0001 0.0016 -0.0017  
Y 0.0008 -0.0005 -0.0035 -0.0037 0.0146 -0.0153  
Z 0.0005 -0.0025 -0.0051 -0.0040 0.0180 -0.0191  
AT. 60 H X -0.0009 0.0018 -0.0012 0.0001 0.0016 0.0017  
Y 0.0008 0.0005 -0.0035 0.0037 0.0146 0.0153  
Z 0.0005 0.0025 -0.0051 0.0040 0.0180 0.0191  
AT. 61 H X 0.0006 0.0002 -0.0022 -0.0027 0.0089 -0.0092  
Y 0.0007 -0.0004 0.0013 0.0022 -0.0078 0.0072  
Z -0.0000 0.0005 -0.0010 -0.0017 0.0053 -0.0051  
AT. 62 H X 0.0006 -0.0002 -0.0022 0.0027 0.0089 0.0092  
Y 0.0007 0.0004 0.0013 -0.0022 -0.0078 -0.0072  
Z -0.0000 -0.0005 -0.0010 0.0017 0.0053 0.0051  
AT. 63 H X 0.0012 0.0018 0.0038 0.0036 -0.0142 0.0144  
Y -0.0014 0.0003 0.0022 0.0018 -0.0087 0.0094  
Z 0.0001 -0.0018 -0.0045 -0.0038 0.0177 -0.0182  
AT. 64 H X 0.0012 -0.0018 0.0038 -0.0036 -0.0142 -0.0144  
Y -0.0014 -0.0003 0.0022 -0.0018 -0.0087 -0.0094  
Z 0.0001 0.0018 -0.0045 0.0038 0.0177 0.0182  
AT. 65 C X -0.0001 -0.0007 0.0000 0.0008 -0.0005 0.0008  
Y -0.0008 0.0005 0.0004 -0.0005 -0.0007 0.0003  
Z 0.0004 -0.0011 -0.0004 0.0008 0.0002 -0.0007

AT. 66 C X -0.0001 0.0007 0.0000 -0.0008 -0.0005 -0.0008  
Y -0.0008 -0.0005 0.0004 0.0005 -0.0007 -0.0003  
Z 0.0004 0.0011 -0.0004 -0.0008 0.0002 0.0007

AT. 67 H X 0.0004 -0.0009 -0.0013 -0.0010 0.0043 -0.0061  
Y 0.0025 -0.0039 -0.0023 0.0027 0.0032 -0.0030  
Z -0.0029 0.0034 0.0033 -0.0008 -0.0074 0.0083

AT. 68 H X 0.0004 0.0009 -0.0013 0.0010 0.0043 0.0061  
Y 0.0025 0.0039 -0.0023 -0.0027 0.0032 0.0030  
Z -0.0029 -0.0034 0.0033 0.0008 -0.0074 -0.0083

AT. 69 H X 0.0022 -0.0011 -0.0011 0.0011 0.0008 -0.0011  
Y 0.0014 0.0023 -0.0001 -0.0015 0.0004 0.0002  
Z -0.0011 0.0032 0.0012 -0.0020 -0.0007 0.0028

AT. 70 H X 0.0022 0.0011 -0.0011 -0.0011 0.0008 0.0011  
Y 0.0014 -0.0023 -0.0001 0.0015 0.0004 -0.0002  
Z -0.0011 -0.0032 0.0012 0.0020 -0.0007 -0.0028

AT. 71 H X -0.0014 0.0050 0.0020 -0.0036 -0.0032 0.0023  
Y -0.0000 0.0007 0.0007 0.0005 -0.0015 0.0034  
Z 0.0001 0.0039 0.0017 -0.0014 -0.0036 0.0053

AT. 72 H X -0.0014 -0.0050 0.0020 0.0036 -0.0032 -0.0023  
Y -0.0000 -0.0007 0.0007 -0.0005 -0.0015 -0.0034  
Z 0.0001 -0.0039 0.0017 0.0014 -0.0036 -0.0053

AT. 73 C X 0.0011 -0.0046 -0.0038 0.0006 0.0123 -0.0122  
Y -0.0012 0.0035 0.0030 -0.0005 -0.0086 0.0085  
Z 0.0000 0.0005 0.0017 0.0016 -0.0069 0.0068

AT. 74 C X 0.0011 0.0046 -0.0038 -0.0006 0.0123 0.0122  
Y -0.0012 -0.0035 0.0030 0.0005 -0.0086 -0.0085  
Z 0.0000 -0.0005 0.0017 -0.0016 -0.0069 -0.0068

AT. 75 H X 0.0005 0.0126 0.0078 -0.0022 -0.0228 0.0248  
Y -0.0002 -0.0091 -0.0065 0.0011 0.0184 -0.0185  
Z 0.0010 -0.0042 -0.0029 0.0017 0.0046 -0.0035

AT. 76 H X 0.0005 -0.0126 0.0078 0.0022 -0.0228 -0.0248  
Y -0.0002 0.0091 -0.0065 -0.0011 0.0184 0.0185

Z 0.0010 0.0042 -0.0029 -0.0017 0.0046 0.0035  
AT. 77 H X -0.0052 0.0058 0.0071 -0.0009 -0.0237 0.0223  
Y 0.0040 -0.0044 -0.0047 0.0010 0.0155 -0.0159  
Z 0.0011 -0.0018 -0.0012 0.0016 0.0040 -0.0026  
AT. 78 H X -0.0052 -0.0058 0.0071 0.0009 -0.0237 -0.0223  
Y 0.0040 0.0044 -0.0047 -0.0010 0.0155 0.0159  
Z 0.0011 0.0018 -0.0012 -0.0016 0.0040 0.0026  
AT. 79 I X 0.0001 -0.0000 -0.0000 0.0000 0.0000 0.0000  
Y 0.0000 0.0000 -0.0000 -0.0000 -0.0000 -0.0000  
Z 0.0000 0.0000 -0.0000 -0.0000 -0.0000 0.0000  
AT. 80 I X 0.0001 0.0000 -0.0000 -0.0000 0.0000 -0.0000  
Y 0.0000 -0.0000 -0.0000 0.0000 -0.0000 0.0000  
Z 0.0000 -0.0000 -0.0000 0.0000 -0.0000 -0.0000  
AT. 81 I X -0.0000 -0.0000 0.0000 -0.0000 0.0000 0.0000  
Y -0.0000 -0.0000 -0.0000 0.0000 -0.0000 0.0000  
Z -0.0000 -0.0000 0.0000 0.0000 0.0000 -0.0000  
AT. 82 I X -0.0000 0.0000 0.0000 0.0000 0.0000 -0.0000  
Y -0.0000 0.0000 -0.0000 -0.0000 -0.0000 -0.0000  
Z -0.0000 0.0000 0.0000 -0.0000 0.0000 0.0000  
AT. 83 O X -0.0022 -0.0009 0.0010 0.0015 0.0007 0.0001  
Y -0.0006 -0.0001 0.0005 0.0006 0.0002 -0.0000  
Z 0.0005 0.0006 -0.0001 -0.0008 0.0000 -0.0002  
AT. 84 O X -0.0022 0.0009 0.0010 -0.0015 0.0007 -0.0001  
Y -0.0006 0.0001 0.0005 -0.0006 0.0002 0.0000  
Z 0.0005 -0.0006 -0.0001 0.0008 0.0000 0.0002  
AT. 85 O X 0.0007 -0.0004 -0.0015 -0.0015 -0.0005 0.0001  
Y -0.0003 -0.0009 -0.0010 -0.0005 -0.0003 0.0003  
Z 0.0012 0.0013 0.0006 -0.0002 0.0001 -0.0004  
AT. 86 O X 0.0007 0.0004 -0.0015 0.0015 -0.0005 -0.0001  
Y -0.0003 0.0009 -0.0010 0.0005 -0.0003 -0.0003  
Z 0.0012 -0.0013 0.0006 0.0002 0.0001 0.0004  
AT. 87 N X -0.0056 -0.0031 0.0024 0.0046 0.0008 0.0008

Y 0.0009 0.0002 -0.0005 -0.0005 -0.0004 -0.0000  
Z 0.0001 -0.0007 -0.0007 -0.0003 -0.0002 0.0003  
AT. 88 N X -0.0056 0.0031 0.0024 -0.0046 0.0008 -0.0008  
Y 0.0009 -0.0002 -0.0005 0.0005 -0.0004 0.0000  
Z 0.0001 0.0007 -0.0007 0.0003 -0.0002 -0.0003  
AT. 89 N X 0.0072 0.0069 0.0020 -0.0022 0.0003 -0.0018  
Y -0.0018 -0.0006 0.0013 0.0021 0.0007 -0.0001  
Z -0.0009 -0.0013 -0.0002 0.0008 -0.0001 0.0005  
AT. 90 N X 0.0072 -0.0069 0.0020 0.0022 0.0003 0.0018  
Y -0.0018 0.0006 0.0013 -0.0021 0.0007 0.0001  
Z -0.0009 0.0013 -0.0002 -0.0008 -0.0001 -0.0005  
AT. 91 C X 0.0070 0.0038 -0.0036 -0.0064 -0.0017 -0.0007  
Y 0.0027 0.0011 -0.0018 -0.0027 -0.0007 -0.0001  
Z -0.0085 -0.0044 0.0054 0.0095 0.0022 0.0007  
AT. 92 C X 0.0070 -0.0038 -0.0036 0.0064 -0.0017 0.0007  
Y 0.0027 -0.0011 -0.0018 0.0027 -0.0007 0.0001  
Z -0.0085 0.0044 0.0054 -0.0095 0.0022 -0.0007  
AT. 93 C X -0.0026 -0.0016 0.0015 0.0031 0.0008 0.0003  
Y -0.0000 0.0002 0.0002 -0.0000 -0.0000 -0.0002  
Z 0.0031 0.0017 -0.0019 -0.0033 -0.0010 -0.0003  
AT. 94 C X -0.0026 0.0016 0.0015 -0.0031 0.0008 -0.0003  
Y -0.0000 -0.0002 0.0002 0.0000 -0.0000 0.0002  
Z 0.0031 -0.0017 -0.0019 0.0033 -0.0010 0.0003  
AT. 95 H X 0.0134 0.0095 -0.0049 -0.0133 -0.0047 -0.0033  
Y -0.0077 -0.0060 0.0026 0.0080 0.0023 0.0020  
Z -0.0027 -0.0007 0.0014 0.0014 0.0015 0.0002  
AT. 96 H X 0.0134 -0.0095 -0.0049 0.0133 -0.0047 0.0033  
Y -0.0077 0.0060 0.0026 -0.0080 0.0023 -0.0020  
Z -0.0027 0.0007 0.0014 -0.0014 0.0015 -0.0002  
AT. 97 H X -0.0074 -0.0038 0.0045 0.0075 0.0012 0.0008  
Y -0.0078 -0.0060 0.0031 0.0088 0.0019 0.0016  
Z 0.0027 0.0008 -0.0021 -0.0025 -0.0006 0.0001

AT. 98 H X -0.0074 0.0038 0.0045 -0.0075 0.0012 -0.0008  
Y -0.0078 0.0060 0.0031 -0.0088 0.0019 -0.0016  
Z 0.0027 -0.0008 -0.0021 0.0025 -0.0006 -0.0001

AT. 99 C X -0.0049 -0.0029 0.0017 0.0039 0.0008 0.0008  
Y 0.0022 0.0021 0.0006 -0.0007 -0.0000 -0.0005  
Z -0.0073 -0.0054 0.0002 0.0038 0.0007 0.0012

AT. 100 C X -0.0049 0.0029 0.0017 -0.0039 0.0008 -0.0008  
Y 0.0022 -0.0021 0.0006 0.0007 -0.0000 0.0005  
Z -0.0073 0.0054 0.0002 -0.0038 0.0007 -0.0012

AT. 101 C X 0.0026 0.0021 -0.0001 -0.0017 -0.0002 -0.0006  
Y -0.0009 -0.0008 -0.0001 0.0004 0.0001 0.0002  
Z 0.0024 0.0016 -0.0005 -0.0016 -0.0004 -0.0003

AT. 102 C X 0.0026 -0.0021 -0.0001 0.0017 -0.0002 0.0006  
Y -0.0009 0.0008 -0.0001 -0.0004 0.0001 -0.0002  
Z 0.0024 -0.0016 -0.0005 0.0016 -0.0004 0.0003

AT. 103 H X -0.0073 -0.0066 -0.0007 0.0040 0.0002 0.0017  
Y 0.0037 0.0031 0.0001 -0.0020 -0.0002 -0.0008  
Z -0.0014 -0.0009 0.0003 0.0004 0.0003 0.0001

AT. 104 H X -0.0073 0.0066 -0.0007 -0.0040 0.0002 -0.0017  
Y 0.0037 -0.0031 0.0001 0.0020 -0.0002 0.0008  
Z -0.0014 0.0009 0.0003 -0.0004 0.0003 -0.0001

AT. 105 H X 0.0021 0.0009 -0.0010 -0.0009 -0.0002 -0.0001  
Y 0.0012 0.0017 0.0006 -0.0012 0.0002 -0.0005  
Z 0.0031 0.0022 -0.0005 -0.0020 -0.0003 -0.0005

AT. 106 H X 0.0021 -0.0009 -0.0010 0.0009 -0.0002 0.0001  
Y 0.0012 -0.0017 0.0006 0.0012 0.0002 0.0005  
Z 0.0031 -0.0022 -0.0005 0.0020 -0.0003 0.0005

AT. 107 C X -0.0004 0.0004 0.0015 0.0018 -0.0003 0.0001  
Y -0.0026 -0.0033 -0.0022 -0.0005 0.0007 0.0002  
Z -0.0038 -0.0060 -0.0066 -0.0045 -0.0007 0.0013

AT. 108 C X -0.0004 -0.0004 0.0015 -0.0018 -0.0003 -0.0001  
Y -0.0026 0.0033 -0.0022 0.0005 0.0007 -0.0002



Z -0.0038 0.0060 -0.0066 0.0045 -0.0007 -0.0013  
AT. 109 H X -0.0268 -0.0317 -0.0268 -0.0162 -0.0046 0.0101  
Y 0.0152 0.0193 0.0179 0.0113 0.0036 -0.0058  
Z 0.0358 0.0437 0.0371 0.0214 0.0059 -0.0123  
AT. 110 H X -0.0268 0.0317 -0.0268 0.0162 -0.0046 -0.0101  
Y 0.0152 -0.0193 0.0179 -0.0113 0.0036 0.0058  
Z 0.0358 -0.0437 0.0371 -0.0214 0.0059 0.0123  
AT. 111 H X 0.0374 0.0248 -0.0095 -0.0266 -0.0016 -0.0073  
Y -0.0179 -0.0131 0.0003 0.0082 -0.0017 0.0051  
Z -0.0416 -0.0300 0.0056 0.0252 0.0014 0.0082  
AT. 112 H X 0.0374 -0.0248 -0.0095 0.0266 -0.0016 0.0073  
Y -0.0179 0.0131 0.0003 -0.0082 -0.0017 -0.0051  
Z -0.0416 0.0300 0.0056 -0.0252 0.0014 -0.0082  
AT. 113 C X 0.0121 0.0126 0.0072 0.0015 0.0023 -0.0041  
Y 0.0077 0.0070 -0.0012 -0.0073 -0.0034 0.0005  
Z 0.0209 0.0187 0.0054 -0.0052 -0.0004 -0.0044  
AT. 114 C X 0.0121 -0.0126 0.0072 -0.0015 0.0023 0.0041  
Y 0.0077 -0.0070 -0.0012 0.0073 -0.0034 -0.0005  
Z 0.0209 -0.0187 0.0054 0.0052 -0.0004 0.0044  
AT. 115 C X -0.0039 -0.0035 -0.0010 0.0009 -0.0003 0.0011  
Y 0.0021 0.0040 0.0048 0.0034 0.0020 -0.0016  
Z -0.0054 -0.0068 -0.0051 -0.0020 -0.0012 0.0018  
AT. 116 C X -0.0039 0.0035 -0.0010 -0.0009 -0.0003 -0.0011  
Y 0.0021 -0.0040 0.0048 -0.0034 0.0020 0.0016  
Z -0.0054 0.0068 -0.0051 0.0020 -0.0012 -0.0018  
AT. 117 H X 0.0053 0.0006 -0.0068 -0.0087 -0.0027 -0.0001  
Y 0.0394 0.0267 -0.0066 -0.0248 -0.0081 -0.0048  
Z -0.0226 -0.0152 0.0043 0.0148 0.0038 0.0035  
AT. 118 H X 0.0053 -0.0006 -0.0068 0.0087 -0.0027 0.0001  
Y 0.0394 -0.0267 -0.0066 0.0248 -0.0081 0.0048  
Z -0.0226 0.0152 0.0043 -0.0148 0.0038 -0.0035  
AT. 119 H X -0.0303 -0.0302 -0.0097 0.0085 0.0009 0.0064

Y -0.0689 -0.0743 -0.0321 0.0111 -0.0017 0.0162  
Z 0.0513 0.0565 0.0263 -0.0061 0.0029 -0.0130  
AT. 120 H X -0.0303 0.0302 -0.0097 -0.0085 0.0009 -0.0064  
Y -0.0689 0.0743 -0.0321 -0.0111 -0.0017 -0.0162  
Z 0.0513 -0.0565 0.0263 0.0061 0.0029 0.0130  
AT. 121 C X 0.0009 -0.0006 -0.0015 -0.0010 -0.0003 0.0001  
Y -0.0009 -0.0027 -0.0054 -0.0054 -0.0024 0.0017  
Z 0.0018 0.0040 0.0050 0.0038 0.0014 -0.0013  
AT. 122 C X 0.0009 0.0006 -0.0015 0.0010 -0.0003 -0.0001  
Y -0.0009 0.0027 -0.0054 0.0054 -0.0024 -0.0017  
Z 0.0018 -0.0040 0.0050 -0.0038 0.0014 0.0013  
AT. 123 H X 0.0001 -0.0106 -0.0198 -0.0182 -0.0033 0.0009  
Y 0.0067 0.0159 0.0189 0.0134 0.0030 -0.0031  
Z -0.0054 -0.0168 -0.0236 -0.0190 -0.0047 0.0035  
AT. 124 H X 0.0001 0.0106 -0.0198 0.0182 -0.0033 -0.0009  
Y 0.0067 -0.0159 0.0189 -0.0134 0.0030 0.0031  
Z -0.0054 0.0168 -0.0236 0.0190 -0.0047 -0.0035  
AT. 125 H X -0.0312 -0.0170 0.0108 0.0226 0.0028 0.0052  
Y 0.0218 0.0052 -0.0181 -0.0235 -0.0041 -0.0023  
Z -0.0264 -0.0127 0.0132 0.0231 0.0042 0.0031  
AT. 126 H X -0.0312 0.0170 0.0108 -0.0226 0.0028 -0.0052  
Y 0.0218 -0.0052 -0.0181 0.0235 -0.0041 0.0023  
Z -0.0264 0.0127 0.0132 -0.0231 0.0042 -0.0031  
AT. 127 C X -0.0041 0.0046 0.0141 0.0140 0.0037 -0.0016  
Y -0.0086 -0.0012 0.0149 0.0197 0.0075 -0.0027  
Z 0.0081 -0.0011 -0.0123 -0.0138 -0.0035 0.0003  
AT. 128 C X -0.0041 -0.0046 0.0141 -0.0140 0.0037 0.0016  
Y -0.0086 0.0012 0.0149 -0.0197 0.0075 0.0027  
Z 0.0081 0.0011 -0.0123 0.0138 -0.0035 -0.0003  
AT. 129 C X 0.0024 0.0010 -0.0018 -0.0028 -0.0005 -0.0002  
Y 0.0027 0.0041 0.0010 -0.0024 -0.0011 0.0000  
Z 0.0018 0.0063 0.0065 0.0029 0.0007 -0.0011

AT. 130 C X 0.0024 -0.0010 -0.0018 0.0028 -0.0005 0.0002  
Y 0.0027 -0.0041 0.0010 0.0024 -0.0011 -0.0000  
Z 0.0018 -0.0063 0.0065 -0.0029 0.0007 0.0011

AT. 131 H X -0.0068 -0.0050 0.0041 0.0089 0.0029 0.0002  
Y -0.0272 -0.0146 0.0231 0.0408 0.0134 -0.0017  
Z -0.0243 -0.0113 0.0232 0.0378 0.0117 -0.0010

AT. 132 H X -0.0068 0.0050 0.0041 -0.0089 0.0029 -0.0002  
Y -0.0272 0.0146 0.0231 -0.0408 0.0134 0.0017  
Z -0.0243 0.0113 0.0232 -0.0378 0.0117 0.0010

AT. 133 H X 0.0149 -0.0017 -0.0261 -0.0300 -0.0097 0.0025  
Y 0.0161 -0.0182 -0.0546 -0.0515 -0.0165 0.0069  
Z 0.0175 -0.0273 -0.0701 -0.0628 -0.0195 0.0085

AT. 134 H X 0.0149 0.0017 -0.0261 0.0300 -0.0097 -0.0025  
Y 0.0161 0.0182 -0.0546 0.0515 -0.0165 -0.0069  
Z 0.0175 0.0273 -0.0701 0.0628 -0.0195 -0.0085

AT. 135 C X -0.0027 -0.0020 -0.0003 0.0002 -0.0001 0.0006  
Y -0.0018 -0.0014 0.0009 0.0023 0.0010 -0.0003  
Z -0.0066 -0.0053 -0.0005 0.0030 0.0004 0.0013

AT. 136 C X -0.0027 0.0020 -0.0003 -0.0002 -0.0001 -0.0006  
Y -0.0018 0.0014 0.0009 -0.0023 0.0010 0.0003  
Z -0.0066 0.0053 -0.0005 -0.0030 0.0004 -0.0013

AT. 137 H X 0.0073 0.0037 -0.0019 -0.0026 -0.0006 -0.0013  
Y 0.0173 0.0156 0.0039 -0.0055 -0.0005 -0.0036  
Z 0.0218 0.0211 0.0057 -0.0083 -0.0016 -0.0038

AT. 138 H X 0.0073 -0.0037 -0.0019 0.0026 -0.0006 0.0013  
Y 0.0173 -0.0156 0.0039 0.0055 -0.0005 0.0036  
Z 0.0218 -0.0211 0.0057 0.0083 -0.0016 0.0038

AT. 139 H X -0.0129 -0.0099 0.0007 0.0090 0.0013 0.0021  
Y 0.0014 0.0008 -0.0041 -0.0075 -0.0038 0.0021  
Z 0.0082 0.0063 -0.0003 -0.0063 -0.0003 -0.0018

AT. 140 H X -0.0129 0.0099 0.0007 -0.0090 0.0013 -0.0021  
Y 0.0014 -0.0008 -0.0041 0.0075 -0.0038 -0.0021

Z 0.0082 -0.0063 -0.0003 0.0063 -0.0003 0.0018  
AT. 141 H X 0.0162 0.0128 0.0014 -0.0043 -0.0014 -0.0024  
Y -0.0101 -0.0112 -0.0071 -0.0010 -0.0022 0.0039  
Z 0.0123 0.0132 0.0090 0.0036 0.0030 -0.0047  
AT. 142 H X 0.0162 -0.0128 0.0014 0.0043 -0.0014 0.0024  
Y -0.0101 0.0112 -0.0071 0.0010 -0.0022 -0.0039  
Z 0.0123 -0.0132 0.0090 -0.0036 0.0030 0.0047  
AT. 143 C X 0.0016 0.0005 -0.0023 -0.0029 -0.0006 -0.0000  
Y 0.0029 0.0009 -0.0040 -0.0055 -0.0021 0.0007  
Z -0.0038 -0.0004 0.0034 0.0043 0.0011 0.0001  
AT. 144 C X 0.0016 -0.0005 -0.0023 0.0029 -0.0006 0.0000  
Y 0.0029 -0.0009 -0.0040 0.0055 -0.0021 -0.0007  
Z -0.0038 0.0004 0.0034 -0.0043 0.0011 -0.0001  
AT. 145 H X -0.0053 -0.0047 0.0024 0.0064 0.0009 0.0006  
Y -0.0122 0.0009 0.0197 0.0225 0.0074 -0.0021  
Z 0.0105 -0.0023 -0.0206 -0.0226 -0.0084 0.0031  
AT. 146 H X -0.0053 0.0047 0.0024 -0.0064 0.0009 -0.0006  
Y -0.0122 -0.0009 0.0197 -0.0225 0.0074 0.0021  
Z 0.0105 0.0023 -0.0206 0.0226 -0.0084 -0.0031  
AT. 147 H X 0.0110 0.0017 -0.0119 -0.0167 -0.0051 0.0011  
Y -0.0064 -0.0033 0.0086 0.0139 0.0061 -0.0026  
Z 0.0062 -0.0006 -0.0055 -0.0074 -0.0016 -0.0001  
AT. 148 H X 0.0110 -0.0017 -0.0119 0.0167 -0.0051 -0.0011  
Y -0.0064 0.0033 0.0086 -0.0139 0.0061 0.0026  
Z 0.0062 0.0006 -0.0055 0.0074 -0.0016 0.0001  
AT. 149 H X -0.0106 -0.0027 0.0123 0.0152 0.0039 0.0003  
Y 0.0021 -0.0035 -0.0061 -0.0048 -0.0015 0.0007  
Z 0.0022 -0.0063 -0.0097 -0.0063 -0.0010 0.0004  
AT. 150 H X -0.0106 0.0027 0.0123 -0.0152 0.0039 -0.0003  
Y 0.0021 0.0035 -0.0061 0.0048 -0.0015 -0.0007  
Z 0.0022 0.0063 -0.0097 0.0063 -0.0010 -0.0004  
AT. 151 C X -0.0079 -0.0169 -0.0204 -0.0141 -0.0054 0.0052

Y -0.0017 -0.0051 -0.0076 -0.0060 -0.0021 0.0016  
Z -0.0072 -0.0046 0.0012 0.0043 0.0008 0.0011  
AT. 152 C X -0.0079 0.0169 -0.0204 0.0141 -0.0054 -0.0052  
Y -0.0017 0.0051 -0.0076 0.0060 -0.0021 -0.0016  
Z -0.0072 0.0046 0.0012 -0.0043 0.0008 -0.0011  
AT. 153 H X 0.0382 0.0543 0.0328 0.0005 -0.0020 -0.0076  
Y 0.0134 0.0174 0.0095 -0.0006 -0.0007 -0.0027  
Z -0.0026 0.0015 0.0063 0.0067 0.0016 -0.0005  
AT. 154 H X 0.0382 -0.0543 0.0328 -0.0005 -0.0020 0.0076  
Y 0.0134 -0.0174 0.0095 0.0006 -0.0007 0.0027  
Z -0.0026 -0.0015 0.0063 -0.0067 0.0016 0.0005  
AT. 155 H X -0.0037 0.0209 0.0574 0.0607 0.0252 -0.0150  
Y -0.0020 0.0062 0.0189 0.0197 0.0080 -0.0043  
Z -0.0051 -0.0027 0.0018 0.0046 0.0013 0.0000  
AT. 156 H X -0.0037 -0.0209 0.0574 -0.0607 0.0252 0.0150  
Y -0.0020 -0.0062 0.0189 -0.0197 0.0080 0.0043  
Z -0.0051 0.0027 0.0018 -0.0046 0.0013 -0.0000  
AT. 157 O X -0.0001 0.0000 -0.0000 -0.0001 0.0001 -0.0001  
Y -0.0001 0.0001 0.0000 -0.0001 0.0001 -0.0002  
Z 0.0000 0.0000 0.0001 0.0000 -0.0000 0.0000  
AT. 158 O X -0.0001 -0.0000 -0.0000 0.0001 0.0001 0.0001  
Y -0.0001 -0.0001 0.0000 0.0001 0.0001 0.0002  
Z 0.0000 -0.0000 0.0001 -0.0000 -0.0000 -0.0000  
AT. 159 O X -0.0001 0.0000 0.0000 -0.0000 0.0001 -0.0001  
Y 0.0000 -0.0001 0.0000 0.0001 -0.0001 0.0001  
Z 0.0000 -0.0001 -0.0000 0.0001 -0.0000 0.0001  
AT. 160 O X -0.0001 -0.0000 0.0000 0.0000 0.0001 0.0001  
Y 0.0000 0.0001 0.0000 -0.0001 -0.0001 -0.0001  
Z 0.0000 0.0001 -0.0000 -0.0001 -0.0000 -0.0001  
AT. 161 H X 0.0016 -0.0022 -0.0006 0.0022 -0.0018 0.0028  
Y 0.0005 -0.0001 0.0002 0.0006 -0.0006 0.0007  
Z -0.0006 -0.0001 -0.0006 -0.0011 0.0015 -0.0014

AT.162 H X 0.0016 0.0022 -0.0006 -0.0022 -0.0018 -0.0028  
Y 0.0005 0.0001 0.0002 -0.0006 -0.0006 -0.0007  
Z -0.0006 0.0001 -0.0006 0.0011 0.0015 0.0014

AT.163 H X 0.0009 0.0004 0.0002 -0.0007 -0.0002 0.0002  
Y 0.0009 0.0002 -0.0007 0.0012 -0.0009 -0.0004  
Z -0.0004 -0.0002 -0.0002 0.0005 -0.0002 -0.0003

AT.164 H X 0.0009 -0.0004 0.0002 0.0007 -0.0002 -0.0002  
Y 0.0009 -0.0002 -0.0007 -0.0012 -0.0009 0.0004  
Z -0.0004 0.0002 -0.0002 -0.0005 -0.0002 0.0003

AT.165 O X -0.0004 -0.0003 0.0000 0.0002 0.0001 0.0001  
Y -0.0002 -0.0001 0.0000 0.0002 -0.0000 -0.0001  
Z 0.0003 0.0001 -0.0001 -0.0002 0.0001 0.0001

AT.166 O X -0.0004 0.0003 0.0000 -0.0002 0.0001 -0.0001  
Y -0.0002 0.0001 0.0000 -0.0002 -0.0000 0.0001  
Z 0.0003 -0.0001 -0.0001 0.0002 0.0001 -0.0001

AT.167 H X 0.0025 0.0015 -0.0001 -0.0014 -0.0003 -0.0000  
Y -0.0003 0.0003 -0.0005 -0.0004 -0.0002 -0.0004  
Z -0.0083 -0.0055 0.0011 0.0062 0.0015 0.0008

AT.168 H X 0.0025 -0.0015 -0.0001 0.0014 -0.0003 0.0000  
Y -0.0003 -0.0003 -0.0005 0.0004 -0.0002 0.0004  
Z -0.0083 0.0055 0.0011 -0.0062 0.0015 -0.0008

AT.169 O X 0.0002 0.0001 -0.0000 -0.0001 -0.0001 -0.0001  
Y 0.0003 0.0001 -0.0000 -0.0002 0.0001 0.0002  
Z 0.0004 0.0001 0.0000 -0.0002 0.0000 0.0001

AT.170 O X 0.0002 -0.0001 -0.0000 0.0001 -0.0001 0.0001  
Y 0.0003 -0.0001 -0.0000 0.0002 0.0001 -0.0002  
Z 0.0004 -0.0001 0.0000 0.0002 0.0000 -0.0001

AT.171 H X -0.0009 0.0015 -0.0001 -0.0015 0.0005 -0.0000  
Y -0.0016 0.0008 0.0000 -0.0001 -0.0011 -0.0015  
Z -0.0025 0.0009 -0.0003 0.0014 -0.0029 -0.0030

AT.172 H X -0.0009 -0.0015 -0.0001 0.0015 0.0005 0.0000  
Y -0.0016 -0.0008 0.0000 0.0001 -0.0011 0.0015

Z -0.0025 -0.0009 -0.0003 -0.0014 -0.0029 0.0030

FREQ(CM\*\*-1) 1381.04 1381.64 1383.54 1384.57 1399.28 1399.54

AT. 1 I X 0.0000 0.0000 0.0000 0.0000 0.0000 0.0000

Y -0.0000 -0.0000 0.0000 0.0000 0.0000 0.0000

Z -0.0000 -0.0000 0.0000 0.0000 0.0000 0.0000

AT. 2 I X 0.0000 -0.0000 -0.0000 0.0000 -0.0000 0.0000

Y -0.0000 0.0000 -0.0000 0.0000 -0.0000 0.0000

Z -0.0000 0.0000 -0.0000 0.0000 -0.0000 0.0000

AT. 3 I X 0.0000 0.0000 -0.0000 -0.0000 0.0000 0.0000

Y -0.0000 -0.0000 -0.0000 -0.0000 0.0000 0.0000

Z -0.0000 -0.0000 0.0000 0.0000 0.0000 0.0000

AT. 4 I X 0.0000 -0.0000 0.0000 -0.0000 -0.0000 0.0000

Y -0.0000 0.0000 0.0000 -0.0000 -0.0000 0.0000

Z -0.0000 0.0000 -0.0000 0.0000 -0.0000 0.0000

AT. 5 O X 0.0000 -0.0002 0.0006 0.0005 0.0010 0.0009

Y 0.0000 0.0002 -0.0004 -0.0003 -0.0007 -0.0006

Z 0.0001 0.0002 -0.0005 -0.0005 0.0001 0.0002

AT. 6 O X 0.0000 0.0002 -0.0006 0.0005 -0.0010 0.0009

Y 0.0000 -0.0002 0.0004 -0.0003 0.0007 -0.0006

Z 0.0001 -0.0002 0.0005 -0.0005 -0.0001 0.0002

AT. 7 O X 0.0000 0.0000 -0.0012 -0.0012 0.0020 0.0021

Y -0.0000 0.0001 0.0013 0.0012 -0.0010 -0.0010

Z -0.0000 -0.0002 -0.0009 -0.0009 -0.0009 -0.0010

AT. 8 O X 0.0000 -0.0000 0.0012 -0.0012 -0.0020 0.0021

Y -0.0000 -0.0001 -0.0013 0.0012 0.0010 -0.0010

Z -0.0000 0.0002 0.0009 -0.0009 0.0009 -0.0010

AT. 9 N X 0.0002 -0.0003 -0.0014 -0.0017 0.0004 0.0004

Y -0.0001 -0.0001 0.0008 0.0008 -0.0051 -0.0052

Z -0.0001 0.0000 0.0008 0.0010 -0.0023 -0.0024

AT. 10 N X 0.0002 0.0003 0.0014 -0.0017 -0.0004 0.0004

Y -0.0001 0.0001 -0.0008 0.0008 0.0051 -0.0052  
Z -0.0001 -0.0000 -0.0008 0.0010 0.0023 -0.0024  
AT. 11 N X 0.0000 0.0006 0.0047 0.0047 0.0030 0.0030  
Y -0.0003 -0.0005 -0.0045 -0.0045 -0.0050 -0.0050  
Z 0.0001 0.0001 0.0006 0.0006 -0.0011 -0.0011  
AT. 12 N X 0.0000 -0.0006 -0.0047 0.0047 -0.0030 0.0030  
Y -0.0003 0.0005 0.0045 -0.0045 0.0050 -0.0050  
Z 0.0001 -0.0001 -0.0006 0.0006 0.0011 -0.0011  
AT. 13 C X -0.0002 0.0003 -0.0009 -0.0006 -0.0040 -0.0040  
Y 0.0001 -0.0004 0.0005 0.0003 0.0034 0.0033  
Z -0.0002 -0.0002 -0.0009 -0.0006 -0.0028 -0.0030  
AT. 14 C X -0.0002 -0.0003 0.0009 -0.0006 0.0040 -0.0040  
Y 0.0001 0.0004 -0.0005 0.0003 -0.0034 0.0033  
Z -0.0002 0.0002 0.0009 -0.0006 0.0028 -0.0030  
AT. 15 C X 0.0001 -0.0000 0.0007 0.0004 0.0012 0.0013  
Y -0.0001 -0.0000 -0.0008 -0.0006 -0.0002 -0.0004  
Z 0.0001 -0.0000 0.0008 0.0006 0.0009 0.0010  
AT. 16 C X 0.0001 0.0000 -0.0007 0.0004 -0.0012 0.0013  
Y -0.0001 0.0000 0.0008 -0.0006 0.0002 -0.0004  
Z 0.0001 0.0000 -0.0008 0.0006 -0.0009 0.0010  
AT. 17 H X -0.0000 0.0000 -0.0024 -0.0018 -0.0028 -0.0028  
Y -0.0000 0.0003 0.0019 0.0015 -0.0046 -0.0035  
Z -0.0000 -0.0004 -0.0036 -0.0028 0.0048 0.0031  
AT. 18 H X -0.0000 -0.0000 0.0024 -0.0018 0.0028 -0.0028  
Y -0.0000 -0.0003 -0.0019 0.0015 0.0046 -0.0035  
Z -0.0000 0.0004 0.0036 -0.0028 -0.0048 0.0031  
AT. 19 H X 0.0001 0.0001 -0.0011 -0.0001 0.0026 0.0025  
Y -0.0001 0.0003 0.0026 0.0023 -0.0083 -0.0070  
Z 0.0000 0.0002 0.0014 0.0015 -0.0015 -0.0009  
AT. 20 H X 0.0001 -0.0001 0.0011 -0.0001 -0.0026 0.0025  
Y -0.0001 -0.0003 -0.0026 0.0023 0.0083 -0.0070  
Z 0.0000 -0.0002 -0.0014 0.0015 0.0015 -0.0009



AT. 21 C X -0.0000 -0.0005 0.0003 0.0001 -0.0077 -0.0080  
Y 0.0001 0.0000 0.0003 0.0002 0.0008 0.0008  
Z -0.0000 0.0007 0.0002 0.0005 0.0092 0.0095

AT. 22 C X -0.0000 0.0005 -0.0003 0.0001 0.0077 -0.0080  
Y 0.0001 -0.0000 -0.0003 0.0002 -0.0008 0.0008  
Z -0.0000 -0.0007 -0.0002 0.0005 -0.0092 0.0095

AT. 23 C X -0.0001 0.0001 -0.0002 -0.0001 0.0029 0.0030  
Y 0.0000 0.0000 0.0003 0.0003 0.0000 0.0001  
Z 0.0001 -0.0001 0.0013 0.0011 -0.0027 -0.0030

AT. 24 C X -0.0001 -0.0001 0.0002 -0.0001 -0.0029 0.0030  
Y 0.0000 -0.0000 -0.0003 0.0003 -0.0000 0.0001  
Z 0.0001 0.0001 -0.0013 0.0011 0.0027 -0.0030

AT. 25 H X 0.0005 -0.0001 0.0007 0.0005 -0.0052 -0.0057  
Y 0.0001 0.0001 0.0010 0.0009 -0.0014 -0.0016  
Z -0.0002 -0.0006 -0.0071 -0.0069 -0.0024 -0.0009

AT. 26 H X 0.0005 0.0001 -0.0007 0.0005 0.0052 -0.0057  
Y 0.0001 -0.0001 -0.0010 0.0009 0.0014 -0.0016  
Z -0.0002 0.0006 0.0071 -0.0069 0.0024 -0.0009

AT. 27 H X 0.0009 0.0003 0.0004 0.0003 0.0023 0.0016  
Y -0.0002 -0.0008 -0.0065 -0.0064 -0.0035 -0.0034  
Z -0.0003 -0.0005 -0.0022 -0.0022 -0.0046 -0.0046

AT. 28 H X 0.0009 -0.0003 -0.0004 0.0003 -0.0023 0.0016  
Y -0.0002 0.0008 0.0065 -0.0064 0.0035 -0.0034  
Z -0.0003 0.0005 0.0022 -0.0022 0.0046 -0.0046

AT. 29 C X -0.0006 -0.0004 -0.0046 -0.0048 0.0107 0.0110  
Y -0.0001 -0.0001 -0.0041 -0.0042 0.0042 0.0044  
Z -0.0009 -0.0005 -0.0015 -0.0018 0.0102 0.0105

AT. 30 C X -0.0006 0.0004 0.0046 -0.0048 -0.0107 0.0110  
Y -0.0001 0.0001 0.0041 -0.0042 -0.0042 0.0044  
Z -0.0009 0.0005 0.0015 -0.0018 -0.0102 0.0105

AT. 31 H X 0.0069 0.0021 -0.0201 -0.0199 -0.0450 -0.0457  
Y 0.0003 -0.0002 -0.0047 -0.0045 -0.0094 -0.0092

Z 0.0045 0.0010 -0.0133 -0.0129 -0.0449 -0.0454  
AT. 32 H X 0.0069 -0.0021 0.0201 -0.0199 0.0450 -0.0457  
Y 0.0003 0.0002 0.0047 -0.0045 0.0094 -0.0092  
Z 0.0045 -0.0010 0.0133 -0.0129 0.0449 -0.0454  
AT. 33 H X -0.0019 0.0006 0.0262 0.0280 -0.0512 -0.0525  
Y -0.0012 -0.0009 0.0064 0.0063 -0.0090 -0.0089  
Z -0.0012 0.0006 0.0147 0.0159 -0.0271 -0.0279  
AT. 34 H X -0.0019 -0.0006 -0.0262 0.0280 0.0512 -0.0525  
Y -0.0012 0.0009 -0.0064 0.0063 0.0090 -0.0089  
Z -0.0012 -0.0006 -0.0147 0.0159 0.0271 -0.0279  
AT. 35 C X -0.0010 -0.0002 0.0129 0.0132 -0.0013 -0.0018  
Y 0.0010 0.0013 0.0161 0.0165 -0.0034 -0.0041  
Z 0.0021 0.0007 0.0001 0.0001 -0.0037 -0.0040  
AT. 36 C X -0.0010 0.0002 -0.0129 0.0132 0.0013 -0.0018  
Y 0.0010 -0.0013 -0.0161 0.0165 0.0034 -0.0041  
Z 0.0021 -0.0007 -0.0001 0.0001 0.0037 -0.0040  
AT. 37 C X 0.0002 -0.0002 -0.0049 -0.0049 0.0005 0.0005  
Y 0.0003 0.0002 -0.0094 -0.0090 0.0128 0.0131  
Z -0.0008 -0.0005 0.0045 0.0041 -0.0068 -0.0069  
AT. 38 C X 0.0002 0.0002 0.0049 -0.0049 -0.0005 0.0005  
Y 0.0003 -0.0002 0.0094 -0.0090 -0.0128 0.0131  
Z -0.0008 0.0005 -0.0045 0.0041 0.0068 -0.0069  
AT. 39 H X 0.0001 -0.0001 0.0003 0.0005 -0.0080 -0.0078  
Y 0.0037 0.0010 0.0491 0.0467 -0.0662 -0.0680  
Z -0.0022 -0.0006 -0.0178 -0.0169 0.0231 0.0241  
AT. 40 H X 0.0001 0.0001 -0.0003 0.0005 0.0080 -0.0078  
Y 0.0037 -0.0010 -0.0491 0.0467 0.0662 -0.0680  
Z -0.0022 0.0006 0.0178 -0.0169 -0.0231 0.0241  
AT. 41 H X 0.0004 -0.0003 0.0024 0.0024 -0.0109 -0.0108  
Y -0.0058 -0.0031 0.0072 0.0044 -0.0259 -0.0253  
Z 0.0038 0.0023 -0.0144 -0.0122 0.0332 0.0328  
AT. 42 H X 0.0004 0.0003 -0.0024 0.0024 0.0109 -0.0108

Y -0.0058 0.0031 -0.0072 0.0044 0.0259 -0.0253  
Z 0.0038 -0.0023 0.0144 -0.0122 -0.0332 0.0328  
AT. 43 C X 0.0005 0.0008 0.0059 0.0062 0.0077 0.0077  
Y 0.0001 0.0006 0.0095 0.0094 0.0076 0.0076  
Z -0.0001 -0.0005 -0.0067 -0.0065 -0.0101 -0.0101  
AT. 44 C X 0.0005 -0.0008 -0.0059 0.0062 -0.0077 0.0077  
Y 0.0001 -0.0006 -0.0095 0.0094 -0.0076 0.0076  
Z -0.0001 0.0005 0.0067 -0.0065 0.0101 -0.0101  
AT. 45 H X 0.0011 0.0017 -0.0057 -0.0042 -0.0307 -0.0303  
Y 0.0008 0.0007 -0.0032 -0.0023 -0.0173 -0.0169  
Z -0.0011 -0.0013 0.0126 0.0110 0.0397 0.0392  
AT. 46 H X 0.0011 -0.0017 0.0057 -0.0042 0.0307 -0.0303  
Y 0.0008 -0.0007 0.0032 -0.0023 0.0173 -0.0169  
Z -0.0011 0.0013 -0.0126 0.0110 -0.0397 0.0392  
AT. 47 H X -0.0034 -0.0069 -0.0330 -0.0348 -0.0477 -0.0479  
Y -0.0021 -0.0033 -0.0111 -0.0124 -0.0167 -0.0166  
Z 0.0030 0.0062 0.0272 0.0288 0.0432 0.0436  
AT. 48 H X -0.0034 0.0069 0.0330 -0.0348 0.0477 -0.0479  
Y -0.0021 0.0033 0.0111 -0.0124 0.0167 -0.0166  
Z 0.0030 -0.0062 -0.0272 0.0288 -0.0432 0.0436  
AT. 49 C X -0.0014 -0.0021 -0.0085 -0.0097 -0.0035 -0.0035  
Y 0.0005 -0.0001 -0.0219 -0.0214 -0.0009 -0.0012  
Z -0.0004 -0.0010 0.0009 0.0002 0.0004 0.0001  
AT. 50 C X -0.0014 0.0021 0.0085 -0.0097 0.0035 -0.0035  
Y 0.0005 0.0001 0.0219 -0.0214 0.0009 -0.0012  
Z -0.0004 0.0010 -0.0009 0.0002 -0.0004 0.0001  
AT. 51 C X 0.0004 0.0007 0.0035 0.0039 0.0028 0.0028  
Y 0.0006 0.0009 0.0077 0.0079 0.0074 0.0077  
Z 0.0011 0.0014 0.0039 0.0044 0.0089 0.0092  
AT. 52 C X 0.0004 -0.0007 -0.0035 0.0039 -0.0028 0.0028  
Y 0.0006 -0.0009 -0.0077 0.0079 -0.0074 0.0077  
Z 0.0011 -0.0014 -0.0039 0.0044 -0.0089 0.0092

AT. 53 H X 0.0001 0.0001 -0.0065 -0.0065 -0.0091 -0.0089  
Y -0.0013 -0.0020 -0.0360 -0.0356 -0.0319 -0.0326  
Z -0.0008 -0.0013 -0.0302 -0.0289 -0.0191 -0.0202

AT. 54 H X 0.0001 -0.0001 0.0065 -0.0065 0.0091 -0.0089  
Y -0.0013 0.0020 0.0360 -0.0356 0.0319 -0.0326  
Z -0.0008 0.0013 0.0302 -0.0289 0.0191 -0.0202

AT. 55 H X -0.0010 -0.0011 -0.0025 -0.0031 -0.0168 -0.0167  
Y -0.0044 -0.0053 0.0158 0.0124 -0.0217 -0.0228  
Z -0.0063 -0.0078 0.0115 0.0065 -0.0416 -0.0428

AT. 56 H X -0.0010 0.0011 0.0025 -0.0031 0.0168 -0.0167  
Y -0.0044 0.0053 -0.0158 0.0124 0.0217 -0.0228  
Z -0.0063 0.0078 -0.0115 0.0065 0.0416 -0.0428

AT. 57 C X 0.0004 0.0002 -0.0029 -0.0031 0.0002 0.0003  
Y -0.0004 -0.0005 -0.0047 -0.0048 -0.0006 -0.0004  
Z -0.0004 0.0001 -0.0004 -0.0004 0.0015 0.0015

AT. 58 C X 0.0004 -0.0002 0.0029 -0.0031 -0.0002 0.0003  
Y -0.0004 0.0005 0.0047 -0.0048 0.0006 -0.0004  
Z -0.0004 -0.0001 0.0004 -0.0004 -0.0015 0.0015

AT. 59 H X -0.0008 -0.0008 0.0034 0.0032 -0.0011 -0.0010  
Y 0.0018 0.0007 0.0016 0.0022 -0.0041 -0.0043  
Z 0.0020 0.0012 0.0115 0.0126 -0.0051 -0.0055

AT. 60 H X -0.0008 0.0008 -0.0034 0.0032 0.0011 -0.0010  
Y 0.0018 -0.0007 -0.0016 0.0022 0.0041 -0.0043  
Z 0.0020 -0.0012 -0.0115 0.0126 0.0051 -0.0055

AT. 61 H X 0.0007 0.0001 0.0138 0.0150 -0.0049 -0.0054  
Y 0.0003 0.0015 0.0185 0.0206 -0.0004 -0.0010  
Z -0.0003 -0.0009 0.0012 0.0012 -0.0029 -0.0028

AT. 62 H X 0.0007 -0.0001 -0.0138 0.0150 0.0049 -0.0054  
Y 0.0003 -0.0015 -0.0185 0.0206 0.0004 -0.0010  
Z -0.0003 0.0009 -0.0012 0.0012 0.0029 -0.0028

AT. 63 H X -0.0018 -0.0010 0.0002 0.0013 -0.0012 -0.0009  
Y 0.0002 0.0013 0.0087 0.0077 0.0057 0.0053

Z 0.0013 -0.0002 -0.0134 -0.0137 -0.0029 -0.0026  
AT. 64 H X -0.0018 0.0010 -0.0002 0.0013 0.0012 -0.0009  
Y 0.0002 -0.0013 -0.0087 0.0077 -0.0057 0.0053  
Z 0.0013 0.0002 0.0134 -0.0137 0.0029 -0.0026  
AT. 65 C X 0.0002 0.0003 0.0030 0.0030 0.0002 0.0001  
Y -0.0001 0.0001 0.0058 0.0055 -0.0006 -0.0005  
Z 0.0000 0.0003 -0.0003 -0.0003 -0.0000 0.0002  
AT. 66 C X 0.0002 -0.0003 -0.0030 0.0030 -0.0002 0.0001  
Y -0.0001 -0.0001 -0.0058 0.0055 0.0006 -0.0005  
Z 0.0000 -0.0003 0.0003 -0.0003 0.0000 0.0002  
AT. 67 H X -0.0001 0.0006 0.0008 -0.0010 0.0018 0.0021  
Y 0.0009 0.0008 -0.0132 -0.0124 -0.0003 0.0007  
Z -0.0007 -0.0006 0.0171 0.0177 -0.0017 -0.0025  
AT. 68 H X -0.0001 -0.0006 -0.0008 -0.0010 -0.0018 0.0021  
Y 0.0009 -0.0008 0.0132 -0.0124 0.0003 0.0007  
Z -0.0007 0.0006 -0.0171 0.0177 0.0017 -0.0025  
AT. 69 H X -0.0001 -0.0004 -0.0199 -0.0178 -0.0002 0.0004  
Y -0.0004 -0.0017 -0.0239 -0.0219 -0.0020 -0.0013  
Z 0.0000 -0.0011 0.0008 -0.0001 -0.0014 -0.0018  
AT. 70 H X -0.0001 0.0004 0.0199 -0.0178 0.0002 0.0004  
Y -0.0004 0.0017 0.0239 -0.0219 0.0020 -0.0013  
Z 0.0000 0.0011 -0.0008 -0.0001 0.0014 -0.0018  
AT. 71 H X -0.0011 -0.0017 -0.0040 -0.0029 -0.0022 -0.0018  
Y -0.0001 -0.0005 0.0007 0.0001 0.0008 -0.0006  
Z -0.0010 -0.0020 -0.0106 -0.0103 -0.0000 -0.0015  
AT. 72 H X -0.0011 0.0017 0.0040 -0.0029 0.0022 -0.0018  
Y -0.0001 0.0005 -0.0007 0.0001 -0.0008 -0.0006  
Z -0.0010 0.0020 0.0106 -0.0103 0.0000 -0.0015  
AT. 73 C X 0.0020 0.0018 -0.0060 -0.0051 0.0024 0.0026  
Y -0.0014 -0.0011 0.0047 0.0038 0.0012 0.0015  
Z -0.0008 -0.0003 0.0009 0.0011 0.0007 0.0009  
AT. 74 C X 0.0020 -0.0018 0.0060 -0.0051 -0.0024 0.0026

Y -0.0014 0.0011 -0.0047 0.0038 -0.0012 0.0015  
Z -0.0008 0.0003 -0.0009 0.0011 -0.0007 0.0009  
AT. 75 H X -0.0053 -0.0070 -0.0448 -0.0490 -0.0029 -0.0022  
Y 0.0040 0.0048 0.0297 0.0325 0.0003 -0.0008  
Z 0.0013 0.0014 0.0069 0.0082 -0.0043 -0.0058  
AT. 76 H X -0.0053 0.0070 0.0448 -0.0490 0.0029 -0.0022  
Y 0.0040 -0.0048 -0.0297 0.0325 -0.0003 -0.0008  
Z 0.0013 -0.0014 -0.0069 0.0082 0.0043 -0.0058  
AT. 77 H X -0.0031 -0.0005 0.0762 0.0759 -0.0063 -0.0074  
Y 0.0020 0.0005 -0.0527 -0.0513 0.0033 0.0039  
Z 0.0008 0.0003 -0.0216 -0.0223 0.0067 0.0077  
AT. 78 H X -0.0031 0.0005 -0.0762 0.0759 0.0063 -0.0074  
Y 0.0020 -0.0005 0.0527 -0.0513 -0.0033 0.0039  
Z 0.0008 -0.0003 0.0216 -0.0223 -0.0067 0.0077  
AT. 79 I X -0.0000 0.0000 -0.0000 -0.0000 0.0000 0.0000  
Y -0.0000 -0.0000 0.0000 -0.0000 0.0000 -0.0000  
Z 0.0000 -0.0000 0.0000 0.0000 0.0000 0.0000  
AT. 80 I X -0.0000 -0.0000 0.0000 -0.0000 -0.0000 0.0000  
Y -0.0000 0.0000 -0.0000 -0.0000 -0.0000 -0.0000  
Z 0.0000 0.0000 -0.0000 0.0000 -0.0000 0.0000  
AT. 81 I X 0.0000 -0.0000 0.0000 0.0000 0.0000 -0.0000  
Y -0.0000 0.0000 0.0000 0.0000 -0.0000 -0.0000  
Z 0.0000 0.0000 0.0000 0.0000 0.0000 0.0000  
AT. 82 I X 0.0000 0.0000 -0.0000 0.0000 -0.0000 -0.0000  
Y -0.0000 -0.0000 -0.0000 0.0000 0.0000 -0.0000  
Z 0.0000 -0.0000 -0.0000 0.0000 -0.0000 0.0000  
AT. 83 O X -0.0003 -0.0003 0.0000 0.0001 -0.0004 -0.0003  
Y 0.0002 0.0001 -0.0000 0.0000 -0.0001 -0.0001  
Z -0.0007 -0.0010 0.0001 -0.0000 0.0002 0.0001  
AT. 84 O X -0.0003 0.0003 -0.0000 0.0001 0.0004 -0.0003  
Y 0.0002 -0.0001 0.0000 0.0000 0.0001 -0.0001  
Z -0.0007 0.0010 -0.0001 -0.0000 -0.0002 0.0001

AT. 85 O X 0.0006 0.0006 0.0000 0.0000 -0.0005 -0.0004  
Y 0.0008 0.0010 -0.0000 0.0000 -0.0002 -0.0001  
Z -0.0009 -0.0011 0.0001 0.0000 -0.0001 -0.0001

AT. 86 O X 0.0006 -0.0006 -0.0000 0.0000 0.0005 -0.0004  
Y 0.0008 -0.0010 0.0000 0.0000 0.0002 -0.0001  
Z -0.0009 0.0011 -0.0001 0.0000 0.0001 -0.0001

AT. 87 N X 0.0053 0.0060 -0.0003 0.0001 -0.0012 -0.0008  
Y 0.0003 0.0003 0.0001 0.0001 -0.0013 -0.0009  
Z 0.0006 0.0010 -0.0001 0.0000 -0.0008 -0.0005

AT. 88 N X 0.0053 -0.0060 0.0003 0.0001 0.0012 -0.0008  
Y 0.0003 -0.0003 -0.0001 0.0001 0.0013 -0.0009  
Z 0.0006 -0.0010 0.0001 0.0000 0.0008 -0.0005

AT. 89 N X -0.0052 -0.0060 0.0005 0.0001 -0.0003 -0.0005  
Y -0.0020 -0.0020 0.0000 -0.0000 -0.0008 -0.0006  
Z 0.0012 0.0018 -0.0002 -0.0000 -0.0006 -0.0002

AT. 90 N X -0.0052 0.0060 -0.0005 0.0001 0.0003 -0.0005  
Y -0.0020 0.0020 -0.0000 -0.0000 0.0008 -0.0006  
Z 0.0012 -0.0018 0.0002 -0.0000 0.0006 -0.0002

AT. 91 C X -0.0014 -0.0023 0.0001 -0.0003 0.0019 0.0013  
Y -0.0010 -0.0011 0.0000 -0.0001 0.0005 0.0005  
Z 0.0018 0.0032 -0.0002 0.0003 -0.0017 -0.0011

AT. 92 C X -0.0014 0.0023 -0.0001 -0.0003 -0.0019 0.0013  
Y -0.0010 0.0011 -0.0000 -0.0001 -0.0005 0.0005  
Z 0.0018 -0.0032 0.0002 0.0003 0.0017 -0.0011

AT. 93 C X 0.0004 0.0012 -0.0001 0.0001 -0.0007 -0.0003  
Y -0.0006 -0.0010 0.0001 0.0001 0.0003 -0.0000  
Z -0.0000 -0.0008 0.0001 -0.0001 0.0007 0.0003

AT. 94 C X 0.0004 -0.0012 0.0001 0.0001 0.0007 -0.0003  
Y -0.0006 0.0010 -0.0001 0.0001 -0.0003 -0.0000  
Z -0.0000 0.0008 -0.0001 -0.0001 -0.0007 0.0003

AT. 95 H X -0.0026 -0.0095 0.0010 0.0004 0.0056 0.0003  
Y 0.0035 0.0072 -0.0005 -0.0001 -0.0038 -0.0006

Z -0.0032 -0.0020 -0.0002 -0.0002 0.0004 0.0007  
AT. 96 H X -0.0026 0.0095 -0.0010 0.0004 -0.0056 0.0003  
Y 0.0035 -0.0072 0.0005 -0.0001 0.0038 -0.0006  
Z -0.0032 0.0020 0.0002 -0.0002 -0.0004 0.0007  
AT. 97 H X 0.0027 0.0033 -0.0000 0.0001 -0.0020 -0.0013  
Y 0.0053 0.0083 -0.0004 0.0001 -0.0037 -0.0012  
Z 0.0007 0.0009 -0.0001 -0.0000 0.0000 0.0004  
AT. 98 H X 0.0027 -0.0033 0.0000 0.0001 0.0020 -0.0013  
Y 0.0053 -0.0083 0.0004 0.0001 0.0037 -0.0012  
Z 0.0007 -0.0009 0.0001 -0.0000 -0.0000 0.0004  
AT. 99 C X 0.0015 0.0019 -0.0004 -0.0002 0.0017 0.0015  
Y -0.0003 -0.0005 0.0001 0.0000 -0.0004 -0.0003  
Z 0.0018 0.0023 -0.0006 -0.0003 0.0019 0.0016  
AT. 100 C X 0.0015 -0.0019 0.0004 -0.0002 -0.0017 0.0015  
Y -0.0003 0.0005 -0.0001 0.0000 0.0004 -0.0003  
Z 0.0018 -0.0023 0.0006 -0.0003 -0.0019 0.0016  
AT. 101 C X -0.0002 -0.0008 0.0001 -0.0000 -0.0006 -0.0006  
Y 0.0003 0.0004 -0.0001 -0.0000 0.0002 0.0001  
Z 0.0003 0.0000 0.0001 0.0001 -0.0005 -0.0005  
AT. 102 C X -0.0002 0.0008 -0.0001 -0.0000 0.0006 -0.0006  
Y 0.0003 -0.0004 0.0001 -0.0000 -0.0002 0.0001  
Z 0.0003 -0.0000 -0.0001 0.0001 0.0005 -0.0005  
AT. 103 H X 0.0002 0.0015 -0.0000 0.0003 0.0005 0.0003  
Y -0.0000 -0.0007 -0.0000 -0.0002 -0.0004 -0.0003  
Z -0.0045 -0.0038 0.0004 0.0000 -0.0002 0.0001  
AT. 104 H X 0.0002 -0.0015 0.0000 0.0003 -0.0005 0.0003  
Y -0.0000 0.0007 0.0000 -0.0002 0.0004 -0.0003  
Z -0.0045 0.0038 -0.0004 0.0000 0.0002 0.0001  
AT. 105 H X -0.0032 -0.0009 0.0008 0.0008 -0.0004 -0.0004  
Y -0.0046 -0.0054 0.0002 -0.0002 -0.0004 -0.0002  
Z -0.0023 -0.0021 0.0004 0.0002 -0.0009 -0.0006  
AT. 106 H X -0.0032 0.0009 -0.0008 0.0008 0.0004 -0.0004



Y -0.0046 0.0054 -0.0002 -0.0002 0.0004 -0.0002  
Z -0.0023 0.0021 -0.0004 0.0002 0.0009 -0.0006  
AT. 107 C X 0.0056 0.0058 -0.0001 0.0001 -0.0024 -0.0016  
Y -0.0070 -0.0070 0.0001 -0.0001 0.0023 0.0016  
Z -0.0065 -0.0068 -0.0001 -0.0002 0.0039 0.0027  
AT. 108 C X 0.0056 -0.0058 0.0001 0.0001 0.0024 -0.0016  
Y -0.0070 0.0070 -0.0001 -0.0001 -0.0023 0.0016  
Z -0.0065 0.0068 0.0001 -0.0002 -0.0039 0.0027  
AT. 109 H X -0.0054 -0.0044 -0.0005 0.0001 0.0098 0.0068  
Y -0.0031 -0.0032 0.0004 0.0000 -0.0061 -0.0045  
Z 0.0027 0.0019 0.0008 0.0001 -0.0142 -0.0102  
AT. 110 H X -0.0054 0.0044 0.0005 0.0001 -0.0098 0.0068  
Y -0.0031 0.0032 -0.0004 0.0000 0.0061 -0.0045  
Z 0.0027 -0.0019 -0.0008 0.0001 0.0142 -0.0102  
AT. 111 H X -0.0410 -0.0453 0.0017 -0.0010 0.0156 0.0106  
Y 0.0194 0.0210 -0.0011 0.0001 -0.0076 -0.0052  
Z 0.0392 0.0435 -0.0018 0.0009 -0.0140 -0.0094  
AT. 112 H X -0.0410 0.0453 -0.0017 -0.0010 -0.0156 0.0106  
Y 0.0194 -0.0210 0.0011 0.0001 0.0076 -0.0052  
Z 0.0392 -0.0435 0.0018 0.0009 0.0140 -0.0094  
AT. 113 C X -0.0082 -0.0086 0.0006 0.0000 0.0004 0.0002  
Y 0.0182 0.0177 -0.0000 0.0003 -0.0013 -0.0009  
Z 0.0000 -0.0012 0.0007 0.0002 -0.0006 -0.0007  
AT. 114 C X -0.0082 0.0086 -0.0006 0.0000 -0.0004 0.0002  
Y 0.0182 -0.0177 0.0000 0.0003 0.0013 -0.0009  
Z 0.0000 0.0012 -0.0007 0.0002 0.0006 -0.0007  
AT. 115 C X 0.0027 0.0030 -0.0003 -0.0001 0.0004 0.0004  
Y -0.0079 -0.0082 0.0002 -0.0001 0.0034 0.0025  
Z 0.0023 0.0025 -0.0001 0.0000 -0.0019 -0.0014  
AT. 116 C X 0.0027 -0.0030 0.0003 -0.0001 -0.0004 0.0004  
Y -0.0079 0.0082 -0.0002 -0.0001 -0.0034 0.0025  
Z 0.0023 -0.0025 0.0001 0.0000 0.0019 -0.0014

AT.117 H X 0.0072 0.0070 0.0004 0.0004 -0.0029 -0.0023  
Y 0.0276 0.0260 0.0013 0.0007 -0.0152 -0.0118  
Z -0.0112 -0.0100 -0.0011 -0.0006 0.0064 0.0051

AT.118 H X 0.0072 -0.0070 -0.0004 0.0004 0.0029 -0.0023  
Y 0.0276 -0.0260 -0.0013 0.0007 0.0152 -0.0118  
Z -0.0112 0.0100 0.0011 -0.0006 -0.0064 0.0051

AT.119 H X -0.0013 0.0014 -0.0013 -0.0003 -0.0007 0.0000  
Y -0.0006 0.0051 -0.0030 -0.0010 -0.0102 -0.0066  
Z -0.0059 -0.0104 0.0024 0.0007 0.0105 0.0070

AT.120 H X -0.0013 -0.0014 0.0013 -0.0003 0.0007 0.0000  
Y -0.0006 -0.0051 0.0030 -0.0010 0.0102 -0.0066  
Z -0.0059 0.0104 -0.0024 0.0007 -0.0105 0.0070

AT.121 C X -0.0040 -0.0039 0.0002 0.0001 -0.0015 -0.0010  
Y 0.0096 0.0092 -0.0004 -0.0001 0.0020 0.0016  
Z -0.0037 -0.0037 0.0003 0.0001 -0.0021 -0.0016

AT.122 C X -0.0040 0.0039 -0.0002 0.0001 0.0015 -0.0010  
Y 0.0096 -0.0092 0.0004 -0.0001 -0.0020 0.0016  
Z -0.0037 0.0037 -0.0003 0.0001 0.0021 -0.0016

AT.123 H X -0.0076 -0.0090 0.0007 0.0002 0.0085 0.0055  
Y 0.0035 0.0036 -0.0006 -0.0007 -0.0071 -0.0049  
Z 0.0006 -0.0001 0.0006 0.0007 0.0089 0.0061

AT.124 H X -0.0076 0.0090 -0.0007 0.0002 -0.0085 0.0055  
Y 0.0035 -0.0036 0.0006 -0.0007 0.0071 -0.0049  
Z 0.0006 0.0001 -0.0006 0.0007 -0.0089 0.0061

AT.125 H X 0.0382 0.0407 -0.0032 -0.0008 0.0077 0.0064  
Y -0.0326 -0.0343 0.0020 0.0001 -0.0043 -0.0034  
Z 0.0273 0.0295 -0.0027 -0.0008 0.0063 0.0052

AT.126 H X 0.0382 -0.0407 0.0032 -0.0008 -0.0077 0.0064  
Y -0.0326 0.0343 -0.0020 0.0001 0.0043 -0.0034  
Z 0.0273 -0.0295 0.0027 -0.0008 -0.0063 0.0052

AT.127 C X 0.0061 0.0065 -0.0004 0.0000 -0.0001 -0.0001  
Y -0.0184 -0.0167 0.0007 0.0005 -0.0005 -0.0007

Z -0.0063 -0.0072 0.0005 0.0001 0.0007 0.0004  
AT. 128 C X 0.0061 -0.0065 0.0004 0.0000 0.0001 -0.0001  
Y -0.0184 0.0167 -0.0007 0.0005 0.0005 -0.0007  
Z -0.0063 0.0072 -0.0005 0.0001 -0.0007 0.0004  
AT. 129 C X -0.0012 -0.0015 0.0001 -0.0000 0.0005 0.0003  
Y 0.0119 0.0112 -0.0004 -0.0003 0.0019 0.0014  
Z 0.0103 0.0097 -0.0003 -0.0002 0.0022 0.0016  
AT. 130 C X -0.0012 0.0015 -0.0001 -0.0000 -0.0005 0.0003  
Y 0.0119 -0.0112 0.0004 -0.0003 -0.0019 0.0014  
Z 0.0103 -0.0097 0.0003 -0.0002 -0.0022 0.0016  
AT. 131 H X -0.0136 -0.0125 0.0005 0.0005 -0.0013 -0.0012  
Y -0.0414 -0.0366 0.0009 0.0011 -0.0100 -0.0074  
Z -0.0316 -0.0275 0.0007 0.0012 -0.0062 -0.0049  
AT. 132 H X -0.0136 0.0125 -0.0005 0.0005 0.0013 -0.0012  
Y -0.0414 0.0366 -0.0009 0.0011 0.0100 -0.0074  
Z -0.0316 0.0275 -0.0007 0.0012 0.0062 -0.0049  
AT. 133 H X -0.0039 -0.0063 0.0005 -0.0002 0.0023 0.0016  
Y -0.0234 -0.0255 0.0009 -0.0003 -0.0047 -0.0029  
Z -0.0422 -0.0441 0.0015 -0.0003 -0.0087 -0.0057  
AT. 134 H X -0.0039 0.0063 -0.0005 -0.0002 -0.0023 0.0016  
Y -0.0234 0.0255 -0.0009 -0.0003 0.0047 -0.0029  
Z -0.0422 0.0441 -0.0015 -0.0003 0.0087 -0.0057  
AT. 135 C X 0.0026 0.0027 -0.0003 -0.0001 -0.0002 -0.0003  
Y -0.0049 -0.0048 0.0000 -0.0001 -0.0000 -0.0001  
Z 0.0003 0.0007 -0.0002 0.0000 0.0002 0.0003  
AT. 136 C X 0.0026 -0.0027 0.0003 -0.0001 0.0002 -0.0003  
Y -0.0049 0.0048 -0.0000 -0.0001 0.0000 -0.0001  
Z 0.0003 -0.0007 0.0002 0.0000 -0.0002 0.0003  
AT. 137 H X -0.0023 -0.0027 0.0008 0.0004 -0.0005 0.0002  
Y 0.0016 0.0005 0.0006 0.0001 -0.0008 -0.0005  
Z 0.0110 0.0097 0.0005 0.0001 -0.0009 -0.0006  
AT. 138 H X -0.0023 0.0027 -0.0008 0.0004 0.0005 0.0002

Y 0.0016 -0.0005 -0.0006 0.0001 0.0008 -0.0005  
Z 0.0110 -0.0097 -0.0005 0.0001 0.0009 -0.0006  
AT. 139 H X -0.0058 -0.0053 -0.0000 0.0001 0.0011 0.0014  
Y 0.0245 0.0245 -0.0005 0.0002 -0.0015 -0.0008  
Z 0.0019 0.0017 -0.0002 -0.0002 -0.0009 -0.0015  
AT. 140 H X -0.0058 0.0053 0.0000 0.0001 -0.0011 0.0014  
Y 0.0245 -0.0245 0.0005 0.0002 0.0015 -0.0008  
Z 0.0019 -0.0017 0.0002 -0.0002 0.0009 -0.0015  
AT. 141 H X -0.0068 -0.0080 0.0013 0.0005 0.0015 0.0016  
Y 0.0063 0.0069 -0.0002 0.0003 0.0009 0.0008  
Z -0.0143 -0.0150 0.0007 -0.0001 -0.0001 0.0001  
AT. 142 H X -0.0068 0.0080 -0.0013 0.0005 -0.0015 0.0016  
Y 0.0063 -0.0069 0.0002 0.0003 -0.0009 0.0008  
Z -0.0143 0.0150 -0.0007 -0.0001 0.0001 0.0001  
AT. 143 C X -0.0014 -0.0014 0.0000 -0.0001 0.0000 0.0002  
Y 0.0047 0.0044 -0.0002 -0.0002 -0.0002 0.0000  
Z 0.0017 0.0022 -0.0002 -0.0001 -0.0003 -0.0000  
AT. 144 C X -0.0014 0.0014 -0.0000 -0.0001 -0.0000 0.0002  
Y 0.0047 -0.0044 0.0002 -0.0002 0.0002 0.0000  
Z 0.0017 -0.0022 0.0002 -0.0001 0.0003 -0.0000  
AT. 145 H X 0.0012 0.0001 0.0001 0.0003 -0.0004 -0.0010  
Y -0.0035 -0.0023 -0.0002 0.0001 -0.0003 -0.0003  
Z 0.0097 0.0083 -0.0001 -0.0002 -0.0002 -0.0000  
AT. 146 H X 0.0012 -0.0001 -0.0001 0.0003 0.0004 -0.0010  
Y -0.0035 0.0023 0.0002 0.0001 0.0003 -0.0003  
Z 0.0097 -0.0083 0.0001 -0.0002 0.0002 -0.0000  
AT. 147 H X 0.0050 0.0037 0.0003 0.0000 0.0003 0.0000  
Y -0.0215 -0.0221 0.0008 0.0005 0.0006 -0.0002  
Z -0.0039 -0.0055 0.0007 0.0004 0.0006 -0.0003  
AT. 148 H X 0.0050 -0.0037 -0.0003 0.0000 -0.0003 0.0000  
Y -0.0215 0.0221 -0.0008 0.0005 -0.0006 -0.0002  
Z -0.0039 0.0055 -0.0007 0.0004 -0.0006 -0.0003

AT.149 H X 0.0041 0.0057 -0.0001 0.0004 -0.0002 -0.0006  
Y -0.0045 -0.0048 0.0005 0.0004 0.0004 -0.0002  
Z -0.0155 -0.0159 0.0008 0.0005 0.0008 -0.0001

AT.150 H X 0.0041 -0.0057 0.0001 0.0004 0.0002 -0.0006  
Y -0.0045 0.0048 -0.0005 0.0004 -0.0004 -0.0002  
Z -0.0155 0.0159 -0.0008 0.0005 -0.0008 -0.0001

AT.151 C X -0.0009 -0.0008 -0.0002 -0.0001 -0.0001 0.0000  
Y -0.0003 -0.0007 -0.0002 -0.0002 0.0006 0.0006  
Z 0.0017 0.0021 -0.0003 -0.0001 0.0000 0.0001

AT.152 C X -0.0009 0.0008 0.0002 -0.0001 0.0001 0.0000  
Y -0.0003 0.0007 0.0002 -0.0002 -0.0006 0.0006  
Z 0.0017 -0.0021 0.0003 -0.0001 -0.0000 0.0001

AT.153 H X 0.0705 0.0673 -0.0010 -0.0000 -0.0013 -0.0006  
Y 0.0187 0.0176 -0.0001 0.0002 -0.0006 -0.0003  
Z 0.0021 0.0027 0.0002 0.0005 -0.0015 -0.0011

AT.154 H X 0.0705 -0.0673 0.0010 -0.0000 0.0013 -0.0006  
Y 0.0187 -0.0176 0.0001 0.0002 0.0006 -0.0003  
Z 0.0021 -0.0027 -0.0002 0.0005 0.0015 -0.0011

AT.155 H X -0.0597 -0.0575 0.0018 0.0007 0.0024 0.0012  
Y -0.0154 -0.0142 0.0005 0.0003 0.0001 -0.0002  
Z -0.0040 -0.0044 -0.0003 -0.0003 0.0016 0.0013

AT.156 H X -0.0597 0.0575 -0.0018 0.0007 -0.0024 0.0012  
Y -0.0154 0.0142 -0.0005 0.0003 -0.0001 -0.0002  
Z -0.0040 0.0044 0.0003 -0.0003 -0.0016 0.0013

AT.157 O X -0.0001 -0.0001 0.0000 0.0001 0.0000 0.0000  
Y 0.0000 -0.0001 0.0000 -0.0000 0.0001 0.0000  
Z 0.0001 0.0001 -0.0000 0.0001 -0.0003 -0.0001

AT.158 O X -0.0001 0.0001 -0.0000 0.0001 -0.0000 0.0000  
Y 0.0000 0.0001 -0.0000 -0.0000 -0.0001 0.0000  
Z 0.0001 -0.0001 0.0000 0.0001 0.0003 -0.0001

AT.159 O X -0.0000 -0.0000 0.0001 -0.0001 0.0003 -0.0001  
Y -0.0000 0.0000 -0.0001 -0.0000 -0.0001 -0.0000

Z -0.0000 -0.0000 0.0000 -0.0001 -0.0001 0.0001  
AT.160 O X -0.0000 0.0000 -0.0001 -0.0001 -0.0003 -0.0001  
Y -0.0000 -0.0000 0.0001 -0.0000 0.0001 -0.0000  
Z -0.0000 0.0000 -0.0000 -0.0001 0.0001 0.0001  
AT.161 H X -0.0001 0.0017 -0.0015 -0.0014 -0.0013 -0.0000  
Y 0.0000 0.0003 0.0004 0.0005 -0.0010 -0.0009  
Z 0.0001 -0.0005 -0.0015 -0.0015 0.0035 0.0034  
AT.162 H X -0.0001 -0.0017 0.0015 -0.0014 0.0013 -0.0000  
Y 0.0000 -0.0003 -0.0004 0.0005 0.0010 -0.0009  
Z 0.0001 0.0005 0.0015 -0.0015 -0.0035 0.0034  
AT.163 H X 0.0006 -0.0000 -0.0017 0.0017 -0.0027 0.0013  
Y 0.0001 0.0002 0.0002 0.0001 -0.0008 -0.0002  
Z -0.0002 0.0002 0.0007 -0.0006 0.0014 -0.0012  
AT.164 H X 0.0006 0.0000 0.0017 0.0017 0.0027 0.0013  
Y 0.0001 -0.0002 -0.0002 0.0001 0.0008 -0.0002  
Z -0.0002 -0.0002 -0.0007 -0.0006 -0.0014 -0.0012  
AT.165 O X 0.0004 0.0004 -0.0001 -0.0001 -0.0001 -0.0000  
Y 0.0001 0.0002 -0.0000 -0.0001 -0.0000 -0.0000  
Z -0.0003 -0.0003 -0.0000 0.0001 -0.0000 0.0000  
AT.166 O X 0.0004 -0.0004 0.0001 -0.0001 0.0001 -0.0000  
Y 0.0001 -0.0002 0.0000 -0.0001 0.0000 -0.0000  
Z -0.0003 0.0003 0.0000 0.0001 0.0000 0.0000  
AT.167 H X -0.0028 -0.0028 0.0003 0.0007 0.0004 0.0003  
Y 0.0012 0.0008 -0.0000 -0.0003 0.0000 -0.0001  
Z 0.0083 0.0089 -0.0014 -0.0022 -0.0013 0.0000  
AT.168 H X -0.0028 0.0028 -0.0003 0.0007 -0.0004 0.0003  
Y 0.0012 -0.0008 0.0000 -0.0003 -0.0000 -0.0001  
Z 0.0083 -0.0089 0.0014 -0.0022 0.0013 0.0000  
AT.169 O X -0.0003 -0.0002 0.0001 0.0000 0.0000 0.0000  
Y -0.0002 -0.0002 -0.0000 0.0001 0.0000 0.0000  
Z -0.0003 -0.0003 0.0000 0.0001 -0.0000 0.0001  
AT.170 O X -0.0003 0.0002 -0.0001 0.0000 -0.0000 0.0000

|         |     |         |         |         |         |         |         |
|---------|-----|---------|---------|---------|---------|---------|---------|
|         | Y   | -0.0002 | 0.0002  | 0.0000  | 0.0001  | -0.0000 | 0.0000  |
|         | Z   | -0.0003 | 0.0003  | -0.0000 | 0.0001  | 0.0000  | 0.0001  |
| AT. 171 | H X | 0.0002  | -0.0014 | -0.0004 | 0.0009  | 0.0004  | -0.0005 |
|         | Y   | 0.0001  | -0.0003 | 0.0000  | -0.0001 | 0.0005  | -0.0008 |
|         | Z   | -0.0001 | 0.0006  | 0.0008  | -0.0013 | 0.0009  | -0.0018 |
| AT. 172 | H X | 0.0002  | 0.0014  | 0.0004  | 0.0009  | -0.0004 | -0.0005 |
|         | Y   | 0.0001  | 0.0003  | -0.0000 | -0.0001 | -0.0005 | -0.0008 |
|         | Z   | -0.0001 | -0.0006 | -0.0008 | -0.0013 | -0.0009 | -0.0018 |

FREQ(CM\*\*-1) 1401.01 1402.50 1428.52 1428.53 1428.79 1429.15

|         |   |         |         |         |         |         |         |
|---------|---|---------|---------|---------|---------|---------|---------|
| AT. 1 I | X | -0.0000 | 0.0000  | 0.0000  | 0.0000  | 0.0000  | 0.0000  |
|         | Y | 0.0000  | 0.0000  | 0.0000  | 0.0000  | 0.0000  | 0.0000  |
|         | Z | -0.0000 | -0.0000 | -0.0000 | 0.0000  | -0.0000 | -0.0000 |
| AT. 2 I | X | 0.0000  | 0.0000  | -0.0000 | 0.0000  | -0.0000 | 0.0000  |
|         | Y | -0.0000 | 0.0000  | -0.0000 | 0.0000  | -0.0000 | 0.0000  |
|         | Z | 0.0000  | -0.0000 | 0.0000  | 0.0000  | 0.0000  | -0.0000 |
| AT. 3 I | X | 0.0000  | 0.0000  | -0.0000 | -0.0000 | 0.0000  | -0.0000 |
|         | Y | 0.0000  | 0.0000  | 0.0000  | -0.0000 | 0.0000  | -0.0000 |
|         | Z | -0.0000 | -0.0000 | 0.0000  | 0.0000  | 0.0000  | 0.0000  |
| AT. 4 I | X | -0.0000 | 0.0000  | 0.0000  | -0.0000 | -0.0000 | -0.0000 |
|         | Y | -0.0000 | 0.0000  | -0.0000 | -0.0000 | -0.0000 | -0.0000 |
|         | Z | 0.0000  | -0.0000 | -0.0000 | 0.0000  | -0.0000 | 0.0000  |
| AT. 5 O | X | 0.0003  | 0.0000  | 0.0002  | 0.0000  | 0.0005  | 0.0005  |
|         | Y | -0.0002 | -0.0000 | -0.0001 | -0.0001 | -0.0004 | -0.0004 |
|         | Z | -0.0001 | 0.0003  | -0.0002 | -0.0001 | -0.0005 | -0.0005 |
| AT. 6 O | X | -0.0003 | 0.0000  | -0.0002 | 0.0000  | -0.0005 | 0.0005  |
|         | Y | 0.0002  | -0.0000 | 0.0001  | -0.0001 | 0.0004  | -0.0004 |
|         | Z | 0.0001  | 0.0003  | 0.0002  | -0.0001 | 0.0005  | -0.0005 |
| AT. 7 O | X | 0.0005  | 0.0003  | -0.0001 | 0.0000  | -0.0002 | -0.0004 |
|         | Y | -0.0003 | -0.0001 | 0.0000  | -0.0000 | -0.0000 | 0.0001  |
|         | Z | -0.0003 | -0.0002 | 0.0001  | 0.0001  | 0.0002  | 0.0002  |

AT. 8 O X -0.0005 0.0003 0.0001 0.0000 0.0002 -0.0004  
Y 0.0003 -0.0001 -0.0000 -0.0000 0.0000 0.0001  
Z 0.0003 -0.0002 -0.0001 0.0001 -0.0002 0.0002

AT. 9 N X 0.0000 0.0002 0.0002 -0.0000 0.0005 0.0006  
Y -0.0013 -0.0010 -0.0002 -0.0001 -0.0005 -0.0008  
Z -0.0004 -0.0006 -0.0003 -0.0001 -0.0007 -0.0010

AT. 10 N X -0.0000 0.0002 -0.0002 -0.0000 -0.0005 0.0006  
Y 0.0013 -0.0010 0.0002 -0.0001 0.0005 -0.0008  
Z 0.0004 -0.0006 0.0003 -0.0001 0.0007 -0.0010

AT. 11 N X 0.0008 0.0004 0.0002 -0.0000 0.0000 0.0000  
Y -0.0014 -0.0009 -0.0000 0.0001 0.0003 0.0005  
Z -0.0002 -0.0002 -0.0002 -0.0003 -0.0004 -0.0004

AT. 12 N X -0.0008 0.0004 -0.0002 -0.0000 -0.0000 0.0000  
Y 0.0014 -0.0009 0.0000 0.0001 -0.0003 0.0005  
Z 0.0002 -0.0002 0.0002 -0.0003 0.0004 -0.0004

AT. 13 C X -0.0011 -0.0007 -0.0003 0.0000 -0.0010 -0.0011  
Y 0.0009 0.0005 0.0002 0.0000 0.0009 0.0010  
Z -0.0008 -0.0009 0.0003 0.0001 0.0006 0.0007

AT. 14 C X 0.0011 -0.0007 0.0003 0.0000 0.0010 -0.0011  
Y -0.0009 0.0005 -0.0002 0.0000 -0.0009 0.0010  
Z 0.0008 -0.0009 -0.0003 0.0001 -0.0006 0.0007

AT. 15 C X 0.0004 0.0005 -0.0001 -0.0002 0.0001 0.0000  
Y -0.0001 -0.0002 0.0003 0.0003 0.0004 0.0006  
Z 0.0003 0.0003 -0.0001 -0.0001 -0.0001 -0.0002

AT. 16 C X -0.0004 0.0005 0.0001 -0.0002 -0.0001 0.0000  
Y 0.0001 -0.0002 -0.0003 0.0003 -0.0004 0.0006  
Z -0.0003 0.0003 0.0001 -0.0001 0.0001 -0.0002

AT. 17 H X -0.0010 -0.0016 -0.0002 -0.0000 -0.0011 -0.0013  
Y -0.0008 -0.0007 -0.0014 -0.0012 -0.0027 -0.0041  
Z 0.0007 0.0002 0.0019 0.0017 0.0032 0.0051

AT. 18 H X 0.0010 -0.0016 0.0002 -0.0000 0.0011 -0.0013  
Y 0.0008 -0.0007 0.0014 -0.0012 0.0027 -0.0041



Z -0.0007 0.0002 -0.0019 0.0017 -0.0032 0.0051  
AT. 19 H X 0.0006 -0.0005 0.0005 0.0010 0.0004 0.0010  
Y -0.0017 -0.0015 -0.0022 -0.0018 -0.0042 -0.0062  
Z -0.0002 -0.0006 -0.0008 -0.0005 -0.0016 -0.0022  
AT. 20 H X -0.0006 -0.0005 -0.0005 0.0010 -0.0004 0.0010  
Y 0.0017 -0.0015 0.0022 -0.0018 0.0042 -0.0062  
Z 0.0002 -0.0006 0.0008 -0.0005 0.0016 -0.0022  
AT. 21 C X -0.0020 -0.0012 0.0006 0.0004 0.0011 0.0016  
Y 0.0002 -0.0001 0.0001 0.0000 0.0001 -0.0000  
Z 0.0025 0.0018 -0.0008 -0.0004 -0.0011 -0.0016  
AT. 22 C X 0.0020 -0.0012 -0.0006 0.0004 -0.0011 0.0016  
Y -0.0002 -0.0001 -0.0001 0.0000 -0.0001 -0.0000  
Z -0.0025 0.0018 0.0008 -0.0004 0.0011 -0.0016  
AT. 23 C X 0.0007 0.0003 -0.0003 -0.0003 -0.0008 -0.0008  
Y 0.0000 0.0001 0.0001 0.0002 0.0004 0.0003  
Z -0.0007 -0.0005 0.0007 0.0005 0.0012 0.0012  
AT. 24 C X -0.0007 0.0003 0.0003 -0.0003 0.0008 -0.0008  
Y -0.0000 0.0001 -0.0001 0.0002 -0.0004 0.0003  
Z 0.0007 -0.0005 -0.0007 0.0005 -0.0012 0.0012  
AT. 25 H X -0.0013 -0.0008 0.0001 0.0000 0.0013 0.0013  
Y -0.0003 -0.0001 0.0006 0.0005 0.0013 0.0011  
Z -0.0009 -0.0007 -0.0036 -0.0031 -0.0061 -0.0042  
AT. 26 H X 0.0013 -0.0008 -0.0001 0.0000 -0.0013 0.0013  
Y 0.0003 -0.0001 -0.0006 0.0005 -0.0013 0.0011  
Z 0.0009 -0.0007 0.0036 -0.0031 0.0061 -0.0042  
AT. 27 H X 0.0013 0.0017 -0.0002 0.0016 0.0022 0.0008  
Y -0.0011 -0.0010 -0.0031 -0.0026 -0.0050 -0.0042  
Z -0.0015 -0.0014 -0.0010 -0.0012 -0.0022 -0.0014  
AT. 28 H X -0.0013 0.0017 0.0002 0.0016 -0.0022 0.0008  
Y 0.0011 -0.0010 0.0031 -0.0026 0.0050 -0.0042  
Z 0.0015 -0.0014 0.0010 -0.0012 0.0022 -0.0014  
AT. 29 C X 0.0029 0.0023 0.0035 0.0018 0.0052 0.0069

Y 0.0010 0.0007 -0.0006 -0.0002 -0.0009 -0.0010  
Z 0.0025 0.0020 0.0021 0.0012 0.0033 0.0047  
AT. 30 C X -0.0029 0.0023 -0.0035 0.0018 -0.0052 0.0069  
Y -0.0010 0.0007 0.0006 -0.0002 0.0009 -0.0010  
Z -0.0025 0.0020 -0.0021 0.0012 -0.0033 0.0047  
AT. 31 H X -0.0120 -0.0088 -0.0125 -0.0072 -0.0187 -0.0261  
Y -0.0016 -0.0007 -0.0007 -0.0010 -0.0005 -0.0013  
Z -0.0106 -0.0074 -0.0082 -0.0058 -0.0113 -0.0168  
AT. 32 H X 0.0120 -0.0088 0.0125 -0.0072 0.0187 -0.0261  
Y 0.0016 -0.0007 0.0007 -0.0010 0.0005 -0.0013  
Z 0.0106 -0.0074 0.0082 -0.0058 0.0113 -0.0168  
AT. 33 H X -0.0127 -0.0108 -0.0134 -0.0063 -0.0212 -0.0276  
Y -0.0019 -0.0007 -0.0006 -0.0011 0.0005 0.0004  
Z -0.0071 -0.0064 -0.0094 -0.0040 -0.0154 -0.0196  
AT. 34 H X 0.0127 -0.0108 0.0134 -0.0063 0.0212 -0.0276  
Y 0.0019 -0.0007 0.0006 -0.0011 -0.0005 0.0004  
Z 0.0071 -0.0064 0.0094 -0.0040 0.0154 -0.0196  
AT. 35 C X -0.0006 -0.0007 -0.0069 -0.0032 -0.0100 -0.0122  
Y -0.0013 -0.0008 0.0050 0.0025 0.0072 0.0089  
Z -0.0008 -0.0004 -0.0018 -0.0011 -0.0028 -0.0040  
AT. 36 C X 0.0006 -0.0007 0.0069 -0.0032 0.0100 -0.0122  
Y 0.0013 -0.0008 -0.0050 0.0025 -0.0072 0.0089  
Z 0.0008 -0.0004 0.0018 -0.0011 0.0028 -0.0040  
AT. 37 C X 0.0002 0.0002 0.0008 0.0004 0.0012 0.0013  
Y 0.0036 0.0025 -0.0041 -0.0022 -0.0059 -0.0078  
Z -0.0020 -0.0013 0.0025 0.0014 0.0037 0.0050  
AT. 38 C X -0.0002 0.0002 -0.0008 0.0004 -0.0012 0.0013  
Y -0.0036 0.0025 0.0041 -0.0022 0.0059 -0.0078  
Z 0.0020 -0.0013 -0.0025 0.0014 -0.0037 0.0050  
AT. 39 H X -0.0019 -0.0015 0.0013 0.0003 0.0022 0.0034  
Y -0.0186 -0.0122 0.0212 0.0110 0.0309 0.0395  
Z 0.0067 0.0041 -0.0085 -0.0046 -0.0121 -0.0149

AT. 40 H X 0.0019 -0.0015 -0.0013 0.0003 -0.0022 0.0034  
Y 0.0186 -0.0122 -0.0212 0.0110 -0.0309 0.0395  
Z -0.0067 0.0041 0.0085 -0.0046 0.0121 -0.0149

AT. 41 H X -0.0030 -0.0020 0.0027 0.0013 0.0044 0.0063  
Y -0.0067 -0.0051 0.0131 0.0068 0.0188 0.0252  
Z 0.0089 0.0065 -0.0124 -0.0063 -0.0182 -0.0249

AT. 42 H X 0.0030 -0.0020 -0.0027 0.0013 -0.0044 0.0063  
Y 0.0067 -0.0051 -0.0131 0.0068 -0.0188 0.0252  
Z -0.0089 0.0065 0.0124 -0.0063 0.0182 -0.0249

AT. 43 C X 0.0020 0.0016 0.0006 0.0001 0.0006 0.0001  
Y 0.0019 0.0013 -0.0003 -0.0003 -0.0008 -0.0011  
Z -0.0028 -0.0020 -0.0004 0.0001 0.0000 0.0008

AT. 44 C X -0.0020 0.0016 -0.0006 0.0001 -0.0006 0.0001  
Y -0.0019 0.0013 0.0003 -0.0003 0.0008 -0.0011  
Z 0.0028 -0.0020 0.0004 0.0001 -0.0000 0.0008

AT. 45 H X -0.0089 -0.0070 -0.0037 -0.0017 -0.0034 -0.0017  
Y -0.0044 -0.0030 0.0004 0.0005 0.0016 0.0032  
Z 0.0107 0.0081 0.0022 0.0007 0.0008 -0.0016

AT. 46 H X 0.0089 -0.0070 0.0037 -0.0017 0.0034 -0.0017  
Y 0.0044 -0.0030 -0.0004 0.0005 -0.0016 0.0032  
Z -0.0107 0.0081 -0.0022 0.0007 -0.0008 -0.0016

AT. 47 H X -0.0123 -0.0086 -0.0011 0.0007 0.0004 0.0026  
Y -0.0035 -0.0025 0.0002 0.0004 0.0006 0.0015  
Z 0.0119 0.0085 0.0025 0.0001 0.0016 -0.0002

AT. 48 H X 0.0123 -0.0086 0.0011 0.0007 -0.0004 0.0026  
Y 0.0035 -0.0025 -0.0002 0.0004 -0.0006 0.0015  
Z -0.0119 0.0085 -0.0025 0.0001 -0.0016 -0.0002

AT. 49 C X -0.0007 -0.0007 -0.0022 -0.0005 -0.0029 -0.0021  
Y -0.0001 -0.0000 0.0016 0.0007 0.0023 0.0021  
Z 0.0003 0.0002 0.0018 0.0004 0.0021 0.0010

AT. 50 C X 0.0007 -0.0007 0.0022 -0.0005 0.0029 -0.0021  
Y 0.0001 -0.0000 -0.0016 0.0007 -0.0023 0.0021

Z -0.0003 0.0002 -0.0018 0.0004 -0.0021 0.0010  
AT. 51 C X 0.0006 0.0005 0.0005 0.0003 0.0007 0.0009  
Y 0.0019 0.0014 -0.0010 -0.0001 -0.0012 -0.0007  
Z 0.0022 0.0018 -0.0011 -0.0001 -0.0012 -0.0003  
AT. 52 C X -0.0006 0.0005 -0.0005 0.0003 -0.0007 0.0009  
Y -0.0019 0.0014 0.0010 -0.0001 0.0012 -0.0007  
Z -0.0022 0.0018 0.0011 -0.0001 0.0012 -0.0003  
AT. 53 H X -0.0024 -0.0016 -0.0009 -0.0009 -0.0017 -0.0029  
Y -0.0079 -0.0059 0.0028 -0.0002 0.0029 -0.0001  
Z -0.0047 -0.0037 0.0056 0.0017 0.0077 0.0066  
AT. 54 H X 0.0024 -0.0016 0.0009 -0.0009 0.0017 -0.0029  
Y 0.0079 -0.0059 -0.0028 -0.0002 -0.0029 -0.0001  
Z 0.0047 -0.0037 -0.0056 0.0017 -0.0077 0.0066  
AT. 55 H X -0.0039 -0.0031 -0.0017 -0.0017 -0.0034 -0.0061  
Y -0.0060 -0.0042 0.0047 0.0006 0.0064 0.0048  
Z -0.0110 -0.0079 0.0048 -0.0004 0.0057 0.0019  
AT. 56 H X 0.0039 -0.0031 0.0017 -0.0017 0.0034 -0.0061  
Y 0.0060 -0.0042 -0.0047 0.0006 -0.0064 0.0048  
Z 0.0110 -0.0079 -0.0048 -0.0004 -0.0057 0.0019  
AT. 57 C X 0.0000 -0.0001 0.0100 0.0045 0.0147 0.0175  
Y -0.0000 0.0001 -0.0075 -0.0035 -0.0107 -0.0129  
Z 0.0003 0.0001 0.0050 0.0023 0.0074 0.0087  
AT. 58 C X -0.0000 -0.0001 -0.0100 0.0045 -0.0147 0.0175  
Y 0.0000 0.0001 0.0075 -0.0035 0.0107 -0.0129  
Z -0.0003 0.0001 -0.0050 0.0023 -0.0074 0.0087  
AT. 59 H X -0.0009 0.0002 -0.0447 -0.0204 -0.0639 -0.0754  
Y -0.0007 -0.0004 0.0105 0.0051 0.0144 0.0176  
Z -0.0014 -0.0006 -0.0091 -0.0035 -0.0139 -0.0154  
AT. 60 H X 0.0009 0.0002 0.0447 -0.0204 0.0639 -0.0754  
Y 0.0007 -0.0004 -0.0105 0.0051 -0.0144 0.0176  
Z 0.0014 -0.0006 0.0091 -0.0035 0.0139 -0.0154  
AT. 61 H X -0.0003 0.0001 -0.0236 -0.0102 -0.0358 -0.0428

Y -0.0001 -0.0006 0.0183 0.0090 0.0252 0.0303  
Z -0.0000 0.0006 -0.0327 -0.0149 -0.0479 -0.0575  
AT. 62 H X 0.0003 0.0001 0.0236 -0.0102 0.0358 -0.0428  
Y 0.0001 -0.0006 -0.0183 0.0090 -0.0252 0.0303  
Z 0.0000 0.0006 0.0327 -0.0149 0.0479 -0.0575  
AT. 63 H X 0.0007 0.0007 -0.0231 -0.0102 -0.0348 -0.0415  
Y 0.0009 -0.0004 0.0397 0.0177 0.0582 0.0683  
Z -0.0012 -0.0003 -0.0058 -0.0028 -0.0076 -0.0081  
AT. 64 H X -0.0007 0.0007 0.0231 -0.0102 0.0348 -0.0415  
Y -0.0009 -0.0004 -0.0397 0.0177 -0.0582 0.0683  
Z 0.0012 -0.0003 0.0058 -0.0028 0.0076 -0.0081  
AT. 65 C X 0.0000 -0.0000 0.0023 0.0005 0.0032 0.0014  
Y -0.0002 -0.0002 -0.0015 -0.0004 -0.0022 -0.0009  
Z -0.0001 -0.0000 -0.0027 -0.0006 -0.0038 -0.0015  
AT. 66 C X -0.0000 -0.0000 -0.0023 0.0005 -0.0032 0.0014  
Y 0.0002 -0.0002 0.0015 -0.0004 0.0022 -0.0009  
Z 0.0001 -0.0000 0.0027 -0.0006 0.0038 -0.0015  
AT. 67 H X 0.0000 0.0003 -0.0111 -0.0025 -0.0164 -0.0056  
Y 0.0000 0.0003 0.0033 0.0012 0.0056 0.0039  
Z -0.0003 -0.0007 0.0045 0.0005 0.0060 0.0003  
AT. 68 H X -0.0000 0.0003 0.0111 -0.0025 0.0164 -0.0056  
Y -0.0000 0.0003 -0.0033 0.0012 -0.0056 0.0039  
Z 0.0003 -0.0007 -0.0045 0.0005 -0.0060 0.0003  
AT. 69 H X 0.0002 0.0005 -0.0035 -0.0008 -0.0047 -0.0024  
Y 0.0002 0.0003 0.0023 0.0008 0.0040 0.0016  
Z 0.0000 -0.0003 0.0134 0.0034 0.0197 0.0089  
AT. 70 H X -0.0002 0.0005 0.0035 -0.0008 0.0047 -0.0024  
Y -0.0002 0.0003 -0.0023 0.0008 -0.0040 0.0016  
Z -0.0000 -0.0003 -0.0134 0.0034 -0.0197 0.0089  
AT. 71 H X -0.0000 0.0002 -0.0061 -0.0016 -0.0090 -0.0046  
Y 0.0002 -0.0003 0.0085 0.0018 0.0120 0.0036  
Z 0.0004 -0.0001 0.0051 0.0009 0.0071 0.0005

AT. 72 H X 0.0000 0.0002 0.0061 -0.0016 0.0090 -0.0046  
Y -0.0002 -0.0003 -0.0085 0.0018 -0.0120 0.0036  
Z -0.0004 -0.0001 -0.0051 0.0009 -0.0071 0.0005

AT. 73 C X 0.0006 0.0008 0.0052 0.0021 0.0073 0.0081  
Y 0.0004 0.0001 -0.0038 -0.0017 -0.0053 -0.0060  
Z 0.0001 -0.0001 -0.0007 -0.0002 -0.0009 -0.0006

AT. 74 C X -0.0006 0.0008 -0.0052 0.0021 -0.0073 0.0081  
Y -0.0004 0.0001 0.0038 -0.0017 0.0053 -0.0060  
Z -0.0001 -0.0001 0.0007 -0.0002 0.0009 -0.0006

AT. 75 H X 0.0003 -0.0005 -0.0149 -0.0063 -0.0206 -0.0226  
Y -0.0004 0.0002 0.0086 0.0035 0.0116 0.0124  
Z -0.0013 -0.0009 0.0017 0.0007 0.0019 0.0020

AT. 76 H X -0.0003 -0.0005 0.0149 -0.0063 0.0206 -0.0226  
Y 0.0004 0.0002 -0.0086 0.0035 -0.0116 0.0124  
Z 0.0013 -0.0009 -0.0017 0.0007 -0.0019 0.0020

AT. 77 H X -0.0025 -0.0028 -0.0142 -0.0057 -0.0197 -0.0217  
Y 0.0010 0.0014 0.0126 0.0055 0.0179 0.0203  
Z 0.0024 0.0020 0.0019 0.0004 0.0024 0.0025

AT. 78 H X 0.0025 -0.0028 0.0142 -0.0057 0.0197 -0.0217  
Y -0.0010 0.0014 -0.0126 0.0055 -0.0179 0.0203  
Z -0.0024 0.0020 -0.0019 0.0004 -0.0024 0.0025

AT. 79 I X -0.0001 -0.0000 0.0000 -0.0000 -0.0000 -0.0000  
Y 0.0000 -0.0000 -0.0000 0.0000 0.0000 -0.0000  
Z 0.0000 -0.0000 0.0000 0.0000 -0.0000 -0.0000

AT. 80 I X 0.0001 -0.0000 -0.0000 -0.0000 0.0000 -0.0000  
Y -0.0000 -0.0000 0.0000 0.0000 -0.0000 -0.0000  
Z -0.0000 -0.0000 -0.0000 0.0000 0.0000 -0.0000

AT. 81 I X 0.0000 0.0000 0.0000 -0.0000 0.0000 0.0000  
Y -0.0000 -0.0000 0.0000 0.0000 0.0000 0.0000  
Z -0.0000 -0.0000 -0.0000 -0.0000 0.0000 0.0000

AT. 82 I X -0.0000 0.0000 -0.0000 -0.0000 -0.0000 0.0000  
Y 0.0000 -0.0000 -0.0000 0.0000 -0.0000 0.0000

Z 0.0000 -0.0000 0.0000 -0.0000 -0.0000 0.0000  
AT. 83 O X 0.0012 0.0020 0.0002 0.0002 -0.0005 -0.0005  
Y 0.0004 0.0005 0.0002 0.0001 -0.0001 -0.0000  
Z -0.0002 -0.0002 0.0003 0.0003 -0.0003 -0.0003  
AT. 84 O X -0.0012 0.0020 -0.0002 0.0002 0.0005 -0.0005  
Y -0.0004 0.0005 -0.0002 0.0001 0.0001 -0.0000  
Z 0.0002 -0.0002 -0.0003 0.0003 0.0003 -0.0003  
AT. 85 O X 0.0022 0.0021 0.0000 -0.0000 0.0001 0.0001  
Y 0.0005 0.0004 0.0001 0.0001 -0.0000 0.0000  
Z 0.0006 0.0006 0.0000 -0.0000 0.0000 0.0000  
AT. 86 O X -0.0022 0.0021 -0.0000 -0.0000 -0.0001 0.0001  
Y -0.0005 0.0004 -0.0001 0.0001 0.0000 0.0000  
Z -0.0006 0.0006 -0.0000 -0.0000 -0.0000 0.0000  
AT. 87 N X 0.0025 0.0035 0.0003 0.0003 -0.0005 -0.0004  
Y 0.0050 0.0047 -0.0002 -0.0000 -0.0001 -0.0001  
Z 0.0019 0.0028 -0.0002 -0.0003 -0.0001 -0.0001  
AT. 88 N X -0.0025 0.0035 -0.0003 0.0003 0.0005 -0.0004  
Y -0.0050 0.0047 0.0002 -0.0000 0.0001 -0.0001  
Z -0.0019 0.0028 0.0002 -0.0003 0.0001 -0.0001  
AT. 89 N X 0.0037 0.0033 0.0013 0.0015 -0.0005 -0.0002  
Y 0.0037 0.0039 0.0005 0.0004 -0.0000 0.0000  
Z 0.0003 0.0007 0.0001 0.0001 -0.0002 -0.0000  
AT. 90 N X -0.0037 0.0033 -0.0013 0.0015 0.0005 -0.0002  
Y -0.0037 0.0039 -0.0005 0.0004 0.0000 0.0000  
Z -0.0003 0.0007 -0.0001 0.0001 0.0002 -0.0000  
AT. 91 C X -0.0049 -0.0064 -0.0001 -0.0001 0.0008 0.0008  
Y -0.0020 -0.0019 -0.0002 -0.0003 0.0002 0.0002  
Z 0.0039 0.0045 -0.0003 -0.0006 0.0003 0.0003  
AT. 92 C X 0.0049 -0.0064 0.0001 -0.0001 -0.0008 0.0008  
Y 0.0020 -0.0019 0.0002 -0.0003 -0.0002 0.0002  
Z -0.0039 0.0045 0.0003 -0.0006 -0.0003 0.0003  
AT. 93 C X 0.0010 0.0020 -0.0002 -0.0003 -0.0002 -0.0001

Y 0.0002 -0.0007 -0.0002 -0.0003 0.0003 0.0002  
Z -0.0009 -0.0019 0.0003 0.0005 -0.0000 -0.0001  
AT. 94 C X -0.0010 0.0020 0.0002 -0.0003 0.0002 -0.0001  
Y -0.0002 -0.0007 0.0002 -0.0003 -0.0003 0.0002  
Z 0.0009 -0.0019 -0.0003 0.0005 0.0000 -0.0001  
AT. 95 H X 0.0043 -0.0125 0.0005 0.0024 0.0020 0.0008  
Y 0.0008 0.0091 0.0010 0.0006 -0.0022 -0.0014  
Z -0.0059 -0.0013 -0.0026 -0.0043 0.0017 0.0015  
AT. 96 H X -0.0043 -0.0125 -0.0005 0.0024 -0.0020 0.0008  
Y -0.0008 0.0091 -0.0010 0.0006 0.0022 -0.0014  
Z 0.0059 -0.0013 0.0026 -0.0043 -0.0017 0.0015  
AT. 97 H X 0.0059 0.0048 0.0018 0.0018 -0.0004 -0.0000  
Y 0.0047 0.0092 0.0021 0.0027 -0.0027 -0.0018  
Z -0.0014 -0.0004 0.0002 0.0005 -0.0006 -0.0005  
AT. 98 H X -0.0059 0.0048 -0.0018 0.0018 0.0004 -0.0000  
Y -0.0047 0.0092 -0.0021 0.0027 0.0027 -0.0018  
Z 0.0014 -0.0004 -0.0002 0.0005 0.0006 -0.0005  
AT. 99 C X -0.0083 -0.0080 -0.0001 0.0000 -0.0005 -0.0003  
Y 0.0011 0.0012 -0.0003 -0.0003 0.0002 0.0001  
Z -0.0076 -0.0075 0.0001 0.0001 -0.0004 -0.0003  
AT. 100 C X 0.0083 -0.0080 0.0001 0.0000 0.0005 -0.0003  
Y -0.0011 0.0012 0.0003 -0.0003 -0.0002 0.0001  
Z 0.0076 -0.0075 -0.0001 0.0001 0.0004 -0.0003  
AT. 101 C X 0.0031 0.0030 -0.0004 -0.0005 0.0004 0.0001  
Y -0.0008 -0.0007 -0.0002 -0.0002 0.0001 0.0000  
Z 0.0022 0.0023 -0.0007 -0.0008 0.0006 0.0002  
AT. 102 C X -0.0031 0.0030 0.0004 -0.0005 -0.0004 0.0001  
Y 0.0008 -0.0007 0.0002 -0.0002 -0.0001 0.0000  
Z -0.0022 0.0023 0.0007 -0.0008 -0.0006 0.0002  
AT. 103 H X -0.0046 -0.0047 0.0006 0.0006 -0.0001 0.0001  
Y 0.0026 0.0027 -0.0006 -0.0007 0.0004 0.0000  
Z 0.0032 0.0017 0.0047 0.0051 -0.0031 -0.0007



AT.104 H X 0.0046 -0.0047 -0.0006 0.0006 0.0001 0.0001  
Y -0.0026 0.0027 0.0006 -0.0007 -0.0004 0.0000  
Z -0.0032 0.0017 -0.0047 0.0051 0.0031 -0.0007

AT.105 H X 0.0019 0.0025 0.0028 0.0029 -0.0018 -0.0003  
Y 0.0043 0.0034 0.0044 0.0050 -0.0029 -0.0009  
Z 0.0041 0.0039 0.0018 0.0019 -0.0011 -0.0002

AT.106 H X -0.0019 0.0025 -0.0028 0.0029 0.0018 -0.0003  
Y -0.0043 0.0034 -0.0044 0.0050 0.0029 -0.0009  
Z -0.0041 0.0039 -0.0018 0.0019 0.0011 -0.0002

AT.107 C X 0.0082 0.0078 0.0035 0.0045 -0.0028 -0.0014  
Y -0.0074 -0.0073 0.0003 0.0002 -0.0001 -0.0000  
Z -0.0122 -0.0122 -0.0024 -0.0033 0.0022 0.0012

AT.108 C X -0.0082 0.0078 -0.0035 0.0045 0.0028 -0.0014  
Y 0.0074 -0.0073 -0.0003 0.0002 0.0001 -0.0000  
Z 0.0122 -0.0122 0.0024 -0.0033 -0.0022 0.0012

AT.109 H X -0.0374 -0.0323 -0.0156 -0.0210 0.0128 0.0064  
Y 0.0196 0.0187 0.0042 0.0052 -0.0028 -0.0009  
Z 0.0476 0.0441 0.0107 0.0137 -0.0075 -0.0028

AT.110 H X 0.0374 -0.0323 0.0156 -0.0210 -0.0128 0.0064  
Y -0.0196 0.0187 -0.0042 0.0052 0.0028 -0.0009  
Z -0.0476 0.0441 -0.0107 0.0137 0.0075 -0.0028

AT.111 H X -0.0458 -0.0490 -0.0091 -0.0117 0.0089 0.0051  
Y 0.0219 0.0234 0.0011 0.0005 -0.0002 0.0004  
Z 0.0419 0.0447 0.0113 0.0146 -0.0108 -0.0061

AT.112 H X 0.0458 -0.0490 0.0091 -0.0117 -0.0089 0.0051  
Y -0.0219 0.0234 -0.0011 0.0005 0.0002 0.0004  
Z -0.0419 0.0447 -0.0113 0.0146 0.0108 -0.0061

AT.113 C X -0.0014 -0.0009 -0.0090 -0.0111 0.0067 0.0031  
Y 0.0045 0.0045 -0.0049 -0.0057 0.0033 0.0012  
Z 0.0031 0.0016 0.0040 0.0054 -0.0032 -0.0016

AT.114 C X 0.0014 -0.0009 0.0090 -0.0111 -0.0067 0.0031  
Y -0.0045 0.0045 0.0049 -0.0057 -0.0033 0.0012

Z -0.0031 0.0016 -0.0040 0.0054 0.0032 -0.0016  
AT. 115 C X -0.0020 -0.0020 0.0022 0.0027 -0.0018 -0.0008  
Y -0.0116 -0.0124 0.0047 0.0059 -0.0037 -0.0017  
Z 0.0071 0.0078 -0.0033 -0.0044 0.0028 0.0013  
AT. 116 C X 0.0020 -0.0020 -0.0022 0.0027 0.0018 -0.0008  
Y 0.0116 -0.0124 -0.0047 0.0059 0.0037 -0.0017  
Z -0.0071 0.0078 0.0033 -0.0044 -0.0028 0.0013  
AT. 117 H X 0.0095 0.0102 -0.0079 -0.0099 0.0057 0.0023  
Y 0.0555 0.0561 -0.0225 -0.0277 0.0179 0.0082  
Z -0.0226 -0.0231 0.0140 0.0171 -0.0104 -0.0044  
AT. 118 H X -0.0095 0.0102 0.0079 -0.0099 -0.0057 0.0023  
Y -0.0555 0.0561 0.0225 -0.0277 -0.0179 0.0082  
Z 0.0226 -0.0231 -0.0140 0.0171 0.0104 -0.0044  
AT. 119 H X -0.0042 -0.0014 -0.0047 -0.0063 0.0028 0.0012  
Y 0.0282 0.0345 -0.0171 -0.0232 0.0140 0.0071  
Z -0.0321 -0.0368 0.0140 0.0191 -0.0120 -0.0062  
AT. 120 H X 0.0042 -0.0014 0.0047 -0.0063 -0.0028 0.0012  
Y -0.0282 0.0345 0.0171 -0.0232 -0.0140 0.0071  
Z 0.0321 -0.0368 -0.0140 0.0191 0.0120 -0.0062  
AT. 121 C X 0.0060 0.0064 0.0039 0.0041 -0.0017 -0.0005  
Y -0.0093 -0.0097 -0.0023 -0.0023 0.0008 0.0002  
Z 0.0086 0.0092 0.0036 0.0035 -0.0013 -0.0003  
AT. 122 C X -0.0060 0.0064 -0.0039 0.0041 0.0017 -0.0005  
Y 0.0093 -0.0097 0.0023 -0.0023 -0.0008 0.0002  
Z -0.0086 0.0092 -0.0036 0.0035 0.0013 -0.0003  
AT. 123 H X -0.0279 -0.0318 -0.0159 -0.0164 0.0070 0.0016  
Y 0.0293 0.0314 0.0078 0.0076 -0.0028 -0.0006  
Z -0.0363 -0.0393 -0.0105 -0.0105 0.0041 0.0010  
AT. 124 H X 0.0279 -0.0318 0.0159 -0.0164 -0.0070 0.0016  
Y -0.0293 0.0314 -0.0078 0.0076 0.0028 -0.0006  
Z 0.0363 -0.0393 0.0105 -0.0105 -0.0041 0.0010  
AT. 125 H X -0.0416 -0.0413 -0.0145 -0.0156 0.0055 0.0014

Y 0.0298 0.0286 0.0058 0.0068 -0.0021 -0.0008  
Z -0.0313 -0.0312 -0.0150 -0.0162 0.0060 0.0014  
AT. 126 H X 0.0416 -0.0413 0.0145 -0.0156 -0.0055 0.0014  
Y -0.0298 0.0286 -0.0058 0.0068 0.0021 -0.0008  
Z 0.0313 -0.0312 0.0150 -0.0162 -0.0060 0.0014  
AT. 127 C X -0.0014 -0.0016 -0.0086 -0.0098 0.0047 0.0017  
Y 0.0010 0.0015 0.0008 0.0006 -0.0003 -0.0000  
Z 0.0004 -0.0014 -0.0053 -0.0053 0.0027 0.0008  
AT. 128 C X 0.0014 -0.0016 0.0086 -0.0098 -0.0047 0.0017  
Y -0.0010 0.0015 -0.0008 0.0006 0.0003 -0.0000  
Z -0.0004 -0.0014 0.0053 -0.0053 -0.0027 0.0008  
AT. 129 C X -0.0015 -0.0016 0.0021 0.0024 -0.0011 -0.0004  
Y -0.0084 -0.0080 0.0026 0.0030 -0.0014 -0.0005  
Z -0.0097 -0.0093 0.0043 0.0046 -0.0021 -0.0007  
AT. 130 C X 0.0015 -0.0016 -0.0021 0.0024 0.0011 -0.0004  
Y 0.0084 -0.0080 -0.0026 0.0030 0.0014 -0.0005  
Z 0.0097 -0.0093 -0.0043 0.0046 0.0021 -0.0007  
AT. 131 H X 0.0054 0.0054 -0.0049 -0.0055 0.0030 0.0011  
Y 0.0366 0.0378 -0.0129 -0.0155 0.0065 0.0024  
Z 0.0219 0.0228 -0.0127 -0.0148 0.0071 0.0028  
AT. 132 H X -0.0054 0.0054 0.0049 -0.0055 -0.0030 0.0011  
Y -0.0366 0.0378 0.0129 -0.0155 -0.0065 0.0024  
Z -0.0219 0.0228 0.0127 -0.0148 -0.0071 0.0028  
AT. 133 H X -0.0014 -0.0058 -0.0048 -0.0045 0.0036 0.0014  
Y 0.0301 0.0241 -0.0170 -0.0175 0.0093 0.0034  
Z 0.0496 0.0422 -0.0234 -0.0245 0.0124 0.0044  
AT. 134 H X 0.0014 -0.0058 0.0048 -0.0045 -0.0036 0.0014  
Y -0.0301 0.0241 0.0170 -0.0175 -0.0093 0.0034  
Z -0.0496 0.0422 0.0234 -0.0245 -0.0124 0.0044  
AT. 135 C X 0.0004 0.0002 0.0132 0.0158 -0.0100 -0.0049  
Y 0.0001 0.0000 0.0047 0.0055 -0.0033 -0.0015  
Z -0.0012 -0.0005 -0.0080 -0.0097 0.0061 0.0030

AT. 136 C X -0.0004 0.0002 -0.0132 0.0158 0.0100 -0.0049  
Y -0.0001 0.0000 -0.0047 0.0055 0.0033 -0.0015  
Z 0.0012 -0.0005 0.0080 -0.0097 -0.0061 0.0030

AT. 137 H X 0.0016 0.0022 -0.0504 -0.0597 0.0377 0.0182  
Y 0.0037 0.0021 0.0031 0.0040 -0.0027 -0.0015  
Z 0.0045 0.0024 0.0148 0.0179 -0.0119 -0.0061

AT. 138 H X -0.0016 0.0022 0.0504 -0.0597 -0.0377 0.0182  
Y -0.0037 0.0021 -0.0031 0.0040 0.0027 -0.0015  
Z -0.0045 0.0024 -0.0148 0.0179 0.0119 -0.0061

AT. 139 H X -0.0032 -0.0030 -0.0275 -0.0331 0.0213 0.0109  
Y 0.0043 0.0046 -0.0106 -0.0120 0.0066 0.0025  
Z 0.0024 0.0021 0.0462 0.0553 -0.0352 -0.0175

AT. 140 H X 0.0032 -0.0030 0.0275 -0.0331 -0.0213 0.0109  
Y -0.0043 0.0046 0.0106 -0.0120 -0.0066 0.0025  
Z -0.0024 0.0021 -0.0462 0.0553 0.0352 -0.0175

AT. 141 H X -0.0026 -0.0038 -0.0421 -0.0503 0.0328 0.0165  
Y -0.0034 -0.0019 -0.0335 -0.0400 0.0255 0.0125  
Z 0.0015 0.0000 0.0109 0.0128 -0.0078 -0.0036

AT. 142 H X 0.0026 -0.0038 0.0421 -0.0503 -0.0328 0.0165  
Y 0.0034 -0.0019 0.0335 -0.0400 -0.0255 0.0125  
Z -0.0015 0.0000 -0.0109 0.0128 0.0078 -0.0036

AT. 143 C X -0.0002 0.0003 0.0084 0.0094 -0.0050 -0.0021  
Y 0.0008 0.0006 0.0009 0.0011 -0.0006 -0.0003  
Z -0.0002 0.0007 0.0061 0.0067 -0.0036 -0.0015

AT. 144 C X 0.0002 0.0003 -0.0084 0.0094 0.0050 -0.0021  
Y -0.0008 0.0006 -0.0009 0.0011 0.0006 -0.0003  
Z 0.0002 0.0007 -0.0061 0.0067 0.0036 -0.0015

AT. 145 H X 0.0030 0.0018 -0.0304 -0.0349 0.0186 0.0082  
Y -0.0008 0.0015 0.0051 0.0058 -0.0027 -0.0011  
Z 0.0022 -0.0002 -0.0100 -0.0114 0.0058 0.0026

AT. 146 H X -0.0030 0.0018 0.0304 -0.0349 -0.0186 0.0082  
Y 0.0008 0.0015 -0.0051 0.0058 0.0027 -0.0011

Z -0.0022 -0.0002 0.0100 -0.0114 -0.0058 0.0026  
AT. 147 H X 0.0014 -0.0002 -0.0184 -0.0198 0.0114 0.0046  
Y -0.0002 0.0009 0.0021 0.0014 -0.0011 -0.0003  
Z 0.0017 0.0001 -0.0304 -0.0334 0.0188 0.0078  
AT. 148 H X -0.0014 -0.0002 0.0184 -0.0198 -0.0114 0.0046  
Y 0.0002 0.0009 -0.0021 0.0014 0.0011 -0.0003  
Z -0.0017 0.0001 0.0304 -0.0334 -0.0188 0.0078  
AT. 149 H X -0.0016 -0.0017 -0.0247 -0.0273 0.0153 0.0064  
Y -0.0001 -0.0017 -0.0167 -0.0190 0.0101 0.0043  
Z -0.0008 -0.0021 -0.0089 -0.0108 0.0053 0.0025  
AT. 150 H X 0.0016 -0.0017 0.0247 -0.0273 -0.0153 0.0064  
Y 0.0001 -0.0017 0.0167 -0.0190 -0.0101 0.0043  
Z 0.0008 -0.0021 0.0089 -0.0108 -0.0053 0.0025  
AT. 151 C X 0.0015 0.0013 0.0107 0.0126 -0.0067 -0.0027  
Y -0.0020 -0.0020 0.0031 0.0036 -0.0020 -0.0008  
Z -0.0009 -0.0001 0.0004 0.0006 0.0001 0.0001  
AT. 152 C X -0.0015 0.0013 -0.0107 0.0126 0.0067 -0.0027  
Y 0.0020 -0.0020 -0.0031 0.0036 0.0020 -0.0008  
Z 0.0009 -0.0001 -0.0004 0.0006 -0.0001 0.0001  
AT. 153 H X 0.0022 0.0020 -0.0400 -0.0445 0.0242 0.0088  
Y 0.0022 0.0007 -0.0104 -0.0134 0.0056 0.0023  
Z 0.0056 0.0043 -0.0001 -0.0030 -0.0007 0.0002  
AT. 154 H X -0.0022 0.0020 0.0400 -0.0445 -0.0242 0.0088  
Y -0.0022 0.0007 0.0104 -0.0134 -0.0056 0.0023  
Z -0.0056 0.0043 0.0001 -0.0030 0.0007 0.0002  
AT. 155 H X -0.0092 -0.0087 -0.0221 -0.0277 0.0142 0.0064  
Y -0.0013 0.0004 -0.0081 -0.0076 0.0059 0.0021  
Z -0.0054 -0.0066 0.0002 -0.0023 -0.0007 0.0003  
AT. 156 H X 0.0092 -0.0087 0.0221 -0.0277 -0.0142 0.0064  
Y 0.0013 0.0004 0.0081 -0.0076 -0.0059 0.0021  
Z 0.0054 -0.0066 -0.0002 -0.0023 0.0007 0.0003  
AT. 157 O X -0.0000 0.0000 0.0002 0.0001 -0.0001 0.0000

Y -0.0001 -0.0000 0.0004 0.0004 -0.0002 -0.0001  
Z -0.0000 -0.0000 -0.0002 0.0000 -0.0000 -0.0001  
AT. 158 O X 0.0000 0.0000 -0.0002 0.0001 0.0001 0.0000  
Y 0.0001 -0.0000 -0.0004 0.0004 0.0002 -0.0001  
Z 0.0000 -0.0000 0.0002 0.0000 0.0000 -0.0001  
AT. 159 O X -0.0000 0.0000 0.0003 0.0001 -0.0001 0.0000  
Y 0.0001 -0.0000 -0.0002 -0.0003 0.0001 0.0000  
Z -0.0000 0.0000 -0.0000 -0.0002 0.0001 0.0000  
AT. 160 O X 0.0000 0.0000 -0.0003 0.0001 0.0001 0.0000  
Y -0.0001 -0.0000 0.0002 -0.0003 -0.0001 0.0000  
Z 0.0000 0.0000 0.0000 -0.0002 -0.0001 0.0000  
AT. 161 H X 0.0021 0.0008 -0.0059 -0.0053 0.0047 0.0011  
Y 0.0000 -0.0004 -0.0020 -0.0018 0.0008 -0.0001  
Z 0.0005 0.0005 0.0039 0.0037 -0.0004 0.0015  
AT. 162 H X -0.0021 0.0008 0.0059 -0.0053 -0.0047 0.0011  
Y -0.0000 -0.0004 0.0020 -0.0018 -0.0008 -0.0001  
Z -0.0005 0.0005 -0.0039 0.0037 0.0004 0.0015  
AT. 163 H X -0.0003 -0.0009 -0.0021 0.0005 -0.0001 -0.0006  
Y -0.0006 0.0002 -0.0011 0.0002 0.0001 -0.0001  
Z 0.0003 0.0005 0.0005 -0.0000 -0.0001 0.0004  
AT. 164 H X 0.0003 -0.0009 0.0021 0.0005 0.0001 -0.0006  
Y 0.0006 0.0002 0.0011 0.0002 -0.0001 -0.0001  
Z -0.0003 0.0005 -0.0005 -0.0000 0.0001 0.0004  
AT. 165 O X 0.0006 0.0006 0.0002 0.0002 -0.0004 -0.0002  
Y 0.0001 0.0003 0.0001 0.0001 -0.0001 0.0000  
Z -0.0002 -0.0004 -0.0002 -0.0001 0.0002 0.0000  
AT. 166 O X -0.0006 0.0006 -0.0002 0.0002 0.0004 -0.0002  
Y -0.0001 0.0003 -0.0001 0.0001 0.0001 0.0000  
Z 0.0002 -0.0004 0.0002 -0.0001 -0.0002 0.0000  
AT. 167 H X -0.0038 -0.0039 -0.0008 -0.0009 0.0032 0.0015  
Y 0.0015 0.0011 -0.0006 -0.0002 -0.0023 -0.0021  
Z 0.0099 0.0108 0.0038 0.0036 -0.0072 -0.0014

AT.168 H X 0.0038 -0.0039 0.0008 -0.0009 -0.0032 0.0015

Y -0.0015 0.0011 0.0006 -0.0002 0.0023 -0.0021

Z -0.0099 0.0108 -0.0038 0.0036 0.0072 -0.0014

AT.169 O X -0.0004 -0.0002 -0.0001 -0.0001 0.0002 0.0001

Y -0.0002 -0.0004 -0.0001 -0.0001 0.0002 0.0001

Z -0.0002 -0.0006 -0.0001 -0.0001 0.0003 0.0001

AT.170 O X 0.0004 -0.0002 0.0001 -0.0001 -0.0002 0.0001

Y 0.0002 -0.0004 0.0001 -0.0001 -0.0002 0.0001

Z 0.0002 -0.0006 0.0001 -0.0001 -0.0003 0.0001

AT.171 H X 0.0014 -0.0025 0.0001 -0.0006 0.0003 0.0000

Y 0.0001 0.0005 -0.0001 -0.0003 -0.0003 0.0000

Z -0.0025 0.0041 -0.0001 -0.0005 -0.0008 -0.0002

AT.172 H X -0.0014 -0.0025 -0.0001 -0.0006 -0.0003 0.0000

Y -0.0001 0.0005 0.0001 -0.0003 0.0003 0.0000

Z 0.0025 0.0041 0.0001 -0.0005 0.0008 -0.0002

FREQ(CM\*\*-1) 1430.80 1431.50 1431.75 1433.88 1440.83 1441.52

AT. 1 I X -0.0000 -0.0000 0.0000 0.0000 -0.0000 -0.0000

Y 0.0000 -0.0000 -0.0000 -0.0000 -0.0000 -0.0000

Z 0.0000 -0.0000 0.0000 0.0000 0.0000 -0.0000

AT. 2 I X -0.0000 0.0000 -0.0000 0.0000 -0.0000 0.0000

Y 0.0000 0.0000 0.0000 -0.0000 -0.0000 0.0000

Z 0.0000 0.0000 -0.0000 0.0000 0.0000 0.0000

AT. 3 I X 0.0000 0.0000 -0.0000 0.0000 0.0000 0.0000

Y 0.0000 -0.0000 0.0000 0.0000 0.0000 0.0000

Z 0.0000 0.0000 0.0000 0.0000 -0.0000 -0.0000

AT. 4 I X 0.0000 -0.0000 0.0000 0.0000 0.0000 -0.0000

Y 0.0000 0.0000 -0.0000 0.0000 0.0000 -0.0000

Z 0.0000 -0.0000 -0.0000 0.0000 -0.0000 0.0000

AT. 5 O X -0.0002 -0.0003 -0.0002 -0.0001 -0.0010 -0.0010

Y 0.0000 0.0001 0.0001 0.0001 0.0007 0.0007

Z -0.0003 -0.0002 -0.0000 0.0001 0.0005 0.0005  
AT. 6 O X -0.0002 0.0003 0.0002 -0.0001 -0.0010 0.0010  
Y 0.0000 -0.0001 -0.0001 0.0001 0.0007 -0.0007  
Z -0.0003 0.0002 0.0000 0.0001 0.0005 -0.0005  
AT. 7 O X 0.0009 0.0008 0.0002 -0.0001 0.0013 0.0011  
Y -0.0007 -0.0005 -0.0002 -0.0000 -0.0008 -0.0006  
Z -0.0001 -0.0001 -0.0001 -0.0000 -0.0001 -0.0001  
AT. 8 O X 0.0009 -0.0008 -0.0002 -0.0001 0.0013 -0.0011  
Y -0.0007 0.0005 0.0002 -0.0000 -0.0008 0.0006  
Z -0.0001 0.0001 0.0001 -0.0000 -0.0001 0.0001  
AT. 9 N X 0.0003 0.0003 0.0001 -0.0001 0.0002 0.0001  
Y 0.0015 0.0015 0.0006 -0.0002 0.0032 0.0030  
Z 0.0024 0.0023 0.0009 -0.0004 0.0006 0.0006  
AT. 10 N X 0.0003 -0.0003 -0.0001 -0.0001 0.0002 -0.0001  
Y 0.0015 -0.0015 -0.0006 -0.0002 0.0032 -0.0030  
Z 0.0024 -0.0023 -0.0009 -0.0004 0.0006 -0.0006  
AT. 11 N X 0.0018 0.0017 0.0007 -0.0003 0.0002 -0.0000  
Y -0.0027 -0.0027 -0.0011 0.0004 -0.0021 -0.0019  
Z 0.0002 0.0006 0.0001 -0.0004 -0.0012 -0.0010  
AT. 12 N X 0.0018 -0.0017 -0.0007 -0.0003 0.0002 0.0000  
Y -0.0027 0.0027 0.0011 0.0004 -0.0021 0.0019  
Z 0.0002 -0.0006 -0.0001 -0.0004 -0.0012 0.0010  
AT. 13 C X 0.0016 0.0014 0.0008 0.0000 0.0028 0.0027  
Y -0.0008 -0.0007 -0.0006 -0.0001 -0.0021 -0.0021  
Z 0.0004 0.0002 0.0001 -0.0002 0.0011 0.0010  
AT. 14 C X 0.0016 -0.0014 -0.0008 0.0000 0.0028 -0.0027  
Y -0.0008 0.0007 0.0006 -0.0001 -0.0021 0.0021  
Z 0.0004 -0.0002 -0.0001 -0.0002 0.0011 -0.0010  
AT. 15 C X -0.0007 -0.0004 -0.0002 -0.0000 -0.0006 -0.0006  
Y 0.0008 0.0003 0.0001 0.0001 -0.0008 -0.0007  
Z -0.0005 -0.0003 -0.0002 0.0000 -0.0002 -0.0002  
AT. 16 C X -0.0007 0.0004 0.0002 -0.0000 -0.0006 0.0006



Y 0.0008 -0.0003 -0.0001 0.0001 -0.0008 0.0007  
Z -0.0005 0.0003 0.0002 0.0000 -0.0002 0.0002  
AT. 17 H X 0.0003 0.0004 0.0002 -0.0002 0.0038 0.0037  
Y -0.0013 0.0007 0.0004 -0.0004 0.0067 0.0062  
Z 0.0024 -0.0005 -0.0004 0.0006 -0.0077 -0.0070  
AT. 18 H X 0.0003 -0.0004 -0.0002 -0.0002 0.0038 -0.0037  
Y -0.0013 -0.0007 -0.0004 -0.0004 0.0067 -0.0062  
Z 0.0024 0.0005 0.0004 0.0006 -0.0077 0.0070  
AT. 19 H X 0.0012 0.0006 0.0001 0.0007 -0.0019 -0.0017  
Y -0.0024 0.0006 0.0003 -0.0009 0.0113 0.0104  
Z -0.0010 0.0001 0.0000 -0.0002 0.0035 0.0033  
AT. 20 H X 0.0012 -0.0006 -0.0001 0.0007 -0.0019 0.0017  
Y -0.0024 -0.0006 -0.0003 -0.0009 0.0113 -0.0104  
Z -0.0010 -0.0001 -0.0000 -0.0002 0.0035 -0.0033  
AT. 21 C X -0.0027 -0.0025 -0.0010 0.0004 -0.0038 -0.0034  
Y 0.0013 0.0011 0.0004 -0.0001 0.0006 0.0003  
Z 0.0019 0.0015 0.0006 -0.0000 0.0039 0.0036  
AT. 22 C X -0.0027 0.0025 0.0010 0.0004 -0.0038 0.0034  
Y 0.0013 -0.0011 -0.0004 -0.0001 0.0006 -0.0003  
Z 0.0019 -0.0015 -0.0006 -0.0000 0.0039 -0.0036  
AT. 23 C X 0.0004 0.0006 0.0004 -0.0002 0.0010 0.0011  
Y 0.0003 0.0001 0.0000 0.0001 0.0001 -0.0000  
Z 0.0004 -0.0001 -0.0001 0.0002 -0.0008 -0.0012  
AT. 24 C X 0.0004 -0.0006 -0.0004 -0.0002 0.0010 -0.0011  
Y 0.0003 -0.0001 -0.0000 0.0001 0.0001 0.0000  
Z 0.0004 0.0001 0.0001 0.0002 -0.0008 0.0012  
AT. 25 H X -0.0013 -0.0012 -0.0006 0.0001 -0.0021 -0.0017  
Y 0.0010 0.0002 0.0000 0.0004 -0.0001 -0.0006  
Z -0.0094 -0.0043 -0.0012 -0.0011 -0.0036 0.0006  
AT. 26 H X -0.0013 0.0012 0.0006 0.0001 -0.0021 0.0017  
Y 0.0010 -0.0002 -0.0000 0.0004 -0.0001 0.0006  
Z -0.0094 0.0043 0.0012 -0.0011 -0.0036 -0.0006

AT. 27 H X 0.0017 0.0004 -0.0007 0.0013 0.0015 0.0004  
Y -0.0079 -0.0040 -0.0014 -0.0010 -0.0032 -0.0004  
Z -0.0041 -0.0022 -0.0006 -0.0007 -0.0027 -0.0013

AT. 28 H X 0.0017 -0.0004 0.0007 0.0013 0.0015 -0.0004  
Y -0.0079 0.0040 0.0014 -0.0010 -0.0032 0.0004  
Z -0.0041 0.0022 0.0006 -0.0007 -0.0027 0.0013

AT. 29 C X -0.0019 -0.0030 -0.0007 0.0009 -0.0085 -0.0085  
Y -0.0010 -0.0008 -0.0007 -0.0002 -0.0012 -0.0009  
Z -0.0034 -0.0041 -0.0015 0.0007 -0.0071 -0.0067

AT. 30 C X -0.0019 0.0030 0.0007 0.0009 -0.0085 0.0085  
Y -0.0010 0.0008 0.0007 -0.0002 -0.0012 0.0009  
Z -0.0034 0.0041 0.0015 0.0007 -0.0071 0.0067

AT. 31 H X 0.0051 0.0117 0.0012 -0.0045 0.0401 0.0395  
Y 0.0066 0.0062 0.0041 0.0005 0.0031 0.0018  
Z 0.0119 0.0153 0.0066 -0.0016 0.0305 0.0281

AT. 32 H X 0.0051 -0.0117 -0.0012 -0.0045 0.0401 -0.0395  
Y 0.0066 -0.0062 -0.0041 0.0005 0.0031 -0.0018  
Z 0.0119 -0.0153 -0.0066 -0.0016 0.0305 -0.0281

AT. 33 H X 0.0132 0.0150 0.0055 -0.0029 0.0339 0.0336  
Y 0.0039 0.0027 0.0033 0.0018 0.0014 0.0002  
Z 0.0051 0.0071 0.0011 -0.0027 0.0207 0.0214

AT. 34 H X 0.0132 -0.0150 -0.0055 -0.0029 0.0339 -0.0336  
Y 0.0039 -0.0027 -0.0033 0.0018 0.0014 -0.0002  
Z 0.0051 -0.0071 -0.0011 -0.0027 0.0207 -0.0214

AT. 35 C X -0.0005 0.0010 -0.0004 -0.0005 0.0060 0.0065  
Y -0.0000 -0.0011 -0.0000 0.0004 -0.0039 -0.0041  
Z 0.0015 0.0033 0.0011 -0.0005 0.0035 0.0028

AT. 36 C X -0.0005 -0.0010 0.0004 -0.0005 0.0060 -0.0065  
Y -0.0000 0.0011 0.0000 0.0004 -0.0039 0.0041  
Z 0.0015 -0.0033 -0.0011 -0.0005 0.0035 -0.0028

AT. 37 C X 0.0002 -0.0001 0.0001 0.0002 0.0004 0.0000  
Y 0.0022 0.0030 0.0008 -0.0004 0.0088 0.0087

Z -0.0021 -0.0029 -0.0009 0.0005 -0.0058 -0.0056  
AT. 38 C X 0.0002 0.0001 -0.0001 0.0002 0.0004 -0.0000  
Y 0.0022 -0.0030 -0.0008 -0.0004 0.0088 -0.0087  
Z -0.0021 0.0029 0.0009 0.0005 -0.0058 0.0056  
AT. 39 H X -0.0047 -0.0040 -0.0020 -0.0004 -0.0073 -0.0049  
Y -0.0088 -0.0107 -0.0019 0.0016 -0.0389 -0.0389  
Z -0.0003 0.0009 -0.0009 -0.0009 0.0103 0.0122  
AT. 40 H X -0.0047 0.0040 0.0020 -0.0004 -0.0073 0.0049  
Y -0.0088 0.0107 0.0019 0.0016 -0.0389 0.0389  
Z -0.0003 -0.0009 0.0009 -0.0009 0.0103 -0.0122  
AT. 41 H X -0.0074 -0.0071 -0.0026 0.0006 -0.0069 -0.0050  
Y -0.0028 -0.0076 -0.0016 0.0008 -0.0338 -0.0335  
Z 0.0087 0.0119 0.0036 -0.0008 0.0342 0.0319  
AT. 42 H X -0.0074 0.0071 0.0026 0.0006 -0.0069 0.0050  
Y -0.0028 0.0076 0.0016 0.0008 -0.0338 0.0335  
Z 0.0087 -0.0119 -0.0036 -0.0008 0.0342 -0.0319  
AT. 43 C X 0.0072 0.0067 0.0030 -0.0007 0.0038 0.0030  
Y 0.0035 0.0033 0.0013 -0.0004 0.0036 0.0032  
Z -0.0098 -0.0091 -0.0039 0.0011 -0.0057 -0.0049  
AT. 44 C X 0.0072 -0.0067 -0.0030 -0.0007 0.0038 -0.0030  
Y 0.0035 -0.0033 -0.0013 -0.0004 0.0036 -0.0032  
Z -0.0098 0.0091 0.0039 0.0011 -0.0057 0.0049  
AT. 45 H X -0.0324 -0.0290 -0.0129 0.0030 -0.0206 -0.0174  
Y -0.0133 -0.0120 -0.0052 0.0013 -0.0092 -0.0084  
Z 0.0339 0.0303 0.0135 -0.0030 0.0237 0.0205  
AT. 46 H X -0.0324 0.0290 0.0129 0.0030 -0.0206 0.0174  
Y -0.0133 0.0120 0.0052 0.0013 -0.0092 0.0084  
Z 0.0339 -0.0303 -0.0135 -0.0030 0.0237 -0.0205  
AT. 47 H X -0.0297 -0.0281 -0.0119 0.0033 -0.0162 -0.0127  
Y -0.0064 -0.0058 -0.0028 0.0002 -0.0031 -0.0020  
Z 0.0322 0.0306 0.0128 -0.0041 0.0153 0.0117  
AT. 48 H X -0.0297 0.0281 0.0119 0.0033 -0.0162 0.0127

Y -0.0064 0.0058 0.0028 0.0002 -0.0031 0.0020  
Z 0.0322 -0.0306 -0.0128 -0.0041 0.0153 -0.0117  
AT. 49 C X -0.0113 -0.0104 -0.0048 0.0012 -0.0011 -0.0001  
Y 0.0048 0.0040 0.0020 -0.0003 -0.0015 -0.0018  
Z 0.0141 0.0126 0.0057 -0.0016 0.0039 0.0035  
AT. 50 C X -0.0113 0.0104 0.0048 0.0012 -0.0011 0.0001  
Y 0.0048 -0.0040 -0.0020 -0.0003 -0.0015 0.0018  
Z 0.0141 -0.0126 -0.0057 -0.0016 0.0039 -0.0035  
AT. 51 C X -0.0004 -0.0007 -0.0002 0.0001 -0.0021 -0.0018  
Y -0.0084 -0.0076 -0.0034 0.0009 -0.0049 -0.0040  
Z -0.0125 -0.0113 -0.0050 0.0015 -0.0071 -0.0062  
AT. 52 C X -0.0004 0.0007 0.0002 0.0001 -0.0021 0.0018  
Y -0.0084 0.0076 0.0034 0.0009 -0.0049 0.0040  
Z -0.0125 0.0113 0.0050 0.0015 -0.0071 0.0062  
AT. 53 H X 0.0062 0.0071 0.0032 -0.0011 0.0067 0.0053  
Y 0.0374 0.0356 0.0158 -0.0045 0.0224 0.0177  
Z 0.0318 0.0278 0.0124 -0.0030 0.0108 0.0081  
AT. 54 H X 0.0062 -0.0071 -0.0032 -0.0011 0.0067 -0.0053  
Y 0.0374 -0.0356 -0.0158 -0.0045 0.0224 -0.0177  
Z 0.0318 -0.0278 -0.0124 -0.0030 0.0108 -0.0081  
AT. 55 H X 0.0165 0.0175 0.0077 -0.0027 0.0159 0.0135  
Y 0.0356 0.0315 0.0136 -0.0039 0.0218 0.0194  
Z 0.0556 0.0513 0.0223 -0.0067 0.0394 0.0343  
AT. 56 H X 0.0165 -0.0175 -0.0077 -0.0027 0.0159 -0.0135  
Y 0.0356 -0.0315 -0.0136 -0.0039 0.0218 -0.0194  
Z 0.0556 -0.0513 -0.0223 -0.0067 0.0394 -0.0343  
AT. 57 C X -0.0017 -0.0050 -0.0010 0.0011 0.0066 0.0069  
Y 0.0011 0.0035 0.0007 -0.0009 -0.0051 -0.0051  
Z -0.0012 -0.0022 -0.0003 0.0006 0.0039 0.0034  
AT. 58 C X -0.0017 0.0050 0.0010 0.0011 0.0066 -0.0069  
Y 0.0011 -0.0035 -0.0007 -0.0009 -0.0051 0.0051  
Z -0.0012 0.0022 0.0003 0.0006 0.0039 -0.0034

AT. 59 H X 0.0095 0.0202 0.0029 -0.0055 -0.0423 -0.0396  
Y 0.0022 -0.0051 -0.0010 0.0008 0.0097 0.0126  
Z 0.0086 0.0036 0.0002 -0.0019 -0.0105 -0.0049

AT. 60 H X 0.0095 -0.0202 -0.0029 -0.0055 -0.0423 0.0396  
Y 0.0022 0.0051 0.0010 0.0008 0.0097 -0.0126  
Z 0.0086 -0.0036 -0.0002 -0.0019 -0.0105 0.0049

AT. 61 H X 0.0033 0.0151 0.0041 -0.0027 -0.0241 -0.0277  
Y 0.0006 -0.0080 -0.0010 0.0019 0.0186 0.0198  
Z 0.0030 0.0187 0.0044 -0.0035 -0.0310 -0.0349

AT. 62 H X 0.0033 -0.0151 -0.0041 -0.0027 -0.0241 0.0277  
Y 0.0006 0.0080 0.0010 0.0019 0.0186 -0.0198  
Z 0.0030 -0.0187 -0.0044 -0.0035 -0.0310 0.0349

AT. 63 H X 0.0035 0.0147 0.0042 -0.0024 -0.0223 -0.0263  
Y -0.0126 -0.0199 -0.0038 0.0052 0.0386 0.0355  
Z 0.0059 0.0002 -0.0012 -0.0014 -0.0075 -0.0014

AT. 64 H X 0.0035 -0.0147 -0.0042 -0.0024 -0.0223 0.0263  
Y -0.0126 0.0199 0.0038 0.0052 0.0386 -0.0355  
Z 0.0059 -0.0002 0.0012 -0.0014 -0.0075 0.0014

AT. 65 C X 0.0112 0.0094 0.0046 -0.0016 -0.0072 -0.0054  
Y -0.0063 -0.0051 -0.0026 0.0009 0.0056 0.0043  
Z -0.0142 -0.0125 -0.0061 0.0020 0.0085 0.0071

AT. 66 C X 0.0112 -0.0094 -0.0046 -0.0016 -0.0072 0.0054  
Y -0.0063 0.0051 0.0026 0.0009 0.0056 -0.0043  
Z -0.0142 0.0125 0.0061 0.0020 0.0085 -0.0071

AT. 67 H X -0.0516 -0.0444 -0.0225 0.0079 0.0470 0.0382  
Y 0.0035 -0.0007 0.0008 -0.0006 -0.0154 -0.0086  
Z 0.0314 0.0302 0.0143 -0.0048 -0.0192 -0.0189

AT. 68 H X -0.0516 0.0444 0.0225 0.0079 0.0470 -0.0382  
Y 0.0035 0.0007 -0.0008 -0.0006 -0.0154 0.0086  
Z 0.0314 -0.0302 -0.0143 -0.0048 -0.0192 0.0189

AT. 69 H X -0.0168 -0.0131 -0.0063 0.0027 0.0120 0.0079  
Y 0.0058 0.0048 0.0030 -0.0009 -0.0128 -0.0105

Z 0.0559 0.0441 0.0226 -0.0086 -0.0538 -0.0389  
AT. 70 H X -0.0168 0.0131 0.0063 0.0027 0.0120 -0.0079  
Y 0.0058 -0.0048 -0.0030 -0.0009 -0.0128 0.0105  
Z 0.0559 -0.0441 -0.0226 -0.0086 -0.0538 0.0389  
AT. 71 H X -0.0230 -0.0157 -0.0083 0.0036 0.0262 0.0168  
Y 0.0438 0.0379 0.0186 -0.0066 -0.0352 -0.0289  
Z 0.0321 0.0308 0.0148 -0.0048 -0.0242 -0.0234  
AT. 72 H X -0.0230 0.0157 0.0083 0.0036 0.0262 -0.0168  
Y 0.0438 -0.0379 -0.0186 -0.0066 -0.0352 0.0289  
Z 0.0321 -0.0308 -0.0148 -0.0048 -0.0242 0.0234  
AT. 73 C X 0.0081 0.0066 0.0035 -0.0005 -0.0030 -0.0041  
Y -0.0050 -0.0039 -0.0021 0.0003 0.0027 0.0033  
Z -0.0053 -0.0051 -0.0022 0.0006 -0.0030 -0.0018  
AT. 74 C X 0.0081 -0.0066 -0.0035 -0.0005 -0.0030 0.0041  
Y -0.0050 0.0039 0.0021 0.0003 0.0027 -0.0033  
Z -0.0053 0.0051 0.0022 0.0006 -0.0030 0.0018  
AT. 75 H X -0.0200 -0.0163 -0.0088 0.0016 0.0149 0.0156  
Y 0.0239 0.0205 0.0095 -0.0020 0.0058 0.0012  
Z 0.0148 0.0128 0.0052 -0.0012 0.0167 0.0117  
AT. 76 H X -0.0200 0.0163 0.0088 0.0016 0.0149 -0.0156  
Y 0.0239 -0.0205 -0.0095 -0.0020 0.0058 -0.0012  
Z 0.0148 -0.0128 -0.0052 -0.0012 0.0167 -0.0117  
AT. 77 H X -0.0281 -0.0219 -0.0112 0.0018 0.0037 0.0078  
Y 0.0087 0.0052 0.0040 -0.0002 -0.0221 -0.0200  
Z 0.0154 0.0131 0.0057 -0.0011 0.0151 0.0100  
AT. 78 H X -0.0281 0.0219 0.0112 0.0018 0.0037 -0.0078  
Y 0.0087 -0.0052 -0.0040 -0.0002 -0.0221 0.0200  
Z 0.0154 -0.0131 -0.0057 -0.0011 0.0151 -0.0100  
AT. 79 I X 0.0000 0.0000 0.0000 0.0000 -0.0000 0.0000  
Y -0.0000 -0.0000 -0.0000 -0.0000 0.0000 -0.0000  
Z 0.0000 -0.0000 -0.0000 -0.0000 -0.0000 -0.0000  
AT. 80 I X 0.0000 -0.0000 -0.0000 0.0000 -0.0000 -0.0000

Y -0.0000 0.0000 0.0000 -0.0000 0.0000 0.0000  
Z 0.0000 0.0000 0.0000 -0.0000 -0.0000 0.0000  
AT. 81 I X -0.0000 -0.0000 -0.0000 -0.0000 -0.0000 -0.0000  
Y -0.0000 -0.0000 0.0000 0.0000 -0.0000 -0.0000  
Z 0.0000 -0.0000 0.0000 0.0000 0.0000 0.0000  
AT. 82 I X -0.0000 0.0000 0.0000 -0.0000 -0.0000 0.0000  
Y -0.0000 0.0000 -0.0000 0.0000 -0.0000 0.0000  
Z 0.0000 0.0000 -0.0000 0.0000 0.0000 -0.0000  
AT. 83 O X -0.0000 -0.0000 0.0003 0.0006 -0.0005 -0.0008  
Y 0.0000 -0.0001 0.0000 0.0001 -0.0001 -0.0002  
Z -0.0001 0.0000 -0.0001 0.0000 -0.0002 -0.0003  
AT. 84 O X -0.0000 0.0000 -0.0003 0.0006 -0.0005 0.0008  
Y 0.0000 0.0001 -0.0000 0.0001 -0.0001 0.0002  
Z -0.0001 -0.0000 0.0001 0.0000 -0.0002 0.0003  
AT. 85 O X -0.0000 0.0004 -0.0008 -0.0007 0.0007 0.0010  
Y 0.0000 0.0002 -0.0002 -0.0003 0.0003 0.0004  
Z -0.0000 -0.0000 -0.0001 -0.0000 -0.0001 -0.0001  
AT. 86 O X -0.0000 -0.0004 0.0008 -0.0007 0.0007 -0.0010  
Y 0.0000 -0.0002 0.0002 -0.0003 0.0003 -0.0004  
Z -0.0000 0.0000 0.0001 -0.0000 -0.0001 0.0001  
AT. 87 N X 0.0001 -0.0002 0.0008 0.0008 -0.0004 -0.0007  
Y 0.0001 -0.0004 0.0008 0.0007 -0.0008 -0.0015  
Z 0.0004 -0.0010 0.0023 0.0030 -0.0002 -0.0001  
AT. 88 N X 0.0001 0.0002 -0.0008 0.0008 -0.0004 0.0007  
Y 0.0001 0.0004 -0.0008 0.0007 -0.0008 0.0015  
Z 0.0004 0.0010 -0.0023 0.0030 -0.0002 0.0001  
AT. 89 N X -0.0002 0.0004 -0.0012 -0.0016 0.0000 0.0001  
Y -0.0002 0.0008 -0.0019 -0.0017 0.0006 0.0010  
Z -0.0001 -0.0009 0.0013 0.0014 0.0001 0.0005  
AT. 90 N X -0.0002 -0.0004 0.0012 -0.0016 0.0000 -0.0001  
Y -0.0002 -0.0008 0.0019 -0.0017 0.0006 -0.0010  
Z -0.0001 0.0009 -0.0013 0.0014 0.0001 -0.0005

AT. 91 C X -0.0002 0.0003 -0.0014 -0.0018 0.0011 0.0018  
Y -0.0000 0.0001 -0.0000 0.0000 0.0003 0.0006  
Z 0.0001 0.0004 -0.0002 -0.0005 -0.0002 -0.0005

AT. 92 C X -0.0002 -0.0003 0.0014 -0.0018 0.0011 -0.0018  
Y -0.0000 -0.0001 0.0000 0.0000 0.0003 -0.0006  
Z 0.0001 -0.0004 0.0002 -0.0005 -0.0002 0.0005

AT. 93 C X 0.0001 -0.0000 0.0006 0.0008 -0.0001 -0.0001  
Y 0.0000 -0.0001 -0.0002 -0.0003 0.0004 0.0002  
Z -0.0001 -0.0000 -0.0004 -0.0007 -0.0000 -0.0001

AT. 94 C X 0.0001 0.0000 -0.0006 0.0008 -0.0001 0.0001  
Y 0.0000 0.0001 0.0002 -0.0003 0.0004 -0.0002  
Z -0.0001 0.0000 0.0004 -0.0007 -0.0000 0.0001

AT. 95 H X -0.0001 -0.0014 -0.0048 -0.0089 0.0015 -0.0017  
Y 0.0001 0.0005 0.0028 0.0042 -0.0023 -0.0013  
Z 0.0001 0.0006 0.0007 0.0033 0.0026 0.0045

AT. 96 H X -0.0001 0.0014 0.0048 -0.0089 0.0015 0.0017  
Y 0.0001 -0.0005 -0.0028 0.0042 -0.0023 0.0013  
Z 0.0001 -0.0006 -0.0007 0.0033 0.0026 -0.0045

AT. 97 H X -0.0002 0.0001 -0.0011 -0.0018 -0.0015 -0.0024  
Y 0.0001 0.0002 0.0016 0.0009 -0.0032 -0.0036  
Z 0.0000 0.0000 0.0006 0.0003 -0.0004 -0.0002

AT. 98 H X -0.0002 -0.0001 0.0011 -0.0018 -0.0015 0.0024  
Y 0.0001 -0.0002 -0.0016 0.0009 -0.0032 0.0036  
Z 0.0000 -0.0000 -0.0006 0.0003 -0.0004 0.0002

AT. 99 C X 0.0002 -0.0013 0.0027 0.0023 -0.0018 -0.0028  
Y -0.0002 -0.0005 0.0004 0.0007 -0.0002 0.0000  
Z 0.0003 -0.0002 0.0011 0.0007 -0.0008 -0.0018

AT. 100 C X 0.0002 0.0013 -0.0027 0.0023 -0.0018 0.0028  
Y -0.0002 0.0005 -0.0004 0.0007 -0.0002 -0.0000  
Z 0.0003 0.0002 -0.0011 0.0007 -0.0008 0.0018

AT. 101 C X -0.0001 0.0004 -0.0009 -0.0006 0.0005 0.0010  
Y 0.0001 0.0000 0.0000 0.0001 0.0000 -0.0000



Z 0.0000 0.0003 -0.0006 -0.0001 0.0004 0.0008  
AT.102 C X -0.0001 -0.0004 0.0009 -0.0006 0.0005 -0.0010  
Y 0.0001 -0.0000 -0.0000 0.0001 0.0000 0.0000  
Z 0.0000 -0.0003 0.0006 -0.0001 0.0004 -0.0008  
AT.103 H X 0.0004 -0.0002 0.0009 0.0005 -0.0006 -0.0012  
Y -0.0002 0.0003 -0.0007 -0.0003 0.0005 0.0010  
Z -0.0006 -0.0003 -0.0004 -0.0033 -0.0000 -0.0014  
AT.104 H X 0.0004 0.0002 -0.0009 0.0005 -0.0006 0.0012  
Y -0.0002 -0.0003 0.0007 -0.0003 0.0005 -0.0010  
Z -0.0006 0.0003 0.0004 -0.0033 -0.0000 0.0014  
AT.105 H X 0.0003 -0.0007 0.0004 0.0004 -0.0006 -0.0012  
Y -0.0007 -0.0006 -0.0001 -0.0024 -0.0004 -0.0010  
Z -0.0002 -0.0002 -0.0003 -0.0009 0.0000 0.0000  
AT.106 H X 0.0003 0.0007 -0.0004 0.0004 -0.0006 0.0012  
Y -0.0007 0.0006 0.0001 -0.0024 -0.0004 0.0010  
Z -0.0002 0.0002 0.0003 -0.0009 0.0000 -0.0000  
AT.107 C X -0.0001 -0.0020 0.0031 0.0023 -0.0027 -0.0043  
Y -0.0003 0.0004 -0.0012 -0.0010 0.0008 0.0015  
Z -0.0004 0.0023 -0.0046 -0.0041 0.0029 0.0047  
AT.108 C X -0.0001 0.0020 -0.0031 0.0023 -0.0027 0.0043  
Y -0.0003 -0.0004 0.0012 -0.0010 0.0008 -0.0015  
Z -0.0004 -0.0023 0.0046 -0.0041 0.0029 -0.0047  
AT.109 H X 0.0025 0.0085 -0.0100 -0.0038 0.0149 0.0234  
Y 0.0014 -0.0032 0.0075 0.0065 -0.0035 -0.0063  
Z 0.0016 -0.0070 0.0140 0.0102 -0.0103 -0.0177  
AT.110 H X 0.0025 -0.0085 0.0100 -0.0038 0.0149 -0.0234  
Y 0.0014 0.0032 -0.0075 0.0065 -0.0035 0.0063  
Z 0.0016 0.0070 -0.0140 0.0102 -0.0103 0.0177  
AT.111 H X -0.0014 0.0074 -0.0148 -0.0135 0.0097 0.0162  
Y 0.0026 -0.0009 0.0057 0.0069 -0.0002 -0.0015  
Z 0.0003 -0.0080 0.0140 0.0123 -0.0106 -0.0172  
AT.112 H X -0.0014 -0.0074 0.0148 -0.0135 0.0097 -0.0162

Y 0.0026 0.0009 -0.0057 0.0069 -0.0002 0.0015  
Z 0.0003 0.0080 -0.0140 0.0123 -0.0106 0.0172  
AT. 113 C X -0.0004 0.0030 -0.0054 -0.0041 0.0030 0.0046  
Y -0.0001 0.0013 -0.0018 -0.0013 0.0011 0.0015  
Z 0.0003 -0.0021 0.0044 0.0033 -0.0021 -0.0033  
AT. 114 C X -0.0004 -0.0030 0.0054 -0.0041 0.0030 -0.0046  
Y -0.0001 -0.0013 0.0018 -0.0013 0.0011 -0.0015  
Z 0.0003 0.0021 -0.0044 0.0033 -0.0021 0.0033  
AT. 115 C X 0.0001 -0.0010 0.0018 0.0012 -0.0011 -0.0017  
Y 0.0004 -0.0023 0.0047 0.0027 -0.0033 -0.0054  
Z -0.0003 0.0022 -0.0044 -0.0029 0.0026 0.0042  
AT. 116 C X 0.0001 0.0010 -0.0018 0.0012 -0.0011 0.0017  
Y 0.0004 0.0023 -0.0047 0.0027 -0.0033 0.0054  
Z -0.0003 -0.0022 0.0044 -0.0029 0.0026 -0.0042  
AT. 117 H X 0.0003 0.0038 -0.0044 -0.0010 0.0046 0.0072  
Y -0.0020 0.0106 -0.0212 -0.0139 0.0139 0.0223  
Z 0.0002 -0.0061 0.0090 0.0039 -0.0076 -0.0120  
AT. 118 H X 0.0003 -0.0038 0.0044 -0.0010 0.0046 -0.0072  
Y -0.0020 -0.0106 0.0212 -0.0139 0.0139 -0.0223  
Z 0.0002 0.0061 -0.0090 0.0039 -0.0076 0.0120  
AT. 119 H X 0.0005 0.0003 0.0011 0.0051 0.0032 0.0058  
Y -0.0018 0.0084 -0.0187 -0.0089 0.0142 0.0242  
Z 0.0020 -0.0075 0.0177 0.0101 -0.0123 -0.0209  
AT. 120 H X 0.0005 -0.0003 -0.0011 0.0051 0.0032 -0.0058  
Y -0.0018 -0.0084 0.0187 -0.0089 0.0142 -0.0242  
Z 0.0020 0.0075 -0.0177 0.0101 -0.0123 0.0209  
AT. 121 C X -0.0009 0.0017 -0.0047 -0.0054 0.0005 0.0013  
Y 0.0007 -0.0017 0.0044 0.0045 -0.0013 -0.0024  
Z -0.0011 0.0025 -0.0066 -0.0069 0.0013 0.0025  
AT. 122 C X -0.0009 -0.0017 0.0047 -0.0054 0.0005 -0.0013  
Y 0.0007 0.0017 -0.0044 0.0045 -0.0013 0.0024  
Z -0.0011 -0.0025 0.0066 -0.0069 0.0013 -0.0025

AT.123 H X 0.0037 -0.0052 0.0175 0.0192 -0.0026 -0.0075  
Y -0.0034 0.0064 -0.0183 -0.0185 0.0050 0.0092  
Z 0.0039 -0.0070 0.0204 0.0210 -0.0056 -0.0108

AT.124 H X 0.0037 0.0052 -0.0175 0.0192 -0.0026 0.0075  
Y -0.0034 -0.0064 0.0183 -0.0185 0.0050 -0.0092  
Z 0.0039 0.0070 -0.0204 0.0210 -0.0056 0.0108

AT.125 H X 0.0030 -0.0084 0.0206 0.0238 -0.0034 -0.0068  
Y -0.0015 0.0052 -0.0119 -0.0138 0.0034 0.0051  
Z 0.0026 -0.0066 0.0170 0.0203 -0.0013 -0.0039

AT.126 H X 0.0030 0.0084 -0.0206 0.0238 -0.0034 0.0068  
Y -0.0015 -0.0052 0.0119 -0.0138 0.0034 -0.0051  
Z 0.0026 0.0066 -0.0170 0.0203 -0.0013 0.0039

AT.127 C X 0.0016 -0.0032 0.0084 0.0104 0.0000 0.0002  
Y 0.0001 0.0003 -0.0006 -0.0004 0.0005 0.0009  
Z 0.0015 -0.0031 0.0084 0.0086 -0.0010 -0.0016

AT.128 C X 0.0016 0.0032 -0.0084 0.0104 0.0000 -0.0002  
Y 0.0001 -0.0003 0.0006 -0.0004 0.0005 -0.0009  
Z 0.0015 0.0031 -0.0084 0.0086 -0.0010 0.0016

AT.129 C X -0.0004 0.0008 -0.0022 -0.0028 0.0000 0.0000  
Y -0.0009 0.0014 -0.0037 -0.0049 0.0008 0.0017  
Z -0.0014 0.0025 -0.0067 -0.0083 0.0013 0.0026

AT.130 C X -0.0004 -0.0008 0.0022 -0.0028 0.0000 -0.0000  
Y -0.0009 -0.0014 0.0037 -0.0049 0.0008 -0.0017  
Z -0.0014 -0.0025 0.0067 -0.0083 0.0013 -0.0026

AT.131 H X 0.0011 -0.0016 0.0044 0.0063 0.0006 0.0002  
Y 0.0044 -0.0071 0.0189 0.0265 -0.0041 -0.0074  
Z 0.0033 -0.0051 0.0136 0.0195 -0.0004 -0.0017

AT.132 H X 0.0011 0.0016 -0.0044 0.0063 0.0006 -0.0002  
Y 0.0044 0.0071 -0.0189 0.0265 -0.0041 0.0074  
Z 0.0033 0.0051 -0.0136 0.0195 -0.0004 0.0017

AT.133 H X -0.0002 0.0008 -0.0011 -0.0017 0.0023 0.0022  
Y 0.0040 -0.0077 0.0206 0.0249 -0.0042 -0.0089

Z 0.0061 -0.0115 0.0305 0.0376 -0.0074 -0.0149  
AT. 134 H X -0.0002 -0.0008 0.0011 -0.0017 0.0023 -0.0022  
Y 0.0040 0.0077 -0.0206 0.0249 -0.0042 0.0089  
Z 0.0061 0.0115 -0.0305 0.0376 -0.0074 0.0149  
AT. 135 C X 0.0016 -0.0043 0.0103 0.0128 0.0022 0.0043  
Y 0.0004 -0.0014 0.0031 0.0037 0.0006 0.0013  
Z -0.0009 0.0029 -0.0065 -0.0077 -0.0013 -0.0024  
AT. 136 C X 0.0016 0.0043 -0.0103 0.0128 0.0022 -0.0043  
Y 0.0004 0.0014 -0.0031 0.0037 0.0006 -0.0013  
Z -0.0009 -0.0029 0.0065 -0.0077 -0.0013 0.0024  
AT. 137 H X -0.0063 0.0160 -0.0388 -0.0498 -0.0123 -0.0234  
Y 0.0008 -0.0030 0.0062 0.0063 0.0004 0.0002  
Z 0.0028 -0.0078 0.0179 0.0212 0.0040 0.0066  
AT. 138 H X -0.0063 -0.0160 0.0388 -0.0498 -0.0123 0.0234  
Y 0.0008 0.0030 -0.0062 0.0063 0.0004 -0.0002  
Z 0.0028 0.0078 -0.0179 0.0212 0.0040 -0.0066  
AT. 139 H X -0.0036 0.0086 -0.0215 -0.0294 -0.0081 -0.0148  
Y -0.0005 0.0017 -0.0037 -0.0040 -0.0016 -0.0040  
Z 0.0057 -0.0140 0.0346 0.0464 0.0121 0.0228  
AT. 140 H X -0.0036 -0.0086 0.0215 -0.0294 -0.0081 0.0148  
Y -0.0005 -0.0017 0.0037 -0.0040 -0.0016 0.0040  
Z 0.0057 0.0140 -0.0346 0.0464 0.0121 -0.0228  
AT. 141 H X -0.0058 0.0138 -0.0342 -0.0470 -0.0120 -0.0221  
Y -0.0047 0.0128 -0.0297 -0.0371 -0.0080 -0.0145  
Z 0.0016 -0.0053 0.0111 0.0124 0.0022 0.0039  
AT. 142 H X -0.0058 -0.0138 0.0342 -0.0470 -0.0120 0.0221  
Y -0.0047 -0.0128 0.0297 -0.0371 -0.0080 0.0145  
Z 0.0016 0.0053 -0.0111 0.0124 0.0022 -0.0039  
AT. 143 C X -0.0016 0.0066 -0.0141 -0.0141 0.0006 -0.0022  
Y -0.0003 0.0011 -0.0024 -0.0022 -0.0000 -0.0008  
Z -0.0013 0.0050 -0.0109 -0.0108 0.0005 -0.0014  
AT. 144 C X -0.0016 -0.0066 0.0141 -0.0141 0.0006 0.0022

Y -0.0003 -0.0011 0.0024 -0.0022 -0.0000 0.0008  
Z -0.0013 -0.0050 0.0109 -0.0108 0.0005 0.0014  
AT. 145 H X 0.0061 -0.0275 0.0576 0.0559 -0.0021 0.0122  
Y -0.0016 0.0061 -0.0125 -0.0141 0.0017 0.0010  
Z 0.0024 -0.0106 0.0215 0.0227 -0.0021 0.0010  
AT. 146 H X 0.0061 0.0275 -0.0576 0.0559 -0.0021 -0.0122  
Y -0.0016 -0.0061 0.0125 -0.0141 0.0017 -0.0010  
Z 0.0024 0.0106 -0.0215 0.0227 -0.0021 -0.0010  
AT. 147 H X 0.0030 -0.0150 0.0313 0.0296 -0.0010 0.0061  
Y 0.0004 -0.0000 0.0009 -0.0005 0.0007 0.0026  
Z 0.0054 -0.0256 0.0541 0.0508 -0.0013 0.0119  
AT. 148 H X 0.0030 0.0150 -0.0313 0.0296 -0.0010 -0.0061  
Y 0.0004 0.0000 -0.0009 -0.0005 0.0007 -0.0026  
Z 0.0054 0.0256 -0.0541 0.0508 -0.0013 -0.0119  
AT. 149 H X 0.0040 -0.0215 0.0440 0.0432 -0.0015 0.0093  
Y 0.0037 -0.0165 0.0341 0.0344 -0.0020 0.0050  
Z 0.0030 -0.0120 0.0246 0.0253 -0.0020 0.0028  
AT. 150 H X 0.0040 0.0215 -0.0440 0.0432 -0.0015 -0.0093  
Y 0.0037 0.0165 -0.0341 0.0344 -0.0020 -0.0050  
Z 0.0030 0.0120 -0.0246 0.0253 -0.0020 -0.0028  
AT. 151 C X -0.0010 0.0000 -0.0024 -0.0047 -0.0026 -0.0039  
Y -0.0002 -0.0003 -0.0002 -0.0007 -0.0009 -0.0014  
Z -0.0005 0.0011 -0.0028 -0.0031 0.0008 0.0015  
AT. 152 C X -0.0010 -0.0000 0.0024 -0.0047 -0.0026 0.0039  
Y -0.0002 0.0003 0.0002 -0.0007 -0.0009 0.0014  
Z -0.0005 -0.0011 0.0028 -0.0031 0.0008 -0.0015  
AT. 153 H X 0.0033 -0.0008 0.0106 0.0173 0.0090 0.0131  
Y 0.0021 -0.0021 0.0074 0.0109 -0.0001 -0.0016  
Z 0.0015 -0.0016 0.0043 0.0069 -0.0033 -0.0069  
AT. 154 H X 0.0033 0.0008 -0.0106 0.0173 0.0090 -0.0131  
Y 0.0021 0.0021 -0.0074 0.0109 -0.0001 0.0016  
Z 0.0015 0.0016 -0.0043 0.0069 -0.0033 0.0069

AT.155 H X 0.0031 -0.0004 0.0070 0.0123 0.0064 0.0097  
Y -0.0004 0.0021 -0.0029 -0.0037 0.0053 0.0095  
Z 0.0013 -0.0017 0.0038 0.0063 -0.0029 -0.0062

AT.156 H X 0.0031 0.0004 -0.0070 0.0123 0.0064 -0.0097  
Y -0.0004 -0.0021 0.0029 -0.0037 0.0053 -0.0095  
Z 0.0013 0.0017 -0.0038 0.0063 -0.0029 0.0062

AT.157 O X -0.0000 -0.0000 0.0001 0.0001 -0.0000 -0.0000  
Y -0.0000 -0.0001 0.0005 0.0004 -0.0001 0.0001  
Z 0.0001 -0.0000 0.0001 -0.0002 0.0002 0.0001

AT.158 O X -0.0000 0.0000 -0.0001 0.0001 -0.0000 0.0000  
Y -0.0000 0.0001 -0.0005 0.0004 -0.0001 -0.0001  
Z 0.0001 0.0000 -0.0001 -0.0002 0.0002 -0.0001

AT.159 O X -0.0001 0.0000 0.0001 0.0002 -0.0002 0.0001  
Y 0.0000 0.0001 -0.0003 -0.0002 0.0000 -0.0001  
Z 0.0000 0.0001 -0.0003 -0.0000 -0.0000 -0.0001

AT.160 O X -0.0001 -0.0000 -0.0001 0.0002 -0.0002 -0.0001  
Y 0.0000 -0.0001 0.0003 -0.0002 0.0000 0.0001  
Z 0.0000 -0.0001 0.0003 -0.0000 -0.0000 0.0001

AT.161 H X 0.0008 0.0015 -0.0069 -0.0050 0.0002 -0.0019  
Y 0.0002 0.0006 -0.0019 -0.0019 0.0005 -0.0001  
Z -0.0010 -0.0026 0.0033 0.0039 -0.0023 -0.0010

AT.162 H X 0.0008 -0.0015 0.0069 -0.0050 0.0002 0.0019  
Y 0.0002 -0.0006 0.0019 -0.0019 0.0005 0.0001  
Z -0.0010 0.0026 -0.0033 0.0039 -0.0023 0.0010

AT.163 H X 0.0016 -0.0012 0.0018 -0.0015 0.0025 -0.0006  
Y 0.0001 0.0004 0.0008 -0.0008 0.0001 0.0006  
Z -0.0009 0.0009 -0.0004 0.0003 -0.0012 0.0007

AT.164 H X 0.0016 0.0012 -0.0018 -0.0015 0.0025 0.0006  
Y 0.0001 -0.0004 -0.0008 -0.0008 0.0001 -0.0006  
Z -0.0009 -0.0009 0.0004 0.0003 -0.0012 -0.0007

AT.165 O X -0.0001 -0.0003 0.0002 0.0004 -0.0005 -0.0004  
Y -0.0002 -0.0001 0.0002 0.0001 -0.0002 -0.0001

Z 0.0003 0.0001 -0.0002 -0.0001 0.0004 0.0002  
AT.166 O X -0.0001 0.0003 -0.0002 0.0004 -0.0005 0.0004  
Y -0.0002 0.0001 -0.0002 0.0001 -0.0002 0.0001  
Z 0.0003 -0.0001 0.0002 -0.0001 0.0004 -0.0002

AT.167 H X 0.0014 0.0020 -0.0017 -0.0024 0.0042 0.0032  
Y -0.0011 -0.0002 0.0009 0.0007 -0.0018 -0.0020  
Z -0.0030 -0.0065 0.0034 0.0061 -0.0115 -0.0076

AT.168 H X 0.0014 -0.0020 0.0017 -0.0024 0.0042 -0.0032  
Y -0.0011 0.0002 -0.0009 0.0007 -0.0018 0.0020  
Z -0.0030 0.0065 -0.0034 0.0061 -0.0115 0.0076

AT.169 O X -0.0001 0.0003 -0.0000 -0.0002 0.0002 0.0003  
Y 0.0003 0.0001 -0.0002 -0.0002 0.0004 0.0001  
Z 0.0003 0.0002 -0.0003 -0.0002 0.0004 0.0003

AT.170 O X -0.0001 -0.0003 0.0000 -0.0002 0.0002 -0.0003  
Y 0.0003 -0.0001 0.0002 -0.0002 0.0004 -0.0001  
Z 0.0003 -0.0002 0.0003 -0.0002 0.0004 -0.0003

AT.171 H X 0.0016 -0.0003 -0.0009 -0.0002 0.0016 -0.0003  
Y -0.0018 0.0005 0.0014 -0.0000 -0.0006 0.0004  
Z -0.0053 0.0014 0.0046 -0.0006 -0.0019 0.0007

AT.172 H X 0.0016 0.0003 0.0009 -0.0002 0.0016 0.0003  
Y -0.0018 -0.0005 -0.0014 -0.0000 -0.0006 -0.0004  
Z -0.0053 -0.0014 -0.0046 -0.0006 -0.0019 -0.0007

FREQ(CM\*\*-1) 1441.96 1442.77 1445.01 1445.43 1445.77 1447.20

AT. 1 I X -0.0000 0.0000 0.0000 0.0000 0.0000 0.0000  
Y -0.0000 0.0000 0.0000 -0.0000 0.0000 0.0000  
Z -0.0000 -0.0000 0.0000 0.0000 -0.0000 0.0000

AT. 2 I X 0.0000 0.0000 -0.0000 -0.0000 0.0000 0.0000  
Y 0.0000 0.0000 -0.0000 0.0000 0.0000 0.0000  
Z 0.0000 -0.0000 -0.0000 -0.0000 -0.0000 0.0000

AT. 3 I X -0.0000 0.0000 0.0000 0.0000 0.0000 0.0000

Y 0.0000 0.0000 0.0000 -0.0000 0.0000 0.0000  
Z 0.0000 0.0000 0.0000 -0.0000 0.0000 -0.0000  
AT. 4 I X 0.0000 0.0000 -0.0000 -0.0000 0.0000 0.0000  
Y -0.0000 0.0000 -0.0000 0.0000 0.0000 0.0000  
Z -0.0000 0.0000 -0.0000 0.0000 0.0000 -0.0000  
AT. 5 O X -0.0004 -0.0003 0.0003 0.0002 0.0005 -0.0001  
Y 0.0003 0.0002 -0.0004 -0.0002 -0.0006 0.0000  
Z 0.0002 0.0002 -0.0006 -0.0001 -0.0007 0.0001  
AT. 6 O X 0.0004 -0.0003 -0.0003 -0.0002 0.0005 -0.0001  
Y -0.0003 0.0002 0.0004 0.0002 -0.0006 0.0000  
Z -0.0002 0.0002 0.0006 0.0001 -0.0007 0.0001  
AT. 7 O X 0.0006 0.0003 0.0001 -0.0002 -0.0001 0.0000  
Y -0.0004 -0.0002 -0.0002 0.0001 -0.0001 -0.0000  
Z -0.0000 -0.0000 -0.0000 0.0000 0.0000 0.0001  
AT. 8 O X -0.0006 0.0003 -0.0001 0.0002 -0.0001 0.0000  
Y 0.0004 -0.0002 0.0002 -0.0001 -0.0001 -0.0000  
Z 0.0000 -0.0000 0.0000 -0.0000 0.0000 0.0001  
AT. 9 N X -0.0000 0.0001 0.0010 0.0001 0.0010 -0.0002  
Y 0.0015 0.0009 -0.0001 -0.0006 -0.0007 -0.0001  
Z 0.0001 -0.0001 0.0002 -0.0000 0.0010 -0.0001  
AT. 10 N X 0.0000 0.0001 -0.0010 -0.0001 0.0010 -0.0002  
Y -0.0015 0.0009 0.0001 0.0006 -0.0007 -0.0001  
Z -0.0001 -0.0001 -0.0002 0.0000 0.0010 -0.0001  
AT. 11 N X -0.0002 -0.0001 0.0017 0.0003 0.0017 -0.0003  
Y -0.0008 -0.0005 -0.0015 0.0001 -0.0012 0.0004  
Z -0.0008 -0.0006 -0.0004 0.0002 -0.0001 -0.0002  
AT. 12 N X 0.0002 -0.0001 -0.0017 -0.0003 0.0017 -0.0003  
Y 0.0008 -0.0005 0.0015 -0.0001 -0.0012 0.0004  
Z 0.0008 -0.0006 0.0004 -0.0002 -0.0001 -0.0002  
AT. 13 C X 0.0012 0.0007 -0.0003 -0.0004 -0.0007 0.0001  
Y -0.0009 -0.0006 0.0006 0.0004 0.0012 -0.0001  
Z 0.0007 0.0003 0.0007 -0.0002 -0.0001 -0.0003



AT. 14 C X -0.0012 0.0007 0.0003 0.0004 -0.0007 0.0001  
Y 0.0009 -0.0006 -0.0006 -0.0004 0.0012 -0.0001  
Z -0.0007 0.0003 -0.0007 0.0002 -0.0001 -0.0003

AT. 15 C X -0.0002 0.0001 -0.0001 -0.0001 -0.0003 -0.0000  
Y -0.0004 -0.0003 0.0008 0.0005 0.0017 0.0001  
Z -0.0000 0.0000 -0.0003 -0.0001 -0.0005 0.0000

AT. 16 C X 0.0002 0.0001 0.0001 0.0001 -0.0003 -0.0000  
Y 0.0004 -0.0003 -0.0008 -0.0005 0.0017 0.0001  
Z 0.0000 0.0000 0.0003 0.0001 -0.0005 0.0000

AT. 17 H X 0.0012 -0.0000 -0.0014 -0.0009 -0.0029 -0.0005  
Y 0.0031 0.0019 -0.0034 -0.0024 -0.0084 -0.0005  
Z -0.0038 -0.0027 0.0042 0.0032 0.0109 0.0006

AT. 18 H X -0.0012 -0.0000 0.0014 0.0009 -0.0029 -0.0005  
Y -0.0031 0.0019 0.0034 0.0024 -0.0084 -0.0005  
Z 0.0038 -0.0027 -0.0042 -0.0032 0.0109 0.0006

AT. 19 H X -0.0011 -0.0014 0.0007 0.0010 0.0029 0.0005  
Y 0.0053 0.0032 -0.0057 -0.0043 -0.0134 -0.0011  
Z 0.0016 0.0007 -0.0023 -0.0014 -0.0047 -0.0002

AT. 20 H X 0.0011 -0.0014 -0.0007 -0.0010 0.0029 0.0005  
Y -0.0053 0.0032 0.0057 0.0043 -0.0134 -0.0011  
Z -0.0016 0.0007 0.0023 0.0014 -0.0047 -0.0002

AT. 21 C X -0.0019 -0.0010 -0.0001 0.0005 0.0006 0.0002  
Y 0.0002 0.0000 0.0007 0.0001 0.0008 -0.0001  
Z 0.0019 0.0011 -0.0001 -0.0008 -0.0009 -0.0001

AT. 22 C X 0.0019 -0.0010 0.0001 -0.0005 0.0006 0.0002  
Y -0.0002 0.0000 -0.0007 -0.0001 0.0008 -0.0001  
Z -0.0019 0.0011 0.0001 0.0008 -0.0009 -0.0001

AT. 23 C X 0.0008 0.0006 -0.0006 -0.0001 -0.0010 -0.0001  
Y -0.0001 -0.0000 0.0008 -0.0001 0.0010 0.0000  
Z -0.0008 -0.0004 0.0019 0.0002 0.0025 0.0000

AT. 24 C X -0.0008 0.0006 0.0006 0.0001 -0.0010 -0.0001  
Y 0.0001 -0.0000 -0.0008 0.0001 0.0010 0.0000

Z 0.0008 -0.0004 -0.0019 -0.0002 0.0025 0.0000  
AT. 25 H X -0.0020 -0.0018 -0.0003 0.0007 -0.0000 0.0001  
Y -0.0007 -0.0005 0.0024 -0.0001 0.0030 0.0001  
Z 0.0017 0.0006 -0.0155 0.0014 -0.0182 0.0002  
AT. 26 H X 0.0020 -0.0018 0.0003 -0.0007 -0.0000 0.0001  
Y 0.0007 -0.0005 -0.0024 0.0001 0.0030 0.0001  
Z -0.0017 0.0006 0.0155 -0.0014 -0.0182 0.0002  
AT. 27 H X -0.0006 -0.0010 0.0030 -0.0015 0.0037 -0.0001  
Y 0.0007 0.0001 -0.0134 0.0011 -0.0159 0.0003  
Z -0.0001 -0.0001 -0.0060 0.0011 -0.0070 0.0002  
AT. 28 H X 0.0006 -0.0010 -0.0030 0.0015 0.0037 -0.0001  
Y -0.0007 0.0001 0.0134 -0.0011 -0.0159 0.0003  
Z 0.0001 -0.0001 0.0060 -0.0011 -0.0070 0.0002  
AT. 29 C X -0.0046 -0.0024 0.0057 0.0028 0.0067 0.0001  
Y -0.0007 -0.0006 -0.0008 -0.0002 -0.0007 -0.0001  
Z -0.0037 -0.0022 0.0033 0.0021 0.0038 0.0002  
AT. 30 C X 0.0046 -0.0024 -0.0057 -0.0028 0.0067 0.0001  
Y 0.0007 -0.0006 0.0008 0.0002 -0.0007 -0.0001  
Z 0.0037 -0.0022 -0.0033 -0.0021 0.0038 0.0002  
AT. 31 H X 0.0216 0.0122 -0.0277 -0.0146 -0.0349 -0.0014  
Y 0.0025 0.0025 0.0034 0.0003 0.0043 0.0002  
Z 0.0179 0.0117 -0.0128 -0.0085 -0.0161 -0.0002  
AT. 32 H X -0.0216 0.0122 0.0277 0.0146 -0.0349 -0.0014  
Y -0.0025 0.0025 -0.0034 -0.0003 0.0043 0.0002  
Z -0.0179 0.0117 0.0128 0.0085 -0.0161 -0.0002  
AT. 33 H X 0.0184 0.0098 -0.0183 -0.0097 -0.0216 0.0002  
Y 0.0022 0.0026 0.0046 0.0015 0.0053 0.0009  
Z 0.0105 0.0050 -0.0151 -0.0072 -0.0178 -0.0003  
AT. 34 H X -0.0184 0.0098 0.0183 0.0097 -0.0216 0.0002  
Y -0.0022 0.0026 -0.0046 -0.0015 0.0053 0.0009  
Z -0.0105 0.0050 0.0151 0.0072 -0.0178 -0.0003  
AT. 35 C X 0.0035 0.0016 -0.0074 -0.0026 -0.0080 0.0004

Y -0.0027 -0.0015 0.0054 0.0021 0.0059 -0.0001  
Z 0.0019 0.0013 -0.0034 -0.0015 -0.0029 -0.0001  
AT. 36 C X -0.0035 0.0016 0.0074 0.0026 -0.0080 0.0004  
Y 0.0027 -0.0015 -0.0054 -0.0021 0.0059 -0.0001  
Z -0.0019 0.0013 0.0034 0.0015 -0.0029 -0.0001  
AT. 37 C X 0.0001 0.0002 0.0010 -0.0001 0.0013 -0.0001  
Y 0.0049 0.0027 -0.0061 -0.0028 -0.0074 0.0000  
Z -0.0031 -0.0017 0.0038 0.0018 0.0045 0.0001  
AT. 38 C X -0.0001 0.0002 -0.0010 0.0001 0.0013 -0.0001  
Y -0.0049 0.0027 0.0061 0.0028 -0.0074 0.0000  
Z 0.0031 -0.0017 -0.0038 -0.0018 0.0045 0.0001  
AT. 39 H X -0.0030 -0.0025 -0.0054 0.0018 -0.0069 0.0010  
Y -0.0211 -0.0111 0.0275 0.0127 0.0327 -0.0003  
Z 0.0063 0.0026 -0.0154 -0.0038 -0.0187 0.0010  
AT. 40 H X 0.0030 -0.0025 0.0054 -0.0018 -0.0069 0.0010  
Y 0.0211 -0.0111 -0.0275 -0.0127 0.0327 -0.0003  
Z -0.0063 0.0026 0.0154 0.0038 -0.0187 0.0010  
AT. 41 H X -0.0024 -0.0018 -0.0043 0.0019 -0.0058 0.0013  
Y -0.0194 -0.0109 0.0275 0.0110 0.0330 -0.0011  
Z 0.0181 0.0107 -0.0173 -0.0107 -0.0201 -0.0003  
AT. 42 H X 0.0024 -0.0018 0.0043 -0.0019 -0.0058 0.0013  
Y 0.0194 -0.0109 -0.0275 -0.0110 0.0330 -0.0011  
Z -0.0181 0.0107 0.0173 0.0107 -0.0201 -0.0003  
AT. 43 C X 0.0014 0.0009 0.0041 -0.0001 0.0034 -0.0007  
Y 0.0016 0.0010 0.0013 -0.0005 0.0009 -0.0004  
Z -0.0023 -0.0014 -0.0048 0.0004 -0.0038 0.0011  
AT. 44 C X -0.0014 0.0009 -0.0041 0.0001 0.0034 -0.0007  
Y -0.0016 0.0010 -0.0013 0.0005 0.0009 -0.0004  
Z 0.0023 -0.0014 0.0048 -0.0004 -0.0038 0.0011  
AT. 45 H X -0.0083 -0.0055 -0.0249 0.0004 -0.0202 0.0041  
Y -0.0046 -0.0030 -0.0023 0.0022 -0.0012 0.0013  
Z 0.0104 0.0069 0.0200 -0.0023 0.0158 -0.0041

AT. 46 H X 0.0083 -0.0055 0.0249 -0.0004 -0.0202 0.0041  
Y 0.0046 -0.0030 0.0023 -0.0022 -0.0012 0.0013  
Z -0.0104 0.0069 -0.0200 0.0023 0.0158 -0.0041

AT. 47 H X -0.0054 -0.0037 -0.0142 0.0006 -0.0119 0.0033  
Y -0.0015 -0.0013 0.0018 0.0011 0.0013 0.0002  
Z 0.0041 0.0027 0.0207 0.0009 0.0175 -0.0039

AT. 48 H X 0.0054 -0.0037 0.0142 -0.0006 -0.0119 0.0033  
Y 0.0015 -0.0013 -0.0018 -0.0011 0.0013 0.0002  
Z -0.0041 0.0027 -0.0207 -0.0009 0.0175 -0.0039

AT. 49 C X 0.0002 -0.0001 -0.0043 -0.0004 -0.0040 0.0007  
Y -0.0012 -0.0004 0.0030 0.0005 0.0027 -0.0003  
Z 0.0016 0.0010 0.0057 -0.0003 0.0051 -0.0011

AT. 50 C X -0.0002 -0.0001 0.0043 0.0004 -0.0040 0.0007  
Y 0.0012 -0.0004 -0.0030 -0.0005 0.0027 -0.0003  
Z -0.0016 0.0010 -0.0057 0.0003 0.0051 -0.0011

AT. 51 C X -0.0010 -0.0006 -0.0006 0.0004 -0.0002 0.0003  
Y -0.0016 -0.0011 -0.0059 0.0000 -0.0050 0.0009  
Z -0.0027 -0.0016 -0.0074 0.0003 -0.0063 0.0012

AT. 52 C X 0.0010 -0.0006 0.0006 -0.0004 -0.0002 0.0003  
Y 0.0016 -0.0011 0.0059 -0.0000 -0.0050 0.0009  
Z 0.0027 -0.0016 0.0074 -0.0003 -0.0063 0.0012

AT. 53 H X 0.0029 0.0021 0.0009 -0.0020 -0.0007 -0.0012  
Y 0.0074 0.0054 0.0222 -0.0016 0.0183 -0.0044  
Z 0.0018 0.0016 0.0232 0.0023 0.0218 -0.0026

AT. 54 H X -0.0029 0.0021 -0.0009 0.0020 -0.0007 -0.0012  
Y -0.0074 0.0054 -0.0222 0.0016 0.0183 -0.0044  
Z -0.0018 0.0016 -0.0232 -0.0023 0.0218 -0.0026

AT. 55 H X 0.0071 0.0046 0.0028 -0.0041 0.0000 -0.0024  
Y 0.0084 0.0053 0.0268 0.0004 0.0226 -0.0039  
Z 0.0157 0.0101 0.0378 -0.0022 0.0301 -0.0068

AT. 56 H X -0.0071 0.0046 -0.0028 0.0041 0.0000 -0.0024  
Y -0.0084 0.0053 -0.0268 -0.0004 0.0226 -0.0039

Z -0.0157 0.0101 -0.0378 0.0022 0.0301 -0.0068  
AT. 57 C X 0.0043 0.0022 -0.0030 -0.0010 -0.0060 0.0007  
Y -0.0033 -0.0018 0.0025 0.0009 0.0045 -0.0005  
Z 0.0021 0.0012 -0.0018 -0.0005 -0.0024 0.0003  
AT. 58 C X -0.0043 0.0022 0.0030 0.0010 -0.0060 0.0007  
Y 0.0033 -0.0018 -0.0025 -0.0009 0.0045 -0.0005  
Z -0.0021 0.0012 0.0018 0.0005 -0.0024 0.0003  
AT. 59 H X -0.0268 -0.0154 0.0282 0.0096 0.0385 -0.0033  
Y 0.0085 0.0046 -0.0043 -0.0029 -0.0130 0.0008  
Z -0.0035 -0.0026 0.0114 0.0018 0.0047 -0.0008  
AT. 60 H X 0.0268 -0.0154 -0.0282 -0.0096 0.0385 -0.0033  
Y -0.0085 0.0046 0.0043 0.0029 -0.0130 0.0008  
Z 0.0035 -0.0026 -0.0114 -0.0018 0.0047 -0.0008  
AT. 61 H X -0.0154 -0.0069 0.0098 0.0038 0.0226 -0.0024  
Y 0.0133 0.0074 -0.0094 -0.0048 -0.0185 0.0012  
Z -0.0209 -0.0102 0.0138 0.0058 0.0304 -0.0028  
AT. 62 H X 0.0154 -0.0069 -0.0098 -0.0038 0.0226 -0.0024  
Y -0.0133 0.0074 0.0094 0.0048 -0.0185 0.0012  
Z 0.0209 -0.0102 -0.0138 -0.0058 0.0304 -0.0028  
AT. 63 H X -0.0147 -0.0065 0.0112 0.0039 0.0240 -0.0026  
Y 0.0221 0.0119 -0.0262 -0.0075 -0.0328 0.0034  
Z -0.0025 -0.0026 0.0101 0.0022 0.0026 -0.0001  
AT. 64 H X 0.0147 -0.0065 -0.0112 -0.0039 0.0240 -0.0026  
Y -0.0221 0.0119 0.0262 0.0075 -0.0328 0.0034  
Z 0.0025 -0.0026 -0.0101 -0.0022 0.0026 -0.0001  
AT. 65 C X -0.0021 -0.0017 -0.0093 -0.0011 -0.0081 0.0010  
Y 0.0017 0.0013 0.0068 0.0006 0.0057 -0.0008  
Z 0.0028 0.0020 0.0106 0.0012 0.0098 -0.0012  
AT. 66 C X 0.0021 -0.0017 0.0093 0.0011 -0.0081 0.0010  
Y -0.0017 0.0013 -0.0068 -0.0006 0.0057 -0.0008  
Z -0.0028 0.0020 -0.0106 -0.0012 0.0098 -0.0012  
AT. 67 H X 0.0146 0.0111 0.0641 0.0060 0.0567 -0.0079

Y -0.0028 -0.0042 -0.0178 -0.0009 -0.0103 0.0025  
Z -0.0076 -0.0040 -0.0301 -0.0035 -0.0315 0.0034  
AT. 68 H X -0.0146 0.0111 -0.0641 -0.0060 0.0567 -0.0079  
Y 0.0028 -0.0042 0.0178 0.0009 -0.0103 0.0025  
Z 0.0076 -0.0040 0.0301 0.0035 -0.0315 0.0034  
AT. 69 H X 0.0031 0.0029 0.0152 0.0021 0.0140 -0.0015  
Y -0.0038 -0.0032 -0.0166 -0.0008 -0.0124 0.0025  
Z -0.0147 -0.0132 -0.0686 -0.0068 -0.0576 0.0082  
AT. 70 H X -0.0031 0.0029 -0.0152 -0.0021 0.0140 -0.0015  
Y 0.0038 -0.0032 0.0166 0.0008 -0.0124 0.0025  
Z 0.0147 -0.0132 0.0686 0.0068 -0.0576 0.0082  
AT. 71 H X 0.0065 0.0066 0.0309 0.0032 0.0249 -0.0035  
Y -0.0116 -0.0081 -0.0467 -0.0051 -0.0439 0.0054  
Z -0.0096 -0.0051 -0.0349 -0.0037 -0.0358 0.0042  
AT. 72 H X -0.0065 0.0066 -0.0309 -0.0032 0.0249 -0.0035  
Y 0.0116 -0.0081 0.0467 0.0051 -0.0439 0.0054  
Z 0.0096 -0.0051 0.0349 0.0037 -0.0358 0.0042  
AT. 73 C X -0.0028 -0.0012 0.0110 0.0024 0.0111 -0.0011  
Y 0.0023 0.0011 -0.0079 -0.0018 -0.0078 0.0006  
Z -0.0009 -0.0008 -0.0021 0.0003 -0.0034 0.0007  
AT. 74 C X 0.0028 -0.0012 -0.0110 -0.0024 0.0111 -0.0011  
Y -0.0023 0.0011 0.0079 0.0018 -0.0078 0.0006  
Z 0.0009 -0.0008 0.0021 -0.0003 -0.0034 0.0007  
AT. 75 H X 0.0104 0.0060 -0.0342 -0.0087 -0.0318 0.0023  
Y -0.0009 0.0007 0.0221 0.0029 0.0257 -0.0034  
Z 0.0054 0.0045 0.0065 -0.0017 0.0116 -0.0026  
AT. 76 H X -0.0104 0.0060 0.0342 0.0087 -0.0318 0.0023  
Y 0.0009 0.0007 -0.0221 -0.0029 0.0257 -0.0034  
Z -0.0054 0.0045 -0.0065 0.0017 0.0116 -0.0026  
AT. 77 H X 0.0057 0.0017 -0.0344 -0.0061 -0.0363 0.0041  
Y -0.0120 -0.0072 0.0274 0.0083 0.0225 -0.0009  
Z 0.0051 0.0045 0.0072 -0.0015 0.0121 -0.0027

AT. 78 H X -0.0057 0.0017 0.0344 0.0061 -0.0363 0.0041  
Y 0.0120 -0.0072 -0.0274 -0.0083 0.0225 -0.0009  
Z -0.0051 0.0045 -0.0072 0.0015 0.0121 -0.0027

AT. 79 I X 0.0000 -0.0000 0.0000 -0.0000 0.0000 -0.0000  
Y -0.0000 -0.0000 0.0000 0.0000 0.0000 -0.0000  
Z -0.0000 -0.0000 0.0000 0.0000 0.0000 -0.0000

AT. 80 I X -0.0000 -0.0000 -0.0000 0.0000 0.0000 -0.0000  
Y 0.0000 -0.0000 -0.0000 -0.0000 0.0000 -0.0000  
Z 0.0000 -0.0000 -0.0000 -0.0000 0.0000 -0.0000

AT. 81 I X -0.0000 -0.0000 0.0000 -0.0000 -0.0000 -0.0000  
Y 0.0000 0.0000 -0.0000 0.0000 -0.0000 0.0000  
Z 0.0000 0.0000 0.0000 0.0000 0.0000 0.0000

AT. 82 I X 0.0000 -0.0000 -0.0000 0.0000 -0.0000 -0.0000  
Y -0.0000 0.0000 0.0000 -0.0000 -0.0000 0.0000  
Z -0.0000 0.0000 -0.0000 -0.0000 0.0000 0.0000

AT. 83 O X 0.0010 0.0019 0.0002 -0.0004 0.0003 0.0000  
Y 0.0002 0.0004 0.0001 -0.0002 -0.0000 -0.0001  
Z 0.0002 0.0006 0.0001 -0.0003 0.0001 -0.0003

AT. 84 O X -0.0010 0.0019 -0.0002 0.0004 0.0003 0.0000  
Y -0.0002 0.0004 -0.0001 0.0002 -0.0000 -0.0001  
Z -0.0002 0.0006 -0.0001 0.0003 0.0001 -0.0003

AT. 85 O X -0.0018 -0.0020 -0.0001 -0.0001 0.0000 -0.0007  
Y -0.0007 -0.0009 -0.0000 -0.0001 0.0000 -0.0003  
Z 0.0000 0.0002 0.0000 -0.0002 -0.0001 -0.0001

AT. 86 O X 0.0018 -0.0020 0.0001 0.0001 0.0000 -0.0007  
Y 0.0007 -0.0009 0.0000 0.0001 0.0000 -0.0003  
Z -0.0000 0.0002 -0.0000 0.0002 -0.0001 -0.0001

AT. 87 N X 0.0008 0.0018 0.0004 -0.0010 0.0001 -0.0006  
Y 0.0027 0.0029 0.0002 0.0002 0.0002 0.0010  
Z 0.0007 0.0016 0.0001 0.0005 -0.0000 0.0012

AT. 88 N X -0.0008 0.0018 -0.0004 0.0010 0.0001 -0.0006  
Y -0.0027 0.0029 -0.0002 -0.0002 0.0002 0.0010

Z -0.0007 0.0016 -0.0001 -0.0005 -0.0000 0.0012  
AT. 89 N X -0.0011 -0.0001 0.0005 -0.0030 -0.0002 -0.0031  
Y -0.0023 -0.0019 0.0000 -0.0011 -0.0002 -0.0016  
Z -0.0011 -0.0010 -0.0002 -0.0004 -0.0003 -0.0008  
AT. 90 N X 0.0011 -0.0001 -0.0005 0.0030 -0.0002 -0.0031  
Y 0.0023 -0.0019 -0.0000 0.0011 -0.0002 -0.0016  
Z 0.0011 -0.0010 0.0002 0.0004 -0.0003 -0.0008  
AT. 91 C X -0.0027 -0.0042 -0.0005 0.0003 -0.0006 -0.0007  
Y -0.0008 -0.0011 -0.0002 0.0003 -0.0002 0.0003  
Z 0.0015 0.0012 0.0001 0.0004 0.0000 0.0008  
AT. 92 C X 0.0027 -0.0042 0.0005 -0.0003 -0.0006 -0.0007  
Y 0.0008 -0.0011 0.0002 -0.0003 -0.0002 0.0003  
Z -0.0015 0.0012 -0.0001 -0.0004 0.0000 0.0008  
AT. 93 C X 0.0002 0.0005 -0.0000 0.0002 0.0001 0.0007  
Y -0.0004 -0.0013 -0.0001 0.0008 0.0000 0.0006  
Z -0.0001 -0.0003 0.0001 -0.0004 0.0001 -0.0009  
AT. 94 C X -0.0002 0.0005 0.0000 -0.0002 0.0001 0.0007  
Y 0.0004 -0.0013 0.0001 -0.0008 0.0000 0.0006  
Z 0.0001 -0.0003 -0.0001 0.0004 0.0001 -0.0009  
AT. 95 H X 0.0005 -0.0090 0.0002 0.0025 0.0010 -0.0021  
Y 0.0028 0.0099 0.0008 -0.0037 0.0002 -0.0019  
Z -0.0060 -0.0079 -0.0018 0.0043 -0.0014 0.0067  
AT. 96 H X -0.0005 -0.0090 -0.0002 -0.0025 0.0010 -0.0021  
Y -0.0028 0.0099 -0.0008 0.0037 0.0002 -0.0019  
Z 0.0060 -0.0079 0.0018 -0.0043 -0.0014 0.0067  
AT. 97 H X 0.0045 0.0058 0.0010 -0.0028 0.0004 -0.0032  
Y 0.0059 0.0122 0.0017 -0.0055 0.0007 -0.0049  
Z -0.0000 0.0012 0.0002 -0.0010 0.0001 -0.0010  
AT. 98 H X -0.0045 0.0058 -0.0010 0.0028 0.0004 -0.0032  
Y -0.0059 0.0122 -0.0017 0.0055 0.0007 -0.0049  
Z 0.0000 0.0012 -0.0002 0.0010 0.0001 -0.0010  
AT. 99 C X 0.0053 0.0055 0.0001 0.0008 0.0001 0.0024



Y -0.0003 -0.0001 -0.0002 0.0003 -0.0003 0.0002  
Z 0.0040 0.0037 0.0002 0.0007 0.0005 0.0019  
AT.100 C X -0.0053 0.0055 -0.0001 -0.0008 0.0001 0.0024  
Y 0.0003 -0.0001 0.0002 -0.0003 -0.0003 0.0002  
Z -0.0040 0.0037 -0.0002 -0.0007 0.0005 0.0019  
AT.101 C X -0.0017 -0.0018 -0.0001 0.0004 -0.0000 -0.0001  
Y 0.0003 0.0003 -0.0001 0.0006 0.0001 0.0007  
Z -0.0012 -0.0014 -0.0003 0.0011 -0.0000 0.0008  
AT.102 C X 0.0017 -0.0018 0.0001 -0.0004 -0.0000 -0.0001  
Y -0.0003 0.0003 0.0001 -0.0006 0.0001 0.0007  
Z 0.0012 -0.0014 0.0003 -0.0011 -0.0000 0.0008  
AT.103 H X 0.0027 0.0025 -0.0002 0.0006 -0.0001 0.0013  
Y -0.0016 -0.0016 0.0000 0.0005 0.0001 0.0001  
Z -0.0012 -0.0006 0.0013 -0.0093 -0.0006 -0.0107  
AT.104 H X -0.0027 0.0025 0.0002 -0.0006 -0.0001 0.0013  
Y 0.0016 -0.0016 -0.0000 -0.0005 0.0001 0.0001  
Z 0.0012 -0.0006 -0.0013 0.0093 -0.0006 -0.0107  
AT.105 H X -0.0004 0.0009 0.0002 -0.0045 -0.0008 -0.0044  
Y -0.0019 -0.0004 0.0014 -0.0092 -0.0007 -0.0106  
Z -0.0019 -0.0011 0.0004 -0.0038 -0.0005 -0.0045  
AT.106 H X 0.0004 0.0009 -0.0002 0.0045 -0.0008 -0.0044  
Y 0.0019 -0.0004 -0.0014 0.0092 -0.0007 -0.0106  
Z 0.0019 -0.0011 -0.0004 0.0038 -0.0005 -0.0045  
AT.107 C X 0.0063 0.0087 0.0012 -0.0042 -0.0000 -0.0020  
Y -0.0031 -0.0037 -0.0004 0.0002 -0.0002 -0.0008  
Z -0.0082 -0.0108 -0.0013 0.0032 -0.0001 0.0002  
AT.108 C X -0.0063 0.0087 -0.0012 0.0042 -0.0000 -0.0020  
Y 0.0031 -0.0037 0.0004 -0.0002 -0.0002 -0.0008  
Z 0.0082 -0.0108 0.0013 -0.0032 -0.0001 0.0002  
AT.109 H X -0.0322 -0.0437 -0.0053 0.0254 0.0004 0.0129  
Y 0.0135 0.0165 0.0018 -0.0033 0.0000 0.0009  
Z 0.0326 0.0408 0.0049 -0.0134 0.0001 -0.0025

AT.110 H X 0.0322 -0.0437 0.0053 -0.0254 0.0004 0.0129  
Y -0.0135 0.0165 -0.0018 0.0033 0.0000 0.0009  
Z -0.0326 0.0408 -0.0049 0.0134 0.0001 -0.0025

AT.111 H X -0.0260 -0.0367 -0.0051 0.0120 -0.0010 0.0030  
Y 0.0075 0.0082 0.0013 0.0040 0.0006 0.0046  
Z 0.0251 0.0365 0.0051 -0.0150 0.0007 -0.0060

AT.112 H X 0.0260 -0.0367 0.0051 -0.0120 -0.0010 0.0030  
Y -0.0075 0.0082 -0.0013 -0.0040 0.0006 0.0046  
Z -0.0251 0.0365 -0.0051 0.0150 0.0007 -0.0060

AT.113 C X -0.0063 -0.0094 -0.0017 0.0061 -0.0000 0.0044  
Y -0.0020 -0.0035 -0.0007 0.0039 0.0004 0.0033  
Z 0.0054 0.0071 0.0009 -0.0034 -0.0000 -0.0016

AT.114 C X 0.0063 -0.0094 0.0017 -0.0061 -0.0000 0.0044  
Y 0.0020 -0.0035 0.0007 -0.0039 0.0004 0.0033  
Z -0.0054 0.0071 -0.0009 0.0034 -0.0000 -0.0016

AT.115 C X 0.0024 0.0035 0.0006 -0.0025 -0.0001 -0.0017  
Y 0.0088 0.0113 0.0017 -0.0054 0.0003 -0.0026  
Z -0.0070 -0.0088 -0.0012 0.0039 -0.0002 0.0015

AT.116 C X -0.0024 0.0035 -0.0006 0.0025 -0.0001 -0.0017  
Y -0.0088 0.0113 -0.0017 0.0054 0.0003 -0.0026  
Z 0.0070 -0.0088 0.0012 -0.0039 -0.0002 0.0015

AT.117 H X -0.0084 -0.0140 -0.0031 0.0157 0.0010 0.0115  
Y -0.0357 -0.0467 -0.0068 0.0206 -0.0014 0.0099  
Z 0.0156 0.0238 0.0047 -0.0210 -0.0007 -0.0148

AT.118 H X 0.0084 -0.0140 0.0031 -0.0157 0.0010 0.0115  
Y 0.0357 -0.0467 0.0068 -0.0206 -0.0014 0.0099  
Z -0.0156 0.0238 -0.0047 0.0210 -0.0007 -0.0148

AT.119 H X -0.0057 -0.0102 -0.0033 0.0163 0.0006 0.0126  
Y -0.0390 -0.0495 -0.0077 0.0234 -0.0021 0.0100  
Z 0.0355 0.0436 0.0060 -0.0149 0.0024 -0.0035

AT.120 H X 0.0057 -0.0102 0.0033 -0.0163 0.0006 0.0126  
Y 0.0390 -0.0495 0.0077 -0.0234 -0.0021 0.0100

Z -0.0355 0.0436 -0.0060 0.0149 0.0024 -0.0035  
AT. 121 C X -0.0046 -0.0029 0.0007 -0.0057 -0.0007 -0.0061  
Y 0.0058 0.0047 -0.0001 0.0038 0.0008 0.0048  
Z -0.0068 -0.0053 0.0004 -0.0056 -0.0008 -0.0066  
AT. 122 C X 0.0046 -0.0029 -0.0007 0.0057 -0.0007 -0.0061  
Y -0.0058 0.0047 0.0001 -0.0038 0.0008 0.0048  
Z 0.0068 -0.0053 -0.0004 0.0056 -0.0008 -0.0066  
AT. 123 H X 0.0255 0.0149 -0.0035 0.0312 0.0041 0.0350  
Y -0.0216 -0.0188 -0.0005 -0.0133 -0.0036 -0.0159  
Z 0.0267 0.0216 -0.0002 0.0195 0.0046 0.0229  
AT. 124 H X -0.0255 0.0149 0.0035 -0.0312 0.0041 0.0350  
Y 0.0216 -0.0188 0.0005 0.0133 -0.0036 -0.0159  
Z -0.0267 0.0216 0.0002 -0.0195 0.0046 0.0229  
AT. 125 H X 0.0217 0.0141 -0.0033 0.0249 0.0027 0.0276  
Y -0.0110 -0.0102 -0.0002 -0.0069 -0.0020 -0.0071  
Z 0.0173 0.0085 -0.0043 0.0262 0.0019 0.0284  
AT. 126 H X -0.0217 0.0141 0.0033 -0.0249 0.0027 0.0276  
Y 0.0110 -0.0102 0.0002 0.0069 -0.0020 -0.0071  
Z -0.0173 0.0085 0.0043 -0.0262 0.0019 0.0284  
AT. 127 C X 0.0030 0.0007 -0.0012 0.0090 0.0006 0.0080  
Y -0.0018 -0.0015 0.0000 -0.0000 0.0000 -0.0008  
Z 0.0053 0.0039 -0.0004 0.0059 0.0008 0.0061  
AT. 128 C X -0.0030 0.0007 0.0012 -0.0090 0.0006 0.0080  
Y 0.0018 -0.0015 -0.0000 0.0000 0.0000 -0.0008  
Z -0.0053 0.0039 0.0004 -0.0059 0.0008 0.0061  
AT. 129 C X -0.0008 -0.0002 0.0003 -0.0028 -0.0003 -0.0027  
Y -0.0052 -0.0040 0.0004 -0.0058 -0.0007 -0.0065  
Z -0.0075 -0.0062 0.0005 -0.0077 -0.0009 -0.0090  
AT. 130 C X 0.0008 -0.0002 -0.0003 0.0028 -0.0003 -0.0027  
Y 0.0052 -0.0040 -0.0004 0.0058 -0.0007 -0.0065  
Z 0.0075 -0.0062 -0.0005 0.0077 -0.0009 -0.0090  
AT. 131 H X 0.0025 -0.0005 -0.0012 0.0102 0.0011 0.0107

Y 0.0240 0.0215 -0.0017 0.0247 0.0024 0.0277  
Z 0.0111 0.0058 -0.0025 0.0240 0.0023 0.0251  
AT. 132 H X -0.0025 -0.0005 0.0012 -0.0102 0.0011 0.0107  
Y -0.0240 0.0215 0.0017 -0.0247 0.0024 0.0277  
Z -0.0111 0.0058 0.0025 -0.0240 0.0023 0.0251  
AT. 133 H X -0.0025 -0.0099 -0.0021 0.0104 0.0011 0.0094  
Y 0.0263 0.0177 -0.0026 0.0294 0.0034 0.0329  
Z 0.0423 0.0320 -0.0032 0.0416 0.0050 0.0475  
AT. 134 H X 0.0025 -0.0099 0.0021 -0.0104 0.0011 0.0094  
Y -0.0263 0.0177 0.0026 -0.0294 0.0034 0.0329  
Z -0.0423 0.0320 0.0032 -0.0416 0.0050 0.0475  
AT. 135 C X -0.0056 -0.0075 -0.0017 0.0077 -0.0001 0.0035  
Y -0.0019 -0.0023 -0.0004 0.0018 -0.0002 0.0003  
Z 0.0032 0.0043 0.0010 -0.0041 0.0001 -0.0017  
AT. 136 C X 0.0056 -0.0075 0.0017 -0.0077 -0.0001 0.0035  
Y 0.0019 -0.0023 0.0004 -0.0018 -0.0002 0.0003  
Z -0.0032 0.0043 -0.0010 0.0041 0.0001 -0.0017  
AT. 137 H X 0.0324 0.0431 0.0085 -0.0388 0.0002 -0.0171  
Y -0.0001 -0.0011 -0.0006 0.0032 0.0001 0.0017  
Z -0.0087 -0.0134 -0.0033 0.0161 0.0003 0.0084  
AT. 138 H X -0.0324 0.0431 -0.0085 0.0388 0.0002 -0.0171  
Y 0.0001 -0.0011 0.0006 -0.0032 0.0001 0.0017  
Z 0.0087 -0.0134 0.0033 -0.0161 0.0003 0.0084  
AT. 139 H X 0.0196 0.0260 0.0056 -0.0226 0.0005 -0.0116  
Y 0.0067 0.0074 0.0008 -0.0029 0.0005 0.0016  
Z -0.0305 -0.0401 -0.0083 0.0344 -0.0008 0.0166  
AT. 140 H X -0.0196 0.0260 -0.0056 0.0226 0.0005 -0.0116  
Y -0.0067 0.0074 -0.0008 0.0029 0.0005 0.0016  
Z 0.0305 -0.0401 0.0083 -0.0344 -0.0008 0.0166  
AT. 141 H X 0.0289 0.0387 0.0084 -0.0353 0.0007 -0.0177  
Y 0.0198 0.0272 0.0059 -0.0264 0.0004 -0.0118  
Z -0.0059 -0.0085 -0.0018 0.0089 -0.0001 0.0030

AT. 142 H X -0.0289 0.0387 -0.0084 0.0353 0.0007 -0.0177  
Y -0.0198 0.0272 -0.0059 0.0264 0.0004 -0.0118  
Z 0.0059 -0.0085 0.0018 -0.0089 -0.0001 0.0030

AT. 143 C X 0.0065 0.0018 -0.0012 0.0085 0.0016 0.0128  
Y 0.0023 0.0008 -0.0004 0.0031 0.0004 0.0042  
Z 0.0043 0.0010 -0.0009 0.0058 0.0010 0.0084

AT. 144 C X -0.0065 0.0018 0.0012 -0.0085 0.0016 0.0128  
Y -0.0023 0.0008 0.0004 -0.0031 0.0004 0.0042  
Z -0.0043 0.0010 0.0009 -0.0058 0.0010 0.0084

AT. 145 H X -0.0384 -0.0113 0.0076 -0.0551 -0.0090 -0.0750  
Y -0.0004 -0.0029 -0.0005 0.0022 0.0002 0.0013  
Z -0.0063 0.0009 0.0019 -0.0124 -0.0019 -0.0148

AT. 146 H X 0.0384 -0.0113 -0.0076 0.0551 -0.0090 -0.0750  
Y 0.0004 -0.0029 0.0005 -0.0022 0.0002 0.0013  
Z 0.0063 0.0009 -0.0019 0.0124 -0.0019 -0.0148

AT. 147 H X -0.0189 -0.0065 0.0033 -0.0247 -0.0045 -0.0354  
Y -0.0073 -0.0026 0.0019 -0.0126 -0.0012 -0.0141  
Z -0.0359 -0.0122 0.0065 -0.0483 -0.0083 -0.0678

AT. 148 H X 0.0189 -0.0065 -0.0033 0.0247 -0.0045 -0.0354  
Y 0.0073 -0.0026 -0.0019 0.0126 -0.0012 -0.0141  
Z 0.0359 -0.0122 -0.0065 0.0483 -0.0083 -0.0678

AT. 149 H X -0.0289 -0.0103 0.0047 -0.0359 -0.0068 -0.0531  
Y -0.0175 -0.0038 0.0037 -0.0257 -0.0041 -0.0346  
Z -0.0122 -0.0007 0.0034 -0.0219 -0.0028 -0.0259

AT. 150 H X 0.0289 -0.0103 -0.0047 0.0359 -0.0068 -0.0531  
Y 0.0175 -0.0038 -0.0037 0.0257 -0.0041 -0.0346  
Z 0.0122 -0.0007 -0.0034 0.0219 -0.0028 -0.0259

AT. 151 C X 0.0023 0.0071 0.0025 -0.0135 -0.0008 -0.0115  
Y 0.0013 0.0025 0.0007 -0.0040 -0.0003 -0.0034  
Z -0.0034 -0.0032 -0.0001 -0.0015 -0.0002 -0.0014

AT. 152 C X -0.0023 0.0071 -0.0025 0.0135 -0.0008 -0.0115  
Y -0.0013 0.0025 -0.0007 0.0040 -0.0003 -0.0034

Z 0.0034 -0.0032 0.0001 0.0015 -0.0002 -0.0014  
AT. 153 H X -0.0075 -0.0248 -0.0089 0.0490 0.0032 0.0435  
Y 0.0091 0.0038 -0.0021 0.0178 0.0017 0.0154  
Z 0.0153 0.0142 0.0004 0.0078 0.0015 0.0066  
AT. 154 H X 0.0075 -0.0248 0.0089 -0.0490 0.0032 0.0435  
Y -0.0091 0.0038 0.0021 -0.0178 0.0017 0.0154  
Z -0.0153 0.0142 -0.0004 -0.0078 0.0015 0.0066  
AT. 155 H X -0.0049 -0.0163 -0.0061 0.0353 0.0022 0.0285  
Y -0.0155 -0.0181 -0.0024 0.0065 -0.0001 0.0055  
Z 0.0136 0.0121 0.0003 0.0055 0.0009 0.0047  
AT. 156 H X 0.0049 -0.0163 0.0061 -0.0353 0.0022 0.0285  
Y 0.0155 -0.0181 0.0024 -0.0065 -0.0001 0.0055  
Z -0.0136 0.0121 -0.0003 -0.0055 0.0009 0.0047  
AT. 157 O X -0.0000 -0.0000 0.0000 -0.0001 -0.0000 -0.0002  
Y -0.0003 -0.0003 0.0001 -0.0001 -0.0000 -0.0002  
Z -0.0000 0.0001 -0.0002 -0.0001 0.0001 0.0002  
AT. 158 O X 0.0000 -0.0000 -0.0000 0.0001 -0.0000 -0.0002  
Y 0.0003 -0.0003 -0.0001 0.0001 -0.0000 -0.0002  
Z 0.0000 0.0001 0.0002 0.0001 0.0001 0.0002  
AT. 159 O X -0.0001 -0.0002 0.0002 -0.0001 -0.0001 -0.0004  
Y 0.0001 0.0001 -0.0000 0.0001 0.0000 0.0000  
Z 0.0001 0.0001 0.0001 0.0001 -0.0001 -0.0002  
AT. 160 O X 0.0001 -0.0002 -0.0002 0.0001 -0.0001 -0.0004  
Y -0.0001 0.0001 0.0000 -0.0001 0.0000 0.0000  
Z -0.0001 0.0001 -0.0001 -0.0001 -0.0001 -0.0002  
AT. 161 H X 0.0027 0.0036 0.0000 0.0028 0.0009 0.0037  
Y 0.0012 0.0009 -0.0004 0.0001 -0.0002 0.0006  
Z -0.0032 -0.0022 0.0012 -0.0004 0.0013 -0.0013  
AT. 162 H X -0.0027 0.0036 -0.0000 -0.0028 0.0009 0.0037  
Y -0.0012 0.0009 0.0004 -0.0001 -0.0002 0.0006  
Z 0.0032 -0.0022 -0.0012 0.0004 0.0013 -0.0013  
AT. 163 H X -0.0006 0.0016 -0.0026 -0.0009 0.0022 0.0039

Y 0.0002 0.0006 -0.0003 -0.0004 0.0005 0.0014  
 Z 0.0004 -0.0006 0.0010 0.0003 -0.0007 -0.0009  
 AT.164 H X 0.0006 0.0016 0.0026 0.0009 0.0022 0.0039  
 Y -0.0002 0.0006 0.0003 0.0004 0.0005 0.0014  
 Z -0.0004 -0.0006 -0.0010 -0.0003 -0.0007 -0.0009  
 AT.165 O X 0.0004 0.0008 -0.0002 -0.0004 -0.0003 0.0001  
 Y 0.0003 0.0001 -0.0003 -0.0002 -0.0000 0.0000  
 Z -0.0005 -0.0003 0.0004 0.0004 -0.0000 0.0000  
 AT.166 O X -0.0004 0.0008 0.0002 0.0004 -0.0003 0.0001  
 Y -0.0003 0.0001 0.0003 0.0002 -0.0000 0.0000  
 Z 0.0005 -0.0003 -0.0004 -0.0004 -0.0000 0.0000  
 AT.167 H X -0.0035 -0.0048 0.0020 0.0032 0.0013 -0.0009  
 Y 0.0008 0.0011 -0.0009 -0.0010 0.0004 0.0004  
 Z 0.0098 0.0137 -0.0060 -0.0096 -0.0067 0.0021  
 AT.168 H X 0.0035 -0.0048 -0.0020 -0.0032 0.0013 -0.0009  
 Y -0.0008 0.0011 0.0009 0.0010 0.0004 0.0004  
 Z -0.0098 0.0137 0.0060 0.0096 -0.0067 0.0021  
 AT.169 O X -0.0001 -0.0004 -0.0000 0.0002 0.0003 -0.0001  
 Y -0.0005 -0.0002 0.0004 0.0003 -0.0002 0.0000  
 Z -0.0006 -0.0003 0.0002 0.0003 0.0001 -0.0000  
 AT.170 O X 0.0001 -0.0004 0.0000 -0.0002 0.0003 -0.0001  
 Y 0.0005 -0.0002 -0.0004 -0.0003 -0.0002 0.0000  
 Z 0.0006 -0.0003 -0.0002 -0.0003 0.0001 -0.0000  
 AT.171 H X -0.0025 0.0003 0.0015 0.0004 -0.0009 0.0011  
 Y 0.0018 -0.0009 -0.0016 -0.0008 0.0023 -0.0001  
 Z 0.0067 -0.0037 -0.0043 -0.0018 0.0062 -0.0015  
 AT.172 H X 0.0025 0.0003 -0.0015 -0.0004 -0.0009 0.0011  
 Y -0.0018 -0.0009 0.0016 0.0008 0.0023 -0.0001  
 Z -0.0067 -0.0037 0.0043 0.0018 0.0062 -0.0015

FREQ(CM\*\*-1) 1467.45 1470.25 1477.20 1477.60 1478.50 1479.30

AT. 1 I X 0.0001 -0.0000 0.0001 -0.0000 0.0000 0.0001  
Y 0.0000 -0.0000 0.0001 -0.0000 0.0000 0.0001  
Z -0.0000 0.0000 -0.0000 0.0000 0.0000 0.0000

AT. 2 I X -0.0001 -0.0000 0.0001 -0.0000 -0.0000 -0.0001  
Y -0.0000 -0.0000 0.0001 -0.0000 -0.0000 -0.0001  
Z 0.0000 0.0000 -0.0000 0.0000 -0.0000 -0.0000

AT. 3 I X -0.0001 -0.0001 -0.0000 0.0000 0.0000 0.0000  
Y -0.0000 -0.0000 -0.0000 0.0000 0.0000 0.0000  
Z -0.0000 -0.0000 -0.0000 0.0000 0.0000 0.0000

AT. 4 I X 0.0001 -0.0001 -0.0000 0.0000 -0.0000 -0.0000  
Y 0.0000 -0.0000 -0.0000 0.0000 -0.0000 -0.0000  
Z 0.0000 -0.0000 -0.0000 0.0000 -0.0000 -0.0000

AT. 5 O X 0.0013 -0.0012 0.0025 -0.0008 0.0012 0.0023  
Y -0.0014 0.0011 -0.0021 0.0006 -0.0011 -0.0019  
Z -0.0017 0.0014 -0.0026 0.0008 -0.0012 -0.0023

AT. 6 O X -0.0013 -0.0012 0.0025 -0.0008 -0.0012 -0.0023  
Y 0.0014 0.0011 -0.0021 0.0006 0.0011 0.0019  
Z 0.0017 0.0014 -0.0026 0.0008 0.0012 0.0023

AT. 7 O X -0.0021 -0.0027 -0.0015 0.0007 0.0011 0.0021  
Y 0.0023 0.0029 0.0017 -0.0007 -0.0012 -0.0023  
Z -0.0008 -0.0008 -0.0007 0.0003 0.0003 0.0006

AT. 8 O X 0.0021 -0.0027 -0.0015 0.0007 -0.0011 -0.0021  
Y -0.0023 0.0029 0.0017 -0.0007 0.0012 0.0023  
Z 0.0008 -0.0008 -0.0007 0.0003 -0.0003 -0.0006

AT. 9 N X 0.0009 -0.0005 0.0015 -0.0004 0.0007 0.0011  
Y -0.0005 0.0006 -0.0008 0.0002 -0.0004 -0.0009  
Z 0.0057 -0.0056 0.0060 -0.0021 0.0032 0.0061

AT. 10 N X -0.0009 -0.0005 0.0015 -0.0004 -0.0007 -0.0011  
Y 0.0005 0.0006 -0.0008 0.0002 0.0004 0.0009  
Z -0.0057 -0.0056 0.0060 -0.0021 -0.0032 -0.0061

AT. 11 N X -0.0001 -0.0002 -0.0003 0.0001 0.0004 0.0005  
Y -0.0027 -0.0024 -0.0025 0.0008 0.0009 0.0018



Z 0.0061 0.0054 0.0063 -0.0021 -0.0023 -0.0045  
AT. 12 N X 0.0001 -0.0002 -0.0003 0.0001 -0.0004 -0.0005  
Y 0.0027 -0.0024 -0.0025 0.0008 -0.0009 -0.0018  
Z -0.0061 0.0054 0.0063 -0.0021 0.0023 0.0045  
AT. 13 C X -0.0002 0.0002 -0.0016 0.0005 -0.0009 -0.0017  
Y 0.0027 -0.0024 0.0040 -0.0012 0.0021 0.0037  
Z -0.0009 0.0013 0.0001 0.0002 -0.0003 -0.0003  
AT. 14 C X 0.0002 0.0002 -0.0016 0.0005 0.0009 0.0017  
Y -0.0027 -0.0024 0.0040 -0.0012 -0.0021 -0.0037  
Z 0.0009 0.0013 0.0001 0.0002 0.0003 0.0003  
AT. 15 C X -0.0032 0.0030 -0.0032 0.0009 -0.0015 -0.0028  
Y 0.0088 -0.0082 0.0099 -0.0029 0.0047 0.0089  
Z -0.0029 0.0028 -0.0034 0.0010 -0.0016 -0.0030  
AT. 16 C X 0.0032 0.0030 -0.0032 0.0009 0.0015 0.0028  
Y -0.0088 -0.0082 0.0099 -0.0029 -0.0047 -0.0089  
Z 0.0029 0.0028 -0.0034 0.0010 0.0016 0.0030  
AT. 17 H X -0.0100 0.0075 -0.0109 0.0034 -0.0056 -0.0099  
Y -0.0442 0.0418 -0.0505 0.0147 -0.0246 -0.0460  
Z 0.0602 -0.0576 0.0685 -0.0198 0.0333 0.0623  
AT. 18 H X 0.0100 0.0075 -0.0109 0.0034 0.0056 0.0099  
Y 0.0442 0.0418 -0.0505 0.0147 0.0246 0.0460  
Z -0.0602 -0.0576 0.0685 -0.0198 -0.0333 -0.0623  
AT. 19 H X 0.0201 -0.0188 0.0211 -0.0064 0.0102 0.0187  
Y -0.0698 0.0661 -0.0810 0.0238 -0.0397 -0.0739  
Z -0.0229 0.0216 -0.0272 0.0079 -0.0133 -0.0250  
AT. 20 H X -0.0201 -0.0188 0.0211 -0.0064 -0.0102 -0.0187  
Y 0.0698 0.0661 -0.0810 0.0238 0.0397 0.0739  
Z 0.0229 0.0216 -0.0272 0.0079 0.0133 0.0250  
AT. 21 C X 0.0012 0.0022 0.0010 -0.0006 -0.0012 -0.0023  
Y -0.0018 -0.0028 -0.0009 0.0005 0.0013 0.0022  
Z -0.0034 -0.0033 -0.0037 0.0011 0.0013 0.0028  
AT. 22 C X -0.0012 0.0022 0.0010 -0.0006 0.0012 0.0023

Y 0.0018 -0.0028 -0.0009 0.0005 -0.0013 -0.0022  
Z 0.0034 -0.0033 -0.0037 0.0011 -0.0013 -0.0028  
AT. 23 C X 0.0040 0.0040 0.0026 -0.0009 -0.0013 -0.0025  
Y -0.0048 -0.0049 -0.0031 0.0011 0.0016 0.0030  
Z -0.0097 -0.0099 -0.0063 0.0023 0.0035 0.0064  
AT. 24 C X -0.0040 0.0040 0.0026 -0.0009 0.0013 0.0025  
Y 0.0048 -0.0049 -0.0031 0.0011 -0.0016 -0.0030  
Z 0.0097 -0.0099 -0.0063 0.0023 -0.0035 -0.0064  
AT. 25 H X 0.0034 0.0033 0.0023 -0.0009 -0.0011 -0.0019  
Y -0.0151 -0.0155 -0.0100 0.0036 0.0054 0.0101  
Z 0.0940 0.0973 0.0634 -0.0233 -0.0354 -0.0656  
AT. 26 H X -0.0034 0.0033 0.0023 -0.0009 0.0011 0.0019  
Y 0.0151 -0.0155 -0.0100 0.0036 -0.0054 -0.0101  
Z -0.0940 0.0973 0.0634 -0.0233 0.0354 0.0656  
AT. 27 H X -0.0236 -0.0244 -0.0170 0.0057 0.0085 0.0165  
Y 0.0807 0.0831 0.0538 -0.0198 -0.0296 -0.0549  
Z 0.0397 0.0411 0.0269 -0.0098 -0.0145 -0.0273  
AT. 28 H X 0.0236 -0.0244 -0.0170 0.0057 -0.0085 -0.0165  
Y -0.0807 0.0831 0.0538 -0.0198 0.0296 0.0549  
Z -0.0397 0.0411 0.0269 -0.0098 0.0145 0.0273  
AT. 29 C X -0.0014 0.0030 -0.0025 0.0008 -0.0016 -0.0032  
Y -0.0007 0.0001 -0.0011 0.0002 -0.0003 -0.0004  
Z -0.0029 0.0031 -0.0036 0.0010 -0.0018 -0.0034  
AT. 30 C X 0.0014 0.0030 -0.0025 0.0008 0.0016 0.0032  
Y 0.0007 0.0001 -0.0011 0.0002 0.0003 0.0004  
Z 0.0029 0.0031 -0.0036 0.0010 0.0018 0.0034  
AT. 31 H X -0.0054 -0.0011 -0.0036 0.0010 -0.0002 -0.0008  
Y 0.0066 -0.0023 0.0098 -0.0019 0.0029 0.0051  
Z 0.0054 -0.0032 0.0116 -0.0021 0.0037 0.0063  
AT. 32 H X 0.0054 -0.0011 -0.0036 0.0010 0.0002 0.0008  
Y -0.0066 -0.0023 0.0098 -0.0019 -0.0029 -0.0051  
Z -0.0054 -0.0032 0.0116 -0.0021 -0.0037 -0.0063

AT. 33 H X 0.0128 -0.0168 0.0167 -0.0054 0.0086 0.0177  
Y 0.0036 0.0014 0.0090 -0.0015 0.0017 0.0033  
Z 0.0051 -0.0109 0.0054 -0.0025 0.0044 0.0093

AT. 34 H X -0.0128 -0.0168 0.0167 -0.0054 -0.0086 -0.0177  
Y -0.0036 0.0014 0.0090 -0.0015 -0.0017 -0.0033  
Z -0.0051 -0.0109 0.0054 -0.0025 -0.0044 -0.0093

AT. 35 C X -0.0002 -0.0035 0.0010 -0.0004 0.0012 0.0030  
Y 0.0008 0.0006 -0.0001 0.0001 0.0002 -0.0002  
Z 0.0004 -0.0002 0.0007 -0.0000 0.0002 0.0004

AT. 36 C X 0.0002 -0.0035 0.0010 -0.0004 -0.0012 -0.0030  
Y -0.0008 0.0006 -0.0001 0.0001 -0.0002 0.0002  
Z -0.0004 -0.0002 0.0007 -0.0000 -0.0002 -0.0004

AT. 37 C X -0.0042 -0.0037 -0.0041 0.0013 0.0017 0.0031  
Y 0.0012 -0.0002 0.0021 -0.0007 -0.0005 -0.0002  
Z -0.0020 -0.0008 -0.0026 0.0008 0.0006 0.0008

AT. 38 C X 0.0042 -0.0037 -0.0041 0.0013 -0.0017 -0.0031  
Y -0.0012 -0.0002 0.0021 -0.0007 0.0005 0.0002  
Z 0.0020 -0.0008 -0.0026 0.0008 -0.0006 -0.0008

AT. 39 H X 0.0291 0.0282 0.0292 -0.0091 -0.0136 -0.0250  
Y 0.0073 0.0167 -0.0010 0.0004 -0.0042 -0.0107  
Z 0.0176 0.0132 0.0210 -0.0066 -0.0081 -0.0135

AT. 40 H X -0.0291 0.0282 0.0292 -0.0091 0.0136 0.0250  
Y -0.0073 0.0167 -0.0010 0.0004 0.0042 0.0107  
Z -0.0176 0.0132 0.0210 -0.0066 0.0081 0.0135

AT. 41 H X 0.0221 0.0237 0.0201 -0.0064 -0.0112 -0.0204  
Y -0.0105 -0.0049 -0.0119 0.0032 0.0043 0.0049  
Z -0.0182 -0.0237 -0.0148 0.0051 0.0095 0.0197

AT. 42 H X -0.0221 0.0237 0.0201 -0.0064 0.0112 0.0204  
Y 0.0105 -0.0049 -0.0119 0.0032 -0.0043 -0.0049  
Z 0.0182 -0.0237 -0.0148 0.0051 -0.0095 -0.0197

AT. 43 C X 0.0014 0.0023 0.0010 -0.0003 -0.0007 -0.0016  
Y 0.0012 0.0016 0.0009 -0.0002 -0.0007 -0.0010

Z -0.0032 -0.0037 -0.0029 0.0008 0.0011 0.0026  
AT. 44 C X -0.0014 0.0023 0.0010 -0.0003 0.0007 0.0016  
Y -0.0012 0.0016 0.0009 -0.0002 0.0007 0.0010  
Z 0.0032 -0.0037 -0.0029 0.0008 -0.0011 -0.0026  
AT. 45 H X 0.0006 -0.0021 0.0019 -0.0009 -0.0016 0.0003  
Y -0.0035 -0.0049 -0.0024 0.0001 0.0028 0.0033  
Z 0.0019 0.0057 -0.0003 0.0009 -0.0016 -0.0030  
AT. 46 H X -0.0006 -0.0021 0.0019 -0.0009 0.0016 -0.0003  
Y 0.0035 -0.0049 -0.0024 0.0001 -0.0028 -0.0033  
Z -0.0019 0.0057 -0.0003 0.0009 0.0016 0.0030  
AT. 47 H X -0.0114 -0.0119 -0.0097 0.0027 0.0045 0.0079  
Y -0.0015 -0.0035 -0.0001 -0.0004 0.0029 0.0022  
Z 0.0119 0.0113 0.0109 -0.0034 -0.0026 -0.0076  
AT. 48 H X 0.0114 -0.0119 -0.0097 0.0027 -0.0045 -0.0079  
Y 0.0015 -0.0035 -0.0001 -0.0004 -0.0029 -0.0022  
Z -0.0119 0.0113 0.0109 -0.0034 0.0026 0.0076  
AT. 49 C X -0.0002 -0.0023 -0.0000 -0.0001 0.0006 0.0014  
Y 0.0001 -0.0001 -0.0003 0.0002 -0.0000 0.0002  
Z 0.0003 0.0019 0.0002 0.0000 -0.0001 -0.0010  
AT. 50 C X 0.0002 -0.0023 -0.0000 -0.0001 -0.0006 -0.0014  
Y -0.0001 -0.0001 -0.0003 0.0002 0.0000 -0.0002  
Z -0.0003 0.0019 0.0002 0.0000 0.0001 0.0010  
AT. 51 C X 0.0034 -0.0031 0.0044 -0.0014 0.0020 0.0037  
Y -0.0008 -0.0006 -0.0010 0.0002 -0.0003 -0.0001  
Z -0.0037 0.0015 -0.0043 0.0011 -0.0020 -0.0028  
AT. 52 C X -0.0034 -0.0031 0.0044 -0.0014 -0.0020 -0.0037  
Y 0.0008 -0.0006 -0.0010 0.0002 0.0003 0.0001  
Z 0.0037 0.0015 -0.0043 0.0011 0.0020 0.0028  
AT. 53 H X -0.0196 0.0183 -0.0253 0.0078 -0.0119 -0.0216  
Y -0.0093 0.0146 -0.0138 0.0046 -0.0071 -0.0140  
Z 0.0254 -0.0171 0.0312 -0.0093 0.0137 0.0241  
AT. 54 H X 0.0196 0.0183 -0.0253 0.0078 0.0119 0.0216

Y 0.0093 0.0146 -0.0138 0.0046 0.0071 0.0140  
Z -0.0254 -0.0171 0.0312 -0.0093 -0.0137 -0.0241  
AT. 55 H X -0.0265 0.0257 -0.0353 0.0110 -0.0161 -0.0303  
Y 0.0139 -0.0050 0.0198 -0.0046 0.0086 0.0114  
Z -0.0049 0.0155 -0.0044 0.0034 -0.0028 -0.0112  
AT. 56 H X 0.0265 0.0257 -0.0353 0.0110 0.0161 0.0303  
Y -0.0139 -0.0050 0.0198 -0.0046 -0.0086 -0.0114  
Z 0.0049 0.0155 -0.0044 0.0034 0.0028 0.0112  
AT. 57 C X 0.0009 -0.0000 0.0009 -0.0005 -0.0001 -0.0002  
Y -0.0000 0.0005 0.0005 -0.0001 0.0000 -0.0000  
Z 0.0001 -0.0003 0.0003 -0.0000 0.0002 0.0002  
AT. 58 C X -0.0009 -0.0000 0.0009 -0.0005 0.0001 0.0002  
Y 0.0000 0.0005 0.0005 -0.0001 -0.0000 0.0000  
Z -0.0001 -0.0003 0.0003 -0.0000 -0.0002 -0.0002  
AT. 59 H X 0.0027 0.0051 0.0039 -0.0014 -0.0002 -0.0014  
Y -0.0014 -0.0007 -0.0048 0.0009 -0.0015 -0.0012  
Z -0.0006 0.0018 -0.0052 0.0006 -0.0023 -0.0027  
AT. 60 H X -0.0027 0.0051 0.0039 -0.0014 0.0002 0.0014  
Y 0.0014 -0.0007 -0.0048 0.0009 0.0015 0.0012  
Z 0.0006 0.0018 -0.0052 0.0006 0.0023 0.0027  
AT. 61 H X -0.0061 0.0001 -0.0087 0.0040 -0.0001 -0.0004  
Y -0.0050 -0.0035 -0.0099 0.0031 -0.0009 -0.0002  
Z -0.0031 0.0019 -0.0024 0.0019 0.0006 -0.0001  
AT. 62 H X 0.0061 0.0001 -0.0087 0.0040 0.0001 0.0004  
Y 0.0050 -0.0035 -0.0099 0.0031 0.0009 0.0002  
Z 0.0031 0.0019 -0.0024 0.0019 -0.0006 0.0001  
AT. 63 H X -0.0067 0.0010 -0.0084 0.0040 -0.0001 -0.0011  
Y 0.0029 -0.0052 0.0059 -0.0016 0.0022 0.0040  
Z 0.0046 0.0036 0.0041 -0.0028 -0.0017 -0.0024  
AT. 64 H X 0.0067 0.0010 -0.0084 0.0040 0.0001 0.0011  
Y -0.0029 -0.0052 0.0059 -0.0016 -0.0022 -0.0040  
Z -0.0046 0.0036 0.0041 -0.0028 0.0017 0.0024

AT. 65 C X -0.0006 -0.0001 -0.0007 0.0001 -0.0002 -0.0001  
Y 0.0003 0.0010 0.0004 0.0002 -0.0002 -0.0008  
Z 0.0011 0.0005 0.0011 -0.0003 0.0001 -0.0001

AT. 66 C X 0.0006 -0.0001 -0.0007 0.0001 0.0002 0.0001  
Y -0.0003 0.0010 0.0004 0.0002 0.0002 0.0008  
Z -0.0011 0.0005 0.0011 -0.0003 -0.0001 0.0001

AT. 67 H X 0.0037 0.0085 0.0029 0.0012 -0.0017 -0.0064  
Y 0.0010 -0.0049 0.0008 -0.0030 0.0017 0.0054  
Z -0.0033 -0.0016 -0.0024 0.0017 -0.0003 -0.0002

AT. 68 H X -0.0037 0.0085 0.0029 0.0012 0.0017 0.0064  
Y -0.0010 -0.0049 0.0008 -0.0030 -0.0017 -0.0054  
Z 0.0033 -0.0016 -0.0024 0.0017 0.0003 0.0002

AT. 69 H X 0.0017 -0.0033 0.0023 -0.0016 0.0017 0.0044  
Y 0.0002 -0.0076 0.0008 -0.0027 0.0027 0.0077  
Z -0.0040 -0.0058 -0.0044 -0.0010 0.0007 0.0034

AT. 70 H X -0.0017 -0.0033 0.0023 -0.0016 -0.0017 -0.0044  
Y -0.0002 -0.0076 0.0008 -0.0027 -0.0027 -0.0077  
Z 0.0040 -0.0058 -0.0044 -0.0010 -0.0007 -0.0034

AT. 71 H X 0.0017 -0.0015 0.0030 -0.0007 0.0017 0.0029  
Y -0.0042 -0.0017 -0.0046 0.0020 -0.0011 -0.0011  
Z -0.0037 -0.0041 -0.0034 0.0018 0.0001 0.0015

AT. 72 H X -0.0017 -0.0015 0.0030 -0.0007 -0.0017 -0.0029  
Y 0.0042 -0.0017 -0.0046 0.0020 0.0011 0.0011  
Z 0.0037 -0.0041 -0.0034 0.0018 -0.0001 -0.0015

AT. 73 C X 0.0004 0.0033 -0.0004 0.0002 -0.0008 -0.0024  
Y -0.0005 -0.0017 0.0002 -0.0001 0.0003 0.0011  
Z 0.0003 -0.0011 0.0005 -0.0008 -0.0002 0.0004

AT. 74 C X -0.0004 0.0033 -0.0004 0.0002 0.0008 0.0024  
Y 0.0005 -0.0017 0.0002 -0.0001 -0.0003 -0.0011  
Z -0.0003 -0.0011 0.0005 -0.0008 0.0002 -0.0004

AT. 75 H X -0.0034 -0.0083 -0.0015 0.0019 0.0021 0.0060  
Y -0.0005 0.0066 -0.0020 0.0032 0.0003 -0.0031

Z -0.0026 0.0021 -0.0034 0.0051 0.0019 0.0005  
AT. 76 H X 0.0034 -0.0083 -0.0015 0.0019 -0.0021 -0.0060  
Y 0.0005 0.0066 -0.0020 0.0032 -0.0003 0.0031  
Z 0.0026 0.0021 -0.0034 0.0051 -0.0019 -0.0005  
AT. 77 H X 0.0006 -0.0096 0.0030 -0.0024 0.0015 0.0068  
Y 0.0032 0.0048 0.0015 -0.0035 -0.0029 -0.0051  
Z -0.0033 0.0046 -0.0039 0.0048 0.0009 -0.0021  
AT. 78 H X -0.0006 -0.0096 0.0030 -0.0024 -0.0015 -0.0068  
Y -0.0032 0.0048 0.0015 -0.0035 0.0029 0.0051  
Z 0.0033 0.0046 -0.0039 0.0048 -0.0009 0.0021  
AT. 79 I X 0.0000 0.0000 -0.0000 -0.0001 -0.0001 0.0000  
Y -0.0000 0.0000 0.0000 0.0001 0.0001 -0.0000  
Z -0.0000 -0.0000 0.0000 0.0000 0.0000 -0.0000  
AT. 80 I X -0.0000 0.0000 -0.0000 -0.0001 0.0001 -0.0000  
Y 0.0000 0.0000 0.0000 0.0001 -0.0001 0.0000  
Z 0.0000 -0.0000 0.0000 0.0000 -0.0000 0.0000  
AT. 81 I X -0.0000 -0.0000 -0.0000 -0.0000 0.0000 -0.0000  
Y -0.0000 0.0000 0.0000 0.0000 -0.0000 0.0000  
Z -0.0000 0.0000 0.0000 0.0000 -0.0000 0.0000  
AT. 82 I X 0.0000 -0.0000 -0.0000 -0.0000 -0.0000 0.0000  
Y 0.0000 0.0000 0.0000 0.0000 0.0000 -0.0000  
Z 0.0000 0.0000 0.0000 0.0000 0.0000 -0.0000  
AT. 83 O X 0.0001 -0.0001 -0.0010 -0.0038 -0.0037 0.0023  
Y 0.0000 -0.0000 -0.0003 -0.0011 -0.0011 0.0007  
Z 0.0001 -0.0001 -0.0006 -0.0022 -0.0021 0.0013  
AT. 84 O X -0.0001 -0.0001 -0.0010 -0.0038 0.0037 -0.0023  
Y -0.0000 -0.0000 -0.0003 -0.0011 0.0011 -0.0007  
Z -0.0001 -0.0001 -0.0006 -0.0022 0.0021 -0.0013  
AT. 85 O X 0.0000 0.0000 -0.0004 -0.0008 0.0003 0.0001  
Y 0.0000 0.0000 -0.0003 -0.0006 0.0003 0.0000  
Z 0.0000 0.0000 0.0001 0.0001 -0.0000 -0.0000  
AT. 86 O X -0.0000 0.0000 -0.0004 -0.0008 -0.0003 -0.0001

Y -0.0000 0.0000 -0.0003 -0.0006 -0.0003 -0.0000  
Z -0.0000 0.0000 0.0001 0.0001 0.0000 0.0000  
AT. 87 N X 0.0001 -0.0001 -0.0002 -0.0006 -0.0010 0.0005  
Y 0.0000 0.0000 -0.0001 -0.0005 -0.0005 0.0003  
Z -0.0003 0.0002 0.0017 0.0070 0.0058 -0.0036  
AT. 88 N X -0.0001 -0.0001 -0.0002 -0.0006 0.0010 -0.0005  
Y -0.0000 0.0000 -0.0001 -0.0005 0.0005 -0.0003  
Z 0.0003 0.0002 0.0017 0.0070 -0.0058 0.0036  
AT. 89 N X 0.0001 0.0001 -0.0001 -0.0003 0.0001 -0.0001  
Y 0.0002 0.0001 0.0005 0.0006 -0.0013 0.0001  
Z -0.0002 -0.0003 -0.0011 -0.0014 0.0029 -0.0002  
AT. 90 N X -0.0001 0.0001 -0.0001 -0.0003 -0.0001 0.0001  
Y -0.0002 0.0001 0.0005 0.0006 0.0013 -0.0001  
Z 0.0002 -0.0003 -0.0011 -0.0014 -0.0029 0.0002  
AT. 91 C X -0.0001 0.0002 0.0010 0.0034 0.0038 -0.0022  
Y -0.0000 0.0001 0.0010 0.0037 0.0034 -0.0020  
Z 0.0002 -0.0001 -0.0005 -0.0016 -0.0014 0.0006  
AT. 92 C X 0.0001 0.0002 0.0010 0.0034 -0.0038 0.0022  
Y 0.0000 0.0001 0.0010 0.0037 -0.0034 0.0020  
Z -0.0002 -0.0001 -0.0005 -0.0016 0.0014 -0.0006  
AT. 93 C X 0.0000 0.0001 0.0019 0.0071 0.0058 -0.0036  
Y -0.0001 0.0003 0.0024 0.0091 0.0073 -0.0048  
Z -0.0000 -0.0001 -0.0019 -0.0071 -0.0056 0.0035  
AT. 94 C X -0.0000 0.0001 0.0019 0.0071 -0.0058 0.0036  
Y 0.0001 0.0003 0.0024 0.0091 -0.0073 0.0048  
Z 0.0000 -0.0001 -0.0019 -0.0071 0.0056 -0.0035  
AT. 95 H X -0.0012 0.0011 0.0006 0.0002 -0.0009 -0.0017  
Y 0.0007 -0.0015 -0.0133 -0.0485 -0.0390 0.0261  
Z 0.0001 0.0017 0.0264 0.0987 0.0805 -0.0509  
AT. 96 H X 0.0012 0.0011 0.0006 0.0002 0.0009 0.0017  
Y -0.0007 -0.0015 -0.0133 -0.0485 0.0390 -0.0261  
Z -0.0001 0.0017 0.0264 0.0987 -0.0805 0.0509



AT. 97 H X 0.0002 -0.0010 -0.0158 -0.0585 -0.0514 0.0326  
Y 0.0006 -0.0021 -0.0237 -0.0877 -0.0708 0.0459  
Z 0.0001 -0.0003 -0.0027 -0.0099 -0.0065 0.0044

AT. 98 H X -0.0002 -0.0010 -0.0158 -0.0585 0.0514 -0.0326  
Y -0.0006 -0.0021 -0.0237 -0.0877 0.0708 -0.0459  
Z -0.0001 -0.0003 -0.0027 -0.0099 0.0065 -0.0044

AT. 99 C X -0.0001 -0.0002 0.0005 0.0012 -0.0003 -0.0002  
Y -0.0002 -0.0002 0.0001 0.0005 0.0006 0.0000  
Z 0.0002 0.0002 0.0008 0.0010 -0.0019 0.0001

AT. 100 C X 0.0001 -0.0002 0.0005 0.0012 0.0003 0.0002  
Y 0.0002 -0.0002 0.0001 0.0005 -0.0006 -0.0000  
Z -0.0002 0.0002 0.0008 0.0010 0.0019 -0.0001

AT. 101 C X 0.0001 0.0002 0.0007 0.0011 -0.0012 0.0004  
Y 0.0000 0.0001 0.0005 0.0008 -0.0009 0.0002  
Z 0.0000 0.0002 0.0010 0.0019 -0.0016 0.0006

AT. 102 C X -0.0001 0.0002 0.0007 0.0011 0.0012 -0.0004  
Y -0.0000 0.0001 0.0005 0.0008 0.0009 -0.0002  
Z -0.0000 0.0002 0.0010 0.0019 0.0016 -0.0006

AT. 103 H X -0.0000 0.0001 -0.0005 -0.0012 -0.0005 -0.0002  
Y 0.0001 0.0002 0.0012 0.0022 -0.0015 0.0006  
Z -0.0003 -0.0018 -0.0110 -0.0210 0.0176 -0.0052

AT. 104 H X 0.0000 0.0001 -0.0005 -0.0012 0.0005 0.0002  
Y -0.0001 0.0002 0.0012 0.0022 0.0015 -0.0006  
Z 0.0003 -0.0018 -0.0110 -0.0210 -0.0176 0.0052

AT. 105 H X -0.0005 -0.0013 -0.0057 -0.0082 0.0095 -0.0018  
Y -0.0003 -0.0016 -0.0087 -0.0165 0.0143 -0.0042  
Z -0.0002 -0.0008 -0.0039 -0.0067 0.0065 -0.0015

AT. 106 H X 0.0005 -0.0013 -0.0057 -0.0082 -0.0095 0.0018  
Y 0.0003 -0.0016 -0.0087 -0.0165 -0.0143 0.0042  
Z 0.0002 -0.0008 -0.0039 -0.0067 -0.0065 0.0015

AT. 107 C X 0.0002 0.0000 0.0007 0.0019 0.0008 -0.0007  
Y 0.0001 -0.0001 0.0002 -0.0006 -0.0004 0.0007

Z -0.0000 -0.0002 -0.0009 -0.0036 -0.0025 0.0018  
AT. 108 C X -0.0002 0.0000 0.0007 0.0019 -0.0008 0.0007  
Y -0.0001 -0.0001 0.0002 -0.0006 0.0004 -0.0007  
Z 0.0000 -0.0002 -0.0009 -0.0036 0.0025 -0.0018  
AT. 109 H X -0.0021 0.0003 -0.0031 0.0003 0.0042 -0.0039  
Y -0.0000 0.0003 -0.0003 0.0024 0.0025 -0.0025  
Z 0.0005 0.0004 -0.0005 0.0020 0.0014 -0.0026  
AT. 110 H X 0.0021 0.0003 -0.0031 0.0003 -0.0042 0.0039  
Y 0.0000 0.0003 -0.0003 0.0024 -0.0025 0.0025  
Z -0.0005 0.0004 -0.0005 0.0020 -0.0014 0.0026  
AT. 111 H X -0.0002 -0.0001 -0.0019 -0.0108 -0.0052 0.0055  
Y -0.0009 0.0002 -0.0035 0.0011 0.0015 -0.0047  
Z 0.0006 -0.0001 0.0028 0.0104 0.0041 -0.0040  
AT. 112 H X 0.0002 -0.0001 -0.0019 -0.0108 0.0052 -0.0055  
Y 0.0009 0.0002 -0.0035 0.0011 -0.0015 0.0047  
Z -0.0006 -0.0001 0.0028 0.0104 -0.0041 0.0040  
AT. 113 C X -0.0002 -0.0001 -0.0002 -0.0012 0.0004 0.0005  
Y -0.0002 0.0002 0.0001 0.0002 0.0002 -0.0002  
Z -0.0000 0.0005 0.0005 0.0008 0.0004 -0.0002  
AT. 114 C X 0.0002 -0.0001 -0.0002 -0.0012 -0.0004 -0.0005  
Y 0.0002 0.0002 0.0001 0.0002 -0.0002 0.0002  
Z 0.0000 0.0005 0.0005 0.0008 -0.0004 0.0002  
AT. 115 C X -0.0001 -0.0004 -0.0006 -0.0005 0.0017 -0.0005  
Y 0.0001 0.0001 0.0002 0.0008 -0.0001 -0.0001  
Z 0.0000 -0.0000 0.0001 -0.0002 -0.0012 0.0003  
AT. 116 C X 0.0001 -0.0004 -0.0006 -0.0005 -0.0017 0.0005  
Y -0.0001 0.0001 0.0002 0.0008 0.0001 0.0001  
Z -0.0000 -0.0000 0.0001 -0.0002 0.0012 -0.0003  
AT. 117 H X 0.0005 0.0021 0.0038 0.0032 -0.0113 0.0030  
Y -0.0008 -0.0008 -0.0031 -0.0077 0.0047 -0.0004  
Z -0.0003 -0.0022 -0.0034 -0.0019 0.0108 -0.0031  
AT. 118 H X -0.0005 0.0021 0.0038 0.0032 0.0113 -0.0030

Y 0.0008 -0.0008 -0.0031 -0.0077 -0.0047 0.0004  
Z 0.0003 -0.0022 -0.0034 -0.0019 -0.0108 0.0031  
AT. 119 H X 0.0004 0.0017 0.0042 0.0053 -0.0101 0.0035  
Y -0.0004 -0.0015 -0.0014 -0.0034 0.0003 0.0013  
Z 0.0007 0.0026 0.0042 0.0068 -0.0074 0.0009  
AT. 120 H X -0.0004 0.0017 0.0042 0.0053 0.0101 -0.0035  
Y 0.0004 -0.0015 -0.0014 -0.0034 -0.0003 -0.0013  
Z -0.0007 0.0026 0.0042 0.0068 0.0074 -0.0009  
AT. 121 C X 0.0004 0.0000 0.0003 0.0004 -0.0006 -0.0001  
Y -0.0000 0.0002 -0.0007 -0.0015 -0.0003 0.0000  
Z 0.0003 -0.0001 0.0006 0.0009 -0.0011 0.0001  
AT. 122 C X -0.0004 0.0000 0.0003 0.0004 0.0006 0.0001  
Y 0.0000 0.0002 -0.0007 -0.0015 0.0003 -0.0000  
Z -0.0003 -0.0001 0.0006 0.0009 0.0011 -0.0001  
AT. 123 H X -0.0029 -0.0007 0.0011 0.0044 0.0031 0.0008  
Y -0.0004 -0.0019 0.0024 0.0055 0.0034 0.0004  
Z 0.0000 0.0020 -0.0024 -0.0055 -0.0039 -0.0002  
AT. 124 H X 0.0029 -0.0007 0.0011 0.0044 -0.0031 -0.0008  
Y 0.0004 -0.0019 0.0024 0.0055 -0.0034 -0.0004  
Z -0.0000 0.0020 -0.0024 -0.0055 0.0039 0.0002  
AT. 125 H X -0.0016 -0.0007 -0.0019 -0.0022 0.0052 0.0000  
Y -0.0013 -0.0016 0.0030 0.0078 0.0041 0.0004  
Z -0.0026 -0.0018 -0.0003 0.0020 0.0080 0.0005  
AT. 126 H X 0.0016 -0.0007 -0.0019 -0.0022 -0.0052 -0.0000  
Y 0.0013 -0.0016 0.0030 0.0078 -0.0041 -0.0004  
Z 0.0026 -0.0018 -0.0003 0.0020 -0.0080 -0.0005  
AT. 127 C X -0.0003 0.0002 -0.0003 -0.0013 -0.0004 0.0004  
Y 0.0001 0.0001 0.0003 0.0006 0.0001 -0.0003  
Z -0.0002 0.0004 -0.0004 -0.0008 -0.0003 0.0001  
AT. 128 C X 0.0003 0.0002 -0.0003 -0.0013 0.0004 -0.0004  
Y -0.0001 0.0001 0.0003 0.0006 -0.0001 0.0003  
Z 0.0002 0.0004 -0.0004 -0.0008 0.0003 -0.0001

AT. 129 C X 0.0001 -0.0002 -0.0011 -0.0045 -0.0039 0.0026  
Y 0.0002 -0.0002 0.0003 0.0011 0.0007 -0.0005  
Z 0.0004 -0.0004 -0.0005 -0.0025 -0.0025 0.0016

AT. 130 C X -0.0001 -0.0002 -0.0011 -0.0045 0.0039 -0.0026  
Y -0.0002 -0.0002 0.0003 0.0011 -0.0007 0.0005  
Z -0.0004 -0.0004 -0.0005 -0.0025 0.0025 -0.0016

AT. 131 H X -0.0010 0.0013 0.0056 0.0232 0.0212 -0.0138  
Y -0.0005 -0.0004 -0.0060 -0.0224 -0.0177 0.0119  
Z -0.0014 0.0016 0.0056 0.0238 0.0227 -0.0146

AT. 132 H X 0.0010 0.0013 0.0056 0.0232 -0.0212 0.0138  
Y 0.0005 -0.0004 -0.0060 -0.0224 0.0177 -0.0119  
Z 0.0014 0.0016 0.0056 0.0238 -0.0227 0.0146

AT. 133 H X -0.0008 0.0021 0.0089 0.0345 0.0305 -0.0200  
Y -0.0011 0.0016 0.0003 0.0022 0.0038 -0.0023  
Z -0.0012 0.0012 -0.0052 -0.0186 -0.0133 0.0090

AT. 134 H X 0.0008 0.0021 0.0089 0.0345 -0.0305 0.0200  
Y 0.0011 0.0016 0.0003 0.0022 -0.0038 0.0023  
Z 0.0012 0.0012 -0.0052 -0.0186 0.0133 -0.0090

AT. 135 C X -0.0003 0.0007 0.0000 -0.0006 -0.0004 0.0004  
Y -0.0002 0.0002 -0.0001 -0.0003 0.0002 0.0002  
Z 0.0001 -0.0002 0.0000 0.0005 0.0003 -0.0002

AT. 136 C X 0.0003 0.0007 0.0000 -0.0006 0.0004 -0.0004  
Y 0.0002 0.0002 -0.0001 -0.0003 -0.0002 -0.0002  
Z -0.0001 -0.0002 0.0000 0.0005 -0.0003 0.0002

AT. 137 H X 0.0022 -0.0023 0.0010 0.0041 -0.0015 -0.0016  
Y 0.0011 -0.0016 -0.0005 -0.0009 -0.0021 -0.0002  
Z 0.0011 -0.0018 -0.0012 -0.0024 -0.0029 0.0001

AT. 138 H X -0.0022 -0.0023 0.0010 0.0041 0.0015 0.0016  
Y -0.0011 -0.0016 -0.0005 -0.0009 0.0021 0.0002  
Z -0.0011 -0.0018 -0.0012 -0.0024 0.0029 -0.0001

AT. 139 H X 0.0010 -0.0024 -0.0007 0.0012 0.0009 -0.0015  
Y 0.0016 -0.0009 0.0006 0.0016 -0.0044 -0.0003

Z -0.0020 0.0039 0.0007 -0.0024 -0.0003 0.0023  
AT. 140 H X -0.0010 -0.0024 -0.0007 0.0012 -0.0009 0.0015  
Y -0.0016 -0.0009 0.0006 0.0016 0.0044 0.0003  
Z 0.0020 0.0039 0.0007 -0.0024 0.0003 -0.0023  
AT. 141 H X 0.0009 -0.0027 -0.0004 0.0025 0.0035 -0.0024  
Y -0.0002 0.0006 0.0012 0.0037 0.0023 -0.0011  
Z 0.0006 -0.0020 -0.0014 -0.0027 -0.0005 -0.0000  
AT. 142 H X -0.0009 -0.0027 -0.0004 0.0025 -0.0035 0.0024  
Y 0.0002 0.0006 0.0012 0.0037 -0.0023 0.0011  
Z -0.0006 -0.0020 -0.0014 -0.0027 0.0005 0.0000  
AT. 143 C X -0.0003 0.0002 0.0000 0.0000 0.0007 -0.0003  
Y -0.0001 -0.0000 -0.0002 -0.0008 -0.0002 0.0004  
Z -0.0002 0.0000 -0.0001 0.0000 0.0005 -0.0002  
AT. 144 C X 0.0003 0.0002 0.0000 0.0000 -0.0007 0.0003  
Y 0.0001 -0.0000 -0.0002 -0.0008 0.0002 -0.0004  
Z 0.0002 0.0000 -0.0001 0.0000 -0.0005 0.0002  
AT. 145 H X 0.0020 -0.0008 0.0018 0.0068 0.0009 -0.0028  
Y 0.0002 -0.0001 -0.0004 0.0027 0.0025 -0.0027  
Z 0.0002 -0.0001 0.0007 -0.0015 -0.0023 0.0023  
AT. 146 H X -0.0020 -0.0008 0.0018 0.0068 -0.0009 0.0028  
Y -0.0002 -0.0001 -0.0004 0.0027 -0.0025 0.0027  
Z -0.0002 -0.0001 0.0007 -0.0015 0.0023 -0.0023  
AT. 147 H X 0.0006 -0.0008 -0.0007 -0.0013 -0.0023 0.0017  
Y 0.0007 0.0005 0.0018 0.0083 0.0047 -0.0057  
Z 0.0015 -0.0010 -0.0000 0.0028 -0.0012 -0.0005  
AT. 148 H X -0.0006 -0.0008 -0.0007 -0.0013 0.0023 -0.0017  
Y -0.0007 0.0005 0.0018 0.0083 -0.0047 0.0057  
Z -0.0015 -0.0010 -0.0000 0.0028 0.0012 0.0005  
AT. 149 H X 0.0010 -0.0014 -0.0009 -0.0030 -0.0046 0.0037  
Y 0.0007 -0.0004 0.0007 -0.0001 -0.0024 0.0016  
Z 0.0007 0.0001 0.0019 0.0024 -0.0008 0.0000  
AT. 150 H X -0.0010 -0.0014 -0.0009 -0.0030 0.0046 -0.0037

Y -0.0007 -0.0004 0.0007 -0.0001 0.0024 -0.0016  
Z -0.0007 0.0001 0.0019 0.0024 0.0008 -0.0000  
AT. 151 C X 0.0004 -0.0001 0.0004 0.0017 0.0001 -0.0006  
Y 0.0001 -0.0001 0.0000 0.0002 -0.0000 -0.0000  
Z 0.0001 -0.0001 0.0002 0.0004 0.0007 -0.0003  
AT. 152 C X -0.0004 -0.0001 0.0004 0.0017 -0.0001 0.0006  
Y -0.0001 -0.0001 0.0000 0.0002 0.0000 0.0000  
Z -0.0001 -0.0001 0.0002 0.0004 -0.0007 0.0003  
AT. 153 H X -0.0017 0.0008 -0.0011 -0.0055 -0.0000 0.0018  
Y -0.0004 0.0002 -0.0015 -0.0034 -0.0038 0.0019  
Z 0.0001 -0.0001 -0.0017 -0.0027 -0.0056 0.0018  
AT. 154 H X 0.0017 0.0008 -0.0011 -0.0055 0.0000 -0.0018  
Y 0.0004 0.0002 -0.0015 -0.0034 0.0038 -0.0019  
Z -0.0001 -0.0001 -0.0017 -0.0027 0.0056 -0.0018  
AT. 155 H X -0.0008 0.0000 -0.0016 -0.0046 -0.0013 0.0017  
Y -0.0004 0.0003 0.0012 0.0014 0.0043 -0.0013  
Z 0.0001 -0.0004 -0.0017 -0.0031 -0.0046 0.0019  
AT. 156 H X 0.0008 0.0000 -0.0016 -0.0046 0.0013 -0.0017  
Y 0.0004 0.0003 0.0012 0.0014 -0.0043 0.0013  
Z -0.0001 -0.0004 -0.0017 -0.0031 0.0046 -0.0019  
AT. 157 O X -0.0001 -0.0002 0.0003 -0.0001 -0.0002 0.0002  
Y -0.0005 0.0001 0.0008 -0.0003 -0.0001 0.0007  
Z 0.0015 -0.0007 -0.0013 0.0004 -0.0001 -0.0005  
AT. 158 O X 0.0001 -0.0002 0.0003 -0.0001 0.0002 -0.0002  
Y 0.0005 0.0001 0.0008 -0.0003 0.0001 -0.0007  
Z -0.0015 -0.0007 -0.0013 0.0004 0.0001 0.0005  
AT. 159 O X -0.0018 0.0007 0.0017 -0.0006 0.0000 0.0008  
Y 0.0004 0.0001 -0.0005 0.0002 0.0001 -0.0003  
Z -0.0008 0.0005 0.0007 -0.0002 0.0002 0.0000  
AT. 160 O X 0.0018 0.0007 0.0017 -0.0006 -0.0000 -0.0008  
Y -0.0004 0.0001 -0.0005 0.0002 -0.0001 0.0003  
Z 0.0008 0.0005 0.0007 -0.0002 -0.0002 -0.0000

AT.161 H X 0.0026 0.0053 -0.0070 0.0036 0.0048 -0.0082  
Y 0.0012 0.0003 -0.0019 0.0009 0.0009 -0.0021  
Z -0.0009 -0.0010 0.0022 -0.0009 -0.0018 0.0026

AT.162 H X -0.0026 0.0053 -0.0070 0.0036 -0.0048 0.0082  
Y -0.0012 0.0003 -0.0019 0.0009 -0.0009 0.0021  
Z 0.0009 -0.0010 0.0022 -0.0009 0.0018 -0.0026

AT.163 H X 0.0288 -0.0128 -0.0274 0.0095 -0.0025 -0.0095  
Y 0.0009 -0.0026 -0.0009 0.0000 -0.0006 -0.0024  
Z -0.0110 0.0045 0.0103 -0.0036 0.0010 0.0034

AT.164 H X -0.0288 -0.0128 -0.0274 0.0095 0.0025 0.0095  
Y -0.0009 -0.0026 -0.0009 0.0000 0.0006 0.0024  
Z 0.0110 0.0045 0.0103 -0.0036 -0.0010 -0.0034

AT.165 O X -0.0000 0.0000 0.0017 0.0028 0.0038 -0.0009  
Y 0.0001 -0.0001 0.0004 0.0009 0.0016 -0.0006  
Z -0.0002 0.0001 -0.0010 -0.0018 -0.0030 0.0009

AT.166 O X 0.0000 0.0000 0.0017 0.0028 -0.0038 0.0009  
Y -0.0001 -0.0001 0.0004 0.0009 -0.0016 0.0006  
Z 0.0002 0.0001 -0.0010 -0.0018 0.0030 -0.0009

AT.167 H X -0.0003 -0.0001 -0.0123 -0.0202 -0.0286 0.0070  
Y 0.0002 0.0000 0.0042 0.0068 0.0097 -0.0024  
Z 0.0006 0.0001 0.0350 0.0578 0.0817 -0.0203

AT.168 H X 0.0003 -0.0001 -0.0123 -0.0202 0.0286 -0.0070  
Y -0.0002 0.0000 0.0042 0.0068 -0.0097 0.0024  
Z -0.0006 0.0001 0.0350 0.0578 -0.0817 0.0203

AT.169 O X 0.0001 -0.0001 -0.0009 -0.0014 -0.0016 0.0003  
Y -0.0002 0.0001 -0.0007 -0.0015 -0.0026 0.0009  
Z -0.0001 0.0000 -0.0011 -0.0019 -0.0030 0.0008

AT.170 O X -0.0001 -0.0001 -0.0009 -0.0014 0.0016 -0.0003  
Y 0.0002 0.0001 -0.0007 -0.0015 0.0026 -0.0009  
Z 0.0001 0.0000 -0.0011 -0.0019 0.0030 -0.0008

AT.171 H X -0.0015 0.0008 -0.0010 -0.0033 -0.0074 0.0031  
Y 0.0013 -0.0005 0.0006 0.0022 0.0074 -0.0031

Z 0.0038 -0.0014 0.0011 0.0058 0.0198 -0.0086  
AT. 172 H X 0.0015 0.0008 -0.0010 -0.0033 0.0074 -0.0031  
Y -0.0013 -0.0005 0.0006 0.0022 -0.0074 0.0031  
Z -0.0038 -0.0014 0.0011 0.0058 -0.0198 0.0086

FREQ(CM\*\*-1) 1482.24 1484.40 1491.57 1491.78 1499.41 1500.38

AT. 1 I X -0.0000 -0.0000 0.0000 -0.0000 -0.0000 -0.0000  
Y -0.0000 -0.0000 0.0000 -0.0000 0.0000 0.0000  
Z 0.0000 -0.0000 -0.0000 -0.0000 -0.0000 -0.0000

AT. 2 I X -0.0000 0.0000 -0.0000 -0.0000 0.0000 -0.0000  
Y -0.0000 0.0000 -0.0000 -0.0000 -0.0000 0.0000  
Z 0.0000 0.0000 0.0000 -0.0000 0.0000 -0.0000

AT. 3 I X 0.0000 -0.0000 -0.0000 -0.0000 0.0000 -0.0000  
Y 0.0000 -0.0000 0.0000 -0.0000 -0.0000 -0.0000  
Z 0.0000 -0.0000 -0.0000 -0.0000 0.0000 -0.0000

AT. 4 I X 0.0000 0.0000 0.0000 -0.0000 -0.0000 -0.0000  
Y 0.0000 0.0000 -0.0000 -0.0000 0.0000 -0.0000  
Z 0.0000 0.0000 0.0000 -0.0000 -0.0000 -0.0000

AT. 5 O X -0.0001 -0.0000 -0.0000 0.0001 -0.0012 -0.0007  
Y 0.0001 0.0001 0.0001 -0.0001 0.0002 0.0001  
Z 0.0002 0.0000 0.0000 -0.0001 0.0013 0.0007

AT. 6 O X -0.0001 0.0000 0.0000 0.0001 0.0012 -0.0007  
Y 0.0001 -0.0001 -0.0001 -0.0001 -0.0002 0.0001  
Z 0.0002 -0.0000 -0.0000 -0.0001 -0.0013 0.0007

AT. 7 O X 0.0002 -0.0005 -0.0002 -0.0003 -0.0002 -0.0009  
Y -0.0002 0.0005 0.0001 0.0002 0.0004 0.0006  
Z 0.0001 -0.0001 -0.0001 -0.0001 -0.0003 -0.0002

AT. 8 O X 0.0002 0.0005 0.0002 -0.0003 0.0002 -0.0009  
Y -0.0002 -0.0005 -0.0001 0.0002 -0.0004 0.0006  
Z 0.0001 0.0001 0.0001 -0.0001 0.0003 -0.0002

AT. 9 N X -0.0000 0.0001 -0.0001 0.0001 -0.0008 -0.0003



Y 0.0001 0.0000 0.0000 -0.0000 0.0012 0.0006  
Z -0.0007 -0.0009 0.0004 0.0000 -0.0003 0.0008  
AT. 10 N X -0.0000 -0.0001 0.0001 0.0001 0.0008 -0.0003  
Y 0.0001 -0.0000 -0.0000 -0.0000 -0.0012 0.0006  
Z -0.0007 0.0009 -0.0004 0.0000 0.0003 0.0008  
AT. 11 N X -0.0001 -0.0001 -0.0000 -0.0001 0.0005 -0.0002  
Y 0.0002 -0.0004 0.0002 0.0000 0.0001 -0.0003  
Z -0.0006 0.0011 -0.0006 -0.0002 -0.0008 0.0009  
AT. 12 N X -0.0001 0.0001 0.0000 -0.0001 -0.0005 -0.0002  
Y 0.0002 0.0004 -0.0002 0.0000 -0.0001 -0.0003  
Z -0.0006 -0.0011 0.0006 -0.0002 0.0008 0.0009  
AT. 13 C X -0.0000 -0.0002 0.0002 -0.0002 0.0014 0.0007  
Y -0.0002 -0.0003 -0.0001 0.0002 -0.0006 -0.0001  
Z 0.0002 0.0004 -0.0003 -0.0000 -0.0011 -0.0013  
AT. 14 C X -0.0000 0.0002 -0.0002 -0.0002 -0.0014 0.0007  
Y -0.0002 0.0003 0.0001 0.0002 0.0006 -0.0001  
Z 0.0002 -0.0004 0.0003 -0.0000 0.0011 -0.0013  
AT. 15 C X 0.0004 0.0005 -0.0002 0.0001 -0.0003 -0.0003  
Y -0.0011 -0.0016 0.0004 -0.0003 0.0007 0.0008  
Z 0.0003 0.0005 -0.0001 0.0001 0.0001 0.0000  
AT. 16 C X 0.0004 -0.0005 0.0002 0.0001 0.0003 -0.0003  
Y -0.0011 0.0016 -0.0004 -0.0003 -0.0007 0.0008  
Z 0.0003 -0.0005 0.0001 0.0001 -0.0001 0.0000  
AT. 17 H X 0.0015 0.0020 -0.0004 0.0004 -0.0015 -0.0020  
Y 0.0057 0.0082 -0.0020 0.0012 -0.0022 -0.0035  
Z -0.0077 -0.0110 0.0027 -0.0017 0.0034 0.0046  
AT. 18 H X 0.0015 -0.0020 0.0004 0.0004 0.0015 -0.0020  
Y 0.0057 -0.0082 0.0020 0.0012 0.0022 -0.0035  
Z -0.0077 0.0110 -0.0027 -0.0017 -0.0034 0.0046  
AT. 19 H X -0.0027 -0.0036 0.0009 -0.0007 0.0025 0.0023  
Y 0.0094 0.0131 -0.0033 0.0020 -0.0046 -0.0071  
Z 0.0031 0.0043 -0.0010 0.0007 -0.0010 -0.0019

AT. 20 H X -0.0027 0.0036 -0.0009 -0.0007 -0.0025 0.0023  
Y 0.0094 -0.0131 0.0033 0.0020 0.0046 -0.0071  
Z 0.0031 -0.0043 0.0010 0.0007 0.0010 -0.0019

AT. 21 C X -0.0001 0.0008 0.0001 0.0004 0.0007 0.0013  
Y 0.0002 -0.0004 -0.0004 -0.0004 -0.0006 -0.0006  
Z 0.0002 -0.0009 0.0006 0.0000 0.0004 -0.0004

AT. 22 C X -0.0001 -0.0008 -0.0001 0.0004 -0.0007 0.0013  
Y 0.0002 0.0004 0.0004 -0.0004 0.0006 -0.0006  
Z 0.0002 0.0009 -0.0006 0.0000 -0.0004 -0.0004

AT. 23 C X -0.0004 0.0003 0.0001 0.0000 -0.0000 -0.0003  
Y 0.0004 -0.0005 -0.0002 -0.0001 0.0001 -0.0001  
Z 0.0009 -0.0009 -0.0004 -0.0003 0.0000 -0.0002

AT. 24 C X -0.0004 -0.0003 -0.0001 0.0000 0.0000 -0.0003  
Y 0.0004 0.0005 0.0002 -0.0001 -0.0001 -0.0001  
Z 0.0009 0.0009 0.0004 -0.0003 -0.0000 -0.0002

AT. 25 H X 0.0002 0.0004 -0.0004 -0.0001 -0.0009 0.0005  
Y 0.0015 -0.0016 -0.0006 -0.0005 -0.0004 -0.0003  
Z -0.0090 0.0106 0.0036 0.0035 0.0017 0.0032

AT. 26 H X 0.0002 -0.0004 0.0004 -0.0001 0.0009 0.0005  
Y 0.0015 0.0016 0.0006 -0.0005 0.0004 -0.0003  
Z -0.0090 -0.0106 -0.0036 0.0035 -0.0017 0.0032

AT. 27 H X 0.0024 -0.0026 0.0001 0.0001 -0.0008 0.0013  
Y -0.0075 0.0089 0.0027 0.0026 -0.0004 0.0031  
Z -0.0037 0.0045 0.0010 0.0011 -0.0002 0.0011

AT. 28 H X 0.0024 0.0026 -0.0001 0.0001 0.0008 0.0013  
Y -0.0075 -0.0089 -0.0027 0.0026 0.0004 0.0031  
Z -0.0037 -0.0045 -0.0010 0.0011 0.0002 0.0011

AT. 29 C X 0.0003 0.0007 -0.0003 -0.0000 -0.0011 -0.0009  
Y -0.0003 -0.0003 0.0004 -0.0002 0.0050 0.0031  
Z 0.0003 0.0005 -0.0002 -0.0001 0.0010 0.0003

AT. 30 C X 0.0003 -0.0007 0.0003 -0.0000 0.0011 -0.0009  
Y -0.0003 0.0003 -0.0004 -0.0002 -0.0050 0.0031

Z 0.0003 -0.0005 0.0002 -0.0001 -0.0010 0.0003  
AT. 31 H X -0.0008 -0.0024 0.0022 -0.0001 0.0280 0.0160  
Y 0.0005 0.0009 -0.0016 0.0009 -0.0282 -0.0167  
Z 0.0008 0.0003 -0.0014 0.0016 -0.0289 -0.0178  
AT. 32 H X -0.0008 0.0024 -0.0022 -0.0001 -0.0280 0.0160  
Y 0.0005 -0.0009 0.0016 0.0009 0.0282 -0.0167  
Z 0.0008 -0.0003 0.0014 0.0016 0.0289 -0.0178  
AT. 33 H X -0.0018 -0.0033 0.0010 -0.0003 -0.0078 -0.0030  
Y 0.0017 0.0023 -0.0030 0.0013 -0.0447 -0.0272  
Z -0.0020 -0.0034 0.0021 -0.0010 0.0172 0.0116  
AT. 34 H X -0.0018 0.0033 -0.0010 -0.0003 0.0078 -0.0030  
Y 0.0017 -0.0023 0.0030 0.0013 0.0447 -0.0272  
Z -0.0020 0.0034 -0.0021 -0.0010 -0.0172 0.0116  
AT. 35 C X -0.0001 -0.0007 0.0002 -0.0002 -0.0009 -0.0003  
Y 0.0006 0.0007 -0.0003 0.0005 0.0005 0.0001  
Z 0.0002 0.0000 0.0001 0.0006 0.0005 0.0001  
AT. 36 C X -0.0001 0.0007 -0.0002 -0.0002 0.0009 -0.0003  
Y 0.0006 -0.0007 0.0003 0.0005 -0.0005 0.0001  
Z 0.0002 -0.0000 -0.0001 0.0006 -0.0005 0.0001  
AT. 37 C X 0.0003 -0.0003 0.0006 0.0007 0.0030 0.0005  
Y -0.0003 -0.0004 0.0001 -0.0002 -0.0009 0.0001  
Z 0.0002 -0.0000 -0.0000 -0.0001 0.0002 -0.0004  
AT. 38 C X 0.0003 0.0003 -0.0006 0.0007 -0.0030 0.0005  
Y -0.0003 0.0004 -0.0001 -0.0002 0.0009 0.0001  
Z 0.0002 0.0000 0.0000 -0.0001 -0.0002 -0.0004  
AT. 39 H X -0.0020 0.0030 -0.0049 -0.0048 -0.0206 -0.0021  
Y 0.0008 0.0033 -0.0007 0.0010 -0.0004 -0.0013  
Z -0.0018 0.0007 -0.0033 -0.0042 -0.0155 -0.0014  
AT. 40 H X -0.0020 -0.0030 0.0049 -0.0048 0.0206 -0.0021  
Y 0.0008 -0.0033 0.0007 0.0010 0.0004 -0.0013  
Z -0.0018 -0.0007 0.0033 -0.0042 0.0155 -0.0014  
AT. 41 H X -0.0014 0.0021 -0.0034 -0.0038 -0.0178 -0.0030

Y -0.0004 0.0011 -0.0001 -0.0001 0.0088 0.0011  
Z 0.0019 -0.0035 0.0040 0.0041 0.0128 0.0022  
AT. 42 H X -0.0014 -0.0021 0.0034 -0.0038 0.0178 -0.0030  
Y -0.0004 -0.0011 0.0001 -0.0001 -0.0088 0.0011  
Z 0.0019 0.0035 -0.0040 0.0041 -0.0128 0.0022  
AT. 43 C X -0.0000 0.0003 0.0001 0.0001 0.0001 0.0002  
Y 0.0001 0.0001 0.0003 0.0004 -0.0006 0.0001  
Z 0.0001 -0.0006 0.0002 -0.0000 0.0002 -0.0003  
AT. 44 C X -0.0000 -0.0003 -0.0001 0.0001 -0.0001 0.0002  
Y 0.0001 -0.0001 -0.0003 0.0004 0.0006 0.0001  
Z 0.0001 0.0006 -0.0002 -0.0000 -0.0002 -0.0003  
AT. 45 H X -0.0004 -0.0003 0.0003 0.0003 -0.0044 0.0001  
Y -0.0006 -0.0008 -0.0010 -0.0018 0.0037 0.0000  
Z 0.0008 0.0008 0.0013 0.0019 -0.0007 -0.0001  
AT. 46 H X -0.0004 0.0003 -0.0003 0.0003 0.0044 0.0001  
Y -0.0006 0.0008 0.0010 -0.0018 -0.0037 0.0000  
Z 0.0008 -0.0008 -0.0013 0.0019 0.0007 -0.0001  
AT. 47 H X 0.0007 -0.0015 0.0001 -0.0004 0.0015 -0.0006  
Y -0.0004 -0.0001 -0.0019 -0.0022 0.0039 0.0003  
Z -0.0014 0.0017 -0.0020 -0.0019 0.0028 0.0009  
AT. 48 H X 0.0007 0.0015 -0.0001 -0.0004 -0.0015 -0.0006  
Y -0.0004 0.0001 0.0019 -0.0022 -0.0039 0.0003  
Z -0.0014 -0.0017 0.0020 -0.0019 -0.0028 0.0009  
AT. 49 C X -0.0001 -0.0002 -0.0002 -0.0003 -0.0003 -0.0001  
Y -0.0003 0.0003 -0.0004 -0.0006 0.0005 0.0000  
Z 0.0003 0.0006 -0.0001 0.0002 -0.0000 0.0003  
AT. 50 C X -0.0001 0.0002 0.0002 -0.0003 0.0003 -0.0001  
Y -0.0003 -0.0003 0.0004 -0.0006 -0.0005 0.0000  
Z 0.0003 -0.0006 0.0001 0.0002 0.0000 0.0003  
AT. 51 C X -0.0005 -0.0005 0.0000 -0.0000 -0.0003 0.0005  
Y -0.0001 -0.0003 0.0002 0.0000 -0.0004 -0.0004  
Z -0.0001 -0.0001 0.0002 -0.0002 -0.0002 -0.0007

AT. 52 C X -0.0005 0.0005 -0.0000 -0.0000 0.0003 0.0005  
Y -0.0001 0.0003 -0.0002 0.0000 0.0004 -0.0004  
Z -0.0001 0.0001 -0.0002 -0.0002 0.0002 -0.0007

AT. 53 H X 0.0025 0.0021 0.0005 0.0003 0.0031 -0.0024  
Y 0.0022 0.0027 -0.0004 0.0003 0.0017 -0.0015  
Z -0.0024 -0.0011 -0.0013 -0.0003 -0.0033 0.0030

AT. 54 H X 0.0025 -0.0021 -0.0005 0.0003 -0.0031 -0.0024  
Y 0.0022 -0.0027 0.0004 0.0003 -0.0017 -0.0015  
Z -0.0024 0.0011 0.0013 -0.0003 0.0033 0.0030

AT. 55 H X 0.0045 0.0038 0.0006 0.0012 0.0036 -0.0032  
Y 0.0009 0.0010 -0.0017 0.0013 -0.0001 0.0026  
Z 0.0046 0.0045 -0.0018 0.0024 0.0025 0.0005

AT. 56 H X 0.0045 -0.0038 -0.0006 0.0012 -0.0036 -0.0032  
Y 0.0009 -0.0010 0.0017 0.0013 0.0001 0.0026  
Z 0.0046 -0.0045 0.0018 0.0024 -0.0025 0.0005

AT. 57 C X -0.0000 0.0002 -0.0003 -0.0003 -0.0006 -0.0001  
Y -0.0000 0.0004 -0.0005 -0.0001 -0.0013 -0.0006  
Z 0.0005 0.0004 -0.0003 0.0004 0.0001 -0.0003

AT. 58 C X -0.0000 -0.0002 0.0003 -0.0003 0.0006 -0.0001  
Y -0.0000 -0.0004 0.0005 -0.0001 0.0013 -0.0006  
Z 0.0005 -0.0004 0.0003 0.0004 -0.0001 -0.0003

AT. 59 H X -0.0011 0.0022 -0.0024 -0.0023 -0.0099 -0.0028  
Y -0.0030 -0.0050 0.0043 -0.0026 0.0071 0.0049  
Z -0.0049 -0.0061 0.0051 -0.0050 0.0050 0.0058

AT. 60 H X -0.0011 -0.0022 0.0024 -0.0023 0.0099 -0.0028  
Y -0.0030 0.0050 -0.0043 -0.0026 -0.0071 0.0049  
Z -0.0049 0.0061 -0.0051 -0.0050 -0.0050 0.0058

AT. 61 H X 0.0007 -0.0022 0.0034 0.0032 0.0115 0.0032  
Y -0.0021 -0.0068 0.0065 -0.0009 0.0149 0.0073  
Z 0.0020 0.0021 -0.0008 0.0034 0.0016 -0.0015

AT. 62 H X 0.0007 0.0022 -0.0034 0.0032 -0.0115 0.0032  
Y -0.0021 0.0068 -0.0065 -0.0009 -0.0149 0.0073

Z 0.0020 -0.0021 0.0008 0.0034 -0.0016 -0.0015  
AT. 63 H X 0.0012 -0.0011 0.0023 0.0032 0.0098 0.0020  
Y 0.0037 0.0037 -0.0033 0.0032 -0.0034 -0.0034  
Z -0.0040 -0.0013 -0.0000 -0.0056 -0.0077 0.0004  
AT. 64 H X 0.0012 0.0011 -0.0023 0.0032 -0.0098 0.0020  
Y 0.0037 -0.0037 0.0033 0.0032 0.0034 -0.0034  
Z -0.0040 0.0013 0.0000 -0.0056 0.0077 0.0004  
AT. 65 C X 0.0000 -0.0001 -0.0001 -0.0002 -0.0003 -0.0002  
Y 0.0002 0.0007 -0.0007 -0.0003 0.0006 -0.0001  
Z -0.0001 0.0001 0.0000 0.0000 -0.0006 0.0001  
AT. 66 C X 0.0000 0.0001 0.0001 -0.0002 0.0003 -0.0002  
Y 0.0002 -0.0007 0.0007 -0.0003 -0.0006 -0.0001  
Z -0.0001 -0.0001 -0.0000 0.0000 0.0006 0.0001  
AT. 67 H X 0.0008 0.0054 -0.0052 -0.0032 0.0011 -0.0004  
Y -0.0010 -0.0053 0.0064 0.0033 -0.0095 0.0016  
Z 0.0004 0.0008 -0.0020 -0.0007 0.0073 -0.0011  
AT. 68 H X 0.0008 -0.0054 0.0052 -0.0032 -0.0011 -0.0004  
Y -0.0010 0.0053 -0.0064 0.0033 0.0095 0.0016  
Z 0.0004 -0.0008 0.0020 -0.0007 -0.0073 -0.0011  
AT. 69 H X -0.0008 -0.0035 0.0046 0.0033 -0.0006 0.0018  
Y -0.0012 -0.0062 0.0075 0.0049 -0.0040 0.0023  
Z -0.0003 -0.0032 0.0028 0.0009 -0.0060 -0.0003  
AT. 70 H X -0.0008 0.0035 -0.0046 0.0033 0.0006 0.0018  
Y -0.0012 0.0062 -0.0075 0.0049 0.0040 0.0023  
Z -0.0003 0.0032 -0.0028 0.0009 0.0060 -0.0003  
AT. 71 H X -0.0001 -0.0018 0.0032 0.0035 0.0043 0.0019  
Y 0.0001 0.0015 -0.0033 -0.0027 0.0039 -0.0019  
Z -0.0001 0.0001 -0.0014 -0.0006 0.0076 -0.0009  
AT. 72 H X -0.0001 0.0018 -0.0032 0.0035 -0.0043 0.0019  
Y 0.0001 -0.0015 0.0033 -0.0027 -0.0039 -0.0019  
Z -0.0001 -0.0001 0.0014 -0.0006 -0.0076 -0.0009  
AT. 73 C X 0.0000 0.0008 -0.0002 -0.0000 0.0007 0.0004

Y 0.0000 -0.0006 0.0002 0.0001 -0.0008 -0.0005  
Z -0.0014 -0.0006 0.0002 -0.0016 0.0013 0.0015  
AT. 74 C X 0.0000 -0.0008 0.0002 -0.0000 -0.0007 0.0004  
Y 0.0000 0.0006 -0.0002 0.0001 0.0008 -0.0005  
Z -0.0014 0.0006 -0.0002 -0.0016 -0.0013 0.0015  
AT. 75 H X 0.0032 -0.0017 -0.0001 0.0037 -0.0067 -0.0074  
Y 0.0056 0.0032 -0.0009 0.0058 -0.0038 -0.0049  
Z 0.0090 0.0029 -0.0012 0.0095 -0.0092 -0.0109  
AT. 76 H X 0.0032 0.0017 0.0001 0.0037 0.0067 -0.0074  
Y 0.0056 -0.0032 0.0009 0.0058 0.0038 -0.0049  
Z 0.0090 -0.0029 0.0012 0.0095 0.0092 -0.0109  
AT. 77 H X -0.0023 -0.0037 0.0017 -0.0020 0.0023 0.0030  
Y -0.0074 0.0001 -0.0003 -0.0084 0.0086 0.0097  
Z 0.0076 0.0030 -0.0012 0.0081 -0.0091 -0.0104  
AT. 78 H X -0.0023 0.0037 -0.0017 -0.0020 -0.0023 0.0030  
Y -0.0074 -0.0001 0.0003 -0.0084 -0.0086 0.0097  
Z 0.0076 -0.0030 0.0012 0.0081 0.0091 -0.0104  
AT. 79 I X 0.0001 0.0000 0.0000 -0.0000 0.0000 0.0000  
Y -0.0000 -0.0000 -0.0000 0.0000 -0.0000 0.0000  
Z 0.0000 0.0000 -0.0000 0.0000 0.0000 -0.0000  
AT. 80 I X 0.0001 -0.0000 -0.0000 -0.0000 -0.0000 0.0000  
Y -0.0000 0.0000 0.0000 0.0000 0.0000 0.0000  
Z 0.0000 -0.0000 0.0000 0.0000 -0.0000 -0.0000  
AT. 81 I X -0.0000 0.0000 0.0000 0.0000 0.0000 -0.0000  
Y 0.0000 -0.0000 -0.0000 -0.0000 -0.0000 -0.0000  
Z 0.0000 -0.0000 -0.0000 -0.0000 -0.0000 -0.0000  
AT. 82 I X -0.0000 -0.0000 -0.0000 0.0000 -0.0000 -0.0000  
Y 0.0000 0.0000 0.0000 -0.0000 0.0000 -0.0000  
Z 0.0000 0.0000 0.0000 -0.0000 0.0000 -0.0000  
AT. 83 O X 0.0010 0.0020 0.0001 -0.0002 -0.0002 -0.0006  
Y 0.0005 0.0007 0.0000 -0.0001 -0.0000 -0.0002  
Z 0.0007 0.0013 -0.0001 -0.0002 0.0001 -0.0002

AT. 84 O X 0.0010 -0.0020 -0.0001 -0.0002 0.0002 -0.0006  
Y 0.0005 -0.0007 -0.0000 -0.0001 0.0000 -0.0002  
Z 0.0007 -0.0013 0.0001 -0.0002 -0.0001 -0.0002

AT. 85 O X -0.0020 0.0016 0.0029 0.0027 0.0004 -0.0008  
Y -0.0015 0.0013 0.0019 0.0017 0.0003 -0.0005  
Z 0.0004 -0.0002 -0.0008 -0.0008 -0.0001 0.0003

AT. 86 O X -0.0020 -0.0016 -0.0029 0.0027 -0.0004 -0.0008  
Y -0.0015 -0.0013 -0.0019 0.0017 -0.0003 -0.0005  
Z 0.0004 0.0002 0.0008 -0.0008 0.0001 0.0003

AT. 87 N X -0.0003 -0.0007 -0.0004 -0.0010 -0.0006 -0.0007  
Y 0.0000 0.0004 -0.0003 -0.0001 -0.0002 -0.0005  
Z -0.0047 -0.0068 0.0007 -0.0027 0.0005 0.0018

AT. 88 N X -0.0003 0.0007 0.0004 -0.0010 0.0006 -0.0007  
Y 0.0000 -0.0004 0.0003 -0.0001 0.0002 -0.0005  
Z -0.0047 0.0068 -0.0007 -0.0027 -0.0005 0.0018

AT. 89 N X -0.0012 0.0010 0.0030 0.0027 0.0009 0.0012  
Y 0.0030 -0.0019 -0.0031 -0.0026 0.0008 0.0025  
Z -0.0066 0.0049 0.0072 0.0061 -0.0011 -0.0039

AT. 90 N X -0.0012 -0.0010 -0.0030 0.0027 -0.0009 0.0012  
Y 0.0030 0.0019 0.0031 -0.0026 -0.0008 0.0025  
Z -0.0066 -0.0049 -0.0072 0.0061 0.0011 -0.0039

AT. 91 C X 0.0001 -0.0010 -0.0005 0.0005 0.0014 0.0015  
Y -0.0015 -0.0022 0.0001 -0.0002 0.0003 0.0006  
Z 0.0007 0.0015 0.0004 0.0014 -0.0016 -0.0018

AT. 92 C X 0.0001 0.0010 0.0005 0.0005 -0.0014 0.0015  
Y -0.0015 0.0022 -0.0001 -0.0002 -0.0003 0.0006  
Z 0.0007 -0.0015 -0.0004 0.0014 0.0016 -0.0018

AT. 93 C X -0.0032 -0.0039 0.0003 -0.0004 -0.0013 -0.0006  
Y -0.0038 -0.0044 0.0002 -0.0005 -0.0009 -0.0003  
Z 0.0034 0.0038 -0.0004 0.0004 0.0012 0.0007

AT. 94 C X -0.0032 0.0039 -0.0003 -0.0004 0.0013 -0.0006  
Y -0.0038 0.0044 -0.0002 -0.0005 0.0009 -0.0003



Z 0.0034 -0.0038 0.0004 0.0004 -0.0012 0.0007  
AT. 95 H X 0.0042 0.0070 -0.0033 0.0022 0.0006 0.0006  
Y 0.0184 0.0211 0.0008 0.0022 0.0036 0.0008  
Z -0.0434 -0.0524 0.0028 -0.0077 -0.0088 -0.0030  
AT. 96 H X 0.0042 -0.0070 0.0033 0.0022 -0.0006 0.0006  
Y 0.0184 -0.0211 -0.0008 0.0022 -0.0036 0.0008  
Z -0.0434 0.0524 -0.0028 -0.0077 0.0088 -0.0030  
AT. 97 H X 0.0254 0.0336 -0.0001 0.0037 0.0059 0.0005  
Y 0.0370 0.0439 -0.0019 0.0067 0.0071 0.0016  
Z 0.0042 0.0037 -0.0007 0.0009 0.0007 0.0008  
AT. 98 H X 0.0254 -0.0336 0.0001 0.0037 -0.0059 0.0005  
Y 0.0370 -0.0439 0.0019 0.0067 -0.0071 0.0016  
Z 0.0042 -0.0037 0.0007 0.0009 -0.0007 0.0008  
AT. 99 C X 0.0025 -0.0028 -0.0039 -0.0037 -0.0004 0.0017  
Y 0.0000 0.0001 -0.0005 -0.0006 -0.0011 -0.0011  
Z 0.0043 -0.0037 -0.0045 -0.0039 0.0010 0.0029  
AT. 100 C X 0.0025 0.0028 0.0039 -0.0037 0.0004 0.0017  
Y 0.0000 -0.0001 0.0005 -0.0006 0.0011 -0.0011  
Z 0.0043 0.0037 0.0045 -0.0039 -0.0010 0.0029  
AT. 101 C X 0.0030 -0.0016 -0.0027 -0.0025 -0.0004 -0.0001  
Y 0.0024 -0.0016 -0.0027 -0.0025 -0.0003 0.0004  
Z 0.0044 -0.0024 -0.0049 -0.0047 -0.0010 -0.0001  
AT. 102 C X 0.0030 0.0016 0.0027 -0.0025 0.0004 -0.0001  
Y 0.0024 0.0016 0.0027 -0.0025 0.0003 0.0004  
Z 0.0044 0.0024 0.0049 -0.0047 0.0010 -0.0001  
AT. 103 H X 0.0008 -0.0010 -0.0024 -0.0015 0.0003 0.0009  
Y 0.0042 -0.0023 -0.0036 -0.0037 -0.0009 -0.0001  
Z -0.0491 0.0308 0.0526 0.0498 0.0094 -0.0037  
AT. 104 H X 0.0008 0.0010 0.0024 -0.0015 -0.0003 0.0009  
Y 0.0042 0.0023 0.0036 -0.0037 0.0009 -0.0001  
Z -0.0491 -0.0308 -0.0526 0.0498 -0.0094 -0.0037  
AT. 105 H X -0.0302 0.0200 0.0268 0.0252 0.0026 -0.0036

Y -0.0403 0.0252 0.0479 0.0447 0.0071 -0.0040  
Z -0.0194 0.0126 0.0214 0.0199 0.0023 -0.0026  
AT. 106 H X -0.0302 -0.0200 -0.0268 0.0252 -0.0026 -0.0036  
Y -0.0403 -0.0252 -0.0479 0.0447 -0.0071 -0.0040  
Z -0.0194 -0.0126 -0.0214 0.0199 -0.0023 -0.0026  
AT. 107 C X -0.0014 -0.0031 -0.0018 -0.0028 -0.0003 -0.0013  
Y 0.0020 0.0009 -0.0033 -0.0018 0.0012 -0.0007  
Z 0.0034 0.0043 -0.0007 0.0015 0.0006 -0.0002  
AT. 108 C X -0.0014 0.0031 0.0018 -0.0028 0.0003 -0.0013  
Y 0.0020 -0.0009 0.0033 -0.0018 -0.0012 -0.0007  
Z 0.0034 -0.0043 0.0007 0.0015 -0.0006 -0.0002  
AT. 109 H X -0.0083 0.0030 0.0275 0.0205 -0.0032 0.0118  
Y -0.0075 -0.0019 0.0122 0.0073 -0.0003 0.0070  
Z -0.0105 -0.0026 0.0155 0.0089 -0.0007 0.0086  
AT. 110 H X -0.0083 -0.0030 -0.0275 0.0205 0.0032 0.0118  
Y -0.0075 0.0019 -0.0122 0.0073 0.0003 0.0070  
Z -0.0105 0.0026 -0.0155 0.0089 0.0007 0.0086  
AT. 111 H X 0.0149 0.0209 -0.0011 0.0113 0.0043 0.0034  
Y -0.0168 -0.0039 0.0325 0.0193 -0.0062 0.0115  
Z -0.0104 -0.0208 -0.0090 -0.0179 -0.0028 -0.0075  
AT. 112 H X 0.0149 -0.0209 0.0011 0.0113 -0.0043 0.0034  
Y -0.0168 0.0039 -0.0325 0.0193 0.0062 0.0115  
Z -0.0104 0.0208 0.0090 -0.0179 0.0028 -0.0075  
AT. 113 C X 0.0009 0.0027 -0.0002 0.0009 0.0022 0.0027  
Y 0.0000 -0.0006 0.0004 0.0005 -0.0029 -0.0027  
Z -0.0002 -0.0011 -0.0007 -0.0009 0.0006 0.0009  
AT. 114 C X 0.0009 -0.0027 0.0002 0.0009 -0.0022 0.0027  
Y 0.0000 0.0006 -0.0004 0.0005 0.0029 -0.0027  
Z -0.0002 0.0011 0.0007 -0.0009 -0.0006 0.0009  
AT. 115 C X -0.0052 0.0029 0.0098 0.0086 -0.0004 -0.0007  
Y -0.0001 -0.0013 -0.0013 -0.0017 0.0002 -0.0006  
Z 0.0029 -0.0008 -0.0028 -0.0020 0.0003 0.0014

AT. 116 C X -0.0052 -0.0029 -0.0098 0.0086 0.0004 -0.0007  
Y -0.0001 0.0013 0.0013 -0.0017 -0.0002 -0.0006  
Z 0.0029 0.0008 0.0028 -0.0020 -0.0003 0.0014

AT. 117 H X 0.0319 -0.0209 -0.0586 -0.0519 -0.0019 -0.0008  
Y -0.0136 0.0160 0.0342 0.0338 0.0043 0.0077  
Z -0.0311 0.0188 0.0571 0.0501 0.0006 -0.0009

AT. 118 H X 0.0319 0.0209 0.0586 -0.0519 0.0019 -0.0008  
Y -0.0136 -0.0160 -0.0342 0.0338 -0.0043 0.0077  
Z -0.0311 -0.0188 -0.0571 0.0501 -0.0006 -0.0009

AT. 119 H X 0.0338 -0.0224 -0.0722 -0.0657 -0.0043 -0.0074  
Y 0.0031 0.0056 -0.0056 -0.0038 0.0011 0.0008  
Z 0.0194 -0.0205 -0.0406 -0.0382 -0.0030 -0.0037

AT. 120 H X 0.0338 0.0224 0.0722 -0.0657 0.0043 -0.0074  
Y 0.0031 -0.0056 0.0056 -0.0038 -0.0011 0.0008  
Z 0.0194 0.0205 0.0406 -0.0382 0.0030 -0.0037

AT. 121 C X 0.0011 -0.0008 -0.0005 -0.0007 0.0018 0.0045  
Y -0.0021 0.0017 0.0055 0.0046 0.0041 0.0071  
Z 0.0030 -0.0019 -0.0035 -0.0032 0.0003 0.0017

AT. 122 C X 0.0011 0.0008 0.0005 -0.0007 -0.0018 0.0045  
Y -0.0021 -0.0017 -0.0055 0.0046 -0.0041 0.0071  
Z 0.0030 0.0019 0.0035 -0.0032 -0.0003 0.0017

AT. 123 H X 0.0059 -0.0065 -0.0256 -0.0195 -0.0256 -0.0529  
Y 0.0056 -0.0042 -0.0224 -0.0191 -0.0187 -0.0352  
Z -0.0040 0.0031 0.0197 0.0171 0.0176 0.0326

AT. 124 H X 0.0059 0.0065 0.0256 -0.0195 0.0256 -0.0529  
Y 0.0056 0.0042 0.0224 -0.0191 0.0187 -0.0352  
Z -0.0040 -0.0031 -0.0197 0.0171 -0.0176 0.0326

AT. 125 H X -0.0096 0.0060 0.0065 0.0060 -0.0044 -0.0130  
Y 0.0088 -0.0075 -0.0341 -0.0278 -0.0305 -0.0588  
Z -0.0050 0.0020 -0.0133 -0.0100 -0.0238 -0.0505

AT. 126 H X -0.0096 -0.0060 -0.0065 0.0060 0.0044 -0.0130  
Y 0.0088 0.0075 0.0341 -0.0278 0.0305 -0.0588

Z -0.0050 -0.0020 0.0133 -0.0100 0.0238 -0.0505  
AT. 127 C X -0.0002 0.0011 0.0012 0.0014 0.0013 0.0016  
Y 0.0006 -0.0010 -0.0008 -0.0007 -0.0014 -0.0013  
Z -0.0005 0.0007 0.0013 0.0016 0.0004 0.0001  
AT. 128 C X -0.0002 -0.0011 -0.0012 0.0014 -0.0013 0.0016  
Y 0.0006 0.0010 0.0008 -0.0007 0.0014 -0.0013  
Z -0.0005 -0.0007 -0.0013 0.0016 -0.0004 0.0001  
AT. 129 C X 0.0027 0.0028 -0.0014 -0.0004 0.0003 -0.0010  
Y 0.0002 -0.0004 -0.0002 -0.0002 -0.0000 0.0002  
Z 0.0027 0.0023 -0.0013 -0.0001 -0.0002 -0.0006  
AT. 130 C X 0.0027 -0.0028 0.0014 -0.0004 -0.0003 -0.0010  
Y 0.0002 0.0004 0.0002 -0.0002 0.0000 0.0002  
Z 0.0027 -0.0023 0.0013 -0.0001 0.0002 -0.0006  
AT. 131 H X -0.0141 -0.0152 0.0084 0.0023 -0.0013 0.0050  
Y 0.0076 0.0109 -0.0034 -0.0014 0.0034 -0.0019  
Z -0.0164 -0.0169 0.0101 0.0028 -0.0008 0.0062  
AT. 132 H X -0.0141 0.0152 -0.0084 0.0023 0.0013 0.0050  
Y 0.0076 -0.0109 0.0034 -0.0014 -0.0034 -0.0019  
Z -0.0164 0.0169 -0.0101 0.0028 0.0008 0.0062  
AT. 133 H X -0.0174 -0.0172 0.0109 0.0066 -0.0038 0.0051  
Y -0.0049 0.0009 0.0046 0.0049 0.0012 0.0015  
Z 0.0037 0.0134 0.0009 0.0048 0.0037 -0.0011  
AT. 134 H X -0.0174 0.0172 -0.0109 0.0066 0.0038 0.0051  
Y -0.0049 -0.0009 -0.0046 0.0049 -0.0012 0.0015  
Z 0.0037 -0.0134 -0.0009 0.0048 -0.0037 -0.0011  
AT. 135 C X 0.0004 -0.0006 -0.0005 -0.0007 0.0018 0.0021  
Y -0.0007 0.0014 0.0023 0.0026 -0.0032 -0.0033  
Z -0.0007 -0.0004 0.0002 -0.0005 0.0002 0.0015  
AT. 136 C X 0.0004 0.0006 0.0005 -0.0007 -0.0018 0.0021  
Y -0.0007 -0.0014 -0.0023 0.0026 0.0032 -0.0033  
Z -0.0007 0.0004 -0.0002 -0.0005 -0.0002 0.0015  
AT. 137 H X 0.0050 -0.0112 -0.0224 -0.0248 0.0309 0.0336

Y 0.0048 -0.0001 -0.0071 -0.0035 0.0049 -0.0035  
Z 0.0064 0.0017 -0.0061 -0.0003 0.0009 -0.0127  
AT. 138 H X 0.0050 0.0112 0.0224 -0.0248 -0.0309 0.0336  
Y 0.0048 0.0001 0.0071 -0.0035 -0.0049 -0.0035  
Z 0.0064 -0.0017 0.0061 -0.0003 -0.0009 -0.0127  
AT. 139 H X -0.0028 0.0049 0.0091 0.0111 -0.0205 -0.0250  
Y 0.0102 -0.0154 -0.0315 -0.0334 0.0461 0.0460  
Z 0.0007 -0.0023 -0.0026 -0.0051 0.0139 0.0207  
AT. 140 H X -0.0028 -0.0049 -0.0091 0.0111 0.0205 -0.0250  
Y 0.0102 0.0154 0.0315 -0.0334 -0.0461 0.0460  
Z 0.0007 0.0023 0.0026 -0.0051 -0.0139 0.0207  
AT. 141 H X -0.0067 0.0095 0.0202 0.0232 -0.0394 -0.0444  
Y -0.0045 -0.0044 0.0014 -0.0036 0.0011 0.0116  
Z 0.0007 0.0097 0.0091 0.0155 -0.0211 -0.0336  
AT. 142 H X -0.0067 -0.0095 -0.0202 0.0232 0.0394 -0.0444  
Y -0.0045 0.0044 -0.0014 -0.0036 -0.0011 0.0116  
Z 0.0007 -0.0097 -0.0091 0.0155 0.0211 -0.0336  
AT. 143 C X -0.0004 -0.0001 0.0007 0.0005 0.0007 0.0015  
Y 0.0000 0.0010 -0.0003 0.0000 -0.0026 -0.0037  
Z -0.0007 0.0001 0.0007 0.0007 -0.0006 -0.0007  
AT. 144 C X -0.0004 0.0001 -0.0007 0.0005 -0.0007 0.0015  
Y 0.0000 -0.0010 0.0003 0.0000 0.0026 -0.0037  
Z -0.0007 -0.0001 -0.0007 0.0007 0.0006 -0.0007  
AT. 145 H X 0.0006 -0.0076 0.0004 -0.0032 0.0240 0.0318  
Y -0.0042 -0.0023 0.0064 0.0050 0.0093 0.0125  
Z 0.0042 0.0012 -0.0065 -0.0057 -0.0059 -0.0080  
AT. 146 H X 0.0006 0.0076 -0.0004 -0.0032 -0.0240 0.0318  
Y -0.0042 0.0023 -0.0064 0.0050 -0.0093 0.0125  
Z 0.0042 -0.0012 0.0065 -0.0057 0.0059 -0.0080  
AT. 147 H X 0.0008 0.0026 -0.0025 -0.0009 -0.0115 -0.0176  
Y -0.0025 -0.0102 0.0069 0.0017 0.0372 0.0527  
Z 0.0000 -0.0020 -0.0003 -0.0007 0.0035 0.0028

AT. 148 H X 0.0008 -0.0026 0.0025 -0.0009 0.0115 -0.0176  
Y -0.0025 0.0102 -0.0069 0.0017 -0.0372 0.0527  
Z 0.0000 0.0020 0.0003 -0.0007 -0.0035 0.0028

AT. 149 H X 0.0030 0.0044 -0.0077 -0.0044 -0.0270 -0.0395  
Y 0.0040 -0.0003 -0.0061 -0.0055 -0.0048 -0.0069  
Z 0.0044 -0.0041 -0.0054 -0.0067 0.0085 0.0133

AT. 150 H X 0.0030 -0.0044 0.0077 -0.0044 0.0270 -0.0395  
Y 0.0040 0.0003 0.0061 -0.0055 0.0048 -0.0069  
Z 0.0044 0.0041 0.0054 -0.0067 -0.0085 0.0133

AT. 151 C X -0.0004 -0.0023 -0.0010 -0.0018 -0.0012 -0.0014  
Y -0.0001 0.0001 -0.0001 -0.0002 0.0004 0.0004  
Z -0.0003 0.0003 -0.0001 0.0003 -0.0016 -0.0036

AT. 152 C X -0.0004 0.0023 0.0010 -0.0018 0.0012 -0.0014  
Y -0.0001 -0.0001 0.0001 -0.0002 -0.0004 0.0004  
Z -0.0003 -0.0003 0.0001 0.0003 0.0016 -0.0036

AT. 153 H X -0.0009 0.0064 0.0041 0.0066 -0.0025 -0.0053  
Y 0.0020 0.0005 0.0007 -0.0005 0.0059 0.0147  
Z 0.0032 -0.0027 -0.0008 -0.0038 0.0084 0.0226

AT. 154 H X -0.0009 -0.0064 -0.0041 0.0066 0.0025 -0.0053  
Y 0.0020 -0.0005 -0.0007 -0.0005 -0.0059 0.0147  
Z 0.0032 0.0027 0.0008 -0.0038 -0.0084 0.0226

AT. 155 H X 0.0022 0.0062 0.0025 0.0045 0.0065 0.0093  
Y -0.0020 0.0023 0.0009 0.0037 -0.0071 -0.0180  
Z 0.0028 0.0006 0.0001 -0.0017 0.0091 0.0206

AT. 156 H X 0.0022 -0.0062 -0.0025 0.0045 -0.0065 0.0093  
Y -0.0020 -0.0023 -0.0009 0.0037 0.0071 -0.0180  
Z 0.0028 -0.0006 -0.0001 -0.0017 -0.0091 0.0206

AT. 157 O X 0.0000 0.0004 0.0002 0.0002 -0.0033 -0.0021  
Y -0.0000 0.0006 0.0004 0.0005 -0.0060 -0.0038  
Z 0.0001 -0.0002 -0.0001 -0.0002 0.0024 0.0013

AT. 158 O X 0.0000 -0.0004 -0.0002 0.0002 0.0033 -0.0021  
Y -0.0000 -0.0006 -0.0004 0.0005 0.0060 -0.0038

Z 0.0001 0.0002 0.0001 -0.0002 -0.0024 0.0013  
AT. 159 O X -0.0001 0.0005 0.0002 0.0004 -0.0051 -0.0029  
Y 0.0000 -0.0004 -0.0002 -0.0003 0.0035 0.0023  
Z -0.0001 -0.0002 -0.0002 -0.0001 0.0015 0.0011  
AT. 160 O X -0.0001 -0.0005 -0.0002 0.0004 0.0051 -0.0029  
Y 0.0000 0.0004 0.0002 -0.0003 -0.0035 0.0023  
Z -0.0001 0.0002 0.0002 -0.0001 -0.0015 0.0011  
AT. 161 H X -0.0007 -0.0123 -0.0071 -0.0075 0.1043 0.0670  
Y 0.0000 -0.0030 -0.0021 -0.0022 0.0289 0.0187  
Z 0.0001 0.0055 0.0037 0.0042 -0.0529 -0.0351  
AT. 162 H X -0.0007 0.0123 0.0071 -0.0075 -0.1043 0.0670  
Y 0.0000 0.0030 0.0021 -0.0022 -0.0289 0.0187  
Z 0.0001 -0.0055 -0.0037 0.0042 0.0529 -0.0351  
AT. 163 H X 0.0024 -0.0031 -0.0008 -0.0029 0.0415 0.0203  
Y 0.0001 -0.0007 -0.0002 -0.0009 0.0081 0.0036  
Z -0.0008 0.0009 0.0002 0.0010 -0.0135 -0.0062  
AT. 164 H X 0.0024 0.0031 0.0008 -0.0029 -0.0415 0.0203  
Y 0.0001 0.0007 0.0002 -0.0009 -0.0081 0.0036  
Z -0.0008 -0.0009 -0.0002 0.0010 0.0135 -0.0062  
AT. 165 O X 0.0058 0.0059 -0.0026 0.0038 0.0009 0.0000  
Y 0.0022 0.0023 -0.0017 0.0022 -0.0000 0.0002  
Z -0.0045 -0.0047 0.0029 -0.0039 -0.0002 -0.0003  
AT. 166 O X 0.0058 -0.0059 0.0026 0.0038 -0.0009 0.0000  
Y 0.0022 -0.0023 0.0017 0.0022 0.0000 0.0002  
Z -0.0045 0.0047 -0.0029 -0.0039 0.0002 -0.0003  
AT. 167 H X -0.0439 -0.0454 0.0216 -0.0307 -0.0055 -0.0008  
Y 0.0141 0.0145 -0.0062 0.0093 0.0014 0.0007  
Z 0.1263 0.1305 -0.0621 0.0877 0.0167 0.0010  
AT. 168 H X -0.0439 0.0454 -0.0216 -0.0307 0.0055 -0.0008  
Y 0.0141 -0.0145 0.0062 0.0093 -0.0014 0.0007  
Z 0.1263 -0.1305 0.0621 0.0877 -0.0167 0.0010  
AT. 169 O X -0.0027 -0.0027 0.0006 -0.0011 -0.0006 0.0001

|                                                              |   |         |         |         |         |         |         |
|--------------------------------------------------------------|---|---------|---------|---------|---------|---------|---------|
|                                                              | Y | -0.0037 | -0.0040 | 0.0028  | -0.0036 | 0.0000  | -0.0004 |
|                                                              | Z | -0.0044 | -0.0046 | 0.0026  | -0.0035 | -0.0003 | -0.0002 |
| AT. 170 O                                                    | X | -0.0027 | 0.0027  | -0.0006 | -0.0011 | 0.0006  | 0.0001  |
|                                                              | Y | -0.0037 | 0.0040  | -0.0028 | -0.0036 | -0.0000 | -0.0004 |
|                                                              | Z | -0.0044 | 0.0046  | -0.0026 | -0.0035 | 0.0003  | -0.0002 |
| AT. 171 H                                                    | X | -0.0087 | -0.0114 | 0.0147  | -0.0174 | 0.0013  | -0.0014 |
|                                                              | Y | 0.0091  | 0.0104  | -0.0102 | 0.0124  | -0.0026 | 0.0030  |
|                                                              | Z | 0.0230  | 0.0277  | -0.0321 | 0.0381  | -0.0076 | 0.0072  |
| AT. 172 H                                                    | X | -0.0087 | 0.0114  | -0.0147 | -0.0174 | -0.0013 | -0.0014 |
|                                                              | Y | 0.0091  | -0.0104 | 0.0102  | 0.0124  | 0.0026  | 0.0030  |
|                                                              | Z | 0.0230  | -0.0277 | 0.0321  | 0.0381  | 0.0076  | 0.0072  |
| FREQ(CM**-1) 1501.44 1502.17 1504.02 1504.82 1505.59 1506.88 |   |         |         |         |         |         |         |
| AT. 1 I                                                      | X | 0.0000  | 0.0000  | 0.0000  | 0.0000  | 0.0000  | -0.0000 |
|                                                              | Y | -0.0000 | -0.0000 | 0.0000  | 0.0000  | 0.0000  | -0.0000 |
|                                                              | Z | 0.0000  | 0.0000  | -0.0000 | -0.0000 | -0.0000 | 0.0000  |
| AT. 2 I                                                      | X | -0.0000 | 0.0000  | 0.0000  | -0.0000 | 0.0000  | -0.0000 |
|                                                              | Y | 0.0000  | -0.0000 | 0.0000  | -0.0000 | 0.0000  | -0.0000 |
|                                                              | Z | -0.0000 | 0.0000  | -0.0000 | 0.0000  | -0.0000 | 0.0000  |
| AT. 3 I                                                      | X | -0.0000 | 0.0000  | 0.0000  | -0.0000 | -0.0000 | 0.0000  |
|                                                              | Y | -0.0000 | -0.0000 | -0.0000 | -0.0000 | -0.0000 | 0.0000  |
|                                                              | Z | -0.0000 | 0.0000  | -0.0000 | -0.0000 | -0.0000 | 0.0000  |
| AT. 4 I                                                      | X | 0.0000  | 0.0000  | 0.0000  | 0.0000  | -0.0000 | 0.0000  |
|                                                              | Y | 0.0000  | -0.0000 | -0.0000 | 0.0000  | -0.0000 | 0.0000  |
|                                                              | Z | 0.0000  | 0.0000  | -0.0000 | 0.0000  | -0.0000 | 0.0000  |
| AT. 5 O                                                      | X | 0.0009  | 0.0012  | -0.0004 | 0.0000  | 0.0007  | -0.0006 |
|                                                              | Y | -0.0003 | -0.0003 | 0.0004  | 0.0003  | -0.0002 | 0.0006  |
|                                                              | Z | -0.0009 | -0.0012 | 0.0005  | -0.0000 | -0.0006 | 0.0005  |
| AT. 6 O                                                      | X | -0.0009 | 0.0012  | -0.0004 | -0.0000 | 0.0007  | -0.0006 |
|                                                              | Y | 0.0003  | -0.0003 | 0.0004  | -0.0003 | -0.0002 | 0.0006  |
|                                                              | Z | 0.0009  | -0.0012 | 0.0005  | 0.0000  | -0.0006 | 0.0005  |



AT. 7 O X -0.0005 -0.0000 -0.0001 -0.0005 -0.0003 0.0015  
Y 0.0003 0.0002 0.0000 0.0004 0.0005 -0.0015  
Z -0.0002 -0.0003 -0.0000 -0.0001 -0.0002 0.0005

AT. 8 O X 0.0005 -0.0000 -0.0001 0.0005 -0.0003 0.0015  
Y -0.0003 0.0002 0.0000 -0.0004 0.0005 -0.0015  
Z 0.0002 -0.0003 -0.0000 0.0001 -0.0002 0.0005

AT. 9 N X 0.0007 0.0005 -0.0005 -0.0006 -0.0001 0.0001  
Y -0.0010 -0.0013 0.0012 0.0008 0.0003 0.0001  
Z 0.0007 0.0001 0.0023 0.0031 0.0034 -0.0024

AT. 10 N X -0.0007 0.0005 -0.0005 0.0006 -0.0001 0.0001  
Y 0.0010 -0.0013 0.0012 -0.0008 0.0003 0.0001  
Z -0.0007 0.0001 0.0023 -0.0031 0.0034 -0.0024

AT. 11 N X -0.0005 0.0000 0.0002 0.0008 0.0011 -0.0009  
Y 0.0001 0.0008 -0.0009 -0.0005 -0.0007 0.0001  
Z 0.0008 -0.0011 0.0010 0.0005 0.0009 -0.0010

AT. 12 N X 0.0005 0.0000 0.0002 -0.0008 0.0011 -0.0009  
Y -0.0001 0.0008 -0.0009 0.0005 -0.0007 0.0001  
Z -0.0008 -0.0011 0.0010 -0.0005 0.0009 -0.0010

AT. 13 C X -0.0012 -0.0014 0.0009 0.0003 -0.0010 0.0012  
Y 0.0008 0.0007 -0.0005 -0.0001 0.0009 -0.0016  
Z 0.0003 0.0012 -0.0020 -0.0019 -0.0016 0.0013

AT. 14 C X 0.0012 -0.0014 0.0009 -0.0003 -0.0010 0.0012  
Y -0.0008 0.0007 -0.0005 0.0001 0.0009 -0.0016  
Z -0.0003 0.0012 -0.0020 0.0019 -0.0016 0.0013

AT. 15 C X 0.0003 0.0002 -0.0003 -0.0004 0.0000 0.0003  
Y -0.0005 -0.0005 0.0004 0.0009 0.0005 -0.0016  
Z 0.0001 -0.0002 0.0001 -0.0002 -0.0001 0.0003

AT. 16 C X -0.0003 0.0002 -0.0003 0.0004 0.0000 0.0003  
Y 0.0005 -0.0005 0.0004 -0.0009 0.0005 -0.0016  
Z -0.0001 -0.0002 0.0001 0.0002 -0.0001 0.0003

AT. 17 H X 0.0008 0.0022 -0.0014 -0.0017 -0.0015 0.0023  
Y 0.0015 0.0009 -0.0016 -0.0051 -0.0043 0.0099

Z -0.0023 -0.0011 0.0021 0.0068 0.0053 -0.0130  
AT. 18 H X -0.0008 0.0022 -0.0014 0.0017 -0.0015 0.0023  
Y -0.0015 0.0009 -0.0016 0.0051 -0.0043 0.0099  
Z 0.0023 -0.0011 0.0021 -0.0068 0.0053 -0.0130  
AT. 19 H X -0.0016 -0.0015 0.0022 0.0028 0.0017 -0.0042  
Y 0.0027 0.0035 -0.0038 -0.0084 -0.0066 0.0157  
Z 0.0006 0.0007 -0.0006 -0.0024 -0.0019 0.0048  
AT. 20 H X 0.0016 -0.0015 0.0022 -0.0028 0.0017 -0.0042  
Y -0.0027 0.0035 -0.0038 0.0084 -0.0066 0.0157  
Z -0.0006 0.0007 -0.0006 0.0024 -0.0019 0.0048  
AT. 21 C X 0.0008 0.0001 0.0001 0.0007 0.0006 -0.0025  
Y -0.0001 -0.0005 0.0003 -0.0005 -0.0005 0.0022  
Z -0.0002 0.0012 -0.0007 -0.0006 -0.0011 0.0011  
AT. 22 C X -0.0008 0.0001 0.0001 -0.0007 0.0006 -0.0025  
Y 0.0001 -0.0005 0.0003 0.0005 -0.0005 0.0022  
Z 0.0002 0.0012 -0.0007 0.0006 -0.0011 0.0011  
AT. 23 C X -0.0005 0.0000 -0.0000 0.0002 0.0004 -0.0005  
Y 0.0002 0.0002 -0.0001 -0.0005 -0.0006 0.0012  
Z 0.0004 -0.0000 0.0000 -0.0010 -0.0011 0.0027  
AT. 24 C X 0.0005 0.0000 -0.0000 -0.0002 0.0004 -0.0005  
Y -0.0002 0.0002 -0.0001 0.0005 -0.0006 0.0012  
Z -0.0004 -0.0000 0.0000 0.0010 -0.0011 0.0027  
AT. 25 H X 0.0009 -0.0005 0.0004 0.0002 -0.0005 -0.0002  
Y 0.0008 0.0001 -0.0000 -0.0017 -0.0023 0.0046  
Z -0.0035 -0.0009 0.0004 0.0116 0.0148 -0.0323  
AT. 26 H X -0.0009 -0.0005 0.0004 -0.0002 -0.0005 -0.0002  
Y -0.0008 0.0001 -0.0000 0.0017 -0.0023 0.0046  
Z 0.0035 -0.0009 0.0004 -0.0116 0.0148 -0.0323  
AT. 27 H X 0.0028 -0.0004 -0.0005 -0.0015 -0.0038 0.0038  
Y -0.0022 -0.0022 0.0010 0.0090 0.0106 -0.0246  
Z -0.0015 -0.0011 0.0007 0.0043 0.0055 -0.0115  
AT. 28 H X -0.0028 -0.0004 -0.0005 0.0015 -0.0038 0.0038

Y 0.0022 -0.0022 0.0010 -0.0090 0.0106 -0.0246  
Z 0.0015 -0.0011 0.0007 -0.0043 0.0055 -0.0115  
AT. 29 C X 0.0010 0.0014 -0.0025 -0.0023 -0.0017 0.0004  
Y -0.0034 -0.0040 0.0068 0.0072 0.0055 -0.0035  
Z -0.0006 -0.0004 0.0002 0.0002 0.0002 -0.0004  
AT. 30 C X -0.0010 0.0014 -0.0025 0.0023 -0.0017 0.0004  
Y 0.0034 -0.0040 0.0068 -0.0072 0.0055 -0.0035  
Z 0.0006 -0.0004 0.0002 -0.0002 0.0002 -0.0004  
AT. 31 H X -0.0207 -0.0249 0.0355 0.0362 0.0251 -0.0154  
Y 0.0191 0.0231 -0.0349 -0.0362 -0.0267 0.0171  
Z 0.0183 0.0225 -0.0360 -0.0380 -0.0292 0.0194  
AT. 32 H X 0.0207 -0.0249 0.0355 -0.0362 0.0251 -0.0154  
Y -0.0191 0.0231 -0.0349 0.0362 -0.0267 0.0171  
Z -0.0183 0.0225 -0.0360 0.0380 -0.0292 0.0194  
AT. 33 H X 0.0048 0.0047 -0.0032 -0.0048 -0.0033 0.0055  
Y 0.0299 0.0368 -0.0579 -0.0613 -0.0457 0.0298  
Z -0.0119 -0.0154 0.0266 0.0270 0.0203 -0.0109  
AT. 34 H X -0.0048 0.0047 -0.0032 0.0048 -0.0033 0.0055  
Y -0.0299 0.0368 -0.0579 0.0613 -0.0457 0.0298  
Z 0.0119 -0.0154 0.0266 -0.0270 0.0203 -0.0109  
AT. 35 C X 0.0003 -0.0001 0.0002 -0.0014 -0.0018 0.0034  
Y 0.0001 -0.0002 -0.0006 -0.0004 -0.0003 -0.0006  
Z -0.0003 -0.0003 -0.0001 0.0009 0.0005 -0.0012  
AT. 36 C X -0.0003 -0.0001 0.0002 0.0014 -0.0018 0.0034  
Y -0.0001 -0.0002 -0.0006 0.0004 -0.0003 -0.0006  
Z 0.0003 -0.0003 -0.0001 -0.0009 0.0005 -0.0012  
AT. 37 C X -0.0008 0.0011 -0.0003 0.0032 0.0045 -0.0072  
Y 0.0003 -0.0003 0.0006 -0.0005 -0.0010 0.0022  
Z -0.0002 0.0005 -0.0006 -0.0004 -0.0002 -0.0000  
AT. 38 C X 0.0008 0.0011 -0.0003 -0.0032 0.0045 -0.0072  
Y -0.0003 -0.0003 0.0006 0.0005 -0.0010 0.0022  
Z 0.0002 0.0005 -0.0006 0.0004 -0.0002 -0.0000

AT. 39 H X 0.0064 -0.0075 0.0022 -0.0213 -0.0300 0.0464  
Y -0.0013 -0.0015 -0.0016 -0.0017 -0.0029 0.0014  
Z 0.0053 -0.0047 0.0022 -0.0158 -0.0220 0.0355

AT. 40 H X -0.0064 -0.0075 0.0022 0.0213 -0.0300 0.0464  
Y 0.0013 -0.0015 -0.0016 0.0017 -0.0029 0.0014  
Z -0.0053 -0.0047 0.0022 0.0158 -0.0220 0.0355

AT. 41 H X 0.0049 -0.0054 0.0004 -0.0196 -0.0279 0.0420  
Y -0.0021 0.0038 -0.0009 0.0108 0.0167 -0.0258  
Z -0.0038 0.0034 -0.0000 0.0134 0.0177 -0.0262

AT. 42 H X -0.0049 -0.0054 0.0004 0.0196 -0.0279 0.0420  
Y 0.0021 0.0038 -0.0009 -0.0108 0.0167 -0.0258  
Z 0.0038 0.0034 -0.0000 -0.0134 0.0177 -0.0262

AT. 43 C X -0.0003 -0.0007 0.0009 0.0002 0.0001 0.0008  
Y 0.0011 0.0010 -0.0016 -0.0022 -0.0009 -0.0010  
Z 0.0002 0.0013 -0.0015 0.0001 -0.0003 -0.0011

AT. 44 C X 0.0003 -0.0007 0.0009 -0.0002 0.0001 0.0008  
Y -0.0011 0.0010 -0.0016 0.0022 -0.0009 -0.0010  
Z -0.0002 0.0013 -0.0015 -0.0001 -0.0003 -0.0011

AT. 45 H X 0.0085 0.0103 -0.0141 -0.0089 -0.0066 -0.0096  
Y -0.0066 -0.0066 0.0106 0.0121 0.0080 0.0033  
Z 0.0012 0.0003 -0.0018 -0.0067 -0.0036 0.0022

AT. 46 H X -0.0085 0.0103 -0.0141 0.0089 -0.0066 -0.0096  
Y 0.0066 -0.0066 0.0106 -0.0121 0.0080 0.0033  
Z -0.0012 0.0003 -0.0018 0.0067 -0.0036 0.0022

AT. 47 H X -0.0019 -0.0012 0.0022 0.0026 0.0013 0.0019  
Y -0.0079 -0.0103 0.0149 0.0127 0.0092 0.0068  
Z -0.0067 -0.0096 0.0135 0.0116 0.0082 0.0056

AT. 48 H X 0.0019 -0.0012 0.0022 -0.0026 0.0013 0.0019  
Y 0.0079 -0.0103 0.0149 -0.0127 0.0092 0.0068  
Z 0.0067 -0.0096 0.0135 -0.0116 0.0082 0.0056

AT. 49 C X 0.0003 0.0001 0.0002 -0.0005 0.0000 0.0004  
Y -0.0007 -0.0003 0.0010 0.0017 -0.0006 0.0023

Z -0.0000 -0.0016 0.0018 -0.0012 0.0004 0.0013  
AT. 50 C X -0.0003 0.0001 0.0002 0.0005 0.0000 0.0004  
Y 0.0007 -0.0003 0.0010 -0.0017 -0.0006 0.0023  
Z 0.0000 -0.0016 0.0018 0.0012 0.0004 0.0013  
AT. 51 C X 0.0004 -0.0005 -0.0004 -0.0009 -0.0014 0.0008  
Y 0.0005 0.0011 -0.0012 -0.0005 -0.0001 -0.0010  
Z 0.0001 0.0014 -0.0021 -0.0010 -0.0011 -0.0005  
AT. 52 C X -0.0004 -0.0005 -0.0004 0.0009 -0.0014 0.0008  
Y -0.0005 0.0011 -0.0012 0.0005 -0.0001 -0.0010  
Z -0.0001 0.0014 -0.0021 0.0010 -0.0011 -0.0005  
AT. 53 H X -0.0036 0.0021 0.0012 0.0056 0.0067 -0.0057  
Y -0.0025 0.0006 0.0047 0.0081 0.0076 -0.0027  
Z 0.0034 -0.0036 0.0023 -0.0019 -0.0053 0.0083  
AT. 54 H X 0.0036 0.0021 0.0012 -0.0056 0.0067 -0.0057  
Y 0.0025 0.0006 0.0047 -0.0081 0.0076 -0.0027  
Z -0.0034 -0.0036 0.0023 0.0019 -0.0053 0.0083  
AT. 55 H X -0.0042 0.0029 0.0046 0.0109 0.0142 -0.0105  
Y 0.0003 -0.0073 0.0014 -0.0077 -0.0064 0.0072  
Z -0.0028 -0.0069 0.0049 -0.0023 0.0017 0.0025  
AT. 56 H X 0.0042 0.0029 0.0046 -0.0109 0.0142 -0.0105  
Y -0.0003 -0.0073 0.0014 0.0077 -0.0064 0.0072  
Z 0.0028 -0.0069 0.0049 0.0023 0.0017 0.0025  
AT. 57 C X 0.0002 -0.0004 -0.0001 -0.0012 -0.0014 0.0021  
Y 0.0009 0.0003 -0.0013 -0.0024 -0.0024 0.0026  
Z 0.0002 0.0005 -0.0013 0.0003 0.0003 -0.0017  
AT. 58 C X -0.0002 -0.0004 -0.0001 0.0012 -0.0014 0.0021  
Y -0.0009 0.0003 -0.0013 0.0024 -0.0024 0.0026  
Z -0.0002 0.0005 -0.0013 -0.0003 0.0003 -0.0017  
AT. 59 H X 0.0055 -0.0014 -0.0025 -0.0207 -0.0212 0.0304  
Y -0.0067 -0.0043 0.0146 0.0131 0.0138 -0.0061  
Z -0.0068 -0.0072 0.0206 0.0083 0.0088 0.0079  
AT. 60 H X -0.0055 -0.0014 -0.0025 0.0207 -0.0212 0.0304

Y 0.0067 -0.0043 0.0146 -0.0131 0.0138 -0.0061  
Z 0.0068 -0.0072 0.0206 -0.0083 0.0088 0.0079  
AT. 61 H X -0.0055 0.0030 0.0027 0.0226 0.0252 -0.0368  
Y -0.0110 -0.0031 0.0179 0.0292 0.0308 -0.0292  
Z 0.0015 0.0046 -0.0080 0.0033 0.0046 -0.0157  
AT. 62 H X 0.0055 0.0030 0.0027 -0.0226 0.0252 -0.0368  
Y 0.0110 -0.0031 0.0179 -0.0292 0.0308 -0.0292  
Z -0.0015 0.0046 -0.0080 -0.0033 0.0046 -0.0157  
AT. 63 H X -0.0043 0.0038 0.0005 0.0204 0.0231 -0.0353  
Y 0.0041 0.0034 -0.0125 -0.0057 -0.0075 -0.0016  
Z 0.0015 -0.0062 0.0087 -0.0162 -0.0174 0.0363  
AT. 64 H X 0.0043 0.0038 0.0005 -0.0204 0.0231 -0.0353  
Y -0.0041 0.0034 -0.0125 0.0057 -0.0075 -0.0016  
Z -0.0015 -0.0062 0.0087 0.0162 -0.0174 0.0363  
AT. 65 C X 0.0002 -0.0000 -0.0000 -0.0010 -0.0002 0.0005  
Y -0.0008 -0.0006 0.0009 0.0019 -0.0004 0.0020  
Z 0.0007 -0.0003 0.0007 -0.0013 0.0003 0.0002  
AT. 66 C X -0.0002 -0.0000 -0.0000 0.0010 -0.0002 0.0005  
Y 0.0008 -0.0006 0.0009 -0.0019 -0.0004 0.0020  
Z -0.0007 -0.0003 0.0007 0.0013 0.0003 0.0002  
AT. 67 H X -0.0021 -0.0061 0.0112 0.0049 -0.0020 0.0182  
Y 0.0120 0.0030 -0.0055 -0.0283 0.0060 -0.0192  
Z -0.0090 0.0017 -0.0032 0.0215 -0.0039 0.0039  
AT. 68 H X 0.0021 -0.0061 0.0112 -0.0049 -0.0020 0.0182  
Y -0.0120 0.0030 -0.0055 0.0283 0.0060 -0.0192  
Z 0.0090 0.0017 -0.0032 -0.0215 -0.0039 0.0039  
AT. 69 H X 0.0018 0.0034 -0.0060 -0.0019 0.0027 -0.0145  
Y 0.0065 0.0055 -0.0102 -0.0132 0.0054 -0.0248  
Z 0.0074 0.0021 -0.0042 -0.0202 0.0028 -0.0096  
AT. 70 H X -0.0018 0.0034 -0.0060 0.0019 0.0027 -0.0145  
Y -0.0065 0.0055 -0.0102 0.0132 0.0054 -0.0248  
Z -0.0074 0.0021 -0.0042 0.0202 0.0028 -0.0096

AT. 71 H X -0.0035 0.0028 -0.0059 0.0116 0.0013 -0.0119  
Y -0.0057 0.0003 0.0006 0.0115 -0.0039 0.0095  
Z -0.0092 0.0028 -0.0040 0.0227 -0.0036 0.0020

AT. 72 H X 0.0035 0.0028 -0.0059 -0.0116 0.0013 -0.0119  
Y 0.0057 0.0003 0.0006 -0.0115 -0.0039 0.0095  
Z 0.0092 0.0028 -0.0040 -0.0227 -0.0036 0.0020

AT. 73 C X -0.0005 -0.0010 0.0013 0.0009 0.0007 0.0002  
Y 0.0006 0.0012 -0.0017 -0.0012 -0.0004 -0.0010  
Z -0.0020 -0.0037 0.0065 0.0038 0.0009 0.0059

AT. 74 C X 0.0005 -0.0010 0.0013 -0.0009 0.0007 0.0002  
Y -0.0006 0.0012 -0.0017 0.0012 -0.0004 -0.0010  
Z 0.0020 -0.0037 0.0065 -0.0038 0.0009 0.0059

AT. 75 H X 0.0076 0.0184 -0.0285 -0.0132 -0.0060 -0.0214  
Y 0.0067 0.0120 -0.0215 -0.0133 -0.0028 -0.0200  
Z 0.0132 0.0266 -0.0445 -0.0244 -0.0075 -0.0375

AT. 76 H X -0.0076 0.0184 -0.0285 0.0132 -0.0060 -0.0214  
Y -0.0067 0.0120 -0.0215 0.0133 -0.0028 -0.0200  
Z -0.0132 0.0266 -0.0445 0.0244 -0.0075 -0.0375

AT. 77 H X -0.0038 -0.0071 0.0117 0.0075 0.0015 0.0109  
Y -0.0113 -0.0238 0.0398 0.0211 0.0068 0.0330  
Z 0.0124 0.0252 -0.0419 -0.0231 -0.0068 -0.0354

AT. 78 H X 0.0038 -0.0071 0.0117 -0.0075 0.0015 0.0109  
Y 0.0113 -0.0238 0.0398 -0.0211 0.0068 0.0330  
Z -0.0124 0.0252 -0.0419 0.0231 -0.0068 -0.0354

AT. 79 I X -0.0001 -0.0000 -0.0000 -0.0000 -0.0000 0.0000  
Y 0.0000 -0.0000 0.0000 0.0000 -0.0000 0.0000  
Z 0.0000 -0.0000 0.0000 0.0000 0.0000 0.0000

AT. 80 I X 0.0001 -0.0000 -0.0000 0.0000 -0.0000 0.0000  
Y -0.0000 -0.0000 0.0000 -0.0000 -0.0000 0.0000  
Z -0.0000 -0.0000 0.0000 -0.0000 0.0000 0.0000

AT. 81 I X -0.0000 -0.0000 -0.0000 -0.0000 0.0000 -0.0000  
Y 0.0000 0.0000 0.0000 0.0000 -0.0000 0.0000

Z 0.0000 0.0000 0.0000 0.0000 -0.0000 0.0000  
AT. 82 I X 0.0000 -0.0000 -0.0000 0.0000 0.0000 -0.0000  
Y -0.0000 0.0000 0.0000 -0.0000 -0.0000 0.0000  
Z -0.0000 0.0000 0.0000 -0.0000 -0.0000 0.0000  
AT. 83 O X -0.0005 0.0000 0.0002 -0.0002 -0.0003 -0.0002  
Y -0.0002 0.0000 0.0000 -0.0002 -0.0001 -0.0001  
Z -0.0002 -0.0001 -0.0001 -0.0003 -0.0002 -0.0000  
AT. 84 O X 0.0005 0.0000 0.0002 0.0002 -0.0003 -0.0002  
Y 0.0002 0.0000 0.0000 0.0002 -0.0001 -0.0001  
Z 0.0002 -0.0001 -0.0001 0.0003 -0.0002 -0.0000  
AT. 85 O X -0.0017 -0.0014 -0.0010 -0.0014 -0.0005 -0.0015  
Y -0.0010 -0.0009 -0.0007 -0.0009 -0.0003 -0.0009  
Z 0.0007 0.0006 0.0004 0.0005 -0.0001 0.0004  
AT. 86 O X 0.0017 -0.0014 -0.0010 0.0014 -0.0005 -0.0015  
Y 0.0010 -0.0009 -0.0007 0.0009 -0.0003 -0.0009  
Z -0.0007 0.0006 0.0004 -0.0005 -0.0001 0.0004  
AT. 87 N X -0.0006 -0.0005 -0.0002 -0.0004 -0.0006 -0.0007  
Y -0.0003 -0.0002 -0.0001 -0.0002 -0.0005 -0.0004  
Z 0.0012 -0.0012 -0.0025 -0.0030 -0.0013 -0.0002  
AT. 88 N X 0.0006 -0.0005 -0.0002 0.0004 -0.0006 -0.0007  
Y 0.0003 -0.0002 -0.0001 0.0002 -0.0005 -0.0004  
Z -0.0012 -0.0012 -0.0025 0.0030 -0.0013 -0.0002  
AT. 89 N X 0.0009 0.0007 0.0001 -0.0003 -0.0009 -0.0004  
Y 0.0034 0.0025 0.0007 0.0013 -0.0001 0.0006  
Z -0.0056 -0.0040 -0.0011 -0.0022 -0.0012 -0.0027  
AT. 90 N X -0.0009 0.0007 0.0001 0.0003 -0.0009 -0.0004  
Y -0.0034 0.0025 0.0007 -0.0013 -0.0001 0.0006  
Z 0.0056 -0.0040 -0.0011 0.0022 -0.0012 -0.0027  
AT. 91 C X 0.0008 -0.0002 -0.0005 -0.0002 0.0006 0.0007  
Y 0.0002 -0.0002 -0.0004 -0.0002 0.0001 0.0000  
Z -0.0010 0.0015 0.0025 0.0033 0.0012 -0.0003  
AT. 92 C X -0.0008 -0.0002 -0.0005 0.0002 0.0006 0.0007



Y -0.0002 -0.0002 -0.0004 0.0002 0.0001 0.0000  
Z 0.0010 0.0015 0.0025 -0.0033 0.0012 -0.0003  
AT. 93 C X -0.0002 0.0001 0.0002 0.0006 -0.0000 -0.0007  
Y -0.0000 0.0001 0.0001 0.0004 -0.0000 -0.0007  
Z 0.0003 -0.0002 -0.0004 -0.0009 -0.0002 0.0006  
AT. 94 C X 0.0002 0.0001 0.0002 -0.0006 -0.0000 -0.0007  
Y 0.0000 0.0001 0.0001 -0.0004 -0.0000 -0.0007  
Z -0.0003 -0.0002 -0.0004 0.0009 -0.0002 0.0006  
AT. 95 H X 0.0024 0.0001 -0.0008 -0.0009 -0.0002 0.0006  
Y -0.0001 0.0001 0.0004 -0.0015 -0.0002 0.0031  
Z -0.0030 -0.0005 0.0002 0.0041 0.0005 -0.0072  
AT. 96 H X -0.0024 0.0001 -0.0008 0.0009 -0.0002 0.0006  
Y 0.0001 0.0001 0.0004 0.0015 -0.0002 0.0031  
Z 0.0030 -0.0005 0.0002 -0.0041 0.0005 -0.0072  
AT. 97 H X -0.0001 0.0018 0.0023 -0.0009 0.0008 0.0040  
Y 0.0010 0.0003 0.0009 -0.0020 0.0002 0.0058  
Z 0.0006 -0.0006 -0.0009 -0.0009 -0.0003 0.0007  
AT. 98 H X 0.0001 0.0018 0.0023 0.0009 0.0008 0.0040  
Y -0.0010 0.0003 0.0009 0.0020 0.0002 0.0058  
Z -0.0006 -0.0006 -0.0009 0.0009 -0.0003 0.0007  
AT. 99 C X 0.0027 0.0017 0.0008 0.0016 0.0015 0.0032  
Y -0.0007 0.0000 0.0011 0.0009 -0.0003 0.0003  
Z 0.0036 0.0023 0.0002 0.0010 0.0014 0.0024  
AT. 100 C X -0.0027 0.0017 0.0008 -0.0016 0.0015 0.0032  
Y 0.0007 0.0000 0.0011 -0.0009 -0.0003 0.0003  
Z -0.0036 0.0023 0.0002 -0.0010 0.0014 0.0024  
AT. 101 C X 0.0009 0.0017 0.0022 0.0018 -0.0009 -0.0004  
Y 0.0013 0.0016 0.0015 0.0015 -0.0003 0.0004  
Z 0.0018 0.0029 0.0035 0.0032 -0.0012 0.0001  
AT. 102 C X -0.0009 0.0017 0.0022 -0.0018 -0.0009 -0.0004  
Y -0.0013 0.0016 0.0015 -0.0015 -0.0003 0.0004  
Z -0.0018 0.0029 0.0035 -0.0032 -0.0012 0.0001

AT.103 H X 0.0017 0.0006 -0.0011 0.0001 0.0004 0.0002  
Y 0.0013 0.0026 0.0036 0.0028 -0.0011 0.0001  
Z -0.0228 -0.0315 -0.0349 -0.0332 0.0081 -0.0076

AT.104 H X -0.0017 0.0006 -0.0011 -0.0001 0.0004 0.0002  
Y -0.0013 0.0026 0.0036 -0.0028 -0.0011 0.0001  
Z 0.0228 -0.0315 -0.0349 0.0332 0.0081 -0.0076

AT.105 H X -0.0122 -0.0160 -0.0163 -0.0147 0.0026 -0.0033  
Y -0.0211 -0.0273 -0.0282 -0.0283 0.0064 -0.0055  
Z -0.0098 -0.0123 -0.0121 -0.0120 0.0021 -0.0029

AT.106 H X 0.0122 -0.0160 -0.0163 0.0147 0.0026 -0.0033  
Y 0.0211 -0.0273 -0.0282 0.0283 0.0064 -0.0055  
Z 0.0098 -0.0123 -0.0121 0.0120 0.0021 -0.0029

AT.107 C X -0.0015 -0.0020 -0.0022 -0.0029 -0.0019 -0.0018  
Y -0.0020 -0.0042 -0.0050 -0.0058 -0.0028 -0.0024  
Z -0.0006 -0.0007 -0.0002 -0.0003 -0.0005 -0.0005

AT.108 C X 0.0015 -0.0020 -0.0022 0.0029 -0.0019 -0.0018  
Y 0.0020 -0.0042 -0.0050 0.0058 -0.0028 -0.0024  
Z 0.0006 -0.0007 -0.0002 0.0003 -0.0005 -0.0005

AT.109 H X 0.0167 0.0282 0.0339 0.0393 0.0190 0.0185  
Y 0.0080 0.0134 0.0145 0.0183 0.0128 0.0116  
Z 0.0101 0.0186 0.0201 0.0257 0.0192 0.0166

AT.110 H X -0.0167 0.0282 0.0339 -0.0393 0.0190 0.0185  
Y -0.0080 0.0134 0.0145 -0.0183 0.0128 0.0116  
Z -0.0101 0.0186 0.0201 -0.0257 0.0192 0.0166

AT.111 H X 0.0027 0.0015 0.0006 0.0029 0.0056 0.0048  
Y 0.0179 0.0361 0.0443 0.0517 0.0260 0.0231  
Z -0.0087 -0.0126 -0.0136 -0.0184 -0.0142 -0.0126

AT.112 H X -0.0027 0.0015 0.0006 -0.0029 0.0056 0.0048  
Y -0.0179 0.0361 0.0443 -0.0517 0.0260 0.0231  
Z 0.0087 -0.0126 -0.0136 0.0184 -0.0142 -0.0126

AT.113 C X 0.0018 -0.0003 -0.0034 -0.0024 0.0017 0.0010  
Y 0.0005 0.0023 0.0029 0.0025 -0.0016 -0.0011

Z 0.0011 0.0007 -0.0013 -0.0004 0.0027 0.0021  
AT. 114 C X -0.0018 -0.0003 -0.0034 0.0024 0.0017 0.0010  
Y -0.0005 0.0023 0.0029 -0.0025 -0.0016 -0.0011  
Z -0.0011 0.0007 -0.0013 0.0004 0.0027 0.0021  
AT. 115 C X -0.0027 -0.0017 0.0000 -0.0015 0.0010 0.0038  
Y -0.0013 -0.0011 -0.0006 -0.0004 0.0009 -0.0003  
Z 0.0024 0.0018 0.0008 0.0011 -0.0007 -0.0002  
AT. 116 C X 0.0027 -0.0017 0.0000 0.0015 0.0010 0.0038  
Y 0.0013 -0.0011 -0.0006 0.0004 0.0009 -0.0003  
Z -0.0024 0.0018 0.0008 -0.0011 -0.0007 -0.0002  
AT. 117 H X 0.0121 0.0094 0.0031 0.0114 -0.0041 -0.0190  
Y 0.0018 -0.0014 -0.0068 -0.0093 0.0058 0.0172  
Z -0.0134 -0.0094 -0.0010 -0.0098 0.0034 0.0184  
AT. 118 H X -0.0121 0.0094 0.0031 -0.0114 -0.0041 -0.0190  
Y -0.0018 -0.0014 -0.0068 0.0093 0.0058 0.0172  
Z 0.0134 -0.0094 -0.0010 0.0098 0.0034 0.0184  
AT. 119 H X 0.0072 0.0068 0.0051 0.0137 -0.0099 -0.0320  
Y 0.0008 -0.0009 -0.0003 -0.0001 -0.0052 -0.0070  
Z 0.0054 0.0060 0.0030 0.0088 -0.0002 -0.0123  
AT. 120 H X -0.0072 0.0068 0.0051 -0.0137 -0.0099 -0.0320  
Y -0.0008 -0.0009 -0.0003 0.0001 -0.0052 -0.0070  
Z -0.0054 0.0060 0.0030 -0.0088 -0.0002 -0.0123  
AT. 121 C X 0.0057 0.0042 0.0012 0.0017 -0.0023 -0.0015  
Y 0.0076 0.0045 0.0007 0.0001 -0.0043 -0.0022  
Z 0.0027 0.0024 0.0004 0.0014 0.0005 0.0003  
AT. 122 C X -0.0057 0.0042 0.0012 -0.0017 -0.0023 -0.0015  
Y -0.0076 0.0045 0.0007 -0.0001 -0.0043 -0.0022  
Z -0.0027 0.0024 0.0004 -0.0014 0.0005 0.0003  
AT. 123 H X -0.0603 -0.0416 -0.0068 -0.0101 0.0268 0.0181  
Y -0.0394 -0.0262 -0.0062 -0.0046 0.0214 0.0118  
Z 0.0365 0.0239 0.0059 0.0038 -0.0201 -0.0105  
AT. 124 H X 0.0603 -0.0416 -0.0068 0.0101 0.0268 0.0181

Y 0.0394 -0.0262 -0.0062 0.0046 0.0214 0.0118  
Z -0.0365 0.0239 0.0059 -0.0038 -0.0201 -0.0105  
AT. 125 H X -0.0178 -0.0139 -0.0054 -0.0067 0.0061 0.0022  
Y -0.0653 -0.0436 -0.0057 -0.0074 0.0289 0.0181  
Z -0.0600 -0.0420 -0.0104 -0.0122 0.0260 0.0142  
AT. 126 H X 0.0178 -0.0139 -0.0054 0.0067 0.0061 0.0022  
Y 0.0653 -0.0436 -0.0057 0.0074 0.0289 0.0181  
Z 0.0600 -0.0420 -0.0104 0.0122 0.0260 0.0142  
AT. 127 C X 0.0013 0.0002 -0.0017 -0.0010 0.0016 0.0008  
Y -0.0011 0.0007 -0.0000 0.0009 0.0012 -0.0005  
Z 0.0006 -0.0001 0.0019 -0.0001 -0.0035 -0.0013  
AT. 128 C X -0.0013 0.0002 -0.0017 0.0010 0.0016 0.0008  
Y 0.0011 0.0007 -0.0000 -0.0009 0.0012 -0.0005  
Z -0.0006 -0.0001 0.0019 0.0001 -0.0035 -0.0013  
AT. 129 C X -0.0019 -0.0013 0.0002 -0.0001 0.0006 0.0000  
Y 0.0003 0.0002 -0.0000 0.0003 0.0004 0.0006  
Z -0.0006 0.0004 0.0003 0.0010 0.0015 0.0009  
AT. 130 C X 0.0019 -0.0013 0.0002 0.0001 0.0006 0.0000  
Y -0.0003 0.0002 -0.0000 -0.0003 0.0004 0.0006  
Z 0.0006 0.0004 0.0003 -0.0010 0.0015 0.0009  
AT. 131 H X 0.0084 0.0064 -0.0002 0.0004 -0.0032 0.0008  
Y -0.0070 -0.0080 -0.0045 -0.0053 0.0043 -0.0009  
Z 0.0095 0.0067 -0.0022 -0.0009 -0.0019 0.0011  
AT. 132 H X -0.0084 0.0064 -0.0002 -0.0004 -0.0032 0.0008  
Y 0.0070 -0.0080 -0.0045 0.0053 0.0043 -0.0009  
Z -0.0095 0.0067 -0.0022 0.0009 -0.0019 0.0011  
AT. 133 H X 0.0130 0.0137 0.0057 0.0074 -0.0050 0.0004  
Y 0.0031 0.0015 0.0033 0.0010 -0.0043 -0.0021  
Z -0.0029 -0.0049 0.0029 -0.0015 -0.0038 -0.0036  
AT. 134 H X -0.0130 0.0137 0.0057 -0.0074 -0.0050 0.0004  
Y -0.0031 0.0015 0.0033 -0.0010 -0.0043 -0.0021  
Z 0.0029 -0.0049 0.0029 0.0015 -0.0038 -0.0036

AT.135 C X 0.0011 0.0004 -0.0011 -0.0007 0.0018 0.0015  
Y -0.0009 0.0020 0.0040 0.0034 -0.0010 -0.0005  
Z 0.0021 0.0018 -0.0016 0.0002 0.0037 0.0025

AT.136 C X -0.0011 0.0004 -0.0011 0.0007 0.0018 0.0015  
Y 0.0009 0.0020 0.0040 -0.0034 -0.0010 -0.0005  
Z -0.0021 0.0018 -0.0016 -0.0002 0.0037 0.0025

AT.137 H X 0.0097 -0.0182 -0.0413 -0.0320 0.0157 0.0077  
Y -0.0136 -0.0195 -0.0012 -0.0110 -0.0240 -0.0177  
Z -0.0234 -0.0266 0.0073 -0.0102 -0.0412 -0.0296

AT.138 H X -0.0097 -0.0182 -0.0413 0.0320 0.0157 0.0077  
Y 0.0136 -0.0195 -0.0012 0.0110 -0.0240 -0.0177  
Z 0.0234 -0.0266 0.0073 0.0102 -0.0412 -0.0296

AT.139 H X -0.0130 0.0016 0.0229 0.0149 -0.0189 -0.0132  
Y 0.0086 -0.0308 -0.0535 -0.0468 0.0105 0.0038  
Z 0.0164 0.0089 -0.0150 -0.0053 0.0249 0.0185

AT.140 H X 0.0130 0.0016 0.0229 -0.0149 -0.0189 -0.0132  
Y -0.0086 -0.0308 -0.0535 0.0468 0.0105 0.0038  
Z -0.0164 0.0089 -0.0150 0.0053 0.0249 0.0185

AT.141 H X -0.0177 0.0119 0.0439 0.0324 -0.0262 -0.0169  
Y 0.0178 0.0174 -0.0094 0.0043 0.0308 0.0215  
Z -0.0262 -0.0110 0.0311 0.0121 -0.0431 -0.0296

AT.142 H X 0.0177 0.0119 0.0439 -0.0324 -0.0262 -0.0169  
Y -0.0178 0.0174 -0.0094 -0.0043 0.0308 0.0215  
Z 0.0262 -0.0110 0.0311 -0.0121 -0.0431 -0.0296

AT.143 C X 0.0006 0.0005 -0.0018 -0.0011 0.0018 0.0012  
Y -0.0033 -0.0007 0.0006 0.0011 0.0014 -0.0008  
Z -0.0002 0.0001 0.0020 0.0002 -0.0036 -0.0017

AT.144 C X -0.0006 0.0005 -0.0018 0.0011 0.0018 0.0012  
Y 0.0033 -0.0007 0.0006 -0.0011 0.0014 -0.0008  
Z 0.0002 0.0001 0.0020 -0.0002 -0.0036 -0.0017

AT.145 H X 0.0292 0.0038 -0.0093 -0.0095 -0.0027 0.0109  
Y 0.0175 0.0032 0.0189 -0.0014 -0.0429 -0.0123

Z -0.0129 -0.0029 -0.0204 0.0000 0.0426 0.0139  
AT. 146 H X -0.0292 0.0038 -0.0093 0.0095 -0.0027 0.0109  
Y -0.0175 0.0032 0.0189 0.0014 -0.0429 -0.0123  
Z 0.0129 -0.0029 -0.0204 -0.0000 0.0426 0.0139  
AT. 147 H X -0.0118 -0.0033 0.0156 0.0087 -0.0146 -0.0112  
Y 0.0460 0.0091 -0.0150 -0.0184 -0.0087 0.0153  
Z 0.0085 0.0001 0.0171 0.0034 -0.0300 -0.0097  
AT. 148 H X 0.0118 -0.0033 0.0156 -0.0087 -0.0146 -0.0112  
Y -0.0460 0.0091 -0.0150 0.0184 -0.0087 0.0153  
Z -0.0085 0.0001 0.0171 -0.0034 -0.0300 -0.0097  
AT. 149 H X -0.0311 -0.0076 0.0228 0.0174 -0.0124 -0.0186  
Y -0.0102 -0.0023 -0.0112 0.0018 0.0262 0.0079  
Z 0.0027 0.0009 -0.0311 -0.0075 0.0479 0.0234  
AT. 150 H X 0.0311 -0.0076 0.0228 -0.0174 -0.0124 -0.0186  
Y 0.0102 -0.0023 -0.0112 -0.0018 0.0262 0.0079  
Z -0.0027 0.0009 -0.0311 0.0075 0.0479 0.0234  
AT. 151 C X -0.0013 -0.0002 0.0017 0.0014 -0.0005 -0.0003  
Y -0.0002 -0.0004 0.0000 0.0000 0.0002 0.0004  
Z -0.0048 -0.0043 -0.0020 -0.0028 -0.0001 -0.0002  
AT. 152 C X 0.0013 -0.0002 0.0017 -0.0014 -0.0005 -0.0003  
Y 0.0002 -0.0004 0.0000 -0.0000 0.0002 0.0004  
Z 0.0048 -0.0043 -0.0020 0.0028 -0.0001 -0.0002  
AT. 153 H X -0.0022 -0.0037 -0.0019 -0.0055 -0.0048 -0.0020  
Y 0.0210 0.0195 0.0093 0.0133 -0.0001 -0.0011  
Z 0.0315 0.0305 0.0149 0.0224 0.0014 -0.0017  
AT. 154 H X 0.0022 -0.0037 -0.0019 0.0055 -0.0048 -0.0020  
Y -0.0210 0.0195 0.0093 -0.0133 -0.0001 -0.0011  
Z -0.0315 0.0305 0.0149 -0.0224 0.0014 -0.0017  
AT. 155 H X 0.0079 0.0045 -0.0014 -0.0004 -0.0002 -0.0008  
Y -0.0237 -0.0225 -0.0110 -0.0170 -0.0023 -0.0004  
Z 0.0251 0.0227 0.0096 0.0161 0.0023 0.0000  
AT. 156 H X -0.0079 0.0045 -0.0014 0.0004 -0.0002 -0.0008

Y 0.0237 -0.0225 -0.0110 0.0170 -0.0023 -0.0004  
Z -0.0251 0.0227 0.0096 -0.0161 0.0023 0.0000  
AT. 157 O X 0.0015 0.0027 -0.0000 0.0009 0.0014 0.0006  
Y 0.0029 0.0049 -0.0000 0.0017 0.0025 0.0009  
Z -0.0010 -0.0016 0.0002 -0.0005 -0.0018 0.0003  
AT. 158 O X -0.0015 0.0027 -0.0000 -0.0009 0.0014 0.0006  
Y -0.0029 0.0049 -0.0000 -0.0017 0.0025 0.0009  
Z 0.0010 -0.0016 0.0002 0.0005 -0.0018 0.0003  
AT. 159 O X 0.0023 0.0037 -0.0002 0.0012 0.0031 0.0001  
Y -0.0018 -0.0029 0.0000 -0.0010 -0.0016 -0.0006  
Z -0.0009 -0.0015 -0.0001 -0.0006 -0.0001 -0.0006  
AT. 160 O X -0.0023 0.0037 -0.0002 -0.0012 0.0031 0.0001  
Y 0.0018 -0.0029 0.0000 0.0010 -0.0016 -0.0006  
Z 0.0009 -0.0015 -0.0001 0.0006 -0.0001 -0.0006  
AT. 161 H X -0.0510 -0.0863 -0.0002 -0.0319 -0.0410 -0.0197  
Y -0.0142 -0.0241 -0.0002 -0.0090 -0.0113 -0.0054  
Z 0.0255 0.0448 0.0001 0.0164 0.0197 0.0101  
AT. 162 H X 0.0510 -0.0863 -0.0002 0.0319 -0.0410 -0.0197  
Y 0.0142 -0.0241 -0.0002 0.0090 -0.0113 -0.0054  
Z -0.0255 0.0448 0.0001 -0.0164 0.0197 0.0101  
AT. 163 H X -0.0176 -0.0241 0.0045 -0.0057 -0.0364 0.0091  
Y -0.0018 -0.0055 -0.0002 -0.0022 -0.0019 -0.0007  
Z 0.0061 0.0071 -0.0020 0.0013 0.0133 -0.0043  
AT. 164 H X 0.0176 -0.0241 0.0045 0.0057 -0.0364 0.0091  
Y 0.0018 -0.0055 -0.0002 0.0022 -0.0019 -0.0007  
Z -0.0061 0.0071 -0.0020 -0.0013 0.0133 -0.0043  
AT. 165 O X 0.0009 -0.0010 0.0002 0.0004 0.0000 0.0011  
Y 0.0004 -0.0006 -0.0005 0.0004 0.0005 -0.0005  
Z -0.0007 0.0011 0.0006 -0.0007 -0.0008 0.0005  
AT. 166 O X -0.0009 -0.0010 0.0002 -0.0004 0.0000 0.0011  
Y -0.0004 -0.0006 -0.0005 -0.0004 0.0005 -0.0005  
Z 0.0007 0.0011 0.0006 0.0007 -0.0008 0.0005

AT.167 H X -0.0072 0.0081 -0.0006 -0.0041 -0.0019 -0.0058  
Y 0.0023 -0.0017 0.0004 0.0011 0.0009 0.0015  
Z 0.0198 -0.0235 0.0025 0.0120 0.0047 0.0180

AT.168 H X 0.0072 0.0081 -0.0006 0.0041 -0.0019 -0.0058  
Y -0.0023 -0.0017 0.0004 -0.0011 0.0009 0.0015  
Z -0.0198 -0.0235 0.0025 -0.0120 0.0047 0.0180

AT.169 O X -0.0003 0.0002 -0.0005 -0.0000 0.0003 -0.0011  
Y -0.0006 0.0010 0.0008 -0.0006 -0.0010 0.0011  
Z -0.0007 0.0009 0.0004 -0.0006 -0.0005 0.0001

AT.170 O X 0.0003 0.0002 -0.0005 0.0000 0.0003 -0.0011  
Y 0.0006 0.0010 0.0008 0.0006 -0.0010 0.0011  
Z 0.0007 0.0009 0.0004 0.0006 -0.0005 0.0001

AT.171 H X -0.0038 0.0059 0.0058 -0.0042 -0.0050 0.0066  
Y 0.0009 -0.0033 -0.0066 0.0026 0.0066 -0.0107  
Z 0.0047 -0.0108 -0.0186 0.0093 0.0172 -0.0278

AT.172 H X 0.0038 0.0059 0.0058 0.0042 -0.0050 0.0066  
Y -0.0009 -0.0033 -0.0066 -0.0026 0.0066 -0.0107  
Z -0.0047 -0.0108 -0.0186 -0.0093 0.0172 -0.0278

FREQ(CM\*\*-1) 1507.29 1507.78 1508.75 1509.65 1510.41 1511.41

AT. 1 I X -0.0000 -0.0000 -0.0000 -0.0000 0.0000 -0.0000  
Y -0.0000 0.0000 0.0000 -0.0000 0.0000 -0.0000  
Z -0.0000 0.0000 -0.0000 0.0000 -0.0000 -0.0000

AT. 2 I X 0.0000 -0.0000 0.0000 0.0000 0.0000 0.0000  
Y 0.0000 0.0000 -0.0000 0.0000 0.0000 0.0000  
Z 0.0000 0.0000 0.0000 -0.0000 -0.0000 0.0000

AT. 3 I X 0.0000 0.0000 0.0000 0.0000 -0.0000 -0.0000  
Y 0.0000 0.0000 0.0000 0.0000 -0.0000 0.0000  
Z 0.0000 0.0000 0.0000 0.0000 -0.0000 0.0000

AT. 4 I X -0.0000 0.0000 -0.0000 -0.0000 -0.0000 0.0000  
Y -0.0000 0.0000 -0.0000 -0.0000 -0.0000 -0.0000



Z -0.0000 0.0000 -0.0000 -0.0000 -0.0000 -0.0000  
AT. 5 O X -0.0005 0.0006 -0.0007 -0.0007 -0.0005 0.0002  
Y 0.0004 -0.0005 0.0001 0.0002 -0.0002 -0.0003  
Z 0.0004 -0.0002 0.0007 0.0007 0.0005 0.0000  
AT. 6 O X 0.0005 0.0006 0.0007 0.0007 -0.0005 -0.0002  
Y -0.0004 -0.0005 -0.0001 -0.0002 -0.0002 0.0003  
Z -0.0004 -0.0002 -0.0007 -0.0007 0.0005 -0.0000  
AT. 7 O X 0.0013 0.0007 0.0011 -0.0003 -0.0002 0.0016  
Y -0.0013 -0.0006 -0.0009 0.0002 0.0002 -0.0012  
Z 0.0004 0.0002 0.0002 -0.0002 0.0002 0.0001  
AT. 8 O X -0.0013 0.0007 -0.0011 0.0003 -0.0002 -0.0016  
Y 0.0013 -0.0006 0.0009 -0.0002 0.0002 0.0012  
Z -0.0004 0.0002 -0.0002 0.0002 0.0002 -0.0001  
AT. 9 N X -0.0000 0.0012 -0.0003 -0.0002 -0.0004 0.0010  
Y 0.0005 -0.0008 0.0003 0.0005 -0.0001 -0.0009  
Z -0.0024 0.0045 -0.0013 -0.0025 -0.0019 0.0015  
AT. 10 N X 0.0000 0.0012 0.0003 0.0002 -0.0004 -0.0010  
Y -0.0005 -0.0008 -0.0003 -0.0005 -0.0001 0.0009  
Z 0.0024 0.0045 0.0013 0.0025 -0.0019 -0.0015  
AT. 11 N X -0.0007 -0.0010 -0.0006 -0.0006 0.0001 -0.0005  
Y -0.0002 0.0003 0.0007 0.0001 0.0004 0.0019  
Z 0.0000 -0.0019 -0.0018 0.0002 0.0005 -0.0059  
AT. 12 N X 0.0007 -0.0010 0.0006 0.0006 0.0001 0.0005  
Y 0.0002 0.0003 -0.0007 -0.0001 0.0004 -0.0019  
Z -0.0000 -0.0019 0.0018 -0.0002 0.0005 0.0059  
AT. 13 C X 0.0015 -0.0024 0.0008 0.0013 0.0007 -0.0014  
Y -0.0015 0.0020 -0.0004 -0.0009 -0.0000 0.0012  
Z 0.0019 -0.0041 0.0000 0.0013 0.0008 -0.0019  
AT. 14 C X -0.0015 -0.0024 -0.0008 -0.0013 0.0007 0.0014  
Y 0.0015 0.0020 0.0004 0.0009 -0.0000 -0.0012  
Z -0.0019 -0.0041 -0.0000 -0.0013 0.0008 0.0019  
AT. 15 C X -0.0003 0.0012 -0.0000 -0.0003 -0.0006 0.0008

Y 0.0000 -0.0021 0.0001 0.0002 0.0018 -0.0014  
Z -0.0003 0.0014 0.0001 -0.0002 -0.0005 0.0009  
AT. 16 C X 0.0003 0.0012 0.0000 0.0003 -0.0006 -0.0008  
Y -0.0000 -0.0021 -0.0001 -0.0002 0.0018 0.0014  
Z 0.0003 0.0014 -0.0001 0.0002 -0.0005 -0.0009  
AT. 17 H X 0.0007 -0.0005 -0.0003 0.0012 -0.0022 0.0005  
Y 0.0024 0.0081 0.0008 0.0011 -0.0089 0.0064  
Z -0.0028 -0.0122 -0.0009 -0.0006 0.0121 -0.0091  
AT. 18 H X -0.0007 -0.0005 0.0003 -0.0012 -0.0022 -0.0005  
Y -0.0024 0.0081 -0.0008 -0.0011 -0.0089 -0.0064  
Z 0.0028 -0.0122 0.0009 0.0006 0.0121 0.0091  
AT. 19 H X -0.0014 -0.0009 0.0001 -0.0000 0.0026 -0.0014  
Y 0.0034 0.0100 0.0003 0.0015 -0.0137 0.0082  
Z 0.0005 0.0049 0.0002 0.0002 -0.0049 0.0035  
AT. 20 H X 0.0014 -0.0009 -0.0001 0.0000 0.0026 0.0014  
Y -0.0034 0.0100 -0.0003 -0.0015 -0.0137 -0.0082  
Z -0.0005 0.0049 -0.0002 -0.0002 -0.0049 -0.0035  
AT. 21 C X -0.0022 -0.0017 -0.0018 0.0008 0.0004 -0.0037  
Y 0.0022 0.0004 0.0010 -0.0002 -0.0003 -0.0001  
Z 0.0002 0.0021 0.0017 0.0002 -0.0008 0.0057  
AT. 22 C X 0.0022 -0.0017 0.0018 -0.0008 0.0004 0.0037  
Y -0.0022 0.0004 -0.0010 0.0002 -0.0003 0.0001  
Z -0.0002 0.0021 -0.0017 -0.0002 -0.0008 -0.0057  
AT. 23 C X -0.0003 0.0002 -0.0001 -0.0007 0.0002 0.0010  
Y 0.0008 0.0004 0.0008 0.0006 -0.0005 0.0002  
Z 0.0020 0.0005 0.0015 0.0014 -0.0009 -0.0008  
AT. 24 C X 0.0003 0.0002 0.0001 0.0007 0.0002 -0.0010  
Y -0.0008 0.0004 -0.0008 -0.0006 -0.0005 -0.0002  
Z -0.0020 0.0005 -0.0015 -0.0014 -0.0009 0.0008  
AT. 25 H X 0.0004 -0.0004 -0.0009 0.0002 0.0001 -0.0017  
Y 0.0034 0.0013 0.0026 0.0022 -0.0015 -0.0002  
Z -0.0237 -0.0103 -0.0192 -0.0135 0.0101 -0.0029

AT. 26 H X -0.0004 -0.0004 0.0009 -0.0002 0.0001 0.0017  
Y -0.0034 0.0013 -0.0026 -0.0022 -0.0015 0.0002  
Z 0.0237 -0.0103 0.0192 0.0135 0.0101 0.0029

AT. 27 H X 0.0025 0.0012 0.0020 0.0018 -0.0009 0.0014  
Y -0.0173 -0.0076 -0.0155 -0.0111 0.0084 -0.0038  
Z -0.0080 -0.0039 -0.0074 -0.0052 0.0039 -0.0031

AT. 28 H X -0.0025 0.0012 -0.0020 -0.0018 -0.0009 -0.0014  
Y 0.0173 -0.0076 0.0155 0.0111 0.0084 0.0038  
Z 0.0080 -0.0039 0.0074 0.0052 0.0039 0.0031

AT. 29 C X -0.0009 -0.0006 0.0003 -0.0000 0.0016 0.0006  
Y -0.0017 -0.0005 0.0001 -0.0013 -0.0011 -0.0025  
Z -0.0010 -0.0019 0.0009 -0.0000 0.0011 -0.0015

AT. 30 C X 0.0009 -0.0006 -0.0003 0.0000 0.0016 -0.0006  
Y 0.0017 -0.0005 -0.0001 0.0013 -0.0011 0.0025  
Z 0.0010 -0.0019 -0.0009 0.0000 0.0011 0.0015

AT. 31 H X 0.0005 -0.0015 -0.0027 -0.0013 -0.0070 -0.0092  
Y 0.0073 0.0050 -0.0012 0.0045 0.0046 0.0154  
Z 0.0133 0.0064 -0.0035 0.0073 0.0034 0.0191

AT. 32 H X -0.0005 -0.0015 0.0027 0.0013 -0.0070 0.0092  
Y -0.0073 0.0050 0.0012 -0.0045 0.0046 -0.0154  
Z -0.0133 0.0064 0.0035 -0.0073 0.0034 -0.0191

AT. 33 H X 0.0036 0.0023 -0.0001 0.0004 -0.0045 -0.0004  
Y 0.0129 0.0023 0.0011 0.0094 0.0094 0.0205  
Z -0.0039 -0.0007 0.0002 -0.0042 -0.0071 -0.0112

AT. 34 H X -0.0036 0.0023 0.0001 -0.0004 -0.0045 0.0004  
Y -0.0129 0.0023 -0.0011 -0.0094 0.0094 -0.0205  
Z 0.0039 -0.0007 -0.0002 0.0042 -0.0071 0.0112

AT. 35 C X 0.0027 -0.0008 0.0017 0.0016 -0.0019 -0.0020  
Y -0.0010 -0.0001 0.0002 0.0004 0.0005 -0.0005  
Z 0.0014 0.0040 -0.0025 0.0001 -0.0004 0.0043

AT. 36 C X -0.0027 -0.0008 -0.0017 -0.0016 -0.0019 0.0020  
Y 0.0010 -0.0001 -0.0002 -0.0004 0.0005 0.0005

Z -0.0014 0.0040 0.0025 -0.0001 -0.0004 -0.0043  
AT. 37 C X -0.0064 -0.0040 -0.0043 -0.0016 0.0012 -0.0027  
Y 0.0028 0.0012 0.0001 0.0008 -0.0013 0.0005  
Z -0.0010 -0.0004 0.0011 -0.0004 0.0007 0.0008  
AT. 38 C X 0.0064 -0.0040 0.0043 0.0016 0.0012 0.0027  
Y -0.0028 0.0012 -0.0001 -0.0008 -0.0013 -0.0005  
Z 0.0010 -0.0004 -0.0011 0.0004 0.0007 -0.0008  
AT. 39 H X 0.0432 0.0319 0.0276 0.0099 -0.0061 0.0228  
Y 0.0011 0.0101 0.0037 -0.0023 0.0033 0.0144  
Z 0.0325 0.0196 0.0204 0.0086 -0.0062 0.0117  
AT. 40 H X -0.0432 0.0319 -0.0276 -0.0099 -0.0061 -0.0228  
Y -0.0011 0.0101 -0.0037 0.0023 0.0033 -0.0144  
Z -0.0325 0.0196 -0.0204 -0.0086 -0.0062 -0.0117  
AT. 41 H X 0.0383 0.0304 0.0259 0.0083 -0.0056 0.0273  
Y -0.0267 -0.0210 -0.0111 -0.0078 0.0088 -0.0201  
Z -0.0213 -0.0165 -0.0201 -0.0034 -0.0006 -0.0126  
AT. 42 H X -0.0383 0.0304 -0.0259 -0.0083 -0.0056 -0.0273  
Y 0.0267 -0.0210 0.0111 0.0078 0.0088 0.0201  
Z 0.0213 -0.0165 0.0201 0.0034 -0.0006 0.0126  
AT. 43 C X 0.0007 0.0008 0.0001 0.0001 -0.0010 0.0005  
Y -0.0024 0.0039 0.0011 0.0000 0.0001 0.0033  
Z -0.0006 -0.0013 -0.0003 -0.0002 0.0014 0.0009  
AT. 44 C X -0.0007 0.0008 -0.0001 -0.0001 -0.0010 -0.0005  
Y 0.0024 0.0039 -0.0011 -0.0000 0.0001 -0.0033  
Z 0.0006 -0.0013 0.0003 0.0002 0.0014 -0.0009  
AT. 45 H X -0.0093 0.0052 0.0006 0.0012 0.0100 0.0095  
Y 0.0091 -0.0131 -0.0059 -0.0027 -0.0034 -0.0126  
Z -0.0046 0.0115 0.0058 0.0014 -0.0035 0.0085  
AT. 46 H X 0.0093 0.0052 -0.0006 -0.0012 0.0100 -0.0095  
Y -0.0091 -0.0131 0.0059 0.0027 -0.0034 0.0126  
Z 0.0046 0.0115 -0.0058 -0.0014 -0.0035 -0.0085  
AT. 47 H X 0.0011 -0.0042 0.0006 -0.0007 -0.0004 -0.0050

Y 0.0102 -0.0126 -0.0043 -0.0026 -0.0062 -0.0192  
Z 0.0115 -0.0109 -0.0062 -0.0016 -0.0061 -0.0146  
AT. 48 H X -0.0011 -0.0042 -0.0006 0.0007 -0.0004 0.0050  
Y -0.0102 -0.0126 0.0043 0.0026 -0.0062 0.0192  
Z -0.0115 -0.0109 0.0062 0.0016 -0.0061 0.0146  
AT. 49 C X -0.0011 -0.0012 0.0011 -0.0000 0.0007 -0.0041  
Y 0.0047 -0.0057 -0.0013 0.0012 0.0004 -0.0031  
Z -0.0020 0.0042 0.0023 -0.0001 -0.0026 -0.0007  
AT. 50 C X 0.0011 -0.0012 -0.0011 0.0000 0.0007 0.0041  
Y -0.0047 -0.0057 0.0013 -0.0012 0.0004 0.0031  
Z 0.0020 0.0042 -0.0023 0.0001 -0.0026 0.0007  
AT. 51 C X 0.0017 0.0007 0.0005 0.0010 -0.0004 0.0018  
Y -0.0011 0.0003 -0.0001 -0.0004 0.0010 0.0007  
Z -0.0001 -0.0024 -0.0001 0.0003 0.0025 -0.0003  
AT. 52 C X -0.0017 0.0007 -0.0005 -0.0010 -0.0004 -0.0018  
Y 0.0011 0.0003 0.0001 0.0004 0.0010 -0.0007  
Z 0.0001 -0.0024 0.0001 -0.0003 0.0025 0.0003  
AT. 53 H X -0.0073 -0.0069 -0.0033 -0.0041 0.0038 -0.0077  
Y -0.0025 -0.0024 -0.0057 -0.0045 -0.0021 -0.0038  
Z 0.0129 0.0077 0.0001 0.0039 -0.0088 0.0103  
AT. 54 H X 0.0073 -0.0069 0.0033 0.0041 0.0038 0.0077  
Y 0.0025 -0.0024 0.0057 0.0045 -0.0021 0.0038  
Z -0.0129 0.0077 -0.0001 -0.0039 -0.0088 -0.0103  
AT. 55 H X -0.0154 -0.0011 -0.0063 -0.0098 0.0013 -0.0082  
Y 0.0052 0.0079 0.0059 0.0059 -0.0071 0.0049  
Z -0.0042 0.0074 0.0032 0.0008 -0.0074 -0.0013  
AT. 56 H X 0.0154 -0.0011 0.0063 0.0098 0.0013 0.0082  
Y -0.0052 0.0079 -0.0059 -0.0059 -0.0071 -0.0049  
Z 0.0042 0.0074 -0.0032 -0.0008 -0.0074 0.0013  
AT. 57 C X 0.0014 -0.0020 0.0013 0.0012 -0.0007 -0.0034  
Y 0.0019 -0.0001 0.0013 0.0017 -0.0001 -0.0013  
Z 0.0006 0.0027 -0.0027 -0.0001 0.0007 0.0040

AT. 58 C X -0.0014 -0.0020 -0.0013 -0.0012 -0.0007 0.0034  
Y -0.0019 -0.0001 -0.0013 -0.0017 -0.0001 0.0013  
Z -0.0006 0.0027 0.0027 0.0001 0.0007 -0.0040

AT. 59 H X 0.0109 -0.0195 0.0254 0.0148 -0.0050 -0.0344  
Y -0.0141 -0.0156 0.0063 -0.0099 -0.0036 -0.0148  
Z -0.0154 -0.0345 0.0236 -0.0067 -0.0081 -0.0412

AT. 60 H X -0.0109 -0.0195 -0.0254 -0.0148 -0.0050 0.0344  
Y 0.0141 -0.0156 -0.0063 0.0099 -0.0036 0.0148  
Z 0.0154 -0.0345 -0.0236 0.0067 -0.0081 0.0412

AT. 61 H X -0.0206 0.0244 -0.0237 -0.0189 0.0097 0.0424  
Y -0.0265 -0.0036 -0.0099 -0.0223 0.0005 0.0100  
Z -0.0028 0.0237 -0.0157 -0.0039 0.0081 0.0322

AT. 62 H X 0.0206 0.0244 0.0237 0.0189 0.0097 -0.0424  
Y 0.0265 -0.0036 0.0099 0.0223 0.0005 -0.0100  
Z 0.0028 0.0237 0.0157 0.0039 0.0081 -0.0322

AT. 63 H X -0.0185 0.0248 -0.0245 -0.0176 0.0103 0.0426  
Y 0.0143 0.0194 -0.0154 0.0064 0.0023 0.0231  
Z 0.0077 -0.0394 0.0357 0.0126 -0.0117 -0.0601

AT. 64 H X 0.0185 0.0248 0.0245 0.0176 0.0103 -0.0426  
Y -0.0143 0.0194 0.0154 -0.0064 0.0023 -0.0231  
Z -0.0077 -0.0394 -0.0357 -0.0126 -0.0117 0.0601

AT. 65 C X -0.0013 -0.0010 0.0023 0.0003 0.0003 -0.0059  
Y 0.0038 -0.0066 -0.0022 0.0008 0.0009 -0.0027  
Z -0.0035 0.0028 0.0018 -0.0007 -0.0006 -0.0006

AT. 66 C X 0.0013 -0.0010 -0.0023 -0.0003 0.0003 0.0059  
Y -0.0038 -0.0066 0.0022 -0.0008 0.0009 0.0027  
Z 0.0035 0.0028 -0.0018 0.0007 -0.0006 0.0006

AT. 67 H X 0.0117 -0.0368 -0.0008 0.0048 0.0024 -0.0384  
Y -0.0638 0.0819 0.0346 -0.0122 -0.0120 0.0164  
Z 0.0475 -0.0465 -0.0299 0.0071 0.0091 0.0118

AT. 68 H X -0.0117 -0.0368 0.0008 -0.0048 0.0024 0.0384  
Y 0.0638 0.0819 -0.0346 0.0122 -0.0120 -0.0164

Z -0.0475 -0.0465 0.0299 -0.0071 0.0091 -0.0118  
AT. 69 H X -0.0081 0.0395 -0.0057 -0.0061 -0.0061 0.0557  
Y -0.0334 0.0735 0.0074 -0.0109 -0.0103 0.0640  
Z -0.0415 0.0389 0.0288 -0.0049 -0.0042 -0.0194  
AT. 70 H X 0.0081 0.0395 0.0057 0.0061 -0.0061 -0.0557  
Y 0.0334 0.0735 -0.0074 0.0109 -0.0103 -0.0640  
Z 0.0415 0.0389 -0.0288 0.0049 -0.0042 0.0194  
AT. 71 H X 0.0191 0.0171 -0.0267 -0.0032 -0.0033 0.0742  
Y 0.0303 -0.0480 -0.0103 0.0082 0.0094 -0.0302  
Z 0.0516 -0.0450 -0.0328 0.0076 0.0091 0.0198  
AT. 72 H X -0.0191 0.0171 0.0267 0.0032 -0.0033 -0.0742  
Y -0.0303 -0.0480 0.0103 -0.0082 0.0094 0.0302  
Z -0.0516 -0.0450 0.0328 -0.0076 0.0091 -0.0198  
AT. 73 C X 0.0002 0.0004 -0.0006 -0.0003 -0.0008 0.0016  
Y -0.0014 0.0004 0.0005 -0.0002 0.0013 0.0002  
Z 0.0081 0.0002 -0.0011 0.0010 -0.0066 -0.0007  
AT. 74 C X -0.0002 0.0004 0.0006 0.0003 -0.0008 -0.0016  
Y 0.0014 0.0004 -0.0005 0.0002 0.0013 -0.0002  
Z -0.0081 0.0002 0.0011 -0.0010 -0.0066 0.0007  
AT. 75 H X -0.0225 -0.0119 0.0022 -0.0021 0.0297 -0.0048  
Y -0.0305 -0.0039 0.0050 -0.0036 0.0219 0.0013  
Z -0.0508 -0.0146 0.0070 -0.0054 0.0457 -0.0031  
AT. 76 H X 0.0225 -0.0119 -0.0022 0.0021 0.0297 0.0048  
Y 0.0305 -0.0039 -0.0050 0.0036 0.0219 -0.0013  
Z 0.0508 -0.0146 -0.0070 0.0054 0.0457 0.0031  
AT. 77 H X 0.0187 0.0066 -0.0035 0.0030 -0.0150 0.0023  
Y 0.0409 0.0084 -0.0049 0.0045 -0.0387 -0.0020  
Z -0.0483 -0.0133 0.0065 -0.0063 0.0438 0.0001  
AT. 78 H X -0.0187 0.0066 0.0035 -0.0030 -0.0150 -0.0023  
Y -0.0409 0.0084 0.0049 -0.0045 -0.0387 0.0020  
Z 0.0483 -0.0133 -0.0065 0.0063 0.0438 -0.0001  
AT. 79 I X 0.0000 -0.0000 0.0000 -0.0000 0.0000 -0.0000

Y -0.0000 0.0000 -0.0000 -0.0000 -0.0000 -0.0000  
Z -0.0000 0.0000 -0.0000 -0.0000 0.0000 -0.0000  
AT. 80 I X -0.0000 -0.0000 -0.0000 0.0000 0.0000 0.0000  
Y 0.0000 0.0000 0.0000 0.0000 -0.0000 0.0000  
Z 0.0000 0.0000 0.0000 0.0000 0.0000 0.0000  
AT. 81 I X 0.0000 -0.0000 -0.0000 -0.0000 -0.0000 -0.0000  
Y 0.0000 0.0000 0.0000 0.0000 0.0000 0.0000  
Z -0.0000 0.0000 0.0000 0.0000 0.0000 0.0000  
AT. 82 I X -0.0000 -0.0000 0.0000 0.0000 -0.0000 0.0000  
Y -0.0000 0.0000 -0.0000 -0.0000 0.0000 -0.0000  
Z 0.0000 0.0000 -0.0000 -0.0000 0.0000 -0.0000  
AT. 83 O X -0.0002 -0.0002 0.0002 0.0008 -0.0001 0.0001  
Y -0.0001 -0.0000 -0.0001 0.0002 -0.0000 -0.0000  
Z -0.0000 -0.0001 0.0001 0.0003 -0.0001 -0.0000  
AT. 84 O X 0.0002 -0.0002 -0.0002 -0.0008 -0.0001 -0.0001  
Y 0.0001 -0.0000 0.0001 -0.0002 -0.0000 0.0000  
Z 0.0000 -0.0001 -0.0001 -0.0003 -0.0001 0.0000  
AT. 85 O X -0.0010 -0.0001 -0.0027 0.0004 -0.0033 0.0002  
Y -0.0006 -0.0000 -0.0016 0.0002 -0.0020 0.0001  
Z 0.0002 0.0001 0.0009 0.0002 0.0009 0.0000  
AT. 86 O X 0.0010 -0.0001 0.0027 -0.0004 -0.0033 -0.0002  
Y 0.0006 -0.0000 0.0016 -0.0002 -0.0020 -0.0001  
Z -0.0002 0.0001 -0.0009 -0.0002 0.0009 -0.0000  
AT. 87 N X -0.0003 -0.0002 -0.0007 0.0009 -0.0007 -0.0002  
Y -0.0002 -0.0002 -0.0004 0.0007 -0.0009 -0.0001  
Z 0.0007 -0.0002 -0.0041 -0.0016 -0.0009 -0.0018  
AT. 88 N X 0.0003 -0.0002 0.0007 -0.0009 -0.0007 0.0002  
Y 0.0002 -0.0002 0.0004 -0.0007 -0.0009 0.0001  
Z -0.0007 -0.0002 0.0041 0.0016 -0.0009 0.0018  
AT. 89 N X -0.0003 -0.0000 -0.0006 0.0013 -0.0012 0.0002  
Y 0.0006 -0.0005 0.0014 0.0011 0.0012 -0.0003  
Z -0.0025 0.0009 -0.0041 0.0004 -0.0049 0.0012



AT. 90 N X 0.0003 -0.0000 0.0006 -0.0013 -0.0012 -0.0002  
Y -0.0006 -0.0005 -0.0014 -0.0011 0.0012 0.0003  
Z 0.0025 0.0009 0.0041 -0.0004 -0.0049 -0.0012

AT. 91 C X 0.0005 0.0004 -0.0002 -0.0019 0.0006 -0.0001  
Y 0.0003 0.0001 -0.0004 -0.0006 -0.0000 -0.0001  
Z -0.0009 0.0002 0.0029 0.0015 0.0006 0.0014

AT. 92 C X -0.0005 0.0004 0.0002 0.0019 0.0006 0.0001  
Y -0.0003 0.0001 0.0004 0.0006 -0.0000 0.0001  
Z 0.0009 0.0002 -0.0029 -0.0015 0.0006 -0.0014

AT. 93 C X -0.0004 -0.0001 -0.0003 0.0009 -0.0008 0.0000  
Y -0.0004 -0.0000 -0.0003 0.0007 -0.0007 0.0001  
Z 0.0004 -0.0001 0.0000 -0.0008 0.0005 -0.0001

AT. 94 C X 0.0004 -0.0001 0.0003 -0.0009 -0.0008 -0.0000  
Y 0.0004 -0.0000 0.0003 -0.0007 -0.0007 -0.0001  
Z -0.0004 -0.0001 -0.0000 0.0008 0.0005 0.0001

AT. 95 H X -0.0005 -0.0007 0.0000 -0.0006 -0.0004 0.0002  
Y 0.0018 -0.0000 0.0016 -0.0027 0.0039 -0.0005  
Z -0.0032 0.0008 -0.0035 0.0068 -0.0076 0.0008

AT. 96 H X 0.0005 -0.0007 -0.0000 0.0006 -0.0004 -0.0002  
Y -0.0018 -0.0000 -0.0016 0.0027 0.0039 0.0005  
Z 0.0032 0.0008 0.0035 -0.0068 -0.0076 -0.0008

AT. 97 H X 0.0014 0.0003 0.0042 -0.0034 0.0056 0.0009  
Y 0.0025 -0.0005 0.0044 -0.0051 0.0067 -0.0002  
Z 0.0005 -0.0003 -0.0003 -0.0009 0.0003 -0.0005

AT. 98 H X -0.0014 0.0003 -0.0042 0.0034 0.0056 -0.0009  
Y -0.0025 -0.0005 -0.0044 0.0051 0.0067 0.0002  
Z -0.0005 -0.0003 0.0003 0.0009 0.0003 0.0005

AT. 99 C X 0.0024 -0.0003 0.0045 -0.0016 0.0060 -0.0009  
Y -0.0002 0.0006 0.0014 0.0001 0.0014 0.0005  
Z 0.0023 -0.0007 0.0029 -0.0010 0.0039 -0.0011

AT. 100 C X -0.0024 -0.0003 -0.0045 0.0016 0.0060 0.0009  
Y 0.0002 0.0006 -0.0014 -0.0001 0.0014 -0.0005

Z -0.0023 -0.0007 -0.0029 0.0010 0.0039 0.0011  
AT. 101 C X -0.0006 0.0006 0.0012 0.0014 0.0007 0.0008  
Y 0.0001 0.0002 0.0016 0.0007 0.0016 0.0003  
Z -0.0005 0.0007 0.0030 0.0018 0.0025 0.0010  
AT. 102 C X 0.0006 0.0006 -0.0012 -0.0014 0.0007 -0.0008  
Y -0.0001 0.0002 -0.0016 -0.0007 0.0016 -0.0003  
Z 0.0005 0.0007 -0.0030 -0.0018 0.0025 -0.0010  
AT. 103 H X 0.0005 -0.0012 -0.0006 -0.0004 -0.0001 -0.0008  
Y -0.0005 0.0011 0.0029 0.0017 0.0024 0.0011  
Z -0.0010 -0.0070 -0.0374 -0.0142 -0.0358 -0.0080  
AT. 104 H X -0.0005 -0.0012 0.0006 0.0004 -0.0001 0.0008  
Y 0.0005 0.0011 -0.0029 -0.0017 0.0024 -0.0011  
Z 0.0010 -0.0070 0.0374 0.0142 -0.0358 0.0080  
AT. 105 H X -0.0006 -0.0026 -0.0150 -0.0069 -0.0157 -0.0029  
Y -0.0005 -0.0052 -0.0303 -0.0118 -0.0286 -0.0063  
Z -0.0007 -0.0020 -0.0131 -0.0049 -0.0129 -0.0024  
AT. 106 H X 0.0006 -0.0026 0.0150 0.0069 -0.0157 0.0029  
Y 0.0005 -0.0052 0.0303 0.0118 -0.0286 0.0063  
Z 0.0007 -0.0020 0.0131 0.0049 -0.0129 0.0024  
AT. 107 C X -0.0002 -0.0008 -0.0035 0.0021 -0.0033 -0.0012  
Y -0.0005 -0.0014 -0.0063 0.0029 -0.0059 -0.0017  
Z -0.0005 -0.0002 -0.0001 0.0013 -0.0006 0.0004  
AT. 108 C X 0.0002 -0.0008 0.0035 -0.0021 -0.0033 0.0012  
Y 0.0005 -0.0014 0.0063 -0.0029 -0.0059 0.0017  
Z 0.0005 -0.0002 0.0001 -0.0013 -0.0006 -0.0004  
AT. 109 H X 0.0033 0.0100 0.0447 -0.0223 0.0471 0.0136  
Y 0.0036 0.0053 0.0241 -0.0150 0.0230 0.0059  
Z 0.0053 0.0075 0.0347 -0.0217 0.0313 0.0082  
AT. 110 H X -0.0033 0.0100 -0.0447 0.0223 0.0471 -0.0136  
Y -0.0036 0.0053 -0.0241 0.0150 0.0230 -0.0059  
Z -0.0053 0.0075 -0.0347 0.0217 0.0313 -0.0082  
AT. 111 H X 0.0005 0.0010 0.0058 -0.0052 0.0029 0.0023

Y 0.0052 0.0128 0.0609 -0.0277 0.0592 0.0173  
Z -0.0021 -0.0051 -0.0239 0.0149 -0.0208 -0.0074  
AT. 112 H X -0.0005 0.0010 -0.0058 0.0052 0.0029 -0.0023  
Y -0.0052 0.0128 -0.0609 0.0277 0.0592 -0.0173  
Z 0.0021 -0.0051 0.0239 -0.0149 -0.0208 0.0074  
AT. 113 C X 0.0004 -0.0001 -0.0025 -0.0031 -0.0027 -0.0006  
Y -0.0009 -0.0002 -0.0004 0.0025 -0.0009 -0.0002  
Z 0.0011 0.0005 0.0003 -0.0045 0.0001 -0.0005  
AT. 114 C X -0.0004 -0.0001 0.0025 0.0031 -0.0027 0.0006  
Y 0.0009 -0.0002 0.0004 -0.0025 -0.0009 0.0002  
Z -0.0011 0.0005 -0.0003 0.0045 0.0001 0.0005  
AT. 115 C X 0.0025 0.0004 0.0036 -0.0016 0.0051 -0.0002  
Y -0.0003 0.0004 -0.0004 -0.0014 -0.0004 0.0003  
Z 0.0001 -0.0005 0.0006 0.0016 0.0005 -0.0002  
AT. 116 C X -0.0025 0.0004 -0.0036 0.0016 0.0051 0.0002  
Y 0.0003 0.0004 0.0004 0.0014 -0.0004 -0.0003  
Z -0.0001 -0.0005 -0.0006 -0.0016 0.0005 0.0002  
AT. 117 H X -0.0123 -0.0024 -0.0152 0.0084 -0.0212 0.0004  
Y 0.0120 -0.0012 0.0082 -0.0094 0.0125 -0.0045  
Z 0.0119 0.0027 0.0169 -0.0068 0.0232 0.0002  
AT. 118 H X 0.0123 -0.0024 0.0152 -0.0084 -0.0212 -0.0004  
Y -0.0120 -0.0012 -0.0082 0.0094 0.0125 0.0045  
Z -0.0119 0.0027 -0.0169 0.0068 0.0232 -0.0002  
AT. 119 H X -0.0218 -0.0011 -0.0249 0.0152 -0.0347 0.0040  
Y -0.0047 -0.0006 -0.0057 0.0067 -0.0072 0.0015  
Z -0.0084 -0.0002 -0.0095 0.0021 -0.0139 0.0008  
AT. 120 H X 0.0218 -0.0011 0.0249 -0.0152 -0.0347 -0.0040  
Y 0.0047 -0.0006 0.0057 -0.0067 -0.0072 -0.0015  
Z 0.0084 -0.0002 0.0095 -0.0021 -0.0139 -0.0008  
AT. 121 C X -0.0009 -0.0006 -0.0007 0.0038 -0.0021 0.0002  
Y -0.0005 -0.0012 -0.0023 0.0053 -0.0040 -0.0004  
Z -0.0001 -0.0003 0.0008 0.0008 0.0004 0.0001

AT.122 C X 0.0009 -0.0006 0.0007 -0.0038 -0.0021 -0.0002  
Y 0.0005 -0.0012 0.0023 -0.0053 -0.0040 0.0004  
Z 0.0001 -0.0003 -0.0008 -0.0008 0.0004 -0.0001

AT.123 H X 0.0106 0.0079 0.0169 -0.0454 0.0347 -0.0010  
Y 0.0044 0.0065 0.0107 -0.0307 0.0206 0.0015  
Z -0.0030 -0.0063 -0.0093 0.0275 -0.0175 -0.0021

AT.124 H X -0.0106 0.0079 -0.0169 0.0454 0.0347 0.0010  
Y -0.0044 0.0065 -0.0107 0.0307 0.0206 -0.0015  
Z 0.0030 -0.0063 0.0093 -0.0275 -0.0175 0.0021

AT.125 H X 0.0011 0.0017 -0.0017 -0.0103 0.0016 -0.0000  
Y 0.0083 0.0106 0.0191 -0.0479 0.0365 0.0016  
Z 0.0064 0.0081 0.0096 -0.0411 0.0238 0.0008

AT.126 H X -0.0011 0.0017 0.0017 0.0103 0.0016 0.0000  
Y -0.0083 0.0106 -0.0191 0.0479 0.0365 -0.0016  
Z -0.0064 0.0081 -0.0096 0.0411 0.0238 -0.0008

AT.127 C X 0.0007 -0.0006 -0.0006 -0.0003 -0.0009 -0.0006  
Y -0.0015 -0.0003 -0.0006 0.0015 -0.0009 0.0005  
Z 0.0003 -0.0000 -0.0002 0.0010 0.0001 -0.0004

AT.128 C X -0.0007 -0.0006 0.0006 0.0003 -0.0009 0.0006  
Y 0.0015 -0.0003 0.0006 -0.0015 -0.0009 -0.0005  
Z -0.0003 -0.0000 0.0002 -0.0010 0.0001 0.0004

AT.129 C X -0.0003 0.0003 0.0008 -0.0010 0.0008 0.0005  
Y 0.0003 0.0003 0.0007 -0.0006 0.0008 0.0002  
Z -0.0002 0.0004 0.0020 -0.0005 0.0010 0.0010

AT.130 C X 0.0003 0.0003 -0.0008 0.0010 0.0008 -0.0005  
Y -0.0003 0.0003 -0.0007 0.0006 0.0008 -0.0002  
Z 0.0002 0.0004 -0.0020 0.0005 0.0010 -0.0010

AT.131 H X 0.0013 -0.0010 -0.0040 0.0033 -0.0013 -0.0023  
Y -0.0010 -0.0008 -0.0033 -0.0045 -0.0019 -0.0008  
Z 0.0015 -0.0018 -0.0063 0.0031 -0.0029 -0.0033

AT.132 H X -0.0013 -0.0010 0.0040 -0.0033 -0.0013 0.0023  
Y 0.0010 -0.0008 0.0033 0.0045 -0.0019 0.0008

Z -0.0015 -0.0018 0.0063 -0.0031 -0.0029 0.0033  
AT. 133 H X 0.0014 -0.0008 0.0015 0.0088 -0.0011 -0.0006  
Y 0.0013 -0.0008 -0.0005 0.0028 -0.0019 -0.0017  
Z 0.0009 -0.0006 -0.0002 -0.0001 -0.0017 -0.0015  
AT. 134 H X -0.0014 -0.0008 -0.0015 -0.0088 -0.0011 0.0006  
Y -0.0013 -0.0008 0.0005 -0.0028 -0.0019 0.0017  
Z -0.0009 -0.0006 0.0002 0.0001 -0.0017 0.0015  
AT. 135 C X 0.0009 0.0003 0.0008 -0.0032 0.0008 -0.0001  
Y -0.0010 0.0003 0.0015 0.0024 0.0006 0.0005  
Z 0.0009 0.0006 -0.0002 -0.0053 -0.0005 -0.0004  
AT. 136 C X -0.0009 0.0003 -0.0008 0.0032 0.0008 0.0001  
Y 0.0010 0.0003 -0.0015 -0.0024 0.0006 -0.0005  
Z -0.0009 0.0006 0.0002 0.0053 -0.0005 0.0004  
AT. 137 H X 0.0100 -0.0017 -0.0139 -0.0305 -0.0068 -0.0047  
Y -0.0045 -0.0060 -0.0054 0.0336 -0.0008 0.0008  
Z -0.0092 -0.0091 -0.0056 0.0594 0.0005 0.0022  
AT. 138 H X -0.0100 -0.0017 0.0139 0.0305 -0.0068 0.0047  
Y 0.0045 -0.0060 0.0054 -0.0336 -0.0008 -0.0008  
Z 0.0092 -0.0091 0.0056 -0.0594 0.0005 -0.0022  
AT. 139 H X -0.0088 -0.0020 0.0033 0.0339 0.0016 0.0027  
Y 0.0124 -0.0045 -0.0178 -0.0278 -0.0065 -0.0057  
Z 0.0088 0.0046 0.0017 -0.0409 0.0002 -0.0021  
AT. 140 H X 0.0088 -0.0020 -0.0033 -0.0339 0.0016 -0.0027  
Y -0.0124 -0.0045 0.0178 0.0278 -0.0065 0.0057  
Z -0.0088 0.0046 -0.0017 0.0409 0.0002 0.0021  
AT. 141 H X -0.0142 -0.0011 0.0089 0.0494 0.0032 0.0047  
Y 0.0075 0.0061 0.0016 -0.0450 -0.0015 -0.0025  
Z -0.0146 -0.0064 0.0025 0.0685 0.0027 0.0048  
AT. 142 H X 0.0142 -0.0011 -0.0089 -0.0494 0.0032 -0.0047  
Y -0.0075 0.0061 -0.0016 0.0450 -0.0015 0.0025  
Z 0.0146 -0.0064 -0.0025 -0.0685 0.0027 -0.0048  
AT. 143 C X 0.0006 -0.0003 -0.0004 -0.0010 -0.0005 -0.0004

Y -0.0016 0.0000 -0.0003 0.0010 -0.0009 0.0006  
Z -0.0003 0.0001 -0.0004 0.0013 -0.0000 0.0000  
AT. 144 C X -0.0006 -0.0003 0.0004 0.0010 -0.0005 0.0004  
Y 0.0016 0.0000 0.0003 -0.0010 -0.0009 -0.0006  
Z 0.0003 0.0001 0.0004 -0.0013 -0.0000 -0.0000  
AT. 145 H X 0.0152 0.0004 0.0049 -0.0133 0.0086 -0.0051  
Y 0.0059 0.0025 0.0003 0.0062 0.0070 -0.0024  
Z -0.0035 -0.0023 0.0004 -0.0086 -0.0056 0.0016  
AT. 146 H X -0.0152 0.0004 -0.0049 0.0133 0.0086 0.0051  
Y -0.0059 0.0025 -0.0003 -0.0062 0.0070 0.0024  
Z 0.0035 -0.0023 -0.0004 0.0086 -0.0056 -0.0016  
AT. 147 H X -0.0075 0.0026 0.0007 0.0094 0.0009 0.0038  
Y 0.0239 -0.0011 0.0032 -0.0183 0.0095 -0.0098  
Z 0.0020 0.0035 0.0031 0.0051 0.0073 0.0004  
AT. 148 H X 0.0075 0.0026 -0.0007 -0.0094 0.0009 -0.0038  
Y -0.0239 -0.0011 -0.0032 0.0183 0.0095 0.0098  
Z -0.0020 0.0035 -0.0031 -0.0051 0.0073 -0.0004  
AT. 149 H X -0.0184 0.0034 -0.0003 0.0178 -0.0019 0.0086  
Y -0.0037 -0.0010 0.0012 -0.0040 -0.0026 0.0020  
Z 0.0050 -0.0035 0.0018 -0.0171 -0.0025 -0.0018  
AT. 150 H X 0.0184 0.0034 0.0003 -0.0178 -0.0019 -0.0086  
Y 0.0037 -0.0010 -0.0012 0.0040 -0.0026 -0.0020  
Z -0.0050 -0.0035 -0.0018 0.0171 -0.0025 0.0018  
AT. 151 C X -0.0003 0.0005 0.0017 0.0005 0.0019 0.0007  
Y 0.0003 0.0003 0.0008 -0.0006 0.0009 0.0002  
Z 0.0003 -0.0005 -0.0009 0.0010 0.0008 -0.0006  
AT. 152 C X 0.0003 0.0005 -0.0017 -0.0005 0.0019 -0.0007  
Y -0.0003 0.0003 -0.0008 0.0006 0.0009 -0.0002  
Z -0.0003 -0.0005 0.0009 -0.0010 0.0008 0.0006  
AT. 153 H X 0.0019 -0.0022 -0.0061 0.0025 -0.0040 -0.0038  
Y -0.0029 0.0014 0.0029 0.0007 -0.0056 0.0029  
Z -0.0057 0.0026 0.0061 0.0016 -0.0071 0.0057

AT.154 H X -0.0019 -0.0022 0.0061 -0.0025 -0.0040 0.0038  
Y 0.0029 0.0014 -0.0029 -0.0007 -0.0056 -0.0029  
Z 0.0057 0.0026 -0.0061 -0.0016 -0.0071 -0.0057

AT.155 H X -0.0012 -0.0007 -0.0029 0.0004 -0.0052 0.0003  
Y 0.0031 -0.0028 -0.0069 0.0014 0.0032 -0.0046  
Z -0.0036 0.0023 0.0055 -0.0004 -0.0050 0.0047

AT.156 H X 0.0012 -0.0007 0.0029 -0.0004 -0.0052 -0.0003  
Y -0.0031 -0.0028 0.0069 -0.0014 0.0032 0.0046  
Z 0.0036 0.0023 -0.0055 0.0004 -0.0050 -0.0047

AT.157 O X 0.0002 -0.0004 -0.0017 -0.0013 -0.0020 -0.0009  
Y 0.0004 -0.0006 -0.0030 -0.0022 -0.0036 -0.0016  
Z -0.0006 0.0010 0.0011 0.0004 0.0011 0.0006

AT.158 O X -0.0002 -0.0004 0.0017 0.0013 -0.0020 0.0009  
Y -0.0004 -0.0006 0.0030 0.0022 -0.0036 0.0016  
Z 0.0006 0.0010 -0.0011 -0.0004 0.0011 -0.0006

AT.159 O X 0.0009 -0.0013 -0.0024 -0.0014 -0.0027 -0.0012  
Y -0.0002 0.0004 0.0018 0.0014 0.0022 0.0010  
Z 0.0001 -0.0003 0.0009 0.0008 0.0011 0.0005

AT.160 O X -0.0009 -0.0013 0.0024 0.0014 -0.0027 0.0012  
Y 0.0002 0.0004 -0.0018 -0.0014 0.0022 -0.0010  
Z -0.0001 -0.0003 -0.0009 -0.0008 0.0011 -0.0005

AT.161 H X -0.0049 0.0087 0.0545 0.0418 0.0649 0.0300  
Y -0.0012 0.0024 0.0155 0.0116 0.0184 0.0084  
Z 0.0016 -0.0044 -0.0286 -0.0213 -0.0342 -0.0156

AT.162 H X 0.0049 0.0087 -0.0545 -0.0418 0.0649 -0.0300  
Y 0.0012 0.0024 -0.0155 -0.0116 0.0184 -0.0084  
Z -0.0016 -0.0044 0.0286 0.0213 -0.0342 0.0156

AT.163 H X -0.0136 0.0209 0.0167 0.0055 0.0166 0.0083  
Y 0.0000 0.0011 0.0038 0.0020 0.0037 0.0016  
Z 0.0057 -0.0080 -0.0049 -0.0013 -0.0046 -0.0025

AT.164 H X 0.0136 0.0209 -0.0167 -0.0055 0.0166 -0.0083  
Y -0.0000 0.0011 -0.0038 -0.0020 0.0037 -0.0016

Z -0.0057 -0.0080 0.0049 0.0013 -0.0046 0.0025  
 AT. 165 O X -0.0006 0.0003 -0.0008 -0.0003 0.0001 -0.0001  
 Y 0.0003 -0.0006 0.0014 0.0002 -0.0011 0.0004  
 Z -0.0003 0.0007 -0.0020 -0.0002 0.0016 -0.0005  
 AT. 166 O X 0.0006 0.0003 0.0008 0.0003 0.0001 0.0001  
 Y -0.0003 -0.0006 -0.0014 -0.0002 -0.0011 -0.0004  
 Z 0.0003 0.0007 0.0020 0.0002 0.0016 0.0005  
 AT. 167 H X 0.0026 -0.0004 0.0002 0.0013 0.0030 -0.0004  
 Y -0.0003 -0.0006 0.0021 -0.0004 -0.0008 0.0000  
 Z -0.0086 0.0026 -0.0054 -0.0040 -0.0069 0.0012  
 AT. 168 H X -0.0026 -0.0004 -0.0002 -0.0013 0.0030 0.0004  
 Y 0.0003 -0.0006 -0.0021 0.0004 -0.0008 -0.0000  
 Z 0.0086 0.0026 0.0054 0.0040 -0.0069 -0.0012  
 AT. 169 O X 0.0005 -0.0006 0.0017 0.0003 -0.0009 0.0003  
 Y -0.0006 0.0010 -0.0028 -0.0003 0.0020 -0.0007  
 Z -0.0001 0.0004 -0.0012 -0.0000 0.0011 -0.0003  
 AT. 170 O X -0.0005 -0.0006 -0.0017 -0.0003 -0.0009 -0.0003  
 Y 0.0006 0.0010 0.0028 0.0003 0.0020 0.0007  
 Z 0.0001 0.0004 0.0012 0.0000 0.0011 0.0003  
 AT. 171 H X -0.0040 0.0049 -0.0162 -0.0023 0.0123 -0.0038  
 Y 0.0058 -0.0080 0.0225 0.0032 -0.0141 0.0050  
 Z 0.0155 -0.0202 0.0597 0.0080 -0.0395 0.0129  
 AT. 172 H X 0.0040 0.0049 0.0162 0.0023 0.0123 0.0038  
 Y -0.0058 -0.0080 -0.0225 -0.0032 -0.0141 -0.0050  
 Z -0.0155 -0.0202 -0.0597 -0.0080 -0.0395 -0.0129  
  
 FREQ(CM\*\*-1) 1511.95 1512.52 1513.04 1514.54 1516.19 1518.78  
  
 AT. 1 I X -0.0000 0.0000 -0.0000 -0.0000 -0.0000 0.0000  
 Y -0.0000 0.0000 -0.0000 0.0000 -0.0000 -0.0000  
 Z 0.0000 0.0000 0.0000 -0.0000 0.0000 -0.0000  
 AT. 2 I X -0.0000 -0.0000 0.0000 -0.0000 -0.0000 -0.0000



Y -0.0000 -0.0000 0.0000 0.0000 -0.0000 0.0000  
Z 0.0000 -0.0000 -0.0000 -0.0000 0.0000 0.0000  
AT. 3 I X -0.0000 -0.0000 0.0000 -0.0000 -0.0000 -0.0000  
Y -0.0000 -0.0000 0.0000 0.0000 0.0000 -0.0000  
Z -0.0000 -0.0000 0.0000 -0.0000 0.0000 -0.0000  
AT. 4 I X -0.0000 0.0000 -0.0000 -0.0000 -0.0000 0.0000  
Y -0.0000 0.0000 -0.0000 0.0000 0.0000 0.0000  
Z -0.0000 0.0000 -0.0000 -0.0000 0.0000 0.0000  
AT. 5 O X 0.0004 0.0004 0.0004 -0.0007 0.0001 -0.0005  
Y -0.0000 -0.0002 0.0001 0.0003 0.0001 0.0002  
Z -0.0004 -0.0004 -0.0002 0.0006 -0.0000 0.0004  
AT. 6 O X 0.0004 -0.0004 -0.0004 -0.0007 0.0001 0.0005  
Y -0.0000 0.0002 -0.0001 0.0003 0.0001 -0.0002  
Z -0.0004 0.0004 0.0002 0.0006 -0.0000 -0.0004  
AT. 7 O X 0.0003 -0.0001 0.0013 -0.0001 0.0027 0.0005  
Y -0.0001 0.0001 -0.0013 -0.0001 -0.0021 -0.0004  
Z -0.0002 0.0001 0.0004 -0.0001 0.0004 -0.0002  
AT. 8 O X 0.0003 0.0001 -0.0013 -0.0001 0.0027 -0.0005  
Y -0.0001 -0.0001 0.0013 -0.0001 -0.0021 0.0004  
Z -0.0002 -0.0001 -0.0004 -0.0001 0.0004 0.0002  
AT. 9 N X 0.0000 0.0001 0.0000 -0.0001 0.0002 -0.0003  
Y -0.0000 -0.0002 0.0004 0.0002 -0.0004 0.0002  
Z 0.0013 0.0017 0.0044 -0.0008 0.0001 -0.0015  
AT. 10 N X 0.0000 -0.0001 -0.0000 -0.0001 0.0002 0.0003  
Y -0.0000 0.0002 -0.0004 0.0002 -0.0004 -0.0002  
Z 0.0013 -0.0017 -0.0044 -0.0008 0.0001 0.0015  
AT. 11 N X 0.0003 0.0005 -0.0007 -0.0005 0.0007 0.0003  
Y -0.0003 0.0001 0.0017 0.0016 0.0034 0.0006  
Z -0.0000 -0.0004 -0.0051 -0.0031 -0.0093 -0.0021  
AT. 12 N X 0.0003 -0.0005 0.0007 -0.0005 0.0007 -0.0003  
Y -0.0003 -0.0001 -0.0017 0.0016 0.0034 -0.0006  
Z -0.0000 0.0004 0.0051 -0.0031 -0.0093 0.0021

AT. 13 C X -0.0006 -0.0008 -0.0007 0.0009 0.0000 0.0008  
Y 0.0003 0.0006 0.0005 -0.0007 -0.0003 -0.0005  
Z -0.0007 -0.0010 -0.0030 -0.0000 0.0002 0.0005

AT. 14 C X -0.0006 0.0008 0.0007 0.0009 0.0000 -0.0008  
Y 0.0003 -0.0006 -0.0005 -0.0007 -0.0003 0.0005  
Z -0.0007 0.0010 0.0030 -0.0000 0.0002 -0.0005

AT. 15 C X 0.0001 0.0000 0.0003 -0.0000 0.0001 -0.0001  
Y -0.0003 0.0003 -0.0007 -0.0003 -0.0006 -0.0001  
Z 0.0001 -0.0000 0.0005 0.0002 0.0001 0.0000

AT. 16 C X 0.0001 -0.0000 -0.0003 -0.0000 0.0001 0.0001  
Y -0.0003 -0.0003 0.0007 -0.0003 -0.0006 0.0001  
Z 0.0001 0.0000 -0.0005 0.0002 0.0001 -0.0000

AT. 17 H X 0.0001 -0.0009 -0.0003 0.0007 0.0015 0.0007  
Y 0.0004 -0.0029 0.0033 0.0033 0.0041 0.0019  
Z -0.0008 0.0035 -0.0048 -0.0040 -0.0052 -0.0021

AT. 18 H X 0.0001 0.0009 0.0003 0.0007 0.0015 -0.0007  
Y 0.0004 0.0029 -0.0033 0.0033 0.0041 -0.0019  
Z -0.0008 -0.0035 0.0048 -0.0040 -0.0052 0.0021

AT. 19 H X 0.0004 0.0010 0.0008 -0.0006 -0.0015 -0.0002  
Y 0.0011 -0.0042 0.0029 0.0037 0.0054 0.0026  
Z 0.0006 -0.0012 0.0020 0.0013 0.0017 0.0009

AT. 20 H X 0.0004 -0.0010 -0.0008 -0.0006 -0.0015 0.0002  
Y 0.0011 0.0042 -0.0029 0.0037 0.0054 -0.0026  
Z 0.0006 0.0012 -0.0020 0.0013 0.0017 -0.0009

AT. 21 C X -0.0003 -0.0002 -0.0036 -0.0005 -0.0064 -0.0010  
Y 0.0003 -0.0002 0.0002 -0.0013 0.0002 -0.0001  
Z 0.0001 0.0000 0.0053 0.0033 0.0084 0.0018

AT. 22 C X -0.0003 0.0002 0.0036 -0.0005 -0.0064 0.0010  
Y 0.0003 0.0002 -0.0002 -0.0013 0.0002 0.0001  
Z 0.0001 -0.0000 -0.0053 0.0033 0.0084 -0.0018

AT. 23 C X 0.0001 0.0004 0.0007 0.0002 0.0019 0.0004  
Y 0.0000 -0.0005 0.0003 0.0001 -0.0004 0.0000

Z 0.0001 -0.0011 -0.0005 -0.0006 -0.0025 -0.0004  
AT. 24 C X 0.0001 -0.0004 -0.0007 0.0002 0.0019 -0.0004  
Y 0.0000 0.0005 -0.0003 0.0001 -0.0004 -0.0000  
Z 0.0001 0.0011 0.0005 -0.0006 -0.0025 0.0004  
AT. 25 H X -0.0004 -0.0001 -0.0009 -0.0009 -0.0022 -0.0012  
Y 0.0000 -0.0017 0.0007 -0.0003 -0.0023 -0.0005  
Z -0.0007 0.0104 -0.0079 0.0009 0.0081 0.0017  
AT. 26 H X -0.0004 0.0001 0.0009 -0.0009 -0.0022 0.0012  
Y 0.0000 0.0017 -0.0007 -0.0003 -0.0023 0.0005  
Z -0.0007 -0.0104 0.0079 0.0009 0.0081 -0.0017  
AT. 27 H X 0.0000 -0.0022 0.0026 0.0031 0.0005 0.0010  
Y -0.0011 0.0081 -0.0064 0.0002 0.0044 0.0004  
Z -0.0005 0.0040 -0.0043 -0.0013 0.0001 -0.0004  
AT. 28 H X 0.0000 0.0022 -0.0026 0.0031 0.0005 -0.0010  
Y -0.0011 -0.0081 0.0064 0.0002 0.0044 -0.0004  
Z -0.0005 -0.0040 0.0043 -0.0013 0.0001 0.0004  
AT. 29 C X -0.0005 -0.0001 -0.0024 0.0000 0.0002 0.0004  
Y 0.0014 0.0012 0.0065 -0.0001 0.0000 -0.0004  
Z -0.0002 -0.0001 0.0002 0.0003 0.0004 0.0004  
AT. 30 C X -0.0005 0.0001 0.0024 0.0000 0.0002 -0.0004  
Y 0.0014 -0.0012 -0.0065 -0.0001 0.0000 0.0004  
Z -0.0002 0.0001 -0.0002 0.0003 0.0004 -0.0004  
AT. 31 H X 0.0065 0.0042 0.0259 -0.0014 -0.0062 -0.0005  
Y -0.0062 -0.0048 -0.0306 -0.0003 0.0040 0.0011  
Z -0.0064 -0.0059 -0.0358 -0.0015 0.0016 0.0017  
AT. 32 H X 0.0065 -0.0042 -0.0259 -0.0014 -0.0062 0.0005  
Y -0.0062 0.0048 0.0306 -0.0003 0.0040 -0.0011  
Z -0.0064 0.0059 0.0358 -0.0015 0.0016 -0.0017  
AT. 33 H X -0.0003 -0.0014 0.0007 0.0005 0.0028 -0.0013  
Y -0.0114 -0.0099 -0.0513 0.0010 0.0069 0.0027  
Z 0.0052 0.0036 0.0263 0.0002 -0.0007 -0.0020  
AT. 34 H X -0.0003 0.0014 -0.0007 0.0005 0.0028 0.0013

Y -0.0114 0.0099 0.0513 0.0010 0.0069 -0.0027  
Z 0.0052 -0.0036 -0.0263 0.0002 -0.0007 0.0020  
AT. 35 C X -0.0005 -0.0018 0.0015 0.0012 0.0004 0.0002  
Y -0.0004 -0.0002 -0.0010 0.0006 -0.0018 -0.0001  
Z 0.0006 0.0007 -0.0025 -0.0014 -0.0035 -0.0001  
AT. 36 C X -0.0005 0.0018 -0.0015 0.0012 0.0004 -0.0002  
Y -0.0004 0.0002 0.0010 0.0006 -0.0018 0.0001  
Z 0.0006 -0.0007 0.0025 -0.0014 -0.0035 0.0001  
AT. 37 C X 0.0008 0.0023 -0.0055 -0.0013 -0.0013 0.0006  
Y 0.0000 -0.0008 0.0006 -0.0004 -0.0010 -0.0003  
Z -0.0001 0.0002 0.0016 0.0011 0.0031 0.0006  
AT. 38 C X 0.0008 -0.0023 0.0055 -0.0013 -0.0013 -0.0006  
Y 0.0000 0.0008 -0.0006 -0.0004 -0.0010 0.0003  
Z -0.0001 -0.0002 -0.0016 0.0011 0.0031 -0.0006  
AT. 39 H X -0.0052 -0.0140 0.0349 0.0064 0.0043 -0.0058  
Y -0.0007 0.0014 0.0087 0.0036 0.0088 0.0012  
Z -0.0038 -0.0114 0.0247 0.0044 0.0021 -0.0043  
AT. 40 H X -0.0052 0.0140 -0.0349 0.0064 0.0043 0.0058  
Y -0.0007 -0.0014 -0.0087 0.0036 0.0088 -0.0012  
Z -0.0038 0.0114 -0.0247 0.0044 0.0021 0.0043  
AT. 41 H X -0.0050 -0.0120 0.0370 0.0097 0.0143 -0.0030  
Y 0.0030 0.0086 -0.0200 -0.0066 -0.0067 0.0011  
Z 0.0033 0.0070 -0.0244 -0.0051 -0.0088 0.0029  
AT. 42 H X -0.0050 0.0120 -0.0370 0.0097 0.0143 0.0030  
Y 0.0030 -0.0086 0.0200 -0.0066 -0.0067 -0.0011  
Z 0.0033 -0.0070 0.0244 -0.0051 -0.0088 -0.0029  
AT. 43 C X 0.0001 -0.0003 0.0010 -0.0000 -0.0002 0.0000  
Y -0.0002 -0.0001 0.0023 0.0023 0.0023 -0.0001  
Z -0.0004 0.0005 -0.0004 0.0009 0.0025 0.0004  
AT. 44 C X 0.0001 0.0003 -0.0010 -0.0000 -0.0002 -0.0000  
Y -0.0002 0.0001 -0.0023 0.0023 0.0023 0.0001  
Z -0.0004 -0.0005 0.0004 0.0009 0.0025 -0.0004

AT. 45 H X -0.0035 0.0007 -0.0002 0.0116 0.0090 -0.0020  
Y 0.0030 0.0017 -0.0090 -0.0144 -0.0122 0.0006  
Z -0.0006 -0.0019 0.0107 0.0078 0.0083 0.0011

AT. 46 H X -0.0035 -0.0007 0.0002 0.0116 0.0090 0.0020  
Y 0.0030 -0.0017 0.0090 -0.0144 -0.0122 -0.0006  
Z -0.0006 0.0019 -0.0107 0.0078 0.0083 -0.0011

AT. 47 H X 0.0011 0.0006 -0.0017 -0.0041 -0.0028 0.0014  
Y 0.0044 0.0011 -0.0101 -0.0190 -0.0204 0.0002  
Z 0.0031 0.0002 -0.0092 -0.0151 -0.0175 -0.0012

AT. 48 H X 0.0011 -0.0006 0.0017 -0.0041 -0.0028 -0.0014  
Y 0.0044 -0.0011 0.0101 -0.0190 -0.0204 -0.0002  
Z 0.0031 -0.0002 0.0092 -0.0151 -0.0175 0.0012

AT. 49 C X 0.0004 0.0000 -0.0019 -0.0017 -0.0042 -0.0002  
Y -0.0006 -0.0005 -0.0021 0.0000 0.0002 0.0001  
Z 0.0011 -0.0003 0.0027 -0.0007 -0.0023 0.0001

AT. 50 C X 0.0004 -0.0000 0.0019 -0.0017 -0.0042 0.0002  
Y -0.0006 0.0005 0.0021 0.0000 0.0002 -0.0001  
Z 0.0011 0.0003 -0.0027 -0.0007 -0.0023 -0.0001

AT. 51 C X -0.0012 -0.0010 0.0013 0.0022 0.0028 0.0003  
Y -0.0001 0.0003 -0.0009 -0.0002 -0.0000 -0.0000  
Z -0.0006 -0.0001 -0.0033 -0.0001 -0.0003 0.0003

AT. 52 C X -0.0012 0.0010 -0.0013 0.0022 0.0028 -0.0003  
Y -0.0001 -0.0003 0.0009 -0.0002 -0.0000 0.0000  
Z -0.0006 0.0001 0.0033 -0.0001 -0.0003 -0.0003

AT. 53 H X 0.0052 0.0045 -0.0063 -0.0088 -0.0096 -0.0007  
Y 0.0052 0.0045 0.0003 -0.0067 -0.0049 -0.0017  
Z -0.0050 -0.0043 0.0116 0.0106 0.0147 0.0001

AT. 54 H X 0.0052 -0.0045 0.0063 -0.0088 -0.0096 0.0007  
Y 0.0052 -0.0045 -0.0003 -0.0067 -0.0049 0.0017  
Z -0.0050 0.0043 -0.0116 0.0106 0.0147 -0.0001

AT. 55 H X 0.0103 0.0091 -0.0028 -0.0149 -0.0147 -0.0025  
Y -0.0035 -0.0053 0.0083 0.0074 0.0066 0.0022

Z 0.0032 -0.0003 0.0060 -0.0023 -0.0039 0.0012  
AT. 56 H X 0.0103 -0.0091 0.0028 -0.0149 -0.0147 0.0025  
Y -0.0035 0.0053 -0.0083 0.0074 0.0066 -0.0022  
Z 0.0032 0.0003 -0.0060 -0.0023 -0.0039 -0.0012  
AT. 57 C X -0.0006 -0.0013 0.0002 0.0008 -0.0006 -0.0001  
Y -0.0007 -0.0014 -0.0019 0.0003 -0.0032 -0.0003  
Z 0.0006 0.0011 -0.0034 -0.0016 -0.0035 -0.0002  
AT. 58 C X -0.0006 0.0013 -0.0002 0.0008 -0.0006 0.0001  
Y -0.0007 0.0014 0.0019 0.0003 -0.0032 0.0003  
Z 0.0006 -0.0011 0.0034 -0.0016 -0.0035 0.0002  
AT. 59 H X -0.0091 -0.0176 0.0069 0.0133 -0.0040 -0.0009  
Y 0.0016 0.0032 0.0290 0.0059 0.0390 0.0025  
Z -0.0028 -0.0051 0.0479 0.0166 0.0568 0.0033  
AT. 60 H X -0.0091 0.0176 -0.0069 0.0133 -0.0040 0.0009  
Y 0.0016 -0.0032 -0.0290 0.0059 0.0390 -0.0025  
Z -0.0028 0.0051 -0.0479 0.0166 0.0568 -0.0033  
AT. 61 H X 0.0096 0.0208 -0.0043 -0.0135 0.0081 0.0010  
Y 0.0081 0.0166 0.0298 -0.0020 0.0489 0.0038  
Z 0.0040 0.0090 -0.0211 -0.0109 -0.0208 -0.0012  
AT. 62 H X 0.0096 -0.0208 0.0043 -0.0135 0.0081 -0.0010  
Y 0.0081 -0.0166 -0.0298 -0.0020 0.0489 -0.0038  
Z 0.0040 -0.0090 0.0211 -0.0109 -0.0208 0.0012  
AT. 63 H X 0.0097 0.0206 -0.0086 -0.0151 0.0024 0.0007  
Y 0.0010 0.0011 -0.0297 -0.0090 -0.0364 -0.0019  
Z -0.0104 -0.0212 0.0303 0.0214 0.0242 0.0006  
AT. 64 H X 0.0097 -0.0206 0.0086 -0.0151 0.0024 -0.0007  
Y 0.0010 -0.0011 0.0297 -0.0090 -0.0364 0.0019  
Z -0.0104 0.0212 -0.0303 0.0214 0.0242 -0.0006  
AT. 65 C X 0.0005 -0.0005 -0.0006 -0.0020 -0.0055 -0.0002  
Y -0.0006 0.0000 -0.0040 -0.0009 -0.0015 -0.0001  
Z 0.0008 0.0004 0.0009 -0.0007 -0.0025 -0.0002  
AT. 66 C X 0.0005 0.0005 0.0006 -0.0020 -0.0055 0.0002

Y -0.0006 -0.0000 0.0040 -0.0009 -0.0015 0.0001  
Z 0.0008 -0.0004 -0.0009 -0.0007 -0.0025 0.0002  
AT. 67 H X 0.0011 -0.0008 -0.0248 -0.0138 -0.0331 -0.0014  
Y 0.0115 0.0025 0.0411 0.0001 -0.0122 -0.0008  
Z -0.0110 -0.0015 -0.0188 0.0094 0.0333 0.0016  
AT. 68 H X 0.0011 0.0008 0.0248 -0.0138 -0.0331 0.0014  
Y 0.0115 -0.0025 -0.0411 0.0001 -0.0122 0.0008  
Z -0.0110 0.0015 0.0188 0.0094 0.0333 -0.0016  
AT. 69 H X -0.0015 0.0032 0.0263 0.0194 0.0482 0.0020  
Y 0.0026 0.0040 0.0431 0.0200 0.0452 0.0017  
Z 0.0085 -0.0012 0.0165 -0.0100 -0.0339 -0.0016  
AT. 70 H X -0.0015 -0.0032 -0.0263 0.0194 0.0482 -0.0020  
Y 0.0026 -0.0040 -0.0431 0.0200 0.0452 -0.0017  
Z 0.0085 0.0012 -0.0165 -0.0100 -0.0339 0.0016  
AT. 71 H X -0.0079 0.0040 0.0163 0.0272 0.0745 0.0031  
Y -0.0049 -0.0039 -0.0243 -0.0064 -0.0110 -0.0002  
Z -0.0120 -0.0018 -0.0167 0.0133 0.0446 0.0022  
AT. 72 H X -0.0079 -0.0040 -0.0163 0.0272 0.0745 -0.0031  
Y -0.0049 0.0039 0.0243 -0.0064 -0.0110 0.0002  
Z -0.0120 0.0018 0.0167 0.0133 0.0446 -0.0022  
AT. 73 C X 0.0002 0.0004 0.0009 0.0002 0.0012 0.0000  
Y -0.0001 0.0001 -0.0006 -0.0003 -0.0005 -0.0001  
Z 0.0010 -0.0014 0.0045 -0.0001 0.0018 0.0003  
AT. 74 C X 0.0002 -0.0004 -0.0009 0.0002 0.0012 -0.0000  
Y -0.0001 -0.0001 0.0006 -0.0003 -0.0005 0.0001  
Z 0.0010 0.0014 -0.0045 -0.0001 0.0018 -0.0003  
AT. 75 H X -0.0054 0.0040 -0.0228 0.0000 -0.0052 -0.0011  
Y -0.0043 0.0043 -0.0124 0.0032 -0.0006 -0.0009  
Z -0.0091 0.0076 -0.0304 0.0046 -0.0026 -0.0017  
AT. 76 H X -0.0054 -0.0040 0.0228 0.0000 -0.0052 0.0011  
Y -0.0043 -0.0043 0.0124 0.0032 -0.0006 0.0009  
Z -0.0091 -0.0076 0.0304 0.0046 -0.0026 0.0017

AT. 77 H X 0.0023 -0.0038 0.0091 -0.0007 -0.0010 0.0005  
Y 0.0075 -0.0060 0.0250 -0.0028 0.0047 0.0016  
Z -0.0082 0.0081 -0.0275 0.0032 -0.0015 -0.0017

AT. 78 H X 0.0023 0.0038 -0.0091 -0.0007 -0.0010 -0.0005  
Y 0.0075 0.0060 -0.0250 -0.0028 0.0047 -0.0016  
Z -0.0082 -0.0081 0.0275 0.0032 -0.0015 0.0017

AT. 79 I X 0.0000 0.0000 0.0000 -0.0000 0.0000 0.0000  
Y -0.0000 -0.0000 -0.0000 0.0000 -0.0000 -0.0000  
Z 0.0000 -0.0000 0.0000 -0.0000 -0.0000 -0.0000

AT. 80 I X 0.0000 -0.0000 -0.0000 -0.0000 0.0000 -0.0000  
Y -0.0000 0.0000 0.0000 0.0000 -0.0000 0.0000  
Z 0.0000 0.0000 -0.0000 -0.0000 -0.0000 0.0000

AT. 81 I X -0.0000 -0.0000 0.0000 -0.0000 -0.0000 -0.0000  
Y 0.0000 0.0000 -0.0000 0.0000 0.0000 0.0000  
Z 0.0000 0.0000 -0.0000 0.0000 0.0000 0.0000

AT. 82 I X -0.0000 0.0000 -0.0000 -0.0000 -0.0000 0.0000  
Y 0.0000 -0.0000 0.0000 0.0000 0.0000 -0.0000  
Z 0.0000 -0.0000 0.0000 0.0000 0.0000 -0.0000

AT. 83 O X 0.0005 0.0002 0.0000 0.0015 -0.0007 0.0006  
Y 0.0003 0.0001 0.0001 0.0003 -0.0002 0.0002  
Z 0.0005 0.0002 0.0000 0.0005 -0.0003 0.0005

AT. 84 O X 0.0005 -0.0002 -0.0000 0.0015 -0.0007 -0.0006  
Y 0.0003 -0.0001 -0.0001 0.0003 -0.0002 -0.0002  
Z 0.0005 -0.0002 -0.0000 0.0005 -0.0003 -0.0005

AT. 85 O X -0.0045 -0.0055 0.0009 -0.0007 -0.0008 0.0002  
Y -0.0027 -0.0033 0.0006 -0.0005 -0.0005 0.0000  
Z 0.0012 0.0012 -0.0001 0.0003 -0.0002 0.0003

AT. 86 O X -0.0045 0.0055 -0.0009 -0.0007 -0.0008 -0.0002  
Y -0.0027 0.0033 -0.0006 -0.0005 -0.0005 -0.0000  
Z 0.0012 -0.0012 0.0001 0.0003 -0.0002 -0.0003

AT. 87 N X 0.0002 0.0000 0.0005 0.0005 -0.0003 0.0004  
Y 0.0001 -0.0001 0.0004 0.0003 -0.0004 0.0013



Z 0.0030 0.0025 0.0016 -0.0050 0.0023 0.0009  
AT. 88 N X 0.0002 -0.0000 -0.0005 0.0005 -0.0003 -0.0004  
Y 0.0001 0.0001 -0.0004 0.0003 -0.0004 -0.0013  
Z 0.0030 -0.0025 -0.0016 -0.0050 0.0023 -0.0009  
AT. 89 N X -0.0006 -0.0018 0.0005 0.0006 -0.0010 0.0008  
Y 0.0042 0.0047 -0.0005 0.0019 0.0008 -0.0010  
Z -0.0105 -0.0131 0.0018 -0.0018 -0.0034 0.0020  
AT. 90 N X -0.0006 0.0018 -0.0005 0.0006 -0.0010 -0.0008  
Y 0.0042 -0.0047 0.0005 0.0019 0.0008 0.0010  
Z -0.0105 0.0131 -0.0018 -0.0018 -0.0034 -0.0020  
AT. 91 C X -0.0006 -0.0001 -0.0001 -0.0035 0.0015 -0.0010  
Y -0.0002 -0.0001 0.0001 -0.0012 0.0004 -0.0006  
Z -0.0027 -0.0024 -0.0012 0.0044 -0.0017 -0.0012  
AT. 92 C X -0.0006 0.0001 0.0001 -0.0035 0.0015 0.0010  
Y -0.0002 0.0001 -0.0001 -0.0012 0.0004 0.0006  
Z -0.0027 0.0024 0.0012 0.0044 -0.0017 0.0012  
AT. 93 C X -0.0006 -0.0007 0.0002 0.0015 -0.0007 -0.0005  
Y -0.0010 -0.0012 0.0001 0.0012 -0.0005 -0.0008  
Z 0.0009 0.0010 -0.0000 -0.0015 0.0007 0.0008  
AT. 94 C X -0.0006 0.0007 -0.0002 0.0015 -0.0007 0.0005  
Y -0.0010 0.0012 -0.0001 0.0012 -0.0005 0.0008  
Z 0.0009 -0.0010 0.0000 -0.0015 0.0007 -0.0008  
AT. 95 H X -0.0018 -0.0015 -0.0005 -0.0008 0.0006 0.0010  
Y 0.0060 0.0068 -0.0003 -0.0040 0.0018 0.0046  
Z -0.0094 -0.0114 0.0015 0.0097 -0.0048 -0.0104  
AT. 96 H X -0.0018 0.0015 0.0005 -0.0008 0.0006 -0.0010  
Y 0.0060 -0.0068 0.0003 -0.0040 0.0018 -0.0046  
Z -0.0094 0.0114 -0.0015 0.0097 -0.0048 0.0104  
AT. 97 H X 0.0035 0.0038 -0.0020 -0.0024 0.0014 0.0039  
Y 0.0074 0.0095 -0.0011 -0.0067 0.0033 0.0078  
Z 0.0015 0.0021 0.0004 -0.0022 0.0010 0.0014  
AT. 98 H X 0.0035 -0.0038 0.0020 -0.0024 0.0014 -0.0039

Y 0.0074 -0.0095 0.0011 -0.0067 0.0033 -0.0078  
Z 0.0015 -0.0021 -0.0004 -0.0022 0.0010 -0.0014  
AT. 99 C X 0.0092 0.0115 -0.0016 0.0010 0.0024 -0.0016  
Y -0.0001 -0.0003 -0.0003 -0.0001 -0.0008 0.0014  
Z 0.0086 0.0110 -0.0014 0.0011 0.0033 -0.0026  
AT. 100 C X 0.0092 -0.0115 0.0016 0.0010 0.0024 0.0016  
Y -0.0001 0.0003 0.0003 -0.0001 -0.0008 -0.0014  
Z 0.0086 -0.0110 0.0014 0.0011 0.0033 0.0026  
AT. 101 C X -0.0001 -0.0005 -0.0004 0.0004 -0.0007 0.0020  
Y 0.0020 0.0022 -0.0006 0.0004 0.0001 0.0009  
Z 0.0017 0.0014 -0.0010 0.0007 -0.0006 0.0030  
AT. 102 C X -0.0001 0.0005 0.0004 0.0004 -0.0007 -0.0020  
Y 0.0020 -0.0022 0.0006 0.0004 0.0001 -0.0009  
Z 0.0017 -0.0014 0.0010 0.0007 -0.0006 -0.0030  
AT. 103 H X 0.0014 0.0025 -0.0003 0.0001 0.0012 -0.0016  
Y 0.0016 0.0011 -0.0007 0.0007 -0.0008 0.0029  
Z -0.0362 -0.0387 0.0126 -0.0085 0.0003 -0.0244  
AT. 104 H X 0.0014 -0.0025 0.0003 0.0001 0.0012 0.0016  
Y 0.0016 -0.0011 0.0007 0.0007 -0.0008 -0.0029  
Z -0.0362 0.0387 -0.0126 -0.0085 0.0003 0.0244  
AT. 105 H X -0.0179 -0.0198 0.0063 -0.0046 -0.0018 -0.0086  
Y -0.0303 -0.0331 0.0104 -0.0074 -0.0006 -0.0192  
Z -0.0149 -0.0167 0.0049 -0.0036 -0.0013 -0.0071  
AT. 106 H X -0.0179 0.0198 -0.0063 -0.0046 -0.0018 0.0086  
Y -0.0303 0.0331 -0.0104 -0.0074 -0.0006 0.0192  
Z -0.0149 0.0167 -0.0049 -0.0036 -0.0013 0.0071  
AT. 107 C X 0.0025 0.0014 0.0018 -0.0008 -0.0002 0.0036  
Y 0.0035 0.0018 0.0036 -0.0015 -0.0005 0.0034  
Z -0.0003 -0.0002 0.0003 0.0008 -0.0004 -0.0013  
AT. 108 C X 0.0025 -0.0014 -0.0018 -0.0008 -0.0002 -0.0036  
Y 0.0035 -0.0018 -0.0036 -0.0015 -0.0005 -0.0034  
Z -0.0003 0.0002 -0.0003 0.0008 -0.0004 0.0013

AT.109 H X -0.0229 -0.0088 -0.0257 0.0076 0.0086 -0.0446  
Y -0.0127 -0.0066 -0.0131 0.0047 0.0020 -0.0184  
Z -0.0190 -0.0108 -0.0184 0.0079 0.0012 -0.0217

AT.110 H X -0.0229 0.0088 0.0257 0.0076 0.0086 0.0446  
Y -0.0127 0.0066 0.0131 0.0047 0.0020 0.0184  
Z -0.0190 0.0108 0.0184 0.0079 0.0012 0.0217

AT.111 H X -0.0057 -0.0037 -0.0020 0.0017 -0.0014 -0.0037  
Y -0.0310 -0.0141 -0.0340 0.0149 0.0070 -0.0514  
Z 0.0157 0.0086 0.0122 -0.0055 -0.0007 0.0179

AT.112 H X -0.0057 0.0037 0.0020 0.0017 -0.0014 0.0037  
Y -0.0310 0.0141 0.0340 0.0149 0.0070 0.0514  
Z 0.0157 -0.0086 -0.0122 -0.0055 -0.0007 -0.0179

AT.113 C X -0.0023 -0.0029 0.0014 -0.0019 -0.0007 0.0014  
Y -0.0005 -0.0003 -0.0004 -0.0001 -0.0002 0.0049  
Z -0.0017 -0.0015 -0.0003 -0.0019 -0.0003 0.0052

AT.114 C X -0.0023 0.0029 -0.0014 -0.0019 -0.0007 -0.0014  
Y -0.0005 0.0003 0.0004 -0.0001 -0.0002 -0.0049  
Z -0.0017 0.0015 0.0003 -0.0019 -0.0003 -0.0052

AT.115 C X 0.0059 0.0064 -0.0011 -0.0003 0.0008 0.0001  
Y -0.0023 -0.0024 -0.0001 -0.0005 -0.0000 -0.0007  
Z 0.0027 0.0032 -0.0002 0.0010 0.0007 -0.0011

AT.116 C X 0.0059 -0.0064 0.0011 -0.0003 0.0008 -0.0001  
Y -0.0023 0.0024 0.0001 -0.0005 -0.0000 0.0007  
Z 0.0027 -0.0032 0.0002 0.0010 0.0007 0.0011

AT.117 H X -0.0250 -0.0239 0.0031 0.0023 -0.0001 -0.0027  
Y 0.0251 0.0271 -0.0013 -0.0032 0.0027 0.0065  
Z 0.0266 0.0261 -0.0040 -0.0012 0.0009 0.0007

AT.118 H X -0.0250 0.0239 -0.0031 0.0023 -0.0001 0.0027  
Y 0.0251 -0.0271 0.0013 -0.0032 0.0027 -0.0065  
Z 0.0266 -0.0261 0.0040 -0.0012 0.0009 -0.0007

AT.119 H X -0.0499 -0.0529 0.0068 0.0018 -0.0061 -0.0027  
Y -0.0082 -0.0102 0.0035 0.0012 -0.0028 -0.0060

Z -0.0213 -0.0211 0.0006 0.0003 -0.0007 0.0038  
AT. 120 H X -0.0499 0.0529 -0.0068 0.0018 -0.0061 0.0027  
Y -0.0082 0.0102 -0.0035 0.0012 -0.0028 0.0060  
Z -0.0213 0.0211 -0.0006 0.0003 -0.0007 -0.0038  
AT. 121 C X 0.0008 -0.0005 0.0007 0.0025 -0.0012 0.0002  
Y 0.0020 -0.0002 0.0018 0.0011 -0.0014 0.0018  
Z 0.0015 0.0016 -0.0004 0.0022 0.0000 -0.0007  
AT. 122 C X 0.0008 0.0005 -0.0007 0.0025 -0.0012 -0.0002  
Y 0.0020 0.0002 -0.0018 0.0011 -0.0014 -0.0018  
Z 0.0015 -0.0016 0.0004 0.0022 0.0000 0.0007  
AT. 123 H X -0.0040 0.0183 -0.0135 -0.0293 0.0205 -0.0110  
Y -0.0122 0.0012 -0.0085 -0.0142 0.0095 -0.0079  
Z 0.0142 0.0032 0.0074 0.0108 -0.0068 0.0071  
AT. 124 H X -0.0040 -0.0183 0.0135 -0.0293 0.0205 0.0110  
Y -0.0122 -0.0012 0.0085 -0.0142 0.0095 0.0079  
Z 0.0142 -0.0032 -0.0074 0.0108 -0.0068 -0.0071  
AT. 125 H X -0.0081 -0.0064 -0.0003 -0.0071 0.0008 0.0007  
Y -0.0144 0.0088 -0.0144 -0.0292 0.0188 -0.0132  
Z -0.0171 -0.0014 -0.0092 -0.0237 0.0120 -0.0072  
AT. 126 H X -0.0081 0.0064 0.0003 -0.0071 0.0008 -0.0007  
Y -0.0144 -0.0088 0.0144 -0.0292 0.0188 0.0132  
Z -0.0171 0.0014 0.0092 -0.0237 0.0120 0.0072  
AT. 127 C X 0.0028 0.0020 0.0005 0.0023 -0.0007 0.0019  
Y -0.0002 -0.0019 0.0000 0.0058 -0.0021 -0.0002  
Z 0.0010 0.0015 0.0005 -0.0044 0.0013 0.0009  
AT. 128 C X 0.0028 -0.0020 -0.0005 0.0023 -0.0007 -0.0019  
Y -0.0002 0.0019 -0.0000 0.0058 -0.0021 0.0002  
Z 0.0010 -0.0015 -0.0005 -0.0044 0.0013 -0.0009  
AT. 129 C X -0.0023 -0.0020 0.0001 -0.0006 0.0002 -0.0027  
Y -0.0005 0.0001 -0.0006 -0.0005 0.0004 -0.0004  
Z -0.0023 -0.0018 -0.0011 0.0019 -0.0006 -0.0016  
AT. 130 C X -0.0023 0.0020 -0.0001 -0.0006 0.0002 0.0027

Y -0.0005 -0.0001 0.0006 -0.0005 0.0004 0.0004  
Z -0.0023 0.0018 0.0011 0.0019 -0.0006 0.0016  
AT. 131 H X 0.0105 0.0090 -0.0013 0.0001 0.0005 0.0108  
Y -0.0027 -0.0049 0.0049 0.0010 -0.0007 -0.0071  
Z 0.0138 0.0109 -0.0003 0.0027 -0.0003 0.0133  
AT. 132 H X 0.0105 -0.0090 0.0013 0.0001 0.0005 -0.0108  
Y -0.0027 0.0049 -0.0049 0.0010 -0.0007 0.0071  
Z 0.0138 -0.0109 0.0003 0.0027 -0.0003 -0.0133  
AT. 133 H X 0.0106 0.0104 -0.0051 0.0054 -0.0022 0.0167  
Y 0.0052 0.0055 0.0013 -0.0047 0.0006 0.0061  
Z 0.0009 0.0015 0.0042 -0.0085 0.0014 -0.0006  
AT. 134 H X 0.0106 -0.0104 0.0051 0.0054 -0.0022 -0.0167  
Y 0.0052 -0.0055 -0.0013 -0.0047 0.0006 -0.0061  
Z 0.0009 -0.0015 -0.0042 -0.0085 0.0014 0.0006  
AT. 135 C X -0.0012 -0.0008 -0.0004 -0.0011 -0.0000 0.0020  
Y -0.0011 -0.0010 -0.0011 0.0009 -0.0009 0.0054  
Z -0.0027 -0.0029 0.0000 -0.0017 -0.0005 0.0043  
AT. 136 C X -0.0012 0.0008 0.0004 -0.0011 -0.0000 -0.0020  
Y -0.0011 0.0010 0.0011 0.0009 -0.0009 -0.0054  
Z -0.0027 0.0029 -0.0000 -0.0017 -0.0005 -0.0043  
AT. 137 H X 0.0059 0.0032 0.0111 -0.0097 0.0068 -0.0486  
Y 0.0251 0.0243 0.0048 0.0123 0.0061 -0.0535  
Z 0.0383 0.0378 0.0051 0.0216 0.0081 -0.0731  
AT. 138 H X 0.0059 -0.0032 -0.0111 -0.0097 0.0068 0.0486  
Y 0.0251 -0.0243 -0.0048 0.0123 0.0061 0.0535  
Z 0.0383 -0.0378 -0.0051 0.0216 0.0081 0.0731  
AT. 139 H X 0.0107 0.0102 -0.0028 0.0137 -0.0007 -0.0033  
Y 0.0167 0.0147 0.0148 -0.0092 0.0115 -0.0792  
Z -0.0209 -0.0196 -0.0012 -0.0166 -0.0027 0.0319  
AT. 140 H X 0.0107 -0.0102 0.0028 0.0137 -0.0007 0.0033  
Y 0.0167 -0.0147 -0.0148 -0.0092 0.0115 0.0792  
Z -0.0209 0.0196 0.0012 -0.0166 -0.0027 -0.0319

AT. 141 H X 0.0074 0.0076 -0.0081 0.0184 -0.0044 0.0230  
Y -0.0255 -0.0254 -0.0023 -0.0162 -0.0046 0.0460  
Z 0.0281 0.0280 -0.0015 0.0250 0.0021 -0.0336

AT. 142 H X 0.0074 -0.0076 0.0081 0.0184 -0.0044 -0.0230  
Y -0.0255 0.0254 0.0023 -0.0162 -0.0046 -0.0460  
Z 0.0281 -0.0280 0.0015 0.0250 0.0021 0.0336

AT. 143 C X 0.0012 0.0013 0.0002 0.0012 -0.0003 0.0006  
Y -0.0020 -0.0030 0.0001 0.0049 -0.0023 0.0002  
Z -0.0016 -0.0006 0.0001 -0.0047 0.0014 -0.0009

AT. 144 C X 0.0012 -0.0013 -0.0002 0.0012 -0.0003 -0.0006  
Y -0.0020 0.0030 -0.0001 0.0049 -0.0023 -0.0002  
Z -0.0016 0.0006 -0.0001 -0.0047 0.0014 0.0009

AT. 145 H X 0.0186 0.0259 -0.0014 -0.0322 0.0164 0.0006  
Y -0.0041 0.0100 0.0002 -0.0723 0.0261 -0.0076  
Z 0.0066 -0.0061 -0.0003 0.0676 -0.0238 0.0075

AT. 146 H X 0.0186 -0.0259 0.0014 -0.0322 0.0164 -0.0006  
Y -0.0041 -0.0100 -0.0002 -0.0723 0.0261 0.0076  
Z 0.0066 0.0061 0.0003 0.0676 -0.0238 -0.0075

AT. 147 H X -0.0161 -0.0159 -0.0008 -0.0080 0.0001 -0.0052  
Y 0.0310 0.0445 0.0001 -0.0559 0.0271 0.0030  
Z -0.0076 0.0008 -0.0013 -0.0472 0.0167 -0.0070

AT. 148 H X -0.0161 0.0159 0.0008 -0.0080 0.0001 0.0052  
Y 0.0310 -0.0445 -0.0001 -0.0559 0.0271 -0.0030  
Z -0.0076 -0.0008 0.0013 -0.0472 0.0167 0.0070

AT. 149 H X -0.0305 -0.0367 -0.0015 0.0145 -0.0106 -0.0086  
Y 0.0026 -0.0068 -0.0010 0.0436 -0.0152 0.0036  
Z 0.0219 0.0107 -0.0008 0.0589 -0.0172 0.0100

AT. 150 H X -0.0305 0.0367 0.0015 0.0145 -0.0106 0.0086  
Y 0.0026 0.0068 0.0010 0.0436 -0.0152 -0.0036  
Z 0.0219 -0.0107 0.0008 0.0589 -0.0172 -0.0100

AT. 151 C X -0.0008 -0.0002 -0.0011 -0.0000 0.0005 -0.0019  
Y -0.0005 -0.0001 -0.0003 -0.0010 0.0005 -0.0014

Z 0.0077 0.0069 0.0009 0.0026 -0.0000 0.0033  
AT. 152 C X -0.0008 0.0002 0.0011 -0.0000 0.0005 0.0019  
Y -0.0005 0.0001 0.0003 -0.0010 0.0005 0.0014  
Z 0.0077 -0.0069 -0.0009 0.0026 -0.0000 -0.0033  
AT. 153 H X 0.0141 0.0138 0.0039 -0.0053 0.0020 0.0149  
Y -0.0324 -0.0295 -0.0037 -0.0065 -0.0008 -0.0175  
Z -0.0522 -0.0484 -0.0069 -0.0048 -0.0026 -0.0321  
AT. 154 H X 0.0141 -0.0138 -0.0039 -0.0053 0.0020 -0.0149  
Y -0.0324 0.0295 0.0037 -0.0065 -0.0008 0.0175  
Z -0.0522 0.0484 0.0069 -0.0048 -0.0026 0.0321  
AT. 155 H X -0.0072 -0.0088 0.0018 0.0009 -0.0020 -0.0085  
Y 0.0412 0.0371 0.0063 0.0072 0.0006 0.0253  
Z -0.0413 -0.0381 -0.0052 -0.0055 -0.0014 -0.0284  
AT. 156 H X -0.0072 0.0088 -0.0018 0.0009 -0.0020 0.0085  
Y 0.0412 -0.0371 -0.0063 0.0072 0.0006 -0.0253  
Z -0.0413 0.0381 0.0052 -0.0055 -0.0014 0.0284  
AT. 157 O X 0.0011 0.0008 0.0011 -0.0012 0.0005 -0.0008  
Y 0.0020 0.0014 0.0020 -0.0020 0.0009 -0.0013  
Z -0.0017 -0.0008 -0.0019 0.0011 -0.0005 0.0015  
AT. 158 O X 0.0011 -0.0008 -0.0011 -0.0012 0.0005 0.0008  
Y 0.0020 -0.0014 -0.0020 -0.0020 0.0009 0.0013  
Z -0.0017 0.0008 0.0019 0.0011 -0.0005 -0.0015  
AT. 159 O X 0.0026 0.0014 0.0030 -0.0019 0.0009 -0.0023  
Y -0.0012 -0.0008 -0.0012 0.0011 -0.0005 0.0009  
Z 0.0001 -0.0002 0.0003 0.0003 -0.0001 -0.0003  
AT. 160 O X 0.0026 -0.0014 -0.0030 -0.0019 0.0009 0.0023  
Y -0.0012 0.0008 0.0012 0.0011 -0.0005 -0.0009  
Z 0.0001 0.0002 -0.0003 0.0003 -0.0001 0.0003  
AT. 161 H X -0.0326 -0.0235 -0.0319 0.0344 -0.0159 0.0198  
Y -0.0093 -0.0067 -0.0090 0.0099 -0.0044 0.0054  
Z 0.0162 0.0118 0.0149 -0.0181 0.0073 -0.0082  
AT. 162 H X -0.0326 0.0235 0.0319 0.0344 -0.0159 -0.0198

Y -0.0093 0.0067 0.0090 0.0099 -0.0044 -0.0054  
Z 0.0162 -0.0118 -0.0149 -0.0181 0.0073 0.0082  
AT.163 H X -0.0337 -0.0156 -0.0401 0.0191 -0.0106 0.0341  
Y -0.0036 -0.0010 -0.0035 0.0066 -0.0024 0.0015  
Z 0.0117 0.0055 0.0145 -0.0057 0.0035 -0.0126  
AT.164 H X -0.0337 0.0156 0.0401 0.0191 -0.0106 -0.0341  
Y -0.0036 0.0010 0.0035 0.0066 -0.0024 -0.0015  
Z 0.0117 -0.0055 -0.0145 -0.0057 0.0035 0.0126  
AT.165 O X -0.0001 0.0001 -0.0000 -0.0006 -0.0004 -0.0005  
Y -0.0009 0.0006 0.0004 0.0001 0.0007 0.0006  
Z 0.0013 -0.0008 -0.0006 0.0000 -0.0009 -0.0008  
AT.166 O X -0.0001 -0.0001 0.0000 -0.0006 -0.0004 0.0005  
Y -0.0009 -0.0006 -0.0004 0.0001 0.0007 -0.0006  
Z 0.0013 0.0008 0.0006 0.0000 -0.0009 0.0008  
AT.167 H X 0.0034 -0.0020 -0.0014 0.0033 0.0002 0.0016  
Y -0.0017 -0.0000 0.0006 -0.0006 0.0006 -0.0005  
Z -0.0084 0.0053 0.0025 -0.0102 -0.0036 -0.0062  
AT.168 H X 0.0034 0.0020 0.0014 0.0033 0.0002 -0.0016  
Y -0.0017 0.0000 -0.0006 -0.0006 0.0006 0.0005  
Z -0.0084 -0.0053 -0.0025 -0.0102 -0.0036 0.0062  
AT.169 O X -0.0006 0.0005 0.0003 0.0004 0.0008 0.0008  
Y 0.0015 -0.0010 -0.0009 -0.0002 -0.0014 -0.0012  
Z 0.0009 -0.0007 -0.0004 0.0001 -0.0005 -0.0004  
AT.170 O X -0.0006 -0.0005 -0.0003 0.0004 0.0008 -0.0008  
Y 0.0015 0.0010 0.0009 -0.0002 -0.0014 0.0012  
Z 0.0009 0.0007 0.0004 0.0001 -0.0005 0.0004  
AT.171 H X 0.0102 -0.0082 -0.0033 -0.0010 -0.0064 -0.0070  
Y -0.0101 0.0061 0.0067 0.0031 0.0117 0.0107  
Z -0.0296 0.0204 0.0159 0.0074 0.0290 0.0275  
AT.172 H X 0.0102 0.0082 0.0033 -0.0010 -0.0064 0.0070  
Y -0.0101 -0.0061 -0.0067 0.0031 0.0117 -0.0107  
Z -0.0296 -0.0204 -0.0159 0.0074 0.0290 -0.0275



FREQ(CM\*\*-1) 1519.17 1520.78 1521.01 1521.89 1522.17 1522.64

AT. 1 I X -0.0000 -0.0000 -0.0000 0.0000 -0.0000 -0.0000

Y -0.0000 -0.0000 -0.0000 0.0000 -0.0000 -0.0000

Z -0.0000 0.0000 0.0000 0.0000 0.0000 -0.0000

AT. 2 I X -0.0000 -0.0000 0.0000 -0.0000 -0.0000 0.0000

Y -0.0000 -0.0000 0.0000 -0.0000 -0.0000 0.0000

Z -0.0000 0.0000 -0.0000 -0.0000 0.0000 0.0000

AT. 3 I X 0.0000 -0.0000 0.0000 0.0000 0.0000 -0.0000

Y -0.0000 -0.0000 -0.0000 0.0000 0.0000 -0.0000

Z 0.0000 -0.0000 0.0000 0.0000 0.0000 -0.0000

AT. 4 I X 0.0000 -0.0000 -0.0000 -0.0000 0.0000 0.0000

Y -0.0000 -0.0000 0.0000 -0.0000 0.0000 0.0000

Z 0.0000 -0.0000 -0.0000 -0.0000 0.0000 0.0000

AT. 5 O X 0.0002 -0.0006 -0.0003 0.0007 -0.0003 -0.0003

Y -0.0001 0.0002 0.0002 -0.0006 0.0006 0.0001

Z -0.0002 0.0004 0.0003 -0.0006 0.0003 0.0001

AT. 6 O X 0.0002 -0.0006 0.0003 -0.0007 -0.0003 0.0003

Y -0.0001 0.0002 -0.0002 0.0006 0.0006 -0.0001

Z -0.0002 0.0004 -0.0003 0.0006 0.0003 -0.0001

AT. 7 O X -0.0006 -0.0022 0.0010 0.0024 0.0002 0.0012

Y 0.0007 0.0020 -0.0007 -0.0022 0.0000 -0.0008

Z -0.0002 -0.0003 0.0001 0.0004 -0.0000 -0.0001

AT. 8 O X -0.0006 -0.0022 -0.0010 -0.0024 0.0002 -0.0012

Y 0.0007 0.0020 0.0007 0.0022 0.0000 0.0008

Z -0.0002 -0.0003 -0.0001 -0.0004 -0.0000 0.0001

AT. 9 N X 0.0004 0.0002 0.0001 -0.0001 -0.0012 0.0006

Y -0.0001 0.0007 -0.0000 -0.0011 0.0014 -0.0010

Z -0.0005 -0.0019 -0.0003 -0.0002 0.0014 -0.0022

AT. 10 N X 0.0004 0.0002 -0.0001 0.0001 -0.0012 -0.0006

Y -0.0001 0.0007 0.0000 0.0011 0.0014 0.0010

Z -0.0005 -0.0019 0.0003 0.0002 0.0014 0.0022  
AT. 11 N X 0.0003 0.0010 0.0004 0.0000 -0.0009 0.0017  
Y -0.0014 -0.0015 0.0004 0.0010 0.0011 0.0016  
Z 0.0033 0.0044 -0.0011 -0.0049 -0.0002 -0.0053  
AT. 12 N X 0.0003 0.0010 -0.0004 -0.0000 -0.0009 -0.0017  
Y -0.0014 -0.0015 -0.0004 -0.0010 0.0011 -0.0016  
Z 0.0033 0.0044 0.0011 0.0049 -0.0002 0.0053  
AT. 13 C X -0.0004 0.0008 0.0004 -0.0011 0.0010 0.0003  
Y -0.0001 -0.0010 -0.0005 0.0014 -0.0010 -0.0006  
Z 0.0006 0.0011 -0.0002 0.0007 -0.0010 0.0013  
AT. 14 C X -0.0004 0.0008 -0.0004 0.0011 0.0010 -0.0003  
Y -0.0001 -0.0010 0.0005 -0.0014 -0.0010 0.0006  
Z 0.0006 0.0011 0.0002 -0.0007 -0.0010 -0.0013  
AT. 15 C X 0.0004 0.0003 0.0002 -0.0005 -0.0004 0.0004  
Y -0.0011 -0.0017 -0.0008 0.0023 0.0004 -0.0015  
Z 0.0003 0.0004 0.0003 -0.0008 -0.0001 0.0003  
AT. 16 C X 0.0004 0.0003 -0.0002 0.0005 -0.0004 -0.0004  
Y -0.0011 -0.0017 0.0008 -0.0023 0.0004 0.0015  
Z 0.0003 0.0004 -0.0003 0.0008 -0.0001 -0.0003  
AT. 17 H X 0.0009 0.0021 0.0013 -0.0026 0.0009 0.0019  
Y 0.0054 0.0109 0.0053 -0.0143 -0.0010 0.0084  
Z -0.0075 -0.0144 -0.0069 0.0190 0.0020 -0.0112  
AT. 18 H X 0.0009 0.0021 -0.0013 0.0026 0.0009 -0.0019  
Y 0.0054 0.0109 -0.0053 0.0143 -0.0010 -0.0084  
Z -0.0075 -0.0144 0.0069 -0.0190 0.0020 0.0112  
AT. 19 H X -0.0019 -0.0036 -0.0015 0.0036 0.0012 -0.0037  
Y 0.0086 0.0151 0.0073 -0.0194 -0.0018 0.0132  
Z 0.0029 0.0049 0.0025 -0.0070 -0.0003 0.0040  
AT. 20 H X -0.0019 -0.0036 0.0015 -0.0036 0.0012 0.0037  
Y 0.0086 0.0151 -0.0073 0.0194 -0.0018 -0.0132  
Z 0.0029 0.0049 -0.0025 0.0070 -0.0003 -0.0040  
AT. 21 C X 0.0018 0.0044 -0.0017 -0.0049 0.0002 -0.0030

Y 0.0002 -0.0016 0.0008 0.0019 0.0000 -0.0006  
Z -0.0032 -0.0043 0.0008 0.0044 0.0002 0.0047  
AT. 22 C X 0.0018 0.0044 0.0017 0.0049 0.0002 0.0030  
Y 0.0002 -0.0016 -0.0008 -0.0019 0.0000 0.0006  
Z -0.0032 -0.0043 -0.0008 -0.0044 0.0002 -0.0047  
AT. 23 C X -0.0005 -0.0006 0.0003 0.0007 -0.0004 0.0014  
Y -0.0000 -0.0006 -0.0000 0.0002 0.0006 -0.0008  
Z 0.0006 -0.0005 -0.0002 -0.0000 0.0012 -0.0027  
AT. 24 C X -0.0005 -0.0006 -0.0003 -0.0007 -0.0004 -0.0014  
Y -0.0000 -0.0006 0.0000 -0.0002 0.0006 0.0008  
Z 0.0006 -0.0005 0.0002 0.0000 0.0012 0.0027  
AT. 25 H X 0.0005 0.0002 -0.0003 -0.0002 -0.0001 -0.0017  
Y 0.0002 -0.0020 -0.0002 0.0010 0.0019 -0.0034  
Z 0.0007 0.0166 0.0001 -0.0107 -0.0121 0.0193  
AT. 26 H X 0.0005 0.0002 0.0003 0.0002 -0.0001 0.0017  
Y 0.0002 -0.0020 0.0002 -0.0010 0.0019 0.0034  
Z 0.0007 0.0166 -0.0001 0.0107 -0.0121 -0.0193  
AT. 27 H X -0.0009 -0.0025 -0.0000 0.0024 0.0020 -0.0005  
Y 0.0010 0.0129 -0.0005 -0.0082 -0.0098 0.0128  
Z 0.0013 0.0069 -0.0004 -0.0049 -0.0047 0.0046  
AT. 28 H X -0.0009 -0.0025 0.0000 -0.0024 0.0020 0.0005  
Y 0.0010 0.0129 0.0005 0.0082 -0.0098 -0.0128  
Z 0.0013 0.0069 0.0004 0.0049 -0.0047 -0.0046  
AT. 29 C X -0.0002 -0.0008 -0.0000 0.0020 -0.0016 0.0015  
Y -0.0024 -0.0019 -0.0007 -0.0018 0.0073 -0.0060  
Z -0.0009 -0.0005 -0.0001 0.0004 0.0020 -0.0004  
AT. 30 C X -0.0002 -0.0008 0.0000 -0.0020 -0.0016 -0.0015  
Y -0.0024 -0.0019 0.0007 0.0018 0.0073 0.0060  
Z -0.0009 -0.0005 0.0001 -0.0004 0.0020 0.0004  
AT. 31 H X -0.0089 -0.0041 -0.0042 -0.0137 0.0311 -0.0343  
Y 0.0115 0.0046 0.0046 0.0165 -0.0435 0.0362  
Z 0.0140 0.0063 0.0047 0.0176 -0.0520 0.0377

AT. 32 H X -0.0089 -0.0041 0.0042 0.0137 0.0311 0.0343  
Y 0.0115 0.0046 -0.0046 -0.0165 -0.0435 -0.0362  
Z 0.0140 0.0063 -0.0047 -0.0176 -0.0520 -0.0377

AT. 33 H X 0.0039 0.0044 0.0027 -0.0005 -0.0074 0.0106  
Y 0.0189 0.0109 0.0077 0.0245 -0.0673 0.0600  
Z -0.0072 -0.0026 -0.0019 -0.0119 0.0287 -0.0219

AT. 34 H X 0.0039 0.0044 -0.0027 0.0005 -0.0074 -0.0106  
Y 0.0189 0.0109 -0.0077 -0.0245 -0.0673 -0.0600  
Z -0.0072 -0.0026 0.0019 0.0119 0.0287 0.0219

AT. 35 C X 0.0013 0.0032 0.0010 -0.0030 0.0014 0.0019  
Y 0.0007 0.0030 -0.0005 -0.0051 0.0044 -0.0037  
Z 0.0012 -0.0002 -0.0012 -0.0006 -0.0028 -0.0037

AT. 36 C X 0.0013 0.0032 -0.0010 0.0030 0.0014 -0.0019  
Y 0.0007 0.0030 0.0005 0.0051 0.0044 0.0037  
Z 0.0012 -0.0002 0.0012 0.0006 -0.0028 0.0037

AT. 37 C X 0.0020 0.0072 0.0002 -0.0039 -0.0033 0.0046  
Y 0.0003 -0.0016 -0.0002 0.0017 -0.0021 -0.0003  
Z -0.0013 -0.0011 0.0004 0.0010 0.0017 0.0013

AT. 38 C X 0.0020 0.0072 -0.0002 0.0039 -0.0033 -0.0046  
Y 0.0003 -0.0016 0.0002 -0.0017 -0.0021 0.0003  
Z -0.0013 -0.0011 -0.0004 -0.0010 0.0017 -0.0013

AT. 39 H X -0.0146 -0.0546 -0.0036 0.0302 0.0196 -0.0382  
Y -0.0072 -0.0145 -0.0013 0.0068 0.0090 -0.0104  
Z -0.0089 -0.0361 -0.0018 0.0209 0.0120 -0.0230

AT. 40 H X -0.0146 -0.0546 0.0036 -0.0302 0.0196 0.0382  
Y -0.0072 -0.0145 0.0013 -0.0068 0.0090 0.0104  
Z -0.0089 -0.0361 0.0018 -0.0209 0.0120 0.0230

AT. 41 H X -0.0169 -0.0545 -0.0022 0.0324 0.0181 -0.0292  
Y 0.0061 0.0269 0.0011 -0.0148 -0.0047 0.0148  
Z 0.0130 0.0372 0.0017 -0.0222 -0.0172 0.0216

AT. 42 H X -0.0169 -0.0545 0.0022 -0.0324 0.0181 0.0292  
Y 0.0061 0.0269 -0.0011 0.0148 -0.0047 -0.0148

Z 0.0130 0.0372 -0.0017 0.0222 -0.0172 -0.0216  
AT. 43 C X 0.0001 -0.0002 -0.0003 0.0002 -0.0009 -0.0003  
Y -0.0001 0.0006 0.0012 -0.0034 0.0048 -0.0013  
Z -0.0010 -0.0006 0.0003 0.0005 0.0007 0.0015  
AT. 44 C X 0.0001 -0.0002 0.0003 -0.0002 -0.0009 0.0003  
Y -0.0001 0.0006 -0.0012 0.0034 0.0048 0.0013  
Z -0.0010 -0.0006 -0.0003 -0.0005 0.0007 -0.0015  
AT. 45 H X -0.0024 0.0038 0.0055 -0.0215 0.0283 -0.0089  
Y 0.0032 0.0011 -0.0061 0.0177 -0.0301 0.0088  
Z -0.0018 -0.0032 0.0031 -0.0040 0.0123 -0.0021  
AT. 46 H X -0.0024 0.0038 -0.0055 0.0215 0.0283 0.0089  
Y 0.0032 0.0011 0.0061 -0.0177 -0.0301 -0.0088  
Z -0.0018 -0.0032 -0.0031 0.0040 0.0123 0.0021  
AT. 47 H X -0.0003 -0.0024 -0.0023 0.0110 -0.0094 0.0052  
Y 0.0056 0.0013 -0.0076 0.0220 -0.0349 0.0076  
Z 0.0056 0.0033 -0.0060 0.0112 -0.0277 0.0028  
AT. 48 H X -0.0003 -0.0024 0.0023 -0.0110 -0.0094 -0.0052  
Y 0.0056 0.0013 0.0076 -0.0220 -0.0349 -0.0076  
Z 0.0056 0.0033 0.0060 -0.0112 -0.0277 -0.0028  
AT. 49 C X 0.0005 -0.0011 -0.0009 0.0029 0.0001 -0.0012  
Y -0.0010 -0.0027 -0.0006 0.0017 -0.0013 0.0004  
Z 0.0012 0.0006 0.0000 0.0004 0.0003 -0.0012  
AT. 50 C X 0.0005 -0.0011 0.0009 -0.0029 0.0001 0.0012  
Y -0.0010 -0.0027 0.0006 -0.0017 -0.0013 -0.0004  
Z 0.0012 0.0006 -0.0000 -0.0004 0.0003 0.0012  
AT. 51 C X 0.0002 0.0041 0.0015 -0.0052 -0.0000 0.0022  
Y -0.0000 -0.0003 -0.0001 0.0008 -0.0003 0.0004  
Z -0.0002 -0.0007 -0.0004 0.0018 -0.0007 0.0006  
AT. 52 C X 0.0002 0.0041 -0.0015 0.0052 -0.0000 -0.0022  
Y -0.0000 -0.0003 0.0001 -0.0008 -0.0003 -0.0004  
Z -0.0002 -0.0007 0.0004 -0.0018 -0.0007 -0.0006  
AT. 53 H X -0.0028 -0.0194 -0.0073 0.0227 0.0034 -0.0115

Y -0.0028 -0.0172 -0.0053 0.0160 0.0018 -0.0096  
Z 0.0019 0.0192 0.0083 -0.0273 -0.0036 0.0117  
AT. 54 H X -0.0028 -0.0194 0.0073 -0.0227 0.0034 0.0115  
Y -0.0028 -0.0172 0.0053 -0.0160 0.0018 0.0096  
Z 0.0019 0.0192 -0.0083 0.0273 -0.0036 -0.0117  
AT. 55 H X -0.0040 -0.0311 -0.0107 0.0348 0.0050 -0.0183  
Y 0.0034 0.0200 0.0067 -0.0208 -0.0008 0.0077  
Z 0.0017 0.0014 0.0002 0.0014 0.0015 -0.0036  
AT. 56 H X -0.0040 -0.0311 0.0107 -0.0348 0.0050 0.0183  
Y 0.0034 0.0200 -0.0067 0.0208 -0.0008 -0.0077  
Z 0.0017 0.0014 -0.0002 -0.0014 0.0015 0.0036  
AT. 57 C X 0.0010 0.0031 0.0006 -0.0032 0.0033 0.0001  
Y 0.0017 0.0030 -0.0006 -0.0044 0.0029 -0.0035  
Z 0.0004 -0.0013 -0.0018 0.0001 -0.0022 -0.0046  
AT. 58 C X 0.0010 0.0031 -0.0006 0.0032 0.0033 -0.0001  
Y 0.0017 0.0030 0.0006 0.0044 0.0029 0.0035  
Z 0.0004 -0.0013 0.0018 -0.0001 -0.0022 0.0046  
AT. 59 H X 0.0095 0.0322 0.0057 -0.0397 0.0419 -0.0040  
Y -0.0130 -0.0140 0.0125 0.0305 -0.0096 0.0476  
Z -0.0146 -0.0032 0.0219 0.0230 0.0100 0.0690  
AT. 60 H X 0.0095 0.0322 -0.0057 0.0397 0.0419 0.0040  
Y -0.0130 -0.0140 -0.0125 -0.0305 -0.0096 -0.0476  
Z -0.0146 -0.0032 -0.0219 -0.0230 0.0100 -0.0690  
AT. 61 H X -0.0137 -0.0412 -0.0073 0.0467 -0.0448 0.0016  
Y -0.0236 -0.0416 0.0093 0.0636 -0.0399 0.0550  
Z 0.0012 -0.0133 -0.0120 0.0056 -0.0175 -0.0300  
AT. 62 H X -0.0137 -0.0412 0.0073 -0.0467 -0.0448 -0.0016  
Y -0.0236 -0.0416 -0.0093 -0.0636 -0.0399 -0.0550  
Z 0.0012 -0.0133 0.0120 -0.0056 -0.0175 0.0300  
AT. 63 H X -0.0126 -0.0412 -0.0095 0.0452 -0.0446 -0.0049  
Y 0.0114 0.0082 -0.0122 -0.0210 -0.0028 -0.0414  
Z 0.0039 0.0346 0.0184 -0.0290 0.0466 0.0352

AT. 64 H X -0.0126 -0.0412 0.0095 -0.0452 -0.0446 0.0049  
Y 0.0114 0.0082 0.0122 0.0210 -0.0028 0.0414  
Z 0.0039 0.0346 -0.0184 0.0290 0.0466 -0.0352

AT. 65 C X 0.0012 -0.0005 -0.0007 0.0023 0.0007 -0.0010  
Y -0.0006 -0.0021 -0.0011 0.0021 -0.0011 -0.0007  
Z 0.0008 0.0006 -0.0005 0.0009 0.0015 -0.0018

AT. 66 C X 0.0012 -0.0005 0.0007 -0.0023 0.0007 0.0010  
Y -0.0006 -0.0021 0.0011 -0.0021 -0.0011 0.0007  
Z 0.0008 0.0006 0.0005 -0.0009 0.0015 0.0018

AT. 67 H X 0.0014 -0.0172 -0.0112 0.0248 -0.0017 -0.0152  
Y 0.0143 0.0259 0.0062 -0.0120 0.0213 -0.0080  
Z -0.0133 -0.0103 0.0025 -0.0067 -0.0173 0.0180

AT. 68 H X 0.0014 -0.0172 0.0112 -0.0248 -0.0017 0.0152  
Y 0.0143 0.0259 -0.0062 0.0120 0.0213 0.0080  
Z -0.0133 -0.0103 -0.0025 0.0067 -0.0173 -0.0180

AT. 69 H X -0.0051 0.0167 0.0114 -0.0291 0.0005 0.0140  
Y 0.0007 0.0283 0.0151 -0.0361 0.0080 0.0125  
Z 0.0136 0.0114 0.0001 0.0046 0.0140 -0.0099

AT. 70 H X -0.0051 0.0167 -0.0114 0.0291 0.0005 -0.0140  
Y 0.0007 0.0283 -0.0151 0.0361 0.0080 -0.0125  
Z 0.0136 0.0114 -0.0001 -0.0046 0.0140 0.0099

AT. 71 H X -0.0137 0.0122 0.0134 -0.0365 -0.0102 0.0229  
Y -0.0044 -0.0164 -0.0050 0.0136 -0.0096 0.0026  
Z -0.0162 -0.0109 0.0042 -0.0117 -0.0198 0.0212

AT. 72 H X -0.0137 0.0122 -0.0134 0.0365 -0.0102 -0.0229  
Y -0.0044 -0.0164 0.0050 -0.0136 -0.0096 -0.0026  
Z -0.0162 -0.0109 -0.0042 0.0117 -0.0198 -0.0212

AT. 73 C X -0.0005 -0.0008 -0.0000 -0.0003 -0.0005 -0.0009  
Y -0.0000 -0.0003 0.0001 0.0011 0.0003 0.0005  
Z 0.0020 0.0019 0.0015 -0.0009 -0.0059 0.0050

AT. 74 C X -0.0005 -0.0008 0.0000 0.0003 -0.0005 0.0009  
Y -0.0000 -0.0003 -0.0001 -0.0011 0.0003 -0.0005

Z 0.0020 0.0019 -0.0015 0.0009 -0.0059 -0.0050  
AT. 75 H X -0.0095 -0.0115 -0.0053 0.0121 0.0187 -0.0096  
Y -0.0076 -0.0023 -0.0034 -0.0032 0.0249 -0.0151  
Z -0.0156 -0.0093 -0.0072 0.0030 0.0430 -0.0231  
AT. 76 H X -0.0095 -0.0115 0.0053 -0.0121 0.0187 0.0096  
Y -0.0076 -0.0023 0.0034 0.0032 0.0249 0.0151  
Z -0.0156 -0.0093 0.0072 -0.0030 0.0430 0.0231  
AT. 77 H X 0.0085 0.0116 0.0037 -0.0093 -0.0114 0.0096  
Y 0.0108 0.0052 0.0051 -0.0008 -0.0343 0.0171  
Z -0.0162 -0.0142 -0.0067 0.0088 0.0369 -0.0203  
AT. 78 H X 0.0085 0.0116 -0.0037 0.0093 -0.0114 -0.0096  
Y 0.0108 0.0052 -0.0051 0.0008 -0.0343 -0.0171  
Z -0.0162 -0.0142 0.0067 -0.0088 0.0369 0.0203  
AT. 79 I X -0.0000 0.0000 0.0000 -0.0000 -0.0000 -0.0000  
Y 0.0000 -0.0000 -0.0000 -0.0000 -0.0000 0.0000  
Z -0.0000 -0.0000 0.0000 -0.0000 0.0000 -0.0000  
AT. 80 I X -0.0000 0.0000 -0.0000 0.0000 -0.0000 0.0000  
Y 0.0000 -0.0000 0.0000 0.0000 -0.0000 -0.0000  
Z -0.0000 -0.0000 -0.0000 0.0000 0.0000 0.0000  
AT. 81 I X 0.0000 -0.0000 0.0000 0.0000 0.0000 -0.0000  
Y -0.0000 0.0000 -0.0000 -0.0000 0.0000 0.0000  
Z -0.0000 0.0000 -0.0000 -0.0000 0.0000 0.0000  
AT. 82 I X 0.0000 -0.0000 -0.0000 -0.0000 0.0000 0.0000  
Y -0.0000 0.0000 0.0000 0.0000 0.0000 -0.0000  
Z -0.0000 0.0000 0.0000 0.0000 0.0000 -0.0000  
AT. 83 O X -0.0003 0.0002 -0.0004 0.0000 -0.0001 0.0001  
Y -0.0003 0.0001 -0.0000 0.0001 -0.0001 0.0000  
Z -0.0003 0.0002 -0.0002 0.0000 -0.0000 0.0000  
AT. 84 O X -0.0003 0.0002 0.0004 -0.0000 -0.0001 -0.0001  
Y -0.0003 0.0001 0.0000 -0.0001 -0.0001 -0.0000  
Z -0.0003 0.0002 0.0002 -0.0000 -0.0000 -0.0000  
AT. 85 O X -0.0012 -0.0010 0.0016 0.0019 -0.0004 -0.0013



Y -0.0006 -0.0007 0.0009 0.0012 -0.0002 -0.0008  
Z -0.0003 -0.0000 -0.0010 -0.0001 0.0001 0.0004  
AT. 86 O X -0.0012 -0.0010 -0.0016 -0.0019 -0.0004 0.0013  
Y -0.0006 -0.0007 -0.0009 -0.0012 -0.0002 0.0008  
Z -0.0003 -0.0000 0.0010 0.0001 0.0001 -0.0004  
AT. 87 N X -0.0004 0.0001 -0.0003 0.0003 0.0002 -0.0001  
Y -0.0008 0.0003 -0.0002 0.0003 -0.0000 -0.0002  
Z -0.0027 0.0010 0.0021 -0.0004 0.0002 -0.0003  
AT. 88 N X -0.0004 0.0001 0.0003 -0.0003 0.0002 0.0001  
Y -0.0008 0.0003 0.0002 -0.0003 -0.0000 0.0002  
Z -0.0027 0.0010 -0.0021 0.0004 0.0002 0.0003  
AT. 89 N X -0.0016 -0.0008 -0.0016 0.0008 -0.0004 0.0001  
Y 0.0026 0.0006 -0.0009 -0.0024 0.0004 0.0011  
Z -0.0063 -0.0027 0.0006 0.0062 -0.0015 -0.0022  
AT. 90 N X -0.0016 -0.0008 0.0016 -0.0008 -0.0004 -0.0001  
Y 0.0026 0.0006 0.0009 0.0024 0.0004 -0.0011  
Z -0.0063 -0.0027 -0.0006 -0.0062 -0.0015 0.0022  
AT. 91 C X 0.0001 -0.0002 0.0012 -0.0000 0.0003 -0.0002  
Y 0.0002 -0.0001 0.0000 -0.0002 0.0003 -0.0003  
Z 0.0026 -0.0010 -0.0017 0.0001 -0.0003 0.0002  
AT. 92 C X 0.0001 -0.0002 -0.0012 0.0000 0.0003 0.0002  
Y 0.0002 -0.0001 -0.0000 0.0002 0.0003 0.0003  
Z 0.0026 -0.0010 0.0017 -0.0001 -0.0003 -0.0002  
AT. 93 C X 0.0006 -0.0005 -0.0014 -0.0001 0.0004 0.0001  
Y 0.0008 -0.0007 -0.0016 0.0001 0.0004 0.0003  
Z -0.0009 0.0007 0.0014 0.0001 -0.0003 -0.0001  
AT. 94 C X 0.0006 -0.0005 0.0014 0.0001 0.0004 -0.0001  
Y 0.0008 -0.0007 0.0016 -0.0001 0.0004 -0.0003  
Z -0.0009 0.0007 -0.0014 -0.0001 -0.0003 0.0001  
AT. 95 H X 0.0007 -0.0001 0.0007 0.0015 -0.0010 0.0023  
Y -0.0047 0.0039 0.0078 -0.0012 -0.0019 -0.0022  
Z 0.0083 -0.0075 -0.0168 0.0003 0.0051 0.0015

AT. 96 H X 0.0007 -0.0001 -0.0007 -0.0015 -0.0010 -0.0023  
Y -0.0047 0.0039 -0.0078 0.0012 -0.0019 0.0022  
Z 0.0083 -0.0075 0.0168 -0.0003 0.0051 -0.0015

AT. 97 H X -0.0026 0.0029 0.0084 0.0003 -0.0032 -0.0007  
Y -0.0065 0.0057 0.0132 -0.0009 -0.0036 -0.0021  
Z -0.0015 0.0011 0.0018 -0.0002 -0.0002 -0.0004

AT. 98 H X -0.0026 0.0029 -0.0084 -0.0003 -0.0032 0.0007  
Y -0.0065 0.0057 -0.0132 0.0009 -0.0036 0.0021  
Z -0.0015 0.0011 -0.0018 0.0002 -0.0002 0.0004

AT. 99 C X 0.0041 0.0020 -0.0019 -0.0044 0.0013 0.0023  
Y -0.0023 0.0001 -0.0015 0.0009 -0.0004 0.0005  
Z 0.0061 0.0021 0.0005 -0.0051 0.0013 0.0014

AT. 100 C X 0.0041 0.0020 0.0019 0.0044 0.0013 -0.0023  
Y -0.0023 0.0001 0.0015 -0.0009 -0.0004 -0.0005  
Z 0.0061 0.0021 -0.0005 0.0051 0.0013 -0.0014

AT. 101 C X -0.0024 0.0005 -0.0008 0.0006 -0.0009 0.0003  
Y -0.0007 0.0007 -0.0007 -0.0005 -0.0003 0.0005  
Z -0.0034 0.0012 -0.0017 0.0003 -0.0011 0.0008

AT. 102 C X -0.0024 0.0005 0.0008 -0.0006 -0.0009 -0.0003  
Y -0.0007 0.0007 0.0007 0.0005 -0.0003 -0.0005  
Z -0.0034 0.0012 0.0017 -0.0003 -0.0011 -0.0008

AT. 103 H X 0.0028 0.0001 0.0016 -0.0016 0.0009 -0.0002  
Y -0.0035 0.0011 -0.0020 0.0005 -0.0012 0.0009  
Z 0.0230 -0.0154 0.0192 0.0066 0.0077 -0.0118

AT. 104 H X 0.0028 0.0001 -0.0016 0.0016 0.0009 0.0002  
Y -0.0035 0.0011 0.0020 -0.0005 -0.0012 -0.0009  
Z 0.0230 -0.0154 -0.0192 -0.0066 0.0077 0.0118

AT. 105 H X 0.0054 -0.0083 0.0059 0.0059 0.0036 -0.0053  
Y 0.0165 -0.0132 0.0141 0.0070 0.0059 -0.0099  
Z 0.0049 -0.0063 0.0055 0.0046 0.0023 -0.0046

AT. 106 H X 0.0054 -0.0083 -0.0059 -0.0059 0.0036 0.0053  
Y 0.0165 -0.0132 -0.0141 -0.0070 0.0059 0.0099

Z 0.0049 -0.0063 -0.0055 -0.0046 0.0023 0.0046  
AT. 107 C X -0.0032 0.0013 0.0001 0.0005 0.0002 -0.0008  
Y -0.0047 0.0000 -0.0014 0.0016 0.0005 -0.0003  
Z 0.0006 -0.0013 -0.0008 0.0010 0.0000 0.0004  
AT. 108 C X -0.0032 0.0013 -0.0001 -0.0005 0.0002 0.0008  
Y -0.0047 0.0000 0.0014 -0.0016 0.0005 0.0003  
Z 0.0006 -0.0013 0.0008 -0.0010 0.0000 -0.0004  
AT. 109 H X 0.0449 -0.0100 0.0095 -0.0091 -0.0038 0.0075  
Y 0.0215 -0.0029 0.0009 -0.0072 -0.0006 0.0024  
Z 0.0280 -0.0024 -0.0004 -0.0106 -0.0005 0.0024  
AT. 110 H X 0.0449 -0.0100 -0.0095 0.0091 -0.0038 -0.0075  
Y 0.0215 -0.0029 -0.0009 0.0072 -0.0006 -0.0024  
Z 0.0280 -0.0024 0.0004 0.0106 -0.0005 -0.0024  
AT. 111 H X 0.0024 -0.0033 -0.0037 0.0001 0.0000 0.0022  
Y 0.0583 -0.0094 0.0088 -0.0137 -0.0035 0.0065  
Z -0.0184 0.0056 0.0010 0.0044 0.0011 -0.0042  
AT. 112 H X 0.0024 -0.0033 0.0037 -0.0001 0.0000 -0.0022  
Y 0.0583 -0.0094 -0.0088 0.0137 -0.0035 -0.0065  
Z -0.0184 0.0056 -0.0010 -0.0044 0.0011 0.0042  
AT. 113 C X -0.0030 -0.0007 -0.0020 0.0009 0.0003 0.0001  
Y -0.0034 0.0029 0.0040 0.0004 -0.0005 -0.0014  
Z -0.0038 0.0026 -0.0005 -0.0013 -0.0000 -0.0007  
AT. 114 C X -0.0030 -0.0007 0.0020 -0.0009 0.0003 -0.0001  
Y -0.0034 0.0029 -0.0040 -0.0004 -0.0005 0.0014  
Z -0.0038 0.0026 0.0005 0.0013 -0.0000 0.0007  
AT. 115 C X -0.0008 0.0005 -0.0031 -0.0008 0.0003 0.0011  
Y 0.0006 -0.0004 0.0003 0.0000 -0.0002 -0.0004  
Z 0.0019 0.0002 0.0001 -0.0011 0.0003 0.0008  
AT. 116 C X -0.0008 0.0005 0.0031 0.0008 0.0003 -0.0011  
Y 0.0006 -0.0004 -0.0003 -0.0000 -0.0002 0.0004  
Z 0.0019 0.0002 -0.0001 0.0011 0.0003 -0.0008  
AT. 117 H X 0.0116 0.0018 0.0227 -0.0003 -0.0003 -0.0061

Y -0.0077 0.0034 -0.0149 -0.0051 0.0034 0.0049  
Z -0.0091 -0.0017 -0.0217 -0.0003 0.0001 0.0064  
AT. 118 H X 0.0116 0.0018 -0.0227 0.0003 -0.0003 0.0061  
Y -0.0077 0.0034 0.0149 0.0051 0.0034 -0.0049  
Z -0.0091 -0.0017 0.0217 0.0003 0.0001 -0.0064  
AT. 119 H X 0.0068 -0.0033 0.0312 0.0106 -0.0039 -0.0109  
Y 0.0007 -0.0067 0.0010 0.0074 -0.0010 0.0002  
Z 0.0043 0.0046 0.0168 -0.0020 -0.0012 -0.0062  
AT. 120 H X 0.0068 -0.0033 -0.0312 -0.0106 -0.0039 0.0109  
Y 0.0007 -0.0067 -0.0010 -0.0074 -0.0010 -0.0002  
Z 0.0043 0.0046 -0.0168 0.0020 -0.0012 0.0062  
AT. 121 C X -0.0002 -0.0009 -0.0024 -0.0003 -0.0003 0.0010  
Y -0.0018 -0.0009 -0.0019 0.0007 -0.0003 0.0000  
Z 0.0015 0.0002 -0.0009 -0.0014 -0.0000 0.0010  
AT. 122 C X -0.0002 -0.0009 0.0024 0.0003 -0.0003 -0.0010  
Y -0.0018 -0.0009 0.0019 -0.0007 -0.0003 -0.0000  
Z 0.0015 0.0002 0.0009 0.0014 -0.0000 -0.0010  
AT. 123 H X 0.0151 0.0127 0.0292 -0.0047 0.0068 -0.0069  
Y 0.0072 0.0063 0.0209 0.0021 0.0017 -0.0046  
Z -0.0051 -0.0044 -0.0176 -0.0033 -0.0007 0.0040  
AT. 124 H X 0.0151 0.0127 -0.0292 0.0047 0.0068 0.0069  
Y 0.0072 0.0063 -0.0209 -0.0021 0.0017 0.0046  
Z -0.0051 -0.0044 0.0176 0.0033 -0.0007 -0.0040  
AT. 125 H X -0.0033 0.0006 0.0076 0.0051 -0.0004 -0.0042  
Y 0.0136 0.0111 0.0310 -0.0005 0.0056 -0.0070  
Z 0.0049 0.0075 0.0266 0.0045 0.0027 -0.0085  
AT. 126 H X -0.0033 0.0006 -0.0076 -0.0051 -0.0004 0.0042  
Y 0.0136 0.0111 -0.0310 0.0005 0.0056 0.0070  
Z 0.0049 0.0075 -0.0266 -0.0045 0.0027 0.0085  
AT. 127 C X -0.0009 0.0007 -0.0002 -0.0006 -0.0005 -0.0002  
Y -0.0002 -0.0015 -0.0065 -0.0025 -0.0007 0.0025  
Z -0.0007 0.0006 0.0004 0.0001 0.0008 -0.0006

AT.128 C X -0.0009 0.0007 0.0002 0.0006 -0.0005 0.0002  
Y -0.0002 -0.0015 0.0065 0.0025 -0.0007 -0.0025  
Z -0.0007 0.0006 -0.0004 -0.0001 0.0008 0.0006

AT.129 C X 0.0011 -0.0017 -0.0022 0.0006 0.0012 0.0006  
Y 0.0005 0.0004 0.0017 0.0002 -0.0002 -0.0003  
Z 0.0017 -0.0006 -0.0003 0.0004 -0.0002 0.0004

AT.130 C X 0.0011 -0.0017 0.0022 -0.0006 0.0012 -0.0006  
Y 0.0005 0.0004 -0.0017 -0.0002 -0.0002 0.0003  
Z 0.0017 -0.0006 0.0003 -0.0004 -0.0002 -0.0004

AT.131 H X -0.0052 0.0071 0.0095 -0.0041 -0.0059 -0.0015  
Y -0.0006 -0.0075 -0.0140 0.0011 0.0055 0.0029  
Z -0.0072 0.0075 0.0084 -0.0053 -0.0067 -0.0013

AT.132 H X -0.0052 0.0071 -0.0095 0.0041 -0.0059 0.0015  
Y -0.0006 -0.0075 0.0140 -0.0011 0.0055 -0.0029  
Z -0.0072 0.0075 -0.0084 0.0053 -0.0067 0.0013

AT.133 H X -0.0024 0.0115 0.0157 -0.0047 -0.0093 -0.0042  
Y -0.0019 0.0033 0.0050 0.0004 0.0007 -0.0041  
Z -0.0004 -0.0021 -0.0028 0.0031 0.0060 -0.0033

AT.134 H X -0.0024 0.0115 -0.0157 0.0047 -0.0093 0.0042  
Y -0.0019 0.0033 -0.0050 -0.0004 0.0007 0.0041  
Z -0.0004 -0.0021 0.0028 -0.0031 0.0060 0.0033

AT.135 C X -0.0016 0.0009 -0.0012 -0.0006 -0.0000 0.0000  
Y -0.0039 0.0030 0.0026 0.0001 -0.0009 -0.0011  
Z -0.0043 0.0016 -0.0013 -0.0005 -0.0000 -0.0003

AT.136 C X -0.0016 0.0009 0.0012 0.0006 -0.0000 -0.0000  
Y -0.0039 0.0030 -0.0026 -0.0001 -0.0009 0.0011  
Z -0.0043 0.0016 0.0013 0.0005 -0.0000 0.0003

AT.137 H X 0.0332 -0.0292 -0.0304 -0.0014 0.0082 0.0114  
Y 0.0462 -0.0244 0.0004 0.0042 0.0034 0.0068  
Z 0.0651 -0.0316 0.0078 0.0069 0.0034 0.0080

AT.138 H X 0.0332 -0.0292 0.0304 0.0014 0.0082 -0.0114  
Y 0.0462 -0.0244 -0.0004 -0.0042 0.0034 -0.0068

Z 0.0651 -0.0316 -0.0078 -0.0069 0.0034 -0.0080  
AT. 139 H X 0.0072 0.0020 0.0172 0.0025 -0.0024 -0.0027  
Y 0.0580 -0.0445 -0.0390 -0.0006 0.0115 0.0170  
Z -0.0302 0.0123 -0.0122 -0.0038 -0.0003 -0.0018  
AT. 140 H X 0.0072 0.0020 -0.0172 -0.0025 -0.0024 0.0027  
Y 0.0580 -0.0445 0.0390 0.0006 0.0115 -0.0170  
Z -0.0302 0.0123 0.0122 0.0038 -0.0003 0.0018  
AT. 141 H X -0.0109 0.0179 0.0353 0.0031 -0.0067 -0.0095  
Y -0.0418 0.0194 -0.0074 -0.0054 -0.0013 -0.0047  
Z 0.0351 -0.0104 0.0243 0.0071 -0.0020 -0.0000  
AT. 142 H X -0.0109 0.0179 -0.0353 -0.0031 -0.0067 0.0095  
Y -0.0418 0.0194 0.0074 0.0054 -0.0013 0.0047  
Z 0.0351 -0.0104 -0.0243 -0.0071 -0.0020 0.0000  
AT. 143 C X 0.0001 0.0001 0.0006 -0.0002 -0.0002 -0.0002  
Y -0.0007 -0.0016 -0.0053 -0.0013 -0.0004 0.0017  
Z 0.0004 -0.0004 0.0015 0.0013 0.0007 -0.0005  
AT. 144 C X 0.0001 0.0001 -0.0006 0.0002 -0.0002 0.0002  
Y -0.0007 -0.0016 0.0053 0.0013 -0.0004 -0.0017  
Z 0.0004 -0.0004 -0.0015 -0.0013 0.0007 0.0005  
AT. 145 H X 0.0048 0.0158 0.0505 0.0125 0.0013 -0.0163  
Y 0.0048 0.0073 0.0431 0.0197 0.0093 -0.0145  
Z -0.0041 -0.0049 -0.0345 -0.0174 -0.0092 0.0117  
AT. 146 H X 0.0048 0.0158 -0.0505 -0.0125 0.0013 0.0163  
Y 0.0048 0.0073 -0.0431 -0.0197 0.0093 0.0145  
Z -0.0041 -0.0049 0.0345 0.0174 -0.0092 -0.0117  
AT. 147 H X -0.0018 -0.0053 -0.0128 0.0005 0.0024 0.0039  
Y 0.0076 0.0227 0.0761 0.0189 0.0035 -0.0249  
Z 0.0022 0.0048 0.0250 0.0123 0.0061 -0.0085  
AT. 148 H X -0.0018 -0.0053 0.0128 -0.0005 0.0024 -0.0039  
Y 0.0076 0.0227 -0.0761 -0.0189 0.0035 0.0249  
Z 0.0022 0.0048 -0.0250 -0.0123 0.0061 0.0085  
AT. 149 H X -0.0039 -0.0151 -0.0455 -0.0076 0.0009 0.0150

Y -0.0025 -0.0034 -0.0253 -0.0122 -0.0058 0.0088  
Z -0.0012 0.0036 -0.0129 -0.0148 -0.0096 0.0051  
AT. 150 H X -0.0039 -0.0151 0.0455 0.0076 0.0009 -0.0150  
Y -0.0025 -0.0034 0.0253 0.0122 -0.0058 -0.0088  
Z -0.0012 0.0036 0.0129 0.0148 -0.0096 -0.0051  
AT. 151 C X 0.0021 -0.0001 0.0010 -0.0001 0.0000 -0.0000  
Y 0.0010 -0.0004 0.0005 0.0004 0.0002 -0.0001  
Z -0.0015 0.0014 -0.0015 -0.0023 -0.0012 0.0005  
AT. 152 C X 0.0021 -0.0001 -0.0010 0.0001 0.0000 0.0000  
Y 0.0010 -0.0004 -0.0005 -0.0004 0.0002 0.0001  
Z -0.0015 0.0014 0.0015 0.0023 -0.0012 -0.0005  
AT. 153 H X -0.0100 0.0075 0.0075 -0.0003 -0.0009 -0.0041  
Y 0.0093 -0.0077 0.0094 0.0114 0.0045 -0.0021  
Z 0.0185 -0.0146 0.0105 0.0163 0.0066 -0.0011  
AT. 154 H X -0.0100 0.0075 -0.0075 0.0003 -0.0009 0.0041  
Y 0.0093 -0.0077 -0.0094 -0.0114 0.0045 0.0021  
Z 0.0185 -0.0146 -0.0105 -0.0163 0.0066 0.0011  
AT. 155 H X 0.0024 -0.0073 -0.0088 0.0018 0.0017 0.0033  
Y -0.0151 0.0104 -0.0114 -0.0139 -0.0055 0.0020  
Z 0.0162 -0.0132 0.0078 0.0141 0.0057 -0.0006  
AT. 156 H X 0.0024 -0.0073 0.0088 -0.0018 0.0017 -0.0033  
Y -0.0151 0.0104 0.0114 0.0139 -0.0055 -0.0020  
Z 0.0162 -0.0132 -0.0078 -0.0141 0.0057 0.0006  
AT. 157 O X 0.0006 -0.0007 -0.0002 -0.0001 0.0009 -0.0002  
Y 0.0010 -0.0012 -0.0003 -0.0000 0.0015 -0.0003  
Z -0.0012 0.0003 0.0013 0.0003 -0.0010 0.0011  
AT. 158 O X 0.0006 -0.0007 0.0002 0.0001 0.0009 0.0002  
Y 0.0010 -0.0012 0.0003 0.0000 0.0015 0.0003  
Z -0.0012 0.0003 -0.0013 -0.0003 -0.0010 -0.0011  
AT. 159 O X 0.0018 -0.0009 -0.0016 -0.0004 0.0017 -0.0013  
Y -0.0006 0.0008 0.0001 0.0000 -0.0009 0.0002  
Z 0.0003 0.0004 -0.0009 -0.0003 -0.0002 -0.0006

AT.160 O X 0.0018 -0.0009 0.0016 0.0004 0.0017 0.0013  
Y -0.0006 0.0008 -0.0001 -0.0000 -0.0009 -0.0002  
Z 0.0003 0.0004 0.0009 0.0003 -0.0002 0.0006

AT.161 H X -0.0145 0.0230 0.0003 -0.0001 -0.0273 0.0013  
Y -0.0041 0.0065 -0.0001 -0.0002 -0.0077 0.0004  
Z 0.0063 -0.0119 0.0011 0.0011 0.0139 -0.0003

AT.162 H X -0.0145 0.0230 -0.0003 0.0001 -0.0273 -0.0013  
Y -0.0041 0.0065 0.0001 0.0002 -0.0077 -0.0004  
Z 0.0063 -0.0119 -0.0011 -0.0011 0.0139 0.0003

AT.163 H X -0.0281 0.0051 0.0318 0.0076 -0.0193 0.0253  
Y -0.0024 0.0003 0.0040 0.0007 -0.0025 0.0004  
Z 0.0102 -0.0011 -0.0115 -0.0023 0.0067 -0.0096

AT.164 H X -0.0281 0.0051 -0.0318 -0.0076 -0.0193 -0.0253  
Y -0.0024 0.0003 -0.0040 -0.0007 -0.0025 -0.0004  
Z 0.0102 -0.0011 0.0115 0.0023 0.0067 0.0096

AT.165 O X -0.0011 -0.0009 0.0015 -0.0011 0.0001 0.0005  
Y 0.0011 0.0006 -0.0011 0.0009 -0.0002 0.0001  
Z -0.0014 -0.0008 0.0013 -0.0011 0.0002 -0.0003

AT.166 O X -0.0011 -0.0009 -0.0015 0.0011 0.0001 -0.0005  
Y 0.0011 0.0006 0.0011 -0.0009 -0.0002 -0.0001  
Z -0.0014 -0.0008 -0.0013 0.0011 0.0002 0.0003

AT.167 H X 0.0027 0.0034 -0.0061 0.0042 0.0002 -0.0038  
Y 0.0011 0.0003 0.0007 -0.0001 -0.0001 0.0011  
Z -0.0125 -0.0128 0.0212 -0.0155 0.0000 0.0099

AT.168 H X 0.0027 0.0034 0.0061 -0.0042 0.0002 0.0038  
Y 0.0011 0.0003 -0.0007 0.0001 -0.0001 -0.0011  
Z -0.0125 -0.0128 -0.0212 0.0155 0.0000 -0.0099

AT.169 O X 0.0015 0.0011 -0.0018 0.0014 -0.0002 -0.0002  
Y -0.0022 -0.0014 0.0021 -0.0019 0.0004 -0.0002  
Z -0.0007 -0.0003 0.0006 -0.0005 0.0001 -0.0004

AT.170 O X 0.0015 0.0011 0.0018 -0.0014 -0.0002 0.0002  
Y -0.0022 -0.0014 -0.0021 0.0019 0.0004 0.0002



Z -0.0007 -0.0003 -0.0006 0.0005 0.0001 0.0004  
AT. 171 H X -0.0120 -0.0070 0.0124 -0.0096 0.0014 -0.0005  
Y 0.0199 0.0133 -0.0209 0.0175 -0.0031 0.0003  
Z 0.0503 0.0319 -0.0534 0.0429 -0.0072 0.0016

AT. 172 H X -0.0120 -0.0070 -0.0124 0.0096 0.0014 0.0005  
Y 0.0199 0.0133 0.0209 -0.0175 -0.0031 -0.0003  
Z 0.0503 0.0319 0.0534 -0.0429 -0.0072 -0.0016

FREQ(CM\*\*-1) 1523.60 1525.16 1525.55 1526.77 1527.62 1529.88

AT. 1 I X 0.0000 -0.0000 0.0000 0.0000 -0.0000 0.0000  
Y -0.0000 -0.0000 -0.0000 0.0000 0.0000 0.0000  
Z -0.0000 0.0000 0.0000 -0.0000 -0.0000 -0.0000

AT. 2 I X 0.0000 -0.0000 -0.0000 0.0000 0.0000 0.0000  
Y -0.0000 -0.0000 0.0000 0.0000 -0.0000 0.0000  
Z -0.0000 0.0000 -0.0000 -0.0000 0.0000 -0.0000

AT. 3 I X 0.0000 0.0000 -0.0000 -0.0000 0.0000 -0.0000  
Y 0.0000 -0.0000 -0.0000 -0.0000 0.0000 0.0000  
Z 0.0000 0.0000 -0.0000 0.0000 -0.0000 0.0000

AT. 4 I X 0.0000 0.0000 0.0000 -0.0000 -0.0000 -0.0000  
Y 0.0000 -0.0000 0.0000 -0.0000 -0.0000 0.0000  
Z 0.0000 0.0000 0.0000 0.0000 0.0000 0.0000

AT. 5 O X -0.0005 -0.0002 0.0001 0.0006 0.0006 0.0013  
Y 0.0003 0.0004 0.0002 -0.0003 -0.0003 -0.0006  
Z 0.0005 0.0002 -0.0001 -0.0005 -0.0005 -0.0012

AT. 6 O X -0.0005 -0.0002 -0.0001 0.0006 -0.0006 0.0013  
Y 0.0003 0.0004 -0.0002 -0.0003 0.0003 -0.0006  
Z 0.0005 0.0002 0.0001 -0.0005 0.0005 -0.0012

AT. 7 O X 0.0006 -0.0007 -0.0005 -0.0014 -0.0013 -0.0024  
Y -0.0005 0.0006 0.0005 0.0010 0.0010 0.0018  
Z 0.0001 -0.0001 -0.0002 0.0004 -0.0003 0.0001

AT. 8 O X 0.0006 -0.0007 0.0005 -0.0014 0.0013 -0.0024

Y -0.0005 0.0006 -0.0005 0.0010 -0.0010 0.0018  
Z 0.0001 -0.0001 0.0002 0.0004 0.0003 0.0001  
AT. 9 N X -0.0004 0.0000 0.0001 0.0007 0.0003 0.0008  
Y 0.0004 0.0006 0.0003 -0.0005 -0.0001 -0.0008  
Z -0.0007 0.0011 0.0001 0.0024 -0.0000 0.0037  
AT. 10 N X -0.0004 0.0000 -0.0001 0.0007 -0.0003 0.0008  
Y 0.0004 0.0006 -0.0003 -0.0005 0.0001 -0.0008  
Z -0.0007 0.0011 -0.0001 0.0024 0.0000 0.0037  
AT. 11 N X -0.0010 -0.0002 0.0013 -0.0012 0.0007 -0.0005  
Y -0.0000 -0.0010 -0.0016 -0.0001 -0.0027 -0.0010  
Z 0.0008 0.0029 0.0024 0.0025 0.0045 0.0042  
AT. 12 N X -0.0010 -0.0002 -0.0013 -0.0012 -0.0007 -0.0005  
Y -0.0000 -0.0010 0.0016 -0.0001 0.0027 -0.0010  
Z 0.0008 0.0029 -0.0024 0.0025 -0.0045 0.0042  
AT. 13 C X 0.0009 0.0003 -0.0001 -0.0012 -0.0011 -0.0023  
Y -0.0005 -0.0007 -0.0003 0.0011 0.0007 0.0017  
Z -0.0002 -0.0010 -0.0001 -0.0012 0.0005 -0.0013  
AT. 14 C X 0.0009 0.0003 0.0001 -0.0012 0.0011 -0.0023  
Y -0.0005 -0.0007 0.0003 0.0011 -0.0007 0.0017  
Z -0.0002 -0.0010 0.0001 -0.0012 -0.0005 -0.0013  
AT. 15 C X -0.0004 0.0003 0.0004 0.0001 0.0004 0.0005  
Y 0.0010 -0.0011 -0.0012 0.0002 -0.0006 -0.0004  
Z -0.0003 0.0004 0.0003 0.0001 0.0001 0.0003  
AT. 16 C X -0.0004 0.0003 -0.0004 0.0001 -0.0004 0.0005  
Y 0.0010 -0.0011 0.0012 0.0002 0.0006 -0.0004  
Z -0.0003 0.0004 -0.0003 0.0001 -0.0001 0.0003  
AT. 17 H X -0.0003 0.0006 0.0005 -0.0006 -0.0008 -0.0008  
Y -0.0043 0.0067 0.0063 -0.0022 0.0017 -0.0004  
Z 0.0063 -0.0091 -0.0088 0.0025 -0.0030 -0.0004  
AT. 18 H X -0.0003 0.0006 -0.0005 -0.0006 0.0008 -0.0008  
Y -0.0043 0.0067 -0.0063 -0.0022 -0.0017 -0.0004  
Z 0.0063 -0.0091 0.0088 0.0025 0.0030 -0.0004

AT. 19 H X 0.0016 -0.0017 -0.0023 0.0010 -0.0015 0.0002  
Y -0.0064 0.0090 0.0094 -0.0039 0.0033 -0.0010  
Z -0.0022 0.0033 0.0032 -0.0010 0.0009 0.0001

AT. 20 H X 0.0016 -0.0017 0.0023 0.0010 0.0015 0.0002  
Y -0.0064 0.0090 -0.0094 -0.0039 -0.0033 -0.0010  
Z -0.0022 0.0033 -0.0032 -0.0010 -0.0009 0.0001

AT. 21 C X -0.0005 0.0019 0.0013 0.0022 0.0027 0.0039  
Y 0.0011 0.0002 0.0001 -0.0009 0.0000 -0.0015  
Z -0.0005 -0.0028 -0.0024 -0.0023 -0.0038 -0.0036

AT. 22 C X -0.0005 0.0019 -0.0013 0.0022 -0.0027 0.0039  
Y 0.0011 0.0002 -0.0001 -0.0009 -0.0000 -0.0015  
Z -0.0005 -0.0028 0.0024 -0.0023 0.0038 -0.0036

AT. 23 C X -0.0006 -0.0007 -0.0001 -0.0001 -0.0006 -0.0003  
Y 0.0006 0.0003 -0.0004 -0.0002 -0.0001 -0.0004  
Z 0.0015 0.0012 -0.0003 -0.0003 0.0006 -0.0003

AT. 24 C X -0.0006 -0.0007 0.0001 -0.0001 0.0006 -0.0003  
Y 0.0006 0.0003 0.0004 -0.0002 0.0001 -0.0004  
Z 0.0015 0.0012 0.0003 -0.0003 -0.0006 -0.0003

AT. 25 H X 0.0008 0.0006 0.0000 0.0008 0.0010 0.0012  
Y 0.0025 0.0012 -0.0011 -0.0005 0.0002 -0.0010  
Z -0.0156 -0.0064 0.0087 0.0046 0.0017 0.0088

AT. 26 H X 0.0008 0.0006 -0.0000 0.0008 -0.0010 0.0012  
Y 0.0025 0.0012 0.0011 -0.0005 -0.0002 -0.0010  
Z -0.0156 -0.0064 -0.0087 0.0046 -0.0017 0.0088

AT. 27 H X 0.0031 -0.0002 -0.0012 -0.0046 -0.0010 -0.0063  
Y -0.0115 -0.0044 0.0066 0.0052 0.0023 0.0085  
Z -0.0055 -0.0013 0.0036 0.0036 0.0020 0.0057

AT. 28 H X 0.0031 -0.0002 0.0012 -0.0046 0.0010 -0.0063  
Y -0.0115 -0.0044 -0.0066 0.0052 -0.0023 0.0085  
Z -0.0055 -0.0013 -0.0036 0.0036 -0.0020 0.0057

AT. 29 C X 0.0002 -0.0015 -0.0007 -0.0003 -0.0004 -0.0007  
Y 0.0014 0.0025 -0.0001 0.0007 -0.0012 0.0013

Z 0.0003 -0.0007 -0.0002 -0.0007 -0.0005 -0.0005  
AT. 30 C X 0.0002 -0.0015 0.0007 -0.0003 0.0004 -0.0007  
Y 0.0014 0.0025 0.0001 0.0007 0.0012 0.0013  
Z 0.0003 -0.0007 0.0002 -0.0007 0.0005 -0.0005  
AT. 31 H X 0.0090 0.0200 0.0020 0.0022 -0.0033 0.0010  
Y -0.0067 -0.0185 -0.0032 -0.0007 0.0050 -0.0045  
Z -0.0057 -0.0172 -0.0030 -0.0009 0.0069 -0.0076  
AT. 32 H X 0.0090 0.0200 -0.0020 0.0022 0.0033 0.0010  
Y -0.0067 -0.0185 0.0032 -0.0007 -0.0050 -0.0045  
Z -0.0057 -0.0172 0.0030 -0.0009 -0.0069 -0.0076  
AT. 33 H X -0.0046 -0.0056 0.0009 0.0006 0.0023 0.0028  
Y -0.0119 -0.0314 -0.0037 -0.0045 0.0085 -0.0097  
Z 0.0028 0.0107 0.0022 0.0022 -0.0029 0.0062  
AT. 34 H X -0.0046 -0.0056 -0.0009 0.0006 -0.0023 0.0028  
Y -0.0119 -0.0314 0.0037 -0.0045 -0.0085 -0.0097  
Z 0.0028 0.0107 -0.0022 0.0022 0.0029 0.0062  
AT. 35 C X -0.0014 -0.0006 0.0012 -0.0014 0.0009 -0.0003  
Y -0.0007 0.0040 0.0021 -0.0011 0.0003 0.0004  
Z 0.0011 0.0045 0.0008 0.0008 0.0011 -0.0008  
AT. 36 C X -0.0014 -0.0006 -0.0012 -0.0014 -0.0009 -0.0003  
Y -0.0007 0.0040 -0.0021 -0.0011 -0.0003 0.0004  
Z 0.0011 0.0045 -0.0008 0.0008 -0.0011 -0.0008  
AT. 37 C X -0.0041 -0.0005 0.0037 -0.0010 0.0017 0.0008  
Y 0.0011 -0.0003 -0.0009 0.0009 0.0009 0.0001  
Z -0.0004 -0.0011 -0.0006 -0.0009 -0.0018 -0.0009  
AT. 38 C X -0.0041 -0.0005 -0.0037 -0.0010 -0.0017 0.0008  
Y 0.0011 -0.0003 0.0009 0.0009 -0.0009 0.0001  
Z -0.0004 -0.0011 0.0006 -0.0009 0.0018 -0.0009  
AT. 39 H X 0.0320 0.0055 -0.0290 0.0118 -0.0130 -0.0030  
Y 0.0055 0.0059 -0.0058 -0.0004 -0.0089 -0.0050  
Z 0.0215 0.0006 -0.0198 0.0080 -0.0071 -0.0012  
AT. 40 H X 0.0320 0.0055 0.0290 0.0118 0.0130 -0.0030

Y 0.0055 0.0059 0.0058 -0.0004 0.0089 -0.0050  
Z 0.0215 0.0006 0.0198 0.0080 0.0071 -0.0012  
AT. 41 H X 0.0284 0.0020 -0.0296 0.0090 -0.0175 -0.0070  
Y -0.0156 -0.0045 0.0163 -0.0056 0.0086 0.0060  
Z -0.0189 0.0006 0.0188 -0.0053 0.0113 0.0022  
AT. 42 H X 0.0284 0.0020 0.0296 0.0090 0.0175 -0.0070  
Y -0.0156 -0.0045 -0.0163 -0.0056 -0.0086 0.0060  
Z -0.0189 0.0006 -0.0188 -0.0053 -0.0113 0.0022  
AT. 43 C X -0.0001 0.0006 0.0008 -0.0005 0.0016 0.0001  
Y 0.0013 -0.0007 -0.0029 0.0023 -0.0050 -0.0001  
Z -0.0001 -0.0002 -0.0009 -0.0002 -0.0022 -0.0007  
AT. 44 C X -0.0001 0.0006 -0.0008 -0.0005 -0.0016 0.0001  
Y 0.0013 -0.0007 0.0029 0.0023 0.0050 -0.0001  
Z -0.0001 -0.0002 0.0009 -0.0002 0.0022 -0.0007  
AT. 45 H X 0.0087 0.0033 -0.0175 0.0154 -0.0321 0.0033  
Y -0.0106 0.0037 0.0245 -0.0185 0.0385 -0.0000  
Z 0.0045 -0.0065 -0.0131 0.0080 -0.0181 -0.0028  
AT. 46 H X 0.0087 0.0033 0.0175 0.0154 0.0321 0.0033  
Y -0.0106 0.0037 -0.0245 -0.0185 -0.0385 -0.0000  
Z 0.0045 -0.0065 0.0131 0.0080 0.0181 -0.0028  
AT. 47 H X -0.0038 -0.0049 0.0056 -0.0067 0.0097 -0.0026  
Y -0.0113 -0.0004 0.0271 -0.0193 0.0450 -0.0001  
Z -0.0079 0.0073 0.0228 -0.0134 0.0375 0.0033  
AT. 48 H X -0.0038 -0.0049 -0.0056 -0.0067 -0.0097 -0.0026  
Y -0.0113 -0.0004 -0.0271 -0.0193 -0.0450 -0.0001  
Z -0.0079 0.0073 -0.0228 -0.0134 -0.0375 0.0033  
AT. 49 C X 0.0004 -0.0042 -0.0011 0.0011 -0.0001 0.0001  
Y 0.0010 0.0015 -0.0025 0.0017 -0.0029 0.0001  
Z 0.0001 -0.0029 -0.0002 0.0006 0.0006 -0.0008  
AT. 50 C X 0.0004 -0.0042 0.0011 0.0011 0.0001 0.0001  
Y 0.0010 0.0015 0.0025 0.0017 0.0029 0.0001  
Z 0.0001 -0.0029 0.0002 0.0006 -0.0006 -0.0008

AT. 51 C X -0.0013 0.0025 0.0011 0.0001 -0.0004 0.0006  
Y -0.0000 -0.0004 0.0002 -0.0004 0.0005 0.0001  
Z 0.0006 -0.0004 -0.0001 -0.0012 0.0003 -0.0012

AT. 52 C X -0.0013 0.0025 -0.0011 0.0001 0.0004 0.0006  
Y -0.0000 -0.0004 -0.0002 -0.0004 -0.0005 0.0001  
Z 0.0006 -0.0004 0.0001 -0.0012 -0.0003 -0.0012

AT. 53 H X 0.0067 -0.0065 -0.0035 -0.0042 0.0021 -0.0049  
Y 0.0045 -0.0008 -0.0038 0.0004 -0.0006 -0.0002  
Z -0.0078 0.0139 0.0033 0.0068 -0.0046 0.0078

AT. 54 H X 0.0067 -0.0065 0.0035 -0.0042 -0.0021 -0.0049  
Y 0.0045 -0.0008 0.0038 0.0004 0.0006 -0.0002  
Z -0.0078 0.0139 -0.0033 0.0068 0.0046 0.0078

AT. 55 H X 0.0089 -0.0112 -0.0052 -0.0033 0.0037 -0.0035  
Y -0.0054 0.0028 0.0046 0.0001 -0.0001 -0.0007  
Z 0.0004 -0.0062 0.0013 -0.0028 0.0027 -0.0048

AT. 56 H X 0.0089 -0.0112 0.0052 -0.0033 -0.0037 -0.0035  
Y -0.0054 0.0028 -0.0046 0.0001 0.0001 -0.0007  
Z 0.0004 -0.0062 -0.0013 -0.0028 -0.0027 -0.0048

AT. 57 C X -0.0007 -0.0005 0.0008 -0.0007 0.0001 0.0006  
Y -0.0002 0.0037 0.0018 -0.0009 0.0011 -0.0001  
Z 0.0012 0.0053 0.0008 0.0008 0.0008 -0.0004

AT. 58 C X -0.0007 -0.0005 -0.0008 -0.0007 -0.0001 0.0006  
Y -0.0002 0.0037 -0.0018 -0.0009 -0.0011 -0.0001  
Z 0.0012 0.0053 -0.0008 0.0008 -0.0008 -0.0004

AT. 59 H X -0.0094 0.0022 0.0116 -0.0130 0.0028 0.0029  
Y -0.0048 -0.0527 -0.0170 0.0022 -0.0111 0.0028  
Z -0.0128 -0.0775 -0.0186 -0.0044 -0.0153 0.0058

AT. 60 H X -0.0094 0.0022 -0.0116 -0.0130 -0.0028 0.0029  
Y -0.0048 -0.0527 0.0170 0.0022 0.0111 0.0028  
Z -0.0128 -0.0775 0.0186 -0.0044 0.0153 0.0058

AT. 61 H X 0.0108 -0.0009 -0.0138 0.0134 -0.0045 -0.0041  
Y 0.0009 -0.0587 -0.0270 0.0109 -0.0151 0.0004

Z 0.0091 0.0329 0.0031 0.0057 0.0046 -0.0041  
AT. 62 H X 0.0108 -0.0009 0.0138 0.0134 0.0045 -0.0041  
Y 0.0009 -0.0587 0.0270 0.0109 0.0151 0.0004  
Z 0.0091 0.0329 -0.0031 0.0057 -0.0046 -0.0041  
AT. 63 H X 0.0119 0.0052 -0.0123 0.0135 -0.0031 -0.0045  
Y 0.0065 0.0487 0.0138 0.0018 0.0102 -0.0030  
Z -0.0164 -0.0415 0.0018 -0.0145 -0.0047 0.0069  
AT. 64 H X 0.0119 0.0052 0.0123 0.0135 0.0031 -0.0045  
Y 0.0065 0.0487 -0.0138 0.0018 -0.0102 -0.0030  
Z -0.0164 -0.0415 -0.0018 -0.0145 0.0047 0.0069  
AT. 65 C X 0.0009 -0.0037 -0.0011 0.0015 -0.0001 -0.0003  
Y 0.0009 0.0015 -0.0015 0.0010 -0.0016 0.0001  
Z -0.0004 -0.0046 0.0003 0.0001 0.0011 0.0001  
AT. 66 C X 0.0009 -0.0037 0.0011 0.0015 0.0001 -0.0003  
Y 0.0009 0.0015 0.0015 0.0010 0.0016 0.0001  
Z -0.0004 -0.0046 -0.0003 0.0001 -0.0011 0.0001  
AT. 67 H X 0.0077 -0.0202 -0.0148 0.0129 -0.0093 -0.0004  
Y -0.0095 -0.0453 0.0165 -0.0072 0.0239 -0.0018  
Z 0.0030 0.0542 -0.0040 -0.0027 -0.0143 0.0020  
AT. 68 H X 0.0077 -0.0202 0.0148 0.0129 0.0093 -0.0004  
Y -0.0095 -0.0453 -0.0165 -0.0072 -0.0239 -0.0018  
Z 0.0030 0.0542 0.0040 -0.0027 0.0143 0.0020  
AT. 69 H X -0.0107 0.0243 0.0169 -0.0164 0.0088 0.0011  
Y -0.0142 0.0102 0.0242 -0.0195 0.0185 0.0003  
Z -0.0005 -0.0416 0.0031 0.0037 0.0124 -0.0023  
AT. 70 H X -0.0107 0.0243 -0.0169 -0.0164 -0.0088 0.0011  
Y -0.0142 0.0102 -0.0242 -0.0195 -0.0185 0.0003  
Z -0.0005 -0.0416 -0.0031 0.0037 -0.0124 -0.0023  
AT. 71 H X -0.0104 0.0589 0.0167 -0.0201 0.0014 0.0023  
Y 0.0082 0.0131 -0.0127 0.0089 -0.0133 0.0004  
Z 0.0019 0.0613 -0.0027 -0.0045 -0.0152 0.0024  
AT. 72 H X -0.0104 0.0589 -0.0167 -0.0201 -0.0014 0.0023

Y 0.0082 0.0131 0.0127 0.0089 0.0133 0.0004  
Z 0.0019 0.0613 0.0027 -0.0045 0.0152 0.0024  
AT. 73 C X 0.0004 0.0022 -0.0001 0.0003 -0.0003 -0.0000  
Y 0.0002 -0.0021 -0.0001 -0.0001 0.0003 0.0000  
Z -0.0014 0.0004 0.0015 -0.0001 0.0028 -0.0005  
AT. 74 C X 0.0004 0.0022 0.0001 0.0003 0.0003 -0.0000  
Y 0.0002 -0.0021 0.0001 -0.0001 -0.0003 0.0000  
Z -0.0014 0.0004 -0.0015 -0.0001 -0.0028 -0.0005  
AT. 75 H X 0.0060 -0.0106 -0.0105 0.0023 -0.0140 0.0027  
Y 0.0022 0.0010 -0.0026 -0.0026 -0.0096 0.0027  
Z 0.0057 -0.0056 -0.0101 -0.0021 -0.0217 0.0055  
AT. 76 H X 0.0060 -0.0106 0.0105 0.0023 0.0140 0.0027  
Y 0.0022 0.0010 0.0026 -0.0026 0.0096 0.0027  
Z 0.0057 -0.0056 0.0101 -0.0021 0.0217 0.0055  
AT. 77 H X -0.0049 0.0033 0.0090 -0.0029 0.0116 -0.0015  
Y -0.0044 0.0063 0.0051 0.0031 0.0135 -0.0041  
Z 0.0075 -0.0085 -0.0119 -0.0002 -0.0210 0.0048  
AT. 78 H X -0.0049 0.0033 -0.0090 -0.0029 -0.0116 -0.0015  
Y -0.0044 0.0063 -0.0051 0.0031 -0.0135 -0.0041  
Z 0.0075 -0.0085 0.0119 -0.0002 0.0210 0.0048  
AT. 79 I X 0.0000 -0.0000 -0.0000 0.0000 -0.0000 0.0000  
Y -0.0000 -0.0000 0.0000 -0.0000 -0.0000 -0.0000  
Z -0.0000 0.0000 -0.0000 -0.0000 -0.0000 0.0000  
AT. 80 I X 0.0000 -0.0000 0.0000 0.0000 0.0000 0.0000  
Y -0.0000 -0.0000 -0.0000 -0.0000 0.0000 -0.0000  
Z -0.0000 0.0000 0.0000 -0.0000 0.0000 0.0000  
AT. 81 I X 0.0000 -0.0000 -0.0000 0.0000 -0.0000 -0.0000  
Y -0.0000 0.0000 -0.0000 0.0000 -0.0000 -0.0000  
Z -0.0000 -0.0000 0.0000 0.0000 -0.0000 0.0000  
AT. 82 I X 0.0000 -0.0000 0.0000 0.0000 0.0000 -0.0000  
Y -0.0000 0.0000 0.0000 0.0000 0.0000 -0.0000  
Z -0.0000 -0.0000 -0.0000 0.0000 0.0000 0.0000



AT. 83 O X 0.0007 0.0001 -0.0004 -0.0003 0.0017 0.0001  
Y 0.0001 -0.0000 -0.0001 -0.0001 0.0004 -0.0000  
Z 0.0002 0.0001 -0.0001 -0.0000 0.0008 0.0000

AT. 84 O X 0.0007 0.0001 0.0004 -0.0003 -0.0017 0.0001  
Y 0.0001 -0.0000 0.0001 -0.0001 -0.0004 -0.0000  
Z 0.0002 0.0001 0.0001 -0.0000 -0.0008 0.0000

AT. 85 O X 0.0012 -0.0006 -0.0001 -0.0043 0.0034 0.0011  
Y 0.0007 -0.0003 -0.0000 -0.0027 0.0021 0.0007  
Z -0.0007 0.0002 0.0004 0.0003 -0.0003 -0.0001

AT. 86 O X 0.0012 -0.0006 0.0001 -0.0043 -0.0034 0.0011  
Y 0.0007 -0.0003 0.0000 -0.0027 -0.0021 0.0007  
Z -0.0007 0.0002 -0.0004 0.0003 0.0003 -0.0001

AT. 87 N X -0.0003 0.0001 0.0012 0.0008 -0.0007 -0.0017  
Y 0.0004 -0.0000 0.0000 -0.0005 0.0010 0.0001  
Z -0.0001 -0.0003 0.0004 0.0026 -0.0047 0.0017

AT. 88 N X -0.0003 0.0001 -0.0012 0.0008 0.0007 -0.0017  
Y 0.0004 -0.0000 -0.0000 -0.0005 -0.0010 0.0001  
Z -0.0001 -0.0003 -0.0004 0.0026 0.0047 0.0017

AT. 89 N X -0.0014 -0.0001 0.0003 -0.0023 0.0014 0.0008  
Y 0.0003 0.0005 -0.0015 0.0060 -0.0041 -0.0015  
Z -0.0007 -0.0014 0.0029 -0.0159 0.0114 0.0039

AT. 90 N X -0.0014 -0.0001 -0.0003 -0.0023 -0.0014 0.0008  
Y 0.0003 0.0005 0.0015 0.0060 0.0041 -0.0015  
Z -0.0007 -0.0014 -0.0029 -0.0159 -0.0114 0.0039

AT. 91 C X -0.0013 -0.0001 0.0005 0.0006 -0.0032 0.0003  
Y -0.0006 0.0002 0.0006 0.0007 -0.0017 -0.0002  
Z 0.0004 0.0001 -0.0006 -0.0018 0.0032 -0.0014

AT. 92 C X -0.0013 -0.0001 -0.0005 0.0006 0.0032 0.0003  
Y -0.0006 0.0002 -0.0006 0.0007 0.0017 -0.0002  
Z 0.0004 0.0001 0.0006 -0.0018 -0.0032 -0.0014

AT. 93 C X -0.0008 0.0002 0.0010 0.0004 -0.0004 -0.0014  
Y -0.0017 0.0002 0.0013 0.0006 -0.0010 -0.0021

Z 0.0009 -0.0003 -0.0009 -0.0004 0.0005 0.0016  
AT. 94 C X -0.0008 0.0002 -0.0010 0.0004 0.0004 -0.0014  
Y -0.0017 0.0002 -0.0013 0.0006 0.0010 -0.0021  
Z 0.0009 -0.0003 0.0009 -0.0004 -0.0005 0.0016  
AT. 95 H X -0.0023 -0.0011 -0.0014 -0.0018 0.0032 0.0000  
Y 0.0105 -0.0009 -0.0076 -0.0040 0.0069 0.0120  
Z -0.0176 0.0033 0.0169 0.0102 -0.0174 -0.0240  
AT. 96 H X -0.0023 -0.0011 0.0014 -0.0018 -0.0032 0.0000  
Y 0.0105 -0.0009 0.0076 -0.0040 -0.0069 0.0120  
Z -0.0176 0.0033 -0.0169 0.0102 0.0174 -0.0240  
AT. 97 H X 0.0082 -0.0014 -0.0096 -0.0061 0.0099 0.0102  
Y 0.0153 -0.0021 -0.0131 -0.0082 0.0135 0.0189  
Z 0.0021 -0.0003 -0.0010 -0.0004 0.0007 0.0030  
AT. 98 H X 0.0082 -0.0014 0.0096 -0.0061 -0.0099 0.0102  
Y 0.0153 -0.0021 0.0131 -0.0082 -0.0135 0.0189  
Z 0.0021 -0.0003 0.0010 -0.0004 -0.0007 0.0030  
AT. 99 C X -0.0010 0.0012 -0.0005 0.0110 -0.0082 -0.0027  
Y -0.0019 -0.0001 0.0017 -0.0029 0.0015 0.0006  
Z 0.0012 0.0012 -0.0025 0.0131 -0.0092 -0.0033  
AT. 100 C X -0.0010 0.0012 0.0005 0.0110 0.0082 -0.0027  
Y -0.0019 -0.0001 -0.0017 -0.0029 -0.0015 0.0006  
Z 0.0012 0.0012 0.0025 0.0131 0.0092 -0.0033  
AT. 101 C X -0.0014 -0.0002 0.0008 -0.0029 0.0016 0.0005  
Y -0.0010 0.0001 0.0003 0.0004 -0.0008 -0.0002  
Z -0.0026 -0.0001 0.0014 -0.0027 0.0010 0.0004  
AT. 102 C X -0.0014 -0.0002 -0.0008 -0.0029 -0.0016 0.0005  
Y -0.0010 0.0001 -0.0003 0.0004 0.0008 -0.0002  
Z -0.0026 -0.0001 -0.0014 -0.0027 -0.0010 0.0004  
AT. 103 H X 0.0026 0.0002 -0.0022 0.0041 -0.0026 -0.0001  
Y -0.0031 -0.0001 0.0019 -0.0032 0.0014 0.0002  
Z 0.0268 -0.0013 -0.0118 0.0032 0.0076 0.0025  
AT. 104 H X 0.0026 0.0002 0.0022 0.0041 0.0026 -0.0001

Y -0.0031 -0.0001 -0.0019 -0.0032 -0.0014 0.0002  
Z 0.0268 -0.0013 0.0118 0.0032 -0.0076 0.0025  
AT. 105 H X 0.0088 -0.0010 -0.0014 -0.0052 0.0076 0.0024  
Y 0.0197 -0.0013 -0.0076 -0.0007 0.0082 0.0026  
Z 0.0076 -0.0008 -0.0020 -0.0041 0.0061 0.0019  
AT. 106 H X 0.0088 -0.0010 0.0014 -0.0052 -0.0076 0.0024  
Y 0.0197 -0.0013 0.0076 -0.0007 -0.0082 0.0026  
Z 0.0076 -0.0008 0.0020 -0.0041 -0.0061 0.0019  
AT. 107 C X 0.0005 0.0001 0.0012 0.0013 -0.0008 -0.0006  
Y -0.0026 0.0002 0.0039 0.0021 -0.0029 -0.0027  
Z -0.0017 0.0001 0.0017 0.0001 -0.0004 -0.0020  
AT. 108 C X 0.0005 0.0001 -0.0012 0.0013 0.0008 -0.0006  
Y -0.0026 0.0002 -0.0039 0.0021 0.0029 -0.0027  
Z -0.0017 0.0001 -0.0017 0.0001 0.0004 -0.0020  
AT. 109 H X 0.0087 -0.0023 -0.0250 -0.0141 0.0139 0.0195  
Y 0.0052 -0.0001 -0.0156 -0.0108 0.0132 0.0148  
Z 0.0081 0.0003 -0.0223 -0.0165 0.0212 0.0209  
AT. 110 H X 0.0087 -0.0023 0.0250 -0.0141 -0.0139 0.0195  
Y 0.0052 -0.0001 0.0156 -0.0108 -0.0132 0.0148  
Z 0.0081 0.0003 0.0223 -0.0165 -0.0212 0.0209  
AT. 111 H X -0.0052 -0.0001 -0.0001 -0.0032 0.0016 -0.0012  
Y 0.0161 -0.0013 -0.0351 -0.0227 0.0285 0.0288  
Z 0.0005 0.0007 0.0111 0.0101 -0.0096 -0.0075  
AT. 112 H X -0.0052 -0.0001 0.0001 -0.0032 -0.0016 -0.0012  
Y 0.0161 -0.0013 0.0351 -0.0227 -0.0285 0.0288  
Z 0.0005 0.0007 -0.0111 0.0101 0.0096 -0.0075  
AT. 113 C X -0.0026 -0.0000 0.0018 -0.0006 -0.0007 -0.0004  
Y 0.0037 -0.0003 0.0007 0.0029 -0.0028 -0.0037  
Z 0.0008 0.0000 -0.0017 0.0003 0.0000 0.0013  
AT. 114 C X -0.0026 -0.0000 -0.0018 -0.0006 0.0007 -0.0004  
Y 0.0037 -0.0003 -0.0007 0.0029 0.0028 -0.0037  
Z 0.0008 0.0000 0.0017 0.0003 -0.0000 0.0013

AT. 115 C X -0.0046 0.0006 0.0030 0.0031 -0.0038 -0.0018  
Y 0.0008 -0.0002 -0.0017 -0.0031 0.0030 0.0026  
Z 0.0001 0.0003 -0.0001 0.0046 -0.0036 -0.0020

AT. 116 C X -0.0046 0.0006 -0.0030 0.0031 0.0038 -0.0018  
Y 0.0008 -0.0002 0.0017 -0.0031 -0.0030 0.0026  
Z 0.0001 0.0003 0.0001 0.0046 0.0036 -0.0020

AT. 117 H X 0.0314 -0.0021 -0.0188 -0.0025 0.0107 0.0046  
Y -0.0200 0.0032 0.0144 0.0273 -0.0283 -0.0155  
Z -0.0306 0.0021 0.0179 0.0028 -0.0105 -0.0041

AT. 118 H X 0.0314 -0.0021 0.0188 -0.0025 -0.0107 0.0046  
Y -0.0200 0.0032 -0.0144 0.0273 0.0283 -0.0155  
Z -0.0306 0.0021 -0.0179 0.0028 0.0105 -0.0041

AT. 119 H X 0.0408 -0.0055 -0.0213 -0.0353 0.0384 0.0154  
Y -0.0010 -0.0014 0.0044 -0.0122 0.0089 0.0005  
Z 0.0253 -0.0018 -0.0186 -0.0078 0.0136 0.0096

AT. 120 H X 0.0408 -0.0055 0.0213 -0.0353 -0.0384 0.0154  
Y -0.0010 -0.0014 -0.0044 -0.0122 -0.0089 0.0005  
Z 0.0253 -0.0018 0.0186 -0.0078 -0.0136 0.0096

AT. 121 C X -0.0009 0.0001 -0.0009 0.0002 -0.0001 0.0003  
Y -0.0003 0.0000 -0.0009 -0.0020 0.0015 0.0006  
Z 0.0001 0.0002 -0.0009 0.0033 -0.0022 -0.0011

AT. 122 C X -0.0009 0.0001 0.0009 0.0002 0.0001 0.0003  
Y -0.0003 0.0000 0.0009 -0.0020 -0.0015 0.0006  
Z 0.0001 0.0002 0.0009 0.0033 0.0022 -0.0011

AT. 123 H X 0.0083 0.0015 0.0094 0.0196 -0.0163 -0.0059  
Y 0.0077 -0.0010 0.0095 0.0020 -0.0015 -0.0055  
Z -0.0064 0.0014 -0.0092 0.0020 -0.0015 0.0046

AT. 124 H X 0.0083 0.0015 -0.0094 0.0196 0.0163 -0.0059  
Y 0.0077 -0.0010 -0.0095 0.0020 0.0015 -0.0055  
Z -0.0064 0.0014 0.0092 0.0020 0.0015 0.0046

AT. 125 H X 0.0041 -0.0012 0.0038 -0.0119 0.0091 0.0009  
Y 0.0068 0.0003 0.0140 0.0119 -0.0109 -0.0052

Z 0.0094 -0.0012 0.0116 -0.0048 0.0029 -0.0027  
AT. 126 H X 0.0041 -0.0012 -0.0038 -0.0119 -0.0091 0.0009  
Y 0.0068 0.0003 -0.0140 0.0119 0.0109 -0.0052  
Z 0.0094 -0.0012 -0.0116 -0.0048 -0.0029 -0.0027  
AT. 127 C X 0.0027 -0.0001 -0.0019 -0.0006 0.0018 -0.0004  
Y -0.0031 0.0001 -0.0032 0.0015 -0.0010 0.0022  
Z -0.0015 0.0004 0.0005 0.0008 -0.0012 0.0018  
AT. 128 C X 0.0027 -0.0001 0.0019 -0.0006 -0.0018 -0.0004  
Y -0.0031 0.0001 0.0032 0.0015 0.0010 0.0022  
Z -0.0015 0.0004 -0.0005 0.0008 0.0012 0.0018  
AT. 129 C X -0.0055 0.0006 0.0044 0.0023 -0.0053 -0.0059  
Y 0.0014 -0.0002 -0.0000 -0.0004 0.0007 0.0002  
Z -0.0005 -0.0000 0.0010 -0.0004 0.0004 -0.0023  
AT. 130 C X -0.0055 0.0006 -0.0044 0.0023 0.0053 -0.0059  
Y 0.0014 -0.0002 0.0000 -0.0004 -0.0007 0.0002  
Z -0.0005 -0.0000 -0.0010 -0.0004 -0.0004 -0.0023  
AT. 131 H X 0.0231 -0.0030 -0.0233 -0.0106 0.0221 0.0335  
Y -0.0242 0.0029 0.0186 0.0127 -0.0261 -0.0298  
Z 0.0256 -0.0034 -0.0267 -0.0112 0.0239 0.0358  
AT. 132 H X 0.0231 -0.0030 0.0233 -0.0106 -0.0221 0.0335  
Y -0.0242 0.0029 -0.0186 0.0127 0.0261 -0.0298  
Z 0.0256 -0.0034 0.0267 -0.0112 -0.0239 0.0358  
AT. 133 H X 0.0414 -0.0043 -0.0377 -0.0235 0.0478 0.0532  
Y 0.0088 0.0004 -0.0053 -0.0059 0.0109 0.0100  
Z -0.0103 0.0031 0.0119 0.0028 -0.0079 -0.0134  
AT. 134 H X 0.0414 -0.0043 0.0377 -0.0235 -0.0478 0.0532  
Y 0.0088 0.0004 0.0053 -0.0059 -0.0109 0.0100  
Z -0.0103 0.0031 -0.0119 0.0028 0.0079 -0.0134  
AT. 135 C X -0.0007 0.0000 -0.0004 0.0007 -0.0008 0.0001  
Y 0.0031 -0.0004 -0.0001 0.0008 -0.0010 -0.0024  
Z -0.0005 -0.0000 -0.0000 0.0004 -0.0008 0.0005  
AT. 136 C X -0.0007 0.0000 0.0004 0.0007 0.0008 0.0001

Y 0.0031 -0.0004 0.0001 0.0008 0.0010 -0.0024  
Z -0.0005 -0.0000 0.0000 0.0004 0.0008 0.0005  
AT. 137 H X -0.0318 0.0035 -0.0013 -0.0147 0.0159 0.0297  
Y -0.0066 0.0014 0.0014 -0.0080 0.0115 0.0064  
Z -0.0031 0.0014 0.0029 -0.0083 0.0135 0.0025  
AT. 138 H X -0.0318 0.0035 0.0013 -0.0147 -0.0159 0.0297  
Y -0.0066 0.0014 -0.0014 -0.0080 -0.0115 0.0064  
Z -0.0031 0.0014 -0.0029 -0.0083 -0.0135 0.0025  
AT. 139 H X 0.0155 -0.0010 -0.0002 0.0012 0.0011 -0.0086  
Y -0.0438 0.0049 0.0003 -0.0164 0.0193 0.0357  
Z -0.0076 -0.0001 -0.0002 0.0046 -0.0083 0.0007  
AT. 140 H X 0.0155 -0.0010 0.0002 0.0012 -0.0011 -0.0086  
Y -0.0438 0.0049 -0.0003 -0.0164 -0.0193 0.0357  
Z -0.0076 -0.0001 0.0002 0.0046 0.0083 0.0007  
AT. 141 H X 0.0345 -0.0029 -0.0009 0.0066 -0.0048 -0.0221  
Y -0.0001 -0.0005 -0.0025 0.0053 -0.0084 0.0016  
Z 0.0167 -0.0009 0.0024 -0.0024 0.0060 -0.0124  
AT. 142 H X 0.0345 -0.0029 0.0009 0.0066 0.0048 -0.0221  
Y -0.0001 -0.0005 0.0025 0.0053 0.0084 0.0016  
Z 0.0167 -0.0009 -0.0024 -0.0024 -0.0060 -0.0124  
AT. 143 C X 0.0021 -0.0002 -0.0007 -0.0007 0.0015 -0.0014  
Y -0.0035 0.0001 -0.0015 0.0004 -0.0005 0.0008  
Z -0.0023 0.0002 0.0022 -0.0003 -0.0010 0.0010  
AT. 144 C X 0.0021 -0.0002 0.0007 -0.0007 -0.0015 -0.0014  
Y -0.0035 0.0001 0.0015 0.0004 0.0005 0.0008  
Z -0.0023 0.0002 -0.0022 -0.0003 0.0010 0.0010  
AT. 145 H X 0.0396 -0.0019 0.0122 -0.0070 0.0099 -0.0127  
Y -0.0031 0.0016 0.0297 -0.0015 -0.0106 0.0056  
Z 0.0098 -0.0021 -0.0275 -0.0002 0.0128 -0.0078  
AT. 146 H X 0.0396 -0.0019 -0.0122 -0.0070 -0.0099 -0.0127  
Y -0.0031 0.0016 -0.0297 -0.0015 0.0106 0.0056  
Z 0.0098 -0.0021 0.0275 -0.0002 -0.0128 -0.0078

AT.147 H X -0.0261 0.0018 0.0063 0.0062 -0.0138 0.0108  
Y 0.0584 -0.0025 0.0177 -0.0115 0.0165 -0.0191  
Z -0.0076 0.0015 0.0209 0.0031 -0.0126 0.0065

AT.148 H X -0.0261 0.0018 -0.0063 0.0062 0.0138 0.0108  
Y 0.0584 -0.0025 -0.0177 -0.0115 -0.0165 -0.0191  
Z -0.0076 0.0015 -0.0209 0.0031 0.0126 0.0065

AT.149 H X -0.0521 0.0029 -0.0009 0.0118 -0.0227 0.0208  
Y 0.0032 -0.0011 -0.0178 0.0021 0.0048 -0.0034  
Z 0.0356 -0.0034 -0.0273 -0.0035 0.0204 -0.0171

AT.150 H X -0.0521 0.0029 0.0009 0.0118 0.0227 0.0208  
Y 0.0032 -0.0011 0.0178 0.0021 -0.0048 -0.0034  
Z 0.0356 -0.0034 0.0273 -0.0035 -0.0204 -0.0171

AT.151 C X 0.0002 0.0000 -0.0001 -0.0001 0.0002 0.0007  
Y -0.0005 0.0001 0.0009 -0.0004 0.0001 -0.0002  
Z 0.0031 -0.0004 -0.0066 -0.0032 0.0054 0.0059

AT.152 C X 0.0002 0.0000 0.0001 -0.0001 -0.0002 0.0007  
Y -0.0005 0.0001 -0.0009 -0.0004 -0.0001 -0.0002  
Z 0.0031 -0.0004 0.0066 -0.0032 -0.0054 0.0059

AT.153 H X 0.0115 -0.0006 -0.0056 -0.0021 0.0049 0.0016  
Y -0.0102 0.0011 0.0301 0.0139 -0.0233 -0.0307  
Z -0.0181 0.0018 0.0448 0.0210 -0.0353 -0.0457

AT.154 H X 0.0115 -0.0006 0.0056 -0.0021 -0.0049 0.0016  
Y -0.0102 0.0011 -0.0301 0.0139 0.0233 -0.0307  
Z -0.0181 0.0018 -0.0448 0.0210 0.0353 -0.0457

AT.155 H X -0.0122 0.0008 0.0073 0.0034 -0.0070 -0.0045  
Y 0.0130 -0.0014 -0.0366 -0.0152 0.0266 0.0360  
Z -0.0165 0.0015 0.0374 0.0145 -0.0268 -0.0363

AT.156 H X -0.0122 0.0008 -0.0073 0.0034 0.0070 -0.0045  
Y 0.0130 -0.0014 0.0366 -0.0152 -0.0266 0.0360  
Z -0.0165 0.0015 -0.0374 0.0145 0.0268 -0.0363

AT.157 O X -0.0003 0.0004 0.0005 -0.0001 0.0002 0.0005  
Y -0.0007 0.0007 0.0009 0.0003 0.0004 0.0015

Z -0.0004 -0.0003 0.0010 0.0035 -0.0001 0.0037  
AT. 158 O X -0.0003 0.0004 -0.0005 -0.0001 -0.0002 0.0005  
Y -0.0007 0.0007 -0.0009 0.0003 -0.0004 0.0015  
Z -0.0004 -0.0003 -0.0010 0.0035 0.0001 0.0037  
AT. 159 O X 0.0001 0.0006 -0.0008 -0.0039 0.0002 -0.0037  
Y 0.0004 -0.0004 -0.0006 -0.0001 -0.0002 -0.0008  
Z 0.0006 -0.0002 -0.0012 -0.0027 -0.0002 -0.0034  
AT. 160 O X 0.0001 0.0006 0.0008 -0.0039 -0.0002 -0.0037  
Y 0.0004 -0.0004 0.0006 -0.0001 0.0002 -0.0008  
Z 0.0006 -0.0002 0.0012 -0.0027 0.0002 -0.0034  
AT. 161 H X 0.0135 -0.0134 -0.0215 -0.0190 -0.0082 -0.0432  
Y 0.0039 -0.0040 -0.0064 -0.0056 -0.0021 -0.0125  
Z -0.0077 0.0072 0.0133 0.0134 0.0045 0.0270  
AT. 162 H X 0.0135 -0.0134 0.0215 -0.0190 0.0082 -0.0432  
Y 0.0039 -0.0040 0.0064 -0.0056 0.0021 -0.0125  
Z -0.0077 0.0072 -0.0133 0.0134 -0.0045 0.0270  
AT. 163 H X -0.0099 -0.0036 0.0271 0.0876 0.0002 0.0962  
Y -0.0002 -0.0011 0.0016 0.0026 -0.0008 0.0013  
Z 0.0038 0.0010 -0.0105 -0.0332 -0.0003 -0.0369  
AT. 164 H X -0.0099 -0.0036 -0.0271 0.0876 -0.0002 0.0962  
Y -0.0002 -0.0011 -0.0016 0.0026 0.0008 0.0013  
Z 0.0038 0.0010 0.0105 -0.0332 0.0003 -0.0369  
AT. 165 O X -0.0010 -0.0003 -0.0019 -0.0019 -0.0012 0.0004  
Y 0.0010 -0.0002 0.0013 0.0014 0.0009 0.0001  
Z -0.0013 0.0003 -0.0016 -0.0017 -0.0012 -0.0001  
AT. 166 O X -0.0010 -0.0003 0.0019 -0.0019 0.0012 0.0004  
Y 0.0010 -0.0002 -0.0013 0.0014 -0.0009 0.0001  
Z -0.0013 0.0003 0.0016 -0.0017 0.0012 -0.0001  
AT. 167 H X 0.0031 0.0023 0.0078 0.0073 0.0043 -0.0028  
Y 0.0001 -0.0011 -0.0012 -0.0004 0.0001 0.0010  
Z -0.0133 -0.0052 -0.0265 -0.0271 -0.0172 0.0071  
AT. 168 H X 0.0031 0.0023 -0.0078 0.0073 -0.0043 -0.0028



|                                                              |     |         |         |         |         |         |         |
|--------------------------------------------------------------|-----|---------|---------|---------|---------|---------|---------|
|                                                              | Y   | 0.0001  | -0.0011 | 0.0012  | -0.0004 | -0.0001 | 0.0010  |
|                                                              | Z   | -0.0133 | -0.0052 | 0.0265  | -0.0271 | 0.0172  | 0.0071  |
| AT. 169                                                      | O X | 0.0015  | -0.0001 | 0.0023  | 0.0023  | 0.0015  | -0.0002 |
|                                                              | Y   | -0.0020 | 0.0004  | -0.0026 | -0.0029 | -0.0019 | -0.0001 |
|                                                              | Z   | -0.0007 | 0.0003  | -0.0007 | -0.0008 | -0.0005 | -0.0002 |
| AT. 170                                                      | O X | 0.0015  | -0.0001 | -0.0023 | 0.0023  | -0.0015 | -0.0002 |
|                                                              | Y   | -0.0020 | 0.0004  | 0.0026  | -0.0029 | 0.0019  | -0.0001 |
|                                                              | Z   | -0.0007 | 0.0003  | 0.0007  | -0.0008 | 0.0005  | -0.0002 |
| AT. 171                                                      | H X | -0.0115 | 0.0024  | -0.0155 | -0.0149 | -0.0102 | -0.0005 |
|                                                              | Y   | 0.0188  | -0.0021 | 0.0261  | 0.0291  | 0.0189  | -0.0009 |
|                                                              | Z   | 0.0483  | -0.0062 | 0.0662  | 0.0706  | 0.0462  | -0.0016 |
| AT. 172                                                      | H X | -0.0115 | 0.0024  | 0.0155  | -0.0149 | 0.0102  | -0.0005 |
|                                                              | Y   | 0.0188  | -0.0021 | -0.0261 | 0.0291  | -0.0189 | -0.0009 |
|                                                              | Z   | 0.0483  | -0.0062 | -0.0662 | 0.0706  | -0.0462 | -0.0016 |
| FREQ(CM**-1) 1530.00 1531.95 1532.35 1534.74 1536.59 1536.79 |     |         |         |         |         |         |         |
| AT. 1                                                        | I X | 0.0000  | 0.0000  | -0.0000 | -0.0000 | -0.0000 | 0.0000  |
|                                                              | Y   | 0.0000  | 0.0000  | -0.0000 | -0.0000 | -0.0000 | 0.0000  |
|                                                              | Z   | -0.0000 | -0.0000 | -0.0000 | 0.0000  | 0.0000  | 0.0000  |
| AT. 2                                                        | I X | -0.0000 | -0.0000 | -0.0000 | -0.0000 | 0.0000  | 0.0000  |
|                                                              | Y   | -0.0000 | -0.0000 | -0.0000 | -0.0000 | 0.0000  | 0.0000  |
|                                                              | Z   | 0.0000  | 0.0000  | -0.0000 | 0.0000  | -0.0000 | 0.0000  |
| AT. 3                                                        | I X | 0.0000  | -0.0000 | 0.0000  | -0.0000 | -0.0000 | -0.0000 |
|                                                              | Y   | 0.0000  | -0.0000 | 0.0000  | -0.0000 | -0.0000 | 0.0000  |
|                                                              | Z   | -0.0000 | -0.0000 | -0.0000 | -0.0000 | -0.0000 | -0.0000 |
| AT. 4                                                        | I X | -0.0000 | 0.0000  | 0.0000  | -0.0000 | 0.0000  | -0.0000 |
|                                                              | Y   | -0.0000 | 0.0000  | 0.0000  | -0.0000 | 0.0000  | 0.0000  |
|                                                              | Z   | 0.0000  | 0.0000  | -0.0000 | -0.0000 | 0.0000  | -0.0000 |
| AT. 5                                                        | O X | 0.0006  | -0.0002 | -0.0011 | 0.0009  | 0.0008  | 0.0014  |
|                                                              | Y   | -0.0000 | 0.0004  | 0.0006  | -0.0005 | -0.0006 | -0.0011 |
|                                                              | Z   | -0.0005 | 0.0001  | 0.0010  | -0.0006 | -0.0005 | -0.0011 |

AT. 6 O X -0.0006 0.0002 -0.0011 0.0009 -0.0008 0.0014  
Y 0.0000 -0.0004 0.0006 -0.0005 0.0006 -0.0011  
Z 0.0005 -0.0001 0.0010 -0.0006 0.0005 -0.0011

AT. 7 O X 0.0029 0.0029 0.0012 0.0031 0.0048 0.0062  
Y -0.0020 -0.0023 -0.0006 -0.0025 -0.0041 -0.0054  
Z -0.0003 0.0003 -0.0002 0.0005 0.0008 0.0008

AT. 8 O X -0.0029 -0.0029 0.0012 0.0031 -0.0048 0.0062  
Y 0.0020 0.0023 -0.0006 -0.0025 0.0041 -0.0054  
Z 0.0003 -0.0003 -0.0002 0.0005 -0.0008 0.0008

AT. 9 N X -0.0002 -0.0004 -0.0002 0.0023 0.0020 -0.0002  
Y -0.0001 -0.0001 0.0006 -0.0013 -0.0017 -0.0011  
Z 0.0014 0.0012 -0.0022 0.0068 0.0076 0.0036

AT. 10 N X 0.0002 0.0004 -0.0002 0.0023 -0.0020 -0.0002  
Y 0.0001 0.0001 0.0006 -0.0013 0.0017 -0.0011  
Z -0.0014 -0.0012 -0.0022 0.0068 -0.0076 0.0036

AT. 11 N X 0.0003 0.0008 -0.0007 0.0008 0.0018 0.0029  
Y 0.0002 0.0052 0.0009 0.0058 0.0058 0.0058  
Z -0.0027 -0.0120 -0.0010 -0.0148 -0.0201 -0.0232

AT. 12 N X -0.0003 -0.0008 -0.0007 0.0008 -0.0018 0.0029  
Y -0.0002 -0.0052 0.0009 0.0058 -0.0058 0.0058  
Z 0.0027 0.0120 -0.0010 -0.0148 0.0201 -0.0232

AT. 13 C X -0.0008 0.0006 0.0018 -0.0028 -0.0033 -0.0027  
Y 0.0004 -0.0006 -0.0015 0.0022 0.0028 0.0029  
Z -0.0005 -0.0007 0.0005 -0.0045 -0.0057 -0.0013

AT. 14 C X 0.0008 -0.0006 0.0018 -0.0028 0.0033 -0.0027  
Y -0.0004 0.0006 -0.0015 0.0022 -0.0028 0.0029  
Z 0.0005 0.0007 0.0005 -0.0045 0.0057 -0.0013

AT. 15 C X 0.0002 -0.0002 -0.0002 0.0013 0.0016 0.0001  
Y -0.0000 0.0000 -0.0001 -0.0031 -0.0033 0.0013  
Z 0.0001 0.0000 0.0000 0.0016 0.0018 -0.0002

AT. 16 C X -0.0002 0.0002 -0.0002 0.0013 -0.0016 0.0001  
Y 0.0000 -0.0000 -0.0001 -0.0031 0.0033 0.0013

Z -0.0001 -0.0000 0.0000 0.0016 -0.0018 -0.0002  
AT. 17 H X 0.0002 0.0015 0.0016 0.0020 0.0008 -0.0026  
Y -0.0011 0.0006 0.0032 0.0152 0.0144 -0.0113  
Z 0.0014 -0.0002 -0.0035 -0.0211 -0.0207 0.0143  
AT. 18 H X -0.0002 -0.0015 0.0016 0.0020 -0.0008 -0.0026  
Y 0.0011 -0.0006 0.0032 0.0152 -0.0144 -0.0113  
Z -0.0014 0.0002 -0.0035 -0.0211 0.0207 0.0143  
AT. 19 H X -0.0011 0.0002 -0.0012 -0.0021 -0.0017 0.0033  
Y -0.0011 0.0005 0.0045 0.0179 0.0185 -0.0160  
Z -0.0007 0.0003 0.0012 0.0076 0.0083 -0.0052  
AT. 20 H X 0.0011 -0.0002 -0.0012 -0.0021 0.0017 0.0033  
Y 0.0011 -0.0005 0.0045 0.0179 -0.0185 -0.0160  
Z 0.0007 -0.0003 0.0012 0.0076 -0.0083 -0.0052  
AT. 21 C X -0.0039 -0.0067 -0.0010 -0.0079 -0.0119 -0.0151  
Y 0.0025 -0.0005 0.0006 -0.0010 -0.0001 0.0012  
Z 0.0026 0.0101 0.0011 0.0120 0.0162 0.0190  
AT. 22 C X 0.0039 0.0067 -0.0010 -0.0079 0.0119 -0.0151  
Y -0.0025 0.0005 0.0006 -0.0010 0.0001 0.0012  
Z -0.0026 -0.0101 0.0011 0.0120 -0.0162 0.0190  
AT. 23 C X -0.0003 0.0020 -0.0005 0.0028 0.0038 0.0045  
Y 0.0010 -0.0006 0.0007 -0.0012 -0.0013 -0.0014  
Z 0.0018 -0.0033 0.0014 -0.0047 -0.0059 -0.0064  
AT. 24 C X 0.0003 -0.0020 -0.0005 0.0028 -0.0038 0.0045  
Y -0.0010 0.0006 0.0007 -0.0012 0.0013 -0.0014  
Z -0.0018 0.0033 0.0014 -0.0047 0.0059 -0.0064  
AT. 25 H X -0.0007 -0.0022 -0.0006 -0.0029 -0.0038 -0.0036  
Y 0.0032 -0.0033 0.0023 -0.0052 -0.0062 -0.0064  
Z -0.0220 0.0156 -0.0146 0.0256 0.0287 0.0270  
AT. 26 H X 0.0007 0.0022 -0.0006 -0.0029 0.0038 -0.0036  
Y -0.0032 0.0033 0.0023 -0.0052 0.0062 -0.0064  
Z 0.0220 -0.0156 -0.0146 0.0256 -0.0287 0.0270  
AT. 27 H X 0.0090 0.0025 0.0060 -0.0005 -0.0002 0.0003

Y -0.0190 0.0091 -0.0126 0.0171 0.0181 0.0169  
Z -0.0105 0.0014 -0.0069 0.0052 0.0048 0.0036  
AT. 28 H X -0.0090 -0.0025 0.0060 -0.0005 0.0002 0.0003  
Y 0.0190 -0.0091 -0.0126 0.0171 -0.0181 0.0169  
Z 0.0105 -0.0014 -0.0069 0.0052 -0.0048 0.0036  
AT. 29 C X -0.0004 0.0001 0.0003 -0.0016 -0.0015 -0.0006  
Y 0.0012 0.0020 -0.0006 0.0008 -0.0006 -0.0002  
Z -0.0000 0.0008 -0.0001 -0.0022 -0.0028 -0.0008  
AT. 30 C X 0.0004 -0.0001 0.0003 -0.0016 0.0015 -0.0006  
Y -0.0012 -0.0020 -0.0006 0.0008 0.0006 -0.0002  
Z 0.0000 -0.0008 -0.0001 -0.0022 0.0028 -0.0008  
AT. 31 H X 0.0052 0.0030 0.0017 -0.0005 -0.0062 -0.0038  
Y -0.0070 -0.0119 0.0029 -0.0001 0.0055 -0.0017  
Z -0.0080 -0.0182 0.0059 -0.0027 0.0037 -0.0049  
AT. 32 H X -0.0052 -0.0030 0.0017 -0.0005 0.0062 -0.0038  
Y 0.0070 0.0119 0.0029 -0.0001 -0.0055 -0.0017  
Z 0.0080 0.0182 0.0059 -0.0027 -0.0037 -0.0049  
AT. 33 H X -0.0010 -0.0022 -0.0020 0.0061 0.0080 0.0031  
Y -0.0117 -0.0190 0.0048 -0.0066 0.0021 -0.0037  
Z 0.0050 0.0077 -0.0037 0.0061 0.0025 0.0032  
AT. 34 H X 0.0010 0.0022 -0.0020 0.0061 -0.0080 0.0031  
Y 0.0117 0.0190 0.0048 -0.0066 -0.0021 -0.0037  
Z -0.0050 -0.0077 -0.0037 0.0061 -0.0025 0.0032  
AT. 35 C X 0.0007 0.0006 -0.0003 0.0007 0.0024 0.0035  
Y 0.0006 0.0027 -0.0010 0.0008 0.0016 0.0033  
Z 0.0005 -0.0018 0.0013 0.0018 0.0034 0.0013  
AT. 36 C X -0.0007 -0.0006 -0.0003 0.0007 -0.0024 0.0035  
Y -0.0006 -0.0027 -0.0010 0.0008 -0.0016 0.0033  
Z -0.0005 0.0018 0.0013 0.0018 -0.0034 0.0013  
AT. 37 C X -0.0027 0.0017 -0.0010 0.0036 0.0021 -0.0007  
Y 0.0002 -0.0038 0.0005 -0.0028 -0.0024 -0.0030  
Z 0.0007 0.0046 -0.0001 0.0041 0.0047 0.0061

AT. 38 C X 0.0027 -0.0017 -0.0010 0.0036 -0.0021 -0.0007  
Y -0.0002 0.0038 0.0005 -0.0028 0.0024 -0.0030  
Z -0.0007 -0.0046 -0.0001 0.0041 -0.0047 0.0061

AT. 39 H X 0.0160 -0.0184 0.0090 -0.0304 -0.0264 -0.0136  
Y 0.0056 0.0153 0.0013 0.0138 0.0205 0.0282  
Z 0.0108 -0.0171 0.0062 -0.0255 -0.0236 -0.0156

AT. 40 H X -0.0160 0.0184 0.0090 -0.0304 0.0264 -0.0136  
Y -0.0056 -0.0153 0.0013 0.0138 -0.0205 0.0282  
Z -0.0108 0.0171 0.0062 -0.0255 0.0236 -0.0156

AT. 41 H X 0.0171 -0.0032 0.0095 -0.0109 -0.0015 0.0131  
Y -0.0110 0.0020 -0.0081 -0.0018 -0.0141 -0.0207  
Z -0.0099 0.0040 -0.0034 0.0167 0.0163 0.0045

AT. 42 H X -0.0171 0.0032 0.0095 -0.0109 0.0015 0.0131  
Y 0.0110 -0.0020 -0.0081 -0.0018 0.0141 -0.0207  
Z 0.0099 -0.0040 -0.0034 0.0167 -0.0163 0.0045

AT. 43 C X 0.0002 -0.0022 -0.0009 -0.0024 -0.0008 0.0006  
Y -0.0001 0.0042 0.0041 0.0046 -0.0006 -0.0054  
Z -0.0000 0.0047 0.0006 0.0045 0.0039 0.0041

AT. 44 C X -0.0002 0.0022 -0.0009 -0.0024 0.0008 0.0006  
Y 0.0001 -0.0042 0.0041 0.0046 0.0006 -0.0054  
Z 0.0000 -0.0047 0.0006 0.0045 -0.0039 0.0041

AT. 45 H X -0.0055 0.0294 0.0230 0.0240 -0.0186 -0.0487  
Y 0.0027 -0.0338 -0.0297 -0.0395 -0.0012 0.0363  
Z 0.0014 0.0166 0.0151 0.0263 0.0165 -0.0013

AT. 46 H X 0.0055 -0.0294 0.0230 0.0240 0.0186 -0.0487  
Y -0.0027 0.0338 -0.0297 -0.0395 0.0012 0.0363  
Z -0.0014 -0.0166 0.0151 0.0263 -0.0165 -0.0013

AT. 47 H X 0.0020 -0.0044 -0.0086 -0.0013 0.0154 0.0265  
Y 0.0035 -0.0445 -0.0324 -0.0457 -0.0004 0.0377  
Z 0.0010 -0.0419 -0.0258 -0.0475 -0.0177 0.0116

AT. 48 H X -0.0020 0.0044 -0.0086 -0.0013 -0.0154 0.0265  
Y -0.0035 0.0445 -0.0324 -0.0457 0.0004 0.0377

Z -0.0010 0.0419 -0.0258 -0.0475 0.0177 0.0116  
AT. 49 C X 0.0000 -0.0009 0.0004 0.0023 0.0034 0.0006  
Y -0.0006 0.0034 0.0018 0.0053 0.0033 -0.0005  
Z 0.0010 -0.0025 0.0013 0.0019 0.0039 0.0010  
AT. 50 C X -0.0000 0.0009 0.0004 0.0023 -0.0034 0.0006  
Y 0.0006 -0.0034 0.0018 0.0053 -0.0033 -0.0005  
Z -0.0010 0.0025 0.0013 0.0019 -0.0039 0.0010  
AT. 51 C X -0.0025 0.0008 0.0006 0.0054 0.0022 -0.0041  
Y 0.0001 -0.0001 -0.0007 -0.0018 -0.0012 0.0009  
Z -0.0000 0.0002 -0.0002 -0.0049 -0.0042 0.0004  
AT. 52 C X 0.0025 -0.0008 0.0006 0.0054 -0.0022 -0.0041  
Y -0.0001 0.0001 -0.0007 -0.0018 0.0012 0.0009  
Z 0.0000 -0.0002 -0.0002 -0.0049 0.0042 0.0004  
AT. 53 H X 0.0132 -0.0021 -0.0044 -0.0381 -0.0225 0.0214  
Y 0.0109 0.0007 -0.0032 -0.0178 -0.0078 0.0163  
Z -0.0135 0.0055 0.0048 0.0488 0.0295 -0.0236  
AT. 54 H X -0.0132 0.0021 -0.0044 -0.0381 0.0225 0.0214  
Y -0.0109 -0.0007 -0.0032 -0.0178 0.0078 0.0163  
Z 0.0135 -0.0055 0.0048 0.0488 -0.0295 -0.0236  
AT. 55 H X 0.0218 -0.0042 -0.0086 -0.0490 -0.0238 0.0355  
Y -0.0097 -0.0043 0.0055 0.0206 0.0099 -0.0192  
Z 0.0041 -0.0094 0.0016 -0.0126 -0.0066 0.0016  
AT. 56 H X -0.0218 0.0042 -0.0086 -0.0490 0.0238 0.0355  
Y 0.0097 0.0043 0.0055 0.0206 -0.0099 -0.0192  
Z -0.0041 0.0094 0.0016 -0.0126 0.0066 0.0016  
AT. 57 C X 0.0001 0.0010 -0.0006 -0.0014 -0.0015 0.0004  
Y 0.0008 0.0006 -0.0000 0.0000 0.0014 0.0021  
Z 0.0006 -0.0012 0.0008 0.0011 0.0020 0.0005  
AT. 58 C X -0.0001 -0.0010 -0.0006 -0.0014 0.0015 0.0004  
Y -0.0008 -0.0006 -0.0000 0.0000 -0.0014 0.0021  
Z -0.0006 0.0012 0.0008 0.0011 -0.0020 0.0005  
AT. 59 H X 0.0038 0.0159 -0.0074 -0.0064 -0.0008 0.0183

Y -0.0084 0.0002 -0.0029 -0.0067 -0.0211 -0.0196  
Z -0.0102 0.0100 -0.0090 -0.0135 -0.0318 -0.0183  
AT. 60 H X -0.0038 -0.0159 -0.0074 -0.0064 0.0008 0.0183  
Y 0.0084 -0.0002 -0.0029 -0.0067 0.0211 -0.0196  
Z 0.0102 -0.0100 -0.0090 -0.0135 0.0318 -0.0183  
AT. 61 H X -0.0043 -0.0155 0.0079 0.0113 0.0057 -0.0180  
Y -0.0113 -0.0097 0.0013 -0.0004 -0.0195 -0.0321  
Z 0.0029 -0.0083 0.0064 0.0105 0.0167 0.0029  
AT. 62 H X 0.0043 0.0155 0.0079 0.0113 -0.0057 -0.0180  
Y 0.0113 0.0097 0.0013 -0.0004 0.0195 -0.0321  
Z -0.0029 0.0083 0.0064 0.0105 -0.0167 0.0029  
AT. 63 H X -0.0029 -0.0166 0.0084 0.0114 0.0074 -0.0170  
Y 0.0068 -0.0042 0.0048 0.0077 0.0195 0.0148  
Z -0.0022 0.0195 -0.0119 -0.0174 -0.0227 0.0048  
AT. 64 H X 0.0029 0.0166 0.0084 0.0114 -0.0074 -0.0170  
Y -0.0068 0.0042 0.0048 0.0077 -0.0195 0.0148  
Z 0.0022 -0.0195 -0.0119 -0.0174 0.0227 0.0048  
AT. 65 C X 0.0002 -0.0014 0.0013 0.0022 0.0033 0.0005  
Y -0.0005 0.0020 0.0008 0.0017 -0.0000 -0.0007  
Z 0.0005 -0.0024 -0.0001 0.0003 0.0018 -0.0004  
AT. 66 C X -0.0002 0.0014 0.0013 0.0022 -0.0033 0.0005  
Y 0.0005 -0.0020 0.0008 0.0017 0.0000 -0.0007  
Z -0.0005 0.0024 -0.0001 0.0003 -0.0018 -0.0004  
AT. 67 H X 0.0001 0.0031 0.0109 0.0258 0.0242 -0.0026  
Y 0.0081 -0.0385 -0.0062 -0.0151 0.0129 0.0062  
Z -0.0073 0.0316 -0.0022 -0.0054 -0.0294 -0.0041  
AT. 68 H X -0.0001 -0.0031 0.0109 0.0258 -0.0242 -0.0026  
Y -0.0081 0.0385 -0.0062 -0.0151 -0.0129 0.0062  
Z 0.0073 -0.0316 -0.0022 -0.0054 0.0294 -0.0041  
AT. 69 H X 0.0001 0.0004 -0.0136 -0.0278 -0.0291 -0.0006  
Y 0.0031 -0.0146 -0.0164 -0.0359 -0.0259 0.0032  
Z 0.0052 -0.0273 0.0028 0.0022 0.0237 0.0074

AT. 70 H X -0.0001 -0.0004 -0.0136 -0.0278 0.0291 -0.0006  
Y -0.0031 0.0146 -0.0164 -0.0359 0.0259 0.0032  
Z -0.0052 0.0273 0.0028 0.0022 -0.0237 0.0074

AT. 71 H X -0.0036 0.0184 -0.0163 -0.0342 -0.0498 -0.0037  
Y -0.0041 0.0174 0.0071 0.0155 0.0044 -0.0005  
Z -0.0077 0.0359 -0.0040 -0.0072 -0.0327 -0.0036

AT. 72 H X 0.0036 -0.0184 -0.0163 -0.0342 0.0498 -0.0037  
Y 0.0041 -0.0174 0.0071 0.0155 -0.0044 -0.0005  
Z 0.0077 -0.0359 -0.0040 -0.0072 0.0327 -0.0036

AT. 73 C X 0.0002 0.0001 0.0004 0.0001 -0.0004 -0.0008  
Y -0.0001 -0.0006 -0.0004 -0.0017 -0.0016 -0.0001  
Z 0.0007 -0.0047 0.0010 0.0008 0.0031 -0.0008

AT. 74 C X -0.0002 -0.0001 0.0004 0.0001 0.0004 -0.0008  
Y 0.0001 0.0006 -0.0004 -0.0017 0.0016 -0.0001  
Z -0.0007 0.0047 0.0010 0.0008 -0.0031 -0.0008

AT. 75 H X -0.0056 0.0204 -0.0036 -0.0030 -0.0153 -0.0015  
Y -0.0024 0.0195 -0.0062 -0.0066 -0.0155 0.0040  
Z -0.0068 0.0392 -0.0104 -0.0097 -0.0294 0.0039

AT. 76 H X 0.0056 -0.0204 -0.0036 -0.0030 0.0153 -0.0015  
Y 0.0024 -0.0195 -0.0062 -0.0066 0.0155 0.0040  
Z 0.0068 -0.0392 -0.0104 -0.0097 0.0294 0.0039

AT. 77 H X 0.0028 -0.0134 0.0002 -0.0015 0.0081 0.0046  
Y 0.0050 -0.0276 0.0101 0.0139 0.0278 -0.0052  
Z -0.0066 0.0341 -0.0085 -0.0115 -0.0321 -0.0010

AT. 78 H X -0.0028 0.0134 0.0002 -0.0015 -0.0081 0.0046  
Y -0.0050 0.0276 0.0101 0.0139 -0.0278 -0.0052  
Z 0.0066 -0.0341 -0.0085 -0.0115 0.0321 -0.0010

AT. 79 I X 0.0000 -0.0001 0.0000 -0.0000 0.0000 0.0000  
Y 0.0000 -0.0000 -0.0000 -0.0000 -0.0000 -0.0000  
Z 0.0000 -0.0000 -0.0000 0.0000 0.0000 -0.0000

AT. 80 I X -0.0000 0.0001 0.0000 -0.0000 -0.0000 0.0000  
Y -0.0000 0.0000 -0.0000 -0.0000 0.0000 -0.0000



Z -0.0000 0.0000 -0.0000 0.0000 -0.0000 -0.0000  
AT. 81 I X 0.0000 -0.0000 -0.0000 0.0000 0.0000 0.0000  
Y -0.0000 0.0000 0.0000 0.0000 0.0000 -0.0000  
Z -0.0000 0.0000 0.0000 0.0000 -0.0000 -0.0000  
AT. 82 I X -0.0000 0.0000 -0.0000 0.0000 -0.0000 0.0000  
Y 0.0000 -0.0000 0.0000 0.0000 -0.0000 -0.0000  
Z 0.0000 -0.0000 0.0000 0.0000 0.0000 -0.0000  
AT. 83 O X 0.0003 0.0014 -0.0004 0.0005 -0.0005 -0.0001  
Y 0.0001 0.0003 -0.0001 0.0001 -0.0001 -0.0001  
Z 0.0001 0.0007 -0.0001 0.0002 -0.0002 0.0000  
AT. 84 O X -0.0003 -0.0014 -0.0004 0.0005 0.0005 -0.0001  
Y -0.0001 -0.0003 -0.0001 0.0001 0.0001 -0.0001  
Z -0.0001 -0.0007 -0.0001 0.0002 0.0002 0.0000  
AT. 85 O X -0.0015 0.0019 -0.0007 0.0007 -0.0004 -0.0013  
Y -0.0009 0.0012 -0.0006 0.0005 -0.0002 -0.0008  
Z 0.0002 0.0002 -0.0001 0.0002 0.0000 0.0001  
AT. 86 O X 0.0015 -0.0019 -0.0007 0.0007 0.0004 -0.0013  
Y 0.0009 -0.0012 -0.0006 0.0005 0.0002 -0.0008  
Z -0.0002 -0.0002 -0.0001 0.0002 -0.0000 0.0001  
AT. 87 N X -0.0000 0.0001 -0.0007 0.0001 -0.0004 -0.0005  
Y -0.0002 0.0009 -0.0002 0.0003 -0.0003 -0.0002  
Z 0.0012 -0.0044 0.0018 -0.0023 0.0025 0.0025  
AT. 88 N X 0.0000 -0.0001 -0.0007 0.0001 0.0004 -0.0005  
Y 0.0002 -0.0009 -0.0002 0.0003 0.0003 -0.0002  
Z -0.0012 0.0044 0.0018 -0.0023 -0.0025 0.0025  
AT. 89 N X -0.0007 0.0009 0.0004 0.0001 -0.0003 -0.0007  
Y 0.0021 -0.0033 0.0008 -0.0014 0.0006 0.0020  
Z -0.0047 0.0087 -0.0025 0.0037 -0.0018 -0.0051  
AT. 90 N X 0.0007 -0.0009 0.0004 0.0001 0.0003 -0.0007  
Y -0.0021 0.0033 0.0008 -0.0014 -0.0006 0.0020  
Z 0.0047 -0.0087 -0.0025 0.0037 0.0018 -0.0051  
AT. 91 C X -0.0007 -0.0029 0.0009 -0.0010 0.0012 0.0006

Y -0.0002 -0.0012 0.0004 -0.0005 0.0005 0.0004  
Z -0.0009 0.0030 -0.0014 0.0017 -0.0019 -0.0021  
AT. 92 C X 0.0007 0.0029 0.0009 -0.0010 -0.0012 0.0006  
Y 0.0002 0.0012 0.0004 -0.0005 -0.0005 0.0004  
Z 0.0009 -0.0030 -0.0014 0.0017 0.0019 -0.0021  
AT. 93 C X 0.0000 0.0005 -0.0005 0.0003 -0.0006 -0.0006  
Y -0.0002 0.0002 -0.0003 0.0001 -0.0006 -0.0008  
Z 0.0002 -0.0005 0.0007 -0.0003 0.0006 0.0007  
AT. 94 C X -0.0000 -0.0005 -0.0005 0.0003 0.0006 -0.0006  
Y 0.0002 -0.0002 -0.0003 0.0001 0.0006 -0.0008  
Z -0.0002 0.0005 0.0007 -0.0003 -0.0006 0.0007  
AT. 95 H X 0.0007 0.0012 0.0018 -0.0005 -0.0003 -0.0015  
Y 0.0018 0.0005 0.0010 0.0003 0.0027 0.0044  
Z -0.0040 -0.0020 -0.0047 0.0002 -0.0052 -0.0069  
AT. 96 H X -0.0007 -0.0012 0.0018 -0.0005 0.0003 -0.0015  
Y -0.0018 -0.0005 0.0010 0.0003 -0.0027 0.0044  
Z 0.0040 0.0020 -0.0047 0.0002 0.0052 -0.0069  
AT. 97 H X 0.0005 0.0017 0.0011 0.0007 0.0018 0.0020  
Y 0.0024 0.0016 0.0025 0.0007 0.0037 0.0053  
Z 0.0007 -0.0005 0.0008 -0.0003 0.0008 0.0014  
AT. 98 H X -0.0005 -0.0017 0.0011 0.0007 -0.0018 0.0020  
Y -0.0024 -0.0016 0.0025 0.0007 -0.0037 0.0053  
Z -0.0007 0.0005 0.0008 -0.0003 -0.0008 0.0014  
AT. 99 C X 0.0037 -0.0050 0.0014 -0.0018 0.0012 0.0035  
Y -0.0008 0.0022 -0.0001 0.0010 -0.0004 -0.0010  
Z 0.0039 -0.0075 0.0016 -0.0033 0.0014 0.0042  
AT. 100 C X -0.0037 0.0050 0.0014 -0.0018 -0.0012 0.0035  
Y 0.0008 -0.0022 -0.0001 0.0010 0.0004 -0.0010  
Z -0.0039 0.0075 0.0016 -0.0033 -0.0014 0.0042  
AT. 101 C X -0.0013 0.0009 0.0005 -0.0000 -0.0006 -0.0010  
Y -0.0001 -0.0005 0.0006 -0.0003 -0.0001 -0.0001  
Z -0.0015 0.0010 0.0013 0.0001 -0.0006 -0.0013

AT.102 C X 0.0013 -0.0009 0.0005 -0.0000 0.0006 -0.0010  
Y 0.0001 0.0005 0.0006 -0.0003 0.0001 -0.0001  
Z 0.0015 -0.0010 0.0013 0.0001 0.0006 -0.0013

AT.103 H X 0.0013 -0.0016 0.0004 0.0001 0.0008 0.0008  
Y -0.0014 0.0009 0.0009 -0.0004 -0.0008 -0.0011  
Z 0.0071 0.0021 -0.0144 0.0046 0.0039 0.0057

AT.104 H X -0.0013 0.0016 0.0004 0.0001 -0.0008 0.0008  
Y 0.0014 -0.0009 0.0009 -0.0004 0.0008 -0.0011  
Z -0.0071 -0.0021 -0.0144 0.0046 -0.0039 0.0057

AT.105 H X 0.0010 0.0070 -0.0077 0.0053 0.0010 -0.0004  
Y 0.0049 0.0038 -0.0123 0.0043 0.0027 0.0037  
Z 0.0010 0.0044 -0.0058 0.0032 0.0007 0.0001

AT.106 H X -0.0010 -0.0070 -0.0077 0.0053 -0.0010 -0.0004  
Y -0.0049 -0.0038 -0.0123 0.0043 -0.0027 0.0037  
Z -0.0010 -0.0044 -0.0058 0.0032 -0.0007 0.0001

AT.107 C X -0.0000 -0.0002 -0.0003 -0.0003 0.0001 0.0005  
Y 0.0006 -0.0005 -0.0016 -0.0000 -0.0002 -0.0001  
Z 0.0000 0.0006 -0.0016 0.0006 -0.0007 -0.0010

AT.108 C X 0.0000 0.0002 -0.0003 -0.0003 -0.0001 0.0005  
Y -0.0006 0.0005 -0.0016 -0.0000 0.0002 -0.0001  
Z -0.0000 -0.0006 -0.0016 0.0006 0.0007 -0.0010

AT.109 H X 0.0003 -0.0011 0.0091 -0.0006 0.0033 0.0009  
Y -0.0014 0.0038 0.0081 0.0003 0.0009 0.0008  
Z -0.0035 0.0077 0.0122 0.0010 0.0001 0.0005

AT.110 H X -0.0003 0.0011 0.0091 -0.0006 -0.0033 0.0009  
Y 0.0014 -0.0038 0.0081 0.0003 -0.0009 0.0008  
Z 0.0035 -0.0077 0.0122 0.0010 -0.0001 0.0005

AT.111 H X -0.0006 0.0023 -0.0013 0.0022 -0.0022 -0.0027  
Y -0.0029 0.0068 0.0139 0.0009 0.0020 0.0005  
Z 0.0015 -0.0036 -0.0035 -0.0022 0.0014 0.0024

AT.112 H X 0.0006 -0.0023 -0.0013 0.0022 0.0022 -0.0027  
Y 0.0029 -0.0068 0.0139 0.0009 -0.0020 0.0005

Z -0.0015 0.0036 -0.0035 -0.0022 -0.0014 0.0024  
AT. 113 C X 0.0001 0.0004 -0.0002 0.0003 -0.0001 -0.0003  
Y -0.0002 -0.0020 -0.0017 -0.0003 0.0002 0.0005  
Z -0.0012 -0.0005 0.0030 -0.0006 0.0001 0.0007  
AT. 114 C X -0.0001 -0.0004 -0.0002 0.0003 0.0001 -0.0003  
Y 0.0002 0.0020 -0.0017 -0.0003 -0.0002 0.0005  
Z 0.0012 0.0005 0.0030 -0.0006 -0.0001 0.0007  
AT. 115 C X 0.0006 -0.0012 0.0002 -0.0007 -0.0002 -0.0001  
Y -0.0010 0.0013 0.0013 0.0002 -0.0001 -0.0004  
Z 0.0016 -0.0024 -0.0004 -0.0008 0.0005 0.0013  
AT. 116 C X -0.0006 0.0012 0.0002 -0.0007 0.0002 -0.0001  
Y 0.0010 -0.0013 0.0013 0.0002 0.0001 -0.0004  
Z -0.0016 0.0024 -0.0004 -0.0008 -0.0005 0.0013  
AT. 117 H X 0.0002 -0.0009 -0.0014 0.0012 0.0025 0.0045  
Y 0.0067 -0.0116 -0.0005 -0.0042 0.0006 0.0036  
Z -0.0000 0.0003 0.0017 -0.0016 -0.0024 -0.0043  
AT. 118 H X -0.0002 0.0009 -0.0014 0.0012 -0.0025 0.0045  
Y -0.0067 0.0116 -0.0005 -0.0042 -0.0006 0.0036  
Z 0.0000 -0.0003 0.0017 -0.0016 0.0024 -0.0043  
AT. 119 H X -0.0085 0.0160 -0.0062 0.0087 0.0002 -0.0033  
Y -0.0012 0.0080 -0.0073 0.0048 -0.0009 -0.0037  
Z -0.0032 0.0006 0.0052 -0.0002 0.0013 0.0026  
AT. 120 H X 0.0085 -0.0160 -0.0062 0.0087 -0.0002 -0.0033  
Y 0.0012 -0.0080 -0.0073 0.0048 0.0009 -0.0037  
Z 0.0032 -0.0006 0.0052 -0.0002 -0.0013 0.0026  
AT. 121 C X 0.0007 -0.0004 0.0009 -0.0003 0.0002 0.0005  
Y -0.0006 0.0005 0.0013 -0.0001 -0.0004 -0.0003  
Z 0.0016 -0.0018 0.0001 -0.0007 0.0005 0.0012  
AT. 122 C X -0.0007 0.0004 0.0009 -0.0003 -0.0002 0.0005  
Y 0.0006 -0.0005 0.0013 -0.0001 0.0004 -0.0003  
Z -0.0016 0.0018 0.0001 -0.0007 -0.0005 0.0012  
AT. 123 H X -0.0010 -0.0062 -0.0061 -0.0001 0.0025 0.0019

Y -0.0025 0.0033 -0.0134 0.0048 0.0003 -0.0023  
Z 0.0028 -0.0052 0.0139 -0.0054 0.0003 0.0033  
AT. 124 H X 0.0010 0.0062 -0.0061 -0.0001 -0.0025 0.0019  
Y 0.0025 -0.0033 -0.0134 0.0048 -0.0003 -0.0023  
Z -0.0028 0.0052 0.0139 -0.0054 -0.0003 0.0033  
AT. 125 H X -0.0046 0.0073 -0.0061 0.0040 -0.0021 -0.0050  
Y -0.0036 -0.0002 -0.0113 0.0036 0.0022 -0.0009  
Z -0.0062 0.0071 -0.0138 0.0062 -0.0010 -0.0056  
AT. 126 H X 0.0046 -0.0073 -0.0061 0.0040 0.0021 -0.0050  
Y 0.0036 0.0002 -0.0113 0.0036 -0.0022 -0.0009  
Z 0.0062 -0.0071 -0.0138 0.0062 0.0010 -0.0056  
AT. 127 C X 0.0007 0.0004 -0.0012 0.0003 -0.0008 -0.0004  
Y 0.0025 -0.0017 0.0033 -0.0015 0.0007 0.0016  
Z -0.0016 -0.0005 0.0034 -0.0008 0.0005 0.0005  
AT. 128 C X -0.0007 -0.0004 -0.0012 0.0003 0.0008 -0.0004  
Y -0.0025 0.0017 0.0033 -0.0015 -0.0007 0.0016  
Z 0.0016 0.0005 0.0034 -0.0008 -0.0005 0.0005  
AT. 129 C X -0.0018 -0.0019 -0.0005 -0.0002 -0.0009 -0.0022  
Y 0.0002 0.0003 -0.0010 0.0003 0.0002 0.0002  
Z -0.0003 0.0009 -0.0017 0.0008 -0.0008 -0.0011  
AT. 130 C X 0.0018 0.0019 -0.0005 -0.0002 0.0009 -0.0022  
Y -0.0002 -0.0003 -0.0010 0.0003 -0.0002 0.0002  
Z 0.0003 -0.0009 -0.0017 0.0008 0.0008 -0.0011  
AT. 131 H X 0.0093 0.0049 0.0071 -0.0015 0.0075 0.0130  
Y -0.0061 -0.0105 -0.0028 -0.0016 -0.0056 -0.0105  
Z 0.0112 0.0048 0.0072 -0.0018 0.0077 0.0138  
AT. 132 H X -0.0093 -0.0049 0.0071 -0.0015 -0.0075 0.0130  
Y 0.0061 0.0105 -0.0028 -0.0016 0.0056 -0.0105  
Z -0.0112 -0.0048 0.0072 -0.0018 -0.0077 0.0138  
AT. 133 H X 0.0116 0.0190 0.0077 0.0025 0.0080 0.0173  
Y -0.0011 0.0065 0.0019 0.0016 -0.0001 0.0014  
Z -0.0086 0.0009 -0.0004 0.0014 -0.0052 -0.0080

AT. 134 H X -0.0116 -0.0190 0.0077 0.0025 -0.0080 0.0173  
Y 0.0011 -0.0065 0.0019 0.0016 0.0001 0.0014  
Z 0.0086 -0.0009 -0.0004 0.0014 0.0052 -0.0080

AT. 135 C X -0.0006 -0.0006 0.0016 -0.0005 0.0000 0.0004  
Y -0.0010 -0.0011 -0.0005 -0.0001 -0.0001 0.0001  
Z -0.0005 -0.0004 0.0020 -0.0005 0.0001 0.0004

AT. 136 C X 0.0006 0.0006 0.0016 -0.0005 -0.0000 0.0004  
Y 0.0010 0.0011 -0.0005 -0.0001 0.0001 0.0001  
Z 0.0005 0.0004 0.0020 -0.0005 -0.0001 0.0004

AT. 137 H X 0.0077 0.0141 0.0099 0.0019 0.0007 -0.0016  
Y 0.0088 0.0090 -0.0148 0.0051 -0.0004 -0.0045  
Z 0.0125 0.0105 -0.0260 0.0074 -0.0006 -0.0065

AT. 138 H X -0.0077 -0.0141 0.0099 0.0019 -0.0007 -0.0016  
Y -0.0088 -0.0090 -0.0148 0.0051 0.0004 -0.0045  
Z -0.0125 -0.0105 -0.0260 0.0074 0.0006 -0.0065

AT. 139 H X 0.0022 -0.0010 -0.0131 0.0022 -0.0006 -0.0022  
Y 0.0127 0.0183 0.0071 0.0031 0.0008 -0.0024  
Z -0.0070 -0.0049 0.0168 -0.0043 0.0005 0.0041

AT. 140 H X -0.0022 0.0010 -0.0131 0.0022 0.0006 -0.0022  
Y -0.0127 -0.0183 0.0071 0.0031 -0.0008 -0.0024  
Z 0.0070 0.0049 0.0168 -0.0043 -0.0005 0.0041

AT. 141 H X -0.0024 -0.0074 -0.0178 0.0015 -0.0007 -0.0015  
Y -0.0073 -0.0065 0.0193 -0.0053 0.0009 0.0048  
Z 0.0062 0.0030 -0.0278 0.0061 -0.0013 -0.0056

AT. 142 H X 0.0024 0.0074 -0.0178 0.0015 0.0007 -0.0015  
Y 0.0073 0.0065 0.0193 -0.0053 -0.0009 0.0048  
Z -0.0062 -0.0030 -0.0278 0.0061 0.0013 -0.0056

AT. 143 C X 0.0010 0.0007 -0.0027 0.0007 -0.0006 -0.0008  
Y 0.0015 -0.0006 0.0026 -0.0009 0.0001 0.0007  
Z -0.0015 0.0001 0.0022 -0.0004 0.0008 0.0003

AT. 144 C X -0.0010 -0.0007 -0.0027 0.0007 0.0006 -0.0008  
Y -0.0015 0.0006 0.0026 -0.0009 -0.0001 0.0007

Z 0.0015 -0.0001 0.0022 -0.0004 -0.0008 0.0003  
AT. 145 H X -0.0117 0.0086 -0.0319 0.0108 -0.0045 -0.0087  
Y -0.0252 0.0022 0.0097 0.0008 0.0068 -0.0002  
Z 0.0234 -0.0003 -0.0153 0.0012 -0.0077 -0.0015  
AT. 146 H X 0.0117 -0.0086 -0.0319 0.0108 0.0045 -0.0087  
Y 0.0252 -0.0022 0.0097 0.0008 -0.0068 -0.0002  
Z -0.0234 0.0003 -0.0153 0.0012 0.0077 -0.0015  
AT. 147 H X -0.0054 -0.0060 0.0242 -0.0068 0.0059 0.0066  
Y -0.0169 0.0137 -0.0476 0.0164 -0.0062 -0.0139  
Z -0.0188 -0.0016 0.0118 -0.0015 0.0060 0.0025  
AT. 148 H X 0.0054 0.0060 0.0242 -0.0068 -0.0059 0.0066  
Y 0.0169 -0.0137 -0.0476 0.0164 0.0062 -0.0139  
Z 0.0188 0.0016 0.0118 -0.0015 -0.0060 0.0025  
AT. 149 H X 0.0013 -0.0130 0.0471 -0.0145 0.0097 0.0137  
Y 0.0149 -0.0024 -0.0062 -0.0006 -0.0037 0.0007  
Z 0.0228 0.0037 -0.0372 0.0075 -0.0112 -0.0067  
AT. 150 H X -0.0013 0.0130 0.0471 -0.0145 -0.0097 0.0137  
Y -0.0149 0.0024 -0.0062 -0.0006 0.0037 0.0007  
Z -0.0228 -0.0037 -0.0372 0.0075 0.0112 -0.0067  
AT. 151 C X -0.0004 0.0001 0.0003 -0.0001 0.0003 0.0002  
Y -0.0005 0.0004 -0.0005 0.0003 -0.0001 -0.0003  
Z -0.0004 0.0009 0.0044 -0.0004 -0.0004 -0.0002  
AT. 152 C X 0.0004 -0.0001 0.0003 -0.0001 -0.0003 0.0002  
Y 0.0005 -0.0004 -0.0005 0.0003 0.0001 -0.0003  
Z 0.0004 -0.0009 0.0044 -0.0004 0.0004 -0.0002  
AT. 153 H X -0.0034 0.0004 0.0022 0.0004 -0.0018 -0.0015  
Y 0.0040 -0.0038 -0.0263 0.0030 0.0008 -0.0006  
Z 0.0082 -0.0058 -0.0400 0.0043 0.0018 -0.0002  
AT. 154 H X 0.0034 -0.0004 0.0022 0.0004 0.0018 -0.0015  
Y -0.0040 0.0038 -0.0263 0.0030 -0.0008 -0.0006  
Z -0.0082 0.0058 -0.0400 0.0043 -0.0018 -0.0002  
AT. 155 H X 0.0044 -0.0011 -0.0033 -0.0002 0.0006 0.0008

Y -0.0043 0.0034 0.0325 -0.0042 -0.0009 0.0013  
Z 0.0061 -0.0031 -0.0331 0.0043 0.0008 -0.0015  
AT. 156 H X -0.0044 0.0011 -0.0033 -0.0002 -0.0006 0.0008  
Y 0.0043 -0.0034 0.0325 -0.0042 0.0009 0.0013  
Z -0.0061 0.0031 -0.0331 0.0043 -0.0008 -0.0015  
AT. 157 O X 0.0004 0.0005 -0.0003 0.0001 -0.0001 -0.0003  
Y 0.0015 0.0011 -0.0009 0.0004 -0.0001 -0.0005  
Z 0.0054 0.0006 -0.0029 0.0003 -0.0003 0.0003  
AT. 158 O X -0.0004 -0.0005 -0.0003 0.0001 0.0001 -0.0003  
Y -0.0015 -0.0011 -0.0009 0.0004 0.0001 -0.0005  
Z -0.0054 -0.0006 -0.0029 0.0003 0.0003 0.0003  
AT. 159 O X -0.0057 -0.0002 0.0031 -0.0002 0.0004 -0.0006  
Y -0.0008 -0.0006 0.0005 -0.0002 0.0001 0.0003  
Z -0.0047 -0.0009 0.0026 -0.0004 0.0004 0.0000  
AT. 160 O X 0.0057 0.0002 0.0031 -0.0002 -0.0004 -0.0006  
Y 0.0008 0.0006 0.0005 -0.0002 -0.0001 0.0003  
Z 0.0047 0.0009 0.0026 -0.0004 -0.0004 0.0000  
AT. 161 H X -0.0508 -0.0233 0.0293 -0.0074 0.0045 0.0087  
Y -0.0149 -0.0070 0.0088 -0.0025 0.0012 0.0028  
Z 0.0327 0.0136 -0.0194 0.0036 -0.0029 -0.0049  
AT. 162 H X 0.0508 0.0233 0.0293 -0.0074 -0.0045 0.0087  
Y 0.0149 0.0070 0.0088 -0.0025 -0.0012 0.0028  
Z -0.0327 -0.0136 -0.0194 0.0036 0.0029 -0.0049  
AT. 163 H X 0.1406 0.0174 -0.0775 0.0082 -0.0091 0.0067  
Y 0.0024 -0.0008 -0.0021 0.0001 -0.0004 0.0017  
Z -0.0536 -0.0071 0.0298 -0.0034 0.0036 -0.0026  
AT. 164 H X -0.1406 -0.0174 -0.0775 0.0082 0.0091 0.0067  
Y -0.0024 0.0008 -0.0021 0.0001 0.0004 0.0017  
Z 0.0536 0.0071 0.0298 -0.0034 -0.0036 -0.0026  
AT. 165 O X 0.0005 -0.0018 -0.0013 0.0008 0.0002 -0.0005  
Y -0.0003 0.0012 0.0012 -0.0007 -0.0002 0.0005  
Z 0.0004 -0.0014 -0.0015 0.0009 0.0002 -0.0006



AT.166 O X -0.0005 0.0018 -0.0013 0.0008 -0.0002 -0.0005

Y 0.0003 -0.0012 0.0012 -0.0007 0.0002 0.0005

Z -0.0004 0.0014 -0.0015 0.0009 -0.0002 -0.0006

AT.167 H X -0.0021 0.0070 0.0039 -0.0028 -0.0005 0.0016

Y -0.0001 0.0002 0.0008 0.0000 0.0003 0.0003

Z 0.0070 -0.0264 -0.0170 0.0120 0.0008 -0.0071

AT.168 H X 0.0021 -0.0070 0.0039 -0.0028 0.0005 0.0016

Y 0.0001 -0.0002 0.0008 0.0000 -0.0003 0.0003

Z -0.0070 0.0264 -0.0170 0.0120 -0.0008 -0.0071

AT.169 O X -0.0006 0.0020 0.0018 -0.0010 -0.0003 0.0007

Y 0.0007 -0.0025 -0.0025 0.0015 0.0004 -0.0010

Z 0.0002 -0.0006 -0.0007 0.0005 0.0001 -0.0003

AT.170 O X 0.0006 -0.0020 0.0018 -0.0010 0.0003 0.0007

Y -0.0007 0.0025 -0.0025 0.0015 -0.0004 -0.0010

Z -0.0002 0.0006 -0.0007 0.0005 -0.0001 -0.0003

AT.171 H X 0.0034 -0.0110 -0.0138 0.0049 0.0031 -0.0040

Y -0.0073 0.0263 0.0230 -0.0159 -0.0026 0.0103

Z -0.0170 0.0621 0.0572 -0.0363 -0.0076 0.0238

AT.172 H X -0.0034 0.0110 -0.0138 0.0049 -0.0031 -0.0040

Y 0.0073 -0.0263 0.0230 -0.0159 0.0026 0.0103

Z 0.0170 -0.0621 0.0572 -0.0363 0.0076 0.0238

FREQ(CM\*\*-1) 1537.06 1539.08 1539.71 1541.38 1543.26 1544.48

AT. 1 I X -0.0000 -0.0000 -0.0000 -0.0000 0.0000 -0.0000

Y -0.0000 -0.0000 -0.0000 -0.0000 0.0000 0.0000

Z -0.0000 0.0000 0.0000 0.0000 0.0000 -0.0000

AT. 2 I X 0.0000 0.0000 -0.0000 0.0000 0.0000 0.0000

Y 0.0000 0.0000 -0.0000 0.0000 0.0000 -0.0000

Z 0.0000 -0.0000 0.0000 -0.0000 0.0000 0.0000

AT. 3 I X 0.0000 -0.0000 0.0000 -0.0000 -0.0000 0.0000

Y 0.0000 -0.0000 -0.0000 -0.0000 -0.0000 -0.0000

Z -0.0000 0.0000 -0.0000 0.0000 0.0000 -0.0000  
AT. 4 I X -0.0000 0.0000 0.0000 0.0000 -0.0000 -0.0000  
Y -0.0000 0.0000 -0.0000 0.0000 -0.0000 0.0000  
Z 0.0000 -0.0000 -0.0000 -0.0000 0.0000 0.0000  
AT. 5 O X -0.0005 0.0000 -0.0009 -0.0008 -0.0010 0.0004  
Y 0.0005 -0.0001 0.0006 0.0005 0.0007 -0.0003  
Z 0.0005 0.0000 0.0008 0.0006 0.0006 -0.0003  
AT. 6 O X 0.0005 -0.0000 -0.0009 0.0008 -0.0010 -0.0004  
Y -0.0005 0.0001 0.0006 -0.0005 0.0007 0.0003  
Z -0.0005 -0.0000 0.0008 -0.0006 0.0006 0.0003  
AT. 7 O X -0.0037 0.0005 -0.0005 -0.0009 -0.0001 0.0003  
Y 0.0035 -0.0005 0.0005 0.0007 0.0001 -0.0003  
Z -0.0006 0.0002 -0.0002 0.0000 0.0000 -0.0001  
AT. 8 O X 0.0037 -0.0005 -0.0005 0.0009 -0.0001 -0.0003  
Y -0.0035 0.0005 0.0005 -0.0007 0.0001 0.0003  
Z 0.0006 -0.0002 -0.0002 -0.0000 0.0000 0.0001  
AT. 9 N X 0.0015 0.0003 -0.0003 -0.0009 -0.0016 0.0006  
Y 0.0005 -0.0004 0.0008 0.0010 0.0014 -0.0007  
Z -0.0004 0.0014 -0.0028 -0.0041 -0.0057 0.0025  
AT. 10 N X -0.0015 -0.0003 -0.0003 0.0009 -0.0016 -0.0006  
Y -0.0005 0.0004 0.0008 -0.0010 0.0014 0.0007  
Z 0.0004 -0.0014 -0.0028 0.0041 -0.0057 -0.0025  
AT. 11 N X -0.0023 0.0004 -0.0000 -0.0000 -0.0003 0.0004  
Y -0.0031 0.0010 -0.0008 -0.0002 0.0006 -0.0003  
Z 0.0144 -0.0036 0.0031 0.0015 0.0002 -0.0001  
AT. 12 N X 0.0023 -0.0004 -0.0000 0.0000 -0.0003 -0.0004  
Y 0.0031 -0.0010 -0.0008 0.0002 0.0006 0.0003  
Z -0.0144 0.0036 0.0031 -0.0015 0.0002 0.0001  
AT. 13 C X 0.0007 -0.0005 0.0019 0.0023 0.0031 -0.0014  
Y -0.0013 0.0005 -0.0017 -0.0018 -0.0024 0.0011  
Z -0.0004 -0.0012 0.0012 0.0027 0.0040 -0.0018  
AT. 14 C X -0.0007 0.0005 0.0019 -0.0023 0.0031 0.0014

Y 0.0013 -0.0005 -0.0017 0.0018 -0.0024 -0.0011  
Z 0.0004 0.0012 0.0012 -0.0027 0.0040 0.0018  
AT. 15 C X 0.0006 0.0002 -0.0003 -0.0009 -0.0014 0.0006  
Y -0.0024 -0.0004 -0.0001 0.0014 0.0025 -0.0011  
Z 0.0008 0.0003 -0.0001 -0.0008 -0.0013 0.0006  
AT. 16 C X -0.0006 -0.0002 -0.0003 0.0009 -0.0014 -0.0006  
Y 0.0024 0.0004 -0.0001 -0.0014 0.0025 0.0011  
Z -0.0008 -0.0003 -0.0001 0.0008 -0.0013 -0.0006  
AT. 17 H X 0.0028 -0.0003 0.0010 0.0005 0.0008 -0.0005  
Y 0.0159 0.0014 0.0031 -0.0048 -0.0106 0.0044  
Z -0.0211 -0.0021 -0.0035 0.0074 0.0158 -0.0066  
AT. 18 H X -0.0028 0.0003 0.0010 -0.0005 0.0008 0.0005  
Y -0.0159 -0.0014 0.0031 0.0048 -0.0106 -0.0044  
Z 0.0211 0.0021 -0.0035 -0.0074 0.0158 0.0066  
AT. 19 H X -0.0046 0.0005 -0.0010 0.0010 0.0019 -0.0010  
Y 0.0204 0.0016 0.0045 -0.0058 -0.0132 0.0054  
Z 0.0070 0.0010 0.0012 -0.0027 -0.0058 0.0023  
AT. 20 H X 0.0046 -0.0005 -0.0010 -0.0010 0.0019 0.0010  
Y -0.0204 -0.0016 0.0045 0.0058 -0.0132 -0.0054  
Z -0.0070 -0.0010 0.0012 0.0027 -0.0058 -0.0023  
AT. 21 C X 0.0096 -0.0018 0.0017 0.0015 0.0002 -0.0004  
Y -0.0010 -0.0004 0.0001 -0.0008 -0.0003 0.0005  
Z -0.0118 0.0030 -0.0025 -0.0011 -0.0001 0.0001  
AT. 22 C X -0.0096 0.0018 0.0017 -0.0015 0.0002 0.0004  
Y 0.0010 0.0004 0.0001 0.0008 -0.0003 -0.0005  
Z 0.0118 -0.0030 -0.0025 0.0011 -0.0001 -0.0001  
AT. 23 C X -0.0029 0.0007 -0.0006 -0.0001 0.0001 -0.0000  
Y 0.0010 -0.0004 0.0002 -0.0002 -0.0001 0.0001  
Z 0.0040 -0.0013 0.0010 -0.0002 -0.0002 0.0002  
AT. 24 C X 0.0029 -0.0007 -0.0006 0.0001 0.0001 0.0000  
Y -0.0010 0.0004 0.0002 0.0002 -0.0001 -0.0001  
Z -0.0040 0.0013 0.0010 0.0002 -0.0002 -0.0002

AT. 25 H X 0.0018 -0.0004 0.0002 0.0001 -0.0003 -0.0000  
Y 0.0041 -0.0015 0.0010 -0.0005 -0.0005 0.0003  
Z -0.0163 0.0075 -0.0043 0.0044 0.0030 -0.0022

AT. 26 H X -0.0018 0.0004 0.0002 -0.0001 -0.0003 0.0000  
Y -0.0041 0.0015 0.0010 0.0005 -0.0005 -0.0003  
Z 0.0163 -0.0075 -0.0043 -0.0044 0.0030 0.0022

AT. 27 H X 0.0013 -0.0011 0.0012 -0.0023 -0.0002 0.0005  
Y -0.0112 0.0054 -0.0033 0.0038 0.0021 -0.0022  
Z -0.0029 0.0020 -0.0012 0.0023 0.0009 -0.0011

AT. 28 H X -0.0013 0.0011 0.0012 0.0023 -0.0002 -0.0005  
Y 0.0112 -0.0054 -0.0033 -0.0038 0.0021 0.0022  
Z 0.0029 -0.0020 -0.0012 -0.0023 0.0009 0.0011

AT. 29 C X -0.0007 -0.0001 0.0003 0.0004 0.0005 -0.0001  
Y 0.0008 -0.0003 -0.0002 -0.0003 -0.0006 0.0003  
Z -0.0006 -0.0004 0.0005 0.0008 0.0009 -0.0002

AT. 30 C X 0.0007 0.0001 0.0003 -0.0004 0.0005 0.0001  
Y -0.0008 0.0003 -0.0002 0.0003 -0.0006 -0.0003  
Z 0.0006 0.0004 0.0005 -0.0008 0.0009 0.0002

AT. 31 H X 0.0073 -0.0028 0.0022 0.0034 0.0052 -0.0031  
Y 0.0009 0.0022 0.0003 -0.0006 -0.0009 -0.0000  
Z 0.0047 0.0016 0.0022 0.0019 0.0033 -0.0026

AT. 32 H X -0.0073 0.0028 0.0022 -0.0034 0.0052 0.0031  
Y -0.0009 -0.0022 0.0003 0.0006 -0.0009 0.0000  
Z -0.0047 -0.0016 0.0022 -0.0019 0.0033 0.0026

AT. 33 H X -0.0004 0.0017 -0.0022 -0.0033 -0.0047 0.0017  
Y -0.0009 0.0026 0.0020 0.0016 0.0020 -0.0012  
Z 0.0005 -0.0004 -0.0020 -0.0024 -0.0037 0.0015

AT. 34 H X 0.0004 -0.0017 -0.0022 0.0033 -0.0047 -0.0017  
Y 0.0009 -0.0026 0.0020 -0.0016 0.0020 0.0012  
Z -0.0005 0.0004 -0.0020 0.0024 -0.0037 -0.0015

AT. 35 C X -0.0028 0.0003 -0.0005 -0.0003 0.0002 -0.0002  
Y -0.0033 0.0003 -0.0007 -0.0003 -0.0001 0.0003

Z 0.0009 0.0002 -0.0003 -0.0001 0.0008 -0.0006  
AT. 36 C X 0.0028 -0.0003 -0.0005 0.0003 0.0002 0.0002  
Y 0.0033 -0.0003 -0.0007 0.0003 -0.0001 -0.0003  
Z -0.0009 -0.0002 -0.0003 0.0001 0.0008 0.0006  
AT. 37 C X 0.0017 0.0003 0.0012 0.0011 0.0008 -0.0000  
Y 0.0022 -0.0004 0.0001 -0.0001 -0.0002 -0.0002  
Z -0.0041 0.0009 -0.0007 -0.0003 -0.0002 0.0003  
AT. 38 C X -0.0017 -0.0003 0.0012 -0.0011 0.0008 0.0000  
Y -0.0022 0.0004 0.0001 0.0001 -0.0002 0.0002  
Z 0.0041 -0.0009 -0.0007 0.0003 -0.0002 -0.0003  
AT. 39 H X 0.0030 -0.0043 -0.0056 -0.0061 -0.0044 -0.0008  
Y -0.0195 0.0036 -0.0053 -0.0027 -0.0005 0.0000  
Z 0.0060 -0.0039 -0.0029 -0.0040 -0.0035 -0.0004  
AT. 40 H X -0.0030 0.0043 -0.0056 0.0061 -0.0044 0.0008  
Y 0.0195 -0.0036 -0.0053 0.0027 -0.0005 -0.0000  
Z -0.0060 0.0039 -0.0029 0.0040 -0.0035 0.0004  
AT. 41 H X -0.0130 0.0001 -0.0091 -0.0074 -0.0039 -0.0011  
Y 0.0141 -0.0022 0.0085 0.0059 0.0006 0.0029  
Z 0.0023 0.0022 0.0030 0.0034 0.0041 -0.0011  
AT. 42 H X 0.0130 -0.0001 -0.0091 0.0074 -0.0039 0.0011  
Y -0.0141 0.0022 0.0085 -0.0059 0.0006 -0.0029  
Z -0.0023 -0.0022 0.0030 -0.0034 0.0041 0.0011  
AT. 43 C X -0.0013 0.0001 -0.0003 -0.0000 -0.0005 0.0000  
Y 0.0059 -0.0011 0.0007 0.0007 0.0042 -0.0022  
Z -0.0022 0.0007 -0.0004 -0.0001 0.0001 0.0003  
AT. 44 C X 0.0013 -0.0001 -0.0003 0.0000 -0.0005 -0.0000  
Y -0.0059 0.0011 0.0007 -0.0007 0.0042 0.0022  
Z 0.0022 -0.0007 -0.0004 0.0001 0.0001 -0.0003  
AT. 45 H X 0.0459 -0.0085 0.0077 0.0058 0.0224 -0.0094  
Y -0.0432 0.0066 -0.0037 -0.0032 -0.0262 0.0144  
Z 0.0114 -0.0006 -0.0016 -0.0006 0.0122 -0.0085  
AT. 46 H X -0.0459 0.0085 0.0077 -0.0058 0.0224 0.0094

Y 0.0432 -0.0066 -0.0037 0.0032 -0.0262 -0.0144  
Z -0.0114 0.0006 -0.0016 0.0006 0.0122 0.0085  
AT. 47 H X -0.0212 0.0048 -0.0033 -0.0028 -0.0103 0.0052  
Y -0.0446 0.0070 -0.0042 -0.0044 -0.0298 0.0152  
Z -0.0252 0.0024 -0.0012 -0.0016 -0.0209 0.0107  
AT. 48 H X 0.0212 -0.0048 -0.0033 0.0028 -0.0103 -0.0052  
Y 0.0446 -0.0070 -0.0042 0.0044 -0.0298 -0.0152  
Z 0.0252 -0.0024 -0.0012 0.0016 -0.0209 -0.0107  
AT. 49 C X 0.0014 0.0004 -0.0004 -0.0008 -0.0013 0.0004  
Y 0.0024 0.0004 -0.0002 -0.0005 0.0000 -0.0000  
Z 0.0013 0.0000 -0.0002 -0.0002 0.0012 -0.0014  
AT. 50 C X -0.0014 -0.0004 -0.0004 0.0008 -0.0013 -0.0004  
Y -0.0024 -0.0004 -0.0002 0.0005 0.0000 0.0000  
Z -0.0013 -0.0000 -0.0002 0.0002 0.0012 0.0014  
AT. 51 C X 0.0065 0.0003 0.0015 -0.0004 -0.0028 0.0012  
Y -0.0019 0.0000 -0.0003 -0.0001 -0.0003 0.0004  
Z -0.0031 -0.0004 0.0003 0.0013 0.0017 -0.0003  
AT. 52 C X -0.0065 -0.0003 0.0015 0.0004 -0.0028 -0.0012  
Y 0.0019 -0.0000 -0.0003 0.0001 -0.0003 -0.0004  
Z 0.0031 0.0004 0.0003 -0.0013 0.0017 0.0003  
AT. 53 H X -0.0393 -0.0031 -0.0061 0.0056 0.0196 -0.0079  
Y -0.0252 -0.0013 -0.0065 0.0006 0.0108 -0.0047  
Z 0.0456 0.0038 0.0056 -0.0081 -0.0229 0.0091  
AT. 54 H X 0.0393 0.0031 -0.0061 -0.0056 0.0196 0.0079  
Y 0.0252 0.0013 -0.0065 -0.0006 0.0108 0.0047  
Z -0.0456 -0.0038 0.0056 0.0081 -0.0229 -0.0091  
AT. 55 H X -0.0583 -0.0031 -0.0122 0.0034 0.0229 -0.0096  
Y 0.0305 0.0003 0.0080 0.0007 -0.0062 0.0005  
Z -0.0051 -0.0023 0.0016 0.0045 0.0112 -0.0075  
AT. 56 H X 0.0583 0.0031 -0.0122 -0.0034 0.0229 0.0096  
Y -0.0305 -0.0003 0.0080 -0.0007 -0.0062 -0.0005  
Z 0.0051 0.0023 0.0016 -0.0045 0.0112 0.0075

AT. 57 C X -0.0016 -0.0002 -0.0003 0.0000 0.0001 0.0000  
Y -0.0018 0.0000 -0.0004 -0.0001 0.0005 -0.0002  
Z 0.0010 0.0001 -0.0002 -0.0001 0.0004 -0.0001

AT. 58 C X 0.0016 0.0002 -0.0003 -0.0000 0.0001 -0.0000  
Y 0.0018 -0.0000 -0.0004 0.0001 0.0005 0.0002  
Z -0.0010 -0.0001 -0.0002 0.0001 0.0004 0.0001

AT. 59 H X -0.0260 0.0000 -0.0033 -0.0011 0.0004 0.0005  
Y 0.0100 -0.0012 0.0046 0.0017 -0.0045 0.0008  
Z -0.0007 -0.0017 0.0049 0.0017 -0.0070 0.0016

AT. 60 H X 0.0260 -0.0000 -0.0033 0.0011 0.0004 -0.0005  
Y -0.0100 0.0012 0.0046 -0.0017 -0.0045 -0.0008  
Z 0.0007 0.0017 0.0049 -0.0017 -0.0070 -0.0016

AT. 61 H X 0.0287 0.0008 0.0042 0.0007 -0.0025 0.0002  
Y 0.0280 -0.0006 0.0075 0.0022 -0.0063 0.0008  
Z 0.0092 0.0012 -0.0006 -0.0006 0.0016 -0.0004

AT. 62 H X -0.0287 -0.0008 0.0042 -0.0007 -0.0025 -0.0002  
Y -0.0280 0.0006 0.0075 -0.0022 -0.0063 -0.0008  
Z -0.0092 -0.0012 -0.0006 0.0006 0.0016 0.0004

AT. 63 H X 0.0289 0.0007 0.0040 0.0007 -0.0014 -0.0002  
Y -0.0044 0.0012 -0.0043 -0.0014 0.0047 -0.0010  
Z -0.0246 -0.0018 -0.0006 0.0004 -0.0021 0.0009

AT. 64 H X -0.0289 -0.0007 0.0040 -0.0007 -0.0014 0.0002  
Y 0.0044 -0.0012 -0.0043 0.0014 0.0047 0.0010  
Z 0.0246 0.0018 -0.0006 -0.0004 -0.0021 -0.0009

AT. 65 C X 0.0021 0.0002 -0.0005 -0.0004 0.0002 -0.0006  
Y 0.0011 0.0001 -0.0001 -0.0001 0.0001 0.0002  
Z 0.0016 0.0000 0.0003 -0.0001 -0.0004 -0.0002

AT. 66 C X -0.0021 -0.0002 -0.0005 0.0004 0.0002 0.0006  
Y -0.0011 -0.0001 -0.0001 0.0001 0.0001 -0.0002  
Z -0.0016 -0.0000 0.0003 0.0001 -0.0004 0.0002

AT. 67 H X 0.0189 0.0020 -0.0018 -0.0034 -0.0001 -0.0017  
Y 0.0010 -0.0008 0.0015 0.0001 -0.0016 -0.0044

Z -0.0138 -0.0008 -0.0000 0.0025 0.0015 0.0052  
AT. 68 H X -0.0189 -0.0020 -0.0018 0.0034 -0.0001 0.0017  
Y -0.0010 0.0008 0.0015 -0.0001 -0.0016 0.0044  
Z 0.0138 0.0008 -0.0000 -0.0025 0.0015 -0.0052  
AT. 69 H X -0.0207 -0.0025 0.0043 0.0047 -0.0000 0.0028  
Y -0.0232 -0.0028 0.0041 0.0045 -0.0007 0.0011  
Z 0.0080 0.0009 -0.0025 -0.0028 -0.0009 -0.0048  
AT. 70 H X 0.0207 0.0025 0.0043 -0.0047 -0.0000 -0.0028  
Y 0.0232 0.0028 0.0041 -0.0045 -0.0007 -0.0011  
Z -0.0080 -0.0009 -0.0025 0.0028 -0.0009 0.0048  
AT. 71 H X -0.0312 -0.0034 0.0050 0.0066 0.0014 0.0058  
Y 0.0043 0.0015 -0.0029 -0.0019 0.0000 0.0013  
Z -0.0189 -0.0007 0.0003 0.0027 0.0006 0.0063  
AT. 72 H X 0.0312 0.0034 0.0050 -0.0066 0.0014 -0.0058  
Y -0.0043 -0.0015 -0.0029 0.0019 0.0000 -0.0013  
Z 0.0189 0.0007 0.0003 -0.0027 0.0006 -0.0063  
AT. 73 C X 0.0005 -0.0002 0.0002 0.0002 0.0009 -0.0005  
Y -0.0007 -0.0000 -0.0001 0.0000 -0.0006 0.0004  
Z 0.0022 -0.0002 0.0003 0.0001 0.0019 -0.0015  
AT. 74 C X -0.0005 0.0002 0.0002 -0.0002 0.0009 0.0005  
Y 0.0007 0.0000 -0.0001 -0.0000 -0.0006 -0.0004  
Z -0.0022 0.0002 0.0003 -0.0001 0.0019 0.0015  
AT. 75 H X -0.0045 0.0012 -0.0011 -0.0009 -0.0106 0.0081  
Y -0.0132 0.0003 -0.0010 0.0002 -0.0058 0.0053  
Z -0.0197 0.0013 -0.0019 -0.0004 -0.0141 0.0121  
AT. 76 H X 0.0045 -0.0012 -0.0011 0.0009 -0.0106 -0.0081  
Y 0.0132 -0.0003 -0.0010 -0.0002 -0.0058 -0.0053  
Z 0.0197 -0.0013 -0.0019 0.0004 -0.0141 -0.0121  
AT. 77 H X -0.0015 -0.0002 -0.0003 0.0002 0.0042 -0.0034  
Y 0.0204 -0.0008 0.0021 -0.0001 0.0120 -0.0101  
Z -0.0156 0.0005 -0.0012 0.0002 -0.0129 0.0112  
AT. 78 H X 0.0015 0.0002 -0.0003 -0.0002 0.0042 0.0034



Y -0.0204 0.0008 0.0021 0.0001 0.0120 0.0101  
Z 0.0156 -0.0005 -0.0012 -0.0002 -0.0129 -0.0112  
AT. 79 I X -0.0000 -0.0000 0.0000 0.0001 0.0000 -0.0000  
Y -0.0000 0.0000 -0.0000 -0.0000 -0.0000 0.0000  
Z -0.0000 -0.0000 0.0000 -0.0000 -0.0000 -0.0000  
AT. 80 I X 0.0000 0.0000 0.0000 -0.0001 0.0000 0.0000  
Y 0.0000 -0.0000 -0.0000 0.0000 -0.0000 -0.0000  
Z 0.0000 0.0000 0.0000 0.0000 -0.0000 0.0000  
AT. 81 I X 0.0000 0.0000 0.0000 0.0000 -0.0000 0.0000  
Y 0.0000 -0.0000 -0.0000 -0.0000 0.0000 -0.0000  
Z 0.0000 -0.0000 -0.0000 -0.0000 0.0000 -0.0000  
AT. 82 I X -0.0000 -0.0000 0.0000 -0.0000 -0.0000 -0.0000  
Y -0.0000 0.0000 -0.0000 0.0000 0.0000 0.0000  
Z -0.0000 0.0000 -0.0000 0.0000 0.0000 0.0000  
AT. 83 O X 0.0006 0.0007 -0.0023 0.0000 0.0011 -0.0015  
Y 0.0001 0.0002 -0.0006 0.0001 0.0004 -0.0003  
Z 0.0002 0.0001 -0.0010 0.0002 0.0007 -0.0008  
AT. 84 O X -0.0006 -0.0007 -0.0023 -0.0000 0.0011 0.0015  
Y -0.0001 -0.0002 -0.0006 -0.0001 0.0004 0.0003  
Z -0.0002 -0.0001 -0.0010 -0.0002 0.0007 0.0008  
AT. 85 O X 0.0003 -0.0004 -0.0042 -0.0030 0.0023 -0.0033  
Y 0.0003 -0.0001 -0.0021 -0.0015 0.0011 -0.0016  
Z 0.0002 -0.0000 0.0012 0.0008 -0.0005 0.0008  
AT. 86 O X -0.0003 0.0004 -0.0042 0.0030 0.0023 0.0033  
Y -0.0003 0.0001 -0.0021 0.0015 0.0011 0.0016  
Z -0.0002 0.0000 0.0012 -0.0008 -0.0005 -0.0008  
AT. 87 N X 0.0003 0.0015 -0.0018 -0.0014 -0.0008 0.0003  
Y 0.0004 -0.0000 -0.0011 -0.0004 0.0005 -0.0011  
Z -0.0024 -0.0044 0.0098 0.0071 0.0025 0.0030  
AT. 88 N X -0.0003 -0.0015 -0.0018 0.0014 -0.0008 -0.0003  
Y -0.0004 0.0000 -0.0011 0.0004 0.0005 0.0011  
Z 0.0024 0.0044 0.0098 -0.0071 0.0025 -0.0030

AT. 89 N X 0.0001 -0.0011 -0.0028 -0.0021 0.0021 -0.0030  
Y -0.0008 0.0012 0.0055 0.0040 -0.0039 0.0054  
Z 0.0021 -0.0018 -0.0137 -0.0100 0.0094 -0.0133

AT. 90 N X -0.0001 0.0011 -0.0028 0.0021 0.0021 0.0030  
Y 0.0008 -0.0012 0.0055 -0.0040 -0.0039 -0.0054  
Z -0.0021 0.0018 -0.0137 0.0100 0.0094 0.0133

AT. 91 C X -0.0014 -0.0022 0.0052 0.0012 -0.0012 0.0028  
Y -0.0005 -0.0006 0.0017 0.0002 -0.0006 0.0014  
Z 0.0020 0.0039 -0.0070 -0.0061 -0.0029 -0.0017

AT. 92 C X 0.0014 0.0022 0.0052 -0.0012 -0.0012 -0.0028  
Y 0.0005 0.0006 0.0017 -0.0002 -0.0006 -0.0014  
Z -0.0020 -0.0039 -0.0070 0.0061 -0.0029 0.0017

AT. 93 C X 0.0006 0.0018 -0.0026 -0.0025 -0.0013 -0.0002  
Y 0.0004 0.0018 -0.0025 -0.0032 -0.0022 0.0006  
Z -0.0006 -0.0020 0.0026 0.0030 0.0017 0.0001

AT. 94 C X -0.0006 -0.0018 -0.0026 0.0025 -0.0013 0.0002  
Y -0.0004 -0.0018 -0.0025 0.0032 -0.0022 -0.0006  
Z 0.0006 0.0020 0.0026 -0.0030 0.0017 -0.0001

AT. 95 H X -0.0006 -0.0029 0.0002 -0.0007 -0.0029 0.0013  
Y -0.0012 -0.0086 0.0118 0.0174 0.0140 -0.0058  
Z 0.0034 0.0213 -0.0247 -0.0336 -0.0234 0.0090

AT. 96 H X 0.0006 0.0029 0.0002 0.0007 -0.0029 -0.0013  
Y 0.0012 0.0086 0.0118 -0.0174 0.0140 0.0058  
Z -0.0034 -0.0213 -0.0247 0.0336 -0.0234 -0.0090

AT. 97 H X -0.0008 -0.0082 0.0075 0.0139 0.0092 -0.0038  
Y -0.0022 -0.0150 0.0178 0.0256 0.0186 -0.0077  
Z -0.0008 -0.0028 0.0044 0.0045 0.0032 -0.0007

AT. 98 H X 0.0008 0.0082 0.0075 -0.0139 0.0092 0.0038  
Y 0.0022 0.0150 0.0178 -0.0256 0.0186 0.0077  
Z 0.0008 0.0028 0.0044 -0.0045 0.0032 0.0007

AT. 99 C X -0.0009 0.0016 0.0109 0.0079 -0.0068 0.0099  
Y 0.0006 -0.0008 -0.0027 -0.0021 0.0027 -0.0037

Z -0.0020 0.0019 0.0105 0.0079 -0.0076 0.0108  
AT.100 C X 0.0009 -0.0016 0.0109 -0.0079 -0.0068 -0.0099  
Y -0.0006 0.0008 -0.0027 0.0021 0.0027 0.0037  
Z 0.0020 -0.0019 0.0105 -0.0079 -0.0076 -0.0108  
AT.101 C X -0.0003 -0.0014 -0.0056 -0.0042 0.0039 -0.0061  
Y -0.0004 -0.0006 -0.0020 -0.0016 0.0015 -0.0026  
Z -0.0003 -0.0020 -0.0074 -0.0057 0.0057 -0.0088  
AT.102 C X 0.0003 0.0014 -0.0056 0.0042 0.0039 0.0061  
Y 0.0004 0.0006 -0.0020 0.0016 0.0015 0.0026  
Z 0.0003 0.0020 -0.0074 0.0057 0.0057 0.0088  
AT.103 H X 0.0003 0.0009 0.0047 0.0029 -0.0031 0.0042  
Y -0.0007 -0.0020 -0.0077 -0.0055 0.0055 -0.0084  
Z 0.0062 0.0168 0.0536 0.0414 -0.0432 0.0687  
AT.104 H X -0.0003 -0.0009 0.0047 -0.0029 -0.0031 -0.0042  
Y 0.0007 0.0020 -0.0077 0.0055 0.0055 0.0084  
Z -0.0062 -0.0168 0.0536 -0.0414 -0.0432 -0.0687  
AT.105 H X 0.0051 0.0063 0.0198 0.0146 -0.0149 0.0241  
Y 0.0056 0.0129 0.0414 0.0328 -0.0324 0.0534  
Z 0.0034 0.0049 0.0151 0.0120 -0.0118 0.0198  
AT.106 H X -0.0051 -0.0063 0.0198 -0.0146 -0.0149 -0.0241  
Y -0.0056 -0.0129 0.0414 -0.0328 -0.0324 -0.0534  
Z -0.0034 -0.0049 0.0151 -0.0120 -0.0118 -0.0198  
AT.107 C X 0.0000 -0.0005 0.0013 0.0016 0.0014 -0.0009  
Y 0.0002 0.0003 0.0010 0.0019 0.0029 -0.0027  
Z 0.0006 0.0017 -0.0021 -0.0013 0.0003 -0.0014  
AT.108 C X -0.0000 0.0005 0.0013 -0.0016 0.0014 0.0009  
Y -0.0002 -0.0003 0.0010 -0.0019 0.0029 0.0027  
Z -0.0006 -0.0017 -0.0021 0.0013 0.0003 0.0014  
AT.109 H X -0.0030 -0.0043 0.0017 -0.0065 -0.0151 0.0191  
Y -0.0008 -0.0049 -0.0042 -0.0073 -0.0086 0.0077  
Z -0.0003 -0.0062 -0.0112 -0.0146 -0.0141 0.0101  
AT.110 H X 0.0030 0.0043 0.0017 0.0065 -0.0151 -0.0191

Y 0.0008 0.0049 -0.0042 0.0073 -0.0086 -0.0077  
Z 0.0003 0.0062 -0.0112 0.0146 -0.0141 -0.0101  
AT. 111 H X 0.0012 0.0024 -0.0073 -0.0063 -0.0019 -0.0037  
Y -0.0015 -0.0054 -0.0093 -0.0169 -0.0225 0.0222  
Z -0.0005 -0.0006 0.0095 0.0110 0.0090 -0.0035  
AT. 112 H X -0.0012 -0.0024 -0.0073 0.0063 -0.0019 0.0037  
Y 0.0015 0.0054 -0.0093 0.0169 -0.0225 -0.0222  
Z 0.0005 0.0006 0.0095 -0.0110 0.0090 0.0035  
AT. 113 C X 0.0002 -0.0002 -0.0001 0.0004 0.0018 -0.0020  
Y -0.0003 0.0028 0.0026 0.0023 -0.0012 0.0020  
Z -0.0004 -0.0016 -0.0001 -0.0008 -0.0024 0.0018  
AT. 114 C X -0.0002 0.0002 -0.0001 -0.0004 0.0018 0.0020  
Y 0.0003 -0.0028 0.0026 -0.0023 -0.0012 -0.0020  
Z 0.0004 0.0016 -0.0001 0.0008 -0.0024 -0.0018  
AT. 115 C X -0.0002 -0.0007 -0.0013 -0.0001 0.0037 -0.0041  
Y 0.0001 -0.0015 -0.0027 -0.0025 0.0002 -0.0010  
Z -0.0005 0.0013 0.0045 0.0035 -0.0024 0.0038  
AT. 116 C X 0.0002 0.0007 -0.0013 0.0001 0.0037 0.0041  
Y -0.0001 0.0015 -0.0027 0.0025 0.0002 0.0010  
Z 0.0005 -0.0013 0.0045 -0.0035 -0.0024 -0.0038  
AT. 117 H X -0.0002 0.0077 0.0197 0.0099 -0.0292 0.0356  
Y -0.0012 0.0029 0.0125 0.0135 0.0050 -0.0019  
Z -0.0002 -0.0081 -0.0203 -0.0105 0.0291 -0.0356  
AT. 118 H X 0.0002 -0.0077 0.0197 -0.0099 -0.0292 -0.0356  
Y 0.0012 -0.0029 0.0125 -0.0135 0.0050 0.0019  
Z 0.0002 0.0081 -0.0203 0.0105 0.0291 0.0356  
AT. 119 H X 0.0032 0.0060 -0.0005 -0.0067 -0.0212 0.0220  
Y 0.0023 0.0025 -0.0045 -0.0028 0.0054 -0.0062  
Z -0.0008 0.0004 0.0056 -0.0007 -0.0201 0.0216  
AT. 120 H X -0.0032 -0.0060 -0.0005 0.0067 -0.0212 -0.0220  
Y -0.0023 -0.0025 -0.0045 0.0028 0.0054 0.0062  
Z 0.0008 -0.0004 0.0056 0.0007 -0.0201 -0.0216

AT. 121 C X -0.0002 -0.0001 0.0013 0.0004 -0.0016 0.0019  
Y -0.0001 -0.0005 -0.0022 -0.0033 -0.0024 0.0016  
Z -0.0005 0.0014 0.0036 0.0029 -0.0017 0.0026

AT. 122 C X 0.0002 0.0001 0.0013 -0.0004 -0.0016 -0.0019  
Y 0.0001 0.0005 -0.0022 0.0033 -0.0024 -0.0016  
Z 0.0005 -0.0014 0.0036 -0.0029 -0.0017 -0.0026

AT. 123 H X -0.0000 -0.0041 0.0127 0.0164 0.0084 -0.0018  
Y 0.0017 0.0062 0.0004 0.0076 0.0127 -0.0114  
Z -0.0021 -0.0071 0.0024 -0.0057 -0.0147 0.0146

AT. 124 H X 0.0000 0.0041 0.0127 -0.0164 0.0084 0.0018  
Y -0.0017 -0.0062 0.0004 -0.0076 0.0127 0.0114  
Z 0.0021 0.0071 0.0024 0.0057 -0.0147 -0.0146

AT. 125 H X 0.0022 0.0028 -0.0123 -0.0081 0.0076 -0.0112  
Y 0.0016 -0.0033 0.0083 0.0158 0.0168 -0.0111  
Z 0.0031 0.0027 -0.0077 0.0019 0.0187 -0.0192

AT. 126 H X -0.0022 -0.0028 -0.0123 0.0081 0.0076 0.0112  
Y -0.0016 0.0033 0.0083 -0.0158 0.0168 0.0111  
Z -0.0031 -0.0027 -0.0077 -0.0019 0.0187 0.0192

AT. 127 C X 0.0004 0.0040 -0.0015 -0.0011 -0.0014 0.0000  
Y -0.0006 -0.0015 0.0040 0.0035 0.0010 0.0001  
Z -0.0005 -0.0055 0.0000 -0.0015 -0.0022 0.0026

AT. 128 C X -0.0004 -0.0040 -0.0015 0.0011 -0.0014 -0.0000  
Y 0.0006 0.0015 0.0040 -0.0035 0.0010 -0.0001  
Z 0.0005 0.0055 0.0000 0.0015 -0.0022 -0.0026

AT. 129 C X -0.0001 0.0036 -0.0056 -0.0082 -0.0069 0.0049  
Y 0.0000 0.0003 0.0009 0.0017 0.0016 -0.0013  
Z 0.0006 0.0032 -0.0033 -0.0022 -0.0008 -0.0009

AT. 130 C X 0.0001 -0.0036 -0.0056 0.0082 -0.0069 -0.0049  
Y -0.0000 -0.0003 0.0009 -0.0017 0.0016 0.0013  
Z -0.0006 -0.0032 -0.0033 0.0022 -0.0008 0.0009

AT. 131 H X -0.0019 -0.0254 0.0364 0.0455 0.0354 -0.0210  
Y -0.0006 0.0234 -0.0269 -0.0412 -0.0358 0.0259

Z -0.0019 -0.0246 0.0392 0.0485 0.0374 -0.0223  
AT. 132 H X 0.0019 0.0254 0.0364 -0.0455 0.0354 0.0210  
Y 0.0006 -0.0234 -0.0269 0.0412 -0.0358 -0.0259  
Z 0.0019 0.0246 0.0392 -0.0485 0.0374 0.0223  
AT. 133 H X 0.0018 -0.0369 0.0422 0.0645 0.0566 -0.0427  
Y 0.0015 -0.0086 0.0004 0.0036 0.0053 -0.0058  
Z 0.0018 0.0067 -0.0257 -0.0327 -0.0243 0.0145  
AT. 134 H X -0.0018 0.0369 0.0422 -0.0645 0.0566 0.0427  
Y -0.0015 0.0086 0.0004 -0.0036 0.0053 0.0058  
Z -0.0018 -0.0067 -0.0257 0.0327 -0.0243 -0.0145  
AT. 135 C X -0.0003 -0.0008 0.0002 -0.0001 -0.0009 0.0007  
Y -0.0003 0.0017 0.0001 0.0000 -0.0010 0.0008  
Z -0.0002 -0.0008 -0.0000 -0.0001 -0.0006 0.0001  
AT. 136 C X 0.0003 0.0008 0.0002 0.0001 -0.0009 -0.0007  
Y 0.0003 -0.0017 0.0001 -0.0000 -0.0010 -0.0008  
Z 0.0002 0.0008 -0.0000 0.0001 -0.0006 -0.0001  
AT. 137 H X 0.0032 -0.0207 -0.0070 -0.0059 0.0088 -0.0096  
Y 0.0034 0.0009 -0.0023 -0.0004 0.0104 -0.0065  
Z 0.0045 0.0066 -0.0012 0.0014 0.0146 -0.0078  
AT. 138 H X -0.0032 0.0207 -0.0070 0.0059 0.0088 0.0096  
Y -0.0034 -0.0009 -0.0023 0.0004 0.0104 0.0065  
Z -0.0045 -0.0066 -0.0012 -0.0014 0.0146 0.0078  
AT. 139 H X 0.0007 0.0119 0.0003 0.0010 0.0001 0.0015  
Y 0.0045 -0.0254 -0.0061 -0.0047 0.0145 -0.0127  
Z -0.0025 -0.0085 0.0015 -0.0001 -0.0059 0.0028  
AT. 140 H X -0.0007 -0.0119 0.0003 -0.0010 0.0001 -0.0015  
Y -0.0045 0.0254 -0.0061 0.0047 0.0145 0.0127  
Z 0.0025 0.0085 0.0015 0.0001 -0.0059 -0.0028  
AT. 141 H X -0.0009 0.0229 0.0035 0.0039 -0.0047 0.0064  
Y -0.0030 -0.0064 0.0015 -0.0005 -0.0099 0.0056  
Z 0.0026 0.0174 -0.0002 0.0020 0.0078 -0.0028  
AT. 142 H X 0.0009 -0.0229 0.0035 -0.0039 -0.0047 -0.0064

Y 0.0030 0.0064 0.0015 0.0005 -0.0099 -0.0056  
Z -0.0026 -0.0174 -0.0002 -0.0020 0.0078 0.0028  
AT. 143 C X 0.0005 0.0041 -0.0008 -0.0002 0.0007 -0.0011  
Y -0.0001 -0.0005 0.0015 0.0010 0.0005 -0.0003  
Z -0.0004 -0.0066 0.0004 -0.0010 0.0001 0.0012  
AT. 144 C X -0.0005 -0.0041 -0.0008 0.0002 0.0007 0.0011  
Y 0.0001 0.0005 0.0015 -0.0010 0.0005 0.0003  
Z 0.0004 0.0066 0.0004 0.0010 0.0001 -0.0012  
AT. 145 H X 0.0029 0.0247 -0.0183 -0.0091 -0.0031 -0.0040  
Y -0.0040 -0.0592 -0.0047 -0.0145 -0.0065 0.0154  
Z 0.0047 0.0643 0.0013 0.0129 0.0063 -0.0167  
AT. 146 H X -0.0029 -0.0247 -0.0183 0.0091 -0.0031 0.0040  
Y 0.0040 0.0592 -0.0047 0.0145 -0.0065 -0.0154  
Z -0.0047 -0.0643 0.0013 -0.0129 0.0063 0.0167  
AT. 147 H X -0.0043 -0.0380 0.0104 0.0033 -0.0009 0.0075  
Y 0.0045 0.0313 -0.0277 -0.0175 -0.0050 -0.0029  
Z -0.0044 -0.0445 0.0004 -0.0055 -0.0050 0.0111  
AT. 148 H X 0.0043 0.0380 0.0104 -0.0033 -0.0009 -0.0075  
Y -0.0045 -0.0313 -0.0277 0.0175 -0.0050 0.0029  
Z 0.0044 0.0445 0.0004 0.0055 -0.0050 -0.0111  
AT. 149 H X -0.0070 -0.0564 0.0244 0.0128 0.0015 0.0095  
Y 0.0019 0.0362 0.0038 0.0109 0.0039 -0.0095  
Z 0.0070 0.0893 -0.0077 0.0105 0.0057 -0.0206  
AT. 150 H X 0.0070 0.0564 0.0244 -0.0128 0.0015 -0.0095  
Y -0.0019 -0.0362 0.0038 -0.0109 0.0039 0.0095  
Z -0.0070 -0.0893 -0.0077 -0.0105 0.0057 0.0206  
AT. 151 C X -0.0001 -0.0014 0.0002 0.0002 0.0003 0.0002  
Y 0.0001 -0.0003 -0.0009 -0.0006 0.0005 -0.0007  
Z 0.0001 -0.0017 -0.0037 -0.0061 -0.0062 0.0045  
AT. 152 C X 0.0001 0.0014 0.0002 -0.0002 0.0003 -0.0002  
Y -0.0001 0.0003 -0.0009 0.0006 0.0005 0.0007  
Z -0.0001 0.0017 -0.0037 0.0061 -0.0062 -0.0045

AT.153 H X 0.0005 0.0034 -0.0072 -0.0115 -0.0146 0.0108  
Y 0.0005 0.0164 0.0163 0.0278 0.0286 -0.0215  
Z 0.0006 0.0246 0.0275 0.0458 0.0473 -0.0351

AT.154 H X -0.0005 -0.0034 -0.0072 0.0115 -0.0146 -0.0108  
Y -0.0005 -0.0164 0.0163 -0.0278 0.0286 0.0215  
Z -0.0006 -0.0246 0.0275 -0.0458 0.0473 0.0351

AT.155 H X 0.0000 -0.0003 0.0070 0.0100 0.0119 -0.0096  
Y -0.0008 -0.0191 -0.0178 -0.0325 -0.0360 0.0275  
Z 0.0010 0.0197 0.0182 0.0336 0.0386 -0.0301

AT.156 H X -0.0000 0.0003 0.0070 -0.0100 0.0119 0.0096  
Y 0.0008 0.0191 -0.0178 0.0325 -0.0360 -0.0275  
Z -0.0010 -0.0197 0.0182 -0.0336 0.0386 0.0301

AT.157 O X 0.0002 0.0000 -0.0003 -0.0002 -0.0000 -0.0001  
Y 0.0005 -0.0002 -0.0005 -0.0005 -0.0000 -0.0001  
Z 0.0011 -0.0010 -0.0011 -0.0012 -0.0002 0.0008

AT.158 O X -0.0002 -0.0000 -0.0003 0.0002 -0.0000 0.0001  
Y -0.0005 0.0002 -0.0005 0.0005 -0.0000 0.0001  
Z -0.0011 0.0010 -0.0011 0.0012 -0.0002 -0.0008

AT.159 O X -0.0010 0.0011 0.0010 0.0011 0.0001 -0.0008  
Y -0.0003 0.0001 0.0002 0.0003 -0.0001 0.0001  
Z -0.0010 0.0008 0.0010 0.0011 0.0001 -0.0005

AT.160 O X 0.0010 -0.0011 0.0010 -0.0011 0.0001 0.0008  
Y 0.0003 -0.0001 0.0002 -0.0003 -0.0001 -0.0001  
Z 0.0010 -0.0008 0.0010 -0.0011 0.0001 0.0005

AT.161 H X -0.0139 0.0082 0.0141 0.0146 0.0002 -0.0012  
Y -0.0043 0.0024 0.0040 0.0044 0.0000 -0.0004  
Z 0.0082 -0.0056 -0.0080 -0.0084 0.0008 0.0007

AT.162 H X 0.0139 -0.0082 0.0141 -0.0146 0.0002 0.0012  
Y 0.0043 -0.0024 0.0040 -0.0044 0.0000 0.0004  
Z -0.0082 0.0056 -0.0080 0.0084 0.0008 -0.0007

AT.163 H X 0.0279 -0.0259 -0.0273 -0.0291 -0.0028 0.0171  
Y 0.0015 -0.0017 -0.0000 -0.0010 0.0009 0.0010



Z -0.0110 0.0097 0.0106 0.0109 0.0012 -0.0062  
AT.164 H X -0.0279 0.0259 -0.0273 0.0291 -0.0028 -0.0171  
Y -0.0015 0.0017 -0.0000 0.0010 0.0009 -0.0010  
Z 0.0110 -0.0097 0.0106 -0.0109 0.0012 0.0062  
AT.165 O X -0.0010 -0.0004 0.0019 -0.0009 -0.0007 -0.0013  
Y 0.0006 0.0000 -0.0012 0.0010 0.0006 0.0009  
Z -0.0007 -0.0000 0.0015 -0.0013 -0.0007 -0.0012  
AT.166 O X 0.0010 0.0004 0.0019 0.0009 -0.0007 0.0013  
Y -0.0006 -0.0000 -0.0012 -0.0010 0.0006 -0.0009  
Z 0.0007 0.0000 0.0015 0.0013 -0.0007 0.0012  
AT.167 H X 0.0041 0.0024 -0.0079 0.0025 0.0027 0.0052  
Y -0.0001 -0.0007 0.0004 0.0006 -0.0001 0.0005  
Z -0.0149 -0.0064 0.0275 -0.0129 -0.0109 -0.0193  
AT.168 H X -0.0041 -0.0024 -0.0079 -0.0025 0.0027 -0.0052  
Y 0.0001 0.0007 0.0004 -0.0006 -0.0001 -0.0005  
Z 0.0149 0.0064 0.0275 0.0129 -0.0109 0.0193  
AT.169 O X 0.0010 0.0003 -0.0021 0.0014 0.0010 0.0016  
Y -0.0012 -0.0001 0.0026 -0.0021 -0.0012 -0.0021  
Z -0.0003 0.0001 0.0006 -0.0007 -0.0002 -0.0004  
AT.170 O X -0.0010 -0.0003 -0.0021 -0.0014 0.0010 -0.0016  
Y 0.0012 0.0001 0.0026 0.0021 -0.0012 0.0021  
Z 0.0003 -0.0001 0.0006 0.0007 -0.0002 0.0004  
AT.171 H X -0.0045 -0.0006 0.0131 -0.0101 -0.0070 -0.0107  
Y 0.0143 0.0022 -0.0263 0.0195 0.0113 0.0203  
Z 0.0322 0.0048 -0.0641 0.0473 0.0283 0.0491  
AT.172 H X 0.0045 0.0006 0.0131 0.0101 -0.0070 0.0107  
Y -0.0143 -0.0022 -0.0263 -0.0195 0.0113 -0.0203  
Z -0.0322 -0.0048 -0.0641 -0.0473 0.0283 -0.0491  
  
FREQ(CM\*\*-1) 1545.12 1546.21 1553.15 1556.44 1556.57 1558.78  
  
AT. 11 X 0.0000 0.0000 0.0000 0.0000 -0.0000 -0.0000

Y 0.0000 0.0000 -0.0000 0.0000 -0.0000 -0.0000  
Z -0.0000 -0.0000 -0.0000 0.0000 -0.0000 -0.0000  
AT. 2 I X 0.0000 -0.0000 0.0000 -0.0000 -0.0000 0.0000  
Y 0.0000 -0.0000 -0.0000 -0.0000 -0.0000 0.0000  
Z -0.0000 0.0000 -0.0000 -0.0000 -0.0000 0.0000  
AT. 3 I X -0.0000 -0.0000 0.0000 0.0000 -0.0000 0.0000  
Y -0.0000 0.0000 -0.0000 0.0000 -0.0000 -0.0000  
Z -0.0000 -0.0000 0.0000 0.0000 0.0000 0.0000  
AT. 4 I X -0.0000 0.0000 0.0000 -0.0000 -0.0000 -0.0000  
Y -0.0000 -0.0000 -0.0000 -0.0000 -0.0000 0.0000  
Z -0.0000 0.0000 0.0000 -0.0000 0.0000 -0.0000  
AT. 5 O X -0.0007 -0.0008 -0.0014 0.0025 -0.0071 -0.0072  
Y 0.0005 0.0004 0.0011 -0.0020 0.0055 0.0055  
Z 0.0003 0.0003 0.0012 -0.0019 0.0055 0.0056  
AT. 6 O X -0.0007 0.0008 -0.0014 -0.0025 -0.0071 0.0072  
Y 0.0005 -0.0004 0.0011 0.0020 0.0055 -0.0055  
Z 0.0003 -0.0003 0.0012 0.0019 0.0055 -0.0056  
AT. 7 O X -0.0003 -0.0003 0.0004 -0.0006 0.0020 0.0027  
Y 0.0004 0.0004 -0.0003 0.0006 -0.0020 -0.0026  
Z 0.0000 -0.0001 0.0001 -0.0001 0.0005 0.0005  
AT. 8 O X -0.0003 0.0003 0.0004 0.0006 0.0020 -0.0027  
Y 0.0004 -0.0004 -0.0003 -0.0006 -0.0020 0.0026  
Z 0.0000 0.0001 0.0001 0.0001 0.0005 -0.0005  
AT. 9 N X -0.0025 -0.0023 -0.0009 0.0019 -0.0050 -0.0051  
Y 0.0014 0.0014 0.0014 -0.0030 0.0076 0.0073  
Z -0.0075 -0.0071 -0.0050 0.0111 -0.0266 -0.0253  
AT. 10 N X -0.0025 0.0023 -0.0009 -0.0019 -0.0050 0.0051  
Y 0.0014 -0.0014 0.0014 0.0030 0.0076 -0.0073  
Z -0.0075 0.0071 -0.0050 -0.0111 -0.0266 0.0253  
AT. 11 N X -0.0000 -0.0002 0.0002 -0.0003 0.0010 0.0013  
Y 0.0016 0.0011 -0.0000 -0.0006 0.0013 0.0014  
Z -0.0013 -0.0001 -0.0005 0.0018 -0.0053 -0.0060

AT. 12 N X -0.0000 0.0002 0.0002 0.0003 0.0010 -0.0013  
Y 0.0016 -0.0011 -0.0000 0.0006 0.0013 -0.0014  
Z -0.0013 0.0001 -0.0005 -0.0018 -0.0053 0.0060

AT. 13 C X 0.0035 0.0033 0.0035 -0.0070 0.0185 0.0184  
Y -0.0023 -0.0021 -0.0031 0.0062 -0.0163 -0.0160  
Z 0.0061 0.0056 0.0025 -0.0068 0.0149 0.0135

AT. 14 C X 0.0035 -0.0033 0.0035 0.0070 0.0185 -0.0184  
Y -0.0023 0.0021 -0.0031 -0.0062 -0.0163 0.0160  
Z 0.0061 -0.0056 0.0025 0.0068 0.0149 -0.0135

AT. 15 C X -0.0022 -0.0020 -0.0007 0.0019 -0.0046 -0.0046  
Y 0.0049 0.0044 0.0009 -0.0019 0.0049 0.0050  
Z -0.0023 -0.0021 -0.0007 0.0016 -0.0039 -0.0037

AT. 16 C X -0.0022 0.0020 -0.0007 -0.0019 -0.0046 0.0046  
Y 0.0049 -0.0044 0.0009 0.0019 0.0049 -0.0050  
Z -0.0023 0.0021 -0.0007 -0.0016 -0.0039 0.0037

AT. 17 H X 0.0005 0.0007 0.0001 -0.0024 0.0038 0.0030  
Y -0.0236 -0.0211 -0.0013 0.0016 -0.0058 -0.0067  
Z 0.0338 0.0304 0.0027 -0.0048 0.0140 0.0150

AT. 18 H X 0.0005 -0.0007 0.0001 0.0024 0.0038 -0.0030  
Y -0.0236 0.0211 -0.0013 -0.0016 -0.0058 0.0067  
Z 0.0338 -0.0304 0.0027 0.0048 0.0140 -0.0150

AT. 19 H X 0.0040 0.0040 -0.0010 0.0014 -0.0032 -0.0004  
Y -0.0299 -0.0262 -0.0015 0.0009 -0.0056 -0.0075  
Z -0.0123 -0.0108 -0.0017 0.0025 -0.0073 -0.0070

AT. 20 H X 0.0040 -0.0040 -0.0010 -0.0014 -0.0032 0.0004  
Y -0.0299 0.0262 -0.0015 -0.0009 -0.0056 0.0075  
Z -0.0123 0.0108 -0.0017 -0.0025 -0.0073 0.0070

AT. 21 C X -0.0000 0.0004 -0.0007 0.0014 -0.0048 -0.0060  
Y -0.0013 -0.0008 0.0004 -0.0003 0.0015 0.0022  
Z 0.0015 0.0003 0.0003 -0.0015 0.0041 0.0046

AT. 22 C X -0.0000 -0.0004 -0.0007 -0.0014 -0.0048 0.0060  
Y -0.0013 0.0008 0.0004 0.0003 0.0015 -0.0022

Z 0.0015 -0.0003 0.0003 0.0015 0.0041 -0.0046  
AT. 23 C X 0.0004 0.0001 0.0002 -0.0003 0.0012 0.0014  
Y -0.0004 -0.0002 -0.0000 0.0001 -0.0005 -0.0005  
Z -0.0014 -0.0005 -0.0001 0.0005 -0.0016 -0.0016  
AT. 24 C X 0.0004 -0.0001 0.0002 0.0003 0.0012 -0.0014  
Y -0.0004 0.0002 -0.0000 -0.0001 -0.0005 0.0005  
Z -0.0014 0.0005 -0.0001 -0.0005 -0.0016 0.0016  
AT. 25 H X -0.0002 -0.0001 -0.0002 0.0000 -0.0005 -0.0012  
Y -0.0019 -0.0008 -0.0001 0.0006 -0.0019 -0.0017  
Z 0.0125 0.0056 -0.0002 -0.0023 0.0068 0.0054  
AT. 26 H X -0.0002 0.0001 -0.0002 -0.0000 -0.0005 0.0012  
Y -0.0019 0.0008 -0.0001 -0.0006 -0.0019 0.0017  
Z 0.0125 -0.0056 -0.0002 0.0023 0.0068 -0.0054  
AT. 27 H X -0.0014 -0.0003 -0.0001 -0.0006 -0.0016 -0.0010  
Y 0.0085 0.0040 -0.0002 -0.0017 0.0054 0.0034  
Z 0.0036 0.0016 -0.0002 -0.0003 0.0020 0.0009  
AT. 28 H X -0.0014 0.0003 -0.0001 0.0006 -0.0016 0.0010  
Y 0.0085 -0.0040 -0.0002 0.0017 0.0054 -0.0034  
Z 0.0036 -0.0016 -0.0002 0.0003 0.0020 -0.0009  
AT. 29 C X 0.0011 0.0010 0.0004 -0.0006 0.0014 0.0017  
Y -0.0025 -0.0030 0.0000 -0.0003 0.0003 -0.0001  
Z 0.0012 0.0008 0.0010 -0.0022 0.0048 0.0046  
AT. 30 C X 0.0011 -0.0010 0.0004 0.0006 0.0014 -0.0017  
Y -0.0025 0.0030 0.0000 0.0003 0.0003 0.0001  
Z 0.0012 -0.0008 0.0010 0.0022 0.0048 -0.0046  
AT. 31 H X -0.0023 -0.0039 0.0057 -0.0136 0.0324 0.0281  
Y 0.0061 0.0090 -0.0019 0.0069 -0.0144 -0.0120  
Z 0.0116 0.0155 0.0010 0.0010 0.0011 0.0023  
AT. 32 H X -0.0023 0.0039 0.0057 0.0136 0.0324 -0.0281  
Y 0.0061 -0.0090 -0.0019 -0.0069 -0.0144 0.0120  
Z 0.0116 -0.0155 0.0010 -0.0010 0.0011 -0.0023  
AT. 33 H X -0.0035 -0.0019 -0.0045 0.0108 -0.0245 -0.0229

Y 0.0162 0.0203 -0.0003 0.0042 -0.0070 -0.0043  
Z -0.0098 -0.0109 -0.0021 0.0038 -0.0098 -0.0104  
AT. 34 H X -0.0035 0.0019 -0.0045 -0.0108 -0.0245 0.0229  
Y 0.0162 -0.0203 -0.0003 -0.0042 -0.0070 0.0043  
Z -0.0098 0.0109 -0.0021 -0.0038 -0.0098 0.0104  
AT. 35 C X 0.0010 0.0015 -0.0003 0.0001 -0.0002 -0.0001  
Y 0.0002 -0.0002 -0.0006 0.0006 -0.0017 -0.0014  
Z 0.0006 0.0013 0.0002 -0.0007 0.0021 0.0019  
AT. 36 C X 0.0010 -0.0015 -0.0003 -0.0001 -0.0002 0.0001  
Y 0.0002 0.0002 -0.0006 -0.0006 -0.0017 0.0014  
Z 0.0006 -0.0013 0.0002 0.0007 0.0021 -0.0019  
AT. 37 C X 0.0032 0.0033 -0.0002 0.0002 -0.0005 -0.0004  
Y -0.0010 -0.0004 0.0001 0.0002 -0.0004 -0.0006  
Z 0.0003 -0.0003 0.0001 -0.0005 0.0011 0.0014  
AT. 38 C X 0.0032 -0.0033 -0.0002 -0.0002 -0.0005 0.0004  
Y -0.0010 0.0004 0.0001 -0.0002 -0.0004 0.0006  
Z 0.0003 0.0003 0.0001 0.0005 0.0011 -0.0014  
AT. 39 H X -0.0210 -0.0213 0.0011 -0.0005 -0.0001 -0.0016  
Y -0.0026 -0.0056 0.0009 -0.0033 0.0083 0.0089  
Z -0.0149 -0.0142 0.0005 0.0006 -0.0022 -0.0034  
AT. 40 H X -0.0210 0.0213 0.0011 0.0005 -0.0001 0.0016  
Y -0.0026 0.0056 0.0009 0.0033 0.0083 -0.0089  
Z -0.0149 0.0142 0.0005 -0.0006 -0.0022 0.0034  
AT. 41 H X -0.0180 -0.0197 0.0014 -0.0022 0.0053 0.0046  
Y 0.0083 0.0078 -0.0003 0.0016 -0.0048 -0.0045  
Z 0.0141 0.0162 -0.0012 0.0011 -0.0016 -0.0009  
AT. 42 H X -0.0180 0.0197 0.0014 0.0022 0.0053 -0.0046  
Y 0.0083 -0.0078 -0.0003 -0.0016 -0.0048 0.0045  
Z 0.0141 -0.0162 -0.0012 -0.0011 -0.0016 0.0009  
AT. 43 C X -0.0010 -0.0010 0.0001 -0.0000 0.0001 -0.0001  
Y 0.0070 0.0077 -0.0007 0.0005 -0.0017 -0.0015  
Z 0.0008 0.0003 -0.0000 -0.0003 0.0006 0.0009

AT. 44 C X -0.0010 0.0010 0.0001 0.0000 0.0001 0.0001  
Y 0.0070 -0.0077 -0.0007 -0.0005 -0.0017 0.0015  
Z 0.0008 -0.0003 -0.0000 0.0003 0.0006 -0.0009

AT. 45 H X 0.0387 0.0405 -0.0043 0.0031 -0.0140 -0.0129  
Y -0.0422 -0.0457 0.0048 -0.0027 0.0124 0.0115  
Z 0.0185 0.0209 -0.0021 0.0007 -0.0029 -0.0024

AT. 46 H X 0.0387 -0.0405 -0.0043 -0.0031 -0.0140 0.0129  
Y -0.0422 0.0457 0.0048 0.0027 0.0124 -0.0115  
Z 0.0185 -0.0209 -0.0021 -0.0007 -0.0029 0.0024

AT. 47 H X -0.0169 -0.0181 0.0020 -0.0025 0.0084 0.0082  
Y -0.0500 -0.0522 0.0057 -0.0028 0.0140 0.0130  
Z -0.0353 -0.0369 0.0037 -0.0004 0.0055 0.0042

AT. 48 H X -0.0169 0.0181 0.0020 0.0025 0.0084 -0.0082  
Y -0.0500 0.0522 0.0057 0.0028 0.0140 -0.0130  
Z -0.0353 0.0369 0.0037 0.0004 0.0055 -0.0042

AT. 49 C X -0.0026 -0.0018 -0.0002 0.0006 -0.0011 -0.0011  
Y -0.0002 -0.0006 -0.0004 0.0002 -0.0012 -0.0012  
Z 0.0014 0.0027 0.0002 -0.0006 0.0019 0.0018

AT. 50 C X -0.0026 0.0018 -0.0002 -0.0006 -0.0011 0.0011  
Y -0.0002 0.0006 -0.0004 -0.0002 -0.0012 0.0012  
Z 0.0014 -0.0027 0.0002 0.0006 0.0019 -0.0018

AT. 51 C X -0.0072 -0.0076 0.0009 -0.0024 0.0056 0.0044  
Y -0.0000 -0.0002 -0.0002 0.0006 -0.0015 -0.0012  
Z 0.0034 0.0031 0.0011 -0.0021 0.0050 0.0052

AT. 52 C X -0.0072 0.0076 0.0009 0.0024 0.0056 -0.0044  
Y -0.0000 0.0002 -0.0002 -0.0006 -0.0015 0.0012  
Z 0.0034 -0.0031 0.0011 0.0021 0.0050 -0.0052

AT. 53 H X 0.0455 0.0456 -0.0015 0.0063 -0.0132 -0.0075  
Y 0.0289 0.0295 -0.0056 0.0141 -0.0328 -0.0275  
Z -0.0509 -0.0513 -0.0012 -0.0009 -0.0001 -0.0055

AT. 54 H X 0.0455 -0.0456 -0.0015 -0.0063 -0.0132 0.0075  
Y 0.0289 -0.0295 -0.0056 -0.0141 -0.0328 0.0275

Z -0.0509 0.0513 -0.0012 0.0009 -0.0001 0.0055  
AT. 55 H X 0.0590 0.0605 -0.0076 0.0217 -0.0492 -0.0390  
Y -0.0225 -0.0220 0.0067 -0.0163 0.0390 0.0330  
Z 0.0193 0.0213 0.0039 -0.0067 0.0184 0.0183  
AT. 56 H X 0.0590 -0.0605 -0.0076 -0.0217 -0.0492 0.0390  
Y -0.0225 0.0220 0.0067 0.0163 0.0390 -0.0330  
Z 0.0193 -0.0213 0.0039 0.0067 0.0184 -0.0183  
AT. 57 C X 0.0002 0.0001 -0.0002 0.0005 -0.0014 -0.0012  
Y 0.0011 0.0012 -0.0004 -0.0004 0.0006 0.0004  
Z 0.0003 0.0005 -0.0001 0.0001 0.0002 0.0001  
AT. 58 C X 0.0002 -0.0001 -0.0002 -0.0005 -0.0014 0.0012  
Y 0.0011 -0.0012 -0.0004 0.0004 0.0006 -0.0004  
Z 0.0003 -0.0005 -0.0001 -0.0001 0.0002 -0.0001  
AT. 59 H X 0.0055 0.0041 -0.0040 0.0002 -0.0056 -0.0046  
Y -0.0068 -0.0088 0.0034 0.0014 -0.0023 -0.0014  
Z -0.0073 -0.0113 0.0024 0.0026 -0.0076 -0.0055  
AT. 60 H X 0.0055 -0.0041 -0.0040 -0.0002 -0.0056 0.0046  
Y -0.0068 0.0088 0.0034 -0.0014 -0.0023 0.0014  
Z -0.0073 0.0113 0.0024 -0.0026 -0.0076 0.0055  
AT. 61 H X -0.0082 -0.0075 0.0042 -0.0036 0.0116 0.0097  
Y -0.0117 -0.0135 0.0061 0.0012 0.0014 0.0018  
Z 0.0000 0.0017 0.0004 -0.0038 0.0096 0.0079  
AT. 62 H X -0.0082 0.0075 0.0042 0.0036 0.0116 -0.0097  
Y -0.0117 0.0135 0.0061 -0.0012 0.0014 -0.0018  
Z 0.0000 -0.0017 0.0004 0.0038 0.0096 -0.0079  
AT. 63 H X -0.0064 -0.0054 0.0040 -0.0034 0.0116 0.0097  
Y 0.0054 0.0080 -0.0022 0.0006 0.0001 -0.0004  
Z 0.0022 -0.0008 -0.0022 0.0030 -0.0116 -0.0093  
AT. 64 H X -0.0064 0.0054 0.0040 0.0034 0.0116 -0.0097  
Y 0.0054 -0.0080 -0.0022 -0.0006 0.0001 0.0004  
Z 0.0022 0.0008 -0.0022 -0.0030 -0.0116 0.0093  
AT. 65 C X -0.0006 0.0007 0.0000 -0.0004 0.0013 0.0010

Y -0.0000 -0.0008 -0.0002 -0.0001 -0.0004 -0.0004  
Z -0.0005 0.0005 -0.0000 0.0002 0.0001 0.0000  
AT. 66 C X -0.0006 -0.0007 0.0000 0.0004 0.0013 -0.0010  
Y -0.0000 0.0008 -0.0002 0.0001 -0.0004 0.0004  
Z -0.0005 -0.0005 -0.0000 -0.0002 0.0001 -0.0000  
AT. 67 H X -0.0028 -0.0001 -0.0018 0.0004 -0.0023 -0.0027  
Y -0.0028 0.0128 0.0024 -0.0001 0.0100 0.0091  
Z 0.0043 -0.0115 -0.0007 -0.0003 -0.0070 -0.0058  
AT. 68 H X -0.0028 0.0001 -0.0018 -0.0004 -0.0023 0.0027  
Y -0.0028 -0.0128 0.0024 0.0001 0.0100 -0.0091  
Z 0.0043 0.0115 -0.0007 0.0003 -0.0070 0.0058  
AT. 69 H X 0.0070 0.0012 0.0016 0.0014 -0.0026 -0.0010  
Y 0.0049 0.0050 0.0026 0.0013 0.0013 0.0027  
Z -0.0071 0.0072 0.0010 -0.0016 0.0098 0.0082  
AT. 70 H X 0.0070 -0.0012 0.0016 -0.0014 -0.0026 0.0010  
Y 0.0049 -0.0050 0.0026 -0.0013 0.0013 -0.0027  
Z -0.0071 -0.0072 0.0010 0.0016 0.0098 -0.0082  
AT. 71 H X 0.0118 -0.0043 0.0012 0.0018 -0.0078 -0.0049  
Y -0.0034 -0.0074 -0.0014 -0.0007 -0.0030 -0.0035  
Z 0.0044 -0.0131 -0.0010 0.0009 -0.0106 -0.0090  
AT. 72 H X 0.0118 0.0043 0.0012 -0.0018 -0.0078 0.0049  
Y -0.0034 0.0074 -0.0014 0.0007 -0.0030 0.0035  
Z 0.0044 0.0131 -0.0010 -0.0009 -0.0106 0.0090  
AT. 73 C X 0.0015 0.0013 -0.0000 -0.0000 -0.0001 0.0000  
Y -0.0014 -0.0013 0.0002 -0.0002 0.0007 0.0005  
Z 0.0044 0.0065 -0.0003 0.0011 -0.0017 -0.0014  
AT. 74 C X 0.0015 -0.0013 -0.0000 0.0000 -0.0001 -0.0000  
Y -0.0014 0.0013 0.0002 0.0002 0.0007 -0.0005  
Z 0.0044 -0.0065 -0.0003 -0.0011 -0.0017 0.0014  
AT. 75 H X -0.0233 -0.0311 0.0014 -0.0031 0.0035 0.0022  
Y -0.0120 -0.0207 0.0005 -0.0030 0.0023 0.0021  
Z -0.0292 -0.0458 0.0012 -0.0049 0.0032 0.0024



AT. 76 H X -0.0233 0.0311 0.0014 0.0031 0.0035 -0.0022  
Y -0.0120 0.0207 0.0005 0.0030 0.0023 -0.0021  
Z -0.0292 0.0458 0.0012 0.0049 0.0032 -0.0024

AT. 77 H X 0.0102 0.0164 -0.0007 0.0022 -0.0021 -0.0017  
Y 0.0251 0.0371 -0.0015 0.0045 -0.0048 -0.0037  
Z -0.0280 -0.0434 0.0018 -0.0052 0.0047 0.0037

AT. 78 H X 0.0102 -0.0164 -0.0007 -0.0022 -0.0021 0.0017  
Y 0.0251 -0.0371 -0.0015 -0.0045 -0.0048 0.0037  
Z -0.0280 0.0434 0.0018 0.0052 0.0047 -0.0037

AT. 79 I X -0.0000 -0.0000 -0.0001 -0.0000 0.0000 0.0000  
Y 0.0000 0.0000 -0.0000 -0.0000 0.0000 -0.0000  
Z 0.0000 -0.0000 -0.0000 -0.0000 0.0000 -0.0000

AT. 80 I X -0.0000 0.0000 -0.0001 0.0000 0.0000 -0.0000  
Y 0.0000 -0.0000 -0.0000 0.0000 0.0000 0.0000  
Z 0.0000 0.0000 -0.0000 0.0000 0.0000 0.0000

AT. 81 I X 0.0000 0.0000 0.0000 0.0000 -0.0000 0.0000  
Y 0.0000 0.0000 -0.0000 -0.0000 -0.0000 -0.0000  
Z -0.0000 0.0000 -0.0000 -0.0000 0.0000 -0.0000

AT. 82 I X 0.0000 -0.0000 0.0000 -0.0000 -0.0000 -0.0000  
Y 0.0000 -0.0000 -0.0000 0.0000 -0.0000 0.0000  
Z -0.0000 -0.0000 -0.0000 0.0000 0.0000 0.0000

AT. 83 O X -0.0004 -0.0005 0.0110 0.0097 -0.0022 0.0042  
Y -0.0001 -0.0002 0.0027 0.0024 -0.0005 0.0010  
Z -0.0003 -0.0002 0.0049 0.0041 -0.0010 0.0018

AT. 84 O X -0.0004 0.0005 0.0110 -0.0097 -0.0022 -0.0042  
Y -0.0001 0.0002 0.0027 -0.0024 -0.0005 -0.0010  
Z -0.0003 0.0002 0.0049 -0.0041 -0.0010 -0.0018

AT. 85 O X -0.0009 -0.0005 -0.0024 -0.0028 0.0007 -0.0013  
Y -0.0003 -0.0002 -0.0015 -0.0017 0.0004 -0.0008  
Z 0.0004 0.0003 0.0006 0.0005 -0.0002 0.0002

AT. 86 O X -0.0009 0.0005 -0.0024 0.0028 0.0007 0.0013  
Y -0.0003 0.0002 -0.0015 0.0017 0.0004 0.0008

Z 0.0004 -0.0003 0.0006 -0.0005 -0.0002 -0.0002  
AT. 87 N X 0.0004 0.0002 0.0033 0.0033 -0.0006 0.0016  
Y -0.0001 -0.0003 0.0052 0.0046 -0.0009 0.0019  
Z -0.0022 0.0002 -0.0280 -0.0260 0.0041 -0.0112  
AT. 88 N X 0.0004 -0.0002 0.0033 -0.0033 -0.0006 -0.0016  
Y -0.0001 0.0003 0.0052 -0.0046 -0.0009 -0.0019  
Z -0.0022 -0.0002 -0.0280 0.0260 0.0041 0.0112  
AT. 89 N X -0.0009 -0.0005 -0.0013 -0.0017 0.0003 -0.0008  
Y 0.0011 0.0003 0.0022 0.0025 -0.0003 0.0012  
Z -0.0025 -0.0006 -0.0054 -0.0063 0.0009 -0.0029  
AT. 90 N X -0.0009 0.0005 -0.0013 0.0017 0.0003 0.0008  
Y 0.0011 -0.0003 0.0022 -0.0025 -0.0003 -0.0012  
Z -0.0025 0.0006 -0.0054 0.0063 0.0009 0.0029  
AT. 91 C X 0.0003 0.0007 -0.0225 -0.0205 0.0042 -0.0090  
Y 0.0000 0.0003 -0.0082 -0.0072 0.0015 -0.0032  
Z 0.0020 -0.0001 0.0184 0.0178 -0.0025 0.0074  
AT. 92 C X 0.0003 -0.0007 -0.0225 0.0205 0.0042 0.0090  
Y 0.0000 -0.0003 -0.0082 0.0072 0.0015 0.0032  
Z 0.0020 0.0001 0.0184 -0.0178 -0.0025 -0.0074  
AT. 93 C X 0.0006 0.0001 0.0056 0.0058 -0.0009 0.0026  
Y 0.0010 0.0007 0.0027 0.0027 -0.0001 0.0017  
Z -0.0008 -0.0002 -0.0053 -0.0054 0.0008 -0.0023  
AT. 94 C X 0.0006 -0.0001 0.0056 -0.0058 -0.0009 -0.0026  
Y 0.0010 -0.0007 0.0027 -0.0027 -0.0001 -0.0017  
Z -0.0008 0.0002 -0.0053 0.0054 0.0008 0.0023  
AT. 95 H X 0.0025 0.0035 -0.0059 -0.0100 0.0036 -0.0006  
Y -0.0066 -0.0055 -0.0020 -0.0023 -0.0021 -0.0043  
Z 0.0096 0.0061 0.0175 0.0229 -0.0017 0.0116  
AT. 96 H X 0.0025 -0.0035 -0.0059 0.0100 0.0036 0.0006  
Y -0.0066 0.0055 -0.0020 0.0023 -0.0021 0.0043  
Z 0.0096 -0.0061 0.0175 -0.0229 -0.0017 -0.0116  
AT. 97 H X -0.0032 -0.0027 -0.0005 -0.0048 -0.0002 -0.0036

Y -0.0079 -0.0064 -0.0074 -0.0107 -0.0006 -0.0076  
Z -0.0017 -0.0010 -0.0061 -0.0055 0.0005 -0.0027  
AT. 98 H X -0.0032 0.0027 -0.0005 0.0048 -0.0002 0.0036  
Y -0.0079 0.0064 -0.0074 0.0107 -0.0006 0.0076  
Z -0.0017 0.0010 -0.0061 0.0055 0.0005 0.0027  
AT. 99 C X 0.0024 0.0011 0.0057 0.0068 -0.0014 0.0031  
Y -0.0005 0.0002 -0.0001 -0.0003 -0.0003 -0.0001  
Z 0.0017 0.0001 0.0042 0.0052 -0.0005 0.0024  
AT. 100 C X 0.0024 -0.0011 0.0057 -0.0068 -0.0014 -0.0031  
Y -0.0005 -0.0002 -0.0001 0.0003 -0.0003 0.0001  
Z 0.0017 -0.0001 0.0042 -0.0052 -0.0005 -0.0024  
AT. 101 C X -0.0019 -0.0009 -0.0018 -0.0023 0.0004 -0.0010  
Y -0.0008 -0.0004 -0.0003 -0.0006 0.0001 -0.0002  
Z -0.0025 -0.0009 -0.0020 -0.0027 0.0002 -0.0012  
AT. 102 C X -0.0019 0.0009 -0.0018 0.0023 0.0004 0.0010  
Y -0.0008 0.0004 -0.0003 0.0006 0.0001 0.0002  
Z -0.0025 0.0009 -0.0020 0.0027 0.0002 0.0012  
AT. 103 H X 0.0016 0.0009 0.0015 0.0018 -0.0002 0.0009  
Y -0.0028 -0.0013 -0.0022 -0.0027 0.0004 -0.0012  
Z 0.0215 0.0092 0.0105 0.0153 -0.0011 0.0070  
AT. 104 H X 0.0016 -0.0009 0.0015 -0.0018 -0.0002 -0.0009  
Y -0.0028 0.0013 -0.0022 0.0027 0.0004 0.0012  
Z 0.0215 -0.0092 0.0105 -0.0153 -0.0011 -0.0070  
AT. 105 H X 0.0098 0.0052 0.0044 0.0036 -0.0012 0.0015  
Y 0.0165 0.0069 0.0076 0.0118 -0.0010 0.0051  
Z 0.0070 0.0032 0.0023 0.0035 -0.0005 0.0014  
AT. 106 H X 0.0098 -0.0052 0.0044 -0.0036 -0.0012 -0.0015  
Y 0.0165 -0.0069 0.0076 -0.0118 -0.0010 -0.0051  
Z 0.0070 -0.0032 0.0023 -0.0035 -0.0005 -0.0014  
AT. 107 C X -0.0008 -0.0006 -0.0007 -0.0009 -0.0001 -0.0008  
Y -0.0013 -0.0010 0.0007 0.0008 -0.0005 -0.0002  
Z 0.0003 -0.0001 0.0052 0.0050 -0.0007 0.0022

AT.108 C X -0.0008 0.0006 -0.0007 0.0009 -0.0001 0.0008  
Y -0.0013 0.0010 0.0007 -0.0008 -0.0005 0.0002  
Z 0.0003 0.0001 0.0052 -0.0050 -0.0007 -0.0022

AT.109 H X 0.0064 0.0069 -0.0344 -0.0312 0.0078 -0.0098  
Y 0.0038 0.0029 -0.0036 -0.0044 0.0022 -0.0001  
Z 0.0066 0.0042 0.0069 0.0044 0.0014 0.0046

AT.110 H X 0.0064 -0.0069 -0.0344 0.0312 0.0078 0.0098  
Y 0.0038 -0.0029 -0.0036 0.0044 0.0022 0.0001  
Z 0.0066 -0.0042 0.0069 -0.0044 0.0014 -0.0046

AT.111 H X 0.0025 -0.0003 0.0197 0.0183 -0.0026 0.0079  
Y 0.0101 0.0086 -0.0155 -0.0155 0.0064 -0.0018  
Z -0.0057 -0.0025 -0.0140 -0.0128 0.0007 -0.0070

AT.112 H X 0.0025 0.0003 0.0197 -0.0183 -0.0026 -0.0079  
Y 0.0101 -0.0086 -0.0155 0.0155 0.0064 0.0018  
Z -0.0057 0.0025 -0.0140 0.0128 0.0007 0.0070

AT.113 C X -0.0005 -0.0004 0.0000 -0.0001 -0.0001 -0.0001  
Y 0.0004 0.0004 -0.0016 -0.0009 -0.0001 -0.0006  
Z 0.0009 0.0003 0.0022 0.0020 -0.0004 0.0007

AT.114 C X -0.0005 0.0004 0.0000 0.0001 -0.0001 0.0001  
Y 0.0004 -0.0004 -0.0016 0.0009 -0.0001 0.0006  
Z 0.0009 -0.0003 0.0022 -0.0020 -0.0004 -0.0007

AT.115 C X -0.0019 -0.0012 0.0005 0.0005 -0.0004 -0.0003  
Y -0.0001 -0.0000 -0.0007 -0.0010 0.0003 -0.0003  
Z 0.0008 0.0003 0.0011 0.0015 -0.0002 0.0007

AT.116 C X -0.0019 0.0012 0.0005 -0.0005 -0.0004 0.0003  
Y -0.0001 0.0000 -0.0007 0.0010 0.0003 0.0003  
Z 0.0008 -0.0003 0.0011 -0.0015 -0.0002 -0.0007

AT.117 H X 0.0130 0.0074 0.0018 0.0037 0.0009 0.0039  
Y -0.0031 -0.0030 0.0082 0.0090 -0.0027 0.0021  
Z -0.0133 -0.0076 -0.0022 -0.0038 -0.0008 -0.0038

AT.118 H X 0.0130 -0.0074 0.0018 -0.0037 0.0009 -0.0039  
Y -0.0031 0.0030 0.0082 -0.0090 -0.0027 -0.0021

Z -0.0133 0.0076 -0.0022 0.0038 -0.0008 0.0038  
AT. 119 H X 0.0124 0.0090 -0.0073 -0.0071 0.0030 0.0003  
Y -0.0002 0.0010 -0.0033 -0.0036 0.0007 -0.0006  
Z 0.0082 0.0046 -0.0009 -0.0004 0.0012 0.0012  
AT. 120 H X 0.0124 -0.0090 -0.0073 0.0071 0.0030 -0.0003  
Y -0.0002 -0.0010 -0.0033 0.0036 0.0007 0.0006  
Z 0.0082 -0.0046 -0.0009 0.0004 0.0012 -0.0012  
AT. 121 C X 0.0006 0.0004 -0.0000 0.0002 0.0002 0.0004  
Y 0.0008 0.0005 -0.0004 -0.0005 0.0004 0.0002  
Z 0.0005 0.0002 0.0007 0.0009 -0.0001 0.0005  
AT. 122 C X 0.0006 -0.0004 -0.0000 -0.0002 0.0002 -0.0004  
Y 0.0008 -0.0005 -0.0004 0.0005 0.0004 -0.0002  
Z 0.0005 -0.0002 0.0007 -0.0009 -0.0001 -0.0005  
AT. 123 H X -0.0029 -0.0019 0.0079 0.0080 -0.0040 0.0002  
Y -0.0026 -0.0007 0.0014 0.0017 -0.0018 -0.0007  
Z 0.0033 0.0010 -0.0000 -0.0000 0.0014 0.0012  
AT. 124 H X -0.0029 0.0019 0.0079 -0.0080 -0.0040 -0.0002  
Y -0.0026 0.0007 0.0014 -0.0017 -0.0018 0.0007  
Z 0.0033 -0.0010 -0.0000 0.0000 0.0014 -0.0012  
AT. 125 H X -0.0019 -0.0005 -0.0037 -0.0044 0.0003 -0.0023  
Y -0.0039 -0.0014 0.0061 0.0062 -0.0040 -0.0003  
Z -0.0049 -0.0019 -0.0005 -0.0012 -0.0020 -0.0029  
AT. 126 H X -0.0019 0.0005 -0.0037 0.0044 0.0003 0.0023  
Y -0.0039 0.0014 0.0061 -0.0062 -0.0040 0.0003  
Z -0.0049 0.0019 -0.0005 0.0012 -0.0020 0.0029  
AT. 127 C X 0.0006 0.0001 0.0014 0.0010 -0.0001 0.0006  
Y -0.0009 -0.0008 -0.0014 -0.0014 0.0001 -0.0007  
Z 0.0007 0.0003 0.0022 0.0020 -0.0002 0.0010  
AT. 128 C X 0.0006 -0.0001 0.0014 -0.0010 -0.0001 -0.0006  
Y -0.0009 0.0008 -0.0014 0.0014 0.0001 0.0007  
Z 0.0007 -0.0003 0.0022 -0.0020 -0.0002 -0.0010  
AT. 129 C X 0.0032 0.0026 -0.0045 -0.0031 0.0014 -0.0004

Y -0.0006 -0.0004 -0.0001 0.0000 -0.0001 -0.0002  
Z 0.0008 0.0003 0.0059 0.0058 -0.0008 0.0025  
AT. 130 C X 0.0032 -0.0026 -0.0045 0.0031 0.0014 0.0004  
Y -0.0006 0.0004 -0.0001 -0.0000 -0.0001 0.0002  
Z 0.0008 -0.0003 0.0059 -0.0058 -0.0008 -0.0025  
AT. 131 H X -0.0169 -0.0119 -0.0014 -0.0061 -0.0032 -0.0069  
Y 0.0157 0.0130 -0.0308 -0.0248 0.0084 -0.0054  
Z -0.0180 -0.0126 -0.0043 -0.0093 -0.0030 -0.0083  
AT. 132 H X -0.0169 0.0119 -0.0014 0.0061 -0.0032 0.0069  
Y 0.0157 -0.0130 -0.0308 0.0248 0.0084 0.0054  
Z -0.0180 0.0126 -0.0043 0.0093 -0.0030 0.0083  
AT. 133 H X -0.0252 -0.0213 0.0564 0.0441 -0.0144 0.0110  
Y -0.0023 -0.0030 0.0223 0.0181 -0.0037 0.0071  
Z 0.0113 0.0073 0.0116 0.0111 0.0011 0.0082  
AT. 134 H X -0.0252 0.0213 0.0564 -0.0441 -0.0144 -0.0110  
Y -0.0023 0.0030 0.0223 -0.0181 -0.0037 -0.0071  
Z 0.0113 -0.0073 0.0116 -0.0111 0.0011 -0.0082  
AT. 135 C X 0.0004 0.0001 0.0012 0.0011 -0.0003 0.0004  
Y 0.0004 0.0002 -0.0001 0.0003 -0.0003 -0.0002  
Z 0.0002 0.0000 0.0000 -0.0002 0.0001 0.0001  
AT. 136 C X 0.0004 -0.0001 0.0012 -0.0011 -0.0003 -0.0004  
Y 0.0004 -0.0002 -0.0001 -0.0003 -0.0003 0.0002  
Z 0.0002 -0.0000 0.0000 0.0002 0.0001 -0.0001  
AT. 137 H X -0.0031 -0.0023 0.0049 -0.0001 0.0033 0.0034  
Y -0.0039 -0.0014 -0.0034 -0.0037 0.0015 -0.0007  
Z -0.0055 -0.0017 -0.0071 -0.0063 0.0016 -0.0022  
AT. 138 H X -0.0031 0.0023 0.0049 0.0001 0.0033 -0.0034  
Y -0.0039 0.0014 -0.0034 0.0037 0.0015 0.0007  
Z -0.0055 0.0017 -0.0071 0.0063 0.0016 0.0022  
AT. 139 H X -0.0001 0.0007 -0.0076 -0.0056 0.0008 -0.0024  
Y -0.0052 -0.0035 0.0066 0.0008 0.0038 0.0044  
Z 0.0023 0.0003 0.0090 0.0080 -0.0021 0.0024

AT.140 H X -0.0001 -0.0007 -0.0076 0.0056 0.0008 0.0024  
Y -0.0052 0.0035 0.0066 -0.0008 0.0038 -0.0044  
Z 0.0023 -0.0003 0.0090 -0.0080 -0.0021 -0.0024

AT.141 H X 0.0015 0.0021 -0.0114 -0.0072 -0.0005 -0.0046  
Y 0.0036 0.0010 0.0038 0.0027 -0.0004 0.0015  
Z -0.0029 -0.0001 -0.0096 -0.0064 0.0002 -0.0038

AT.142 H X 0.0015 -0.0021 -0.0114 0.0072 -0.0005 0.0046  
Y 0.0036 -0.0010 0.0038 -0.0027 -0.0004 -0.0015  
Z -0.0029 0.0001 -0.0096 0.0064 0.0002 0.0038

AT.143 C X -0.0001 0.0001 -0.0015 -0.0015 0.0003 -0.0006  
Y -0.0006 -0.0004 0.0001 -0.0000 -0.0001 -0.0001  
Z -0.0001 0.0001 0.0004 0.0004 -0.0001 0.0002

AT.144 C X -0.0001 -0.0001 -0.0015 0.0015 0.0003 0.0006  
Y -0.0006 0.0004 0.0001 0.0000 -0.0001 0.0001  
Z -0.0001 -0.0001 0.0004 -0.0004 -0.0001 -0.0002

AT.145 H X 0.0049 0.0034 0.0029 0.0035 0.0001 0.0020  
Y 0.0035 0.0038 0.0102 0.0107 -0.0016 0.0054  
Z -0.0028 -0.0033 -0.0096 -0.0099 0.0015 -0.0050

AT.146 H X 0.0049 -0.0034 0.0029 -0.0035 0.0001 -0.0020  
Y 0.0035 -0.0038 0.0102 -0.0107 -0.0016 -0.0054  
Z -0.0028 0.0033 -0.0096 0.0099 0.0015 0.0050

AT.147 H X -0.0016 -0.0013 0.0061 0.0061 -0.0014 0.0023  
Y 0.0078 0.0063 -0.0006 0.0001 0.0013 0.0013  
Z 0.0021 0.0017 0.0105 0.0109 -0.0017 0.0050

AT.148 H X -0.0016 0.0013 0.0061 -0.0061 -0.0014 -0.0023  
Y 0.0078 -0.0063 -0.0006 -0.0001 0.0013 -0.0013  
Z 0.0021 -0.0017 0.0105 -0.0109 -0.0017 -0.0050

AT.149 H X -0.0054 -0.0044 0.0064 0.0062 -0.0023 0.0017  
Y -0.0022 -0.0026 -0.0059 -0.0059 0.0008 -0.0033  
Z -0.0005 -0.0018 -0.0139 -0.0138 0.0026 -0.0065

AT.150 H X -0.0054 0.0044 0.0064 -0.0062 -0.0023 -0.0017  
Y -0.0022 0.0026 -0.0059 0.0059 0.0008 0.0033

Z -0.0005 0.0018 -0.0139 0.0138 0.0026 0.0065  
AT. 151 C X -0.0001 0.0000 -0.0003 -0.0002 0.0000 -0.0001  
Y -0.0002 -0.0001 0.0004 0.0004 -0.0001 0.0001  
Z 0.0026 0.0016 -0.0014 -0.0016 0.0010 0.0001  
AT. 152 C X -0.0001 -0.0000 -0.0003 0.0002 0.0000 0.0001  
Y -0.0002 0.0001 0.0004 -0.0004 -0.0001 -0.0001  
Z 0.0026 -0.0016 -0.0014 0.0016 0.0010 -0.0001  
AT. 153 H X 0.0064 0.0038 -0.0006 -0.0005 0.0012 0.0009  
Y -0.0119 -0.0066 0.0018 0.0032 -0.0035 -0.0017  
Z -0.0199 -0.0110 0.0011 0.0033 -0.0053 -0.0034  
AT. 154 H X 0.0064 -0.0038 -0.0006 0.0005 0.0012 -0.0009  
Y -0.0119 0.0066 0.0018 -0.0032 -0.0035 0.0017  
Z -0.0199 0.0110 0.0011 -0.0033 -0.0053 0.0034  
AT. 155 H X -0.0053 -0.0035 0.0017 0.0012 -0.0011 -0.0003  
Y 0.0148 0.0081 -0.0024 -0.0040 0.0042 0.0021  
Z -0.0160 -0.0089 0.0018 0.0034 -0.0042 -0.0024  
AT. 156 H X -0.0053 0.0035 0.0017 -0.0012 -0.0011 0.0003  
Y 0.0148 -0.0081 -0.0024 0.0040 0.0042 -0.0021  
Z -0.0160 0.0089 0.0018 -0.0034 -0.0042 0.0024  
AT. 157 O X -0.0000 0.0001 0.0000 -0.0003 0.0005 0.0005  
Y -0.0001 -0.0000 -0.0000 -0.0003 0.0010 0.0008  
Z 0.0010 -0.0002 -0.0001 -0.0000 0.0006 -0.0002  
AT. 158 O X -0.0000 -0.0001 0.0000 0.0003 0.0005 -0.0005  
Y -0.0001 0.0000 -0.0000 0.0003 0.0010 -0.0008  
Z 0.0010 0.0002 -0.0001 0.0000 0.0006 0.0002  
AT. 159 O X -0.0011 0.0002 0.0001 -0.0001 -0.0003 0.0006  
Y 0.0000 0.0000 0.0000 0.0002 -0.0006 -0.0004  
Z -0.0007 0.0001 0.0001 0.0002 -0.0009 -0.0004  
AT. 160 O X -0.0011 -0.0002 0.0001 0.0001 -0.0003 -0.0006  
Y 0.0000 -0.0000 0.0000 -0.0002 -0.0006 0.0004  
Z -0.0007 -0.0001 0.0001 -0.0002 -0.0009 0.0004  
AT. 161 H X -0.0041 0.0006 0.0003 0.0088 -0.0231 -0.0168



Y -0.0011 0.0002 -0.0001 0.0026 -0.0075 -0.0056  
Z 0.0035 0.0002 -0.0002 -0.0057 0.0145 0.0101  
AT. 162 H X -0.0041 -0.0006 0.0003 -0.0088 -0.0231 0.0168  
Y -0.0011 -0.0002 -0.0001 -0.0026 -0.0075 0.0056  
Z 0.0035 -0.0002 -0.0002 0.0057 0.0145 -0.0101  
AT. 163 H X 0.0238 -0.0049 -0.0020 -0.0030 0.0192 -0.0008  
Y 0.0010 -0.0008 -0.0008 0.0013 0.0004 -0.0013  
Z -0.0086 0.0016 0.0008 0.0016 -0.0078 0.0005  
AT. 164 H X 0.0238 0.0049 -0.0020 0.0030 0.0192 0.0008  
Y 0.0010 0.0008 -0.0008 -0.0013 0.0004 0.0013  
Z -0.0086 -0.0016 0.0008 -0.0016 -0.0078 -0.0005  
AT. 165 O X 0.0010 -0.0003 -0.0001 -0.0002 -0.0001 0.0002  
Y -0.0006 0.0004 -0.0001 -0.0001 -0.0000 -0.0003  
Z 0.0008 -0.0005 0.0003 0.0004 -0.0000 0.0004  
AT. 166 O X 0.0010 0.0003 -0.0001 0.0002 -0.0001 -0.0002  
Y -0.0006 -0.0004 -0.0001 0.0001 -0.0000 0.0003  
Z 0.0008 0.0005 0.0003 -0.0004 -0.0000 -0.0004  
AT. 167 H X -0.0044 0.0001 0.0008 0.0019 0.0004 -0.0006  
Y 0.0000 0.0005 -0.0022 -0.0029 0.0009 -0.0003  
Z 0.0168 -0.0031 -0.0009 -0.0019 -0.0024 0.0023  
AT. 168 H X -0.0044 -0.0001 0.0008 -0.0019 0.0004 0.0006  
Y 0.0000 -0.0005 -0.0022 0.0029 0.0009 0.0003  
Z 0.0168 0.0031 -0.0009 0.0019 -0.0024 -0.0023  
AT. 169 O X -0.0011 0.0003 -0.0002 -0.0002 0.0001 -0.0004  
Y 0.0014 -0.0008 0.0004 0.0006 -0.0001 0.0006  
Z 0.0004 -0.0004 0.0002 0.0003 -0.0000 0.0002  
AT. 170 O X -0.0011 -0.0003 -0.0002 0.0002 0.0001 0.0004  
Y 0.0014 0.0008 0.0004 -0.0006 -0.0001 -0.0006  
Z 0.0004 0.0004 0.0002 -0.0003 -0.0000 -0.0002  
AT. 171 H X 0.0044 -0.0010 0.0028 0.0031 -0.0003 0.0030  
Y -0.0158 0.0088 -0.0031 -0.0047 0.0014 -0.0056  
Z -0.0352 0.0191 -0.0092 -0.0113 0.0034 -0.0130

AT. 172 H X 0.0044 0.0010 0.0028 -0.0031 -0.0003 -0.0030  
Y -0.0158 -0.0088 -0.0031 0.0047 0.0014 0.0056  
Z -0.0352 -0.0191 -0.0092 0.0113 0.0034 0.0130

FREQ(CM\*\*-1) 1703.89 1704.44 1709.62 1711.55 1715.06 1716.91

AT. 1 I X -0.0000 0.0000 -0.0000 -0.0000 0.0000 0.0000  
Y 0.0000 0.0000 -0.0000 0.0000 -0.0000 0.0000  
Z -0.0000 0.0000 0.0000 0.0000 0.0000 -0.0000

AT. 2 I X -0.0000 -0.0000 0.0000 -0.0000 0.0000 -0.0000  
Y 0.0000 -0.0000 0.0000 0.0000 -0.0000 -0.0000  
Z -0.0000 -0.0000 -0.0000 0.0000 0.0000 0.0000

AT. 3 I X -0.0000 -0.0000 0.0000 0.0000 0.0000 -0.0000  
Y 0.0000 0.0000 0.0000 0.0000 -0.0000 -0.0000  
Z -0.0000 -0.0000 0.0000 -0.0000 0.0000 -0.0000

AT. 4 I X -0.0000 0.0000 -0.0000 0.0000 0.0000 0.0000  
Y 0.0000 -0.0000 -0.0000 0.0000 -0.0000 0.0000  
Z -0.0000 0.0000 -0.0000 -0.0000 0.0000 0.0000

AT. 5 O X -0.0052 -0.0039 -0.0004 -0.0125 -0.0027 0.0098  
Y 0.0038 0.0027 0.0003 0.0090 0.0019 -0.0070  
Z 0.0055 0.0041 0.0004 0.0138 0.0031 -0.0108

AT. 6 O X -0.0052 0.0039 0.0004 -0.0125 -0.0027 -0.0098  
Y 0.0038 -0.0027 -0.0003 0.0090 0.0019 0.0070  
Z 0.0055 -0.0041 -0.0004 0.0138 0.0031 0.0108

AT. 7 O X -0.0128 -0.0143 0.0029 0.0029 0.0086 0.0004  
Y 0.0129 0.0144 -0.0029 -0.0029 -0.0088 -0.0004  
Z -0.0052 -0.0058 0.0012 0.0012 0.0036 0.0000

AT. 8 O X -0.0128 0.0143 -0.0029 0.0029 0.0086 -0.0004  
Y 0.0129 -0.0144 0.0029 -0.0029 -0.0088 0.0004  
Z -0.0052 0.0058 -0.0012 0.0012 0.0036 -0.0000

AT. 9 N X -0.0013 -0.0012 0.0000 -0.0022 -0.0002 0.0018  
Y 0.0004 0.0003 0.0000 0.0008 0.0002 -0.0006

Z 0.0034 0.0019 0.0004 0.0110 0.0030 -0.0082  
AT. 10 N X -0.0013 0.0012 -0.0000 -0.0022 -0.0002 -0.0018  
Y 0.0004 -0.0003 -0.0000 0.0008 0.0002 0.0006  
Z 0.0034 -0.0019 -0.0004 0.0110 0.0030 0.0082  
AT. 11 N X -0.0033 -0.0038 0.0007 0.0007 0.0021 0.0003  
Y 0.0047 0.0052 -0.0011 -0.0014 -0.0034 0.0002  
Z -0.0068 -0.0075 0.0016 0.0020 0.0051 -0.0005  
AT. 12 N X -0.0033 0.0038 -0.0007 0.0007 0.0021 -0.0003  
Y 0.0047 -0.0052 0.0011 -0.0014 -0.0034 -0.0002  
Z -0.0068 0.0075 -0.0016 0.0020 0.0051 0.0005  
AT. 13 C X 0.0088 0.0070 0.0005 0.0202 0.0040 -0.0160  
Y -0.0062 -0.0050 -0.0003 -0.0141 -0.0028 0.0112  
Z -0.0111 -0.0077 -0.0010 -0.0306 -0.0075 0.0236  
AT. 14 C X 0.0088 -0.0070 -0.0005 0.0202 0.0040 0.0160  
Y -0.0062 0.0050 0.0003 -0.0141 -0.0028 -0.0112  
Z -0.0111 0.0077 0.0010 -0.0306 -0.0075 -0.0236  
AT. 15 C X -0.0010 -0.0008 -0.0000 -0.0020 -0.0003 0.0017  
Y 0.0012 0.0012 0.0000 0.0019 0.0002 -0.0017  
Z 0.0007 0.0004 0.0001 0.0022 0.0006 -0.0016  
AT. 16 C X -0.0010 0.0008 0.0000 -0.0020 -0.0003 -0.0017  
Y 0.0012 -0.0012 -0.0000 0.0019 0.0002 0.0017  
Z 0.0007 -0.0004 -0.0001 0.0022 0.0006 0.0016  
AT. 17 H X -0.0053 -0.0051 -0.0000 -0.0095 -0.0015 0.0080  
Y -0.0010 -0.0019 0.0005 0.0034 0.0021 -0.0020  
Z 0.0014 0.0022 -0.0005 -0.0028 -0.0021 0.0015  
AT. 18 H X -0.0053 0.0051 0.0000 -0.0095 -0.0015 -0.0080  
Y -0.0010 0.0019 -0.0005 0.0034 0.0021 0.0020  
Z 0.0014 -0.0022 0.0005 -0.0028 -0.0021 -0.0015  
AT. 19 H X 0.0052 0.0044 0.0005 0.0145 0.0032 -0.0126  
Y -0.0076 -0.0068 -0.0000 -0.0123 -0.0012 0.0102  
Z -0.0006 -0.0010 0.0003 0.0016 0.0010 -0.0013  
AT. 20 H X 0.0052 -0.0044 -0.0005 0.0145 0.0032 0.0126

Y -0.0076 0.0068 0.0000 -0.0123 -0.0012 -0.0102  
Z -0.0006 0.0010 -0.0003 0.0016 0.0010 0.0013  
AT. 21 C X 0.0213 0.0239 -0.0048 -0.0048 -0.0142 -0.0011  
Y -0.0243 -0.0270 0.0055 0.0055 0.0165 0.0007  
Z 0.0141 0.0156 -0.0033 -0.0038 -0.0103 0.0003  
AT. 22 C X 0.0213 -0.0239 0.0048 -0.0048 -0.0142 0.0011  
Y -0.0243 0.0270 -0.0055 0.0055 0.0165 -0.0007  
Z 0.0141 -0.0156 0.0033 -0.0038 -0.0103 -0.0003  
AT. 23 C X -0.0021 -0.0025 0.0005 0.0008 0.0015 0.0003  
Y 0.0023 0.0029 -0.0005 -0.0009 -0.0017 -0.0004  
Z -0.0004 -0.0002 0.0001 -0.0001 0.0003 -0.0003  
AT. 24 C X -0.0021 0.0025 -0.0005 0.0008 0.0015 -0.0003  
Y 0.0023 -0.0029 0.0005 -0.0009 -0.0017 0.0004  
Z -0.0004 0.0002 -0.0001 -0.0001 0.0003 0.0003  
AT. 25 H X -0.0086 -0.0095 0.0014 -0.0006 0.0044 0.0026  
Y 0.0006 0.0012 -0.0003 -0.0013 -0.0009 -0.0001  
Z 0.0036 0.0009 -0.0005 0.0034 -0.0009 0.0026  
AT. 26 H X -0.0086 0.0095 -0.0014 -0.0006 0.0044 -0.0026  
Y 0.0006 -0.0012 0.0003 -0.0013 -0.0009 0.0001  
Z 0.0036 -0.0009 0.0005 0.0034 -0.0009 -0.0026  
AT. 27 H X 0.0163 0.0189 -0.0039 -0.0050 -0.0116 -0.0007  
Y -0.0057 -0.0105 0.0017 0.0066 0.0061 0.0042  
Z -0.0081 -0.0111 0.0020 0.0045 0.0066 0.0021  
AT. 28 H X 0.0163 -0.0189 0.0039 -0.0050 -0.0116 0.0007  
Y -0.0057 0.0105 -0.0017 0.0066 0.0061 -0.0042  
Z -0.0081 0.0111 -0.0020 0.0045 0.0066 -0.0021  
AT. 29 C X 0.0009 0.0007 0.0001 0.0022 0.0004 -0.0017  
Y -0.0006 -0.0005 -0.0001 -0.0017 -0.0004 0.0013  
Z -0.0005 -0.0003 -0.0001 -0.0015 -0.0004 0.0011  
AT. 30 C X 0.0009 -0.0007 -0.0001 0.0022 0.0004 0.0017  
Y -0.0006 0.0005 0.0001 -0.0017 -0.0004 -0.0013  
Z -0.0005 0.0003 0.0001 -0.0015 -0.0004 -0.0011

AT. 31 H X -0.0066 -0.0051 -0.0008 -0.0169 -0.0036 0.0133  
Y 0.0031 0.0023 0.0007 0.0073 0.0018 -0.0060  
Z 0.0004 0.0002 0.0006 0.0010 0.0006 -0.0011

AT. 32 H X -0.0066 0.0051 0.0008 -0.0169 -0.0036 -0.0133  
Y 0.0031 -0.0023 -0.0007 0.0073 0.0018 0.0060  
Z 0.0004 -0.0002 -0.0006 0.0010 0.0006 0.0011

AT. 33 H X 0.0004 0.0003 0.0002 0.0020 0.0007 -0.0015  
Y 0.0023 0.0021 0.0007 0.0051 0.0012 -0.0047  
Z -0.0026 -0.0021 -0.0003 -0.0058 -0.0011 0.0048

AT. 34 H X 0.0004 -0.0003 -0.0002 0.0020 0.0007 0.0015  
Y 0.0023 -0.0021 -0.0007 0.0051 0.0012 0.0047  
Z -0.0026 0.0021 0.0003 -0.0058 -0.0011 -0.0048

AT. 35 C X 0.0002 0.0003 -0.0000 -0.0010 -0.0004 0.0006  
Y 0.0002 0.0001 0.0001 0.0014 0.0005 -0.0010  
Z 0.0003 0.0003 -0.0000 -0.0001 -0.0001 0.0000

AT. 36 C X 0.0002 -0.0003 0.0000 -0.0010 -0.0004 -0.0006  
Y 0.0002 -0.0001 -0.0001 0.0014 0.0005 0.0010  
Z 0.0003 -0.0003 0.0000 -0.0001 -0.0001 -0.0000

AT. 37 C X 0.0001 0.0001 -0.0001 0.0005 -0.0002 -0.0004  
Y 0.0009 0.0011 -0.0002 -0.0003 -0.0006 -0.0000  
Z -0.0000 -0.0001 -0.0000 -0.0001 -0.0001 0.0001

AT. 38 C X 0.0001 -0.0001 0.0001 0.0005 -0.0002 0.0004  
Y 0.0009 -0.0011 0.0002 -0.0003 -0.0006 0.0000  
Z -0.0000 0.0001 0.0000 -0.0001 -0.0001 -0.0001

AT. 39 H X 0.0027 0.0032 -0.0002 -0.0028 -0.0006 0.0014  
Y -0.0001 -0.0001 0.0003 -0.0003 0.0006 0.0007  
Z 0.0023 0.0028 -0.0004 -0.0024 -0.0012 0.0011

AT. 40 H X 0.0027 -0.0032 0.0002 -0.0028 -0.0006 -0.0014  
Y -0.0001 0.0001 -0.0003 -0.0003 0.0006 -0.0007  
Z 0.0023 -0.0028 0.0004 -0.0024 -0.0012 -0.0011

AT. 41 H X 0.0069 0.0078 -0.0010 -0.0039 -0.0032 0.0019  
Y -0.0116 -0.0129 0.0014 0.0038 0.0055 -0.0012

Z 0.0014 0.0016 -0.0000 0.0015 -0.0009 -0.0012  
AT. 42 H X 0.0069 -0.0078 0.0010 -0.0039 -0.0032 -0.0019  
Y -0.0116 0.0129 -0.0014 0.0038 0.0055 0.0012  
Z 0.0014 -0.0016 0.0000 0.0015 -0.0009 0.0012  
AT. 43 C X 0.0024 0.0027 -0.0004 -0.0006 -0.0014 -0.0000  
Y -0.0012 -0.0014 0.0002 0.0005 0.0007 -0.0001  
Z -0.0000 -0.0000 -0.0002 0.0001 -0.0004 -0.0001  
AT. 44 C X 0.0024 -0.0027 0.0004 -0.0006 -0.0014 0.0000  
Y -0.0012 0.0014 -0.0002 0.0005 0.0007 0.0001  
Z -0.0000 0.0000 0.0002 0.0001 -0.0004 0.0001  
AT. 45 H X -0.0151 -0.0165 0.0014 0.0041 0.0066 -0.0015  
Y 0.0033 0.0035 -0.0006 -0.0005 -0.0023 -0.0004  
Z 0.0071 0.0077 -0.0004 -0.0018 -0.0023 0.0009  
AT. 46 H X -0.0151 0.0165 -0.0014 0.0041 0.0066 0.0015  
Y 0.0033 -0.0035 0.0006 -0.0005 -0.0023 0.0004  
Z 0.0071 -0.0077 0.0004 -0.0018 -0.0023 -0.0009  
AT. 47 H X 0.0005 0.0006 0.0000 -0.0003 -0.0001 0.0002  
Y 0.0005 0.0003 0.0010 -0.0001 0.0013 0.0005  
Z 0.0061 0.0066 -0.0005 -0.0012 -0.0028 0.0000  
AT. 48 H X 0.0005 -0.0006 -0.0000 -0.0003 -0.0001 -0.0002  
Y 0.0005 -0.0003 -0.0010 -0.0001 0.0013 -0.0005  
Z 0.0061 -0.0066 0.0005 -0.0012 -0.0028 -0.0000  
AT. 49 C X -0.0005 -0.0007 0.0002 0.0009 0.0007 -0.0005  
Y 0.0010 0.0012 -0.0003 -0.0003 -0.0007 0.0001  
Z 0.0004 0.0005 0.0000 -0.0008 -0.0003 0.0005  
AT. 50 C X -0.0005 0.0007 -0.0002 0.0009 0.0007 0.0005  
Y 0.0010 -0.0012 0.0003 -0.0003 -0.0007 -0.0001  
Z 0.0004 -0.0005 -0.0000 -0.0008 -0.0003 -0.0005  
AT. 51 C X 0.0000 0.0001 -0.0001 -0.0004 -0.0003 0.0004  
Y -0.0000 0.0000 0.0000 0.0003 0.0001 -0.0002  
Z -0.0000 0.0001 -0.0000 -0.0000 -0.0001 -0.0001  
AT. 52 C X 0.0000 -0.0001 0.0001 -0.0004 -0.0003 -0.0004

Y -0.0000 -0.0000 -0.0000 0.0003 0.0001 0.0002  
Z -0.0000 -0.0001 0.0000 -0.0000 -0.0001 0.0001  
AT. 53 H X 0.0009 0.0006 0.0003 0.0024 0.0009 -0.0023  
Y 0.0006 0.0000 0.0003 0.0021 0.0009 -0.0020  
Z -0.0008 -0.0006 -0.0003 -0.0032 -0.0014 0.0027  
AT. 54 H X 0.0009 -0.0006 -0.0003 0.0024 0.0009 0.0023  
Y 0.0006 -0.0000 -0.0003 0.0021 0.0009 0.0020  
Z -0.0008 0.0006 0.0003 -0.0032 -0.0014 -0.0027  
AT. 55 H X 0.0020 0.0009 0.0006 0.0073 0.0028 -0.0059  
Y -0.0029 -0.0021 -0.0001 -0.0094 -0.0020 0.0072  
Z -0.0019 -0.0018 0.0005 -0.0055 -0.0002 0.0040  
AT. 56 H X 0.0020 -0.0009 -0.0006 0.0073 0.0028 0.0059  
Y -0.0029 0.0021 0.0001 -0.0094 -0.0020 -0.0072  
Z -0.0019 0.0018 -0.0005 -0.0055 -0.0002 -0.0040  
AT. 57 C X -0.0003 -0.0002 -0.0001 0.0003 0.0001 -0.0000  
Y -0.0002 -0.0002 0.0001 -0.0004 -0.0000 0.0003  
Z -0.0000 -0.0000 -0.0001 -0.0002 -0.0001 0.0001  
AT. 58 C X -0.0003 0.0002 0.0001 0.0003 0.0001 0.0000  
Y -0.0002 0.0002 -0.0001 -0.0004 -0.0000 -0.0003  
Z -0.0000 0.0000 0.0001 -0.0002 -0.0001 -0.0001  
AT. 59 H X 0.0011 0.0012 0.0014 0.0008 0.0006 -0.0011  
Y -0.0006 -0.0005 -0.0004 0.0000 0.0003 0.0004  
Z 0.0001 0.0003 0.0005 0.0011 0.0010 -0.0006  
AT. 60 H X 0.0011 -0.0012 -0.0014 0.0008 0.0006 0.0011  
Y -0.0006 0.0005 0.0004 0.0000 0.0003 -0.0004  
Z 0.0001 -0.0003 -0.0005 0.0011 0.0010 0.0006  
AT. 61 H X 0.0000 -0.0002 0.0002 -0.0016 -0.0005 0.0005  
Y -0.0001 -0.0001 -0.0003 -0.0007 -0.0002 0.0004  
Z 0.0002 0.0001 0.0003 -0.0014 -0.0004 0.0005  
AT. 62 H X 0.0000 0.0002 -0.0002 -0.0016 -0.0005 -0.0005  
Y -0.0001 0.0001 0.0003 -0.0007 -0.0002 -0.0004  
Z 0.0002 -0.0001 -0.0003 -0.0014 -0.0004 -0.0005

AT. 63 H X -0.0003 -0.0006 0.0000 -0.0030 -0.0007 0.0016  
Y 0.0006 0.0006 -0.0006 0.0016 -0.0006 -0.0011  
Z -0.0005 -0.0002 0.0004 0.0014 0.0012 -0.0003

AT. 64 H X -0.0003 0.0006 -0.0000 -0.0030 -0.0007 -0.0016  
Y 0.0006 -0.0006 0.0006 0.0016 -0.0006 0.0011  
Z -0.0005 0.0002 -0.0004 0.0014 0.0012 0.0003

AT. 65 C X -0.0001 -0.0000 -0.0000 -0.0004 -0.0002 0.0003  
Y -0.0004 -0.0004 0.0000 0.0000 0.0002 0.0001  
Z 0.0000 -0.0001 0.0000 -0.0001 0.0000 -0.0001

AT. 66 C X -0.0001 0.0000 0.0000 -0.0004 -0.0002 -0.0003  
Y -0.0004 0.0004 -0.0000 0.0000 0.0002 -0.0001  
Z 0.0000 0.0001 -0.0000 -0.0001 0.0000 0.0001

AT. 67 H X 0.0011 0.0010 -0.0006 0.0004 -0.0001 -0.0007  
Y -0.0005 -0.0008 0.0009 -0.0007 -0.0003 -0.0001  
Z -0.0009 -0.0005 -0.0003 0.0004 0.0006 0.0008

AT. 68 H X 0.0011 -0.0010 0.0006 0.0004 -0.0001 0.0007  
Y -0.0005 0.0008 -0.0009 -0.0007 -0.0003 0.0001  
Z -0.0009 0.0005 0.0003 0.0004 0.0006 -0.0008

AT. 69 H X -0.0001 -0.0003 0.0004 0.0001 0.0007 -0.0002  
Y -0.0008 -0.0011 0.0011 0.0006 0.0008 -0.0006  
Z -0.0005 -0.0004 0.0006 -0.0002 -0.0008 -0.0001

AT. 70 H X -0.0001 0.0003 -0.0004 0.0001 0.0007 0.0002  
Y -0.0008 0.0011 -0.0011 0.0006 0.0008 0.0006  
Z -0.0005 0.0004 -0.0006 -0.0002 -0.0008 0.0001

AT. 71 H X -0.0012 -0.0014 0.0006 0.0009 0.0017 -0.0002  
Y 0.0008 0.0014 -0.0007 0.0002 -0.0010 0.0002  
Z 0.0007 0.0012 -0.0006 0.0014 0.0001 -0.0002

AT. 72 H X -0.0012 0.0014 -0.0006 0.0009 0.0017 0.0002  
Y 0.0008 -0.0014 0.0007 0.0002 -0.0010 -0.0002  
Z 0.0007 -0.0012 0.0006 0.0014 0.0001 0.0002

AT. 73 C X 0.0002 0.0002 -0.0000 0.0001 -0.0001 -0.0001  
Y -0.0002 -0.0002 0.0000 -0.0001 -0.0000 0.0002



Z -0.0001 -0.0002 0.0000 0.0002 -0.0000 -0.0003  
AT. 74 C X 0.0002 -0.0002 0.0000 0.0001 -0.0001 0.0001  
Y -0.0002 0.0002 -0.0000 -0.0001 -0.0000 -0.0002  
Z -0.0001 0.0002 -0.0000 0.0002 -0.0000 0.0003  
AT. 75 H X -0.0006 -0.0004 -0.0002 0.0002 0.0005 0.0006  
Y 0.0006 0.0005 0.0000 0.0001 0.0002 0.0002  
Z 0.0001 0.0001 -0.0000 0.0007 0.0011 0.0004  
AT. 76 H X -0.0006 0.0004 0.0002 0.0002 0.0005 -0.0006  
Y 0.0006 -0.0005 -0.0000 0.0001 0.0002 -0.0002  
Z 0.0001 -0.0001 0.0000 0.0007 0.0011 -0.0004  
AT. 77 H X -0.0003 0.0001 0.0000 -0.0002 -0.0004 -0.0000  
Y 0.0004 0.0006 -0.0001 0.0004 -0.0008 -0.0010  
Z -0.0001 -0.0005 0.0000 0.0002 0.0012 0.0007  
AT. 78 H X -0.0003 -0.0001 -0.0000 -0.0002 -0.0004 0.0000  
Y 0.0004 -0.0006 0.0001 0.0004 -0.0008 0.0010  
Z -0.0001 0.0005 -0.0000 0.0002 0.0012 -0.0007  
AT. 79 I X -0.0000 -0.0000 -0.0002 0.0000 -0.0001 0.0000  
Y 0.0000 0.0000 0.0000 0.0000 -0.0000 -0.0000  
Z 0.0000 0.0000 -0.0000 -0.0000 -0.0000 -0.0000  
AT. 80 I X -0.0000 0.0000 0.0002 0.0000 -0.0001 -0.0000  
Y 0.0000 -0.0000 -0.0000 0.0000 -0.0000 0.0000  
Z 0.0000 -0.0000 0.0000 -0.0000 -0.0000 0.0000  
AT. 81 I X -0.0000 -0.0000 -0.0000 0.0000 -0.0000 -0.0000  
Y -0.0000 -0.0000 -0.0000 0.0000 -0.0000 -0.0000  
Z 0.0000 0.0000 0.0000 -0.0000 -0.0000 0.0000  
AT. 82 I X -0.0000 0.0000 0.0000 0.0000 -0.0000 0.0000  
Y -0.0000 0.0000 0.0000 0.0000 -0.0000 0.0000  
Z 0.0000 -0.0000 -0.0000 -0.0000 -0.0000 -0.0000  
AT. 83 O X -0.0058 -0.0005 -0.0169 0.0020 -0.0086 0.0055  
Y -0.0013 -0.0001 -0.0038 0.0005 -0.0020 0.0013  
Z -0.0036 -0.0002 -0.0108 0.0012 -0.0055 0.0036  
AT. 84 O X -0.0058 0.0005 0.0169 0.0020 -0.0086 -0.0055

Y -0.0013 0.0001 0.0038 0.0005 -0.0020 -0.0013  
Z -0.0036 0.0002 0.0108 0.0012 -0.0055 -0.0036  
AT. 85 O X -0.0066 -0.0059 -0.0079 0.0066 -0.0119 -0.0113  
Y -0.0049 -0.0044 -0.0058 0.0049 -0.0090 -0.0085  
Z 0.0027 0.0024 0.0031 -0.0028 0.0050 0.0048  
AT. 86 O X -0.0066 0.0059 0.0079 0.0066 -0.0119 0.0113  
Y -0.0049 0.0044 0.0058 0.0049 -0.0090 0.0085  
Z 0.0027 -0.0024 -0.0031 -0.0028 0.0050 -0.0048  
AT. 87 N X -0.0014 -0.0002 -0.0041 0.0005 -0.0021 0.0012  
Y 0.0000 0.0001 0.0000 -0.0001 0.0002 0.0001  
Z -0.0032 0.0000 -0.0096 0.0010 -0.0048 0.0041  
AT. 88 N X -0.0014 0.0002 0.0041 0.0005 -0.0021 -0.0012  
Y 0.0000 -0.0001 -0.0000 -0.0001 0.0002 -0.0001  
Z -0.0032 -0.0000 0.0096 0.0010 -0.0048 -0.0041  
AT. 89 N X -0.0018 -0.0016 -0.0021 0.0016 -0.0026 -0.0025  
Y -0.0018 -0.0017 -0.0014 0.0018 -0.0031 -0.0034  
Z 0.0028 0.0025 0.0027 -0.0030 0.0057 0.0058  
AT. 90 N X -0.0018 0.0016 0.0021 0.0016 -0.0026 0.0025  
Y -0.0018 0.0017 0.0014 0.0018 -0.0031 0.0034  
Z 0.0028 -0.0025 -0.0027 -0.0030 0.0057 -0.0058  
AT. 91 C X 0.0096 0.0010 0.0283 -0.0034 0.0144 -0.0089  
Y 0.0020 0.0001 0.0058 -0.0008 0.0030 -0.0016  
Z 0.0084 -0.0000 0.0250 -0.0028 0.0129 -0.0092  
AT. 92 C X 0.0096 -0.0010 -0.0283 -0.0034 0.0144 0.0089  
Y 0.0020 -0.0001 -0.0058 -0.0008 0.0030 0.0016  
Z 0.0084 0.0000 -0.0250 -0.0028 0.0129 0.0092  
AT. 93 C X -0.0010 -0.0003 -0.0031 0.0004 -0.0015 0.0009  
Y -0.0003 0.0003 -0.0011 0.0002 -0.0009 -0.0001  
Z -0.0004 0.0004 -0.0011 0.0002 -0.0009 0.0004  
AT. 94 C X -0.0010 0.0003 0.0031 0.0004 -0.0015 -0.0009  
Y -0.0003 -0.0003 0.0011 0.0002 -0.0009 0.0001  
Z -0.0004 -0.0004 0.0011 0.0002 -0.0009 -0.0004

AT. 95 H X -0.0004 0.0072 -0.0020 0.0029 -0.0082 -0.0055  
Y -0.0010 -0.0035 -0.0020 -0.0013 0.0028 0.0048  
Z -0.0006 -0.0034 -0.0022 -0.0006 0.0016 0.0010

AT. 96 H X -0.0004 -0.0072 0.0020 0.0029 -0.0082 0.0055  
Y -0.0010 0.0035 0.0020 -0.0013 0.0028 -0.0048  
Z -0.0006 0.0034 0.0022 -0.0006 0.0016 -0.0010

AT. 97 H X 0.0066 0.0009 0.0213 -0.0025 0.0099 -0.0066  
Y 0.0024 -0.0001 0.0078 -0.0011 0.0046 -0.0008  
Z -0.0016 -0.0001 -0.0052 0.0006 -0.0025 0.0022

AT. 98 H X 0.0066 -0.0009 -0.0213 -0.0025 0.0099 0.0066  
Y 0.0024 0.0001 -0.0078 -0.0011 0.0046 0.0008  
Z -0.0016 0.0001 0.0052 0.0006 -0.0025 -0.0022

AT. 99 C X 0.0110 0.0099 0.0137 -0.0110 0.0197 0.0185  
Y 0.0094 0.0085 0.0109 -0.0095 0.0173 0.0166  
Z -0.0066 -0.0062 -0.0072 0.0070 -0.0127 -0.0126

AT. 100 C X 0.0110 -0.0099 -0.0137 -0.0110 0.0197 -0.0185  
Y 0.0094 -0.0085 -0.0109 -0.0095 0.0173 -0.0166  
Z -0.0066 0.0062 0.0072 0.0070 -0.0127 0.0126

AT. 101 C X -0.0010 -0.0011 -0.0018 0.0011 -0.0017 -0.0019  
Y -0.0008 -0.0008 -0.0012 0.0009 -0.0015 -0.0015  
Z 0.0001 0.0002 0.0002 -0.0002 0.0004 0.0004

AT. 102 C X -0.0010 0.0011 0.0018 0.0011 -0.0017 0.0019  
Y -0.0008 0.0008 0.0012 0.0009 -0.0015 0.0015  
Z 0.0001 -0.0002 -0.0002 -0.0002 0.0004 -0.0004

AT. 103 H X -0.0049 -0.0038 -0.0073 0.0043 -0.0085 -0.0058  
Y 0.0010 0.0005 0.0013 -0.0007 0.0016 0.0006  
Z -0.0007 -0.0006 0.0005 0.0008 -0.0018 -0.0020

AT. 104 H X -0.0049 0.0038 0.0073 0.0043 -0.0085 0.0058  
Y 0.0010 -0.0005 -0.0013 -0.0007 0.0016 -0.0006  
Z -0.0007 0.0006 -0.0005 0.0008 -0.0018 0.0020

AT. 105 H X 0.0059 0.0072 0.0136 -0.0067 0.0107 0.0115  
Y 0.0021 0.0020 0.0039 -0.0022 0.0040 0.0035

Z 0.0028 0.0028 0.0047 -0.0030 0.0054 0.0053  
AT. 106 H X 0.0059 -0.0072 -0.0136 -0.0067 0.0107 -0.0115  
Y 0.0021 -0.0020 -0.0039 -0.0022 0.0040 -0.0035  
Z 0.0028 -0.0028 -0.0047 -0.0030 0.0054 -0.0053  
AT. 107 C X 0.0010 0.0000 0.0027 -0.0003 0.0015 -0.0009  
Y 0.0003 -0.0001 0.0008 -0.0000 0.0004 -0.0003  
Z 0.0003 0.0000 0.0009 -0.0001 0.0004 -0.0004  
AT. 108 C X 0.0010 -0.0000 -0.0027 -0.0003 0.0015 0.0009  
Y 0.0003 0.0001 -0.0008 -0.0000 0.0004 0.0003  
Z 0.0003 -0.0000 -0.0009 -0.0001 0.0004 0.0004  
AT. 109 H X -0.0064 -0.0003 -0.0178 0.0018 -0.0097 0.0061  
Y -0.0008 0.0001 -0.0018 -0.0002 -0.0013 0.0005  
Z 0.0006 0.0004 0.0022 -0.0009 0.0010 -0.0005  
AT. 110 H X -0.0064 0.0003 0.0178 0.0018 -0.0097 -0.0061  
Y -0.0008 -0.0001 0.0018 -0.0002 -0.0013 -0.0005  
Z 0.0006 -0.0004 -0.0022 -0.0009 0.0010 0.0005  
AT. 111 H X 0.0002 0.0000 0.0009 -0.0001 -0.0001 -0.0004  
Y -0.0023 0.0001 -0.0056 -0.0002 -0.0033 0.0020  
Z 0.0021 0.0000 0.0058 -0.0005 0.0036 -0.0019  
AT. 112 H X 0.0002 -0.0000 -0.0009 -0.0001 -0.0001 0.0004  
Y -0.0023 -0.0001 0.0056 -0.0002 -0.0033 -0.0020  
Z 0.0021 -0.0000 -0.0058 -0.0005 0.0036 0.0019  
AT. 113 C X -0.0001 0.0002 -0.0009 -0.0000 -0.0002 0.0008  
Y -0.0003 -0.0000 -0.0009 -0.0000 -0.0004 0.0005  
Z -0.0001 -0.0001 -0.0000 0.0001 -0.0002 -0.0003  
AT. 114 C X -0.0001 -0.0002 0.0009 -0.0000 -0.0002 -0.0008  
Y -0.0003 0.0000 0.0009 -0.0000 -0.0004 -0.0005  
Z -0.0001 0.0001 0.0000 0.0001 -0.0002 0.0003  
AT. 115 C X 0.0002 -0.0000 0.0002 -0.0001 0.0002 -0.0001  
Y -0.0005 -0.0005 -0.0009 0.0006 -0.0011 -0.0010  
Z -0.0000 0.0000 0.0003 -0.0000 0.0001 -0.0001  
AT. 116 C X 0.0002 0.0000 -0.0002 -0.0001 0.0002 0.0001

Y -0.0005 0.0005 0.0009 0.0006 -0.0011 0.0010  
Z -0.0000 -0.0000 -0.0003 -0.0000 0.0001 0.0001  
AT. 117 H X 0.0003 0.0007 0.0004 -0.0006 0.0008 0.0017  
Y 0.0005 0.0002 0.0009 -0.0004 0.0007 -0.0001  
Z -0.0004 -0.0011 -0.0003 0.0010 -0.0013 -0.0023  
AT. 118 H X 0.0003 -0.0007 -0.0004 -0.0006 0.0008 -0.0017  
Y 0.0005 -0.0002 -0.0009 -0.0004 0.0007 0.0001  
Z -0.0004 0.0011 0.0003 0.0010 -0.0013 0.0023  
AT. 119 H X 0.0033 0.0036 0.0036 -0.0037 0.0065 0.0076  
Y 0.0040 0.0035 0.0052 -0.0038 0.0075 0.0071  
Z -0.0022 -0.0015 -0.0033 0.0018 -0.0039 -0.0026  
AT. 120 H X 0.0033 -0.0036 -0.0036 -0.0037 0.0065 -0.0076  
Y 0.0040 -0.0035 -0.0052 -0.0038 0.0075 -0.0071  
Z -0.0022 0.0015 0.0033 0.0018 -0.0039 0.0026  
AT. 121 C X 0.0007 0.0007 0.0013 -0.0009 0.0019 0.0017  
Y -0.0001 -0.0001 0.0001 -0.0001 0.0004 0.0004  
Z -0.0001 -0.0000 -0.0001 0.0002 -0.0005 -0.0004  
AT. 122 C X 0.0007 -0.0007 -0.0013 -0.0009 0.0019 -0.0017  
Y -0.0001 0.0001 -0.0001 -0.0001 0.0004 -0.0004  
Z -0.0001 0.0000 0.0001 0.0002 -0.0005 0.0004  
AT. 123 H X -0.0003 0.0003 -0.0073 0.0042 -0.0119 -0.0087  
Y 0.0035 0.0034 0.0013 -0.0014 0.0008 0.0020  
Z -0.0032 -0.0029 -0.0026 0.0020 -0.0031 -0.0031  
AT. 124 H X -0.0003 -0.0003 0.0073 0.0042 -0.0119 0.0087  
Y 0.0035 -0.0034 -0.0013 -0.0014 0.0008 -0.0020  
Z -0.0032 0.0029 0.0026 0.0020 -0.0031 0.0031  
AT. 125 H X 0.0008 0.0008 -0.0005 -0.0001 -0.0005 0.0002  
Y 0.0040 0.0042 0.0004 -0.0013 -0.0003 0.0013  
Z 0.0010 0.0010 -0.0029 0.0014 -0.0046 -0.0029  
AT. 126 H X 0.0008 -0.0008 0.0005 -0.0001 -0.0005 -0.0002  
Y 0.0040 -0.0042 -0.0004 -0.0013 -0.0003 -0.0013  
Z 0.0010 -0.0010 0.0029 0.0014 -0.0046 0.0029

AT.127 C X -0.0002 -0.0004 0.0002 0.0004 -0.0004 -0.0011  
Y -0.0004 -0.0004 -0.0006 0.0004 -0.0007 -0.0006  
Z -0.0001 -0.0001 0.0002 0.0001 -0.0001 -0.0004

AT.128 C X -0.0002 0.0004 -0.0002 0.0004 -0.0004 0.0011  
Y -0.0004 0.0004 0.0006 0.0004 -0.0007 0.0006  
Z -0.0001 0.0001 -0.0002 0.0001 -0.0001 0.0004

AT.129 C X -0.0001 0.0002 -0.0004 -0.0001 -0.0002 0.0004  
Y 0.0000 -0.0000 -0.0002 0.0001 -0.0002 0.0000  
Z 0.0001 0.0001 0.0001 0.0000 -0.0001 -0.0001

AT.130 C X -0.0001 -0.0002 0.0004 -0.0001 -0.0002 -0.0004  
Y 0.0000 0.0000 0.0002 0.0001 -0.0002 -0.0000  
Z 0.0001 -0.0001 -0.0001 0.0000 -0.0001 0.0001

AT.131 H X 0.0009 -0.0002 0.0023 0.0002 0.0011 -0.0012  
Y -0.0011 0.0002 -0.0031 -0.0002 -0.0009 0.0014  
Z 0.0010 -0.0005 0.0026 0.0002 0.0013 -0.0017

AT.132 H X 0.0009 0.0002 -0.0023 0.0002 0.0011 0.0012  
Y -0.0011 -0.0002 0.0031 -0.0002 -0.0009 -0.0014  
Z 0.0010 0.0005 -0.0026 0.0002 0.0013 0.0017

AT.133 H X 0.0036 -0.0006 0.0106 -0.0007 0.0050 -0.0048  
Y 0.0017 -0.0000 0.0065 -0.0013 0.0035 -0.0021  
Z 0.0006 0.0004 0.0038 -0.0017 0.0026 -0.0005

AT.134 H X 0.0036 0.0006 -0.0106 -0.0007 0.0050 0.0048  
Y 0.0017 0.0000 -0.0065 -0.0013 0.0035 0.0021  
Z 0.0006 -0.0004 -0.0038 -0.0017 0.0026 0.0005

AT.135 C X -0.0001 -0.0001 0.0001 -0.0001 -0.0001 -0.0001  
Y 0.0001 0.0000 0.0004 -0.0001 0.0003 0.0000  
Z 0.0001 -0.0000 0.0000 0.0001 0.0000 -0.0001

AT.136 C X -0.0001 0.0001 -0.0001 -0.0001 -0.0001 0.0001  
Y 0.0001 -0.0000 -0.0004 -0.0001 0.0003 -0.0000  
Z 0.0001 0.0000 -0.0000 0.0001 0.0000 0.0001

AT.137 H X 0.0012 0.0011 0.0010 0.0011 0.0008 -0.0012  
Y 0.0003 0.0002 0.0003 0.0000 0.0002 -0.0004

Z -0.0002 -0.0002 -0.0004 -0.0004 -0.0002 0.0001  
AT. 138 H X 0.0012 -0.0011 -0.0010 0.0011 0.0008 0.0012  
Y 0.0003 -0.0002 -0.0003 0.0000 0.0002 0.0004  
Z -0.0002 0.0002 0.0004 -0.0004 -0.0002 -0.0001  
AT. 139 H X 0.0001 -0.0002 -0.0002 0.0006 -0.0001 -0.0003  
Y 0.0008 0.0005 0.0007 0.0003 0.0000 -0.0011  
Z -0.0002 0.0000 0.0004 -0.0009 0.0001 0.0004  
AT. 140 H X 0.0001 0.0002 0.0002 0.0006 -0.0001 0.0003  
Y 0.0008 -0.0005 -0.0007 0.0003 0.0000 0.0011  
Z -0.0002 -0.0000 -0.0004 -0.0009 0.0001 -0.0004  
AT. 141 H X -0.0006 -0.0004 -0.0019 0.0006 -0.0008 0.0005  
Y -0.0002 -0.0001 -0.0010 0.0007 -0.0008 -0.0001  
Z 0.0001 -0.0000 0.0005 -0.0005 0.0007 0.0003  
AT. 142 H X -0.0006 0.0004 0.0019 0.0006 -0.0008 -0.0005  
Y -0.0002 0.0001 0.0010 0.0007 -0.0008 0.0001  
Z 0.0001 0.0000 -0.0005 -0.0005 0.0007 -0.0003  
AT. 143 C X -0.0001 0.0001 -0.0002 -0.0001 0.0000 0.0003  
Y 0.0000 -0.0001 0.0004 -0.0001 0.0004 0.0001  
Z 0.0002 0.0002 -0.0000 -0.0000 -0.0001 0.0001  
AT. 144 C X -0.0001 -0.0001 0.0002 -0.0001 0.0000 -0.0003  
Y 0.0000 0.0001 -0.0004 -0.0001 0.0004 -0.0001  
Z 0.0002 -0.0002 0.0000 -0.0000 -0.0001 -0.0001  
AT. 145 H X 0.0020 0.0013 0.0016 -0.0006 0.0008 0.0006  
Y 0.0021 0.0024 -0.0003 -0.0003 -0.0013 0.0008  
Z -0.0014 -0.0019 0.0010 0.0001 0.0017 -0.0005  
AT. 146 H X 0.0020 -0.0013 -0.0016 -0.0006 0.0008 -0.0006  
Y 0.0021 -0.0024 0.0003 -0.0003 -0.0013 -0.0008  
Z -0.0014 0.0019 -0.0010 0.0001 0.0017 0.0005  
AT. 147 H X -0.0002 -0.0005 0.0002 0.0004 -0.0001 -0.0002  
Y 0.0022 0.0028 -0.0002 -0.0011 -0.0002 0.0016  
Z 0.0009 0.0005 0.0004 0.0001 -0.0004 0.0000  
AT. 148 H X -0.0002 0.0005 -0.0002 0.0004 -0.0001 0.0002

Y 0.0022 -0.0028 0.0002 -0.0011 -0.0002 -0.0016  
Z 0.0009 -0.0005 -0.0004 0.0001 -0.0004 -0.0000  
AT. 149 H X -0.0012 -0.0022 -0.0006 0.0015 -0.0012 -0.0021  
Y -0.0011 -0.0016 -0.0002 0.0006 0.0002 -0.0010  
Z -0.0014 -0.0015 -0.0006 0.0002 0.0005 -0.0006  
AT. 150 H X -0.0012 0.0022 0.0006 0.0015 -0.0012 0.0021  
Y -0.0011 0.0016 0.0002 0.0006 0.0002 0.0010  
Z -0.0014 0.0015 0.0006 0.0002 0.0005 0.0006  
AT. 151 C X 0.0001 0.0001 0.0002 -0.0001 0.0002 0.0001  
Y 0.0001 -0.0000 0.0002 0.0000 0.0001 -0.0001  
Z -0.0001 0.0001 -0.0001 0.0000 -0.0000 0.0002  
AT. 152 C X 0.0001 -0.0001 -0.0002 -0.0001 0.0002 -0.0001  
Y 0.0001 0.0000 -0.0002 0.0000 0.0001 0.0001  
Z -0.0001 -0.0001 0.0001 0.0000 -0.0000 -0.0002  
AT. 153 H X -0.0006 -0.0002 -0.0004 0.0001 -0.0003 -0.0002  
Y -0.0001 -0.0003 0.0000 -0.0002 0.0001 -0.0003  
Z 0.0002 -0.0003 0.0001 -0.0004 0.0004 -0.0000  
AT. 154 H X -0.0006 0.0002 0.0004 0.0001 -0.0003 0.0002  
Y -0.0001 0.0003 -0.0000 -0.0002 0.0001 0.0003  
Z 0.0002 0.0003 -0.0001 -0.0004 0.0004 0.0000  
AT. 155 H X -0.0000 -0.0001 -0.0004 0.0002 -0.0002 -0.0001  
Y -0.0005 0.0001 -0.0009 0.0005 -0.0008 0.0002  
Z 0.0004 -0.0002 0.0005 -0.0003 0.0004 -0.0001  
AT. 156 H X -0.0000 0.0001 0.0004 0.0002 -0.0002 0.0001  
Y -0.0005 -0.0001 0.0009 0.0005 -0.0008 -0.0002  
Z 0.0004 0.0002 -0.0005 -0.0003 0.0004 0.0001  
AT. 157 O X -0.0000 0.0001 -0.0000 -0.0000 0.0000 0.0000  
Y 0.0003 0.0005 0.0000 0.0006 0.0002 -0.0007  
Z 0.0000 0.0002 0.0000 0.0004 0.0002 -0.0003  
AT. 158 O X -0.0000 -0.0001 0.0000 -0.0000 0.0000 -0.0000  
Y 0.0003 -0.0005 -0.0000 0.0006 0.0002 0.0007  
Z 0.0000 -0.0002 -0.0000 0.0004 0.0002 0.0003



AT.159 O X 0.0003 -0.0000 0.0000 0.0002 -0.0001 -0.0002  
Y -0.0001 -0.0002 -0.0000 -0.0002 -0.0000 0.0002  
Z -0.0005 0.0004 -0.0001 0.0000 0.0002 0.0001

AT.160 O X 0.0003 0.0000 -0.0000 0.0002 -0.0001 0.0002  
Y -0.0001 0.0002 0.0000 -0.0002 -0.0000 -0.0002  
Z -0.0005 -0.0004 0.0001 0.0000 0.0002 -0.0001

AT.161 H X -0.0030 -0.0042 -0.0001 -0.0051 -0.0013 0.0049  
Y -0.0024 -0.0035 -0.0001 -0.0049 -0.0013 0.0049  
Z 0.0013 0.0017 0.0000 -0.0023 -0.0010 0.0000

AT.162 H X -0.0030 0.0042 0.0001 -0.0051 -0.0013 -0.0049  
Y -0.0024 0.0035 0.0001 -0.0049 -0.0013 -0.0049  
Z 0.0013 -0.0017 -0.0000 -0.0023 -0.0010 -0.0000

AT.163 H X -0.0045 0.0054 -0.0011 0.0012 0.0036 0.0001  
Y 0.0024 -0.0022 0.0005 0.0003 -0.0010 -0.0010  
Z 0.0062 -0.0074 0.0016 -0.0017 -0.0043 0.0004

AT.164 H X -0.0045 -0.0054 0.0011 0.0012 0.0036 -0.0001  
Y 0.0024 0.0022 -0.0005 0.0003 -0.0010 0.0010  
Z 0.0062 0.0074 -0.0016 -0.0017 -0.0043 -0.0004

AT.165 O X -0.0002 0.0000 -0.0006 0.0001 -0.0003 0.0001  
Y 0.0000 -0.0001 -0.0004 -0.0000 0.0001 -0.0002  
Z -0.0002 0.0002 0.0002 0.0001 -0.0005 0.0005

AT.166 O X -0.0002 -0.0000 0.0006 0.0001 -0.0003 -0.0001  
Y 0.0000 0.0001 0.0004 -0.0000 0.0001 0.0002  
Z -0.0002 -0.0002 -0.0002 0.0001 -0.0005 -0.0005

AT.167 H X 0.0015 -0.0000 0.0056 -0.0007 0.0024 -0.0009  
Y 0.0002 0.0004 0.0007 -0.0003 -0.0001 0.0000  
Z -0.0013 0.0003 -0.0034 0.0018 -0.0025 0.0004

AT.168 H X 0.0015 0.0000 -0.0056 -0.0007 0.0024 0.0009  
Y 0.0002 -0.0004 -0.0007 -0.0003 -0.0001 -0.0000  
Z -0.0013 -0.0003 0.0034 0.0018 -0.0025 -0.0004

AT.169 O X 0.0003 -0.0002 -0.0002 -0.0003 0.0005 -0.0004  
Y -0.0003 0.0004 0.0008 0.0003 -0.0006 0.0006

Z 0.0002 -0.0001 0.0001 -0.0002 0.0002 -0.0002  
AT. 170 O X 0.0003 0.0002 0.0002 -0.0003 0.0005 0.0004  
Y -0.0003 -0.0004 -0.0008 0.0003 -0.0006 -0.0006  
Z 0.0002 0.0001 -0.0001 -0.0002 0.0002 0.0002  
AT. 171 H X -0.0039 0.0037 0.0040 0.0034 -0.0061 0.0064  
Y 0.0023 -0.0024 -0.0049 -0.0020 0.0052 -0.0048  
Z 0.0041 -0.0037 -0.0065 -0.0034 0.0086 -0.0077  
AT. 172 H X -0.0039 -0.0037 -0.0040 0.0034 -0.0061 -0.0064  
Y 0.0023 0.0024 0.0049 -0.0020 0.0052 0.0048  
Z 0.0041 0.0037 0.0065 -0.0034 0.0086 0.0077

FREQ(CM\*\*-1) 1738.37 1741.09 3052.37 3052.61 3062.02 3062.20

AT. 1 I X -0.0000 0.0000 0.0000 0.0000 0.0000 -0.0000  
Y -0.0000 0.0000 0.0000 0.0000 -0.0000 -0.0000  
Z 0.0000 -0.0000 0.0000 0.0000 0.0000 0.0000  
AT. 2 I X 0.0000 0.0000 0.0000 -0.0000 0.0000 0.0000  
Y 0.0000 0.0000 0.0000 -0.0000 -0.0000 0.0000  
Z -0.0000 -0.0000 0.0000 -0.0000 0.0000 -0.0000  
AT. 3 I X 0.0000 0.0000 0.0000 -0.0000 -0.0000 -0.0000  
Y 0.0000 -0.0000 0.0000 0.0000 -0.0000 0.0000  
Z 0.0000 -0.0000 0.0000 0.0000 0.0000 0.0000  
AT. 4 I X -0.0000 0.0000 0.0000 0.0000 -0.0000 0.0000  
Y -0.0000 -0.0000 0.0000 -0.0000 -0.0000 -0.0000  
Z -0.0000 -0.0000 0.0000 -0.0000 0.0000 -0.0000  
AT. 5 O X -0.0087 0.0017 0.0000 -0.0000 0.0000 -0.0000  
Y 0.0062 -0.0012 -0.0000 0.0000 -0.0000 0.0000  
Z 0.0098 -0.0018 -0.0000 0.0000 0.0000 0.0000  
AT. 6 O X 0.0087 0.0017 0.0000 0.0000 0.0000 0.0000  
Y -0.0062 -0.0012 -0.0000 -0.0000 -0.0000 -0.0000  
Z -0.0098 -0.0018 -0.0000 -0.0000 0.0000 -0.0000  
AT. 7 O X 0.0056 0.0002 0.0000 -0.0000 0.0000 0.0000

Y -0.0059 -0.0001 -0.0000 0.0000 0.0000 0.0000  
Z 0.0027 0.0001 0.0000 -0.0000 0.0000 0.0000  
AT. 8 O X -0.0056 0.0002 0.0000 0.0000 0.0000 -0.0000  
Y 0.0059 -0.0001 -0.0000 -0.0000 0.0000 -0.0000  
Z -0.0027 0.0001 0.0000 0.0000 0.0000 -0.0000  
AT. 9 N X -0.0013 0.0004 0.0000 0.0000 0.0000 0.0000  
Y 0.0004 -0.0003 -0.0000 -0.0000 -0.0000 -0.0000  
Z 0.0085 -0.0013 -0.0000 0.0000 0.0000 0.0000  
AT. 10 N X 0.0013 0.0004 0.0000 -0.0000 0.0000 -0.0000  
Y -0.0004 -0.0003 -0.0000 0.0000 -0.0000 0.0000  
Z -0.0085 -0.0013 -0.0000 -0.0000 0.0000 -0.0000  
AT. 11 N X 0.0010 0.0001 0.0000 -0.0000 -0.0000 -0.0000  
Y -0.0028 0.0001 -0.0000 0.0000 -0.0000 -0.0000  
Z 0.0046 -0.0001 0.0000 0.0000 0.0000 0.0000  
AT. 12 N X -0.0010 0.0001 0.0000 0.0000 -0.0000 0.0000  
Y 0.0028 0.0001 -0.0000 -0.0000 -0.0000 0.0000  
Z -0.0046 -0.0001 0.0000 -0.0000 0.0000 -0.0000  
AT. 13 C X 0.0137 -0.0030 -0.0000 0.0000 0.0000 0.0000  
Y -0.0094 0.0021 0.0000 -0.0000 0.0000 -0.0000  
Z -0.0225 0.0038 0.0000 -0.0000 -0.0000 -0.0000  
AT. 14 C X -0.0137 -0.0030 -0.0000 -0.0000 0.0000 -0.0000  
Y 0.0094 0.0021 0.0000 0.0000 0.0000 0.0000  
Z 0.0225 0.0038 0.0000 0.0000 -0.0000 0.0000  
AT. 15 C X -0.0014 0.0005 0.0000 0.0000 0.0000 0.0000  
Y 0.0011 -0.0003 0.0000 0.0000 0.0000 0.0000  
Z 0.0017 -0.0002 -0.0000 -0.0000 -0.0000 -0.0000  
AT. 16 C X 0.0014 0.0005 0.0000 -0.0000 0.0000 -0.0000  
Y -0.0011 -0.0003 0.0000 -0.0000 0.0000 -0.0000  
Z -0.0017 -0.0002 -0.0000 0.0000 -0.0000 0.0000  
AT. 17 H X -0.0061 0.0007 0.0000 0.0000 0.0000 0.0000  
Y 0.0036 -0.0007 -0.0000 -0.0000 -0.0000 -0.0000  
Z -0.0036 0.0005 -0.0000 -0.0000 -0.0000 -0.0000

AT. 18 H X 0.0061 0.0007 0.0000 -0.0000 0.0000 -0.0000  
Y -0.0036 -0.0007 -0.0000 0.0000 -0.0000 0.0000  
Z 0.0036 0.0005 -0.0000 0.0000 -0.0000 0.0000

AT. 19 H X 0.0113 -0.0025 -0.0001 -0.0001 -0.0000 -0.0000  
Y -0.0069 0.0011 -0.0001 -0.0001 -0.0000 -0.0001  
Z 0.0023 -0.0007 0.0002 0.0002 0.0001 0.0001

AT. 20 H X -0.0113 -0.0025 -0.0001 0.0001 -0.0000 0.0000  
Y 0.0069 0.0011 -0.0001 0.0001 -0.0000 0.0001  
Z -0.0023 -0.0007 0.0002 -0.0002 0.0001 -0.0001

AT. 21 C X -0.0088 -0.0002 -0.0000 0.0000 0.0000 0.0000  
Y 0.0112 0.0002 0.0000 -0.0000 -0.0000 0.0000  
Z -0.0084 0.0002 -0.0000 -0.0000 -0.0000 -0.0000

AT. 22 C X 0.0088 -0.0002 -0.0000 -0.0000 0.0000 -0.0000  
Y -0.0112 0.0002 0.0000 0.0000 -0.0000 -0.0000  
Z 0.0084 0.0002 -0.0000 0.0000 -0.0000 0.0000

AT. 23 C X 0.0007 -0.0000 -0.0000 0.0000 0.0000 0.0000  
Y -0.0009 0.0001 0.0000 0.0000 0.0000 0.0000  
Z 0.0006 0.0000 -0.0000 -0.0000 -0.0000 0.0000

AT. 24 C X -0.0007 -0.0000 -0.0000 -0.0000 0.0000 -0.0000  
Y 0.0009 0.0001 0.0000 -0.0000 0.0000 -0.0000  
Z -0.0006 0.0000 -0.0000 0.0000 -0.0000 -0.0000

AT. 25 H X 0.0010 0.0005 0.0000 -0.0000 -0.0000 -0.0000  
Y -0.0005 0.0003 -0.0000 0.0000 -0.0001 -0.0001  
Z -0.0033 -0.0006 0.0000 0.0000 -0.0000 -0.0000

AT. 26 H X -0.0010 0.0005 0.0000 0.0000 -0.0000 0.0000  
Y 0.0005 0.0003 -0.0000 -0.0000 -0.0001 0.0001  
Z 0.0033 -0.0006 0.0000 -0.0000 -0.0000 0.0000

AT. 27 H X -0.0076 0.0004 0.0000 0.0000 -0.0000 -0.0000  
Y 0.0004 -0.0007 -0.0000 0.0000 -0.0000 0.0000  
Z 0.0029 -0.0006 0.0001 0.0000 0.0000 -0.0000

AT. 28 H X 0.0076 0.0004 0.0000 -0.0000 -0.0000 0.0000  
Y -0.0004 -0.0007 -0.0000 -0.0000 -0.0000 -0.0000

Z -0.0029 -0.0006 0.0001 -0.0000 0.0000 0.0000  
AT. 29 C X 0.0014 -0.0003 -0.0000 -0.0000 0.0000 -0.0000  
Y -0.0009 0.0002 -0.0000 -0.0000 0.0000 0.0000  
Z -0.0010 0.0001 0.0000 0.0000 -0.0000 0.0000  
AT. 30 C X -0.0014 -0.0003 -0.0000 0.0000 0.0000 0.0000  
Y 0.0009 0.0002 -0.0000 0.0000 0.0000 -0.0000  
Z 0.0010 0.0001 0.0000 -0.0000 -0.0000 -0.0000  
AT. 31 H X -0.0109 0.0020 0.0001 0.0001 -0.0001 -0.0000  
Y 0.0044 -0.0002 0.0001 0.0003 -0.0002 -0.0001  
Z 0.0000 -0.0000 -0.0001 -0.0002 0.0001 0.0000  
AT. 32 H X 0.0109 0.0020 0.0001 -0.0001 -0.0001 0.0000  
Y -0.0044 -0.0002 0.0001 -0.0003 -0.0002 0.0001  
Z -0.0000 -0.0000 -0.0001 0.0002 0.0001 -0.0000  
AT. 33 H X 0.0011 -0.0003 0.0000 -0.0001 0.0001 0.0000  
Y 0.0025 -0.0000 0.0000 0.0000 -0.0000 -0.0000  
Z -0.0038 0.0011 -0.0000 0.0001 -0.0001 -0.0001  
AT. 34 H X -0.0011 -0.0003 0.0000 0.0001 0.0001 -0.0000  
Y -0.0025 -0.0000 0.0000 -0.0000 -0.0000 0.0000  
Z 0.0038 0.0011 -0.0000 -0.0001 -0.0001 0.0001  
AT. 35 C X -0.0006 0.0002 0.0000 0.0000 0.0000 0.0000  
Y 0.0009 -0.0001 0.0000 -0.0000 0.0000 0.0000  
Z -0.0001 -0.0000 0.0000 -0.0000 0.0000 -0.0000  
AT. 36 C X 0.0006 0.0002 0.0000 -0.0000 0.0000 -0.0000  
Y -0.0009 -0.0001 0.0000 0.0000 0.0000 -0.0000  
Z 0.0001 -0.0000 0.0000 0.0000 0.0000 0.0000  
AT. 37 C X -0.0001 0.0000 -0.0000 -0.0000 0.0000 0.0000  
Y -0.0002 -0.0000 -0.0000 -0.0000 0.0000 0.0000  
Z -0.0003 0.0000 -0.0000 -0.0000 0.0000 0.0000  
AT. 38 C X 0.0001 0.0000 -0.0000 0.0000 0.0000 -0.0000  
Y 0.0002 -0.0000 -0.0000 0.0000 0.0000 -0.0000  
Z 0.0003 0.0000 -0.0000 0.0000 0.0000 -0.0000  
AT. 39 H X -0.0001 -0.0002 0.0000 0.0001 -0.0000 0.0000

Y -0.0003 -0.0001 -0.0000 -0.0000 0.0000 0.0000  
Z -0.0007 0.0001 -0.0000 -0.0001 0.0000 0.0000  
AT. 40 H X 0.0001 -0.0002 0.0000 -0.0001 -0.0000 -0.0000  
Y 0.0003 -0.0001 -0.0000 0.0000 0.0000 -0.0000  
Z 0.0007 0.0001 -0.0000 0.0001 0.0000 -0.0000  
AT. 41 H X -0.0023 -0.0003 0.0001 0.0002 -0.0001 -0.0002  
Y 0.0034 0.0006 0.0000 0.0002 -0.0001 -0.0002  
Z -0.0003 -0.0001 0.0001 0.0002 -0.0001 -0.0002  
AT. 42 H X 0.0023 -0.0003 0.0001 -0.0002 -0.0001 0.0002  
Y -0.0034 0.0006 0.0000 -0.0002 -0.0001 0.0002  
Z 0.0003 -0.0001 0.0001 -0.0002 -0.0001 0.0002  
AT. 43 C X -0.0007 -0.0001 0.0000 -0.0000 0.0000 0.0000  
Y 0.0006 0.0000 0.0000 -0.0000 0.0000 0.0000  
Z -0.0005 0.0002 0.0000 -0.0000 0.0000 0.0000  
AT. 44 C X 0.0007 -0.0001 0.0000 0.0000 0.0000 -0.0000  
Y -0.0006 0.0000 0.0000 0.0000 0.0000 -0.0000  
Z 0.0005 0.0002 0.0000 0.0000 0.0000 -0.0000  
AT. 45 H X 0.0034 0.0017 -0.0001 0.0000 -0.0002 -0.0002  
Y -0.0015 0.0001 -0.0001 0.0000 -0.0002 -0.0003  
Z -0.0009 -0.0011 -0.0001 0.0000 -0.0002 -0.0003  
AT. 46 H X -0.0034 0.0017 -0.0001 -0.0000 -0.0002 0.0002  
Y 0.0015 0.0001 -0.0001 -0.0000 -0.0002 0.0003  
Z 0.0009 -0.0011 -0.0001 -0.0000 -0.0002 0.0003  
AT. 47 H X -0.0002 -0.0001 0.0001 0.0000 0.0001 0.0001  
Y 0.0010 -0.0006 -0.0000 -0.0000 -0.0001 -0.0001  
Z -0.0014 -0.0007 0.0000 0.0000 0.0001 0.0001  
AT. 48 H X 0.0002 -0.0001 0.0001 -0.0000 0.0001 -0.0001  
Y -0.0010 -0.0006 -0.0000 0.0000 -0.0001 0.0001  
Z 0.0014 -0.0007 0.0000 -0.0000 0.0001 -0.0001  
AT. 49 C X 0.0009 -0.0001 0.0000 -0.0000 0.0000 0.0000  
Y -0.0004 0.0000 0.0000 0.0000 0.0000 0.0000  
Z -0.0004 -0.0001 0.0000 -0.0000 0.0000 0.0000

AT. 50 C X -0.0009 -0.0001 0.0000 0.0000 0.0000 -0.0000  
Y 0.0004 0.0000 0.0000 -0.0000 0.0000 -0.0000  
Z 0.0004 -0.0001 0.0000 0.0000 0.0000 -0.0000

AT. 51 C X -0.0003 0.0000 0.0000 -0.0000 -0.0000 -0.0000  
Y 0.0002 -0.0000 0.0000 -0.0000 -0.0000 -0.0000  
Z -0.0003 0.0002 -0.0000 0.0000 0.0000 0.0000

AT. 52 C X 0.0003 0.0000 0.0000 0.0000 -0.0000 0.0000  
Y -0.0002 -0.0000 0.0000 0.0000 -0.0000 0.0000  
Z 0.0003 0.0002 -0.0000 -0.0000 0.0000 -0.0000

AT. 53 H X 0.0014 -0.0001 -0.0000 0.0000 0.0000 0.0000  
Y 0.0015 -0.0000 0.0000 -0.0000 -0.0000 0.0000  
Z -0.0018 0.0001 -0.0000 0.0000 0.0000 0.0000

AT. 54 H X -0.0014 -0.0001 -0.0000 -0.0000 0.0000 -0.0000  
Y -0.0015 -0.0000 0.0000 0.0000 -0.0000 -0.0000  
Z 0.0018 0.0001 -0.0000 -0.0000 0.0000 -0.0000

AT. 55 H X 0.0050 -0.0004 -0.0000 0.0001 0.0000 0.0000  
Y -0.0063 0.0008 -0.0000 0.0001 0.0000 0.0001  
Z -0.0038 0.0003 0.0000 -0.0001 -0.0000 -0.0001

AT. 56 H X -0.0050 -0.0004 -0.0000 -0.0001 0.0000 -0.0000  
Y 0.0063 0.0008 -0.0000 -0.0001 0.0000 -0.0001  
Z 0.0038 0.0003 0.0000 0.0001 -0.0000 0.0001

AT. 57 C X 0.0003 -0.0002 0.0000 0.0000 0.0000 0.0000  
Y -0.0003 0.0001 -0.0000 -0.0000 -0.0000 -0.0000  
Z 0.0000 -0.0000 -0.0000 -0.0000 -0.0000 0.0000

AT. 58 C X -0.0003 -0.0002 0.0000 -0.0000 0.0000 -0.0000  
Y 0.0003 0.0001 -0.0000 0.0000 -0.0000 0.0000  
Z -0.0000 -0.0000 -0.0000 0.0000 -0.0000 -0.0000

AT. 59 H X -0.0008 0.0013 -0.0000 0.0001 0.0000 0.0002  
Y 0.0001 -0.0001 -0.0000 0.0002 0.0000 0.0004  
Z -0.0005 0.0005 0.0000 -0.0001 -0.0000 -0.0003

AT. 60 H X 0.0008 0.0013 -0.0000 -0.0001 0.0000 -0.0002  
Y -0.0001 -0.0001 -0.0000 -0.0002 0.0000 -0.0004

Z 0.0005 0.0005 0.0000 0.0001 -0.0000 0.0003  
AT. 61 H X -0.0009 0.0003 -0.0000 -0.0002 -0.0000 -0.0003  
Y -0.0006 0.0003 0.0000 0.0001 0.0000 0.0002  
Z -0.0009 0.0006 0.0000 0.0002 0.0001 0.0004  
AT. 62 H X 0.0009 0.0003 -0.0000 0.0002 -0.0000 0.0003  
Y 0.0006 0.0003 0.0000 -0.0001 0.0000 -0.0002  
Z 0.0009 0.0006 0.0000 -0.0002 0.0001 -0.0004  
AT. 63 H X -0.0017 0.0007 0.0000 -0.0001 0.0000 -0.0002  
Y 0.0015 -0.0009 0.0000 -0.0001 -0.0000 -0.0002  
Z 0.0001 0.0002 0.0000 -0.0001 0.0000 -0.0003  
AT. 64 H X 0.0017 0.0007 0.0000 0.0001 0.0000 0.0002  
Y -0.0015 -0.0009 0.0000 0.0001 -0.0000 0.0002  
Z -0.0001 0.0002 0.0000 0.0001 0.0000 0.0003  
AT. 65 C X -0.0003 0.0000 -0.0000 0.0000 0.0000 0.0000  
Y 0.0001 0.0000 0.0000 -0.0000 -0.0000 -0.0000  
Z 0.0001 0.0001 -0.0000 -0.0000 -0.0000 -0.0000  
AT. 66 C X 0.0003 0.0000 -0.0000 -0.0000 0.0000 -0.0000  
Y -0.0001 0.0000 0.0000 0.0000 -0.0000 0.0000  
Z -0.0001 0.0001 -0.0000 0.0000 -0.0000 0.0000  
AT. 67 H X 0.0003 0.0004 0.0000 0.0001 0.0001 0.0001  
Y -0.0000 -0.0001 0.0000 0.0001 0.0001 0.0001  
Z -0.0003 -0.0001 0.0000 0.0001 0.0001 0.0001  
AT. 68 H X -0.0003 0.0004 0.0000 -0.0001 0.0001 -0.0001  
Y 0.0000 -0.0001 0.0000 -0.0001 0.0001 -0.0001  
Z 0.0003 -0.0001 0.0000 -0.0001 0.0001 -0.0001  
AT. 69 H X 0.0004 -0.0000 0.0000 -0.0001 -0.0001 -0.0002  
Y 0.0006 -0.0005 -0.0000 0.0000 0.0001 0.0001  
Z -0.0004 -0.0004 0.0000 -0.0000 -0.0001 -0.0001  
AT. 70 H X -0.0004 -0.0000 0.0000 0.0001 -0.0001 0.0002  
Y -0.0006 -0.0005 -0.0000 -0.0000 0.0001 -0.0001  
Z 0.0004 -0.0004 0.0000 0.0000 -0.0001 0.0001  
AT. 71 H X 0.0009 -0.0002 -0.0000 -0.0000 -0.0001 -0.0001



Y -0.0005 -0.0000 -0.0000 -0.0001 -0.0001 -0.0001  
Z -0.0000 -0.0002 0.0000 0.0000 0.0001 0.0001  
AT. 72 H X -0.0009 -0.0002 -0.0000 0.0000 -0.0001 0.0001  
Y 0.0005 -0.0000 -0.0000 0.0001 -0.0001 0.0001  
Z 0.0000 -0.0002 0.0000 -0.0000 0.0001 -0.0001  
AT. 73 C X 0.0000 -0.0000 0.0000 0.0000 0.0000 -0.0000  
Y -0.0001 -0.0000 0.0000 -0.0000 0.0000 -0.0000  
Z 0.0002 0.0000 -0.0000 0.0000 -0.0000 -0.0000  
AT. 74 C X -0.0000 -0.0000 0.0000 -0.0000 0.0000 0.0000  
Y 0.0001 -0.0000 0.0000 0.0000 0.0000 0.0000  
Z -0.0002 0.0000 -0.0000 -0.0000 -0.0000 0.0000  
AT. 75 H X 0.0003 0.0001 -0.0001 0.0001 -0.0001 -0.0000  
Y -0.0001 -0.0000 -0.0001 0.0001 -0.0002 -0.0000  
Z 0.0003 -0.0001 0.0001 -0.0001 0.0001 0.0000  
AT. 76 H X -0.0003 0.0001 -0.0001 -0.0001 -0.0001 0.0000  
Y 0.0001 -0.0000 -0.0001 -0.0001 -0.0002 0.0000  
Z -0.0003 -0.0001 0.0001 0.0001 0.0001 -0.0000  
AT. 77 H X -0.0005 0.0003 0.0001 -0.0001 0.0001 0.0000  
Y 0.0003 -0.0001 0.0001 -0.0001 0.0001 0.0000  
Z 0.0004 -0.0000 0.0001 -0.0001 0.0001 0.0000  
AT. 78 H X 0.0005 0.0003 0.0001 0.0001 0.0001 -0.0000  
Y -0.0003 -0.0001 0.0001 0.0001 0.0001 -0.0000  
Z -0.0004 -0.0000 0.0001 0.0001 0.0001 -0.0000  
AT. 79 I X -0.0003 -0.0000 -0.0000 -0.0000 -0.0000 -0.0000  
Y 0.0000 -0.0000 0.0000 0.0000 -0.0000 -0.0000  
Z 0.0000 -0.0000 0.0000 0.0000 0.0000 -0.0000  
AT. 80 I X 0.0003 -0.0000 -0.0000 0.0000 -0.0000 0.0000  
Y -0.0000 -0.0000 0.0000 -0.0000 -0.0000 0.0000  
Z -0.0000 -0.0000 0.0000 -0.0000 0.0000 0.0000  
AT. 81 I X -0.0000 0.0000 0.0000 0.0000 0.0000 0.0000  
Y -0.0000 -0.0000 0.0000 0.0000 -0.0000 -0.0000  
Z 0.0000 -0.0000 -0.0000 -0.0000 0.0000 0.0000

AT. 82 I X 0.0000 0.0000 0.0000 -0.0000 0.0000 -0.0000  
Y 0.0000 -0.0000 0.0000 -0.0000 -0.0000 0.0000  
Z -0.0000 -0.0000 -0.0000 0.0000 0.0000 -0.0000

AT. 83 O X 0.0063 -0.0145 -0.0000 -0.0000 0.0000 0.0000  
Y 0.0016 -0.0034 -0.0000 0.0000 -0.0000 -0.0000  
Z 0.0044 -0.0097 -0.0000 -0.0000 -0.0000 -0.0000

AT. 84 O X -0.0063 -0.0145 -0.0000 0.0000 0.0000 -0.0000  
Y -0.0016 -0.0034 -0.0000 -0.0000 -0.0000 0.0000  
Z -0.0044 -0.0097 -0.0000 0.0000 -0.0000 0.0000

AT. 85 O X -0.0092 0.0090 -0.0000 -0.0000 0.0000 0.0000  
Y -0.0071 0.0067 0.0000 -0.0000 0.0000 0.0000  
Z 0.0041 -0.0039 0.0000 0.0000 -0.0000 -0.0000

AT. 86 O X 0.0092 0.0090 -0.0000 0.0000 0.0000 -0.0000  
Y 0.0071 0.0067 0.0000 0.0000 0.0000 -0.0000  
Z -0.0041 -0.0039 0.0000 -0.0000 -0.0000 0.0000

AT. 87 N X 0.0012 -0.0032 0.0000 0.0000 0.0000 0.0000  
Y 0.0001 -0.0001 0.0000 0.0000 0.0000 0.0000  
Z 0.0054 -0.0098 -0.0000 -0.0000 -0.0000 0.0000

AT. 88 N X -0.0012 -0.0032 0.0000 -0.0000 0.0000 -0.0000  
Y -0.0001 -0.0001 0.0000 -0.0000 0.0000 -0.0000  
Z -0.0054 -0.0098 -0.0000 0.0000 -0.0000 -0.0000

AT. 89 N X -0.0016 0.0020 -0.0000 -0.0000 0.0002 0.0002  
Y -0.0031 0.0031 -0.0000 -0.0000 0.0002 0.0002  
Z 0.0055 -0.0050 0.0000 0.0000 -0.0002 -0.0002

AT. 90 N X 0.0016 0.0020 -0.0000 0.0000 0.0002 -0.0002  
Y 0.0031 0.0031 -0.0000 0.0000 0.0002 -0.0002  
Z -0.0055 -0.0050 0.0000 -0.0000 -0.0002 0.0002

AT. 91 C X -0.0099 0.0243 0.0000 0.0000 0.0000 0.0000  
Y -0.0022 0.0056 -0.0000 -0.0000 0.0000 0.0000  
Z -0.0122 0.0248 0.0000 0.0000 0.0000 0.0000

AT. 92 C X 0.0099 0.0243 0.0000 -0.0000 0.0000 -0.0000  
Y 0.0022 0.0056 -0.0000 0.0000 0.0000 -0.0000

Z 0.0122 0.0248 0.0000 -0.0000 0.0000 -0.0000  
AT. 93 C X 0.0006 -0.0024 -0.0001 0.0000 -0.0001 -0.0001  
Y 0.0009 -0.0025 -0.0002 0.0001 -0.0001 -0.0001  
Z 0.0017 -0.0027 -0.0001 0.0000 -0.0000 -0.0000  
AT. 94 C X -0.0006 -0.0024 -0.0001 -0.0000 -0.0001 0.0001  
Y -0.0009 -0.0025 -0.0002 -0.0001 -0.0001 0.0001  
Z -0.0017 -0.0027 -0.0001 -0.0000 -0.0000 0.0000  
AT. 95 H X 0.0167 -0.0326 0.0009 -0.0002 0.0006 0.0004  
Y -0.0065 0.0140 0.0025 -0.0006 0.0016 0.0012  
Z -0.0081 0.0124 0.0015 -0.0003 0.0009 0.0007  
AT. 96 H X -0.0167 -0.0326 0.0009 0.0002 0.0006 -0.0004  
Y 0.0065 0.0140 0.0025 0.0006 0.0016 -0.0012  
Z 0.0081 0.0124 0.0015 0.0003 0.0009 -0.0007  
AT. 97 H X -0.0071 0.0176 -0.0002 0.0001 -0.0001 -0.0001  
Y -0.0024 0.0081 0.0001 -0.0001 0.0001 0.0001  
Z 0.0025 -0.0049 -0.0007 0.0002 -0.0005 -0.0004  
AT. 98 H X 0.0071 0.0176 -0.0002 -0.0001 -0.0001 0.0001  
Y 0.0024 0.0081 0.0001 0.0001 0.0001 -0.0001  
Z -0.0025 -0.0049 -0.0007 -0.0002 -0.0005 0.0004  
AT. 99 C X 0.0146 -0.0148 -0.0000 -0.0000 0.0000 0.0000  
Y 0.0141 -0.0136 0.0000 0.0000 -0.0001 -0.0001  
Z -0.0115 0.0110 -0.0000 -0.0000 0.0002 0.0002  
AT. 100 C X -0.0146 -0.0148 -0.0000 0.0000 0.0000 -0.0000  
Y -0.0141 -0.0136 0.0000 -0.0000 -0.0001 0.0001  
Z 0.0115 0.0110 -0.0000 0.0000 0.0002 -0.0002  
AT. 101 C X -0.0012 0.0021 0.0000 0.0000 -0.0001 -0.0001  
Y -0.0013 0.0014 0.0000 0.0000 -0.0001 -0.0001  
Z 0.0007 -0.0006 0.0000 -0.0000 -0.0000 -0.0000  
AT. 102 C X 0.0012 0.0021 0.0000 -0.0000 -0.0001 0.0001  
Y 0.0013 0.0014 0.0000 -0.0000 -0.0001 0.0001  
Z -0.0007 -0.0006 0.0000 0.0000 -0.0000 0.0000  
AT. 103 H X -0.0047 0.0021 -0.0001 -0.0001 0.0005 0.0004

Y 0.0005 0.0009 -0.0002 -0.0001 0.0012 0.0011  
Z -0.0022 0.0008 -0.0000 -0.0001 0.0003 0.0003  
AT. 104 H X 0.0047 0.0021 -0.0001 0.0001 0.0005 -0.0004  
Y -0.0005 0.0009 -0.0002 0.0001 0.0012 -0.0011  
Z 0.0022 0.0008 -0.0000 0.0001 0.0003 -0.0003  
AT. 105 H X 0.0089 -0.0149 0.0001 0.0000 -0.0001 -0.0002  
Y 0.0030 -0.0032 0.0001 -0.0000 -0.0001 -0.0002  
Z 0.0043 -0.0052 -0.0002 0.0000 0.0003 0.0003  
AT. 106 H X -0.0089 -0.0149 0.0001 -0.0000 -0.0001 0.0002  
Y -0.0030 -0.0032 0.0001 0.0000 -0.0001 0.0002  
Z -0.0043 -0.0052 -0.0002 -0.0000 0.0003 -0.0003  
AT. 107 C X -0.0010 0.0028 -0.0001 -0.0001 -0.0000 -0.0000  
Y -0.0003 0.0008 -0.0001 -0.0001 -0.0001 -0.0002  
Z -0.0005 0.0005 0.0001 0.0001 0.0001 0.0001  
AT. 108 C X 0.0010 0.0028 -0.0001 0.0001 -0.0000 0.0000  
Y 0.0003 0.0008 -0.0001 0.0001 -0.0001 0.0002  
Z 0.0005 0.0005 0.0001 -0.0001 0.0001 -0.0001  
AT. 109 H X 0.0063 -0.0167 -0.0003 -0.0003 -0.0004 -0.0004  
Y 0.0002 -0.0013 0.0019 0.0018 0.0024 0.0026  
Z -0.0014 0.0025 -0.0011 -0.0011 -0.0015 -0.0016  
AT. 110 H X -0.0063 -0.0167 -0.0003 0.0003 -0.0004 0.0004  
Y -0.0002 -0.0013 0.0019 -0.0018 0.0024 -0.0026  
Z 0.0014 0.0025 -0.0011 0.0011 -0.0015 0.0016  
AT. 111 H X -0.0007 -0.0004 0.0009 0.0009 0.0006 0.0007  
Y 0.0011 -0.0044 0.0001 0.0001 0.0001 0.0001  
Z -0.0018 0.0067 0.0007 0.0008 0.0005 0.0006  
AT. 112 H X 0.0007 -0.0004 0.0009 -0.0009 0.0006 -0.0007  
Y -0.0011 -0.0044 0.0001 -0.0001 0.0001 -0.0001  
Z 0.0018 0.0067 0.0007 -0.0008 0.0005 -0.0006  
AT. 113 C X 0.0008 -0.0013 0.0001 0.0001 0.0000 0.0000  
Y 0.0004 -0.0009 -0.0001 -0.0001 -0.0001 -0.0001  
Z -0.0003 0.0003 -0.0000 -0.0000 -0.0002 -0.0002

AT.114 C X -0.0008 -0.0013 0.0001 -0.0001 0.0000 -0.0000  
Y -0.0004 -0.0009 -0.0001 0.0001 -0.0001 0.0001  
Z 0.0003 0.0003 -0.0000 0.0000 -0.0002 0.0002

AT.115 C X -0.0002 0.0006 -0.0009 -0.0011 0.0053 0.0053  
Y -0.0006 0.0008 0.0011 0.0013 -0.0066 -0.0065  
Z -0.0001 -0.0000 0.0010 0.0011 -0.0053 -0.0053

AT.116 C X 0.0002 0.0006 -0.0009 0.0011 0.0053 -0.0053  
Y 0.0006 0.0008 0.0011 -0.0013 -0.0066 0.0065  
Z 0.0001 -0.0000 0.0010 -0.0011 -0.0053 0.0053

AT.117 H X 0.0011 -0.0027 0.0033 0.0039 -0.0200 -0.0199  
Y -0.0007 0.0006 0.0012 0.0014 -0.0064 -0.0064  
Z -0.0020 0.0035 0.0036 0.0042 -0.0208 -0.0208

AT.118 H X -0.0011 -0.0027 0.0033 -0.0039 -0.0200 0.0199  
Y 0.0007 0.0006 0.0012 -0.0014 -0.0064 0.0064  
Z 0.0020 0.0035 0.0036 -0.0042 -0.0208 0.0208

AT.119 H X 0.0064 -0.0074 0.0077 0.0092 -0.0455 -0.0453  
Y 0.0055 -0.0057 -0.0141 -0.0167 0.0829 0.0825  
Z -0.0017 0.0008 -0.0148 -0.0176 0.0850 0.0845

AT.120 H X -0.0064 -0.0074 0.0077 -0.0092 -0.0455 0.0453  
Y -0.0055 -0.0057 -0.0141 0.0167 0.0829 -0.0825  
Z 0.0017 0.0008 -0.0148 0.0176 0.0850 -0.0845

AT.121 C X 0.0013 -0.0015 0.0000 0.0000 -0.0000 -0.0000  
Y 0.0005 -0.0004 0.0003 0.0003 0.0005 0.0005  
Z -0.0004 0.0002 0.0003 0.0003 0.0003 0.0003

AT.122 C X -0.0013 -0.0015 0.0000 -0.0000 -0.0000 0.0000  
Y -0.0005 -0.0004 0.0003 -0.0003 0.0005 -0.0005  
Z 0.0004 0.0002 0.0003 -0.0003 0.0003 -0.0003

AT.123 H X -0.0085 0.0069 0.0006 0.0006 0.0013 0.0014  
Y 0.0005 -0.0018 -0.0039 -0.0038 -0.0050 -0.0056  
Z -0.0018 0.0017 -0.0042 -0.0042 -0.0049 -0.0055

AT.124 H X 0.0085 0.0069 0.0006 -0.0006 0.0013 -0.0014  
Y -0.0005 -0.0018 -0.0039 0.0038 -0.0050 0.0056

Z 0.0018 0.0017 -0.0042 0.0042 -0.0049 0.0055  
AT. 125 H X -0.0001 0.0001 -0.0010 -0.0009 -0.0014 -0.0015  
Y 0.0001 -0.0011 -0.0002 -0.0001 -0.0004 -0.0004  
Z -0.0033 0.0029 0.0009 0.0008 0.0013 0.0014  
AT. 126 H X 0.0001 0.0001 -0.0010 0.0009 -0.0014 0.0015  
Y -0.0001 -0.0011 -0.0002 0.0001 -0.0004 0.0004  
Z 0.0033 0.0029 0.0009 -0.0008 0.0013 -0.0014  
AT. 127 C X -0.0010 0.0014 -0.0001 -0.0001 -0.0000 -0.0000  
Y -0.0003 0.0002 -0.0001 -0.0001 -0.0000 -0.0000  
Z -0.0003 0.0004 -0.0000 -0.0000 -0.0000 -0.0000  
AT. 128 C X 0.0010 0.0014 -0.0001 0.0001 -0.0000 0.0000  
Y 0.0003 0.0002 -0.0001 0.0001 -0.0000 0.0000  
Z 0.0003 0.0004 -0.0000 0.0000 -0.0000 0.0000  
AT. 129 C X 0.0003 -0.0011 0.0002 0.0001 0.0000 0.0000  
Y 0.0000 -0.0003 -0.0002 -0.0001 -0.0001 -0.0001  
Z -0.0003 -0.0003 0.0002 0.0001 0.0000 0.0000  
AT. 130 C X -0.0003 -0.0011 0.0002 -0.0001 0.0000 -0.0000  
Y -0.0000 -0.0003 -0.0002 0.0001 -0.0001 0.0001  
Z 0.0003 -0.0003 0.0002 -0.0001 0.0000 -0.0000  
AT. 131 H X -0.0001 0.0030 -0.0013 -0.0011 -0.0004 -0.0004  
Y 0.0011 -0.0022 -0.0006 -0.0005 -0.0001 -0.0001  
Z -0.0008 0.0044 0.0009 0.0007 0.0003 0.0003  
AT. 132 H X 0.0001 0.0030 -0.0013 0.0011 -0.0004 0.0004  
Y -0.0011 -0.0022 -0.0006 0.0005 -0.0001 0.0001  
Z 0.0008 0.0044 0.0009 -0.0007 0.0003 -0.0003  
AT. 133 H X -0.0049 0.0112 -0.0010 -0.0009 -0.0003 -0.0004  
Y -0.0031 0.0067 0.0030 0.0027 0.0010 0.0011  
Z -0.0019 0.0038 -0.0020 -0.0018 -0.0006 -0.0007  
AT. 134 H X 0.0049 0.0112 -0.0010 0.0009 -0.0003 0.0004  
Y 0.0031 0.0067 0.0030 -0.0027 0.0010 -0.0011  
Z 0.0019 0.0038 -0.0020 0.0018 -0.0006 0.0007  
AT. 135 C X -0.0004 0.0004 -0.0003 -0.0002 -0.0009 -0.0008

Y -0.0001 0.0002 -0.0000 -0.0000 0.0001 0.0001  
Z 0.0001 0.0002 0.0002 0.0001 0.0005 0.0005  
AT. 136 C X 0.0004 0.0004 -0.0003 0.0002 -0.0009 0.0008  
Y 0.0001 0.0002 -0.0000 0.0000 0.0001 -0.0001  
Z -0.0001 0.0002 0.0002 -0.0001 0.0005 -0.0005  
AT. 137 H X 0.0009 0.0000 -0.0008 -0.0005 -0.0017 -0.0017  
Y 0.0002 -0.0004 0.0028 0.0018 0.0064 0.0064  
Z -0.0002 -0.0004 -0.0018 -0.0011 -0.0035 -0.0036  
AT. 138 H X -0.0009 0.0000 -0.0008 0.0005 -0.0017 0.0017  
Y -0.0002 -0.0004 0.0028 -0.0018 0.0064 -0.0064  
Z 0.0002 -0.0004 -0.0018 0.0011 -0.0035 0.0036  
AT. 139 H X 0.0008 -0.0007 0.0032 0.0016 0.0083 0.0079  
Y -0.0006 0.0010 0.0008 0.0005 0.0019 0.0018  
Z -0.0013 0.0008 0.0029 0.0016 0.0068 0.0065  
AT. 140 H X -0.0008 -0.0007 0.0032 -0.0016 0.0083 -0.0079  
Y 0.0006 0.0010 0.0008 -0.0005 0.0019 -0.0018  
Z 0.0013 0.0008 0.0029 -0.0016 0.0068 -0.0065  
AT. 141 H X 0.0017 -0.0023 0.0011 0.0006 0.0032 0.0032  
Y 0.0003 -0.0003 -0.0035 -0.0023 -0.0094 -0.0095  
Z 0.0002 -0.0006 -0.0032 -0.0020 -0.0083 -0.0084  
AT. 142 H X -0.0017 -0.0023 0.0011 -0.0006 0.0032 -0.0032  
Y -0.0003 -0.0003 -0.0035 0.0023 -0.0094 0.0095  
Z -0.0002 -0.0006 -0.0032 0.0020 -0.0083 0.0084  
AT. 143 C X 0.0003 -0.0005 0.0002 0.0004 0.0011 0.0011  
Y 0.0002 0.0000 0.0002 0.0002 0.0003 0.0003  
Z -0.0000 0.0001 0.0001 0.0003 0.0002 0.0001  
AT. 144 C X -0.0003 -0.0005 0.0002 -0.0004 0.0011 -0.0011  
Y -0.0002 0.0000 0.0002 -0.0002 0.0003 -0.0003  
Z 0.0000 0.0001 0.0001 -0.0003 0.0002 -0.0001  
AT. 145 H X -0.0007 0.0006 0.0011 0.0017 0.0021 0.0021  
Y -0.0010 0.0004 -0.0028 -0.0047 -0.0064 -0.0063  
Z 0.0007 -0.0007 -0.0026 -0.0045 -0.0062 -0.0061

AT. 146 H X 0.0007 0.0006 0.0011 -0.0017 0.0021 -0.0021  
Y 0.0010 0.0004 -0.0028 0.0047 -0.0064 0.0063  
Z -0.0007 -0.0007 -0.0026 0.0045 -0.0062 0.0061

AT. 147 H X -0.0002 0.0008 -0.0027 -0.0048 -0.0124 -0.0123  
Y -0.0001 -0.0011 -0.0010 -0.0017 -0.0046 -0.0045  
Z -0.0008 0.0012 0.0022 0.0037 0.0089 0.0088

AT. 148 H X 0.0002 0.0008 -0.0027 0.0048 -0.0124 0.0123  
Y 0.0001 -0.0011 -0.0010 0.0017 -0.0046 0.0045  
Z 0.0008 0.0012 0.0022 -0.0037 0.0089 -0.0088

AT. 149 H X -0.0010 0.0025 -0.0004 -0.0012 -0.0020 -0.0019  
Y 0.0002 0.0001 0.0020 0.0042 0.0072 0.0070  
Z 0.0005 -0.0009 -0.0010 -0.0025 -0.0041 -0.0040

AT. 150 H X 0.0010 0.0025 -0.0004 0.0012 -0.0020 0.0019  
Y -0.0002 0.0001 0.0020 -0.0042 0.0072 -0.0070  
Z -0.0005 -0.0009 -0.0010 0.0025 -0.0041 0.0040

AT. 151 C X 0.0000 0.0000 0.0014 0.0014 0.0002 0.0002  
Y 0.0000 0.0002 -0.0033 -0.0032 -0.0004 -0.0005  
Z 0.0003 -0.0003 -0.0090 -0.0090 -0.0013 -0.0016

AT. 152 C X -0.0000 0.0000 0.0014 -0.0014 0.0002 -0.0002  
Y -0.0000 0.0002 -0.0033 0.0032 -0.0004 0.0005  
Z -0.0003 -0.0003 -0.0090 0.0090 -0.0013 0.0016

AT. 153 H X -0.0004 0.0002 0.0125 0.0125 0.0020 0.0024  
Y -0.0003 0.0001 -0.0473 -0.0474 -0.0074 -0.0090  
Z -0.0002 -0.0000 0.0267 0.0267 0.0043 0.0053

AT. 154 H X 0.0004 0.0002 0.0125 -0.0125 0.0020 -0.0024  
Y 0.0003 0.0001 -0.0473 0.0474 -0.0074 0.0090  
Z 0.0002 -0.0000 0.0267 -0.0267 0.0043 -0.0053

AT. 155 H X 0.0001 -0.0003 -0.0297 -0.0294 -0.0041 -0.0049  
Y 0.0001 -0.0006 0.0865 0.0858 0.0127 0.0151  
Z 0.0001 -0.0007 0.0792 0.0785 0.0118 0.0140

AT. 156 H X -0.0001 -0.0003 -0.0297 0.0294 -0.0041 0.0049  
Y -0.0001 -0.0006 0.0865 -0.0858 0.0127 -0.0151



Z -0.0001 -0.0007 0.0792 -0.0785 0.0118 -0.0140  
AT. 157 O X -0.0001 -0.0000 -0.0000 0.0000 -0.0000 0.0000  
Y 0.0001 -0.0002 0.0000 -0.0000 0.0000 -0.0000  
Z 0.0001 0.0001 0.0000 -0.0000 0.0000 -0.0000  
AT. 158 O X 0.0001 -0.0000 -0.0000 -0.0000 -0.0000 -0.0000  
Y -0.0001 -0.0002 0.0000 0.0000 0.0000 0.0000  
Z -0.0001 0.0001 0.0000 0.0000 0.0000 0.0000  
AT. 159 O X 0.0002 -0.0001 -0.0000 -0.0000 -0.0000 -0.0000  
Y 0.0000 0.0001 0.0000 0.0000 0.0000 0.0000  
Z 0.0000 0.0000 -0.0000 -0.0000 -0.0000 0.0000  
AT. 160 O X -0.0002 -0.0001 -0.0000 0.0000 -0.0000 0.0000  
Y -0.0000 0.0001 0.0000 -0.0000 0.0000 -0.0000  
Z -0.0000 0.0000 -0.0000 0.0000 -0.0000 -0.0000  
AT. 161 H X 0.0005 0.0024 0.0001 -0.0000 0.0000 0.0000  
Y -0.0000 0.0013 -0.0003 0.0003 -0.0000 0.0002  
Z -0.0077 -0.0021 -0.0001 -0.0002 -0.0000 -0.0001  
AT. 162 H X -0.0005 0.0024 0.0001 0.0000 0.0000 -0.0000  
Y 0.0000 0.0013 -0.0003 -0.0003 -0.0000 -0.0002  
Z 0.0077 -0.0021 -0.0001 0.0002 -0.0000 0.0001  
AT. 163 H X -0.0040 0.0003 0.0003 0.0001 0.0001 -0.0000  
Y 0.0012 -0.0005 -0.0002 -0.0001 -0.0000 -0.0000  
Z 0.0027 0.0004 0.0005 0.0003 0.0001 -0.0001  
AT. 164 H X 0.0040 0.0003 0.0003 -0.0001 0.0001 0.0000  
Y -0.0012 -0.0005 -0.0002 0.0001 -0.0000 0.0000  
Z -0.0027 0.0004 0.0005 -0.0003 0.0001 0.0001  
AT. 165 O X 0.0001 -0.0005 0.0000 0.0000 0.0000 0.0000  
Y 0.0000 -0.0005 0.0000 0.0000 0.0000 -0.0000  
Z 0.0002 0.0002 0.0000 0.0000 0.0000 0.0000  
AT. 166 O X -0.0001 -0.0005 0.0000 -0.0000 0.0000 -0.0000  
Y -0.0000 -0.0005 0.0000 -0.0000 0.0000 0.0000  
Z -0.0002 0.0002 0.0000 -0.0000 0.0000 -0.0000  
AT. 167 H X -0.0010 0.0052 -0.0002 -0.0001 -0.0002 -0.0000

Y -0.0006 0.0007 -0.0001 -0.0000 -0.0001 0.0000  
Z 0.0015 -0.0037 -0.0000 -0.0000 -0.0000 0.0000  
AT. 168 H X 0.0010 0.0052 -0.0002 0.0001 -0.0002 0.0000  
Y 0.0006 0.0007 -0.0001 0.0000 -0.0001 -0.0000  
Z -0.0015 -0.0037 -0.0000 0.0000 -0.0000 -0.0000  
AT. 169 O X -0.0003 -0.0001 0.0000 0.0000 0.0000 -0.0000  
Y 0.0003 0.0007 -0.0000 -0.0000 -0.0000 0.0000  
Z -0.0001 0.0001 0.0000 0.0000 0.0000 -0.0000  
AT. 170 O X 0.0003 -0.0001 0.0000 -0.0000 0.0000 0.0000  
Y -0.0003 0.0007 -0.0000 0.0000 -0.0000 -0.0000  
Z 0.0001 0.0001 0.0000 -0.0000 0.0000 0.0000  
AT. 171 H X 0.0037 0.0046 -0.0001 -0.0001 -0.0002 0.0002  
Y -0.0027 -0.0044 0.0001 0.0001 0.0005 -0.0003  
Z -0.0042 -0.0053 -0.0000 -0.0001 -0.0002 0.0002  
AT. 172 H X -0.0037 0.0046 -0.0001 0.0001 -0.0002 -0.0002  
Y 0.0027 -0.0044 0.0001 -0.0001 0.0005 0.0003  
Z 0.0042 -0.0053 -0.0000 0.0001 -0.0002 -0.0002

FREQ(CM\*\*-1) 3069.52 3069.86 3070.20 3071.70 3071.81 3072.31

AT. 1 I X 0.0000 0.0000 0.0000 0.0000 0.0000 0.0000  
Y -0.0000 -0.0000 0.0000 -0.0000 -0.0000 0.0000  
Z 0.0000 -0.0000 -0.0000 0.0000 -0.0000 0.0000  
AT. 2 I X 0.0000 -0.0000 0.0000 -0.0000 -0.0000 0.0000  
Y -0.0000 0.0000 0.0000 0.0000 0.0000 0.0000  
Z 0.0000 0.0000 -0.0000 -0.0000 0.0000 0.0000  
AT. 3 I X 0.0000 -0.0000 -0.0000 -0.0000 -0.0000 0.0000  
Y 0.0000 -0.0000 -0.0000 0.0000 -0.0000 0.0000  
Z 0.0000 0.0000 0.0000 -0.0000 0.0000 0.0000  
AT. 4 I X 0.0000 0.0000 -0.0000 0.0000 0.0000 0.0000  
Y 0.0000 0.0000 -0.0000 -0.0000 0.0000 0.0000  
Z 0.0000 -0.0000 0.0000 0.0000 -0.0000 0.0000

AT. 5 O X 0.0000 0.0000 0.0000 0.0000 0.0000 -0.0000  
Y -0.0000 -0.0000 -0.0000 -0.0000 -0.0000 0.0000  
Z -0.0000 -0.0000 -0.0000 -0.0000 0.0000 0.0000

AT. 6 O X 0.0000 -0.0000 0.0000 -0.0000 -0.0000 -0.0000  
Y -0.0000 0.0000 -0.0000 0.0000 0.0000 0.0000  
Z -0.0000 0.0000 -0.0000 0.0000 -0.0000 0.0000

AT. 7 O X 0.0000 0.0000 -0.0000 0.0000 0.0000 -0.0000  
Y -0.0000 0.0000 0.0000 -0.0000 -0.0000 -0.0000  
Z 0.0000 -0.0000 -0.0000 -0.0000 0.0000 0.0000

AT. 8 O X 0.0000 -0.0000 -0.0000 -0.0000 -0.0000 -0.0000  
Y -0.0000 -0.0000 0.0000 0.0000 0.0000 -0.0000  
Z 0.0000 0.0000 -0.0000 0.0000 -0.0000 0.0000

AT. 9 N X 0.0000 -0.0000 0.0000 -0.0000 0.0000 0.0000  
Y -0.0000 0.0000 0.0000 -0.0000 0.0000 -0.0000  
Z -0.0000 -0.0000 0.0000 -0.0000 0.0000 0.0000

AT. 10 N X 0.0000 0.0000 0.0000 0.0000 -0.0000 0.0000  
Y -0.0000 -0.0000 0.0000 0.0000 -0.0000 -0.0000  
Z -0.0000 0.0000 0.0000 0.0000 -0.0000 0.0000

AT. 11 N X 0.0000 -0.0000 -0.0000 0.0000 -0.0000 0.0000  
Y -0.0000 0.0000 0.0000 -0.0000 -0.0000 -0.0000  
Z 0.0000 0.0000 0.0000 0.0000 -0.0000 -0.0000

AT. 12 N X 0.0000 0.0000 -0.0000 -0.0000 0.0000 0.0000  
Y -0.0000 -0.0000 0.0000 0.0000 0.0000 -0.0000  
Z 0.0000 -0.0000 0.0000 -0.0000 0.0000 -0.0000

AT. 13 C X -0.0000 0.0000 0.0000 -0.0000 0.0000 0.0000  
Y 0.0000 -0.0000 0.0000 0.0000 0.0000 0.0000  
Z 0.0000 0.0000 0.0000 0.0000 0.0000 -0.0000

AT. 14 C X -0.0000 -0.0000 0.0000 0.0000 -0.0000 0.0000  
Y 0.0000 0.0000 0.0000 -0.0000 -0.0000 0.0000  
Z 0.0000 -0.0000 0.0000 -0.0000 -0.0000 -0.0000

AT. 15 C X 0.0000 -0.0000 -0.0000 0.0000 -0.0000 -0.0000  
Y 0.0000 0.0000 0.0000 0.0000 0.0000 0.0000

Z 0.0000 0.0000 0.0000 -0.0000 0.0000 0.0000  
AT. 16 C X 0.0000 0.0000 -0.0000 -0.0000 0.0000 -0.0000  
Y 0.0000 -0.0000 0.0000 -0.0000 -0.0000 0.0000  
Z 0.0000 -0.0000 0.0000 0.0000 -0.0000 0.0000  
AT. 17 H X 0.0000 0.0000 0.0000 0.0000 0.0001 0.0001  
Y -0.0000 -0.0000 -0.0002 0.0000 -0.0002 -0.0004  
Z -0.0000 -0.0000 -0.0001 -0.0000 -0.0001 -0.0003  
AT. 18 H X 0.0000 -0.0000 0.0000 -0.0000 -0.0001 0.0001  
Y -0.0000 0.0000 -0.0002 -0.0000 0.0002 -0.0004  
Z -0.0000 0.0000 -0.0001 0.0000 0.0001 -0.0003  
AT. 19 H X -0.0000 0.0000 0.0000 -0.0001 0.0001 -0.0001  
Y -0.0000 0.0000 0.0000 -0.0001 0.0001 -0.0001  
Z 0.0000 -0.0000 0.0000 0.0003 -0.0002 0.0002  
AT. 20 H X -0.0000 -0.0000 0.0000 0.0001 -0.0001 -0.0001  
Y -0.0000 -0.0000 0.0000 0.0001 -0.0001 -0.0001  
Z 0.0000 0.0000 0.0000 -0.0003 0.0002 0.0002  
AT. 21 C X -0.0000 0.0000 -0.0000 -0.0000 -0.0000 -0.0000  
Y 0.0000 -0.0000 -0.0000 0.0000 -0.0000 -0.0000  
Z -0.0000 0.0000 0.0000 -0.0000 0.0000 0.0000  
AT. 22 C X -0.0000 -0.0000 -0.0000 0.0000 0.0000 -0.0000  
Y 0.0000 0.0000 -0.0000 -0.0000 0.0000 -0.0000  
Z -0.0000 -0.0000 0.0000 0.0000 -0.0000 0.0000  
AT. 23 C X 0.0000 0.0000 0.0000 0.0000 0.0000 0.0000  
Y 0.0000 -0.0000 -0.0000 0.0000 -0.0000 -0.0000  
Z 0.0000 -0.0000 -0.0000 0.0000 0.0000 -0.0000  
AT. 24 C X 0.0000 -0.0000 0.0000 -0.0000 -0.0000 0.0000  
Y 0.0000 0.0000 -0.0000 -0.0000 0.0000 -0.0000  
Z 0.0000 0.0000 -0.0000 -0.0000 -0.0000 -0.0000  
AT. 25 H X -0.0000 -0.0000 -0.0000 0.0000 -0.0000 -0.0000  
Y -0.0000 0.0003 0.0004 -0.0001 0.0001 0.0001  
Z -0.0000 0.0001 0.0001 -0.0000 0.0000 0.0000  
AT. 26 H X -0.0000 0.0000 -0.0000 -0.0000 0.0000 -0.0000

Y -0.0000 -0.0003 0.0004 0.0001 -0.0001 0.0001  
Z -0.0000 -0.0001 0.0001 0.0000 -0.0000 0.0000  
AT. 27 H X 0.0000 0.0000 0.0000 -0.0000 -0.0000 0.0000  
Y -0.0000 -0.0001 -0.0000 0.0000 0.0000 -0.0001  
Z 0.0000 0.0001 0.0001 -0.0001 -0.0001 0.0001  
AT. 28 H X 0.0000 -0.0000 0.0000 0.0000 0.0000 0.0000  
Y -0.0000 0.0001 -0.0000 -0.0000 -0.0000 -0.0001  
Z 0.0000 -0.0001 0.0001 0.0001 0.0001 0.0001  
AT. 29 C X -0.0000 0.0001 0.0001 -0.0000 -0.0000 0.0001  
Y -0.0000 0.0009 0.0007 -0.0001 0.0002 0.0003  
Z 0.0000 -0.0003 -0.0002 0.0000 -0.0000 -0.0001  
AT. 30 C X -0.0000 -0.0001 0.0001 0.0000 0.0000 0.0001  
Y -0.0000 -0.0009 0.0007 0.0001 -0.0002 0.0003  
Z 0.0000 0.0003 -0.0002 -0.0000 0.0000 -0.0001  
AT. 31 H X 0.0002 -0.0042 -0.0029 0.0006 -0.0009 -0.0011  
Y 0.0004 -0.0098 -0.0069 0.0014 -0.0023 -0.0028  
Z -0.0003 0.0067 0.0047 -0.0009 0.0015 0.0019  
AT. 32 H X 0.0002 0.0042 -0.0029 -0.0006 0.0009 -0.0011  
Y 0.0004 0.0098 -0.0069 -0.0014 0.0023 -0.0028  
Z -0.0003 -0.0067 0.0047 0.0009 -0.0015 0.0019  
AT. 33 H X -0.0001 0.0026 0.0022 -0.0004 0.0011 0.0005  
Y 0.0001 -0.0014 -0.0011 0.0002 -0.0006 -0.0003  
Z 0.0001 -0.0036 -0.0028 0.0005 -0.0014 -0.0007  
AT. 34 H X -0.0001 -0.0026 0.0022 0.0004 -0.0011 0.0005  
Y 0.0001 0.0014 -0.0011 -0.0002 0.0006 -0.0003  
Z 0.0001 0.0036 -0.0028 -0.0005 0.0014 -0.0007  
AT. 35 C X 0.0000 -0.0001 -0.0001 0.0000 -0.0001 0.0000  
Y -0.0000 0.0000 0.0001 -0.0000 0.0001 -0.0000  
Z 0.0000 -0.0001 -0.0001 0.0000 -0.0001 -0.0000  
AT. 36 C X 0.0000 0.0001 -0.0001 -0.0000 0.0001 0.0000  
Y -0.0000 -0.0000 0.0001 0.0000 -0.0001 -0.0000  
Z 0.0000 0.0001 -0.0001 -0.0000 0.0001 -0.0000

AT. 37 C X 0.0001 -0.0011 -0.0011 0.0001 -0.0007 -0.0003  
Y 0.0000 -0.0004 -0.0005 0.0000 -0.0003 -0.0002  
Z 0.0000 -0.0005 -0.0005 0.0000 -0.0002 -0.0002

AT. 38 C X 0.0001 0.0011 -0.0011 -0.0001 0.0007 -0.0003  
Y 0.0000 0.0004 -0.0005 -0.0000 0.0003 -0.0002  
Z 0.0000 0.0005 -0.0005 -0.0000 0.0002 -0.0002

AT. 39 H X -0.0002 0.0030 0.0032 -0.0003 0.0020 0.0007  
Y 0.0001 -0.0023 -0.0025 0.0003 -0.0015 -0.0006  
Z 0.0002 -0.0047 -0.0050 0.0005 -0.0030 -0.0012

AT. 40 H X -0.0002 -0.0030 0.0032 0.0003 -0.0020 0.0007  
Y 0.0001 0.0023 -0.0025 -0.0003 0.0015 -0.0006  
Z 0.0002 0.0047 -0.0050 -0.0005 0.0030 -0.0012

AT. 41 H X -0.0006 0.0101 0.0104 -0.0010 0.0060 0.0034  
Y -0.0005 0.0078 0.0080 -0.0008 0.0046 0.0026  
Z -0.0006 0.0103 0.0106 -0.0011 0.0061 0.0034

AT. 42 H X -0.0006 -0.0101 0.0104 0.0010 -0.0060 0.0034  
Y -0.0005 -0.0078 0.0080 0.0008 -0.0046 0.0026  
Z -0.0006 -0.0103 0.0106 0.0011 -0.0061 0.0034

AT. 43 C X 0.0000 0.0001 0.0000 0.0000 -0.0000 -0.0002  
Y 0.0000 0.0004 -0.0000 0.0001 -0.0003 -0.0010  
Z 0.0000 0.0003 0.0000 0.0000 -0.0001 -0.0006

AT. 44 C X 0.0000 -0.0001 0.0000 -0.0000 0.0000 -0.0002  
Y 0.0000 -0.0004 -0.0000 -0.0001 0.0003 -0.0010  
Z 0.0000 -0.0003 0.0000 -0.0000 0.0001 -0.0006

AT. 45 H X -0.0002 -0.0031 -0.0001 -0.0003 0.0020 0.0069  
Y -0.0003 -0.0040 -0.0001 -0.0004 0.0028 0.0093  
Z -0.0003 -0.0043 -0.0001 -0.0005 0.0030 0.0101

AT. 46 H X -0.0002 0.0031 -0.0001 0.0003 -0.0020 0.0069  
Y -0.0003 0.0040 -0.0001 0.0004 -0.0028 0.0093  
Z -0.0003 0.0043 -0.0001 0.0005 -0.0030 0.0101

AT. 47 H X 0.0002 0.0020 -0.0003 0.0003 -0.0018 -0.0046  
Y -0.0001 -0.0013 0.0002 -0.0002 0.0012 0.0030

Z 0.0001 0.0013 -0.0002 0.0002 -0.0012 -0.0031  
AT. 48 H X 0.0002 -0.0020 -0.0003 -0.0003 0.0018 -0.0046  
Y -0.0001 0.0013 0.0002 0.0002 -0.0012 0.0030  
Z 0.0001 -0.0013 -0.0002 -0.0002 0.0012 -0.0031  
AT. 49 C X 0.0000 -0.0001 0.0000 -0.0000 0.0001 0.0000  
Y 0.0000 0.0000 -0.0000 0.0000 -0.0000 -0.0000  
Z 0.0000 0.0000 -0.0001 0.0000 -0.0001 -0.0001  
AT. 50 C X 0.0000 0.0001 0.0000 0.0000 -0.0001 0.0000  
Y 0.0000 -0.0000 -0.0000 -0.0000 0.0000 -0.0000  
Z 0.0000 -0.0000 -0.0001 -0.0000 0.0001 -0.0001  
AT. 51 C X -0.0000 0.0002 0.0006 -0.0001 0.0007 0.0009  
Y -0.0000 0.0001 0.0004 -0.0001 0.0005 0.0008  
Z 0.0000 -0.0001 -0.0003 0.0001 -0.0004 -0.0007  
AT. 52 C X -0.0000 -0.0002 0.0006 0.0001 -0.0007 0.0009  
Y -0.0000 -0.0001 0.0004 0.0001 -0.0005 0.0008  
Z 0.0000 0.0001 -0.0003 -0.0001 0.0004 -0.0007  
AT. 53 H X 0.0001 -0.0013 -0.0034 0.0006 -0.0037 -0.0040  
Y -0.0001 0.0009 0.0024 -0.0004 0.0027 0.0032  
Z 0.0001 -0.0008 -0.0019 0.0003 -0.0021 -0.0023  
AT. 54 H X 0.0001 0.0013 -0.0034 -0.0006 0.0037 -0.0040  
Y -0.0001 -0.0009 0.0024 0.0004 -0.0027 0.0032  
Z 0.0001 0.0008 -0.0019 -0.0003 0.0021 -0.0023  
AT. 55 H X 0.0001 -0.0014 -0.0039 0.0007 -0.0046 -0.0069  
Y 0.0001 -0.0023 -0.0070 0.0013 -0.0084 -0.0130  
Z -0.0001 0.0018 0.0055 -0.0010 0.0066 0.0104  
AT. 56 H X 0.0001 0.0014 -0.0039 -0.0007 0.0046 -0.0069  
Y 0.0001 0.0023 -0.0070 -0.0013 0.0084 -0.0130  
Z -0.0001 -0.0018 0.0055 0.0010 -0.0066 0.0104  
AT. 57 C X -0.0002 0.0043 0.0051 -0.0006 0.0030 -0.0010  
Y 0.0002 -0.0035 -0.0042 0.0005 -0.0025 0.0008  
Z -0.0000 0.0006 0.0006 -0.0000 0.0002 0.0000  
AT. 58 C X -0.0002 -0.0043 0.0051 0.0006 -0.0030 -0.0010

Y 0.0002 0.0035 -0.0042 -0.0005 0.0025 0.0008  
Z -0.0000 -0.0006 0.0006 0.0000 -0.0002 0.0000  
AT. 59 H X -0.0010 0.0224 0.0262 -0.0030 0.0153 -0.0047  
Y -0.0019 0.0438 0.0511 -0.0058 0.0297 -0.0089  
Z 0.0013 -0.0297 -0.0347 0.0039 -0.0202 0.0060  
AT. 60 H X -0.0010 -0.0224 0.0262 0.0030 -0.0153 -0.0047  
Y -0.0019 -0.0438 0.0511 0.0058 -0.0297 -0.0089  
Z 0.0013 0.0297 -0.0347 -0.0039 0.0202 0.0060  
AT. 61 H X 0.0019 -0.0429 -0.0507 0.0061 -0.0307 0.0098  
Y -0.0012 0.0269 0.0317 -0.0038 0.0192 -0.0061  
Z -0.0024 0.0561 0.0662 -0.0079 0.0401 -0.0129  
AT. 62 H X 0.0019 0.0429 -0.0507 -0.0061 0.0307 0.0098  
Y -0.0012 -0.0269 0.0317 0.0038 -0.0192 -0.0061  
Z -0.0024 -0.0561 0.0662 0.0079 -0.0401 -0.0129  
AT. 63 H X 0.0013 -0.0307 -0.0350 0.0040 -0.0198 0.0066  
Y 0.0012 -0.0295 -0.0338 0.0039 -0.0194 0.0064  
Z 0.0014 -0.0336 -0.0384 0.0044 -0.0219 0.0071  
AT. 64 H X 0.0013 0.0307 -0.0350 -0.0040 0.0198 0.0066  
Y 0.0012 0.0295 -0.0338 -0.0039 0.0194 0.0064  
Z 0.0014 0.0336 -0.0384 -0.0044 0.0219 0.0071  
AT. 65 C X 0.0000 0.0027 -0.0011 0.0006 -0.0035 -0.0043  
Y -0.0000 -0.0013 0.0005 -0.0003 0.0016 0.0020  
Z -0.0000 -0.0027 0.0012 -0.0005 0.0034 0.0041  
AT. 66 C X 0.0000 -0.0027 -0.0011 -0.0006 0.0035 -0.0043  
Y -0.0000 0.0013 0.0005 0.0003 -0.0016 0.0020  
Z -0.0000 0.0027 0.0012 0.0005 -0.0034 0.0041  
AT. 67 H X 0.0004 0.0222 -0.0099 0.0045 -0.0284 -0.0343  
Y 0.0004 0.0232 -0.0103 0.0047 -0.0297 -0.0360  
Z 0.0004 0.0254 -0.0113 0.0051 -0.0324 -0.0393  
AT. 68 H X 0.0004 -0.0222 -0.0099 -0.0045 0.0284 -0.0343  
Y 0.0004 -0.0232 -0.0103 -0.0047 0.0297 -0.0360  
Z 0.0004 -0.0254 -0.0113 -0.0051 0.0324 -0.0393



AT. 69 H X -0.0006 -0.0349 0.0145 -0.0072 0.0453 0.0556  
Y 0.0004 0.0268 -0.0111 0.0055 -0.0346 -0.0425  
Z -0.0003 -0.0187 0.0077 -0.0039 0.0243 0.0296

AT. 70 H X -0.0006 0.0349 0.0145 0.0072 -0.0453 0.0556  
Y 0.0004 -0.0268 -0.0111 -0.0055 0.0346 -0.0425  
Z -0.0003 0.0187 0.0077 0.0039 -0.0243 0.0296

AT. 71 H X -0.0003 -0.0185 0.0082 -0.0038 0.0238 0.0290  
Y -0.0006 -0.0351 0.0155 -0.0071 0.0451 0.0545  
Z 0.0004 0.0244 -0.0107 0.0050 -0.0313 -0.0380

AT. 72 H X -0.0003 0.0185 0.0082 0.0038 -0.0238 0.0290  
Y -0.0006 0.0351 0.0155 0.0071 -0.0451 0.0545  
Z 0.0004 -0.0244 -0.0107 -0.0050 0.0313 -0.0380

AT. 73 C X 0.0000 -0.0000 -0.0001 0.0000 -0.0001 0.0002  
Y -0.0000 -0.0003 0.0006 -0.0002 0.0009 -0.0010  
Z 0.0000 0.0010 -0.0018 0.0006 -0.0030 0.0033

AT. 74 C X 0.0000 0.0000 -0.0001 -0.0000 0.0001 0.0002  
Y -0.0000 0.0003 0.0006 0.0002 -0.0009 -0.0010  
Z 0.0000 -0.0010 -0.0018 -0.0006 0.0030 0.0033

AT. 75 H X 0.0002 0.0045 -0.0087 0.0026 -0.0144 0.0155  
Y 0.0004 0.0082 -0.0165 0.0049 -0.0268 0.0290  
Z -0.0003 -0.0059 0.0116 -0.0035 0.0189 -0.0206

AT. 76 H X 0.0002 -0.0045 -0.0087 -0.0026 0.0144 0.0155  
Y 0.0004 -0.0082 -0.0165 -0.0049 0.0268 0.0290  
Z -0.0003 0.0059 0.0116 0.0035 -0.0189 -0.0206

AT. 77 H X -0.0002 -0.0047 0.0099 -0.0029 0.0158 -0.0175  
Y -0.0003 -0.0050 0.0100 -0.0030 0.0161 -0.0176  
Z -0.0003 -0.0052 0.0106 -0.0032 0.0169 -0.0188

AT. 78 H X -0.0002 0.0047 0.0099 0.0029 -0.0158 -0.0175  
Y -0.0003 0.0050 0.0100 0.0030 -0.0161 -0.0176  
Z -0.0003 0.0052 0.0106 0.0032 -0.0169 -0.0188

AT. 79 I X -0.0000 -0.0000 -0.0000 -0.0000 0.0000 0.0000  
Y 0.0000 -0.0000 0.0000 0.0000 -0.0000 0.0000

Z 0.0000 0.0000 0.0000 -0.0000 -0.0000 0.0000  
AT. 80 I X -0.0000 0.0000 -0.0000 0.0000 -0.0000 0.0000  
Y 0.0000 0.0000 0.0000 -0.0000 0.0000 0.0000  
Z 0.0000 -0.0000 0.0000 0.0000 0.0000 0.0000  
AT. 81 I X 0.0000 0.0000 0.0000 -0.0000 -0.0000 0.0000  
Y -0.0000 -0.0000 0.0000 -0.0000 0.0000 0.0000  
Z 0.0000 0.0000 0.0000 0.0000 -0.0000 -0.0000  
AT. 82 I X 0.0000 -0.0000 0.0000 0.0000 0.0000 0.0000  
Y -0.0000 0.0000 0.0000 0.0000 -0.0000 0.0000  
Z 0.0000 -0.0000 0.0000 -0.0000 0.0000 -0.0000  
AT. 83 O X 0.0000 -0.0000 -0.0000 -0.0000 -0.0000 0.0000  
Y 0.0000 -0.0000 -0.0000 0.0000 -0.0000 0.0000  
Z -0.0000 0.0000 -0.0000 -0.0000 -0.0000 0.0000  
AT. 84 O X 0.0000 0.0000 -0.0000 0.0000 0.0000 0.0000  
Y 0.0000 0.0000 -0.0000 -0.0000 0.0000 0.0000  
Z -0.0000 -0.0000 -0.0000 0.0000 0.0000 0.0000  
AT. 85 O X 0.0000 0.0000 -0.0000 -0.0000 -0.0000 -0.0000  
Y 0.0000 0.0000 -0.0000 0.0000 -0.0000 -0.0000  
Z -0.0000 0.0000 0.0000 -0.0000 -0.0000 -0.0000  
AT. 86 O X 0.0000 -0.0000 -0.0000 0.0000 0.0000 -0.0000  
Y 0.0000 -0.0000 -0.0000 -0.0000 0.0000 -0.0000  
Z -0.0000 -0.0000 0.0000 0.0000 0.0000 -0.0000  
AT. 87 N X 0.0000 0.0000 0.0000 0.0000 0.0000 0.0000  
Y 0.0000 -0.0000 -0.0000 0.0000 -0.0000 0.0000  
Z -0.0000 0.0000 -0.0000 -0.0000 -0.0000 -0.0000  
AT. 88 N X 0.0000 -0.0000 0.0000 -0.0000 -0.0000 0.0000  
Y 0.0000 0.0000 -0.0000 -0.0000 0.0000 0.0000  
Z -0.0000 -0.0000 -0.0000 0.0000 0.0000 -0.0000  
AT. 89 N X 0.0000 0.0000 0.0000 0.0000 0.0000 -0.0000  
Y 0.0000 -0.0000 0.0000 0.0000 0.0000 0.0000  
Z -0.0000 0.0000 -0.0000 -0.0000 -0.0000 -0.0000  
AT. 90 N X 0.0000 -0.0000 0.0000 -0.0000 -0.0000 -0.0000

Y 0.0000 0.0000 0.0000 -0.0000 -0.0000 0.0000  
Z -0.0000 -0.0000 -0.0000 0.0000 0.0000 -0.0000  
AT. 91 C X -0.0000 0.0000 0.0000 -0.0000 0.0000 -0.0000  
Y -0.0000 0.0000 -0.0000 -0.0000 0.0000 -0.0000  
Z -0.0000 -0.0000 0.0000 -0.0000 -0.0000 0.0000  
AT. 92 C X -0.0000 -0.0000 0.0000 0.0000 -0.0000 -0.0000  
Y -0.0000 -0.0000 -0.0000 0.0000 -0.0000 -0.0000  
Z -0.0000 0.0000 0.0000 0.0000 0.0000 0.0000  
AT. 93 C X -0.0001 0.0000 0.0001 0.0001 -0.0001 -0.0000  
Y -0.0002 0.0000 0.0002 0.0002 -0.0002 -0.0001  
Z -0.0000 0.0000 0.0001 0.0000 -0.0000 -0.0000  
AT. 94 C X -0.0001 -0.0000 0.0001 -0.0001 0.0001 -0.0000  
Y -0.0002 -0.0000 0.0002 -0.0002 0.0002 -0.0001  
Z -0.0000 -0.0000 0.0001 -0.0000 0.0000 -0.0000  
AT. 95 H X 0.0007 -0.0001 -0.0010 -0.0006 0.0008 0.0004  
Y 0.0018 -0.0002 -0.0026 -0.0018 0.0020 0.0010  
Z 0.0010 -0.0001 -0.0015 -0.0011 0.0012 0.0006  
AT. 96 H X 0.0007 0.0001 -0.0010 0.0006 -0.0008 0.0004  
Y 0.0018 0.0002 -0.0026 0.0018 -0.0020 0.0010  
Z 0.0010 0.0001 -0.0015 0.0011 -0.0012 0.0006  
AT. 97 H X -0.0002 -0.0000 0.0002 0.0002 -0.0002 -0.0001  
Y 0.0001 -0.0000 -0.0002 -0.0001 0.0002 0.0001  
Z -0.0005 0.0000 0.0008 0.0006 -0.0007 -0.0003  
AT. 98 H X -0.0002 0.0000 0.0002 -0.0002 0.0002 -0.0001  
Y 0.0001 0.0000 -0.0002 0.0001 -0.0002 0.0001  
Z -0.0005 -0.0000 0.0008 -0.0006 0.0007 -0.0003  
AT. 99 C X -0.0000 -0.0000 0.0000 0.0000 0.0000 0.0000  
Y -0.0000 0.0000 0.0000 -0.0000 0.0000 0.0000  
Z 0.0000 -0.0000 0.0000 0.0000 -0.0000 0.0000  
AT. 100 C X -0.0000 0.0000 0.0000 -0.0000 -0.0000 0.0000  
Y -0.0000 -0.0000 0.0000 0.0000 -0.0000 0.0000  
Z 0.0000 0.0000 0.0000 -0.0000 0.0000 0.0000

AT.101 C X -0.0000 0.0000 0.0000 -0.0000 0.0000 -0.0000  
Y -0.0000 0.0000 0.0000 -0.0000 -0.0000 -0.0000  
Z -0.0000 0.0000 -0.0000 -0.0000 0.0000 0.0000

AT.102 C X -0.0000 -0.0000 0.0000 0.0000 -0.0000 -0.0000  
Y -0.0000 -0.0000 0.0000 0.0000 0.0000 -0.0000  
Z -0.0000 -0.0000 -0.0000 0.0000 -0.0000 0.0000

AT.103 H X 0.0001 -0.0000 -0.0000 0.0001 -0.0000 0.0000  
Y 0.0002 -0.0001 -0.0000 0.0002 0.0000 0.0000  
Z 0.0000 -0.0000 -0.0000 0.0000 0.0000 0.0000

AT.104 H X 0.0001 0.0000 -0.0000 -0.0001 0.0000 0.0000  
Y 0.0002 0.0001 -0.0000 -0.0002 -0.0000 0.0000  
Z 0.0000 0.0000 -0.0000 -0.0000 -0.0000 0.0000

AT.105 H X -0.0000 0.0000 -0.0000 -0.0001 0.0000 0.0000  
Y -0.0000 0.0000 -0.0000 -0.0000 0.0000 0.0000  
Z 0.0000 -0.0000 0.0001 0.0001 -0.0001 -0.0001

AT.106 H X -0.0000 -0.0000 -0.0000 0.0001 -0.0000 0.0000  
Y -0.0000 -0.0000 -0.0000 0.0000 -0.0000 0.0000  
Z 0.0000 0.0000 0.0001 -0.0001 0.0001 -0.0001

AT.107 C X -0.0000 -0.0000 -0.0000 0.0000 0.0000 0.0000  
Y 0.0000 -0.0001 -0.0001 0.0001 -0.0001 0.0001  
Z -0.0000 0.0000 0.0000 -0.0000 0.0000 -0.0000

AT.108 C X -0.0000 0.0000 -0.0000 -0.0000 -0.0000 0.0000  
Y 0.0000 0.0001 -0.0001 -0.0001 0.0001 0.0001  
Z -0.0000 -0.0000 0.0000 0.0000 -0.0000 -0.0000

AT.109 H X 0.0001 -0.0003 -0.0003 0.0002 -0.0002 0.0001  
Y -0.0003 0.0013 0.0015 -0.0007 0.0008 -0.0007  
Z 0.0002 -0.0008 -0.0009 0.0004 -0.0005 0.0004

AT.110 H X 0.0001 0.0003 -0.0003 -0.0002 0.0002 0.0001  
Y -0.0003 -0.0013 0.0015 0.0007 -0.0008 -0.0007  
Z 0.0002 0.0008 -0.0009 -0.0004 0.0005 0.0004

AT.111 H X -0.0001 0.0004 0.0004 -0.0002 0.0001 -0.0003  
Y -0.0000 0.0001 0.0001 -0.0000 0.0000 -0.0001

Z -0.0001 0.0003 0.0004 -0.0002 0.0002 -0.0003  
AT. 112 H X -0.0001 -0.0004 0.0004 0.0002 -0.0001 -0.0003  
Y -0.0000 -0.0001 0.0001 0.0000 -0.0000 -0.0001  
Z -0.0001 -0.0003 0.0004 0.0002 -0.0002 -0.0003  
AT. 113 C X 0.0000 -0.0000 -0.0000 0.0000 0.0000 0.0000  
Y 0.0000 -0.0000 -0.0000 -0.0000 0.0000 0.0000  
Z -0.0000 0.0000 0.0000 -0.0000 0.0000 -0.0000  
AT. 114 C X 0.0000 0.0000 -0.0000 -0.0000 -0.0000 0.0000  
Y 0.0000 0.0000 -0.0000 0.0000 -0.0000 0.0000  
Z -0.0000 -0.0000 0.0000 0.0000 -0.0000 -0.0000  
AT. 115 C X 0.0006 -0.0000 0.0000 0.0005 0.0001 0.0000  
Y -0.0008 0.0000 -0.0000 -0.0006 -0.0001 -0.0000  
Z -0.0006 0.0000 -0.0000 -0.0005 -0.0001 -0.0000  
AT. 116 C X 0.0006 0.0000 0.0000 -0.0005 -0.0001 0.0000  
Y -0.0008 -0.0000 -0.0000 0.0006 0.0001 -0.0000  
Z -0.0006 -0.0000 -0.0000 0.0005 0.0001 -0.0000  
AT. 117 H X -0.0024 0.0000 -0.0001 -0.0021 -0.0003 -0.0000  
Y -0.0008 0.0000 -0.0000 -0.0007 -0.0001 -0.0000  
Z -0.0025 0.0000 -0.0001 -0.0022 -0.0004 -0.0000  
AT. 118 H X -0.0024 -0.0000 -0.0001 0.0021 0.0003 -0.0000  
Y -0.0008 -0.0000 -0.0000 0.0007 0.0001 -0.0000  
Z -0.0025 -0.0000 -0.0001 0.0022 0.0004 -0.0000  
AT. 119 H X -0.0052 0.0001 -0.0003 -0.0045 -0.0005 -0.0001  
Y 0.0096 -0.0002 0.0005 0.0082 0.0010 0.0002  
Z 0.0098 -0.0002 0.0005 0.0084 0.0011 0.0002  
AT. 120 H X -0.0052 -0.0001 -0.0003 0.0045 0.0005 -0.0001  
Y 0.0096 0.0002 0.0005 -0.0082 -0.0010 0.0002  
Z 0.0098 0.0002 0.0005 -0.0084 -0.0011 0.0002  
AT. 121 C X 0.0001 0.0000 0.0000 0.0001 0.0000 0.0000  
Y 0.0005 0.0000 0.0000 0.0005 0.0001 -0.0000  
Z 0.0003 0.0000 0.0000 0.0003 0.0001 -0.0000  
AT. 122 C X 0.0001 -0.0000 0.0000 -0.0001 -0.0000 0.0000

Y 0.0005 -0.0000 0.0000 -0.0005 -0.0001 -0.0000  
Z 0.0003 -0.0000 0.0000 -0.0003 -0.0001 -0.0000  
AT. 123 H X 0.0009 0.0000 0.0001 0.0010 0.0002 -0.0000  
Y -0.0050 -0.0000 -0.0003 -0.0056 -0.0011 0.0003  
Z -0.0051 -0.0000 -0.0003 -0.0057 -0.0011 0.0002  
AT. 124 H X 0.0009 -0.0000 0.0001 -0.0010 -0.0002 -0.0000  
Y -0.0050 0.0000 -0.0003 0.0056 0.0011 0.0003  
Z -0.0051 0.0000 -0.0003 0.0057 0.0011 0.0002  
AT. 125 H X -0.0024 -0.0001 -0.0001 -0.0026 -0.0005 0.0001  
Y -0.0007 -0.0000 -0.0000 -0.0008 -0.0001 0.0000  
Z 0.0019 0.0000 0.0001 0.0020 0.0004 -0.0001  
AT. 126 H X -0.0024 0.0001 -0.0001 0.0026 0.0005 0.0001  
Y -0.0007 0.0000 -0.0000 0.0008 0.0001 0.0000  
Z 0.0019 -0.0000 0.0001 -0.0020 -0.0004 -0.0001  
AT. 127 C X 0.0001 0.0000 0.0000 0.0001 0.0000 0.0000  
Y -0.0000 0.0000 0.0000 -0.0000 -0.0000 0.0000  
Z 0.0001 0.0000 0.0000 0.0001 0.0000 -0.0000  
AT. 128 C X 0.0001 -0.0000 0.0000 -0.0001 -0.0000 0.0000  
Y -0.0000 -0.0000 0.0000 0.0000 0.0000 0.0000  
Z 0.0001 -0.0000 0.0000 -0.0001 -0.0000 -0.0000  
AT. 129 C X 0.0006 -0.0000 -0.0000 0.0006 0.0001 0.0000  
Y -0.0007 0.0000 0.0000 -0.0007 -0.0001 -0.0000  
Z 0.0003 -0.0000 -0.0000 0.0004 0.0001 0.0000  
AT. 130 C X 0.0006 0.0000 -0.0000 -0.0006 -0.0001 0.0000  
Y -0.0007 -0.0000 0.0000 0.0007 0.0001 -0.0000  
Z 0.0003 0.0000 -0.0000 -0.0004 -0.0001 0.0000  
AT. 131 H X -0.0037 0.0001 0.0002 -0.0038 -0.0007 -0.0001  
Y -0.0015 0.0000 0.0001 -0.0016 -0.0003 -0.0000  
Z 0.0026 -0.0001 -0.0002 0.0027 0.0005 0.0001  
AT. 132 H X -0.0037 -0.0001 0.0002 0.0038 0.0007 -0.0001  
Y -0.0015 -0.0000 0.0001 0.0016 0.0003 -0.0000  
Z 0.0026 0.0001 -0.0002 -0.0027 -0.0005 0.0001

AT. 133 H X -0.0029 0.0001 0.0001 -0.0032 -0.0006 -0.0001  
Y 0.0098 -0.0002 -0.0004 0.0105 0.0020 0.0003  
Z -0.0064 0.0001 0.0003 -0.0068 -0.0013 -0.0002

AT. 134 H X -0.0029 -0.0001 0.0001 0.0032 0.0006 -0.0001  
Y 0.0098 0.0002 -0.0004 -0.0105 -0.0020 0.0003  
Z -0.0064 -0.0001 0.0003 0.0068 0.0013 -0.0002

AT. 135 C X -0.0012 0.0000 0.0000 -0.0014 -0.0004 -0.0001  
Y -0.0000 0.0000 0.0000 -0.0000 -0.0000 -0.0000  
Z 0.0005 -0.0000 -0.0000 0.0006 0.0001 0.0000

AT. 136 C X -0.0012 -0.0000 0.0000 0.0014 0.0004 -0.0001  
Y -0.0000 -0.0000 0.0000 0.0000 0.0000 -0.0000  
Z 0.0005 0.0000 -0.0000 -0.0006 -0.0001 0.0000

AT. 137 H X -0.0022 0.0001 0.0001 -0.0026 -0.0007 -0.0001  
Y 0.0085 -0.0004 -0.0004 0.0102 0.0027 0.0005  
Z -0.0050 0.0002 0.0002 -0.0060 -0.0016 -0.0003

AT. 138 H X -0.0022 -0.0001 0.0001 0.0026 0.0007 -0.0001  
Y 0.0085 0.0004 -0.0004 -0.0102 -0.0027 0.0005  
Z -0.0050 -0.0002 0.0002 0.0060 0.0016 -0.0003

AT. 139 H X 0.0120 -0.0005 -0.0005 0.0138 0.0037 0.0006  
Y 0.0027 -0.0001 -0.0001 0.0031 0.0008 0.0001  
Z 0.0097 -0.0004 -0.0004 0.0112 0.0030 0.0005

AT. 140 H X 0.0120 0.0005 -0.0005 -0.0138 -0.0037 0.0006  
Y 0.0027 0.0001 -0.0001 -0.0031 -0.0008 0.0001  
Z 0.0097 0.0004 -0.0004 -0.0112 -0.0030 0.0005

AT. 141 H X 0.0041 -0.0001 -0.0001 0.0048 0.0012 0.0002  
Y -0.0110 0.0004 0.0002 -0.0130 -0.0032 -0.0005  
Z -0.0100 0.0004 0.0002 -0.0118 -0.0029 -0.0005

AT. 142 H X 0.0041 0.0001 -0.0001 -0.0048 -0.0012 0.0002  
Y -0.0110 -0.0004 0.0002 0.0130 0.0032 -0.0005  
Z -0.0100 -0.0004 0.0002 0.0118 0.0029 -0.0005

AT. 143 C X -0.0063 -0.0001 -0.0003 -0.0064 -0.0011 0.0000  
Y -0.0021 -0.0000 -0.0001 -0.0021 -0.0004 -0.0000

Z -0.0021 -0.0000 -0.0001 -0.0017 -0.0003 0.0000  
AT. 144 C X -0.0063 0.0001 -0.0003 0.0064 0.0011 0.0000  
Y -0.0021 0.0000 -0.0001 0.0021 0.0004 -0.0000  
Z -0.0021 0.0000 -0.0001 0.0017 0.0003 0.0000  
AT. 145 H X -0.0144 -0.0003 -0.0006 -0.0137 -0.0023 0.0000  
Y 0.0487 0.0010 0.0019 0.0458 0.0078 -0.0000  
Z 0.0462 0.0009 0.0018 0.0435 0.0074 -0.0000  
AT. 146 H X -0.0144 0.0003 -0.0006 0.0137 0.0023 0.0000  
Y 0.0487 -0.0010 0.0019 -0.0458 -0.0078 -0.0000  
Z 0.0462 -0.0009 0.0018 -0.0435 -0.0074 -0.0000  
AT. 147 H X 0.0740 0.0015 0.0030 0.0748 0.0128 -0.0000  
Y 0.0281 0.0006 0.0011 0.0284 0.0049 -0.0000  
Z -0.0530 -0.0011 -0.0021 -0.0534 -0.0091 0.0000  
AT. 148 H X 0.0740 -0.0015 0.0030 -0.0748 -0.0128 -0.0000  
Y 0.0281 -0.0006 0.0011 -0.0284 -0.0049 -0.0000  
Z -0.0530 0.0011 -0.0021 0.0534 0.0091 0.0000  
AT. 149 H X 0.0144 0.0003 0.0006 0.0134 0.0023 -0.0000  
Y -0.0529 -0.0010 -0.0021 -0.0496 -0.0085 0.0001  
Z 0.0303 0.0006 0.0012 0.0283 0.0049 -0.0000  
AT. 150 H X 0.0144 -0.0003 0.0006 -0.0134 -0.0023 -0.0000  
Y -0.0529 0.0010 -0.0021 0.0496 0.0085 0.0001  
Z 0.0303 -0.0006 0.0012 -0.0283 -0.0049 -0.0000  
AT. 151 C X 0.0001 -0.0000 0.0000 0.0002 0.0000 0.0000  
Y -0.0001 0.0000 0.0000 -0.0003 -0.0000 -0.0000  
Z -0.0004 0.0000 -0.0000 -0.0007 -0.0001 -0.0000  
AT. 152 C X 0.0001 0.0000 0.0000 -0.0002 -0.0000 0.0000  
Y -0.0001 -0.0000 0.0000 0.0003 0.0000 -0.0000  
Z -0.0004 -0.0000 -0.0000 0.0007 0.0001 -0.0000  
AT. 153 H X 0.0006 -0.0000 0.0001 0.0009 0.0001 -0.0000  
Y -0.0025 0.0001 -0.0003 -0.0038 -0.0005 0.0000  
Z 0.0015 -0.0000 0.0002 0.0021 0.0003 -0.0000  
AT. 154 H X 0.0006 0.0000 0.0001 -0.0009 -0.0001 -0.0000



Y -0.0025 -0.0001 -0.0003 0.0038 0.0005 0.0000  
Z 0.0015 0.0000 0.0002 -0.0021 -0.0003 -0.0000  
AT. 155 H X -0.0014 0.0001 -0.0001 -0.0025 -0.0004 -0.0000  
Y 0.0037 -0.0002 0.0002 0.0070 0.0010 0.0001  
Z 0.0035 -0.0002 0.0002 0.0064 0.0009 0.0001  
AT. 156 H X -0.0014 -0.0001 -0.0001 0.0025 0.0004 -0.0000  
Y 0.0037 0.0002 0.0002 -0.0070 -0.0010 0.0001  
Z 0.0035 0.0002 0.0002 -0.0064 -0.0009 0.0001  
AT. 157 O X 0.0000 -0.0000 -0.0000 0.0000 -0.0000 0.0000  
Y 0.0000 0.0000 0.0000 -0.0000 0.0000 -0.0000  
Z 0.0000 0.0000 0.0000 -0.0000 0.0000 -0.0000  
AT. 158 O X 0.0000 0.0000 -0.0000 -0.0000 0.0000 0.0000  
Y 0.0000 -0.0000 0.0000 0.0000 -0.0000 -0.0000  
Z 0.0000 -0.0000 0.0000 0.0000 -0.0000 -0.0000  
AT. 159 O X -0.0000 0.0000 -0.0000 -0.0000 -0.0000 -0.0000  
Y -0.0000 -0.0000 -0.0000 0.0000 0.0000 0.0000  
Z 0.0000 0.0000 0.0000 -0.0000 -0.0000 -0.0000  
AT. 160 O X -0.0000 -0.0000 -0.0000 0.0000 0.0000 -0.0000  
Y -0.0000 0.0000 -0.0000 -0.0000 -0.0000 0.0000  
Z 0.0000 -0.0000 0.0000 0.0000 0.0000 -0.0000  
AT. 161 H X 0.0000 0.0000 0.0000 -0.0001 0.0000 -0.0000  
Y -0.0001 -0.0001 -0.0001 0.0002 -0.0003 0.0002  
Z -0.0000 -0.0000 -0.0000 -0.0004 0.0001 -0.0000  
AT. 162 H X 0.0000 -0.0000 0.0000 0.0001 -0.0000 -0.0000  
Y -0.0001 0.0001 -0.0001 -0.0002 0.0003 0.0002  
Z -0.0000 0.0000 -0.0000 0.0004 -0.0001 -0.0000  
AT. 163 H X -0.0001 -0.0000 -0.0000 0.0003 0.0000 0.0001  
Y 0.0000 0.0000 0.0000 -0.0001 0.0000 -0.0000  
Z -0.0000 0.0000 0.0000 0.0005 0.0000 0.0002  
AT. 164 H X -0.0001 0.0000 -0.0000 -0.0003 -0.0000 0.0001  
Y 0.0000 -0.0000 0.0000 0.0001 -0.0000 -0.0000  
Z -0.0000 -0.0000 0.0000 -0.0005 -0.0000 0.0002

AT.165 O X 0.0000 0.0000 0.0000 0.0000 0.0000 -0.0000  
Y 0.0000 -0.0000 -0.0000 0.0000 -0.0000 0.0000  
Z 0.0000 0.0000 -0.0000 0.0000 -0.0000 -0.0000

AT.166 O X 0.0000 -0.0000 0.0000 -0.0000 -0.0000 -0.0000  
Y 0.0000 0.0000 -0.0000 -0.0000 0.0000 0.0000  
Z 0.0000 -0.0000 -0.0000 -0.0000 0.0000 -0.0000

AT.167 H X -0.0001 -0.0000 -0.0000 -0.0000 0.0000 -0.0000  
Y -0.0000 0.0001 0.0001 -0.0000 0.0001 -0.0001  
Z -0.0000 -0.0001 -0.0001 0.0000 -0.0000 -0.0000

AT.168 H X -0.0001 0.0000 -0.0000 0.0000 -0.0000 -0.0000  
Y -0.0000 -0.0001 0.0001 0.0000 -0.0001 -0.0001  
Z -0.0000 0.0001 -0.0001 -0.0000 0.0000 -0.0000

AT.169 O X 0.0000 -0.0000 -0.0000 -0.0000 0.0000 -0.0000  
Y -0.0000 0.0000 0.0000 -0.0000 0.0000 0.0000  
Z 0.0000 -0.0000 -0.0000 -0.0000 0.0000 0.0000

AT.170 O X 0.0000 0.0000 -0.0000 0.0000 -0.0000 -0.0000  
Y -0.0000 -0.0000 0.0000 0.0000 -0.0000 0.0000  
Z 0.0000 0.0000 -0.0000 0.0000 -0.0000 0.0000

AT.171 H X -0.0000 0.0000 0.0001 0.0000 0.0000 -0.0000  
Y 0.0001 -0.0001 -0.0001 -0.0000 -0.0001 0.0001  
Z -0.0000 0.0001 0.0000 -0.0000 0.0000 0.0001

AT.172 H X -0.0000 -0.0000 0.0001 -0.0000 -0.0000 -0.0000  
Y 0.0001 0.0001 -0.0001 0.0000 0.0001 0.0001  
Z -0.0000 -0.0001 0.0000 0.0000 -0.0000 0.0001

FREQ(CM\*\*-1) 3074.05 3077.25 3077.41 3078.55 3080.50 3080.54

AT. 1 I X -0.0000 0.0000 0.0000 -0.0000 -0.0000 -0.0000  
Y 0.0000 -0.0000 -0.0000 0.0000 -0.0000 -0.0000  
Z 0.0000 0.0000 -0.0000 0.0000 0.0000 0.0000

AT. 2 I X -0.0000 -0.0000 0.0000 0.0000 -0.0000 0.0000  
Y 0.0000 0.0000 -0.0000 -0.0000 -0.0000 0.0000

Z 0.0000 -0.0000 -0.0000 -0.0000 0.0000 -0.0000  
AT. 3 I X -0.0000 0.0000 0.0000 -0.0000 -0.0000 -0.0000  
Y 0.0000 -0.0000 0.0000 0.0000 0.0000 0.0000  
Z 0.0000 -0.0000 -0.0000 0.0000 0.0000 0.0000  
AT. 4 I X -0.0000 -0.0000 0.0000 0.0000 -0.0000 0.0000  
Y 0.0000 0.0000 0.0000 -0.0000 0.0000 -0.0000  
Z 0.0000 0.0000 -0.0000 -0.0000 0.0000 -0.0000  
AT. 5 O X 0.0000 0.0000 0.0000 0.0000 -0.0000 -0.0000  
Y -0.0000 -0.0000 -0.0000 -0.0000 0.0000 0.0000  
Z 0.0000 -0.0000 -0.0000 -0.0000 0.0000 0.0000  
AT. 6 O X 0.0000 -0.0000 0.0000 -0.0000 -0.0000 0.0000  
Y -0.0000 0.0000 -0.0000 0.0000 0.0000 -0.0000  
Z 0.0000 0.0000 -0.0000 0.0000 0.0000 -0.0000  
AT. 7 O X -0.0000 -0.0000 0.0000 -0.0000 -0.0000 -0.0000  
Y 0.0000 0.0000 -0.0000 0.0000 0.0000 0.0000  
Z 0.0000 -0.0000 0.0000 -0.0000 -0.0000 -0.0000  
AT. 8 O X -0.0000 0.0000 0.0000 0.0000 -0.0000 0.0000  
Y 0.0000 -0.0000 -0.0000 -0.0000 0.0000 -0.0000  
Z 0.0000 0.0000 0.0000 0.0000 -0.0000 0.0000  
AT. 9 N X -0.0000 -0.0000 -0.0000 -0.0000 0.0001 0.0001  
Y -0.0000 -0.0000 -0.0000 -0.0000 -0.0000 0.0000  
Z -0.0000 -0.0000 -0.0000 -0.0001 0.0000 0.0001  
AT. 10 N X -0.0000 0.0000 -0.0000 0.0000 0.0001 -0.0001  
Y -0.0000 0.0000 -0.0000 0.0000 -0.0000 -0.0000  
Z -0.0000 0.0000 -0.0000 0.0001 0.0000 -0.0001  
AT. 11 N X -0.0000 0.0000 -0.0000 -0.0000 -0.0001 -0.0001  
Y 0.0000 0.0000 -0.0000 0.0001 0.0002 0.0002  
Z -0.0000 -0.0000 0.0000 -0.0001 -0.0001 -0.0001  
AT. 12 N X -0.0000 -0.0000 -0.0000 0.0000 -0.0001 0.0001  
Y 0.0000 -0.0000 -0.0000 -0.0001 0.0002 -0.0002  
Z -0.0000 0.0000 0.0000 0.0001 -0.0001 0.0001  
AT. 13 C X 0.0000 -0.0000 -0.0000 0.0000 -0.0000 -0.0000

Y 0.0000 0.0000 0.0000 0.0000 -0.0000 -0.0000  
Z 0.0000 0.0000 0.0000 0.0001 -0.0001 -0.0001  
AT. 14 C X 0.0000 0.0000 -0.0000 -0.0000 -0.0000 0.0000  
Y 0.0000 -0.0000 0.0000 -0.0000 -0.0000 0.0000  
Z 0.0000 -0.0000 0.0000 -0.0001 -0.0001 0.0001  
AT. 15 C X -0.0000 -0.0000 -0.0000 -0.0000 0.0000 0.0000  
Y 0.0000 -0.0000 0.0000 0.0001 -0.0000 -0.0000  
Z 0.0000 0.0000 -0.0000 0.0000 -0.0000 -0.0000  
AT. 16 C X -0.0000 0.0000 -0.0000 0.0000 0.0000 -0.0000  
Y 0.0000 0.0000 0.0000 -0.0001 -0.0000 0.0000  
Z 0.0000 -0.0000 -0.0000 -0.0000 -0.0000 0.0000  
AT. 17 H X 0.0001 -0.0000 0.0000 0.0002 -0.0001 -0.0001  
Y -0.0003 0.0002 -0.0001 -0.0007 0.0003 0.0005  
Z -0.0002 0.0001 -0.0000 -0.0004 0.0002 0.0003  
AT. 18 H X 0.0001 0.0000 0.0000 -0.0002 -0.0001 0.0001  
Y -0.0003 -0.0002 -0.0001 0.0007 0.0003 -0.0005  
Z -0.0002 -0.0001 -0.0000 0.0004 0.0002 -0.0003  
AT. 19 H X -0.0001 0.0002 -0.0000 -0.0001 0.0001 0.0000  
Y -0.0000 0.0003 -0.0000 -0.0000 0.0000 -0.0000  
Z 0.0002 -0.0007 0.0001 0.0002 -0.0001 -0.0000  
AT. 20 H X -0.0001 -0.0002 -0.0000 0.0001 0.0001 -0.0000  
Y -0.0000 -0.0003 -0.0000 0.0000 0.0000 0.0000  
Z 0.0002 0.0007 0.0001 -0.0002 -0.0001 0.0000  
AT. 21 C X -0.0000 0.0000 -0.0000 -0.0000 -0.0000 -0.0000  
Y -0.0000 -0.0000 0.0000 -0.0001 -0.0001 -0.0001  
Z 0.0000 0.0000 -0.0000 0.0001 0.0002 0.0001  
AT. 22 C X -0.0000 -0.0000 -0.0000 0.0000 -0.0000 0.0000  
Y -0.0000 0.0000 0.0000 0.0001 -0.0001 0.0001  
Z 0.0000 -0.0000 -0.0000 -0.0001 0.0002 -0.0001  
AT. 23 C X 0.0000 0.0000 -0.0000 0.0000 0.0000 0.0000  
Y -0.0000 0.0000 0.0000 -0.0001 -0.0002 -0.0002  
Z -0.0000 0.0000 -0.0000 -0.0000 -0.0001 -0.0001

AT. 24 C X 0.0000 -0.0000 -0.0000 -0.0000 0.0000 -0.0000  
Y -0.0000 -0.0000 0.0000 0.0001 -0.0002 0.0002  
Z -0.0000 -0.0000 -0.0000 0.0000 -0.0001 0.0001

AT. 25 H X -0.0001 0.0001 0.0000 -0.0001 -0.0002 -0.0002  
Y 0.0005 -0.0003 0.0001 0.0009 0.0019 0.0019  
Z 0.0001 -0.0000 0.0000 0.0002 0.0004 0.0004

AT. 26 H X -0.0001 -0.0001 0.0000 0.0001 -0.0002 0.0002  
Y 0.0005 0.0003 0.0001 -0.0009 0.0019 -0.0019  
Z 0.0001 0.0000 0.0000 -0.0002 0.0004 -0.0004

AT. 27 H X 0.0000 -0.0001 0.0000 0.0001 0.0002 0.0002  
Y -0.0001 0.0002 -0.0001 -0.0002 -0.0003 -0.0003  
Z 0.0001 -0.0004 0.0002 0.0003 0.0005 0.0006

AT. 28 H X 0.0000 0.0001 0.0000 -0.0001 0.0002 -0.0002  
Y -0.0001 -0.0002 -0.0001 0.0002 -0.0003 0.0003  
Z 0.0001 0.0004 0.0002 -0.0003 0.0005 -0.0006

AT. 29 C X 0.0003 0.0001 0.0001 0.0003 -0.0007 -0.0008  
Y 0.0016 0.0004 0.0003 0.0015 -0.0037 -0.0041  
Z -0.0006 -0.0001 -0.0001 -0.0005 0.0012 0.0014

AT. 30 C X 0.0003 -0.0001 0.0001 -0.0003 -0.0007 0.0008  
Y 0.0016 -0.0004 0.0003 -0.0015 -0.0037 0.0041  
Z -0.0006 0.0001 -0.0001 0.0005 0.0012 -0.0014

AT. 31 H X -0.0074 -0.0018 -0.0016 -0.0067 0.0168 0.0187  
Y -0.0174 -0.0043 -0.0036 -0.0160 0.0391 0.0436  
Z 0.0120 0.0029 0.0025 0.0109 -0.0266 -0.0296

AT. 32 H X -0.0074 0.0018 -0.0016 0.0067 0.0168 -0.0187  
Y -0.0174 0.0043 -0.0036 0.0160 0.0391 -0.0436  
Z 0.0120 -0.0029 0.0025 -0.0109 -0.0266 0.0296

AT. 33 H X 0.0038 0.0010 0.0009 0.0032 -0.0083 -0.0093  
Y -0.0020 -0.0006 -0.0005 -0.0017 0.0046 0.0051  
Z -0.0053 -0.0015 -0.0012 -0.0046 0.0119 0.0133

AT. 34 H X 0.0038 -0.0010 0.0009 -0.0032 -0.0083 0.0093  
Y -0.0020 0.0006 -0.0005 0.0017 0.0046 -0.0051

Z -0.0053 0.0015 -0.0012 0.0046 0.0119 -0.0133  
AT. 35 C X 0.0000 -0.0000 0.0000 0.0000 -0.0000 -0.0000  
Y -0.0001 -0.0000 0.0000 -0.0001 -0.0001 -0.0001  
Z -0.0001 -0.0000 -0.0000 -0.0001 -0.0001 -0.0000  
AT. 36 C X 0.0000 0.0000 0.0000 -0.0000 -0.0000 0.0000  
Y -0.0001 0.0000 0.0000 0.0001 -0.0001 0.0001  
Z -0.0001 0.0000 -0.0000 0.0001 -0.0001 0.0000  
AT. 37 C X -0.0015 0.0000 0.0002 -0.0032 -0.0073 -0.0069  
Y -0.0007 0.0000 0.0001 -0.0016 -0.0037 -0.0034  
Z -0.0008 0.0000 0.0001 -0.0016 -0.0037 -0.0034  
AT. 38 C X -0.0015 -0.0000 0.0002 0.0032 -0.0073 0.0069  
Y -0.0007 -0.0000 0.0001 0.0016 -0.0037 0.0034  
Z -0.0008 -0.0000 0.0001 0.0016 -0.0037 0.0034  
AT. 39 H X 0.0038 -0.0000 -0.0004 0.0074 0.0171 0.0159  
Y -0.0030 0.0000 0.0003 -0.0056 -0.0127 -0.0118  
Z -0.0061 0.0001 0.0006 -0.0119 -0.0273 -0.0254  
AT. 40 H X 0.0038 0.0000 -0.0004 -0.0074 0.0171 -0.0159  
Y -0.0030 -0.0000 0.0003 0.0056 -0.0127 0.0118  
Z -0.0061 -0.0001 0.0006 0.0119 -0.0273 0.0254  
AT. 41 H X 0.0149 -0.0004 -0.0016 0.0307 0.0715 0.0667  
Y 0.0114 -0.0003 -0.0012 0.0238 0.0556 0.0519  
Z 0.0151 -0.0004 -0.0016 0.0312 0.0725 0.0676  
AT. 42 H X 0.0149 0.0004 -0.0016 -0.0307 0.0715 -0.0667  
Y 0.0114 0.0003 -0.0012 -0.0238 0.0556 -0.0519  
Z 0.0151 0.0004 -0.0016 -0.0312 0.0725 -0.0676  
AT. 43 C X -0.0001 -0.0000 0.0000 -0.0002 0.0003 0.0004  
Y -0.0002 -0.0001 0.0001 -0.0007 0.0012 0.0013  
Z -0.0002 -0.0000 0.0000 -0.0005 0.0006 0.0007  
AT. 44 C X -0.0001 0.0000 0.0000 0.0002 0.0003 -0.0004  
Y -0.0002 0.0001 0.0001 0.0007 0.0012 -0.0013  
Z -0.0002 0.0000 0.0000 0.0005 0.0006 -0.0007  
AT. 45 H X 0.0013 0.0005 -0.0006 0.0046 -0.0084 -0.0093

Y 0.0018 0.0006 -0.0008 0.0065 -0.0108 -0.0120  
Z 0.0021 0.0007 -0.0009 0.0071 -0.0114 -0.0127  
AT. 46 H X 0.0013 -0.0005 -0.0006 -0.0046 -0.0084 0.0093  
Y 0.0018 -0.0006 -0.0008 -0.0065 -0.0108 0.0120  
Z 0.0021 -0.0007 -0.0009 -0.0071 -0.0114 0.0127  
AT. 47 H X -0.0005 -0.0003 0.0004 -0.0028 0.0047 0.0052  
Y 0.0003 0.0002 -0.0003 0.0018 -0.0031 -0.0035  
Z -0.0004 -0.0002 0.0003 -0.0019 0.0034 0.0037  
AT. 48 H X -0.0005 0.0003 0.0004 0.0028 0.0047 -0.0052  
Y 0.0003 -0.0002 -0.0003 -0.0018 -0.0031 0.0035  
Z -0.0004 0.0002 0.0003 0.0019 0.0034 -0.0037  
AT. 49 C X -0.0001 -0.0000 0.0000 -0.0001 0.0000 0.0000  
Y 0.0001 0.0000 -0.0000 0.0000 0.0000 -0.0000  
Z 0.0000 0.0000 0.0000 -0.0001 0.0000 0.0000  
AT. 50 C X -0.0001 0.0000 0.0000 0.0001 0.0000 -0.0000  
Y 0.0001 -0.0000 -0.0000 -0.0000 0.0000 0.0000  
Z 0.0000 -0.0000 0.0000 0.0001 0.0000 -0.0000  
AT. 51 C X 0.0008 0.0001 0.0000 0.0023 -0.0002 -0.0009  
Y 0.0008 0.0001 0.0001 0.0023 -0.0002 -0.0009  
Z -0.0007 -0.0000 -0.0000 -0.0018 0.0001 0.0007  
AT. 52 C X 0.0008 -0.0001 0.0000 -0.0023 -0.0002 0.0009  
Y 0.0008 -0.0001 0.0001 -0.0023 -0.0002 0.0009  
Z -0.0007 0.0000 -0.0000 0.0018 0.0001 -0.0007  
AT. 53 H X -0.0034 -0.0002 -0.0001 -0.0093 0.0010 0.0038  
Y 0.0026 0.0002 0.0001 0.0071 -0.0007 -0.0028  
Z -0.0021 -0.0001 -0.0001 -0.0057 0.0005 0.0022  
AT. 54 H X -0.0034 0.0002 -0.0001 0.0093 0.0010 -0.0038  
Y 0.0026 -0.0002 0.0001 -0.0071 -0.0007 0.0028  
Z -0.0021 0.0001 -0.0001 0.0057 0.0005 -0.0022  
AT. 55 H X -0.0067 -0.0005 -0.0004 -0.0181 0.0016 0.0071  
Y -0.0123 -0.0008 -0.0008 -0.0336 0.0027 0.0128  
Z 0.0099 0.0007 0.0006 0.0265 -0.0023 -0.0103

AT. 56 H X -0.0067 0.0005 -0.0004 0.0181 0.0016 -0.0071  
Y -0.0123 0.0008 -0.0008 0.0336 0.0027 -0.0128  
Z 0.0099 -0.0007 0.0006 -0.0265 -0.0023 0.0103

AT. 57 C X 0.0014 0.0000 0.0001 0.0001 -0.0004 -0.0004  
Y -0.0010 -0.0000 -0.0001 0.0001 0.0008 0.0007  
Z 0.0000 0.0000 0.0000 -0.0002 0.0000 0.0001

AT. 58 C X 0.0014 -0.0000 0.0001 -0.0001 -0.0004 0.0004  
Y -0.0010 0.0000 -0.0001 -0.0001 0.0008 -0.0007  
Z 0.0000 -0.0000 0.0000 0.0002 0.0000 -0.0001

AT. 59 H X 0.0060 0.0001 0.0005 -0.0006 -0.0037 -0.0034  
Y 0.0118 0.0002 0.0009 -0.0011 -0.0075 -0.0068  
Z -0.0079 -0.0001 -0.0006 0.0009 0.0052 0.0047

AT. 60 H X 0.0060 -0.0001 0.0005 0.0006 -0.0037 0.0034  
Y 0.0118 -0.0002 0.0009 0.0011 -0.0075 0.0068  
Z -0.0079 0.0001 -0.0006 -0.0009 0.0052 -0.0047

AT. 61 H X -0.0134 -0.0001 -0.0008 -0.0009 0.0066 0.0065  
Y 0.0084 0.0000 0.0005 0.0006 -0.0042 -0.0041  
Z 0.0171 0.0001 0.0011 0.0008 -0.0085 -0.0083

AT. 62 H X -0.0134 0.0001 -0.0008 0.0009 0.0066 -0.0065  
Y 0.0084 -0.0000 0.0005 -0.0006 -0.0042 0.0041  
Z 0.0171 -0.0001 0.0011 -0.0008 -0.0085 0.0083

AT. 63 H X -0.0088 -0.0002 -0.0007 0.0002 0.0027 0.0024  
Y -0.0083 -0.0001 -0.0006 0.0002 0.0024 0.0021  
Z -0.0094 -0.0002 -0.0007 0.0003 0.0029 0.0025

AT. 64 H X -0.0088 0.0002 -0.0007 -0.0002 0.0027 -0.0024  
Y -0.0083 0.0001 -0.0006 -0.0002 0.0024 -0.0021  
Z -0.0094 0.0002 -0.0007 -0.0003 0.0029 -0.0025

AT. 65 C X 0.0018 -0.0000 0.0000 -0.0015 -0.0001 0.0003  
Y -0.0008 0.0000 -0.0000 0.0007 0.0000 -0.0002  
Z -0.0014 0.0000 -0.0000 0.0010 -0.0001 -0.0003

AT. 66 C X 0.0018 0.0000 0.0000 0.0015 -0.0001 -0.0003  
Y -0.0008 -0.0000 -0.0000 -0.0007 0.0000 0.0002



Z -0.0014 -0.0000 -0.0000 -0.0010 -0.0001 0.0003  
AT. 67 H X 0.0127 -0.0001 0.0002 -0.0092 0.0005 0.0027  
Y 0.0132 -0.0001 0.0002 -0.0097 0.0006 0.0028  
Z 0.0143 -0.0001 0.0002 -0.0104 0.0005 0.0029  
AT. 68 H X 0.0127 0.0001 0.0002 0.0092 0.0005 -0.0027  
Y 0.0132 0.0001 0.0002 0.0097 0.0006 -0.0028  
Z 0.0143 0.0001 0.0002 0.0104 0.0005 -0.0029  
AT. 69 H X -0.0227 0.0004 -0.0004 0.0185 0.0009 -0.0042  
Y 0.0175 -0.0003 0.0003 -0.0141 -0.0007 0.0032  
Z -0.0122 0.0002 -0.0002 0.0096 0.0005 -0.0021  
AT. 70 H X -0.0227 -0.0004 -0.0004 -0.0185 0.0009 0.0042  
Y 0.0175 0.0003 0.0003 0.0141 -0.0007 -0.0032  
Z -0.0122 -0.0002 -0.0002 -0.0096 0.0005 0.0021  
AT. 71 H X -0.0108 0.0001 -0.0002 0.0084 -0.0000 -0.0022  
Y -0.0209 0.0002 -0.0005 0.0156 0.0001 -0.0041  
Z 0.0143 -0.0002 0.0003 -0.0108 -0.0000 0.0028  
AT. 72 H X -0.0108 -0.0001 -0.0002 -0.0084 -0.0000 0.0022  
Y -0.0209 -0.0002 -0.0005 -0.0156 0.0001 0.0041  
Z 0.0143 0.0002 0.0003 0.0108 -0.0000 -0.0028  
AT. 73 C X 0.0003 0.0000 0.0000 0.0001 0.0002 0.0002  
Y -0.0024 -0.0002 0.0000 -0.0024 0.0004 0.0009  
Z 0.0078 0.0006 0.0000 0.0070 -0.0007 -0.0019  
AT. 74 C X 0.0003 -0.0000 0.0000 -0.0001 0.0002 -0.0002  
Y -0.0024 0.0002 0.0000 0.0024 0.0004 -0.0009  
Z 0.0078 -0.0006 0.0000 -0.0070 -0.0007 0.0019  
AT. 75 H X 0.0369 0.0032 0.0000 0.0343 -0.0038 -0.0101  
Y 0.0687 0.0059 0.0000 0.0637 -0.0072 -0.0190  
Z -0.0486 -0.0042 -0.0000 -0.0448 0.0051 0.0134  
AT. 76 H X 0.0369 -0.0032 0.0000 -0.0343 -0.0038 0.0101  
Y 0.0687 -0.0059 0.0000 -0.0637 -0.0072 0.0190  
Z -0.0486 0.0042 -0.0000 0.0448 0.0051 -0.0134  
AT. 77 H X -0.0404 -0.0033 -0.0001 -0.0357 0.0023 0.0085

Y -0.0411 -0.0033 -0.0001 -0.0363 0.0026 0.0089  
Z -0.0433 -0.0035 -0.0001 -0.0379 0.0027 0.0092  
AT. 78 H X -0.0404 0.0033 -0.0001 0.0357 0.0023 -0.0085  
Y -0.0411 0.0033 -0.0001 0.0363 0.0026 -0.0089  
Z -0.0433 0.0035 -0.0001 0.0379 0.0027 -0.0092  
AT. 79 I X 0.0000 0.0000 -0.0000 0.0000 0.0000 -0.0000  
Y -0.0000 0.0000 -0.0000 -0.0000 -0.0000 -0.0000  
Z -0.0000 -0.0000 -0.0000 -0.0000 0.0000 0.0000  
AT. 80 I X 0.0000 -0.0000 -0.0000 -0.0000 0.0000 0.0000  
Y -0.0000 -0.0000 -0.0000 0.0000 -0.0000 0.0000  
Z -0.0000 0.0000 -0.0000 0.0000 0.0000 -0.0000  
AT. 81 I X -0.0000 -0.0000 0.0000 0.0000 -0.0000 -0.0000  
Y -0.0000 -0.0000 -0.0000 0.0000 -0.0000 -0.0000  
Z 0.0000 -0.0000 -0.0000 -0.0000 -0.0000 0.0000  
AT. 82 I X -0.0000 0.0000 0.0000 -0.0000 -0.0000 0.0000  
Y -0.0000 0.0000 -0.0000 -0.0000 -0.0000 0.0000  
Z 0.0000 0.0000 -0.0000 0.0000 -0.0000 -0.0000  
AT. 83 O X -0.0000 0.0000 0.0000 0.0000 -0.0000 0.0000  
Y -0.0000 0.0000 0.0000 0.0000 -0.0000 0.0000  
Z -0.0000 0.0000 0.0000 0.0000 0.0000 0.0000  
AT. 84 O X -0.0000 -0.0000 0.0000 -0.0000 -0.0000 -0.0000  
Y -0.0000 -0.0000 0.0000 -0.0000 -0.0000 -0.0000  
Z -0.0000 -0.0000 0.0000 -0.0000 0.0000 -0.0000  
AT. 85 O X -0.0000 -0.0000 -0.0000 -0.0000 -0.0000 0.0000  
Y -0.0000 -0.0000 -0.0000 -0.0000 -0.0000 0.0000  
Z 0.0000 0.0000 0.0000 0.0000 0.0000 -0.0000  
AT. 86 O X -0.0000 0.0000 -0.0000 0.0000 -0.0000 -0.0000  
Y -0.0000 0.0000 -0.0000 0.0000 -0.0000 -0.0000  
Z 0.0000 -0.0000 0.0000 -0.0000 0.0000 0.0000  
AT. 87 N X -0.0000 -0.0000 -0.0000 0.0000 0.0000 0.0000  
Y -0.0000 0.0000 -0.0000 0.0000 0.0000 -0.0000  
Z -0.0000 0.0000 0.0000 -0.0000 0.0000 0.0000

AT. 88 N X -0.0000 0.0000 -0.0000 -0.0000 0.0000 -0.0000  
Y -0.0000 -0.0000 -0.0000 -0.0000 0.0000 0.0000  
Z -0.0000 -0.0000 0.0000 0.0000 0.0000 -0.0000

AT. 89 N X -0.0000 -0.0000 -0.0000 0.0000 -0.0000 -0.0000  
Y -0.0000 -0.0000 -0.0000 0.0000 -0.0000 -0.0000  
Z 0.0000 0.0000 0.0000 -0.0000 0.0000 0.0000

AT. 90 N X -0.0000 0.0000 -0.0000 -0.0000 -0.0000 0.0000  
Y -0.0000 0.0000 -0.0000 -0.0000 -0.0000 0.0000  
Z 0.0000 -0.0000 0.0000 0.0000 0.0000 -0.0000

AT. 91 C X 0.0000 0.0000 -0.0000 -0.0000 -0.0000 -0.0000  
Y 0.0000 0.0000 0.0000 -0.0000 -0.0000 -0.0000  
Z 0.0000 -0.0000 -0.0000 -0.0000 -0.0000 -0.0000

AT. 92 C X 0.0000 -0.0000 -0.0000 0.0000 -0.0000 0.0000  
Y 0.0000 -0.0000 0.0000 0.0000 -0.0000 0.0000  
Z 0.0000 0.0000 -0.0000 0.0000 -0.0000 0.0000

AT. 93 C X -0.0000 -0.0002 -0.0001 -0.0000 0.0000 0.0001  
Y -0.0000 -0.0004 -0.0003 -0.0000 0.0001 0.0003  
Z 0.0000 -0.0001 -0.0001 -0.0000 0.0000 0.0000

AT. 94 C X -0.0000 0.0002 -0.0001 0.0000 0.0000 -0.0001  
Y -0.0000 0.0004 -0.0003 0.0000 0.0001 -0.0003  
Z 0.0000 0.0001 -0.0001 0.0000 0.0000 -0.0000

AT. 95 H X 0.0000 0.0017 0.0013 0.0001 -0.0004 -0.0012  
Y 0.0001 0.0045 0.0034 0.0002 -0.0011 -0.0029  
Z 0.0001 0.0027 0.0020 0.0001 -0.0007 -0.0017

AT. 96 H X 0.0000 -0.0017 0.0013 -0.0001 -0.0004 0.0012  
Y 0.0001 -0.0045 0.0034 -0.0002 -0.0011 0.0029  
Z 0.0001 -0.0027 0.0020 -0.0001 -0.0007 0.0017

AT. 97 H X -0.0000 -0.0005 -0.0003 -0.0000 0.0001 0.0003  
Y 0.0000 0.0003 0.0002 0.0000 -0.0001 -0.0002  
Z -0.0001 -0.0016 -0.0010 -0.0001 0.0004 0.0011

AT. 98 H X -0.0000 0.0005 -0.0003 0.0000 0.0001 -0.0003  
Y 0.0000 -0.0003 0.0002 -0.0000 -0.0001 0.0002

Z -0.0001 0.0016 -0.0010 0.0001 0.0004 -0.0011  
AT. 99 C X 0.0000 -0.0000 -0.0000 0.0000 0.0000 0.0000  
Y 0.0000 0.0000 0.0000 0.0000 0.0000 0.0000  
Z -0.0000 -0.0000 -0.0000 -0.0000 -0.0000 0.0000  
AT. 100 C X 0.0000 0.0000 -0.0000 -0.0000 0.0000 -0.0000  
Y 0.0000 -0.0000 0.0000 -0.0000 0.0000 -0.0000  
Z -0.0000 0.0000 -0.0000 0.0000 -0.0000 -0.0000  
AT. 101 C X -0.0000 0.0000 0.0000 -0.0000 0.0000 -0.0000  
Y 0.0000 0.0000 0.0000 -0.0000 0.0000 -0.0000  
Z 0.0000 0.0000 -0.0000 -0.0000 -0.0000 -0.0000  
AT. 102 C X -0.0000 -0.0000 0.0000 0.0000 0.0000 0.0000  
Y 0.0000 -0.0000 0.0000 0.0000 0.0000 0.0000  
Z 0.0000 -0.0000 -0.0000 0.0000 -0.0000 0.0000  
AT. 103 H X -0.0000 -0.0002 -0.0000 0.0000 -0.0000 0.0001  
Y -0.0001 -0.0004 -0.0000 0.0001 -0.0000 0.0002  
Z 0.0000 -0.0000 -0.0000 0.0000 -0.0000 -0.0000  
AT. 104 H X -0.0000 0.0002 -0.0000 -0.0000 -0.0000 -0.0001  
Y -0.0001 0.0004 -0.0000 -0.0001 -0.0000 -0.0002  
Z 0.0000 0.0000 -0.0000 -0.0000 -0.0000 0.0000  
AT. 105 H X 0.0000 0.0001 0.0000 -0.0000 -0.0000 -0.0001  
Y 0.0000 0.0002 -0.0000 -0.0000 -0.0000 -0.0001  
Z -0.0000 -0.0004 0.0000 0.0000 0.0000 0.0002  
AT. 106 H X 0.0000 -0.0001 0.0000 0.0000 -0.0000 0.0001  
Y 0.0000 -0.0002 -0.0000 0.0000 -0.0000 0.0001  
Z -0.0000 0.0004 0.0000 -0.0000 0.0000 -0.0002  
AT. 107 C X 0.0000 0.0002 0.0002 -0.0000 0.0000 -0.0000  
Y -0.0000 0.0004 0.0004 0.0000 0.0000 0.0000  
Z 0.0000 -0.0001 -0.0001 0.0000 -0.0000 -0.0000  
AT. 108 C X 0.0000 -0.0002 0.0002 0.0000 0.0000 0.0000  
Y -0.0000 -0.0004 0.0004 -0.0000 0.0000 -0.0000  
Z 0.0000 0.0001 -0.0001 -0.0000 -0.0000 0.0000  
AT. 109 H X -0.0000 0.0010 0.0010 0.0000 0.0001 0.0000

Y 0.0002 -0.0055 -0.0056 -0.0000 -0.0003 -0.0002  
Z -0.0001 0.0033 0.0034 -0.0000 0.0002 0.0001  
AT. 110 H X -0.0000 -0.0010 0.0010 -0.0000 0.0001 -0.0000  
Y 0.0002 0.0055 -0.0056 0.0000 -0.0003 0.0002  
Z -0.0001 -0.0033 0.0034 0.0000 0.0002 -0.0001  
AT. 111 H X -0.0000 -0.0028 -0.0027 -0.0000 -0.0001 0.0000  
Y -0.0000 -0.0004 -0.0004 -0.0000 -0.0000 0.0000  
Z -0.0000 -0.0023 -0.0023 -0.0000 -0.0001 -0.0000  
AT. 112 H X -0.0000 0.0028 -0.0027 0.0000 -0.0001 -0.0000  
Y -0.0000 0.0004 -0.0004 0.0000 -0.0000 -0.0000  
Z -0.0000 0.0023 -0.0023 0.0000 -0.0001 0.0000  
AT. 113 C X -0.0000 0.0001 0.0001 -0.0000 0.0000 0.0000  
Y 0.0000 0.0001 0.0001 -0.0000 0.0000 0.0000  
Z 0.0000 -0.0001 -0.0001 0.0000 -0.0000 -0.0000  
AT. 114 C X -0.0000 -0.0001 0.0001 0.0000 0.0000 -0.0000  
Y 0.0000 -0.0001 0.0001 0.0000 0.0000 -0.0000  
Z 0.0000 0.0001 -0.0001 -0.0000 -0.0000 0.0000  
AT. 115 C X 0.0000 -0.0007 -0.0007 0.0001 -0.0000 -0.0000  
Y -0.0000 0.0010 0.0010 -0.0001 0.0000 0.0000  
Z -0.0000 0.0008 0.0008 -0.0001 0.0000 0.0000  
AT. 116 C X 0.0000 0.0007 -0.0007 -0.0001 -0.0000 0.0000  
Y -0.0000 -0.0010 0.0010 0.0001 0.0000 -0.0000  
Z -0.0000 -0.0008 0.0008 0.0001 0.0000 -0.0000  
AT. 117 H X -0.0001 0.0021 0.0022 -0.0002 0.0001 0.0002  
Y -0.0000 0.0006 0.0006 -0.0001 0.0000 0.0000  
Z -0.0001 0.0023 0.0024 -0.0002 0.0001 0.0002  
AT. 118 H X -0.0001 -0.0021 0.0022 0.0002 0.0001 -0.0002  
Y -0.0000 -0.0006 0.0006 0.0001 0.0000 -0.0000  
Z -0.0001 -0.0023 0.0024 0.0002 0.0001 -0.0002  
AT. 119 H X -0.0001 0.0067 0.0066 -0.0005 0.0002 0.0002  
Y 0.0002 -0.0124 -0.0122 0.0010 -0.0003 -0.0003  
Z 0.0003 -0.0124 -0.0122 0.0010 -0.0003 -0.0003

AT.120 H X -0.0001 -0.0067 0.0066 0.0005 0.0002 -0.0002  
Y 0.0002 0.0124 -0.0122 -0.0010 -0.0003 0.0003  
Z 0.0003 0.0124 -0.0122 -0.0010 -0.0003 0.0003

AT.121 C X 0.0000 -0.0000 -0.0000 0.0000 -0.0000 -0.0000  
Y 0.0000 -0.0003 -0.0003 -0.0000 -0.0000 -0.0000  
Z 0.0000 -0.0001 -0.0002 -0.0000 -0.0000 -0.0000

AT.122 C X 0.0000 0.0000 -0.0000 -0.0000 -0.0000 0.0000  
Y 0.0000 0.0003 -0.0003 0.0000 -0.0000 0.0000  
Z 0.0000 0.0001 -0.0002 0.0000 -0.0000 0.0000

AT.123 H X 0.0000 -0.0005 -0.0007 -0.0000 -0.0000 -0.0001  
Y -0.0000 0.0026 0.0033 0.0001 0.0000 0.0003  
Z -0.0000 0.0027 0.0033 0.0001 0.0000 0.0003

AT.124 H X 0.0000 0.0005 -0.0007 0.0000 -0.0000 0.0001  
Y -0.0000 -0.0026 0.0033 -0.0001 0.0000 -0.0003  
Z -0.0000 -0.0027 0.0033 -0.0001 0.0000 -0.0003

AT.125 H X -0.0000 0.0012 0.0013 0.0000 0.0000 0.0001  
Y -0.0000 0.0004 0.0004 0.0000 -0.0000 0.0000  
Z 0.0000 -0.0010 -0.0010 -0.0000 -0.0000 -0.0001

AT.126 H X -0.0000 -0.0012 0.0013 -0.0000 0.0000 -0.0001  
Y -0.0000 -0.0004 0.0004 -0.0000 -0.0000 -0.0000  
Z 0.0000 0.0010 -0.0010 0.0000 -0.0000 0.0001

AT.127 C X -0.0000 -0.0000 -0.0000 0.0000 -0.0000 -0.0000  
Y 0.0000 0.0000 0.0000 -0.0000 -0.0000 -0.0000  
Z -0.0000 -0.0001 -0.0001 0.0000 0.0000 -0.0000

AT.128 C X -0.0000 0.0000 -0.0000 -0.0000 -0.0000 0.0000  
Y 0.0000 -0.0000 0.0000 0.0000 -0.0000 0.0000  
Z -0.0000 0.0001 -0.0001 -0.0000 0.0000 0.0000

AT.129 C X -0.0000 -0.0006 -0.0006 0.0001 0.0001 0.0001  
Y 0.0000 0.0008 0.0008 -0.0001 -0.0002 -0.0001  
Z -0.0000 -0.0004 -0.0004 0.0000 0.0001 0.0001

AT.130 C X -0.0000 0.0006 -0.0006 -0.0001 0.0001 -0.0001  
Y 0.0000 -0.0008 0.0008 0.0001 -0.0002 0.0001

Z -0.0000 0.0004 -0.0004 -0.0000 0.0001 -0.0001  
AT. 131 H X 0.0001 0.0036 0.0034 -0.0003 -0.0005 -0.0002  
Y 0.0000 0.0014 0.0013 -0.0001 -0.0002 -0.0001  
Z -0.0001 -0.0027 -0.0026 0.0003 0.0004 0.0002  
AT. 132 H X 0.0001 -0.0036 0.0034 0.0003 -0.0005 0.0002  
Y 0.0000 -0.0014 0.0013 0.0001 -0.0002 0.0001  
Z -0.0001 0.0027 -0.0026 -0.0003 0.0004 -0.0002  
AT. 133 H X 0.0002 0.0034 0.0034 -0.0003 -0.0007 -0.0004  
Y -0.0006 -0.0113 -0.0112 0.0010 0.0025 0.0014  
Z 0.0004 0.0073 0.0073 -0.0007 -0.0015 -0.0008  
AT. 134 H X 0.0002 -0.0034 0.0034 0.0003 -0.0007 0.0004  
Y -0.0006 0.0113 -0.0112 -0.0010 0.0025 -0.0014  
Z 0.0004 -0.0073 0.0073 0.0007 -0.0015 0.0008  
AT. 135 C X 0.0001 -0.0064 -0.0065 0.0004 -0.0002 -0.0003  
Y 0.0000 -0.0010 -0.0010 0.0001 -0.0000 -0.0001  
Z -0.0000 0.0022 0.0022 -0.0002 0.0001 0.0001  
AT. 136 C X 0.0001 0.0064 -0.0065 -0.0004 -0.0002 0.0003  
Y 0.0000 0.0010 -0.0010 -0.0001 -0.0000 0.0001  
Z -0.0000 -0.0022 0.0022 0.0002 0.0001 -0.0001  
AT. 137 H X 0.0001 -0.0125 -0.0126 0.0009 -0.0005 -0.0006  
Y -0.0005 0.0498 0.0502 -0.0034 0.0018 0.0022  
Z 0.0003 -0.0301 -0.0303 0.0021 -0.0011 -0.0013  
AT. 138 H X 0.0001 0.0125 -0.0126 -0.0009 -0.0005 0.0006  
Y -0.0005 -0.0498 0.0502 0.0034 0.0018 -0.0022  
Z 0.0003 0.0301 -0.0303 -0.0021 -0.0011 0.0013  
AT. 139 H X -0.0008 0.0684 0.0690 -0.0046 0.0025 0.0032  
Y -0.0002 0.0155 0.0156 -0.0010 0.0006 0.0007  
Z -0.0006 0.0550 0.0555 -0.0037 0.0020 0.0025  
AT. 140 H X -0.0008 -0.0684 0.0690 0.0046 0.0025 -0.0032  
Y -0.0002 -0.0155 0.0156 0.0010 0.0006 -0.0007  
Z -0.0006 -0.0550 0.0555 0.0037 0.0020 -0.0025  
AT. 141 H X -0.0002 0.0201 0.0203 -0.0014 0.0007 0.0008

Y 0.0005 -0.0539 -0.0544 0.0037 -0.0019 -0.0023  
Z 0.0004 -0.0498 -0.0503 0.0034 -0.0018 -0.0021  
AT. 142 H X -0.0002 -0.0201 0.0203 0.0014 0.0007 -0.0008  
Y 0.0005 0.0539 -0.0544 -0.0037 -0.0019 0.0023  
Z 0.0004 0.0498 -0.0503 -0.0034 -0.0018 0.0021  
AT. 143 C X -0.0000 0.0011 0.0009 -0.0000 0.0000 0.0001  
Y -0.0000 0.0005 0.0004 -0.0000 0.0000 0.0000  
Z -0.0000 0.0004 0.0004 -0.0000 0.0000 0.0000  
AT. 144 C X -0.0000 -0.0011 0.0009 0.0000 0.0000 -0.0001  
Y -0.0000 -0.0005 0.0004 0.0000 0.0000 -0.0000  
Z -0.0000 -0.0004 0.0004 0.0000 0.0000 -0.0000  
AT. 145 H X -0.0001 0.0027 0.0022 -0.0001 0.0001 0.0002  
Y 0.0002 -0.0094 -0.0079 0.0004 -0.0004 -0.0007  
Z 0.0002 -0.0090 -0.0075 0.0004 -0.0003 -0.0007  
AT. 146 H X -0.0001 -0.0027 0.0022 0.0001 0.0001 -0.0002  
Y 0.0002 0.0094 -0.0079 -0.0004 -0.0004 0.0007  
Z 0.0002 0.0090 -0.0075 -0.0004 -0.0003 0.0007  
AT. 147 H X 0.0004 -0.0138 -0.0108 0.0005 -0.0006 -0.0012  
Y 0.0001 -0.0053 -0.0042 0.0002 -0.0002 -0.0004  
Z -0.0003 0.0098 0.0077 -0.0004 0.0004 0.0008  
AT. 148 H X 0.0004 0.0138 -0.0108 -0.0005 -0.0006 0.0012  
Y 0.0001 0.0053 -0.0042 -0.0002 -0.0002 0.0004  
Z -0.0003 -0.0098 0.0077 0.0004 0.0004 -0.0008  
AT. 149 H X 0.0001 -0.0023 -0.0019 0.0001 -0.0001 -0.0002  
Y -0.0002 0.0085 0.0071 -0.0003 0.0002 0.0006  
Z 0.0001 -0.0049 -0.0041 0.0002 -0.0001 -0.0003  
AT. 150 H X 0.0001 0.0023 -0.0019 -0.0001 -0.0001 0.0002  
Y -0.0002 -0.0085 0.0071 0.0003 0.0002 -0.0006  
Z 0.0001 0.0049 -0.0041 -0.0002 -0.0001 0.0003  
AT. 151 C X 0.0000 -0.0000 -0.0000 0.0000 -0.0000 -0.0000  
Y -0.0000 0.0002 0.0001 -0.0000 0.0000 0.0000  
Z -0.0000 0.0007 0.0008 -0.0000 0.0000 0.0001



AT.152 C X 0.0000 0.0000 -0.0000 -0.0000 -0.0000 0.0000  
Y -0.0000 -0.0002 0.0001 0.0000 0.0000 -0.0000  
Z -0.0000 -0.0007 0.0008 0.0000 0.0000 -0.0001

AT.153 H X 0.0000 -0.0010 -0.0013 0.0001 -0.0000 -0.0001  
Y -0.0001 0.0036 0.0046 -0.0002 0.0002 0.0002  
Z 0.0001 -0.0021 -0.0027 0.0001 -0.0001 -0.0001

AT.154 H X 0.0000 0.0010 -0.0013 -0.0001 -0.0000 0.0001  
Y -0.0001 -0.0036 0.0046 0.0002 0.0002 -0.0002  
Z 0.0001 0.0021 -0.0027 -0.0001 -0.0001 0.0001

AT.155 H X -0.0001 0.0018 0.0020 -0.0001 0.0001 0.0002  
Y 0.0002 -0.0057 -0.0064 0.0003 -0.0004 -0.0006  
Z 0.0002 -0.0053 -0.0059 0.0003 -0.0004 -0.0006

AT.156 H X -0.0001 -0.0018 0.0020 0.0001 0.0001 -0.0002  
Y 0.0002 0.0057 -0.0064 -0.0003 -0.0004 0.0006  
Z 0.0002 0.0053 -0.0059 -0.0003 -0.0004 0.0006

AT.157 O X -0.0000 -0.0000 -0.0000 -0.0000 0.0000 0.0000  
Y 0.0000 0.0001 0.0000 0.0000 -0.0000 -0.0000  
Z 0.0000 0.0000 0.0000 0.0000 -0.0000 -0.0000

AT.158 O X -0.0000 0.0000 -0.0000 0.0000 0.0000 -0.0000  
Y 0.0000 -0.0001 0.0000 -0.0000 -0.0000 0.0000  
Z 0.0000 -0.0000 0.0000 -0.0000 -0.0000 0.0000

AT.159 O X -0.0000 -0.0000 -0.0000 -0.0000 0.0000 -0.0000  
Y 0.0000 -0.0000 -0.0000 0.0000 -0.0000 0.0000  
Z -0.0000 -0.0000 -0.0000 -0.0000 0.0000 -0.0000

AT.160 O X -0.0000 0.0000 -0.0000 0.0000 0.0000 0.0000  
Y 0.0000 0.0000 -0.0000 -0.0000 -0.0000 -0.0000  
Z -0.0000 0.0000 -0.0000 0.0000 0.0000 0.0000

AT.161 H X 0.0000 0.0002 0.0002 0.0001 -0.0001 -0.0001  
Y -0.0001 -0.0007 -0.0000 -0.0005 0.0001 0.0005  
Z -0.0000 0.0002 -0.0002 0.0001 0.0001 -0.0000

AT.162 H X 0.0000 -0.0002 0.0002 -0.0001 -0.0001 0.0001  
Y -0.0001 0.0007 -0.0000 0.0005 0.0001 -0.0005

Z -0.0000 -0.0002 -0.0002 -0.0001 0.0001 0.0000  
AT.163 H X 0.0000 -0.0000 0.0001 0.0000 -0.0001 0.0001  
Y -0.0000 0.0000 -0.0000 -0.0000 0.0001 -0.0001  
Z 0.0001 0.0001 0.0002 0.0001 -0.0004 0.0004  
AT.164 H X 0.0000 0.0000 0.0001 -0.0000 -0.0001 -0.0001  
Y -0.0000 -0.0000 -0.0000 0.0000 0.0001 0.0001  
Z 0.0001 -0.0001 0.0002 -0.0001 -0.0004 -0.0004  
AT.165 O X 0.0000 -0.0000 -0.0000 -0.0000 -0.0000 -0.0000  
Y 0.0000 -0.0000 -0.0000 -0.0000 -0.0000 0.0000  
Z 0.0000 -0.0000 -0.0000 -0.0000 -0.0000 0.0000  
AT.166 O X 0.0000 0.0000 -0.0000 0.0000 -0.0000 0.0000  
Y 0.0000 0.0000 -0.0000 0.0000 -0.0000 -0.0000  
Z 0.0000 0.0000 -0.0000 0.0000 -0.0000 -0.0000  
AT.167 H X -0.0002 0.0001 0.0001 0.0000 -0.0000 0.0001  
Y -0.0001 0.0001 0.0001 0.0000 -0.0000 0.0000  
Z -0.0001 0.0000 0.0000 0.0000 -0.0001 0.0001  
AT.168 H X -0.0002 -0.0001 0.0001 -0.0000 -0.0000 -0.0001  
Y -0.0001 -0.0001 0.0001 -0.0000 -0.0000 -0.0000  
Z -0.0001 -0.0000 0.0000 -0.0000 -0.0001 -0.0001  
AT.169 O X 0.0000 0.0000 -0.0000 0.0000 0.0000 -0.0000  
Y 0.0000 -0.0000 0.0000 -0.0000 -0.0000 0.0000  
Z -0.0000 0.0000 -0.0000 0.0000 -0.0000 0.0000  
AT.170 O X 0.0000 -0.0000 -0.0000 -0.0000 0.0000 0.0000  
Y 0.0000 0.0000 0.0000 0.0000 -0.0000 -0.0000  
Z -0.0000 -0.0000 -0.0000 -0.0000 -0.0000 -0.0000  
AT.171 H X 0.0002 -0.0001 0.0001 -0.0002 0.0000 0.0000  
Y -0.0004 0.0002 -0.0001 0.0002 0.0002 -0.0003  
Z 0.0002 -0.0001 0.0001 -0.0001 -0.0001 0.0001  
AT.172 H X 0.0002 0.0001 0.0001 0.0002 0.0000 -0.0000  
Y -0.0004 -0.0002 -0.0001 -0.0002 0.0002 0.0003  
Z 0.0002 0.0001 0.0001 0.0001 -0.0001 -0.0001

FREQ(CM\*\*-1) 3082.62 3082.67 3084.72 3084.77 3085.06 3085.85

AT. 1 I X 0.0000 -0.0000 0.0000 0.0000 -0.0000 0.0000

Y 0.0000 0.0000 -0.0000 -0.0000 0.0000 -0.0000

Z 0.0000 0.0000 -0.0000 -0.0000 -0.0000 -0.0000

AT. 2 I X 0.0000 0.0000 0.0000 -0.0000 -0.0000 -0.0000

Y 0.0000 -0.0000 -0.0000 0.0000 0.0000 0.0000

Z 0.0000 -0.0000 -0.0000 0.0000 -0.0000 0.0000

AT. 3 I X 0.0000 -0.0000 0.0000 0.0000 -0.0000 -0.0000

Y -0.0000 -0.0000 -0.0000 -0.0000 -0.0000 -0.0000

Z 0.0000 0.0000 -0.0000 -0.0000 0.0000 -0.0000

AT. 4 I X 0.0000 0.0000 0.0000 -0.0000 -0.0000 0.0000

Y -0.0000 0.0000 -0.0000 0.0000 -0.0000 0.0000

Z 0.0000 -0.0000 -0.0000 0.0000 0.0000 0.0000

AT. 5 O X -0.0000 0.0000 -0.0000 -0.0000 -0.0001 -0.0000

Y -0.0000 -0.0000 0.0000 0.0000 0.0000 0.0000

Z 0.0000 0.0000 0.0000 0.0000 0.0000 0.0000

AT. 6 O X -0.0000 -0.0000 -0.0000 0.0000 -0.0001 0.0000

Y -0.0000 0.0000 0.0000 -0.0000 0.0000 -0.0000

Z 0.0000 -0.0000 0.0000 -0.0000 0.0000 -0.0000

AT. 7 O X -0.0000 -0.0000 -0.0000 -0.0000 -0.0000 -0.0000

Y 0.0000 0.0000 -0.0000 -0.0000 -0.0000 0.0000

Z -0.0000 -0.0000 -0.0000 0.0000 0.0000 0.0000

AT. 8 O X -0.0000 0.0000 -0.0000 0.0000 -0.0000 0.0000

Y 0.0000 -0.0000 -0.0000 0.0000 -0.0000 -0.0000

Z -0.0000 0.0000 -0.0000 -0.0000 0.0000 -0.0000

AT. 9 N X -0.0001 -0.0001 0.0000 0.0000 0.0001 0.0001

Y 0.0001 0.0001 0.0000 0.0000 0.0000 0.0000

Z 0.0001 0.0000 0.0000 0.0001 0.0002 0.0001

AT. 10 N X -0.0001 0.0001 0.0000 -0.0000 0.0001 -0.0001

Y 0.0001 -0.0001 0.0000 -0.0000 0.0000 -0.0000

Z 0.0001 -0.0000 0.0000 -0.0001 0.0002 -0.0001

AT. 11 N X 0.0000 0.0000 0.0000 0.0000 0.0001 0.0001  
Y 0.0000 0.0001 -0.0000 -0.0000 -0.0001 -0.0000  
Z -0.0001 -0.0001 -0.0000 -0.0000 -0.0000 -0.0001

AT. 12 N X 0.0000 -0.0000 0.0000 -0.0000 0.0001 -0.0001  
Y 0.0000 -0.0001 -0.0000 0.0000 -0.0001 0.0000  
Z -0.0001 0.0001 -0.0000 0.0000 -0.0000 0.0001

AT. 13 C X -0.0000 0.0000 0.0000 0.0000 -0.0000 -0.0000  
Y 0.0000 0.0000 -0.0000 -0.0000 -0.0000 -0.0000  
Z -0.0001 -0.0000 -0.0000 -0.0001 -0.0003 -0.0002

AT. 14 C X -0.0000 -0.0000 0.0000 -0.0000 -0.0000 0.0000  
Y 0.0000 -0.0000 -0.0000 0.0000 -0.0000 0.0000  
Z -0.0001 0.0000 -0.0000 0.0001 -0.0003 0.0002

AT. 15 C X 0.0000 0.0000 0.0000 -0.0000 0.0000 0.0000  
Y -0.0002 -0.0001 -0.0000 -0.0000 -0.0001 -0.0001  
Z -0.0001 -0.0001 -0.0000 0.0000 -0.0000 -0.0000

AT. 16 C X 0.0000 -0.0000 0.0000 0.0000 0.0000 -0.0000  
Y -0.0002 0.0001 -0.0000 0.0000 -0.0001 0.0001  
Z -0.0001 0.0001 -0.0000 -0.0000 -0.0000 0.0000

AT. 17 H X -0.0004 -0.0004 -0.0000 -0.0001 -0.0002 -0.0001  
Y 0.0017 0.0016 0.0001 0.0004 0.0008 0.0005  
Z 0.0010 0.0010 0.0001 0.0002 0.0004 0.0003

AT. 18 H X -0.0004 0.0004 -0.0000 0.0001 -0.0002 0.0001  
Y 0.0017 -0.0016 0.0001 -0.0004 0.0008 -0.0005  
Z 0.0010 -0.0010 0.0001 -0.0002 0.0004 -0.0003

AT. 19 H X 0.0003 0.0003 -0.0000 0.0002 0.0002 0.0001  
Y 0.0002 0.0002 -0.0000 0.0002 0.0001 0.0001  
Z -0.0007 -0.0008 0.0000 -0.0005 -0.0004 -0.0003

AT. 20 H X 0.0003 -0.0003 -0.0000 -0.0002 0.0002 -0.0001  
Y 0.0002 -0.0002 -0.0000 -0.0002 0.0001 -0.0001  
Z -0.0007 0.0008 0.0000 0.0005 -0.0004 0.0003

AT. 21 C X -0.0000 -0.0000 0.0000 0.0000 0.0000 0.0000  
Y -0.0000 -0.0000 -0.0000 -0.0000 -0.0000 -0.0001

Z 0.0001 0.0001 -0.0000 0.0000 -0.0000 0.0001  
AT. 22 C X -0.0000 0.0000 0.0000 -0.0000 0.0000 -0.0000  
Y -0.0000 0.0000 -0.0000 0.0000 -0.0000 0.0001  
Z 0.0001 -0.0001 -0.0000 -0.0000 -0.0000 -0.0001  
AT. 23 C X 0.0000 0.0000 -0.0000 -0.0000 -0.0000 -0.0000  
Y -0.0000 -0.0000 0.0000 0.0000 0.0000 0.0000  
Z -0.0000 -0.0000 -0.0000 0.0000 0.0000 -0.0000  
AT. 24 C X 0.0000 -0.0000 -0.0000 0.0000 -0.0000 0.0000  
Y -0.0000 0.0000 0.0000 -0.0000 0.0000 -0.0000  
Z -0.0000 0.0000 -0.0000 -0.0000 0.0000 0.0000  
AT. 25 H X -0.0000 -0.0001 0.0000 0.0000 0.0000 0.0000  
Y 0.0005 0.0006 -0.0001 -0.0002 -0.0004 -0.0003  
Z 0.0001 0.0001 -0.0000 -0.0000 -0.0001 -0.0001  
AT. 26 H X -0.0000 0.0001 0.0000 -0.0000 0.0000 -0.0000  
Y 0.0005 -0.0006 -0.0001 0.0002 -0.0004 0.0003  
Z 0.0001 -0.0001 -0.0000 0.0000 -0.0001 0.0001  
AT. 27 H X 0.0000 0.0001 0.0000 -0.0000 -0.0001 0.0000  
Y -0.0001 -0.0001 -0.0000 0.0001 0.0001 0.0000  
Z 0.0001 0.0002 0.0000 -0.0001 -0.0002 -0.0001  
AT. 28 H X 0.0000 -0.0001 0.0000 0.0000 -0.0001 -0.0000  
Y -0.0001 0.0001 -0.0000 -0.0001 0.0001 -0.0000  
Z 0.0001 -0.0002 0.0000 0.0001 -0.0002 0.0001  
AT. 29 C X 0.0010 0.0012 -0.0000 -0.0002 -0.0015 -0.0013  
Y 0.0045 0.0054 -0.0001 -0.0010 -0.0070 -0.0058  
Z -0.0014 -0.0017 0.0000 0.0003 0.0023 0.0019  
AT. 30 C X 0.0010 -0.0012 -0.0000 0.0002 -0.0015 0.0013  
Y 0.0045 -0.0054 -0.0001 0.0010 -0.0070 0.0058  
Z -0.0014 0.0017 0.0000 -0.0003 0.0023 -0.0019  
AT. 31 H X -0.0208 -0.0248 0.0004 0.0046 0.0317 0.0262  
Y -0.0473 -0.0567 0.0011 0.0109 0.0741 0.0611  
Z 0.0321 0.0384 -0.0006 -0.0073 -0.0500 -0.0413  
AT. 32 H X -0.0208 0.0248 0.0004 -0.0046 0.0317 -0.0262

Y -0.0473 0.0567 0.0011 -0.0109 0.0741 -0.0611  
Z 0.0321 -0.0384 -0.0006 0.0073 -0.0500 0.0413  
AT. 33 H X 0.0098 0.0118 -0.0002 -0.0022 -0.0151 -0.0123  
Y -0.0053 -0.0064 0.0001 0.0012 0.0084 0.0069  
Z -0.0143 -0.0170 0.0002 0.0031 0.0218 0.0178  
AT. 34 H X 0.0098 -0.0118 -0.0002 0.0022 -0.0151 0.0123  
Y -0.0053 0.0064 0.0001 -0.0012 0.0084 -0.0069  
Z -0.0143 0.0170 0.0002 -0.0031 0.0218 -0.0178  
AT. 35 C X 0.0000 0.0000 -0.0000 -0.0000 -0.0000 -0.0000  
Y 0.0000 0.0000 -0.0000 -0.0000 -0.0000 -0.0000  
Z -0.0001 -0.0001 0.0000 0.0000 0.0001 0.0001  
AT. 36 C X 0.0000 -0.0000 -0.0000 0.0000 -0.0000 0.0000  
Y 0.0000 -0.0000 -0.0000 0.0000 -0.0000 0.0000  
Z -0.0001 0.0001 0.0000 -0.0000 0.0001 -0.0001  
AT. 37 C X -0.0016 -0.0018 0.0002 0.0004 0.0019 0.0013  
Y -0.0009 -0.0009 0.0001 0.0002 0.0010 0.0008  
Z -0.0008 -0.0009 0.0001 0.0002 0.0009 0.0006  
AT. 38 C X -0.0016 0.0018 0.0002 -0.0004 0.0019 -0.0013  
Y -0.0009 0.0009 0.0001 -0.0002 0.0010 -0.0008  
Z -0.0008 0.0009 0.0001 -0.0002 0.0009 -0.0006  
AT. 39 H X 0.0037 0.0041 -0.0004 -0.0008 -0.0042 -0.0029  
Y -0.0027 -0.0030 0.0003 0.0006 0.0030 0.0021  
Z -0.0059 -0.0066 0.0007 0.0013 0.0068 0.0048  
AT. 40 H X 0.0037 -0.0041 -0.0004 0.0008 -0.0042 0.0029  
Y -0.0027 0.0030 0.0003 -0.0006 0.0030 -0.0021  
Z -0.0059 0.0066 0.0007 -0.0013 0.0068 -0.0048  
AT. 41 H X 0.0159 0.0176 -0.0019 -0.0036 -0.0182 -0.0127  
Y 0.0123 0.0136 -0.0015 -0.0029 -0.0144 -0.0102  
Z 0.0160 0.0177 -0.0020 -0.0037 -0.0184 -0.0129  
AT. 42 H X 0.0159 -0.0176 -0.0019 0.0036 -0.0182 0.0127  
Y 0.0123 -0.0136 -0.0015 0.0029 -0.0144 0.0102  
Z 0.0160 -0.0177 -0.0020 0.0037 -0.0184 0.0129

AT. 43 C X -0.0002 -0.0003 -0.0001 -0.0003 -0.0009 -0.0013  
Y -0.0010 -0.0011 -0.0003 -0.0011 -0.0034 -0.0048  
Z -0.0007 -0.0007 -0.0002 -0.0007 -0.0020 -0.0028

AT. 44 C X -0.0002 0.0003 -0.0001 0.0003 -0.0009 0.0013  
Y -0.0010 0.0011 -0.0003 0.0011 -0.0034 0.0048  
Z -0.0007 0.0007 -0.0002 0.0007 -0.0020 0.0028

AT. 45 H X 0.0074 0.0077 0.0024 0.0078 0.0242 0.0336  
Y 0.0101 0.0105 0.0032 0.0104 0.0324 0.0450  
Z 0.0108 0.0112 0.0034 0.0111 0.0345 0.0479

AT. 46 H X 0.0074 -0.0077 0.0024 -0.0078 0.0242 -0.0336  
Y 0.0101 -0.0105 0.0032 -0.0104 0.0324 -0.0450  
Z 0.0108 -0.0112 0.0034 -0.0111 0.0345 -0.0479

AT. 47 H X -0.0041 -0.0043 -0.0012 -0.0043 -0.0133 -0.0184  
Y 0.0028 0.0029 0.0008 0.0029 0.0091 0.0126  
Z -0.0029 -0.0030 -0.0008 -0.0030 -0.0095 -0.0131

AT. 48 H X -0.0041 0.0043 -0.0012 0.0043 -0.0133 0.0184  
Y 0.0028 -0.0029 0.0008 -0.0029 0.0091 -0.0126  
Z -0.0029 0.0030 -0.0008 0.0030 -0.0095 0.0131

AT. 49 C X -0.0000 -0.0000 -0.0000 -0.0000 -0.0000 -0.0001  
Y -0.0001 -0.0001 -0.0000 -0.0000 -0.0000 -0.0000  
Z 0.0001 0.0001 0.0000 0.0000 -0.0000 -0.0000

AT. 50 C X -0.0000 0.0000 -0.0000 0.0000 -0.0000 0.0001  
Y -0.0001 0.0001 -0.0000 0.0000 -0.0000 0.0000  
Z 0.0001 -0.0001 0.0000 -0.0000 -0.0000 0.0000

AT. 51 C X -0.0054 -0.0049 -0.0007 -0.0011 -0.0025 -0.0021  
Y -0.0054 -0.0050 -0.0006 -0.0011 -0.0025 -0.0021  
Z 0.0040 0.0036 0.0005 0.0008 0.0019 0.0016

AT. 52 C X -0.0054 0.0049 -0.0007 0.0011 -0.0025 0.0021  
Y -0.0054 0.0050 -0.0006 0.0011 -0.0025 0.0021  
Z 0.0040 -0.0036 0.0005 -0.0008 0.0019 -0.0016

AT. 53 H X 0.0215 0.0197 0.0026 0.0041 0.0097 0.0081  
Y -0.0162 -0.0148 -0.0019 -0.0031 -0.0072 -0.0060

Z 0.0133 0.0121 0.0016 0.0025 0.0058 0.0048  
AT. 54 H X 0.0215 -0.0197 0.0026 -0.0041 0.0097 -0.0081  
Y -0.0162 0.0148 -0.0019 0.0031 -0.0072 0.0060  
Z 0.0133 -0.0121 0.0016 -0.0025 0.0058 -0.0048  
AT. 55 H X 0.0425 0.0388 0.0051 0.0084 0.0201 0.0168  
Y 0.0793 0.0725 0.0095 0.0155 0.0368 0.0308  
Z -0.0618 -0.0564 -0.0074 -0.0122 -0.0291 -0.0243  
AT. 56 H X 0.0425 -0.0388 0.0051 -0.0084 0.0201 -0.0168  
Y 0.0793 -0.0725 0.0095 -0.0155 0.0368 -0.0308  
Z -0.0618 0.0564 -0.0074 0.0122 -0.0291 0.0243  
AT. 57 C X -0.0002 -0.0003 0.0001 0.0003 0.0009 0.0009  
Y -0.0000 -0.0000 -0.0001 -0.0002 -0.0007 -0.0007  
Z 0.0003 0.0002 0.0000 0.0000 -0.0000 -0.0000  
AT. 58 C X -0.0002 0.0003 0.0001 -0.0003 0.0009 -0.0009  
Y -0.0000 0.0000 -0.0001 0.0002 -0.0007 0.0007  
Z 0.0003 -0.0002 0.0000 -0.0000 -0.0000 0.0000  
AT. 59 H X 0.0008 0.0007 0.0009 0.0013 0.0040 0.0037  
Y 0.0016 0.0012 0.0017 0.0026 0.0084 0.0078  
Z -0.0009 -0.0006 -0.0012 -0.0018 -0.0058 -0.0054  
AT. 60 H X 0.0008 -0.0007 0.0009 -0.0013 0.0040 -0.0037  
Y 0.0016 -0.0012 0.0017 -0.0026 0.0084 -0.0078  
Z -0.0009 0.0006 -0.0012 0.0018 -0.0058 0.0054  
AT. 61 H X 0.0021 0.0021 -0.0014 -0.0026 -0.0096 -0.0091  
Y -0.0012 -0.0012 0.0009 0.0017 0.0060 0.0057  
Z -0.0023 -0.0024 0.0019 0.0034 0.0124 0.0117  
AT. 62 H X 0.0021 -0.0021 -0.0014 0.0026 -0.0096 0.0091  
Y -0.0012 0.0012 0.0009 -0.0017 0.0060 -0.0057  
Z -0.0023 0.0024 0.0019 -0.0034 0.0124 -0.0117  
AT. 63 H X 0.0002 0.0005 -0.0011 -0.0017 -0.0061 -0.0057  
Y -0.0001 0.0002 -0.0011 -0.0016 -0.0056 -0.0053  
Z 0.0001 0.0005 -0.0012 -0.0019 -0.0067 -0.0063  
AT. 64 H X 0.0002 -0.0005 -0.0011 0.0017 -0.0061 0.0057



Y -0.0001 -0.0002 -0.0011 0.0016 -0.0056 0.0053  
Z 0.0001 -0.0005 -0.0012 0.0019 -0.0067 0.0063  
AT. 65 C X -0.0003 -0.0005 0.0000 -0.0001 0.0002 -0.0002  
Y 0.0003 0.0004 0.0000 0.0001 0.0001 0.0004  
Z 0.0003 0.0004 0.0000 0.0001 0.0001 0.0002  
AT. 66 C X -0.0003 0.0005 0.0000 0.0001 0.0002 0.0002  
Y 0.0003 -0.0004 0.0000 -0.0001 0.0001 -0.0004  
Z 0.0003 -0.0004 0.0000 -0.0001 0.0001 -0.0002  
AT. 67 H X -0.0034 -0.0039 -0.0003 -0.0011 -0.0006 -0.0029  
Y -0.0036 -0.0041 -0.0003 -0.0011 -0.0006 -0.0030  
Z -0.0041 -0.0046 -0.0004 -0.0012 -0.0007 -0.0031  
AT. 68 H X -0.0034 0.0039 -0.0003 0.0011 -0.0006 0.0029  
Y -0.0036 0.0041 -0.0003 0.0011 -0.0006 0.0030  
Z -0.0041 0.0046 -0.0004 0.0012 -0.0007 0.0031  
AT. 69 H X 0.0055 0.0067 0.0001 0.0019 -0.0013 0.0043  
Y -0.0042 -0.0052 -0.0001 -0.0014 0.0010 -0.0033  
Z 0.0029 0.0035 0.0000 0.0009 -0.0007 0.0022  
AT. 70 H X 0.0055 -0.0067 0.0001 -0.0019 -0.0013 -0.0043  
Y -0.0042 0.0052 -0.0001 0.0014 0.0010 0.0033  
Z 0.0029 -0.0035 0.0000 -0.0009 -0.0007 -0.0022  
AT. 71 H X 0.0020 0.0025 0.0000 0.0006 -0.0006 0.0012  
Y 0.0037 0.0046 0.0000 0.0011 -0.0013 0.0022  
Z -0.0027 -0.0033 -0.0000 -0.0008 0.0008 -0.0014  
AT. 72 H X 0.0020 -0.0025 0.0000 -0.0006 -0.0006 -0.0012  
Y 0.0037 -0.0046 0.0000 -0.0011 -0.0013 -0.0022  
Z -0.0027 0.0033 -0.0000 0.0008 0.0008 0.0014  
AT. 73 C X 0.0001 0.0001 0.0000 0.0001 0.0002 0.0002  
Y 0.0001 -0.0002 -0.0000 -0.0002 -0.0003 -0.0005  
Z 0.0002 0.0007 0.0002 0.0008 0.0018 0.0025  
AT. 74 C X 0.0001 -0.0001 0.0000 -0.0001 0.0002 -0.0002  
Y 0.0001 0.0002 -0.0000 0.0002 -0.0003 0.0005  
Z 0.0002 -0.0007 0.0002 -0.0008 0.0018 -0.0025

AT. 75 H X 0.0003 0.0030 0.0008 0.0038 0.0077 0.0111  
Y 0.0011 0.0062 0.0016 0.0070 0.0142 0.0205  
Z -0.0006 -0.0042 -0.0012 -0.0050 -0.0103 -0.0146

AT. 76 H X 0.0003 -0.0030 0.0008 -0.0038 0.0077 -0.0111  
Y 0.0011 -0.0062 0.0016 -0.0070 0.0142 -0.0205  
Z -0.0006 0.0042 -0.0012 0.0050 -0.0103 0.0146

AT. 77 H X -0.0018 -0.0042 -0.0013 -0.0046 -0.0104 -0.0136  
Y -0.0017 -0.0043 -0.0013 -0.0047 -0.0106 -0.0140  
Z -0.0019 -0.0045 -0.0014 -0.0050 -0.0115 -0.0148

AT. 78 H X -0.0018 0.0042 -0.0013 0.0046 -0.0104 0.0136  
Y -0.0017 0.0043 -0.0013 0.0047 -0.0106 0.0140  
Z -0.0019 0.0045 -0.0014 0.0050 -0.0115 0.0148

AT. 79 I X 0.0000 0.0000 0.0000 0.0000 0.0000 0.0000  
Y 0.0000 0.0000 -0.0000 -0.0000 -0.0000 -0.0000  
Z -0.0000 -0.0000 -0.0000 -0.0000 0.0000 0.0000

AT. 80 I X 0.0000 -0.0000 0.0000 -0.0000 0.0000 -0.0000  
Y 0.0000 -0.0000 -0.0000 0.0000 -0.0000 0.0000  
Z -0.0000 0.0000 -0.0000 0.0000 0.0000 -0.0000

AT. 81 I X 0.0000 0.0000 0.0000 0.0000 -0.0000 0.0000  
Y 0.0000 0.0000 -0.0000 0.0000 0.0000 0.0000  
Z -0.0000 -0.0000 -0.0000 -0.0000 0.0000 -0.0000

AT. 82 I X 0.0000 -0.0000 0.0000 -0.0000 -0.0000 -0.0000  
Y 0.0000 -0.0000 -0.0000 -0.0000 0.0000 -0.0000  
Z -0.0000 0.0000 -0.0000 0.0000 0.0000 0.0000

AT. 83 O X -0.0000 -0.0000 0.0000 0.0000 -0.0000 -0.0000  
Y 0.0000 0.0000 -0.0000 -0.0000 -0.0000 0.0000  
Z -0.0000 -0.0000 0.0000 0.0000 -0.0000 -0.0000

AT. 84 O X -0.0000 0.0000 0.0000 -0.0000 -0.0000 0.0000  
Y 0.0000 -0.0000 -0.0000 0.0000 -0.0000 -0.0000  
Z -0.0000 0.0000 0.0000 -0.0000 -0.0000 0.0000

AT. 85 O X -0.0000 -0.0000 -0.0000 -0.0000 -0.0000 -0.0000  
Y -0.0000 -0.0000 -0.0000 -0.0000 -0.0000 -0.0000

Z -0.0000 -0.0000 0.0000 0.0000 -0.0000 -0.0000  
AT. 86 O X -0.0000 0.0000 -0.0000 0.0000 -0.0000 0.0000  
Y -0.0000 0.0000 -0.0000 0.0000 -0.0000 0.0000  
Z -0.0000 0.0000 0.0000 -0.0000 -0.0000 0.0000  
AT. 87 N X -0.0000 -0.0000 0.0001 0.0001 -0.0000 -0.0000  
Y -0.0000 -0.0000 0.0001 0.0001 -0.0000 -0.0000  
Z -0.0000 -0.0000 0.0002 0.0001 -0.0000 -0.0000  
AT. 88 N X -0.0000 0.0000 0.0001 -0.0001 -0.0000 0.0000  
Y -0.0000 0.0000 0.0001 -0.0001 -0.0000 0.0000  
Z -0.0000 0.0000 0.0002 -0.0001 -0.0000 0.0000  
AT. 89 N X 0.0000 0.0000 -0.0000 -0.0000 0.0000 0.0000  
Y 0.0000 0.0000 -0.0000 -0.0000 -0.0000 0.0000  
Z -0.0000 0.0000 -0.0000 -0.0000 0.0000 0.0000  
AT. 90 N X 0.0000 -0.0000 -0.0000 0.0000 0.0000 -0.0000  
Y 0.0000 -0.0000 -0.0000 0.0000 -0.0000 -0.0000  
Z -0.0000 -0.0000 -0.0000 0.0000 0.0000 -0.0000  
AT. 91 C X -0.0000 0.0000 -0.0000 -0.0000 0.0000 -0.0000  
Y -0.0000 -0.0000 0.0000 0.0000 -0.0000 0.0000  
Z 0.0000 0.0000 -0.0002 -0.0002 0.0000 0.0000  
AT. 92 C X -0.0000 -0.0000 -0.0000 0.0000 0.0000 0.0000  
Y -0.0000 0.0000 0.0000 -0.0000 -0.0000 -0.0000  
Z 0.0000 -0.0000 -0.0002 0.0002 0.0000 -0.0000  
AT. 93 C X -0.0000 -0.0000 -0.0002 -0.0002 0.0003 0.0001  
Y -0.0000 -0.0001 -0.0004 -0.0003 0.0007 0.0002  
Z -0.0000 -0.0000 -0.0001 -0.0001 0.0001 0.0000  
AT. 94 C X -0.0000 0.0000 -0.0002 0.0002 0.0003 -0.0001  
Y -0.0000 0.0001 -0.0004 0.0003 0.0007 -0.0002  
Z -0.0000 0.0000 -0.0001 0.0001 0.0001 -0.0000  
AT. 95 H X 0.0002 0.0003 0.0022 0.0018 -0.0030 -0.0008  
Y 0.0006 0.0008 0.0047 0.0037 -0.0075 -0.0017  
Z 0.0003 0.0005 0.0025 0.0018 -0.0043 -0.0009  
AT. 96 H X 0.0002 -0.0003 0.0022 -0.0018 -0.0030 0.0008

Y 0.0006 -0.0008 0.0047 -0.0037 -0.0075 0.0017  
Z 0.0003 -0.0005 0.0025 -0.0018 -0.0043 0.0009  
AT. 97 H X -0.0000 -0.0001 -0.0006 -0.0005 0.0008 0.0002  
Y 0.0000 0.0000 0.0003 0.0003 -0.0005 -0.0002  
Z -0.0002 -0.0002 -0.0017 -0.0015 0.0026 0.0008  
AT. 98 H X -0.0000 0.0001 -0.0006 0.0005 0.0008 -0.0002  
Y 0.0000 -0.0000 0.0003 -0.0003 -0.0005 0.0002  
Z -0.0002 0.0002 -0.0017 0.0015 0.0026 -0.0008  
AT. 99 C X -0.0000 0.0000 0.0000 0.0000 -0.0000 -0.0000  
Y -0.0000 0.0000 0.0000 0.0000 -0.0000 -0.0000  
Z 0.0000 -0.0000 -0.0000 -0.0000 -0.0000 -0.0000  
AT. 100 C X -0.0000 -0.0000 0.0000 -0.0000 -0.0000 0.0000  
Y -0.0000 -0.0000 0.0000 -0.0000 -0.0000 0.0000  
Z 0.0000 0.0000 -0.0000 0.0000 -0.0000 0.0000  
AT. 101 C X -0.0000 -0.0000 -0.0000 0.0000 0.0000 -0.0000  
Y 0.0000 -0.0000 -0.0000 0.0000 0.0000 -0.0000  
Z 0.0000 -0.0000 -0.0000 0.0000 0.0000 -0.0000  
AT. 102 C X -0.0000 0.0000 -0.0000 -0.0000 0.0000 0.0000  
Y 0.0000 0.0000 -0.0000 -0.0000 0.0000 0.0000  
Z 0.0000 0.0000 -0.0000 -0.0000 0.0000 0.0000  
AT. 103 H X 0.0000 0.0000 0.0001 -0.0001 -0.0001 0.0001  
Y -0.0000 0.0000 0.0001 -0.0003 -0.0002 0.0001  
Z -0.0000 0.0000 0.0000 -0.0000 -0.0000 -0.0000  
AT. 104 H X 0.0000 -0.0000 0.0001 0.0001 -0.0001 -0.0001  
Y -0.0000 -0.0000 0.0001 0.0003 -0.0002 -0.0001  
Z -0.0000 -0.0000 0.0000 0.0000 -0.0000 0.0000  
AT. 105 H X 0.0000 -0.0000 -0.0000 0.0001 -0.0000 -0.0000  
Y 0.0000 -0.0000 -0.0001 0.0002 0.0000 -0.0001  
Z -0.0000 0.0000 0.0001 -0.0004 -0.0000 0.0002  
AT. 106 H X 0.0000 0.0000 -0.0000 -0.0001 -0.0000 0.0000  
Y 0.0000 0.0000 -0.0001 -0.0002 0.0000 0.0001  
Z -0.0000 -0.0000 0.0001 0.0004 -0.0000 -0.0002

AT.107 C X -0.0000 -0.0000 0.0000 0.0000 -0.0000 -0.0000  
Y -0.0001 -0.0001 0.0004 0.0004 -0.0002 -0.0003  
Z 0.0000 0.0000 -0.0001 -0.0001 0.0000 0.0001

AT.108 C X -0.0000 0.0000 0.0000 -0.0000 -0.0000 0.0000  
Y -0.0001 0.0001 0.0004 -0.0004 -0.0002 0.0003  
Z 0.0000 -0.0000 -0.0001 0.0001 0.0000 -0.0001

AT.109 H X -0.0002 -0.0002 0.0014 0.0013 -0.0004 -0.0008  
Y 0.0010 0.0011 -0.0049 -0.0046 0.0018 0.0035  
Z -0.0005 -0.0006 0.0028 0.0026 -0.0010 -0.0020

AT.110 H X -0.0002 0.0002 0.0014 -0.0013 -0.0004 0.0008  
Y 0.0010 -0.0011 -0.0049 0.0046 0.0018 -0.0035  
Z -0.0005 0.0006 0.0028 -0.0026 -0.0010 0.0020

AT.111 H X 0.0005 0.0006 -0.0018 -0.0017 0.0008 0.0013  
Y 0.0001 0.0001 -0.0001 -0.0001 0.0002 0.0002  
Z 0.0004 0.0005 -0.0018 -0.0016 0.0007 0.0012

AT.112 H X 0.0005 -0.0006 -0.0018 0.0017 0.0008 -0.0013  
Y 0.0001 -0.0001 -0.0001 0.0001 0.0002 -0.0002  
Z 0.0004 -0.0005 -0.0018 0.0016 0.0007 -0.0012

AT.113 C X -0.0000 -0.0000 0.0000 0.0000 0.0000 -0.0000  
Y -0.0000 -0.0000 0.0000 0.0000 0.0000 -0.0000  
Z 0.0000 0.0000 -0.0000 -0.0000 -0.0000 0.0000

AT.114 C X -0.0000 0.0000 0.0000 -0.0000 0.0000 0.0000  
Y -0.0000 0.0000 0.0000 -0.0000 0.0000 0.0000  
Z 0.0000 -0.0000 -0.0000 0.0000 -0.0000 -0.0000

AT.115 C X 0.0000 0.0000 -0.0001 -0.0001 0.0000 0.0000  
Y -0.0000 -0.0000 0.0002 0.0002 0.0000 -0.0000  
Z -0.0000 -0.0000 0.0001 0.0002 0.0000 -0.0001

AT.116 C X 0.0000 -0.0000 -0.0001 0.0001 0.0000 -0.0000  
Y -0.0000 0.0000 0.0002 -0.0002 0.0000 0.0000  
Z -0.0000 0.0000 0.0001 -0.0002 0.0000 0.0001

AT.117 H X -0.0000 -0.0001 0.0004 0.0001 -0.0001 -0.0000  
Y -0.0000 -0.0000 0.0001 0.0001 -0.0000 0.0000

Z -0.0000 -0.0001 0.0004 0.0002 -0.0001 -0.0000  
AT. 118 H X -0.0000 0.0001 0.0004 -0.0001 -0.0001 0.0000  
Y -0.0000 0.0000 0.0001 -0.0001 -0.0000 -0.0000  
Z -0.0000 0.0001 0.0004 -0.0002 -0.0001 0.0000  
AT. 119 H X -0.0001 -0.0003 0.0011 0.0011 0.0000 -0.0003  
Y 0.0002 0.0005 -0.0021 -0.0021 -0.0001 0.0006  
Z 0.0002 0.0005 -0.0021 -0.0021 -0.0001 0.0006  
AT. 120 H X -0.0001 0.0003 0.0011 -0.0011 0.0000 0.0003  
Y 0.0002 -0.0005 -0.0021 0.0021 -0.0001 -0.0006  
Z 0.0002 -0.0005 -0.0021 0.0021 -0.0001 -0.0006  
AT. 121 C X 0.0000 0.0000 -0.0001 -0.0001 0.0000 0.0000  
Y 0.0000 0.0001 -0.0009 -0.0008 0.0002 0.0001  
Z 0.0000 0.0001 -0.0006 -0.0005 0.0001 0.0001  
AT. 122 C X 0.0000 -0.0000 -0.0001 0.0001 0.0000 -0.0000  
Y 0.0000 -0.0001 -0.0009 0.0008 0.0002 -0.0001  
Z 0.0000 -0.0001 -0.0006 0.0005 0.0001 -0.0001  
AT. 123 H X 0.0001 0.0002 -0.0019 -0.0016 0.0004 0.0003  
Y -0.0005 -0.0009 0.0103 0.0088 -0.0018 -0.0015  
Z -0.0005 -0.0009 0.0102 0.0087 -0.0018 -0.0015  
AT. 124 H X 0.0001 -0.0002 -0.0019 0.0016 0.0004 -0.0003  
Y -0.0005 0.0009 0.0103 -0.0088 -0.0018 0.0015  
Z -0.0005 0.0009 0.0102 -0.0087 -0.0018 0.0015  
AT. 125 H X -0.0002 -0.0004 0.0034 0.0030 -0.0006 -0.0006  
Y -0.0001 -0.0001 0.0011 0.0010 -0.0001 -0.0002  
Z 0.0002 0.0003 -0.0028 -0.0025 0.0005 0.0005  
AT. 126 H X -0.0002 0.0004 0.0034 -0.0030 -0.0006 0.0006  
Y -0.0001 0.0001 0.0011 -0.0010 -0.0001 0.0002  
Z 0.0002 -0.0003 -0.0028 0.0025 0.0005 -0.0005  
AT. 127 C X 0.0000 0.0000 -0.0000 -0.0000 -0.0000 0.0000  
Y 0.0000 0.0000 -0.0001 -0.0001 0.0000 0.0000  
Z -0.0000 -0.0000 0.0001 0.0001 -0.0000 -0.0000  
AT. 128 C X 0.0000 -0.0000 -0.0000 0.0000 -0.0000 -0.0000

Y 0.0000 -0.0000 -0.0001 0.0001 0.0000 -0.0000  
Z -0.0000 0.0000 0.0001 -0.0001 -0.0000 0.0000  
AT. 129 C X -0.0004 -0.0004 0.0049 0.0047 -0.0004 -0.0012  
Y 0.0006 0.0007 -0.0078 -0.0076 0.0006 0.0019  
Z -0.0003 -0.0003 0.0038 0.0037 -0.0003 -0.0009  
AT. 130 C X -0.0004 0.0004 0.0049 -0.0047 -0.0004 0.0012  
Y 0.0006 -0.0007 -0.0078 0.0076 0.0006 -0.0019  
Z -0.0003 0.0003 0.0038 -0.0037 -0.0003 0.0009  
AT. 131 H X 0.0021 0.0022 -0.0275 -0.0265 0.0027 0.0069  
Y 0.0008 0.0008 -0.0107 -0.0103 0.0010 0.0027  
Z -0.0016 -0.0017 0.0209 0.0202 -0.0020 -0.0053  
AT. 132 H X 0.0021 -0.0022 -0.0275 0.0265 0.0027 -0.0069  
Y 0.0008 -0.0008 -0.0107 0.0103 0.0010 -0.0027  
Z -0.0016 0.0017 0.0209 -0.0202 -0.0020 0.0053  
AT. 133 H X 0.0026 0.0026 -0.0308 -0.0300 0.0024 0.0077  
Y -0.0085 -0.0087 0.1028 0.1001 -0.0078 -0.0256  
Z 0.0054 0.0055 -0.0661 -0.0642 0.0051 0.0165  
AT. 134 H X 0.0026 -0.0026 -0.0308 0.0300 0.0024 -0.0077  
Y -0.0085 0.0087 0.1028 -0.1001 -0.0078 0.0256  
Z 0.0054 -0.0055 -0.0661 0.0642 0.0051 -0.0165  
AT. 135 C X 0.0001 0.0002 -0.0005 -0.0004 -0.0002 0.0001  
Y 0.0000 0.0000 -0.0001 -0.0001 -0.0000 0.0000  
Z -0.0000 -0.0001 0.0003 0.0003 0.0000 -0.0001  
AT. 136 C X 0.0001 -0.0002 -0.0005 0.0004 -0.0002 -0.0001  
Y 0.0000 -0.0000 -0.0001 0.0001 -0.0000 -0.0000  
Z -0.0000 0.0001 0.0003 -0.0003 0.0000 0.0001  
AT. 137 H X 0.0001 0.0004 -0.0011 -0.0010 -0.0003 0.0003  
Y -0.0006 -0.0015 0.0050 0.0046 0.0011 -0.0012  
Z 0.0003 0.0009 -0.0030 -0.0027 -0.0006 0.0007  
AT. 138 H X 0.0001 -0.0004 -0.0011 0.0010 -0.0003 -0.0003  
Y -0.0006 0.0015 0.0050 -0.0046 0.0011 0.0012  
Z 0.0003 -0.0009 -0.0030 0.0027 -0.0006 -0.0007

AT. 139 H X -0.0008 -0.0020 0.0050 0.0045 0.0018 -0.0007  
Y -0.0002 -0.0005 0.0012 0.0011 0.0004 -0.0001  
Z -0.0006 -0.0016 0.0040 0.0036 0.0015 -0.0005

AT. 140 H X -0.0008 0.0020 0.0050 -0.0045 0.0018 0.0007  
Y -0.0002 0.0005 0.0012 -0.0011 0.0004 0.0001  
Z -0.0006 0.0016 0.0040 -0.0036 0.0015 0.0005

AT. 141 H X -0.0002 -0.0006 0.0018 0.0016 0.0005 -0.0005  
Y 0.0006 0.0016 -0.0047 -0.0043 -0.0013 0.0012  
Z 0.0005 0.0015 -0.0043 -0.0040 -0.0013 0.0011

AT. 142 H X -0.0002 0.0006 0.0018 -0.0016 0.0005 0.0005  
Y 0.0006 -0.0016 -0.0047 0.0043 -0.0013 -0.0012  
Z 0.0005 -0.0015 -0.0043 0.0040 -0.0013 -0.0011

AT. 143 C X -0.0001 -0.0001 0.0007 0.0007 -0.0000 -0.0001  
Y -0.0000 -0.0001 0.0004 0.0005 -0.0000 -0.0001  
Z -0.0000 -0.0000 0.0001 0.0001 0.0000 -0.0000

AT. 144 C X -0.0001 0.0001 0.0007 -0.0007 -0.0000 0.0001  
Y -0.0000 0.0001 0.0004 -0.0005 -0.0000 0.0001  
Z -0.0000 0.0000 0.0001 -0.0001 0.0000 0.0000

AT. 145 H X -0.0002 -0.0003 0.0015 0.0015 -0.0000 -0.0003  
Y 0.0006 0.0009 -0.0053 -0.0055 0.0001 0.0012  
Z 0.0006 0.0009 -0.0053 -0.0055 0.0001 0.0012

AT. 146 H X -0.0002 0.0003 0.0015 -0.0015 -0.0000 0.0003  
Y 0.0006 -0.0009 -0.0053 0.0055 0.0001 -0.0012  
Z 0.0006 -0.0009 -0.0053 0.0055 0.0001 -0.0012

AT. 147 H X 0.0010 0.0015 -0.0083 -0.0092 0.0004 0.0019  
Y 0.0004 0.0006 -0.0032 -0.0035 0.0002 0.0007  
Z -0.0007 -0.0011 0.0059 0.0065 -0.0003 -0.0013

AT. 148 H X 0.0010 -0.0015 -0.0083 0.0092 0.0004 -0.0019  
Y 0.0004 -0.0006 -0.0032 0.0035 0.0002 -0.0007  
Z -0.0007 0.0011 0.0059 -0.0065 -0.0003 0.0013

AT. 149 H X 0.0001 0.0002 -0.0010 -0.0010 0.0001 0.0002  
Y -0.0005 -0.0008 0.0035 0.0035 -0.0002 -0.0005



Z 0.0003 0.0005 -0.0022 -0.0022 0.0002 0.0004  
AT.150 H X 0.0001 -0.0002 -0.0010 0.0010 0.0001 -0.0002  
Y -0.0005 0.0008 0.0035 -0.0035 -0.0002 0.0005  
Z 0.0003 -0.0005 -0.0022 0.0022 0.0002 -0.0004  
AT.151 C X 0.0000 0.0000 -0.0002 -0.0002 -0.0000 0.0001  
Y -0.0001 -0.0001 0.0006 0.0006 0.0000 -0.0002  
Z -0.0000 -0.0000 0.0003 0.0003 -0.0000 -0.0000  
AT.152 C X 0.0000 -0.0000 -0.0002 0.0002 -0.0000 -0.0001  
Y -0.0001 0.0001 0.0006 -0.0006 0.0000 0.0002  
Z -0.0000 0.0000 0.0003 -0.0003 -0.0000 0.0000  
AT.153 H X -0.0000 -0.0000 0.0007 0.0008 0.0001 -0.0003  
Y 0.0001 0.0000 -0.0018 -0.0023 -0.0006 0.0008  
Z -0.0001 -0.0000 0.0011 0.0014 0.0004 -0.0005  
AT.154 H X -0.0000 0.0000 0.0007 -0.0008 0.0001 0.0003  
Y 0.0001 -0.0000 -0.0018 0.0023 -0.0006 -0.0008  
Z -0.0001 0.0000 0.0011 -0.0014 0.0004 0.0005  
AT.155 H X -0.0002 -0.0002 0.0015 0.0015 0.0000 -0.0003  
Y 0.0005 0.0006 -0.0045 -0.0046 -0.0000 0.0009  
Z 0.0005 0.0006 -0.0044 -0.0044 -0.0000 0.0009  
AT.156 H X -0.0002 0.0002 0.0015 -0.0015 0.0000 0.0003  
Y 0.0005 -0.0006 -0.0045 0.0046 -0.0000 -0.0009  
Z 0.0005 -0.0006 -0.0044 0.0044 -0.0000 -0.0009  
AT.157 O X -0.0000 -0.0000 0.0000 0.0000 0.0000 0.0000  
Y 0.0000 0.0000 -0.0001 -0.0000 -0.0000 -0.0000  
Z 0.0000 0.0000 0.0000 0.0000 -0.0000 -0.0000  
AT.158 O X -0.0000 0.0000 0.0000 -0.0000 0.0000 -0.0000  
Y 0.0000 -0.0000 -0.0001 0.0000 -0.0000 0.0000  
Z 0.0000 -0.0000 0.0000 -0.0000 -0.0000 0.0000  
AT.159 O X 0.0000 -0.0000 0.0000 0.0000 -0.0000 -0.0000  
Y -0.0000 0.0000 0.0000 -0.0000 0.0000 0.0000  
Z 0.0000 -0.0000 0.0000 0.0000 -0.0000 -0.0000  
AT.160 O X 0.0000 0.0000 0.0000 -0.0000 -0.0000 0.0000

Y -0.0000 -0.0000 0.0000 0.0000 0.0000 -0.0000  
Z 0.0000 0.0000 0.0000 -0.0000 -0.0000 0.0000  
AT.161 H X 0.0001 0.0001 -0.0000 -0.0000 -0.0002 -0.0001  
Y -0.0002 -0.0003 0.0007 0.0003 0.0003 0.0002  
Z -0.0000 -0.0000 0.0002 0.0004 0.0003 0.0002  
AT.162 H X 0.0001 -0.0001 -0.0000 0.0000 -0.0002 0.0001  
Y -0.0002 0.0003 0.0007 -0.0003 0.0003 -0.0002  
Z -0.0000 0.0000 0.0002 -0.0004 0.0003 -0.0002  
AT.163 H X -0.0000 0.0000 -0.0000 -0.0000 0.0001 0.0000  
Y 0.0000 -0.0000 0.0000 0.0001 -0.0001 -0.0000  
Z -0.0001 0.0001 -0.0002 -0.0002 0.0003 0.0001  
AT.164 H X -0.0000 -0.0000 -0.0000 0.0000 0.0001 -0.0000  
Y 0.0000 0.0000 0.0000 -0.0001 -0.0001 0.0000  
Z -0.0001 -0.0001 -0.0002 0.0002 0.0003 -0.0001  
AT.165 O X -0.0000 -0.0000 -0.0000 -0.0000 -0.0000 -0.0000  
Y -0.0000 -0.0000 -0.0000 -0.0000 -0.0000 -0.0000  
Z 0.0000 0.0000 -0.0000 -0.0000 0.0000 0.0000  
AT.166 O X -0.0000 0.0000 -0.0000 0.0000 -0.0000 0.0000  
Y -0.0000 0.0000 -0.0000 0.0000 -0.0000 0.0000  
Z 0.0000 -0.0000 -0.0000 0.0000 0.0000 -0.0000  
AT.167 H X 0.0003 0.0003 0.0003 0.0003 0.0001 0.0001  
Y 0.0000 0.0001 0.0001 0.0001 0.0001 0.0000  
Z 0.0001 0.0001 0.0001 0.0001 0.0000 0.0000  
AT.168 H X 0.0003 -0.0003 0.0003 -0.0003 0.0001 -0.0001  
Y 0.0000 -0.0001 0.0001 -0.0001 0.0001 -0.0000  
Z 0.0001 -0.0001 0.0001 -0.0001 0.0000 -0.0000  
AT.169 O X 0.0000 0.0000 -0.0000 0.0000 -0.0000 0.0000  
Y -0.0000 -0.0000 0.0000 -0.0000 0.0000 -0.0000  
Z 0.0000 0.0000 -0.0000 0.0000 -0.0000 0.0000  
AT.170 O X 0.0000 -0.0000 -0.0000 -0.0000 -0.0000 -0.0000  
Y -0.0000 0.0000 0.0000 0.0000 0.0000 0.0000  
Z 0.0000 -0.0000 -0.0000 -0.0000 -0.0000 -0.0000

AT. 171 H X -0.0001 -0.0001 0.0000 -0.0001 0.0002 -0.0001  
Y 0.0002 0.0002 -0.0001 0.0001 -0.0005 0.0004  
Z -0.0001 -0.0001 0.0000 -0.0001 0.0002 -0.0002

AT. 172 H X -0.0001 0.0001 0.0000 0.0001 0.0002 0.0001  
Y 0.0002 -0.0002 -0.0001 -0.0001 -0.0005 -0.0004  
Z -0.0001 0.0001 0.0000 0.0001 0.0002 0.0002

FREQ(CM\*\*-1) 3089.25 3089.92 3098.20 3098.38 3104.96 3104.97

AT. 1 I X -0.0000 -0.0000 0.0000 -0.0000 -0.0000 -0.0000  
Y -0.0000 0.0000 -0.0000 -0.0000 -0.0000 -0.0000  
Z -0.0000 0.0000 0.0000 0.0000 0.0000 0.0000

AT. 2 I X -0.0000 0.0000 0.0000 0.0000 -0.0000 0.0000  
Y -0.0000 -0.0000 -0.0000 0.0000 -0.0000 0.0000  
Z -0.0000 -0.0000 0.0000 -0.0000 0.0000 -0.0000

AT. 3 I X -0.0000 0.0000 0.0000 0.0000 0.0000 -0.0000  
Y -0.0000 0.0000 -0.0000 -0.0000 0.0000 0.0000  
Z -0.0000 0.0000 0.0000 -0.0000 -0.0000 0.0000

AT. 4 I X -0.0000 -0.0000 0.0000 -0.0000 0.0000 0.0000  
Y -0.0000 -0.0000 -0.0000 0.0000 0.0000 -0.0000  
Z -0.0000 -0.0000 0.0000 0.0000 -0.0000 -0.0000

AT. 5 O X 0.0000 0.0000 0.0000 -0.0000 -0.0000 -0.0000  
Y -0.0000 -0.0000 -0.0000 0.0000 -0.0000 -0.0000  
Z -0.0000 -0.0000 -0.0000 0.0000 0.0000 0.0000

AT. 6 O X 0.0000 -0.0000 0.0000 0.0000 -0.0000 0.0000  
Y -0.0000 0.0000 -0.0000 -0.0000 -0.0000 0.0000  
Z -0.0000 0.0000 -0.0000 -0.0000 0.0000 -0.0000

AT. 7 O X -0.0001 -0.0001 0.0000 0.0000 0.0000 -0.0000  
Y 0.0001 0.0000 -0.0001 -0.0001 -0.0000 0.0000  
Z -0.0000 -0.0000 -0.0000 -0.0000 0.0000 -0.0000

AT. 8 O X -0.0001 0.0001 0.0000 -0.0000 0.0000 0.0000  
Y 0.0001 -0.0000 -0.0001 0.0001 -0.0000 -0.0000

Z -0.0000 0.0000 -0.0000 0.0000 0.0000 0.0000  
AT. 9 N X -0.0000 -0.0001 0.0000 -0.0000 -0.0000 -0.0000  
Y -0.0000 -0.0000 -0.0000 -0.0000 -0.0000 -0.0000  
Z -0.0001 -0.0001 0.0000 0.0000 0.0000 -0.0000  
AT. 10 N X -0.0000 0.0001 0.0000 0.0000 -0.0000 0.0000  
Y -0.0000 0.0000 -0.0000 0.0000 -0.0000 0.0000  
Z -0.0001 0.0001 0.0000 -0.0000 0.0000 0.0000  
AT. 11 N X 0.0002 0.0001 0.0000 0.0000 0.0000 -0.0000  
Y 0.0001 0.0001 -0.0000 -0.0000 -0.0000 0.0000  
Z -0.0002 -0.0002 0.0000 0.0000 0.0000 -0.0000  
AT. 12 N X 0.0002 -0.0001 0.0000 -0.0000 0.0000 0.0000  
Y 0.0001 -0.0001 -0.0000 0.0000 -0.0000 -0.0000  
Z -0.0002 0.0002 0.0000 -0.0000 0.0000 0.0000  
AT. 13 C X -0.0000 0.0000 0.0000 -0.0000 0.0000 0.0000  
Y 0.0000 0.0000 0.0000 0.0000 0.0000 0.0000  
Z 0.0002 0.0001 -0.0000 -0.0000 -0.0000 -0.0000  
AT. 14 C X -0.0000 -0.0000 0.0000 0.0000 0.0000 -0.0000  
Y 0.0000 -0.0000 0.0000 -0.0000 0.0000 -0.0000  
Z 0.0002 -0.0001 -0.0000 0.0000 -0.0000 0.0000  
AT. 15 C X -0.0000 0.0000 0.0000 0.0000 -0.0000 -0.0000  
Y 0.0001 0.0001 0.0000 0.0000 0.0000 -0.0000  
Z 0.0000 -0.0000 0.0000 -0.0000 -0.0000 0.0000  
AT. 16 C X -0.0000 -0.0000 0.0000 -0.0000 -0.0000 0.0000  
Y 0.0001 -0.0001 0.0000 -0.0000 0.0000 0.0000  
Z 0.0000 0.0000 0.0000 0.0000 -0.0000 -0.0000  
AT. 17 H X 0.0002 0.0003 0.0000 0.0000 0.0000 0.0000  
Y -0.0008 -0.0010 -0.0001 -0.0001 -0.0001 -0.0000  
Z -0.0006 -0.0007 -0.0001 -0.0001 -0.0001 -0.0000  
AT. 18 H X 0.0002 -0.0003 0.0000 -0.0000 0.0000 -0.0000  
Y -0.0008 0.0010 -0.0001 0.0001 -0.0001 0.0000  
Z -0.0006 0.0007 -0.0001 0.0001 -0.0001 0.0000  
AT. 19 H X -0.0002 -0.0004 -0.0000 -0.0001 -0.0000 0.0001

Y -0.0001 -0.0003 -0.0000 -0.0002 -0.0000 0.0001  
Z 0.0004 0.0010 0.0000 0.0004 0.0001 -0.0002  
AT. 20 H X -0.0002 0.0004 -0.0000 0.0001 -0.0000 -0.0001  
Y -0.0001 0.0003 -0.0000 0.0002 -0.0000 -0.0001  
Z 0.0004 -0.0010 0.0000 -0.0004 0.0001 0.0002  
AT. 21 C X 0.0000 0.0000 -0.0000 -0.0001 0.0000 0.0000  
Y -0.0002 -0.0001 0.0000 0.0000 0.0000 -0.0000  
Z 0.0002 0.0002 -0.0000 -0.0000 -0.0000 0.0000  
AT. 22 C X 0.0000 -0.0000 -0.0000 0.0001 0.0000 -0.0000  
Y -0.0002 0.0001 0.0000 -0.0000 0.0000 0.0000  
Z 0.0002 -0.0002 -0.0000 0.0000 -0.0000 -0.0000  
AT. 23 C X 0.0000 0.0000 -0.0000 -0.0000 -0.0000 0.0000  
Y -0.0000 -0.0000 0.0000 -0.0000 0.0000 0.0000  
Z -0.0000 -0.0000 -0.0000 -0.0000 -0.0000 0.0000  
AT. 24 C X 0.0000 -0.0000 -0.0000 0.0000 -0.0000 -0.0000  
Y -0.0000 0.0000 0.0000 0.0000 0.0000 -0.0000  
Z -0.0000 0.0000 -0.0000 0.0000 -0.0000 -0.0000  
AT. 25 H X -0.0000 -0.0001 0.0000 -0.0000 -0.0000 0.0000  
Y 0.0003 0.0005 -0.0000 0.0002 -0.0000 -0.0002  
Z 0.0001 0.0001 -0.0000 0.0000 -0.0000 -0.0000  
AT. 26 H X -0.0000 0.0001 0.0000 0.0000 -0.0000 -0.0000  
Y 0.0003 -0.0005 -0.0000 -0.0002 -0.0000 0.0002  
Z 0.0001 -0.0001 -0.0000 -0.0000 -0.0000 0.0000  
AT. 27 H X 0.0001 0.0001 0.0000 0.0000 0.0000 -0.0000  
Y -0.0000 -0.0002 -0.0001 -0.0002 -0.0000 0.0001  
Z -0.0000 0.0002 0.0002 0.0002 0.0001 -0.0002  
AT. 28 H X 0.0001 -0.0001 0.0000 -0.0000 0.0000 0.0000  
Y -0.0000 0.0002 -0.0001 0.0002 -0.0000 -0.0001  
Z -0.0000 -0.0002 0.0002 -0.0002 0.0001 0.0002  
AT. 29 C X 0.0004 0.0006 -0.0000 0.0000 0.0000 0.0000  
Y 0.0020 0.0027 -0.0001 0.0001 0.0001 0.0001  
Z -0.0006 -0.0009 0.0001 -0.0000 -0.0001 -0.0001

AT. 30 C X 0.0004 -0.0006 -0.0000 -0.0000 0.0000 -0.0000  
Y 0.0020 -0.0027 -0.0001 -0.0001 0.0001 -0.0001  
Z -0.0006 0.0009 0.0001 0.0000 -0.0001 0.0001

AT. 31 H X -0.0091 -0.0120 0.0007 -0.0002 -0.0005 -0.0006  
Y -0.0214 -0.0281 0.0016 -0.0005 -0.0012 -0.0014  
Z 0.0143 0.0188 -0.0011 0.0004 0.0008 0.0010

AT. 32 H X -0.0091 0.0120 0.0007 0.0002 -0.0005 0.0006  
Y -0.0214 0.0281 0.0016 0.0005 -0.0012 0.0014  
Z 0.0143 -0.0188 -0.0011 -0.0004 0.0008 -0.0010

AT. 33 H X 0.0043 0.0054 -0.0002 0.0001 0.0001 0.0002  
Y -0.0024 -0.0031 0.0001 -0.0000 -0.0000 -0.0001  
Z -0.0062 -0.0079 0.0003 -0.0001 -0.0002 -0.0003

AT. 34 H X 0.0043 -0.0054 -0.0002 -0.0001 0.0001 -0.0002  
Y -0.0024 0.0031 0.0001 0.0000 -0.0000 0.0001  
Z -0.0062 0.0079 0.0003 0.0001 -0.0002 0.0003

AT. 35 C X 0.0000 0.0000 0.0000 0.0000 0.0000 0.0000  
Y 0.0000 0.0000 0.0000 -0.0000 -0.0000 -0.0000  
Z -0.0000 -0.0001 0.0000 -0.0000 -0.0000 -0.0000

AT. 36 C X 0.0000 -0.0000 0.0000 -0.0000 0.0000 -0.0000  
Y 0.0000 -0.0000 0.0000 0.0000 -0.0000 0.0000  
Z -0.0000 0.0001 0.0000 0.0000 -0.0000 0.0000

AT. 37 C X -0.0018 -0.0019 0.0000 0.0000 -0.0000 -0.0000  
Y -0.0009 -0.0009 0.0000 0.0000 -0.0000 -0.0000  
Z -0.0009 -0.0009 0.0000 -0.0000 -0.0000 -0.0000

AT. 38 C X -0.0018 0.0019 0.0000 -0.0000 -0.0000 0.0000  
Y -0.0009 0.0009 0.0000 -0.0000 -0.0000 0.0000  
Z -0.0009 0.0009 0.0000 0.0000 -0.0000 0.0000

AT. 39 H X 0.0039 0.0040 -0.0001 -0.0001 0.0001 0.0001  
Y -0.0028 -0.0029 0.0000 0.0000 -0.0000 -0.0001  
Z -0.0060 -0.0062 0.0001 0.0001 -0.0001 -0.0002

AT. 40 H X 0.0039 -0.0040 -0.0001 0.0001 0.0001 -0.0001  
Y -0.0028 0.0029 0.0000 -0.0000 -0.0000 0.0001

Z -0.0060 0.0062 0.0001 -0.0001 -0.0001 0.0002  
AT. 41 H X 0.0172 0.0180 -0.0001 0.0000 0.0003 0.0004  
Y 0.0130 0.0136 -0.0001 -0.0000 0.0002 0.0003  
Z 0.0172 0.0180 -0.0001 -0.0000 0.0003 0.0004  
AT. 42 H X 0.0172 -0.0180 -0.0001 -0.0000 0.0003 -0.0004  
Y 0.0130 -0.0136 -0.0001 0.0000 0.0002 -0.0003  
Z 0.0172 -0.0180 -0.0001 0.0000 0.0003 -0.0004  
AT. 43 C X -0.0020 -0.0018 -0.0000 0.0000 -0.0000 0.0000  
Y -0.0073 -0.0064 0.0000 0.0001 -0.0000 0.0000  
Z -0.0043 -0.0037 -0.0000 0.0000 -0.0000 0.0000  
AT. 44 C X -0.0020 0.0018 -0.0000 -0.0000 -0.0000 -0.0000  
Y -0.0073 0.0064 0.0000 -0.0001 -0.0000 -0.0000  
Z -0.0043 0.0037 -0.0000 -0.0000 -0.0000 -0.0000  
AT. 45 H X 0.0508 0.0445 0.0000 -0.0003 0.0002 -0.0000  
Y 0.0683 0.0598 -0.0000 -0.0005 0.0003 -0.0000  
Z 0.0725 0.0635 0.0000 -0.0005 0.0003 -0.0000  
AT. 46 H X 0.0508 -0.0445 0.0000 0.0003 0.0002 0.0000  
Y 0.0683 -0.0598 -0.0000 0.0005 0.0003 0.0000  
Z 0.0725 -0.0635 0.0000 0.0005 0.0003 0.0000  
AT. 47 H X -0.0274 -0.0239 0.0002 0.0003 -0.0001 -0.0000  
Y 0.0190 0.0165 -0.0002 -0.0002 0.0001 0.0000  
Z -0.0196 -0.0171 0.0001 0.0002 -0.0001 -0.0000  
AT. 48 H X -0.0274 0.0239 0.0002 -0.0003 -0.0001 0.0000  
Y 0.0190 -0.0165 -0.0002 0.0002 0.0001 -0.0000  
Z -0.0196 0.0171 0.0001 -0.0002 -0.0001 0.0000  
AT. 49 C X -0.0001 -0.0000 0.0000 0.0000 0.0000 0.0000  
Y 0.0000 0.0001 0.0000 0.0000 0.0000 0.0000  
Z -0.0001 -0.0001 0.0000 -0.0000 -0.0000 0.0000  
AT. 50 C X -0.0001 0.0000 0.0000 -0.0000 0.0000 -0.0000  
Y 0.0000 -0.0001 0.0000 -0.0000 0.0000 -0.0000  
Z -0.0001 0.0001 0.0000 0.0000 -0.0000 -0.0000  
AT. 51 C X 0.0019 0.0022 -0.0000 0.0000 0.0001 0.0001

Y 0.0020 0.0023 -0.0000 0.0000 0.0001 0.0001  
Z -0.0014 -0.0016 0.0000 -0.0000 -0.0001 -0.0001  
AT. 52 C X 0.0019 -0.0022 -0.0000 -0.0000 0.0001 -0.0001  
Y 0.0020 -0.0023 -0.0000 -0.0000 0.0001 -0.0001  
Z -0.0014 0.0016 0.0000 0.0000 -0.0001 0.0001  
AT. 53 H X -0.0068 -0.0080 0.0002 -0.0001 -0.0004 -0.0004  
Y 0.0049 0.0058 -0.0001 0.0001 0.0003 0.0003  
Z -0.0042 -0.0049 0.0001 -0.0000 -0.0002 -0.0003  
AT. 54 H X -0.0068 0.0080 0.0002 0.0001 -0.0004 0.0004  
Y 0.0049 -0.0058 -0.0001 -0.0001 0.0003 -0.0003  
Z -0.0042 0.0049 0.0001 0.0000 -0.0002 0.0003  
AT. 55 H X -0.0148 -0.0175 0.0002 -0.0001 -0.0006 -0.0008  
Y -0.0272 -0.0322 0.0003 -0.0001 -0.0012 -0.0016  
Z 0.0213 0.0252 -0.0002 0.0001 0.0010 0.0013  
AT. 56 H X -0.0148 0.0175 0.0002 0.0001 -0.0006 0.0008  
Y -0.0272 0.0322 0.0003 0.0001 -0.0012 0.0016  
Z 0.0213 -0.0252 -0.0002 -0.0001 0.0010 -0.0013  
AT. 57 C X -0.0004 -0.0007 0.0000 -0.0000 -0.0001 -0.0001  
Y 0.0004 0.0006 -0.0000 -0.0000 0.0000 0.0000  
Z -0.0000 0.0001 -0.0000 -0.0000 -0.0002 -0.0002  
AT. 58 C X -0.0004 0.0007 0.0000 0.0000 -0.0001 0.0001  
Y 0.0004 -0.0006 -0.0000 0.0000 0.0000 -0.0000  
Z -0.0000 -0.0001 -0.0000 0.0000 -0.0002 0.0002  
AT. 59 H X -0.0021 -0.0028 0.0000 -0.0000 -0.0007 -0.0008  
Y -0.0044 -0.0059 0.0001 -0.0000 -0.0015 -0.0016  
Z 0.0031 0.0040 -0.0001 0.0000 0.0010 0.0011  
AT. 60 H X -0.0021 0.0028 0.0000 0.0000 -0.0007 0.0008  
Y -0.0044 0.0059 0.0001 0.0000 -0.0015 0.0016  
Z 0.0031 -0.0040 -0.0001 -0.0000 0.0010 -0.0011  
AT. 61 H X 0.0044 0.0071 -0.0001 0.0000 0.0002 0.0004  
Y -0.0028 -0.0045 0.0001 -0.0000 -0.0000 -0.0002  
Z -0.0058 -0.0092 0.0002 -0.0001 -0.0003 -0.0006



AT. 62 H X 0.0044 -0.0071 -0.0001 -0.0000 0.0002 -0.0004  
Y -0.0028 0.0045 0.0001 0.0000 -0.0000 0.0002  
Z -0.0058 0.0092 0.0002 0.0001 -0.0003 0.0006

AT. 63 H X 0.0027 0.0038 -0.0001 0.0001 0.0012 0.0014  
Y 0.0024 0.0035 -0.0001 0.0001 0.0011 0.0012  
Z 0.0030 0.0042 -0.0001 0.0001 0.0012 0.0014

AT. 64 H X 0.0027 -0.0038 -0.0001 -0.0001 0.0012 -0.0014  
Y 0.0024 -0.0035 -0.0001 -0.0001 0.0011 -0.0012  
Z 0.0030 -0.0042 -0.0001 -0.0001 0.0012 -0.0014

AT. 65 C X 0.0008 0.0012 0.0000 -0.0000 -0.0000 0.0000  
Y -0.0001 -0.0004 0.0000 0.0000 -0.0000 -0.0000  
Z -0.0005 -0.0006 -0.0000 0.0000 -0.0000 -0.0000

AT. 66 C X 0.0008 -0.0012 0.0000 0.0000 -0.0000 -0.0000  
Y -0.0001 0.0004 0.0000 -0.0000 -0.0000 0.0000  
Z -0.0005 0.0006 -0.0000 -0.0000 -0.0000 0.0000

AT. 67 H X 0.0033 0.0052 0.0000 -0.0001 0.0000 0.0003  
Y 0.0037 0.0057 0.0000 -0.0001 0.0000 0.0003  
Z 0.0044 0.0064 0.0000 -0.0001 0.0001 0.0003

AT. 68 H X 0.0033 -0.0052 0.0000 0.0001 0.0000 -0.0003  
Y 0.0037 -0.0057 0.0000 0.0001 0.0000 -0.0003  
Z 0.0044 -0.0064 0.0000 0.0001 0.0001 -0.0003

AT. 69 H X -0.0080 -0.0133 -0.0001 0.0001 0.0002 -0.0004  
Y 0.0061 0.0101 0.0001 -0.0001 -0.0001 0.0003  
Z -0.0041 -0.0068 -0.0001 0.0001 0.0001 -0.0002

AT. 70 H X -0.0080 0.0133 -0.0001 -0.0001 0.0002 0.0004  
Y 0.0061 -0.0101 0.0001 0.0001 -0.0001 -0.0003  
Z -0.0041 0.0068 -0.0001 -0.0001 0.0001 0.0002

AT. 71 H X -0.0044 -0.0059 -0.0001 0.0000 0.0000 -0.0001  
Y -0.0080 -0.0109 -0.0001 0.0001 0.0001 -0.0001  
Z 0.0060 0.0080 0.0001 -0.0000 -0.0000 0.0001

AT. 72 H X -0.0044 0.0059 -0.0001 -0.0000 0.0000 0.0001  
Y -0.0080 0.0109 -0.0001 -0.0001 0.0001 0.0001

Z 0.0060 -0.0080 0.0001 0.0000 -0.0000 -0.0001  
AT. 73 C X 0.0000 0.0000 0.0000 0.0000 0.0000 0.0000  
Y 0.0007 0.0012 0.0000 0.0000 0.0000 0.0000  
Z -0.0017 -0.0030 0.0000 -0.0000 -0.0000 -0.0001  
AT. 74 C X 0.0000 -0.0000 0.0000 -0.0000 0.0000 -0.0000  
Y 0.0007 -0.0012 0.0000 -0.0000 0.0000 -0.0000  
Z -0.0017 0.0030 0.0000 0.0000 -0.0000 0.0001  
AT. 75 H X -0.0082 -0.0151 0.0000 -0.0003 -0.0000 -0.0003  
Y -0.0154 -0.0283 0.0001 -0.0005 -0.0001 -0.0006  
Z 0.0112 0.0202 -0.0001 0.0004 0.0001 0.0004  
AT. 76 H X -0.0082 0.0151 0.0000 0.0003 -0.0000 0.0003  
Y -0.0154 0.0283 0.0001 0.0005 -0.0001 0.0006  
Z 0.0112 -0.0202 -0.0001 -0.0004 0.0001 -0.0004  
AT. 77 H X 0.0078 0.0146 -0.0001 0.0000 0.0000 0.0002  
Y 0.0077 0.0146 -0.0001 0.0000 0.0000 0.0003  
Z 0.0085 0.0157 -0.0001 0.0000 0.0000 0.0003  
AT. 78 H X 0.0078 -0.0146 -0.0001 -0.0000 0.0000 -0.0002  
Y 0.0077 -0.0146 -0.0001 -0.0000 0.0000 -0.0003  
Z 0.0085 -0.0157 -0.0001 -0.0000 0.0000 -0.0003  
AT. 79 I X 0.0000 -0.0000 -0.0000 -0.0000 -0.0000 -0.0000  
Y -0.0000 0.0000 0.0000 0.0000 -0.0000 -0.0000  
Z -0.0000 -0.0000 0.0000 0.0000 -0.0000 -0.0000  
AT. 80 I X 0.0000 0.0000 -0.0000 0.0000 -0.0000 0.0000  
Y -0.0000 -0.0000 0.0000 -0.0000 -0.0000 0.0000  
Z -0.0000 0.0000 0.0000 -0.0000 -0.0000 0.0000  
AT. 81 I X 0.0000 0.0000 0.0000 -0.0000 0.0000 -0.0000  
Y -0.0000 0.0000 -0.0000 -0.0000 -0.0000 -0.0000  
Z -0.0000 -0.0000 0.0000 0.0000 -0.0000 -0.0000  
AT. 82 I X 0.0000 -0.0000 0.0000 0.0000 0.0000 0.0000  
Y -0.0000 -0.0000 -0.0000 0.0000 -0.0000 0.0000  
Z -0.0000 0.0000 0.0000 -0.0000 -0.0000 0.0000  
AT. 83 O X -0.0000 0.0000 0.0000 -0.0000 0.0001 0.0001

Y -0.0000 -0.0000 0.0000 0.0000 0.0000 0.0000  
Z -0.0000 0.0000 -0.0000 -0.0000 0.0000 0.0000  
AT. 84 O X -0.0000 -0.0000 0.0000 0.0000 0.0001 -0.0001  
Y -0.0000 0.0000 0.0000 -0.0000 0.0000 -0.0000  
Z -0.0000 -0.0000 -0.0000 0.0000 0.0000 -0.0000  
AT. 85 O X -0.0000 -0.0000 0.0001 0.0001 -0.0000 -0.0000  
Y -0.0000 -0.0000 0.0000 0.0000 -0.0000 -0.0000  
Z -0.0000 -0.0000 -0.0000 -0.0000 0.0000 0.0000  
AT. 86 O X -0.0000 0.0000 0.0001 -0.0001 -0.0000 0.0000  
Y -0.0000 0.0000 0.0000 -0.0000 -0.0000 0.0000  
Z -0.0000 0.0000 -0.0000 0.0000 0.0000 -0.0000  
AT. 87 N X 0.0000 0.0000 -0.0000 -0.0000 -0.0002 -0.0002  
Y 0.0000 0.0000 -0.0000 -0.0000 0.0000 0.0001  
Z -0.0000 0.0000 -0.0000 -0.0000 0.0002 0.0002  
AT. 88 N X 0.0000 -0.0000 -0.0000 0.0000 -0.0002 0.0002  
Y 0.0000 -0.0000 -0.0000 0.0000 0.0000 -0.0001  
Z -0.0000 -0.0000 -0.0000 0.0000 0.0002 -0.0002  
AT. 89 N X 0.0000 0.0000 -0.0002 -0.0002 0.0000 0.0000  
Y 0.0000 0.0000 0.0001 0.0001 -0.0000 -0.0000  
Z -0.0000 0.0000 -0.0002 -0.0002 0.0000 0.0000  
AT. 90 N X 0.0000 -0.0000 -0.0002 0.0002 0.0000 -0.0000  
Y 0.0000 -0.0000 0.0001 -0.0001 -0.0000 0.0000  
Z -0.0000 -0.0000 -0.0002 0.0002 0.0000 -0.0000  
AT. 91 C X 0.0000 -0.0000 0.0000 -0.0000 -0.0000 -0.0000  
Y 0.0000 -0.0000 0.0000 -0.0000 -0.0000 -0.0000  
Z 0.0000 -0.0000 0.0000 0.0000 -0.0003 -0.0002  
AT. 92 C X 0.0000 0.0000 0.0000 0.0000 -0.0000 0.0000  
Y 0.0000 0.0000 0.0000 0.0000 -0.0000 0.0000  
Z 0.0000 0.0000 0.0000 -0.0000 -0.0003 0.0002  
AT. 93 C X -0.0001 0.0001 -0.0002 0.0001 -0.0001 -0.0002  
Y -0.0001 0.0002 -0.0004 0.0002 -0.0002 -0.0003  
Z -0.0000 0.0000 -0.0001 0.0000 -0.0000 -0.0000

AT. 94 C X -0.0001 -0.0001 -0.0002 -0.0001 -0.0001 0.0002  
Y -0.0001 -0.0002 -0.0004 -0.0002 -0.0002 0.0003  
Z -0.0000 -0.0000 -0.0001 -0.0000 -0.0000 0.0000

AT. 95 H X 0.0006 -0.0009 0.0019 -0.0010 0.0010 0.0016  
Y 0.0014 -0.0021 0.0047 -0.0021 0.0023 0.0036  
Z 0.0008 -0.0013 0.0028 -0.0012 0.0014 0.0021

AT. 96 H X 0.0006 0.0009 0.0019 0.0010 0.0010 -0.0016  
Y 0.0014 0.0021 0.0047 0.0021 0.0023 -0.0036  
Z 0.0008 0.0013 0.0028 0.0012 0.0014 -0.0021

AT. 97 H X -0.0002 0.0003 -0.0005 0.0003 -0.0003 -0.0005  
Y 0.0001 -0.0002 0.0004 -0.0002 0.0002 0.0003  
Z -0.0005 0.0008 -0.0017 0.0009 -0.0009 -0.0014

AT. 98 H X -0.0002 -0.0003 -0.0005 -0.0003 -0.0003 0.0005  
Y 0.0001 0.0002 0.0004 0.0002 0.0002 -0.0003  
Z -0.0005 -0.0008 -0.0017 -0.0009 -0.0009 0.0014

AT. 99 C X -0.0000 -0.0000 -0.0000 -0.0001 0.0000 0.0000  
Y -0.0000 -0.0000 -0.0002 -0.0002 0.0000 0.0000  
Z -0.0000 -0.0000 0.0002 0.0002 -0.0000 -0.0000

AT. 100 C X -0.0000 0.0000 -0.0000 0.0001 0.0000 -0.0000  
Y -0.0000 0.0000 -0.0002 0.0002 0.0000 -0.0000  
Z -0.0000 0.0000 0.0002 -0.0002 -0.0000 0.0000

AT. 101 C X -0.0000 -0.0000 -0.0000 -0.0000 0.0000 0.0000  
Y -0.0000 -0.0000 -0.0000 -0.0000 0.0000 0.0000  
Z 0.0000 -0.0000 -0.0000 -0.0000 -0.0000 0.0000

AT. 102 C X -0.0000 0.0000 -0.0000 0.0000 0.0000 -0.0000  
Y -0.0000 0.0000 -0.0000 0.0000 0.0000 -0.0000  
Z 0.0000 0.0000 -0.0000 0.0000 -0.0000 -0.0000

AT. 103 H X 0.0001 0.0001 0.0000 0.0000 0.0000 -0.0001  
Y -0.0001 0.0001 -0.0000 0.0001 0.0001 -0.0003  
Z -0.0000 -0.0000 0.0000 0.0000 -0.0000 -0.0000

AT. 104 H X 0.0001 -0.0001 0.0000 -0.0000 0.0000 0.0001  
Y -0.0001 -0.0001 -0.0000 -0.0001 0.0001 0.0003

Z -0.0000 0.0000 0.0000 -0.0000 -0.0000 0.0000  
AT. 105 H X 0.0000 -0.0001 -0.0000 -0.0001 -0.0001 0.0001  
Y 0.0000 -0.0001 0.0001 -0.0001 -0.0001 0.0002  
Z -0.0000 0.0002 -0.0002 0.0001 0.0002 -0.0004  
AT. 106 H X 0.0000 0.0001 -0.0000 0.0001 -0.0001 -0.0001  
Y 0.0000 0.0001 0.0001 0.0001 -0.0001 -0.0002  
Z -0.0000 -0.0002 -0.0002 -0.0001 0.0002 0.0004  
AT. 107 C X 0.0000 0.0000 -0.0001 -0.0001 -0.0010 -0.0010  
Y 0.0001 0.0002 -0.0008 -0.0007 -0.0093 -0.0093  
Z -0.0000 -0.0001 0.0002 0.0002 0.0027 0.0027  
AT. 108 C X 0.0000 -0.0000 -0.0001 0.0001 -0.0010 0.0010  
Y 0.0001 -0.0002 -0.0008 0.0007 -0.0093 0.0093  
Z -0.0000 0.0001 0.0002 -0.0002 0.0027 -0.0027  
AT. 109 H X 0.0002 0.0004 -0.0017 -0.0015 -0.0199 -0.0199  
Y -0.0013 -0.0019 0.0088 0.0079 0.1062 0.1062  
Z 0.0007 0.0011 -0.0052 -0.0047 -0.0627 -0.0627  
AT. 110 H X 0.0002 -0.0004 -0.0017 0.0015 -0.0199 0.0199  
Y -0.0013 0.0019 0.0088 -0.0079 0.1062 -0.1062  
Z 0.0007 -0.0011 -0.0052 0.0047 -0.0627 0.0627  
AT. 111 H X -0.0005 -0.0006 0.0027 0.0025 0.0328 0.0328  
Y -0.0001 -0.0001 0.0004 0.0004 0.0051 0.0051  
Z -0.0004 -0.0005 0.0024 0.0023 0.0298 0.0298  
AT. 112 H X -0.0005 0.0006 0.0027 -0.0025 0.0328 -0.0328  
Y -0.0001 0.0001 0.0004 -0.0004 0.0051 -0.0051  
Z -0.0004 0.0005 0.0024 -0.0023 0.0298 -0.0298  
AT. 113 C X -0.0000 0.0000 -0.0000 -0.0000 0.0000 0.0000  
Y 0.0000 0.0000 -0.0000 -0.0000 -0.0000 -0.0000  
Z -0.0000 -0.0000 0.0000 -0.0000 0.0001 0.0001  
AT. 114 C X -0.0000 -0.0000 -0.0000 0.0000 0.0000 -0.0000  
Y 0.0000 -0.0000 -0.0000 0.0000 -0.0000 0.0000  
Z -0.0000 0.0000 0.0000 0.0000 0.0001 -0.0001  
AT. 115 C X 0.0000 0.0000 0.0003 0.0004 -0.0002 -0.0002

Y -0.0000 -0.0000 -0.0004 -0.0004 0.0003 0.0003  
Z -0.0000 -0.0000 -0.0004 -0.0004 0.0002 0.0002  
AT. 116 C X 0.0000 -0.0000 0.0003 -0.0004 -0.0002 0.0002  
Y -0.0000 0.0000 -0.0004 0.0004 0.0003 -0.0003  
Z -0.0000 0.0000 -0.0004 0.0004 0.0002 -0.0002  
AT. 117 H X -0.0001 -0.0001 -0.0010 -0.0011 0.0006 0.0005  
Y -0.0000 -0.0000 -0.0003 -0.0003 0.0001 0.0001  
Z -0.0001 -0.0000 -0.0009 -0.0010 0.0007 0.0006  
AT. 118 H X -0.0001 0.0001 -0.0010 0.0011 0.0006 -0.0005  
Y -0.0000 0.0000 -0.0003 0.0003 0.0001 -0.0001  
Z -0.0001 0.0000 -0.0009 0.0010 0.0007 -0.0006  
AT. 119 H X -0.0001 -0.0001 -0.0031 -0.0032 0.0015 0.0016  
Y 0.0001 0.0002 0.0048 0.0052 -0.0028 -0.0028  
Z 0.0001 0.0002 0.0051 0.0055 -0.0027 -0.0028  
AT. 120 H X -0.0001 0.0001 -0.0031 0.0032 0.0015 -0.0016  
Y 0.0001 -0.0002 0.0048 -0.0052 -0.0028 0.0028  
Z 0.0001 -0.0002 0.0051 -0.0055 -0.0027 0.0028  
AT. 121 C X 0.0000 0.0000 -0.0008 -0.0008 0.0001 0.0001  
Y -0.0001 -0.0000 -0.0083 -0.0084 0.0006 0.0006  
Z -0.0001 -0.0000 -0.0054 -0.0054 0.0004 0.0004  
AT. 122 C X 0.0000 -0.0000 -0.0008 0.0008 0.0001 -0.0001  
Y -0.0001 0.0000 -0.0083 0.0084 0.0006 -0.0006  
Z -0.0001 0.0000 -0.0054 0.0054 0.0004 -0.0004  
AT. 123 H X -0.0001 -0.0001 -0.0164 -0.0165 0.0012 0.0011  
Y 0.0006 0.0005 0.0897 0.0899 -0.0067 -0.0062  
Z 0.0006 0.0005 0.0883 0.0885 -0.0065 -0.0060  
AT. 124 H X -0.0001 0.0001 -0.0164 0.0165 0.0012 -0.0011  
Y 0.0006 -0.0005 0.0897 -0.0899 -0.0067 0.0062  
Z 0.0006 -0.0005 0.0883 -0.0885 -0.0065 0.0060  
AT. 125 H X 0.0000 -0.0000 0.0274 0.0274 -0.0022 -0.0019  
Y 0.0000 0.0000 0.0094 0.0094 -0.0008 -0.0007  
Z -0.0000 0.0000 -0.0229 -0.0229 0.0018 0.0016

AT.126 H X 0.0000 0.0000 0.0274 -0.0274 -0.0022 0.0019  
Y 0.0000 -0.0000 0.0094 -0.0094 -0.0008 0.0007  
Z -0.0000 -0.0000 -0.0229 0.0229 0.0018 -0.0016

AT.127 C X -0.0000 -0.0000 0.0001 0.0001 -0.0000 -0.0000  
Y 0.0000 -0.0000 -0.0000 -0.0000 0.0000 0.0000  
Z -0.0000 0.0000 -0.0001 -0.0001 0.0000 0.0000

AT.128 C X -0.0000 0.0000 0.0001 -0.0001 -0.0000 0.0000  
Y 0.0000 0.0000 -0.0000 0.0000 0.0000 -0.0000  
Z -0.0000 -0.0000 -0.0001 0.0001 0.0000 -0.0000

AT.129 C X 0.0000 0.0002 -0.0005 -0.0004 0.0003 0.0003  
Y -0.0000 -0.0003 0.0009 0.0008 -0.0004 -0.0004  
Z 0.0000 0.0001 -0.0004 -0.0003 0.0002 0.0002

AT.130 C X 0.0000 -0.0002 -0.0005 0.0004 0.0003 -0.0003  
Y -0.0000 0.0003 0.0009 -0.0008 -0.0004 0.0004  
Z 0.0000 -0.0001 -0.0004 0.0003 0.0002 -0.0002

AT.131 H X -0.0003 -0.0010 0.0021 0.0019 -0.0012 -0.0011  
Y -0.0001 -0.0004 0.0008 0.0007 -0.0003 -0.0003  
Z 0.0002 0.0008 -0.0017 -0.0015 0.0007 0.0007

AT.132 H X -0.0003 0.0010 0.0021 -0.0019 -0.0012 0.0011  
Y -0.0001 0.0004 0.0008 -0.0007 -0.0003 0.0003  
Z 0.0002 -0.0008 -0.0017 0.0015 0.0007 -0.0007

AT.133 H X -0.0002 -0.0011 0.0032 0.0027 -0.0018 -0.0018  
Y 0.0006 0.0036 -0.0110 -0.0090 0.0046 0.0046  
Z -0.0004 -0.0024 0.0069 0.0057 -0.0033 -0.0033

AT.134 H X -0.0002 0.0011 0.0032 -0.0027 -0.0018 0.0018  
Y 0.0006 -0.0036 -0.0110 0.0090 0.0046 -0.0046  
Z -0.0004 0.0024 0.0069 -0.0057 -0.0033 0.0033

AT.135 C X -0.0000 -0.0000 0.0001 0.0001 -0.0005 -0.0005  
Y -0.0000 -0.0000 0.0001 0.0001 0.0001 0.0001  
Z 0.0000 0.0001 -0.0001 0.0001 0.0000 0.0000

AT.136 C X -0.0000 0.0000 0.0001 -0.0001 -0.0005 0.0005  
Y -0.0000 0.0000 0.0001 -0.0001 0.0001 -0.0001

Z 0.0000 -0.0001 -0.0001 -0.0001 0.0000 -0.0000  
AT. 137 H X -0.0001 -0.0002 0.0003 0.0001 -0.0001 -0.0001  
Y 0.0003 0.0007 -0.0014 -0.0006 0.0010 0.0009  
Z -0.0002 -0.0004 0.0009 0.0004 -0.0008 -0.0007  
AT. 138 H X -0.0001 0.0002 0.0003 -0.0001 -0.0001 0.0001  
Y 0.0003 -0.0007 -0.0014 0.0006 0.0010 -0.0009  
Z -0.0002 0.0004 0.0009 -0.0004 -0.0008 0.0007  
AT. 139 H X 0.0002 0.0005 -0.0017 -0.0012 0.0045 0.0044  
Y 0.0000 0.0001 -0.0004 -0.0003 0.0010 0.0009  
Z 0.0001 0.0004 -0.0013 -0.0010 0.0035 0.0034  
AT. 140 H X 0.0002 -0.0005 -0.0017 0.0012 0.0045 -0.0044  
Y 0.0000 -0.0001 -0.0004 0.0003 0.0010 -0.0009  
Z 0.0001 -0.0004 -0.0013 0.0010 0.0035 -0.0034  
AT. 141 H X 0.0001 0.0003 -0.0004 0.0000 0.0015 0.0014  
Y -0.0003 -0.0007 0.0011 -0.0001 -0.0034 -0.0033  
Z -0.0003 -0.0006 0.0011 -0.0001 -0.0034 -0.0033  
AT. 142 H X 0.0001 -0.0003 -0.0004 -0.0000 0.0015 -0.0014  
Y -0.0003 0.0007 0.0011 0.0001 -0.0034 0.0033  
Z -0.0003 0.0006 0.0011 0.0001 -0.0034 0.0033  
AT. 143 C X -0.0000 0.0000 -0.0006 -0.0007 0.0001 0.0001  
Y -0.0000 0.0000 -0.0000 0.0000 -0.0000 0.0000  
Z -0.0000 0.0000 0.0001 0.0002 -0.0000 -0.0000  
AT. 144 C X -0.0000 -0.0000 -0.0006 0.0007 0.0001 -0.0001  
Y -0.0000 -0.0000 -0.0000 -0.0000 -0.0000 -0.0000  
Z -0.0000 -0.0000 0.0001 -0.0002 -0.0000 0.0000  
AT. 145 H X -0.0000 0.0000 -0.0001 -0.0000 -0.0000 0.0000  
Y 0.0001 -0.0002 0.0010 0.0006 -0.0001 -0.0002  
Z 0.0001 -0.0002 0.0012 0.0008 -0.0001 -0.0002  
AT. 146 H X -0.0000 -0.0000 -0.0001 0.0000 -0.0000 -0.0000  
Y 0.0001 0.0002 0.0010 -0.0006 -0.0001 0.0002  
Z 0.0001 0.0002 0.0012 -0.0008 -0.0001 0.0002  
AT. 147 H X 0.0001 -0.0002 0.0064 0.0071 -0.0013 -0.0010



Y 0.0000 -0.0001 0.0024 0.0027 -0.0005 -0.0004  
Z -0.0001 0.0002 -0.0045 -0.0049 0.0009 0.0007  
AT. 148 H X 0.0001 0.0002 0.0064 -0.0071 -0.0013 0.0010  
Y 0.0000 0.0001 0.0024 -0.0027 -0.0005 0.0004  
Z -0.0001 -0.0002 -0.0045 0.0049 0.0009 -0.0007  
AT. 149 H X 0.0000 0.0000 0.0010 0.0010 -0.0002 -0.0001  
Y -0.0001 -0.0000 -0.0032 -0.0035 0.0006 0.0005  
Z 0.0001 0.0000 0.0022 0.0023 -0.0004 -0.0003  
AT. 150 H X 0.0000 -0.0000 0.0010 -0.0010 -0.0002 0.0001  
Y -0.0001 0.0000 -0.0032 0.0035 0.0006 -0.0005  
Z 0.0001 -0.0000 0.0022 -0.0023 -0.0004 0.0003  
AT. 151 C X 0.0000 -0.0000 0.0000 0.0000 -0.0004 -0.0004  
Y -0.0000 0.0000 0.0001 0.0002 0.0014 0.0014  
Z -0.0000 -0.0000 -0.0006 -0.0007 0.0001 0.0001  
AT. 152 C X 0.0000 0.0000 0.0000 -0.0000 -0.0004 0.0004  
Y -0.0000 -0.0000 0.0001 -0.0002 0.0014 -0.0014  
Z -0.0000 0.0000 -0.0006 0.0007 0.0001 -0.0001  
AT. 153 H X -0.0000 0.0001 0.0011 0.0016 0.0022 0.0023  
Y 0.0001 -0.0004 -0.0044 -0.0061 -0.0093 -0.0096  
Z -0.0001 0.0003 0.0028 0.0038 0.0055 0.0057  
AT. 154 H X -0.0000 -0.0001 0.0011 -0.0016 0.0022 -0.0023  
Y 0.0001 0.0004 -0.0044 0.0061 -0.0093 0.0096  
Z -0.0001 -0.0003 0.0028 -0.0038 0.0055 -0.0057  
AT. 155 H X -0.0001 0.0000 -0.0017 -0.0016 0.0023 0.0023  
Y 0.0001 -0.0001 0.0042 0.0039 -0.0066 -0.0066  
Z 0.0001 -0.0001 0.0042 0.0039 -0.0065 -0.0065  
AT. 156 H X -0.0001 -0.0000 -0.0017 0.0016 0.0023 -0.0023  
Y 0.0001 0.0001 0.0042 -0.0039 -0.0066 0.0066  
Z 0.0001 0.0001 0.0042 -0.0039 -0.0065 0.0065  
AT. 157 O X -0.0000 -0.0000 -0.0000 0.0000 0.0000 -0.0000  
Y 0.0000 -0.0000 0.0000 -0.0000 -0.0000 -0.0000  
Z 0.0000 0.0000 0.0000 -0.0000 0.0000 0.0000

AT.158 O X -0.0000 0.0000 -0.0000 -0.0000 0.0000 0.0000  
Y 0.0000 0.0000 0.0000 0.0000 -0.0000 0.0000  
Z 0.0000 -0.0000 0.0000 0.0000 0.0000 -0.0000

AT.159 O X 0.0000 -0.0000 0.0000 -0.0000 -0.0000 -0.0000  
Y -0.0000 0.0000 -0.0000 0.0000 0.0000 0.0000  
Z 0.0000 -0.0000 0.0000 -0.0000 -0.0000 -0.0000

AT.160 O X 0.0000 0.0000 0.0000 0.0000 -0.0000 0.0000  
Y -0.0000 -0.0000 -0.0000 -0.0000 0.0000 -0.0000  
Z 0.0000 0.0000 0.0000 0.0000 -0.0000 0.0000

AT.161 H X 0.0001 0.0000 0.0000 -0.0000 -0.0000 0.0000  
Y -0.0006 0.0002 -0.0001 0.0002 0.0002 -0.0000  
Z -0.0001 -0.0005 -0.0001 -0.0002 -0.0001 -0.0000

AT.162 H X 0.0001 -0.0000 0.0000 0.0000 -0.0000 -0.0000  
Y -0.0006 -0.0002 -0.0001 -0.0002 0.0002 0.0000  
Z -0.0001 0.0005 -0.0001 0.0002 -0.0001 0.0000

AT.163 H X -0.0003 0.0002 -0.0001 0.0001 0.0001 0.0000  
Y 0.0001 -0.0001 0.0001 -0.0001 -0.0000 -0.0000  
Z -0.0007 0.0005 -0.0002 0.0004 0.0002 0.0001

AT.164 H X -0.0003 -0.0002 -0.0001 -0.0001 0.0001 -0.0000  
Y 0.0001 0.0001 0.0001 0.0001 -0.0000 0.0000  
Z -0.0007 -0.0005 -0.0002 -0.0004 0.0002 -0.0001

AT.165 O X 0.0000 0.0000 0.0000 0.0000 -0.0000 -0.0000  
Y 0.0000 0.0000 0.0000 0.0000 -0.0000 -0.0000  
Z -0.0000 -0.0000 0.0000 0.0000 -0.0000 -0.0000

AT.166 O X 0.0000 -0.0000 0.0000 -0.0000 -0.0000 0.0000  
Y 0.0000 -0.0000 0.0000 -0.0000 -0.0000 0.0000  
Z -0.0000 0.0000 0.0000 -0.0000 -0.0000 0.0000

AT.167 H X -0.0002 -0.0002 -0.0002 -0.0001 0.0004 0.0004  
Y -0.0000 -0.0001 -0.0001 -0.0000 0.0001 0.0001  
Z -0.0001 -0.0001 -0.0000 -0.0000 0.0000 0.0001

AT.168 H X -0.0002 0.0002 -0.0002 0.0001 0.0004 -0.0004  
Y -0.0000 0.0001 -0.0001 0.0000 0.0001 -0.0001

Z -0.0001 0.0001 -0.0000 0.0000 0.0000 -0.0001  
AT. 169 O X -0.0000 0.0000 0.0000 -0.0000 -0.0000 0.0000  
Y 0.0000 -0.0000 -0.0000 0.0000 0.0000 -0.0000  
Z -0.0000 0.0000 0.0000 -0.0000 -0.0000 0.0000  
AT. 170 O X -0.0000 -0.0000 0.0000 0.0000 -0.0000 -0.0000  
Y 0.0000 0.0000 -0.0000 -0.0000 0.0000 0.0000  
Z -0.0000 -0.0000 0.0000 0.0000 -0.0000 -0.0000  
AT. 171 H X 0.0001 -0.0000 -0.0002 0.0002 0.0001 -0.0001  
Y -0.0004 0.0003 0.0004 -0.0003 -0.0002 0.0001  
Z 0.0002 -0.0002 -0.0002 0.0002 0.0001 -0.0001  
AT. 172 H X 0.0001 0.0000 -0.0002 -0.0002 0.0001 0.0001  
Y -0.0004 -0.0003 0.0004 0.0003 -0.0002 -0.0001  
Z 0.0002 0.0002 -0.0002 -0.0002 0.0001 0.0001

FREQ(CM\*\*-1) 3116.84 3117.28 3132.36 3135.58 3142.10 3144.79

AT. 1 I X 0.0000 -0.0000 0.0000 -0.0000 -0.0000 -0.0000  
Y -0.0000 -0.0000 0.0000 0.0000 0.0000 0.0000  
Z 0.0000 0.0000 0.0000 -0.0000 0.0000 0.0000  
AT. 2 I X 0.0000 0.0000 -0.0000 -0.0000 -0.0000 -0.0000  
Y -0.0000 0.0000 -0.0000 0.0000 0.0000 0.0000  
Z 0.0000 -0.0000 -0.0000 -0.0000 0.0000 0.0000  
AT. 3 I X 0.0000 0.0000 -0.0000 -0.0000 -0.0000 0.0000  
Y 0.0000 0.0000 0.0000 -0.0000 0.0000 0.0000  
Z 0.0000 -0.0000 0.0000 -0.0000 0.0000 -0.0000  
AT. 4 I X 0.0000 -0.0000 0.0000 -0.0000 -0.0000 0.0000  
Y 0.0000 -0.0000 -0.0000 -0.0000 0.0000 0.0000  
Z 0.0000 0.0000 -0.0000 -0.0000 0.0000 -0.0000  
AT. 5 O X -0.0000 -0.0000 -0.0000 0.0000 -0.0000 -0.0000  
Y 0.0000 0.0000 -0.0000 -0.0000 0.0000 0.0000  
Z 0.0000 0.0000 -0.0000 -0.0000 0.0000 0.0000  
AT. 6 O X -0.0000 0.0000 0.0000 0.0000 -0.0000 -0.0000

Y 0.0000 -0.0000 0.0000 -0.0000 0.0000 0.0000  
Z 0.0000 -0.0000 0.0000 -0.0000 0.0000 0.0000  
AT. 7 O X -0.0000 0.0000 0.0000 0.0000 -0.0000 0.0000  
Y 0.0000 -0.0000 -0.0000 -0.0000 0.0000 -0.0000  
Z -0.0000 0.0000 0.0000 0.0000 0.0000 0.0000  
AT. 8 O X -0.0000 -0.0000 -0.0000 0.0000 -0.0000 0.0000  
Y 0.0000 0.0000 0.0000 -0.0000 0.0000 -0.0000  
Z -0.0000 -0.0000 -0.0000 0.0000 0.0000 0.0000  
AT. 9 N X 0.0000 -0.0000 -0.0000 -0.0000 -0.0000 0.0000  
Y -0.0000 -0.0000 0.0000 0.0000 0.0000 0.0000  
Z 0.0000 0.0000 -0.0000 -0.0000 0.0000 -0.0000  
AT. 10 N X 0.0000 0.0000 0.0000 -0.0000 -0.0000 0.0000  
Y -0.0000 0.0000 -0.0000 0.0000 0.0000 0.0000  
Z 0.0000 -0.0000 0.0000 -0.0000 0.0000 -0.0000  
AT. 11 N X 0.0000 0.0000 0.0000 -0.0000 0.0000 -0.0000  
Y 0.0000 -0.0000 -0.0000 -0.0000 0.0000 -0.0000  
Z -0.0000 0.0000 -0.0000 -0.0000 -0.0000 -0.0000  
AT. 12 N X 0.0000 -0.0000 -0.0000 -0.0000 0.0000 -0.0000  
Y 0.0000 0.0000 0.0000 -0.0000 0.0000 -0.0000  
Z -0.0000 -0.0000 0.0000 -0.0000 -0.0000 -0.0000  
AT. 13 C X 0.0000 0.0000 -0.0000 -0.0000 0.0000 0.0000  
Y -0.0000 -0.0000 -0.0000 -0.0000 -0.0000 -0.0000  
Z -0.0000 -0.0000 0.0000 0.0000 -0.0000 -0.0000  
AT. 14 C X 0.0000 -0.0000 0.0000 -0.0000 0.0000 0.0000  
Y -0.0000 0.0000 0.0000 -0.0000 -0.0000 -0.0000  
Z -0.0000 0.0000 -0.0000 0.0000 -0.0000 -0.0000  
AT. 15 C X 0.0000 -0.0000 0.0000 0.0000 0.0000 0.0000  
Y 0.0000 -0.0000 -0.0000 -0.0000 0.0000 -0.0000  
Z -0.0000 0.0000 -0.0000 -0.0000 -0.0000 -0.0000  
AT. 16 C X 0.0000 0.0000 -0.0000 0.0000 0.0000 0.0000  
Y 0.0000 0.0000 0.0000 -0.0000 0.0000 -0.0000  
Z -0.0000 -0.0000 0.0000 -0.0000 -0.0000 -0.0000

AT. 17 H X 0.0001 -0.0000 -0.0001 -0.0001 0.0000 -0.0001  
Y -0.0002 0.0000 0.0003 0.0002 -0.0001 0.0004  
Z -0.0002 0.0000 0.0002 0.0002 -0.0001 0.0002

AT. 18 H X 0.0001 0.0000 0.0001 -0.0001 0.0000 -0.0001  
Y -0.0002 -0.0000 -0.0003 0.0002 -0.0001 0.0004  
Z -0.0002 -0.0000 -0.0002 0.0002 -0.0001 0.0002

AT. 19 H X -0.0001 0.0001 0.0000 0.0000 -0.0001 -0.0000  
Y -0.0002 0.0001 0.0001 0.0000 -0.0001 -0.0000  
Z 0.0004 -0.0004 -0.0002 -0.0001 0.0003 0.0001

AT. 20 H X -0.0001 -0.0001 -0.0000 0.0000 -0.0001 -0.0000  
Y -0.0002 -0.0001 -0.0001 0.0000 -0.0001 -0.0000  
Z 0.0004 0.0004 0.0002 -0.0001 0.0003 0.0001

AT. 21 C X 0.0000 -0.0000 -0.0000 -0.0000 0.0000 -0.0000  
Y -0.0000 0.0000 0.0000 0.0000 -0.0000 0.0000  
Z 0.0000 -0.0000 -0.0000 -0.0000 0.0000 -0.0000

AT. 22 C X 0.0000 0.0000 0.0000 -0.0000 0.0000 -0.0000  
Y -0.0000 -0.0000 -0.0000 0.0000 -0.0000 0.0000  
Z 0.0000 0.0000 0.0000 -0.0000 0.0000 -0.0000

AT. 23 C X -0.0000 0.0000 0.0000 0.0000 -0.0000 -0.0000  
Y 0.0000 0.0000 -0.0000 -0.0000 0.0000 0.0001  
Z -0.0000 0.0000 -0.0000 -0.0000 -0.0000 0.0000

AT. 24 C X -0.0000 -0.0000 -0.0000 0.0000 -0.0000 -0.0000  
Y 0.0000 -0.0000 0.0000 -0.0000 0.0000 0.0001  
Z -0.0000 -0.0000 0.0000 -0.0000 -0.0000 0.0000

AT. 25 H X 0.0000 0.0000 -0.0000 -0.0001 0.0000 0.0001  
Y -0.0002 -0.0003 0.0004 0.0005 0.0001 -0.0007  
Z -0.0000 -0.0000 0.0000 0.0001 0.0000 -0.0001

AT. 26 H X 0.0000 -0.0000 0.0000 -0.0001 0.0000 0.0001  
Y -0.0002 0.0003 -0.0004 0.0005 0.0001 -0.0007  
Z -0.0000 0.0000 -0.0000 0.0001 0.0000 -0.0001

AT. 27 H X 0.0000 -0.0001 0.0000 0.0000 0.0001 -0.0000  
Y -0.0001 0.0001 -0.0000 -0.0001 -0.0001 0.0000

Z 0.0001 -0.0002 0.0001 0.0001 0.0002 -0.0001  
AT. 28 H X 0.0000 0.0001 -0.0000 0.0000 0.0001 -0.0000  
Y -0.0001 -0.0001 0.0000 -0.0001 -0.0001 0.0000  
Z 0.0001 0.0002 -0.0001 0.0001 0.0002 -0.0001  
AT. 29 C X -0.0000 0.0000 0.0000 0.0001 -0.0000 0.0002  
Y -0.0001 0.0000 -0.0001 -0.0001 -0.0000 -0.0002  
Z 0.0001 0.0000 0.0000 -0.0000 0.0000 -0.0003  
AT. 30 C X -0.0000 -0.0000 -0.0000 0.0001 -0.0000 0.0002  
Y -0.0001 -0.0000 0.0001 -0.0001 -0.0000 -0.0002  
Z 0.0001 -0.0000 -0.0000 -0.0000 0.0000 -0.0003  
AT. 31 H X 0.0005 -0.0001 0.0006 0.0004 0.0002 0.0005  
Y 0.0012 -0.0002 0.0014 0.0010 0.0005 0.0009  
Z -0.0008 0.0001 -0.0007 -0.0005 -0.0003 -0.0005  
AT. 32 H X 0.0005 0.0001 -0.0006 0.0004 0.0002 0.0005  
Y 0.0012 0.0002 -0.0014 0.0010 0.0005 0.0009  
Z -0.0008 -0.0001 0.0007 -0.0005 -0.0003 -0.0005  
AT. 33 H X 0.0001 0.0001 -0.0009 -0.0010 0.0001 -0.0029  
Y -0.0000 -0.0000 0.0007 0.0008 -0.0001 0.0017  
Z -0.0001 -0.0002 0.0013 0.0015 -0.0002 0.0039  
AT. 34 H X 0.0001 -0.0001 0.0009 -0.0010 0.0001 -0.0029  
Y -0.0000 0.0000 -0.0007 0.0008 -0.0001 0.0017  
Z -0.0001 0.0002 -0.0013 0.0015 -0.0002 0.0039  
AT. 35 C X 0.0000 -0.0000 -0.0001 -0.0001 -0.0000 -0.0001  
Y -0.0000 0.0000 -0.0001 -0.0001 -0.0000 0.0000  
Z 0.0000 -0.0000 -0.0000 -0.0000 0.0000 0.0001  
AT. 36 C X 0.0000 0.0000 0.0001 -0.0001 -0.0000 -0.0001  
Y -0.0000 -0.0000 0.0001 -0.0001 -0.0000 0.0000  
Z 0.0000 0.0000 0.0000 -0.0000 0.0000 0.0001  
AT. 37 C X 0.0000 -0.0000 -0.0002 -0.0002 0.0000 0.0002  
Y 0.0000 -0.0000 0.0000 0.0000 0.0000 -0.0002  
Z 0.0000 -0.0000 0.0000 0.0000 0.0000 -0.0004  
AT. 38 C X 0.0000 0.0000 0.0002 -0.0002 0.0000 0.0002

Y 0.0000 0.0000 -0.0000 0.0000 0.0000 -0.0002  
Z 0.0000 0.0000 -0.0000 0.0000 0.0000 -0.0004  
AT. 39 H X 0.0000 0.0001 0.0014 0.0013 0.0000 -0.0027  
Y 0.0000 -0.0001 -0.0008 -0.0008 0.0000 0.0020  
Z -0.0000 -0.0002 -0.0019 -0.0018 -0.0000 0.0039  
AT. 40 H X 0.0000 -0.0001 -0.0014 0.0013 0.0000 -0.0027  
Y 0.0000 0.0001 0.0008 -0.0008 0.0000 0.0020  
Z -0.0000 0.0002 0.0019 -0.0018 -0.0000 0.0039  
AT. 41 H X -0.0002 0.0002 0.0012 0.0011 -0.0001 0.0005  
Y -0.0002 0.0002 0.0009 0.0009 -0.0000 0.0004  
Z -0.0002 0.0002 0.0010 0.0009 -0.0001 0.0005  
AT. 42 H X -0.0002 -0.0002 -0.0012 0.0011 -0.0001 0.0005  
Y -0.0002 -0.0002 -0.0009 0.0009 -0.0000 0.0004  
Z -0.0002 -0.0002 -0.0010 0.0009 -0.0001 0.0005  
AT. 43 C X -0.0000 -0.0000 0.0001 0.0001 -0.0000 -0.0002  
Y -0.0000 -0.0000 -0.0002 -0.0002 -0.0000 0.0001  
Z -0.0000 -0.0000 -0.0000 0.0000 -0.0000 -0.0002  
AT. 44 C X -0.0000 0.0000 -0.0001 0.0001 -0.0000 -0.0002  
Y -0.0000 0.0000 0.0002 -0.0002 -0.0000 0.0001  
Z -0.0000 0.0000 0.0000 0.0000 -0.0000 -0.0002  
AT. 45 H X 0.0002 0.0001 0.0011 0.0008 0.0001 0.0002  
Y 0.0003 0.0002 0.0016 0.0012 0.0001 0.0002  
Z 0.0003 0.0002 0.0013 0.0010 0.0002 0.0002  
AT. 46 H X 0.0002 -0.0001 -0.0011 0.0008 0.0001 0.0002  
Y 0.0003 -0.0002 -0.0016 0.0012 0.0001 0.0002  
Z 0.0003 -0.0002 -0.0013 0.0010 0.0002 0.0002  
AT. 47 H X 0.0002 -0.0000 -0.0022 -0.0019 0.0001 0.0022  
Y -0.0001 0.0000 0.0017 0.0015 -0.0001 -0.0015  
Z 0.0001 -0.0000 -0.0015 -0.0013 0.0001 0.0014  
AT. 48 H X 0.0002 0.0000 0.0022 -0.0019 0.0001 0.0022  
Y -0.0001 -0.0000 -0.0017 0.0015 -0.0001 -0.0015  
Z 0.0001 0.0000 0.0015 -0.0013 0.0001 0.0014

AT. 49 C X 0.0000 0.0000 -0.0001 -0.0001 -0.0000 0.0000  
Y -0.0000 0.0000 -0.0001 -0.0001 -0.0000 -0.0000  
Z 0.0000 0.0000 -0.0000 -0.0000 0.0000 0.0001

AT. 50 C X 0.0000 -0.0000 0.0001 -0.0001 -0.0000 0.0000  
Y -0.0000 -0.0000 0.0001 -0.0001 -0.0000 -0.0000  
Z 0.0000 -0.0000 0.0000 -0.0000 0.0000 0.0001

AT. 51 C X -0.0000 0.0000 -0.0001 -0.0001 -0.0000 -0.0003  
Y -0.0000 0.0000 0.0000 0.0000 -0.0000 0.0004  
Z 0.0000 -0.0000 0.0000 0.0000 0.0000 -0.0003

AT. 52 C X -0.0000 -0.0000 0.0001 -0.0001 -0.0000 -0.0003  
Y -0.0000 -0.0000 -0.0000 0.0000 -0.0000 0.0004  
Z 0.0000 0.0000 -0.0000 0.0000 0.0000 -0.0003

AT. 53 H X 0.0002 -0.0001 0.0019 0.0016 0.0001 0.0038  
Y -0.0002 0.0000 -0.0011 -0.0009 -0.0001 -0.0027  
Z 0.0001 -0.0000 0.0010 0.0008 0.0001 0.0020

AT. 54 H X 0.0002 0.0001 -0.0019 0.0016 0.0001 0.0038  
Y -0.0002 -0.0000 0.0011 -0.0009 -0.0001 -0.0027  
Z 0.0001 0.0000 -0.0010 0.0008 0.0001 0.0020

AT. 55 H X 0.0002 -0.0001 0.0008 0.0007 0.0001 -0.0012  
Y 0.0004 -0.0003 0.0012 0.0011 0.0001 -0.0023  
Z -0.0003 0.0002 -0.0008 -0.0007 -0.0001 0.0018

AT. 56 H X 0.0002 0.0001 -0.0008 0.0007 0.0001 -0.0012  
Y 0.0004 0.0003 -0.0012 0.0011 0.0001 -0.0023  
Z -0.0003 -0.0002 0.0008 -0.0007 -0.0001 0.0018

AT. 57 C X 0.0000 -0.0000 0.0003 0.0003 0.0000 -0.0044  
Y -0.0000 0.0000 0.0005 0.0004 0.0000 -0.0008  
Z 0.0000 -0.0000 0.0001 -0.0000 0.0001 0.0102

AT. 58 C X 0.0000 0.0000 -0.0003 0.0003 0.0000 -0.0044  
Y -0.0000 -0.0000 -0.0005 0.0004 0.0000 -0.0008  
Z 0.0000 0.0000 -0.0001 -0.0000 0.0001 0.0102

AT. 59 H X 0.0001 -0.0001 -0.0015 -0.0017 0.0002 0.0291  
Y 0.0002 -0.0001 -0.0027 -0.0032 0.0004 0.0606



Z -0.0001 0.0001 0.0019 0.0022 -0.0003 -0.0387  
AT. 60 H X 0.0001 0.0001 0.0015 -0.0017 0.0002 0.0291  
Y 0.0002 0.0001 0.0027 -0.0032 0.0004 0.0606  
Z -0.0001 -0.0001 -0.0019 0.0022 -0.0003 -0.0387  
AT. 61 H X -0.0002 0.0002 0.0006 0.0001 0.0003 0.0476  
Y 0.0001 -0.0001 -0.0001 0.0002 -0.0002 -0.0305  
Z 0.0003 -0.0002 -0.0006 0.0001 -0.0004 -0.0610  
AT. 62 H X -0.0002 -0.0002 -0.0006 0.0001 0.0003 0.0476  
Y 0.0001 0.0001 0.0001 0.0002 -0.0002 -0.0305  
Z 0.0003 0.0002 0.0006 0.0001 -0.0004 -0.0610  
AT. 63 H X -0.0003 0.0002 -0.0023 -0.0018 -0.0005 -0.0235  
Y -0.0003 0.0002 -0.0025 -0.0021 -0.0005 -0.0212  
Z -0.0003 0.0002 -0.0027 -0.0023 -0.0005 -0.0224  
AT. 64 H X -0.0003 -0.0002 0.0023 -0.0018 -0.0005 -0.0235  
Y -0.0003 -0.0002 0.0025 -0.0021 -0.0005 -0.0212  
Z -0.0003 -0.0002 0.0027 -0.0023 -0.0005 -0.0224  
AT. 65 C X 0.0000 0.0000 0.0002 0.0008 0.0000 0.0026  
Y 0.0000 -0.0000 -0.0002 0.0015 0.0001 -0.0024  
Z 0.0000 -0.0000 0.0002 -0.0000 -0.0000 0.0033  
AT. 66 C X 0.0000 -0.0000 -0.0002 0.0008 0.0000 0.0026  
Y 0.0000 0.0000 0.0002 0.0015 0.0001 -0.0024  
Z 0.0000 0.0000 -0.0002 -0.0000 -0.0000 0.0033  
AT. 67 H X -0.0001 0.0001 -0.0004 -0.0064 -0.0003 -0.0105  
Y -0.0001 0.0001 -0.0002 -0.0066 -0.0003 -0.0123  
Z -0.0001 0.0001 -0.0002 -0.0074 -0.0003 -0.0124  
AT. 68 H X -0.0001 -0.0001 0.0004 -0.0064 -0.0003 -0.0105  
Y -0.0001 -0.0001 0.0002 -0.0066 -0.0003 -0.0123  
Z -0.0001 -0.0001 0.0002 -0.0074 -0.0003 -0.0124  
AT. 69 H X -0.0001 -0.0002 -0.0027 0.0026 0.0001 -0.0302  
Y 0.0001 0.0001 0.0022 -0.0013 -0.0001 0.0232  
Z -0.0000 -0.0001 -0.0014 0.0012 0.0001 -0.0155  
AT. 70 H X -0.0001 0.0002 0.0027 0.0026 0.0001 -0.0302

Y 0.0001 -0.0001 -0.0022 -0.0013 -0.0001 0.0232  
Z -0.0000 0.0001 0.0014 0.0012 0.0001 -0.0155  
AT. 71 H X -0.0000 -0.0001 0.0008 -0.0050 -0.0002 0.0101  
Y -0.0000 -0.0001 0.0009 -0.0096 -0.0004 0.0174  
Z 0.0000 0.0001 -0.0008 0.0068 0.0003 -0.0120  
AT. 72 H X -0.0000 0.0001 -0.0008 -0.0050 -0.0002 0.0101  
Y -0.0000 0.0001 -0.0009 -0.0096 -0.0004 0.0174  
Z 0.0000 -0.0001 0.0008 0.0068 0.0003 -0.0120  
AT. 73 C X 0.0000 0.0000 -0.0075 -0.0074 -0.0001 -0.0002  
Y 0.0001 0.0000 -0.0097 -0.0097 -0.0001 -0.0002  
Z 0.0000 -0.0000 -0.0019 -0.0017 -0.0000 -0.0000  
AT. 74 C X 0.0000 -0.0000 0.0075 -0.0074 -0.0001 -0.0002  
Y 0.0001 -0.0000 0.0097 -0.0097 -0.0001 -0.0002  
Z 0.0000 0.0000 0.0019 -0.0017 -0.0000 -0.0000  
AT. 75 H X -0.0001 -0.0001 0.0305 0.0313 0.0003 0.0010  
Y -0.0002 -0.0002 0.0577 0.0590 0.0006 0.0016  
Z 0.0002 0.0002 -0.0424 -0.0433 -0.0004 -0.0013  
AT. 76 H X -0.0001 0.0001 -0.0305 0.0313 0.0003 0.0010  
Y -0.0002 0.0002 -0.0577 0.0590 0.0006 0.0016  
Z 0.0002 -0.0002 0.0424 -0.0433 -0.0004 -0.0013  
AT. 77 H X -0.0004 0.0000 0.0586 0.0569 0.0004 0.0012  
Y -0.0004 0.0000 0.0586 0.0569 0.0004 0.0011  
Z -0.0005 0.0000 0.0650 0.0632 0.0005 0.0013  
AT. 78 H X -0.0004 -0.0000 -0.0586 0.0569 0.0004 0.0012  
Y -0.0004 -0.0000 -0.0586 0.0569 0.0004 0.0011  
Z -0.0005 -0.0000 -0.0650 0.0632 0.0005 0.0013  
AT. 79 I X -0.0000 -0.0000 -0.0000 0.0000 0.0000 -0.0000  
Y -0.0000 0.0000 -0.0000 -0.0000 0.0000 -0.0000  
Z -0.0000 -0.0000 -0.0000 -0.0000 0.0000 0.0000  
AT. 80 I X -0.0000 0.0000 0.0000 0.0000 0.0000 -0.0000  
Y -0.0000 -0.0000 0.0000 -0.0000 0.0000 -0.0000  
Z -0.0000 0.0000 0.0000 -0.0000 0.0000 0.0000

AT. 81 I X 0.0000 -0.0000 -0.0000 -0.0000 -0.0000 0.0000  
Y -0.0000 -0.0000 -0.0000 0.0000 0.0000 -0.0000  
Z 0.0000 -0.0000 -0.0000 -0.0000 -0.0000 0.0000

AT. 82 I X 0.0000 0.0000 0.0000 -0.0000 -0.0000 0.0000  
Y -0.0000 0.0000 0.0000 0.0000 0.0000 -0.0000  
Z 0.0000 0.0000 0.0000 -0.0000 -0.0000 0.0000

AT. 83 O X 0.0000 0.0000 -0.0000 -0.0000 0.0000 0.0000  
Y 0.0000 0.0000 -0.0000 0.0000 -0.0000 -0.0000  
Z 0.0000 -0.0000 -0.0000 -0.0000 -0.0000 -0.0000

AT. 84 O X 0.0000 -0.0000 0.0000 -0.0000 0.0000 0.0000  
Y 0.0000 -0.0000 0.0000 0.0000 -0.0000 -0.0000  
Z 0.0000 0.0000 0.0000 -0.0000 -0.0000 -0.0000

AT. 85 O X -0.0000 -0.0000 0.0000 -0.0000 0.0000 -0.0000  
Y -0.0000 -0.0000 0.0000 -0.0000 0.0000 -0.0000  
Z 0.0000 0.0000 -0.0000 -0.0000 0.0000 0.0000

AT. 86 O X -0.0000 0.0000 -0.0000 -0.0000 0.0000 -0.0000  
Y -0.0000 0.0000 -0.0000 -0.0000 0.0000 -0.0000  
Z 0.0000 -0.0000 0.0000 -0.0000 0.0000 0.0000

AT. 87 N X -0.0000 -0.0000 -0.0000 0.0000 -0.0000 -0.0000  
Y 0.0000 0.0000 -0.0000 0.0000 -0.0000 -0.0000  
Z 0.0000 0.0000 -0.0000 -0.0000 0.0000 0.0000

AT. 88 N X -0.0000 0.0000 0.0000 0.0000 -0.0000 -0.0000  
Y 0.0000 -0.0000 0.0000 0.0000 -0.0000 -0.0000  
Z 0.0000 -0.0000 0.0000 -0.0000 0.0000 0.0000

AT. 89 N X 0.0000 -0.0000 0.0000 -0.0000 -0.0000 0.0000  
Y -0.0000 -0.0000 0.0000 0.0000 0.0000 -0.0000  
Z 0.0000 0.0000 -0.0000 -0.0000 0.0000 0.0000

AT. 90 N X 0.0000 0.0000 -0.0000 -0.0000 -0.0000 0.0000  
Y -0.0000 0.0000 -0.0000 0.0000 0.0000 -0.0000  
Z 0.0000 -0.0000 0.0000 -0.0000 0.0000 0.0000

AT. 91 C X -0.0000 0.0000 0.0000 -0.0000 0.0000 0.0000  
Y 0.0000 0.0000 0.0000 -0.0000 0.0000 -0.0000

Z -0.0001 -0.0000 0.0000 0.0000 -0.0000 -0.0000  
AT. 92 C X -0.0000 -0.0000 -0.0000 -0.0000 0.0000 0.0000  
Y 0.0000 -0.0000 -0.0000 -0.0000 0.0000 -0.0000  
Z -0.0001 0.0000 -0.0000 0.0000 -0.0000 -0.0000  
AT. 93 C X -0.0004 -0.0002 -0.0000 0.0001 -0.0002 -0.0001  
Y -0.0009 -0.0004 -0.0001 0.0003 -0.0004 -0.0003  
Z -0.0001 -0.0000 -0.0000 0.0000 0.0000 0.0000  
AT. 94 C X -0.0004 0.0002 0.0000 0.0001 -0.0002 -0.0001  
Y -0.0009 0.0004 0.0001 0.0003 -0.0004 -0.0003  
Z -0.0001 0.0000 0.0000 0.0000 0.0000 0.0000  
AT. 95 H X 0.0044 0.0023 0.0003 -0.0015 0.0023 0.0014  
Y 0.0093 0.0046 0.0007 -0.0029 0.0044 0.0027  
Z 0.0054 0.0027 0.0004 -0.0017 0.0026 0.0016  
AT. 96 H X 0.0044 -0.0023 -0.0003 -0.0015 0.0023 0.0014  
Y 0.0093 -0.0046 -0.0007 -0.0029 0.0044 0.0027  
Z 0.0054 -0.0027 -0.0004 -0.0017 0.0026 0.0016  
AT. 97 H X -0.0013 -0.0006 -0.0000 0.0005 -0.0008 -0.0005  
Y 0.0009 0.0005 0.0000 -0.0003 0.0006 0.0004  
Z -0.0041 -0.0021 -0.0002 0.0015 -0.0025 -0.0016  
AT. 98 H X -0.0013 0.0006 0.0000 0.0005 -0.0008 -0.0005  
Y 0.0009 -0.0005 -0.0000 -0.0003 0.0006 0.0004  
Z -0.0041 0.0021 0.0002 0.0015 -0.0025 -0.0016  
AT. 99 C X 0.0000 0.0000 -0.0000 -0.0000 -0.0000 0.0000  
Y 0.0000 0.0000 -0.0000 -0.0000 -0.0000 0.0000  
Z -0.0000 -0.0000 0.0000 0.0000 -0.0000 -0.0000  
AT. 100 C X 0.0000 -0.0000 0.0000 -0.0000 -0.0000 0.0000  
Y 0.0000 -0.0000 0.0000 -0.0000 -0.0000 0.0000  
Z -0.0000 0.0000 -0.0000 0.0000 -0.0000 -0.0000  
AT. 101 C X -0.0000 0.0000 0.0000 0.0000 -0.0000 -0.0000  
Y -0.0000 0.0000 0.0000 0.0000 -0.0000 -0.0000  
Z -0.0000 0.0000 0.0000 0.0000 0.0000 0.0000  
AT. 102 C X -0.0000 -0.0000 -0.0000 0.0000 -0.0000 -0.0000

Y -0.0000 -0.0000 -0.0000 0.0000 -0.0000 -0.0000  
Z -0.0000 -0.0000 -0.0000 0.0000 0.0000 0.0000  
AT. 103 H X 0.0002 -0.0001 -0.0000 -0.0001 -0.0000 0.0000  
Y 0.0005 -0.0001 -0.0001 -0.0002 -0.0001 -0.0001  
Z 0.0000 0.0000 -0.0000 -0.0000 0.0000 0.0000  
AT. 104 H X 0.0002 0.0001 0.0000 -0.0001 -0.0000 0.0000  
Y 0.0005 0.0001 0.0001 -0.0002 -0.0001 -0.0001  
Z 0.0000 -0.0000 0.0000 -0.0000 0.0000 0.0000  
AT. 105 H X 0.0000 0.0001 0.0000 0.0000 0.0001 0.0000  
Y -0.0000 0.0001 0.0000 0.0000 0.0001 0.0000  
Z 0.0001 -0.0003 -0.0001 -0.0001 -0.0003 -0.0001  
AT. 106 H X 0.0000 -0.0001 -0.0000 0.0000 0.0001 0.0000  
Y -0.0000 -0.0001 -0.0000 0.0000 0.0001 0.0000  
Z 0.0001 0.0003 0.0001 -0.0001 -0.0003 -0.0001  
AT. 107 C X -0.0002 -0.0002 0.0000 -0.0000 0.0000 -0.0000  
Y -0.0009 -0.0010 -0.0000 -0.0000 0.0000 -0.0001  
Z 0.0003 0.0002 0.0000 -0.0000 0.0000 0.0000  
AT. 108 C X -0.0002 0.0002 -0.0000 -0.0000 0.0000 -0.0000  
Y -0.0009 0.0010 0.0000 -0.0000 0.0000 -0.0001  
Z 0.0003 -0.0002 -0.0000 -0.0000 0.0000 0.0000  
AT. 109 H X -0.0020 -0.0021 -0.0000 -0.0000 0.0001 -0.0002  
Y 0.0110 0.0114 0.0001 0.0002 -0.0004 0.0011  
Z -0.0062 -0.0064 -0.0001 -0.0001 0.0002 -0.0007  
AT. 110 H X -0.0020 0.0021 0.0000 -0.0000 0.0001 -0.0002  
Y 0.0110 -0.0114 -0.0001 0.0002 -0.0004 0.0011  
Z -0.0062 0.0064 0.0001 -0.0001 0.0002 -0.0007  
AT. 111 H X 0.0039 0.0042 0.0000 0.0002 -0.0003 0.0004  
Y 0.0008 0.0008 0.0000 0.0000 -0.0000 0.0000  
Z 0.0034 0.0038 0.0000 0.0002 -0.0003 0.0003  
AT. 112 H X 0.0039 -0.0042 -0.0000 0.0002 -0.0003 0.0004  
Y 0.0008 -0.0008 -0.0000 0.0000 -0.0000 0.0000  
Z 0.0034 -0.0038 -0.0000 0.0002 -0.0003 0.0003

AT.113 C X 0.0000 0.0000 0.0000 0.0000 -0.0000 0.0000  
Y -0.0001 -0.0001 0.0000 -0.0000 0.0000 0.0000  
Z -0.0000 -0.0000 -0.0000 -0.0000 -0.0000 0.0000

AT.114 C X 0.0000 -0.0000 -0.0000 0.0000 -0.0000 0.0000  
Y -0.0001 0.0001 -0.0000 -0.0000 0.0000 0.0000  
Z -0.0000 0.0000 0.0000 -0.0000 -0.0000 0.0000

AT.115 C X -0.0000 0.0000 0.0000 0.0000 -0.0001 -0.0000  
Y 0.0001 0.0001 0.0000 0.0000 0.0001 -0.0000  
Z 0.0000 0.0000 0.0000 0.0000 0.0000 -0.0000

AT.116 C X -0.0000 -0.0000 -0.0000 0.0000 -0.0001 -0.0000  
Y 0.0001 -0.0001 -0.0000 0.0000 0.0001 -0.0000  
Z 0.0000 -0.0000 -0.0000 0.0000 0.0000 -0.0000

AT.117 H X -0.0007 -0.0012 -0.0000 -0.0001 0.0008 0.0003  
Y -0.0001 -0.0002 -0.0000 -0.0000 0.0002 0.0001  
Z -0.0006 -0.0011 -0.0000 -0.0001 0.0009 0.0002

AT.118 H X -0.0007 0.0012 0.0000 -0.0001 0.0008 0.0003  
Y -0.0001 0.0002 0.0000 -0.0000 0.0002 0.0001  
Z -0.0006 0.0011 0.0000 -0.0001 0.0009 0.0002

AT.119 H X -0.0001 -0.0001 -0.0000 0.0000 0.0007 0.0000  
Y 0.0001 0.0002 0.0000 -0.0000 -0.0013 0.0000  
Z -0.0001 -0.0000 0.0000 -0.0000 -0.0013 -0.0000

AT.120 H X -0.0001 0.0001 0.0000 0.0000 0.0007 0.0000  
Y 0.0001 -0.0002 -0.0000 -0.0000 -0.0013 0.0000  
Z -0.0001 0.0000 -0.0000 -0.0000 -0.0013 -0.0000

AT.121 C X -0.0000 -0.0001 0.0000 -0.0000 -0.0003 0.0000  
Y -0.0000 -0.0002 -0.0000 -0.0000 -0.0002 0.0000  
Z -0.0000 -0.0001 -0.0000 -0.0000 0.0002 0.0000

AT.122 C X -0.0000 0.0001 -0.0000 -0.0000 -0.0003 0.0000  
Y -0.0000 0.0002 0.0000 -0.0000 -0.0002 0.0000  
Z -0.0000 0.0001 0.0000 -0.0000 0.0002 0.0000

AT.123 H X -0.0001 -0.0004 -0.0000 -0.0000 -0.0003 0.0000  
Y 0.0007 0.0026 0.0003 0.0002 0.0014 -0.0002

Z 0.0005 0.0023 0.0003 0.0001 0.0012 -0.0002  
AT.124 H X -0.0001 0.0004 0.0000 -0.0000 -0.0003 0.0000  
Y 0.0007 -0.0026 -0.0003 0.0002 0.0014 -0.0002  
Z 0.0005 -0.0023 -0.0003 0.0001 0.0012 -0.0002  
AT.125 H X 0.0008 0.0017 -0.0000 0.0001 0.0036 -0.0002  
Y 0.0004 0.0007 -0.0000 0.0000 0.0012 -0.0001  
Z -0.0007 -0.0013 0.0000 -0.0000 -0.0028 0.0002  
AT.126 H X 0.0008 -0.0017 0.0000 0.0001 0.0036 -0.0002  
Y 0.0004 -0.0007 0.0000 0.0000 0.0012 -0.0001  
Z -0.0007 0.0013 -0.0000 -0.0000 -0.0028 0.0002  
AT.127 C X 0.0001 0.0001 -0.0000 -0.0000 0.0001 -0.0000  
Y -0.0001 -0.0001 0.0000 -0.0000 0.0000 0.0000  
Z -0.0000 -0.0000 -0.0000 -0.0000 -0.0001 0.0000  
AT.128 C X 0.0001 -0.0001 0.0000 -0.0000 0.0001 -0.0000  
Y -0.0001 0.0001 -0.0000 -0.0000 0.0000 0.0000  
Z -0.0000 0.0000 0.0000 -0.0000 -0.0001 0.0000  
AT.129 C X 0.0003 0.0003 0.0000 -0.0000 -0.0002 0.0000  
Y -0.0002 -0.0003 -0.0000 -0.0000 0.0000 0.0000  
Z 0.0000 0.0001 0.0000 0.0000 0.0002 -0.0000  
AT.130 C X 0.0003 -0.0003 -0.0000 -0.0000 -0.0002 0.0000  
Y -0.0002 0.0003 0.0000 -0.0000 0.0000 0.0000  
Z 0.0000 -0.0001 -0.0000 0.0000 0.0002 -0.0000  
AT.131 H X -0.0027 -0.0022 -0.0000 0.0002 0.0025 -0.0005  
Y -0.0008 -0.0007 -0.0000 0.0001 0.0010 -0.0001  
Z 0.0018 0.0015 0.0000 -0.0001 -0.0017 0.0003  
AT.132 H X -0.0027 0.0022 0.0000 0.0002 0.0025 -0.0005  
Y -0.0008 0.0007 0.0000 0.0001 0.0010 -0.0001  
Z 0.0018 -0.0015 -0.0000 -0.0001 -0.0017 0.0003  
AT.133 H X -0.0011 -0.0014 -0.0000 -0.0001 0.0002 0.0001  
Y 0.0033 0.0043 0.0001 0.0003 -0.0007 -0.0003  
Z -0.0019 -0.0025 -0.0000 -0.0002 0.0004 0.0002  
AT.134 H X -0.0011 0.0014 0.0000 -0.0001 0.0002 0.0001

Y 0.0033 -0.0043 -0.0001 0.0003 -0.0007 -0.0003  
Z -0.0019 0.0025 0.0000 -0.0002 0.0004 0.0002  
AT. 135 C X -0.0001 -0.0001 0.0000 0.0000 0.0001 0.0001  
Y 0.0003 0.0004 -0.0000 0.0001 0.0001 0.0001  
Z -0.0001 0.0001 0.0000 0.0001 0.0003 0.0002  
AT. 136 C X -0.0001 0.0001 -0.0000 0.0000 0.0001 0.0001  
Y 0.0003 -0.0004 0.0000 0.0001 0.0001 0.0001  
Z -0.0001 -0.0001 -0.0000 0.0001 0.0003 0.0002  
AT. 137 H X 0.0009 0.0008 -0.0000 -0.0000 -0.0002 -0.0001  
Y -0.0026 -0.0022 0.0001 0.0002 0.0010 0.0004  
Z 0.0016 0.0013 -0.0001 -0.0001 -0.0006 -0.0002  
AT. 138 H X 0.0009 -0.0008 0.0000 -0.0000 -0.0002 -0.0001  
Y -0.0026 0.0022 -0.0001 0.0002 0.0010 0.0004  
Z 0.0016 -0.0013 0.0001 -0.0001 -0.0006 -0.0002  
AT. 139 H X 0.0001 -0.0002 -0.0000 -0.0005 -0.0021 -0.0013  
Y 0.0003 0.0002 -0.0000 -0.0001 -0.0004 -0.0003  
Z 0.0001 -0.0002 -0.0000 -0.0004 -0.0017 -0.0010  
AT. 140 H X 0.0001 0.0002 0.0000 -0.0005 -0.0021 -0.0013  
Y 0.0003 -0.0002 0.0000 -0.0001 -0.0004 -0.0003  
Z 0.0001 0.0002 0.0000 -0.0004 -0.0017 -0.0010  
AT. 141 H X 0.0003 0.0007 -0.0000 0.0003 0.0006 0.0004  
Y -0.0011 -0.0022 0.0000 -0.0009 -0.0015 -0.0010  
Z -0.0009 -0.0020 0.0000 -0.0008 -0.0014 -0.0009  
AT. 142 H X 0.0003 -0.0007 0.0000 0.0003 0.0006 0.0004  
Y -0.0011 0.0022 -0.0000 -0.0009 -0.0015 -0.0010  
Z -0.0009 0.0020 -0.0000 -0.0008 -0.0014 -0.0009  
AT. 143 C X -0.0001 -0.0000 -0.0000 -0.0001 0.0061 -0.0000  
Y 0.0002 0.0003 0.0000 0.0001 -0.0002 -0.0001  
Z 0.0001 -0.0000 0.0000 0.0001 -0.0105 0.0001  
AT. 144 C X -0.0001 0.0000 0.0000 -0.0001 0.0061 -0.0000  
Y 0.0002 -0.0003 -0.0000 0.0001 -0.0002 -0.0001  
Z 0.0001 0.0000 -0.0000 0.0001 -0.0105 0.0001



AT.145 H X 0.0005 0.0004 0.0001 0.0002 -0.0161 0.0001  
Y -0.0014 -0.0011 -0.0002 -0.0007 0.0637 -0.0003  
Z -0.0013 -0.0010 -0.0002 -0.0007 0.0579 -0.0002

AT.146 H X 0.0005 -0.0004 -0.0001 0.0002 -0.0161 0.0001  
Y -0.0014 0.0011 0.0002 -0.0007 0.0637 -0.0003  
Z -0.0013 0.0010 0.0002 -0.0007 0.0579 -0.0002

AT.147 H X 0.0003 -0.0009 0.0002 0.0005 -0.0687 0.0006  
Y 0.0003 -0.0001 0.0001 0.0002 -0.0267 0.0002  
Z -0.0003 0.0005 -0.0001 -0.0003 0.0478 -0.0004

AT.148 H X 0.0003 0.0009 -0.0002 0.0005 -0.0687 0.0006  
Y 0.0003 0.0001 -0.0001 0.0002 -0.0267 0.0002  
Z -0.0003 -0.0005 0.0001 -0.0003 0.0478 -0.0004

AT.149 H X 0.0001 0.0003 0.0000 0.0000 0.0116 -0.0002  
Y -0.0014 -0.0019 -0.0002 -0.0001 -0.0357 0.0008  
Z 0.0007 0.0010 0.0001 0.0001 0.0188 -0.0005

AT.150 H X 0.0001 -0.0003 -0.0000 0.0000 0.0116 -0.0002  
Y -0.0014 0.0019 0.0002 -0.0001 -0.0357 0.0008  
Z 0.0007 -0.0010 -0.0001 0.0001 0.0188 -0.0005

AT.151 C X 0.0032 0.0032 0.0000 0.0000 0.0000 -0.0000  
Y -0.0114 -0.0114 -0.0000 -0.0001 -0.0001 0.0001  
Z 0.0023 0.0022 -0.0000 0.0000 0.0000 -0.0000

AT.152 C X 0.0032 -0.0032 -0.0000 0.0000 0.0000 -0.0000  
Y -0.0114 0.0114 0.0000 -0.0001 -0.0001 0.0001  
Z 0.0023 -0.0022 0.0000 0.0000 0.0000 -0.0000

AT.153 H X -0.0260 -0.0260 -0.0000 -0.0002 -0.0002 0.0001  
Y 0.0994 0.0993 0.0000 0.0008 0.0003 -0.0005  
Z -0.0611 -0.0611 -0.0000 -0.0005 -0.0002 0.0003

AT.154 H X -0.0260 0.0260 0.0000 -0.0002 -0.0002 0.0001  
Y 0.0994 -0.0993 -0.0000 0.0008 0.0003 -0.0005  
Z -0.0611 0.0611 0.0000 -0.0005 -0.0002 0.0003

AT.155 H X -0.0126 -0.0128 -0.0000 -0.0001 -0.0005 0.0001  
Y 0.0365 0.0371 0.0000 0.0003 0.0005 -0.0002

Z 0.0352 0.0358 0.0000 0.0003 0.0006 -0.0002  
AT. 156 H X -0.0126 0.0128 0.0000 -0.0001 -0.0005 0.0001  
Y 0.0365 -0.0371 -0.0000 0.0003 0.0005 -0.0002  
Z 0.0352 -0.0358 -0.0000 0.0003 0.0006 -0.0002  
AT. 157 O X 0.0000 0.0000 -0.0000 -0.0000 0.0000 0.0000  
Y -0.0000 -0.0000 0.0000 0.0000 -0.0000 -0.0000  
Z -0.0000 0.0000 0.0000 0.0000 -0.0000 -0.0000  
AT. 158 O X 0.0000 -0.0000 0.0000 -0.0000 0.0000 0.0000  
Y -0.0000 0.0000 -0.0000 0.0000 -0.0000 -0.0000  
Z -0.0000 -0.0000 -0.0000 0.0000 -0.0000 -0.0000  
AT. 159 O X 0.0000 0.0000 0.0000 -0.0000 -0.0000 -0.0000  
Y -0.0000 -0.0000 -0.0000 0.0000 -0.0000 0.0000  
Z 0.0001 0.0001 0.0000 -0.0000 0.0000 -0.0000  
AT. 160 O X 0.0000 -0.0000 -0.0000 -0.0000 -0.0000 -0.0000  
Y -0.0000 0.0000 0.0000 0.0000 -0.0000 0.0000  
Z 0.0001 -0.0001 -0.0000 -0.0000 0.0000 -0.0000  
AT. 161 H X -0.0001 -0.0001 0.0000 0.0000 -0.0000 -0.0001  
Y 0.0004 -0.0000 -0.0001 -0.0001 0.0001 0.0003  
Z 0.0000 0.0002 -0.0000 0.0000 0.0001 0.0001  
AT. 162 H X -0.0001 0.0001 -0.0000 0.0000 -0.0000 -0.0001  
Y 0.0004 0.0000 0.0001 -0.0001 0.0001 0.0003  
Z 0.0000 -0.0002 0.0000 0.0000 0.0001 0.0001  
AT. 163 H X -0.0003 -0.0003 -0.0001 0.0000 -0.0001 0.0001  
Y 0.0002 0.0002 0.0000 -0.0000 -0.0001 -0.0001  
Z -0.0006 -0.0006 -0.0002 0.0001 -0.0001 0.0004  
AT. 164 H X -0.0003 0.0003 0.0001 0.0000 -0.0001 0.0001  
Y 0.0002 -0.0002 -0.0000 -0.0000 -0.0001 -0.0001  
Z -0.0006 0.0006 0.0002 0.0001 -0.0001 0.0004  
AT. 165 O X 0.0000 0.0000 -0.0000 -0.0000 0.0000 0.0000  
Y 0.0000 0.0000 -0.0000 -0.0000 0.0000 0.0000  
Z 0.0000 -0.0000 0.0000 0.0000 0.0000 -0.0000  
AT. 166 O X 0.0000 -0.0000 0.0000 -0.0000 0.0000 0.0000

Y 0.0000 -0.0000 0.0000 -0.0000 0.0000 0.0000  
Z 0.0000 0.0000 -0.0000 0.0000 0.0000 -0.0000  
AT. 167 H X -0.0001 -0.0000 -0.0001 0.0001 -0.0001 -0.0001  
Y -0.0000 -0.0000 -0.0001 0.0000 -0.0001 0.0000  
Z -0.0000 -0.0000 -0.0000 -0.0000 -0.0000 0.0000  
AT. 168 H X -0.0001 0.0000 0.0001 0.0001 -0.0001 -0.0001  
Y -0.0000 0.0000 0.0001 0.0000 -0.0001 0.0000  
Z -0.0000 0.0000 0.0000 -0.0000 -0.0000 0.0000  
AT. 169 O X 0.0000 0.0000 0.0000 -0.0000 0.0000 0.0000  
Y -0.0000 -0.0000 0.0001 -0.0000 -0.0000 -0.0000  
Z 0.0000 0.0000 -0.0000 -0.0000 0.0000 0.0000  
AT. 170 O X 0.0000 -0.0000 -0.0000 -0.0000 0.0000 0.0000  
Y -0.0000 0.0000 -0.0001 -0.0000 -0.0000 -0.0000  
Z 0.0000 -0.0000 0.0000 -0.0000 0.0000 0.0000  
AT. 171 H X -0.0000 -0.0001 0.0002 -0.0001 -0.0001 -0.0000  
Y 0.0001 0.0001 -0.0005 0.0004 0.0002 0.0001  
Z -0.0000 -0.0001 0.0002 -0.0001 -0.0001 -0.0000  
AT. 172 H X -0.0000 0.0001 -0.0002 -0.0001 -0.0001 -0.0000  
Y 0.0001 -0.0001 0.0005 0.0004 0.0002 0.0001  
Z -0.0000 0.0001 -0.0002 -0.0001 -0.0001 -0.0000  
  
FREQ(CM\*\*-1) 3144.84 3145.11 3147.23 3147.92 3148.02 3148.08  
  
AT. 1 I X -0.0000 0.0000 -0.0000 -0.0000 0.0000 -0.0000  
Y 0.0000 -0.0000 0.0000 0.0000 -0.0000 0.0000  
Z 0.0000 0.0000 0.0000 0.0000 0.0000 -0.0000  
AT. 2 I X 0.0000 -0.0000 -0.0000 0.0000 0.0000 0.0000  
Y -0.0000 0.0000 0.0000 -0.0000 -0.0000 -0.0000  
Z -0.0000 -0.0000 0.0000 -0.0000 0.0000 0.0000  
AT. 3 I X -0.0000 0.0000 0.0000 -0.0000 0.0000 -0.0000  
Y 0.0000 0.0000 0.0000 0.0000 0.0000 0.0000  
Z -0.0000 0.0000 0.0000 -0.0000 -0.0000 0.0000

AT. 4 I X 0.0000 -0.0000 0.0000 0.0000 0.0000 0.0000  
Y -0.0000 -0.0000 0.0000 -0.0000 0.0000 -0.0000  
Z 0.0000 -0.0000 0.0000 0.0000 -0.0000 -0.0000

AT. 5 O X -0.0000 0.0000 -0.0000 -0.0000 0.0000 0.0000  
Y 0.0000 -0.0000 -0.0000 -0.0000 -0.0000 -0.0000  
Z 0.0000 -0.0000 0.0000 0.0000 -0.0000 0.0000

AT. 6 O X 0.0000 -0.0000 -0.0000 0.0000 0.0000 -0.0000  
Y -0.0000 0.0000 -0.0000 0.0000 -0.0000 0.0000  
Z -0.0000 0.0000 0.0000 -0.0000 -0.0000 -0.0000

AT. 7 O X 0.0000 -0.0000 0.0000 0.0000 -0.0000 -0.0000  
Y -0.0000 -0.0000 -0.0000 -0.0000 0.0000 -0.0000  
Z 0.0000 0.0000 0.0000 0.0000 0.0000 0.0000

AT. 8 O X -0.0000 0.0000 0.0000 -0.0000 -0.0000 0.0000  
Y 0.0000 0.0000 -0.0000 0.0000 0.0000 0.0000  
Z -0.0000 -0.0000 0.0000 -0.0000 0.0000 -0.0000

AT. 9 N X 0.0000 0.0000 -0.0000 -0.0000 0.0000 0.0000  
Y -0.0000 -0.0000 -0.0000 -0.0000 -0.0000 -0.0000  
Z -0.0000 -0.0000 0.0000 -0.0000 0.0000 0.0000

AT. 10 N X -0.0000 -0.0000 -0.0000 0.0000 0.0000 -0.0000  
Y 0.0000 0.0000 -0.0000 0.0000 -0.0000 0.0000  
Z 0.0000 0.0000 0.0000 0.0000 0.0000 -0.0000

AT. 11 N X -0.0000 0.0000 0.0000 -0.0000 0.0000 0.0000  
Y 0.0000 -0.0000 -0.0000 -0.0000 -0.0000 -0.0000  
Z -0.0000 -0.0000 0.0000 -0.0000 0.0000 0.0000

AT. 12 N X 0.0000 -0.0000 0.0000 0.0000 0.0000 -0.0000  
Y -0.0000 0.0000 -0.0000 0.0000 -0.0000 0.0000  
Z 0.0000 0.0000 0.0000 0.0000 0.0000 -0.0000

AT. 13 C X 0.0000 -0.0000 0.0000 -0.0000 -0.0000 -0.0000  
Y -0.0000 0.0000 0.0000 0.0000 -0.0000 0.0000  
Z -0.0000 0.0000 -0.0000 -0.0000 0.0000 0.0000

AT. 14 C X -0.0000 0.0000 0.0000 0.0000 -0.0000 0.0000  
Y 0.0000 -0.0000 0.0000 -0.0000 -0.0000 -0.0000

Z 0.0000 -0.0000 -0.0000 0.0000 0.0000 -0.0000  
AT. 15 C X -0.0000 0.0000 0.0000 0.0000 -0.0000 0.0000  
Y -0.0001 0.0000 0.0001 -0.0000 0.0000 0.0001  
Z 0.0001 -0.0000 -0.0000 -0.0000 0.0000 -0.0001  
AT. 16 C X 0.0000 -0.0000 0.0000 -0.0000 -0.0000 -0.0000  
Y 0.0001 -0.0000 0.0001 0.0000 0.0000 -0.0001  
Z -0.0001 0.0000 -0.0000 0.0000 0.0000 0.0001  
AT. 17 H X -0.0001 0.0000 0.0001 -0.0001 0.0001 0.0003  
Y 0.0004 -0.0001 -0.0004 0.0003 -0.0005 -0.0010  
Z 0.0003 -0.0001 -0.0003 0.0002 -0.0004 -0.0008  
AT. 18 H X 0.0001 -0.0000 0.0001 0.0001 0.0001 -0.0003  
Y -0.0004 0.0001 -0.0004 -0.0003 -0.0005 0.0010  
Z -0.0003 0.0001 -0.0003 -0.0002 -0.0004 0.0008  
AT. 19 H X 0.0005 -0.0002 -0.0002 -0.0000 -0.0001 -0.0005  
Y 0.0005 -0.0002 -0.0003 -0.0000 -0.0001 -0.0005  
Z -0.0014 0.0006 0.0007 -0.0000 0.0002 0.0015  
AT. 20 H X -0.0005 0.0002 -0.0002 0.0000 -0.0001 0.0005  
Y -0.0005 0.0002 -0.0003 0.0000 -0.0001 0.0005  
Z 0.0014 -0.0006 0.0007 0.0000 0.0002 -0.0015  
AT. 21 C X 0.0000 -0.0000 -0.0000 -0.0000 0.0000 0.0000  
Y -0.0000 0.0000 0.0000 0.0000 -0.0000 0.0000  
Z -0.0000 0.0000 -0.0000 -0.0000 0.0000 -0.0000  
AT. 22 C X -0.0000 0.0000 -0.0000 0.0000 0.0000 -0.0000  
Y 0.0000 -0.0000 0.0000 -0.0000 -0.0000 -0.0000  
Z 0.0000 -0.0000 -0.0000 0.0000 0.0000 0.0000  
AT. 23 C X -0.0000 0.0000 -0.0000 -0.0000 -0.0000 0.0000  
Y 0.0002 -0.0000 0.0000 0.0000 0.0000 -0.0001  
Z 0.0001 -0.0000 -0.0000 0.0000 0.0000 -0.0001  
AT. 24 C X 0.0000 -0.0000 -0.0000 0.0000 -0.0000 -0.0000  
Y -0.0002 0.0000 0.0000 -0.0000 0.0000 0.0001  
Z -0.0001 0.0000 -0.0000 -0.0000 0.0000 0.0001  
AT. 25 H X 0.0004 -0.0001 0.0000 0.0000 0.0001 -0.0002

Y -0.0028 0.0005 -0.0002 -0.0002 -0.0006 0.0011  
Z -0.0003 0.0000 -0.0000 -0.0000 -0.0001 0.0001  
AT. 26 H X -0.0004 0.0001 0.0000 -0.0000 0.0001 0.0002  
Y 0.0028 -0.0005 -0.0002 0.0002 -0.0006 -0.0011  
Z 0.0003 -0.0000 -0.0000 0.0000 -0.0001 -0.0001  
AT. 27 H X -0.0003 0.0001 0.0001 -0.0000 -0.0001 0.0001  
Y 0.0007 -0.0002 -0.0001 0.0000 0.0002 -0.0003  
Z -0.0014 0.0003 0.0002 -0.0000 -0.0003 0.0006  
AT. 28 H X 0.0003 -0.0001 0.0001 0.0000 -0.0001 -0.0001  
Y -0.0007 0.0002 -0.0001 -0.0000 0.0002 0.0003  
Z 0.0014 -0.0003 0.0002 0.0000 -0.0003 -0.0006  
AT. 29 C X 0.0001 0.0001 -0.0001 0.0001 0.0001 -0.0001  
Y -0.0002 -0.0001 -0.0000 -0.0000 -0.0001 0.0001  
Z -0.0002 -0.0002 0.0001 -0.0001 -0.0001 0.0001  
AT. 30 C X -0.0001 -0.0001 -0.0001 -0.0001 0.0001 0.0001  
Y 0.0002 0.0001 -0.0000 0.0000 -0.0001 -0.0001  
Z 0.0002 0.0002 0.0001 0.0001 -0.0001 -0.0001  
AT. 31 H X 0.0005 0.0000 0.0003 -0.0001 0.0002 -0.0003  
Y 0.0012 0.0000 0.0007 -0.0003 0.0003 -0.0008  
Z -0.0007 0.0000 -0.0004 0.0002 -0.0002 0.0005  
AT. 32 H X -0.0005 -0.0000 0.0003 0.0001 0.0002 0.0003  
Y -0.0012 -0.0000 0.0007 0.0003 0.0003 0.0008  
Z 0.0007 -0.0000 -0.0004 -0.0002 -0.0002 -0.0005  
AT. 33 H X -0.0023 -0.0014 0.0004 -0.0006 -0.0013 0.0010  
Y 0.0013 0.0008 -0.0002 0.0003 0.0007 -0.0005  
Z 0.0030 0.0019 -0.0005 0.0008 0.0018 -0.0013  
AT. 34 H X 0.0023 0.0014 0.0004 0.0006 -0.0013 -0.0010  
Y -0.0013 -0.0008 -0.0002 -0.0003 0.0007 0.0005  
Z -0.0030 -0.0019 -0.0005 -0.0008 0.0018 0.0013  
AT. 35 C X -0.0001 -0.0000 -0.0000 -0.0000 -0.0000 0.0000  
Y 0.0000 -0.0000 -0.0000 0.0000 -0.0000 -0.0000  
Z 0.0001 0.0000 0.0000 0.0000 0.0000 -0.0001

AT. 36 C X 0.0001 0.0000 -0.0000 0.0000 -0.0000 -0.0000  
Y -0.0000 0.0000 -0.0000 -0.0000 -0.0000 0.0000  
Z -0.0001 -0.0000 0.0000 -0.0000 0.0000 0.0001

AT. 37 C X 0.0002 0.0001 0.0000 0.0000 0.0001 -0.0000  
Y -0.0001 -0.0001 -0.0000 -0.0000 -0.0000 0.0001  
Z -0.0004 -0.0002 -0.0000 -0.0001 -0.0002 0.0002

AT. 38 C X -0.0002 -0.0001 0.0000 -0.0000 0.0001 0.0000  
Y 0.0001 0.0001 -0.0000 0.0000 -0.0000 -0.0001  
Z 0.0004 0.0002 -0.0000 0.0001 -0.0002 -0.0002

AT. 39 H X -0.0025 -0.0012 -0.0001 -0.0003 -0.0013 0.0010  
Y 0.0018 0.0009 0.0001 0.0003 0.0009 -0.0007  
Z 0.0036 0.0018 0.0001 0.0005 0.0020 -0.0013

AT. 40 H X 0.0025 0.0012 -0.0001 0.0003 -0.0013 -0.0010  
Y -0.0018 -0.0009 0.0001 -0.0003 0.0009 0.0007  
Z -0.0036 -0.0018 0.0001 -0.0005 0.0020 0.0013

AT. 41 H X 0.0003 -0.0001 0.0000 0.0000 -0.0002 -0.0005  
Y 0.0002 -0.0001 0.0000 0.0000 -0.0002 -0.0004  
Z 0.0003 -0.0001 0.0000 0.0001 -0.0002 -0.0005

AT. 42 H X -0.0003 0.0001 0.0000 -0.0000 -0.0002 0.0005  
Y -0.0002 0.0001 0.0000 -0.0000 -0.0002 0.0004  
Z -0.0003 0.0001 0.0000 -0.0001 -0.0002 0.0005

AT. 43 C X 0.0001 0.0001 -0.0001 -0.0002 0.0004 0.0004  
Y -0.0001 -0.0000 -0.0000 0.0001 -0.0002 -0.0002  
Z 0.0001 0.0001 -0.0001 -0.0001 0.0004 0.0004

AT. 44 C X -0.0001 -0.0001 -0.0001 0.0002 0.0004 -0.0004  
Y 0.0001 0.0000 -0.0000 -0.0001 -0.0002 0.0002  
Z -0.0001 -0.0001 -0.0001 0.0001 0.0004 -0.0004

AT. 45 H X -0.0002 -0.0002 0.0002 0.0002 -0.0008 -0.0006  
Y -0.0003 -0.0003 0.0003 0.0002 -0.0010 -0.0008  
Z -0.0003 -0.0003 0.0004 0.0002 -0.0010 -0.0008

AT. 46 H X 0.0002 0.0002 0.0002 -0.0002 -0.0008 0.0006  
Y 0.0003 0.0003 0.0003 -0.0002 -0.0010 0.0008

Z 0.0003 0.0003 0.0004 -0.0002 -0.0010 0.0008  
AT. 47 H X -0.0016 -0.0008 0.0004 0.0019 -0.0047 -0.0048  
Y 0.0012 0.0006 -0.0003 -0.0013 0.0033 0.0034  
Z -0.0011 -0.0006 0.0003 0.0013 -0.0031 -0.0032  
AT. 48 H X 0.0016 0.0008 0.0004 -0.0019 -0.0047 0.0048  
Y -0.0012 -0.0006 -0.0003 0.0013 0.0033 -0.0034  
Z 0.0011 0.0006 0.0003 -0.0013 -0.0031 0.0032  
AT. 49 C X -0.0000 -0.0000 -0.0000 0.0000 -0.0000 -0.0001  
Y 0.0000 0.0000 0.0000 -0.0000 0.0001 0.0001  
Z -0.0000 -0.0000 -0.0000 0.0000 -0.0001 -0.0001  
AT. 50 C X 0.0000 0.0000 -0.0000 -0.0000 -0.0000 0.0001  
Y -0.0000 -0.0000 0.0000 0.0000 0.0001 -0.0001  
Z 0.0000 0.0000 -0.0000 -0.0000 -0.0001 0.0001  
AT. 51 C X -0.0000 0.0000 -0.0000 -0.0001 0.0003 0.0004  
Y 0.0003 0.0001 0.0000 0.0001 -0.0001 -0.0003  
Z -0.0002 -0.0001 -0.0000 -0.0001 0.0001 0.0003  
AT. 52 C X 0.0000 -0.0000 -0.0000 0.0001 0.0003 -0.0004  
Y -0.0003 -0.0001 0.0000 -0.0001 -0.0001 0.0003  
Z 0.0002 0.0001 -0.0000 0.0001 0.0001 -0.0003  
AT. 53 H X 0.0012 0.0002 0.0004 0.0017 -0.0026 -0.0045  
Y -0.0007 -0.0001 -0.0003 -0.0013 0.0020 0.0033  
Z 0.0007 0.0001 0.0002 0.0009 -0.0014 -0.0024  
AT. 54 H X -0.0012 -0.0002 0.0004 -0.0017 -0.0026 0.0045  
Y 0.0007 0.0001 -0.0003 0.0013 0.0020 -0.0033  
Z -0.0007 -0.0001 0.0002 -0.0009 -0.0014 0.0024  
AT. 55 H X -0.0012 -0.0004 0.0000 -0.0002 -0.0006 0.0003  
Y -0.0023 -0.0007 0.0001 -0.0003 -0.0011 0.0005  
Z 0.0017 0.0006 -0.0000 0.0003 0.0007 -0.0005  
AT. 56 H X 0.0012 0.0004 0.0000 0.0002 -0.0006 -0.0003  
Y 0.0023 0.0007 0.0001 0.0003 -0.0011 -0.0005  
Z -0.0017 -0.0006 -0.0000 -0.0003 0.0007 0.0005  
AT. 57 C X -0.0043 -0.0017 -0.0000 -0.0007 -0.0023 0.0015



Y -0.0011 -0.0004 0.0001 -0.0003 -0.0012 0.0005  
Z 0.0096 0.0037 0.0003 0.0015 0.0041 -0.0033  
AT. 58 C X 0.0043 0.0017 -0.0000 0.0007 -0.0023 -0.0015  
Y 0.0011 0.0004 0.0001 0.0003 -0.0012 -0.0005  
Z -0.0096 -0.0037 0.0003 -0.0015 0.0041 0.0033  
AT. 59 H X 0.0284 0.0111 0.0006 0.0048 0.0149 -0.0105  
Y 0.0591 0.0232 0.0012 0.0100 0.0309 -0.0217  
Z -0.0379 -0.0149 -0.0007 -0.0064 -0.0200 0.0138  
AT. 60 H X -0.0284 -0.0111 0.0006 -0.0048 0.0149 0.0105  
Y -0.0591 -0.0232 0.0012 -0.0100 0.0309 0.0217  
Z 0.0379 0.0149 -0.0007 0.0064 -0.0200 -0.0138  
AT. 61 H X 0.0448 0.0173 0.0011 0.0067 0.0184 -0.0152  
Y -0.0287 -0.0111 -0.0007 -0.0043 -0.0120 0.0098  
Z -0.0574 -0.0222 -0.0014 -0.0087 -0.0238 0.0196  
AT. 62 H X -0.0448 -0.0173 0.0011 -0.0067 0.0184 0.0152  
Y 0.0287 0.0111 -0.0007 0.0043 -0.0120 -0.0098  
Z 0.0574 0.0222 -0.0014 0.0087 -0.0238 -0.0196  
AT. 63 H X -0.0205 -0.0079 -0.0013 -0.0028 -0.0057 0.0070  
Y -0.0184 -0.0071 -0.0012 -0.0025 -0.0051 0.0063  
Z -0.0193 -0.0074 -0.0014 -0.0025 -0.0049 0.0064  
AT. 64 H X 0.0205 0.0079 -0.0013 0.0028 -0.0057 -0.0070  
Y 0.0184 0.0071 -0.0012 0.0025 -0.0051 -0.0063  
Z 0.0193 0.0074 -0.0014 0.0025 -0.0049 -0.0064  
AT. 65 C X -0.0021 -0.0010 -0.0000 0.0019 -0.0048 -0.0044  
Y 0.0018 0.0008 0.0003 -0.0029 0.0067 0.0063  
Z -0.0027 -0.0012 -0.0001 0.0031 -0.0076 -0.0071  
AT. 66 C X 0.0021 0.0010 -0.0000 -0.0019 -0.0048 0.0044  
Y -0.0018 -0.0008 0.0003 0.0029 0.0067 -0.0063  
Z 0.0027 0.0012 -0.0001 -0.0031 -0.0076 0.0071  
AT. 67 H X 0.0087 0.0037 -0.0003 -0.0072 0.0181 0.0167  
Y 0.0101 0.0044 -0.0003 -0.0087 0.0219 0.0203  
Z 0.0103 0.0044 -0.0004 -0.0083 0.0209 0.0194

AT. 68 H X -0.0087 -0.0037 -0.0003 0.0072 0.0181 -0.0167  
Y -0.0101 -0.0044 -0.0003 0.0087 0.0219 -0.0203  
Z -0.0103 -0.0044 -0.0004 0.0083 0.0209 -0.0194

AT. 69 H X 0.0244 0.0112 0.0015 -0.0281 0.0677 0.0634  
Y -0.0187 -0.0085 -0.0011 0.0213 -0.0515 -0.0481  
Z 0.0125 0.0057 0.0007 -0.0144 0.0346 0.0324

AT. 70 H X -0.0244 -0.0112 0.0015 0.0281 0.0677 -0.0634  
Y 0.0187 0.0085 -0.0011 -0.0213 -0.0515 0.0481  
Z -0.0125 -0.0057 0.0007 0.0144 0.0346 -0.0324

AT. 71 H X -0.0076 -0.0035 -0.0011 0.0123 -0.0291 -0.0273  
Y -0.0130 -0.0060 -0.0019 0.0216 -0.0510 -0.0480  
Z 0.0090 0.0041 0.0014 -0.0150 0.0353 0.0332

AT. 72 H X 0.0076 0.0035 -0.0011 -0.0123 -0.0291 0.0273  
Y 0.0130 0.0060 -0.0019 -0.0216 -0.0510 0.0480  
Z -0.0090 -0.0041 0.0014 0.0150 0.0353 -0.0332

AT. 73 C X -0.0001 -0.0001 -0.0001 0.0001 0.0003 -0.0002  
Y -0.0001 -0.0001 -0.0001 0.0001 0.0003 -0.0002  
Z -0.0000 -0.0000 -0.0000 0.0001 0.0002 -0.0003

AT. 74 C X 0.0001 0.0001 -0.0001 -0.0001 0.0003 0.0002  
Y 0.0001 0.0001 -0.0001 -0.0001 0.0003 0.0002  
Z 0.0000 0.0000 -0.0000 -0.0001 0.0002 0.0003

AT. 75 H X 0.0006 0.0003 0.0004 0.0002 -0.0003 -0.0006  
Y 0.0005 0.0004 0.0008 0.0005 -0.0011 -0.0013  
Z -0.0006 -0.0004 -0.0006 -0.0003 0.0008 0.0007

AT. 76 H X -0.0006 -0.0003 0.0004 -0.0002 -0.0003 0.0006  
Y -0.0005 -0.0004 0.0008 -0.0005 -0.0011 0.0013  
Z 0.0006 0.0004 -0.0006 0.0003 0.0008 -0.0007

AT. 77 H X 0.0007 0.0005 0.0005 -0.0012 -0.0027 0.0030  
Y 0.0005 0.0004 0.0005 -0.0011 -0.0030 0.0029  
Z 0.0006 0.0005 0.0006 -0.0012 -0.0031 0.0030

AT. 78 H X -0.0007 -0.0005 0.0005 0.0012 -0.0027 -0.0030  
Y -0.0005 -0.0004 0.0005 0.0011 -0.0030 -0.0029

Z -0.0006 -0.0005 0.0006 0.0012 -0.0031 -0.0030  
AT. 79 I X 0.0000 -0.0000 -0.0000 -0.0000 -0.0000 -0.0000  
Y -0.0000 -0.0000 0.0000 -0.0000 -0.0000 0.0000  
Z 0.0000 0.0000 -0.0000 0.0000 0.0000 0.0000  
AT. 80 I X -0.0000 0.0000 -0.0000 0.0000 -0.0000 0.0000  
Y 0.0000 0.0000 0.0000 0.0000 -0.0000 -0.0000  
Z -0.0000 -0.0000 -0.0000 -0.0000 0.0000 -0.0000  
AT. 81 I X -0.0000 0.0000 -0.0000 -0.0000 0.0000 0.0000  
Y -0.0000 0.0000 0.0000 -0.0000 0.0000 0.0000  
Z -0.0000 -0.0000 0.0000 0.0000 -0.0000 -0.0000  
AT. 82 I X 0.0000 -0.0000 -0.0000 0.0000 0.0000 -0.0000  
Y 0.0000 -0.0000 0.0000 0.0000 0.0000 -0.0000  
Z 0.0000 0.0000 0.0000 -0.0000 -0.0000 0.0000  
AT. 83 O X 0.0000 -0.0000 0.0000 -0.0000 -0.0000 -0.0000  
Y -0.0000 -0.0000 0.0000 -0.0000 -0.0000 0.0000  
Z -0.0000 -0.0000 0.0000 -0.0000 0.0000 -0.0000  
AT. 84 O X -0.0000 0.0000 0.0000 0.0000 -0.0000 0.0000  
Y 0.0000 0.0000 0.0000 0.0000 -0.0000 -0.0000  
Z 0.0000 0.0000 0.0000 0.0000 0.0000 0.0000  
AT. 85 O X -0.0000 0.0000 -0.0000 0.0000 -0.0000 0.0000  
Y -0.0000 0.0000 -0.0000 -0.0000 -0.0000 0.0000  
Z 0.0000 -0.0000 -0.0000 0.0000 0.0000 -0.0000  
AT. 86 O X 0.0000 -0.0000 -0.0000 -0.0000 -0.0000 -0.0000  
Y 0.0000 -0.0000 -0.0000 0.0000 -0.0000 -0.0000  
Z -0.0000 0.0000 -0.0000 -0.0000 0.0000 0.0000  
AT. 87 N X -0.0000 0.0000 0.0000 0.0000 -0.0000 0.0000  
Y 0.0000 -0.0000 0.0000 0.0000 -0.0000 0.0000  
Z -0.0000 0.0000 0.0000 0.0000 0.0000 0.0000  
AT. 88 N X 0.0000 -0.0000 0.0000 -0.0000 -0.0000 -0.0000  
Y -0.0000 0.0000 0.0000 -0.0000 -0.0000 -0.0000  
Z 0.0000 -0.0000 0.0000 -0.0000 0.0000 -0.0000  
AT. 89 N X 0.0000 -0.0000 0.0000 -0.0000 -0.0000 -0.0000

Y 0.0000 0.0000 0.0000 0.0000 0.0000 0.0000  
Z -0.0000 0.0000 0.0000 0.0000 -0.0000 0.0000  
AT. 90 N X -0.0000 0.0000 0.0000 0.0000 -0.0000 0.0000  
Y -0.0000 -0.0000 0.0000 -0.0000 0.0000 -0.0000  
Z 0.0000 -0.0000 0.0000 -0.0000 -0.0000 -0.0000  
AT. 91 C X 0.0001 -0.0000 0.0000 -0.0000 0.0000 -0.0000  
Y 0.0000 -0.0000 0.0000 -0.0000 -0.0000 -0.0000  
Z -0.0000 0.0000 -0.0000 0.0000 -0.0000 0.0000  
AT. 92 C X -0.0001 0.0000 0.0000 0.0000 0.0000 0.0000  
Y -0.0000 0.0000 0.0000 0.0000 -0.0000 0.0000  
Z 0.0000 -0.0000 -0.0000 -0.0000 -0.0000 -0.0000  
AT. 93 C X -0.0004 0.0002 -0.0003 0.0001 0.0000 0.0002  
Y -0.0011 0.0005 -0.0008 0.0003 0.0001 0.0005  
Z 0.0000 -0.0000 0.0000 -0.0000 -0.0000 -0.0000  
AT. 94 C X 0.0004 -0.0002 -0.0003 -0.0001 0.0000 -0.0002  
Y 0.0011 -0.0005 -0.0008 -0.0003 0.0001 -0.0005  
Z -0.0000 0.0000 0.0000 0.0000 -0.0000 0.0000  
AT. 95 H X 0.0061 -0.0029 0.0047 -0.0017 -0.0005 -0.0026  
Y 0.0109 -0.0052 0.0087 -0.0030 -0.0009 -0.0047  
Z 0.0064 -0.0030 0.0051 -0.0018 -0.0005 -0.0027  
AT. 96 H X -0.0061 0.0029 0.0047 0.0017 -0.0005 0.0026  
Y -0.0109 0.0052 0.0087 0.0030 -0.0009 0.0047  
Z -0.0064 0.0030 0.0051 0.0018 -0.0005 0.0027  
AT. 97 H X -0.0020 0.0010 -0.0016 0.0005 0.0002 0.0009  
Y 0.0015 -0.0007 0.0011 -0.0004 -0.0001 -0.0006  
Z -0.0067 0.0031 -0.0051 0.0018 0.0005 0.0029  
AT. 98 H X 0.0020 -0.0010 -0.0016 -0.0005 0.0002 -0.0009  
Y -0.0015 0.0007 0.0011 0.0004 -0.0001 0.0006  
Z 0.0067 -0.0031 -0.0051 -0.0018 0.0005 -0.0029  
AT. 99 C X -0.0000 -0.0000 0.0000 0.0000 0.0000 0.0000  
Y 0.0000 -0.0000 0.0000 0.0000 0.0000 -0.0000  
Z -0.0000 0.0000 -0.0000 0.0000 0.0000 0.0000

AT.100 C X 0.0000 0.0000 0.0000 -0.0000 0.0000 -0.0000  
Y -0.0000 0.0000 0.0000 -0.0000 0.0000 0.0000  
Z 0.0000 -0.0000 -0.0000 -0.0000 0.0000 -0.0000

AT.101 C X 0.0000 -0.0000 -0.0000 -0.0000 0.0000 -0.0000  
Y 0.0001 -0.0000 -0.0001 -0.0001 -0.0000 -0.0001  
Z 0.0002 -0.0001 -0.0000 -0.0001 -0.0000 -0.0001

AT.102 C X -0.0000 0.0000 -0.0000 0.0000 0.0000 0.0000  
Y -0.0001 0.0000 -0.0001 0.0001 -0.0000 0.0001  
Z -0.0002 0.0001 -0.0000 0.0001 -0.0000 0.0001

AT.103 H X -0.0008 0.0003 0.0005 0.0005 0.0001 0.0006  
Y -0.0018 0.0007 0.0012 0.0011 0.0003 0.0016  
Z -0.0000 0.0000 0.0001 0.0000 0.0000 0.0000

AT.104 H X 0.0008 -0.0003 0.0005 -0.0005 0.0001 -0.0006  
Y 0.0018 -0.0007 0.0012 -0.0011 0.0003 -0.0016  
Z 0.0000 -0.0000 0.0001 -0.0000 0.0000 -0.0000

AT.105 H X 0.0005 -0.0002 -0.0001 -0.0002 -0.0001 -0.0003  
Y 0.0008 -0.0003 -0.0002 -0.0004 -0.0001 -0.0005  
Z -0.0020 0.0008 0.0004 0.0009 0.0002 0.0013

AT.106 H X -0.0005 0.0002 -0.0001 0.0002 -0.0001 0.0003  
Y -0.0008 0.0003 -0.0002 0.0004 -0.0001 0.0005  
Z 0.0020 -0.0008 0.0004 -0.0009 0.0002 -0.0013

AT.107 C X 0.0000 -0.0000 0.0003 0.0002 -0.0000 0.0001  
Y -0.0001 -0.0000 0.0000 -0.0000 -0.0000 0.0000  
Z 0.0001 -0.0000 0.0003 0.0003 -0.0000 0.0001

AT.108 C X -0.0000 0.0000 0.0003 -0.0002 -0.0000 -0.0001  
Y 0.0001 0.0000 0.0000 0.0000 -0.0000 -0.0000  
Z -0.0001 0.0000 0.0003 -0.0003 -0.0000 -0.0001

AT.109 H X -0.0002 -0.0000 -0.0002 -0.0003 -0.0001 -0.0001  
Y 0.0009 0.0003 0.0009 0.0012 0.0003 0.0003  
Z -0.0005 -0.0002 -0.0005 -0.0007 -0.0002 -0.0002

AT.110 H X 0.0002 0.0000 -0.0002 0.0003 -0.0001 0.0001  
Y -0.0009 -0.0003 0.0009 -0.0012 0.0003 -0.0003

Z 0.0005 0.0002 -0.0005 0.0007 -0.0002 0.0002  
AT. 111 H X -0.0002 0.0007 -0.0033 -0.0023 0.0003 -0.0010  
Y -0.0001 0.0001 -0.0005 -0.0003 0.0001 -0.0001  
Z -0.0001 0.0006 -0.0027 -0.0017 0.0003 -0.0007  
AT. 112 H X 0.0002 -0.0007 -0.0033 0.0023 0.0003 0.0010  
Y 0.0001 -0.0001 -0.0005 0.0003 0.0001 0.0001  
Z 0.0001 -0.0006 -0.0027 0.0017 0.0003 0.0007  
AT. 113 C X -0.0000 -0.0000 -0.0001 -0.0001 0.0000 -0.0000  
Y -0.0000 0.0000 -0.0001 -0.0001 0.0000 -0.0000  
Z -0.0000 0.0000 -0.0001 -0.0001 0.0000 -0.0001  
AT. 114 C X 0.0000 0.0000 -0.0001 0.0001 0.0000 0.0000  
Y 0.0000 -0.0000 -0.0001 0.0001 0.0000 0.0000  
Z 0.0000 -0.0000 -0.0001 0.0001 0.0000 0.0001  
AT. 115 C X 0.0001 -0.0001 0.0004 0.0004 -0.0000 0.0002  
Y 0.0000 0.0001 0.0000 0.0000 -0.0000 -0.0000  
Z 0.0001 -0.0000 0.0003 0.0003 -0.0000 0.0001  
AT. 116 C X -0.0001 0.0001 0.0004 -0.0004 -0.0000 -0.0002  
Y -0.0000 -0.0001 0.0000 -0.0000 -0.0000 0.0000  
Z -0.0001 0.0000 0.0003 -0.0003 -0.0000 -0.0001  
AT. 117 H X -0.0010 0.0012 -0.0040 -0.0045 0.0001 -0.0017  
Y -0.0003 0.0003 -0.0012 -0.0012 0.0000 -0.0005  
Z -0.0011 0.0013 -0.0038 -0.0042 0.0001 -0.0016  
AT. 118 H X 0.0010 -0.0012 -0.0040 0.0045 0.0001 0.0017  
Y 0.0003 -0.0003 -0.0012 0.0012 0.0000 0.0005  
Z 0.0011 -0.0013 -0.0038 0.0042 0.0001 0.0016  
AT. 119 H X -0.0001 0.0005 -0.0004 -0.0005 0.0000 -0.0003  
Y 0.0003 -0.0011 0.0010 0.0010 -0.0000 0.0006  
Z 0.0003 -0.0011 0.0008 0.0008 -0.0000 0.0005  
AT. 120 H X 0.0001 -0.0005 -0.0004 0.0005 0.0000 0.0003  
Y -0.0003 0.0011 0.0010 -0.0010 -0.0000 -0.0006  
Z -0.0003 0.0011 0.0008 -0.0008 -0.0000 -0.0005  
AT. 121 C X 0.0001 -0.0002 -0.0000 -0.0001 0.0000 -0.0000

Y 0.0001 -0.0003 0.0000 -0.0001 -0.0000 -0.0000  
Z -0.0000 0.0001 0.0000 0.0000 -0.0000 -0.0000  
AT. 122 C X -0.0001 0.0002 -0.0000 0.0001 0.0000 0.0000  
Y -0.0001 0.0003 0.0000 0.0001 -0.0000 0.0000  
Z 0.0000 -0.0001 0.0000 -0.0000 -0.0000 0.0000  
AT. 123 H X 0.0001 -0.0004 0.0000 -0.0001 -0.0000 -0.0000  
Y -0.0006 0.0017 -0.0003 0.0008 0.0000 0.0003  
Z -0.0005 0.0015 -0.0003 0.0007 0.0000 0.0002  
AT. 124 H X -0.0001 0.0004 0.0000 0.0001 -0.0000 0.0000  
Y 0.0006 -0.0017 -0.0003 -0.0008 0.0000 -0.0003  
Z 0.0005 -0.0015 -0.0003 -0.0007 0.0000 -0.0002  
AT. 125 H X -0.0011 0.0034 0.0000 0.0010 -0.0000 0.0002  
Y -0.0004 0.0012 -0.0000 0.0004 -0.0000 0.0001  
Z 0.0008 -0.0026 -0.0000 -0.0008 0.0000 -0.0002  
AT. 126 H X 0.0011 -0.0034 0.0000 -0.0010 -0.0000 -0.0002  
Y 0.0004 -0.0012 -0.0000 -0.0004 -0.0000 -0.0001  
Z -0.0008 0.0026 -0.0000 0.0008 0.0000 0.0002  
AT. 127 C X -0.0000 0.0001 0.0000 0.0000 -0.0000 0.0000  
Y 0.0000 -0.0000 0.0000 -0.0000 -0.0000 -0.0000  
Z 0.0000 -0.0001 -0.0000 -0.0000 0.0000 -0.0000  
AT. 128 C X 0.0000 -0.0001 0.0000 -0.0000 -0.0000 -0.0000  
Y -0.0000 0.0000 0.0000 0.0000 -0.0000 0.0000  
Z -0.0000 0.0001 -0.0000 0.0000 0.0000 0.0000  
AT. 129 C X 0.0001 -0.0002 0.0001 -0.0000 -0.0000 0.0000  
Y 0.0000 -0.0000 0.0000 -0.0001 -0.0000 -0.0001  
Z -0.0001 0.0002 -0.0001 0.0001 0.0000 0.0000  
AT. 130 C X -0.0001 0.0002 0.0001 0.0000 -0.0000 -0.0000  
Y -0.0000 0.0000 0.0000 0.0001 -0.0000 0.0001  
Z 0.0001 -0.0002 -0.0001 -0.0001 0.0000 -0.0000  
AT. 131 H X -0.0011 0.0027 -0.0011 0.0003 0.0001 0.0000  
Y -0.0004 0.0010 -0.0004 0.0001 0.0000 -0.0000  
Z 0.0007 -0.0018 0.0008 -0.0001 -0.0001 0.0000

AT.132 H X 0.0011 -0.0027 -0.0011 -0.0003 0.0001 -0.0000  
Y 0.0004 -0.0010 -0.0004 -0.0001 0.0000 0.0000  
Z -0.0007 0.0018 0.0008 0.0001 -0.0001 -0.0000

AT.133 H X 0.0001 0.0000 -0.0001 -0.0004 -0.0000 -0.0002  
Y -0.0004 -0.0001 0.0002 0.0012 0.0001 0.0007  
Z 0.0002 0.0000 -0.0001 -0.0008 -0.0001 -0.0005

AT.134 H X -0.0001 -0.0000 -0.0001 0.0004 -0.0000 0.0002  
Y 0.0004 0.0001 0.0002 -0.0012 0.0001 -0.0007  
Z -0.0002 -0.0000 -0.0001 0.0008 -0.0001 0.0005

AT.135 C X -0.0001 0.0004 -0.0035 -0.0032 0.0001 -0.0015  
Y -0.0003 0.0007 -0.0061 -0.0054 0.0002 -0.0024  
Z -0.0005 0.0013 -0.0099 -0.0090 0.0003 -0.0040

AT.136 C X 0.0001 -0.0004 -0.0035 0.0032 0.0001 0.0015  
Y 0.0003 -0.0007 -0.0061 0.0054 0.0002 0.0024  
Z 0.0005 -0.0013 -0.0099 0.0090 0.0003 0.0040

AT.137 H X 0.0001 -0.0003 0.0013 0.0012 0.0000 0.0005  
Y -0.0006 0.0018 -0.0097 -0.0094 0.0001 -0.0042  
Z 0.0002 -0.0008 0.0032 0.0032 0.0000 0.0014

AT.138 H X -0.0001 0.0003 0.0013 -0.0012 0.0000 -0.0005  
Y 0.0006 -0.0018 -0.0097 0.0094 0.0001 0.0042  
Z -0.0002 0.0008 0.0032 -0.0032 0.0000 -0.0014

AT.139 H X 0.0031 -0.0085 0.0684 0.0628 -0.0017 0.0282  
Y 0.0006 -0.0017 0.0141 0.0130 -0.0004 0.0058  
Z 0.0024 -0.0066 0.0530 0.0487 -0.0013 0.0219

AT.140 H X -0.0031 0.0085 0.0684 -0.0628 -0.0017 -0.0282  
Y -0.0006 0.0017 0.0141 -0.0130 -0.0004 -0.0058  
Z -0.0024 0.0066 0.0530 -0.0487 -0.0013 -0.0219

AT.141 H X -0.0017 0.0036 -0.0275 -0.0248 0.0007 -0.0110  
Y 0.0041 -0.0089 0.0676 0.0608 -0.0018 0.0269  
Z 0.0038 -0.0082 0.0614 0.0552 -0.0017 0.0244

AT.142 H X 0.0017 -0.0036 -0.0275 0.0248 0.0007 0.0110  
Y -0.0041 0.0089 0.0676 -0.0608 -0.0018 -0.0269



Z -0.0038 0.0082 0.0614 -0.0552 -0.0017 -0.0244

AT. 143 C X -0.0022 0.0056 0.0002 0.0008 -0.0000 0.0002

Y 0.0004 -0.0010 -0.0008 -0.0008 0.0000 -0.0003

Z 0.0037 -0.0095 -0.0002 -0.0013 0.0000 -0.0003

AT. 144 C X 0.0022 -0.0056 0.0002 -0.0008 -0.0000 -0.0002

Y -0.0004 0.0010 -0.0008 0.0008 0.0000 0.0003

Z -0.0037 0.0095 -0.0002 0.0013 0.0000 0.0003

AT. 145 H X 0.0061 -0.0161 -0.0013 -0.0030 0.0001 -0.0009

Y -0.0242 0.0634 0.0049 0.0116 -0.0005 0.0034

Z -0.0220 0.0576 0.0047 0.0107 -0.0004 0.0032

AT. 146 H X -0.0061 0.0161 -0.0013 0.0030 0.0001 0.0009

Y 0.0242 -0.0634 0.0049 -0.0116 -0.0005 -0.0034

Z 0.0220 -0.0576 0.0047 -0.0107 -0.0004 -0.0032

AT. 147 H X 0.0233 -0.0597 -0.0001 -0.0070 0.0003 -0.0017

Y 0.0091 -0.0235 -0.0001 -0.0028 0.0001 -0.0007

Z -0.0163 0.0418 0.0000 0.0048 -0.0002 0.0012

AT. 148 H X -0.0233 0.0597 -0.0001 0.0070 0.0003 0.0017

Y -0.0091 0.0235 -0.0001 0.0028 0.0001 0.0007

Z 0.0163 -0.0418 0.0000 -0.0048 -0.0002 -0.0012

AT. 149 H X -0.0036 0.0092 -0.0013 0.0001 0.0000 -0.0001

Y 0.0110 -0.0281 0.0046 0.0001 -0.0001 0.0006

Z -0.0056 0.0143 -0.0027 -0.0003 0.0001 -0.0004

AT. 150 H X 0.0036 -0.0092 -0.0013 -0.0001 0.0000 0.0001

Y -0.0110 0.0281 0.0046 -0.0001 -0.0001 -0.0006

Z 0.0056 -0.0143 -0.0027 0.0003 0.0001 0.0004

AT. 151 C X -0.0000 0.0000 0.0000 0.0001 0.0000 0.0000

Y 0.0001 -0.0000 0.0000 -0.0002 -0.0000 -0.0001

Z 0.0000 -0.0001 -0.0000 -0.0000 0.0000 -0.0000

AT. 152 C X 0.0000 -0.0000 0.0000 -0.0001 0.0000 -0.0000

Y -0.0001 0.0000 0.0000 0.0002 -0.0000 0.0001

Z -0.0000 0.0001 -0.0000 0.0000 0.0000 0.0000

AT. 153 H X 0.0001 0.0000 0.0003 -0.0002 -0.0000 -0.0001

Y -0.0003 -0.0008 -0.0006 0.0010 0.0001 0.0007  
Z 0.0002 0.0004 0.0003 -0.0007 -0.0001 -0.0004  
AT. 154 H X -0.0001 -0.0000 0.0003 0.0002 -0.0000 0.0001  
Y 0.0003 0.0008 -0.0006 -0.0010 0.0001 -0.0007  
Z -0.0002 -0.0004 0.0003 0.0007 -0.0001 0.0004  
AT. 155 H X 0.0003 -0.0007 0.0001 -0.0004 -0.0000 -0.0002  
Y -0.0005 0.0009 0.0007 0.0018 -0.0000 0.0008  
Z -0.0005 0.0009 0.0006 0.0016 0.0000 0.0007  
AT. 156 H X -0.0003 0.0007 0.0001 0.0004 -0.0000 0.0002  
Y 0.0005 -0.0009 0.0007 -0.0018 -0.0000 -0.0008  
Z 0.0005 -0.0009 0.0006 -0.0016 0.0000 -0.0007  
AT. 157 O X -0.0000 0.0000 -0.0000 0.0000 -0.0000 0.0000  
Y 0.0000 0.0000 -0.0000 -0.0000 0.0000 -0.0000  
Z 0.0000 -0.0000 -0.0000 -0.0000 0.0000 -0.0000  
AT. 158 O X 0.0000 -0.0000 -0.0000 -0.0000 -0.0000 -0.0000  
Y -0.0000 -0.0000 -0.0000 0.0000 0.0000 0.0000  
Z -0.0000 0.0000 -0.0000 0.0000 0.0000 0.0000  
AT. 159 O X 0.0000 -0.0000 -0.0000 -0.0000 0.0000 -0.0000  
Y -0.0000 0.0000 0.0000 0.0000 -0.0000 0.0000  
Z 0.0000 -0.0000 -0.0000 0.0000 0.0000 -0.0000  
AT. 160 O X -0.0000 0.0000 -0.0000 0.0000 0.0000 0.0000  
Y 0.0000 -0.0000 0.0000 -0.0000 -0.0000 -0.0000  
Z -0.0000 0.0000 -0.0000 -0.0000 0.0000 0.0000  
AT. 161 H X -0.0000 -0.0000 0.0001 0.0000 0.0000 -0.0000  
Y -0.0002 0.0001 0.0004 0.0005 -0.0001 0.0006  
Z 0.0003 -0.0002 0.0000 -0.0001 -0.0000 -0.0002  
AT. 162 H X 0.0000 0.0000 0.0001 -0.0000 0.0000 0.0000  
Y 0.0002 -0.0001 0.0004 -0.0005 -0.0001 -0.0006  
Z -0.0003 0.0002 0.0000 0.0001 -0.0000 0.0002  
AT. 163 H X -0.0001 0.0001 0.0000 -0.0000 -0.0000 0.0000  
Y 0.0000 -0.0000 -0.0000 -0.0001 0.0000 -0.0001  
Z -0.0003 0.0003 0.0002 0.0001 -0.0001 0.0002

AT.164 H X 0.0001 -0.0001 0.0000 0.0000 -0.0000 -0.0000  
Y -0.0000 0.0000 -0.0000 0.0001 0.0000 0.0001  
Z 0.0003 -0.0003 0.0002 -0.0001 -0.0001 -0.0002

AT.165 O X 0.0000 0.0000 0.0000 0.0000 0.0000 -0.0000  
Y -0.0000 0.0000 0.0000 -0.0000 0.0000 0.0000  
Z -0.0000 0.0000 0.0000 0.0000 0.0000 -0.0000

AT.166 O X -0.0000 -0.0000 0.0000 -0.0000 0.0000 0.0000  
Y 0.0000 -0.0000 0.0000 0.0000 0.0000 -0.0000  
Z 0.0000 -0.0000 0.0000 -0.0000 0.0000 0.0000

AT.167 H X -0.0001 -0.0001 -0.0002 -0.0001 -0.0000 0.0001  
Y 0.0001 -0.0000 -0.0001 -0.0000 0.0000 -0.0000  
Z 0.0000 -0.0000 0.0000 0.0000 -0.0000 0.0000

AT.168 H X 0.0001 0.0001 -0.0002 0.0001 -0.0000 -0.0001  
Y -0.0001 0.0000 -0.0001 0.0000 0.0000 0.0000  
Z -0.0000 0.0000 0.0000 -0.0000 -0.0000 -0.0000

AT.169 O X 0.0000 -0.0000 0.0000 -0.0000 -0.0000 0.0000  
Y 0.0000 0.0000 -0.0000 -0.0000 0.0000 -0.0000  
Z -0.0000 -0.0000 0.0000 0.0000 -0.0000 0.0000

AT.170 O X -0.0000 0.0000 0.0000 0.0000 -0.0000 -0.0000  
Y -0.0000 -0.0000 -0.0000 0.0000 0.0000 0.0000  
Z 0.0000 0.0000 0.0000 -0.0000 -0.0000 -0.0000

AT.171 H X 0.0000 0.0001 -0.0001 -0.0000 0.0001 -0.0001  
Y -0.0001 -0.0001 0.0002 0.0000 -0.0002 0.0001  
Z 0.0000 0.0001 -0.0001 -0.0000 0.0001 -0.0001

AT.172 H X -0.0000 -0.0001 -0.0001 0.0000 0.0001 0.0001  
Y 0.0001 0.0001 0.0002 -0.0000 -0.0002 -0.0001  
Z -0.0000 -0.0001 -0.0001 0.0000 0.0001 0.0001

FREQ(CM\*\*-1) 3158.02 3158.50 3159.12 3164.25 3165.07 3168.23

AT. 1 I X -0.0000 -0.0000 -0.0000 0.0000 -0.0000 0.0000  
Y -0.0000 -0.0000 0.0000 0.0000 -0.0000 -0.0000

Z -0.0000 -0.0000 -0.0000 -0.0000 -0.0000 0.0000  
AT. 2 I X 0.0000 0.0000 -0.0000 0.0000 0.0000 0.0000  
Y 0.0000 0.0000 0.0000 0.0000 0.0000 -0.0000  
Z 0.0000 0.0000 -0.0000 -0.0000 0.0000 0.0000  
AT. 3 I X -0.0000 -0.0000 -0.0000 -0.0000 0.0000 0.0000  
Y 0.0000 0.0000 -0.0000 -0.0000 0.0000 0.0000  
Z -0.0000 -0.0000 -0.0000 0.0000 0.0000 0.0000  
AT. 4 I X 0.0000 0.0000 -0.0000 -0.0000 -0.0000 0.0000  
Y -0.0000 -0.0000 -0.0000 -0.0000 -0.0000 0.0000  
Z 0.0000 0.0000 -0.0000 0.0000 -0.0000 0.0000  
AT. 5 O X -0.0001 -0.0000 0.0000 0.0000 -0.0000 -0.0000  
Y 0.0000 0.0000 -0.0000 0.0000 0.0000 -0.0000  
Z 0.0001 0.0001 -0.0000 -0.0000 0.0000 -0.0000  
AT. 6 O X 0.0001 0.0000 0.0000 0.0000 0.0000 -0.0000  
Y -0.0000 -0.0000 -0.0000 0.0000 -0.0000 -0.0000  
Z -0.0001 -0.0001 -0.0000 -0.0000 -0.0000 -0.0000  
AT. 7 O X 0.0000 0.0000 -0.0000 0.0000 0.0000 -0.0000  
Y -0.0000 -0.0000 -0.0000 -0.0000 -0.0000 0.0000  
Z -0.0000 0.0000 0.0000 0.0000 0.0000 -0.0000  
AT. 8 O X -0.0000 -0.0000 -0.0000 0.0000 -0.0000 -0.0000  
Y 0.0000 0.0000 -0.0000 -0.0000 0.0000 0.0000  
Z 0.0000 -0.0000 0.0000 0.0000 -0.0000 -0.0000  
AT. 9 N X -0.0000 -0.0000 -0.0000 0.0000 0.0000 -0.0000  
Y -0.0000 0.0000 0.0000 0.0000 0.0000 0.0000  
Z 0.0001 0.0000 -0.0000 -0.0000 0.0000 0.0000  
AT. 10 N X 0.0000 0.0000 -0.0000 0.0000 -0.0000 -0.0000  
Y 0.0000 -0.0000 0.0000 0.0000 -0.0000 0.0000  
Z -0.0001 -0.0000 -0.0000 -0.0000 -0.0000 0.0000  
AT. 11 N X -0.0000 0.0000 0.0000 0.0000 -0.0000 0.0000  
Y 0.0000 0.0000 0.0000 0.0000 0.0000 -0.0000  
Z -0.0000 0.0000 -0.0000 0.0000 0.0000 0.0000  
AT. 12 N X 0.0000 -0.0000 0.0000 0.0000 0.0000 0.0000

Y -0.0000 -0.0000 0.0000 0.0000 -0.0000 -0.0000  
Z 0.0000 -0.0000 -0.0000 0.0000 -0.0000 0.0000  
AT. 13 C X 0.0001 0.0001 -0.0000 -0.0000 0.0000 0.0000  
Y -0.0001 -0.0001 0.0000 0.0000 -0.0000 -0.0000  
Z -0.0002 -0.0001 0.0000 0.0000 -0.0000 -0.0000  
AT. 14 C X -0.0001 -0.0001 -0.0000 -0.0000 -0.0000 0.0000  
Y 0.0001 0.0001 0.0000 0.0000 0.0000 -0.0000  
Z 0.0002 0.0001 0.0000 0.0000 0.0000 -0.0000  
AT. 15 C X -0.0002 -0.0001 0.0000 -0.0000 -0.0000 0.0001  
Y -0.0004 -0.0003 -0.0000 -0.0002 -0.0001 0.0003  
Z 0.0006 0.0004 0.0000 0.0001 0.0000 -0.0003  
AT. 16 C X 0.0002 0.0001 0.0000 -0.0000 0.0000 0.0001  
Y 0.0004 0.0003 -0.0000 -0.0002 0.0001 0.0003  
Z -0.0006 -0.0004 0.0000 0.0001 -0.0000 -0.0003  
AT. 17 H X -0.0006 -0.0004 -0.0001 -0.0003 -0.0001 0.0005  
Y 0.0021 0.0015 0.0003 0.0011 0.0004 -0.0016  
Z 0.0017 0.0012 0.0003 0.0009 0.0003 -0.0013  
AT. 18 H X 0.0006 0.0004 -0.0001 -0.0003 0.0001 0.0005  
Y -0.0021 -0.0015 0.0003 0.0011 -0.0004 -0.0016  
Z -0.0017 -0.0012 0.0003 0.0009 -0.0003 -0.0013  
AT. 19 H X 0.0027 0.0018 0.0001 0.0006 0.0002 -0.0016  
Y 0.0028 0.0019 0.0001 0.0007 0.0003 -0.0017  
Z -0.0079 -0.0054 -0.0004 -0.0020 -0.0007 0.0049  
AT. 20 H X -0.0027 -0.0018 0.0001 0.0006 -0.0002 -0.0016  
Y -0.0028 -0.0019 0.0001 0.0007 -0.0003 -0.0017  
Z 0.0079 0.0054 -0.0004 -0.0020 0.0007 0.0049  
AT. 21 C X 0.0000 0.0000 0.0000 -0.0000 -0.0000 -0.0001  
Y 0.0000 0.0000 -0.0000 0.0000 0.0000 0.0000  
Z -0.0001 -0.0000 0.0000 0.0000 0.0000 0.0001  
AT. 22 C X -0.0000 -0.0000 0.0000 -0.0000 0.0000 -0.0001  
Y -0.0000 -0.0000 -0.0000 0.0000 -0.0000 0.0000  
Z 0.0001 0.0000 0.0000 0.0000 -0.0000 0.0001

AT. 23 C X -0.0001 -0.0001 0.0000 0.0001 0.0000 0.0003  
Y 0.0016 0.0011 -0.0000 -0.0006 -0.0005 -0.0052  
Z 0.0014 0.0010 0.0000 -0.0003 -0.0003 -0.0042

AT. 24 C X 0.0001 0.0001 0.0000 0.0001 -0.0000 0.0003  
Y -0.0016 -0.0011 -0.0000 -0.0006 0.0005 -0.0052  
Z -0.0014 -0.0010 0.0000 -0.0003 0.0003 -0.0042

AT. 25 H X 0.0036 0.0024 -0.0000 -0.0012 -0.0010 -0.0115  
Y -0.0256 -0.0170 -0.0000 0.0082 0.0070 0.0812  
Z -0.0026 -0.0017 0.0000 0.0009 0.0007 0.0082

AT. 26 H X -0.0036 -0.0024 -0.0000 -0.0012 0.0010 -0.0115  
Y 0.0256 0.0170 -0.0000 0.0082 -0.0070 0.0812  
Z 0.0026 0.0017 0.0000 0.0009 -0.0007 0.0082

AT. 27 H X -0.0032 -0.0021 -0.0000 0.0007 0.0007 0.0094  
Y 0.0070 0.0047 0.0001 -0.0016 -0.0016 -0.0206  
Z -0.0137 -0.0092 -0.0002 0.0029 0.0031 0.0398

AT. 28 H X 0.0032 0.0021 -0.0000 0.0007 -0.0007 0.0094  
Y -0.0070 -0.0047 0.0001 -0.0016 0.0016 -0.0206  
Z 0.0137 0.0092 -0.0002 0.0029 -0.0031 0.0398

AT. 29 C X -0.0005 -0.0004 0.0001 0.0003 -0.0000 -0.0004  
Y -0.0000 -0.0000 0.0000 -0.0000 -0.0001 -0.0001  
Z 0.0008 0.0007 -0.0002 -0.0004 0.0001 0.0006

AT. 30 C X 0.0005 0.0004 0.0001 0.0003 0.0000 -0.0004  
Y 0.0000 0.0000 0.0000 -0.0000 0.0001 -0.0001  
Z -0.0008 -0.0007 -0.0002 -0.0004 -0.0001 0.0006

AT. 31 H X 0.0013 0.0011 -0.0003 -0.0004 0.0008 0.0014  
Y 0.0033 0.0028 -0.0007 -0.0015 0.0015 0.0033  
Z -0.0022 -0.0018 0.0005 0.0011 -0.0009 -0.0022

AT. 32 H X -0.0013 -0.0011 -0.0003 -0.0004 -0.0008 0.0014  
Y -0.0033 -0.0028 -0.0007 -0.0015 -0.0015 0.0033  
Z 0.0022 0.0018 0.0005 0.0011 0.0009 -0.0022

AT. 33 H X 0.0052 0.0040 -0.0010 -0.0030 0.0001 0.0031  
Y -0.0033 -0.0024 0.0007 0.0019 -0.0001 -0.0020

Z -0.0080 -0.0059 0.0015 0.0046 -0.0000 -0.0047  
AT. 34 H X -0.0052 -0.0040 -0.0010 -0.0030 -0.0001 0.0031  
Y 0.0033 0.0024 0.0007 0.0019 0.0001 -0.0020  
Z 0.0080 0.0059 0.0015 0.0046 0.0000 -0.0047  
AT. 35 C X -0.0000 -0.0000 0.0000 -0.0001 -0.0001 -0.0000  
Y 0.0000 -0.0000 0.0000 -0.0001 -0.0001 0.0000  
Z 0.0000 -0.0000 0.0000 -0.0000 -0.0000 0.0000  
AT. 36 C X 0.0000 0.0000 0.0000 -0.0001 0.0001 -0.0000  
Y -0.0000 0.0000 0.0000 -0.0001 0.0001 0.0000  
Z -0.0000 0.0000 0.0000 -0.0000 0.0000 0.0000  
AT. 37 C X -0.0001 -0.0002 0.0000 -0.0004 -0.0004 -0.0007  
Y -0.0001 0.0000 -0.0000 0.0003 0.0003 0.0011  
Z -0.0001 0.0001 -0.0000 0.0005 0.0006 0.0020  
AT. 38 C X 0.0001 0.0002 0.0000 -0.0004 0.0004 -0.0007  
Y 0.0001 -0.0000 -0.0000 0.0003 -0.0003 0.0011  
Z 0.0001 -0.0001 -0.0000 0.0005 -0.0006 0.0020  
AT. 39 H X 0.0000 0.0019 -0.0003 0.0046 0.0052 0.0129  
Y -0.0000 -0.0013 0.0002 -0.0031 -0.0034 -0.0081  
Z -0.0000 -0.0028 0.0005 -0.0069 -0.0077 -0.0189  
AT. 40 H X -0.0000 -0.0019 -0.0003 0.0046 -0.0052 0.0129  
Y 0.0000 0.0013 0.0002 -0.0031 0.0034 -0.0081  
Z 0.0000 0.0028 0.0005 -0.0069 0.0077 -0.0189  
AT. 41 H X 0.0014 0.0011 -0.0002 0.0004 0.0001 -0.0053  
Y 0.0011 0.0009 -0.0002 0.0006 0.0004 -0.0040  
Z 0.0015 0.0011 -0.0002 0.0004 0.0001 -0.0050  
AT. 42 H X -0.0014 -0.0011 -0.0002 0.0004 -0.0001 -0.0053  
Y -0.0011 -0.0009 -0.0002 0.0006 -0.0004 -0.0040  
Z -0.0015 -0.0011 -0.0002 0.0004 -0.0001 -0.0050  
AT. 43 C X -0.0005 0.0003 0.0006 0.0004 -0.0001 -0.0004  
Y 0.0002 -0.0003 -0.0004 -0.0001 0.0001 0.0001  
Z -0.0004 0.0001 0.0004 0.0003 -0.0001 -0.0004  
AT. 44 C X 0.0005 -0.0003 0.0006 0.0004 0.0001 -0.0004

Y -0.0002 0.0003 -0.0004 -0.0001 -0.0001 0.0001  
Z 0.0004 -0.0001 0.0004 0.0003 0.0001 -0.0004  
AT. 45 H X 0.0007 0.0010 0.0003 -0.0008 -0.0001 0.0012  
Y 0.0010 0.0014 0.0003 -0.0011 -0.0000 0.0017  
Z 0.0013 0.0013 0.0000 -0.0011 0.0000 0.0017  
AT. 46 H X -0.0007 -0.0010 0.0003 -0.0008 0.0001 0.0012  
Y -0.0010 -0.0014 0.0003 -0.0011 0.0000 0.0017  
Z -0.0013 -0.0013 0.0000 -0.0011 -0.0000 0.0017  
AT. 47 H X 0.0047 -0.0038 -0.0069 -0.0035 0.0017 0.0038  
Y -0.0035 0.0027 0.0051 0.0027 -0.0012 -0.0029  
Z 0.0034 -0.0026 -0.0049 -0.0025 0.0012 0.0028  
AT. 48 H X -0.0047 0.0038 -0.0069 -0.0035 -0.0017 0.0038  
Y 0.0035 -0.0027 0.0051 0.0027 0.0012 -0.0029  
Z -0.0034 0.0026 -0.0049 -0.0025 -0.0012 0.0028  
AT. 49 C X 0.0001 -0.0001 -0.0001 -0.0000 0.0000 -0.0000  
Y 0.0001 -0.0001 -0.0001 -0.0000 0.0000 -0.0000  
Z 0.0000 -0.0000 -0.0000 0.0000 0.0000 -0.0000  
AT. 50 C X -0.0001 0.0001 -0.0001 -0.0000 -0.0000 -0.0000  
Y -0.0001 0.0001 -0.0001 -0.0000 -0.0000 -0.0000  
Z -0.0000 0.0000 -0.0000 0.0000 -0.0000 -0.0000  
AT. 51 C X -0.0001 -0.0002 -0.0001 0.0000 -0.0000 -0.0001  
Y 0.0002 0.0001 0.0001 0.0001 0.0001 0.0001  
Z -0.0001 -0.0000 0.0000 -0.0001 -0.0001 -0.0001  
AT. 52 C X 0.0001 0.0002 -0.0001 0.0000 0.0000 -0.0001  
Y -0.0002 -0.0001 0.0001 0.0001 -0.0001 0.0001  
Z 0.0001 0.0000 0.0000 -0.0001 0.0001 -0.0001  
AT. 53 H X 0.0014 0.0018 0.0011 0.0005 0.0006 0.0016  
Y -0.0010 -0.0012 -0.0008 -0.0003 -0.0003 -0.0011  
Z 0.0006 0.0010 0.0008 0.0002 0.0002 0.0009  
AT. 54 H X -0.0014 -0.0018 0.0011 0.0005 -0.0006 0.0016  
Y 0.0010 0.0012 -0.0008 -0.0003 0.0003 -0.0011  
Z -0.0006 -0.0010 0.0008 0.0002 -0.0002 0.0009



AT. 55 H X -0.0006 0.0000 0.0003 -0.0004 -0.0004 0.0001  
Y -0.0014 0.0001 0.0008 -0.0009 -0.0008 0.0003  
Z 0.0008 0.0001 -0.0003 0.0007 0.0005 -0.0002

AT. 56 H X 0.0006 -0.0000 0.0003 -0.0004 0.0004 0.0001  
Y 0.0014 -0.0001 0.0008 -0.0009 0.0008 0.0003  
Z -0.0008 -0.0001 -0.0003 0.0007 -0.0005 -0.0002

AT. 57 C X 0.0014 -0.0008 0.0006 -0.0061 -0.0060 -0.0006  
Y 0.0020 -0.0018 0.0012 -0.0092 -0.0093 -0.0010  
Z 0.0002 -0.0019 0.0011 -0.0034 -0.0035 -0.0003

AT. 58 C X -0.0014 0.0008 0.0006 -0.0061 0.0060 -0.0006  
Y -0.0020 0.0018 0.0012 -0.0092 0.0093 -0.0010  
Z -0.0002 0.0019 0.0011 -0.0034 0.0035 -0.0003

AT. 59 H X -0.0069 0.0016 -0.0016 0.0250 0.0252 0.0029  
Y -0.0141 0.0033 -0.0031 0.0509 0.0513 0.0058  
Z 0.0097 -0.0028 0.0024 -0.0358 -0.0360 -0.0041

AT. 60 H X 0.0069 -0.0016 -0.0016 0.0250 -0.0252 0.0029  
Y 0.0141 -0.0033 -0.0031 0.0509 -0.0513 0.0058  
Z -0.0097 0.0028 0.0024 -0.0358 0.0360 -0.0041

AT. 61 H X 0.0010 -0.0075 0.0044 -0.0114 -0.0121 -0.0013  
Y -0.0001 0.0043 -0.0024 0.0050 0.0055 0.0006  
Z -0.0009 0.0094 -0.0054 0.0130 0.0139 0.0016

AT. 62 H X -0.0010 0.0075 0.0044 -0.0114 0.0121 -0.0013  
Y 0.0001 -0.0043 -0.0024 0.0050 -0.0055 0.0006  
Z 0.0009 -0.0094 -0.0054 0.0130 -0.0139 0.0016

AT. 63 H X -0.0110 0.0157 -0.0097 0.0590 0.0591 0.0054  
Y -0.0100 0.0144 -0.0090 0.0543 0.0545 0.0050  
Z -0.0118 0.0165 -0.0104 0.0636 0.0638 0.0058

AT. 64 H X 0.0110 -0.0157 -0.0097 0.0590 -0.0591 0.0054  
Y 0.0100 -0.0144 -0.0090 0.0543 -0.0545 0.0050  
Z 0.0118 -0.0165 -0.0104 0.0636 -0.0638 0.0058

AT. 65 C X 0.0045 -0.0060 -0.0077 -0.0004 0.0022 -0.0004  
Y 0.0051 -0.0069 -0.0088 -0.0015 0.0026 -0.0003

Z 0.0013 -0.0021 -0.0025 0.0003 0.0006 -0.0002  
AT. 66 C X -0.0045 0.0060 -0.0077 -0.0004 -0.0022 -0.0004  
Y -0.0051 0.0069 -0.0088 -0.0015 -0.0026 -0.0003  
Z -0.0013 0.0021 -0.0025 0.0003 -0.0006 -0.0002  
AT. 67 H X -0.0306 0.0436 0.0544 0.0043 -0.0151 0.0026  
Y -0.0331 0.0471 0.0588 0.0045 -0.0162 0.0028  
Z -0.0367 0.0521 0.0651 0.0053 -0.0180 0.0031  
AT. 68 H X 0.0306 -0.0436 0.0544 0.0043 0.0151 0.0026  
Y 0.0331 -0.0471 0.0588 0.0045 0.0162 0.0028  
Z 0.0367 -0.0521 0.0651 0.0053 0.0180 0.0031  
AT. 69 H X -0.0055 0.0061 0.0089 -0.0048 -0.0026 0.0008  
Y 0.0057 -0.0068 -0.0094 0.0034 0.0028 -0.0007  
Z -0.0030 0.0034 0.0049 -0.0024 -0.0014 0.0004  
AT. 70 H X 0.0055 -0.0061 0.0089 -0.0048 0.0026 0.0008  
Y -0.0057 0.0068 -0.0094 0.0034 -0.0028 -0.0007  
Z 0.0030 -0.0034 0.0049 -0.0024 0.0014 0.0004  
AT. 71 H X -0.0175 0.0224 0.0292 0.0052 -0.0092 0.0011  
Y -0.0331 0.0424 0.0551 0.0095 -0.0174 0.0021  
Z 0.0241 -0.0310 -0.0403 -0.0068 0.0126 -0.0015  
AT. 72 H X 0.0175 -0.0224 0.0292 0.0052 0.0092 0.0011  
Y 0.0331 -0.0424 0.0551 0.0095 0.0174 0.0021  
Z -0.0241 0.0310 -0.0403 -0.0068 -0.0126 -0.0015  
AT. 73 C X 0.0001 -0.0000 -0.0009 -0.0003 -0.0003 -0.0001  
Y 0.0001 0.0000 -0.0011 -0.0004 -0.0004 -0.0001  
Z 0.0000 -0.0001 -0.0001 -0.0001 -0.0001 -0.0000  
AT. 74 C X -0.0001 0.0000 -0.0009 -0.0003 0.0003 -0.0001  
Y -0.0001 -0.0000 -0.0011 -0.0004 0.0004 -0.0001  
Z -0.0000 0.0001 -0.0001 -0.0001 0.0001 -0.0000  
AT. 75 H X -0.0004 -0.0006 0.0039 0.0014 0.0013 0.0005  
Y -0.0007 -0.0010 0.0076 0.0024 0.0021 0.0009  
Z 0.0006 0.0006 -0.0055 -0.0019 -0.0017 -0.0007  
AT. 76 H X 0.0004 0.0006 0.0039 0.0014 -0.0013 0.0005

Y 0.0007 0.0010 0.0076 0.0024 -0.0021 0.0009  
Z -0.0006 -0.0006 -0.0055 -0.0019 0.0017 -0.0007  
AT. 77 H X -0.0007 0.0010 0.0067 0.0025 0.0021 0.0008  
Y -0.0005 0.0008 0.0062 0.0028 0.0025 0.0008  
Z -0.0007 0.0010 0.0071 0.0031 0.0027 0.0009  
AT. 78 H X 0.0007 -0.0010 0.0067 0.0025 -0.0021 0.0008  
Y 0.0005 -0.0008 0.0062 0.0028 -0.0025 0.0008  
Z 0.0007 -0.0010 0.0071 0.0031 -0.0027 0.0009  
AT. 79 I X -0.0000 -0.0000 -0.0000 -0.0000 -0.0000 -0.0000  
Y 0.0000 0.0000 -0.0000 -0.0000 -0.0000 0.0000  
Z -0.0000 -0.0000 -0.0000 0.0000 0.0000 -0.0000  
AT. 80 I X 0.0000 0.0000 -0.0000 -0.0000 0.0000 -0.0000  
Y -0.0000 -0.0000 -0.0000 -0.0000 0.0000 0.0000  
Z 0.0000 0.0000 -0.0000 0.0000 -0.0000 -0.0000  
AT. 81 I X -0.0000 -0.0000 0.0000 0.0000 -0.0000 -0.0000  
Y -0.0000 -0.0000 0.0000 0.0000 -0.0000 0.0000  
Z -0.0000 -0.0000 -0.0000 -0.0000 -0.0000 0.0000  
AT. 82 I X 0.0000 0.0000 0.0000 0.0000 0.0000 -0.0000  
Y 0.0000 0.0000 0.0000 0.0000 0.0000 0.0000  
Z 0.0000 0.0000 -0.0000 -0.0000 0.0000 0.0000  
AT. 83 O X 0.0000 0.0000 -0.0000 -0.0000 0.0000 0.0001  
Y 0.0000 0.0000 -0.0000 -0.0000 -0.0000 0.0000  
Z 0.0000 0.0000 -0.0000 -0.0000 0.0000 0.0000  
AT. 84 O X -0.0000 -0.0000 -0.0000 -0.0000 -0.0000 0.0001  
Y -0.0000 -0.0000 -0.0000 -0.0000 0.0000 0.0000  
Z -0.0000 -0.0000 -0.0000 -0.0000 -0.0000 0.0000  
AT. 85 O X -0.0001 -0.0000 0.0000 0.0000 -0.0000 -0.0000  
Y -0.0001 -0.0001 0.0000 0.0000 -0.0000 -0.0000  
Z 0.0000 0.0000 -0.0000 -0.0000 0.0000 0.0000  
AT. 86 O X 0.0001 0.0000 0.0000 0.0000 0.0000 -0.0000  
Y 0.0001 0.0001 0.0000 0.0000 0.0000 -0.0000  
Z -0.0000 -0.0000 -0.0000 -0.0000 -0.0000 0.0000

AT. 87 N X -0.0000 -0.0000 -0.0000 0.0000 -0.0000 -0.0000  
Y 0.0000 0.0000 0.0000 -0.0000 -0.0000 -0.0000  
Z -0.0001 -0.0000 -0.0000 -0.0000 -0.0000 0.0000

AT. 88 N X 0.0000 0.0000 -0.0000 0.0000 0.0000 -0.0000  
Y -0.0000 -0.0000 0.0000 -0.0000 0.0000 -0.0000  
Z 0.0001 0.0000 -0.0000 -0.0000 0.0000 0.0000

AT. 89 N X 0.0000 0.0000 0.0000 -0.0000 0.0000 0.0000  
Y -0.0000 -0.0000 0.0000 0.0000 -0.0000 -0.0000  
Z -0.0000 -0.0000 -0.0000 -0.0000 -0.0000 0.0000

AT. 90 N X -0.0000 -0.0000 0.0000 -0.0000 -0.0000 0.0000  
Y 0.0000 0.0000 0.0000 0.0000 0.0000 -0.0000  
Z 0.0000 0.0000 -0.0000 -0.0000 0.0000 0.0000

AT. 91 C X 0.0003 0.0002 0.0000 0.0000 0.0000 -0.0000  
Y 0.0001 0.0001 -0.0000 -0.0000 0.0000 0.0000  
Z -0.0001 -0.0001 0.0000 0.0001 -0.0000 -0.0002

AT. 92 C X -0.0003 -0.0002 0.0000 0.0000 -0.0000 -0.0000  
Y -0.0001 -0.0001 -0.0000 -0.0000 -0.0000 0.0000  
Z 0.0001 0.0001 0.0000 0.0001 0.0000 -0.0002

AT. 93 C X -0.0023 -0.0017 0.0002 0.0006 -0.0001 -0.0008  
Y -0.0062 -0.0046 0.0005 0.0019 -0.0004 -0.0024  
Z 0.0008 0.0006 -0.0001 -0.0003 0.0001 0.0004

AT. 94 C X 0.0023 0.0017 0.0002 0.0006 0.0001 -0.0008  
Y 0.0062 0.0046 0.0005 0.0019 0.0004 -0.0024  
Z -0.0008 -0.0006 -0.0001 -0.0003 -0.0001 0.0004

AT. 95 H X 0.0368 0.0274 -0.0028 -0.0112 0.0024 0.0139  
Y 0.0626 0.0466 -0.0048 -0.0191 0.0040 0.0233  
Z 0.0365 0.0272 -0.0028 -0.0112 0.0023 0.0136

AT. 96 H X -0.0368 -0.0274 -0.0028 -0.0112 -0.0024 0.0139  
Y -0.0626 -0.0466 -0.0048 -0.0191 -0.0040 0.0233  
Z -0.0365 -0.0272 -0.0028 -0.0112 -0.0023 0.0136

AT. 97 H X -0.0135 -0.0100 0.0010 0.0043 -0.0009 -0.0056  
Y 0.0101 0.0074 -0.0007 -0.0032 0.0007 0.0042

Z -0.0444 -0.0330 0.0033 0.0141 -0.0031 -0.0184  
AT. 98 H X 0.0135 0.0100 0.0010 0.0043 0.0009 -0.0056  
Y -0.0101 -0.0074 -0.0007 -0.0032 -0.0007 0.0042  
Z 0.0444 0.0330 0.0033 0.0141 0.0031 -0.0184  
AT. 99 C X -0.0000 -0.0000 -0.0000 -0.0000 -0.0000 0.0001  
Y 0.0001 0.0001 -0.0000 -0.0000 0.0000 0.0001  
Z -0.0002 -0.0001 0.0000 0.0000 -0.0000 -0.0001  
AT. 100 C X 0.0000 0.0000 -0.0000 -0.0000 0.0000 0.0001  
Y -0.0001 -0.0001 -0.0000 -0.0000 -0.0000 0.0001  
Z 0.0002 0.0001 0.0000 0.0000 0.0000 -0.0001  
AT. 101 C X 0.0004 0.0003 0.0000 0.0001 0.0000 -0.0001  
Y 0.0010 0.0007 0.0001 0.0002 0.0001 -0.0003  
Z 0.0017 0.0013 0.0000 0.0001 0.0002 -0.0003  
AT. 102 C X -0.0004 -0.0003 0.0000 0.0001 -0.0000 -0.0001  
Y -0.0010 -0.0007 0.0001 0.0002 -0.0001 -0.0003  
Z -0.0017 -0.0013 0.0000 0.0001 -0.0002 -0.0003  
AT. 103 H X -0.0081 -0.0061 -0.0003 -0.0012 -0.0008 0.0023  
Y -0.0190 -0.0144 -0.0008 -0.0028 -0.0020 0.0054  
Z -0.0002 -0.0002 -0.0000 -0.0001 -0.0000 0.0001  
AT. 104 H X 0.0081 0.0061 -0.0003 -0.0012 0.0008 0.0023  
Y 0.0190 0.0144 -0.0008 -0.0028 0.0020 0.0054  
Z 0.0002 0.0002 -0.0000 -0.0001 0.0000 0.0001  
AT. 105 H X 0.0047 0.0035 0.0001 0.0003 0.0005 -0.0008  
Y 0.0073 0.0055 0.0002 0.0005 0.0007 -0.0013  
Z -0.0190 -0.0142 -0.0004 -0.0014 -0.0018 0.0035  
AT. 106 H X -0.0047 -0.0035 0.0001 0.0003 -0.0005 -0.0008  
Y -0.0073 -0.0055 0.0002 0.0005 -0.0007 -0.0013  
Z 0.0190 0.0142 -0.0004 -0.0014 0.0018 0.0035  
AT. 107 C X 0.0003 0.0002 -0.0000 -0.0001 0.0000 0.0000  
Y 0.0001 0.0001 -0.0000 0.0000 0.0000 -0.0000  
Z 0.0003 0.0002 -0.0000 -0.0002 -0.0000 0.0001  
AT. 108 C X -0.0003 -0.0002 -0.0000 -0.0001 -0.0000 0.0000

Y -0.0001 -0.0001 -0.0000 0.0000 -0.0000 -0.0000  
Z -0.0003 -0.0002 -0.0000 -0.0002 0.0000 0.0001  
AT. 109 H X 0.0002 0.0003 -0.0000 -0.0000 0.0001 -0.0000  
Y -0.0009 -0.0012 0.0001 -0.0005 -0.0005 0.0004  
Z 0.0007 0.0008 -0.0000 0.0003 0.0003 -0.0001  
AT. 110 H X -0.0002 -0.0003 -0.0000 -0.0000 -0.0001 -0.0000  
Y 0.0009 0.0012 0.0001 -0.0005 0.0005 0.0004  
Z -0.0007 -0.0008 -0.0000 0.0003 -0.0003 -0.0001  
AT. 111 H X -0.0043 -0.0031 0.0005 0.0015 -0.0003 -0.0006  
Y -0.0008 -0.0006 0.0001 0.0003 -0.0000 -0.0002  
Z -0.0039 -0.0029 0.0005 0.0015 -0.0003 -0.0008  
AT. 112 H X 0.0043 0.0031 0.0005 0.0015 0.0003 -0.0006  
Y 0.0008 0.0006 0.0001 0.0003 0.0000 -0.0002  
Z 0.0039 0.0029 0.0005 0.0015 0.0003 -0.0008  
AT. 113 C X -0.0000 -0.0000 -0.0000 -0.0000 -0.0000 0.0000  
Y -0.0000 -0.0000 -0.0000 -0.0000 -0.0000 -0.0000  
Z 0.0000 0.0000 -0.0000 -0.0000 0.0000 0.0000  
AT. 114 C X 0.0000 0.0000 -0.0000 -0.0000 0.0000 0.0000  
Y 0.0000 0.0000 -0.0000 -0.0000 0.0000 -0.0000  
Z -0.0000 -0.0000 -0.0000 -0.0000 -0.0000 0.0000  
AT. 115 C X 0.0004 0.0003 0.0001 0.0002 0.0000 -0.0002  
Y 0.0002 0.0002 0.0000 0.0001 0.0000 -0.0001  
Z 0.0005 0.0004 0.0001 0.0002 0.0000 -0.0003  
AT. 116 C X -0.0004 -0.0003 0.0001 0.0002 -0.0000 -0.0002  
Y -0.0002 -0.0002 0.0000 0.0001 -0.0000 -0.0001  
Z -0.0005 -0.0004 0.0001 0.0002 -0.0000 -0.0003  
AT. 117 H X -0.0056 -0.0040 -0.0007 -0.0025 -0.0002 0.0029  
Y -0.0013 -0.0010 -0.0002 -0.0006 -0.0001 0.0007  
Z -0.0055 -0.0040 -0.0007 -0.0024 -0.0002 0.0027  
AT. 118 H X 0.0056 0.0040 -0.0007 -0.0025 0.0002 0.0029  
Y 0.0013 0.0010 -0.0002 -0.0006 0.0001 0.0007  
Z 0.0055 0.0040 -0.0007 -0.0024 0.0002 0.0027

AT.119 H X 0.0007 0.0005 0.0000 0.0002 0.0000 -0.0003  
Y -0.0009 -0.0006 -0.0001 -0.0003 -0.0000 0.0007  
Z -0.0009 -0.0006 -0.0001 -0.0003 -0.0000 0.0006

AT.120 H X -0.0007 -0.0005 0.0000 0.0002 -0.0000 -0.0003  
Y 0.0009 0.0006 -0.0001 -0.0003 0.0000 0.0007  
Z 0.0009 0.0006 -0.0001 -0.0003 0.0000 0.0006

AT.121 C X -0.0002 -0.0002 -0.0000 -0.0001 -0.0000 0.0001  
Y -0.0001 -0.0001 -0.0000 -0.0001 -0.0000 0.0001  
Z 0.0002 0.0001 -0.0000 -0.0000 0.0000 0.0000

AT.122 C X 0.0002 0.0002 -0.0000 -0.0001 0.0000 0.0001  
Y 0.0001 0.0001 -0.0000 -0.0001 0.0000 0.0001  
Z -0.0002 -0.0001 -0.0000 -0.0000 -0.0000 0.0000

AT.123 H X -0.0002 -0.0002 -0.0000 -0.0001 -0.0000 0.0001  
Y 0.0006 0.0005 0.0003 0.0008 0.0000 -0.0007  
Z 0.0007 0.0006 0.0003 0.0009 0.0000 -0.0008

AT.124 H X 0.0002 0.0002 -0.0000 -0.0001 0.0000 0.0001  
Y -0.0006 -0.0005 0.0003 0.0008 -0.0000 -0.0007  
Z -0.0007 -0.0006 0.0003 0.0009 -0.0000 -0.0008

AT.125 H X 0.0034 0.0024 0.0002 0.0007 0.0001 -0.0008  
Y 0.0013 0.0009 0.0001 0.0003 0.0000 -0.0003  
Z -0.0029 -0.0021 -0.0001 -0.0005 -0.0001 0.0005

AT.126 H X -0.0034 -0.0024 0.0002 0.0007 -0.0001 -0.0008  
Y -0.0013 -0.0009 0.0001 0.0003 -0.0000 -0.0003  
Z 0.0029 0.0021 -0.0001 -0.0005 0.0001 0.0005

AT.127 C X 0.0000 0.0000 0.0000 -0.0000 0.0000 0.0000  
Y 0.0000 0.0000 -0.0000 -0.0000 0.0000 -0.0000  
Z 0.0000 0.0000 -0.0000 -0.0000 0.0000 0.0000

AT.128 C X -0.0000 -0.0000 0.0000 -0.0000 -0.0000 0.0000  
Y -0.0000 -0.0000 -0.0000 -0.0000 -0.0000 -0.0000  
Z -0.0000 -0.0000 -0.0000 -0.0000 -0.0000 0.0000

AT.129 C X -0.0000 -0.0000 -0.0001 -0.0004 -0.0000 0.0007  
Y 0.0002 0.0002 -0.0001 -0.0004 0.0000 0.0005

Z -0.0002 -0.0002 0.0001 0.0004 -0.0000 -0.0006  
AT. 130 C X 0.0000 0.0000 -0.0001 -0.0004 0.0000 0.0007  
Y -0.0002 -0.0002 -0.0001 -0.0004 -0.0000 0.0005  
Z 0.0002 0.0002 0.0001 0.0004 0.0000 -0.0006  
AT. 131 H X -0.0002 -0.0003 0.0009 0.0049 0.0001 -0.0082  
Y 0.0002 0.0001 0.0003 0.0016 0.0000 -0.0027  
Z 0.0001 0.0002 -0.0006 -0.0035 -0.0001 0.0059  
AT. 132 H X 0.0002 0.0003 0.0009 0.0049 -0.0001 -0.0082  
Y -0.0002 -0.0001 0.0003 0.0016 -0.0000 -0.0027  
Z -0.0001 -0.0002 -0.0006 -0.0035 0.0001 0.0059  
AT. 133 H X 0.0009 0.0007 -0.0002 -0.0007 0.0000 0.0010  
Y -0.0029 -0.0022 0.0006 0.0025 -0.0002 -0.0034  
Z 0.0020 0.0015 -0.0004 -0.0015 0.0001 0.0021  
AT. 134 H X -0.0009 -0.0007 -0.0002 -0.0007 -0.0000 0.0010  
Y 0.0029 0.0022 0.0006 0.0025 0.0002 -0.0034  
Z -0.0020 -0.0015 -0.0004 -0.0015 -0.0001 0.0021  
AT. 135 C X 0.0006 0.0005 -0.0001 -0.0006 0.0001 0.0026  
Y -0.0010 -0.0008 -0.0000 0.0004 -0.0002 -0.0044  
Z 0.0000 0.0001 -0.0002 -0.0007 0.0001 0.0024  
AT. 136 C X -0.0006 -0.0005 -0.0001 -0.0006 -0.0001 0.0026  
Y 0.0010 0.0008 -0.0000 0.0004 0.0002 -0.0044  
Z -0.0000 -0.0001 -0.0002 -0.0007 -0.0001 0.0024  
AT. 137 H X -0.0015 -0.0013 0.0001 0.0015 -0.0005 -0.0102  
Y 0.0068 0.0060 -0.0007 -0.0068 0.0022 0.0456  
Z -0.0043 -0.0037 0.0004 0.0040 -0.0014 -0.0276  
AT. 138 H X 0.0015 0.0013 0.0001 0.0015 0.0005 -0.0102  
Y -0.0068 -0.0060 -0.0007 -0.0068 -0.0022 0.0456  
Z 0.0043 0.0037 0.0004 0.0040 0.0014 -0.0276  
AT. 139 H X -0.0028 -0.0028 0.0014 0.0053 -0.0008 -0.0168  
Y -0.0008 -0.0008 0.0003 0.0013 -0.0002 -0.0045  
Z -0.0023 -0.0022 0.0011 0.0042 -0.0006 -0.0133  
AT. 140 H X 0.0028 0.0028 0.0014 0.0053 0.0008 -0.0168



Y 0.0008 0.0008 0.0003 0.0013 0.0002 -0.0045  
Z 0.0023 0.0022 0.0011 0.0042 0.0006 -0.0133  
AT. 141 H X -0.0024 -0.0017 -0.0003 -0.0001 -0.0002 -0.0043  
Y 0.0065 0.0046 0.0007 0.0001 0.0007 0.0117  
Z 0.0061 0.0044 0.0006 -0.0001 0.0007 0.0118  
AT. 142 H X 0.0024 0.0017 -0.0003 -0.0001 0.0002 -0.0043  
Y -0.0065 -0.0046 0.0007 0.0001 -0.0007 0.0117  
Z -0.0061 -0.0044 0.0006 -0.0001 -0.0007 0.0118  
AT. 143 C X 0.0005 0.0003 -0.0000 -0.0002 0.0000 0.0007  
Y -0.0009 -0.0007 0.0002 0.0015 -0.0001 -0.0045  
Z -0.0007 -0.0005 -0.0001 -0.0003 -0.0000 0.0006  
AT. 144 C X -0.0005 -0.0003 -0.0000 -0.0002 -0.0000 0.0007  
Y 0.0009 0.0007 0.0002 0.0015 0.0001 -0.0045  
Z 0.0007 0.0005 -0.0001 -0.0003 0.0000 0.0006  
AT. 145 H X -0.0025 -0.0019 0.0001 0.0015 -0.0002 -0.0049  
Y 0.0093 0.0068 -0.0005 -0.0051 0.0006 0.0174  
Z 0.0087 0.0064 -0.0005 -0.0051 0.0006 0.0172  
AT. 146 H X 0.0025 0.0019 0.0001 0.0015 0.0002 -0.0049  
Y -0.0093 -0.0068 -0.0005 -0.0051 -0.0006 0.0174  
Z -0.0087 -0.0064 -0.0005 -0.0051 -0.0006 0.0172  
AT. 147 H X -0.0024 -0.0016 -0.0007 -0.0028 0.0001 0.0068  
Y -0.0011 -0.0007 -0.0002 -0.0008 0.0000 0.0019  
Z 0.0016 0.0010 0.0005 0.0020 -0.0001 -0.0048  
AT. 148 H X 0.0024 0.0016 -0.0007 -0.0028 -0.0001 0.0068  
Y 0.0011 0.0007 -0.0002 -0.0008 -0.0000 0.0019  
Z -0.0016 -0.0010 0.0005 0.0020 0.0001 -0.0048  
AT. 149 H X -0.0007 -0.0006 0.0006 0.0035 -0.0002 -0.0102  
Y 0.0023 0.0020 -0.0019 -0.0119 0.0008 0.0346  
Z -0.0015 -0.0013 0.0011 0.0070 -0.0005 -0.0201  
AT. 150 H X 0.0007 0.0006 0.0006 0.0035 0.0002 -0.0102  
Y -0.0023 -0.0020 -0.0019 -0.0119 -0.0008 0.0346  
Z 0.0015 0.0013 0.0011 0.0070 0.0005 -0.0201

AT.151 C X -0.0001 -0.0001 0.0000 0.0001 -0.0000 -0.0000  
Y 0.0003 0.0002 -0.0001 -0.0002 0.0000 0.0001  
Z -0.0001 -0.0001 0.0000 -0.0000 -0.0000 0.0000

AT.152 C X 0.0001 0.0001 0.0000 0.0001 0.0000 -0.0000  
Y -0.0003 -0.0002 -0.0001 -0.0002 -0.0000 0.0001  
Z 0.0001 0.0001 0.0000 -0.0000 0.0000 0.0000

AT.153 H X 0.0008 0.0006 -0.0002 -0.0005 0.0000 0.0001  
Y -0.0032 -0.0024 0.0006 0.0017 -0.0002 -0.0006  
Z 0.0019 0.0014 -0.0004 -0.0010 0.0001 0.0003

AT.154 H X -0.0008 -0.0006 -0.0002 -0.0005 -0.0000 0.0001  
Y 0.0032 0.0024 0.0006 0.0017 0.0002 -0.0006  
Z -0.0019 -0.0014 -0.0004 -0.0010 -0.0001 0.0003

AT.155 H X 0.0001 0.0001 -0.0001 -0.0004 0.0000 0.0002  
Y -0.0001 -0.0002 0.0004 0.0011 -0.0001 -0.0007  
Z -0.0002 -0.0002 0.0003 0.0010 -0.0001 -0.0006

AT.156 H X -0.0001 -0.0001 -0.0001 -0.0004 -0.0000 0.0002  
Y 0.0001 0.0002 0.0004 0.0011 0.0001 -0.0007  
Z 0.0002 0.0002 0.0003 0.0010 0.0001 -0.0006

AT.157 O X 0.0000 0.0000 -0.0000 -0.0000 0.0000 0.0000  
Y -0.0000 -0.0000 0.0000 0.0000 -0.0000 -0.0001  
Z -0.0000 -0.0000 0.0000 0.0000 -0.0000 -0.0000

AT.158 O X -0.0000 -0.0000 -0.0000 -0.0000 -0.0000 0.0000  
Y 0.0000 0.0000 0.0000 0.0000 0.0000 -0.0001  
Z 0.0000 0.0000 0.0000 0.0000 0.0000 -0.0000

AT.159 O X 0.0000 0.0000 -0.0000 -0.0000 0.0000 0.0000  
Y -0.0000 -0.0000 0.0000 0.0000 -0.0000 -0.0000  
Z 0.0001 0.0001 -0.0000 -0.0000 0.0000 0.0001

AT.160 O X -0.0000 -0.0000 -0.0000 -0.0000 -0.0000 0.0000  
Y 0.0000 0.0000 0.0000 0.0000 0.0000 -0.0000  
Z -0.0001 -0.0001 -0.0000 -0.0000 -0.0000 0.0001

AT.161 H X -0.0001 -0.0001 0.0000 0.0000 0.0000 -0.0003  
Y 0.0003 0.0001 -0.0004 -0.0004 0.0001 0.0009

Z 0.0005 0.0002 -0.0000 -0.0001 0.0000 0.0000  
AT.162 H X 0.0001 0.0001 0.0000 0.0000 -0.0000 -0.0003  
Y -0.0003 -0.0001 -0.0004 -0.0004 -0.0001 0.0009  
Z -0.0005 -0.0002 -0.0000 -0.0001 -0.0000 0.0000  
AT.163 H X -0.0005 -0.0004 0.0000 0.0001 -0.0001 -0.0004  
Y 0.0003 0.0003 -0.0000 -0.0001 0.0000 0.0002  
Z -0.0016 -0.0014 0.0001 0.0003 -0.0002 -0.0011  
AT.164 H X 0.0005 0.0004 0.0000 0.0001 0.0001 -0.0004  
Y -0.0003 -0.0003 -0.0000 -0.0001 -0.0000 0.0002  
Z 0.0016 0.0014 0.0001 0.0003 0.0002 -0.0011  
AT.165 O X -0.0000 -0.0000 -0.0000 -0.0000 -0.0000 0.0000  
Y -0.0000 -0.0000 -0.0000 -0.0000 -0.0000 0.0000  
Z -0.0000 -0.0000 0.0000 -0.0000 -0.0000 -0.0000  
AT.166 O X 0.0000 0.0000 -0.0000 -0.0000 0.0000 0.0000  
Y 0.0000 0.0000 -0.0000 -0.0000 0.0000 0.0000  
Z 0.0000 0.0000 0.0000 -0.0000 0.0000 -0.0000  
AT.167 H X 0.0001 0.0001 -0.0000 0.0002 0.0003 -0.0000  
Y 0.0002 0.0002 0.0000 0.0001 0.0002 0.0000  
Z 0.0002 0.0001 0.0000 -0.0000 0.0001 0.0000  
AT.168 H X -0.0001 -0.0001 -0.0000 0.0002 -0.0003 -0.0000  
Y -0.0002 -0.0002 0.0000 0.0001 -0.0002 0.0000  
Z -0.0002 -0.0001 0.0000 -0.0000 -0.0001 0.0000  
AT.169 O X 0.0000 0.0000 -0.0000 -0.0000 0.0000 0.0000  
Y -0.0001 -0.0000 -0.0000 0.0000 -0.0000 -0.0000  
Z 0.0000 0.0000 -0.0000 -0.0000 0.0000 0.0000  
AT.170 O X -0.0000 -0.0000 -0.0000 -0.0000 -0.0000 0.0000  
Y 0.0001 0.0000 -0.0000 0.0000 0.0000 -0.0000  
Z -0.0000 -0.0000 -0.0000 -0.0000 -0.0000 0.0000  
AT.171 H X -0.0004 -0.0003 0.0000 0.0002 -0.0001 -0.0001  
Y 0.0009 0.0006 0.0000 -0.0003 0.0001 0.0001  
Z -0.0003 -0.0002 0.0000 0.0002 -0.0001 -0.0001  
AT.172 H X 0.0004 0.0003 0.0000 0.0002 0.0001 -0.0001

Y -0.0009 -0.0006 0.0000 -0.0003 -0.0001 0.0001  
Z 0.0003 0.0002 0.0000 0.0002 0.0001 -0.0001

FREQ(CM\*\*-1) 3168.52 3168.67 3169.17 3170.59 3171.25 3175.11

AT. 1 I X 0.0000 0.0000 -0.0000 0.0000 0.0000 -0.0000  
Y -0.0000 -0.0000 0.0000 -0.0000 -0.0000 0.0000  
Z 0.0000 0.0000 -0.0000 0.0000 0.0000 0.0000

AT. 2 I X 0.0000 -0.0000 0.0000 -0.0000 0.0000 -0.0000  
Y -0.0000 0.0000 -0.0000 0.0000 -0.0000 0.0000  
Z 0.0000 -0.0000 0.0000 -0.0000 0.0000 0.0000

AT. 3 I X -0.0000 0.0000 0.0000 -0.0000 0.0000 -0.0000  
Y 0.0000 -0.0000 -0.0000 -0.0000 -0.0000 -0.0000  
Z -0.0000 0.0000 0.0000 -0.0000 -0.0000 -0.0000

AT. 4 I X -0.0000 -0.0000 -0.0000 0.0000 0.0000 -0.0000  
Y 0.0000 0.0000 0.0000 0.0000 -0.0000 -0.0000  
Z -0.0000 -0.0000 -0.0000 0.0000 -0.0000 -0.0000

AT. 5 O X 0.0000 -0.0000 -0.0000 0.0000 0.0000 0.0000  
Y -0.0000 -0.0000 0.0000 -0.0000 -0.0000 -0.0000  
Z 0.0000 0.0000 0.0000 -0.0000 -0.0000 0.0000

AT. 6 O X 0.0000 0.0000 0.0000 -0.0000 0.0000 0.0000  
Y -0.0000 0.0000 -0.0000 0.0000 -0.0000 -0.0000  
Z 0.0000 -0.0000 -0.0000 0.0000 -0.0000 0.0000

AT. 7 O X 0.0000 -0.0000 -0.0000 -0.0000 -0.0000 0.0001  
Y -0.0000 0.0000 0.0000 0.0000 -0.0000 0.0000  
Z -0.0000 -0.0000 -0.0000 -0.0000 0.0000 -0.0001

AT. 8 O X 0.0000 0.0000 0.0000 0.0000 -0.0000 0.0001  
Y -0.0000 -0.0000 -0.0000 -0.0000 -0.0000 0.0000  
Z -0.0000 0.0000 0.0000 0.0000 0.0000 -0.0001

AT. 9 N X -0.0000 -0.0000 -0.0000 0.0000 0.0000 -0.0000  
Y 0.0000 -0.0000 0.0000 -0.0000 -0.0000 0.0000  
Z 0.0000 -0.0000 0.0000 -0.0000 -0.0000 0.0000

AT. 10 N X -0.0000 0.0000 0.0000 -0.0000 0.0000 -0.0000  
Y 0.0000 0.0000 -0.0000 0.0000 -0.0000 0.0000  
Z 0.0000 0.0000 -0.0000 0.0000 -0.0000 0.0000

AT. 11 N X -0.0000 0.0000 0.0000 -0.0000 -0.0000 -0.0000  
Y 0.0000 -0.0000 -0.0000 0.0000 -0.0000 0.0000  
Z 0.0000 0.0000 -0.0000 -0.0000 -0.0000 0.0000

AT. 12 N X -0.0000 -0.0000 -0.0000 0.0000 -0.0000 -0.0000  
Y 0.0000 0.0000 0.0000 -0.0000 -0.0000 0.0000  
Z 0.0000 -0.0000 0.0000 0.0000 -0.0000 0.0000

AT. 13 C X 0.0000 0.0000 0.0000 -0.0000 -0.0000 0.0000  
Y -0.0000 -0.0000 -0.0000 0.0000 0.0000 0.0000  
Z -0.0000 -0.0000 -0.0001 0.0000 0.0000 0.0000

AT. 14 C X 0.0000 -0.0000 -0.0000 0.0000 -0.0000 0.0000  
Y -0.0000 0.0000 0.0000 -0.0000 0.0000 0.0000  
Z -0.0000 0.0000 0.0001 -0.0000 0.0000 0.0000

AT. 15 C X -0.0000 -0.0001 -0.0001 0.0000 -0.0000 0.0000  
Y 0.0001 -0.0004 -0.0006 0.0001 -0.0002 -0.0001  
Z -0.0000 0.0002 0.0004 -0.0001 0.0001 -0.0001

AT. 16 C X -0.0000 0.0001 0.0001 -0.0000 -0.0000 0.0000  
Y 0.0001 0.0004 0.0006 -0.0001 -0.0002 -0.0001  
Z -0.0000 -0.0002 -0.0004 0.0001 0.0001 -0.0001

AT. 17 H X 0.0003 -0.0008 -0.0011 0.0001 -0.0004 -0.0003  
Y -0.0010 0.0026 0.0038 -0.0004 0.0011 0.0012  
Z -0.0008 0.0021 0.0032 -0.0003 0.0009 0.0012

AT. 18 H X 0.0003 0.0008 0.0011 -0.0001 -0.0004 -0.0003  
Y -0.0010 -0.0026 -0.0038 0.0004 0.0011 0.0012  
Z -0.0008 -0.0021 -0.0032 0.0003 0.0009 0.0012

AT. 19 H X -0.0002 0.0016 0.0027 -0.0003 0.0008 0.0001  
Y -0.0003 0.0017 0.0028 -0.0003 0.0009 0.0001  
Z 0.0008 -0.0048 -0.0079 0.0009 -0.0026 -0.0003

AT. 20 H X -0.0002 -0.0016 -0.0027 0.0003 0.0008 0.0001  
Y -0.0003 -0.0017 -0.0028 0.0003 0.0009 0.0001

Z 0.0008 0.0048 0.0079 -0.0009 -0.0026 -0.0003  
AT. 21 C X 0.0001 -0.0001 -0.0001 0.0000 0.0000 -0.0001  
Y -0.0000 0.0000 0.0000 -0.0000 0.0000 0.0001  
Z -0.0001 0.0001 0.0001 0.0000 -0.0000 -0.0000  
AT. 22 C X 0.0001 0.0001 0.0001 -0.0000 0.0000 -0.0001  
Y -0.0000 -0.0000 -0.0000 0.0000 0.0000 0.0001  
Z -0.0001 -0.0001 -0.0001 -0.0000 -0.0000 -0.0000  
AT. 23 C X -0.0003 0.0003 0.0003 -0.0000 0.0000 -0.0000  
Y 0.0050 -0.0049 -0.0049 0.0001 -0.0001 0.0001  
Z 0.0038 -0.0038 -0.0038 0.0001 -0.0000 0.0000  
AT. 24 C X -0.0003 -0.0003 -0.0003 0.0000 0.0000 -0.0000  
Y 0.0050 0.0049 0.0049 -0.0001 -0.0001 0.0001  
Z 0.0038 0.0038 0.0038 -0.0001 -0.0000 0.0000  
AT. 25 H X 0.0108 -0.0106 -0.0108 0.0002 -0.0002 0.0002  
Y -0.0763 0.0749 0.0759 -0.0014 0.0016 -0.0011  
Z -0.0077 0.0076 0.0077 -0.0002 0.0002 -0.0001  
AT. 26 H X 0.0108 0.0106 0.0108 -0.0002 -0.0002 0.0002  
Y -0.0763 -0.0749 -0.0759 0.0014 0.0016 -0.0011  
Z -0.0077 -0.0076 -0.0077 0.0002 0.0002 -0.0001  
AT. 27 H X -0.0084 0.0083 0.0084 -0.0002 -0.0000 -0.0000  
Y 0.0184 -0.0184 -0.0185 0.0003 -0.0000 0.0000  
Z -0.0354 0.0354 0.0357 -0.0007 -0.0000 -0.0000  
AT. 28 H X -0.0084 -0.0083 -0.0084 0.0002 -0.0000 -0.0000  
Y 0.0184 0.0184 0.0185 -0.0003 -0.0000 0.0000  
Z -0.0354 -0.0354 -0.0357 0.0007 -0.0000 -0.0000  
AT. 29 C X -0.0005 -0.0000 -0.0002 0.0001 0.0006 -0.0003  
Y -0.0001 -0.0000 -0.0000 -0.0000 0.0001 -0.0000  
Z 0.0007 0.0000 0.0003 -0.0001 -0.0008 0.0005  
AT. 30 C X -0.0005 0.0000 0.0002 -0.0001 0.0006 -0.0003  
Y -0.0001 0.0000 0.0000 0.0000 0.0001 -0.0000  
Z 0.0007 -0.0000 -0.0003 0.0001 -0.0008 0.0005  
AT. 31 H X 0.0016 0.0000 0.0005 -0.0001 -0.0017 0.0010

Y 0.0037 0.0001 0.0013 -0.0003 -0.0042 0.0023  
Z -0.0024 -0.0001 -0.0009 0.0002 0.0027 -0.0015  
AT. 32 H X 0.0016 -0.0000 -0.0005 0.0001 -0.0017 0.0010  
Y 0.0037 -0.0001 -0.0013 0.0003 -0.0042 0.0023  
Z -0.0024 0.0001 0.0009 -0.0002 0.0027 -0.0015  
AT. 33 H X 0.0041 0.0003 0.0022 -0.0006 -0.0049 0.0030  
Y -0.0025 -0.0002 -0.0014 0.0004 0.0031 -0.0019  
Z -0.0059 -0.0005 -0.0033 0.0009 0.0073 -0.0044  
AT. 34 H X 0.0041 -0.0003 -0.0022 0.0006 -0.0049 0.0030  
Y -0.0025 0.0002 0.0014 -0.0004 0.0031 -0.0019  
Z -0.0059 0.0005 0.0033 -0.0009 0.0073 -0.0044  
AT. 35 C X -0.0000 0.0000 0.0000 -0.0000 0.0000 -0.0000  
Y -0.0001 0.0000 0.0000 0.0000 0.0000 -0.0000  
Z -0.0000 0.0000 0.0000 -0.0000 0.0000 -0.0000  
AT. 36 C X -0.0000 -0.0000 -0.0000 0.0000 0.0000 -0.0000  
Y -0.0001 -0.0000 -0.0000 -0.0000 0.0000 -0.0000  
Z -0.0000 -0.0000 -0.0000 0.0000 0.0000 -0.0000  
AT. 37 C X 0.0005 -0.0006 -0.0007 0.0001 0.0000 -0.0000  
Y -0.0008 0.0009 0.0010 -0.0001 -0.0000 0.0001  
Z -0.0016 0.0018 0.0020 -0.0001 -0.0001 0.0003  
AT. 38 C X 0.0005 0.0006 0.0007 -0.0001 0.0000 -0.0000  
Y -0.0008 -0.0009 -0.0010 0.0001 -0.0000 0.0001  
Z -0.0016 -0.0018 -0.0020 0.0001 -0.0001 0.0003  
AT. 39 H X -0.0099 0.0112 0.0130 -0.0008 -0.0007 0.0021  
Y 0.0062 -0.0070 -0.0081 0.0005 0.0004 -0.0013  
Z 0.0145 -0.0163 -0.0190 0.0012 0.0011 -0.0030  
AT. 40 H X -0.0099 -0.0112 -0.0130 0.0008 -0.0007 0.0021  
Y 0.0062 0.0070 0.0081 -0.0005 0.0004 -0.0013  
Z 0.0145 0.0163 0.0190 -0.0012 0.0011 -0.0030  
AT. 41 H X 0.0046 -0.0047 -0.0050 0.0001 0.0001 -0.0008  
Y 0.0035 -0.0036 -0.0038 0.0001 0.0000 -0.0007  
Z 0.0043 -0.0044 -0.0047 0.0001 0.0001 -0.0008

AT. 42 H X 0.0046 0.0047 0.0050 -0.0001 0.0001 -0.0008  
Y 0.0035 0.0036 0.0038 -0.0001 0.0000 -0.0007  
Z 0.0043 0.0044 0.0047 -0.0001 0.0001 -0.0008

AT. 43 C X -0.0005 -0.0001 -0.0001 -0.0000 0.0009 -0.0080  
Y 0.0002 0.0000 -0.0000 0.0000 -0.0003 0.0029  
Z -0.0004 -0.0001 -0.0001 0.0000 0.0008 -0.0065

AT. 44 C X -0.0005 0.0001 0.0001 0.0000 0.0009 -0.0080  
Y 0.0002 -0.0000 0.0000 -0.0000 -0.0003 0.0029  
Z -0.0004 0.0001 0.0001 -0.0000 0.0008 -0.0065

AT. 45 H X 0.0012 0.0002 0.0004 -0.0001 -0.0021 0.0165  
Y 0.0018 0.0002 0.0005 -0.0001 -0.0030 0.0237  
Z 0.0018 0.0002 0.0006 -0.0001 -0.0030 0.0235

AT. 46 H X 0.0012 -0.0002 -0.0004 0.0001 -0.0021 0.0165  
Y 0.0018 -0.0002 -0.0005 0.0001 -0.0030 0.0237  
Z 0.0018 -0.0002 -0.0006 0.0001 -0.0030 0.0235

AT. 47 H X 0.0048 0.0005 0.0008 0.0001 -0.0084 0.0777  
Y -0.0036 -0.0004 -0.0006 -0.0001 0.0063 -0.0581  
Z 0.0034 0.0004 0.0006 0.0001 -0.0060 0.0555

AT. 48 H X 0.0048 -0.0005 -0.0008 -0.0001 -0.0084 0.0777  
Y -0.0036 0.0004 0.0006 0.0001 0.0063 -0.0581  
Z 0.0034 -0.0004 -0.0006 -0.0001 -0.0060 0.0555

AT. 49 C X -0.0000 0.0000 0.0000 0.0000 0.0000 -0.0001  
Y -0.0000 0.0000 0.0000 -0.0000 0.0000 -0.0001  
Z -0.0000 0.0000 0.0000 -0.0000 0.0000 -0.0001

AT. 50 C X -0.0000 -0.0000 -0.0000 -0.0000 0.0000 -0.0001  
Y -0.0000 -0.0000 -0.0000 0.0000 0.0000 -0.0001  
Z -0.0000 -0.0000 -0.0000 0.0000 0.0000 -0.0001

AT. 51 C X -0.0001 -0.0001 -0.0002 0.0000 0.0002 0.0004  
Y 0.0000 0.0002 0.0003 -0.0000 -0.0001 -0.0004  
Z -0.0000 -0.0001 -0.0002 0.0000 0.0001 0.0004

AT. 52 C X -0.0001 0.0001 0.0002 -0.0000 0.0002 0.0004  
Y 0.0000 -0.0002 -0.0003 0.0000 -0.0001 -0.0004



Z -0.0000 0.0001 0.0002 -0.0000 0.0001 0.0004  
AT. 53 H X 0.0014 0.0017 0.0030 -0.0004 -0.0022 -0.0052  
Y -0.0009 -0.0011 -0.0020 0.0002 0.0015 0.0039  
Z 0.0008 0.0010 0.0017 -0.0002 -0.0013 -0.0030  
AT. 54 H X 0.0014 -0.0017 -0.0030 0.0004 -0.0022 -0.0052  
Y -0.0009 0.0011 0.0020 -0.0002 0.0015 0.0039  
Z 0.0008 -0.0010 -0.0017 0.0002 -0.0013 -0.0030  
AT. 55 H X 0.0002 -0.0003 -0.0006 0.0001 -0.0001 0.0011  
Y 0.0003 -0.0006 -0.0010 0.0001 -0.0003 0.0016  
Z -0.0003 0.0004 0.0008 -0.0001 0.0002 -0.0012  
AT. 56 H X 0.0002 0.0003 0.0006 -0.0001 -0.0001 0.0011  
Y 0.0003 0.0006 0.0010 -0.0001 -0.0003 0.0016  
Z -0.0003 -0.0004 -0.0008 0.0001 0.0002 -0.0012  
AT. 57 C X -0.0012 0.0004 0.0003 0.0000 0.0006 -0.0002  
Y -0.0021 0.0007 0.0006 0.0001 0.0011 -0.0004  
Z -0.0010 0.0004 0.0002 0.0001 0.0005 -0.0001  
AT. 58 C X -0.0012 -0.0004 -0.0003 -0.0000 0.0006 -0.0002  
Y -0.0021 -0.0007 -0.0006 -0.0001 0.0011 -0.0004  
Z -0.0010 -0.0004 -0.0002 -0.0001 0.0005 -0.0001  
AT. 59 H X 0.0052 -0.0016 -0.0016 -0.0001 -0.0029 0.0014  
Y 0.0107 -0.0034 -0.0032 -0.0002 -0.0060 0.0029  
Z -0.0076 0.0024 0.0022 0.0002 0.0042 -0.0020  
AT. 60 H X 0.0052 0.0016 0.0016 0.0001 -0.0029 0.0014  
Y 0.0107 0.0034 0.0032 0.0002 -0.0060 0.0029  
Z -0.0076 -0.0024 -0.0022 -0.0002 0.0042 -0.0020  
AT. 61 H X -0.0042 0.0017 0.0011 0.0002 0.0022 -0.0006  
Y 0.0022 -0.0009 -0.0006 -0.0001 -0.0012 0.0003  
Z 0.0050 -0.0019 -0.0012 -0.0002 -0.0027 0.0007  
AT. 62 H X -0.0042 -0.0017 -0.0011 -0.0002 0.0022 -0.0006  
Y 0.0022 0.0009 0.0006 0.0001 -0.0012 0.0003  
Z 0.0050 0.0019 0.0012 0.0002 -0.0027 0.0007  
AT. 63 H X 0.0131 -0.0047 -0.0032 -0.0006 -0.0065 0.0022

Y 0.0120 -0.0043 -0.0029 -0.0006 -0.0059 0.0020  
Z 0.0140 -0.0051 -0.0035 -0.0007 -0.0069 0.0024  
AT. 64 H X 0.0131 0.0047 0.0032 0.0006 -0.0065 0.0022  
Y 0.0120 0.0043 0.0029 0.0006 -0.0059 0.0020  
Z 0.0140 0.0051 0.0035 0.0007 -0.0069 0.0024  
AT. 65 C X -0.0004 -0.0000 -0.0000 0.0000 0.0004 -0.0008  
Y -0.0005 -0.0000 -0.0001 0.0000 0.0004 -0.0003  
Z -0.0001 -0.0000 -0.0001 0.0000 0.0002 -0.0005  
AT. 66 C X -0.0004 0.0000 0.0000 -0.0000 0.0004 -0.0008  
Y -0.0005 0.0000 0.0001 -0.0000 0.0004 -0.0003  
Z -0.0001 0.0000 0.0001 -0.0000 0.0002 -0.0005  
AT. 67 H X 0.0030 0.0003 0.0006 -0.0001 -0.0027 0.0047  
Y 0.0033 0.0003 0.0006 -0.0001 -0.0029 0.0053  
Z 0.0037 0.0003 0.0007 -0.0002 -0.0032 0.0058  
AT. 68 H X 0.0030 -0.0003 -0.0006 0.0001 -0.0027 0.0047  
Y 0.0033 -0.0003 -0.0006 0.0001 -0.0029 0.0053  
Z 0.0037 -0.0003 -0.0007 0.0002 -0.0032 0.0058  
AT. 69 H X 0.0001 0.0001 -0.0001 0.0000 -0.0008 0.0046  
Y -0.0002 -0.0001 0.0000 0.0000 0.0007 -0.0037  
Z 0.0001 0.0000 -0.0000 0.0000 -0.0004 0.0022  
AT. 70 H X 0.0001 -0.0001 0.0001 -0.0000 -0.0008 0.0046  
Y -0.0002 0.0001 -0.0000 -0.0000 0.0007 -0.0037  
Z 0.0001 -0.0000 0.0000 -0.0000 -0.0004 0.0022  
AT. 71 H X 0.0019 0.0001 0.0000 0.0001 -0.0012 0.0011  
Y 0.0034 0.0003 0.0000 0.0001 -0.0023 0.0019  
Z -0.0025 -0.0002 -0.0000 -0.0001 0.0017 -0.0014  
AT. 72 H X 0.0019 -0.0001 -0.0000 -0.0001 -0.0012 0.0011  
Y 0.0034 -0.0003 -0.0000 -0.0001 -0.0023 0.0019  
Z -0.0025 0.0002 0.0000 0.0001 0.0017 -0.0014  
AT. 73 C X -0.0002 0.0001 0.0001 0.0000 0.0002 -0.0002  
Y -0.0003 0.0001 0.0001 0.0000 0.0002 -0.0003  
Z -0.0000 -0.0000 -0.0000 0.0000 0.0000 0.0000

AT. 74 C X -0.0002 -0.0001 -0.0001 -0.0000 0.0002 -0.0002  
Y -0.0003 -0.0001 -0.0001 -0.0000 0.0002 -0.0003  
Z -0.0000 0.0000 0.0000 -0.0000 0.0000 0.0000

AT. 75 H X 0.0011 -0.0003 -0.0004 0.0000 -0.0008 0.0010  
Y 0.0019 -0.0005 -0.0007 0.0000 -0.0015 0.0018  
Z -0.0015 0.0004 0.0005 -0.0000 0.0011 -0.0012

AT. 76 H X 0.0011 0.0003 0.0004 -0.0000 -0.0008 0.0010  
Y 0.0019 0.0005 0.0007 -0.0000 -0.0015 0.0018  
Z -0.0015 -0.0004 -0.0005 0.0000 0.0011 -0.0012

AT. 77 H X 0.0016 -0.0003 -0.0004 -0.0002 -0.0012 0.0015  
Y 0.0017 -0.0004 -0.0004 -0.0002 -0.0012 0.0014  
Z 0.0019 -0.0004 -0.0005 -0.0002 -0.0014 0.0017

AT. 78 H X 0.0016 0.0003 0.0004 0.0002 -0.0012 0.0015  
Y 0.0017 0.0004 0.0004 0.0002 -0.0012 0.0014  
Z 0.0019 0.0004 0.0005 0.0002 -0.0014 0.0017

AT. 79 I X -0.0000 -0.0000 -0.0000 -0.0000 -0.0000 0.0000  
Y -0.0000 0.0000 0.0000 -0.0000 -0.0000 -0.0000  
Z -0.0000 -0.0000 -0.0000 0.0000 0.0000 -0.0000

AT. 80 I X -0.0000 0.0000 0.0000 0.0000 -0.0000 0.0000  
Y -0.0000 -0.0000 -0.0000 0.0000 -0.0000 -0.0000  
Z -0.0000 0.0000 0.0000 -0.0000 0.0000 -0.0000

AT. 81 I X -0.0000 -0.0000 -0.0000 0.0000 0.0000 -0.0000  
Y -0.0000 -0.0000 -0.0000 0.0000 0.0000 0.0000  
Z 0.0000 -0.0000 -0.0000 0.0000 -0.0000 0.0000

AT. 82 I X -0.0000 0.0000 0.0000 -0.0000 0.0000 -0.0000  
Y -0.0000 0.0000 0.0000 -0.0000 0.0000 0.0000  
Z 0.0000 0.0000 0.0000 -0.0000 -0.0000 0.0000

AT. 83 O X 0.0000 -0.0000 0.0000 0.0000 -0.0001 0.0000  
Y 0.0000 0.0000 0.0000 0.0000 -0.0000 0.0000  
Z 0.0000 -0.0000 0.0000 -0.0000 -0.0000 0.0000

AT. 84 O X 0.0000 0.0000 -0.0000 -0.0000 -0.0001 0.0000  
Y 0.0000 -0.0000 -0.0000 -0.0000 -0.0000 0.0000

Z 0.0000 0.0000 -0.0000 0.0000 -0.0000 0.0000  
AT. 85 O X -0.0000 -0.0000 -0.0000 0.0000 0.0000 -0.0000  
Y -0.0000 -0.0000 -0.0000 0.0000 0.0000 -0.0000  
Z 0.0000 0.0000 0.0000 -0.0000 -0.0000 0.0000  
AT. 86 O X -0.0000 0.0000 0.0000 -0.0000 0.0000 -0.0000  
Y -0.0000 0.0000 0.0000 -0.0000 0.0000 -0.0000  
Z 0.0000 -0.0000 -0.0000 0.0000 -0.0000 0.0000  
AT. 87 N X -0.0000 -0.0000 -0.0000 -0.0000 -0.0000 -0.0000  
Y -0.0000 0.0000 -0.0000 -0.0000 0.0000 -0.0000  
Z 0.0000 -0.0000 -0.0000 0.0000 -0.0000 0.0000  
AT. 88 N X -0.0000 0.0000 0.0000 0.0000 -0.0000 -0.0000  
Y -0.0000 -0.0000 0.0000 0.0000 0.0000 -0.0000  
Z 0.0000 0.0000 0.0000 -0.0000 -0.0000 0.0000  
AT. 89 N X 0.0000 -0.0000 0.0000 0.0000 0.0000 -0.0000  
Y -0.0000 0.0000 -0.0000 0.0000 0.0000 -0.0000  
Z 0.0000 -0.0000 -0.0000 0.0000 -0.0000 0.0000  
AT. 90 N X 0.0000 0.0000 -0.0000 -0.0000 0.0000 -0.0000  
Y -0.0000 -0.0000 0.0000 -0.0000 0.0000 -0.0000  
Z 0.0000 0.0000 0.0000 -0.0000 -0.0000 0.0000  
AT. 91 C X -0.0000 0.0000 0.0001 -0.0000 0.0000 -0.0000  
Y 0.0000 0.0000 0.0000 -0.0000 -0.0000 0.0000  
Z -0.0001 -0.0000 -0.0000 0.0000 0.0002 -0.0001  
AT. 92 C X -0.0000 -0.0000 -0.0001 0.0000 0.0000 -0.0000  
Y 0.0000 -0.0000 -0.0000 0.0000 -0.0000 0.0000  
Z -0.0001 0.0000 0.0000 -0.0000 0.0002 -0.0001  
AT. 93 C X -0.0007 -0.0002 -0.0006 0.0001 0.0008 -0.0004  
Y -0.0021 -0.0006 -0.0019 0.0003 0.0025 -0.0013  
Z 0.0004 0.0001 0.0004 -0.0001 -0.0005 0.0004  
AT. 94 C X -0.0007 0.0002 0.0006 -0.0001 0.0008 -0.0004  
Y -0.0021 0.0006 0.0019 -0.0003 0.0025 -0.0013  
Z 0.0004 -0.0001 -0.0004 0.0001 -0.0005 0.0004  
AT. 95 H X 0.0126 0.0038 0.0117 -0.0021 -0.0149 0.0078

Y 0.0210 0.0061 0.0189 -0.0032 -0.0246 0.0127  
Z 0.0123 0.0035 0.0111 -0.0019 -0.0144 0.0074  
AT. 96 H X 0.0126 -0.0038 -0.0117 0.0021 -0.0149 0.0078  
Y 0.0210 -0.0061 -0.0189 0.0032 -0.0246 0.0127  
Z 0.0123 -0.0035 -0.0111 0.0019 -0.0144 0.0074  
AT. 97 H X -0.0051 -0.0015 -0.0048 0.0009 0.0062 -0.0035  
Y 0.0038 0.0011 0.0036 -0.0007 -0.0046 0.0026  
Z -0.0167 -0.0049 -0.0158 0.0028 0.0204 -0.0115  
AT. 98 H X -0.0051 0.0015 0.0048 -0.0009 0.0062 -0.0035  
Y 0.0038 -0.0011 -0.0036 0.0007 -0.0046 0.0026  
Z -0.0167 0.0049 0.0158 -0.0028 0.0204 -0.0115  
AT. 99 C X 0.0000 -0.0000 -0.0000 0.0000 -0.0001 0.0001  
Y 0.0001 0.0000 0.0000 0.0000 -0.0001 0.0000  
Z -0.0001 -0.0000 -0.0001 0.0000 0.0000 0.0000  
AT. 100 C X 0.0000 0.0000 0.0000 -0.0000 -0.0001 0.0001  
Y 0.0001 -0.0000 -0.0000 -0.0000 -0.0001 0.0000  
Z -0.0001 0.0000 0.0001 -0.0000 0.0000 0.0000  
AT. 101 C X -0.0001 0.0001 0.0003 -0.0001 0.0002 -0.0005  
Y -0.0003 0.0002 0.0008 -0.0002 0.0004 -0.0014  
Z -0.0002 0.0003 0.0012 -0.0003 0.0003 -0.0016  
AT. 102 C X -0.0001 -0.0001 -0.0003 0.0001 0.0002 -0.0005  
Y -0.0003 -0.0002 -0.0008 0.0002 0.0004 -0.0014  
Z -0.0002 -0.0003 -0.0012 0.0003 0.0003 -0.0016  
AT. 103 H X 0.0018 -0.0013 -0.0062 0.0017 -0.0025 0.0100  
Y 0.0043 -0.0031 -0.0148 0.0041 -0.0059 0.0241  
Z 0.0001 -0.0000 -0.0002 0.0001 -0.0001 0.0005  
AT. 104 H X 0.0018 0.0013 0.0062 -0.0017 -0.0025 0.0100  
Y 0.0043 0.0031 0.0148 -0.0041 -0.0059 0.0241  
Z 0.0001 0.0000 0.0002 -0.0001 -0.0001 0.0005  
AT. 105 H X -0.0006 0.0007 0.0032 -0.0008 0.0009 -0.0044  
Y -0.0010 0.0011 0.0050 -0.0013 0.0015 -0.0069  
Z 0.0026 -0.0029 -0.0130 0.0033 -0.0039 0.0180

AT.106 H X -0.0006 -0.0007 -0.0032 0.0008 0.0009 -0.0044  
Y -0.0010 -0.0011 -0.0050 0.0013 0.0015 -0.0069  
Z 0.0026 0.0029 0.0130 -0.0033 -0.0039 0.0180

AT.107 C X -0.0000 -0.0002 0.0003 -0.0003 -0.0006 0.0002  
Y -0.0000 -0.0001 0.0001 -0.0001 -0.0001 0.0000  
Z 0.0001 -0.0001 0.0003 -0.0003 -0.0005 0.0002

AT.108 C X -0.0000 0.0002 -0.0003 0.0003 -0.0006 0.0002  
Y -0.0000 0.0001 -0.0001 0.0001 -0.0001 0.0000  
Z 0.0001 0.0001 -0.0003 0.0003 -0.0005 0.0002

AT.109 H X -0.0000 -0.0001 0.0001 -0.0002 -0.0003 0.0000  
Y 0.0004 0.0003 -0.0002 0.0006 0.0003 0.0003  
Z -0.0001 -0.0001 0.0001 -0.0002 -0.0001 -0.0002

AT.110 H X -0.0000 0.0001 -0.0001 0.0002 -0.0003 0.0000  
Y 0.0004 -0.0003 0.0002 -0.0006 0.0003 0.0003  
Z -0.0001 0.0001 -0.0001 0.0002 -0.0001 -0.0002

AT.111 H X -0.0002 0.0020 -0.0040 0.0040 0.0070 -0.0024  
Y -0.0001 0.0004 -0.0007 0.0007 0.0013 -0.0005  
Z -0.0004 0.0018 -0.0036 0.0036 0.0065 -0.0023

AT.112 H X -0.0002 -0.0020 0.0040 -0.0040 0.0070 -0.0024  
Y -0.0001 -0.0004 0.0007 -0.0007 0.0013 -0.0005  
Z -0.0004 -0.0018 0.0036 -0.0036 0.0065 -0.0023

AT.113 C X 0.0000 0.0000 -0.0000 0.0001 0.0001 0.0000  
Y -0.0000 -0.0000 0.0000 -0.0001 -0.0001 0.0000  
Z 0.0000 0.0000 -0.0000 0.0000 0.0000 0.0000

AT.114 C X 0.0000 -0.0000 0.0000 -0.0001 0.0001 0.0000  
Y -0.0000 0.0000 -0.0000 0.0001 -0.0001 0.0000  
Z 0.0000 -0.0000 0.0000 -0.0000 0.0000 0.0000

AT.115 C X -0.0002 0.0001 0.0000 0.0000 0.0004 0.0002  
Y -0.0001 0.0000 0.0000 -0.0000 0.0001 0.0002  
Z -0.0003 0.0000 0.0001 -0.0001 0.0003 0.0004

AT.116 C X -0.0002 -0.0001 -0.0000 -0.0000 0.0004 0.0002  
Y -0.0001 -0.0000 -0.0000 0.0000 0.0001 0.0002

Z -0.0003 -0.0000 -0.0001 0.0001 0.0003 0.0004  
AT. 117 H X 0.0029 -0.0008 -0.0005 0.0002 -0.0041 -0.0034  
Y 0.0007 -0.0001 -0.0002 0.0001 -0.0010 -0.0008  
Z 0.0027 -0.0008 -0.0005 0.0001 -0.0040 -0.0033  
AT. 118 H X 0.0029 0.0008 0.0005 -0.0002 -0.0041 -0.0034  
Y 0.0007 0.0001 0.0002 -0.0001 -0.0010 -0.0008  
Z 0.0027 0.0008 0.0005 -0.0001 -0.0040 -0.0033  
AT. 119 H X -0.0003 -0.0001 0.0001 -0.0003 0.0000 0.0006  
Y 0.0007 0.0003 -0.0003 0.0007 0.0003 -0.0010  
Z 0.0005 0.0002 -0.0002 0.0005 0.0001 -0.0010  
AT. 120 H X -0.0003 0.0001 -0.0001 0.0003 0.0000 0.0006  
Y 0.0007 -0.0003 0.0003 -0.0007 0.0003 -0.0010  
Z 0.0005 -0.0002 0.0002 -0.0005 0.0001 -0.0010  
AT. 121 C X 0.0001 -0.0001 -0.0001 0.0001 -0.0001 0.0001  
Y 0.0001 -0.0001 0.0000 0.0001 -0.0001 0.0001  
Z 0.0000 0.0000 0.0001 0.0000 0.0000 -0.0000  
AT. 122 C X 0.0001 0.0001 0.0001 -0.0001 -0.0001 0.0001  
Y 0.0001 0.0001 -0.0000 -0.0001 -0.0001 0.0001  
Z 0.0000 -0.0000 -0.0001 -0.0000 0.0000 -0.0000  
AT. 123 H X 0.0000 -0.0002 0.0001 0.0002 -0.0000 0.0002  
Y -0.0006 0.0006 -0.0007 -0.0008 0.0005 -0.0009  
Z -0.0007 0.0005 -0.0005 -0.0006 0.0006 -0.0009  
AT. 124 H X 0.0000 0.0002 -0.0001 -0.0002 -0.0000 0.0002  
Y -0.0006 -0.0006 0.0007 0.0008 0.0005 -0.0009  
Z -0.0007 -0.0005 0.0005 0.0006 0.0006 -0.0009  
AT. 125 H X -0.0006 0.0008 0.0009 -0.0006 0.0008 -0.0013  
Y -0.0003 0.0004 0.0003 -0.0002 0.0004 -0.0005  
Z 0.0004 -0.0008 -0.0007 0.0005 -0.0005 0.0010  
AT. 126 H X -0.0006 -0.0008 -0.0009 0.0006 0.0008 -0.0013  
Y -0.0003 -0.0004 -0.0003 0.0002 0.0004 -0.0005  
Z 0.0004 0.0008 0.0007 -0.0005 -0.0005 0.0010  
AT. 127 C X 0.0000 0.0000 0.0000 -0.0000 -0.0000 -0.0000

Y -0.0000 -0.0001 0.0001 0.0001 0.0001 0.0001  
Z 0.0000 0.0000 -0.0000 -0.0000 -0.0000 0.0000  
AT. 128 C X 0.0000 -0.0000 -0.0000 0.0000 -0.0000 -0.0000  
Y -0.0000 0.0001 -0.0001 -0.0001 0.0001 0.0001  
Z 0.0000 -0.0000 0.0000 0.0000 -0.0000 0.0000  
AT. 129 C X 0.0006 0.0003 -0.0002 -0.0002 -0.0008 0.0003  
Y 0.0005 0.0001 -0.0000 0.0000 -0.0005 0.0003  
Z -0.0006 -0.0002 0.0001 0.0001 0.0007 -0.0003  
AT. 130 C X 0.0006 -0.0003 0.0002 0.0002 -0.0008 0.0003  
Y 0.0005 -0.0001 0.0000 -0.0000 -0.0005 0.0003  
Z -0.0006 0.0002 -0.0001 -0.0001 0.0007 -0.0003  
AT. 131 H X -0.0077 -0.0032 0.0026 0.0019 0.0093 -0.0036  
Y -0.0026 -0.0011 0.0010 0.0007 0.0032 -0.0011  
Z 0.0056 0.0024 -0.0020 -0.0014 -0.0068 0.0025  
AT. 132 H X -0.0077 0.0032 -0.0026 -0.0019 0.0093 -0.0036  
Y -0.0026 0.0011 -0.0010 -0.0007 0.0032 -0.0011  
Z 0.0056 -0.0024 0.0020 0.0014 -0.0068 0.0025  
AT. 133 H X 0.0009 0.0001 0.0003 0.0002 -0.0009 0.0007  
Y -0.0031 -0.0001 -0.0011 -0.0010 0.0028 -0.0025  
Z 0.0019 0.0002 0.0006 0.0005 -0.0018 0.0014  
AT. 134 H X 0.0009 -0.0001 -0.0003 -0.0002 -0.0009 0.0007  
Y -0.0031 0.0001 0.0011 0.0010 0.0028 -0.0025  
Z 0.0019 -0.0002 -0.0006 -0.0005 -0.0018 0.0014  
AT. 135 C X 0.0028 0.0023 -0.0019 0.0040 0.0034 0.0001  
Y -0.0048 -0.0044 0.0035 -0.0083 -0.0076 0.0001  
Z 0.0026 0.0021 -0.0020 0.0030 0.0024 0.0000  
AT. 136 C X 0.0028 -0.0023 0.0019 -0.0040 0.0034 0.0001  
Y -0.0048 0.0044 -0.0035 0.0083 -0.0076 0.0001  
Z 0.0026 -0.0021 0.0020 -0.0030 0.0024 0.0000  
AT. 137 H X -0.0113 -0.0100 0.0084 -0.0178 -0.0160 0.0002  
Y 0.0500 0.0440 -0.0373 0.0783 0.0701 -0.0008  
Z -0.0302 -0.0267 0.0226 -0.0476 -0.0426 0.0005



AT. 138 H X -0.0113 0.0100 -0.0084 0.0178 -0.0160 0.0002  
Y 0.0500 -0.0440 0.0373 -0.0783 0.0701 -0.0008  
Z -0.0302 0.0267 -0.0226 0.0476 -0.0426 0.0005

AT. 139 H X -0.0176 -0.0136 0.0117 -0.0201 -0.0151 -0.0010  
Y -0.0047 -0.0037 0.0032 -0.0060 -0.0047 -0.0002  
Z -0.0140 -0.0108 0.0093 -0.0162 -0.0122 -0.0008

AT. 140 H X -0.0176 0.0136 -0.0117 0.0201 -0.0151 -0.0010  
Y -0.0047 0.0037 -0.0032 0.0060 -0.0047 -0.0002  
Z -0.0140 0.0108 -0.0093 0.0162 -0.0122 -0.0008

AT. 141 H X -0.0048 -0.0045 0.0031 -0.0107 -0.0103 0.0000  
Y 0.0129 0.0120 -0.0084 0.0280 0.0266 0.0000  
Z 0.0131 0.0121 -0.0086 0.0276 0.0262 0.0000

AT. 142 H X -0.0048 0.0045 -0.0031 0.0107 -0.0103 0.0000  
Y 0.0129 -0.0120 0.0084 -0.0280 0.0266 0.0000  
Z 0.0131 -0.0121 0.0086 -0.0276 0.0262 0.0000

AT. 143 C X 0.0008 0.0010 -0.0009 -0.0010 -0.0012 -0.0006  
Y -0.0048 -0.0070 0.0065 0.0070 0.0070 0.0035  
Z 0.0006 0.0012 -0.0013 -0.0012 -0.0008 -0.0003

AT. 144 C X 0.0008 -0.0010 0.0009 0.0010 -0.0012 -0.0006  
Y -0.0048 0.0070 -0.0065 -0.0070 0.0070 0.0035  
Z 0.0006 -0.0012 0.0013 0.0012 -0.0008 -0.0003

AT. 145 H X -0.0053 -0.0072 0.0063 0.0072 0.0079 0.0041  
Y 0.0189 0.0256 -0.0224 -0.0257 -0.0280 -0.0148  
Z 0.0186 0.0252 -0.0223 -0.0253 -0.0274 -0.0144

AT. 146 H X -0.0053 0.0072 -0.0063 -0.0072 0.0079 0.0041  
Y 0.0189 -0.0256 0.0224 0.0257 -0.0280 -0.0148  
Z 0.0186 -0.0252 0.0223 0.0253 -0.0274 -0.0144

AT. 147 H X 0.0070 0.0117 -0.0116 -0.0109 -0.0087 -0.0041  
Y 0.0020 0.0034 -0.0034 -0.0030 -0.0022 -0.0010  
Z -0.0050 -0.0082 0.0081 0.0075 0.0061 0.0028

AT. 148 H X 0.0070 -0.0117 0.0116 0.0109 -0.0087 -0.0041  
Y 0.0020 -0.0034 0.0034 0.0030 -0.0022 -0.0010

Z -0.0050 0.0082 -0.0081 -0.0075 0.0061 0.0028  
AT. 149 H X -0.0108 -0.0160 0.0154 0.0162 0.0157 0.0075  
Y 0.0367 0.0545 -0.0526 -0.0554 -0.0538 -0.0259  
Z -0.0214 -0.0316 0.0304 0.0322 0.0314 0.0151  
AT. 150 H X -0.0108 0.0160 -0.0154 -0.0162 0.0157 0.0075  
Y 0.0367 -0.0545 0.0526 0.0554 -0.0538 -0.0259  
Z -0.0214 0.0316 -0.0304 -0.0322 0.0314 0.0151  
AT. 151 C X -0.0000 0.0001 -0.0001 0.0000 0.0001 -0.0001  
Y 0.0001 -0.0002 0.0003 -0.0001 -0.0004 0.0003  
Z 0.0000 0.0000 -0.0001 0.0000 0.0000 0.0000  
AT. 152 C X -0.0000 -0.0001 0.0001 -0.0000 0.0001 -0.0001  
Y 0.0001 0.0002 -0.0003 0.0001 -0.0004 0.0003  
Z 0.0000 -0.0000 0.0001 -0.0000 0.0000 0.0000  
AT. 153 H X 0.0000 -0.0005 0.0007 -0.0006 -0.0012 0.0004  
Y -0.0003 0.0019 -0.0029 0.0009 0.0032 -0.0020  
Z 0.0001 -0.0012 0.0018 -0.0007 -0.0020 0.0012  
AT. 154 H X 0.0000 0.0005 -0.0007 0.0006 -0.0012 0.0004  
Y -0.0003 -0.0019 0.0029 -0.0009 0.0032 -0.0020  
Z 0.0001 0.0012 -0.0018 0.0007 -0.0020 0.0012  
AT. 155 H X 0.0001 -0.0003 0.0003 0.0000 -0.0004 0.0005  
Y -0.0005 0.0008 -0.0007 0.0004 0.0017 -0.0013  
Z -0.0004 0.0008 -0.0008 0.0003 0.0016 -0.0012  
AT. 156 H X 0.0001 0.0003 -0.0003 -0.0000 -0.0004 0.0005  
Y -0.0005 -0.0008 0.0007 -0.0004 0.0017 -0.0013  
Z -0.0004 -0.0008 0.0008 -0.0003 0.0016 -0.0012  
AT. 157 O X -0.0000 -0.0000 0.0000 0.0000 -0.0000 0.0000  
Y -0.0000 -0.0000 0.0000 0.0000 0.0000 -0.0000  
Z -0.0000 0.0000 -0.0000 -0.0000 0.0000 -0.0000  
AT. 158 O X -0.0000 0.0000 -0.0000 -0.0000 -0.0000 0.0000  
Y -0.0000 0.0000 -0.0000 -0.0000 0.0000 -0.0000  
Z -0.0000 -0.0000 0.0000 0.0000 0.0000 -0.0000  
AT. 159 O X 0.0000 -0.0000 -0.0000 -0.0000 -0.0000 0.0000

Y -0.0000 0.0000 -0.0000 -0.0000 0.0000 0.0000  
Z -0.0000 -0.0001 0.0000 0.0000 -0.0000 0.0000  
AT.160 O X 0.0000 0.0000 0.0000 0.0000 -0.0000 0.0000  
Y -0.0000 -0.0000 0.0000 0.0000 0.0000 0.0000  
Z -0.0000 0.0001 -0.0000 -0.0000 -0.0000 0.0000  
AT.161 H X 0.0003 0.0002 0.0001 0.0001 0.0001 -0.0001  
Y 0.0001 -0.0001 -0.0000 0.0000 -0.0006 0.0003  
Z 0.0002 0.0001 0.0002 -0.0000 -0.0002 0.0000  
AT.162 H X 0.0003 -0.0002 -0.0001 -0.0001 0.0001 -0.0001  
Y 0.0001 0.0001 0.0000 -0.0000 -0.0006 0.0003  
Z 0.0002 -0.0001 -0.0002 0.0000 -0.0002 0.0000  
AT.163 H X 0.0000 0.0003 -0.0000 -0.0000 0.0003 -0.0000  
Y 0.0000 -0.0002 0.0000 0.0000 -0.0001 -0.0000  
Z -0.0000 0.0007 -0.0001 -0.0001 0.0007 -0.0001  
AT.164 H X 0.0000 -0.0003 0.0000 0.0000 0.0003 -0.0000  
Y 0.0000 0.0002 -0.0000 -0.0000 -0.0001 -0.0000  
Z -0.0000 -0.0007 0.0001 0.0001 0.0007 -0.0001  
AT.165 O X 0.0000 0.0000 0.0000 -0.0000 -0.0000 0.0000  
Y 0.0000 0.0000 -0.0000 -0.0000 -0.0000 0.0000  
Z -0.0000 0.0000 -0.0000 -0.0000 0.0000 0.0000  
AT.166 O X 0.0000 -0.0000 -0.0000 0.0000 -0.0000 0.0000  
Y 0.0000 -0.0000 0.0000 0.0000 -0.0000 0.0000  
Z -0.0000 -0.0000 0.0000 0.0000 0.0000 0.0000  
AT.167 H X -0.0001 -0.0001 -0.0001 0.0000 0.0001 -0.0002  
Y -0.0000 -0.0000 0.0001 -0.0000 -0.0000 -0.0000  
Z -0.0000 -0.0000 -0.0000 0.0000 -0.0000 -0.0001  
AT.168 H X -0.0001 0.0001 0.0001 -0.0000 0.0001 -0.0002  
Y -0.0000 0.0000 -0.0001 0.0000 -0.0000 -0.0000  
Z -0.0000 0.0000 0.0000 -0.0000 -0.0000 -0.0001  
AT.169 O X 0.0000 0.0000 0.0000 -0.0000 -0.0000 -0.0000  
Y -0.0000 -0.0000 -0.0000 0.0000 0.0000 -0.0000  
Z 0.0000 0.0000 0.0000 -0.0000 -0.0000 -0.0000

AT.170 O X 0.0000 -0.0000 -0.0000 0.0000 -0.0000 -0.0000  
Y -0.0000 0.0000 0.0000 -0.0000 0.0000 -0.0000  
Z 0.0000 -0.0000 -0.0000 0.0000 -0.0000 -0.0000

AT.171 H X -0.0001 -0.0001 -0.0001 0.0000 0.0002 -0.0001  
Y 0.0002 0.0002 0.0003 -0.0000 -0.0003 0.0001  
Z -0.0001 -0.0001 -0.0001 0.0000 0.0001 0.0000

AT.172 H X -0.0001 0.0001 0.0001 -0.0000 0.0002 -0.0001  
Y 0.0002 -0.0002 -0.0003 0.0000 -0.0003 0.0001  
Z -0.0001 0.0001 0.0001 -0.0000 0.0001 0.0000

FREQ(CM\*\*-1) 3175.39 3175.90 3178.01 3178.18 3182.83 3183.53

AT. 1 I X -0.0000 -0.0000 -0.0000 -0.0000 0.0000 0.0000  
Y 0.0000 -0.0000 0.0000 0.0000 0.0000 0.0000  
Z 0.0000 -0.0000 -0.0000 0.0000 -0.0000 -0.0000

AT. 2 I X 0.0000 -0.0000 0.0000 -0.0000 0.0000 -0.0000  
Y -0.0000 -0.0000 -0.0000 0.0000 0.0000 -0.0000  
Z -0.0000 -0.0000 0.0000 0.0000 -0.0000 0.0000

AT. 3 I X -0.0000 -0.0000 0.0000 -0.0000 0.0000 0.0000  
Y 0.0000 -0.0000 -0.0000 -0.0000 -0.0000 -0.0000  
Z -0.0000 -0.0000 0.0000 0.0000 -0.0000 -0.0000

AT. 4 I X 0.0000 -0.0000 -0.0000 -0.0000 0.0000 -0.0000  
Y -0.0000 -0.0000 0.0000 -0.0000 -0.0000 0.0000  
Z 0.0000 -0.0000 -0.0000 0.0000 -0.0000 0.0000

AT. 5 O X 0.0000 -0.0000 -0.0000 0.0000 -0.0000 -0.0000  
Y -0.0000 0.0000 0.0000 -0.0000 0.0000 0.0000  
Z -0.0000 0.0000 0.0000 0.0000 0.0000 0.0000

AT. 6 O X -0.0000 -0.0000 0.0000 0.0000 -0.0000 0.0000  
Y 0.0000 0.0000 -0.0000 -0.0000 0.0000 -0.0000  
Z 0.0000 0.0000 -0.0000 0.0000 0.0000 -0.0000

AT. 7 O X 0.0001 -0.0000 -0.0000 -0.0000 -0.0000 -0.0000  
Y -0.0000 0.0000 0.0000 0.0000 -0.0000 -0.0000

Z -0.0001 0.0000 0.0000 0.0000 -0.0000 -0.0000  
AT. 8 O X -0.0001 -0.0000 0.0000 -0.0000 -0.0000 0.0000  
Y 0.0000 0.0000 -0.0000 0.0000 -0.0000 0.0000  
Z 0.0001 0.0000 -0.0000 0.0000 -0.0000 0.0000  
AT. 9 N X -0.0000 -0.0000 -0.0000 -0.0000 0.0000 0.0000  
Y 0.0000 -0.0000 0.0000 0.0000 -0.0000 -0.0000  
Z 0.0000 0.0000 0.0000 0.0000 -0.0000 -0.0000  
AT. 10 N X 0.0000 -0.0000 0.0000 -0.0000 0.0000 -0.0000  
Y -0.0000 -0.0000 -0.0000 0.0000 -0.0000 0.0000  
Z -0.0000 0.0000 -0.0000 0.0000 -0.0000 0.0000  
AT. 11 N X -0.0000 0.0000 0.0000 0.0000 0.0000 -0.0000  
Y 0.0000 -0.0000 -0.0000 0.0000 -0.0000 0.0000  
Z 0.0000 -0.0000 -0.0000 -0.0000 0.0000 0.0000  
AT. 12 N X 0.0000 0.0000 -0.0000 0.0000 0.0000 0.0000  
Y -0.0000 -0.0000 0.0000 0.0000 -0.0000 -0.0000  
Z -0.0000 -0.0000 0.0000 -0.0000 0.0000 -0.0000  
AT. 13 C X -0.0000 0.0000 0.0000 0.0001 -0.0001 -0.0002  
Y 0.0000 -0.0000 -0.0000 -0.0000 0.0002 0.0002  
Z 0.0000 -0.0000 -0.0001 -0.0000 -0.0001 -0.0001  
AT. 14 C X 0.0000 0.0000 -0.0000 0.0001 -0.0001 0.0002  
Y -0.0000 -0.0000 0.0000 -0.0000 0.0002 -0.0002  
Z -0.0000 -0.0000 0.0001 -0.0000 -0.0001 0.0001  
AT. 15 C X 0.0000 0.0000 -0.0001 0.0001 -0.0005 -0.0004  
Y -0.0001 0.0001 -0.0005 0.0009 -0.0048 -0.0045  
Z -0.0000 -0.0001 0.0003 -0.0006 0.0020 0.0017  
AT. 16 C X -0.0000 0.0000 0.0001 0.0001 -0.0005 0.0004  
Y 0.0001 0.0001 0.0005 0.0009 -0.0048 0.0045  
Z 0.0000 -0.0001 -0.0003 -0.0006 0.0020 -0.0017  
AT. 17 H X -0.0004 0.0003 -0.0010 0.0017 -0.0104 -0.0098  
Y 0.0013 -0.0009 0.0036 -0.0057 0.0374 0.0352  
Z 0.0013 -0.0008 0.0029 -0.0048 0.0297 0.0279  
AT. 18 H X 0.0004 0.0003 0.0010 0.0017 -0.0104 0.0098

Y -0.0013 -0.0009 -0.0036 -0.0057 0.0374 -0.0352  
Z -0.0013 -0.0008 -0.0029 -0.0048 0.0297 -0.0279  
AT. 19 H X 0.0002 -0.0004 0.0023 -0.0037 0.0178 0.0160  
Y 0.0002 -0.0005 0.0024 -0.0039 0.0185 0.0166  
Z -0.0006 0.0014 -0.0068 0.0113 -0.0539 -0.0484  
AT. 20 H X -0.0002 -0.0004 -0.0023 -0.0037 0.0178 -0.0160  
Y -0.0002 -0.0005 -0.0024 -0.0039 0.0185 -0.0166  
Z 0.0006 0.0014 0.0068 0.0113 -0.0539 0.0484  
AT. 21 C X -0.0001 0.0000 0.0000 0.0001 0.0000 0.0000  
Y 0.0001 -0.0000 -0.0000 -0.0001 -0.0000 0.0000  
Z -0.0000 0.0000 0.0000 0.0000 0.0000 -0.0000  
AT. 22 C X 0.0001 0.0000 -0.0000 0.0001 0.0000 -0.0000  
Y -0.0001 -0.0000 0.0000 -0.0001 -0.0000 -0.0000  
Z 0.0000 0.0000 -0.0000 0.0000 0.0000 0.0000  
AT. 23 C X -0.0000 -0.0000 0.0000 -0.0001 0.0000 -0.0000  
Y 0.0000 0.0001 -0.0004 0.0003 0.0001 0.0003  
Z 0.0000 0.0000 -0.0002 -0.0001 0.0001 0.0002  
AT. 24 C X 0.0000 -0.0000 -0.0000 -0.0001 0.0000 0.0000  
Y -0.0000 0.0001 0.0004 0.0003 0.0001 -0.0003  
Z -0.0000 0.0000 0.0002 -0.0001 0.0001 -0.0002  
AT. 25 H X 0.0001 0.0002 -0.0008 0.0003 0.0002 0.0006  
Y -0.0007 -0.0011 0.0054 -0.0022 -0.0010 -0.0043  
Z -0.0001 -0.0001 0.0006 -0.0003 -0.0000 -0.0005  
AT. 26 H X -0.0001 0.0002 0.0008 0.0003 0.0002 -0.0006  
Y 0.0007 -0.0011 -0.0054 -0.0022 -0.0010 0.0043  
Z 0.0001 -0.0001 -0.0006 -0.0003 -0.0000 0.0005  
AT. 27 H X -0.0001 -0.0001 0.0005 0.0003 -0.0002 -0.0006  
Y 0.0002 0.0001 -0.0010 -0.0007 0.0003 0.0012  
Z -0.0003 -0.0003 0.0019 0.0015 -0.0007 -0.0023  
AT. 28 H X 0.0001 -0.0001 -0.0005 0.0003 -0.0002 0.0006  
Y -0.0002 0.0001 0.0010 -0.0007 0.0003 -0.0012  
Z 0.0003 -0.0003 -0.0019 0.0015 -0.0007 0.0023

AT. 29 C X 0.0000 -0.0001 -0.0005 -0.0022 0.0001 -0.0001  
Y -0.0000 -0.0000 0.0001 0.0001 -0.0001 -0.0000  
Z -0.0001 0.0002 0.0008 0.0033 -0.0000 0.0002

AT. 30 C X -0.0000 -0.0001 0.0005 -0.0022 0.0001 0.0001  
Y 0.0000 -0.0000 -0.0001 0.0001 -0.0001 0.0000  
Z 0.0001 0.0002 -0.0008 0.0033 -0.0000 -0.0002

AT. 31 H X -0.0001 0.0003 0.0011 0.0053 0.0001 0.0003  
Y -0.0002 0.0008 0.0026 0.0128 -0.0001 0.0004  
Z 0.0002 -0.0005 -0.0017 -0.0082 -0.0000 -0.0003

AT. 32 H X 0.0001 0.0003 -0.0011 0.0053 0.0001 -0.0003  
Y 0.0002 0.0008 -0.0026 0.0128 -0.0001 -0.0004  
Z -0.0002 -0.0005 0.0017 -0.0082 -0.0000 0.0003

AT. 33 H X -0.0005 0.0012 0.0052 0.0212 -0.0001 0.0012  
Y 0.0004 -0.0007 -0.0033 -0.0133 -0.0000 -0.0008  
Z 0.0008 -0.0018 -0.0078 -0.0314 0.0001 -0.0018

AT. 34 H X 0.0005 0.0012 -0.0052 0.0212 -0.0001 -0.0012  
Y -0.0004 -0.0007 0.0033 -0.0133 -0.0000 0.0008  
Z -0.0008 -0.0018 0.0078 -0.0314 0.0001 0.0018

AT. 35 C X 0.0000 -0.0000 -0.0000 -0.0000 0.0000 0.0000  
Y -0.0000 -0.0000 0.0000 -0.0000 0.0000 -0.0000  
Z -0.0000 0.0000 0.0000 0.0000 0.0000 -0.0000

AT. 36 C X -0.0000 -0.0000 0.0000 -0.0000 0.0000 -0.0000  
Y 0.0000 -0.0000 -0.0000 -0.0000 0.0000 0.0000  
Z 0.0000 0.0000 -0.0000 0.0000 0.0000 0.0000

AT. 37 C X -0.0000 0.0000 -0.0003 0.0001 -0.0003 0.0004  
Y 0.0001 -0.0001 0.0003 -0.0001 0.0004 -0.0005  
Z 0.0003 -0.0001 0.0006 -0.0003 0.0008 -0.0009

AT. 38 C X 0.0000 0.0000 0.0003 0.0001 -0.0003 -0.0004  
Y -0.0001 -0.0001 -0.0003 -0.0001 0.0004 0.0005  
Z -0.0003 -0.0001 -0.0006 -0.0003 0.0008 0.0009

AT. 39 H X 0.0020 -0.0009 0.0041 -0.0016 0.0051 -0.0062  
Y -0.0013 0.0006 -0.0026 0.0011 -0.0033 0.0040

Z -0.0029 0.0013 -0.0061 0.0024 -0.0075 0.0091  
AT. 40 H X -0.0020 -0.0009 -0.0041 -0.0016 0.0051 0.0062  
Y 0.0013 0.0006 0.0026 0.0011 -0.0033 -0.0040  
Z 0.0029 0.0013 0.0061 0.0024 -0.0075 -0.0091  
AT. 41 H X -0.0008 0.0004 -0.0011 0.0006 -0.0019 0.0019  
Y -0.0007 0.0003 -0.0009 0.0005 -0.0015 0.0014  
Z -0.0008 0.0004 -0.0010 0.0005 -0.0018 0.0017  
AT. 42 H X 0.0008 0.0004 0.0011 0.0006 -0.0019 -0.0019  
Y 0.0007 0.0003 0.0009 0.0005 -0.0015 -0.0014  
Z 0.0008 0.0004 0.0010 0.0005 -0.0018 -0.0017  
AT. 43 C X -0.0087 0.0025 0.0007 0.0024 -0.0004 -0.0007  
Y 0.0032 -0.0009 -0.0003 -0.0009 0.0001 0.0003  
Z -0.0071 0.0020 0.0005 0.0019 -0.0003 -0.0005  
AT. 44 C X 0.0087 0.0025 -0.0007 0.0024 -0.0004 0.0007  
Y -0.0032 -0.0009 0.0003 -0.0009 0.0001 -0.0003  
Z 0.0071 0.0020 -0.0005 0.0019 -0.0003 0.0005  
AT. 45 H X 0.0180 -0.0051 -0.0013 -0.0044 0.0008 0.0013  
Y 0.0257 -0.0073 -0.0019 -0.0063 0.0009 0.0018  
Z 0.0255 -0.0072 -0.0018 -0.0063 0.0011 0.0019  
AT. 46 H X -0.0180 -0.0051 0.0013 -0.0044 0.0008 -0.0013  
Y -0.0257 -0.0073 0.0019 -0.0063 0.0009 -0.0018  
Z -0.0255 -0.0072 0.0018 -0.0063 0.0011 -0.0019  
AT. 47 H X 0.0853 -0.0245 -0.0068 -0.0234 0.0036 0.0065  
Y -0.0638 0.0183 0.0050 0.0175 -0.0031 -0.0052  
Z 0.0610 -0.0175 -0.0049 -0.0167 0.0027 0.0048  
AT. 48 H X -0.0853 -0.0245 0.0068 -0.0234 0.0036 -0.0065  
Y 0.0638 0.0183 -0.0050 0.0175 -0.0031 0.0052  
Z -0.0610 -0.0175 0.0049 -0.0167 0.0027 -0.0048  
AT. 49 C X -0.0001 0.0000 0.0000 0.0000 -0.0000 -0.0000  
Y -0.0001 0.0000 0.0000 0.0000 0.0001 0.0001  
Z -0.0001 0.0000 0.0000 0.0000 -0.0001 -0.0001  
AT. 50 C X 0.0001 0.0000 -0.0000 0.0000 -0.0000 0.0000



Y 0.0001 0.0000 -0.0000 0.0000 0.0001 -0.0001  
Z 0.0001 0.0000 -0.0000 0.0000 -0.0001 0.0001  
AT. 51 C X 0.0007 -0.0002 -0.0005 -0.0008 -0.0056 -0.0057  
Y -0.0007 0.0002 0.0006 0.0006 0.0060 0.0061  
Z 0.0006 -0.0002 -0.0004 -0.0005 -0.0048 -0.0049  
AT. 52 C X -0.0007 -0.0002 0.0005 -0.0008 -0.0056 0.0057  
Y 0.0007 0.0002 -0.0006 0.0006 0.0060 -0.0061  
Z -0.0006 -0.0002 0.0004 -0.0005 -0.0048 0.0049  
AT. 53 H X -0.0088 0.0030 0.0068 0.0095 0.0762 0.0776  
Y 0.0065 -0.0022 -0.0047 -0.0066 -0.0521 -0.0531  
Z -0.0051 0.0018 0.0039 0.0055 0.0442 0.0451  
AT. 54 H X 0.0088 0.0030 -0.0068 0.0095 0.0762 -0.0776  
Y -0.0065 -0.0022 0.0047 -0.0066 -0.0521 0.0531  
Z 0.0051 0.0018 -0.0039 0.0055 0.0442 -0.0451  
AT. 55 H X 0.0015 -0.0004 -0.0011 -0.0006 -0.0117 -0.0119  
Y 0.0022 -0.0006 -0.0019 -0.0008 -0.0194 -0.0197  
Z -0.0016 0.0005 0.0014 0.0006 0.0148 0.0150  
AT. 56 H X -0.0015 -0.0004 0.0011 -0.0006 -0.0117 0.0119  
Y -0.0022 -0.0006 0.0019 -0.0008 -0.0194 0.0197  
Z 0.0016 0.0005 -0.0014 0.0006 0.0148 -0.0150  
AT. 57 C X -0.0000 -0.0000 0.0000 -0.0005 0.0003 0.0002  
Y 0.0000 -0.0001 0.0000 -0.0011 0.0001 -0.0001  
Z 0.0000 -0.0000 -0.0000 -0.0004 -0.0002 -0.0003  
AT. 58 C X 0.0000 -0.0000 -0.0000 -0.0005 0.0003 -0.0002  
Y -0.0000 -0.0001 -0.0000 -0.0011 0.0001 0.0001  
Z -0.0000 -0.0000 0.0000 -0.0004 -0.0002 0.0003  
AT. 59 H X 0.0001 0.0001 -0.0002 0.0030 -0.0009 -0.0007  
Y 0.0001 0.0002 -0.0005 0.0061 -0.0018 -0.0013  
Z -0.0001 -0.0002 0.0003 -0.0043 0.0012 0.0008  
AT. 60 H X -0.0001 0.0001 0.0002 0.0030 -0.0009 0.0007  
Y -0.0001 0.0002 0.0005 0.0061 -0.0018 0.0013  
Z 0.0001 -0.0002 -0.0003 -0.0043 0.0012 -0.0008

AT. 61 H X 0.0001 -0.0002 -0.0000 -0.0025 -0.0015 -0.0024  
Y -0.0000 0.0001 0.0000 0.0014 0.0010 0.0015  
Z -0.0001 0.0003 0.0001 0.0032 0.0020 0.0031

AT. 62 H X -0.0001 -0.0002 0.0000 -0.0025 -0.0015 0.0024  
Y 0.0000 0.0001 -0.0000 0.0014 0.0010 -0.0015  
Z 0.0001 0.0003 -0.0001 0.0032 0.0020 -0.0031

AT. 63 H X -0.0000 0.0004 0.0002 0.0059 -0.0008 0.0005  
Y -0.0001 0.0004 0.0002 0.0053 -0.0008 0.0004  
Z -0.0001 0.0005 0.0002 0.0062 -0.0010 0.0003

AT. 64 H X 0.0000 0.0004 -0.0002 0.0059 -0.0008 -0.0005  
Y 0.0001 0.0004 -0.0002 0.0053 -0.0008 -0.0004  
Z 0.0001 0.0005 -0.0002 0.0062 -0.0010 -0.0003

AT. 65 C X -0.0008 0.0002 0.0001 -0.0002 -0.0002 -0.0003  
Y -0.0001 -0.0000 0.0000 -0.0003 0.0003 0.0003  
Z -0.0006 0.0002 0.0000 -0.0000 -0.0002 -0.0003

AT. 66 C X 0.0008 0.0002 -0.0001 -0.0002 -0.0002 0.0003  
Y 0.0001 -0.0000 -0.0000 -0.0003 0.0003 -0.0003  
Z 0.0006 0.0002 -0.0000 -0.0000 -0.0002 0.0003

AT. 67 H X 0.0041 -0.0010 -0.0001 0.0015 0.0002 0.0008  
Y 0.0047 -0.0012 -0.0002 0.0015 0.0001 0.0008  
Z 0.0051 -0.0013 -0.0002 0.0017 0.0001 0.0009

AT. 68 H X -0.0041 -0.0010 0.0001 0.0015 0.0002 -0.0008  
Y -0.0047 -0.0012 0.0002 0.0015 0.0001 -0.0008  
Z -0.0051 -0.0013 0.0002 0.0017 0.0001 -0.0009

AT. 69 H X 0.0050 -0.0016 -0.0006 -0.0005 0.0032 0.0039  
Y -0.0039 0.0012 0.0005 0.0003 -0.0025 -0.0030  
Z 0.0023 -0.0007 -0.0003 -0.0002 0.0014 0.0017

AT. 70 H X -0.0050 -0.0016 0.0006 -0.0005 0.0032 -0.0039  
Y 0.0039 0.0012 -0.0005 0.0003 -0.0025 0.0030  
Z -0.0023 -0.0007 0.0003 -0.0002 0.0014 -0.0017

AT. 71 H X 0.0005 0.0000 -0.0002 0.0009 -0.0011 -0.0011  
Y 0.0008 0.0001 -0.0004 0.0018 -0.0019 -0.0017

Z -0.0007 -0.0000 0.0003 -0.0013 0.0014 0.0013  
AT. 72 H X -0.0005 0.0000 0.0002 0.0009 -0.0011 0.0011  
Y -0.0008 0.0001 0.0004 0.0018 -0.0019 0.0017  
Z 0.0007 -0.0000 -0.0003 -0.0013 0.0014 -0.0013  
AT. 73 C X -0.0001 0.0000 0.0000 -0.0002 0.0002 0.0001  
Y -0.0002 0.0000 0.0000 -0.0002 0.0001 0.0000  
Z -0.0000 -0.0000 -0.0000 -0.0000 0.0001 0.0001  
AT. 74 C X 0.0001 0.0000 -0.0000 -0.0002 0.0002 -0.0001  
Y 0.0002 0.0000 -0.0000 -0.0002 0.0001 -0.0000  
Z 0.0000 -0.0000 0.0000 -0.0000 0.0001 -0.0001  
AT. 75 H X 0.0005 -0.0001 -0.0002 0.0008 -0.0003 -0.0002  
Y 0.0009 -0.0001 -0.0003 0.0016 -0.0007 -0.0006  
Z -0.0006 0.0001 0.0002 -0.0013 0.0006 0.0005  
AT. 76 H X -0.0005 -0.0001 0.0002 0.0008 -0.0003 0.0002  
Y -0.0009 -0.0001 0.0003 0.0016 -0.0007 0.0006  
Z 0.0006 0.0001 -0.0002 -0.0013 0.0006 -0.0005  
AT. 77 H X 0.0013 -0.0002 -0.0002 0.0012 -0.0009 -0.0005  
Y 0.0011 -0.0002 -0.0001 0.0013 -0.0009 -0.0004  
Z 0.0014 -0.0002 -0.0002 0.0013 -0.0009 -0.0004  
AT. 78 H X -0.0013 -0.0002 0.0002 0.0012 -0.0009 0.0005  
Y -0.0011 -0.0002 0.0001 0.0013 -0.0009 0.0004  
Z -0.0014 -0.0002 0.0002 0.0013 -0.0009 0.0004  
AT. 79 I X -0.0000 0.0000 0.0000 0.0000 0.0000 0.0000  
Y -0.0000 -0.0000 -0.0000 0.0000 -0.0000 -0.0000  
Z -0.0000 -0.0000 -0.0000 -0.0000 -0.0000 0.0000  
AT. 80 I X 0.0000 0.0000 -0.0000 0.0000 0.0000 -0.0000  
Y 0.0000 -0.0000 0.0000 0.0000 -0.0000 0.0000  
Z 0.0000 -0.0000 0.0000 -0.0000 -0.0000 -0.0000  
AT. 81 I X -0.0000 -0.0000 -0.0000 -0.0000 0.0000 -0.0000  
Y 0.0000 0.0000 0.0000 -0.0000 -0.0000 0.0000  
Z 0.0000 0.0000 0.0000 -0.0000 -0.0000 -0.0000  
AT. 82 I X 0.0000 -0.0000 0.0000 -0.0000 0.0000 0.0000

Y -0.0000 0.0000 -0.0000 -0.0000 -0.0000 -0.0000  
Z -0.0000 0.0000 -0.0000 -0.0000 -0.0000 0.0000  
AT. 83 O X -0.0000 0.0000 -0.0000 0.0001 -0.0000 -0.0000  
Y -0.0000 0.0000 -0.0000 0.0000 -0.0000 -0.0000  
Z -0.0000 0.0000 0.0000 0.0001 -0.0000 0.0000  
AT. 84 O X 0.0000 0.0000 0.0000 0.0001 -0.0000 0.0000  
Y 0.0000 0.0000 0.0000 0.0000 -0.0000 0.0000  
Z 0.0000 0.0000 -0.0000 0.0001 -0.0000 -0.0000  
AT. 85 O X -0.0000 0.0000 0.0000 -0.0000 0.0000 -0.0000  
Y -0.0000 0.0000 -0.0000 -0.0000 -0.0000 0.0000  
Z -0.0000 -0.0000 0.0000 0.0000 -0.0000 -0.0000  
AT. 86 O X 0.0000 0.0000 -0.0000 -0.0000 0.0000 0.0000  
Y 0.0000 0.0000 0.0000 -0.0000 -0.0000 -0.0000  
Z 0.0000 -0.0000 -0.0000 0.0000 -0.0000 0.0000  
AT. 87 N X -0.0000 0.0000 -0.0000 -0.0000 0.0000 0.0000  
Y -0.0000 -0.0000 -0.0000 -0.0000 0.0000 -0.0000  
Z -0.0000 0.0000 -0.0001 0.0001 -0.0000 0.0000  
AT. 88 N X 0.0000 0.0000 0.0000 -0.0000 0.0000 -0.0000  
Y 0.0000 -0.0000 0.0000 -0.0000 0.0000 0.0000  
Z 0.0000 0.0000 0.0001 0.0001 -0.0000 -0.0000  
AT. 89 N X -0.0000 -0.0000 -0.0000 0.0000 -0.0000 0.0000  
Y 0.0000 -0.0000 -0.0000 -0.0000 0.0000 0.0000  
Z -0.0000 0.0000 0.0000 0.0000 -0.0000 0.0000  
AT. 90 N X 0.0000 -0.0000 0.0000 0.0000 -0.0000 -0.0000  
Y -0.0000 -0.0000 0.0000 -0.0000 0.0000 -0.0000  
Z 0.0000 0.0000 -0.0000 0.0000 -0.0000 -0.0000  
AT. 91 C X 0.0000 -0.0001 0.0002 -0.0000 0.0000 -0.0000  
Y 0.0000 -0.0000 0.0000 0.0000 0.0000 -0.0000  
Z 0.0000 -0.0001 0.0000 -0.0003 0.0000 -0.0000  
AT. 92 C X -0.0000 -0.0001 -0.0002 -0.0000 0.0000 0.0000  
Y -0.0000 -0.0000 -0.0000 0.0000 0.0000 0.0000  
Z -0.0000 -0.0001 -0.0000 -0.0003 0.0000 0.0000

AT. 93 C X -0.0000 -0.0000 -0.0006 -0.0015 -0.0000 0.0002  
Y -0.0000 -0.0003 -0.0018 -0.0052 -0.0000 0.0007  
Z -0.0000 0.0002 0.0005 0.0015 -0.0000 -0.0003

AT. 94 C X 0.0000 -0.0000 0.0006 -0.0015 -0.0000 -0.0002  
Y 0.0000 -0.0003 0.0018 -0.0052 -0.0000 -0.0007  
Z 0.0000 0.0002 -0.0005 0.0015 -0.0000 0.0003

AT. 95 H X 0.0000 0.0018 0.0115 0.0312 0.0001 -0.0042  
Y 0.0001 0.0026 0.0176 0.0499 0.0001 -0.0063  
Z 0.0000 0.0015 0.0103 0.0291 0.0001 -0.0037

AT. 96 H X -0.0000 0.0018 -0.0115 0.0312 0.0001 0.0042  
Y -0.0001 0.0026 -0.0176 0.0499 0.0001 0.0063  
Z -0.0000 0.0015 -0.0103 0.0291 0.0001 0.0037

AT. 97 H X 0.0001 -0.0012 -0.0049 -0.0142 -0.0000 0.0021  
Y -0.0000 0.0009 0.0037 0.0106 0.0000 -0.0016  
Z 0.0002 -0.0038 -0.0161 -0.0463 -0.0001 0.0069

AT. 98 H X -0.0001 -0.0012 0.0049 -0.0142 -0.0000 -0.0021  
Y 0.0000 0.0009 -0.0037 0.0106 0.0000 0.0016  
Z -0.0002 -0.0038 0.0161 -0.0463 -0.0001 -0.0069

AT. 99 C X 0.0000 0.0002 0.0001 0.0001 0.0000 -0.0000  
Y -0.0000 0.0000 0.0000 0.0001 -0.0000 -0.0000  
Z 0.0000 0.0002 0.0001 -0.0002 0.0000 0.0000

AT. 100 C X -0.0000 0.0002 -0.0001 0.0001 0.0000 0.0000  
Y 0.0000 0.0000 -0.0000 0.0001 -0.0000 0.0000  
Z -0.0000 0.0002 -0.0001 -0.0002 0.0000 -0.0000

AT. 101 C X -0.0002 -0.0019 -0.0019 0.0001 0.0000 0.0001  
Y -0.0005 -0.0052 -0.0049 0.0003 0.0000 0.0001  
Z -0.0006 -0.0059 -0.0053 0.0005 0.0000 0.0000

AT. 102 C X 0.0002 -0.0019 0.0019 0.0001 0.0000 -0.0001  
Y 0.0005 -0.0052 0.0049 0.0003 0.0000 -0.0001  
Z 0.0006 -0.0059 0.0053 0.0005 0.0000 -0.0000

AT. 103 H X 0.0034 0.0365 0.0342 -0.0023 -0.0002 -0.0007  
Y 0.0084 0.0870 0.0819 -0.0058 -0.0004 -0.0016

Z 0.0002 0.0017 0.0017 -0.0002 -0.0000 -0.0001  
AT.104 H X -0.0034 0.0365 -0.0342 -0.0023 -0.0002 0.0007  
Y -0.0084 0.0870 -0.0819 -0.0058 -0.0004 0.0016  
Z -0.0002 0.0017 -0.0017 -0.0002 -0.0000 0.0001  
AT.105 H X -0.0015 -0.0163 -0.0147 0.0014 0.0001 0.0001  
Y -0.0024 -0.0257 -0.0234 0.0021 0.0002 0.0001  
Z 0.0062 0.0667 0.0601 -0.0054 -0.0004 -0.0002  
AT.106 H X 0.0015 -0.0163 0.0147 0.0014 0.0001 -0.0001  
Y 0.0024 -0.0257 0.0234 0.0021 0.0002 -0.0001  
Z -0.0062 0.0667 -0.0601 -0.0054 -0.0004 0.0002  
AT.107 C X -0.0000 -0.0000 0.0000 0.0011 0.0000 0.0000  
Y -0.0000 0.0000 0.0000 -0.0000 -0.0000 -0.0000  
Z -0.0000 -0.0001 0.0000 0.0012 0.0000 0.0001  
AT.108 C X 0.0000 -0.0000 -0.0000 0.0011 0.0000 -0.0000  
Y 0.0000 0.0000 -0.0000 -0.0000 -0.0000 0.0000  
Z 0.0000 -0.0001 -0.0000 0.0012 0.0000 -0.0001  
AT.109 H X 0.0000 0.0001 0.0001 -0.0002 -0.0000 -0.0001  
Y -0.0000 -0.0005 -0.0006 0.0029 0.0001 0.0005  
Z 0.0000 0.0002 0.0002 -0.0016 -0.0001 -0.0003  
AT.110 H X -0.0000 0.0001 -0.0001 -0.0002 -0.0000 0.0001  
Y 0.0000 -0.0005 0.0006 0.0029 0.0001 -0.0005  
Z -0.0000 0.0002 -0.0002 -0.0016 -0.0001 0.0003  
AT.111 H X 0.0001 0.0005 -0.0005 -0.0132 -0.0001 -0.0004  
Y 0.0000 -0.0001 -0.0003 -0.0025 -0.0000 -0.0001  
Z 0.0001 0.0003 -0.0006 -0.0123 -0.0000 -0.0004  
AT.112 H X -0.0001 0.0005 0.0005 -0.0132 -0.0001 0.0004  
Y -0.0000 -0.0001 0.0003 -0.0025 -0.0000 0.0001  
Z -0.0001 0.0003 0.0006 -0.0123 -0.0000 0.0004  
AT.113 C X 0.0000 0.0000 0.0000 -0.0000 0.0000 -0.0000  
Y 0.0000 0.0001 0.0001 0.0000 -0.0000 -0.0000  
Z 0.0000 0.0000 0.0001 0.0000 -0.0000 -0.0000  
AT.114 C X -0.0000 0.0000 -0.0000 -0.0000 0.0000 0.0000

Y -0.0000 0.0001 -0.0001 0.0000 -0.0000 0.0000  
Z -0.0000 0.0000 -0.0001 0.0000 -0.0000 0.0000  
AT. 115 C X 0.0002 0.0022 0.0032 -0.0020 0.0000 -0.0008  
Y 0.0001 0.0012 0.0017 -0.0009 -0.0000 -0.0004  
Z 0.0002 0.0030 0.0043 -0.0024 -0.0000 -0.0010  
AT. 116 C X -0.0002 0.0022 -0.0032 -0.0020 0.0000 0.0008  
Y -0.0001 0.0012 -0.0017 -0.0009 -0.0000 0.0004  
Z -0.0002 0.0030 -0.0043 -0.0024 -0.0000 0.0010  
AT. 117 H X -0.0022 -0.0299 -0.0435 0.0253 -0.0000 0.0102  
Y -0.0005 -0.0069 -0.0101 0.0060 -0.0000 0.0024  
Z -0.0021 -0.0291 -0.0423 0.0246 -0.0000 0.0099  
AT. 118 H X 0.0022 -0.0299 0.0435 0.0253 -0.0000 -0.0102  
Y 0.0005 -0.0069 0.0101 0.0060 -0.0000 -0.0024  
Z 0.0021 -0.0291 0.0423 0.0246 -0.0000 -0.0099  
AT. 119 H X 0.0003 0.0040 0.0056 -0.0027 -0.0000 -0.0013  
Y -0.0005 -0.0066 -0.0094 0.0045 0.0000 0.0022  
Z -0.0005 -0.0064 -0.0089 0.0042 0.0000 0.0020  
AT. 120 H X -0.0003 0.0040 -0.0056 -0.0027 -0.0000 0.0013  
Y 0.0005 -0.0066 0.0094 0.0045 0.0000 -0.0022  
Z 0.0005 -0.0064 0.0089 0.0042 0.0000 -0.0020  
AT. 121 C X 0.0000 -0.0000 -0.0002 0.0003 -0.0001 0.0001  
Y 0.0000 -0.0000 -0.0001 0.0003 -0.0000 0.0000  
Z -0.0000 -0.0000 0.0001 0.0000 0.0001 -0.0000  
AT. 122 C X -0.0000 -0.0000 0.0002 0.0003 -0.0001 -0.0001  
Y -0.0000 -0.0000 0.0001 0.0003 -0.0000 -0.0000  
Z 0.0000 -0.0000 -0.0001 0.0000 0.0001 0.0000  
AT. 123 H X -0.0000 -0.0000 -0.0000 0.0005 0.0000 -0.0000  
Y -0.0000 -0.0001 -0.0001 -0.0028 -0.0002 0.0002  
Z -0.0000 -0.0000 -0.0000 -0.0026 -0.0002 0.0001  
AT. 124 H X 0.0000 -0.0000 0.0000 0.0005 0.0000 0.0000  
Y 0.0000 -0.0001 0.0001 -0.0028 -0.0002 -0.0002  
Z 0.0000 -0.0000 0.0000 -0.0026 -0.0002 -0.0001

AT.125 H X -0.0003 0.0001 0.0017 -0.0035 0.0007 -0.0005  
Y -0.0001 -0.0000 0.0006 -0.0015 0.0003 -0.0002  
Z 0.0002 -0.0000 -0.0014 0.0027 -0.0006 0.0004

AT.126 H X 0.0003 0.0001 -0.0017 -0.0035 0.0007 0.0005  
Y 0.0001 -0.0000 -0.0006 -0.0015 0.0003 0.0002  
Z -0.0002 -0.0000 0.0014 0.0027 -0.0006 -0.0004

AT.127 C X 0.0000 0.0000 0.0000 -0.0000 -0.0000 -0.0000  
Y 0.0000 0.0000 0.0000 0.0002 -0.0000 -0.0000  
Z -0.0000 0.0000 0.0000 0.0000 -0.0000 -0.0000

AT.128 C X -0.0000 0.0000 -0.0000 -0.0000 -0.0000 0.0000  
Y -0.0000 0.0000 -0.0000 0.0002 -0.0000 0.0000  
Z 0.0000 0.0000 -0.0000 0.0000 -0.0000 0.0000

AT.129 C X 0.0000 0.0002 0.0001 0.0017 0.0000 -0.0000  
Y 0.0000 0.0002 0.0001 0.0015 -0.0000 -0.0000  
Z -0.0000 -0.0002 -0.0001 -0.0018 0.0000 0.0000

AT.130 C X -0.0000 0.0002 -0.0001 0.0017 0.0000 0.0000  
Y -0.0000 0.0002 -0.0001 0.0015 -0.0000 0.0000  
Z 0.0000 -0.0002 0.0001 -0.0018 0.0000 -0.0000

AT.131 H X -0.0003 -0.0022 -0.0012 -0.0220 0.0000 0.0003  
Y -0.0001 -0.0007 -0.0003 -0.0073 -0.0000 0.0001  
Z 0.0002 0.0016 0.0008 0.0160 -0.0000 -0.0002

AT.132 H X 0.0003 -0.0022 0.0012 -0.0220 0.0000 -0.0003  
Y 0.0001 -0.0007 0.0003 -0.0073 -0.0000 -0.0001  
Z -0.0002 0.0016 -0.0008 0.0160 -0.0000 0.0002

AT.133 H X 0.0000 0.0004 0.0003 0.0031 -0.0000 -0.0001  
Y -0.0001 -0.0012 -0.0011 -0.0103 0.0000 0.0004  
Z 0.0000 0.0007 0.0007 0.0060 -0.0000 -0.0002

AT.134 H X -0.0000 0.0004 -0.0003 0.0031 -0.0000 0.0001  
Y 0.0001 -0.0012 0.0011 -0.0103 0.0000 -0.0004  
Z -0.0000 0.0007 -0.0007 0.0060 -0.0000 0.0002

AT.135 C X -0.0000 0.0000 -0.0001 -0.0000 0.0000 0.0000  
Y 0.0001 0.0003 0.0006 0.0007 -0.0001 -0.0001



Z -0.0000 0.0001 0.0000 -0.0001 0.0000 -0.0000  
AT. 136 C X 0.0000 0.0000 0.0001 -0.0000 0.0000 -0.0000  
Y -0.0001 0.0003 -0.0006 0.0007 -0.0001 0.0001  
Z 0.0000 0.0001 -0.0000 -0.0001 0.0000 0.0000  
AT. 137 H X 0.0001 0.0003 0.0010 0.0016 -0.0002 -0.0002  
Y -0.0006 -0.0015 -0.0048 -0.0066 0.0007 0.0009  
Z 0.0004 0.0009 0.0029 0.0041 -0.0004 -0.0005  
AT. 138 H X -0.0001 0.0003 -0.0010 0.0016 -0.0002 0.0002  
Y 0.0006 -0.0015 0.0048 -0.0066 0.0007 -0.0009  
Z -0.0004 0.0009 -0.0029 0.0041 -0.0004 0.0005  
AT. 139 H X 0.0002 -0.0014 -0.0014 -0.0016 -0.0002 0.0004  
Y 0.0000 -0.0003 -0.0003 -0.0003 -0.0001 0.0001  
Z 0.0001 -0.0010 -0.0010 -0.0014 -0.0002 0.0003  
AT. 140 H X -0.0002 -0.0014 0.0014 -0.0016 -0.0002 -0.0004  
Y -0.0000 -0.0003 0.0003 -0.0003 -0.0001 -0.0001  
Z -0.0001 -0.0010 0.0010 -0.0014 -0.0002 -0.0003  
AT. 141 H X 0.0001 0.0006 0.0011 0.0007 -0.0001 -0.0002  
Y -0.0003 -0.0015 -0.0026 -0.0018 0.0003 0.0006  
Z -0.0003 -0.0014 -0.0025 -0.0017 0.0003 0.0006  
AT. 142 H X -0.0001 0.0006 -0.0011 0.0007 -0.0001 0.0002  
Y 0.0003 -0.0015 0.0026 -0.0018 0.0003 -0.0006  
Z 0.0003 -0.0014 0.0025 -0.0017 0.0003 -0.0006  
AT. 143 C X 0.0000 -0.0001 -0.0000 -0.0011 -0.0000 0.0000  
Y 0.0000 0.0008 0.0003 0.0058 0.0000 -0.0001  
Z -0.0000 -0.0001 -0.0002 -0.0003 -0.0000 0.0000  
AT. 144 C X -0.0000 -0.0001 0.0000 -0.0011 -0.0000 -0.0000  
Y -0.0000 0.0008 -0.0003 0.0058 0.0000 0.0001  
Z 0.0000 -0.0001 0.0002 -0.0003 -0.0000 -0.0000  
AT. 145 H X 0.0000 0.0008 0.0000 0.0071 0.0000 -0.0000  
Y -0.0001 -0.0030 -0.0002 -0.0258 -0.0001 0.0001  
Z -0.0001 -0.0029 -0.0002 -0.0251 -0.0001 0.0002  
AT. 146 H X -0.0000 0.0008 -0.0000 0.0071 0.0000 0.0000

Y 0.0001 -0.0030 0.0002 -0.0258 -0.0001 -0.0001  
Z 0.0001 -0.0029 0.0002 -0.0251 -0.0001 -0.0002  
AT. 147 H X -0.0001 -0.0011 -0.0009 -0.0062 -0.0000 0.0002  
Y -0.0000 -0.0003 -0.0003 -0.0015 -0.0000 0.0001  
Z 0.0001 0.0008 0.0006 0.0041 0.0000 -0.0001  
AT. 148 H X 0.0001 -0.0011 0.0009 -0.0062 -0.0000 -0.0002  
Y 0.0000 -0.0003 0.0003 -0.0015 -0.0000 -0.0001  
Z -0.0001 0.0008 -0.0006 0.0041 0.0000 0.0001  
AT. 149 H X 0.0001 0.0017 0.0009 0.0124 0.0000 -0.0002  
Y -0.0002 -0.0058 -0.0030 -0.0428 -0.0001 0.0007  
Z 0.0001 0.0034 0.0017 0.0249 0.0001 -0.0004  
AT. 150 H X -0.0001 0.0017 -0.0009 0.0124 0.0000 0.0002  
Y 0.0002 -0.0058 0.0030 -0.0428 -0.0001 -0.0007  
Z -0.0001 0.0034 -0.0017 0.0249 0.0001 0.0004  
AT. 151 C X -0.0000 -0.0001 -0.0001 -0.0002 0.0000 0.0000  
Y 0.0000 0.0001 0.0002 0.0008 -0.0000 -0.0000  
Z 0.0000 -0.0000 -0.0001 0.0001 -0.0000 0.0000  
AT. 152 C X 0.0000 -0.0001 0.0001 -0.0002 0.0000 -0.0000  
Y -0.0000 0.0001 -0.0002 0.0008 -0.0000 0.0000  
Z -0.0000 -0.0000 0.0001 0.0001 -0.0000 -0.0000  
AT. 153 H X 0.0000 0.0002 0.0004 0.0013 -0.0000 -0.0001  
Y -0.0001 -0.0009 -0.0016 -0.0057 0.0000 0.0003  
Z 0.0000 0.0005 0.0009 0.0035 -0.0000 -0.0002  
AT. 154 H X -0.0000 0.0002 -0.0004 0.0013 -0.0000 0.0001  
Y 0.0001 -0.0009 0.0016 -0.0057 0.0000 -0.0003  
Z -0.0000 0.0005 -0.0009 0.0035 -0.0000 0.0002  
AT. 155 H X 0.0000 0.0001 0.0001 0.0015 -0.0000 -0.0001  
Y -0.0001 -0.0004 -0.0005 -0.0039 0.0001 0.0002  
Z -0.0001 -0.0004 -0.0006 -0.0037 0.0001 0.0002  
AT. 156 H X -0.0000 0.0001 -0.0001 0.0015 -0.0000 0.0001  
Y 0.0001 -0.0004 0.0005 -0.0039 0.0001 -0.0002  
Z 0.0001 -0.0004 0.0006 -0.0037 0.0001 -0.0002

AT.157 O X 0.0000 -0.0000 0.0000 0.0000 0.0000 0.0000  
Y -0.0000 0.0000 -0.0000 -0.0000 -0.0001 -0.0000  
Z -0.0000 0.0000 -0.0000 -0.0000 -0.0000 -0.0000

AT.158 O X -0.0000 -0.0000 -0.0000 0.0000 0.0000 -0.0000  
Y 0.0000 0.0000 0.0000 -0.0000 -0.0001 0.0000  
Z 0.0000 0.0000 0.0000 -0.0000 -0.0000 0.0000

AT.159 O X -0.0000 -0.0000 0.0000 0.0000 -0.0000 0.0000  
Y -0.0000 0.0000 -0.0000 0.0000 0.0000 -0.0000  
Z -0.0000 -0.0000 0.0000 0.0000 -0.0000 0.0000

AT.160 O X 0.0000 -0.0000 -0.0000 0.0000 -0.0000 -0.0000  
Y 0.0000 0.0000 0.0000 0.0000 0.0000 0.0000  
Z 0.0000 -0.0000 -0.0000 0.0000 -0.0000 -0.0000

AT.161 H X -0.0000 -0.0000 -0.0000 -0.0001 -0.0001 0.0000  
Y 0.0001 -0.0000 0.0004 0.0006 0.0008 0.0002  
Z -0.0001 0.0001 0.0000 0.0003 0.0002 0.0001

AT.162 H X 0.0000 -0.0000 0.0000 -0.0001 -0.0001 -0.0000  
Y -0.0001 -0.0000 -0.0004 0.0006 0.0008 -0.0002  
Z 0.0001 0.0001 -0.0000 0.0003 0.0002 -0.0001

AT.163 H X -0.0000 0.0001 -0.0002 -0.0002 0.0002 -0.0001  
Y 0.0000 -0.0001 0.0001 0.0001 -0.0001 0.0001  
Z 0.0001 0.0002 -0.0005 -0.0007 0.0006 -0.0002

AT.164 H X 0.0000 0.0001 0.0002 -0.0002 0.0002 0.0001  
Y -0.0000 -0.0001 -0.0001 0.0001 -0.0001 -0.0001  
Z -0.0001 0.0002 0.0005 -0.0007 0.0006 0.0002

AT.165 O X -0.0000 0.0000 -0.0000 0.0000 0.0000 0.0000  
Y -0.0000 0.0000 -0.0000 0.0000 0.0000 0.0000  
Z -0.0000 0.0000 -0.0000 -0.0000 -0.0000 -0.0000

AT.166 O X 0.0000 0.0000 0.0000 0.0000 0.0000 -0.0000  
Y 0.0000 0.0000 0.0000 0.0000 0.0000 -0.0000  
Z 0.0000 0.0000 0.0000 -0.0000 -0.0000 0.0000

AT.167 H X 0.0001 -0.0006 0.0007 -0.0001 -0.0001 -0.0001  
Y 0.0000 -0.0001 0.0002 0.0000 -0.0000 -0.0000

Z 0.0001 -0.0004 0.0004 0.0001 -0.0000 -0.0000  
AT.168 H X -0.0001 -0.0006 -0.0007 -0.0001 -0.0001 0.0001  
Y -0.0000 -0.0001 -0.0002 0.0000 -0.0000 0.0000  
Z -0.0001 -0.0004 -0.0004 0.0001 -0.0000 0.0000  
AT.169 O X 0.0000 0.0000 -0.0000 0.0000 0.0000 0.0000  
Y -0.0000 -0.0000 0.0000 -0.0001 -0.0000 -0.0000  
Z 0.0000 0.0000 -0.0000 0.0000 -0.0000 0.0000  
AT.170 O X -0.0000 0.0000 0.0000 0.0000 0.0000 -0.0000  
Y 0.0000 -0.0000 -0.0000 -0.0001 -0.0000 0.0000  
Z -0.0000 0.0000 0.0000 0.0000 -0.0000 -0.0000  
AT.171 H X -0.0001 -0.0004 0.0003 -0.0004 -0.0000 -0.0001  
Y 0.0002 0.0008 -0.0005 0.0007 0.0000 0.0001  
Z -0.0002 -0.0003 0.0002 -0.0003 -0.0000 -0.0001  
AT.172 H X 0.0001 -0.0004 -0.0003 -0.0004 -0.0000 0.0001  
Y -0.0002 0.0008 0.0005 0.0007 0.0000 -0.0001  
Z 0.0002 -0.0003 -0.0002 -0.0003 -0.0000 0.0001

FREQ(CM\*\*-1) 3184.25 3184.54 3187.29 3187.45 3188.22 3188.74

AT. 1 I X 0.0000 0.0000 0.0000 0.0000 -0.0000 0.0000  
Y -0.0000 -0.0000 -0.0000 -0.0000 -0.0000 -0.0000  
Z -0.0000 -0.0000 -0.0000 -0.0000 -0.0000 -0.0000  
AT. 2 I X -0.0000 0.0000 0.0000 -0.0000 -0.0000 -0.0000  
Y 0.0000 -0.0000 -0.0000 0.0000 -0.0000 0.0000  
Z 0.0000 -0.0000 -0.0000 0.0000 -0.0000 0.0000  
AT. 3 I X 0.0000 0.0000 0.0000 0.0000 -0.0000 -0.0000  
Y -0.0000 0.0000 -0.0000 -0.0000 -0.0000 -0.0000  
Z -0.0000 -0.0000 -0.0000 -0.0000 0.0000 -0.0000  
AT. 4 I X -0.0000 0.0000 0.0000 -0.0000 -0.0000 0.0000  
Y 0.0000 0.0000 -0.0000 0.0000 -0.0000 0.0000  
Z 0.0000 -0.0000 -0.0000 0.0000 0.0000 0.0000  
AT. 5 O X 0.0001 0.0000 -0.0001 -0.0001 -0.0001 -0.0001

Y -0.0000 -0.0000 0.0000 0.0000 0.0000 0.0000  
Z 0.0000 0.0000 -0.0000 -0.0000 -0.0000 -0.0000  
AT. 6 O X -0.0001 0.0000 -0.0001 0.0001 -0.0001 0.0001  
Y 0.0000 -0.0000 0.0000 -0.0000 0.0000 -0.0000  
Z -0.0000 0.0000 -0.0000 0.0000 -0.0000 0.0000  
AT. 7 O X -0.0000 -0.0000 -0.0000 -0.0000 -0.0000 -0.0000  
Y -0.0000 -0.0000 -0.0000 -0.0000 0.0000 -0.0000  
Z 0.0000 0.0000 0.0000 0.0000 0.0000 0.0000  
AT. 8 O X 0.0000 -0.0000 -0.0000 0.0000 -0.0000 0.0000  
Y 0.0000 -0.0000 -0.0000 0.0000 0.0000 0.0000  
Z -0.0000 0.0000 0.0000 -0.0000 0.0000 -0.0000  
AT. 9 N X -0.0000 0.0000 0.0000 0.0000 0.0000 -0.0000  
Y 0.0000 0.0000 -0.0000 -0.0000 -0.0000 -0.0000  
Z -0.0000 -0.0000 0.0000 0.0000 0.0000 0.0000  
AT. 10 N X 0.0000 0.0000 0.0000 -0.0000 0.0000 0.0000  
Y -0.0000 0.0000 -0.0000 0.0000 -0.0000 0.0000  
Z 0.0000 -0.0000 0.0000 -0.0000 0.0000 -0.0000  
AT. 11 N X -0.0000 -0.0000 -0.0000 -0.0000 -0.0000 -0.0000  
Y 0.0000 0.0000 0.0000 0.0000 0.0000 0.0000  
Z 0.0000 0.0000 0.0000 0.0000 0.0000 -0.0000  
AT. 12 N X 0.0000 -0.0000 -0.0000 0.0000 -0.0000 0.0000  
Y -0.0000 0.0000 0.0000 -0.0000 0.0000 -0.0000  
Z -0.0000 0.0000 0.0000 -0.0000 0.0000 0.0000  
AT. 13 C X -0.0000 -0.0001 0.0001 0.0001 0.0001 0.0001  
Y 0.0000 0.0000 -0.0000 -0.0000 -0.0001 -0.0001  
Z 0.0001 0.0001 -0.0001 -0.0001 -0.0001 -0.0001  
AT. 14 C X 0.0000 -0.0001 0.0001 -0.0001 0.0001 -0.0001  
Y -0.0000 0.0000 -0.0000 0.0000 -0.0001 0.0001  
Z -0.0001 0.0001 -0.0001 0.0001 -0.0001 0.0001  
AT. 15 C X 0.0000 -0.0000 -0.0000 -0.0001 0.0000 -0.0002  
Y 0.0004 -0.0004 -0.0003 -0.0005 0.0000 -0.0004  
Z -0.0001 0.0002 0.0002 0.0003 -0.0000 0.0005

AT. 16 C X -0.0000 -0.0000 -0.0000 0.0001 0.0000 0.0002  
Y -0.0004 -0.0004 -0.0003 0.0005 0.0000 0.0004  
Z 0.0001 0.0002 0.0002 -0.0003 -0.0000 -0.0005

AT. 17 H X 0.0008 -0.0008 -0.0007 -0.0010 0.0000 -0.0006  
Y -0.0031 0.0028 0.0022 0.0033 -0.0001 0.0017  
Z -0.0024 0.0023 0.0018 0.0027 -0.0001 0.0016

AT. 18 H X -0.0008 -0.0008 -0.0007 0.0010 0.0000 0.0006  
Y 0.0031 0.0028 0.0022 -0.0033 -0.0001 -0.0017  
Z 0.0024 0.0023 0.0018 -0.0027 -0.0001 -0.0016

AT. 19 H X -0.0013 0.0014 0.0013 0.0021 -0.0002 0.0023  
Y -0.0013 0.0015 0.0014 0.0022 -0.0003 0.0025  
Z 0.0039 -0.0043 -0.0040 -0.0063 0.0007 -0.0069

AT. 20 H X 0.0013 0.0014 0.0013 -0.0021 -0.0002 -0.0023  
Y 0.0013 0.0015 0.0014 -0.0022 -0.0003 -0.0025  
Z -0.0039 -0.0043 -0.0040 0.0063 0.0007 0.0069

AT. 21 C X 0.0000 0.0000 0.0000 0.0000 0.0000 0.0000  
Y 0.0000 0.0000 0.0000 -0.0000 -0.0000 0.0000  
Z -0.0000 -0.0000 -0.0000 0.0000 0.0000 -0.0000

AT. 22 C X -0.0000 0.0000 0.0000 -0.0000 0.0000 -0.0000  
Y -0.0000 0.0000 0.0000 0.0000 -0.0000 -0.0000  
Z 0.0000 -0.0000 -0.0000 -0.0000 0.0000 0.0000

AT. 23 C X 0.0000 0.0001 0.0000 0.0000 -0.0000 0.0000  
Y -0.0013 -0.0014 -0.0005 -0.0006 -0.0004 -0.0007  
Z -0.0014 -0.0015 -0.0006 -0.0007 -0.0006 -0.0007

AT. 24 C X -0.0000 0.0001 0.0000 -0.0000 -0.0000 -0.0000  
Y 0.0013 -0.0014 -0.0005 0.0006 -0.0004 0.0007  
Z 0.0014 -0.0015 -0.0006 0.0007 -0.0006 0.0007

AT. 25 H X -0.0034 -0.0037 -0.0014 -0.0017 -0.0011 -0.0018  
Y 0.0227 0.0247 0.0097 0.0115 0.0077 0.0122  
Z 0.0018 0.0020 0.0008 0.0009 0.0006 0.0010

AT. 26 H X 0.0034 -0.0037 -0.0014 0.0017 -0.0011 0.0018  
Y -0.0227 0.0247 0.0097 -0.0115 0.0077 -0.0122

Z -0.0018 0.0020 0.0008 -0.0009 0.0006 -0.0010  
AT. 27 H X 0.0031 0.0032 0.0014 0.0016 0.0013 0.0015  
Y -0.0068 -0.0071 -0.0030 -0.0036 -0.0027 -0.0034  
Z 0.0135 0.0140 0.0060 0.0071 0.0055 0.0066  
AT. 28 H X -0.0031 0.0032 0.0014 -0.0016 0.0013 -0.0015  
Y 0.0068 -0.0071 -0.0030 0.0036 -0.0027 0.0034  
Z -0.0135 0.0140 0.0060 -0.0071 0.0055 -0.0066  
AT. 29 C X -0.0039 -0.0031 0.0031 0.0042 0.0037 0.0031  
Y 0.0008 0.0007 -0.0006 -0.0008 -0.0008 -0.0006  
Z 0.0058 0.0045 -0.0045 -0.0060 -0.0054 -0.0045  
AT. 30 C X 0.0039 -0.0031 0.0031 -0.0042 0.0037 -0.0031  
Y -0.0008 0.0007 -0.0006 0.0008 -0.0008 0.0006  
Z -0.0058 0.0045 -0.0045 0.0060 -0.0054 0.0045  
AT. 31 H X 0.0069 0.0051 -0.0054 -0.0072 -0.0061 -0.0053  
Y 0.0166 0.0123 -0.0129 -0.0171 -0.0146 -0.0124  
Z -0.0104 -0.0077 0.0082 0.0109 0.0092 0.0079  
AT. 32 H X -0.0069 0.0051 -0.0054 0.0072 -0.0061 0.0053  
Y -0.0166 0.0123 -0.0129 0.0171 -0.0146 0.0124  
Z 0.0104 -0.0077 0.0082 -0.0109 0.0092 -0.0079  
AT. 33 H X 0.0398 0.0312 -0.0311 -0.0418 -0.0378 -0.0311  
Y -0.0248 -0.0194 0.0196 0.0264 0.0239 0.0197  
Z -0.0584 -0.0457 0.0459 0.0619 0.0559 0.0459  
AT. 34 H X -0.0398 0.0312 -0.0311 0.0418 -0.0378 0.0311  
Y 0.0248 -0.0194 0.0196 -0.0264 0.0239 -0.0197  
Z 0.0584 -0.0457 0.0459 -0.0619 0.0559 -0.0459  
AT. 35 C X -0.0001 -0.0000 0.0000 0.0000 0.0000 0.0000  
Y -0.0001 -0.0001 -0.0000 -0.0000 0.0000 -0.0000  
Z -0.0001 -0.0001 -0.0001 -0.0001 -0.0001 -0.0001  
AT. 36 C X 0.0001 -0.0000 0.0000 -0.0000 0.0000 -0.0000  
Y 0.0001 -0.0001 -0.0000 0.0000 0.0000 0.0000  
Z 0.0001 -0.0001 -0.0001 0.0001 -0.0001 0.0001  
AT. 37 C X 0.0030 0.0032 0.0014 0.0017 0.0012 0.0012

Y -0.0040 -0.0042 -0.0019 -0.0023 -0.0017 -0.0017  
Z -0.0076 -0.0081 -0.0036 -0.0044 -0.0032 -0.0033  
AT. 38 C X -0.0030 0.0032 0.0014 -0.0017 0.0012 -0.0012  
Y 0.0040 -0.0042 -0.0019 0.0023 -0.0017 0.0017  
Z 0.0076 -0.0081 -0.0036 0.0044 -0.0032 0.0033  
AT. 39 H X -0.0511 -0.0545 -0.0241 -0.0301 -0.0215 -0.0219  
Y 0.0330 0.0352 0.0153 0.0191 0.0136 0.0139  
Z 0.0758 0.0810 0.0356 0.0445 0.0317 0.0324  
AT. 40 H X 0.0511 -0.0545 -0.0241 0.0301 -0.0215 0.0219  
Y -0.0330 0.0352 0.0153 -0.0191 0.0136 -0.0139  
Z -0.0758 0.0810 0.0356 -0.0445 0.0317 -0.0324  
AT. 41 H X 0.0174 0.0185 0.0079 0.0099 0.0070 0.0075  
Y 0.0129 0.0138 0.0060 0.0075 0.0053 0.0056  
Z 0.0159 0.0169 0.0074 0.0092 0.0065 0.0070  
AT. 42 H X -0.0174 0.0185 0.0079 -0.0099 0.0070 -0.0075  
Y -0.0129 0.0138 0.0060 -0.0075 0.0053 -0.0056  
Z -0.0159 0.0169 0.0074 -0.0092 0.0065 -0.0070  
AT. 43 C X -0.0003 -0.0005 -0.0001 -0.0001 -0.0000 0.0001  
Y 0.0001 0.0002 0.0000 0.0001 -0.0000 -0.0001  
Z -0.0001 -0.0003 -0.0000 -0.0001 0.0000 0.0001  
AT. 44 C X 0.0003 -0.0005 -0.0001 0.0001 -0.0000 -0.0001  
Y -0.0001 0.0002 0.0000 -0.0001 -0.0000 0.0001  
Z 0.0001 -0.0003 -0.0000 0.0001 0.0000 -0.0001  
AT. 45 H X 0.0003 0.0008 0.0001 0.0002 -0.0000 -0.0002  
Y 0.0006 0.0012 0.0001 0.0003 0.0000 -0.0003  
Z 0.0005 0.0011 0.0002 0.0003 0.0000 -0.0002  
AT. 46 H X -0.0003 0.0008 0.0001 -0.0002 -0.0000 0.0002  
Y -0.0006 0.0012 0.0001 -0.0003 0.0000 0.0003  
Z -0.0005 0.0011 0.0002 -0.0003 0.0000 0.0002  
AT. 47 H X 0.0021 0.0046 0.0002 0.0012 -0.0003 -0.0017  
Y -0.0015 -0.0034 -0.0002 -0.0009 0.0002 0.0013  
Z 0.0015 0.0033 0.0002 0.0009 -0.0002 -0.0012



AT. 48 H X -0.0021 0.0046 0.0002 -0.0012 -0.0003 0.0017  
Y 0.0015 -0.0034 -0.0002 0.0009 0.0002 -0.0013  
Z -0.0015 0.0033 0.0002 -0.0009 -0.0002 0.0012

AT. 49 C X -0.0000 -0.0000 -0.0000 -0.0000 -0.0000 0.0000  
Y -0.0000 -0.0000 0.0000 0.0000 0.0000 -0.0000  
Z -0.0000 -0.0000 -0.0000 -0.0000 -0.0000 0.0000

AT. 50 C X 0.0000 -0.0000 -0.0000 0.0000 -0.0000 -0.0000  
Y 0.0000 -0.0000 0.0000 -0.0000 0.0000 0.0000  
Z 0.0000 -0.0000 -0.0000 0.0000 -0.0000 -0.0000

AT. 51 C X 0.0005 -0.0003 -0.0001 -0.0000 -0.0003 0.0007  
Y -0.0005 0.0004 0.0001 0.0000 0.0002 -0.0008  
Z 0.0003 -0.0003 -0.0000 0.0000 -0.0002 0.0007

AT. 52 C X -0.0005 -0.0003 -0.0001 0.0000 -0.0003 -0.0007  
Y 0.0005 0.0004 0.0001 -0.0000 0.0002 0.0008  
Z -0.0003 -0.0003 -0.0000 -0.0000 -0.0002 -0.0007

AT. 53 H X -0.0058 0.0044 0.0006 -0.0003 0.0030 -0.0105  
Y 0.0041 -0.0029 -0.0004 0.0002 -0.0021 0.0072  
Z -0.0034 0.0026 0.0004 -0.0001 0.0019 -0.0061

AT. 54 H X 0.0058 0.0044 0.0006 0.0003 0.0030 0.0105  
Y -0.0041 -0.0029 -0.0004 -0.0002 -0.0021 -0.0072  
Z 0.0034 0.0026 0.0004 0.0001 0.0019 0.0061

AT. 55 H X 0.0009 -0.0008 -0.0001 0.0000 -0.0003 0.0015  
Y 0.0013 -0.0015 -0.0000 0.0002 -0.0003 0.0026  
Z -0.0010 0.0011 0.0001 -0.0001 0.0002 -0.0020

AT. 56 H X -0.0009 -0.0008 -0.0001 -0.0000 -0.0003 -0.0015  
Y -0.0013 -0.0015 -0.0000 -0.0002 -0.0003 -0.0026  
Z 0.0010 0.0011 0.0001 0.0001 0.0002 0.0020

AT. 57 C X -0.0002 -0.0001 0.0001 0.0001 0.0001 0.0001  
Y -0.0004 -0.0003 -0.0001 -0.0002 -0.0003 -0.0002  
Z -0.0002 -0.0003 -0.0004 -0.0006 -0.0005 -0.0004

AT. 58 C X 0.0002 -0.0001 0.0001 -0.0001 0.0001 -0.0001  
Y 0.0004 -0.0003 -0.0001 0.0002 -0.0003 0.0002

Z 0.0002 -0.0003 -0.0004 0.0006 -0.0005 0.0004  
AT. 59 H X 0.0008 0.0003 -0.0005 -0.0005 -0.0002 -0.0005  
Y 0.0020 0.0009 -0.0010 -0.0012 -0.0005 -0.0011  
Z -0.0013 -0.0005 0.0007 0.0007 0.0002 0.0007  
AT. 60 H X -0.0008 0.0003 -0.0005 0.0005 -0.0002 0.0005  
Y -0.0020 0.0009 -0.0010 0.0012 -0.0005 0.0011  
Z 0.0013 -0.0005 0.0007 -0.0007 0.0002 -0.0007  
AT. 61 H X -0.0010 -0.0013 -0.0025 -0.0035 -0.0034 -0.0024  
Y 0.0007 0.0009 0.0016 0.0022 0.0020 0.0015  
Z 0.0012 0.0015 0.0028 0.0040 0.0039 0.0028  
AT. 62 H X 0.0010 -0.0013 -0.0025 0.0035 -0.0034 0.0024  
Y -0.0007 0.0009 0.0016 -0.0022 0.0020 -0.0015  
Z -0.0012 0.0015 0.0028 -0.0040 0.0039 -0.0028  
AT. 63 H X 0.0028 0.0023 0.0014 0.0021 0.0022 0.0018  
Y 0.0024 0.0019 0.0013 0.0020 0.0020 0.0017  
Z 0.0028 0.0023 0.0015 0.0023 0.0024 0.0019  
AT. 64 H X -0.0028 0.0023 0.0014 -0.0021 0.0022 -0.0018  
Y -0.0024 0.0019 0.0013 -0.0020 0.0020 -0.0017  
Z -0.0028 0.0023 0.0015 -0.0023 0.0024 -0.0019  
AT. 65 C X 0.0000 -0.0000 0.0000 -0.0000 -0.0000 0.0001  
Y -0.0000 -0.0000 -0.0000 0.0000 -0.0000 -0.0000  
Z 0.0000 -0.0000 0.0000 -0.0000 -0.0000 0.0000  
AT. 66 C X -0.0000 -0.0000 0.0000 0.0000 -0.0000 -0.0001  
Y 0.0000 -0.0000 -0.0000 -0.0000 -0.0000 0.0000  
Z -0.0000 -0.0000 0.0000 0.0000 -0.0000 -0.0000  
AT. 67 H X 0.0001 0.0001 -0.0000 0.0000 0.0002 0.0000  
Y 0.0001 0.0002 -0.0000 0.0001 0.0002 0.0000  
Z 0.0001 0.0002 -0.0000 0.0001 0.0002 0.0000  
AT. 68 H X -0.0001 0.0001 -0.0000 -0.0000 0.0002 -0.0000  
Y -0.0001 0.0002 -0.0000 -0.0001 0.0002 -0.0000  
Z -0.0001 0.0002 -0.0000 -0.0001 0.0002 -0.0000  
AT. 69 H X -0.0002 0.0002 -0.0001 0.0004 0.0003 -0.0007

Y 0.0002 -0.0001 0.0000 -0.0003 -0.0002 0.0005  
Z -0.0001 0.0001 -0.0000 0.0002 0.0001 -0.0003  
AT. 70 H X 0.0002 0.0002 -0.0001 -0.0004 0.0003 0.0007  
Y -0.0002 -0.0001 0.0000 0.0003 -0.0002 -0.0005  
Z 0.0001 0.0001 -0.0000 -0.0002 0.0001 0.0003  
AT. 71 H X 0.0001 0.0001 0.0001 -0.0001 0.0001 -0.0000  
Y 0.0001 0.0002 0.0002 -0.0002 0.0001 -0.0001  
Z -0.0001 -0.0001 -0.0001 0.0001 -0.0001 0.0000  
AT. 72 H X -0.0001 0.0001 0.0001 0.0001 0.0001 0.0000  
Y -0.0001 0.0002 0.0002 0.0002 0.0001 0.0001  
Z 0.0001 -0.0001 -0.0001 -0.0001 -0.0001 -0.0000  
AT. 73 C X -0.0002 -0.0001 -0.0000 -0.0000 -0.0000 -0.0000  
Y -0.0002 -0.0002 0.0000 0.0000 0.0000 0.0000  
Z -0.0000 0.0000 0.0001 0.0001 0.0001 0.0000  
AT. 74 C X 0.0002 -0.0001 -0.0000 0.0000 -0.0000 0.0000  
Y 0.0002 -0.0002 0.0000 -0.0000 0.0000 -0.0000  
Z 0.0000 0.0000 0.0001 -0.0001 0.0001 -0.0000  
AT. 75 H X 0.0006 0.0005 0.0000 0.0000 0.0001 -0.0001  
Y 0.0011 0.0009 0.0001 0.0001 0.0002 -0.0001  
Z -0.0008 -0.0006 0.0000 0.0001 -0.0001 0.0001  
AT. 76 H X -0.0006 0.0005 0.0000 -0.0000 0.0001 0.0001  
Y -0.0011 0.0009 0.0001 -0.0001 0.0002 0.0001  
Z 0.0008 -0.0006 0.0000 -0.0001 -0.0001 -0.0001  
AT. 77 H X 0.0010 0.0007 -0.0000 0.0000 0.0000 0.0001  
Y 0.0010 0.0007 0.0000 0.0001 0.0001 0.0001  
Z 0.0012 0.0009 0.0001 0.0002 0.0002 0.0002  
AT. 78 H X -0.0010 0.0007 -0.0000 -0.0000 0.0000 -0.0001  
Y -0.0010 0.0007 0.0000 -0.0001 0.0001 -0.0001  
Z -0.0012 0.0009 0.0001 -0.0002 0.0002 -0.0002  
AT. 79 I X 0.0000 -0.0000 0.0000 -0.0000 0.0000 0.0000  
Y -0.0000 -0.0000 0.0000 0.0000 0.0000 0.0000  
Z 0.0000 0.0000 0.0000 -0.0000 -0.0000 -0.0000

AT. 80 I X -0.0000 -0.0000 0.0000 0.0000 0.0000 -0.0000  
Y 0.0000 -0.0000 0.0000 -0.0000 0.0000 -0.0000  
Z -0.0000 0.0000 0.0000 0.0000 -0.0000 0.0000

AT. 81 I X -0.0000 0.0000 0.0000 0.0000 -0.0000 -0.0000  
Y -0.0000 0.0000 0.0000 -0.0000 -0.0000 0.0000  
Z 0.0000 0.0000 -0.0000 0.0000 0.0000 -0.0000

AT. 82 I X 0.0000 0.0000 0.0000 -0.0000 -0.0000 0.0000  
Y 0.0000 0.0000 0.0000 0.0000 -0.0000 -0.0000  
Z -0.0000 0.0000 -0.0000 -0.0000 0.0000 0.0000

AT. 83 O X 0.0000 -0.0000 0.0000 0.0000 0.0000 -0.0000  
Y 0.0000 -0.0000 -0.0000 0.0000 0.0000 -0.0000  
Z -0.0000 -0.0000 0.0000 -0.0000 0.0000 0.0000

AT. 84 O X -0.0000 -0.0000 0.0000 -0.0000 0.0000 0.0000  
Y -0.0000 -0.0000 -0.0000 -0.0000 0.0000 0.0000  
Z 0.0000 -0.0000 0.0000 0.0000 0.0000 -0.0000

AT. 85 O X -0.0000 0.0000 0.0000 -0.0000 -0.0000 0.0000  
Y -0.0000 0.0000 -0.0000 0.0000 -0.0000 -0.0000  
Z 0.0000 -0.0000 0.0000 -0.0000 0.0000 0.0000

AT. 86 O X 0.0000 0.0000 0.0000 0.0000 -0.0000 -0.0000  
Y 0.0000 0.0000 -0.0000 -0.0000 -0.0000 0.0000  
Z -0.0000 -0.0000 0.0000 0.0000 0.0000 -0.0000

AT. 87 N X -0.0000 0.0000 0.0000 -0.0000 -0.0000 -0.0000  
Y -0.0000 0.0000 0.0000 -0.0000 -0.0000 0.0000  
Z -0.0000 -0.0000 0.0000 0.0000 -0.0000 -0.0000

AT. 88 N X 0.0000 0.0000 0.0000 0.0000 -0.0000 0.0000  
Y 0.0000 0.0000 0.0000 0.0000 -0.0000 -0.0000  
Z 0.0000 -0.0000 0.0000 -0.0000 -0.0000 0.0000

AT. 89 N X -0.0000 -0.0000 0.0000 -0.0000 -0.0000 0.0000  
Y -0.0000 0.0000 0.0000 -0.0000 -0.0000 -0.0000  
Z 0.0000 -0.0000 0.0000 -0.0000 0.0000 0.0000

AT. 90 N X 0.0000 -0.0000 0.0000 0.0000 -0.0000 -0.0000  
Y 0.0000 0.0000 0.0000 0.0000 -0.0000 0.0000

Z -0.0000 -0.0000 0.0000 0.0000 0.0000 -0.0000  
AT. 91 C X 0.0000 0.0000 -0.0000 -0.0000 0.0000 0.0001  
Y 0.0000 -0.0000 -0.0000 -0.0000 0.0000 0.0000  
Z -0.0000 0.0001 0.0000 -0.0000 -0.0001 0.0000  
AT. 92 C X -0.0000 0.0000 -0.0000 0.0000 0.0000 -0.0001  
Y -0.0000 -0.0000 -0.0000 0.0000 0.0000 -0.0000  
Z 0.0000 0.0001 0.0000 0.0000 -0.0001 -0.0000  
AT. 93 C X -0.0000 0.0002 0.0000 0.0000 -0.0003 -0.0005  
Y -0.0001 0.0009 0.0001 0.0001 -0.0010 -0.0018  
Z 0.0000 -0.0004 0.0000 -0.0000 0.0004 0.0008  
AT. 94 C X 0.0000 0.0002 0.0000 -0.0000 -0.0003 0.0005  
Y 0.0001 0.0009 0.0001 -0.0001 -0.0010 0.0018  
Z -0.0000 -0.0004 0.0000 0.0000 0.0004 -0.0008  
AT. 95 H X 0.0004 -0.0057 -0.0008 -0.0007 0.0065 0.0114  
Y 0.0007 -0.0088 -0.0012 -0.0011 0.0092 0.0169  
Z 0.0004 -0.0051 -0.0006 -0.0007 0.0050 0.0100  
AT. 96 H X -0.0004 -0.0057 -0.0008 0.0007 0.0065 -0.0114  
Y -0.0007 -0.0088 -0.0012 0.0011 0.0092 -0.0169  
Z -0.0004 -0.0051 -0.0006 0.0007 0.0050 -0.0100  
AT. 97 H X -0.0002 0.0029 0.0003 0.0003 -0.0032 -0.0058  
Y 0.0001 -0.0022 -0.0001 -0.0002 0.0023 0.0044  
Z -0.0007 0.0094 0.0008 0.0008 -0.0103 -0.0191  
AT. 98 H X 0.0002 0.0029 0.0003 -0.0003 -0.0032 0.0058  
Y -0.0001 -0.0022 -0.0001 0.0002 0.0023 -0.0044  
Z 0.0007 0.0094 0.0008 -0.0008 -0.0103 0.0191  
AT. 99 C X 0.0000 -0.0000 -0.0000 0.0000 0.0000 0.0000  
Y 0.0000 -0.0000 0.0000 -0.0000 0.0000 0.0001  
Z -0.0000 0.0000 0.0000 -0.0000 -0.0000 -0.0000  
AT. 100 C X -0.0000 -0.0000 -0.0000 -0.0000 0.0000 -0.0000  
Y -0.0000 -0.0000 0.0000 0.0000 0.0000 -0.0001  
Z 0.0000 0.0000 0.0000 0.0000 -0.0000 0.0000  
AT. 101 C X 0.0000 0.0001 -0.0004 0.0004 0.0002 -0.0006

Y 0.0000 0.0002 -0.0013 0.0011 0.0007 -0.0018  
Z 0.0000 0.0003 -0.0021 0.0018 0.0012 -0.0024  
AT. 102 C X -0.0000 0.0001 -0.0004 -0.0004 0.0002 0.0006  
Y -0.0000 0.0002 -0.0013 -0.0011 0.0007 0.0018  
Z -0.0000 0.0003 -0.0021 -0.0018 0.0012 0.0024  
AT. 103 H X -0.0001 -0.0018 0.0105 -0.0089 -0.0058 0.0136  
Y -0.0003 -0.0041 0.0248 -0.0210 -0.0138 0.0324  
Z -0.0000 -0.0000 0.0000 -0.0000 -0.0000 0.0002  
AT. 104 H X 0.0001 -0.0018 0.0105 0.0089 -0.0058 -0.0136  
Y 0.0003 -0.0041 0.0248 0.0210 -0.0138 -0.0324  
Z 0.0000 -0.0000 0.0000 0.0000 -0.0000 -0.0002  
AT. 105 H X 0.0001 0.0008 -0.0056 0.0047 0.0032 -0.0065  
Y 0.0001 0.0013 -0.0089 0.0075 0.0050 -0.0104  
Z -0.0003 -0.0035 0.0236 -0.0197 -0.0133 0.0271  
AT. 106 H X -0.0001 0.0008 -0.0056 -0.0047 0.0032 0.0065  
Y -0.0001 0.0013 -0.0089 -0.0075 0.0050 0.0104  
Z 0.0003 -0.0035 0.0236 0.0197 -0.0133 -0.0271  
AT. 107 C X -0.0001 -0.0005 0.0014 -0.0009 0.0003 0.0026  
Y 0.0000 0.0001 -0.0002 0.0002 -0.0000 -0.0004  
Z -0.0001 -0.0006 0.0014 -0.0009 0.0003 0.0027  
AT. 108 C X 0.0001 -0.0005 0.0014 0.0009 0.0003 -0.0026  
Y -0.0000 0.0001 -0.0002 -0.0002 -0.0000 0.0004  
Z 0.0001 -0.0006 0.0014 0.0009 0.0003 -0.0027  
AT. 109 H X 0.0001 0.0003 -0.0009 0.0006 -0.0002 -0.0018  
Y -0.0003 -0.0020 0.0060 -0.0043 0.0008 0.0110  
Z 0.0002 0.0011 -0.0032 0.0023 -0.0005 -0.0060  
AT. 110 H X -0.0001 0.0003 -0.0009 -0.0006 -0.0002 0.0018  
Y 0.0003 -0.0020 0.0060 0.0043 0.0008 -0.0110  
Z -0.0002 0.0011 -0.0032 -0.0023 -0.0005 0.0060  
AT. 111 H X 0.0011 0.0062 -0.0151 0.0098 -0.0038 -0.0292  
Y 0.0002 0.0012 -0.0027 0.0017 -0.0009 -0.0055  
Z 0.0010 0.0057 -0.0135 0.0088 -0.0036 -0.0264

AT.112 H X -0.0011 0.0062 -0.0151 -0.0098 -0.0038 0.0292  
Y -0.0002 0.0012 -0.0027 -0.0017 -0.0009 0.0055  
Z -0.0010 0.0057 -0.0135 -0.0088 -0.0036 0.0264

AT.113 C X -0.0000 0.0000 -0.0000 0.0000 0.0000 -0.0000  
Y 0.0000 0.0000 -0.0001 0.0001 0.0001 -0.0001  
Z -0.0000 0.0000 -0.0001 0.0001 0.0001 -0.0000

AT.114 C X 0.0000 0.0000 -0.0000 -0.0000 0.0000 0.0000  
Y -0.0000 0.0000 -0.0001 -0.0001 0.0001 0.0001  
Z 0.0000 0.0000 -0.0001 -0.0001 0.0001 0.0000

AT.115 C X 0.0000 0.0009 -0.0049 0.0038 0.0024 -0.0040  
Y 0.0000 0.0005 -0.0024 0.0019 0.0012 -0.0019  
Z 0.0000 0.0012 -0.0061 0.0047 0.0031 -0.0050

AT.116 C X -0.0000 0.0009 -0.0049 -0.0038 0.0024 0.0040  
Y -0.0000 0.0005 -0.0024 -0.0019 0.0012 0.0019  
Z -0.0000 0.0012 -0.0061 -0.0047 0.0031 0.0050

AT.117 H X -0.0002 -0.0123 0.0646 -0.0499 -0.0325 0.0528  
Y -0.0000 -0.0029 0.0153 -0.0118 -0.0077 0.0125  
Z -0.0002 -0.0120 0.0631 -0.0487 -0.0318 0.0515

AT.118 H X 0.0002 -0.0123 0.0646 0.0499 -0.0325 -0.0528  
Y 0.0000 -0.0029 0.0153 0.0118 -0.0077 -0.0125  
Z 0.0002 -0.0120 0.0631 0.0487 -0.0318 -0.0515

AT.119 H X 0.0000 0.0014 -0.0076 0.0058 0.0039 -0.0062  
Y -0.0000 -0.0023 0.0126 -0.0097 -0.0066 0.0102  
Z -0.0000 -0.0021 0.0119 -0.0091 -0.0062 0.0096

AT.120 H X -0.0000 0.0014 -0.0076 -0.0058 0.0039 0.0062  
Y 0.0000 -0.0023 0.0126 0.0097 -0.0066 -0.0102  
Z 0.0000 -0.0021 0.0119 0.0091 -0.0062 -0.0096

AT.121 C X -0.0000 0.0000 -0.0002 0.0002 -0.0008 -0.0007  
Y 0.0000 -0.0000 -0.0000 0.0000 -0.0000 -0.0001  
Z 0.0000 -0.0001 0.0002 -0.0003 0.0009 0.0007

AT.122 C X 0.0000 0.0000 -0.0002 -0.0002 -0.0008 0.0007  
Y -0.0000 -0.0000 -0.0000 -0.0000 -0.0000 0.0001

Z -0.0000 -0.0001 0.0002 0.0003 0.0009 -0.0007  
AT. 123 H X 0.0000 -0.0001 0.0001 -0.0001 0.0004 0.0003  
Y -0.0001 0.0007 -0.0006 0.0007 -0.0033 -0.0019  
Z -0.0001 0.0006 -0.0006 0.0007 -0.0029 -0.0018  
AT. 124 H X -0.0000 -0.0001 0.0001 0.0001 0.0004 -0.0003  
Y 0.0001 0.0007 -0.0006 -0.0007 -0.0033 0.0019  
Z 0.0001 0.0006 -0.0006 -0.0007 -0.0029 0.0018  
AT. 125 H X 0.0001 -0.0005 0.0028 -0.0029 0.0089 0.0083  
Y 0.0001 -0.0002 0.0012 -0.0012 0.0034 0.0034  
Z -0.0001 0.0004 -0.0023 0.0023 -0.0072 -0.0068  
AT. 126 H X -0.0001 -0.0005 0.0028 0.0029 0.0089 -0.0083  
Y -0.0001 -0.0002 0.0012 0.0012 0.0034 -0.0034  
Z 0.0001 0.0004 -0.0023 -0.0023 -0.0072 0.0068  
AT. 127 C X 0.0000 -0.0000 -0.0000 0.0000 0.0000 0.0000  
Y 0.0000 -0.0000 -0.0000 0.0000 0.0001 -0.0000  
Z -0.0000 0.0000 0.0000 -0.0000 -0.0000 0.0000  
AT. 128 C X -0.0000 -0.0000 -0.0000 -0.0000 0.0000 -0.0000  
Y -0.0000 -0.0000 -0.0000 -0.0000 0.0001 0.0000  
Z 0.0000 0.0000 0.0000 0.0000 -0.0000 -0.0000  
AT. 129 C X 0.0001 -0.0007 -0.0012 0.0008 0.0047 -0.0012  
Y 0.0000 -0.0005 -0.0008 0.0006 0.0032 -0.0007  
Z -0.0001 0.0007 0.0011 -0.0008 -0.0045 0.0011  
AT. 130 C X -0.0001 -0.0007 -0.0012 -0.0008 0.0047 0.0012  
Y -0.0000 -0.0005 -0.0008 -0.0006 0.0032 0.0007  
Z 0.0001 0.0007 0.0011 0.0008 -0.0045 -0.0011  
AT. 131 H X -0.0008 0.0088 0.0147 -0.0102 -0.0601 0.0149  
Y -0.0003 0.0030 0.0051 -0.0035 -0.0205 0.0052  
Z 0.0006 -0.0065 -0.0110 0.0076 0.0448 -0.0111  
AT. 132 H X 0.0008 0.0088 0.0147 0.0102 -0.0601 -0.0149  
Y 0.0003 0.0030 0.0051 0.0035 -0.0205 -0.0052  
Z -0.0006 -0.0065 -0.0110 -0.0076 0.0448 0.0111  
AT. 133 H X 0.0000 -0.0010 -0.0014 0.0011 0.0059 -0.0013



Y -0.0001 0.0032 0.0043 -0.0032 -0.0178 0.0037  
Z 0.0000 -0.0019 -0.0026 0.0020 0.0108 -0.0021  
AT. 134 H X -0.0000 -0.0010 -0.0014 -0.0011 0.0059 0.0013  
Y 0.0001 0.0032 0.0043 0.0032 -0.0178 -0.0037  
Z -0.0000 -0.0019 -0.0026 -0.0020 0.0108 0.0021  
AT. 135 C X -0.0000 0.0000 -0.0001 0.0001 0.0001 -0.0001  
Y -0.0000 -0.0001 -0.0003 0.0002 0.0003 -0.0001  
Z -0.0000 0.0000 -0.0002 0.0002 0.0002 -0.0002  
AT. 136 C X 0.0000 0.0000 -0.0001 -0.0001 0.0001 0.0001  
Y 0.0000 -0.0001 -0.0003 -0.0002 0.0003 0.0001  
Z 0.0000 0.0000 -0.0002 -0.0002 0.0002 0.0002  
AT. 137 H X 0.0000 -0.0003 -0.0001 0.0000 0.0003 0.0003  
Y -0.0001 0.0010 0.0011 -0.0004 -0.0014 -0.0008  
Z 0.0001 -0.0006 -0.0006 0.0002 0.0008 0.0005  
AT. 138 H X -0.0000 -0.0003 -0.0001 -0.0000 0.0003 -0.0003  
Y 0.0001 0.0010 0.0011 0.0004 -0.0014 0.0008  
Z -0.0001 -0.0006 -0.0006 -0.0002 0.0008 -0.0005  
AT. 139 H X 0.0003 0.0001 0.0018 -0.0015 -0.0017 0.0013  
Y 0.0000 -0.0000 0.0005 -0.0004 -0.0004 0.0004  
Z 0.0002 0.0001 0.0013 -0.0010 -0.0012 0.0009  
AT. 140 H X -0.0003 0.0001 0.0018 0.0015 -0.0017 -0.0013  
Y -0.0000 -0.0000 0.0005 0.0004 -0.0004 -0.0004  
Z -0.0002 0.0001 0.0013 0.0010 -0.0012 -0.0009  
AT. 141 H X -0.0001 -0.0001 -0.0008 0.0006 0.0007 -0.0007  
Y 0.0001 0.0002 0.0018 -0.0014 -0.0016 0.0015  
Z 0.0001 0.0002 0.0017 -0.0013 -0.0015 0.0014  
AT. 142 H X 0.0001 -0.0001 -0.0008 -0.0006 0.0007 0.0007  
Y -0.0001 0.0002 0.0018 0.0014 -0.0016 -0.0015  
Z -0.0001 0.0002 0.0017 0.0013 -0.0015 -0.0014  
AT. 143 C X 0.0000 0.0001 0.0000 0.0000 -0.0001 -0.0000  
Y 0.0000 -0.0005 -0.0002 0.0001 0.0008 -0.0000  
Z -0.0000 0.0000 0.0001 -0.0000 -0.0002 -0.0000

AT. 144 C X -0.0000 0.0001 0.0000 -0.0000 -0.0001 0.0000  
Y -0.0000 -0.0005 -0.0002 -0.0001 0.0008 0.0000  
Z 0.0000 0.0000 0.0001 0.0000 -0.0002 0.0000

AT. 145 H X -0.0000 -0.0007 -0.0002 0.0000 0.0008 -0.0002  
Y -0.0000 0.0025 0.0007 -0.0001 -0.0032 0.0005  
Z -0.0000 0.0024 0.0007 -0.0001 -0.0031 0.0005

AT. 146 H X 0.0000 -0.0007 -0.0002 -0.0000 0.0008 0.0002  
Y 0.0000 0.0025 0.0007 0.0001 -0.0032 -0.0005  
Z 0.0000 0.0024 0.0007 0.0001 -0.0031 -0.0005

AT. 147 H X -0.0000 0.0006 0.0008 -0.0005 -0.0021 0.0006  
Y -0.0000 0.0002 0.0003 -0.0002 -0.0007 0.0002  
Z 0.0000 -0.0004 -0.0005 0.0003 0.0013 -0.0004

AT. 148 H X 0.0000 0.0006 0.0008 0.0005 -0.0021 -0.0006  
Y 0.0000 0.0002 0.0003 0.0002 -0.0007 -0.0002  
Z -0.0000 -0.0004 -0.0005 -0.0003 0.0013 0.0004

AT. 149 H X 0.0000 -0.0011 -0.0005 0.0002 0.0018 0.0000  
Y -0.0000 0.0039 0.0017 -0.0007 -0.0061 -0.0002  
Z 0.0000 -0.0023 -0.0010 0.0004 0.0036 0.0001

AT. 150 H X -0.0000 -0.0011 -0.0005 -0.0002 0.0018 -0.0000  
Y 0.0000 0.0039 0.0017 0.0007 -0.0061 0.0002  
Z -0.0000 -0.0023 -0.0010 -0.0004 0.0036 -0.0001

AT. 151 C X 0.0000 0.0000 0.0001 -0.0001 -0.0001 0.0000  
Y -0.0000 -0.0001 -0.0001 0.0001 0.0003 -0.0001  
Z 0.0000 -0.0000 0.0000 -0.0000 0.0000 -0.0000

AT. 152 C X -0.0000 0.0000 0.0001 0.0001 -0.0001 -0.0000  
Y 0.0000 -0.0001 -0.0001 -0.0001 0.0003 0.0001  
Z -0.0000 -0.0000 0.0000 0.0000 0.0000 0.0000

AT. 153 H X -0.0000 -0.0002 -0.0003 0.0002 0.0004 -0.0000  
Y 0.0000 0.0009 0.0010 -0.0007 -0.0018 0.0000  
Z -0.0000 -0.0005 -0.0006 0.0004 0.0011 -0.0001

AT. 154 H X 0.0000 -0.0002 -0.0003 -0.0002 0.0004 0.0000  
Y -0.0000 0.0009 0.0010 0.0007 -0.0018 -0.0000

Z 0.0000 -0.0005 -0.0006 -0.0004 0.0011 0.0001  
AT.155 H X -0.0000 -0.0002 -0.0001 0.0001 0.0005 -0.0001  
Y -0.0000 0.0006 0.0006 -0.0003 -0.0013 0.0004  
Z 0.0000 0.0006 0.0006 -0.0003 -0.0013 0.0004  
AT.156 H X 0.0000 -0.0002 -0.0001 -0.0001 0.0005 0.0001  
Y 0.0000 0.0006 0.0006 0.0003 -0.0013 -0.0004  
Z -0.0000 0.0006 0.0006 0.0003 -0.0013 -0.0004  
AT.157 O X -0.0000 -0.0000 0.0000 0.0000 0.0000 0.0000  
Y 0.0000 0.0000 -0.0000 -0.0000 -0.0000 -0.0000  
Z 0.0000 0.0000 -0.0000 -0.0000 -0.0000 -0.0000  
AT.158 O X 0.0000 -0.0000 0.0000 -0.0000 0.0000 -0.0000  
Y -0.0000 0.0000 -0.0000 0.0000 -0.0000 0.0000  
Z -0.0000 0.0000 -0.0000 0.0000 -0.0000 0.0000  
AT.159 O X 0.0000 -0.0000 -0.0000 -0.0000 0.0000 0.0000  
Y -0.0000 0.0000 0.0000 0.0000 0.0000 -0.0000  
Z 0.0000 -0.0000 -0.0000 -0.0000 0.0000 0.0000  
AT.160 O X -0.0000 -0.0000 -0.0000 0.0000 0.0000 -0.0000  
Y 0.0000 0.0000 0.0000 -0.0000 0.0000 0.0000  
Z -0.0000 -0.0000 -0.0000 0.0000 0.0000 -0.0000  
AT.161 H X 0.0003 0.0002 -0.0002 -0.0002 -0.0003 -0.0002  
Y -0.0005 -0.0003 0.0002 0.0003 0.0003 0.0007  
Z -0.0001 -0.0001 -0.0001 -0.0001 0.0000 -0.0000  
AT.162 H X -0.0003 0.0002 -0.0002 0.0002 -0.0003 0.0002  
Y 0.0005 -0.0003 0.0002 -0.0003 0.0003 -0.0007  
Z 0.0001 -0.0001 -0.0001 0.0001 0.0000 0.0000  
AT.163 H X -0.0001 0.0000 0.0001 0.0000 -0.0001 -0.0001  
Y 0.0000 -0.0000 -0.0000 -0.0000 0.0000 0.0001  
Z -0.0002 0.0001 0.0001 0.0001 -0.0002 -0.0004  
AT.164 H X 0.0001 0.0000 0.0001 -0.0000 -0.0001 0.0001  
Y -0.0000 -0.0000 -0.0000 0.0000 0.0000 -0.0001  
Z 0.0002 0.0001 0.0001 -0.0001 -0.0002 0.0004  
AT.165 O X -0.0000 0.0000 0.0000 -0.0000 -0.0000 -0.0000

Y -0.0000 0.0000 0.0000 -0.0000 -0.0000 -0.0000  
Z 0.0000 0.0000 0.0000 0.0000 -0.0000 -0.0000  
AT.166 O X 0.0000 0.0000 0.0000 0.0000 -0.0000 0.0000

Y 0.0000 0.0000 0.0000 0.0000 -0.0000 0.0000  
Z -0.0000 0.0000 0.0000 -0.0000 -0.0000 0.0000

AT.167 H X 0.0001 -0.0000 -0.0003 0.0001 0.0003 0.0003  
Y 0.0000 -0.0000 -0.0001 0.0001 0.0002 0.0001  
Z 0.0000 -0.0001 -0.0001 -0.0001 0.0002 0.0003

AT.168 H X -0.0001 -0.0000 -0.0003 -0.0001 0.0003 -0.0003  
Y -0.0000 -0.0000 -0.0001 -0.0001 0.0002 -0.0001  
Z -0.0000 -0.0001 -0.0001 0.0001 0.0002 -0.0003

AT.169 O X 0.0000 -0.0000 0.0000 0.0000 -0.0000 0.0000  
Y 0.0000 0.0000 0.0000 0.0000 -0.0000 -0.0000  
Z 0.0000 -0.0000 -0.0000 0.0000 0.0000 0.0000

AT.170 O X -0.0000 -0.0000 0.0000 -0.0000 -0.0000 -0.0000  
Y -0.0000 0.0000 0.0000 -0.0000 -0.0000 0.0000  
Z -0.0000 -0.0000 -0.0000 -0.0000 0.0000 -0.0000

AT.171 H X -0.0000 0.0001 -0.0000 -0.0000 -0.0000 -0.0001  
Y -0.0000 -0.0001 0.0000 -0.0000 0.0001 0.0003  
Z -0.0000 0.0001 0.0000 0.0000 -0.0000 -0.0002

AT.172 H X 0.0000 0.0001 -0.0000 0.0000 -0.0000 0.0001  
Y 0.0000 -0.0001 0.0000 0.0000 0.0001 -0.0003  
Z 0.0000 0.0001 0.0000 -0.0000 -0.0000 0.0002

FREQ(CM\*\*-1) 3189.23 3191.14 3192.78 3192.78 3194.23 3194.35

AT. 1 I X 0.0000 -0.0000 0.0000 -0.0000 -0.0000 0.0000  
Y 0.0000 -0.0000 0.0000 0.0000 -0.0000 -0.0000  
Z -0.0000 -0.0000 -0.0000 -0.0000 -0.0000 0.0000

AT. 2 I X -0.0000 -0.0000 -0.0000 -0.0000 -0.0000 -0.0000  
Y -0.0000 -0.0000 -0.0000 0.0000 -0.0000 0.0000  
Z 0.0000 -0.0000 0.0000 -0.0000 -0.0000 -0.0000

AT. 3 I X 0.0000 0.0000 -0.0000 -0.0000 0.0000 -0.0000  
Y 0.0000 -0.0000 0.0000 0.0000 0.0000 -0.0000  
Z 0.0000 0.0000 -0.0000 0.0000 0.0000 0.0000

AT. 4 I X -0.0000 0.0000 0.0000 -0.0000 0.0000 0.0000  
Y -0.0000 -0.0000 -0.0000 0.0000 0.0000 0.0000  
Z -0.0000 0.0000 0.0000 0.0000 0.0000 -0.0000

AT. 5 O X -0.0000 -0.0000 -0.0000 -0.0000 0.0000 0.0000  
Y 0.0000 0.0000 0.0000 0.0000 -0.0000 -0.0000  
Z 0.0000 -0.0000 0.0000 0.0000 0.0000 0.0000

AT. 6 O X 0.0000 -0.0000 0.0000 -0.0000 0.0000 -0.0000  
Y -0.0000 0.0000 -0.0000 0.0000 -0.0000 0.0000  
Z -0.0000 -0.0000 -0.0000 0.0000 0.0000 -0.0000

AT. 7 O X -0.0000 -0.0000 0.0000 -0.0000 0.0000 0.0000  
Y 0.0000 0.0000 -0.0000 0.0000 -0.0000 -0.0000  
Z 0.0000 0.0000 0.0000 0.0000 -0.0000 -0.0000

AT. 8 O X 0.0000 -0.0000 -0.0000 -0.0000 0.0000 -0.0000  
Y -0.0000 0.0000 0.0000 0.0000 -0.0000 0.0000  
Z -0.0000 0.0000 -0.0000 0.0000 -0.0000 0.0000

AT. 9 N X -0.0000 0.0000 -0.0000 0.0000 0.0000 0.0000  
Y -0.0000 -0.0000 -0.0000 -0.0000 -0.0000 -0.0000  
Z -0.0000 0.0000 0.0000 0.0000 0.0000 -0.0000

AT. 10 N X 0.0000 0.0000 0.0000 0.0000 0.0000 -0.0000  
Y 0.0000 -0.0000 0.0000 -0.0000 -0.0000 0.0000  
Z 0.0000 0.0000 -0.0000 0.0000 0.0000 0.0000

AT. 11 N X 0.0000 -0.0000 -0.0000 -0.0000 -0.0000 0.0000  
Y 0.0000 0.0000 -0.0000 0.0000 -0.0000 -0.0000  
Z -0.0000 -0.0000 0.0000 0.0000 0.0000 0.0000

AT. 12 N X -0.0000 -0.0000 0.0000 -0.0000 -0.0000 -0.0000  
Y -0.0000 0.0000 0.0000 0.0000 -0.0000 0.0000  
Z 0.0000 -0.0000 -0.0000 0.0000 0.0000 -0.0000

AT. 13 C X 0.0000 0.0001 0.0000 0.0001 0.0001 0.0000  
Y 0.0000 -0.0001 -0.0000 -0.0000 -0.0001 -0.0000

Z 0.0000 -0.0001 -0.0001 -0.0000 -0.0000 0.0000  
AT. 14 C X -0.0000 0.0001 -0.0000 0.0001 0.0001 -0.0000  
Y -0.0000 -0.0001 0.0000 -0.0000 -0.0001 0.0000  
Z -0.0000 -0.0001 0.0001 -0.0000 -0.0000 -0.0000  
AT. 15 C X 0.0000 0.0003 -0.0001 0.0003 0.0009 0.0005  
Y -0.0000 0.0015 -0.0002 0.0015 0.0042 0.0025  
Z -0.0000 -0.0011 0.0002 -0.0011 -0.0032 -0.0019  
AT. 16 C X -0.0000 0.0003 0.0001 0.0003 0.0009 -0.0005  
Y 0.0000 0.0015 0.0002 0.0015 0.0042 -0.0025  
Z 0.0000 -0.0011 -0.0002 -0.0011 -0.0032 0.0019  
AT. 17 H X -0.0000 0.0029 -0.0004 0.0029 0.0083 0.0049  
Y 0.0001 -0.0100 0.0012 -0.0099 -0.0285 -0.0169  
Z 0.0001 -0.0083 0.0010 -0.0083 -0.0237 -0.0140  
AT. 18 H X 0.0000 0.0029 0.0004 0.0029 0.0083 -0.0049  
Y -0.0001 -0.0100 -0.0012 -0.0099 -0.0285 0.0169  
Z -0.0001 -0.0083 -0.0010 -0.0083 -0.0237 0.0140  
AT. 19 H X 0.0000 -0.0069 0.0011 -0.0068 -0.0195 -0.0116  
Y 0.0000 -0.0074 0.0012 -0.0073 -0.0210 -0.0125  
Z -0.0001 0.0210 -0.0034 0.0207 0.0593 0.0353  
AT. 20 H X -0.0000 -0.0069 -0.0011 -0.0068 -0.0195 0.0116  
Y -0.0000 -0.0074 -0.0012 -0.0073 -0.0210 0.0125  
Z 0.0001 0.0210 0.0034 0.0207 0.0593 -0.0353  
AT. 21 C X 0.0000 0.0000 -0.0000 -0.0000 -0.0000 -0.0000  
Y -0.0000 -0.0000 0.0000 -0.0000 0.0000 0.0000  
Z 0.0000 0.0000 -0.0000 -0.0000 -0.0000 -0.0000  
AT. 22 C X -0.0000 0.0000 0.0000 -0.0000 -0.0000 0.0000  
Y 0.0000 -0.0000 -0.0000 -0.0000 0.0000 -0.0000  
Z -0.0000 0.0000 0.0000 -0.0000 -0.0000 0.0000  
AT. 23 C X 0.0000 -0.0000 0.0000 -0.0000 0.0000 -0.0000  
Y -0.0000 0.0000 -0.0001 0.0000 0.0001 -0.0000  
Z -0.0000 -0.0002 -0.0001 -0.0001 0.0001 -0.0001  
AT. 24 C X -0.0000 -0.0000 -0.0000 -0.0000 0.0000 0.0000

Y 0.0000 0.0000 0.0001 0.0000 0.0001 0.0000  
Z 0.0000 -0.0002 0.0001 -0.0001 0.0001 0.0001  
AT. 25 H X -0.0001 -0.0001 -0.0003 0.0000 0.0002 -0.0001  
Y 0.0004 0.0010 0.0022 -0.0001 -0.0013 0.0007  
Z 0.0000 0.0000 0.0002 -0.0001 -0.0002 0.0001  
AT. 26 H X 0.0001 -0.0001 0.0003 0.0000 0.0002 0.0001  
Y -0.0004 0.0010 -0.0022 -0.0001 -0.0013 -0.0007  
Z -0.0000 0.0000 -0.0002 -0.0001 -0.0002 -0.0001  
AT. 27 H X 0.0001 0.0005 0.0002 0.0002 -0.0002 0.0002  
Y -0.0001 -0.0011 -0.0005 -0.0003 0.0005 -0.0004  
Z 0.0002 0.0023 0.0010 0.0007 -0.0009 0.0008  
AT. 28 H X -0.0001 0.0005 -0.0002 0.0002 -0.0002 -0.0002  
Y 0.0001 -0.0011 0.0005 -0.0003 0.0005 0.0004  
Z -0.0002 0.0023 -0.0010 0.0007 -0.0009 -0.0008  
AT. 29 C X 0.0000 0.0019 0.0005 0.0008 0.0003 -0.0000  
Y 0.0000 -0.0005 -0.0001 -0.0002 -0.0001 0.0000  
Z -0.0000 -0.0027 -0.0007 -0.0012 -0.0003 0.0001  
AT. 30 C X -0.0000 0.0019 -0.0005 0.0008 0.0003 0.0000  
Y -0.0000 -0.0005 0.0001 -0.0002 -0.0001 -0.0000  
Z 0.0000 -0.0027 0.0007 -0.0012 -0.0003 -0.0001  
AT. 31 H X -0.0001 -0.0027 -0.0009 -0.0012 -0.0004 0.0001  
Y -0.0001 -0.0064 -0.0021 -0.0028 -0.0009 0.0001  
Z 0.0001 0.0040 0.0013 0.0018 0.0006 -0.0001  
AT. 32 H X 0.0001 -0.0027 0.0009 -0.0012 -0.0004 -0.0001  
Y 0.0001 -0.0064 0.0021 -0.0028 -0.0009 -0.0001  
Z -0.0001 0.0040 -0.0013 0.0018 0.0006 0.0001  
AT. 33 H X -0.0000 -0.0195 -0.0052 -0.0086 -0.0024 0.0004  
Y 0.0000 0.0123 0.0033 0.0054 0.0015 -0.0003  
Z 0.0000 0.0287 0.0077 0.0127 0.0036 -0.0005  
AT. 34 H X 0.0000 -0.0195 0.0052 -0.0086 -0.0024 -0.0004  
Y -0.0000 0.0123 -0.0033 0.0054 0.0015 0.0003  
Z -0.0000 0.0287 -0.0077 0.0127 0.0036 0.0005

AT. 35 C X -0.0000 0.0000 0.0000 0.0000 0.0000 0.0000  
Y -0.0000 0.0000 0.0000 0.0000 0.0000 0.0000  
Z -0.0000 -0.0000 -0.0000 -0.0000 -0.0000 -0.0000

AT. 36 C X 0.0000 0.0000 -0.0000 0.0000 0.0000 -0.0000  
Y 0.0000 0.0000 -0.0000 0.0000 0.0000 -0.0000  
Z 0.0000 -0.0000 0.0000 -0.0000 -0.0000 0.0000

AT. 37 C X 0.0000 0.0004 0.0001 0.0001 0.0000 -0.0000  
Y -0.0000 -0.0005 -0.0002 -0.0002 -0.0000 0.0000  
Z -0.0001 -0.0010 -0.0004 -0.0004 -0.0000 0.0000

AT. 38 C X -0.0000 0.0004 -0.0001 0.0001 0.0000 0.0000  
Y 0.0000 -0.0005 0.0002 -0.0002 -0.0000 -0.0000  
Z 0.0001 -0.0010 0.0004 -0.0004 -0.0000 -0.0000

AT. 39 H X -0.0005 -0.0066 -0.0026 -0.0024 -0.0002 0.0002  
Y 0.0003 0.0041 0.0017 0.0015 0.0001 -0.0002  
Z 0.0008 0.0097 0.0039 0.0036 0.0003 -0.0004

AT. 40 H X 0.0005 -0.0066 0.0026 -0.0024 -0.0002 -0.0002  
Y -0.0003 0.0041 -0.0017 0.0015 0.0001 0.0002  
Z -0.0008 0.0097 -0.0039 0.0036 0.0003 0.0004

AT. 41 H X 0.0002 0.0020 0.0010 0.0008 0.0001 -0.0001  
Y 0.0001 0.0016 0.0007 0.0006 0.0000 -0.0001  
Z 0.0002 0.0019 0.0009 0.0007 0.0001 -0.0001

AT. 42 H X -0.0002 0.0020 -0.0010 0.0008 0.0001 0.0001  
Y -0.0001 0.0016 -0.0007 0.0006 0.0000 0.0001  
Z -0.0002 0.0019 -0.0009 0.0007 0.0001 0.0001

AT. 43 C X -0.0000 0.0001 0.0001 -0.0001 -0.0004 -0.0003  
Y 0.0000 -0.0000 -0.0000 0.0000 0.0002 0.0001  
Z -0.0000 0.0000 0.0000 -0.0001 -0.0004 -0.0002

AT. 44 C X 0.0000 0.0001 -0.0001 -0.0001 -0.0004 0.0003  
Y -0.0000 -0.0000 0.0000 0.0000 0.0002 -0.0001  
Z 0.0000 0.0000 -0.0000 -0.0001 -0.0004 0.0002

AT. 45 H X 0.0000 -0.0001 -0.0001 0.0002 0.0008 0.0005  
Y 0.0001 -0.0001 -0.0001 0.0002 0.0011 0.0007



Z 0.0001 -0.0001 -0.0001 0.0002 0.0012 0.0008  
AT. 46 H X -0.0000 -0.0001 0.0001 0.0002 0.0008 -0.0005  
Y -0.0001 -0.0001 0.0001 0.0002 0.0011 -0.0007  
Z -0.0001 -0.0001 0.0001 0.0002 0.0012 -0.0008  
AT. 47 H X 0.0003 -0.0006 -0.0007 0.0006 0.0044 0.0027  
Y -0.0002 0.0005 0.0005 -0.0005 -0.0034 -0.0021  
Z 0.0002 -0.0004 -0.0005 0.0005 0.0032 0.0020  
AT. 48 H X -0.0003 -0.0006 0.0007 0.0006 0.0044 -0.0027  
Y 0.0002 0.0005 -0.0005 -0.0005 -0.0034 0.0021  
Z -0.0002 -0.0004 0.0005 0.0005 0.0032 -0.0020  
AT. 49 C X -0.0000 0.0000 0.0000 -0.0000 -0.0000 -0.0000  
Y 0.0000 0.0000 -0.0000 0.0000 0.0001 0.0000  
Z -0.0000 -0.0000 0.0000 -0.0000 -0.0000 -0.0000  
AT. 50 C X 0.0000 0.0000 -0.0000 -0.0000 -0.0000 0.0000  
Y -0.0000 0.0000 0.0000 0.0000 0.0001 -0.0000  
Z 0.0000 -0.0000 -0.0000 -0.0000 -0.0000 0.0000  
AT. 51 C X -0.0001 -0.0012 0.0002 -0.0011 -0.0028 -0.0016  
Y 0.0001 0.0011 -0.0002 0.0010 0.0028 0.0016  
Z -0.0000 -0.0008 0.0002 -0.0008 -0.0022 -0.0013  
AT. 52 C X 0.0001 -0.0012 -0.0002 -0.0011 -0.0028 0.0016  
Y -0.0001 0.0011 0.0002 0.0010 0.0028 -0.0016  
Z 0.0000 -0.0008 -0.0002 -0.0008 -0.0022 0.0013  
AT. 53 H X 0.0007 0.0147 -0.0030 0.0138 0.0372 0.0216  
Y -0.0005 -0.0102 0.0021 -0.0095 -0.0256 -0.0149  
Z 0.0004 0.0087 -0.0018 0.0081 0.0218 0.0127  
AT. 54 H X -0.0007 0.0147 0.0030 0.0138 0.0372 -0.0216  
Y 0.0005 -0.0102 -0.0021 -0.0095 -0.0256 0.0149  
Z -0.0004 0.0087 0.0018 0.0081 0.0218 -0.0127  
AT. 55 H X -0.0001 -0.0017 0.0003 -0.0018 -0.0050 -0.0028  
Y -0.0002 -0.0026 0.0005 -0.0030 -0.0082 -0.0046  
Z 0.0002 0.0020 -0.0003 0.0023 0.0062 0.0035  
AT. 56 H X 0.0001 -0.0017 -0.0003 -0.0018 -0.0050 0.0028

Y 0.0002 -0.0026 -0.0005 -0.0030 -0.0082 0.0046  
Z -0.0002 0.0020 0.0003 0.0023 0.0062 -0.0035  
AT. 57 C X 0.0000 0.0000 0.0000 0.0000 0.0001 0.0000  
Y 0.0000 -0.0003 -0.0000 -0.0001 0.0000 -0.0000  
Z -0.0000 -0.0004 -0.0001 -0.0002 -0.0001 -0.0000  
AT. 58 C X -0.0000 0.0000 -0.0000 0.0000 0.0001 -0.0000  
Y -0.0000 -0.0003 0.0000 -0.0001 0.0000 0.0000  
Z 0.0000 -0.0004 0.0001 -0.0002 -0.0001 0.0000  
AT. 59 H X -0.0001 0.0002 -0.0002 -0.0000 -0.0003 0.0000  
Y -0.0002 0.0004 -0.0004 -0.0000 -0.0006 0.0000  
Z 0.0001 -0.0003 0.0003 -0.0000 0.0004 -0.0000  
AT. 60 H X 0.0001 0.0002 0.0002 -0.0000 -0.0003 -0.0000  
Y 0.0002 0.0004 0.0004 -0.0000 -0.0006 -0.0000  
Z -0.0001 -0.0003 -0.0003 -0.0000 0.0004 0.0000  
AT. 61 H X -0.0000 -0.0024 -0.0005 -0.0014 -0.0009 -0.0003  
Y 0.0000 0.0015 0.0003 0.0008 0.0006 0.0002  
Z 0.0000 0.0030 0.0006 0.0016 0.0012 0.0004  
AT. 62 H X 0.0000 -0.0024 0.0005 -0.0014 -0.0009 0.0003  
Y -0.0000 0.0015 -0.0003 0.0008 0.0006 -0.0002  
Z -0.0000 0.0030 -0.0006 0.0016 0.0012 -0.0004  
AT. 63 H X -0.0000 0.0016 0.0003 0.0007 -0.0001 -0.0002  
Y -0.0000 0.0015 0.0003 0.0006 -0.0001 -0.0002  
Z -0.0001 0.0017 0.0003 0.0007 -0.0001 -0.0002  
AT. 64 H X 0.0000 0.0016 -0.0003 0.0007 -0.0001 0.0002  
Y 0.0000 0.0015 -0.0003 0.0006 -0.0001 0.0002  
Z 0.0001 0.0017 -0.0003 0.0007 -0.0001 0.0002  
AT. 65 C X -0.0000 -0.0001 0.0000 -0.0001 -0.0001 -0.0001  
Y -0.0000 -0.0000 -0.0000 0.0000 0.0001 0.0001  
Z -0.0000 -0.0001 0.0000 -0.0000 -0.0001 -0.0001  
AT. 66 C X 0.0000 -0.0001 -0.0000 -0.0001 -0.0001 0.0001  
Y 0.0000 -0.0000 0.0000 0.0000 0.0001 -0.0001  
Z 0.0000 -0.0001 -0.0000 -0.0000 -0.0001 0.0001

AT. 67 H X 0.0001 0.0005 -0.0000 0.0002 0.0002 0.0001  
Y 0.0001 0.0005 -0.0000 0.0002 0.0001 0.0001  
Z 0.0001 0.0006 -0.0001 0.0003 0.0002 0.0001

AT. 68 H X -0.0001 0.0005 0.0000 0.0002 0.0002 -0.0001  
Y -0.0001 0.0005 0.0000 0.0002 0.0001 -0.0001  
Z -0.0001 0.0006 0.0001 0.0003 0.0002 -0.0001

AT. 69 H X 0.0001 0.0007 -0.0003 0.0005 0.0013 0.0009  
Y -0.0001 -0.0005 0.0002 -0.0004 -0.0011 -0.0007  
Z 0.0000 0.0003 -0.0001 0.0002 0.0006 0.0004

AT. 70 H X -0.0001 0.0007 0.0003 0.0005 0.0013 -0.0009  
Y 0.0001 -0.0005 -0.0002 -0.0004 -0.0011 0.0007  
Z -0.0000 0.0003 0.0001 0.0002 0.0006 -0.0004

AT. 71 H X 0.0000 0.0000 -0.0000 -0.0000 -0.0004 -0.0001  
Y 0.0000 0.0001 -0.0001 -0.0000 -0.0006 -0.0001  
Z -0.0000 -0.0001 0.0001 0.0000 0.0004 0.0001

AT. 72 H X -0.0000 0.0000 0.0000 -0.0000 -0.0004 0.0001  
Y -0.0000 0.0001 0.0001 -0.0000 -0.0006 0.0001  
Z 0.0000 -0.0001 -0.0001 0.0000 0.0004 -0.0001

AT. 73 C X 0.0000 -0.0000 -0.0000 -0.0000 0.0001 0.0000  
Y 0.0000 -0.0000 0.0000 -0.0000 0.0000 -0.0000  
Z 0.0000 0.0000 0.0000 0.0000 0.0000 0.0000

AT. 74 C X -0.0000 -0.0000 0.0000 -0.0000 0.0001 -0.0000  
Y -0.0000 -0.0000 -0.0000 -0.0000 0.0000 0.0000  
Z -0.0000 0.0000 -0.0000 0.0000 0.0000 -0.0000

AT. 75 H X -0.0000 0.0002 -0.0000 0.0001 -0.0001 0.0000  
Y -0.0000 0.0003 -0.0001 0.0001 -0.0003 0.0000  
Z 0.0000 -0.0002 0.0000 -0.0001 0.0003 0.0000

AT. 76 H X 0.0000 0.0002 0.0000 0.0001 -0.0001 -0.0000  
Y 0.0000 0.0003 0.0001 0.0001 -0.0003 -0.0000  
Z -0.0000 -0.0002 -0.0000 -0.0001 0.0003 -0.0000

AT. 77 H X -0.0000 0.0001 0.0000 -0.0000 -0.0003 -0.0001  
Y -0.0000 0.0002 0.0000 0.0000 -0.0003 -0.0001

Z -0.0000 0.0002 0.0000 0.0000 -0.0003 -0.0001  
AT. 78 H X 0.0000 0.0001 -0.0000 -0.0000 -0.0003 0.0001  
Y 0.0000 0.0002 -0.0000 0.0000 -0.0003 0.0001  
Z 0.0000 0.0002 -0.0000 0.0000 -0.0003 0.0001  
AT. 79 I X -0.0000 -0.0000 0.0000 0.0000 -0.0000 -0.0000  
Y 0.0000 0.0000 0.0000 0.0000 0.0000 -0.0000  
Z 0.0000 0.0000 -0.0000 -0.0000 0.0000 0.0000  
AT. 80 I X 0.0000 -0.0000 -0.0000 0.0000 -0.0000 0.0000  
Y -0.0000 0.0000 -0.0000 0.0000 0.0000 0.0000  
Z -0.0000 0.0000 0.0000 -0.0000 0.0000 -0.0000  
AT. 81 I X 0.0000 0.0000 -0.0000 -0.0000 -0.0000 -0.0000  
Y -0.0000 -0.0000 0.0000 0.0000 -0.0000 -0.0000  
Z 0.0000 0.0000 0.0000 -0.0000 0.0000 0.0000  
AT. 82 I X -0.0000 0.0000 0.0000 -0.0000 -0.0000 0.0000  
Y 0.0000 -0.0000 -0.0000 0.0000 -0.0000 0.0000  
Z -0.0000 0.0000 -0.0000 -0.0000 0.0000 -0.0000  
AT. 83 O X 0.0000 0.0000 0.0001 0.0001 -0.0000 -0.0000  
Y 0.0000 0.0000 0.0000 0.0000 -0.0000 -0.0000  
Z -0.0000 0.0000 -0.0001 -0.0001 0.0000 0.0000  
AT. 84 O X -0.0000 0.0000 -0.0001 0.0001 -0.0000 0.0000  
Y -0.0000 0.0000 -0.0000 0.0000 -0.0000 0.0000  
Z 0.0000 0.0000 0.0001 -0.0001 0.0000 -0.0000  
AT. 85 O X -0.0000 -0.0001 0.0000 -0.0000 0.0001 0.0001  
Y 0.0000 -0.0000 -0.0000 -0.0000 -0.0000 -0.0000  
Z -0.0000 -0.0000 0.0000 -0.0000 0.0000 0.0000  
AT. 86 O X 0.0000 -0.0001 -0.0000 -0.0000 0.0001 -0.0001  
Y -0.0000 -0.0000 0.0000 -0.0000 -0.0000 0.0000  
Z 0.0000 -0.0000 -0.0000 -0.0000 0.0000 -0.0000  
AT. 87 N X 0.0000 0.0000 -0.0000 -0.0000 0.0000 0.0000  
Y 0.0000 0.0000 -0.0000 -0.0000 0.0000 0.0000  
Z 0.0000 0.0000 -0.0000 0.0000 0.0000 0.0000  
AT. 88 N X -0.0000 0.0000 0.0000 -0.0000 0.0000 -0.0000

Y -0.0000 0.0000 0.0000 -0.0000 0.0000 -0.0000  
Z -0.0000 0.0000 0.0000 0.0000 0.0000 -0.0000  
AT. 89 N X -0.0000 -0.0000 0.0000 0.0000 -0.0000 -0.0000  
Y 0.0000 -0.0000 0.0000 -0.0000 0.0000 0.0000  
Z 0.0000 0.0000 -0.0000 0.0000 -0.0000 -0.0000  
AT. 90 N X 0.0000 -0.0000 -0.0000 0.0000 -0.0000 0.0000  
Y -0.0000 -0.0000 -0.0000 -0.0000 0.0000 -0.0000  
Z -0.0000 0.0000 0.0000 0.0000 -0.0000 0.0000  
AT. 91 C X -0.0001 0.0000 -0.0001 -0.0002 -0.0000 -0.0000  
Y -0.0000 0.0000 -0.0000 -0.0000 -0.0000 -0.0000  
Z 0.0000 -0.0001 -0.0001 -0.0002 0.0000 0.0000  
AT. 92 C X 0.0001 0.0000 0.0001 -0.0002 -0.0000 0.0000  
Y 0.0000 0.0000 0.0000 -0.0000 -0.0000 0.0000  
Z -0.0000 -0.0001 0.0001 -0.0002 0.0000 -0.0000  
AT. 93 C X -0.0000 -0.0005 -0.0002 -0.0002 -0.0000 0.0001  
Y -0.0001 -0.0024 -0.0009 -0.0011 -0.0000 0.0004  
Z 0.0001 0.0012 0.0005 0.0006 0.0000 -0.0002  
AT. 94 C X 0.0000 -0.0005 0.0002 -0.0002 -0.0000 -0.0001  
Y 0.0001 -0.0024 0.0009 -0.0011 -0.0000 -0.0004  
Z -0.0001 0.0012 -0.0005 0.0006 0.0000 0.0002  
AT. 95 H X -0.0002 0.0145 0.0055 0.0065 -0.0000 -0.0029  
Y 0.0008 0.0223 0.0079 0.0095 0.0004 -0.0035  
Z 0.0011 0.0136 0.0046 0.0056 0.0003 -0.0019  
AT. 96 H X 0.0002 0.0145 -0.0055 0.0065 -0.0000 0.0029  
Y -0.0008 0.0223 -0.0079 0.0095 0.0004 0.0035  
Z -0.0011 0.0136 -0.0046 0.0056 0.0003 0.0019  
AT. 97 H X -0.0001 -0.0080 -0.0032 -0.0040 -0.0001 0.0015  
Y 0.0003 0.0062 0.0024 0.0030 0.0002 -0.0010  
Z -0.0005 -0.0263 -0.0105 -0.0129 -0.0004 0.0048  
AT. 98 H X 0.0001 -0.0080 0.0032 -0.0040 -0.0001 -0.0015  
Y -0.0003 0.0062 -0.0024 0.0030 0.0002 0.0010  
Z 0.0005 -0.0263 0.0105 -0.0129 -0.0004 -0.0048

AT. 99 C X 0.0000 0.0001 -0.0000 0.0000 -0.0001 -0.0001  
Y 0.0000 0.0001 -0.0000 0.0000 -0.0001 -0.0001  
Z -0.0000 -0.0001 0.0000 -0.0000 0.0000 0.0001

AT. 100 C X -0.0000 0.0001 0.0000 0.0000 -0.0001 0.0001  
Y -0.0000 0.0001 0.0000 0.0000 -0.0001 0.0001  
Z 0.0000 -0.0001 -0.0000 -0.0000 0.0000 -0.0001

AT. 101 C X 0.0001 0.0001 -0.0002 -0.0000 0.0000 0.0001  
Y 0.0002 0.0005 -0.0006 -0.0001 0.0002 0.0004  
Z 0.0003 0.0010 -0.0008 -0.0002 0.0002 0.0005

AT. 102 C X -0.0001 0.0001 0.0002 -0.0000 0.0000 -0.0001  
Y -0.0002 0.0005 0.0006 -0.0001 0.0002 -0.0004  
Z -0.0003 0.0010 0.0008 -0.0002 0.0002 -0.0005

AT. 103 H X -0.0017 -0.0044 0.0045 0.0010 -0.0011 -0.0030  
Y -0.0040 -0.0105 0.0105 0.0022 -0.0026 -0.0071  
Z 0.0000 0.0000 0.0001 0.0000 0.0000 -0.0000

AT. 104 H X 0.0017 -0.0044 -0.0045 0.0010 -0.0011 0.0030  
Y 0.0040 -0.0105 -0.0105 0.0022 -0.0026 0.0071  
Z -0.0000 0.0000 -0.0001 0.0000 0.0000 0.0000

AT. 105 H X 0.0008 0.0028 -0.0022 -0.0005 0.0005 0.0014  
Y 0.0013 0.0044 -0.0035 -0.0008 0.0009 0.0023  
Z -0.0035 -0.0116 0.0093 0.0023 -0.0024 -0.0059

AT. 106 H X -0.0008 0.0028 0.0022 -0.0005 0.0005 -0.0014  
Y -0.0013 0.0044 0.0035 -0.0008 0.0009 -0.0023  
Z 0.0035 -0.0116 -0.0093 0.0023 -0.0024 0.0059

AT. 107 C X -0.0009 0.0018 -0.0074 -0.0076 0.0006 0.0015  
Y 0.0002 -0.0002 0.0013 0.0013 -0.0001 -0.0003  
Z -0.0010 0.0018 -0.0076 -0.0078 0.0006 0.0015

AT. 108 C X 0.0009 0.0018 0.0074 -0.0076 0.0006 -0.0015  
Y -0.0002 -0.0002 -0.0013 0.0013 -0.0001 0.0003  
Z 0.0010 0.0018 0.0076 -0.0078 0.0006 -0.0015

AT. 109 H X 0.0008 -0.0010 0.0057 0.0059 -0.0004 -0.0012  
Y -0.0043 0.0068 -0.0331 -0.0340 0.0026 0.0068

Z 0.0024 -0.0038 0.0185 0.0190 -0.0015 -0.0038  
AT. 110 H X -0.0008 -0.0010 -0.0057 0.0059 -0.0004 0.0012  
Y 0.0043 0.0068 0.0331 -0.0340 0.0026 -0.0068  
Z -0.0024 -0.0038 -0.0185 0.0190 -0.0015 0.0038  
AT. 111 H X 0.0106 -0.0197 0.0820 0.0837 -0.0066 -0.0166  
Y 0.0021 -0.0040 0.0163 0.0166 -0.0013 -0.0033  
Z 0.0097 -0.0181 0.0747 0.0761 -0.0060 -0.0151  
AT. 112 H X -0.0106 -0.0197 -0.0820 0.0837 -0.0066 0.0166  
Y -0.0021 -0.0040 -0.0163 0.0166 -0.0013 0.0033  
Z -0.0097 -0.0181 -0.0747 0.0761 -0.0060 0.0151  
AT. 113 C X 0.0000 0.0000 -0.0001 -0.0001 0.0000 0.0000  
Y 0.0000 0.0000 0.0001 0.0001 0.0000 -0.0000  
Z 0.0000 0.0001 -0.0001 -0.0001 0.0000 0.0000  
AT. 114 C X -0.0000 0.0000 0.0001 -0.0001 0.0000 -0.0000  
Y -0.0000 0.0000 -0.0001 0.0001 0.0000 0.0000  
Z -0.0000 0.0001 0.0001 -0.0001 0.0000 -0.0000  
AT. 115 C X 0.0007 0.0021 -0.0016 -0.0008 0.0006 0.0011  
Y 0.0003 0.0011 -0.0008 -0.0004 0.0003 0.0005  
Z 0.0010 0.0027 -0.0020 -0.0010 0.0007 0.0013  
AT. 116 C X -0.0007 0.0021 0.0016 -0.0008 0.0006 -0.0011  
Y -0.0003 0.0011 0.0008 -0.0004 0.0003 -0.0005  
Z -0.0010 0.0027 0.0020 -0.0010 0.0007 -0.0013  
AT. 117 H X -0.0102 -0.0287 0.0215 0.0106 -0.0068 -0.0133  
Y -0.0024 -0.0067 0.0048 0.0023 -0.0016 -0.0031  
Z -0.0100 -0.0281 0.0210 0.0105 -0.0068 -0.0131  
AT. 118 H X 0.0102 -0.0287 -0.0215 0.0106 -0.0068 0.0133  
Y 0.0024 -0.0067 -0.0048 0.0023 -0.0016 0.0031  
Z 0.0100 -0.0281 -0.0210 0.0105 -0.0068 0.0131  
AT. 119 H X 0.0011 0.0034 -0.0024 -0.0011 0.0008 0.0016  
Y -0.0017 -0.0057 0.0042 0.0020 -0.0013 -0.0025  
Z -0.0017 -0.0054 0.0041 0.0020 -0.0012 -0.0024  
AT. 120 H X -0.0011 0.0034 0.0024 -0.0011 0.0008 -0.0016

Y 0.0017 -0.0057 -0.0042 0.0020 -0.0013 0.0025  
Z 0.0017 -0.0054 -0.0041 0.0020 -0.0012 0.0024  
AT. 121 C X 0.0026 0.0044 -0.0023 0.0013 -0.0055 -0.0068  
Y 0.0003 0.0007 -0.0003 0.0002 -0.0007 -0.0009  
Z -0.0026 -0.0043 0.0023 -0.0012 0.0055 0.0068  
AT. 122 C X -0.0026 0.0044 0.0023 0.0013 -0.0055 0.0068  
Y -0.0003 0.0007 0.0003 0.0002 -0.0007 0.0009  
Z 0.0026 -0.0043 -0.0023 -0.0012 0.0055 -0.0068  
AT. 123 H X -0.0011 -0.0016 0.0010 -0.0004 0.0023 0.0029  
Y 0.0084 0.0124 -0.0070 0.0034 -0.0169 -0.0209  
Z 0.0075 0.0111 -0.0063 0.0031 -0.0153 -0.0190  
AT. 124 H X 0.0011 -0.0016 -0.0010 -0.0004 0.0023 -0.0029  
Y -0.0084 0.0124 0.0070 0.0034 -0.0169 0.0209  
Z -0.0075 0.0111 0.0063 0.0031 -0.0153 0.0190  
AT. 125 H X -0.0295 -0.0496 0.0262 -0.0146 0.0625 0.0770  
Y -0.0117 -0.0200 0.0106 -0.0059 0.0254 0.0314  
Z 0.0241 0.0404 -0.0214 0.0119 -0.0512 -0.0631  
AT. 126 H X 0.0295 -0.0496 -0.0262 -0.0146 0.0625 -0.0770  
Y 0.0117 -0.0200 -0.0106 -0.0059 0.0254 -0.0314  
Z -0.0241 0.0404 0.0214 0.0119 -0.0512 0.0631  
AT. 127 C X -0.0000 0.0000 -0.0000 0.0000 -0.0000 -0.0001  
Y -0.0002 -0.0001 0.0000 0.0000 0.0000 0.0000  
Z 0.0000 0.0000 0.0000 -0.0000 0.0001 0.0001  
AT. 128 C X 0.0000 0.0000 0.0000 0.0000 -0.0000 0.0001  
Y 0.0002 -0.0001 -0.0000 0.0000 0.0000 -0.0000  
Z -0.0000 0.0000 -0.0000 -0.0000 0.0001 -0.0001  
AT. 129 C X -0.0071 -0.0042 -0.0000 -0.0001 -0.0017 -0.0022  
Y -0.0047 -0.0027 -0.0001 -0.0000 -0.0011 -0.0014  
Z 0.0068 0.0040 0.0001 0.0001 0.0016 0.0020  
AT. 130 C X 0.0071 -0.0042 0.0000 -0.0001 -0.0017 0.0022  
Y 0.0047 -0.0027 0.0001 -0.0000 -0.0011 0.0014  
Z -0.0068 0.0040 -0.0001 0.0001 0.0016 -0.0020



AT.131 H X 0.0910 0.0537 0.0015 0.0019 0.0219 0.0275  
Y 0.0312 0.0186 0.0004 0.0007 0.0073 0.0092  
Z -0.0679 -0.0403 -0.0011 -0.0014 -0.0163 -0.0206

AT.132 H X -0.0910 0.0537 -0.0015 0.0019 0.0219 -0.0275  
Y -0.0312 0.0186 -0.0004 0.0007 0.0073 -0.0092  
Z 0.0679 -0.0403 0.0011 -0.0014 -0.0163 0.0206

AT.133 H X -0.0086 -0.0048 0.0001 0.0001 -0.0019 -0.0025  
Y 0.0257 0.0136 0.0003 0.0001 0.0059 0.0076  
Z -0.0155 -0.0083 -0.0002 -0.0000 -0.0036 -0.0047

AT.134 H X 0.0086 -0.0048 -0.0001 0.0001 -0.0019 0.0025  
Y -0.0257 0.0136 -0.0003 0.0001 0.0059 -0.0076  
Z 0.0155 -0.0083 0.0002 -0.0000 -0.0036 0.0047

AT.135 C X 0.0001 0.0002 -0.0004 -0.0003 0.0001 0.0001  
Y -0.0000 0.0002 0.0003 0.0003 0.0000 -0.0000  
Z 0.0001 0.0003 -0.0005 -0.0004 0.0001 0.0002

AT.136 C X -0.0001 0.0002 0.0004 -0.0003 0.0001 -0.0001  
Y 0.0000 0.0002 -0.0003 0.0003 0.0000 0.0000  
Z -0.0001 0.0003 0.0005 -0.0004 0.0001 -0.0002

AT.137 H X -0.0001 0.0002 0.0010 0.0010 -0.0001 -0.0003  
Y 0.0004 -0.0005 -0.0049 -0.0048 0.0002 0.0014  
Z -0.0003 0.0003 0.0029 0.0029 -0.0001 -0.0009

AT.138 H X 0.0001 0.0002 -0.0010 0.0010 -0.0001 0.0003  
Y -0.0004 -0.0005 0.0049 -0.0048 0.0002 -0.0014  
Z 0.0003 0.0003 -0.0029 0.0029 -0.0001 0.0009

AT.139 H X -0.0006 -0.0037 0.0046 0.0035 -0.0010 -0.0018  
Y -0.0002 -0.0008 0.0010 0.0008 -0.0002 -0.0004  
Z -0.0005 -0.0027 0.0032 0.0024 -0.0007 -0.0013

AT.140 H X 0.0006 -0.0037 -0.0046 0.0035 -0.0010 0.0018  
Y 0.0002 -0.0008 -0.0010 0.0008 -0.0002 0.0004  
Z 0.0005 -0.0027 -0.0032 0.0024 -0.0007 0.0013

AT.141 H X 0.0000 0.0007 -0.0002 0.0002 0.0001 0.0002  
Y 0.0000 -0.0016 0.0006 -0.0001 -0.0003 -0.0006

Z 0.0001 -0.0015 0.0006 -0.0001 -0.0003 -0.0005  
AT. 142 H X -0.0000 0.0007 0.0002 0.0002 0.0001 -0.0002  
Y -0.0000 -0.0016 -0.0006 -0.0001 -0.0003 0.0006  
Z -0.0001 -0.0015 -0.0006 -0.0001 -0.0003 0.0005  
AT. 143 C X -0.0001 -0.0001 -0.0001 -0.0000 -0.0002 -0.0003  
Y -0.0004 0.0005 0.0001 0.0003 -0.0000 -0.0001  
Z 0.0002 0.0000 0.0000 -0.0000 0.0003 0.0004  
AT. 144 C X 0.0001 -0.0001 0.0001 -0.0000 -0.0002 0.0003  
Y 0.0004 0.0005 -0.0001 0.0003 -0.0000 0.0001  
Z -0.0002 0.0000 -0.0000 -0.0000 0.0003 -0.0004  
AT. 145 H X -0.0001 0.0008 0.0001 0.0004 0.0003 0.0004  
Y 0.0010 -0.0026 -0.0004 -0.0015 -0.0012 -0.0017  
Z 0.0009 -0.0025 -0.0004 -0.0015 -0.0012 -0.0016  
AT. 146 H X 0.0001 0.0008 -0.0001 0.0004 0.0003 -0.0004  
Y -0.0010 -0.0026 0.0004 -0.0015 -0.0012 0.0017  
Z -0.0009 -0.0025 0.0004 -0.0015 -0.0012 0.0016  
AT. 147 H X 0.0023 -0.0001 0.0005 -0.0008 0.0026 0.0034  
Y 0.0009 0.0001 0.0002 -0.0002 0.0009 0.0012  
Z -0.0014 0.0000 -0.0003 0.0005 -0.0016 -0.0021  
AT. 148 H X -0.0023 -0.0001 -0.0005 -0.0008 0.0026 -0.0034  
Y -0.0009 0.0001 -0.0002 -0.0002 0.0009 -0.0012  
Z 0.0014 0.0000 0.0003 0.0005 -0.0016 0.0021  
AT. 149 H X -0.0012 0.0008 0.0002 0.0007 -0.0001 -0.0004  
Y 0.0036 -0.0035 -0.0005 -0.0024 0.0007 0.0016  
Z -0.0021 0.0020 0.0003 0.0014 -0.0004 -0.0009  
AT. 150 H X 0.0012 0.0008 -0.0002 0.0007 -0.0001 0.0004  
Y -0.0036 -0.0035 0.0005 -0.0024 0.0007 -0.0016  
Z 0.0021 0.0020 -0.0003 0.0014 -0.0004 0.0009  
AT. 151 C X 0.0001 -0.0001 0.0000 -0.0000 0.0000 0.0000  
Y -0.0001 0.0001 0.0002 0.0002 0.0001 0.0001  
Z -0.0001 -0.0000 0.0001 0.0001 -0.0001 -0.0001  
AT. 152 C X -0.0001 -0.0001 -0.0000 -0.0000 0.0000 -0.0000

Y 0.0001 0.0001 -0.0002 0.0002 0.0001 -0.0001  
Z 0.0001 -0.0000 -0.0001 0.0001 -0.0001 0.0001  
AT. 153 H X -0.0001 0.0003 0.0003 0.0004 0.0001 0.0001  
Y 0.0008 -0.0013 -0.0009 -0.0013 -0.0003 -0.0001  
Z -0.0005 0.0007 0.0007 0.0010 0.0001 -0.0001  
AT. 154 H X 0.0001 0.0003 -0.0003 0.0004 0.0001 -0.0001  
Y -0.0008 -0.0013 0.0009 -0.0013 -0.0003 0.0001  
Z 0.0005 0.0007 -0.0007 0.0010 0.0001 0.0001  
AT. 155 H X -0.0003 0.0002 0.0003 0.0004 0.0001 0.0001  
Y 0.0007 -0.0007 -0.0006 -0.0010 -0.0002 -0.0002  
Z 0.0007 -0.0007 -0.0005 -0.0008 -0.0003 -0.0004  
AT. 156 H X 0.0003 0.0002 -0.0003 0.0004 0.0001 -0.0001  
Y -0.0007 -0.0007 0.0006 -0.0010 -0.0002 0.0002  
Z -0.0007 -0.0007 0.0005 -0.0008 -0.0003 0.0004  
AT. 157 O X 0.0000 0.0000 0.0000 0.0000 -0.0000 -0.0000  
Y -0.0000 -0.0000 -0.0001 -0.0000 0.0000 0.0000  
Z 0.0000 -0.0000 -0.0000 -0.0000 0.0000 0.0000  
AT. 158 O X -0.0000 0.0000 -0.0000 0.0000 -0.0000 0.0000  
Y 0.0000 -0.0000 0.0001 -0.0000 0.0000 -0.0000  
Z -0.0000 -0.0000 0.0000 -0.0000 0.0000 -0.0000  
AT. 159 O X 0.0000 0.0000 0.0000 0.0000 0.0000 -0.0000  
Y -0.0000 -0.0000 -0.0000 -0.0000 -0.0000 0.0000  
Z 0.0000 0.0000 0.0000 0.0000 0.0001 -0.0000  
AT. 160 O X -0.0000 0.0000 -0.0000 0.0000 0.0000 0.0000  
Y 0.0000 -0.0000 0.0000 -0.0000 -0.0000 -0.0000  
Z -0.0000 0.0000 -0.0000 0.0000 0.0001 0.0000  
AT. 161 H X 0.0000 -0.0002 -0.0001 -0.0001 0.0001 0.0000  
Y -0.0000 0.0004 0.0008 0.0006 -0.0003 -0.0004  
Z 0.0001 0.0002 -0.0001 0.0000 -0.0001 0.0001  
AT. 162 H X -0.0000 -0.0002 0.0001 -0.0001 0.0001 -0.0000  
Y 0.0000 0.0004 -0.0008 0.0006 -0.0003 0.0004  
Z -0.0001 0.0002 0.0001 0.0000 -0.0001 -0.0001

AT.163 H X 0.0000 -0.0002 -0.0001 -0.0001 -0.0003 0.0002  
Y 0.0000 0.0001 0.0000 0.0001 0.0002 -0.0001  
Z -0.0000 -0.0005 -0.0002 -0.0003 -0.0008 0.0006  
AT.164 H X -0.0000 -0.0002 0.0001 -0.0001 -0.0003 -0.0002  
Y -0.0000 0.0001 -0.0000 0.0001 0.0002 0.0001  
Z 0.0000 -0.0005 0.0002 -0.0003 -0.0008 -0.0006  
AT.165 O X 0.0000 0.0000 -0.0000 0.0000 -0.0000 0.0000  
Y 0.0000 0.0000 -0.0000 0.0000 0.0000 0.0000  
Z 0.0000 -0.0000 0.0000 0.0000 -0.0000 0.0000  
AT.166 O X -0.0000 0.0000 0.0000 0.0000 -0.0000 -0.0000  
Y -0.0000 0.0000 0.0000 0.0000 0.0000 -0.0000  
Z -0.0000 -0.0000 -0.0000 0.0000 -0.0000 -0.0000  
AT.167 H X -0.0002 -0.0001 0.0001 -0.0001 0.0000 -0.0002  
Y -0.0001 0.0000 -0.0001 -0.0001 0.0000 -0.0000  
Z -0.0001 0.0001 -0.0001 -0.0002 0.0000 -0.0000  
AT.168 H X 0.0002 -0.0001 -0.0001 -0.0001 0.0000 0.0002  
Y 0.0001 0.0000 0.0001 -0.0001 0.0000 0.0000  
Z 0.0001 0.0001 0.0001 -0.0002 0.0000 0.0000  
AT.169 O X 0.0000 0.0000 0.0000 0.0000 -0.0000 0.0000  
Y -0.0000 -0.0000 -0.0000 -0.0000 0.0000 -0.0000  
Z 0.0000 0.0000 0.0000 0.0000 -0.0000 0.0000  
AT.170 O X -0.0000 0.0000 -0.0000 0.0000 -0.0000 -0.0000  
Y 0.0000 -0.0000 0.0000 -0.0000 0.0000 0.0000  
Z -0.0000 0.0000 -0.0000 0.0000 -0.0000 -0.0000  
AT.171 H X -0.0000 -0.0002 -0.0000 -0.0001 0.0001 -0.0001  
Y 0.0001 0.0004 0.0001 0.0001 -0.0002 0.0001  
Z -0.0000 -0.0002 -0.0001 -0.0001 0.0001 -0.0001  
AT.172 H X 0.0000 -0.0002 0.0000 -0.0001 0.0001 0.0001  
Y -0.0001 0.0004 -0.0001 0.0001 -0.0002 -0.0001  
Z 0.0000 -0.0002 0.0001 -0.0001 0.0001 0.0001

FREQ(CM\*\*-1) 3194.65 3195.73 3253.73 3254.57 3259.44 3259.59

AT. 1 I X 0.0000 0.0000 0.0000 0.0000 -0.0000 0.0000  
Y -0.0000 0.0000 0.0000 0.0000 -0.0000 0.0000  
Z 0.0000 0.0000 0.0000 -0.0000 0.0000 0.0000

AT. 2 I X -0.0000 0.0000 -0.0000 0.0000 -0.0000 -0.0000  
Y 0.0000 0.0000 -0.0000 0.0000 -0.0000 -0.0000  
Z -0.0000 0.0000 -0.0000 -0.0000 0.0000 -0.0000

AT. 3 I X -0.0000 -0.0000 0.0000 0.0000 0.0000 0.0000  
Y -0.0000 -0.0000 0.0000 -0.0000 0.0000 0.0000  
Z 0.0000 0.0000 0.0000 -0.0000 0.0000 0.0000

AT. 4 I X 0.0000 -0.0000 -0.0000 0.0000 0.0000 -0.0000  
Y 0.0000 -0.0000 -0.0000 -0.0000 0.0000 -0.0000  
Z -0.0000 0.0000 -0.0000 -0.0000 0.0000 -0.0000

AT. 5 O X -0.0000 -0.0000 0.0000 0.0000 -0.0000 0.0000  
Y -0.0000 0.0000 -0.0000 -0.0000 0.0000 -0.0000  
Z 0.0000 -0.0000 -0.0000 0.0000 -0.0000 -0.0000

AT. 6 O X 0.0000 -0.0000 -0.0000 0.0000 -0.0000 -0.0000  
Y 0.0000 0.0000 0.0000 -0.0000 0.0000 0.0000  
Z -0.0000 -0.0000 0.0000 0.0000 -0.0000 0.0000

AT. 7 O X 0.0000 -0.0000 -0.0000 0.0000 0.0000 0.0000  
Y 0.0000 0.0000 0.0000 -0.0000 -0.0000 -0.0000  
Z 0.0000 -0.0000 -0.0000 0.0000 0.0000 0.0000

AT. 8 O X -0.0000 -0.0000 0.0000 0.0000 0.0000 -0.0000  
Y -0.0000 0.0000 -0.0000 -0.0000 -0.0000 0.0000  
Z -0.0000 -0.0000 0.0000 0.0000 0.0000 -0.0000

AT. 9 N X 0.0000 -0.0000 0.0000 0.0000 -0.0000 0.0000  
Y -0.0000 0.0000 -0.0000 -0.0000 0.0000 -0.0000  
Z 0.0000 0.0000 -0.0000 -0.0000 0.0000 -0.0000

AT. 10 N X -0.0000 -0.0000 -0.0000 0.0000 -0.0000 -0.0000  
Y 0.0000 0.0000 0.0000 -0.0000 0.0000 0.0000  
Z -0.0000 0.0000 0.0000 -0.0000 0.0000 0.0000

AT. 11 N X -0.0000 0.0000 0.0000 0.0000 -0.0000 -0.0000

Y 0.0000 0.0000 0.0000 -0.0000 0.0000 0.0000  
Z -0.0000 -0.0000 0.0000 -0.0000 0.0000 0.0000  
AT. 12 N X 0.0000 0.0000 -0.0000 0.0000 -0.0000 0.0000  
Y -0.0000 0.0000 -0.0000 -0.0000 0.0000 -0.0000  
Z 0.0000 -0.0000 -0.0000 -0.0000 0.0000 -0.0000  
AT. 13 C X 0.0001 0.0000 -0.0000 -0.0000 0.0000 -0.0001  
Y -0.0001 0.0000 0.0000 0.0000 -0.0000 0.0001  
Z -0.0001 -0.0000 0.0000 0.0000 -0.0001 0.0001  
AT. 14 C X -0.0001 0.0000 0.0000 -0.0000 0.0000 0.0001  
Y 0.0001 0.0000 -0.0000 0.0000 -0.0000 -0.0001  
Z 0.0001 -0.0000 -0.0000 0.0000 -0.0001 -0.0001  
AT. 15 C X 0.0011 -0.0008 0.0001 0.0000 -0.0003 0.0002  
Y 0.0057 -0.0036 -0.0002 -0.0000 0.0003 -0.0005  
Z -0.0041 0.0028 -0.0003 -0.0001 0.0008 -0.0006  
AT. 16 C X -0.0011 -0.0008 -0.0001 0.0000 -0.0003 -0.0002  
Y -0.0057 -0.0036 0.0002 -0.0000 0.0003 0.0005  
Z 0.0041 0.0028 0.0003 -0.0001 0.0008 0.0006  
AT. 17 H X 0.0113 -0.0071 -0.0008 -0.0001 0.0015 -0.0018  
Y -0.0387 0.0243 0.0028 0.0002 -0.0056 0.0064  
Z -0.0322 0.0203 0.0022 0.0002 -0.0044 0.0051  
AT. 18 H X -0.0113 -0.0071 0.0008 -0.0001 0.0015 0.0018  
Y 0.0387 0.0243 -0.0028 0.0002 -0.0056 -0.0064  
Z 0.0322 0.0203 -0.0022 0.0002 -0.0044 -0.0051  
AT. 19 H X -0.0258 0.0169 -0.0003 -0.0002 0.0016 -0.0007  
Y -0.0277 0.0181 -0.0004 -0.0002 0.0018 -0.0008  
Z 0.0783 -0.0512 0.0009 0.0005 -0.0046 0.0018  
AT. 20 H X 0.0258 0.0169 0.0003 -0.0002 0.0016 0.0007  
Y 0.0277 0.0181 0.0004 -0.0002 0.0018 0.0008  
Z -0.0783 -0.0512 -0.0009 0.0005 -0.0046 -0.0018  
AT. 21 C X -0.0000 0.0000 -0.0000 -0.0000 -0.0001 -0.0001  
Y 0.0000 -0.0000 -0.0000 0.0000 0.0001 0.0001  
Z -0.0000 0.0000 0.0000 -0.0000 -0.0000 -0.0000

AT. 22 C X 0.0000 0.0000 0.0000 -0.0000 -0.0001 0.0001  
Y -0.0000 -0.0000 0.0000 0.0000 0.0001 -0.0001  
Z 0.0000 0.0000 -0.0000 -0.0000 -0.0000 0.0000

AT. 23 C X -0.0000 -0.0000 -0.0001 0.0001 -0.0024 -0.0023  
Y -0.0003 0.0000 0.0002 -0.0004 0.0087 0.0082  
Z -0.0004 -0.0003 -0.0002 0.0003 -0.0075 -0.0070

AT. 24 C X 0.0000 -0.0000 0.0001 0.0001 -0.0024 0.0023  
Y 0.0003 0.0000 -0.0002 -0.0004 0.0087 -0.0082  
Z 0.0004 -0.0003 0.0002 0.0003 -0.0075 0.0070

AT. 25 H X -0.0008 -0.0002 0.0003 -0.0003 0.0077 0.0074  
Y 0.0059 0.0010 -0.0020 0.0023 -0.0564 -0.0539  
Z 0.0006 0.0001 -0.0002 0.0003 -0.0067 -0.0064

AT. 26 H X 0.0008 -0.0002 -0.0003 -0.0003 0.0077 -0.0074  
Y -0.0059 0.0010 0.0020 0.0023 -0.0564 0.0539  
Z -0.0006 0.0001 0.0002 0.0003 -0.0067 0.0064

AT. 27 H X 0.0009 0.0006 0.0005 -0.0009 0.0224 0.0208  
Y -0.0019 -0.0014 -0.0010 0.0019 -0.0466 -0.0433  
Z 0.0038 0.0027 0.0021 -0.0039 0.0953 0.0885

AT. 28 H X -0.0009 0.0006 -0.0005 -0.0009 0.0224 -0.0208  
Y 0.0019 -0.0014 0.0010 0.0019 -0.0466 0.0433  
Z -0.0038 0.0027 -0.0021 -0.0039 0.0953 -0.0885

AT. 29 C X 0.0006 0.0008 -0.0000 -0.0000 0.0000 -0.0001  
Y -0.0002 -0.0003 0.0000 0.0000 -0.0000 0.0000  
Z -0.0009 -0.0012 0.0000 0.0000 -0.0001 0.0001

AT. 30 C X -0.0006 0.0008 0.0000 -0.0000 0.0000 0.0001  
Y 0.0002 -0.0003 -0.0000 0.0000 -0.0000 -0.0000  
Z 0.0009 -0.0012 -0.0000 0.0000 -0.0001 -0.0001

AT. 31 H X -0.0009 -0.0009 0.0000 -0.0001 0.0001 0.0001  
Y -0.0022 -0.0020 0.0001 -0.0001 0.0003 0.0001  
Z 0.0013 0.0013 -0.0000 0.0001 -0.0002 -0.0001

AT. 32 H X 0.0009 -0.0009 -0.0000 -0.0001 0.0001 -0.0001  
Y 0.0022 -0.0020 -0.0001 -0.0001 0.0003 -0.0001

Z -0.0013 0.0013 0.0000 0.0001 -0.0002 0.0001  
AT. 33 H X -0.0062 -0.0092 0.0004 0.0004 -0.0006 0.0009  
Y 0.0039 0.0058 -0.0003 -0.0003 0.0003 -0.0005  
Z 0.0091 0.0136 -0.0006 -0.0006 0.0008 -0.0012  
AT. 34 H X 0.0062 -0.0092 -0.0004 0.0004 -0.0006 -0.0009  
Y -0.0039 0.0058 0.0003 -0.0003 0.0003 0.0005  
Z -0.0091 0.0136 0.0006 -0.0006 0.0008 0.0012  
AT. 35 C X 0.0000 -0.0000 0.0000 0.0000 0.0000 0.0000  
Y 0.0000 -0.0000 -0.0000 0.0000 -0.0000 -0.0000  
Z -0.0000 -0.0000 0.0000 0.0000 -0.0000 0.0000  
AT. 36 C X -0.0000 -0.0000 -0.0000 0.0000 0.0000 -0.0000  
Y -0.0000 -0.0000 0.0000 0.0000 -0.0000 0.0000  
Z 0.0000 -0.0000 -0.0000 0.0000 -0.0000 -0.0000  
AT. 37 C X 0.0002 0.0002 -0.0000 0.0000 -0.0001 -0.0001  
Y -0.0002 -0.0002 0.0000 0.0000 0.0001 0.0001  
Z -0.0005 -0.0004 0.0000 -0.0000 0.0002 0.0003  
AT. 38 C X -0.0002 0.0002 0.0000 0.0000 -0.0001 0.0001  
Y 0.0002 -0.0002 -0.0000 0.0000 0.0001 -0.0001  
Z 0.0005 -0.0004 -0.0000 -0.0000 0.0002 -0.0003  
AT. 39 H X -0.0032 -0.0027 0.0002 0.0000 0.0016 0.0019  
Y 0.0020 0.0018 -0.0001 0.0000 -0.0011 -0.0013  
Z 0.0046 0.0041 -0.0003 0.0000 -0.0023 -0.0028  
AT. 40 H X 0.0032 -0.0027 -0.0002 0.0000 0.0016 -0.0019  
Y -0.0020 0.0018 0.0001 0.0000 -0.0011 0.0013  
Z -0.0046 0.0041 0.0003 0.0000 -0.0023 0.0028  
AT. 41 H X 0.0010 0.0008 -0.0001 0.0000 -0.0003 -0.0006  
Y 0.0007 0.0007 -0.0001 -0.0000 -0.0002 -0.0004  
Z 0.0009 0.0008 -0.0001 0.0000 -0.0003 -0.0006  
AT. 42 H X -0.0010 0.0008 0.0001 0.0000 -0.0003 0.0006  
Y -0.0007 0.0007 0.0001 -0.0000 -0.0002 0.0004  
Z -0.0009 0.0008 0.0001 0.0000 -0.0003 0.0006  
AT. 43 C X -0.0004 0.0006 -0.0000 -0.0000 0.0000 0.0000



Y 0.0002 -0.0003 0.0000 0.0000 -0.0000 -0.0000  
Z -0.0003 0.0004 -0.0000 -0.0000 0.0000 0.0000  
AT. 44 C X 0.0004 0.0006 0.0000 -0.0000 0.0000 -0.0000  
Y -0.0002 -0.0003 -0.0000 0.0000 -0.0000 0.0000  
Z 0.0003 0.0004 0.0000 -0.0000 0.0000 -0.0000  
AT. 45 H X 0.0006 -0.0008 -0.0000 -0.0000 0.0000 -0.0000  
Y 0.0009 -0.0012 -0.0000 -0.0000 0.0000 -0.0001  
Z 0.0010 -0.0012 -0.0000 0.0000 0.0000 -0.0001  
AT. 46 H X -0.0006 -0.0008 0.0000 -0.0000 0.0000 0.0000  
Y -0.0009 -0.0012 0.0000 -0.0000 0.0000 0.0001  
Z -0.0010 -0.0012 0.0000 0.0000 0.0000 0.0001  
AT. 47 H X 0.0045 -0.0060 0.0002 0.0003 -0.0002 0.0000  
Y -0.0034 0.0046 -0.0001 -0.0002 0.0002 -0.0000  
Z 0.0033 -0.0044 0.0001 0.0002 -0.0002 -0.0000  
AT. 48 H X -0.0045 -0.0060 -0.0002 0.0003 -0.0002 -0.0000  
Y 0.0034 0.0046 0.0001 -0.0002 0.0002 0.0000  
Z -0.0033 -0.0044 -0.0001 0.0002 -0.0002 0.0000  
AT. 49 C X -0.0000 0.0000 -0.0000 -0.0000 -0.0000 -0.0000  
Y 0.0001 -0.0001 -0.0000 0.0000 -0.0000 0.0000  
Z -0.0000 0.0000 -0.0000 -0.0000 0.0000 -0.0000  
AT. 50 C X 0.0000 0.0000 0.0000 -0.0000 -0.0000 0.0000  
Y -0.0001 -0.0001 0.0000 0.0000 -0.0000 -0.0000  
Z 0.0000 0.0000 0.0000 -0.0000 0.0000 0.0000  
AT. 51 C X -0.0034 0.0024 0.0000 -0.0000 -0.0000 0.0000  
Y 0.0034 -0.0025 -0.0000 0.0000 -0.0000 -0.0000  
Z -0.0027 0.0020 0.0000 -0.0000 -0.0000 0.0000  
AT. 52 C X 0.0034 0.0024 -0.0000 -0.0000 -0.0000 -0.0000  
Y -0.0034 -0.0025 0.0000 0.0000 -0.0000 0.0000  
Z 0.0027 0.0020 -0.0000 -0.0000 -0.0000 -0.0000  
AT. 53 H X 0.0448 -0.0324 -0.0002 0.0002 0.0003 -0.0004  
Y -0.0310 0.0223 0.0002 -0.0001 -0.0002 0.0003  
Z 0.0263 -0.0190 -0.0001 0.0001 0.0002 -0.0002

AT. 54 H X -0.0448 -0.0324 0.0002 0.0002 0.0003 0.0004  
Y 0.0310 0.0223 -0.0002 -0.0001 -0.0002 -0.0003  
Z -0.0263 -0.0190 0.0001 0.0001 0.0002 0.0002

AT. 55 H X -0.0059 0.0047 0.0000 -0.0001 0.0001 0.0000  
Y -0.0096 0.0078 0.0000 -0.0002 0.0002 0.0001  
Z 0.0073 -0.0059 -0.0000 0.0001 -0.0001 -0.0001

AT. 56 H X 0.0059 0.0047 -0.0000 -0.0001 0.0001 -0.0000  
Y 0.0096 0.0078 -0.0000 -0.0002 0.0002 -0.0001  
Z -0.0073 -0.0059 0.0000 0.0001 -0.0001 0.0001

AT. 57 C X 0.0001 -0.0001 -0.0000 0.0000 -0.0000 -0.0000  
Y 0.0000 -0.0003 -0.0000 0.0000 -0.0001 0.0000  
Z -0.0002 -0.0001 0.0000 0.0000 -0.0000 0.0000

AT. 58 C X -0.0001 -0.0001 0.0000 0.0000 -0.0000 0.0000  
Y -0.0000 -0.0003 0.0000 0.0000 -0.0001 -0.0000  
Z 0.0002 -0.0001 -0.0000 0.0000 -0.0000 -0.0000

AT. 59 H X -0.0005 0.0009 0.0001 -0.0001 0.0001 0.0001  
Y -0.0009 0.0018 0.0001 -0.0002 0.0003 0.0002  
Z 0.0006 -0.0013 -0.0001 0.0002 -0.0002 -0.0002

AT. 60 H X 0.0005 0.0009 -0.0001 -0.0001 0.0001 -0.0001  
Y 0.0009 0.0018 -0.0001 -0.0002 0.0003 -0.0002  
Z -0.0006 -0.0013 0.0001 0.0002 -0.0002 0.0002

AT. 61 H X -0.0014 -0.0009 0.0000 0.0002 -0.0003 0.0001  
Y 0.0009 0.0005 -0.0000 -0.0001 0.0002 -0.0001  
Z 0.0018 0.0010 -0.0000 -0.0003 0.0004 -0.0001

AT. 62 H X 0.0014 -0.0009 -0.0000 0.0002 -0.0003 -0.0001  
Y -0.0009 0.0005 0.0000 -0.0001 0.0002 0.0001  
Z -0.0018 0.0010 0.0000 -0.0003 0.0004 0.0001

AT. 63 H X -0.0000 0.0016 -0.0001 -0.0002 0.0002 -0.0002  
Y -0.0001 0.0015 -0.0001 -0.0001 0.0002 -0.0002  
Z -0.0001 0.0018 -0.0001 -0.0002 0.0002 -0.0002

AT. 64 H X 0.0000 0.0016 0.0001 -0.0002 0.0002 0.0002  
Y 0.0001 0.0015 0.0001 -0.0001 0.0002 0.0002

Z 0.0001 0.0018 0.0001 -0.0002 0.0002 0.0002  
AT. 65 C X -0.0001 -0.0000 -0.0000 0.0000 -0.0000 -0.0000  
Y 0.0001 -0.0002 0.0000 0.0000 -0.0000 0.0000  
Z -0.0001 0.0001 0.0000 0.0000 -0.0000 0.0000  
AT. 66 C X 0.0001 -0.0000 0.0000 0.0000 -0.0000 0.0000  
Y -0.0001 -0.0002 -0.0000 0.0000 -0.0000 -0.0000  
Z 0.0001 0.0001 -0.0000 0.0000 -0.0000 -0.0000  
AT. 67 H X 0.0001 0.0004 -0.0000 -0.0001 0.0001 -0.0001  
Y -0.0000 0.0005 -0.0000 -0.0001 0.0001 -0.0001  
Z 0.0000 0.0005 -0.0000 -0.0001 0.0002 -0.0001  
AT. 68 H X -0.0001 0.0004 0.0000 -0.0001 0.0001 0.0001  
Y 0.0000 0.0005 0.0000 -0.0001 0.0001 0.0001  
Z -0.0000 0.0005 0.0000 -0.0001 0.0002 0.0001  
AT. 69 H X 0.0013 -0.0010 0.0002 0.0000 0.0000 0.0002  
Y -0.0010 0.0008 -0.0001 -0.0000 -0.0000 -0.0001  
Z 0.0005 -0.0004 0.0001 0.0000 0.0000 0.0001  
AT. 70 H X -0.0013 -0.0010 -0.0002 0.0000 0.0000 -0.0002  
Y 0.0010 0.0008 0.0001 -0.0000 -0.0000 0.0001  
Z -0.0005 -0.0004 -0.0001 0.0000 0.0000 -0.0001  
AT. 71 H X -0.0004 0.0006 0.0000 -0.0000 0.0000 0.0001  
Y -0.0006 0.0010 0.0001 -0.0001 0.0000 0.0001  
Z 0.0004 -0.0007 -0.0001 0.0001 -0.0000 -0.0001  
AT. 72 H X 0.0004 0.0006 -0.0000 -0.0000 0.0000 -0.0001  
Y 0.0006 0.0010 -0.0001 -0.0001 0.0000 -0.0001  
Z -0.0004 -0.0007 0.0001 0.0001 -0.0000 0.0001  
AT. 73 C X 0.0001 -0.0001 -0.0000 0.0000 -0.0000 -0.0000  
Y 0.0000 -0.0001 -0.0000 0.0000 -0.0000 -0.0000  
Z 0.0001 -0.0000 0.0000 -0.0000 -0.0000 -0.0000  
AT. 74 C X -0.0001 -0.0001 0.0000 0.0000 -0.0000 0.0000  
Y -0.0000 -0.0001 0.0000 0.0000 -0.0000 0.0000  
Z -0.0001 -0.0000 -0.0000 -0.0000 -0.0000 0.0000  
AT. 75 H X -0.0000 0.0004 0.0000 -0.0000 0.0001 0.0001

Y -0.0002 0.0008 0.0001 -0.0001 0.0001 0.0001  
Z 0.0002 -0.0006 -0.0000 0.0001 -0.0001 -0.0001  
AT. 76 H X 0.0000 0.0004 -0.0000 -0.0000 0.0001 -0.0001  
Y 0.0002 0.0008 -0.0001 -0.0001 0.0001 -0.0001  
Z -0.0002 -0.0006 0.0000 0.0001 -0.0001 0.0001  
AT. 77 H X -0.0004 0.0006 -0.0000 -0.0001 0.0001 0.0000  
Y -0.0003 0.0007 -0.0000 -0.0001 0.0001 0.0000  
Z -0.0003 0.0007 -0.0000 -0.0001 0.0001 0.0001  
AT. 78 H X 0.0004 0.0006 0.0000 -0.0001 0.0001 -0.0000  
Y 0.0003 0.0007 0.0000 -0.0001 0.0001 -0.0000  
Z 0.0003 0.0007 0.0000 -0.0001 0.0001 -0.0001  
AT. 79 I X -0.0000 -0.0000 -0.0000 -0.0000 0.0000 -0.0000  
Y 0.0000 0.0000 0.0000 0.0000 -0.0000 -0.0000  
Z -0.0000 0.0000 -0.0000 -0.0000 0.0000 -0.0000  
AT. 80 I X 0.0000 -0.0000 0.0000 -0.0000 0.0000 0.0000  
Y -0.0000 0.0000 -0.0000 0.0000 -0.0000 0.0000  
Z 0.0000 0.0000 0.0000 -0.0000 0.0000 0.0000  
AT. 81 I X 0.0000 -0.0000 -0.0000 0.0000 -0.0000 0.0000  
Y -0.0000 -0.0000 -0.0000 -0.0000 -0.0000 0.0000  
Z -0.0000 0.0000 0.0000 0.0000 0.0000 -0.0000  
AT. 82 I X -0.0000 -0.0000 0.0000 0.0000 -0.0000 -0.0000  
Y 0.0000 -0.0000 0.0000 -0.0000 -0.0000 -0.0000  
Z 0.0000 0.0000 -0.0000 0.0000 0.0000 0.0000  
AT. 83 O X 0.0000 0.0001 -0.0001 0.0000 0.0000 -0.0000  
Y 0.0000 0.0000 -0.0000 0.0000 0.0000 0.0000  
Z -0.0000 0.0000 -0.0000 -0.0000 0.0000 -0.0000  
AT. 84 O X -0.0000 0.0001 0.0001 0.0000 0.0000 0.0000  
Y -0.0000 0.0000 0.0000 0.0000 0.0000 -0.0000  
Z 0.0000 0.0000 0.0000 -0.0000 0.0000 0.0000  
AT. 85 O X -0.0000 0.0000 -0.0000 -0.0000 -0.0000 0.0000  
Y -0.0000 -0.0000 -0.0000 0.0000 -0.0000 0.0000  
Z -0.0000 0.0000 0.0000 0.0000 0.0000 -0.0000

AT. 86 O X 0.0000 0.0000 0.0000 -0.0000 -0.0000 -0.0000  
Y 0.0000 -0.0000 0.0000 0.0000 -0.0000 -0.0000  
Z 0.0000 0.0000 -0.0000 0.0000 0.0000 0.0000

AT. 87 N X -0.0000 0.0000 0.0000 0.0000 -0.0000 0.0000  
Y -0.0000 -0.0000 0.0000 0.0000 -0.0000 0.0000  
Z -0.0000 0.0000 -0.0000 0.0000 0.0000 0.0000

AT. 88 N X 0.0000 0.0000 -0.0000 0.0000 -0.0000 -0.0000  
Y 0.0000 -0.0000 -0.0000 0.0000 -0.0000 -0.0000  
Z 0.0000 0.0000 0.0000 0.0000 0.0000 -0.0000

AT. 89 N X 0.0000 -0.0000 0.0001 0.0001 0.0000 -0.0000  
Y -0.0000 -0.0000 -0.0000 -0.0000 -0.0000 0.0000  
Z 0.0000 0.0000 0.0000 0.0000 0.0000 -0.0000

AT. 90 N X -0.0000 -0.0000 -0.0001 0.0001 0.0000 0.0000  
Y 0.0000 -0.0000 0.0000 -0.0000 -0.0000 -0.0000  
Z -0.0000 0.0000 -0.0000 0.0000 0.0000 0.0000

AT. 91 C X 0.0000 -0.0001 0.0001 -0.0000 -0.0001 0.0000  
Y 0.0000 -0.0000 0.0000 -0.0000 -0.0000 -0.0000  
Z -0.0000 -0.0002 0.0001 -0.0000 -0.0001 0.0001

AT. 92 C X -0.0000 -0.0001 -0.0001 -0.0000 -0.0001 -0.0000  
Y -0.0000 -0.0000 -0.0000 -0.0000 -0.0000 0.0000  
Z 0.0000 -0.0002 -0.0001 -0.0000 -0.0001 -0.0001

AT. 93 C X -0.0002 -0.0005 0.0013 0.0008 -0.0014 0.0021  
Y -0.0010 -0.0030 0.0003 0.0003 -0.0006 0.0008  
Z 0.0006 0.0018 0.0030 0.0018 -0.0030 0.0046

AT. 94 C X 0.0002 -0.0005 -0.0013 0.0008 -0.0014 -0.0021  
Y 0.0010 -0.0030 -0.0003 0.0003 -0.0006 -0.0008  
Z -0.0006 0.0018 -0.0030 0.0018 -0.0030 -0.0046

AT. 95 H X 0.0066 0.0179 -0.0063 -0.0045 0.0085 -0.0128  
Y 0.0090 0.0267 -0.0110 -0.0077 0.0143 -0.0209  
Z 0.0052 0.0160 -0.0060 -0.0043 0.0079 -0.0116

AT. 96 H X -0.0066 0.0179 0.0063 -0.0045 0.0085 0.0128  
Y -0.0090 0.0267 0.0110 -0.0077 0.0143 0.0209

Z -0.0052 0.0160 0.0060 -0.0043 0.0079 0.0116  
AT. 97 H X -0.0039 -0.0110 -0.0092 -0.0054 0.0085 -0.0133  
Y 0.0029 0.0085 0.0075 0.0044 -0.0071 0.0110  
Z -0.0126 -0.0361 -0.0301 -0.0175 0.0282 -0.0436  
AT. 98 H X 0.0039 -0.0110 0.0092 -0.0054 0.0085 0.0133  
Y -0.0029 0.0085 -0.0075 0.0044 -0.0071 -0.0110  
Z 0.0126 -0.0361 0.0301 -0.0175 0.0282 0.0436  
AT. 99 C X 0.0000 -0.0000 0.0001 0.0000 0.0000 -0.0000  
Y 0.0001 0.0000 0.0001 0.0000 0.0000 -0.0001  
Z -0.0000 -0.0000 -0.0001 -0.0000 -0.0000 0.0001  
AT. 100 C X -0.0000 -0.0000 -0.0001 0.0000 0.0000 0.0000  
Y -0.0001 0.0000 -0.0001 0.0000 0.0000 0.0001  
Z 0.0000 -0.0000 0.0001 -0.0000 -0.0000 -0.0001  
AT. 101 C X -0.0001 0.0000 0.0042 0.0043 0.0004 -0.0006  
Y -0.0004 0.0002 0.0086 0.0088 0.0008 -0.0012  
Z -0.0004 0.0006 -0.0072 -0.0074 -0.0006 0.0012  
AT. 102 C X 0.0001 0.0000 -0.0042 0.0043 0.0004 0.0006  
Y 0.0004 0.0002 -0.0086 0.0088 0.0008 0.0012  
Z 0.0004 0.0006 0.0072 -0.0074 -0.0006 -0.0012  
AT. 103 H X 0.0025 -0.0023 -0.0297 -0.0301 -0.0026 0.0037  
Y 0.0061 -0.0057 -0.0712 -0.0723 -0.0064 0.0088  
Z 0.0000 0.0001 -0.0022 -0.0022 -0.0002 0.0003  
AT. 104 H X -0.0025 -0.0023 0.0297 -0.0301 -0.0026 -0.0037  
Y -0.0061 -0.0057 0.0712 -0.0723 -0.0064 -0.0088  
Z -0.0000 0.0001 0.0022 -0.0022 -0.0002 -0.0003  
AT. 105 H X -0.0011 0.0017 -0.0209 -0.0216 -0.0018 0.0034  
Y -0.0017 0.0027 -0.0322 -0.0332 -0.0028 0.0054  
Z 0.0045 -0.0071 0.0882 0.0911 0.0077 -0.0146  
AT. 106 H X 0.0011 0.0017 0.0209 -0.0216 -0.0018 -0.0034  
Y 0.0017 0.0027 0.0322 -0.0332 -0.0028 -0.0054  
Z -0.0045 -0.0071 -0.0882 0.0911 0.0077 0.0146  
AT. 107 C X -0.0007 -0.0014 0.0001 0.0001 -0.0001 0.0001

Y 0.0001 0.0003 -0.0000 -0.0000 0.0000 -0.0000  
Z -0.0008 -0.0015 0.0001 0.0000 -0.0001 0.0001  
AT. 108 C X 0.0007 -0.0014 -0.0001 0.0001 -0.0001 -0.0001  
Y -0.0001 0.0003 0.0000 -0.0000 0.0000 0.0000  
Z 0.0008 -0.0015 -0.0001 0.0000 -0.0001 -0.0001  
AT. 109 H X 0.0006 0.0014 -0.0001 -0.0001 0.0002 -0.0001  
Y -0.0035 -0.0073 0.0005 0.0003 -0.0006 0.0007  
Z 0.0020 0.0041 -0.0003 -0.0001 0.0003 -0.0004  
AT. 110 H X -0.0006 0.0014 0.0001 -0.0001 0.0002 0.0001  
Y 0.0035 -0.0073 -0.0005 0.0003 -0.0006 -0.0007  
Z -0.0020 0.0041 0.0003 -0.0001 0.0003 0.0004  
AT. 111 H X 0.0079 0.0154 -0.0007 -0.0007 0.0006 -0.0007  
Y 0.0016 0.0030 -0.0001 -0.0001 0.0001 -0.0002  
Z 0.0072 0.0138 -0.0006 -0.0006 0.0004 -0.0006  
AT. 112 H X -0.0079 0.0154 0.0007 -0.0007 0.0006 0.0007  
Y -0.0016 0.0030 0.0001 -0.0001 0.0001 0.0002  
Z -0.0072 0.0138 0.0006 -0.0006 0.0004 0.0006  
AT. 113 C X -0.0000 -0.0000 0.0000 0.0000 -0.0000 0.0000  
Y -0.0000 0.0001 -0.0000 -0.0000 0.0000 0.0000  
Z -0.0000 0.0000 -0.0000 -0.0000 0.0000 -0.0000  
AT. 114 C X 0.0000 -0.0000 -0.0000 0.0000 -0.0000 -0.0000  
Y 0.0000 0.0001 0.0000 -0.0000 0.0000 -0.0000  
Z 0.0000 0.0000 0.0000 -0.0000 0.0000 0.0000  
AT. 115 C X -0.0007 0.0011 0.0003 0.0002 0.0000 0.0001  
Y -0.0003 0.0005 0.0001 0.0001 0.0000 0.0000  
Z -0.0008 0.0014 0.0003 0.0002 0.0001 0.0001  
AT. 116 C X 0.0007 0.0011 -0.0003 0.0002 0.0000 -0.0001  
Y 0.0003 0.0005 -0.0001 0.0001 0.0000 -0.0000  
Z 0.0008 0.0014 -0.0003 0.0002 0.0001 -0.0001  
AT. 117 H X 0.0091 -0.0143 -0.0040 -0.0031 -0.0008 -0.0006  
Y 0.0021 -0.0034 -0.0011 -0.0009 -0.0002 -0.0001  
Z 0.0089 -0.0141 -0.0039 -0.0030 -0.0009 -0.0006

AT.118 H X -0.0091 -0.0143 0.0040 -0.0031 -0.0008 0.0006  
Y -0.0021 -0.0034 0.0011 -0.0009 -0.0002 0.0001  
Z -0.0089 -0.0141 0.0039 -0.0030 -0.0009 0.0006

AT.119 H X -0.0010 0.0018 0.0003 0.0002 0.0002 0.0001  
Y 0.0016 -0.0029 -0.0005 -0.0002 -0.0002 -0.0002  
Z 0.0015 -0.0027 -0.0004 -0.0002 -0.0002 -0.0002

AT.120 H X 0.0010 0.0018 -0.0003 0.0002 0.0002 -0.0001  
Y -0.0016 -0.0029 0.0005 -0.0002 -0.0002 0.0002  
Z -0.0015 -0.0027 0.0004 -0.0002 -0.0002 0.0002

AT.121 C X 0.0029 -0.0040 -0.0000 0.0000 -0.0000 -0.0001  
Y 0.0004 -0.0004 -0.0000 -0.0000 0.0000 0.0000  
Z -0.0029 0.0040 0.0000 -0.0000 0.0001 0.0001

AT.122 C X -0.0029 -0.0040 0.0000 0.0000 -0.0000 0.0001  
Y -0.0004 -0.0004 0.0000 -0.0000 0.0000 -0.0000  
Z 0.0029 0.0040 -0.0000 -0.0000 0.0001 -0.0001

AT.123 H X -0.0012 0.0019 0.0000 -0.0001 0.0001 0.0001  
Y 0.0088 -0.0134 -0.0001 0.0003 -0.0006 -0.0004  
Z 0.0080 -0.0123 -0.0002 0.0003 -0.0005 -0.0003

AT.124 H X 0.0012 0.0019 -0.0000 -0.0001 0.0001 -0.0001  
Y -0.0088 -0.0134 0.0001 0.0003 -0.0006 0.0004  
Z -0.0080 -0.0123 0.0002 0.0003 -0.0005 0.0003

AT.125 H X -0.0327 0.0445 0.0002 -0.0002 0.0002 0.0005  
Y -0.0133 0.0182 0.0001 -0.0001 0.0001 0.0002  
Z 0.0268 -0.0366 -0.0002 0.0002 -0.0002 -0.0004

AT.126 H X 0.0327 0.0445 -0.0002 -0.0002 0.0002 -0.0005  
Y 0.0133 0.0182 -0.0001 -0.0001 0.0001 -0.0002  
Z -0.0268 -0.0366 0.0002 0.0002 -0.0002 0.0004

AT.127 C X 0.0000 -0.0001 -0.0000 0.0000 -0.0000 -0.0000  
Y -0.0000 0.0000 -0.0000 -0.0000 0.0000 -0.0000  
Z -0.0000 0.0001 0.0000 -0.0000 0.0000 -0.0000

AT.128 C X -0.0000 -0.0001 0.0000 0.0000 -0.0000 0.0000  
Y 0.0000 0.0000 0.0000 -0.0000 0.0000 0.0000



Z 0.0000 0.0001 -0.0000 -0.0000 0.0000 0.0000  
AT. 129 C X 0.0009 -0.0030 0.0000 0.0000 -0.0001 -0.0000  
Y 0.0006 -0.0018 -0.0000 0.0000 -0.0000 -0.0000  
Z -0.0009 0.0028 -0.0000 -0.0000 0.0001 0.0000  
AT. 130 C X -0.0009 -0.0030 -0.0000 0.0000 -0.0001 0.0000  
Y -0.0006 -0.0018 0.0000 0.0000 -0.0000 0.0000  
Z 0.0009 0.0028 0.0000 -0.0000 0.0001 -0.0000  
AT. 131 H X -0.0117 0.0385 -0.0002 -0.0006 0.0013 -0.0000  
Y -0.0039 0.0131 -0.0001 -0.0002 0.0005 -0.0001  
Z 0.0087 -0.0290 0.0001 0.0005 -0.0010 -0.0000  
AT. 132 H X 0.0117 0.0385 0.0002 -0.0006 0.0013 0.0000  
Y 0.0039 0.0131 0.0001 -0.0002 0.0005 0.0001  
Z -0.0087 -0.0290 -0.0001 0.0005 -0.0010 0.0000  
AT. 133 H X 0.0011 -0.0031 -0.0001 0.0000 -0.0000 -0.0001  
Y -0.0034 0.0090 0.0001 0.0000 -0.0001 0.0003  
Z 0.0021 -0.0056 -0.0001 0.0000 0.0000 -0.0002  
AT. 134 H X -0.0011 -0.0031 0.0001 0.0000 -0.0000 0.0001  
Y 0.0034 0.0090 -0.0001 0.0000 -0.0001 -0.0003  
Z -0.0021 -0.0056 0.0001 0.0000 0.0000 0.0002  
AT. 135 C X -0.0001 0.0001 0.0000 -0.0000 0.0000 0.0000  
Y 0.0001 0.0003 -0.0000 -0.0000 0.0001 -0.0000  
Z -0.0001 0.0001 0.0000 -0.0000 0.0000 0.0001  
AT. 136 C X 0.0001 0.0001 -0.0000 -0.0000 0.0000 -0.0000  
Y -0.0001 0.0003 0.0000 -0.0000 0.0001 0.0000  
Z 0.0001 0.0001 -0.0000 -0.0000 0.0000 -0.0001  
AT. 137 H X 0.0003 0.0006 -0.0001 -0.0001 0.0002 -0.0003  
Y -0.0012 -0.0026 0.0004 0.0003 -0.0006 0.0008  
Z 0.0007 0.0015 -0.0002 -0.0002 0.0004 -0.0005  
AT. 138 H X -0.0003 0.0006 0.0001 -0.0001 0.0002 0.0003  
Y 0.0012 -0.0026 -0.0004 0.0003 -0.0006 -0.0008  
Z -0.0007 0.0015 0.0002 -0.0002 0.0004 0.0005  
AT. 139 H X 0.0013 -0.0017 -0.0001 0.0002 -0.0005 0.0001

Y 0.0003 -0.0004 -0.0000 0.0000 -0.0001 0.0000  
Z 0.0009 -0.0014 -0.0000 0.0002 -0.0004 0.0001  
AT. 140 H X -0.0013 -0.0017 0.0001 0.0002 -0.0005 -0.0001  
Y -0.0003 -0.0004 0.0000 0.0000 -0.0001 -0.0000  
Z -0.0009 -0.0014 0.0000 0.0002 -0.0004 -0.0001  
AT. 141 H X -0.0001 0.0006 0.0001 -0.0001 0.0001 0.0001  
Y 0.0002 -0.0012 -0.0002 0.0001 -0.0002 -0.0003  
Z 0.0002 -0.0012 -0.0001 0.0001 -0.0002 -0.0002  
AT. 142 H X 0.0001 0.0006 -0.0001 -0.0001 0.0001 -0.0001  
Y -0.0002 -0.0012 0.0002 0.0001 -0.0002 0.0003  
Z -0.0002 -0.0012 0.0001 0.0001 -0.0002 0.0002  
AT. 143 C X 0.0001 -0.0004 0.0000 0.0000 -0.0000 0.0000  
Y 0.0001 0.0007 -0.0000 -0.0001 0.0001 -0.0000  
Z -0.0002 0.0003 0.0000 -0.0000 0.0000 0.0000  
AT. 144 C X -0.0001 -0.0004 -0.0000 0.0000 -0.0000 -0.0000  
Y -0.0001 0.0007 0.0000 -0.0001 0.0001 0.0000  
Z 0.0002 0.0003 -0.0000 -0.0000 0.0000 -0.0000  
AT. 145 H X -0.0002 0.0013 0.0000 -0.0001 0.0002 0.0001  
Y 0.0007 -0.0050 -0.0001 0.0004 -0.0006 -0.0002  
Z 0.0006 -0.0048 -0.0001 0.0004 -0.0006 -0.0002  
AT. 146 H X 0.0002 0.0013 -0.0000 -0.0001 0.0002 -0.0001  
Y -0.0007 -0.0050 0.0001 0.0004 -0.0006 0.0002  
Z -0.0006 -0.0048 0.0001 0.0004 -0.0006 0.0002  
AT. 147 H X -0.0016 0.0021 -0.0000 -0.0001 0.0000 0.0001  
Y -0.0006 0.0009 0.0000 -0.0000 0.0000 0.0000  
Z 0.0009 -0.0013 0.0000 0.0000 -0.0000 -0.0000  
AT. 148 H X 0.0016 0.0021 0.0000 -0.0001 0.0000 -0.0001  
Y 0.0006 0.0009 -0.0000 -0.0000 0.0000 -0.0000  
Z -0.0009 -0.0013 -0.0000 0.0000 -0.0000 0.0000  
AT. 149 H X 0.0002 0.0012 -0.0000 -0.0001 0.0001 -0.0001  
Y -0.0009 -0.0044 0.0002 0.0003 -0.0006 0.0004  
Z 0.0005 0.0025 -0.0001 -0.0002 0.0003 -0.0002

AT.150 H X -0.0002 0.0012 0.0000 -0.0001 0.0001 0.0001  
Y 0.0009 -0.0044 -0.0002 0.0003 -0.0006 -0.0004  
Z -0.0005 0.0025 0.0001 -0.0002 0.0003 0.0002

AT.151 C X -0.0000 -0.0001 0.0000 0.0000 -0.0000 0.0000  
Y -0.0000 0.0004 -0.0000 -0.0000 0.0001 -0.0000  
Z 0.0000 -0.0000 0.0000 -0.0000 0.0000 0.0000

AT.152 C X 0.0000 -0.0001 -0.0000 0.0000 -0.0000 -0.0000  
Y 0.0000 0.0004 0.0000 -0.0000 0.0001 0.0000  
Z -0.0000 -0.0000 -0.0000 -0.0000 0.0000 -0.0000

AT.153 H X -0.0000 0.0007 -0.0001 -0.0001 0.0001 -0.0001  
Y -0.0000 -0.0025 0.0002 0.0003 -0.0006 0.0004  
Z 0.0001 0.0014 -0.0001 -0.0002 0.0003 -0.0002

AT.154 H X 0.0000 0.0007 0.0001 -0.0001 0.0001 0.0001  
Y 0.0000 -0.0025 -0.0002 0.0003 -0.0006 -0.0004  
Z -0.0001 0.0014 0.0001 -0.0002 0.0003 0.0002

AT.155 H X 0.0000 0.0006 0.0000 -0.0001 0.0002 -0.0000  
Y -0.0001 -0.0016 -0.0000 0.0003 -0.0005 0.0000  
Z -0.0000 -0.0016 -0.0000 0.0003 -0.0004 0.0000

AT.156 H X -0.0000 0.0006 -0.0000 -0.0001 0.0002 0.0000  
Y 0.0001 -0.0016 0.0000 0.0003 -0.0005 -0.0000  
Z 0.0000 -0.0016 0.0000 0.0003 -0.0004 -0.0000

AT.157 O X 0.0000 0.0000 -0.0000 -0.0000 0.0000 -0.0000  
Y -0.0001 -0.0000 -0.0000 0.0000 -0.0001 0.0001  
Z -0.0000 -0.0000 0.0000 0.0000 -0.0000 0.0000

AT.158 O X -0.0000 0.0000 0.0000 -0.0000 0.0000 0.0000  
Y 0.0001 -0.0000 0.0000 0.0000 -0.0001 -0.0001  
Z 0.0000 -0.0000 -0.0000 0.0000 -0.0000 -0.0000

AT.159 O X -0.0000 0.0000 -0.0000 -0.0000 0.0001 -0.0001  
Y 0.0000 0.0000 0.0000 0.0000 -0.0000 0.0000  
Z -0.0000 -0.0000 -0.0000 -0.0000 0.0002 -0.0002

AT.160 O X 0.0000 0.0000 0.0000 -0.0000 0.0001 0.0001  
Y -0.0000 0.0000 -0.0000 0.0000 -0.0000 -0.0000

Z 0.0000 -0.0000 0.0000 -0.0000 0.0002 0.0002  
AT.161 H X -0.0002 -0.0002 0.0000 0.0001 -0.0006 0.0006  
Y 0.0009 0.0007 -0.0000 -0.0002 0.0013 -0.0013  
Z -0.0002 0.0004 -0.0001 -0.0000 -0.0003 0.0002  
AT.162 H X 0.0002 -0.0002 -0.0000 0.0001 -0.0006 -0.0006  
Y -0.0009 0.0007 0.0000 -0.0002 0.0013 0.0013  
Z 0.0002 0.0004 0.0001 -0.0000 -0.0003 -0.0002  
AT.163 H X 0.0002 0.0001 0.0001 0.0002 -0.0012 0.0011  
Y -0.0001 -0.0000 -0.0001 -0.0001 0.0006 -0.0006  
Z 0.0003 0.0000 0.0004 0.0005 -0.0031 0.0031  
AT.164 H X -0.0002 0.0001 -0.0001 0.0002 -0.0012 -0.0011  
Y 0.0001 -0.0000 0.0001 -0.0001 0.0006 0.0006  
Z -0.0003 0.0000 -0.0004 0.0005 -0.0031 -0.0031  
AT.165 O X -0.0000 0.0000 -0.0001 0.0001 0.0000 0.0000  
Y -0.0000 0.0000 -0.0000 0.0000 0.0000 0.0000  
Z -0.0000 -0.0000 -0.0000 0.0000 0.0000 0.0000  
AT.166 O X 0.0000 0.0000 0.0001 0.0001 0.0000 -0.0000  
Y 0.0000 0.0000 0.0000 0.0000 0.0000 -0.0000  
Z 0.0000 -0.0000 0.0000 0.0000 0.0000 -0.0000  
AT.167 H X 0.0001 -0.0001 0.0010 -0.0012 -0.0003 -0.0001  
Y 0.0000 -0.0000 0.0003 -0.0003 -0.0001 -0.0001  
Z 0.0000 0.0000 0.0006 -0.0006 -0.0001 -0.0001  
AT.168 H X -0.0001 -0.0001 -0.0010 -0.0012 -0.0003 0.0001  
Y -0.0000 -0.0000 -0.0003 -0.0003 -0.0001 0.0001  
Z -0.0000 0.0000 -0.0006 -0.0006 -0.0001 0.0001  
AT.169 O X 0.0000 0.0000 -0.0001 0.0001 0.0000 -0.0000  
Y -0.0000 -0.0000 0.0001 -0.0001 -0.0000 0.0000  
Z -0.0000 0.0000 -0.0001 0.0001 0.0000 -0.0000  
AT.170 O X -0.0000 0.0000 0.0001 0.0001 0.0000 0.0000  
Y 0.0000 -0.0000 -0.0001 -0.0001 -0.0000 -0.0000  
Z 0.0000 0.0000 0.0001 0.0001 0.0000 0.0000  
AT.171 H X -0.0000 -0.0002 0.0008 -0.0008 -0.0002 0.0001

Y -0.0000 0.0003 -0.0015 0.0016 0.0004 -0.0002  
Z 0.0000 -0.0001 0.0007 -0.0007 -0.0002 0.0001  
AT. 172 H X 0.0000 -0.0002 -0.0008 -0.0008 -0.0002 -0.0001  
Y 0.0000 0.0003 0.0015 0.0016 0.0004 0.0002  
Z -0.0000 -0.0001 -0.0007 -0.0007 -0.0002 -0.0001  
  
FREQ(CM\*\*-1) 3261.17 3266.90 3269.65 3270.24 3431.38 3436.14

AT. 1 I X -0.0000 -0.0000 -0.0000 0.0000 -0.0000 -0.0000  
Y -0.0000 0.0000 0.0000 0.0000 0.0000 -0.0000  
Z -0.0000 -0.0000 0.0000 0.0000 -0.0000 0.0000  
AT. 2 I X 0.0000 -0.0000 -0.0000 -0.0000 0.0000 -0.0000  
Y 0.0000 0.0000 0.0000 -0.0000 -0.0000 -0.0000  
Z 0.0000 -0.0000 0.0000 -0.0000 0.0000 0.0000  
AT. 3 I X 0.0000 -0.0000 0.0000 0.0000 -0.0000 0.0000  
Y 0.0000 -0.0000 -0.0000 -0.0000 0.0000 -0.0000  
Z 0.0000 -0.0000 0.0000 -0.0000 0.0000 0.0000  
AT. 4 I X -0.0000 -0.0000 0.0000 -0.0000 0.0000 0.0000  
Y -0.0000 -0.0000 -0.0000 0.0000 -0.0000 -0.0000  
Z -0.0000 -0.0000 0.0000 0.0000 -0.0000 0.0000  
AT. 5 O X -0.0000 -0.0000 -0.0001 -0.0001 -0.0002 -0.0001  
Y 0.0000 0.0000 0.0000 0.0000 0.0002 0.0001  
Z 0.0001 0.0000 0.0000 0.0001 0.0002 0.0001  
AT. 6 O X 0.0000 -0.0000 -0.0001 0.0001 0.0002 -0.0001  
Y -0.0000 0.0000 0.0000 -0.0000 -0.0002 0.0001  
Z -0.0001 0.0000 0.0000 -0.0001 -0.0002 0.0001  
AT. 7 O X 0.0000 -0.0000 -0.0000 -0.0000 -0.0004 0.0003  
Y -0.0000 0.0000 -0.0000 -0.0000 0.0003 -0.0002  
Z 0.0000 -0.0000 0.0000 0.0000 -0.0001 0.0001  
AT. 8 O X -0.0000 -0.0000 -0.0000 0.0000 0.0004 0.0003  
Y 0.0000 0.0000 -0.0000 0.0000 -0.0003 -0.0002  
Z -0.0000 -0.0000 0.0000 -0.0000 0.0001 0.0001

AT. 9 N X -0.0000 -0.0000 0.0000 0.0000 -0.0000 -0.0000  
Y 0.0000 0.0000 -0.0000 -0.0000 -0.0000 -0.0000  
Z 0.0000 0.0000 0.0000 0.0000 0.0002 0.0001

AT. 10 N X 0.0000 -0.0000 0.0000 -0.0000 0.0000 -0.0000  
Y -0.0000 0.0000 -0.0000 0.0000 0.0000 -0.0000  
Z -0.0000 0.0000 0.0000 -0.0000 -0.0002 0.0001

AT. 11 N X -0.0000 0.0000 -0.0000 -0.0000 -0.0001 0.0000  
Y 0.0000 0.0000 -0.0000 -0.0000 0.0002 -0.0001  
Z 0.0000 -0.0000 0.0000 -0.0000 -0.0002 0.0002

AT. 12 N X 0.0000 0.0000 -0.0000 0.0000 0.0001 0.0000  
Y -0.0000 0.0000 -0.0000 0.0000 -0.0002 -0.0001  
Z -0.0000 -0.0000 0.0000 0.0000 0.0002 0.0002

AT. 13 C X 0.0001 0.0001 -0.0000 0.0000 0.0003 0.0002  
Y -0.0001 -0.0000 0.0001 0.0000 -0.0001 -0.0001  
Z -0.0001 -0.0000 -0.0002 -0.0002 -0.0005 -0.0003

AT. 14 C X -0.0001 0.0001 -0.0000 -0.0000 -0.0003 0.0002  
Y 0.0001 -0.0000 0.0001 -0.0000 0.0001 -0.0001  
Z 0.0001 -0.0000 -0.0002 0.0002 0.0005 -0.0003

AT. 15 C X -0.0007 0.0000 0.0037 0.0036 -0.0000 -0.0000  
Y 0.0012 -0.0003 -0.0051 -0.0049 -0.0000 0.0000  
Z 0.0020 -0.0001 -0.0105 -0.0103 0.0000 -0.0001

AT. 16 C X 0.0007 0.0000 0.0037 -0.0036 0.0000 -0.0000  
Y -0.0012 -0.0003 -0.0051 0.0049 0.0000 0.0000  
Z -0.0020 -0.0001 -0.0105 0.0103 -0.0000 -0.0001

AT. 17 H X 0.0048 -0.0009 -0.0227 -0.0221 -0.0003 -0.0001  
Y -0.0176 0.0033 0.0828 0.0806 0.0004 0.0003  
Z -0.0139 0.0026 0.0651 0.0634 0.0003 0.0000

AT. 18 H X -0.0048 -0.0009 -0.0227 0.0221 0.0003 -0.0001  
Y 0.0176 0.0033 0.0828 -0.0806 -0.0004 0.0003  
Z 0.0139 0.0026 0.0651 -0.0634 -0.0003 0.0000

AT. 19 H X 0.0035 0.0004 -0.0203 -0.0201 0.0002 -0.0002  
Y 0.0040 0.0003 -0.0232 -0.0230 0.0002 -0.0004

Z -0.0103 -0.0010 0.0610 0.0606 -0.0005 0.0012  
AT. 20 H X -0.0035 0.0004 -0.0203 0.0201 -0.0002 -0.0002  
Y -0.0040 0.0003 -0.0232 0.0230 -0.0002 -0.0004  
Z 0.0103 -0.0010 0.0610 -0.0606 0.0005 0.0012  
AT. 21 C X -0.0000 0.0001 0.0000 0.0000 0.0005 -0.0004  
Y 0.0001 -0.0001 -0.0000 -0.0000 -0.0006 0.0004  
Z -0.0000 0.0000 -0.0000 -0.0000 0.0002 -0.0001  
AT. 22 C X 0.0000 0.0001 0.0000 -0.0000 -0.0005 -0.0004  
Y -0.0001 -0.0001 -0.0000 0.0000 0.0006 0.0004  
Z 0.0000 0.0000 -0.0000 0.0000 -0.0002 -0.0001  
AT. 23 C X -0.0011 0.0007 -0.0002 -0.0001 0.0000 -0.0000  
Y 0.0039 -0.0026 0.0007 0.0003 -0.0001 0.0001  
Z -0.0037 0.0022 -0.0005 -0.0003 0.0002 -0.0001  
AT. 24 C X 0.0011 0.0007 -0.0002 0.0001 -0.0000 -0.0000  
Y -0.0039 -0.0026 0.0007 -0.0003 0.0001 0.0001  
Z 0.0037 0.0022 -0.0005 0.0003 -0.0002 -0.0001  
AT. 25 H X 0.0033 -0.0023 0.0007 0.0001 -0.0003 0.0002  
Y -0.0243 0.0167 -0.0054 -0.0013 0.0003 -0.0006  
Z -0.0029 0.0020 -0.0006 -0.0001 0.0000 -0.0000  
AT. 26 H X -0.0033 -0.0023 0.0007 -0.0001 0.0003 0.0002  
Y 0.0243 0.0167 -0.0054 0.0013 -0.0003 -0.0006  
Z 0.0029 0.0020 -0.0006 0.0001 -0.0000 -0.0000  
AT. 27 H X 0.0108 -0.0067 0.0016 0.0008 -0.0003 0.0002  
Y -0.0225 0.0139 -0.0033 -0.0018 0.0006 -0.0004  
Z 0.0459 -0.0283 0.0068 0.0035 -0.0021 0.0016  
AT. 28 H X -0.0108 -0.0067 0.0016 -0.0008 0.0003 0.0002  
Y 0.0225 0.0139 -0.0033 0.0018 -0.0006 -0.0004  
Z -0.0459 -0.0283 0.0068 -0.0035 0.0021 0.0016  
AT. 29 C X 0.0002 0.0002 -0.0000 0.0000 -0.0000 -0.0000  
Y -0.0001 -0.0003 0.0000 -0.0000 0.0000 0.0000  
Z -0.0002 -0.0003 0.0000 -0.0000 0.0000 -0.0000  
AT. 30 C X -0.0002 0.0002 -0.0000 -0.0000 0.0000 -0.0000

Y 0.0001 -0.0003 0.0000 0.0000 -0.0000 0.0000  
Z 0.0002 -0.0003 0.0000 0.0000 -0.0000 -0.0000  
AT. 31 H X -0.0002 0.0004 -0.0000 -0.0001 0.0000 -0.0001  
Y -0.0002 0.0011 -0.0001 -0.0001 -0.0001 -0.0002  
Z 0.0001 -0.0007 0.0001 0.0000 0.0001 0.0002  
AT. 32 H X 0.0002 0.0004 -0.0000 0.0001 -0.0000 -0.0001  
Y 0.0002 0.0011 -0.0001 0.0001 0.0001 -0.0002  
Z -0.0001 -0.0007 0.0001 -0.0000 -0.0001 0.0002  
AT. 33 H X -0.0015 -0.0029 -0.0000 -0.0005 0.0001 -0.0000  
Y 0.0010 0.0018 0.0000 0.0003 -0.0001 -0.0000  
Z 0.0021 0.0042 -0.0001 0.0005 -0.0007 -0.0004  
AT. 34 H X 0.0015 -0.0029 -0.0000 0.0005 -0.0001 -0.0000  
Y -0.0010 0.0018 0.0000 -0.0003 0.0001 -0.0000  
Z -0.0021 0.0042 -0.0001 -0.0005 0.0007 -0.0004  
AT. 35 C X 0.0000 -0.0000 -0.0000 0.0000 -0.0000 0.0000  
Y 0.0000 -0.0000 0.0000 0.0000 -0.0000 -0.0000  
Z -0.0000 -0.0000 0.0000 -0.0000 -0.0000 -0.0000  
AT. 36 C X -0.0000 -0.0000 -0.0000 -0.0000 0.0000 0.0000  
Y -0.0000 -0.0000 0.0000 -0.0000 0.0000 -0.0000  
Z 0.0000 -0.0000 0.0000 0.0000 0.0000 -0.0000  
AT. 37 C X -0.0000 0.0001 0.0000 0.0000 0.0001 -0.0001  
Y -0.0000 -0.0001 -0.0000 -0.0000 -0.0000 0.0000  
Z -0.0000 -0.0001 -0.0000 -0.0000 -0.0000 -0.0000  
AT. 38 C X 0.0000 0.0001 0.0000 -0.0000 -0.0001 -0.0001  
Y 0.0000 -0.0001 -0.0000 0.0000 0.0000 0.0000  
Z 0.0000 -0.0001 -0.0000 0.0000 0.0000 -0.0000  
AT. 39 H X 0.0002 -0.0008 -0.0001 -0.0003 -0.0002 0.0001  
Y -0.0002 0.0006 0.0001 0.0002 0.0001 -0.0001  
Z -0.0003 0.0012 0.0001 0.0005 0.0003 -0.0001  
AT. 40 H X -0.0002 -0.0008 -0.0001 0.0003 0.0002 0.0001  
Y 0.0002 0.0006 0.0001 -0.0002 -0.0001 -0.0001  
Z 0.0003 0.0012 0.0001 -0.0005 -0.0003 -0.0001



AT. 41 H X 0.0004 0.0001 -0.0000 0.0001 -0.0003 0.0004  
Y 0.0003 0.0001 -0.0000 0.0001 0.0001 0.0001  
Z 0.0005 0.0001 -0.0001 0.0001 -0.0003 0.0004

AT. 42 H X -0.0004 0.0001 -0.0000 -0.0001 0.0003 0.0004  
Y -0.0003 0.0001 -0.0000 -0.0001 -0.0001 0.0001  
Z -0.0005 0.0001 -0.0001 -0.0001 0.0003 0.0004

AT. 43 C X -0.0000 0.0001 0.0001 0.0001 -0.0000 0.0000  
Y -0.0000 -0.0001 -0.0001 -0.0001 0.0000 -0.0000  
Z -0.0000 0.0001 0.0001 0.0001 0.0000 -0.0000

AT. 44 C X 0.0000 0.0001 0.0001 -0.0001 0.0000 0.0000  
Y 0.0000 -0.0001 -0.0001 0.0001 -0.0000 -0.0000  
Z 0.0000 0.0001 0.0001 -0.0001 -0.0000 -0.0000

AT. 45 H X 0.0001 0.0000 -0.0002 -0.0002 0.0001 -0.0002  
Y 0.0001 0.0000 -0.0003 -0.0003 -0.0001 -0.0001  
Z 0.0002 0.0001 -0.0002 -0.0003 -0.0003 0.0002

AT. 46 H X -0.0001 0.0000 -0.0002 0.0002 -0.0001 -0.0002  
Y -0.0001 0.0000 -0.0003 0.0003 0.0001 -0.0001  
Z -0.0002 0.0001 -0.0002 0.0003 0.0003 0.0002

AT. 47 H X -0.0000 -0.0014 -0.0014 -0.0016 -0.0001 -0.0001  
Y 0.0000 0.0010 0.0009 0.0010 -0.0000 0.0001  
Z -0.0000 -0.0010 -0.0010 -0.0011 0.0002 -0.0002

AT. 48 H X 0.0000 -0.0014 -0.0014 0.0016 0.0001 -0.0001  
Y -0.0000 0.0010 0.0009 -0.0010 0.0000 0.0001  
Z 0.0000 -0.0010 -0.0010 0.0011 -0.0002 -0.0002

AT. 49 C X 0.0000 -0.0000 -0.0000 0.0000 -0.0000 -0.0000  
Y 0.0000 -0.0000 0.0000 0.0000 -0.0000 0.0000  
Z 0.0000 0.0000 0.0000 0.0000 0.0000 0.0000

AT. 50 C X -0.0000 -0.0000 -0.0000 -0.0000 0.0000 -0.0000  
Y -0.0000 -0.0000 0.0000 -0.0000 0.0000 0.0000  
Z -0.0000 0.0000 0.0000 -0.0000 -0.0000 0.0000

AT. 51 C X -0.0001 0.0001 0.0006 0.0006 0.0001 0.0001  
Y 0.0001 -0.0002 -0.0005 -0.0005 -0.0000 -0.0000

Z -0.0000 0.0001 0.0004 0.0004 -0.0000 -0.0000  
AT. 52 C X 0.0001 0.0001 0.0006 -0.0006 -0.0001 0.0001  
Y -0.0001 -0.0002 -0.0005 0.0005 0.0000 -0.0000  
Z 0.0000 0.0001 0.0004 -0.0004 0.0000 -0.0000  
AT. 53 H X 0.0014 -0.0015 -0.0076 -0.0076 -0.0002 -0.0002  
Y -0.0011 0.0011 0.0055 0.0056 0.0001 0.0001  
Z 0.0008 -0.0009 -0.0046 -0.0046 -0.0001 -0.0001  
AT. 54 H X -0.0014 -0.0015 -0.0076 0.0076 0.0002 -0.0002  
Y 0.0011 0.0011 0.0055 -0.0056 -0.0001 0.0001  
Z -0.0008 -0.0009 -0.0046 0.0046 0.0001 -0.0001  
AT. 55 H X -0.0001 0.0006 0.0004 0.0005 -0.0000 -0.0001  
Y -0.0003 0.0011 0.0008 0.0008 0.0001 0.0000  
Z 0.0002 -0.0008 -0.0006 -0.0006 0.0001 0.0000  
AT. 56 H X 0.0001 0.0006 0.0004 -0.0005 0.0000 -0.0001  
Y 0.0003 0.0011 0.0008 -0.0008 -0.0001 0.0000  
Z -0.0002 -0.0008 -0.0006 0.0006 -0.0001 0.0000  
AT. 57 C X 0.0000 -0.0000 -0.0000 0.0000 0.0000 0.0000  
Y 0.0000 -0.0002 -0.0000 0.0000 -0.0000 0.0000  
Z -0.0001 -0.0001 0.0000 -0.0000 -0.0000 -0.0000  
AT. 58 C X -0.0000 -0.0000 -0.0000 -0.0000 -0.0000 0.0000  
Y -0.0000 -0.0002 -0.0000 -0.0000 0.0000 0.0000  
Z 0.0001 -0.0001 0.0000 0.0000 0.0000 -0.0000  
AT. 59 H X -0.0003 0.0006 0.0000 -0.0000 0.0000 -0.0002  
Y -0.0005 0.0011 0.0000 -0.0001 0.0002 -0.0003  
Z 0.0004 -0.0008 -0.0000 0.0001 -0.0001 0.0002  
AT. 60 H X 0.0003 0.0006 0.0000 0.0000 -0.0000 -0.0002  
Y 0.0005 0.0011 0.0000 0.0001 -0.0002 -0.0003  
Z -0.0004 -0.0008 -0.0000 -0.0001 0.0001 0.0002  
AT. 61 H X -0.0002 -0.0012 0.0000 -0.0000 -0.0001 -0.0000  
Y 0.0001 0.0007 -0.0000 -0.0000 0.0001 0.0000  
Z 0.0002 0.0015 -0.0000 -0.0000 0.0001 -0.0000  
AT. 62 H X 0.0002 -0.0012 0.0000 0.0000 0.0001 -0.0000

Y -0.0001 0.0007 -0.0000 0.0000 -0.0001 0.0000  
Z -0.0002 0.0015 -0.0000 0.0000 -0.0001 -0.0000  
AT. 63 H X 0.0002 0.0006 0.0000 -0.0000 0.0001 0.0001  
Y 0.0003 0.0006 0.0000 0.0000 -0.0000 0.0001  
Z 0.0003 0.0006 0.0000 0.0000 0.0000 0.0000  
AT. 64 H X -0.0002 0.0006 0.0000 0.0000 -0.0001 0.0001  
Y -0.0003 0.0006 0.0000 -0.0000 0.0000 0.0001  
Z -0.0003 0.0006 0.0000 -0.0000 -0.0000 0.0000  
AT. 65 C X 0.0000 -0.0001 0.0000 0.0000 0.0000 -0.0000  
Y -0.0000 -0.0001 0.0000 0.0000 0.0000 -0.0000  
Z -0.0000 -0.0000 0.0000 0.0000 0.0000 -0.0000  
AT. 66 C X -0.0000 -0.0001 0.0000 -0.0000 -0.0000 -0.0000  
Y 0.0000 -0.0001 0.0000 -0.0000 -0.0000 -0.0000  
Z 0.0000 -0.0000 0.0000 -0.0000 -0.0000 -0.0000  
AT. 67 H X 0.0001 0.0004 -0.0001 -0.0001 -0.0000 0.0001  
Y 0.0001 0.0004 -0.0001 -0.0001 0.0000 0.0001  
Z 0.0001 0.0005 -0.0001 -0.0001 0.0000 0.0001  
AT. 68 H X -0.0001 0.0004 -0.0001 0.0001 0.0000 0.0001  
Y -0.0001 0.0004 -0.0001 0.0001 -0.0000 0.0001  
Z -0.0001 0.0005 -0.0001 0.0001 -0.0000 0.0001  
AT. 69 H X -0.0004 0.0000 -0.0000 -0.0002 0.0000 -0.0000  
Y 0.0003 -0.0001 0.0000 0.0002 -0.0000 -0.0000  
Z -0.0002 0.0001 -0.0000 -0.0001 0.0000 0.0001  
AT. 70 H X 0.0004 0.0000 -0.0000 0.0002 -0.0000 -0.0000  
Y -0.0003 -0.0001 0.0000 -0.0002 0.0000 -0.0000  
Z 0.0002 0.0001 -0.0000 0.0001 -0.0000 0.0001  
AT. 71 H X -0.0002 0.0002 -0.0000 -0.0000 0.0001 -0.0001  
Y -0.0004 0.0003 -0.0001 -0.0001 0.0002 0.0000  
Z 0.0002 -0.0002 0.0001 0.0001 -0.0002 0.0000  
AT. 72 H X 0.0002 0.0002 -0.0000 0.0000 -0.0001 -0.0001  
Y 0.0004 0.0003 -0.0001 0.0001 -0.0002 0.0000  
Z -0.0002 -0.0002 0.0001 -0.0001 0.0002 0.0000

AT. 73 C X 0.0000 -0.0001 -0.0000 0.0000 0.0000 -0.0000  
Y 0.0000 -0.0001 0.0000 0.0000 -0.0000 0.0000  
Z -0.0000 0.0000 -0.0000 0.0000 0.0000 -0.0000

AT. 74 C X -0.0000 -0.0001 -0.0000 -0.0000 -0.0000 -0.0000  
Y -0.0000 -0.0001 0.0000 -0.0000 0.0000 0.0000  
Z 0.0000 0.0000 -0.0000 -0.0000 -0.0000 -0.0000

AT. 75 H X -0.0002 0.0003 -0.0000 -0.0000 0.0001 -0.0001  
Y -0.0003 0.0006 -0.0001 -0.0001 0.0003 -0.0003  
Z 0.0002 -0.0004 0.0000 0.0000 -0.0002 0.0001

AT. 76 H X 0.0002 0.0003 -0.0000 0.0000 -0.0001 -0.0001  
Y 0.0003 0.0006 -0.0001 0.0001 -0.0003 -0.0003  
Z -0.0002 -0.0004 0.0000 -0.0000 0.0002 0.0001

AT. 77 H X -0.0000 0.0003 -0.0001 -0.0001 -0.0001 0.0004  
Y -0.0000 0.0004 -0.0000 -0.0001 -0.0001 0.0004  
Z -0.0000 0.0004 -0.0001 -0.0001 0.0000 0.0002

AT. 78 H X 0.0000 0.0003 -0.0001 0.0001 0.0001 0.0004  
Y 0.0000 0.0004 -0.0000 0.0001 0.0001 0.0004  
Z 0.0000 0.0004 -0.0001 0.0001 -0.0000 0.0002

AT. 79 I X 0.0000 0.0000 0.0000 -0.0000 -0.0000 0.0000  
Y 0.0000 0.0000 -0.0000 0.0000 -0.0000 -0.0000  
Z 0.0000 0.0000 0.0000 0.0000 0.0000 0.0000

AT. 80 I X -0.0000 0.0000 0.0000 0.0000 0.0000 0.0000  
Y -0.0000 0.0000 -0.0000 -0.0000 0.0000 -0.0000  
Z -0.0000 0.0000 0.0000 -0.0000 -0.0000 0.0000

AT. 81 I X -0.0000 -0.0000 -0.0000 -0.0000 0.0000 -0.0000  
Y -0.0000 -0.0000 -0.0000 -0.0000 0.0000 -0.0000  
Z 0.0000 -0.0000 0.0000 0.0000 0.0000 0.0000

AT. 82 I X 0.0000 -0.0000 -0.0000 0.0000 -0.0000 -0.0000  
Y 0.0000 -0.0000 -0.0000 0.0000 -0.0000 -0.0000  
Z -0.0000 -0.0000 0.0000 -0.0000 -0.0000 0.0000

AT. 83 O X 0.0000 0.0002 0.0000 0.0000 0.0000 0.0001  
Y -0.0000 0.0000 0.0000 -0.0000 0.0000 0.0000

Z 0.0001 0.0001 0.0000 0.0000 0.0000 0.0001  
AT. 84 O X -0.0000 0.0002 0.0000 -0.0000 -0.0000 0.0001  
Y 0.0000 0.0000 0.0000 0.0000 -0.0000 0.0000  
Z -0.0001 0.0001 0.0000 -0.0000 -0.0000 0.0001  
AT. 85 O X -0.0000 -0.0001 0.0000 -0.0000 0.0001 -0.0002  
Y -0.0001 -0.0000 -0.0000 -0.0000 0.0001 -0.0002  
Z 0.0000 0.0000 0.0000 0.0000 -0.0000 0.0001  
AT. 86 O X 0.0000 -0.0001 0.0000 0.0000 -0.0001 -0.0002  
Y 0.0001 -0.0000 -0.0000 0.0000 -0.0001 -0.0002  
Z -0.0000 0.0000 0.0000 -0.0000 0.0000 0.0001  
AT. 87 N X -0.0001 -0.0000 0.0000 -0.0000 0.0000 0.0000  
Y -0.0000 -0.0000 -0.0000 0.0000 -0.0000 -0.0000  
Z -0.0000 0.0001 0.0000 -0.0000 0.0000 0.0001  
AT. 88 N X 0.0001 -0.0000 0.0000 0.0000 -0.0000 0.0000  
Y 0.0000 -0.0000 -0.0000 -0.0000 0.0000 -0.0000  
Z 0.0000 0.0001 0.0000 0.0000 -0.0000 0.0001  
AT. 89 N X 0.0000 0.0000 -0.0000 0.0000 0.0000 -0.0001  
Y -0.0000 -0.0001 -0.0000 -0.0000 0.0000 -0.0001  
Z 0.0000 0.0001 0.0000 -0.0000 -0.0000 0.0002  
AT. 90 N X -0.0000 0.0000 -0.0000 -0.0000 -0.0000 -0.0001  
Y 0.0000 -0.0001 -0.0000 0.0000 -0.0000 -0.0001  
Z -0.0000 0.0001 0.0000 0.0000 0.0000 0.0002  
AT. 91 C X -0.0000 -0.0003 -0.0000 0.0000 -0.0000 -0.0002  
Y 0.0000 -0.0000 -0.0000 0.0000 -0.0000 -0.0000  
Z -0.0002 -0.0005 -0.0000 -0.0000 -0.0001 -0.0002  
AT. 92 C X 0.0000 -0.0003 -0.0000 -0.0000 0.0000 -0.0002  
Y -0.0000 -0.0000 -0.0000 -0.0000 0.0000 -0.0000  
Z 0.0002 -0.0005 -0.0000 0.0000 0.0001 -0.0002  
AT. 93 C X -0.0043 -0.0050 0.0000 -0.0011 -0.0001 -0.0001  
Y -0.0019 -0.0029 0.0000 -0.0007 -0.0001 -0.0001  
Z -0.0091 -0.0099 0.0000 -0.0022 -0.0001 -0.0001  
AT. 94 C X 0.0043 -0.0050 0.0000 0.0011 0.0001 -0.0001

Y 0.0019 -0.0029 0.0000 0.0007 0.0001 -0.0001  
Z 0.0091 -0.0099 0.0000 0.0022 0.0001 -0.0001  
AT. 95 H X 0.0271 0.0367 -0.0002 0.0087 0.0014 0.0014  
Y 0.0433 0.0572 -0.0003 0.0129 0.0013 0.0013  
Z 0.0241 0.0320 -0.0001 0.0072 0.0007 0.0007  
AT. 96 H X -0.0271 0.0367 -0.0002 -0.0087 -0.0014 0.0014  
Y -0.0433 0.0572 -0.0003 -0.0129 -0.0013 0.0013  
Z -0.0241 0.0320 -0.0001 -0.0072 -0.0007 0.0007  
AT. 97 H X 0.0260 0.0267 -0.0001 0.0058 -0.0000 0.0001  
Y -0.0215 -0.0224 0.0001 -0.0049 -0.0001 -0.0002  
Z 0.0852 0.0881 -0.0003 0.0191 0.0000 0.0007  
AT. 98 H X -0.0260 0.0267 -0.0001 -0.0058 0.0000 0.0001  
Y 0.0215 -0.0224 0.0001 0.0049 0.0001 -0.0002  
Z -0.0852 0.0881 -0.0003 -0.0191 -0.0000 0.0007  
AT. 99 C X 0.0000 0.0001 -0.0000 0.0000 -0.0001 0.0005  
Y 0.0001 0.0001 -0.0000 0.0000 -0.0001 0.0003  
Z -0.0001 -0.0002 0.0000 -0.0000 0.0001 -0.0002  
AT. 100 C X -0.0000 0.0001 -0.0000 -0.0000 0.0001 0.0005  
Y -0.0001 0.0001 -0.0000 -0.0000 0.0001 0.0003  
Z 0.0001 -0.0002 0.0000 0.0000 -0.0001 -0.0002  
AT. 101 C X 0.0010 0.0006 -0.0000 0.0001 -0.0000 0.0000  
Y 0.0019 0.0013 -0.0000 0.0002 0.0000 0.0000  
Z -0.0020 -0.0010 0.0000 -0.0003 0.0000 -0.0001  
AT. 102 C X -0.0010 0.0006 -0.0000 -0.0001 0.0000 0.0000  
Y -0.0019 0.0013 -0.0000 -0.0002 -0.0000 0.0000  
Z 0.0020 -0.0010 0.0000 0.0003 -0.0000 -0.0001  
AT. 103 H X -0.0057 -0.0046 0.0000 -0.0005 0.0001 -0.0004  
Y -0.0136 -0.0112 0.0001 -0.0013 -0.0000 -0.0005  
Z -0.0004 -0.0003 0.0000 -0.0000 0.0000 -0.0001  
AT. 104 H X 0.0057 -0.0046 0.0000 0.0005 -0.0001 -0.0004  
Y 0.0136 -0.0112 0.0001 0.0013 0.0000 -0.0005  
Z 0.0004 -0.0003 0.0000 0.0000 -0.0000 -0.0001

AT.105 H X -0.0057 -0.0030 0.0000 -0.0007 0.0001 -0.0001  
Y -0.0089 -0.0047 0.0001 -0.0012 0.0002 -0.0005  
Z 0.0243 0.0129 -0.0002 0.0032 -0.0005 0.0013

AT.106 H X 0.0057 -0.0030 0.0000 0.0007 -0.0001 -0.0001  
Y 0.0089 -0.0047 0.0001 0.0012 -0.0002 -0.0005  
Z -0.0243 0.0129 -0.0002 -0.0032 0.0005 0.0013

AT.107 C X -0.0001 -0.0003 0.0000 -0.0000 0.0000 0.0000  
Y 0.0001 0.0001 -0.0000 0.0000 0.0000 0.0000  
Z -0.0001 -0.0002 -0.0000 -0.0000 0.0000 -0.0000

AT.108 C X 0.0001 -0.0003 0.0000 0.0000 -0.0000 0.0000  
Y -0.0001 0.0001 -0.0000 -0.0000 -0.0000 0.0000  
Z 0.0001 -0.0002 -0.0000 0.0000 -0.0000 -0.0000

AT.109 H X 0.0003 0.0007 -0.0000 0.0000 0.0000 0.0001  
Y -0.0013 -0.0021 0.0000 -0.0003 -0.0000 -0.0003  
Z 0.0008 0.0011 -0.0000 0.0002 -0.0000 0.0002

AT.110 H X -0.0003 0.0007 -0.0000 -0.0000 -0.0000 0.0001  
Y 0.0013 -0.0021 0.0000 0.0003 0.0000 -0.0003  
Z -0.0008 0.0011 -0.0000 -0.0002 0.0000 0.0002

AT.111 H X 0.0013 0.0024 0.0000 0.0002 -0.0002 -0.0001  
Y 0.0003 0.0005 -0.0000 0.0001 -0.0000 -0.0000  
Z 0.0012 0.0017 0.0000 0.0002 -0.0002 -0.0002

AT.112 H X -0.0013 0.0024 0.0000 -0.0002 0.0002 -0.0001  
Y -0.0003 0.0005 -0.0000 -0.0001 0.0000 -0.0000  
Z -0.0012 0.0017 0.0000 -0.0002 0.0002 -0.0002

AT.113 C X -0.0000 -0.0000 -0.0000 -0.0000 0.0000 -0.0000  
Y -0.0000 0.0000 -0.0000 -0.0000 -0.0000 -0.0000  
Z 0.0000 0.0000 0.0000 0.0000 -0.0000 -0.0000

AT.114 C X 0.0000 -0.0000 -0.0000 0.0000 -0.0000 -0.0000  
Y 0.0000 0.0000 -0.0000 0.0000 0.0000 -0.0000  
Z -0.0000 0.0000 0.0000 -0.0000 0.0000 -0.0000

AT.115 C X -0.0001 0.0001 0.0000 -0.0000 -0.0000 0.0001  
Y -0.0000 0.0001 -0.0000 -0.0000 0.0000 0.0000

Z -0.0001 0.0003 -0.0000 -0.0000 0.0000 0.0000  
AT.116 C X 0.0001 0.0001 0.0000 0.0000 0.0000 0.0001  
Y 0.0000 0.0001 -0.0000 0.0000 -0.0000 0.0000  
Z 0.0001 0.0003 -0.0000 0.0000 -0.0000 0.0000  
AT.117 H X 0.0015 -0.0025 0.0000 0.0005 -0.0000 -0.0002  
Y 0.0003 -0.0006 0.0000 0.0001 -0.0000 -0.0001  
Z 0.0014 -0.0026 0.0000 0.0004 -0.0000 -0.0002  
AT.118 H X -0.0015 -0.0025 0.0000 -0.0005 0.0000 -0.0002  
Y -0.0003 -0.0006 0.0000 -0.0001 0.0000 -0.0001  
Z -0.0014 -0.0026 0.0000 -0.0004 0.0000 -0.0002  
AT.119 H X -0.0001 0.0005 -0.0000 -0.0000 0.0001 -0.0003  
Y 0.0003 -0.0007 0.0000 0.0000 -0.0000 0.0001  
Z 0.0003 -0.0007 0.0000 0.0000 -0.0001 0.0003  
AT.120 H X 0.0001 0.0005 -0.0000 0.0000 -0.0001 -0.0003  
Y -0.0003 -0.0007 0.0000 -0.0000 0.0000 0.0001  
Z -0.0003 -0.0007 0.0000 -0.0000 0.0001 0.0003  
AT.121 C X 0.0001 -0.0000 -0.0000 0.0000 0.0000 -0.0000  
Y 0.0000 0.0001 -0.0000 0.0000 0.0000 -0.0000  
Z -0.0001 0.0002 0.0000 -0.0000 0.0000 -0.0000  
AT.122 C X -0.0001 -0.0000 -0.0000 -0.0000 -0.0000 -0.0000  
Y -0.0000 0.0001 -0.0000 -0.0000 -0.0000 -0.0000  
Z 0.0001 0.0002 0.0000 0.0000 -0.0000 -0.0000  
AT.123 H X -0.0001 0.0003 0.0000 -0.0000 0.0002 -0.0001  
Y 0.0005 -0.0018 0.0000 0.0001 -0.0001 0.0002  
Z 0.0005 -0.0017 0.0000 0.0001 -0.0003 0.0004  
AT.124 H X 0.0001 0.0003 0.0000 0.0000 -0.0002 -0.0001  
Y -0.0005 -0.0018 0.0000 -0.0001 0.0001 0.0002  
Z -0.0005 -0.0017 0.0000 -0.0001 0.0003 0.0004  
AT.125 H X -0.0010 0.0007 0.0001 -0.0003 -0.0000 -0.0000  
Y -0.0004 0.0002 0.0000 -0.0001 0.0000 0.0000  
Z 0.0007 -0.0008 -0.0001 0.0002 0.0002 -0.0002  
AT.126 H X 0.0010 0.0007 0.0001 0.0003 0.0000 -0.0000



Y 0.0004 0.0002 0.0000 0.0001 -0.0000 0.0000  
Z -0.0007 -0.0008 -0.0001 -0.0002 -0.0002 -0.0002  
AT. 127 C X 0.0000 -0.0000 -0.0000 0.0000 0.0000 0.0000  
Y 0.0000 0.0001 -0.0000 0.0000 0.0000 0.0000  
Z 0.0000 0.0000 0.0000 0.0000 -0.0000 0.0000  
AT. 128 C X -0.0000 -0.0000 -0.0000 -0.0000 -0.0000 0.0000  
Y -0.0000 0.0001 -0.0000 -0.0000 -0.0000 0.0000  
Z -0.0000 0.0000 0.0000 -0.0000 0.0000 0.0000  
AT. 129 C X 0.0000 -0.0003 -0.0000 0.0000 -0.0000 -0.0000  
Y 0.0000 -0.0001 -0.0000 0.0000 0.0000 0.0000  
Z -0.0000 0.0003 0.0000 -0.0000 -0.0000 -0.0000  
AT. 130 C X -0.0000 -0.0003 -0.0000 -0.0000 0.0000 -0.0000  
Y -0.0000 -0.0001 -0.0000 -0.0000 -0.0000 0.0000  
Z 0.0000 0.0003 0.0000 0.0000 0.0000 -0.0000  
AT. 131 H X 0.0001 0.0048 0.0000 -0.0000 0.0001 0.0001  
Y 0.0001 0.0018 0.0000 0.0000 0.0000 0.0001  
Z 0.0000 -0.0039 -0.0000 0.0000 -0.0000 -0.0001  
AT. 132 H X -0.0001 0.0048 0.0000 0.0000 -0.0001 0.0001  
Y -0.0001 0.0018 0.0000 -0.0000 -0.0000 0.0001  
Z -0.0000 -0.0039 -0.0000 -0.0000 0.0000 -0.0001  
AT. 133 H X 0.0002 -0.0000 -0.0000 0.0000 0.0000 0.0001  
Y -0.0007 -0.0006 0.0000 -0.0002 -0.0001 -0.0002  
Z 0.0005 0.0002 -0.0000 0.0001 0.0000 0.0002  
AT. 134 H X -0.0002 -0.0000 -0.0000 -0.0000 -0.0000 0.0001  
Y 0.0007 -0.0006 0.0000 0.0002 0.0001 -0.0002  
Z -0.0005 0.0002 -0.0000 -0.0001 -0.0000 0.0002  
AT. 135 C X -0.0000 0.0001 -0.0000 -0.0000 0.0000 0.0000  
Y 0.0001 0.0002 0.0000 0.0000 0.0000 0.0000  
Z -0.0001 0.0001 -0.0000 -0.0000 0.0000 0.0000  
AT. 136 C X 0.0000 0.0001 -0.0000 0.0000 -0.0000 0.0000  
Y -0.0001 0.0002 0.0000 -0.0000 -0.0000 0.0000  
Z 0.0001 0.0001 -0.0000 0.0000 -0.0000 0.0000

AT.137 H X 0.0003 0.0004 0.0000 0.0001 0.0000 0.0000  
Y -0.0012 -0.0016 -0.0001 -0.0004 0.0000 -0.0001  
Z 0.0007 0.0010 0.0001 0.0002 0.0001 0.0002

AT.138 H X -0.0003 0.0004 0.0000 -0.0001 -0.0000 0.0000  
Y 0.0012 -0.0016 -0.0001 0.0004 -0.0000 -0.0001  
Z -0.0007 0.0010 0.0001 -0.0002 -0.0001 0.0002

AT.139 H X -0.0000 -0.0017 0.0000 0.0000 -0.0001 -0.0002  
Y -0.0000 -0.0004 0.0000 0.0000 0.0000 -0.0000  
Z -0.0001 -0.0014 0.0000 -0.0000 -0.0001 -0.0002

AT.140 H X 0.0000 -0.0017 0.0000 -0.0000 0.0001 -0.0002  
Y 0.0000 -0.0004 0.0000 -0.0000 -0.0000 -0.0000  
Z 0.0001 -0.0014 0.0000 0.0000 0.0001 -0.0002

AT.141 H X -0.0002 0.0003 0.0000 -0.0000 0.0001 -0.0000  
Y 0.0005 -0.0005 -0.0000 0.0001 -0.0001 -0.0000  
Z 0.0004 -0.0005 -0.0000 0.0000 -0.0001 0.0000

AT.142 H X 0.0002 0.0003 0.0000 0.0000 -0.0001 -0.0000  
Y -0.0005 -0.0005 -0.0000 -0.0001 0.0001 -0.0000  
Z -0.0004 -0.0005 -0.0000 -0.0000 0.0001 0.0000

AT.143 C X -0.0000 -0.0001 -0.0000 0.0000 0.0000 -0.0000  
Y 0.0000 0.0004 -0.0000 0.0000 0.0000 -0.0000  
Z -0.0001 0.0001 0.0000 -0.0000 0.0000 -0.0000

AT.144 C X 0.0000 -0.0001 -0.0000 -0.0000 -0.0000 -0.0000  
Y -0.0000 0.0004 -0.0000 -0.0000 -0.0000 -0.0000  
Z 0.0001 0.0001 0.0000 0.0000 -0.0000 -0.0000

AT.145 H X -0.0002 0.0006 0.0000 -0.0000 0.0000 0.0000  
Y 0.0006 -0.0024 0.0000 0.0001 -0.0003 0.0001  
Z 0.0005 -0.0023 0.0000 0.0001 -0.0005 0.0003

AT.146 H X 0.0002 0.0006 0.0000 0.0000 -0.0000 0.0000  
Y -0.0006 -0.0024 0.0000 -0.0001 0.0003 0.0001  
Z -0.0005 -0.0023 0.0000 -0.0001 0.0005 0.0003

AT.147 H X -0.0001 0.0000 0.0000 -0.0000 -0.0002 0.0001  
Y -0.0000 0.0001 0.0000 -0.0000 -0.0000 -0.0000

Z -0.0000 -0.0002 -0.0000 0.0000 0.0001 -0.0001  
AT. 148 H X 0.0001 0.0000 0.0000 0.0000 0.0002 0.0001  
Y 0.0000 0.0001 0.0000 0.0000 0.0000 -0.0000  
Z 0.0000 -0.0002 -0.0000 -0.0000 -0.0001 -0.0001  
AT. 149 H X 0.0002 0.0006 -0.0000 0.0000 -0.0000 0.0001  
Y -0.0009 -0.0025 0.0001 -0.0002 -0.0000 0.0000  
Z 0.0005 0.0014 -0.0000 0.0001 -0.0000 0.0001  
AT. 150 H X -0.0002 0.0006 -0.0000 -0.0000 0.0000 0.0001  
Y 0.0009 -0.0025 0.0001 0.0002 0.0000 0.0000  
Z -0.0005 0.0014 -0.0000 -0.0001 0.0000 0.0001  
AT. 151 C X -0.0000 -0.0001 0.0000 -0.0000 0.0000 0.0000  
Y 0.0001 0.0003 -0.0000 0.0000 -0.0000 -0.0000  
Z -0.0000 0.0000 0.0000 0.0000 0.0000 0.0000  
AT. 152 C X 0.0000 -0.0001 0.0000 0.0000 -0.0000 0.0000  
Y -0.0001 0.0003 -0.0000 -0.0000 0.0000 -0.0000  
Z 0.0000 0.0000 0.0000 -0.0000 -0.0000 0.0000  
AT. 153 H X 0.0002 0.0006 -0.0000 0.0000 -0.0002 -0.0001  
Y -0.0008 -0.0022 0.0000 -0.0002 0.0005 0.0002  
Z 0.0004 0.0013 -0.0000 0.0001 -0.0003 -0.0001  
AT. 154 H X -0.0002 0.0006 -0.0000 -0.0000 0.0002 -0.0001  
Y 0.0008 -0.0022 0.0000 0.0002 -0.0005 0.0002  
Z -0.0004 0.0013 -0.0000 -0.0001 0.0003 -0.0001  
AT. 155 H X 0.0000 0.0006 0.0000 0.0000 0.0001 -0.0000  
Y -0.0001 -0.0017 -0.0000 -0.0001 -0.0001 0.0000  
Z -0.0001 -0.0017 -0.0000 -0.0001 -0.0001 0.0001  
AT. 156 H X -0.0000 0.0006 0.0000 -0.0000 -0.0001 -0.0000  
Y 0.0001 -0.0017 -0.0000 0.0001 0.0001 0.0000  
Z 0.0001 -0.0017 -0.0000 0.0001 0.0001 0.0001  
AT. 157 O X 0.0000 0.0000 -0.0000 0.0000 0.0005 0.0004  
Y -0.0001 -0.0001 0.0001 0.0000 -0.0037 -0.0027  
Z -0.0000 -0.0000 0.0000 0.0000 -0.0012 -0.0009  
AT. 158 O X -0.0000 0.0000 -0.0000 -0.0000 -0.0005 0.0004

Y 0.0001 -0.0001 0.0001 -0.0000 0.0037 -0.0027  
Z 0.0000 -0.0000 0.0000 -0.0000 0.0012 -0.0009  
AT.159 O X -0.0000 0.0000 0.0000 0.0000 -0.0021 -0.0016  
Y -0.0000 0.0000 -0.0000 0.0000 0.0014 0.0011  
Z 0.0000 0.0000 0.0001 0.0000 -0.0067 -0.0051  
AT.160 O X 0.0000 0.0000 0.0000 -0.0000 0.0021 -0.0016  
Y 0.0000 0.0000 -0.0000 -0.0000 -0.0014 0.0011  
Z -0.0000 0.0000 0.0001 -0.0000 0.0067 -0.0051  
AT.161 H X -0.0000 -0.0002 0.0002 -0.0000 -0.0092 -0.0067  
Y 0.0012 0.0015 -0.0010 -0.0001 0.0575 0.0420  
Z 0.0004 0.0007 -0.0004 -0.0002 0.0189 0.0141  
AT.162 H X 0.0000 -0.0002 0.0002 0.0000 0.0092 -0.0067  
Y -0.0012 0.0015 -0.0010 0.0001 -0.0575 0.0420  
Z -0.0004 0.0007 -0.0004 0.0002 -0.0189 0.0141  
AT.163 H X -0.0000 -0.0000 -0.0004 -0.0001 0.0343 0.0264  
Y 0.0001 -0.0000 0.0002 -0.0000 -0.0208 -0.0162  
Z -0.0003 -0.0001 -0.0010 -0.0002 0.1012 0.0781  
AT.164 H X 0.0000 -0.0000 -0.0004 0.0001 -0.0343 0.0264  
Y -0.0001 -0.0000 0.0002 0.0000 0.0208 -0.0162  
Z 0.0003 -0.0001 -0.0010 0.0002 -0.1012 0.0781  
AT.165 O X -0.0000 0.0001 -0.0000 -0.0000 -0.0004 -0.0012  
Y -0.0000 0.0001 -0.0000 -0.0000 -0.0002 -0.0007  
Z -0.0000 0.0000 -0.0000 -0.0000 -0.0001 -0.0002  
AT.166 O X 0.0000 0.0001 -0.0000 0.0000 0.0004 -0.0012  
Y 0.0000 0.0001 -0.0000 0.0000 0.0002 -0.0007  
Z 0.0000 0.0000 -0.0000 0.0000 0.0001 -0.0002  
AT.167 H X 0.0001 -0.0013 0.0001 0.0000 0.0055 0.0187  
Y 0.0001 -0.0005 0.0000 0.0000 0.0028 0.0097  
Z 0.0002 -0.0003 0.0000 0.0001 0.0019 0.0064  
AT.168 H X -0.0001 -0.0013 0.0001 -0.0000 -0.0055 0.0187  
Y -0.0001 -0.0005 0.0000 -0.0000 -0.0028 0.0097  
Z -0.0002 -0.0003 0.0000 -0.0001 -0.0019 0.0064

AT.169 O X 0.0000 0.0001 -0.0000 0.0000 -0.0006 -0.0019  
Y -0.0000 -0.0002 0.0000 -0.0000 0.0013 0.0043  
Z 0.0000 0.0001 -0.0000 0.0000 -0.0008 -0.0026

AT.170 O X -0.0000 0.0001 -0.0000 -0.0000 0.0006 -0.0019  
Y 0.0000 -0.0002 0.0000 0.0000 -0.0013 0.0043  
Z -0.0000 0.0001 -0.0000 -0.0000 0.0008 -0.0026

AT.171 H X -0.0002 -0.0011 0.0000 -0.0001 0.0094 0.0305  
Y 0.0005 0.0022 -0.0001 0.0002 -0.0203 -0.0662  
Z -0.0003 -0.0011 0.0000 -0.0001 0.0114 0.0371

AT.172 H X 0.0002 -0.0011 0.0000 0.0001 -0.0094 0.0305  
Y -0.0005 0.0022 -0.0001 -0.0002 0.0203 -0.0662  
Z 0.0003 -0.0011 0.0000 0.0001 -0.0114 0.0371

FREQ(CM\*\*-1) 3437.64 3443.09 3488.66 3495.71 3529.97 3532.86

AT. 1 I X -0.0000 -0.0000 0.0000 0.0000 0.0000 0.0000  
Y 0.0000 -0.0000 0.0000 0.0000 0.0000 0.0000  
Z -0.0000 0.0000 0.0000 0.0000 0.0000 0.0000

AT. 2 I X 0.0000 -0.0000 0.0000 -0.0000 0.0000 -0.0000  
Y -0.0000 -0.0000 0.0000 -0.0000 0.0000 -0.0000  
Z 0.0000 0.0000 0.0000 -0.0000 0.0000 -0.0000

AT. 3 I X -0.0000 0.0000 0.0000 0.0000 0.0000 0.0000  
Y 0.0000 -0.0000 0.0000 -0.0000 -0.0000 0.0000  
Z -0.0000 0.0000 -0.0000 0.0000 0.0000 -0.0000

AT. 4 I X 0.0000 0.0000 0.0000 -0.0000 0.0000 -0.0000  
Y -0.0000 -0.0000 0.0000 0.0000 -0.0000 -0.0000  
Z 0.0000 0.0000 -0.0000 -0.0000 0.0000 0.0000

AT. 5 O X -0.0000 -0.0001 -0.0002 -0.0002 0.0000 -0.0000  
Y 0.0000 0.0001 0.0002 0.0002 0.0000 0.0000  
Z 0.0000 0.0001 0.0003 0.0003 0.0000 0.0000

AT. 6 O X 0.0000 -0.0001 -0.0002 0.0002 0.0000 0.0000  
Y -0.0000 0.0001 0.0002 -0.0002 0.0000 -0.0000

Z -0.0000 0.0001 0.0003 -0.0003 0.0000 -0.0000  
AT. 7 O X -0.0001 0.0002 -0.0001 0.0001 0.0000 -0.0000  
Y 0.0001 -0.0002 0.0001 -0.0001 0.0000 0.0000  
Z -0.0000 0.0001 -0.0000 -0.0000 0.0000 -0.0000  
AT. 8 O X 0.0001 0.0002 -0.0001 -0.0001 0.0000 0.0000  
Y -0.0001 -0.0002 0.0001 0.0001 0.0000 -0.0000  
Z 0.0000 0.0001 -0.0000 0.0000 0.0000 0.0000  
AT. 9 N X -0.0000 -0.0000 -0.0000 -0.0000 0.0000 -0.0000  
Y 0.0000 -0.0000 -0.0000 -0.0000 0.0000 0.0000  
Z 0.0000 0.0001 0.0002 0.0002 -0.0000 -0.0000  
AT. 10 N X 0.0000 -0.0000 -0.0000 0.0000 0.0000 0.0000  
Y -0.0000 -0.0000 -0.0000 0.0000 0.0000 -0.0000  
Z -0.0000 0.0001 0.0002 -0.0002 -0.0000 0.0000  
AT. 11 N X -0.0000 0.0000 -0.0000 0.0000 0.0000 0.0000  
Y 0.0001 -0.0001 0.0001 -0.0001 -0.0000 0.0000  
Z -0.0001 0.0001 -0.0001 0.0001 0.0000 -0.0000  
AT. 12 N X 0.0000 0.0000 -0.0000 -0.0000 0.0000 -0.0000  
Y -0.0001 -0.0001 0.0001 0.0001 -0.0000 -0.0000  
Z 0.0001 0.0001 -0.0001 -0.0001 0.0000 0.0000  
AT. 13 C X 0.0000 0.0002 0.0004 0.0004 0.0000 0.0000  
Y -0.0000 -0.0001 -0.0002 -0.0002 -0.0000 -0.0000  
Z -0.0000 -0.0003 -0.0006 -0.0006 -0.0000 -0.0000  
AT. 14 C X -0.0000 0.0002 0.0004 -0.0004 0.0000 -0.0000  
Y 0.0000 -0.0001 -0.0002 0.0002 -0.0000 0.0000  
Z 0.0000 -0.0003 -0.0006 0.0006 -0.0000 0.0000  
AT. 15 C X -0.0000 -0.0000 -0.0000 -0.0001 -0.0000 -0.0000  
Y -0.0000 0.0000 0.0000 0.0000 -0.0000 0.0000  
Z 0.0000 -0.0001 -0.0000 -0.0000 0.0000 -0.0000  
AT. 16 C X 0.0000 -0.0000 -0.0000 0.0001 -0.0000 0.0000  
Y 0.0000 0.0000 0.0000 -0.0000 -0.0000 -0.0000  
Z -0.0000 -0.0001 -0.0000 0.0000 0.0000 0.0000  
AT. 17 H X -0.0000 -0.0001 -0.0004 -0.0004 -0.0000 -0.0000

Y -0.0000 0.0002 0.0003 0.0003 -0.0000 -0.0001  
Z 0.0000 0.0000 0.0001 0.0002 -0.0000 0.0000  
AT. 18 H X 0.0000 -0.0001 -0.0004 0.0004 -0.0000 0.0000  
Y 0.0000 0.0002 0.0003 -0.0003 -0.0000 0.0001  
Z -0.0000 0.0000 0.0001 -0.0002 -0.0000 -0.0000  
AT. 19 H X 0.0000 -0.0002 -0.0001 -0.0001 0.0000 -0.0000  
Y 0.0000 -0.0005 -0.0001 -0.0004 0.0000 -0.0001  
Z -0.0001 0.0013 0.0003 0.0002 -0.0001 0.0001  
AT. 20 H X -0.0000 -0.0002 -0.0001 0.0001 0.0000 0.0000  
Y -0.0000 -0.0005 -0.0001 0.0004 0.0000 0.0001  
Z 0.0001 0.0013 0.0003 -0.0002 -0.0001 -0.0001  
AT. 21 C X 0.0001 -0.0003 0.0002 -0.0002 0.0000 -0.0000  
Y -0.0002 0.0004 -0.0003 0.0002 -0.0000 -0.0000  
Z 0.0001 -0.0001 0.0001 -0.0000 -0.0000 0.0001  
AT. 22 C X -0.0001 -0.0003 0.0002 0.0002 0.0000 0.0000  
Y 0.0002 0.0004 -0.0003 -0.0002 -0.0000 0.0000  
Z -0.0001 -0.0001 0.0001 0.0000 -0.0000 -0.0001  
AT. 23 C X -0.0000 -0.0000 0.0000 -0.0000 0.0000 -0.0000  
Y -0.0000 0.0001 -0.0001 0.0001 -0.0000 0.0000  
Z 0.0000 -0.0001 0.0001 -0.0001 0.0000 -0.0000  
AT. 24 C X 0.0000 -0.0000 0.0000 0.0000 0.0000 0.0000  
Y 0.0000 0.0001 -0.0001 -0.0001 -0.0000 -0.0000  
Z -0.0000 -0.0001 0.0001 0.0001 0.0000 0.0000  
AT. 25 H X -0.0000 0.0001 -0.0002 0.0000 -0.0000 0.0000  
Y 0.0001 -0.0006 0.0002 -0.0004 0.0000 0.0000  
Z 0.0000 -0.0000 0.0003 -0.0002 -0.0000 -0.0000  
AT. 26 H X 0.0000 0.0001 -0.0002 -0.0000 -0.0000 -0.0000  
Y -0.0001 -0.0006 0.0002 0.0004 0.0000 -0.0000  
Z -0.0000 -0.0000 0.0003 0.0002 -0.0000 0.0000  
AT. 27 H X -0.0001 0.0002 -0.0005 0.0004 -0.0000 0.0001  
Y 0.0002 -0.0005 0.0014 -0.0013 0.0001 -0.0002  
Z -0.0006 0.0018 -0.0017 0.0014 -0.0001 0.0002

AT. 28 H X 0.0001 0.0002 -0.0005 -0.0004 -0.0000 -0.0001  
Y -0.0002 -0.0005 0.0014 0.0013 0.0001 0.0002  
Z 0.0006 0.0018 -0.0017 -0.0014 -0.0001 -0.0002

AT. 29 C X -0.0000 -0.0000 -0.0000 -0.0001 -0.0000 -0.0000  
Y -0.0000 0.0000 0.0001 0.0001 -0.0000 0.0000  
Z 0.0000 0.0000 -0.0000 0.0000 0.0000 0.0000

AT. 30 C X 0.0000 -0.0000 -0.0000 0.0001 -0.0000 0.0000  
Y 0.0000 0.0000 0.0001 -0.0001 -0.0000 -0.0000  
Z -0.0000 0.0000 -0.0000 -0.0000 0.0000 -0.0000

AT. 31 H X 0.0000 -0.0001 -0.0001 -0.0001 0.0000 -0.0001  
Y 0.0001 -0.0001 -0.0003 -0.0003 0.0001 0.0000  
Z -0.0000 0.0001 0.0004 0.0004 0.0000 0.0001

AT. 32 H X -0.0000 -0.0001 -0.0001 0.0001 0.0000 0.0001  
Y -0.0001 -0.0001 -0.0003 0.0003 0.0001 -0.0000  
Z 0.0000 0.0001 0.0004 -0.0004 0.0000 -0.0001

AT. 33 H X 0.0000 0.0000 0.0001 0.0003 0.0001 0.0001  
Y -0.0000 -0.0000 0.0001 0.0000 0.0000 0.0000  
Z -0.0002 -0.0003 -0.0006 -0.0009 -0.0001 -0.0002

AT. 34 H X -0.0000 0.0000 0.0001 -0.0003 0.0001 -0.0001  
Y 0.0000 -0.0000 0.0001 -0.0000 0.0000 -0.0000  
Z 0.0002 -0.0003 -0.0006 0.0009 -0.0001 0.0002

AT. 35 C X -0.0000 0.0000 -0.0000 -0.0000 0.0000 -0.0000  
Y -0.0000 -0.0000 -0.0000 -0.0000 0.0000 -0.0000  
Z 0.0000 -0.0000 -0.0000 -0.0000 0.0000 0.0000

AT. 36 C X 0.0000 0.0000 -0.0000 0.0000 0.0000 0.0000  
Y 0.0000 -0.0000 -0.0000 0.0000 0.0000 0.0000  
Z -0.0000 -0.0000 -0.0000 0.0000 0.0000 -0.0000

AT. 37 C X 0.0000 -0.0001 0.0000 -0.0000 -0.0000 0.0000  
Y -0.0000 0.0000 -0.0000 0.0000 -0.0000 -0.0000  
Z 0.0000 -0.0000 -0.0000 0.0000 -0.0000 0.0000

AT. 38 C X -0.0000 -0.0001 0.0000 0.0000 -0.0000 -0.0000  
Y 0.0000 0.0000 -0.0000 -0.0000 -0.0000 0.0000



Z -0.0000 -0.0000 -0.0000 -0.0000 -0.0000 -0.0000  
AT. 39 H X -0.0001 0.0001 -0.0002 0.0001 0.0000 0.0000  
Y 0.0000 -0.0001 0.0001 -0.0001 0.0001 -0.0000  
Z -0.0000 -0.0000 0.0002 -0.0001 0.0001 -0.0002  
AT. 40 H X 0.0001 0.0001 -0.0002 -0.0001 0.0000 -0.0000  
Y -0.0000 -0.0001 0.0001 0.0001 0.0001 0.0000  
Z 0.0000 -0.0000 0.0002 0.0001 0.0001 0.0002  
AT. 41 H X -0.0001 0.0003 -0.0001 0.0001 0.0001 -0.0002  
Y 0.0000 0.0000 0.0001 -0.0000 0.0000 -0.0001  
Z 0.0002 0.0001 -0.0000 0.0001 -0.0001 0.0001  
AT. 42 H X 0.0001 0.0003 -0.0001 -0.0001 0.0001 0.0002  
Y -0.0000 0.0000 0.0001 0.0000 0.0000 0.0001  
Z -0.0002 0.0001 -0.0000 -0.0001 -0.0001 -0.0001  
AT. 43 C X 0.0000 0.0000 0.0000 0.0000 -0.0000 0.0000  
Y 0.0000 -0.0000 -0.0000 -0.0000 -0.0000 0.0000  
Z 0.0000 -0.0001 0.0000 -0.0000 -0.0000 0.0000  
AT. 44 C X -0.0000 0.0000 0.0000 -0.0000 -0.0000 -0.0000  
Y -0.0000 -0.0000 -0.0000 0.0000 -0.0000 -0.0000  
Z -0.0000 -0.0001 0.0000 0.0000 -0.0000 -0.0000  
AT. 45 H X -0.0004 0.0004 0.0000 -0.0000 0.0001 -0.0000  
Y -0.0006 0.0006 -0.0000 0.0000 0.0002 -0.0002  
Z -0.0003 0.0004 -0.0000 0.0000 0.0001 -0.0001  
AT. 46 H X 0.0004 0.0004 0.0000 0.0000 0.0001 0.0000  
Y 0.0006 0.0006 -0.0000 -0.0000 0.0002 0.0002  
Z 0.0003 0.0004 -0.0000 -0.0000 0.0001 0.0001  
AT. 47 H X -0.0001 0.0001 -0.0002 -0.0000 0.0000 -0.0001  
Y 0.0000 -0.0000 0.0001 0.0000 0.0000 -0.0000  
Z -0.0000 -0.0001 -0.0000 -0.0001 0.0000 -0.0001  
AT. 48 H X 0.0001 0.0001 -0.0002 0.0000 0.0000 0.0001  
Y -0.0000 -0.0000 0.0001 -0.0000 0.0000 0.0000  
Z 0.0000 -0.0001 -0.0000 0.0001 0.0000 0.0001  
AT. 49 C X -0.0000 -0.0000 -0.0000 -0.0000 -0.0000 0.0000

Y -0.0000 0.0000 -0.0000 0.0000 0.0000 -0.0000  
Z 0.0000 -0.0000 0.0000 0.0000 -0.0000 0.0000  
AT. 50 C X 0.0000 -0.0000 -0.0000 0.0000 -0.0000 -0.0000  
Y 0.0000 0.0000 -0.0000 -0.0000 0.0000 0.0000  
Z -0.0000 -0.0000 0.0000 -0.0000 -0.0000 -0.0000  
AT. 51 C X -0.0000 0.0000 0.0001 0.0001 0.0000 0.0000  
Y -0.0000 -0.0000 -0.0000 -0.0000 0.0000 0.0000  
Z 0.0000 -0.0000 -0.0000 -0.0000 -0.0000 0.0000  
AT. 52 C X 0.0000 0.0000 0.0001 -0.0001 0.0000 -0.0000  
Y 0.0000 -0.0000 -0.0000 0.0000 0.0000 -0.0000  
Z -0.0000 -0.0000 -0.0000 0.0000 -0.0000 -0.0000  
AT. 53 H X -0.0001 -0.0001 -0.0004 -0.0002 0.0000 -0.0000  
Y 0.0000 0.0002 0.0003 0.0002 0.0001 0.0001  
Z -0.0001 -0.0001 -0.0001 -0.0001 -0.0001 -0.0001  
AT. 54 H X 0.0001 -0.0001 -0.0004 0.0002 0.0000 0.0000  
Y -0.0000 0.0002 0.0003 -0.0002 0.0001 -0.0001  
Z 0.0001 -0.0001 -0.0001 0.0001 -0.0001 0.0001  
AT. 55 H X 0.0001 -0.0001 -0.0001 -0.0001 -0.0001 -0.0001  
Y 0.0001 -0.0001 0.0001 0.0001 -0.0002 -0.0002  
Z 0.0001 0.0001 0.0001 0.0001 0.0004 0.0004  
AT. 56 H X -0.0001 -0.0001 -0.0001 0.0001 -0.0001 0.0001  
Y -0.0001 -0.0001 0.0001 -0.0001 -0.0002 0.0002  
Z -0.0001 0.0001 0.0001 -0.0001 0.0004 -0.0004  
AT. 57 C X -0.0000 -0.0000 0.0000 -0.0000 0.0000 0.0000  
Y -0.0000 -0.0000 0.0000 0.0000 0.0000 0.0000  
Z 0.0000 -0.0000 0.0000 0.0000 0.0000 0.0000  
AT. 58 C X 0.0000 -0.0000 0.0000 0.0000 0.0000 -0.0000  
Y 0.0000 -0.0000 0.0000 -0.0000 0.0000 -0.0000  
Z -0.0000 -0.0000 0.0000 -0.0000 0.0000 -0.0000  
AT. 59 H X 0.0002 0.0001 -0.0000 0.0001 -0.0000 -0.0001  
Y 0.0002 -0.0001 0.0000 0.0001 0.0001 0.0000  
Z -0.0001 -0.0000 -0.0000 -0.0001 0.0001 0.0001

AT. 60 H X -0.0002 0.0001 -0.0000 -0.0001 -0.0000 0.0001  
Y -0.0002 -0.0001 0.0000 -0.0001 0.0001 -0.0000  
Z 0.0001 -0.0000 -0.0000 0.0001 0.0001 -0.0001

AT. 61 H X 0.0000 -0.0001 0.0000 0.0001 0.0001 0.0002  
Y -0.0001 0.0001 0.0000 0.0000 0.0001 -0.0000  
Z -0.0000 0.0002 -0.0000 -0.0001 0.0000 -0.0002

AT. 62 H X -0.0000 -0.0001 0.0000 -0.0001 0.0001 -0.0002  
Y 0.0001 0.0001 0.0000 -0.0000 0.0001 0.0000  
Z 0.0000 0.0002 -0.0000 0.0001 0.0000 0.0002

AT. 63 H X -0.0001 0.0002 0.0001 -0.0001 0.0000 -0.0002  
Y -0.0000 0.0000 -0.0000 -0.0002 -0.0002 -0.0002  
Z -0.0000 0.0001 0.0000 -0.0001 -0.0001 -0.0002

AT. 64 H X 0.0001 0.0002 0.0001 0.0001 0.0000 0.0002  
Y 0.0000 0.0000 -0.0000 0.0002 -0.0002 0.0002  
Z 0.0000 0.0001 0.0000 0.0001 -0.0001 0.0002

AT. 65 C X 0.0000 -0.0000 0.0000 0.0000 0.0000 -0.0000  
Y -0.0000 -0.0000 -0.0000 -0.0000 -0.0000 -0.0000  
Z -0.0000 -0.0000 -0.0000 0.0000 0.0000 0.0000

AT. 66 C X -0.0000 -0.0000 0.0000 -0.0000 0.0000 0.0000  
Y 0.0000 -0.0000 -0.0000 0.0000 -0.0000 0.0000  
Z 0.0000 -0.0000 -0.0000 -0.0000 0.0000 -0.0000

AT. 67 H X 0.0000 0.0002 0.0001 -0.0001 0.0000 0.0001  
Y -0.0000 0.0003 0.0001 -0.0001 0.0001 -0.0000  
Z 0.0000 0.0002 0.0002 -0.0000 0.0000 0.0000

AT. 68 H X -0.0000 0.0002 0.0001 0.0001 0.0000 -0.0001  
Y 0.0000 0.0003 0.0001 0.0001 0.0001 0.0000  
Z -0.0000 0.0002 0.0002 0.0000 0.0000 -0.0000

AT. 69 H X -0.0001 0.0001 -0.0000 0.0000 0.0001 -0.0002  
Y 0.0001 -0.0001 0.0000 -0.0001 0.0000 0.0001  
Z 0.0001 -0.0001 -0.0000 -0.0000 -0.0002 0.0000

AT. 70 H X 0.0001 0.0001 -0.0000 -0.0000 0.0001 0.0002  
Y -0.0001 -0.0001 0.0000 0.0001 0.0000 -0.0001

Z -0.0001 -0.0001 -0.0000 0.0000 -0.0002 -0.0000  
AT. 71 H X 0.0001 -0.0002 0.0000 0.0001 0.0000 0.0000  
Y 0.0001 -0.0003 0.0000 0.0002 -0.0002 -0.0000  
Z -0.0001 0.0001 -0.0001 -0.0001 -0.0000 -0.0001  
AT. 72 H X -0.0001 -0.0002 0.0000 -0.0001 0.0000 -0.0000  
Y -0.0001 -0.0003 0.0000 -0.0002 -0.0002 0.0000  
Z 0.0001 0.0001 -0.0001 0.0001 -0.0000 0.0001  
AT. 73 C X -0.0000 0.0000 -0.0000 0.0000 0.0000 -0.0000  
Y -0.0000 0.0000 -0.0000 -0.0000 -0.0000 -0.0000  
Z -0.0000 -0.0000 -0.0000 0.0000 0.0000 0.0000  
AT. 74 C X 0.0000 0.0000 -0.0000 -0.0000 0.0000 0.0000  
Y 0.0000 0.0000 -0.0000 0.0000 -0.0000 0.0000  
Z 0.0000 -0.0000 -0.0000 -0.0000 0.0000 -0.0000  
AT. 75 H X -0.0001 -0.0001 0.0000 0.0001 -0.0000 -0.0002  
Y 0.0001 -0.0002 0.0001 0.0002 0.0001 0.0000  
Z -0.0002 0.0001 -0.0001 -0.0001 -0.0000 -0.0001  
AT. 76 H X 0.0001 -0.0001 0.0000 -0.0001 -0.0000 0.0002  
Y -0.0001 -0.0002 0.0001 -0.0002 0.0001 -0.0000  
Z 0.0002 0.0001 -0.0001 0.0001 -0.0000 0.0001  
AT. 77 H X 0.0004 -0.0002 0.0001 -0.0001 -0.0002 0.0003  
Y 0.0004 -0.0002 0.0001 -0.0001 -0.0002 0.0002  
Z 0.0002 -0.0001 0.0001 -0.0001 -0.0001 0.0000  
AT. 78 H X -0.0004 -0.0002 0.0001 0.0001 -0.0002 -0.0003  
Y -0.0004 -0.0002 0.0001 0.0001 -0.0002 -0.0002  
Z -0.0002 -0.0001 0.0001 0.0001 -0.0001 -0.0000  
AT. 79 I X 0.0000 -0.0000 -0.0000 0.0000 -0.0000 -0.0000  
Y 0.0000 0.0000 -0.0000 -0.0000 0.0000 0.0000  
Z -0.0000 -0.0000 -0.0000 -0.0000 0.0000 0.0000  
AT. 80 I X -0.0000 -0.0000 -0.0000 -0.0000 -0.0000 0.0000  
Y -0.0000 0.0000 -0.0000 0.0000 0.0000 -0.0000  
Z 0.0000 -0.0000 -0.0000 0.0000 0.0000 -0.0000  
AT. 81 I X -0.0000 0.0000 0.0000 -0.0000 0.0000 -0.0000

Y -0.0000 -0.0000 -0.0000 0.0000 0.0000 0.0000  
Z 0.0000 0.0000 0.0000 -0.0000 -0.0000 0.0000  
AT. 82 I X 0.0000 0.0000 0.0000 0.0000 0.0000 0.0000  
Y 0.0000 -0.0000 -0.0000 -0.0000 0.0000 -0.0000  
Z -0.0000 0.0000 0.0000 0.0000 -0.0000 -0.0000  
AT. 83 O X -0.0002 -0.0001 -0.0000 -0.0001 0.0003 0.0003  
Y -0.0001 -0.0000 -0.0000 -0.0000 0.0001 0.0001  
Z -0.0001 -0.0000 -0.0000 -0.0001 0.0002 0.0002  
AT. 84 O X 0.0002 -0.0001 -0.0000 0.0001 0.0003 -0.0003  
Y 0.0001 -0.0000 -0.0000 0.0000 0.0001 -0.0001  
Z 0.0001 -0.0000 -0.0000 0.0001 0.0002 -0.0002  
AT. 85 O X -0.0004 0.0003 0.0000 0.0000 0.0001 -0.0000  
Y -0.0003 0.0002 0.0000 0.0000 0.0000 0.0000  
Z 0.0002 -0.0001 -0.0000 -0.0000 -0.0000 -0.0000  
AT. 86 O X 0.0004 0.0003 0.0000 -0.0000 0.0001 0.0000  
Y 0.0003 0.0002 0.0000 -0.0000 0.0000 -0.0000  
Z -0.0002 -0.0001 -0.0000 0.0000 -0.0000 0.0000  
AT. 87 N X -0.0000 -0.0000 -0.0000 -0.0000 0.0001 0.0001  
Y -0.0000 0.0000 0.0000 0.0000 -0.0000 -0.0000  
Z -0.0001 -0.0000 -0.0000 -0.0001 0.0002 0.0002  
AT. 88 N X 0.0000 -0.0000 -0.0000 0.0000 0.0001 -0.0001  
Y 0.0000 0.0000 0.0000 -0.0000 -0.0000 0.0000  
Z 0.0001 -0.0000 -0.0000 0.0001 0.0002 -0.0002  
AT. 89 N X -0.0001 0.0001 -0.0000 -0.0000 0.0000 -0.0000  
Y -0.0002 0.0001 0.0000 0.0000 0.0000 -0.0000  
Z 0.0002 -0.0002 0.0000 -0.0000 -0.0000 0.0000  
AT. 90 N X 0.0001 0.0001 -0.0000 0.0000 0.0000 0.0000  
Y 0.0002 0.0001 0.0000 -0.0000 0.0000 0.0000  
Z -0.0002 -0.0002 0.0000 0.0000 -0.0000 -0.0000  
AT. 91 C X 0.0002 0.0001 0.0000 0.0001 -0.0005 -0.0005  
Y 0.0000 0.0000 0.0000 0.0000 -0.0000 -0.0000  
Z 0.0003 0.0001 0.0001 0.0002 -0.0005 -0.0005

AT. 92 C X -0.0002 0.0001 0.0000 -0.0001 -0.0005 0.0005  
Y -0.0000 0.0000 0.0000 -0.0000 -0.0000 0.0000  
Z -0.0003 0.0001 0.0001 -0.0002 -0.0005 0.0005

AT. 93 C X 0.0000 0.0001 0.0001 0.0001 0.0001 0.0001  
Y 0.0000 0.0001 0.0001 0.0001 -0.0000 0.0001  
Z 0.0001 0.0001 0.0001 0.0001 -0.0000 0.0000

AT. 94 C X -0.0000 0.0001 0.0001 -0.0001 0.0001 -0.0001  
Y -0.0000 0.0001 0.0001 -0.0001 -0.0000 -0.0001  
Z -0.0001 0.0001 0.0001 -0.0001 -0.0000 -0.0000

AT. 95 H X -0.0007 -0.0012 -0.0022 -0.0019 0.0004 -0.0008  
Y -0.0005 -0.0012 -0.0018 -0.0015 0.0001 -0.0007  
Z -0.0003 -0.0006 -0.0010 -0.0008 -0.0000 -0.0005

AT. 96 H X 0.0007 -0.0012 -0.0022 0.0019 0.0004 0.0008  
Y 0.0005 -0.0012 -0.0018 0.0015 0.0001 0.0007  
Z 0.0003 -0.0006 -0.0010 0.0008 -0.0000 0.0005

AT. 97 H X -0.0001 -0.0001 -0.0001 -0.0003 0.0001 0.0000  
Y 0.0001 0.0002 0.0001 0.0002 -0.0003 -0.0002  
Z -0.0005 -0.0009 -0.0004 -0.0009 0.0005 0.0001

AT. 98 H X 0.0001 -0.0001 -0.0001 0.0003 0.0001 -0.0000  
Y -0.0001 0.0002 0.0001 -0.0002 -0.0003 0.0002  
Z 0.0005 -0.0009 -0.0004 0.0009 0.0005 -0.0001

AT. 99 C X 0.0007 -0.0005 0.0000 -0.0000 -0.0001 0.0001  
Y 0.0005 -0.0004 -0.0000 -0.0001 -0.0001 0.0000  
Z -0.0003 0.0002 0.0000 0.0001 0.0001 -0.0000

AT. 100 C X -0.0007 -0.0005 0.0000 0.0000 -0.0001 -0.0001  
Y -0.0005 -0.0004 -0.0000 0.0001 -0.0001 -0.0000  
Z 0.0003 0.0002 0.0000 -0.0001 0.0001 0.0000

AT. 101 C X 0.0000 -0.0000 -0.0000 -0.0000 0.0000 -0.0000  
Y 0.0000 -0.0001 -0.0000 0.0000 0.0000 -0.0000  
Z -0.0001 0.0001 -0.0000 0.0000 -0.0001 0.0001

AT. 102 C X -0.0000 -0.0000 -0.0000 0.0000 0.0000 0.0000  
Y -0.0000 -0.0001 -0.0000 -0.0000 0.0000 0.0000

Z 0.0001 0.0001 -0.0000 -0.0000 -0.0001 -0.0001  
AT.103 H X -0.0005 0.0004 0.0000 -0.0001 0.0001 0.0000  
Y -0.0003 0.0006 0.0000 -0.0002 -0.0001 -0.0000  
Z -0.0002 0.0001 0.0000 0.0000 0.0001 -0.0000  
AT.104 H X 0.0005 0.0004 0.0000 0.0001 0.0001 -0.0000  
Y 0.0003 0.0006 0.0000 0.0002 -0.0001 0.0000  
Z 0.0002 0.0001 0.0000 -0.0000 0.0001 0.0000  
AT.105 H X -0.0001 0.0001 0.0000 0.0001 0.0000 -0.0001  
Y -0.0008 0.0008 -0.0000 0.0002 -0.0002 0.0001  
Z 0.0018 -0.0020 0.0001 -0.0004 0.0011 -0.0009  
AT.106 H X 0.0001 0.0001 0.0000 -0.0001 0.0000 0.0001  
Y 0.0008 0.0008 -0.0000 -0.0002 -0.0002 -0.0001  
Z -0.0018 -0.0020 0.0001 0.0004 0.0011 0.0009  
AT.107 C X -0.0000 0.0000 0.0000 0.0000 0.0000 0.0000  
Y 0.0000 -0.0000 -0.0000 -0.0000 0.0000 0.0000  
Z 0.0000 0.0000 0.0000 0.0000 -0.0000 -0.0000  
AT.108 C X 0.0000 0.0000 0.0000 -0.0000 0.0000 -0.0000  
Y -0.0000 -0.0000 -0.0000 0.0000 0.0000 -0.0000  
Z -0.0000 0.0000 0.0000 -0.0000 -0.0000 0.0000  
AT.109 H X 0.0000 -0.0001 0.0000 0.0000 0.0000 0.0001  
Y -0.0000 0.0001 0.0001 0.0003 -0.0002 -0.0002  
Z -0.0000 -0.0001 -0.0000 -0.0001 0.0002 0.0003  
AT.110 H X -0.0000 -0.0001 0.0000 -0.0000 0.0000 -0.0001  
Y 0.0000 0.0001 0.0001 -0.0003 -0.0002 0.0002  
Z 0.0000 -0.0001 -0.0000 0.0001 0.0002 -0.0003  
AT.111 H X -0.0000 -0.0001 -0.0002 -0.0004 0.0002 0.0001  
Y 0.0001 -0.0000 0.0000 -0.0000 0.0001 0.0001  
Z 0.0001 -0.0000 -0.0002 -0.0003 -0.0001 -0.0002  
AT.112 H X 0.0000 -0.0001 -0.0002 0.0004 0.0002 -0.0001  
Y -0.0001 -0.0000 0.0000 0.0000 0.0001 -0.0001  
Z -0.0001 -0.0000 -0.0002 0.0003 -0.0001 0.0002  
AT.113 C X -0.0000 0.0000 0.0000 0.0000 0.0000 -0.0000

Y 0.0000 -0.0000 0.0000 0.0000 -0.0000 -0.0000  
Z 0.0000 0.0000 0.0000 0.0000 -0.0000 -0.0000  
AT. 114 C X 0.0000 0.0000 0.0000 -0.0000 0.0000 0.0000  
Y -0.0000 -0.0000 0.0000 -0.0000 -0.0000 0.0000  
Z -0.0000 0.0000 0.0000 -0.0000 -0.0000 0.0000  
AT. 115 C X 0.0001 -0.0001 0.0000 0.0000 -0.0000 0.0000  
Y 0.0000 -0.0000 -0.0000 0.0000 -0.0000 -0.0000  
Z 0.0000 0.0000 0.0000 0.0000 -0.0000 -0.0000  
AT. 116 C X -0.0001 -0.0001 0.0000 -0.0000 -0.0000 -0.0000  
Y -0.0000 -0.0000 -0.0000 -0.0000 -0.0000 0.0000  
Z -0.0000 0.0000 0.0000 -0.0000 -0.0000 0.0000  
AT. 117 H X -0.0004 0.0002 -0.0001 -0.0002 0.0001 0.0000  
Y -0.0001 0.0001 -0.0000 -0.0000 0.0000 -0.0000  
Z -0.0003 0.0002 -0.0001 -0.0002 0.0001 -0.0000  
AT. 118 H X 0.0004 0.0002 -0.0001 0.0002 0.0001 -0.0000  
Y 0.0001 0.0001 -0.0000 0.0000 0.0000 0.0000  
Z 0.0003 0.0002 -0.0001 0.0002 0.0001 0.0000  
AT. 119 H X -0.0003 0.0003 -0.0000 0.0001 0.0000 -0.0001  
Y -0.0000 -0.0001 -0.0000 -0.0002 0.0001 0.0001  
Z 0.0003 -0.0003 0.0000 -0.0002 0.0000 0.0001  
AT. 120 H X 0.0003 0.0003 -0.0000 -0.0001 0.0000 0.0001  
Y 0.0000 -0.0001 -0.0000 0.0002 0.0001 -0.0001  
Z -0.0003 -0.0003 0.0000 0.0002 0.0000 -0.0001  
AT. 121 C X -0.0000 0.0000 0.0000 -0.0000 0.0000 -0.0000  
Y -0.0000 -0.0000 -0.0000 -0.0000 -0.0000 -0.0000  
Z -0.0001 0.0000 -0.0000 0.0000 0.0000 -0.0000  
AT. 122 C X 0.0000 0.0000 0.0000 0.0000 0.0000 0.0000  
Y 0.0000 -0.0000 -0.0000 0.0000 -0.0000 0.0000  
Z 0.0001 0.0000 -0.0000 -0.0000 0.0000 0.0000  
AT. 123 H X 0.0001 -0.0002 0.0000 -0.0001 -0.0000 -0.0000  
Y 0.0002 -0.0002 0.0001 -0.0002 0.0000 0.0001  
Z 0.0002 -0.0001 -0.0000 -0.0001 -0.0000 0.0001



AT.124 H X -0.0001 -0.0002 0.0000 0.0001 -0.0000 0.0000  
Y -0.0002 -0.0002 0.0001 0.0002 0.0000 -0.0001  
Z -0.0002 -0.0001 -0.0000 0.0001 -0.0000 -0.0001

AT.125 H X -0.0002 0.0003 -0.0000 0.0002 0.0000 0.0000  
Y 0.0001 -0.0000 0.0000 0.0000 -0.0000 -0.0000  
Z -0.0000 -0.0001 0.0000 -0.0002 0.0000 -0.0001

AT.126 H X 0.0002 0.0003 -0.0000 -0.0002 0.0000 -0.0000  
Y -0.0001 -0.0000 0.0000 -0.0000 -0.0000 0.0000  
Z 0.0000 -0.0001 0.0000 0.0002 0.0000 0.0001

AT.127 C X -0.0000 0.0000 -0.0000 0.0000 0.0000 0.0000  
Y 0.0000 -0.0000 0.0000 -0.0000 -0.0000 -0.0000  
Z 0.0000 0.0000 0.0000 0.0000 -0.0000 0.0000

AT.128 C X 0.0000 0.0000 -0.0000 -0.0000 0.0000 -0.0000  
Y -0.0000 -0.0000 0.0000 0.0000 -0.0000 0.0000  
Z -0.0000 0.0000 0.0000 -0.0000 -0.0000 -0.0000

AT.129 C X 0.0000 0.0000 0.0000 0.0000 -0.0001 -0.0001  
Y 0.0000 0.0000 0.0000 0.0000 -0.0000 -0.0000  
Z 0.0000 -0.0000 -0.0000 0.0000 -0.0000 -0.0000

AT.130 C X -0.0000 0.0000 0.0000 -0.0000 -0.0001 0.0001  
Y -0.0000 0.0000 0.0000 -0.0000 -0.0000 0.0000  
Z -0.0000 -0.0000 -0.0000 -0.0000 -0.0000 0.0000

AT.131 H X -0.0002 -0.0001 0.0000 0.0001 0.0003 0.0002  
Y -0.0000 -0.0001 0.0001 0.0001 0.0001 0.0001  
Z 0.0001 0.0000 -0.0001 -0.0001 -0.0001 -0.0001

AT.132 H X 0.0002 -0.0001 0.0000 -0.0001 0.0003 -0.0002  
Y 0.0000 -0.0001 0.0001 -0.0001 0.0001 -0.0001  
Z -0.0001 0.0000 -0.0001 0.0001 -0.0001 0.0001

AT.133 H X -0.0000 -0.0000 0.0001 0.0000 0.0002 0.0002  
Y -0.0001 0.0001 -0.0004 -0.0002 -0.0000 -0.0001  
Z -0.0001 0.0000 0.0005 0.0004 0.0002 0.0002

AT.134 H X 0.0000 -0.0000 0.0001 -0.0000 0.0002 -0.0002  
Y 0.0001 0.0001 -0.0004 0.0002 -0.0000 0.0001

Z 0.0001 0.0000 0.0005 -0.0004 0.0002 -0.0002  
AT. 135 C X 0.0000 0.0000 0.0000 -0.0000 0.0000 0.0000  
Y 0.0000 0.0000 -0.0000 0.0000 0.0000 0.0000  
Z 0.0000 0.0000 -0.0000 0.0000 -0.0000 0.0000  
AT. 136 C X -0.0000 0.0000 0.0000 0.0000 0.0000 -0.0000  
Y -0.0000 0.0000 -0.0000 -0.0000 0.0000 -0.0000  
Z -0.0000 0.0000 -0.0000 -0.0000 -0.0000 -0.0000  
AT. 137 H X -0.0000 0.0000 -0.0001 -0.0001 0.0000 0.0000  
Y -0.0001 0.0002 0.0002 0.0004 -0.0000 0.0000  
Z 0.0001 0.0000 -0.0000 -0.0002 -0.0000 0.0000  
AT. 138 H X 0.0000 0.0000 -0.0001 0.0001 0.0000 -0.0000  
Y 0.0001 0.0002 0.0002 -0.0004 -0.0000 -0.0000  
Z -0.0001 0.0000 -0.0000 0.0002 -0.0000 -0.0000  
AT. 139 H X -0.0001 -0.0001 -0.0000 -0.0002 0.0000 -0.0001  
Y 0.0000 -0.0000 0.0000 0.0000 0.0000 0.0000  
Z -0.0001 -0.0002 0.0003 0.0002 0.0000 -0.0000  
AT. 140 H X 0.0001 -0.0001 -0.0000 0.0002 0.0000 0.0001  
Y -0.0000 -0.0000 0.0000 -0.0000 0.0000 -0.0000  
Z 0.0001 -0.0002 0.0003 -0.0002 0.0000 0.0000  
AT. 141 H X 0.0001 0.0001 -0.0001 0.0001 -0.0001 -0.0000  
Y -0.0001 -0.0002 -0.0002 -0.0005 0.0001 -0.0001  
Z -0.0001 -0.0001 -0.0001 -0.0004 0.0001 -0.0000  
AT. 142 H X -0.0001 0.0001 -0.0001 -0.0001 -0.0001 0.0000  
Y 0.0001 -0.0002 -0.0002 0.0005 0.0001 0.0001  
Z 0.0001 -0.0001 -0.0001 0.0004 0.0001 0.0000  
AT. 143 C X 0.0000 -0.0000 0.0000 -0.0000 -0.0000 -0.0000  
Y 0.0000 -0.0000 0.0000 -0.0000 0.0000 -0.0000  
Z 0.0000 0.0000 0.0000 0.0000 -0.0000 0.0000  
AT. 144 C X -0.0000 -0.0000 0.0000 0.0000 -0.0000 0.0000  
Y -0.0000 -0.0000 0.0000 0.0000 0.0000 0.0000  
Z -0.0000 0.0000 0.0000 -0.0000 -0.0000 -0.0000  
AT. 145 H X -0.0000 0.0001 -0.0001 0.0001 0.0000 0.0000

Y -0.0001 -0.0000 -0.0001 0.0001 0.0001 0.0000  
Z -0.0002 0.0002 -0.0003 0.0001 0.0001 0.0001  
AT. 146 H X 0.0000 0.0001 -0.0001 -0.0001 0.0000 -0.0000  
Y 0.0001 -0.0000 -0.0001 -0.0001 0.0001 -0.0000  
Z 0.0002 0.0002 -0.0003 -0.0001 0.0001 -0.0001  
AT. 147 H X -0.0001 0.0002 0.0000 0.0002 0.0000 0.0001  
Y -0.0000 0.0000 0.0001 0.0001 -0.0000 0.0000  
Z 0.0000 -0.0001 -0.0000 -0.0001 0.0000 -0.0000  
AT. 148 H X 0.0001 0.0002 0.0000 -0.0002 0.0000 -0.0001  
Y 0.0000 0.0000 0.0001 -0.0001 -0.0000 -0.0000  
Z -0.0000 -0.0001 -0.0000 0.0001 0.0000 0.0000  
AT. 149 H X 0.0001 -0.0001 -0.0001 -0.0001 0.0000 -0.0000  
Y -0.0001 0.0003 -0.0004 0.0000 -0.0000 0.0000  
Z 0.0001 -0.0000 0.0001 -0.0002 -0.0000 -0.0000  
AT. 150 H X -0.0001 -0.0001 -0.0001 0.0001 0.0000 0.0000  
Y 0.0001 0.0003 -0.0004 -0.0000 -0.0000 -0.0000  
Z -0.0001 -0.0000 0.0001 0.0002 -0.0000 0.0000  
AT. 151 C X 0.0000 -0.0000 0.0000 -0.0000 0.0000 0.0000  
Y -0.0000 0.0000 -0.0000 0.0000 -0.0000 -0.0000  
Z 0.0000 0.0000 -0.0000 0.0000 -0.0000 -0.0000  
AT. 152 C X -0.0000 -0.0000 0.0000 0.0000 0.0000 -0.0000  
Y 0.0000 0.0000 -0.0000 -0.0000 -0.0000 0.0000  
Z -0.0000 0.0000 -0.0000 -0.0000 -0.0000 0.0000  
AT. 153 H X -0.0000 -0.0001 0.0002 0.0002 0.0000 0.0000  
Y 0.0000 0.0004 -0.0005 -0.0002 -0.0000 0.0000  
Z 0.0000 -0.0002 0.0003 0.0001 -0.0000 -0.0000  
AT. 154 H X 0.0000 -0.0001 0.0002 -0.0002 0.0000 -0.0000  
Y -0.0000 0.0004 -0.0005 0.0002 -0.0000 -0.0000  
Z -0.0000 -0.0002 0.0003 -0.0001 -0.0000 0.0000  
AT. 155 H X 0.0000 0.0001 -0.0001 0.0000 -0.0000 -0.0000  
Y -0.0001 -0.0003 0.0003 -0.0001 0.0002 0.0001  
Z -0.0001 -0.0001 0.0002 -0.0002 0.0001 0.0001

AT.156 H X -0.0000 0.0001 -0.0001 -0.0000 -0.0000 0.0000  
Y 0.0001 -0.0003 0.0003 0.0001 0.0002 -0.0001  
Z 0.0001 -0.0001 0.0002 0.0002 0.0001 -0.0001

AT.157 O X 0.0001 0.0004 0.0014 0.0013 0.0000 0.0002  
Y -0.0005 -0.0025 -0.0066 -0.0065 -0.0001 -0.0008  
Z -0.0002 -0.0008 -0.0025 -0.0024 -0.0000 -0.0003

AT.158 O X -0.0001 0.0004 0.0014 -0.0013 0.0000 -0.0002  
Y 0.0005 -0.0025 -0.0066 0.0065 -0.0001 0.0008  
Z 0.0002 -0.0008 -0.0025 0.0024 -0.0000 0.0003

AT.159 O X -0.0005 -0.0014 0.0009 0.0009 0.0000 0.0001  
Y 0.0003 0.0010 -0.0008 -0.0008 -0.0000 -0.0001  
Z -0.0015 -0.0045 0.0038 0.0038 0.0002 0.0004

AT.160 O X 0.0005 -0.0014 0.0009 -0.0009 0.0000 -0.0001  
Y -0.0003 0.0010 -0.0008 0.0008 -0.0000 0.0001  
Z 0.0015 -0.0045 0.0038 -0.0038 0.0002 -0.0004

AT.161 H X -0.0013 -0.0063 -0.0161 -0.0160 -0.0002 -0.0019  
Y 0.0080 0.0392 0.1043 0.1032 0.0013 0.0121  
Z 0.0029 0.0133 0.0342 0.0344 0.0004 0.0044

AT.162 H X 0.0013 -0.0063 -0.0161 0.0160 -0.0002 0.0019  
Y -0.0080 0.0392 0.1043 -0.1032 0.0013 -0.0121  
Z -0.0029 0.0133 0.0342 -0.0344 0.0004 -0.0044

AT.163 H X 0.0079 0.0231 -0.0196 -0.0195 -0.0008 -0.0020  
Y -0.0047 -0.0141 0.0116 0.0117 0.0005 0.0012  
Z 0.0231 0.0685 -0.0563 -0.0562 -0.0024 -0.0057

AT.164 H X -0.0079 0.0231 -0.0196 0.0195 -0.0008 0.0020  
Y 0.0047 -0.0141 0.0116 -0.0117 0.0005 -0.0012  
Z -0.0231 0.0685 -0.0563 0.0562 -0.0024 0.0057

AT.165 O X 0.0020 0.0012 0.0001 0.0008 -0.0066 -0.0065  
Y 0.0010 0.0007 0.0001 0.0004 -0.0036 -0.0035  
Z 0.0004 0.0002 0.0000 0.0003 -0.0026 -0.0026

AT.166 O X -0.0020 0.0012 0.0001 -0.0008 -0.0066 0.0065  
Y -0.0010 0.0007 0.0001 -0.0004 -0.0036 0.0035

Z -0.0004 0.0002 0.0000 -0.0003 -0.0026 0.0026  
 AT.167 H X -0.0300 -0.0189 -0.0017 -0.0129 0.1039 0.1019  
 Y -0.0154 -0.0098 -0.0008 -0.0066 0.0538 0.0529  
 Z -0.0103 -0.0066 -0.0005 -0.0043 0.0347 0.0341  
 AT.168 H X 0.0300 -0.0189 -0.0017 0.0129 0.1039 -0.1019  
 Y 0.0154 -0.0098 -0.0008 0.0066 0.0538 -0.0529  
 Z 0.0103 -0.0066 -0.0005 0.0043 0.0347 -0.0341  
 AT.169 O X 0.0028 0.0022 -0.0001 0.0000 0.0007 0.0008  
 Y -0.0063 -0.0049 0.0001 -0.0000 -0.0015 -0.0018  
 Z 0.0038 0.0029 -0.0001 -0.0000 0.0012 0.0014  
 AT.170 O X -0.0028 0.0022 -0.0001 -0.0000 0.0007 -0.0008  
 Y 0.0063 -0.0049 0.0001 0.0000 -0.0015 0.0018  
 Z -0.0038 0.0029 -0.0001 0.0000 0.0012 -0.0014  
 AT.171 H X -0.0446 -0.0345 0.0009 -0.0000 -0.0116 -0.0132  
 Y 0.0967 0.0747 -0.0019 0.0002 0.0250 0.0290  
 Z -0.0543 -0.0421 0.0011 -0.0001 -0.0137 -0.0160  
 AT.172 H X 0.0446 -0.0345 0.0009 0.0000 -0.0116 0.0132  
 Y -0.0967 0.0747 -0.0019 -0.0002 0.0250 -0.0290  
 Z 0.0543 -0.0421 0.0011 0.0001 -0.0137 0.0160

ESTIMATED NUMBER OF IMAGINARY FREQS 2

\*\*\*\*\*

VIBRATIONAL TEMPERATURES (K) [MODE NUMBER;IRREP]

TO MODES

15.2 [ 6;Ag ] 28.7 [ 7;Ag ] 32.6 [ 8;Au ] 39.7 [ 9;Ag ]  
 44.4 [ 10;Au ] 44.5 [ 11;Ag ] 52.6 [ 12;Ag ] 53.0 [ 13;Au ]  
 53.6 [ 14;Ag ] 54.0 [ 15;Au ] 56.0 [ 16;Au ] 61.7 [ 17;Ag ]  
 61.7 [ 18;Au ] 64.8 [ 19;Au ] 65.3 [ 20;Ag ] 67.1 [ 21;Au ]

67.9 [ 22;Ag ] 71.3 [ 23;Ag ] 75.1 [ 24;Ag ] 78.1 [ 25;Au ]  
81.6 [ 26;Ag ] 84.0 [ 27;Au ] 88.8 [ 28;Ag ] 90.3 [ 29;Au ]  
92.6 [ 30;Ag ] 94.9 [ 31;Au ] 97.7 [ 32;Ag ] 100.1 [ 33;Ag ]  
101.0 [ 34;Au ] 102.8 [ 35;Au ] 106.2 [ 36;Ag ] 106.5 [ 37;Au ]  
108.8 [ 38;Ag ] 111.1 [ 39;Au ] 115.1 [ 40;Ag ] 117.6 [ 41;Au ]  
118.2 [ 42;Ag ] 120.5 [ 43;Au ] 120.8 [ 44;Au ] 122.8 [ 45;Ag ]  
124.6 [ 46;Ag ] 127.0 [ 47;Au ] 129.3 [ 48;Au ] 132.7 [ 49;Ag ]  
136.3 [ 50;Ag ] 137.3 [ 51;Ag ] 139.8 [ 52;Au ] 147.5 [ 53;Au ]  
148.8 [ 54;Ag ] 151.0 [ 55;Au ] 152.5 [ 56;Ag ] 165.5 [ 57;Au ]  
167.0 [ 58;Ag ] 178.3 [ 59;Ag ] 181.2 [ 60;Au ] 184.7 [ 61;Au ]  
186.9 [ 62;Ag ] 197.6 [ 63;Ag ] 198.7 [ 64;Au ] 202.5 [ 65;Au ]  
204.8 [ 66;Ag ] 209.1 [ 67;Ag ] 209.7 [ 68;Au ] 222.5 [ 69;Au ]  
222.7 [ 70;Ag ] 226.9 [ 71;Ag ] 231.9 [ 72;Au ] 276.2 [ 73;Au ]  
290.3 [ 74;Ag ] 294.5 [ 75;Ag ] 302.6 [ 76;Au ] 316.0 [ 77;Ag ]  
317.5 [ 78;Au ] 318.8 [ 79;Ag ] 323.4 [ 80;Au ] 337.6 [ 81;Au ]  
341.0 [ 82;Ag ] 342.5 [ 83;Au ] 346.4 [ 84;Ag ] 350.4 [ 85;Au ]  
355.8 [ 86;Au ] 357.7 [ 87;Ag ] 358.5 [ 88;Ag ] 364.3 [ 89;Ag ]  
369.4 [ 90;Au ] 373.1 [ 91;Ag ] 374.9 [ 92;Au ] 381.4 [ 93;Au ]  
385.0 [ 94;Ag ] 386.6 [ 95;Au ] 387.6 [ 96;Ag ] 390.3 [ 97;Au ]  
391.2 [ 98;Ag ] 395.4 [ 99;Au ] 396.3 [ 100;Ag ] 415.3 [ 101;Ag ]  
417.3 [ 102;Au ] 422.3 [ 103;Ag ] 446.7 [ 104;Ag ] 447.5 [ 105;Au ]  
448.5 [ 106;Au ] 456.1 [ 107;Ag ] 457.9 [ 108;Au ] 469.7 [ 109;Ag ]  
473.2 [ 110;Au ] 473.6 [ 111;Ag ] 479.8 [ 112;Au ] 489.4 [ 113;Au ]  
491.3 [ 114;Ag ] 492.9 [ 115;Ag ] 493.4 [ 116;Au ] 528.0 [ 117;Ag ]  
531.2 [ 118;Au ] 534.9 [ 119;Au ] 535.6 [ 120;Ag ] 545.4 [ 121;Ag ]  
547.7 [ 122;Au ] 556.0 [ 123;Au ] 556.2 [ 124;Ag ] 579.1 [ 125;Ag ]  
579.2 [ 126;Au ] 585.6 [ 127;Ag ] 587.7 [ 128;Au ] 594.4 [ 129;Au ]  
595.9 [ 130;Ag ] 600.6 [ 131;Ag ] 601.7 [ 132;Au ] 613.0 [ 133;Au ]  
614.3 [ 134;Ag ] 617.6 [ 135;Au ] 618.4 [ 136;Ag ] 642.6 [ 137;Au ]  
643.2 [ 138;Ag ] 654.9 [ 139;Ag ] 656.3 [ 140;Au ] 696.4 [ 141;Au ]  
697.2 [ 142;Ag ] 703.1 [ 143;Ag ] 703.5 [ 144;Au ] 704.5 [ 145;Au ]  
704.8 [ 146;Ag ] 711.8 [ 147;Au ] 713.9 [ 148;Ag ] 717.6 [ 149;Au ]

721.1 [ 150;Ag ] 726.5 [ 151;Au ] 731.5 [ 152;Ag ] 735.3 [ 153;Ag ]  
737.7 [ 154;Au ] 752.3 [ 155;Ag ] 755.6 [ 156;Au ] 757.6 [ 157;Ag ]  
759.8 [ 158;Au ] 761.7 [ 159;Au ] 762.9 [ 160;Ag ] 795.9 [ 161;Au ]  
796.8 [ 162;Au ] 797.4 [ 163;Ag ] 799.6 [ 164;Ag ] 815.8 [ 165;Au ]  
817.1 [ 166;Ag ] 819.0 [ 167;Au ] 819.3 [ 168;Ag ] 944.1 [ 169;Au ]  
946.0 [ 170;Ag ] 947.2 [ 171;Ag ] 947.5 [ 172;Au ] 948.3 [ 173;Au ]  
950.2 [ 174;Ag ] 955.3 [ 175;Au ] 959.7 [ 176;Ag ] 1020.7 [ 177;Ag ]  
1026.1 [ 178;Au ] 1033.6 [ 179;Ag ] 1036.1 [ 180;Au ] 1083.7 [ 181;Ag ]  
1097.7 [ 182;Au ] 1100.0 [ 183;Ag ] 1107.5 [ 184;Au ] 1113.0 [ 185;Ag ]  
1113.1 [ 186;Au ] 1123.1 [ 187;Ag ] 1123.8 [ 188;Au ] 1151.9 [ 189;Ag ]  
1162.2 [ 190;Au ] 1171.5 [ 191;Ag ] 1172.0 [ 192;Au ] 1174.4 [ 193;Au ]  
1175.5 [ 194;Ag ] 1184.2 [ 195;Ag ] 1185.1 [ 196;Au ] 1188.3 [ 197;Ag ]  
1188.3 [ 198;Au ] 1190.7 [ 199;Ag ] 1191.9 [ 200;Au ] 1205.4 [ 201;Au ]  
1214.8 [ 202;Ag ] 1216.1 [ 203;Au ] 1220.3 [ 204;Au ] 1224.6 [ 205;Ag ]  
1248.1 [ 206;Ag ] 1257.0 [ 207;Ag ] 1263.6 [ 208;Au ] 1265.1 [ 209;Ag ]  
1267.5 [ 210;Ag ] 1267.8 [ 211;Au ] 1269.1 [ 212;Au ] 1271.2 [ 213;Au ]  
1274.4 [ 214;Ag ] 1287.2 [ 215;Ag ] 1295.4 [ 216;Au ] 1329.3 [ 217;Ag ]  
1329.4 [ 218;Au ] 1330.1 [ 219;Ag ] 1335.9 [ 220;Au ] 1348.7 [ 221;Ag ]  
1350.9 [ 222;Au ] 1355.4 [ 223;Au ] 1356.8 [ 224;Ag ] 1358.1 [ 225;Ag ]  
1358.9 [ 226;Au ] 1359.0 [ 227;Ag ] 1359.2 [ 228;Au ] 1369.9 [ 229;Ag ]  
1371.4 [ 230;Au ] 1372.0 [ 231;Au ] 1373.1 [ 232;Ag ] 1373.9 [ 233;Au ]  
1374.4 [ 234;Ag ] 1374.9 [ 235;Au ] 1375.3 [ 236;Ag ] 1389.8 [ 237;Au ]  
1391.1 [ 238;Ag ] 1393.0 [ 239;Ag ] 1396.9 [ 240;Au ] 1423.0 [ 241;Ag ]  
1446.9 [ 242;Au ] 1452.1 [ 243;Ag ] 1453.4 [ 244;Au ] 1455.0 [ 245;Au ]  
1455.9 [ 246;Ag ] 1456.6 [ 247;Au ] 1457.3 [ 248;Ag ] 1471.6 [ 249;Ag ]  
1471.8 [ 250;Au ] 1473.4 [ 251;Au ] 1474.4 [ 252;Ag ] 1491.0 [ 253;Au ]  
1492.6 [ 254;Ag ] 1498.1 [ 255;Ag ] 1501.5 [ 256;Au ] 1511.7 [ 257;Au ]  
1518.7 [ 258;Ag ] 1542.5 [ 259;Au ] 1543.3 [ 260;Ag ] 1544.5 [ 261;Ag ]  
1544.8 [ 262;Au ] 1552.0 [ 263;Ag ] 1552.6 [ 264;Au ] 1601.1 [ 265;Au ]  
1621.9 [ 266;Ag ] 1623.3 [ 267;Au ] 1625.7 [ 268;Ag ] 1625.8 [ 269;Au ]  
1637.9 [ 270;Ag ] 1646.1 [ 271;Au ] 1646.5 [ 272;Ag ] 1652.9 [ 273;Ag ]  
1653.4 [ 274;Au ] 1655.4 [ 275;Ag ] 1656.5 [ 276;Au ] 1658.0 [ 277;Au ]

1658.9 [ 278;Ag ] 1659.1 [ 279;Au ] 1660.5 [ 280;Ag ] 1712.9 [ 281;Au ]  
1713.3 [ 282;Ag ] 1716.4 [ 283;Au ] 1716.4 [ 284;Ag ] 1740.0 [ 285;Au ]  
1742.8 [ 286;Ag ] 1744.7 [ 287;Au ] 1745.0 [ 288;Ag ] 1752.9 [ 289;Au ]  
1753.3 [ 290;Ag ] 1755.3 [ 291;Au ] 1755.5 [ 292;Ag ] 1761.7 [ 293;Au ]  
1767.7 [ 294;Ag ] 1776.7 [ 295;Au ] 1780.5 [ 296;Ag ] 1785.2 [ 297;Au ]  
1786.2 [ 298;Ag ] 1801.1 [ 299;Au ] 1802.5 [ 300;Ag ] 1821.0 [ 301;Au ]  
1822.2 [ 302;Ag ] 1826.3 [ 303;Ag ] 1827.5 [ 304;Au ] 1833.6 [ 305;Au ]  
1834.1 [ 306;Ag ] 1839.8 [ 307;Au ] 1841.3 [ 308;Ag ] 1851.1 [ 309;Au ]  
1852.2 [ 310;Ag ] 1856.0 [ 311;Ag ] 1856.7 [ 312;Au ] 1875.1 [ 313;Au ]  
1877.7 [ 314;Ag ] 1879.1 [ 315;Au ] 1882.7 [ 316;Ag ] 1922.0 [ 317;Ag ]  
1922.2 [ 318;Au ] 1922.3 [ 319;Ag ] 1923.5 [ 320;Au ] 1924.6 [ 321;Ag ]  
1926.8 [ 322;Ag ] 1927.0 [ 323;Au ] 1930.3 [ 324;Au ] 1958.9 [ 325;Au ]  
1959.1 [ 326;Ag ] 1967.1 [ 327;Au ] 1967.1 [ 328;Ag ] 1972.6 [ 329;Au ]  
1973.7 [ 330;Ag ] 1978.2 [ 331;Au ] 1978.4 [ 332;Ag ] 1978.6 [ 333;Au ]  
1979.1 [ 334;Ag ] 1981.2 [ 335;Au ] 1981.3 [ 336;Ag ] 1987.0 [ 337;Au ]  
1987.9 [ 338;Ag ] 1990.6 [ 339;Ag ] 1992.1 [ 340;Au ] 2013.3 [ 341;Ag ]  
2013.6 [ 342;Au ] 2015.7 [ 343;Ag ] 2017.9 [ 344;Au ] 2055.3 [ 345;Ag ]  
2055.3 [ 346;Au ] 2055.7 [ 347;Ag ] 2056.2 [ 348;Au ] 2058.6 [ 349;Au ]  
2059.6 [ 350;Ag ] 2060.0 [ 351;Ag ] 2063.0 [ 352;Au ] 2073.0 [ 353;Au ]  
2074.0 [ 354;Ag ] 2074.7 [ 355;Ag ] 2075.8 [ 356;Au ] 2079.0 [ 357;Ag ]  
2079.6 [ 358;Ag ] 2080.1 [ 359;Au ] 2082.2 [ 360;Au ] 2111.3 [ 361;Ag ]  
2115.4 [ 362;Au ] 2125.4 [ 363;Au ] 2125.9 [ 364;Au ] 2127.2 [ 365;Ag ]  
2128.4 [ 366;Ag ] 2132.6 [ 367;Au ] 2135.7 [ 368;Ag ] 2146.0 [ 369;Ag ]  
2146.3 [ 370;Au ] 2157.3 [ 371;Ag ] 2158.7 [ 372;Au ] 2160.2 [ 373;Ag ]  
2161.3 [ 374;Au ] 2163.9 [ 375;Au ] 2165.1 [ 376;Ag ] 2166.2 [ 377;Au ]  
2168.1 [ 378;Au ] 2168.6 [ 379;Ag ] 2169.4 [ 380;Au ] 2170.8 [ 381;Ag ]  
2172.1 [ 382;Ag ] 2173.1 [ 383;Au ] 2174.6 [ 384;Ag ] 2175.4 [ 385;Au ]  
2176.2 [ 386;Ag ] 2176.9 [ 387;Ag ] 2179.1 [ 388;Au ] 2181.5 [ 389;Au ]  
2185.2 [ 390;Ag ] 2185.7 [ 391;Au ] 2188.1 [ 392;Au ] 2188.4 [ 393;Ag ]  
2189.7 [ 394;Ag ] 2190.1 [ 395;Au ] 2190.7 [ 396;Ag ] 2192.1 [ 397;Au ]  
2194.4 [ 398;Au ] 2194.9 [ 399;Ag ] 2196.7 [ 400;Au ] 2197.9 [ 401;Ag ]  
2201.2 [ 402;Au ] 2201.3 [ 403;Ag ] 2204.1 [ 404;Ag ] 2204.7 [ 405;Au ]



2208.2 [ 406;Au ] 2210.8 [ 407;Ag ] 2211.1 [ 408;Au ] 2211.5 [ 409;Ag ]  
2214.4 [ 410;Ag ] 2215.3 [ 411;Au ] 2217.7 [ 412;Ag ] 2220.4 [ 413;Au ]  
2222.2 [ 414;Ag ] 2223.1 [ 415;Au ] 2224.7 [ 416;Ag ] 2234.6 [ 417;Au ]  
2239.4 [ 418;Ag ] 2239.5 [ 419;Au ] 2242.7 [ 420;Ag ] 2451.5 [ 421;Au ]  
2452.3 [ 422;Ag ] 2459.8 [ 423;Ag ] 2462.5 [ 424;Au ] 2467.6 [ 425;Au ]  
2470.2 [ 426;Ag ] 2501.1 [ 427;Ag ] 2505.0 [ 428;Au ] 4391.7 [ 429;Au ]  
4392.0 [ 430;Ag ] 4405.6 [ 431;Au ] 4405.8 [ 432;Ag ] 4416.4 [ 433;Au ]  
4416.8 [ 434;Ag ] 4417.3 [ 435;Au ] 4419.5 [ 436;Ag ] 4419.6 [ 437;Ag ]  
4420.4 [ 438;Au ] 4422.9 [ 439;Au ] 4427.5 [ 440;Ag ] 4427.7 [ 441;Au ]  
4429.3 [ 442;Ag ] 4432.1 [ 443;Au ] 4432.2 [ 444;Ag ] 4435.2 [ 445;Au ]  
4435.3 [ 446;Ag ] 4438.2 [ 447;Au ] 4438.3 [ 448;Ag ] 4438.7 [ 449;Au ]  
4439.9 [ 450;Ag ] 4444.7 [ 451;Au ] 4445.7 [ 452;Ag ] 4457.6 [ 453;Au ]  
4457.9 [ 454;Ag ] 4467.3 [ 455;Au ] 4467.4 [ 456;Ag ] 4484.4 [ 457;Au ]  
4485.1 [ 458;Ag ] 4506.8 [ 459;Ag ] 4511.4 [ 460;Au ] 4520.8 [ 461;Au ]  
4524.6 [ 462;Au ] 4524.7 [ 463;Ag ] 4525.1 [ 464;Ag ] 4528.2 [ 465;Au ]  
4529.2 [ 466;Ag ] 4529.3 [ 467;Au ] 4529.4 [ 468;Ag ] 4543.7 [ 469;Ag ]  
4544.4 [ 470;Ag ] 4545.3 [ 471;Au ] 4552.6 [ 472;Au ] 4553.8 [ 473;Ag ]  
4558.4 [ 474;Au ] 4558.8 [ 475;Au ] 4559.0 [ 476;Ag ] 4559.7 [ 477;Ag ]  
4561.8 [ 478;Ag ] 4562.7 [ 479;Au ] 4568.3 [ 480;Au ] 4568.7 [ 481;Ag ]  
4569.4 [ 482;Au ] 4572.4 [ 483;Ag ] 4572.7 [ 484;Au ] 4579.4 [ 485;Au ]  
4580.4 [ 486;Ag ] 4581.4 [ 487;Ag ] 4581.8 [ 488;Au ] 4585.8 [ 489;Au ]  
4586.0 [ 490;Ag ] 4587.1 [ 491;Au ] 4587.9 [ 492;Ag ] 4588.6 [ 493;Ag ]  
4591.3 [ 494;Au ] 4593.7 [ 495;Ag ] 4593.7 [ 496;Au ] 4595.8 [ 497;Au ]  
4596.0 [ 498;Ag ] 4596.4 [ 499;Ag ] 4597.9 [ 500;Au ] 4681.4 [ 501;Ag ]  
4682.6 [ 502;Au ] 4689.6 [ 503;Au ] 4689.8 [ 504;Ag ] 4692.1 [ 505;Ag ]  
4700.3 [ 506;Au ] 4704.3 [ 507;Au ] 4705.1 [ 508;Ag ] 4937.0 [ 509;Ag ]  
4943.8 [ 510;Au ] 4946.0 [ 511;Ag ] 4953.8 [ 512;Au ] 5019.4 [ 513;Au ]  
5029.5 [ 514;Ag ] 5078.8 [ 515;Au ] 5083.0 [ 516;Ag ]

\*\*\*\*\*

HARMONIC VIBRATIONAL CONTRIBUTIONS TO THERMODYNAMIC FUNCTIONS AT GIVEN

TEMPERATURE AND PRESSURE:

(EL = ELECTRONIC ENERGY

E0 = ZERO-POINT ENERGY

ET = THERMAL CONTRIBUTION TO THE VIBRATIONAL ENERGY

PV = PRESSURE \* VOLUME

TS = TEMPERATURE \* ENTROPY)

|    | AU/CELL              | EV/CELL              | KJ/MOL             |
|----|----------------------|----------------------|--------------------|
| EL | : -6039.543489328300 | -164344.333449086174 | -15856819.19660036 |
| E0 | : 1.449629245463     | 39.446417186141      | 3806.00104760      |

\*\*\*\*\*

THERMODYNAMIC FUNCTIONS WITH VIBRATIONAL CONTRIBUTIONS

AT (T = 298.15 K, P = 0.10132500E+00 MPA):

|                 | AU/CELL            | EV/CELL              | KJ/MOL             |
|-----------------|--------------------|----------------------|--------------------|
| ET              | : 0.092440437440   | 2.515432184851       | 242.70233430       |
| PV              | : 0.000039962227   | 0.001087427478       | 0.10492081         |
| TS              | : 0.192703734811   | 5.243735210543       | 505.94358444       |
| ET+PV-TS        | : -0.100223335143  | -2.727215598214      | -263.13632934      |
| EL+E0+ET+PV-TS: | -6038.194083417981 | -164307.614247498277 | -15853276.33188210 |

OTHER THERMODYNAMIC FUNCTIONS:

|               | mHARTREE/(CELL*K) | mEV/(CELL*K)    | J/(MOL*K)     |
|---------------|-------------------|-----------------|---------------|
| ENTROPY       | : 0.646331493579  | 17.587574075275 | 1696.94309725 |
| HEAT CAPACITY | : 0.550998902829  | 14.993442397866 | 1446.64741551 |

\*\*\*\*\*

TTTTTTTTTTTTTTTTTTTTTTTTTTTTTTTTTTTTTTTT END TELAPSE 1191172.29 TCPU 1182213.97

EEEEEEEEEE TERMINATION DATE 25 10 2023 TIME 11:11:02.7

NODE 0 CPU TIME = 1182213.965  
NODE 1 CPU TIME = 1183921.469  
NODE 2 CPU TIME = 1184170.107  
NODE 3 CPU TIME = 1184082.850  
NODE 4 CPU TIME = 1184113.358  
NODE 5 CPU TIME = 1183921.610  
NODE 6 CPU TIME = 1183983.983  
NODE 7 CPU TIME = 1183888.764  
NODE 8 CPU TIME = 1184138.953  
NODE 9 CPU TIME = 1184044.913  
NODE 10 CPU TIME = 1185306.812  
NODE 11 CPU TIME = 1185308.378  
NODE 12 CPU TIME = 1185225.263  
NODE 13 CPU TIME = 1185184.665  
NODE 14 CPU TIME = 1185353.067  
NODE 15 CPU TIME = 1185353.013  
NODE 16 CPU TIME = 1185317.600  
NODE 17 CPU TIME = 1185348.871  
NODE 18 CPU TIME = 1185251.689  
NODE 19 CPU TIME = 1185440.928  
NODE 20 CPU TIME = 1185408.537  
NODE 21 CPU TIME = 1185366.788  
NODE 22 CPU TIME = 1185346.665  
NODE 23 CPU TIME = 1183854.666  
TOTAL CPU TIME = 28431546.915

Crystal 1 PBE-D3

|         |       |            |
|---------|-------|------------|
| PROCESS | 13 OF | 24 WORKING |
| PROCESS | 0 OF  | 24 WORKING |
| PROCESS | 1 OF  | 24 WORKING |
| PROCESS | 2 OF  | 24 WORKING |
| PROCESS | 3 OF  | 24 WORKING |
| PROCESS | 4 OF  | 24 WORKING |
| PROCESS | 5 OF  | 24 WORKING |
| PROCESS | 6 OF  | 24 WORKING |
| PROCESS | 7 OF  | 24 WORKING |
| PROCESS | 8 OF  | 24 WORKING |
| PROCESS | 9 OF  | 24 WORKING |
| PROCESS | 10 OF | 24 WORKING |
| PROCESS | 11 OF | 24 WORKING |
| PROCESS | 12 OF | 24 WORKING |
| PROCESS | 14 OF | 24 WORKING |
| PROCESS | 15 OF | 24 WORKING |
| PROCESS | 16 OF | 24 WORKING |
| PROCESS | 17 OF | 24 WORKING |

\*\*\*\*\*

|   |                                                                       |   |
|---|-----------------------------------------------------------------------|---|
| * |                                                                       | * |
| * | CRYSTAL17                                                             | * |
| * | public : 1.0.1 - Jun 21st, 2017                                       | * |
| * | <a href="http://www.crystal.unito.it">HTTP://WWW.CRYSTAL.UNITO.IT</a> | * |

\* \*  
 \* MAIN AUTHORS \*  
 \* \*  
 \* R. DOVESI(1,11), V.R. SAUNDERS(2), C. ROETTI(1,11), R. ORLANDO(1,11), \*  
 \* C.M. ZICOVICH-WILSON(1,3), F. PASCALE(4), B. CIVALLERI(1,11), \*  
 \* K. DOLL(5), N.M. HARRISON(2,6), I.J. BUSH(7), Ph. D'ARCO(8), \*  
 \* M. LLUNELL(9), M. CAUSA'(10), Y. NOEL(8), L. MASCHIO(1,11), A. ERBA(1,11) \*  
 \* M. RE'RAT(14), S. CASASSA(1,11) \*  
 \* \*  
 \* CONTRIBUTIONS TO THE CODE HAVE ALSO BEEN GIVEN BY \*  
 \* \*  
 \* M. FERRABONE(1,11), M. DE LA PIERRE(1,11), M. FERRERO(1,11), \*  
 \* J. BAIMA(1,11), E. ALBANESE(1,11), M.F. PEINTINGER(12), R. BAST(13), \*  
 \* B. KIRTMAN(15), V. LACIVITA(1,11), R. DEMICHELIS(1,16) \*  
 \* G. BRANDEBURG(17), S. SALUSTRO(1,11), G. SANSONE(1,11) \*  
 \* M.T. RUGGIERO(18) \*  
 \* \*  
 \* (1) THEORETICAL CHEMISTRY GROUP - UNIVERSITA' DI TORINO - TORINO (ITALY) \*  
 \* (2) COMPUTATIONAL SCIENCE & ENGINEERING DEPARTMENT - STFC DARESBUY (UK) \*  
 \* (3) UNIVERSIDAD AUTONOMA DEL ESTADO DE MORELOS - CUERNAVACA (MEXICO) \*  
 \* (4) UNIVERSITE' DE LORRAINE - NANCY (FRANCE) \*  
 \* (5) UNIVERSITAET STUTTGART- STUTTGART (GERMANY) \*  
 \* (6) IMPERIAL COLLEGE - LONDON (UK) \*  
 \* (7) OXFORD E-RESEARCH CENTRE - OXFORD (UK) \*  
 \* (8) UPMC - SORBONNE UNIVERSITES - PARIS (FRANCE) \*  
 \* (9) UNIVERSIDAD DE BARCELONA - BARCELONA (SPAIN) \*  
 \* (10) UNIVERSITA' DI NAPOLI "FEDERICO II" - NAPOLI (ITALY) \*  
 \* (11) NIS - NANOSTRUCTURED INTERFACES AND SURFACES - TORINO (ITALY) \*  
 \* (12) MPI FUER CHEMISCHE ENERGIEKONVERSION - MUELHEIM AN DER RUHR (GERMANY) \*  
 \* (13) UNIVERSITY OF TROMSO - TROMSO (NORWAY) \*  
 \* (14) UNIVERSITE' DE PAU ET DES PAYS DE L'ADOUR - PAU (FRANCE) \*

\*(15) UNIVERSITY OF CALIFORNIA SANTA BARBARA - SANTA BARBARA (USA) \*

\*(16) CURTIN UNIVERSITY - PERTH (AUSTRALIA) \*

\*(17) UNIVERSITY COLLEGE LONDON - LONDON (UK) \*

\*(18) CAMBRIDGE UNIVERSITY - CAMBRIDGE (UK) \*

\* \*

\*\*\*\*\*

EEEEEEEEEE STARTING DATE 02 10 2023 TIME 11:39:45.4

\*\* eometry was taken from 2048268.cif, del O5 H5 O6 H6, B3LYP CHNO 6-31G\*\*\* I -p

GEOMETRY INPUT FROM EXTERNAL FILE (FORTRAN UNIT 34)

3D - CRYSTAL

\*\*\*\*\*

LATTICE PARAMETERS (ANGSTROMS AND DEGREES) - PRIMITIVE CELL

| A       | B        | C          | ALPHA    | BETA     | GAMMA    | VOLUME      |
|---------|----------|------------|----------|----------|----------|-------------|
| 7.78730 | 13.90390 | 16.13670   | 90.58630 | 92.08030 | 99.96120 | 1719.467764 |
| PROCESS | 19 OF    | 24 WORKING |          |          |          |             |
| PROCESS | 20 OF    | 24 WORKING |          |          |          |             |
| PROCESS | 21 OF    | 24 WORKING |          |          |          |             |
| PROCESS | 22 OF    | 24 WORKING |          |          |          |             |
| PROCESS | 18 OF    | 24 WORKING |          |          |          |             |

NUMBER OF IRREDUCIBLE ATOMS IN THE CELL: 86

CARTESIAN COORDINATES (ANGSTROM) - IRREDUCIBLE ATOMS AND SYMMETRY RELATED

| AT.IRR. | AT | AT.N. | X                   | Y                   | Z                   |
|---------|----|-------|---------------------|---------------------|---------------------|
| 1       | 1  | 253   | -3.401626207256E+00 | -4.925735409976E+00 | -1.413738005894E+00 |
| 1       | 2  | 253   | 3.401626207256E+00  | 4.925735409976E+00  | 1.413738005894E+00  |
| 3       | 3  | 253   | 4.138216702191E+00  | 3.118340764957E+00  | -2.286946241349E+00 |
| 3       | 4  | 253   | -4.138216702191E+00 | -3.118340764957E+00 | 2.286946241349E+00  |
| 5       | 5  | 8     | 5.268683645730E-01  | -5.894929787579E+00 | -1.460182233620E+00 |

5 6 8 -5.268683645730E-01 5.894929787579E+00 1.460182233620E+00  
7 7 8 3.906013797070E-01 4.065476643049E+00 -2.243313066059E+00  
7 8 8 -3.906013797070E-01 -4.065476643049E+00 2.243313066059E+00  
9 9 7 1.227672922085E+00 -6.106405716902E+00 -3.635906885620E+00  
9 10 7 -1.227672922085E+00 6.106405716902E+00 3.635906885620E+00  
11 11 7 -4.465538168010E-01 5.520702978501E+00 -3.795660416387E+00  
11 12 7 4.465538168010E-01 -5.520702978501E+00 3.795660416387E+00  
13 13 6 1.322417440356E+00 -6.381219984919E+00 -2.307901229040E+00  
13 14 6 -1.322417440356E+00 6.381219984919E+00 2.307901229040E+00  
15 15 6 2.389281050122E+00 6.577653752047E+00 -1.821748982754E+00  
15 16 6 -2.389281050122E+00 -6.577653752047E+00 1.821748982754E+00  
17 17 1 2.642825322106E+00 5.737381150997E+00 -2.476111263652E+00  
17 18 1 -2.642825322106E+00 -5.737381150997E+00 2.476111263652E+00  
19 19 1 2.089131321426E+00 6.197854436008E+00 -8.393137885490E-01  
19 20 1 -2.089131321426E+00 -6.197854436008E+00 8.393137885490E-01  
21 21 6 -4.865057409940E-01 4.906834159889E+00 -2.581310932474E+00  
21 22 6 4.865057409940E-01 -4.906834159889E+00 2.581310932474E+00  
23 23 6 -1.597374698324E+00 5.249983735937E+00 -1.611546244586E+00  
23 24 6 1.597374698324E+00 -5.249983735937E+00 1.611546244586E+00  
25 25 1 -1.759915014157E+00 6.325387327213E+00 -1.460266025818E+00  
25 26 1 1.759915014157E+00 -6.325387327213E+00 1.460266025818E+00  
27 27 1 -1.404450232185E+00 4.750642607944E+00 -6.570003521560E-01  
27 28 1 1.404450232185E+00 -4.750642607944E+00 6.570003521560E-01  
29 29 6 6.893565351200E-02 -5.361888483994E+00 -4.143055624682E+00  
29 30 6 -6.893565351200E-02 5.361888483994E+00 4.143055624682E+00  
31 31 1 4.320644562320E-01 -4.495503049154E+00 -4.727413139488E+00  
31 32 1 -4.320644562320E-01 4.495503049154E+00 4.727413139488E+00  
33 33 1 -5.019666512270E-01 -4.989901763963E+00 -3.281403777423E+00  
33 34 1 5.019666512270E-01 4.989901763963E+00 3.281403777423E+00  
35 35 6 -8.183082056130E-01 -6.239542779073E+00 -5.059443026296E+00  
35 36 6 8.183082056130E-01 6.239542779073E+00 5.059443026296E+00  
37 37 6 -1.446646039824E+00 6.483268656017E+00 -4.279350004595E+00

37 38 6 1.446646039824E+00 -6.483268656017E+00 4.279350004595E+00  
39 39 1 -2.022560794010E+00 -7.030965075971E+00 -3.428338926135E+00  
39 40 1 2.022560794010E+00 7.030965075971E+00 3.428338926135E+00  
41 41 1 -2.149222093288E+00 5.954223172900E+00 -4.952611468065E+00  
41 42 1 2.149222093288E+00 -5.954223172900E+00 4.952611468065E+00  
43 43 6 5.570381119940E-01 5.080660272353E+00 -4.781133037877E+00  
43 44 6 -5.570381119940E-01 -5.080660272353E+00 4.781133037877E+00  
45 45 1 5.420314018200E-02 4.389667579694E+00 -5.485059035589E+00  
45 46 1 -5.420314018200E-02 -4.389667579694E+00 5.485059035589E+00  
47 47 1 1.321174542103E+00 4.512639389301E+00 -4.230494745320E+00  
47 48 1 -1.321174542103E+00 -4.512639389301E+00 4.230494745320E+00  
49 49 PROCESS 23 OF 24 WORKING  
6 1.184368522316E+00 6.239931979310E+00 -5.585282037550E+00  
49 50 6 -1.184368522316E+00 -6.239931979310E+00 5.585282037550E+00  
51 51 6 2.036305168848E+00 -6.735884301015E+00 -4.685442282572E+00  
51 52 6 -2.036305168848E+00 6.735884301015E+00 4.685442282572E+00  
53 53 1 2.876726033700E+00 6.623927898950E+00 -4.235088214006E+00  
53 54 1 -2.876726033700E+00 -6.623927898950E+00 4.235088214006E+00  
55 55 1 2.460094535041E+00 -5.938149509338E+00 -5.324533362409E+00  
55 56 1 -2.460094535041E+00 5.938149509338E+00 5.324533362409E+00  
57 57 6 -1.952453185457E+00 -5.364755354230E+00 -5.610762810914E+00  
57 58 6 1.952453185457E+00 5.364755354230E+00 5.610762810914E+00  
59 59 1 -1.543016455833E+00 -4.513720966556E+00 -6.179463874557E+00  
59 60 1 1.543016455833E+00 4.513720966556E+00 6.179463874557E+00  
61 61 1 -2.572639875176E+00 -4.962025905834E+00 -4.791295272735E+00  
61 62 1 2.572639875176E+00 4.962025905834E+00 4.791295272735E+00  
63 63 1 -2.601123793790E+00 -5.945971573287E+00 -6.285853359587E+00  
63 64 1 2.601123793790E+00 5.945971573287E+00 6.285853359587E+00  
65 65 6 2.082794939357E+00 5.658569503883E+00 -6.685149634019E+00  
65 66 6 -2.082794939357E+00 -5.658569503883E+00 6.685149634019E+00  
67 67 1 1.497072647138E+00 5.017264439377E+00 -7.364289361208E+00  
67 68 1 -1.497072647138E+00 -5.017264439377E+00 7.364289361208E+00



69 69 1 2.898305650445E+00 5.038429811383E+00 -6.275957073842E+00  
69 70 1 -2.898305650445E+00 -5.038429811383E+00 6.275957073842E+00  
71 71 1 2.528742746358E+00 6.473558262563E+00 -7.278850731222E+00  
71 72 1 -2.528742746358E+00 -6.473558262563E+00 7.278850731222E+00  
73 73 6 4.914768262700E-02 -6.817471484588E+00 -6.191041408193E+00  
73 74 6 -4.914768262700E-02 6.817471484588E+00 6.191041408193E+00  
75 75 1 4.794788316860E-01 -5.999112713806E+00 -6.795646090303E+00  
75 76 1 -4.794788316860E-01 5.999112713806E+00 6.795646090303E+00  
77 77 1 -5.786598280370E-01 6.459565312849E+00 -6.850478204974E+00  
77 78 1 5.786598280370E-01 -6.459565312849E+00 6.850478204974E+00  
79 79 253 8.832004274850E-01 -2.315139282581E+00 -6.926283668674E+00  
79 80 253 -8.832004274850E-01 2.315139282581E+00 6.926283668674E+00  
81 81 253 2.136726039454E+00 1.831671297207E+00 -5.612471308666E+00  
81 82 253 -2.136726039454E+00 -1.831671297207E+00 5.612471308666E+00  
83 83 8 -2.914445153880E+00 -1.365841719310E+00 -6.641296360911E+00  
83 84 8 2.914445153880E+00 1.365841719310E+00 6.641296360911E+00  
85 85 8 -1.704577890284E+00 2.722676869207E+00 -5.866709467805E+00  
85 86 8 1.704577890284E+00 -2.722676869207E+00 5.866709467805E+00  
87 87 7 -1.806773400808E+00 -1.361910269041E+00 -4.631682796789E+00  
87 88 7 1.806773400808E+00 1.361910269041E+00 4.631682796789E+00  
89 89 7 -2.596802340544E+00 1.333230006916E+00 -4.279132672433E+00  
89 90 7 2.596802340544E+00 -1.333230006916E+00 4.279132672433E+00  
91 91 6 -1.856013159262E+00 -1.188558387694E+00 -5.977865336659E+00  
91 92 6 1.856013159262E+00 1.188558387694E+00 5.977865336659E+00  
93 93 6 -6.226334194340E-01 -7.290037941730E-01 -6.710543383410E+00  
93 94 6 6.226334194340E-01 7.290037941730E-01 6.710543383410E+00  
95 95 1 -9.906485226200E-02 1.218623569800E-01 -6.254161728151E+00  
95 96 1 9.906485226200E-02 -1.218623569800E-01 6.254161728151E+00  
97 97 1 -9.085721271130E-01 -4.923936028240E-01 -7.740730416017E+00  
97 98 1 9.085721271130E-01 4.923936028240E-01 7.740730416017E+00  
99 99 6 -2.667988430684E+00 2.027130115710E+00 -5.447974301820E+00  
99 100 6 2.667988430684E+00 -2.027130115710E+00 5.447974301820E+00

101 101 6 3.760965272874E+00 5.433677826510E-01 -6.300831011139E+00  
101 102 6 -3.760965272874E+00 -5.433677826510E-01 6.300831011139E+00  
103 103 1 3.336046740623E+00 -4.689060763020E-01 -6.335371365073E+00  
103 104 1 -3.336046740623E+00 4.689060763020E-01 6.335371365073E+00  
105 105 1 3.956259023363E+00 9.140016272630E-01 -7.314709915264E+00  
105 106 1 -3.956259023363E+00 -9.140016272630E-01 7.314709915264E+00  
107 107 6 -3.025238081204E+00 -1.706793179914E+00 -3.892204892070E+00  
107 108 6 3.025238081204E+00 1.706793179914E+00 3.892204892070E+00  
109 109 1 -2.855620090541E+00 -2.652906330740E+00 -3.345829274807E+00  
109 110 1 2.855620090541E+00 2.652906330740E+00 3.345829274807E+00  
111 111 1 -3.830679463386E+00 -1.863389817819E+00 -4.623646108039E+00  
111 112 1 3.830679463386E+00 1.863389817819E+00 4.623646108039E+00  
113 113 6 -3.409389952281E+00 -6.030483221850E-01 -2.879359589270E+00  
113 114 6 3.409389952281E+00 6.030483221850E-01 2.879359589270E+00  
115 115 6 -3.752368307281E+00 7.115256054030E-01 -3.614648188879E+00  
115 116 6 3.752368307281E+00 -7.115256054030E-01 3.614648188879E+00  
117 117 1 3.121665520046E+00 -8.190698114250E-01 -4.349829827497E+00  
117 118 1 -3.121665520046E+00 8.190698114250E-01 4.349829827497E+00  
119 119 1 3.524425412140E+00 8.813419778900E-02 -2.872974425650E+00  
119 120 1 -3.524425412140E+00 -8.813419778900E-02 2.872974425650E+00  
121 121 6 -1.367472752522E+00 1.428691852829E+00 -3.477583585205E+00  
121 122 6 1.367472752522E+00 -1.428691852829E+00 3.477583585205E+00  
123 123 1 -1.503247025751E+00 2.214406482383E+00 -2.711459431083E+00  
123 124 1 1.503247025751E+00 -2.214406482383E+00 2.711459431083E+00  
125 125 1 -5.628152398460E-01 1.763256319588E+00 -4.146413099647E+00  
125 126 1 5.628152398460E-01 -1.763256319588E+00 4.146413099647E+00  
127 127 6 -1.003363862821E+00 1.083305997730E-01 -2.769415276917E+00  
127 128 6 1.003363862821E+00 -1.083305997730E-01 2.769415276917E+00  
129 129 6 -6.623471773200E-01 -1.022641034080E+00 -3.775503526031E+00  
129 130 6 6.623471773200E-01 1.022641034080E+00 3.775503526031E+00  
131 131 1 1.999379001530E-01 -7.441822033920E-01 -4.395991670523E+00  
131 132 1 -1.999379001530E-01 7.441822033920E-01 4.395991670523E+00

133 133 1 -3.856510981800E-01 -1.921637633697E+00 -3.191335718772E+00  
133 134 1 3.856510981800E-01 1.921637633697E+00 3.191335718772E+00  
135 135 6 3.024819835121E+00 -2.406319020476E+00 -2.093553331631E+00  
135 136 6 -3.024819835121E+00 2.406319020476E+00 2.093553331631E+00  
137 137 1 3.236167437865E+00 -3.337728687205E+00 -1.544247733023E+00  
137 138 1 -3.236167437865E+00 3.337728687205E+00 1.544247733023E+00  
139 139 1 2.162894890744E+00 -2.587718277735E+00 -2.758506000600E+00  
139 140 1 -2.162894890744E+00 2.587718277735E+00 2.758506000600E+00  
141 141 1 2.724192288209E+00 -1.642905005574E+00 -1.357814603503E+00  
141 142 1 -2.724192288209E+00 1.642905005574E+00 1.357814603503E+00  
143 143 6 2.279517896080E-01 3.598802669660E-01 -1.887790271054E+00  
143 144 6 -2.279517896080E-01 -3.598802669660E-01 1.887790271054E+00  
145 145 1 3.435864459500E-02 1.155782097136E+00 -1.150803583549E+00  
145 146 1 -3.435864459500E-02 -1.155782097136E+00 1.150803583549E+00  
147 147 1 1.088193604124E+00 6.814366607460E-01 -2.500750194205E+00  
147 148 1 -1.088193604124E+00 -6.814366607460E-01 2.500750194205E+00  
149 149 1 5.018568742180E-01 -5.605781251790E-01 -1.348154182907E+00  
149 150 1 -5.018568742180E-01 5.605781251790E-01 1.348154182907E+00  
151 151 6 -2.215575218716E+00 -3.505602028070E-01 -1.937951175853E+00  
151 152 6 2.215575218716E+00 3.505602028070E-01 1.937951175853E+00  
153 153 1 -1.971032506071E+00 -1.267405024484E+00 -1.370493273049E+00  
153 154 1 1.971032506071E+00 1.267405024484E+00 1.370493273049E+00  
155 155 1 -2.481737810699E+00 4.337946244360E-01 -1.203221190246E+00  
155 156 1 2.481737810699E+00 -4.337946244360E-01 1.203221190246E+00  
157 157 8 1.042529214930E-01 -3.325820053994E+00 -1.006428313532E+00  
157 158 8 -1.042529214930E-01 3.325820053994E+00 1.006428313532E+00  
159 159 8 -1.174890377307E+00 -3.403096119727E+00 -2.909468289230E-01  
159 160 8 1.174890377307E+00 3.403096119727E+00 2.909468289230E-01  
161 161 1 2.222588715420E-01 -4.288121513431E+00 -1.276580769220E+00  
161 162 1 -2.222588715420E-01 4.288121513431E+00 1.276580769220E+00  
163 163 1 -8.620235593930E-01 -3.637045425267E+00 6.364559945080E-01  
163 164 1 8.620235593930E-01 3.637045425267E+00 -6.364559945080E-01

```

165 165 8 2.773412405661E+00 -4.355922426540E+00 -7.301831367428E+00
165 166 8 -2.773412405661E+00 4.355922426540E+00 7.301831367428E+00
167 167 1 -4.069400089132E+00 -2.514654132949E+00 -7.023841993648E+00
167 168 1 4.069400089132E+00 2.514654132949E+00 7.023841993648E+00
169 169 8 2.449796889177E+00 -4.821684448189E+00 7.417675180044E+00
169 170 8 -2.449796889177E+00 4.821684448189E+00 -7.417675180044E+00
171 171 1 2.099418762598E+00 -4.003832815209E+00 6.948450158451E+00
171 172 1 -2.099418762598E+00 4.003832815209E+00 -6.948450158451E+00

```

SPACE GROUP N. : 0

NUMBER OF SYMMETRY OPERATORS : 2

\*\*\*\*\*

LATTICE PARAMETERS (ANGSTROMS AND DEGREES) - BOHR = 0.5291772083 ANGSTROM

PRIMITIVE CELL - CENTRING CODE 1/0 VOLUME= 1719.467764 - DENSITY 2.024 g/cm<sup>3</sup>

| A | B | C | ALPHA | BETA | GAMMA |
|---|---|---|-------|------|-------|
|---|---|---|-------|------|-------|

|            |             |             |           |           |           |
|------------|-------------|-------------|-----------|-----------|-----------|
| 7.78730000 | 13.90390000 | 16.13670000 | 90.586300 | 92.080300 | 99.961200 |
|------------|-------------|-------------|-----------|-----------|-----------|

\*\*\*\*\*

ATOMS IN THE ASYMMETRIC UNIT 86 - ATOMS IN THE UNIT CELL: 172

| ATOM | X/A | Y/B | Z/C |
|------|-----|-----|-----|
|------|-----|-----|-----|

\*\*\*\*\*

|           |                     |                     |                     |
|-----------|---------------------|---------------------|---------------------|
| 1 T 253 I | -4.506332061725E-01 | -3.989702061285E-01 | -8.768022399225E-02 |
| 2 F 253 I | 4.506332061725E-01  | 3.989702061285E-01  | 8.768022399225E-02  |
| 3 T 253 I | -4.719950653002E-01 | 2.737485933233E-01  | -1.418367178811E-01 |
| 4 F 253 I | 4.719950653002E-01  | -2.737485933233E-01 | 1.418367178811E-01  |
| 5 T 8 O   | 6.132837776381E-02  | -4.191105031907E-01 | -9.056070133189E-02 |
| 6 F 8 O   | -6.132837776381E-02 | 4.191105031907E-01  | 9.056070133189E-02  |
| 7 T 8 O   | 3.961214998426E-02  | 2.945837475126E-01  | -1.391305823970E-01 |
| 8 F 8 O   | -3.961214998426E-02 | -2.945837475126E-01 | 1.391305823970E-01  |
| 9 T 7 N   | 1.417256035458E-01  | -4.281337000788E-01 | -2.254994410683E-01 |
| 10 F 7 N  | -1.417256035458E-01 | 4.281337000788E-01  | 2.254994410683E-01  |
| 11 T 7 N  | -7.736525730302E-02 | 3.867703805184E-01  | -2.354073768406E-01 |
| 12 F 7 N  | 7.736525730302E-02  | -3.867703805184E-01 | 2.354073768406E-01  |

13 T 6 C 1.607762656646E-01 -4.450751339464E-01 -1.431363490764E-01  
14 F 6 C -1.607762656646E-01 4.450751339464E-01 1.431363490764E-01  
15 T 6 C 3.023255397596E-01 -4.989717188141E-01 -1.129851204393E-01  
16 F 6 C -3.023255397596E-01 4.989717188141E-01 1.129851204393E-01  
17 T 1 H 3.320822298479E-01 4.429949313570E-01 -1.535687583708E-01  
18 F 1 H -3.320822298479E-01 -4.429949313570E-01 1.535687583708E-01  
19 T 1 H 2.681471076109E-01 4.711245413762E-01 -5.205435566771E-02  
20 F 1 H -2.681471076109E-01 -4.711245413762E-01 5.205435566771E-02  
21 T 6 C -7.644950703458E-02 3.436026903010E-01 -1.600932561828E-01  
22 F 6 C 7.644950703458E-02 -3.436026903010E-01 1.600932561828E-01  
23 T 6 C -2.163931500608E-01 3.554388500100E-01 -9.994831794157E-02  
24 F 6 C 2.163931500608E-01 -3.554388500100E-01 9.994831794157E-02  
25 T 1 H -2.368221090216E-01 4.309165120543E-01 -9.056589813544E-02  
26 F 1 H 2.368221090216E-01 -4.309165120543E-01 9.056589813544E-02  
27 T 1 H -1.864253929231E-01 3.231315498584E-01 -4.074725147083E-02  
28 F 1 H 1.864253929231E-01 -3.231315498584E-01 4.074725147083E-02  
29 T 6 C -1.190802543715E-02 -3.898444171183E-01 -2.569528750518E-01  
30 F 6 C 1.190802543715E-02 3.898444171183E-01 2.569528750518E-01  
31 T 1 H 3.248933434739E-02 -3.236610536755E-01 -2.931948078400E-01  
32 F 1 H -3.248933434739E-02 3.236610536755E-01 2.931948078400E-01  
33 T 1 H -8.199626982128E-02 -3.692460278756E-01 -2.035131099355E-01  
34 F 1 H 8.199626982128E-02 3.692460278756E-01 2.035131099355E-01  
35 T 6 C -1.322084610734E-01 -4.652973781271E-01 -3.137873467164E-01  
36 F 6 C 1.322084610734E-01 4.652973781271E-01 3.137873467164E-01  
37 T 6 C -2.101964793603E-01 4.427748880196E-01 -2.654058710877E-01  
38 F 6 C 2.101964793603E-01 -4.427748880196E-01 2.654058710877E-01  
39 T 1 H -2.809919128241E-01 4.645684781289E-01 -2.126260479040E-01  
40 F 1 H 2.809919128241E-01 -4.645684781289E-01 2.126260479040E-01  
41 T 1 H -3.051937621182E-01 3.950251914682E-01 -3.071616389007E-01  
42 F 1 H 3.051937621182E-01 -3.950251914682E-01 3.071616389007E-01  
43 T 6 C 4.851241783275E-02 3.665911191801E-01 -2.965265232668E-01  
44 F 6 C -4.851241783275E-02 -3.665911191801E-01 2.965265232668E-01

45 T 1 H -2.059734748584E-02 3.096792965380E-01 -3.401841096767E-01  
46 F 1 H 2.059734748584E-02 -3.096792965380E-01 3.401841096767E-01  
47 T 1 H 1.509174624387E-01 3.360646875253E-01 -2.623758612425E-01  
48 F 1 H -1.509174624387E-01 -3.360646875253E-01 2.623758612425E-01  
49 T 6 C 1.262477602708E-01 4.569075367142E-01 -3.463999539311E-01  
50 F 6 C -1.262477602708E-01 -4.569075367142E-01 3.463999539311E-01  
51 T 6 C 2.418613937687E-01 -4.644787651083E-01 -2.905917695683E-01  
52 F 6 C -2.418613937687E-01 4.644787651083E-01 2.905917695683E-01  
53 T 1 H 3.537065863408E-01 -4.924431458172E-01 -2.626607487971E-01  
54 F 1 H -3.537065863408E-01 4.924431458172E-01 2.626607487971E-01  
55 T 1 H 2.938916047271E-01 -4.025337289544E-01 -3.302282855267E-01  
56 F 1 H -2.938916047271E-01 4.025337289544E-01 3.302282855267E-01  
57 T 6 C -2.828585357570E-01 -4.173822449511E-01 -3.479802749713E-01  
58 F 6 C 2.828585357570E-01 4.173822449511E-01 3.479802749713E-01  
59 T 1 H -2.323445991392E-01 -3.516988372756E-01 -3.832511925225E-01  
60 F 1 H 2.323445991392E-01 3.516988372756E-01 3.832511925225E-01  
61 T 1 H -3.595852219771E-01 -3.952469944046E-01 -2.971567864590E-01  
62 F 1 H 3.595852219771E-01 3.952469944046E-01 2.971567864590E-01  
63 T 1 H -3.708368694608E-01 -4.682055067865E-01 -3.898494828980E-01  
64 F 1 H 3.708368694608E-01 4.682055067865E-01 3.898494828980E-01  
65 T 6 C 2.378370303727E-01 4.250956710576E-01 -4.146138923116E-01  
66 F 6 C -2.378370303727E-01 -4.250956710576E-01 4.146138923116E-01  
67 T 1 H 1.580454550466E-01 3.707408616652E-01 -4.567342308423E-01  
68 F 1 H -1.580454550466E-01 -3.707408616652E-01 4.567342308423E-01  
69 T 1 H 3.462268439287E-01 3.912963796997E-01 -3.892357139060E-01  
70 F 1 H -3.462268439287E-01 -3.912963796997E-01 3.892357139060E-01  
71 T 1 H 2.929851795667E-01 4.886171598683E-01 -4.514353153547E-01  
72 F 1 H -2.929851795667E-01 -4.886171598683E-01 4.514353153547E-01  
73 T 6 C -2.481715508254E-02 -4.972923634282E-01 -3.839692327380E-01  
74 F 6 C 2.481715508254E-02 4.972923634282E-01 3.839692327380E-01  
75 T 1 H 2.823990628471E-02 -4.337391183643E-01 -4.214668976046E-01  
76 F 1 H -2.823990628471E-02 4.337391183643E-01 4.214668976046E-01

77 T 1 H -1.099964140269E-01 4.488840537695E-01 -4.248675928369E-01  
78 F 1 H 1.099964140269E-01 -4.488840537695E-01 4.248675928369E-01  
79 T 253 I 8.021811394940E-02 -1.638397961738E-01 -4.295690580372E-01  
80 F 253 I -8.021811394940E-02 1.638397961738E-01 4.295690580372E-01  
81 T 253 I 2.502786885964E-01 1.518519466160E-01 -3.480862362349E-01  
82 F 253 I -2.502786885964E-01 -1.518519466160E-01 3.480862362349E-01  
83 T 8 O -4.134803105306E-01 -1.431854283166E-01 -4.118941063308E-01  
84 F 8 O 4.134803105306E-01 1.431854283166E-01 4.118941063308E-01  
85 T 8 O -2.518315238530E-01 1.671016949938E-01 -3.638541215487E-01  
86 F 8 O 2.518315238530E-01 -1.671016949938E-01 3.638541215487E-01  
87 T 7 N -2.589267848303E-01 -1.264488269657E-01 -2.872575989260E-01  
88 F 7 N 2.589267848303E-01 1.264488269657E-01 2.872575989260E-01  
89 T 7 N -3.601523831163E-01 5.784436186026E-02 -2.653923921174E-01  
90 F 7 N 3.601523831163E-01 -5.784436186026E-02 2.653923921174E-01  
91 T 6 C -2.721362279115E-01 -1.162522690024E-01 -3.707480236993E-01  
92 F 6 C 2.721362279115E-01 1.162522690024E-01 3.707480236993E-01  
93 T 6 C -1.150239039052E-01 -6.851814030675E-02 -4.161888161131E-01  
94 F 6 C 1.150239039052E-01 6.851814030675E-02 4.161888161131E-01  
95 T 1 H -4.445940898884E-02 -1.492451260316E-04 -3.878839635929E-01  
96 F 1 H 4.445940898884E-02 1.492451260316E-04 3.878839635929E-01  
97 T 1 H -1.575003293929E-01 -5.637463987472E-02 -4.800811564168E-01  
98 F 1 H 1.575003293929E-01 5.637463987472E-02 4.800811564168E-01  
99 T 6 C -3.753287485966E-01 1.054199859567E-01 -3.378841094291E-01  
100 F 6 C 3.753287485966E-01 -1.054199859567E-01 3.378841094291E-01  
101 T 6 C 4.585746678400E-01 7.886764675816E-02 -3.907783988906E-01  
102 F 6 C -4.585746678400E-01 -7.886764675816E-02 3.907783988906E-01  
103 T 1 H 4.029997224320E-01 6.528875652920E-04 -3.929205963537E-01  
104 F 1 H -4.029997224320E-01 -6.528875652920E-04 3.929205963537E-01  
105 T 1 H 4.789234231935E-01 1.067491595174E-01 -4.536593068410E-01  
106 F 1 H -4.789234231935E-01 -1.067491595174E-01 4.536593068410E-01  
107 T 6 C -4.140601926686E-01 -1.657387758538E-01 -2.413950783934E-01  
108 F 6 C 4.140601926686E-01 1.657387758538E-01 2.413950783934E-01

109 T 1 H -3.891897656432E-01 -2.309734156253E-01 -2.075087880724E-01  
110 F 1 H 3.891897656432E-01 2.309734156253E-01 2.075087880724E-01  
111 T 1 H 4.772375426289E-01 -1.880717444016E-01 -2.867591623933E-01  
112 F 1 H -4.772375426289E-01 1.880717444016E-01 2.867591623933E-01  
113 T 6 C -4.590374206686E-01 -8.996648170230E-02 -1.785782745381E-01  
114 F 6 C 4.590374206686E-01 8.996648170230E-02 1.785782745381E-01  
115 T 6 C 4.925366872949E-01 -6.525840941918E-04 -2.241809737963E-01  
116 F 6 C -4.925366872949E-01 6.525840941918E-04 2.241809737963E-01  
117 T 1 H 3.850630074152E-01 -2.480700667310E-02 -2.697770393192E-01  
118 F 1 H -3.850630074152E-01 2.480700667310E-02 2.697770393192E-01  
119 T 1 H 4.450233482085E-01 4.733809559320E-02 -1.781822658193E-01  
120 F 1 H -4.450233482085E-01 -4.733809559320E-02 1.781822658193E-01  
121 T 6 C -1.958301189984E-01 8.122066877004E-02 -2.156802083776E-01  
122 F 6 C 1.958301189984E-01 -8.122066877004E-02 2.156802083776E-01  
123 T 1 H -2.096683154466E-01 1.369546409475E-01 -1.681650838218E-01  
124 F 1 H 2.096683154466E-01 -1.369546409475E-01 1.681650838218E-01  
125 T 1 H -9.429243265239E-02 1.146279931033E-01 -2.571611061072E-01  
126 F 1 H 9.429243265239E-02 -1.146279931033E-01 2.571611061072E-01  
127 T 6 C -1.447860181671E-01 -8.275780860833E-03 -1.717595132870E-01  
128 F 6 C 1.447860181671E-01 8.275780860833E-03 1.717595132870E-01  
129 T 6 C -1.053986617215E-01 -8.654287520784E-02 -2.341572437508E-01  
130 F 6 C 1.053986617215E-01 8.654287520784E-02 2.341572437508E-01  
131 T 1 H 3.896301128930E-03 -5.638363853652E-02 -2.726400031212E-01  
132 F 1 H -3.896301128930E-03 5.638363853652E-02 2.726400031212E-01  
133 T 1 H -6.637682082705E-02 -1.469899133294E-01 -1.979270766506E-01  
134 F 1 H 6.637682082705E-02 1.469899133294E-01 1.979270766506E-01  
135 T 6 C 3.838160103180E-01 -1.374245266666E-01 -1.298424632371E-01  
136 F 6 C -3.838160103180E-01 1.374245266666E-01 1.298424632371E-01  
137 T 1 H 4.141419080261E-01 -2.010709560416E-01 -9.577445507335E-02  
138 F 1 H -4.141419080261E-01 2.010709560416E-01 9.577445507335E-02  
139 T 1 H 2.680847776875E-01 -1.621733740237E-01 -1.710829184815E-01  
140 F 1 H -2.680847776875E-01 1.621733740237E-01 1.710829184815E-01



141 T 1 H 3.483310469798E-01 -8.541405742664E-02 -8.421184694671E-02  
142 F 1 H -3.483310469798E-01 8.541405742664E-02 8.421184694671E-02  
143 T 6 C 2.019905769080E-02 2.644991103622E-02 -1.170810101492E-01  
144 F 6 C -2.019905769080E-02 -2.644991103622E-02 1.170810101492E-01  
145 T 1 H -1.324501377416E-03 8.215052476572E-02 -7.137299524805E-02  
146 F 1 H 1.324501377416E-03 -8.215052476572E-02 7.137299524805E-02  
147 T 1 H 1.292655897775E-01 5.969223586724E-02 -1.550968682050E-01  
148 F 1 H -1.292655897775E-01 -5.969223586724E-02 1.550968682050E-01  
149 T 1 H 5.863241034106E-02 -3.563052228010E-02 -8.361270634344E-02  
150 F 1 H -5.863241034106E-02 3.563052228010E-02 8.361270634344E-02  
151 T 6 C -2.986401798582E-01 -5.557374586120E-02 -1.201919963080E-01  
152 F 6 C 2.986401798582E-01 5.557374586120E-02 1.201919963080E-01  
153 T 1 H -2.638947620464E-01 -1.177310905084E-01 -8.499817976162E-02  
154 F 1 H 2.638947620464E-01 1.177310905084E-01 8.499817976162E-02  
155 T 1 H -3.296367013915E-01 -1.623053520530E-03 -7.462394236638E-02  
156 F 1 H 3.296367013915E-01 1.623053520530E-03 7.462394236638E-02  
157 T 8 O 8.516459688210E-03 -2.391166943852E-01 -6.241882130546E-02  
158 F 8 O -8.516459688210E-03 2.391166943852E-01 6.241882130546E-02  
159 T 8 O -1.546492343128E-01 -2.599556219695E-01 -1.804456202171E-02  
160 F 8 O 1.546492343128E-01 2.599556219695E-01 1.804456202171E-02  
161 T 1 H 2.253950103910E-02 -3.071679767013E-01 -7.917371346230E-02  
162 F 1 H -2.253950103910E-02 3.071679767013E-01 7.917371346230E-02  
163 T 1 H -1.091803310773E-01 -2.716935295166E-01 3.947308760677E-02  
164 F 1 H 1.091803310773E-01 2.716935295166E-01 -3.947308760677E-02  
165 T 8 O 3.247692245267E-01 -2.872012160690E-01 -4.528605775473E-01  
166 F 8 O -3.247692245267E-01 2.872012160690E-01 4.528605775473E-01  
167 T 1 H 4.340076456178E-01 -2.408682656002E-01 -4.356196386613E-01  
168 F 1 H -4.340076456178E-01 2.408682656002E-01 4.356196386613E-01  
169 T 8 O 3.568153515556E-01 -3.067535302523E-01 4.600452266095E-01  
170 F 8 O -3.568153515556E-01 3.067535302523E-01 -4.600452266095E-01  
171 T 1 H 3.087665927262E-01 -2.529325195709E-01 4.309438267572E-01  
172 F 1 H -3.087665927262E-01 2.529325195709E-01 -4.309438267572E-01



3 T 253 I -4.719950653002E-01 2.737485933233E-01 -1.418367178811E-01  
4 F 253 I 4.719950653002E-01 -2.737485933233E-01 1.418367178811E-01  
5 T 8 O 6.132837776381E-02 -4.191105031907E-01 -9.056070133189E-02  
6 F 8 O -6.132837776381E-02 4.191105031907E-01 9.056070133189E-02  
7 T 8 O 3.961214998426E-02 2.945837475126E-01 -1.391305823970E-01  
8 F 8 O -3.961214998426E-02 -2.945837475126E-01 1.391305823970E-01  
9 T 7 N 1.417256035458E-01 -4.281337000788E-01 -2.254994410683E-01  
10 F 7 N -1.417256035458E-01 4.281337000788E-01 2.254994410683E-01  
11 T 7 N -7.736525730302E-02 3.867703805184E-01 -2.354073768406E-01  
12 F 7 N 7.736525730302E-02 -3.867703805184E-01 2.354073768406E-01  
13 T 6 C 1.607762656646E-01 -4.450751339464E-01 -1.431363490764E-01  
14 F 6 C -1.607762656646E-01 4.450751339464E-01 1.431363490764E-01  
15 T 6 C 3.023255397596E-01 -4.989717188141E-01 -1.129851204393E-01  
16 F 6 C -3.023255397596E-01 4.989717188141E-01 1.129851204393E-01  
17 T 1 H 3.320822298479E-01 4.429949313570E-01 -1.535687583708E-01  
18 F 1 H -3.320822298479E-01 -4.429949313570E-01 1.535687583708E-01  
19 T 1 H 2.681471076109E-01 4.711245413762E-01 -5.205435566771E-02  
20 F 1 H -2.681471076109E-01 -4.711245413762E-01 5.205435566771E-02  
21 T 6 C -7.644950703458E-02 3.436026903010E-01 -1.600932561828E-01  
22 F 6 C 7.644950703458E-02 -3.436026903010E-01 1.600932561828E-01  
23 T 6 C -2.163931500608E-01 3.554388500100E-01 -9.994831794157E-02  
24 F 6 C 2.163931500608E-01 -3.554388500100E-01 9.994831794157E-02  
25 T 1 H -2.368221090216E-01 4.309165120543E-01 -9.056589813544E-02  
26 F 1 H 2.368221090216E-01 -4.309165120543E-01 9.056589813544E-02  
27 T 1 H -1.864253929231E-01 3.231315498584E-01 -4.074725147083E-02  
28 F 1 H 1.864253929231E-01 -3.231315498584E-01 4.074725147083E-02  
29 T 6 C -1.190802543715E-02 -3.898444171183E-01 -2.569528750518E-01  
30 F 6 C 1.190802543715E-02 3.898444171183E-01 2.569528750518E-01  
31 T 1 H 3.248933434739E-02 -3.236610536755E-01 -2.931948078400E-01  
32 F 1 H -3.248933434739E-02 3.236610536755E-01 2.931948078400E-01  
33 T 1 H -8.199626982128E-02 -3.692460278756E-01 -2.035131099355E-01  
34 F 1 H 8.199626982128E-02 3.692460278756E-01 2.035131099355E-01

35 T 6 C -1.322084610734E-01 -4.652973781271E-01 -3.137873467164E-01  
36 F 6 C 1.322084610734E-01 4.652973781271E-01 3.137873467164E-01  
37 T 6 C -2.101964793603E-01 4.427748880196E-01 -2.654058710877E-01  
38 F 6 C 2.101964793603E-01 -4.427748880196E-01 2.654058710877E-01  
39 T 1 H -2.809919128241E-01 4.645684781289E-01 -2.126260479040E-01  
40 F 1 H 2.809919128241E-01 -4.645684781289E-01 2.126260479040E-01  
41 T 1 H -3.051937621182E-01 3.950251914682E-01 -3.071616389007E-01  
42 F 1 H 3.051937621182E-01 -3.950251914682E-01 3.071616389007E-01  
43 T 6 C 4.851241783275E-02 3.665911191801E-01 -2.965265232668E-01  
44 F 6 C -4.851241783275E-02 -3.665911191801E-01 2.965265232668E-01  
45 T 1 H -2.059734748584E-02 3.096792965380E-01 -3.401841096767E-01  
46 F 1 H 2.059734748584E-02 -3.096792965380E-01 3.401841096767E-01  
47 T 1 H 1.509174624387E-01 3.360646875253E-01 -2.623758612425E-01  
48 F 1 H -1.509174624387E-01 -3.360646875253E-01 2.623758612425E-01  
49 T 6 C 1.262477602708E-01 4.569075367142E-01 -3.463999539311E-01  
50 F 6 C -1.262477602708E-01 -4.569075367142E-01 3.463999539311E-01  
51 T 6 C 2.418613937687E-01 -4.644787651083E-01 -2.905917695683E-01  
52 F 6 C -2.418613937687E-01 4.644787651083E-01 2.905917695683E-01  
53 T 1 H 3.537065863408E-01 -4.924431458172E-01 -2.626607487971E-01  
54 F 1 H -3.537065863408E-01 4.924431458172E-01 2.626607487971E-01  
55 T 1 H 2.938916047271E-01 -4.025337289544E-01 -3.302282855267E-01  
56 F 1 H -2.938916047271E-01 4.025337289544E-01 3.302282855267E-01  
57 T 6 C -2.828585357570E-01 -4.173822449511E-01 -3.479802749713E-01  
58 F 6 C 2.828585357570E-01 4.173822449511E-01 3.479802749713E-01  
59 T 1 H -2.323445991392E-01 -3.516988372756E-01 -3.832511925225E-01  
60 F 1 H 2.323445991392E-01 3.516988372756E-01 3.832511925225E-01  
61 T 1 H -3.595852219771E-01 -3.952469944046E-01 -2.971567864590E-01  
62 F 1 H 3.595852219771E-01 3.952469944046E-01 2.971567864590E-01  
63 T 1 H -3.708368694608E-01 -4.682055067865E-01 -3.898494828980E-01  
64 F 1 H 3.708368694608E-01 4.682055067865E-01 3.898494828980E-01  
65 T 6 C 2.378370303727E-01 4.250956710576E-01 -4.146138923116E-01  
66 F 6 C -2.378370303727E-01 -4.250956710576E-01 4.146138923116E-01

67 T 1 H 1.580454550466E-01 3.707408616652E-01 -4.567342308423E-01  
68 F 1 H -1.580454550466E-01 -3.707408616652E-01 4.567342308423E-01  
69 T 1 H 3.462268439287E-01 3.912963796997E-01 -3.892357139060E-01  
70 F 1 H -3.462268439287E-01 -3.912963796997E-01 3.892357139060E-01  
71 T 1 H 2.929851795667E-01 4.886171598683E-01 -4.514353153547E-01  
72 F 1 H -2.929851795667E-01 -4.886171598683E-01 4.514353153547E-01  
73 T 6 C -2.481715508254E-02 -4.972923634282E-01 -3.839692327380E-01  
74 F 6 C 2.481715508254E-02 4.972923634282E-01 3.839692327380E-01  
75 T 1 H 2.823990628471E-02 -4.337391183643E-01 -4.214668976046E-01  
76 F 1 H -2.823990628471E-02 4.337391183643E-01 4.214668976046E-01  
77 T 1 H -1.099964140269E-01 4.488840537695E-01 -4.248675928369E-01  
78 F 1 H 1.099964140269E-01 -4.488840537695E-01 4.248675928369E-01  
79 T 253 I 8.021811394940E-02 -1.638397961738E-01 -4.295690580372E-01  
80 F 253 I -8.021811394940E-02 1.638397961738E-01 4.295690580372E-01  
81 T 253 I 2.502786885964E-01 1.518519466160E-01 -3.480862362349E-01  
82 F 253 I -2.502786885964E-01 -1.518519466160E-01 3.480862362349E-01  
83 T 8 O -4.134803105306E-01 -1.431854283166E-01 -4.118941063308E-01  
84 F 8 O 4.134803105306E-01 1.431854283166E-01 4.118941063308E-01  
85 T 8 O -2.518315238530E-01 1.671016949938E-01 -3.638541215487E-01  
86 F 8 O 2.518315238530E-01 -1.671016949938E-01 3.638541215487E-01  
87 T 7 N -2.589267848303E-01 -1.264488269657E-01 -2.872575989260E-01  
88 F 7 N 2.589267848303E-01 1.264488269657E-01 2.872575989260E-01  
89 T 7 N -3.601523831163E-01 5.784436186026E-02 -2.653923921174E-01  
90 F 7 N 3.601523831163E-01 -5.784436186026E-02 2.653923921174E-01  
91 T 6 C -2.721362279115E-01 -1.162522690024E-01 -3.707480236993E-01  
92 F 6 C 2.721362279115E-01 1.162522690024E-01 3.707480236993E-01  
93 T 6 C -1.150239039052E-01 -6.851814030675E-02 -4.161888161131E-01  
94 F 6 C 1.150239039052E-01 6.851814030675E-02 4.161888161131E-01  
95 T 1 H -4.445940898884E-02 -1.492451260316E-04 -3.878839635929E-01  
96 F 1 H 4.445940898884E-02 1.492451260316E-04 3.878839635929E-01  
97 T 1 H -1.575003293929E-01 -5.637463987472E-02 -4.800811564168E-01  
98 F 1 H 1.575003293929E-01 5.637463987472E-02 4.800811564168E-01

99 T 6 C -3.753287485966E-01 1.054199859567E-01 -3.378841094291E-01  
100 F 6 C 3.753287485966E-01 -1.054199859567E-01 3.378841094291E-01  
101 T 6 C 4.585746678400E-01 7.886764675816E-02 -3.907783988906E-01  
102 F 6 C -4.585746678400E-01 -7.886764675816E-02 3.907783988906E-01  
103 T 1 H 4.029997224320E-01 6.528875652920E-04 -3.929205963537E-01  
104 F 1 H -4.029997224320E-01 -6.528875652920E-04 3.929205963537E-01  
105 T 1 H 4.789234231935E-01 1.067491595174E-01 -4.536593068410E-01  
106 F 1 H -4.789234231935E-01 -1.067491595174E-01 4.536593068410E-01  
107 T 6 C -4.140601926686E-01 -1.657387758538E-01 -2.413950783934E-01  
108 F 6 C 4.140601926686E-01 1.657387758538E-01 2.413950783934E-01  
109 T 1 H -3.891897656432E-01 -2.309734156253E-01 -2.075087880724E-01  
110 F 1 H 3.891897656432E-01 2.309734156253E-01 2.075087880724E-01  
111 T 1 H 4.772375426289E-01 -1.880717444016E-01 -2.867591623933E-01  
112 F 1 H -4.772375426289E-01 1.880717444016E-01 2.867591623933E-01  
113 T 6 C -4.590374206686E-01 -8.996648170230E-02 -1.785782745381E-01  
114 F 6 C 4.590374206686E-01 8.996648170230E-02 1.785782745381E-01  
115 T 6 C 4.925366872949E-01 -6.525840941918E-04 -2.241809737963E-01  
116 F 6 C -4.925366872949E-01 6.525840941918E-04 2.241809737963E-01  
117 T 1 H 3.850630074152E-01 -2.480700667310E-02 -2.697770393192E-01  
118 F 1 H -3.850630074152E-01 2.480700667310E-02 2.697770393192E-01  
119 T 1 H 4.450233482085E-01 4.733809559320E-02 -1.781822658193E-01  
120 F 1 H -4.450233482085E-01 -4.733809559320E-02 1.781822658193E-01  
121 T 6 C -1.958301189984E-01 8.122066877004E-02 -2.156802083776E-01  
122 F 6 C 1.958301189984E-01 -8.122066877004E-02 2.156802083776E-01  
123 T 1 H -2.096683154466E-01 1.369546409475E-01 -1.681650838218E-01  
124 F 1 H 2.096683154466E-01 -1.369546409475E-01 1.681650838218E-01  
125 T 1 H -9.429243265239E-02 1.146279931033E-01 -2.571611061072E-01  
126 F 1 H 9.429243265239E-02 -1.146279931033E-01 2.571611061072E-01  
127 T 6 C -1.447860181671E-01 -8.275780860833E-03 -1.717595132870E-01  
128 F 6 C 1.447860181671E-01 8.275780860833E-03 1.717595132870E-01  
129 T 6 C -1.053986617215E-01 -8.654287520784E-02 -2.341572437508E-01  
130 F 6 C 1.053986617215E-01 8.654287520784E-02 2.341572437508E-01

131 T 1 H 3.896301128930E-03 -5.638363853652E-02 -2.726400031212E-01  
132 F 1 H -3.896301128930E-03 5.638363853652E-02 2.726400031212E-01  
133 T 1 H -6.637682082705E-02 -1.469899133294E-01 -1.979270766506E-01  
134 F 1 H 6.637682082705E-02 1.469899133294E-01 1.979270766506E-01  
135 T 6 C 3.838160103180E-01 -1.374245266666E-01 -1.298424632371E-01  
136 F 6 C -3.838160103180E-01 1.374245266666E-01 1.298424632371E-01  
137 T 1 H 4.141419080261E-01 -2.010709560416E-01 -9.577445507335E-02  
138 F 1 H -4.141419080261E-01 2.010709560416E-01 9.577445507335E-02  
139 T 1 H 2.680847776875E-01 -1.621733740237E-01 -1.710829184815E-01  
140 F 1 H -2.680847776875E-01 1.621733740237E-01 1.710829184815E-01  
141 T 1 H 3.483310469798E-01 -8.541405742664E-02 -8.421184694671E-02  
142 F 1 H -3.483310469798E-01 8.541405742664E-02 8.421184694671E-02  
143 T 6 C 2.019905769080E-02 2.644991103622E-02 -1.170810101492E-01  
144 F 6 C -2.019905769080E-02 -2.644991103622E-02 1.170810101492E-01  
145 T 1 H -1.324501377416E-03 8.215052476572E-02 -7.137299524805E-02  
146 F 1 H 1.324501377416E-03 -8.215052476572E-02 7.137299524805E-02  
147 T 1 H 1.292655897775E-01 5.969223586724E-02 -1.550968682050E-01  
148 F 1 H -1.292655897775E-01 -5.969223586724E-02 1.550968682050E-01  
149 T 1 H 5.863241034106E-02 -3.563052228010E-02 -8.361270634344E-02  
150 F 1 H -5.863241034106E-02 3.563052228010E-02 8.361270634344E-02  
151 T 6 C -2.986401798582E-01 -5.557374586120E-02 -1.201919963080E-01  
152 F 6 C 2.986401798582E-01 5.557374586120E-02 1.201919963080E-01  
153 T 1 H -2.638947620464E-01 -1.177310905084E-01 -8.499817976162E-02  
154 F 1 H 2.638947620464E-01 1.177310905084E-01 8.499817976162E-02  
155 T 1 H -3.296367013915E-01 -1.623053520530E-03 -7.462394236638E-02  
156 F 1 H 3.296367013915E-01 1.623053520530E-03 7.462394236638E-02  
157 T 8 O 8.516459688210E-03 -2.391166943852E-01 -6.241882130546E-02  
158 F 8 O -8.516459688210E-03 2.391166943852E-01 6.241882130546E-02  
159 T 8 O -1.546492343128E-01 -2.599556219695E-01 -1.804456202171E-02  
160 F 8 O 1.546492343128E-01 2.599556219695E-01 1.804456202171E-02  
161 T 1 H 2.253950103910E-02 -3.071679767013E-01 -7.917371346230E-02  
162 F 1 H -2.253950103910E-02 3.071679767013E-01 7.917371346230E-02

163 T 1 H -1.091803310773E-01 -2.716935295166E-01 3.947308760677E-02  
 164 F 1 H 1.091803310773E-01 2.716935295166E-01 -3.947308760677E-02  
 165 T 8 O 3.247692245267E-01 -2.872012160690E-01 -4.528605775473E-01  
 166 F 8 O -3.247692245267E-01 2.872012160690E-01 4.528605775473E-01  
 167 T 1 H 4.340076456178E-01 -2.408682656002E-01 -4.356196386613E-01  
 168 F 1 H -4.340076456178E-01 2.408682656002E-01 4.356196386613E-01  
 169 T 8 O 3.568153515556E-01 -3.067535302523E-01 4.600452266095E-01  
 170 F 8 O -3.568153515556E-01 3.067535302523E-01 -4.600452266095E-01  
 171 T 1 H 3.087665927262E-01 -2.529325195709E-01 4.309438267572E-01  
 172 F 1 H -3.087665927262E-01 2.529325195709E-01 -4.309438267572E-01

T = ATOM BELONGING TO THE ASYMMETRIC UNIT

\*\*\*\* 2 SYMMOPS - TRANSLATORS IN FRACTIONAL UNITS

\*\*\*\* MATRICES AND TRANSLATORS IN THE CRYSTALLOGRAPHIC REFERENCE FRAME

| V INV | ROTATION MATRICES |      |      |      |       |      | TRANSLATORS |      |      |       |      |      |      |
|-------|-------------------|------|------|------|-------|------|-------------|------|------|-------|------|------|------|
| 1 1   | 1.00              | 0.00 | 0.00 | 0.00 | 1.00  | 0.00 | 0.00        | 0.00 | 0.00 | 1.00  | 0.00 | 0.00 | 0.00 |
| 2 2   | -1.00             | 0.00 | 0.00 | 0.00 | -1.00 | 0.00 | 0.00        | 0.00 | 0.00 | -1.00 | 0.00 | 0.00 | 0.00 |

DIRECT LATTICE VECTORS CARTESIAN COMPONENTS (ANGSTROM)

|   | X                   | Y                   | Z                  |
|---|---------------------|---------------------|--------------------|
| 1 | 0.766990738397E+01  | -0.134705679589E+01 | 0.000000000000E+00 |
| 2 | 0.000000000000E+00  | 0.139039000000E+02  | 0.000000000000E+00 |
| 3 | -0.623729567955E+00 | -0.165121797444E+00 | 0.161237955553E+02 |

CARTESIAN COORDINATES - PRIMITIVE CELL

\*\*\*\*\*

| * ATOM  | X(ANGSTROM)         | Y(ANGSTROM)         | Z(ANGSTROM)         |
|---------|---------------------|---------------------|---------------------|
| 1 253 I | -3.401626207256E+00 | -4.925735409976E+00 | -1.413738005894E+00 |
| 2 253 I | 3.401626207256E+00  | 4.925735409976E+00  | 1.413738005894E+00  |

\*\*\*\*\*



3 253 I 4.138216702191E+00 3.118340764957E+00 -2.286946241349E+00  
4 253 I -4.138216702191E+00 -3.118340764957E+00 2.286946241349E+00  
5 8 O 5.268683645730E-01 -5.894929787579E+00 -1.460182233620E+00  
6 8 O -5.268683645730E-01 5.894929787579E+00 1.460182233620E+00  
7 8 O 3.906013797070E-01 4.065476643049E+00 -2.243313066059E+00  
8 8 O -3.906013797070E-01 -4.065476643049E+00 2.243313066059E+00  
9 7 N 1.227672922085E+00 -6.106405716902E+00 -3.635906885620E+00  
10 7 N -1.227672922085E+00 6.106405716902E+00 3.635906885620E+00  
11 7 N -4.465538168010E-01 5.520702978501E+00 -3.795660416387E+00  
12 7 N 4.465538168010E-01 -5.520702978501E+00 3.795660416387E+00  
13 6 C 1.322417440356E+00 -6.381219984919E+00 -2.307901229040E+00  
14 6 C -1.322417440356E+00 6.381219984919E+00 2.307901229040E+00  
15 6 C 2.389281050122E+00 6.577653752047E+00 -1.821748982754E+00  
16 6 C -2.389281050122E+00 -6.577653752047E+00 1.821748982754E+00  
17 1 H 2.642825322106E+00 5.737381150997E+00 -2.476111263652E+00  
18 1 H -2.642825322106E+00 -5.737381150997E+00 2.476111263652E+00  
19 1 H 2.089131321426E+00 6.197854436008E+00 -8.393137885490E-01  
20 1 H -2.089131321426E+00 -6.197854436008E+00 8.393137885490E-01  
21 6 C -4.865057409940E-01 4.906834159889E+00 -2.581310932474E+00  
22 6 C 4.865057409940E-01 -4.906834159889E+00 2.581310932474E+00  
23 6 C -1.597374698324E+00 5.249983735937E+00 -1.611546244586E+00  
24 6 C 1.597374698324E+00 -5.249983735937E+00 1.611546244586E+00  
25 1 H -1.759915014157E+00 6.325387327213E+00 -1.460266025818E+00  
26 1 H 1.759915014157E+00 -6.325387327213E+00 1.460266025818E+00  
27 1 H -1.404450232185E+00 4.750642607944E+00 -6.570003521560E-01  
28 1 H 1.404450232185E+00 -4.750642607944E+00 6.570003521560E-01  
29 6 C 6.893565351200E-02 -5.361888483994E+00 -4.143055624682E+00  
30 6 C -6.893565351200E-02 5.361888483994E+00 4.143055624682E+00  
31 1 H 4.320644562320E-01 -4.495503049154E+00 -4.727413139488E+00  
32 1 H -4.320644562320E-01 4.495503049154E+00 4.727413139488E+00  
33 1 H -5.019666512270E-01 -4.989901763963E+00 -3.281403777423E+00  
34 1 H 5.019666512270E-01 4.989901763963E+00 3.281403777423E+00

35 6 C -8.183082056130E-01 -6.239542779073E+00 -5.059443026296E+00  
36 6 C 8.183082056130E-01 6.239542779073E+00 5.059443026296E+00  
37 6 C -1.446646039824E+00 6.483268656017E+00 -4.279350004595E+00  
38 6 C 1.446646039824E+00 -6.483268656017E+00 4.279350004595E+00  
39 1 H -2.022560794010E+00 -7.030965075971E+00 -3.428338926135E+00  
40 1 H 2.022560794010E+00 7.030965075971E+00 3.428338926135E+00  
41 1 H -2.149222093288E+00 5.954223172900E+00 -4.952611468065E+00  
42 1 H 2.149222093288E+00 -5.954223172900E+00 4.952611468065E+00  
43 6 C 5.570381119940E-01 5.080660272353E+00 -4.781133037877E+00  
44 6 C -5.570381119940E-01 -5.080660272353E+00 4.781133037877E+00  
45 1 H 5.420314018200E-02 4.389667579694E+00 -5.485059035589E+00  
46 1 H -5.420314018200E-02 -4.389667579694E+00 5.485059035589E+00  
47 1 H 1.321174542103E+00 4.512639389301E+00 -4.230494745320E+00  
48 1 H -1.321174542103E+00 -4.512639389301E+00 4.230494745320E+00  
49 6 C 1.184368522316E+00 6.239931979310E+00 -5.585282037550E+00  
50 6 C -1.184368522316E+00 -6.239931979310E+00 5.585282037550E+00  
51 6 C 2.036305168848E+00 -6.735884301015E+00 -4.685442282572E+00  
52 6 C -2.036305168848E+00 6.735884301015E+00 4.685442282572E+00  
53 1 H 2.876726033700E+00 6.623927898950E+00 -4.235088214006E+00  
54 1 H -2.876726033700E+00 -6.623927898950E+00 4.235088214006E+00  
55 1 H 2.460094535041E+00 -5.938149509338E+00 -5.324533362409E+00  
56 1 H -2.460094535041E+00 5.938149509338E+00 5.324533362409E+00  
57 6 C -1.952453185457E+00 -5.364755354230E+00 -5.610762810914E+00  
58 6 C 1.952453185457E+00 5.364755354230E+00 5.610762810914E+00  
59 1 H -1.543016455833E+00 -4.513720966556E+00 -6.179463874557E+00  
60 1 H 1.543016455833E+00 4.513720966556E+00 6.179463874557E+00  
61 1 H -2.572639875176E+00 -4.962025905834E+00 -4.791295272735E+00  
62 1 H 2.572639875176E+00 4.962025905834E+00 4.791295272735E+00  
63 1 H -2.601123793790E+00 -5.945971573287E+00 -6.285853359587E+00  
64 1 H 2.601123793790E+00 5.945971573287E+00 6.285853359587E+00  
65 6 C 2.082794939357E+00 5.658569503883E+00 -6.685149634019E+00  
66 6 C -2.082794939357E+00 -5.658569503883E+00 6.685149634019E+00

67 1 H 1.497072647138E+00 5.017264439377E+00 -7.364289361208E+00  
68 1 H -1.497072647138E+00 -5.017264439377E+00 7.364289361208E+00  
69 1 H 2.898305650445E+00 5.038429811383E+00 -6.275957073842E+00  
70 1 H -2.898305650445E+00 -5.038429811383E+00 6.275957073842E+00  
71 1 H 2.528742746358E+00 6.473558262563E+00 -7.278850731222E+00  
72 1 H -2.528742746358E+00 -6.473558262563E+00 7.278850731222E+00  
73 6 C 4.914768262700E-02 -6.817471484588E+00 -6.191041408193E+00  
74 6 C -4.914768262700E-02 6.817471484588E+00 6.191041408193E+00  
75 1 H 4.794788316860E-01 -5.999112713806E+00 -6.795646090303E+00  
76 1 H -4.794788316860E-01 5.999112713806E+00 6.795646090303E+00  
77 1 H -5.786598280370E-01 6.459565312849E+00 -6.850478204974E+00  
78 1 H 5.786598280370E-01 -6.459565312849E+00 6.850478204974E+00  
79 253 I 8.832004274850E-01 -2.315139282581E+00 -6.926283668674E+00  
80 253 I -8.832004274850E-01 2.315139282581E+00 6.926283668674E+00  
81 253 I 2.136726039454E+00 1.831671297207E+00 -5.612471308666E+00  
82 253 I -2.136726039454E+00 -1.831671297207E+00 5.612471308666E+00  
83 8 O -2.914445153880E+00 -1.365841719310E+00 -6.641296360911E+00  
84 8 O 2.914445153880E+00 1.365841719310E+00 6.641296360911E+00  
85 8 O -1.704577890284E+00 2.722676869207E+00 -5.866709467805E+00  
86 8 O 1.704577890284E+00 -2.722676869207E+00 5.866709467805E+00  
87 7 N -1.806773400808E+00 -1.361910269041E+00 -4.631682796789E+00  
88 7 N 1.806773400808E+00 1.361910269041E+00 4.631682796789E+00  
89 7 N -2.596802340544E+00 1.333230006916E+00 -4.279132672433E+00  
90 7 N 2.596802340544E+00 -1.333230006916E+00 4.279132672433E+00  
91 6 C -1.856013159262E+00 -1.188558387694E+00 -5.977865336659E+00  
92 6 C 1.856013159262E+00 1.188558387694E+00 5.977865336659E+00  
93 6 C -6.226334194340E-01 -7.290037941730E-01 -6.710543383410E+00  
94 6 C 6.226334194340E-01 7.290037941730E-01 6.710543383410E+00  
95 1 H -9.906485226200E-02 1.218623569800E-01 -6.254161728151E+00  
96 1 H 9.906485226200E-02 -1.218623569800E-01 6.254161728151E+00  
97 1 H -9.085721271130E-01 -4.923936028240E-01 -7.740730416017E+00  
98 1 H 9.085721271130E-01 4.923936028240E-01 7.740730416017E+00

99 6 C -2.667988430684E+00 2.027130115710E+00 -5.447974301820E+00  
100 6 C 2.667988430684E+00 -2.027130115710E+00 5.447974301820E+00  
101 6 C 3.760965272874E+00 5.433677826510E-01 -6.300831011139E+00  
102 6 C -3.760965272874E+00 -5.433677826510E-01 6.300831011139E+00  
103 1 H 3.336046740623E+00 -4.689060763020E-01 -6.335371365073E+00  
104 1 H -3.336046740623E+00 4.689060763020E-01 6.335371365073E+00  
105 1 H 3.956259023363E+00 9.140016272630E-01 -7.314709915264E+00  
106 1 H -3.956259023363E+00 -9.140016272630E-01 7.314709915264E+00  
107 6 C -3.025238081204E+00 -1.706793179914E+00 -3.892204892070E+00  
108 6 C 3.025238081204E+00 1.706793179914E+00 3.892204892070E+00  
109 1 H -2.855620090541E+00 -2.652906330740E+00 -3.345829274807E+00  
110 1 H 2.855620090541E+00 2.652906330740E+00 3.345829274807E+00  
111 1 H -3.830679463386E+00 -1.863389817819E+00 -4.623646108039E+00  
112 1 H 3.830679463386E+00 1.863389817819E+00 4.623646108039E+00  
113 6 C -3.409389952281E+00 -6.030483221850E-01 -2.879359589270E+00  
114 6 C 3.409389952281E+00 6.030483221850E-01 2.879359589270E+00  
115 6 C -3.752368307281E+00 7.115256054030E-01 -3.614648188879E+00  
116 6 C 3.752368307281E+00 -7.115256054030E-01 3.614648188879E+00  
117 1 H 3.121665520046E+00 -8.190698114250E-01 -4.349829827497E+00  
118 1 H -3.121665520046E+00 8.190698114250E-01 4.349829827497E+00  
119 1 H 3.524425412140E+00 8.813419778900E-02 -2.872974425650E+00  
120 1 H -3.524425412140E+00 -8.813419778900E-02 2.872974425650E+00  
121 6 C -1.367472752522E+00 1.428691852829E+00 -3.477583585205E+00  
122 6 C 1.367472752522E+00 -1.428691852829E+00 3.477583585205E+00  
123 1 H -1.503247025751E+00 2.214406482383E+00 -2.711459431083E+00  
124 1 H 1.503247025751E+00 -2.214406482383E+00 2.711459431083E+00  
125 1 H -5.628152398460E-01 1.763256319588E+00 -4.146413099647E+00  
126 1 H 5.628152398460E-01 -1.763256319588E+00 4.146413099647E+00  
127 6 C -1.003363862821E+00 1.083305997730E-01 -2.769415276917E+00  
128 6 C 1.003363862821E+00 -1.083305997730E-01 2.769415276917E+00  
129 6 C -6.623471773200E-01 -1.022641034080E+00 -3.775503526031E+00  
130 6 C 6.623471773200E-01 1.022641034080E+00 3.775503526031E+00

131 1 H 1.999379001530E-01 -7.441822033920E-01 -4.395991670523E+00  
132 1 H -1.999379001530E-01 7.441822033920E-01 4.395991670523E+00  
133 1 H -3.856510981800E-01 -1.921637633697E+00 -3.191335718772E+00  
134 1 H 3.856510981800E-01 1.921637633697E+00 3.191335718772E+00  
135 6 C 3.024819835121E+00 -2.406319020476E+00 -2.093553331631E+00  
136 6 C -3.024819835121E+00 2.406319020476E+00 2.093553331631E+00  
137 1 H 3.236167437865E+00 -3.337728687205E+00 -1.544247733023E+00  
138 1 H -3.236167437865E+00 3.337728687205E+00 1.544247733023E+00  
139 1 H 2.162894890744E+00 -2.587718277735E+00 -2.758506000600E+00  
140 1 H -2.162894890744E+00 2.587718277735E+00 2.758506000600E+00  
141 1 H 2.724192288209E+00 -1.642905005574E+00 -1.357814603503E+00  
142 1 H -2.724192288209E+00 1.642905005574E+00 1.357814603503E+00  
143 6 C 2.279517896080E-01 3.598802669660E-01 -1.887790271054E+00  
144 6 C -2.279517896080E-01 -3.598802669660E-01 1.887790271054E+00  
145 1 H 3.435864459500E-02 1.155782097136E+00 -1.150803583549E+00  
146 1 H -3.435864459500E-02 -1.155782097136E+00 1.150803583549E+00  
147 1 H 1.088193604124E+00 6.814366607460E-01 -2.500750194205E+00  
148 1 H -1.088193604124E+00 -6.814366607460E-01 2.500750194205E+00  
149 1 H 5.018568742180E-01 -5.605781251790E-01 -1.348154182907E+00  
150 1 H -5.018568742180E-01 5.605781251790E-01 1.348154182907E+00  
151 6 C -2.215575218716E+00 -3.505602028070E-01 -1.937951175853E+00  
152 6 C 2.215575218716E+00 3.505602028070E-01 1.937951175853E+00  
153 1 H -1.971032506071E+00 -1.267405024484E+00 -1.370493273049E+00  
154 1 H 1.971032506071E+00 1.267405024484E+00 1.370493273049E+00  
155 1 H -2.481737810699E+00 4.337946244360E-01 -1.203221190246E+00  
156 1 H 2.481737810699E+00 -4.337946244360E-01 1.203221190246E+00  
157 8 O 1.042529214930E-01 -3.325820053994E+00 -1.006428313532E+00  
158 8 O -1.042529214930E-01 3.325820053994E+00 1.006428313532E+00  
159 8 O -1.174890377307E+00 -3.403096119727E+00 -2.909468289230E-01  
160 8 O 1.174890377307E+00 3.403096119727E+00 2.909468289230E-01  
161 1 H 2.222588715420E-01 -4.288121513431E+00 -1.276580769220E+00  
162 1 H -2.222588715420E-01 4.288121513431E+00 1.276580769220E+00

163 1 H -8.620235593930E-01 -3.637045425267E+00 6.364559945080E-01  
 164 1 H 8.620235593930E-01 3.637045425267E+00 -6.364559945080E-01  
 165 8 O 2.773412405661E+00 -4.355922426540E+00 -7.301831367428E+00  
 166 8 O -2.773412405661E+00 4.355922426540E+00 7.301831367428E+00  
 167 1 H -4.069400089132E+00 -2.514654132949E+00 -7.023841993648E+00  
 168 1 H 4.069400089132E+00 2.514654132949E+00 7.023841993648E+00  
 169 8 O 2.449796889177E+00 -4.821684448189E+00 7.417675180044E+00  
 170 8 O -2.449796889177E+00 4.821684448189E+00 -7.417675180044E+00  
 171 1 H 2.099418762598E+00 -4.003832815209E+00 6.948450158451E+00  
 172 1 H -2.099418762598E+00 4.003832815209E+00 -6.948450158451E+00

\*\*\*\*\*

\*\*\* PSEUDOPOTENTIAL INFORMATION \*\*\*

\*\*\*\*\*

ATOMIC NUMBER 53, NUCLEAR CHARGE 25.000, GIVEN IN INPUT PSEUDOPOTENTIAL

|    | TYPE | EXPONENT   | COEFF.      | N | EXPONENT   | COEFF.      | N |
|----|------|------------|-------------|---|------------|-------------|---|
| P0 | TMS  | 40.0333760 | 49.9896490  | 0 | 17.3005760 | 281.0065560 | 0 |
|    |      | 8.8517200  | 61.4167390  | 0 |            |             |   |
| P1 | TMS  | 15.7201410 | 67.4162390  | 0 | 15.2082220 | 134.8076960 | 0 |
|    |      | 8.2941860  | 14.5665480  | 0 | 7.7539490  | 28.9684220  | 0 |
| P2 | TMS  | 13.8177510 | 35.5387560  | 0 | 13.5878050 | 53.3397590  | 0 |
|    |      | 6.9476300  | 9.7164660   | 0 | 6.9600990  | 14.9775000  | 0 |
| P3 | TMS  | 18.5229500 | -20.1766180 | 0 | 18.2510350 | -26.0880770 | 0 |
|    |      | 7.5579010  | -0.2204340  | 0 | 7.5974040  | -0.2216460  | 0 |

\*\*\*\*\*

LOCAL ATOMIC FUNCTIONS BASIS SET

\*\*\*\*\*

| ATOM | X(AU) | Y(AU) | Z(AU) | N. | TYPE | EXPONENT | S COEF | P COEF | D/F/G COEF |
|------|-------|-------|-------|----|------|----------|--------|--------|------------|
|------|-------|-------|-------|----|------|----------|--------|--------|------------|

\*\*\*\*\*

|   |   |        |        |        |  |  |  |  |  |
|---|---|--------|--------|--------|--|--|--|--|--|
| 1 | I | -6.428 | -9.308 | -2.672 |  |  |  |  |  |
|---|---|--------|--------|--------|--|--|--|--|--|

1 S

5.900E+03 2.419E-04 0.000E+00 0.000E+00  
8.985E+02 1.547E-03 0.000E+00 0.000E+00  
2.004E+02 4.284E-03 0.000E+00 0.000E+00  
3.142E+01-3.942E-02 0.000E+00 0.000E+00  
1.565E+01 9.609E-01 0.000E+00 0.000E+00

2 S

1.182E+01 7.596E-01 0.000E+00 0.000E+00  
6.461E+00 4.250E-01 0.000E+00 0.000E+00

3 S

1.793E+00 1.000E+00 0.000E+00 0.000E+00

4 S

2.229E-01 1.000E+00 0.000E+00 0.000E+00

5- 7 P

1.973E+02 0.000E+00 7.395E-04 0.000E+00  
2.006E+01 0.000E+00 6.617E-02 0.000E+00  
9.763E+00 0.000E+00-2.855E-01 0.000E+00

8- 10 P

1.298E+01 0.000E+00-4.910E-02 0.000E+00  
3.620E+00 0.000E+00 3.891E-01 0.000E+00  
2.023E+00 0.000E+00 6.561E-01 0.000E+00  
1.037E+00 0.000E+00 3.180E-01 0.000E+00

11- 13 P

4.758E-01 0.000E+00 1.000E+00 0.000E+00

14- 16 P

1.500E-01 0.000E+00 1.000E+00 0.000E+00

17- 21 D

1.191E+02 0.000E+00 0.000E+00 8.260E-04  
3.340E+01 0.000E+00 0.000E+00 6.838E-03  
1.781E+01 0.000E+00 0.000E+00-1.031E-02  
4.899E+00 0.000E+00 0.000E+00 2.267E-01  
2.452E+00 0.000E+00 0.000E+00 4.418E-01

1.182E+00 0.000E+00 0.000E+00 3.678E-01  
22- 26 D  
2.537E+00 0.000E+00 0.000E+00 1.000E+00  
27- 31 D  
6.887E-01 0.000E+00 0.000E+00 1.000E+00  
32- 36 D  
2.068E-01 0.000E+00 0.000E+00 1.000E+00  
2 I 6.428 9.308 2.672  
3 I 7.820 5.893 -4.322  
4 I -7.820 -5.893 4.322  
5 O 0.996 -11.140 -2.759  
145 S  
5.485E+03 1.831E-03 0.000E+00 0.000E+00  
8.252E+02 1.395E-02 0.000E+00 0.000E+00  
1.880E+02 6.845E-02 0.000E+00 0.000E+00  
5.296E+01 2.327E-01 0.000E+00 0.000E+00  
1.690E+01 4.702E-01 0.000E+00 0.000E+00  
5.800E+00 3.585E-01 0.000E+00 0.000E+00  
146- 149 SP  
1.554E+01 -1.108E-01 7.087E-02 0.000E+00  
3.600E+00 -1.480E-01 3.398E-01 0.000E+00  
1.014E+00 1.131E+00 7.272E-01 0.000E+00  
150- 153 SP  
2.700E-01 1.000E+00 1.000E+00 0.000E+00  
154- 158 D  
8.000E-01 0.000E+00 0.000E+00 1.000E+00  
6 O -0.996 11.140 2.759  
7 O 0.738 7.683 -4.239  
8 O -0.738 -7.683 4.239  
9 N 2.320 -11.539 -6.871  
201 S  
4.174E+03 1.835E-03 0.000E+00 0.000E+00



6.275E+02 1.400E-02 0.000E+00 0.000E+00  
1.429E+02 6.859E-02 0.000E+00 0.000E+00  
4.023E+01 2.322E-01 0.000E+00 0.000E+00  
1.282E+01 4.691E-01 0.000E+00 0.000E+00  
4.390E+00 3.605E-01 0.000E+00 0.000E+00

202- 205 SP

1.163E+01-1.150E-01 6.758E-02 0.000E+00  
2.716E+00-1.691E-01 3.239E-01 0.000E+00  
7.722E-01 1.146E+00 7.409E-01 0.000E+00

206- 209 SP

2.120E-01 1.000E+00 1.000E+00 0.000E+00

210- 214 D

8.000E-01 0.000E+00 0.000E+00 1.000E+00

10 N -2.320 11.539 6.871

11 N -0.844 10.433 -7.173

12 N 0.844 -10.433 7.173

13 C 2.499 -12.059 -4.361

257 S

3.048E+03 1.835E-03 0.000E+00 0.000E+00  
4.574E+02 1.404E-02 0.000E+00 0.000E+00  
1.039E+02 6.884E-02 0.000E+00 0.000E+00  
2.921E+01 2.322E-01 0.000E+00 0.000E+00  
9.287E+00 4.679E-01 0.000E+00 0.000E+00  
3.164E+00 3.623E-01 0.000E+00 0.000E+00

258- 261 SP

7.868E+00-1.193E-01 6.900E-02 0.000E+00  
1.881E+00-1.609E-01 3.164E-01 0.000E+00  
5.442E-01 1.143E+00 7.443E-01 0.000E+00

262- 265 SP

1.687E-01 1.000E+00 1.000E+00 0.000E+00

266- 270 D

8.000E-01 0.000E+00 0.000E+00 1.000E+00

14 C -2.499 12.059 4.361  
15 C 4.515 12.430 -3.443  
16 C -4.515 -12.430 3.443  
17 H 4.994 10.842 -4.679

313 S

1.873E+01 3.349E-02 0.000E+00 0.000E+00  
2.825E+00 2.347E-01 0.000E+00 0.000E+00  
6.401E-01 8.138E-01 0.000E+00 0.000E+00

314 S

1.613E-01 1.000E+00 0.000E+00 0.000E+00

315- 317 P

1.100E+00 0.000E+00 1.000E+00 0.000E+00

18 H -4.994 -10.842 4.679  
19 H 3.948 11.712 -1.586  
20 H -3.948 -11.712 1.586  
21 C -0.919 9.273 -4.878  
22 C 0.919 -9.273 4.878  
23 C -3.019 9.921 -3.045  
24 C 3.019 -9.921 3.045  
25 H -3.326 11.953 -2.760  
26 H 3.326 -11.953 2.760  
27 H -2.654 8.977 -1.242  
28 H 2.654 -8.977 1.242  
29 C 0.130 -10.133 -7.829  
30 C -0.130 10.133 7.829  
31 H 0.816 -8.495 -8.934  
32 H -0.816 8.495 8.934  
33 H -0.949 -9.430 -6.201  
34 H 0.949 9.430 6.201  
35 C -1.546 -11.791 -9.561  
36 C 1.546 11.791 9.561  
37 C -2.734 12.252 -8.087

38 C 2.734 -12.252 8.087  
39 H -3.822 -13.287 -6.479  
40 H 3.822 13.287 6.479  
41 H -4.061 11.252 -9.359  
42 H 4.061 -11.252 9.359  
43 C 1.053 9.601 -9.035  
44 C -1.053 -9.601 9.035  
45 H 0.102 8.295 -10.365  
46 H -0.102 -8.295 10.365  
47 H 2.497 8.528 -7.994  
48 H -2.497 -8.528 7.994  
49 C 2.238 11.792 -10.555  
50 C -2.238 -11.792 10.555  
51 C 3.848 -12.729 -8.854  
52 C -3.848 12.729 8.854  
53 H 5.436 12.517 -8.003  
54 H -5.436 -12.517 8.003  
55 H 4.649 -11.221 -10.062  
56 H -4.649 11.221 10.062  
57 C -3.690 -10.138 -10.603  
58 C 3.690 10.138 10.603  
59 H -2.916 -8.530 -11.677  
60 H 2.916 8.530 11.677  
61 H -4.862 -9.377 -9.054  
62 H 4.862 9.377 9.054  
63 H -4.915 -11.236 -11.879  
64 H 4.915 11.236 11.879  
65 C 3.936 10.693 -12.633  
66 C -3.936 -10.693 12.633  
67 H 2.829 9.481 -13.916  
68 H -2.829 -9.481 13.916  
69 H 5.477 9.521 -11.860

70 H -5.477 -9.521 11.860  
71 H 4.779 12.233 -13.755  
72 H -4.779 -12.233 13.755  
73 C 0.093 -12.883 -11.699  
74 C -0.093 12.883 11.699  
75 H 0.906 -11.337 -12.842  
76 H -0.906 11.337 12.842  
77 H -1.094 12.207 -12.946  
78 H 1.094 -12.207 12.946  
79 I 1.669 -4.375 -13.089  
80 I -1.669 4.375 13.089  
81 I 4.038 3.461 -10.606  
82 I -4.038 -3.461 10.606  
83 O -5.508 -2.581 -12.550  
84 O 5.508 2.581 12.550  
85 O -3.221 5.145 -11.086  
86 O 3.221 -5.145 11.086  
87 N -3.414 -2.574 -8.753  
88 N 3.414 2.574 8.753  
89 N -4.907 2.519 -8.086  
90 N 4.907 -2.519 8.086  
91 C -3.507 -2.246 -11.297  
92 C 3.507 2.246 11.297  
93 C -1.177 -1.378 -12.681  
94 C 1.177 1.378 12.681  
95 H -0.187 0.230 -11.819  
96 H 0.187 -0.230 11.819  
97 H -1.717 -0.930 -14.628  
98 H 1.717 0.930 14.628  
99 C -5.042 3.831 -10.295  
100 C 5.042 -3.831 10.295  
101 C 7.107 1.027 -11.907

102 C -7.107 -1.027 11.907  
103 H 6.304 -0.886 -11.972  
104 H -6.304 0.886 11.972  
105 H 7.476 1.727 -13.823  
106 H -7.476 -1.727 13.823  
107 C -5.717 -3.225 -7.355  
108 C 5.717 3.225 7.355  
109 H -5.396 -5.013 -6.323  
110 H 5.396 5.013 6.323  
111 H -7.239 -3.521 -8.737  
112 H 7.239 3.521 8.737  
113 C -6.443 -1.140 -5.441  
114 C 6.443 1.140 5.441  
115 C -7.091 1.345 -6.831  
116 C 7.091 -1.345 6.831  
117 H 5.899 -1.548 -8.220  
118 H -5.899 1.548 8.220  
119 H 6.660 0.167 -5.429  
120 H -6.660 -0.167 5.429  
121 C -2.584 2.700 -6.572  
122 C 2.584 -2.700 6.572  
123 H -2.841 4.185 -5.124  
124 H 2.841 -4.185 5.124  
125 H -1.064 3.332 -7.836  
126 H 1.064 -3.332 7.836  
127 C -1.896 0.205 -5.233  
128 C 1.896 -0.205 5.233  
129 C -1.252 -1.933 -7.135  
130 C 1.252 1.933 7.135  
131 H 0.378 -1.406 -8.307  
132 H -0.378 1.406 8.307  
133 H -0.729 -3.631 -6.031

134 H 0.729 3.631 6.031  
135 C 5.716 -4.547 -3.956  
136 C -5.716 4.547 3.956  
137 H 6.115 -6.307 -2.918  
138 H -6.115 6.307 2.918  
139 H 4.087 -4.890 -5.213  
140 H -4.087 4.890 5.213  
141 H 5.148 -3.105 -2.566  
142 H -5.148 3.105 2.566  
143 C 0.431 0.680 -3.567  
144 C -0.431 -0.680 3.567  
145 H 0.065 2.184 -2.175  
146 H -0.065 -2.184 2.175  
147 H 2.056 1.288 -4.726  
148 H -2.056 -1.288 4.726  
149 H 0.948 -1.059 -2.548  
150 H -0.948 1.059 2.548  
151 C -4.187 -0.662 -3.662  
152 C 4.187 0.662 3.662  
153 H -3.725 -2.395 -2.590  
154 H 3.725 2.395 2.590  
155 H -4.690 0.820 -2.274  
156 H 4.690 -0.820 2.274  
157 O 0.197 -6.285 -1.902  
158 O -0.197 6.285 1.902  
159 O -2.220 -6.431 -0.550  
160 O 2.220 6.431 0.550  
161 H 0.420 -8.103 -2.412  
162 H -0.420 8.103 2.412  
163 H -1.629 -6.873 1.203  
164 H 1.629 6.873 -1.203  
165 O 5.241 -8.232 -13.798

166 O -5.241 8.232 13.798

167 H -7.690 -4.752 -13.273

168 H 7.690 4.752 13.273

169 O 4.629 -9.112 14.017

170 O -4.629 9.112 -14.017

171 H 3.967 -7.566 13.131

172 H -3.967 7.566 -13.131

INFORMATION \*\*\*\* SET\_MPP \*\*\*\* PCRYSTAL CALCULATION

INFORMATION \*\*\*\* READM2 \*\*\*\* NEW DEFAULT: FOCK/KS MATRIX MIXING SET TO 30 %

INFORMATION \*\*\*\* READM2 \*\*\*\* NEW DEFAULT: FULL DIRECT SCF MODE

INFORMATION \*\*\*\* READM2 \*\*\*\* NEW DEFAULT: COULOMB BIPOLAR BUFFER SET TO 32 Mb

INFORMATION \*\*\*\* READM2 \*\*\*\* NEW DEFAULT: EXCHANGE BIPOLAR BUFFER SET TO 32 Mb

\*\*\*\*\*

NEW DEFAULT: DFT INTEGRATION GRID INCREASED TO XLGRID

NEW DEFAULT: DIIS ACCELERATOR ACTIVE

USE KEYWORD NODIIS TO TURN IT OFF

\*\*\*\*\*

INFORMATION \*\*\*\* DFTD3\_INPUT \*\*\*\* PERFORM DISPERSION CORRECTION DFT-D3(BJ) IN THE BECKE-JOHNSON DAMPING SCHEME

PLEASE CITE:

(1) DFT-D3 Reference

S. Grimme, J. Antony, S. Ehrlich, and H. Krieg, J. Chem. Phys. 132 (2010), 154104

(2) BJ-Damping Reference

S. Grimme, S. Ehrlich, and L. Goerigk, J. Comput. Chem. 32 (2011), 1456-1465

(3) General DFT-D Review

S. Grimme, A. Hansen, J. G. Brandenburg, and C. Bannwarth,

Chem. Rev. 116 (2016), 5105-5154

INFORMATION \*\*\*\* BIPOSIZE \*\*\*\* COULOMB BIPOLAR BUFFER SET TO 20000000

INFORMATION \*\*\*\* EXCHSIZE \*\*\*\* EXCHANGE BIPOLAR BUFFER SIZE SET TO 20000000

INFORMATION \*\*\*\* LEVSHIFT \*\*\*\* LEVEL SHIFTER ACTIVE

INFORMATION \*\*\*\* TOLDEE \*\*\*\* SCF TOL ON TOTAL ENERGY SET TO 11

INFORMATION \*\*\*\* READM2 \*\*\*\* FULL DIRECT SCF (MONO AND BIEL INT) SELECTED

INFORMATION \*\*\*\* MAXCYCLE \*\*\*\* MAX NUMBER OF SCF CYCLES SET TO 200

INFORMATION \*\*\*\* READM2 \*\*\*\* LEVSHIFT DISABLED BECAUSE NOT COMPATIBLE WITH DIIS

INFORMATION \*\*\*\* READM2 \*\*\*\* TO MAKE LEVSHIFT EFFECTIVE YOU MUST SET NODIIS

\*\*\*\*\*

N. OF ATOMS PER CELL 172 COULOMB OVERLAP TOL (T1) 10\*\* -6

NUMBER OF SHELLS 664 COULOMB PENETRATION TOL (T2) 10\*\* -6

NUMBER OF AO 1792 EXCHANGE OVERLAP TOL (T3) 10\*\* 20

N. OF ELECTRONS PER CELL 784 EXCHANGE PSEUDO OVP (F(G)) (T4) 10\*\* 20

CORE ELECTRONS PER CELL 152 EXCHANGE PSEUDO OVP (P(G)) (T5) 10\*\* 20

N. OF SYMMETRY OPERATORS 2 POLE ORDER IN MONO ZONE 4

\*\*\*\*\*

TYPE OF CALCULATION : RESTRICTED CLOSED SHELL

KOHN-SHAM HAMILTONIAN

(EXCHANGE)[CORRELATION] FUNCTIONAL:(PERDEW-BURKE-ERNZERHOF)[PERDEW-BURKE-ERNZERHOF]

CORE PSEUDO POTENTIAL TOL. ON PSEUDO (TP) 10\*\*-6

CAPPA:IS1 3;IS2 3;IS3 3; K PTS MONK NET 14; SYMMOPS:K SPACE 2;G SPACE 2

\*\*\*\*\*

MAX NUMBER OF SCF CYCLES 200 CONVERGENCE ON DELTAP 10\*\*-21

WEIGHT OF F(I) IN F(I+1) 25% CONVERGENCE ON ENERGY 10\*\*-11

SHRINK. FACT.(MONKH.) 3 3 3 NUMBER OF K POINTS IN THE IBZ 14

SHRINKING FACTOR(GILAT NET) 3 NUMBER OF K POINTS(GILAT NET) 14

\*\*\*\*\*

\*\*\* K POINTS COORDINATES (OBLIQUE COORDINATES IN UNITS OF IS = 3)

1-R( 0 0 0) 2-C( 1 0 0) 3-C( 0 1 0) 4-C( 1 1 0)

5-C( 2 1 0) 6-C( 0 0 1) 7-C( 1 0 1) 8-C( 2 0 1)



9-C( 0 1 1) 10-C( 1 1 1) 11-C( 2 1 1) 12-C( 0 2 1)  
 13-C( 1 2 1) 14-C( 2 2 1)

DIRECT LATTICE VECTORS COMPON. (A.U.)    RECIP. LATTICE VECTORS COMPON. (A.U.)

| X          | Y          | Z          | X         | Y         | Z         |
|------------|------------|------------|-----------|-----------|-----------|
| 14.4940244 | -2.5455684 | 0.0000000  | 0.4335018 | 0.0000000 | 0.0167695 |
| 0.0000000  | 26.2745632 | 0.0000000  | 0.0419991 | 0.2391357 | 0.0040736 |
| -1.1786781 | -0.3120350 | 30.4695578 | 0.0000000 | 0.0000000 | 0.2062119 |

DISK SPACE FOR EIGENVECTORS (FTN 10) 86704128 REALS

SYMMETRY ADAPTION OF THE BLOCH FUNCTIONS ENABLED

TTTTTTTTTTTTTTTTTTTTTTTTTTTTTTTTTTTTTTT gordsh1    TELAPSE    1.19 TCPU    0.08

MATRIX SIZE: P(G) 642834, F(G) 322313, P(G) IRR 162596, F(G) IRR 162596

MAX G-VECTOR INDEX FOR 1- AND 2-ELECTRON INTEGRALS 37

TTTTTTTTTTTTTTTTTTTTTTTTTTTTTTTTTTTTTTT INPUT    TELAPSE    1.28 TCPU    0.17

NEIGHBORS OF THE NON-EQUIVALENT ATOMS

N = NUMBER OF NEIGHBORS AT DISTANCE R

| ATOM | N | R/ANG  | R/AU   | NEIGHBORS (ATOM LABELS AND CELL INDICES) |
|------|---|--------|--------|------------------------------------------|
| 1    | 1 | 2.1925 | 4.1431 | 15 C -1-1 0                              |
| 1    | 1 | 2.6707 | 5.0470 | 19 H -1-1 0                              |
| 1    | 1 | 2.7124 | 5.1256 | 17 H -1-1 0                              |
| 1    | 1 | 2.9012 | 5.4825 | 20 H 0 0 0                               |
| 1    | 1 | 2.9219 | 5.5216 | 159 O 0 0 0                              |
| 1    | 1 | 3.0326 | 5.7308 | 109 H 0 0 0                              |
| 3    | 1 | 2.1939 | 4.1459 | 23 C 1 0 0                               |
| 3    | 1 | 2.6950 | 5.0929 | 27 H 1 0 0                               |

|      |   |        |        |       |       |
|------|---|--------|--------|-------|-------|
| 3 I  | 1 | 2.6985 | 5.0995 | 25 H  | 1 0 0 |
| 3 I  | 1 | 3.0218 | 5.7104 | 17 H  | 0 0 0 |
| 3 I  | 1 | 3.0597 | 5.7820 | 123 H | 1 0 0 |
| 3 I  | 1 | 3.0621 | 5.7865 | 39 H  | 1 1 0 |
|      |   |        |        |       |       |
| 5 O  | 1 | 1.2602 | 2.3814 | 13 C  | 0 0 0 |
| 5 O  | 1 | 1.6457 | 3.1099 | 161 H | 0 0 0 |
| 5 O  | 1 | 2.2791 | 4.3069 | 33 H  | 0 0 0 |
| 5 O  | 1 | 2.2956 | 4.3380 | 9 N   | 0 0 0 |
| 5 O  | 1 | 2.3765 | 4.4910 | 15 C  | 0-1 0 |
| 5 O  | 1 | 2.4711 | 4.6697 | 19 H  | 0-1 0 |
|      |   |        |        |       |       |
| 7 O  | 1 | 1.2615 | 2.3839 | 21 C  | 0 0 0 |
| 7 O  | 1 | 1.7285 | 3.2664 | 164 H | 0 0 0 |
| 7 O  | 1 | 2.2394 | 4.2318 | 47 H  | 0 0 0 |
| 7 O  | 1 | 2.2865 | 4.3209 | 11 N  | 0 0 0 |
| 7 O  | 1 | 2.3988 | 4.5331 | 23 C  | 0 0 0 |
| 7 O  | 1 | 2.4916 | 4.7084 | 27 H  | 0 0 0 |
|      |   |        |        |       |       |
| 9 N  | 1 | 1.3594 | 2.5690 | 13 C  | 0 0 0 |
| 9 N  | 1 | 1.4669 | 2.7719 | 51 C  | 0 0 0 |
| 9 N  | 1 | 1.4677 | 2.7736 | 29 C  | 0 0 0 |
| 9 N  | 1 | 2.0890 | 3.9476 | 33 H  | 0 0 0 |
| 9 N  | 1 | 2.0973 | 3.9633 | 55 H  | 0 0 0 |
| 9 N  | 1 | 2.1022 | 3.9726 | 31 H  | 0 0 0 |
|      |   |        |        |       |       |
| 11 N | 1 | 1.3613 | 2.5724 | 21 C  | 0 0 0 |
| 11 N | 1 | 1.4699 | 2.7778 | 37 C  | 0 0 0 |
| 11 N | 1 | 1.4738 | 2.7850 | 43 C  | 0 0 0 |
| 11 N | 1 | 2.0809 | 3.9323 | 47 H  | 0 0 0 |
| 11 N | 1 | 2.0938 | 3.9567 | 45 H  | 0 0 0 |
| 11 N | 1 | 2.1037 | 3.9754 | 41 H  | 0 0 0 |

|      |   |        |        |      |       |
|------|---|--------|--------|------|-------|
| 13 C | 1 | 1.2602 | 2.3814 | 5 O  | 0 0 0 |
| 13 C | 1 | 1.3594 | 2.5690 | 9 N  | 0 0 0 |
| 13 C | 1 | 1.5059 | 2.8457 | 15 C | 0-1 0 |
| 13 C | 1 | 2.1213 | 4.0086 | 19 H | 0-1 0 |
| 13 C | 1 | 2.2269 | 4.2082 | 17 H | 0-1 0 |
| 13 C | 1 | 2.4450 | 4.6204 | 29 C | 0 0 0 |
|      |   |        |        |      |       |
| 15 C | 1 | 1.0948 | 2.0688 | 17 H | 0 0 0 |
| 15 C | 1 | 1.0952 | 2.0697 | 19 H | 0 0 0 |
| 15 C | 1 | 1.5059 | 2.8457 | 13 C | 0 1 0 |
| 15 C | 1 | 2.1925 | 4.1431 | 1 I  | 1 1 0 |
| 15 C | 1 | 2.3765 | 4.4910 | 5 O  | 0 1 0 |
| 15 C | 1 | 2.4625 | 4.6535 | 53 H | 0 0 0 |
|      |   |        |        |      |       |
| 17 H | 1 | 1.0948 | 2.0688 | 15 C | 0 0 0 |
| 17 H | 1 | 1.7882 | 3.3792 | 19 H | 0 0 0 |
| 17 H | 1 | 1.9836 | 3.7485 | 53 H | 0 0 0 |
| 17 H | 1 | 2.2269 | 4.2082 | 13 C | 0 1 0 |
| 17 H | 1 | 2.5149 | 4.7524 | 47 H | 0 0 0 |
| 17 H | 1 | 2.7011 | 5.1043 | 51 C | 0 1 0 |
|      |   |        |        |      |       |
| 19 H | 1 | 1.0952 | 2.0697 | 15 C | 0 0 0 |
| 19 H | 1 | 1.7882 | 3.3792 | 17 H | 0 0 0 |
| 19 H | 1 | 2.1213 | 4.0086 | 13 C | 0 1 0 |
| 19 H | 1 | 2.4711 | 4.6697 | 5 O  | 0 1 0 |
| 19 H | 1 | 2.6707 | 5.0470 | 1 I  | 1 1 0 |
| 19 H | 1 | 2.7023 | 5.1067 | 26 H | 0 1 0 |
|      |   |        |        |      |       |
| 21 C | 1 | 1.2615 | 2.3839 | 7 O  | 0 0 0 |
| 21 C | 1 | 1.3613 | 2.5724 | 11 N | 0 0 0 |
| 21 C | 1 | 1.5140 | 2.8611 | 23 C | 0 0 0 |

|      |   |        |        |       |        |
|------|---|--------|--------|-------|--------|
| 21 C | 1 | 2.1378 | 4.0398 | 27 H  | 0 0 0  |
| 21 C | 1 | 2.2115 | 4.1791 | 25 H  | 0 0 0  |
| 21 C | 1 | 2.4410 | 4.6128 | 43 C  | 0 0 0  |
|      |   |        |        |       |        |
| 23 C | 1 | 1.0944 | 2.0681 | 27 H  | 0 0 0  |
| 23 C | 1 | 1.0981 | 2.0751 | 25 H  | 0 0 0  |
| 23 C | 1 | 1.5140 | 2.8611 | 21 C  | 0 0 0  |
| 23 C | 1 | 2.1939 | 4.1459 | 3 I   | -1 0 0 |
| 23 C | 1 | 2.3988 | 4.5331 | 7 O   | 0 0 0  |
| 23 C | 1 | 2.4730 | 4.6732 | 39 H  | 0 1 0  |
|      |   |        |        |       |        |
| 25 H | 1 | 1.0981 | 2.0751 | 23 C  | 0 0 0  |
| 25 H | 1 | 1.8032 | 3.4075 | 27 H  | 0 0 0  |
| 25 H | 1 | 2.0596 | 3.8921 | 39 H  | 0 1 0  |
| 25 H | 1 | 2.2115 | 4.1791 | 21 C  | 0 0 0  |
| 25 H | 1 | 2.6985 | 5.0995 | 3 I   | -1 0 0 |
| 25 H | 1 | 2.7023 | 5.1067 | 20 H  | 0 1 0  |
|      |   |        |        |       |        |
| 27 H | 1 | 1.0944 | 2.0681 | 23 C  | 0 0 0  |
| 27 H | 1 | 1.8032 | 3.4075 | 25 H  | 0 0 0  |
| 27 H | 1 | 2.1378 | 4.0398 | 21 C  | 0 0 0  |
| 27 H | 1 | 2.3131 | 4.3710 | 162 H | 0 0 0  |
| 27 H | 1 | 2.4916 | 4.7084 | 7 O   | 0 0 0  |
| 27 H | 1 | 2.5254 | 4.7722 | 164 H | 0 0 0  |
|      |   |        |        |       |        |
| 29 C | 1 | 1.0985 | 2.0759 | 33 H  | 0 0 0  |
| 29 C | 1 | 1.1063 | 2.0907 | 31 H  | 0 0 0  |
| 29 C | 1 | 1.4677 | 2.7736 | 9 N   | 0 0 0  |
| 29 C | 1 | 1.5483 | 2.9259 | 35 C  | 0 0 0  |
| 29 C | 1 | 2.4450 | 4.6204 | 13 C  | 0 0 0  |
| 29 C | 1 | 2.4602 | 4.6491 | 51 C  | 0 0 0  |

|      |   |        |        |       |       |
|------|---|--------|--------|-------|-------|
| 31 H | 1 | 1.1063 | 2.0907 | 29 C  | 0 0 0 |
| 31 H | 1 | 1.7910 | 3.3846 | 33 H  | 0 0 0 |
| 31 H | 1 | 2.1022 | 3.9726 | 9 N   | 0 0 0 |
| 31 H | 1 | 2.1715 | 4.1035 | 35 C  | 0 0 0 |
| 31 H | 1 | 2.4515 | 4.6326 | 59 H  | 0 0 0 |
| 31 H | 1 | 2.5575 | 4.8329 | 75 H  | 0 0 0 |
|      |   |        |        |       |       |
| 33 H | 1 | 1.0985 | 2.0759 | 29 C  | 0 0 0 |
| 33 H | 1 | 1.7910 | 3.3846 | 31 H  | 0 0 0 |
| 33 H | 1 | 2.0890 | 3.9476 | 9 N   | 0 0 0 |
| 33 H | 1 | 2.1962 | 4.1501 | 35 C  | 0 0 0 |
| 33 H | 1 | 2.2442 | 4.2409 | 161 H | 0 0 0 |
| 33 H | 1 | 2.2791 | 4.3069 | 5 O   | 0 0 0 |
|      |   |        |        |       |       |
| 35 C | 1 | 1.5348 | 2.9003 | 57 C  | 0 0 0 |
| 35 C | 1 | 1.5385 | 2.9074 | 73 C  | 0 0 0 |
| 35 C | 1 | 1.5483 | 2.9259 | 29 C  | 0 0 0 |
| 35 C | 1 | 1.5487 | 2.9265 | 37 C  | 0-1 0 |
| 35 C | 1 | 2.1696 | 4.1000 | 41 H  | 0-1 0 |
| 35 C | 1 | 2.1715 | 4.1035 | 31 H  | 0 0 0 |
|      |   |        |        |       |       |
| 37 C | 1 | 1.0990 | 2.0768 | 39 H  | 0 1 0 |
| 37 C | 1 | 1.1076 | 2.0931 | 41 H  | 0 0 0 |
| 37 C | 1 | 1.4699 | 2.7778 | 11 N  | 0 0 0 |
| 37 C | 1 | 1.5487 | 2.9265 | 35 C  | 0 1 0 |
| 37 C | 1 | 2.4968 | 4.7182 | 43 C  | 0 0 0 |
| 37 C | 1 | 2.5010 | 4.7263 | 57 C  | 0 1 0 |
|      |   |        |        |       |       |
| 39 H | 1 | 1.0990 | 2.0768 | 37 C  | 0-1 0 |
| 39 H | 1 | 1.7842 | 3.3717 | 41 H  | 0-1 0 |
| 39 H | 1 | 2.0596 | 3.8921 | 25 H  | 0-1 0 |
| 39 H | 1 | 2.1089 | 3.9852 | 11 N  | 0-1 0 |

|      |   |        |        |      |       |
|------|---|--------|--------|------|-------|
| 39 H | 1 | 2.1765 | 4.1130 | 35 C | 0 0 0 |
| 39 H | 1 | 2.4730 | 4.6732 | 23 C | 0-1 0 |
| 41 H | 1 | 1.1076 | 2.0931 | 37 C | 0 0 0 |
| 41 H | 1 | 1.7842 | 3.3717 | 39 H | 0 1 0 |
| 41 H | 1 | 2.1037 | 3.9754 | 11 N | 0 0 0 |
| 41 H | 1 | 2.1696 | 4.1000 | 35 C | 0 1 0 |
| 41 H | 1 | 2.4488 | 4.6275 | 63 H | 0 1 0 |
| 41 H | 1 | 2.5147 | 4.7522 | 77 H | 0 0 0 |
| 43 C | 1 | 1.0999 | 2.0785 | 47 H | 0 0 0 |
| 43 C | 1 | 1.1072 | 2.0922 | 45 H | 0 0 0 |
| 43 C | 1 | 1.4738 | 2.7850 | 11 N | 0 0 0 |
| 43 C | 1 | 1.5441 | 2.9178 | 49 C | 0 0 0 |
| 43 C | 1 | 2.4410 | 4.6128 | 21 C | 0 0 0 |
| 43 C | 1 | 2.4968 | 4.7182 | 37 C | 0 0 0 |
| 45 H | 1 | 1.1072 | 2.0922 | 43 C | 0 0 0 |
| 45 H | 1 | 1.7873 | 3.3774 | 47 H | 0 0 0 |
| 45 H | 1 | 2.0938 | 3.9567 | 11 N | 0 0 0 |
| 45 H | 1 | 2.1704 | 4.1015 | 49 C | 0 0 0 |
| 45 H | 1 | 2.4510 | 4.6317 | 67 H | 0 0 0 |
| 45 H | 1 | 2.4531 | 4.6357 | 85 O | 0 0 0 |
| 47 H | 1 | 1.0999 | 2.0785 | 43 C | 0 0 0 |
| 47 H | 1 | 1.7873 | 3.3774 | 45 H | 0 0 0 |
| 47 H | 1 | 2.0809 | 3.9323 | 11 N | 0 0 0 |
| 47 H | 1 | 2.1995 | 4.1564 | 49 C | 0 0 0 |
| 47 H | 1 | 2.2394 | 4.2318 | 7 O  | 0 0 0 |
| 47 H | 1 | 2.4785 | 4.6837 | 21 C | 0 0 0 |
| 49 C | 1 | 1.5346 | 2.8999 | 65 C | 0 0 0 |

|      |   |        |        |      |       |
|------|---|--------|--------|------|-------|
| 49 C | 1 | 1.5402 | 2.9106 | 73 C | 0 1 0 |
| 49 C | 1 | 1.5441 | 2.9178 | 43 C | 0 0 0 |
| 49 C | 1 | 1.5482 | 2.9256 | 51 C | 0 1 0 |
| 49 C | 1 | 2.1619 | 4.0854 | 55 H | 0 1 0 |
| 49 C | 1 | 2.1704 | 4.1015 | 45 H | 0 0 0 |
|      |   |        |        |      |       |
| 51 C | 1 | 1.0978 | 2.0745 | 53 H | 0-1 0 |
| 51 C | 1 | 1.1065 | 2.0910 | 55 H | 0 0 0 |
| 51 C | 1 | 1.4669 | 2.7719 | 9 N  | 0 0 0 |
| 51 C | 1 | 1.5482 | 2.9256 | 49 C | 0-1 0 |
| 51 C | 1 | 2.4602 | 4.6491 | 29 C | 0 0 0 |
| 51 C | 1 | 2.4944 | 4.7138 | 73 C | 0 0 0 |
|      |   |        |        |      |       |
| 53 H | 1 | 1.0978 | 2.0745 | 51 C | 0 1 0 |
| 53 H | 1 | 1.7779 | 3.3598 | 55 H | 0 1 0 |
| 53 H | 1 | 1.9836 | 3.7485 | 17 H | 0 0 0 |
| 53 H | 1 | 2.1108 | 3.9889 | 9 N  | 0 1 0 |
| 53 H | 1 | 2.1988 | 4.1551 | 49 C | 0 0 0 |
| 53 H | 1 | 2.4625 | 4.6535 | 15 C | 0 0 0 |
|      |   |        |        |      |       |
| 55 H | 1 | 1.1065 | 2.0910 | 51 C | 0 0 0 |
| 55 H | 1 | 1.7779 | 3.3598 | 53 H | 0-1 0 |
| 55 H | 1 | 2.0973 | 3.9633 | 9 N  | 0 0 0 |
| 55 H | 1 | 2.1619 | 4.0854 | 49 C | 0-1 0 |
| 55 H | 1 | 2.4598 | 4.6484 | 71 H | 0-1 0 |
| 55 H | 1 | 2.4679 | 4.6637 | 75 H | 0 0 0 |
|      |   |        |        |      |       |
| 57 C | 1 | 1.1020 | 2.0824 | 63 H | 0 0 0 |
| 57 C | 1 | 1.1024 | 2.0833 | 59 H | 0 0 0 |
| 57 C | 1 | 1.1038 | 2.0859 | 61 H | 0 0 0 |
| 57 C | 1 | 1.5348 | 2.9003 | 35 C | 0 0 0 |
| 57 C | 1 | 2.4980 | 4.7206 | 29 C | 0 0 0 |

|      |   |        |        |      |        |
|------|---|--------|--------|------|--------|
| 57 C | 1 | 2.5010 | 4.7263 | 37 C | 0-1 0  |
| 59 H | 1 | 1.1024 | 2.0833 | 57 C | 0 0 0  |
| 59 H | 1 | 1.7839 | 3.3711 | 63 H | 0 0 0  |
| 59 H | 1 | 1.7855 | 3.3742 | 61 H | 0 0 0  |
| 59 H | 1 | 2.1813 | 4.1221 | 35 C | 0 0 0  |
| 59 H | 1 | 2.4515 | 4.6326 | 31 H | 0 0 0  |
| 59 H | 1 | 2.5839 | 4.8829 | 75 H | 0 0 0  |
| 61 H | 1 | 1.1038 | 2.0859 | 57 C | 0 0 0  |
| 61 H | 1 | 1.7855 | 3.3742 | 59 H | 0 0 0  |
| 61 H | 1 | 1.7896 | 3.3819 | 63 H | 0 0 0  |
| 61 H | 1 | 2.1867 | 4.1323 | 35 C | 0 0 0  |
| 61 H | 1 | 2.4865 | 4.6988 | 53 H | -1-1 0 |
| 61 H | 1 | 2.5379 | 4.7959 | 39 H | 0 0 0  |
| 63 H | 1 | 1.1020 | 2.0824 | 57 C | 0 0 0  |
| 63 H | 1 | 1.7839 | 3.3711 | 59 H | 0 0 0  |
| 63 H | 1 | 1.7896 | 3.3819 | 61 H | 0 0 0  |
| 63 H | 1 | 2.1837 | 4.1267 | 35 C | 0 0 0  |
| 63 H | 1 | 2.4488 | 4.6275 | 41 H | 0-1 0  |
| 63 H | 1 | 2.5796 | 4.8747 | 77 H | 0-1 0  |
| 65 C | 1 | 1.1025 | 2.0835 | 71 H | 0 0 0  |
| 65 C | 1 | 1.1025 | 2.0835 | 67 H | 0 0 0  |
| 65 C | 1 | 1.1032 | 2.0848 | 69 H | 0 0 0  |
| 65 C | 1 | 1.5346 | 2.8999 | 49 C | 0 0 0  |
| 65 C | 1 | 2.5059 | 4.7354 | 51 C | 0 1 0  |
| 65 C | 1 | 2.5074 | 4.7384 | 43 C | 0 0 0  |
| 67 H | 1 | 1.1025 | 2.0835 | 65 C | 0 0 0  |
| 67 H | 1 | 1.7744 | 3.3531 | 69 H | 0 0 0  |



|      |   |        |        |      |       |
|------|---|--------|--------|------|-------|
| 67 H | 1 | 1.7867 | 3.3764 | 71 H | 0 0 0 |
| 67 H | 1 | 2.1812 | 4.1218 | 49 C | 0 0 0 |
| 67 H | 1 | 2.4510 | 4.6317 | 45 H | 0 0 0 |
| 67 H | 1 | 2.5793 | 4.8742 | 77 H | 0 0 0 |
|      |   |        |        |      |       |
| 69 H | 1 | 1.1032 | 2.0848 | 65 C | 0 0 0 |
| 69 H | 1 | 1.7744 | 3.3531 | 67 H | 0 0 0 |
| 69 H | 1 | 1.7894 | 3.3815 | 71 H | 0 0 0 |
| 69 H | 1 | 2.2041 | 4.1652 | 49 C | 0 0 0 |
| 69 H | 1 | 2.5845 | 4.8839 | 53 H | 0 0 0 |
| 69 H | 1 | 2.6359 | 4.9810 | 47 H | 0 0 0 |
|      |   |        |        |      |       |
| 71 H | 1 | 1.1025 | 2.0835 | 65 C | 0 0 0 |
| 71 H | 1 | 1.7867 | 3.3764 | 67 H | 0 0 0 |
| 71 H | 1 | 1.7894 | 3.3815 | 69 H | 0 0 0 |
| 71 H | 1 | 2.1749 | 4.1099 | 49 C | 0 0 0 |
| 71 H | 1 | 2.4598 | 4.6484 | 55 H | 0 1 0 |
| 71 H | 1 | 2.5459 | 4.8110 | 75 H | 0 1 0 |
|      |   |        |        |      |       |
| 73 C | 1 | 1.1047 | 2.0876 | 75 H | 0 0 0 |
| 73 C | 1 | 1.1054 | 2.0889 | 77 H | 0-1 0 |
| 73 C | 1 | 1.5385 | 2.9074 | 35 C | 0 0 0 |
| 73 C | 1 | 1.5402 | 2.9106 | 49 C | 0-1 0 |
| 73 C | 1 | 2.4944 | 4.7138 | 51 C | 0 0 0 |
| 73 C | 1 | 2.5012 | 4.7265 | 37 C | 0-1 0 |
|      |   |        |        |      |       |
| 75 H | 1 | 1.1047 | 2.0876 | 73 C | 0 0 0 |
| 75 H | 1 | 1.7920 | 3.3864 | 77 H | 0-1 0 |
| 75 H | 1 | 2.1757 | 4.1114 | 49 C | 0-1 0 |
| 75 H | 1 | 2.1809 | 4.1214 | 35 C | 0 0 0 |
| 75 H | 1 | 2.4679 | 4.6637 | 55 H | 0 0 0 |
| 75 H | 1 | 2.5459 | 4.8110 | 71 H | 0-1 0 |

77 H 1 1.1054 2.0889 73 C 0 1 0  
77 H 1 1.7920 3.3864 75 H 0 1 0  
77 H 1 2.1718 4.1041 35 C 0 1 0  
77 H 1 2.1811 4.1217 49 C 0 0 0  
77 H 1 2.5147 4.7522 41 H 0 0 0  
77 H 1 2.5506 4.8199 170 O 0 0 0

79 I 1 2.1977 4.1531 93 C 0 0 0  
79 I 1 2.6826 5.0693 97 H 0 0 0  
79 I 1 2.7121 5.1252 95 H 0 0 0  
79 I 1 2.8069 5.3043 165 O 0 0 0  
79 I 1 3.0557 5.7744 131 H 0 0 0  
79 I 1 3.1100 5.8770 91 C 0 0 0

81 I 1 2.1844 4.1280 101 C 0 0 0  
81 I 1 2.6553 5.0177 105 H 0 0 0  
81 I 1 2.6933 5.0895 103 H 0 0 0  
81 I 1 2.8869 5.4554 95 H 0 0 0  
81 I 1 3.0692 5.8000 98 H 0 0-1  
81 I 1 3.0727 5.8066 125 H 0 0 0

83 O 1 1.2617 2.3842 91 C 0 0 0  
83 O 1 1.6733 3.1621 167 H 0 0 0  
83 O 1 2.2711 4.2918 111 H 0 0 0  
83 O 1 2.2923 4.3319 106 H 0 0-1  
83 O 1 2.2947 4.3363 87 N 0 0 0  
83 O 1 2.3797 4.4969 93 C 0 0 0

85 O 1 1.2599 2.3808 99 C 0 0 0  
85 O 1 1.7226 3.2553 172 H 0 0 0  
85 O 1 2.2767 4.3024 125 H 0 0 0

|      |   |        |        |       |        |
|------|---|--------|--------|-------|--------|
| 85 O | 1 | 2.2906 | 4.3287 | 89 N  | 0 0 0  |
| 85 O | 1 | 2.3959 | 4.5276 | 101 C | -1 0 0 |
| 85 O | 1 | 2.4531 | 4.6357 | 45 H  | 0 0 0  |
|      |   |        |        |       |        |
| 87 N | 1 | 1.3582 | 2.5666 | 91 C  | 0 0 0  |
| 87 N | 1 | 1.4664 | 2.7712 | 107 C | 0 0 0  |
| 87 N | 1 | 1.4690 | 2.7759 | 129 C | 0 0 0  |
| 87 N | 1 | 2.0851 | 3.9403 | 111 H | 0 0 0  |
| 87 N | 1 | 2.0994 | 3.9673 | 133 H | 0 0 0  |
| 87 N | 1 | 2.1024 | 3.9730 | 109 H | 0 0 0  |
|      |   |        |        |       |        |
| 89 N | 1 | 1.3612 | 2.5722 | 99 C  | 0 0 0  |
| 89 N | 1 | 1.4707 | 2.7791 | 121 C | 0 0 0  |
| 89 N | 1 | 1.4708 | 2.7795 | 115 C | 0 0 0  |
| 89 N | 1 | 2.0832 | 3.9366 | 125 H | 0 0 0  |
| 89 N | 1 | 2.0943 | 3.9577 | 119 H | -1 0 0 |
| 89 N | 1 | 2.1047 | 3.9774 | 123 H | 0 0 0  |
|      |   |        |        |       |        |
| 91 C | 1 | 1.2617 | 2.3842 | 83 O  | 0 0 0  |
| 91 C | 1 | 1.3582 | 2.5666 | 87 N  | 0 0 0  |
| 91 C | 1 | 1.5064 | 2.8467 | 93 C  | 0 0 0  |
| 91 C | 1 | 2.1190 | 4.0043 | 97 H  | 0 0 0  |
| 91 C | 1 | 2.2092 | 4.1747 | 95 H  | 0 0 0  |
| 91 C | 1 | 2.4466 | 4.6233 | 107 C | 0 0 0  |
|      |   |        |        |       |        |
| 93 C | 1 | 1.0950 | 2.0693 | 97 H  | 0 0 0  |
| 93 C | 1 | 1.0984 | 2.0756 | 95 H  | 0 0 0  |
| 93 C | 1 | 1.5064 | 2.8467 | 91 C  | 0 0 0  |
| 93 C | 1 | 2.1977 | 4.1531 | 79 I  | 0 0 0  |
| 93 C | 1 | 2.3797 | 4.4969 | 83 O  | 0 0 0  |
| 93 C | 1 | 2.4564 | 4.6420 | 131 H | 0 0 0  |

95 H 1 1.0984 2.0756 93 C 0 0 0  
95 H 1 1.8007 3.4028 97 H 0 0 0  
95 H 1 2.0718 3.9151 131 H 0 0 0  
95 H 1 2.2092 4.1747 91 C 0 0 0  
95 H 1 2.7114 5.1239 125 H 0 0 0  
95 H 1 2.7121 5.1252 79 I 0 0 0  
  
97 H 1 1.0950 2.0693 93 C 0 0 0  
97 H 1 1.8007 3.4028 95 H 0 0 0  
97 H 1 2.1190 4.0043 91 C 0 0 0  
97 H 1 2.4485 4.6270 83 O 0 0 0  
97 H 1 2.6613 5.0292 106 H 0 0-1  
97 H 1 2.6826 5.0693 79 I 0 0 0  
  
99 C 1 1.2599 2.3808 85 O 0 0 0  
99 C 1 1.3612 2.5722 89 N 0 0 0  
99 C 1 1.5120 2.8572 101 C -1 0 0  
99 C 1 2.1524 4.0674 105 H -1 0 0  
99 C 1 2.2097 4.1757 103 H -1 0 0  
99 C 1 2.4356 4.6025 121 C 0 0 0  
  
101 C 1 1.0970 2.0731 105 H 0 0 0  
101 C 1 1.0984 2.0756 103 H 0 0 0  
101 C 1 1.5120 2.8572 99 C 1 0 0  
101 C 1 2.1844 4.1280 81 I 0 0 0  
101 C 1 2.3959 4.5276 85 O 1 0 0  
101 C 1 2.4640 4.6563 117 H 0 0 0  
  
103 H 1 1.0984 2.0756 101 C 0 0 0  
103 H 1 1.8045 3.4100 105 H 0 0 0  
103 H 1 2.0275 3.8315 117 H 0 0 0  
103 H 1 2.2097 4.1757 99 C 1 0 0

|       |   |        |        |       |        |
|-------|---|--------|--------|-------|--------|
| 103 H | 1 | 2.6728 | 5.0509 | 83 O  | 1 0 0  |
| 103 H | 1 | 2.6933 | 5.0895 | 81 I  | 0 0 0  |
| 105 H | 1 | 1.0970 | 2.0731 | 101 C | 0 0 0  |
| 105 H | 1 | 1.8045 | 3.4100 | 103 H | 0 0 0  |
| 105 H | 1 | 2.1524 | 4.0674 | 99 C  | 1 0 0  |
| 105 H | 1 | 2.2923 | 4.3319 | 84 O  | 0 0-1  |
| 105 H | 1 | 2.4036 | 4.5421 | 172 H | 1 0 0  |
| 105 H | 1 | 2.5192 | 4.7605 | 85 O  | 1 0 0  |
| 107 C | 1 | 1.0992 | 2.0772 | 111 H | 0 0 0  |
| 107 C | 1 | 1.1056 | 2.0893 | 109 H | 0 0 0  |
| 107 C | 1 | 1.4664 | 2.7712 | 87 N  | 0 0 0  |
| 107 C | 1 | 1.5465 | 2.9225 | 113 C | 0 0 0  |
| 107 C | 1 | 2.4466 | 4.6233 | 91 C  | 0 0 0  |
| 107 C | 1 | 2.4627 | 4.6538 | 129 C | 0 0 0  |
| 109 H | 1 | 1.1056 | 2.0893 | 107 C | 0 0 0  |
| 109 H | 1 | 1.7908 | 3.3841 | 111 H | 0 0 0  |
| 109 H | 1 | 2.1024 | 3.9730 | 87 N  | 0 0 0  |
| 109 H | 1 | 2.1740 | 4.1082 | 113 C | 0 0 0  |
| 109 H | 1 | 2.4849 | 4.6958 | 137 H | -1 0 0 |
| 109 H | 1 | 2.5698 | 4.8563 | 153 H | 0 0 0  |
| 111 H | 1 | 1.0992 | 2.0772 | 107 C | 0 0 0  |
| 111 H | 1 | 1.7908 | 3.3841 | 109 H | 0 0 0  |
| 111 H | 1 | 2.0851 | 3.9403 | 87 N  | 0 0 0  |
| 111 H | 1 | 2.1928 | 4.1438 | 113 C | 0 0 0  |
| 111 H | 1 | 2.2711 | 4.2918 | 83 O  | 0 0 0  |
| 111 H | 1 | 2.4877 | 4.7011 | 91 C  | 0 0 0  |
| 113 C | 1 | 1.5338 | 2.8985 | 135 C | -1 0 0 |

|       |   |        |        |       |        |
|-------|---|--------|--------|-------|--------|
| 113 C | 1 | 1.5412 | 2.9124 | 151 C | 0 0 0  |
| 113 C | 1 | 1.5448 | 2.9192 | 115 C | 0 0 0  |
| 113 C | 1 | 1.5465 | 2.9225 | 107 C | 0 0 0  |
| 113 C | 1 | 2.1671 | 4.0952 | 119 H | -1 0 0 |
| 113 C | 1 | 2.1740 | 4.1082 | 109 H | 0 0 0  |
|       |   |        |        |       |        |
| 115 C | 1 | 1.0989 | 2.0766 | 117 H | -1 0 0 |
| 115 C | 1 | 1.1083 | 2.0944 | 119 H | -1 0 0 |
| 115 C | 1 | 1.4708 | 2.7795 | 89 N  | 0 0 0  |
| 115 C | 1 | 1.5448 | 2.9192 | 113 C | 0 0 0  |
| 115 C | 1 | 2.4942 | 4.7133 | 121 C | 0 0 0  |
| 115 C | 1 | 2.4993 | 4.7229 | 135 C | -1 0 0 |
|       |   |        |        |       |        |
| 117 H | 1 | 1.0989 | 2.0766 | 115 C | 1 0 0  |
| 117 H | 1 | 1.7794 | 3.3626 | 119 H | 0 0 0  |
| 117 H | 1 | 2.0275 | 3.8315 | 103 H | 0 0 0  |
| 117 H | 1 | 2.1122 | 3.9915 | 89 N  | 1 0 0  |
| 117 H | 1 | 2.1768 | 4.1136 | 113 C | 1 0 0  |
| 117 H | 1 | 2.4640 | 4.6563 | 101 C | 0 0 0  |
|       |   |        |        |       |        |
| 119 H | 1 | 1.1083 | 2.0944 | 115 C | 1 0 0  |
| 119 H | 1 | 1.7794 | 3.3626 | 117 H | 0 0 0  |
| 119 H | 1 | 2.0943 | 3.9577 | 89 N  | 1 0 0  |
| 119 H | 1 | 2.1671 | 4.0952 | 113 C | 1 0 0  |
| 119 H | 1 | 2.4357 | 4.6028 | 141 H | 0 0 0  |
| 119 H | 1 | 2.5349 | 4.7903 | 147 H | 0 0 0  |
|       |   |        |        |       |        |
| 121 C | 1 | 1.0985 | 2.0759 | 125 H | 0 0 0  |
| 121 C | 1 | 1.1058 | 2.0896 | 123 H | 0 0 0  |
| 121 C | 1 | 1.4707 | 2.7791 | 89 N  | 0 0 0  |
| 121 C | 1 | 1.5419 | 2.9138 | 127 C | 0 0 0  |
| 121 C | 1 | 2.4356 | 4.6025 | 99 C  | 0 0 0  |

|       |   |        |        |       |       |
|-------|---|--------|--------|-------|-------|
| 121 C | 1 | 2.4930 | 4.7111 | 143 C | 0 0 0 |
| 123 H | 1 | 1.1058 | 2.0896 | 121 C | 0 0 0 |
| 123 H | 1 | 1.7740 | 3.3524 | 125 H | 0 0 0 |
| 123 H | 1 | 2.1047 | 3.9774 | 89 N  | 0 0 0 |
| 123 H | 1 | 2.1654 | 4.0919 | 127 C | 0 0 0 |
| 123 H | 1 | 2.4332 | 4.5981 | 145 H | 0 0 0 |
| 123 H | 1 | 2.5304 | 4.7817 | 155 H | 0 0 0 |
| 125 H | 1 | 1.0985 | 2.0759 | 121 C | 0 0 0 |
| 125 H | 1 | 1.7740 | 3.3524 | 123 H | 0 0 0 |
| 125 H | 1 | 2.0832 | 3.9366 | 89 N  | 0 0 0 |
| 125 H | 1 | 2.1975 | 4.1527 | 127 C | 0 0 0 |
| 125 H | 1 | 2.2767 | 4.3024 | 85 O  | 0 0 0 |
| 125 H | 1 | 2.4891 | 4.7037 | 99 C  | 0 0 0 |
| 127 C | 1 | 1.5351 | 2.9010 | 143 C | 0 0 0 |
| 127 C | 1 | 1.5399 | 2.9100 | 151 C | 0 0 0 |
| 127 C | 1 | 1.5419 | 2.9138 | 121 C | 0 0 0 |
| 127 C | 1 | 1.5516 | 2.9322 | 129 C | 0 0 0 |
| 127 C | 1 | 2.1634 | 4.0883 | 133 H | 0 0 0 |
| 127 C | 1 | 2.1654 | 4.0919 | 123 H | 0 0 0 |
| 129 C | 1 | 1.0982 | 2.0753 | 131 H | 0 0 0 |
| 129 C | 1 | 1.1073 | 2.0924 | 133 H | 0 0 0 |
| 129 C | 1 | 1.4690 | 2.7759 | 87 N  | 0 0 0 |
| 129 C | 1 | 1.5516 | 2.9322 | 127 C | 0 0 0 |
| 129 C | 1 | 2.4627 | 4.6538 | 107 C | 0 0 0 |
| 129 C | 1 | 2.4982 | 4.7208 | 151 C | 0 0 0 |
| 131 H | 1 | 1.0982 | 2.0753 | 129 C | 0 0 0 |
| 131 H | 1 | 1.7834 | 3.3701 | 133 H | 0 0 0 |

|       |   |        |        |       |       |
|-------|---|--------|--------|-------|-------|
| 131 H | 1 | 2.0718 | 3.9151 | 95 H  | 0 0 0 |
| 131 H | 1 | 2.1128 | 3.9927 | 87 N  | 0 0 0 |
| 131 H | 1 | 2.1956 | 4.1490 | 127 C | 0 0 0 |
| 131 H | 1 | 2.4564 | 4.6420 | 93 C  | 0 0 0 |
|       |   |        |        |       |       |
| 133 H | 1 | 1.1073 | 2.0924 | 129 C | 0 0 0 |
| 133 H | 1 | 1.7834 | 3.3701 | 131 H | 0 0 0 |
| 133 H | 1 | 2.0994 | 3.9673 | 87 N  | 0 0 0 |
| 133 H | 1 | 2.1634 | 4.0883 | 127 C | 0 0 0 |
| 133 H | 1 | 2.4571 | 4.6433 | 149 H | 0 0 0 |
| 133 H | 1 | 2.5014 | 4.7269 | 153 H | 0 0 0 |
|       |   |        |        |       |       |
| 135 C | 1 | 1.1018 | 2.0821 | 137 H | 0 0 0 |
| 135 C | 1 | 1.1020 | 2.0826 | 141 H | 0 0 0 |
| 135 C | 1 | 1.1036 | 2.0855 | 139 H | 0 0 0 |
| 135 C | 1 | 1.5338 | 2.8985 | 113 C | 1 0 0 |
| 135 C | 1 | 2.4993 | 4.7229 | 115 C | 1 0 0 |
| 135 C | 1 | 2.5057 | 4.7350 | 107 C | 1 0 0 |
|       |   |        |        |       |       |
| 137 H | 1 | 1.1018 | 2.0821 | 135 C | 0 0 0 |
| 137 H | 1 | 1.7803 | 3.3642 | 141 H | 0 0 0 |
| 137 H | 1 | 1.7857 | 3.3746 | 139 H | 0 0 0 |
| 137 H | 1 | 2.1811 | 4.1217 | 113 C | 1 0 0 |
| 137 H | 1 | 2.4849 | 4.6958 | 109 H | 1 0 0 |
| 137 H | 1 | 2.5726 | 4.8615 | 153 H | 1 0 0 |
|       |   |        |        |       |       |
| 139 H | 1 | 1.1036 | 2.0855 | 135 C | 0 0 0 |
| 139 H | 1 | 1.7804 | 3.3644 | 141 H | 0 0 0 |
| 139 H | 1 | 1.7857 | 3.3746 | 137 H | 0 0 0 |
| 139 H | 1 | 2.1957 | 4.1493 | 113 C | 1 0 0 |
| 139 H | 1 | 2.5651 | 4.8473 | 117 H | 0 0 0 |
| 139 H | 1 | 2.5839 | 4.8829 | 111 H | 1 0 0 |



|       |   |        |        |       |       |
|-------|---|--------|--------|-------|-------|
| 141 H | 1 | 1.1020 | 2.0826 | 135 C | 0 0 0 |
| 141 H | 1 | 1.7803 | 3.3642 | 137 H | 0 0 0 |
| 141 H | 1 | 1.7804 | 3.3644 | 139 H | 0 0 0 |
| 141 H | 1 | 2.1840 | 4.1271 | 113 C | 1 0 0 |
| 141 H | 1 | 2.4357 | 4.6028 | 119 H | 0 0 0 |
| 141 H | 1 | 2.4719 | 4.6712 | 149 H | 0 0 0 |
|       |   |        |        |       |       |
| 143 C | 1 | 1.1016 | 2.0817 | 149 H | 0 0 0 |
| 143 C | 1 | 1.1019 | 2.0822 | 145 H | 0 0 0 |
| 143 C | 1 | 1.1041 | 2.0865 | 147 H | 0 0 0 |
| 143 C | 1 | 1.5351 | 2.9010 | 127 C | 0 0 0 |
| 143 C | 1 | 2.4930 | 4.7111 | 121 C | 0 0 0 |
| 143 C | 1 | 2.5035 | 4.7309 | 129 C | 0 0 0 |
|       |   |        |        |       |       |
| 145 H | 1 | 1.1019 | 2.0822 | 143 C | 0 0 0 |
| 145 H | 1 | 1.7771 | 3.3581 | 147 H | 0 0 0 |
| 145 H | 1 | 1.7898 | 3.3822 | 149 H | 0 0 0 |
| 145 H | 1 | 2.1895 | 4.1376 | 127 C | 0 0 0 |
| 145 H | 1 | 2.4332 | 4.5981 | 123 H | 0 0 0 |
| 145 H | 1 | 2.6182 | 4.9476 | 155 H | 0 0 0 |
|       |   |        |        |       |       |
| 147 H | 1 | 1.1041 | 2.0865 | 143 C | 0 0 0 |
| 147 H | 1 | 1.7771 | 3.3581 | 145 H | 0 0 0 |
| 147 H | 1 | 1.7930 | 3.3883 | 149 H | 0 0 0 |
| 147 H | 1 | 2.1852 | 4.1295 | 127 C | 0 0 0 |
| 147 H | 1 | 2.5325 | 4.7856 | 131 H | 0 0 0 |
| 147 H | 1 | 2.5349 | 4.7903 | 119 H | 0 0 0 |
|       |   |        |        |       |       |
| 149 H | 1 | 1.1016 | 2.0817 | 143 C | 0 0 0 |
| 149 H | 1 | 1.7898 | 3.3822 | 145 H | 0 0 0 |
| 149 H | 1 | 1.7930 | 3.3883 | 147 H | 0 0 0 |

|       |   |        |        |       |        |
|-------|---|--------|--------|-------|--------|
| 149 H | 1 | 2.1756 | 4.1112 | 127 C | 0 0 0  |
| 149 H | 1 | 2.4571 | 4.6433 | 133 H | 0 0 0  |
| 149 H | 1 | 2.4719 | 4.6712 | 141 H | 0 0 0  |
|       |   |        |        |       |        |
| 151 C | 1 | 1.1056 | 2.0893 | 153 H | 0 0 0  |
| 151 C | 1 | 1.1072 | 2.0923 | 155 H | 0 0 0  |
| 151 C | 1 | 1.5399 | 2.9100 | 127 C | 0 0 0  |
| 151 C | 1 | 1.5412 | 2.9124 | 113 C | 0 0 0  |
| 151 C | 1 | 2.4982 | 4.7208 | 129 C | 0 0 0  |
| 151 C | 1 | 2.5011 | 4.7264 | 121 C | 0 0 0  |
|       |   |        |        |       |        |
| 153 H | 1 | 1.1056 | 2.0893 | 151 C | 0 0 0  |
| 153 H | 1 | 1.7841 | 3.3714 | 155 H | 0 0 0  |
| 153 H | 1 | 2.1877 | 4.1341 | 127 C | 0 0 0  |
| 153 H | 1 | 2.1879 | 4.1345 | 113 C | 0 0 0  |
| 153 H | 1 | 2.5014 | 4.7269 | 133 H | 0 0 0  |
| 153 H | 1 | 2.5220 | 4.7659 | 159 O | 0 0 0  |
|       |   |        |        |       |        |
| 155 H | 1 | 1.1072 | 2.0923 | 151 C | 0 0 0  |
| 155 H | 1 | 1.7841 | 3.3714 | 153 H | 0 0 0  |
| 155 H | 1 | 2.1782 | 4.1162 | 127 C | 0 0 0  |
| 155 H | 1 | 2.1783 | 4.1164 | 113 C | 0 0 0  |
| 155 H | 1 | 2.5304 | 4.7817 | 123 H | 0 0 0  |
| 155 H | 1 | 2.5610 | 4.8397 | 119 H | -1 0 0 |
|       |   |        |        |       |        |
| 157 O | 1 | 1.0064 | 1.9019 | 161 H | 0 0 0  |
| 157 O | 1 | 1.4677 | 2.7735 | 159 O | 0 0 0  |
| 157 O | 1 | 1.9312 | 3.6495 | 163 H | 0 0 0  |
| 157 O | 1 | 2.5471 | 4.8133 | 28 H  | 0 0 0  |
| 157 O | 1 | 2.6429 | 4.9943 | 5 O   | 0 0 0  |
| 157 O | 1 | 2.6430 | 4.9946 | 133 H | 0 0 0  |

|       |   |        |        |       |        |
|-------|---|--------|--------|-------|--------|
| 159 O | 1 | 1.0063 | 1.9017 | 163 H | 0 0 0  |
| 159 O | 1 | 1.4677 | 2.7735 | 157 O | 0 0 0  |
| 159 O | 1 | 1.9253 | 3.6383 | 161 H | 0 0 0  |
| 159 O | 1 | 2.5220 | 4.7659 | 153 H | 0 0 0  |
| 159 O | 1 | 2.7343 | 5.1671 | 8 O   | 0 0 0  |
| 159 O | 1 | 2.9034 | 5.4867 | 146 H | 0 0 0  |
|       |   |        |        |       |        |
| 161 H | 1 | 1.0064 | 1.9019 | 157 O | 0 0 0  |
| 161 H | 1 | 1.6457 | 3.1099 | 5 O   | 0 0 0  |
| 161 H | 1 | 1.9253 | 3.6383 | 159 O | 0 0 0  |
| 161 H | 1 | 2.2442 | 4.2409 | 33 H  | 0 0 0  |
| 161 H | 1 | 2.2933 | 4.3337 | 163 H | 0 0 0  |
| 161 H | 1 | 2.3131 | 4.3710 | 28 H  | 0 0 0  |
|       |   |        |        |       |        |
| 163 H | 1 | 1.0063 | 1.9017 | 159 O | 0 0 0  |
| 163 H | 1 | 1.7285 | 3.2664 | 8 O   | 0 0 0  |
| 163 H | 1 | 1.9312 | 3.6495 | 157 O | 0 0 0  |
| 163 H | 1 | 2.2933 | 4.3337 | 161 H | 0 0 0  |
| 163 H | 1 | 2.5254 | 4.7722 | 28 H  | 0 0 0  |
| 163 H | 1 | 2.6658 | 5.0375 | 146 H | 0 0 0  |
|       |   |        |        |       |        |
| 165 O | 1 | 1.0028 | 1.8950 | 167 H | 1 0 0  |
| 165 O | 1 | 1.4671 | 2.7725 | 169 O | 0 0-1  |
| 165 O | 1 | 1.9442 | 3.6741 | 171 H | 0 0-1  |
| 165 O | 1 | 2.5517 | 4.8221 | 55 H  | 0 0 0  |
| 165 O | 1 | 2.6579 | 5.0227 | 83 O  | 1 0 0  |
| 165 O | 1 | 2.8069 | 5.3043 | 79 I  | 0 0 0  |
|       |   |        |        |       |        |
| 167 H | 1 | 1.0028 | 1.8950 | 165 O | -1 0 0 |
| 167 H | 1 | 1.6733 | 3.1621 | 83 O  | 0 0 0  |
| 167 H | 1 | 1.9338 | 3.6543 | 169 O | -1 0-1 |
| 167 H | 1 | 2.3236 | 4.3910 | 171 H | -1 0-1 |

```

167 H 1 2.4984 4.7213 111 H 0 0 0
167 H 1 2.6169 4.9452 106 H 0 0-1

169 O 1 1.0059 1.9009 171 H 0 0 0
169 O 1 1.4671 2.7725 165 O 0 0 1
169 O 1 1.9338 3.6543 167 H 1 0 1
169 O 1 2.5506 4.8199 78 H 0 0 0
169 O 1 2.7142 5.1290 86 O 0 0 0
169 O 1 2.7294 5.1578 42 H 0 0 0

171 H 1 1.0059 1.9009 169 O 0 0 0
171 H 1 1.7226 3.2553 86 O 0 0 0
171 H 1 1.9442 3.6741 165 O 0 0 1
171 H 1 2.3236 4.3910 167 H 1 0 1
171 H 1 2.4036 4.5421 106 H 1 0 0
171 H 1 2.5460 4.8112 100 C 0 0 0

```

SYMMETRY ALLOWED INTERNAL DEGREE(S) OF FREEDOM: 258

TTTTTTTTTTTTTTTTTTTTTTTTTTTTTTTTTTTT SYMM TELAPSE 1.32 TCPU 0.21

TTTTTTTTTTTTTTTTTTTTTTTTTTTTTTTTTTTT INT\_SCREEN TELAPSE 1.34 TCPU 0.22

\*\*\*\*\*

```

*
*
*   FFFF RRRR EEEE QQQ U U EEEE N N CCC Y Y   *
*   F  R R E  Q Q U U E  NN N C  YY   *
*   FFF  RRRR EEEE Q  Q U U EEEE N N N C  Y   *
*   F  R R E  Q QQ U U E  N NN C  Y   *
*   F  R R EEEE QQQ  UUU EEEE N N CCC Y   *
*
*

```

```

* CALCULATION OF PHONON FREQUENCIES AT THE GAMMA POINT.          *
*
*
* SYMMETRY IS EXPLOITED TO BUILD THE TOTAL HESSIAN MATRIX.      *
* (F. PASCALE PHD THESIS TURIN-PARIS 2002)                      *
*
*
*****

```

```

* INTENSITIES COMPUTED VIA THE BERRY PHASE APPROACH              *
*
*
* REFERENCES TO BE QUOTED WHEN USING THIS MODULE:                *
*
*
* F. Pascale, C.M. Zicovich-Wilson, F. Lopez, B. Civalleri      *
* R. Orlando, R. Dovesi                                          *
* The calculation of the vibration frequencies of crystalline     *
* compounds and its implementation in the CRYSTAL code           *
* J. Comput. Chem. 25 (2004) 888-897                             *
*
*
* C.M. Zicovich-Wilson, F. Pascale, C. Roetti, V.R. Saunders,   *
* R. Orlando, R. Dovesi                                          *
* The calculation of the vibration frequencies of alpha-quartz:   *
* the effect of hamiltonian and basis set                         *
* J. Comput. Chem. 25 (2004) 1873-1881                           *
*
*****

```

ATOMS ISOTOPIC MASS (AMU) FOR FREQUENCY CALCULATION

```

1 I  126.9044  2 I  126.9044  3 I  126.9044  4 I  126.9044
5 O  15.9949   6 O  15.9949   7 O  15.9949   8 O  15.9949
9 N  14.0031  10 N  14.0031  11 N  14.0031  12 N  14.0031

```

|       |          |       |          |       |          |       |          |
|-------|----------|-------|----------|-------|----------|-------|----------|
| 13 C  | 12.0000  | 14 C  | 12.0000  | 15 C  | 12.0000  | 16 C  | 12.0000  |
| 17 H  | 1.0078   | 18 H  | 1.0078   | 19 H  | 1.0078   | 20 H  | 1.0078   |
| 21 C  | 12.0000  | 22 C  | 12.0000  | 23 C  | 12.0000  | 24 C  | 12.0000  |
| 25 H  | 1.0078   | 26 H  | 1.0078   | 27 H  | 1.0078   | 28 H  | 1.0078   |
| 29 C  | 12.0000  | 30 C  | 12.0000  | 31 H  | 1.0078   | 32 H  | 1.0078   |
| 33 H  | 1.0078   | 34 H  | 1.0078   | 35 C  | 12.0000  | 36 C  | 12.0000  |
| 37 C  | 12.0000  | 38 C  | 12.0000  | 39 H  | 1.0078   | 40 H  | 1.0078   |
| 41 H  | 1.0078   | 42 H  | 1.0078   | 43 C  | 12.0000  | 44 C  | 12.0000  |
| 45 H  | 1.0078   | 46 H  | 1.0078   | 47 H  | 1.0078   | 48 H  | 1.0078   |
| 49 C  | 12.0000  | 50 C  | 12.0000  | 51 C  | 12.0000  | 52 C  | 12.0000  |
| 53 H  | 1.0078   | 54 H  | 1.0078   | 55 H  | 1.0078   | 56 H  | 1.0078   |
| 57 C  | 12.0000  | 58 C  | 12.0000  | 59 H  | 1.0078   | 60 H  | 1.0078   |
| 61 H  | 1.0078   | 62 H  | 1.0078   | 63 H  | 1.0078   | 64 H  | 1.0078   |
| 65 C  | 12.0000  | 66 C  | 12.0000  | 67 H  | 1.0078   | 68 H  | 1.0078   |
| 69 H  | 1.0078   | 70 H  | 1.0078   | 71 H  | 1.0078   | 72 H  | 1.0078   |
| 73 C  | 12.0000  | 74 C  | 12.0000  | 75 H  | 1.0078   | 76 H  | 1.0078   |
| 77 H  | 1.0078   | 78 H  | 1.0078   | 79 I  | 126.9044 | 80 I  | 126.9044 |
| 81 I  | 126.9044 | 82 I  | 126.9044 | 83 O  | 15.9949  | 84 O  | 15.9949  |
| 85 O  | 15.9949  | 86 O  | 15.9949  | 87 N  | 14.0031  | 88 N  | 14.0031  |
| 89 N  | 14.0031  | 90 N  | 14.0031  | 91 C  | 12.0000  | 92 C  | 12.0000  |
| 93 C  | 12.0000  | 94 C  | 12.0000  | 95 H  | 1.0078   | 96 H  | 1.0078   |
| 97 H  | 1.0078   | 98 H  | 1.0078   | 99 C  | 12.0000  | 100 C | 12.0000  |
| 101 C | 12.0000  | 102 C | 12.0000  | 103 H | 1.0078   | 104 H | 1.0078   |
| 105 H | 1.0078   | 106 H | 1.0078   | 107 C | 12.0000  | 108 C | 12.0000  |
| 109 H | 1.0078   | 110 H | 1.0078   | 111 H | 1.0078   | 112 H | 1.0078   |
| 113 C | 12.0000  | 114 C | 12.0000  | 115 C | 12.0000  | 116 C | 12.0000  |
| 117 H | 1.0078   | 118 H | 1.0078   | 119 H | 1.0078   | 120 H | 1.0078   |
| 121 C | 12.0000  | 122 C | 12.0000  | 123 H | 1.0078   | 124 H | 1.0078   |
| 125 H | 1.0078   | 126 H | 1.0078   | 127 C | 12.0000  | 128 C | 12.0000  |
| 129 C | 12.0000  | 130 C | 12.0000  | 131 H | 1.0078   | 132 H | 1.0078   |
| 133 H | 1.0078   | 134 H | 1.0078   | 135 C | 12.0000  | 136 C | 12.0000  |
| 137 H | 1.0078   | 138 H | 1.0078   | 139 H | 1.0078   | 140 H | 1.0078   |

|       |         |       |         |       |         |       |         |
|-------|---------|-------|---------|-------|---------|-------|---------|
| 141 H | 1.0078  | 142 H | 1.0078  | 143 C | 12.0000 | 144 C | 12.0000 |
| 145 H | 1.0078  | 146 H | 1.0078  | 147 H | 1.0078  | 148 H | 1.0078  |
| 149 H | 1.0078  | 150 H | 1.0078  | 151 C | 12.0000 | 152 C | 12.0000 |
| 153 H | 1.0078  | 154 H | 1.0078  | 155 H | 1.0078  | 156 H | 1.0078  |
| 157 O | 15.9949 | 158 O | 15.9949 | 159 O | 15.9949 | 160 O | 15.9949 |
| 161 H | 1.0078  | 162 H | 1.0078  | 163 H | 1.0078  | 164 H | 1.0078  |
| 165 O | 15.9949 | 166 O | 15.9949 | 167 H | 1.0078  | 168 H | 1.0078  |
| 169 O | 15.9949 | 170 O | 15.9949 | 171 H | 1.0078  | 172 H | 1.0078  |

INFORMATION CONCERNING THE SCF+GRADIENT CALCULATIONS REQUIRED FOR GENERATING FREQUENCIES. IN PRINCIPLE  $3N+1$  SCF + GRADIENT CALCULATIONS ARE REQUIRED; FOR EACH OF THEM THE REMAINING POINT SYMMETRY IS INDICATED. POINT SYMMETRY PERMITS TO GENERATE GRADIENTS FOR DISPLACEMENT B STARTING FROM THE GRADIENT GENERATED BY DISPLACEMENT A.

N LABEL SYMBOL DISPLACEMENT SYM.

1 EQUILIBRIUM GEOMETRY 2

|    |     |    |   |
|----|-----|----|---|
| 2  | 1 I | DX | 1 |
| 3  | 1 I | DY | 1 |
| 4  | 1 I | DZ | 1 |
| 5  | 3 I | DX | 1 |
| 6  | 3 I | DY | 1 |
| 7  | 3 I | DZ | 1 |
| 8  | 5 O | DX | 1 |
| 9  | 5 O | DY | 1 |
| 10 | 5 O | DZ | 1 |
| 11 | 7 O | DX | 1 |
| 12 | 7 O | DY | 1 |
| 13 | 7 O | DZ | 1 |

|    |    |   |    |   |
|----|----|---|----|---|
| 14 | 9  | N | DX | 1 |
| 15 | 9  | N | DY | 1 |
| 16 | 9  | N | DZ | 1 |
| 17 | 11 | N | DX | 1 |
| 18 | 11 | N | DY | 1 |
| 19 | 11 | N | DZ | 1 |
| 20 | 13 | C | DX | 1 |
| 21 | 13 | C | DY | 1 |
| 22 | 13 | C | DZ | 1 |
| 23 | 15 | C | DX | 1 |
| 24 | 15 | C | DY | 1 |
| 25 | 15 | C | DZ | 1 |
| 26 | 17 | H | DX | 1 |
| 27 | 17 | H | DY | 1 |
| 28 | 17 | H | DZ | 1 |
| 29 | 19 | H | DX | 1 |
| 30 | 19 | H | DY | 1 |
| 31 | 19 | H | DZ | 1 |
| 32 | 21 | C | DX | 1 |
| 33 | 21 | C | DY | 1 |
| 34 | 21 | C | DZ | 1 |
| 35 | 23 | C | DX | 1 |
| 36 | 23 | C | DY | 1 |
| 37 | 23 | C | DZ | 1 |
| 38 | 25 | H | DX | 1 |
| 39 | 25 | H | DY | 1 |
| 40 | 25 | H | DZ | 1 |
| 41 | 27 | H | DX | 1 |
| 42 | 27 | H | DY | 1 |
| 43 | 27 | H | DZ | 1 |
| 44 | 29 | C | DX | 1 |
| 45 | 29 | C | DY | 1 |



|    |    |   |    |   |
|----|----|---|----|---|
| 46 | 29 | C | DZ | 1 |
| 47 | 31 | H | DX | 1 |
| 48 | 31 | H | DY | 1 |
| 49 | 31 | H | DZ | 1 |
| 50 | 33 | H | DX | 1 |
| 51 | 33 | H | DY | 1 |
| 52 | 33 | H | DZ | 1 |
| 53 | 35 | C | DX | 1 |
| 54 | 35 | C | DY | 1 |
| 55 | 35 | C | DZ | 1 |
| 56 | 37 | C | DX | 1 |
| 57 | 37 | C | DY | 1 |
| 58 | 37 | C | DZ | 1 |
| 59 | 39 | H | DX | 1 |
| 60 | 39 | H | DY | 1 |
| 61 | 39 | H | DZ | 1 |
| 62 | 41 | H | DX | 1 |
| 63 | 41 | H | DY | 1 |
| 64 | 41 | H | DZ | 1 |
| 65 | 43 | C | DX | 1 |
| 66 | 43 | C | DY | 1 |
| 67 | 43 | C | DZ | 1 |
| 68 | 45 | H | DX | 1 |
| 69 | 45 | H | DY | 1 |
| 70 | 45 | H | DZ | 1 |
| 71 | 47 | H | DX | 1 |
| 72 | 47 | H | DY | 1 |
| 73 | 47 | H | DZ | 1 |
| 74 | 49 | C | DX | 1 |
| 75 | 49 | C | DY | 1 |
| 76 | 49 | C | DZ | 1 |
| 77 | 51 | C | DX | 1 |

|     |    |   |    |   |
|-----|----|---|----|---|
| 78  | 51 | C | DY | 1 |
| 79  | 51 | C | DZ | 1 |
| 80  | 53 | H | DX | 1 |
| 81  | 53 | H | DY | 1 |
| 82  | 53 | H | DZ | 1 |
| 83  | 55 | H | DX | 1 |
| 84  | 55 | H | DY | 1 |
| 85  | 55 | H | DZ | 1 |
| 86  | 57 | C | DX | 1 |
| 87  | 57 | C | DY | 1 |
| 88  | 57 | C | DZ | 1 |
| 89  | 59 | H | DX | 1 |
| 90  | 59 | H | DY | 1 |
| 91  | 59 | H | DZ | 1 |
| 92  | 61 | H | DX | 1 |
| 93  | 61 | H | DY | 1 |
| 94  | 61 | H | DZ | 1 |
| 95  | 63 | H | DX | 1 |
| 96  | 63 | H | DY | 1 |
| 97  | 63 | H | DZ | 1 |
| 98  | 65 | C | DX | 1 |
| 99  | 65 | C | DY | 1 |
| 100 | 65 | C | DZ | 1 |
| 101 | 67 | H | DX | 1 |
| 102 | 67 | H | DY | 1 |
| 103 | 67 | H | DZ | 1 |
| 104 | 69 | H | DX | 1 |
| 105 | 69 | H | DY | 1 |
| 106 | 69 | H | DZ | 1 |
| 107 | 71 | H | DX | 1 |
| 108 | 71 | H | DY | 1 |
| 109 | 71 | H | DZ | 1 |

|     |    |   |    |   |
|-----|----|---|----|---|
| 110 | 73 | C | DX | 1 |
| 111 | 73 | C | DY | 1 |
| 112 | 73 | C | DZ | 1 |
| 113 | 75 | H | DX | 1 |
| 114 | 75 | H | DY | 1 |
| 115 | 75 | H | DZ | 1 |
| 116 | 77 | H | DX | 1 |
| 117 | 77 | H | DY | 1 |
| 118 | 77 | H | DZ | 1 |
| 119 | 79 | I | DX | 1 |
| 120 | 79 | I | DY | 1 |
| 121 | 79 | I | DZ | 1 |
| 122 | 81 | I | DX | 1 |
| 123 | 81 | I | DY | 1 |
| 124 | 81 | I | DZ | 1 |
| 125 | 83 | O | DX | 1 |
| 126 | 83 | O | DY | 1 |
| 127 | 83 | O | DZ | 1 |
| 128 | 85 | O | DX | 1 |
| 129 | 85 | O | DY | 1 |
| 130 | 85 | O | DZ | 1 |
| 131 | 87 | N | DX | 1 |
| 132 | 87 | N | DY | 1 |
| 133 | 87 | N | DZ | 1 |
| 134 | 89 | N | DX | 1 |
| 135 | 89 | N | DY | 1 |
| 136 | 89 | N | DZ | 1 |
| 137 | 91 | C | DX | 1 |
| 138 | 91 | C | DY | 1 |
| 139 | 91 | C | DZ | 1 |
| 140 | 93 | C | DX | 1 |
| 141 | 93 | C | DY | 1 |

|     |     |   |    |   |
|-----|-----|---|----|---|
| 142 | 93  | C | DZ | 1 |
| 143 | 95  | H | DX | 1 |
| 144 | 95  | H | DY | 1 |
| 145 | 95  | H | DZ | 1 |
| 146 | 97  | H | DX | 1 |
| 147 | 97  | H | DY | 1 |
| 148 | 97  | H | DZ | 1 |
| 149 | 99  | C | DX | 1 |
| 150 | 99  | C | DY | 1 |
| 151 | 99  | C | DZ | 1 |
| 152 | 101 | C | DX | 1 |
| 153 | 101 | C | DY | 1 |
| 154 | 101 | C | DZ | 1 |
| 155 | 103 | H | DX | 1 |
| 156 | 103 | H | DY | 1 |
| 157 | 103 | H | DZ | 1 |
| 158 | 105 | H | DX | 1 |
| 159 | 105 | H | DY | 1 |
| 160 | 105 | H | DZ | 1 |
| 161 | 107 | C | DX | 1 |
| 162 | 107 | C | DY | 1 |
| 163 | 107 | C | DZ | 1 |
| 164 | 109 | H | DX | 1 |
| 165 | 109 | H | DY | 1 |
| 166 | 109 | H | DZ | 1 |
| 167 | 111 | H | DX | 1 |
| 168 | 111 | H | DY | 1 |
| 169 | 111 | H | DZ | 1 |
| 170 | 113 | C | DX | 1 |
| 171 | 113 | C | DY | 1 |
| 172 | 113 | C | DZ | 1 |
| 173 | 115 | C | DX | 1 |

|     |     |   |    |   |
|-----|-----|---|----|---|
| 174 | 115 | C | DY | 1 |
| 175 | 115 | C | DZ | 1 |
| 176 | 117 | H | DX | 1 |
| 177 | 117 | H | DY | 1 |
| 178 | 117 | H | DZ | 1 |
| 179 | 119 | H | DX | 1 |
| 180 | 119 | H | DY | 1 |
| 181 | 119 | H | DZ | 1 |
| 182 | 121 | C | DX | 1 |
| 183 | 121 | C | DY | 1 |
| 184 | 121 | C | DZ | 1 |
| 185 | 123 | H | DX | 1 |
| 186 | 123 | H | DY | 1 |
| 187 | 123 | H | DZ | 1 |
| 188 | 125 | H | DX | 1 |
| 189 | 125 | H | DY | 1 |
| 190 | 125 | H | DZ | 1 |
| 191 | 127 | C | DX | 1 |
| 192 | 127 | C | DY | 1 |
| 193 | 127 | C | DZ | 1 |
| 194 | 129 | C | DX | 1 |
| 195 | 129 | C | DY | 1 |
| 196 | 129 | C | DZ | 1 |
| 197 | 131 | H | DX | 1 |
| 198 | 131 | H | DY | 1 |
| 199 | 131 | H | DZ | 1 |
| 200 | 133 | H | DX | 1 |
| 201 | 133 | H | DY | 1 |
| 202 | 133 | H | DZ | 1 |
| 203 | 135 | C | DX | 1 |
| 204 | 135 | C | DY | 1 |
| 205 | 135 | C | DZ | 1 |

|     |     |   |    |   |
|-----|-----|---|----|---|
| 206 | 137 | H | DX | 1 |
| 207 | 137 | H | DY | 1 |
| 208 | 137 | H | DZ | 1 |
| 209 | 139 | H | DX | 1 |
| 210 | 139 | H | DY | 1 |
| 211 | 139 | H | DZ | 1 |
| 212 | 141 | H | DX | 1 |
| 213 | 141 | H | DY | 1 |
| 214 | 141 | H | DZ | 1 |
| 215 | 143 | C | DX | 1 |
| 216 | 143 | C | DY | 1 |
| 217 | 143 | C | DZ | 1 |
| 218 | 145 | H | DX | 1 |
| 219 | 145 | H | DY | 1 |
| 220 | 145 | H | DZ | 1 |
| 221 | 147 | H | DX | 1 |
| 222 | 147 | H | DY | 1 |
| 223 | 147 | H | DZ | 1 |
| 224 | 149 | H | DX | 1 |
| 225 | 149 | H | DY | 1 |
| 226 | 149 | H | DZ | 1 |
| 227 | 151 | C | DX | 1 |
| 228 | 151 | C | DY | 1 |
| 229 | 151 | C | DZ | 1 |
| 230 | 153 | H | DX | 1 |
| 231 | 153 | H | DY | 1 |
| 232 | 153 | H | DZ | 1 |
| 233 | 155 | H | DX | 1 |
| 234 | 155 | H | DY | 1 |
| 235 | 155 | H | DZ | 1 |
| 236 | 157 | O | DX | 1 |
| 237 | 157 | O | DY | 1 |

|     |     |   |    |   |
|-----|-----|---|----|---|
| 238 | 157 | O | DZ | 1 |
| 239 | 159 | O | DX | 1 |
| 240 | 159 | O | DY | 1 |
| 241 | 159 | O | DZ | 1 |
| 242 | 161 | H | DX | 1 |
| 243 | 161 | H | DY | 1 |
| 244 | 161 | H | DZ | 1 |
| 245 | 163 | H | DX | 1 |
| 246 | 163 | H | DY | 1 |
| 247 | 163 | H | DZ | 1 |
| 248 | 165 | O | DX | 1 |
| 249 | 165 | O | DY | 1 |
| 250 | 165 | O | DZ | 1 |
| 251 | 167 | H | DX | 1 |
| 252 | 167 | H | DY | 1 |
| 253 | 167 | H | DZ | 1 |
| 254 | 169 | O | DX | 1 |
| 255 | 169 | O | DY | 1 |
| 256 | 169 | O | DZ | 1 |
| 257 | 171 | H | DX | 1 |
| 258 | 171 | H | DY | 1 |
| 259 | 171 | H | DZ | 1 |

USE OF RESIDUAL SYMMETRY AFTER DISPLACEMENT

NUMERICAL GRADIENT COMPUTED WITH A SINGLE DISPLACEMENT (+DX) FOR EACH

CARTESIAN COORDINATE WITH RESPECT TO THE EQUILIBRIUM CONFIGURATION

DX= 0.003 ANGSTROM

NUMBER OF IRREDUCIBLE ATOMS           86

NUMBER OF SCF+GRADIENT CALCULATIONS   259

ATOM SYMOP ORDER

1 1 1

3 1 1  
5 1 1  
7 1 1  
9 1 1  
11 1 1  
13 1 1  
15 1 1  
17 1 1  
19 1 1  
21 1 1  
23 1 1  
25 1 1  
27 1 1  
29 1 1  
31 1 1  
33 1 1  
35 1 1  
37 1 1  
39 1 1  
41 1 1  
43 1 1  
45 1 1  
47 1 1  
49 1 1  
51 1 1  
53 1 1  
55 1 1  
57 1 1  
59 1 1  
61 1 1  
63 1 1  
65 1 1



|     |   |   |
|-----|---|---|
| 67  | 1 | 1 |
| 69  | 1 | 1 |
| 71  | 1 | 1 |
| 73  | 1 | 1 |
| 75  | 1 | 1 |
| 77  | 1 | 1 |
| 79  | 1 | 1 |
| 81  | 1 | 1 |
| 83  | 1 | 1 |
| 85  | 1 | 1 |
| 87  | 1 | 1 |
| 89  | 1 | 1 |
| 91  | 1 | 1 |
| 93  | 1 | 1 |
| 95  | 1 | 1 |
| 97  | 1 | 1 |
| 99  | 1 | 1 |
| 101 | 1 | 1 |
| 103 | 1 | 1 |
| 105 | 1 | 1 |
| 107 | 1 | 1 |
| 109 | 1 | 1 |
| 111 | 1 | 1 |
| 113 | 1 | 1 |
| 115 | 1 | 1 |
| 117 | 1 | 1 |
| 119 | 1 | 1 |
| 121 | 1 | 1 |
| 123 | 1 | 1 |
| 125 | 1 | 1 |
| 127 | 1 | 1 |
| 129 | 1 | 1 |

131 1 1  
133 1 1  
135 1 1  
137 1 1  
139 1 1  
141 1 1  
143 1 1  
145 1 1  
147 1 1  
149 1 1  
151 1 1  
153 1 1  
155 1 1  
157 1 1  
159 1 1  
161 1 1  
163 1 1  
165 1 1  
167 1 1  
169 1 1  
171 1 1

ATOM : IRREDUCIBLE ATOM

SYMOP : NUMBER OF SYMMETRY OPERATORS THAT DOESN'T MOVE THE IRREDUCIBLE ATOM

ORDER : MAXIMUM ORDER AMONG THE OPERATORS OF THE IRREDUCIBLE ATOM

\*\*\*\*\*

GCALCO - MAX INDICES DIRECT LATTICE VECTOR 23 12 11

NO.OF VECTORS CREATED 6999 STARS 3500 RMAX 268.37266 BOHR



|         |                                    |
|---------|------------------------------------|
| 1 I DY  | RESTORED FROM A PREV. HESS. MATRIX |
| 1 I DZ  | RESTORED FROM A PREV. HESS. MATRIX |
| 3 I DX  | RESTORED FROM A PREV. HESS. MATRIX |
| 3 I DY  | RESTORED FROM A PREV. HESS. MATRIX |
| 3 I DZ  | RESTORED FROM A PREV. HESS. MATRIX |
| 5 O DX  | RESTORED FROM A PREV. HESS. MATRIX |
| 5 O DY  | RESTORED FROM A PREV. HESS. MATRIX |
| 5 O DZ  | RESTORED FROM A PREV. HESS. MATRIX |
| 7 O DX  | RESTORED FROM A PREV. HESS. MATRIX |
| 7 O DY  | RESTORED FROM A PREV. HESS. MATRIX |
| 7 O DZ  | RESTORED FROM A PREV. HESS. MATRIX |
| 9 N DX  | RESTORED FROM A PREV. HESS. MATRIX |
| 9 N DY  | RESTORED FROM A PREV. HESS. MATRIX |
| 9 N DZ  | RESTORED FROM A PREV. HESS. MATRIX |
| 11 N DX | RESTORED FROM A PREV. HESS. MATRIX |
| 11 N DY | RESTORED FROM A PREV. HESS. MATRIX |
| 11 N DZ | RESTORED FROM A PREV. HESS. MATRIX |
| 13 C DX | RESTORED FROM A PREV. HESS. MATRIX |
| 13 C DY | RESTORED FROM A PREV. HESS. MATRIX |
| 13 C DZ | RESTORED FROM A PREV. HESS. MATRIX |
| 15 C DX | RESTORED FROM A PREV. HESS. MATRIX |
| 15 C DY | RESTORED FROM A PREV. HESS. MATRIX |
| 15 C DZ | RESTORED FROM A PREV. HESS. MATRIX |
| 17 H DX | RESTORED FROM A PREV. HESS. MATRIX |
| 17 H DY | RESTORED FROM A PREV. HESS. MATRIX |
| 17 H DZ | RESTORED FROM A PREV. HESS. MATRIX |
| 19 H DX | RESTORED FROM A PREV. HESS. MATRIX |
| 19 H DY | RESTORED FROM A PREV. HESS. MATRIX |
| 19 H DZ | RESTORED FROM A PREV. HESS. MATRIX |
| 21 C DX | RESTORED FROM A PREV. HESS. MATRIX |
| 21 C DY | RESTORED FROM A PREV. HESS. MATRIX |
| 21 C DZ | RESTORED FROM A PREV. HESS. MATRIX |

|         |                                    |
|---------|------------------------------------|
| 23 C DX | RESTORED FROM A PREV. HESS. MATRIX |
| 23 C DY | RESTORED FROM A PREV. HESS. MATRIX |
| 23 C DZ | RESTORED FROM A PREV. HESS. MATRIX |
| 25 H DX | RESTORED FROM A PREV. HESS. MATRIX |
| 25 H DY | RESTORED FROM A PREV. HESS. MATRIX |
| 25 H DZ | RESTORED FROM A PREV. HESS. MATRIX |
| 27 H DX | RESTORED FROM A PREV. HESS. MATRIX |
| 27 H DY | RESTORED FROM A PREV. HESS. MATRIX |
| 27 H DZ | RESTORED FROM A PREV. HESS. MATRIX |
| 29 C DX | RESTORED FROM A PREV. HESS. MATRIX |
| 29 C DY | RESTORED FROM A PREV. HESS. MATRIX |
| 29 C DZ | RESTORED FROM A PREV. HESS. MATRIX |
| 31 H DX | RESTORED FROM A PREV. HESS. MATRIX |
| 31 H DY | RESTORED FROM A PREV. HESS. MATRIX |
| 31 H DZ | RESTORED FROM A PREV. HESS. MATRIX |
| 33 H DX | RESTORED FROM A PREV. HESS. MATRIX |
| 33 H DY | RESTORED FROM A PREV. HESS. MATRIX |
| 33 H DZ | RESTORED FROM A PREV. HESS. MATRIX |
| 35 C DX | RESTORED FROM A PREV. HESS. MATRIX |
| 35 C DY | RESTORED FROM A PREV. HESS. MATRIX |
| 35 C DZ | RESTORED FROM A PREV. HESS. MATRIX |
| 37 C DX | RESTORED FROM A PREV. HESS. MATRIX |
| 37 C DY | RESTORED FROM A PREV. HESS. MATRIX |
| 37 C DZ | RESTORED FROM A PREV. HESS. MATRIX |
| 39 H DX | RESTORED FROM A PREV. HESS. MATRIX |
| 39 H DY | RESTORED FROM A PREV. HESS. MATRIX |
| 39 H DZ | RESTORED FROM A PREV. HESS. MATRIX |
| 41 H DX | RESTORED FROM A PREV. HESS. MATRIX |
| 41 H DY | RESTORED FROM A PREV. HESS. MATRIX |
| 41 H DZ | RESTORED FROM A PREV. HESS. MATRIX |
| 43 C DX | RESTORED FROM A PREV. HESS. MATRIX |
| 43 C DY | RESTORED FROM A PREV. HESS. MATRIX |

|         |            |                                    |    |            |   |  |
|---------|------------|------------------------------------|----|------------|---|--|
| 43 C DZ |            | RESTORED FROM A PREV. HESS. MATRIX |    |            |   |  |
| 45 H DX |            | RESTORED FROM A PREV. HESS. MATRIX |    |            |   |  |
| 45 H DY |            | RESTORED FROM A PREV. HESS. MATRIX |    |            |   |  |
| 45 H DZ |            | RESTORED FROM A PREV. HESS. MATRIX |    |            |   |  |
| 47 H DX |            | RESTORED FROM A PREV. HESS. MATRIX |    |            |   |  |
| 47 H DY |            | RESTORED FROM A PREV. HESS. MATRIX |    |            |   |  |
| 47 H DZ |            | RESTORED FROM A PREV. HESS. MATRIX |    |            |   |  |
| 49 C DX |            | RESTORED FROM A PREV. HESS. MATRIX |    |            |   |  |
| 49 C DY |            | RESTORED FROM A PREV. HESS. MATRIX |    |            |   |  |
| 49 C DZ | 2.6112E-03 | -6.037288640379E+03                | 16 | 7.3543E-06 | 1 |  |
| 51 C DX | 3.0275E-03 | -6.037288639874E+03                | 14 | 7.8598E-06 | 1 |  |
| 51 C DY | 2.8665E-03 | -6.037288638922E+03                | 17 | 8.8115E-06 | 1 |  |
| 51 C DZ | 2.7609E-03 | -6.037288639415E+03                | 17 | 8.3182E-06 | 1 |  |
| 53 H DX | 1.1953E-03 | -6.037288644783E+03                | 16 | 2.9507E-06 | 1 |  |
| 53 H DY | 6.7322E-04 | -6.037288646441E+03                | 18 | 1.2928E-06 | 1 |  |
| 53 H DZ | 6.0173E-04 | -6.037288646170E+03                | 14 | 1.5632E-06 | 1 |  |
| 55 H DX | 5.0552E-04 | -6.037288646050E+03                | 15 | 1.6833E-06 | 1 |  |
| 55 H DY | 1.0986E-03 | -6.037288644469E+03                | 14 | 3.2647E-06 | 1 |  |
| 55 H DZ | 8.0857E-04 | -6.037288645511E+03                | 14 | 2.2222E-06 | 1 |  |
| 57 C DX | 2.7905E-03 | -6.037288639545E+03                | 15 | 8.1890E-06 | 1 |  |
| 57 C DY | 2.9386E-03 | -6.037288640161E+03                | 16 | 7.5730E-06 | 1 |  |
| 57 C DZ | 3.0614E-03 | -6.037288638953E+03                | 17 | 8.7805E-06 | 1 |  |
| 59 H DX | 4.9668E-04 | -6.037288646419E+03                | 15 | 1.3143E-06 | 1 |  |
| 59 H DY | 1.1995E-03 | -6.037288644244E+03                | 14 | 3.4891E-06 | 1 |  |
| 59 H DZ | 6.7879E-04 | -6.037288645932E+03                | 13 | 1.8013E-06 | 1 |  |
| 61 H DX | 7.6247E-04 | -6.037288645763E+03                | 14 | 1.9709E-06 | 1 |  |
| 61 H DY | 4.6408E-04 | -6.037288646473E+03                | 12 | 1.2603E-06 | 1 |  |
| 61 H DZ | 1.1307E-03 | -6.037288644859E+03                | 14 | 2.8747E-06 | 1 |  |
| 63 H DX | 8.1188E-04 | -6.037288645465E+03                | 14 | 2.2684E-06 | 1 |  |
| 63 H DY | 7.1667E-04 | -6.037288645580E+03                | 16 | 2.1532E-06 | 1 |  |
| 63 H DZ | 8.5680E-04 | -6.037288645346E+03                | 14 | 2.3871E-06 | 1 |  |
| 65 C DX | 2.9234E-03 | -6.037288639825E+03                | 16 | 7.9087E-06 | 1 |  |

|         |            |                     |    |            |   |
|---------|------------|---------------------|----|------------|---|
| 65 C DY | 3.0835E-03 | -6.037288638907E+03 | 14 | 8.8261E-06 | 1 |
| 65 C DZ | 2.7951E-03 | -6.037288640127E+03 | 12 | 7.6061E-06 | 1 |
| 67 H DX | 7.2641E-04 | -6.037288645760E+03 | 12 | 1.9738E-06 | 1 |
| 67 H DY | 7.8554E-04 | -6.037288645740E+03 | 15 | 1.9930E-06 | 1 |
| 67 H DZ | 8.6465E-04 | -6.037288645352E+03 | 16 | 2.3815E-06 | 1 |
| 69 H DX | 1.1167E-03 | -6.037288644886E+03 | 14 | 2.8478E-06 | 1 |
| 69 H DY | 7.4716E-04 | -6.037288645432E+03 | 17 | 2.3011E-06 | 1 |
| 69 H DZ | 4.9405E-04 | -6.037288646302E+03 | 15 | 1.4311E-06 | 1 |
| 71 H DX | 5.2026E-04 | -6.037288646273E+03 | 16 | 1.4605E-06 | 1 |
| 71 H DY | 1.1439E-03 | -6.037288644694E+03 | 15 | 3.0398E-06 | 1 |
| 71 H DZ | 7.2800E-04 | -6.037288645565E+03 | 14 | 2.1685E-06 | 1 |
| 73 C DX | 2.7272E-03 | -6.037288639437E+03 | 15 | 8.2964E-06 | 1 |
| 73 C DY | 3.0258E-03 | -6.037288639487E+03 | 16 | 8.2469E-06 | 1 |
| 73 C DZ | 2.8896E-03 | -6.037288640678E+03 | 15 | 7.0557E-06 | 1 |
| 75 H DX | 5.1734E-04 | -6.037288646544E+03 | 15 | 1.1896E-06 | 1 |
| 75 H DY | 1.1248E-03 | -6.037288644541E+03 | 15 | 3.1920E-06 | 1 |
| 75 H DZ | 7.3743E-04 | -6.037288645506E+03 | 13 | 2.2274E-06 | 1 |
| 77 H DX | 7.7718E-04 | -6.037288645582E+03 | 13 | 2.1517E-06 | 1 |
| 77 H DY | 7.7770E-04 | -6.037288645616E+03 | 14 | 2.1173E-06 | 1 |
| 77 H DZ | 8.3291E-04 | -6.037288645332E+03 | 16 | 2.4020E-06 | 1 |
| 79 I DX | 4.3215E-04 | -6.037288646592E+03 | 16 | 1.1411E-06 | 1 |
| 79 I DY | 4.5452E-04 | -6.037288646650E+03 | 13 | 1.0838E-06 | 1 |
| 79 I DZ | 1.8858E-04 | -6.037288647388E+03 | 14 | 3.4513E-07 | 1 |
| 81 I DX | 4.6873E-04 | -6.037288645778E+03 | 16 | 1.9560E-06 | 1 |
| 81 I DY | 3.4935E-04 | -6.037288646716E+03 | 14 | 1.0174E-06 | 1 |
| 81 I DZ | 1.7767E-04 | -6.037288647262E+03 | 15 | 4.7198E-07 | 1 |
| 83 O DX | 2.7104E-03 | -6.037288639783E+03 | 15 | 7.9506E-06 | 1 |
| 83 O DY | 5.2575E-04 | -6.037288645987E+03 | 5  | 1.7470E-06 | 1 |
| 83 O DZ | 1.4417E-03 | -6.037288643684E+03 | 16 | 4.0493E-06 | 1 |
| 85 O DX | 2.3172E-03 | -6.037288640383E+03 | 15 | 7.3504E-06 | 1 |
| 85 O DY | 1.3760E-03 | -6.037288644567E+03 | 16 | 3.1668E-06 | 1 |
| 85 O DZ | 8.9367E-04 | -6.037288645492E+03 | 14 | 2.2416E-06 | 1 |

|          |            |                     |    |            |   |
|----------|------------|---------------------|----|------------|---|
| 87 N DX  | 2.9405E-03 | -6.037288639248E+03 | 14 | 8.4856E-06 | 1 |
| 87 N DY  | 9.3521E-04 | -6.037288645748E+03 | 16 | 1.9858E-06 | 1 |
| 87 N DZ  | 3.9876E-03 | -6.037288635928E+03 | 16 | 1.1806E-05 | 1 |
| 89 N DX  | 2.8854E-03 | -6.037288638534E+03 | 13 | 9.1993E-06 | 1 |
| 89 N DY  | 1.6232E-03 | -6.037288642513E+03 | 14 | 5.2206E-06 | 1 |
| 89 N DZ  | 3.2621E-03 | -6.037288638333E+03 | 10 | 9.4002E-06 | 1 |
| 91 C DX  | 3.9276E-03 | -6.037288637660E+03 | 17 | 1.0073E-05 | 1 |
| 91 C DY  | 1.3109E-03 | -6.037288644111E+03 | 14 | 3.6224E-06 | 1 |
| 91 C DZ  | 3.9162E-03 | -6.037288637362E+03 | 15 | 1.0371E-05 | 1 |
| 93 C DX  | 2.1167E-03 | -6.037288642035E+03 | 16 | 5.6986E-06 | 1 |
| 93 C DY  | 2.0649E-03 | -6.037288641598E+03 | 16 | 6.1354E-06 | 1 |
| 93 C DZ  | 3.0549E-03 | -6.037288639804E+03 | 14 | 7.9296E-06 | 1 |
| 95 H DX  | 6.2431E-04 | -6.037288645437E+03 | 12 | 2.2966E-06 | 1 |
| 95 H DY  | 1.1766E-03 | -6.037288644860E+03 | 13 | 2.8736E-06 | 1 |
| 95 H DZ  | 5.6927E-04 | -6.037288646004E+03 | 14 | 1.7292E-06 | 1 |
| 97 H DX  | 4.4839E-04 | -6.037288646792E+03 | 13 | 9.4165E-07 | 1 |
| 97 H DY  | 3.4870E-04 | -6.037288646269E+03 | 13 | 1.4643E-06 | 1 |
| 97 H DZ  | 1.7787E-03 | -6.037288642461E+03 | 15 | 5.2720E-06 | 1 |
| 99 C DX  | 3.6458E-03 | -6.037288639361E+03 | 18 | 8.3721E-06 | 1 |
| 99 C DY  | 2.3694E-03 | -6.037288640971E+03 | 15 | 6.7620E-06 | 1 |
| 99 C DZ  | 3.1248E-03 | -6.037288637998E+03 | 16 | 9.7353E-06 | 1 |
| 101 C DX | 1.9264E-03 | -6.037288642800E+03 | 16 | 4.9338E-06 | 1 |
| 101 C DY | 2.5299E-03 | -6.037288640497E+03 | 15 | 7.2367E-06 | 1 |
| 101 C DZ | 2.7557E-03 | -6.037288640730E+03 | 17 | 7.0031E-06 | 1 |
| 103 H DX | 6.1014E-04 | -6.037288646684E+03 | 13 | 1.0499E-06 | 1 |
| 103 H DY | 1.6402E-03 | -6.037288643353E+03 | 14 | 4.3807E-06 | 1 |
| 103 H DZ | 2.6666E-04 | -6.037288646871E+03 | 13 | 8.6288E-07 | 1 |
| 105 H DX | 3.3743E-04 | -6.037288646788E+03 | 12 | 9.4503E-07 | 1 |
| 105 H DY | 5.4140E-04 | -6.037288646477E+03 | 13 | 1.2567E-06 | 1 |
| 105 H DZ | 1.6740E-03 | -6.037288643109E+03 | 14 | 4.6242E-06 | 1 |
| 107 C DX | 2.8558E-03 | -6.037288640864E+03 | 15 | 6.8691E-06 | 1 |
| 107 C DY | 2.8200E-03 | -6.037288639788E+03 | 14 | 7.9450E-06 | 1 |



|          |            |                     |    |            |   |
|----------|------------|---------------------|----|------------|---|
| 107 C DZ | 2.9860E-03 | -6.037288639667E+03 | 15 | 8.0663E-06 | 1 |
| 109 H DX | 3.4185E-04 | -6.037288646599E+03 | 11 | 1.1345E-06 | 1 |
| 109 H DY | 1.3911E-03 | -6.037288644027E+03 | 14 | 3.7063E-06 | 1 |
| 109 H DZ | 6.6125E-04 | -6.037288646035E+03 | 14 | 1.6981E-06 | 1 |
| 111 H DX | 1.1839E-03 | -6.037288644420E+03 | 14 | 3.3134E-06 | 1 |
| 111 H DY | 3.1022E-04 | -6.037288647079E+03 | 13 | 6.5483E-07 | 1 |
| 111 H DZ | 1.0065E-03 | -6.037288644844E+03 | 18 | 2.8898E-06 | 1 |
| 113 C DX | 2.7640E-03 | -6.037288640548E+03 | 15 | 7.1859E-06 | 1 |
| 113 C DY | 2.6261E-03 | -6.037288641234E+03 | 13 | 6.4991E-06 | 1 |
| 113 C DZ | 2.5878E-03 | -6.037288640354E+03 | 13 | 7.3796E-06 | 1 |
| 115 C DX | 2.9210E-03 | -6.037288639818E+03 | 14 | 7.9159E-06 | 1 |
| 115 C DY | 2.5868E-03 | -6.037288639562E+03 | 15 | 8.1712E-06 | 1 |
| 115 C DZ | 3.0652E-03 | -6.037288639223E+03 | 16 | 8.5101E-06 | 1 |
| 117 H DX | 1.1186E-03 | -6.037288644361E+03 | 15 | 3.3723E-06 | 1 |
| 117 H DY | 3.1336E-04 | -6.037288647178E+03 | 13 | 5.5509E-07 | 1 |
| 117 H DZ | 1.0497E-03 | -6.037288645028E+03 | 17 | 2.7057E-06 | 1 |
| 119 H DX | 4.6711E-04 | -6.037288646248E+03 | 14 | 1.4851E-06 | 1 |
| 119 H DY | 9.3066E-04 | -6.037288645293E+03 | 16 | 2.4401E-06 | 1 |
| 119 H DZ | 9.4624E-04 | -6.037288645175E+03 | 15 | 2.5581E-06 | 1 |
| 121 C DX | 2.8115E-03 | -6.037288639819E+03 | 15 | 7.9142E-06 | 1 |
| 121 C DY | 2.7588E-03 | -6.037288639677E+03 | 16 | 8.0569E-06 | 1 |
| 121 C DZ | 3.0672E-03 | -6.037288638616E+03 | 16 | 9.1172E-06 | 1 |
| 123 H DX | 3.0759E-04 | -6.037288647226E+03 | 13 | 5.0706E-07 | 1 |
| 123 H DY | 1.0386E-03 | -6.037288644868E+03 | 16 | 2.8655E-06 | 1 |
| 123 H DZ | 1.0084E-03 | -6.037288645306E+03 | 14 | 2.4271E-06 | 1 |
| 125 H DX | 1.1674E-03 | -6.037288644725E+03 | 15 | 3.0081E-06 | 1 |
| 125 H DY | 4.0911E-04 | -6.037288646391E+03 | 15 | 1.3423E-06 | 1 |
| 125 H DZ | 8.9298E-04 | -6.037288645558E+03 | 13 | 2.1758E-06 | 1 |
| 127 C DX | 2.7637E-03 | -6.037288637900E+03 | 16 | 9.8336E-06 | 1 |
| 127 C DY | 2.6318E-03 | -6.037288639949E+03 | 15 | 7.7845E-06 | 1 |
| 127 C DZ | 2.5714E-03 | -6.037288640750E+03 | 16 | 6.9835E-06 | 1 |
| 129 C DX | 3.0250E-03 | -6.037288639860E+03 | 18 | 7.8731E-06 | 1 |

|          |            |                     |    |            |   |
|----------|------------|---------------------|----|------------|---|
| 129 C DY | 2.7242E-03 | -6.037288640605E+03 | 17 | 7.1286E-06 | 1 |
| 129 C DZ | 2.8581E-03 | -6.037288640067E+03 | 15 | 7.6665E-06 | 1 |
| 131 H DX | 1.2600E-03 | -6.037288644256E+03 | 14 | 3.4776E-06 | 1 |
| 131 H DY | 3.6110E-04 | -6.037288646470E+03 | 16 | 1.2633E-06 | 1 |
| 131 H DZ | 8.4925E-04 | -6.037288645684E+03 | 15 | 2.0494E-06 | 1 |
| 133 H DX | 3.9478E-04 | -6.037288646647E+03 | 15 | 1.0866E-06 | 1 |
| 133 H DY | 1.3020E-03 | -6.037288644223E+03 | 15 | 3.5104E-06 | 1 |
| 133 H DZ | 7.1386E-04 | -6.037288645970E+03 | 13 | 1.7630E-06 | 1 |
| 135 C DX | 2.7407E-03 | -6.037288639529E+03 | 15 | 8.2047E-06 | 1 |
| 135 C DY | 3.0910E-03 | -6.037288638927E+03 | 13 | 8.8068E-06 | 1 |
| 135 C DZ | 2.9655E-03 | -6.037288639248E+03 | 14 | 8.4853E-06 | 1 |
| 137 H DX | 3.3694E-04 | -6.037288646949E+03 | 13 | 7.8440E-07 | 1 |
| 137 H DY | 1.4107E-03 | -6.037288643917E+03 | 15 | 3.8167E-06 | 1 |
| 137 H DZ | 6.7745E-04 | -6.037288646010E+03 | 15 | 1.7238E-06 | 1 |
| 139 H DX | 1.2288E-03 | -6.037288644250E+03 | 14 | 3.4839E-06 | 1 |
| 139 H DY | 2.8857E-04 | -6.037288647111E+03 | 13 | 6.2250E-07 | 1 |
| 139 H DZ | 8.4646E-04 | -6.037288645145E+03 | 13 | 2.5885E-06 | 1 |
| 141 H DX | 3.7590E-04 | -6.037288646817E+03 | 13 | 9.1669E-07 | 1 |
| 141 H DY | 1.0322E-03 | -6.037288645003E+03 | 15 | 2.7300E-06 | 1 |
| 141 H DZ | 9.5886E-04 | -6.037288645439E+03 | 13 | 2.2946E-06 | 1 |
| 143 C DX | 2.6935E-03 | -6.037288640849E+03 | 18 | 6.8844E-06 | 1 |
| 143 C DY | 3.1622E-03 | -6.037288639260E+03 | 18 | 8.4738E-06 | 1 |
| 143 C DZ | 2.9379E-03 | -6.037288639926E+03 | 14 | 7.8078E-06 | 1 |
| 145 H DX | 3.2150E-04 | -6.037288646815E+03 | 14 | 9.1839E-07 | 1 |
| 145 H DY | 1.0887E-03 | -6.037288644481E+03 | 14 | 3.2526E-06 | 1 |
| 145 H DZ | 9.7163E-04 | -6.037288645155E+03 | 16 | 2.5785E-06 | 1 |
| 147 H DX | 1.2095E-03 | -6.037288644167E+03 | 14 | 3.5667E-06 | 1 |
| 147 H DY | 3.7953E-04 | -6.037288646747E+03 | 13 | 9.8681E-07 | 1 |
| 147 H DZ | 7.5930E-04 | -6.037288645371E+03 | 14 | 2.3625E-06 | 1 |
| 149 H DX | 3.7087E-04 | -6.037288646664E+03 | 14 | 1.0696E-06 | 1 |
| 149 H DY | 1.3943E-03 | -6.037288643306E+03 | 16 | 4.4273E-06 | 1 |
| 149 H DZ | 6.5623E-04 | -6.037288645714E+03 | 13 | 2.0199E-06 | 1 |

|          |            |                     |    |            |   |
|----------|------------|---------------------|----|------------|---|
| 151 C DX | 2.4163E-03 | -6.037288641397E+03 | 15 | 6.3364E-06 | 1 |
| 151 C DY | 3.2564E-03 | -6.037288638859E+03 | 14 | 8.8741E-06 | 1 |
| 151 C DZ | 2.9084E-03 | -6.037288638180E+03 | 16 | 9.5535E-06 | 1 |
| 153 H DX | 3.7669E-04 | -6.037288646584E+03 | 15 | 1.1497E-06 | 1 |
| 153 H DY | 1.3504E-03 | -6.037288644022E+03 | 14 | 3.7116E-06 | 1 |
| 153 H DZ | 6.7993E-04 | -6.037288646159E+03 | 12 | 1.5749E-06 | 1 |
| 155 H DX | 3.7033E-04 | -6.037288646626E+03 | 14 | 1.1072E-06 | 1 |
| 155 H DY | 1.0282E-03 | -6.037288644576E+03 | 12 | 3.1574E-06 | 1 |
| 155 H DZ | 9.2723E-04 | -6.037288645354E+03 | 14 | 2.3798E-06 | 1 |
| 157 O DX | 1.1848E-03 | -6.037288644196E+03 | 13 | 3.5377E-06 | 1 |
| 157 O DY | 2.3300E-03 | -6.037288641376E+03 | 17 | 6.3572E-06 | 1 |
| 157 O DZ | 7.6343E-04 | -6.037288645510E+03 | 11 | 2.2236E-06 | 1 |
| 159 O DX | 1.5922E-03 | -6.037288643990E+03 | 15 | 3.7434E-06 | 1 |
| 159 O DY | 4.5272E-04 | -6.037288646847E+03 | 14 | 8.8638E-07 | 1 |
| 159 O DZ | 2.4292E-03 | -6.037288640982E+03 | 15 | 6.7519E-06 | 1 |
| 161 H DX | 3.7279E-04 | -6.037288646133E+03 | 13 | 1.6008E-06 | 1 |
| 161 H DY | 1.9740E-03 | -6.037288642400E+03 | 18 | 5.3339E-06 | 1 |
| 161 H DZ | 4.4825E-04 | -6.037288647093E+03 | 15 | 6.4018E-07 | 1 |
| 163 H DX | 7.5812E-04 | -6.037288645689E+03 | 17 | 2.0447E-06 | 1 |
| 163 H DY | 4.2086E-04 | -6.037288646948E+03 | 14 | 7.8560E-07 | 1 |
| 163 H DZ | 1.7519E-03 | -6.037288642661E+03 | 15 | 5.0728E-06 | 1 |
| 165 O DX | 1.9206E-03 | -6.037288641987E+03 | 14 | 5.7467E-06 | 1 |
| 165 O DY | 8.9400E-04 | -6.037288646252E+03 | 16 | 1.4817E-06 | 1 |
| 165 O DZ | 1.6400E-03 | -6.037288643335E+03 | 17 | 4.3984E-06 | 1 |
| 167 H DX | 1.5635E-03 | -6.037288643465E+03 | 18 | 4.2684E-06 | 1 |
| 167 H DY | 7.9188E-04 | -6.037288646085E+03 | 20 | 1.6482E-06 | 1 |
| 167 H DZ | 4.9901E-04 | -6.037288646394E+03 | 16 | 1.3395E-06 | 1 |
| 169 O DX | 7.5794E-04 | -6.037288646312E+03 | 16 | 1.4215E-06 | 1 |
| 169 O DY | 1.8792E-03 | -6.037288642042E+03 | 18 | 5.6919E-06 | 1 |
| 169 O DZ | 1.9170E-03 | -6.037288642352E+03 | 14 | 5.3814E-06 | 1 |
| 171 H DX | 6.7795E-04 | -6.037288646671E+03 | 17 | 1.0627E-06 | 1 |
| 171 H DY | 1.5153E-03 | -6.037288643730E+03 | 18 | 4.0035E-06 | 1 |

171 H DZ 7.3667E-04 -6.037288645659E+03 14 2.0747E-06 1

GCALCO - MAX INDICES DIRECT LATTICE VECTOR 23 12 11

NO.OF VECTORS CREATED 6999 STARS 3500 RMAX 268.37266 BOHR

CAPPA:IS1 3;IS2 3;IS3 3; K PTS MONK NET 14; SYMMOPS:K SPACE 2;G SPACE 2

TTTTTTTTTTTTTTTTTTTTTTTTTTTTTTTTTTTTTTT gordsh1 TELAPSE 777362.22 TCPU 770884.07

MATRIX SIZE: P(G) 642834, F(G) 322313, P(G) IRR 162596, F(G) IRR 162596

MAX G-VECTOR INDEX FOR 1- AND 2-ELECTRON INTEGRALS 37

TTTTTTTTTTTTTTTTTTTTTTTTTTTTTTTTTTTTTTT INPUT TELAPSE 777362.29 TCPU 770884.15

SYMMETRY ALLOWED INTERNAL DEGREE(S) OF FREEDOM: 258

TTTTTTTTTTTTTTTTTTTTTTTTTTTTTTTTTTTTTTT SYMM TELAPSE 777362.31 TCPU 770884.17

TTTTTTTTTTTTTTTTTTTTTTTTTTTTTTTTTTTTTTT INT\_SCREEN TELAPSE 777362.32 TCPU 770884.18

+++ SYMMETRY ADAPTION OF VIBRATIONAL MODES +++

SYMMETRY INFORMATION:

K-LITTLE GROUP: CLASS TABLE, CHARACTER TABLE.

IRREP-(DIMENSION, NO. IRREDUCIBLE SETS)

[WARNINGS: (1) ONLY ACTIVE IRREPS ARE GENERATED AND LISTED.

(2) ONLY RELEVANT CLASSES ARE CONSIDERED IN THE CHARACTER TABLE

(3) SYMBOLS MAY NOT FULLY COINCIDE WITH THOSE FROM TEXT BOOKS.]

(P, D, RP, RD, STAND FOR PAIRING, DOUBLING, REAL PAIRING AND REAL DOUBLING  
OF THE IRREPS (SEE MANUAL))

CLASS | GROUP OPERATORS (SEE SYMMOPS KEYWORD)

-----



|     |    |            |         |        |      |   |   |       |   |
|-----|----|------------|---------|--------|------|---|---|-------|---|
| 5-  | 5  | 0.8857E-08 | 20.6550 | 0.6192 | (Au) | A | ( | 0.00) | I |
| 6-  | 6  | 0.9603E-08 | 21.5077 | 0.6448 | (Ag) | I | ( | 0.00) | A |
| 7-  | 7  | 0.1271E-07 | 24.7397 | 0.7417 | (Au) | A | ( | 0.00) | I |
| 8-  | 8  | 0.1341E-07 | 25.4176 | 0.7620 | (Ag) | I | ( | 0.00) | A |
| 9-  | 9  | 0.1727E-07 | 28.8423 | 0.8647 | (Au) | A | ( | 0.00) | I |
| 10- | 10 | 0.2001E-07 | 31.0466 | 0.9308 | (Ag) | I | ( | 0.00) | A |
| 11- | 11 | 0.2574E-07 | 35.2106 | 1.0556 | (Au) | A | ( | 0.00) | I |
| 12- | 12 | 0.2814E-07 | 36.8169 | 1.1037 | (Ag) | I | ( | 0.00) | A |
| 13- | 13 | 0.2888E-07 | 37.2985 | 1.1182 | (Ag) | I | ( | 0.00) | A |
| 14- | 14 | 0.2923E-07 | 37.5244 | 1.1250 | (Au) | A | ( | 0.00) | I |
| 15- | 15 | 0.3573E-07 | 41.4833 | 1.2436 | (Ag) | I | ( | 0.00) | A |
| 16- | 16 | 0.3735E-07 | 42.4182 | 1.2717 | (Ag) | I | ( | 0.00) | A |
| 17- | 17 | 0.3836E-07 | 42.9873 | 1.2887 | (Au) | A | ( | 0.00) | I |
| 18- | 18 | 0.4014E-07 | 43.9725 | 1.3183 | (Au) | A | ( | 0.00) | I |
| 19- | 19 | 0.4161E-07 | 44.7704 | 1.3422 | (Ag) | I | ( | 0.00) | A |
| 20- | 20 | 0.4390E-07 | 45.9827 | 1.3785 | (Ag) | I | ( | 0.00) | A |
| 21- | 21 | 0.4821E-07 | 48.1900 | 1.4447 | (Ag) | I | ( | 0.00) | A |
| 22- | 22 | 0.4910E-07 | 48.6301 | 1.4579 | (Au) | A | ( | 0.00) | I |
| 23- | 23 | 0.5328E-07 | 50.6598 | 1.5187 | (Au) | A | ( | 0.00) | I |
| 24- | 24 | 0.5450E-07 | 51.2350 | 1.5360 | (Ag) | I | ( | 0.00) | A |
| 25- | 25 | 0.5824E-07 | 52.9662 | 1.5879 | (Au) | A | ( | 0.00) | I |
| 26- | 26 | 0.6184E-07 | 54.5782 | 1.6362 | (Au) | A | ( | 0.00) | I |
| 27- | 27 | 0.6390E-07 | 55.4781 | 1.6632 | (Ag) | I | ( | 0.00) | A |
| 28- | 28 | 0.7795E-07 | 61.2767 | 1.8370 | (Ag) | I | ( | 0.00) | A |
| 29- | 29 | 0.7950E-07 | 61.8834 | 1.8552 | (Au) | A | ( | 0.00) | I |
| 30- | 30 | 0.8357E-07 | 63.4468 | 1.9021 | (Ag) | I | ( | 0.00) | A |
| 31- | 31 | 0.8974E-07 | 65.7460 | 1.9710 | (Ag) | I | ( | 0.00) | A |
| 32- | 32 | 0.9533E-07 | 67.7658 | 2.0316 | (Au) | A | ( | 0.00) | I |
| 33- | 33 | 0.9934E-07 | 69.1758 | 2.0738 | (Ag) | I | ( | 0.00) | A |
| 34- | 34 | 0.1036E-06 | 70.6442 | 2.1179 | (Au) | A | ( | 0.00) | I |
| 35- | 35 | 0.1044E-06 | 70.9229 | 2.1262 | (Au) | A | ( | 0.00) | I |
| 36- | 36 | 0.1073E-06 | 71.8878 | 2.1551 | (Ag) | I | ( | 0.00) | A |

|     |    |            |          |        |      |   |   |       |   |
|-----|----|------------|----------|--------|------|---|---|-------|---|
| 37- | 37 | 0.1106E-06 | 72.9820  | 2.1879 | (Ag) | I | ( | 0.00) | A |
| 38- | 38 | 0.1135E-06 | 73.9280  | 2.2163 | (Au) | A | ( | 0.00) | I |
| 39- | 39 | 0.1190E-06 | 75.7120  | 2.2698 | (Ag) | I | ( | 0.00) | A |
| 40- | 40 | 0.1193E-06 | 75.7922  | 2.2722 | (Au) | A | ( | 0.00) | I |
| 41- | 41 | 0.1271E-06 | 78.2539  | 2.3460 | (Au) | A | ( | 0.00) | I |
| 42- | 42 | 0.1351E-06 | 80.6719  | 2.4185 | (Ag) | I | ( | 0.00) | A |
| 43- | 43 | 0.1386E-06 | 81.7033  | 2.4494 | (Au) | A | ( | 0.00) | I |
| 44- | 44 | 0.1450E-06 | 83.5777  | 2.5056 | (Ag) | I | ( | 0.00) | A |
| 45- | 45 | 0.1489E-06 | 84.6780  | 2.5386 | (Au) | A | ( | 0.00) | I |
| 46- | 46 | 0.1498E-06 | 84.9577  | 2.5470 | (Ag) | I | ( | 0.00) | A |
| 47- | 47 | 0.1622E-06 | 88.3913  | 2.6499 | (Au) | A | ( | 0.00) | I |
| 48- | 48 | 0.1664E-06 | 89.5241  | 2.6839 | (Au) | A | ( | 0.00) | I |
| 49- | 49 | 0.1745E-06 | 91.6729  | 2.7483 | (Ag) | I | ( | 0.00) | A |
| 50- | 50 | 0.1859E-06 | 94.6175  | 2.8366 | (Ag) | I | ( | 0.00) | A |
| 51- | 51 | 0.2032E-06 | 98.9380  | 2.9661 | (Ag) | I | ( | 0.00) | A |
| 52- | 52 | 0.2086E-06 | 100.2344 | 3.0050 | (Au) | A | ( | 0.00) | I |
| 53- | 53 | 0.2251E-06 | 104.1267 | 3.1216 | (Ag) | I | ( | 0.00) | A |
| 54- | 54 | 0.2314E-06 | 105.5752 | 3.1651 | (Au) | A | ( | 0.00) | I |
| 55- | 55 | 0.2338E-06 | 106.1153 | 3.1813 | (Au) | A | ( | 0.00) | I |
| 56- | 56 | 0.2393E-06 | 107.3670 | 3.2188 | (Ag) | I | ( | 0.00) | A |
| 57- | 57 | 0.3093E-06 | 122.0569 | 3.6592 | (Ag) | I | ( | 0.00) | A |
| 58- | 58 | 0.3178E-06 | 123.7201 | 3.7090 | (Ag) | I | ( | 0.00) | A |
| 59- | 59 | 0.3200E-06 | 124.1552 | 3.7221 | (Au) | A | ( | 0.00) | I |
| 60- | 60 | 0.3379E-06 | 127.5718 | 3.8245 | (Au) | A | ( | 0.00) | I |
| 61- | 61 | 0.3609E-06 | 131.8416 | 3.9525 | (Au) | A | ( | 0.00) | I |
| 62- | 62 | 0.3636E-06 | 132.3381 | 3.9674 | (Ag) | I | ( | 0.00) | A |
| 63- | 63 | 0.3913E-06 | 137.2932 | 4.1159 | (Au) | A | ( | 0.00) | I |
| 64- | 64 | 0.3920E-06 | 137.4134 | 4.1196 | (Ag) | I | ( | 0.00) | A |
| 65- | 65 | 0.4321E-06 | 144.2766 | 4.3253 | (Au) | A | ( | 0.00) | I |
| 66- | 66 | 0.4337E-06 | 144.5375 | 4.3331 | (Ag) | I | ( | 0.00) | A |
| 67- | 67 | 0.4431E-06 | 146.0882 | 4.3796 | (Au) | A | ( | 0.00) | I |
| 68- | 68 | 0.4587E-06 | 148.6522 | 4.4565 | (Ag) | I | ( | 0.00) | A |

|      |     |            |          |        |      |    |       |   |
|------|-----|------------|----------|--------|------|----|-------|---|
| 69-  | 69  | 0.4734E-06 | 151.0054 | 4.5270 | (Ag) | I( | 0.00) | A |
| 70-  | 70  | 0.4769E-06 | 151.5630 | 4.5437 | (Au) | A( | 0.00) | I |
| 71-  | 71  | 0.5311E-06 | 159.9443 | 4.7950 | (Ag) | I( | 0.00) | A |
| 72-  | 72  | 0.5751E-06 | 166.4402 | 4.9898 | (Au) | A( | 0.00) | I |
| 73-  | 73  | 0.7568E-06 | 190.9328 | 5.7240 | (Au) | A( | 0.00) | I |
| 74-  | 74  | 0.7955E-06 | 195.7573 | 5.8687 | (Ag) | I( | 0.00) | A |
| 75-  | 75  | 0.8403E-06 | 201.1891 | 6.0315 | (Au) | A( | 0.00) | I |
| 76-  | 76  | 0.8552E-06 | 202.9633 | 6.0847 | (Ag) | I( | 0.00) | A |
| 77-  | 77  | 0.1013E-05 | 220.8561 | 6.6211 | (Ag) | I( | 0.00) | A |
| 78-  | 78  | 0.1021E-05 | 221.7159 | 6.6469 | (Au) | A( | 0.00) | I |
| 79-  | 79  | 0.1032E-05 | 222.9573 | 6.6841 | (Ag) | I( | 0.00) | A |
| 80-  | 80  | 0.1055E-05 | 225.4509 | 6.7588 | (Au) | A( | 0.00) | I |
| 81-  | 81  | 0.1104E-05 | 230.5883 | 6.9129 | (Au) | A( | 0.00) | I |
| 82-  | 82  | 0.1105E-05 | 230.7016 | 6.9163 | (Ag) | I( | 0.00) | A |
| 83-  | 83  | 0.1141E-05 | 234.4239 | 7.0279 | (Au) | A( | 0.00) | I |
| 84-  | 84  | 0.1155E-05 | 235.8701 | 7.0712 | (Au) | A( | 0.00) | I |
| 85-  | 85  | 0.1160E-05 | 236.4039 | 7.0872 | (Ag) | I( | 0.00) | A |
| 86-  | 86  | 0.1164E-05 | 236.8330 | 7.1001 | (Ag) | I( | 0.00) | A |
| 87-  | 87  | 0.1176E-05 | 238.0527 | 7.1366 | (Au) | A( | 0.00) | I |
| 88-  | 88  | 0.1245E-05 | 244.9051 | 7.3421 | (Ag) | I( | 0.00) | A |
| 89-  | 89  | 0.1268E-05 | 247.1356 | 7.4089 | (Ag) | I( | 0.00) | A |
| 90-  | 90  | 0.1279E-05 | 248.2092 | 7.4411 | (Au) | A( | 0.00) | I |
| 91-  | 91  | 0.1294E-05 | 249.6260 | 7.4836 | (Ag) | I( | 0.00) | A |
| 92-  | 92  | 0.1319E-05 | 252.0217 | 7.5554 | (Au) | A( | 0.00) | I |
| 93-  | 93  | 0.1385E-05 | 258.2926 | 7.7434 | (Ag) | I( | 0.00) | A |
| 94-  | 94  | 0.1387E-05 | 258.4634 | 7.7485 | (Au) | A( | 0.00) | I |
| 95-  | 95  | 0.1395E-05 | 259.2623 | 7.7725 | (Ag) | I( | 0.00) | A |
| 96-  | 96  | 0.1401E-05 | 259.7390 | 7.7868 | (Au) | A( | 0.00) | I |
| 97-  | 97  | 0.1427E-05 | 262.1638 | 7.8595 | (Au) | A( | 0.00) | I |
| 98-  | 98  | 0.1457E-05 | 264.9486 | 7.9430 | (Ag) | I( | 0.00) | A |
| 99-  | 99  | 0.1508E-05 | 269.5168 | 8.0799 | (Au) | A( | 0.00) | I |
| 100- | 100 | 0.1531E-05 | 271.5345 | 8.1404 | (Ag) | I( | 0.00) | A |



|      |     |            |          |              |           |   |
|------|-----|------------|----------|--------------|-----------|---|
| 101- | 101 | 0.1640E-05 | 281.0506 | 8.4257 (Ag)  | I ( 0.00) | A |
| 102- | 102 | 0.1642E-05 | 281.2589 | 8.4319 (Ag)  | I ( 0.00) | A |
| 103- | 103 | 0.1646E-05 | 281.5627 | 8.4410 (Au)  | A ( 0.00) | I |
| 104- | 104 | 0.1797E-05 | 294.2235 | 8.8206 (Au)  | A ( 0.00) | I |
| 105- | 105 | 0.1843E-05 | 297.9908 | 8.9335 (Ag)  | I ( 0.00) | A |
| 106- | 106 | 0.1865E-05 | 299.7238 | 8.9855 (Au)  | A ( 0.00) | I |
| 107- | 107 | 0.1899E-05 | 302.4318 | 9.0667 (Ag)  | I ( 0.00) | A |
| 108- | 108 | 0.1907E-05 | 303.0609 | 9.0855 (Au)  | A ( 0.00) | I |
| 109- | 109 | 0.2057E-05 | 314.7378 | 9.4356 (Ag)  | I ( 0.00) | A |
| 110- | 110 | 0.2062E-05 | 315.1357 | 9.4475 (Ag)  | I ( 0.00) | A |
| 111- | 111 | 0.2078E-05 | 316.3910 | 9.4852 (Au)  | A ( 0.00) | I |
| 112- | 112 | 0.2100E-05 | 318.0228 | 9.5341 (Au)  | A ( 0.00) | I |
| 113- | 113 | 0.2196E-05 | 325.2539 | 9.7509 (Au)  | A ( 0.00) | I |
| 114- | 114 | 0.2205E-05 | 325.9026 | 9.7703 (Ag)  | I ( 0.00) | A |
| 115- | 115 | 0.2252E-05 | 329.3280 | 9.8730 (Ag)  | I ( 0.00) | A |
| 116- | 116 | 0.2296E-05 | 332.5925 | 9.9709 (Au)  | A ( 0.00) | I |
| 117- | 117 | 0.2600E-05 | 353.8815 | 10.6091 (Ag) | I ( 0.00) | A |
| 118- | 118 | 0.2602E-05 | 354.0114 | 10.6130 (Au) | A ( 0.00) | I |
| 119- | 119 | 0.2622E-05 | 355.3774 | 10.6539 (Au) | A ( 0.00) | I |
| 120- | 120 | 0.2627E-05 | 355.7337 | 10.6646 (Ag) | I ( 0.00) | A |
| 121- | 121 | 0.2796E-05 | 366.9827 | 11.0019 (Ag) | I ( 0.00) | A |
| 122- | 122 | 0.2818E-05 | 368.4183 | 11.0449 (Au) | A ( 0.00) | I |
| 123- | 123 | 0.2881E-05 | 372.5400 | 11.1685 (Au) | A ( 0.00) | I |
| 124- | 124 | 0.2884E-05 | 372.7347 | 11.1743 (Ag) | I ( 0.00) | A |
| 125- | 125 | 0.3101E-05 | 386.4595 | 11.5858 (Au) | A ( 0.00) | I |
| 126- | 126 | 0.3139E-05 | 388.8429 | 11.6572 (Ag) | I ( 0.00) | A |
| 127- | 127 | 0.3154E-05 | 389.7948 | 11.6858 (Ag) | I ( 0.00) | A |
| 128- | 128 | 0.3170E-05 | 390.7916 | 11.7156 (Au) | A ( 0.00) | I |
| 129- | 129 | 0.3238E-05 | 394.9359 | 11.8399 (Au) | A ( 0.00) | I |
| 130- | 130 | 0.3249E-05 | 395.5782 | 11.8591 (Ag) | I ( 0.00) | A |
| 131- | 131 | 0.3334E-05 | 400.7539 | 12.0143 (Ag) | I ( 0.00) | A |
| 132- | 132 | 0.3335E-05 | 400.8338 | 12.0167 (Au) | A ( 0.00) | I |

|          |            |          |         |       |     |       |   |
|----------|------------|----------|---------|-------|-----|-------|---|
| 133- 133 | 0.3449E-05 | 407.6222 | 12.2202 | (Au ) | A ( | 0.00) | I |
| 134- 134 | 0.3451E-05 | 407.7372 | 12.2237 | (Ag ) | I ( | 0.00) | A |
| 135- 135 | 0.3550E-05 | 413.5003 | 12.3964 | (Au ) | A ( | 0.00) | I |
| 136- 136 | 0.3567E-05 | 414.4850 | 12.4259 | (Ag ) | I ( | 0.00) | A |
| 137- 137 | 0.3780E-05 | 426.7035 | 12.7922 | (Ag ) | I ( | 0.00) | A |
| 138- 138 | 0.3785E-05 | 426.9781 | 12.8005 | (Au ) | A ( | 0.00) | I |
| 139- 139 | 0.3955E-05 | 436.4736 | 13.0852 | (Ag ) | I ( | 0.00) | A |
| 140- 140 | 0.3963E-05 | 436.8974 | 13.0979 | (Au ) | A ( | 0.00) | I |
| 141- 141 | 0.4320E-05 | 456.1698 | 13.6756 | (Au ) | A ( | 0.00) | I |
| 142- 142 | 0.4323E-05 | 456.3349 | 13.6806 | (Ag ) | I ( | 0.00) | A |
| 143- 143 | 0.4326E-05 | 456.4834 | 13.6850 | (Au ) | A ( | 0.00) | I |
| 144- 144 | 0.4351E-05 | 457.8019 | 13.7246 | (Ag ) | I ( | 0.00) | A |
| 145- 145 | 0.4406E-05 | 460.6880 | 13.8111 | (Au ) | A ( | 0.00) | I |
| 146- 146 | 0.4412E-05 | 460.9843 | 13.8200 | (Ag ) | I ( | 0.00) | A |
| 147- 147 | 0.4652E-05 | 473.3765 | 14.1915 | (Au ) | A ( | 0.00) | I |
| 148- 148 | 0.4667E-05 | 474.1432 | 14.2145 | (Ag ) | I ( | 0.00) | A |
| 149- 149 | 0.4715E-05 | 476.5805 | 14.2875 | (Ag ) | I ( | 0.00) | A |
| 150- 150 | 0.4726E-05 | 477.0989 | 14.3031 | (Au ) | A ( | 0.00) | I |
| 151- 151 | 0.4737E-05 | 477.6610 | 14.3199 | (Au ) | A ( | 0.00) | I |
| 152- 152 | 0.4761E-05 | 478.8921 | 14.3568 | (Au ) | A ( | 0.00) | I |
| 153- 153 | 0.4778E-05 | 479.7188 | 14.3816 | (Ag ) | I ( | 0.00) | A |
| 154- 154 | 0.4807E-05 | 481.2132 | 14.4264 | (Ag ) | I ( | 0.00) | A |
| 155- 155 | 0.4955E-05 | 488.5490 | 14.6463 | (Ag ) | I ( | 0.00) | A |
| 156- 156 | 0.4973E-05 | 489.4098 | 14.6721 | (Au ) | A ( | 0.00) | I |
| 157- 157 | 0.5196E-05 | 500.2893 | 14.9983 | (Ag ) | I ( | 0.00) | A |
| 158- 158 | 0.5234E-05 | 502.1048 | 15.0527 | (Ag ) | I ( | 0.00) | A |
| 159- 159 | 0.5248E-05 | 502.7766 | 15.0729 | (Au ) | A ( | 0.00) | I |
| 160- 160 | 0.5260E-05 | 503.3686 | 15.0906 | (Au ) | A ( | 0.00) | I |
| 161- 161 | 0.5854E-05 | 531.0382 | 15.9201 | (Au ) | A ( | 0.00) | I |
| 162- 162 | 0.5885E-05 | 532.4450 | 15.9623 | (Ag ) | I ( | 0.00) | A |
| 163- 163 | 0.5955E-05 | 535.5887 | 16.0565 | (Ag ) | I ( | 0.00) | A |
| 164- 164 | 0.5963E-05 | 535.9456 | 16.0672 | (Au ) | A ( | 0.00) | I |

|          |            |          |         |       |     |       |   |
|----------|------------|----------|---------|-------|-----|-------|---|
| 165- 165 | 0.6192E-05 | 546.1135 | 16.3721 | (Au ) | A ( | 0.00) | I |
| 166- 166 | 0.6197E-05 | 546.3553 | 16.3793 | (Ag ) | I ( | 0.00) | A |
| 167- 167 | 0.6206E-05 | 546.7523 | 16.3912 | (Ag ) | I ( | 0.00) | A |
| 168- 168 | 0.6216E-05 | 547.1844 | 16.4042 | (Au ) | A ( | 0.00) | I |
| 169- 169 | 0.7992E-05 | 620.4444 | 18.6005 | (Au ) | A ( | 0.00) | I |
| 170- 170 | 0.8012E-05 | 621.2425 | 18.6244 | (Ag ) | I ( | 0.00) | A |
| 171- 171 | 0.8024E-05 | 621.6834 | 18.6376 | (Au ) | A ( | 0.00) | I |
| 172- 172 | 0.8066E-05 | 623.3166 | 18.6866 | (Ag ) | I ( | 0.00) | A |
| 173- 173 | 0.8095E-05 | 624.4249 | 18.7198 | (Au ) | A ( | 0.00) | I |
| 174- 174 | 0.8128E-05 | 625.7057 | 18.7582 | (Ag ) | I ( | 0.00) | A |
| 175- 175 | 0.8147E-05 | 626.4420 | 18.7803 | (Ag ) | I ( | 0.00) | A |
| 176- 176 | 0.8173E-05 | 627.4305 | 18.8099 | (Au ) | A ( | 0.00) | I |
| 177- 177 | 0.1023E-04 | 702.0409 | 21.0467 | (Ag ) | I ( | 0.00) | A |
| 178- 178 | 0.1026E-04 | 702.8757 | 21.0717 | (Au ) | A ( | 0.00) | I |
| 179- 179 | 0.1049E-04 | 710.7287 | 21.3071 | (Au ) | A ( | 0.00) | I |
| 180- 180 | 0.1051E-04 | 711.5701 | 21.3323 | (Ag ) | I ( | 0.00) | A |
| 181- 181 | 0.1065E-04 | 716.0861 | 21.4677 | (Ag ) | I ( | 0.00) | A |
| 182- 182 | 0.1066E-04 | 716.5658 | 21.4821 | (Au ) | A ( | 0.00) | I |
| 183- 183 | 0.1082E-04 | 721.9940 | 21.6448 | (Au ) | A ( | 0.00) | I |
| 184- 184 | 0.1083E-04 | 722.2908 | 21.6537 | (Ag ) | I ( | 0.00) | A |
| 185- 185 | 0.1140E-04 | 741.0154 | 22.2151 | (Ag ) | I ( | 0.00) | A |
| 186- 186 | 0.1140E-04 | 741.1151 | 22.2181 | (Au ) | A ( | 0.00) | I |
| 187- 187 | 0.1182E-04 | 754.6838 | 22.6249 | (Ag ) | I ( | 0.00) | A |
| 188- 188 | 0.1186E-04 | 755.6767 | 22.6546 | (Au ) | A ( | 0.00) | I |
| 189- 189 | 0.1238E-04 | 772.2462 | 23.1514 | (Au ) | A ( | 0.00) | I |
| 190- 190 | 0.1243E-04 | 773.7299 | 23.1958 | (Ag ) | I ( | 0.00) | A |
| 191- 191 | 0.1256E-04 | 777.9015 | 23.3209 | (Ag ) | I ( | 0.00) | A |
| 192- 192 | 0.1260E-04 | 779.0080 | 23.3541 | (Au ) | A ( | 0.00) | I |
| 193- 193 | 0.1270E-04 | 782.1617 | 23.4486 | (Ag ) | I ( | 0.00) | A |
| 194- 194 | 0.1270E-04 | 782.2065 | 23.4500 | (Au ) | A ( | 0.00) | I |
| 195- 195 | 0.1301E-04 | 791.4847 | 23.7281 | (Ag ) | I ( | 0.00) | A |
| 196- 196 | 0.1302E-04 | 792.0860 | 23.7461 | (Ag ) | I ( | 0.00) | A |

|          |            |          |         |       |     |       |   |
|----------|------------|----------|---------|-------|-----|-------|---|
| 197- 197 | 0.1303E-04 | 792.3093 | 23.7528 | (Au ) | A ( | 0.00) | I |
| 198- 198 | 0.1306E-04 | 793.2849 | 23.7821 | (Au ) | A ( | 0.00) | I |
| 199- 199 | 0.1319E-04 | 797.2353 | 23.9005 | (Ag ) | I ( | 0.00) | A |
| 200- 200 | 0.1321E-04 | 797.5561 | 23.9101 | (Au ) | A ( | 0.00) | I |
| 201- 201 | 0.1390E-04 | 818.2883 | 24.5317 | (Au ) | A ( | 0.00) | I |
| 202- 202 | 0.1406E-04 | 823.1008 | 24.6759 | (Au ) | A ( | 0.00) | I |
| 203- 203 | 0.1412E-04 | 824.7976 | 24.7268 | (Ag ) | I ( | 0.00) | A |
| 204- 204 | 0.1421E-04 | 827.2471 | 24.8002 | (Ag ) | I ( | 0.00) | A |
| 205- 205 | 0.1440E-04 | 832.8398 | 24.9679 | (Ag ) | I ( | 0.00) | A |
| 206- 206 | 0.1450E-04 | 835.6224 | 25.0513 | (Au ) | A ( | 0.00) | I |
| 207- 207 | 0.1451E-04 | 836.0666 | 25.0646 | (Ag ) | I ( | 0.00) | A |
| 208- 208 | 0.1468E-04 | 840.8156 | 25.2070 | (Ag ) | I ( | 0.00) | A |
| 209- 209 | 0.1472E-04 | 841.9680 | 25.2416 | (Au ) | A ( | 0.00) | I |
| 210- 210 | 0.1480E-04 | 844.2772 | 25.3108 | (Au ) | A ( | 0.00) | I |
| 211- 211 | 0.1486E-04 | 846.0620 | 25.3643 | (Au ) | A ( | 0.00) | I |
| 212- 212 | 0.1490E-04 | 847.0460 | 25.3938 | (Ag ) | I ( | 0.00) | A |
| 213- 213 | 0.1518E-04 | 855.1361 | 25.6363 | (Ag ) | I ( | 0.00) | A |
| 214- 214 | 0.1529E-04 | 858.1768 | 25.7275 | (Au ) | A ( | 0.00) | I |
| 215- 215 | 0.1538E-04 | 860.7778 | 25.8055 | (Au ) | A ( | 0.00) | I |
| 216- 216 | 0.1546E-04 | 862.8882 | 25.8687 | (Ag ) | I ( | 0.00) | A |
| 217- 217 | 0.1621E-04 | 883.5384 | 26.4878 | (Au ) | A ( | 0.00) | I |
| 218- 218 | 0.1622E-04 | 883.9979 | 26.5016 | (Ag ) | I ( | 0.00) | A |
| 219- 219 | 0.1626E-04 | 884.9126 | 26.5290 | (Ag ) | I ( | 0.00) | A |
| 220- 220 | 0.1642E-04 | 889.2370 | 26.6587 | (Au ) | A ( | 0.00) | I |
| 221- 221 | 0.1660E-04 | 894.2255 | 26.8082 | (Ag ) | I ( | 0.00) | A |
| 222- 222 | 0.1661E-04 | 894.4037 | 26.8135 | (Au ) | A ( | 0.00) | I |
| 223- 223 | 0.1668E-04 | 896.3738 | 26.8726 | (Au ) | A ( | 0.00) | I |
| 224- 224 | 0.1669E-04 | 896.5924 | 26.8792 | (Ag ) | I ( | 0.00) | A |
| 225- 225 | 0.1678E-04 | 898.9248 | 26.9491 | (Au ) | A ( | 0.00) | I |
| 226- 226 | 0.1678E-04 | 899.0124 | 26.9517 | (Ag ) | I ( | 0.00) | A |
| 227- 227 | 0.1685E-04 | 900.9802 | 27.0107 | (Au ) | A ( | 0.00) | I |
| 228- 228 | 0.1687E-04 | 901.4285 | 27.0241 | (Ag ) | I ( | 0.00) | A |

|          |            |           |         |       |     |       |   |
|----------|------------|-----------|---------|-------|-----|-------|---|
| 229- 229 | 0.1689E-04 | 901.8516  | 27.0368 | (Ag ) | I ( | 0.00) | A |
| 230- 230 | 0.1689E-04 | 902.0864  | 27.0439 | (Au ) | A ( | 0.00) | I |
| 231- 231 | 0.1693E-04 | 903.0970  | 27.0742 | (Au ) | A ( | 0.00) | I |
| 232- 232 | 0.1694E-04 | 903.4506  | 27.0848 | (Ag ) | I ( | 0.00) | A |
| 233- 233 | 0.1726E-04 | 911.9190  | 27.3386 | (Ag ) | I ( | 0.00) | A |
| 234- 234 | 0.1732E-04 | 913.4038  | 27.3832 | (Au ) | A ( | 0.00) | I |
| 235- 235 | 0.1735E-04 | 914.2317  | 27.4080 | (Au ) | A ( | 0.00) | I |
| 236- 236 | 0.1737E-04 | 914.6677  | 27.4210 | (Ag ) | I ( | 0.00) | A |
| 237- 237 | 0.1742E-04 | 915.9840  | 27.4605 | (Au ) | A ( | 0.00) | I |
| 238- 238 | 0.1742E-04 | 916.0511  | 27.4625 | (Ag ) | I ( | 0.00) | A |
| 239- 239 | 0.1745E-04 | 916.7015  | 27.4820 | (Au ) | A ( | 0.00) | I |
| 240- 240 | 0.1745E-04 | 916.7087  | 27.4822 | (Ag ) | I ( | 0.00) | A |
| 241- 241 | 0.1764E-04 | 921.6673  | 27.6309 | (Au ) | A ( | 0.00) | I |
| 242- 242 | 0.1771E-04 | 923.6120  | 27.6892 | (Ag ) | I ( | 0.00) | A |
| 243- 243 | 0.1783E-04 | 926.6720  | 27.7809 | (Ag ) | I ( | 0.00) | A |
| 244- 244 | 0.1784E-04 | 927.0075  | 27.7910 | (Au ) | A ( | 0.00) | I |
| 245- 245 | 0.1938E-04 | 966.2957  | 28.9688 | (Au ) | A ( | 0.00) | I |
| 246- 246 | 0.1940E-04 | 966.6109  | 28.9783 | (Ag ) | I ( | 0.00) | A |
| 247- 247 | 0.1949E-04 | 968.9781  | 29.0492 | (Au ) | A ( | 0.00) | I |
| 248- 248 | 0.1952E-04 | 969.5520  | 29.0664 | (Ag ) | I ( | 0.00) | A |
| 249- 249 | 0.1980E-04 | 976.6888  | 29.2804 | (Au ) | A ( | 0.00) | I |
| 250- 250 | 0.1981E-04 | 976.7757  | 29.2830 | (Ag ) | I ( | 0.00) | A |
| 251- 251 | 0.1985E-04 | 977.7512  | 29.3122 | (Au ) | A ( | 0.00) | I |
| 252- 252 | 0.1988E-04 | 978.6894  | 29.3404 | (Ag ) | I ( | 0.00) | A |
| 253- 253 | 0.2056E-04 | 995.0644  | 29.8313 | (Ag ) | I ( | 0.00) | A |
| 254- 254 | 0.2062E-04 | 996.5591  | 29.8761 | (Au ) | A ( | 0.00) | I |
| 255- 255 | 0.2064E-04 | 997.1277  | 29.8931 | (Ag ) | I ( | 0.00) | A |
| 256- 256 | 0.2065E-04 | 997.3799  | 29.9007 | (Au ) | A ( | 0.00) | I |
| 257- 257 | 0.2165E-04 | 1021.1119 | 30.6122 | (Ag ) | I ( | 0.00) | A |
| 258- 258 | 0.2166E-04 | 1021.3428 | 30.6191 | (Au ) | A ( | 0.00) | I |
| 259- 259 | 0.2174E-04 | 1023.2692 | 30.6768 | (Ag ) | I ( | 0.00) | A |
| 260- 260 | 0.2176E-04 | 1023.7944 | 30.6926 | (Au ) | A ( | 0.00) | I |

|          |            |           |               |           |   |
|----------|------------|-----------|---------------|-----------|---|
| 261- 261 | 0.2194E-04 | 1028.0681 | 30.8207 (Ag ) | I ( 0.00) | A |
| 262- 262 | 0.2196E-04 | 1028.4170 | 30.8312 (Au ) | A ( 0.00) | I |
| 263- 263 | 0.2236E-04 | 1037.7623 | 31.1113 (Ag ) | I ( 0.00) | A |
| 264- 264 | 0.2240E-04 | 1038.8145 | 31.1429 (Au ) | A ( 0.00) | I |
| 265- 265 | 0.2403E-04 | 1075.8926 | 32.2544 (Au ) | A ( 0.00) | I |
| 266- 266 | 0.2403E-04 | 1075.9416 | 32.2559 (Ag ) | I ( 0.00) | A |
| 267- 267 | 0.2414E-04 | 1078.4005 | 32.3296 (Ag ) | I ( 0.00) | A |
| 268- 268 | 0.2416E-04 | 1078.7919 | 32.3414 (Au ) | A ( 0.00) | I |
| 269- 269 | 0.2427E-04 | 1081.3042 | 32.4167 (Ag ) | I ( 0.00) | A |
| 270- 270 | 0.2428E-04 | 1081.5320 | 32.4235 (Au ) | A ( 0.00) | I |
| 271- 271 | 0.2437E-04 | 1083.4709 | 32.4816 (Au ) | A ( 0.00) | I |
| 272- 272 | 0.2440E-04 | 1084.0528 | 32.4991 (Ag ) | I ( 0.00) | A |
| 273- 273 | 0.2451E-04 | 1086.6535 | 32.5771 (Au ) | A ( 0.00) | I |
| 274- 274 | 0.2457E-04 | 1087.9065 | 32.6146 (Ag ) | I ( 0.00) | A |
| 275- 275 | 0.2479E-04 | 1092.7836 | 32.7608 (Ag ) | I ( 0.00) | A |
| 276- 276 | 0.2496E-04 | 1096.5635 | 32.8741 (Au ) | A ( 0.00) | I |
| 277- 277 | 0.2500E-04 | 1097.3330 | 32.8972 (Ag ) | I ( 0.00) | A |
| 278- 278 | 0.2502E-04 | 1097.8301 | 32.9121 (Au ) | A ( 0.00) | I |
| 279- 279 | 0.2511E-04 | 1099.8336 | 32.9722 (Au ) | A ( 0.00) | I |
| 280- 280 | 0.2513E-04 | 1100.2385 | 32.9843 (Ag ) | I ( 0.00) | A |
| 281- 281 | 0.2638E-04 | 1127.2618 | 33.7945 (Au ) | A ( 0.00) | I |
| 282- 282 | 0.2644E-04 | 1128.4881 | 33.8312 (Ag ) | I ( 0.00) | A |
| 283- 283 | 0.2646E-04 | 1128.9983 | 33.8465 (Ag ) | I ( 0.00) | A |
| 284- 284 | 0.2647E-04 | 1129.1976 | 33.8525 (Au ) | A ( 0.00) | I |
| 285- 285 | 0.2671E-04 | 1134.2189 | 34.0030 (Ag ) | I ( 0.00) | A |
| 286- 286 | 0.2671E-04 | 1134.3394 | 34.0066 (Au ) | A ( 0.00) | I |
| 287- 287 | 0.2698E-04 | 1140.0067 | 34.1765 (Au ) | A ( 0.00) | I |
| 288- 288 | 0.2701E-04 | 1140.6408 | 34.1956 (Ag ) | I ( 0.00) | A |
| 289- 289 | 0.2755E-04 | 1152.0045 | 34.5362 (Au ) | A ( 0.00) | I |
| 290- 290 | 0.2756E-04 | 1152.1545 | 34.5407 (Ag ) | I ( 0.00) | A |
| 291- 291 | 0.2760E-04 | 1153.0617 | 34.5679 (Au ) | A ( 0.00) | I |
| 292- 292 | 0.2770E-04 | 1155.1511 | 34.6306 (Ag ) | I ( 0.00) | A |

|          |            |           |         |       |     |       |   |
|----------|------------|-----------|---------|-------|-----|-------|---|
| 293- 293 | 0.2809E-04 | 1163.2346 | 34.8729 | (Ag ) | I ( | 0.00) | A |
| 294- 294 | 0.2811E-04 | 1163.6483 | 34.8853 | (Au ) | A ( | 0.00) | I |
| 295- 295 | 0.2811E-04 | 1163.7099 | 34.8871 | (Ag ) | I ( | 0.00) | A |
| 296- 296 | 0.2814E-04 | 1164.2129 | 34.9022 | (Au ) | A ( | 0.00) | I |
| 297- 297 | 0.2829E-04 | 1167.4257 | 34.9985 | (Au ) | A ( | 0.00) | I |
| 298- 298 | 0.2831E-04 | 1167.6954 | 35.0066 | (Ag ) | I ( | 0.00) | A |
| 299- 299 | 0.2865E-04 | 1174.7764 | 35.2189 | (Au ) | A ( | 0.00) | I |
| 300- 300 | 0.2869E-04 | 1175.6677 | 35.2456 | (Ag ) | I ( | 0.00) | A |
| 301- 301 | 0.2992E-04 | 1200.5449 | 35.9914 | (Au ) | A ( | 0.00) | I |
| 302- 302 | 0.2993E-04 | 1200.6798 | 35.9955 | (Ag ) | I ( | 0.00) | A |
| 303- 303 | 0.3003E-04 | 1202.6894 | 36.0557 | (Ag ) | I ( | 0.00) | A |
| 304- 304 | 0.3010E-04 | 1204.1010 | 36.0980 | (Au ) | A ( | 0.00) | I |
| 305- 305 | 0.3041E-04 | 1210.3196 | 36.2845 | (Ag ) | I ( | 0.00) | A |
| 306- 306 | 0.3041E-04 | 1210.3722 | 36.2860 | (Au ) | A ( | 0.00) | I |
| 307- 307 | 0.3063E-04 | 1214.6511 | 36.4143 | (Ag ) | I ( | 0.00) | A |
| 308- 308 | 0.3065E-04 | 1215.0623 | 36.4267 | (Au ) | A ( | 0.00) | I |
| 309- 309 | 0.3066E-04 | 1215.2948 | 36.4336 | (Ag ) | I ( | 0.00) | A |
| 310- 310 | 0.3067E-04 | 1215.4483 | 36.4382 | (Au ) | A ( | 0.00) | I |
| 311- 311 | 0.3089E-04 | 1219.7212 | 36.5663 | (Ag ) | I ( | 0.00) | A |
| 312- 312 | 0.3090E-04 | 1219.9253 | 36.5724 | (Au ) | A ( | 0.00) | I |
| 313- 313 | 0.3163E-04 | 1234.3276 | 37.0042 | (Au ) | A ( | 0.00) | I |
| 314- 314 | 0.3164E-04 | 1234.5932 | 37.0122 | (Ag ) | I ( | 0.00) | A |
| 315- 315 | 0.3171E-04 | 1235.9305 | 37.0523 | (Ag ) | I ( | 0.00) | A |
| 316- 316 | 0.3173E-04 | 1236.2679 | 37.0624 | (Au ) | A ( | 0.00) | I |
| 317- 317 | 0.3341E-04 | 1268.5494 | 38.0302 | (Ag ) | I ( | 0.00) | A |
| 318- 318 | 0.3348E-04 | 1269.9183 | 38.0712 | (Au ) | A ( | 0.00) | I |
| 319- 319 | 0.3349E-04 | 1270.2001 | 38.0796 | (Ag ) | I ( | 0.00) | A |
| 320- 320 | 0.3351E-04 | 1270.4572 | 38.0873 | (Au ) | A ( | 0.00) | I |
| 321- 321 | 0.3354E-04 | 1270.9647 | 38.1026 | (Ag ) | I ( | 0.00) | A |
| 322- 322 | 0.3357E-04 | 1271.7032 | 38.1247 | (Ag ) | I ( | 0.00) | A |
| 323- 323 | 0.3358E-04 | 1271.8418 | 38.1289 | (Au ) | A ( | 0.00) | I |
| 324- 324 | 0.3369E-04 | 1273.9102 | 38.1909 | (Au ) | A ( | 0.00) | I |

|          |            |           |               |           |   |
|----------|------------|-----------|---------------|-----------|---|
| 325- 325 | 0.3456E-04 | 1290.1645 | 38.6782 (Au ) | A ( 0.00) | I |
| 326- 326 | 0.3458E-04 | 1290.6491 | 38.6927 (Ag ) | I ( 0.00) | A |
| 327- 327 | 0.3492E-04 | 1296.9028 | 38.8802 (Au ) | A ( 0.00) | I |
| 328- 328 | 0.3492E-04 | 1296.9802 | 38.8825 (Ag ) | I ( 0.00) | A |
| 329- 329 | 0.3516E-04 | 1301.3104 | 39.0123 (Ag ) | I ( 0.00) | A |
| 330- 330 | 0.3516E-04 | 1301.3327 | 39.0130 (Au ) | A ( 0.00) | I |
| 331- 331 | 0.3520E-04 | 1302.1638 | 39.0379 (Au ) | A ( 0.00) | I |
| 332- 332 | 0.3525E-04 | 1303.0104 | 39.0633 (Ag ) | I ( 0.00) | A |
| 333- 333 | 0.3538E-04 | 1305.4079 | 39.1351 (Au ) | A ( 0.00) | I |
| 334- 334 | 0.3538E-04 | 1305.4169 | 39.1354 (Ag ) | I ( 0.00) | A |
| 335- 335 | 0.3544E-04 | 1306.5386 | 39.1690 (Au ) | A ( 0.00) | I |
| 336- 336 | 0.3545E-04 | 1306.7037 | 39.1740 (Ag ) | I ( 0.00) | A |
| 337- 337 | 0.3573E-04 | 1311.8125 | 39.3271 (Au ) | A ( 0.00) | I |
| 338- 338 | 0.3574E-04 | 1311.9942 | 39.3326 (Ag ) | I ( 0.00) | A |
| 339- 339 | 0.3594E-04 | 1315.7502 | 39.4452 (Ag ) | I ( 0.00) | A |
| 340- 340 | 0.3602E-04 | 1317.1280 | 39.4865 (Au ) | A ( 0.00) | I |
| 341- 341 | 0.3637E-04 | 1323.5593 | 39.6793 (Ag ) | I ( 0.00) | A |
| 342- 342 | 0.3638E-04 | 1323.8247 | 39.6873 (Au ) | A ( 0.00) | I |
| 343- 343 | 0.3644E-04 | 1324.8374 | 39.7176 (Au ) | A ( 0.00) | I |
| 344- 344 | 0.3644E-04 | 1324.9423 | 39.7208 (Ag ) | I ( 0.00) | A |
| 345- 345 | 0.3789E-04 | 1350.8934 | 40.4988 (Au ) | A ( 0.00) | I |
| 346- 346 | 0.3790E-04 | 1351.1841 | 40.5075 (Ag ) | I ( 0.00) | A |
| 347- 347 | 0.3790E-04 | 1351.2285 | 40.5088 (Au ) | A ( 0.00) | I |
| 348- 348 | 0.3791E-04 | 1351.3416 | 40.5122 (Ag ) | I ( 0.00) | A |
| 349- 349 | 0.3800E-04 | 1352.8832 | 40.5584 (Ag ) | I ( 0.00) | A |
| 350- 350 | 0.3800E-04 | 1352.8851 | 40.5585 (Au ) | A ( 0.00) | I |
| 351- 351 | 0.3809E-04 | 1354.4657 | 40.6059 (Ag ) | I ( 0.00) | A |
| 352- 352 | 0.3814E-04 | 1355.4620 | 40.6357 (Au ) | A ( 0.00) | I |
| 353- 353 | 0.3895E-04 | 1369.8079 | 41.0658 (Au ) | A ( 0.00) | I |
| 354- 354 | 0.3898E-04 | 1370.1947 | 41.0774 (Ag ) | I ( 0.00) | A |
| 355- 355 | 0.3900E-04 | 1370.5895 | 41.0892 (Ag ) | I ( 0.00) | A |
| 356- 356 | 0.3900E-04 | 1370.6902 | 41.0923 (Au ) | A ( 0.00) | I |



|          |            |           |              |           |   |
|----------|------------|-----------|--------------|-----------|---|
| 357- 357 | 0.3927E-04 | 1375.3809 | 41.2329 (Ag) | I ( 0.00) | A |
| 358- 358 | 0.3928E-04 | 1375.6027 | 41.2395 (Ag) | I ( 0.00) | A |
| 359- 359 | 0.3930E-04 | 1375.9590 | 41.2502 (Au) | A ( 0.00) | I |
| 360- 360 | 0.3938E-04 | 1377.3242 | 41.2911 (Au) | A ( 0.00) | I |
| 361- 361 | 0.4045E-04 | 1395.9178 | 41.8486 (Ag) | I ( 0.00) | A |
| 362- 362 | 0.4060E-04 | 1398.3975 | 41.9229 (Au) | A ( 0.00) | I |
| 363- 363 | 0.4092E-04 | 1403.9353 | 42.0889 (Au) | A ( 0.00) | I |
| 364- 364 | 0.4100E-04 | 1405.3247 | 42.1306 (Au) | A ( 0.00) | I |
| 365- 365 | 0.4101E-04 | 1405.5026 | 42.1359 (Ag) | I ( 0.00) | A |
| 366- 366 | 0.4111E-04 | 1407.2371 | 42.1879 (Ag) | I ( 0.00) | A |
| 367- 367 | 0.4123E-04 | 1409.3411 | 42.2510 (Au) | A ( 0.00) | I |
| 368- 368 | 0.4142E-04 | 1412.4832 | 42.3452 (Ag) | I ( 0.00) | A |
| 369- 369 | 0.4182E-04 | 1419.2261 | 42.5473 (Ag) | I ( 0.00) | A |
| 370- 370 | 0.4189E-04 | 1420.4321 | 42.5835 (Au) | A ( 0.00) | I |
| 371- 371 | 0.4237E-04 | 1428.6706 | 42.8305 (Au) | A ( 0.00) | I |
| 372- 372 | 0.4238E-04 | 1428.8338 | 42.8354 (Ag) | I ( 0.00) | A |
| 373- 373 | 0.4252E-04 | 1431.1238 | 42.9040 (Au) | A ( 0.00) | I |
| 374- 374 | 0.4252E-04 | 1431.1673 | 42.9053 (Ag) | I ( 0.00) | A |
| 375- 375 | 0.4264E-04 | 1433.1479 | 42.9647 (Au) | A ( 0.00) | I |
| 376- 376 | 0.4264E-04 | 1433.2141 | 42.9667 (Ag) | I ( 0.00) | A |
| 377- 377 | 0.4284E-04 | 1436.4320 | 43.0631 (Au) | A ( 0.00) | I |
| 378- 378 | 0.4289E-04 | 1437.4287 | 43.0930 (Ag) | I ( 0.00) | A |
| 379- 379 | 0.4302E-04 | 1439.5958 | 43.1580 (Au) | A ( 0.00) | I |
| 380- 380 | 0.4305E-04 | 1440.0968 | 43.1730 (Ag) | I ( 0.00) | A |
| 381- 381 | 0.4308E-04 | 1440.5617 | 43.1870 (Au) | A ( 0.00) | I |
| 382- 382 | 0.4314E-04 | 1441.6111 | 43.2184 (Au) | A ( 0.00) | I |
| 383- 383 | 0.4315E-04 | 1441.7454 | 43.2224 (Ag) | I ( 0.00) | A |
| 384- 384 | 0.4326E-04 | 1443.5943 | 43.2779 (Ag) | I ( 0.00) | A |
| 385- 385 | 0.4329E-04 | 1444.0011 | 43.2901 (Au) | A ( 0.00) | I |
| 386- 386 | 0.4343E-04 | 1446.4208 | 43.3626 (Ag) | I ( 0.00) | A |
| 387- 387 | 0.4351E-04 | 1447.6534 | 43.3996 (Au) | A ( 0.00) | I |
| 388- 388 | 0.4361E-04 | 1449.3715 | 43.4511 (Au) | A ( 0.00) | I |

|          |            |           |               |           |   |
|----------|------------|-----------|---------------|-----------|---|
| 389- 389 | 0.4361E-04 | 1449.4088 | 43.4522 (Ag ) | I ( 0.00) | A |
| 390- 390 | 0.4370E-04 | 1450.8741 | 43.4961 (Au ) | A ( 0.00) | I |
| 391- 391 | 0.4379E-04 | 1452.3630 | 43.5407 (Ag ) | I ( 0.00) | A |
| 392- 392 | 0.4390E-04 | 1454.0938 | 43.5926 (Ag ) | I ( 0.00) | A |
| 393- 393 | 0.4392E-04 | 1454.5249 | 43.6056 (Au ) | A ( 0.00) | I |
| 394- 394 | 0.4398E-04 | 1455.4303 | 43.6327 (Ag ) | I ( 0.00) | A |
| 395- 395 | 0.4400E-04 | 1455.8485 | 43.6452 (Ag ) | I ( 0.00) | A |
| 396- 396 | 0.4405E-04 | 1456.6845 | 43.6703 (Au ) | A ( 0.00) | I |
| 397- 397 | 0.4409E-04 | 1457.2534 | 43.6874 (Au ) | A ( 0.00) | I |
| 398- 398 | 0.4409E-04 | 1457.2761 | 43.6880 (Ag ) | I ( 0.00) | A |
| 399- 399 | 0.4415E-04 | 1458.3698 | 43.7208 (Ag ) | I ( 0.00) | A |
| 400- 400 | 0.4419E-04 | 1459.0277 | 43.7406 (Au ) | A ( 0.00) | I |
| 401- 401 | 0.4425E-04 | 1459.9608 | 43.7685 (Au ) | A ( 0.00) | I |
| 402- 402 | 0.4426E-04 | 1460.1177 | 43.7732 (Ag ) | I ( 0.00) | A |
| 403- 403 | 0.4435E-04 | 1461.6425 | 43.8189 (Ag ) | I ( 0.00) | A |
| 404- 404 | 0.4438E-04 | 1462.1197 | 43.8332 (Au ) | A ( 0.00) | I |
| 405- 405 | 0.4442E-04 | 1462.6915 | 43.8504 (Au ) | A ( 0.00) | I |
| 406- 406 | 0.4450E-04 | 1464.1058 | 43.8928 (Au ) | A ( 0.00) | I |
| 407- 407 | 0.4459E-04 | 1465.5459 | 43.9360 (Ag ) | I ( 0.00) | A |
| 408- 408 | 0.4466E-04 | 1466.6727 | 43.9697 (Au ) | A ( 0.00) | I |
| 409- 409 | 0.4468E-04 | 1467.0305 | 43.9805 (Ag ) | I ( 0.00) | A |
| 410- 410 | 0.4476E-04 | 1468.4157 | 44.0220 (Au ) | A ( 0.00) | I |
| 411- 411 | 0.4482E-04 | 1469.3456 | 44.0499 (Ag ) | I ( 0.00) | A |
| 412- 412 | 0.4494E-04 | 1471.2218 | 44.1061 (Au ) | A ( 0.00) | I |
| 413- 413 | 0.4506E-04 | 1473.1896 | 44.1651 (Ag ) | I ( 0.00) | A |
| 414- 414 | 0.4515E-04 | 1474.6897 | 44.2101 (Au ) | A ( 0.00) | I |
| 415- 415 | 0.4520E-04 | 1475.5144 | 44.2348 (Ag ) | I ( 0.00) | A |
| 416- 416 | 0.4527E-04 | 1476.7551 | 44.2720 (Ag ) | I ( 0.00) | A |
| 417- 417 | 0.4529E-04 | 1476.9895 | 44.2790 (Au ) | A ( 0.00) | I |
| 418- 418 | 0.4533E-04 | 1477.6055 | 44.2975 (Ag ) | I ( 0.00) | A |
| 419- 419 | 0.4568E-04 | 1483.3545 | 44.4699 (Au ) | A ( 0.00) | I |
| 420- 420 | 0.4569E-04 | 1483.5935 | 44.4770 (Ag ) | I ( 0.00) | A |

|          |            |           |               |           |   |
|----------|------------|-----------|---------------|-----------|---|
| 421- 421 | 0.5381E-04 | 1610.0090 | 48.2669 (Au ) | A ( 0.00) | I |
| 422- 422 | 0.5382E-04 | 1610.0408 | 48.2678 (Ag ) | I ( 0.00) | A |
| 423- 423 | 0.5415E-04 | 1615.0203 | 48.4171 (Au ) | A ( 0.00) | I |
| 424- 424 | 0.5430E-04 | 1617.3363 | 48.4865 (Ag ) | I ( 0.00) | A |
| 425- 425 | 0.5445E-04 | 1619.4895 | 48.5511 (Au ) | A ( 0.00) | I |
| 426- 426 | 0.5472E-04 | 1623.5183 | 48.6719 (Ag ) | I ( 0.00) | A |
| 427- 427 | 0.5498E-04 | 1627.3740 | 48.7874 (Au ) | A ( 0.00) | I |
| 428- 428 | 0.5546E-04 | 1634.4974 | 49.0010 (Ag ) | I ( 0.00) | A |
| 429- 429 | 0.1798E-03 | 2942.5177 | 88.2145 (Ag ) | I ( 0.00) | A |
| 430- 430 | 0.1798E-03 | 2942.5742 | 88.2162 (Au ) | A ( 0.00) | I |
| 431- 431 | 0.1815E-03 | 2956.6193 | 88.6372 (Au ) | A ( 0.00) | I |
| 432- 432 | 0.1815E-03 | 2957.1818 | 88.6541 (Ag ) | I ( 0.00) | A |
| 433- 433 | 0.1825E-03 | 2964.9980 | 88.8884 (Ag ) | I ( 0.00) | A |
| 434- 434 | 0.1825E-03 | 2965.1024 | 88.8915 (Au ) | A ( 0.00) | I |
| 435- 435 | 0.1827E-03 | 2966.4387 | 88.9316 (Au ) | A ( 0.00) | I |
| 436- 436 | 0.1827E-03 | 2966.5906 | 88.9361 (Ag ) | I ( 0.00) | A |
| 437- 437 | 0.1831E-03 | 2969.8436 | 89.0337 (Au ) | A ( 0.00) | I |
| 438- 438 | 0.1831E-03 | 2969.9720 | 89.0375 (Ag ) | I ( 0.00) | A |
| 439- 439 | 0.1831E-03 | 2970.1097 | 89.0416 (Au ) | A ( 0.00) | I |
| 440- 440 | 0.1833E-03 | 2971.0251 | 89.0691 (Ag ) | I ( 0.00) | A |
| 441- 441 | 0.1834E-03 | 2972.3071 | 89.1075 (Au ) | A ( 0.00) | I |
| 442- 442 | 0.1835E-03 | 2972.7520 | 89.1209 (Au ) | A ( 0.00) | I |
| 443- 443 | 0.1835E-03 | 2972.9862 | 89.1279 (Ag ) | I ( 0.00) | A |
| 444- 444 | 0.1836E-03 | 2973.7765 | 89.1516 (Au ) | A ( 0.00) | I |
| 445- 445 | 0.1836E-03 | 2973.7965 | 89.1522 (Ag ) | I ( 0.00) | A |
| 446- 446 | 0.1836E-03 | 2973.9784 | 89.1576 (Ag ) | I ( 0.00) | A |
| 447- 447 | 0.1839E-03 | 2976.3568 | 89.2289 (Ag ) | I ( 0.00) | A |
| 448- 448 | 0.1839E-03 | 2976.4482 | 89.2317 (Au ) | A ( 0.00) | I |
| 449- 449 | 0.1841E-03 | 2977.6162 | 89.2667 (Au ) | A ( 0.00) | I |
| 450- 450 | 0.1841E-03 | 2977.8483 | 89.2736 (Ag ) | I ( 0.00) | A |
| 451- 451 | 0.1844E-03 | 2980.0710 | 89.3403 (Au ) | A ( 0.00) | I |
| 452- 452 | 0.1846E-03 | 2982.1905 | 89.4038 (Ag ) | I ( 0.00) | A |

|          |            |           |               |           |   |
|----------|------------|-----------|---------------|-----------|---|
| 453- 453 | 0.1848E-03 | 2983.2763 | 89.4364 (Au ) | A ( 0.00) | I |
| 454- 454 | 0.1848E-03 | 2983.4655 | 89.4420 (Ag ) | I ( 0.00) | A |
| 455- 455 | 0.1852E-03 | 2986.6898 | 89.5387 (Au ) | A ( 0.00) | I |
| 456- 456 | 0.1852E-03 | 2986.7264 | 89.5398 (Ag ) | I ( 0.00) | A |
| 457- 457 | 0.1895E-03 | 3020.9334 | 90.5653 (Au ) | A ( 0.00) | I |
| 458- 458 | 0.1895E-03 | 3021.0124 | 90.5677 (Ag ) | I ( 0.00) | A |
| 459- 459 | 0.1908E-03 | 3031.4674 | 90.8811 (Ag ) | I ( 0.00) | A |
| 460- 460 | 0.1910E-03 | 3033.3314 | 90.9370 (Au ) | A ( 0.00) | I |
| 461- 461 | 0.1923E-03 | 3043.5314 | 91.2428 (Au ) | A ( 0.00) | I |
| 462- 462 | 0.1924E-03 | 3044.4940 | 91.2716 (Ag ) | I ( 0.00) | A |
| 463- 463 | 0.1931E-03 | 3049.6329 | 91.4257 (Ag ) | I ( 0.00) | A |
| 464- 464 | 0.1931E-03 | 3049.8153 | 91.4312 (Au ) | A ( 0.00) | I |
| 465- 465 | 0.1933E-03 | 3051.4095 | 91.4790 (Au ) | A ( 0.00) | I |
| 466- 466 | 0.1935E-03 | 3052.7172 | 91.5182 (Ag ) | I ( 0.00) | A |
| 467- 467 | 0.1935E-03 | 3052.7180 | 91.5182 (Au ) | A ( 0.00) | I |
| 468- 468 | 0.1936E-03 | 3054.0561 | 91.5583 (Ag ) | I ( 0.00) | A |
| 469- 469 | 0.1938E-03 | 3055.6391 | 91.6058 (Au ) | A ( 0.00) | I |
| 470- 470 | 0.1940E-03 | 3056.6990 | 91.6375 (Ag ) | I ( 0.00) | A |
| 471- 471 | 0.1940E-03 | 3057.1627 | 91.6514 (Au ) | A ( 0.00) | I |
| 472- 472 | 0.1940E-03 | 3057.2809 | 91.6550 (Ag ) | I ( 0.00) | A |
| 473- 473 | 0.1945E-03 | 3060.8693 | 91.7626 (Au ) | A ( 0.00) | I |
| 474- 474 | 0.1945E-03 | 3060.9790 | 91.7658 (Ag ) | I ( 0.00) | A |
| 475- 475 | 0.1947E-03 | 3062.0627 | 91.7983 (Au ) | A ( 0.00) | I |
| 476- 476 | 0.1947E-03 | 3062.4476 | 91.8099 (Ag ) | I ( 0.00) | A |
| 477- 477 | 0.1953E-03 | 3066.9306 | 91.9443 (Ag ) | I ( 0.00) | A |
| 478- 478 | 0.1953E-03 | 3067.0152 | 91.9468 (Au ) | A ( 0.00) | I |
| 479- 479 | 0.1956E-03 | 3069.8847 | 92.0328 (Ag ) | I ( 0.00) | A |
| 480- 480 | 0.1957E-03 | 3070.0998 | 92.0393 (Au ) | A ( 0.00) | I |
| 481- 481 | 0.1961E-03 | 3073.1626 | 92.1311 (Au ) | A ( 0.00) | I |
| 482- 482 | 0.1961E-03 | 3073.5944 | 92.1440 (Ag ) | I ( 0.00) | A |
| 483- 483 | 0.1961E-03 | 3073.6411 | 92.1454 (Au ) | A ( 0.00) | I |
| 484- 484 | 0.1962E-03 | 3074.0199 | 92.1568 (Ag ) | I ( 0.00) | A |

|          |            |           |         |       |     |       |   |
|----------|------------|-----------|---------|-------|-----|-------|---|
| 485- 485 | 0.1962E-03 | 3074.2076 | 92.1624 | (Au ) | A ( | 0.00) | I |
| 486- 486 | 0.1962E-03 | 3074.4133 | 92.1686 | (Ag ) | I ( | 0.00) | A |
| 487- 487 | 0.1967E-03 | 3077.9137 | 92.2735 | (Au ) | A ( | 0.00) | I |
| 488- 488 | 0.1967E-03 | 3077.9208 | 92.2737 | (Ag ) | I ( | 0.00) | A |
| 489- 489 | 0.1969E-03 | 3079.6691 | 92.3262 | (Ag ) | I ( | 0.00) | A |
| 490- 490 | 0.1969E-03 | 3079.7415 | 92.3283 | (Au ) | A ( | 0.00) | I |
| 491- 491 | 0.1969E-03 | 3079.9732 | 92.3353 | (Ag ) | I ( | 0.00) | A |
| 492- 492 | 0.1970E-03 | 3080.2804 | 92.3445 | (Au ) | A ( | 0.00) | I |
| 493- 493 | 0.1970E-03 | 3080.5584 | 92.3528 | (Ag ) | I ( | 0.00) | A |
| 494- 494 | 0.1971E-03 | 3081.1411 | 92.3703 | (Au ) | A ( | 0.00) | I |
| 495- 495 | 0.1971E-03 | 3081.1543 | 92.3707 | (Ag ) | I ( | 0.00) | A |
| 496- 496 | 0.1971E-03 | 3081.6305 | 92.3850 | (Au ) | A ( | 0.00) | I |
| 497- 497 | 0.1973E-03 | 3082.7858 | 92.4196 | (Au ) | A ( | 0.00) | I |
| 498- 498 | 0.1973E-03 | 3083.0289 | 92.4269 | (Ag ) | I ( | 0.00) | A |
| 499- 499 | 0.1978E-03 | 3086.9382 | 92.5441 | (Au ) | A ( | 0.00) | I |
| 500- 500 | 0.1978E-03 | 3086.9801 | 92.5453 | (Ag ) | I ( | 0.00) | A |
| 501- 501 | 0.2020E-03 | 3119.2222 | 93.5119 | (Ag ) | I ( | 0.00) | A |
| 502- 502 | 0.2030E-03 | 3126.7953 | 93.7390 | (Au ) | A ( | 0.00) | I |
| 503- 503 | 0.2041E-03 | 3135.6826 | 94.0054 | (Ag ) | I ( | 0.00) | A |
| 504- 504 | 0.2042E-03 | 3136.3318 | 94.0249 | (Au ) | A ( | 0.00) | I |
| 505- 505 | 0.2051E-03 | 3143.4836 | 94.2393 | (Au ) | A ( | 0.00) | I |
| 506- 506 | 0.2052E-03 | 3143.7330 | 94.2467 | (Ag ) | I ( | 0.00) | A |
| 507- 507 | 0.2055E-03 | 3146.1559 | 94.3194 | (Ag ) | I ( | 0.00) | A |
| 508- 508 | 0.2055E-03 | 3146.3797 | 94.3261 | (Au ) | A ( | 0.00) | I |
| 509- 509 | 0.2056E-03 | 3147.1300 | 94.3486 | (Ag ) | I ( | 0.00) | A |
| 510- 510 | 0.2062E-03 | 3151.4525 | 94.4782 | (Au ) | A ( | 0.00) | I |
| 511- 511 | 0.2063E-03 | 3152.5896 | 94.5123 | (Ag ) | I ( | 0.00) | A |
| 512- 512 | 0.2064E-03 | 3153.4274 | 94.5374 | (Au ) | A ( | 0.00) | I |
| 513- 513 | 0.2089E-03 | 3172.2839 | 95.1027 | (Au ) | A ( | 0.00) | I |
| 514- 514 | 0.2091E-03 | 3173.9605 | 95.1529 | (Ag ) | I ( | 0.00) | A |
| 515- 515 | 0.2127E-03 | 3201.1362 | 95.9676 | (Au ) | A ( | 0.00) | I |
| 516- 516 | 0.2133E-03 | 3205.2163 | 96.0900 | (Ag ) | I ( | 0.00) | A |

NORMAL MODES NORMALIZED TO CLASSICAL AMPLITUDES (IN BOHR)

FREQ(CM\*\*-1) -12.84 0.00 0.00 0.00 20.66 21.51

AT. 1 I X -0.0350 -0.0216 -0.0009 0.0028 0.0221 0.0538

Y -0.0517 0.0027 0.0014 0.0216 -0.0283 -0.0265

Z -0.0135 -0.0011 0.0218 -0.0013 -0.0370 -0.0255

AT. 2 I X 0.0350 -0.0216 -0.0009 0.0028 0.0221 -0.0538

Y 0.0517 0.0027 0.0014 0.0216 -0.0283 0.0265

Z 0.0135 -0.0011 0.0218 -0.0013 -0.0370 0.0255

AT. 3 I X -0.0416 -0.0216 -0.0009 0.0028 0.0193 0.0469

Y -0.0367 0.0027 0.0014 0.0216 0.0121 -0.0254

Z 0.0524 -0.0011 0.0218 -0.0013 -0.0574 0.0312

AT. 4 I X 0.0416 -0.0216 -0.0009 0.0028 0.0193 -0.0469

Y 0.0367 0.0027 0.0014 0.0216 0.0121 0.0254

Z -0.0524 -0.0011 0.0218 -0.0013 -0.0574 -0.0312

AT. 5 O X -0.0257 -0.0216 -0.0009 0.0028 0.0236 0.0587

Y -0.0642 0.0027 0.0014 0.0216 -0.0093 -0.0183

Z -0.0077 -0.0011 0.0218 -0.0013 -0.0374 -0.0253

AT. 6 O X 0.0257 -0.0216 -0.0009 0.0028 0.0236 -0.0587

Y 0.0642 0.0027 0.0014 0.0216 -0.0093 0.0183

Z 0.0077 -0.0011 0.0218 -0.0013 -0.0374 0.0253

AT. 7 O X -0.0412 -0.0216 -0.0009 0.0028 0.0182 0.0399

Y -0.0438 0.0027 0.0014 0.0216 -0.0150 -0.0246

Z 0.0161 -0.0011 0.0218 -0.0013 -0.0408 0.0115

AT. 8 O X 0.0412 -0.0216 -0.0009 0.0028 0.0182 -0.0399

Y 0.0438 0.0027 0.0014 0.0216 -0.0150 0.0246

Z -0.0161 -0.0011 0.0218 -0.0013 -0.0408 -0.0115

AT. 9 N X -0.0344 -0.0216 -0.0009 0.0028 0.0312 0.0487

Y -0.0592 0.0027 0.0014 0.0216 -0.0052 -0.0175

Z -0.0117 -0.0011 0.0218 -0.0013 -0.0355 -0.0286

AT. 10 N X 0.0344 -0.0216 -0.0009 0.0028 0.0312 -0.0487  
Y 0.0592 0.0027 0.0014 0.0216 -0.0052 0.0175  
Z 0.0117 -0.0011 0.0218 -0.0013 -0.0355 0.0286

AT. 11 N X -0.0490 -0.0216 -0.0009 0.0028 0.0283 0.0433  
Y -0.0501 0.0027 0.0014 0.0216 -0.0033 -0.0203  
Z 0.0143 -0.0011 0.0218 -0.0013 -0.0359 0.0130

AT. 12 N X 0.0490 -0.0216 -0.0009 0.0028 0.0283 -0.0433  
Y 0.0501 0.0027 0.0014 0.0216 -0.0033 0.0203  
Z -0.0143 -0.0011 0.0218 -0.0013 -0.0359 -0.0130

AT. 13 C X -0.0303 -0.0216 -0.0009 0.0028 0.0238 0.0538  
Y -0.0627 0.0027 0.0014 0.0216 -0.0105 -0.0188  
Z -0.0123 -0.0011 0.0218 -0.0013 -0.0369 -0.0296

AT. 14 C X 0.0303 -0.0216 -0.0009 0.0028 0.0238 -0.0538  
Y 0.0627 0.0027 0.0014 0.0216 -0.0105 0.0188  
Z 0.0123 -0.0011 0.0218 -0.0013 -0.0369 0.0296

AT. 15 C X -0.0291 -0.0216 -0.0009 0.0028 0.0167 0.0534  
Y -0.0618 0.0027 0.0014 0.0216 -0.0179 -0.0226  
Z -0.0170 -0.0011 0.0218 -0.0013 -0.0365 -0.0352

AT. 16 C X 0.0291 -0.0216 -0.0009 0.0028 0.0167 -0.0534  
Y 0.0618 0.0027 0.0014 0.0216 -0.0179 0.0226  
Z 0.0170 -0.0011 0.0218 -0.0013 -0.0365 0.0352

AT. 17 H X -0.0245 -0.0216 -0.0009 0.0028 0.0123 0.0530  
Y -0.0582 0.0027 0.0014 0.0216 -0.0182 -0.0188  
Z -0.0191 -0.0011 0.0218 -0.0013 -0.0373 -0.0395

AT. 18 H X 0.0245 -0.0216 -0.0009 0.0028 0.0123 -0.0530  
Y 0.0582 0.0027 0.0014 0.0216 -0.0182 0.0188  
Z 0.0191 -0.0011 0.0218 -0.0013 -0.0373 0.0395

AT. 19 H X -0.0272 -0.0216 -0.0009 0.0028 0.0142 0.0545  
Y -0.0663 0.0027 0.0014 0.0216 -0.0166 -0.0270  
Z -0.0183 -0.0011 0.0218 -0.0013 -0.0371 -0.0370

AT. 20 H X 0.0272 -0.0216 -0.0009 0.0028 0.0142 -0.0545  
Y 0.0663 0.0027 0.0014 0.0216 -0.0166 0.0270

Z 0.0183 -0.0011 0.0218 -0.0013 -0.0371 0.0370  
AT. 21 C X -0.0411 -0.0216 -0.0009 0.0028 0.0230 0.0431  
Y -0.0425 0.0027 0.0014 0.0216 -0.0093 -0.0198  
Z 0.0186 -0.0011 0.0218 -0.0013 -0.0394 0.0130  
AT. 22 C X 0.0411 -0.0216 -0.0009 0.0028 0.0230 -0.0431  
Y 0.0425 0.0027 0.0014 0.0216 -0.0093 0.0198  
Z -0.0186 -0.0011 0.0218 -0.0013 -0.0394 -0.0130  
AT. 23 C X -0.0307 -0.0216 -0.0009 0.0028 0.0222 0.0474  
Y -0.0336 0.0027 0.0014 0.0216 -0.0083 -0.0149  
Z 0.0271 -0.0011 0.0218 -0.0013 -0.0410 0.0160  
AT. 24 C X 0.0307 -0.0216 -0.0009 0.0028 0.0222 -0.0474  
Y 0.0336 0.0027 0.0014 0.0216 -0.0083 0.0149  
Z -0.0271 -0.0011 0.0218 -0.0013 -0.0410 -0.0160  
AT. 25 H X -0.0294 -0.0217 -0.0009 0.0028 0.0300 0.0464  
Y -0.0331 0.0027 0.0014 0.0216 -0.0081 -0.0149  
Z 0.0232 -0.0011 0.0218 -0.0013 -0.0343 0.0127  
AT. 26 H X 0.0294 -0.0217 -0.0009 0.0028 0.0300 -0.0464  
Y 0.0331 0.0027 0.0014 0.0216 -0.0081 0.0149  
Z -0.0232 -0.0011 0.0218 -0.0013 -0.0343 -0.0127  
AT. 27 H X -0.0206 -0.0216 -0.0009 0.0028 0.0143 0.0487  
Y -0.0298 0.0027 0.0014 0.0216 -0.0166 -0.0122  
Z 0.0273 -0.0011 0.0218 -0.0013 -0.0441 0.0170  
AT. 28 H X 0.0206 -0.0216 -0.0009 0.0028 0.0143 -0.0487  
Y 0.0298 0.0027 0.0014 0.0216 -0.0166 0.0122  
Z -0.0273 -0.0011 0.0218 -0.0013 -0.0441 -0.0170  
AT. 29 C X -0.0355 -0.0217 -0.0009 0.0028 0.0347 0.0437  
Y -0.0567 0.0027 0.0014 0.0216 -0.0013 -0.0212  
Z -0.0069 -0.0011 0.0218 -0.0013 -0.0383 -0.0230  
AT. 30 C X 0.0355 -0.0217 -0.0009 0.0028 0.0347 -0.0437  
Y 0.0567 0.0027 0.0014 0.0216 -0.0013 0.0212  
Z 0.0069 -0.0011 0.0218 -0.0013 -0.0383 0.0230  
AT. 31 H X -0.0358 -0.0217 -0.0009 0.0028 0.0382 0.0382



Y -0.0627 0.0027 0.0014 0.0216 -0.0040 -0.0284  
Z -0.0154 -0.0011 0.0218 -0.0013 -0.0395 -0.0367  
AT. 32 H X 0.0358 -0.0217 -0.0009 0.0028 0.0382 -0.0382  
Y 0.0627 0.0027 0.0014 0.0216 -0.0040 0.0284  
Z 0.0154 -0.0011 0.0218 -0.0013 -0.0395 0.0367  
AT. 33 H X -0.0262 -0.0217 -0.0009 0.0028 0.0352 0.0543  
Y -0.0464 0.0027 0.0014 0.0216 0.0028 -0.0110  
Z -0.0051 -0.0011 0.0218 -0.0013 -0.0399 -0.0207  
AT. 34 H X 0.0262 -0.0217 -0.0009 0.0028 0.0352 -0.0543  
Y 0.0464 0.0027 0.0014 0.0216 0.0028 0.0110  
Z 0.0051 -0.0011 0.0218 -0.0013 -0.0399 0.0207  
AT. 35 C X -0.0479 -0.0217 -0.0009 0.0028 0.0330 0.0320  
Y -0.0569 0.0027 0.0014 0.0216 -0.0013 -0.0306  
Z 0.0049 -0.0011 0.0218 -0.0013 -0.0363 -0.0028  
AT. 36 C X 0.0479 -0.0217 -0.0009 0.0028 0.0330 -0.0320  
Y 0.0569 0.0027 0.0014 0.0216 -0.0013 0.0306  
Z -0.0049 -0.0011 0.0218 -0.0013 -0.0363 0.0028  
AT. 37 C X -0.0483 -0.0216 -0.0009 0.0028 0.0312 0.0398  
Y -0.0488 0.0027 0.0014 0.0216 0.0010 -0.0226  
Z 0.0169 -0.0011 0.0218 -0.0013 -0.0345 0.0150  
AT. 38 C X 0.0483 -0.0216 -0.0009 0.0028 0.0312 -0.0398  
Y 0.0488 0.0027 0.0014 0.0216 0.0010 0.0226  
Z -0.0169 -0.0011 0.0218 -0.0013 -0.0345 -0.0150  
AT. 39 H X -0.0394 -0.0217 -0.0009 0.0028 0.0346 0.0501  
Y -0.0406 0.0027 0.0014 0.0216 0.0036 -0.0139  
Z 0.0194 -0.0011 0.0218 -0.0013 -0.0335 0.0181  
AT. 40 H X 0.0394 -0.0217 -0.0009 0.0028 0.0346 -0.0501  
Y 0.0406 0.0027 0.0014 0.0216 0.0036 0.0139  
Z -0.0194 -0.0011 0.0218 -0.0013 -0.0335 -0.0181  
AT. 41 H X -0.0573 -0.0216 -0.0009 0.0028 0.0287 0.0315  
Y -0.0492 0.0027 0.0014 0.0216 0.0039 -0.0275  
Z 0.0264 -0.0011 0.0218 -0.0013 -0.0337 0.0273

AT. 42 H X 0.0573 -0.0216 -0.0009 0.0028 0.0287 -0.0315  
Y 0.0492 0.0027 0.0014 0.0216 0.0039 0.0275  
Z -0.0264 -0.0011 0.0218 -0.0013 -0.0337 -0.0273

AT. 43 C X -0.0569 -0.0216 -0.0009 0.0028 0.0270 0.0364  
Y -0.0600 0.0027 0.0014 0.0216 -0.0043 -0.0282  
Z 0.0109 -0.0011 0.0218 -0.0013 -0.0359 0.0084

AT. 44 C X 0.0569 -0.0216 -0.0009 0.0028 0.0270 -0.0364  
Y 0.0600 0.0027 0.0014 0.0216 -0.0043 0.0282  
Z -0.0109 -0.0011 0.0218 -0.0013 -0.0359 -0.0084

AT. 45 H X -0.0626 -0.0216 -0.0009 0.0028 0.0267 0.0322  
Y -0.0657 0.0027 0.0014 0.0216 -0.0028 -0.0389  
Z 0.0211 -0.0011 0.0218 -0.0013 -0.0370 0.0219

AT. 46 H X 0.0626 -0.0216 -0.0009 0.0028 0.0267 -0.0322  
Y 0.0657 0.0027 0.0014 0.0216 -0.0028 0.0389  
Z -0.0211 -0.0011 0.0218 -0.0013 -0.0370 -0.0219

AT. 47 H X -0.0546 -0.0216 -0.0009 0.0028 0.0261 0.0433  
Y -0.0562 0.0027 0.0014 0.0216 -0.0055 -0.0198  
Z 0.0111 -0.0011 0.0218 -0.0013 -0.0361 0.0081

AT. 48 H X 0.0546 -0.0216 -0.0009 0.0028 0.0261 -0.0433  
Y 0.0562 0.0027 0.0014 0.0216 -0.0055 0.0198  
Z -0.0111 -0.0011 0.0218 -0.0013 -0.0361 -0.0081

AT. 49 C X -0.0586 -0.0216 -0.0009 0.0028 0.0300 0.0255  
Y -0.0687 0.0027 0.0014 0.0216 -0.0059 -0.0363  
Z -0.0032 -0.0011 0.0218 -0.0013 -0.0351 -0.0120

AT. 50 C X 0.0586 -0.0216 -0.0009 0.0028 0.0300 -0.0255  
Y 0.0687 0.0027 0.0014 0.0216 -0.0059 0.0363  
Z 0.0032 -0.0011 0.0218 -0.0013 -0.0351 0.0120

AT. 51 C X -0.0464 -0.0216 -0.0009 0.0028 0.0313 0.0363  
Y -0.0666 0.0027 0.0014 0.0216 -0.0077 -0.0261  
Z -0.0168 -0.0011 0.0218 -0.0013 -0.0343 -0.0329

AT. 52 C X 0.0464 -0.0216 -0.0009 0.0028 0.0313 -0.0363  
Y 0.0666 0.0027 0.0014 0.0216 -0.0077 0.0261

Z 0.0168 -0.0011 0.0218 -0.0013 -0.0343 0.0329  
AT. 53 H X -0.0430 -0.0216 -0.0009 0.0028 0.0293 0.0433  
Y -0.0668 0.0027 0.0014 0.0216 -0.0099 -0.0200  
Z -0.0238 -0.0011 0.0218 -0.0013 -0.0329 -0.0386  
AT. 54 H X 0.0430 -0.0216 -0.0009 0.0028 0.0293 -0.0433  
Y 0.0668 0.0027 0.0014 0.0216 -0.0099 0.0200  
Z 0.0238 -0.0011 0.0218 -0.0013 -0.0329 0.0386  
AT. 55 H X -0.0505 -0.0217 -0.0009 0.0028 0.0327 0.0262  
Y -0.0702 0.0027 0.0014 0.0216 -0.0086 -0.0314  
Z -0.0237 -0.0011 0.0218 -0.0013 -0.0340 -0.0456  
AT. 56 H X 0.0505 -0.0217 -0.0009 0.0028 0.0327 -0.0262  
Y 0.0702 0.0027 0.0014 0.0216 -0.0086 0.0314  
Z 0.0237 -0.0011 0.0218 -0.0013 -0.0340 0.0456  
AT. 57 C X -0.0467 -0.0217 -0.0009 0.0028 0.0326 0.0258  
Y -0.0527 0.0027 0.0014 0.0216 -0.0012 -0.0359  
Z 0.0086 -0.0011 0.0218 -0.0013 -0.0360 0.0019  
AT. 58 C X 0.0467 -0.0217 -0.0009 0.0028 0.0326 -0.0258  
Y 0.0527 0.0027 0.0014 0.0216 -0.0012 0.0359  
Z -0.0086 -0.0011 0.0218 -0.0013 -0.0360 -0.0019  
AT. 59 H X -0.0468 -0.0217 -0.0009 0.0028 0.0317 0.0188  
Y -0.0532 0.0027 0.0014 0.0216 -0.0014 -0.0425  
Z 0.0079 -0.0011 0.0218 -0.0013 -0.0368 -0.0127  
AT. 60 H X 0.0468 -0.0217 -0.0009 0.0028 0.0317 -0.0188  
Y 0.0532 0.0027 0.0014 0.0216 -0.0014 0.0425  
Z -0.0079 -0.0011 0.0218 -0.0013 -0.0368 0.0127  
AT. 61 H X -0.0439 -0.0217 -0.0009 0.0028 0.0337 0.0372  
Y -0.0510 0.0027 0.0014 0.0216 -0.0008 -0.0262  
Z 0.0101 -0.0011 0.0218 -0.0013 -0.0355 0.0058  
AT. 62 H X 0.0439 -0.0217 -0.0009 0.0028 0.0337 -0.0372  
Y 0.0510 0.0027 0.0014 0.0216 -0.0008 0.0262  
Z -0.0101 -0.0011 0.0218 -0.0013 -0.0355 -0.0058  
AT. 63 H X -0.0507 -0.0217 -0.0009 0.0028 0.0320 0.0168

Y -0.0502 0.0027 0.0014 0.0216 -0.0023 -0.0439  
Z 0.0103 -0.0011 0.0218 -0.0013 -0.0344 0.0173  
AT. 64 H X 0.0507 -0.0217 -0.0009 0.0028 0.0320 -0.0168  
Y 0.0502 0.0027 0.0014 0.0216 -0.0023 0.0439  
Z -0.0103 -0.0011 0.0218 -0.0013 -0.0344 -0.0173  
AT. 65 C X -0.0701 -0.0217 -0.0009 0.0028 0.0297 0.0116  
Y -0.0804 0.0027 0.0014 0.0216 -0.0087 -0.0465  
Z -0.0069 -0.0011 0.0218 -0.0013 -0.0339 -0.0179  
AT. 66 C X 0.0701 -0.0217 -0.0009 0.0028 0.0297 -0.0116  
Y 0.0804 0.0027 0.0014 0.0216 -0.0087 0.0465  
Z 0.0069 -0.0011 0.0218 -0.0013 -0.0339 0.0179  
AT. 67 H X -0.0772 -0.0217 -0.0009 0.0028 0.0282 0.0022  
Y -0.0852 0.0027 0.0014 0.0216 -0.0074 -0.0503  
Z 0.0038 -0.0011 0.0218 -0.0013 -0.0338 -0.0062  
AT. 68 H X 0.0772 -0.0217 -0.0009 0.0028 0.0282 -0.0022  
Y 0.0852 0.0027 0.0014 0.0216 -0.0074 0.0503  
Z -0.0038 -0.0011 0.0218 -0.0013 -0.0338 0.0062  
AT. 69 H X -0.0680 -0.0216 -0.0009 0.0028 0.0274 0.0159  
Y -0.0791 0.0027 0.0014 0.0216 -0.0114 -0.0448  
Z -0.0101 -0.0011 0.0218 -0.0013 -0.0333 -0.0243  
AT. 70 H X 0.0680 -0.0216 -0.0009 0.0028 0.0274 -0.0159  
Y 0.0791 0.0027 0.0014 0.0216 -0.0114 0.0448  
Z 0.0101 -0.0011 0.0218 -0.0013 -0.0333 0.0243  
AT. 71 H X -0.0726 -0.0217 -0.0009 0.0028 0.0321 0.0056  
Y -0.0877 0.0027 0.0014 0.0216 -0.0102 -0.0515  
Z -0.0181 -0.0011 0.0218 -0.0013 -0.0339 -0.0290  
AT. 72 H X 0.0726 -0.0217 -0.0009 0.0028 0.0321 -0.0056  
Y 0.0877 0.0027 0.0014 0.0216 -0.0102 0.0515  
Z 0.0181 -0.0011 0.0218 -0.0013 -0.0339 0.0290  
AT. 73 C X -0.0597 -0.0217 -0.0009 0.0028 0.0318 0.0180  
Y -0.0677 0.0027 0.0014 0.0216 -0.0038 -0.0426  
Z 0.0009 -0.0011 0.0218 -0.0013 -0.0358 -0.0070

AT. 74 C X 0.0597 -0.0217 -0.0009 0.0028 0.0318 -0.0180  
Y 0.0677 0.0027 0.0014 0.0216 -0.0038 0.0426  
Z -0.0009 -0.0011 0.0218 -0.0013 -0.0358 0.0070

AT. 75 H X -0.0614 -0.0217 -0.0009 0.0028 0.0334 0.0104  
Y -0.0732 0.0027 0.0014 0.0216 -0.0055 -0.0489  
Z -0.0074 -0.0011 0.0218 -0.0013 -0.0367 -0.0204

AT. 76 H X 0.0614 -0.0217 -0.0009 0.0028 0.0334 -0.0104  
Y 0.0732 0.0027 0.0014 0.0216 -0.0055 0.0489  
Z 0.0074 -0.0011 0.0218 -0.0013 -0.0367 0.0204

AT. 77 H X -0.0679 -0.0217 -0.0009 0.0028 0.0301 0.0093  
Y -0.0693 0.0027 0.0014 0.0216 -0.0038 -0.0489  
Z 0.0106 -0.0011 0.0218 -0.0013 -0.0340 0.0072

AT. 78 H X 0.0679 -0.0217 -0.0009 0.0028 0.0301 -0.0093  
Y 0.0693 0.0027 0.0014 0.0216 -0.0038 0.0489  
Z -0.0106 -0.0011 0.0218 -0.0013 -0.0340 -0.0072

AT. 79 I X -0.0318 -0.0216 -0.0009 0.0028 -0.0218 0.0177  
Y -0.0124 0.0027 0.0014 0.0216 0.0364 -0.0128  
Z -0.0104 -0.0011 0.0218 -0.0013 0.0261 -0.0221

AT. 80 I X 0.0318 -0.0216 -0.0009 0.0028 -0.0218 -0.0177  
Y 0.0124 0.0027 0.0014 0.0216 0.0364 0.0128  
Z 0.0104 -0.0011 0.0218 -0.0013 0.0261 0.0221

AT. 81 I X -0.0491 -0.0216 -0.0009 0.0028 -0.0291 0.0295  
Y -0.0444 0.0027 0.0014 0.0216 -0.0069 -0.0329  
Z 0.0248 -0.0011 0.0218 -0.0013 0.0612 0.0218

AT. 82 I X 0.0491 -0.0216 -0.0009 0.0028 -0.0291 -0.0295  
Y 0.0444 0.0027 0.0014 0.0216 -0.0069 0.0329  
Z -0.0248 -0.0011 0.0218 -0.0013 0.0612 -0.0218

AT. 83 O X -0.0365 -0.0216 -0.0009 0.0028 -0.0262 0.0154  
Y -0.0041 0.0027 0.0014 0.0216 0.0243 -0.0134  
Z -0.0190 -0.0011 0.0218 -0.0013 0.0346 0.0053

AT. 84 O X 0.0365 -0.0216 -0.0009 0.0028 -0.0262 -0.0154  
Y 0.0041 0.0027 0.0014 0.0216 0.0243 0.0134

Z 0.0190 -0.0011 0.0218 -0.0013 0.0346 -0.0053  
AT. 85 O X -0.0450 -0.0216 -0.0009 0.0028 -0.0219 0.0257  
Y -0.0473 0.0027 0.0014 0.0216 -0.0018 -0.0074  
Z -0.0090 -0.0011 0.0218 -0.0013 0.0456 0.0161  
AT. 86 O X 0.0450 -0.0216 -0.0009 0.0028 -0.0219 -0.0257  
Y 0.0473 0.0027 0.0014 0.0216 -0.0018 0.0074  
Z 0.0090 -0.0011 0.0218 -0.0013 0.0456 -0.0161  
AT. 87 N X -0.0346 -0.0216 -0.0009 0.0028 -0.0199 0.0337  
Y -0.0470 0.0027 0.0014 0.0216 0.0027 -0.0221  
Z -0.0195 -0.0011 0.0218 -0.0013 0.0313 -0.0044  
AT. 88 N X 0.0346 -0.0216 -0.0009 0.0028 -0.0199 -0.0337  
Y 0.0470 0.0027 0.0014 0.0216 0.0027 0.0221  
Z 0.0195 -0.0011 0.0218 -0.0013 0.0313 0.0044  
AT. 89 N X -0.0501 -0.0216 -0.0009 0.0028 -0.0220 0.0398  
Y -0.0515 0.0027 0.0014 0.0216 -0.0022 -0.0235  
Z -0.0169 -0.0011 0.0218 -0.0013 0.0460 0.0103  
AT. 90 N X 0.0501 -0.0216 -0.0009 0.0028 -0.0220 -0.0398  
Y 0.0515 0.0027 0.0014 0.0216 -0.0022 0.0235  
Z 0.0169 -0.0011 0.0218 -0.0013 0.0460 -0.0103  
AT. 91 C X -0.0354 -0.0216 -0.0009 0.0028 -0.0242 0.0217  
Y -0.0207 0.0027 0.0014 0.0216 0.0179 -0.0175  
Z -0.0160 -0.0011 0.0218 -0.0013 0.0338 -0.0035  
AT. 92 C X 0.0354 -0.0216 -0.0009 0.0028 -0.0242 -0.0217  
Y 0.0207 0.0027 0.0014 0.0216 0.0179 0.0175  
Z 0.0160 -0.0011 0.0218 -0.0013 0.0338 0.0035  
AT. 93 C X -0.0339 -0.0216 -0.0009 0.0028 -0.0274 0.0159  
Y -0.0142 0.0027 0.0014 0.0216 0.0283 -0.0163  
Z -0.0082 -0.0011 0.0218 -0.0013 0.0354 -0.0131  
AT. 94 C X 0.0339 -0.0216 -0.0009 0.0028 -0.0274 -0.0159  
Y 0.0142 0.0027 0.0014 0.0216 0.0283 0.0163  
Z 0.0082 -0.0011 0.0218 -0.0013 0.0354 0.0131  
AT. 95 H X -0.0371 -0.0216 -0.0009 0.0028 -0.0311 0.0171

Y -0.0165 0.0027 0.0014 0.0216 0.0275 -0.0149  
Z -0.0006 -0.0011 0.0218 -0.0013 0.0412 -0.0168  
AT. 96 H X 0.0371 -0.0216 -0.0009 0.0028 -0.0311 -0.0171  
Y 0.0165 0.0027 0.0014 0.0216 0.0275 0.0149  
Z 0.0006 -0.0011 0.0218 -0.0013 0.0412 0.0168  
AT. 97 H X -0.0276 -0.0216 -0.0009 0.0028 -0.0298 0.0070  
Y -0.0071 0.0027 0.0014 0.0216 0.0345 -0.0181  
Z -0.0082 -0.0011 0.0218 -0.0013 0.0372 -0.0110  
AT. 98 H X 0.0276 -0.0216 -0.0009 0.0028 -0.0298 -0.0070  
Y 0.0071 0.0027 0.0014 0.0216 0.0345 0.0181  
Z 0.0082 -0.0011 0.0218 -0.0013 0.0372 0.0110  
AT. 99 C X -0.0485 -0.0216 -0.0009 0.0028 -0.0227 0.0324  
Y -0.0450 0.0027 0.0014 0.0216 0.0008 -0.0183  
Z -0.0128 -0.0011 0.0218 -0.0013 0.0471 0.0142  
AT. 100 C X 0.0485 -0.0216 -0.0009 0.0028 -0.0227 -0.0324  
Y 0.0450 0.0027 0.0014 0.0216 0.0008 0.0183  
Z 0.0128 -0.0011 0.0218 -0.0013 0.0471 -0.0142  
AT. 101 C X -0.0502 -0.0216 -0.0009 0.0028 -0.0250 0.0322  
Y -0.0300 0.0027 0.0014 0.0216 0.0051 -0.0241  
Z -0.0104 -0.0011 0.0218 -0.0013 0.0493 0.0146  
AT. 102 C X 0.0502 -0.0216 -0.0009 0.0028 -0.0250 -0.0322  
Y 0.0300 0.0027 0.0014 0.0216 0.0051 0.0241  
Z 0.0104 -0.0011 0.0218 -0.0013 0.0493 -0.0146  
AT. 103 H X -0.0496 -0.0216 -0.0009 0.0028 -0.0219 0.0382  
Y -0.0296 0.0027 0.0014 0.0216 0.0040 -0.0263  
Z -0.0271 -0.0011 0.0218 -0.0013 0.0421 0.0123  
AT. 104 H X 0.0496 -0.0216 -0.0009 0.0028 -0.0219 -0.0382  
Y 0.0296 0.0027 0.0014 0.0216 0.0040 0.0263  
Z 0.0271 -0.0011 0.0218 -0.0013 0.0421 -0.0123  
AT. 105 H X -0.0540 -0.0216 -0.0009 0.0028 -0.0270 0.0295  
Y -0.0094 0.0027 0.0014 0.0216 0.0136 -0.0197  
Z -0.0041 -0.0011 0.0218 -0.0013 0.0516 0.0157

AT.106 H X 0.0540 -0.0216 -0.0009 0.0028 -0.0270 -0.0295  
Y 0.0094 0.0027 0.0014 0.0216 0.0136 0.0197  
Z 0.0041 -0.0011 0.0218 -0.0013 0.0516 -0.0157

AT.107 C X -0.0352 -0.0216 -0.0009 0.0028 -0.0179 0.0397  
Y -0.0546 0.0027 0.0014 0.0216 -0.0032 -0.0253  
Z -0.0253 -0.0011 0.0218 -0.0013 0.0314 0.0045

AT.108 C X 0.0352 -0.0216 -0.0009 0.0028 -0.0179 -0.0397  
Y 0.0546 0.0027 0.0014 0.0216 -0.0032 0.0253  
Z 0.0253 -0.0011 0.0218 -0.0013 0.0314 -0.0045

AT.109 H X -0.0321 -0.0216 -0.0009 0.0028 -0.0154 0.0452  
Y -0.0549 0.0027 0.0014 0.0216 -0.0062 -0.0260  
Z -0.0275 -0.0011 0.0218 -0.0013 0.0252 0.0009

AT.110 H X 0.0321 -0.0216 -0.0009 0.0028 -0.0154 -0.0452  
Y 0.0549 0.0027 0.0014 0.0216 -0.0062 0.0260  
Z 0.0275 -0.0011 0.0218 -0.0013 0.0252 -0.0009

AT.111 H X -0.0313 -0.0216 -0.0009 0.0028 -0.0196 0.0345  
Y -0.0570 0.0027 0.0014 0.0216 -0.0002 -0.0249  
Z -0.0287 -0.0011 0.0218 -0.0013 0.0326 0.0096

AT.112 H X 0.0313 -0.0216 -0.0009 0.0028 -0.0196 -0.0345  
Y 0.0570 0.0027 0.0014 0.0216 -0.0002 0.0249  
Z 0.0287 -0.0011 0.0218 -0.0013 0.0326 -0.0096

AT.113 C X -0.0457 -0.0216 -0.0009 0.0028 -0.0174 0.0470  
Y -0.0586 0.0027 0.0014 0.0216 -0.0093 -0.0276  
Z -0.0255 -0.0011 0.0218 -0.0013 0.0382 0.0094

AT.114 C X 0.0457 -0.0216 -0.0009 0.0028 -0.0174 -0.0470  
Y 0.0586 0.0027 0.0014 0.0216 -0.0093 0.0276  
Z 0.0255 -0.0011 0.0218 -0.0013 0.0382 -0.0094

AT.115 C X -0.0502 -0.0216 -0.0009 0.0028 -0.0203 0.0432  
Y -0.0606 0.0027 0.0014 0.0216 -0.0059 -0.0266  
Z -0.0256 -0.0011 0.0218 -0.0013 0.0454 0.0142

AT.116 C X 0.0502 -0.0216 -0.0009 0.0028 -0.0203 -0.0432  
Y 0.0606 0.0027 0.0014 0.0216 -0.0059 0.0266



Z 0.0256 -0.0011 0.0218 -0.0013 0.0454 -0.0142  
AT. 117 H X -0.0420 -0.0216 -0.0009 0.0028 -0.0217 0.0398  
Y -0.0681 0.0027 0.0014 0.0216 -0.0035 -0.0250  
Z -0.0325 -0.0011 0.0218 -0.0013 0.0461 0.0170  
AT. 118 H X 0.0420 -0.0216 -0.0009 0.0028 -0.0217 -0.0398  
Y 0.0681 0.0027 0.0014 0.0216 -0.0035 0.0250  
Z 0.0325 -0.0011 0.0218 -0.0013 0.0461 -0.0170  
AT. 119 H X -0.0631 -0.0216 -0.0009 0.0028 -0.0199 0.0464  
Y -0.0642 0.0027 0.0014 0.0216 -0.0093 -0.0280  
Z -0.0294 -0.0011 0.0218 -0.0013 0.0492 0.0172  
AT. 120 H X 0.0631 -0.0216 -0.0009 0.0028 -0.0199 -0.0464  
Y 0.0642 0.0027 0.0014 0.0216 -0.0093 0.0280  
Z 0.0294 -0.0011 0.0218 -0.0013 0.0492 -0.0172  
AT. 121 C X -0.0509 -0.0216 -0.0009 0.0028 -0.0215 0.0437  
Y -0.0504 0.0027 0.0014 0.0216 -0.0048 -0.0248  
Z -0.0156 -0.0011 0.0218 -0.0013 0.0455 0.0050  
AT. 122 C X 0.0509 -0.0216 -0.0009 0.0028 -0.0215 -0.0437  
Y 0.0504 0.0027 0.0014 0.0216 -0.0048 0.0248  
Z 0.0156 -0.0011 0.0218 -0.0013 0.0455 -0.0050  
AT. 123 H X -0.0525 -0.0216 -0.0009 0.0028 -0.0234 0.0468  
Y -0.0486 0.0027 0.0014 0.0216 -0.0092 -0.0284  
Z -0.0179 -0.0011 0.0218 -0.0013 0.0499 0.0092  
AT. 124 H X 0.0525 -0.0216 -0.0009 0.0028 -0.0234 -0.0468  
Y 0.0486 0.0027 0.0014 0.0216 -0.0092 0.0284  
Z 0.0179 -0.0011 0.0218 -0.0013 0.0499 -0.0092  
AT. 125 H X -0.0513 -0.0216 -0.0009 0.0028 -0.0228 0.0397  
Y -0.0495 0.0027 0.0014 0.0216 0.0020 -0.0206  
Z -0.0154 -0.0011 0.0218 -0.0013 0.0476 0.0020  
AT. 126 H X 0.0513 -0.0216 -0.0009 0.0028 -0.0228 -0.0397  
Y 0.0495 0.0027 0.0014 0.0216 0.0020 0.0206  
Z 0.0154 -0.0011 0.0218 -0.0013 0.0476 -0.0020  
AT. 127 C X -0.0481 -0.0216 -0.0009 0.0028 -0.0181 0.0481

Y -0.0489 0.0027 0.0014 0.0216 -0.0078 -0.0283  
Z -0.0149 -0.0011 0.0218 -0.0013 0.0380 -0.0042  
AT. 128 C X 0.0481 -0.0216 -0.0009 0.0028 -0.0181 -0.0481  
Y 0.0489 0.0027 0.0014 0.0216 -0.0078 0.0283  
Z 0.0149 -0.0011 0.0218 -0.0013 0.0380 0.0042  
AT. 129 C X -0.0392 -0.0216 -0.0009 0.0028 -0.0184 0.0407  
Y -0.0463 0.0027 0.0014 0.0216 -0.0020 -0.0236  
Z -0.0143 -0.0011 0.0218 -0.0013 0.0314 -0.0123  
AT. 130 C X 0.0392 -0.0216 -0.0009 0.0028 -0.0184 -0.0407  
Y 0.0463 0.0027 0.0014 0.0216 -0.0020 0.0236  
Z 0.0143 -0.0011 0.0218 -0.0013 0.0314 0.0123  
AT. 131 H X -0.0375 -0.0216 -0.0009 0.0028 -0.0197 0.0351  
Y -0.0426 0.0027 0.0014 0.0216 0.0026 -0.0197  
Z -0.0100 -0.0011 0.0218 -0.0013 0.0318 -0.0187  
AT. 132 H X 0.0375 -0.0216 -0.0009 0.0028 -0.0197 -0.0351  
Y 0.0426 0.0027 0.0014 0.0216 0.0026 0.0197  
Z 0.0100 -0.0011 0.0218 -0.0013 0.0318 0.0187  
AT. 133 H X -0.0400 -0.0216 -0.0009 0.0028 -0.0167 0.0466  
Y -0.0467 0.0027 0.0014 0.0216 -0.0053 -0.0255  
Z -0.0155 -0.0011 0.0218 -0.0013 0.0254 -0.0185  
AT. 134 H X 0.0400 -0.0216 -0.0009 0.0028 -0.0167 -0.0466  
Y 0.0467 0.0027 0.0014 0.0216 -0.0053 0.0255  
Z 0.0155 -0.0011 0.0218 -0.0013 0.0254 0.0185  
AT. 135 C X -0.0458 -0.0217 -0.0009 0.0028 -0.0144 0.0522  
Y -0.0692 0.0027 0.0014 0.0216 -0.0156 -0.0278  
Z -0.0318 -0.0011 0.0218 -0.0013 0.0386 0.0181  
AT. 136 C X 0.0458 -0.0217 -0.0009 0.0028 -0.0144 -0.0522  
Y 0.0692 0.0027 0.0014 0.0216 -0.0156 0.0278  
Z 0.0318 -0.0011 0.0218 -0.0013 0.0386 -0.0181  
AT. 137 H X -0.0435 -0.0217 -0.0009 0.0028 -0.0109 0.0551  
Y -0.0739 0.0027 0.0014 0.0216 -0.0185 -0.0283  
Z -0.0410 -0.0011 0.0218 -0.0013 0.0324 0.0156

AT. 138 H X 0.0435 -0.0217 -0.0009 0.0028 -0.0109 -0.0551  
Y 0.0739 0.0027 0.0014 0.0216 -0.0185 0.0283  
Z 0.0410 -0.0011 0.0218 -0.0013 0.0324 -0.0156

AT. 139 H X -0.0442 -0.0216 -0.0009 0.0028 -0.0166 0.0467  
Y -0.0661 0.0027 0.0014 0.0216 -0.0126 -0.0259  
Z -0.0345 -0.0011 0.0218 -0.0013 0.0408 0.0244

AT. 140 H X 0.0442 -0.0216 -0.0009 0.0028 -0.0166 -0.0467  
Y 0.0661 0.0027 0.0014 0.0216 -0.0126 0.0259  
Z 0.0345 -0.0011 0.0218 -0.0013 0.0408 -0.0244

AT. 141 H X -0.0500 -0.0217 -0.0009 0.0028 -0.0135 0.0592  
Y -0.0783 0.0027 0.0014 0.0216 -0.0206 -0.0281  
Z -0.0246 -0.0011 0.0218 -0.0013 0.0442 0.0211

AT. 142 H X 0.0500 -0.0217 -0.0009 0.0028 -0.0135 -0.0592  
Y 0.0783 0.0027 0.0014 0.0216 -0.0206 0.0281  
Z 0.0246 -0.0011 0.0218 -0.0013 0.0442 -0.0211

AT. 143 C X -0.0506 -0.0217 -0.0009 0.0028 -0.0175 0.0547  
Y -0.0442 0.0027 0.0014 0.0216 -0.0105 -0.0343  
Z -0.0129 -0.0011 0.0218 -0.0013 0.0377 -0.0108

AT. 144 C X 0.0506 -0.0217 -0.0009 0.0028 -0.0175 -0.0547  
Y 0.0442 0.0027 0.0014 0.0216 -0.0105 0.0343  
Z 0.0129 -0.0011 0.0218 -0.0013 0.0377 0.0108

AT. 145 H X -0.0536 -0.0217 -0.0009 0.0028 -0.0187 0.0621  
Y -0.0442 0.0027 0.0014 0.0216 -0.0150 -0.0343  
Z -0.0136 -0.0011 0.0218 -0.0013 0.0424 -0.0091

AT. 146 H X 0.0536 -0.0217 -0.0009 0.0028 -0.0187 -0.0621  
Y 0.0442 0.0027 0.0014 0.0216 -0.0150 0.0343  
Z 0.0136 -0.0011 0.0218 -0.0013 0.0424 0.0091

AT. 147 H X -0.0518 -0.0216 -0.0009 0.0028 -0.0188 0.0521  
Y -0.0411 0.0027 0.0014 0.0216 -0.0046 -0.0369  
Z -0.0127 -0.0011 0.0218 -0.0013 0.0393 -0.0162

AT. 148 H X 0.0518 -0.0216 -0.0009 0.0028 -0.0188 -0.0521  
Y 0.0411 0.0027 0.0014 0.0216 -0.0046 0.0369

Z 0.0127 -0.0011 0.0218 -0.0013 0.0393 0.0162  
AT. 149 H X -0.0464 -0.0217 -0.0009 0.0028 -0.0149 0.0538  
Y -0.0427 0.0027 0.0014 0.0216 -0.0133 -0.0362  
Z -0.0127 -0.0011 0.0218 -0.0013 0.0315 -0.0141  
AT. 150 H X 0.0464 -0.0217 -0.0009 0.0028 -0.0149 -0.0538  
Y 0.0427 0.0027 0.0014 0.0216 -0.0133 0.0362  
Z 0.0127 -0.0011 0.0218 -0.0013 0.0315 0.0141  
AT. 151 C X -0.0504 -0.0217 -0.0009 0.0028 -0.0160 0.0535  
Y -0.0549 0.0027 0.0014 0.0216 -0.0136 -0.0309  
Z -0.0206 -0.0011 0.0218 -0.0013 0.0375 0.0023  
AT. 152 C X 0.0504 -0.0217 -0.0009 0.0028 -0.0160 -0.0535  
Y 0.0549 0.0027 0.0014 0.0216 -0.0136 0.0309  
Z 0.0206 -0.0011 0.0218 -0.0013 0.0375 -0.0023  
AT. 153 H X -0.0495 -0.0217 -0.0009 0.0028 -0.0143 0.0562  
Y -0.0545 0.0027 0.0014 0.0216 -0.0170 -0.0330  
Z -0.0205 -0.0011 0.0218 -0.0013 0.0313 -0.0028  
AT. 154 H X 0.0495 -0.0217 -0.0009 0.0028 -0.0143 -0.0562  
Y 0.0545 0.0027 0.0014 0.0216 -0.0170 0.0330  
Z 0.0205 -0.0011 0.0218 -0.0013 0.0313 0.0028  
AT. 155 H X -0.0574 -0.0217 -0.0009 0.0028 -0.0154 0.0590  
Y -0.0576 0.0027 0.0014 0.0216 -0.0179 -0.0331  
Z -0.0205 -0.0011 0.0218 -0.0013 0.0424 0.0064  
AT. 156 H X 0.0574 -0.0217 -0.0009 0.0028 -0.0154 -0.0590  
Y 0.0576 0.0027 0.0014 0.0216 -0.0179 0.0331  
Z 0.0205 -0.0011 0.0218 -0.0013 0.0424 -0.0064  
AT. 157 O X -0.0424 -0.0216 -0.0009 0.0028 0.0102 0.0418  
Y -0.0579 0.0027 0.0014 0.0216 -0.0143 -0.0226  
Z -0.0417 -0.0011 0.0218 -0.0013 -0.0356 -0.0122  
AT. 158 O X 0.0424 -0.0216 -0.0009 0.0028 0.0102 -0.0418  
Y 0.0579 0.0027 0.0014 0.0216 -0.0143 0.0226  
Z 0.0417 -0.0011 0.0218 -0.0013 -0.0356 0.0122  
AT. 159 O X -0.0306 -0.0216 -0.0009 0.0028 0.0113 0.0290

Y -0.0437 0.0027 0.0014 0.0216 -0.0230 -0.0112  
Z -0.0187 -0.0011 0.0218 -0.0013 -0.0351 -0.0339  
AT.160 O X 0.0306 -0.0216 -0.0009 0.0028 0.0113 -0.0290  
Y 0.0437 0.0027 0.0014 0.0216 -0.0230 0.0112  
Z 0.0187 -0.0011 0.0218 -0.0013 -0.0351 0.0339  
AT.161 H X -0.0430 -0.0216 -0.0009 0.0028 0.0153 0.0388  
Y -0.0638 0.0027 0.0014 0.0216 -0.0131 -0.0220  
Z -0.0192 -0.0011 0.0218 -0.0013 -0.0387 -0.0154  
AT.162 H X 0.0430 -0.0216 -0.0009 0.0028 0.0153 -0.0388  
Y 0.0638 0.0027 0.0014 0.0216 -0.0131 0.0220  
Z 0.0192 -0.0011 0.0218 -0.0013 -0.0387 0.0154  
AT.163 H X -0.0122 -0.0216 -0.0009 0.0028 0.0134 0.0098  
Y -0.0066 0.0027 0.0014 0.0216 -0.0223 0.0032  
Z -0.0160 -0.0011 0.0218 -0.0013 -0.0360 -0.0227  
AT.164 H X 0.0122 -0.0216 -0.0009 0.0028 0.0134 -0.0098  
Y 0.0066 0.0027 0.0014 0.0216 -0.0223 -0.0032  
Z 0.0160 -0.0011 0.0218 -0.0013 -0.0360 0.0227  
AT.165 O X -0.0363 -0.0216 -0.0009 0.0028 -0.0254 0.0220  
Y -0.0034 0.0027 0.0014 0.0216 0.0248 -0.0099  
Z -0.0122 -0.0011 0.0218 -0.0013 0.0425 -0.0328  
AT.166 O X 0.0363 -0.0216 -0.0009 0.0028 -0.0254 -0.0220  
Y 0.0034 0.0027 0.0014 0.0216 0.0248 0.0099  
Z 0.0122 -0.0011 0.0218 -0.0013 0.0425 0.0328  
AT.167 H X -0.0426 -0.0216 -0.0009 0.0028 -0.0243 0.0207  
Y -0.0039 0.0027 0.0014 0.0216 0.0243 -0.0118  
Z 0.0075 -0.0011 0.0218 -0.0013 0.0403 -0.0261  
AT.168 H X 0.0426 -0.0216 -0.0009 0.0028 -0.0243 -0.0207  
Y 0.0039 0.0027 0.0014 0.0216 0.0243 0.0118  
Z -0.0075 -0.0011 0.0218 -0.0013 0.0403 0.0261  
AT.169 O X -0.0059 -0.0216 -0.0009 0.0028 -0.0190 0.0227  
Y 0.0225 0.0027 0.0014 0.0216 0.0031 0.0087  
Z -0.0121 -0.0011 0.0218 -0.0013 0.0480 -0.0362

AT.170 O X 0.0059 -0.0216 -0.0009 0.0028 -0.0190 -0.0227

Y -0.0225 0.0027 0.0014 0.0216 0.0031 -0.0087

Z 0.0121 -0.0011 0.0218 -0.0013 0.0480 0.0362

AT.171 H X 0.0162 -0.0216 -0.0009 0.0028 -0.0186 0.0031

Y 0.0370 0.0027 0.0014 0.0216 -0.0026 0.0052

Z -0.0044 -0.0011 0.0218 -0.0013 0.0379 -0.0278

AT.172 H X -0.0162 -0.0216 -0.0009 0.0028 -0.0186 -0.0031

Y -0.0370 0.0027 0.0014 0.0216 -0.0026 -0.0052

Z 0.0044 -0.0011 0.0218 -0.0013 0.0379 0.0278

FREQ(CM\*\*-1) 24.74 25.42 28.84 31.05 35.21 36.82

AT. 1 I X -0.0479 -0.0276 0.0067 0.0126 -0.0054 0.0243

Y -0.0099 -0.0048 0.0120 0.0055 -0.0117 0.0046

Z -0.0193 -0.0102 -0.0068 -0.0217 0.0409 -0.0044

AT. 2 I X -0.0479 0.0276 0.0067 -0.0126 -0.0054 -0.0243

Y -0.0099 0.0048 0.0120 -0.0055 -0.0117 -0.0046

Z -0.0193 0.0102 -0.0068 0.0217 0.0409 0.0044

AT. 3 I X -0.0351 -0.0159 -0.0030 0.0172 -0.0150 -0.0022

Y 0.0093 -0.0212 0.0206 0.0169 0.0326 0.0101

Z -0.0373 0.0430 -0.0004 0.0749 -0.0619 0.0081

AT. 4 I X -0.0351 0.0159 -0.0030 -0.0172 -0.0150 0.0022

Y 0.0093 0.0212 0.0206 -0.0169 0.0326 -0.0101

Z -0.0373 -0.0430 -0.0004 -0.0749 -0.0619 -0.0081

AT. 5 O X -0.0574 -0.0335 0.0092 0.0134 -0.0205 0.0320

Y -0.0089 -0.0112 0.0210 0.0197 0.0081 0.0143

Z -0.0114 0.0105 -0.0098 -0.0149 0.0211 -0.0008

AT. 6 O X -0.0574 0.0335 0.0092 -0.0134 -0.0205 -0.0320

Y -0.0089 0.0112 0.0210 -0.0197 0.0081 -0.0143

Z -0.0114 -0.0105 -0.0098 0.0149 0.0211 0.0008

AT. 7 O X -0.0343 -0.0082 0.0045 0.0148 -0.0103 -0.0054

Y 0.0260 0.0046 0.0306 0.0145 -0.0098 0.0039

Z -0.0161 0.0196 0.0088 0.0185 0.0266 0.0046  
AT. 8 O X -0.0343 0.0082 0.0045 -0.0148 -0.0103 0.0054  
Y 0.0260 -0.0046 0.0306 -0.0145 -0.0098 -0.0039  
Z -0.0161 -0.0196 0.0088 -0.0185 0.0266 -0.0046  
AT. 9 N X -0.0408 -0.0382 -0.0026 -0.0006 0.0257 0.0124  
Y 0.0078 -0.0222 -0.0049 0.0044 0.0094 0.0043  
Z -0.0074 0.0107 -0.0109 -0.0171 0.0358 -0.0062  
AT. 10 N X -0.0408 0.0382 -0.0026 0.0006 0.0257 -0.0124  
Y 0.0078 0.0222 -0.0049 -0.0044 0.0094 -0.0043  
Z -0.0074 -0.0107 -0.0109 0.0171 0.0358 0.0062  
AT. 11 N X -0.0372 -0.0284 -0.0098 0.0028 0.0257 -0.0008  
Y 0.0103 -0.0242 0.0025 0.0007 0.0074 0.0116  
Z -0.0287 0.0037 -0.0088 0.0115 0.0231 0.0090  
AT. 12 N X -0.0372 0.0284 -0.0098 -0.0028 0.0257 0.0008  
Y 0.0103 0.0242 0.0025 -0.0007 0.0074 -0.0116  
Z -0.0287 -0.0037 -0.0088 -0.0115 0.0231 -0.0090  
AT. 13 C X -0.0501 -0.0337 0.0048 0.0081 -0.0039 0.0230  
Y -0.0011 -0.0141 0.0112 0.0128 0.0063 0.0086  
Z -0.0091 0.0119 -0.0082 -0.0164 0.0376 -0.0061  
AT. 14 C X -0.0501 0.0337 0.0048 -0.0081 -0.0039 -0.0230  
Y -0.0011 0.0141 0.0112 -0.0128 0.0063 -0.0086  
Z -0.0091 -0.0119 -0.0082 0.0164 0.0376 0.0061  
AT. 15 C X -0.0523 -0.0299 0.0049 0.0082 -0.0164 0.0234  
Y -0.0030 -0.0087 0.0139 0.0117 0.0030 0.0061  
Z -0.0085 0.0149 -0.0026 -0.0171 0.0571 -0.0122  
AT. 16 C X -0.0523 0.0299 0.0049 -0.0082 -0.0164 -0.0234  
Y -0.0030 0.0087 0.0139 -0.0117 0.0030 -0.0061  
Z -0.0085 -0.0149 -0.0026 0.0171 0.0571 0.0122  
AT. 17 H X -0.0573 -0.0348 0.0041 0.0036 -0.0244 0.0235  
Y -0.0056 -0.0155 0.0094 0.0102 -0.0099 0.0096  
Z -0.0071 0.0215 0.0029 -0.0167 0.0700 -0.0164  
AT. 18 H X -0.0573 0.0348 0.0041 -0.0036 -0.0244 -0.0235

Y -0.0056 0.0155 0.0094 -0.0102 -0.0099 -0.0096  
Z -0.0071 -0.0215 0.0029 0.0167 0.0700 0.0164  
AT. 19 H X -0.0515 -0.0240 0.0041 0.0105 -0.0246 0.0249  
Y 0.0006 0.0010 0.0204 0.0133 0.0206 0.0009  
Z -0.0071 0.0207 -0.0004 -0.0158 0.0618 -0.0139  
AT. 20 H X -0.0515 0.0240 0.0041 -0.0105 -0.0246 -0.0249  
Y 0.0006 -0.0010 0.0204 -0.0133 0.0206 -0.0009  
Z -0.0071 -0.0207 -0.0004 0.0158 0.0618 0.0139  
AT. 21 C X -0.0379 -0.0172 -0.0024 0.0134 -0.0000 -0.0024  
Y 0.0188 -0.0078 0.0200 0.0132 -0.0031 0.0081  
Z -0.0247 0.0122 -0.0005 0.0184 0.0174 0.0076  
AT. 22 C X -0.0379 0.0172 -0.0024 -0.0134 -0.0000 0.0024  
Y 0.0188 0.0078 0.0200 -0.0132 -0.0031 -0.0081  
Z -0.0247 -0.0122 -0.0005 -0.0184 0.0174 -0.0076  
AT. 23 C X -0.0424 -0.0139 -0.0036 0.0264 -0.0181 -0.0013  
Y 0.0195 -0.0034 0.0241 0.0300 -0.0076 0.0094  
Z -0.0305 0.0148 -0.0034 0.0271 -0.0010 0.0081  
AT. 24 C X -0.0424 0.0139 -0.0036 -0.0264 -0.0181 0.0013  
Y 0.0195 0.0034 0.0241 -0.0300 -0.0076 -0.0094  
Z -0.0305 -0.0148 -0.0034 -0.0271 -0.0010 -0.0081  
AT. 25 H X -0.0472 -0.0190 -0.0042 0.0278 -0.0068 -0.0010  
Y 0.0200 -0.0025 0.0252 0.0331 -0.0084 0.0095  
Z -0.0373 0.0023 -0.0093 0.0083 0.0172 0.0080  
AT. 26 H X -0.0472 0.0190 -0.0042 -0.0278 -0.0068 0.0010  
Y 0.0200 0.0025 0.0252 -0.0331 -0.0084 -0.0095  
Z -0.0373 -0.0023 -0.0093 -0.0083 0.0172 -0.0080  
AT. 27 H X -0.0438 -0.0032 -0.0036 0.0387 -0.0448 -0.0023  
Y 0.0275 0.0100 0.0303 0.0499 -0.0297 0.0100  
Z -0.0263 0.0198 -0.0002 0.0348 -0.0068 0.0084  
AT. 28 H X -0.0438 0.0032 -0.0036 -0.0387 -0.0448 0.0023  
Y 0.0275 -0.0100 0.0303 -0.0499 -0.0297 -0.0100  
Z -0.0263 -0.0198 -0.0002 -0.0348 -0.0068 -0.0084



AT. 29 C X -0.0385 -0.0402 -0.0014 -0.0058 0.0374 0.0108  
Y 0.0085 -0.0266 -0.0032 -0.0018 0.0120 0.0069  
Z -0.0112 0.0091 -0.0116 -0.0150 0.0139 0.0009

AT. 30 C X -0.0385 0.0402 -0.0014 0.0058 0.0374 -0.0108  
Y 0.0085 0.0266 -0.0032 0.0018 0.0120 -0.0069  
Z -0.0112 -0.0091 -0.0116 0.0150 0.0139 -0.0009

AT. 31 H X -0.0356 -0.0425 -0.0003 -0.0114 0.0497 0.0095  
Y 0.0136 -0.0222 -0.0030 -0.0052 0.0041 0.0056  
Z -0.0017 0.0143 -0.0105 -0.0234 0.0097 -0.0017

AT. 32 H X -0.0356 0.0425 -0.0003 0.0114 0.0497 -0.0095  
Y 0.0136 0.0222 -0.0030 0.0052 0.0041 -0.0056  
Z -0.0017 -0.0143 -0.0105 0.0234 0.0097 0.0017

AT. 33 H X -0.0464 -0.0454 -0.0008 -0.0014 0.0283 0.0175  
Y 0.0006 -0.0328 -0.0034 0.0030 0.0238 0.0092  
Z -0.0133 0.0083 -0.0111 -0.0145 0.0030 0.0044

AT. 34 H X -0.0464 0.0454 -0.0008 0.0014 0.0283 -0.0175  
Y 0.0006 0.0328 -0.0034 -0.0030 0.0238 -0.0092  
Z -0.0133 -0.0083 -0.0111 0.0145 0.0030 -0.0044

AT. 35 C X -0.0295 -0.0330 -0.0028 -0.0097 0.0452 0.0019  
Y 0.0132 -0.0272 -0.0005 -0.0106 0.0069 0.0098  
Z -0.0242 0.0028 -0.0129 -0.0032 0.0119 0.0064

AT. 36 C X -0.0295 0.0330 -0.0028 0.0097 0.0452 -0.0019  
Y 0.0132 0.0272 -0.0005 0.0106 0.0069 -0.0098  
Z -0.0242 -0.0028 -0.0129 0.0032 0.0119 -0.0064

AT. 37 C X -0.0353 -0.0319 -0.0076 -0.0026 0.0357 0.0004  
Y 0.0086 -0.0312 0.0017 -0.0065 0.0133 0.0138  
Z -0.0358 -0.0021 -0.0136 0.0087 0.0135 0.0111

AT. 38 C X -0.0353 0.0319 -0.0076 0.0026 0.0357 -0.0004  
Y 0.0086 0.0312 0.0017 0.0065 0.0133 -0.0138  
Z -0.0358 0.0021 -0.0136 -0.0087 0.0135 -0.0111

AT. 39 H X -0.0458 -0.0404 -0.0104 -0.0012 0.0342 0.0053  
Y 0.0033 -0.0356 0.0036 -0.0023 0.0209 0.0179

Z -0.0408 -0.0060 -0.0166 0.0077 0.0093 0.0127  
AT. 40 H X -0.0458 0.0404 -0.0104 0.0012 0.0342 -0.0053  
Y 0.0033 0.0356 0.0036 0.0023 0.0209 -0.0179  
Z -0.0408 0.0060 -0.0166 -0.0077 0.0093 -0.0127  
AT. 41 H X -0.0258 -0.0238 -0.0053 -0.0035 0.0351 -0.0047  
Y 0.0093 -0.0359 0.0013 -0.0150 0.0159 0.0149  
Z -0.0457 -0.0065 -0.0156 0.0162 0.0118 0.0151  
AT. 42 H X -0.0258 0.0238 -0.0053 0.0035 0.0351 0.0047  
Y 0.0093 0.0359 0.0013 0.0150 0.0159 -0.0149  
Z -0.0457 0.0065 -0.0156 -0.0162 0.0118 -0.0151  
AT. 43 C X -0.0289 -0.0244 -0.0123 -0.0025 0.0346 -0.0061  
Y 0.0139 -0.0218 -0.0046 -0.0049 0.0023 0.0062  
Z -0.0217 0.0063 -0.0078 0.0084 0.0344 0.0061  
AT. 44 C X -0.0289 0.0244 -0.0123 0.0025 0.0346 0.0061  
Y 0.0139 0.0218 -0.0046 0.0049 0.0023 -0.0062  
Z -0.0217 -0.0063 -0.0078 -0.0084 0.0344 -0.0061  
AT. 45 H X -0.0216 -0.0214 -0.0169 -0.0061 0.0383 -0.0107  
Y 0.0150 -0.0233 -0.0021 -0.0112 0.0054 0.0036  
Z -0.0272 0.0062 -0.0069 0.0171 0.0280 0.0116  
AT. 46 H X -0.0216 0.0214 -0.0169 0.0061 0.0383 0.0107  
Y 0.0150 0.0233 -0.0021 0.0112 0.0054 -0.0036  
Z -0.0272 -0.0062 -0.0069 -0.0171 0.0280 -0.0116  
AT. 47 H X -0.0324 -0.0242 -0.0150 0.0021 0.0254 -0.0043  
Y 0.0137 -0.0192 -0.0079 0.0013 -0.0032 0.0081  
Z -0.0173 0.0088 -0.0076 0.0084 0.0417 0.0056  
AT. 48 H X -0.0324 0.0242 -0.0150 -0.0021 0.0254 0.0043  
Y 0.0137 0.0192 -0.0079 -0.0013 -0.0032 -0.0081  
Z -0.0173 -0.0088 -0.0076 -0.0084 0.0417 -0.0056  
AT. 49 C X -0.0236 -0.0258 -0.0070 -0.0100 0.0485 -0.0068  
Y 0.0170 -0.0190 -0.0083 -0.0095 -0.0007 0.0008  
Z -0.0135 0.0087 -0.0087 -0.0049 0.0415 -0.0023  
AT. 50 C X -0.0236 0.0258 -0.0070 0.0100 0.0485 0.0068

Y 0.0170 0.0190 -0.0083 0.0095 -0.0007 -0.0008  
Z -0.0135 -0.0087 -0.0087 0.0049 0.0415 0.0023  
AT. 51 C X -0.0313 -0.0321 -0.0042 -0.0062 0.0390 0.0028  
Y 0.0147 -0.0179 -0.0107 -0.0007 -0.0006 -0.0000  
Z -0.0043 0.0130 -0.0089 -0.0180 0.0515 -0.0109  
AT. 52 C X -0.0313 0.0321 -0.0042 0.0062 0.0390 -0.0028  
Y 0.0147 0.0179 -0.0107 0.0007 -0.0006 0.0000  
Z -0.0043 -0.0130 -0.0089 0.0180 0.0515 0.0109  
AT. 53 H X -0.0336 -0.0329 -0.0074 -0.0017 0.0297 0.0045  
Y 0.0147 -0.0163 -0.0139 0.0052 -0.0028 -0.0020  
Z -0.0002 0.0160 -0.0069 -0.0196 0.0674 -0.0164  
AT. 54 H X -0.0336 0.0329 -0.0074 0.0017 0.0297 -0.0045  
Y 0.0147 0.0163 -0.0139 -0.0052 -0.0028 0.0020  
Z -0.0002 -0.0160 -0.0069 0.0196 0.0674 0.0164  
AT. 55 H X -0.0279 -0.0308 -0.0001 -0.0133 0.0520 0.0008  
Y 0.0179 -0.0158 -0.0139 -0.0038 -0.0052 -0.0030  
Z 0.0020 0.0164 -0.0101 -0.0265 0.0543 -0.0158  
AT. 56 H X -0.0279 0.0308 -0.0001 0.0133 0.0520 -0.0008  
Y 0.0179 0.0158 -0.0139 0.0038 -0.0052 0.0030  
Z 0.0020 -0.0164 -0.0101 0.0265 0.0543 0.0158  
AT. 57 C X -0.0247 -0.0320 -0.0003 -0.0144 0.0490 0.0033  
Y 0.0164 -0.0292 0.0025 -0.0168 0.0036 0.0142  
Z -0.0290 -0.0018 -0.0136 -0.0029 -0.0018 0.0101  
AT. 58 C X -0.0247 0.0320 -0.0003 0.0144 0.0490 -0.0033  
Y 0.0164 0.0292 0.0025 0.0168 0.0036 -0.0142  
Z -0.0290 0.0018 -0.0136 0.0029 -0.0018 -0.0101  
AT. 59 H X -0.0199 -0.0307 0.0019 -0.0196 0.0524 0.0044  
Y 0.0181 -0.0289 -0.0004 -0.0220 0.0041 0.0113  
Z -0.0230 -0.0002 -0.0161 -0.0143 0.0015 0.0062  
AT. 60 H X -0.0199 0.0307 0.0019 0.0196 0.0524 -0.0044  
Y 0.0181 0.0289 -0.0004 0.0220 0.0041 -0.0113  
Z -0.0230 0.0002 -0.0161 0.0143 0.0015 -0.0062

AT. 61 H X -0.0303 -0.0361 0.0026 -0.0082 0.0397 0.0085  
Y 0.0138 -0.0294 0.0068 -0.0091 0.0026 0.0183  
Z -0.0321 -0.0049 -0.0135 -0.0021 -0.0082 0.0121

AT. 62 H X -0.0303 0.0361 0.0026 0.0082 0.0397 -0.0085  
Y 0.0138 0.0294 0.0068 0.0091 0.0026 -0.0183  
Z -0.0321 0.0049 -0.0135 0.0021 -0.0082 -0.0121

AT. 63 H X -0.0211 -0.0280 -0.0034 -0.0191 0.0571 -0.0025  
Y 0.0207 -0.0300 0.0032 -0.0239 0.0006 0.0161  
Z -0.0358 -0.0046 -0.0111 0.0077 -0.0070 0.0137

AT. 64 H X -0.0211 0.0280 -0.0034 0.0191 0.0571 0.0025  
Y 0.0207 0.0300 0.0032 0.0239 0.0006 -0.0161  
Z -0.0358 0.0046 -0.0111 -0.0077 -0.0070 -0.0137

AT. 65 C X -0.0154 -0.0206 -0.0086 -0.0159 0.0623 -0.0160  
Y 0.0200 -0.0131 -0.0141 -0.0140 -0.0041 -0.0056  
Z -0.0083 0.0101 -0.0071 -0.0071 0.0541 -0.0066

AT. 66 C X -0.0154 0.0206 -0.0086 0.0159 0.0623 0.0160  
Y 0.0200 0.0131 -0.0141 0.0140 -0.0041 0.0056  
Z -0.0083 -0.0101 -0.0071 0.0071 0.0541 0.0066

AT. 67 H X -0.0101 -0.0160 -0.0111 -0.0180 0.0715 -0.0228  
Y 0.0201 -0.0138 -0.0126 -0.0210 -0.0082 -0.0053  
Z -0.0131 0.0069 -0.0062 0.0014 0.0495 -0.0010

AT. 68 H X -0.0101 0.0160 -0.0111 0.0180 0.0715 0.0228  
Y 0.0201 0.0138 -0.0126 0.0210 -0.0082 0.0053  
Z -0.0131 -0.0069 -0.0062 -0.0014 0.0495 0.0010

AT. 69 H X -0.0179 -0.0191 -0.0114 -0.0104 0.0584 -0.0153  
Y 0.0203 -0.0101 -0.0169 -0.0076 -0.0015 -0.0073  
Z -0.0025 0.0108 -0.0058 -0.0089 0.0665 -0.0107

AT. 70 H X -0.0179 0.0191 -0.0114 0.0104 0.0584 0.0153  
Y 0.0203 0.0101 -0.0169 0.0076 -0.0015 0.0073  
Z -0.0025 -0.0108 -0.0058 0.0089 0.0665 0.0107

AT. 71 H X -0.0118 -0.0222 -0.0049 -0.0233 0.0676 -0.0168  
Y 0.0213 -0.0098 -0.0172 -0.0162 -0.0058 -0.0088

Z -0.0038 0.0136 -0.0084 -0.0155 0.0554 -0.0115  
AT. 72 H X -0.0118 0.0222 -0.0049 0.0233 0.0676 0.0168  
Y 0.0213 0.0098 -0.0172 0.0162 -0.0058 0.0088  
Z -0.0038 -0.0136 -0.0084 0.0155 0.0554 0.0115  
AT. 73 C X -0.0192 -0.0259 -0.0030 -0.0155 0.0572 -0.0070  
Y 0.0188 -0.0218 -0.0043 -0.0166 -0.0004 0.0038  
Z -0.0192 0.0058 -0.0112 -0.0041 0.0243 0.0026  
AT. 74 C X -0.0192 0.0259 -0.0030 0.0155 0.0572 0.0070  
Y 0.0188 0.0218 -0.0043 0.0166 -0.0004 -0.0038  
Z -0.0192 -0.0058 -0.0112 0.0041 0.0243 -0.0026  
AT. 75 H X -0.0145 -0.0259 0.0012 -0.0208 0.0659 -0.0072  
Y 0.0215 -0.0187 -0.0065 -0.0197 -0.0045 0.0006  
Z -0.0125 0.0101 -0.0109 -0.0117 0.0250 -0.0020  
AT. 76 H X -0.0145 0.0259 0.0012 0.0208 0.0659 0.0072  
Y 0.0215 0.0187 -0.0065 0.0197 -0.0045 -0.0006  
Z -0.0125 -0.0101 -0.0109 0.0117 0.0250 0.0020  
AT. 77 H X -0.0131 -0.0208 -0.0039 -0.0178 0.0639 -0.0135  
Y 0.0206 -0.0214 -0.0028 -0.0224 -0.0030 0.0051  
Z -0.0264 0.0007 -0.0117 0.0035 0.0199 0.0074  
AT. 78 H X -0.0131 0.0208 -0.0039 0.0178 0.0639 0.0135  
Y 0.0206 0.0214 -0.0028 0.0224 -0.0030 -0.0051  
Z -0.0264 -0.0007 -0.0117 -0.0035 0.0199 -0.0074  
AT. 79 I X 0.0532 0.0433 -0.0400 -0.0251 -0.0021 0.0553  
Y -0.0140 -0.0219 -0.0285 0.0346 0.0002 -0.0244  
Z 0.0370 0.0411 -0.0138 0.0132 -0.0010 0.0235  
AT. 80 I X 0.0532 -0.0433 -0.0400 0.0251 -0.0021 -0.0553  
Y -0.0140 0.0219 -0.0285 -0.0346 0.0002 0.0244  
Z 0.0370 -0.0411 -0.0138 -0.0132 -0.0010 -0.0235  
AT. 81 I X 0.0314 0.0376 -0.0074 -0.0040 -0.0061 -0.0311  
Y 0.0015 0.0069 -0.0370 0.0345 -0.0197 0.0216  
Z 0.0100 -0.0519 -0.0167 0.0188 -0.0317 0.0344  
AT. 82 I X 0.0314 -0.0376 -0.0074 0.0040 -0.0061 0.0311

Y 0.0015 -0.0069 -0.0370 -0.0345 -0.0197 -0.0216  
Z 0.0100 0.0519 -0.0167 -0.0188 -0.0317 -0.0344  
AT. 83 O X 0.0513 0.0409 -0.0383 -0.0232 -0.0062 0.0512  
Y -0.0223 -0.0154 -0.0295 0.0418 -0.0013 -0.0352  
Z 0.0183 0.0167 0.0667 0.0099 0.0002 -0.0427  
AT. 84 O X 0.0513 -0.0409 -0.0383 0.0232 -0.0062 -0.0512  
Y -0.0223 0.0154 -0.0295 -0.0418 -0.0013 0.0352  
Z 0.0183 -0.0167 0.0667 -0.0099 0.0002 0.0427  
AT. 85 O X 0.0311 0.0227 -0.0058 -0.0056 0.0021 -0.0330  
Y -0.0060 0.0044 -0.0133 0.0115 0.0003 0.0202  
Z 0.0190 -0.0318 -0.0169 0.0024 0.0028 -0.0074  
AT. 86 O X 0.0311 -0.0227 -0.0058 0.0056 0.0021 0.0330  
Y -0.0060 -0.0044 -0.0133 -0.0115 0.0003 -0.0202  
Z 0.0190 0.0318 -0.0169 -0.0024 0.0028 0.0074  
AT. 87 N X 0.0386 0.0402 0.0123 -0.0211 -0.0049 0.0095  
Y 0.0025 0.0030 0.0147 0.0414 -0.0066 0.0044  
Z 0.0259 0.0174 0.0382 0.0089 -0.0006 -0.0198  
AT. 88 N X 0.0386 -0.0402 0.0123 0.0211 -0.0049 -0.0095  
Y 0.0025 -0.0030 0.0147 -0.0414 -0.0066 -0.0044  
Z 0.0259 -0.0174 0.0382 -0.0089 -0.0006 0.0198  
AT. 89 N X 0.0287 0.0315 0.0237 -0.0139 -0.0037 -0.0283  
Y -0.0006 0.0060 0.0167 0.0388 -0.0049 0.0002  
Z 0.0224 -0.0244 0.0250 0.0222 -0.0051 -0.0218  
AT. 90 N X 0.0287 -0.0315 0.0237 0.0139 -0.0037 0.0283  
Y -0.0006 -0.0060 0.0167 -0.0388 -0.0049 -0.0002  
Z 0.0224 0.0244 0.0250 -0.0222 -0.0051 0.0218  
AT. 91 C X 0.0466 0.0405 -0.0211 -0.0223 -0.0055 0.0364  
Y -0.0120 -0.0097 -0.0157 0.0403 -0.0041 -0.0182  
Z 0.0236 0.0159 0.0351 0.0089 -0.0004 -0.0231  
AT. 92 C X 0.0466 -0.0405 -0.0211 0.0223 -0.0055 -0.0364  
Y -0.0120 0.0097 -0.0157 -0.0403 -0.0041 0.0182  
Z 0.0236 -0.0159 0.0351 -0.0089 -0.0004 0.0231

AT. 93 C X 0.0498 0.0419 -0.0389 -0.0223 -0.0066 0.0482  
Y -0.0147 -0.0188 -0.0301 0.0376 -0.0042 -0.0236  
Z 0.0263 0.0123 -0.0045 0.0071 -0.0018 -0.0073

AT. 94 C X 0.0498 -0.0419 -0.0389 0.0223 -0.0066 -0.0482  
Y -0.0147 0.0188 -0.0301 -0.0376 -0.0042 0.0236  
Z 0.0263 -0.0123 -0.0045 -0.0071 -0.0018 0.0073

AT. 95 H X 0.0470 0.0396 -0.0286 -0.0209 -0.0076 0.0392  
Y -0.0114 -0.0112 -0.0218 0.0382 -0.0028 -0.0180  
Z 0.0233 0.0006 -0.0319 0.0050 -0.0033 -0.0073

AT. 96 H X 0.0470 -0.0396 -0.0286 0.0209 -0.0076 -0.0392  
Y -0.0114 0.0112 -0.0218 -0.0382 -0.0028 0.0180  
Z 0.0233 -0.0006 -0.0319 -0.0050 -0.0033 0.0073

AT. 97 H X 0.0530 0.0435 -0.0631 -0.0221 -0.0076 0.0621  
Y -0.0212 -0.0377 -0.0481 0.0369 -0.0056 -0.0356  
Z 0.0236 0.0073 -0.0018 0.0070 -0.0018 -0.0138

AT. 98 H X 0.0530 -0.0435 -0.0631 0.0221 -0.0076 -0.0621  
Y -0.0212 0.0377 -0.0481 -0.0369 -0.0056 0.0356  
Z 0.0236 -0.0073 -0.0018 -0.0070 -0.0018 0.0138

AT. 99 C X 0.0302 0.0282 0.0043 -0.0104 0.0016 -0.0317  
Y -0.0045 -0.0013 -0.0116 0.0245 -0.0036 0.0156  
Z 0.0205 -0.0287 0.0094 0.0133 -0.0049 -0.0125

AT. 100 C X 0.0302 -0.0282 0.0043 0.0104 0.0016 0.0317  
Y -0.0045 0.0013 -0.0116 -0.0245 -0.0036 -0.0156  
Z 0.0205 0.0287 0.0094 -0.0133 -0.0049 0.0125

AT. 101 C X 0.0309 0.0300 -0.0004 -0.0135 0.0089 -0.0376  
Y -0.0052 -0.0139 -0.0475 0.0243 -0.0101 0.0317  
Z 0.0197 -0.0291 0.0216 0.0179 -0.0145 -0.0056

AT. 102 C X 0.0309 -0.0300 -0.0004 0.0135 0.0089 0.0376  
Y -0.0052 0.0139 -0.0475 -0.0243 -0.0101 -0.0317  
Z 0.0197 0.0291 0.0216 -0.0179 -0.0145 0.0056

AT. 103 H X 0.0281 0.0252 0.0085 -0.0169 0.0152 -0.0418  
Y -0.0041 -0.0121 -0.0517 0.0254 -0.0126 0.0334

Z 0.0233 -0.0132 0.0538 0.0250 -0.0169 -0.0189  
AT.104 H X 0.0281 -0.0252 0.0085 0.0169 0.0152 0.0418  
Y -0.0041 0.0121 -0.0517 -0.0254 -0.0126 -0.0334  
Z 0.0233 0.0132 0.0538 -0.0250 -0.0169 0.0189  
AT.105 H X 0.0333 0.0312 -0.0092 -0.0144 0.0141 -0.0484  
Y -0.0097 -0.0293 -0.0750 0.0162 -0.0100 0.0483  
Z 0.0183 -0.0340 0.0096 0.0145 -0.0132 -0.0016  
AT.106 H X 0.0333 -0.0312 -0.0092 0.0144 0.0141 0.0484  
Y -0.0097 0.0293 -0.0750 -0.0162 -0.0100 -0.0483  
Z 0.0183 0.0340 0.0096 -0.0145 -0.0132 0.0016  
AT.107 C X 0.0363 0.0405 0.0310 -0.0198 -0.0053 -0.0007  
Y 0.0009 0.0085 0.0228 0.0412 -0.0074 -0.0022  
Z 0.0223 0.0206 0.0737 0.0109 -0.0014 -0.0393  
AT.108 C X 0.0363 -0.0405 0.0310 0.0198 -0.0053 0.0007  
Y 0.0009 -0.0085 0.0228 -0.0412 -0.0074 0.0022  
Z 0.0223 -0.0206 0.0737 -0.0109 -0.0014 0.0393  
AT.109 H X 0.0356 0.0443 0.0457 -0.0208 -0.0038 -0.0064  
Y 0.0007 0.0175 0.0295 0.0374 -0.0052 -0.0052  
Z 0.0221 0.0350 0.0809 0.0055 0.0022 -0.0425  
AT.110 H X 0.0356 -0.0443 0.0457 0.0208 -0.0038 0.0064  
Y 0.0007 -0.0175 0.0295 -0.0374 -0.0052 0.0052  
Z 0.0221 -0.0350 0.0809 -0.0055 0.0022 0.0425  
AT.111 H X 0.0391 0.0420 0.0133 -0.0230 -0.0038 0.0107  
Y -0.0002 -0.0063 0.0121 0.0473 -0.0114 0.0002  
Z 0.0190 0.0218 0.0945 0.0133 -0.0020 -0.0521  
AT.112 H X 0.0391 -0.0420 0.0133 0.0230 -0.0038 -0.0107  
Y -0.0002 0.0063 0.0121 -0.0473 -0.0114 -0.0002  
Z 0.0190 -0.0218 0.0945 -0.0133 -0.0020 0.0521  
AT.113 C X 0.0307 0.0344 0.0563 -0.0133 -0.0092 -0.0217  
Y -0.0004 0.0227 0.0355 0.0366 -0.0049 -0.0114  
Z 0.0218 0.0026 0.0697 0.0187 -0.0059 -0.0374  
AT.114 C X 0.0307 -0.0344 0.0563 0.0133 -0.0092 0.0217



Y -0.0004 -0.0227 0.0355 -0.0366 -0.0049 0.0114  
Z 0.0218 -0.0026 0.0697 -0.0187 -0.0059 0.0374  
AT. 115 C X 0.0286 0.0318 0.0387 -0.0128 -0.0065 -0.0277  
Y -0.0017 0.0103 0.0263 0.0420 -0.0061 -0.0112  
Z 0.0210 -0.0187 0.0604 0.0268 -0.0105 -0.0327  
AT. 116 C X 0.0286 -0.0318 0.0387 0.0128 -0.0065 0.0277  
Y -0.0017 -0.0103 0.0263 -0.0420 -0.0061 0.0112  
Z 0.0210 0.0187 0.0604 -0.0268 -0.0105 0.0327  
AT. 117 H X 0.0299 0.0351 0.0195 -0.0194 -0.0021 -0.0195  
Y -0.0038 -0.0042 0.0202 0.0503 -0.0083 -0.0177  
Z 0.0199 -0.0188 0.0821 0.0320 -0.0147 -0.0396  
AT. 118 H X 0.0299 -0.0351 0.0195 0.0194 -0.0021 0.0195  
Y -0.0038 0.0042 0.0202 -0.0503 -0.0083 0.0177  
Z 0.0199 0.0188 0.0821 -0.0320 -0.0147 0.0396  
AT. 119 H X 0.0269 0.0270 0.0589 -0.0038 -0.0116 -0.0412  
Y -0.0014 0.0192 0.0373 0.0406 -0.0052 -0.0188  
Z 0.0199 -0.0301 0.0607 0.0333 -0.0140 -0.0327  
AT. 120 H X 0.0269 -0.0270 0.0589 0.0038 -0.0116 0.0412  
Y -0.0014 -0.0192 0.0373 -0.0406 -0.0052 0.0188  
Z 0.0199 0.0301 0.0607 -0.0333 -0.0140 0.0327  
AT. 121 C X 0.0260 0.0306 0.0384 -0.0122 -0.0083 -0.0324  
Y 0.0047 0.0197 0.0319 0.0351 -0.0031 0.0043  
Z 0.0263 -0.0236 0.0001 0.0194 0.0010 -0.0160  
AT. 122 C X 0.0260 -0.0306 0.0384 0.0122 -0.0083 0.0324  
Y 0.0047 -0.0197 0.0319 -0.0351 -0.0031 -0.0043  
Z 0.0263 0.0236 0.0001 -0.0194 0.0010 0.0160  
AT. 123 H X 0.0200 0.0283 0.0493 -0.0117 -0.0130 -0.0388  
Y 0.0044 0.0298 0.0360 0.0305 -0.0040 0.0070  
Z 0.0257 -0.0347 -0.0023 0.0244 0.0012 -0.0198  
AT. 124 H X 0.0200 -0.0283 0.0493 0.0117 -0.0130 0.0388  
Y 0.0044 -0.0298 0.0360 -0.0305 -0.0040 -0.0070  
Z 0.0257 0.0347 -0.0023 -0.0244 0.0012 0.0198

AT.125 H X 0.0268 0.0313 0.0226 -0.0134 -0.0054 -0.0304  
Y 0.0086 0.0109 0.0315 0.0374 -0.0007 0.0043  
Z 0.0289 -0.0274 -0.0189 0.0194 0.0057 -0.0133

AT.126 H X 0.0268 -0.0313 0.0226 0.0134 -0.0054 0.0304  
Y 0.0086 -0.0109 0.0315 -0.0374 -0.0007 -0.0043  
Z 0.0289 0.0274 -0.0189 -0.0194 0.0057 0.0133

AT.127 C X 0.0287 0.0326 0.0594 -0.0117 -0.0099 -0.0296  
Y 0.0062 0.0311 0.0384 0.0313 -0.0037 0.0088  
Z 0.0276 -0.0027 0.0020 0.0129 0.0007 -0.0090

AT.128 C X 0.0287 -0.0326 0.0594 0.0117 -0.0099 0.0296  
Y 0.0062 -0.0311 0.0384 -0.0313 -0.0037 -0.0088  
Z 0.0276 0.0027 0.0020 -0.0129 0.0007 0.0090

AT.129 C X 0.0352 0.0379 0.0343 -0.0175 -0.0068 -0.0055  
Y 0.0068 0.0167 0.0283 0.0351 -0.0032 0.0118  
Z 0.0292 0.0152 0.0038 0.0067 0.0006 -0.0036

AT.130 C X 0.0352 -0.0379 0.0343 0.0175 -0.0068 0.0055  
Y 0.0068 -0.0167 0.0283 -0.0351 -0.0032 -0.0118  
Z 0.0292 -0.0152 0.0038 -0.0067 0.0006 0.0036

AT.131 H X 0.0360 0.0390 0.0170 -0.0192 -0.0067 0.0006  
Y 0.0100 0.0099 0.0238 0.0363 -0.0016 0.0208  
Z 0.0312 0.0132 -0.0225 0.0052 0.0014 0.0090

AT.132 H X 0.0360 -0.0390 0.0170 0.0192 -0.0067 -0.0006  
Y 0.0100 -0.0099 0.0238 -0.0363 -0.0016 -0.0208  
Z 0.0312 -0.0132 -0.0225 -0.0052 0.0014 -0.0090

AT.133 H X 0.0357 0.0372 0.0511 -0.0170 -0.0057 -0.0055  
Y 0.0077 0.0249 0.0351 0.0316 -0.0022 0.0138  
Z 0.0306 0.0284 0.0070 0.0016 0.0016 -0.0004

AT.134 H X 0.0357 -0.0372 0.0511 0.0170 -0.0057 0.0055  
Y 0.0077 -0.0249 0.0351 -0.0316 -0.0022 -0.0138  
Z 0.0306 -0.0284 0.0070 -0.0016 0.0016 0.0004

AT.135 C X 0.0292 0.0340 0.0779 -0.0105 -0.0120 -0.0277  
Y -0.0033 0.0307 0.0464 0.0342 -0.0039 -0.0282

Z 0.0187 0.0074 0.1112 0.0214 -0.0095 -0.0567  
AT. 136 C X 0.0292 -0.0340 0.0779 0.0105 -0.0120 0.0277  
Y -0.0033 -0.0307 0.0464 -0.0342 -0.0039 0.0282  
Z 0.0187 -0.0074 0.1112 -0.0214 -0.0095 0.0567  
AT. 137 H X 0.0312 0.0373 0.0946 -0.0085 -0.0134 -0.0262  
Y 0.0005 0.0422 0.0561 0.0323 -0.0027 -0.0288  
Z 0.0242 0.0262 0.1219 0.0181 -0.0068 -0.0587  
AT. 138 H X 0.0312 -0.0373 0.0946 0.0085 -0.0134 0.0262  
Y 0.0005 -0.0422 0.0561 -0.0323 -0.0027 0.0288  
Z 0.0242 -0.0262 0.1219 -0.0181 -0.0068 0.0587  
AT. 139 H X 0.0334 0.0373 0.0578 -0.0133 -0.0090 -0.0150  
Y -0.0112 0.0127 0.0333 0.0370 -0.0054 -0.0335  
Z 0.0150 0.0077 0.1399 0.0244 -0.0129 -0.0715  
AT. 140 H X 0.0334 -0.0373 0.0578 0.0133 -0.0090 0.0150  
Y -0.0112 -0.0127 0.0333 -0.0370 -0.0054 0.0335  
Z 0.0150 -0.0077 0.1399 -0.0244 -0.0129 0.0715  
AT. 141 H X 0.0221 0.0276 0.0981 -0.0076 -0.0151 -0.0474  
Y -0.0006 0.0435 0.0599 0.0317 -0.0030 -0.0359  
Z 0.0131 -0.0082 0.1064 0.0254 -0.0118 -0.0574  
AT. 142 H X 0.0221 -0.0276 0.0981 0.0076 -0.0151 0.0474  
Y -0.0006 -0.0435 0.0599 -0.0317 -0.0030 0.0359  
Z 0.0131 0.0082 0.1064 -0.0254 -0.0118 0.0574  
AT. 143 C X 0.0263 0.0296 0.0836 -0.0087 -0.0123 -0.0436  
Y 0.0104 0.0475 0.0469 0.0261 -0.0042 0.0221  
Z 0.0302 -0.0028 -0.0337 0.0097 0.0041 0.0064  
AT. 144 C X 0.0263 -0.0296 0.0836 0.0087 -0.0123 0.0436  
Y 0.0104 -0.0475 0.0469 -0.0261 -0.0042 -0.0221  
Z 0.0302 0.0028 -0.0337 -0.0097 0.0041 -0.0064  
AT. 145 H X 0.0235 0.0249 0.1070 -0.0064 -0.0144 -0.0642  
Y 0.0110 0.0547 0.0564 0.0226 -0.0043 0.0153  
Z 0.0290 -0.0116 -0.0379 0.0143 0.0036 0.0085  
AT. 146 H X 0.0235 -0.0249 0.1070 0.0064 -0.0144 0.0642

Y 0.0110 -0.0547 0.0564 -0.0226 -0.0043 -0.0153  
Z 0.0290 0.0116 -0.0379 -0.0143 0.0036 -0.0085  
AT. 147 H X 0.0273 0.0299 0.0676 -0.0106 -0.0104 -0.0407  
Y 0.0111 0.0436 0.0357 0.0285 -0.0038 0.0378  
Z 0.0316 -0.0047 -0.0624 0.0085 0.0069 0.0192  
AT. 148 H X 0.0273 -0.0299 0.0676 0.0106 -0.0104 0.0407  
Y 0.0111 -0.0436 0.0357 -0.0285 -0.0038 -0.0378  
Z 0.0316 0.0047 -0.0624 -0.0085 0.0069 -0.0192  
AT. 149 H X 0.0273 0.0330 0.0958 -0.0076 -0.0140 -0.0365  
Y 0.0115 0.0550 0.0529 0.0233 -0.0043 0.0234  
Z 0.0318 0.0093 -0.0293 0.0045 0.0048 0.0055  
AT. 150 H X 0.0273 -0.0330 0.0958 0.0076 -0.0140 0.0365  
Y 0.0115 -0.0550 0.0529 -0.0233 -0.0043 -0.0234  
Z 0.0318 -0.0093 -0.0293 -0.0045 0.0048 -0.0055  
AT. 151 C X 0.0279 0.0316 0.0806 -0.0093 -0.0121 -0.0350  
Y 0.0027 0.0406 0.0459 0.0297 -0.0038 -0.0034  
Z 0.0251 0.0015 0.0372 0.0152 -0.0026 -0.0234  
AT. 152 C X 0.0279 -0.0316 0.0806 0.0093 -0.0121 0.0350  
Y 0.0027 -0.0406 0.0459 -0.0297 -0.0038 0.0034  
Z 0.0251 -0.0015 0.0372 -0.0152 -0.0026 0.0234  
AT. 153 H X 0.0283 0.0323 0.0932 -0.0089 -0.0138 -0.0322  
Y 0.0027 0.0483 0.0497 0.0261 -0.0033 -0.0018  
Z 0.0251 0.0144 0.0384 0.0096 -0.0010 -0.0220  
AT. 154 H X 0.0283 -0.0323 0.0932 0.0089 -0.0138 0.0322  
Y 0.0027 -0.0483 0.0497 -0.0261 -0.0033 0.0018  
Z 0.0251 -0.0144 0.0384 -0.0096 -0.0010 0.0220  
AT. 155 H X 0.0241 0.0278 0.0986 -0.0052 -0.0143 -0.0501  
Y 0.0023 0.0508 0.0524 0.0268 -0.0036 -0.0074  
Z 0.0242 -0.0104 0.0373 0.0201 -0.0036 -0.0249  
AT. 156 H X 0.0241 -0.0278 0.0986 0.0052 -0.0143 0.0501  
Y 0.0023 -0.0508 0.0524 -0.0268 -0.0036 0.0074  
Z 0.0242 0.0104 0.0373 -0.0201 -0.0036 0.0249

AT.157 O X -0.0331 -0.0070 0.0186 -0.0023 -0.0197 0.0062  
Y -0.0062 -0.0025 0.0210 0.0186 0.0085 0.0121  
Z -0.0168 -0.0200 0.0032 -0.0172 0.0234 -0.0034

AT.158 O X -0.0331 0.0070 0.0186 0.0023 -0.0197 -0.0062  
Y -0.0062 0.0025 0.0210 -0.0186 0.0085 -0.0121  
Z -0.0168 0.0200 0.0032 0.0172 0.0234 0.0034

AT.159 O X -0.0366 -0.0063 0.0142 -0.0022 -0.0148 0.0066  
Y 0.0045 0.0047 0.0212 0.0036 0.0007 0.0011  
Z -0.0219 -0.0172 -0.0039 -0.0191 0.0317 -0.0040

AT.160 O X -0.0366 0.0063 0.0142 0.0022 -0.0148 -0.0066  
Y 0.0045 -0.0047 0.0212 -0.0036 0.0007 -0.0011  
Z -0.0219 0.0172 -0.0039 0.0191 0.0317 0.0040

AT.161 H X -0.0418 -0.0128 0.0157 0.0058 -0.0188 0.0158  
Y -0.0078 -0.0050 0.0220 0.0212 0.0103 0.0132  
Z -0.0159 -0.0135 -0.0024 -0.0229 0.0184 -0.0033

AT.162 H X -0.0418 0.0128 0.0157 -0.0058 -0.0188 -0.0158  
Y -0.0078 0.0050 0.0220 -0.0212 0.0103 -0.0132  
Z -0.0159 0.0135 -0.0024 0.0229 0.0184 0.0033

AT.163 H X -0.0397 -0.0043 0.0098 -0.0031 -0.0088 0.0068  
Y 0.0156 -0.0006 0.0310 -0.0057 -0.0044 -0.0009  
Z -0.0184 -0.0199 -0.0003 -0.0212 0.0291 -0.0045

AT.164 H X -0.0397 0.0043 0.0098 0.0031 -0.0088 -0.0068  
Y 0.0156 0.0006 0.0310 0.0057 -0.0044 0.0009  
Z -0.0184 0.0199 -0.0003 0.0212 0.0291 0.0045

AT.165 O X 0.0485 0.0427 -0.0271 -0.0219 -0.0008 0.0420  
Y -0.0184 -0.0218 -0.0208 0.0328 -0.0012 -0.0331  
Z 0.0192 0.0343 -0.0127 0.0329 0.0029 0.0090

AT.166 O X 0.0485 -0.0427 -0.0271 0.0219 -0.0008 -0.0420  
Y -0.0184 0.0218 -0.0208 -0.0328 -0.0012 0.0331  
Z 0.0192 -0.0343 -0.0127 -0.0329 0.0029 -0.0090

AT.167 H X 0.0525 0.0444 -0.0320 -0.0239 -0.0046 0.0468  
Y -0.0202 -0.0181 -0.0278 0.0380 0.0019 -0.0317

Z 0.0117 0.0242 0.0096 0.0299 0.0095 -0.0043  
 AT. 168 H X 0.0525 -0.0444 -0.0320 0.0239 -0.0046 -0.0468  
 Y -0.0202 0.0181 -0.0278 -0.0380 0.0019 0.0317  
 Z 0.0117 -0.0242 0.0096 -0.0299 0.0095 0.0043  
 AT. 169 O X 0.0289 0.0187 0.0001 -0.0124 0.0125 0.0182  
 Y -0.0154 -0.0044 -0.0063 0.0119 0.0072 -0.0317  
 Z 0.0143 0.0253 -0.0100 0.0392 0.0038 0.0036  
 AT. 170 O X 0.0289 -0.0187 0.0001 0.0124 0.0125 -0.0182  
 Y -0.0154 0.0044 -0.0063 -0.0119 0.0072 0.0317  
 Z 0.0143 -0.0253 -0.0100 -0.0392 0.0038 -0.0036  
 AT. 171 H X 0.0281 0.0003 -0.0121 -0.0083 0.0086 0.0237  
 Y -0.0125 -0.0051 -0.0120 0.0055 0.0059 -0.0259  
 Z 0.0209 0.0389 -0.0111 0.0248 0.0040 0.0098  
 AT. 172 H X 0.0281 -0.0003 -0.0121 0.0083 0.0086 -0.0237  
 Y -0.0125 0.0051 -0.0120 -0.0055 0.0059 0.0259  
 Z 0.0209 -0.0389 -0.0111 -0.0248 0.0040 -0.0098  
  
 FREQ(CM\*\*-1) 37.30 37.52 41.48 42.42 42.99 43.97  
  
 AT. 1 I X -0.0408 -0.0210 -0.0138 -0.0053 -0.0080 0.0236  
 Y 0.0049 -0.0374 -0.0253 -0.0363 0.0134 -0.0189  
 Z 0.0145 0.0112 0.0061 -0.0208 0.0070 0.0022  
 AT. 2 I X 0.0408 -0.0210 0.0138 0.0053 -0.0080 0.0236  
 Y -0.0049 -0.0374 0.0253 0.0363 0.0134 -0.0189  
 Z -0.0145 0.0112 -0.0061 0.0208 0.0070 0.0022  
 AT. 3 I X -0.0004 -0.0022 0.0230 -0.0086 -0.0066 0.0011  
 Y -0.0105 -0.0300 -0.0276 0.0186 0.0088 -0.0220  
 Z 0.0140 -0.0020 0.0037 -0.0279 -0.0071 -0.0345  
 AT. 4 I X 0.0004 -0.0022 -0.0230 0.0086 -0.0066 0.0011  
 Y 0.0105 -0.0300 0.0276 -0.0186 0.0088 -0.0220  
 Z -0.0140 -0.0020 -0.0037 0.0279 -0.0071 -0.0345  
 AT. 5 O X -0.0484 -0.0250 -0.0139 -0.0108 -0.0085 0.0291

Y 0.0021 -0.0377 -0.0361 -0.0194 0.0234 -0.0112  
Z 0.0116 0.0149 0.0048 -0.0069 -0.0058 0.0384  
AT. 6 O X 0.0484 -0.0250 0.0139 0.0108 -0.0085 0.0291  
Y -0.0021 -0.0377 0.0361 0.0194 0.0234 -0.0112  
Z -0.0116 0.0149 -0.0048 0.0069 -0.0058 0.0384  
AT. 7 O X -0.0077 -0.0087 0.0143 -0.0025 -0.0147 0.0009  
Y 0.0082 -0.0089 -0.0242 -0.0004 0.0098 0.0102  
Z -0.0024 -0.0009 -0.0294 -0.0193 0.0172 -0.0115  
AT. 8 O X 0.0077 -0.0087 -0.0143 0.0025 -0.0147 0.0009  
Y -0.0082 -0.0089 0.0242 0.0004 0.0098 0.0102  
Z 0.0024 -0.0009 0.0294 0.0193 0.0172 -0.0115  
AT. 9 N X -0.0281 -0.0054 0.0054 -0.0029 0.0022 0.0026  
Y 0.0198 -0.0038 0.0090 -0.0184 0.0162 0.0116  
Z 0.0170 0.0177 0.0061 -0.0047 -0.0018 0.0280  
AT. 10 N X 0.0281 -0.0054 -0.0054 0.0029 0.0022 0.0026  
Y -0.0198 -0.0038 -0.0090 0.0184 0.0162 0.0116  
Z -0.0170 0.0177 -0.0061 0.0047 -0.0018 0.0280  
AT. 11 N X -0.0118 -0.0070 0.0147 -0.0063 -0.0015 -0.0125  
Y 0.0118 -0.0008 0.0023 -0.0114 0.0162 0.0255  
Z 0.0040 0.0059 -0.0053 -0.0275 0.0165 0.0093  
AT. 12 N X 0.0118 -0.0070 -0.0147 0.0063 -0.0015 -0.0125  
Y -0.0118 -0.0008 -0.0023 0.0114 0.0162 0.0255  
Z -0.0040 0.0059 0.0053 0.0275 0.0165 0.0093  
AT. 13 C X -0.0394 -0.0183 -0.0069 -0.0089 -0.0055 0.0175  
Y 0.0094 -0.0257 -0.0183 -0.0198 0.0193 -0.0054  
Z 0.0157 0.0144 0.0017 -0.0046 -0.0003 0.0237  
AT. 14 C X 0.0394 -0.0183 0.0069 0.0089 -0.0055 0.0175  
Y -0.0094 -0.0257 0.0183 0.0198 0.0193 -0.0054  
Z -0.0157 0.0144 -0.0017 0.0046 -0.0003 0.0237  
AT. 15 C X -0.0414 -0.0221 -0.0086 -0.0136 -0.0103 0.0201  
Y 0.0082 -0.0326 -0.0253 -0.0238 0.0179 -0.0147  
Z 0.0190 0.0093 -0.0084 -0.0028 0.0079 0.0004

AT. 16 C X 0.0414 -0.0221 0.0086 0.0136 -0.0103 0.0201  
Y -0.0082 -0.0326 0.0253 0.0238 0.0179 -0.0147  
Z -0.0190 0.0093 0.0084 0.0028 0.0079 0.0004

AT. 17 H X -0.0430 -0.0246 -0.0065 -0.0230 -0.0110 0.0139  
Y 0.0067 -0.0292 -0.0164 -0.0295 0.0136 -0.0048  
Z 0.0199 0.0042 -0.0188 0.0011 0.0129 -0.0145

AT. 18 H X 0.0430 -0.0246 0.0065 0.0230 -0.0110 0.0139  
Y -0.0067 -0.0292 0.0164 0.0295 0.0136 -0.0048  
Z -0.0199 0.0042 0.0188 -0.0011 0.0129 -0.0145

AT. 19 H X -0.0444 -0.0232 -0.0101 -0.0121 -0.0147 0.0285  
Y 0.0099 -0.0376 -0.0375 -0.0151 0.0242 -0.0291  
Z 0.0190 0.0070 -0.0137 0.0011 0.0090 -0.0026

AT. 20 H X 0.0444 -0.0232 0.0101 0.0121 -0.0147 0.0285  
Y -0.0099 -0.0376 0.0375 0.0151 0.0242 -0.0291  
Z -0.0190 0.0070 0.0137 -0.0011 0.0090 -0.0026

AT. 21 C X -0.0092 -0.0086 0.0167 -0.0042 -0.0097 -0.0057  
Y 0.0086 -0.0072 -0.0152 -0.0041 0.0140 0.0081  
Z 0.0027 0.0028 -0.0138 -0.0242 0.0158 0.0013

AT. 22 C X 0.0092 -0.0086 -0.0167 0.0042 -0.0097 -0.0057  
Y -0.0086 -0.0072 0.0152 0.0041 0.0140 0.0081  
Z -0.0027 0.0028 0.0138 0.0242 0.0158 0.0013

AT. 23 C X -0.0064 -0.0105 0.0235 -0.0028 -0.0146 -0.0119  
Y 0.0061 -0.0146 -0.0242 0.0007 0.0148 -0.0204  
Z 0.0062 0.0027 -0.0029 -0.0241 0.0094 0.0040

AT. 24 C X 0.0064 -0.0105 -0.0235 0.0028 -0.0146 -0.0119  
Y -0.0061 -0.0146 0.0242 -0.0007 0.0148 -0.0204  
Z -0.0062 0.0027 0.0029 0.0241 0.0094 0.0040

AT. 25 H X -0.0129 -0.0194 0.0214 0.0056 -0.0179 -0.0229  
Y 0.0057 -0.0162 -0.0265 0.0017 0.0147 -0.0252  
Z 0.0008 0.0024 0.0083 -0.0217 0.0070 0.0248

AT. 26 H X 0.0129 -0.0194 -0.0214 -0.0056 -0.0179 -0.0229  
Y -0.0057 -0.0162 0.0265 -0.0017 0.0147 -0.0252



Z -0.0008 0.0024 -0.0083 0.0217 0.0070 0.0248  
AT. 27 H X 0.0019 -0.0079 0.0310 -0.0058 -0.0197 -0.0127  
Y 0.0123 -0.0131 -0.0340 -0.0035 0.0163 -0.0405  
Z 0.0078 0.0030 -0.0096 -0.0256 0.0112 -0.0059  
AT. 28 H X -0.0019 -0.0079 -0.0310 0.0058 -0.0197 -0.0127  
Y -0.0123 -0.0131 0.0340 0.0035 0.0163 -0.0405  
Z -0.0078 0.0030 0.0096 0.0256 0.0112 -0.0059  
AT. 29 C X -0.0278 -0.0015 0.0054 0.0026 0.0046 0.0012  
Y 0.0166 0.0021 0.0112 -0.0124 0.0149 0.0246  
Z 0.0119 0.0175 0.0102 -0.0078 -0.0090 0.0497  
AT. 30 C X 0.0278 -0.0015 -0.0054 -0.0026 0.0046 0.0012  
Y -0.0166 0.0021 -0.0112 0.0124 0.0149 0.0246  
Z -0.0119 0.0175 -0.0102 0.0078 -0.0090 0.0497  
AT. 31 H X -0.0272 0.0036 0.0053 0.0082 0.0073 0.0004  
Y 0.0183 0.0007 0.0115 -0.0095 0.0078 0.0322  
Z 0.0145 0.0183 0.0104 0.0001 -0.0180 0.0600  
AT. 32 H X 0.0272 0.0036 -0.0053 -0.0082 0.0073 0.0004  
Y -0.0183 0.0007 -0.0115 0.0095 0.0078 0.0322  
Z -0.0145 0.0183 -0.0104 -0.0001 -0.0180 0.0600  
AT. 33 H X -0.0343 -0.0013 0.0067 -0.0014 0.0060 0.0092  
Y 0.0133 0.0047 0.0107 -0.0163 0.0246 0.0148  
Z 0.0089 0.0165 0.0114 -0.0087 -0.0122 0.0592  
AT. 34 H X 0.0343 -0.0013 -0.0067 0.0014 0.0060 0.0092  
Y -0.0133 0.0047 -0.0107 0.0163 0.0246 0.0148  
Z -0.0089 0.0165 -0.0114 0.0087 -0.0122 0.0592  
AT. 35 C X -0.0191 -0.0034 0.0043 0.0063 0.0024 -0.0113  
Y 0.0132 0.0063 0.0121 -0.0046 0.0079 0.0442  
Z 0.0068 0.0151 0.0105 -0.0185 -0.0005 0.0426  
AT. 36 C X 0.0191 -0.0034 -0.0043 -0.0063 0.0024 -0.0113  
Y -0.0132 0.0063 -0.0121 0.0046 0.0079 0.0442  
Z -0.0068 0.0151 -0.0105 0.0185 -0.0005 0.0426  
AT. 37 C X -0.0154 -0.0054 0.0111 -0.0016 0.0008 -0.0124

Y 0.0083 0.0033 0.0063 -0.0081 0.0156 0.0354  
Z 0.0033 0.0100 0.0084 -0.0301 0.0103 0.0291  
AT. 38 C X 0.0154 -0.0054 -0.0111 0.0016 0.0008 -0.0124  
Y -0.0083 0.0033 -0.0063 0.0081 0.0156 0.0354  
Z -0.0033 0.0100 -0.0084 0.0301 0.0103 0.0291  
AT. 39 H X -0.0201 -0.0053 0.0178 -0.0085 0.0033 -0.0055  
Y 0.0033 0.0000 0.0006 -0.0126 0.0242 0.0263  
Z 0.0025 0.0118 0.0159 -0.0331 0.0084 0.0381  
AT. 40 H X 0.0201 -0.0053 -0.0178 0.0085 0.0033 -0.0055  
Y -0.0033 0.0000 -0.0006 0.0126 0.0242 0.0263  
Z -0.0025 0.0118 -0.0159 0.0331 0.0084 0.0381  
AT. 41 H X -0.0104 -0.0057 0.0053 0.0043 -0.0024 -0.0189  
Y 0.0057 0.0076 0.0102 -0.0039 0.0123 0.0479  
Z 0.0003 0.0070 0.0111 -0.0394 0.0159 0.0258  
AT. 42 H X 0.0104 -0.0057 -0.0053 -0.0043 -0.0024 -0.0189  
Y -0.0057 0.0076 -0.0102 0.0039 0.0123 0.0479  
Z -0.0003 0.0070 -0.0111 0.0394 0.0159 0.0258  
AT. 43 C X -0.0079 -0.0063 0.0124 -0.0039 -0.0022 -0.0219  
Y 0.0191 0.0031 0.0132 -0.0102 0.0073 0.0347  
Z 0.0050 0.0043 -0.0125 -0.0247 0.0197 -0.0041  
AT. 44 C X 0.0079 -0.0063 -0.0124 0.0039 -0.0022 -0.0219  
Y -0.0191 0.0031 -0.0132 0.0102 0.0073 0.0347  
Z -0.0050 0.0043 0.0125 0.0247 0.0197 -0.0041  
AT. 45 H X -0.0027 -0.0067 0.0124 -0.0028 -0.0028 -0.0305  
Y 0.0200 0.0071 0.0179 -0.0033 0.0019 0.0459  
Z 0.0004 0.0007 -0.0173 -0.0318 0.0251 -0.0093  
AT. 46 H X 0.0027 -0.0067 -0.0124 0.0028 -0.0028 -0.0305  
Y -0.0200 0.0071 -0.0179 0.0033 0.0019 0.0459  
Z -0.0004 0.0007 0.0173 0.0318 0.0251 -0.0093  
AT. 47 H X -0.0074 -0.0077 0.0149 -0.0091 -0.0027 -0.0199  
Y 0.0197 -0.0009 0.0097 -0.0165 0.0107 0.0249  
Z 0.0048 0.0021 -0.0192 -0.0244 0.0238 -0.0172

AT. 48 H X 0.0074 -0.0077 -0.0149 0.0091 -0.0027 -0.0199  
Y -0.0197 -0.0009 -0.0097 0.0165 0.0107 0.0249  
Z -0.0048 0.0021 0.0192 0.0244 0.0238 -0.0172

AT. 49 C X -0.0093 -0.0042 0.0075 0.0056 -0.0002 -0.0230  
Y 0.0247 0.0064 0.0216 -0.0078 -0.0002 0.0419  
Z 0.0124 0.0103 -0.0045 -0.0133 0.0108 0.0055

AT. 50 C X 0.0093 -0.0042 -0.0075 -0.0056 -0.0002 -0.0230  
Y -0.0247 0.0064 -0.0216 0.0078 -0.0002 0.0419  
Z -0.0124 0.0103 0.0045 0.0133 0.0108 0.0055

AT. 51 C X -0.0190 -0.0041 0.0059 0.0026 0.0013 -0.0101  
Y 0.0263 0.0015 0.0186 -0.0161 0.0057 0.0241  
Z 0.0202 0.0154 0.0008 -0.0019 0.0037 0.0111

AT. 52 C X 0.0190 -0.0041 -0.0059 -0.0026 0.0013 -0.0101  
Y -0.0263 0.0015 -0.0186 0.0161 0.0057 0.0241  
Z -0.0202 0.0154 -0.0008 0.0019 0.0037 0.0111

AT. 53 H X -0.0191 -0.0043 0.0090 -0.0034 0.0005 -0.0087  
Y 0.0295 -0.0005 0.0190 -0.0224 0.0082 0.0131  
Z 0.0243 0.0135 -0.0042 0.0018 0.0085 -0.0051

AT. 54 H X 0.0191 -0.0043 -0.0090 0.0034 0.0005 -0.0087  
Y -0.0295 -0.0005 -0.0190 0.0224 0.0082 0.0131  
Z -0.0243 0.0135 0.0042 -0.0018 0.0085 -0.0051

AT. 55 H X -0.0181 -0.0037 0.0021 0.0106 0.0028 -0.0108  
Y 0.0297 0.0053 0.0244 -0.0141 -0.0001 0.0309  
Z 0.0248 0.0202 0.0054 0.0059 -0.0027 0.0191

AT. 56 H X 0.0181 -0.0037 -0.0021 -0.0106 0.0028 -0.0108  
Y -0.0297 0.0053 -0.0244 0.0141 -0.0001 0.0309  
Z -0.0248 0.0202 -0.0054 -0.0059 -0.0027 0.0191

AT. 57 C X -0.0207 -0.0013 0.0007 0.0116 0.0031 -0.0091  
Y 0.0075 0.0104 0.0122 0.0017 0.0049 0.0604  
Z 0.0016 0.0175 0.0181 -0.0194 -0.0068 0.0631

AT. 58 C X 0.0207 -0.0013 -0.0007 -0.0116 0.0031 -0.0091  
Y -0.0075 0.0104 -0.0122 -0.0017 0.0049 0.0604

Z -0.0016 0.0175 -0.0181 0.0194 -0.0068 0.0631  
AT. 59 H X -0.0215 0.0014 -0.0022 0.0166 0.0036 -0.0055  
Y 0.0091 0.0137 0.0180 0.0054 0.0015 0.0652  
Z 0.0032 0.0239 0.0242 -0.0102 -0.0115 0.0721  
AT. 60 H X 0.0215 0.0014 0.0022 -0.0166 0.0036 -0.0055  
Y -0.0091 0.0137 -0.0180 -0.0054 0.0015 0.0652  
Z -0.0032 0.0239 -0.0242 0.0102 -0.0115 0.0721  
AT. 61 H X -0.0267 -0.0033 0.0000 0.0072 0.0026 -0.0016  
Y 0.0049 0.0059 0.0042 -0.0035 0.0097 0.0525  
Z -0.0018 0.0183 0.0216 -0.0202 -0.0096 0.0728  
AT. 62 H X 0.0267 -0.0033 -0.0000 -0.0072 0.0026 -0.0016  
Y -0.0049 0.0059 -0.0042 0.0035 0.0097 0.0525  
Z 0.0018 0.0183 -0.0216 0.0202 -0.0096 0.0728  
AT. 63 H X -0.0145 0.0001 0.0018 0.0144 0.0032 -0.0177  
Y 0.0044 0.0152 0.0158 0.0084 0.0013 0.0754  
Z -0.0016 0.0120 0.0138 -0.0277 -0.0038 0.0576  
AT. 64 H X 0.0145 0.0001 -0.0018 -0.0144 0.0032 -0.0177  
Y -0.0044 0.0152 -0.0158 -0.0084 0.0013 0.0754  
Z 0.0016 0.0120 -0.0138 0.0277 -0.0038 0.0576  
AT. 65 C X -0.0009 -0.0041 0.0076 0.0109 -0.0010 -0.0357  
Y 0.0311 0.0108 0.0331 -0.0059 -0.0114 0.0511  
Z 0.0159 0.0082 -0.0105 -0.0099 0.0158 -0.0092  
AT. 66 C X 0.0009 -0.0041 -0.0076 -0.0109 -0.0010 -0.0357  
Y -0.0311 0.0108 -0.0331 0.0059 -0.0114 0.0511  
Z -0.0159 0.0082 0.0105 0.0099 0.0158 -0.0092  
AT. 67 H X 0.0046 -0.0044 0.0091 0.0129 -0.0020 -0.0459  
Y 0.0315 0.0137 0.0348 -0.0005 -0.0154 0.0634  
Z 0.0105 0.0056 -0.0134 -0.0165 0.0203 -0.0120  
AT. 68 H X -0.0046 -0.0044 -0.0091 -0.0129 -0.0020 -0.0459  
Y -0.0315 0.0137 -0.0348 0.0005 -0.0154 0.0634  
Z -0.0105 0.0056 0.0134 0.0165 0.0203 -0.0120  
AT. 69 H X -0.0022 -0.0039 0.0112 0.0056 -0.0033 -0.0357

Y 0.0317 0.0092 0.0338 -0.0110 -0.0105 0.0411  
Z 0.0195 0.0054 -0.0162 -0.0068 0.0220 -0.0239  
AT. 70 H X 0.0022 -0.0039 -0.0112 -0.0056 -0.0033 -0.0357  
Y -0.0317 0.0092 -0.0338 0.0110 -0.0105 0.0411  
Z -0.0195 0.0054 0.0162 0.0068 0.0220 -0.0239  
AT. 71 H X 0.0008 -0.0043 0.0028 0.0178 0.0020 -0.0356  
Y 0.0342 0.0131 0.0389 -0.0050 -0.0175 0.0561  
Z 0.0212 0.0111 -0.0066 -0.0033 0.0097 -0.0024  
AT. 72 H X -0.0008 -0.0043 -0.0028 -0.0178 0.0020 -0.0356  
Y -0.0342 0.0131 -0.0389 0.0050 -0.0175 0.0561  
Z -0.0212 0.0111 0.0066 0.0033 0.0097 -0.0024  
AT. 73 C X -0.0108 -0.0031 0.0023 0.0125 0.0012 -0.0239  
Y 0.0201 0.0101 0.0208 -0.0001 -0.0031 0.0562  
Z 0.0094 0.0133 0.0044 -0.0160 0.0040 0.0270  
AT. 74 C X 0.0108 -0.0031 -0.0023 -0.0125 0.0012 -0.0239  
Y -0.0201 0.0101 -0.0208 0.0001 -0.0031 0.0562  
Z -0.0094 0.0133 -0.0044 0.0160 0.0040 0.0270  
AT. 75 H X -0.0128 -0.0018 -0.0030 0.0193 0.0025 -0.0252  
Y 0.0238 0.0125 0.0256 0.0022 -0.0088 0.0628  
Z 0.0127 0.0171 0.0068 -0.0080 -0.0027 0.0344  
AT. 76 H X 0.0128 -0.0018 0.0030 -0.0193 0.0025 -0.0252  
Y -0.0238 0.0125 -0.0256 -0.0022 -0.0088 0.0628  
Z -0.0127 0.0171 -0.0068 0.0080 -0.0027 0.0344  
AT. 77 H X -0.0048 -0.0033 0.0025 0.0156 0.0005 -0.0324  
Y 0.0183 0.0133 0.0214 0.0055 -0.0075 0.0683  
Z 0.0052 0.0104 0.0035 -0.0242 0.0086 0.0231  
AT. 78 H X 0.0048 -0.0033 -0.0025 -0.0156 0.0005 -0.0324  
Y -0.0183 0.0133 -0.0214 -0.0055 -0.0075 0.0683  
Z -0.0052 0.0104 -0.0035 0.0242 0.0086 0.0231  
AT. 79 I X 0.0105 -0.0180 0.0176 0.0243 0.0117 -0.0075  
Y -0.0082 0.0573 0.0392 0.0385 -0.0026 -0.0376  
Z -0.0219 -0.0356 -0.0081 0.0460 -0.0452 0.0020

AT. 80 I X -0.0105 -0.0180 -0.0176 -0.0243 0.0117 -0.0075  
Y 0.0082 0.0573 -0.0392 -0.0385 -0.0026 -0.0376  
Z 0.0219 -0.0356 0.0081 -0.0460 -0.0452 0.0020

AT. 81 I X 0.0092 0.0252 0.0261 -0.0008 -0.0153 -0.0109  
Y 0.0105 0.0117 0.0467 -0.0197 -0.0226 0.0365  
Z 0.0711 -0.0011 -0.0121 0.0271 0.0713 0.0108

AT. 82 I X -0.0092 0.0252 -0.0261 0.0008 -0.0153 -0.0109  
Y -0.0105 0.0117 -0.0467 0.0197 -0.0226 0.0365  
Z -0.0711 -0.0011 0.0121 -0.0271 0.0713 0.0108

AT. 83 O X 0.0121 -0.0190 0.0139 0.0083 0.0136 -0.0047  
Y -0.0024 0.0353 0.0078 0.0181 -0.0103 -0.0028  
Z 0.0067 0.0221 -0.0276 0.0220 -0.0193 0.0058

AT. 84 O X -0.0121 -0.0190 -0.0139 -0.0083 0.0136 -0.0047  
Y 0.0024 0.0353 -0.0078 -0.0181 -0.0103 -0.0028  
Z -0.0067 0.0221 0.0276 -0.0220 -0.0193 0.0058

AT. 85 O X 0.0066 0.0143 0.0048 0.0112 -0.0001 -0.0222  
Y 0.0185 -0.0012 0.0040 -0.0237 -0.0076 0.0108  
Z 0.0287 -0.0038 0.0105 0.0086 -0.0172 -0.0089

AT. 86 O X -0.0066 0.0143 -0.0048 -0.0112 -0.0001 -0.0222  
Y -0.0185 -0.0012 -0.0040 0.0237 -0.0076 0.0108  
Z -0.0287 -0.0038 -0.0105 -0.0086 -0.0172 -0.0089

AT. 87 N X 0.0230 0.0168 -0.0029 0.0091 0.0174 0.0028  
Y 0.0048 -0.0071 -0.0218 0.0083 -0.0101 -0.0069  
Z 0.0011 0.0028 -0.0183 0.0224 -0.0219 0.0012

AT. 88 N X -0.0230 0.0168 0.0029 -0.0091 0.0174 0.0028  
Y -0.0048 -0.0071 0.0218 -0.0083 -0.0101 -0.0069  
Z -0.0011 0.0028 0.0183 -0.0224 -0.0219 0.0012

AT. 89 N X 0.0235 0.0253 -0.0046 0.0005 0.0079 -0.0048  
Y 0.0028 -0.0060 -0.0211 0.0026 -0.0101 -0.0032  
Z 0.0253 -0.0011 -0.0168 0.0267 -0.0143 -0.0121

AT. 90 N X -0.0235 0.0253 0.0046 -0.0005 0.0079 -0.0048  
Y -0.0028 -0.0060 0.0211 -0.0026 -0.0101 -0.0032

Z -0.0253 -0.0011 0.0168 -0.0267 -0.0143 -0.0121  
AT. 91 C X 0.0160 -0.0083 0.0064 0.0079 0.0149 -0.0006  
Y -0.0013 0.0248 0.0045 0.0158 -0.0086 -0.0103  
Z 0.0001 0.0077 -0.0151 0.0233 -0.0218 0.0009  
AT. 92 C X -0.0160 -0.0083 -0.0064 -0.0079 0.0149 -0.0006  
Y 0.0013 0.0248 -0.0045 -0.0158 -0.0086 -0.0103  
Z -0.0001 0.0077 0.0151 -0.0233 -0.0218 0.0009  
AT. 93 C X 0.0128 -0.0222 0.0087 0.0061 0.0125 0.0021  
Y -0.0061 0.0465 0.0289 0.0231 -0.0040 -0.0259  
Z -0.0102 -0.0022 0.0039 0.0249 -0.0236 -0.0049  
AT. 94 C X -0.0128 -0.0222 -0.0087 -0.0061 0.0125 0.0021  
Y 0.0061 0.0465 -0.0289 -0.0231 -0.0040 -0.0259  
Z 0.0102 -0.0022 -0.0039 -0.0249 -0.0236 -0.0049  
AT. 95 H X 0.0177 -0.0229 -0.0020 -0.0061 0.0148 0.0091  
Y -0.0063 0.0435 0.0258 0.0331 -0.0082 -0.0259  
Z -0.0148 0.0048 0.0226 0.0208 -0.0187 -0.0127  
AT. 96 H X -0.0177 -0.0229 0.0020 0.0061 0.0148 0.0091  
Y 0.0063 0.0435 -0.0258 -0.0331 -0.0082 -0.0259  
Z 0.0148 0.0048 -0.0226 -0.0208 -0.0187 -0.0127  
AT. 97 H X 0.0037 -0.0366 0.0144 0.0072 0.0078 0.0023  
Y -0.0059 0.0615 0.0448 0.0120 0.0035 -0.0326  
Z -0.0076 0.0053 0.0061 0.0219 -0.0204 -0.0065  
AT. 98 H X -0.0037 -0.0366 -0.0144 -0.0072 0.0078 0.0023  
Y 0.0059 0.0615 -0.0448 -0.0120 0.0035 -0.0326  
Z 0.0076 0.0053 -0.0061 -0.0219 -0.0204 -0.0065  
AT. 99 C X 0.0120 0.0176 0.0015 0.0059 0.0000 -0.0181  
Y 0.0127 -0.0037 -0.0014 -0.0105 -0.0027 0.0076  
Z 0.0318 0.0002 -0.0058 0.0183 -0.0094 -0.0055  
AT. 100 C X -0.0120 0.0176 -0.0015 -0.0059 0.0000 -0.0181  
Y -0.0127 -0.0037 0.0014 0.0105 -0.0027 0.0076  
Z -0.0318 0.0002 0.0058 -0.0183 -0.0094 -0.0055  
AT. 101 C X 0.0035 0.0144 0.0035 0.0041 -0.0128 -0.0268

Y 0.0186 -0.0039 0.0173 -0.0094 0.0129 0.0164  
Z 0.0417 0.0050 -0.0101 0.0200 0.0060 0.0060  
AT. 102 C X -0.0035 0.0144 -0.0035 -0.0041 -0.0128 -0.0268  
Y -0.0186 -0.0039 -0.0173 0.0094 0.0129 0.0164  
Z -0.0417 0.0050 0.0101 -0.0200 0.0060 0.0060  
AT. 103 H X 0.0045 0.0080 -0.0154 0.0073 -0.0056 -0.0381  
Y 0.0182 -0.0011 0.0254 -0.0106 0.0102 0.0208  
Z 0.0359 0.0120 -0.0111 0.0165 -0.0134 0.0131  
AT. 104 H X -0.0045 0.0080 0.0154 -0.0073 -0.0056 -0.0381  
Y -0.0182 -0.0011 -0.0254 0.0106 0.0102 0.0208  
Z -0.0359 0.0120 0.0111 -0.0165 -0.0134 0.0131  
AT. 105 H X -0.0051 0.0133 0.0096 0.0025 -0.0314 -0.0305  
Y 0.0271 -0.0106 0.0126 -0.0054 0.0407 0.0103  
Z 0.0427 0.0023 -0.0102 0.0211 0.0124 0.0027  
AT. 106 H X 0.0051 0.0133 -0.0096 -0.0025 -0.0314 -0.0305  
Y -0.0271 -0.0106 -0.0126 0.0054 0.0407 0.0103  
Z -0.0427 0.0023 0.0102 -0.0211 0.0124 0.0027  
AT. 107 C X 0.0280 0.0278 -0.0100 0.0105 0.0190 0.0045  
Y 0.0010 -0.0104 -0.0249 0.0019 -0.0136 -0.0014  
Z 0.0088 0.0192 -0.0320 0.0217 -0.0205 0.0066  
AT. 108 C X -0.0280 0.0278 0.0100 -0.0105 0.0190 0.0045  
Y -0.0010 -0.0104 0.0249 -0.0019 -0.0136 -0.0014  
Z -0.0088 0.0192 0.0320 -0.0217 -0.0205 0.0066  
AT. 109 H X 0.0316 0.0407 -0.0157 0.0139 0.0214 0.0060  
Y -0.0026 -0.0046 -0.0262 0.0011 -0.0142 0.0014  
Z 0.0012 0.0248 -0.0328 0.0192 -0.0226 0.0109  
AT. 110 H X -0.0316 0.0407 0.0157 -0.0139 0.0214 0.0060  
Y 0.0026 -0.0046 0.0262 -0.0011 -0.0142 0.0014  
Z -0.0012 0.0248 0.0328 -0.0192 -0.0226 0.0109  
AT. 111 H X 0.0227 0.0196 -0.0028 0.0107 0.0185 0.0023  
Y 0.0061 -0.0212 -0.0224 0.0008 -0.0137 -0.0044  
Z 0.0131 0.0303 -0.0400 0.0215 -0.0201 0.0095



AT.112 H X -0.0227 0.0196 0.0028 -0.0107 0.0185 0.0023  
Y -0.0061 -0.0212 0.0224 -0.0008 -0.0137 -0.0044  
Z -0.0131 0.0303 0.0400 -0.0215 -0.0201 0.0095

AT.113 C X 0.0359 0.0351 -0.0200 0.0064 0.0182 0.0076  
Y -0.0057 -0.0027 -0.0274 -0.0016 -0.0166 0.0030  
Z 0.0195 0.0139 -0.0329 0.0243 -0.0175 0.0028

AT.114 C X -0.0359 0.0351 0.0200 -0.0064 0.0182 0.0076  
Y 0.0057 -0.0027 0.0274 0.0016 -0.0166 0.0030  
Z -0.0195 0.0139 0.0329 -0.0243 -0.0175 0.0028

AT.115 C X 0.0294 0.0294 -0.0114 0.0020 0.0120 0.0002  
Y -0.0018 -0.0074 -0.0238 -0.0011 -0.0168 -0.0015  
Z 0.0307 0.0066 -0.0306 0.0260 -0.0137 -0.0016

AT.116 C X -0.0294 0.0294 0.0114 -0.0020 0.0120 0.0002  
Y 0.0018 -0.0074 0.0238 0.0011 -0.0168 -0.0015  
Z -0.0307 0.0066 0.0306 -0.0260 -0.0137 -0.0016

AT.117 H X 0.0235 0.0277 -0.0039 0.0026 0.0130 -0.0034  
Y 0.0023 -0.0133 -0.0204 -0.0033 -0.0212 -0.0070  
Z 0.0358 0.0095 -0.0395 0.0257 -0.0136 0.0036

AT.118 H X -0.0235 0.0277 0.0039 -0.0026 0.0130 -0.0034  
Y -0.0023 -0.0133 0.0204 0.0033 -0.0212 -0.0070  
Z -0.0358 0.0095 0.0395 -0.0257 -0.0136 0.0036

AT.119 H X 0.0351 0.0301 -0.0188 -0.0001 0.0081 0.0029  
Y -0.0063 -0.0047 -0.0276 -0.0027 -0.0205 0.0008  
Z 0.0382 0.0042 -0.0311 0.0266 -0.0124 -0.0025

AT.120 H X -0.0351 0.0301 0.0188 0.0001 0.0081 0.0029  
Y 0.0063 -0.0047 0.0276 0.0027 -0.0205 0.0008  
Z -0.0382 0.0042 0.0311 -0.0266 -0.0124 -0.0025

AT.121 C X 0.0297 0.0311 -0.0092 -0.0029 0.0111 0.0042  
Y -0.0010 -0.0041 -0.0288 0.0072 -0.0104 -0.0022  
Z 0.0167 -0.0094 -0.0082 0.0308 -0.0188 -0.0252

AT.122 C X -0.0297 0.0311 0.0092 0.0029 0.0111 0.0042  
Y 0.0010 -0.0041 0.0288 -0.0072 -0.0104 -0.0022

Z -0.0167 -0.0094 0.0082 -0.0308 -0.0188 -0.0252  
AT. 123 H X 0.0354 0.0370 -0.0104 -0.0124 0.0144 0.0174  
Y -0.0061 -0.0028 -0.0277 0.0021 -0.0103 0.0077  
Z 0.0228 -0.0100 -0.0096 0.0347 -0.0185 -0.0333  
AT. 124 H X -0.0354 0.0370 0.0104 0.0124 0.0144 0.0174  
Y 0.0061 -0.0028 0.0277 -0.0021 -0.0103 0.0077  
Z -0.0228 -0.0100 0.0096 -0.0347 -0.0185 -0.0333  
AT. 125 H X 0.0238 0.0261 -0.0023 -0.0030 0.0071 -0.0014  
Y 0.0041 -0.0049 -0.0323 0.0170 -0.0097 -0.0140  
Z 0.0121 -0.0158 -0.0019 0.0357 -0.0230 -0.0378  
AT. 126 H X -0.0238 0.0261 0.0023 0.0030 0.0071 -0.0014  
Y -0.0041 -0.0049 0.0323 -0.0170 -0.0097 -0.0140  
Z -0.0121 -0.0158 0.0019 -0.0357 -0.0230 -0.0378  
AT. 127 C X 0.0362 0.0367 -0.0203 0.0037 0.0163 0.0077  
Y -0.0055 -0.0023 -0.0301 0.0066 -0.0104 0.0053  
Z 0.0049 -0.0095 -0.0061 0.0266 -0.0213 -0.0134  
AT. 128 C X -0.0362 0.0367 0.0203 -0.0037 0.0163 0.0077  
Y 0.0055 -0.0023 0.0301 -0.0066 -0.0104 0.0053  
Z -0.0049 -0.0095 0.0061 -0.0266 -0.0213 -0.0134  
AT. 129 C X 0.0294 0.0258 -0.0117 0.0082 0.0176 0.0052  
Y 0.0013 -0.0057 -0.0278 0.0111 -0.0086 -0.0039  
Z -0.0055 -0.0092 -0.0047 0.0230 -0.0231 -0.0036  
AT. 130 C X -0.0294 0.0258 0.0117 -0.0082 0.0176 0.0052  
Y -0.0013 -0.0057 0.0278 -0.0111 -0.0086 -0.0039  
Z 0.0055 -0.0092 0.0047 -0.0230 -0.0231 -0.0036  
AT. 131 H X 0.0242 0.0211 -0.0037 0.0064 0.0166 0.0045  
Y 0.0065 -0.0107 -0.0293 0.0176 -0.0069 -0.0102  
Z -0.0106 -0.0183 0.0057 0.0234 -0.0237 -0.0073  
AT. 132 H X -0.0242 0.0211 0.0037 -0.0064 0.0166 0.0045  
Y -0.0065 -0.0107 0.0293 -0.0176 -0.0069 -0.0102  
Z 0.0106 -0.0183 -0.0057 -0.0234 -0.0237 -0.0073  
AT. 133 H X 0.0341 0.0279 -0.0207 0.0128 0.0193 0.0044

Y -0.0016 -0.0051 -0.0306 0.0102 -0.0080 0.0001  
Z -0.0124 -0.0096 -0.0052 0.0196 -0.0232 0.0029  
AT. 134 H X -0.0341 0.0279 0.0207 -0.0128 0.0193 0.0044  
Y 0.0016 -0.0051 0.0306 -0.0102 -0.0080 0.0001  
Z 0.0124 -0.0096 0.0052 -0.0196 -0.0232 0.0029  
AT. 135 C X 0.0416 0.0425 -0.0291 0.0079 0.0198 0.0142  
Y -0.0085 0.0020 -0.0310 -0.0083 -0.0200 0.0026  
Z 0.0276 0.0292 -0.0492 0.0230 -0.0163 0.0132  
AT. 136 C X -0.0416 0.0425 0.0291 -0.0079 0.0198 0.0142  
Y 0.0085 0.0020 0.0310 0.0083 -0.0200 0.0026  
Z -0.0276 0.0292 0.0492 -0.0230 -0.0163 0.0132  
AT. 137 H X 0.0458 0.0483 -0.0362 0.0114 0.0221 0.0218  
Y -0.0088 0.0050 -0.0352 -0.0090 -0.0190 0.0069  
Z 0.0249 0.0324 -0.0539 0.0205 -0.0161 0.0180  
AT. 138 H X -0.0458 0.0483 0.0362 -0.0114 0.0221 0.0218  
Y 0.0088 0.0050 0.0352 0.0090 -0.0190 0.0069  
Z -0.0249 0.0324 0.0539 -0.0205 -0.0161 0.0180  
AT. 139 H X 0.0368 0.0348 -0.0212 0.0087 0.0203 0.0103  
Y -0.0082 -0.0024 -0.0255 -0.0100 -0.0223 -0.0053  
Z 0.0332 0.0399 -0.0606 0.0223 -0.0166 0.0203  
AT. 140 H X -0.0368 0.0348 0.0212 -0.0087 0.0203 0.0103  
Y 0.0082 -0.0024 0.0255 0.0100 -0.0223 -0.0053  
Z -0.0332 0.0399 0.0606 -0.0223 -0.0166 0.0203  
AT. 141 H X 0.0469 0.0508 -0.0365 0.0046 0.0182 0.0155  
Y -0.0088 0.0068 -0.0367 -0.0112 -0.0201 0.0058  
Z 0.0302 0.0279 -0.0468 0.0247 -0.0170 0.0106  
AT. 142 H X -0.0469 0.0508 0.0365 -0.0046 0.0182 0.0155  
Y 0.0088 0.0068 0.0367 0.0112 -0.0201 0.0058  
Z -0.0302 0.0279 0.0468 -0.0247 -0.0170 0.0106  
AT. 143 C X 0.0428 0.0461 -0.0284 0.0035 0.0172 0.0115  
Y -0.0119 -0.0019 -0.0328 0.0098 -0.0092 0.0152  
Z -0.0017 -0.0226 0.0057 0.0259 -0.0224 -0.0213

AT. 144 C X -0.0428 0.0461 0.0284 -0.0035 0.0172 0.0115  
Y 0.0119 -0.0019 0.0328 -0.0098 -0.0092 0.0152  
Z 0.0017 -0.0226 -0.0057 -0.0259 -0.0224 -0.0213

AT. 145 H X 0.0497 0.0569 -0.0352 0.0013 0.0176 0.0132  
Y -0.0137 0.0014 -0.0343 0.0088 -0.0088 0.0183  
Z 0.0017 -0.0237 0.0056 0.0266 -0.0229 -0.0245

AT. 146 H X -0.0497 0.0569 0.0352 -0.0013 0.0176 0.0132  
Y 0.0137 0.0014 0.0343 -0.0088 -0.0088 0.0183  
Z -0.0017 -0.0237 -0.0056 -0.0266 -0.0229 -0.0245

AT. 147 H X 0.0401 0.0407 -0.0232 0.0020 0.0166 0.0069  
Y -0.0130 -0.0075 -0.0304 0.0133 -0.0099 0.0145  
Z -0.0062 -0.0335 0.0144 0.0256 -0.0234 -0.0279

AT. 148 H X -0.0401 0.0407 0.0232 -0.0020 0.0166 0.0069  
Y 0.0130 -0.0075 0.0304 -0.0133 -0.0099 0.0145  
Z 0.0062 -0.0335 -0.0144 -0.0256 -0.0234 -0.0279

AT. 149 H X 0.0423 0.0489 -0.0327 0.0072 0.0170 0.0179  
Y -0.0147 -0.0005 -0.0339 0.0103 -0.0090 0.0193  
Z -0.0065 -0.0215 0.0057 0.0249 -0.0221 -0.0173

AT. 150 H X -0.0423 0.0489 0.0327 -0.0072 0.0170 0.0179  
Y 0.0147 -0.0005 0.0339 -0.0103 -0.0090 0.0193  
Z 0.0065 -0.0215 -0.0057 -0.0249 -0.0221 -0.0173

AT. 151 C X 0.0432 0.0433 -0.0296 0.0057 0.0190 0.0119  
Y -0.0113 0.0024 -0.0308 -0.0008 -0.0146 0.0110  
Z 0.0118 0.0029 -0.0196 0.0254 -0.0194 -0.0046

AT. 152 C X -0.0432 0.0433 0.0296 -0.0057 0.0190 0.0119  
Y 0.0113 0.0024 0.0308 0.0008 -0.0146 0.0110  
Z -0.0118 0.0029 0.0196 -0.0254 -0.0194 -0.0046

AT. 153 H X 0.0471 0.0462 -0.0359 0.0084 0.0224 0.0149  
Y -0.0143 0.0043 -0.0316 -0.0025 -0.0140 0.0146  
Z 0.0046 0.0047 -0.0183 0.0215 -0.0202 0.0002

AT. 154 H X -0.0471 0.0462 0.0359 -0.0084 0.0224 0.0149  
Y 0.0143 0.0043 0.0316 0.0025 -0.0140 0.0146

Z -0.0046 0.0047 0.0183 -0.0215 -0.0202 0.0002  
AT. 155 H X 0.0490 0.0498 -0.0367 0.0030 0.0184 0.0144  
Y -0.0154 0.0062 -0.0321 -0.0044 -0.0161 0.0157  
Z 0.0180 0.0012 -0.0210 0.0283 -0.0183 -0.0087  
AT. 156 H X -0.0490 0.0498 0.0367 -0.0030 0.0184 0.0144  
Y 0.0154 0.0062 0.0321 0.0044 -0.0161 0.0157  
Z -0.0180 0.0012 0.0210 -0.0283 -0.0183 -0.0087  
AT. 157 O X -0.0239 -0.0143 -0.0211 0.0083 -0.0041 0.0117  
Y 0.0053 -0.0329 -0.0364 -0.0203 0.0194 -0.0051  
Z 0.0024 -0.0046 0.0162 0.0140 0.0182 -0.0101  
AT. 158 O X 0.0239 -0.0143 0.0211 -0.0083 -0.0041 0.0117  
Y -0.0053 -0.0329 0.0364 0.0203 0.0194 -0.0051  
Z -0.0024 -0.0046 -0.0162 -0.0140 0.0182 -0.0101  
AT. 159 O X -0.0178 -0.0151 -0.0207 0.0029 -0.0062 0.0098  
Y 0.0042 -0.0228 -0.0229 -0.0228 0.0106 -0.0031  
Z 0.0134 -0.0045 0.0186 0.0050 0.0139 -0.0133  
AT. 160 O X 0.0178 -0.0151 0.0207 -0.0029 -0.0062 0.0098  
Y -0.0042 -0.0228 0.0229 0.0228 0.0106 -0.0031  
Z -0.0134 -0.0045 -0.0186 -0.0050 0.0139 -0.0133  
AT. 161 H X -0.0275 -0.0174 -0.0266 0.0052 -0.0034 0.0203  
Y 0.0046 -0.0361 -0.0380 -0.0183 0.0222 -0.0095  
Z 0.0037 0.0064 0.0207 0.0071 0.0081 0.0084  
AT. 162 H X 0.0275 -0.0174 0.0266 -0.0052 -0.0034 0.0203  
Y -0.0046 -0.0361 0.0380 0.0183 0.0222 -0.0095  
Z -0.0037 0.0064 -0.0207 -0.0071 0.0081 0.0084  
AT. 163 H X -0.0087 -0.0150 -0.0197 -0.0012 -0.0082 0.0076  
Y 0.0004 -0.0151 0.0009 -0.0130 0.0100 0.0012  
Z 0.0092 -0.0028 0.0248 0.0081 0.0148 -0.0112  
AT. 164 H X 0.0087 -0.0150 0.0197 0.0012 -0.0082 0.0076  
Y -0.0004 -0.0151 -0.0009 0.0130 0.0100 0.0012  
Z -0.0092 -0.0028 -0.0248 -0.0081 0.0148 -0.0112  
AT. 165 O X 0.0194 -0.0272 -0.0085 0.0074 0.0117 0.0122

|              |     |         |         |         |         |         |         |
|--------------|-----|---------|---------|---------|---------|---------|---------|
|              | Y   | -0.0047 | 0.0447  | 0.0252  | 0.0257  | -0.0068 | -0.0132 |
|              | Z   | -0.0227 | 0.0065  | -0.0024 | 0.0212  | -0.0362 | -0.0129 |
| AT. 166      | O X | -0.0194 | -0.0272 | 0.0085  | -0.0074 | 0.0117  | 0.0122  |
|              | Y   | 0.0047  | 0.0447  | -0.0252 | -0.0257 | -0.0068 | -0.0132 |
|              | Z   | 0.0227  | 0.0065  | 0.0024  | -0.0212 | -0.0362 | -0.0129 |
| AT. 167      | H X | 0.0158  | -0.0272 | 0.0013  | 0.0127  | 0.0128  | 0.0059  |
|              | Y   | -0.0023 | 0.0382  | 0.0152  | 0.0206  | -0.0103 | -0.0049 |
|              | Z   | -0.0169 | 0.0162  | -0.0126 | 0.0151  | -0.0339 | -0.0080 |
| AT. 168      | H X | -0.0158 | -0.0272 | -0.0013 | -0.0127 | 0.0128  | 0.0059  |
|              | Y   | 0.0023  | 0.0382  | -0.0152 | -0.0206 | -0.0103 | -0.0049 |
|              | Z   | 0.0169  | 0.0162  | 0.0126  | -0.0151 | -0.0339 | -0.0080 |
| AT. 169      | O X | 0.0286  | 0.0018  | -0.0225 | -0.0119 | 0.0146  | 0.0116  |
|              | Y   | -0.0022 | 0.0167  | 0.0006  | 0.0347  | -0.0106 | 0.0153  |
|              | Z   | -0.0210 | 0.0183  | -0.0003 | 0.0151  | -0.0344 | -0.0189 |
| AT. 170      | O X | -0.0286 | 0.0018  | 0.0225  | 0.0119  | 0.0146  | 0.0116  |
|              | Y   | 0.0022  | 0.0167  | -0.0006 | -0.0347 | -0.0106 | 0.0153  |
|              | Z   | 0.0210  | 0.0183  | 0.0003  | -0.0151 | -0.0344 | -0.0189 |
| AT. 171      | H X | 0.0132  | 0.0077  | -0.0138 | -0.0197 | 0.0155  | -0.0087 |
|              | Y   | -0.0104 | 0.0077  | -0.0003 | 0.0347  | -0.0107 | 0.0137  |
|              | Z   | -0.0238 | -0.0023 | -0.0094 | 0.0212  | -0.0354 | -0.0068 |
| AT. 172      | H X | -0.0132 | 0.0077  | 0.0138  | 0.0197  | 0.0155  | -0.0087 |
|              | Y   | 0.0104  | 0.0077  | 0.0003  | -0.0347 | -0.0107 | 0.0137  |
|              | Z   | 0.0238  | -0.0023 | 0.0094  | -0.0212 | -0.0354 | -0.0068 |
| FREQ(CM**-1) |     | 44.77   | 45.98   | 48.19   | 48.63   | 50.66   | 51.23   |
| AT. 11       | I X | -0.0073 | -0.0202 | 0.0239  | 0.0320  | 0.0069  | 0.0120  |
|              | Y   | 0.0346  | -0.0269 | -0.0181 | 0.0075  | 0.0277  | 0.0097  |
|              | Z   | 0.0351  | -0.0107 | -0.0103 | -0.0230 | -0.0107 | 0.0196  |
| AT. 21       | I X | 0.0073  | 0.0202  | -0.0239 | 0.0320  | 0.0069  | -0.0120 |
|              | Y   | -0.0346 | 0.0269  | 0.0181  | 0.0075  | 0.0277  | -0.0097 |
|              | Z   | -0.0351 | 0.0107  | 0.0103  | -0.0230 | -0.0107 | -0.0196 |

AT. 3 I X 0.0324 0.0309 -0.0028 -0.0289 -0.0035 -0.0070  
Y -0.0404 0.0327 -0.0342 -0.0272 -0.0036 0.0099  
Z -0.0003 0.0216 -0.0152 -0.0149 -0.0213 0.0307

AT. 4 I X -0.0324 -0.0309 0.0028 -0.0289 -0.0035 0.0070  
Y 0.0404 -0.0327 0.0342 -0.0272 -0.0036 -0.0099  
Z 0.0003 -0.0216 0.0152 -0.0149 -0.0213 -0.0307

AT. 5 O X -0.0036 -0.0355 0.0326 0.0324 0.0123 0.0327  
Y -0.0015 -0.0114 -0.0236 0.0323 0.0336 0.0212  
Z 0.0060 0.0052 0.0246 0.0063 -0.0083 0.0056

AT. 6 O X 0.0036 0.0355 -0.0326 0.0324 0.0123 -0.0327  
Y 0.0015 0.0114 0.0236 0.0323 0.0336 -0.0212  
Z -0.0060 -0.0052 -0.0246 0.0063 -0.0083 -0.0056

AT. 7 O X 0.0257 0.0304 0.0044 -0.0232 -0.0039 -0.0158  
Y -0.0198 -0.0092 0.0052 0.0025 0.0036 0.0262  
Z 0.0053 -0.0362 -0.0278 0.0340 0.0181 -0.0230

AT. 8 O X -0.0257 -0.0304 -0.0044 -0.0232 -0.0039 0.0158  
Y 0.0198 0.0092 -0.0052 0.0025 0.0036 -0.0262  
Z -0.0053 0.0362 0.0278 0.0340 0.0181 0.0230

AT. 9 N X 0.0065 -0.0026 -0.0097 0.0002 -0.0023 -0.0038  
Y 0.0008 0.0061 -0.0120 0.0033 0.0224 0.0163  
Z 0.0090 0.0142 0.0097 -0.0009 -0.0118 -0.0054

AT. 10 N X -0.0065 0.0026 0.0097 0.0002 -0.0023 0.0038  
Y -0.0008 -0.0061 0.0120 0.0033 0.0224 -0.0163  
Z -0.0090 -0.0142 -0.0097 -0.0009 -0.0118 0.0054

AT. 11 N X 0.0259 0.0242 -0.0214 -0.0168 0.0014 -0.0267  
Y -0.0125 -0.0063 -0.0001 0.0062 0.0125 0.0313  
Z 0.0125 -0.0310 -0.0183 0.0349 0.0226 -0.0113

AT. 12 N X -0.0259 -0.0242 0.0214 -0.0168 0.0014 0.0267  
Y 0.0125 0.0063 0.0001 0.0062 0.0125 -0.0313  
Z -0.0125 0.0310 0.0183 0.0349 0.0226 0.0113

AT. 13 C X 0.0032 -0.0231 0.0167 0.0184 0.0058 0.0171  
Y 0.0026 -0.0049 -0.0180 0.0191 0.0285 0.0170

Z 0.0096 0.0130 0.0067 0.0010 -0.0115 -0.0065  
AT. 14 C X -0.0032 0.0231 -0.0167 0.0184 0.0058 -0.0171  
Y -0.0026 0.0049 0.0180 0.0191 0.0285 -0.0170  
Z -0.0096 -0.0130 -0.0067 0.0010 -0.0115 0.0065  
AT. 15 C X 0.0086 -0.0312 0.0264 0.0206 0.0072 0.0188  
Y 0.0121 -0.0105 -0.0211 0.0177 0.0282 0.0107  
Z 0.0158 0.0187 -0.0191 -0.0040 -0.0138 -0.0222  
AT. 16 C X -0.0086 0.0312 -0.0264 0.0206 0.0072 -0.0188  
Y -0.0121 0.0105 0.0211 0.0177 0.0282 -0.0107  
Z -0.0158 -0.0187 0.0191 -0.0040 -0.0138 0.0222  
AT. 17 H X 0.0233 -0.0457 0.0258 0.0096 0.0073 0.0270  
Y 0.0156 -0.0203 -0.0087 0.0121 0.0289 0.0261  
Z 0.0166 0.0254 -0.0347 -0.0012 -0.0149 -0.0384  
AT. 18 H X -0.0233 0.0457 -0.0258 0.0096 0.0073 -0.0270  
Y -0.0156 0.0203 0.0087 0.0121 0.0289 -0.0261  
Z -0.0166 -0.0254 0.0347 -0.0012 -0.0149 0.0384  
AT. 19 H X 0.0038 -0.0296 0.0368 0.0285 0.0082 0.0149  
Y 0.0071 0.0036 -0.0384 0.0256 0.0273 -0.0122  
Z 0.0124 0.0248 -0.0228 0.0015 -0.0139 -0.0324  
AT. 20 H X -0.0038 0.0296 -0.0368 0.0285 0.0082 -0.0149  
Y -0.0071 -0.0036 0.0384 0.0256 0.0273 0.0122  
Z -0.0124 -0.0248 0.0228 0.0015 -0.0139 0.0324  
AT. 21 C X 0.0254 0.0325 -0.0076 -0.0251 -0.0035 -0.0168  
Y -0.0183 -0.0044 -0.0041 -0.0009 0.0038 0.0296  
Z 0.0094 -0.0304 -0.0204 0.0315 0.0188 -0.0120  
AT. 22 C X -0.0254 -0.0325 0.0076 -0.0251 -0.0035 0.0168  
Y 0.0183 0.0044 0.0041 -0.0009 0.0038 -0.0296  
Z -0.0094 0.0304 0.0204 0.0315 0.0188 0.0120  
AT. 23 C X 0.0227 0.0496 -0.0073 -0.0408 -0.0128 -0.0058  
Y -0.0251 0.0122 -0.0243 -0.0200 -0.0081 0.0309  
Z 0.0086 -0.0166 -0.0130 0.0207 0.0126 -0.0005  
AT. 24 C X -0.0227 -0.0496 0.0073 -0.0408 -0.0128 0.0058



Y 0.0251 -0.0122 0.0243 -0.0200 -0.0081 -0.0309  
Z -0.0086 0.0166 0.0130 0.0207 0.0126 0.0005  
AT. 25 H X 0.0157 0.0657 -0.0156 -0.0533 -0.0156 -0.0128  
Y -0.0267 0.0151 -0.0279 -0.0233 -0.0101 0.0309  
Z 0.0099 -0.0202 0.0022 0.0304 0.0234 -0.0062  
AT. 26 H X -0.0157 -0.0657 0.0156 -0.0533 -0.0156 0.0128  
Y 0.0267 -0.0151 0.0279 -0.0233 -0.0101 -0.0309  
Z -0.0099 0.0202 -0.0022 0.0304 0.0234 0.0062  
AT. 27 H X 0.0229 0.0576 -0.0006 -0.0474 -0.0210 0.0081  
Y -0.0258 0.0146 -0.0359 -0.0300 -0.0200 0.0408  
Z 0.0081 -0.0171 -0.0207 0.0174 0.0082 0.0015  
AT. 28 H X -0.0229 -0.0576 0.0006 -0.0474 -0.0210 -0.0081  
Y 0.0258 -0.0146 0.0359 -0.0300 -0.0200 -0.0408  
Z -0.0081 0.0171 0.0207 0.0174 0.0082 -0.0015  
AT. 29 C X 0.0027 0.0021 -0.0156 -0.0040 -0.0089 -0.0060  
Y -0.0081 0.0054 -0.0040 0.0017 0.0144 0.0264  
Z 0.0054 0.0041 0.0349 0.0063 -0.0084 0.0137  
AT. 30 C X -0.0027 -0.0021 0.0156 -0.0040 -0.0089 0.0060  
Y 0.0081 -0.0054 0.0040 0.0017 0.0144 -0.0264  
Z -0.0054 -0.0041 -0.0349 0.0063 -0.0084 -0.0137  
AT. 31 H X -0.0025 0.0052 -0.0221 -0.0084 -0.0167 -0.0077  
Y -0.0073 0.0114 0.0116 -0.0028 0.0102 0.0323  
Z 0.0037 0.0151 0.0536 -0.0033 -0.0193 0.0208  
AT. 32 H X 0.0025 -0.0052 0.0221 -0.0084 -0.0167 0.0077  
Y 0.0073 -0.0114 -0.0116 -0.0028 0.0102 -0.0323  
Z -0.0037 -0.0151 -0.0536 -0.0033 -0.0193 -0.0208  
AT. 33 H X -0.0015 -0.0113 -0.0111 0.0063 -0.0029 0.0032  
Y -0.0096 -0.0042 -0.0262 0.0082 0.0191 0.0182  
Z 0.0033 -0.0006 0.0475 0.0105 -0.0064 0.0233  
AT. 34 H X 0.0015 0.0113 0.0111 0.0063 -0.0029 -0.0032  
Y 0.0096 0.0042 0.0262 0.0082 0.0191 -0.0182  
Z -0.0033 0.0006 -0.0475 0.0105 -0.0064 -0.0233

AT. 35 C X 0.0098 0.0198 -0.0212 -0.0157 -0.0136 -0.0189  
Y -0.0173 0.0059 0.0180 -0.0022 0.0025 0.0431  
Z 0.0079 -0.0126 0.0188 0.0209 0.0074 0.0097

AT. 36 C X -0.0098 -0.0198 0.0212 -0.0157 -0.0136 0.0189  
Y 0.0173 -0.0059 -0.0180 -0.0022 0.0025 -0.0431  
Z -0.0079 0.0126 -0.0188 0.0209 0.0074 -0.0097

AT. 37 C X 0.0193 0.0222 -0.0234 -0.0157 -0.0036 -0.0246  
Y -0.0190 -0.0063 0.0045 0.0066 0.0084 0.0391  
Z 0.0125 -0.0287 -0.0034 0.0344 0.0239 0.0002

AT. 38 C X -0.0193 -0.0222 0.0234 -0.0157 -0.0036 0.0246  
Y 0.0190 0.0063 -0.0045 0.0066 0.0084 -0.0391  
Z -0.0125 0.0287 0.0034 0.0344 0.0239 -0.0002

AT. 39 H X 0.0198 0.0118 -0.0253 -0.0068 0.0060 -0.0214  
Y -0.0197 -0.0195 -0.0111 0.0167 0.0163 0.0333  
Z 0.0134 -0.0301 0.0023 0.0362 0.0270 0.0050

AT. 40 H X -0.0198 -0.0118 0.0253 -0.0068 0.0060 0.0214  
Y 0.0197 0.0195 0.0111 0.0167 0.0163 -0.0333  
Z -0.0134 0.0301 -0.0023 0.0362 0.0270 -0.0050

AT. 41 H X 0.0201 0.0327 -0.0206 -0.0242 -0.0116 -0.0275  
Y -0.0255 -0.0048 0.0148 0.0058 0.0030 0.0487  
Z 0.0166 -0.0405 -0.0142 0.0437 0.0362 -0.0044

AT. 42 H X -0.0201 -0.0327 0.0206 -0.0242 -0.0116 0.0275  
Y 0.0255 0.0048 -0.0148 0.0058 0.0030 -0.0487  
Z -0.0166 0.0405 0.0142 0.0437 0.0362 0.0044

AT. 43 C X 0.0276 0.0280 -0.0252 -0.0200 -0.0017 -0.0361  
Y -0.0076 0.0075 0.0130 -0.0031 0.0088 0.0307  
Z 0.0120 -0.0317 -0.0277 0.0344 0.0203 -0.0205

AT. 44 C X -0.0276 -0.0280 0.0252 -0.0200 -0.0017 0.0361  
Y 0.0076 -0.0075 -0.0130 -0.0031 0.0088 -0.0307  
Z -0.0120 0.0317 0.0277 0.0344 0.0203 0.0205

AT. 45 H X 0.0307 0.0319 -0.0281 -0.0238 -0.0019 -0.0441  
Y -0.0108 0.0235 0.0227 -0.0132 -0.0026 0.0384

Z 0.0124 -0.0502 -0.0350 0.0469 0.0314 -0.0219  
AT. 46 H X -0.0307 -0.0319 0.0281 -0.0238 -0.0019 0.0441  
Y 0.0108 -0.0235 -0.0227 -0.0132 -0.0026 -0.0384  
Z -0.0124 0.0502 0.0350 0.0469 0.0314 0.0219  
AT. 47 H X 0.0313 0.0228 -0.0233 -0.0162 0.0053 -0.0365  
Y -0.0034 -0.0052 0.0067 0.0040 0.0188 0.0216  
Z 0.0114 -0.0377 -0.0372 0.0364 0.0212 -0.0295  
AT. 48 H X -0.0313 -0.0228 0.0233 -0.0162 0.0053 0.0365  
Y 0.0034 0.0052 -0.0067 0.0040 0.0188 -0.0216  
Z -0.0114 0.0377 0.0372 0.0364 0.0212 0.0295  
AT. 49 C X 0.0198 0.0350 -0.0269 -0.0257 -0.0142 -0.0334  
Y -0.0041 0.0232 0.0225 -0.0138 0.0038 0.0317  
Z 0.0113 -0.0039 -0.0156 0.0153 0.0036 -0.0169  
AT. 50 C X -0.0198 -0.0350 0.0269 -0.0257 -0.0142 0.0334  
Y 0.0041 -0.0232 -0.0225 -0.0138 0.0038 -0.0317  
Z -0.0113 0.0039 0.0156 0.0153 0.0036 0.0169  
AT. 51 C X 0.0121 0.0163 -0.0190 -0.0132 -0.0097 -0.0189  
Y 0.0034 0.0154 0.0067 -0.0070 0.0160 0.0198  
Z 0.0116 0.0227 -0.0079 -0.0045 -0.0137 -0.0188  
AT. 52 C X -0.0121 -0.0163 0.0190 -0.0132 -0.0097 0.0189  
Y -0.0034 -0.0154 -0.0067 -0.0070 0.0160 -0.0198  
Z -0.0116 -0.0227 0.0079 -0.0045 -0.0137 0.0188  
AT. 53 H X 0.0146 0.0091 -0.0158 -0.0087 -0.0029 -0.0169  
Y 0.0096 0.0126 -0.0016 -0.0041 0.0243 0.0121  
Z 0.0145 0.0334 -0.0247 -0.0097 -0.0165 -0.0325  
AT. 54 H X -0.0146 -0.0091 0.0158 -0.0087 -0.0029 0.0169  
Y -0.0096 -0.0126 0.0016 -0.0041 0.0243 -0.0121  
Z -0.0145 -0.0334 0.0247 -0.0097 -0.0165 0.0325  
AT. 55 H X 0.0083 0.0273 -0.0227 -0.0197 -0.0197 -0.0207  
Y 0.0046 0.0214 0.0165 -0.0131 0.0119 0.0218  
Z 0.0105 0.0374 0.0018 -0.0164 -0.0253 -0.0177  
AT. 56 H X -0.0083 -0.0273 0.0227 -0.0197 -0.0197 0.0207

Y -0.0046 -0.0214 -0.0165 -0.0131 0.0119 -0.0218  
Z -0.0105 -0.0374 -0.0018 -0.0164 -0.0253 0.0177  
AT. 57 C X 0.0031 0.0172 -0.0183 -0.0153 -0.0210 -0.0139  
Y -0.0276 0.0004 0.0345 -0.0010 -0.0066 0.0602  
Z 0.0063 -0.0158 0.0387 0.0218 0.0084 0.0254  
AT. 58 C X -0.0031 -0.0172 0.0183 -0.0153 -0.0210 0.0139  
Y 0.0276 -0.0004 -0.0345 -0.0010 -0.0066 -0.0602  
Z -0.0063 0.0158 -0.0387 0.0218 0.0084 -0.0254  
AT. 59 H X -0.0037 0.0151 -0.0146 -0.0146 -0.0287 -0.0086  
Y -0.0273 0.0098 0.0414 -0.0066 -0.0111 0.0612  
Z 0.0021 -0.0032 0.0511 0.0137 -0.0038 0.0300  
AT. 60 H X 0.0037 -0.0151 0.0146 -0.0146 -0.0287 0.0086  
Y 0.0273 -0.0098 -0.0414 -0.0066 -0.0111 -0.0612  
Z -0.0021 0.0032 -0.0511 0.0137 -0.0038 -0.0300  
AT. 61 H X 0.0024 0.0055 -0.0124 -0.0089 -0.0150 -0.0045  
Y -0.0273 -0.0135 0.0244 0.0073 0.0000 0.0586  
Z 0.0058 -0.0179 0.0483 0.0225 0.0096 0.0335  
AT. 62 H X -0.0024 -0.0055 0.0124 -0.0089 -0.0150 0.0045  
Y 0.0273 0.0135 -0.0244 0.0073 0.0000 -0.0586  
Z -0.0058 0.0179 -0.0483 0.0225 0.0096 -0.0335  
AT. 63 H X 0.0056 0.0296 -0.0252 -0.0216 -0.0253 -0.0253  
Y -0.0351 0.0007 0.0510 -0.0029 -0.0155 0.0741  
Z 0.0104 -0.0277 0.0308 0.0292 0.0201 0.0238  
AT. 64 H X -0.0056 -0.0296 0.0252 -0.0216 -0.0253 0.0253  
Y 0.0351 -0.0007 -0.0510 -0.0029 -0.0155 -0.0741  
Z -0.0104 0.0277 -0.0308 0.0292 0.0201 -0.0238  
AT. 65 C X 0.0241 0.0549 -0.0342 -0.0388 -0.0221 -0.0460  
Y 0.0005 0.0425 0.0347 -0.0282 -0.0030 0.0287  
Z 0.0122 0.0022 -0.0278 0.0123 0.0008 -0.0256  
AT. 66 C X -0.0241 -0.0549 0.0342 -0.0388 -0.0221 0.0460  
Y -0.0005 -0.0425 -0.0347 -0.0282 -0.0030 -0.0287  
Z -0.0122 -0.0022 0.0278 0.0123 0.0008 0.0256

AT. 67 H X 0.0274 0.0680 -0.0394 -0.0477 -0.0271 -0.0571  
Y -0.0013 0.0486 0.0473 -0.0305 -0.0077 0.0400  
Z 0.0109 -0.0150 -0.0349 0.0224 0.0094 -0.0265

AT. 68 H X -0.0274 -0.0680 0.0394 -0.0477 -0.0271 0.0571  
Y 0.0013 -0.0486 -0.0473 -0.0305 -0.0077 -0.0400  
Z -0.0109 0.0150 0.0349 0.0224 0.0094 0.0265

AT. 69 H X 0.0256 0.0510 -0.0356 -0.0380 -0.0184 -0.0514  
Y 0.0028 0.0400 0.0254 -0.0284 0.0006 0.0165  
Z 0.0132 0.0072 -0.0391 0.0099 -0.0012 -0.0329

AT. 70 H X -0.0256 -0.0510 0.0356 -0.0380 -0.0184 0.0514  
Y -0.0028 -0.0400 -0.0254 -0.0284 0.0006 -0.0165  
Z -0.0132 -0.0072 0.0391 0.0099 -0.0012 0.0329

AT. 71 H X 0.0216 0.0599 -0.0316 -0.0393 -0.0270 -0.0383  
Y 0.0028 0.0525 0.0410 -0.0355 -0.0067 0.0266  
Z 0.0134 0.0193 -0.0174 0.0020 -0.0079 -0.0229

AT. 72 H X -0.0216 -0.0599 0.0316 -0.0393 -0.0270 0.0383  
Y -0.0028 -0.0525 -0.0410 -0.0355 -0.0067 -0.0266  
Z -0.0134 -0.0193 0.0174 0.0020 -0.0079 0.0229

AT. 73 C X 0.0138 0.0380 -0.0276 -0.0283 -0.0225 -0.0311  
Y -0.0135 0.0245 0.0355 -0.0156 -0.0063 0.0458  
Z 0.0091 -0.0084 0.0048 0.0182 0.0055 -0.0015

AT. 74 C X -0.0138 -0.0380 0.0276 -0.0283 -0.0225 0.0311  
Y 0.0135 -0.0245 -0.0355 -0.0156 -0.0063 -0.0458  
Z -0.0091 0.0084 -0.0048 0.0182 0.0055 0.0015

AT. 75 H X 0.0077 0.0408 -0.0279 -0.0306 -0.0306 -0.0284  
Y -0.0115 0.0339 0.0445 -0.0219 -0.0109 0.0471  
Z 0.0075 0.0062 0.0165 0.0078 -0.0064 0.0019

AT. 76 H X -0.0077 -0.0408 0.0279 -0.0306 -0.0306 0.0284  
Y 0.0115 -0.0339 -0.0445 -0.0219 -0.0109 -0.0471  
Z -0.0075 -0.0062 -0.0165 0.0078 -0.0064 -0.0019

AT. 77 H X 0.0184 0.0502 -0.0319 -0.0370 -0.0268 -0.0402  
Y -0.0195 0.0280 0.0483 -0.0181 -0.0150 0.0551

Z 0.0100 -0.0232 -0.0032 0.0289 0.0177 -0.0015  
AT. 78 H X -0.0184 -0.0502 0.0319 -0.0370 -0.0268 0.0402  
Y 0.0195 -0.0280 -0.0483 -0.0181 -0.0150 -0.0551  
Z -0.0100 0.0232 0.0032 0.0289 0.0177 0.0015  
AT. 79 I X -0.0037 -0.0103 -0.0252 0.0207 -0.0279 0.0095  
Y -0.0027 -0.0445 -0.0328 0.0317 -0.0089 0.0058  
Z 0.0462 0.0083 0.0179 0.0160 -0.0160 0.0104  
AT. 80 I X 0.0037 0.0103 0.0252 0.0207 -0.0279 -0.0095  
Y 0.0027 0.0445 0.0328 0.0317 -0.0089 -0.0058  
Z -0.0462 -0.0083 -0.0179 0.0160 -0.0160 -0.0104  
AT. 81 I X -0.0060 -0.0068 -0.0012 -0.0148 0.0451 0.0150  
Y -0.0204 -0.0027 0.0327 -0.0297 0.0092 -0.0254  
Z 0.0174 -0.0102 0.0083 -0.0124 0.0014 -0.0094  
AT. 82 I X 0.0060 0.0068 0.0012 -0.0148 0.0451 -0.0150  
Y 0.0204 0.0027 -0.0327 -0.0297 0.0092 0.0254  
Z -0.0174 0.0102 -0.0083 -0.0124 0.0014 0.0094  
AT. 83 O X -0.0109 -0.0018 -0.0193 0.0075 -0.0104 0.0027  
Y 0.0042 -0.0210 0.0200 0.0032 0.0029 -0.0129  
Z 0.0173 0.0000 0.0235 -0.0013 0.0026 0.0045  
AT. 84 O X 0.0109 0.0018 0.0193 0.0075 -0.0104 -0.0027  
Y -0.0042 0.0210 -0.0200 0.0032 0.0029 0.0129  
Z -0.0173 -0.0000 -0.0235 -0.0013 0.0026 -0.0045  
AT. 85 O X 0.0086 -0.0048 -0.0124 -0.0042 0.0398 0.0234  
Y -0.0199 -0.0132 -0.0115 0.0147 -0.0423 -0.0437  
Z -0.0074 0.0028 -0.0084 0.0026 0.0141 0.0120  
AT. 86 O X -0.0086 0.0048 0.0124 -0.0042 0.0398 -0.0234  
Y 0.0199 0.0132 0.0115 0.0147 -0.0423 0.0437  
Z 0.0074 -0.0028 0.0084 0.0026 0.0141 -0.0120  
AT. 87 N X -0.0153 -0.0136 -0.0060 0.0123 -0.0200 -0.0076  
Y -0.0127 0.0003 0.0021 0.0051 -0.0215 -0.0158  
Z 0.0201 0.0063 0.0163 -0.0036 0.0082 0.0102  
AT. 88 N X 0.0153 0.0136 0.0060 0.0123 -0.0200 0.0076

Y 0.0127 -0.0003 -0.0021 0.0051 -0.0215 0.0158  
Z -0.0201 -0.0063 -0.0163 -0.0036 0.0082 -0.0102  
AT. 89 N X -0.0047 -0.0131 -0.0039 0.0025 0.0122 0.0006  
Y -0.0066 0.0001 0.0025 0.0022 -0.0186 -0.0169  
Z -0.0024 0.0093 0.0085 -0.0046 0.0199 0.0219  
AT. 90 N X 0.0047 0.0131 0.0039 0.0025 0.0122 -0.0006  
Y 0.0066 -0.0001 -0.0025 0.0022 -0.0186 0.0169  
Z 0.0024 -0.0093 -0.0085 -0.0046 0.0199 -0.0219  
AT. 91 C X -0.0118 -0.0046 -0.0124 0.0078 -0.0133 -0.0010  
Y -0.0042 -0.0169 0.0045 0.0079 -0.0055 -0.0125  
Z 0.0211 0.0034 0.0166 -0.0030 0.0099 0.0100  
AT. 92 C X 0.0118 0.0046 0.0124 0.0078 -0.0133 0.0010  
Y 0.0042 0.0169 -0.0045 0.0079 -0.0055 0.0125  
Z -0.0211 -0.0034 -0.0166 -0.0030 0.0099 -0.0100  
AT. 93 C X -0.0081 0.0016 -0.0092 0.0031 -0.0099 0.0006  
Y -0.0049 -0.0311 -0.0152 0.0164 0.0027 -0.0041  
Z 0.0269 0.0047 0.0090 -0.0047 0.0210 0.0176  
AT. 94 C X 0.0081 -0.0016 0.0092 0.0031 -0.0099 -0.0006  
Y 0.0049 0.0311 0.0152 0.0164 0.0027 0.0041  
Z -0.0269 -0.0047 -0.0090 -0.0047 0.0210 -0.0176  
AT. 95 H X -0.0129 0.0090 0.0013 -0.0085 -0.0010 -0.0048  
Y -0.0019 -0.0346 -0.0170 0.0265 -0.0137 -0.0039  
Z 0.0267 0.0021 0.0006 -0.0101 0.0410 0.0233  
AT. 96 H X 0.0129 -0.0090 -0.0013 -0.0085 -0.0010 0.0048  
Y 0.0019 0.0346 0.0170 0.0265 -0.0137 0.0039  
Z -0.0267 -0.0021 -0.0006 -0.0101 0.0410 -0.0233  
AT. 97 H X -0.0012 0.0061 -0.0089 0.0028 -0.0086 0.0028  
Y -0.0098 -0.0331 -0.0197 0.0035 0.0332 -0.0007  
Z 0.0236 0.0028 0.0078 -0.0075 0.0275 0.0175  
AT. 98 H X 0.0012 -0.0061 0.0089 0.0028 -0.0086 -0.0028  
Y 0.0098 0.0331 0.0197 0.0035 0.0332 0.0007  
Z -0.0236 -0.0028 -0.0078 -0.0075 0.0275 -0.0175

AT. 99 C X 0.0021 -0.0082 -0.0124 0.0003 0.0283 0.0141  
Y -0.0094 -0.0072 -0.0030 0.0049 -0.0260 -0.0299  
Z -0.0047 0.0045 0.0051 -0.0026 0.0148 0.0139

AT. 100 C X -0.0021 0.0082 0.0124 0.0003 0.0283 -0.0141  
Y 0.0094 0.0072 0.0030 0.0049 -0.0260 0.0299  
Z 0.0047 -0.0045 -0.0051 -0.0026 0.0148 -0.0139

AT. 101 C X 0.0004 -0.0065 -0.0214 0.0058 0.0295 0.0186  
Y -0.0012 -0.0089 0.0012 -0.0054 -0.0138 -0.0280  
Z -0.0040 0.0016 0.0167 -0.0084 0.0101 0.0063

AT. 102 C X -0.0004 0.0065 0.0214 0.0058 0.0295 -0.0186  
Y 0.0012 0.0089 -0.0012 -0.0054 -0.0138 0.0280  
Z 0.0040 -0.0016 -0.0167 -0.0084 0.0101 -0.0063

AT. 103 H X 0.0055 -0.0074 -0.0346 0.0179 0.0180 0.0176  
Y -0.0032 -0.0086 0.0064 -0.0103 -0.0089 -0.0273  
Z -0.0153 0.0046 0.0316 -0.0139 0.0105 0.0052

AT. 104 H X -0.0055 0.0074 0.0346 0.0179 0.0180 -0.0176  
Y 0.0032 0.0086 -0.0064 -0.0103 -0.0089 0.0273  
Z 0.0153 -0.0046 -0.0316 -0.0139 0.0105 -0.0052

AT. 105 H X -0.0030 -0.0018 -0.0208 0.0055 0.0375 0.0268  
Y 0.0123 -0.0133 -0.0143 0.0012 -0.0188 -0.0302  
Z 0.0004 0.0008 0.0107 -0.0060 0.0100 0.0072

AT. 106 H X 0.0030 0.0018 0.0208 0.0055 0.0375 -0.0268  
Y -0.0123 0.0133 0.0143 0.0012 -0.0188 0.0302  
Z -0.0004 -0.0008 -0.0107 -0.0060 0.0100 -0.0072

AT. 107 C X -0.0190 -0.0176 -0.0037 0.0160 -0.0277 -0.0123  
Y -0.0050 0.0044 0.0093 -0.0026 -0.0120 -0.0144  
Z 0.0172 0.0019 0.0239 -0.0015 0.0000 0.0034

AT. 108 C X 0.0190 0.0176 0.0037 0.0160 -0.0277 0.0123  
Y 0.0050 -0.0044 -0.0093 -0.0026 -0.0120 0.0144  
Z -0.0172 -0.0019 -0.0239 -0.0015 0.0000 -0.0034

AT. 109 H X -0.0227 -0.0246 -0.0038 0.0234 -0.0424 -0.0195  
Y -0.0011 0.0009 0.0095 -0.0001 -0.0181 -0.0185



Z 0.0249 -0.0015 0.0243 0.0003 -0.0065 -0.0016  
AT. 110 H X 0.0227 0.0246 0.0038 0.0234 -0.0424 0.0195  
Y 0.0011 -0.0009 -0.0095 -0.0001 -0.0181 0.0185  
Z -0.0249 0.0015 -0.0243 0.0003 -0.0065 0.0016  
AT. 111 H X -0.0168 -0.0158 -0.0085 0.0159 -0.0263 -0.0095  
Y -0.0086 0.0116 0.0111 -0.0101 0.0029 -0.0060  
Z 0.0157 -0.0016 0.0287 0.0001 -0.0043 -0.0015  
AT. 112 H X 0.0168 0.0158 0.0085 0.0159 -0.0263 0.0095  
Y 0.0086 -0.0116 -0.0111 -0.0101 0.0029 0.0060  
Z -0.0157 0.0016 -0.0287 0.0001 -0.0043 0.0015  
AT. 113 C X -0.0198 -0.0163 0.0058 0.0099 -0.0182 -0.0114  
Y 0.0045 0.0011 0.0119 -0.0024 -0.0144 -0.0193  
Z 0.0065 0.0063 0.0249 -0.0046 0.0065 0.0095  
AT. 114 C X 0.0198 0.0163 -0.0058 0.0099 -0.0182 0.0114  
Y -0.0045 -0.0011 -0.0119 -0.0024 -0.0144 0.0193  
Z -0.0065 -0.0063 -0.0249 -0.0046 0.0065 -0.0095  
AT. 115 C X -0.0106 -0.0140 0.0010 0.0042 0.0023 -0.0037  
Y -0.0005 0.0050 0.0105 -0.0068 -0.0044 -0.0130  
Z -0.0064 0.0114 0.0242 -0.0095 0.0154 0.0169  
AT. 116 C X 0.0106 0.0140 -0.0010 0.0042 0.0023 0.0037  
Y 0.0005 -0.0050 -0.0105 -0.0068 -0.0044 0.0130  
Z 0.0064 -0.0114 -0.0242 -0.0095 0.0154 -0.0169  
AT. 117 H X -0.0048 -0.0181 -0.0085 0.0102 -0.0015 -0.0049  
Y -0.0058 0.0117 0.0118 -0.0158 0.0150 -0.0030  
Z -0.0112 0.0143 0.0340 -0.0138 0.0147 0.0157  
AT. 118 H X 0.0048 0.0181 0.0085 0.0102 -0.0015 0.0049  
Y 0.0058 -0.0117 -0.0118 -0.0158 0.0150 0.0030  
Z 0.0112 -0.0143 -0.0340 -0.0138 0.0147 -0.0157  
AT. 119 H X -0.0160 -0.0075 0.0130 -0.0059 0.0144 0.0006  
Y 0.0048 0.0053 0.0145 -0.0086 -0.0025 -0.0143  
Z -0.0146 0.0149 0.0268 -0.0133 0.0202 0.0206  
AT. 120 H X 0.0160 0.0075 -0.0130 -0.0059 0.0144 -0.0006

Y -0.0048 -0.0053 -0.0145 -0.0086 -0.0025 0.0143  
Z 0.0146 -0.0149 -0.0268 -0.0133 0.0202 -0.0206  
AT. 121 C X -0.0064 -0.0147 0.0056 0.0002 0.0095 -0.0044  
Y -0.0100 -0.0006 0.0018 0.0085 -0.0349 -0.0211  
Z 0.0006 0.0112 -0.0051 -0.0022 0.0263 0.0299  
AT. 122 C X 0.0064 0.0147 -0.0056 0.0002 0.0095 0.0044  
Y 0.0100 0.0006 -0.0018 0.0085 -0.0349 0.0211  
Z -0.0006 -0.0112 0.0051 -0.0022 0.0263 -0.0299  
AT. 123 H X -0.0028 -0.0178 0.0180 -0.0052 0.0148 -0.0107  
Y -0.0024 -0.0029 0.0086 0.0067 -0.0357 -0.0266  
Z -0.0069 0.0133 -0.0102 -0.0015 0.0281 0.0348  
AT. 124 H X 0.0028 0.0178 -0.0180 -0.0052 0.0148 0.0107  
Y 0.0024 0.0029 -0.0086 0.0067 -0.0357 0.0266  
Z 0.0069 -0.0133 0.0102 -0.0015 0.0281 -0.0348  
AT. 125 H X -0.0019 -0.0137 -0.0000 -0.0005 0.0173 -0.0002  
Y -0.0219 0.0020 -0.0079 0.0140 -0.0417 -0.0152  
Z 0.0002 0.0139 -0.0167 -0.0003 0.0316 0.0378  
AT. 126 H X 0.0019 0.0137 0.0000 -0.0005 0.0173 0.0002  
Y 0.0219 -0.0020 0.0079 0.0140 -0.0417 0.0152  
Z -0.0002 -0.0139 0.0167 -0.0003 0.0316 -0.0378  
AT. 127 C X -0.0177 -0.0156 0.0085 0.0063 -0.0105 -0.0098  
Y -0.0055 -0.0021 0.0069 0.0097 -0.0429 -0.0270  
Z 0.0138 0.0094 0.0034 -0.0036 0.0216 0.0216  
AT. 128 C X 0.0177 0.0156 -0.0085 0.0063 -0.0105 0.0098  
Y 0.0055 0.0021 -0.0069 0.0097 -0.0429 0.0270  
Z -0.0138 -0.0094 -0.0034 -0.0036 0.0216 -0.0216  
AT. 129 C X -0.0180 -0.0152 -0.0003 0.0114 -0.0202 -0.0100  
Y -0.0148 -0.0014 -0.0011 0.0128 -0.0411 -0.0215  
Z 0.0245 0.0086 0.0097 -0.0053 0.0165 0.0156  
AT. 130 C X 0.0180 0.0152 0.0003 0.0114 -0.0202 0.0100  
Y 0.0148 0.0014 0.0011 0.0128 -0.0411 0.0215  
Z -0.0245 -0.0086 -0.0097 -0.0053 0.0165 -0.0156

AT. 131 H X -0.0125 -0.0140 -0.0014 0.0086 -0.0131 -0.0078  
Y -0.0243 -0.0012 -0.0090 0.0192 -0.0503 -0.0199  
Z 0.0278 0.0105 0.0047 -0.0064 0.0222 0.0194

AT. 132 H X 0.0125 0.0140 0.0014 0.0086 -0.0131 0.0078  
Y 0.0243 0.0012 0.0090 0.0192 -0.0503 0.0199  
Z -0.0278 -0.0105 -0.0047 -0.0064 0.0222 -0.0194

AT. 133 H X -0.0271 -0.0161 -0.0020 0.0187 -0.0345 -0.0128  
Y -0.0129 -0.0019 0.0002 0.0143 -0.0475 -0.0245  
Z 0.0315 0.0086 0.0128 -0.0064 0.0128 0.0120

AT. 134 H X 0.0271 0.0161 0.0020 0.0187 -0.0345 0.0128  
Y 0.0129 0.0019 -0.0002 0.0143 -0.0475 0.0245  
Z -0.0315 -0.0086 -0.0128 -0.0064 0.0128 -0.0120

AT. 135 C X -0.0264 -0.0164 0.0142 0.0105 -0.0274 -0.0162  
Y 0.0169 -0.0018 0.0140 -0.0048 -0.0039 -0.0194  
Z 0.0029 0.0046 0.0393 -0.0049 -0.0025 0.0017

AT. 136 C X 0.0264 0.0164 -0.0142 0.0105 -0.0274 0.0162  
Y -0.0169 0.0018 -0.0140 -0.0048 -0.0039 0.0194  
Z -0.0029 -0.0046 -0.0393 -0.0049 -0.0025 -0.0017

AT. 137 H X -0.0337 -0.0157 0.0212 0.0125 -0.0422 -0.0224  
Y 0.0206 -0.0027 0.0168 -0.0023 -0.0103 -0.0233  
Z 0.0122 0.0030 0.0418 -0.0016 -0.0079 -0.0030

AT. 138 H X 0.0337 0.0157 -0.0212 0.0125 -0.0422 0.0224  
Y -0.0206 0.0027 -0.0168 -0.0023 -0.0103 0.0233  
Z -0.0122 -0.0030 -0.0418 -0.0016 -0.0079 0.0030

AT. 139 H X -0.0232 -0.0158 0.0065 0.0125 -0.0264 -0.0138  
Y 0.0151 -0.0013 0.0098 -0.0095 0.0123 -0.0115  
Z -0.0005 0.0038 0.0504 -0.0065 -0.0079 -0.0036

AT. 140 H X 0.0232 0.0158 -0.0065 0.0125 -0.0264 0.0138  
Y -0.0151 0.0013 -0.0098 -0.0095 0.0123 0.0115  
Z 0.0005 -0.0038 -0.0504 -0.0065 -0.0079 0.0036

AT. 141 H X -0.0273 -0.0176 0.0216 0.0063 -0.0208 -0.0166  
Y 0.0244 -0.0036 0.0173 -0.0038 -0.0052 -0.0229

Z -0.0052 0.0061 0.0393 -0.0078 0.0014 0.0050  
AT. 142 H X 0.0273 0.0176 -0.0216 0.0063 -0.0208 0.0166  
Y -0.0244 0.0036 -0.0173 -0.0038 -0.0052 0.0229  
Z 0.0052 -0.0061 -0.0393 -0.0078 0.0014 -0.0050  
AT. 143 C X -0.0213 -0.0165 0.0145 0.0057 -0.0118 -0.0100  
Y -0.0036 -0.0027 0.0122 0.0139 -0.0631 -0.0356  
Z 0.0179 0.0105 -0.0063 -0.0037 0.0291 0.0242  
AT. 144 C X 0.0213 0.0165 -0.0145 0.0057 -0.0118 0.0100  
Y 0.0036 0.0027 -0.0122 0.0139 -0.0631 0.0356  
Z -0.0179 -0.0105 0.0063 -0.0037 0.0291 -0.0242  
AT. 145 H X -0.0230 -0.0179 0.0201 0.0036 -0.0049 -0.0064  
Y 0.0009 -0.0033 0.0169 0.0135 -0.0612 -0.0347  
Z 0.0125 0.0108 -0.0100 -0.0038 0.0291 0.0241  
AT. 146 H X 0.0230 0.0179 -0.0201 0.0036 -0.0049 0.0064  
Y -0.0009 0.0033 -0.0169 0.0135 -0.0612 0.0347  
Z -0.0125 -0.0108 0.0100 -0.0038 0.0291 -0.0241  
AT. 147 H X -0.0176 -0.0162 0.0106 0.0046 -0.0040 -0.0076  
Y -0.0089 -0.0013 0.0075 0.0163 -0.0729 -0.0397  
Z 0.0205 0.0118 -0.0142 -0.0039 0.0346 0.0251  
AT. 148 H X 0.0176 0.0162 -0.0106 0.0046 -0.0040 0.0076  
Y 0.0089 0.0013 -0.0075 0.0163 -0.0729 0.0397  
Z -0.0205 -0.0118 0.0142 -0.0039 0.0346 -0.0251  
AT. 149 H X -0.0257 -0.0164 0.0178 0.0085 -0.0282 -0.0159  
Y -0.0011 -0.0029 0.0156 0.0147 -0.0685 -0.0379  
Z 0.0241 0.0101 -0.0018 -0.0035 0.0272 0.0225  
AT. 150 H X 0.0257 0.0164 -0.0178 0.0085 -0.0282 0.0159  
Y 0.0011 0.0029 -0.0156 0.0147 -0.0685 0.0379  
Z -0.0241 -0.0101 0.0018 -0.0035 0.0272 -0.0225  
AT. 151 C X -0.0243 -0.0163 0.0138 0.0079 -0.0194 -0.0134  
Y 0.0077 -0.0035 0.0141 0.0048 -0.0346 -0.0297  
Z 0.0111 0.0076 0.0145 -0.0040 0.0134 0.0153  
AT. 152 C X 0.0243 0.0163 -0.0138 0.0079 -0.0194 0.0134

Y -0.0077 0.0035 -0.0141 0.0048 -0.0346 0.0297  
Z -0.0111 -0.0076 -0.0145 -0.0040 0.0134 -0.0153  
AT. 153 H X -0.0309 -0.0175 0.0159 0.0116 -0.0312 -0.0175  
Y 0.0116 -0.0055 0.0157 0.0067 -0.0397 -0.0336  
Z 0.0205 0.0050 0.0166 -0.0024 0.0096 0.0102  
AT. 154 H X 0.0309 0.0175 -0.0159 0.0116 -0.0312 0.0175  
Y -0.0116 0.0055 -0.0157 0.0067 -0.0397 0.0336  
Z -0.0205 -0.0050 -0.0166 -0.0024 0.0096 -0.0102  
AT. 155 H X -0.0253 -0.0158 0.0207 0.0036 -0.0141 -0.0136  
Y 0.0157 -0.0055 0.0179 0.0045 -0.0360 -0.0340  
Z 0.0023 0.0100 0.0130 -0.0052 0.0168 0.0196  
AT. 156 H X 0.0253 0.0158 -0.0207 0.0036 -0.0141 0.0136  
Y -0.0157 0.0055 -0.0179 0.0045 -0.0360 0.0340  
Z -0.0023 -0.0100 -0.0130 -0.0052 0.0168 -0.0196  
AT. 157 O X -0.0164 -0.0168 0.0305 0.0305 0.0012 -0.0053  
Y -0.0008 -0.0095 -0.0241 0.0290 0.0229 0.0109  
Z -0.0012 0.0295 0.0323 0.0374 0.0256 0.0315  
AT. 158 O X 0.0164 0.0168 -0.0305 0.0305 0.0012 0.0053  
Y 0.0008 0.0095 0.0241 0.0290 0.0229 -0.0109  
Z 0.0012 -0.0295 -0.0323 0.0374 0.0256 -0.0315  
AT. 159 O X -0.0147 -0.0223 0.0208 0.0190 0.0001 0.0010  
Y 0.0175 -0.0128 -0.0134 0.0117 0.0027 -0.0149  
Z 0.0025 0.0200 0.0172 0.0160 0.0213 0.0400  
AT. 160 O X 0.0147 0.0223 -0.0208 0.0190 0.0001 -0.0010  
Y -0.0175 0.0128 0.0134 0.0117 0.0027 0.0149  
Z -0.0025 -0.0200 -0.0172 0.0160 0.0213 -0.0400  
AT. 161 H X -0.0220 -0.0211 0.0256 0.0352 0.0082 0.0083  
Y -0.0034 -0.0065 -0.0245 0.0347 0.0278 0.0157  
Z 0.0049 0.0189 0.0317 0.0192 0.0093 0.0205  
AT. 162 H X 0.0220 0.0211 -0.0256 0.0352 0.0082 -0.0083  
Y 0.0034 0.0065 0.0245 0.0347 0.0278 -0.0157  
Z -0.0049 -0.0189 -0.0317 0.0192 0.0093 -0.0205

AT. 163 H X -0.0160 -0.0272 0.0088 0.0051 -0.0002 0.0109  
Y 0.0181 -0.0023 -0.0093 0.0083 -0.0023 -0.0209  
Z 0.0042 0.0241 0.0228 0.0199 0.0206 0.0364  
AT. 164 H X 0.0160 0.0272 -0.0088 0.0051 -0.0002 -0.0109  
Y -0.0181 0.0023 0.0093 0.0083 -0.0023 0.0209  
Z -0.0042 -0.0241 -0.0228 0.0199 0.0206 -0.0364  
AT. 165 O X -0.0063 0.0052 0.0015 -0.0048 -0.0177 0.0027  
Y 0.0030 -0.0250 -0.0023 0.0144 0.0008 0.0015  
Z 0.0227 -0.0173 0.0106 0.0147 0.0217 -0.0378  
AT. 166 O X 0.0063 -0.0052 -0.0015 -0.0048 -0.0177 -0.0027  
Y -0.0030 0.0250 0.0023 0.0144 0.0008 -0.0015  
Z -0.0227 0.0173 -0.0106 0.0147 0.0217 0.0378  
AT. 167 H X -0.0056 0.0034 -0.0068 0.0041 -0.0211 0.0064  
Y 0.0048 -0.0224 0.0102 0.0051 0.0055 -0.0083  
Z 0.0186 -0.0171 0.0130 0.0047 0.0243 -0.0328  
AT. 168 H X 0.0056 -0.0034 0.0068 0.0041 -0.0211 -0.0064  
Y -0.0048 0.0224 -0.0102 0.0051 0.0055 0.0083  
Z -0.0186 0.0171 -0.0130 0.0047 0.0243 0.0328  
AT. 169 O X -0.0204 -0.0058 0.0065 -0.0271 0.0069 -0.0096  
Y 0.0177 -0.0046 0.0084 0.0111 -0.0342 0.0280  
Z 0.0165 -0.0236 0.0096 0.0106 0.0342 -0.0456  
AT. 170 O X 0.0204 0.0058 -0.0065 -0.0271 0.0069 0.0096  
Y -0.0177 0.0046 -0.0084 0.0111 -0.0342 -0.0280  
Z -0.0165 0.0236 -0.0096 0.0106 0.0342 0.0456  
AT. 171 H X -0.0245 -0.0020 0.0088 -0.0194 0.0316 -0.0186  
Y 0.0210 0.0048 0.0114 0.0164 -0.0358 0.0340  
Z 0.0254 -0.0103 0.0131 0.0139 0.0129 -0.0289  
AT. 172 H X 0.0245 0.0020 -0.0088 -0.0194 0.0316 0.0186  
Y -0.0210 -0.0048 -0.0114 0.0164 -0.0358 -0.0340  
Z -0.0254 0.0103 -0.0131 0.0139 0.0129 0.0289

FREQ(CM\*\*-1) 52.97 54.58 55.48 61.28 61.88 63.45

AT. 1 I X -0.0082 0.0210 0.0039 0.0153 -0.0169 -0.0008  
Y 0.0061 -0.0481 0.0081 0.0017 -0.0226 -0.0306  
Z -0.0142 -0.0234 -0.0023 -0.0278 -0.0402 0.0088

AT. 2 I X -0.0082 0.0210 -0.0039 -0.0153 -0.0169 0.0008  
Y 0.0061 -0.0481 -0.0081 -0.0017 -0.0226 0.0306  
Z -0.0142 -0.0234 0.0023 0.0278 -0.0402 -0.0088

AT. 3 I X -0.0035 -0.0260 -0.0181 -0.0176 0.0275 -0.0003  
Y -0.0204 0.0458 0.0241 -0.0276 -0.0069 -0.0030  
Z -0.0154 0.0199 -0.0116 0.0101 0.0101 -0.0083

AT. 4 I X -0.0035 -0.0260 0.0181 0.0176 0.0275 0.0003  
Y -0.0204 0.0458 -0.0241 0.0276 -0.0069 0.0030  
Z -0.0154 0.0199 0.0116 -0.0101 0.0101 0.0083

AT. 5 O X -0.0261 0.0184 -0.0013 -0.0084 -0.0315 0.0081  
Y 0.0057 0.0243 0.0005 0.0209 0.0262 0.0222  
Z -0.0166 0.0017 -0.0019 0.0438 0.0040 -0.0014

AT. 6 O X -0.0261 0.0184 0.0013 0.0084 -0.0315 -0.0081  
Y 0.0057 0.0243 -0.0005 -0.0209 0.0262 -0.0222  
Z -0.0166 0.0017 0.0019 -0.0438 0.0040 0.0014

AT. 7 O X 0.0014 -0.0218 -0.0133 -0.0056 0.0126 -0.0054  
Y -0.0194 -0.0098 -0.0110 -0.0075 0.0042 -0.0171  
Z 0.0394 0.0144 0.0290 0.0041 0.0159 0.0359

AT. 8 O X 0.0014 -0.0218 0.0133 0.0056 0.0126 0.0054  
Y -0.0194 -0.0098 0.0110 0.0075 0.0042 0.0171  
Z 0.0394 0.0144 -0.0290 -0.0041 0.0159 -0.0359

AT. 9 N X -0.0020 0.0053 0.0037 -0.0168 -0.0046 0.0183  
Y -0.0061 -0.0085 -0.0080 0.0021 0.0544 0.0369  
Z -0.0075 0.0006 0.0004 0.0432 0.0093 -0.0002

AT. 10 N X -0.0020 0.0053 -0.0037 0.0168 -0.0046 -0.0183  
Y -0.0061 -0.0085 0.0080 -0.0021 0.0544 -0.0369  
Z -0.0075 0.0006 -0.0004 -0.0432 0.0093 0.0002

AT. 11 N X 0.0192 -0.0091 0.0029 0.0006 0.0265 0.0219

Y -0.0268 -0.0024 -0.0102 -0.0093 0.0280 0.0225  
Z 0.0244 0.0148 0.0211 -0.0005 0.0300 0.0572  
AT. 12 N X 0.0192 -0.0091 -0.0029 -0.0006 0.0265 -0.0219  
Y -0.0268 -0.0024 0.0102 0.0093 0.0280 -0.0225  
Z 0.0244 0.0148 -0.0211 0.0005 0.0300 -0.0572  
AT. 13 C X -0.0147 0.0077 0.0015 -0.0113 -0.0263 0.0052  
Y 0.0046 0.0048 -0.0017 0.0137 0.0325 0.0199  
Z -0.0045 0.0031 0.0017 0.0449 0.0059 -0.0027  
AT. 14 C X -0.0147 0.0077 -0.0015 0.0113 -0.0263 -0.0052  
Y 0.0046 0.0048 0.0017 -0.0137 0.0325 -0.0199  
Z -0.0045 0.0031 -0.0017 -0.0449 0.0059 0.0027  
AT. 15 C X -0.0152 -0.0063 0.0027 -0.0092 -0.0407 -0.0110  
Y 0.0117 -0.0092 0.0041 0.0155 0.0136 -0.0014  
Z 0.0118 0.0063 0.0084 0.0452 0.0021 -0.0076  
AT. 16 C X -0.0152 -0.0063 -0.0027 0.0092 -0.0407 0.0110  
Y 0.0117 -0.0092 -0.0041 -0.0155 0.0136 0.0014  
Z 0.0118 0.0063 -0.0084 -0.0452 0.0021 0.0076  
AT. 17 H X -0.0213 -0.0298 0.0037 -0.0365 -0.0694 -0.0200  
Y -0.0029 -0.0222 -0.0007 -0.0053 0.0015 0.0033  
Z 0.0275 0.0141 0.0149 0.0601 0.0060 -0.0167  
AT. 18 H X -0.0213 -0.0298 -0.0037 0.0365 -0.0694 0.0200  
Y -0.0029 -0.0222 0.0007 0.0053 0.0015 -0.0033  
Z 0.0275 0.0141 -0.0149 -0.0601 0.0060 0.0167  
AT. 19 H X -0.0149 -0.0052 0.0040 0.0090 -0.0354 -0.0214  
Y 0.0324 0.0093 0.0109 0.0444 0.0308 -0.0085  
Z 0.0198 0.0139 0.0114 0.0622 0.0103 -0.0136  
AT. 20 H X -0.0149 -0.0052 -0.0040 -0.0090 -0.0354 0.0214  
Y 0.0324 0.0093 -0.0109 -0.0444 0.0308 0.0085  
Z 0.0198 0.0139 -0.0114 -0.0622 0.0103 0.0136  
AT. 21 C X 0.0036 -0.0147 -0.0081 -0.0079 0.0180 0.0041  
Y -0.0224 -0.0021 -0.0087 -0.0130 0.0131 -0.0041  
Z 0.0260 0.0148 0.0218 -0.0025 0.0227 0.0444



AT. 22 C X 0.0036 -0.0147 0.0081 0.0079 0.0180 -0.0041  
Y -0.0224 -0.0021 0.0087 0.0130 0.0131 0.0041  
Z 0.0260 0.0148 -0.0218 0.0025 0.0227 -0.0444

AT. 23 C X -0.0105 -0.0099 -0.0146 -0.0147 0.0156 -0.0080  
Y -0.0220 0.0093 -0.0029 -0.0178 0.0072 -0.0209  
Z 0.0100 0.0165 0.0127 -0.0076 0.0209 0.0364

AT. 24 C X -0.0105 -0.0099 0.0146 0.0147 0.0156 0.0080  
Y -0.0220 0.0093 0.0029 0.0178 0.0072 0.0209  
Z 0.0100 0.0165 -0.0127 0.0076 0.0209 -0.0364

AT. 25 H X -0.0114 0.0068 -0.0028 -0.0195 0.0073 -0.0091  
Y -0.0220 0.0115 -0.0015 -0.0180 0.0056 -0.0242  
Z 0.0082 0.0207 0.0162 -0.0127 0.0215 0.0555

AT. 26 H X -0.0114 0.0068 0.0028 0.0195 0.0073 0.0091  
Y -0.0220 0.0115 0.0015 0.0180 0.0056 0.0242  
Z 0.0082 0.0207 -0.0162 0.0127 0.0215 -0.0555

AT. 27 H X -0.0235 -0.0156 -0.0277 -0.0101 0.0132 -0.0218  
Y -0.0216 0.0028 -0.0092 -0.0110 0.0066 -0.0409  
Z 0.0127 0.0145 0.0122 -0.0053 0.0211 0.0288

AT. 28 H X -0.0235 -0.0156 0.0277 0.0101 0.0132 0.0218  
Y -0.0216 0.0028 0.0092 0.0110 0.0066 0.0409  
Z 0.0127 0.0145 -0.0122 0.0053 0.0211 -0.0288

AT. 29 C X -0.0062 0.0103 0.0031 -0.0182 -0.0086 0.0159  
Y -0.0258 -0.0033 -0.0133 -0.0048 0.0413 0.0313  
Z -0.0261 -0.0028 -0.0061 0.0372 0.0004 -0.0031

AT. 30 C X -0.0062 0.0103 -0.0031 0.0182 -0.0086 -0.0159  
Y -0.0258 -0.0033 0.0133 0.0048 0.0413 -0.0313  
Z -0.0261 -0.0028 0.0061 -0.0372 0.0004 0.0031

AT. 31 H X -0.0121 0.0150 0.0026 -0.0210 -0.0152 0.0131  
Y -0.0321 -0.0105 -0.0179 0.0086 0.0361 0.0152  
Z -0.0383 -0.0106 -0.0128 0.0546 -0.0110 -0.0284

AT. 32 H X -0.0121 0.0150 -0.0026 0.0210 -0.0152 -0.0131  
Y -0.0321 -0.0105 0.0179 -0.0086 0.0361 -0.0152

Z -0.0383 -0.0106 0.0128 -0.0546 -0.0110 0.0284  
AT. 33 H X -0.0139 0.0158 0.0026 -0.0349 -0.0121 0.0267  
Y -0.0183 0.0076 -0.0063 -0.0246 0.0473 0.0551  
Z -0.0342 -0.0038 -0.0095 0.0350 -0.0044 -0.0065  
AT. 34 H X -0.0139 0.0158 -0.0026 0.0349 -0.0121 -0.0267  
Y -0.0183 0.0076 0.0063 0.0246 0.0473 -0.0551  
Z -0.0342 -0.0038 0.0095 -0.0350 -0.0044 0.0065  
AT. 35 C X 0.0077 0.0022 0.0037 0.0044 0.0009 0.0038  
Y -0.0517 -0.0045 -0.0217 -0.0020 0.0183 0.0090  
Z -0.0149 0.0057 0.0015 0.0123 0.0129 0.0296  
AT. 36 C X 0.0077 0.0022 -0.0037 -0.0044 0.0009 -0.0038  
Y -0.0517 -0.0045 0.0217 0.0020 0.0183 -0.0090  
Z -0.0149 0.0057 -0.0015 -0.0123 0.0129 -0.0296  
AT. 37 C X 0.0150 -0.0029 0.0040 -0.0002 0.0175 0.0183  
Y -0.0417 0.0035 -0.0134 -0.0157 0.0195 0.0235  
Z 0.0044 0.0138 0.0126 -0.0110 0.0287 0.0635  
AT. 38 C X 0.0150 -0.0029 -0.0040 0.0002 0.0175 -0.0183  
Y -0.0417 0.0035 0.0134 0.0157 0.0195 -0.0235  
Z 0.0044 0.0138 -0.0126 0.0110 0.0287 -0.0635  
AT. 39 H X 0.0114 0.0026 0.0064 -0.0220 0.0206 0.0409  
Y -0.0297 0.0117 -0.0037 -0.0306 0.0227 0.0413  
Z -0.0033 0.0139 0.0098 -0.0190 0.0296 0.0714  
AT. 40 H X 0.0114 0.0026 -0.0064 0.0220 0.0206 -0.0409  
Y -0.0297 0.0117 0.0037 0.0306 0.0227 -0.0413  
Z -0.0033 0.0139 -0.0098 0.0190 0.0296 -0.0714  
AT. 41 H X 0.0188 -0.0094 0.0014 0.0199 0.0159 -0.0018  
Y -0.0585 0.0059 -0.0185 -0.0166 0.0083 0.0176  
Z 0.0138 0.0185 0.0192 -0.0309 0.0388 0.0884  
AT. 42 H X 0.0188 -0.0094 -0.0014 -0.0199 0.0159 0.0018  
Y -0.0585 0.0059 0.0185 0.0166 0.0083 -0.0176  
Z 0.0138 0.0185 -0.0192 0.0309 0.0388 -0.0884  
AT. 43 C X 0.0319 -0.0136 0.0068 0.0182 0.0270 0.0144

Y -0.0326 -0.0126 -0.0175 0.0062 0.0313 0.0142  
Z 0.0391 0.0147 0.0278 0.0102 0.0287 0.0516  
AT. 44 C X 0.0319 -0.0136 -0.0068 -0.0182 0.0270 -0.0144  
Y -0.0326 -0.0126 0.0175 -0.0062 0.0313 -0.0142  
Z 0.0391 0.0147 -0.0278 -0.0102 0.0287 -0.0516  
AT. 45 H X 0.0431 -0.0191 0.0110 0.0323 0.0289 0.0084  
Y -0.0514 -0.0129 -0.0287 0.0114 0.0269 0.0014  
Z 0.0490 0.0189 0.0356 -0.0048 0.0308 0.0674  
AT. 46 H X 0.0431 -0.0191 -0.0110 -0.0323 0.0289 -0.0084  
Y -0.0514 -0.0129 0.0287 -0.0114 0.0269 -0.0014  
Z 0.0490 0.0189 -0.0356 0.0048 0.0308 -0.0674  
AT. 47 H X 0.0345 -0.0158 0.0081 0.0131 0.0315 0.0226  
Y -0.0137 -0.0144 -0.0075 0.0039 0.0340 0.0229  
Z 0.0552 0.0160 0.0366 0.0148 0.0256 0.0496  
AT. 48 H X 0.0345 -0.0158 -0.0081 -0.0131 0.0315 -0.0226  
Y -0.0137 -0.0144 0.0075 -0.0039 0.0340 -0.0229  
Z 0.0552 0.0160 -0.0366 -0.0148 0.0256 -0.0496  
AT. 49 C X 0.0244 -0.0079 0.0043 0.0232 0.0157 -0.0009  
Y -0.0411 -0.0198 -0.0248 0.0179 0.0339 0.0043  
Z 0.0208 0.0091 0.0148 0.0301 0.0236 0.0257  
AT. 50 C X 0.0244 -0.0079 -0.0043 -0.0232 0.0157 0.0009  
Y -0.0411 -0.0198 0.0248 -0.0179 0.0339 -0.0043  
Z 0.0208 0.0091 -0.0148 -0.0301 0.0236 -0.0257  
AT. 51 C X 0.0100 -0.0004 0.0041 0.0028 0.0034 0.0072  
Y -0.0157 -0.0223 -0.0153 0.0157 0.0521 0.0227  
Z 0.0080 0.0044 0.0052 0.0508 0.0167 -0.0006  
AT. 52 C X 0.0100 -0.0004 -0.0041 -0.0028 0.0034 -0.0072  
Y -0.0157 -0.0223 0.0153 -0.0157 0.0521 -0.0227  
Z 0.0080 0.0044 -0.0052 -0.0508 0.0167 0.0006  
AT. 53 H X 0.0144 -0.0052 0.0056 -0.0005 0.0105 0.0169  
Y 0.0023 -0.0273 -0.0101 0.0180 0.0688 0.0357  
Z 0.0220 0.0076 0.0088 0.0598 0.0240 -0.0028

AT. 54 H X 0.0144 -0.0052 -0.0056 0.0005 0.0105 -0.0169  
Y 0.0023 -0.0273 0.0101 -0.0180 0.0688 -0.0357  
Z 0.0220 0.0076 -0.0088 -0.0598 0.0240 0.0028

AT. 55 H X 0.0038 0.0064 0.0019 0.0083 -0.0053 -0.0057  
Y -0.0220 -0.0291 -0.0197 0.0236 0.0506 0.0146  
Z -0.0039 0.0004 -0.0016 0.0635 0.0090 -0.0190

AT. 56 H X 0.0038 0.0064 -0.0019 -0.0083 -0.0053 0.0057  
Y -0.0220 -0.0291 0.0197 -0.0236 0.0506 -0.0146  
Z -0.0039 0.0004 0.0016 -0.0635 0.0090 0.0190

AT. 57 C X 0.0007 0.0052 0.0029 0.0090 -0.0116 -0.0074  
Y -0.0749 -0.0020 -0.0277 -0.0042 -0.0036 -0.0070  
Z -0.0363 0.0033 -0.0062 -0.0000 0.0042 0.0274

AT. 58 C X 0.0007 0.0052 -0.0029 -0.0090 -0.0116 0.0074  
Y -0.0749 -0.0020 0.0277 0.0042 -0.0036 0.0070  
Z -0.0363 0.0033 0.0062 0.0000 0.0042 -0.0274

AT. 59 H X -0.0074 0.0080 0.0015 0.0149 -0.0236 -0.0185  
Y -0.0813 -0.0053 -0.0320 0.0034 -0.0054 -0.0196  
Z -0.0507 0.0002 -0.0132 0.0153 -0.0071 0.0007

AT. 60 H X -0.0074 0.0080 -0.0015 -0.0149 -0.0236 0.0185  
Y -0.0813 -0.0053 0.0320 -0.0034 -0.0054 0.0196  
Z -0.0507 0.0002 0.0132 -0.0153 -0.0071 -0.0007

AT. 61 H X -0.0058 0.0067 0.0024 -0.0088 -0.0152 0.0044  
Y -0.0651 0.0026 -0.0215 -0.0154 -0.0016 0.0108  
Z -0.0463 0.0022 -0.0097 -0.0082 0.0001 0.0276

AT. 62 H X -0.0058 0.0067 -0.0024 0.0088 -0.0152 -0.0044  
Y -0.0651 0.0026 0.0215 0.0154 -0.0016 -0.0108  
Z -0.0463 0.0022 0.0097 0.0082 0.0001 -0.0276

AT. 63 H X 0.0102 0.0029 0.0037 0.0259 -0.0050 -0.0160  
Y -0.0964 -0.0020 -0.0350 -0.0023 -0.0209 -0.0256  
Z -0.0262 0.0054 -0.0007 -0.0176 0.0129 0.0514

AT. 64 H X 0.0102 0.0029 -0.0037 -0.0259 -0.0050 0.0160  
Y -0.0964 -0.0020 0.0350 0.0023 -0.0209 0.0256

Z -0.0262 0.0054 0.0007 0.0176 0.0129 -0.0514  
AT. 65 C X 0.0365 -0.0125 0.0040 0.0437 0.0235 -0.0140  
Y -0.0488 -0.0272 -0.0319 0.0337 0.0347 -0.0078  
Z 0.0343 0.0092 0.0182 0.0383 0.0294 0.0212  
AT. 66 C X 0.0365 -0.0125 -0.0040 -0.0437 0.0235 0.0140  
Y -0.0488 -0.0272 0.0319 -0.0337 0.0347 0.0078  
Z 0.0343 0.0092 -0.0182 -0.0383 0.0294 -0.0212  
AT. 67 H X 0.0491 -0.0151 0.0054 0.0572 0.0296 -0.0219  
Y -0.0674 -0.0303 -0.0412 0.0380 0.0295 -0.0170  
Z 0.0410 0.0145 0.0256 0.0224 0.0287 0.0364  
AT. 68 H X 0.0491 -0.0151 -0.0054 -0.0572 0.0296 0.0219  
Y -0.0674 -0.0303 0.0412 -0.0380 0.0295 0.0170  
Z 0.0410 0.0145 -0.0256 -0.0224 0.0287 -0.0364  
AT. 69 H X 0.0426 -0.0110 0.0086 0.0401 0.0239 -0.0069  
Y -0.0312 -0.0248 -0.0236 0.0332 0.0392 -0.0008  
Z 0.0480 0.0092 0.0214 0.0454 0.0362 0.0173  
AT. 70 H X 0.0426 -0.0110 -0.0086 -0.0401 0.0239 0.0069  
Y -0.0312 -0.0248 0.0236 -0.0332 0.0392 0.0008  
Z 0.0480 0.0092 -0.0214 -0.0454 0.0362 -0.0173  
AT. 71 H X 0.0290 -0.0144 -0.0021 0.0482 0.0232 -0.0237  
Y -0.0524 -0.0305 -0.0350 0.0428 0.0344 -0.0138  
Z 0.0237 0.0034 0.0093 0.0534 0.0284 0.0056  
AT. 72 H X 0.0290 -0.0144 0.0021 -0.0482 0.0232 0.0237  
Y -0.0524 -0.0305 0.0350 -0.0428 0.0344 0.0138  
Z 0.0237 0.0034 -0.0093 -0.0534 0.0284 -0.0056  
AT. 73 C X 0.0189 -0.0036 0.0032 0.0277 0.0060 -0.0128  
Y -0.0640 -0.0156 -0.0322 0.0168 0.0165 -0.0109  
Z 0.0001 0.0071 0.0067 0.0203 0.0173 0.0273  
AT. 74 C X 0.0189 -0.0036 -0.0032 -0.0277 0.0060 0.0128  
Y -0.0640 -0.0156 0.0322 -0.0168 0.0165 0.0109  
Z 0.0001 0.0071 -0.0067 -0.0203 0.0173 -0.0273  
AT. 75 H X 0.0141 0.0006 0.0019 0.0326 -0.0036 -0.0251

Y -0.0706 -0.0210 -0.0379 0.0265 0.0155 -0.0211  
Z -0.0118 0.0028 -0.0019 0.0361 0.0091 0.0047  
AT. 76 H X 0.0141 0.0006 -0.0019 -0.0326 -0.0036 0.0251  
Y -0.0706 -0.0210 0.0379 -0.0265 0.0155 0.0211  
Z -0.0118 0.0028 0.0019 -0.0361 0.0091 -0.0047  
AT. 77 H X 0.0280 -0.0082 0.0033 0.0428 0.0113 -0.0220  
Y -0.0807 -0.0148 -0.0395 0.0202 0.0041 -0.0251  
Z 0.0075 0.0108 0.0136 0.0026 0.0237 0.0489  
AT. 78 H X 0.0280 -0.0082 -0.0033 -0.0428 0.0113 0.0220  
Y -0.0807 -0.0148 0.0395 -0.0202 0.0041 0.0251  
Z 0.0075 0.0108 -0.0136 -0.0026 0.0237 -0.0489  
AT. 79 I X -0.0056 0.0011 -0.0102 0.0061 -0.0045 0.0026  
Y -0.0126 -0.0037 -0.0233 0.0060 -0.0100 -0.0009  
Z 0.0073 -0.0155 0.0189 0.0007 0.0029 0.0006  
AT. 80 I X -0.0056 0.0011 0.0102 -0.0061 -0.0045 -0.0026  
Y -0.0126 -0.0037 0.0233 -0.0060 -0.0100 0.0009  
Z 0.0073 -0.0155 -0.0189 -0.0007 0.0029 -0.0006  
AT. 81 I X 0.0022 0.0101 0.0424 -0.0101 -0.0100 -0.0083  
Y 0.0420 0.0225 0.0280 -0.0105 -0.0192 0.0056  
Z 0.0112 -0.0007 0.0134 -0.0089 -0.0073 -0.0137  
AT. 82 I X 0.0022 0.0101 -0.0424 0.0101 -0.0100 0.0083  
Y 0.0420 0.0225 -0.0280 0.0105 -0.0192 -0.0056  
Z 0.0112 -0.0007 -0.0134 0.0089 -0.0073 0.0137  
AT. 83 O X -0.0037 0.0108 -0.0046 0.0055 -0.0054 0.0043  
Y 0.0053 -0.0134 0.0108 0.0008 0.0148 -0.0173  
Z 0.0069 -0.0113 -0.0202 -0.0263 -0.0035 0.0307  
AT. 84 O X -0.0037 0.0108 0.0046 -0.0055 -0.0054 -0.0043  
Y 0.0053 -0.0134 -0.0108 -0.0008 0.0148 0.0173  
Z 0.0069 -0.0113 0.0202 0.0263 -0.0035 -0.0307  
AT. 85 O X -0.0137 -0.0005 0.0323 0.0115 0.0074 -0.0079  
Y 0.0353 -0.0134 -0.0400 0.0169 0.0216 0.0092  
Z -0.0038 0.0016 0.0052 0.0407 0.0170 0.0322

AT. 86 O X -0.0137 -0.0005 -0.0323 -0.0115 0.0074 0.0079  
Y 0.0353 -0.0134 0.0400 -0.0169 0.0216 -0.0092  
Z -0.0038 0.0016 -0.0052 -0.0407 0.0170 -0.0322

AT. 87 N X 0.0023 0.0014 -0.0212 -0.0129 -0.0037 0.0013  
Y 0.0093 0.0114 -0.0055 0.0229 0.0027 0.0056  
Z 0.0035 -0.0063 -0.0108 -0.0162 -0.0049 0.0323

AT. 88 N X 0.0023 0.0014 0.0212 0.0129 -0.0037 -0.0013  
Y 0.0093 0.0114 0.0055 -0.0229 0.0027 -0.0056  
Z 0.0035 -0.0063 0.0108 0.0162 -0.0049 -0.0323

AT. 89 N X 0.0041 -0.0084 0.0044 -0.0019 0.0065 -0.0111  
Y 0.0138 0.0045 -0.0071 0.0194 0.0067 0.0049  
Z -0.0122 0.0127 0.0187 0.0357 0.0040 0.0262

AT. 90 N X 0.0041 -0.0084 -0.0044 0.0019 0.0065 0.0111  
Y 0.0138 0.0045 0.0071 -0.0194 0.0067 -0.0049  
Z -0.0122 0.0127 -0.0187 -0.0357 0.0040 -0.0262

AT. 91 C X -0.0011 0.0066 -0.0089 -0.0008 -0.0030 0.0027  
Y 0.0039 -0.0004 -0.0000 0.0090 0.0051 -0.0071  
Z 0.0026 -0.0083 -0.0104 -0.0184 -0.0043 0.0298

AT. 92 C X -0.0011 0.0066 0.0089 0.0008 -0.0030 -0.0027  
Y 0.0039 -0.0004 0.0000 -0.0090 0.0051 0.0071  
Z 0.0026 -0.0083 0.0104 0.0184 -0.0043 -0.0298

AT. 93 C X 0.0004 0.0071 0.0020 0.0044 -0.0005 0.0011  
Y -0.0052 0.0018 -0.0081 0.0063 -0.0052 -0.0051  
Z -0.0011 -0.0065 0.0023 -0.0109 -0.0053 0.0269

AT. 94 C X 0.0004 0.0071 -0.0020 -0.0044 -0.0005 -0.0011  
Y -0.0052 0.0018 0.0081 -0.0063 -0.0052 0.0051  
Z -0.0011 -0.0065 -0.0023 0.0109 -0.0053 -0.0269

AT. 95 H X 0.0036 0.0097 0.0034 0.0016 0.0031 0.0054  
Y -0.0039 -0.0015 -0.0113 0.0071 -0.0059 -0.0088  
Z -0.0069 -0.0033 0.0071 -0.0092 -0.0082 0.0285

AT. 96 H X 0.0036 0.0097 -0.0034 -0.0016 0.0031 -0.0054  
Y -0.0039 -0.0015 0.0113 -0.0071 -0.0059 0.0088

Z -0.0069 -0.0033 -0.0071 0.0092 -0.0082 -0.0285  
AT. 97 H X 0.0012 0.0071 0.0137 0.0108 0.0020 -0.0048  
Y -0.0118 0.0069 -0.0069 0.0027 -0.0079 0.0023  
Z -0.0029 -0.0053 -0.0008 -0.0134 -0.0065 0.0299  
AT. 98 H X 0.0012 0.0071 -0.0137 -0.0108 0.0020 0.0048  
Y -0.0118 0.0069 0.0069 -0.0027 -0.0079 -0.0023  
Z -0.0029 -0.0053 0.0008 0.0134 -0.0065 -0.0299  
AT. 99 C X -0.0072 -0.0041 0.0194 0.0079 0.0086 -0.0076  
Y 0.0254 -0.0051 -0.0188 0.0179 0.0144 0.0049  
Z -0.0050 0.0069 0.0114 0.0342 0.0080 0.0257  
AT. 100 C X -0.0072 -0.0041 -0.0194 -0.0079 0.0086 0.0076  
Y 0.0254 -0.0051 0.0188 -0.0179 0.0144 -0.0049  
Z -0.0050 0.0069 -0.0114 -0.0342 0.0080 -0.0257  
AT. 101 C X -0.0124 -0.0054 0.0164 0.0173 0.0148 -0.0007  
Y 0.0277 -0.0019 -0.0034 0.0088 0.0083 -0.0007  
Z 0.0029 0.0083 0.0131 0.0206 -0.0011 0.0155  
AT. 102 C X -0.0124 -0.0054 -0.0164 -0.0173 0.0148 0.0007  
Y 0.0277 -0.0019 0.0034 -0.0088 0.0083 0.0007  
Z 0.0029 0.0083 -0.0131 -0.0206 -0.0011 -0.0155  
AT. 103 H X -0.0190 -0.0164 0.0001 0.0294 0.0288 -0.0008  
Y 0.0301 0.0025 0.0033 0.0038 0.0026 -0.0007  
Z 0.0090 0.0160 0.0185 0.0155 -0.0110 0.0178  
AT. 104 H X -0.0190 -0.0164 -0.0001 -0.0294 0.0288 0.0008  
Y 0.0301 0.0025 -0.0033 -0.0038 0.0026 0.0007  
Z 0.0090 0.0160 -0.0185 -0.0155 -0.0110 -0.0178  
AT. 105 H X -0.0173 -0.0014 0.0197 0.0257 0.0173 0.0109  
Y 0.0237 -0.0121 -0.0118 0.0087 0.0172 -0.0075  
Z 0.0003 0.0052 0.0108 0.0223 0.0027 0.0152  
AT. 106 H X -0.0173 -0.0014 -0.0197 -0.0257 0.0173 -0.0109  
Y 0.0237 -0.0121 0.0118 -0.0087 0.0172 0.0075  
Z 0.0003 0.0052 -0.0108 -0.0223 0.0027 -0.0152  
AT. 107 C X 0.0039 0.0007 -0.0291 -0.0164 -0.0047 0.0016



Y 0.0153 0.0054 0.0010 0.0177 0.0045 0.0019  
Z 0.0085 -0.0098 -0.0210 -0.0248 -0.0062 0.0317  
AT. 108 C X 0.0039 0.0007 0.0291 0.0164 -0.0047 -0.0016  
Y 0.0153 0.0054 -0.0010 -0.0177 0.0045 -0.0019  
Z 0.0085 -0.0098 0.0210 0.0248 -0.0062 -0.0317  
AT. 109 H X 0.0036 -0.0006 -0.0455 -0.0259 -0.0074 0.0059  
Y 0.0176 0.0003 -0.0104 0.0043 0.0028 0.0051  
Z 0.0127 -0.0178 -0.0356 -0.0446 -0.0084 0.0361  
AT. 110 H X 0.0036 -0.0006 0.0455 0.0259 -0.0074 -0.0059  
Y 0.0176 0.0003 0.0104 -0.0043 0.0028 -0.0051  
Z 0.0127 -0.0178 0.0356 0.0446 -0.0084 -0.0361  
AT. 111 H X 0.0017 0.0016 -0.0280 -0.0162 -0.0050 0.0040  
Y 0.0130 0.0120 0.0246 0.0401 0.0083 -0.0052  
Z 0.0111 -0.0123 -0.0270 -0.0296 -0.0064 0.0302  
AT. 112 H X 0.0017 0.0016 0.0280 0.0162 -0.0050 -0.0040  
Y 0.0130 0.0120 -0.0246 -0.0401 0.0083 0.0052  
Z 0.0111 -0.0123 0.0270 0.0296 -0.0064 -0.0302  
AT. 113 C X 0.0088 -0.0014 -0.0178 -0.0097 -0.0018 -0.0063  
Y 0.0219 -0.0049 -0.0105 -0.0020 0.0030 0.0032  
Z 0.0033 0.0008 -0.0037 -0.0010 -0.0040 0.0275  
AT. 114 C X 0.0088 -0.0014 0.0178 0.0097 -0.0018 0.0063  
Y 0.0219 -0.0049 0.0105 0.0020 0.0030 -0.0032  
Z 0.0033 0.0008 0.0037 0.0010 -0.0040 -0.0275  
AT. 115 C X 0.0065 -0.0060 -0.0022 -0.0039 0.0036 -0.0108  
Y 0.0169 0.0021 0.0051 0.0150 0.0060 0.0002  
Z -0.0041 0.0139 0.0174 0.0268 -0.0011 0.0228  
AT. 116 C X 0.0065 -0.0060 0.0022 0.0039 0.0036 0.0108  
Y 0.0169 0.0021 -0.0051 -0.0150 0.0060 -0.0002  
Z -0.0041 0.0139 -0.0174 -0.0268 -0.0011 -0.0228  
AT. 117 H X 0.0045 -0.0108 -0.0115 -0.0095 0.0052 -0.0067  
Y 0.0117 0.0097 0.0306 0.0377 0.0104 -0.0054  
Z -0.0007 0.0172 0.0213 0.0273 -0.0039 0.0195

AT. 118 H X 0.0045 -0.0108 0.0115 0.0095 0.0052 0.0067  
Y 0.0117 0.0097 -0.0306 -0.0377 0.0104 0.0054  
Z -0.0007 0.0172 -0.0213 -0.0273 -0.0039 -0.0195

AT. 119 H X 0.0085 -0.0002 0.0162 0.0054 0.0029 -0.0175  
Y 0.0211 -0.0027 0.0027 0.0032 0.0042 -0.0004  
Z -0.0071 0.0218 0.0298 0.0434 0.0002 0.0200

AT. 120 H X 0.0085 -0.0002 -0.0162 -0.0054 0.0029 0.0175  
Y 0.0211 -0.0027 -0.0027 -0.0032 0.0042 0.0004  
Z -0.0071 0.0218 -0.0298 -0.0434 0.0002 -0.0200

AT. 121 C X 0.0105 -0.0106 0.0031 -0.0055 0.0061 -0.0144  
Y 0.0139 0.0063 -0.0245 0.0043 -0.0005 0.0108  
Z -0.0218 0.0155 0.0223 0.0418 0.0056 0.0304

AT. 122 C X 0.0105 -0.0106 -0.0031 0.0055 0.0061 0.0144  
Y 0.0139 0.0063 0.0245 -0.0043 -0.0005 -0.0108  
Z -0.0218 0.0155 -0.0223 -0.0418 0.0056 -0.0304

AT. 123 H X 0.0223 -0.0190 0.0072 -0.0107 0.0092 -0.0218  
Y 0.0225 -0.0018 -0.0309 -0.0150 -0.0025 0.0099  
Z -0.0290 0.0227 0.0299 0.0611 0.0082 0.0301

AT. 124 H X 0.0223 -0.0190 -0.0072 0.0107 0.0092 0.0218  
Y 0.0225 -0.0018 0.0309 0.0150 -0.0025 -0.0099  
Z -0.0290 0.0227 -0.0299 -0.0611 0.0082 -0.0301

AT. 125 H X 0.0076 -0.0114 0.0082 -0.0031 0.0079 -0.0135  
Y 0.0014 0.0179 -0.0249 0.0221 -0.0010 0.0153  
Z -0.0316 0.0204 0.0278 0.0535 0.0074 0.0339

AT. 126 H X 0.0076 -0.0114 -0.0082 0.0031 0.0079 0.0135  
Y 0.0014 0.0179 0.0249 -0.0221 -0.0010 -0.0153  
Z -0.0316 0.0204 -0.0278 -0.0535 0.0074 -0.0339

AT. 127 C X 0.0102 -0.0036 -0.0111 -0.0082 0.0001 -0.0099  
Y 0.0200 0.0020 -0.0360 -0.0124 -0.0050 0.0134  
Z -0.0104 0.0046 0.0088 0.0123 0.0003 0.0319

AT. 128 C X 0.0102 -0.0036 0.0111 0.0082 0.0001 0.0099  
Y 0.0200 0.0020 0.0360 0.0124 -0.0050 -0.0134

Z -0.0104 0.0046 -0.0088 -0.0123 0.0003 -0.0319  
AT. 129 C X 0.0050 0.0001 -0.0206 -0.0122 -0.0029 -0.0019  
Y 0.0106 0.0114 -0.0273 0.0080 -0.0025 0.0135  
Z -0.0015 -0.0047 -0.0030 -0.0112 -0.0037 0.0335  
AT. 130 C X 0.0050 0.0001 0.0206 0.0122 -0.0029 0.0019  
Y 0.0106 0.0114 0.0273 -0.0080 -0.0025 -0.0135  
Z -0.0015 -0.0047 0.0030 0.0112 -0.0037 -0.0335  
AT. 131 H X 0.0054 -0.0019 -0.0164 -0.0138 -0.0024 -0.0026  
Y 0.0021 0.0202 -0.0290 0.0208 -0.0025 0.0182  
Z -0.0048 -0.0034 0.0025 -0.0073 -0.0029 0.0344  
AT. 132 H X 0.0054 -0.0019 0.0164 0.0138 -0.0024 0.0026  
Y 0.0021 0.0202 0.0290 -0.0208 -0.0025 -0.0182  
Z -0.0048 -0.0034 -0.0025 0.0073 -0.0029 -0.0344  
AT. 133 H X 0.0026 0.0056 -0.0303 -0.0090 -0.0051 0.0017  
Y 0.0139 0.0089 -0.0363 -0.0023 -0.0045 0.0161  
Z 0.0050 -0.0109 -0.0126 -0.0282 -0.0060 0.0360  
AT. 134 H X 0.0026 0.0056 0.0303 0.0090 -0.0051 -0.0017  
Y 0.0139 0.0089 0.0363 0.0023 -0.0045 -0.0161  
Z 0.0050 -0.0109 0.0126 0.0282 -0.0060 -0.0360  
AT. 135 C X 0.0122 0.0016 -0.0232 -0.0116 -0.0040 -0.0054  
Y 0.0281 -0.0183 -0.0105 -0.0120 0.0038 -0.0016  
Z 0.0126 -0.0020 -0.0129 -0.0105 -0.0069 0.0263  
AT. 136 C X 0.0122 0.0016 0.0232 0.0116 -0.0040 0.0054  
Y 0.0281 -0.0183 0.0105 0.0120 0.0038 0.0016  
Z 0.0126 -0.0020 0.0129 0.0105 -0.0069 -0.0263  
AT. 137 H X 0.0148 0.0064 -0.0338 -0.0163 -0.0072 -0.0001  
Y 0.0328 -0.0237 -0.0231 -0.0247 0.0000 0.0009  
Z 0.0200 -0.0130 -0.0304 -0.0305 -0.0118 0.0288  
AT. 138 H X 0.0148 0.0064 0.0338 0.0163 -0.0072 0.0001  
Y 0.0328 -0.0237 0.0231 0.0247 0.0000 -0.0009  
Z 0.0200 -0.0130 0.0304 0.0305 -0.0118 -0.0288  
AT. 139 H X 0.0092 0.0014 -0.0250 -0.0128 -0.0040 -0.0030

Y 0.0219 -0.0137 0.0123 0.0082 0.0102 -0.0086  
Z 0.0182 -0.0031 -0.0163 -0.0141 -0.0086 0.0250  
AT. 140 H X 0.0092 0.0014 0.0250 0.0128 -0.0040 0.0030  
Y 0.0219 -0.0137 -0.0123 -0.0082 0.0102 0.0086  
Z 0.0182 -0.0031 0.0163 0.0141 -0.0086 -0.0250  
AT. 141 H X 0.0154 -0.0003 -0.0145 -0.0069 -0.0016 -0.0115  
Y 0.0344 -0.0281 -0.0212 -0.0266 0.0009 -0.0012  
Z 0.0077 0.0073 0.0015 0.0064 -0.0030 0.0236  
AT. 142 H X 0.0154 -0.0003 0.0145 0.0069 -0.0016 0.0115  
Y 0.0344 -0.0281 0.0212 0.0266 0.0009 0.0012  
Z 0.0077 0.0073 -0.0015 -0.0064 -0.0030 -0.0236  
AT. 143 C X 0.0133 -0.0035 -0.0085 -0.0058 0.0006 -0.0135  
Y 0.0264 -0.0007 -0.0582 -0.0356 -0.0143 0.0223  
Z -0.0165 0.0051 0.0113 0.0155 0.0023 0.0343  
AT. 144 C X 0.0133 -0.0035 0.0085 0.0058 0.0006 0.0135  
Y 0.0264 -0.0007 0.0582 0.0356 -0.0143 -0.0223  
Z -0.0165 0.0051 -0.0113 -0.0155 0.0023 -0.0343  
AT. 145 H X 0.0149 -0.0045 0.0013 0.0001 0.0045 -0.0236  
Y 0.0292 -0.0057 -0.0609 -0.0458 -0.0147 0.0179  
Z -0.0191 0.0102 0.0165 0.0279 0.0037 0.0364  
AT. 146 H X 0.0149 -0.0045 -0.0013 -0.0001 0.0045 0.0236  
Y 0.0292 -0.0057 0.0609 0.0458 -0.0147 -0.0179  
Z -0.0191 0.0102 -0.0165 -0.0279 0.0037 -0.0364  
AT. 147 H X 0.0104 -0.0048 -0.0050 -0.0045 0.0031 -0.0155  
Y 0.0248 0.0054 -0.0632 -0.0309 -0.0178 0.0333  
Z -0.0214 0.0064 0.0133 0.0195 0.0039 0.0374  
AT. 148 H X 0.0104 -0.0048 0.0050 0.0045 0.0031 0.0155  
Y 0.0248 0.0054 0.0632 0.0309 -0.0178 -0.0333  
Z -0.0214 0.0064 -0.0133 -0.0195 0.0039 -0.0374  
AT. 149 H X 0.0168 -0.0011 -0.0195 -0.0118 -0.0060 -0.0052  
Y 0.0295 -0.0036 -0.0658 -0.0465 -0.0174 0.0234  
Z -0.0127 -0.0009 0.0028 -0.0010 0.0002 0.0319

AT. 150 H X 0.0168 -0.0011 0.0195 0.0118 -0.0060 0.0052  
Y 0.0295 -0.0036 0.0658 0.0465 -0.0174 -0.0234  
Z -0.0127 -0.0009 -0.0028 0.0010 0.0002 -0.0319

AT. 151 C X 0.0124 -0.0009 -0.0163 -0.0085 -0.0021 -0.0096  
Y 0.0285 -0.0104 -0.0361 -0.0262 -0.0035 0.0099  
Z -0.0029 0.0019 0.0014 0.0040 -0.0020 0.0302

AT. 152 C X 0.0124 -0.0009 0.0163 0.0085 -0.0021 0.0096  
Y 0.0285 -0.0104 0.0361 0.0262 -0.0035 -0.0099  
Z -0.0029 0.0019 -0.0014 -0.0040 -0.0020 -0.0302

AT. 153 H X 0.0133 0.0024 -0.0245 -0.0106 -0.0056 -0.0081  
Y 0.0324 -0.0149 -0.0453 -0.0371 -0.0054 0.0110  
Z 0.0035 -0.0070 -0.0104 -0.0133 -0.0037 0.0316

AT. 154 H X 0.0133 0.0024 0.0245 0.0106 -0.0056 0.0081  
Y 0.0324 -0.0149 0.0453 0.0371 -0.0054 -0.0110  
Z 0.0035 -0.0070 0.0104 0.0133 -0.0037 -0.0316

AT. 155 H X 0.0154 -0.0025 -0.0101 -0.0055 -0.0003 -0.0144  
Y 0.0344 -0.0185 -0.0440 -0.0399 -0.0044 0.0106  
Z -0.0078 0.0099 0.0119 0.0195 -0.0005 0.0279

AT. 156 H X 0.0154 -0.0025 0.0101 0.0055 -0.0003 0.0144  
Y 0.0344 -0.0185 0.0440 0.0399 -0.0044 -0.0106  
Z -0.0078 0.0099 -0.0119 -0.0195 -0.0005 -0.0279

AT. 157 O X 0.0065 0.0094 -0.0018 0.0258 -0.0154 -0.0343  
Y 0.0066 0.0187 0.0020 0.0326 0.0258 0.0177  
Z 0.0339 0.0229 -0.0305 0.0062 0.0198 -0.0391

AT. 158 O X 0.0065 0.0094 0.0018 -0.0258 -0.0154 0.0343  
Y 0.0066 0.0187 -0.0020 -0.0326 0.0258 -0.0177  
Z 0.0339 0.0229 0.0305 -0.0062 0.0198 0.0391

AT. 159 O X 0.0042 -0.0007 0.0029 0.0178 -0.0177 -0.0250  
Y 0.0046 -0.0161 0.0060 0.0274 -0.0007 -0.0053  
Z 0.0310 0.0019 -0.0229 -0.0084 0.0138 -0.0261

AT. 160 O X 0.0042 -0.0007 -0.0029 -0.0178 -0.0177 0.0250  
Y 0.0046 -0.0161 -0.0060 -0.0274 -0.0007 0.0053

Z 0.0310 0.0019 0.0229 0.0084 0.0138 0.0261  
AT.161 H X -0.0062 0.0257 0.0004 0.0270 -0.0068 -0.0117  
Y 0.0122 0.0254 -0.0011 0.0318 0.0297 0.0155  
Z 0.0115 0.0069 -0.0194 0.0091 0.0101 -0.0253  
AT.162 H X -0.0062 0.0257 -0.0004 -0.0270 -0.0068 0.0117  
Y 0.0122 0.0254 0.0011 -0.0318 0.0297 -0.0155  
Z 0.0115 0.0069 0.0194 -0.0091 0.0101 0.0253  
AT.163 H X 0.0022 -0.0098 0.0076 0.0089 -0.0147 -0.0115  
Y -0.0024 -0.0127 0.0084 0.0207 -0.0007 0.0075  
Z 0.0295 0.0057 -0.0240 -0.0078 0.0117 -0.0273  
AT.164 H X 0.0022 -0.0098 -0.0076 -0.0089 -0.0147 0.0115  
Y -0.0024 -0.0127 -0.0084 -0.0207 -0.0007 -0.0075  
Z 0.0295 0.0057 0.0240 0.0078 0.0117 0.0273  
AT.165 O X 0.0004 -0.0003 -0.0029 0.0003 0.0060 0.0117  
Y -0.0019 -0.0099 -0.0004 -0.0009 0.0058 -0.0074  
Z -0.0184 -0.0040 -0.0089 -0.0123 0.0043 -0.0389  
AT.166 O X 0.0004 -0.0003 0.0029 -0.0003 0.0060 -0.0117  
Y -0.0019 -0.0099 0.0004 0.0009 0.0058 0.0074  
Z -0.0184 -0.0040 0.0089 0.0123 0.0043 0.0389  
AT.167 H X 0.0005 0.0011 -0.0037 0.0045 0.0018 0.0092  
Y -0.0032 -0.0124 0.0048 -0.0026 0.0132 -0.0138  
Z -0.0183 -0.0043 -0.0145 -0.0219 0.0052 -0.0233  
AT.168 H X 0.0005 0.0011 0.0037 -0.0045 0.0018 -0.0092  
Y -0.0032 -0.0124 -0.0048 0.0026 0.0132 0.0138  
Z -0.0183 -0.0043 0.0145 0.0219 0.0052 0.0233  
AT.169 O X -0.0128 0.0009 -0.0253 -0.0182 0.0081 0.0314  
Y 0.0188 -0.0152 0.0306 -0.0034 0.0155 -0.0009  
Z -0.0253 -0.0027 -0.0202 -0.0155 0.0028 -0.0356  
AT.170 O X -0.0128 0.0009 0.0253 0.0182 0.0081 -0.0314  
Y 0.0188 -0.0152 -0.0306 0.0034 0.0155 0.0009  
Z -0.0253 -0.0027 0.0202 0.0155 0.0028 0.0356  
AT.171 H X -0.0154 0.0035 -0.0373 -0.0209 0.0095 0.0192

Y 0.0256 -0.0153 0.0366 -0.0044 0.0192 -0.0074  
Z -0.0115 -0.0048 -0.0012 -0.0147 0.0074 -0.0373  
AT. 172 H X -0.0154 0.0035 0.0373 0.0209 0.0095 -0.0192  
Y 0.0256 -0.0153 -0.0366 0.0044 0.0192 0.0074  
Z -0.0115 -0.0048 0.0012 0.0147 0.0074 0.0373

FREQ(CM\*\*-1) 65.75 67.77 69.18 70.64 70.92 71.89

AT. 1 I X 0.0100 0.0098 0.0095 -0.0025 0.0121 0.0123  
Y -0.0250 0.0122 -0.0007 -0.0002 -0.0072 -0.0032  
Z -0.0095 -0.0163 0.0187 0.0036 -0.0066 0.0321

AT. 2 I X -0.0100 0.0098 -0.0095 -0.0025 0.0121 -0.0123  
Y 0.0250 0.0122 0.0007 -0.0002 -0.0072 0.0032  
Z 0.0095 -0.0163 -0.0187 0.0036 -0.0066 -0.0321

AT. 3 I X -0.0047 -0.0227 -0.0099 -0.0034 -0.0109 -0.0224  
Y 0.0002 -0.0060 -0.0079 0.0259 -0.0122 0.0234  
Z 0.0040 0.0046 0.0057 -0.0014 0.0107 0.0171

AT. 4 I X 0.0047 -0.0227 0.0099 -0.0034 -0.0109 0.0224  
Y -0.0002 -0.0060 0.0079 0.0259 -0.0122 -0.0234  
Z -0.0040 0.0046 -0.0057 -0.0014 0.0107 -0.0171

AT. 5 O X 0.0119 -0.0265 0.0218 0.0036 0.0068 0.0021  
Y 0.0633 -0.0751 0.0592 -0.0084 0.0543 -0.0552  
Z 0.0181 0.0224 -0.0034 -0.0032 0.0224 0.0336

AT. 6 O X -0.0119 -0.0265 -0.0218 0.0036 0.0068 -0.0021  
Y -0.0633 -0.0751 -0.0592 -0.0084 0.0543 0.0552  
Z -0.0181 0.0224 0.0034 -0.0032 0.0224 -0.0336

AT. 7 O X -0.0111 -0.0150 -0.0051 0.0010 -0.0118 -0.0056  
Y 0.0057 0.0084 -0.0076 -0.0231 0.0235 -0.0509  
Z 0.0083 0.0046 -0.0168 -0.0078 -0.0131 -0.0156

AT. 8 O X 0.0111 -0.0150 0.0051 0.0010 -0.0118 0.0056  
Y -0.0057 0.0084 0.0076 -0.0231 0.0235 0.0509  
Z -0.0083 0.0046 0.0168 -0.0078 -0.0131 0.0156

AT. 9 N X -0.0033 -0.0010 -0.0112 -0.0014 -0.0174 0.0117  
Y 0.0222 -0.0157 -0.0260 -0.0028 -0.0135 -0.0201  
Z 0.0173 0.0247 -0.0051 -0.0054 0.0218 0.0324

AT. 10 N X 0.0033 -0.0010 0.0112 -0.0014 -0.0174 -0.0117  
Y -0.0222 -0.0157 0.0260 -0.0028 -0.0135 0.0201  
Z -0.0173 0.0247 0.0051 -0.0054 0.0218 -0.0324

AT. 11 N X 0.0008 -0.0086 -0.0074 0.0028 -0.0180 0.0092  
Y 0.0170 -0.0058 -0.0286 -0.0074 -0.0061 -0.0214  
Z 0.0121 -0.0108 -0.0337 0.0058 -0.0355 0.0048

AT. 12 N X -0.0008 -0.0086 0.0074 0.0028 -0.0180 -0.0092  
Y -0.0170 -0.0058 0.0286 -0.0074 -0.0061 0.0214  
Z -0.0121 -0.0108 0.0337 0.0058 -0.0355 -0.0048

AT. 13 C X -0.0018 -0.0058 0.0058 0.0019 -0.0056 0.0113  
Y 0.0371 -0.0382 0.0211 -0.0061 0.0232 -0.0340  
Z 0.0198 0.0201 0.0033 -0.0064 0.0282 0.0299

AT. 14 C X 0.0018 -0.0058 -0.0058 0.0019 -0.0056 -0.0113  
Y -0.0371 -0.0382 -0.0211 -0.0061 0.0232 0.0340  
Z -0.0198 0.0201 -0.0033 -0.0064 0.0282 -0.0299

AT. 15 C X -0.0200 0.0175 -0.0036 0.0035 -0.0141 0.0242  
Y 0.0177 -0.0158 0.0192 -0.0054 0.0191 -0.0220  
Z 0.0237 0.0101 0.0212 -0.0104 0.0410 0.0207

AT. 16 C X 0.0200 0.0175 0.0036 0.0035 -0.0141 -0.0242  
Y -0.0177 -0.0158 -0.0192 -0.0054 0.0191 0.0220  
Z -0.0237 0.0101 -0.0212 -0.0104 0.0410 -0.0207

AT. 17 H X -0.0490 0.0229 -0.0116 0.0105 -0.0388 0.0373  
Y 0.0018 -0.0139 0.0044 0.0014 -0.0038 -0.0119  
Z 0.0323 0.0097 0.0365 -0.0162 0.0599 0.0130

AT. 18 H X 0.0490 0.0229 0.0116 0.0105 -0.0388 -0.0373  
Y -0.0018 -0.0139 -0.0044 0.0014 -0.0038 0.0119  
Z -0.0323 0.0097 -0.0365 -0.0162 0.0599 -0.0130

AT. 19 H X -0.0212 0.0367 -0.0129 0.0022 -0.0102 0.0293  
Y 0.0390 -0.0186 0.0390 -0.0144 0.0496 -0.0358



Z 0.0318 0.0147 0.0263 -0.0143 0.0543 0.0168  
AT. 20 H X 0.0212 0.0367 0.0129 0.0022 -0.0102 -0.0293  
Y -0.0390 -0.0186 -0.0390 -0.0144 0.0496 0.0358  
Z -0.0318 0.0147 -0.0263 -0.0143 0.0543 -0.0168  
AT. 21 C X -0.0065 -0.0158 -0.0062 0.0042 -0.0159 0.0011  
Y 0.0103 0.0026 -0.0128 -0.0160 0.0143 -0.0390  
Z 0.0092 -0.0068 -0.0264 0.0011 -0.0258 -0.0051  
AT. 22 C X 0.0065 -0.0158 0.0062 0.0042 -0.0159 -0.0011  
Y -0.0103 0.0026 0.0128 -0.0160 0.0143 0.0390  
Z -0.0092 -0.0068 0.0264 0.0011 -0.0258 0.0051  
AT. 23 C X -0.0096 -0.0206 -0.0022 0.0098 -0.0134 0.0081  
Y 0.0097 0.0096 0.0033 -0.0157 0.0268 -0.0393  
Z 0.0053 -0.0139 -0.0270 0.0076 -0.0268 0.0048  
AT. 24 C X 0.0096 -0.0206 0.0022 0.0098 -0.0134 -0.0081  
Y -0.0097 0.0096 -0.0033 -0.0157 0.0268 0.0393  
Z -0.0053 -0.0139 0.0270 0.0076 -0.0268 -0.0048  
AT. 25 H X -0.0160 -0.0254 -0.0026 0.0283 -0.0263 0.0376  
Y 0.0096 0.0113 0.0063 -0.0154 0.0288 -0.0392  
Z -0.0007 -0.0307 -0.0469 0.0243 -0.0507 0.0320  
AT. 26 H X 0.0160 -0.0254 0.0026 0.0283 -0.0263 -0.0376  
Y -0.0096 0.0113 -0.0063 -0.0154 0.0288 0.0392  
Z 0.0007 -0.0307 0.0469 0.0243 -0.0507 -0.0320  
AT. 27 H X -0.0093 -0.0171 0.0048 0.0037 -0.0002 0.0029  
Y 0.0164 0.0290 0.0244 -0.0345 0.0530 -0.0677  
Z 0.0085 -0.0045 -0.0175 -0.0010 -0.0155 -0.0090  
AT. 28 H X 0.0093 -0.0171 -0.0048 0.0037 -0.0002 -0.0029  
Y -0.0164 0.0290 -0.0244 -0.0345 0.0530 0.0677  
Z -0.0085 -0.0045 0.0175 -0.0010 -0.0155 0.0090  
AT. 29 C X -0.0006 -0.0020 -0.0096 -0.0040 -0.0117 0.0123  
Y 0.0216 -0.0152 -0.0304 -0.0033 -0.0118 -0.0154  
Z 0.0103 0.0274 -0.0153 0.0001 0.0114 0.0393  
AT. 30 C X 0.0006 -0.0020 0.0096 -0.0040 -0.0117 -0.0123

Y -0.0216 -0.0152 0.0304 -0.0033 -0.0118 0.0154  
Z -0.0103 0.0274 0.0153 0.0001 0.0114 -0.0393  
AT. 31 H X 0.0004 -0.0007 -0.0100 -0.0072 -0.0074 0.0133  
Y 0.0209 -0.0021 -0.0227 -0.0050 0.0025 -0.0093  
Z 0.0098 0.0473 -0.0044 -0.0041 0.0348 0.0487  
AT. 32 H X -0.0004 -0.0007 0.0100 -0.0072 -0.0074 -0.0133  
Y -0.0209 -0.0021 0.0227 -0.0050 0.0025 0.0093  
Z -0.0098 0.0473 0.0044 -0.0041 0.0348 -0.0487  
AT. 33 H X -0.0045 -0.0132 -0.0209 0.0010 -0.0301 0.0105  
Y 0.0225 -0.0341 -0.0417 -0.0010 -0.0321 -0.0240  
Z 0.0074 0.0282 -0.0175 0.0023 0.0083 0.0418  
AT. 34 H X 0.0045 -0.0132 0.0209 0.0010 -0.0301 -0.0105  
Y -0.0225 -0.0341 0.0417 -0.0010 -0.0321 0.0240  
Z -0.0074 0.0282 0.0175 0.0023 0.0083 -0.0418  
AT. 35 C X 0.0046 0.0097 0.0056 -0.0090 0.0092 0.0135  
Y 0.0176 -0.0001 -0.0283 -0.0063 0.0021 -0.0053  
Z 0.0085 0.0013 -0.0322 0.0085 -0.0224 0.0292  
AT. 36 C X -0.0046 0.0097 -0.0056 -0.0090 0.0092 -0.0135  
Y -0.0176 -0.0001 0.0283 -0.0063 0.0021 0.0053  
Z -0.0085 0.0013 0.0322 0.0085 -0.0224 -0.0292  
AT. 37 C X 0.0026 -0.0041 -0.0042 -0.0002 -0.0108 0.0121  
Y 0.0173 -0.0090 -0.0335 -0.0048 -0.0091 -0.0125  
Z 0.0079 -0.0239 -0.0481 0.0164 -0.0540 0.0165  
AT. 38 C X -0.0026 -0.0041 0.0042 -0.0002 -0.0108 -0.0121  
Y -0.0173 -0.0090 0.0335 -0.0048 -0.0091 0.0125  
Z -0.0079 -0.0239 0.0481 0.0164 -0.0540 -0.0165  
AT. 39 H X -0.0017 -0.0252 -0.0230 0.0113 -0.0406 0.0147  
Y 0.0172 -0.0201 -0.0408 -0.0022 -0.0240 -0.0208  
Z 0.0051 -0.0334 -0.0579 0.0231 -0.0678 0.0222  
AT. 40 H X 0.0017 -0.0252 0.0230 0.0113 -0.0406 -0.0147  
Y -0.0172 -0.0201 0.0408 -0.0022 -0.0240 0.0208  
Z -0.0051 -0.0334 0.0579 0.0231 -0.0678 -0.0222

AT. 41 H X 0.0053 0.0146 0.0132 -0.0102 0.0156 0.0093  
Y 0.0166 -0.0067 -0.0350 -0.0035 -0.0064 -0.0031  
Z 0.0053 -0.0449 -0.0643 0.0260 -0.0831 0.0119

AT. 42 H X -0.0053 0.0146 -0.0132 -0.0102 0.0156 -0.0093  
Y -0.0166 -0.0067 0.0350 -0.0035 -0.0064 0.0031  
Z -0.0053 -0.0449 0.0643 0.0260 -0.0831 -0.0119

AT. 43 C X 0.0016 0.0092 0.0026 -0.0020 -0.0039 0.0148  
Y 0.0156 0.0023 -0.0275 -0.0050 -0.0022 -0.0079  
Z 0.0136 0.0030 -0.0230 -0.0002 -0.0223 0.0035

AT. 44 C X -0.0016 0.0092 -0.0026 -0.0020 -0.0039 -0.0148  
Y -0.0156 0.0023 0.0275 -0.0050 -0.0022 0.0079  
Z -0.0136 0.0030 0.0230 -0.0002 -0.0223 -0.0035

AT. 45 H X 0.0013 0.0229 0.0101 -0.0029 0.0042 0.0203  
Y 0.0189 0.0024 -0.0236 -0.0092 0.0113 -0.0032  
Z 0.0102 -0.0064 -0.0319 0.0050 -0.0409 -0.0049

AT. 46 H X -0.0013 0.0229 -0.0101 -0.0029 0.0042 -0.0203  
Y -0.0189 0.0024 0.0236 -0.0092 0.0113 0.0032  
Z -0.0102 -0.0064 0.0319 0.0050 -0.0409 0.0049

AT. 47 H X -0.0016 0.0031 -0.0043 0.0040 -0.0178 0.0149  
Y 0.0111 0.0035 -0.0287 -0.0007 -0.0135 -0.0102  
Z 0.0135 0.0126 -0.0147 -0.0039 -0.0151 0.0010

AT. 48 H X 0.0016 0.0031 0.0043 0.0040 -0.0178 -0.0149  
Y -0.0111 0.0035 0.0287 -0.0007 -0.0135 0.0102  
Z -0.0135 0.0126 0.0147 -0.0039 -0.0151 -0.0010

AT. 49 C X 0.0067 0.0176 0.0139 -0.0114 0.0190 0.0144  
Y 0.0165 0.0060 -0.0245 -0.0037 0.0048 0.0015  
Z 0.0191 0.0126 -0.0096 -0.0049 0.0049 0.0159

AT. 50 C X -0.0067 0.0176 -0.0139 -0.0114 0.0190 -0.0144  
Y -0.0165 0.0060 0.0245 -0.0037 0.0048 -0.0015  
Z -0.0191 0.0126 0.0096 -0.0049 0.0049 -0.0159

AT. 51 C X 0.0014 0.0098 0.0012 -0.0071 0.0020 0.0137  
Y 0.0154 0.0035 -0.0294 -0.0022 -0.0092 -0.0072

Z 0.0248 0.0221 0.0068 -0.0104 0.0345 0.0262  
AT. 52 C X -0.0014 0.0098 -0.0012 -0.0071 0.0020 -0.0137  
Y -0.0154 0.0035 0.0294 -0.0022 -0.0092 0.0072  
Z -0.0248 0.0221 -0.0068 -0.0104 0.0345 -0.0262  
AT. 53 H X -0.0031 0.0121 -0.0086 -0.0040 -0.0118 0.0136  
Y 0.0147 0.0055 -0.0341 -0.0015 -0.0187 -0.0119  
Z 0.0329 0.0200 0.0194 -0.0155 0.0492 0.0203  
AT. 54 H X 0.0031 0.0121 0.0086 -0.0040 -0.0118 -0.0136  
Y -0.0147 0.0055 0.0341 -0.0015 -0.0187 0.0119  
Z -0.0329 0.0200 -0.0194 -0.0155 0.0492 -0.0203  
AT. 55 H X 0.0080 0.0067 0.0152 -0.0118 0.0222 0.0132  
Y 0.0127 0.0125 -0.0300 -0.0015 -0.0057 -0.0002  
Z 0.0257 0.0310 0.0147 -0.0126 0.0515 0.0347  
AT. 56 H X -0.0080 0.0067 -0.0152 -0.0118 0.0222 -0.0132  
Y -0.0127 0.0125 0.0300 -0.0015 -0.0057 0.0002  
Z -0.0257 0.0310 -0.0147 -0.0126 0.0515 -0.0347  
AT. 57 C X 0.0058 0.0208 0.0114 -0.0158 0.0230 0.0147  
Y 0.0146 0.0113 -0.0279 -0.0109 0.0118 0.0009  
Z 0.0009 -0.0034 -0.0432 0.0155 -0.0359 0.0369  
AT. 58 C X -0.0058 0.0208 -0.0114 -0.0158 0.0230 -0.0147  
Y -0.0146 0.0113 0.0279 -0.0109 0.0118 -0.0009  
Z -0.0009 -0.0034 0.0432 0.0155 -0.0359 -0.0369  
AT. 59 H X 0.0077 0.0322 0.0162 -0.0221 0.0370 0.0167  
Y 0.0146 0.0164 -0.0237 -0.0097 0.0193 0.0068  
Z 0.0022 0.0123 -0.0329 0.0128 -0.0144 0.0468  
AT. 60 H X -0.0077 0.0322 -0.0162 -0.0221 0.0370 -0.0167  
Y -0.0146 0.0164 0.0237 -0.0097 0.0193 -0.0068  
Z -0.0022 0.0123 0.0329 0.0128 -0.0144 -0.0468  
AT. 61 H X -0.0003 0.0115 -0.0000 -0.0120 0.0048 0.0132  
Y 0.0140 0.0037 -0.0334 -0.0127 0.0006 -0.0075  
Z -0.0036 -0.0067 -0.0493 0.0192 -0.0443 0.0402  
AT. 62 H X 0.0003 0.0115 0.0000 -0.0120 0.0048 -0.0132

Y -0.0140 0.0037 0.0334 -0.0127 0.0006 0.0075  
Z 0.0036 -0.0067 0.0493 0.0192 -0.0443 -0.0402  
AT. 63 H X 0.0114 0.0272 0.0219 -0.0175 0.0376 0.0161  
Y 0.0120 0.0226 -0.0262 -0.0143 0.0224 0.0083  
Z -0.0024 -0.0192 -0.0541 0.0200 -0.0586 0.0288  
AT. 64 H X -0.0114 0.0272 -0.0219 -0.0175 0.0376 -0.0161  
Y -0.0120 0.0226 0.0262 -0.0143 0.0224 -0.0083  
Z 0.0024 -0.0192 0.0541 0.0200 -0.0586 -0.0288  
AT. 65 C X 0.0131 0.0275 0.0309 -0.0184 0.0422 0.0148  
Y 0.0173 0.0091 -0.0183 -0.0029 0.0145 0.0141  
Z 0.0237 0.0188 0.0012 -0.0108 0.0184 0.0092  
AT. 66 C X -0.0131 0.0275 -0.0309 -0.0184 0.0422 -0.0148  
Y -0.0173 0.0091 0.0183 -0.0029 0.0145 -0.0141  
Z -0.0237 0.0188 -0.0012 -0.0108 0.0184 -0.0092  
AT. 67 H X 0.0170 0.0336 0.0431 -0.0233 0.0573 0.0142  
Y 0.0162 0.0114 -0.0199 -0.0010 0.0158 0.0232  
Z 0.0211 0.0113 -0.0077 -0.0082 0.0039 0.0010  
AT. 68 H X -0.0170 0.0336 -0.0431 -0.0233 0.0573 -0.0142  
Y -0.0162 0.0114 0.0199 -0.0010 0.0158 -0.0232  
Z -0.0211 0.0113 0.0077 -0.0082 0.0039 -0.0010  
AT. 69 H X 0.0116 0.0233 0.0286 -0.0166 0.0362 0.0144  
Y 0.0182 0.0074 -0.0153 -0.0044 0.0145 0.0084  
Z 0.0287 0.0251 0.0100 -0.0173 0.0308 0.0017  
AT. 70 H X -0.0116 0.0233 -0.0286 -0.0166 0.0362 -0.0144  
Y -0.0182 0.0074 0.0153 -0.0044 0.0145 -0.0084  
Z -0.0287 0.0251 -0.0100 -0.0173 0.0308 -0.0017  
AT. 71 H X 0.0148 0.0333 0.0341 -0.0206 0.0502 0.0150  
Y 0.0177 0.0109 -0.0146 -0.0027 0.0194 0.0215  
Z 0.0253 0.0253 0.0088 -0.0121 0.0307 0.0192  
AT. 72 H X -0.0148 0.0333 -0.0341 -0.0206 0.0502 -0.0150  
Y -0.0177 0.0109 0.0146 -0.0027 0.0194 -0.0215  
Z -0.0253 0.0253 -0.0088 -0.0121 0.0307 -0.0192

AT. 73 C X 0.0107 0.0246 0.0228 -0.0175 0.0359 0.0145  
Y 0.0175 0.0111 -0.0218 -0.0068 0.0168 0.0071  
Z 0.0129 0.0065 -0.0223 0.0027 -0.0101 0.0237

AT. 74 C X -0.0107 0.0246 -0.0228 -0.0175 0.0359 -0.0145  
Y -0.0175 0.0111 0.0218 -0.0068 0.0168 -0.0071  
Z -0.0129 0.0065 0.0223 0.0027 -0.0101 -0.0237

AT. 75 H X 0.0147 0.0323 0.0312 -0.0241 0.0526 0.0150  
Y 0.0175 0.0163 -0.0185 -0.0069 0.0238 0.0138  
Z 0.0155 0.0188 -0.0117 -0.0020 0.0111 0.0328

AT. 76 H X -0.0147 0.0323 -0.0312 -0.0241 0.0526 -0.0150  
Y -0.0175 0.0163 0.0185 -0.0069 0.0238 -0.0138  
Z -0.0155 0.0188 0.0117 -0.0020 0.0111 -0.0328

AT. 77 H X 0.0143 0.0325 0.0325 -0.0226 0.0504 0.0156  
Y 0.0178 0.0172 -0.0186 -0.0082 0.0269 0.0140  
Z 0.0088 -0.0067 -0.0341 0.0090 -0.0332 0.0159

AT. 78 H X -0.0143 0.0325 -0.0325 -0.0226 0.0504 -0.0156  
Y -0.0178 0.0172 0.0186 -0.0082 0.0269 -0.0140  
Z -0.0088 -0.0067 0.0341 0.0090 -0.0332 -0.0159

AT. 79 I X -0.0141 -0.0106 0.0023 -0.0127 -0.0129 -0.0020  
Y 0.0022 -0.0129 0.0041 -0.0089 -0.0019 0.0070  
Z 0.0046 -0.0101 -0.0130 0.0308 0.0108 -0.0021

AT. 80 I X 0.0141 -0.0106 -0.0023 -0.0127 -0.0129 0.0020  
Y -0.0022 -0.0129 -0.0041 -0.0089 -0.0019 -0.0070  
Z -0.0046 -0.0101 0.0130 0.0308 0.0108 0.0021

AT. 81 I X 0.0175 -0.0024 0.0023 0.0097 0.0120 0.0018  
Y -0.0093 -0.0102 0.0216 -0.0085 -0.0025 -0.0001  
Z 0.0193 0.0039 -0.0011 0.0102 0.0093 0.0052

AT. 82 I X -0.0175 -0.0024 -0.0023 0.0097 0.0120 -0.0018  
Y 0.0093 -0.0102 -0.0216 -0.0085 -0.0025 0.0001  
Z -0.0193 0.0039 0.0011 0.0102 0.0093 -0.0052

AT. 83 O X -0.0097 -0.0018 0.0066 -0.0237 -0.0158 -0.0006  
Y -0.0215 0.0511 -0.0087 0.0603 0.0333 -0.0200

Z 0.0170 -0.0177 0.0285 -0.0203 0.0159 0.0141  
AT. 84 O X 0.0097 -0.0018 -0.0066 -0.0237 -0.0158 0.0006  
Y 0.0215 0.0511 0.0087 0.0603 0.0333 0.0200  
Z -0.0170 -0.0177 -0.0285 -0.0203 0.0159 -0.0141  
AT. 85 O X 0.0078 0.0275 -0.0224 0.0062 -0.0012 -0.0021  
Y -0.0067 0.0179 -0.0182 0.0304 -0.0148 0.0240  
Z -0.0366 0.0238 0.0043 -0.0044 -0.0243 0.0088  
AT. 86 O X -0.0078 0.0275 0.0224 0.0062 -0.0012 0.0021  
Y 0.0067 0.0179 0.0182 0.0304 -0.0148 -0.0240  
Z 0.0366 0.0238 -0.0043 -0.0044 -0.0243 -0.0088  
AT. 87 N X 0.0077 -0.0071 0.0108 -0.0006 0.0027 0.0084  
Y -0.0346 0.0344 -0.0145 -0.0122 -0.0275 -0.0030  
Z 0.0076 -0.0160 0.0264 -0.0326 0.0062 0.0092  
AT. 88 N X -0.0077 -0.0071 -0.0108 -0.0006 0.0027 -0.0084  
Y 0.0346 0.0344 0.0145 -0.0122 -0.0275 0.0030  
Z -0.0076 -0.0160 -0.0264 -0.0326 0.0062 -0.0092  
AT. 89 N X 0.0098 0.0087 -0.0181 0.0239 0.0001 0.0047  
Y -0.0246 0.0324 -0.0198 -0.0074 -0.0235 -0.0003  
Z -0.0502 0.0264 0.0037 -0.0278 -0.0323 -0.0077  
AT. 90 N X -0.0098 0.0087 0.0181 0.0239 0.0001 -0.0047  
Y 0.0246 0.0324 0.0198 -0.0074 -0.0235 0.0003  
Z 0.0502 0.0264 -0.0037 -0.0278 -0.0323 0.0077  
AT. 91 C X -0.0062 0.0008 0.0073 -0.0126 -0.0078 0.0005  
Y -0.0179 0.0331 -0.0079 0.0212 0.0048 -0.0074  
Z 0.0105 -0.0160 0.0266 -0.0266 0.0110 0.0086  
AT. 92 C X 0.0062 0.0008 -0.0073 -0.0126 -0.0078 -0.0005  
Y 0.0179 0.0331 0.0079 0.0212 0.0048 0.0074  
Z -0.0105 -0.0160 -0.0266 -0.0266 0.0110 -0.0086  
AT. 93 C X -0.0150 0.0100 0.0036 -0.0071 -0.0075 -0.0064  
Y -0.0019 0.0083 0.0013 0.0026 0.0021 0.0011  
Z 0.0065 -0.0148 0.0248 -0.0268 0.0103 0.0021  
AT. 94 C X 0.0150 0.0100 -0.0036 -0.0071 -0.0075 0.0064

Y 0.0019 0.0083 -0.0013 0.0026 0.0021 -0.0011  
Z -0.0065 -0.0148 -0.0248 -0.0268 0.0103 -0.0021  
AT. 95 H X -0.0186 0.0238 0.0087 -0.0096 -0.0045 -0.0088  
Y -0.0007 0.0003 -0.0057 0.0108 -0.0002 0.0041  
Z 0.0086 -0.0159 0.0318 -0.0383 0.0115 -0.0007  
AT. 96 H X 0.0186 0.0238 -0.0087 -0.0096 -0.0045 0.0088  
Y 0.0007 0.0003 0.0057 0.0108 -0.0002 -0.0041  
Z -0.0086 -0.0159 -0.0318 -0.0383 0.0115 0.0007  
AT. 97 H X -0.0192 0.0165 -0.0044 0.0049 -0.0078 -0.0125  
Y 0.0011 0.0113 0.0176 -0.0188 0.0057 -0.0011  
Z 0.0083 -0.0157 0.0305 -0.0345 0.0111 0.0032  
AT. 98 H X 0.0192 0.0165 0.0044 0.0049 -0.0078 0.0125  
Y -0.0011 0.0113 -0.0176 -0.0188 0.0057 0.0011  
Z -0.0083 -0.0157 -0.0305 -0.0345 0.0111 -0.0032  
AT. 99 C X 0.0087 0.0206 -0.0212 0.0143 -0.0014 0.0027  
Y -0.0118 0.0262 -0.0204 0.0124 -0.0168 0.0113  
Z -0.0427 0.0223 0.0037 -0.0151 -0.0281 -0.0011  
AT. 100 C X -0.0087 0.0206 0.0212 0.0143 -0.0014 -0.0027  
Y 0.0118 0.0262 0.0204 0.0124 -0.0168 -0.0113  
Z 0.0427 0.0223 -0.0037 -0.0151 -0.0281 0.0011  
AT. 101 C X 0.0039 0.0269 -0.0230 0.0141 -0.0050 0.0055  
Y 0.0043 0.0227 -0.0146 0.0131 -0.0055 0.0106  
Z -0.0366 0.0113 0.0062 -0.0147 -0.0228 -0.0049  
AT. 102 C X -0.0039 0.0269 0.0230 0.0141 -0.0050 -0.0055  
Y -0.0043 0.0227 0.0146 0.0131 -0.0055 -0.0106  
Z 0.0366 0.0113 -0.0062 -0.0147 -0.0228 0.0049  
AT. 103 H X 0.0019 0.0440 -0.0398 0.0235 -0.0100 0.0092  
Y 0.0055 0.0155 -0.0076 0.0095 -0.0030 0.0092  
Z -0.0519 -0.0025 0.0160 -0.0248 -0.0278 -0.0119  
AT. 104 H X -0.0019 0.0440 0.0398 0.0235 -0.0100 -0.0092  
Y -0.0055 0.0155 0.0076 0.0095 -0.0030 -0.0092  
Z 0.0519 -0.0025 -0.0160 -0.0248 -0.0278 0.0119



AT.105 H X -0.0073 0.0318 -0.0175 0.0086 -0.0116 0.0053  
Y 0.0264 0.0340 -0.0262 0.0275 0.0036 0.0185  
Z -0.0305 0.0166 0.0028 -0.0104 -0.0207 -0.0020

AT.106 H X 0.0073 0.0318 0.0175 0.0086 -0.0116 -0.0053  
Y -0.0264 0.0340 0.0262 0.0275 0.0036 -0.0185  
Z 0.0305 0.0166 -0.0028 -0.0104 -0.0207 0.0020

AT.107 C X 0.0123 -0.0115 0.0116 0.0042 0.0043 0.0132  
Y -0.0310 0.0331 -0.0202 -0.0074 -0.0241 -0.0063  
Z 0.0152 -0.0238 0.0260 -0.0240 0.0092 0.0152

AT.108 C X -0.0123 -0.0115 -0.0116 0.0042 0.0043 -0.0132  
Y 0.0310 0.0331 0.0202 -0.0074 -0.0241 0.0063  
Z -0.0152 -0.0238 -0.0260 -0.0240 0.0092 -0.0152

AT.109 H X 0.0244 -0.0207 0.0197 0.0059 0.0116 0.0222  
Y -0.0129 0.0216 -0.0141 -0.0073 -0.0133 0.0012  
Z 0.0416 -0.0401 0.0335 -0.0247 0.0246 0.0253

AT.110 H X -0.0244 -0.0207 -0.0197 0.0059 0.0116 -0.0222  
Y 0.0129 0.0216 0.0141 -0.0073 -0.0133 -0.0012  
Z -0.0416 -0.0401 -0.0335 -0.0247 0.0246 -0.0253

AT.111 H X 0.0136 -0.0113 0.0152 -0.0031 0.0055 0.0128  
Y -0.0610 0.0528 -0.0334 -0.0047 -0.0416 -0.0208  
Z 0.0202 -0.0278 0.0245 -0.0164 0.0116 0.0186

AT.112 H X -0.0136 -0.0113 -0.0152 -0.0031 0.0055 -0.0128  
Y 0.0610 0.0528 0.0334 -0.0047 -0.0416 0.0208  
Z -0.0202 -0.0278 -0.0245 -0.0164 0.0116 -0.0186

AT.113 C X 0.0020 -0.0049 -0.0029 0.0186 -0.0032 0.0077  
Y -0.0047 0.0172 -0.0160 -0.0038 -0.0088 0.0027  
Z -0.0182 -0.0047 0.0165 -0.0232 -0.0109 0.0029

AT.114 C X -0.0020 -0.0049 0.0029 0.0186 -0.0032 -0.0077  
Y 0.0047 0.0172 0.0160 -0.0038 -0.0088 -0.0027  
Z 0.0182 -0.0047 -0.0165 -0.0232 -0.0109 -0.0029

AT.115 C X 0.0046 0.0047 -0.0144 0.0233 -0.0027 0.0044  
Y -0.0252 0.0321 -0.0252 -0.0037 -0.0224 -0.0056

Z -0.0567 0.0179 0.0048 -0.0241 -0.0350 -0.0118  
AT. 116 C X -0.0046 0.0047 0.0144 0.0233 -0.0027 -0.0044  
Y 0.0252 0.0321 0.0252 -0.0037 -0.0224 0.0056  
Z 0.0567 0.0179 -0.0048 -0.0241 -0.0350 0.0118  
AT. 117 H X 0.0231 0.0006 -0.0092 0.0212 0.0083 0.0128  
Y -0.0553 0.0525 -0.0402 -0.0017 -0.0413 -0.0202  
Z -0.0691 0.0174 0.0027 -0.0224 -0.0420 -0.0174  
AT. 118 H X -0.0231 0.0006 0.0092 0.0212 0.0083 -0.0128  
Y 0.0553 0.0525 0.0402 -0.0017 -0.0413 0.0202  
Z 0.0691 0.0174 -0.0027 -0.0224 -0.0420 0.0174  
AT. 119 H X -0.0202 0.0134 -0.0248 0.0281 -0.0173 -0.0081  
Y -0.0136 0.0239 -0.0234 -0.0004 -0.0145 -0.0024  
Z -0.0818 0.0308 -0.0025 -0.0250 -0.0508 -0.0218  
AT. 120 H X 0.0202 0.0134 0.0248 0.0281 -0.0173 0.0081  
Y 0.0136 0.0239 0.0234 -0.0004 -0.0145 0.0024  
Z 0.0818 0.0308 0.0025 -0.0250 -0.0508 0.0218  
AT. 121 C X 0.0056 0.0060 -0.0195 0.0294 -0.0006 -0.0004  
Y -0.0123 0.0157 -0.0050 -0.0162 -0.0156 0.0083  
Z -0.0447 0.0321 0.0046 -0.0349 -0.0315 -0.0016  
AT. 122 C X -0.0056 0.0060 0.0195 0.0294 -0.0006 0.0004  
Y 0.0123 0.0157 0.0050 -0.0162 -0.0156 -0.0083  
Z 0.0447 0.0321 -0.0046 -0.0349 -0.0315 0.0016  
AT. 123 H X 0.0049 0.0044 -0.0277 0.0425 0.0017 -0.0101  
Y 0.0042 0.0006 0.0005 -0.0150 -0.0025 0.0066  
Z -0.0622 0.0475 -0.0024 -0.0341 -0.0447 -0.0018  
AT. 124 H X -0.0049 0.0044 0.0277 0.0425 0.0017 0.0101  
Y -0.0042 0.0006 -0.0005 -0.0150 -0.0025 -0.0066  
Z 0.0622 0.0475 0.0024 -0.0341 -0.0447 0.0018  
AT. 125 H X 0.0095 0.0092 -0.0211 0.0277 0.0008 0.0009  
Y -0.0282 0.0272 -0.0042 -0.0224 -0.0289 0.0146  
Z -0.0480 0.0416 0.0033 -0.0402 -0.0365 0.0033  
AT. 126 H X -0.0095 0.0092 0.0211 0.0277 0.0008 -0.0009

Y 0.0282 0.0272 0.0042 -0.0224 -0.0289 -0.0146  
Z 0.0480 0.0416 -0.0033 -0.0402 -0.0365 -0.0033  
AT. 127 C X -0.0003 -0.0008 -0.0089 0.0240 -0.0043 0.0047  
Y 0.0021 0.0003 0.0055 -0.0198 -0.0045 0.0116  
Z -0.0173 0.0087 0.0178 -0.0386 -0.0105 0.0012  
AT. 128 C X 0.0003 -0.0008 0.0089 0.0240 -0.0043 -0.0047  
Y -0.0021 0.0003 -0.0055 -0.0198 -0.0045 -0.0116  
Z 0.0173 0.0087 -0.0178 -0.0386 -0.0105 -0.0012  
AT. 129 C X 0.0050 -0.0055 0.0050 0.0076 -0.0001 0.0086  
Y -0.0167 0.0160 -0.0007 -0.0232 -0.0198 0.0093  
Z 0.0050 -0.0109 0.0287 -0.0393 0.0074 0.0043  
AT. 130 C X -0.0050 -0.0055 -0.0050 0.0076 -0.0001 -0.0086  
Y 0.0167 0.0160 0.0007 -0.0232 -0.0198 -0.0093  
Z -0.0050 -0.0109 -0.0287 -0.0393 0.0074 -0.0043  
AT. 131 H X 0.0076 -0.0056 0.0062 0.0070 0.0041 0.0052  
Y -0.0286 0.0245 0.0004 -0.0324 -0.0307 0.0125  
Z 0.0030 -0.0070 0.0303 -0.0437 0.0081 0.0007  
AT. 132 H X -0.0076 -0.0056 -0.0062 0.0070 0.0041 -0.0052  
Y 0.0286 0.0245 -0.0004 -0.0324 -0.0307 -0.0125  
Z -0.0030 -0.0070 -0.0303 -0.0437 0.0081 -0.0007  
AT. 133 H X 0.0018 -0.0059 0.0077 0.0019 -0.0063 0.0166  
Y -0.0056 0.0053 0.0062 -0.0253 -0.0123 0.0129  
Z 0.0229 -0.0268 0.0379 -0.0406 0.0212 0.0062  
AT. 134 H X -0.0018 -0.0059 -0.0077 0.0019 -0.0063 -0.0166  
Y 0.0056 0.0053 -0.0062 -0.0253 -0.0123 -0.0129  
Z -0.0229 -0.0268 -0.0379 -0.0406 0.0212 -0.0062  
AT. 135 C X -0.0039 -0.0085 -0.0006 0.0205 -0.0062 0.0078  
Y 0.0124 0.0115 -0.0212 0.0058 0.0009 0.0069  
Z -0.0175 -0.0143 0.0173 -0.0147 -0.0105 0.0053  
AT. 136 C X 0.0039 -0.0085 0.0006 0.0205 -0.0062 -0.0078  
Y -0.0124 0.0115 0.0212 0.0058 0.0009 -0.0069  
Z 0.0175 -0.0143 -0.0173 -0.0147 -0.0105 -0.0053

AT. 137 H X -0.0073 -0.0151 0.0070 0.0165 -0.0080 0.0100  
Y 0.0233 0.0006 -0.0134 0.0033 0.0071 0.0130  
Z 0.0030 -0.0302 0.0273 -0.0174 0.0009 0.0150

AT. 138 H X 0.0073 -0.0151 -0.0070 0.0165 -0.0080 -0.0100  
Y -0.0233 0.0006 0.0134 0.0033 0.0071 -0.0130  
Z -0.0030 -0.0302 -0.0273 -0.0174 0.0009 -0.0150

AT. 139 H X 0.0018 -0.0093 0.0036 0.0140 -0.0031 0.0092  
Y -0.0013 0.0283 -0.0362 0.0141 -0.0064 -0.0032  
Z -0.0210 -0.0176 0.0154 -0.0086 -0.0125 0.0064

AT. 140 H X -0.0018 -0.0093 -0.0036 0.0140 -0.0031 -0.0092  
Y 0.0013 0.0283 0.0362 0.0141 -0.0064 0.0032  
Z 0.0210 -0.0176 -0.0154 -0.0086 -0.0125 -0.0064

AT. 141 H X -0.0098 -0.0041 -0.0116 0.0330 -0.0098 0.0042  
Y 0.0270 0.0002 -0.0168 0.0075 0.0092 0.0133  
Z -0.0353 -0.0009 0.0082 -0.0114 -0.0207 -0.0028

AT. 142 H X 0.0098 -0.0041 0.0116 0.0330 -0.0098 -0.0042  
Y -0.0270 0.0002 0.0168 0.0075 0.0092 -0.0133  
Z 0.0353 -0.0009 -0.0082 -0.0114 -0.0207 0.0028

AT. 143 C X -0.0069 -0.0012 -0.0144 0.0350 -0.0079 0.0035  
Y 0.0180 -0.0219 0.0277 -0.0318 0.0093 0.0179  
Z -0.0128 0.0155 0.0190 -0.0503 -0.0096 0.0011

AT. 144 C X 0.0069 -0.0012 0.0144 0.0350 -0.0079 -0.0035  
Y -0.0180 -0.0219 -0.0277 -0.0318 0.0093 -0.0179  
Z 0.0128 0.0155 -0.0190 -0.0503 -0.0096 -0.0011

AT. 145 H X -0.0149 0.0029 -0.0286 0.0527 -0.0118 0.0008  
Y 0.0271 -0.0288 0.0272 -0.0269 0.0179 0.0192  
Z -0.0248 0.0240 0.0161 -0.0514 -0.0196 -0.0011

AT. 146 H X 0.0149 0.0029 0.0286 0.0527 -0.0118 -0.0008  
Y -0.0271 -0.0288 -0.0272 -0.0269 0.0179 -0.0192  
Z 0.0248 0.0240 -0.0161 -0.0514 -0.0196 0.0011

AT. 147 H X -0.0034 0.0040 -0.0183 0.0326 -0.0070 0.0032  
Y 0.0118 -0.0223 0.0394 -0.0450 0.0039 0.0186

Z -0.0111 0.0224 0.0197 -0.0606 -0.0112 0.0011  
AT. 148 H X 0.0034 0.0040 0.0183 0.0326 -0.0070 -0.0032  
Y -0.0118 -0.0223 -0.0394 -0.0450 0.0039 -0.0186  
Z 0.0111 0.0224 -0.0197 -0.0606 -0.0112 -0.0011  
AT. 149 H X -0.0085 -0.0111 -0.0009 0.0282 -0.0070 0.0062  
Y 0.0261 -0.0307 0.0339 -0.0335 0.0164 0.0205  
Z 0.0019 0.0053 0.0231 -0.0505 0.0020 0.0045  
AT. 150 H X 0.0085 -0.0111 0.0009 0.0282 -0.0070 -0.0062  
Y -0.0261 -0.0307 -0.0339 -0.0335 0.0164 -0.0205  
Z -0.0019 0.0053 -0.0231 -0.0505 0.0020 -0.0045  
AT. 151 C X -0.0060 -0.0038 -0.0077 0.0263 -0.0084 0.0057  
Y 0.0204 -0.0072 0.0024 -0.0107 0.0087 0.0127  
Z -0.0156 0.0001 0.0181 -0.0307 -0.0091 0.0026  
AT. 152 C X 0.0060 -0.0038 0.0077 0.0263 -0.0084 -0.0057  
Y -0.0204 -0.0072 -0.0024 -0.0107 0.0087 -0.0127  
Z 0.0156 0.0001 -0.0181 -0.0307 -0.0091 -0.0026  
AT. 153 H X -0.0091 -0.0087 -0.0024 0.0235 -0.0105 0.0074  
Y 0.0336 -0.0181 0.0091 -0.0117 0.0185 0.0160  
Z 0.0072 -0.0152 0.0267 -0.0315 0.0076 0.0077  
AT. 154 H X 0.0091 -0.0087 0.0024 0.0235 -0.0105 -0.0074  
Y -0.0336 -0.0181 -0.0091 -0.0117 0.0185 -0.0160  
Z -0.0072 -0.0152 -0.0267 -0.0315 0.0076 -0.0077  
AT. 155 H X -0.0122 0.0012 -0.0164 0.0356 -0.0132 0.0030  
Y 0.0378 -0.0186 0.0069 -0.0089 0.0215 0.0162  
Z -0.0364 0.0140 0.0103 -0.0295 -0.0244 -0.0021  
AT. 156 H X 0.0122 0.0012 0.0164 0.0356 -0.0132 -0.0030  
Y -0.0378 -0.0186 -0.0069 -0.0089 0.0215 -0.0162  
Z 0.0364 0.0140 -0.0103 -0.0295 -0.0244 0.0021  
AT. 157 O X -0.0069 0.0329 0.0013 -0.0017 0.0089 0.0321  
Y 0.0644 -0.0640 0.0545 -0.0108 0.0613 -0.0489  
Z 0.0008 0.0011 0.0285 -0.0107 -0.0024 0.0070  
AT. 158 O X 0.0069 0.0329 -0.0013 -0.0017 0.0089 -0.0321

Y -0.0644 -0.0640 -0.0545 -0.0108 0.0613 0.0489  
Z -0.0008 0.0011 -0.0285 -0.0107 -0.0024 -0.0070  
AT. 159 O X -0.0071 0.0225 -0.0004 0.0004 0.0019 0.0273  
Y 0.0166 -0.0027 0.0095 -0.0152 0.0452 0.0039  
Z -0.0041 -0.0110 0.0213 -0.0074 -0.0160 0.0044  
AT. 160 O X 0.0071 0.0225 0.0004 0.0004 0.0019 -0.0273  
Y -0.0166 -0.0027 -0.0095 -0.0152 0.0452 -0.0039  
Z 0.0041 -0.0110 -0.0213 -0.0074 -0.0160 -0.0044  
AT. 161 H X 0.0193 -0.0019 0.0201 0.0027 0.0178 0.0065  
Y 0.0694 -0.0722 0.0638 -0.0114 0.0629 -0.0574  
Z -0.0070 0.0163 0.0041 -0.0069 -0.0061 0.0257  
AT. 162 H X -0.0193 -0.0019 -0.0201 0.0027 0.0178 -0.0065  
Y -0.0694 -0.0722 -0.0638 -0.0114 0.0629 0.0574  
Z 0.0070 0.0163 -0.0041 -0.0069 -0.0061 -0.0257  
AT. 163 H X -0.0024 0.0036 0.0025 0.0025 -0.0054 0.0184  
Y 0.0081 0.0044 0.0034 -0.0172 0.0404 0.0225  
Z -0.0088 -0.0023 0.0188 -0.0089 -0.0149 0.0131  
AT. 164 H X 0.0024 0.0036 -0.0025 0.0025 -0.0054 -0.0184  
Y -0.0081 0.0044 -0.0034 -0.0172 0.0404 -0.0225  
Z 0.0088 -0.0023 -0.0188 -0.0089 -0.0149 -0.0131  
AT. 165 O X -0.0293 0.0217 0.0108 -0.0074 0.0055 -0.0129  
Y -0.0014 0.0110 0.0028 0.0264 0.0141 -0.0063  
Z 0.0304 0.0057 -0.0296 0.0358 0.0088 0.0058  
AT. 166 O X 0.0293 0.0217 -0.0108 -0.0074 0.0055 0.0129  
Y 0.0014 0.0110 -0.0028 0.0264 0.0141 0.0063  
Z -0.0304 0.0057 0.0296 0.0358 0.0088 -0.0058  
AT. 167 H X -0.0229 0.0100 0.0060 -0.0081 -0.0031 -0.0079  
Y -0.0095 0.0311 -0.0020 0.0420 0.0268 -0.0149  
Z 0.0256 0.0060 -0.0086 0.0133 0.0127 0.0044  
AT. 168 H X 0.0229 0.0100 -0.0060 -0.0081 -0.0031 0.0079  
Y 0.0095 0.0311 0.0020 0.0420 0.0268 0.0149  
Z -0.0256 0.0060 0.0086 0.0133 0.0127 -0.0044

AT. 169 O X -0.0376 0.0369 0.0387 -0.0427 0.0223 -0.0141  
Y -0.0127 0.0101 0.0195 0.0306 0.0133 -0.0216  
Z 0.0308 0.0091 -0.0272 0.0276 0.0123 0.0089

AT. 170 O X 0.0376 0.0369 -0.0387 -0.0427 0.0223 0.0141  
Y 0.0127 0.0101 -0.0195 0.0306 0.0133 0.0216  
Z -0.0308 0.0091 0.0272 0.0276 0.0123 -0.0089

AT. 171 H X -0.0232 0.0384 0.0355 -0.0315 0.0062 -0.0056  
Y -0.0075 0.0093 0.0203 0.0395 0.0012 -0.0224  
Z 0.0291 0.0060 -0.0247 0.0346 0.0040 0.0017

AT. 172 H X 0.0232 0.0384 -0.0355 -0.0315 0.0062 0.0056  
Y 0.0075 0.0093 -0.0203 0.0395 0.0012 0.0224  
Z -0.0291 0.0060 0.0247 0.0346 0.0040 -0.0017

FREQ(CM\*\*-1) 72.98 73.93 75.71 75.79 78.25 80.67

AT. 1 I X 0.0033 -0.0025 0.0022 0.0031 -0.0040 -0.0004  
Y -0.0242 -0.0025 0.0103 -0.0119 -0.0125 -0.0150  
Z 0.0335 -0.0108 -0.0167 0.0136 0.0186 0.0132

AT. 2 I X -0.0033 -0.0025 -0.0022 0.0031 -0.0040 0.0004  
Y 0.0242 -0.0025 -0.0103 -0.0119 -0.0125 0.0150  
Z -0.0335 -0.0108 0.0167 0.0136 0.0186 -0.0132

AT. 3 I X 0.0011 -0.0008 0.0050 -0.0013 -0.0046 -0.0037  
Y 0.0059 0.0109 0.0170 -0.0021 -0.0199 -0.0128  
Z 0.0016 0.0011 -0.0099 -0.0071 0.0071 -0.0042

AT. 4 I X -0.0011 -0.0008 -0.0050 -0.0013 -0.0046 0.0037  
Y -0.0059 0.0109 -0.0170 -0.0021 -0.0199 0.0128  
Z -0.0016 0.0011 0.0099 -0.0071 0.0071 0.0042

AT. 5 O X 0.0273 -0.0111 0.0050 0.0282 0.0284 0.0221  
Y 0.0548 -0.0512 0.0230 0.0481 0.0295 0.0127  
Z 0.0000 -0.0109 0.0081 0.0083 -0.0409 -0.0122

AT. 6 O X -0.0273 -0.0111 -0.0050 0.0282 0.0284 -0.0221  
Y -0.0548 -0.0512 -0.0230 0.0481 0.0295 -0.0127

Z -0.0000 -0.0109 -0.0081 0.0083 -0.0409 0.0122  
AT. 7 O X 0.0021 -0.0089 0.0324 0.0194 -0.0316 -0.0031  
Y -0.0173 -0.0018 -0.0472 -0.0401 0.0215 -0.0011  
Z -0.0093 0.0125 -0.0253 -0.0258 0.0101 -0.0128  
AT. 8 O X -0.0021 -0.0089 -0.0324 0.0194 -0.0316 0.0031  
Y 0.0173 -0.0018 0.0472 -0.0401 0.0215 0.0011  
Z 0.0093 0.0125 0.0253 -0.0258 0.0101 0.0128  
AT. 9 N X -0.0037 0.0171 -0.0305 -0.0180 0.0360 0.0002  
Y 0.0031 0.0035 0.0099 -0.0081 0.0072 -0.0120  
Z -0.0049 -0.0079 -0.0023 -0.0004 -0.0367 -0.0170  
AT. 10 N X 0.0037 0.0171 0.0305 -0.0180 0.0360 -0.0002  
Y -0.0031 0.0035 -0.0099 -0.0081 0.0072 0.0120  
Z 0.0049 -0.0079 0.0023 -0.0004 -0.0367 0.0170  
AT. 11 N X 0.0039 0.0029 0.0112 0.0036 -0.0048 -0.0070  
Y -0.0063 0.0120 -0.0271 -0.0285 0.0325 -0.0080  
Z 0.0003 0.0184 0.0041 -0.0065 0.0062 -0.0163  
AT. 12 N X -0.0039 0.0029 -0.0112 0.0036 -0.0048 0.0070  
Y 0.0063 0.0120 0.0271 -0.0285 0.0325 0.0080  
Z -0.0003 0.0184 -0.0041 -0.0065 0.0062 0.0163  
AT. 13 C X 0.0086 0.0030 -0.0083 0.0046 0.0224 0.0098  
Y 0.0258 -0.0248 0.0187 0.0175 0.0105 -0.0013  
Z -0.0011 -0.0126 -0.0018 0.0035 -0.0348 -0.0153  
AT. 14 C X -0.0086 0.0030 0.0083 0.0046 0.0224 -0.0098  
Y -0.0258 -0.0248 -0.0187 0.0175 0.0105 0.0013  
Z 0.0011 -0.0126 0.0018 0.0035 -0.0348 0.0153  
AT. 15 C X -0.0077 0.0100 -0.0023 -0.0046 0.0024 0.0036  
Y 0.0087 -0.0197 0.0173 0.0056 -0.0063 -0.0093  
Z 0.0022 -0.0198 -0.0143 0.0018 -0.0228 -0.0170  
AT. 16 C X 0.0077 0.0100 0.0023 -0.0046 0.0024 -0.0036  
Y -0.0087 -0.0197 -0.0173 0.0056 -0.0063 0.0093  
Z -0.0022 -0.0198 0.0143 0.0018 -0.0228 0.0170  
AT. 17 H X -0.0134 0.0205 -0.0061 -0.0109 0.0099 0.0078



Y 0.0091 -0.0104 0.0216 0.0062 -0.0019 -0.0029  
Z -0.0004 -0.0272 -0.0215 -0.0013 -0.0250 -0.0230  
AT. 18 H X 0.0134 0.0205 0.0061 -0.0109 0.0099 -0.0078  
Y -0.0091 -0.0104 -0.0216 0.0062 -0.0019 0.0029  
Z 0.0004 -0.0272 0.0215 -0.0013 -0.0250 0.0230  
AT. 19 H X -0.0243 0.0133 0.0051 -0.0110 -0.0192 -0.0057  
Y 0.0066 -0.0313 0.0104 0.0042 -0.0118 -0.0183  
Z -0.0035 -0.0236 -0.0145 -0.0004 -0.0316 -0.0234  
AT. 20 H X 0.0243 0.0133 -0.0051 -0.0110 -0.0192 0.0057  
Y -0.0066 -0.0313 -0.0104 0.0042 -0.0118 0.0183  
Z 0.0035 -0.0236 0.0145 -0.0004 -0.0316 0.0234  
AT. 21 C X 0.0043 -0.0026 0.0244 0.0133 -0.0194 -0.0047  
Y -0.0124 0.0060 -0.0473 -0.0409 0.0324 -0.0033  
Z -0.0031 0.0158 -0.0065 -0.0136 0.0068 -0.0143  
AT. 22 C X -0.0043 -0.0026 -0.0244 0.0133 -0.0194 0.0047  
Y 0.0124 0.0060 0.0473 -0.0409 0.0324 0.0033  
Z 0.0031 0.0158 0.0065 -0.0136 0.0068 0.0143  
AT. 23 C X 0.0080 -0.0038 0.0317 0.0190 -0.0242 -0.0034  
Y -0.0125 0.0074 -0.0655 -0.0549 0.0388 -0.0017  
Z 0.0011 0.0132 0.0098 -0.0005 -0.0025 -0.0132  
AT. 24 C X -0.0080 -0.0038 -0.0317 0.0190 -0.0242 0.0034  
Y 0.0125 0.0074 0.0655 -0.0549 0.0388 0.0017  
Z -0.0011 0.0132 -0.0098 -0.0005 -0.0025 0.0132  
AT. 25 H X 0.0145 -0.0024 0.0636 0.0381 -0.0493 -0.0088  
Y -0.0125 0.0076 -0.0677 -0.0570 0.0388 -0.0017  
Z 0.0085 0.0123 0.0571 0.0334 -0.0284 -0.0179  
AT. 26 H X -0.0145 -0.0024 -0.0636 0.0381 -0.0493 0.0088  
Y 0.0125 0.0076 0.0677 -0.0570 0.0388 0.0017  
Z -0.0085 0.0123 -0.0571 0.0334 -0.0284 0.0179  
AT. 27 H X 0.0062 -0.0085 0.0229 0.0160 -0.0177 0.0005  
Y -0.0187 0.0079 -0.1138 -0.0909 0.0646 0.0050  
Z -0.0018 0.0142 -0.0137 -0.0183 0.0095 -0.0104

AT. 28 H X -0.0062 -0.0085 -0.0229 0.0160 -0.0177 -0.0005  
Y 0.0187 0.0079 0.1138 -0.0909 0.0646 -0.0050  
Z 0.0018 0.0142 0.0137 -0.0183 0.0095 0.0104

AT. 29 C X -0.0061 0.0185 -0.0466 -0.0244 0.0476 -0.0002  
Y -0.0010 0.0088 -0.0075 -0.0142 0.0212 -0.0101  
Z -0.0051 -0.0032 0.0099 0.0057 -0.0431 -0.0133

AT. 30 C X 0.0061 0.0185 0.0466 -0.0244 0.0476 0.0002  
Y 0.0010 0.0088 0.0075 -0.0142 0.0212 0.0101  
Z 0.0051 -0.0032 -0.0099 0.0057 -0.0431 0.0133

AT. 31 H X -0.0110 0.0218 -0.0673 -0.0343 0.0612 -0.0013  
Y -0.0013 0.0011 -0.0001 -0.0103 0.0023 -0.0090  
Z -0.0086 -0.0122 0.0078 0.0052 -0.0621 -0.0123

AT. 32 H X 0.0110 0.0218 0.0673 -0.0343 0.0612 0.0013  
Y 0.0013 0.0011 0.0001 -0.0103 0.0023 0.0090  
Z 0.0086 -0.0122 -0.0078 0.0052 -0.0621 0.0123

AT. 33 H X -0.0053 0.0283 -0.0456 -0.0235 0.0622 0.0026  
Y -0.0008 0.0204 -0.0201 -0.0197 0.0500 -0.0113  
Z -0.0044 -0.0020 0.0163 0.0087 -0.0459 -0.0108

AT. 34 H X 0.0053 0.0283 0.0456 -0.0235 0.0622 -0.0026  
Y 0.0008 0.0204 0.0201 -0.0197 0.0500 0.0113  
Z 0.0044 -0.0020 -0.0163 0.0087 -0.0459 0.0108

AT. 35 C X -0.0052 0.0050 -0.0397 -0.0211 0.0240 -0.0030  
Y -0.0074 0.0088 -0.0237 -0.0209 0.0220 -0.0069  
Z -0.0002 0.0100 0.0190 0.0093 -0.0216 -0.0139

AT. 36 C X 0.0052 0.0050 0.0397 -0.0211 0.0240 0.0030  
Y 0.0074 0.0088 0.0237 -0.0209 0.0220 0.0069  
Z 0.0002 0.0100 -0.0190 0.0093 -0.0216 0.0139

AT. 37 C X 0.0012 0.0054 -0.0074 -0.0048 0.0083 -0.0056  
Y -0.0072 0.0170 -0.0339 -0.0284 0.0426 -0.0070  
Z 0.0046 0.0225 0.0275 0.0106 -0.0010 -0.0162

AT. 38 C X -0.0012 0.0054 0.0074 -0.0048 0.0083 0.0056  
Y 0.0072 0.0170 0.0339 -0.0284 0.0426 0.0070

Z -0.0046 0.0225 -0.0275 0.0106 -0.0010 0.0162  
AT. 39 H X 0.0053 0.0169 0.0078 0.0047 0.0193 -0.0063  
Y -0.0065 0.0264 -0.0413 -0.0347 0.0632 -0.0077  
Z 0.0072 0.0262 0.0413 0.0200 -0.0024 -0.0165  
AT. 40 H X -0.0053 0.0169 -0.0078 0.0047 0.0193 0.0063  
Y 0.0065 0.0264 0.0413 -0.0347 0.0632 0.0077  
Z -0.0072 0.0262 -0.0413 0.0200 -0.0024 0.0165  
AT. 41 H X -0.0027 -0.0063 -0.0180 -0.0122 -0.0046 -0.0054  
Y -0.0091 0.0183 -0.0389 -0.0274 0.0459 -0.0053  
Z 0.0100 0.0332 0.0428 0.0177 0.0094 -0.0176  
AT. 42 H X 0.0027 -0.0063 0.0180 -0.0122 -0.0046 0.0054  
Y 0.0091 0.0183 0.0389 -0.0274 0.0459 0.0053  
Z -0.0100 0.0332 -0.0428 0.0177 0.0094 0.0176  
AT. 43 C X 0.0006 -0.0036 0.0069 0.0007 -0.0138 -0.0059  
Y -0.0051 0.0035 -0.0044 -0.0133 0.0046 -0.0088  
Z -0.0032 0.0148 -0.0098 -0.0160 0.0085 -0.0151  
AT. 44 C X -0.0006 -0.0036 -0.0069 0.0007 -0.0138 0.0059  
Y 0.0051 0.0035 0.0044 -0.0133 0.0046 0.0088  
Z 0.0032 0.0148 0.0098 -0.0160 0.0085 0.0151  
AT. 45 H X -0.0013 -0.0091 0.0120 0.0027 -0.0261 -0.0039  
Y -0.0052 -0.0018 -0.0095 -0.0123 -0.0016 -0.0122  
Z -0.0017 0.0238 -0.0084 -0.0177 0.0237 -0.0122  
AT. 46 H X 0.0013 -0.0091 -0.0120 0.0027 -0.0261 0.0039  
Y 0.0052 -0.0018 0.0095 -0.0123 -0.0016 0.0122  
Z 0.0017 0.0238 0.0084 -0.0177 0.0237 0.0122  
AT. 47 H X 0.0030 -0.0012 0.0235 0.0091 -0.0191 -0.0051  
Y -0.0048 0.0058 0.0058 -0.0105 0.0037 -0.0054  
Z -0.0063 0.0140 -0.0221 -0.0249 0.0148 -0.0129  
AT. 48 H X -0.0030 -0.0012 -0.0235 0.0091 -0.0191 0.0051  
Y 0.0048 0.0058 -0.0058 -0.0105 0.0037 0.0054  
Z 0.0063 0.0140 0.0221 -0.0249 0.0148 0.0129  
AT. 49 C X -0.0037 -0.0062 -0.0231 -0.0137 -0.0014 -0.0064

Y -0.0033 -0.0042 0.0120 -0.0017 -0.0183 -0.0106  
Z -0.0028 0.0011 -0.0084 -0.0088 -0.0140 -0.0172  
AT. 50 C X 0.0037 -0.0062 0.0231 -0.0137 -0.0014 0.0064  
Y 0.0033 -0.0042 -0.0120 -0.0017 -0.0183 0.0106  
Z 0.0028 0.0011 0.0084 -0.0088 -0.0140 0.0172  
AT. 51 C X -0.0050 0.0064 -0.0317 -0.0182 0.0205 -0.0031  
Y -0.0021 -0.0008 0.0227 -0.0035 -0.0198 -0.0129  
Z -0.0030 -0.0137 -0.0110 -0.0033 -0.0331 -0.0189  
AT. 52 C X 0.0050 0.0064 0.0317 -0.0182 0.0205 0.0031  
Y 0.0021 -0.0008 -0.0227 -0.0035 -0.0198 0.0129  
Z 0.0030 -0.0137 0.0110 -0.0033 -0.0331 0.0189  
AT. 53 H X -0.0063 0.0115 -0.0206 -0.0175 0.0150 -0.0032  
Y -0.0021 0.0012 0.0339 -0.0039 -0.0271 -0.0147  
Z -0.0007 -0.0209 -0.0189 -0.0053 -0.0313 -0.0210  
AT. 54 H X 0.0063 0.0115 0.0206 -0.0175 0.0150 0.0032  
Y 0.0021 0.0012 -0.0339 -0.0039 -0.0271 0.0147  
Z 0.0007 -0.0209 0.0189 -0.0053 -0.0313 0.0210  
AT. 55 H X -0.0032 -0.0004 -0.0466 -0.0184 0.0277 -0.0031  
Y -0.0038 -0.0040 0.0299 0.0003 -0.0341 -0.0131  
Z -0.0042 -0.0218 -0.0123 0.0008 -0.0457 -0.0191  
AT. 56 H X 0.0032 -0.0004 0.0466 -0.0184 0.0277 0.0031  
Y 0.0038 -0.0040 -0.0299 0.0003 -0.0341 0.0131  
Z 0.0042 -0.0218 0.0123 0.0008 -0.0457 0.0191  
AT. 57 C X -0.0108 0.0052 -0.0630 -0.0338 0.0346 -0.0021  
Y -0.0135 0.0123 -0.0457 -0.0314 0.0336 -0.0032  
Z 0.0017 0.0151 0.0329 0.0192 -0.0261 -0.0104  
AT. 58 C X 0.0108 0.0052 0.0630 -0.0338 0.0346 0.0021  
Y 0.0135 0.0123 0.0457 -0.0314 0.0336 0.0032  
Z -0.0017 0.0151 -0.0329 0.0192 -0.0261 0.0104  
AT. 59 H X -0.0164 0.0056 -0.0859 -0.0462 0.0447 -0.0019  
Y -0.0118 0.0073 -0.0399 -0.0273 0.0228 -0.0039  
Z 0.0003 0.0077 0.0250 0.0165 -0.0350 -0.0113

AT. 60 H X 0.0164 0.0056 0.0859 -0.0462 0.0447 0.0019  
Y 0.0118 0.0073 0.0399 -0.0273 0.0228 0.0039  
Z -0.0003 0.0077 -0.0250 0.0165 -0.0350 0.0113

AT. 61 H X -0.0108 0.0144 -0.0582 -0.0310 0.0430 0.0017  
Y -0.0160 0.0200 -0.0536 -0.0373 0.0495 -0.0020  
Z 0.0029 0.0184 0.0403 0.0243 -0.0274 -0.0080

AT. 62 H X 0.0108 0.0144 0.0582 -0.0310 0.0430 -0.0017  
Y 0.0160 0.0200 0.0536 -0.0373 0.0495 0.0020  
Z -0.0029 0.0184 -0.0403 0.0243 -0.0274 0.0080

AT. 63 H X -0.0096 -0.0036 -0.0616 -0.0332 0.0234 -0.0060  
Y -0.0171 0.0128 -0.0590 -0.0372 0.0370 -0.0009  
Z 0.0039 0.0228 0.0435 0.0237 -0.0187 -0.0085

AT. 64 H X 0.0096 -0.0036 0.0616 -0.0332 0.0234 0.0060  
Y 0.0171 0.0128 0.0590 -0.0372 0.0370 0.0009  
Z -0.0039 0.0228 -0.0435 0.0237 -0.0187 0.0085

AT. 65 C X -0.0033 -0.0195 -0.0232 -0.0139 -0.0193 -0.0100  
Y -0.0008 -0.0160 0.0316 0.0127 -0.0476 -0.0138  
Z -0.0039 -0.0035 -0.0188 -0.0165 -0.0134 -0.0184

AT. 66 C X 0.0033 -0.0195 0.0232 -0.0139 -0.0193 0.0100  
Y 0.0008 -0.0160 -0.0316 0.0127 -0.0476 0.0138  
Z 0.0039 -0.0035 0.0188 -0.0165 -0.0134 0.0184

AT. 67 H X -0.0027 -0.0295 -0.0209 -0.0145 -0.0332 -0.0127  
Y -0.0016 -0.0156 0.0316 0.0192 -0.0510 -0.0133  
Z -0.0037 0.0048 -0.0208 -0.0218 0.0018 -0.0163

AT. 68 H X 0.0027 -0.0295 0.0209 -0.0145 -0.0332 0.0127  
Y 0.0016 -0.0156 -0.0316 0.0192 -0.0510 0.0133  
Z 0.0037 0.0048 0.0208 -0.0218 0.0018 0.0163

AT. 69 H X -0.0023 -0.0197 -0.0163 -0.0124 -0.0218 -0.0106  
Y 0.0001 -0.0187 0.0347 0.0095 -0.0500 -0.0150  
Z -0.0046 -0.0075 -0.0278 -0.0242 -0.0125 -0.0191

AT. 70 H X 0.0023 -0.0197 0.0163 -0.0124 -0.0218 0.0106  
Y -0.0001 -0.0187 -0.0347 0.0095 -0.0500 0.0150

Z 0.0046 -0.0075 0.0278 -0.0242 -0.0125 0.0191  
AT. 71 H X -0.0048 -0.0190 -0.0325 -0.0162 -0.0152 -0.0093  
Y -0.0000 -0.0220 0.0401 0.0198 -0.0622 -0.0156  
Z -0.0038 -0.0111 -0.0140 -0.0084 -0.0301 -0.0201  
AT. 72 H X 0.0048 -0.0190 0.0325 -0.0162 -0.0152 0.0093  
Y 0.0000 -0.0220 -0.0401 0.0198 -0.0622 0.0156  
Z 0.0038 -0.0111 0.0140 -0.0084 -0.0301 0.0201  
AT. 73 C X -0.0066 -0.0079 -0.0446 -0.0230 0.0079 -0.0051  
Y -0.0065 -0.0028 -0.0068 -0.0073 -0.0087 -0.0073  
Z -0.0015 0.0060 0.0074 0.0017 -0.0188 -0.0153  
AT. 74 C X 0.0066 -0.0079 0.0446 -0.0230 0.0079 0.0051  
Y 0.0065 -0.0028 0.0068 -0.0073 -0.0087 0.0073  
Z 0.0015 0.0060 -0.0074 0.0017 -0.0188 0.0153  
AT. 75 H X -0.0101 -0.0091 -0.0664 -0.0328 0.0173 -0.0032  
Y -0.0059 -0.0081 0.0017 0.0005 -0.0235 -0.0075  
Z -0.0031 -0.0022 0.0034 0.0051 -0.0320 -0.0139  
AT. 76 H X 0.0101 -0.0091 0.0664 -0.0328 0.0173 0.0032  
Y 0.0059 -0.0081 -0.0017 0.0005 -0.0235 0.0075  
Z 0.0031 -0.0022 -0.0034 0.0051 -0.0320 0.0139  
AT. 77 H X -0.0063 -0.0164 -0.0428 -0.0212 -0.0053 -0.0069  
Y -0.0084 -0.0034 -0.0160 -0.0079 -0.0080 -0.0046  
Z 0.0000 0.0145 0.0144 0.0008 -0.0068 -0.0157  
AT. 78 H X 0.0063 -0.0164 0.0428 -0.0212 -0.0053 0.0069  
Y 0.0084 -0.0034 0.0160 -0.0079 -0.0080 0.0046  
Z -0.0000 0.0145 -0.0144 0.0008 -0.0068 0.0157  
AT. 79 I X -0.0003 -0.0060 -0.0002 -0.0060 -0.0046 -0.0056  
Y -0.0052 0.0013 0.0010 -0.0059 -0.0126 -0.0096  
Z 0.0139 0.0045 -0.0078 -0.0093 0.0035 -0.0106  
AT. 80 I X 0.0003 -0.0060 0.0002 -0.0060 -0.0046 0.0056  
Y 0.0052 0.0013 -0.0010 -0.0059 -0.0126 0.0096  
Z -0.0139 0.0045 0.0078 -0.0093 0.0035 0.0106  
AT. 81 I X -0.0113 0.0157 0.0067 0.0066 -0.0029 0.0178

Y -0.0009 -0.0135 -0.0096 -0.0155 0.0010 -0.0117  
Z -0.0097 0.0089 0.0029 0.0070 -0.0037 0.0091  
AT. 82 I X 0.0113 0.0157 -0.0067 0.0066 -0.0029 -0.0178  
Y 0.0009 -0.0135 0.0096 -0.0155 0.0010 0.0117  
Z 0.0097 0.0089 -0.0029 0.0070 -0.0037 -0.0091  
AT. 83 O X -0.0089 -0.0059 0.0064 0.0065 -0.0052 0.0186  
Y 0.0564 0.0033 0.0177 0.0354 0.0413 -0.0384  
Z -0.0300 0.0364 0.0047 0.0042 -0.0015 -0.0163  
AT. 84 O X 0.0089 -0.0059 -0.0064 0.0065 -0.0052 -0.0186  
Y -0.0564 0.0033 -0.0177 0.0354 0.0413 0.0384  
Z 0.0300 0.0364 -0.0047 0.0042 -0.0015 0.0163  
AT. 85 O X -0.0073 0.0073 0.0026 0.0236 0.0104 0.0347  
Y 0.0154 -0.0000 0.0068 0.0165 0.0224 0.0350  
Z 0.0084 -0.0347 0.0045 0.0039 0.0165 0.0182  
AT. 86 O X 0.0073 0.0073 -0.0026 0.0236 0.0104 -0.0347  
Y -0.0154 -0.0000 -0.0068 0.0165 0.0224 -0.0350  
Z -0.0084 -0.0347 -0.0045 0.0039 0.0165 -0.0182  
AT. 87 N X 0.0009 0.0018 0.0078 0.0045 -0.0021 -0.0060  
Y 0.0136 -0.0230 -0.0019 0.0330 0.0089 0.0393  
Z -0.0352 0.0329 0.0037 0.0049 -0.0039 -0.0027  
AT. 88 N X -0.0009 0.0018 -0.0078 0.0045 -0.0021 0.0060  
Y -0.0136 -0.0230 0.0019 0.0330 0.0089 -0.0393  
Z 0.0352 0.0329 -0.0037 0.0049 -0.0039 0.0027  
AT. 89 N X 0.0083 0.0037 -0.0003 0.0045 0.0083 0.0073  
Y 0.0085 -0.0107 -0.0045 0.0307 0.0130 0.0412  
Z 0.0125 -0.0441 -0.0065 0.0072 0.0075 0.0106  
AT. 90 N X -0.0083 0.0037 0.0003 0.0045 0.0083 -0.0073  
Y -0.0085 -0.0107 0.0045 0.0307 0.0130 -0.0412  
Z -0.0125 -0.0441 0.0065 0.0072 0.0075 -0.0106  
AT. 91 C X -0.0023 -0.0031 0.0079 0.0084 -0.0004 0.0072  
Y 0.0282 -0.0075 0.0089 0.0280 0.0184 0.0004  
Z -0.0321 0.0342 0.0049 0.0041 -0.0023 -0.0084

AT. 92 C X 0.0023 -0.0031 -0.0079 0.0084 -0.0004 -0.0072  
Y -0.0282 -0.0075 -0.0089 0.0280 0.0184 -0.0004  
Z 0.0321 0.0342 -0.0049 0.0041 -0.0023 0.0084

AT. 93 C X 0.0046 -0.0048 0.0085 0.0130 0.0064 0.0071  
Y 0.0064 -0.0023 0.0076 0.0112 -0.0003 0.0018  
Z -0.0327 0.0340 0.0061 0.0022 -0.0021 -0.0069

AT. 94 C X -0.0046 -0.0048 -0.0085 0.0130 0.0064 -0.0071  
Y -0.0064 -0.0023 -0.0076 0.0112 -0.0003 -0.0018  
Z 0.0327 0.0340 -0.0061 0.0022 -0.0021 0.0069

AT. 95 H X 0.0042 -0.0006 0.0149 0.0272 0.0152 0.0124  
Y 0.0127 -0.0085 0.0009 0.0019 -0.0046 -0.0029  
Z -0.0433 0.0406 0.0111 0.0029 -0.0039 -0.0048

AT. 96 H X -0.0042 -0.0006 -0.0149 0.0272 0.0152 -0.0124  
Y -0.0127 -0.0085 -0.0009 0.0019 -0.0046 0.0029  
Z 0.0433 0.0406 -0.0111 0.0029 -0.0039 0.0048

AT. 97 H X 0.0139 -0.0110 0.0071 0.0134 0.0109 0.0069  
Y -0.0127 0.0118 0.0176 0.0189 0.0005 0.0047  
Z -0.0392 0.0385 0.0088 0.0039 -0.0030 -0.0063

AT. 98 H X -0.0139 -0.0110 -0.0071 0.0134 0.0109 -0.0069  
Y 0.0127 0.0118 -0.0176 0.0189 0.0005 -0.0047  
Z 0.0392 0.0385 -0.0088 0.0039 -0.0030 0.0063

AT. 99 C X -0.0010 0.0079 0.0040 0.0186 0.0101 0.0288  
Y 0.0102 -0.0045 -0.0003 0.0214 0.0193 0.0356  
Z 0.0132 -0.0411 -0.0041 0.0012 0.0110 0.0068

AT. 100 C X 0.0010 0.0079 -0.0040 0.0186 0.0101 -0.0288  
Y -0.0102 -0.0045 0.0003 0.0214 0.0193 -0.0356  
Z -0.0132 -0.0411 0.0041 0.0012 0.0110 -0.0068

AT. 101 C X -0.0018 0.0070 0.0076 0.0252 0.0142 0.0409  
Y -0.0033 0.0023 -0.0011 0.0170 0.0179 0.0311  
Z 0.0159 -0.0382 -0.0086 -0.0078 0.0042 -0.0099

AT. 102 C X 0.0018 0.0070 -0.0076 0.0252 0.0142 -0.0409  
Y 0.0033 0.0023 0.0011 0.0170 0.0179 -0.0311



Z -0.0159 -0.0382 0.0086 -0.0078 0.0042 0.0099  
AT. 103 H X 0.0027 0.0099 0.0115 0.0409 0.0234 0.0601  
Y -0.0053 0.0013 -0.0024 0.0105 0.0141 0.0230  
Z 0.0274 -0.0488 -0.0143 -0.0219 -0.0040 -0.0316  
AT. 104 H X -0.0027 0.0099 -0.0115 0.0409 0.0234 -0.0601  
Y 0.0053 0.0013 0.0024 0.0105 0.0141 -0.0230  
Z -0.0274 -0.0488 0.0143 -0.0219 -0.0040 0.0316  
AT. 105 H X -0.0021 -0.0055 0.0062 0.0237 0.0182 0.0401  
Y -0.0165 0.0197 0.0055 0.0324 0.0244 0.0533  
Z 0.0109 -0.0339 -0.0062 -0.0021 0.0074 -0.0015  
AT. 106 H X 0.0021 -0.0055 -0.0062 0.0237 0.0182 -0.0401  
Y 0.0165 0.0197 -0.0055 0.0324 0.0244 -0.0533  
Z -0.0109 -0.0339 0.0062 -0.0021 0.0074 0.0015  
AT. 107 C X 0.0043 -0.0017 0.0060 0.0026 -0.0043 -0.0090  
Y 0.0089 -0.0110 -0.0055 0.0278 0.0111 0.0336  
Z -0.0317 0.0320 -0.0012 -0.0008 -0.0065 -0.0113  
AT. 108 C X -0.0043 -0.0017 -0.0060 0.0026 -0.0043 0.0090  
Y -0.0089 -0.0110 0.0055 0.0278 0.0111 -0.0336  
Z 0.0317 0.0320 0.0012 -0.0008 -0.0065 0.0113  
AT. 109 H X 0.0030 0.0023 0.0089 0.0054 -0.0073 -0.0117  
Y -0.0024 0.0079 -0.0023 0.0291 0.0088 0.0325  
Z -0.0500 0.0627 0.0030 0.0014 -0.0091 -0.0110  
AT. 110 H X -0.0030 0.0023 -0.0089 0.0054 -0.0073 0.0117  
Y 0.0024 0.0079 0.0023 0.0291 0.0088 -0.0325  
Z 0.0500 0.0627 -0.0030 0.0014 -0.0091 0.0110  
AT. 111 H X -0.0030 0.0059 0.0102 0.0070 -0.0042 -0.0034  
Y 0.0280 -0.0404 -0.0127 0.0236 0.0163 0.0335  
Z -0.0276 0.0300 -0.0042 -0.0047 -0.0074 -0.0172  
AT. 112 H X 0.0030 0.0059 -0.0102 0.0070 -0.0042 0.0034  
Y -0.0280 -0.0404 0.0127 0.0236 0.0163 -0.0335  
Z 0.0276 0.0300 0.0042 -0.0047 -0.0074 0.0172  
AT. 113 C X 0.0189 -0.0171 -0.0051 -0.0073 -0.0013 -0.0169

Y -0.0085 0.0194 -0.0037 0.0263 0.0085 0.0311  
Z -0.0072 -0.0073 -0.0080 -0.0039 -0.0028 -0.0127  
AT. 114 C X -0.0189 -0.0171 0.0051 -0.0073 -0.0013 0.0169  
Y 0.0085 0.0194 0.0037 0.0263 0.0085 -0.0311  
Z 0.0072 -0.0073 0.0080 -0.0039 -0.0028 0.0127  
AT. 115 C X 0.0147 -0.0064 -0.0038 -0.0015 0.0053 -0.0030  
Y 0.0065 -0.0032 -0.0077 0.0263 0.0131 0.0352  
Z 0.0215 -0.0522 -0.0151 -0.0068 0.0026 -0.0122  
AT. 116 C X -0.0147 -0.0064 0.0038 -0.0015 0.0053 0.0030  
Y -0.0065 -0.0032 0.0077 0.0263 0.0131 -0.0352  
Z -0.0215 -0.0522 0.0151 -0.0068 0.0026 0.0122  
AT. 117 H X -0.0008 0.0140 0.0047 0.0080 0.0058 0.0092  
Y 0.0277 -0.0335 -0.0152 0.0233 0.0201 0.0378  
Z 0.0329 -0.0662 -0.0222 -0.0160 0.0003 -0.0255  
AT. 118 H X 0.0008 0.0140 -0.0047 0.0080 0.0058 -0.0092  
Y -0.0277 -0.0335 0.0152 0.0233 0.0201 -0.0378  
Z -0.0329 -0.0662 0.0222 -0.0160 0.0003 0.0255  
AT. 119 H X 0.0344 -0.0310 -0.0144 -0.0123 0.0065 -0.0159  
Y -0.0026 0.0135 -0.0065 0.0248 0.0105 0.0311  
Z 0.0412 -0.0820 -0.0220 -0.0112 0.0058 -0.0152  
AT. 120 H X -0.0344 -0.0310 0.0144 -0.0123 0.0065 0.0159  
Y 0.0026 0.0135 0.0065 0.0248 0.0105 -0.0311  
Z -0.0412 -0.0820 0.0220 -0.0112 0.0058 0.0152  
AT. 121 C X 0.0165 -0.0044 -0.0077 -0.0059 0.0099 -0.0084  
Y -0.0040 0.0029 0.0009 0.0314 0.0024 0.0377  
Z 0.0015 -0.0334 0.0035 0.0218 0.0073 0.0327  
AT. 122 C X -0.0165 -0.0044 0.0077 -0.0059 0.0099 0.0084  
Y 0.0040 0.0029 -0.0009 0.0314 0.0024 -0.0377  
Z -0.0015 -0.0334 -0.0035 0.0218 0.0073 -0.0327  
AT. 123 H X 0.0258 -0.0062 -0.0194 -0.0218 0.0178 -0.0278  
Y -0.0157 0.0252 -0.0012 0.0224 0.0019 0.0239  
Z 0.0152 -0.0569 0.0034 0.0281 0.0091 0.0436

AT. 124 H X -0.0258 -0.0062 0.0194 -0.0218 0.0178 0.0278  
Y 0.0157 0.0252 0.0012 0.0224 0.0019 -0.0239  
Z -0.0152 -0.0569 -0.0034 0.0281 0.0091 -0.0436

AT. 125 H X 0.0101 0.0045 -0.0034 0.0004 0.0117 0.0022  
Y 0.0052 -0.0203 0.0065 0.0428 -0.0018 0.0530  
Z -0.0017 -0.0345 0.0114 0.0353 0.0071 0.0531

AT. 126 H X -0.0101 0.0045 0.0034 0.0004 0.0117 -0.0022  
Y -0.0052 -0.0203 -0.0065 0.0428 -0.0018 -0.0530  
Z 0.0017 -0.0345 -0.0114 0.0353 0.0071 -0.0531

AT. 127 C X 0.0218 -0.0179 -0.0077 -0.0088 0.0017 -0.0179  
Y -0.0162 0.0210 0.0028 0.0278 -0.0026 0.0276  
Z -0.0216 0.0062 0.0066 0.0162 0.0027 0.0174

AT. 128 C X -0.0218 -0.0179 0.0077 -0.0088 0.0017 0.0179  
Y 0.0162 0.0210 -0.0028 0.0278 -0.0026 -0.0276  
Z 0.0216 0.0062 -0.0066 0.0162 0.0027 -0.0174

AT. 129 C X 0.0091 -0.0066 0.0024 0.0000 -0.0018 -0.0109  
Y -0.0028 -0.0056 0.0031 0.0335 -0.0009 0.0412  
Z -0.0397 0.0380 0.0091 0.0113 -0.0007 0.0038

AT. 130 C X -0.0091 -0.0066 -0.0024 0.0000 -0.0018 0.0109  
Y 0.0028 -0.0056 -0.0031 0.0335 -0.0009 -0.0412  
Z 0.0397 0.0380 -0.0091 0.0113 -0.0007 -0.0038

AT. 131 H X 0.0048 0.0020 0.0047 0.0014 0.0006 -0.0115  
Y 0.0027 -0.0234 0.0062 0.0409 -0.0029 0.0547  
Z -0.0426 0.0413 0.0133 0.0163 0.0017 0.0089

AT. 132 H X -0.0048 0.0020 -0.0047 0.0014 0.0006 0.0115  
Y -0.0027 -0.0234 -0.0062 0.0409 -0.0029 -0.0547  
Z 0.0426 0.0413 -0.0133 0.0163 0.0017 -0.0089

AT. 133 H X 0.0102 -0.0161 0.0031 0.0003 -0.0076 -0.0055  
Y -0.0108 0.0066 0.0048 0.0321 -0.0041 0.0366  
Z -0.0530 0.0613 0.0113 0.0094 -0.0031 -0.0050

AT. 134 H X -0.0102 -0.0161 -0.0031 0.0003 -0.0076 0.0055  
Y 0.0108 0.0066 -0.0048 0.0321 -0.0041 -0.0366

Z 0.0530 0.0613 -0.0113 0.0094 -0.0031 0.0050  
AT. 135 C X 0.0273 -0.0288 -0.0108 -0.0151 -0.0044 -0.0301  
Y -0.0215 0.0428 -0.0044 0.0242 0.0088 0.0312  
Z -0.0011 -0.0126 -0.0174 -0.0175 -0.0074 -0.0336  
AT. 136 C X -0.0273 -0.0288 0.0108 -0.0151 -0.0044 0.0301  
Y 0.0215 0.0428 0.0044 0.0242 0.0088 -0.0312  
Z 0.0011 -0.0126 0.0174 -0.0175 -0.0074 0.0336  
AT. 137 H X 0.0309 -0.0368 -0.0135 -0.0219 -0.0099 -0.0438  
Y -0.0354 0.0586 -0.0027 0.0196 0.0018 0.0222  
Z -0.0262 0.0184 -0.0134 -0.0220 -0.0167 -0.0427  
AT. 138 H X -0.0309 -0.0368 0.0135 -0.0219 -0.0099 0.0438  
Y 0.0354 0.0586 0.0027 0.0196 0.0018 -0.0222  
Z 0.0262 0.0184 0.0134 -0.0220 -0.0167 0.0427  
AT. 139 H X 0.0176 -0.0186 -0.0039 -0.0088 -0.0049 -0.0220  
Y -0.0012 0.0219 -0.0080 0.0309 0.0204 0.0456  
Z 0.0054 -0.0195 -0.0253 -0.0274 -0.0099 -0.0476  
AT. 140 H X -0.0176 -0.0186 0.0039 -0.0088 -0.0049 0.0220  
Y 0.0012 0.0219 0.0080 0.0309 0.0204 -0.0456  
Z -0.0054 -0.0195 0.0253 -0.0274 -0.0099 0.0476  
AT. 141 H X 0.0411 -0.0405 -0.0193 -0.0207 0.0002 -0.0345  
Y -0.0373 0.0638 -0.0032 0.0193 0.0034 0.0235  
Z 0.0209 -0.0390 -0.0222 -0.0147 0.0000 -0.0276  
AT. 142 H X -0.0411 -0.0405 0.0193 -0.0207 0.0002 0.0345  
Y 0.0373 0.0638 0.0032 0.0193 0.0034 -0.0235  
Z -0.0209 -0.0390 0.0222 -0.0147 0.0000 0.0276  
AT. 143 C X 0.0325 -0.0329 -0.0149 -0.0174 0.0020 -0.0266  
Y -0.0349 0.0435 0.0084 0.0245 -0.0130 0.0149  
Z -0.0306 0.0199 0.0148 0.0291 0.0054 0.0328  
AT. 144 C X -0.0325 -0.0329 0.0149 -0.0174 0.0020 0.0266  
Y 0.0349 0.0435 -0.0084 0.0245 -0.0130 -0.0149  
Z 0.0306 0.0199 -0.0148 0.0291 0.0054 -0.0328  
AT. 145 H X 0.0448 -0.0506 -0.0248 -0.0262 0.0075 -0.0325

Y -0.0429 0.0521 0.0061 0.0204 -0.0123 0.0098  
Z -0.0191 0.0061 0.0146 0.0314 0.0060 0.0369  
AT. 146 H X -0.0448 -0.0506 0.0248 -0.0262 0.0075 0.0325  
Y 0.0429 0.0521 -0.0061 0.0204 -0.0123 -0.0098  
Z 0.0191 0.0061 -0.0146 0.0314 0.0060 -0.0369  
AT. 147 H X 0.0280 -0.0250 -0.0124 -0.0114 0.0054 -0.0183  
Y -0.0331 0.0401 0.0147 0.0293 -0.0189 0.0174  
Z -0.0359 0.0294 0.0216 0.0402 0.0069 0.0459  
AT. 148 H X -0.0280 -0.0250 0.0124 -0.0114 0.0054 0.0183  
Y 0.0331 0.0401 -0.0147 0.0293 -0.0189 -0.0174  
Z 0.0359 0.0294 -0.0216 0.0402 0.0069 -0.0459  
AT. 149 H X 0.0302 -0.0332 -0.0133 -0.0220 -0.0061 -0.0357  
Y -0.0442 0.0541 0.0093 0.0215 -0.0161 0.0094  
Z -0.0454 0.0391 0.0156 0.0267 0.0040 0.0281  
AT. 150 H X -0.0302 -0.0332 0.0133 -0.0220 -0.0061 0.0357  
Y 0.0442 0.0541 -0.0093 0.0215 -0.0161 -0.0094  
Z 0.0454 0.0391 -0.0156 0.0267 0.0040 -0.0281  
AT. 151 C X 0.0300 -0.0306 -0.0124 -0.0151 -0.0015 -0.0269  
Y -0.0276 0.0462 0.0015 0.0245 0.0001 0.0215  
Z -0.0160 0.0016 -0.0004 0.0058 -0.0003 0.0017  
AT. 152 C X -0.0300 -0.0306 0.0124 -0.0151 -0.0015 0.0269  
Y 0.0276 0.0462 -0.0015 0.0245 0.0001 -0.0215  
Z 0.0160 0.0016 0.0004 0.0058 -0.0003 -0.0017  
AT. 153 H X 0.0338 -0.0385 -0.0139 -0.0190 -0.0065 -0.0336  
Y -0.0365 0.0604 0.0038 0.0230 -0.0028 0.0161  
Z -0.0328 0.0293 0.0041 0.0053 -0.0029 -0.0036  
AT. 154 H X -0.0338 -0.0385 0.0139 -0.0190 -0.0065 0.0336  
Y 0.0365 0.0604 -0.0038 0.0230 -0.0028 -0.0161  
Z 0.0328 0.0293 -0.0041 0.0053 -0.0029 0.0036  
AT. 155 H X 0.0395 -0.0396 -0.0188 -0.0203 0.0010 -0.0322  
Y -0.0394 0.0670 0.0031 0.0230 -0.0010 0.0159  
Z -0.0003 -0.0236 -0.0043 0.0058 0.0018 0.0057

AT.156 H X -0.0395 -0.0396 0.0188 -0.0203 0.0010 0.0322  
Y 0.0394 0.0670 -0.0031 0.0230 -0.0010 -0.0159  
Z 0.0003 -0.0236 0.0043 0.0058 0.0018 -0.0057

AT.157 O X -0.0218 0.0152 0.0051 -0.0317 -0.0281 -0.0188  
Y 0.0475 -0.0501 0.0229 0.0500 0.0129 0.0065  
Z 0.0092 0.0126 0.0385 -0.0307 0.0051 0.0100

AT.158 O X 0.0218 0.0152 -0.0051 -0.0317 -0.0281 0.0188  
Y -0.0475 -0.0501 -0.0229 0.0500 0.0129 -0.0065  
Z -0.0092 0.0126 -0.0385 -0.0307 0.0051 -0.0100

AT.159 O X -0.0162 0.0079 -0.0105 -0.0153 -0.0279 -0.0143  
Y -0.0008 -0.0107 0.0237 0.0008 -0.0158 -0.0188  
Z 0.0144 0.0040 0.0115 -0.0073 0.0019 0.0154

AT.160 O X 0.0162 0.0079 0.0105 -0.0153 -0.0279 0.0143  
Y 0.0008 -0.0107 -0.0237 0.0008 -0.0158 0.0188  
Z -0.0144 0.0040 -0.0115 -0.0073 0.0019 -0.0154

AT.161 H X 0.0057 -0.0085 0.0019 0.0024 -0.0092 -0.0037  
Y 0.0540 -0.0529 0.0260 0.0530 0.0186 0.0111  
Z -0.0031 0.0146 0.0250 -0.0268 -0.0090 0.0011

AT.162 H X -0.0057 -0.0085 -0.0019 0.0024 -0.0092 0.0037  
Y -0.0540 -0.0529 -0.0260 0.0530 0.0186 -0.0111  
Z 0.0031 0.0146 -0.0250 -0.0268 -0.0090 -0.0011

AT.163 H X -0.0048 -0.0029 -0.0277 0.0068 -0.0260 -0.0060  
Y 0.0066 -0.0066 0.0335 -0.0161 -0.0029 -0.0127  
Z 0.0127 0.0087 0.0202 -0.0196 0.0049 0.0143

AT.164 H X 0.0048 -0.0029 0.0277 0.0068 -0.0260 0.0060  
Y -0.0066 -0.0066 -0.0335 -0.0161 -0.0029 0.0127  
Z -0.0127 0.0087 -0.0202 -0.0196 0.0049 -0.0143

AT.165 O X 0.0112 0.0071 0.0130 0.0236 0.0194 -0.0153  
Y 0.0167 0.0084 0.0136 0.0106 0.0093 -0.0129  
Z 0.0424 -0.0363 -0.0005 -0.0162 0.0047 0.0072

AT.166 O X -0.0112 0.0071 -0.0130 0.0236 0.0194 0.0153  
Y -0.0167 0.0084 -0.0136 0.0106 0.0093 0.0129

Z -0.0424 -0.0363 0.0005 -0.0162 0.0047 -0.0072  
 AT. 167 H X 0.0066 0.0018 0.0069 0.0148 0.0103 -0.0068  
 Y 0.0387 0.0054 0.0197 0.0211 0.0254 -0.0236  
 Z 0.0218 -0.0181 0.0076 -0.0101 0.0044 0.0009  
 AT. 168 H X -0.0066 0.0018 -0.0069 0.0148 0.0103 0.0068  
 Y -0.0387 0.0054 -0.0197 0.0211 0.0254 0.0236  
 Z -0.0218 -0.0181 -0.0076 -0.0101 0.0044 -0.0009  
 AT. 169 O X -0.0056 0.0309 0.0338 0.0397 0.0237 -0.0289  
 Y 0.0027 0.0210 0.0133 0.0133 0.0195 -0.0212  
 Z 0.0417 -0.0336 0.0037 -0.0133 0.0036 0.0059  
 AT. 170 O X 0.0056 0.0309 -0.0338 0.0397 0.0237 0.0289  
 Y -0.0027 0.0210 -0.0133 0.0133 0.0195 0.0212  
 Z -0.0417 -0.0336 -0.0037 -0.0133 0.0036 -0.0059  
 AT. 171 H X -0.0022 0.0189 0.0166 0.0360 0.0175 -0.0355  
 Y -0.0002 0.0156 0.0024 0.0111 0.0194 -0.0258  
 Z 0.0349 -0.0344 -0.0030 -0.0146 0.0076 0.0033  
 AT. 172 H X 0.0022 0.0189 -0.0166 0.0360 0.0175 0.0355  
 Y 0.0002 0.0156 -0.0024 0.0111 0.0194 0.0258  
 Z -0.0349 -0.0344 0.0030 -0.0146 0.0076 -0.0033  
  
 FREQ(CM\*\*-1) 81.70 83.58 84.68 84.96 88.39 89.52  
  
 AT. 1 I X 0.0062 0.0011 -0.0064 0.0039 -0.0005 0.0009  
 Y 0.0108 0.0022 0.0118 -0.0030 -0.0061 0.0008  
 Z -0.0016 -0.0041 -0.0059 0.0068 0.0067 -0.0038  
 AT. 2 I X 0.0062 -0.0011 -0.0064 -0.0039 -0.0005 0.0009  
 Y 0.0108 -0.0022 0.0118 0.0030 -0.0061 0.0008  
 Z -0.0016 0.0041 -0.0059 -0.0068 0.0067 -0.0038  
 AT. 3 I X -0.0244 -0.0139 -0.0022 0.0049 0.0145 0.0019  
 Y 0.0032 -0.0015 0.0013 -0.0018 0.0112 0.0040  
 Z 0.0135 0.0069 0.0029 -0.0002 -0.0083 -0.0004  
 AT. 4 I X -0.0244 0.0139 -0.0022 -0.0049 0.0145 0.0019

Y 0.0032 0.0015 0.0013 0.0018 0.0112 0.0040  
Z 0.0135 -0.0069 0.0029 0.0002 -0.0083 -0.0004  
AT. 5 O X 0.0044 -0.0083 -0.0096 -0.0014 -0.0003 0.0049  
Y 0.0058 -0.0131 -0.0056 -0.0179 -0.0040 0.0078  
Z -0.0074 -0.0176 -0.0111 0.0209 0.0014 0.0057  
AT. 6 O X 0.0044 0.0083 -0.0096 0.0014 -0.0003 0.0049  
Y 0.0058 0.0131 -0.0056 0.0179 -0.0040 0.0078  
Z -0.0074 0.0176 -0.0111 -0.0209 0.0014 0.0057  
AT. 7 O X -0.0190 -0.0192 -0.0061 0.0048 0.0278 0.0005  
Y -0.0562 -0.0020 -0.0322 0.0243 0.0552 -0.0065  
Z -0.0332 -0.0058 -0.0079 0.0171 0.0312 -0.0003  
AT. 8 O X -0.0190 0.0192 -0.0061 -0.0048 0.0278 0.0005  
Y -0.0562 0.0020 -0.0322 -0.0243 0.0552 -0.0065  
Z -0.0332 0.0058 -0.0079 -0.0171 0.0312 -0.0003  
AT. 9 N X 0.0092 0.0095 0.0103 0.0019 -0.0236 -0.0044  
Y 0.0228 0.0177 0.0091 -0.0073 -0.0167 -0.0081  
Z -0.0073 -0.0148 -0.0063 0.0209 -0.0044 0.0041  
AT. 10 N X 0.0092 -0.0095 0.0103 -0.0019 -0.0236 -0.0044  
Y 0.0228 -0.0177 0.0091 0.0073 -0.0167 -0.0081  
Z -0.0073 0.0148 -0.0063 -0.0209 -0.0044 0.0041  
AT. 11 N X 0.0199 0.0071 0.0112 -0.0050 -0.0164 -0.0043  
Y 0.0009 0.0141 0.0010 0.0040 -0.0103 -0.0070  
Z -0.0003 -0.0033 0.0134 0.0027 -0.0085 0.0013  
AT. 12 N X 0.0199 -0.0071 0.0112 0.0050 -0.0164 -0.0043  
Y 0.0009 -0.0141 0.0010 -0.0040 -0.0103 -0.0070  
Z -0.0003 0.0033 0.0134 -0.0027 -0.0085 0.0013  
AT. 13 C X 0.0066 0.0012 -0.0018 0.0014 -0.0060 0.0000  
Y 0.0124 0.0025 0.0007 -0.0124 -0.0051 0.0001  
Z -0.0094 -0.0174 -0.0074 0.0199 -0.0031 0.0054  
AT. 14 C X 0.0066 -0.0012 -0.0018 -0.0014 -0.0060 0.0000  
Y 0.0124 -0.0025 0.0007 0.0124 -0.0051 0.0001  
Z -0.0094 0.0174 -0.0074 -0.0199 -0.0031 0.0054



AT. 15 C X 0.0071 0.0036 -0.0018 0.0047 0.0002 -0.0009  
Y 0.0107 0.0032 0.0034 -0.0090 -0.0013 0.0004  
Z -0.0144 -0.0196 -0.0039 0.0169 -0.0058 0.0065

AT. 16 C X 0.0071 -0.0036 -0.0018 -0.0047 0.0002 -0.0009  
Y 0.0107 -0.0032 0.0034 0.0090 -0.0013 0.0004  
Z -0.0144 0.0196 -0.0039 -0.0169 -0.0058 0.0065

AT. 17 H X 0.0110 0.0090 0.0022 0.0030 0.0034 -0.0048  
Y 0.0176 0.0092 0.0033 -0.0100 0.0013 -0.0038  
Z -0.0218 -0.0251 -0.0023 0.0177 -0.0077 0.0102

AT. 18 H X 0.0110 -0.0090 0.0022 -0.0030 0.0034 -0.0048  
Y 0.0176 -0.0092 0.0033 0.0100 0.0013 -0.0038  
Z -0.0218 0.0251 -0.0023 -0.0177 -0.0077 0.0102

AT. 19 H X 0.0057 0.0009 -0.0020 0.0092 -0.0004 0.0016  
Y 0.0010 -0.0051 0.0047 -0.0076 -0.0061 0.0062  
Z -0.0186 -0.0236 -0.0035 0.0187 -0.0079 0.0096

AT. 20 H X 0.0057 -0.0009 -0.0020 -0.0092 -0.0004 0.0016  
Y 0.0010 0.0051 0.0047 0.0076 -0.0061 0.0062  
Z -0.0186 0.0236 -0.0035 -0.0187 -0.0079 0.0096

AT. 21 C X -0.0026 -0.0099 0.0032 -0.0006 0.0068 0.0001  
Y -0.0329 0.0071 -0.0176 0.0152 0.0246 -0.0060  
Z -0.0177 -0.0073 0.0042 0.0088 0.0096 0.0020

AT. 22 C X -0.0026 0.0099 0.0032 0.0006 0.0068 0.0001  
Y -0.0329 -0.0071 -0.0176 -0.0152 0.0246 -0.0060  
Z -0.0177 0.0073 0.0042 -0.0088 0.0096 0.0020

AT. 23 C X 0.0019 -0.0119 0.0057 -0.0046 0.0018 0.0029  
Y -0.0341 0.0130 -0.0207 0.0152 0.0273 -0.0056  
Z -0.0101 -0.0111 0.0084 0.0039 0.0021 0.0050

AT. 24 C X 0.0019 0.0119 0.0057 0.0046 0.0018 0.0029  
Y -0.0341 -0.0130 -0.0207 -0.0152 0.0273 -0.0056  
Z -0.0101 0.0111 0.0084 -0.0039 0.0021 0.0050

AT. 25 H X 0.0185 -0.0165 0.0146 -0.0117 -0.0049 0.0074  
Y -0.0341 0.0140 -0.0216 0.0153 0.0286 -0.0057

Z 0.0059 -0.0219 0.0219 -0.0037 -0.0110 0.0101  
AT. 26 H X 0.0185 0.0165 0.0146 0.0117 -0.0049 0.0074  
Y -0.0341 -0.0140 -0.0216 -0.0153 0.0286 -0.0057  
Z 0.0059 0.0219 0.0219 0.0037 -0.0110 0.0101  
AT. 27 H X 0.0030 -0.0080 0.0020 -0.0043 0.0002 0.0013  
Y -0.0502 0.0238 -0.0350 0.0238 0.0419 -0.0117  
Z -0.0187 -0.0060 0.0016 0.0082 0.0099 0.0023  
AT. 28 H X 0.0030 0.0080 0.0020 0.0043 0.0002 0.0013  
Y -0.0502 -0.0238 -0.0350 -0.0238 0.0419 -0.0117  
Z -0.0187 0.0060 0.0016 -0.0082 0.0099 0.0023  
AT. 29 C X 0.0025 0.0054 0.0126 0.0055 -0.0315 -0.0032  
Y 0.0131 0.0108 0.0096 -0.0016 -0.0221 -0.0065  
Z -0.0066 -0.0164 -0.0099 0.0218 0.0034 0.0047  
AT. 30 C X 0.0025 -0.0054 0.0126 -0.0055 -0.0315 -0.0032  
Y 0.0131 -0.0108 0.0096 0.0016 -0.0221 -0.0065  
Z -0.0066 0.0164 -0.0099 -0.0218 0.0034 0.0047  
AT. 31 H X -0.0052 0.0019 0.0153 0.0098 -0.0397 -0.0025  
Y 0.0134 0.0114 -0.0008 0.0026 -0.0108 -0.0064  
Z -0.0108 -0.0172 -0.0233 0.0304 0.0149 0.0051  
AT. 32 H X -0.0052 -0.0019 0.0153 -0.0098 -0.0397 -0.0025  
Y 0.0134 -0.0114 -0.0008 -0.0026 -0.0108 -0.0064  
Z -0.0108 0.0172 -0.0233 -0.0304 0.0149 0.0051  
AT. 33 H X 0.0013 0.0029 0.0189 0.0020 -0.0347 -0.0026  
Y 0.0119 0.0091 0.0247 -0.0063 -0.0398 -0.0065  
Z -0.0070 -0.0173 -0.0123 0.0215 0.0091 0.0051  
AT. 34 H X 0.0013 -0.0029 0.0189 -0.0020 -0.0347 -0.0026  
Y 0.0119 -0.0091 0.0247 0.0063 -0.0398 -0.0065  
Z -0.0070 0.0173 -0.0123 -0.0215 0.0091 0.0051  
AT. 35 C X 0.0071 0.0087 0.0057 0.0067 -0.0249 -0.0038  
Y 0.0021 0.0058 0.0003 0.0088 -0.0172 -0.0049  
Z -0.0007 -0.0160 0.0067 0.0107 -0.0084 0.0042  
AT. 36 C X 0.0071 -0.0087 0.0057 -0.0067 -0.0249 -0.0038

Y 0.0021 -0.0058 0.0003 -0.0088 -0.0172 -0.0049  
Z -0.0007 0.0160 0.0067 -0.0107 -0.0084 0.0042  
AT. 37 C X 0.0166 0.0072 0.0118 -0.0017 -0.0233 -0.0038  
Y 0.0011 0.0086 0.0076 0.0048 -0.0237 -0.0050  
Z 0.0054 -0.0135 0.0231 -0.0017 -0.0184 0.0043  
AT. 38 C X 0.0166 -0.0072 0.0118 0.0017 -0.0233 -0.0038  
Y 0.0011 -0.0086 0.0076 -0.0048 -0.0237 -0.0050  
Z 0.0054 0.0135 0.0231 0.0017 -0.0184 0.0043  
AT. 39 H X 0.0228 0.0016 0.0283 -0.0108 -0.0371 -0.0015  
Y 0.0004 0.0107 0.0164 -0.0001 -0.0299 -0.0047  
Z 0.0103 -0.0182 0.0305 -0.0058 -0.0256 0.0057  
AT. 40 H X 0.0228 -0.0016 0.0283 0.0108 -0.0371 -0.0015  
Y 0.0004 -0.0107 0.0164 0.0001 -0.0299 -0.0047  
Z 0.0103 0.0182 0.0305 0.0058 -0.0256 0.0057  
AT. 41 H X 0.0111 0.0123 -0.0031 0.0062 -0.0093 -0.0065  
Y -0.0006 0.0030 0.0098 0.0078 -0.0315 -0.0036  
Z 0.0122 -0.0145 0.0367 -0.0123 -0.0262 0.0059  
AT. 42 H X 0.0111 -0.0123 -0.0031 -0.0062 -0.0093 -0.0065  
Y -0.0006 -0.0030 0.0098 -0.0078 -0.0315 -0.0036  
Z 0.0122 0.0145 0.0367 0.0123 -0.0262 0.0059  
AT. 43 C X 0.0285 0.0180 0.0053 -0.0041 -0.0169 -0.0085  
Y 0.0122 0.0131 -0.0008 0.0032 -0.0100 -0.0074  
Z 0.0018 0.0069 0.0078 0.0043 -0.0078 -0.0023  
AT. 44 C X 0.0285 -0.0180 0.0053 0.0041 -0.0169 -0.0085  
Y 0.0122 -0.0131 -0.0008 -0.0032 -0.0100 -0.0074  
Z 0.0018 -0.0069 0.0078 -0.0043 -0.0078 -0.0023  
AT. 45 H X 0.0391 0.0284 0.0002 -0.0055 -0.0174 -0.0127  
Y 0.0035 -0.0007 0.0007 0.0098 -0.0109 -0.0019  
Z 0.0026 0.0132 0.0092 -0.0016 -0.0058 -0.0047  
AT. 46 H X 0.0391 -0.0284 0.0002 0.0055 -0.0174 -0.0127  
Y 0.0035 0.0007 0.0007 -0.0098 -0.0109 -0.0019  
Z 0.0026 -0.0132 0.0092 0.0016 -0.0058 -0.0047

AT. 47 H X 0.0337 0.0193 0.0069 -0.0087 -0.0147 -0.0098  
Y 0.0213 0.0246 -0.0028 -0.0034 -0.0067 -0.0127  
Z 0.0042 0.0172 0.0036 0.0039 -0.0076 -0.0060

AT. 48 H X 0.0337 -0.0193 0.0069 0.0087 -0.0147 -0.0098  
Y 0.0213 -0.0246 -0.0028 0.0034 -0.0067 -0.0127  
Z 0.0042 -0.0172 0.0036 -0.0039 -0.0076 -0.0060

AT. 49 C X 0.0166 0.0138 0.0026 0.0047 -0.0201 -0.0057  
Y 0.0167 0.0083 -0.0028 0.0046 -0.0088 -0.0062  
Z -0.0017 -0.0042 0.0030 0.0120 -0.0096 0.0018

AT. 50 C X 0.0166 -0.0138 0.0026 -0.0047 -0.0201 -0.0057  
Y 0.0167 -0.0083 -0.0028 -0.0046 -0.0088 -0.0062  
Z -0.0017 0.0042 0.0030 -0.0120 -0.0096 0.0018

AT. 51 C X 0.0111 0.0112 0.0070 0.0041 -0.0225 -0.0048  
Y 0.0278 0.0209 0.0009 -0.0024 -0.0085 -0.0106  
Z -0.0083 -0.0148 -0.0045 0.0201 -0.0084 0.0052

AT. 52 C X 0.0111 -0.0112 0.0070 -0.0041 -0.0225 -0.0048  
Y 0.0278 -0.0209 0.0009 0.0024 -0.0085 -0.0106  
Z -0.0083 0.0148 -0.0045 -0.0201 -0.0084 0.0052

AT. 53 H X 0.0192 0.0183 0.0072 0.0010 -0.0202 -0.0081  
Y 0.0389 0.0313 0.0022 -0.0076 -0.0071 -0.0145  
Z -0.0100 -0.0155 -0.0032 0.0196 -0.0112 0.0066

AT. 54 H X 0.0192 -0.0183 0.0072 -0.0010 -0.0202 -0.0081  
Y 0.0389 -0.0313 0.0022 0.0076 -0.0071 -0.0145  
Z -0.0100 0.0155 -0.0032 -0.0196 -0.0112 0.0066

AT. 55 H X 0.0002 0.0011 0.0064 0.0090 -0.0255 0.0005  
Y 0.0297 0.0210 -0.0033 0.0005 -0.0045 -0.0119  
Z -0.0132 -0.0213 -0.0100 0.0266 -0.0057 0.0070

AT. 56 H X 0.0002 -0.0011 0.0064 -0.0090 -0.0255 0.0005  
Y 0.0297 -0.0210 -0.0033 -0.0005 -0.0045 -0.0119  
Z -0.0132 0.0213 -0.0100 -0.0266 -0.0057 0.0070

AT. 57 C X -0.0002 0.0101 0.0000 0.0142 -0.0253 -0.0036  
Y -0.0082 0.0030 -0.0066 0.0185 -0.0175 -0.0035

Z -0.0020 -0.0235 0.0076 0.0109 -0.0074 0.0062  
AT. 58 C X -0.0002 -0.0101 0.0000 -0.0142 -0.0253 -0.0036  
Y -0.0082 -0.0030 -0.0066 -0.0185 -0.0175 -0.0035  
Z -0.0020 0.0235 0.0076 -0.0109 -0.0074 0.0062  
AT. 59 H X -0.0073 0.0115 -0.0054 0.0223 -0.0258 -0.0031  
Y -0.0087 -0.0004 -0.0085 0.0219 -0.0143 -0.0031  
Z -0.0075 -0.0273 0.0007 0.0215 -0.0028 0.0073  
AT. 60 H X -0.0073 -0.0115 -0.0054 -0.0223 -0.0258 -0.0031  
Y -0.0087 0.0004 -0.0085 -0.0219 -0.0143 -0.0031  
Z -0.0075 0.0273 0.0007 -0.0215 -0.0028 0.0073  
AT. 61 H X -0.0002 0.0090 0.0030 0.0102 -0.0286 -0.0030  
Y -0.0074 0.0081 -0.0037 0.0133 -0.0222 -0.0043  
Z -0.0024 -0.0270 0.0084 0.0104 -0.0078 0.0071  
AT. 62 H X -0.0002 -0.0090 0.0030 -0.0102 -0.0286 -0.0030  
Y -0.0074 -0.0081 -0.0037 -0.0133 -0.0222 -0.0043  
Z -0.0024 0.0270 0.0084 -0.0104 -0.0078 0.0071  
AT. 63 H X 0.0019 0.0110 -0.0016 0.0159 -0.0217 -0.0046  
Y -0.0164 -0.0004 -0.0125 0.0281 -0.0163 -0.0012  
Z 0.0031 -0.0211 0.0142 0.0008 -0.0116 0.0051  
AT. 64 H X 0.0019 -0.0110 -0.0016 -0.0159 -0.0217 -0.0046  
Y -0.0164 0.0004 -0.0125 -0.0281 -0.0163 -0.0012  
Z 0.0031 0.0211 0.0142 -0.0008 -0.0116 0.0051  
AT. 65 C X 0.0197 0.0168 -0.0023 0.0080 -0.0215 -0.0058  
Y 0.0211 0.0010 -0.0065 0.0067 -0.0065 -0.0044  
Z -0.0018 0.0022 0.0007 0.0136 -0.0116 0.0007  
AT. 66 C X 0.0197 -0.0168 -0.0023 -0.0080 -0.0215 -0.0058  
Y 0.0211 -0.0010 -0.0065 -0.0067 -0.0065 -0.0044  
Z -0.0018 -0.0022 0.0007 -0.0136 -0.0116 0.0007  
AT. 67 H X 0.0227 0.0204 -0.0062 0.0095 -0.0229 -0.0061  
Y 0.0202 -0.0062 -0.0062 0.0122 -0.0048 -0.0026  
Z -0.0036 0.0059 0.0038 0.0071 -0.0118 -0.0007  
AT. 68 H X 0.0227 -0.0204 -0.0062 -0.0095 -0.0229 -0.0061

Y 0.0202 0.0062 -0.0062 -0.0122 -0.0048 -0.0026  
Z -0.0036 -0.0059 0.0038 -0.0071 -0.0118 -0.0007  
AT. 69 H X 0.0212 0.0167 -0.0013 0.0035 -0.0207 -0.0065  
Y 0.0229 0.0058 -0.0069 0.0017 -0.0070 -0.0058  
Z -0.0015 0.0094 -0.0018 0.0149 -0.0143 0.0002  
AT. 70 H X 0.0212 -0.0167 -0.0013 -0.0035 -0.0207 -0.0065  
Y 0.0229 -0.0058 -0.0069 -0.0017 -0.0070 -0.0058  
Z -0.0015 -0.0094 -0.0018 -0.0149 -0.0143 0.0002  
AT. 71 H X 0.0180 0.0172 -0.0029 0.0145 -0.0222 -0.0049  
Y 0.0235 -0.0032 -0.0081 0.0081 -0.0055 -0.0033  
Z 0.0000 -0.0032 -0.0020 0.0201 -0.0108 0.0028  
AT. 72 H X 0.0180 -0.0172 -0.0029 -0.0145 -0.0222 -0.0049  
Y 0.0235 0.0032 -0.0081 -0.0081 -0.0055 -0.0033  
Z 0.0000 0.0032 -0.0020 -0.0201 -0.0108 0.0028  
AT. 73 C X 0.0082 0.0113 -0.0016 0.0103 -0.0202 -0.0038  
Y 0.0051 -0.0001 -0.0072 0.0122 -0.0085 -0.0028  
Z -0.0014 -0.0111 0.0050 0.0114 -0.0086 0.0032  
AT. 74 C X 0.0082 -0.0113 -0.0016 -0.0103 -0.0202 -0.0038  
Y 0.0051 0.0001 -0.0072 -0.0122 -0.0085 -0.0028  
Z -0.0014 0.0111 0.0050 -0.0114 -0.0086 0.0032  
AT. 75 H X -0.0002 0.0086 -0.0063 0.0156 -0.0196 -0.0019  
Y 0.0069 -0.0037 -0.0097 0.0139 -0.0042 -0.0010  
Z -0.0049 -0.0178 -0.0019 0.0171 -0.0026 0.0069  
AT. 76 H X -0.0002 -0.0086 -0.0063 -0.0156 -0.0196 -0.0019  
Y 0.0069 0.0037 -0.0097 -0.0139 -0.0042 -0.0010  
Z -0.0049 0.0178 -0.0019 -0.0171 -0.0026 0.0069  
AT. 77 H X 0.0110 0.0125 -0.0050 0.0114 -0.0171 -0.0029  
Y -0.0016 -0.0056 -0.0125 0.0182 -0.0057 -0.0005  
Z 0.0022 -0.0072 0.0135 0.0042 -0.0136 0.0003  
AT. 78 H X 0.0110 -0.0125 -0.0050 -0.0114 -0.0171 -0.0029  
Y -0.0016 0.0056 -0.0125 -0.0182 -0.0057 -0.0005  
Z 0.0022 0.0072 0.0135 -0.0042 -0.0136 0.0003

AT. 79 I X 0.0015 -0.0076 -0.0005 -0.0061 -0.0011 0.0141  
Y 0.0004 -0.0099 -0.0082 -0.0075 -0.0018 0.0139  
Z -0.0072 0.0051 -0.0051 -0.0114 -0.0088 0.0091

AT. 80 I X 0.0015 0.0076 -0.0005 0.0061 -0.0011 0.0141  
Y 0.0004 0.0099 -0.0082 0.0075 -0.0018 0.0139  
Z -0.0072 -0.0051 -0.0051 0.0114 -0.0088 0.0091

AT. 81 I X -0.0100 -0.0001 -0.0101 0.0130 -0.0138 -0.0125  
Y 0.0054 -0.0035 0.0066 -0.0111 0.0030 0.0034  
Z -0.0080 -0.0015 -0.0055 0.0037 -0.0096 -0.0025

AT. 82 I X -0.0100 0.0001 -0.0101 -0.0130 -0.0138 -0.0125  
Y 0.0054 0.0035 0.0066 0.0111 0.0030 0.0034  
Z -0.0080 0.0015 -0.0055 -0.0037 -0.0096 -0.0025

AT. 83 O X -0.0047 -0.0104 0.0036 0.0121 -0.0019 -0.0287  
Y -0.0096 0.0624 0.0663 0.0774 0.0459 0.0398  
Z 0.0289 0.0246 0.0129 -0.0050 0.0204 -0.0009

AT. 84 O X -0.0047 0.0104 0.0036 -0.0121 -0.0019 -0.0287  
Y -0.0096 -0.0624 0.0663 -0.0774 0.0459 0.0398  
Z 0.0289 -0.0246 0.0129 0.0050 0.0204 -0.0009

AT. 85 O X -0.0150 -0.0029 -0.0129 -0.0030 -0.0098 0.0114  
Y 0.0595 0.0774 -0.0639 -0.0399 0.0364 -0.0422  
Z 0.0520 0.0532 -0.0322 -0.0308 0.0373 -0.0294

AT. 86 O X -0.0150 0.0029 -0.0129 0.0030 -0.0098 0.0114  
Y 0.0595 -0.0774 -0.0639 0.0399 0.0364 -0.0422  
Z 0.0520 -0.0532 -0.0322 0.0308 0.0373 -0.0294

AT. 87 N X 0.0111 0.0061 0.0243 0.0182 0.0172 -0.0327  
Y -0.0397 -0.0292 0.0054 0.0296 -0.0218 -0.0126  
Z 0.0202 0.0147 0.0008 -0.0093 0.0091 -0.0007

AT. 88 N X 0.0111 -0.0061 0.0243 -0.0182 0.0172 -0.0327  
Y -0.0397 0.0292 0.0054 -0.0296 -0.0218 -0.0126  
Z 0.0202 -0.0147 0.0008 0.0093 0.0091 -0.0007

AT. 89 N X 0.0149 0.0195 -0.0242 -0.0186 0.0057 0.0050  
Y -0.0262 -0.0139 -0.0149 0.0075 -0.0163 0.0000

Z -0.0039 -0.0105 -0.0009 0.0019 0.0004 0.0030  
AT. 90 N X 0.0149 -0.0195 -0.0242 0.0186 0.0057 0.0050  
Y -0.0262 0.0139 -0.0149 -0.0075 -0.0163 0.0000  
Z -0.0039 0.0105 -0.0009 -0.0019 0.0004 0.0030  
AT. 91 C X 0.0005 0.0003 0.0154 0.0188 0.0083 -0.0240  
Y -0.0199 0.0147 0.0308 0.0481 0.0125 0.0019  
Z 0.0231 0.0209 0.0048 -0.0066 0.0135 0.0016  
AT. 92 C X 0.0005 -0.0003 0.0154 -0.0188 0.0083 -0.0240  
Y -0.0199 -0.0147 0.0308 -0.0481 0.0125 0.0019  
Z 0.0231 -0.0209 0.0048 0.0066 0.0135 0.0016  
AT. 93 C X -0.0048 0.0058 0.0170 0.0255 0.0089 -0.0130  
Y -0.0099 0.0016 0.0102 0.0233 0.0053 -0.0093  
Z 0.0202 0.0223 -0.0046 -0.0082 0.0112 0.0082  
AT. 94 C X -0.0048 -0.0058 0.0170 -0.0255 0.0089 -0.0130  
Y -0.0099 -0.0016 0.0102 -0.0233 0.0053 -0.0093  
Z 0.0202 -0.0223 -0.0046 0.0082 0.0112 0.0082  
AT. 95 H X -0.0045 0.0194 0.0313 0.0456 0.0190 -0.0226  
Y -0.0132 -0.0104 0.0044 0.0107 -0.0037 -0.0023  
Z 0.0263 0.0297 -0.0103 -0.0079 0.0164 0.0067  
AT. 96 H X -0.0045 -0.0194 0.0313 -0.0456 0.0190 -0.0226  
Y -0.0132 0.0104 0.0044 -0.0107 -0.0037 -0.0023  
Z 0.0263 -0.0297 -0.0103 0.0079 0.0164 0.0067  
AT. 97 H X -0.0122 0.0060 0.0130 0.0271 0.0057 -0.0073  
Y 0.0020 0.0176 0.0123 0.0327 0.0191 -0.0148  
Z 0.0248 0.0257 -0.0029 -0.0062 0.0152 0.0053  
AT. 98 H X -0.0122 -0.0060 0.0130 -0.0271 0.0057 -0.0073  
Y 0.0020 -0.0176 0.0123 -0.0327 0.0191 -0.0148  
Z 0.0248 -0.0257 -0.0029 0.0062 0.0152 0.0053  
AT. 99 C X 0.0009 0.0130 -0.0236 -0.0081 -0.0017 0.0009  
Y 0.0200 0.0338 -0.0383 -0.0239 0.0137 -0.0129  
Z 0.0224 0.0164 -0.0137 -0.0168 0.0172 -0.0046  
AT. 100 C X 0.0009 -0.0130 -0.0236 0.0081 -0.0017 0.0009



Y 0.0200 -0.0338 -0.0383 0.0239 0.0137 -0.0129  
Z 0.0224 -0.0164 -0.0137 0.0168 0.0172 -0.0046  
AT. 101 C X 0.0084 0.0244 -0.0320 -0.0105 0.0046 -0.0109  
Y 0.0157 0.0271 -0.0253 -0.0294 0.0142 -0.0029  
Z 0.0118 0.0001 -0.0029 -0.0107 0.0073 0.0094  
AT. 102 C X 0.0084 -0.0244 -0.0320 0.0105 0.0046 -0.0109  
Y 0.0157 -0.0271 -0.0253 0.0294 0.0142 -0.0029  
Z 0.0118 -0.0001 -0.0029 0.0107 0.0073 0.0094  
AT. 103 H X 0.0140 0.0410 -0.0481 -0.0160 0.0101 -0.0148  
Y 0.0137 0.0208 -0.0185 -0.0270 0.0123 -0.0016  
Z 0.0046 -0.0165 0.0070 0.0009 -0.0033 0.0169  
AT. 104 H X 0.0140 -0.0410 -0.0481 0.0160 0.0101 -0.0148  
Y 0.0137 -0.0208 -0.0185 0.0270 0.0123 -0.0016  
Z 0.0046 0.0165 0.0070 -0.0009 -0.0033 0.0169  
AT. 105 H X 0.0146 0.0283 -0.0299 -0.0175 0.0120 -0.0130  
Y 0.0192 0.0407 -0.0346 -0.0385 0.0217 -0.0102  
Z 0.0143 0.0064 -0.0063 -0.0151 0.0113 0.0060  
AT. 106 H X 0.0146 -0.0283 -0.0299 0.0175 0.0120 -0.0130  
Y 0.0192 -0.0407 -0.0346 0.0385 0.0217 -0.0102  
Z 0.0143 -0.0064 -0.0063 0.0151 0.0113 0.0060  
AT. 107 C X 0.0128 0.0019 0.0285 0.0179 0.0172 -0.0431  
Y -0.0358 -0.0226 -0.0110 0.0101 -0.0265 0.0188  
Z 0.0245 0.0102 0.0016 -0.0186 0.0062 -0.0011  
AT. 108 C X 0.0128 -0.0019 0.0285 -0.0179 0.0172 -0.0431  
Y -0.0358 0.0226 -0.0110 -0.0101 -0.0265 0.0188  
Z 0.0245 -0.0102 0.0016 0.0186 0.0062 -0.0011  
AT. 109 H X 0.0180 0.0026 0.0447 0.0285 0.0241 -0.0700  
Y -0.0267 -0.0143 -0.0088 0.0084 -0.0210 0.0082  
Z 0.0374 0.0233 -0.0003 -0.0246 0.0127 -0.0109  
AT. 110 H X 0.0180 -0.0026 0.0447 -0.0285 0.0241 -0.0700  
Y -0.0267 0.0143 -0.0088 -0.0084 -0.0210 0.0082  
Z 0.0374 -0.0233 -0.0003 0.0246 0.0127 -0.0109

AT.111 H X 0.0132 0.0061 0.0294 0.0236 0.0207 -0.0487  
Y -0.0496 -0.0342 -0.0225 0.0054 -0.0377 0.0497  
Z 0.0269 0.0084 0.0031 -0.0236 0.0048 -0.0014

AT.112 H X 0.0132 -0.0061 0.0294 -0.0236 0.0207 -0.0487  
Y -0.0496 0.0342 -0.0225 -0.0054 -0.0377 0.0497  
Z 0.0269 -0.0084 0.0031 0.0236 0.0048 -0.0014

AT.113 C X 0.0099 -0.0055 0.0095 -0.0046 0.0050 -0.0097  
Y -0.0218 -0.0091 -0.0198 -0.0045 -0.0231 0.0193  
Z 0.0079 -0.0083 0.0037 -0.0123 -0.0031 0.0134

AT.114 C X 0.0099 0.0055 0.0095 0.0046 0.0050 -0.0097  
Y -0.0218 0.0091 -0.0198 0.0045 -0.0231 0.0193  
Z 0.0079 0.0083 0.0037 0.0123 -0.0031 0.0134

AT.115 C X 0.0122 0.0093 -0.0141 -0.0154 0.0041 0.0042  
Y -0.0309 -0.0163 -0.0250 -0.0032 -0.0272 0.0309  
Z -0.0099 -0.0270 0.0042 -0.0045 -0.0106 0.0288

AT.116 C X 0.0122 -0.0093 -0.0141 0.0154 0.0041 0.0042  
Y -0.0309 0.0163 -0.0250 0.0032 -0.0272 0.0309  
Z -0.0099 0.0270 0.0042 0.0045 -0.0106 0.0288

AT.117 H X 0.0226 0.0255 -0.0135 -0.0119 0.0156 -0.0207  
Y -0.0445 -0.0264 -0.0379 -0.0070 -0.0370 0.0595  
Z -0.0182 -0.0420 0.0066 -0.0067 -0.0209 0.0486

AT.118 H X 0.0226 -0.0255 -0.0135 0.0119 0.0156 -0.0207  
Y -0.0445 0.0264 -0.0379 0.0070 -0.0370 0.0595  
Z -0.0182 0.0420 0.0066 0.0067 -0.0209 0.0486

AT.119 H X -0.0020 -0.0091 -0.0209 -0.0231 -0.0123 0.0441  
Y -0.0266 -0.0120 -0.0291 -0.0105 -0.0298 0.0388  
Z -0.0217 -0.0410 0.0044 -0.0015 -0.0168 0.0427

AT.120 H X -0.0020 0.0091 -0.0209 0.0231 -0.0123 0.0441  
Y -0.0266 0.0120 -0.0291 0.0105 -0.0298 0.0388  
Z -0.0217 0.0410 0.0044 0.0015 -0.0168 0.0427

AT.121 C X 0.0146 0.0153 -0.0230 -0.0268 0.0052 0.0224  
Y -0.0276 -0.0227 0.0034 0.0226 -0.0184 -0.0248

Z -0.0020 -0.0018 -0.0043 0.0109 0.0031 -0.0191  
AT. 122 C X 0.0146 -0.0153 -0.0230 0.0268 0.0052 0.0224  
Y -0.0276 0.0227 0.0034 -0.0226 -0.0184 -0.0248  
Z -0.0020 0.0018 -0.0043 -0.0109 0.0031 -0.0191  
AT. 123 H X 0.0205 0.0238 -0.0363 -0.0484 0.0080 0.0579  
Y -0.0210 -0.0133 0.0024 0.0150 -0.0130 -0.0137  
Z -0.0079 -0.0099 -0.0059 0.0152 -0.0013 -0.0246  
AT. 124 H X 0.0205 -0.0238 -0.0363 0.0484 0.0080 0.0579  
Y -0.0210 0.0133 0.0024 -0.0150 -0.0130 -0.0137  
Z -0.0079 0.0099 -0.0059 -0.0152 -0.0013 -0.0246  
AT. 125 H X 0.0174 0.0243 -0.0305 -0.0272 0.0076 0.0190  
Y -0.0346 -0.0376 0.0149 0.0390 -0.0242 -0.0522  
Z -0.0025 0.0008 -0.0067 0.0189 0.0025 -0.0370  
AT. 126 H X 0.0174 -0.0243 -0.0305 0.0272 0.0076 0.0190  
Y -0.0346 0.0376 0.0149 -0.0390 -0.0242 -0.0522  
Z -0.0025 -0.0008 -0.0067 -0.0189 0.0025 -0.0370  
AT. 127 C X 0.0100 -0.0033 0.0008 -0.0132 0.0023 0.0050  
Y -0.0236 -0.0213 0.0128 0.0239 -0.0163 -0.0270  
Z 0.0078 0.0112 0.0001 0.0069 0.0096 -0.0114  
AT. 128 C X 0.0100 0.0033 0.0008 0.0132 0.0023 0.0050  
Y -0.0236 0.0213 0.0128 -0.0239 -0.0163 -0.0270  
Z 0.0078 -0.0112 0.0001 -0.0069 0.0096 -0.0114  
AT. 129 C X 0.0105 0.0005 0.0202 0.0099 0.0124 -0.0243  
Y -0.0337 -0.0328 0.0157 0.0349 -0.0190 -0.0420  
Z 0.0187 0.0238 0.0025 0.0006 0.0145 -0.0024  
AT. 130 C X 0.0105 -0.0005 0.0202 -0.0099 0.0124 -0.0243  
Y -0.0337 0.0328 0.0157 -0.0349 -0.0190 -0.0420  
Z 0.0187 -0.0238 0.0025 -0.0006 0.0145 -0.0024  
AT. 131 H X 0.0125 0.0094 0.0172 0.0097 0.0157 -0.0165  
Y -0.0420 -0.0448 0.0286 0.0530 -0.0190 -0.0718  
Z 0.0173 0.0304 0.0039 0.0082 0.0186 -0.0046  
AT. 132 H X 0.0125 -0.0094 0.0172 -0.0097 0.0157 -0.0165

Y -0.0420 0.0448 0.0286 -0.0530 -0.0190 -0.0718  
Z 0.0173 -0.0304 0.0039 -0.0082 0.0186 -0.0046  
AT. 133 H X 0.0064 -0.0133 0.0296 0.0174 0.0107 -0.0489  
Y -0.0287 -0.0304 0.0189 0.0334 -0.0169 -0.0454  
Z 0.0276 0.0335 0.0027 -0.0050 0.0182 0.0035  
AT. 134 H X 0.0064 0.0133 0.0296 -0.0174 0.0107 -0.0489  
Y -0.0287 0.0304 0.0189 -0.0334 -0.0169 -0.0454  
Z 0.0276 -0.0335 0.0027 0.0050 0.0182 0.0035  
AT. 135 C X 0.0070 -0.0187 0.0177 -0.0067 0.0004 -0.0044  
Y -0.0105 0.0054 -0.0407 -0.0276 -0.0248 0.0350  
Z 0.0103 -0.0208 0.0047 -0.0293 -0.0114 0.0310  
AT. 136 C X 0.0070 0.0187 0.0177 0.0067 0.0004 -0.0044  
Y -0.0105 -0.0054 -0.0407 0.0276 -0.0248 0.0350  
Z 0.0103 0.0208 0.0047 0.0293 -0.0114 0.0310  
AT. 137 H X 0.0049 -0.0320 0.0352 0.0003 -0.0010 -0.0106  
Y -0.0032 0.0082 -0.0320 -0.0271 -0.0226 0.0277  
Z 0.0233 -0.0108 0.0117 -0.0316 -0.0076 0.0216  
AT. 138 H X 0.0049 0.0320 0.0352 -0.0003 -0.0010 -0.0106  
Y -0.0032 -0.0082 -0.0320 0.0271 -0.0226 0.0277  
Z 0.0233 0.0108 0.0117 0.0316 -0.0076 0.0216  
AT. 139 H X 0.0089 -0.0103 0.0230 0.0056 0.0069 -0.0205  
Y -0.0191 0.0052 -0.0635 -0.0376 -0.0297 0.0551  
Z 0.0100 -0.0314 0.0035 -0.0426 -0.0185 0.0466  
AT. 140 H X 0.0089 0.0103 0.0230 -0.0056 0.0069 -0.0205  
Y -0.0191 -0.0052 -0.0635 0.0376 -0.0297 0.0551  
Z 0.0100 0.0314 0.0035 0.0426 -0.0185 0.0466  
AT. 141 H X 0.0053 -0.0242 -0.0004 -0.0292 -0.0087 0.0234  
Y -0.0001 0.0126 -0.0412 -0.0363 -0.0244 0.0357  
Z -0.0011 -0.0307 -0.0022 -0.0296 -0.0158 0.0420  
AT. 142 H X 0.0053 0.0242 -0.0004 0.0292 -0.0087 0.0234  
Y -0.0001 -0.0126 -0.0412 0.0363 -0.0244 0.0357  
Z -0.0011 0.0307 -0.0022 0.0296 -0.0158 0.0420

AT. 143 C X 0.0093 -0.0106 -0.0037 -0.0251 -0.0049 0.0195  
Y -0.0209 -0.0243 0.0392 0.0392 -0.0110 -0.0448  
Z 0.0085 0.0222 -0.0012 0.0186 0.0187 -0.0267

AT. 144 C X 0.0093 0.0106 -0.0037 0.0251 -0.0049 0.0195  
Y -0.0209 0.0243 0.0392 -0.0392 -0.0110 -0.0448  
Z 0.0085 -0.0222 -0.0012 -0.0186 0.0187 -0.0267

AT. 145 H X 0.0101 -0.0115 -0.0210 -0.0474 -0.0145 0.0455  
Y -0.0168 -0.0164 0.0333 0.0288 -0.0122 -0.0348  
Z 0.0041 0.0134 0.0005 0.0244 0.0178 -0.0309

AT. 146 H X 0.0101 0.0115 -0.0210 0.0474 -0.0145 0.0455  
Y -0.0168 0.0164 0.0333 -0.0288 -0.0122 -0.0348  
Z 0.0041 -0.0134 0.0005 -0.0244 0.0178 -0.0309

AT. 147 H X 0.0107 -0.0015 -0.0116 -0.0256 -0.0015 0.0185  
Y -0.0255 -0.0361 0.0597 0.0611 -0.0065 -0.0678  
Z 0.0079 0.0285 -0.0014 0.0296 0.0256 -0.0403

AT. 148 H X 0.0107 0.0015 -0.0116 0.0256 -0.0015 0.0185  
Y -0.0255 0.0361 0.0597 -0.0611 -0.0065 -0.0678  
Z 0.0079 -0.0285 -0.0014 -0.0296 0.0256 -0.0403

AT. 149 H X 0.0066 -0.0234 0.0180 -0.0116 -0.0049 0.0063  
Y -0.0190 -0.0224 0.0448 0.0401 -0.0098 -0.0465  
Z 0.0127 0.0315 -0.0018 0.0140 0.0205 -0.0239

AT. 150 H X 0.0066 0.0234 0.0180 0.0116 -0.0049 0.0063  
Y -0.0190 0.0224 0.0448 -0.0401 -0.0098 -0.0465  
Z 0.0127 -0.0315 -0.0018 -0.0140 0.0205 -0.0239

AT. 151 C X 0.0071 -0.0155 0.0077 -0.0134 -0.0023 0.0055  
Y -0.0131 -0.0054 -0.0029 0.0031 -0.0156 -0.0039  
Z 0.0091 0.0029 0.0019 -0.0035 0.0038 0.0010

AT. 152 C X 0.0071 0.0155 0.0077 0.0134 -0.0023 0.0055  
Y -0.0131 0.0054 -0.0029 -0.0031 -0.0156 -0.0039  
Z 0.0091 -0.0029 0.0019 0.0035 0.0038 0.0010

AT. 153 H X 0.0035 -0.0262 0.0194 -0.0056 -0.0032 -0.0045  
Y -0.0080 -0.0008 0.0007 0.0024 -0.0120 -0.0084

Z 0.0187 0.0151 0.0025 -0.0080 0.0100 -0.0020  
AT. 154 H X 0.0035 0.0262 0.0194 0.0056 -0.0032 -0.0045  
Y -0.0080 0.0008 0.0007 -0.0024 -0.0120 -0.0084  
Z 0.0187 -0.0151 0.0025 0.0080 0.0100 -0.0020  
AT. 155 H X 0.0063 -0.0191 -0.0012 -0.0266 -0.0086 0.0260  
Y -0.0046 0.0043 -0.0054 -0.0046 -0.0125 -0.0003  
Z -0.0001 -0.0087 0.0013 0.0001 -0.0018 0.0046  
AT. 156 H X 0.0063 0.0191 -0.0012 0.0266 -0.0086 0.0260  
Y -0.0046 -0.0043 -0.0054 0.0046 -0.0125 -0.0003  
Z -0.0001 0.0087 0.0013 -0.0001 -0.0018 0.0046  
AT. 157 O X -0.0138 0.0024 -0.0019 -0.0085 0.0389 -0.0139  
Y -0.0009 -0.0182 -0.0058 -0.0136 -0.0036 0.0047  
Z -0.0215 0.0050 -0.0076 -0.0256 0.0458 0.0026  
AT. 158 O X -0.0138 -0.0024 -0.0019 0.0085 0.0389 -0.0139  
Y -0.0009 0.0182 -0.0058 0.0136 -0.0036 0.0047  
Z -0.0215 -0.0050 -0.0076 0.0256 0.0458 0.0026  
AT. 159 O X -0.0110 0.0059 -0.0002 -0.0037 0.0286 -0.0112  
Y -0.0129 -0.0124 -0.0007 -0.0087 0.0103 -0.0119  
Z -0.0192 0.0117 -0.0043 -0.0172 0.0304 0.0052  
AT. 160 O X -0.0110 -0.0059 -0.0002 0.0037 0.0286 -0.0112  
Y -0.0129 0.0124 -0.0007 0.0087 0.0103 -0.0119  
Z -0.0192 -0.0117 -0.0043 0.0172 0.0304 0.0052  
AT. 161 H X -0.0035 -0.0044 -0.0055 -0.0039 0.0197 -0.0021  
Y -0.0010 -0.0179 -0.0065 -0.0184 -0.0002 0.0059  
Z -0.0188 0.0013 -0.0065 -0.0075 0.0275 0.0029  
AT. 162 H X -0.0035 0.0044 -0.0055 0.0039 0.0197 -0.0021  
Y -0.0010 0.0179 -0.0065 0.0184 -0.0002 0.0059  
Z -0.0188 -0.0013 -0.0065 0.0075 0.0275 0.0029  
AT. 163 H X -0.0100 0.0111 -0.0000 -0.0008 0.0206 -0.0065  
Y -0.0314 -0.0091 -0.0127 -0.0125 0.0256 -0.0109  
Z -0.0241 0.0112 -0.0077 -0.0195 0.0377 0.0043  
AT. 164 H X -0.0100 -0.0111 -0.0000 0.0008 0.0206 -0.0065

|              |     |         |         |         |         |         |         |
|--------------|-----|---------|---------|---------|---------|---------|---------|
|              | Y   | -0.0314 | 0.0091  | -0.0127 | 0.0125  | 0.0256  | -0.0109 |
|              | Z   | -0.0241 | -0.0112 | -0.0077 | 0.0195  | 0.0377  | 0.0043  |
| AT. 165      | O X | 0.0065  | 0.0311  | 0.0375  | 0.0398  | 0.0234  | 0.0357  |
|              | Y   | 0.0007  | 0.0218  | 0.0253  | 0.0352  | 0.0193  | -0.0226 |
|              | Z   | -0.0232 | 0.0236  | 0.0523  | 0.0149  | -0.0050 | -0.0400 |
| AT. 166      | O X | 0.0065  | -0.0311 | 0.0375  | -0.0398 | 0.0234  | 0.0357  |
|              | Y   | 0.0007  | -0.0218 | 0.0253  | -0.0352 | 0.0193  | -0.0226 |
|              | Z   | -0.0232 | -0.0236 | 0.0523  | -0.0149 | -0.0050 | -0.0400 |
| AT. 167      | H X | 0.0013  | 0.0144  | 0.0227  | 0.0262  | 0.0138  | 0.0153  |
|              | Y   | -0.0016 | 0.0491  | 0.0556  | 0.0609  | 0.0323  | -0.0017 |
|              | Z   | -0.0043 | 0.0283  | 0.0481  | 0.0122  | 0.0004  | -0.0190 |
| AT. 168      | H X | 0.0013  | -0.0144 | 0.0227  | -0.0262 | 0.0138  | 0.0153  |
|              | Y   | -0.0016 | -0.0491 | 0.0556  | -0.0609 | 0.0323  | -0.0017 |
|              | Z   | -0.0043 | -0.0283 | 0.0481  | -0.0122 | 0.0004  | -0.0190 |
| AT. 169      | O X | 0.0241  | 0.0695  | 0.0631  | 0.0484  | 0.0359  | 0.0866  |
|              | Y   | 0.0331  | -0.0048 | 0.0020  | 0.0433  | 0.0295  | -0.0128 |
|              | Z   | -0.0263 | 0.0370  | 0.0618  | 0.0148  | -0.0046 | -0.0315 |
| AT. 170      | O X | 0.0241  | -0.0695 | 0.0631  | -0.0484 | 0.0359  | 0.0866  |
|              | Y   | 0.0331  | 0.0048  | 0.0020  | -0.0433 | 0.0295  | -0.0128 |
|              | Z   | -0.0263 | -0.0370 | 0.0618  | -0.0148 | -0.0046 | -0.0315 |
| AT. 171      | H X | 0.0076  | 0.0352  | 0.0240  | 0.0275  | 0.0160  | 0.0531  |
|              | Y   | 0.0361  | -0.0376 | -0.0306 | 0.0355  | 0.0237  | -0.0324 |
|              | Z   | -0.0096 | 0.0066  | 0.0363  | 0.0163  | -0.0006 | -0.0402 |
| AT. 172      | H X | 0.0076  | -0.0352 | 0.0240  | -0.0275 | 0.0160  | 0.0531  |
|              | Y   | 0.0361  | 0.0376  | -0.0306 | -0.0355 | 0.0237  | -0.0324 |
|              | Z   | -0.0096 | -0.0066 | 0.0363  | -0.0163 | -0.0006 | -0.0402 |
| FREQ(CM**-1) |     | 91.67   | 94.62   | 98.94   | 100.23  | 104.13  | 105.58  |
| AT. 11       | I X | 0.0119  | 0.0041  | 0.0154  | -0.0199 | -0.0028 | -0.0069 |
|              | Y   | -0.0040 | 0.0093  | -0.0026 | 0.0058  | -0.0148 | -0.0111 |
|              | Z   | 0.0081  | -0.0021 | 0.0036  | -0.0090 | 0.0162  | 0.0153  |

AT. 2 I X -0.0119 -0.0041 -0.0154 -0.0199 0.0028 -0.0069  
Y 0.0040 -0.0093 0.0026 0.0058 0.0148 -0.0111  
Z -0.0081 0.0021 -0.0036 -0.0090 -0.0162 0.0153

AT. 3 I X 0.0175 -0.0066 -0.0166 0.0091 0.0032 -0.0104  
Y 0.0112 -0.0023 -0.0026 0.0008 -0.0013 -0.0043  
Z -0.0085 0.0009 0.0026 -0.0017 0.0000 0.0019

AT. 4 I X -0.0175 0.0066 0.0166 0.0091 -0.0032 -0.0104  
Y -0.0112 0.0023 0.0026 0.0008 0.0013 -0.0043  
Z 0.0085 -0.0009 -0.0026 -0.0017 -0.0000 0.0019

AT. 5 O X 0.0138 -0.0088 0.0018 -0.0098 -0.0262 -0.0153  
Y -0.0074 -0.0129 -0.0180 0.0157 -0.0117 0.0020  
Z 0.0347 -0.0117 0.0013 -0.0010 -0.0147 -0.0228

AT. 6 O X -0.0138 0.0088 -0.0018 -0.0098 0.0262 -0.0153  
Y 0.0074 0.0129 0.0180 0.0157 0.0117 0.0020  
Z -0.0347 0.0117 -0.0013 -0.0010 0.0147 -0.0228

AT. 7 O X 0.0352 0.0029 0.0029 -0.0127 0.0114 -0.0032  
Y 0.0700 0.0072 0.0012 -0.0342 0.0321 -0.0149  
Z 0.0404 0.0038 0.0006 -0.0240 0.0210 -0.0112

AT. 8 O X -0.0352 -0.0029 -0.0029 -0.0127 -0.0114 -0.0032  
Y -0.0700 -0.0072 -0.0012 -0.0342 -0.0321 -0.0149  
Z -0.0404 -0.0038 -0.0006 -0.0240 -0.0210 -0.0112

AT. 9 N X -0.0311 -0.0032 -0.0089 0.0110 -0.0137 0.0033  
Y -0.0259 0.0246 0.0279 -0.0290 0.0232 0.0297  
Z 0.0224 -0.0134 -0.0072 0.0106 -0.0120 -0.0176

AT. 10 N X 0.0311 0.0032 0.0089 0.0110 0.0137 0.0033  
Y 0.0259 -0.0246 -0.0279 -0.0290 -0.0232 0.0297  
Z -0.0224 0.0134 0.0072 0.0106 0.0120 -0.0176

AT. 11 N X -0.0208 0.0104 0.0149 -0.0116 0.0031 0.0150  
Y -0.0155 0.0077 -0.0001 -0.0061 0.0091 0.0099  
Z -0.0107 0.0007 -0.0061 0.0030 0.0056 0.0009

AT. 12 N X 0.0208 -0.0104 -0.0149 -0.0116 -0.0031 0.0150  
Y 0.0155 -0.0077 0.0001 -0.0061 -0.0091 0.0099



Z 0.0107 -0.0007 0.0061 0.0030 -0.0056 0.0009  
AT. 13 C X -0.0001 -0.0017 0.0036 -0.0080 -0.0144 -0.0061  
Y -0.0117 0.0079 0.0079 -0.0100 0.0083 0.0134  
Z 0.0230 -0.0166 -0.0116 0.0151 -0.0148 -0.0199  
AT. 14 C X 0.0001 0.0017 -0.0036 -0.0080 0.0144 -0.0061  
Y 0.0117 -0.0079 -0.0079 -0.0100 -0.0083 0.0134  
Z -0.0230 0.0166 0.0116 0.0151 0.0148 -0.0199  
AT. 15 C X 0.0100 0.0067 0.0150 -0.0205 -0.0107 -0.0102  
Y -0.0058 0.0109 0.0076 -0.0072 0.0086 0.0071  
Z 0.0101 -0.0265 -0.0342 0.0422 -0.0160 -0.0180  
AT. 16 C X -0.0100 -0.0067 -0.0150 -0.0205 0.0107 -0.0102  
Y 0.0058 -0.0109 -0.0076 -0.0072 -0.0086 0.0071  
Z -0.0101 0.0265 0.0342 0.0422 0.0160 -0.0180  
AT. 17 H X 0.0068 0.0134 0.0189 -0.0262 -0.0041 -0.0021  
Y -0.0039 0.0217 0.0250 -0.0295 0.0162 0.0162  
Z 0.0069 -0.0376 -0.0545 0.0678 -0.0232 -0.0267  
AT. 18 H X -0.0068 -0.0134 -0.0189 -0.0262 0.0041 -0.0021  
Y 0.0039 -0.0217 -0.0250 -0.0295 -0.0162 0.0162  
Z -0.0069 0.0376 0.0545 0.0678 0.0232 -0.0267  
AT. 19 H X 0.0181 0.0061 0.0158 -0.0200 -0.0216 -0.0227  
Y -0.0100 -0.0052 -0.0186 0.0274 -0.0038 -0.0061  
Z 0.0107 -0.0331 -0.0442 0.0559 -0.0243 -0.0269  
AT. 20 H X -0.0181 -0.0061 -0.0158 -0.0200 0.0216 -0.0227  
Y 0.0100 0.0052 0.0186 0.0274 0.0038 -0.0061  
Z -0.0107 0.0331 0.0442 0.0559 0.0243 -0.0269  
AT. 21 C X 0.0077 0.0021 0.0018 -0.0045 0.0028 0.0023  
Y 0.0302 0.0042 -0.0033 -0.0162 0.0186 -0.0077  
Z 0.0124 -0.0008 -0.0079 -0.0030 0.0106 -0.0074  
AT. 22 C X -0.0077 -0.0021 -0.0018 -0.0045 -0.0028 0.0023  
Y -0.0302 -0.0042 0.0033 -0.0162 -0.0186 -0.0077  
Z -0.0124 0.0008 0.0079 -0.0030 -0.0106 -0.0074  
AT. 23 C X 0.0010 -0.0037 -0.0060 0.0095 -0.0048 -0.0008

Y 0.0334 0.0017 -0.0050 -0.0165 0.0148 -0.0123  
Z 0.0024 -0.0054 -0.0141 0.0117 0.0029 -0.0079  
AT. 24 C X -0.0010 0.0037 0.0060 0.0095 0.0048 -0.0008  
Y -0.0334 -0.0017 0.0050 -0.0165 -0.0148 -0.0123  
Z -0.0024 0.0054 0.0141 0.0117 -0.0029 -0.0079  
AT. 25 H X -0.0078 -0.0063 -0.0059 0.0177 -0.0127 0.0010  
Y 0.0349 0.0017 -0.0045 -0.0180 0.0147 -0.0128  
Z -0.0136 -0.0075 -0.0161 0.0282 -0.0033 -0.0038  
AT. 26 H X 0.0078 0.0063 0.0059 0.0177 0.0127 0.0010  
Y -0.0349 -0.0017 0.0045 -0.0180 -0.0147 -0.0128  
Z 0.0136 0.0075 0.0161 0.0282 0.0033 -0.0038  
AT. 27 H X -0.0007 -0.0031 -0.0046 0.0100 -0.0056 0.0006  
Y 0.0521 0.0046 -0.0001 -0.0331 0.0180 -0.0123  
Z 0.0121 -0.0039 -0.0117 0.0031 0.0049 -0.0083  
AT. 28 H X 0.0007 0.0031 0.0046 0.0100 0.0056 0.0006  
Y -0.0521 -0.0046 0.0001 -0.0331 -0.0180 -0.0123  
Z -0.0121 0.0039 0.0117 0.0031 -0.0049 -0.0083  
AT. 29 C X -0.0406 -0.0166 -0.0308 0.0370 -0.0291 -0.0062  
Y -0.0317 0.0076 0.0006 0.0006 0.0038 0.0177  
Z 0.0337 -0.0103 0.0001 -0.0015 -0.0101 -0.0161  
AT. 30 C X 0.0406 0.0166 0.0308 0.0370 0.0291 -0.0062  
Y 0.0317 -0.0076 -0.0006 0.0006 -0.0038 0.0177  
Z -0.0337 0.0103 -0.0001 -0.0015 0.0101 -0.0161  
AT. 31 H X -0.0508 -0.0300 -0.0542 0.0645 -0.0438 -0.0159  
Y -0.0091 0.0138 0.0186 -0.0212 0.0116 0.0175  
Z 0.0602 -0.0091 0.0122 -0.0167 -0.0073 -0.0219  
AT. 32 H X 0.0508 0.0300 0.0542 0.0645 0.0438 -0.0159  
Y 0.0091 -0.0138 -0.0186 -0.0212 -0.0116 0.0175  
Z -0.0602 0.0091 -0.0122 -0.0167 0.0073 -0.0219  
AT. 33 H X -0.0531 -0.0213 -0.0443 0.0499 -0.0354 -0.0054  
Y -0.0638 -0.0025 -0.0265 0.0335 -0.0102 0.0156  
Z 0.0394 -0.0090 0.0029 -0.0075 -0.0081 -0.0146

AT. 34 H X 0.0531 0.0213 0.0443 0.0499 0.0354 -0.0054  
Y 0.0638 0.0025 0.0265 0.0335 0.0102 0.0156  
Z -0.0394 0.0090 -0.0029 -0.0075 0.0081 -0.0146

AT. 35 C X -0.0244 -0.0062 -0.0075 0.0138 -0.0165 -0.0030  
Y -0.0169 -0.0036 -0.0115 0.0108 -0.0088 0.0044  
Z 0.0031 -0.0111 -0.0134 0.0144 -0.0122 -0.0076

AT. 36 C X 0.0244 0.0062 0.0075 0.0138 0.0165 -0.0030  
Y 0.0169 0.0036 0.0115 0.0108 0.0088 0.0044  
Z -0.0031 0.0111 0.0134 0.0144 0.0122 -0.0076

AT. 37 C X -0.0280 0.0023 0.0027 0.0033 -0.0075 0.0085  
Y -0.0325 -0.0053 -0.0209 0.0218 -0.0098 0.0042  
Z -0.0256 -0.0080 -0.0218 0.0255 -0.0085 0.0014

AT. 38 C X 0.0280 -0.0023 -0.0027 0.0033 0.0075 0.0085  
Y 0.0325 0.0053 0.0209 0.0218 0.0098 0.0042  
Z 0.0256 0.0080 0.0218 0.0255 0.0085 0.0014

AT. 39 H X -0.0560 -0.0037 -0.0158 0.0290 -0.0176 0.0116  
Y -0.0493 -0.0067 -0.0313 0.0335 -0.0108 0.0049  
Z -0.0378 -0.0114 -0.0297 0.0380 -0.0149 0.0033

AT. 40 H X 0.0560 0.0037 0.0158 0.0290 0.0176 0.0116  
Y 0.0493 0.0067 0.0313 0.0335 0.0108 0.0049  
Z 0.0378 0.0114 0.0297 0.0380 0.0149 0.0033

AT. 41 H X -0.0008 0.0089 0.0228 -0.0233 0.0041 0.0067  
Y -0.0393 -0.0163 -0.0349 0.0405 -0.0244 -0.0021  
Z -0.0478 -0.0064 -0.0314 0.0383 -0.0089 0.0079

AT. 42 H X 0.0008 -0.0089 -0.0228 -0.0233 -0.0041 0.0067  
Y 0.0393 0.0163 0.0349 0.0405 0.0244 -0.0021  
Z 0.0478 0.0064 0.0314 0.0383 0.0089 0.0079

AT. 43 C X -0.0145 0.0212 0.0384 -0.0336 0.0137 0.0204  
Y -0.0088 0.0146 0.0172 -0.0200 0.0124 0.0172  
Z -0.0055 0.0076 0.0083 -0.0118 0.0144 0.0015

AT. 44 C X 0.0145 -0.0212 -0.0384 -0.0336 -0.0137 0.0204  
Y 0.0088 -0.0146 -0.0172 -0.0200 -0.0124 0.0172

Z 0.0055 -0.0076 -0.0083 -0.0118 -0.0144 0.0015  
AT. 45 H X -0.0094 0.0325 0.0628 -0.0566 0.0254 0.0279  
Y -0.0062 0.0031 -0.0009 0.0005 -0.0023 0.0076  
Z -0.0111 0.0102 0.0077 -0.0144 0.0200 0.0050  
AT. 46 H X 0.0094 -0.0325 -0.0628 -0.0566 -0.0254 0.0279  
Y 0.0062 -0.0031 0.0009 0.0005 0.0023 0.0076  
Z 0.0111 -0.0102 -0.0077 -0.0144 -0.0200 0.0050  
AT. 47 H X -0.0151 0.0264 0.0456 -0.0423 0.0193 0.0271  
Y -0.0072 0.0276 0.0382 -0.0436 0.0280 0.0273  
Z -0.0033 0.0141 0.0205 -0.0248 0.0228 0.0030  
AT. 48 H X 0.0151 -0.0264 -0.0456 -0.0423 -0.0193 0.0271  
Y 0.0072 -0.0276 -0.0382 -0.0436 -0.0280 0.0273  
Z 0.0033 -0.0141 -0.0205 -0.0248 -0.0228 0.0030  
AT. 49 C X -0.0139 0.0087 0.0197 -0.0129 0.0005 0.0067  
Y -0.0014 0.0154 0.0236 -0.0242 0.0109 0.0190  
Z 0.0041 -0.0033 -0.0008 0.0032 0.0005 -0.0082  
AT. 50 C X 0.0139 -0.0087 -0.0197 -0.0129 -0.0005 0.0067  
Y 0.0014 -0.0154 -0.0236 -0.0242 -0.0109 0.0190  
Z -0.0041 0.0033 0.0008 0.0032 -0.0005 -0.0082  
AT. 51 C X -0.0239 0.0001 0.0003 0.0046 -0.0092 0.0032  
Y -0.0059 0.0354 0.0521 -0.0552 0.0329 0.0333  
Z 0.0166 -0.0164 -0.0130 0.0199 -0.0132 -0.0192  
AT. 52 C X 0.0239 -0.0001 -0.0003 0.0046 0.0092 0.0032  
Y 0.0059 -0.0354 -0.0521 -0.0552 -0.0329 0.0333  
Z -0.0166 0.0164 0.0130 0.0199 0.0132 -0.0192  
AT. 53 H X -0.0215 0.0147 0.0232 -0.0215 0.0045 0.0125  
Y -0.0050 0.0551 0.0825 -0.0880 0.0531 0.0460  
Z 0.0124 -0.0201 -0.0197 0.0298 -0.0145 -0.0209  
AT. 54 H X 0.0215 -0.0147 -0.0232 -0.0215 -0.0045 0.0125  
Y 0.0050 -0.0551 -0.0825 -0.0880 -0.0531 0.0460  
Z -0.0124 0.0201 0.0197 0.0298 0.0145 -0.0209  
AT. 55 H X -0.0271 -0.0209 -0.0308 0.0406 -0.0284 -0.0096

Y 0.0046 0.0395 0.0620 -0.0662 0.0356 0.0336  
Z 0.0271 -0.0252 -0.0215 0.0304 -0.0227 -0.0272  
AT. 56 H X 0.0271 0.0209 0.0308 0.0406 0.0284 -0.0096  
Y -0.0046 -0.0395 -0.0620 -0.0662 -0.0356 0.0336  
Z -0.0271 0.0252 0.0215 0.0304 0.0227 -0.0272  
AT. 57 C X -0.0202 -0.0126 -0.0150 0.0212 -0.0234 -0.0124  
Y -0.0109 -0.0160 -0.0281 0.0263 -0.0242 -0.0084  
Z 0.0044 -0.0173 -0.0238 0.0234 -0.0222 -0.0089  
AT. 58 C X 0.0202 0.0126 0.0150 0.0212 0.0234 -0.0124  
Y 0.0109 0.0160 0.0281 0.0263 0.0242 -0.0084  
Z -0.0044 0.0173 0.0238 0.0234 0.0222 -0.0089  
AT. 59 H X -0.0162 -0.0196 -0.0227 0.0294 -0.0312 -0.0218  
Y -0.0022 -0.0173 -0.0274 0.0263 -0.0274 -0.0108  
Z 0.0201 -0.0240 -0.0279 0.0288 -0.0322 -0.0191  
AT. 60 H X 0.0162 0.0196 0.0227 0.0294 0.0312 -0.0218  
Y 0.0022 0.0173 0.0274 0.0263 0.0274 -0.0108  
Z -0.0201 0.0240 0.0279 0.0288 0.0322 -0.0191  
AT. 61 H X -0.0292 -0.0152 -0.0224 0.0271 -0.0267 -0.0102  
Y -0.0233 -0.0140 -0.0286 0.0261 -0.0195 -0.0050  
Z 0.0037 -0.0205 -0.0294 0.0283 -0.0273 -0.0091  
AT. 62 H X 0.0292 0.0152 0.0224 0.0271 0.0267 -0.0102  
Y 0.0233 0.0140 0.0286 0.0261 0.0195 -0.0050  
Z -0.0037 0.0205 0.0294 0.0283 0.0273 -0.0091  
AT. 63 H X -0.0122 -0.0085 -0.0052 0.0132 -0.0181 -0.0122  
Y -0.0024 -0.0264 -0.0406 0.0385 -0.0383 -0.0190  
Z -0.0103 -0.0122 -0.0218 0.0201 -0.0148 0.0002  
AT. 64 H X 0.0122 0.0085 0.0052 0.0132 0.0181 -0.0122  
Y 0.0024 0.0264 0.0406 0.0385 0.0383 -0.0190  
Z 0.0103 0.0122 0.0218 0.0201 0.0148 0.0002  
AT. 65 C X -0.0058 0.0128 0.0337 -0.0226 0.0063 0.0065  
Y 0.0095 0.0140 0.0293 -0.0274 0.0076 0.0206  
Z 0.0054 0.0007 0.0075 -0.0028 0.0072 -0.0094

AT. 66 C X 0.0058 -0.0128 -0.0337 -0.0226 -0.0063 0.0065  
Y -0.0095 -0.0140 -0.0293 -0.0274 -0.0076 0.0206  
Z -0.0054 -0.0007 -0.0075 -0.0028 -0.0072 -0.0094

AT. 67 H X -0.0000 0.0181 0.0467 -0.0322 0.0127 0.0075  
Y 0.0138 0.0039 0.0187 -0.0181 -0.0041 0.0180  
Z -0.0037 0.0056 0.0062 -0.0031 0.0127 -0.0078

AT. 68 H X 0.0000 -0.0181 -0.0467 -0.0322 -0.0127 0.0075  
Y -0.0138 -0.0039 -0.0187 -0.0181 0.0041 0.0180  
Z 0.0037 -0.0056 -0.0062 -0.0031 -0.0127 -0.0078

AT. 69 H X -0.0074 0.0178 0.0380 -0.0268 0.0104 0.0092  
Y 0.0079 0.0239 0.0407 -0.0374 0.0181 0.0236  
Z 0.0061 0.0063 0.0168 -0.0102 0.0149 -0.0097

AT. 70 H X 0.0074 -0.0178 -0.0380 -0.0268 -0.0104 0.0092  
Y -0.0079 -0.0239 -0.0407 -0.0374 -0.0181 0.0236  
Z -0.0061 -0.0063 -0.0168 -0.0102 -0.0149 -0.0097

AT. 71 H X -0.0033 0.0062 0.0283 -0.0175 0.0009 0.0029  
Y 0.0151 0.0129 0.0322 -0.0288 0.0054 0.0216  
Z 0.0147 -0.0058 0.0071 -0.0006 0.0000 -0.0108

AT. 72 H X 0.0033 -0.0062 -0.0283 -0.0175 -0.0009 0.0029  
Y -0.0151 -0.0129 -0.0322 -0.0288 -0.0054 0.0216  
Z -0.0147 0.0058 -0.0071 -0.0006 -0.0000 -0.0108

AT. 73 C X -0.0103 -0.0009 0.0066 0.0006 -0.0092 -0.0038  
Y 0.0031 -0.0013 -0.0003 -0.0004 -0.0080 0.0048  
Z 0.0040 -0.0083 -0.0085 0.0101 -0.0071 -0.0082

AT. 74 C X 0.0103 0.0009 -0.0066 0.0006 0.0092 -0.0038  
Y -0.0031 0.0013 0.0003 -0.0004 0.0080 0.0048  
Z -0.0040 0.0083 0.0085 0.0101 0.0071 -0.0082

AT. 75 H X -0.0054 -0.0099 -0.0057 0.0124 -0.0187 -0.0141  
Y 0.0125 -0.0007 0.0039 -0.0041 -0.0086 0.0044  
Z 0.0199 -0.0137 -0.0115 0.0135 -0.0145 -0.0159

AT. 76 H X 0.0054 0.0099 0.0057 0.0124 0.0187 -0.0141  
Y -0.0125 0.0007 -0.0039 -0.0041 0.0086 0.0044

Z -0.0199 0.0137 0.0115 0.0135 0.0145 -0.0159  
AT. 77 H X -0.0021 0.0051 0.0175 -0.0099 -0.0031 -0.0014  
Y 0.0115 -0.0123 -0.0133 0.0121 -0.0206 -0.0051  
Z -0.0116 -0.0034 -0.0065 0.0083 -0.0008 -0.0013  
AT. 78 H X 0.0021 -0.0051 -0.0175 -0.0099 0.0031 -0.0014  
Y -0.0115 0.0123 0.0133 0.0121 0.0206 -0.0051  
Z 0.0116 0.0034 0.0065 0.0083 0.0008 -0.0013  
AT. 79 I X 0.0006 -0.0083 0.0043 0.0019 -0.0034 -0.0068  
Y 0.0041 -0.0085 0.0054 -0.0011 0.0020 0.0043  
Z -0.0018 0.0026 0.0019 -0.0049 0.0050 0.0120  
AT. 80 I X -0.0006 0.0083 -0.0043 0.0019 0.0034 -0.0068  
Y -0.0041 0.0085 -0.0054 -0.0011 -0.0020 0.0043  
Z 0.0018 -0.0026 -0.0019 -0.0049 -0.0050 0.0120  
AT. 81 I X -0.0035 0.0008 -0.0016 -0.0021 -0.0012 0.0059  
Y 0.0010 0.0027 -0.0016 0.0016 -0.0003 -0.0013  
Z -0.0021 -0.0042 0.0039 -0.0018 0.0003 0.0015  
AT. 82 I X 0.0035 -0.0008 0.0016 -0.0021 0.0012 0.0059  
Y -0.0010 -0.0027 0.0016 0.0016 0.0003 -0.0013  
Z 0.0021 0.0042 -0.0039 -0.0018 -0.0003 0.0015  
AT. 83 O X -0.0013 0.0198 -0.0098 0.0020 -0.0025 -0.0097  
Y -0.0187 -0.0333 0.0055 -0.0093 -0.0020 0.0037  
Z 0.0075 0.0037 -0.0071 0.0009 -0.0058 -0.0068  
AT. 84 O X 0.0013 -0.0198 0.0098 0.0020 0.0025 -0.0097  
Y 0.0187 0.0333 -0.0055 -0.0093 0.0020 0.0037  
Z -0.0075 -0.0037 0.0071 0.0009 0.0058 -0.0068  
AT. 85 O X -0.0015 -0.0149 0.0106 0.0018 0.0080 0.0004  
Y 0.0371 0.0012 -0.0274 0.0230 -0.0086 -0.0158  
Z 0.0323 0.0253 -0.0359 0.0190 -0.0074 -0.0058  
AT. 86 O X 0.0015 0.0149 -0.0106 0.0018 -0.0080 0.0004  
Y -0.0371 -0.0012 0.0274 0.0230 0.0086 -0.0158  
Z -0.0323 -0.0253 0.0359 0.0190 0.0074 -0.0058  
AT. 87 N X -0.0006 0.0291 -0.0116 -0.0023 -0.0020 -0.0042

Y -0.0175 0.0050 0.0046 -0.0053 0.0033 0.0107  
Z 0.0075 0.0004 -0.0070 0.0034 -0.0062 -0.0101  
AT. 88 N X 0.0006 -0.0291 0.0116 -0.0023 0.0020 -0.0042  
Y 0.0175 -0.0050 -0.0046 -0.0053 -0.0033 0.0107  
Z -0.0075 -0.0004 0.0070 0.0034 0.0062 -0.0101  
AT. 89 N X 0.0088 -0.0131 0.0021 0.0072 -0.0034 -0.0084  
Y -0.0071 -0.0114 0.0066 0.0007 0.0039 0.0040  
Z 0.0003 0.0154 -0.0132 0.0029 -0.0041 0.0070  
AT. 90 N X -0.0088 0.0131 -0.0021 0.0072 0.0034 -0.0084  
Y 0.0071 0.0114 -0.0066 0.0007 -0.0039 0.0040  
Z -0.0003 -0.0154 0.0132 0.0029 0.0041 0.0070  
AT. 91 C X -0.0025 0.0178 -0.0090 0.0002 -0.0030 -0.0083  
Y -0.0139 -0.0043 0.0006 -0.0066 0.0015 0.0065  
Z 0.0079 -0.0007 -0.0073 0.0030 -0.0063 -0.0102  
AT. 92 C X 0.0025 -0.0178 0.0090 0.0002 0.0030 -0.0083  
Y 0.0139 0.0043 -0.0006 -0.0066 -0.0015 0.0065  
Z -0.0079 0.0007 0.0073 0.0030 0.0063 -0.0102  
AT. 93 C X -0.0055 0.0071 -0.0062 0.0002 -0.0033 -0.0086  
Y -0.0033 0.0060 -0.0035 -0.0034 0.0021 0.0033  
Z 0.0090 -0.0084 -0.0066 0.0047 -0.0061 -0.0131  
AT. 94 C X 0.0055 -0.0071 0.0062 0.0002 0.0033 -0.0086  
Y 0.0033 -0.0060 0.0035 -0.0034 -0.0021 0.0033  
Z -0.0090 0.0084 0.0066 0.0047 0.0061 -0.0131  
AT. 95 H X -0.0084 0.0095 -0.0116 0.0001 -0.0057 -0.0132  
Y -0.0040 0.0064 0.0019 -0.0055 0.0050 0.0113  
Z 0.0135 -0.0124 -0.0105 0.0085 -0.0087 -0.0225  
AT. 96 H X 0.0084 -0.0095 0.0116 0.0001 0.0057 -0.0132  
Y 0.0040 -0.0064 -0.0019 -0.0055 -0.0050 0.0113  
Z -0.0135 0.0124 0.0105 0.0085 0.0087 -0.0225  
AT. 97 H X -0.0080 0.0020 -0.0034 -0.0008 -0.0010 -0.0051  
Y 0.0019 0.0014 -0.0109 0.0018 -0.0038 -0.0126  
Z 0.0107 -0.0079 -0.0090 0.0061 -0.0079 -0.0176



AT. 98 H X 0.0080 -0.0020 0.0034 -0.0008 0.0010 -0.0051  
Y -0.0019 -0.0014 0.0109 0.0018 0.0038 -0.0126  
Z -0.0107 0.0079 0.0090 0.0061 0.0079 -0.0176

AT. 99 C X 0.0052 -0.0113 0.0023 0.0053 0.0020 -0.0028  
Y 0.0171 -0.0092 -0.0076 0.0131 -0.0004 -0.0083  
Z 0.0141 0.0159 -0.0207 0.0104 -0.0063 -0.0006

AT. 100 C X -0.0052 0.0113 -0.0023 0.0053 -0.0020 -0.0028  
Y -0.0171 0.0092 0.0076 0.0131 0.0004 -0.0083  
Z -0.0141 -0.0159 0.0207 0.0104 0.0063 -0.0006

AT. 101 C X 0.0118 -0.0054 -0.0058 0.0087 0.0016 -0.0027  
Y 0.0161 -0.0125 -0.0006 0.0110 0.0059 -0.0094  
Z 0.0041 0.0082 -0.0098 0.0054 -0.0067 -0.0002

AT. 102 C X -0.0118 0.0054 0.0058 0.0087 -0.0016 -0.0027  
Y -0.0161 0.0125 0.0006 0.0110 -0.0059 -0.0094  
Z -0.0041 -0.0082 0.0098 0.0054 0.0067 -0.0002

AT. 103 H X 0.0184 -0.0119 -0.0075 0.0133 0.0023 -0.0059  
Y 0.0136 -0.0097 -0.0002 0.0091 0.0057 -0.0080  
Z -0.0068 0.0094 -0.0067 0.0011 -0.0119 0.0036

AT. 104 H X -0.0184 0.0119 0.0075 0.0133 -0.0023 -0.0059  
Y -0.0136 0.0097 0.0002 0.0091 -0.0057 -0.0080  
Z 0.0068 -0.0094 0.0067 0.0011 0.0119 0.0036

AT. 105 H X 0.0168 0.0021 -0.0132 0.0113 0.0008 -0.0029  
Y 0.0252 -0.0164 -0.0006 0.0130 0.0112 -0.0125  
Z 0.0084 0.0080 -0.0112 0.0067 -0.0048 -0.0014

AT. 106 H X -0.0168 -0.0021 0.0132 0.0113 -0.0008 -0.0029  
Y -0.0252 0.0164 0.0006 0.0130 -0.0112 -0.0125  
Z -0.0084 -0.0080 0.0112 0.0067 0.0048 -0.0014

AT. 107 C X -0.0005 0.0415 -0.0138 -0.0048 -0.0012 -0.0004  
Y -0.0153 -0.0269 0.0161 -0.0002 0.0002 0.0023  
Z 0.0079 0.0045 -0.0045 0.0016 -0.0068 -0.0081

AT. 108 C X 0.0005 -0.0415 0.0138 -0.0048 0.0012 -0.0004  
Y 0.0153 0.0269 -0.0161 -0.0002 -0.0002 0.0023

Z -0.0079 -0.0045 0.0045 0.0016 0.0068 -0.0081  
AT. 109 H X 0.0000 0.0668 -0.0217 -0.0097 0.0009 0.0043  
Y -0.0114 -0.0225 0.0139 -0.0004 0.0013 -0.0003  
Z 0.0142 0.0038 -0.0053 0.0026 -0.0053 -0.0136  
AT. 110 H X -0.0000 -0.0668 0.0217 -0.0097 -0.0009 0.0043  
Y 0.0114 0.0225 -0.0139 -0.0004 -0.0013 -0.0003  
Z -0.0142 -0.0038 0.0053 0.0026 0.0053 -0.0136  
AT. 111 H X 0.0002 0.0424 -0.0165 -0.0041 -0.0002 -0.0019  
Y -0.0206 -0.0471 0.0248 0.0019 -0.0024 0.0041  
Z 0.0083 0.0074 -0.0033 0.0004 -0.0074 -0.0069  
AT. 112 H X -0.0002 -0.0424 0.0165 -0.0041 0.0002 -0.0019  
Y 0.0206 0.0471 -0.0248 0.0019 0.0024 0.0041  
Z -0.0083 -0.0074 0.0033 0.0004 0.0074 -0.0069  
AT. 113 C X -0.0013 0.0175 -0.0012 -0.0021 -0.0042 -0.0003  
Y -0.0082 -0.0362 0.0193 0.0020 0.0004 -0.0049  
Z -0.0003 0.0039 -0.0022 0.0001 -0.0088 -0.0010  
AT. 114 C X 0.0013 -0.0175 0.0012 -0.0021 0.0042 -0.0003  
Y 0.0082 0.0362 -0.0193 0.0020 -0.0004 -0.0049  
Z 0.0003 -0.0039 0.0022 0.0001 0.0088 -0.0010  
AT. 115 C X 0.0048 -0.0052 0.0023 0.0041 -0.0044 -0.0056  
Y -0.0105 -0.0407 0.0203 0.0028 0.0000 -0.0012  
Z -0.0076 0.0029 -0.0012 -0.0004 -0.0096 0.0067  
AT. 116 C X -0.0048 0.0052 -0.0023 0.0041 0.0044 -0.0056  
Y 0.0105 0.0407 -0.0203 0.0028 -0.0000 -0.0012  
Z 0.0076 -0.0029 0.0012 -0.0004 0.0096 0.0067  
AT. 117 H X 0.0122 0.0070 -0.0066 0.0053 -0.0004 -0.0078  
Y -0.0144 -0.0596 0.0268 0.0055 -0.0022 0.0012  
Z -0.0149 -0.0060 0.0069 -0.0025 -0.0133 0.0085  
AT. 118 H X -0.0122 -0.0070 0.0066 0.0053 0.0004 -0.0078  
Y 0.0144 0.0596 -0.0268 0.0055 0.0022 0.0012  
Z 0.0149 0.0060 -0.0069 -0.0025 0.0133 0.0085  
AT. 119 H X -0.0043 -0.0298 0.0167 0.0040 -0.0099 -0.0043

Y -0.0099 -0.0520 0.0261 0.0034 -0.0019 -0.0057  
Z -0.0131 0.0006 0.0007 -0.0011 -0.0108 0.0117  
AT. 120 H X 0.0043 0.0298 -0.0167 0.0040 0.0099 -0.0043  
Y 0.0099 0.0520 -0.0261 0.0034 0.0019 -0.0057  
Z 0.0131 -0.0006 -0.0007 -0.0011 0.0108 0.0117  
AT. 121 C X 0.0082 -0.0231 0.0085 0.0073 -0.0059 -0.0117  
Y -0.0124 0.0098 0.0029 -0.0060 0.0047 0.0076  
Z 0.0025 0.0275 -0.0228 0.0039 -0.0005 0.0105  
AT. 122 C X -0.0082 0.0231 -0.0085 0.0073 0.0059 -0.0117  
Y 0.0124 -0.0098 -0.0029 -0.0060 -0.0047 0.0076  
Z -0.0025 -0.0275 0.0228 0.0039 0.0005 0.0105  
AT. 123 H X 0.0135 -0.0541 0.0198 0.0121 -0.0110 -0.0228  
Y -0.0077 -0.0052 0.0091 -0.0050 0.0022 -0.0031  
Z -0.0007 0.0380 -0.0273 0.0034 0.0014 0.0196  
AT. 124 H X -0.0135 0.0541 -0.0198 0.0121 0.0110 -0.0228  
Y 0.0077 0.0052 -0.0091 -0.0050 -0.0022 -0.0031  
Z 0.0007 -0.0380 0.0273 0.0034 -0.0014 0.0196  
AT. 125 H X 0.0115 -0.0261 0.0059 0.0098 -0.0049 -0.0132  
Y -0.0200 0.0419 -0.0080 -0.0101 0.0081 0.0233  
Z 0.0019 0.0402 -0.0312 0.0048 0.0025 0.0168  
AT. 126 H X -0.0115 0.0261 -0.0059 0.0098 0.0049 -0.0132  
Y 0.0200 -0.0419 0.0080 -0.0101 -0.0081 0.0233  
Z -0.0019 -0.0402 0.0312 0.0048 -0.0025 0.0168  
AT. 127 C X -0.0003 0.0037 0.0043 -0.0000 -0.0055 -0.0027  
Y -0.0132 0.0096 0.0052 -0.0077 0.0035 0.0029  
Z 0.0053 0.0115 -0.0163 0.0044 -0.0035 -0.0031  
AT. 128 C X 0.0003 -0.0037 -0.0043 -0.0000 0.0055 -0.0027  
Y 0.0132 -0.0096 -0.0052 -0.0077 -0.0035 0.0029  
Z -0.0053 -0.0115 0.0163 0.0044 0.0035 -0.0031  
AT. 129 C X -0.0015 0.0259 -0.0073 -0.0024 -0.0026 -0.0014  
Y -0.0169 0.0284 -0.0030 -0.0088 0.0072 0.0141  
Z 0.0085 -0.0031 -0.0104 0.0050 -0.0067 -0.0148

AT. 130 C X 0.0015 -0.0259 0.0073 -0.0024 0.0026 -0.0014  
Y 0.0169 -0.0284 0.0030 -0.0088 -0.0072 0.0141  
Z -0.0085 0.0031 0.0104 0.0050 0.0067 -0.0148

AT. 131 H X 0.0004 0.0149 -0.0054 -0.0009 -0.0048 -0.0082  
Y -0.0212 0.0590 -0.0154 -0.0115 0.0132 0.0273  
Z 0.0091 -0.0048 -0.0130 0.0057 -0.0070 -0.0180

AT. 132 H X -0.0004 -0.0149 0.0054 -0.0009 0.0048 -0.0082  
Y 0.0212 -0.0590 0.0154 -0.0115 -0.0132 0.0273  
Z -0.0091 0.0048 0.0130 0.0057 0.0070 -0.0180

AT. 133 H X -0.0058 0.0520 -0.0164 -0.0046 0.0045 0.0123  
Y -0.0159 0.0293 -0.0031 -0.0092 0.0071 0.0119  
Z 0.0117 -0.0138 -0.0063 0.0053 -0.0099 -0.0244

AT. 134 H X 0.0058 -0.0520 0.0164 -0.0046 -0.0045 0.0123  
Y 0.0159 -0.0293 0.0031 -0.0092 -0.0071 0.0119  
Z -0.0117 0.0138 0.0063 0.0053 0.0099 -0.0244

AT. 135 C X -0.0057 0.0225 0.0024 -0.0059 -0.0056 0.0037  
Y -0.0021 -0.0607 0.0263 0.0093 -0.0008 -0.0124  
Z -0.0032 -0.0018 0.0082 -0.0026 -0.0128 -0.0001

AT. 136 C X 0.0057 -0.0225 -0.0024 -0.0059 0.0056 0.0037  
Y 0.0021 0.0607 -0.0263 0.0093 0.0008 -0.0124  
Z 0.0032 0.0018 -0.0082 -0.0026 0.0128 -0.0001

AT. 137 H X -0.0106 0.0395 0.0033 -0.0140 -0.0074 0.0072  
Y -0.0023 -0.0536 0.0265 0.0066 -0.0025 -0.0157  
Z -0.0016 0.0023 0.0088 -0.0041 -0.0150 -0.0072

AT. 138 H X 0.0106 -0.0395 -0.0033 -0.0140 0.0074 0.0072  
Y 0.0023 0.0536 -0.0265 0.0066 0.0025 -0.0157  
Z 0.0016 -0.0023 -0.0088 -0.0041 0.0150 -0.0072

AT. 139 H X -0.0043 0.0317 -0.0041 -0.0068 -0.0046 0.0013  
Y 0.0004 -0.0831 0.0282 0.0179 0.0020 -0.0090  
Z -0.0056 -0.0082 0.0161 -0.0034 -0.0145 0.0022

AT. 140 H X 0.0043 -0.0317 0.0041 -0.0068 0.0046 0.0013  
Y -0.0004 0.0831 -0.0282 0.0179 -0.0020 -0.0090

Z 0.0056 0.0082 -0.0161 -0.0034 0.0145 0.0022  
AT. 141 H X -0.0049 -0.0005 0.0125 -0.0011 -0.0071 0.0047  
Y -0.0002 -0.0646 0.0298 0.0097 -0.0037 -0.0187  
Z -0.0049 -0.0074 0.0090 -0.0011 -0.0106 0.0067  
AT. 142 H X 0.0049 0.0005 -0.0125 -0.0011 0.0071 0.0047  
Y 0.0002 0.0646 -0.0298 0.0097 0.0037 -0.0187  
Z 0.0049 0.0074 -0.0090 -0.0011 0.0106 0.0067  
AT. 143 C X -0.0010 -0.0011 0.0097 -0.0015 -0.0064 -0.0005  
Y -0.0169 0.0261 0.0031 -0.0134 0.0026 -0.0000  
Z 0.0076 0.0138 -0.0232 0.0083 -0.0022 -0.0055  
AT. 144 C X 0.0010 0.0011 -0.0097 -0.0015 0.0064 -0.0005  
Y 0.0169 -0.0261 -0.0031 -0.0134 -0.0026 -0.0000  
Z -0.0076 -0.0138 0.0232 0.0083 0.0022 -0.0055  
AT. 145 H X 0.0016 -0.0182 0.0184 -0.0020 -0.0061 -0.0022  
Y -0.0135 0.0145 0.0096 -0.0138 0.0017 -0.0067  
Z 0.0049 0.0221 -0.0278 0.0086 -0.0012 0.0012  
AT. 146 H X -0.0016 0.0182 -0.0184 -0.0020 0.0061 -0.0022  
Y 0.0135 -0.0145 -0.0096 -0.0138 -0.0017 -0.0067  
Z -0.0049 -0.0221 0.0278 0.0086 0.0012 0.0012  
AT. 147 H X 0.0020 -0.0076 0.0092 0.0013 -0.0061 -0.0040  
Y -0.0229 0.0509 -0.0076 -0.0144 0.0032 0.0088  
Z 0.0085 0.0176 -0.0294 0.0116 -0.0016 -0.0057  
AT. 148 H X -0.0020 0.0076 -0.0092 0.0013 0.0061 -0.0040  
Y 0.0229 -0.0509 0.0076 -0.0144 -0.0032 0.0088  
Z -0.0085 -0.0176 0.0294 0.0116 0.0016 -0.0057  
AT. 149 H X -0.0065 0.0187 0.0055 -0.0061 -0.0060 0.0048  
Y -0.0167 0.0268 0.0051 -0.0156 0.0019 -0.0032  
Z 0.0103 0.0055 -0.0175 0.0065 -0.0034 -0.0136  
AT. 150 H X 0.0065 -0.0187 -0.0055 -0.0061 0.0060 0.0048  
Y 0.0167 -0.0268 -0.0051 -0.0156 -0.0019 -0.0032  
Z -0.0103 -0.0055 0.0175 0.0065 0.0034 -0.0136  
AT. 151 C X -0.0043 0.0118 0.0055 -0.0033 -0.0063 0.0021

Y -0.0072 -0.0204 0.0153 -0.0024 0.0008 -0.0091  
Z 0.0031 0.0073 -0.0094 0.0022 -0.0064 -0.0031  
AT. 152 C X 0.0043 -0.0118 -0.0055 -0.0033 0.0063 0.0021  
Y 0.0072 0.0204 -0.0153 -0.0024 -0.0008 -0.0091  
Z -0.0031 -0.0073 0.0094 0.0022 0.0064 -0.0031  
AT. 153 H X -0.0083 0.0266 0.0026 -0.0072 -0.0053 0.0075  
Y -0.0061 -0.0203 0.0150 -0.0025 0.0004 -0.0127  
Z 0.0064 0.0006 -0.0085 0.0037 -0.0071 -0.0111  
AT. 154 H X 0.0083 -0.0266 -0.0026 -0.0072 0.0053 0.0075  
Y 0.0061 0.0203 -0.0150 -0.0025 -0.0004 -0.0127  
Z -0.0064 -0.0006 0.0085 0.0037 0.0071 -0.0111  
AT. 155 H X -0.0051 -0.0024 0.0130 -0.0019 -0.0082 0.0020  
Y -0.0040 -0.0304 0.0185 -0.0005 -0.0006 -0.0163  
Z -0.0006 0.0128 -0.0099 0.0008 -0.0057 0.0045  
AT. 156 H X 0.0051 0.0024 -0.0130 -0.0019 0.0082 0.0020  
Y 0.0040 0.0304 -0.0185 -0.0005 0.0006 -0.0163  
Z 0.0006 -0.0128 0.0099 0.0008 0.0057 0.0045  
AT. 157 O X -0.0263 -0.0143 -0.0598 0.0611 0.1047 0.0944  
Y -0.0074 -0.0189 -0.0276 0.0291 -0.0069 0.0055  
Z -0.0452 -0.0112 -0.0260 -0.0138 0.0223 0.0360  
AT. 158 O X 0.0263 0.0143 0.0598 0.0611 -0.1047 0.0944  
Y 0.0074 0.0189 0.0276 0.0291 0.0069 0.0055  
Z 0.0452 0.0112 0.0260 -0.0138 -0.0223 0.0360  
AT. 159 O X -0.0186 -0.0092 -0.0408 0.0447 0.0746 0.0658  
Y -0.0185 -0.0165 -0.0358 0.0462 0.0279 0.0272  
Z -0.0345 -0.0024 0.0051 -0.0398 -0.0253 -0.0101  
AT. 160 O X 0.0186 0.0092 0.0408 0.0447 -0.0746 0.0658  
Y 0.0185 0.0165 0.0358 0.0462 -0.0279 0.0272  
Z 0.0345 0.0024 -0.0051 -0.0398 0.0253 -0.0101  
AT. 161 H X -0.0063 -0.0146 -0.0441 0.0462 0.0634 0.0602  
Y -0.0127 -0.0204 -0.0314 0.0279 -0.0051 0.0105  
Z -0.0213 -0.0068 -0.0078 -0.0158 -0.0014 0.0053

AT.162 H X 0.0063 0.0146 0.0441 0.0462 -0.0634 0.0602  
Y 0.0127 0.0204 0.0314 0.0279 0.0051 0.0105  
Z 0.0213 0.0068 0.0078 -0.0158 0.0014 0.0053  
AT.163 H X -0.0149 -0.0044 -0.0197 0.0216 0.0378 0.0333  
Y -0.0380 -0.0143 -0.0271 0.0203 0.0085 0.0099  
Z -0.0409 -0.0032 0.0007 -0.0404 -0.0183 -0.0033  
AT.164 H X 0.0149 0.0044 0.0197 0.0216 -0.0378 0.0333  
Y 0.0380 0.0143 0.0271 0.0203 -0.0085 0.0099  
Z 0.0409 0.0032 -0.0007 -0.0404 0.0183 -0.0033  
AT.165 O X -0.0097 -0.0349 0.0103 -0.0045 0.0022 0.0105  
Y -0.0055 0.0269 -0.0118 -0.0032 -0.0068 -0.0241  
Z 0.0038 0.0332 -0.0290 0.0079 -0.0207 -0.0294  
AT.166 O X 0.0097 0.0349 -0.0103 -0.0045 -0.0022 0.0105  
Y 0.0055 -0.0269 0.0118 -0.0032 0.0068 -0.0241  
Z -0.0038 -0.0332 0.0290 0.0079 0.0207 -0.0294  
AT.167 H X -0.0091 -0.0145 0.0046 -0.0057 -0.0005 0.0046  
Y -0.0107 0.0052 -0.0081 -0.0039 -0.0068 -0.0187  
Z 0.0110 0.0133 -0.0205 0.0134 -0.0146 -0.0254  
AT.168 H X 0.0091 0.0145 -0.0046 -0.0057 0.0005 0.0046  
Y 0.0107 -0.0052 0.0081 -0.0039 0.0068 -0.0187  
Z -0.0110 -0.0133 0.0205 0.0134 0.0146 -0.0254  
AT.169 O X 0.0065 -0.0777 0.0184 0.0010 0.0078 0.0192  
Y -0.0128 0.0012 0.0103 0.0131 0.0078 -0.0187  
Z 0.0084 0.0300 -0.0319 0.0053 -0.0226 -0.0286  
AT.170 O X -0.0065 0.0777 -0.0184 0.0010 -0.0078 0.0192  
Y 0.0128 -0.0012 -0.0103 0.0131 -0.0078 -0.0187  
Z -0.0084 -0.0300 0.0319 0.0053 0.0226 -0.0286  
AT.171 H X 0.0027 -0.0398 0.0046 -0.0010 -0.0029 0.0129  
Y -0.0207 0.0146 0.0127 0.0163 0.0077 -0.0199  
Z -0.0016 0.0245 -0.0191 0.0124 -0.0158 -0.0261  
AT.172 H X -0.0027 0.0398 -0.0046 -0.0010 0.0029 0.0129  
Y 0.0207 -0.0146 -0.0127 0.0163 -0.0077 -0.0199

Z 0.0016 -0.0245 0.0191 0.0124 0.0158 -0.0261

FREQ(CM\*\*-1) 106.12 107.37 122.06 123.72 124.16 127.57

AT. 1 I X 0.0009 0.0035 0.0100 0.0090 -0.0055 0.0003

Y -0.0099 -0.0052 -0.0003 -0.0004 0.0055 -0.0001

Z 0.0085 0.0040 -0.0003 -0.0007 -0.0052 0.0007

AT. 2 I X 0.0009 -0.0035 -0.0100 -0.0090 -0.0055 0.0003

Y -0.0099 0.0052 0.0003 0.0004 0.0055 -0.0001

Z 0.0085 -0.0040 0.0003 0.0007 -0.0052 0.0007

AT. 3 I X -0.0072 -0.0016 0.0032 0.0023 0.0031 0.0002

Y -0.0004 0.0007 -0.0006 0.0019 -0.0008 0.0000

Z 0.0021 0.0009 -0.0018 -0.0006 -0.0005 0.0003

AT. 4 I X -0.0072 0.0016 -0.0032 -0.0023 0.0031 0.0002

Y -0.0004 -0.0007 0.0006 -0.0019 -0.0008 0.0000

Z 0.0021 -0.0009 0.0018 0.0006 -0.0005 0.0003

AT. 5 O X -0.0021 -0.0076 -0.0262 -0.0206 0.0148 -0.0036

Y 0.0009 -0.0050 -0.0130 -0.0084 0.0096 0.0004

Z -0.0074 -0.0006 -0.0015 0.0001 0.0044 0.0021

AT. 6 O X -0.0021 0.0076 0.0262 0.0206 0.0148 -0.0036

Y 0.0009 0.0050 0.0130 0.0084 0.0096 0.0004

Z -0.0074 0.0006 0.0015 -0.0001 0.0044 0.0021

AT. 7 O X 0.0003 -0.0000 -0.0006 0.0085 -0.0250 -0.0026

Y -0.0064 0.0031 0.0131 0.0223 -0.0449 -0.0004

Z -0.0056 0.0060 0.0108 0.0170 -0.0268 -0.0000

AT. 8 O X 0.0003 0.0000 0.0006 -0.0085 -0.0250 -0.0026

Y -0.0064 -0.0031 -0.0131 -0.0223 -0.0449 -0.0004

Z -0.0056 -0.0060 -0.0108 -0.0170 -0.0268 -0.0000

AT. 9 N X -0.0029 -0.0031 -0.0028 -0.0034 0.0035 0.0008

Y 0.0115 0.0080 0.0068 -0.0038 -0.0123 0.0040

Z -0.0080 -0.0001 0.0045 0.0056 0.0027 0.0032

AT. 10 N X -0.0029 0.0031 0.0028 0.0034 0.0035 0.0008



Y 0.0115 -0.0080 -0.0068 0.0038 -0.0123 0.0040  
Z -0.0080 0.0001 -0.0045 -0.0056 0.0027 0.0032  
AT. 11 N X 0.0070 0.0020 -0.0047 -0.0092 0.0023 0.0008  
Y -0.0003 0.0027 0.0083 0.0025 -0.0108 0.0047  
Z -0.0045 0.0060 0.0150 0.0152 -0.0197 0.0054  
AT. 12 N X 0.0070 -0.0020 0.0047 0.0092 0.0023 0.0008  
Y -0.0003 -0.0027 -0.0083 -0.0025 -0.0108 0.0047  
Z -0.0045 -0.0060 -0.0150 -0.0152 -0.0197 0.0054  
AT. 13 C X -0.0011 -0.0033 -0.0104 -0.0083 0.0055 -0.0015  
Y 0.0059 0.0030 0.0025 -0.0004 -0.0043 0.0019  
Z -0.0093 -0.0012 0.0047 0.0071 0.0043 0.0030  
AT. 14 C X -0.0011 0.0033 0.0104 0.0083 0.0055 -0.0015  
Y 0.0059 -0.0030 -0.0025 0.0004 -0.0043 0.0019  
Z -0.0093 0.0012 -0.0047 -0.0071 0.0043 0.0030  
AT. 15 C X -0.0018 -0.0009 -0.0031 -0.0027 0.0014 -0.0019  
Y 0.0018 0.0037 0.0120 0.0091 -0.0077 0.0021  
Z -0.0124 -0.0029 0.0097 0.0144 0.0023 0.0044  
AT. 16 C X -0.0018 0.0009 0.0031 0.0027 0.0014 -0.0019  
Y 0.0018 -0.0037 -0.0120 -0.0091 -0.0077 0.0021  
Z -0.0124 0.0029 -0.0097 -0.0144 0.0023 0.0044  
AT. 17 H X 0.0015 -0.0011 -0.0081 -0.0088 0.0009 -0.0030  
Y 0.0087 0.0055 0.0051 -0.0001 -0.0082 0.0008  
Z -0.0199 -0.0053 0.0162 0.0235 0.0026 0.0055  
AT. 18 H X 0.0015 0.0011 0.0081 0.0088 0.0009 -0.0030  
Y 0.0087 -0.0055 -0.0051 0.0001 -0.0082 0.0008  
Z -0.0199 0.0053 -0.0162 -0.0235 0.0026 0.0055  
AT. 19 H X -0.0074 -0.0025 -0.0003 0.0003 0.0047 -0.0021  
Y -0.0084 0.0004 0.0199 0.0203 -0.0062 0.0038  
Z -0.0180 -0.0046 0.0136 0.0198 0.0039 0.0050  
AT. 20 H X -0.0074 0.0025 0.0003 -0.0003 0.0047 -0.0021  
Y -0.0084 -0.0004 -0.0199 -0.0203 -0.0062 0.0038  
Z -0.0180 0.0046 -0.0136 -0.0198 0.0039 0.0050

AT. 21 C X 0.0016 -0.0007 -0.0042 -0.0023 -0.0035 -0.0017  
Y -0.0053 0.0022 0.0115 0.0126 -0.0218 0.0020  
Z -0.0070 0.0056 0.0154 0.0188 -0.0238 0.0037

AT. 22 C X 0.0016 0.0007 0.0042 0.0023 -0.0035 -0.0017  
Y -0.0053 -0.0022 -0.0115 -0.0126 -0.0218 0.0020  
Z -0.0070 -0.0056 -0.0154 -0.0188 -0.0238 0.0037

AT. 23 C X -0.0000 -0.0028 -0.0057 -0.0050 0.0075 -0.0015  
Y -0.0060 0.0001 0.0058 0.0020 0.0013 0.0003  
Z -0.0078 0.0038 0.0141 0.0178 -0.0185 0.0039

AT. 24 C X -0.0000 0.0028 0.0057 0.0050 0.0075 -0.0015  
Y -0.0060 -0.0001 -0.0058 -0.0020 0.0013 0.0003  
Z -0.0078 -0.0038 -0.0141 -0.0178 -0.0185 0.0039

AT. 25 H X 0.0020 -0.0029 -0.0100 -0.0083 0.0137 -0.0018  
Y -0.0057 -0.0000 0.0049 0.0006 0.0041 -0.0000  
Z -0.0076 0.0048 0.0152 0.0241 -0.0318 0.0055

AT. 26 H X 0.0020 0.0029 0.0100 0.0083 0.0137 -0.0018  
Y -0.0057 0.0000 -0.0049 -0.0006 0.0041 -0.0000  
Z -0.0076 -0.0048 -0.0152 -0.0241 -0.0318 0.0055

AT. 27 H X 0.0009 -0.0036 -0.0061 -0.0059 0.0089 -0.0015  
Y -0.0046 -0.0018 0.0004 -0.0083 0.0169 -0.0022  
Z -0.0073 0.0030 0.0114 0.0127 -0.0106 0.0026

AT. 28 H X 0.0009 0.0036 0.0061 0.0059 0.0089 -0.0015  
Y -0.0046 0.0018 -0.0004 0.0083 0.0169 -0.0022  
Z -0.0073 -0.0030 -0.0114 -0.0127 -0.0106 0.0026

AT. 29 C X -0.0101 -0.0072 -0.0030 -0.0014 0.0094 0.0015  
Y 0.0030 0.0019 0.0029 -0.0047 -0.0023 0.0032  
Z -0.0057 -0.0008 -0.0021 -0.0007 0.0082 0.0007

AT. 30 C X -0.0101 0.0072 0.0030 0.0014 0.0094 0.0015  
Y 0.0030 -0.0019 -0.0029 0.0047 -0.0023 0.0032  
Z -0.0057 0.0008 0.0021 0.0007 0.0082 0.0007

AT. 31 H X -0.0176 -0.0110 -0.0015 0.0019 0.0123 0.0026  
Y 0.0071 0.0030 -0.0010 -0.0090 0.0016 0.0020

Z -0.0041 -0.0013 -0.0068 -0.0051 0.0153 -0.0004  
AT. 32 H X -0.0176 0.0110 0.0015 -0.0019 0.0123 0.0026  
Y 0.0071 -0.0030 0.0010 0.0090 0.0016 0.0020  
Z -0.0041 0.0013 0.0068 0.0051 0.0153 -0.0004  
AT. 33 H X -0.0130 -0.0097 -0.0041 -0.0013 0.0113 0.0001  
Y -0.0048 -0.0013 0.0075 0.0007 -0.0086 0.0052  
Z -0.0041 -0.0011 -0.0046 -0.0028 0.0125 -0.0012  
AT. 34 H X -0.0130 0.0097 0.0041 0.0013 0.0113 0.0001  
Y -0.0048 0.0013 -0.0075 -0.0007 -0.0086 0.0052  
Z -0.0041 0.0011 0.0046 0.0028 0.0125 -0.0012  
AT. 35 C X -0.0039 -0.0034 -0.0023 -0.0023 0.0075 0.0017  
Y -0.0030 -0.0031 -0.0022 -0.0076 0.0084 0.0016  
Z -0.0065 -0.0005 0.0011 0.0026 0.0012 0.0018  
AT. 36 C X -0.0039 0.0034 0.0023 0.0023 0.0075 0.0017  
Y -0.0030 0.0031 0.0022 0.0076 0.0084 0.0016  
Z -0.0065 0.0005 -0.0011 -0.0026 0.0012 0.0018  
AT. 37 C X 0.0021 -0.0007 -0.0044 -0.0072 0.0065 0.0006  
Y -0.0062 -0.0025 0.0050 0.0015 -0.0007 0.0030  
Z -0.0072 0.0020 0.0097 0.0120 -0.0124 0.0029  
AT. 38 C X 0.0021 0.0007 0.0044 0.0072 0.0065 0.0006  
Y -0.0062 0.0025 -0.0050 -0.0015 -0.0007 0.0030  
Z -0.0072 -0.0020 -0.0097 -0.0120 -0.0124 0.0029  
AT. 39 H X -0.0017 -0.0030 -0.0027 -0.0017 0.0031 -0.0010  
Y -0.0097 -0.0020 0.0119 0.0108 -0.0096 0.0036  
Z -0.0082 0.0003 0.0079 0.0118 -0.0111 0.0016  
AT. 40 H X -0.0017 0.0030 0.0027 0.0017 0.0031 -0.0010  
Y -0.0097 0.0020 -0.0119 -0.0108 -0.0096 0.0036  
Z -0.0082 -0.0003 -0.0079 -0.0118 -0.0111 0.0016  
AT. 41 H X 0.0073 0.0013 -0.0055 -0.0126 0.0085 0.0030  
Y -0.0101 -0.0075 0.0004 -0.0001 0.0075 0.0010  
Z -0.0092 0.0034 0.0144 0.0190 -0.0209 0.0019  
AT. 42 H X 0.0073 -0.0013 0.0055 0.0126 0.0085 0.0030

Y -0.0101 0.0075 -0.0004 0.0001 0.0075 0.0010  
Z -0.0092 -0.0034 -0.0144 -0.0190 -0.0209 0.0019  
AT. 43 C X 0.0142 0.0050 -0.0048 -0.0096 -0.0031 0.0008  
Y 0.0068 0.0033 0.0001 -0.0062 -0.0050 0.0019  
Z -0.0013 0.0086 0.0191 0.0194 -0.0276 0.0067  
AT. 44 C X 0.0142 -0.0050 0.0048 0.0096 -0.0031 0.0008  
Y 0.0068 -0.0033 -0.0001 0.0062 -0.0050 0.0019  
Z -0.0013 -0.0086 -0.0191 -0.0194 -0.0276 0.0067  
AT. 45 H X 0.0224 0.0076 -0.0066 -0.0123 -0.0063 0.0001  
Y -0.0005 -0.0003 -0.0029 -0.0069 0.0054 0.0004  
Z -0.0002 0.0097 0.0229 0.0224 -0.0353 0.0081  
AT. 46 H X 0.0224 -0.0076 0.0066 0.0123 -0.0063 0.0001  
Y -0.0005 0.0003 0.0029 0.0069 0.0054 0.0004  
Z -0.0002 -0.0097 -0.0229 -0.0224 -0.0353 0.0081  
AT. 47 H X 0.0183 0.0059 -0.0071 -0.0133 -0.0041 -0.0000  
Y 0.0151 0.0065 0.0013 -0.0069 -0.0145 0.0020  
Z 0.0016 0.0107 0.0232 0.0232 -0.0355 0.0078  
AT. 48 H X 0.0183 -0.0059 0.0071 0.0133 -0.0041 -0.0000  
Y 0.0151 -0.0065 -0.0013 0.0069 -0.0145 0.0020  
Z 0.0016 -0.0107 -0.0232 -0.0232 -0.0355 0.0078  
AT. 49 C X 0.0048 0.0019 -0.0013 -0.0037 0.0008 0.0018  
Y 0.0097 0.0027 -0.0065 -0.0145 0.0044 0.0002  
Z -0.0057 0.0048 0.0144 0.0149 -0.0132 0.0053  
AT. 50 C X 0.0048 -0.0019 0.0013 0.0037 0.0008 0.0018  
Y 0.0097 -0.0027 0.0065 0.0145 0.0044 0.0002  
Z -0.0057 -0.0048 -0.0144 -0.0149 -0.0132 0.0053  
AT. 51 C X -0.0005 -0.0015 -0.0021 -0.0025 0.0028 0.0008  
Y 0.0190 0.0109 0.0003 -0.0113 -0.0113 0.0034  
Z -0.0104 -0.0002 0.0090 0.0109 0.0013 0.0037  
AT. 52 C X -0.0005 0.0015 0.0021 0.0025 0.0028 0.0008  
Y 0.0190 -0.0109 -0.0003 0.0113 -0.0113 0.0034  
Z -0.0104 0.0002 -0.0090 -0.0109 0.0013 0.0037

AT. 53 H X 0.0067 0.0032 -0.0022 -0.0049 -0.0046 0.0019  
Y 0.0283 0.0180 0.0036 -0.0109 -0.0235 0.0052  
Z -0.0126 -0.0005 0.0131 0.0157 0.0005 0.0039

AT. 54 H X 0.0067 -0.0032 0.0022 0.0049 -0.0046 0.0019  
Y 0.0283 -0.0180 -0.0036 0.0109 -0.0235 0.0052  
Z -0.0126 0.0005 -0.0131 -0.0157 0.0005 0.0039

AT. 55 H X -0.0114 -0.0089 -0.0023 0.0006 0.0139 -0.0005  
Y 0.0228 0.0122 -0.0049 -0.0157 -0.0089 0.0037  
Z -0.0128 -0.0035 0.0026 0.0074 0.0114 0.0031

AT. 56 H X -0.0114 0.0089 0.0023 -0.0006 0.0139 -0.0005  
Y 0.0228 -0.0122 0.0049 0.0157 -0.0089 0.0037  
Z -0.0128 0.0035 -0.0026 -0.0074 0.0114 0.0031

AT. 57 C X -0.0090 -0.0048 -0.0007 0.0012 0.0095 0.0034  
Y -0.0108 -0.0077 -0.0076 -0.0102 0.0182 0.0021  
Z -0.0084 -0.0045 -0.0105 -0.0082 0.0123 -0.0008

AT. 58 C X -0.0090 0.0048 0.0007 -0.0012 0.0095 0.0034  
Y -0.0108 0.0077 0.0076 0.0102 0.0182 0.0021  
Z -0.0084 0.0045 0.0105 0.0082 0.0123 -0.0008

AT. 59 H X -0.0143 -0.0065 -0.0003 0.0051 0.0129 0.0062  
Y -0.0117 -0.0102 -0.0128 -0.0151 0.0244 0.0018  
Z -0.0134 -0.0094 -0.0178 -0.0126 0.0237 0.0007

AT. 60 H X -0.0143 0.0065 0.0003 -0.0051 0.0129 0.0062  
Y -0.0117 0.0102 0.0128 0.0151 0.0244 0.0018  
Z -0.0134 0.0094 0.0178 0.0126 0.0237 0.0007

AT. 61 H X -0.0092 -0.0050 -0.0042 -0.0022 0.0105 0.0018  
Y -0.0093 -0.0040 -0.0007 -0.0034 0.0090 0.0027  
Z -0.0094 -0.0065 -0.0167 -0.0143 0.0178 -0.0024

AT. 62 H X -0.0092 0.0050 0.0042 0.0022 0.0105 0.0018  
Y -0.0093 0.0040 0.0007 0.0034 0.0090 0.0027  
Z -0.0094 0.0065 0.0167 0.0143 0.0178 -0.0024

AT. 63 H X -0.0072 -0.0046 0.0024 0.0040 0.0077 0.0047  
Y -0.0178 -0.0121 -0.0151 -0.0152 0.0297 0.0024

Z -0.0040 -0.0009 -0.0071 -0.0065 0.0039 -0.0024  
AT. 64 H X -0.0072 0.0046 -0.0024 -0.0040 0.0077 0.0047  
Y -0.0178 0.0121 0.0151 0.0152 0.0297 0.0024  
Z -0.0040 0.0009 0.0071 0.0065 0.0039 -0.0024  
AT. 65 C X 0.0071 0.0046 0.0022 -0.0041 -0.0010 0.0044  
Y 0.0130 0.0010 -0.0161 -0.0267 0.0181 -0.0024  
Z -0.0057 0.0079 0.0227 0.0212 -0.0220 0.0091  
AT. 66 C X 0.0071 -0.0046 -0.0022 0.0041 -0.0010 0.0044  
Y 0.0130 -0.0010 0.0161 0.0267 0.0181 -0.0024  
Z -0.0057 -0.0079 -0.0227 -0.0212 -0.0220 0.0091  
AT. 67 H X 0.0093 0.0078 0.0057 -0.0048 -0.0037 0.0080  
Y 0.0112 -0.0044 -0.0241 -0.0337 0.0291 -0.0077  
Z -0.0061 0.0102 0.0270 0.0283 -0.0300 0.0110  
AT. 68 H X 0.0093 -0.0078 -0.0057 0.0048 -0.0037 0.0080  
Y 0.0112 0.0044 0.0241 0.0337 0.0291 -0.0077  
Z -0.0061 -0.0102 -0.0270 -0.0283 -0.0300 0.0110  
AT. 69 H X 0.0094 0.0061 0.0014 -0.0041 -0.0014 0.0051  
Y 0.0157 0.0057 -0.0109 -0.0222 0.0105 0.0016  
Z -0.0063 0.0123 0.0318 0.0278 -0.0326 0.0136  
AT. 70 H X 0.0094 -0.0061 -0.0014 0.0041 -0.0014 0.0051  
Y 0.0157 -0.0057 0.0109 0.0222 0.0105 0.0016  
Z -0.0063 -0.0123 -0.0318 -0.0278 -0.0326 0.0136  
AT. 71 H X 0.0040 0.0026 0.0036 -0.0043 -0.0008 0.0034  
Y 0.0147 -0.0002 -0.0217 -0.0335 0.0258 -0.0046  
Z -0.0058 0.0047 0.0161 0.0119 -0.0113 0.0052  
AT. 72 H X 0.0040 -0.0026 -0.0036 0.0043 -0.0008 0.0034  
Y 0.0147 0.0002 0.0217 0.0335 0.0258 -0.0046  
Z -0.0058 -0.0047 -0.0161 -0.0119 -0.0113 0.0052  
AT. 73 C X -0.0016 -0.0012 -0.0004 -0.0010 0.0060 0.0011  
Y 0.0004 -0.0040 -0.0112 -0.0167 0.0184 -0.0024  
Z -0.0063 0.0014 0.0065 0.0077 -0.0046 0.0030  
AT. 74 C X -0.0016 0.0012 0.0004 0.0010 0.0060 0.0011

Y 0.0004 0.0040 0.0112 0.0167 0.0184 -0.0024  
Z -0.0063 -0.0014 -0.0065 -0.0077 -0.0046 0.0030  
AT. 75 H X -0.0081 -0.0048 -0.0003 0.0003 0.0117 -0.0008  
Y 0.0015 -0.0043 -0.0157 -0.0205 0.0232 -0.0051  
Z -0.0091 -0.0014 0.0005 0.0034 0.0057 -0.0019  
AT. 76 H X -0.0081 0.0048 0.0003 -0.0003 0.0117 -0.0008  
Y 0.0015 0.0043 0.0157 0.0205 0.0232 -0.0051  
Z -0.0091 0.0014 -0.0005 -0.0034 0.0057 -0.0019  
AT. 77 H X 0.0005 0.0014 -0.0004 -0.0007 0.0039 0.0001  
Y -0.0052 -0.0089 -0.0153 -0.0203 0.0299 -0.0046  
Z -0.0029 0.0032 0.0101 0.0109 -0.0136 0.0056  
AT. 78 H X 0.0005 -0.0014 0.0004 0.0007 0.0039 0.0001  
Y -0.0052 0.0089 0.0153 0.0203 0.0299 -0.0046  
Z -0.0029 -0.0032 -0.0101 -0.0109 -0.0136 0.0056  
AT. 79 I X 0.0157 0.0183 -0.0042 0.0013 0.0017 0.0080  
Y -0.0075 -0.0082 0.0063 -0.0038 -0.0025 -0.0061  
Z -0.0162 -0.0244 0.0032 -0.0008 -0.0008 -0.0036  
AT. 80 I X 0.0157 -0.0183 0.0042 -0.0013 0.0017 0.0080  
Y -0.0075 0.0082 -0.0063 0.0038 -0.0025 -0.0061  
Z -0.0162 0.0244 -0.0032 0.0008 -0.0008 -0.0036  
AT. 81 I X -0.0143 -0.0067 0.0133 -0.0105 0.0039 0.0023  
Y 0.0011 -0.0008 -0.0033 0.0033 -0.0021 -0.0018  
Z -0.0005 -0.0004 0.0003 -0.0009 0.0004 -0.0030  
AT. 82 I X -0.0143 0.0067 -0.0133 0.0105 0.0039 0.0023  
Y 0.0011 0.0008 0.0033 -0.0033 -0.0021 -0.0018  
Z -0.0005 0.0004 -0.0003 0.0009 0.0004 -0.0030  
AT. 83 O X 0.0124 0.0225 0.0038 -0.0044 0.0037 -0.0062  
Y -0.0083 -0.0118 -0.0489 0.0467 0.0108 0.0803  
Z 0.0001 -0.0025 -0.0175 0.0143 -0.0012 0.0156  
AT. 84 O X 0.0124 -0.0225 -0.0038 0.0044 0.0037 -0.0062  
Y -0.0083 0.0118 0.0489 -0.0467 0.0108 0.0803  
Z 0.0001 0.0025 0.0175 -0.0143 -0.0012 0.0156

AT. 85 O X 0.0209 0.0036 -0.0262 0.0213 -0.0122 -0.0139  
Y -0.0170 -0.0278 0.0086 -0.0036 0.0024 -0.0116  
Z -0.0233 -0.0183 0.0016 -0.0019 -0.0036 -0.0072

AT. 86 O X 0.0209 -0.0036 0.0262 -0.0213 -0.0122 -0.0139  
Y -0.0170 0.0278 -0.0086 0.0036 0.0024 -0.0116  
Z -0.0233 0.0183 -0.0016 0.0019 -0.0036 -0.0072

AT. 87 N X -0.0112 -0.0129 -0.0129 0.0142 0.0012 0.0041  
Y -0.0118 -0.0098 0.0063 -0.0016 0.0057 -0.0005  
Z 0.0136 0.0175 -0.0070 0.0029 -0.0001 0.0087

AT. 88 N X -0.0112 0.0129 0.0129 -0.0142 0.0012 0.0041  
Y -0.0118 0.0098 -0.0063 0.0016 0.0057 -0.0005  
Z 0.0136 -0.0175 0.0070 -0.0029 -0.0001 0.0087

AT. 89 N X 0.0125 0.0037 -0.0117 0.0104 -0.0031 -0.0025  
Y 0.0039 -0.0011 0.0003 0.0023 0.0007 -0.0059  
Z -0.0126 0.0061 0.0076 -0.0068 0.0021 0.0082

AT. 90 N X 0.0125 -0.0037 0.0117 -0.0104 -0.0031 -0.0025  
Y 0.0039 0.0011 -0.0003 -0.0023 0.0007 -0.0059  
Z -0.0126 -0.0061 -0.0076 0.0068 0.0021 0.0082

AT. 91 C X 0.0061 0.0121 -0.0072 0.0064 0.0038 0.0058  
Y -0.0135 -0.0136 -0.0167 0.0189 0.0069 0.0301  
Z 0.0121 0.0152 -0.0097 0.0052 -0.0004 0.0123

AT. 92 C X 0.0061 -0.0121 0.0072 -0.0064 0.0038 0.0058  
Y -0.0135 0.0136 0.0167 -0.0189 0.0069 0.0301  
Z 0.0121 -0.0152 0.0097 -0.0052 -0.0004 0.0123

AT. 93 C X 0.0113 0.0190 -0.0114 0.0094 0.0062 0.0183  
Y -0.0112 -0.0085 -0.0014 0.0045 0.0027 0.0058  
Z 0.0218 0.0298 -0.0079 0.0017 0.0013 0.0168

AT. 94 C X 0.0113 -0.0190 0.0114 -0.0094 0.0062 0.0183  
Y -0.0112 0.0085 0.0014 -0.0045 0.0027 0.0058  
Z 0.0218 -0.0298 0.0079 -0.0017 0.0013 0.0168

AT. 95 H X 0.0151 0.0267 -0.0207 0.0173 0.0092 0.0323  
Y -0.0219 -0.0256 0.0053 0.0002 0.0001 -0.0064



Z 0.0367 0.0518 -0.0099 0.0009 0.0026 0.0238  
AT. 96 H X 0.0151 -0.0267 0.0207 -0.0173 0.0092 0.0323  
Y -0.0219 0.0256 -0.0053 -0.0002 0.0001 -0.0064  
Z 0.0367 -0.0518 0.0099 -0.0009 0.0026 0.0238  
AT. 97 H X 0.0087 0.0170 -0.0110 0.0092 0.0075 0.0223  
Y 0.0125 0.0265 -0.0108 0.0088 0.0056 0.0236  
Z 0.0277 0.0380 -0.0101 0.0028 0.0016 0.0196  
AT. 98 H X 0.0087 -0.0170 0.0110 -0.0092 0.0075 0.0223  
Y 0.0125 -0.0265 0.0108 -0.0088 0.0056 0.0236  
Z 0.0277 -0.0380 0.0101 -0.0028 0.0016 0.0196  
AT. 99 C X 0.0106 -0.0001 -0.0138 0.0118 -0.0062 -0.0075  
Y 0.0032 -0.0116 -0.0065 0.0079 -0.0033 -0.0131  
Z -0.0119 -0.0004 0.0024 -0.0026 -0.0008 0.0030  
AT. 100 C X 0.0106 0.0001 0.0138 -0.0118 -0.0062 -0.0075  
Y 0.0032 0.0116 0.0065 -0.0079 -0.0033 -0.0131  
Z -0.0119 0.0004 -0.0024 0.0026 -0.0008 0.0030  
AT. 101 C X 0.0019 -0.0087 -0.0097 0.0088 -0.0061 -0.0102  
Y 0.0179 -0.0102 -0.0254 0.0221 -0.0125 -0.0212  
Z -0.0034 0.0102 0.0011 -0.0018 0.0010 0.0078  
AT. 102 C X 0.0019 0.0087 0.0097 -0.0088 -0.0061 -0.0102  
Y 0.0179 0.0102 0.0254 -0.0221 -0.0125 -0.0212  
Z -0.0034 -0.0102 -0.0011 0.0018 0.0010 0.0078  
AT. 103 H X 0.0052 -0.0128 -0.0151 0.0140 -0.0077 -0.0135  
Y 0.0163 -0.0088 -0.0232 0.0201 -0.0119 -0.0197  
Z -0.0093 0.0195 0.0150 -0.0133 0.0090 0.0182  
AT. 104 H X 0.0052 0.0128 0.0151 -0.0140 -0.0077 -0.0135  
Y 0.0163 0.0088 0.0232 -0.0201 -0.0119 -0.0197  
Z -0.0093 -0.0195 -0.0150 0.0133 0.0090 0.0182  
AT. 105 H X -0.0018 -0.0122 -0.0092 0.0083 -0.0067 -0.0088  
Y 0.0239 -0.0190 -0.0336 0.0289 -0.0184 -0.0257  
Z -0.0019 0.0062 -0.0023 0.0009 -0.0014 0.0060  
AT. 106 H X -0.0018 0.0122 0.0092 -0.0083 -0.0067 -0.0088

Y 0.0239 0.0190 0.0336 -0.0289 -0.0184 -0.0257  
Z -0.0019 -0.0062 0.0023 -0.0009 -0.0014 0.0060  
AT. 107 C X -0.0241 -0.0289 -0.0110 0.0137 -0.0005 -0.0026  
Y 0.0173 0.0174 0.0028 -0.0016 0.0061 0.0045  
Z 0.0081 0.0067 -0.0050 0.0015 -0.0022 0.0013  
AT. 108 C X -0.0241 0.0289 0.0110 -0.0137 -0.0005 -0.0026  
Y 0.0173 -0.0174 -0.0028 0.0016 0.0061 0.0045  
Z 0.0081 -0.0067 0.0050 -0.0015 -0.0022 0.0013  
AT. 109 H X -0.0475 -0.0580 -0.0138 0.0176 -0.0036 -0.0090  
Y 0.0157 0.0085 -0.0033 0.0032 0.0027 -0.0000  
Z 0.0129 0.0009 -0.0144 0.0085 -0.0068 -0.0047  
AT. 110 H X -0.0475 0.0580 0.0138 -0.0176 -0.0036 -0.0090  
Y 0.0157 -0.0085 0.0033 -0.0032 0.0027 -0.0000  
Z 0.0129 -0.0009 0.0144 -0.0085 -0.0068 -0.0047  
AT. 111 H X -0.0230 -0.0274 -0.0146 0.0169 -0.0000 0.0006  
Y 0.0304 0.0425 0.0120 -0.0102 0.0114 0.0145  
Z 0.0043 -0.0000 -0.0030 -0.0002 -0.0039 -0.0044  
AT. 112 H X -0.0230 0.0274 0.0146 -0.0169 -0.0000 0.0006  
Y 0.0304 -0.0425 -0.0120 0.0102 0.0114 0.0145  
Z 0.0043 0.0000 0.0030 0.0002 -0.0039 -0.0044  
AT. 113 C X -0.0092 -0.0123 -0.0042 0.0062 0.0005 -0.0021  
Y 0.0289 0.0181 -0.0045 0.0031 0.0017 -0.0020  
Z 0.0034 0.0152 0.0058 -0.0070 0.0032 0.0093  
AT. 114 C X -0.0092 0.0123 0.0042 -0.0062 0.0005 -0.0021  
Y 0.0289 -0.0181 0.0045 -0.0031 0.0017 -0.0020  
Z 0.0034 -0.0152 -0.0058 0.0070 0.0032 0.0093  
AT. 115 C X 0.0067 0.0012 -0.0078 0.0078 -0.0011 -0.0011  
Y 0.0290 0.0257 0.0004 -0.0005 0.0037 0.0025  
Z -0.0013 0.0249 0.0155 -0.0141 0.0079 0.0181  
AT. 116 C X 0.0067 -0.0012 0.0078 -0.0078 -0.0011 -0.0011  
Y 0.0290 -0.0257 -0.0004 0.0005 0.0037 0.0025  
Z -0.0013 -0.0249 -0.0155 0.0141 0.0079 0.0181

AT.117 H X -0.0016 -0.0171 -0.0170 0.0162 -0.0066 -0.0103  
Y 0.0394 0.0476 0.0080 -0.0075 0.0077 0.0124  
Z 0.0051 0.0394 0.0236 -0.0215 0.0130 0.0258

AT.118 H X -0.0016 0.0171 0.0170 -0.0162 -0.0066 -0.0103  
Y 0.0394 -0.0476 -0.0080 0.0075 0.0077 0.0124  
Z 0.0051 -0.0394 -0.0236 0.0215 0.0130 0.0258

AT.119 H X 0.0239 0.0311 0.0028 -0.0023 0.0059 0.0126  
Y 0.0399 0.0332 -0.0015 -0.0002 0.0039 0.0034  
Z -0.0026 0.0339 0.0232 -0.0200 0.0116 0.0248

AT.120 H X 0.0239 -0.0311 -0.0028 0.0023 0.0059 0.0126  
Y 0.0399 -0.0332 0.0015 0.0002 0.0039 0.0034  
Z -0.0026 -0.0339 -0.0232 0.0200 0.0116 0.0248

AT.121 C X 0.0225 0.0144 -0.0131 0.0113 -0.0025 0.0026  
Y -0.0117 -0.0166 0.0056 -0.0010 0.0030 -0.0093  
Z -0.0245 -0.0070 0.0074 -0.0065 0.0007 0.0017

AT.122 C X 0.0225 -0.0144 0.0131 -0.0113 -0.0025 0.0026  
Y -0.0117 0.0166 -0.0056 0.0010 0.0030 -0.0093  
Z -0.0245 0.0070 -0.0074 0.0065 0.0007 0.0017

AT.123 H X 0.0502 0.0408 -0.0184 0.0149 -0.0024 0.0130  
Y 0.0076 -0.0012 -0.0016 0.0044 0.0025 -0.0027  
Z -0.0399 -0.0184 0.0140 -0.0114 0.0009 -0.0033

AT.124 H X 0.0502 -0.0408 0.0184 -0.0149 -0.0024 0.0130  
Y 0.0076 0.0012 0.0016 -0.0044 0.0025 -0.0027  
Z -0.0399 0.0184 -0.0140 0.0114 0.0009 -0.0033

AT.125 H X 0.0246 0.0153 -0.0155 0.0130 -0.0036 0.0015  
Y -0.0449 -0.0452 0.0163 -0.0092 0.0049 -0.0197  
Z -0.0387 -0.0206 0.0095 -0.0085 0.0002 -0.0051

AT.126 H X 0.0246 -0.0153 0.0155 -0.0130 -0.0036 0.0015  
Y -0.0449 0.0452 -0.0163 0.0092 0.0049 -0.0197  
Z -0.0387 0.0206 -0.0095 0.0085 0.0002 -0.0051

AT.127 C X 0.0008 -0.0035 -0.0055 0.0066 0.0003 -0.0004  
Y -0.0051 -0.0132 0.0014 0.0022 0.0033 -0.0069

Z -0.0004 0.0118 -0.0034 0.0015 0.0011 0.0110  
AT. 128 C X 0.0008 0.0035 0.0055 -0.0066 0.0003 -0.0004  
Y -0.0051 0.0132 -0.0014 -0.0022 0.0033 -0.0069  
Z -0.0004 -0.0118 0.0034 -0.0015 0.0011 0.0110  
AT. 129 C X -0.0125 -0.0158 -0.0102 0.0118 0.0005 0.0013  
Y -0.0274 -0.0308 0.0086 -0.0017 0.0038 -0.0130  
Z 0.0207 0.0284 -0.0119 0.0064 0.0010 0.0176  
AT. 130 C X -0.0125 0.0158 0.0102 -0.0118 0.0005 0.0013  
Y -0.0274 0.0308 -0.0086 0.0017 0.0038 -0.0130  
Z 0.0207 -0.0284 0.0119 -0.0064 0.0010 0.0176  
AT. 131 H X 0.0002 -0.0018 -0.0148 0.0149 0.0016 0.0088  
Y -0.0577 -0.0593 0.0141 -0.0042 0.0030 -0.0218  
Z 0.0245 0.0350 -0.0154 0.0092 0.0021 0.0239  
AT. 132 H X 0.0002 0.0018 0.0148 -0.0149 0.0016 0.0088  
Y -0.0577 0.0593 -0.0141 0.0042 0.0030 -0.0218  
Z 0.0245 -0.0350 0.0154 -0.0092 0.0021 0.0239  
AT. 133 H X -0.0381 -0.0431 -0.0024 0.0082 -0.0001 -0.0121  
Y -0.0252 -0.0314 0.0067 -0.0006 0.0033 -0.0143  
Z 0.0361 0.0405 -0.0181 0.0098 0.0008 0.0216  
AT. 134 H X -0.0381 0.0431 0.0024 -0.0082 -0.0001 -0.0121  
Y -0.0252 0.0314 -0.0067 0.0006 0.0033 -0.0143  
Z 0.0361 -0.0405 0.0181 -0.0098 0.0008 0.0216  
AT. 135 C X -0.0132 -0.0136 0.0024 0.0011 0.0028 -0.0007  
Y 0.0499 0.0293 -0.0111 0.0046 -0.0016 -0.0073  
Z 0.0088 0.0197 0.0131 -0.0140 0.0053 0.0084  
AT. 136 C X -0.0132 0.0136 -0.0024 -0.0011 0.0028 -0.0007  
Y 0.0499 -0.0293 0.0111 -0.0046 -0.0016 -0.0073  
Z 0.0088 -0.0197 -0.0131 0.0140 0.0053 0.0084  
AT. 137 H X -0.0247 -0.0201 0.0105 -0.0010 0.0059 0.0022  
Y 0.0491 0.0270 -0.0117 0.0075 -0.0019 -0.0074  
Z 0.0129 0.0189 0.0090 -0.0082 0.0036 0.0070  
AT. 138 H X -0.0247 0.0201 -0.0105 0.0010 0.0059 0.0022

Y 0.0491 -0.0270 0.0117 -0.0075 -0.0019 -0.0074  
Z 0.0129 -0.0189 -0.0090 0.0082 0.0036 0.0070  
AT. 139 H X -0.0190 -0.0194 -0.0023 0.0077 0.0017 -0.0002  
Y 0.0598 0.0387 -0.0127 -0.0012 -0.0027 -0.0086  
Z 0.0142 0.0251 0.0195 -0.0212 0.0067 0.0082  
AT. 140 H X -0.0190 0.0194 0.0023 -0.0077 0.0017 -0.0002  
Y 0.0598 -0.0387 0.0127 0.0012 -0.0027 -0.0086  
Z 0.0142 -0.0251 -0.0195 0.0212 0.0067 0.0082  
AT. 141 H X 0.0014 -0.0018 0.0055 -0.0071 0.0033 -0.0033  
Y 0.0574 0.0321 -0.0141 0.0073 -0.0029 -0.0093  
Z 0.0072 0.0219 0.0175 -0.0202 0.0069 0.0096  
AT. 142 H X 0.0014 0.0018 -0.0055 0.0071 0.0033 -0.0033  
Y 0.0574 -0.0321 0.0141 -0.0073 -0.0029 -0.0093  
Z 0.0072 -0.0219 -0.0175 0.0202 0.0069 0.0096  
AT. 143 C X 0.0006 -0.0028 0.0002 0.0014 0.0003 -0.0045  
Y -0.0077 -0.0176 -0.0028 0.0078 0.0028 -0.0028  
Z 0.0006 0.0120 -0.0104 0.0075 0.0011 0.0157  
AT. 144 C X 0.0006 0.0028 -0.0002 -0.0014 0.0003 -0.0045  
Y -0.0077 0.0176 0.0028 -0.0078 0.0028 -0.0028  
Z 0.0006 -0.0120 0.0104 -0.0075 0.0011 0.0157  
AT. 145 H X 0.0060 0.0044 0.0076 -0.0022 -0.0012 -0.0104  
Y 0.0013 -0.0086 -0.0014 0.0150 -0.0011 -0.0030  
Z -0.0078 0.0041 -0.0101 -0.0011 0.0048 0.0146  
AT. 146 H X 0.0060 -0.0044 -0.0076 0.0022 -0.0012 -0.0104  
Y 0.0013 0.0086 0.0014 -0.0150 -0.0011 -0.0030  
Z -0.0078 -0.0041 0.0101 0.0011 0.0048 0.0146  
AT. 147 H X 0.0055 0.0018 -0.0024 0.0063 -0.0007 -0.0026  
Y -0.0225 -0.0325 -0.0062 0.0007 0.0074 -0.0004  
Z -0.0003 0.0106 -0.0158 0.0106 0.0023 0.0196  
AT. 148 H X 0.0055 -0.0018 0.0024 -0.0063 -0.0007 -0.0026  
Y -0.0225 0.0325 0.0062 -0.0007 0.0074 -0.0004  
Z -0.0003 -0.0106 0.0158 -0.0106 0.0023 0.0196

AT. 149 H X -0.0099 -0.0134 0.0001 -0.0040 0.0016 -0.0038  
Y -0.0050 -0.0156 -0.0036 0.0119 0.0014 -0.0018  
Z 0.0102 0.0203 -0.0114 0.0176 -0.0018 0.0170

AT. 150 H X -0.0099 0.0134 -0.0001 0.0040 0.0016 -0.0038  
Y -0.0050 0.0156 0.0036 -0.0119 0.0014 -0.0018  
Z 0.0102 -0.0203 0.0114 -0.0176 -0.0018 0.0170

AT. 151 C X -0.0073 -0.0089 0.0013 0.0016 0.0018 -0.0021  
Y 0.0229 0.0061 -0.0091 0.0078 0.0004 -0.0047  
Z 0.0024 0.0140 0.0004 -0.0022 0.0019 0.0099

AT. 152 C X -0.0073 0.0089 -0.0013 -0.0016 0.0018 -0.0021  
Y 0.0229 -0.0061 0.0091 -0.0078 0.0004 -0.0047  
Z 0.0024 -0.0140 -0.0004 0.0022 0.0019 0.0099

AT. 153 H X -0.0198 -0.0183 0.0071 -0.0024 0.0031 -0.0029  
Y 0.0259 0.0055 -0.0128 0.0104 -0.0004 -0.0049  
Z 0.0132 0.0172 -0.0081 0.0040 0.0003 0.0099

AT. 154 H X -0.0198 0.0183 -0.0071 0.0024 0.0031 -0.0029  
Y 0.0259 -0.0055 0.0128 -0.0104 -0.0004 -0.0049  
Z 0.0132 -0.0172 0.0081 -0.0040 0.0003 0.0099

AT. 155 H X 0.0011 -0.0008 0.0032 -0.0009 0.0021 -0.0019  
Y 0.0348 0.0117 -0.0164 0.0122 -0.0016 -0.0044  
Z -0.0070 0.0112 0.0086 -0.0077 0.0041 0.0098

AT. 156 H X 0.0011 0.0008 -0.0032 0.0009 0.0021 -0.0019  
Y 0.0348 -0.0117 0.0164 -0.0122 -0.0016 -0.0044  
Z -0.0070 -0.0112 -0.0086 0.0077 0.0041 0.0098

AT. 157 O X 0.0351 0.0148 -0.0038 -0.0064 0.0049 0.0024  
Y 0.0004 -0.0077 -0.0193 -0.0159 0.0032 0.0014  
Z 0.0194 0.0112 0.0689 0.0821 0.1155 -0.0273

AT. 158 O X 0.0351 -0.0148 0.0038 0.0064 0.0049 0.0024  
Y 0.0004 0.0077 0.0193 0.0159 0.0032 0.0014  
Z 0.0194 -0.0112 -0.0689 -0.0821 0.1155 -0.0273

AT. 159 O X 0.0231 0.0091 -0.0190 -0.0281 -0.0322 0.0081  
Y 0.0088 -0.0013 -0.0227 -0.0276 -0.0285 0.0067

Z -0.0002 0.0016 0.0416 0.0423 0.0469 -0.0169  
AT.160 O X 0.0231 -0.0091 0.0190 0.0281 -0.0322 0.0081  
Y 0.0088 0.0013 0.0227 0.0276 -0.0285 0.0067  
Z -0.0002 -0.0016 -0.0416 -0.0423 0.0469 -0.0169  
AT.161 H X 0.0219 0.0070 -0.0133 -0.0116 0.0106 0.0022  
Y 0.0028 -0.0071 -0.0119 -0.0059 0.0194 -0.0021  
Z 0.0052 0.0053 0.0423 0.0486 0.0657 -0.0165  
AT.162 H X 0.0219 -0.0070 0.0133 0.0116 0.0106 0.0022  
Y 0.0028 0.0071 0.0119 0.0059 0.0194 -0.0021  
Z 0.0052 -0.0053 -0.0423 -0.0486 0.0657 -0.0165  
AT.163 H X 0.0104 0.0032 -0.0282 -0.0428 -0.0601 0.0107  
Y 0.0026 -0.0033 -0.0322 -0.0414 -0.0509 0.0068  
Z 0.0027 0.0035 0.0450 0.0466 0.0536 -0.0186  
AT.164 H X 0.0104 -0.0032 0.0282 0.0428 -0.0601 0.0107  
Y 0.0026 0.0033 0.0322 0.0414 -0.0509 0.0068  
Z 0.0027 -0.0035 -0.0450 -0.0466 0.0536 -0.0186  
AT.165 O X -0.0178 -0.0142 -0.0024 0.0035 -0.0023 0.0132  
Y 0.0417 0.0490 -0.0348 0.0190 0.0153 0.0327  
Z 0.0551 0.0585 0.0294 -0.0291 -0.0092 -0.0405  
AT.166 O X -0.0178 0.0142 0.0024 -0.0035 -0.0023 0.0132  
Y 0.0417 -0.0490 0.0348 -0.0190 0.0153 0.0327  
Z 0.0551 -0.0585 -0.0294 0.0291 -0.0092 -0.0405  
AT.167 H X -0.0052 -0.0033 -0.0158 0.0143 0.0025 0.0329  
Y 0.0336 0.0420 -0.0276 0.0139 0.0107 0.0274  
Z 0.0408 0.0493 0.0593 -0.0571 -0.0159 -0.0948  
AT.168 H X -0.0052 0.0033 0.0158 -0.0143 0.0025 0.0329  
Y 0.0336 -0.0420 0.0276 -0.0139 0.0107 0.0274  
Z 0.0408 -0.0493 -0.0593 0.0571 -0.0159 -0.0948  
AT.169 O X -0.0335 -0.0297 0.0661 -0.0573 -0.0205 -0.0925  
Y -0.0005 0.0324 -0.0116 -0.0028 0.0122 -0.0290  
Z 0.0608 0.0588 0.0375 -0.0361 -0.0119 -0.0477  
AT.170 O X -0.0335 0.0297 -0.0661 0.0573 -0.0205 -0.0925

Y -0.0005 -0.0324 0.0116 0.0028 0.0122 -0.0290  
Z 0.0608 -0.0588 -0.0375 0.0361 -0.0119 -0.0477  
AT. 171 H X -0.0054 -0.0178 0.0525 -0.0441 -0.0221 -0.0554  
Y -0.0013 0.0332 -0.0230 0.0075 0.0135 -0.0120  
Z 0.0395 0.0513 0.0325 -0.0309 -0.0104 -0.0494  
AT. 172 H X -0.0054 0.0178 -0.0525 0.0441 -0.0221 -0.0554  
Y -0.0013 -0.0332 0.0230 -0.0075 0.0135 -0.0120  
Z 0.0395 -0.0513 -0.0325 0.0309 -0.0104 -0.0494

FREQ(CM\*\*-1) 131.84 132.34 137.29 137.41 144.28 144.54

AT. 1 I X -0.0008 -0.0007 -0.0097 -0.0174 -0.0231 0.0126  
Y 0.0012 0.0007 -0.0007 0.0032 0.0045 -0.0053  
Z -0.0015 -0.0011 -0.0069 -0.0023 -0.0050 0.0035  
AT. 2 I X -0.0008 0.0007 -0.0097 0.0174 -0.0231 -0.0126  
Y 0.0012 -0.0007 -0.0007 -0.0032 0.0045 0.0053  
Z -0.0015 0.0011 -0.0069 0.0023 -0.0050 -0.0035  
AT. 3 I X 0.0026 0.0009 -0.0195 -0.0182 -0.0046 -0.0097  
Y 0.0016 0.0012 -0.0023 -0.0018 0.0009 -0.0023  
Z 0.0003 0.0009 0.0047 0.0037 -0.0005 0.0018  
AT. 4 I X 0.0026 -0.0009 -0.0195 0.0182 -0.0046 0.0097  
Y 0.0016 -0.0012 -0.0023 0.0018 0.0009 0.0023  
Z 0.0003 -0.0009 0.0047 -0.0037 -0.0005 -0.0018  
AT. 5 O X 0.0059 0.0033 0.0057 0.0407 0.0757 -0.0497  
Y 0.0019 0.0004 -0.0051 0.0220 0.0303 -0.0250  
Z 0.0038 0.0027 -0.0093 0.0025 0.0284 -0.0246  
AT. 6 O X 0.0059 -0.0033 0.0057 -0.0407 0.0757 0.0497  
Y 0.0019 -0.0004 -0.0051 -0.0220 0.0303 0.0250  
Z 0.0038 -0.0027 -0.0093 -0.0025 0.0284 0.0246  
AT. 7 O X -0.0117 -0.0055 0.0776 0.0712 0.0086 0.0464  
Y -0.0140 -0.0063 0.0546 0.0608 0.0182 0.0400  
Z -0.0061 -0.0023 0.0175 0.0273 0.0175 0.0049



AT. 8 O X -0.0117 0.0055 0.0776 -0.0712 0.0086 -0.0464  
Y -0.0140 0.0063 0.0546 -0.0608 0.0182 -0.0400  
Z -0.0061 0.0023 0.0175 -0.0273 0.0175 -0.0049

AT. 9 N X 0.0010 0.0036 0.0202 0.0181 0.0036 0.0062  
Y -0.0031 -0.0023 -0.0083 -0.0035 -0.0059 -0.0006  
Z 0.0023 0.0029 -0.0043 -0.0028 0.0069 -0.0080

AT. 10 N X 0.0010 -0.0036 0.0202 -0.0181 0.0036 -0.0062  
Y -0.0031 0.0023 -0.0083 0.0035 -0.0059 0.0006  
Z 0.0023 -0.0029 -0.0043 0.0028 0.0069 0.0080

AT. 11 N X 0.0002 0.0003 0.0127 0.0136 0.0041 -0.0006  
Y -0.0009 0.0010 -0.0109 -0.0061 -0.0018 -0.0016  
Z -0.0015 0.0017 -0.0099 -0.0017 0.0041 -0.0090

AT. 12 N X 0.0002 -0.0003 0.0127 -0.0136 0.0041 0.0006  
Y -0.0009 -0.0010 -0.0109 0.0061 -0.0018 0.0016  
Z -0.0015 -0.0017 -0.0099 0.0017 0.0041 0.0090

AT. 13 C X 0.0024 0.0021 0.0081 0.0201 0.0287 -0.0157  
Y -0.0016 -0.0020 -0.0098 -0.0017 -0.0036 -0.0024  
Z 0.0025 0.0032 -0.0039 -0.0026 0.0048 -0.0062

AT. 14 C X 0.0024 -0.0021 0.0081 -0.0201 0.0287 0.0157  
Y -0.0016 0.0020 -0.0098 0.0017 -0.0036 0.0024  
Z 0.0025 -0.0032 -0.0039 0.0026 0.0048 0.0062

AT. 15 C X 0.0014 0.0010 0.0024 0.0051 0.0137 -0.0071  
Y -0.0030 -0.0028 -0.0125 -0.0176 -0.0299 0.0146  
Z 0.0006 0.0031 0.0002 -0.0092 -0.0246 0.0148

AT. 16 C X 0.0014 -0.0010 0.0024 -0.0051 0.0137 0.0071  
Y -0.0030 0.0028 -0.0125 0.0176 -0.0299 -0.0146  
Z 0.0006 -0.0031 0.0002 0.0092 -0.0246 -0.0148

AT. 17 H X 0.0014 0.0005 0.0023 0.0092 0.0224 -0.0131  
Y -0.0022 -0.0032 -0.0144 -0.0090 -0.0070 -0.0010  
Z -0.0004 0.0033 0.0032 -0.0175 -0.0488 0.0317

AT. 18 H X 0.0014 -0.0005 0.0023 -0.0092 0.0224 0.0131  
Y -0.0022 0.0032 -0.0144 0.0090 -0.0070 0.0010

Z -0.0004 -0.0033 0.0032 0.0175 -0.0488 -0.0317  
AT. 19 H X 0.0028 0.0022 0.0016 0.0009 0.0154 -0.0085  
Y -0.0037 -0.0020 -0.0081 -0.0273 -0.0576 0.0338  
Z 0.0008 0.0038 0.0013 -0.0145 -0.0351 0.0216  
AT. 20 H X 0.0028 -0.0022 0.0016 -0.0009 0.0154 0.0085  
Y -0.0037 0.0020 -0.0081 0.0273 -0.0576 -0.0338  
Z 0.0008 -0.0038 0.0013 0.0145 -0.0351 -0.0216  
AT. 21 C X -0.0032 -0.0018 0.0325 0.0285 0.0023 0.0170  
Y -0.0041 -0.0013 0.0006 0.0087 0.0077 0.0062  
Z -0.0032 0.0005 -0.0034 0.0059 0.0085 -0.0040  
AT. 22 C X -0.0032 0.0018 0.0325 -0.0285 0.0023 -0.0170  
Y -0.0041 0.0013 0.0006 -0.0087 0.0077 -0.0062  
Z -0.0032 -0.0005 -0.0034 -0.0059 0.0085 0.0040  
AT. 23 C X 0.0010 0.0000 0.0112 0.0053 -0.0051 0.0063  
Y 0.0048 0.0015 -0.0477 -0.0352 0.0071 -0.0245  
Z -0.0019 0.0011 -0.0055 -0.0007 0.0015 -0.0026  
AT. 24 C X 0.0010 -0.0000 0.0112 -0.0053 -0.0051 -0.0063  
Y 0.0048 -0.0015 -0.0477 0.0352 0.0071 0.0245  
Z -0.0019 -0.0011 -0.0055 0.0007 0.0015 0.0026  
AT. 25 H X 0.0021 0.0007 0.0168 0.0057 -0.0095 0.0070  
Y 0.0059 0.0018 -0.0529 -0.0401 0.0078 -0.0277  
Z -0.0082 -0.0005 0.0372 0.0352 -0.0057 0.0199  
AT. 26 H X 0.0021 -0.0007 0.0168 -0.0057 -0.0095 -0.0070  
Y 0.0059 -0.0018 -0.0529 0.0401 0.0078 0.0277  
Z -0.0082 0.0005 0.0372 -0.0352 -0.0057 -0.0199  
AT. 27 H X 0.0010 -0.0002 0.0120 0.0038 -0.0047 0.0104  
Y 0.0102 0.0026 -0.0831 -0.0648 0.0122 -0.0436  
Z 0.0010 0.0017 -0.0241 -0.0159 0.0046 -0.0131  
AT. 28 H X 0.0010 0.0002 0.0120 -0.0038 -0.0047 -0.0104  
Y 0.0102 -0.0026 -0.0831 0.0648 0.0122 0.0436  
Z 0.0010 -0.0017 -0.0241 0.0159 0.0046 0.0131  
AT. 29 C X 0.0022 0.0061 0.0275 0.0179 -0.0050 0.0148

Y -0.0014 0.0005 0.0008 -0.0016 -0.0099 0.0055  
Z 0.0034 0.0023 -0.0032 0.0043 0.0230 -0.0185  
AT. 30 C X 0.0022 -0.0061 0.0275 -0.0179 -0.0050 -0.0148  
Y -0.0014 -0.0005 0.0008 0.0016 -0.0099 -0.0055  
Z 0.0034 -0.0023 -0.0032 -0.0043 0.0230 0.0185  
AT. 31 H X 0.0026 0.0083 0.0338 0.0135 -0.0196 0.0272  
Y -0.0001 -0.0007 -0.0085 -0.0006 0.0090 -0.0104  
Z 0.0056 0.0017 -0.0130 0.0031 0.0416 -0.0340  
AT. 32 H X 0.0026 -0.0083 0.0338 -0.0135 -0.0196 -0.0272  
Y -0.0001 0.0007 -0.0085 0.0006 0.0090 0.0104  
Z 0.0056 -0.0017 -0.0130 -0.0031 0.0416 0.0340  
AT. 33 H X 0.0018 0.0069 0.0373 0.0227 -0.0106 0.0219  
Y -0.0032 0.0027 0.0153 -0.0033 -0.0369 0.0288  
Z 0.0040 0.0018 -0.0031 0.0084 0.0316 -0.0245  
AT. 34 H X 0.0018 -0.0069 0.0373 -0.0227 -0.0106 -0.0219  
Y -0.0032 -0.0027 0.0153 0.0033 -0.0369 -0.0288  
Z 0.0040 -0.0018 -0.0031 -0.0084 0.0316 0.0245  
AT. 35 C X 0.0017 0.0036 0.0147 0.0134 0.0057 0.0024  
Y 0.0013 0.0025 0.0038 -0.0007 -0.0043 0.0047  
Z 0.0013 0.0028 0.0081 0.0080 0.0061 -0.0042  
AT. 36 C X 0.0017 -0.0036 0.0147 -0.0134 0.0057 -0.0024  
Y 0.0013 -0.0025 0.0038 0.0007 -0.0043 -0.0047  
Z 0.0013 -0.0028 0.0081 -0.0080 0.0061 0.0042  
AT. 37 C X 0.0007 0.0016 0.0146 0.0130 0.0019 0.0017  
Y -0.0004 0.0023 -0.0007 -0.0051 -0.0113 0.0071  
Z -0.0025 0.0010 0.0061 0.0040 -0.0085 0.0026  
AT. 38 C X 0.0007 -0.0016 0.0146 -0.0130 0.0019 -0.0017  
Y -0.0004 -0.0023 -0.0007 0.0051 -0.0113 -0.0071  
Z -0.0025 -0.0010 0.0061 -0.0040 -0.0085 -0.0026  
AT. 39 H X -0.0029 -0.0005 0.0257 0.0151 -0.0158 0.0147  
Y -0.0029 0.0012 -0.0048 -0.0099 -0.0198 0.0106  
Z -0.0040 0.0001 0.0159 0.0080 -0.0167 0.0102

AT. 40 H X -0.0029 0.0005 0.0257 -0.0151 -0.0158 -0.0147  
Y -0.0029 -0.0012 -0.0048 0.0099 -0.0198 -0.0106  
Z -0.0040 -0.0001 0.0159 -0.0080 -0.0167 -0.0102

AT. 41 H X 0.0044 0.0042 0.0048 0.0116 0.0185 -0.0101  
Y -0.0001 0.0032 0.0117 0.0005 -0.0160 0.0148  
Z -0.0068 -0.0026 0.0067 0.0011 -0.0220 0.0089

AT. 42 H X 0.0044 -0.0042 0.0048 -0.0116 0.0185 0.0101  
Y -0.0001 -0.0032 0.0117 -0.0005 -0.0160 -0.0148  
Z -0.0068 0.0026 0.0067 -0.0011 -0.0220 -0.0089

AT. 43 C X 0.0007 -0.0003 0.0102 0.0167 0.0133 -0.0070  
Y -0.0008 -0.0007 -0.0014 0.0008 0.0007 0.0003  
Z -0.0009 0.0020 -0.0189 -0.0037 0.0115 -0.0169

AT. 44 C X 0.0007 0.0003 0.0102 -0.0167 0.0133 0.0070  
Y -0.0008 0.0007 -0.0014 -0.0008 0.0007 -0.0003  
Z -0.0009 -0.0020 -0.0189 0.0037 0.0115 0.0169

AT. 45 H X 0.0023 -0.0009 0.0037 0.0157 0.0207 -0.0158  
Y -0.0015 -0.0006 0.0073 0.0015 -0.0064 0.0101  
Z -0.0011 0.0023 -0.0226 -0.0037 0.0130 -0.0199

AT. 46 H X 0.0023 0.0009 0.0037 -0.0157 0.0207 0.0158  
Y -0.0015 0.0006 0.0073 -0.0015 -0.0064 -0.0101  
Z -0.0011 -0.0023 -0.0226 0.0037 0.0130 0.0199

AT. 47 H X 0.0006 -0.0011 0.0122 0.0195 0.0146 -0.0080  
Y -0.0006 -0.0016 -0.0065 0.0031 0.0083 -0.0078  
Z -0.0007 0.0018 -0.0272 -0.0054 0.0177 -0.0243

AT. 48 H X 0.0006 0.0011 0.0122 -0.0195 0.0146 0.0080  
Y -0.0006 0.0016 -0.0065 -0.0031 0.0083 0.0078  
Z -0.0007 -0.0018 -0.0272 0.0054 0.0177 0.0243

AT. 49 C X 0.0003 0.0008 0.0094 0.0129 0.0097 -0.0022  
Y -0.0002 -0.0017 0.0033 0.0020 -0.0000 0.0011  
Z -0.0001 0.0020 -0.0129 -0.0053 0.0060 -0.0109

AT. 50 C X 0.0003 -0.0008 0.0094 -0.0129 0.0097 0.0022  
Y -0.0002 0.0017 0.0033 -0.0020 -0.0000 -0.0011

Z -0.0001 -0.0020 -0.0129 0.0053 0.0060 0.0109  
AT. 51 C X 0.0006 0.0023 0.0176 0.0158 0.0033 0.0057  
Y -0.0021 -0.0039 -0.0113 -0.0020 0.0083 -0.0108  
Z 0.0015 0.0029 -0.0053 -0.0055 -0.0006 -0.0034  
AT. 52 C X 0.0006 -0.0023 0.0176 -0.0158 0.0033 -0.0057  
Y -0.0021 0.0039 -0.0113 0.0020 0.0083 0.0108  
Z 0.0015 -0.0029 -0.0053 0.0055 -0.0006 0.0034  
AT. 53 H X -0.0003 0.0010 0.0092 0.0159 0.0169 -0.0069  
Y -0.0042 -0.0063 -0.0252 -0.0042 0.0223 -0.0261  
Z 0.0006 0.0024 -0.0058 -0.0083 -0.0096 0.0024  
AT. 54 H X -0.0003 -0.0010 0.0092 -0.0159 0.0169 0.0069  
Y -0.0042 0.0063 -0.0252 0.0042 0.0223 0.0261  
Z 0.0006 -0.0024 -0.0058 0.0083 -0.0096 -0.0024  
AT. 55 H X 0.0018 0.0042 0.0286 0.0156 -0.0139 0.0219  
Y -0.0017 -0.0046 -0.0116 -0.0004 0.0163 -0.0163  
Z 0.0028 0.0033 0.0019 -0.0036 -0.0023 0.0008  
AT. 56 H X 0.0018 -0.0042 0.0286 -0.0156 -0.0139 -0.0219  
Y -0.0017 0.0046 -0.0116 0.0004 0.0163 0.0163  
Z 0.0028 -0.0033 0.0019 0.0036 -0.0023 -0.0008  
AT. 57 C X 0.0033 0.0053 0.0136 0.0119 0.0096 0.0018  
Y 0.0050 0.0055 0.0121 0.0034 0.0000 0.0085  
Z 0.0039 0.0041 0.0239 0.0181 0.0056 0.0025  
AT. 58 C X 0.0033 -0.0053 0.0136 -0.0119 0.0096 -0.0018  
Y 0.0050 -0.0055 0.0121 -0.0034 0.0000 -0.0085  
Z 0.0039 -0.0041 0.0239 -0.0181 0.0056 -0.0025  
AT. 59 H X 0.0054 0.0060 0.0135 0.0103 0.0137 0.0013  
Y 0.0055 0.0043 0.0153 0.0053 0.0018 0.0087  
Z 0.0060 0.0027 0.0282 0.0197 0.0112 0.0024  
AT. 60 H X 0.0054 -0.0060 0.0135 -0.0103 0.0137 -0.0013  
Y 0.0055 -0.0043 0.0153 -0.0053 0.0018 -0.0087  
Z 0.0060 -0.0027 0.0282 -0.0197 0.0112 -0.0024  
AT. 61 H X 0.0047 0.0078 0.0220 0.0180 0.0073 0.0070

Y 0.0045 0.0071 0.0075 0.0007 -0.0022 0.0082  
Z 0.0053 0.0053 0.0327 0.0242 0.0051 0.0066  
AT. 62 H X 0.0047 -0.0078 0.0220 -0.0180 0.0073 -0.0070  
Y 0.0045 -0.0071 0.0075 -0.0007 -0.0022 -0.0082  
Z 0.0053 -0.0053 0.0327 -0.0242 0.0051 -0.0066  
AT. 63 H X 0.0008 0.0021 0.0055 0.0063 0.0110 -0.0034  
Y 0.0091 0.0070 0.0214 0.0083 0.0047 0.0120  
Z 0.0027 0.0057 0.0233 0.0191 0.0003 0.0043  
AT. 64 H X 0.0008 -0.0021 0.0055 -0.0063 0.0110 0.0034  
Y 0.0091 -0.0070 0.0214 -0.0083 0.0047 -0.0120  
Z 0.0027 -0.0057 0.0233 -0.0191 0.0003 -0.0043  
AT. 65 C X 0.0005 0.0007 0.0000 0.0071 0.0134 -0.0084  
Y 0.0017 -0.0017 0.0131 0.0060 -0.0016 0.0035  
Z -0.0010 0.0019 -0.0261 -0.0126 0.0100 -0.0175  
AT. 66 C X 0.0005 -0.0007 0.0000 -0.0071 0.0134 0.0084  
Y 0.0017 0.0017 0.0131 -0.0060 -0.0016 -0.0035  
Z -0.0010 -0.0019 -0.0261 0.0126 0.0100 0.0175  
AT. 67 H X 0.0012 0.0008 -0.0079 0.0030 0.0177 -0.0142  
Y 0.0012 -0.0002 0.0240 0.0104 -0.0056 0.0095  
Z -0.0011 0.0004 -0.0294 -0.0133 0.0100 -0.0180  
AT. 68 H X 0.0012 -0.0008 -0.0079 -0.0030 0.0177 0.0142  
Y 0.0012 0.0002 0.0240 -0.0104 -0.0056 -0.0095  
Z -0.0011 -0.0004 -0.0294 0.0133 0.0100 0.0180  
AT. 69 H X 0.0009 -0.0010 0.0013 0.0086 0.0138 -0.0087  
Y 0.0020 -0.0036 0.0050 0.0029 0.0021 -0.0019  
Z -0.0012 0.0021 -0.0410 -0.0201 0.0151 -0.0251  
AT. 70 H X 0.0009 0.0010 0.0013 -0.0086 0.0138 0.0087  
Y 0.0020 0.0036 0.0050 -0.0029 0.0021 0.0019  
Z -0.0012 -0.0021 -0.0410 0.0201 0.0151 0.0251  
AT. 71 H X -0.0010 0.0025 -0.0024 0.0050 0.0134 -0.0084  
Y 0.0029 -0.0012 0.0194 0.0087 -0.0025 0.0050  
Z -0.0003 0.0038 -0.0192 -0.0105 0.0087 -0.0154

AT. 72 H X -0.0010 -0.0025 -0.0024 -0.0050 0.0134 0.0084  
Y 0.0029 0.0012 0.0194 -0.0087 -0.0025 -0.0050  
Z -0.0003 -0.0038 -0.0192 0.0105 0.0087 0.0154

AT. 73 C X 0.0005 0.0016 0.0066 0.0093 0.0100 -0.0024  
Y 0.0010 -0.0001 0.0094 0.0034 0.0005 0.0040  
Z 0.0006 0.0024 -0.0004 0.0026 0.0060 -0.0069

AT. 74 C X 0.0005 -0.0016 0.0066 -0.0093 0.0100 0.0024  
Y 0.0010 0.0001 0.0094 -0.0034 0.0005 -0.0040  
Z 0.0006 -0.0024 -0.0004 -0.0026 0.0060 0.0069

AT. 75 H X 0.0006 0.0022 0.0036 0.0064 0.0120 -0.0036  
Y -0.0002 -0.0018 0.0131 0.0057 0.0021 0.0045  
Z -0.0007 0.0005 0.0023 0.0038 0.0096 -0.0069

AT. 76 H X 0.0006 -0.0022 0.0036 -0.0064 0.0120 0.0036  
Y -0.0002 0.0018 0.0131 -0.0057 0.0021 -0.0045  
Z -0.0007 -0.0005 0.0023 -0.0038 0.0096 0.0069

AT. 77 H X -0.0003 -0.0003 0.0031 0.0075 0.0106 -0.0032  
Y 0.0008 0.0001 0.0137 0.0052 0.0037 0.0041  
Z 0.0013 0.0037 -0.0014 0.0026 0.0024 -0.0061

AT. 78 H X -0.0003 0.0003 0.0031 -0.0075 0.0106 0.0032  
Y 0.0008 -0.0001 0.0137 -0.0052 0.0037 -0.0041  
Z 0.0013 -0.0037 -0.0014 -0.0026 0.0024 0.0061

AT. 79 I X -0.0107 -0.0103 0.0005 0.0007 0.0004 0.0033  
Y 0.0043 0.0010 -0.0003 0.0003 -0.0000 -0.0016  
Z 0.0047 0.0037 0.0003 0.0000 -0.0001 -0.0004

AT. 80 I X -0.0107 0.0103 0.0005 -0.0007 0.0004 -0.0033  
Y 0.0043 -0.0010 -0.0003 -0.0003 -0.0000 0.0016  
Z 0.0047 -0.0037 0.0003 -0.0000 -0.0001 0.0004

AT. 81 I X -0.0182 -0.0172 -0.0007 0.0008 -0.0004 0.0008  
Y 0.0074 0.0076 0.0008 0.0002 0.0005 0.0003  
Z -0.0030 -0.0031 0.0010 0.0011 0.0000 0.0004

AT. 82 I X -0.0182 0.0172 -0.0007 -0.0008 -0.0004 -0.0008  
Y 0.0074 -0.0076 0.0008 -0.0002 0.0005 -0.0003

Z -0.0030 0.0031 0.0010 -0.0011 0.0000 -0.0004  
AT. 83 O X -0.0024 0.0203 -0.0040 -0.0027 0.0002 -0.0094  
Y 0.0093 -0.0554 0.0061 -0.0032 -0.0037 0.0008  
Z 0.0172 -0.0069 0.0018 -0.0007 0.0013 0.0038  
AT. 84 O X -0.0024 -0.0203 -0.0040 0.0027 0.0002 0.0094  
Y 0.0093 0.0554 0.0061 0.0032 -0.0037 -0.0008  
Z 0.0172 0.0069 0.0018 0.0007 0.0013 -0.0038  
AT. 85 O X 0.0523 0.0497 0.0035 -0.0019 -0.0002 0.0039  
Y -0.0219 -0.0274 -0.0031 -0.0020 -0.0041 0.0009  
Z -0.0065 -0.0096 -0.0003 -0.0012 -0.0038 0.0056  
AT. 86 O X 0.0523 -0.0497 0.0035 0.0019 -0.0002 -0.0039  
Y -0.0219 0.0274 -0.0031 0.0020 -0.0041 -0.0009  
Z -0.0065 0.0096 -0.0003 0.0012 -0.0038 -0.0056  
AT. 87 N X 0.0213 0.0152 -0.0000 -0.0024 0.0007 -0.0031  
Y -0.0049 -0.0006 -0.0029 -0.0029 -0.0004 -0.0012  
Z 0.0042 -0.0035 -0.0006 -0.0010 0.0008 -0.0005  
AT. 88 N X 0.0213 -0.0152 -0.0000 0.0024 0.0007 0.0031  
Y -0.0049 0.0006 -0.0029 0.0029 -0.0004 0.0012  
Z 0.0042 0.0035 -0.0006 0.0010 0.0008 0.0005  
AT. 89 N X 0.0209 0.0176 0.0016 -0.0009 -0.0016 -0.0018  
Y 0.0030 0.0069 -0.0015 -0.0017 -0.0002 0.0013  
Z -0.0076 -0.0009 -0.0004 -0.0003 -0.0010 0.0020  
AT. 90 N X 0.0209 -0.0176 0.0016 0.0009 -0.0016 0.0018  
Y 0.0030 -0.0069 -0.0015 0.0017 -0.0002 -0.0013  
Z -0.0076 0.0009 -0.0004 0.0003 -0.0010 -0.0020  
AT. 91 C X 0.0052 0.0115 -0.0018 -0.0026 0.0001 -0.0059  
Y 0.0063 -0.0158 0.0007 -0.0033 -0.0017 -0.0031  
Z 0.0059 -0.0052 -0.0001 -0.0011 0.0006 -0.0004  
AT. 92 C X 0.0052 -0.0115 -0.0018 0.0026 0.0001 0.0059  
Y 0.0063 0.0158 0.0007 0.0033 -0.0017 0.0031  
Z 0.0059 0.0052 -0.0001 0.0011 0.0006 0.0004  
AT. 93 C X -0.0007 0.0002 -0.0014 -0.0032 -0.0009 -0.0067



Y 0.0082 0.0057 -0.0016 -0.0029 -0.0009 -0.0080  
Z -0.0023 -0.0062 -0.0012 -0.0021 -0.0002 -0.0056  
AT. 94 C X -0.0007 -0.0002 -0.0014 0.0032 -0.0009 0.0067  
Y 0.0082 -0.0057 -0.0016 0.0029 -0.0009 0.0080  
Z -0.0023 0.0062 -0.0012 0.0021 -0.0002 0.0056  
AT. 95 H X 0.0022 -0.0038 -0.0016 -0.0051 -0.0018 -0.0095  
Y 0.0084 0.0070 -0.0007 -0.0007 0.0001 -0.0027  
Z -0.0057 -0.0047 -0.0025 -0.0039 -0.0012 -0.0123  
AT. 96 H X 0.0022 0.0038 -0.0016 0.0051 -0.0018 0.0095  
Y 0.0084 -0.0070 -0.0007 0.0007 0.0001 0.0027  
Z -0.0057 0.0047 -0.0025 0.0039 -0.0012 0.0123  
AT. 97 H X -0.0039 -0.0028 -0.0014 -0.0037 -0.0017 -0.0085  
Y 0.0059 0.0029 -0.0029 -0.0057 -0.0023 -0.0163  
Z -0.0018 -0.0060 -0.0015 -0.0025 -0.0003 -0.0070  
AT. 98 H X -0.0039 0.0028 -0.0014 0.0037 -0.0017 0.0085  
Y 0.0059 -0.0029 -0.0029 0.0057 -0.0023 0.0163  
Z -0.0018 0.0060 -0.0015 0.0025 -0.0003 0.0070  
AT. 99 C X 0.0293 0.0273 0.0019 -0.0014 -0.0009 0.0016  
Y 0.0094 0.0069 -0.0006 -0.0020 -0.0022 0.0020  
Z -0.0027 -0.0004 0.0000 -0.0007 -0.0024 0.0024  
AT. 100 C X 0.0293 -0.0273 0.0019 0.0014 -0.0009 -0.0016  
Y 0.0094 -0.0069 -0.0006 0.0020 -0.0022 -0.0020  
Z -0.0027 0.0004 0.0000 0.0007 -0.0024 -0.0024  
AT. 101 C X 0.0223 0.0200 0.0009 -0.0020 -0.0018 0.0036  
Y 0.0465 0.0422 0.0026 -0.0023 -0.0013 0.0049  
Z -0.0026 -0.0003 0.0006 0.0003 -0.0013 -0.0008  
AT. 102 C X 0.0223 -0.0200 0.0009 0.0020 -0.0018 -0.0036  
Y 0.0465 -0.0422 0.0026 0.0023 -0.0013 -0.0049  
Z -0.0026 0.0003 0.0006 -0.0003 -0.0013 0.0008  
AT. 103 H X 0.0297 0.0246 0.0012 -0.0030 -0.0032 0.0049  
Y 0.0437 0.0404 0.0026 -0.0018 -0.0008 0.0044  
Z -0.0326 -0.0295 -0.0016 0.0013 -0.0008 -0.0054

AT.104 H X 0.0297 -0.0246 0.0012 0.0030 -0.0032 -0.0049  
Y 0.0437 -0.0404 0.0026 0.0018 -0.0008 -0.0044  
Z -0.0326 0.0295 -0.0016 -0.0013 -0.0008 0.0054

AT.105 H X 0.0222 0.0217 0.0007 -0.0023 -0.0026 0.0054  
Y 0.0726 0.0685 0.0049 -0.0026 -0.0016 0.0088  
Z 0.0077 0.0101 0.0014 0.0001 -0.0016 0.0011

AT.106 H X 0.0222 -0.0217 0.0007 0.0023 -0.0026 -0.0054  
Y 0.0726 -0.0685 0.0049 0.0026 -0.0016 -0.0088  
Z 0.0077 -0.0101 0.0014 -0.0001 -0.0016 -0.0011

AT.107 C X 0.0263 0.0192 0.0004 -0.0023 0.0012 -0.0004  
Y -0.0115 -0.0067 -0.0025 -0.0022 -0.0015 -0.0028  
Z 0.0075 -0.0027 0.0001 -0.0002 0.0010 0.0032

AT.108 C X 0.0263 -0.0192 0.0004 0.0023 0.0012 0.0004  
Y -0.0115 0.0067 -0.0025 0.0022 -0.0015 0.0028  
Z 0.0075 0.0027 0.0001 0.0002 0.0010 -0.0032

AT.109 H X 0.0399 0.0242 0.0011 -0.0031 0.0023 0.0044  
Y 0.0002 -0.0017 -0.0020 -0.0025 -0.0008 -0.0003  
Z 0.0231 0.0044 0.0006 -0.0006 0.0018 0.0060

AT.110 H X 0.0399 -0.0242 0.0011 0.0031 0.0023 -0.0044  
Y 0.0002 0.0017 -0.0020 0.0025 -0.0008 0.0003  
Z 0.0231 -0.0044 0.0006 0.0006 0.0018 -0.0060

AT.111 H X 0.0296 0.0202 0.0002 -0.0029 0.0015 -0.0016  
Y -0.0344 -0.0176 -0.0035 -0.0014 -0.0034 -0.0079  
Z 0.0086 -0.0014 0.0005 0.0004 0.0011 0.0057

AT.112 H X 0.0296 -0.0202 0.0002 0.0029 0.0015 0.0016  
Y -0.0344 0.0176 -0.0035 0.0014 -0.0034 0.0079  
Z 0.0086 0.0014 0.0005 -0.0004 0.0011 -0.0057

AT.113 C X 0.0123 0.0119 0.0006 -0.0007 -0.0003 -0.0017  
Y -0.0003 -0.0021 -0.0019 -0.0018 -0.0009 -0.0009  
Z -0.0117 -0.0119 -0.0007 0.0001 -0.0003 0.0004

AT.114 C X 0.0123 -0.0119 0.0006 0.0007 -0.0003 0.0017  
Y -0.0003 0.0021 -0.0019 0.0018 -0.0009 0.0009

Z -0.0117 0.0119 -0.0007 -0.0001 -0.0003 -0.0004  
AT. 115 C X 0.0155 0.0146 0.0012 -0.0005 -0.0010 -0.0030  
Y -0.0070 -0.0021 -0.0021 -0.0014 -0.0017 -0.0030  
Z -0.0271 -0.0161 -0.0014 0.0007 -0.0016 -0.0032  
AT. 116 C X 0.0155 -0.0146 0.0012 0.0005 -0.0010 0.0030  
Y -0.0070 0.0021 -0.0021 0.0014 -0.0017 0.0030  
Z -0.0271 0.0161 -0.0014 -0.0007 -0.0016 0.0032  
AT. 117 H X 0.0347 0.0261 0.0025 -0.0012 0.0000 0.0022  
Y -0.0221 -0.0073 -0.0028 -0.0009 -0.0039 -0.0076  
Z -0.0442 -0.0275 -0.0027 0.0014 -0.0022 -0.0078  
AT. 118 H X 0.0347 -0.0261 0.0025 0.0012 0.0000 -0.0022  
Y -0.0221 0.0073 -0.0028 0.0009 -0.0039 0.0076  
Z -0.0442 0.0275 -0.0027 -0.0014 -0.0022 0.0078  
AT. 119 H X -0.0096 -0.0009 0.0001 0.0008 -0.0032 -0.0101  
Y -0.0089 -0.0073 -0.0017 -0.0009 -0.0020 -0.0035  
Z -0.0390 -0.0196 -0.0024 0.0009 -0.0025 -0.0066  
AT. 120 H X -0.0096 0.0009 0.0001 -0.0008 -0.0032 0.0101  
Y -0.0089 0.0073 -0.0017 0.0009 -0.0020 0.0035  
Z -0.0390 0.0196 -0.0024 -0.0009 -0.0025 0.0066  
AT. 121 C X 0.0168 0.0134 0.0016 -0.0012 -0.0030 -0.0031  
Y -0.0007 0.0012 -0.0023 -0.0013 0.0015 0.0019  
Z 0.0015 0.0078 -0.0007 -0.0005 0.0008 0.0037  
AT. 122 C X 0.0168 -0.0134 0.0016 0.0012 -0.0030 0.0031  
Y -0.0007 -0.0012 -0.0023 0.0013 0.0015 -0.0019  
Z 0.0015 -0.0078 -0.0007 0.0005 0.0008 -0.0037  
AT. 123 H X 0.0106 0.0050 0.0006 -0.0029 -0.0063 -0.0072  
Y -0.0001 -0.0046 -0.0027 -0.0024 0.0005 -0.0013  
Z -0.0004 0.0122 0.0002 0.0009 0.0014 0.0067  
AT. 124 H X 0.0106 -0.0050 0.0006 0.0029 -0.0063 0.0072  
Y -0.0001 0.0046 -0.0027 0.0024 0.0005 0.0013  
Z -0.0004 -0.0122 0.0002 -0.0009 0.0014 -0.0067  
AT. 125 H X 0.0219 0.0174 0.0018 -0.0014 -0.0027 -0.0034

Y -0.0016 0.0071 -0.0028 -0.0008 0.0033 0.0062  
Z 0.0077 0.0160 -0.0010 -0.0007 0.0021 0.0055  
AT. 126 H X 0.0219 -0.0174 0.0018 0.0014 -0.0027 0.0034  
Y -0.0016 -0.0071 -0.0028 0.0008 0.0033 -0.0062  
Z 0.0077 -0.0160 -0.0010 0.0007 0.0021 -0.0055  
AT. 127 C X 0.0112 0.0108 0.0010 -0.0005 -0.0011 -0.0021  
Y 0.0007 -0.0021 -0.0026 -0.0021 0.0015 0.0004  
Z 0.0047 0.0012 -0.0007 -0.0016 0.0003 -0.0006  
AT. 128 C X 0.0112 -0.0108 0.0010 0.0005 -0.0011 0.0021  
Y 0.0007 0.0021 -0.0026 0.0021 0.0015 -0.0004  
Z 0.0047 -0.0012 -0.0007 0.0016 0.0003 0.0006  
AT. 129 C X 0.0202 0.0150 0.0002 -0.0017 0.0004 -0.0023  
Y 0.0030 0.0062 -0.0033 -0.0018 0.0023 0.0022  
Z 0.0040 -0.0058 -0.0007 -0.0025 -0.0000 -0.0033  
AT. 130 C X 0.0202 -0.0150 0.0002 0.0017 0.0004 0.0023  
Y 0.0030 -0.0062 -0.0033 0.0018 0.0023 -0.0022  
Z 0.0040 0.0058 -0.0007 0.0025 -0.0000 0.0033  
AT. 131 H X 0.0183 0.0110 0.0006 -0.0027 -0.0008 -0.0049  
Y 0.0111 0.0169 -0.0046 -0.0017 0.0044 0.0056  
Z 0.0045 -0.0067 -0.0008 -0.0038 -0.0007 -0.0053  
AT. 132 H X 0.0183 -0.0110 0.0006 0.0027 -0.0008 0.0049  
Y 0.0111 -0.0169 -0.0046 0.0017 0.0044 -0.0056  
Z 0.0045 0.0067 -0.0008 0.0038 -0.0007 0.0053  
AT. 133 H X 0.0256 0.0237 -0.0012 0.0004 0.0031 0.0019  
Y 0.0040 0.0051 -0.0029 -0.0013 0.0032 0.0028  
Z 0.0027 -0.0115 0.0004 -0.0027 0.0002 -0.0046  
AT. 134 H X 0.0256 -0.0237 -0.0012 -0.0004 0.0031 -0.0019  
Y 0.0040 -0.0051 -0.0029 0.0013 0.0032 -0.0028  
Z 0.0027 0.0115 0.0004 0.0027 0.0002 0.0046  
AT. 135 C X 0.0021 0.0040 -0.0002 -0.0004 -0.0014 -0.0007  
Y 0.0055 -0.0007 -0.0011 -0.0003 0.0010 -0.0021  
Z -0.0250 -0.0240 -0.0013 0.0015 -0.0012 0.0015

AT. 136 C X 0.0021 -0.0040 -0.0002 0.0004 -0.0014 0.0007  
Y 0.0055 0.0007 -0.0011 0.0003 0.0010 0.0021  
Z -0.0250 0.0240 -0.0013 -0.0015 -0.0012 -0.0015

AT. 137 H X -0.0068 -0.0041 -0.0017 -0.0020 -0.0051 0.0026  
Y 0.0075 -0.0032 -0.0014 -0.0021 -0.0009 -0.0003  
Z -0.0180 -0.0254 -0.0013 -0.0010 -0.0029 0.0034

AT. 138 H X -0.0068 0.0041 -0.0017 0.0020 -0.0051 -0.0026  
Y 0.0075 0.0032 -0.0014 0.0021 -0.0009 0.0003  
Z -0.0180 0.0254 -0.0013 0.0010 -0.0029 -0.0034

AT. 139 H X 0.0119 0.0108 0.0002 -0.0019 -0.0015 -0.0006  
Y 0.0029 0.0036 -0.0004 0.0033 0.0054 -0.0063  
Z -0.0371 -0.0341 -0.0020 0.0025 -0.0021 0.0026

AT. 140 H X 0.0119 -0.0108 0.0002 0.0019 -0.0015 0.0006  
Y 0.0029 -0.0036 -0.0004 -0.0033 0.0054 0.0063  
Z -0.0371 0.0341 -0.0020 -0.0025 -0.0021 -0.0026

AT. 141 H X -0.0076 -0.0017 -0.0003 0.0031 0.0007 -0.0023  
Y 0.0090 -0.0027 -0.0011 -0.0006 0.0004 -0.0013  
Z -0.0328 -0.0246 -0.0013 0.0033 0.0002 0.0000

AT. 142 H X -0.0076 0.0017 -0.0003 -0.0031 0.0007 0.0023  
Y 0.0090 0.0027 -0.0011 0.0006 0.0004 0.0013  
Z -0.0328 0.0246 -0.0013 -0.0033 0.0002 -0.0000

AT. 143 C X 0.0029 0.0077 0.0014 0.0005 -0.0009 0.0006  
Y 0.0004 -0.0091 -0.0030 -0.0019 0.0021 -0.0035  
Z 0.0170 0.0080 -0.0010 -0.0029 -0.0002 -0.0033

AT. 144 C X 0.0029 -0.0077 0.0014 -0.0005 -0.0009 -0.0006  
Y 0.0004 0.0091 -0.0030 0.0019 0.0021 0.0035  
Z 0.0170 -0.0080 -0.0010 0.0029 -0.0002 0.0033

AT. 145 H X -0.0052 0.0069 0.0018 0.0018 0.0002 0.0059  
Y -0.0006 -0.0110 -0.0015 0.0012 0.0011 -0.0049  
Z 0.0160 0.0097 -0.0023 -0.0056 0.0010 -0.0006

AT. 146 H X -0.0052 -0.0069 0.0018 -0.0018 0.0002 -0.0059  
Y -0.0006 0.0110 -0.0015 -0.0012 0.0011 0.0049

Z 0.0160 -0.0097 -0.0023 0.0056 0.0010 0.0006  
AT. 147 H X 0.0094 0.0117 0.0020 0.0009 -0.0016 -0.0003  
Y 0.0016 -0.0097 -0.0054 -0.0058 0.0028 -0.0049  
Z 0.0267 0.0131 -0.0015 -0.0045 -0.0008 -0.0054  
AT. 148 H X 0.0094 -0.0117 0.0020 -0.0009 -0.0016 0.0003  
Y 0.0016 0.0097 -0.0054 0.0058 0.0028 0.0049  
Z 0.0267 -0.0131 -0.0015 0.0045 -0.0008 0.0054  
AT. 149 H X -0.0029 0.0015 -0.0003 -0.0013 0.0001 0.0004  
Y -0.0003 -0.0122 -0.0024 -0.0007 0.0016 -0.0049  
Z 0.0189 0.0055 0.0008 -0.0001 -0.0014 -0.0057  
AT. 150 H X -0.0029 -0.0015 -0.0003 0.0013 0.0001 -0.0004  
Y -0.0003 0.0122 -0.0024 0.0007 0.0016 0.0049  
Z 0.0189 -0.0055 0.0008 0.0001 -0.0014 0.0057  
AT. 151 C X 0.0036 0.0067 0.0005 0.0004 -0.0005 -0.0020  
Y 0.0060 -0.0038 -0.0017 -0.0029 -0.0008 0.0018  
Z -0.0028 -0.0051 -0.0006 -0.0008 0.0001 0.0001  
AT. 152 C X 0.0036 -0.0067 0.0005 -0.0004 -0.0005 0.0020  
Y 0.0060 0.0038 -0.0017 0.0029 -0.0008 -0.0018  
Z -0.0028 0.0051 -0.0006 0.0008 0.0001 -0.0001  
AT. 153 H X -0.0024 0.0032 0.0006 0.0006 0.0004 -0.0024  
Y 0.0091 -0.0052 -0.0006 -0.0039 -0.0021 0.0040  
Z 0.0050 -0.0059 0.0011 -0.0025 -0.0020 0.0033  
AT. 154 H X -0.0024 -0.0032 0.0006 -0.0006 0.0004 0.0024  
Y 0.0091 0.0052 -0.0006 0.0039 -0.0021 -0.0040  
Z 0.0050 0.0059 0.0011 0.0025 -0.0020 -0.0033  
AT. 155 H X -0.0006 0.0047 0.0005 0.0012 -0.0011 -0.0025  
Y 0.0116 -0.0049 -0.0007 -0.0039 -0.0025 0.0042  
Z -0.0103 -0.0048 -0.0015 0.0005 0.0018 -0.0026  
AT. 156 H X -0.0006 -0.0047 0.0005 -0.0012 -0.0011 0.0025  
Y 0.0116 0.0049 -0.0007 0.0039 -0.0025 -0.0042  
Z -0.0103 0.0048 -0.0015 -0.0005 0.0018 0.0026  
AT. 157 O X -0.0025 -0.0051 -0.0197 0.0188 0.0265 -0.0266

Y 0.0006 0.0008 0.0127 0.0080 0.0157 -0.0029  
Z 0.0142 0.0042 0.0036 0.0390 -0.0117 -0.0097  
AT. 158 O X -0.0025 0.0051 -0.0197 -0.0188 0.0265 0.0266  
Y 0.0006 -0.0008 0.0127 -0.0080 0.0157 0.0029  
Z 0.0142 -0.0042 0.0036 -0.0390 -0.0117 0.0097  
AT. 159 O X -0.0091 -0.0038 0.0033 -0.0162 0.0227 -0.0238  
Y -0.0052 -0.0033 0.0353 -0.0351 -0.0714 0.0966  
Z 0.0017 0.0059 0.0482 -0.0280 -0.0276 0.0061  
AT. 160 O X -0.0091 0.0038 0.0033 0.0162 0.0227 0.0238  
Y -0.0052 0.0033 0.0353 0.0351 -0.0714 -0.0966  
Z 0.0017 -0.0059 0.0482 0.0280 -0.0276 -0.0061  
AT. 161 H X 0.0010 -0.0023 -0.0310 0.0419 0.0767 -0.0746  
Y 0.0027 0.0015 0.0113 0.0176 0.0228 -0.0135  
Z 0.0087 0.0036 0.0108 0.0120 -0.0198 0.0105  
AT. 162 H X 0.0010 0.0023 -0.0310 -0.0419 0.0767 0.0746  
Y 0.0027 -0.0015 0.0113 -0.0176 0.0228 0.0135  
Z 0.0087 -0.0036 0.0108 -0.0120 -0.0198 -0.0105  
AT. 163 H X -0.0152 -0.0011 0.0337 -0.0521 0.0222 -0.0317  
Y -0.0104 -0.0004 0.0411 -0.0471 -0.0396 0.0554  
Z 0.0027 0.0059 0.0401 -0.0191 -0.0203 -0.0021  
AT. 164 H X -0.0152 0.0011 0.0337 0.0521 0.0222 0.0317  
Y -0.0104 0.0004 0.0411 0.0471 -0.0396 -0.0554  
Z 0.0027 -0.0059 0.0401 0.0191 -0.0203 0.0021  
AT. 165 O X 0.0139 -0.0169 0.0006 -0.0013 -0.0033 -0.0042  
Y -0.0429 0.0102 -0.0028 -0.0006 0.0066 0.0046  
Z 0.0005 0.0057 -0.0016 0.0041 -0.0018 0.0017  
AT. 166 O X 0.0139 0.0169 0.0006 0.0013 -0.0033 0.0042  
Y -0.0429 -0.0102 -0.0028 0.0006 0.0066 -0.0046  
Z 0.0005 -0.0057 -0.0016 -0.0041 -0.0018 -0.0017  
AT. 167 H X 0.0180 -0.0273 0.0019 -0.0029 -0.0025 -0.0057  
Y -0.0375 0.0030 -0.0020 0.0004 0.0038 0.0050  
Z -0.0273 0.0527 -0.0075 0.0080 0.0011 0.0066

AT.168 H X 0.0180 0.0273 0.0019 0.0029 -0.0025 0.0057

Y -0.0375 -0.0030 -0.0020 -0.0004 0.0038 -0.0050

Z -0.0273 -0.0527 -0.0075 -0.0080 0.0011 -0.0066

AT.169 O X -0.0221 0.0508 -0.0092 0.0074 0.0025 0.0032

Y -0.0892 0.0862 -0.0092 0.0023 0.0029 0.0118

Z 0.0028 0.0029 -0.0021 0.0052 0.0003 0.0017

AT.170 O X -0.0221 -0.0508 -0.0092 -0.0074 0.0025 -0.0032

Y -0.0892 -0.0862 -0.0092 -0.0023 0.0029 -0.0118

Z 0.0028 -0.0029 -0.0021 -0.0052 0.0003 -0.0017

AT.171 H X 0.0327 -0.0172 -0.0024 0.0044 0.0024 -0.0033

Y -0.0717 0.0662 -0.0063 0.0002 0.0009 0.0092

Z -0.0031 0.0166 -0.0023 0.0043 -0.0035 0.0015

AT.172 H X 0.0327 0.0172 -0.0024 -0.0044 0.0024 0.0033

Y -0.0717 -0.0662 -0.0063 -0.0002 0.0009 -0.0092

Z -0.0031 -0.0166 -0.0023 -0.0043 -0.0035 -0.0015

FREQ(CM\*\*-1) 146.09 148.65 151.01 151.56 159.94 166.44

AT. 1 I X -0.0008 -0.0039 -0.0114 -0.0081 0.0015 0.0006

Y -0.0001 0.0006 -0.0029 -0.0034 0.0000 0.0002

Z -0.0004 -0.0019 -0.0036 -0.0023 0.0007 -0.0002

AT. 2 I X -0.0008 0.0039 0.0114 -0.0081 -0.0015 0.0006

Y -0.0001 -0.0006 0.0029 -0.0034 -0.0000 0.0002

Z -0.0004 0.0019 0.0036 -0.0023 -0.0007 -0.0002

AT. 3 I X 0.0017 0.0038 0.0016 0.0034 -0.0000 0.0008

Y -0.0001 0.0003 0.0020 0.0024 -0.0002 0.0000

Z -0.0006 -0.0011 -0.0004 -0.0014 -0.0001 0.0001

AT. 4 I X 0.0017 -0.0038 -0.0016 0.0034 0.0000 0.0008

Y -0.0001 -0.0003 -0.0020 0.0024 0.0002 0.0000

Z -0.0006 0.0011 0.0004 -0.0014 0.0001 0.0001

AT. 5 O X 0.0071 0.0169 0.0504 0.0453 -0.0081 -0.0009

Y -0.0023 -0.0008 -0.0173 -0.0183 0.0030 -0.0024



Z 0.0034 0.0096 0.0241 0.0193 -0.0027 -0.0000  
AT. 6 O X 0.0071 -0.0169 -0.0504 0.0453 0.0081 -0.0009  
Y -0.0023 0.0008 0.0173 -0.0183 -0.0030 -0.0024  
Z 0.0034 -0.0096 -0.0241 0.0193 0.0027 -0.0000  
AT. 7 O X -0.0060 -0.0136 -0.0130 -0.0307 0.0015 -0.0028  
Y -0.0040 -0.0070 0.0060 -0.0250 0.0004 -0.0031  
Z 0.0003 0.0016 0.0138 0.0025 -0.0010 -0.0012  
AT. 8 O X -0.0060 0.0136 0.0130 -0.0307 -0.0015 -0.0028  
Y -0.0040 0.0070 -0.0060 -0.0250 -0.0004 -0.0031  
Z 0.0003 -0.0016 -0.0138 0.0025 0.0010 -0.0012  
AT. 9 N X -0.0002 -0.0003 0.0034 0.0051 0.0008 -0.0005  
Y 0.0000 -0.0007 -0.0048 -0.0032 -0.0017 -0.0008  
Z 0.0002 0.0032 0.0036 0.0011 0.0014 -0.0001  
AT. 10 N X -0.0002 0.0003 -0.0034 0.0051 -0.0008 -0.0005  
Y 0.0000 0.0007 0.0048 -0.0032 0.0017 -0.0008  
Z 0.0002 -0.0032 -0.0036 0.0011 -0.0014 -0.0001  
AT. 11 N X 0.0009 -0.0003 0.0017 0.0062 -0.0010 -0.0010  
Y 0.0002 0.0022 0.0037 -0.0002 -0.0005 -0.0008  
Z 0.0003 0.0040 0.0075 0.0066 -0.0008 0.0000  
AT. 12 N X 0.0009 0.0003 -0.0017 0.0062 0.0010 -0.0010  
Y 0.0002 -0.0022 -0.0037 -0.0002 0.0005 -0.0008  
Z 0.0003 -0.0040 -0.0075 0.0066 0.0008 0.0000  
AT. 13 C X 0.0030 0.0064 0.0219 0.0212 -0.0033 -0.0003  
Y -0.0021 -0.0039 -0.0189 -0.0177 0.0016 -0.0012  
Z -0.0005 0.0022 -0.0000 -0.0025 0.0025 -0.0000  
AT. 14 C X 0.0030 -0.0064 -0.0219 0.0212 0.0033 -0.0003  
Y -0.0021 0.0039 0.0189 -0.0177 -0.0016 -0.0012  
Z -0.0005 -0.0022 0.0000 -0.0025 -0.0025 -0.0000  
AT. 15 C X 0.0035 0.0058 0.0233 0.0226 -0.0043 0.0008  
Y -0.0045 -0.0100 -0.0376 -0.0344 0.0048 -0.0007  
Z -0.0062 -0.0091 -0.0385 -0.0368 0.0101 -0.0007  
AT. 16 C X 0.0035 -0.0058 -0.0233 0.0226 0.0043 0.0008

Y -0.0045 0.0100 0.0376 -0.0344 -0.0048 -0.0007  
Z -0.0062 0.0091 0.0385 -0.0368 -0.0101 -0.0007  
AT. 17 H X 0.0059 0.0094 0.0378 0.0374 -0.0074 0.0014  
Y 0.0003 -0.0013 -0.0054 -0.0038 -0.0017 -0.0000  
Z -0.0113 -0.0183 -0.0726 -0.0689 0.0168 -0.0014  
AT. 18 H X 0.0059 -0.0094 -0.0378 0.0374 0.0074 0.0014  
Y 0.0003 0.0013 0.0054 -0.0038 0.0017 -0.0000  
Z -0.0113 0.0183 0.0726 -0.0689 -0.0168 -0.0014  
AT. 19 H X 0.0045 0.0083 0.0310 0.0278 -0.0052 0.0012  
Y -0.0110 -0.0212 -0.0803 -0.0744 0.0136 -0.0017  
Z -0.0085 -0.0127 -0.0531 -0.0507 0.0133 -0.0010  
AT. 20 H X 0.0045 -0.0083 -0.0310 0.0278 0.0052 0.0012  
Y -0.0110 0.0212 0.0803 -0.0744 -0.0136 -0.0017  
Z -0.0085 0.0127 0.0531 -0.0507 -0.0133 -0.0010  
AT. 21 C X -0.0020 -0.0057 -0.0071 -0.0102 0.0005 -0.0012  
Y -0.0001 0.0017 0.0100 -0.0035 -0.0004 -0.0013  
Z -0.0001 0.0034 0.0102 0.0038 -0.0009 -0.0000  
AT. 22 C X -0.0020 0.0057 0.0071 -0.0102 -0.0005 -0.0012  
Y -0.0001 -0.0017 -0.0100 -0.0035 0.0004 -0.0013  
Z -0.0001 -0.0034 -0.0102 0.0038 0.0009 -0.0000  
AT. 23 C X -0.0009 -0.0033 -0.0090 -0.0060 0.0007 -0.0001  
Y 0.0054 0.0114 0.0221 0.0199 -0.0019 0.0006  
Z -0.0011 0.0017 0.0029 -0.0011 -0.0002 0.0005  
AT. 24 C X -0.0009 0.0033 0.0090 -0.0060 -0.0007 -0.0001  
Y 0.0054 -0.0114 -0.0221 0.0199 0.0019 0.0006  
Z -0.0011 -0.0017 -0.0029 -0.0011 0.0002 0.0005  
AT. 25 H X -0.0017 -0.0052 -0.0140 -0.0073 0.0009 0.0005  
Y 0.0062 0.0124 0.0235 0.0231 -0.0021 0.0008  
Z -0.0073 -0.0073 -0.0112 -0.0250 0.0012 -0.0006  
AT. 26 H X -0.0017 0.0052 0.0140 -0.0073 -0.0009 0.0005  
Y 0.0062 -0.0124 -0.0235 0.0231 0.0021 0.0008  
Z -0.0073 0.0073 0.0112 -0.0250 -0.0012 -0.0006

AT. 27 H X -0.0011 -0.0044 -0.0116 -0.0080 0.0010 0.0001  
Y 0.0109 0.0191 0.0358 0.0387 -0.0035 0.0015  
Z 0.0018 0.0058 0.0103 0.0092 -0.0010 0.0009

AT. 28 H X -0.0011 0.0044 0.0116 -0.0080 -0.0010 0.0001  
Y 0.0109 -0.0191 -0.0358 0.0387 0.0035 0.0015  
Z 0.0018 -0.0058 -0.0103 0.0092 0.0010 0.0009

AT. 29 C X -0.0021 -0.0037 -0.0074 -0.0055 0.0038 -0.0004  
Y -0.0014 -0.0031 -0.0116 -0.0100 0.0010 -0.0007  
Z 0.0028 0.0078 0.0195 0.0167 -0.0013 -0.0002

AT. 30 C X -0.0021 0.0037 0.0074 -0.0055 -0.0038 -0.0004  
Y -0.0014 0.0031 0.0116 -0.0100 -0.0010 -0.0007  
Z 0.0028 -0.0078 -0.0195 0.0167 0.0013 -0.0002

AT. 31 H X -0.0044 -0.0083 -0.0217 -0.0196 0.0073 -0.0002  
Y 0.0011 0.0030 0.0073 0.0056 -0.0023 -0.0007  
Z 0.0049 0.0138 0.0385 0.0309 -0.0039 -0.0002

AT. 32 H X -0.0044 0.0083 0.0217 -0.0196 -0.0073 -0.0002  
Y 0.0011 -0.0030 -0.0073 0.0056 0.0023 -0.0007  
Z 0.0049 -0.0138 -0.0385 0.0309 0.0039 -0.0002

AT. 33 H X -0.0028 -0.0061 -0.0136 -0.0093 0.0050 -0.0005  
Y -0.0052 -0.0120 -0.0386 -0.0320 0.0058 -0.0005  
Z 0.0041 0.0102 0.0276 0.0240 -0.0027 -0.0003

AT. 34 H X -0.0028 0.0061 0.0136 -0.0093 -0.0050 -0.0005  
Y -0.0052 0.0120 0.0386 -0.0320 -0.0058 -0.0005  
Z 0.0041 -0.0102 -0.0276 0.0240 0.0027 -0.0003

AT. 35 C X -0.0009 0.0000 0.0026 0.0013 0.0011 -0.0001  
Y -0.0008 -0.0014 -0.0057 -0.0064 0.0017 -0.0008  
Z 0.0006 0.0017 0.0019 0.0049 0.0012 -0.0003

AT. 36 C X -0.0009 -0.0000 -0.0026 0.0013 -0.0011 -0.0001  
Y -0.0008 0.0014 0.0057 -0.0064 -0.0017 -0.0008  
Z 0.0006 -0.0017 -0.0019 0.0049 -0.0012 -0.0003

AT. 37 C X -0.0005 -0.0015 -0.0013 0.0026 0.0002 -0.0003  
Y -0.0024 -0.0027 -0.0093 -0.0107 0.0022 0.0000

Z -0.0023 -0.0028 -0.0097 -0.0051 0.0017 0.0006  
AT. 38 C X -0.0005 0.0015 0.0013 0.0026 -0.0002 -0.0003  
Y -0.0024 0.0027 0.0093 -0.0107 -0.0022 0.0000  
Z -0.0023 0.0028 0.0097 -0.0051 -0.0017 0.0006  
AT. 39 H X -0.0044 -0.0093 -0.0200 -0.0123 0.0025 0.0011  
Y -0.0045 -0.0051 -0.0153 -0.0170 0.0028 0.0012  
Z -0.0041 -0.0071 -0.0198 -0.0127 0.0030 0.0011  
AT. 40 H X -0.0044 0.0093 0.0200 -0.0123 -0.0025 0.0011  
Y -0.0045 0.0051 0.0153 -0.0170 -0.0028 0.0012  
Z -0.0041 0.0071 0.0198 -0.0127 -0.0030 0.0011  
AT. 41 H X 0.0038 0.0062 0.0163 0.0165 -0.0014 -0.0026  
Y -0.0043 -0.0067 -0.0179 -0.0183 0.0040 0.0009  
Z -0.0051 -0.0078 -0.0213 -0.0137 0.0021 0.0021  
AT. 42 H X 0.0038 -0.0062 -0.0163 0.0165 0.0014 -0.0026  
Y -0.0043 0.0067 0.0179 -0.0183 -0.0040 0.0009  
Z -0.0051 0.0078 0.0213 -0.0137 -0.0021 0.0021  
AT. 43 C X 0.0028 0.0034 0.0125 0.0159 -0.0033 -0.0008  
Y 0.0007 0.0009 0.0023 0.0007 -0.0013 -0.0010  
Z 0.0019 0.0085 0.0186 0.0157 -0.0027 0.0005  
AT. 44 C X 0.0028 -0.0034 -0.0125 0.0159 0.0033 -0.0008  
Y 0.0007 -0.0009 -0.0023 0.0007 0.0013 -0.0010  
Z 0.0019 -0.0085 -0.0186 0.0157 0.0027 0.0005  
AT. 45 H X 0.0055 0.0079 0.0228 0.0278 -0.0064 0.0000  
Y -0.0022 -0.0044 -0.0112 -0.0151 0.0028 -0.0021  
Z 0.0032 0.0106 0.0241 0.0223 -0.0041 0.0007  
AT. 46 H X 0.0055 -0.0079 -0.0228 0.0278 0.0064 0.0000  
Y -0.0022 0.0044 0.0112 -0.0151 -0.0028 -0.0021  
Z 0.0032 -0.0106 -0.0241 0.0223 0.0041 0.0007  
AT. 47 H X 0.0040 0.0039 0.0144 0.0206 -0.0044 -0.0010  
Y 0.0038 0.0056 0.0147 0.0153 -0.0046 -0.0010  
Z 0.0035 0.0128 0.0290 0.0249 -0.0046 0.0007  
AT. 48 H X 0.0040 -0.0039 -0.0144 0.0206 0.0044 -0.0010

Y 0.0038 -0.0056 -0.0147 0.0153 0.0046 -0.0010  
Z 0.0035 -0.0128 -0.0290 0.0249 0.0046 0.0007  
AT. 49 C X 0.0001 0.0012 0.0064 0.0045 -0.0010 -0.0005  
Y 0.0009 -0.0008 -0.0022 -0.0009 -0.0010 -0.0013  
Z -0.0001 0.0042 0.0054 0.0022 -0.0000 0.0001  
AT. 50 C X 0.0001 -0.0012 -0.0064 0.0045 0.0010 -0.0005  
Y 0.0009 0.0008 0.0022 -0.0009 0.0010 -0.0013  
Z -0.0001 -0.0042 -0.0054 0.0022 0.0000 0.0001  
AT. 51 C X -0.0007 -0.0011 0.0011 0.0012 0.0007 -0.0007  
Y 0.0031 0.0049 0.0142 0.0145 -0.0049 -0.0004  
Z -0.0021 -0.0003 -0.0090 -0.0122 0.0031 -0.0005  
AT. 52 C X -0.0007 0.0011 -0.0011 0.0012 -0.0007 -0.0007  
Y 0.0031 -0.0049 -0.0142 0.0145 0.0049 -0.0004  
Z -0.0021 0.0003 0.0090 -0.0122 -0.0031 -0.0005  
AT. 53 H X 0.0021 0.0057 0.0226 0.0217 -0.0030 0.0007  
Y 0.0056 0.0119 0.0357 0.0341 -0.0093 0.0011  
Z -0.0044 -0.0048 -0.0240 -0.0276 0.0051 -0.0013  
AT. 54 H X 0.0021 -0.0057 -0.0226 0.0217 0.0030 0.0007  
Y 0.0056 -0.0119 -0.0357 0.0341 0.0093 0.0011  
Z -0.0044 0.0048 0.0240 -0.0276 -0.0051 -0.0013  
AT. 55 H X -0.0047 -0.0101 -0.0271 -0.0260 0.0058 -0.0026  
Y 0.0044 0.0079 0.0241 0.0237 -0.0055 0.0006  
Z -0.0029 -0.0026 -0.0156 -0.0189 0.0054 -0.0008  
AT. 56 H X -0.0047 0.0101 0.0271 -0.0260 -0.0058 -0.0026  
Y 0.0044 -0.0079 -0.0241 0.0237 0.0055 0.0006  
Z -0.0029 0.0026 0.0156 -0.0189 -0.0054 -0.0008  
AT. 57 C X -0.0002 0.0032 0.0085 0.0017 0.0012 0.0003  
Y 0.0005 0.0011 -0.0020 -0.0048 0.0031 -0.0012  
Z 0.0013 -0.0006 -0.0036 0.0073 0.0035 -0.0015  
AT. 58 C X -0.0002 -0.0032 -0.0085 0.0017 -0.0012 0.0003  
Y 0.0005 -0.0011 0.0020 -0.0048 -0.0031 -0.0012  
Z 0.0013 0.0006 0.0036 0.0073 -0.0035 -0.0015

AT. 59 H X 0.0017 0.0072 0.0143 0.0016 0.0003 0.0008  
Y -0.0003 -0.0007 -0.0043 -0.0050 0.0034 -0.0017  
Z 0.0015 -0.0005 -0.0029 0.0071 0.0032 -0.0019

AT. 60 H X 0.0017 -0.0072 -0.0143 0.0016 -0.0003 0.0008  
Y -0.0003 0.0007 0.0043 -0.0050 -0.0034 -0.0017  
Z 0.0015 0.0005 0.0029 0.0071 -0.0032 -0.0019

AT. 61 H X 0.0006 0.0027 0.0064 0.0039 0.0030 -0.0002  
Y 0.0013 0.0034 0.0019 -0.0042 0.0028 -0.0005  
Z 0.0016 -0.0021 -0.0070 0.0088 0.0051 -0.0022

AT. 62 H X 0.0006 -0.0027 -0.0064 0.0039 -0.0030 -0.0002  
Y 0.0013 -0.0034 -0.0019 -0.0042 -0.0028 -0.0005  
Z 0.0016 0.0021 0.0070 0.0088 -0.0051 -0.0022

AT. 63 H X -0.0014 0.0026 0.0092 -0.0004 -0.0006 0.0011  
Y 0.0019 0.0027 -0.0003 -0.0035 0.0038 -0.0022  
Z 0.0013 -0.0015 -0.0056 0.0082 0.0045 -0.0016

AT. 64 H X -0.0014 -0.0026 -0.0092 -0.0004 0.0006 0.0011  
Y 0.0019 -0.0027 0.0003 -0.0035 -0.0038 -0.0022  
Z 0.0013 0.0015 0.0056 0.0082 -0.0045 -0.0016

AT. 65 C X 0.0001 0.0021 0.0071 0.0019 -0.0027 -0.0001  
Y 0.0011 -0.0042 -0.0107 -0.0053 -0.0005 -0.0019  
Z -0.0002 0.0068 0.0106 0.0025 -0.0017 0.0007

AT. 66 C X 0.0001 -0.0021 -0.0071 0.0019 0.0027 -0.0001  
Y 0.0011 0.0042 0.0107 -0.0053 0.0005 -0.0019  
Z -0.0002 -0.0068 -0.0106 0.0025 0.0017 0.0007

AT. 67 H X 0.0006 0.0033 0.0089 0.0009 -0.0043 0.0005  
Y 0.0006 -0.0076 -0.0176 -0.0085 0.0005 -0.0031  
Z -0.0001 0.0090 0.0156 0.0064 -0.0013 0.0013

AT. 68 H X 0.0006 -0.0033 -0.0089 0.0009 0.0043 0.0005  
Y 0.0006 0.0076 0.0176 -0.0085 -0.0005 -0.0031  
Z -0.0001 -0.0090 -0.0156 0.0064 0.0013 0.0013

AT. 69 H X 0.0003 0.0022 0.0078 0.0033 -0.0022 0.0002  
Y 0.0012 -0.0017 -0.0057 -0.0028 -0.0014 -0.0010

Z -0.0004 0.0104 0.0169 0.0036 -0.0041 0.0011  
AT. 70 H X 0.0003 -0.0022 -0.0078 0.0033 0.0022 0.0002  
Y 0.0012 0.0017 0.0057 -0.0028 0.0014 -0.0010  
Z -0.0004 -0.0104 -0.0169 0.0036 0.0041 0.0011  
AT. 71 H X -0.0003 0.0020 0.0067 0.0005 -0.0034 -0.0009  
Y 0.0014 -0.0062 -0.0153 -0.0077 -0.0004 -0.0024  
Z -0.0001 0.0038 0.0038 -0.0020 -0.0023 -0.0007  
AT. 72 H X -0.0003 -0.0020 -0.0067 0.0005 0.0034 -0.0009  
Y 0.0014 0.0062 0.0153 -0.0077 0.0004 -0.0024  
Z -0.0001 -0.0038 -0.0038 -0.0020 0.0023 -0.0007  
AT. 73 C X -0.0012 0.0009 0.0053 0.0002 -0.0004 0.0003  
Y -0.0005 -0.0024 -0.0059 -0.0057 0.0007 -0.0007  
Z 0.0002 0.0024 0.0030 0.0033 0.0007 -0.0001  
AT. 74 C X -0.0012 -0.0009 -0.0053 0.0002 0.0004 0.0003  
Y -0.0005 0.0024 0.0059 -0.0057 -0.0007 -0.0007  
Z 0.0002 -0.0024 -0.0030 0.0033 -0.0007 -0.0001  
AT. 75 H X -0.0024 0.0007 0.0053 -0.0021 -0.0001 0.0011  
Y -0.0008 -0.0035 -0.0073 -0.0069 0.0000 -0.0003  
Z -0.0009 0.0009 0.0012 0.0003 -0.0001 0.0009  
AT. 76 H X -0.0024 -0.0007 -0.0053 -0.0021 0.0001 0.0011  
Y -0.0008 0.0035 0.0073 -0.0069 -0.0000 -0.0003  
Z -0.0009 -0.0009 -0.0012 0.0003 0.0001 0.0009  
AT. 77 H X -0.0017 0.0006 0.0042 -0.0018 -0.0011 0.0002  
Y -0.0018 -0.0037 -0.0064 -0.0070 0.0002 0.0006  
Z 0.0018 0.0037 0.0043 0.0065 0.0016 -0.0012  
AT. 78 H X -0.0017 -0.0006 -0.0042 -0.0018 0.0011 0.0002  
Y -0.0018 0.0037 0.0064 -0.0070 -0.0002 0.0006  
Z 0.0018 -0.0037 -0.0043 0.0065 -0.0016 -0.0012  
AT. 79 I X 0.0191 0.0202 -0.0044 -0.0023 -0.0018 0.0085  
Y -0.0010 -0.0053 0.0009 0.0007 -0.0042 -0.0042  
Z -0.0101 -0.0044 0.0016 0.0008 0.0074 0.0038  
AT. 80 I X 0.0191 -0.0202 0.0044 -0.0023 0.0018 0.0085

Y -0.0010 0.0053 -0.0009 0.0007 0.0042 -0.0042  
Z -0.0101 0.0044 -0.0016 0.0008 -0.0074 0.0038  
AT. 81 I X 0.0100 0.0054 0.0004 -0.0003 0.0071 -0.0056  
Y -0.0006 0.0007 -0.0010 -0.0004 -0.0052 0.0056  
Z 0.0021 -0.0004 -0.0001 -0.0007 0.0012 0.0002  
AT. 82 I X 0.0100 -0.0054 -0.0004 -0.0003 -0.0071 -0.0056  
Y -0.0006 -0.0007 0.0010 -0.0004 0.0052 0.0056  
Z 0.0021 0.0004 0.0001 -0.0007 -0.0012 0.0002  
AT. 83 O X -0.0618 -0.0589 0.0176 0.0093 0.0274 -0.0329  
Y 0.0377 0.0169 -0.0059 -0.0053 -0.0189 -0.0072  
Z 0.0289 0.0248 -0.0105 -0.0083 -0.0303 0.0243  
AT. 84 O X -0.0618 0.0589 -0.0176 0.0093 -0.0274 -0.0329  
Y 0.0377 -0.0169 0.0059 -0.0053 0.0189 -0.0072  
Z 0.0289 -0.0248 0.0105 -0.0083 0.0303 0.0243  
AT. 85 O X -0.0043 0.0050 -0.0086 -0.0031 -0.0298 0.0326  
Y 0.0239 0.0094 0.0044 -0.0004 0.0447 -0.0404  
Z 0.0306 0.0206 0.0001 0.0016 0.0287 -0.0299  
AT. 86 O X -0.0043 -0.0050 0.0086 -0.0031 0.0298 0.0326  
Y 0.0239 -0.0094 -0.0044 -0.0004 -0.0447 -0.0404  
Z 0.0306 -0.0206 -0.0001 0.0016 -0.0287 -0.0299  
AT. 87 N X -0.0168 -0.0154 0.0025 -0.0006 -0.0090 0.0055  
Y -0.0042 -0.0018 0.0020 0.0007 0.0031 -0.0007  
Z -0.0000 -0.0038 -0.0006 -0.0020 -0.0067 -0.0001  
AT. 88 N X -0.0168 0.0154 -0.0025 -0.0006 0.0090 0.0055  
Y -0.0042 0.0018 -0.0020 0.0007 -0.0031 -0.0007  
Z -0.0000 0.0038 0.0006 -0.0020 0.0067 -0.0001  
AT. 89 N X -0.0157 -0.0148 0.0000 -0.0004 -0.0100 0.0109  
Y 0.0009 0.0043 -0.0011 -0.0014 -0.0029 0.0086  
Z -0.0003 0.0016 -0.0003 0.0022 -0.0104 0.0096  
AT. 90 N X -0.0157 0.0148 -0.0000 -0.0004 0.0100 0.0109  
Y 0.0009 -0.0043 0.0011 -0.0014 0.0029 0.0086  
Z -0.0003 -0.0016 0.0003 0.0022 0.0104 0.0096



AT. 91 C X -0.0360 -0.0351 0.0097 0.0043 0.0097 -0.0161  
Y -0.0047 -0.0117 0.0034 0.0005 -0.0001 -0.0115  
Z 0.0012 -0.0039 -0.0007 -0.0021 -0.0080 -0.0003

AT. 92 C X -0.0360 0.0351 -0.0097 0.0043 -0.0097 -0.0161  
Y -0.0047 0.0117 -0.0034 0.0005 0.0001 -0.0115  
Z 0.0012 0.0039 0.0007 -0.0021 0.0080 -0.0003

AT. 93 C X -0.0377 -0.0402 0.0119 0.0057 0.0172 -0.0272  
Y -0.0403 -0.0443 0.0124 0.0061 0.0138 -0.0270  
Z -0.0318 -0.0377 0.0104 0.0046 0.0177 -0.0268

AT. 94 C X -0.0377 0.0402 -0.0119 0.0057 -0.0172 -0.0272  
Y -0.0403 0.0443 -0.0124 0.0061 -0.0138 -0.0270  
Z -0.0318 0.0377 -0.0104 0.0046 -0.0177 -0.0268

AT. 95 H X -0.0489 -0.0569 0.0161 0.0070 0.0197 -0.0416  
Y -0.0113 -0.0105 0.0029 0.0013 0.0004 0.0002  
Z -0.0711 -0.0801 0.0228 0.0118 0.0388 -0.0600

AT. 96 H X -0.0489 0.0569 -0.0161 0.0070 -0.0197 -0.0416  
Y -0.0113 0.0105 -0.0029 0.0013 -0.0004 0.0002  
Z -0.0711 0.0801 -0.0228 0.0118 -0.0388 -0.0600

AT. 97 H X -0.0513 -0.0518 0.0164 0.0088 0.0310 -0.0379  
Y -0.0848 -0.0959 0.0269 0.0137 0.0348 -0.0690  
Z -0.0380 -0.0460 0.0123 0.0054 0.0185 -0.0332

AT. 98 H X -0.0513 0.0518 -0.0164 0.0088 -0.0310 -0.0379  
Y -0.0848 0.0959 -0.0269 0.0137 -0.0348 -0.0690  
Z -0.0380 0.0460 -0.0123 0.0054 -0.0185 -0.0332

AT. 99 C X -0.0058 -0.0016 -0.0045 -0.0020 -0.0183 0.0207  
Y 0.0103 0.0071 -0.0011 -0.0017 0.0119 -0.0079  
Z 0.0054 0.0034 0.0002 0.0022 0.0012 -0.0027

AT. 100 C X -0.0058 0.0016 0.0045 -0.0020 0.0183 0.0207  
Y 0.0103 -0.0071 0.0011 -0.0017 -0.0119 -0.0079  
Z 0.0054 -0.0034 -0.0002 0.0022 -0.0012 -0.0027

AT. 101 C X 0.0072 0.0089 -0.0048 -0.0019 -0.0061 0.0084  
Y 0.0107 0.0136 -0.0073 -0.0042 -0.0061 0.0101

Z -0.0103 -0.0106 0.0019 0.0026 -0.0091 0.0082  
AT. 102 C X 0.0072 -0.0089 0.0048 -0.0019 0.0061 0.0084  
Y 0.0107 -0.0136 0.0073 -0.0042 0.0061 0.0101  
Z -0.0103 0.0106 -0.0019 0.0026 0.0091 0.0082  
AT. 103 H X 0.0126 0.0122 -0.0058 -0.0030 -0.0019 0.0048  
Y 0.0088 0.0125 -0.0069 -0.0039 -0.0078 0.0115  
Z -0.0201 -0.0244 0.0080 0.0057 -0.0030 0.0019  
AT. 104 H X 0.0126 -0.0122 0.0058 -0.0030 0.0019 0.0048  
Y 0.0088 -0.0125 0.0069 -0.0039 0.0078 0.0115  
Z -0.0201 0.0244 -0.0080 0.0057 0.0030 0.0019  
AT. 105 H X 0.0092 0.0159 -0.0067 -0.0011 -0.0087 0.0061  
Y 0.0213 0.0263 -0.0124 -0.0073 -0.0074 0.0121  
Z -0.0055 -0.0044 -0.0004 0.0015 -0.0101 0.0089  
AT. 106 H X 0.0092 -0.0159 0.0067 -0.0011 0.0087 0.0061  
Y 0.0213 -0.0263 0.0124 -0.0073 0.0074 0.0121  
Z -0.0055 0.0044 0.0004 0.0015 0.0101 0.0089  
AT. 107 C X -0.0068 -0.0031 -0.0000 -0.0023 -0.0129 0.0156  
Y -0.0078 -0.0084 0.0030 0.0018 0.0082 -0.0105  
Z 0.0175 0.0151 -0.0047 -0.0044 -0.0108 0.0098  
AT. 108 C X -0.0068 0.0031 0.0000 -0.0023 0.0129 0.0156  
Y -0.0078 0.0084 -0.0030 0.0018 -0.0082 -0.0105  
Z 0.0175 -0.0151 0.0047 -0.0044 0.0108 0.0098  
AT. 109 H X 0.0142 0.0195 -0.0052 -0.0067 -0.0245 0.0335  
Y 0.0026 0.0022 -0.0006 -0.0016 0.0011 -0.0006  
Z 0.0288 0.0262 -0.0092 -0.0090 -0.0193 0.0213  
AT. 110 H X 0.0142 -0.0195 0.0052 -0.0067 0.0245 0.0335  
Y 0.0026 -0.0022 0.0006 -0.0016 -0.0011 -0.0006  
Z 0.0288 -0.0262 0.0092 -0.0090 0.0193 0.0213  
AT. 111 H X -0.0123 -0.0093 0.0006 -0.0026 -0.0145 0.0147  
Y -0.0289 -0.0308 0.0095 0.0084 0.0230 -0.0324  
Z 0.0283 0.0271 -0.0069 -0.0056 -0.0126 0.0157  
AT. 112 H X -0.0123 0.0093 -0.0006 -0.0026 0.0145 0.0147

Y -0.0289 0.0308 -0.0095 0.0084 -0.0230 -0.0324  
Z 0.0283 -0.0271 0.0069 -0.0056 0.0126 0.0157  
AT. 113 C X -0.0101 -0.0070 0.0019 0.0008 -0.0017 0.0048  
Y 0.0009 -0.0007 -0.0000 -0.0014 0.0059 -0.0062  
Z 0.0056 0.0036 0.0001 0.0009 -0.0018 -0.0023  
AT. 114 C X -0.0101 0.0070 -0.0019 0.0008 0.0017 0.0048  
Y 0.0009 0.0007 0.0000 -0.0014 -0.0059 -0.0062  
Z 0.0056 -0.0036 -0.0001 0.0009 0.0018 -0.0023  
AT. 115 C X -0.0177 -0.0161 0.0013 0.0004 -0.0075 0.0090  
Y -0.0108 -0.0111 0.0014 0.0010 0.0023 -0.0037  
Z -0.0134 -0.0136 0.0042 0.0059 -0.0019 -0.0042  
AT. 116 C X -0.0177 0.0161 -0.0013 0.0004 0.0075 0.0090  
Y -0.0108 0.0111 -0.0014 0.0010 -0.0023 -0.0037  
Z -0.0134 0.0136 -0.0042 0.0059 0.0019 -0.0042  
AT. 117 H X -0.0014 0.0013 -0.0031 -0.0040 -0.0126 0.0181  
Y -0.0331 -0.0338 0.0058 0.0063 0.0015 -0.0073  
Z -0.0257 -0.0270 0.0079 0.0093 0.0035 -0.0128  
AT. 118 H X -0.0014 -0.0013 0.0031 -0.0040 0.0126 0.0181  
Y -0.0331 0.0338 -0.0058 0.0063 -0.0015 -0.0073  
Z -0.0257 0.0270 -0.0079 0.0093 -0.0035 -0.0128  
AT. 119 H X -0.0419 -0.0424 0.0071 0.0065 -0.0013 -0.0043  
Y -0.0092 -0.0120 0.0013 0.0004 0.0067 -0.0104  
Z -0.0282 -0.0271 0.0074 0.0098 -0.0029 -0.0048  
AT. 120 H X -0.0419 0.0424 -0.0071 0.0065 0.0013 -0.0043  
Y -0.0092 0.0120 -0.0013 0.0004 -0.0067 -0.0104  
Z -0.0282 0.0271 -0.0074 0.0098 0.0029 -0.0048  
AT. 121 C X -0.0232 -0.0233 0.0042 0.0028 -0.0026 -0.0009  
Y 0.0102 0.0133 -0.0020 -0.0037 0.0007 0.0085  
Z 0.0073 0.0114 -0.0060 -0.0022 -0.0241 0.0288  
AT. 122 C X -0.0232 0.0233 -0.0042 0.0028 0.0026 -0.0009  
Y 0.0102 -0.0133 0.0020 -0.0037 -0.0007 0.0085  
Z 0.0073 -0.0114 0.0060 -0.0022 0.0241 0.0288

AT. 123 H X -0.0388 -0.0437 0.0125 0.0093 0.0125 -0.0272  
Y -0.0008 -0.0025 0.0035 -0.0013 0.0105 -0.0108  
Z 0.0160 0.0242 -0.0103 -0.0038 -0.0319 0.0445

AT. 124 H X -0.0388 0.0437 -0.0125 0.0093 -0.0125 -0.0272  
Y -0.0008 0.0025 -0.0035 -0.0013 -0.0105 -0.0108  
Z 0.0160 -0.0242 0.0103 -0.0038 0.0319 0.0445

AT. 125 H X -0.0243 -0.0248 0.0025 0.0014 -0.0084 0.0050  
Y 0.0291 0.0384 -0.0098 -0.0077 -0.0106 0.0332  
Z 0.0159 0.0229 -0.0122 -0.0060 -0.0366 0.0484

AT. 126 H X -0.0243 0.0248 -0.0025 0.0014 0.0084 0.0050  
Y 0.0291 -0.0384 0.0098 -0.0077 0.0106 0.0332  
Z 0.0159 -0.0229 0.0122 -0.0060 0.0366 0.0484

AT. 127 C X -0.0122 -0.0096 0.0021 0.0015 -0.0002 0.0019  
Y 0.0082 0.0087 0.0003 -0.0031 0.0076 -0.0030  
Z -0.0069 -0.0089 -0.0004 -0.0008 -0.0157 0.0084

AT. 128 C X -0.0122 0.0096 -0.0021 0.0015 0.0002 0.0019  
Y 0.0082 -0.0087 -0.0003 -0.0031 -0.0076 -0.0030  
Z -0.0069 0.0089 0.0004 -0.0008 0.0157 0.0084

AT. 129 C X -0.0107 -0.0080 0.0002 -0.0010 -0.0104 0.0107  
Y 0.0131 0.0187 -0.0036 -0.0046 -0.0052 0.0172  
Z -0.0149 -0.0220 0.0042 0.0006 -0.0027 -0.0132

AT. 130 C X -0.0107 0.0080 -0.0002 -0.0010 0.0104 0.0107  
Y 0.0131 -0.0187 0.0036 -0.0046 0.0052 0.0172  
Z -0.0149 0.0220 -0.0042 0.0006 0.0027 -0.0132

AT. 131 H X -0.0246 -0.0256 0.0057 0.0018 -0.0015 -0.0067  
Y 0.0292 0.0406 -0.0116 -0.0091 -0.0263 0.0494  
Z -0.0272 -0.0367 0.0083 0.0026 0.0010 -0.0233

AT. 132 H X -0.0246 0.0256 -0.0057 0.0018 0.0015 -0.0067  
Y 0.0292 -0.0406 0.0116 -0.0091 0.0263 0.0494  
Z -0.0272 0.0367 -0.0083 0.0026 -0.0010 -0.0233

AT. 133 H X 0.0116 0.0207 -0.0087 -0.0064 -0.0268 0.0415  
Y 0.0175 0.0226 -0.0043 -0.0059 -0.0036 0.0164

Z -0.0188 -0.0295 0.0074 0.0011 0.0076 -0.0290  
AT. 134 H X 0.0116 -0.0207 0.0087 -0.0064 0.0268 0.0415  
Y 0.0175 -0.0226 0.0043 -0.0059 0.0036 0.0164  
Z -0.0188 0.0295 -0.0074 0.0011 -0.0076 -0.0290  
AT. 135 C X -0.0052 -0.0016 0.0030 0.0029 0.0085 -0.0049  
Y 0.0076 0.0040 -0.0032 -0.0045 0.0077 -0.0066  
Z 0.0177 0.0153 0.0002 0.0025 0.0154 -0.0181  
AT. 136 C X -0.0052 0.0016 -0.0030 0.0029 -0.0085 -0.0049  
Y 0.0076 -0.0040 0.0032 -0.0045 -0.0077 -0.0066  
Z 0.0177 -0.0153 -0.0002 0.0025 -0.0154 -0.0181  
AT. 137 H X -0.0013 0.0026 0.0053 0.0053 0.0176 -0.0149  
Y 0.0127 0.0077 -0.0020 -0.0045 0.0113 -0.0114  
Z 0.0251 0.0202 0.0011 0.0013 0.0181 -0.0226  
AT. 138 H X -0.0013 -0.0026 -0.0053 0.0053 -0.0176 -0.0149  
Y 0.0127 -0.0077 0.0020 -0.0045 -0.0113 -0.0114  
Z 0.0251 -0.0202 -0.0011 0.0013 -0.0181 -0.0226  
AT. 139 H X -0.0108 -0.0074 0.0036 0.0016 -0.0010 0.0033  
Y 0.0015 -0.0004 -0.0068 -0.0056 0.0030 0.0009  
Z 0.0267 0.0241 0.0004 0.0045 0.0291 -0.0308  
AT. 140 H X -0.0108 0.0074 -0.0036 0.0016 0.0010 0.0033  
Y 0.0015 0.0004 0.0068 -0.0056 -0.0030 0.0009  
Z 0.0267 -0.0241 -0.0004 0.0045 -0.0291 -0.0308  
AT. 141 H X 0.0010 0.0047 0.0003 0.0030 0.0181 -0.0119  
Y 0.0149 0.0092 -0.0036 -0.0056 0.0119 -0.0112  
Z 0.0128 0.0127 -0.0005 0.0038 0.0153 -0.0164  
AT. 142 H X 0.0010 -0.0047 -0.0003 0.0030 -0.0181 -0.0119  
Y 0.0149 -0.0092 0.0036 -0.0056 -0.0119 -0.0112  
Z 0.0128 -0.0127 0.0005 0.0038 -0.0153 -0.0164  
AT. 143 C X -0.0053 -0.0027 0.0029 0.0023 0.0082 -0.0044  
Y 0.0110 0.0076 0.0010 -0.0022 0.0194 -0.0214  
Z -0.0180 -0.0188 -0.0019 -0.0020 -0.0311 0.0231  
AT. 144 C X -0.0053 0.0027 -0.0029 0.0023 -0.0082 -0.0044

Y 0.0110 -0.0076 -0.0010 -0.0022 -0.0194 -0.0214  
Z -0.0180 0.0188 0.0019 -0.0020 0.0311 0.0231  
AT. 145 H X 0.0001 0.0031 0.0048 0.0015 0.0146 -0.0078  
Y 0.0123 0.0063 0.0004 -0.0009 0.0251 -0.0284  
Z -0.0181 -0.0159 -0.0010 -0.0034 -0.0355 0.0299  
AT. 146 H X 0.0001 -0.0031 -0.0048 0.0015 -0.0146 -0.0078  
Y 0.0123 -0.0063 -0.0004 -0.0009 -0.0251 -0.0284  
Z -0.0181 0.0159 0.0010 -0.0034 0.0355 0.0299  
AT. 147 H X -0.0120 -0.0087 0.0020 0.0015 -0.0011 0.0053  
Y 0.0117 0.0096 0.0007 -0.0021 0.0170 -0.0201  
Z -0.0269 -0.0261 -0.0034 -0.0031 -0.0453 0.0373  
AT. 148 H X -0.0120 0.0087 -0.0020 0.0015 0.0011 0.0053  
Y 0.0117 -0.0096 -0.0007 -0.0021 -0.0170 -0.0201  
Z -0.0269 0.0261 0.0034 -0.0031 0.0453 0.0373  
AT. 149 H X 0.0018 0.0030 0.0040 0.0033 0.0190 -0.0183  
Y 0.0130 0.0071 0.0010 -0.0014 0.0256 -0.0302  
Z -0.0181 -0.0223 -0.0025 -0.0013 -0.0257 0.0150  
AT. 150 H X 0.0018 -0.0030 -0.0040 0.0033 -0.0190 -0.0183  
Y 0.0130 -0.0071 -0.0010 -0.0014 -0.0256 -0.0302  
Z -0.0181 0.0223 0.0025 -0.0013 0.0257 0.0150  
AT. 151 C X -0.0069 -0.0031 0.0017 0.0017 0.0039 0.0008  
Y 0.0080 0.0045 0.0025 -0.0017 0.0126 -0.0139  
Z -0.0003 -0.0028 0.0001 -0.0001 -0.0088 0.0025  
AT. 152 C X -0.0069 0.0031 -0.0017 0.0017 -0.0039 0.0008  
Y 0.0080 -0.0045 -0.0025 -0.0017 -0.0126 -0.0139  
Z -0.0003 0.0028 -0.0001 -0.0001 0.0088 0.0025  
AT. 153 H X -0.0053 -0.0003 0.0026 0.0021 0.0066 0.0006  
Y 0.0101 0.0049 0.0054 -0.0001 0.0159 -0.0189  
Z 0.0024 -0.0033 0.0040 0.0020 -0.0045 -0.0058  
AT. 154 H X -0.0053 0.0003 -0.0026 0.0021 -0.0066 0.0006  
Y 0.0101 -0.0049 -0.0054 -0.0001 -0.0159 -0.0189  
Z 0.0024 0.0033 -0.0040 0.0020 0.0045 -0.0058

AT. 155 H X -0.0041 0.0002 0.0000 0.0017 0.0035 0.0021  
Y 0.0112 0.0049 0.0048 -0.0004 0.0159 -0.0202  
Z -0.0027 -0.0020 -0.0029 -0.0014 -0.0124 0.0096

AT. 156 H X -0.0041 -0.0002 -0.0000 0.0017 -0.0035 0.0021  
Y 0.0112 -0.0049 -0.0048 -0.0004 -0.0159 -0.0202  
Z -0.0027 0.0020 0.0029 -0.0014 0.0124 0.0096

AT. 157 O X -0.0002 0.0014 -0.0140 -0.0161 0.0022 -0.0030  
Y -0.0002 0.0037 0.0107 0.0119 0.0004 0.0012  
Z 0.0060 0.0096 0.0247 -0.0028 -0.0010 -0.0012

AT. 158 O X -0.0002 -0.0014 0.0140 -0.0161 -0.0022 -0.0030  
Y -0.0002 -0.0037 -0.0107 0.0119 -0.0004 0.0012  
Z 0.0060 -0.0096 -0.0247 -0.0028 0.0010 -0.0012

AT. 159 O X -0.0040 0.0008 -0.0127 -0.0157 0.0011 -0.0026  
Y 0.0095 0.0033 0.0866 0.1059 -0.0135 0.0110  
Z 0.0004 0.0090 0.0366 0.0093 -0.0043 0.0005

AT. 160 O X -0.0040 -0.0008 0.0127 -0.0157 -0.0011 -0.0026  
Y 0.0095 -0.0033 -0.0866 0.1059 0.0135 0.0110  
Z 0.0004 -0.0090 -0.0366 0.0093 0.0043 0.0005

AT. 161 H X -0.0036 0.0027 -0.0418 -0.0476 0.0069 -0.0070  
Y -0.0008 0.0045 0.0045 0.0009 0.0020 0.0003  
Z 0.0069 0.0092 0.0416 0.0267 -0.0051 0.0011

AT. 162 H X -0.0036 -0.0027 0.0418 -0.0476 -0.0069 -0.0070  
Y -0.0008 -0.0045 -0.0045 0.0009 -0.0020 0.0003  
Z 0.0069 -0.0092 -0.0416 0.0267 0.0051 0.0011

AT. 163 H X -0.0086 0.0025 -0.0109 -0.0244 0.0005 -0.0034  
Y 0.0060 0.0037 0.0584 0.0696 -0.0116 0.0050  
Z 0.0008 0.0088 0.0295 0.0022 -0.0037 -0.0008

AT. 164 H X -0.0086 -0.0025 0.0109 -0.0244 -0.0005 -0.0034  
Y 0.0060 -0.0037 -0.0584 0.0696 0.0116 0.0050  
Z 0.0008 -0.0088 -0.0295 0.0022 0.0037 -0.0008

AT. 165 O X 0.0109 -0.0241 0.0009 0.0013 -0.0349 -0.0469  
Y -0.0330 0.0221 0.0075 0.0037 0.0737 0.0536

Z 0.0253 0.0037 -0.0060 -0.0028 -0.0394 -0.0265  
AT.166 O X 0.0109 0.0241 -0.0009 0.0013 0.0349 -0.0469  
Y -0.0330 -0.0221 -0.0075 0.0037 -0.0737 0.0536  
Z 0.0253 -0.0037 0.0060 -0.0028 0.0394 -0.0265  
AT.167 H X 0.0033 -0.0294 0.0044 0.0018 -0.0242 -0.0427  
Y -0.0109 0.0230 0.0029 0.0021 0.0446 0.0306  
Z 0.0105 0.0214 -0.0085 -0.0011 -0.0179 0.0023  
AT.168 H X 0.0033 0.0294 -0.0044 0.0018 0.0242 -0.0427  
Y -0.0109 -0.0230 -0.0029 0.0021 -0.0446 0.0306  
Z 0.0105 -0.0214 0.0085 -0.0011 0.0179 0.0023  
AT.169 O X -0.0098 0.0024 -0.0020 0.0055 0.0057 0.0024  
Y -0.0274 0.0451 -0.0050 -0.0000 0.0370 0.0393  
Z 0.0196 0.0049 -0.0038 -0.0011 -0.0217 -0.0117  
AT.170 O X -0.0098 -0.0024 0.0020 0.0055 -0.0057 0.0024  
Y -0.0274 -0.0451 0.0050 -0.0000 -0.0370 0.0393  
Z 0.0196 -0.0049 0.0038 -0.0011 0.0217 -0.0117  
AT.171 H X -0.0026 -0.0173 0.0062 0.0034 0.0195 0.0116  
Y -0.0202 0.0371 -0.0035 -0.0023 0.0295 0.0334  
Z 0.0301 0.0022 -0.0078 -0.0034 -0.0522 -0.0349  
AT.172 H X -0.0026 0.0173 -0.0062 0.0034 -0.0195 0.0116  
Y -0.0202 -0.0371 0.0035 -0.0023 -0.0295 0.0334  
Z 0.0301 -0.0022 0.0078 -0.0034 0.0522 -0.0349  
  
FREQ(CM\*\*-1) 190.93 195.76 201.19 202.96 220.86 221.72  
  
AT. 1 I X 0.0002 0.0005 0.0001 -0.0005 -0.0020 -0.0013  
Y 0.0007 -0.0007 -0.0001 0.0003 -0.0006 -0.0008  
Z -0.0002 -0.0004 -0.0009 -0.0002 -0.0025 -0.0017  
AT. 2 I X 0.0002 -0.0005 0.0001 0.0005 0.0020 -0.0013  
Y 0.0007 0.0007 -0.0001 -0.0003 0.0006 -0.0008  
Z -0.0002 0.0004 -0.0009 0.0002 0.0025 -0.0017  
AT. 3 I X 0.0008 -0.0022 -0.0020 0.0005 -0.0012 0.0014



Y -0.0000 -0.0013 -0.0015 0.0003 -0.0002 0.0001  
Z -0.0001 -0.0010 -0.0006 -0.0000 -0.0003 0.0002  
AT. 4 I X 0.0008 0.0022 -0.0020 -0.0005 0.0012 0.0014  
Y -0.0000 0.0013 -0.0015 -0.0003 0.0002 0.0001  
Z -0.0001 0.0010 -0.0006 0.0000 0.0003 0.0002  
AT. 5 O X -0.0042 -0.0201 -0.0156 0.0020 -0.0029 0.0002  
Y 0.0008 -0.0037 0.0075 0.0013 -0.0030 -0.0014  
Z -0.0027 -0.0179 -0.0164 0.0005 -0.0015 0.0033  
AT. 6 O X -0.0042 0.0201 -0.0156 -0.0020 0.0029 0.0002  
Y 0.0008 0.0037 0.0075 -0.0013 0.0030 -0.0014  
Z -0.0027 0.0179 -0.0164 -0.0005 0.0015 0.0033  
AT. 7 O X 0.0001 -0.0257 -0.0238 0.0025 0.0212 -0.0236  
Y 0.0010 -0.0065 -0.0050 0.0019 0.0220 -0.0236  
Z 0.0019 0.0303 0.0302 -0.0012 0.0023 -0.0005  
AT. 8 O X 0.0001 0.0257 -0.0238 -0.0025 -0.0212 -0.0236  
Y 0.0010 0.0065 -0.0050 -0.0019 -0.0220 -0.0236  
Z 0.0019 -0.0303 0.0302 0.0012 -0.0023 -0.0005  
AT. 9 N X 0.0016 0.0147 0.0145 -0.0002 0.0035 -0.0052  
Y -0.0022 -0.0067 -0.0071 0.0003 -0.0036 0.0010  
Z -0.0000 -0.0034 -0.0026 -0.0002 0.0011 0.0006  
AT. 10 N X 0.0016 -0.0147 0.0145 0.0002 -0.0035 -0.0052  
Y -0.0022 0.0067 -0.0071 -0.0003 0.0036 0.0010  
Z -0.0000 0.0034 -0.0026 0.0002 -0.0011 0.0006  
AT. 11 N X 0.0004 0.0240 0.0240 -0.0013 0.0031 -0.0041  
Y -0.0010 -0.0082 -0.0084 0.0009 -0.0015 -0.0008  
Z 0.0002 0.0016 0.0014 0.0004 0.0010 -0.0015  
AT. 12 N X 0.0004 -0.0240 0.0240 0.0013 -0.0031 -0.0041  
Y -0.0010 0.0082 -0.0084 -0.0009 0.0015 -0.0008  
Z 0.0002 -0.0016 0.0014 -0.0004 -0.0010 -0.0015  
AT. 13 C X -0.0011 -0.0019 -0.0010 0.0006 -0.0004 -0.0031  
Y -0.0001 -0.0037 0.0017 0.0006 -0.0038 -0.0001  
Z 0.0006 -0.0014 0.0002 -0.0003 0.0019 0.0000

AT. 14 C X -0.0011 0.0019 -0.0010 -0.0006 0.0004 -0.0031  
Y -0.0001 0.0037 0.0017 -0.0006 0.0038 -0.0001  
Z 0.0006 0.0014 0.0002 0.0003 -0.0019 0.0000

AT. 15 C X -0.0018 -0.0062 -0.0085 0.0004 0.0002 -0.0004  
Y 0.0019 0.0038 0.0079 -0.0001 -0.0027 -0.0003  
Z 0.0055 0.0196 0.0250 -0.0010 0.0032 -0.0053

AT. 16 C X -0.0018 0.0062 -0.0085 -0.0004 -0.0002 -0.0004  
Y 0.0019 -0.0038 0.0079 0.0001 0.0027 -0.0003  
Z 0.0055 -0.0196 0.0250 0.0010 -0.0032 -0.0053

AT. 17 H X -0.0027 -0.0091 -0.0141 0.0006 0.0003 -0.0005  
Y -0.0016 -0.0092 -0.0091 0.0003 -0.0031 0.0012  
Z 0.0094 0.0343 0.0438 -0.0013 0.0039 -0.0074

AT. 18 H X -0.0027 0.0091 -0.0141 -0.0006 -0.0003 -0.0005  
Y -0.0016 0.0092 -0.0091 -0.0003 0.0031 0.0012  
Z 0.0094 -0.0343 0.0438 0.0013 -0.0039 -0.0074

AT. 19 H X -0.0024 -0.0101 -0.0134 0.0003 0.0022 0.0030  
Y 0.0069 0.0234 0.0322 -0.0006 -0.0033 -0.0012  
Z 0.0072 0.0261 0.0331 -0.0012 0.0036 -0.0048

AT. 20 H X -0.0024 0.0101 -0.0134 -0.0003 -0.0022 0.0030  
Y 0.0069 -0.0234 0.0322 0.0006 0.0033 -0.0012  
Z 0.0072 -0.0261 0.0331 0.0012 -0.0036 -0.0048

AT. 21 C X -0.0001 -0.0027 -0.0020 0.0002 0.0062 -0.0073  
Y 0.0003 0.0067 0.0071 0.0002 0.0076 -0.0085  
Z 0.0007 0.0077 0.0078 -0.0000 0.0021 -0.0015

AT. 22 C X -0.0001 0.0027 -0.0020 -0.0002 -0.0062 -0.0073  
Y 0.0003 -0.0067 0.0071 -0.0002 -0.0076 -0.0085  
Z 0.0007 -0.0077 0.0078 0.0000 -0.0021 -0.0015

AT. 23 C X -0.0004 -0.0131 -0.0126 0.0007 0.0016 -0.0024  
Y 0.0018 0.0508 0.0495 -0.0029 -0.0068 0.0090  
Z -0.0003 -0.0178 -0.0171 0.0014 0.0020 -0.0022

AT. 24 C X -0.0004 0.0131 -0.0126 -0.0007 -0.0016 -0.0024  
Y 0.0018 -0.0508 0.0495 0.0029 0.0068 0.0090

Z -0.0003 0.0178 -0.0171 -0.0014 -0.0020 -0.0022  
AT. 25 H X -0.0006 -0.0248 -0.0242 0.0014 0.0013 -0.0019  
Y 0.0021 0.0570 0.0550 -0.0033 -0.0080 0.0106  
Z -0.0021 -0.0723 -0.0668 0.0046 0.0103 -0.0129  
AT. 26 H X -0.0006 0.0248 -0.0242 -0.0014 -0.0013 -0.0019  
Y 0.0021 -0.0570 0.0550 0.0033 0.0080 0.0106  
Z -0.0021 0.0723 -0.0668 -0.0046 -0.0103 -0.0129  
AT. 27 H X -0.0009 -0.0183 -0.0187 0.0008 -0.0011 0.0004  
Y 0.0038 0.1008 0.0967 -0.0058 -0.0101 0.0145  
Z 0.0008 0.0094 0.0085 -0.0001 0.0012 -0.0003  
AT. 28 H X -0.0009 0.0183 -0.0187 -0.0008 0.0011 0.0004  
Y 0.0038 -0.1008 0.0967 0.0058 0.0101 0.0145  
Z 0.0008 -0.0094 0.0085 0.0001 -0.0012 -0.0003  
AT. 29 C X 0.0024 0.0115 0.0133 -0.0003 0.0044 -0.0037  
Y -0.0015 -0.0103 -0.0095 0.0003 -0.0039 0.0030  
Z -0.0004 0.0014 -0.0013 -0.0001 -0.0006 0.0011  
AT. 30 C X 0.0024 -0.0115 0.0133 0.0003 -0.0044 -0.0037  
Y -0.0015 0.0103 -0.0095 -0.0003 0.0039 0.0030  
Z -0.0004 -0.0014 -0.0013 0.0001 0.0006 0.0011  
AT. 31 H X 0.0032 0.0061 0.0102 -0.0002 0.0051 -0.0022  
Y -0.0028 -0.0137 -0.0153 0.0004 -0.0078 0.0054  
Z -0.0018 -0.0068 -0.0116 0.0001 -0.0058 0.0055  
AT. 32 H X 0.0032 -0.0061 0.0102 0.0002 -0.0051 -0.0022  
Y -0.0028 0.0137 -0.0153 -0.0004 0.0078 0.0054  
Z -0.0018 0.0068 -0.0116 -0.0001 0.0058 0.0055  
AT. 33 H X 0.0037 0.0203 0.0217 -0.0002 0.0066 -0.0066  
Y 0.0004 -0.0057 -0.0009 0.0001 0.0022 -0.0001  
Z -0.0005 0.0047 -0.0001 -0.0000 -0.0018 0.0006  
AT. 34 H X 0.0037 -0.0203 0.0217 0.0002 -0.0066 -0.0066  
Y 0.0004 0.0057 -0.0009 -0.0001 -0.0022 -0.0001  
Z -0.0005 -0.0047 -0.0001 0.0000 0.0018 0.0006  
AT. 35 C X 0.0004 0.0033 0.0040 -0.0005 0.0008 -0.0005

Y -0.0006 -0.0092 -0.0092 0.0004 -0.0056 0.0053  
Z 0.0012 0.0110 0.0101 -0.0002 0.0046 -0.0037  
AT. 36 C X 0.0004 -0.0033 0.0040 0.0005 -0.0008 -0.0005  
Y -0.0006 0.0092 -0.0092 -0.0004 0.0056 0.0053  
Z 0.0012 -0.0110 0.0101 0.0002 -0.0046 -0.0037  
AT. 37 C X 0.0002 0.0178 0.0186 -0.0013 0.0026 -0.0024  
Y -0.0021 -0.0269 -0.0262 0.0009 -0.0036 0.0037  
Z -0.0013 -0.0132 -0.0125 0.0004 0.0056 -0.0041  
AT. 38 C X 0.0002 -0.0178 0.0186 0.0013 -0.0026 -0.0024  
Y -0.0021 0.0269 -0.0262 -0.0009 0.0036 0.0037  
Z -0.0013 0.0132 -0.0125 -0.0004 -0.0056 -0.0041  
AT. 39 H X -0.0028 -0.0137 -0.0115 -0.0007 0.0068 -0.0042  
Y -0.0040 -0.0475 -0.0460 0.0016 -0.0028 0.0041  
Z -0.0026 -0.0267 -0.0254 0.0007 0.0081 -0.0056  
AT. 40 H X -0.0028 0.0137 -0.0115 0.0007 -0.0068 -0.0042  
Y -0.0040 0.0475 -0.0460 -0.0016 0.0028 0.0041  
Z -0.0026 0.0267 -0.0254 -0.0007 -0.0081 -0.0056  
AT. 41 H X 0.0034 0.0464 0.0457 -0.0017 -0.0013 -0.0016  
Y -0.0028 -0.0361 -0.0346 0.0008 -0.0025 0.0046  
Z -0.0043 -0.0359 -0.0343 0.0008 0.0090 -0.0058  
AT. 42 H X 0.0034 -0.0464 0.0457 0.0017 0.0013 -0.0016  
Y -0.0028 0.0361 -0.0346 -0.0008 0.0025 0.0046  
Z -0.0043 0.0359 -0.0343 -0.0008 -0.0090 -0.0058  
AT. 43 C X 0.0012 0.0344 0.0326 -0.0012 0.0072 -0.0074  
Y -0.0009 -0.0048 -0.0057 0.0008 -0.0010 -0.0005  
Z 0.0012 0.0081 0.0066 0.0008 0.0036 -0.0039  
AT. 44 C X 0.0012 -0.0344 0.0326 0.0012 -0.0072 -0.0074  
Y -0.0009 0.0048 -0.0057 -0.0008 0.0010 -0.0005  
Z 0.0012 -0.0081 0.0066 -0.0008 -0.0036 -0.0039  
AT. 45 H X 0.0027 0.0488 0.0451 -0.0007 0.0092 -0.0084  
Y -0.0032 -0.0282 -0.0273 0.0003 -0.0047 0.0032  
Z 0.0027 0.0204 0.0183 0.0013 0.0057 -0.0068

AT. 46 H X 0.0027 -0.0488 0.0451 0.0007 -0.0092 -0.0084  
Y -0.0032 0.0282 -0.0273 -0.0003 0.0047 0.0032  
Z 0.0027 -0.0204 0.0183 -0.0013 -0.0057 -0.0068

AT. 47 H X 0.0023 0.0487 0.0466 -0.0014 0.0085 -0.0092  
Y 0.0012 0.0211 0.0185 0.0008 0.0036 -0.0055  
Z 0.0018 0.0164 0.0136 0.0008 0.0060 -0.0059

AT. 48 H X 0.0023 -0.0487 0.0466 0.0014 -0.0085 -0.0092  
Y 0.0012 -0.0211 0.0185 -0.0008 -0.0036 -0.0055  
Z 0.0018 -0.0164 0.0136 -0.0008 -0.0060 -0.0059

AT. 49 C X -0.0006 0.0078 0.0072 -0.0007 0.0041 -0.0037  
Y -0.0011 0.0036 0.0030 -0.0002 -0.0015 0.0009  
Z -0.0004 -0.0081 -0.0078 0.0006 0.0014 -0.0006

AT. 50 C X -0.0006 -0.0078 0.0072 0.0007 -0.0041 -0.0037  
Y -0.0011 -0.0036 0.0030 0.0002 0.0015 0.0009  
Z -0.0004 0.0081 -0.0078 -0.0006 -0.0014 -0.0006

AT. 51 C X 0.0015 0.0164 0.0165 -0.0004 0.0045 -0.0053  
Y -0.0030 -0.0063 -0.0101 -0.0004 -0.0021 0.0013  
Z 0.0000 -0.0042 -0.0012 0.0000 0.0015 0.0004

AT. 52 C X 0.0015 -0.0164 0.0165 0.0004 -0.0045 -0.0053  
Y -0.0030 0.0063 -0.0101 0.0004 0.0021 0.0013  
Z 0.0000 0.0042 -0.0012 -0.0000 -0.0015 0.0004

AT. 53 H X -0.0003 0.0077 0.0040 -0.0010 0.0038 -0.0038  
Y -0.0056 -0.0189 -0.0268 -0.0010 -0.0034 0.0032  
Z 0.0005 -0.0019 0.0034 0.0004 0.0014 -0.0004

AT. 54 H X -0.0003 -0.0077 0.0040 0.0010 -0.0038 -0.0038  
Y -0.0056 0.0189 -0.0268 0.0010 0.0034 0.0032  
Z 0.0005 0.0019 0.0034 -0.0004 -0.0014 -0.0004

AT. 55 H X 0.0035 0.0263 0.0316 0.0006 0.0052 -0.0065  
Y -0.0026 -0.0058 -0.0111 -0.0014 -0.0014 0.0018  
Z 0.0014 0.0033 0.0079 -0.0004 0.0027 0.0001

AT. 56 H X 0.0035 -0.0263 0.0316 -0.0006 -0.0052 -0.0065  
Y -0.0026 0.0058 -0.0111 0.0014 0.0014 0.0018

Z 0.0014 -0.0033 0.0079 0.0004 -0.0027 0.0001  
AT. 57 C X 0.0002 -0.0197 -0.0196 0.0003 -0.0078 0.0089  
Y 0.0018 -0.0112 -0.0127 0.0008 -0.0107 0.0120  
Z 0.0057 0.0573 0.0559 -0.0016 0.0159 -0.0136  
AT. 58 C X 0.0002 0.0197 -0.0196 -0.0003 0.0078 0.0089  
Y 0.0018 0.0112 -0.0127 -0.0008 0.0107 0.0120  
Z 0.0057 -0.0573 0.0559 0.0016 -0.0159 -0.0136  
AT. 59 H X -0.0008 -0.0488 -0.0496 0.0013 -0.0197 0.0219  
Y 0.0032 0.0014 -0.0013 0.0004 -0.0083 0.0113  
Z 0.0071 0.0551 0.0513 -0.0015 0.0112 -0.0055  
AT. 60 H X -0.0008 0.0488 -0.0496 -0.0013 0.0197 0.0219  
Y 0.0032 -0.0014 -0.0013 -0.0004 0.0083 0.0113  
Z 0.0071 -0.0551 0.0513 0.0015 -0.0112 -0.0055  
AT. 61 H X 0.0027 0.0080 0.0081 -0.0004 0.0003 0.0003  
Y -0.0001 -0.0296 -0.0298 0.0013 -0.0145 0.0134  
Z 0.0086 0.0880 0.0860 -0.0024 0.0241 -0.0210  
AT. 62 H X 0.0027 -0.0080 0.0081 0.0004 -0.0003 0.0003  
Y -0.0001 0.0296 -0.0298 -0.0013 0.0145 0.0134  
Z 0.0086 -0.0880 0.0860 0.0024 -0.0241 -0.0210  
AT. 63 H X -0.0024 -0.0410 -0.0407 0.0006 -0.0132 0.0146  
Y 0.0045 -0.0063 -0.0101 0.0011 -0.0145 0.0183  
Z 0.0057 0.0732 0.0735 -0.0020 0.0242 -0.0245  
AT. 64 H X -0.0024 0.0410 -0.0407 -0.0006 0.0132 0.0146  
Y 0.0045 0.0063 -0.0101 -0.0011 0.0145 0.0183  
Z 0.0057 -0.0732 0.0735 0.0020 -0.0242 -0.0245  
AT. 65 C X -0.0043 -0.0195 -0.0190 -0.0002 0.0048 -0.0022  
Y -0.0018 0.0253 0.0265 -0.0021 -0.0015 0.0035  
Z -0.0031 -0.0430 -0.0419 0.0020 0.0017 -0.0006  
AT. 66 C X -0.0043 0.0195 -0.0190 0.0002 -0.0048 -0.0022  
Y -0.0018 -0.0253 0.0265 0.0021 0.0015 0.0035  
Z -0.0031 0.0430 -0.0419 -0.0020 -0.0017 -0.0006  
AT. 67 H X -0.0077 -0.0444 -0.0438 -0.0005 0.0069 -0.0012

Y -0.0010 0.0526 0.0555 -0.0002 -0.0054 0.0043  
Z -0.0009 -0.0473 -0.0476 0.0006 0.0035 -0.0023  
AT. 68 H X -0.0077 0.0444 -0.0438 0.0005 -0.0069 -0.0012  
Y -0.0010 -0.0526 0.0555 0.0002 0.0054 0.0043  
Z -0.0009 0.0473 -0.0476 -0.0006 -0.0035 -0.0023  
AT. 69 H X -0.0036 -0.0138 -0.0137 -0.0032 0.0071 -0.0020  
Y -0.0027 0.0053 0.0055 -0.0048 0.0024 0.0033  
Z -0.0060 -0.0851 -0.0848 0.0039 0.0029 -0.0011  
AT. 70 H X -0.0036 0.0138 -0.0137 0.0032 -0.0071 -0.0020  
Y -0.0027 -0.0053 0.0055 0.0048 -0.0024 0.0033  
Z -0.0060 0.0851 -0.0848 -0.0039 -0.0029 -0.0011  
AT. 71 H X -0.0059 -0.0287 -0.0282 0.0035 0.0018 -0.0023  
Y -0.0023 0.0398 0.0426 -0.0030 -0.0015 0.0049  
Z -0.0052 -0.0302 -0.0266 0.0037 -0.0006 0.0012  
AT. 72 H X -0.0059 0.0287 -0.0282 -0.0035 -0.0018 -0.0023  
Y -0.0023 -0.0398 0.0426 0.0030 0.0015 0.0049  
Z -0.0052 0.0302 -0.0266 -0.0037 0.0006 0.0012  
AT. 73 C X -0.0006 -0.0015 -0.0011 -0.0002 -0.0006 0.0010  
Y -0.0000 0.0052 0.0056 -0.0001 -0.0053 0.0050  
Z 0.0005 0.0044 0.0033 0.0001 0.0028 -0.0019  
AT. 74 C X -0.0006 0.0015 -0.0011 0.0002 0.0006 0.0010  
Y -0.0000 -0.0052 0.0056 0.0001 0.0053 0.0050  
Z 0.0005 -0.0044 0.0033 -0.0001 -0.0028 -0.0019  
AT. 75 H X -0.0002 -0.0030 -0.0030 -0.0000 -0.0048 0.0055  
Y -0.0000 0.0087 0.0095 -0.0002 -0.0047 0.0048  
Z 0.0006 0.0080 0.0070 0.0001 0.0006 0.0009  
AT. 76 H X -0.0002 0.0030 -0.0030 0.0000 0.0048 0.0055  
Y -0.0000 -0.0087 0.0095 0.0002 0.0047 0.0048  
Z 0.0006 -0.0080 0.0070 -0.0001 -0.0006 0.0009  
AT. 77 H X -0.0007 0.0015 0.0016 -0.0002 -0.0000 0.0004  
Y 0.0005 0.0057 0.0066 0.0002 -0.0084 0.0088  
Z 0.0001 0.0013 -0.0002 -0.0002 0.0050 -0.0049

AT. 78 H X -0.0007 -0.0015 0.0016 0.0002 0.0000 0.0004  
Y 0.0005 -0.0057 0.0066 -0.0002 0.0084 0.0088  
Z 0.0001 -0.0013 -0.0002 0.0002 -0.0050 -0.0049

AT. 79 I X 0.0006 0.0000 0.0004 -0.0024 0.0001 -0.0001  
Y -0.0037 0.0005 0.0003 0.0006 -0.0005 -0.0001  
Z 0.0026 -0.0006 -0.0000 -0.0035 0.0004 0.0001

AT. 80 I X 0.0006 -0.0000 0.0004 0.0024 -0.0001 -0.0001  
Y -0.0037 -0.0005 0.0003 -0.0006 0.0005 -0.0001  
Z 0.0026 0.0006 -0.0000 0.0035 -0.0004 0.0001

AT. 81 I X -0.0006 -0.0001 -0.0000 0.0001 -0.0009 -0.0002  
Y -0.0007 -0.0002 -0.0001 -0.0009 0.0007 0.0000  
Z -0.0008 0.0001 0.0003 -0.0003 0.0002 -0.0001

AT. 82 I X -0.0006 0.0001 -0.0000 -0.0001 0.0009 -0.0002  
Y -0.0007 0.0002 -0.0001 0.0009 -0.0007 0.0000  
Z -0.0008 -0.0001 0.0003 0.0003 -0.0002 -0.0001

AT. 83 O X 0.0147 0.0003 -0.0017 0.0172 0.0010 0.0001  
Y -0.0059 0.0013 -0.0006 0.0105 -0.0043 0.0007  
Z -0.0212 -0.0007 0.0021 -0.0219 0.0016 -0.0055

AT. 84 O X 0.0147 -0.0003 -0.0017 -0.0172 -0.0010 0.0001  
Y -0.0059 -0.0013 -0.0006 -0.0105 0.0043 0.0007  
Z -0.0212 0.0007 0.0021 0.0219 -0.0016 -0.0055

AT. 85 O X 0.0285 -0.0000 -0.0032 0.0280 0.0019 0.0045  
Y -0.0088 -0.0008 0.0005 -0.0093 -0.0067 -0.0005  
Z 0.0241 0.0005 -0.0017 0.0225 -0.0090 -0.0002

AT. 86 O X 0.0285 0.0000 -0.0032 -0.0280 -0.0019 0.0045  
Y -0.0088 0.0008 0.0005 0.0093 0.0067 -0.0005  
Z 0.0241 -0.0005 -0.0017 -0.0225 0.0090 -0.0002

AT. 87 N X -0.0156 -0.0004 0.0010 -0.0145 -0.0011 -0.0022  
Y -0.0055 0.0000 -0.0001 -0.0041 -0.0022 0.0017  
Z -0.0004 -0.0003 0.0001 -0.0013 0.0024 -0.0028

AT. 88 N X -0.0156 0.0004 0.0010 0.0145 0.0011 -0.0022  
Y -0.0055 -0.0000 -0.0001 0.0041 0.0022 0.0017



Z -0.0004 0.0003 0.0001 0.0013 -0.0024 -0.0028  
AT. 89 N X -0.0203 -0.0013 0.0011 -0.0201 -0.0002 0.0005  
Y 0.0014 -0.0001 -0.0002 -0.0025 0.0026 -0.0031  
Z 0.0038 0.0002 0.0001 -0.0003 0.0010 -0.0038  
AT. 90 N X -0.0203 0.0013 0.0011 0.0201 0.0002 0.0005  
Y 0.0014 0.0001 -0.0002 0.0025 -0.0026 -0.0031  
Z 0.0038 -0.0002 0.0001 0.0003 -0.0010 -0.0038  
AT. 91 C X 0.0005 0.0002 -0.0003 0.0038 -0.0001 -0.0012  
Y -0.0015 0.0006 -0.0008 0.0070 -0.0028 0.0007  
Z -0.0003 -0.0002 0.0002 -0.0005 0.0030 -0.0031  
AT. 92 C X 0.0005 -0.0002 -0.0003 -0.0038 0.0001 -0.0012  
Y -0.0015 -0.0006 -0.0008 -0.0070 0.0028 0.0007  
Z -0.0003 0.0002 0.0002 0.0005 -0.0030 -0.0031  
AT. 93 C X 0.0112 0.0005 -0.0015 0.0165 -0.0002 -0.0003  
Y 0.0073 0.0006 -0.0015 0.0156 -0.0010 0.0003  
Z 0.0247 0.0001 -0.0020 0.0225 0.0049 -0.0025  
AT. 94 C X 0.0112 -0.0005 -0.0015 -0.0165 0.0002 -0.0003  
Y 0.0073 -0.0006 -0.0015 -0.0156 0.0010 0.0003  
Z 0.0247 -0.0001 -0.0020 -0.0225 -0.0049 -0.0025  
AT. 95 H X 0.0130 0.0010 -0.0024 0.0263 -0.0008 -0.0006  
Y -0.0056 -0.0001 0.0003 -0.0043 -0.0016 0.0006  
Z 0.0455 0.0008 -0.0042 0.0476 0.0064 -0.0028  
AT. 96 H X 0.0130 -0.0010 -0.0024 -0.0263 0.0008 -0.0006  
Y -0.0056 0.0001 0.0003 0.0043 0.0016 0.0006  
Z 0.0455 -0.0008 -0.0042 -0.0476 -0.0064 -0.0028  
AT. 97 H X 0.0229 0.0005 -0.0027 0.0256 0.0001 0.0006  
Y 0.0312 0.0017 -0.0043 0.0477 0.0016 -0.0008  
Z 0.0267 0.0004 -0.0023 0.0271 0.0054 -0.0029  
AT. 98 H X 0.0229 -0.0005 -0.0027 -0.0256 -0.0001 0.0006  
Y 0.0312 -0.0017 -0.0043 -0.0477 -0.0016 -0.0008  
Z 0.0267 -0.0004 -0.0023 -0.0271 -0.0054 -0.0029  
AT. 99 C X 0.0075 -0.0007 -0.0015 0.0068 0.0020 0.0026

Y 0.0075 -0.0004 -0.0011 0.0068 -0.0029 0.0005  
Z 0.0052 0.0000 -0.0002 0.0026 -0.0028 -0.0021  
AT.100 C X 0.0075 0.0007 -0.0015 -0.0068 -0.0020 0.0026  
Y 0.0075 0.0004 -0.0011 -0.0068 0.0029 0.0005  
Z 0.0052 -0.0000 -0.0002 -0.0026 0.0028 -0.0021  
AT.101 C X 0.0207 -0.0004 -0.0026 0.0195 -0.0007 0.0033  
Y 0.0351 -0.0001 -0.0041 0.0358 -0.0014 0.0061  
Z -0.0164 -0.0004 0.0017 -0.0180 -0.0004 -0.0040  
AT.102 C X 0.0207 0.0004 -0.0026 -0.0195 0.0007 0.0033  
Y 0.0351 0.0001 -0.0041 -0.0358 0.0014 0.0061  
Z -0.0164 0.0004 0.0017 0.0180 0.0004 -0.0040  
AT.103 H X 0.0263 -0.0005 -0.0034 0.0260 -0.0028 0.0040  
Y 0.0330 -0.0001 -0.0038 0.0334 -0.0005 0.0059  
Z -0.0506 -0.0004 0.0055 -0.0517 -0.0010 -0.0097  
AT.104 H X 0.0263 0.0005 -0.0034 -0.0260 0.0028 0.0040  
Y 0.0330 0.0001 -0.0038 -0.0334 0.0005 0.0059  
Z -0.0506 0.0004 0.0055 0.0517 0.0010 -0.0097  
AT.105 H X 0.0317 -0.0004 -0.0038 0.0270 -0.0011 0.0045  
Y 0.0645 0.0001 -0.0071 0.0646 -0.0017 0.0110  
Z -0.0029 -0.0003 0.0003 -0.0050 -0.0005 -0.0018  
AT.106 H X 0.0317 0.0004 -0.0038 -0.0270 0.0011 0.0045  
Y 0.0645 -0.0001 -0.0071 -0.0646 0.0017 0.0110  
Z -0.0029 0.0003 0.0003 0.0050 0.0005 -0.0018  
AT.107 C X -0.0125 -0.0006 0.0007 -0.0157 0.0018 -0.0025  
Y -0.0105 0.0002 0.0007 -0.0070 -0.0049 -0.0010  
Z 0.0029 -0.0004 -0.0003 -0.0010 0.0050 -0.0020  
AT.108 C X -0.0125 0.0006 0.0007 0.0157 -0.0018 -0.0025  
Y -0.0105 -0.0002 0.0007 0.0070 0.0049 -0.0010  
Z 0.0029 0.0004 -0.0003 0.0010 -0.0050 -0.0020  
AT.109 H X -0.0089 -0.0008 0.0002 -0.0159 0.0073 -0.0016  
Y -0.0120 -0.0002 0.0008 -0.0114 -0.0015 -0.0025  
Z -0.0010 -0.0010 -0.0000 -0.0087 0.0090 -0.0052

AT.110 H X -0.0089 0.0008 0.0002 0.0159 -0.0073 -0.0016  
Y -0.0120 0.0002 0.0008 0.0114 0.0015 -0.0025  
Z -0.0010 0.0010 -0.0000 0.0087 -0.0090 -0.0052

AT.111 H X -0.0164 -0.0009 0.0010 -0.0188 0.0011 -0.0031  
Y -0.0096 0.0009 0.0007 0.0005 -0.0120 0.0012  
Z 0.0064 -0.0002 -0.0006 0.0005 0.0071 -0.0019

AT.112 H X -0.0164 0.0009 0.0010 0.0188 -0.0011 -0.0031  
Y -0.0096 -0.0009 0.0007 -0.0005 0.0120 0.0012  
Z 0.0064 0.0002 -0.0006 -0.0005 -0.0071 -0.0019

AT.113 C X -0.0047 -0.0002 0.0003 -0.0063 0.0004 0.0008  
Y -0.0080 -0.0004 0.0003 -0.0063 -0.0013 -0.0016  
Z 0.0057 0.0005 -0.0004 0.0053 0.0005 0.0005

AT.114 C X -0.0047 0.0002 0.0003 0.0063 -0.0004 0.0008  
Y -0.0080 0.0004 0.0003 0.0063 0.0013 -0.0016  
Z 0.0057 -0.0005 -0.0004 -0.0053 -0.0005 0.0005

AT.115 C X -0.0225 -0.0011 0.0017 -0.0239 0.0002 -0.0003  
Y -0.0192 -0.0005 0.0016 -0.0180 -0.0044 -0.0031  
Z -0.0143 0.0005 0.0021 -0.0154 -0.0058 -0.0033

AT.116 C X -0.0225 0.0011 0.0017 0.0239 -0.0002 -0.0003  
Y -0.0192 0.0005 0.0016 0.0180 0.0044 -0.0031  
Z -0.0143 -0.0005 0.0021 0.0154 0.0058 -0.0033

AT.117 H X -0.0003 -0.0013 -0.0009 -0.0032 0.0069 0.0010  
Y -0.0493 -0.0006 0.0049 -0.0469 -0.0133 -0.0064  
Z -0.0320 0.0007 0.0042 -0.0316 -0.0107 -0.0041

AT.118 H X -0.0003 0.0013 -0.0009 0.0032 -0.0069 0.0010  
Y -0.0493 0.0006 0.0049 0.0469 0.0133 -0.0064  
Z -0.0320 -0.0007 0.0042 0.0316 0.0107 -0.0041

AT.119 H X -0.0569 -0.0012 0.0052 -0.0550 -0.0108 -0.0022  
Y -0.0211 -0.0009 0.0012 -0.0174 -0.0054 -0.0013  
Z -0.0313 0.0009 0.0044 -0.0331 -0.0106 -0.0061

AT.120 H X -0.0569 0.0012 0.0052 0.0550 0.0108 -0.0022  
Y -0.0211 0.0009 0.0012 0.0174 0.0054 -0.0013

Z -0.0313 -0.0009 0.0044 0.0331 0.0106 -0.0061  
AT. 121 C X -0.0292 -0.0001 0.0028 -0.0261 -0.0085 -0.0008  
Y 0.0053 -0.0006 -0.0010 -0.0003 0.0072 -0.0017  
Z 0.0135 -0.0013 -0.0020 0.0062 0.0130 -0.0013  
AT. 122 C X -0.0292 0.0001 0.0028 0.0261 0.0085 -0.0008  
Y 0.0053 0.0006 -0.0010 0.0003 -0.0072 -0.0017  
Z 0.0135 0.0013 -0.0020 -0.0062 -0.0130 -0.0013  
AT. 123 H X -0.0514 0.0029 0.0075 -0.0417 -0.0293 -0.0030  
Y -0.0144 0.0010 0.0023 -0.0142 -0.0061 -0.0024  
Z 0.0305 -0.0024 -0.0046 0.0182 0.0235 -0.0012  
AT. 124 H X -0.0514 -0.0029 0.0075 0.0417 0.0293 -0.0030  
Y -0.0144 -0.0010 0.0023 0.0142 0.0061 -0.0024  
Z 0.0305 0.0024 -0.0046 -0.0182 -0.0235 -0.0012  
AT. 125 H X -0.0325 -0.0007 0.0028 -0.0297 -0.0063 -0.0002  
Y 0.0378 -0.0030 -0.0063 0.0239 0.0274 0.0003  
Z 0.0268 -0.0033 -0.0048 0.0151 0.0258 0.0006  
AT. 126 H X -0.0325 0.0007 0.0028 0.0297 0.0063 -0.0002  
Y 0.0378 0.0030 -0.0063 -0.0239 -0.0274 0.0003  
Z 0.0268 0.0033 -0.0048 -0.0151 -0.0258 0.0006  
AT. 127 C X -0.0076 -0.0003 0.0004 -0.0079 -0.0010 0.0005  
Y 0.0036 0.0000 -0.0005 0.0010 0.0022 -0.0014  
Z -0.0072 -0.0005 0.0004 -0.0069 0.0021 -0.0021  
AT. 128 C X -0.0076 0.0003 0.0004 0.0079 0.0010 0.0005  
Y 0.0036 -0.0000 -0.0005 -0.0010 -0.0022 -0.0014  
Z -0.0072 0.0005 0.0004 0.0069 -0.0021 -0.0021  
AT. 129 C X -0.0172 -0.0006 0.0012 -0.0173 -0.0024 0.0005  
Y -0.0022 -0.0009 -0.0004 -0.0088 0.0045 -0.0006  
Z -0.0021 0.0004 0.0003 0.0027 -0.0006 -0.0029  
AT. 130 C X -0.0172 0.0006 0.0012 0.0173 0.0024 0.0005  
Y -0.0022 0.0009 -0.0004 0.0088 -0.0045 -0.0006  
Z -0.0021 -0.0004 0.0003 -0.0027 0.0006 -0.0029  
AT. 131 H X -0.0137 0.0002 0.0008 -0.0087 -0.0044 0.0003

Y -0.0150 -0.0024 0.0004 -0.0283 0.0071 -0.0017  
Z -0.0018 0.0009 0.0001 0.0068 -0.0019 -0.0037  
AT. 132 H X -0.0137 -0.0002 0.0008 0.0087 0.0044 0.0003  
Y -0.0150 0.0024 0.0004 0.0283 -0.0071 -0.0017  
Z -0.0018 -0.0009 0.0001 -0.0068 0.0019 -0.0037  
AT. 133 H X -0.0217 -0.0021 0.0013 -0.0316 0.0016 -0.0020  
Y 0.0016 -0.0009 -0.0007 -0.0065 0.0067 -0.0017  
Z 0.0062 0.0012 -0.0003 0.0133 0.0010 -0.0034  
AT. 134 H X -0.0217 0.0021 0.0013 0.0316 -0.0016 -0.0020  
Y 0.0016 0.0009 -0.0007 0.0065 -0.0067 -0.0017  
Z 0.0062 -0.0012 -0.0003 -0.0133 -0.0010 -0.0034  
AT. 135 C X 0.0170 0.0012 -0.0019 0.0219 -0.0077 0.0113  
Y -0.0087 -0.0017 -0.0006 -0.0060 0.0057 0.0050  
Z 0.0410 0.0021 -0.0045 0.0517 -0.0081 0.0208  
AT. 136 C X 0.0170 -0.0012 -0.0019 -0.0219 0.0077 0.0113  
Y -0.0087 0.0017 -0.0006 0.0060 -0.0057 0.0050  
Z 0.0410 -0.0021 -0.0045 -0.0517 0.0081 0.0208  
AT. 137 H X 0.0423 0.0049 -0.0049 0.0574 -0.0281 0.0200  
Y 0.0011 0.0013 -0.0037 0.0128 -0.0110 0.0103  
Z 0.0481 0.0058 -0.0086 0.0700 -0.0288 0.0265  
AT. 138 H X 0.0423 -0.0049 -0.0049 -0.0574 0.0281 0.0200  
Y 0.0011 -0.0013 -0.0037 -0.0128 0.0110 0.0103  
Z 0.0481 -0.0058 -0.0086 -0.0700 0.0288 0.0265  
AT. 139 H X -0.0021 0.0019 -0.0004 -0.0011 -0.0106 -0.0013  
Y -0.0258 -0.0075 0.0045 -0.0377 0.0391 -0.0001  
Z 0.0704 0.0028 -0.0078 0.0902 -0.0134 0.0386  
AT. 140 H X -0.0021 -0.0019 -0.0004 0.0011 0.0106 -0.0013  
Y -0.0258 0.0075 0.0045 0.0377 -0.0391 -0.0001  
Z 0.0704 -0.0028 -0.0078 -0.0902 0.0134 0.0386  
AT. 141 H X 0.0329 -0.0016 -0.0021 0.0382 0.0074 0.0257  
Y -0.0008 -0.0001 -0.0034 0.0100 -0.0044 0.0127  
Z 0.0396 -0.0007 -0.0017 0.0422 0.0085 0.0190

AT. 142 H X 0.0329 0.0016 -0.0021 -0.0382 -0.0074 0.0257  
Y -0.0008 0.0001 -0.0034 -0.0100 0.0044 0.0127  
Z 0.0396 0.0007 -0.0017 -0.0422 -0.0085 0.0190

AT. 143 C X 0.0162 -0.0003 -0.0015 0.0091 0.0124 -0.0118  
Y 0.0154 0.0016 0.0001 0.0136 -0.0072 0.0029  
Z -0.0445 -0.0009 0.0029 -0.0350 -0.0133 0.0132

AT. 144 C X 0.0162 0.0003 -0.0015 -0.0091 -0.0124 -0.0118  
Y 0.0154 -0.0016 0.0001 -0.0136 0.0072 0.0029  
Z -0.0445 0.0009 0.0029 0.0350 0.0133 0.0132

AT. 145 H X 0.0409 -0.0006 -0.0035 0.0245 0.0446 -0.0411  
Y 0.0232 0.0033 0.0005 0.0189 0.0115 -0.0149  
Z -0.0469 -0.0029 0.0019 -0.0366 -0.0254 0.0251

AT. 146 H X 0.0409 0.0006 -0.0035 -0.0245 -0.0446 -0.0411  
Y 0.0232 -0.0033 0.0005 -0.0189 -0.0115 -0.0149  
Z -0.0469 0.0029 0.0019 0.0366 0.0254 0.0251

AT. 147 H X -0.0069 -0.0004 -0.0000 -0.0092 0.0116 -0.0096  
Y 0.0110 0.0003 -0.0000 0.0131 -0.0396 0.0318  
Z -0.0793 -0.0018 0.0048 -0.0609 -0.0317 0.0318

AT. 148 H X -0.0069 0.0004 -0.0000 0.0092 -0.0116 -0.0096  
Y 0.0110 -0.0003 -0.0000 -0.0131 0.0396 0.0318  
Z -0.0793 0.0018 0.0048 0.0609 0.0317 0.0318

AT. 149 H X 0.0390 -0.0004 -0.0023 0.0288 -0.0016 -0.0027  
Y 0.0225 0.0026 0.0003 0.0201 -0.0041 -0.0019  
Z -0.0440 0.0009 0.0038 -0.0336 -0.0011 0.0006

AT. 150 H X 0.0390 0.0004 -0.0023 -0.0288 0.0016 -0.0027  
Y 0.0225 -0.0026 0.0003 -0.0201 0.0041 -0.0019  
Z -0.0440 -0.0009 0.0038 0.0336 0.0011 0.0006

AT. 151 C X 0.0016 0.0001 -0.0002 -0.0003 0.0002 0.0028  
Y 0.0012 0.0005 -0.0003 0.0032 -0.0020 -0.0041  
Z 0.0002 0.0000 0.0001 -0.0016 0.0037 -0.0042

AT. 152 C X 0.0016 -0.0001 -0.0002 0.0003 -0.0002 0.0028  
Y 0.0012 -0.0005 -0.0003 -0.0032 0.0020 -0.0041

Z 0.0002 -0.0000 0.0001 0.0016 -0.0037 -0.0042  
AT. 153 H X 0.0034 0.0002 -0.0002 -0.0005 0.0013 0.0043  
Y 0.0024 0.0009 -0.0005 0.0058 -0.0031 -0.0052  
Z 0.0013 0.0006 -0.0002 0.0027 0.0015 -0.0065  
AT. 154 H X 0.0034 -0.0002 -0.0002 0.0005 -0.0013 0.0043  
Y 0.0024 -0.0009 -0.0005 -0.0058 0.0031 -0.0052  
Z 0.0013 -0.0006 -0.0002 -0.0027 -0.0015 -0.0065  
AT. 155 H X -0.0015 0.0000 0.0001 -0.0031 -0.0012 0.0044  
Y 0.0014 0.0009 -0.0004 0.0059 -0.0045 -0.0065  
Z -0.0012 -0.0005 0.0003 -0.0055 0.0057 -0.0011  
AT. 156 H X -0.0015 -0.0000 0.0001 0.0031 0.0012 0.0044  
Y 0.0014 -0.0009 -0.0004 -0.0059 0.0045 -0.0065  
Z -0.0012 0.0005 0.0003 0.0055 -0.0057 -0.0011  
AT. 157 O X 0.0010 -0.0008 -0.0024 0.0000 -0.0142 -0.0140  
Y 0.0007 0.0122 0.0070 -0.0006 0.0183 0.0109  
Z 0.0017 0.0194 -0.0186 -0.0027 -0.0374 -0.0406  
AT. 158 O X 0.0010 0.0008 -0.0024 -0.0000 0.0142 -0.0140  
Y 0.0007 -0.0122 0.0070 0.0006 -0.0183 0.0109  
Z 0.0017 -0.0194 -0.0186 0.0027 0.0374 -0.0406  
AT. 159 O X -0.0023 -0.0086 0.0059 0.0035 0.0525 0.0557  
Y -0.0012 -0.0025 -0.0070 -0.0018 -0.0176 -0.0147  
Z -0.0046 0.0037 -0.0053 0.0036 0.0783 0.0818  
AT. 160 O X -0.0023 0.0086 0.0059 -0.0035 -0.0525 0.0557  
Y -0.0012 0.0025 -0.0070 0.0018 0.0176 -0.0147  
Z -0.0046 -0.0037 -0.0053 -0.0036 -0.0783 0.0818  
AT. 161 H X 0.0016 0.0024 0.0024 0.0003 -0.0053 -0.0097  
Y 0.0010 0.0179 0.0073 -0.0010 0.0193 0.0097  
Z 0.0003 0.0065 -0.0196 -0.0016 -0.0307 -0.0299  
AT. 162 H X 0.0016 -0.0024 0.0024 -0.0003 0.0053 -0.0097  
Y 0.0010 -0.0179 0.0073 0.0010 -0.0193 0.0097  
Z 0.0003 -0.0065 -0.0196 0.0016 0.0307 -0.0299  
AT. 163 H X -0.0055 -0.0091 0.0092 0.0067 0.1193 0.1242

Y 0.0022 -0.0098 0.0012 -0.0029 -0.0312 -0.0304  
Z -0.0031 0.0027 -0.0047 0.0025 0.0576 0.0601  
AT. 164 H X -0.0055 0.0091 0.0092 -0.0067 -0.1193 0.1242  
Y 0.0022 0.0098 0.0012 0.0029 0.0312 -0.0304  
Z -0.0031 -0.0027 -0.0047 -0.0025 -0.0576 0.0601  
AT. 165 O X -0.0132 0.0039 -0.0005 0.0388 0.0044 0.0002  
Y 0.0555 -0.0052 0.0003 -0.0335 0.0199 -0.0018  
Z -0.0245 0.0026 0.0003 0.0205 -0.0046 0.0006  
AT. 166 O X -0.0132 -0.0039 -0.0005 -0.0388 -0.0044 0.0002  
Y 0.0555 0.0052 0.0003 0.0335 -0.0199 -0.0018  
Z -0.0245 -0.0026 0.0003 -0.0205 0.0046 0.0006  
AT. 167 H X -0.0031 0.0032 -0.0008 0.0347 0.0092 -0.0002  
Y 0.0407 -0.0027 0.0003 -0.0139 0.0163 -0.0007  
Z -0.0246 0.0000 0.0011 -0.0001 -0.0099 0.0003  
AT. 168 H X -0.0031 -0.0032 -0.0008 -0.0347 -0.0092 -0.0002  
Y 0.0407 0.0027 0.0003 0.0139 -0.0163 -0.0007  
Z -0.0246 -0.0000 0.0011 0.0001 0.0099 0.0003  
AT. 169 O X 0.0093 -0.0031 0.0015 -0.0136 0.0042 -0.0018  
Y -0.0264 0.0021 0.0001 0.0131 -0.0165 0.0033  
Z -0.0012 -0.0005 0.0007 -0.0012 0.0034 -0.0009  
AT. 170 O X 0.0093 0.0031 0.0015 0.0136 -0.0042 -0.0018  
Y -0.0264 -0.0021 0.0001 -0.0131 0.0165 0.0033  
Z -0.0012 0.0005 0.0007 0.0012 -0.0034 -0.0009  
AT. 171 H X 0.0511 -0.0052 -0.0011 -0.0457 0.0131 0.0002  
Y -0.0287 0.0038 -0.0015 0.0146 -0.0211 0.0057  
Z -0.0374 0.0039 -0.0001 0.0274 -0.0101 0.0019  
AT. 172 H X 0.0511 0.0052 -0.0011 0.0457 -0.0131 0.0002  
Y -0.0287 -0.0038 -0.0015 -0.0146 0.0211 0.0057  
Z -0.0374 -0.0039 -0.0001 -0.0274 0.0101 0.0019  
FREQ(CM\*\*-1) 222.96 225.45 230.59 230.70 234.42 235.87



AT. 1 I X -0.0009 -0.0001 0.0002 -0.0008 -0.0007 -0.0002  
Y -0.0003 -0.0000 0.0002 -0.0005 0.0001 0.0005  
Z -0.0007 0.0005 -0.0001 -0.0002 -0.0003 -0.0002

AT. 2 I X 0.0009 -0.0001 0.0002 0.0008 -0.0007 -0.0002  
Y 0.0003 -0.0000 0.0002 0.0005 0.0001 0.0005  
Z 0.0007 0.0005 -0.0001 0.0002 -0.0003 -0.0002

AT. 3 I X -0.0007 -0.0006 -0.0000 -0.0005 -0.0005 -0.0011  
Y 0.0002 -0.0001 -0.0003 -0.0000 -0.0003 -0.0001  
Z 0.0000 0.0002 -0.0002 -0.0002 0.0000 -0.0000

AT. 4 I X 0.0007 -0.0006 -0.0000 0.0005 -0.0005 -0.0011  
Y -0.0002 -0.0001 -0.0003 0.0000 -0.0003 -0.0001  
Z -0.0000 0.0002 -0.0002 0.0002 0.0000 -0.0000

AT. 5 O X -0.0004 0.0041 0.0011 0.0025 0.0072 0.0082  
Y -0.0002 0.0045 -0.0026 0.0032 0.0007 -0.0005  
Z -0.0011 0.0006 0.0016 0.0004 0.0089 0.0155

AT. 6 O X 0.0004 0.0041 0.0011 -0.0025 0.0072 0.0082  
Y 0.0002 0.0045 -0.0026 -0.0032 0.0007 -0.0005  
Z 0.0011 0.0006 0.0016 -0.0004 0.0089 0.0155

AT. 7 O X 0.0092 0.0053 -0.0016 0.0038 -0.0050 0.0001  
Y 0.0072 0.0071 0.0007 0.0039 -0.0043 -0.0011  
Z -0.0018 0.0020 0.0026 -0.0001 0.0034 0.0054

AT. 8 O X -0.0092 0.0053 -0.0016 -0.0038 -0.0050 0.0001  
Y -0.0072 0.0071 0.0007 -0.0039 -0.0043 -0.0011  
Z 0.0018 0.0020 0.0026 0.0001 0.0034 0.0054

AT. 9 N X 0.0018 0.0014 -0.0005 0.0007 -0.0029 -0.0044  
Y 0.0015 -0.0005 -0.0015 -0.0002 -0.0042 -0.0097  
Z -0.0004 0.0001 0.0006 0.0001 0.0043 0.0091

AT. 10 N X -0.0018 0.0014 -0.0005 -0.0007 -0.0029 -0.0044  
Y -0.0015 -0.0005 -0.0015 0.0002 -0.0042 -0.0097  
Z 0.0004 0.0001 0.0006 -0.0001 0.0043 0.0091

AT. 11 N X 0.0014 0.0020 0.0014 0.0001 0.0055 0.0113  
Y 0.0017 0.0002 0.0001 -0.0008 0.0053 0.0131

Z 0.0013 0.0002 0.0005 -0.0006 0.0049 0.0127  
AT. 12 N X -0.0014 0.0020 0.0014 -0.0001 0.0055 0.0113  
Y -0.0017 0.0002 0.0001 0.0008 0.0053 0.0131  
Z -0.0013 0.0002 0.0005 0.0006 0.0049 0.0127  
AT. 13 C X 0.0003 0.0025 0.0001 0.0013 0.0012 0.0010  
Y 0.0002 0.0019 -0.0022 0.0014 -0.0019 -0.0048  
Z -0.0004 0.0006 0.0005 0.0005 0.0050 0.0109  
AT. 14 C X -0.0003 0.0025 0.0001 -0.0013 0.0012 0.0010  
Y -0.0002 0.0019 -0.0022 -0.0014 -0.0019 -0.0048  
Z 0.0004 0.0006 0.0005 -0.0005 0.0050 0.0109  
AT. 15 C X 0.0001 -0.0001 0.0011 -0.0002 0.0008 0.0003  
Y -0.0002 0.0005 -0.0020 0.0004 -0.0030 -0.0048  
Z -0.0009 0.0028 -0.0006 0.0013 0.0044 0.0130  
AT. 16 C X -0.0001 -0.0001 0.0011 0.0002 0.0008 0.0003  
Y 0.0002 0.0005 -0.0020 -0.0004 -0.0030 -0.0048  
Z 0.0009 0.0028 -0.0006 -0.0013 0.0044 0.0130  
AT. 17 H X 0.0003 -0.0010 0.0019 -0.0013 -0.0001 -0.0018  
Y 0.0004 -0.0011 -0.0015 -0.0003 -0.0051 -0.0099  
Z -0.0016 0.0045 -0.0009 0.0018 0.0067 0.0186  
AT. 18 H X -0.0003 -0.0010 0.0019 0.0013 -0.0001 -0.0018  
Y -0.0004 -0.0011 -0.0015 0.0003 -0.0051 -0.0099  
Z 0.0016 0.0045 -0.0009 -0.0018 0.0067 0.0186  
AT. 19 H X 0.0003 -0.0021 0.0023 -0.0007 0.0018 0.0023  
Y -0.0018 0.0024 -0.0026 0.0010 0.0005 0.0032  
Z -0.0014 0.0029 -0.0004 0.0014 0.0061 0.0168  
AT. 20 H X -0.0003 -0.0021 0.0023 0.0007 0.0018 0.0023  
Y 0.0018 0.0024 -0.0026 -0.0010 0.0005 0.0032  
Z 0.0014 0.0029 -0.0004 -0.0014 0.0061 0.0168  
AT. 21 C X 0.0029 0.0020 -0.0001 0.0013 0.0003 0.0035  
Y 0.0024 0.0033 0.0012 0.0014 0.0012 0.0041  
Z 0.0000 0.0011 0.0013 -0.0001 0.0034 0.0082  
AT. 22 C X -0.0029 0.0020 -0.0001 -0.0013 0.0003 0.0035

Y -0.0024 0.0033 0.0012 -0.0014 0.0012 0.0041  
Z -0.0000 0.0011 0.0013 0.0001 0.0034 0.0082  
AT. 23 C X 0.0016 -0.0002 -0.0009 0.0005 -0.0011 -0.0001  
Y -0.0065 0.0008 0.0042 -0.0003 0.0023 -0.0039  
Z 0.0015 -0.0001 -0.0004 -0.0003 0.0022 0.0081  
AT. 24 C X -0.0016 -0.0002 -0.0009 -0.0005 -0.0011 -0.0001  
Y 0.0065 0.0008 0.0042 0.0003 0.0023 -0.0039  
Z -0.0015 -0.0001 -0.0004 0.0003 0.0022 0.0081  
AT. 25 H X 0.0023 -0.0016 -0.0023 -0.0003 -0.0027 -0.0022  
Y -0.0074 0.0006 0.0045 -0.0004 0.0020 -0.0055  
Z 0.0084 0.0002 -0.0038 0.0002 0.0025 0.0163  
AT. 26 H X -0.0023 -0.0016 -0.0023 0.0003 -0.0027 -0.0022  
Y 0.0074 0.0006 0.0045 0.0004 0.0020 -0.0055  
Z -0.0084 0.0002 -0.0038 -0.0002 0.0025 0.0163  
AT. 27 H X 0.0008 -0.0008 -0.0015 -0.0001 -0.0017 -0.0021  
Y -0.0116 0.0020 0.0076 0.0000 0.0016 -0.0119  
Z -0.0009 0.0007 0.0016 0.0001 0.0020 0.0046  
AT. 28 H X -0.0008 -0.0008 -0.0015 0.0001 -0.0017 -0.0021  
Y 0.0116 0.0020 0.0076 -0.0000 0.0016 -0.0119  
Z 0.0009 0.0007 0.0016 -0.0001 0.0020 0.0046  
AT. 29 C X 0.0013 0.0011 0.0006 0.0008 -0.0004 -0.0007  
Y -0.0001 -0.0004 0.0007 -0.0003 0.0022 0.0016  
Z -0.0008 -0.0007 -0.0002 -0.0007 0.0019 0.0060  
AT. 30 C X -0.0013 0.0011 0.0006 -0.0008 -0.0004 -0.0007  
Y 0.0001 -0.0004 0.0007 0.0003 0.0022 0.0016  
Z 0.0008 -0.0007 -0.0002 0.0007 0.0019 0.0060  
AT. 31 H X 0.0007 0.0011 0.0024 0.0009 0.0044 0.0077  
Y -0.0013 -0.0015 -0.0003 -0.0015 0.0015 0.0020  
Z -0.0031 -0.0022 -0.0005 -0.0024 0.0038 0.0118  
AT. 32 H X -0.0007 0.0011 0.0024 -0.0009 0.0044 0.0077  
Y 0.0013 -0.0015 -0.0003 0.0015 0.0015 0.0020  
Z 0.0031 -0.0022 -0.0005 0.0024 0.0038 0.0118

AT. 33 H X 0.0021 0.0022 0.0009 0.0015 -0.0007 -0.0018  
Y 0.0020 0.0011 0.0019 0.0017 0.0034 0.0009  
Z -0.0012 -0.0006 -0.0005 -0.0011 0.0014 0.0058

AT. 34 H X -0.0021 0.0022 0.0009 -0.0015 -0.0007 -0.0018  
Y -0.0020 0.0011 0.0019 -0.0017 0.0034 0.0009  
Z 0.0012 -0.0006 -0.0005 0.0011 0.0014 0.0058

AT. 35 C X -0.0002 0.0003 0.0005 0.0001 0.0015 0.0028  
Y -0.0009 -0.0016 -0.0001 -0.0011 0.0018 0.0025  
Z 0.0013 0.0008 0.0001 0.0006 -0.0006 0.0001

AT. 36 C X 0.0002 0.0003 0.0005 -0.0001 0.0015 0.0028  
Y 0.0009 -0.0016 -0.0001 0.0011 0.0018 0.0025  
Z -0.0013 0.0008 0.0001 -0.0006 -0.0006 0.0001

AT. 37 C X -0.0002 0.0019 0.0023 0.0006 0.0040 0.0056  
Y -0.0011 -0.0007 0.0018 -0.0003 0.0062 0.0089  
Z 0.0004 0.0018 0.0034 0.0014 0.0075 0.0116

AT. 38 C X 0.0002 0.0019 0.0023 -0.0006 0.0040 0.0056  
Y 0.0011 -0.0007 0.0018 0.0003 0.0062 0.0089  
Z -0.0004 0.0018 0.0034 -0.0014 0.0075 0.0116

AT. 39 H X -0.0020 0.0035 0.0066 0.0026 0.0114 0.0124  
Y -0.0027 0.0000 0.0045 0.0006 0.0118 0.0160  
Z 0.0000 0.0025 0.0051 0.0024 0.0102 0.0134

AT. 40 H X 0.0020 0.0035 0.0066 -0.0026 0.0114 0.0124  
Y 0.0027 0.0000 0.0045 -0.0006 0.0118 0.0160  
Z -0.0000 0.0025 0.0051 -0.0024 0.0102 0.0134

AT. 41 H X 0.0037 -0.0004 -0.0034 -0.0016 -0.0037 0.0012  
Y -0.0033 -0.0003 0.0034 0.0008 0.0049 0.0016  
Z -0.0018 0.0039 0.0080 0.0028 0.0165 0.0219

AT. 42 H X -0.0037 -0.0004 -0.0034 0.0016 -0.0037 0.0012  
Y 0.0033 -0.0003 0.0034 -0.0008 0.0049 0.0016  
Z 0.0018 0.0039 0.0080 -0.0028 0.0165 0.0219

AT. 43 C X 0.0016 0.0022 0.0009 -0.0001 0.0019 0.0058  
Y 0.0011 -0.0004 -0.0003 -0.0010 0.0014 0.0048

Z 0.0016 0.0002 -0.0005 -0.0008 0.0006 0.0064  
AT. 44 C X -0.0016 0.0022 0.0009 0.0001 0.0019 0.0058  
Y -0.0011 -0.0004 -0.0003 0.0010 0.0014 0.0048  
Z -0.0016 0.0002 -0.0005 0.0008 0.0006 0.0064  
AT. 45 H X 0.0001 0.0024 0.0011 -0.0005 -0.0022 -0.0025  
Y 0.0014 -0.0017 -0.0011 -0.0005 0.0016 0.0034  
Z 0.0027 0.0013 -0.0001 -0.0009 0.0033 0.0137  
AT. 46 H X -0.0001 0.0024 0.0011 0.0005 -0.0022 -0.0025  
Y -0.0014 -0.0017 -0.0011 0.0005 0.0016 0.0034  
Z -0.0027 0.0013 -0.0001 0.0009 0.0033 0.0137  
AT. 47 H X 0.0019 0.0028 0.0011 -0.0003 0.0020 0.0071  
Y 0.0017 0.0008 -0.0002 -0.0014 -0.0003 0.0047  
Z 0.0016 0.0004 -0.0006 -0.0011 -0.0011 0.0044  
AT. 48 H X -0.0019 0.0028 0.0011 0.0003 0.0020 0.0071  
Y -0.0017 0.0008 -0.0002 0.0014 -0.0003 0.0047  
Z -0.0016 0.0004 -0.0006 0.0011 -0.0011 0.0044  
AT. 49 C X 0.0007 0.0012 0.0007 0.0004 0.0015 0.0035  
Y 0.0002 -0.0002 0.0003 -0.0008 0.0016 0.0025  
Z 0.0009 -0.0003 -0.0006 -0.0000 -0.0006 0.0003  
AT. 50 C X -0.0007 0.0012 0.0007 -0.0004 0.0015 0.0035  
Y -0.0002 -0.0002 0.0003 0.0008 0.0016 0.0025  
Z -0.0009 -0.0003 -0.0006 0.0000 -0.0006 0.0003  
AT. 51 C X 0.0010 0.0018 0.0003 0.0005 0.0012 0.0045  
Y 0.0002 -0.0023 -0.0012 -0.0015 -0.0039 -0.0058  
Z 0.0003 0.0011 0.0010 0.0007 0.0053 0.0089  
AT. 52 C X -0.0010 0.0018 0.0003 -0.0005 0.0012 0.0045  
Y -0.0002 -0.0023 -0.0012 0.0015 -0.0039 -0.0058  
Z -0.0003 0.0011 0.0010 -0.0007 0.0053 0.0089  
AT. 53 H X 0.0005 -0.0007 -0.0008 -0.0004 -0.0027 -0.0010  
Y -0.0004 -0.0048 -0.0025 -0.0024 -0.0076 -0.0113  
Z 0.0004 0.0026 0.0015 0.0013 0.0079 0.0128  
AT. 54 H X -0.0005 -0.0007 -0.0008 0.0004 -0.0027 -0.0010

Y 0.0004 -0.0048 -0.0025 0.0024 -0.0076 -0.0113  
Z -0.0004 0.0026 0.0015 -0.0013 0.0079 0.0128  
AT. 55 H X 0.0018 0.0049 0.0019 0.0018 0.0061 0.0108  
Y -0.0015 -0.0035 -0.0017 -0.0019 -0.0031 -0.0015  
Z -0.0007 0.0018 0.0017 0.0010 0.0101 0.0183  
AT. 56 H X -0.0018 0.0049 0.0019 -0.0018 0.0061 0.0108  
Y 0.0015 -0.0035 -0.0017 0.0019 -0.0031 -0.0015  
Z 0.0007 0.0018 0.0017 -0.0010 0.0101 0.0183  
AT. 57 C X -0.0019 -0.0043 -0.0026 -0.0025 0.0044 0.0121  
Y 0.0005 -0.0075 -0.0075 -0.0034 -0.0152 -0.0254  
Z 0.0072 0.0015 -0.0049 0.0027 -0.0324 -0.0609  
AT. 58 C X 0.0019 -0.0043 -0.0026 0.0025 0.0044 0.0121  
Y -0.0005 -0.0075 -0.0075 0.0034 -0.0152 -0.0254  
Z -0.0072 0.0015 -0.0049 -0.0027 -0.0324 -0.0609  
AT. 59 H X -0.0043 -0.0105 -0.0064 -0.0059 0.0089 0.0245  
Y -0.0003 -0.0061 -0.0072 -0.0020 -0.0204 -0.0385  
Z 0.0044 -0.0007 -0.0070 0.0023 -0.0366 -0.0710  
AT. 60 H X 0.0043 -0.0105 -0.0064 0.0059 0.0089 0.0245  
Y 0.0003 -0.0061 -0.0072 0.0020 -0.0204 -0.0385  
Z -0.0044 -0.0007 -0.0070 -0.0023 -0.0366 -0.0710  
AT. 61 H X 0.0044 -0.0053 -0.0078 -0.0019 -0.0202 -0.0319  
Y 0.0014 -0.0101 -0.0085 -0.0055 -0.0090 -0.0086  
Z 0.0116 0.0020 -0.0084 0.0042 -0.0546 -0.1036  
AT. 62 H X -0.0044 -0.0053 -0.0078 0.0019 -0.0202 -0.0319  
Y -0.0014 -0.0101 -0.0085 0.0055 -0.0090 -0.0086  
Z -0.0116 0.0020 -0.0084 -0.0042 -0.0546 -0.1036  
AT. 63 H X -0.0078 -0.0020 0.0033 -0.0022 0.0283 0.0532  
Y 0.0015 -0.0127 -0.0145 -0.0050 -0.0344 -0.0590  
Z 0.0119 0.0038 -0.0046 0.0038 -0.0388 -0.0716  
AT. 64 H X 0.0078 -0.0020 0.0033 0.0022 0.0283 0.0532  
Y -0.0015 -0.0127 -0.0145 0.0050 -0.0344 -0.0590  
Z -0.0119 0.0038 -0.0046 -0.0038 -0.0388 -0.0716

AT. 65 C X 0.0037 -0.0004 -0.0006 0.0013 -0.0152 -0.0361  
Y -0.0019 0.0024 0.0055 -0.0005 0.0166 0.0232  
Z 0.0043 -0.0030 -0.0043 0.0006 -0.0222 -0.0429

AT. 66 C X -0.0037 -0.0004 -0.0006 -0.0013 -0.0152 -0.0361  
Y 0.0019 0.0024 0.0055 0.0005 0.0166 0.0232  
Z -0.0043 -0.0030 -0.0043 -0.0006 -0.0222 -0.0429

AT. 67 H X 0.0063 -0.0022 -0.0021 0.0027 -0.0351 -0.0814  
Y -0.0040 0.0067 0.0120 -0.0025 0.0474 0.0821  
Z 0.0041 -0.0055 -0.0091 0.0012 -0.0343 -0.0597

AT. 68 H X -0.0063 -0.0022 -0.0021 -0.0027 -0.0351 -0.0814  
Y 0.0040 0.0067 0.0120 0.0025 0.0474 0.0821  
Z -0.0041 -0.0055 -0.0091 -0.0012 -0.0343 -0.0597

AT. 69 H X 0.0027 -0.0014 -0.0020 0.0022 -0.0196 -0.0451  
Y -0.0004 -0.0011 0.0006 0.0013 -0.0086 -0.0270  
Z 0.0091 -0.0065 -0.0090 0.0016 -0.0523 -0.1022

AT. 70 H X -0.0027 -0.0014 -0.0020 -0.0022 -0.0196 -0.0451  
Y 0.0004 -0.0011 0.0006 -0.0013 -0.0086 -0.0270  
Z -0.0091 -0.0065 -0.0090 -0.0016 -0.0523 -0.1022

AT. 71 H X 0.0051 0.0007 0.0012 0.0002 -0.0110 -0.0276  
Y -0.0030 0.0044 0.0093 -0.0005 0.0277 0.0395  
Z 0.0040 0.0005 0.0023 -0.0003 -0.0039 -0.0145

AT. 72 H X -0.0051 0.0007 0.0012 -0.0002 -0.0110 -0.0276  
Y 0.0030 0.0044 0.0093 0.0005 0.0277 0.0395  
Z -0.0040 0.0005 0.0023 0.0003 -0.0039 -0.0145

AT. 73 C X -0.0013 0.0008 0.0010 0.0000 0.0034 0.0063  
Y -0.0019 -0.0001 0.0007 -0.0008 0.0024 0.0031  
Z 0.0003 0.0007 0.0009 0.0002 0.0046 0.0103

AT. 74 C X 0.0013 0.0008 0.0010 -0.0000 0.0034 0.0063  
Y 0.0019 -0.0001 0.0007 0.0008 0.0024 0.0031  
Z -0.0003 0.0007 0.0009 -0.0002 0.0046 0.0103

AT. 75 H X -0.0033 0.0004 0.0010 -0.0003 0.0030 0.0047  
Y -0.0029 0.0007 0.0014 -0.0004 0.0034 0.0044

Z -0.0021 0.0016 0.0018 0.0005 0.0055 0.0102  
AT. 76 H X 0.0033 0.0004 0.0010 0.0003 0.0030 0.0047  
Y 0.0029 0.0007 0.0014 0.0004 0.0034 0.0044  
Z 0.0021 0.0016 0.0018 -0.0005 0.0055 0.0102  
AT. 77 H X -0.0015 0.0014 0.0012 0.0001 0.0041 0.0079  
Y -0.0051 0.0004 0.0022 -0.0006 0.0035 0.0034  
Z 0.0034 -0.0004 -0.0007 -0.0000 0.0026 0.0081  
AT. 78 H X 0.0015 0.0014 0.0012 -0.0001 0.0041 0.0079  
Y 0.0051 0.0004 0.0022 0.0006 0.0035 0.0034  
Z -0.0034 -0.0004 -0.0007 0.0000 0.0026 0.0081  
AT. 79 I X 0.0007 -0.0002 -0.0010 0.0006 0.0027 -0.0008  
Y 0.0016 0.0003 0.0005 -0.0004 -0.0010 0.0002  
Z -0.0019 -0.0008 -0.0027 0.0008 -0.0014 0.0011  
AT. 80 I X -0.0007 -0.0002 -0.0010 -0.0006 0.0027 -0.0008  
Y -0.0016 0.0003 0.0005 0.0004 -0.0010 0.0002  
Z 0.0019 -0.0008 -0.0027 -0.0008 -0.0014 0.0011  
AT. 81 I X 0.0025 -0.0013 -0.0024 -0.0005 -0.0003 0.0005  
Y -0.0018 0.0006 0.0013 0.0001 -0.0006 -0.0003  
Z -0.0001 -0.0000 -0.0001 -0.0001 -0.0001 0.0002  
AT. 82 I X -0.0025 -0.0013 -0.0024 0.0005 -0.0003 0.0005  
Y 0.0018 0.0006 0.0013 -0.0001 -0.0006 -0.0003  
Z 0.0001 -0.0000 -0.0001 0.0001 -0.0001 0.0002  
AT. 83 O X -0.0053 0.0045 0.0092 -0.0018 -0.0024 -0.0004  
Y 0.0125 0.0053 0.0054 0.0001 0.0161 -0.0060  
Z 0.0060 -0.0164 -0.0031 -0.0078 0.0051 -0.0017  
AT. 84 O X 0.0053 0.0045 0.0092 0.0018 -0.0024 -0.0004  
Y -0.0125 0.0053 0.0054 -0.0001 0.0161 -0.0060  
Z -0.0060 -0.0164 -0.0031 0.0078 0.0051 -0.0017  
AT. 85 O X -0.0144 0.0097 0.0095 0.0041 0.0146 -0.0067  
Y 0.0203 -0.0080 -0.0179 -0.0019 -0.0132 0.0075  
Z 0.0227 -0.0096 -0.0180 -0.0067 -0.0032 0.0051  
AT. 86 O X 0.0144 0.0097 0.0095 -0.0041 0.0146 -0.0067



Y -0.0203 -0.0080 -0.0179 0.0019 -0.0132 0.0075  
Z -0.0227 -0.0096 -0.0180 0.0067 -0.0032 0.0051  
AT. 87 N X 0.0061 -0.0054 -0.0025 -0.0029 -0.0010 0.0011  
Y 0.0033 0.0090 -0.0050 0.0084 -0.0035 0.0023  
Z -0.0006 -0.0074 0.0044 -0.0059 0.0047 -0.0027  
AT. 88 N X -0.0061 -0.0054 -0.0025 0.0029 -0.0010 0.0011  
Y -0.0033 0.0090 -0.0050 -0.0084 -0.0035 0.0023  
Z 0.0006 -0.0074 0.0044 0.0059 0.0047 -0.0027  
AT. 89 N X -0.0015 0.0022 -0.0007 0.0042 -0.0047 0.0016  
Y -0.0030 -0.0080 0.0002 -0.0020 0.0105 -0.0054  
Z -0.0003 -0.0088 0.0009 -0.0043 0.0097 -0.0044  
AT. 90 N X 0.0015 0.0022 -0.0007 -0.0042 -0.0047 0.0016  
Y 0.0030 -0.0080 0.0002 0.0020 0.0105 -0.0054  
Z 0.0003 -0.0088 0.0009 0.0043 0.0097 -0.0044  
AT. 91 C X 0.0004 -0.0004 0.0035 -0.0022 -0.0009 0.0000  
Y 0.0069 0.0071 0.0038 0.0024 0.0072 -0.0029  
Z -0.0010 -0.0092 0.0052 -0.0072 0.0057 -0.0033  
AT. 92 C X -0.0004 -0.0004 0.0035 0.0022 -0.0009 0.0000  
Y -0.0069 0.0071 0.0038 -0.0024 0.0072 -0.0029  
Z 0.0010 -0.0092 0.0052 0.0072 0.0057 -0.0033  
AT. 93 C X 0.0007 0.0037 0.0093 -0.0021 0.0074 -0.0039  
Y 0.0026 0.0061 0.0104 -0.0014 0.0068 -0.0041  
Z -0.0062 -0.0057 0.0157 -0.0091 0.0165 -0.0091  
AT. 94 C X -0.0007 0.0037 0.0093 0.0021 0.0074 -0.0039  
Y -0.0026 0.0061 0.0104 0.0014 0.0068 -0.0041  
Z 0.0062 -0.0057 0.0157 0.0091 0.0165 -0.0091  
AT. 95 H X 0.0040 0.0055 0.0155 -0.0042 0.0126 -0.0069  
Y 0.0012 0.0043 -0.0011 0.0026 -0.0048 0.0023  
Z -0.0069 -0.0045 0.0297 -0.0141 0.0317 -0.0173  
AT. 96 H X -0.0040 0.0055 0.0155 0.0042 0.0126 -0.0069  
Y -0.0012 0.0043 -0.0011 -0.0026 -0.0048 0.0023  
Z 0.0069 -0.0045 0.0297 0.0141 0.0317 -0.0173

AT. 97 H X -0.0003 0.0071 0.0125 -0.0011 0.0148 -0.0070  
Y 0.0013 0.0066 0.0307 -0.0094 0.0265 -0.0151  
Z -0.0062 -0.0064 0.0193 -0.0111 0.0188 -0.0107

AT. 98 H X 0.0003 0.0071 0.0125 0.0011 0.0148 -0.0070  
Y -0.0013 0.0066 0.0307 0.0094 0.0265 -0.0151  
Z 0.0062 -0.0064 0.0193 0.0111 0.0188 -0.0107

AT. 99 C X -0.0110 0.0067 0.0077 0.0038 0.0063 -0.0036  
Y 0.0066 -0.0035 -0.0081 -0.0002 0.0023 -0.0001  
Z 0.0079 -0.0081 -0.0060 -0.0040 0.0038 -0.0005

AT. 100 C X 0.0110 0.0067 0.0077 -0.0038 0.0063 -0.0036  
Y -0.0066 -0.0035 -0.0081 0.0002 0.0023 -0.0001  
Z -0.0079 -0.0081 -0.0060 0.0040 0.0038 -0.0005

AT. 101 C X -0.0051 0.0055 0.0031 0.0024 0.0075 -0.0031  
Y -0.0060 0.0108 0.0023 0.0040 0.0089 -0.0035  
Z 0.0043 -0.0100 -0.0038 -0.0029 0.0018 -0.0006

AT. 102 C X 0.0051 0.0055 0.0031 -0.0024 0.0075 -0.0031  
Y 0.0060 0.0108 0.0023 -0.0040 0.0089 -0.0035  
Z -0.0043 -0.0100 -0.0038 0.0029 0.0018 -0.0006

AT. 103 H X -0.0010 0.0044 -0.0007 0.0023 0.0104 -0.0037  
Y -0.0078 0.0114 0.0041 0.0040 0.0076 -0.0032  
Z 0.0149 -0.0235 -0.0129 -0.0060 -0.0046 0.0027

AT. 104 H X 0.0010 0.0044 -0.0007 -0.0023 0.0104 -0.0037  
Y 0.0078 0.0114 0.0041 -0.0040 0.0076 -0.0032  
Z -0.0149 -0.0235 -0.0129 0.0060 -0.0046 0.0027

AT. 105 H X -0.0063 0.0080 0.0050 0.0017 0.0117 -0.0048  
Y -0.0122 0.0218 0.0085 0.0069 0.0124 -0.0050  
Z 0.0014 -0.0053 -0.0011 -0.0019 0.0043 -0.0017

AT. 106 H X 0.0063 0.0080 0.0050 -0.0017 0.0117 -0.0048  
Y 0.0122 0.0218 0.0085 -0.0069 0.0124 -0.0050  
Z -0.0014 -0.0053 -0.0011 0.0019 0.0043 -0.0017

AT. 107 C X 0.0010 -0.0043 0.0007 -0.0020 -0.0014 0.0003  
Y 0.0119 -0.0007 -0.0126 0.0051 0.0040 -0.0003

Z -0.0072 -0.0043 0.0089 -0.0049 0.0008 -0.0024  
AT. 108 C X -0.0010 -0.0043 0.0007 0.0020 -0.0014 0.0003  
Y -0.0119 -0.0007 -0.0126 -0.0051 0.0040 -0.0003  
Z 0.0072 -0.0043 0.0089 0.0049 0.0008 -0.0024  
AT. 109 H X -0.0107 0.0005 0.0120 -0.0030 -0.0099 0.0021  
Y 0.0067 -0.0038 -0.0074 0.0017 0.0014 -0.0007  
Z -0.0125 -0.0112 0.0139 -0.0100 -0.0007 -0.0037  
AT. 110 H X 0.0107 0.0005 0.0120 0.0030 -0.0099 0.0021  
Y -0.0067 -0.0038 -0.0074 -0.0017 0.0014 -0.0007  
Z 0.0125 -0.0112 0.0139 0.0100 -0.0007 -0.0037  
AT. 111 H X 0.0024 -0.0062 -0.0001 -0.0033 -0.0023 0.0012  
Y 0.0247 0.0021 -0.0242 0.0103 0.0120 -0.0009  
Z -0.0111 -0.0031 0.0118 -0.0045 0.0002 -0.0032  
AT. 112 H X -0.0024 -0.0062 -0.0001 0.0033 -0.0023 0.0012  
Y -0.0247 0.0021 -0.0242 -0.0103 0.0120 -0.0009  
Z 0.0111 -0.0031 0.0118 0.0045 0.0002 -0.0032  
AT. 113 C X -0.0002 -0.0010 0.0005 -0.0015 -0.0019 0.0010  
Y 0.0041 -0.0021 -0.0050 0.0018 0.0015 -0.0009  
Z -0.0001 0.0004 0.0027 -0.0014 0.0021 -0.0011  
AT. 114 C X 0.0002 -0.0010 0.0005 0.0015 -0.0019 0.0010  
Y -0.0041 -0.0021 -0.0050 -0.0018 0.0015 -0.0009  
Z 0.0001 0.0004 0.0027 0.0014 0.0021 -0.0011  
AT. 115 C X 0.0017 -0.0044 -0.0023 -0.0006 -0.0046 0.0022  
Y 0.0123 -0.0087 -0.0156 0.0025 0.0061 -0.0012  
Z 0.0177 -0.0131 -0.0176 -0.0024 0.0076 -0.0003  
AT. 116 C X -0.0017 -0.0044 -0.0023 0.0006 -0.0046 0.0022  
Y -0.0123 -0.0087 -0.0156 -0.0025 0.0061 -0.0012  
Z -0.0177 -0.0131 -0.0176 0.0024 0.0076 -0.0003  
AT. 117 H X -0.0166 0.0038 0.0187 -0.0032 -0.0058 -0.0003  
Y 0.0345 -0.0189 -0.0440 0.0091 0.0118 -0.0002  
Z 0.0319 -0.0197 -0.0333 -0.0012 0.0074 0.0021  
AT. 118 H X 0.0166 0.0038 0.0187 0.0032 -0.0058 -0.0003

Y -0.0345 -0.0189 -0.0440 -0.0091 0.0118 -0.0002  
Z -0.0319 -0.0197 -0.0333 0.0012 0.0074 0.0021  
AT. 119 H X 0.0292 -0.0133 -0.0352 0.0069 -0.0026 0.0057  
Y 0.0132 -0.0032 -0.0159 0.0055 0.0015 0.0007  
Z 0.0319 -0.0237 -0.0350 -0.0016 0.0131 -0.0002  
AT. 120 H X -0.0292 -0.0133 -0.0352 -0.0069 -0.0026 0.0057  
Y -0.0132 -0.0032 -0.0159 -0.0055 0.0015 0.0007  
Z -0.0319 -0.0237 -0.0350 0.0016 0.0131 -0.0002  
AT. 121 C X 0.0174 -0.0009 -0.0204 0.0074 -0.0021 0.0038  
Y -0.0129 -0.0021 0.0100 -0.0013 0.0024 -0.0038  
Z -0.0298 0.0006 0.0305 -0.0052 0.0041 -0.0075  
AT. 122 C X -0.0174 -0.0009 -0.0204 -0.0074 -0.0021 0.0038  
Y 0.0129 -0.0021 0.0100 0.0013 0.0024 -0.0038  
Z 0.0298 0.0006 0.0305 0.0052 0.0041 -0.0075  
AT. 123 H X 0.0637 -0.0126 -0.0673 0.0122 0.0059 0.0089  
Y 0.0190 -0.0042 -0.0213 0.0051 0.0014 0.0025  
Z -0.0551 0.0008 0.0552 -0.0111 0.0065 -0.0132  
AT. 124 H X -0.0637 -0.0126 -0.0673 -0.0122 0.0059 0.0089  
Y -0.0190 -0.0042 -0.0213 -0.0051 0.0014 0.0025  
Z 0.0551 0.0008 0.0552 0.0111 0.0065 -0.0132  
AT. 125 H X 0.0125 0.0010 -0.0154 0.0081 -0.0040 0.0037  
Y -0.0611 0.0042 0.0585 -0.0107 0.0005 -0.0119  
Z -0.0602 0.0060 0.0612 -0.0093 0.0010 -0.0116  
AT. 126 H X -0.0125 0.0010 -0.0154 -0.0081 -0.0040 0.0037  
Y 0.0611 0.0042 0.0585 0.0107 0.0005 -0.0119  
Z 0.0602 0.0060 0.0612 0.0093 0.0010 -0.0116  
AT. 127 C X 0.0019 -0.0013 -0.0019 -0.0015 -0.0027 0.0016  
Y 0.0002 -0.0027 -0.0008 -0.0006 0.0025 -0.0013  
Z -0.0013 -0.0000 0.0054 0.0001 0.0029 -0.0020  
AT. 128 C X -0.0019 -0.0013 -0.0019 0.0015 -0.0027 0.0016  
Y -0.0002 -0.0027 -0.0008 0.0006 0.0025 -0.0013  
Z 0.0013 -0.0000 0.0054 -0.0001 0.0029 -0.0020

AT. 129 C X 0.0042 -0.0016 -0.0046 -0.0012 -0.0077 0.0047  
Y -0.0104 0.0030 0.0040 0.0029 -0.0080 0.0022  
Z 0.0095 -0.0066 0.0008 -0.0042 0.0121 -0.0049

AT. 130 C X -0.0042 -0.0016 -0.0046 0.0012 -0.0077 0.0047  
Y 0.0104 0.0030 0.0040 -0.0029 -0.0080 0.0022  
Z -0.0095 -0.0066 0.0008 0.0042 0.0121 -0.0049

AT. 131 H X 0.0130 -0.0026 -0.0065 -0.0016 0.0019 0.0011  
Y -0.0218 0.0065 0.0061 0.0067 -0.0226 0.0076  
Z 0.0156 -0.0063 -0.0001 -0.0031 0.0190 -0.0077

AT. 132 H X -0.0130 -0.0026 -0.0065 0.0016 0.0019 0.0011  
Y 0.0218 0.0065 0.0061 -0.0067 -0.0226 0.0076  
Z -0.0156 -0.0063 -0.0001 0.0031 0.0190 -0.0077

AT. 133 H X -0.0128 -0.0007 0.0013 -0.0007 -0.0211 0.0088  
Y -0.0122 -0.0013 0.0063 -0.0006 -0.0057 0.0006  
Z 0.0148 -0.0138 0.0017 -0.0098 0.0222 -0.0094

AT. 134 H X 0.0128 -0.0007 0.0013 0.0007 -0.0211 0.0088  
Y 0.0122 -0.0013 0.0063 0.0006 -0.0057 0.0006  
Z -0.0148 -0.0138 0.0017 0.0098 0.0222 -0.0094

AT. 135 C X -0.0045 0.0337 -0.0053 0.0208 -0.0073 0.0039  
Y -0.0169 0.0046 0.0229 -0.0107 -0.0290 0.0102  
Z -0.0195 0.0591 0.0104 0.0261 -0.0236 0.0098

AT. 136 C X 0.0045 0.0337 -0.0053 -0.0208 -0.0073 0.0039  
Y 0.0169 0.0046 0.0229 0.0107 -0.0290 0.0102  
Z 0.0195 0.0591 0.0104 -0.0261 -0.0236 0.0098

AT. 137 H X 0.0056 0.1085 -0.0662 0.1242 0.0380 -0.0205  
Y -0.0083 0.0849 -0.0516 0.1222 0.0312 -0.0264  
Z -0.0092 0.1673 -0.0924 0.2125 0.0610 -0.0430

AT. 138 H X -0.0056 0.1085 -0.0662 -0.1242 0.0380 -0.0205  
Y 0.0083 0.0849 -0.0516 -0.1222 0.0312 -0.0264  
Z 0.0092 0.1673 -0.0924 -0.2125 0.0610 -0.0430

AT. 139 H X 0.0162 0.0325 -0.0538 0.0728 0.0470 -0.0250  
Y -0.0431 -0.1344 0.1714 -0.2558 -0.1547 0.0826

Z -0.0394 0.0981 0.0336 0.0245 -0.0604 0.0279  
AT. 140 H X -0.0162 0.0325 -0.0538 -0.0728 0.0470 -0.0250  
Y 0.0431 -0.1344 0.1714 0.2558 -0.1547 0.0826  
Z 0.0394 0.0981 0.0336 -0.0245 -0.0604 0.0279  
AT. 141 H X -0.0418 -0.0048 0.1019 -0.1149 -0.1154 0.0614  
Y -0.0199 0.0725 -0.0230 0.0891 0.0034 -0.0132  
Z -0.0319 -0.0264 0.1024 -0.1332 -0.1024 0.0580  
AT. 142 H X 0.0418 -0.0048 0.1019 0.1149 -0.1154 0.0614  
Y 0.0199 0.0725 -0.0230 -0.0891 0.0034 -0.0132  
Z 0.0319 -0.0264 0.1024 0.1332 -0.1024 0.0580  
AT. 143 C X -0.0073 -0.0283 0.0167 -0.0203 0.0208 -0.0127  
Y 0.0254 -0.0226 -0.0145 -0.0209 0.0083 0.0038  
Z 0.0045 0.0419 -0.0161 0.0307 -0.0310 0.0163  
AT. 144 C X 0.0073 -0.0283 0.0167 0.0203 0.0208 -0.0127  
Y -0.0254 -0.0226 -0.0145 0.0209 0.0083 0.0038  
Z -0.0045 0.0419 -0.0161 -0.0307 -0.0310 0.0163  
AT. 145 H X -0.0293 -0.0576 0.0488 -0.0309 0.0581 -0.0400  
Y 0.0232 -0.0399 -0.0055 -0.0218 0.0330 -0.0120  
Z 0.0014 0.0534 -0.0176 0.0289 -0.0484 0.0265  
AT. 146 H X 0.0293 -0.0576 0.0488 0.0309 0.0581 -0.0400  
Y -0.0232 -0.0399 -0.0055 0.0218 0.0330 -0.0120  
Z -0.0014 0.0534 -0.0176 -0.0289 -0.0484 0.0265  
AT. 147 H X -0.0099 -0.0023 0.0088 0.0046 0.0068 -0.0080  
Y 0.0427 -0.0096 -0.0350 -0.0316 -0.0244 0.0298  
Z 0.0100 0.0855 -0.0382 0.0602 -0.0680 0.0368  
AT. 148 H X 0.0099 -0.0023 0.0088 -0.0046 0.0068 -0.0080  
Y -0.0427 -0.0096 -0.0350 0.0316 -0.0244 0.0298  
Z -0.0100 0.0855 -0.0382 -0.0602 -0.0680 0.0368  
AT. 149 H X 0.0092 -0.0537 0.0128 -0.0541 0.0228 -0.0054  
Y 0.0333 -0.0363 -0.0161 -0.0290 0.0193 -0.0000  
Z 0.0099 0.0318 -0.0172 0.0340 -0.0134 0.0064  
AT. 150 H X -0.0092 -0.0537 0.0128 0.0541 0.0228 -0.0054

Y -0.0333 -0.0363 -0.0161 0.0290 0.0193 -0.0000  
Z -0.0099 0.0318 -0.0172 -0.0340 -0.0134 0.0064  
AT. 151 C X -0.0017 -0.0007 0.0014 -0.0039 -0.0043 0.0023  
Y 0.0083 0.0005 -0.0087 0.0067 0.0087 -0.0042  
Z 0.0009 -0.0094 0.0058 -0.0058 0.0092 -0.0050  
AT. 152 C X 0.0017 -0.0007 0.0014 0.0039 -0.0043 0.0023  
Y -0.0083 0.0005 -0.0087 -0.0067 0.0087 -0.0042  
Z -0.0009 -0.0094 0.0058 0.0058 0.0092 -0.0050  
AT. 153 H X -0.0004 -0.0028 -0.0004 -0.0053 -0.0051 0.0034  
Y 0.0127 0.0004 -0.0118 0.0078 0.0118 -0.0052  
Z 0.0077 -0.0086 0.0015 -0.0035 0.0145 -0.0071  
AT. 154 H X 0.0004 -0.0028 -0.0004 0.0053 -0.0051 0.0034  
Y -0.0127 0.0004 -0.0118 -0.0078 0.0118 -0.0052  
Z -0.0077 -0.0086 0.0015 0.0035 0.0145 -0.0071  
AT. 155 H X -0.0023 0.0006 -0.0004 -0.0033 -0.0083 0.0042  
Y 0.0137 0.0001 -0.0124 0.0081 0.0130 -0.0059  
Z -0.0049 -0.0085 0.0089 -0.0069 0.0035 -0.0026  
AT. 156 H X 0.0023 0.0006 -0.0004 0.0033 -0.0083 0.0042  
Y -0.0137 0.0001 -0.0124 -0.0081 0.0130 -0.0059  
Z 0.0049 -0.0085 0.0089 0.0069 0.0035 -0.0026  
AT. 157 O X -0.0039 0.0032 -0.0003 -0.0013 0.0003 0.0005  
Y 0.0046 -0.0072 0.0007 -0.0009 -0.0036 -0.0059  
Z -0.0138 0.0077 -0.0001 -0.0067 -0.0043 0.0027  
AT. 158 O X 0.0039 0.0032 -0.0003 0.0013 0.0003 0.0005  
Y -0.0046 -0.0072 0.0007 0.0009 -0.0036 -0.0059  
Z 0.0138 0.0077 -0.0001 0.0067 -0.0043 0.0027  
AT. 159 O X 0.0190 -0.0130 -0.0007 0.0093 0.0062 -0.0066  
Y -0.0053 0.0048 0.0023 -0.0025 -0.0003 0.0029  
Z 0.0264 -0.0199 -0.0008 0.0122 0.0064 -0.0092  
AT. 160 O X -0.0190 -0.0130 -0.0007 -0.0093 0.0062 -0.0066  
Y 0.0053 0.0048 0.0023 0.0025 -0.0003 0.0029  
Z -0.0264 -0.0199 -0.0008 -0.0122 0.0064 -0.0092

AT.161 H X -0.0019 0.0001 0.0002 -0.0014 -0.0005 -0.0001  
Y 0.0043 -0.0082 0.0004 -0.0019 -0.0053 -0.0076  
Z -0.0104 0.0072 0.0015 -0.0038 0.0008 0.0073

AT.162 H X 0.0019 0.0001 0.0002 0.0014 -0.0005 -0.0001  
Y -0.0043 -0.0082 0.0004 0.0019 -0.0053 -0.0076  
Z 0.0104 0.0072 0.0015 0.0038 0.0008 0.0073

AT.163 H X 0.0414 -0.0298 -0.0017 0.0198 0.0110 -0.0151  
Y -0.0092 0.0057 0.0038 -0.0032 0.0013 0.0019  
Z 0.0197 -0.0153 -0.0000 0.0091 0.0054 -0.0075

AT.164 H X -0.0414 -0.0298 -0.0017 -0.0198 0.0110 -0.0151  
Y 0.0092 0.0057 0.0038 0.0032 0.0013 0.0019  
Z -0.0197 -0.0153 -0.0000 -0.0091 0.0054 -0.0075

AT.165 O X -0.0150 0.0042 0.0260 -0.0091 -0.0306 0.0050  
Y -0.0622 -0.0237 -0.0361 0.0106 -0.0378 0.0202  
Z 0.0136 0.0068 0.0146 -0.0055 0.0024 -0.0047

AT.166 O X 0.0150 0.0042 0.0260 0.0091 -0.0306 0.0050  
Y 0.0622 -0.0237 -0.0361 -0.0106 -0.0378 0.0202  
Z -0.0136 0.0068 0.0146 0.0055 0.0024 -0.0047

AT.167 H X -0.0296 -0.0012 0.0210 -0.0084 -0.0423 0.0105  
Y -0.0517 -0.0153 -0.0230 0.0078 -0.0339 0.0159  
Z 0.0305 0.0064 0.0044 -0.0018 0.0237 -0.0108

AT.168 H X 0.0296 -0.0012 0.0210 0.0084 -0.0423 0.0105  
Y 0.0517 -0.0153 -0.0230 -0.0078 -0.0339 0.0159  
Z -0.0305 0.0064 0.0044 0.0018 0.0237 -0.0108

AT.169 O X -0.0169 -0.0099 -0.0231 0.0067 -0.0054 0.0055  
Y 0.0527 0.0244 0.0427 -0.0100 0.0244 -0.0190  
Z -0.0118 -0.0066 -0.0124 0.0022 -0.0061 0.0039

AT.170 O X 0.0169 -0.0099 -0.0231 -0.0067 -0.0054 0.0055  
Y -0.0527 0.0244 0.0427 0.0100 0.0244 -0.0190  
Z 0.0118 -0.0066 -0.0124 -0.0022 -0.0061 0.0039

AT.171 H X -0.0372 -0.0153 -0.0374 0.0094 -0.0098 0.0111  
Y 0.0717 0.0355 0.0612 -0.0154 0.0353 -0.0261



Z 0.0321 0.0148 0.0273 -0.0088 0.0127 -0.0107  
 AT. 172 H X 0.0372 -0.0153 -0.0374 -0.0094 -0.0098 0.0111  
 Y -0.0717 0.0355 0.0612 0.0154 0.0353 -0.0261  
 Z -0.0321 0.0148 0.0273 0.0088 0.0127 -0.0107  
  
 FREQ(CM\*\*-1) 236.40 236.83 238.05 244.91 247.14 248.21  
  
 AT. 1 I X -0.0000 0.0004 0.0001 0.0001 -0.0000 0.0011  
 Y 0.0000 -0.0001 0.0005 -0.0001 -0.0006 0.0002  
 Z -0.0003 0.0002 0.0002 -0.0000 -0.0001 0.0004  
 AT. 2 I X 0.0000 -0.0004 0.0001 -0.0001 0.0000 0.0011  
 Y -0.0000 0.0001 0.0005 0.0001 0.0006 0.0002  
 Z 0.0003 -0.0002 0.0002 0.0000 0.0001 0.0004  
 AT. 3 I X -0.0003 0.0009 -0.0004 0.0001 -0.0002 0.0025  
 Y 0.0002 0.0002 0.0002 0.0002 -0.0002 0.0013  
 Z 0.0001 -0.0001 0.0000 -0.0001 -0.0002 0.0003  
 AT. 4 I X 0.0003 -0.0009 -0.0004 -0.0001 0.0002 0.0025  
 Y -0.0002 -0.0002 0.0002 -0.0002 0.0002 0.0013  
 Z -0.0001 0.0001 0.0000 0.0001 0.0002 0.0003  
 AT. 5 O X -0.0038 -0.0084 -0.0008 -0.0029 0.0055 -0.0275  
 Y -0.0034 0.0016 -0.0002 -0.0012 0.0047 -0.0156  
 Z -0.0024 -0.0146 -0.0020 -0.0007 0.0020 -0.0103  
 AT. 6 O X 0.0038 0.0084 -0.0008 0.0029 -0.0055 -0.0275  
 Y 0.0034 -0.0016 -0.0002 0.0012 -0.0047 -0.0156  
 Z 0.0024 0.0146 -0.0020 0.0007 -0.0020 -0.0103  
 AT. 7 O X 0.0043 -0.0001 0.0025 0.0017 -0.0011 0.0057  
 Y 0.0050 0.0003 0.0028 0.0009 -0.0001 -0.0021  
 Z -0.0001 -0.0050 -0.0014 -0.0007 0.0013 -0.0039  
 AT. 8 O X -0.0043 0.0001 0.0025 -0.0017 0.0011 0.0057  
 Y -0.0050 -0.0003 0.0028 -0.0009 0.0001 -0.0021  
 Z 0.0001 0.0050 -0.0014 0.0007 -0.0013 -0.0039  
 AT. 9 N X 0.0008 0.0037 0.0006 -0.0005 0.0010 -0.0013

Y -0.0003 0.0086 0.0016 -0.0015 0.0028 -0.0039  
Z -0.0007 -0.0081 -0.0013 0.0003 -0.0001 0.0005  
AT. 10 N X -0.0008 -0.0037 0.0006 0.0005 -0.0010 -0.0013  
Y 0.0003 -0.0086 0.0016 0.0015 -0.0028 -0.0039  
Z 0.0007 0.0081 -0.0013 -0.0003 0.0001 0.0005  
AT. 11 N X -0.0005 -0.0114 -0.0003 -0.0023 0.0006 0.0004  
Y -0.0005 -0.0128 -0.0005 -0.0015 0.0012 0.0006  
Z -0.0006 -0.0117 -0.0017 -0.0005 0.0009 0.0043  
AT. 12 N X 0.0005 0.0114 -0.0003 0.0023 -0.0006 0.0004  
Y 0.0005 0.0128 -0.0005 0.0015 -0.0012 0.0006  
Z 0.0006 0.0117 -0.0017 0.0005 -0.0009 0.0043  
AT. 13 C X -0.0011 -0.0012 0.0000 -0.0013 0.0022 -0.0093  
Y -0.0018 0.0051 0.0004 -0.0009 0.0034 -0.0076  
Z -0.0008 -0.0098 -0.0016 0.0004 -0.0003 0.0011  
AT. 14 C X 0.0011 0.0012 0.0000 0.0013 -0.0022 -0.0093  
Y 0.0018 -0.0051 0.0004 0.0009 -0.0034 -0.0076  
Z 0.0008 0.0098 -0.0016 -0.0004 0.0003 0.0011  
AT. 15 C X 0.0004 -0.0008 0.0003 -0.0004 -0.0002 -0.0021  
Y -0.0006 0.0055 0.0003 0.0003 0.0008 0.0024  
Z -0.0013 -0.0108 -0.0022 0.0007 -0.0002 0.0032  
AT. 16 C X -0.0004 0.0008 0.0003 0.0004 0.0002 -0.0021  
Y 0.0006 -0.0055 0.0003 -0.0003 -0.0008 0.0024  
Z 0.0013 0.0108 -0.0022 -0.0007 0.0002 0.0032  
AT. 17 H X 0.0015 0.0006 0.0012 -0.0001 -0.0022 0.0023  
Y 0.0008 0.0098 0.0016 0.0010 -0.0009 0.0075  
Z -0.0027 -0.0158 -0.0035 -0.0000 0.0013 -0.0018  
AT. 18 H X -0.0015 -0.0006 0.0012 0.0001 0.0022 0.0023  
Y -0.0008 -0.0098 0.0016 -0.0010 0.0009 0.0075  
Z 0.0027 0.0158 -0.0035 0.0000 -0.0013 -0.0018  
AT. 19 H X 0.0009 -0.0030 0.0001 0.0002 -0.0014 0.0014  
Y -0.0031 -0.0008 -0.0019 -0.0005 0.0031 -0.0047  
Z -0.0021 -0.0140 -0.0031 0.0006 0.0004 0.0015

AT. 20 H X -0.0009 0.0030 0.0001 -0.0002 0.0014 0.0014  
Y 0.0031 0.0008 -0.0019 0.0005 -0.0031 -0.0047  
Z 0.0021 0.0140 -0.0031 -0.0006 -0.0004 0.0015

AT. 21 C X 0.0009 -0.0034 0.0006 -0.0004 0.0005 -0.0014  
Y 0.0016 -0.0046 0.0009 -0.0008 0.0013 -0.0064  
Z -0.0001 -0.0075 -0.0015 -0.0003 0.0007 0.0014

AT. 22 C X -0.0009 0.0034 0.0006 0.0004 -0.0005 -0.0014  
Y -0.0016 0.0046 0.0009 0.0008 -0.0013 -0.0064  
Z 0.0001 0.0075 -0.0015 0.0003 -0.0007 0.0014

AT. 23 C X 0.0003 0.0004 0.0004 0.0005 -0.0003 0.0022  
Y -0.0011 0.0024 0.0001 -0.0033 0.0035 -0.0205  
Z 0.0001 -0.0064 -0.0015 0.0012 -0.0006 0.0078

AT. 24 C X -0.0003 -0.0004 0.0004 -0.0005 0.0003 0.0022  
Y 0.0011 -0.0024 0.0001 0.0033 -0.0035 -0.0205  
Z -0.0001 0.0064 -0.0015 -0.0012 0.0006 0.0078

AT. 25 H X 0.0004 0.0025 0.0005 0.0014 -0.0022 0.0100  
Y -0.0013 0.0038 0.0001 -0.0035 0.0036 -0.0215  
Z 0.0015 -0.0131 -0.0017 0.0039 -0.0035 0.0226

AT. 26 H X -0.0004 -0.0025 0.0005 -0.0014 0.0022 0.0100  
Y 0.0013 -0.0038 0.0001 0.0035 -0.0036 -0.0215  
Z -0.0015 0.0131 -0.0017 -0.0039 0.0035 0.0226

AT. 27 H X 0.0002 0.0028 0.0006 0.0007 -0.0008 0.0030  
Y -0.0017 0.0086 0.0011 -0.0058 0.0060 -0.0374  
Z -0.0001 -0.0037 -0.0011 -0.0001 0.0009 -0.0010

AT. 28 H X -0.0002 -0.0028 0.0006 -0.0007 0.0008 0.0030  
Y 0.0017 -0.0086 0.0011 0.0058 -0.0060 -0.0374  
Z 0.0001 0.0037 -0.0011 0.0001 -0.0009 -0.0010

AT. 29 C X 0.0005 0.0008 0.0004 -0.0008 0.0019 -0.0126  
Y -0.0015 -0.0031 0.0002 -0.0025 0.0038 -0.0170  
Z -0.0000 -0.0056 -0.0013 0.0009 -0.0027 0.0161

AT. 30 C X -0.0005 -0.0008 0.0004 0.0008 -0.0019 -0.0126  
Y 0.0015 0.0031 0.0002 0.0025 -0.0038 -0.0170

Z 0.0000 0.0056 -0.0013 -0.0009 0.0027 0.0161  
AT. 31 H X -0.0004 -0.0072 -0.0006 -0.0012 0.0039 -0.0287  
Y -0.0012 -0.0031 -0.0001 -0.0018 0.0005 0.0031  
Z -0.0001 -0.0106 -0.0023 0.0017 -0.0064 0.0358  
AT. 32 H X 0.0004 0.0072 -0.0006 0.0012 -0.0039 -0.0287  
Y 0.0012 0.0031 -0.0001 0.0018 -0.0005 0.0031  
Z 0.0001 0.0106 -0.0023 -0.0017 0.0064 0.0358  
AT. 33 H X 0.0005 0.0008 0.0006 -0.0015 0.0035 -0.0210  
Y -0.0020 -0.0028 0.0008 -0.0039 0.0090 -0.0479  
Z 0.0002 -0.0060 -0.0014 0.0010 -0.0038 0.0236  
AT. 34 H X -0.0005 -0.0008 0.0006 0.0015 -0.0035 -0.0210  
Y 0.0020 0.0028 0.0008 0.0039 -0.0090 -0.0479  
Z -0.0002 0.0060 -0.0014 -0.0010 0.0038 0.0236  
AT. 35 C X -0.0002 -0.0029 -0.0003 -0.0008 0.0006 -0.0033  
Y -0.0010 -0.0030 -0.0004 -0.0011 0.0010 -0.0043  
Z 0.0005 -0.0001 0.0000 -0.0001 0.0005 -0.0012  
AT. 36 C X 0.0002 0.0029 -0.0003 0.0008 -0.0006 -0.0033  
Y 0.0010 0.0030 -0.0004 0.0011 -0.0010 -0.0043  
Z -0.0005 0.0001 0.0000 0.0001 -0.0005 -0.0012  
AT. 37 C X -0.0006 -0.0063 -0.0000 -0.0026 0.0015 -0.0106  
Y -0.0016 -0.0092 -0.0003 -0.0015 0.0019 -0.0168  
Z -0.0012 -0.0114 -0.0001 -0.0015 0.0022 -0.0215  
AT. 38 C X 0.0006 0.0063 -0.0000 0.0026 -0.0015 -0.0106  
Y 0.0016 0.0092 -0.0003 0.0015 -0.0019 -0.0168  
Z 0.0012 0.0114 -0.0001 0.0015 -0.0022 -0.0215  
AT. 39 H X -0.0021 -0.0136 0.0013 -0.0034 0.0028 -0.0408  
Y -0.0027 -0.0165 -0.0003 -0.0024 0.0035 -0.0356  
Z -0.0016 -0.0135 0.0008 -0.0016 0.0023 -0.0333  
AT. 40 H X 0.0021 0.0136 0.0013 0.0034 -0.0028 -0.0408  
Y 0.0027 0.0165 -0.0003 0.0024 -0.0035 -0.0356  
Z 0.0016 0.0135 0.0008 0.0016 -0.0023 -0.0333  
AT. 41 H X 0.0009 -0.0007 -0.0017 -0.0015 0.0012 0.0208

Y -0.0016 -0.0028 0.0007 -0.0015 0.0017 -0.0297  
Z -0.0027 -0.0223 0.0008 -0.0026 0.0026 -0.0439  
AT. 42 H X -0.0009 0.0007 -0.0017 0.0015 -0.0012 0.0208  
Y 0.0016 0.0028 0.0007 0.0015 -0.0017 -0.0297  
Z 0.0027 0.0223 0.0008 0.0026 -0.0026 -0.0439  
AT. 43 C X 0.0012 -0.0060 0.0006 0.0010 -0.0064 0.0299  
Y 0.0002 -0.0043 -0.0000 -0.0001 -0.0010 0.0085  
Z 0.0011 -0.0060 -0.0006 0.0022 -0.0049 0.0308  
AT. 44 C X -0.0012 0.0060 0.0006 -0.0010 0.0064 0.0299  
Y -0.0002 0.0043 -0.0000 0.0001 0.0010 0.0085  
Z -0.0011 0.0060 -0.0006 -0.0022 0.0049 0.0308  
AT. 45 H X 0.0029 0.0019 0.0019 0.0041 -0.0156 0.0649  
Y -0.0016 -0.0033 -0.0008 -0.0025 0.0100 -0.0347  
Z 0.0017 -0.0125 -0.0007 0.0024 -0.0091 0.0474  
AT. 46 H X -0.0029 -0.0019 0.0019 -0.0041 0.0156 0.0649  
Y 0.0016 0.0033 -0.0008 0.0025 -0.0100 -0.0347  
Z -0.0017 0.0125 -0.0007 -0.0024 0.0091 0.0474  
AT. 47 H X 0.0018 -0.0068 0.0006 0.0014 -0.0093 0.0441  
Y 0.0023 -0.0036 0.0007 0.0030 -0.0108 0.0528  
Z 0.0024 -0.0042 0.0001 0.0048 -0.0112 0.0571  
AT. 48 H X -0.0018 0.0068 0.0006 -0.0014 0.0093 0.0441  
Y -0.0023 0.0036 0.0007 -0.0030 0.0108 0.0528  
Z -0.0024 0.0042 0.0001 -0.0048 0.0112 0.0571  
AT. 49 C X 0.0002 -0.0041 0.0000 -0.0001 -0.0004 0.0022  
Y -0.0004 -0.0025 0.0001 -0.0007 -0.0001 0.0015  
Z -0.0001 -0.0017 -0.0003 0.0007 0.0006 0.0024  
AT. 50 C X -0.0002 0.0041 0.0000 0.0001 0.0004 0.0022  
Y 0.0004 0.0025 0.0001 0.0007 0.0001 0.0015  
Z 0.0001 0.0017 -0.0003 -0.0007 -0.0006 0.0024  
AT. 51 C X 0.0001 -0.0061 -0.0007 0.0001 0.0001 0.0030  
Y 0.0009 0.0068 0.0007 0.0017 -0.0029 0.0178  
Z -0.0013 -0.0096 -0.0008 -0.0015 0.0026 -0.0121

AT. 52 C X -0.0001 0.0061 -0.0007 -0.0001 -0.0001 0.0030  
Y -0.0009 -0.0068 0.0007 -0.0017 0.0029 0.0178  
Z 0.0013 0.0096 -0.0008 0.0015 -0.0026 -0.0121

AT. 53 H X 0.0014 0.0005 -0.0002 0.0025 -0.0033 0.0202  
Y 0.0018 0.0125 0.0012 0.0040 -0.0058 0.0351  
Z -0.0025 -0.0152 -0.0013 -0.0030 0.0052 -0.0219

AT. 54 H X -0.0014 -0.0005 -0.0002 -0.0025 0.0033 0.0202  
Y -0.0018 -0.0125 0.0012 -0.0040 0.0058 0.0351  
Z 0.0025 0.0152 -0.0013 0.0030 -0.0052 -0.0219

AT. 55 H X -0.0016 -0.0139 -0.0012 -0.0033 0.0052 -0.0226  
Y 0.0011 0.0040 -0.0002 0.0036 -0.0061 0.0286  
Z -0.0022 -0.0185 -0.0019 -0.0019 0.0021 -0.0156

AT. 56 H X 0.0016 0.0139 -0.0012 0.0033 -0.0052 -0.0226  
Y -0.0011 -0.0040 -0.0002 -0.0036 0.0061 0.0286  
Z 0.0022 0.0185 -0.0019 0.0019 -0.0021 -0.0156

AT. 57 C X -0.0011 -0.0100 -0.0030 0.0032 -0.0064 0.0361  
Y 0.0026 0.0314 0.0017 0.0055 -0.0076 0.0441  
Z 0.0082 0.0669 0.0087 0.0021 0.0013 -0.0065

AT. 58 C X 0.0011 0.0100 -0.0030 -0.0032 0.0064 0.0361  
Y -0.0026 -0.0314 0.0017 -0.0055 0.0076 0.0441  
Z -0.0082 -0.0669 0.0087 -0.0021 -0.0013 -0.0065

AT. 59 H X -0.0026 -0.0196 -0.0065 0.0080 -0.0155 0.0881  
Y 0.0036 0.0373 0.0056 -0.0001 -0.0071 0.0409  
Z 0.0085 0.0683 0.0119 -0.0027 -0.0045 0.0252

AT. 60 H X 0.0026 0.0196 -0.0065 -0.0080 0.0155 0.0881  
Y -0.0036 -0.0373 0.0056 0.0001 0.0071 0.0409  
Z -0.0085 -0.0683 0.0119 0.0027 0.0045 0.0252

AT. 61 H X 0.0052 0.0461 0.0015 0.0108 -0.0061 0.0343  
Y 0.0013 0.0250 -0.0037 0.0141 -0.0088 0.0524  
Z 0.0138 0.1139 0.0150 0.0037 0.0021 -0.0118

AT. 62 H X -0.0052 -0.0461 0.0015 -0.0108 0.0061 0.0343  
Y -0.0013 -0.0250 -0.0037 -0.0141 0.0088 0.0524

Z -0.0138 -0.1139 0.0150 -0.0037 -0.0021 -0.0118  
AT. 63 H X -0.0071 -0.0642 -0.0064 -0.0057 -0.0050 0.0273  
Y 0.0066 0.0681 0.0052 0.0098 -0.0158 0.0914  
Z 0.0105 0.0874 0.0090 0.0070 0.0071 -0.0388  
AT. 64 H X 0.0071 0.0642 -0.0064 0.0057 0.0050 0.0273  
Y -0.0066 -0.0681 0.0052 -0.0098 0.0158 0.0914  
Z -0.0105 -0.0874 0.0090 -0.0070 -0.0071 -0.0388  
AT. 65 C X 0.0040 0.0438 0.0063 -0.0008 0.0038 -0.0317  
Y -0.0035 -0.0264 -0.0017 -0.0036 0.0019 -0.0195  
Z 0.0045 0.0487 0.0057 0.0015 0.0029 -0.0139  
AT. 66 C X -0.0040 -0.0438 0.0063 0.0008 -0.0038 -0.0317  
Y 0.0035 0.0264 -0.0017 0.0036 -0.0019 -0.0195  
Z -0.0045 -0.0487 0.0057 -0.0015 -0.0029 -0.0139  
AT. 67 H X 0.0088 0.1007 0.0131 -0.0026 0.0051 -0.0647  
Y -0.0115 -0.1045 -0.0103 -0.0020 0.0094 -0.0146  
Z 0.0079 0.0733 0.0079 0.0015 -0.0054 0.0097  
AT. 68 H X -0.0088 -0.1007 0.0131 0.0026 -0.0051 -0.0647  
Y 0.0115 0.1045 -0.0103 0.0020 -0.0094 -0.0146  
Z -0.0079 -0.0733 0.0079 -0.0015 0.0054 0.0097  
AT. 69 H X 0.0058 0.0604 0.0083 -0.0024 -0.0018 -0.0294  
Y 0.0033 0.0413 0.0058 -0.0056 -0.0047 -0.0296  
Z 0.0112 0.1198 0.0133 0.0018 0.0044 -0.0347  
AT. 70 H X -0.0058 -0.0604 0.0083 0.0024 0.0018 -0.0294  
Y -0.0033 -0.0413 0.0058 0.0056 0.0047 -0.0296  
Z -0.0112 -0.1198 0.0133 -0.0018 -0.0044 -0.0347  
AT. 71 H X 0.0018 0.0261 0.0040 0.0017 0.0116 -0.0363  
Y -0.0058 -0.0458 -0.0034 -0.0051 0.0037 -0.0324  
Z -0.0003 0.0087 0.0018 0.0012 0.0111 -0.0346  
AT. 72 H X -0.0018 -0.0261 0.0040 -0.0017 -0.0116 -0.0363  
Y 0.0058 0.0458 -0.0034 0.0051 -0.0037 -0.0324  
Z 0.0003 -0.0087 0.0018 -0.0012 -0.0111 -0.0346  
AT. 73 C X -0.0011 -0.0094 -0.0016 -0.0014 0.0011 -0.0038

Y -0.0013 -0.0052 -0.0014 -0.0026 0.0020 -0.0078  
Z -0.0010 -0.0131 -0.0016 -0.0002 -0.0000 0.0028  
AT. 74 C X 0.0011 0.0094 -0.0016 0.0014 -0.0011 -0.0038  
Y 0.0013 0.0052 -0.0014 0.0026 -0.0020 -0.0078  
Z 0.0010 0.0131 -0.0016 0.0002 0.0000 0.0028  
AT. 75 H X -0.0019 -0.0121 -0.0026 -0.0021 0.0022 -0.0057  
Y -0.0017 -0.0071 -0.0020 -0.0034 0.0026 -0.0123  
Z -0.0019 -0.0173 -0.0028 -0.0019 0.0015 -0.0047  
AT. 76 H X 0.0019 0.0121 -0.0026 0.0021 -0.0022 -0.0057  
Y 0.0017 0.0071 -0.0020 0.0034 -0.0026 -0.0123  
Z 0.0019 0.0173 -0.0028 0.0019 -0.0015 -0.0047  
AT. 77 H X -0.0015 -0.0133 -0.0020 -0.0015 0.0017 -0.0044  
Y -0.0023 -0.0082 -0.0031 -0.0044 0.0021 -0.0132  
Z 0.0003 -0.0065 0.0004 0.0014 -0.0008 0.0084  
AT. 78 H X 0.0015 0.0133 -0.0020 0.0015 -0.0017 -0.0044  
Y 0.0023 0.0082 -0.0031 0.0044 -0.0021 -0.0132  
Z -0.0003 0.0065 0.0004 -0.0014 0.0008 0.0084  
AT. 79 I X 0.0002 0.0003 0.0044 -0.0065 -0.0018 0.0004  
Y -0.0001 -0.0001 -0.0022 0.0041 0.0011 -0.0002  
Z 0.0006 0.0001 0.0002 0.0004 -0.0011 -0.0003  
AT. 80 I X -0.0002 -0.0003 0.0044 0.0065 0.0018 0.0004  
Y 0.0001 0.0001 -0.0022 -0.0041 -0.0011 -0.0002  
Z -0.0006 -0.0001 0.0002 -0.0004 0.0011 -0.0003  
AT. 81 I X -0.0006 -0.0002 0.0002 0.0011 -0.0003 -0.0004  
Y 0.0003 0.0003 -0.0009 -0.0004 0.0010 0.0002  
Z -0.0002 -0.0000 -0.0002 0.0001 0.0003 -0.0002  
AT. 82 I X 0.0006 0.0002 0.0002 -0.0011 0.0003 -0.0004  
Y -0.0003 -0.0003 -0.0009 0.0004 -0.0010 0.0002  
Z 0.0002 0.0000 -0.0002 -0.0001 -0.0003 -0.0002  
AT. 83 O X 0.0019 0.0007 -0.0036 -0.0043 0.0096 0.0008  
Y 0.0041 0.0003 0.0235 -0.0325 -0.0044 0.0033  
Z -0.0111 0.0003 -0.0037 0.0068 -0.0073 -0.0012



AT. 84 O X -0.0019 -0.0007 -0.0036 0.0043 -0.0096 0.0008  
Y -0.0041 -0.0003 0.0235 0.0325 0.0044 0.0033  
Z 0.0111 -0.0003 -0.0037 -0.0068 0.0073 -0.0012

AT. 85 O X -0.0011 0.0005 0.0105 -0.0008 -0.0309 -0.0016  
Y 0.0038 -0.0010 -0.0041 0.0051 0.0195 -0.0009  
Z -0.0011 -0.0010 0.0084 0.0117 0.0027 -0.0027

AT. 86 O X 0.0011 -0.0005 0.0105 0.0008 0.0309 -0.0016  
Y -0.0038 0.0010 -0.0041 -0.0051 -0.0195 -0.0009  
Z 0.0011 0.0010 0.0084 -0.0117 -0.0027 -0.0027

AT. 87 N X 0.0005 -0.0001 0.0017 -0.0002 0.0029 -0.0001  
Y 0.0081 -0.0009 0.0039 -0.0061 0.0079 0.0013  
Z -0.0079 0.0008 -0.0034 -0.0002 -0.0023 -0.0001

AT. 88 N X -0.0005 0.0001 0.0017 0.0002 -0.0029 -0.0001  
Y -0.0081 0.0009 0.0039 0.0061 -0.0079 0.0013  
Z 0.0079 -0.0008 -0.0034 0.0002 0.0023 -0.0001

AT. 89 N X 0.0060 -0.0003 -0.0031 -0.0008 0.0057 0.0008  
Y -0.0144 0.0018 -0.0038 -0.0045 -0.0085 -0.0017  
Z -0.0129 0.0015 -0.0011 -0.0018 -0.0064 -0.0012

AT. 90 N X -0.0060 0.0003 -0.0031 0.0008 -0.0057 0.0008  
Y 0.0144 -0.0018 -0.0038 0.0045 0.0085 -0.0017  
Z 0.0129 -0.0015 -0.0011 0.0018 0.0064 -0.0012

AT. 91 C X 0.0008 0.0003 -0.0009 -0.0017 0.0047 0.0002  
Y 0.0054 0.0003 0.0137 -0.0226 0.0042 0.0028  
Z -0.0095 0.0010 -0.0041 -0.0005 -0.0030 -0.0001

AT. 92 C X -0.0008 -0.0003 -0.0009 0.0017 -0.0047 0.0002  
Y -0.0054 -0.0003 0.0137 0.0226 -0.0042 0.0028  
Z 0.0095 -0.0010 -0.0041 0.0005 0.0030 -0.0001

AT. 93 C X 0.0009 0.0011 0.0084 -0.0206 0.0039 0.0023  
Y 0.0021 0.0010 0.0078 -0.0197 0.0072 0.0029  
Z -0.0124 0.0026 0.0043 -0.0242 -0.0048 0.0023

AT. 94 C X -0.0009 -0.0011 0.0084 0.0206 -0.0039 0.0023  
Y -0.0021 -0.0010 0.0078 0.0197 -0.0072 0.0029

Z 0.0124 -0.0026 0.0043 0.0242 0.0048 0.0023  
AT. 95 H X -0.0001 0.0015 0.0120 -0.0303 0.0067 0.0038  
Y 0.0062 -0.0002 0.0007 -0.0003 0.0071 0.0004  
Z -0.0186 0.0043 0.0132 -0.0485 -0.0077 0.0051  
AT. 96 H X 0.0001 -0.0015 0.0120 0.0303 -0.0067 0.0038  
Y -0.0062 0.0002 0.0007 0.0003 -0.0071 0.0004  
Z 0.0186 -0.0043 0.0132 0.0485 0.0077 0.0051  
AT. 97 H X 0.0013 0.0018 0.0182 -0.0387 0.0016 0.0041  
Y -0.0075 0.0031 0.0169 -0.0490 0.0046 0.0066  
Z -0.0146 0.0028 0.0036 -0.0257 -0.0046 0.0026  
AT. 98 H X -0.0013 -0.0018 0.0182 0.0387 -0.0016 0.0041  
Y 0.0075 -0.0031 0.0169 0.0490 -0.0046 0.0066  
Z 0.0146 -0.0028 0.0036 0.0257 0.0046 0.0026  
AT. 99 C X 0.0014 0.0003 0.0028 -0.0021 -0.0129 -0.0002  
Y -0.0030 0.0001 0.0024 0.0029 -0.0062 -0.0020  
Z -0.0063 0.0004 0.0024 0.0038 -0.0022 -0.0016  
AT. 100 C X -0.0014 -0.0003 0.0028 0.0021 0.0129 -0.0002  
Y 0.0030 -0.0001 0.0024 -0.0029 0.0062 -0.0020  
Z 0.0063 -0.0004 0.0024 -0.0038 0.0022 -0.0016  
AT. 101 C X 0.0002 0.0000 0.0070 0.0006 -0.0173 -0.0016  
Y 0.0021 0.0000 0.0121 0.0016 -0.0271 -0.0029  
Z -0.0057 0.0007 -0.0031 0.0017 0.0051 -0.0000  
AT. 102 C X -0.0002 -0.0000 0.0070 -0.0006 0.0173 -0.0016  
Y -0.0021 -0.0000 0.0121 -0.0016 0.0271 -0.0029  
Z 0.0057 -0.0007 -0.0031 -0.0017 -0.0051 -0.0000  
AT. 103 H X -0.0012 0.0000 0.0104 0.0014 -0.0232 -0.0023  
Y 0.0029 -0.0000 0.0107 0.0011 -0.0245 -0.0026  
Z -0.0093 0.0006 -0.0127 0.0037 0.0226 0.0013  
AT. 104 H X 0.0012 -0.0000 0.0104 -0.0014 0.0232 -0.0023  
Y -0.0029 0.0000 0.0107 -0.0011 0.0245 -0.0026  
Z 0.0093 -0.0006 -0.0127 -0.0037 -0.0226 0.0013  
AT. 105 H X -0.0014 0.0002 0.0125 0.0042 -0.0232 -0.0018

Y 0.0066 -0.0003 0.0193 0.0001 -0.0409 -0.0042  
Z -0.0043 0.0006 0.0011 0.0020 -0.0014 -0.0005  
AT. 106 H X 0.0014 -0.0002 0.0125 -0.0042 0.0232 -0.0018  
Y -0.0066 0.0003 0.0193 -0.0001 0.0409 -0.0042  
Z 0.0043 -0.0006 0.0011 -0.0020 0.0014 -0.0005  
AT. 107 C X -0.0014 0.0007 -0.0014 -0.0071 0.0117 0.0011  
Y -0.0020 -0.0005 0.0043 0.0035 -0.0073 -0.0004  
Z -0.0077 0.0015 -0.0090 -0.0042 0.0105 0.0010  
AT. 108 C X 0.0014 -0.0007 -0.0014 0.0071 -0.0117 0.0011  
Y 0.0020 0.0005 0.0043 -0.0035 0.0073 -0.0004  
Z 0.0077 -0.0015 -0.0090 0.0042 -0.0105 0.0010  
AT. 109 H X 0.0038 0.0015 -0.0066 -0.0186 0.0351 0.0031  
Y -0.0043 0.0007 -0.0012 0.0003 0.0032 0.0002  
Z -0.0136 0.0032 -0.0169 -0.0063 0.0212 0.0014  
AT. 110 H X -0.0038 -0.0015 -0.0066 0.0186 -0.0351 0.0031  
Y 0.0043 -0.0007 -0.0012 -0.0003 -0.0032 0.0002  
Z 0.0136 -0.0032 -0.0169 0.0063 -0.0212 0.0014  
AT. 111 H X -0.0003 0.0003 -0.0011 -0.0041 0.0100 0.0006  
Y -0.0012 -0.0024 0.0145 0.0122 -0.0323 -0.0020  
Z -0.0091 0.0023 -0.0114 -0.0090 0.0172 0.0018  
AT. 112 H X 0.0003 -0.0003 -0.0011 0.0041 -0.0100 0.0006  
Y 0.0012 0.0024 0.0145 -0.0122 0.0323 -0.0020  
Z 0.0091 -0.0023 -0.0114 0.0090 -0.0172 0.0018  
AT. 113 C X 0.0016 0.0002 0.0011 -0.0027 0.0013 0.0002  
Y -0.0044 0.0004 -0.0034 0.0014 0.0029 0.0001  
Z -0.0024 0.0003 0.0000 -0.0010 -0.0015 0.0003  
AT. 114 C X -0.0016 -0.0002 0.0011 0.0027 -0.0013 0.0002  
Y 0.0044 -0.0004 -0.0034 -0.0014 -0.0029 0.0001  
Z 0.0024 -0.0003 0.0000 0.0010 0.0015 0.0003  
AT. 115 C X 0.0033 -0.0003 -0.0025 0.0014 0.0036 0.0001  
Y -0.0081 -0.0001 0.0001 0.0098 -0.0138 -0.0015  
Z -0.0092 -0.0005 0.0064 0.0131 -0.0225 -0.0022

AT.116 C X -0.0033 0.0003 -0.0025 -0.0014 -0.0036 0.0001  
Y 0.0081 0.0001 0.0001 -0.0098 0.0138 -0.0015  
Z 0.0092 0.0005 0.0064 -0.0131 0.0225 -0.0022

AT.117 H X 0.0050 0.0013 -0.0064 -0.0157 0.0210 0.0017  
Y -0.0137 -0.0017 0.0041 0.0300 -0.0381 -0.0040  
Z -0.0097 -0.0018 0.0091 0.0265 -0.0347 -0.0032

AT.118 H X -0.0050 -0.0013 -0.0064 0.0157 -0.0210 0.0017  
Y 0.0137 0.0017 0.0041 -0.0300 0.0381 -0.0040  
Z 0.0097 0.0018 0.0091 -0.0265 0.0347 -0.0032

AT.119 H X 0.0021 -0.0028 0.0031 0.0271 -0.0225 -0.0018  
Y -0.0018 -0.0009 -0.0001 0.0109 -0.0089 -0.0004  
Z -0.0160 -0.0011 0.0097 0.0261 -0.0413 -0.0043

AT.120 H X -0.0021 0.0028 0.0031 -0.0271 0.0225 -0.0018  
Y 0.0018 0.0009 -0.0001 -0.0109 0.0089 -0.0004  
Z 0.0160 0.0011 0.0097 -0.0261 0.0413 -0.0043

AT.121 C X 0.0048 -0.0014 0.0072 0.0061 -0.0036 -0.0013  
Y -0.0097 0.0018 -0.0132 -0.0089 0.0109 0.0011  
Z -0.0094 0.0030 -0.0187 -0.0158 0.0124 0.0024

AT.122 C X -0.0048 0.0014 0.0072 -0.0061 0.0036 -0.0013  
Y 0.0097 -0.0018 -0.0132 0.0089 -0.0109 0.0011  
Z 0.0094 -0.0030 -0.0187 0.0158 -0.0124 0.0024

AT.123 H X 0.0033 -0.0043 0.0355 0.0271 -0.0337 -0.0071  
Y -0.0024 -0.0014 0.0058 0.0054 -0.0014 -0.0012  
Z -0.0171 0.0058 -0.0335 -0.0270 0.0199 0.0038

AT.124 H X -0.0033 0.0043 0.0355 -0.0271 0.0337 -0.0071  
Y 0.0024 0.0014 0.0058 -0.0054 0.0014 -0.0012  
Z 0.0171 -0.0058 -0.0335 0.0270 -0.0199 0.0038

AT.125 H X 0.0076 -0.0015 0.0042 0.0046 -0.0016 -0.0006  
Y -0.0169 0.0060 -0.0415 -0.0309 0.0353 0.0055  
Z -0.0098 0.0051 -0.0366 -0.0288 0.0271 0.0056

AT.126 H X -0.0076 0.0015 0.0042 -0.0046 0.0016 -0.0006  
Y 0.0169 -0.0060 -0.0415 0.0309 -0.0353 0.0055

Z 0.0098 -0.0051 -0.0366 0.0288 -0.0271 0.0056  
AT. 127 C X 0.0020 0.0001 0.0015 -0.0004 0.0012 -0.0002  
Y -0.0060 0.0004 -0.0029 -0.0028 0.0041 0.0004  
Z -0.0015 0.0002 -0.0014 -0.0056 0.0025 0.0013  
AT. 128 C X -0.0020 -0.0001 0.0015 0.0004 -0.0012 -0.0002  
Y 0.0060 -0.0004 -0.0029 0.0028 -0.0041 0.0004  
Z 0.0015 -0.0002 -0.0014 0.0056 -0.0025 0.0013  
AT. 129 C X 0.0081 -0.0008 0.0027 0.0041 0.0028 -0.0007  
Y 0.0019 0.0002 -0.0109 -0.0021 0.0171 0.0013  
Z -0.0083 0.0004 0.0062 -0.0052 -0.0093 0.0002  
AT. 130 C X -0.0081 0.0008 0.0027 -0.0041 -0.0028 -0.0007  
Y -0.0019 -0.0002 -0.0109 0.0021 -0.0171 0.0013  
Z 0.0083 -0.0004 0.0062 0.0052 0.0093 0.0002  
AT. 131 H X 0.0044 -0.0007 0.0113 -0.0028 -0.0051 -0.0003  
Y 0.0088 -0.0002 -0.0242 0.0047 0.0357 0.0019  
Z -0.0106 0.0005 0.0119 -0.0124 -0.0116 0.0011  
AT. 132 H X -0.0044 0.0007 0.0113 0.0028 0.0051 -0.0003  
Y -0.0088 0.0002 -0.0242 -0.0047 -0.0357 0.0019  
Z 0.0106 -0.0005 0.0119 0.0124 0.0116 0.0011  
AT. 133 H X 0.0097 -0.0003 -0.0153 0.0123 0.0200 -0.0007  
Y -0.0034 0.0007 -0.0139 -0.0013 0.0161 0.0012  
Z -0.0176 0.0010 0.0100 -0.0082 -0.0189 -0.0000  
AT. 134 H X -0.0097 0.0003 -0.0153 -0.0123 -0.0200 -0.0007  
Y 0.0034 -0.0007 -0.0139 0.0013 -0.0161 0.0012  
Z 0.0176 -0.0010 0.0100 0.0082 0.0189 -0.0000  
AT. 135 C X 0.0235 -0.0017 0.0127 -0.0050 -0.0091 0.0006  
Y 0.0230 -0.0007 -0.0144 0.0001 0.0441 0.0017  
Z 0.0473 -0.0034 0.0120 -0.0050 0.0050 0.0019  
AT. 136 C X -0.0235 0.0017 0.0127 0.0050 0.0091 0.0006  
Y -0.0230 0.0007 -0.0144 -0.0001 -0.0441 0.0017  
Z -0.0473 0.0034 0.0120 0.0050 -0.0050 0.0019  
AT. 137 H X 0.0007 -0.0004 -0.0100 -0.0023 -0.0337 0.0034

Y -0.0272 0.0037 -0.0807 0.0082 0.0550 0.0065  
Z -0.0287 0.0035 -0.0922 0.0076 0.0335 0.0092  
AT. 138 H X -0.0007 0.0004 -0.0100 0.0023 0.0337 0.0034  
Y 0.0272 -0.0037 -0.0807 -0.0082 -0.0550 0.0065  
Z 0.0287 -0.0035 -0.0922 -0.0076 -0.0335 0.0092  
AT. 139 H X -0.0434 0.0036 -0.0311 0.0030 -0.0125 0.0024  
Y 0.1299 -0.0093 0.1001 -0.0149 0.0470 -0.0059  
Z 0.1057 -0.0080 0.0379 -0.0112 0.0089 0.0014  
AT. 140 H X 0.0434 -0.0036 -0.0311 -0.0030 0.0125 0.0024  
Y -0.1299 0.0093 0.1001 0.0149 -0.0470 -0.0059  
Z -0.1057 0.0080 0.0379 0.0112 -0.0089 0.0014  
AT. 141 H X 0.1389 -0.0105 0.0927 -0.0184 0.0081 -0.0030  
Y -0.0030 0.0023 -0.0722 0.0060 0.0737 0.0066  
Z 0.1228 -0.0101 0.1051 -0.0167 -0.0182 -0.0046  
AT. 142 H X -0.1389 0.0105 0.0927 0.0184 -0.0081 -0.0030  
Y 0.0030 -0.0023 -0.0722 -0.0060 -0.0737 0.0066  
Z -0.1228 0.0101 0.1051 0.0167 0.0182 -0.0046  
AT. 143 C X -0.0401 0.0048 -0.0169 -0.0114 0.0055 0.0011  
Y 0.0024 -0.0023 0.0337 0.0201 -0.0452 -0.0056  
Z 0.0531 -0.0054 0.0138 0.0026 0.0104 0.0013  
AT. 144 C X 0.0401 -0.0048 -0.0169 0.0114 -0.0055 0.0011  
Y -0.0024 0.0023 0.0337 -0.0201 0.0452 -0.0056  
Z -0.0531 0.0054 0.0138 -0.0026 -0.0104 0.0013  
AT. 145 H X -0.1240 0.0139 -0.0714 -0.0440 0.0555 0.0089  
Y -0.0603 0.0033 0.0045 0.0034 -0.0070 -0.0006  
Z 0.0993 -0.0092 0.0315 0.0123 -0.0181 -0.0020  
AT. 146 H X 0.1240 -0.0139 -0.0714 0.0440 -0.0555 0.0089  
Y 0.0603 -0.0033 0.0045 -0.0034 0.0070 -0.0006  
Z -0.0993 0.0092 0.0315 -0.0123 0.0181 -0.0020  
AT. 147 H X -0.0303 0.0038 -0.0270 -0.0176 0.0369 0.0043  
Y 0.0964 -0.0120 0.0979 0.0578 -0.1284 -0.0161  
Z 0.1167 -0.0118 0.0336 0.0140 0.0105 0.0002

AT. 148 H X 0.0303 -0.0038 -0.0270 0.0176 -0.0369 0.0043  
Y -0.0964 0.0120 0.0979 -0.0578 0.1284 -0.0161  
Z -0.1167 0.0118 0.0336 -0.0140 -0.0105 0.0002

AT. 149 H X -0.0115 0.0011 0.0282 0.0149 -0.0685 -0.0077  
Y -0.0178 -0.0011 0.0367 0.0225 -0.0494 -0.0062  
Z 0.0041 -0.0016 -0.0035 -0.0066 0.0404 0.0046

AT. 150 H X 0.0115 -0.0011 0.0282 -0.0149 0.0685 -0.0077  
Y 0.0178 0.0011 0.0367 -0.0225 0.0494 -0.0062  
Z -0.0041 0.0016 -0.0035 0.0066 -0.0404 0.0046

AT. 151 C X 0.0040 0.0000 0.0022 0.0010 -0.0026 -0.0006  
Y -0.0127 0.0011 -0.0029 -0.0063 0.0096 0.0012  
Z -0.0130 0.0013 -0.0032 -0.0046 -0.0007 0.0009

AT. 152 C X -0.0040 -0.0000 0.0022 -0.0010 0.0026 -0.0006  
Y 0.0127 -0.0011 -0.0029 0.0063 -0.0096 0.0012  
Z 0.0130 -0.0013 -0.0032 0.0046 0.0007 0.0009

AT. 153 H X 0.0045 -0.0005 0.0038 0.0034 -0.0066 -0.0015  
Y -0.0154 0.0011 -0.0011 -0.0092 0.0124 0.0014  
Z -0.0174 0.0015 -0.0009 -0.0104 0.0056 0.0016

AT. 154 H X -0.0045 0.0005 0.0038 -0.0034 0.0066 -0.0015  
Y 0.0154 -0.0011 -0.0011 0.0092 -0.0124 0.0014  
Z 0.0174 -0.0015 -0.0009 0.0104 -0.0056 0.0016

AT. 155 H X 0.0077 -0.0002 0.0010 0.0059 -0.0030 -0.0011  
Y -0.0172 0.0015 -0.0017 -0.0101 0.0151 0.0017  
Z -0.0070 0.0007 -0.0050 0.0011 -0.0066 0.0001

AT. 156 H X -0.0077 0.0002 0.0010 -0.0059 0.0030 -0.0011  
Y 0.0172 -0.0015 -0.0017 0.0101 -0.0151 0.0017  
Z 0.0070 -0.0007 -0.0050 -0.0011 0.0066 0.0001

AT. 157 O X -0.0029 0.0018 0.0008 -0.0007 0.0002 -0.0007  
Y 0.0065 0.0023 -0.0000 0.0038 -0.0113 0.0386  
Z -0.0047 0.0032 0.0038 -0.0011 0.0009 0.0045

AT. 158 O X 0.0029 -0.0018 0.0008 0.0007 -0.0002 -0.0007  
Y -0.0065 -0.0023 -0.0000 -0.0038 0.0113 0.0386

Z 0.0047 -0.0032 0.0038 0.0011 -0.0009 0.0045  
AT. 159 O X 0.0071 -0.0062 -0.0056 0.0014 -0.0020 -0.0050  
Y -0.0022 0.0017 0.0003 -0.0014 0.0021 -0.0096  
Z 0.0123 -0.0110 -0.0076 0.0023 -0.0020 -0.0074  
AT. 160 O X -0.0071 0.0062 -0.0056 -0.0014 0.0020 -0.0050  
Y 0.0022 -0.0017 0.0003 0.0014 -0.0021 -0.0096  
Z -0.0123 0.0110 -0.0076 -0.0023 0.0020 -0.0074  
AT. 161 H X 0.0009 0.0007 0.0008 0.0013 -0.0052 0.0184  
Y 0.0068 0.0037 0.0008 0.0042 -0.0130 0.0463  
Z -0.0027 -0.0024 0.0012 -0.0014 0.0024 -0.0085  
AT. 162 H X -0.0009 -0.0007 0.0008 -0.0013 0.0052 0.0184  
Y -0.0068 -0.0037 0.0008 -0.0042 0.0130 0.0463  
Z 0.0027 0.0024 0.0012 0.0014 -0.0024 -0.0085  
AT. 163 H X 0.0181 -0.0144 -0.0117 0.0037 -0.0052 -0.0043  
Y 0.0021 0.0013 -0.0008 -0.0006 -0.0006 -0.0097  
Z 0.0104 -0.0092 -0.0062 0.0019 -0.0017 -0.0079  
AT. 164 H X -0.0181 0.0144 -0.0117 -0.0037 0.0052 -0.0043  
Y -0.0021 -0.0013 -0.0008 0.0006 0.0006 -0.0097  
Z -0.0104 0.0092 -0.0062 -0.0019 0.0017 -0.0079  
AT. 165 O X -0.0098 -0.0013 -0.0678 0.0825 0.0292 -0.0061  
Y -0.0027 0.0005 -0.0334 0.0340 -0.0161 -0.0088  
Z -0.0023 -0.0011 -0.0071 0.0095 0.0084 0.0017  
AT. 166 O X 0.0098 0.0013 -0.0678 -0.0825 -0.0292 -0.0061  
Y 0.0027 -0.0005 -0.0334 -0.0340 0.0161 -0.0088  
Z 0.0023 0.0011 -0.0071 -0.0095 -0.0084 0.0017  
AT. 167 H X -0.0120 -0.0012 -0.0839 0.1018 0.0302 -0.0088  
Y -0.0027 0.0003 -0.0343 0.0338 -0.0108 -0.0078  
Z 0.0030 -0.0014 0.0337 -0.0382 -0.0050 0.0071  
AT. 168 H X 0.0120 0.0012 -0.0839 -0.1018 -0.0302 -0.0088  
Y 0.0027 -0.0003 -0.0343 -0.0338 0.0108 -0.0078  
Z -0.0030 0.0014 0.0337 0.0382 0.0050 0.0071  
AT. 169 O X 0.0021 0.0001 0.0108 -0.0182 -0.0209 0.0009



|                           |   |         |         |         |         |         |         |
|---------------------------|---|---------|---------|---------|---------|---------|---------|
|                           | Y | 0.0013  | -0.0042 | 0.0067  | 0.0069  | 0.0354  | 0.0052  |
|                           | Z | -0.0007 | 0.0002  | -0.0001 | -0.0044 | -0.0124 | 0.0001  |
| AT. 170 O X               |   | -0.0021 | -0.0001 | 0.0108  | 0.0182  | 0.0209  | 0.0009  |
|                           | Y | -0.0013 | 0.0042  | 0.0067  | -0.0069 | -0.0354 | 0.0052  |
|                           | Z | 0.0007  | -0.0002 | -0.0001 | 0.0044  | 0.0124  | 0.0001  |
| AT. 171 H X               |   | 0.0012  | 0.0016  | 0.0113  | -0.0172 | -0.0132 | -0.0014 |
|                           | Y | 0.0007  | -0.0047 | 0.0085  | 0.0114  | 0.0578  | 0.0067  |
|                           | Z | -0.0019 | -0.0013 | 0.0000  | 0.0049  | 0.0175  | 0.0041  |
| AT. 172 H X               |   | -0.0012 | -0.0016 | 0.0113  | 0.0172  | 0.0132  | -0.0014 |
|                           | Y | -0.0007 | 0.0047  | 0.0085  | -0.0114 | -0.0578 | 0.0067  |
|                           | Z | 0.0019  | 0.0013  | 0.0000  | -0.0049 | -0.0175 | 0.0041  |
|                           |   |         |         |         |         |         |         |
| FREQ(CM** <sup>-1</sup> ) |   | 249.63  | 252.02  | 258.29  | 258.46  | 259.26  | 259.74  |
|                           |   |         |         |         |         |         |         |
| AT. 1 I X                 |   | 0.0008  | 0.0001  | -0.0011 | -0.0001 | -0.0004 | 0.0009  |
|                           | Y | -0.0001 | 0.0003  | -0.0004 | -0.0008 | 0.0007  | -0.0000 |
|                           | Z | 0.0003  | 0.0001  | -0.0004 | 0.0000  | -0.0002 | 0.0002  |
| AT. 2 I X                 |   | -0.0008 | 0.0001  | 0.0011  | -0.0001 | 0.0004  | 0.0009  |
|                           | Y | 0.0001  | 0.0003  | 0.0004  | -0.0008 | -0.0007 | -0.0000 |
|                           | Z | -0.0003 | 0.0001  | 0.0004  | 0.0000  | 0.0002  | 0.0002  |
| AT. 3 I X                 |   | 0.0024  | 0.0001  | -0.0005 | -0.0001 | -0.0001 | 0.0009  |
|                           | Y | 0.0013  | 0.0000  | 0.0000  | -0.0003 | 0.0003  | -0.0000 |
|                           | Z | 0.0001  | 0.0002  | 0.0002  | 0.0000  | 0.0001  | -0.0001 |
| AT. 4 I X                 |   | -0.0024 | 0.0001  | 0.0005  | -0.0001 | 0.0001  | 0.0009  |
|                           | Y | -0.0013 | 0.0000  | -0.0000 | -0.0003 | -0.0003 | -0.0000 |
|                           | Z | -0.0001 | 0.0002  | -0.0002 | 0.0000  | -0.0001 | -0.0001 |
| AT. 5 O X                 |   | -0.0228 | -0.0023 | 0.0011  | 0.0019  | 0.0007  | -0.0019 |
|                           | Y | -0.0096 | -0.0013 | 0.0054  | 0.0027  | 0.0020  | -0.0030 |
|                           | Z | -0.0082 | -0.0015 | -0.0010 | -0.0010 | 0.0006  | 0.0025  |
| AT. 6 O X                 |   | 0.0228  | -0.0023 | -0.0011 | 0.0019  | -0.0007 | -0.0019 |
|                           | Y | 0.0096  | -0.0013 | -0.0054 | 0.0027  | -0.0020 | -0.0030 |
|                           | Z | 0.0082  | -0.0015 | 0.0010  | -0.0010 | -0.0006 | 0.0025  |

AT. 7 O X 0.0063 0.0015 0.0078 0.0020 0.0005 -0.0036  
Y -0.0050 0.0016 -0.0023 -0.0003 -0.0010 0.0041  
Z -0.0051 -0.0006 -0.0124 -0.0015 -0.0020 0.0059

AT. 8 O X -0.0063 0.0015 -0.0078 0.0020 -0.0005 -0.0036  
Y 0.0050 0.0016 0.0023 -0.0003 0.0010 0.0041  
Z 0.0051 -0.0006 0.0124 -0.0015 0.0020 0.0059

AT. 9 N X -0.0027 -0.0004 0.0076 0.0032 -0.0001 -0.0056  
Y -0.0032 -0.0022 0.0160 0.0053 0.0005 -0.0099  
Z 0.0007 -0.0003 -0.0012 -0.0010 0.0003 0.0022

AT. 10 N X 0.0027 -0.0004 -0.0076 0.0032 0.0001 -0.0056  
Y 0.0032 -0.0022 -0.0160 0.0053 -0.0005 -0.0099  
Z -0.0007 -0.0003 0.0012 -0.0010 -0.0003 0.0022

AT. 11 N X -0.0020 -0.0013 0.0063 0.0031 0.0008 -0.0076  
Y -0.0024 -0.0013 0.0102 0.0035 0.0008 -0.0085  
Z 0.0023 -0.0006 0.0037 0.0021 0.0000 -0.0050

AT. 12 N X 0.0020 -0.0013 -0.0063 0.0031 -0.0008 -0.0076  
Y 0.0024 -0.0013 -0.0102 0.0035 -0.0008 -0.0085  
Z -0.0023 -0.0006 -0.0037 0.0021 -0.0000 -0.0050

AT. 13 C X -0.0082 -0.0008 0.0038 0.0022 0.0001 -0.0033  
Y -0.0039 -0.0015 0.0102 0.0036 0.0013 -0.0058  
Z 0.0016 -0.0001 -0.0015 -0.0011 0.0004 0.0026

AT. 14 C X 0.0082 -0.0008 -0.0038 0.0022 -0.0001 -0.0033  
Y 0.0039 -0.0015 -0.0102 0.0036 -0.0013 -0.0058  
Z -0.0016 -0.0001 0.0015 -0.0011 -0.0004 0.0026

AT. 15 C X -0.0028 -0.0000 -0.0029 -0.0007 -0.0008 0.0014  
Y 0.0044 -0.0002 0.0073 0.0020 0.0012 -0.0040  
Z 0.0036 0.0007 0.0046 0.0014 0.0015 -0.0026

AT. 16 C X 0.0028 -0.0000 0.0029 -0.0007 0.0008 0.0014  
Y -0.0044 -0.0002 -0.0073 0.0020 -0.0012 -0.0040  
Z -0.0036 0.0007 -0.0046 0.0014 -0.0015 -0.0026

AT. 17 H X -0.0002 0.0009 -0.0084 -0.0031 -0.0012 0.0044  
Y 0.0086 0.0003 0.0004 -0.0010 -0.0000 0.0018

Z -0.0009 0.0004 0.0111 0.0041 0.0028 -0.0086  
AT. 18 H X 0.0002 0.0009 0.0084 -0.0031 0.0012 0.0044  
Y -0.0086 0.0003 -0.0004 -0.0010 0.0000 0.0018  
Z 0.0009 0.0004 -0.0111 0.0041 -0.0028 -0.0086  
AT. 19 H X -0.0001 0.0002 -0.0079 -0.0034 -0.0011 0.0054  
Y -0.0006 -0.0008 0.0166 0.0057 0.0030 -0.0117  
Z 0.0025 0.0005 0.0068 0.0020 0.0021 -0.0044  
AT. 20 H X 0.0001 0.0002 0.0079 -0.0034 0.0011 0.0054  
Y 0.0006 -0.0008 -0.0166 0.0057 -0.0030 -0.0117  
Z -0.0025 0.0005 -0.0068 0.0020 -0.0021 -0.0044  
AT. 21 C X -0.0011 -0.0005 0.0043 0.0016 0.0004 -0.0040  
Y -0.0094 -0.0004 -0.0017 -0.0000 -0.0003 0.0009  
Z -0.0004 -0.0002 -0.0033 -0.0000 -0.0007 0.0002  
AT. 22 C X 0.0011 -0.0005 -0.0043 0.0016 -0.0004 -0.0040  
Y 0.0094 -0.0004 0.0017 -0.0000 0.0003 0.0009  
Z 0.0004 -0.0002 0.0033 -0.0000 0.0007 0.0002  
AT. 23 C X 0.0037 0.0000 0.0046 0.0010 0.0005 -0.0029  
Y -0.0237 -0.0024 -0.0081 -0.0007 -0.0017 0.0038  
Z 0.0075 0.0008 -0.0023 -0.0007 -0.0002 0.0010  
AT. 24 C X -0.0037 0.0000 -0.0046 0.0010 -0.0005 -0.0029  
Y 0.0237 -0.0024 0.0081 -0.0007 0.0017 0.0038  
Z -0.0075 0.0008 0.0023 -0.0007 0.0002 0.0010  
AT. 25 H X 0.0129 0.0009 0.0062 0.0003 0.0015 -0.0035  
Y -0.0247 -0.0025 -0.0079 -0.0006 -0.0018 0.0037  
Z 0.0241 0.0029 -0.0021 -0.0020 0.0013 0.0013  
AT. 26 H X -0.0129 0.0009 -0.0062 0.0003 -0.0015 -0.0035  
Y 0.0247 -0.0025 0.0079 -0.0006 0.0018 0.0037  
Z -0.0241 0.0029 0.0021 -0.0020 -0.0013 0.0013  
AT. 27 H X 0.0054 0.0003 0.0045 0.0000 0.0005 -0.0018  
Y -0.0411 -0.0042 -0.0103 0.0004 -0.0032 0.0041  
Z -0.0019 -0.0001 -0.0033 0.0000 -0.0009 0.0010  
AT. 28 H X -0.0054 0.0003 -0.0045 0.0000 -0.0005 -0.0018

Y 0.0411 -0.0042 0.0103 0.0004 0.0032 0.0041  
Z 0.0019 -0.0001 0.0033 0.0000 0.0009 0.0010  
AT. 29 C X -0.0133 -0.0009 -0.0100 -0.0014 -0.0010 0.0049  
Y -0.0167 -0.0024 0.0060 0.0033 -0.0002 -0.0061  
Z 0.0151 0.0014 0.0146 0.0031 0.0011 -0.0090  
AT. 30 C X 0.0133 -0.0009 0.0100 -0.0014 0.0010 0.0049  
Y 0.0167 -0.0024 -0.0060 0.0033 0.0002 -0.0061  
Z -0.0151 0.0014 -0.0146 0.0031 -0.0011 -0.0090  
AT. 31 H X -0.0293 -0.0017 -0.0312 -0.0056 -0.0024 0.0152  
Y 0.0033 -0.0011 0.0271 0.0064 0.0016 -0.0158  
Z 0.0346 0.0029 0.0327 0.0052 0.0029 -0.0173  
AT. 32 H X 0.0293 -0.0017 0.0312 -0.0056 0.0024 0.0152  
Y -0.0033 -0.0011 -0.0271 0.0064 -0.0016 -0.0158  
Z -0.0346 0.0029 -0.0327 0.0052 -0.0029 -0.0173  
AT. 33 H X -0.0227 -0.0012 -0.0134 -0.0001 -0.0018 0.0033  
Y -0.0469 -0.0048 -0.0258 -0.0013 -0.0030 0.0090  
Z 0.0217 0.0021 0.0259 0.0058 0.0018 -0.0164  
AT. 34 H X 0.0227 -0.0012 0.0134 -0.0001 0.0018 0.0033  
Y 0.0469 -0.0048 0.0258 -0.0013 0.0030 0.0090  
Z -0.0217 0.0021 -0.0259 0.0058 -0.0018 -0.0164  
AT. 35 C X -0.0039 -0.0005 0.0052 0.0016 0.0002 -0.0035  
Y -0.0042 -0.0008 0.0076 0.0025 0.0003 -0.0060  
Z -0.0017 -0.0001 -0.0005 0.0008 -0.0003 -0.0011  
AT. 36 C X 0.0039 -0.0005 -0.0052 0.0016 -0.0002 -0.0035  
Y 0.0042 -0.0008 -0.0076 0.0025 -0.0003 -0.0060  
Z 0.0017 -0.0001 0.0005 0.0008 0.0003 -0.0011  
AT. 37 C X -0.0125 -0.0010 0.0054 0.0027 0.0003 -0.0065  
Y -0.0162 -0.0016 -0.0109 -0.0022 -0.0011 0.0055  
Z -0.0208 -0.0016 -0.0251 -0.0051 -0.0020 0.0126  
AT. 38 C X 0.0125 -0.0010 -0.0054 0.0027 -0.0003 -0.0065  
Y 0.0162 -0.0016 0.0109 -0.0022 0.0011 0.0055  
Z 0.0208 -0.0016 0.0251 -0.0051 0.0020 0.0126

AT. 39 H X -0.0403 -0.0023 -0.0391 -0.0072 -0.0032 0.0178  
Y -0.0349 -0.0026 -0.0295 -0.0054 -0.0030 0.0139  
Z -0.0309 -0.0020 -0.0469 -0.0104 -0.0035 0.0254

AT. 40 H X 0.0403 -0.0023 0.0391 -0.0072 0.0032 0.0178  
Y 0.0349 -0.0026 0.0295 -0.0054 0.0030 0.0139  
Z 0.0309 -0.0020 0.0469 -0.0104 0.0035 0.0254

AT. 41 H X 0.0170 -0.0007 0.0471 0.0121 0.0035 -0.0291  
Y -0.0273 -0.0011 -0.0241 -0.0060 -0.0023 0.0148  
Z -0.0424 -0.0024 -0.0583 -0.0121 -0.0044 0.0293

AT. 42 H X -0.0170 -0.0007 -0.0471 0.0121 -0.0035 -0.0291  
Y 0.0273 -0.0011 0.0241 -0.0060 0.0023 0.0148  
Z 0.0424 -0.0024 0.0583 -0.0121 0.0044 0.0293

AT. 43 C X 0.0277 0.0033 -0.0047 -0.0022 0.0004 0.0045  
Y 0.0062 0.0005 0.0133 0.0040 0.0007 -0.0094  
Z 0.0281 0.0033 0.0016 -0.0007 0.0002 0.0009

AT. 44 C X -0.0277 0.0033 0.0047 -0.0022 -0.0004 0.0045  
Y -0.0062 0.0005 -0.0133 0.0040 -0.0007 -0.0094  
Z -0.0281 0.0033 -0.0016 -0.0007 -0.0002 0.0009

AT. 45 H X 0.0620 0.0094 -0.0129 -0.0075 0.0001 0.0155  
Y -0.0341 -0.0068 0.0218 0.0092 0.0006 -0.0184  
Z 0.0424 0.0060 -0.0016 -0.0022 0.0004 0.0022

AT. 46 H X -0.0620 0.0094 0.0129 -0.0075 -0.0001 0.0155  
Y 0.0341 -0.0068 -0.0218 0.0092 -0.0006 -0.0184  
Z -0.0424 0.0060 0.0016 -0.0022 -0.0004 0.0022

AT. 47 H X 0.0405 0.0051 -0.0029 -0.0019 0.0005 0.0031  
Y 0.0481 0.0068 0.0043 -0.0010 0.0005 0.0007  
Z 0.0537 0.0072 -0.0108 -0.0064 -0.0002 0.0134

AT. 48 H X -0.0405 0.0051 0.0029 -0.0019 -0.0005 0.0031  
Y -0.0481 0.0068 -0.0043 -0.0010 -0.0005 0.0007  
Z -0.0537 0.0072 0.0108 -0.0064 0.0002 0.0134

AT. 49 C X 0.0012 0.0000 0.0045 0.0009 0.0006 -0.0018  
Y 0.0007 -0.0004 0.0070 0.0027 0.0004 -0.0057

Z 0.0028 -0.0000 0.0042 0.0003 0.0003 -0.0003  
AT. 50 C X -0.0012 0.0000 -0.0045 0.0009 -0.0006 -0.0018  
Y -0.0007 -0.0004 -0.0070 0.0027 -0.0004 -0.0057  
Z -0.0028 -0.0000 -0.0042 0.0003 -0.0003 -0.0003  
AT. 51 C X 0.0009 0.0005 0.0122 0.0036 0.0007 -0.0078  
Y 0.0181 0.0008 0.0045 -0.0003 0.0005 0.0001  
Z -0.0118 -0.0016 0.0023 0.0008 0.0004 -0.0009  
AT. 52 C X -0.0009 0.0005 -0.0122 0.0036 -0.0007 -0.0078  
Y -0.0181 0.0008 -0.0045 -0.0003 -0.0005 0.0001  
Z 0.0118 -0.0016 -0.0023 0.0008 -0.0004 -0.0009  
AT. 53 H X 0.0193 0.0016 0.0059 -0.0017 0.0007 0.0031  
Y 0.0368 0.0016 0.0043 -0.0044 0.0008 0.0081  
Z -0.0220 -0.0024 0.0140 0.0056 0.0011 -0.0113  
AT. 54 H X -0.0193 0.0016 -0.0059 -0.0017 -0.0007 0.0031  
Y -0.0368 0.0016 -0.0043 -0.0044 -0.0008 0.0081  
Z 0.0220 -0.0024 -0.0140 0.0056 -0.0011 -0.0113  
AT. 55 H X -0.0260 -0.0013 0.0205 0.0102 0.0009 -0.0210  
Y 0.0288 0.0021 -0.0020 -0.0040 0.0006 0.0069  
Z -0.0162 -0.0014 0.0001 0.0008 0.0006 -0.0014  
AT. 56 H X 0.0260 -0.0013 -0.0205 0.0102 -0.0009 -0.0210  
Y -0.0288 0.0021 0.0020 -0.0040 -0.0006 0.0069  
Z 0.0162 -0.0014 -0.0001 0.0008 -0.0006 -0.0014  
AT. 57 C X 0.0411 0.0013 -0.0193 -0.0071 -0.0006 0.0159  
Y 0.0504 0.0022 -0.0170 -0.0083 -0.0000 0.0181  
Z -0.0097 0.0010 0.0103 0.0022 0.0006 -0.0038  
AT. 58 C X -0.0411 0.0013 0.0193 -0.0071 0.0006 0.0159  
Y -0.0504 0.0022 0.0170 -0.0083 0.0000 0.0181  
Z 0.0097 0.0010 -0.0103 0.0022 -0.0006 -0.0038  
AT. 59 H X 0.0996 0.0038 -0.0529 -0.0160 -0.0023 0.0360  
Y 0.0211 0.0041 -0.0350 0.0424 -0.0131 -0.0856  
Z -0.0123 0.0056 -0.0402 0.0713 -0.0202 -0.1437  
AT. 60 H X -0.0996 0.0038 0.0529 -0.0160 0.0023 0.0360

Y -0.0211 0.0041 0.0350 0.0424 0.0131 -0.0856  
Z 0.0123 0.0056 0.0402 0.0713 0.0202 -0.1437  
AT. 61 H X 0.0641 0.0000 0.0111 -0.0593 0.0141 0.1231  
Y 0.0962 -0.0003 0.0069 -0.0820 0.0188 0.1688  
Z -0.0145 0.0012 0.0218 -0.0015 0.0026 0.0041  
AT. 62 H X -0.0641 0.0000 -0.0111 -0.0593 -0.0141 0.1231  
Y -0.0962 -0.0003 -0.0069 -0.0820 -0.0188 0.1688  
Z 0.0145 0.0012 -0.0218 -0.0015 -0.0026 0.0041  
AT. 63 H X 0.0057 0.0019 -0.0431 0.0472 -0.0151 -0.0959  
Y 0.0913 0.0065 -0.0513 0.0056 -0.0067 -0.0089  
Z -0.0110 -0.0033 0.0620 -0.0618 0.0201 0.1264  
AT. 64 H X -0.0057 0.0019 0.0431 0.0472 0.0151 -0.0959  
Y -0.0913 0.0065 0.0513 0.0056 0.0067 -0.0089  
Z 0.0110 -0.0033 -0.0620 -0.0618 -0.0201 0.1264  
AT. 65 C X -0.0295 -0.0027 -0.0307 -0.0091 -0.0017 0.0222  
Y -0.0148 -0.0033 -0.0595 -0.0144 -0.0031 0.0362  
Z -0.0135 -0.0005 0.0109 0.0012 0.0003 -0.0031  
AT. 66 C X 0.0295 -0.0027 0.0307 -0.0091 0.0017 0.0222  
Y 0.0148 -0.0033 0.0595 -0.0144 0.0031 0.0362  
Z 0.0135 -0.0005 -0.0109 0.0012 -0.0003 -0.0031  
AT. 67 H X -0.0568 -0.0048 -0.0895 -0.0167 -0.0050 0.0419  
Y -0.0176 -0.0033 0.0028 -0.0322 -0.0015 0.0714  
Z 0.0126 0.0012 0.0024 0.0245 0.0015 -0.0532  
AT. 68 H X 0.0568 -0.0048 0.0895 -0.0167 0.0050 0.0419  
Y 0.0176 -0.0033 -0.0028 -0.0322 0.0015 0.0714  
Z -0.0126 0.0012 -0.0024 0.0245 -0.0015 -0.0532  
AT. 69 H X -0.0203 -0.0040 -0.0982 -0.0014 -0.0041 0.0107  
Y -0.0158 -0.0046 -0.1444 -0.0025 -0.0064 0.0156  
Z -0.0339 -0.0001 0.0155 0.0040 0.0001 -0.0108  
AT. 70 H X 0.0203 -0.0040 0.0982 -0.0014 0.0041 0.0107  
Y 0.0158 -0.0046 0.1444 -0.0025 0.0064 0.0156  
Z 0.0339 -0.0001 -0.0155 0.0040 -0.0001 -0.0108

AT. 71 H X -0.0433 -0.0012 0.0551 -0.0196 0.0012 0.0389  
Y -0.0245 -0.0051 -0.1024 -0.0270 -0.0057 0.0664  
Z -0.0369 -0.0018 0.0171 -0.0235 -0.0012 0.0500

AT. 72 H X 0.0433 -0.0012 -0.0551 -0.0196 -0.0012 0.0389  
Y 0.0245 -0.0051 0.1024 -0.0270 0.0057 0.0664  
Z 0.0369 -0.0018 -0.0171 -0.0235 0.0012 0.0500

AT. 73 C X -0.0060 0.0003 0.0285 0.0075 0.0017 -0.0190  
Y -0.0110 0.0002 0.0386 0.0119 0.0019 -0.0295  
Z 0.0030 0.0002 0.0002 0.0004 -0.0001 -0.0005

AT. 74 C X 0.0060 0.0003 -0.0285 0.0075 -0.0017 -0.0190  
Y 0.0110 0.0002 -0.0386 0.0119 -0.0019 -0.0295  
Z -0.0030 0.0002 -0.0002 0.0004 0.0001 -0.0005

AT. 75 H X -0.0095 0.0013 0.0557 0.0146 0.0033 -0.0375  
Y -0.0173 0.0006 0.0542 0.0162 0.0028 -0.0405  
Z -0.0077 0.0013 0.0400 0.0109 0.0022 -0.0278

AT. 76 H X 0.0095 0.0013 -0.0557 0.0146 -0.0033 -0.0375  
Y 0.0173 0.0006 -0.0542 0.0162 -0.0028 -0.0405  
Z 0.0077 0.0013 -0.0400 0.0109 -0.0022 -0.0278

AT. 77 H X -0.0073 0.0006 0.0406 0.0099 0.0027 -0.0251  
Y -0.0189 0.0021 0.0681 0.0200 0.0034 -0.0513  
Z 0.0116 -0.0018 -0.0388 -0.0095 -0.0025 0.0258

AT. 78 H X 0.0073 0.0006 -0.0406 0.0099 -0.0027 -0.0251  
Y 0.0189 0.0021 -0.0681 0.0200 -0.0034 -0.0513  
Z -0.0116 -0.0018 0.0388 -0.0095 0.0025 0.0258

AT. 79 I X -0.0001 -0.0040 0.0001 0.0008 -0.0001 0.0001  
Y -0.0002 0.0031 -0.0000 -0.0007 0.0002 -0.0003  
Z -0.0003 -0.0004 -0.0001 0.0002 -0.0000 0.0002

AT. 80 I X 0.0001 -0.0040 -0.0001 0.0008 0.0001 0.0001  
Y 0.0002 0.0031 0.0000 -0.0007 -0.0002 -0.0003  
Z 0.0003 -0.0004 0.0001 0.0002 0.0000 0.0002

AT. 81 I X -0.0004 0.0003 0.0000 -0.0017 0.0019 -0.0008  
Y 0.0002 -0.0006 0.0007 0.0011 -0.0010 0.0002



Z -0.0001 -0.0001 -0.0002 0.0002 -0.0004 0.0002  
AT. 82 I X 0.0004 0.0003 -0.0000 -0.0017 -0.0019 -0.0008  
Y -0.0002 -0.0006 -0.0007 0.0011 0.0010 0.0002  
Z 0.0001 -0.0001 0.0002 0.0002 0.0004 0.0002  
AT. 83 O X 0.0025 -0.0070 -0.0003 0.0036 -0.0027 0.0020  
Y 0.0014 -0.0162 0.0009 0.0115 -0.0094 0.0056  
Z -0.0018 0.0095 0.0002 -0.0040 0.0034 -0.0023  
AT. 84 O X -0.0025 -0.0070 0.0003 0.0036 0.0027 0.0020  
Y -0.0014 -0.0162 -0.0009 0.0115 0.0094 0.0056  
Z 0.0018 0.0095 -0.0002 -0.0040 -0.0034 -0.0023  
AT. 85 O X -0.0055 0.0273 0.0011 -0.0039 -0.0014 -0.0018  
Y 0.0021 -0.0144 -0.0007 0.0069 -0.0045 0.0033  
Z -0.0020 0.0010 -0.0005 0.0042 -0.0035 0.0026  
AT. 86 O X 0.0055 0.0273 -0.0011 -0.0039 0.0014 -0.0018  
Y -0.0021 -0.0144 0.0007 0.0069 0.0045 0.0033  
Z 0.0020 0.0010 0.0005 0.0042 0.0035 0.0026  
AT. 87 N X 0.0004 -0.0017 0.0002 0.0034 -0.0022 0.0016  
Y 0.0018 -0.0142 -0.0016 -0.0133 0.0187 -0.0062  
Z -0.0001 0.0032 0.0001 -0.0003 -0.0005 -0.0004  
AT. 88 N X -0.0004 -0.0017 -0.0002 0.0034 0.0022 0.0016  
Y -0.0018 -0.0142 0.0016 -0.0133 -0.0187 -0.0062  
Z 0.0001 0.0032 -0.0001 -0.0003 0.0005 -0.0004  
AT. 89 N X 0.0014 -0.0022 0.0008 0.0114 -0.0118 0.0049  
Y -0.0019 -0.0003 -0.0012 -0.0194 0.0197 -0.0098  
Z -0.0015 0.0006 -0.0009 -0.0120 0.0123 -0.0059  
AT. 90 N X -0.0014 -0.0022 -0.0008 0.0114 0.0118 0.0049  
Y 0.0019 -0.0003 0.0012 -0.0194 -0.0197 -0.0098  
Z 0.0015 0.0006 0.0009 -0.0120 -0.0123 -0.0059  
AT. 91 C X 0.0012 -0.0031 -0.0001 0.0027 -0.0016 0.0015  
Y 0.0024 -0.0176 -0.0004 0.0017 0.0020 0.0004  
Z -0.0001 0.0035 0.0002 0.0003 -0.0014 -0.0001  
AT. 92 C X -0.0012 -0.0031 0.0001 0.0027 0.0016 0.0015

Y -0.0024 -0.0176 0.0004 0.0017 -0.0020 0.0004  
Z 0.0001 0.0035 -0.0002 0.0003 0.0014 -0.0001  
AT. 93 C X 0.0027 -0.0148 0.0000 0.0059 -0.0038 0.0028  
Y 0.0032 -0.0151 -0.0002 0.0042 -0.0021 0.0017  
Z 0.0021 -0.0100 0.0005 0.0057 -0.0065 0.0024  
AT. 94 C X -0.0027 -0.0148 -0.0000 0.0059 0.0038 0.0028  
Y -0.0032 -0.0151 0.0002 0.0042 0.0021 0.0017  
Z -0.0021 -0.0100 -0.0005 0.0057 0.0065 0.0024  
AT. 95 H X 0.0043 -0.0215 -0.0003 0.0061 -0.0032 0.0030  
Y 0.0010 -0.0044 -0.0003 0.0018 -0.0001 0.0005  
Z 0.0042 -0.0219 0.0009 0.0101 -0.0111 0.0044  
AT. 96 H X -0.0043 -0.0215 0.0003 0.0061 0.0032 0.0030  
Y -0.0010 -0.0044 0.0003 0.0018 0.0001 0.0005  
Z -0.0042 -0.0219 -0.0009 0.0101 0.0111 0.0044  
AT. 97 H X 0.0040 -0.0266 0.0001 0.0085 -0.0051 0.0040  
Y 0.0061 -0.0289 0.0004 0.0096 -0.0082 0.0043  
Z 0.0023 -0.0097 0.0006 0.0062 -0.0075 0.0027  
AT. 98 H X -0.0040 -0.0266 -0.0001 0.0085 0.0051 0.0040  
Y -0.0061 -0.0289 -0.0004 0.0096 0.0082 0.0043  
Z -0.0023 -0.0097 -0.0006 0.0062 0.0075 0.0027  
AT. 99 C X -0.0020 0.0123 0.0010 0.0032 -0.0062 0.0014  
Y -0.0023 0.0045 -0.0005 -0.0060 0.0054 -0.0028  
Z -0.0015 0.0013 -0.0005 -0.0026 0.0028 -0.0012  
AT. 100 C X 0.0020 0.0123 -0.0010 0.0032 0.0062 0.0014  
Y 0.0023 0.0045 0.0005 -0.0060 -0.0054 -0.0028  
Z 0.0015 0.0013 0.0005 -0.0026 -0.0028 -0.0012  
AT. 101 C X -0.0037 0.0153 0.0003 -0.0026 -0.0001 -0.0010  
Y -0.0063 0.0234 0.0000 -0.0110 0.0074 -0.0046  
Z 0.0008 -0.0038 0.0003 0.0051 -0.0049 0.0018  
AT. 102 C X 0.0037 0.0153 -0.0003 -0.0026 0.0001 -0.0010  
Y 0.0063 0.0234 -0.0000 -0.0110 -0.0074 -0.0046  
Z -0.0008 -0.0038 -0.0003 0.0051 0.0049 0.0018

AT.103 H X -0.0051 0.0195 -0.0000 -0.0056 0.0022 -0.0022  
Y -0.0057 0.0214 0.0002 -0.0097 0.0064 -0.0040  
Z 0.0047 -0.0158 0.0008 0.0165 -0.0158 0.0063

AT.104 H X 0.0051 0.0195 0.0000 -0.0056 -0.0022 -0.0022  
Y 0.0057 0.0214 -0.0002 -0.0097 -0.0064 -0.0040  
Z -0.0047 -0.0158 -0.0008 0.0165 0.0158 0.0063

AT.105 H X -0.0054 0.0170 -0.0002 -0.0080 0.0068 -0.0032  
Y -0.0094 0.0342 -0.0002 -0.0188 0.0147 -0.0075  
Z -0.0008 0.0007 0.0001 0.0010 -0.0008 0.0001

AT.106 H X 0.0054 0.0170 0.0002 -0.0080 -0.0068 -0.0032  
Y 0.0094 0.0342 0.0002 -0.0188 -0.0147 -0.0075  
Z 0.0008 0.0007 -0.0001 0.0010 0.0008 0.0001

AT.107 C X 0.0025 -0.0164 -0.0010 -0.0081 0.0119 -0.0037  
Y -0.0011 0.0046 -0.0002 -0.0062 0.0069 -0.0024  
Z 0.0024 -0.0116 -0.0009 -0.0080 0.0094 -0.0039

AT.108 C X -0.0025 -0.0164 0.0010 -0.0081 -0.0119 -0.0037  
Y 0.0011 0.0046 0.0002 -0.0062 -0.0069 -0.0024  
Z -0.0024 -0.0116 0.0009 -0.0080 -0.0094 -0.0039

AT.109 H X 0.0069 -0.0462 -0.0032 -0.0273 0.0376 -0.0127  
Y 0.0010 -0.0075 -0.0008 -0.0143 0.0169 -0.0052  
Z 0.0047 -0.0235 -0.0013 -0.0167 0.0193 -0.0062

AT.110 H X -0.0069 -0.0462 0.0032 -0.0273 -0.0376 -0.0127  
Y -0.0010 -0.0075 0.0008 -0.0143 -0.0169 -0.0052  
Z -0.0047 -0.0235 0.0013 -0.0167 -0.0193 -0.0062

AT.111 H X 0.0020 -0.0115 -0.0005 -0.0032 0.0065 -0.0013  
Y -0.0059 0.0343 0.0017 0.0136 -0.0186 0.0059  
Z 0.0038 -0.0228 -0.0018 -0.0176 0.0207 -0.0083

AT.112 H X -0.0020 -0.0115 0.0005 -0.0032 -0.0065 -0.0013  
Y 0.0059 0.0343 -0.0017 0.0136 0.0186 0.0059  
Z -0.0038 -0.0228 0.0018 -0.0176 -0.0207 -0.0083

AT.113 C X 0.0005 -0.0025 0.0002 0.0046 -0.0047 0.0019  
Y 0.0008 -0.0040 -0.0004 -0.0060 0.0072 -0.0027

Z 0.0001 0.0008 -0.0004 -0.0027 0.0024 -0.0013  
AT. 114 C X -0.0005 -0.0025 -0.0002 0.0046 0.0047 0.0019  
Y -0.0008 -0.0040 0.0004 -0.0060 -0.0072 -0.0027  
Z -0.0001 0.0008 0.0004 -0.0027 -0.0024 -0.0013  
AT. 115 C X 0.0008 0.0009 0.0013 0.0172 -0.0185 0.0074  
Y -0.0025 0.0144 0.0007 -0.0005 -0.0015 -0.0001  
Z -0.0043 0.0238 0.0010 0.0038 -0.0073 0.0020  
AT. 116 C X -0.0008 0.0009 -0.0013 0.0172 0.0185 0.0074  
Y 0.0025 0.0144 -0.0007 -0.0005 0.0015 -0.0001  
Z 0.0043 0.0238 -0.0010 0.0038 0.0073 0.0020  
AT. 117 H X 0.0040 -0.0251 -0.0012 -0.0040 0.0077 -0.0028  
Y -0.0073 0.0458 0.0030 0.0154 -0.0228 0.0076  
Z -0.0064 0.0436 0.0031 0.0230 -0.0306 0.0112  
AT. 118 H X -0.0040 -0.0251 0.0012 -0.0040 -0.0077 -0.0028  
Y 0.0073 0.0458 -0.0030 0.0154 0.0228 0.0076  
Z 0.0064 0.0436 -0.0031 0.0230 0.0306 0.0112  
AT. 119 H X -0.0038 0.0398 0.0049 0.0469 -0.0553 0.0219  
Y -0.0011 0.0134 0.0012 0.0061 -0.0081 0.0032  
Z -0.0081 0.0460 0.0026 0.0137 -0.0212 0.0068  
AT. 120 H X 0.0038 0.0398 -0.0049 0.0469 0.0553 0.0219  
Y 0.0011 0.0134 -0.0012 0.0061 0.0081 0.0032  
Z 0.0081 0.0460 -0.0026 0.0137 0.0212 0.0068  
AT. 121 C X -0.0020 -0.0013 -0.0015 -0.0167 0.0195 -0.0079  
Y 0.0028 -0.0127 -0.0003 -0.0007 0.0015 -0.0012  
Z 0.0045 -0.0078 0.0015 0.0206 -0.0231 0.0089  
AT. 122 C X 0.0020 -0.0013 0.0015 -0.0167 -0.0195 -0.0079  
Y -0.0028 -0.0127 0.0003 -0.0007 -0.0015 -0.0012  
Z -0.0045 -0.0078 -0.0015 0.0206 0.0231 0.0089  
AT. 123 H X -0.0118 0.0115 -0.0059 -0.0739 0.0814 -0.0337  
Y -0.0020 -0.0071 -0.0029 -0.0298 0.0345 -0.0142  
Z 0.0077 -0.0110 0.0035 0.0417 -0.0474 0.0183  
AT. 124 H X 0.0118 0.0115 0.0059 -0.0739 -0.0814 -0.0337

Y 0.0020 -0.0071 0.0029 -0.0298 -0.0345 -0.0142  
Z -0.0077 -0.0110 -0.0035 0.0417 0.0474 0.0183  
AT. 125 H X -0.0010 0.0007 -0.0006 -0.0059 0.0072 -0.0029  
Y 0.0112 -0.0245 0.0039 0.0489 -0.0530 0.0209  
Z 0.0100 -0.0112 0.0048 0.0589 -0.0658 0.0262  
AT. 126 H X 0.0010 0.0007 0.0006 -0.0059 -0.0072 -0.0029  
Y -0.0112 -0.0245 -0.0039 0.0489 0.0530 0.0209  
Z -0.0100 -0.0112 -0.0048 0.0589 0.0658 0.0262  
AT. 127 C X 0.0002 -0.0017 0.0003 0.0042 -0.0039 0.0019  
Y 0.0008 -0.0074 -0.0008 -0.0070 0.0085 -0.0039  
Z 0.0013 -0.0027 -0.0002 -0.0005 0.0009 -0.0004  
AT. 128 C X -0.0002 -0.0017 -0.0003 0.0042 0.0039 0.0019  
Y -0.0008 -0.0074 0.0008 -0.0070 -0.0085 -0.0039  
Z -0.0013 -0.0027 0.0002 -0.0005 -0.0009 -0.0004  
AT. 129 C X -0.0001 0.0016 0.0008 0.0095 -0.0087 0.0046  
Y 0.0033 -0.0137 -0.0006 0.0006 0.0025 -0.0001  
Z -0.0011 0.0038 -0.0004 -0.0079 0.0074 -0.0040  
AT. 130 C X 0.0001 0.0016 -0.0008 0.0095 0.0087 0.0046  
Y -0.0033 -0.0137 0.0006 0.0006 -0.0025 -0.0001  
Z 0.0011 0.0038 0.0004 -0.0079 -0.0074 -0.0040  
AT. 131 H X -0.0011 0.0003 0.0001 -0.0009 0.0020 -0.0004  
Y 0.0064 -0.0198 -0.0003 0.0103 -0.0053 0.0049  
Z -0.0009 -0.0014 -0.0013 -0.0173 0.0182 -0.0084  
AT. 132 H X 0.0011 0.0003 -0.0001 -0.0009 -0.0020 -0.0004  
Y -0.0064 -0.0198 0.0003 0.0103 0.0053 0.0049  
Z 0.0009 -0.0014 0.0013 -0.0173 -0.0182 -0.0084  
AT. 133 H X 0.0025 -0.0003 0.0018 0.0268 -0.0263 0.0130  
Y 0.0033 -0.0114 -0.0004 0.0038 -0.0021 0.0013  
Z -0.0025 0.0080 -0.0006 -0.0115 0.0092 -0.0061  
AT. 134 H X -0.0025 -0.0003 -0.0018 0.0268 0.0263 0.0130  
Y -0.0033 -0.0114 0.0004 0.0038 0.0021 0.0013  
Z 0.0025 0.0080 0.0006 -0.0115 -0.0092 -0.0061

AT. 135 C X -0.0011 0.0029 -0.0015 -0.0170 0.0183 -0.0070  
Y 0.0071 -0.0227 0.0024 0.0508 -0.0490 0.0223  
Z 0.0009 -0.0003 -0.0015 -0.0046 0.0066 -0.0011

AT. 136 C X 0.0011 0.0029 0.0015 -0.0170 -0.0183 -0.0070  
Y -0.0071 -0.0227 -0.0024 0.0508 0.0490 0.0223  
Z -0.0009 -0.0003 0.0015 -0.0046 -0.0066 -0.0011

AT. 137 H X -0.0005 0.0167 -0.0037 -0.0443 0.0423 -0.0175  
Y 0.0158 -0.0247 0.0040 0.0886 -0.0935 0.0406  
Z 0.0155 -0.0093 0.0020 0.0706 -0.0787 0.0343

AT. 138 H X 0.0005 0.0167 0.0037 -0.0443 -0.0423 -0.0175  
Y -0.0158 -0.0247 -0.0040 0.0886 0.0935 0.0406  
Z -0.0155 -0.0093 -0.0020 0.0706 0.0787 0.0343

AT. 139 H X 0.0027 0.0050 -0.0004 -0.0005 -0.0038 0.0006  
Y -0.0049 -0.0293 0.0011 0.0133 0.0010 0.0030  
Z -0.0009 -0.0014 -0.0025 -0.0156 0.0216 -0.0056

AT. 140 H X -0.0027 0.0050 0.0004 -0.0005 0.0038 0.0006  
Y 0.0049 -0.0293 -0.0011 0.0133 -0.0010 0.0030  
Z 0.0009 -0.0014 0.0025 -0.0156 -0.0216 -0.0056

AT. 141 H X -0.0068 -0.0070 -0.0023 -0.0293 0.0407 -0.0134  
Y 0.0175 -0.0339 0.0050 0.1090 -0.1120 0.0494  
Z -0.0121 0.0072 -0.0044 -0.0695 0.0808 -0.0316

AT. 142 H X 0.0068 -0.0070 0.0023 -0.0293 -0.0407 -0.0134  
Y -0.0175 -0.0339 -0.0050 0.1090 0.1120 0.0494  
Z 0.0121 0.0072 0.0044 -0.0695 -0.0808 -0.0316

AT. 143 C X 0.0028 -0.0120 0.0000 -0.0009 -0.0003 -0.0013  
Y -0.0110 0.0497 0.0041 0.0319 -0.0414 0.0146  
Z 0.0010 -0.0050 -0.0011 -0.0043 0.0097 -0.0013

AT. 144 C X -0.0028 -0.0120 -0.0000 -0.0009 0.0003 -0.0013  
Y 0.0110 0.0497 -0.0041 0.0319 0.0414 0.0146  
Z -0.0010 -0.0050 0.0011 -0.0043 -0.0097 -0.0013

AT. 145 H X 0.0168 -0.0658 -0.0046 -0.0289 0.0351 -0.0149  
Y -0.0006 0.0249 0.0002 0.0286 -0.0307 0.0133

Z -0.0067 0.0080 0.0019 -0.0079 0.0070 -0.0033  
AT. 146 H X -0.0168 -0.0658 0.0046 -0.0289 -0.0351 -0.0149  
Y 0.0006 0.0249 -0.0002 0.0286 0.0307 0.0133  
Z 0.0067 0.0080 -0.0019 -0.0079 -0.0070 -0.0033  
AT. 147 H X 0.0094 -0.0366 -0.0032 -0.0137 0.0210 -0.0067  
Y -0.0328 0.1205 0.0123 0.0606 -0.0867 0.0280  
Z -0.0010 -0.0022 -0.0013 -0.0071 0.0157 -0.0019  
AT. 148 H X -0.0094 -0.0366 0.0032 -0.0137 -0.0210 -0.0067  
Y 0.0328 0.1205 -0.0123 0.0606 0.0867 0.0280  
Z 0.0010 -0.0022 0.0013 -0.0071 -0.0157 -0.0019  
AT. 149 H X -0.0153 0.0543 0.0075 0.0329 -0.0510 0.0141  
Y -0.0116 0.0623 0.0045 0.0459 -0.0566 0.0213  
Z 0.0091 -0.0168 -0.0041 0.0022 0.0095 0.0022  
AT. 150 H X 0.0153 0.0543 -0.0075 0.0329 0.0510 0.0141  
Y 0.0116 0.0623 -0.0045 0.0459 0.0566 0.0213  
Z -0.0091 -0.0168 0.0041 0.0022 -0.0095 0.0022  
AT. 151 C X -0.0005 0.0046 0.0012 0.0140 -0.0157 0.0065  
Y 0.0019 -0.0231 -0.0039 -0.0411 0.0471 -0.0196  
Z 0.0008 -0.0017 -0.0003 -0.0032 0.0025 -0.0018  
AT. 152 C X 0.0005 0.0046 -0.0012 0.0140 0.0157 0.0065  
Y -0.0019 -0.0231 0.0039 -0.0411 -0.0471 -0.0196  
Z -0.0008 -0.0017 0.0003 -0.0032 -0.0025 -0.0018  
AT. 153 H X -0.0018 0.0100 0.0018 0.0201 -0.0231 0.0090  
Y 0.0020 -0.0332 -0.0059 -0.0623 0.0711 -0.0299  
Z 0.0015 -0.0207 -0.0038 -0.0407 0.0451 -0.0198  
AT. 154 H X 0.0018 0.0100 -0.0018 0.0201 0.0231 0.0090  
Y -0.0020 -0.0332 0.0059 -0.0623 -0.0711 -0.0299  
Z -0.0015 -0.0207 0.0038 -0.0407 -0.0451 -0.0198  
AT. 155 H X -0.0007 0.0091 0.0020 0.0217 -0.0243 0.0105  
Y 0.0025 -0.0380 -0.0066 -0.0707 0.0804 -0.0337  
Z 0.0001 0.0156 0.0029 0.0306 -0.0356 0.0143  
AT. 156 H X 0.0007 0.0091 -0.0020 0.0217 0.0243 0.0105

Y -0.0025 -0.0380 0.0066 -0.0707 -0.0804 -0.0337  
Z -0.0001 0.0156 -0.0029 0.0306 0.0356 0.0143  
AT. 157 O X -0.0013 0.0005 -0.0004 -0.0008 0.0011 0.0002  
Y 0.0301 0.0047 -0.0131 -0.0061 -0.0030 0.0093  
Z -0.0012 0.0031 -0.0044 0.0007 -0.0003 0.0015  
AT. 158 O X 0.0013 0.0005 0.0004 -0.0008 -0.0011 0.0002  
Y -0.0301 0.0047 0.0131 -0.0061 0.0030 0.0093  
Z 0.0012 0.0031 0.0044 0.0007 0.0003 0.0015  
AT. 159 O X -0.0005 -0.0043 0.0008 -0.0019 0.0013 -0.0022  
Y -0.0097 -0.0006 0.0032 0.0031 -0.0025 -0.0019  
Z -0.0031 -0.0057 -0.0009 -0.0005 0.0000 -0.0038  
AT. 160 O X 0.0005 -0.0043 -0.0008 -0.0019 -0.0013 -0.0022  
Y 0.0097 -0.0006 -0.0032 0.0031 0.0025 -0.0019  
Z 0.0031 -0.0057 0.0009 -0.0005 -0.0000 -0.0038  
AT. 161 H X 0.0136 0.0027 -0.0072 -0.0050 0.0011 0.0050  
Y 0.0357 0.0060 -0.0159 -0.0070 -0.0031 0.0109  
Z -0.0114 0.0004 0.0006 0.0019 -0.0004 -0.0013  
AT. 162 H X -0.0136 0.0027 0.0072 -0.0050 -0.0011 0.0050  
Y -0.0357 0.0060 0.0159 -0.0070 0.0031 0.0109  
Z 0.0114 0.0004 -0.0006 0.0019 0.0004 -0.0013  
AT. 163 H X 0.0025 -0.0083 -0.0011 -0.0033 0.0012 -0.0044  
Y -0.0066 -0.0005 0.0071 0.0034 -0.0022 0.0015  
Z -0.0029 -0.0046 0.0003 -0.0002 0.0000 -0.0023  
AT. 164 H X -0.0025 -0.0083 0.0011 -0.0033 -0.0012 -0.0044  
Y 0.0066 -0.0005 -0.0071 0.0034 0.0022 0.0015  
Z 0.0029 -0.0046 -0.0003 -0.0002 -0.0000 -0.0023  
AT. 165 O X -0.0020 0.0488 -0.0021 -0.0192 0.0104 -0.0079  
Y -0.0059 0.0048 0.0015 -0.0054 0.0086 -0.0006  
Z 0.0006 0.0089 -0.0007 -0.0029 -0.0002 -0.0016  
AT. 166 O X 0.0020 0.0488 0.0021 -0.0192 -0.0104 -0.0079  
Y 0.0059 0.0048 -0.0015 -0.0054 -0.0086 -0.0006  
Z -0.0006 0.0089 0.0007 -0.0029 0.0002 -0.0016



AT.167 H X -0.0029 0.0572 -0.0029 -0.0235 0.0143 -0.0094

Y -0.0057 0.0070 0.0021 -0.0051 0.0063 -0.0010

Z 0.0018 -0.0166 0.0004 0.0071 -0.0057 0.0028

AT.168 H X 0.0029 0.0572 0.0029 -0.0235 -0.0143 -0.0094

Y 0.0057 0.0070 -0.0021 -0.0051 -0.0063 -0.0010

Z -0.0018 -0.0166 -0.0004 0.0071 0.0057 0.0028

AT.169 O X -0.0018 -0.0204 0.0018 0.0059 -0.0003 0.0037

Y 0.0028 0.0267 -0.0017 -0.0070 -0.0030 -0.0023

Z -0.0012 -0.0092 0.0007 0.0023 0.0002 0.0009

AT.170 O X 0.0018 -0.0204 -0.0018 0.0059 0.0003 0.0037

Y -0.0028 0.0267 0.0017 -0.0070 0.0030 -0.0023

Z 0.0012 -0.0092 -0.0007 0.0023 -0.0002 0.0009

AT.171 H X -0.0015 -0.0095 0.0018 0.0029 0.0008 0.0023

Y 0.0054 0.0454 -0.0027 -0.0114 -0.0039 -0.0044

Z 0.0023 0.0133 -0.0006 -0.0030 -0.0016 -0.0017

AT.172 H X 0.0015 -0.0095 -0.0018 0.0029 -0.0008 0.0023

Y -0.0054 0.0454 0.0027 -0.0114 0.0039 -0.0044

Z -0.0023 0.0133 0.0006 -0.0030 0.0016 -0.0017

FREQ(CM\*\*-1) 262.16 264.95 269.52 271.53 281.05 281.26

AT. 1 I X 0.0006 -0.0002 0.0029 0.0030 0.0001 -0.0000

Y 0.0002 -0.0001 0.0018 0.0017 0.0002 -0.0000

Z 0.0002 -0.0002 0.0011 0.0017 0.0002 -0.0002

AT. 2 I X 0.0006 0.0002 0.0029 -0.0030 -0.0001 0.0000

Y 0.0002 0.0001 0.0018 -0.0017 -0.0002 0.0000

Z 0.0002 0.0002 0.0011 -0.0017 -0.0002 0.0002

AT. 3 I X 0.0005 -0.0004 -0.0012 -0.0012 -0.0015 -0.0007

Y -0.0000 -0.0002 -0.0003 -0.0003 -0.0003 -0.0001

Z -0.0001 0.0000 0.0000 -0.0002 0.0000 -0.0001

AT. 4 I X 0.0005 0.0004 -0.0012 0.0012 0.0015 0.0007

Y -0.0000 0.0002 -0.0003 0.0003 0.0003 0.0001

Z -0.0001 -0.0000 0.0000 0.0002 -0.0000 0.0001  
AT. 5 O X 0.0006 0.0063 -0.0211 -0.0221 0.0006 0.0006  
Y 0.0012 0.0042 -0.0448 -0.0462 -0.0056 0.0002  
Z -0.0015 0.0091 -0.0025 -0.0032 0.0035 0.0009  
AT. 6 O X 0.0006 -0.0063 -0.0211 0.0221 -0.0006 -0.0006  
Y 0.0012 -0.0042 -0.0448 0.0462 0.0056 -0.0002  
Z -0.0015 -0.0091 -0.0025 0.0032 -0.0035 -0.0009  
AT. 7 O X -0.0059 -0.0004 -0.0027 -0.0008 0.0024 0.0019  
Y 0.0014 0.0020 0.0045 -0.0027 -0.0040 -0.0000  
Z 0.0117 -0.0015 -0.0008 -0.0013 -0.0059 -0.0018  
AT. 8 O X -0.0059 0.0004 -0.0027 0.0008 -0.0024 -0.0019  
Y 0.0014 -0.0020 0.0045 0.0027 0.0040 0.0000  
Z 0.0117 0.0015 -0.0008 0.0013 0.0059 0.0018  
AT. 9 N X -0.0056 -0.0035 0.0022 0.0009 -0.0003 0.0003  
Y -0.0120 -0.0051 -0.0090 -0.0055 -0.0059 -0.0011  
Z -0.0007 0.0046 0.0022 0.0015 0.0022 0.0007  
AT. 10 N X -0.0056 0.0035 0.0022 -0.0009 0.0003 -0.0003  
Y -0.0120 0.0051 -0.0090 0.0055 0.0059 0.0011  
Z -0.0007 -0.0046 0.0022 -0.0015 -0.0022 -0.0007  
AT. 11 N X -0.0026 0.0002 0.0029 0.0011 0.0159 0.0049  
Y -0.0073 0.0004 0.0092 0.0045 0.0191 0.0057  
Z -0.0006 -0.0032 0.0024 0.0011 0.0094 0.0031  
AT. 12 N X -0.0026 -0.0002 0.0029 -0.0011 -0.0159 -0.0049  
Y -0.0073 -0.0004 0.0092 -0.0045 -0.0191 -0.0057  
Z -0.0006 0.0032 0.0024 -0.0011 -0.0094 -0.0031  
AT. 13 C X -0.0017 0.0003 -0.0090 -0.0093 0.0005 0.0005  
Y -0.0046 0.0001 -0.0305 -0.0293 -0.0061 -0.0004  
Z -0.0003 0.0057 0.0008 -0.0004 0.0035 0.0012  
AT. 14 C X -0.0017 -0.0003 -0.0090 0.0093 -0.0005 -0.0005  
Y -0.0046 -0.0001 -0.0305 0.0293 0.0061 0.0004  
Z -0.0003 -0.0057 0.0008 0.0004 -0.0035 -0.0012  
AT. 15 C X 0.0010 -0.0010 0.0108 0.0110 0.0002 -0.0005

Y -0.0026 -0.0010 -0.0224 -0.0211 -0.0038 -0.0000  
Z -0.0013 0.0065 -0.0158 -0.0188 0.0096 0.0038  
AT. 16 C X 0.0010 0.0010 0.0108 -0.0110 -0.0002 0.0005  
Y -0.0026 0.0010 -0.0224 0.0211 0.0038 0.0000  
Z -0.0013 -0.0065 -0.0158 0.0188 -0.0096 -0.0038  
AT. 17 H X 0.0037 -0.0034 0.0273 0.0276 -0.0004 -0.0015  
Y -0.0003 -0.0038 -0.0043 -0.0016 -0.0104 -0.0026  
Z -0.0031 0.0091 -0.0322 -0.0368 0.0175 0.0066  
AT. 18 H X 0.0037 0.0034 0.0273 -0.0276 0.0004 0.0015  
Y -0.0003 0.0038 -0.0043 0.0016 0.0104 0.0026  
Z -0.0031 -0.0091 -0.0322 0.0368 -0.0175 -0.0066  
AT. 19 H X 0.0027 0.0001 0.0229 0.0225 -0.0000 -0.0012  
Y -0.0058 0.0037 -0.0497 -0.0481 0.0061 0.0033  
Z -0.0020 0.0086 -0.0229 -0.0259 0.0135 0.0049  
AT. 20 H X 0.0027 -0.0001 0.0229 -0.0225 0.0000 0.0012  
Y -0.0058 -0.0037 -0.0497 0.0481 -0.0061 -0.0033  
Z -0.0020 -0.0086 -0.0229 0.0259 -0.0135 -0.0049  
AT. 21 C X -0.0029 0.0005 0.0006 0.0024 0.0069 0.0027  
Y 0.0012 0.0021 0.0080 0.0014 0.0039 0.0019  
Z 0.0045 -0.0026 0.0011 -0.0005 0.0010 0.0009  
AT. 22 C X -0.0029 -0.0005 0.0006 -0.0024 -0.0069 -0.0027  
Y 0.0012 -0.0021 0.0080 -0.0014 -0.0039 -0.0019  
Z 0.0045 0.0026 0.0011 0.0005 -0.0010 -0.0009  
AT. 23 C X -0.0038 -0.0001 -0.0015 0.0014 0.0034 0.0013  
Y 0.0053 0.0050 0.0111 0.0042 0.0011 0.0004  
Z 0.0032 -0.0040 -0.0017 -0.0016 -0.0018 -0.0001  
AT. 24 C X -0.0038 0.0001 -0.0015 -0.0014 -0.0034 -0.0013  
Y 0.0053 -0.0050 0.0111 -0.0042 -0.0011 -0.0004  
Z 0.0032 0.0040 -0.0017 0.0016 0.0018 0.0001  
AT. 25 H X -0.0050 -0.0018 -0.0060 0.0014 0.0009 0.0000  
Y 0.0051 0.0052 0.0113 0.0040 0.0009 0.0003  
Z 0.0033 -0.0074 -0.0091 -0.0015 -0.0040 -0.0008

AT. 26 H X -0.0050 0.0018 -0.0060 -0.0014 -0.0009 -0.0000  
Y 0.0051 -0.0052 0.0113 -0.0040 -0.0009 -0.0003  
Z 0.0033 0.0074 -0.0091 0.0015 0.0040 0.0008

AT. 27 H X -0.0041 0.0004 -0.0016 0.0000 0.0011 0.0005  
Y 0.0060 0.0091 0.0159 0.0067 0.0024 0.0009  
Z 0.0037 -0.0019 0.0012 -0.0006 -0.0008 0.0003

AT. 28 H X -0.0041 -0.0004 -0.0016 -0.0000 -0.0011 -0.0005  
Y 0.0060 -0.0091 0.0159 -0.0067 -0.0024 -0.0009  
Z 0.0037 0.0019 0.0012 0.0006 0.0008 -0.0003

AT. 29 C X 0.0072 0.0012 0.0072 0.0024 -0.0034 -0.0011  
Y -0.0054 -0.0014 0.0018 0.0019 -0.0018 -0.0009  
Z -0.0117 -0.0024 0.0011 0.0055 0.0084 0.0022

AT. 30 C X 0.0072 -0.0012 0.0072 -0.0024 0.0034 0.0011  
Y -0.0054 0.0014 0.0018 -0.0019 0.0018 0.0009  
Z -0.0117 0.0024 0.0011 -0.0055 -0.0084 -0.0022

AT. 31 H X 0.0234 0.0051 0.0151 0.0043 -0.0059 -0.0022  
Y -0.0229 -0.0026 -0.0010 0.0060 0.0078 0.0014  
Z -0.0274 -0.0019 0.0019 0.0126 0.0210 0.0049

AT. 32 H X 0.0234 -0.0051 0.0151 -0.0043 0.0059 0.0022  
Y -0.0229 0.0026 -0.0010 -0.0060 -0.0078 -0.0014  
Z -0.0274 0.0019 0.0019 -0.0126 -0.0210 -0.0049

AT. 33 H X 0.0113 -0.0020 0.0092 0.0015 -0.0052 -0.0014  
Y 0.0212 0.0011 0.0027 -0.0076 -0.0164 -0.0044  
Z -0.0203 -0.0055 0.0024 0.0094 0.0136 0.0036

AT. 34 H X 0.0113 0.0020 0.0092 -0.0015 0.0052 0.0014  
Y 0.0212 -0.0011 0.0027 0.0076 0.0164 0.0044  
Z -0.0203 0.0055 0.0024 -0.0094 -0.0136 -0.0036

AT. 35 C X -0.0050 -0.0007 0.0037 0.0038 0.0009 -0.0001  
Y -0.0069 -0.0010 0.0034 0.0046 0.0044 0.0005  
Z 0.0008 -0.0018 0.0013 0.0011 -0.0023 -0.0003

AT. 36 C X -0.0050 0.0007 0.0037 -0.0038 -0.0009 0.0001  
Y -0.0069 0.0010 0.0034 -0.0046 -0.0044 -0.0005

Z 0.0008 0.0018 0.0013 -0.0011 0.0023 0.0003  
AT. 37 C X -0.0038 -0.0002 0.0068 0.0052 0.0074 0.0016  
Y 0.0059 0.0035 0.0129 0.0114 0.0009 -0.0007  
Z 0.0185 0.0040 0.0134 0.0115 -0.0041 -0.0015  
AT. 38 C X -0.0038 0.0002 0.0068 -0.0052 -0.0074 -0.0016  
Y 0.0059 -0.0035 0.0129 -0.0114 -0.0009 0.0007  
Z 0.0185 -0.0040 0.0134 -0.0115 0.0041 0.0015  
AT. 39 H X 0.0287 0.0056 0.0240 0.0207 -0.0079 -0.0040  
Y 0.0199 0.0047 0.0264 0.0227 -0.0020 -0.0024  
Z 0.0342 0.0074 0.0189 0.0170 -0.0131 -0.0046  
AT. 40 H X 0.0287 -0.0056 0.0240 -0.0207 0.0079 0.0040  
Y 0.0199 -0.0047 0.0264 -0.0227 0.0020 0.0024  
Z 0.0342 -0.0074 0.0189 -0.0170 0.0131 0.0046  
AT. 41 H X -0.0339 -0.0056 -0.0103 -0.0096 0.0233 0.0076  
Y 0.0137 0.0054 0.0162 0.0153 -0.0144 -0.0058  
Z 0.0437 0.0084 0.0283 0.0239 -0.0092 -0.0040  
AT. 42 H X -0.0339 0.0056 -0.0103 0.0096 -0.0233 -0.0076  
Y 0.0137 -0.0054 0.0162 -0.0153 0.0144 0.0058  
Z 0.0437 -0.0084 0.0283 -0.0239 0.0092 0.0040  
AT. 43 C X 0.0067 -0.0007 -0.0122 -0.0148 -0.0030 -0.0002  
Y -0.0097 -0.0026 0.0042 0.0035 0.0107 0.0028  
Z 0.0018 -0.0045 -0.0103 -0.0136 -0.0029 0.0002  
AT. 44 C X 0.0067 0.0007 -0.0122 0.0148 0.0030 0.0002  
Y -0.0097 0.0026 0.0042 -0.0035 -0.0107 -0.0028  
Z 0.0018 0.0045 -0.0103 0.0136 0.0029 -0.0002  
AT. 45 H X 0.0142 -0.0033 -0.0301 -0.0334 -0.0235 -0.0060  
Y -0.0204 0.0012 0.0226 0.0258 0.0205 0.0052  
Z 0.0073 -0.0061 -0.0154 -0.0220 0.0020 0.0018  
AT. 46 H X 0.0142 0.0033 -0.0301 0.0334 0.0235 0.0060  
Y -0.0204 -0.0012 0.0226 -0.0258 -0.0205 -0.0052  
Z 0.0073 0.0061 -0.0154 0.0220 -0.0020 -0.0018  
AT. 47 H X 0.0077 -0.0039 -0.0186 -0.0214 -0.0020 0.0002

Y 0.0014 -0.0067 -0.0161 -0.0201 -0.0019 -0.0002  
Z 0.0122 -0.0042 -0.0225 -0.0290 -0.0174 -0.0033  
AT. 48 H X 0.0077 0.0039 -0.0186 0.0214 0.0020 -0.0002  
Y 0.0014 0.0067 -0.0161 0.0201 0.0019 0.0002  
Z 0.0122 0.0042 -0.0225 0.0290 0.0174 0.0033  
AT. 49 C X -0.0044 0.0009 0.0021 0.0012 -0.0003 0.0000  
Y -0.0053 -0.0007 0.0024 0.0032 0.0056 0.0012  
Z -0.0046 -0.0002 -0.0034 -0.0034 -0.0070 -0.0013  
AT. 50 C X -0.0044 -0.0009 0.0021 -0.0012 0.0003 -0.0000  
Y -0.0053 0.0007 0.0024 -0.0032 -0.0056 -0.0012  
Z -0.0046 0.0002 -0.0034 0.0034 0.0070 0.0013  
AT. 51 C X -0.0097 -0.0014 0.0024 0.0004 0.0032 0.0011  
Y -0.0041 -0.0027 -0.0029 0.0019 -0.0052 -0.0016  
Z -0.0034 0.0048 0.0002 -0.0020 0.0010 0.0006  
AT. 52 C X -0.0097 0.0014 0.0024 -0.0004 -0.0032 -0.0011  
Y -0.0041 0.0027 -0.0029 -0.0019 0.0052 0.0016  
Z -0.0034 -0.0048 0.0002 0.0020 -0.0010 -0.0006  
AT. 53 H X -0.0079 -0.0004 0.0029 0.0058 -0.0089 -0.0025  
Y -0.0074 -0.0024 -0.0053 0.0058 -0.0193 -0.0056  
Z -0.0111 0.0037 -0.0045 -0.0082 0.0065 0.0025  
AT. 54 H X -0.0079 0.0004 0.0029 -0.0058 0.0089 0.0025  
Y -0.0074 0.0024 -0.0053 -0.0058 0.0193 0.0056  
Z -0.0111 -0.0037 -0.0045 0.0082 -0.0065 -0.0025  
AT. 55 H X -0.0128 -0.0009 0.0025 -0.0056 0.0188 0.0057  
Y -0.0002 -0.0004 -0.0004 0.0051 -0.0066 -0.0025  
Z -0.0010 0.0079 0.0033 -0.0021 0.0096 0.0026  
AT. 56 H X -0.0128 0.0009 0.0025 0.0056 -0.0188 -0.0057  
Y -0.0002 0.0004 -0.0004 -0.0051 0.0066 0.0025  
Z -0.0010 -0.0079 0.0033 0.0021 -0.0096 -0.0026  
AT. 57 C X 0.0150 0.0020 -0.0187 -0.0107 -0.0088 -0.0017  
Y 0.0148 -0.0005 -0.0283 -0.0190 -0.0119 -0.0026  
Z -0.0050 -0.0077 -0.0008 -0.0052 -0.0079 -0.0020

AT. 58 C X 0.0150 -0.0020 -0.0187 0.0107 0.0088 0.0017  
Y 0.0148 0.0005 -0.0283 0.0190 0.0119 0.0026  
Z -0.0050 0.0077 -0.0008 0.0052 0.0079 0.0020

AT. 59 H X 0.0454 -0.0018 -0.0492 -0.0311 -0.0204 -0.0033  
Y 0.0892 -0.1459 -0.0127 -0.0341 0.0021 0.0036  
Z 0.1267 -0.2261 0.0011 -0.0418 0.0049 0.0062

AT. 60 H X 0.0454 0.0018 -0.0492 0.0311 0.0204 0.0033  
Y 0.0892 0.1459 -0.0127 0.0341 -0.0021 -0.0036  
Z 0.1267 0.2261 0.0011 0.0418 -0.0049 -0.0062

AT. 61 H X -0.0707 0.1513 -0.0373 -0.0008 -0.0308 -0.0105  
Y -0.0903 0.2088 -0.0531 0.0013 -0.0343 -0.0123  
Z -0.0187 0.0034 -0.0030 -0.0078 -0.0139 -0.0040

AT. 62 H X -0.0707 -0.1513 -0.0373 0.0008 0.0308 0.0105  
Y -0.0903 -0.2088 -0.0531 -0.0013 0.0343 0.0123  
Z -0.0187 -0.0034 -0.0030 0.0078 0.0139 0.0040

AT. 63 H X 0.0949 -0.1472 0.0059 -0.0165 0.0144 0.0071  
Y 0.0737 -0.0709 -0.0538 -0.0506 -0.0205 -0.0024  
Z -0.1316 0.1954 -0.0026 0.0274 -0.0229 -0.0107

AT. 64 H X 0.0949 0.1472 0.0059 0.0165 -0.0144 -0.0071  
Y 0.0737 0.0709 -0.0538 0.0506 0.0205 0.0024  
Z -0.1316 -0.1954 -0.0026 -0.0274 0.0229 0.0107

AT. 65 C X 0.0223 0.0041 0.0105 0.0094 -0.0138 -0.0045  
Y 0.0448 0.0151 0.0001 -0.0049 -0.0125 -0.0029  
Z -0.0097 -0.0057 0.0045 0.0075 -0.0082 -0.0029

AT. 66 C X 0.0223 -0.0041 0.0105 -0.0094 0.0138 0.0045  
Y 0.0448 -0.0151 0.0001 0.0049 0.0125 0.0029  
Z -0.0097 0.0057 0.0045 -0.0075 0.0082 0.0029

AT. 67 H X 0.0792 0.0144 0.0173 0.0088 0.0217 0.0053  
Y -0.0544 -0.0134 0.0021 0.0189 -0.1936 -0.0551  
Z 0.0351 0.0123 -0.0032 -0.0145 0.1318 0.0378

AT. 68 H X 0.0792 -0.0144 0.0173 -0.0088 -0.0217 -0.0053  
Y -0.0544 0.0134 0.0021 -0.0189 0.1936 0.0551

Z 0.0351 -0.0123 -0.0032 0.0145 -0.1318 -0.0378  
AT. 69 H X 0.1110 0.0301 0.0031 -0.0172 0.1120 0.0331  
Y 0.1611 0.0456 -0.0029 -0.0319 0.1621 0.0481  
Z -0.0090 -0.0108 0.0149 0.0198 0.0065 -0.0003  
AT. 70 H X 0.1110 -0.0301 0.0031 0.0172 -0.1120 -0.0331  
Y 0.1611 -0.0456 -0.0029 0.0319 -0.1621 -0.0481  
Z -0.0090 0.0108 0.0149 -0.0198 -0.0065 0.0003  
AT. 71 H X -0.0912 -0.0316 0.0209 0.0449 -0.1788 -0.0538  
Y 0.0743 0.0218 -0.0011 -0.0097 -0.0303 -0.0071  
Z -0.0545 -0.0232 0.0105 0.0275 -0.1550 -0.0453  
AT. 72 H X -0.0912 0.0316 0.0209 -0.0449 0.1788 0.0538  
Y 0.0743 -0.0218 -0.0011 0.0097 0.0303 0.0071  
Z -0.0545 0.0232 0.0105 -0.0275 0.1550 0.0453  
AT. 73 C X -0.0228 -0.0042 0.0056 0.0071 0.0074 0.0014  
Y -0.0284 -0.0081 0.0084 0.0116 0.0177 0.0035  
Z -0.0009 0.0001 -0.0014 -0.0018 -0.0038 -0.0004  
AT. 74 C X -0.0228 0.0042 0.0056 -0.0071 -0.0074 -0.0014  
Y -0.0284 0.0081 0.0084 -0.0116 -0.0177 -0.0035  
Z -0.0009 -0.0001 -0.0014 0.0018 0.0038 0.0004  
AT. 75 H X -0.0407 -0.0094 0.0064 0.0108 0.0134 0.0024  
Y -0.0384 -0.0099 0.0126 0.0175 0.0257 0.0052  
Z -0.0269 -0.0058 0.0047 0.0086 0.0108 0.0024  
AT. 76 H X -0.0407 0.0094 0.0064 -0.0108 -0.0134 -0.0024  
Y -0.0384 0.0099 0.0126 -0.0175 -0.0257 -0.0052  
Z -0.0269 0.0058 0.0047 -0.0086 -0.0108 -0.0024  
AT. 77 H X -0.0323 -0.0040 0.0058 0.0076 0.0101 0.0021  
Y -0.0463 -0.0143 0.0129 0.0204 0.0287 0.0053  
Z 0.0247 0.0057 -0.0059 -0.0106 -0.0166 -0.0029  
AT. 78 H X -0.0323 0.0040 0.0058 -0.0076 -0.0101 -0.0021  
Y -0.0463 0.0143 0.0129 -0.0204 -0.0287 -0.0053  
Z 0.0247 -0.0057 -0.0059 0.0106 0.0166 0.0029  
AT. 79 I X -0.0003 0.0001 0.0002 0.0001 -0.0002 0.0003



Y -0.0000 -0.0000 -0.0001 0.0000 0.0002 -0.0003  
Z 0.0001 0.0000 0.0000 -0.0002 0.0000 -0.0004  
AT. 80 I X -0.0003 -0.0001 0.0002 -0.0001 0.0002 -0.0003  
Y -0.0000 0.0000 -0.0001 -0.0000 -0.0002 0.0003  
Z 0.0001 -0.0000 0.0000 0.0002 -0.0000 0.0004  
AT. 81 I X -0.0001 -0.0001 0.0000 0.0001 -0.0002 0.0007  
Y -0.0006 -0.0001 0.0000 0.0001 -0.0002 -0.0003  
Z 0.0001 0.0001 0.0000 -0.0000 -0.0000 0.0000  
AT. 82 I X -0.0001 0.0001 0.0000 -0.0001 0.0002 -0.0007  
Y -0.0006 0.0001 0.0000 -0.0001 0.0002 0.0003  
Z 0.0001 -0.0001 0.0000 0.0000 0.0000 -0.0000  
AT. 83 O X -0.0000 -0.0001 -0.0002 0.0004 0.0003 0.0003  
Y -0.0018 0.0024 0.0004 0.0002 -0.0005 -0.0007  
Z 0.0001 -0.0005 -0.0008 -0.0004 -0.0001 -0.0003  
AT. 84 O X -0.0000 0.0001 -0.0002 -0.0004 -0.0003 -0.0003  
Y -0.0018 -0.0024 0.0004 -0.0002 0.0005 0.0007  
Z 0.0001 0.0005 -0.0008 0.0004 0.0001 0.0003  
AT. 85 O X -0.0004 0.0006 -0.0003 -0.0011 0.0021 -0.0072  
Y 0.0003 -0.0001 0.0008 0.0003 -0.0006 0.0010  
Z 0.0003 -0.0000 0.0022 0.0013 0.0035 -0.0076  
AT. 86 O X -0.0004 -0.0006 -0.0003 0.0011 -0.0021 0.0072  
Y 0.0003 0.0001 0.0008 -0.0003 0.0006 -0.0010  
Z 0.0003 0.0000 0.0022 -0.0013 -0.0035 0.0076  
AT. 87 N X -0.0003 0.0002 -0.0006 -0.0004 0.0004 -0.0015  
Y 0.0004 -0.0017 0.0003 0.0000 0.0034 -0.0082  
Z 0.0001 -0.0003 -0.0003 0.0001 -0.0003 0.0012  
AT. 88 N X -0.0003 -0.0002 -0.0006 0.0004 -0.0004 0.0015  
Y 0.0004 0.0017 0.0003 -0.0000 -0.0034 0.0082  
Z 0.0001 0.0003 -0.0003 -0.0001 0.0003 -0.0012  
AT. 89 N X -0.0002 0.0005 0.0011 0.0000 0.0013 -0.0046  
Y 0.0003 -0.0014 -0.0030 0.0005 -0.0079 0.0240  
Z 0.0002 -0.0010 -0.0012 0.0013 -0.0043 0.0154

AT. 90 N X -0.0002 -0.0005 0.0011 -0.0000 -0.0013 0.0046  
Y 0.0003 0.0014 -0.0030 -0.0005 0.0079 -0.0240  
Z 0.0002 0.0010 -0.0012 -0.0013 0.0043 -0.0154

AT. 91 C X -0.0002 0.0001 -0.0003 -0.0001 0.0007 -0.0017  
Y -0.0005 -0.0000 0.0002 0.0003 0.0008 -0.0021  
Z 0.0000 -0.0001 -0.0005 0.0001 -0.0009 0.0026

AT. 92 C X -0.0002 -0.0001 -0.0003 0.0001 -0.0007 0.0017  
Y -0.0005 0.0000 0.0002 -0.0003 -0.0008 0.0021  
Z 0.0000 0.0001 -0.0005 -0.0001 0.0009 -0.0026

AT. 93 C X -0.0008 0.0008 -0.0001 0.0006 -0.0009 0.0022  
Y -0.0006 0.0004 -0.0002 0.0008 -0.0008 0.0029  
Z -0.0007 0.0011 -0.0003 0.0013 -0.0045 0.0118

AT. 94 C X -0.0008 -0.0008 -0.0001 -0.0006 0.0009 -0.0022  
Y -0.0006 -0.0004 -0.0002 -0.0008 0.0008 -0.0029  
Z -0.0007 -0.0011 -0.0003 -0.0013 0.0045 -0.0118

AT. 95 H X -0.0008 0.0009 -0.0003 0.0009 -0.0010 0.0040  
Y -0.0001 -0.0005 0.0001 -0.0001 0.0018 -0.0043  
Z -0.0017 0.0025 -0.0007 0.0026 -0.0088 0.0227

AT. 96 H X -0.0008 -0.0009 -0.0003 -0.0009 0.0010 -0.0040  
Y -0.0001 0.0005 0.0001 0.0001 -0.0018 0.0043  
Z -0.0017 -0.0025 -0.0007 -0.0026 0.0088 -0.0227

AT. 97 H X -0.0013 0.0015 -0.0000 0.0011 -0.0029 0.0069  
Y -0.0018 0.0023 -0.0006 0.0027 -0.0061 0.0167  
Z -0.0008 0.0013 -0.0004 0.0016 -0.0051 0.0136

AT. 98 H X -0.0013 -0.0015 -0.0000 -0.0011 0.0029 -0.0069  
Y -0.0018 -0.0023 -0.0006 -0.0027 0.0061 -0.0167  
Z -0.0008 -0.0013 -0.0004 -0.0016 0.0051 -0.0136

AT. 99 C X -0.0003 0.0007 0.0000 -0.0006 0.0011 -0.0045  
Y 0.0002 -0.0004 -0.0005 -0.0000 -0.0021 0.0049  
Z 0.0000 -0.0004 0.0004 0.0012 -0.0010 0.0048

AT. 100 C X -0.0003 -0.0007 0.0000 0.0006 -0.0011 0.0045  
Y 0.0002 0.0004 -0.0005 0.0000 0.0021 -0.0049

Z 0.0000 0.0004 0.0004 -0.0012 0.0010 -0.0048  
AT. 101 C X -0.0001 0.0004 0.0001 -0.0006 0.0015 -0.0053  
Y -0.0001 0.0000 0.0001 -0.0011 0.0019 -0.0086  
Z -0.0002 -0.0001 0.0002 0.0012 -0.0020 0.0078  
AT. 102 C X -0.0001 -0.0004 0.0001 0.0006 -0.0015 0.0053  
Y -0.0001 -0.0000 0.0001 0.0011 -0.0019 0.0086  
Z -0.0002 0.0001 0.0002 -0.0012 0.0020 -0.0078  
AT. 103 H X 0.0002 0.0003 -0.0001 -0.0007 0.0011 -0.0039  
Y -0.0002 0.0001 0.0002 -0.0010 0.0021 -0.0092  
Z -0.0002 0.0001 -0.0002 0.0016 -0.0041 0.0149  
AT. 104 H X 0.0002 -0.0003 -0.0001 0.0007 -0.0011 0.0039  
Y -0.0002 -0.0001 0.0002 0.0010 -0.0021 0.0092  
Z -0.0002 -0.0001 -0.0002 -0.0016 0.0041 -0.0149  
AT. 105 H X 0.0000 -0.0000 0.0003 -0.0004 0.0020 -0.0058  
Y -0.0002 -0.0001 0.0004 -0.0017 0.0042 -0.0168  
Z -0.0002 -0.0003 0.0004 0.0011 -0.0011 0.0046  
AT. 106 H X 0.0000 0.0000 0.0003 0.0004 -0.0020 0.0058  
Y -0.0002 0.0001 0.0004 0.0017 -0.0042 0.0168  
Z -0.0002 0.0003 0.0004 -0.0011 0.0011 -0.0046  
AT. 107 C X -0.0001 -0.0007 -0.0007 0.0009 -0.0012 0.0052  
Y 0.0001 -0.0003 -0.0002 -0.0007 0.0028 -0.0091  
Z 0.0001 -0.0009 -0.0005 0.0016 -0.0024 0.0098  
AT. 108 C X -0.0001 0.0007 -0.0007 -0.0009 0.0012 -0.0052  
Y 0.0001 0.0003 -0.0002 0.0007 -0.0028 0.0091  
Z 0.0001 0.0009 -0.0005 -0.0016 0.0024 -0.0098  
AT. 109 H X 0.0000 -0.0022 -0.0014 0.0027 -0.0039 0.0171  
Y -0.0006 0.0003 -0.0012 0.0003 -0.0003 0.0009  
Z -0.0010 0.0007 -0.0020 0.0030 -0.0069 0.0234  
AT. 110 H X 0.0000 0.0022 -0.0014 -0.0027 0.0039 -0.0171  
Y -0.0006 -0.0003 -0.0012 -0.0003 0.0003 -0.0009  
Z -0.0010 -0.0007 -0.0020 -0.0030 0.0069 -0.0234  
AT. 111 H X -0.0001 -0.0003 -0.0008 0.0003 -0.0006 0.0027

Y 0.0005 0.0002 0.0012 -0.0030 0.0079 -0.0279  
Z 0.0000 -0.0014 -0.0007 0.0027 -0.0041 0.0162  
AT. 112 H X -0.0001 0.0003 -0.0008 -0.0003 0.0006 -0.0027  
Y 0.0005 -0.0002 0.0012 0.0030 -0.0079 0.0279  
Z 0.0000 0.0014 -0.0007 -0.0027 0.0041 -0.0162  
AT. 113 C X -0.0002 0.0001 0.0001 0.0001 -0.0006 0.0014  
Y 0.0000 -0.0006 -0.0004 0.0006 -0.0006 0.0024  
Z 0.0002 -0.0004 0.0001 0.0001 0.0015 -0.0035  
AT. 114 C X -0.0002 -0.0001 0.0001 -0.0001 0.0006 -0.0014  
Y 0.0000 0.0006 -0.0004 -0.0006 0.0006 -0.0024  
Z 0.0002 0.0004 0.0001 -0.0001 -0.0015 0.0035  
AT. 115 C X -0.0004 0.0009 0.0007 -0.0004 0.0008 -0.0035  
Y -0.0000 0.0001 -0.0005 -0.0007 0.0002 -0.0027  
Z 0.0001 0.0005 -0.0000 -0.0013 0.0025 -0.0092  
AT. 116 C X -0.0004 -0.0009 0.0007 0.0004 -0.0008 0.0035  
Y -0.0000 -0.0001 -0.0005 0.0007 -0.0002 0.0027  
Z 0.0001 -0.0005 -0.0000 0.0013 -0.0025 0.0092  
AT. 117 H X -0.0000 -0.0010 -0.0004 0.0020 -0.0045 0.0168  
Y -0.0000 0.0017 0.0005 -0.0029 0.0044 -0.0196  
Z -0.0003 0.0021 0.0008 -0.0033 0.0070 -0.0265  
AT. 118 H X -0.0000 0.0010 -0.0004 -0.0020 0.0045 -0.0168  
Y -0.0000 -0.0017 0.0005 0.0029 -0.0044 0.0196  
Z -0.0003 -0.0021 0.0008 0.0033 -0.0070 0.0265  
AT. 119 H X -0.0008 0.0036 0.0028 -0.0040 0.0099 -0.0374  
Y -0.0002 0.0005 0.0006 -0.0010 0.0039 -0.0139  
Z -0.0000 0.0016 -0.0000 -0.0029 0.0039 -0.0169  
AT. 120 H X -0.0008 -0.0036 0.0028 0.0040 -0.0099 0.0374  
Y -0.0002 -0.0005 0.0006 0.0010 -0.0039 0.0139  
Z -0.0000 -0.0016 -0.0000 0.0029 -0.0039 0.0169  
AT. 121 C X 0.0009 -0.0020 0.0008 0.0012 -0.0010 0.0046  
Y 0.0001 -0.0006 -0.0011 0.0003 -0.0034 0.0097  
Z -0.0010 0.0019 -0.0009 0.0002 -0.0020 0.0054

AT.122 C X 0.0009 0.0020 0.0008 -0.0012 0.0010 -0.0046  
Y 0.0001 0.0006 -0.0011 -0.0003 0.0034 -0.0097  
Z -0.0010 -0.0019 -0.0009 -0.0002 0.0020 -0.0054

AT.123 H X 0.0032 -0.0069 0.0008 0.0033 -0.0053 0.0234  
Y 0.0017 -0.0036 0.0008 0.0011 -0.0010 0.0057  
Z -0.0023 0.0043 -0.0029 -0.0002 -0.0053 0.0128

AT.124 H X 0.0032 0.0069 0.0008 -0.0033 0.0053 -0.0234  
Y 0.0017 0.0036 0.0008 -0.0011 0.0010 -0.0057  
Z -0.0023 -0.0043 -0.0029 0.0002 0.0053 -0.0128

AT.125 H X 0.0006 -0.0011 0.0012 0.0004 0.0007 -0.0016  
Y -0.0026 0.0042 -0.0028 -0.0009 -0.0039 0.0066  
Z -0.0027 0.0055 -0.0013 -0.0014 -0.0002 -0.0038

AT.126 H X 0.0006 0.0011 0.0012 -0.0004 -0.0007 0.0016  
Y -0.0026 -0.0042 -0.0028 0.0009 0.0039 -0.0066  
Z -0.0027 -0.0055 -0.0013 0.0014 0.0002 0.0038

AT.127 C X -0.0003 0.0003 -0.0000 0.0002 -0.0004 0.0014  
Y 0.0005 -0.0013 -0.0002 0.0000 -0.0003 0.0011  
Z 0.0002 -0.0005 0.0007 -0.0002 0.0023 -0.0065

AT.128 C X -0.0003 -0.0003 -0.0000 -0.0002 0.0004 -0.0014  
Y 0.0005 0.0013 -0.0002 -0.0000 0.0003 -0.0011  
Z 0.0002 0.0005 0.0007 0.0002 -0.0023 0.0065

AT.129 C X -0.0004 0.0009 -0.0004 -0.0008 0.0010 -0.0033  
Y 0.0005 -0.0009 0.0004 0.0002 0.0017 -0.0038  
Z 0.0002 -0.0009 -0.0003 -0.0004 0.0005 -0.0020

AT.130 C X -0.0004 -0.0009 -0.0004 0.0008 -0.0010 0.0033  
Y 0.0005 0.0009 0.0004 -0.0002 -0.0017 0.0038  
Z 0.0002 0.0009 -0.0003 0.0004 -0.0005 0.0020

AT.131 H X -0.0005 0.0002 -0.0009 -0.0006 -0.0008 0.0016  
Y 0.0009 -0.0005 0.0015 0.0001 0.0062 -0.0152  
Z 0.0002 -0.0016 -0.0005 -0.0000 -0.0002 0.0000

AT.132 H X -0.0005 -0.0002 -0.0009 0.0006 0.0008 -0.0016  
Y 0.0009 0.0005 0.0015 -0.0001 -0.0062 0.0152

Z 0.0002 0.0016 -0.0005 0.0000 0.0002 -0.0000  
AT. 133 H X -0.0002 0.0021 0.0002 -0.0009 0.0036 -0.0104  
Y 0.0005 -0.0007 0.0005 0.0006 0.0004 -0.0006  
Z 0.0000 -0.0012 -0.0010 -0.0001 -0.0028 0.0062  
AT. 134 H X -0.0002 -0.0021 0.0002 0.0009 -0.0036 0.0104  
Y 0.0005 0.0007 0.0005 -0.0006 -0.0004 0.0006  
Z 0.0000 0.0012 -0.0010 0.0001 0.0028 -0.0062  
AT. 135 C X 0.0005 -0.0010 0.0009 -0.0002 0.0004 -0.0052  
Y -0.0013 0.0024 0.0006 0.0010 -0.0012 0.0093  
Z 0.0006 -0.0006 0.0020 -0.0003 0.0032 -0.0108  
AT. 136 C X 0.0005 0.0010 0.0009 0.0002 -0.0004 0.0052  
Y -0.0013 -0.0024 0.0006 -0.0010 0.0012 -0.0093  
Z 0.0006 0.0006 0.0020 0.0003 -0.0032 0.0108  
AT. 137 H X 0.0016 -0.0025 0.0055 0.0038 -0.0007 -0.0051  
Y -0.0019 0.0046 0.0068 0.0078 -0.0055 0.0274  
Z -0.0008 0.0038 0.0110 0.0100 -0.0037 0.0199  
AT. 138 H X 0.0016 0.0025 0.0055 -0.0038 0.0007 0.0051  
Y -0.0019 -0.0046 0.0068 -0.0078 0.0055 -0.0274  
Z -0.0008 -0.0038 0.0110 -0.0100 0.0037 -0.0199  
AT. 139 H X 0.0001 -0.0002 0.0042 0.0052 -0.0031 0.0097  
Y -0.0009 0.0001 -0.0103 -0.0112 0.0065 -0.0202  
Z 0.0011 -0.0010 0.0003 -0.0043 0.0056 -0.0222  
AT. 140 H X 0.0001 0.0002 0.0042 -0.0052 0.0031 -0.0097  
Y -0.0009 -0.0001 -0.0103 0.0112 -0.0065 0.0202  
Z 0.0011 0.0010 0.0003 0.0043 -0.0056 0.0222  
AT. 141 H X 0.0007 -0.0018 -0.0050 -0.0089 0.0060 -0.0267  
Y -0.0023 0.0056 0.0066 0.0071 -0.0047 0.0269  
Z 0.0018 -0.0042 -0.0067 -0.0103 0.0092 -0.0382  
AT. 142 H X 0.0007 0.0018 -0.0050 0.0089 -0.0060 0.0267  
Y -0.0023 -0.0056 0.0066 -0.0071 0.0047 -0.0269  
Z 0.0018 0.0042 -0.0067 0.0103 -0.0092 0.0382  
AT. 143 C X -0.0003 -0.0002 -0.0012 0.0014 -0.0021 0.0094

Y -0.0013 0.0035 -0.0004 -0.0047 0.0052 -0.0192  
Z 0.0008 -0.0011 0.0025 -0.0007 0.0033 -0.0127  
AT. 144 C X -0.0003 0.0002 -0.0012 -0.0014 0.0021 -0.0094  
Y -0.0013 -0.0035 -0.0004 0.0047 -0.0052 0.0192  
Z 0.0008 0.0011 0.0025 0.0007 -0.0033 0.0127  
AT. 145 H X 0.0019 -0.0052 0.0020 0.0017 0.0161 -0.0508  
Y 0.0007 -0.0004 0.0066 -0.0085 0.0493 -0.1716  
Z -0.0009 0.0019 -0.0041 0.0034 -0.0394 0.1356  
AT. 146 H X 0.0019 0.0052 0.0020 -0.0017 -0.0161 0.0508  
Y 0.0007 0.0004 0.0066 0.0085 -0.0493 0.1716  
Z -0.0009 -0.0019 -0.0041 -0.0034 0.0394 -0.1356  
AT. 147 H X 0.0012 -0.0033 0.0024 0.0006 0.0143 -0.0492  
Y -0.0053 0.0120 -0.0100 -0.0018 -0.0529 0.1809  
Z 0.0009 -0.0010 0.0026 -0.0003 -0.0043 0.0103  
AT. 148 H X 0.0012 0.0033 0.0024 -0.0006 -0.0143 0.0492  
Y -0.0053 -0.0120 -0.0100 0.0018 0.0529 -0.1809  
Z 0.0009 0.0010 0.0026 0.0003 0.0043 -0.0103  
AT. 149 H X -0.0036 0.0072 -0.0082 0.0011 -0.0352 0.1247  
Y -0.0013 0.0039 0.0020 -0.0078 0.0242 -0.0853  
Z 0.0025 -0.0042 0.0100 -0.0060 0.0526 -0.1844  
AT. 150 H X -0.0036 -0.0072 -0.0082 -0.0011 0.0352 -0.1247  
Y -0.0013 -0.0039 0.0020 0.0078 -0.0242 0.0853  
Z 0.0025 0.0042 0.0100 0.0060 -0.0526 0.1844  
AT. 151 C X -0.0007 0.0013 -0.0004 -0.0007 -0.0000 -0.0007  
Y 0.0016 -0.0046 0.0002 0.0032 -0.0027 0.0113  
Z 0.0001 -0.0006 0.0001 0.0004 0.0015 -0.0029  
AT. 152 C X -0.0007 -0.0013 -0.0004 0.0007 0.0000 0.0007  
Y 0.0016 0.0046 0.0002 -0.0032 0.0027 -0.0113  
Z 0.0001 0.0006 0.0001 -0.0004 -0.0015 0.0029  
AT. 153 H X -0.0007 0.0018 -0.0009 -0.0025 0.0008 -0.0046  
Y 0.0024 -0.0068 0.0002 0.0047 -0.0044 0.0178  
Z 0.0015 -0.0045 0.0002 0.0033 -0.0017 0.0097

AT.154 H X -0.0007 -0.0018 -0.0009 0.0025 -0.0008 0.0046  
Y 0.0024 0.0068 0.0002 -0.0047 0.0044 -0.0178  
Z 0.0015 0.0045 0.0002 -0.0033 0.0017 -0.0097

AT.155 H X -0.0012 0.0025 -0.0007 -0.0008 -0.0004 0.0005  
Y 0.0026 -0.0076 0.0002 0.0058 -0.0055 0.0225  
Z -0.0011 0.0030 -0.0002 -0.0024 0.0043 -0.0145

AT.156 H X -0.0012 -0.0025 -0.0007 0.0008 0.0004 -0.0005  
Y 0.0026 0.0076 0.0002 -0.0058 0.0055 -0.0225  
Z -0.0011 -0.0030 -0.0002 0.0024 -0.0043 0.0145

AT.157 O X 0.0009 0.0001 -0.0015 0.0001 -0.0003 -0.0004  
Y 0.0025 -0.0095 0.0742 0.0737 0.0063 -0.0022  
Z 0.0001 -0.0003 0.0048 0.0075 -0.0004 0.0007

AT.158 O X 0.0009 -0.0001 -0.0015 -0.0001 0.0003 0.0004  
Y 0.0025 0.0095 0.0742 -0.0737 -0.0063 0.0022  
Z 0.0001 0.0003 0.0048 -0.0075 0.0004 -0.0007

AT.159 O X -0.0021 0.0000 -0.0034 -0.0078 -0.0013 0.0011  
Y -0.0001 0.0024 -0.0168 -0.0162 -0.0004 -0.0032  
Z -0.0054 0.0005 -0.0060 -0.0139 -0.0025 0.0025

AT.160 O X -0.0021 -0.0000 -0.0034 0.0078 0.0013 -0.0011  
Y -0.0001 -0.0024 -0.0168 0.0162 0.0004 0.0032  
Z -0.0054 -0.0005 -0.0060 0.0139 0.0025 -0.0025

AT.161 H X 0.0024 -0.0041 0.0390 0.0414 0.0037 0.0005  
Y 0.0029 -0.0116 0.0870 0.0862 0.0071 -0.0023  
Z -0.0012 0.0038 -0.0116 -0.0081 -0.0001 0.0016

AT.162 H X 0.0024 0.0041 0.0390 -0.0414 -0.0037 -0.0005  
Y 0.0029 0.0116 0.0870 -0.0862 -0.0071 0.0023  
Z -0.0012 -0.0038 -0.0116 0.0081 0.0001 -0.0016

AT.163 H X -0.0062 -0.0011 0.0024 -0.0077 -0.0026 0.0036  
Y 0.0032 0.0020 -0.0139 -0.0117 -0.0001 0.0081  
Z -0.0036 0.0005 -0.0066 -0.0124 -0.0020 0.0045

AT.164 H X -0.0062 0.0011 0.0024 0.0077 0.0026 -0.0036  
Y 0.0032 -0.0020 -0.0139 0.0117 0.0001 -0.0081



Z -0.0036 -0.0005 -0.0066 0.0124 0.0020 -0.0045  
AT. 165 O X 0.0024 -0.0025 -0.0010 0.0011 0.0020 0.0045  
Y 0.0023 -0.0010 0.0015 -0.0018 0.0001 -0.0025  
Z 0.0000 -0.0002 -0.0007 0.0010 0.0006 0.0010  
AT. 166 O X 0.0024 0.0025 -0.0010 -0.0011 -0.0020 -0.0045  
Y 0.0023 0.0010 0.0015 0.0018 -0.0001 0.0025  
Z 0.0000 0.0002 -0.0007 -0.0010 -0.0006 -0.0010  
AT. 167 H X 0.0033 -0.0031 -0.0007 0.0007 0.0023 0.0043  
Y 0.0013 -0.0006 0.0012 -0.0013 -0.0002 -0.0010  
Z -0.0006 0.0008 -0.0010 0.0010 0.0000 -0.0009  
AT. 168 H X 0.0033 0.0031 -0.0007 -0.0007 -0.0023 -0.0043  
Y 0.0013 0.0006 0.0012 0.0013 0.0002 0.0010  
Z -0.0006 -0.0008 -0.0010 -0.0010 -0.0000 0.0009  
AT. 169 O X 0.0017 0.0004 0.0003 -0.0007 0.0009 -0.0030  
Y -0.0001 -0.0011 -0.0031 0.0023 0.0006 0.0050  
Z 0.0002 0.0004 0.0006 -0.0002 0.0002 -0.0019  
AT. 170 O X 0.0017 -0.0004 0.0003 0.0007 -0.0009 0.0030  
Y -0.0001 0.0011 -0.0031 -0.0023 -0.0006 -0.0050  
Z 0.0002 -0.0004 0.0006 0.0002 -0.0002 0.0019  
AT. 171 H X 0.0013 0.0011 0.0013 -0.0008 -0.0010 0.0014  
Y -0.0006 -0.0012 -0.0037 0.0033 -0.0003 0.0102  
Z -0.0003 -0.0003 -0.0011 0.0018 0.0006 0.0032  
AT. 172 H X 0.0013 -0.0011 0.0013 0.0008 0.0010 -0.0014  
Y -0.0006 0.0012 -0.0037 -0.0033 0.0003 -0.0102  
Z -0.0003 0.0003 -0.0011 -0.0018 -0.0006 -0.0032  
  
FREQ(CM\*\*-1) 281.56 294.22 297.99 299.72 302.43 303.06  
  
AT. 1 I X -0.0002 0.0003 0.0001 -0.0002 -0.0011 -0.0005  
Y 0.0001 0.0002 -0.0003 0.0003 -0.0002 -0.0002  
Z -0.0002 -0.0000 0.0001 -0.0001 -0.0002 0.0004  
AT. 2 I X -0.0002 0.0003 -0.0001 -0.0002 0.0011 -0.0005

Y 0.0001 0.0002 0.0003 0.0003 0.0002 -0.0002  
Z -0.0002 -0.0000 -0.0001 -0.0001 0.0002 0.0004  
AT. 3 I X -0.0013 -0.0003 -0.0002 0.0001 0.0028 0.0030  
Y -0.0002 -0.0000 0.0002 -0.0003 0.0008 0.0009  
Z -0.0000 -0.0001 0.0001 -0.0002 -0.0002 -0.0001  
AT. 4 I X -0.0013 -0.0003 0.0002 0.0001 -0.0028 0.0030  
Y -0.0002 -0.0000 -0.0002 -0.0003 -0.0008 0.0009  
Z -0.0000 -0.0001 -0.0001 -0.0002 0.0002 -0.0001  
AT. 5 O X 0.0012 -0.0012 0.0007 -0.0000 -0.0061 -0.0076  
Y -0.0024 -0.0016 0.0012 -0.0003 -0.0032 -0.0052  
Z 0.0030 0.0003 0.0007 0.0007 -0.0178 -0.0175  
AT. 6 O X 0.0012 -0.0012 -0.0007 -0.0000 0.0061 -0.0076  
Y -0.0024 -0.0016 -0.0012 -0.0003 0.0032 -0.0052  
Z 0.0030 0.0003 -0.0007 0.0007 0.0178 -0.0175  
AT. 7 O X 0.0016 0.0009 0.0001 0.0001 -0.0056 -0.0056  
Y -0.0040 0.0011 0.0002 -0.0003 0.0022 0.0035  
Z -0.0033 -0.0007 -0.0015 0.0005 0.0180 0.0178  
AT. 8 O X 0.0016 0.0009 -0.0001 0.0001 0.0056 -0.0056  
Y -0.0040 0.0011 -0.0002 -0.0003 -0.0022 0.0035  
Z -0.0033 -0.0007 0.0015 0.0005 -0.0180 0.0178  
AT. 9 N X -0.0010 -0.0002 -0.0020 0.0012 0.0275 0.0279  
Y -0.0054 -0.0010 -0.0028 0.0028 0.0385 0.0384  
Z 0.0016 0.0006 0.0002 0.0004 -0.0076 -0.0070  
AT. 10 N X -0.0010 -0.0002 0.0020 0.0012 -0.0275 0.0279  
Y -0.0054 -0.0010 0.0028 0.0028 -0.0385 0.0384  
Z 0.0016 0.0006 -0.0002 0.0004 0.0076 -0.0070  
AT. 11 N X 0.0143 0.0011 0.0019 -0.0017 -0.0329 -0.0339  
Y 0.0167 0.0017 0.0027 -0.0031 -0.0411 -0.0421  
Z 0.0101 0.0006 0.0004 -0.0015 -0.0124 -0.0136  
AT. 12 N X 0.0143 0.0011 -0.0019 -0.0017 0.0329 -0.0339  
Y 0.0167 0.0017 -0.0027 -0.0031 0.0411 -0.0421  
Z 0.0101 0.0006 -0.0004 -0.0015 0.0124 -0.0136

AT. 13 C X 0.0005 -0.0006 -0.0003 0.0002 0.0080 0.0076  
Y -0.0037 -0.0015 -0.0005 0.0010 0.0125 0.0112  
Z 0.0028 0.0006 0.0007 0.0001 -0.0125 -0.0120

AT. 14 C X 0.0005 -0.0006 0.0003 0.0002 -0.0080 0.0076  
Y -0.0037 -0.0015 0.0005 0.0010 -0.0125 0.0112  
Z 0.0028 0.0006 -0.0007 0.0001 0.0125 -0.0120

AT. 15 C X -0.0008 0.0003 -0.0005 0.0002 0.0033 0.0038  
Y -0.0019 -0.0011 -0.0000 0.0005 0.0057 0.0048  
Z 0.0092 -0.0001 0.0017 -0.0011 -0.0180 -0.0180

AT. 16 C X -0.0008 0.0003 0.0005 0.0002 -0.0033 0.0038  
Y -0.0019 -0.0011 0.0000 0.0005 -0.0057 0.0048  
Z 0.0092 -0.0001 -0.0017 -0.0011 0.0180 -0.0180

AT. 17 H X -0.0024 0.0013 -0.0009 0.0001 0.0023 0.0040  
Y -0.0086 0.0001 -0.0011 0.0014 0.0121 0.0126  
Z 0.0170 -0.0012 0.0028 -0.0023 -0.0265 -0.0276

AT. 18 H X -0.0024 0.0013 0.0009 0.0001 -0.0023 0.0040  
Y -0.0086 0.0001 0.0011 0.0014 -0.0121 0.0126  
Z 0.0170 -0.0012 -0.0028 -0.0023 0.0265 -0.0276

AT. 19 H X -0.0016 0.0011 -0.0004 0.0006 -0.0023 -0.0014  
Y 0.0082 -0.0032 0.0015 -0.0006 -0.0057 -0.0083  
Z 0.0129 -0.0006 0.0023 -0.0015 -0.0243 -0.0249

AT. 20 H X -0.0016 0.0011 0.0004 0.0006 0.0023 -0.0014  
Y 0.0082 -0.0032 -0.0015 -0.0006 0.0057 -0.0083  
Z 0.0129 -0.0006 -0.0023 -0.0015 0.0243 -0.0249

AT. 21 C X 0.0058 0.0009 0.0006 -0.0003 -0.0141 -0.0148  
Y 0.0032 0.0014 0.0010 -0.0012 -0.0133 -0.0132  
Z 0.0031 0.0003 -0.0006 -0.0007 0.0038 0.0030

AT. 22 C X 0.0058 0.0009 -0.0006 -0.0003 0.0141 -0.0148  
Y 0.0032 0.0014 -0.0010 -0.0012 0.0133 -0.0132  
Z 0.0031 0.0003 0.0006 -0.0007 -0.0038 0.0030

AT. 23 C X 0.0027 0.0003 0.0004 0.0000 -0.0078 -0.0086  
Y -0.0010 0.0008 0.0002 0.0008 -0.0063 -0.0055

Z 0.0015 -0.0000 -0.0006 -0.0012 0.0088 0.0072  
AT. 24 C X 0.0027 0.0003 -0.0004 0.0000 0.0078 -0.0086  
Y -0.0010 0.0008 -0.0002 0.0008 0.0063 -0.0055  
Z 0.0015 -0.0000 0.0006 -0.0012 -0.0088 0.0072  
AT. 25 H X 0.0006 -0.0004 0.0001 0.0001 0.0005 0.0000  
Y -0.0015 0.0007 0.0001 0.0011 -0.0051 -0.0041  
Z 0.0023 -0.0004 -0.0001 -0.0032 0.0104 0.0065  
AT. 26 H X 0.0006 -0.0004 -0.0001 0.0001 -0.0005 0.0000  
Y -0.0015 0.0007 -0.0001 0.0011 0.0051 -0.0041  
Z 0.0023 -0.0004 0.0001 -0.0032 -0.0104 0.0065  
AT. 27 H X 0.0005 0.0003 0.0008 0.0001 -0.0056 -0.0064  
Y -0.0030 0.0013 -0.0002 0.0029 -0.0085 -0.0052  
Z 0.0009 0.0003 -0.0010 -0.0001 0.0074 0.0070  
AT. 28 H X 0.0005 0.0003 -0.0008 0.0001 0.0056 -0.0064  
Y -0.0030 0.0013 0.0002 0.0029 0.0085 -0.0052  
Z 0.0009 0.0003 0.0010 -0.0001 -0.0074 0.0070  
AT. 29 C X -0.0049 0.0003 -0.0005 0.0006 0.0018 0.0028  
Y -0.0038 -0.0007 -0.0014 0.0021 0.0120 0.0126  
Z 0.0076 0.0000 -0.0007 0.0004 0.0090 0.0093  
AT. 30 C X -0.0049 0.0003 0.0005 0.0006 -0.0018 0.0028  
Y -0.0038 -0.0007 0.0014 0.0021 -0.0120 0.0126  
Z 0.0076 0.0000 0.0007 0.0004 -0.0090 0.0093  
AT. 31 H X -0.0103 0.0009 0.0011 0.0000 -0.0277 -0.0257  
Y 0.0079 -0.0008 -0.0013 0.0014 0.0164 0.0158  
Z 0.0214 0.0002 0.0003 -0.0010 -0.0023 -0.0032  
AT. 32 H X -0.0103 0.0009 -0.0011 0.0000 0.0277 -0.0257  
Y 0.0079 -0.0008 0.0013 0.0014 -0.0164 0.0158  
Z 0.0214 0.0002 -0.0003 -0.0010 0.0023 -0.0032  
AT. 33 H X -0.0085 -0.0002 -0.0012 0.0011 0.0122 0.0137  
Y -0.0213 -0.0006 -0.0016 0.0035 0.0042 0.0064  
Z 0.0128 -0.0003 -0.0010 0.0001 0.0188 0.0187  
AT. 34 H X -0.0085 -0.0002 0.0012 0.0011 -0.0122 0.0137

Y -0.0213 -0.0006 0.0016 0.0035 -0.0042 0.0064  
Z 0.0128 -0.0003 0.0010 0.0001 -0.0188 0.0187  
AT. 35 C X 0.0002 -0.0000 -0.0007 0.0007 0.0051 0.0053  
Y 0.0025 -0.0003 -0.0000 0.0004 -0.0042 -0.0040  
Z -0.0030 -0.0002 -0.0018 0.0018 0.0215 0.0229  
AT. 36 C X 0.0002 -0.0000 0.0007 0.0007 -0.0051 0.0053  
Y 0.0025 -0.0003 0.0000 0.0004 0.0042 -0.0040  
Z -0.0030 -0.0002 0.0018 0.0018 -0.0215 0.0229  
AT. 37 C X 0.0054 0.0003 0.0006 -0.0001 -0.0135 -0.0138  
Y -0.0017 0.0006 0.0012 -0.0003 -0.0173 -0.0162  
Z -0.0054 0.0007 0.0005 0.0003 -0.0059 -0.0042  
AT. 38 C X 0.0054 0.0003 -0.0006 -0.0001 0.0135 -0.0138  
Y -0.0017 0.0006 -0.0012 -0.0003 0.0173 -0.0162  
Z -0.0054 0.0007 -0.0005 0.0003 0.0059 -0.0042  
AT. 39 H X -0.0133 0.0011 0.0026 0.0002 -0.0278 -0.0253  
Y -0.0070 0.0011 0.0028 -0.0013 -0.0335 -0.0320  
Z -0.0156 0.0010 0.0012 0.0009 -0.0087 -0.0054  
AT. 40 H X -0.0133 0.0011 -0.0026 0.0002 0.0278 -0.0253  
Y -0.0070 0.0011 -0.0028 -0.0013 0.0335 -0.0320  
Z -0.0156 0.0010 -0.0012 0.0009 0.0087 -0.0054  
AT. 41 H X 0.0249 -0.0001 -0.0015 -0.0004 -0.0040 -0.0071  
Y -0.0177 -0.0001 0.0000 0.0020 0.0060 0.0093  
Z -0.0133 0.0017 0.0036 -0.0012 -0.0338 -0.0309  
AT. 42 H X 0.0249 -0.0001 0.0015 -0.0004 0.0040 -0.0071  
Y -0.0177 -0.0001 -0.0000 0.0020 -0.0060 0.0093  
Z -0.0133 0.0017 -0.0036 -0.0012 0.0338 -0.0309  
AT. 43 C X -0.0035 0.0007 0.0022 -0.0006 -0.0221 -0.0201  
Y 0.0069 0.0007 0.0012 -0.0014 -0.0209 -0.0212  
Z -0.0019 0.0004 0.0014 -0.0010 -0.0117 -0.0103  
AT. 44 C X -0.0035 0.0007 -0.0022 -0.0006 0.0221 -0.0201  
Y 0.0069 0.0007 -0.0012 -0.0014 0.0209 -0.0212  
Z -0.0019 0.0004 -0.0014 -0.0010 0.0117 -0.0103

AT. 45 H X -0.0238 -0.0001 0.0038 -0.0001 -0.0221 -0.0165  
Y 0.0163 0.0007 -0.0036 0.0012 0.0140 0.0104  
Z 0.0033 0.0007 0.0048 -0.0039 -0.0453 -0.0433

AT. 46 H X -0.0238 -0.0001 -0.0038 -0.0001 0.0221 -0.0165  
Y 0.0163 0.0007 0.0036 0.0012 -0.0140 0.0104  
Z 0.0033 0.0007 -0.0048 -0.0039 0.0453 -0.0433

AT. 47 H X -0.0030 0.0008 0.0037 -0.0016 -0.0406 -0.0381  
Y -0.0051 0.0011 0.0050 -0.0030 -0.0525 -0.0493  
Z -0.0150 0.0005 0.0033 -0.0014 -0.0190 -0.0146

AT. 48 H X -0.0030 0.0008 -0.0037 -0.0016 0.0406 -0.0381  
Y -0.0051 0.0011 -0.0050 -0.0030 0.0525 -0.0493  
Z -0.0150 0.0005 -0.0033 -0.0014 0.0190 -0.0146

AT. 49 C X -0.0011 0.0003 -0.0003 0.0003 0.0037 0.0038  
Y 0.0026 0.0002 0.0000 -0.0002 -0.0046 -0.0049  
Z -0.0058 -0.0004 -0.0015 0.0015 0.0211 0.0215

AT. 50 C X -0.0011 0.0003 0.0003 0.0003 -0.0037 0.0038  
Y 0.0026 0.0002 -0.0000 -0.0002 0.0046 -0.0049  
Z -0.0058 -0.0004 0.0015 0.0015 -0.0211 0.0215

AT. 51 C X 0.0017 -0.0001 -0.0011 0.0005 0.0147 0.0148  
Y -0.0060 0.0003 -0.0004 0.0009 0.0033 0.0044  
Z 0.0012 -0.0001 -0.0004 0.0005 0.0031 0.0025

AT. 52 C X 0.0017 -0.0001 0.0011 0.0005 -0.0147 0.0148  
Y -0.0060 0.0003 0.0004 0.0009 -0.0033 0.0044  
Z 0.0012 -0.0001 0.0004 0.0005 -0.0031 0.0025

AT. 53 H X -0.0075 0.0005 -0.0013 0.0011 0.0161 0.0181  
Y -0.0165 0.0004 -0.0011 0.0022 0.0136 0.0164  
Z 0.0058 -0.0009 -0.0008 0.0007 0.0123 0.0102

AT. 54 H X -0.0075 0.0005 0.0013 0.0011 -0.0161 0.0181  
Y -0.0165 0.0004 0.0011 0.0022 -0.0136 0.0164  
Z 0.0058 -0.0009 0.0008 0.0007 -0.0123 0.0102

AT. 55 H X 0.0148 -0.0008 -0.0011 -0.0002 0.0159 0.0132  
Y -0.0076 0.0010 0.0010 0.0001 -0.0173 -0.0152

Z 0.0078 0.0003 0.0013 -0.0008 -0.0214 -0.0225  
AT. 56 H X 0.0148 -0.0008 0.0011 -0.0002 -0.0159 0.0132  
Y -0.0076 0.0010 -0.0010 0.0001 0.0173 -0.0152  
Z 0.0078 0.0003 -0.0013 -0.0008 0.0214 -0.0225  
AT. 57 C X -0.0038 -0.0003 -0.0011 0.0010 0.0153 0.0165  
Y -0.0054 -0.0004 0.0011 -0.0010 -0.0096 -0.0107  
Z -0.0082 0.0004 0.0003 -0.0006 -0.0044 -0.0064  
AT. 58 C X -0.0038 -0.0003 0.0011 0.0010 -0.0153 0.0165  
Y -0.0054 -0.0004 -0.0011 -0.0010 0.0096 -0.0107  
Z -0.0082 0.0004 -0.0003 -0.0006 0.0044 -0.0064  
AT. 59 H X -0.0113 -0.0007 -0.0018 0.0016 0.0274 0.0293  
Y -0.0673 0.0013 0.0016 -0.0029 -0.0225 -0.0272  
Z -0.1054 0.0028 0.0004 -0.0029 -0.0148 -0.0218  
AT. 60 H X -0.0113 -0.0007 0.0018 0.0016 -0.0274 0.0293  
Y -0.0673 0.0013 -0.0016 -0.0029 0.0225 -0.0272  
Z -0.1054 0.0028 -0.0004 -0.0029 0.0148 -0.0218  
AT. 61 H X 0.0569 -0.0017 0.0004 0.0010 0.0049 0.0069  
Y 0.0837 -0.0030 0.0004 0.0020 0.0087 0.0132  
Z -0.0058 0.0006 0.0018 -0.0021 -0.0216 -0.0258  
AT. 62 H X 0.0569 -0.0017 -0.0004 0.0010 -0.0049 0.0069  
Y 0.0837 -0.0030 -0.0004 0.0020 -0.0087 0.0132  
Z -0.0058 0.0006 -0.0018 -0.0021 0.0216 -0.0258  
AT. 63 H X -0.0629 0.0013 -0.0025 0.0011 0.0233 0.0234  
Y -0.0427 0.0001 0.0022 -0.0031 -0.0193 -0.0236  
Z 0.0802 -0.0016 0.0008 0.0011 -0.0038 -0.0020  
AT. 64 H X -0.0629 0.0013 0.0025 0.0011 -0.0233 0.0234  
Y -0.0427 0.0001 -0.0022 -0.0031 0.0193 -0.0236  
Z 0.0802 -0.0016 -0.0008 0.0011 0.0038 -0.0020  
AT. 65 C X -0.0095 0.0005 0.0012 -0.0019 -0.0098 -0.0106  
Y -0.0045 0.0000 -0.0005 -0.0006 0.0178 0.0184  
Z -0.0088 -0.0002 -0.0001 -0.0000 -0.0007 -0.0017  
AT. 66 C X -0.0095 0.0005 -0.0012 -0.0019 0.0098 -0.0106

Y -0.0045 0.0000 0.0005 -0.0006 -0.0178 0.0184  
Z -0.0088 -0.0002 0.0001 -0.0000 0.0007 -0.0017  
AT. 67 H X 0.0320 -0.0000 0.0009 -0.0030 -0.0081 -0.0128  
Y -0.1808 0.0021 0.0052 -0.0042 -0.0103 0.0037  
Z 0.1215 -0.0017 -0.0051 0.0043 0.0243 0.0140  
AT. 68 H X 0.0320 -0.0000 -0.0009 -0.0030 0.0081 -0.0128  
Y -0.1808 0.0021 -0.0052 -0.0042 0.0103 0.0037  
Z 0.1215 -0.0017 0.0051 0.0043 -0.0243 0.0140  
AT. 69 H X 0.1172 -0.0010 -0.0043 0.0016 0.0309 0.0210  
Y 0.1691 -0.0020 -0.0066 0.0028 0.0547 0.0417  
Z 0.0029 -0.0003 0.0015 -0.0018 -0.0260 -0.0297  
AT. 70 H X 0.1172 -0.0010 0.0043 0.0016 -0.0309 0.0210  
Y 0.1691 -0.0020 0.0066 0.0028 -0.0547 0.0417  
Z 0.0029 -0.0003 -0.0015 -0.0018 0.0260 -0.0297  
AT. 71 H X -0.1758 0.0026 0.0084 -0.0066 -0.0639 -0.0530  
Y -0.0138 -0.0000 -0.0008 -0.0012 0.0318 0.0334  
Z -0.1453 0.0013 0.0049 -0.0042 -0.0221 -0.0130  
AT. 72 H X -0.1758 0.0026 -0.0084 -0.0066 0.0639 -0.0530  
Y -0.0138 -0.0000 0.0008 -0.0012 -0.0318 0.0334  
Z -0.1453 0.0013 -0.0049 -0.0042 0.0221 -0.0130  
AT. 73 C X 0.0069 -0.0009 -0.0013 0.0002 0.0172 0.0157  
Y 0.0147 -0.0014 -0.0012 -0.0003 0.0119 0.0100  
Z -0.0036 -0.0004 -0.0020 0.0020 0.0277 0.0293  
AT. 74 C X 0.0069 -0.0009 0.0013 0.0002 -0.0172 0.0157  
Y 0.0147 -0.0014 0.0012 -0.0003 -0.0119 0.0100  
Z -0.0036 -0.0004 0.0020 0.0020 -0.0277 0.0293  
AT. 75 H X 0.0200 -0.0025 -0.0021 -0.0000 0.0303 0.0274  
Y 0.0244 -0.0022 -0.0018 -0.0006 0.0229 0.0200  
Z 0.0183 -0.0024 -0.0034 0.0014 0.0509 0.0503  
AT. 76 H X 0.0200 -0.0025 0.0021 -0.0000 -0.0303 0.0274  
Y 0.0244 -0.0022 0.0018 -0.0006 -0.0229 0.0200  
Z 0.0183 -0.0024 0.0034 0.0014 -0.0509 0.0503



AT. 77 H X 0.0104 -0.0014 -0.0017 -0.0003 0.0249 0.0213  
Y 0.0328 -0.0033 -0.0020 -0.0007 0.0302 0.0276  
Z -0.0240 0.0018 -0.0008 0.0028 0.0031 0.0071

AT. 78 H X 0.0104 -0.0014 0.0017 -0.0003 -0.0249 0.0213  
Y 0.0328 -0.0033 0.0020 -0.0007 -0.0302 0.0276  
Z -0.0240 0.0018 0.0008 0.0028 -0.0031 0.0071

AT. 79 I X 0.0000 0.0001 0.0010 -0.0004 0.0000 -0.0000  
Y 0.0001 -0.0001 -0.0007 0.0004 -0.0001 -0.0001  
Z -0.0001 -0.0000 0.0001 0.0002 0.0000 -0.0000

AT. 80 I X 0.0000 0.0001 -0.0010 -0.0004 -0.0000 -0.0000  
Y 0.0001 -0.0001 0.0007 0.0004 0.0001 -0.0001  
Z -0.0001 -0.0000 -0.0001 0.0002 -0.0000 -0.0000

AT. 81 I X -0.0000 0.0015 -0.0017 0.0009 -0.0001 -0.0000  
Y -0.0003 -0.0008 0.0008 -0.0005 -0.0001 -0.0001  
Z 0.0000 -0.0002 -0.0003 0.0001 0.0000 0.0001

AT. 82 I X -0.0000 0.0015 0.0017 0.0009 0.0001 -0.0000  
Y -0.0003 -0.0008 -0.0008 -0.0005 0.0001 -0.0001  
Z 0.0000 -0.0002 0.0003 0.0001 -0.0000 0.0001

AT. 83 O X -0.0001 -0.0015 0.0032 -0.0030 0.0000 0.0002  
Y 0.0007 0.0027 -0.0022 0.0046 0.0001 0.0002  
Z -0.0001 0.0051 -0.0217 0.0183 -0.0021 -0.0014

AT. 84 O X -0.0001 -0.0015 -0.0032 -0.0030 -0.0000 0.0002  
Y 0.0007 0.0027 0.0022 0.0046 -0.0001 0.0002  
Z -0.0001 0.0051 0.0217 0.0183 0.0021 -0.0014

AT. 85 O X 0.0004 -0.0082 0.0105 -0.0072 0.0010 0.0004  
Y -0.0003 0.0035 -0.0175 0.0172 -0.0010 -0.0009  
Z -0.0001 -0.0164 0.0235 -0.0198 0.0021 0.0014

AT. 86 O X 0.0004 -0.0082 -0.0105 -0.0072 -0.0010 0.0004  
Y -0.0003 0.0035 0.0175 0.0172 0.0010 -0.0009  
Z -0.0001 -0.0164 -0.0235 -0.0198 -0.0021 0.0014

AT. 87 N X -0.0001 0.0035 -0.0119 0.0101 -0.0011 -0.0003  
Y 0.0001 -0.0291 0.0448 -0.0373 0.0032 0.0007

Z -0.0000 0.0021 -0.0086 0.0080 -0.0009 -0.0007  
AT. 88 N X -0.0001 0.0035 0.0119 0.0101 0.0011 -0.0003  
Y 0.0001 -0.0291 -0.0448 -0.0373 -0.0032 0.0007  
Z -0.0000 0.0021 0.0086 0.0080 0.0009 -0.0007  
AT. 89 N X 0.0000 -0.0096 0.0070 -0.0019 0.0006 -0.0004  
Y -0.0000 0.0440 -0.0366 0.0210 -0.0022 0.0011  
Z 0.0001 0.0224 -0.0023 -0.0073 0.0002 0.0021  
AT. 90 N X 0.0000 -0.0096 -0.0070 -0.0019 -0.0006 -0.0004  
Y -0.0000 0.0440 0.0366 0.0210 0.0022 0.0011  
Z 0.0001 0.0224 0.0023 -0.0073 -0.0002 0.0021  
AT. 91 C X -0.0000 -0.0004 -0.0042 0.0035 -0.0005 -0.0001  
Y 0.0001 -0.0084 0.0159 -0.0131 0.0011 0.0004  
Z -0.0000 0.0057 -0.0142 0.0124 -0.0013 -0.0009  
AT. 92 C X -0.0000 -0.0004 0.0042 0.0035 0.0005 -0.0001  
Y 0.0001 -0.0084 -0.0159 -0.0131 -0.0011 0.0004  
Z -0.0000 0.0057 0.0142 0.0124 0.0013 -0.0009  
AT. 93 C X 0.0003 0.0031 -0.0014 0.0015 -0.0002 0.0002  
Y 0.0001 0.0011 0.0044 -0.0049 0.0001 0.0002  
Z 0.0004 0.0183 -0.0204 0.0175 -0.0017 -0.0007  
AT. 94 C X 0.0003 0.0031 0.0014 0.0015 0.0002 0.0002  
Y 0.0001 0.0011 -0.0044 -0.0049 -0.0001 0.0002  
Z 0.0004 0.0183 0.0204 0.0175 0.0017 -0.0007  
AT. 95 H X 0.0005 0.0034 0.0000 -0.0004 -0.0000 0.0004  
Y -0.0003 -0.0085 0.0109 -0.0095 0.0005 0.0001  
Z 0.0010 0.0353 -0.0339 0.0283 -0.0024 -0.0007  
AT. 96 H X 0.0005 0.0034 -0.0000 -0.0004 0.0000 0.0004  
Y -0.0003 -0.0085 -0.0109 -0.0095 -0.0005 0.0001  
Z 0.0010 0.0353 0.0339 0.0283 0.0024 -0.0007  
AT. 97 H X 0.0003 0.0085 -0.0009 0.0003 0.0000 0.0006  
Y 0.0011 0.0225 -0.0153 0.0104 -0.0010 0.0001  
Z 0.0006 0.0215 -0.0249 0.0212 -0.0020 -0.0009  
AT. 98 H X 0.0003 0.0085 0.0009 0.0003 -0.0000 0.0006

Y 0.0011 0.0225 0.0153 0.0104 0.0010 0.0001  
Z 0.0006 0.0215 0.0249 0.0212 0.0020 -0.0009  
AT. 99 C X 0.0003 -0.0063 0.0064 -0.0031 0.0006 -0.0001  
Y -0.0002 0.0137 -0.0194 0.0150 -0.0008 0.0002  
Z 0.0001 0.0045 0.0105 -0.0135 0.0012 0.0018  
AT. 100 C X 0.0003 -0.0063 -0.0064 -0.0031 -0.0006 -0.0001  
Y -0.0002 0.0137 0.0194 0.0150 0.0008 0.0002  
Z 0.0001 0.0045 -0.0105 -0.0135 -0.0012 0.0018  
AT. 101 C X 0.0003 -0.0062 0.0054 -0.0028 0.0008 0.0002  
Y 0.0000 -0.0061 -0.0046 0.0063 0.0005 0.0001  
Z 0.0000 0.0079 0.0103 -0.0128 0.0011 0.0017  
AT. 102 C X 0.0003 -0.0062 -0.0054 -0.0028 -0.0008 0.0002  
Y 0.0000 -0.0061 0.0046 0.0063 -0.0005 0.0001  
Z 0.0000 0.0079 -0.0103 -0.0128 -0.0011 0.0017  
AT. 103 H X 0.0003 -0.0009 -0.0025 0.0036 0.0007 0.0005  
Y -0.0000 -0.0086 -0.0010 0.0033 0.0005 -0.0000  
Z -0.0002 0.0181 0.0034 -0.0079 0.0001 0.0013  
AT. 104 H X 0.0003 -0.0009 0.0025 0.0036 -0.0007 0.0005  
Y -0.0000 -0.0086 0.0010 0.0033 -0.0005 -0.0000  
Z -0.0002 0.0181 -0.0034 -0.0079 -0.0001 0.0013  
AT. 105 H X 0.0006 -0.0074 0.0098 -0.0089 0.0012 0.0009  
Y 0.0001 -0.0170 -0.0014 0.0064 0.0010 -0.0001  
Z 0.0001 0.0034 0.0124 -0.0140 0.0014 0.0018  
AT. 106 H X 0.0006 -0.0074 -0.0098 -0.0089 -0.0012 0.0009  
Y 0.0001 -0.0170 0.0014 0.0064 -0.0010 -0.0001  
Z 0.0001 0.0034 -0.0124 -0.0140 -0.0014 0.0018  
AT. 107 C X 0.0001 0.0007 0.0100 -0.0113 0.0007 0.0008  
Y 0.0001 -0.0149 0.0060 -0.0012 0.0001 -0.0009  
Z 0.0001 0.0023 0.0115 -0.0131 0.0008 0.0006  
AT. 108 C X 0.0001 0.0007 -0.0100 -0.0113 -0.0007 0.0008  
Y 0.0001 -0.0149 -0.0060 -0.0012 -0.0001 -0.0009  
Z 0.0001 0.0023 -0.0115 -0.0131 -0.0008 0.0006

AT. 109 H X 0.0004 -0.0033 0.0502 -0.0529 0.0041 0.0034  
Y 0.0006 -0.0054 0.0077 -0.0068 0.0005 0.0001  
Z 0.0009 0.0197 0.0025 -0.0104 0.0004 0.0015

AT. 110 H X 0.0004 -0.0033 -0.0502 -0.0529 -0.0041 0.0034  
Y 0.0006 -0.0054 -0.0077 -0.0068 -0.0005 0.0001  
Z 0.0009 0.0197 -0.0025 -0.0104 -0.0004 0.0015

AT. 111 H X -0.0000 0.0029 -0.0013 -0.0010 -0.0003 0.0003  
Y -0.0005 -0.0261 -0.0132 0.0241 -0.0019 -0.0034  
Z 0.0004 0.0025 0.0273 -0.0292 0.0023 0.0017

AT. 112 H X -0.0000 0.0029 0.0013 -0.0010 0.0003 0.0003  
Y -0.0005 -0.0261 0.0132 0.0241 0.0019 -0.0034  
Z 0.0004 0.0025 -0.0273 -0.0292 -0.0023 0.0017

AT. 113 C X 0.0000 0.0030 -0.0028 0.0025 -0.0003 -0.0001  
Y -0.0000 0.0008 -0.0035 0.0032 -0.0004 -0.0003  
Z 0.0001 -0.0140 0.0202 -0.0164 0.0012 -0.0001

AT. 114 C X 0.0000 0.0030 0.0028 0.0025 0.0003 -0.0001  
Y -0.0000 0.0008 0.0035 0.0032 0.0004 -0.0003  
Z 0.0001 -0.0140 -0.0202 -0.0164 -0.0012 -0.0001

AT. 115 C X -0.0000 -0.0044 0.0004 0.0026 0.0000 -0.0006  
Y -0.0001 0.0052 -0.0230 0.0219 -0.0016 -0.0011  
Z -0.0001 -0.0050 -0.0071 0.0084 -0.0005 -0.0006

AT. 116 C X -0.0000 -0.0044 -0.0004 0.0026 -0.0000 -0.0006  
Y -0.0001 0.0052 0.0230 0.0219 0.0016 -0.0011  
Z -0.0001 -0.0050 0.0071 0.0084 0.0005 -0.0006

AT. 117 H X 0.0002 0.0108 0.0182 -0.0220 0.0015 0.0019  
Y -0.0004 0.0002 -0.0516 0.0541 -0.0035 -0.0030  
Z -0.0003 -0.0196 -0.0199 0.0275 -0.0017 -0.0028

AT. 118 H X 0.0002 0.0108 -0.0182 -0.0220 -0.0015 0.0019  
Y -0.0004 0.0002 0.0516 0.0541 0.0035 -0.0030  
Z -0.0003 -0.0196 0.0199 0.0275 0.0017 -0.0028

AT. 119 H X -0.0003 -0.0337 -0.0226 0.0383 -0.0019 -0.0044  
Y -0.0001 -0.0167 -0.0081 0.0150 -0.0009 -0.0021

Z -0.0003 0.0004 -0.0343 0.0346 -0.0023 -0.0017  
AT. 120 H X -0.0003 -0.0337 0.0226 0.0383 0.0019 -0.0044  
Y -0.0001 -0.0167 0.0081 0.0150 0.0009 -0.0021  
Z -0.0003 0.0004 0.0343 0.0346 0.0023 -0.0017  
AT. 121 C X -0.0003 0.0023 0.0112 -0.0130 0.0013 0.0016  
Y -0.0002 0.0186 -0.0269 0.0230 -0.0023 -0.0012  
Z 0.0005 0.0084 -0.0125 0.0109 -0.0014 -0.0010  
AT. 122 C X -0.0003 0.0023 -0.0112 -0.0130 -0.0013 0.0016  
Y -0.0002 0.0186 0.0269 0.0230 0.0023 -0.0012  
Z 0.0005 0.0084 0.0125 0.0109 0.0014 -0.0010  
AT. 123 H X -0.0007 0.0217 0.0367 -0.0514 0.0041 0.0064  
Y -0.0007 0.0019 0.0090 -0.0102 0.0004 0.0005  
Z 0.0009 0.0290 -0.0454 0.0388 -0.0037 -0.0020  
AT. 124 H X -0.0007 0.0217 -0.0367 -0.0514 -0.0041 0.0064  
Y -0.0007 0.0019 -0.0090 -0.0102 -0.0004 0.0005  
Z 0.0009 0.0290 0.0454 0.0388 0.0037 -0.0020  
AT. 125 H X -0.0001 -0.0065 0.0118 -0.0095 0.0012 0.0005  
Y 0.0005 0.0277 -0.0710 0.0692 -0.0064 -0.0051  
Z 0.0009 0.0022 -0.0343 0.0387 -0.0037 -0.0043  
AT. 126 H X -0.0001 -0.0065 -0.0118 -0.0095 -0.0012 0.0005  
Y 0.0005 0.0277 0.0710 0.0692 0.0064 -0.0051  
Z 0.0009 0.0022 0.0343 0.0387 0.0037 -0.0043  
AT. 127 C X 0.0001 0.0023 -0.0005 -0.0002 -0.0000 0.0003  
Y -0.0004 0.0017 -0.0063 0.0076 -0.0007 -0.0006  
Z -0.0000 -0.0163 0.0179 -0.0126 0.0012 -0.0001  
AT. 128 C X 0.0001 0.0023 0.0005 -0.0002 0.0000 0.0003  
Y -0.0004 0.0017 0.0063 0.0076 0.0007 -0.0006  
Z -0.0000 -0.0163 -0.0179 -0.0126 -0.0012 -0.0001  
AT. 129 C X 0.0001 0.0012 -0.0077 0.0062 -0.0007 -0.0001  
Y -0.0002 -0.0108 0.0082 -0.0046 0.0001 -0.0007  
Z -0.0002 -0.0035 -0.0001 0.0021 0.0001 -0.0003  
AT. 130 C X 0.0001 0.0012 0.0077 0.0062 0.0007 -0.0001

Y -0.0002 -0.0108 -0.0082 -0.0046 -0.0001 -0.0007  
Z -0.0002 -0.0035 0.0001 0.0021 -0.0001 -0.0003  
AT. 131 H X 0.0001 0.0057 -0.0054 0.0030 -0.0002 0.0004  
Y -0.0002 -0.0300 0.0222 -0.0144 0.0006 -0.0010  
Z -0.0002 -0.0053 0.0088 -0.0061 0.0010 0.0003  
AT. 132 H X 0.0001 0.0057 0.0054 0.0030 0.0002 0.0004  
Y -0.0002 -0.0300 -0.0222 -0.0144 -0.0006 -0.0010  
Z -0.0002 -0.0053 -0.0088 -0.0061 -0.0010 0.0003  
AT. 133 H X 0.0000 -0.0042 -0.0166 0.0162 -0.0021 -0.0011  
Y -0.0004 0.0001 -0.0107 0.0117 -0.0013 -0.0012  
Z -0.0004 0.0156 -0.0246 0.0223 -0.0015 -0.0008  
AT. 134 H X 0.0000 -0.0042 0.0166 0.0162 0.0021 -0.0011  
Y -0.0004 0.0001 0.0107 0.0117 0.0013 -0.0012  
Z -0.0004 0.0156 0.0246 0.0223 0.0015 -0.0008  
AT. 135 C X -0.0002 0.0068 -0.0253 0.0253 -0.0018 -0.0010  
Y 0.0003 0.0061 0.0160 -0.0214 0.0009 0.0017  
Z -0.0002 -0.0068 -0.0018 0.0037 -0.0003 -0.0002  
AT. 136 C X -0.0002 0.0068 0.0253 0.0253 0.0018 -0.0010  
Y 0.0003 0.0061 -0.0160 -0.0214 -0.0009 0.0017  
Z -0.0002 -0.0068 0.0018 0.0037 0.0003 -0.0002  
AT. 137 H X -0.0002 0.0138 -0.0535 0.0528 -0.0036 -0.0027  
Y 0.0011 0.0183 0.0226 -0.0353 0.0009 0.0021  
Z 0.0012 0.0114 0.0202 -0.0306 0.0004 0.0010  
AT. 138 H X -0.0002 0.0138 0.0535 0.0528 0.0036 -0.0027  
Y 0.0011 0.0183 -0.0226 -0.0353 -0.0009 0.0021  
Z 0.0012 0.0114 -0.0202 -0.0306 -0.0004 0.0010  
AT. 139 H X 0.0004 0.0084 -0.0079 0.0057 -0.0008 -0.0007  
Y -0.0010 -0.0138 0.0165 -0.0115 0.0015 0.0023  
Z -0.0006 -0.0035 -0.0244 0.0263 -0.0017 -0.0007  
AT. 140 H X 0.0004 0.0084 0.0079 0.0057 0.0008 -0.0007  
Y -0.0010 -0.0138 -0.0165 -0.0115 -0.0015 0.0023  
Z -0.0006 -0.0035 0.0244 0.0263 0.0017 -0.0007

AT. 141 H X -0.0011 0.0022 -0.0377 0.0409 -0.0020 -0.0000  
Y 0.0011 0.0180 0.0329 -0.0466 0.0017 0.0032  
Z -0.0014 -0.0212 -0.0244 0.0363 -0.0012 -0.0013

AT. 142 H X -0.0011 0.0022 0.0377 0.0409 0.0020 -0.0000  
Y 0.0011 0.0180 -0.0329 -0.0466 -0.0017 0.0032  
Z -0.0014 -0.0212 0.0244 0.0363 0.0012 -0.0013

AT. 143 C X 0.0002 -0.0030 0.0142 -0.0131 0.0005 -0.0001  
Y 0.0005 -0.0140 0.0140 -0.0071 0.0018 0.0009  
Z -0.0004 -0.0060 -0.0071 0.0091 -0.0001 0.0001

AT. 144 C X 0.0002 -0.0030 -0.0142 -0.0131 -0.0005 -0.0001  
Y 0.0005 -0.0140 -0.0140 -0.0071 -0.0018 0.0009  
Z -0.0004 -0.0060 0.0071 0.0091 0.0001 0.0001

AT. 145 H X -0.0017 -0.0703 0.0114 0.0197 -0.0004 -0.0036  
Y -0.0022 -0.1433 0.0006 0.0647 0.0010 -0.0041  
Z 0.0020 0.1160 0.0066 -0.0596 0.0005 0.0046

AT. 146 H X -0.0017 -0.0703 -0.0114 0.0197 0.0004 -0.0036  
Y -0.0022 -0.1433 -0.0006 0.0647 -0.0010 -0.0041  
Z 0.0020 0.1160 -0.0066 -0.0596 -0.0005 0.0046

AT. 147 H X -0.0013 -0.0441 -0.0128 0.0338 -0.0012 -0.0025  
Y 0.0048 0.1619 0.0463 -0.1199 0.0045 0.0091  
Z -0.0002 0.0289 -0.0282 0.0157 -0.0013 0.0010

AT. 148 H X -0.0013 -0.0441 0.0128 0.0338 0.0012 -0.0025  
Y 0.0048 0.1619 -0.0463 -0.1199 -0.0045 0.0091  
Z -0.0002 0.0289 0.0282 0.0157 0.0013 0.0010

AT. 149 H X 0.0033 0.0895 0.0558 -0.0981 0.0039 0.0055  
Y -0.0002 -0.0681 0.0163 0.0147 0.0024 -0.0005  
Z -0.0031 -0.1454 -0.0247 0.0900 -0.0009 -0.0051

AT. 150 H X 0.0033 0.0895 -0.0558 -0.0981 -0.0039 0.0055  
Y -0.0002 -0.0681 -0.0163 0.0147 -0.0024 -0.0005  
Z -0.0031 -0.1454 0.0247 0.0900 0.0009 -0.0051

AT. 151 C X 0.0002 0.0029 -0.0061 0.0055 -0.0007 -0.0005  
Y -0.0007 0.0029 0.0121 -0.0122 0.0012 0.0013

Z 0.0001 -0.0178 0.0269 -0.0214 0.0017 0.0000  
AT.152 C X 0.0002 0.0029 0.0061 0.0055 0.0007 -0.0005  
Y -0.0007 0.0029 -0.0121 -0.0122 -0.0012 0.0013  
Z 0.0001 -0.0178 -0.0269 -0.0214 -0.0017 0.0000  
AT.153 H X 0.0001 0.0026 -0.0123 0.0126 -0.0012 -0.0012  
Y -0.0010 0.0051 0.0233 -0.0242 0.0024 0.0024  
Z -0.0004 -0.0140 0.0479 -0.0442 0.0039 0.0021  
AT.154 H X 0.0001 0.0026 0.0123 0.0126 0.0012 -0.0012  
Y -0.0010 0.0051 -0.0233 -0.0242 -0.0024 0.0024  
Z -0.0004 -0.0140 -0.0479 -0.0442 -0.0039 0.0021  
AT.155 H X 0.0005 0.0042 -0.0078 0.0052 -0.0009 -0.0006  
Y -0.0010 0.0055 0.0312 -0.0330 0.0030 0.0031  
Z 0.0005 -0.0203 0.0061 0.0004 -0.0002 -0.0020  
AT.156 H X 0.0005 0.0042 0.0078 0.0052 0.0009 -0.0006  
Y -0.0010 0.0055 -0.0312 -0.0330 -0.0030 0.0031  
Z 0.0005 -0.0203 -0.0061 0.0004 0.0002 -0.0020  
AT.157 O X -0.0007 -0.0004 0.0006 -0.0001 -0.0006 0.0006  
Y 0.0011 0.0033 -0.0013 -0.0002 0.0032 0.0065  
Z -0.0000 0.0010 0.0005 -0.0005 0.0002 -0.0009  
AT.158 O X -0.0007 -0.0004 -0.0006 -0.0001 0.0006 0.0006  
Y 0.0011 0.0033 0.0013 -0.0002 -0.0032 0.0065  
Z -0.0000 0.0010 -0.0005 -0.0005 -0.0002 -0.0009  
AT.159 O X -0.0000 -0.0021 -0.0001 0.0004 0.0021 -0.0027  
Y 0.0002 0.0002 -0.0002 0.0001 -0.0008 -0.0004  
Z 0.0011 -0.0020 -0.0007 0.0005 0.0047 -0.0071  
AT.160 O X -0.0000 -0.0021 0.0001 0.0004 -0.0021 -0.0027  
Y 0.0002 0.0002 0.0002 0.0001 0.0008 -0.0004  
Z 0.0011 -0.0020 0.0007 0.0005 -0.0047 -0.0071  
AT.161 H X 0.0002 0.0006 0.0002 0.0002 -0.0006 0.0041  
Y 0.0012 0.0041 -0.0015 -0.0005 0.0045 0.0075  
Z 0.0005 -0.0016 0.0009 0.0007 -0.0030 -0.0020  
AT.162 H X 0.0002 0.0006 -0.0002 0.0002 0.0006 0.0041



Y 0.0012 0.0041 0.0015 -0.0005 -0.0045 0.0075  
Z 0.0005 -0.0016 -0.0009 0.0007 0.0030 -0.0020  
AT. 163 H X 0.0010 -0.0042 -0.0011 0.0014 0.0067 -0.0067  
Y -0.0029 -0.0085 0.0003 0.0043 -0.0060 0.0066  
Z 0.0000 -0.0032 -0.0004 0.0011 0.0024 -0.0045  
AT. 164 H X 0.0010 -0.0042 0.0011 0.0014 -0.0067 -0.0067  
Y -0.0029 -0.0085 -0.0003 0.0043 0.0060 0.0066  
Z 0.0000 -0.0032 0.0004 0.0011 -0.0024 -0.0045  
AT. 165 O X 0.0002 -0.0002 -0.0034 -0.0068 -0.0001 0.0000  
Y -0.0012 -0.0013 0.0035 -0.0018 0.0003 -0.0003  
Z 0.0006 0.0020 0.0003 0.0020 0.0001 -0.0001  
AT. 166 O X 0.0002 -0.0002 0.0034 -0.0068 0.0001 0.0000  
Y -0.0012 -0.0013 -0.0035 -0.0018 -0.0003 -0.0003  
Z 0.0006 0.0020 -0.0003 0.0020 -0.0001 -0.0001  
AT. 167 H X -0.0002 -0.0010 -0.0039 -0.0077 0.0003 0.0003  
Y -0.0009 0.0004 0.0060 -0.0020 -0.0004 -0.0005  
Z 0.0010 0.0016 -0.0002 0.0048 0.0009 -0.0002  
AT. 168 H X -0.0002 -0.0010 0.0039 -0.0077 -0.0003 0.0003  
Y -0.0009 0.0004 -0.0060 -0.0020 0.0004 -0.0005  
Z 0.0010 0.0016 0.0002 0.0048 -0.0009 -0.0002  
AT. 169 O X -0.0001 0.0018 0.0062 0.0044 0.0009 -0.0009  
Y 0.0012 -0.0047 -0.0134 -0.0105 -0.0007 0.0003  
Z -0.0000 0.0028 0.0055 0.0057 0.0006 -0.0004  
AT. 170 O X -0.0001 0.0018 -0.0062 0.0044 -0.0009 -0.0009  
Y 0.0012 -0.0047 0.0134 -0.0105 0.0007 0.0003  
Z -0.0000 0.0028 -0.0055 0.0057 -0.0006 -0.0004  
AT. 171 H X -0.0013 -0.0036 0.0045 0.0034 0.0024 -0.0023  
Y 0.0013 -0.0094 -0.0210 -0.0157 -0.0005 0.0001  
Z 0.0008 -0.0003 -0.0039 -0.0004 0.0000 -0.0000  
AT. 172 H X -0.0013 -0.0036 -0.0045 0.0034 -0.0024 -0.0023  
Y 0.0013 -0.0094 0.0210 -0.0157 0.0005 0.0001  
Z 0.0008 -0.0003 0.0039 -0.0004 -0.0000 -0.0000

FREQ(CM\*\*-1) 314.74 315.14 316.39 318.02 325.25 325.90

AT. 1 I X -0.0001 -0.0004 0.0005 0.0002 0.0010 0.0002

Y 0.0002 -0.0001 0.0001 -0.0002 -0.0002 -0.0003

Z 0.0000 -0.0001 -0.0000 -0.0001 0.0008 0.0000

AT. 2 I X 0.0001 0.0004 0.0005 0.0002 0.0010 -0.0002

Y -0.0002 0.0001 0.0001 -0.0002 -0.0002 0.0003

Z -0.0000 0.0001 -0.0000 -0.0001 0.0008 -0.0000

AT. 3 I X 0.0005 0.0010 -0.0022 -0.0005 -0.0045 -0.0048

Y -0.0001 0.0007 -0.0010 0.0001 -0.0015 -0.0017

Z -0.0000 -0.0001 -0.0003 0.0000 -0.0008 -0.0009

AT. 4 I X -0.0005 -0.0010 -0.0022 -0.0005 -0.0045 0.0048

Y 0.0001 -0.0007 -0.0010 0.0001 -0.0015 0.0017

Z 0.0000 0.0001 -0.0003 0.0000 -0.0008 0.0009

AT. 5 O X 0.0006 0.0014 -0.0026 -0.0007 -0.0118 -0.0090

Y 0.0009 0.0047 -0.0017 0.0001 0.0015 0.0032

Z -0.0055 -0.0241 0.0262 0.0036 0.0025 0.0063

AT. 6 O X -0.0006 -0.0014 -0.0026 -0.0007 -0.0118 0.0090

Y -0.0009 -0.0047 -0.0017 0.0001 0.0015 -0.0032

Z 0.0055 0.0241 0.0262 0.0036 0.0025 -0.0063

AT. 7 O X -0.0032 -0.0128 0.0153 0.0021 0.0107 0.0123

Y -0.0008 -0.0085 0.0060 -0.0009 -0.0172 -0.0165

Z 0.0039 0.0133 -0.0122 -0.0018 0.0240 0.0221

AT. 8 O X 0.0032 0.0128 0.0153 0.0021 0.0107 -0.0123

Y 0.0008 0.0085 0.0060 -0.0009 -0.0172 0.0165

Z -0.0039 -0.0133 -0.0122 -0.0018 0.0240 -0.0221

AT. 9 N X 0.0008 0.0014 -0.0053 -0.0021 -0.0123 -0.0133

Y -0.0039 -0.0156 0.0142 0.0013 0.0113 0.0134

Z -0.0031 -0.0137 0.0148 0.0018 0.0003 0.0019

AT. 10 N X -0.0008 -0.0014 -0.0053 -0.0021 -0.0123 0.0133

Y 0.0039 0.0156 0.0142 0.0013 0.0113 -0.0134

Z 0.0031 0.0137 0.0148 0.0018 0.0003 -0.0019  
AT. 11 N X 0.0011 0.0106 -0.0041 0.0021 0.0368 0.0368  
Y 0.0062 0.0276 -0.0258 -0.0023 0.0025 -0.0004  
Z 0.0071 0.0309 -0.0284 -0.0028 0.0178 0.0139  
AT. 12 N X -0.0011 -0.0106 -0.0041 0.0021 0.0368 -0.0368  
Y -0.0062 -0.0276 -0.0258 -0.0023 0.0025 0.0004  
Z -0.0071 -0.0309 -0.0284 -0.0028 0.0178 -0.0139  
AT. 13 C X 0.0013 0.0054 -0.0078 -0.0015 -0.0087 -0.0081  
Y -0.0012 -0.0036 0.0053 0.0009 0.0107 0.0124  
Z -0.0033 -0.0144 0.0161 0.0021 -0.0008 0.0009  
AT. 14 C X -0.0013 -0.0054 -0.0078 -0.0015 -0.0087 0.0081  
Y 0.0012 0.0036 0.0053 0.0009 0.0107 -0.0124  
Z 0.0033 0.0144 0.0161 0.0021 -0.0008 -0.0009  
AT. 15 C X 0.0005 0.0018 -0.0030 -0.0007 -0.0032 -0.0039  
Y -0.0006 -0.0003 0.0019 0.0008 0.0101 0.0113  
Z -0.0003 -0.0006 -0.0005 -0.0001 -0.0173 -0.0154  
AT. 16 C X -0.0005 -0.0018 -0.0030 -0.0007 -0.0032 0.0039  
Y 0.0006 0.0003 0.0019 0.0008 0.0101 -0.0113  
Z 0.0003 0.0006 -0.0005 -0.0001 -0.0173 0.0154  
AT. 17 H X 0.0011 0.0029 -0.0046 -0.0011 -0.0044 -0.0075  
Y -0.0021 -0.0091 0.0131 0.0018 0.0236 0.0224  
Z 0.0017 0.0109 -0.0151 -0.0015 -0.0349 -0.0308  
AT. 18 H X -0.0011 -0.0029 -0.0046 -0.0011 -0.0044 0.0075  
Y 0.0021 0.0091 0.0131 0.0018 0.0236 -0.0224  
Z -0.0017 -0.0109 -0.0151 -0.0015 -0.0349 0.0308  
AT. 19 H X -0.0011 -0.0052 0.0063 0.0006 0.0023 0.0009  
Y 0.0012 0.0112 -0.0148 -0.0007 -0.0122 -0.0068  
Z -0.0002 0.0017 -0.0041 -0.0003 -0.0244 -0.0209  
AT. 20 H X 0.0011 0.0052 0.0063 0.0006 0.0023 -0.0009  
Y -0.0012 -0.0112 -0.0148 -0.0007 -0.0122 0.0068  
Z 0.0002 -0.0017 -0.0041 -0.0003 -0.0244 0.0209  
AT. 21 C X -0.0016 -0.0040 0.0085 0.0022 0.0255 0.0267

Y 0.0014 0.0050 -0.0050 -0.0009 -0.0040 -0.0042  
Z 0.0058 0.0238 -0.0221 -0.0026 0.0163 0.0130  
AT. 22 C X 0.0016 0.0040 0.0085 0.0022 0.0255 -0.0267  
Y -0.0014 -0.0050 -0.0050 -0.0009 -0.0040 0.0042  
Z -0.0058 -0.0238 -0.0221 -0.0026 0.0163 -0.0130  
AT. 23 C X -0.0016 -0.0050 0.0077 0.0014 0.0103 0.0114  
Y -0.0050 -0.0225 0.0262 0.0032 0.0191 0.0226  
Z 0.0090 0.0357 -0.0367 -0.0053 -0.0060 -0.0109  
AT. 24 C X 0.0016 0.0050 0.0077 0.0014 0.0103 -0.0114  
Y 0.0050 0.0225 0.0262 0.0032 0.0191 -0.0226  
Z -0.0090 -0.0357 -0.0367 -0.0053 -0.0060 0.0109  
AT. 25 H X -0.0021 -0.0041 0.0043 0.0017 0.0022 0.0028  
Y -0.0061 -0.0271 0.0315 0.0040 0.0226 0.0265  
Z 0.0164 0.0685 -0.0772 -0.0104 -0.0404 -0.0483  
AT. 26 H X 0.0021 0.0041 0.0043 0.0017 0.0022 -0.0028  
Y 0.0061 0.0271 0.0315 0.0040 0.0226 -0.0265  
Z -0.0164 -0.0685 -0.0772 -0.0104 -0.0404 0.0483  
AT. 27 H X -0.0018 -0.0056 0.0066 0.0008 -0.0064 -0.0049  
Y -0.0139 -0.0600 0.0701 0.0090 0.0498 0.0570  
Z 0.0045 0.0168 -0.0137 -0.0021 0.0134 0.0102  
AT. 28 H X 0.0018 0.0056 0.0066 0.0008 -0.0064 0.0049  
Y 0.0139 0.0600 0.0701 0.0090 0.0498 -0.0570  
Z -0.0045 -0.0168 -0.0137 -0.0021 0.0134 -0.0102  
AT. 29 C X -0.0008 -0.0093 0.0069 -0.0007 -0.0192 -0.0190  
Y -0.0048 -0.0229 0.0225 0.0024 0.0023 0.0054  
Z -0.0012 -0.0002 0.0014 0.0012 0.0149 0.0152  
AT. 30 C X 0.0008 0.0093 0.0069 -0.0007 -0.0192 0.0190  
Y 0.0048 0.0229 0.0225 0.0024 0.0023 -0.0054  
Z 0.0012 0.0002 0.0014 0.0012 0.0149 -0.0152  
AT. 31 H X -0.0023 -0.0227 0.0202 0.0001 -0.0382 -0.0366  
Y -0.0031 -0.0066 0.0085 0.0027 0.0269 0.0285  
Z 0.0004 0.0159 -0.0115 0.0021 0.0394 0.0384

AT. 32 H X 0.0023 0.0227 0.0202 0.0001 -0.0382 0.0366  
Y 0.0031 0.0066 0.0085 0.0027 0.0269 -0.0285  
Z -0.0004 -0.0159 -0.0115 0.0021 0.0394 -0.0384

AT. 33 H X 0.0003 -0.0086 0.0034 -0.0025 -0.0356 -0.0357  
Y -0.0073 -0.0474 0.0435 0.0018 -0.0356 -0.0299  
Z 0.0005 0.0102 -0.0094 0.0003 0.0207 0.0198

AT. 34 H X -0.0003 0.0086 0.0034 -0.0025 -0.0356 0.0357  
Y 0.0073 0.0474 0.0435 0.0018 -0.0356 0.0299  
Z -0.0005 -0.0102 -0.0094 0.0003 0.0207 -0.0198

AT. 35 C X -0.0018 -0.0075 0.0080 0.0012 0.0070 0.0076  
Y -0.0018 -0.0087 0.0085 0.0012 -0.0018 -0.0005  
Z -0.0026 -0.0112 0.0107 0.0007 0.0018 0.0029

AT. 36 C X 0.0018 0.0075 0.0080 0.0012 0.0070 -0.0076  
Y 0.0018 0.0087 0.0085 0.0012 -0.0018 0.0005  
Z 0.0026 0.0112 0.0107 0.0007 0.0018 -0.0029

AT. 37 C X -0.0026 -0.0077 0.0117 0.0031 0.0245 0.0259  
Y -0.0031 -0.0129 0.0128 0.0017 -0.0082 -0.0067  
Z -0.0038 -0.0125 0.0147 0.0024 0.0110 0.0123

AT. 38 C X 0.0026 0.0077 0.0117 0.0031 0.0245 -0.0259  
Y 0.0031 0.0129 0.0128 0.0017 -0.0082 0.0067  
Z 0.0038 0.0125 0.0147 0.0024 0.0110 -0.0123

AT. 39 H X -0.0129 -0.0462 0.0508 0.0086 0.0188 0.0247  
Y -0.0042 -0.0158 0.0162 0.0025 -0.0084 -0.0072  
Z -0.0100 -0.0364 0.0386 0.0056 0.0063 0.0105

AT. 40 H X 0.0129 0.0462 0.0508 0.0086 0.0188 -0.0247  
Y 0.0042 0.0158 0.0162 0.0025 -0.0084 0.0072  
Z 0.0100 0.0364 0.0386 0.0056 0.0063 -0.0105

AT. 41 H X 0.0082 0.0332 -0.0293 -0.0026 0.0326 0.0295  
Y -0.0112 -0.0489 0.0457 0.0046 -0.0265 -0.0214  
Z -0.0089 -0.0274 0.0322 0.0062 0.0168 0.0200

AT. 42 H X -0.0082 -0.0332 -0.0293 -0.0026 0.0326 -0.0295  
Y 0.0112 0.0489 0.0457 0.0046 -0.0265 0.0214

Z 0.0089 0.0274 0.0322 0.0062 0.0168 -0.0200  
AT. 43 C X -0.0052 -0.0199 0.0195 0.0029 -0.0209 -0.0173  
Y 0.0031 0.0111 -0.0135 -0.0022 -0.0215 -0.0232  
Z 0.0003 -0.0005 -0.0019 -0.0009 -0.0269 -0.0266  
AT. 44 C X 0.0052 0.0199 0.0195 0.0029 -0.0209 0.0173  
Y -0.0031 -0.0111 -0.0135 -0.0022 -0.0215 0.0232  
Z -0.0003 0.0005 -0.0019 -0.0009 -0.0269 0.0266  
AT. 45 H X -0.0140 -0.0608 0.0537 0.0052 -0.0824 -0.0735  
Y 0.0087 0.0336 -0.0328 -0.0048 0.0290 0.0230  
Z 0.0011 0.0066 -0.0074 -0.0003 -0.0324 -0.0318  
AT. 46 H X 0.0140 0.0608 0.0537 0.0052 -0.0824 0.0735  
Y -0.0087 -0.0336 -0.0328 -0.0048 0.0290 -0.0230  
Z -0.0011 -0.0066 -0.0074 -0.0003 -0.0324 0.0318  
AT. 47 H X -0.0059 -0.0220 0.0222 0.0038 -0.0251 -0.0204  
Y -0.0033 -0.0164 0.0104 0.0002 -0.0739 -0.0707  
Z -0.0054 -0.0264 0.0194 0.0004 -0.0752 -0.0712  
AT. 48 H X 0.0059 0.0220 0.0222 0.0038 -0.0251 0.0204  
Y 0.0033 0.0164 0.0104 0.0002 -0.0739 0.0707  
Z 0.0054 0.0264 0.0194 0.0004 -0.0752 0.0712  
AT. 49 C X -0.0003 -0.0015 0.0003 -0.0004 -0.0080 -0.0084  
Y 0.0011 0.0033 -0.0054 -0.0012 -0.0140 -0.0148  
Z -0.0016 -0.0095 0.0077 -0.0003 -0.0080 -0.0073  
AT. 50 C X 0.0003 0.0015 0.0003 -0.0004 -0.0080 0.0084  
Y -0.0011 -0.0033 -0.0054 -0.0012 -0.0140 0.0148  
Z 0.0016 0.0095 0.0077 -0.0003 -0.0080 0.0073  
AT. 51 C X 0.0018 0.0050 -0.0085 -0.0026 -0.0215 -0.0231  
Y -0.0043 -0.0168 0.0155 0.0021 -0.0003 0.0014  
Z -0.0003 -0.0034 0.0039 -0.0001 -0.0042 -0.0037  
AT. 52 C X -0.0018 -0.0050 -0.0085 -0.0026 -0.0215 0.0231  
Y 0.0043 0.0168 0.0155 0.0021 -0.0003 -0.0014  
Z 0.0003 0.0034 0.0039 -0.0001 -0.0042 0.0037  
AT. 53 H X -0.0027 -0.0120 0.0095 0.0003 -0.0091 -0.0093

Y -0.0097 -0.0367 0.0368 0.0056 0.0183 0.0219  
Z 0.0015 0.0044 -0.0042 -0.0013 -0.0061 -0.0057  
AT. 54 H X 0.0027 0.0120 0.0095 0.0003 -0.0091 0.0093  
Y 0.0097 0.0367 0.0368 0.0056 0.0183 -0.0219  
Z -0.0015 -0.0044 -0.0042 -0.0013 -0.0061 0.0057  
AT. 55 H X 0.0081 0.0287 -0.0328 -0.0065 -0.0350 -0.0385  
Y -0.0055 -0.0218 0.0214 0.0032 -0.0021 -0.0000  
Z 0.0023 0.0060 -0.0050 -0.0014 -0.0153 -0.0157  
AT. 56 H X -0.0081 -0.0287 -0.0328 -0.0065 -0.0350 0.0385  
Y 0.0055 0.0218 0.0214 0.0032 -0.0021 0.0000  
Z -0.0023 -0.0060 -0.0050 -0.0014 -0.0153 0.0157  
AT. 57 C X -0.0008 0.0005 0.0029 0.0012 0.0255 0.0259  
Y 0.0016 0.0096 -0.0068 0.0007 0.0187 0.0183  
Z 0.0003 0.0000 -0.0014 -0.0001 -0.0008 -0.0020  
AT. 58 C X 0.0008 -0.0005 0.0029 0.0012 0.0255 -0.0259  
Y -0.0016 -0.0096 -0.0068 0.0007 0.0187 -0.0183  
Z -0.0003 -0.0000 -0.0014 -0.0001 -0.0008 0.0020  
AT. 59 H X 0.0003 0.0108 -0.0031 0.0019 0.0561 0.0564  
Y 0.0010 0.0033 -0.0121 -0.0003 0.0142 0.0105  
Z 0.0001 -0.0022 -0.0135 -0.0010 0.0138 0.0075  
AT. 60 H X -0.0003 -0.0108 -0.0031 0.0019 0.0561 -0.0564  
Y -0.0010 -0.0033 -0.0121 -0.0003 0.0142 -0.0105  
Z -0.0001 0.0022 -0.0135 -0.0010 0.0138 -0.0075  
AT. 61 H X 0.0024 0.0173 -0.0020 0.0015 0.0257 0.0279  
Y 0.0027 0.0198 0.0008 0.0021 0.0279 0.0326  
Z 0.0022 0.0078 -0.0089 -0.0006 -0.0049 -0.0073  
AT. 62 H X -0.0024 -0.0173 -0.0020 0.0015 0.0257 -0.0279  
Y -0.0027 -0.0198 0.0008 0.0021 0.0279 -0.0326  
Z -0.0022 -0.0078 -0.0089 -0.0006 -0.0049 0.0073  
AT. 63 H X -0.0041 -0.0178 0.0090 0.0009 0.0196 0.0183  
Y 0.0043 0.0240 -0.0228 0.0003 0.0439 0.0405  
Z 0.0012 0.0055 0.0062 0.0006 -0.0165 -0.0135

AT. 64 H X 0.0041 0.0178 0.0090 0.0009 0.0196 -0.0183  
Y -0.0043 -0.0240 -0.0228 0.0003 0.0439 -0.0405  
Z -0.0012 -0.0055 0.0062 0.0006 -0.0165 0.0135

AT. 65 C X 0.0055 0.0233 -0.0242 -0.0026 0.0037 0.0004  
Y 0.0068 0.0269 -0.0273 -0.0043 -0.0061 -0.0091  
Z -0.0001 -0.0025 -0.0001 -0.0004 -0.0039 -0.0043

AT. 66 C X -0.0055 -0.0233 -0.0242 -0.0026 0.0037 -0.0004  
Y -0.0068 -0.0269 -0.0273 -0.0043 -0.0061 0.0091  
Z 0.0001 0.0025 -0.0001 -0.0004 -0.0039 0.0043

AT. 67 H X 0.0115 0.0481 -0.0458 -0.0049 0.0075 0.0030  
Y 0.0100 0.0431 -0.0542 -0.0072 0.0093 -0.0012  
Z -0.0082 -0.0388 0.0436 0.0042 -0.0219 -0.0141

AT. 68 H X -0.0115 -0.0481 -0.0458 -0.0049 0.0075 -0.0030  
Y -0.0100 -0.0431 -0.0542 -0.0072 0.0093 0.0012  
Z 0.0082 0.0388 0.0436 0.0042 -0.0219 0.0141

AT. 69 H X 0.0046 0.0165 -0.0089 -0.0019 -0.0088 -0.0069  
Y 0.0064 0.0220 -0.0109 -0.0031 -0.0200 -0.0165  
Z 0.0012 0.0039 -0.0063 -0.0000 -0.0002 -0.0011

AT. 70 H X -0.0046 -0.0165 -0.0089 -0.0019 -0.0088 0.0069  
Y -0.0064 -0.0220 -0.0109 -0.0031 -0.0200 0.0165  
Z -0.0012 -0.0039 -0.0063 -0.0000 -0.0002 0.0011

AT. 71 H X 0.0073 0.0350 -0.0467 -0.0038 0.0201 0.0099  
Y 0.0120 0.0477 -0.0478 -0.0073 -0.0026 -0.0079  
Z 0.0081 0.0338 -0.0442 -0.0054 0.0132 0.0047

AT. 72 H X -0.0073 -0.0350 -0.0467 -0.0038 0.0201 -0.0099  
Y -0.0120 -0.0477 -0.0478 -0.0073 -0.0026 0.0079  
Z -0.0081 -0.0338 -0.0442 -0.0054 0.0132 -0.0047

AT. 73 C X 0.0025 0.0103 -0.0105 -0.0014 0.0027 0.0006  
Y 0.0047 0.0188 -0.0192 -0.0023 0.0017 -0.0013  
Z -0.0028 -0.0129 0.0121 0.0004 -0.0040 -0.0026

AT. 74 C X -0.0025 -0.0103 -0.0105 -0.0014 0.0027 -0.0006  
Y -0.0047 -0.0188 -0.0192 -0.0023 0.0017 0.0013



Z 0.0028 0.0129 0.0121 0.0004 -0.0040 0.0026  
AT. 75 H X 0.0057 0.0238 -0.0217 -0.0022 0.0136 0.0102  
Y 0.0089 0.0374 -0.0367 -0.0046 0.0029 -0.0026  
Z 0.0050 0.0213 -0.0190 -0.0032 0.0054 0.0025  
AT. 76 H X -0.0057 -0.0238 -0.0217 -0.0022 0.0136 -0.0102  
Y -0.0089 -0.0374 -0.0367 -0.0046 0.0029 0.0026  
Z -0.0050 -0.0213 -0.0190 -0.0032 0.0054 -0.0025  
AT. 77 H X 0.0065 0.0259 -0.0269 -0.0040 -0.0066 -0.0112  
Y 0.0086 0.0378 -0.0345 -0.0032 0.0183 0.0134  
Z -0.0102 -0.0449 0.0415 0.0038 -0.0107 -0.0053  
AT. 78 H X -0.0065 -0.0259 -0.0269 -0.0040 -0.0066 0.0112  
Y -0.0086 -0.0378 -0.0345 -0.0032 0.0183 -0.0134  
Z 0.0102 0.0449 0.0415 0.0038 -0.0107 0.0053  
AT. 79 I X 0.0003 -0.0000 0.0001 -0.0010 -0.0001 0.0000  
Y -0.0001 0.0000 -0.0000 0.0005 0.0001 -0.0000  
Z -0.0004 0.0000 -0.0000 0.0004 -0.0000 -0.0001  
AT. 80 I X -0.0003 0.0000 0.0001 -0.0010 -0.0001 -0.0000  
Y 0.0001 -0.0000 -0.0000 0.0005 0.0001 0.0000  
Z 0.0004 -0.0000 -0.0000 0.0004 -0.0000 0.0001  
AT. 81 I X -0.0016 0.0005 -0.0004 0.0021 -0.0001 -0.0001  
Y 0.0008 -0.0005 0.0004 -0.0012 0.0003 0.0004  
Z 0.0008 -0.0002 0.0001 -0.0007 0.0002 0.0002  
AT. 82 I X 0.0016 -0.0005 -0.0004 0.0021 -0.0001 0.0001  
Y -0.0008 0.0005 0.0004 -0.0012 0.0003 -0.0004  
Z -0.0008 0.0002 0.0001 -0.0007 0.0002 -0.0002  
AT. 83 O X -0.0029 0.0002 -0.0007 0.0057 0.0002 -0.0011  
Y -0.0036 0.0006 -0.0004 0.0017 -0.0005 -0.0001  
Z 0.0144 -0.0034 0.0000 -0.0059 0.0004 -0.0016  
AT. 84 O X 0.0029 -0.0002 -0.0007 0.0057 0.0002 0.0011  
Y 0.0036 -0.0006 -0.0004 0.0017 -0.0005 0.0001  
Z -0.0144 0.0034 0.0000 -0.0059 0.0004 0.0016  
AT. 85 O X -0.0048 0.0014 -0.0004 0.0040 0.0006 0.0005

Y 0.0173 -0.0041 0.0016 -0.0195 0.0005 0.0015  
Z -0.0039 0.0002 0.0001 0.0089 0.0002 -0.0014  
AT. 86 O X 0.0048 -0.0014 -0.0004 0.0040 0.0006 -0.0005  
Y -0.0173 0.0041 0.0016 -0.0195 0.0005 -0.0015  
Z 0.0039 -0.0002 0.0001 0.0089 0.0002 0.0014  
AT. 87 N X -0.0042 0.0007 -0.0018 0.0105 -0.0001 -0.0020  
Y 0.0201 -0.0046 0.0032 -0.0162 0.0003 0.0011  
Z 0.0083 -0.0020 0.0004 -0.0061 0.0002 -0.0005  
AT. 88 N X 0.0042 -0.0007 -0.0018 0.0105 -0.0001 0.0020  
Y -0.0201 0.0046 0.0032 -0.0162 0.0003 -0.0011  
Z -0.0083 0.0020 0.0004 -0.0061 0.0002 0.0005  
AT. 89 N X 0.0163 -0.0038 0.0031 -0.0228 0.0011 0.0026  
Y -0.0420 0.0104 -0.0061 0.0370 -0.0019 -0.0007  
Z -0.0410 0.0096 -0.0046 0.0382 -0.0015 -0.0013  
AT. 90 N X -0.0163 0.0038 0.0031 -0.0228 0.0011 -0.0026  
Y 0.0420 -0.0104 -0.0061 0.0370 -0.0019 0.0007  
Z 0.0410 -0.0096 -0.0046 0.0382 -0.0015 0.0013  
AT. 91 C X -0.0003 -0.0002 -0.0010 0.0060 0.0003 -0.0015  
Y 0.0033 -0.0011 0.0007 -0.0015 -0.0003 -0.0001  
Z 0.0084 -0.0020 0.0002 -0.0059 0.0001 -0.0006  
AT. 92 C X 0.0003 0.0002 -0.0010 0.0060 0.0003 0.0015  
Y -0.0033 0.0011 0.0007 -0.0015 -0.0003 0.0001  
Z -0.0084 0.0020 0.0002 -0.0059 0.0001 0.0006  
AT. 93 C X -0.0012 0.0000 -0.0005 0.0025 -0.0001 -0.0009  
Y -0.0004 -0.0002 0.0000 0.0011 -0.0004 -0.0004  
Z 0.0062 -0.0012 0.0007 -0.0119 -0.0004 0.0002  
AT. 94 C X 0.0012 -0.0000 -0.0005 0.0025 -0.0001 0.0009  
Y 0.0004 0.0002 0.0000 0.0011 -0.0004 0.0004  
Z -0.0062 0.0012 0.0007 -0.0119 -0.0004 -0.0002  
AT. 95 H X 0.0008 -0.0007 -0.0005 0.0013 -0.0004 -0.0010  
Y -0.0017 0.0000 -0.0001 0.0062 -0.0000 -0.0010  
Z 0.0062 -0.0007 0.0009 -0.0197 -0.0007 0.0012

AT. 96 H X -0.0008 0.0007 -0.0005 0.0013 -0.0004 0.0010  
Y 0.0017 -0.0000 -0.0001 0.0062 -0.0000 0.0010  
Z -0.0062 0.0007 0.0009 -0.0197 -0.0007 -0.0012

AT. 97 H X -0.0020 0.0004 -0.0001 -0.0014 -0.0005 -0.0001  
Y 0.0017 0.0000 0.0002 -0.0083 -0.0009 0.0005  
Z 0.0068 -0.0012 0.0006 -0.0128 -0.0004 0.0002

AT. 98 H X 0.0020 -0.0004 -0.0001 -0.0014 -0.0005 0.0001  
Y -0.0017 -0.0000 0.0002 -0.0083 -0.0009 -0.0005  
Z -0.0068 0.0012 0.0006 -0.0128 -0.0004 -0.0002

AT. 99 C X 0.0048 -0.0009 0.0011 -0.0088 0.0007 0.0014  
Y -0.0083 0.0020 -0.0017 0.0070 -0.0002 0.0004  
Z -0.0241 0.0055 -0.0023 0.0230 -0.0003 -0.0003

AT. 100 C X -0.0048 0.0009 0.0011 -0.0088 0.0007 -0.0014  
Y 0.0083 -0.0020 -0.0017 0.0070 -0.0002 -0.0004  
Z 0.0241 -0.0055 -0.0023 0.0230 -0.0003 0.0003

AT. 101 C X 0.0022 0.0000 -0.0000 -0.0024 0.0008 0.0008  
Y 0.0062 -0.0010 -0.0007 0.0003 0.0015 0.0007  
Z -0.0267 0.0059 -0.0014 0.0188 -0.0006 0.0007

AT. 102 C X -0.0022 -0.0000 -0.0000 -0.0024 0.0008 -0.0008  
Y -0.0062 0.0010 -0.0007 0.0003 0.0015 -0.0007  
Z 0.0267 -0.0059 -0.0014 0.0188 -0.0006 -0.0007

AT. 103 H X -0.0024 0.0008 -0.0008 0.0021 0.0005 0.0008  
Y 0.0083 -0.0013 -0.0003 -0.0017 0.0016 0.0007  
Z -0.0359 0.0076 -0.0014 0.0192 -0.0019 0.0009

AT. 104 H X 0.0024 -0.0008 -0.0008 0.0021 0.0005 -0.0008  
Y -0.0083 0.0013 -0.0003 -0.0017 0.0016 -0.0007  
Z 0.0359 -0.0076 -0.0014 0.0192 -0.0019 -0.0009

AT. 105 H X -0.0035 0.0014 -0.0011 0.0078 0.0006 -0.0000  
Y 0.0227 -0.0044 -0.0000 -0.0078 0.0026 0.0005  
Z -0.0217 0.0049 -0.0014 0.0178 -0.0002 0.0004

AT. 106 H X 0.0035 -0.0014 -0.0011 0.0078 0.0006 0.0000  
Y -0.0227 0.0044 -0.0000 -0.0078 0.0026 -0.0005

Z 0.0217 -0.0049 -0.0014 0.0178 -0.0002 -0.0004  
AT.107 C X -0.0084 0.0019 -0.0011 0.0103 -0.0009 -0.0013  
Y 0.0245 -0.0058 0.0024 -0.0187 0.0013 -0.0000  
Z -0.0019 0.0004 0.0004 0.0003 -0.0009 -0.0005  
AT.108 C X 0.0084 -0.0019 -0.0011 0.0103 -0.0009 0.0013  
Y -0.0245 0.0058 0.0024 -0.0187 0.0013 0.0000  
Z 0.0019 -0.0004 0.0004 0.0003 -0.0009 0.0005  
AT.109 H X -0.0253 0.0062 -0.0016 0.0236 -0.0028 -0.0011  
Y 0.0116 -0.0026 0.0011 -0.0072 0.0004 -0.0007  
Z -0.0186 0.0046 -0.0017 0.0154 -0.0017 -0.0017  
AT.110 H X 0.0253 -0.0062 -0.0016 0.0236 -0.0028 0.0011  
Y -0.0116 0.0026 0.0011 -0.0072 0.0004 0.0007  
Z 0.0186 -0.0046 -0.0017 0.0154 -0.0017 0.0017  
AT.111 H X -0.0074 0.0015 -0.0017 0.0131 -0.0006 -0.0022  
Y 0.0497 -0.0120 0.0047 -0.0414 0.0033 0.0012  
Z -0.0081 0.0021 0.0006 0.0019 -0.0016 0.0003  
AT.112 H X 0.0074 -0.0015 -0.0017 0.0131 -0.0006 0.0022  
Y -0.0497 0.0120 0.0047 -0.0414 0.0033 -0.0012  
Z 0.0081 -0.0021 0.0006 0.0019 -0.0016 -0.0003  
AT.113 C X -0.0011 0.0005 -0.0000 -0.0017 -0.0001 0.0007  
Y 0.0102 -0.0024 0.0009 -0.0079 0.0007 -0.0005  
Z 0.0107 -0.0027 0.0018 -0.0098 -0.0001 0.0003  
AT.114 C X 0.0011 -0.0005 -0.0000 -0.0017 -0.0001 -0.0007  
Y -0.0102 0.0024 0.0009 -0.0079 0.0007 0.0005  
Z -0.0107 0.0027 0.0018 -0.0098 -0.0001 -0.0003  
AT.115 C X 0.0092 -0.0020 0.0018 -0.0150 0.0003 0.0021  
Y 0.0103 -0.0023 -0.0000 -0.0073 0.0005 -0.0008  
Z 0.0025 -0.0007 -0.0006 0.0016 -0.0004 -0.0012  
AT.116 C X -0.0092 0.0020 0.0018 -0.0150 0.0003 -0.0021  
Y -0.0103 0.0023 -0.0000 -0.0073 0.0005 0.0008  
Z -0.0025 0.0007 -0.0006 0.0016 -0.0004 0.0012  
AT.117 H X -0.0197 0.0047 -0.0002 0.0080 -0.0003 0.0027

Y 0.0254 -0.0058 0.0003 -0.0190 0.0009 -0.0014  
Z 0.0294 -0.0070 0.0014 -0.0203 0.0001 -0.0017  
AT. 118 H X 0.0197 -0.0047 -0.0002 0.0080 -0.0003 -0.0027  
Y -0.0254 0.0058 0.0003 -0.0190 0.0009 0.0014  
Z -0.0294 0.0070 0.0014 -0.0203 0.0001 0.0017  
AT. 119 H X 0.0601 -0.0138 0.0057 -0.0571 0.0020 0.0018  
Y 0.0401 -0.0093 0.0038 -0.0347 0.0020 0.0003  
Z 0.0011 -0.0002 -0.0022 0.0057 -0.0009 -0.0024  
AT. 120 H X -0.0601 0.0138 0.0057 -0.0571 0.0020 -0.0018  
Y -0.0401 0.0093 0.0038 -0.0347 0.0020 -0.0003  
Z -0.0011 0.0002 -0.0022 0.0057 -0.0009 0.0024  
AT. 121 C X -0.0145 0.0030 -0.0005 0.0102 -0.0004 0.0009  
Y -0.0001 0.0002 -0.0004 -0.0055 -0.0003 0.0008  
Z 0.0067 -0.0009 0.0005 -0.0110 0.0010 0.0012  
AT. 122 C X 0.0145 -0.0030 -0.0005 0.0102 -0.0004 -0.0009  
Y 0.0001 -0.0002 -0.0004 -0.0055 -0.0003 -0.0008  
Z -0.0067 0.0009 0.0005 -0.0110 0.0010 -0.0012  
AT. 123 H X -0.0829 0.0181 -0.0074 0.0806 -0.0041 -0.0025  
Y -0.0111 0.0019 -0.0003 0.0088 -0.0012 0.0003  
Z 0.0069 -0.0003 -0.0006 -0.0144 0.0013 0.0012  
AT. 124 H X 0.0829 -0.0181 -0.0074 0.0806 -0.0041 0.0025  
Y 0.0111 -0.0019 -0.0003 0.0088 -0.0012 -0.0003  
Z -0.0069 0.0003 -0.0006 -0.0144 0.0013 -0.0012  
AT. 125 H X 0.0023 -0.0007 0.0016 -0.0079 0.0005 0.0023  
Y 0.0350 -0.0066 0.0014 -0.0435 0.0011 0.0015  
Z 0.0450 -0.0089 0.0040 -0.0521 0.0028 0.0032  
AT. 126 H X -0.0023 0.0007 0.0016 -0.0079 0.0005 -0.0023  
Y -0.0350 0.0066 0.0014 -0.0435 0.0011 -0.0015  
Z -0.0450 0.0089 0.0040 -0.0521 0.0028 -0.0032  
AT. 127 C X -0.0014 0.0004 -0.0002 0.0008 0.0001 0.0001  
Y 0.0039 -0.0011 0.0005 -0.0065 -0.0002 0.0007  
Z 0.0131 -0.0031 0.0021 -0.0128 0.0010 0.0013

AT. 128 C X 0.0014 -0.0004 -0.0002 0.0008 0.0001 -0.0001  
Y -0.0039 0.0011 0.0005 -0.0065 -0.0002 -0.0007  
Z -0.0131 0.0031 0.0021 -0.0128 0.0010 -0.0013

AT. 129 C X -0.0049 0.0010 -0.0018 0.0115 -0.0004 -0.0021  
Y 0.0130 -0.0033 0.0017 -0.0102 -0.0002 -0.0005  
Z 0.0062 -0.0015 0.0006 -0.0067 0.0008 0.0012

AT. 130 C X 0.0049 -0.0010 -0.0018 0.0115 -0.0004 0.0021  
Y -0.0130 0.0033 0.0017 -0.0102 -0.0002 0.0005  
Z -0.0062 0.0015 0.0006 -0.0067 0.0008 -0.0012

AT. 131 H X -0.0071 0.0017 -0.0017 0.0094 -0.0001 -0.0006  
Y 0.0200 -0.0055 0.0021 -0.0068 -0.0007 -0.0035  
Z 0.0063 -0.0015 0.0009 -0.0084 0.0010 0.0020

AT. 132 H X 0.0071 -0.0017 -0.0017 0.0094 -0.0001 0.0006  
Y -0.0200 0.0055 0.0021 -0.0068 -0.0007 0.0035  
Z -0.0063 0.0015 0.0009 -0.0084 0.0010 -0.0020

AT. 133 H X -0.0007 -0.0005 -0.0020 0.0152 -0.0009 -0.0055  
Y 0.0090 -0.0026 0.0008 -0.0071 -0.0004 -0.0010  
Z -0.0017 0.0004 -0.0007 -0.0040 0.0007 0.0022

AT. 134 H X 0.0007 0.0005 -0.0020 0.0152 -0.0009 0.0055  
Y -0.0090 0.0026 0.0008 -0.0071 -0.0004 0.0010  
Z 0.0017 -0.0004 -0.0007 -0.0040 0.0007 -0.0022

AT. 135 C X 0.0048 -0.0009 -0.0000 -0.0074 0.0006 0.0009  
Y -0.0264 0.0061 -0.0030 0.0297 -0.0010 -0.0023  
Z -0.0018 0.0002 -0.0006 0.0042 -0.0001 -0.0003

AT. 136 C X -0.0048 0.0009 -0.0000 -0.0074 0.0006 -0.0009  
Y 0.0264 -0.0061 -0.0030 0.0297 -0.0010 0.0023  
Z 0.0018 -0.0002 -0.0006 0.0042 -0.0001 0.0003

AT. 137 H X 0.0259 -0.0049 0.0026 -0.0298 0.0027 0.0019  
Y -0.0375 0.0094 -0.0035 0.0408 -0.0011 -0.0034  
Z -0.0287 0.0074 -0.0025 0.0318 -0.0009 -0.0027

AT. 138 H X -0.0259 0.0049 0.0026 -0.0298 0.0027 -0.0019  
Y 0.0375 -0.0094 -0.0035 0.0408 -0.0011 0.0034

Z 0.0287 -0.0074 -0.0025 0.0318 -0.0009 0.0027  
AT. 139 H X 0.0113 -0.0019 0.0019 -0.0153 0.0007 0.0007  
Y -0.0294 0.0051 -0.0047 0.0343 -0.0020 -0.0014  
Z -0.0096 0.0019 -0.0027 0.0135 0.0001 -0.0003  
AT. 140 H X -0.0113 0.0019 0.0019 -0.0153 0.0007 -0.0007  
Y 0.0294 -0.0051 -0.0047 0.0343 -0.0020 0.0014  
Z 0.0096 -0.0019 -0.0027 0.0135 0.0001 0.0003  
AT. 141 H X -0.0149 0.0027 -0.0038 0.0148 -0.0001 0.0006  
Y -0.0554 0.0134 -0.0056 0.0601 -0.0020 -0.0047  
Z 0.0197 -0.0058 0.0004 -0.0177 0.0006 0.0019  
AT. 142 H X 0.0149 -0.0027 -0.0038 0.0148 -0.0001 -0.0006  
Y 0.0554 -0.0134 -0.0056 0.0601 -0.0020 0.0047  
Z -0.0197 0.0058 0.0004 -0.0177 0.0006 -0.0019  
AT. 143 C X 0.0153 -0.0038 0.0022 -0.0143 0.0010 0.0005  
Y -0.0222 0.0058 -0.0022 0.0169 -0.0001 0.0023  
Z -0.0019 0.0006 -0.0004 0.0003 -0.0001 0.0006  
AT. 144 C X -0.0153 0.0038 0.0022 -0.0143 0.0010 -0.0005  
Y 0.0222 -0.0058 -0.0022 0.0169 -0.0001 -0.0023  
Z 0.0019 -0.0006 -0.0004 0.0003 -0.0001 -0.0006  
AT. 145 H X 0.0241 -0.0063 -0.0001 -0.0030 0.0008 -0.0000  
Y -0.0702 0.0171 -0.0140 0.0909 -0.0031 0.0024  
Z 0.0518 -0.0122 0.0117 -0.0764 0.0030 0.0003  
AT. 146 H X -0.0241 0.0063 -0.0001 -0.0030 0.0008 0.0000  
Y 0.0702 -0.0171 -0.0140 0.0909 -0.0031 -0.0024  
Z -0.0518 0.0122 0.0117 -0.0764 0.0030 -0.0003  
AT. 147 H X -0.0056 0.0012 -0.0035 0.0174 -0.0011 -0.0005  
Y 0.0253 -0.0049 0.0129 -0.0730 0.0041 0.0035  
Z -0.0065 0.0020 -0.0005 -0.0023 -0.0007 -0.0002  
AT. 148 H X 0.0056 -0.0012 -0.0035 0.0174 -0.0011 0.0005  
Y -0.0253 0.0049 0.0129 -0.0730 0.0041 -0.0035  
Z 0.0065 -0.0020 -0.0005 -0.0023 -0.0007 0.0002  
AT. 149 H X 0.0413 -0.0095 0.0115 -0.0656 0.0044 0.0023

Y -0.0524 0.0131 -0.0077 0.0548 -0.0013 0.0029  
Z -0.0664 0.0160 -0.0146 0.0909 -0.0039 0.0007  
AT. 150 H X -0.0413 0.0095 0.0115 -0.0656 0.0044 -0.0023  
Y 0.0524 -0.0131 -0.0077 0.0548 -0.0013 -0.0029  
Z 0.0664 -0.0160 -0.0146 0.0909 -0.0039 -0.0007  
AT. 151 C X 0.0007 0.0001 -0.0004 -0.0010 -0.0003 0.0002  
Y -0.0025 -0.0002 0.0012 -0.0023 0.0002 0.0001  
Z 0.0151 -0.0036 0.0028 -0.0154 0.0006 0.0012  
AT. 152 C X -0.0007 -0.0001 -0.0004 -0.0010 -0.0003 -0.0002  
Y 0.0025 0.0002 0.0012 -0.0023 0.0002 -0.0001  
Z -0.0151 0.0036 0.0028 -0.0154 0.0006 -0.0012  
AT. 153 H X -0.0004 0.0005 -0.0007 -0.0013 -0.0011 0.0008  
Y -0.0105 0.0013 0.0015 0.0008 -0.0001 0.0002  
Z 0.0028 -0.0015 0.0036 -0.0104 0.0003 0.0012  
AT. 154 H X 0.0004 -0.0005 -0.0007 -0.0013 -0.0011 -0.0008  
Y 0.0105 -0.0013 0.0015 0.0008 -0.0001 -0.0002  
Z -0.0028 0.0015 0.0036 -0.0104 0.0003 -0.0012  
AT. 155 H X 0.0042 -0.0005 -0.0005 -0.0000 -0.0003 -0.0011  
Y -0.0112 0.0012 0.0019 0.0015 0.0001 -0.0002  
Z 0.0254 -0.0053 0.0019 -0.0191 0.0006 0.0009  
AT. 156 H X -0.0042 0.0005 -0.0005 -0.0000 -0.0003 0.0011  
Y 0.0112 -0.0012 0.0019 0.0015 0.0001 0.0002  
Z -0.0254 0.0053 0.0019 -0.0191 0.0006 -0.0009  
AT. 157 O X -0.0001 -0.0012 0.0007 0.0001 0.0013 0.0000  
Y -0.0002 -0.0020 0.0015 0.0000 -0.0001 -0.0058  
Z 0.0011 0.0004 0.0002 0.0003 -0.0017 -0.0004  
AT. 158 O X 0.0001 0.0012 0.0007 0.0001 0.0013 -0.0000  
Y 0.0002 0.0020 0.0015 0.0000 -0.0001 0.0058  
Z -0.0011 -0.0004 0.0002 0.0003 -0.0017 0.0004  
AT. 159 O X -0.0004 0.0009 0.0016 0.0002 -0.0040 0.0053  
Y -0.0003 0.0003 -0.0024 -0.0012 0.0024 -0.0017  
Z 0.0003 0.0045 0.0016 0.0003 -0.0104 0.0089



AT.160 O X 0.0004 -0.0009 0.0016 0.0002 -0.0040 -0.0053  
Y 0.0003 -0.0003 -0.0024 -0.0012 0.0024 0.0017  
Z -0.0003 -0.0045 0.0016 0.0003 -0.0104 -0.0089

AT.161 H X -0.0008 -0.0056 0.0026 0.0006 0.0002 -0.0041  
Y 0.0005 0.0000 -0.0001 -0.0002 -0.0013 -0.0067  
Z -0.0017 -0.0086 0.0051 0.0013 -0.0000 0.0021

AT.162 H X 0.0008 0.0056 0.0026 0.0006 0.0002 0.0041  
Y -0.0005 -0.0000 -0.0001 -0.0002 -0.0013 0.0067  
Z 0.0017 0.0086 0.0051 0.0013 -0.0000 -0.0021

AT.163 H X 0.0002 0.0043 0.0039 0.0013 -0.0114 0.0117  
Y 0.0029 0.0007 -0.0012 0.0033 0.0006 -0.0000  
Z 0.0010 0.0040 0.0018 0.0011 -0.0097 0.0084

AT.164 H X -0.0002 -0.0043 0.0039 0.0013 -0.0114 -0.0117  
Y -0.0029 -0.0007 -0.0012 0.0033 0.0006 0.0000  
Z -0.0010 -0.0040 0.0018 0.0011 -0.0097 -0.0084

AT.165 O X 0.0038 -0.0013 0.0009 0.0012 0.0005 0.0010  
Y 0.0001 0.0018 0.0006 -0.0011 -0.0000 0.0005  
Z -0.0001 -0.0009 -0.0005 -0.0013 0.0004 -0.0002

AT.166 O X -0.0038 0.0013 0.0009 0.0012 0.0005 -0.0010  
Y -0.0001 -0.0018 0.0006 -0.0011 -0.0000 -0.0005  
Z 0.0001 0.0009 -0.0005 -0.0013 0.0004 0.0002

AT.167 H X 0.0063 -0.0014 0.0012 0.0012 0.0008 0.0019  
Y -0.0046 0.0023 0.0002 -0.0019 -0.0006 -0.0008  
Z 0.0003 -0.0009 -0.0008 -0.0014 0.0002 -0.0001

AT.168 H X -0.0063 0.0014 0.0012 0.0012 0.0008 -0.0019  
Y 0.0046 -0.0023 0.0002 -0.0019 -0.0006 0.0008  
Z -0.0003 0.0009 -0.0008 -0.0014 0.0002 0.0001

AT.169 O X -0.0037 0.0011 0.0009 -0.0030 -0.0001 -0.0004  
Y 0.0066 -0.0030 -0.0009 0.0076 0.0004 0.0002  
Z -0.0028 0.0005 -0.0002 -0.0038 0.0002 -0.0003

AT.170 O X 0.0037 -0.0011 0.0009 -0.0030 -0.0001 0.0004  
Y -0.0066 0.0030 -0.0009 0.0076 0.0004 -0.0002

Z 0.0028 -0.0005 -0.0002 -0.0038 0.0002 0.0003  
AT. 171 H X -0.0043 0.0036 0.0019 -0.0026 -0.0039 0.0042  
Y 0.0091 -0.0031 -0.0005 0.0111 -0.0014 0.0026  
Z 0.0005 -0.0008 0.0002 0.0000 -0.0003 0.0005  
AT. 172 H X 0.0043 -0.0036 0.0019 -0.0026 -0.0039 -0.0042  
Y -0.0091 0.0031 -0.0005 0.0111 -0.0014 -0.0026  
Z -0.0005 0.0008 0.0002 0.0000 -0.0003 -0.0005

FREQ(CM\*\*-1) 329.33 332.59 353.88 354.01 355.38 355.73

AT. 1 I X -0.0001 0.0002 0.0004 0.0004 0.0022 0.0021  
Y 0.0002 -0.0001 0.0003 0.0003 0.0007 0.0008  
Z -0.0001 0.0001 -0.0000 0.0000 0.0010 0.0007

AT. 2 I X 0.0001 0.0002 -0.0004 0.0004 0.0022 -0.0021  
Y -0.0002 -0.0001 -0.0003 0.0003 0.0007 -0.0008  
Z 0.0001 0.0001 0.0000 0.0000 0.0010 -0.0007

AT. 3 I X 0.0003 0.0001 0.0001 0.0001 0.0016 0.0018  
Y 0.0001 -0.0001 0.0001 0.0000 0.0006 0.0005  
Z 0.0001 0.0000 0.0001 0.0001 0.0005 0.0006

AT. 4 I X -0.0003 0.0001 -0.0001 0.0001 0.0016 -0.0018  
Y -0.0001 -0.0001 -0.0001 0.0000 0.0006 -0.0005  
Z -0.0001 0.0000 -0.0001 0.0001 0.0005 -0.0006

AT. 5 O X 0.0007 -0.0004 -0.0004 -0.0004 -0.0014 -0.0023  
Y -0.0005 -0.0004 -0.0003 -0.0002 -0.0012 -0.0007  
Z 0.0003 0.0002 0.0047 0.0041 0.0257 0.0254

AT. 6 O X -0.0007 -0.0004 0.0004 -0.0004 -0.0014 0.0023  
Y 0.0005 -0.0004 0.0003 -0.0002 -0.0012 0.0007  
Z -0.0003 0.0002 -0.0047 0.0041 0.0257 -0.0254

AT. 7 O X -0.0010 -0.0001 -0.0006 -0.0001 -0.0036 -0.0049  
Y 0.0002 0.0007 -0.0007 -0.0007 -0.0021 -0.0019  
Z -0.0019 0.0013 0.0027 0.0028 0.0199 0.0210

AT. 8 O X 0.0010 -0.0001 0.0006 -0.0001 -0.0036 0.0049

Y -0.0002 0.0007 0.0007 -0.0007 -0.0021 0.0019  
Z 0.0019 0.0013 -0.0027 0.0028 0.0199 -0.0210  
AT. 9 N X 0.0010 -0.0008 -0.0042 -0.0037 -0.0231 -0.0250  
Y -0.0009 -0.0004 -0.0004 0.0001 -0.0021 -0.0037  
Z 0.0002 -0.0000 0.0014 0.0012 0.0071 0.0068  
AT. 10 N X -0.0010 -0.0008 0.0042 -0.0037 -0.0231 0.0250  
Y 0.0009 -0.0004 0.0004 0.0001 -0.0021 0.0037  
Z -0.0002 -0.0000 -0.0014 0.0012 0.0071 -0.0068  
AT. 11 N X -0.0023 -0.0004 0.0007 0.0010 0.0019 0.0028  
Y 0.0003 -0.0007 -0.0021 -0.0021 -0.0129 -0.0137  
Z -0.0007 -0.0002 0.0002 0.0005 0.0022 0.0007  
AT. 12 N X 0.0023 -0.0004 -0.0007 0.0010 0.0019 -0.0028  
Y -0.0003 -0.0007 0.0021 -0.0021 -0.0129 0.0137  
Z 0.0007 -0.0002 -0.0002 0.0005 0.0022 -0.0007  
AT. 13 C X 0.0005 -0.0006 -0.0035 -0.0030 -0.0185 -0.0197  
Y -0.0009 -0.0003 0.0001 0.0004 0.0007 0.0005  
Z 0.0003 -0.0001 0.0016 0.0013 0.0079 0.0081  
AT. 14 C X -0.0005 -0.0006 0.0035 -0.0030 -0.0185 0.0197  
Y 0.0009 -0.0003 -0.0001 0.0004 0.0007 -0.0005  
Z -0.0003 -0.0001 -0.0016 0.0013 0.0079 -0.0081  
AT. 15 C X 0.0002 0.0000 -0.0004 -0.0004 -0.0025 -0.0031  
Y -0.0007 -0.0004 -0.0005 -0.0002 -0.0034 -0.0031  
Z 0.0016 -0.0012 -0.0051 -0.0048 -0.0285 -0.0289  
AT. 16 C X -0.0002 0.0000 0.0004 -0.0004 -0.0025 0.0031  
Y 0.0007 -0.0004 0.0005 -0.0002 -0.0034 0.0031  
Z -0.0016 -0.0012 0.0051 -0.0048 -0.0285 0.0289  
AT. 17 H X 0.0005 0.0006 0.0010 0.0008 0.0052 0.0048  
Y -0.0016 0.0007 0.0044 0.0043 0.0235 0.0242  
Z 0.0028 -0.0023 -0.0104 -0.0098 -0.0582 -0.0590  
AT. 18 H X -0.0005 0.0006 -0.0010 0.0008 0.0052 -0.0048  
Y 0.0016 0.0007 -0.0044 0.0043 0.0235 -0.0242  
Z -0.0028 -0.0023 0.0104 -0.0098 -0.0582 0.0590

AT. 19 H X 0.0000 0.0001 0.0028 0.0026 0.0140 0.0139  
Y 0.0011 -0.0022 -0.0077 -0.0071 -0.0445 -0.0449  
Z 0.0022 -0.0019 -0.0070 -0.0065 -0.0397 -0.0402

AT. 20 H X -0.0000 0.0001 -0.0028 0.0026 0.0140 -0.0139  
Y -0.0011 -0.0022 0.0077 -0.0071 -0.0445 0.0449  
Z -0.0022 -0.0019 0.0070 -0.0065 -0.0397 0.0402

AT. 21 C X -0.0016 -0.0004 -0.0005 0.0001 -0.0045 -0.0048  
Y 0.0003 -0.0003 -0.0009 -0.0008 -0.0073 -0.0068  
Z -0.0010 0.0002 0.0012 0.0016 0.0085 0.0077

AT. 22 C X 0.0016 -0.0004 0.0005 0.0001 -0.0045 0.0048  
Y -0.0003 -0.0003 0.0009 -0.0008 -0.0073 0.0068  
Z 0.0010 0.0002 -0.0012 0.0016 0.0085 -0.0077

AT. 23 C X -0.0003 -0.0007 -0.0005 -0.0002 -0.0048 -0.0054  
Y -0.0015 -0.0002 -0.0031 -0.0025 -0.0188 -0.0181  
Z 0.0009 -0.0002 0.0019 0.0019 0.0122 0.0112

AT. 24 C X 0.0003 -0.0007 0.0005 -0.0002 -0.0048 0.0054  
Y 0.0015 -0.0002 0.0031 -0.0025 -0.0188 0.0181  
Z -0.0009 -0.0002 -0.0019 0.0019 0.0122 -0.0112

AT. 25 H X 0.0001 -0.0004 0.0005 0.0003 0.0004 0.0003  
Y -0.0018 -0.0002 -0.0034 -0.0027 -0.0200 -0.0201  
Z 0.0033 -0.0002 0.0054 0.0037 0.0268 0.0319

AT. 26 H X -0.0001 -0.0004 -0.0005 0.0003 0.0004 -0.0003  
Y 0.0018 -0.0002 0.0034 -0.0027 -0.0200 0.0201  
Z -0.0033 -0.0002 -0.0054 0.0037 0.0268 -0.0319

AT. 27 H X 0.0007 -0.0005 -0.0001 -0.0006 -0.0026 -0.0040  
Y -0.0038 -0.0004 -0.0064 -0.0047 -0.0356 -0.0378  
Z -0.0004 -0.0003 0.0000 0.0009 0.0034 0.0006

AT. 28 H X -0.0007 -0.0005 0.0001 -0.0006 -0.0026 0.0040  
Y 0.0038 -0.0004 0.0064 -0.0047 -0.0356 0.0378  
Z 0.0004 -0.0003 -0.0000 0.0009 0.0034 -0.0006

AT. 29 C X 0.0015 0.0004 0.0026 0.0020 0.0155 0.0142  
Y -0.0004 0.0008 0.0047 0.0043 0.0265 0.0263

Z -0.0010 -0.0009 -0.0054 -0.0046 -0.0321 -0.0306  
AT. 30 C X -0.0015 0.0004 -0.0026 0.0020 0.0155 -0.0142  
Y 0.0004 0.0008 -0.0047 0.0043 0.0265 -0.0263  
Z 0.0010 -0.0009 0.0054 -0.0046 -0.0321 0.0306  
AT. 31 H X 0.0029 0.0018 0.0106 0.0086 0.0609 0.0589  
Y -0.0021 -0.0004 -0.0027 -0.0018 -0.0150 -0.0128  
Z -0.0026 -0.0017 -0.0116 -0.0098 -0.0662 -0.0616  
AT. 32 H X -0.0029 0.0018 -0.0106 0.0086 0.0609 -0.0589  
Y 0.0021 -0.0004 0.0027 -0.0018 -0.0150 0.0128  
Z 0.0026 -0.0017 0.0116 -0.0098 -0.0662 0.0616  
AT. 33 H X 0.0025 0.0005 0.0032 0.0023 0.0174 0.0149  
Y 0.0020 0.0026 0.0158 0.0135 0.0890 0.0851  
Z -0.0014 -0.0016 -0.0097 -0.0082 -0.0573 -0.0549  
AT. 34 H X -0.0025 0.0005 -0.0032 0.0023 0.0174 -0.0149  
Y -0.0020 0.0026 -0.0158 0.0135 0.0890 -0.0851  
Z 0.0014 -0.0016 0.0097 -0.0082 -0.0573 0.0549  
AT. 35 C X -0.0004 0.0001 0.0013 0.0013 0.0079 0.0084  
Y -0.0000 0.0006 0.0028 0.0024 0.0156 0.0162  
Z -0.0002 -0.0004 -0.0026 -0.0023 -0.0169 -0.0169  
AT. 36 C X 0.0004 0.0001 -0.0013 0.0013 0.0079 -0.0084  
Y 0.0000 0.0006 -0.0028 0.0024 0.0156 -0.0162  
Z 0.0002 -0.0004 0.0026 -0.0023 -0.0169 0.0169  
AT. 37 C X -0.0019 0.0004 0.0030 0.0031 0.0166 0.0182  
Y 0.0006 -0.0000 -0.0012 -0.0013 -0.0059 -0.0047  
Z -0.0008 -0.0006 -0.0047 -0.0041 -0.0266 -0.0251  
AT. 38 C X 0.0019 0.0004 -0.0030 0.0031 0.0166 -0.0182  
Y -0.0006 -0.0000 0.0012 -0.0013 -0.0059 0.0047  
Z 0.0008 -0.0006 0.0047 -0.0041 -0.0266 0.0251  
AT. 39 H X -0.0020 0.0001 -0.0034 -0.0030 -0.0186 -0.0124  
Y 0.0005 -0.0001 -0.0049 -0.0046 -0.0239 -0.0212  
Z -0.0008 -0.0007 -0.0074 -0.0067 -0.0421 -0.0381  
AT. 40 H X 0.0020 0.0001 0.0034 -0.0030 -0.0186 0.0124

Y -0.0005 -0.0001 0.0049 -0.0046 -0.0239 0.0212  
Z 0.0008 -0.0007 0.0074 -0.0067 -0.0421 0.0381  
AT. 41 H X -0.0013 0.0002 0.0088 0.0085 0.0478 0.0450  
Y 0.0011 0.0005 -0.0016 -0.0018 -0.0077 -0.0048  
Z -0.0018 -0.0008 -0.0104 -0.0093 -0.0576 -0.0529  
AT. 42 H X 0.0013 0.0002 -0.0088 0.0085 0.0478 -0.0450  
Y -0.0011 0.0005 0.0016 -0.0018 -0.0077 0.0048  
Z 0.0018 -0.0008 0.0104 -0.0093 -0.0576 0.0529  
AT. 43 C X 0.0008 0.0003 0.0013 0.0008 0.0066 0.0078  
Y 0.0019 -0.0004 -0.0027 -0.0031 -0.0134 -0.0141  
Z 0.0013 0.0005 0.0013 0.0010 0.0083 0.0070  
AT. 44 C X -0.0008 0.0003 -0.0013 0.0008 0.0066 -0.0078  
Y -0.0019 -0.0004 0.0027 -0.0031 -0.0134 0.0141  
Z -0.0013 0.0005 -0.0013 0.0010 0.0083 -0.0070  
AT. 45 H X 0.0031 0.0019 0.0031 0.0017 0.0174 0.0195  
Y 0.0004 -0.0019 -0.0060 -0.0055 -0.0308 -0.0323  
Z 0.0011 0.0009 0.0033 0.0028 0.0174 0.0164  
AT. 46 H X -0.0031 0.0019 -0.0031 0.0017 0.0174 -0.0195  
Y -0.0004 -0.0019 0.0060 -0.0055 -0.0308 0.0323  
Z -0.0011 0.0009 -0.0033 0.0028 0.0174 -0.0164  
AT. 47 H X 0.0007 0.0007 0.0036 0.0029 0.0199 0.0214  
Y 0.0040 0.0007 0.0010 -0.0001 0.0073 0.0075  
Z 0.0034 0.0012 0.0020 0.0012 0.0120 0.0114  
AT. 48 H X -0.0007 0.0007 -0.0036 0.0029 0.0199 -0.0214  
Y -0.0040 0.0007 -0.0010 -0.0001 0.0073 -0.0075  
Z -0.0034 0.0012 -0.0020 0.0012 0.0120 -0.0114  
AT. 49 C X 0.0005 -0.0001 -0.0018 -0.0019 -0.0096 -0.0088  
Y 0.0013 -0.0002 -0.0014 -0.0017 -0.0057 -0.0061  
Z 0.0004 0.0002 0.0006 0.0006 0.0033 0.0018  
AT. 50 C X -0.0005 -0.0001 0.0018 -0.0019 -0.0096 0.0088  
Y -0.0013 -0.0002 0.0014 -0.0017 -0.0057 0.0061  
Z -0.0004 0.0002 -0.0006 0.0006 0.0033 -0.0018

AT. 51 C X 0.0016 -0.0003 -0.0033 -0.0033 -0.0175 -0.0182  
Y 0.0002 -0.0003 -0.0020 -0.0019 -0.0099 -0.0096  
Z 0.0001 0.0003 0.0026 0.0022 0.0144 0.0139

AT. 52 C X -0.0016 -0.0003 0.0033 -0.0033 -0.0175 0.0182  
Y -0.0002 -0.0003 0.0020 -0.0019 -0.0099 0.0096  
Z -0.0001 0.0003 -0.0026 0.0022 0.0144 -0.0139

AT. 53 H X 0.0009 -0.0003 -0.0039 -0.0036 -0.0213 -0.0214  
Y -0.0012 -0.0002 -0.0022 -0.0018 -0.0122 -0.0109  
Z -0.0001 0.0004 0.0027 0.0024 0.0154 0.0150

AT. 54 H X -0.0009 -0.0003 0.0039 -0.0036 -0.0213 0.0214  
Y 0.0012 -0.0002 0.0022 -0.0018 -0.0122 0.0109  
Z 0.0001 0.0004 -0.0027 0.0024 0.0154 -0.0150

AT. 55 H X 0.0023 -0.0002 -0.0021 -0.0024 -0.0095 -0.0109  
Y 0.0005 -0.0002 -0.0021 -0.0023 -0.0099 -0.0086  
Z 0.0009 0.0006 0.0032 0.0023 0.0199 0.0200

AT. 56 H X -0.0023 -0.0002 0.0021 -0.0024 -0.0095 0.0109  
Y -0.0005 -0.0002 0.0021 -0.0023 -0.0099 0.0086  
Z -0.0009 0.0006 -0.0032 0.0023 0.0199 -0.0200

AT. 57 C X -0.0015 -0.0006 -0.0015 -0.0009 -0.0085 -0.0086  
Y -0.0012 -0.0001 0.0018 0.0018 0.0101 0.0101  
Z 0.0002 -0.0001 0.0003 0.0002 0.0015 0.0018

AT. 58 C X 0.0015 -0.0006 0.0015 -0.0009 -0.0085 0.0086  
Y 0.0012 -0.0001 -0.0018 0.0018 0.0101 -0.0101  
Z -0.0002 -0.0001 -0.0003 0.0002 0.0015 -0.0018

AT. 59 H X -0.0034 -0.0015 -0.0042 -0.0030 -0.0249 -0.0256  
Y -0.0013 0.0013 0.0031 0.0029 0.0167 0.0167  
Z -0.0013 0.0012 0.0002 0.0003 -0.0005 -0.0007

AT. 60 H X 0.0034 -0.0015 0.0042 -0.0030 -0.0249 0.0256  
Y 0.0013 0.0013 -0.0031 0.0029 0.0167 -0.0167  
Z 0.0013 0.0012 -0.0002 0.0003 -0.0005 0.0007

AT. 61 H X -0.0011 -0.0014 0.0002 0.0006 0.0040 0.0045  
Y -0.0014 -0.0016 -0.0002 0.0001 0.0003 0.0005

Z 0.0006 0.0000 0.0027 0.0023 0.0161 0.0168  
AT. 62 H X 0.0011 -0.0014 -0.0002 0.0006 0.0040 -0.0045  
Y 0.0014 -0.0016 0.0002 0.0001 0.0003 -0.0005  
Z -0.0006 0.0000 -0.0027 0.0023 0.0161 -0.0168  
AT. 63 H X -0.0017 0.0005 -0.0027 -0.0020 -0.0174 -0.0181  
Y -0.0027 -0.0001 0.0020 0.0023 0.0105 0.0103  
Z 0.0018 -0.0011 0.0013 0.0009 0.0096 0.0107  
AT. 64 H X 0.0017 0.0005 0.0027 -0.0020 -0.0174 0.0181  
Y 0.0027 -0.0001 -0.0020 0.0023 0.0105 -0.0103  
Z -0.0018 -0.0011 -0.0013 0.0009 0.0096 -0.0107  
AT. 65 C X -0.0003 -0.0004 -0.0018 -0.0014 -0.0099 -0.0093  
Y -0.0000 0.0001 0.0006 0.0008 0.0049 0.0032  
Z 0.0005 -0.0001 -0.0002 -0.0001 -0.0007 -0.0024  
AT. 66 C X 0.0003 -0.0004 0.0018 -0.0014 -0.0099 0.0093  
Y 0.0000 0.0001 -0.0006 0.0008 0.0049 -0.0032  
Z -0.0005 -0.0001 0.0002 -0.0001 -0.0007 0.0024  
AT. 67 H X -0.0007 -0.0005 -0.0016 -0.0013 -0.0108 -0.0092  
Y -0.0015 -0.0003 -0.0006 0.0014 0.0043 -0.0034  
Z 0.0022 0.0004 0.0007 -0.0008 0.0007 0.0037  
AT. 68 H X 0.0007 -0.0005 0.0016 -0.0013 -0.0108 0.0092  
Y 0.0015 -0.0003 0.0006 0.0014 0.0043 0.0034  
Z -0.0022 0.0004 -0.0007 -0.0008 0.0007 -0.0037  
AT. 69 H X 0.0008 0.0001 0.0003 -0.0004 -0.0019 0.0023  
Y 0.0012 0.0005 0.0022 0.0012 0.0090 0.0129  
Z 0.0003 -0.0004 -0.0018 -0.0017 -0.0107 -0.0111  
AT. 70 H X -0.0008 0.0001 -0.0003 -0.0004 -0.0019 -0.0023  
Y -0.0012 0.0005 -0.0022 0.0012 0.0090 -0.0129  
Z -0.0003 -0.0004 0.0018 -0.0017 -0.0107 0.0111  
AT. 71 H X -0.0015 -0.0012 -0.0046 -0.0029 -0.0213 -0.0249  
Y -0.0006 0.0004 0.0017 0.0024 0.0115 0.0083  
Z -0.0013 -0.0004 -0.0007 0.0009 -0.0002 -0.0070  
AT. 72 H X 0.0015 -0.0012 0.0046 -0.0029 -0.0213 0.0249



Y 0.0006 0.0004 -0.0017 0.0024 0.0115 -0.0083  
Z 0.0013 -0.0004 0.0007 0.0009 -0.0002 0.0070  
AT. 73 C X -0.0005 0.0008 0.0016 0.0017 0.0101 0.0110  
Y -0.0004 0.0010 0.0022 0.0020 0.0130 0.0140  
Z -0.0001 -0.0001 -0.0019 -0.0017 -0.0128 -0.0128  
AT. 74 C X 0.0005 0.0008 -0.0016 0.0017 0.0101 -0.0110  
Y 0.0004 0.0010 -0.0022 0.0020 0.0130 -0.0140  
Z 0.0001 -0.0001 0.0019 -0.0017 -0.0128 0.0128  
AT. 75 H X -0.0019 0.0023 0.0069 0.0069 0.0392 0.0407  
Y -0.0007 0.0013 0.0013 0.0012 0.0071 0.0089  
Z -0.0014 0.0013 0.0004 0.0008 -0.0005 0.0010  
AT. 76 H X 0.0019 0.0023 -0.0069 0.0069 0.0392 -0.0407  
Y 0.0007 0.0013 -0.0013 0.0012 0.0071 -0.0089  
Z 0.0014 0.0013 -0.0004 0.0008 -0.0005 -0.0010  
AT. 77 H X -0.0001 0.0012 0.0017 0.0016 0.0114 0.0118  
Y -0.0026 0.0024 0.0051 0.0053 0.0282 0.0306  
Z 0.0015 -0.0017 -0.0046 -0.0046 -0.0279 -0.0286  
AT. 78 H X 0.0001 0.0012 -0.0017 0.0016 0.0114 -0.0118  
Y 0.0026 0.0024 -0.0051 0.0053 0.0282 -0.0306  
Z -0.0015 -0.0017 0.0046 -0.0046 -0.0279 0.0286  
AT. 79 I X 0.0012 -0.0014 0.0028 0.0026 -0.0004 -0.0006  
Y -0.0004 0.0006 -0.0025 -0.0024 0.0002 0.0003  
Z -0.0006 0.0005 -0.0010 -0.0009 0.0003 0.0003  
AT. 80 I X -0.0012 -0.0014 -0.0028 0.0026 -0.0004 0.0006  
Y 0.0004 0.0006 0.0025 -0.0024 0.0002 -0.0003  
Z 0.0006 0.0005 0.0010 -0.0009 0.0003 -0.0003  
AT. 81 I X -0.0025 0.0021 0.0010 0.0008 -0.0003 -0.0002  
Y 0.0018 -0.0016 -0.0009 -0.0009 0.0002 0.0002  
Z 0.0003 -0.0002 -0.0003 -0.0004 0.0001 0.0001  
AT. 82 I X 0.0025 0.0021 -0.0010 0.0008 -0.0003 0.0002  
Y -0.0018 -0.0016 0.0009 -0.0009 0.0002 -0.0002  
Z -0.0003 -0.0002 0.0003 -0.0004 0.0001 -0.0001

AT. 83 O X -0.0126 0.0127 -0.0080 -0.0066 0.0009 0.0018  
Y 0.0004 -0.0028 -0.0026 -0.0023 0.0009 0.0011  
Z -0.0267 0.0289 -0.0119 -0.0133 0.0009 0.0009

AT. 84 O X 0.0126 0.0127 0.0080 -0.0066 0.0009 -0.0018  
Y -0.0004 -0.0028 0.0026 -0.0023 0.0009 -0.0011  
Z 0.0267 0.0289 0.0119 -0.0133 0.0009 -0.0009

AT. 85 O X 0.0038 -0.0036 0.0005 -0.0004 0.0004 0.0002  
Y 0.0137 -0.0090 0.0031 0.0028 -0.0006 -0.0009  
Z -0.0142 0.0134 -0.0081 -0.0085 0.0016 0.0019

AT. 86 O X -0.0038 -0.0036 -0.0005 -0.0004 0.0004 -0.0002  
Y -0.0137 -0.0090 -0.0031 0.0028 -0.0006 0.0009  
Z 0.0142 0.0134 0.0081 -0.0085 0.0016 -0.0019

AT. 87 N X -0.0271 0.0272 -0.0192 -0.0182 0.0023 0.0035  
Y -0.0049 0.0032 0.0090 0.0073 -0.0025 -0.0030  
Z -0.0080 0.0104 0.0011 0.0015 -0.0006 -0.0005

AT. 88 N X 0.0271 0.0272 0.0192 -0.0182 0.0023 -0.0035  
Y 0.0049 0.0032 -0.0090 0.0073 -0.0025 0.0030  
Z 0.0080 0.0104 -0.0011 0.0015 -0.0006 0.0005

AT. 89 N X 0.0341 -0.0297 -0.0003 -0.0014 0.0011 0.0001  
Y -0.0017 -0.0074 0.0074 0.0078 -0.0014 -0.0016  
Z -0.0040 -0.0058 -0.0041 -0.0038 0.0009 0.0010

AT. 90 N X -0.0341 -0.0297 0.0003 -0.0014 0.0011 -0.0001  
Y 0.0017 -0.0074 -0.0074 0.0078 -0.0014 0.0016  
Z 0.0040 -0.0058 0.0041 -0.0038 0.0009 -0.0010

AT. 91 C X -0.0207 0.0205 -0.0188 -0.0182 0.0023 0.0033  
Y -0.0063 0.0037 0.0069 0.0060 -0.0011 -0.0014  
Z -0.0100 0.0122 0.0024 0.0024 -0.0008 -0.0007

AT. 92 C X 0.0207 0.0205 0.0188 -0.0182 0.0023 -0.0033  
Y 0.0063 0.0037 -0.0069 0.0060 -0.0011 0.0014  
Z 0.0100 0.0122 -0.0024 0.0024 -0.0008 0.0007

AT. 93 C X -0.0101 0.0088 -0.0010 -0.0008 0.0001 0.0003  
Y -0.0037 0.0022 0.0167 0.0157 -0.0025 -0.0032

Z 0.0117 -0.0099 0.0350 0.0343 -0.0048 -0.0062  
AT. 94 C X 0.0101 0.0088 0.0010 -0.0008 0.0001 -0.0003  
Y 0.0037 0.0022 -0.0167 0.0157 -0.0025 0.0032  
Z -0.0117 -0.0099 -0.0350 0.0343 -0.0048 0.0062  
AT. 95 H X -0.0127 0.0108 0.0072 0.0063 -0.0010 -0.0011  
Y -0.0139 0.0129 -0.0064 -0.0061 0.0006 0.0011  
Z 0.0332 -0.0316 0.0665 0.0647 -0.0090 -0.0122  
AT. 96 H X 0.0127 0.0108 -0.0072 0.0063 -0.0010 0.0011  
Y 0.0139 0.0129 0.0064 -0.0061 0.0006 -0.0011  
Z -0.0332 -0.0316 -0.0665 0.0647 -0.0090 0.0122  
AT. 97 H X 0.0060 -0.0084 0.0220 0.0203 -0.0024 -0.0037  
Y 0.0166 -0.0186 0.0580 0.0546 -0.0081 -0.0111  
Z 0.0118 -0.0099 0.0378 0.0372 -0.0054 -0.0069  
AT. 98 H X -0.0060 -0.0084 -0.0220 0.0203 -0.0024 0.0037  
Y -0.0166 -0.0186 -0.0580 0.0546 -0.0081 0.0111  
Z -0.0118 -0.0099 -0.0378 0.0372 -0.0054 0.0069  
AT. 99 C X 0.0188 -0.0167 -0.0035 -0.0040 0.0012 0.0008  
Y 0.0000 -0.0008 0.0085 0.0079 -0.0016 -0.0016  
Z -0.0012 -0.0043 -0.0060 -0.0063 0.0015 0.0016  
AT. 100 C X -0.0188 -0.0167 0.0035 -0.0040 0.0012 -0.0008  
Y -0.0000 -0.0008 -0.0085 0.0079 -0.0016 0.0016  
Z 0.0012 -0.0043 0.0060 -0.0063 0.0015 -0.0016  
AT. 101 C X 0.0021 -0.0015 0.0010 0.0017 -0.0002 -0.0002  
Y -0.0244 0.0251 0.0173 0.0173 -0.0041 -0.0036  
Z 0.0257 -0.0291 -0.0122 -0.0145 0.0037 0.0032  
AT. 102 C X -0.0021 -0.0015 -0.0010 0.0017 -0.0002 0.0002  
Y 0.0244 0.0251 -0.0173 0.0173 -0.0041 0.0036  
Z -0.0257 -0.0291 0.0122 -0.0145 0.0037 -0.0032  
AT. 103 H X -0.0003 0.0003 0.0054 0.0052 -0.0009 -0.0007  
Y -0.0236 0.0244 0.0152 0.0156 -0.0038 -0.0033  
Z 0.0591 -0.0606 -0.0226 -0.0272 0.0072 0.0059  
AT. 104 H X 0.0003 0.0003 -0.0054 0.0052 -0.0009 0.0007

Y 0.0236 0.0244 -0.0152 0.0156 -0.0038 0.0033  
Z -0.0591 -0.0606 0.0226 -0.0272 0.0072 -0.0059  
AT.105 H X -0.0160 0.0126 0.0033 0.0065 -0.0016 -0.0007  
Y -0.0531 0.0543 0.0281 0.0302 -0.0073 -0.0062  
Z 0.0114 -0.0149 -0.0075 -0.0087 0.0021 0.0021  
AT.106 H X 0.0160 0.0126 -0.0033 0.0065 -0.0016 0.0007  
Y 0.0531 0.0543 -0.0281 0.0302 -0.0073 0.0062  
Z -0.0114 -0.0149 0.0075 -0.0087 0.0021 -0.0021  
AT.107 C X -0.0144 0.0126 0.0077 0.0087 -0.0018 -0.0013  
Y -0.0146 0.0192 -0.0231 -0.0231 0.0028 0.0033  
Z -0.0014 0.0019 0.0279 0.0292 -0.0046 -0.0044  
AT.108 C X 0.0144 0.0126 -0.0077 0.0087 -0.0018 0.0013  
Y 0.0146 0.0192 0.0231 -0.0231 0.0028 -0.0033  
Z 0.0014 0.0019 -0.0279 0.0292 -0.0046 0.0044  
AT.109 H X -0.0094 0.0013 0.0548 0.0556 -0.0095 -0.0094  
Y -0.0179 0.0210 -0.0045 -0.0039 -0.0000 0.0008  
Z -0.0085 0.0085 0.0455 0.0480 -0.0069 -0.0063  
AT.110 H X 0.0094 0.0013 -0.0548 0.0556 -0.0095 0.0094  
Y 0.0179 0.0210 0.0045 -0.0039 -0.0000 -0.0008  
Z 0.0085 0.0085 -0.0455 0.0480 -0.0069 0.0063  
AT.111 H X -0.0284 0.0271 -0.0036 -0.0027 -0.0002 0.0008  
Y -0.0076 0.0167 -0.0669 -0.0680 0.0098 0.0101  
Z 0.0117 -0.0129 0.0486 0.0501 -0.0077 -0.0079  
AT.112 H X 0.0284 0.0271 0.0036 -0.0027 -0.0002 -0.0008  
Y 0.0076 0.0167 0.0669 -0.0680 0.0098 -0.0101  
Z -0.0117 -0.0129 -0.0486 0.0501 -0.0077 0.0079  
AT.113 C X 0.0092 -0.0097 0.0012 0.0014 -0.0002 -0.0005  
Y -0.0096 0.0135 -0.0143 -0.0138 0.0019 0.0025  
Z -0.0011 0.0021 0.0153 0.0162 -0.0029 -0.0029  
AT.114 C X -0.0092 -0.0097 -0.0012 0.0014 -0.0002 0.0005  
Y 0.0096 0.0135 0.0143 -0.0138 0.0019 -0.0025  
Z 0.0011 0.0021 -0.0153 0.0162 -0.0029 0.0029

AT. 115 C X 0.0281 -0.0263 0.0137 0.0132 -0.0015 -0.0026  
Y -0.0114 0.0155 0.0003 0.0012 -0.0004 -0.0000  
Z -0.0142 0.0140 0.0214 0.0231 -0.0038 -0.0036

AT. 116 C X -0.0281 -0.0263 -0.0137 0.0132 -0.0015 0.0026  
Y 0.0114 0.0155 -0.0003 0.0012 -0.0004 0.0000  
Z 0.0142 0.0140 -0.0214 0.0231 -0.0038 0.0036

AT. 117 H X 0.0383 -0.0437 -0.0085 -0.0102 0.0024 0.0012  
Y -0.0145 0.0236 0.0233 0.0251 -0.0036 -0.0034  
Z -0.0231 0.0296 0.0388 0.0416 -0.0070 -0.0066

AT. 118 H X -0.0383 -0.0437 0.0085 -0.0102 0.0024 -0.0012  
Y 0.0145 0.0236 -0.0233 0.0251 -0.0036 0.0034  
Z 0.0231 0.0296 -0.0388 0.0416 -0.0070 0.0066

AT. 119 H X 0.0163 -0.0017 0.0434 0.0448 -0.0064 -0.0073  
Y -0.0089 0.0198 -0.0038 -0.0030 0.0001 0.0008  
Z -0.0234 0.0236 0.0414 0.0443 -0.0071 -0.0069

AT. 120 H X -0.0163 -0.0017 -0.0434 0.0448 -0.0064 0.0073  
Y 0.0089 0.0198 0.0038 -0.0030 0.0001 -0.0008  
Z 0.0234 0.0236 -0.0414 0.0443 -0.0071 0.0069

AT. 121 C X 0.0144 -0.0186 0.0089 0.0083 -0.0006 -0.0014  
Y 0.0197 -0.0178 0.0044 0.0045 -0.0001 -0.0009  
Z 0.0159 -0.0135 -0.0201 -0.0201 0.0032 0.0033

AT. 122 C X -0.0144 -0.0186 -0.0089 0.0083 -0.0006 0.0014  
Y -0.0197 -0.0178 -0.0044 0.0045 -0.0001 0.0009  
Z -0.0159 -0.0135 0.0201 -0.0201 0.0032 -0.0033

AT. 123 H X -0.0168 -0.0063 0.0389 0.0385 -0.0056 -0.0062  
Y 0.0082 -0.0113 0.0273 0.0274 -0.0037 -0.0044  
Z 0.0229 -0.0182 -0.0389 -0.0388 0.0061 0.0061

AT. 124 H X 0.0168 -0.0063 -0.0389 0.0385 -0.0056 0.0062  
Y -0.0082 -0.0113 -0.0273 0.0274 -0.0037 0.0044  
Z -0.0229 -0.0182 0.0389 -0.0388 0.0061 -0.0061

AT. 125 H X 0.0262 -0.0264 0.0108 0.0098 -0.0008 -0.0018  
Y 0.0375 -0.0237 -0.0333 -0.0329 0.0053 0.0048

Z 0.0386 -0.0252 -0.0371 -0.0375 0.0059 0.0057  
AT. 126 H X -0.0262 -0.0264 -0.0108 0.0098 -0.0008 0.0018  
Y -0.0375 -0.0237 0.0333 -0.0329 0.0053 -0.0048  
Z -0.0386 -0.0252 0.0371 -0.0375 0.0059 -0.0057  
AT. 127 C X -0.0001 -0.0009 -0.0072 -0.0070 0.0010 0.0009  
Y 0.0138 -0.0117 0.0064 0.0065 -0.0003 -0.0010  
Z 0.0063 -0.0047 -0.0089 -0.0088 0.0011 0.0013  
AT. 128 C X 0.0001 -0.0009 0.0072 -0.0070 0.0010 -0.0009  
Y -0.0138 -0.0117 -0.0064 0.0065 -0.0003 0.0010  
Z -0.0063 -0.0047 0.0089 -0.0088 0.0011 -0.0013  
AT. 129 C X -0.0295 0.0283 -0.0060 -0.0052 0.0002 0.0011  
Y -0.0043 0.0066 0.0263 0.0260 -0.0036 -0.0040  
Z 0.0057 -0.0042 -0.0247 -0.0244 0.0033 0.0037  
AT. 130 C X 0.0295 0.0283 0.0060 -0.0052 0.0002 -0.0011  
Y 0.0043 0.0066 -0.0263 0.0260 -0.0036 0.0040  
Z -0.0057 -0.0042 0.0247 -0.0244 0.0033 -0.0037  
AT. 131 H X -0.0152 0.0133 -0.0272 -0.0266 0.0032 0.0040  
Y -0.0393 0.0429 0.0570 0.0570 -0.0084 -0.0080  
Z 0.0108 -0.0097 -0.0377 -0.0376 0.0051 0.0056  
AT. 132 H X 0.0152 0.0133 0.0272 -0.0266 0.0032 -0.0040  
Y 0.0393 0.0429 -0.0570 0.0570 -0.0084 0.0080  
Z -0.0108 -0.0097 0.0377 -0.0376 0.0051 -0.0056  
AT. 133 H X -0.0574 0.0590 0.0317 0.0332 -0.0049 -0.0038  
Y -0.0037 0.0074 0.0255 0.0258 -0.0029 -0.0033  
Z 0.0199 -0.0175 -0.0441 -0.0433 0.0067 0.0071  
AT. 134 H X 0.0574 0.0590 -0.0317 0.0332 -0.0049 0.0038  
Y 0.0037 0.0074 -0.0255 0.0258 -0.0029 0.0033  
Z -0.0199 -0.0175 0.0441 -0.0433 0.0067 -0.0071  
AT. 135 C X 0.0130 -0.0099 -0.0146 -0.0152 0.0027 0.0023  
Y -0.0215 0.0138 -0.0066 -0.0064 0.0008 0.0014  
Z -0.0038 0.0034 -0.0005 -0.0009 0.0001 0.0002  
AT. 136 C X -0.0130 -0.0099 0.0146 -0.0152 0.0027 -0.0023

Y 0.0215 0.0138 0.0066 -0.0064 0.0008 -0.0014  
Z 0.0038 0.0034 0.0005 -0.0009 0.0001 -0.0002  
AT. 137 H X 0.0250 -0.0140 -0.0315 -0.0331 0.0057 0.0059  
Y -0.0286 0.0169 -0.0093 -0.0097 0.0015 0.0027  
Z -0.0205 0.0102 0.0014 0.0004 0.0002 0.0011  
AT. 138 H X -0.0250 -0.0140 0.0315 -0.0331 0.0057 -0.0059  
Y 0.0286 0.0169 0.0093 -0.0097 0.0015 -0.0027  
Z 0.0205 0.0102 -0.0014 0.0004 0.0002 -0.0011  
AT. 139 H X 0.0131 -0.0100 -0.0019 -0.0017 0.0005 0.0004  
Y -0.0210 0.0134 -0.0000 0.0009 -0.0006 -0.0011  
Z -0.0043 0.0039 -0.0187 -0.0204 0.0033 0.0034  
AT. 140 H X -0.0131 -0.0100 0.0019 -0.0017 0.0005 -0.0004  
Y 0.0210 0.0134 0.0000 0.0009 -0.0006 0.0011  
Z 0.0043 0.0039 0.0187 -0.0204 0.0033 -0.0034  
AT. 141 H X 0.0072 -0.0075 -0.0252 -0.0265 0.0043 0.0035  
Y -0.0372 0.0201 -0.0066 -0.0069 0.0010 0.0024  
Z 0.0098 -0.0019 -0.0050 -0.0052 0.0006 -0.0003  
AT. 142 H X -0.0072 -0.0075 0.0252 -0.0265 0.0043 -0.0035  
Y 0.0372 0.0201 0.0066 -0.0069 0.0010 -0.0024  
Z -0.0098 -0.0019 0.0050 -0.0052 0.0006 0.0003  
AT. 143 C X -0.0032 0.0052 -0.0144 -0.0140 0.0018 0.0021  
Y 0.0247 -0.0304 -0.0043 -0.0047 0.0013 0.0008  
Z 0.0094 -0.0098 0.0001 0.0004 0.0001 -0.0003  
AT. 144 C X 0.0032 0.0052 0.0144 -0.0140 0.0018 -0.0021  
Y -0.0247 -0.0304 0.0043 -0.0047 0.0013 -0.0008  
Z -0.0094 -0.0098 -0.0001 0.0004 0.0001 0.0003  
AT. 145 H X -0.0162 0.0164 -0.0172 -0.0164 0.0018 0.0025  
Y 0.0349 -0.0571 -0.0022 -0.0034 0.0008 0.0001  
Z -0.0044 0.0215 -0.0029 -0.0017 0.0007 0.0006  
AT. 146 H X 0.0162 0.0164 0.0172 -0.0164 0.0018 -0.0025  
Y -0.0349 -0.0571 0.0022 -0.0034 0.0008 -0.0001  
Z 0.0044 0.0215 0.0029 -0.0017 0.0007 -0.0006

AT. 147 H X -0.0016 -0.0024 -0.0016 -0.0011 -0.0001 -0.0003  
Y 0.0243 -0.0109 -0.0139 -0.0142 0.0035 0.0033  
Z 0.0114 -0.0103 0.0132 0.0137 -0.0014 -0.0025

AT. 148 H X 0.0016 -0.0024 0.0016 -0.0011 -0.0001 0.0003  
Y -0.0243 -0.0109 0.0139 -0.0142 0.0035 -0.0033  
Z -0.0114 -0.0103 -0.0132 0.0137 -0.0014 0.0025

AT. 149 H X 0.0014 0.0098 -0.0325 -0.0323 0.0049 0.0057  
Y 0.0366 -0.0518 -0.0073 -0.0083 0.0019 0.0012  
Z 0.0274 -0.0488 0.0043 0.0037 -0.0005 -0.0016

AT. 150 H X -0.0014 0.0098 0.0325 -0.0323 0.0049 -0.0057  
Y -0.0366 -0.0518 0.0073 -0.0083 0.0019 -0.0012  
Z -0.0274 -0.0488 -0.0043 0.0037 -0.0005 0.0016

AT. 151 C X -0.0011 -0.0000 0.0093 0.0096 -0.0019 -0.0022  
Y 0.0161 -0.0126 -0.0210 -0.0205 0.0044 0.0045  
Z 0.0055 -0.0035 0.0034 0.0042 -0.0011 -0.0008

AT. 152 C X 0.0011 -0.0000 -0.0093 0.0096 -0.0019 0.0022  
Y -0.0161 -0.0126 0.0210 -0.0205 0.0044 -0.0045  
Z -0.0055 -0.0035 -0.0034 0.0042 -0.0011 0.0008

AT. 153 H X 0.0066 -0.0090 0.0348 0.0352 -0.0057 -0.0069  
Y 0.0305 -0.0267 -0.0300 -0.0297 0.0067 0.0067  
Z 0.0255 -0.0225 -0.0224 -0.0218 0.0043 0.0048

AT. 154 H X -0.0066 -0.0090 -0.0348 0.0352 -0.0057 0.0069  
Y -0.0305 -0.0267 0.0300 -0.0297 0.0067 -0.0067  
Z -0.0255 -0.0225 0.0224 -0.0218 0.0043 -0.0048

AT. 155 H X -0.0227 0.0217 0.0169 0.0179 -0.0039 -0.0037  
Y 0.0268 -0.0221 -0.0415 -0.0410 0.0084 0.0090  
Z -0.0134 0.0145 0.0277 0.0286 -0.0061 -0.0060

AT. 156 H X 0.0227 0.0217 -0.0169 0.0179 -0.0039 0.0037  
Y -0.0268 -0.0221 0.0415 -0.0410 0.0084 -0.0090  
Z 0.0134 0.0145 -0.0277 0.0286 -0.0061 0.0060

AT. 157 O X 0.0005 -0.0008 0.0002 0.0005 0.0023 0.0011  
Y 0.0001 0.0009 0.0003 0.0001 0.0017 0.0022



Z 0.0001 -0.0012 0.0004 0.0003 0.0003 0.0012  
AT. 158 O X -0.0005 -0.0008 -0.0002 0.0005 0.0023 -0.0011  
Y -0.0001 0.0009 -0.0003 0.0001 0.0017 -0.0022  
Z -0.0001 -0.0012 -0.0004 0.0003 0.0003 -0.0012  
AT. 159 O X -0.0002 0.0002 0.0003 -0.0004 -0.0008 0.0022  
Y -0.0000 0.0010 -0.0000 0.0005 -0.0004 -0.0024  
Z -0.0010 0.0005 0.0004 -0.0012 -0.0052 0.0028  
AT. 160 O X 0.0002 0.0002 -0.0003 -0.0004 -0.0008 -0.0022  
Y 0.0000 0.0010 0.0000 0.0005 -0.0004 0.0024  
Z 0.0010 0.0005 -0.0004 -0.0012 -0.0052 -0.0028  
AT. 161 H X 0.0007 -0.0008 0.0004 0.0006 0.0044 0.0026  
Y 0.0000 0.0008 0.0001 -0.0002 -0.0002 0.0008  
Z 0.0001 -0.0014 0.0013 0.0014 0.0060 0.0046  
AT. 162 H X -0.0007 -0.0008 -0.0004 0.0006 0.0044 -0.0026  
Y -0.0000 0.0008 -0.0001 -0.0002 -0.0002 -0.0008  
Z -0.0001 -0.0014 -0.0013 0.0014 0.0060 -0.0046  
AT. 163 H X -0.0013 0.0006 0.0004 -0.0018 -0.0054 0.0054  
Y -0.0016 -0.0014 0.0004 0.0002 0.0017 -0.0054  
Z -0.0010 -0.0003 0.0006 -0.0008 -0.0037 0.0017  
AT. 164 H X 0.0013 0.0006 -0.0004 -0.0018 -0.0054 -0.0054  
Y 0.0016 -0.0014 -0.0004 0.0002 0.0017 0.0054  
Z 0.0010 -0.0003 -0.0006 -0.0008 -0.0037 -0.0017  
AT. 165 O X 0.0089 -0.0078 0.0070 0.0055 -0.0007 -0.0011  
Y 0.0002 -0.0030 0.0004 -0.0013 0.0001 0.0005  
Z 0.0012 -0.0018 0.0007 0.0020 -0.0004 -0.0004  
AT. 166 O X -0.0089 -0.0078 -0.0070 0.0055 -0.0007 0.0011  
Y -0.0002 -0.0030 -0.0004 -0.0013 0.0001 -0.0005  
Z -0.0012 -0.0018 -0.0007 0.0020 -0.0004 0.0004  
AT. 167 H X 0.0068 -0.0067 0.0055 0.0029 -0.0005 -0.0008  
Y 0.0093 -0.0105 0.0067 0.0071 -0.0010 -0.0003  
Z -0.0057 0.0041 -0.0026 -0.0019 0.0005 -0.0001  
AT. 168 H X -0.0068 -0.0067 -0.0055 0.0029 -0.0005 0.0008

Y -0.0093 -0.0105 -0.0067 0.0071 -0.0010 0.0003  
 Z 0.0057 0.0041 0.0026 -0.0019 0.0005 0.0001  
 AT. 169 O X -0.0036 -0.0011 -0.0020 -0.0009 0.0004 0.0004  
 Y 0.0072 0.0035 0.0022 -0.0004 0.0004 -0.0008  
 Z -0.0023 -0.0017 -0.0013 0.0006 -0.0002 0.0001  
 AT. 170 O X 0.0036 -0.0011 0.0020 -0.0009 0.0004 -0.0004  
 Y -0.0072 0.0035 -0.0022 -0.0004 0.0004 0.0008  
 Z 0.0023 -0.0017 0.0013 0.0006 -0.0002 -0.0001  
 AT. 171 H X 0.0020 0.0059 -0.0054 0.0034 0.0004 0.0003  
 Y 0.0134 0.0085 0.0024 0.0018 0.0003 -0.0014  
 Z 0.0033 0.0009 0.0011 0.0017 -0.0007 -0.0007  
 AT. 172 H X -0.0020 0.0059 0.0054 0.0034 0.0004 -0.0003  
 Y -0.0134 0.0085 -0.0024 0.0018 0.0003 0.0014  
 Z -0.0033 0.0009 -0.0011 0.0017 -0.0007 0.0007

FREQ(CM\*\*-1) 366.98 368.42 372.54 372.73 386.46 388.84

AT. 1 I X 0.0000 -0.0000 0.0009 0.0007 0.0000 0.0005  
 Y -0.0000 -0.0001 -0.0000 -0.0001 0.0000 0.0003  
 Z 0.0001 0.0001 0.0001 -0.0001 -0.0000 0.0002  
 AT. 2 I X -0.0000 -0.0000 0.0009 -0.0007 0.0000 -0.0005  
 Y 0.0000 -0.0001 -0.0000 0.0001 0.0000 -0.0003  
 Z -0.0001 0.0001 0.0001 0.0001 -0.0000 -0.0002  
 AT. 3 I X -0.0000 -0.0002 0.0030 0.0028 0.0002 -0.0012  
 Y 0.0002 0.0001 0.0006 0.0005 0.0000 -0.0002  
 Z 0.0000 -0.0000 0.0010 0.0009 0.0000 -0.0004  
 AT. 4 I X 0.0000 -0.0002 0.0030 -0.0028 0.0002 0.0012  
 Y -0.0002 0.0001 0.0006 -0.0005 0.0000 0.0002  
 Z -0.0000 -0.0000 0.0010 -0.0009 0.0000 0.0004  
 AT. 5 O X 0.0001 -0.0001 -0.0052 -0.0054 -0.0007 0.0057  
 Y -0.0012 -0.0017 0.0133 0.0150 -0.0003 0.0028  
 Z 0.0018 0.0022 -0.0100 -0.0106 0.0023 -0.0237

AT. 6 O X -0.0001 -0.0001 -0.0052 0.0054 -0.0007 -0.0057  
Y 0.0012 -0.0017 0.0133 -0.0150 -0.0003 -0.0028  
Z -0.0018 0.0022 -0.0100 0.0106 0.0023 0.0237

AT. 7 O X 0.0003 0.0010 -0.0167 -0.0166 -0.0011 0.0128  
Y -0.0002 -0.0002 0.0053 0.0060 0.0012 -0.0094  
Z -0.0013 -0.0030 0.0284 0.0253 -0.0003 0.0116

AT. 8 O X -0.0003 0.0010 -0.0167 0.0166 -0.0011 -0.0128  
Y 0.0002 -0.0002 0.0053 -0.0060 0.0012 0.0094  
Z 0.0013 -0.0030 0.0284 -0.0253 -0.0003 -0.0116

AT. 9 N X 0.0011 0.0023 -0.0229 -0.0223 0.0000 -0.0037  
Y 0.0017 0.0035 -0.0270 -0.0270 0.0011 -0.0144  
Z 0.0009 0.0011 -0.0044 -0.0049 0.0011 -0.0110

AT. 10 N X -0.0011 0.0023 -0.0229 0.0223 0.0000 0.0037  
Y -0.0017 0.0035 -0.0270 0.0270 0.0011 0.0144  
Z -0.0009 0.0011 -0.0044 0.0049 0.0011 0.0110

AT. 11 N X -0.0000 0.0014 -0.0124 -0.0127 -0.0002 0.0013  
Y 0.0009 0.0027 -0.0246 -0.0226 0.0011 -0.0189  
Z 0.0003 0.0011 -0.0131 -0.0131 -0.0002 -0.0004

AT. 12 N X 0.0000 0.0014 -0.0124 0.0127 -0.0002 -0.0013  
Y -0.0009 0.0027 -0.0246 0.0226 0.0011 0.0189  
Z -0.0003 0.0011 -0.0131 0.0131 -0.0002 0.0004

AT. 13 C X -0.0001 0.0002 -0.0072 -0.0070 -0.0007 0.0040  
Y -0.0001 0.0006 -0.0029 -0.0013 0.0009 -0.0129  
Z 0.0009 0.0011 -0.0036 -0.0036 0.0013 -0.0147

AT. 14 C X 0.0001 0.0002 -0.0072 0.0070 -0.0007 -0.0040  
Y 0.0001 0.0006 -0.0029 0.0013 0.0009 0.0129  
Z -0.0009 0.0011 -0.0036 0.0036 0.0013 0.0147

AT. 15 C X 0.0002 0.0004 -0.0051 -0.0057 -0.0001 -0.0004  
Y -0.0006 -0.0002 0.0028 0.0040 0.0006 -0.0091  
Z -0.0001 -0.0006 -0.0019 -0.0017 -0.0008 0.0069

AT. 16 C X -0.0002 0.0004 -0.0051 0.0057 -0.0001 0.0004  
Y 0.0006 -0.0002 0.0028 -0.0040 0.0006 0.0091

Z 0.0001 -0.0006 -0.0019 0.0017 -0.0008 -0.0069  
AT. 17 H X 0.0004 0.0005 -0.0027 -0.0043 -0.0004 0.0057  
Y -0.0001 0.0006 0.0062 0.0072 0.0022 -0.0256  
Z -0.0007 -0.0017 -0.0055 -0.0054 -0.0030 0.0302  
AT. 18 H X -0.0004 0.0005 -0.0027 0.0043 -0.0004 -0.0057  
Y 0.0001 0.0006 0.0062 -0.0072 0.0022 0.0256  
Z 0.0007 -0.0017 -0.0055 0.0054 -0.0030 -0.0302  
AT. 19 H X 0.0007 0.0009 -0.0021 -0.0036 0.0010 -0.0085  
Y -0.0012 -0.0018 -0.0006 0.0000 -0.0020 0.0167  
Z -0.0002 -0.0011 -0.0023 -0.0026 -0.0015 0.0145  
AT. 20 H X -0.0007 0.0009 -0.0021 0.0036 0.0010 0.0085  
Y 0.0012 -0.0018 -0.0006 -0.0000 -0.0020 -0.0167  
Z 0.0002 -0.0011 -0.0023 0.0026 -0.0015 -0.0145  
AT. 21 C X -0.0001 0.0008 -0.0140 -0.0139 -0.0012 0.0095  
Y 0.0001 0.0008 -0.0047 -0.0032 0.0009 -0.0141  
Z -0.0003 -0.0002 -0.0000 -0.0006 -0.0003 0.0033  
AT. 22 C X 0.0001 0.0008 -0.0140 0.0139 -0.0012 -0.0095  
Y -0.0001 0.0008 -0.0047 0.0032 0.0009 0.0141  
Z 0.0003 -0.0002 -0.0000 0.0006 -0.0003 -0.0033  
AT. 23 C X 0.0001 0.0008 -0.0138 -0.0131 -0.0009 0.0065  
Y -0.0010 0.0001 -0.0128 -0.0112 -0.0011 0.0090  
Z 0.0002 -0.0002 0.0053 0.0056 0.0009 -0.0101  
AT. 24 C X -0.0001 0.0008 -0.0138 0.0131 -0.0009 -0.0065  
Y 0.0010 0.0001 -0.0128 0.0112 -0.0011 -0.0090  
Z -0.0002 -0.0002 0.0053 -0.0056 0.0009 0.0101  
AT. 25 H X 0.0008 0.0009 -0.0075 -0.0081 -0.0009 0.0082  
Y -0.0010 0.0002 -0.0161 -0.0144 -0.0015 0.0142  
Z 0.0012 -0.0009 0.0346 0.0333 0.0037 -0.0444  
AT. 26 H X -0.0008 0.0009 -0.0075 0.0081 -0.0009 -0.0082  
Y 0.0010 0.0002 -0.0161 0.0144 -0.0015 -0.0142  
Z -0.0012 -0.0009 0.0346 -0.0333 0.0037 0.0444  
AT. 27 H X 0.0004 0.0007 -0.0054 -0.0038 0.0000 -0.0035

Y -0.0019 0.0004 -0.0355 -0.0332 -0.0037 0.0404  
Z -0.0004 0.0000 -0.0082 -0.0075 -0.0006 0.0083  
AT. 28 H X -0.0004 0.0007 -0.0054 0.0038 0.0000 0.0035  
Y 0.0019 0.0004 -0.0355 0.0332 -0.0037 -0.0404  
Z 0.0004 0.0000 -0.0082 0.0075 -0.0006 -0.0083  
AT. 29 C X 0.0016 0.0017 -0.0120 -0.0136 0.0000 0.0031  
Y 0.0010 0.0010 -0.0039 -0.0065 -0.0006 0.0136  
Z -0.0017 -0.0019 0.0152 0.0163 -0.0007 0.0087  
AT. 30 C X -0.0016 0.0017 -0.0120 0.0136 0.0000 -0.0031  
Y -0.0010 0.0010 -0.0039 0.0065 -0.0006 -0.0136  
Z 0.0017 -0.0019 0.0152 -0.0163 -0.0007 -0.0087  
AT. 31 H X 0.0032 0.0023 -0.0112 -0.0158 -0.0005 0.0133  
Y -0.0016 -0.0018 0.0215 0.0215 0.0003 0.0050  
Z -0.0047 -0.0058 0.0528 0.0559 0.0004 0.0021  
AT. 32 H X -0.0032 0.0023 -0.0112 0.0158 -0.0005 -0.0133  
Y 0.0016 -0.0018 0.0215 -0.0215 0.0003 -0.0050  
Z 0.0047 -0.0058 0.0528 -0.0559 0.0004 -0.0021  
AT. 33 H X 0.0019 0.0021 -0.0245 -0.0266 -0.0023 0.0262  
Y 0.0045 0.0050 -0.0431 -0.0495 -0.0021 0.0250  
Z -0.0030 -0.0033 0.0237 0.0261 -0.0015 0.0182  
AT. 34 H X -0.0019 0.0021 -0.0245 0.0266 -0.0023 -0.0262  
Y -0.0045 0.0050 -0.0431 0.0495 -0.0021 -0.0250  
Z 0.0030 -0.0033 0.0237 -0.0261 -0.0015 -0.0182  
AT. 35 C X 0.0001 -0.0001 0.0114 0.0109 0.0016 -0.0122  
Y 0.0002 -0.0005 0.0069 0.0047 -0.0010 0.0196  
Z -0.0006 -0.0001 -0.0048 -0.0045 -0.0018 0.0186  
AT. 36 C X -0.0001 -0.0001 0.0114 -0.0109 0.0016 0.0122  
Y -0.0002 -0.0005 0.0069 -0.0047 -0.0010 -0.0196  
Z 0.0006 -0.0001 -0.0048 0.0045 -0.0018 -0.0186  
AT. 37 C X -0.0004 -0.0006 0.0125 0.0109 0.0005 0.0020  
Y -0.0007 -0.0018 0.0209 0.0216 0.0009 -0.0046  
Z -0.0022 -0.0030 0.0211 0.0230 -0.0005 0.0055

AT. 38 C X 0.0004 -0.0006 0.0125 -0.0109 0.0005 -0.0020  
Y 0.0007 -0.0018 0.0209 -0.0216 0.0009 0.0046  
Z 0.0022 -0.0030 0.0211 -0.0230 -0.0005 -0.0055

AT. 39 H X -0.0044 -0.0077 0.0772 0.0791 0.0020 -0.0102  
Y -0.0028 -0.0056 0.0549 0.0582 0.0029 -0.0269  
Z -0.0039 -0.0062 0.0506 0.0537 -0.0003 0.0062

AT. 40 H X 0.0044 -0.0077 0.0772 -0.0791 0.0020 0.0102  
Y 0.0028 -0.0056 0.0549 -0.0582 0.0029 0.0269  
Z 0.0039 -0.0062 0.0506 -0.0537 -0.0003 -0.0062

AT. 41 H X 0.0036 0.0067 -0.0518 -0.0566 -0.0009 0.0127  
Y -0.0019 -0.0048 0.0523 0.0527 0.0011 0.0016  
Z -0.0055 -0.0082 0.0643 0.0696 0.0008 -0.0100

AT. 42 H X -0.0036 0.0067 -0.0518 0.0566 -0.0009 -0.0127  
Y 0.0019 -0.0048 0.0523 -0.0527 0.0011 -0.0016  
Z 0.0055 -0.0082 0.0643 -0.0696 0.0008 0.0100

AT. 43 C X -0.0006 -0.0014 0.0128 0.0124 -0.0009 0.0167  
Y 0.0001 -0.0006 -0.0008 -0.0003 -0.0002 -0.0005  
Z 0.0003 0.0002 -0.0056 -0.0055 -0.0007 0.0111

AT. 44 C X 0.0006 -0.0014 0.0128 -0.0124 -0.0009 -0.0167  
Y -0.0001 -0.0006 -0.0008 0.0003 -0.0002 0.0005  
Z -0.0003 0.0002 -0.0056 0.0055 -0.0007 -0.0111

AT. 45 H X -0.0017 -0.0051 0.0388 0.0371 -0.0030 0.0523  
Y 0.0009 0.0019 -0.0169 -0.0149 0.0028 -0.0465  
Z 0.0002 0.0003 -0.0079 -0.0083 -0.0021 0.0306

AT. 46 H X 0.0017 -0.0051 0.0388 -0.0371 -0.0030 -0.0523  
Y -0.0009 0.0019 -0.0169 0.0149 0.0028 0.0465  
Z -0.0002 0.0003 -0.0079 0.0083 -0.0021 -0.0306

AT. 47 H X -0.0009 -0.0025 0.0183 0.0157 -0.0029 0.0475  
Y -0.0006 -0.0033 0.0181 0.0165 -0.0035 0.0525  
Z -0.0000 -0.0013 0.0080 0.0087 -0.0014 0.0247

AT. 48 H X 0.0009 -0.0025 0.0183 -0.0157 -0.0029 -0.0475  
Y 0.0006 -0.0033 0.0181 -0.0165 -0.0035 -0.0525

Z 0.0000 -0.0013 0.0080 -0.0087 -0.0014 -0.0247  
AT. 49 C X -0.0004 -0.0008 0.0120 0.0142 0.0019 -0.0236  
Y 0.0002 -0.0007 0.0021 0.0013 -0.0006 0.0071  
Z 0.0009 0.0017 -0.0155 -0.0150 0.0004 -0.0055  
AT. 50 C X 0.0004 -0.0008 0.0120 -0.0142 0.0019 0.0236  
Y -0.0002 -0.0007 0.0021 -0.0013 -0.0006 -0.0071  
Z -0.0009 0.0017 -0.0155 0.0150 0.0004 0.0055  
AT. 51 C X 0.0002 0.0001 -0.0029 -0.0009 0.0007 -0.0120  
Y 0.0003 -0.0005 0.0124 0.0122 0.0014 -0.0160  
Z 0.0007 0.0015 -0.0130 -0.0126 0.0006 -0.0070  
AT. 52 C X -0.0002 0.0001 -0.0029 0.0009 0.0007 0.0120  
Y -0.0003 -0.0005 0.0124 -0.0122 0.0014 0.0160  
Z -0.0007 0.0015 -0.0130 0.0126 0.0006 0.0070  
AT. 53 H X 0.0001 -0.0007 0.0153 0.0169 0.0024 -0.0313  
Y -0.0001 -0.0016 0.0355 0.0357 0.0037 -0.0434  
Z 0.0003 0.0015 -0.0184 -0.0168 0.0002 -0.0036  
AT. 54 H X -0.0001 -0.0007 0.0153 -0.0169 0.0024 0.0313  
Y 0.0001 -0.0016 0.0355 -0.0357 0.0037 0.0434  
Z -0.0003 0.0015 -0.0184 0.0168 0.0002 0.0036  
AT. 55 H X 0.0003 0.0014 -0.0297 -0.0274 -0.0014 0.0129  
Y -0.0001 -0.0022 0.0339 0.0333 0.0020 -0.0222  
Z 0.0003 0.0003 -0.0045 -0.0044 -0.0001 0.0019  
AT. 56 H X -0.0003 0.0014 -0.0297 0.0274 -0.0014 -0.0129  
Y 0.0001 -0.0022 0.0339 -0.0333 0.0020 0.0222  
Z -0.0003 0.0003 -0.0045 0.0044 -0.0001 -0.0019  
AT. 57 C X -0.0006 0.0001 0.0006 0.0018 0.0003 -0.0056  
Y -0.0001 -0.0000 -0.0016 -0.0025 -0.0008 0.0084  
Z 0.0001 0.0003 0.0052 0.0054 0.0019 -0.0227  
AT. 58 C X 0.0006 0.0001 0.0006 -0.0018 0.0003 0.0056  
Y 0.0001 -0.0000 -0.0016 0.0025 -0.0008 -0.0084  
Z -0.0001 0.0003 0.0052 -0.0054 0.0019 0.0227  
AT. 59 H X -0.0021 -0.0005 -0.0126 -0.0102 -0.0023 0.0137

Y 0.0001 0.0004 0.0009 0.0016 0.0014 -0.0127  
Z -0.0007 0.0005 -0.0004 0.0031 0.0034 -0.0405  
AT. 60 H X 0.0021 -0.0005 -0.0126 0.0102 -0.0023 -0.0137  
Y -0.0001 0.0004 0.0009 -0.0016 0.0014 0.0127  
Z 0.0007 0.0005 -0.0004 -0.0031 0.0034 0.0405  
AT. 61 H X -0.0003 -0.0002 0.0093 0.0093 0.0020 -0.0301  
Y -0.0008 -0.0010 -0.0045 -0.0074 -0.0038 0.0370  
Z 0.0007 0.0006 0.0136 0.0137 0.0048 -0.0562  
AT. 62 H X 0.0003 -0.0002 0.0093 -0.0093 0.0020 0.0301  
Y 0.0008 -0.0010 -0.0045 0.0074 -0.0038 -0.0370  
Z -0.0007 0.0006 0.0136 -0.0137 0.0048 0.0562  
AT. 63 H X -0.0010 0.0000 -0.0048 -0.0031 -0.0010 0.0158  
Y -0.0005 0.0003 -0.0075 -0.0061 0.0004 -0.0134  
Z 0.0009 0.0000 0.0155 0.0133 0.0021 -0.0245  
AT. 64 H X 0.0010 0.0000 -0.0048 0.0031 -0.0010 -0.0158  
Y 0.0005 0.0003 -0.0075 0.0061 0.0004 0.0134  
Z -0.0009 0.0000 0.0155 -0.0133 0.0021 0.0245  
AT. 65 C X -0.0009 -0.0012 0.0099 0.0099 -0.0005 0.0034  
Y 0.0006 0.0014 -0.0140 -0.0141 -0.0003 0.0038  
Z 0.0005 0.0007 -0.0149 -0.0170 -0.0021 0.0241  
AT. 66 C X 0.0009 -0.0012 0.0099 -0.0099 -0.0005 -0.0034  
Y -0.0006 0.0014 -0.0140 0.0141 -0.0003 -0.0038  
Z -0.0005 0.0007 -0.0149 0.0170 -0.0021 -0.0241  
AT. 67 H X -0.0016 -0.0017 0.0049 0.0041 -0.0033 0.0363  
Y 0.0010 0.0024 -0.0210 -0.0241 0.0000 -0.0099  
Z 0.0007 0.0002 -0.0040 -0.0025 -0.0000 0.0093  
AT. 68 H X 0.0016 -0.0017 0.0049 -0.0041 -0.0033 -0.0363  
Y -0.0010 0.0024 -0.0210 0.0241 0.0000 0.0099  
Z -0.0007 0.0002 -0.0040 0.0025 -0.0000 -0.0093  
AT. 69 H X -0.0006 -0.0004 0.0090 0.0131 0.0012 -0.0106  
Y 0.0001 0.0010 -0.0120 -0.0084 -0.0006 0.0139  
Z -0.0006 -0.0015 -0.0100 -0.0148 -0.0059 0.0685



AT. 70 H X 0.0006 -0.0004 0.0090 -0.0131 0.0012 0.0106  
Y -0.0001 0.0010 -0.0120 0.0084 -0.0006 -0.0139  
Z 0.0006 -0.0015 -0.0100 0.0148 -0.0059 -0.0685

AT. 71 H X -0.0013 -0.0024 0.0108 0.0057 -0.0032 0.0268  
Y 0.0008 0.0027 -0.0236 -0.0232 0.0000 -0.0019  
Z 0.0004 0.0016 -0.0272 -0.0324 -0.0035 0.0340

AT. 72 H X 0.0013 -0.0024 0.0108 -0.0057 -0.0032 -0.0268  
Y -0.0008 0.0027 -0.0236 0.0232 0.0000 0.0019  
Z -0.0004 0.0016 -0.0272 0.0324 -0.0035 -0.0340

AT. 73 C X -0.0008 -0.0018 0.0209 0.0217 0.0013 -0.0148  
Y -0.0012 -0.0032 0.0216 0.0195 -0.0024 0.0305  
Z -0.0004 0.0004 -0.0092 -0.0078 -0.0012 0.0111

AT. 74 C X 0.0008 -0.0018 0.0209 -0.0217 0.0013 0.0148  
Y 0.0012 -0.0032 0.0216 -0.0195 -0.0024 -0.0305  
Z 0.0004 0.0004 -0.0092 0.0078 -0.0012 -0.0111

AT. 75 H X -0.0015 -0.0033 0.0350 0.0342 0.0002 0.0005  
Y -0.0026 -0.0053 0.0334 0.0324 -0.0036 0.0400  
Z -0.0027 -0.0036 0.0162 0.0179 -0.0035 0.0339

AT. 76 H X 0.0015 -0.0033 0.0350 -0.0342 0.0002 -0.0005  
Y 0.0026 -0.0053 0.0334 -0.0324 -0.0036 -0.0400  
Z 0.0027 -0.0036 0.0162 -0.0179 -0.0035 -0.0339

AT. 77 H X -0.0010 -0.0024 0.0216 0.0238 0.0016 -0.0227  
Y -0.0034 -0.0065 0.0445 0.0412 -0.0048 0.0586  
Z 0.0019 0.0041 -0.0310 -0.0297 0.0008 -0.0078

AT. 78 H X 0.0010 -0.0024 0.0216 -0.0238 0.0016 0.0227  
Y 0.0034 -0.0065 0.0445 -0.0412 -0.0048 -0.0586  
Z -0.0019 0.0041 -0.0310 0.0297 0.0008 0.0078

AT. 79 I X 0.0013 0.0014 0.0003 0.0002 -0.0014 -0.0002  
Y -0.0010 -0.0011 -0.0002 -0.0000 0.0014 0.0002  
Z -0.0003 -0.0002 -0.0001 -0.0001 0.0005 0.0001

AT. 80 I X -0.0013 0.0014 0.0003 -0.0002 -0.0014 0.0002  
Y 0.0010 -0.0011 -0.0002 0.0000 0.0014 -0.0002

Z 0.0003 -0.0002 -0.0001 0.0001 0.0005 -0.0001  
AT. 81 I X 0.0014 0.0016 0.0001 0.0001 0.0020 0.0003  
Y -0.0007 -0.0009 -0.0000 -0.0000 -0.0011 -0.0002  
Z -0.0005 -0.0005 -0.0000 -0.0000 -0.0004 -0.0001  
AT. 82 I X -0.0014 0.0016 0.0001 -0.0001 0.0020 -0.0003  
Y 0.0007 -0.0009 -0.0000 0.0000 -0.0011 0.0002  
Z 0.0005 -0.0005 -0.0000 0.0000 -0.0004 0.0001  
AT. 83 O X -0.0105 -0.0099 -0.0021 -0.0011 0.0093 0.0007  
Y -0.0131 -0.0131 -0.0011 -0.0010 0.0074 0.0007  
Z 0.0207 0.0221 0.0022 0.0001 -0.0290 -0.0050  
AT. 84 O X 0.0105 -0.0099 -0.0021 0.0011 0.0093 -0.0007  
Y 0.0131 -0.0131 -0.0011 0.0010 0.0074 -0.0007  
Z -0.0207 0.0221 0.0022 -0.0001 -0.0290 0.0050  
AT. 85 O X -0.0148 -0.0141 -0.0023 -0.0020 -0.0155 -0.0035  
Y 0.0092 0.0092 0.0012 0.0011 0.0083 0.0016  
Z -0.0253 -0.0255 -0.0017 -0.0013 -0.0222 -0.0042  
AT. 86 O X 0.0148 -0.0141 -0.0023 0.0020 -0.0155 0.0035  
Y -0.0092 0.0092 0.0012 -0.0011 0.0083 -0.0016  
Z 0.0253 -0.0255 -0.0017 0.0013 -0.0222 0.0042  
AT. 87 N X -0.0112 -0.0098 -0.0014 -0.0009 0.0023 -0.0002  
Y 0.0427 0.0430 0.0045 0.0022 -0.0093 -0.0003  
Z 0.0073 0.0083 0.0005 -0.0003 -0.0097 -0.0022  
AT. 88 N X 0.0112 -0.0098 -0.0014 0.0009 0.0023 0.0002  
Y -0.0427 0.0430 0.0045 -0.0022 -0.0093 0.0003  
Z -0.0073 0.0083 0.0005 0.0003 -0.0097 0.0022  
AT. 89 N X -0.0031 -0.0047 -0.0004 -0.0005 -0.0077 -0.0019  
Y 0.0256 0.0249 0.0020 0.0012 0.0143 0.0029  
Z 0.0084 0.0065 0.0004 -0.0001 -0.0005 -0.0003  
AT. 90 N X 0.0031 -0.0047 -0.0004 0.0005 -0.0077 0.0019  
Y -0.0256 0.0249 0.0020 -0.0012 0.0143 -0.0029  
Z -0.0084 0.0065 0.0004 0.0001 -0.0005 0.0003  
AT. 91 C X -0.0056 -0.0049 -0.0013 -0.0011 0.0027 -0.0003

Y 0.0115 0.0116 0.0013 0.0007 -0.0040 -0.0004  
Z 0.0070 0.0082 0.0007 -0.0003 -0.0146 -0.0030  
AT. 92 C X 0.0056 -0.0049 -0.0013 0.0011 0.0027 0.0003  
Y -0.0115 0.0116 0.0013 -0.0007 -0.0040 0.0004  
Z -0.0070 0.0082 0.0007 0.0003 -0.0146 0.0030  
AT. 93 C X -0.0063 -0.0054 -0.0006 -0.0007 -0.0003 -0.0005  
Y 0.0058 0.0061 0.0011 0.0009 -0.0114 -0.0015  
Z 0.0048 0.0060 0.0021 0.0004 -0.0265 -0.0041  
AT. 94 C X 0.0063 -0.0054 -0.0006 0.0007 -0.0003 0.0005  
Y -0.0058 0.0061 0.0011 -0.0009 -0.0114 0.0015  
Z -0.0048 0.0060 0.0021 -0.0004 -0.0265 0.0041  
AT. 95 H X -0.0003 0.0010 0.0002 -0.0003 -0.0067 -0.0014  
Y -0.0002 -0.0002 -0.0008 -0.0003 0.0026 -0.0001  
Z 0.0088 0.0101 0.0048 0.0021 -0.0439 -0.0054  
AT. 96 H X 0.0003 0.0010 0.0002 0.0003 -0.0067 0.0014  
Y 0.0002 -0.0002 -0.0008 0.0003 0.0026 0.0001  
Z -0.0088 0.0101 0.0048 -0.0021 -0.0439 0.0054  
AT. 97 H X -0.0022 -0.0018 0.0013 0.0005 -0.0092 -0.0008  
Y 0.0097 0.0106 0.0041 0.0024 -0.0377 -0.0044  
Z 0.0045 0.0060 0.0022 0.0004 -0.0299 -0.0047  
AT. 98 H X 0.0022 -0.0018 0.0013 -0.0005 -0.0092 0.0008  
Y -0.0097 0.0106 0.0041 -0.0024 -0.0377 0.0044  
Z -0.0045 0.0060 0.0022 -0.0004 -0.0299 0.0047  
AT. 99 C X -0.0067 -0.0074 -0.0013 -0.0013 -0.0112 -0.0027  
Y 0.0105 0.0117 0.0010 0.0009 0.0107 0.0020  
Z -0.0033 -0.0045 -0.0006 -0.0007 -0.0082 -0.0019  
AT. 100 C X 0.0067 -0.0074 -0.0013 0.0013 -0.0112 0.0027  
Y -0.0105 0.0117 0.0010 -0.0009 0.0107 -0.0020  
Z 0.0033 -0.0045 -0.0006 0.0007 -0.0082 0.0019  
AT. 101 C X -0.0055 -0.0057 -0.0013 -0.0011 -0.0051 -0.0017  
Y 0.0075 0.0101 0.0000 0.0006 0.0236 0.0036  
Z -0.0067 -0.0080 -0.0007 -0.0011 -0.0217 -0.0042

AT.102 C X 0.0055 -0.0057 -0.0013 0.0011 -0.0051 0.0017  
Y -0.0075 0.0101 0.0000 -0.0006 0.0236 -0.0036  
Z 0.0067 -0.0080 -0.0007 0.0011 -0.0217 0.0042

AT.103 H X -0.0026 -0.0022 -0.0012 -0.0009 -0.0008 -0.0009  
Y 0.0065 0.0088 -0.0000 0.0005 0.0219 0.0033  
Z -0.0203 -0.0214 -0.0015 -0.0021 -0.0469 -0.0083

AT.104 H X 0.0026 -0.0022 -0.0012 0.0009 -0.0008 0.0009  
Y -0.0065 0.0088 -0.0000 -0.0005 0.0219 -0.0033  
Z 0.0203 -0.0214 -0.0015 0.0021 -0.0469 0.0083

AT.105 H X 0.0008 -0.0015 -0.0011 -0.0007 0.0066 0.0000  
Y 0.0166 0.0192 0.0009 0.0019 0.0454 0.0077  
Z -0.0022 -0.0035 -0.0003 -0.0006 -0.0113 -0.0022

AT.106 H X -0.0008 -0.0015 -0.0011 0.0007 0.0066 -0.0000  
Y -0.0166 0.0192 0.0009 -0.0019 0.0454 -0.0077  
Z 0.0022 -0.0035 -0.0003 0.0006 -0.0113 0.0022

AT.107 C X -0.0110 -0.0098 -0.0009 0.0004 0.0186 0.0035  
Y 0.0112 0.0125 0.0014 0.0003 -0.0049 -0.0002  
Z -0.0138 -0.0123 -0.0012 0.0002 0.0200 0.0037

AT.108 C X 0.0110 -0.0098 -0.0009 -0.0004 0.0186 -0.0035  
Y -0.0112 0.0125 0.0014 -0.0003 -0.0049 0.0002  
Z 0.0138 -0.0123 -0.0012 -0.0002 0.0200 -0.0037

AT.109 H X -0.0159 -0.0141 -0.0010 0.0021 0.0448 0.0091  
Y -0.0077 -0.0053 -0.0003 0.0002 0.0074 0.0021  
Z -0.0444 -0.0413 -0.0041 -0.0004 0.0336 0.0060

AT.110 H X 0.0159 -0.0141 -0.0010 -0.0021 0.0448 -0.0091  
Y 0.0077 -0.0053 -0.0003 -0.0002 0.0074 -0.0021  
Z 0.0444 -0.0413 -0.0041 0.0004 0.0336 -0.0060

AT.111 H X -0.0065 -0.0047 -0.0007 -0.0004 0.0009 -0.0003  
Y 0.0390 0.0381 0.0042 0.0002 -0.0300 -0.0049  
Z -0.0236 -0.0224 -0.0020 0.0010 0.0437 0.0086

AT.112 H X 0.0065 -0.0047 -0.0007 0.0004 0.0009 0.0003  
Y -0.0390 0.0381 0.0042 -0.0002 -0.0300 0.0049

Z 0.0236 -0.0224 -0.0020 -0.0010 0.0437 -0.0086  
AT. 113 C X 0.0040 0.0032 0.0009 0.0010 0.0153 0.0035  
Y -0.0072 -0.0058 -0.0004 -0.0003 0.0029 0.0009  
Z 0.0005 0.0010 -0.0001 0.0006 0.0197 0.0038  
AT. 114 C X -0.0040 0.0032 0.0009 -0.0010 0.0153 -0.0035  
Y 0.0072 -0.0058 -0.0004 0.0003 0.0029 -0.0009  
Z -0.0005 0.0010 -0.0001 -0.0006 0.0197 -0.0038  
AT. 115 C X -0.0010 -0.0027 0.0000 0.0003 0.0060 0.0010  
Y -0.0174 -0.0157 -0.0017 -0.0008 0.0041 0.0005  
Z -0.0228 -0.0223 -0.0024 -0.0005 0.0149 0.0023  
AT. 116 C X 0.0010 -0.0027 0.0000 -0.0003 0.0060 -0.0010  
Y 0.0174 -0.0157 -0.0017 0.0008 0.0041 -0.0005  
Z 0.0228 -0.0223 -0.0024 0.0005 0.0149 -0.0023  
AT. 117 H X 0.0398 0.0363 0.0039 0.0015 -0.0022 0.0002  
Y -0.0672 -0.0651 -0.0069 -0.0032 -0.0031 -0.0024  
Z -0.0551 -0.0529 -0.0053 -0.0013 0.0243 0.0037  
AT. 118 H X -0.0398 0.0363 0.0039 -0.0015 -0.0022 -0.0002  
Y 0.0672 -0.0651 -0.0069 0.0032 -0.0031 0.0024  
Z 0.0551 -0.0529 -0.0053 0.0013 0.0243 -0.0037  
AT. 119 H X -0.0666 -0.0656 -0.0064 -0.0020 0.0107 0.0005  
Y -0.0245 -0.0218 -0.0024 -0.0012 0.0023 0.0001  
Z -0.0519 -0.0510 -0.0052 -0.0014 0.0195 0.0025  
AT. 120 H X 0.0666 -0.0656 -0.0064 0.0020 0.0107 -0.0005  
Y 0.0245 -0.0218 -0.0024 0.0012 0.0023 -0.0001  
Z 0.0519 -0.0510 -0.0052 0.0014 0.0195 -0.0025  
AT. 121 C X 0.0092 0.0074 0.0006 -0.0002 -0.0123 -0.0026  
Y -0.0080 -0.0092 -0.0002 -0.0001 -0.0050 -0.0009  
Z 0.0014 -0.0001 -0.0002 0.0001 0.0138 0.0022  
AT. 122 C X -0.0092 0.0074 0.0006 0.0002 -0.0123 0.0026  
Y 0.0080 -0.0092 -0.0002 0.0001 -0.0050 0.0009  
Z -0.0014 -0.0001 -0.0002 -0.0001 0.0138 -0.0022  
AT. 123 H X 0.0401 0.0379 0.0024 -0.0000 -0.0270 -0.0061

Y 0.0001 -0.0009 -0.0004 -0.0009 -0.0228 -0.0054  
Z -0.0023 -0.0040 0.0003 0.0010 0.0300 0.0063  
AT. 124 H X -0.0401 0.0379 0.0024 0.0000 -0.0270 0.0061  
Y -0.0001 -0.0009 -0.0004 0.0009 -0.0228 0.0054  
Z 0.0023 -0.0040 0.0003 -0.0010 0.0300 -0.0063  
AT. 125 H X 0.0098 0.0081 0.0002 -0.0003 -0.0052 -0.0016  
Y -0.0301 -0.0312 -0.0007 0.0005 0.0143 0.0040  
Z -0.0105 -0.0118 -0.0011 0.0002 0.0317 0.0058  
AT. 126 H X -0.0098 0.0081 0.0002 0.0003 -0.0052 0.0016  
Y 0.0301 -0.0312 -0.0007 -0.0005 0.0143 -0.0040  
Z 0.0105 -0.0118 -0.0011 -0.0002 0.0317 -0.0058  
AT. 127 C X 0.0093 0.0087 0.0016 0.0006 -0.0022 0.0004  
Y -0.0106 -0.0112 -0.0005 -0.0005 -0.0133 -0.0026  
Z 0.0121 0.0114 0.0003 0.0002 0.0123 0.0014  
AT. 128 C X -0.0093 0.0087 0.0016 -0.0006 -0.0022 -0.0004  
Y 0.0106 -0.0112 -0.0005 0.0005 -0.0133 0.0026  
Z -0.0121 0.0114 0.0003 -0.0002 0.0123 -0.0014  
AT. 129 C X -0.0026 -0.0007 -0.0001 -0.0005 -0.0071 -0.0014  
Y -0.0105 -0.0093 -0.0010 -0.0013 -0.0291 -0.0063  
Z 0.0134 0.0127 0.0008 0.0006 0.0161 0.0027  
AT. 130 C X 0.0026 -0.0007 -0.0001 0.0005 -0.0071 0.0014  
Y 0.0105 -0.0093 -0.0010 0.0013 -0.0291 0.0063  
Z -0.0134 0.0127 0.0008 -0.0006 0.0161 -0.0027  
AT. 131 H X 0.0100 0.0102 0.0015 0.0012 0.0158 0.0039  
Y -0.0359 -0.0311 -0.0048 -0.0043 -0.0550 -0.0137  
Z 0.0191 0.0176 0.0014 0.0016 0.0347 0.0065  
AT. 132 H X -0.0100 0.0102 0.0015 -0.0012 0.0158 -0.0039  
Y 0.0359 -0.0311 -0.0048 0.0043 -0.0550 0.0137  
Z -0.0191 0.0176 0.0014 -0.0016 0.0347 -0.0065  
AT. 133 H X -0.0376 -0.0324 -0.0045 -0.0042 -0.0465 -0.0113  
Y -0.0256 -0.0243 -0.0025 -0.0022 -0.0338 -0.0075  
Z 0.0073 0.0052 0.0007 0.0011 0.0279 0.0055

AT. 134 H X 0.0376 -0.0324 -0.0045 0.0042 -0.0465 0.0113  
Y 0.0256 -0.0243 -0.0025 0.0022 -0.0338 0.0075  
Z -0.0073 0.0052 0.0007 -0.0011 0.0279 -0.0055

AT. 135 C X 0.0016 0.0012 0.0005 0.0002 0.0011 0.0007  
Y -0.0006 -0.0013 -0.0001 0.0000 0.0027 0.0005  
Z -0.0001 0.0001 -0.0009 -0.0008 -0.0028 -0.0013

AT. 136 C X -0.0016 0.0012 0.0005 -0.0002 0.0011 -0.0007  
Y 0.0006 -0.0013 -0.0001 -0.0000 0.0027 -0.0005  
Z 0.0001 0.0001 -0.0009 0.0008 -0.0028 0.0013

AT. 137 H X 0.0013 0.0021 -0.0001 -0.0007 -0.0135 -0.0026  
Y 0.0046 0.0031 0.0003 0.0003 0.0003 -0.0001  
Z 0.0087 0.0072 -0.0000 0.0000 -0.0014 -0.0011

AT. 138 H X -0.0013 0.0021 -0.0001 0.0007 -0.0135 0.0026  
Y -0.0046 0.0031 0.0003 -0.0003 0.0003 0.0001  
Z -0.0087 0.0072 -0.0000 -0.0000 -0.0014 0.0011

AT. 139 H X 0.0046 0.0043 0.0012 0.0011 0.0150 0.0041  
Y -0.0091 -0.0096 -0.0006 -0.0002 0.0072 0.0014  
Z -0.0019 -0.0018 -0.0018 -0.0020 -0.0222 -0.0059

AT. 140 H X -0.0046 0.0043 0.0012 -0.0011 0.0150 -0.0041  
Y 0.0091 -0.0096 -0.0006 0.0002 0.0072 -0.0014  
Z 0.0019 -0.0018 -0.0018 0.0020 -0.0222 0.0059

AT. 141 H X -0.0027 -0.0037 -0.0008 -0.0012 -0.0131 -0.0031  
Y 0.0058 0.0036 0.0002 0.0003 0.0010 -0.0001  
Z -0.0088 -0.0072 -0.0018 -0.0017 -0.0070 -0.0023

AT. 142 H X 0.0027 -0.0037 -0.0008 0.0012 -0.0131 0.0031  
Y -0.0058 0.0036 0.0002 -0.0003 0.0010 0.0001  
Z 0.0088 -0.0072 -0.0018 0.0017 -0.0070 0.0023

AT. 143 C X 0.0132 0.0128 0.0011 0.0002 -0.0008 -0.0004  
Y 0.0074 0.0054 0.0003 -0.0000 0.0027 0.0004  
Z 0.0071 0.0061 0.0014 0.0009 0.0084 0.0022

AT. 144 C X -0.0132 0.0128 0.0011 -0.0002 -0.0008 0.0004  
Y -0.0074 0.0054 0.0003 0.0000 0.0027 -0.0004

Z -0.0071 0.0061 0.0014 -0.0009 0.0084 -0.0022  
AT. 145 H X 0.0146 0.0157 0.0000 -0.0010 -0.0096 -0.0035  
Y 0.0192 0.0174 0.0003 -0.0011 0.0063 0.0010  
Z -0.0053 -0.0061 0.0011 0.0017 0.0025 0.0008  
AT. 146 H X -0.0146 0.0157 0.0000 0.0010 -0.0096 0.0035  
Y -0.0192 0.0174 0.0003 0.0011 0.0063 -0.0010  
Z 0.0053 -0.0061 0.0011 -0.0017 0.0025 -0.0008  
AT. 147 H X 0.0084 0.0086 0.0015 0.0003 -0.0024 0.0004  
Y 0.0003 -0.0035 0.0008 0.0016 0.0058 0.0012  
Z -0.0035 -0.0046 0.0022 0.0020 0.0079 0.0038  
AT. 148 H X -0.0084 0.0086 0.0015 -0.0003 -0.0024 -0.0004  
Y -0.0003 -0.0035 0.0008 -0.0016 0.0058 -0.0012  
Z 0.0035 -0.0046 0.0022 -0.0020 0.0079 -0.0038  
AT. 149 H X 0.0206 0.0183 0.0012 0.0008 0.0063 -0.0002  
Y 0.0177 0.0150 0.0005 -0.0004 0.0100 0.0017  
Z 0.0209 0.0196 0.0016 0.0001 0.0173 0.0042  
AT. 150 H X -0.0206 0.0183 0.0012 -0.0008 0.0063 0.0002  
Y -0.0177 0.0150 0.0005 0.0004 0.0100 -0.0017  
Z -0.0209 0.0196 0.0016 -0.0001 0.0173 -0.0042  
AT. 151 C X 0.0116 0.0117 0.0020 0.0013 0.0061 0.0024  
Y -0.0365 -0.0378 -0.0032 -0.0016 0.0002 -0.0000  
Z 0.0030 0.0028 -0.0005 0.0006 0.0316 0.0054  
AT. 152 C X -0.0116 0.0117 0.0020 -0.0013 0.0061 -0.0024  
Y 0.0365 -0.0378 -0.0032 0.0016 0.0002 0.0000  
Z -0.0030 0.0028 -0.0005 -0.0006 0.0316 -0.0054  
AT. 153 H X 0.0144 0.0144 0.0026 0.0019 0.0009 0.0016  
Y -0.0596 -0.0626 -0.0054 -0.0024 0.0034 0.0004  
Z -0.0358 -0.0386 -0.0044 -0.0010 0.0391 0.0064  
AT. 154 H X -0.0144 0.0144 0.0026 -0.0019 0.0009 -0.0016  
Y 0.0596 -0.0626 -0.0054 0.0024 0.0034 -0.0004  
Z 0.0358 -0.0386 -0.0044 0.0010 0.0391 -0.0064  
AT. 155 H X 0.0146 0.0172 0.0026 0.0019 0.0115 0.0041



Y -0.0686 -0.0715 -0.0063 -0.0028 0.0106 0.0018  
Z 0.0376 0.0399 0.0031 0.0020 0.0227 0.0041  
AT. 156 H X -0.0146 0.0172 0.0026 -0.0019 0.0115 -0.0041  
Y 0.0686 -0.0715 -0.0063 0.0028 0.0106 -0.0018  
Z -0.0376 0.0399 0.0031 -0.0020 0.0227 -0.0041  
AT. 157 O X 0.0003 0.0001 0.0003 -0.0009 0.0004 -0.0010  
Y 0.0013 0.0011 -0.0057 -0.0075 0.0003 -0.0012  
Z 0.0003 0.0006 -0.0018 0.0003 0.0004 0.0004  
AT. 158 O X -0.0003 0.0001 0.0003 0.0009 0.0004 0.0010  
Y -0.0013 0.0011 -0.0057 0.0075 0.0003 0.0012  
Z -0.0003 0.0006 -0.0018 -0.0003 0.0004 -0.0004  
AT. 159 O X -0.0006 -0.0003 -0.0005 0.0008 -0.0001 0.0011  
Y 0.0007 0.0004 0.0013 0.0021 -0.0001 0.0005  
Z -0.0010 -0.0002 -0.0028 0.0036 -0.0005 0.0040  
AT. 160 O X 0.0006 -0.0003 -0.0005 -0.0008 -0.0001 -0.0011  
Y -0.0007 0.0004 0.0013 -0.0021 -0.0001 -0.0005  
Z 0.0010 -0.0002 -0.0028 -0.0036 -0.0005 -0.0040  
AT. 161 H X 0.0008 0.0006 -0.0031 -0.0056 0.0003 0.0001  
Y 0.0010 0.0010 -0.0062 -0.0079 0.0002 -0.0001  
Z 0.0008 0.0013 -0.0031 -0.0017 0.0003 -0.0013  
AT. 162 H X -0.0008 0.0006 -0.0031 0.0056 0.0003 -0.0001  
Y -0.0010 0.0010 -0.0062 0.0079 0.0002 0.0001  
Z -0.0008 0.0013 -0.0031 0.0017 0.0003 0.0013  
AT. 163 H X -0.0019 -0.0002 -0.0050 0.0042 -0.0006 0.0036  
Y -0.0001 0.0022 0.0096 -0.0075 0.0004 -0.0003  
Z -0.0007 0.0003 0.0004 0.0003 -0.0001 0.0037  
AT. 164 H X 0.0019 -0.0002 -0.0050 -0.0042 -0.0006 -0.0036  
Y 0.0001 0.0022 0.0096 0.0075 0.0004 0.0003  
Z 0.0007 0.0003 0.0004 -0.0003 -0.0001 -0.0037  
AT. 165 O X 0.0047 0.0012 -0.0005 0.0005 -0.0030 0.0006  
Y 0.0016 0.0018 0.0003 -0.0017 -0.0003 0.0007  
Z -0.0003 0.0016 -0.0002 0.0006 -0.0000 -0.0004

AT.166 O X -0.0047 0.0012 -0.0005 -0.0005 -0.0030 -0.0006

Y -0.0016 0.0018 0.0003 0.0017 -0.0003 -0.0007

Z 0.0003 0.0016 -0.0002 -0.0006 -0.0000 0.0004

AT.167 H X 0.0094 0.0044 0.0002 -0.0006 -0.0068 0.0002

Y -0.0071 -0.0033 -0.0004 -0.0005 0.0076 0.0020

Z 0.0006 0.0021 -0.0004 0.0016 -0.0018 -0.0014

AT.168 H X -0.0094 0.0044 0.0002 0.0006 -0.0068 -0.0002

Y 0.0071 -0.0033 -0.0004 0.0005 0.0076 -0.0020

Z -0.0006 0.0021 -0.0004 -0.0016 -0.0018 0.0014

AT.169 O X -0.0027 0.0025 -0.0002 0.0002 0.0023 -0.0010

Y 0.0052 -0.0048 -0.0030 0.0033 -0.0045 0.0014

Z -0.0020 0.0032 0.0005 -0.0004 0.0015 -0.0008

AT.170 O X 0.0027 0.0025 -0.0002 -0.0002 0.0023 0.0010

Y -0.0052 -0.0048 -0.0030 -0.0033 -0.0045 -0.0014

Z 0.0020 0.0032 0.0005 0.0004 0.0015 0.0008

AT.171 H X 0.0070 -0.0039 0.0026 -0.0031 -0.0037 -0.0049

Y 0.0127 -0.0110 -0.0021 0.0027 -0.0100 0.0000

Z 0.0016 -0.0005 -0.0002 0.0009 -0.0016 -0.0003

AT.172 H X -0.0070 -0.0039 0.0026 0.0031 -0.0037 0.0049

Y -0.0127 -0.0110 -0.0021 -0.0027 -0.0100 -0.0000

Z -0.0016 -0.0005 -0.0002 -0.0009 -0.0016 0.0003

FREQ(CM\*\*-1) 389.79 390.79 394.94 395.58 400.75 400.83

AT. 1 I X -0.0001 0.0008 -0.0001 0.0000 -0.0005 0.0006

Y -0.0000 0.0004 -0.0001 0.0001 0.0001 -0.0003

Z -0.0001 0.0003 0.0000 -0.0000 -0.0002 0.0004

AT. 2 I X 0.0001 0.0008 -0.0001 -0.0000 0.0005 0.0006

Y 0.0000 0.0004 -0.0001 -0.0001 -0.0001 -0.0003

Z 0.0001 0.0003 0.0000 0.0000 0.0002 0.0004

AT. 3 I X 0.0002 -0.0014 0.0000 0.0001 0.0022 -0.0014

Y 0.0000 -0.0003 -0.0000 0.0000 0.0008 -0.0005

Z 0.0000 -0.0004 -0.0001 0.0000 0.0008 -0.0005  
AT. 4 I X -0.0002 -0.0014 0.0000 -0.0001 -0.0022 -0.0014  
Y -0.0000 -0.0003 -0.0000 -0.0000 -0.0008 -0.0005  
Z -0.0000 -0.0004 -0.0001 -0.0000 -0.0008 -0.0005  
AT. 5 O X -0.0008 0.0030 -0.0001 0.0000 0.0098 -0.0103  
Y -0.0017 0.0043 -0.0000 -0.0002 -0.0106 0.0130  
Z 0.0055 -0.0262 0.0028 -0.0010 0.0136 -0.0104  
AT. 6 O X 0.0008 0.0030 -0.0001 -0.0000 -0.0098 -0.0103  
Y 0.0017 0.0043 -0.0000 0.0002 0.0106 0.0130  
Z -0.0055 -0.0262 0.0028 0.0010 -0.0136 -0.0104  
AT. 7 O X -0.0020 0.0136 0.0003 -0.0009 -0.0115 0.0090  
Y 0.0017 -0.0081 0.0003 -0.0000 -0.0019 0.0031  
Z -0.0021 0.0052 -0.0002 -0.0002 0.0303 -0.0278  
AT. 8 O X 0.0020 0.0136 0.0003 0.0009 0.0115 0.0090  
Y -0.0017 -0.0081 0.0003 0.0000 0.0019 0.0031  
Z 0.0021 0.0052 -0.0002 0.0002 -0.0303 -0.0278  
AT. 9 N X 0.0016 -0.0061 0.0003 0.0004 0.0184 -0.0188  
Y 0.0034 -0.0157 0.0005 0.0003 0.0155 -0.0163  
Z 0.0024 -0.0122 0.0013 -0.0004 0.0072 -0.0055  
AT. 10 N X -0.0016 -0.0061 0.0003 -0.0004 -0.0184 -0.0188  
Y -0.0034 -0.0157 0.0005 -0.0003 -0.0155 -0.0163  
Z -0.0024 -0.0122 0.0013 0.0004 -0.0072 -0.0055  
AT. 11 N X -0.0004 0.0033 -0.0005 -0.0000 0.0005 -0.0016  
Y 0.0038 -0.0136 0.0014 -0.0003 -0.0126 0.0144  
Z 0.0004 0.0001 0.0010 -0.0007 -0.0015 0.0026  
AT. 12 N X 0.0004 0.0033 -0.0005 0.0000 -0.0005 -0.0016  
Y -0.0038 -0.0136 0.0014 0.0003 0.0126 0.0144  
Z -0.0004 0.0001 0.0010 0.0007 0.0015 0.0026  
AT. 13 C X -0.0005 0.0017 -0.0003 0.0003 0.0087 -0.0100  
Y 0.0021 -0.0117 0.0011 -0.0005 -0.0066 0.0085  
Z 0.0031 -0.0162 0.0018 -0.0006 0.0101 -0.0073  
AT. 14 C X 0.0005 0.0017 -0.0003 -0.0003 -0.0087 -0.0100

Y -0.0021 -0.0117 0.0011 0.0005 0.0066 0.0085  
Z -0.0031 -0.0162 0.0018 0.0006 -0.0101 -0.0073  
AT. 15 C X 0.0004 -0.0007 0.0003 -0.0002 -0.0033 0.0019  
Y 0.0015 -0.0087 0.0006 -0.0003 -0.0061 0.0066  
Z -0.0006 -0.0002 -0.0007 0.0011 0.0398 -0.0411  
AT. 16 C X -0.0004 -0.0007 0.0003 0.0002 0.0033 0.0019  
Y -0.0015 -0.0087 0.0006 0.0003 0.0061 0.0066  
Z 0.0006 -0.0002 -0.0007 -0.0011 -0.0398 -0.0411  
AT. 17 H X -0.0007 0.0074 -0.0006 -0.0000 -0.0093 0.0069  
Y 0.0040 -0.0197 0.0025 -0.0014 -0.0321 0.0365  
Z -0.0043 0.0172 -0.0034 0.0027 0.0688 -0.0755  
AT. 18 H X 0.0007 0.0074 -0.0006 0.0000 0.0093 0.0069  
Y -0.0040 -0.0197 0.0025 0.0014 0.0321 0.0365  
Z 0.0043 0.0172 -0.0034 -0.0027 -0.0688 -0.0755  
AT. 19 H X 0.0020 -0.0073 0.0012 -0.0008 -0.0120 0.0137  
Y -0.0024 0.0077 -0.0024 0.0018 0.0381 -0.0435  
Z -0.0016 0.0041 -0.0016 0.0017 0.0545 -0.0572  
AT. 20 H X -0.0020 -0.0073 0.0012 0.0008 0.0120 0.0137  
Y 0.0024 0.0077 -0.0024 -0.0018 -0.0381 -0.0435  
Z 0.0016 0.0041 -0.0016 -0.0017 -0.0545 -0.0572  
AT. 21 C X -0.0018 0.0104 -0.0001 -0.0004 -0.0067 0.0042  
Y 0.0021 -0.0108 -0.0001 0.0006 -0.0083 0.0081  
Z -0.0007 0.0018 0.0005 -0.0004 0.0046 -0.0043  
AT. 22 C X 0.0018 0.0104 -0.0001 0.0004 0.0067 0.0042  
Y -0.0021 -0.0108 -0.0001 -0.0006 0.0083 0.0081  
Z 0.0007 0.0018 0.0005 0.0004 -0.0046 -0.0043  
AT. 23 C X -0.0012 0.0078 -0.0001 -0.0001 -0.0107 0.0071  
Y -0.0018 0.0113 0.0005 -0.0011 -0.0153 0.0110  
Z 0.0016 -0.0114 0.0004 0.0005 0.0041 -0.0039  
AT. 24 C X 0.0012 0.0078 -0.0001 0.0001 0.0107 0.0071  
Y 0.0018 0.0113 0.0005 0.0011 0.0153 0.0110  
Z -0.0016 -0.0114 0.0004 -0.0005 -0.0041 -0.0039

AT. 25 H X -0.0013 0.0086 -0.0005 -0.0000 -0.0035 0.0013  
Y -0.0026 0.0160 0.0007 -0.0015 -0.0164 0.0119  
Z 0.0072 -0.0440 -0.0011 0.0033 0.0196 -0.0173

AT. 26 H X 0.0013 0.0086 -0.0005 0.0000 0.0035 0.0013  
Y 0.0026 0.0160 0.0007 0.0015 0.0164 0.0119  
Z -0.0072 -0.0440 -0.0011 -0.0033 -0.0196 -0.0173

AT. 27 H X 0.0005 -0.0018 -0.0003 0.0006 -0.0073 0.0048  
Y -0.0068 0.0416 0.0018 -0.0038 -0.0292 0.0230  
Z -0.0014 0.0062 0.0011 -0.0010 -0.0038 0.0026

AT. 28 H X -0.0005 -0.0018 -0.0003 -0.0006 0.0073 0.0048  
Y 0.0068 0.0416 0.0018 0.0038 0.0292 0.0230  
Z 0.0014 0.0062 0.0011 0.0010 0.0038 0.0026

AT. 29 C X 0.0004 0.0004 0.0007 -0.0005 0.0140 -0.0138  
Y -0.0024 0.0137 -0.0028 0.0013 0.0069 -0.0118  
Z -0.0028 0.0108 -0.0036 0.0025 -0.0019 -0.0017

AT. 30 C X -0.0004 0.0004 0.0007 0.0005 -0.0140 -0.0138  
Y 0.0024 0.0137 -0.0028 -0.0013 -0.0069 -0.0118  
Z 0.0028 0.0108 -0.0036 -0.0025 0.0019 -0.0017

AT. 31 H X -0.0007 0.0088 0.0021 -0.0023 0.0144 -0.0137  
Y -0.0021 0.0076 -0.0063 0.0046 0.0037 -0.0099  
Z -0.0031 0.0069 -0.0078 0.0062 -0.0065 0.0012

AT. 32 H X 0.0007 0.0088 0.0021 0.0023 -0.0144 -0.0137  
Y 0.0021 0.0076 -0.0063 -0.0046 -0.0037 -0.0099  
Z 0.0031 0.0069 -0.0078 -0.0062 0.0065 0.0012

AT. 33 H X -0.0036 0.0245 -0.0001 -0.0011 0.0067 -0.0090  
Y -0.0027 0.0212 0.0024 -0.0035 0.0125 -0.0147  
Z -0.0052 0.0228 -0.0062 0.0041 -0.0089 0.0026

AT. 34 H X 0.0036 0.0245 -0.0001 0.0011 -0.0067 -0.0090  
Y 0.0027 0.0212 0.0024 0.0035 -0.0125 -0.0147  
Z 0.0052 0.0228 -0.0062 -0.0041 0.0089 0.0026

AT. 35 C X 0.0021 -0.0135 -0.0004 0.0010 0.0093 -0.0082  
Y -0.0038 0.0208 -0.0039 0.0020 0.0020 -0.0074

Z -0.0040 0.0205 -0.0020 0.0007 -0.0049 0.0013  
AT. 36 C X -0.0021 -0.0135 -0.0004 -0.0010 -0.0093 -0.0082  
Y 0.0038 0.0208 -0.0039 -0.0020 -0.0020 -0.0074  
Z 0.0040 0.0205 -0.0020 -0.0007 0.0049 0.0013  
AT. 37 C X -0.0008 0.0013 -0.0018 0.0011 0.0083 -0.0101  
Y 0.0005 -0.0033 -0.0012 0.0011 -0.0073 0.0072  
Z -0.0019 0.0055 0.0003 -0.0005 -0.0108 0.0118  
AT. 38 C X 0.0008 0.0013 -0.0018 -0.0011 -0.0083 -0.0101  
Y -0.0005 -0.0033 -0.0012 -0.0011 0.0073 0.0072  
Z 0.0019 0.0055 0.0003 0.0005 0.0108 0.0118  
AT. 39 H X -0.0002 -0.0130 -0.0005 0.0005 -0.0073 0.0105  
Y 0.0041 -0.0281 0.0020 -0.0002 -0.0144 0.0213  
Z -0.0029 0.0059 -0.0002 -0.0003 -0.0181 0.0195  
AT. 40 H X 0.0002 -0.0130 -0.0005 -0.0005 0.0073 0.0105  
Y -0.0041 -0.0281 0.0020 0.0002 0.0144 0.0213  
Z 0.0029 0.0059 -0.0002 0.0003 0.0181 0.0195  
AT. 41 H X -0.0011 0.0146 -0.0031 0.0018 0.0214 -0.0277  
Y -0.0012 0.0009 -0.0029 0.0022 -0.0052 0.0039  
Z -0.0003 -0.0112 0.0029 -0.0020 -0.0262 0.0328  
AT. 42 H X 0.0011 0.0146 -0.0031 -0.0018 -0.0214 -0.0277  
Y 0.0012 0.0009 -0.0029 -0.0022 0.0052 0.0039  
Z 0.0003 -0.0112 0.0029 0.0020 0.0262 0.0328  
AT. 43 C X -0.0036 0.0177 -0.0024 0.0008 -0.0080 0.0047  
Y 0.0009 -0.0032 0.0023 -0.0015 0.0068 -0.0033  
Z -0.0021 0.0143 -0.0013 0.0003 -0.0196 0.0168  
AT. 44 C X 0.0036 0.0177 -0.0024 -0.0008 0.0080 0.0047  
Y -0.0009 -0.0032 0.0023 0.0015 -0.0068 -0.0033  
Z 0.0021 0.0143 -0.0013 -0.0003 0.0196 0.0168  
AT. 45 H X -0.0104 0.0521 -0.0063 0.0021 -0.0161 0.0064  
Y 0.0099 -0.0511 0.0093 -0.0046 0.0191 -0.0052  
Z -0.0060 0.0363 -0.0054 0.0025 -0.0260 0.0177  
AT. 46 H X 0.0104 0.0521 -0.0063 -0.0021 0.0161 0.0064

Y -0.0099 -0.0511 0.0093 0.0046 -0.0191 -0.0052  
Z 0.0060 0.0363 -0.0054 -0.0025 0.0260 0.0177  
AT. 47 H X -0.0090 0.0461 -0.0057 0.0020 0.0022 -0.0107  
Y -0.0091 0.0502 -0.0052 0.0018 -0.0009 -0.0069  
Z -0.0052 0.0314 -0.0046 0.0021 -0.0410 0.0336  
AT. 48 H X 0.0090 0.0461 -0.0057 -0.0020 -0.0022 -0.0107  
Y 0.0091 0.0502 -0.0052 -0.0018 0.0009 -0.0069  
Z 0.0052 0.0314 -0.0046 -0.0021 0.0410 0.0336  
AT. 49 C X 0.0038 -0.0216 0.0027 -0.0011 -0.0140 0.0193  
Y -0.0005 0.0020 0.0017 -0.0014 0.0160 -0.0135  
Z 0.0011 -0.0022 0.0012 -0.0009 -0.0212 0.0213  
AT. 50 C X -0.0038 -0.0216 0.0027 0.0011 0.0140 0.0193  
Y 0.0005 0.0020 0.0017 0.0014 -0.0160 -0.0135  
Z -0.0011 -0.0022 0.0012 0.0009 0.0212 0.0213  
AT. 51 C X 0.0025 -0.0115 0.0026 -0.0014 -0.0088 0.0130  
Y 0.0033 -0.0220 0.0028 -0.0010 0.0251 -0.0206  
Z 0.0014 -0.0032 0.0013 -0.0011 -0.0224 0.0236  
AT. 52 C X -0.0025 -0.0115 0.0026 0.0014 0.0088 0.0130  
Y -0.0033 -0.0220 0.0028 0.0010 -0.0251 -0.0206  
Z -0.0014 -0.0032 0.0013 0.0011 0.0224 0.0236  
AT. 53 H X 0.0057 -0.0338 0.0041 -0.0012 0.0067 0.0006  
Y 0.0075 -0.0497 0.0044 -0.0008 0.0266 -0.0185  
Z 0.0004 0.0048 0.0006 -0.0013 -0.0459 0.0457  
AT. 54 H X -0.0057 -0.0338 0.0041 0.0012 -0.0067 0.0006  
Y -0.0075 -0.0497 0.0044 0.0008 -0.0266 -0.0185  
Z -0.0004 0.0048 0.0006 0.0013 0.0459 0.0457  
AT. 55 H X -0.0017 0.0182 0.0006 -0.0016 -0.0326 0.0326  
Y 0.0042 -0.0311 0.0041 -0.0015 0.0341 -0.0264  
Z -0.0003 0.0056 0.0015 -0.0020 -0.0274 0.0297  
AT. 56 H X 0.0017 0.0182 0.0006 0.0016 0.0326 0.0326  
Y -0.0042 -0.0311 0.0041 0.0015 -0.0341 -0.0264  
Z 0.0003 0.0056 0.0015 0.0020 0.0274 0.0297

AT. 57 C X 0.0006 -0.0072 0.0010 -0.0004 0.0052 -0.0030  
Y -0.0019 0.0092 -0.0003 -0.0004 -0.0063 0.0049  
Z 0.0037 -0.0215 0.0016 -0.0002 -0.0077 0.0104

AT. 58 C X -0.0006 -0.0072 0.0010 0.0004 -0.0052 -0.0030  
Y 0.0019 0.0092 -0.0003 0.0004 0.0063 0.0049  
Z -0.0037 -0.0215 0.0016 0.0002 0.0077 0.0104

AT. 59 H X -0.0030 0.0110 0.0021 -0.0022 0.0019 0.0002  
Y 0.0025 -0.0096 0.0012 -0.0010 -0.0080 0.0089  
Z 0.0077 -0.0368 0.0047 -0.0025 -0.0127 0.0188

AT. 60 H X 0.0030 0.0110 0.0021 0.0022 -0.0019 0.0002  
Y -0.0025 -0.0096 0.0012 0.0010 0.0080 0.0089  
Z -0.0077 -0.0368 0.0047 0.0025 0.0127 0.0188

AT. 61 H X 0.0045 -0.0332 0.0032 -0.0006 -0.0038 0.0106  
Y -0.0078 0.0343 -0.0021 0.0004 -0.0052 0.0013  
Z 0.0098 -0.0545 0.0042 -0.0008 -0.0154 0.0230

AT. 62 H X -0.0045 -0.0332 0.0032 0.0006 0.0038 0.0106  
Y 0.0078 0.0343 -0.0021 -0.0004 0.0052 0.0013  
Z -0.0098 -0.0545 0.0042 0.0008 0.0154 0.0230

AT. 63 H X -0.0026 0.0155 -0.0015 0.0001 0.0148 -0.0171  
Y 0.0021 -0.0120 0.0044 -0.0033 -0.0170 0.0211  
Z 0.0034 -0.0251 -0.0001 0.0019 -0.0078 0.0103

AT. 64 H X 0.0026 0.0155 -0.0015 -0.0001 -0.0148 -0.0171  
Y -0.0021 -0.0120 0.0044 0.0033 0.0170 0.0211  
Z -0.0034 -0.0251 -0.0001 -0.0019 0.0078 0.0103

AT. 65 C X -0.0014 0.0050 -0.0016 0.0012 0.0001 -0.0021  
Y -0.0007 0.0044 -0.0003 0.0002 -0.0055 0.0054  
Z -0.0039 0.0234 -0.0013 -0.0000 0.0007 -0.0057

AT. 66 C X 0.0014 0.0050 -0.0016 -0.0012 -0.0001 -0.0021  
Y 0.0007 0.0044 -0.0003 -0.0002 0.0055 0.0054  
Z 0.0039 0.0234 -0.0013 0.0000 -0.0007 -0.0057

AT. 67 H X -0.0078 0.0380 -0.0063 0.0035 0.0088 -0.0194  
Y 0.0017 -0.0044 0.0006 0.0002 -0.0120 0.0161



Z -0.0006 0.0038 0.0018 -0.0020 -0.0005 -0.0009  
AT. 68 H X 0.0078 0.0380 -0.0063 -0.0035 -0.0088 -0.0194  
Y -0.0017 -0.0044 0.0006 -0.0002 0.0120 0.0161  
Z 0.0006 0.0038 0.0018 0.0020 0.0005 -0.0009  
AT. 69 H X 0.0010 -0.0094 -0.0009 0.0010 -0.0166 0.0147  
Y -0.0027 0.0111 -0.0016 0.0007 -0.0078 0.0026  
Z -0.0118 0.0635 -0.0050 0.0013 0.0308 -0.0439  
AT. 70 H X -0.0010 -0.0094 -0.0009 -0.0010 0.0166 0.0147  
Y 0.0027 0.0111 -0.0016 -0.0007 0.0078 0.0026  
Z 0.0118 0.0635 -0.0050 -0.0013 -0.0308 -0.0439  
AT. 71 H X -0.0054 0.0287 -0.0033 0.0019 0.0233 -0.0263  
Y -0.0001 0.0024 -0.0013 0.0012 -0.0216 0.0204  
Z -0.0060 0.0383 -0.0039 0.0018 -0.0037 -0.0033  
AT. 72 H X 0.0054 0.0287 -0.0033 -0.0019 -0.0233 -0.0263  
Y 0.0001 0.0024 -0.0013 -0.0012 0.0216 0.0204  
Z 0.0060 0.0383 -0.0039 -0.0018 0.0037 -0.0033  
AT. 73 C X 0.0018 -0.0122 0.0012 -0.0004 -0.0205 0.0237  
Y -0.0061 0.0287 -0.0023 0.0004 -0.0001 -0.0024  
Z -0.0027 0.0172 -0.0012 0.0001 -0.0259 0.0231  
AT. 74 C X -0.0018 -0.0122 0.0012 0.0004 0.0205 0.0237  
Y 0.0061 0.0287 -0.0023 -0.0004 0.0001 -0.0024  
Z 0.0027 0.0172 -0.0012 -0.0001 0.0259 0.0231  
AT. 75 H X -0.0019 0.0058 -0.0016 0.0007 -0.0390 0.0377  
Y -0.0084 0.0369 -0.0015 -0.0006 -0.0079 0.0069  
Z -0.0082 0.0404 -0.0020 -0.0005 -0.0487 0.0448  
AT. 76 H X 0.0019 0.0058 -0.0016 -0.0007 0.0390 0.0377  
Y 0.0084 0.0369 -0.0015 0.0006 0.0079 0.0069  
Z 0.0082 0.0404 -0.0020 0.0005 0.0487 0.0448  
AT. 77 H X 0.0033 -0.0198 0.0044 -0.0026 -0.0378 0.0446  
Y -0.0128 0.0576 -0.0057 0.0017 -0.0124 0.0052  
Z 0.0022 -0.0026 -0.0010 0.0010 0.0018 -0.0036  
AT. 78 H X -0.0033 -0.0198 0.0044 0.0026 0.0378 0.0446

Y 0.0128 0.0576 -0.0057 -0.0017 0.0124 0.0052  
Z -0.0022 -0.0026 -0.0010 -0.0010 -0.0018 -0.0036  
AT. 79 I X -0.0011 0.0000 0.0011 -0.0012 0.0000 0.0000  
Y 0.0011 -0.0000 -0.0007 0.0009 -0.0001 0.0000  
Z 0.0003 0.0000 -0.0000 0.0000 0.0000 -0.0000  
AT. 80 I X 0.0011 0.0000 0.0011 0.0012 -0.0000 0.0000  
Y -0.0011 -0.0000 -0.0007 -0.0009 0.0001 0.0000  
Z -0.0003 0.0000 -0.0000 -0.0000 -0.0000 -0.0000  
AT. 81 I X 0.0020 0.0002 0.0001 -0.0002 -0.0000 -0.0000  
Y -0.0012 -0.0001 0.0000 -0.0000 0.0001 -0.0000  
Z -0.0006 -0.0001 -0.0001 0.0000 0.0000 -0.0000  
AT. 82 I X -0.0020 0.0002 0.0001 0.0002 0.0000 -0.0000  
Y 0.0012 -0.0001 0.0000 0.0000 -0.0001 -0.0000  
Z 0.0006 -0.0001 -0.0001 -0.0000 -0.0000 -0.0000  
AT. 83 O X 0.0069 -0.0013 -0.0160 0.0170 -0.0001 0.0001  
Y 0.0064 -0.0001 -0.0061 0.0062 0.0001 0.0001  
Z -0.0273 -0.0023 -0.0060 0.0043 0.0002 0.0004  
AT. 84 O X -0.0069 -0.0013 -0.0160 -0.0170 0.0001 0.0001  
Y -0.0064 -0.0001 -0.0061 -0.0062 -0.0001 0.0001  
Z 0.0273 -0.0023 -0.0060 -0.0043 -0.0002 0.0004  
AT. 85 O X -0.0145 -0.0025 -0.0027 0.0022 0.0010 0.0001  
Y 0.0083 -0.0003 -0.0136 0.0134 -0.0002 0.0002  
Z -0.0220 -0.0006 0.0205 -0.0212 0.0007 0.0000  
AT. 86 O X 0.0145 -0.0025 -0.0027 -0.0022 -0.0010 0.0001  
Y -0.0083 -0.0003 -0.0136 -0.0134 0.0002 0.0002  
Z 0.0220 -0.0006 0.0205 0.0212 -0.0007 0.0000  
AT. 87 N X 0.0015 -0.0008 -0.0076 0.0075 0.0002 0.0001  
Y -0.0064 0.0007 0.0065 -0.0078 0.0002 -0.0000  
Z -0.0111 -0.0012 -0.0056 0.0056 0.0002 0.0001  
AT. 88 N X -0.0015 -0.0008 -0.0076 -0.0075 -0.0002 0.0001  
Y 0.0064 0.0007 0.0065 0.0078 -0.0002 -0.0000  
Z 0.0111 -0.0012 -0.0056 -0.0056 -0.0002 0.0001

AT. 89 N X -0.0078 -0.0018 -0.0119 0.0111 -0.0001 0.0003  
Y 0.0127 0.0009 -0.0118 0.0127 -0.0005 0.0001  
Z -0.0024 0.0005 0.0034 -0.0029 -0.0001 -0.0000

AT. 90 N X 0.0078 -0.0018 -0.0119 -0.0111 0.0001 0.0003  
Y -0.0127 0.0009 -0.0118 -0.0127 0.0005 0.0001  
Z 0.0024 0.0005 0.0034 0.0029 0.0001 -0.0000

AT. 91 C X 0.0014 -0.0015 -0.0153 0.0156 -0.0001 0.0003  
Y -0.0021 -0.0005 -0.0056 0.0046 0.0001 0.0002  
Z -0.0155 -0.0016 -0.0055 0.0051 0.0003 0.0002

AT. 92 C X -0.0014 -0.0015 -0.0153 -0.0156 0.0001 0.0003  
Y 0.0021 -0.0005 -0.0056 -0.0046 -0.0001 0.0002  
Z 0.0155 -0.0016 -0.0055 -0.0051 -0.0003 0.0002

AT. 93 C X -0.0004 -0.0007 -0.0051 0.0046 0.0002 0.0001  
Y -0.0086 -0.0003 0.0041 -0.0057 0.0004 -0.0001  
Z -0.0246 0.0003 0.0226 -0.0243 0.0009 -0.0004

AT. 94 C X 0.0004 -0.0007 -0.0051 -0.0046 -0.0002 0.0001  
Y 0.0086 -0.0003 0.0041 0.0057 -0.0004 -0.0001  
Z 0.0246 0.0003 0.0226 0.0243 -0.0009 -0.0004

AT. 95 H X -0.0062 -0.0009 -0.0062 0.0045 0.0005 0.0001  
Y 0.0021 -0.0017 -0.0175 0.0177 -0.0002 0.0002  
Z -0.0368 0.0031 0.0629 -0.0668 0.0017 -0.0010

AT. 96 H X 0.0062 -0.0009 -0.0062 -0.0045 -0.0005 0.0001  
Y -0.0021 -0.0017 -0.0175 -0.0177 0.0002 0.0002  
Z 0.0368 0.0031 0.0629 0.0668 -0.0017 -0.0010

AT. 97 H X -0.0058 0.0013 0.0185 -0.0215 0.0007 -0.0003  
Y -0.0290 0.0021 0.0469 -0.0506 0.0014 -0.0008  
Z -0.0276 0.0003 0.0258 -0.0273 0.0010 -0.0004

AT. 98 H X 0.0058 0.0013 0.0185 0.0215 -0.0007 -0.0003  
Y 0.0290 0.0021 0.0469 0.0506 -0.0014 -0.0008  
Z 0.0276 0.0003 0.0258 0.0273 -0.0010 -0.0004

AT. 99 C X -0.0108 -0.0023 -0.0084 0.0080 0.0005 0.0002  
Y 0.0112 -0.0002 -0.0122 0.0120 -0.0000 -0.0001

Z -0.0087 -0.0005 0.0055 -0.0061 0.0004 -0.0002  
AT.100 C X 0.0108 -0.0023 -0.0084 -0.0080 -0.0005 0.0002  
Y -0.0112 -0.0002 -0.0122 -0.0120 0.0000 -0.0001  
Z 0.0087 -0.0005 0.0055 0.0061 -0.0004 -0.0002  
AT.101 C X -0.0050 -0.0014 -0.0019 0.0025 0.0004 0.0000  
Y 0.0236 0.0012 0.0017 -0.0011 -0.0004 -0.0007  
Z -0.0203 -0.0027 -0.0073 0.0050 0.0009 0.0001  
AT.102 C X 0.0050 -0.0014 -0.0019 -0.0025 -0.0004 0.0000  
Y -0.0236 0.0012 0.0017 0.0011 0.0004 -0.0007  
Z 0.0203 -0.0027 -0.0073 -0.0050 -0.0009 0.0001  
AT.103 H X -0.0005 -0.0015 -0.0073 0.0071 0.0005 -0.0001  
Y 0.0217 0.0013 0.0043 -0.0034 -0.0004 -0.0007  
Z -0.0439 -0.0062 -0.0255 0.0212 0.0020 0.0009  
AT.104 H X 0.0005 -0.0015 -0.0073 -0.0071 -0.0005 -0.0001  
Y -0.0217 0.0013 0.0043 0.0034 0.0004 -0.0007  
Z 0.0439 -0.0062 -0.0255 -0.0212 -0.0020 0.0009  
AT.105 H X 0.0039 0.0006 0.0094 -0.0076 -0.0002 -0.0004  
Y 0.0447 0.0044 0.0156 -0.0131 -0.0016 -0.0011  
Z -0.0104 -0.0012 0.0002 -0.0015 0.0003 -0.0001  
AT.106 H X -0.0039 0.0006 0.0094 0.0076 0.0002 -0.0004  
Y -0.0447 0.0044 0.0156 0.0131 0.0016 -0.0011  
Z 0.0104 -0.0012 0.0002 0.0015 -0.0003 -0.0001  
AT.107 C X 0.0203 0.0011 0.0012 -0.0011 0.0002 -0.0003  
Y -0.0044 0.0019 0.0218 -0.0221 0.0004 -0.0004  
Z 0.0209 0.0015 0.0078 -0.0069 0.0006 -0.0007  
AT.108 C X -0.0203 0.0011 0.0012 0.0011 -0.0002 -0.0003  
Y 0.0044 0.0019 0.0218 0.0221 -0.0004 -0.0004  
Z -0.0209 0.0015 0.0078 0.0069 -0.0006 -0.0007  
AT.109 H X 0.0521 0.0022 -0.0008 0.0004 0.0008 -0.0006  
Y 0.0105 0.0021 0.0227 -0.0233 0.0010 -0.0006  
Z 0.0374 0.0017 0.0104 -0.0099 0.0015 -0.0010  
AT.110 H X -0.0521 0.0022 -0.0008 -0.0004 -0.0008 -0.0006

Y -0.0105 0.0021 0.0227 0.0233 -0.0010 -0.0006  
Z -0.0374 0.0017 0.0104 0.0099 -0.0015 -0.0010  
AT. 111 H X 0.0017 -0.0010 -0.0080 0.0074 0.0006 0.0000  
Y -0.0354 0.0015 0.0228 -0.0225 -0.0012 0.0005  
Z 0.0469 0.0039 0.0173 -0.0161 0.0006 -0.0012  
AT. 112 H X -0.0017 -0.0010 -0.0080 -0.0074 -0.0006 0.0000  
Y 0.0354 0.0015 0.0228 0.0225 0.0012 0.0005  
Z -0.0469 0.0039 0.0173 0.0161 -0.0006 -0.0012  
AT. 113 C X 0.0149 0.0029 0.0124 -0.0116 -0.0008 -0.0001  
Y 0.0040 0.0019 0.0210 -0.0212 0.0008 -0.0006  
Z 0.0190 0.0020 0.0073 -0.0059 -0.0002 -0.0004  
AT. 114 C X -0.0149 0.0029 0.0124 0.0116 0.0008 -0.0001  
Y -0.0040 0.0019 0.0210 0.0212 -0.0008 -0.0006  
Z -0.0190 0.0020 0.0073 0.0059 0.0002 -0.0004  
AT. 115 C X 0.0056 -0.0005 -0.0131 0.0132 -0.0009 0.0004  
Y 0.0055 -0.0003 0.0003 -0.0006 0.0006 -0.0003  
Z 0.0147 0.0002 -0.0026 0.0037 -0.0002 -0.0002  
AT. 116 C X -0.0056 -0.0005 -0.0131 -0.0132 0.0009 0.0004  
Y -0.0055 -0.0003 0.0003 0.0006 -0.0006 -0.0003  
Z -0.0147 0.0002 -0.0026 -0.0037 0.0002 -0.0002  
AT. 117 H X -0.0046 0.0013 0.0010 -0.0011 -0.0009 0.0003  
Y -0.0002 -0.0053 -0.0317 0.0307 0.0009 0.0002  
Z 0.0260 -0.0007 -0.0109 0.0122 -0.0002 -0.0002  
AT. 118 H X 0.0046 0.0013 0.0010 0.0011 0.0009 0.0003  
Y 0.0002 -0.0053 -0.0317 -0.0307 -0.0009 0.0002  
Z -0.0260 -0.0007 -0.0109 -0.0122 0.0002 -0.0002  
AT. 119 H X 0.0134 -0.0044 -0.0361 0.0360 -0.0005 0.0005  
Y 0.0045 -0.0002 0.0078 -0.0083 0.0011 -0.0006  
Z 0.0203 -0.0019 -0.0219 0.0232 -0.0004 0.0001  
AT. 120 H X -0.0134 -0.0044 -0.0361 -0.0360 0.0005 0.0005  
Y -0.0045 -0.0002 0.0078 0.0083 -0.0011 -0.0006  
Z -0.0203 -0.0019 -0.0219 -0.0232 0.0004 0.0001

AT. 121 C X -0.0139 -0.0015 -0.0094 0.0091 0.0000 0.0002  
Y -0.0062 -0.0005 -0.0022 0.0025 -0.0008 0.0007  
Z 0.0130 0.0014 0.0034 -0.0033 -0.0004 -0.0001

AT. 122 C X 0.0139 -0.0015 -0.0094 -0.0091 -0.0000 0.0002  
Y 0.0062 -0.0005 -0.0022 -0.0025 0.0008 0.0007  
Z -0.0130 0.0014 0.0034 0.0033 0.0004 -0.0001

AT. 123 H X -0.0319 -0.0047 -0.0418 0.0422 -0.0002 0.0008  
Y -0.0265 -0.0046 -0.0351 0.0357 -0.0013 0.0017  
Z 0.0315 0.0051 0.0319 -0.0321 0.0001 -0.0010

AT. 124 H X 0.0319 -0.0047 -0.0418 -0.0422 0.0002 0.0008  
Y 0.0265 -0.0046 -0.0351 -0.0357 0.0013 0.0017  
Z -0.0315 0.0051 0.0319 0.0321 -0.0001 -0.0010

AT. 125 H X -0.0066 -0.0025 -0.0267 0.0262 -0.0003 0.0004  
Y 0.0173 0.0054 0.0562 -0.0564 -0.0003 -0.0005  
Z 0.0334 0.0032 0.0135 -0.0139 -0.0006 -0.0004

AT. 126 H X 0.0066 -0.0025 -0.0267 -0.0262 0.0003 0.0004  
Y -0.0173 0.0054 0.0562 0.0564 0.0003 -0.0005  
Z -0.0334 0.0032 0.0135 0.0139 0.0006 -0.0004

AT. 127 C X -0.0026 0.0029 0.0290 -0.0287 0.0003 -0.0006  
Y -0.0148 -0.0016 -0.0060 0.0063 -0.0006 0.0007  
Z 0.0097 -0.0005 -0.0209 0.0215 -0.0007 0.0003

AT. 128 C X 0.0026 0.0029 0.0290 0.0287 -0.0003 -0.0006  
Y 0.0148 -0.0016 -0.0060 -0.0063 0.0006 0.0007  
Z -0.0097 -0.0005 -0.0209 -0.0215 0.0007 0.0003

AT. 129 C X -0.0072 0.0002 0.0118 -0.0122 0.0010 -0.0005  
Y -0.0299 -0.0044 -0.0191 0.0185 0.0004 0.0005  
Z 0.0136 0.0004 -0.0160 0.0166 -0.0011 0.0006

AT. 130 C X 0.0072 0.0002 0.0118 0.0122 -0.0010 -0.0005  
Y 0.0299 -0.0044 -0.0191 -0.0185 -0.0004 0.0005  
Z -0.0136 0.0004 -0.0160 -0.0166 0.0011 0.0006

AT. 131 H X 0.0167 0.0034 0.0195 -0.0198 -0.0001 -0.0003  
Y -0.0570 -0.0110 -0.0534 0.0522 0.0023 0.0003

Z 0.0333 0.0019 -0.0193 0.0197 -0.0018 0.0008  
AT. 132 H X -0.0167 0.0034 0.0195 0.0198 0.0001 -0.0003  
Y 0.0570 -0.0110 -0.0534 -0.0522 -0.0023 0.0003  
Z -0.0333 0.0019 -0.0193 -0.0197 0.0018 0.0008  
AT. 133 H X -0.0485 -0.0067 -0.0142 0.0136 0.0029 -0.0007  
Y -0.0356 -0.0054 -0.0228 0.0226 0.0004 0.0008  
Z 0.0249 0.0021 -0.0095 0.0107 -0.0022 0.0011  
AT. 134 H X 0.0485 -0.0067 -0.0142 -0.0136 -0.0029 -0.0007  
Y 0.0356 -0.0054 -0.0228 -0.0226 -0.0004 0.0008  
Z -0.0249 0.0021 -0.0095 -0.0107 0.0022 0.0011  
AT. 135 C X 0.0018 0.0010 0.0053 -0.0058 -0.0004 0.0001  
Y 0.0024 0.0007 0.0031 -0.0031 -0.0001 0.0002  
Z -0.0031 -0.0025 -0.0224 0.0221 0.0002 0.0003  
AT. 136 C X -0.0018 0.0010 0.0053 0.0058 0.0004 0.0001  
Y -0.0024 0.0007 0.0031 0.0031 0.0001 0.0002  
Z 0.0031 -0.0025 -0.0224 -0.0221 -0.0002 0.0003  
AT. 137 H X -0.0115 -0.0014 -0.0065 0.0042 0.0007 0.0002  
Y -0.0004 0.0002 -0.0057 0.0053 -0.0002 0.0005  
Z -0.0029 -0.0025 -0.0334 0.0329 -0.0004 0.0008  
AT. 138 H X 0.0115 -0.0014 -0.0065 -0.0042 -0.0007 0.0002  
Y 0.0004 0.0002 -0.0057 -0.0053 0.0002 0.0005  
Z 0.0029 -0.0025 -0.0334 -0.0329 0.0004 0.0008  
AT. 139 H X 0.0151 0.0047 0.0301 -0.0294 -0.0005 -0.0006  
Y 0.0070 0.0007 0.0068 -0.0058 -0.0008 0.0002  
Z -0.0218 -0.0075 -0.0563 0.0542 0.0005 0.0012  
AT. 140 H X -0.0151 0.0047 0.0301 0.0294 0.0005 -0.0006  
Y -0.0070 0.0007 0.0068 0.0058 0.0008 0.0002  
Z 0.0218 -0.0075 -0.0563 -0.0542 -0.0005 0.0012  
AT. 141 H X -0.0121 -0.0037 -0.0280 0.0263 -0.0005 0.0008  
Y -0.0002 0.0000 -0.0119 0.0117 -0.0005 0.0007  
Z -0.0061 -0.0038 -0.0209 0.0205 0.0005 0.0001  
AT. 142 H X 0.0121 -0.0037 -0.0280 -0.0263 0.0005 0.0008

Y 0.0002 0.0000 -0.0119 -0.0117 0.0005 0.0007  
Z 0.0061 -0.0038 -0.0209 -0.0205 -0.0005 0.0001  
AT. 143 C X -0.0034 0.0006 0.0007 0.0004 -0.0004 0.0001  
Y 0.0020 0.0005 0.0030 -0.0022 0.0000 -0.0000  
Z 0.0072 0.0030 0.0201 -0.0201 -0.0002 -0.0006  
AT. 144 C X 0.0034 0.0006 0.0007 -0.0004 0.0004 0.0001  
Y -0.0020 0.0005 0.0030 0.0022 -0.0000 -0.0000  
Z -0.0072 0.0030 0.0201 0.0201 0.0002 -0.0006  
AT. 145 H X -0.0151 -0.0038 -0.0409 0.0433 -0.0011 0.0012  
Y 0.0059 0.0011 0.0071 -0.0049 -0.0007 0.0005  
Z 0.0003 0.0013 0.0054 -0.0065 0.0004 -0.0009  
AT. 146 H X 0.0151 -0.0038 -0.0409 -0.0433 0.0011 0.0012  
Y -0.0059 0.0011 0.0071 0.0049 0.0007 0.0005  
Z -0.0003 0.0013 0.0054 0.0065 -0.0004 -0.0009  
AT. 147 H X -0.0038 0.0032 0.0309 -0.0295 -0.0005 -0.0001  
Y 0.0057 0.0006 0.0018 -0.0038 0.0015 -0.0014  
Z 0.0089 0.0069 0.0624 -0.0634 0.0004 -0.0015  
AT. 148 H X 0.0038 0.0032 0.0309 0.0295 0.0005 -0.0001  
Y -0.0057 0.0006 0.0018 0.0038 -0.0015 -0.0014  
Z -0.0089 0.0069 0.0624 0.0634 -0.0004 -0.0015  
AT. 149 H X 0.0030 -0.0013 -0.0257 0.0256 0.0005 -0.0006  
Y 0.0099 0.0015 0.0086 -0.0072 -0.0002 0.0000  
Z 0.0174 0.0058 0.0436 -0.0416 -0.0009 -0.0002  
AT. 150 H X -0.0030 -0.0013 -0.0257 -0.0256 -0.0005 -0.0006  
Y -0.0099 0.0015 0.0086 0.0072 0.0002 0.0000  
Z -0.0174 0.0058 0.0436 0.0416 0.0009 -0.0002  
AT. 151 C X 0.0060 0.0036 0.0277 -0.0269 -0.0003 -0.0003  
Y 0.0006 0.0006 0.0156 -0.0155 0.0004 -0.0005  
Z 0.0299 0.0015 -0.0105 0.0121 -0.0009 -0.0001  
AT. 152 C X -0.0060 0.0036 0.0277 0.0269 0.0003 -0.0003  
Y -0.0006 0.0006 0.0156 0.0155 -0.0004 -0.0005  
Z -0.0299 0.0015 -0.0105 -0.0121 0.0009 -0.0001



AT.153 H X -0.0001 0.0024 0.0169 -0.0156 -0.0011 0.0004  
Y 0.0039 0.0004 0.0172 -0.0171 0.0005 -0.0007  
Z 0.0380 0.0017 -0.0033 0.0047 -0.0004 -0.0007

AT.154 H X 0.0001 0.0024 0.0169 0.0156 0.0011 0.0004  
Y -0.0039 0.0004 0.0172 0.0171 -0.0005 -0.0007  
Z -0.0380 0.0017 -0.0033 -0.0047 0.0004 -0.0007

AT.155 H X 0.0135 0.0062 0.0545 -0.0535 0.0007 -0.0013  
Y 0.0121 0.0016 0.0295 -0.0294 0.0010 -0.0013  
Z 0.0205 0.0014 -0.0155 0.0173 -0.0012 0.0005

AT.156 H X -0.0135 0.0062 0.0545 0.0535 -0.0007 -0.0013  
Y -0.0121 0.0016 0.0295 0.0294 -0.0010 -0.0013  
Z -0.0205 0.0014 -0.0155 -0.0173 0.0012 0.0005

AT.157 O X 0.0004 -0.0005 0.0003 -0.0001 -0.0012 0.0001  
Y 0.0008 -0.0001 -0.0001 0.0005 0.0029 -0.0051  
Z 0.0001 -0.0003 0.0006 -0.0000 0.0014 0.0005

AT.158 O X -0.0004 -0.0005 0.0003 0.0001 0.0012 0.0001  
Y -0.0008 -0.0001 -0.0001 -0.0005 -0.0029 -0.0051  
Z -0.0001 -0.0003 0.0006 0.0000 -0.0014 0.0005

AT.159 O X -0.0005 -0.0017 -0.0003 -0.0002 0.0009 0.0019  
Y -0.0001 0.0017 -0.0003 0.0000 -0.0010 0.0010  
Z -0.0015 -0.0020 -0.0003 -0.0004 0.0047 0.0037

AT.160 O X 0.0005 -0.0017 -0.0003 0.0002 -0.0009 0.0019  
Y 0.0001 0.0017 -0.0003 -0.0000 0.0010 0.0010  
Z 0.0015 -0.0020 -0.0003 0.0004 -0.0047 0.0037

AT.161 H X 0.0009 0.0016 -0.0001 -0.0002 0.0011 -0.0044  
Y 0.0004 0.0003 0.0000 0.0008 0.0032 -0.0051  
Z 0.0009 -0.0013 0.0000 -0.0009 0.0025 -0.0021

AT.162 H X -0.0009 0.0016 -0.0001 0.0002 -0.0011 -0.0044  
Y -0.0004 0.0003 0.0000 -0.0008 -0.0032 -0.0051  
Z -0.0009 -0.0013 0.0000 0.0009 -0.0025 -0.0021

AT.163 H X -0.0015 -0.0031 -0.0008 -0.0003 0.0060 0.0056  
Y 0.0003 -0.0001 -0.0018 -0.0008 -0.0094 -0.0072

Z -0.0010 -0.0023 -0.0005 -0.0005 0.0014 0.0010  
AT.164 H X 0.0015 -0.0031 -0.0008 0.0003 -0.0060 0.0056  
Y -0.0003 -0.0001 -0.0018 0.0008 0.0094 -0.0072  
Z 0.0010 -0.0023 -0.0005 0.0005 -0.0014 0.0010  
AT.165 O X 0.0005 -0.0001 0.0060 -0.0047 -0.0003 -0.0000  
Y 0.0004 0.0005 0.0014 -0.0017 -0.0007 0.0008  
Z -0.0021 -0.0002 0.0000 -0.0019 0.0002 -0.0003  
AT.166 O X -0.0005 -0.0001 0.0060 0.0047 0.0003 -0.0000  
Y -0.0004 0.0005 0.0014 0.0017 0.0007 0.0008  
Z 0.0021 -0.0002 0.0000 0.0019 -0.0002 -0.0003  
AT.167 H X -0.0011 -0.0001 0.0061 -0.0052 -0.0001 0.0005  
Y 0.0030 0.0008 0.0038 -0.0042 -0.0009 0.0004  
Z -0.0021 -0.0000 -0.0027 0.0005 0.0002 -0.0009  
AT.168 H X 0.0011 -0.0001 0.0061 0.0052 0.0001 0.0005  
Y -0.0030 0.0008 0.0038 0.0042 0.0009 0.0004  
Z 0.0021 -0.0000 -0.0027 -0.0005 -0.0002 -0.0009  
AT.169 O X -0.0018 0.0004 -0.0022 -0.0010 -0.0003 -0.0006  
Y 0.0034 -0.0012 0.0045 0.0035 -0.0009 -0.0009  
Z -0.0030 0.0003 -0.0017 -0.0022 0.0002 -0.0001  
AT.170 O X 0.0018 0.0004 -0.0022 0.0010 0.0003 -0.0006  
Y -0.0034 -0.0012 0.0045 -0.0035 0.0009 -0.0009  
Z 0.0030 0.0003 -0.0017 0.0022 -0.0002 -0.0001  
AT.171 H X 0.0022 0.0055 0.0001 -0.0003 0.0015 0.0007  
Y 0.0075 0.0007 0.0080 0.0061 0.0000 -0.0005  
Z -0.0006 -0.0005 0.0016 0.0002 0.0002 -0.0007  
AT.172 H X -0.0022 0.0055 0.0001 0.0003 -0.0015 0.0007  
Y -0.0075 0.0007 0.0080 -0.0061 -0.0000 -0.0005  
Z 0.0006 -0.0005 0.0016 -0.0002 -0.0002 -0.0007  
  
FREQ(CM\*\*-1) 407.62 407.74 413.50 414.48 426.70 426.98  
  
AT. 11 X 0.0004 0.0003 -0.0001 0.0001 -0.0000 0.0000

Y 0.0003 0.0001 0.0001 -0.0001 -0.0001 -0.0001  
Z 0.0001 0.0000 -0.0000 0.0000 0.0000 0.0000  
AT. 2 I X 0.0004 -0.0003 -0.0001 -0.0001 0.0000 0.0000  
Y 0.0003 -0.0001 0.0001 0.0001 0.0001 -0.0001  
Z 0.0001 -0.0000 -0.0000 -0.0000 -0.0000 0.0000  
AT. 3 I X -0.0007 -0.0009 0.0001 -0.0000 -0.0000 -0.0000  
Y -0.0000 -0.0001 0.0000 -0.0000 -0.0000 -0.0000  
Z -0.0005 -0.0006 0.0000 -0.0000 -0.0000 -0.0000  
AT. 4 I X -0.0007 0.0009 0.0001 0.0000 0.0000 -0.0000  
Y -0.0000 0.0001 0.0000 0.0000 0.0000 -0.0000  
Z -0.0005 0.0006 0.0000 0.0000 0.0000 -0.0000  
AT. 5 O X 0.0005 0.0004 -0.0001 0.0002 -0.0001 -0.0000  
Y 0.0076 0.0078 -0.0002 0.0000 -0.0002 -0.0002  
Z 0.0016 0.0031 -0.0002 0.0004 0.0004 0.0004  
AT. 6 O X 0.0005 -0.0004 -0.0001 -0.0002 0.0001 -0.0000  
Y 0.0076 -0.0078 -0.0002 -0.0000 0.0002 -0.0002  
Z 0.0016 -0.0031 -0.0002 -0.0004 -0.0004 0.0004  
AT. 7 O X 0.0078 0.0079 -0.0002 -0.0002 0.0002 0.0004  
Y -0.0116 -0.0110 0.0010 -0.0009 -0.0001 -0.0002  
Z 0.0162 0.0131 0.0001 0.0003 0.0000 -0.0000  
AT. 8 O X 0.0078 -0.0079 -0.0002 0.0002 -0.0002 0.0004  
Y -0.0116 0.0110 0.0010 0.0009 0.0001 -0.0002  
Z 0.0162 -0.0131 0.0001 -0.0003 -0.0000 -0.0000  
AT. 9 N X -0.0064 -0.0086 0.0001 0.0000 0.0003 0.0004  
Y -0.0199 -0.0194 0.0006 -0.0002 0.0002 0.0003  
Z 0.0027 0.0028 -0.0002 0.0003 0.0003 0.0002  
AT. 10 N X -0.0064 0.0086 0.0001 -0.0000 -0.0003 0.0004  
Y -0.0199 0.0194 0.0006 0.0002 -0.0002 0.0003  
Z 0.0027 -0.0028 -0.0002 -0.0003 -0.0003 0.0002  
AT. 11 N X -0.0058 -0.0056 0.0006 -0.0004 -0.0001 -0.0003  
Y -0.0120 -0.0103 0.0007 -0.0008 -0.0001 -0.0002  
Z 0.0065 0.0064 -0.0002 0.0001 0.0002 0.0002

AT. 12 N X -0.0058 0.0056 0.0006 0.0004 0.0001 -0.0003  
Y -0.0120 0.0103 0.0007 0.0008 0.0001 -0.0002  
Z 0.0065 -0.0064 -0.0002 -0.0001 -0.0002 0.0002

AT. 13 C X -0.0035 -0.0043 0.0000 0.0000 0.0001 0.0001  
Y -0.0039 -0.0023 0.0003 -0.0003 0.0002 0.0000  
Z 0.0047 0.0046 -0.0003 0.0005 0.0004 0.0002

AT. 14 C X -0.0035 0.0043 0.0000 -0.0000 -0.0001 0.0001  
Y -0.0039 0.0023 0.0003 0.0003 -0.0002 0.0000  
Z 0.0047 -0.0046 -0.0003 -0.0005 -0.0004 0.0002

AT. 15 C X 0.0000 0.0002 0.0002 -0.0001 0.0004 0.0000  
Y -0.0048 -0.0034 0.0004 -0.0004 0.0002 -0.0001  
Z -0.0026 -0.0065 -0.0006 0.0009 0.0000 0.0003

AT. 16 C X 0.0000 -0.0002 0.0002 0.0001 -0.0004 0.0000  
Y -0.0048 0.0034 0.0004 0.0004 -0.0002 -0.0001  
Z -0.0026 0.0065 -0.0006 -0.0009 -0.0000 0.0003

AT. 17 H X 0.0011 0.0007 0.0003 -0.0003 0.0000 -0.0003  
Y 0.0043 0.0077 0.0006 -0.0007 0.0006 -0.0002  
Z -0.0137 -0.0204 -0.0007 0.0011 -0.0005 0.0002

AT. 18 H X 0.0011 -0.0007 0.0003 0.0003 -0.0000 -0.0003  
Y 0.0043 -0.0077 0.0006 0.0007 -0.0006 -0.0002  
Z -0.0137 0.0204 -0.0007 -0.0011 0.0005 0.0002

AT. 19 H X 0.0065 0.0074 0.0002 -0.0002 0.0006 -0.0002  
Y -0.0181 -0.0197 0.0001 0.0001 -0.0004 -0.0001  
Z -0.0057 -0.0106 -0.0007 0.0011 -0.0002 0.0002

AT. 20 H X 0.0065 -0.0074 0.0002 0.0002 -0.0006 -0.0002  
Y -0.0181 0.0197 0.0001 -0.0001 0.0004 -0.0001  
Z -0.0057 0.0106 -0.0007 -0.0011 0.0002 0.0002

AT. 21 C X 0.0067 0.0069 -0.0005 0.0002 0.0001 0.0002  
Y -0.0150 -0.0133 0.0002 -0.0002 -0.0004 -0.0003  
Z 0.0077 0.0073 -0.0006 0.0006 0.0003 0.0003

AT. 22 C X 0.0067 -0.0069 -0.0005 -0.0002 -0.0001 0.0002  
Y -0.0150 0.0133 0.0002 0.0002 0.0004 -0.0003

Z 0.0077 -0.0073 -0.0006 -0.0006 -0.0003 0.0003  
AT. 23 C X 0.0027 0.0035 -0.0005 0.0003 -0.0000 0.0002  
Y 0.0105 0.0117 -0.0005 0.0001 0.0001 0.0003  
Z -0.0055 -0.0050 -0.0005 0.0008 0.0000 0.0002  
AT. 24 C X 0.0027 -0.0035 -0.0005 -0.0003 0.0000 0.0002  
Y 0.0105 -0.0117 -0.0005 -0.0001 -0.0001 0.0003  
Z -0.0055 0.0050 -0.0005 -0.0008 -0.0000 0.0002  
AT. 25 H X 0.0047 0.0044 -0.0007 0.0005 0.0000 0.0001  
Y 0.0160 0.0169 -0.0007 0.0001 0.0002 0.0005  
Z -0.0417 -0.0401 0.0003 0.0008 -0.0007 -0.0009  
AT. 26 H X 0.0047 -0.0044 -0.0007 -0.0005 -0.0000 0.0001  
Y 0.0160 -0.0169 -0.0007 -0.0001 -0.0002 0.0005  
Z -0.0417 0.0401 0.0003 -0.0008 0.0007 -0.0009  
AT. 27 H X -0.0079 -0.0070 0.0001 0.0003 -0.0003 -0.0001  
Y 0.0434 0.0439 -0.0011 -0.0001 0.0007 0.0011  
Z 0.0137 0.0138 -0.0009 0.0007 0.0004 0.0007  
AT. 28 H X -0.0079 0.0070 0.0001 -0.0003 0.0003 -0.0001  
Y 0.0434 -0.0439 -0.0011 0.0001 -0.0007 0.0011  
Z 0.0137 -0.0138 -0.0009 -0.0007 -0.0004 0.0007  
AT. 29 C X 0.0110 0.0090 -0.0005 0.0006 0.0006 0.0004  
Y -0.0174 -0.0186 0.0008 -0.0005 -0.0001 -0.0001  
Z -0.0270 -0.0286 0.0014 -0.0013 -0.0006 -0.0006  
AT. 30 C X 0.0110 -0.0090 -0.0005 -0.0006 -0.0006 0.0004  
Y -0.0174 0.0186 0.0008 0.0005 0.0001 -0.0001  
Z -0.0270 0.0286 0.0014 0.0013 0.0006 -0.0006  
AT. 31 H X 0.0419 0.0397 -0.0018 0.0018 0.0009 0.0005  
Y -0.0651 -0.0663 0.0031 -0.0025 -0.0004 -0.0002  
Z -0.0786 -0.0803 0.0039 -0.0035 -0.0007 -0.0006  
AT. 32 H X 0.0419 -0.0397 -0.0018 -0.0018 -0.0009 0.0005  
Y -0.0651 0.0663 0.0031 0.0025 0.0004 -0.0002  
Z -0.0786 0.0803 0.0039 0.0035 0.0007 -0.0006  
AT. 33 H X 0.0302 0.0269 -0.0011 0.0008 0.0003 0.0000

Y 0.0562 0.0552 -0.0031 0.0029 0.0002 -0.0002  
Z -0.0465 -0.0490 0.0027 -0.0027 -0.0009 -0.0009  
AT. 34 H X 0.0302 -0.0269 -0.0011 -0.0008 -0.0003 0.0000  
Y 0.0562 -0.0552 -0.0031 -0.0029 -0.0002 -0.0002  
Z -0.0465 0.0490 0.0027 0.0027 0.0009 -0.0009  
AT. 35 C X -0.0172 -0.0173 0.0006 -0.0002 0.0002 0.0002  
Y -0.0211 -0.0233 0.0013 -0.0011 -0.0001 -0.0002  
Z 0.0019 0.0002 0.0000 -0.0002 -0.0005 -0.0006  
AT. 36 C X -0.0172 0.0173 0.0006 0.0002 -0.0002 0.0002  
Y -0.0211 0.0233 0.0013 0.0011 0.0001 -0.0002  
Z 0.0019 -0.0002 0.0000 0.0002 0.0005 -0.0006  
AT. 37 C X -0.0178 -0.0182 0.0009 -0.0005 0.0002 0.0000  
Y -0.0164 -0.0157 0.0011 -0.0010 -0.0002 -0.0001  
Z 0.0148 0.0157 -0.0003 0.0000 -0.0004 -0.0002  
AT. 38 C X -0.0178 0.0182 0.0009 0.0005 -0.0002 0.0000  
Y -0.0164 0.0157 0.0011 0.0010 0.0002 -0.0001  
Z 0.0148 -0.0157 -0.0003 -0.0000 0.0004 -0.0002  
AT. 39 H X -0.0053 -0.0018 0.0007 -0.0005 -0.0003 -0.0002  
Y -0.0032 0.0009 0.0006 -0.0007 -0.0001 0.0003  
Z 0.0167 0.0188 -0.0002 -0.0002 -0.0008 -0.0005  
AT. 40 H X -0.0053 0.0018 0.0007 0.0005 0.0003 -0.0002  
Y -0.0032 -0.0009 0.0006 0.0007 0.0001 0.0003  
Z 0.0167 -0.0188 -0.0002 0.0002 0.0008 -0.0005  
AT. 41 H X -0.0284 -0.0323 0.0012 -0.0006 0.0004 0.0000  
Y -0.0223 -0.0220 0.0015 -0.0013 -0.0004 -0.0003  
Z 0.0307 0.0355 -0.0010 0.0004 -0.0006 -0.0002  
AT. 42 H X -0.0284 0.0323 0.0012 0.0006 -0.0004 0.0000  
Y -0.0223 0.0220 0.0015 0.0013 0.0004 -0.0003  
Z 0.0307 -0.0355 -0.0010 -0.0004 0.0006 -0.0002  
AT. 43 C X -0.0067 -0.0070 0.0004 -0.0005 -0.0003 -0.0004  
Y 0.0291 0.0279 -0.0011 0.0009 0.0002 0.0002  
Z -0.0108 -0.0100 0.0004 -0.0006 0.0001 0.0001

AT. 44 C X -0.0067 0.0070 0.0004 0.0005 0.0003 -0.0004  
Y 0.0291 -0.0279 -0.0011 -0.0009 -0.0002 0.0002  
Z -0.0108 0.0100 0.0004 0.0006 -0.0001 0.0001

AT. 45 H X -0.0136 -0.0156 0.0004 -0.0005 -0.0001 -0.0002  
Y 0.0619 0.0631 -0.0022 0.0019 0.0001 0.0003  
Z -0.0380 -0.0383 0.0016 -0.0018 -0.0001 -0.0001

AT. 46 H X -0.0136 0.0156 0.0004 0.0005 0.0001 -0.0002  
Y 0.0619 -0.0631 -0.0022 -0.0019 -0.0001 0.0003  
Z -0.0380 0.0383 0.0016 0.0018 0.0001 -0.0001

AT. 47 H X -0.0115 -0.0149 0.0007 -0.0005 0.0000 -0.0003  
Y -0.0018 -0.0062 0.0002 -0.0003 0.0003 0.0000  
Z -0.0355 -0.0340 0.0014 -0.0018 -0.0003 -0.0003

AT. 48 H X -0.0115 0.0149 0.0007 0.0005 -0.0000 -0.0003  
Y -0.0018 0.0062 0.0002 0.0003 -0.0003 0.0000  
Z -0.0355 0.0340 0.0014 0.0018 0.0003 -0.0003

AT. 49 C X 0.0105 0.0135 -0.0004 0.0002 -0.0006 -0.0004  
Y 0.0332 0.0310 -0.0013 0.0012 0.0003 0.0002  
Z 0.0008 0.0033 0.0000 -0.0003 0.0000 0.0002

AT. 50 C X 0.0105 -0.0135 -0.0004 -0.0002 0.0006 -0.0004  
Y 0.0332 -0.0310 -0.0013 -0.0012 -0.0003 0.0002  
Z 0.0008 -0.0033 0.0000 0.0003 -0.0000 0.0002

AT. 51 C X 0.0186 0.0197 -0.0007 0.0003 -0.0003 -0.0000  
Y 0.0202 0.0198 -0.0017 0.0018 0.0000 0.0002  
Z 0.0036 0.0063 0.0004 -0.0005 0.0001 0.0000

AT. 52 C X 0.0186 -0.0197 -0.0007 -0.0003 0.0003 -0.0000  
Y 0.0202 -0.0198 -0.0017 -0.0018 -0.0000 0.0002  
Z 0.0036 -0.0063 0.0004 0.0005 -0.0001 0.0000

AT. 53 H X 0.0213 0.0228 -0.0018 0.0016 -0.0003 0.0000  
Y 0.0164 0.0188 -0.0026 0.0028 -0.0004 -0.0000  
Z -0.0058 -0.0009 0.0013 -0.0017 -0.0004 -0.0003

AT. 54 H X 0.0213 -0.0228 -0.0018 -0.0016 0.0003 0.0000  
Y 0.0164 -0.0188 -0.0026 -0.0028 0.0004 -0.0000

Z -0.0058 0.0009 0.0013 0.0017 0.0004 -0.0003  
AT. 55 H X 0.0121 0.0130 0.0011 -0.0016 -0.0001 -0.0002  
Y 0.0379 0.0371 -0.0029 0.0030 -0.0000 0.0001  
Z 0.0205 0.0226 0.0001 -0.0003 0.0000 -0.0002  
AT. 56 H X 0.0121 -0.0130 0.0011 0.0016 0.0001 -0.0002  
Y 0.0379 -0.0371 -0.0029 -0.0030 0.0000 0.0001  
Z 0.0205 -0.0226 0.0001 0.0003 -0.0000 -0.0002  
AT. 57 C X 0.0067 0.0068 -0.0007 0.0007 0.0001 0.0001  
Y 0.0047 0.0053 -0.0001 -0.0001 -0.0001 0.0000  
Z -0.0055 -0.0028 -0.0001 0.0001 -0.0001 -0.0000  
AT. 58 C X 0.0067 -0.0068 -0.0007 -0.0007 -0.0001 0.0001  
Y 0.0047 -0.0053 -0.0001 0.0001 0.0001 0.0000  
Z -0.0055 0.0028 -0.0001 -0.0001 0.0001 -0.0000  
AT. 59 H X 0.0415 0.0411 -0.0023 0.0018 -0.0002 -0.0003  
Y -0.0081 -0.0032 0.0011 -0.0013 -0.0004 -0.0003  
Z -0.0001 0.0086 0.0007 -0.0008 -0.0009 -0.0009  
AT. 60 H X 0.0415 -0.0411 -0.0023 -0.0018 0.0002 -0.0003  
Y -0.0081 0.0032 0.0011 0.0013 0.0004 -0.0003  
Z -0.0001 -0.0086 0.0007 0.0008 0.0009 -0.0009  
AT. 61 H X 0.0107 0.0116 -0.0022 0.0022 0.0008 0.0010  
Y 0.0265 0.0208 -0.0021 0.0016 0.0003 0.0005  
Z -0.0134 -0.0069 -0.0002 0.0003 0.0002 0.0004  
AT. 62 H X 0.0107 -0.0116 -0.0022 -0.0022 -0.0008 0.0010  
Y 0.0265 -0.0208 -0.0021 -0.0016 -0.0003 0.0005  
Z -0.0134 0.0069 -0.0002 -0.0003 -0.0002 0.0004  
AT. 63 H X -0.0025 -0.0034 0.0012 -0.0011 -0.0006 -0.0009  
Y 0.0269 0.0326 -0.0013 0.0006 -0.0003 -0.0001  
Z -0.0156 -0.0163 -0.0009 0.0012 0.0008 0.0011  
AT. 64 H X -0.0025 0.0034 0.0012 0.0011 0.0006 -0.0009  
Y 0.0269 -0.0326 -0.0013 -0.0006 0.0003 -0.0001  
Z -0.0156 0.0163 -0.0009 -0.0012 -0.0008 0.0011  
AT. 65 C X -0.0088 -0.0098 0.0005 -0.0004 -0.0006 -0.0005



Y -0.0056 -0.0054 0.0002 -0.0002 0.0003 0.0004  
Z 0.0091 0.0069 -0.0002 0.0000 0.0003 0.0003  
AT. 66 C X -0.0088 0.0098 0.0005 0.0004 0.0006 -0.0005  
Y -0.0056 0.0054 0.0002 0.0002 -0.0003 0.0004  
Z 0.0091 -0.0069 -0.0002 -0.0000 -0.0003 0.0003  
AT. 67 H X -0.0285 -0.0341 0.0013 -0.0011 -0.0005 -0.0004  
Y -0.0119 -0.0086 0.0006 -0.0004 0.0002 0.0002  
Z 0.0317 0.0305 -0.0013 0.0008 0.0003 0.0004  
AT. 68 H X -0.0285 0.0341 0.0013 0.0011 0.0005 -0.0004  
Y -0.0119 0.0086 0.0006 0.0004 -0.0002 0.0002  
Z 0.0317 -0.0305 -0.0013 -0.0008 -0.0003 0.0004  
AT. 69 H X -0.0204 -0.0196 0.0009 -0.0010 -0.0007 -0.0004  
Y -0.0132 -0.0153 0.0005 -0.0006 0.0004 0.0005  
Z 0.0207 0.0113 -0.0006 0.0006 0.0006 0.0003  
AT. 70 H X -0.0204 0.0196 0.0009 0.0010 0.0007 -0.0004  
Y -0.0132 0.0153 0.0005 0.0006 -0.0004 0.0005  
Z 0.0207 -0.0113 -0.0006 -0.0006 -0.0006 0.0003  
AT. 71 H X 0.0053 0.0012 0.0002 0.0002 -0.0006 -0.0007  
Y -0.0329 -0.0306 0.0012 -0.0012 0.0003 0.0005  
Z -0.0176 -0.0192 0.0009 -0.0009 0.0003 0.0003  
AT. 72 H X 0.0053 -0.0012 0.0002 -0.0002 0.0006 -0.0007  
Y -0.0329 0.0306 0.0012 0.0012 -0.0003 0.0005  
Z -0.0176 0.0192 0.0009 0.0009 -0.0003 0.0003  
AT. 73 C X -0.0000 0.0033 -0.0001 -0.0001 -0.0003 -0.0001  
Y 0.0149 0.0126 -0.0006 0.0004 -0.0002 -0.0002  
Z -0.0011 -0.0002 0.0003 -0.0007 -0.0006 -0.0006  
AT. 74 C X -0.0000 -0.0033 -0.0001 0.0001 0.0003 -0.0001  
Y 0.0149 -0.0126 -0.0006 -0.0004 0.0002 -0.0002  
Z -0.0011 0.0002 0.0003 0.0007 0.0006 -0.0006  
AT. 75 H X -0.0196 -0.0151 0.0004 -0.0008 -0.0003 -0.0000  
Y 0.0406 0.0391 -0.0019 0.0013 -0.0004 -0.0003  
Z 0.0194 0.0222 -0.0011 0.0001 -0.0009 -0.0007

AT. 76 H X -0.0196 0.0151 0.0004 0.0008 0.0003 -0.0000  
Y 0.0406 -0.0391 -0.0019 -0.0013 0.0004 -0.0003  
Z 0.0194 -0.0222 -0.0011 -0.0001 0.0009 -0.0007

AT. 77 H X 0.0276 0.0339 -0.0015 0.0008 -0.0003 0.0000  
Y 0.0067 0.0041 -0.0006 0.0002 -0.0003 -0.0003  
Z -0.0191 -0.0208 0.0016 -0.0015 -0.0005 -0.0006

AT. 78 H X 0.0276 -0.0339 -0.0015 -0.0008 0.0003 0.0000  
Y 0.0067 -0.0041 -0.0006 -0.0002 0.0003 -0.0003  
Z -0.0191 0.0208 0.0016 0.0015 0.0005 -0.0006

AT. 79 I X -0.0000 -0.0001 0.0011 -0.0010 0.0030 0.0029  
Y -0.0000 -0.0000 -0.0014 0.0012 -0.0034 -0.0033  
Z 0.0001 0.0001 0.0001 0.0000 0.0001 0.0002

AT. 80 I X -0.0000 0.0001 0.0011 0.0010 -0.0030 0.0029  
Y -0.0000 0.0000 -0.0014 -0.0012 0.0034 -0.0033  
Z 0.0001 -0.0001 0.0001 -0.0000 -0.0001 0.0002

AT. 81 I X 0.0001 0.0000 -0.0007 0.0008 -0.0002 0.0001  
Y -0.0000 -0.0000 0.0002 -0.0003 0.0000 -0.0002  
Z -0.0000 0.0000 0.0003 -0.0004 0.0001 0.0000

AT. 82 I X 0.0001 -0.0000 -0.0007 -0.0008 0.0002 0.0001  
Y -0.0000 0.0000 0.0002 0.0003 -0.0000 -0.0002  
Z -0.0000 -0.0000 0.0003 0.0004 -0.0001 0.0000

AT. 83 O X 0.0010 0.0010 -0.0054 0.0038 -0.0199 -0.0196  
Y 0.0001 0.0001 -0.0085 0.0094 -0.0189 -0.0187  
Z 0.0002 0.0004 0.0060 -0.0070 0.0223 0.0216

AT. 84 O X 0.0010 -0.0010 -0.0054 -0.0038 0.0199 -0.0196  
Y 0.0001 -0.0001 -0.0085 -0.0094 0.0189 -0.0187  
Z 0.0002 -0.0004 0.0060 0.0070 -0.0223 0.0216

AT. 85 O X 0.0005 0.0010 0.0099 -0.0107 0.0018 0.0011  
Y 0.0015 0.0010 0.0131 -0.0133 -0.0057 -0.0058  
Z -0.0027 -0.0014 -0.0107 0.0107 0.0097 0.0097

AT. 86 O X 0.0005 -0.0010 0.0099 0.0107 -0.0018 0.0011  
Y 0.0015 -0.0010 0.0131 0.0133 0.0057 -0.0058

Z -0.0027 0.0014 -0.0107 -0.0107 -0.0097 0.0097  
AT. 87 N X 0.0005 0.0006 0.0037 -0.0038 0.0052 0.0048  
Y 0.0007 0.0004 0.0160 -0.0156 0.0179 0.0171  
Z 0.0001 0.0003 -0.0050 0.0025 -0.0104 -0.0100  
AT. 88 N X 0.0005 -0.0006 0.0037 0.0038 -0.0052 0.0048  
Y 0.0007 -0.0004 0.0160 0.0156 -0.0179 0.0171  
Z 0.0001 -0.0003 -0.0050 -0.0025 0.0104 -0.0100  
AT. 89 N X 0.0007 0.0005 0.0034 -0.0039 -0.0026 -0.0039  
Y 0.0018 0.0010 0.0030 -0.0033 -0.0042 -0.0041  
Z -0.0003 -0.0003 -0.0083 0.0079 -0.0011 -0.0019  
AT. 90 N X 0.0007 -0.0005 0.0034 0.0039 0.0026 -0.0039  
Y 0.0018 -0.0010 0.0030 0.0033 0.0042 -0.0041  
Z -0.0003 0.0003 -0.0083 -0.0079 0.0011 -0.0019  
AT. 91 C X 0.0009 0.0008 -0.0026 0.0018 -0.0068 -0.0069  
Y 0.0009 0.0006 0.0094 -0.0079 0.0201 0.0197  
Z 0.0001 0.0004 -0.0041 0.0017 -0.0077 -0.0077  
AT. 92 C X 0.0009 -0.0008 -0.0026 -0.0018 0.0068 -0.0069  
Y 0.0009 -0.0006 0.0094 0.0079 -0.0201 0.0197  
Z 0.0001 -0.0004 -0.0041 -0.0017 0.0077 -0.0077  
AT. 93 C X 0.0005 0.0003 0.0005 0.0001 -0.0112 -0.0114  
Y 0.0004 0.0002 0.0165 -0.0148 0.0358 0.0346  
Z -0.0014 -0.0010 0.0021 -0.0031 -0.0073 -0.0081  
AT. 94 C X 0.0005 -0.0003 0.0005 -0.0001 0.0112 -0.0114  
Y 0.0004 -0.0002 0.0165 0.0148 -0.0358 0.0346  
Z -0.0014 0.0010 0.0021 0.0031 0.0073 -0.0081  
AT. 95 H X 0.0010 0.0008 0.0052 -0.0040 -0.0001 -0.0005  
Y 0.0012 0.0010 0.0055 -0.0060 0.0162 0.0159  
Z -0.0034 -0.0031 0.0170 -0.0148 0.0164 0.0141  
AT. 96 H X 0.0010 -0.0008 0.0052 0.0040 0.0001 -0.0005  
Y 0.0012 -0.0010 0.0055 0.0060 -0.0162 0.0159  
Z -0.0034 0.0031 0.0170 0.0148 -0.0164 0.0141  
AT. 97 H X -0.0003 -0.0007 0.0114 -0.0080 0.0066 0.0054

Y -0.0020 -0.0022 0.0303 -0.0259 0.0506 0.0477  
Z -0.0017 -0.0012 0.0022 -0.0034 -0.0087 -0.0096  
AT. 98 H X -0.0003 0.0007 0.0114 0.0080 -0.0066 0.0054  
Y -0.0020 0.0022 0.0303 0.0259 -0.0506 0.0477  
Z -0.0017 0.0012 0.0022 0.0034 0.0087 -0.0096  
AT. 99 C X 0.0010 0.0011 0.0125 -0.0135 -0.0028 -0.0046  
Y 0.0019 0.0012 0.0120 -0.0120 -0.0045 -0.0036  
Z -0.0008 -0.0003 -0.0036 0.0033 0.0004 -0.0003  
AT. 100 C X 0.0010 -0.0011 0.0125 0.0135 0.0028 -0.0046  
Y 0.0019 -0.0012 0.0120 0.0120 0.0045 -0.0036  
Z -0.0008 0.0003 -0.0036 -0.0033 -0.0004 -0.0003  
AT. 101 C X -0.0001 0.0002 0.0006 -0.0009 0.0004 -0.0005  
Y -0.0003 -0.0007 -0.0168 0.0184 0.0014 0.0052  
Z 0.0013 0.0015 0.0200 -0.0213 -0.0060 -0.0078  
AT. 102 C X -0.0001 -0.0002 0.0006 0.0009 -0.0004 -0.0005  
Y -0.0003 0.0007 -0.0168 -0.0184 -0.0014 0.0052  
Z 0.0013 -0.0015 0.0200 0.0213 0.0060 -0.0078  
AT. 103 H X 0.0006 0.0006 0.0062 -0.0063 -0.0011 -0.0022  
Y -0.0007 -0.0009 -0.0198 0.0214 0.0019 0.0058  
Z 0.0045 0.0046 0.0638 -0.0683 -0.0103 -0.0161  
AT. 104 H X 0.0006 -0.0006 0.0062 0.0063 0.0011 -0.0022  
Y -0.0007 0.0009 -0.0198 -0.0214 -0.0019 0.0058  
Z 0.0045 -0.0046 0.0638 0.0683 0.0103 -0.0161  
AT. 105 H X -0.0020 -0.0015 -0.0220 0.0220 0.0047 0.0029  
Y -0.0030 -0.0033 -0.0527 0.0573 0.0069 0.0137  
Z -0.0001 0.0002 0.0020 -0.0019 -0.0034 -0.0036  
AT. 106 H X -0.0020 0.0015 -0.0220 -0.0220 -0.0047 0.0029  
Y -0.0030 0.0033 -0.0527 -0.0573 -0.0069 0.0137  
Z -0.0001 -0.0002 0.0020 0.0019 0.0034 -0.0036  
AT. 107 C X 0.0011 0.0006 0.0219 -0.0194 0.0155 0.0147  
Y -0.0012 -0.0009 0.0072 -0.0087 -0.0178 -0.0178  
Z 0.0007 0.0002 0.0197 -0.0191 -0.0168 -0.0167

AT.108 C X 0.0011 -0.0006 0.0219 0.0194 -0.0155 0.0147  
Y -0.0012 0.0009 0.0072 0.0087 0.0178 -0.0178  
Z 0.0007 -0.0002 0.0197 0.0191 0.0168 -0.0167

AT.109 H X 0.0041 0.0023 0.0755 -0.0680 0.0442 0.0405  
Y 0.0002 0.0001 0.0429 -0.0426 -0.0110 -0.0132  
Z 0.0023 0.0014 0.0654 -0.0632 -0.0139 -0.0168

AT.110 H X 0.0041 -0.0023 0.0755 0.0680 -0.0442 0.0405  
Y 0.0002 -0.0001 0.0429 0.0426 0.0110 -0.0132  
Z 0.0023 -0.0014 0.0654 0.0632 0.0139 -0.0168

AT.111 H X 0.0015 0.0013 0.0203 -0.0200 0.0152 0.0137  
Y -0.0044 -0.0029 -0.0685 0.0631 -0.0376 -0.0327  
Z 0.0009 -0.0002 0.0378 -0.0339 -0.0111 -0.0113

AT.112 H X 0.0015 -0.0013 0.0203 0.0200 -0.0152 0.0137  
Y -0.0044 0.0029 -0.0685 -0.0631 0.0376 -0.0327  
Z 0.0009 0.0002 0.0378 0.0339 0.0111 -0.0113

AT.113 C X -0.0013 -0.0015 -0.0149 0.0168 0.0055 0.0077  
Y -0.0008 -0.0007 0.0210 -0.0218 -0.0183 -0.0192  
Z -0.0002 -0.0005 -0.0062 0.0065 -0.0195 -0.0174

AT.114 C X -0.0013 0.0015 -0.0149 -0.0168 -0.0055 0.0077  
Y -0.0008 0.0007 0.0210 0.0218 0.0183 -0.0192  
Z -0.0002 0.0005 -0.0062 -0.0065 0.0195 -0.0174

AT.115 C X 0.0005 0.0001 -0.0108 0.0122 0.0093 0.0100  
Y 0.0006 0.0004 0.0231 -0.0228 0.0007 -0.0008  
Z -0.0003 -0.0004 -0.0086 0.0111 0.0158 0.0169

AT.116 C X 0.0005 -0.0001 -0.0108 -0.0122 -0.0093 0.0100  
Y 0.0006 -0.0004 0.0231 0.0228 -0.0007 -0.0008  
Z -0.0003 0.0004 -0.0086 -0.0111 -0.0158 0.0169

AT.117 H X 0.0001 -0.0003 -0.0145 0.0122 -0.0280 -0.0277  
Y 0.0019 0.0017 0.0271 -0.0234 0.0549 0.0512  
Z -0.0000 -0.0002 -0.0040 0.0094 0.0429 0.0448

AT.118 H X 0.0001 0.0003 -0.0145 -0.0122 0.0280 -0.0277  
Y 0.0019 -0.0017 0.0271 0.0234 -0.0549 0.0512

Z -0.0000 0.0002 -0.0040 -0.0094 -0.0429 0.0448  
AT. 119 H X 0.0010 0.0009 -0.0001 0.0063 0.0627 0.0629  
Y 0.0001 0.0001 0.0318 -0.0322 -0.0138 -0.0153  
Z 0.0005 0.0002 -0.0114 0.0172 0.0592 0.0601  
AT. 120 H X 0.0010 -0.0009 -0.0001 -0.0063 -0.0627 0.0629  
Y 0.0001 -0.0001 0.0318 0.0322 0.0138 -0.0153  
Z 0.0005 -0.0002 -0.0114 -0.0172 -0.0592 0.0601  
AT. 121 C X 0.0006 0.0006 -0.0104 0.0089 -0.0065 -0.0075  
Y -0.0014 -0.0009 -0.0248 0.0255 0.0077 0.0093  
Z -0.0003 -0.0008 0.0080 -0.0072 0.0010 -0.0000  
AT. 122 C X 0.0006 -0.0006 -0.0104 -0.0089 0.0065 -0.0075  
Y -0.0014 0.0009 -0.0248 -0.0255 -0.0077 0.0093  
Z -0.0003 0.0008 0.0080 0.0072 -0.0010 -0.0000  
AT. 123 H X 0.0033 0.0030 -0.0269 0.0214 -0.0229 -0.0244  
Y -0.0001 0.0006 -0.0487 0.0465 -0.0008 0.0016  
Z -0.0012 -0.0020 0.0304 -0.0272 0.0074 0.0055  
AT. 124 H X 0.0033 -0.0030 -0.0269 -0.0214 0.0229 -0.0244  
Y -0.0001 -0.0006 -0.0487 -0.0465 0.0008 0.0016  
Z -0.0012 0.0020 0.0304 0.0272 -0.0074 0.0055  
AT. 125 H X 0.0020 0.0014 -0.0004 -0.0010 -0.0069 -0.0083  
Y -0.0052 -0.0044 0.0006 0.0046 0.0233 0.0249  
Z -0.0007 -0.0017 0.0325 -0.0292 0.0093 0.0077  
AT. 126 H X 0.0020 -0.0014 -0.0004 0.0010 0.0069 -0.0083  
Y -0.0052 0.0044 0.0006 -0.0046 -0.0233 0.0249  
Z -0.0007 0.0017 0.0325 0.0292 -0.0093 0.0077  
AT. 127 C X -0.0023 -0.0019 -0.0078 0.0075 -0.0048 -0.0042  
Y -0.0014 -0.0006 -0.0309 0.0307 0.0072 0.0092  
Z 0.0014 0.0007 -0.0057 0.0049 -0.0019 -0.0018  
AT. 128 C X -0.0023 0.0019 -0.0078 -0.0075 0.0048 -0.0042  
Y -0.0014 0.0006 -0.0309 -0.0307 -0.0072 0.0092  
Z 0.0014 -0.0007 -0.0057 -0.0049 0.0019 -0.0018  
AT. 129 C X -0.0004 -0.0001 0.0096 -0.0114 -0.0119 -0.0129

Y 0.0002 0.0008 -0.0163 0.0133 -0.0123 -0.0125  
Z 0.0008 0.0005 -0.0098 0.0108 0.0171 0.0185  
AT. 130 C X -0.0004 0.0001 0.0096 0.0114 0.0119 -0.0129  
Y 0.0002 -0.0008 -0.0163 -0.0133 0.0123 -0.0125  
Z 0.0008 -0.0005 -0.0098 -0.0108 -0.0171 0.0185  
AT. 131 H X -0.0008 -0.0007 0.0113 -0.0085 0.0254 0.0256  
Y 0.0032 0.0036 -0.0027 -0.0068 -0.0664 -0.0700  
Z 0.0016 0.0008 -0.0012 0.0054 0.0435 0.0449  
AT. 132 H X -0.0008 0.0007 0.0113 0.0085 -0.0254 0.0256  
Y 0.0032 -0.0036 -0.0027 0.0068 0.0664 -0.0700  
Z 0.0016 -0.0008 -0.0012 -0.0054 -0.0435 0.0449  
AT. 133 H X 0.0010 0.0018 0.0061 -0.0156 -0.0756 -0.0790  
Y -0.0004 0.0008 -0.0277 0.0242 -0.0163 -0.0158  
Z -0.0008 -0.0005 -0.0255 0.0294 0.0422 0.0457  
AT. 134 H X 0.0010 -0.0018 0.0061 0.0156 0.0756 -0.0790  
Y -0.0004 -0.0008 -0.0277 -0.0242 0.0163 -0.0158  
Z -0.0008 0.0005 -0.0255 -0.0294 -0.0422 0.0457  
AT. 135 C X -0.0005 -0.0006 0.0039 -0.0029 0.0092 0.0092  
Y -0.0005 -0.0005 -0.0072 0.0084 0.0132 0.0137  
Z 0.0021 0.0017 0.0078 -0.0086 -0.0027 -0.0036  
AT. 136 C X -0.0005 0.0006 0.0039 0.0029 -0.0092 0.0092  
Y -0.0005 0.0005 -0.0072 -0.0084 -0.0132 0.0137  
Z 0.0021 -0.0017 0.0078 0.0086 0.0027 -0.0036  
AT. 137 H X 0.0014 0.0009 0.0412 -0.0428 -0.0045 -0.0083  
Y 0.0002 -0.0001 -0.0065 0.0077 0.0217 0.0215  
Z 0.0025 0.0019 -0.0049 0.0050 0.0169 0.0163  
AT. 138 H X 0.0014 -0.0009 0.0412 0.0428 0.0045 -0.0083  
Y 0.0002 0.0001 -0.0065 -0.0077 -0.0217 0.0215  
Z 0.0025 -0.0019 -0.0049 -0.0050 -0.0169 0.0163  
AT. 139 H X -0.0023 -0.0026 -0.0072 0.0086 -0.0063 -0.0042  
Y -0.0014 -0.0008 -0.0247 0.0273 0.0208 0.0233  
Z 0.0048 0.0045 0.0273 -0.0291 0.0157 0.0114

AT. 140 H X -0.0023 0.0026 -0.0072 -0.0086 0.0063 -0.0042  
Y -0.0014 0.0008 -0.0247 -0.0273 -0.0208 0.0233  
Z 0.0048 -0.0045 0.0273 0.0291 -0.0157 0.0114

AT. 141 H X 0.0015 0.0015 0.0028 -0.0012 0.0399 0.0384  
Y 0.0001 -0.0003 -0.0226 0.0248 0.0375 0.0384  
Z 0.0023 0.0024 0.0234 -0.0250 -0.0148 -0.0166

AT. 142 H X 0.0015 -0.0015 0.0028 0.0012 -0.0399 0.0384  
Y 0.0001 0.0003 -0.0226 -0.0248 -0.0375 0.0384  
Z 0.0023 -0.0024 0.0234 0.0250 0.0148 -0.0166

AT. 143 C X -0.0008 -0.0006 -0.0149 0.0129 -0.0027 -0.0023  
Y 0.0002 0.0002 0.0051 -0.0054 -0.0031 -0.0039  
Z -0.0018 -0.0019 -0.0155 0.0163 -0.0055 -0.0038

AT. 144 C X -0.0008 0.0006 -0.0149 -0.0129 0.0027 -0.0023  
Y 0.0002 -0.0002 0.0051 0.0054 0.0031 -0.0039  
Z -0.0018 0.0019 -0.0155 -0.0163 0.0055 -0.0038

AT. 145 H X 0.0014 0.0016 -0.0278 0.0243 0.0077 0.0086  
Y 0.0011 0.0007 0.0195 -0.0188 -0.0061 -0.0080  
Z -0.0023 -0.0019 -0.0345 0.0337 0.0004 0.0035

AT. 146 H X 0.0014 -0.0016 -0.0278 -0.0243 -0.0077 0.0086  
Y 0.0011 -0.0007 0.0195 0.0188 0.0061 -0.0080  
Z -0.0023 0.0019 -0.0345 -0.0337 -0.0004 0.0035

AT. 147 H X -0.0033 -0.0026 -0.0254 0.0255 -0.0040 -0.0016  
Y 0.0002 0.0002 0.0097 -0.0115 -0.0066 -0.0083  
Z -0.0054 -0.0047 -0.0279 0.0307 -0.0091 -0.0052

AT. 148 H X -0.0033 0.0026 -0.0254 -0.0255 0.0040 -0.0016  
Y 0.0002 -0.0002 0.0097 0.0115 0.0066 -0.0083  
Z -0.0054 0.0047 -0.0279 -0.0307 0.0091 -0.0052

AT. 149 H X 0.0022 0.0014 0.0090 -0.0130 -0.0056 -0.0085  
Y 0.0012 0.0005 0.0254 -0.0252 -0.0082 -0.0110  
Z -0.0018 -0.0024 0.0065 -0.0038 -0.0125 -0.0124

AT. 150 H X 0.0022 -0.0014 0.0090 0.0130 0.0056 -0.0085  
Y 0.0012 -0.0005 0.0254 0.0252 0.0082 -0.0110



Z -0.0018 0.0024 0.0065 0.0038 0.0125 -0.0124  
AT. 151 C X -0.0023 -0.0020 -0.0145 0.0149 -0.0085 -0.0060  
Y -0.0018 -0.0013 -0.0064 0.0081 0.0076 0.0073  
Z 0.0011 0.0002 -0.0048 0.0057 -0.0109 -0.0092  
AT. 152 C X -0.0023 0.0020 -0.0145 -0.0149 0.0085 -0.0060  
Y -0.0018 0.0013 -0.0064 -0.0081 -0.0076 0.0073  
Z 0.0011 -0.0002 -0.0048 -0.0057 0.0109 -0.0092  
AT. 153 H X -0.0027 -0.0019 -0.0420 0.0426 -0.0043 0.0007  
Y -0.0024 -0.0018 -0.0156 0.0190 0.0238 0.0233  
Z 0.0002 -0.0006 -0.0078 0.0113 0.0132 0.0135  
AT. 154 H X -0.0027 0.0019 -0.0420 -0.0426 0.0043 0.0007  
Y -0.0024 0.0018 -0.0156 -0.0190 -0.0238 0.0233  
Z 0.0002 0.0006 -0.0078 -0.0113 -0.0132 0.0135  
AT. 155 H X -0.0027 -0.0025 0.0123 -0.0125 -0.0346 -0.0329  
Y -0.0026 -0.0021 0.0000 0.0039 0.0196 0.0179  
Z 0.0017 0.0009 -0.0022 0.0005 -0.0328 -0.0298  
AT. 156 H X -0.0027 0.0025 0.0123 0.0125 0.0346 -0.0329  
Y -0.0026 0.0021 0.0000 -0.0039 -0.0196 0.0179  
Z 0.0017 -0.0009 -0.0022 -0.0005 0.0328 -0.0298  
AT. 157 O X 0.0007 0.0005 0.0002 -0.0000 0.0003 0.0002  
Y -0.0009 -0.0026 0.0005 -0.0003 -0.0001 -0.0001  
Z -0.0003 0.0013 0.0002 0.0002 0.0004 0.0001  
AT. 158 O X 0.0007 -0.0005 0.0002 0.0000 -0.0003 0.0002  
Y -0.0009 0.0026 0.0005 0.0003 0.0001 -0.0001  
Z -0.0003 -0.0013 0.0002 -0.0002 -0.0004 0.0001  
AT. 159 O X -0.0012 0.0016 0.0002 -0.0003 -0.0001 -0.0001  
Y 0.0008 -0.0006 -0.0002 -0.0002 -0.0002 0.0001  
Z -0.0033 0.0029 0.0002 -0.0003 -0.0003 -0.0003  
AT. 160 O X -0.0012 -0.0016 0.0002 0.0003 0.0001 -0.0001  
Y 0.0008 0.0006 -0.0002 0.0002 0.0002 0.0001  
Z -0.0033 -0.0029 0.0002 0.0003 0.0003 -0.0003  
AT. 161 H X -0.0002 -0.0023 0.0012 -0.0008 0.0001 -0.0000

Y -0.0014 -0.0021 0.0001 0.0001 -0.0000 -0.0001  
Z -0.0015 -0.0015 0.0020 -0.0017 -0.0002 -0.0006  
AT.162 H X -0.0002 0.0023 0.0012 0.0008 -0.0001 -0.0000  
Y -0.0014 0.0021 0.0001 -0.0001 0.0000 -0.0001  
Z -0.0015 0.0015 0.0020 0.0017 0.0002 -0.0006  
AT.163 H X -0.0047 0.0033 0.0002 -0.0003 -0.0002 -0.0004  
Y -0.0009 0.0001 0.0010 0.0001 0.0005 -0.0011  
Z -0.0032 0.0030 0.0006 -0.0002 -0.0001 -0.0005  
AT.164 H X -0.0047 -0.0033 0.0002 0.0003 0.0002 -0.0004  
Y -0.0009 -0.0001 0.0010 -0.0001 -0.0005 -0.0011  
Z -0.0032 -0.0030 0.0006 0.0002 0.0001 -0.0005  
AT.165 O X -0.0007 -0.0008 0.0025 -0.0021 0.0039 0.0042  
Y -0.0007 -0.0008 0.0014 -0.0005 0.0027 0.0025  
Z 0.0001 -0.0002 0.0007 0.0006 0.0005 -0.0003  
AT.166 O X -0.0007 0.0008 0.0025 0.0021 -0.0039 0.0042  
Y -0.0007 0.0008 0.0014 0.0005 -0.0027 0.0025  
Z 0.0001 0.0002 0.0007 -0.0006 -0.0005 -0.0003  
AT.167 H X -0.0013 -0.0016 0.0043 -0.0024 0.0077 0.0077  
Y 0.0005 0.0001 -0.0012 -0.0002 -0.0026 -0.0028  
Z -0.0004 0.0005 0.0010 0.0013 0.0004 -0.0005  
AT.168 H X -0.0013 0.0016 0.0043 0.0024 -0.0077 0.0077  
Y 0.0005 -0.0001 -0.0012 0.0002 0.0026 -0.0028  
Z -0.0004 -0.0005 0.0010 -0.0013 -0.0004 -0.0005  
AT.169 O X -0.0003 0.0008 0.0006 0.0009 0.0011 -0.0004  
Y -0.0003 0.0004 -0.0026 -0.0024 -0.0020 0.0012  
Z 0.0000 -0.0001 0.0010 0.0010 0.0013 -0.0002  
AT.170 O X -0.0003 -0.0008 0.0006 -0.0009 -0.0011 -0.0004  
Y -0.0003 -0.0004 -0.0026 0.0024 0.0020 0.0012  
Z 0.0000 0.0001 0.0010 -0.0010 -0.0013 -0.0002  
AT.171 H X -0.0025 0.0025 0.0013 -0.0007 0.0004 0.0055  
Y -0.0015 0.0016 -0.0038 -0.0045 -0.0037 0.0046  
Z -0.0004 0.0005 -0.0011 -0.0012 -0.0007 0.0007

AT. 172 H X -0.0025 -0.0025 0.0013 0.0007 -0.0004 0.0055  
Y -0.0015 -0.0016 -0.0038 0.0045 0.0037 0.0046  
Z -0.0004 -0.0005 -0.0011 0.0012 0.0007 0.0007

FREQ(CM\*\*-1) 436.47 436.90 456.17 456.33 456.48 457.80

AT. 1 I X 0.0021 -0.0020 -0.0003 -0.0001 -0.0005 -0.0005  
Y 0.0011 -0.0011 -0.0002 -0.0001 -0.0004 -0.0003  
Z 0.0002 0.0000 -0.0001 0.0000 -0.0002 -0.0001

AT. 2 I X -0.0021 -0.0020 -0.0003 0.0001 -0.0005 0.0005  
Y -0.0011 -0.0011 -0.0002 0.0001 -0.0004 0.0003  
Z -0.0002 0.0000 -0.0001 -0.0000 -0.0002 0.0001

AT. 3 I X -0.0010 0.0003 -0.0029 -0.0002 -0.0040 -0.0046  
Y -0.0003 0.0001 -0.0012 -0.0000 -0.0016 -0.0018  
Z -0.0005 0.0002 -0.0013 -0.0001 -0.0018 -0.0021

AT. 4 I X 0.0010 0.0003 -0.0029 0.0002 -0.0040 0.0046  
Y 0.0003 0.0001 -0.0012 0.0000 -0.0016 0.0018  
Z 0.0005 0.0002 -0.0013 0.0001 -0.0018 0.0021

AT. 5 O X -0.0152 0.0150 0.0032 0.0011 0.0026 0.0074  
Y 0.0269 -0.0272 -0.0027 -0.0008 -0.0040 -0.0069  
Z -0.0157 0.0153 0.0001 -0.0002 0.0014 0.0032

AT. 6 O X 0.0152 0.0150 0.0032 -0.0011 0.0026 -0.0074  
Y -0.0269 -0.0272 -0.0027 0.0008 -0.0040 0.0069  
Z 0.0157 0.0153 0.0001 0.0002 0.0014 -0.0032

AT. 7 O X 0.0019 -0.0002 0.0108 0.0008 0.0149 0.0183  
Y 0.0022 -0.0039 -0.0067 -0.0005 -0.0092 -0.0112  
Z -0.0162 0.0146 -0.0116 -0.0003 -0.0167 -0.0181

AT. 8 O X -0.0019 -0.0002 0.0108 -0.0008 0.0149 -0.0183  
Y -0.0022 -0.0039 -0.0067 0.0005 -0.0092 0.0112  
Z 0.0162 0.0146 -0.0116 0.0003 -0.0167 0.0181

AT. 9 N X -0.0066 0.0067 -0.0001 -0.0005 0.0017 0.0011  
Y -0.0300 0.0299 0.0001 -0.0001 0.0009 0.0045

Z 0.0077 -0.0075 -0.0011 -0.0006 -0.0003 -0.0006  
AT. 10 N X 0.0066 0.0067 -0.0001 0.0005 0.0017 -0.0011  
Y 0.0300 0.0299 0.0001 0.0001 0.0009 -0.0045  
Z -0.0077 -0.0075 -0.0011 0.0006 -0.0003 0.0006  
AT. 11 N X -0.0031 0.0012 -0.0142 -0.0008 -0.0199 -0.0236  
Y 0.0073 -0.0102 -0.0103 -0.0008 -0.0146 -0.0176  
Z 0.0043 -0.0044 0.0029 0.0002 0.0041 0.0052  
AT. 12 N X 0.0031 0.0012 -0.0142 0.0008 -0.0199 0.0236  
Y -0.0073 -0.0102 -0.0103 0.0008 -0.0146 0.0176  
Z -0.0043 -0.0044 0.0029 -0.0002 0.0041 -0.0052  
AT. 13 C X -0.0094 0.0098 0.0021 0.0006 0.0032 0.0050  
Y -0.0087 0.0083 -0.0018 -0.0004 -0.0008 -0.0032  
Z 0.0084 -0.0085 -0.0011 -0.0008 0.0003 -0.0013  
AT. 14 C X 0.0094 0.0098 0.0021 -0.0006 0.0032 -0.0050  
Y 0.0087 0.0083 -0.0018 0.0004 -0.0008 0.0032  
Z -0.0084 -0.0085 -0.0011 0.0008 0.0003 0.0013  
AT. 15 C X -0.0113 0.0120 0.0004 0.0005 0.0022 0.0020  
Y -0.0136 0.0134 0.0003 0.0002 0.0027 0.0004  
Z -0.0031 0.0037 0.0081 0.0014 0.0101 0.0161  
AT. 16 C X 0.0113 0.0120 0.0004 -0.0005 0.0022 -0.0020  
Y 0.0136 0.0134 0.0003 -0.0002 0.0027 -0.0004  
Z 0.0031 0.0037 0.0081 -0.0014 0.0101 -0.0161  
AT. 17 H X -0.0053 0.0068 0.0002 0.0002 0.0018 0.0011  
Y 0.0157 -0.0158 -0.0080 -0.0020 -0.0056 -0.0164  
Z -0.0377 0.0385 0.0181 0.0040 0.0199 0.0362  
AT. 18 H X 0.0053 0.0068 0.0002 -0.0002 0.0018 -0.0011  
Y -0.0157 -0.0158 -0.0080 0.0020 -0.0056 0.0164  
Z 0.0377 0.0385 0.0181 -0.0040 0.0199 -0.0362  
AT. 19 H X 0.0061 -0.0055 -0.0037 -0.0009 -0.0023 -0.0060  
Y -0.0492 0.0485 0.0141 0.0035 0.0162 0.0270  
Z -0.0115 0.0121 0.0123 0.0023 0.0141 0.0241  
AT. 20 H X -0.0061 -0.0055 -0.0037 0.0009 -0.0023 0.0060

Y 0.0492 0.0485 0.0141 -0.0035 0.0162 -0.0270  
Z 0.0115 0.0121 0.0123 -0.0023 0.0141 -0.0241  
AT. 21 C X -0.0003 0.0019 0.0074 0.0007 0.0098 0.0116  
Y 0.0074 -0.0075 0.0014 -0.0000 0.0018 0.0006  
Z 0.0025 -0.0006 0.0113 0.0007 0.0158 0.0190  
AT. 22 C X 0.0003 0.0019 0.0074 -0.0007 0.0098 -0.0116  
Y -0.0074 -0.0075 0.0014 0.0000 0.0018 -0.0006  
Z -0.0025 -0.0006 0.0113 -0.0007 0.0158 -0.0190  
AT. 23 C X 0.0041 -0.0004 0.0173 0.0014 0.0233 0.0269  
Y 0.0047 -0.0011 0.0164 0.0012 0.0228 0.0256  
Z 0.0110 -0.0069 0.0212 0.0012 0.0294 0.0336  
AT. 24 C X -0.0041 -0.0004 0.0173 -0.0014 0.0233 -0.0269  
Y -0.0047 -0.0011 0.0164 -0.0012 0.0228 -0.0256  
Z -0.0110 -0.0069 0.0212 -0.0012 0.0294 -0.0336  
AT. 25 H X -0.0010 0.0026 0.0090 0.0005 0.0127 0.0146  
Y 0.0040 -0.0000 0.0179 0.0013 0.0251 0.0287  
Z 0.0117 -0.0116 0.0016 -0.0006 0.0020 -0.0027  
AT. 26 H X 0.0010 0.0026 0.0090 -0.0005 0.0127 -0.0146  
Y -0.0040 -0.0000 0.0179 -0.0013 0.0251 -0.0287  
Z -0.0117 -0.0116 0.0016 0.0006 0.0020 0.0027  
AT. 27 H X 0.0044 -0.0019 0.0073 0.0004 0.0101 0.0109  
Y 0.0001 0.0057 0.0254 0.0020 0.0360 0.0443  
Z 0.0087 -0.0030 0.0280 0.0019 0.0391 0.0468  
AT. 28 H X -0.0044 -0.0019 0.0073 -0.0004 0.0101 -0.0109  
Y -0.0001 0.0057 0.0254 -0.0020 0.0360 -0.0443  
Z -0.0087 -0.0030 0.0280 -0.0019 0.0391 -0.0468  
AT. 29 C X 0.0220 -0.0218 0.0009 -0.0006 0.0027 0.0002  
Y 0.0041 -0.0042 -0.0016 0.0002 -0.0036 -0.0028  
Z 0.0140 -0.0144 -0.0044 -0.0006 -0.0057 -0.0093  
AT. 30 C X -0.0220 -0.0218 0.0009 0.0006 0.0027 -0.0002  
Y -0.0041 -0.0042 -0.0016 -0.0002 -0.0036 0.0028  
Z -0.0140 -0.0144 -0.0044 0.0006 -0.0057 0.0093

AT. 31 H X 0.0489 -0.0482 0.0016 -0.0004 0.0027 -0.0005  
Y -0.0157 0.0158 0.0019 0.0004 0.0016 0.0056  
Z 0.0005 -0.0003 0.0011 -0.0002 0.0017 0.0024

AT. 32 H X -0.0489 -0.0482 0.0016 0.0004 0.0027 0.0005  
Y 0.0157 0.0158 0.0019 -0.0004 0.0016 -0.0056  
Z -0.0005 -0.0003 0.0011 0.0002 0.0017 -0.0024

AT. 33 H X 0.0333 -0.0340 -0.0065 -0.0008 -0.0087 -0.0174  
Y 0.0334 -0.0339 -0.0067 -0.0000 -0.0114 -0.0156  
Z 0.0076 -0.0085 -0.0069 -0.0007 -0.0098 -0.0153

AT. 34 H X -0.0333 -0.0340 -0.0065 0.0008 -0.0087 0.0174  
Y -0.0334 -0.0339 -0.0067 0.0000 -0.0114 0.0156  
Z -0.0076 -0.0085 -0.0069 0.0007 -0.0098 0.0153

AT. 35 C X 0.0146 -0.0139 0.0072 -0.0002 0.0115 0.0132  
Y 0.0078 -0.0079 -0.0018 0.0002 -0.0041 -0.0043  
Z 0.0223 -0.0234 -0.0103 -0.0011 -0.0140 -0.0217

AT. 36 C X -0.0146 -0.0139 0.0072 0.0002 0.0115 -0.0132  
Y -0.0078 -0.0079 -0.0018 -0.0002 -0.0041 0.0043  
Z -0.0223 -0.0234 -0.0103 0.0011 -0.0140 0.0217

AT. 37 C X 0.0020 -0.0015 0.0006 -0.0001 0.0013 0.0025  
Y -0.0039 0.0038 0.0036 0.0004 0.0043 0.0070  
Z -0.0108 0.0109 -0.0016 -0.0001 -0.0017 -0.0028

AT. 38 C X -0.0020 -0.0015 0.0006 0.0001 0.0013 -0.0025  
Y 0.0039 0.0038 0.0036 -0.0004 0.0043 -0.0070  
Z 0.0108 0.0109 -0.0016 0.0001 -0.0017 0.0028

AT. 39 H X -0.0491 0.0512 0.0077 0.0007 0.0124 0.0190  
Y -0.0353 0.0369 0.0181 0.0014 0.0260 0.0365  
Z -0.0313 0.0319 -0.0031 -0.0000 -0.0036 -0.0045

AT. 40 H X 0.0491 0.0512 0.0077 -0.0007 0.0124 -0.0190  
Y 0.0353 0.0369 0.0181 -0.0014 0.0260 -0.0365  
Z 0.0313 0.0319 -0.0031 0.0000 -0.0036 0.0045

AT. 41 H X 0.0474 -0.0491 -0.0092 -0.0008 -0.0140 -0.0188  
Y -0.0037 0.0050 0.0091 0.0007 0.0124 0.0161

Z -0.0590 0.0604 0.0044 0.0005 0.0081 0.0126  
AT. 42 H X -0.0474 -0.0491 -0.0092 0.0008 -0.0140 0.0188  
Y 0.0037 0.0050 0.0091 -0.0007 0.0124 -0.0161  
Z 0.0590 0.0604 0.0044 -0.0005 0.0081 -0.0126  
AT. 43 C X -0.0105 0.0104 -0.0043 0.0003 -0.0068 -0.0083  
Y -0.0011 0.0009 -0.0029 -0.0004 -0.0032 -0.0053  
Z 0.0002 0.0005 0.0096 0.0010 0.0128 0.0161  
AT. 44 C X 0.0105 0.0104 -0.0043 -0.0003 -0.0068 0.0083  
Y 0.0011 0.0009 -0.0029 0.0004 -0.0032 0.0053  
Z -0.0002 0.0005 0.0096 -0.0010 0.0128 -0.0161  
AT. 45 H X -0.0257 0.0285 0.0089 0.0009 0.0133 0.0141  
Y 0.0141 -0.0162 -0.0151 -0.0009 -0.0230 -0.0259  
Z -0.0040 0.0044 0.0120 0.0007 0.0181 0.0205  
AT. 46 H X 0.0257 0.0285 0.0089 -0.0009 0.0133 -0.0141  
Y -0.0141 -0.0162 -0.0151 0.0009 -0.0230 0.0259  
Z 0.0040 0.0044 0.0120 -0.0007 0.0181 -0.0205  
AT. 47 H X -0.0198 0.0210 -0.0002 0.0002 0.0013 -0.0006  
Y -0.0191 0.0213 0.0103 0.0001 0.0181 0.0171  
Z -0.0067 0.0080 0.0171 0.0016 0.0232 0.0277  
AT. 48 H X 0.0198 0.0210 -0.0002 -0.0002 0.0013 0.0006  
Y 0.0191 0.0213 0.0103 -0.0001 0.0181 -0.0171  
Z 0.0067 0.0080 0.0171 -0.0016 0.0232 -0.0277  
AT. 49 C X -0.0005 -0.0006 -0.0049 0.0003 -0.0092 -0.0097  
Y -0.0053 0.0061 -0.0031 -0.0003 -0.0035 -0.0051  
Z -0.0001 0.0004 0.0028 0.0007 0.0021 0.0053  
AT. 50 C X 0.0005 -0.0006 -0.0049 -0.0003 -0.0092 0.0097  
Y 0.0053 0.0061 -0.0031 0.0003 -0.0035 0.0051  
Z 0.0001 0.0004 0.0028 -0.0007 0.0021 -0.0053  
AT. 51 C X -0.0085 0.0080 -0.0051 0.0000 -0.0082 -0.0099  
Y 0.0194 -0.0186 0.0074 0.0008 0.0091 0.0124  
Z -0.0182 0.0177 -0.0070 -0.0003 -0.0103 -0.0103  
AT. 52 C X 0.0085 0.0080 -0.0051 -0.0000 -0.0082 0.0099

Y -0.0194 -0.0186 0.0074 -0.0008 0.0091 -0.0124  
Z 0.0182 0.0177 -0.0070 0.0003 -0.0103 0.0103  
AT. 53 H X 0.0446 -0.0443 0.0086 0.0008 0.0097 0.0111  
Y 0.0685 -0.0673 0.0214 0.0023 0.0251 0.0337  
Z -0.0567 0.0552 -0.0147 0.0001 -0.0231 -0.0222  
AT. 54 H X -0.0446 -0.0443 0.0086 -0.0008 0.0097 -0.0111  
Y -0.0685 -0.0673 0.0214 -0.0023 0.0251 -0.0337  
Z 0.0567 0.0552 -0.0147 -0.0001 -0.0231 0.0222  
AT. 55 H X -0.0825 0.0808 -0.0248 -0.0012 -0.0338 -0.0400  
Y 0.0512 -0.0499 0.0114 0.0009 0.0143 0.0170  
Z -0.0288 0.0281 -0.0153 -0.0009 -0.0211 -0.0250  
AT. 56 H X 0.0825 0.0808 -0.0248 0.0012 -0.0338 0.0400  
Y -0.0512 -0.0499 0.0114 -0.0009 0.0143 -0.0170  
Z 0.0288 0.0281 -0.0153 0.0009 -0.0211 0.0250  
AT. 57 C X 0.0119 -0.0116 0.0020 -0.0008 0.0052 0.0032  
Y -0.0191 0.0187 -0.0023 0.0006 -0.0052 -0.0031  
Z 0.0051 -0.0054 0.0025 -0.0001 0.0039 0.0049  
AT. 58 C X -0.0119 -0.0116 0.0020 0.0008 0.0052 -0.0032  
Y 0.0191 0.0187 -0.0023 -0.0006 -0.0052 0.0031  
Z -0.0051 -0.0054 0.0025 0.0001 0.0039 -0.0049  
AT. 59 H X -0.0020 0.0019 -0.0068 -0.0013 -0.0064 -0.0129  
Y -0.0212 0.0205 0.0035 0.0011 0.0025 0.0079  
Z -0.0076 0.0066 0.0049 0.0003 0.0071 0.0098  
AT. 60 H X 0.0020 0.0019 -0.0068 0.0013 -0.0064 0.0129  
Y 0.0212 0.0205 0.0035 -0.0011 0.0025 -0.0079  
Z 0.0076 0.0066 0.0049 -0.0003 0.0071 -0.0098  
AT. 61 H X -0.0062 0.0072 0.0093 0.0004 0.0140 0.0188  
Y -0.0185 0.0187 -0.0100 0.0004 -0.0158 -0.0179  
Z -0.0091 0.0091 0.0120 0.0010 0.0161 0.0245  
AT. 62 H X 0.0062 0.0072 0.0093 -0.0004 0.0140 -0.0188  
Y 0.0185 0.0187 -0.0100 -0.0004 -0.0158 0.0179  
Z 0.0091 0.0091 0.0120 -0.0010 0.0161 -0.0245



AT. 63 H X 0.0325 -0.0329 -0.0036 -0.0018 -0.0015 -0.0093  
Y -0.0473 0.0467 0.0003 0.0012 -0.0020 0.0041  
Z 0.0091 -0.0086 0.0057 0.0004 0.0076 0.0108

AT. 64 H X -0.0325 -0.0329 -0.0036 0.0018 -0.0015 0.0093  
Y 0.0473 0.0467 0.0003 -0.0012 -0.0020 -0.0041  
Z -0.0091 -0.0086 0.0057 -0.0004 0.0076 -0.0108

AT. 65 C X 0.0032 -0.0042 -0.0033 -0.0002 -0.0050 -0.0075  
Y 0.0013 -0.0005 0.0066 0.0003 0.0093 0.0119  
Z -0.0000 0.0011 0.0013 0.0001 0.0022 0.0024

AT. 66 C X -0.0032 -0.0042 -0.0033 0.0002 -0.0050 0.0075  
Y -0.0013 -0.0005 0.0066 -0.0003 0.0093 -0.0119  
Z 0.0000 0.0011 0.0013 -0.0001 0.0022 -0.0024

AT. 67 H X 0.0111 -0.0121 -0.0005 -0.0006 0.0009 -0.0027  
Y -0.0003 0.0018 0.0104 0.0007 0.0135 0.0159  
Z -0.0052 0.0056 -0.0047 0.0000 -0.0067 -0.0054

AT. 68 H X -0.0111 -0.0121 -0.0005 0.0006 0.0009 0.0027  
Y 0.0003 0.0018 0.0104 -0.0007 0.0135 -0.0159  
Z 0.0052 0.0056 -0.0047 -0.0000 -0.0067 0.0054

AT. 69 H X 0.0060 -0.0074 0.0025 0.0005 0.0019 0.0047  
Y 0.0066 -0.0063 0.0088 0.0006 0.0129 0.0184  
Z 0.0023 -0.0012 -0.0070 -0.0011 -0.0065 -0.0126

AT. 70 H X -0.0060 -0.0074 0.0025 -0.0005 0.0019 -0.0047  
Y -0.0066 -0.0063 0.0088 -0.0006 0.0129 -0.0184  
Z -0.0023 -0.0012 -0.0070 0.0011 -0.0065 0.0126

AT. 71 H X 0.0006 -0.0012 -0.0105 -0.0012 -0.0137 -0.0229  
Y 0.0066 -0.0057 0.0159 0.0010 0.0220 0.0280  
Z 0.0050 -0.0035 0.0084 0.0004 0.0124 0.0124

AT. 72 H X -0.0006 -0.0012 -0.0105 0.0012 -0.0137 0.0229  
Y -0.0066 -0.0057 0.0159 -0.0010 0.0220 -0.0280  
Z -0.0050 -0.0035 0.0084 -0.0004 0.0124 -0.0124

AT. 73 C X -0.0027 0.0036 0.0097 0.0009 0.0126 0.0170  
Y -0.0028 0.0043 0.0047 0.0001 0.0076 0.0070

Z 0.0145 -0.0160 -0.0097 -0.0002 -0.0156 -0.0200  
AT. 74 C X 0.0027 0.0036 0.0097 -0.0009 0.0126 -0.0170  
Y 0.0028 0.0043 0.0047 -0.0001 0.0076 -0.0070  
Z -0.0145 -0.0160 -0.0097 0.0002 -0.0156 0.0200  
AT. 75 H X -0.0091 0.0117 0.0264 0.0022 0.0360 0.0469  
Y -0.0100 0.0116 0.0074 0.0002 0.0127 0.0112  
Z 0.0003 -0.0007 0.0053 0.0008 0.0072 0.0065  
AT. 76 H X 0.0091 0.0117 0.0264 -0.0022 0.0360 -0.0469  
Y 0.0100 0.0116 0.0074 -0.0002 0.0127 -0.0112  
Z -0.0003 -0.0007 0.0053 -0.0008 0.0072 -0.0065  
AT. 77 H X -0.0220 0.0235 0.0144 0.0018 0.0181 0.0259  
Y -0.0003 0.0029 0.0165 0.0004 0.0259 0.0265  
Z 0.0300 -0.0330 -0.0249 -0.0013 -0.0376 -0.0460  
AT. 78 H X 0.0220 0.0235 0.0144 -0.0018 0.0181 -0.0259  
Y 0.0003 0.0029 0.0165 -0.0004 0.0259 -0.0265  
Z -0.0300 -0.0330 -0.0249 0.0013 -0.0376 0.0460  
AT. 79 I X 0.0000 0.0000 0.0009 0.0014 -0.0008 -0.0001  
Y -0.0000 -0.0000 -0.0014 -0.0019 0.0011 0.0001  
Z 0.0000 -0.0000 -0.0001 -0.0001 0.0000 -0.0000  
AT. 80 I X -0.0000 0.0000 0.0009 -0.0014 -0.0008 0.0001  
Y 0.0000 -0.0000 -0.0014 0.0019 0.0011 -0.0001  
Z -0.0000 -0.0000 -0.0001 0.0001 0.0000 0.0000  
AT. 81 I X 0.0001 -0.0000 0.0042 0.0049 -0.0029 -0.0002  
Y -0.0001 0.0000 -0.0037 -0.0041 0.0024 0.0000  
Z -0.0001 -0.0000 -0.0024 -0.0027 0.0015 0.0000  
AT. 82 I X -0.0001 -0.0000 0.0042 -0.0049 -0.0029 0.0002  
Y 0.0001 0.0000 -0.0037 0.0041 0.0024 -0.0000  
Z 0.0001 -0.0000 -0.0024 0.0027 0.0015 -0.0000  
AT. 83 O X -0.0005 0.0001 -0.0040 -0.0064 0.0029 0.0004  
Y 0.0003 -0.0000 -0.0033 -0.0040 0.0032 0.0003  
Z -0.0002 -0.0000 0.0014 0.0019 -0.0012 0.0002  
AT. 84 O X 0.0005 0.0001 -0.0040 0.0064 0.0029 -0.0004

Y -0.0003 -0.0000 -0.0033 0.0040 0.0032 -0.0003  
Z 0.0002 -0.0000 0.0014 -0.0019 -0.0012 -0.0002  
AT. 85 O X 0.0001 -0.0006 -0.0156 -0.0195 0.0106 0.0011  
Y -0.0003 0.0002 -0.0050 -0.0064 0.0040 0.0005  
Z -0.0001 -0.0003 -0.0185 -0.0222 0.0130 0.0010  
AT. 86 O X -0.0001 -0.0006 -0.0156 0.0195 0.0106 -0.0011  
Y 0.0003 0.0002 -0.0050 0.0064 0.0040 -0.0005  
Z 0.0001 -0.0003 -0.0185 0.0222 0.0130 -0.0010  
AT. 87 N X 0.0003 -0.0002 0.0019 0.0039 -0.0012 -0.0000  
Y -0.0000 -0.0003 -0.0080 -0.0128 0.0067 0.0008  
Z -0.0004 0.0002 -0.0017 -0.0025 0.0012 0.0002  
AT. 88 N X -0.0003 -0.0002 0.0019 -0.0039 -0.0012 0.0000  
Y 0.0000 -0.0003 -0.0080 0.0128 0.0067 -0.0008  
Z 0.0004 0.0002 -0.0017 0.0025 0.0012 -0.0002  
AT. 89 N X -0.0001 0.0001 0.0081 0.0097 -0.0056 -0.0004  
Y -0.0004 0.0004 -0.0151 -0.0172 0.0103 0.0004  
Z 0.0000 0.0002 -0.0021 -0.0011 0.0011 -0.0004  
AT. 90 N X 0.0001 0.0001 0.0081 -0.0097 -0.0056 0.0004  
Y 0.0004 0.0004 -0.0151 0.0172 0.0103 -0.0004  
Z -0.0000 0.0002 -0.0021 0.0011 0.0011 0.0004  
AT. 91 C X -0.0002 -0.0001 -0.0034 -0.0055 0.0028 0.0005  
Y -0.0002 0.0001 0.0033 0.0045 -0.0029 -0.0001  
Z -0.0005 0.0002 -0.0009 -0.0018 0.0007 0.0002  
AT. 92 C X 0.0002 -0.0001 -0.0034 0.0055 0.0028 -0.0005  
Y 0.0002 0.0001 0.0033 -0.0045 -0.0029 0.0001  
Z 0.0005 0.0002 -0.0009 0.0018 0.0007 -0.0002  
AT. 93 C X 0.0002 -0.0002 -0.0042 -0.0075 0.0040 0.0007  
Y -0.0002 0.0001 0.0138 0.0198 -0.0119 -0.0011  
Z 0.0002 -0.0000 0.0030 0.0033 -0.0018 -0.0000  
AT. 94 C X -0.0002 -0.0002 -0.0042 0.0075 0.0040 -0.0007  
Y 0.0002 0.0001 0.0138 -0.0198 -0.0119 0.0011  
Z -0.0002 -0.0000 0.0030 -0.0033 -0.0018 0.0000

AT. 95 H X 0.0000 -0.0001 -0.0029 -0.0052 0.0029 0.0006  
Y -0.0007 0.0003 0.0089 0.0125 -0.0084 -0.0008  
Z 0.0013 -0.0004 0.0100 0.0135 -0.0065 -0.0005

AT. 96 H X -0.0000 -0.0001 -0.0029 0.0052 0.0029 -0.0006  
Y 0.0007 0.0003 0.0089 -0.0125 -0.0084 0.0008  
Z -0.0013 -0.0004 0.0100 -0.0135 -0.0065 0.0005

AT. 97 H X 0.0010 -0.0004 0.0017 -0.0004 -0.0001 0.0003  
Y 0.0010 -0.0002 0.0191 0.0292 -0.0148 -0.0016  
Z 0.0002 -0.0000 0.0026 0.0036 -0.0014 -0.0000

AT. 98 H X -0.0010 -0.0004 0.0017 0.0004 -0.0001 -0.0003  
Y -0.0010 -0.0002 0.0191 -0.0292 -0.0148 0.0016  
Z -0.0002 -0.0000 0.0026 -0.0036 -0.0014 0.0000

AT. 99 C X -0.0000 -0.0003 -0.0114 -0.0138 0.0079 0.0006  
Y 0.0002 0.0000 0.0130 0.0140 -0.0083 0.0003  
Z 0.0005 -0.0002 0.0168 0.0198 -0.0116 -0.0005

AT. 100 C X 0.0000 -0.0003 -0.0114 0.0138 0.0079 -0.0006  
Y -0.0002 0.0000 0.0130 -0.0140 -0.0083 -0.0003  
Z -0.0005 -0.0002 0.0168 -0.0198 -0.0116 0.0005

AT. 101 C X 0.0000 -0.0003 -0.0185 -0.0211 0.0124 0.0004  
Y 0.0008 -0.0002 0.0393 0.0463 -0.0279 -0.0019  
Z 0.0006 -0.0004 0.0309 0.0340 -0.0206 -0.0000

AT. 102 C X -0.0000 -0.0003 -0.0185 0.0211 0.0124 -0.0004  
Y -0.0008 -0.0002 0.0393 -0.0463 -0.0279 0.0019  
Z -0.0006 -0.0004 0.0309 -0.0340 -0.0206 0.0000

AT. 103 H X 0.0002 -0.0004 -0.0081 -0.0089 0.0060 0.0005  
Y 0.0007 -0.0002 0.0352 0.0416 -0.0254 -0.0020  
Z 0.0002 -0.0008 0.0064 0.0006 -0.0020 0.0032

AT. 104 H X -0.0002 -0.0004 -0.0081 0.0089 0.0060 -0.0005  
Y -0.0007 -0.0002 0.0352 -0.0416 -0.0254 0.0020  
Z -0.0002 -0.0008 0.0064 -0.0006 -0.0020 -0.0032

AT. 105 H X 0.0004 -0.0002 0.0008 0.0038 -0.0012 -0.0012  
Y 0.0006 0.0004 0.0418 0.0522 -0.0308 -0.0039

Z 0.0006 -0.0002 0.0357 0.0411 -0.0243 -0.0011  
AT. 106 H X -0.0004 -0.0002 0.0008 -0.0038 -0.0012 0.0012  
Y -0.0006 0.0004 0.0418 -0.0522 -0.0308 0.0039  
Z -0.0006 -0.0002 0.0357 -0.0411 -0.0243 0.0011  
AT. 107 C X 0.0006 -0.0004 -0.0053 -0.0066 0.0045 0.0006  
Y 0.0002 -0.0002 0.0005 0.0009 0.0001 0.0005  
Z -0.0000 -0.0001 -0.0063 -0.0094 0.0049 0.0007  
AT. 108 C X -0.0006 -0.0004 -0.0053 0.0066 0.0045 -0.0006  
Y -0.0002 -0.0002 0.0005 -0.0009 0.0001 -0.0005  
Z 0.0000 -0.0001 -0.0063 0.0094 0.0049 -0.0007  
AT. 109 H X 0.0008 -0.0008 -0.0215 -0.0310 0.0179 0.0018  
Y 0.0003 -0.0002 -0.0064 -0.0087 0.0059 0.0010  
Z -0.0001 0.0000 -0.0137 -0.0190 0.0113 0.0012  
AT. 110 H X -0.0008 -0.0008 -0.0215 0.0310 0.0179 -0.0018  
Y -0.0003 -0.0002 -0.0064 0.0087 0.0059 -0.0010  
Z 0.0001 0.0000 -0.0137 0.0190 0.0113 -0.0012  
AT. 111 H X 0.0006 -0.0005 -0.0021 -0.0020 0.0023 0.0002  
Y 0.0002 -0.0002 0.0162 0.0237 -0.0135 -0.0009  
Z -0.0001 -0.0001 -0.0131 -0.0192 0.0103 0.0014  
AT. 112 H X -0.0006 -0.0005 -0.0021 0.0020 0.0023 -0.0002  
Y -0.0002 -0.0002 0.0162 -0.0237 -0.0135 0.0009  
Z 0.0001 -0.0001 -0.0131 0.0192 0.0103 -0.0014  
AT. 113 C X -0.0001 0.0000 -0.0041 -0.0047 0.0025 0.0004  
Y 0.0002 -0.0000 -0.0012 -0.0012 0.0015 0.0005  
Z -0.0000 -0.0002 -0.0022 -0.0039 0.0012 0.0005  
AT. 114 C X 0.0001 0.0000 -0.0041 0.0047 0.0025 -0.0004  
Y -0.0002 -0.0000 -0.0012 0.0012 0.0015 -0.0005  
Z 0.0000 -0.0002 -0.0022 0.0039 0.0012 -0.0005  
AT. 115 C X -0.0004 0.0002 0.0003 0.0001 -0.0006 -0.0001  
Y 0.0000 0.0000 -0.0015 -0.0013 0.0016 0.0001  
Z 0.0000 -0.0001 -0.0007 -0.0009 -0.0001 -0.0003  
AT. 116 C X 0.0004 0.0002 0.0003 -0.0001 -0.0006 0.0001

Y -0.0000 0.0000 -0.0015 0.0013 0.0016 -0.0001  
Z -0.0000 -0.0001 -0.0007 0.0009 -0.0001 0.0003  
AT. 117 H X -0.0004 0.0005 -0.0003 0.0001 0.0001 0.0002  
Y 0.0001 -0.0002 0.0041 0.0062 -0.0030 -0.0014  
Z 0.0001 -0.0004 -0.0014 -0.0028 0.0003 -0.0001  
AT. 118 H X 0.0004 0.0005 -0.0003 -0.0001 0.0001 -0.0002  
Y -0.0001 -0.0002 0.0041 -0.0062 -0.0030 0.0014  
Z -0.0001 -0.0004 -0.0014 0.0028 0.0003 0.0001  
AT. 119 H X -0.0001 -0.0004 0.0065 0.0067 -0.0053 -0.0010  
Y 0.0002 -0.0002 0.0019 0.0021 -0.0006 0.0003  
Z 0.0000 -0.0002 -0.0008 -0.0008 -0.0005 -0.0009  
AT. 120 H X 0.0001 -0.0004 0.0065 -0.0067 -0.0053 0.0010  
Y -0.0002 -0.0002 0.0019 -0.0021 -0.0006 -0.0003  
Z -0.0000 -0.0002 -0.0008 0.0008 -0.0005 0.0009  
AT. 121 C X -0.0003 0.0004 0.0023 0.0036 -0.0019 -0.0006  
Y -0.0005 -0.0000 -0.0082 -0.0114 0.0055 0.0003  
Z 0.0003 0.0000 0.0068 0.0095 -0.0049 -0.0007  
AT. 122 C X 0.0003 0.0004 0.0023 -0.0036 -0.0019 0.0006  
Y 0.0005 -0.0000 -0.0082 0.0114 0.0055 -0.0003  
Z -0.0003 0.0000 0.0068 -0.0095 -0.0049 0.0007  
AT. 123 H X -0.0009 0.0013 -0.0161 -0.0151 0.0109 -0.0001  
Y -0.0008 0.0004 -0.0144 -0.0171 0.0107 0.0010  
Z 0.0005 -0.0003 0.0104 0.0125 -0.0082 -0.0013  
AT. 124 H X 0.0009 0.0013 -0.0161 0.0151 0.0109 0.0001  
Y 0.0008 0.0004 -0.0144 0.0171 0.0107 -0.0010  
Z -0.0005 -0.0003 0.0104 -0.0125 -0.0082 0.0013  
AT. 125 H X -0.0003 0.0005 0.0042 0.0066 -0.0030 -0.0006  
Y 0.0003 -0.0012 0.0052 0.0007 -0.0039 -0.0002  
Z 0.0008 -0.0005 0.0157 0.0187 -0.0108 -0.0009  
AT. 126 H X 0.0003 0.0005 0.0042 -0.0066 -0.0030 0.0006  
Y -0.0003 -0.0012 0.0052 -0.0007 -0.0039 0.0002  
Z -0.0008 -0.0005 0.0157 -0.0187 -0.0108 0.0009

AT.127 C X -0.0000 0.0001 0.0033 0.0035 -0.0026 -0.0005  
Y -0.0006 0.0000 -0.0066 -0.0092 0.0044 0.0003  
Z -0.0000 0.0006 0.0041 0.0079 -0.0028 -0.0007

AT.128 C X 0.0000 0.0001 0.0033 -0.0035 -0.0026 0.0005  
Y 0.0006 0.0000 -0.0066 0.0092 0.0044 -0.0003  
Z 0.0000 0.0006 0.0041 -0.0079 -0.0028 0.0007

AT.129 C X 0.0004 -0.0002 0.0061 0.0084 -0.0041 -0.0004  
Y -0.0004 0.0003 0.0052 0.0075 -0.0041 -0.0004  
Z -0.0001 0.0001 -0.0089 -0.0109 0.0068 0.0005

AT.130 C X -0.0004 -0.0002 0.0061 -0.0084 -0.0041 0.0004  
Y 0.0004 0.0003 0.0052 -0.0075 -0.0041 0.0004  
Z 0.0001 0.0001 -0.0089 0.0109 0.0068 -0.0005

AT.131 H X 0.0006 -0.0006 -0.0091 -0.0125 0.0074 0.0007  
Y -0.0002 0.0010 0.0331 0.0480 -0.0245 -0.0023  
Z 0.0003 -0.0002 -0.0170 -0.0211 0.0133 0.0012

AT.132 H X -0.0006 -0.0006 -0.0091 0.0125 0.0074 -0.0007  
Y 0.0002 0.0010 0.0331 -0.0480 -0.0245 0.0023  
Z -0.0003 -0.0002 -0.0170 0.0211 0.0133 -0.0012

AT.133 H X 0.0002 0.0006 0.0342 0.0483 -0.0255 -0.0024  
Y -0.0006 0.0002 0.0041 0.0062 -0.0038 -0.0004  
Z -0.0002 -0.0006 -0.0246 -0.0326 0.0179 0.0016

AT.134 H X -0.0002 0.0006 0.0342 -0.0483 -0.0255 0.0024  
Y 0.0006 0.0002 0.0041 -0.0062 -0.0038 0.0004  
Z 0.0002 -0.0006 -0.0246 0.0326 0.0179 -0.0016

AT.135 C X -0.0000 0.0002 -0.0026 -0.0020 0.0021 0.0004  
Y 0.0000 0.0000 -0.0009 -0.0006 0.0006 -0.0000  
Z -0.0000 -0.0000 0.0025 0.0029 -0.0017 -0.0002

AT.136 C X 0.0000 0.0002 -0.0026 0.0020 0.0021 -0.0004  
Y -0.0000 0.0000 -0.0009 0.0006 0.0006 0.0000  
Z 0.0000 -0.0000 0.0025 -0.0029 -0.0017 0.0002

AT.137 H X -0.0001 0.0005 -0.0001 0.0022 0.0014 0.0003  
Y 0.0003 -0.0002 0.0001 0.0008 0.0001 -0.0004

Z 0.0005 -0.0005 0.0032 0.0038 -0.0022 -0.0008  
AT. 138 H X 0.0001 0.0005 -0.0001 -0.0022 0.0014 -0.0003  
Y -0.0003 -0.0002 0.0001 -0.0008 0.0001 0.0004  
Z -0.0005 -0.0005 0.0032 -0.0038 -0.0022 0.0008  
AT. 139 H X -0.0002 0.0002 -0.0060 -0.0073 0.0042 0.0007  
Y -0.0001 0.0002 -0.0015 -0.0015 0.0002 0.0006  
Z 0.0002 -0.0001 0.0072 0.0103 -0.0043 -0.0008  
AT. 140 H X 0.0002 0.0002 -0.0060 0.0073 0.0042 -0.0007  
Y 0.0001 0.0002 -0.0015 0.0015 0.0002 -0.0006  
Z -0.0002 -0.0001 0.0072 -0.0103 -0.0043 0.0008  
AT. 141 H X -0.0002 0.0006 0.0013 0.0044 -0.0007 -0.0000  
Y 0.0003 -0.0001 0.0004 0.0013 -0.0003 -0.0008  
Z -0.0003 0.0003 0.0028 0.0036 -0.0019 0.0004  
AT. 142 H X 0.0002 0.0006 0.0013 -0.0044 -0.0007 0.0000  
Y -0.0003 -0.0001 0.0004 -0.0013 -0.0003 0.0008  
Z 0.0003 0.0003 0.0028 -0.0036 -0.0019 -0.0004  
AT. 143 C X -0.0001 0.0004 0.0051 0.0079 -0.0037 -0.0010  
Y 0.0003 -0.0001 0.0040 0.0053 -0.0029 -0.0005  
Z -0.0002 0.0005 0.0019 0.0030 -0.0018 -0.0008  
AT. 144 C X 0.0001 0.0004 0.0051 -0.0079 -0.0037 0.0010  
Y -0.0003 -0.0001 0.0040 -0.0053 -0.0029 0.0005  
Z 0.0002 0.0005 0.0019 -0.0030 -0.0018 0.0008  
AT. 145 H X -0.0003 0.0009 0.0008 0.0040 -0.0003 -0.0009  
Y 0.0011 -0.0007 0.0072 0.0095 -0.0043 -0.0003  
Z -0.0011 0.0013 -0.0026 -0.0024 0.0005 -0.0010  
AT. 146 H X 0.0003 0.0009 0.0008 -0.0040 -0.0003 0.0009  
Y -0.0011 -0.0007 0.0072 -0.0095 -0.0043 0.0003  
Z 0.0011 0.0013 -0.0026 0.0024 0.0005 0.0010  
AT. 147 H X -0.0001 -0.0001 -0.0002 -0.0011 -0.0001 -0.0003  
Y -0.0002 0.0009 0.0089 0.0124 -0.0071 -0.0013  
Z -0.0005 0.0003 -0.0031 -0.0061 0.0012 -0.0002  
AT. 148 H X 0.0001 -0.0001 -0.0002 0.0011 -0.0001 0.0003



Y 0.0002 0.0009 0.0089 -0.0124 -0.0071 0.0013  
Z 0.0005 0.0003 -0.0031 0.0061 0.0012 0.0002  
AT. 149 H X 0.0000 0.0014 0.0154 0.0238 -0.0112 -0.0023  
Y 0.0009 -0.0005 0.0100 0.0132 -0.0066 -0.0006  
Z 0.0009 -0.0006 0.0067 0.0082 -0.0043 -0.0003  
AT. 150 H X -0.0000 0.0014 0.0154 -0.0238 -0.0112 0.0023  
Y -0.0009 -0.0005 0.0100 -0.0132 -0.0066 0.0006  
Z -0.0009 -0.0006 0.0067 -0.0082 -0.0043 0.0003  
AT. 151 C X -0.0003 -0.0001 -0.0075 -0.0109 0.0051 0.0007  
Y 0.0003 -0.0003 0.0115 0.0145 -0.0091 -0.0009  
Z 0.0002 0.0002 0.0010 0.0028 -0.0010 0.0001  
AT. 152 C X 0.0003 -0.0001 -0.0075 0.0109 0.0051 -0.0007  
Y -0.0003 -0.0003 0.0115 -0.0145 -0.0091 0.0009  
Z -0.0002 0.0002 0.0010 -0.0028 -0.0010 -0.0001  
AT. 153 H X -0.0008 -0.0003 -0.0192 -0.0275 0.0131 0.0015  
Y 0.0006 -0.0006 0.0254 0.0321 -0.0202 -0.0022  
Z 0.0009 -0.0002 0.0285 0.0383 -0.0223 -0.0023  
AT. 154 H X 0.0008 -0.0003 -0.0192 0.0275 0.0131 -0.0015  
Y -0.0006 -0.0006 0.0254 -0.0321 -0.0202 0.0022  
Z -0.0009 -0.0002 0.0285 -0.0383 -0.0223 0.0023  
AT. 155 H X -0.0000 -0.0004 -0.0121 -0.0182 0.0091 0.0017  
Y 0.0011 -0.0007 0.0341 0.0435 -0.0263 -0.0026  
Z -0.0006 0.0005 -0.0243 -0.0302 0.0184 0.0022  
AT. 156 H X 0.0000 -0.0004 -0.0121 0.0182 0.0091 -0.0017  
Y -0.0011 -0.0007 0.0341 -0.0435 -0.0263 0.0026  
Z 0.0006 0.0005 -0.0243 0.0302 0.0184 -0.0022  
AT. 157 O X 0.0002 0.0005 -0.0006 -0.0002 -0.0006 0.0005  
Y -0.0072 0.0081 0.0005 0.0001 0.0009 0.0017  
Z -0.0011 0.0003 0.0003 -0.0003 0.0007 0.0001  
AT. 158 O X -0.0002 0.0005 -0.0006 0.0002 -0.0006 -0.0005  
Y 0.0072 0.0081 0.0005 -0.0001 0.0009 -0.0017  
Z 0.0011 0.0003 0.0003 0.0003 0.0007 -0.0001

AT.159 O X -0.0001 -0.0018 -0.0003 0.0001 -0.0007 0.0002  
Y 0.0012 -0.0011 0.0000 -0.0003 0.0006 -0.0007  
Z -0.0016 -0.0032 0.0007 0.0003 0.0006 -0.0004

AT.160 O X 0.0001 -0.0018 -0.0003 -0.0001 -0.0007 -0.0002  
Y -0.0012 -0.0011 0.0000 0.0003 0.0006 0.0007  
Z 0.0016 -0.0032 0.0007 -0.0003 0.0006 0.0004

AT.161 H X -0.0033 0.0043 0.0013 -0.0003 0.0011 -0.0033  
Y -0.0080 0.0087 0.0002 0.0003 0.0005 0.0040  
Z -0.0035 0.0024 0.0027 -0.0004 0.0025 -0.0080

AT.162 H X 0.0033 0.0043 0.0013 0.0003 0.0011 0.0033  
Y 0.0080 0.0087 0.0002 -0.0003 0.0005 -0.0040  
Z 0.0035 0.0024 0.0027 0.0004 0.0025 0.0080

AT.163 H X -0.0032 -0.0031 0.0020 0.0004 0.0020 -0.0027  
Y 0.0052 0.0085 -0.0048 -0.0015 -0.0071 0.0084  
Z 0.0003 -0.0006 -0.0017 -0.0002 -0.0028 0.0034

AT.164 H X 0.0032 -0.0031 0.0020 -0.0004 0.0020 0.0027  
Y -0.0052 0.0085 -0.0048 0.0015 -0.0071 -0.0084  
Z -0.0003 -0.0006 -0.0017 0.0002 -0.0028 -0.0034

AT.165 O X -0.0002 0.0001 0.0007 0.0018 -0.0011 -0.0002  
Y -0.0003 0.0009 0.0003 0.0003 -0.0003 -0.0004  
Z 0.0000 -0.0001 0.0003 -0.0003 -0.0003 0.0001

AT.166 O X 0.0002 0.0001 0.0007 -0.0018 -0.0011 0.0002  
Y 0.0003 0.0009 0.0003 -0.0003 -0.0003 0.0004  
Z -0.0000 -0.0001 0.0003 0.0003 -0.0003 -0.0001

AT.167 H X 0.0008 0.0000 0.0009 0.0021 -0.0004 -0.0004  
Y -0.0019 0.0018 0.0009 0.0003 -0.0024 -0.0005  
Z 0.0004 -0.0012 -0.0000 -0.0001 0.0013 0.0009

AT.168 H X -0.0008 0.0000 0.0009 -0.0021 -0.0004 0.0004  
Y 0.0019 0.0018 0.0009 -0.0003 -0.0024 0.0005  
Z -0.0004 -0.0012 -0.0000 0.0001 0.0013 -0.0009

AT.169 O X -0.0002 -0.0005 0.0011 -0.0014 -0.0009 0.0003  
Y -0.0007 -0.0010 -0.0017 0.0011 0.0002 0.0008

Z 0.0001 0.0002 0.0009 -0.0007 -0.0003 0.0000  
AT.170 O X 0.0002 -0.0005 0.0011 0.0014 -0.0009 -0.0003  
Y 0.0007 -0.0010 -0.0017 -0.0011 0.0002 -0.0008  
Z -0.0001 0.0002 0.0009 0.0007 -0.0003 -0.0000  
AT.171 H X 0.0015 0.0020 -0.0058 0.0113 0.0076 -0.0033  
Y 0.0002 -0.0003 -0.0059 0.0083 0.0049 -0.0008  
Z 0.0003 -0.0005 -0.0007 0.0011 0.0009 0.0000  
AT.172 H X -0.0015 0.0020 -0.0058 -0.0113 0.0076 0.0033  
Y -0.0002 -0.0003 -0.0059 -0.0083 0.0049 0.0008  
Z -0.0003 -0.0005 -0.0007 -0.0011 0.0009 -0.0000

FREQ(CM\*\*-1) 460.69 460.98 473.38 474.14 476.58 477.10

AT. 1 I X -0.0051 -0.0051 -0.0003 0.0001 0.0000 -0.0011  
Y -0.0037 -0.0034 -0.0002 0.0001 0.0001 -0.0008  
Z -0.0009 -0.0012 -0.0000 -0.0000 -0.0001 -0.0000  
AT. 2 I X -0.0051 0.0051 -0.0003 -0.0001 -0.0000 -0.0011  
Y -0.0037 0.0034 -0.0002 -0.0001 -0.0001 -0.0008  
Z -0.0009 0.0012 -0.0000 0.0000 0.0001 -0.0000  
AT. 3 I X 0.0004 -0.0001 -0.0002 0.0001 -0.0001 -0.0009  
Y -0.0001 -0.0004 -0.0001 0.0000 -0.0001 -0.0004  
Z 0.0001 -0.0002 -0.0001 0.0000 -0.0001 -0.0004  
AT. 4 I X 0.0004 0.0001 -0.0002 -0.0001 0.0001 -0.0009  
Y -0.0001 0.0004 -0.0001 -0.0000 0.0001 -0.0004  
Z 0.0001 0.0002 -0.0001 -0.0000 0.0001 -0.0004  
AT. 5 O X -0.0177 -0.0172 0.0009 -0.0005 -0.0013 0.0040  
Y -0.0037 -0.0045 -0.0015 0.0005 0.0011 -0.0077  
Z 0.0082 0.0096 0.0003 -0.0001 0.0000 0.0036  
AT. 6 O X -0.0177 0.0172 0.0009 0.0005 0.0013 0.0040  
Y -0.0037 0.0045 -0.0015 -0.0005 -0.0011 -0.0077  
Z 0.0082 -0.0096 0.0003 0.0001 -0.0000 0.0036  
AT. 7 O X -0.0020 -0.0019 -0.0001 -0.0000 0.0002 -0.0050

Y 0.0014 0.0015 -0.0005 0.0001 -0.0001 -0.0004  
Z -0.0034 -0.0043 -0.0008 0.0003 -0.0003 -0.0007  
AT. 8 O X -0.0020 0.0019 -0.0001 0.0000 -0.0002 -0.0050  
Y 0.0014 -0.0015 -0.0005 -0.0001 0.0001 -0.0004  
Z -0.0034 0.0043 -0.0008 -0.0003 0.0003 -0.0007  
AT. 9 N X 0.0096 0.0101 -0.0015 0.0005 0.0012 -0.0069  
Y -0.0101 -0.0088 -0.0015 0.0003 0.0003 -0.0043  
Z 0.0102 0.0103 -0.0007 0.0002 0.0008 -0.0032  
AT. 10 N X 0.0096 -0.0101 -0.0015 -0.0005 -0.0012 -0.0069  
Y -0.0101 0.0088 -0.0015 -0.0003 -0.0003 -0.0043  
Z 0.0102 -0.0103 -0.0007 -0.0002 -0.0008 -0.0032  
AT. 11 N X -0.0032 -0.0044 -0.0002 0.0000 -0.0007 0.0030  
Y 0.0003 -0.0017 0.0000 0.0002 -0.0005 0.0004  
Z 0.0002 -0.0006 -0.0001 0.0001 0.0001 -0.0038  
AT. 12 N X -0.0032 0.0044 -0.0002 -0.0000 0.0007 0.0030  
Y 0.0003 0.0017 0.0000 -0.0002 0.0005 0.0004  
Z 0.0002 0.0006 -0.0001 -0.0001 -0.0001 -0.0038  
AT. 13 C X 0.0141 0.0137 0.0010 -0.0004 -0.0003 0.0033  
Y 0.0283 0.0282 0.0005 -0.0002 0.0006 0.0025  
Z 0.0172 0.0174 -0.0007 0.0002 0.0011 -0.0029  
AT. 14 C X 0.0141 -0.0137 0.0010 0.0004 0.0003 0.0033  
Y 0.0283 -0.0282 0.0005 0.0002 -0.0006 0.0025  
Z 0.0172 -0.0174 -0.0007 -0.0002 -0.0011 -0.0029  
AT. 15 C X 0.0369 0.0356 0.0019 -0.0006 -0.0002 0.0074  
Y 0.0491 0.0484 0.0026 -0.0007 -0.0001 0.0113  
Z -0.0113 -0.0104 0.0014 -0.0006 -0.0011 0.0041  
AT. 16 C X 0.0369 -0.0356 0.0019 0.0006 0.0002 0.0074  
Y 0.0491 -0.0484 0.0026 0.0007 0.0001 0.0113  
Z -0.0113 0.0104 0.0014 0.0006 0.0011 0.0041  
AT. 17 H X 0.0233 0.0224 0.0011 -0.0003 -0.0000 0.0035  
Y 0.0793 0.0776 -0.0001 0.0003 0.0027 -0.0002  
Z -0.0547 -0.0523 0.0044 -0.0018 -0.0046 0.0167

AT. 18 H X 0.0233 -0.0224 0.0011 0.0003 0.0000 0.0035  
Y 0.0793 -0.0776 -0.0001 -0.0003 -0.0027 -0.0002  
Z -0.0547 0.0523 0.0044 0.0018 0.0046 0.0167

AT. 19 H X 0.0419 0.0388 0.0000 0.0001 0.0011 0.0008  
Y -0.0133 -0.0119 0.0060 -0.0021 -0.0044 0.0251  
Z -0.0337 -0.0328 0.0021 -0.0009 -0.0024 0.0076

AT. 20 H X 0.0419 -0.0388 0.0000 -0.0001 -0.0011 0.0008  
Y -0.0133 0.0119 0.0060 0.0021 0.0044 0.0251  
Z -0.0337 0.0328 0.0021 0.0009 0.0024 0.0076

AT. 21 C X -0.0031 -0.0016 0.0006 -0.0003 -0.0000 0.0029  
Y 0.0007 0.0030 0.0009 -0.0004 -0.0001 0.0078  
Z -0.0003 0.0014 0.0003 -0.0003 0.0005 0.0001

AT. 22 C X -0.0031 0.0016 0.0006 0.0003 0.0000 0.0029  
Y 0.0007 -0.0030 0.0009 0.0004 0.0001 0.0078  
Z -0.0003 -0.0014 0.0003 0.0003 -0.0005 0.0001

AT. 23 C X -0.0034 -0.0002 0.0012 -0.0005 0.0005 0.0068  
Y -0.0007 0.0034 0.0006 -0.0004 0.0005 0.0038  
Z 0.0008 0.0050 0.0013 -0.0008 0.0010 0.0085

AT. 24 C X -0.0034 0.0002 0.0012 0.0005 -0.0005 0.0068  
Y -0.0007 -0.0034 0.0006 0.0004 -0.0005 0.0038  
Z 0.0008 -0.0050 0.0013 0.0008 -0.0010 0.0085

AT. 25 H X -0.0036 -0.0010 0.0010 -0.0004 0.0002 0.0031  
Y -0.0008 0.0028 0.0004 -0.0003 0.0006 0.0009  
Z 0.0006 0.0086 0.0028 -0.0012 0.0005 0.0245

AT. 26 H X -0.0036 0.0010 0.0010 0.0004 -0.0002 0.0031  
Y -0.0008 -0.0028 0.0004 0.0003 -0.0006 0.0009  
Z 0.0006 -0.0086 0.0028 0.0012 -0.0005 0.0245

AT. 27 H X -0.0023 0.0013 0.0012 -0.0004 0.0005 0.0085  
Y -0.0001 -0.0006 -0.0011 0.0003 0.0008 -0.0139  
Z 0.0009 0.0026 0.0004 -0.0005 0.0012 -0.0010

AT. 28 H X -0.0023 -0.0013 0.0012 0.0004 -0.0005 0.0085  
Y -0.0001 0.0006 -0.0011 -0.0003 -0.0008 -0.0139

Z 0.0009 -0.0026 0.0004 0.0005 -0.0012 -0.0010  
AT. 29 C X 0.0146 0.0145 -0.0000 0.0000 0.0006 -0.0013  
Y -0.0135 -0.0141 0.0009 -0.0004 -0.0009 0.0060  
Z 0.0080 0.0068 -0.0006 0.0003 0.0008 -0.0026  
AT. 30 C X 0.0146 -0.0145 -0.0000 -0.0000 -0.0006 -0.0013  
Y -0.0135 0.0141 0.0009 0.0004 0.0009 0.0060  
Z 0.0080 -0.0068 -0.0006 -0.0003 -0.0008 -0.0026  
AT. 31 H X 0.0169 0.0163 0.0022 -0.0007 -0.0007 0.0090  
Y -0.0148 -0.0160 -0.0015 0.0006 0.0007 -0.0082  
Z 0.0072 0.0048 -0.0028 0.0014 0.0023 -0.0176  
AT. 32 H X 0.0169 -0.0163 0.0022 0.0007 0.0007 0.0090  
Y -0.0148 0.0160 -0.0015 -0.0006 -0.0007 -0.0082  
Z 0.0072 -0.0048 -0.0028 -0.0014 -0.0023 -0.0176  
AT. 33 H X 0.0144 0.0137 0.0016 -0.0006 -0.0005 0.0105  
Y -0.0106 -0.0103 0.0048 -0.0024 -0.0030 0.0269  
Z 0.0065 0.0045 -0.0012 0.0008 0.0009 -0.0037  
AT. 34 H X 0.0144 -0.0137 0.0016 0.0006 0.0005 0.0105  
Y -0.0106 0.0103 0.0048 0.0024 0.0030 0.0269  
Z 0.0065 -0.0045 -0.0012 -0.0008 -0.0009 -0.0037  
AT. 35 C X 0.0088 0.0092 -0.0009 0.0004 0.0012 -0.0086  
Y -0.0054 -0.0072 0.0006 -0.0001 -0.0005 0.0037  
Z 0.0075 0.0069 0.0008 -0.0004 -0.0002 0.0073  
AT. 36 C X 0.0088 -0.0092 -0.0009 -0.0004 -0.0012 -0.0086  
Y -0.0054 0.0072 0.0006 0.0001 0.0005 0.0037  
Z 0.0075 -0.0069 0.0008 0.0004 0.0002 0.0073  
AT. 37 C X 0.0010 0.0011 -0.0006 0.0002 0.0003 -0.0034  
Y -0.0015 -0.0023 -0.0002 0.0003 0.0001 -0.0030  
Z 0.0016 0.0021 -0.0000 -0.0001 -0.0001 0.0007  
AT. 38 C X 0.0010 -0.0011 -0.0006 -0.0002 -0.0003 -0.0034  
Y -0.0015 0.0023 -0.0002 -0.0003 -0.0001 -0.0030  
Z 0.0016 -0.0021 -0.0000 0.0001 0.0001 0.0007  
AT. 39 H X 0.0009 0.0038 -0.0018 0.0006 0.0006 -0.0094

Y 0.0017 0.0025 -0.0018 0.0010 0.0011 -0.0170  
Z 0.0002 0.0019 -0.0002 -0.0002 -0.0003 0.0029  
AT. 40 H X 0.0009 -0.0038 -0.0018 -0.0006 -0.0006 -0.0094  
Y 0.0017 -0.0025 -0.0018 -0.0010 -0.0011 -0.0170  
Z 0.0002 -0.0019 -0.0002 0.0002 0.0003 0.0029  
AT. 41 H X -0.0004 -0.0032 0.0007 -0.0000 -0.0003 0.0036  
Y 0.0032 0.0034 -0.0005 0.0004 0.0006 -0.0041  
Z -0.0008 0.0018 -0.0012 0.0001 0.0001 -0.0058  
AT. 42 H X -0.0004 0.0032 0.0007 0.0000 0.0003 0.0036  
Y 0.0032 -0.0034 -0.0005 -0.0004 -0.0006 -0.0041  
Z -0.0008 -0.0018 -0.0012 -0.0001 -0.0001 -0.0058  
AT. 43 C X 0.0014 0.0018 -0.0004 0.0002 -0.0000 0.0034  
Y 0.0094 0.0089 -0.0012 0.0004 0.0010 -0.0061  
Z 0.0012 0.0011 -0.0002 0.0003 0.0002 -0.0045  
AT. 44 C X 0.0014 -0.0018 -0.0004 -0.0002 0.0000 0.0034  
Y 0.0094 -0.0089 -0.0012 -0.0004 -0.0010 -0.0061  
Z 0.0012 -0.0011 -0.0002 -0.0003 -0.0002 -0.0045  
AT. 45 H X 0.0173 0.0203 -0.0015 0.0005 0.0016 -0.0013  
Y -0.0191 -0.0219 0.0000 -0.0000 -0.0007 0.0005  
Z 0.0178 0.0180 -0.0005 0.0005 0.0008 -0.0075  
AT. 46 H X 0.0173 -0.0203 -0.0015 -0.0005 -0.0016 -0.0013  
Y -0.0191 0.0219 0.0000 0.0000 0.0007 0.0005  
Z 0.0178 -0.0180 -0.0005 -0.0005 -0.0008 -0.0075  
AT. 47 H X 0.0199 0.0216 -0.0018 0.0006 0.0014 -0.0033  
Y 0.0406 0.0428 -0.0028 0.0011 0.0032 -0.0139  
Z 0.0082 0.0092 0.0000 0.0004 0.0004 -0.0033  
AT. 48 H X 0.0199 -0.0216 -0.0018 -0.0006 -0.0014 -0.0033  
Y 0.0406 -0.0428 -0.0028 -0.0011 -0.0032 -0.0139  
Z 0.0082 -0.0092 0.0000 -0.0004 -0.0004 -0.0033  
AT. 49 C X -0.0160 -0.0167 0.0013 -0.0006 -0.0011 0.0087  
Y 0.0074 0.0077 -0.0013 0.0003 0.0010 -0.0052  
Z -0.0159 -0.0166 0.0003 0.0001 -0.0009 -0.0012

AT. 50 C X -0.0160 0.0167 0.0013 0.0006 0.0011 0.0087  
Y 0.0074 -0.0077 -0.0013 -0.0003 -0.0010 -0.0052  
Z -0.0159 0.0166 0.0003 -0.0001 0.0009 -0.0012

AT. 51 C X -0.0035 -0.0040 0.0001 -0.0000 -0.0001 0.0025  
Y -0.0124 -0.0117 0.0014 -0.0006 -0.0009 0.0033  
Z -0.0040 -0.0046 -0.0010 0.0003 0.0003 -0.0025

AT. 52 C X -0.0035 0.0040 0.0001 0.0000 0.0001 0.0025  
Y -0.0124 0.0117 0.0014 0.0006 0.0009 0.0033  
Z -0.0040 0.0046 -0.0010 -0.0003 -0.0003 -0.0025

AT. 53 H X -0.0129 -0.0132 0.0032 -0.0010 -0.0015 0.0098  
Y -0.0418 -0.0412 0.0057 -0.0020 -0.0038 0.0173  
Z -0.0237 -0.0246 -0.0014 0.0003 -0.0007 0.0011

AT. 54 H X -0.0129 0.0132 0.0032 0.0010 0.0015 0.0098  
Y -0.0418 0.0412 0.0057 0.0020 0.0038 0.0173  
Z -0.0237 0.0246 -0.0014 -0.0003 0.0007 0.0011

AT. 55 H X 0.0101 0.0094 -0.0044 0.0013 0.0022 -0.0090  
Y -0.0100 -0.0093 0.0030 -0.0012 -0.0012 0.0075  
Z 0.0082 0.0075 -0.0021 0.0005 0.0014 -0.0051

AT. 56 H X 0.0101 -0.0094 -0.0044 -0.0013 -0.0022 -0.0090  
Y -0.0100 0.0093 0.0030 0.0012 0.0012 0.0075  
Z 0.0082 -0.0075 -0.0021 -0.0005 -0.0014 -0.0051

AT. 57 C X 0.0138 0.0152 -0.0008 0.0001 0.0013 -0.0068  
Y -0.0146 -0.0155 0.0006 -0.0003 -0.0011 0.0059  
Z 0.0007 0.0009 -0.0001 0.0001 0.0001 -0.0018

AT. 58 C X 0.0138 -0.0152 -0.0008 -0.0001 -0.0013 -0.0068  
Y -0.0146 0.0155 0.0006 0.0003 0.0011 0.0059  
Z 0.0007 -0.0009 -0.0001 -0.0001 -0.0001 -0.0018

AT. 59 H X 0.0134 0.0161 -0.0007 -0.0003 0.0001 -0.0004  
Y -0.0206 -0.0219 0.0006 -0.0001 -0.0011 0.0032  
Z -0.0082 -0.0077 0.0001 -0.0000 -0.0007 -0.0014

AT. 60 H X 0.0134 -0.0161 -0.0007 0.0003 -0.0001 -0.0004  
Y -0.0206 0.0219 0.0006 0.0001 0.0011 0.0032



Z -0.0082 0.0077 0.0001 0.0000 0.0007 -0.0014  
AT. 61 H X 0.0029 0.0054 -0.0005 -0.0002 0.0014 -0.0099  
Y -0.0080 -0.0079 0.0013 -0.0010 -0.0007 0.0097  
Z -0.0109 -0.0103 -0.0002 0.0002 -0.0001 -0.0061  
AT. 62 H X 0.0029 -0.0054 -0.0005 0.0002 -0.0014 -0.0099  
Y -0.0080 0.0079 0.0013 0.0010 0.0007 0.0097  
Z -0.0109 0.0103 -0.0002 -0.0002 0.0001 -0.0061  
AT. 63 H X 0.0247 0.0250 -0.0011 0.0004 0.0013 -0.0049  
Y -0.0287 -0.0285 0.0005 -0.0004 -0.0024 0.0075  
Z 0.0021 0.0025 0.0002 -0.0001 0.0012 -0.0050  
AT. 64 H X 0.0247 -0.0250 -0.0011 -0.0004 -0.0013 -0.0049  
Y -0.0287 0.0285 0.0005 0.0004 0.0024 0.0075  
Z 0.0021 -0.0025 0.0002 0.0001 -0.0012 -0.0050  
AT. 65 C X 0.0013 0.0002 0.0011 -0.0005 -0.0004 0.0078  
Y 0.0006 0.0011 -0.0006 0.0003 0.0004 -0.0067  
Z 0.0024 0.0016 -0.0010 0.0005 0.0002 -0.0074  
AT. 66 C X 0.0013 -0.0002 0.0011 0.0005 0.0004 0.0078  
Y 0.0006 -0.0011 -0.0006 -0.0003 -0.0004 -0.0067  
Z 0.0024 -0.0016 -0.0010 -0.0005 -0.0002 -0.0074  
AT. 67 H X 0.0184 0.0171 0.0008 -0.0004 0.0004 0.0056  
Y -0.0085 -0.0087 -0.0001 0.0001 0.0000 -0.0064  
Z -0.0034 -0.0033 -0.0012 0.0006 0.0000 -0.0059  
AT. 68 H X 0.0184 -0.0171 0.0008 0.0004 -0.0004 0.0056  
Y -0.0085 0.0087 -0.0001 -0.0001 -0.0000 -0.0064  
Z -0.0034 0.0033 -0.0012 -0.0006 -0.0000 -0.0059  
AT. 69 H X -0.0069 -0.0073 0.0016 -0.0004 -0.0010 0.0072  
Y 0.0065 0.0076 -0.0006 0.0005 0.0004 -0.0081  
Z 0.0283 0.0269 -0.0023 0.0007 0.0015 -0.0084  
AT. 70 H X -0.0069 0.0073 0.0016 0.0004 0.0010 0.0072  
Y 0.0065 -0.0076 -0.0006 -0.0005 -0.0004 -0.0081  
Z 0.0283 -0.0269 -0.0023 -0.0007 -0.0015 -0.0084  
AT. 71 H X 0.0141 0.0125 0.0004 -0.0006 0.0005 0.0085

Y -0.0047 -0.0041 0.0002 0.0003 -0.0000 -0.0081  
Z 0.0047 0.0038 -0.0006 0.0005 0.0002 -0.0087  
AT. 72 H X 0.0141 -0.0125 0.0004 0.0006 -0.0005 0.0085  
Y -0.0047 0.0041 0.0002 -0.0003 0.0000 -0.0081  
Z 0.0047 -0.0038 -0.0006 -0.0005 -0.0002 -0.0087  
AT. 73 C X -0.0106 -0.0101 0.0010 -0.0003 -0.0007 0.0011  
Y 0.0096 0.0105 0.0001 -0.0001 0.0003 0.0004  
Z -0.0107 -0.0121 0.0017 -0.0006 -0.0014 0.0110  
AT. 74 C X -0.0106 0.0101 0.0010 0.0003 0.0007 0.0011  
Y 0.0096 -0.0105 0.0001 0.0001 -0.0003 0.0004  
Z -0.0107 0.0121 0.0017 0.0006 0.0014 0.0110  
AT. 75 H X -0.0140 -0.0122 0.0019 -0.0004 -0.0015 -0.0000  
Y 0.0173 0.0205 0.0007 -0.0005 0.0002 0.0032  
Z -0.0025 -0.0001 0.0030 -0.0011 -0.0021 0.0138  
AT. 76 H X -0.0140 0.0122 0.0019 0.0004 0.0015 -0.0000  
Y 0.0173 -0.0205 0.0007 0.0005 -0.0002 0.0032  
Z -0.0025 0.0001 0.0030 0.0011 0.0021 0.0138  
AT. 77 H X -0.0197 -0.0183 0.0013 -0.0006 -0.0013 0.0016  
Y 0.0199 0.0231 0.0014 -0.0007 -0.0002 0.0038  
Z -0.0117 -0.0160 0.0002 0.0002 -0.0004 0.0074  
AT. 78 H X -0.0197 0.0183 0.0013 0.0006 0.0013 0.0016  
Y 0.0199 -0.0231 0.0014 0.0007 0.0002 0.0038  
Z -0.0117 0.0160 0.0002 -0.0002 0.0004 0.0074  
AT. 79 I X -0.0000 -0.0001 0.0026 -0.0026 0.0021 -0.0021  
Y 0.0000 0.0001 -0.0033 0.0033 -0.0031 0.0031  
Z -0.0000 -0.0000 0.0001 -0.0000 -0.0003 0.0002  
AT. 80 I X -0.0000 0.0001 0.0026 0.0026 -0.0021 -0.0021  
Y 0.0000 -0.0001 -0.0033 -0.0033 0.0031 0.0031  
Z -0.0000 0.0000 0.0001 0.0000 0.0003 0.0002  
AT. 81 I X 0.0003 0.0001 -0.0021 0.0024 -0.0012 0.0010  
Y -0.0003 -0.0001 0.0019 -0.0020 0.0008 -0.0007  
Z -0.0002 -0.0001 0.0012 -0.0013 0.0004 -0.0004

AT. 82 I X 0.0003 -0.0001 -0.0021 -0.0024 0.0012 0.0010  
Y -0.0003 0.0001 0.0019 0.0020 -0.0008 -0.0007  
Z -0.0002 0.0001 0.0012 0.0013 -0.0004 -0.0004

AT. 83 O X -0.0006 -0.0006 -0.0133 0.0111 0.0190 -0.0166  
Y -0.0000 0.0002 -0.0077 0.0077 -0.0050 0.0053  
Z -0.0001 -0.0002 -0.0021 0.0017 0.0019 -0.0022

AT. 84 O X -0.0006 0.0006 -0.0133 -0.0111 -0.0190 -0.0166  
Y -0.0000 -0.0002 -0.0077 -0.0077 0.0050 0.0053  
Z -0.0001 0.0002 -0.0021 -0.0017 -0.0019 -0.0022

AT. 85 O X -0.0011 -0.0007 -0.0032 -0.0008 -0.0014 -0.0008  
Y -0.0005 -0.0003 0.0040 -0.0043 0.0050 -0.0052  
Z -0.0009 -0.0003 0.0035 -0.0046 -0.0050 0.0034

AT. 86 O X -0.0011 0.0007 -0.0032 0.0008 0.0014 -0.0008  
Y -0.0005 0.0003 0.0040 0.0043 -0.0050 -0.0052  
Z -0.0009 0.0003 0.0035 0.0046 0.0050 0.0034

AT. 87 N X 0.0003 0.0002 0.0099 -0.0094 -0.0080 0.0063  
Y -0.0003 -0.0001 -0.0333 0.0341 -0.0083 0.0107  
Z -0.0004 -0.0004 -0.0091 0.0089 0.0129 -0.0114

AT. 88 N X 0.0003 -0.0002 0.0099 0.0094 0.0080 0.0063  
Y -0.0003 0.0001 -0.0333 -0.0341 0.0083 0.0107  
Z -0.0004 0.0004 -0.0091 -0.0089 -0.0129 -0.0114

AT. 89 N X 0.0002 0.0000 -0.0030 0.0049 0.0058 -0.0041  
Y -0.0009 -0.0003 0.0123 -0.0135 0.0014 -0.0023  
Z -0.0001 0.0000 0.0079 -0.0064 0.0035 -0.0020

AT. 90 N X 0.0002 -0.0000 -0.0030 -0.0049 -0.0058 -0.0041  
Y -0.0009 0.0003 0.0123 0.0135 -0.0014 -0.0023  
Z -0.0001 -0.0000 0.0079 0.0064 -0.0035 -0.0020

AT. 91 C X -0.0003 -0.0002 -0.0103 0.0086 0.0035 -0.0026  
Y -0.0006 -0.0012 0.0058 -0.0072 0.0273 -0.0259  
Z -0.0003 -0.0005 -0.0084 0.0076 0.0150 -0.0135

AT. 92 C X -0.0003 0.0002 -0.0103 -0.0086 -0.0035 -0.0026  
Y -0.0006 0.0012 0.0058 0.0072 -0.0273 -0.0259

Z -0.0003 0.0005 -0.0084 -0.0076 -0.0150 -0.0135  
AT. 93 C X 0.0000 0.0004 -0.0160 0.0156 -0.0138 0.0140  
Y -0.0002 -0.0013 0.0382 -0.0400 0.0386 -0.0387  
Z 0.0007 0.0009 -0.0009 0.0033 -0.0219 0.0206  
AT. 94 C X 0.0000 -0.0004 -0.0160 -0.0156 0.0138 0.0140  
Y -0.0002 0.0013 0.0382 0.0400 -0.0386 -0.0387  
Z 0.0007 -0.0009 -0.0009 -0.0033 0.0219 0.0206  
AT. 95 H X -0.0002 -0.0001 -0.0099 0.0091 -0.0019 0.0023  
Y -0.0010 -0.0022 0.0232 -0.0274 0.0643 -0.0616  
Z 0.0024 0.0029 0.0197 -0.0125 -0.0822 0.0752  
AT. 96 H X -0.0002 0.0001 -0.0099 -0.0091 0.0019 0.0023  
Y -0.0010 0.0022 0.0232 0.0274 -0.0643 -0.0616  
Z 0.0024 -0.0029 0.0197 0.0125 0.0822 0.0752  
AT. 97 H X 0.0009 0.0014 -0.0012 0.0032 -0.0453 0.0416  
Y 0.0018 0.0012 0.0519 -0.0477 -0.0349 0.0295  
Z 0.0009 0.0012 -0.0016 0.0047 -0.0297 0.0284  
AT. 98 H X 0.0009 -0.0014 -0.0012 -0.0032 0.0453 0.0416  
Y 0.0018 -0.0012 0.0519 0.0477 0.0349 0.0295  
Z 0.0009 -0.0012 -0.0016 -0.0047 0.0297 0.0284  
AT. 99 C X -0.0010 -0.0006 0.0022 -0.0039 0.0054 -0.0050  
Y 0.0007 0.0001 -0.0096 0.0085 -0.0041 0.0019  
Z 0.0010 0.0004 -0.0078 0.0095 -0.0019 0.0028  
AT. 100 C X -0.0010 0.0006 0.0022 0.0039 -0.0054 -0.0050  
Y 0.0007 -0.0001 -0.0096 -0.0085 0.0041 0.0019  
Z 0.0010 -0.0004 -0.0078 -0.0095 0.0019 0.0028  
AT. 101 C X -0.0014 -0.0007 0.0100 -0.0110 0.0091 -0.0069  
Y 0.0022 0.0005 -0.0185 0.0212 -0.0056 0.0065  
Z 0.0017 0.0005 -0.0267 0.0259 -0.0075 0.0057  
AT. 102 C X -0.0014 0.0007 0.0100 0.0110 -0.0091 -0.0069  
Y 0.0022 -0.0005 -0.0185 -0.0212 0.0056 0.0065  
Z 0.0017 -0.0005 -0.0267 -0.0259 0.0075 0.0057  
AT. 103 H X -0.0008 -0.0006 0.0010 -0.0028 0.0058 -0.0048

Y 0.0019 0.0005 -0.0146 0.0178 -0.0041 0.0056  
Z 0.0003 -0.0001 -0.0366 0.0269 -0.0147 0.0059  
AT. 104 H X -0.0008 0.0006 0.0010 0.0028 -0.0058 -0.0048  
Y 0.0019 -0.0005 -0.0146 -0.0178 0.0041 0.0056  
Z 0.0003 0.0001 -0.0366 -0.0269 0.0147 0.0059  
AT. 105 H X 0.0000 -0.0001 0.0093 -0.0073 0.0101 -0.0038  
Y 0.0023 0.0008 0.0002 0.0086 0.0041 0.0023  
Z 0.0020 0.0007 -0.0198 0.0219 -0.0037 0.0047  
AT. 106 H X 0.0000 0.0001 0.0093 0.0073 -0.0101 -0.0038  
Y 0.0023 -0.0008 0.0002 -0.0086 -0.0041 0.0023  
Z 0.0020 -0.0007 -0.0198 -0.0219 0.0037 0.0047  
AT. 107 C X 0.0001 0.0003 -0.0022 0.0027 -0.0186 0.0172  
Y 0.0001 0.0004 0.0081 -0.0095 -0.0082 0.0060  
Z -0.0007 -0.0006 -0.0074 0.0057 0.0122 -0.0108  
AT. 108 C X 0.0001 -0.0003 -0.0022 -0.0027 0.0186 0.0172  
Y 0.0001 -0.0004 0.0081 0.0095 0.0082 0.0060  
Z -0.0007 0.0006 -0.0074 -0.0057 -0.0122 -0.0108  
AT. 109 H X -0.0009 0.0000 -0.0450 0.0479 -0.0233 0.0268  
Y -0.0004 0.0003 -0.0052 0.0061 -0.0099 0.0098  
Z -0.0012 -0.0006 -0.0178 0.0193 0.0099 -0.0064  
AT. 110 H X -0.0009 -0.0000 -0.0450 -0.0479 0.0233 0.0268  
Y -0.0004 -0.0003 -0.0052 -0.0061 0.0099 0.0098  
Z -0.0012 0.0006 -0.0178 -0.0193 -0.0099 -0.0064  
AT. 111 H X 0.0002 0.0004 -0.0056 0.0081 -0.0144 0.0142  
Y 0.0015 0.0009 0.0457 -0.0519 -0.0050 -0.0027  
Z -0.0012 -0.0008 -0.0116 0.0088 0.0066 -0.0055  
AT. 112 H X 0.0002 -0.0004 -0.0056 -0.0081 0.0144 0.0142  
Y 0.0015 -0.0009 0.0457 0.0519 0.0050 -0.0027  
Z -0.0012 0.0008 -0.0116 -0.0088 -0.0066 -0.0055  
AT. 113 C X 0.0002 0.0003 0.0122 -0.0153 -0.0166 0.0124  
Y -0.0000 0.0002 0.0096 -0.0100 -0.0042 0.0026  
Z -0.0005 -0.0006 0.0027 -0.0073 0.0134 -0.0136

AT. 114 C X 0.0002 -0.0003 0.0122 0.0153 0.0166 0.0124  
Y -0.0000 -0.0002 0.0096 0.0100 0.0042 0.0026  
Z -0.0005 0.0006 0.0027 0.0073 -0.0134 -0.0136

AT. 115 C X 0.0000 -0.0000 0.0006 -0.0011 -0.0030 0.0024  
Y -0.0001 0.0000 0.0032 -0.0013 -0.0017 0.0021  
Z -0.0000 -0.0004 -0.0024 0.0021 0.0022 -0.0012

AT. 116 C X 0.0000 0.0000 0.0006 0.0011 0.0030 0.0024  
Y -0.0001 -0.0000 0.0032 0.0013 0.0017 0.0021  
Z -0.0000 0.0004 -0.0024 -0.0021 -0.0022 -0.0012

AT. 117 H X -0.0002 0.0002 0.0137 -0.0154 0.0037 -0.0050  
Y 0.0001 -0.0003 -0.0183 0.0278 0.0018 0.0046  
Z 0.0001 -0.0006 -0.0118 0.0110 -0.0059 0.0062

AT. 118 H X -0.0002 -0.0002 0.0137 0.0154 -0.0037 -0.0050  
Y 0.0001 0.0003 -0.0183 -0.0278 -0.0018 0.0046  
Z 0.0001 0.0006 -0.0118 -0.0110 0.0059 0.0062

AT. 119 H X 0.0004 -0.0005 -0.0236 0.0273 -0.0057 0.0086  
Y -0.0001 -0.0001 0.0017 -0.0012 0.0038 -0.0035  
Z 0.0002 -0.0005 -0.0137 0.0171 -0.0051 0.0081

AT. 120 H X 0.0004 0.0005 -0.0236 -0.0273 0.0057 0.0086  
Y -0.0001 0.0001 0.0017 0.0012 -0.0038 -0.0035  
Z 0.0002 0.0005 -0.0137 -0.0171 0.0051 0.0081

AT. 121 C X -0.0000 -0.0000 0.0022 0.0003 0.0083 -0.0060  
Y -0.0006 -0.0006 -0.0123 0.0106 0.0095 -0.0081  
Z 0.0004 0.0002 0.0076 -0.0048 0.0018 -0.0003

AT. 122 C X -0.0000 0.0000 0.0022 -0.0003 -0.0083 -0.0060  
Y -0.0006 0.0006 -0.0123 -0.0106 -0.0095 -0.0081  
Z 0.0004 -0.0002 0.0076 0.0048 -0.0018 -0.0003

AT. 123 H X -0.0004 0.0008 0.0332 -0.0311 -0.0097 0.0078  
Y -0.0002 0.0006 0.0061 -0.0078 -0.0132 0.0104  
Z -0.0001 -0.0008 -0.0067 0.0094 0.0223 -0.0171

AT. 124 H X -0.0004 -0.0008 0.0332 0.0311 0.0097 0.0078  
Y -0.0002 -0.0006 0.0061 0.0078 0.0132 0.0104

Z -0.0001 0.0008 -0.0067 -0.0094 -0.0223 -0.0171  
AT. 125 H X 0.0002 0.0004 0.0098 -0.0071 0.0002 0.0003  
Y -0.0007 -0.0019 -0.0488 0.0472 0.0437 -0.0350  
Z 0.0006 -0.0001 -0.0025 0.0054 0.0093 -0.0065  
AT. 126 H X 0.0002 -0.0004 0.0098 0.0071 -0.0002 0.0003  
Y -0.0007 0.0019 -0.0488 -0.0472 -0.0437 -0.0350  
Z 0.0006 0.0001 -0.0025 -0.0054 -0.0093 -0.0065  
AT. 127 C X -0.0001 -0.0005 -0.0105 0.0125 0.0174 -0.0135  
Y -0.0003 -0.0003 -0.0125 0.0106 0.0008 -0.0010  
Z 0.0007 0.0009 0.0206 -0.0172 -0.0183 0.0157  
AT. 128 C X -0.0001 0.0005 -0.0105 -0.0125 -0.0174 -0.0135  
Y -0.0003 0.0003 -0.0125 -0.0106 -0.0008 -0.0010  
Z 0.0007 -0.0009 0.0206 0.0172 0.0183 0.0157  
AT. 129 C X 0.0003 0.0001 0.0030 -0.0007 0.0040 -0.0028  
Y 0.0006 0.0006 0.0073 -0.0063 -0.0114 0.0095  
Z -0.0004 -0.0002 -0.0061 0.0056 -0.0061 0.0050  
AT. 130 C X 0.0003 -0.0001 0.0030 0.0007 -0.0040 -0.0028  
Y 0.0006 -0.0006 0.0073 0.0063 0.0114 0.0095  
Z -0.0004 0.0002 -0.0061 -0.0056 0.0061 0.0050  
AT. 131 H X -0.0005 -0.0005 -0.0189 0.0190 -0.0043 0.0055  
Y 0.0030 0.0029 0.0667 -0.0605 -0.0342 0.0268  
Z -0.0004 0.0001 -0.0095 0.0083 -0.0288 0.0253  
AT. 132 H X -0.0005 0.0005 -0.0189 -0.0190 0.0043 0.0055  
Y 0.0030 -0.0029 0.0667 0.0605 0.0342 0.0268  
Z -0.0004 -0.0001 -0.0095 -0.0083 0.0288 0.0253  
AT. 133 H X 0.0021 0.0016 0.0551 -0.0489 0.0025 -0.0044  
Y 0.0004 0.0004 0.0076 -0.0081 -0.0054 0.0033  
Z -0.0016 -0.0013 -0.0315 0.0267 0.0039 -0.0038  
AT. 134 H X 0.0021 -0.0016 0.0551 0.0489 -0.0025 -0.0044  
Y 0.0004 -0.0004 0.0076 0.0081 0.0054 0.0033  
Z -0.0016 0.0013 -0.0315 -0.0267 -0.0039 -0.0038  
AT. 135 C X 0.0004 0.0007 0.0153 -0.0155 -0.0288 0.0238

Y 0.0004 0.0003 0.0054 -0.0054 -0.0140 0.0121  
Z -0.0003 -0.0005 -0.0044 0.0051 0.0117 -0.0095  
AT. 136 C X 0.0004 -0.0007 0.0153 0.0155 0.0288 0.0238  
Y 0.0004 -0.0003 0.0054 0.0054 0.0140 0.0121  
Z -0.0003 0.0005 -0.0044 -0.0051 -0.0117 -0.0095  
AT. 137 H X 0.0008 0.0015 0.0192 -0.0153 -0.0302 0.0260  
Y 0.0005 0.0004 0.0054 -0.0037 -0.0187 0.0170  
Z -0.0002 -0.0007 -0.0059 0.0080 0.0043 -0.0019  
AT. 138 H X 0.0008 -0.0015 0.0192 0.0153 0.0302 0.0260  
Y 0.0005 -0.0004 0.0054 0.0037 0.0187 0.0170  
Z -0.0002 0.0007 -0.0059 -0.0080 -0.0043 -0.0019  
AT. 139 H X -0.0002 0.0000 0.0152 -0.0190 -0.0185 0.0133  
Y 0.0011 0.0010 0.0034 -0.0058 -0.0140 0.0113  
Z 0.0002 0.0002 -0.0038 0.0099 -0.0018 0.0043  
AT. 140 H X -0.0002 -0.0000 0.0152 0.0190 0.0185 0.0133  
Y 0.0011 -0.0010 0.0034 0.0058 0.0140 0.0113  
Z 0.0002 -0.0002 -0.0038 -0.0099 0.0018 0.0043  
AT. 141 H X 0.0012 0.0016 0.0137 -0.0102 -0.0448 0.0396  
Y 0.0005 0.0000 0.0032 -0.0018 -0.0233 0.0214  
Z -0.0000 0.0002 -0.0027 0.0035 0.0144 -0.0124  
AT. 142 H X 0.0012 -0.0016 0.0137 0.0102 0.0448 0.0396  
Y 0.0005 -0.0000 0.0032 0.0018 0.0233 0.0214  
Z -0.0000 -0.0002 -0.0027 -0.0035 -0.0144 -0.0124  
AT. 143 C X 0.0003 0.0003 0.0013 0.0034 0.0041 -0.0021  
Y 0.0001 -0.0000 0.0031 -0.0012 0.0026 -0.0015  
Z 0.0002 -0.0001 0.0029 -0.0009 0.0035 -0.0025  
AT. 144 C X 0.0003 -0.0003 0.0013 -0.0034 -0.0041 -0.0021  
Y 0.0001 0.0000 0.0031 0.0012 -0.0026 -0.0015  
Z 0.0002 0.0001 0.0029 0.0009 -0.0035 -0.0025  
AT. 145 H X 0.0005 0.0010 0.0056 0.0002 -0.0164 0.0151  
Y 0.0001 0.0003 0.0101 -0.0065 0.0002 0.0008  
Z 0.0002 -0.0003 -0.0036 0.0040 0.0010 -0.0008



AT. 146 H X 0.0005 -0.0010 0.0056 -0.0002 0.0164 0.0151  
Y 0.0001 -0.0003 0.0101 0.0065 -0.0002 0.0008  
Z 0.0002 0.0003 -0.0036 -0.0040 -0.0010 -0.0008

AT. 147 H X -0.0003 -0.0004 -0.0118 0.0132 0.0163 -0.0132  
Y 0.0007 -0.0002 0.0056 -0.0028 0.0078 -0.0052  
Z -0.0005 -0.0011 -0.0143 0.0119 0.0236 -0.0201

AT. 148 H X -0.0003 0.0004 -0.0118 -0.0132 -0.0163 -0.0132  
Y 0.0007 0.0002 0.0056 0.0028 -0.0078 -0.0052  
Z -0.0005 0.0011 -0.0143 -0.0119 -0.0236 -0.0201

AT. 149 H X 0.0012 0.0010 0.0197 -0.0100 -0.0045 0.0067  
Y 0.0002 0.0003 0.0121 -0.0078 0.0036 -0.0017  
Z -0.0001 0.0001 0.0086 -0.0053 0.0096 -0.0073

AT. 150 H X 0.0012 -0.0010 0.0197 0.0100 0.0045 0.0067  
Y 0.0002 -0.0003 0.0121 0.0078 -0.0036 -0.0017  
Z -0.0001 -0.0001 0.0086 0.0053 -0.0096 -0.0073

AT. 151 C X -0.0006 -0.0006 -0.0071 0.0032 0.0089 -0.0090  
Y 0.0006 -0.0002 0.0024 -0.0017 0.0063 -0.0050  
Z 0.0005 0.0005 0.0258 -0.0280 -0.0131 0.0087

AT. 152 C X -0.0006 0.0006 -0.0071 -0.0032 -0.0089 -0.0090  
Y 0.0006 0.0002 0.0024 0.0017 -0.0063 -0.0050  
Z 0.0005 -0.0005 0.0258 0.0280 0.0131 0.0087

AT. 153 H X -0.0015 -0.0013 -0.0234 0.0147 0.0159 -0.0162  
Y 0.0013 -0.0003 0.0044 -0.0021 0.0137 -0.0103  
Z 0.0020 0.0007 0.0361 -0.0338 -0.0042 0.0033

AT. 154 H X -0.0015 0.0013 -0.0234 -0.0147 -0.0159 -0.0162  
Y 0.0013 0.0003 0.0044 0.0021 -0.0137 -0.0103  
Z 0.0020 -0.0007 0.0361 0.0338 0.0042 0.0033

AT. 155 H X -0.0014 -0.0011 -0.0113 0.0046 0.0239 -0.0231  
Y 0.0019 0.0000 0.0137 -0.0101 0.0154 -0.0116  
Z -0.0012 0.0002 0.0126 -0.0187 -0.0172 0.0105

AT. 156 H X -0.0014 0.0011 -0.0113 -0.0046 -0.0239 -0.0231  
Y 0.0019 -0.0000 0.0137 0.0101 -0.0154 -0.0116

Z -0.0012 -0.0002 0.0126 0.0187 0.0172 0.0105  
AT. 157 O X 0.0002 0.0006 -0.0004 0.0003 0.0002 -0.0002  
Y -0.0003 0.0002 0.0002 0.0000 -0.0001 0.0017  
Z -0.0005 -0.0008 -0.0002 0.0002 -0.0002 0.0002  
AT. 158 O X 0.0002 -0.0006 -0.0004 -0.0003 -0.0002 -0.0002  
Y -0.0003 -0.0002 0.0002 -0.0000 0.0001 0.0017  
Z -0.0005 0.0008 -0.0002 -0.0002 0.0002 0.0002  
AT. 159 O X 0.0001 -0.0004 -0.0001 0.0001 0.0004 -0.0004  
Y -0.0013 -0.0012 -0.0003 0.0001 0.0000 -0.0006  
Z -0.0004 -0.0019 0.0003 -0.0002 -0.0000 0.0000  
AT. 160 O X 0.0001 0.0004 -0.0001 -0.0001 -0.0004 -0.0004  
Y -0.0013 0.0012 -0.0003 -0.0001 -0.0000 -0.0006  
Z -0.0004 0.0019 0.0003 0.0002 0.0000 0.0000  
AT. 161 H X -0.0006 0.0002 -0.0001 0.0005 -0.0001 0.0030  
Y -0.0017 -0.0013 0.0002 -0.0000 0.0000 0.0008  
Z 0.0062 0.0066 0.0007 0.0001 -0.0005 0.0056  
AT. 162 H X -0.0006 -0.0002 -0.0001 -0.0005 0.0001 0.0030  
Y -0.0017 0.0013 0.0002 0.0000 -0.0000 0.0008  
Z 0.0062 -0.0066 0.0007 -0.0001 0.0005 0.0056  
AT. 163 H X 0.0017 -0.0004 0.0007 0.0001 0.0004 0.0005  
Y 0.0075 0.0074 0.0020 0.0010 0.0007 0.0063  
Z 0.0008 -0.0001 0.0005 0.0000 0.0001 0.0014  
AT. 164 H X 0.0017 0.0004 0.0007 -0.0001 -0.0004 0.0005  
Y 0.0075 -0.0074 0.0020 -0.0010 -0.0007 0.0063  
Z 0.0008 0.0001 0.0005 -0.0000 -0.0001 0.0014  
AT. 165 O X -0.0000 0.0001 0.0033 -0.0034 -0.0008 0.0008  
Y 0.0002 0.0001 0.0012 -0.0012 -0.0009 0.0006  
Z -0.0000 0.0000 0.0000 0.0002 -0.0011 0.0007  
AT. 166 O X -0.0000 -0.0001 0.0033 0.0034 0.0008 0.0008  
Y 0.0002 -0.0001 0.0012 0.0012 0.0009 0.0006  
Z -0.0000 -0.0000 0.0000 -0.0002 0.0011 0.0007  
AT. 167 H X 0.0002 -0.0001 0.0029 -0.0047 -0.0003 0.0007

Y -0.0001 0.0007 0.0036 -0.0000 -0.0038 0.0020  
Z 0.0001 -0.0004 -0.0013 0.0003 0.0022 -0.0019  
AT. 168 H X 0.0002 0.0001 0.0029 0.0047 0.0003 0.0007  
Y -0.0001 -0.0007 0.0036 0.0000 0.0038 0.0020  
Z 0.0001 0.0004 -0.0013 -0.0003 -0.0022 -0.0019  
AT. 169 O X 0.0002 -0.0002 0.0002 -0.0001 -0.0004 -0.0003  
Y -0.0003 0.0003 -0.0009 0.0004 0.0000 0.0018  
Z 0.0001 -0.0001 0.0003 -0.0001 -0.0011 0.0002  
AT. 170 O X 0.0002 0.0002 0.0002 0.0001 0.0004 -0.0003  
Y -0.0003 -0.0003 -0.0009 -0.0004 -0.0000 0.0018  
Z 0.0001 0.0001 0.0003 0.0001 0.0011 0.0002  
AT. 171 H X 0.0023 -0.0023 0.0016 0.0004 0.0032 -0.0015  
Y 0.0006 -0.0007 -0.0003 0.0009 0.0023 0.0015  
Z 0.0001 -0.0002 -0.0002 0.0005 -0.0007 0.0010  
AT. 172 H X 0.0023 0.0023 0.0016 -0.0004 -0.0032 -0.0015  
Y 0.0006 0.0007 -0.0003 -0.0009 -0.0023 0.0015  
Z 0.0001 0.0002 -0.0002 -0.0005 0.0007 0.0010  
  
FREQ(CM\*\*-1) 477.66 478.89 479.72 481.21 488.55 489.41

AT. 1 I X 0.0024 0.0005 0.0002 -0.0032 0.0028 0.0032  
Y 0.0017 0.0004 0.0002 -0.0021 0.0018 0.0020  
Z 0.0002 0.0000 0.0000 -0.0004 0.0005 0.0004  
AT. 2 I X 0.0024 0.0005 -0.0002 0.0032 -0.0028 0.0032  
Y 0.0017 0.0004 -0.0002 0.0021 -0.0018 0.0020  
Z 0.0002 0.0000 -0.0000 0.0004 -0.0005 0.0004  
AT. 3 I X 0.0021 0.0004 0.0001 -0.0018 -0.0034 -0.0026  
Y 0.0011 0.0003 0.0001 -0.0009 -0.0017 -0.0013  
Z 0.0010 0.0002 0.0001 -0.0008 -0.0016 -0.0013  
AT. 4 I X 0.0021 0.0004 -0.0001 0.0018 0.0034 -0.0026  
Y 0.0011 0.0003 -0.0001 0.0009 0.0017 -0.0013  
Z 0.0010 0.0002 -0.0001 0.0008 0.0016 -0.0013

AT. 5 O X -0.0065 -0.0012 -0.0002 0.0096 -0.0043 -0.0065  
Y 0.0152 0.0034 0.0011 -0.0185 0.0085 0.0101  
Z -0.0072 -0.0014 -0.0004 0.0069 0.0084 0.0100

AT. 6 O X -0.0065 -0.0012 0.0002 -0.0096 0.0043 -0.0065  
Y 0.0152 0.0034 -0.0011 0.0185 -0.0085 0.0101  
Z -0.0072 -0.0014 0.0004 -0.0069 -0.0084 0.0100

AT. 7 O X 0.0097 0.0023 0.0013 -0.0085 -0.0120 -0.0108  
Y 0.0017 0.0003 -0.0000 -0.0017 -0.0011 0.0014  
Z 0.0018 -0.0001 -0.0007 -0.0001 -0.0049 -0.0056

AT. 8 O X 0.0097 0.0023 -0.0013 0.0085 0.0120 -0.0108  
Y 0.0017 0.0003 0.0000 0.0017 0.0011 0.0014  
Z 0.0018 -0.0001 0.0007 0.0001 0.0049 -0.0056

AT. 9 N X 0.0132 0.0025 0.0008 -0.0158 0.0092 0.0112  
Y 0.0095 0.0016 0.0009 -0.0130 0.0180 0.0200  
Z 0.0058 0.0012 0.0003 -0.0070 0.0033 0.0039

AT. 10 N X 0.0132 0.0025 -0.0008 0.0158 -0.0092 0.0112  
Y 0.0095 0.0016 -0.0009 0.0130 -0.0180 0.0200  
Z 0.0058 0.0012 -0.0003 0.0070 -0.0033 0.0039

AT. 11 N X -0.0043 -0.0009 -0.0006 0.0045 -0.0019 -0.0026  
Y 0.0013 0.0005 0.0000 -0.0005 -0.0094 -0.0066  
Z 0.0080 0.0019 0.0010 -0.0069 -0.0127 -0.0101

AT. 12 N X -0.0043 -0.0009 0.0006 -0.0045 0.0019 -0.0026  
Y 0.0013 0.0005 -0.0000 0.0005 0.0094 -0.0066  
Z 0.0080 0.0019 -0.0010 0.0069 0.0127 -0.0101

AT. 13 C X -0.0069 -0.0015 -0.0007 0.0104 -0.0124 -0.0152  
Y -0.0061 -0.0013 -0.0008 0.0063 -0.0015 -0.0007  
Z 0.0050 0.0011 0.0002 -0.0062 0.0047 0.0058

AT. 14 C X -0.0069 -0.0015 0.0007 -0.0104 0.0124 -0.0152  
Y -0.0061 -0.0013 0.0008 -0.0063 0.0015 -0.0007  
Z 0.0050 0.0011 -0.0002 0.0062 -0.0047 0.0058

AT. 15 C X -0.0167 -0.0036 -0.0016 0.0221 -0.0227 -0.0270  
Y -0.0248 -0.0050 -0.0023 0.0305 -0.0213 -0.0232

Z -0.0070 -0.0013 -0.0002 0.0128 -0.0098 -0.0144  
AT. 16 C X -0.0167 -0.0036 0.0016 -0.0221 0.0227 -0.0270  
Y -0.0248 -0.0050 0.0023 -0.0305 0.0213 -0.0232  
Z -0.0070 -0.0013 0.0002 -0.0128 0.0098 -0.0144  
AT. 17 H X -0.0089 -0.0020 -0.0009 0.0117 -0.0154 -0.0189  
Y -0.0043 -0.0009 -0.0013 0.0021 -0.0056 -0.0018  
Z -0.0290 -0.0057 -0.0011 0.0434 -0.0260 -0.0371  
AT. 18 H X -0.0089 -0.0020 0.0009 -0.0117 0.0154 -0.0189  
Y -0.0043 -0.0009 0.0013 -0.0021 0.0056 -0.0018  
Z -0.0290 -0.0057 0.0011 -0.0434 0.0260 -0.0371  
AT. 19 H X -0.0045 -0.0009 -0.0007 0.0045 -0.0101 -0.0117  
Y -0.0478 -0.0094 -0.0027 0.0621 -0.0387 -0.0457  
Z -0.0125 -0.0023 -0.0001 0.0200 -0.0130 -0.0189  
AT. 20 H X -0.0045 -0.0009 0.0007 -0.0045 0.0101 -0.0117  
Y -0.0478 -0.0094 0.0027 -0.0621 0.0387 -0.0457  
Z -0.0125 -0.0023 0.0001 -0.0200 0.0130 -0.0189  
AT. 21 C X -0.0066 -0.0016 -0.0006 0.0068 0.0077 0.0041  
Y -0.0163 -0.0037 -0.0015 0.0148 0.0226 0.0194  
Z -0.0018 -0.0006 -0.0001 0.0020 0.0054 0.0041  
AT. 22 C X -0.0066 -0.0016 0.0006 -0.0068 -0.0077 0.0041  
Y -0.0163 -0.0037 0.0015 -0.0148 -0.0226 0.0194  
Z -0.0018 -0.0006 0.0001 -0.0020 -0.0054 0.0041  
AT. 23 C X -0.0163 -0.0038 -0.0015 0.0148 0.0255 0.0186  
Y -0.0100 -0.0024 -0.0006 0.0076 0.0199 0.0153  
Z -0.0214 -0.0050 -0.0019 0.0185 0.0388 0.0328  
AT. 24 C X -0.0163 -0.0038 0.0015 -0.0148 -0.0255 0.0186  
Y -0.0100 -0.0024 0.0006 -0.0076 -0.0199 0.0153  
Z -0.0214 -0.0050 0.0019 -0.0185 -0.0388 0.0328  
AT. 25 H X -0.0077 -0.0017 -0.0006 0.0079 0.0108 0.0068  
Y -0.0042 -0.0010 0.0001 0.0023 0.0117 0.0086  
Z -0.0526 -0.0121 -0.0057 0.0468 0.0812 0.0679  
AT. 26 H X -0.0077 -0.0017 0.0006 -0.0079 -0.0108 0.0068

Y -0.0042 -0.0010 -0.0001 -0.0023 -0.0117 0.0086  
Z -0.0526 -0.0121 0.0057 -0.0468 -0.0812 0.0679  
AT. 27 H X -0.0187 -0.0042 -0.0019 0.0161 0.0273 0.0223  
Y 0.0262 0.0060 0.0036 -0.0251 -0.0322 -0.0275  
Z -0.0021 -0.0006 0.0003 0.0011 0.0114 0.0099  
AT. 28 H X -0.0187 -0.0042 0.0019 -0.0161 -0.0273 0.0223  
Y 0.0262 0.0060 -0.0036 0.0251 0.0322 -0.0275  
Z -0.0021 -0.0006 -0.0003 -0.0011 -0.0114 0.0099  
AT. 29 C X 0.0019 0.0006 0.0001 -0.0016 -0.0031 -0.0021  
Y -0.0117 -0.0025 -0.0011 0.0137 0.0029 0.0005  
Z 0.0041 0.0007 -0.0003 -0.0049 0.0038 0.0045  
AT. 30 C X 0.0019 0.0006 -0.0001 0.0016 0.0031 -0.0021  
Y -0.0117 -0.0025 0.0011 -0.0137 -0.0029 0.0005  
Z 0.0041 0.0007 0.0003 0.0049 -0.0038 0.0045  
AT. 31 H X -0.0182 -0.0031 -0.0011 0.0235 -0.0183 -0.0210  
Y 0.0150 0.0023 0.0002 -0.0162 0.0046 0.0033  
Z 0.0317 0.0056 0.0009 -0.0343 -0.0026 -0.0025  
AT. 32 H X -0.0182 -0.0031 0.0011 -0.0235 0.0183 -0.0210  
Y 0.0150 0.0023 -0.0002 0.0162 -0.0046 0.0033  
Z 0.0317 0.0056 -0.0009 0.0343 0.0026 -0.0025  
AT. 33 H X -0.0211 -0.0038 -0.0017 0.0236 -0.0017 -0.0016  
Y -0.0513 -0.0099 -0.0033 0.0577 0.0010 -0.0024  
Z 0.0059 0.0010 -0.0005 -0.0071 0.0058 0.0064  
AT. 34 H X -0.0211 -0.0038 0.0017 -0.0236 0.0017 -0.0016  
Y -0.0513 -0.0099 0.0033 -0.0577 -0.0010 -0.0024  
Z 0.0059 0.0010 0.0005 0.0071 -0.0058 0.0064  
AT. 35 C X 0.0161 0.0033 0.0014 -0.0178 -0.0046 -0.0016  
Y -0.0083 -0.0019 -0.0013 0.0114 -0.0058 -0.0099  
Z -0.0146 -0.0029 -0.0014 0.0143 0.0105 0.0118  
AT. 36 C X 0.0161 0.0033 -0.0014 0.0178 0.0046 -0.0016  
Y -0.0083 -0.0019 0.0013 -0.0114 0.0058 -0.0099  
Z -0.0146 -0.0029 0.0014 -0.0143 -0.0105 0.0118

AT. 37 C X 0.0066 0.0011 0.0004 -0.0072 -0.0043 -0.0050  
Y 0.0056 0.0012 0.0005 -0.0045 -0.0087 -0.0091  
Z -0.0010 -0.0000 0.0004 0.0004 0.0032 0.0044

AT. 38 C X 0.0066 0.0011 -0.0004 0.0072 0.0043 -0.0050  
Y 0.0056 0.0012 -0.0005 0.0045 0.0087 -0.0091  
Z -0.0010 -0.0000 -0.0004 -0.0004 -0.0032 0.0044

AT. 39 H X 0.0184 0.0037 0.0026 -0.0226 0.0032 0.0026  
Y 0.0337 0.0072 0.0039 -0.0350 -0.0196 -0.0156  
Z -0.0055 -0.0010 0.0004 0.0035 0.0135 0.0128

AT. 40 H X 0.0184 0.0037 -0.0026 0.0226 -0.0032 0.0026  
Y 0.0337 0.0072 -0.0039 0.0350 0.0196 -0.0156  
Z -0.0055 -0.0010 -0.0004 -0.0035 -0.0135 0.0128

AT. 41 H X -0.0072 -0.0017 -0.0017 0.0100 -0.0105 -0.0118  
Y 0.0064 0.0011 0.0004 -0.0064 -0.0019 -0.0027  
Z 0.0128 0.0031 0.0028 -0.0161 0.0043 0.0063

AT. 42 H X -0.0072 -0.0017 0.0017 -0.0100 0.0105 -0.0118  
Y 0.0064 0.0011 -0.0004 0.0064 0.0019 -0.0027  
Z 0.0128 0.0031 -0.0028 0.0161 -0.0043 0.0063

AT. 43 C X -0.0073 -0.0015 -0.0006 0.0058 0.0135 0.0120  
Y 0.0113 0.0023 0.0007 -0.0138 0.0039 0.0069  
Z 0.0093 0.0023 0.0015 -0.0082 -0.0131 -0.0109

AT. 44 C X -0.0073 -0.0015 0.0006 -0.0058 -0.0135 0.0120  
Y 0.0113 0.0023 -0.0007 0.0138 -0.0039 0.0069  
Z 0.0093 0.0023 -0.0015 0.0082 0.0131 -0.0109

AT. 45 H X -0.0003 -0.0000 0.0006 -0.0050 0.0316 0.0311  
Y -0.0009 -0.0009 -0.0015 0.0030 -0.0139 -0.0171  
Z 0.0159 0.0042 0.0028 -0.0167 -0.0080 -0.0006

AT. 46 H X -0.0003 -0.0000 -0.0006 0.0050 -0.0316 0.0311  
Y -0.0009 -0.0009 0.0015 -0.0030 0.0139 -0.0171  
Z 0.0159 0.0042 -0.0028 0.0167 0.0080 -0.0006

AT. 47 H X 0.0047 0.0012 0.0010 -0.0098 0.0236 0.0254  
Y 0.0249 0.0059 0.0031 -0.0328 0.0245 0.0334

Z 0.0068 0.0022 0.0019 -0.0064 -0.0051 -0.0016  
AT. 48 H X 0.0047 0.0012 -0.0010 0.0098 -0.0236 0.0254  
Y 0.0249 0.0059 -0.0031 0.0328 -0.0245 0.0334  
Z 0.0068 0.0022 -0.0019 0.0064 0.0051 -0.0016  
AT. 49 C X -0.0173 -0.0035 -0.0016 0.0191 0.0031 -0.0003  
Y 0.0089 0.0016 0.0004 -0.0121 0.0106 0.0105  
Z 0.0038 0.0008 0.0005 -0.0009 -0.0195 -0.0227  
AT. 50 C X -0.0173 -0.0035 0.0016 -0.0191 -0.0031 -0.0003  
Y 0.0089 0.0016 -0.0004 0.0121 -0.0106 0.0105  
Z 0.0038 0.0008 -0.0005 0.0009 0.0195 -0.0227  
AT. 51 C X -0.0056 -0.0013 -0.0010 0.0052 0.0062 0.0039  
Y -0.0058 -0.0009 0.0000 0.0090 -0.0096 -0.0122  
Z 0.0048 0.0007 -0.0001 -0.0069 0.0065 0.0052  
AT. 52 C X -0.0056 -0.0013 0.0010 -0.0052 -0.0062 0.0039  
Y -0.0058 -0.0009 -0.0000 -0.0090 0.0096 -0.0122  
Z 0.0048 0.0007 0.0001 0.0069 -0.0065 0.0052  
AT. 53 H X -0.0185 -0.0031 -0.0009 0.0259 -0.0267 -0.0313  
Y -0.0307 -0.0050 -0.0006 0.0442 -0.0473 -0.0546  
Z -0.0018 -0.0012 -0.0011 -0.0017 0.0211 0.0181  
AT. 54 H X -0.0185 -0.0031 0.0009 -0.0259 0.0267 -0.0313  
Y -0.0307 -0.0050 0.0006 -0.0442 0.0473 -0.0546  
Z -0.0018 -0.0012 0.0011 0.0017 -0.0211 0.0181  
AT. 55 H X 0.0146 0.0015 -0.0011 -0.0266 0.0535 0.0551  
Y -0.0145 -0.0024 -0.0005 0.0205 -0.0208 -0.0247  
Z 0.0076 0.0007 -0.0008 -0.0140 0.0248 0.0246  
AT. 56 H X 0.0146 0.0015 0.0011 0.0266 -0.0535 0.0551  
Y -0.0145 -0.0024 0.0005 -0.0205 0.0208 -0.0247  
Z 0.0076 0.0007 0.0008 0.0140 -0.0248 0.0246  
AT. 57 C X 0.0131 0.0028 0.0015 -0.0171 0.0060 0.0117  
Y -0.0114 -0.0025 -0.0010 0.0140 -0.0021 -0.0067  
Z 0.0041 0.0010 0.0008 -0.0057 -0.0009 0.0021  
AT. 58 C X 0.0131 0.0028 -0.0015 0.0171 -0.0060 0.0117



Y -0.0114 -0.0025 0.0010 -0.0140 0.0021 -0.0067  
Z 0.0041 0.0010 -0.0008 0.0057 0.0009 0.0021  
AT. 59 H X 0.0028 0.0008 0.0012 -0.0079 0.0206 0.0271  
Y -0.0061 -0.0012 -0.0004 0.0097 -0.0104 -0.0160  
Z 0.0049 0.0014 0.0015 -0.0059 -0.0029 -0.0007  
AT. 60 H X 0.0028 0.0008 -0.0012 0.0079 -0.0206 0.0271  
Y -0.0061 -0.0012 0.0004 -0.0097 0.0104 -0.0160  
Z 0.0049 0.0014 -0.0015 0.0059 0.0029 -0.0007  
AT. 61 H X 0.0191 0.0038 0.0021 -0.0237 -0.0016 0.0049  
Y -0.0199 -0.0046 -0.0022 0.0212 0.0095 0.0062  
Z 0.0131 0.0028 0.0019 -0.0146 -0.0126 -0.0095  
AT. 62 H X 0.0191 0.0038 -0.0021 0.0237 0.0016 0.0049  
Y -0.0199 -0.0046 0.0022 -0.0212 -0.0095 0.0062  
Z 0.0131 0.0028 -0.0019 0.0146 0.0126 -0.0095  
AT. 63 H X 0.0089 0.0022 0.0010 -0.0122 0.0103 0.0155  
Y -0.0115 -0.0021 -0.0001 0.0136 -0.0018 -0.0061  
Z 0.0082 0.0013 0.0004 -0.0099 -0.0054 -0.0022  
AT. 64 H X 0.0089 0.0022 -0.0010 0.0122 -0.0103 0.0155  
Y -0.0115 -0.0021 0.0001 -0.0136 0.0018 -0.0061  
Z 0.0082 0.0013 -0.0004 0.0099 0.0054 -0.0022  
AT. 65 C X -0.0162 -0.0033 -0.0014 0.0172 0.0106 0.0113  
Y 0.0136 0.0028 0.0014 -0.0136 -0.0121 -0.0117  
Z 0.0152 0.0031 0.0014 -0.0150 -0.0122 -0.0126  
AT. 66 C X -0.0162 -0.0033 0.0014 -0.0172 -0.0106 0.0113  
Y 0.0136 0.0028 -0.0014 0.0136 0.0121 -0.0117  
Z 0.0152 0.0031 -0.0014 0.0150 0.0122 -0.0126  
AT. 67 H X -0.0119 -0.0023 -0.0008 0.0125 0.0096 0.0146  
Y 0.0141 0.0030 0.0015 -0.0123 -0.0199 -0.0213  
Z 0.0111 0.0021 0.0008 -0.0122 -0.0039 -0.0064  
AT. 68 H X -0.0119 -0.0023 0.0008 -0.0125 -0.0096 0.0146  
Y 0.0141 0.0030 -0.0015 0.0123 0.0199 -0.0213  
Z 0.0111 0.0021 -0.0008 0.0122 0.0039 -0.0064

AT. 69 H X -0.0146 -0.0028 -0.0009 0.0176 -0.0026 -0.0016  
Y 0.0162 0.0034 0.0019 -0.0157 -0.0159 -0.0129  
Z 0.0160 0.0031 0.0010 -0.0191 0.0087 0.0121

AT. 70 H X -0.0146 -0.0028 0.0009 -0.0176 0.0026 -0.0016  
Y 0.0162 0.0034 -0.0019 0.0157 0.0159 -0.0129  
Z 0.0160 0.0031 -0.0010 0.0191 -0.0087 0.0121

AT. 71 H X -0.0181 -0.0038 -0.0020 0.0159 0.0279 0.0289  
Y 0.0176 0.0039 0.0023 -0.0147 -0.0302 -0.0288  
Z 0.0191 0.0042 0.0021 -0.0174 -0.0236 -0.0224

AT. 72 H X -0.0181 -0.0038 0.0020 -0.0159 -0.0279 0.0289  
Y 0.0176 0.0039 -0.0023 0.0147 0.0302 -0.0288  
Z 0.0191 0.0042 -0.0021 0.0174 0.0236 -0.0224

AT. 73 C X -0.0013 0.0001 0.0008 0.0032 -0.0122 -0.0123  
Y -0.0011 0.0000 0.0006 0.0004 0.0032 0.0047  
Z -0.0210 -0.0042 -0.0018 0.0237 -0.0028 -0.0055

AT. 74 C X -0.0013 0.0001 -0.0008 -0.0032 0.0122 -0.0123  
Y -0.0011 0.0000 -0.0006 -0.0004 -0.0032 0.0047  
Z -0.0210 -0.0042 0.0018 -0.0237 0.0028 -0.0055

AT. 75 H X 0.0031 0.0016 0.0027 0.0022 -0.0342 -0.0331  
Y -0.0059 -0.0005 0.0014 0.0034 0.0109 0.0160  
Z -0.0239 -0.0038 0.0005 0.0265 -0.0079 -0.0047

AT. 76 H X 0.0031 0.0016 -0.0027 -0.0022 0.0342 -0.0331  
Y -0.0059 -0.0005 -0.0014 -0.0034 -0.0109 0.0160  
Z -0.0239 -0.0038 -0.0005 -0.0265 0.0079 -0.0047

AT. 77 H X -0.0009 0.0005 0.0016 0.0039 -0.0180 -0.0190  
Y -0.0062 -0.0004 0.0019 0.0066 -0.0019 0.0045  
Z -0.0164 -0.0041 -0.0037 0.0172 0.0072 0.0008

AT. 78 H X -0.0009 0.0005 -0.0016 -0.0039 0.0180 -0.0190  
Y -0.0062 -0.0004 -0.0019 -0.0066 0.0019 0.0045  
Z -0.0164 -0.0041 0.0037 -0.0172 -0.0072 0.0008

AT. 79 I X -0.0008 -0.0006 -0.0005 -0.0000 -0.0000 0.0000  
Y 0.0011 0.0011 0.0009 0.0000 0.0001 -0.0000

Z 0.0001 -0.0000 0.0000 0.0000 0.0000 0.0000  
AT. 80 I X -0.0008 -0.0006 0.0005 0.0000 0.0000 0.0000  
Y 0.0011 0.0011 -0.0009 -0.0000 -0.0001 -0.0000  
Z 0.0001 -0.0000 -0.0000 -0.0000 -0.0000 0.0000  
AT. 81 I X 0.0007 -0.0013 -0.0018 -0.0002 0.0000 -0.0000  
Y -0.0006 0.0014 0.0018 0.0002 0.0000 0.0000  
Z -0.0003 0.0009 0.0011 0.0001 -0.0001 -0.0001  
AT. 82 I X 0.0007 -0.0013 0.0018 0.0002 -0.0000 -0.0000  
Y -0.0006 0.0014 -0.0018 -0.0002 -0.0000 0.0000  
Z -0.0003 0.0009 -0.0011 -0.0001 0.0001 -0.0001  
AT. 83 O X -0.0086 -0.0032 -0.0040 0.0008 -0.0006 -0.0010  
Y 0.0015 0.0026 0.0038 0.0003 -0.0000 -0.0004  
Z 0.0007 -0.0073 -0.0091 -0.0007 -0.0003 -0.0000  
AT. 84 O X -0.0086 -0.0032 0.0040 -0.0008 0.0006 -0.0010  
Y 0.0015 0.0026 -0.0038 -0.0003 0.0000 -0.0004  
Z 0.0007 -0.0073 0.0091 0.0007 0.0003 -0.0000  
AT. 85 O X 0.0033 -0.0202 -0.0202 -0.0012 -0.0007 -0.0005  
Y -0.0019 -0.0001 0.0010 0.0000 -0.0002 0.0000  
Z 0.0012 -0.0009 0.0006 0.0006 0.0001 -0.0001  
AT. 86 O X 0.0033 -0.0202 0.0202 0.0012 0.0007 -0.0005  
Y -0.0019 -0.0001 -0.0010 -0.0000 0.0002 0.0000  
Z 0.0012 -0.0009 -0.0006 -0.0006 -0.0001 -0.0001  
AT. 87 N X 0.0045 -0.0030 -0.0027 -0.0008 0.0004 0.0008  
Y 0.0006 0.0103 0.0055 0.0011 0.0003 -0.0006  
Z -0.0063 0.0007 -0.0011 0.0006 -0.0005 -0.0007  
AT. 88 N X 0.0045 -0.0030 0.0027 0.0008 -0.0004 0.0008  
Y 0.0006 0.0103 -0.0055 -0.0011 -0.0003 -0.0006  
Z -0.0063 0.0007 0.0011 -0.0006 0.0005 -0.0007  
AT. 89 N X -0.0041 0.0096 0.0092 0.0009 0.0000 -0.0002  
Y 0.0001 0.0002 0.0027 -0.0003 -0.0004 -0.0002  
Z -0.0033 0.0144 0.0155 0.0011 0.0002 0.0003  
AT. 90 N X -0.0041 0.0096 -0.0092 -0.0009 -0.0000 -0.0002

Y 0.0001 0.0002 -0.0027 0.0003 0.0004 -0.0002  
Z -0.0033 0.0144 -0.0155 -0.0011 -0.0002 0.0003  
AT. 91 C X -0.0011 -0.0042 -0.0049 -0.0000 -0.0003 -0.0004  
Y -0.0109 -0.0079 -0.0077 0.0006 -0.0008 -0.0007  
Z -0.0069 -0.0011 -0.0029 0.0006 -0.0006 -0.0008  
AT. 92 C X -0.0011 -0.0042 0.0049 0.0000 0.0003 -0.0004  
Y -0.0109 -0.0079 0.0077 -0.0006 0.0008 -0.0007  
Z -0.0069 -0.0011 0.0029 -0.0006 0.0006 -0.0008  
AT. 93 C X 0.0056 0.0015 0.0019 -0.0001 0.0001 -0.0003  
Y -0.0130 -0.0159 -0.0134 -0.0004 -0.0007 0.0005  
Z 0.0086 0.0094 0.0097 -0.0003 0.0007 0.0005  
AT. 94 C X 0.0056 0.0015 -0.0019 0.0001 -0.0001 -0.0003  
Y -0.0130 -0.0159 0.0134 0.0004 0.0007 0.0005  
Z 0.0086 0.0094 -0.0097 0.0003 -0.0007 0.0005  
AT. 95 H X 0.0011 -0.0025 -0.0015 0.0001 -0.0002 -0.0006  
Y -0.0248 -0.0195 -0.0187 0.0007 -0.0017 -0.0009  
Z 0.0350 0.0202 0.0232 -0.0025 0.0030 0.0033  
AT. 96 H X 0.0011 -0.0025 0.0015 -0.0001 0.0002 -0.0006  
Y -0.0248 -0.0195 0.0187 -0.0007 0.0017 -0.0009  
Z 0.0350 0.0202 -0.0232 0.0025 -0.0030 0.0033  
AT. 97 H X 0.0190 0.0077 0.0104 -0.0011 0.0013 0.0011  
Y 0.0190 0.0004 0.0047 -0.0029 0.0019 0.0033  
Z 0.0121 0.0113 0.0114 -0.0007 0.0010 0.0008  
AT. 98 H X 0.0190 0.0077 -0.0104 0.0011 -0.0013 0.0011  
Y 0.0190 0.0004 -0.0047 0.0029 -0.0019 0.0033  
Z 0.0121 0.0113 -0.0114 0.0007 -0.0010 0.0008  
AT. 99 C X -0.0019 -0.0020 -0.0012 0.0002 -0.0003 -0.0001  
Y 0.0050 -0.0206 -0.0229 -0.0020 -0.0002 -0.0003  
Z 0.0003 0.0013 -0.0007 0.0001 0.0004 0.0002  
AT. 100 C X -0.0019 -0.0020 0.0012 -0.0002 0.0003 -0.0001  
Y 0.0050 -0.0206 0.0229 0.0020 0.0002 -0.0003  
Z 0.0003 0.0013 0.0007 -0.0001 -0.0004 0.0002

AT.101 C X -0.0051 0.0106 0.0127 0.0013 -0.0002 0.0002  
Y 0.0031 -0.0046 -0.0092 -0.0008 0.0004 -0.0000  
Z 0.0070 -0.0284 -0.0338 -0.0025 -0.0002 -0.0005

AT.102 C X -0.0051 0.0106 -0.0127 -0.0013 0.0002 0.0002  
Y 0.0031 -0.0046 0.0092 0.0008 -0.0004 -0.0000  
Z 0.0070 -0.0284 0.0338 0.0025 0.0002 -0.0005

AT.103 H X -0.0022 -0.0004 0.0003 0.0003 -0.0004 -0.0001  
Y 0.0017 0.0011 -0.0028 -0.0003 0.0005 0.0001  
Z 0.0177 -0.0823 -0.0899 -0.0068 -0.0016 -0.0017

AT.104 H X -0.0022 -0.0004 -0.0003 -0.0003 0.0004 -0.0001  
Y 0.0017 0.0011 0.0028 0.0003 -0.0005 0.0001  
Z 0.0177 -0.0823 0.0899 0.0068 0.0016 -0.0017

AT.105 H X -0.0084 0.0336 0.0337 0.0028 0.0005 0.0009  
Y -0.0083 0.0460 0.0468 0.0034 0.0014 0.0011  
Z 0.0020 -0.0049 -0.0084 -0.0006 0.0004 0.0001

AT.106 H X -0.0084 0.0336 -0.0337 -0.0028 -0.0005 0.0009  
Y -0.0083 0.0460 -0.0468 -0.0034 -0.0014 0.0011  
Z 0.0020 -0.0049 0.0084 0.0006 -0.0004 0.0001

AT.107 C X 0.0075 0.0010 0.0008 -0.0002 0.0008 0.0005  
Y 0.0059 -0.0116 -0.0104 -0.0013 0.0002 0.0006  
Z -0.0060 -0.0025 -0.0021 0.0009 -0.0002 -0.0007

AT.108 C X 0.0075 0.0010 -0.0008 0.0002 -0.0008 0.0005  
Y 0.0059 -0.0116 0.0104 0.0013 -0.0002 0.0006  
Z -0.0060 -0.0025 0.0021 -0.0009 0.0002 -0.0007

AT.109 H X 0.0011 0.0305 0.0266 0.0039 0.0017 -0.0007  
Y 0.0011 0.0081 0.0084 0.0015 0.0010 0.0001  
Z -0.0121 0.0224 0.0226 0.0045 0.0009 -0.0012

AT.110 H X 0.0011 0.0305 -0.0266 -0.0039 -0.0017 -0.0007  
Y 0.0011 0.0081 -0.0084 -0.0015 -0.0010 0.0001  
Z -0.0121 0.0224 -0.0226 -0.0045 -0.0009 -0.0012

AT.111 H X 0.0040 0.0103 0.0083 0.0005 0.0008 0.0004  
Y 0.0163 -0.0551 -0.0507 -0.0071 -0.0016 0.0015

Z -0.0041 -0.0036 -0.0018 0.0012 0.0002 -0.0009  
AT. 112 H X 0.0040 0.0103 -0.0083 -0.0005 -0.0008 0.0004  
Y 0.0163 -0.0551 0.0507 0.0071 0.0016 0.0015  
Z -0.0041 -0.0036 0.0018 -0.0012 -0.0002 -0.0009  
AT. 113 C X 0.0116 -0.0218 -0.0196 -0.0025 -0.0001 0.0002  
Y 0.0017 -0.0029 -0.0009 0.0001 0.0005 0.0002  
Z -0.0013 -0.0223 -0.0208 -0.0015 -0.0008 -0.0002  
AT. 114 C X 0.0116 -0.0218 0.0196 0.0025 0.0001 0.0002  
Y 0.0017 -0.0029 0.0009 -0.0001 -0.0005 0.0002  
Z -0.0013 -0.0223 0.0208 0.0015 0.0008 -0.0002  
AT. 115 C X 0.0024 -0.0036 -0.0030 -0.0006 -0.0003 -0.0003  
Y -0.0019 0.0125 0.0131 0.0013 0.0006 0.0001  
Z -0.0005 0.0007 0.0004 -0.0000 -0.0000 0.0001  
AT. 116 C X 0.0024 -0.0036 0.0030 0.0006 0.0003 -0.0003  
Y -0.0019 0.0125 -0.0131 -0.0013 -0.0006 0.0001  
Z -0.0005 0.0007 -0.0004 0.0000 0.0000 0.0001  
AT. 117 H X 0.0007 -0.0086 -0.0054 -0.0009 -0.0006 -0.0002  
Y -0.0119 0.0596 0.0557 0.0052 0.0012 -0.0002  
Z 0.0037 -0.0054 -0.0075 -0.0007 0.0001 0.0000  
AT. 118 H X 0.0007 -0.0086 0.0054 0.0009 0.0006 -0.0002  
Y -0.0119 0.0596 -0.0557 -0.0052 -0.0012 -0.0002  
Z 0.0037 -0.0054 0.0075 0.0007 -0.0001 0.0000  
AT. 119 H X -0.0009 0.0180 0.0139 0.0013 0.0002 -0.0005  
Y -0.0032 0.0034 0.0041 0.0009 0.0004 0.0001  
Z -0.0010 0.0216 0.0187 0.0013 0.0005 0.0001  
AT. 120 H X -0.0009 0.0180 -0.0139 -0.0013 -0.0002 -0.0005  
Y -0.0032 0.0034 -0.0041 -0.0009 -0.0004 0.0001  
Z -0.0010 0.0216 -0.0187 -0.0013 -0.0005 0.0001  
AT. 121 C X -0.0065 0.0184 0.0188 0.0015 0.0001 -0.0001  
Y -0.0048 -0.0028 -0.0037 0.0007 -0.0004 -0.0007  
Z -0.0030 0.0159 0.0167 0.0012 0.0007 0.0006  
AT. 122 C X -0.0065 0.0184 -0.0188 -0.0015 -0.0001 -0.0001

Y -0.0048 -0.0028 0.0037 -0.0007 0.0004 -0.0007  
Z -0.0030 0.0159 -0.0167 -0.0012 -0.0007 0.0006  
AT. 123 H X 0.0021 0.0186 0.0239 0.0007 0.0004 0.0007  
Y 0.0055 -0.0084 -0.0068 -0.0001 0.0009 0.0006  
Z -0.0122 0.0214 0.0203 0.0019 -0.0005 -0.0005  
AT. 124 H X 0.0021 0.0186 -0.0239 -0.0007 -0.0004 0.0007  
Y 0.0055 -0.0084 0.0068 0.0001 -0.0009 0.0006  
Z -0.0122 0.0214 -0.0203 -0.0019 0.0005 -0.0005  
AT. 125 H X -0.0018 0.0147 0.0162 0.0006 0.0001 0.0000  
Y -0.0215 0.0034 -0.0030 0.0028 -0.0009 -0.0016  
Z -0.0059 0.0140 0.0133 0.0012 0.0004 0.0003  
AT. 126 H X -0.0018 0.0147 -0.0162 -0.0006 -0.0001 0.0000  
Y -0.0215 0.0034 0.0030 -0.0028 0.0009 -0.0016  
Z -0.0059 0.0140 -0.0133 -0.0012 -0.0004 0.0003  
AT. 127 C X -0.0108 0.0167 0.0149 0.0020 0.0001 -0.0003  
Y -0.0001 -0.0087 -0.0102 -0.0001 -0.0004 -0.0007  
Z 0.0066 0.0120 0.0141 -0.0001 0.0010 0.0009  
AT. 128 C X -0.0108 0.0167 -0.0149 -0.0020 -0.0001 -0.0003  
Y -0.0001 -0.0087 0.0102 0.0001 0.0004 -0.0007  
Z 0.0066 0.0120 -0.0141 0.0001 -0.0010 0.0009  
AT. 129 C X -0.0030 0.0114 0.0106 0.0005 0.0003 0.0007  
Y 0.0058 -0.0001 0.0005 -0.0010 -0.0000 0.0002  
Z 0.0018 -0.0035 -0.0050 0.0002 0.0002 -0.0003  
AT. 130 C X -0.0030 0.0114 -0.0106 -0.0005 -0.0003 0.0007  
Y 0.0058 -0.0001 -0.0005 0.0010 0.0000 0.0002  
Z 0.0018 -0.0035 0.0050 -0.0002 -0.0002 -0.0003  
AT. 131 H X -0.0004 0.0036 0.0002 0.0010 0.0006 0.0001  
Y 0.0194 0.0095 0.0171 -0.0041 0.0005 0.0028  
Z 0.0119 -0.0096 -0.0113 -0.0005 0.0008 0.0001  
AT. 132 H X -0.0004 0.0036 -0.0002 -0.0010 -0.0006 0.0001  
Y 0.0194 0.0095 -0.0171 0.0041 -0.0005 0.0028  
Z 0.0119 -0.0096 0.0113 0.0005 -0.0008 0.0001

AT. 133 H X 0.0015 0.0174 0.0230 -0.0018 0.0002 0.0024  
Y 0.0044 -0.0086 -0.0077 -0.0014 -0.0006 -0.0002  
Z -0.0025 -0.0198 -0.0242 0.0007 -0.0006 -0.0016

AT. 134 H X 0.0015 0.0174 -0.0230 0.0018 -0.0002 0.0024  
Y 0.0044 -0.0086 0.0077 0.0014 0.0006 -0.0002  
Z -0.0025 -0.0198 0.0242 -0.0007 0.0006 -0.0016

AT. 135 C X 0.0139 -0.0079 -0.0058 -0.0015 0.0008 0.0005  
Y 0.0067 -0.0035 -0.0030 -0.0007 0.0004 0.0004  
Z -0.0060 0.0063 0.0056 0.0007 -0.0001 -0.0000

AT. 136 C X 0.0139 -0.0079 0.0058 0.0015 -0.0008 0.0005  
Y 0.0067 -0.0035 0.0030 0.0007 -0.0004 0.0004  
Z -0.0060 0.0063 -0.0056 -0.0007 0.0001 -0.0000

AT. 137 H X 0.0098 0.0122 0.0148 0.0006 0.0013 0.0004  
Y 0.0076 0.0034 0.0035 -0.0003 0.0006 0.0005  
Z -0.0031 0.0106 0.0089 0.0006 -0.0001 0.0001

AT. 138 H X 0.0098 0.0122 -0.0148 -0.0006 -0.0013 0.0004  
Y 0.0076 0.0034 -0.0035 0.0003 -0.0006 0.0005  
Z -0.0031 0.0106 -0.0089 -0.0006 0.0001 0.0001

AT. 139 H X 0.0128 -0.0264 -0.0231 -0.0025 0.0001 0.0001  
Y 0.0089 -0.0136 -0.0135 -0.0013 0.0002 0.0001  
Z -0.0052 0.0335 0.0314 0.0023 0.0009 0.0007

AT. 140 H X 0.0128 -0.0264 0.0231 0.0025 -0.0001 0.0001  
Y 0.0089 -0.0136 0.0135 0.0013 -0.0002 0.0001  
Z -0.0052 0.0335 -0.0314 -0.0023 -0.0009 0.0007

AT. 141 H X 0.0180 0.0105 0.0107 -0.0008 0.0018 0.0011  
Y 0.0103 0.0015 0.0009 -0.0009 0.0007 0.0007  
Z -0.0079 0.0088 0.0085 0.0013 0.0001 -0.0001

AT. 142 H X 0.0180 0.0105 -0.0107 0.0008 -0.0018 0.0011  
Y 0.0103 0.0015 -0.0009 0.0009 -0.0007 0.0007  
Z -0.0079 0.0088 -0.0085 -0.0013 -0.0001 -0.0001

AT. 143 C X -0.0066 0.0270 0.0260 0.0022 0.0007 0.0003  
Y -0.0028 0.0118 0.0121 0.0009 0.0003 0.0002



Z -0.0036 0.0118 0.0122 0.0010 0.0003 0.0000  
AT. 144 C X -0.0066 0.0270 -0.0260 -0.0022 -0.0007 0.0003  
Y -0.0028 0.0118 -0.0121 -0.0009 -0.0003 0.0002  
Z -0.0036 0.0118 -0.0122 -0.0010 -0.0003 0.0000  
AT. 145 H X 0.0021 0.0245 0.0236 0.0014 0.0010 0.0005  
Y -0.0024 0.0203 0.0213 0.0013 0.0009 0.0012  
Z -0.0018 0.0020 0.0018 0.0003 -0.0004 -0.0009  
AT. 146 H X 0.0021 0.0245 -0.0236 -0.0014 -0.0010 0.0005  
Y -0.0024 0.0203 -0.0213 -0.0013 -0.0009 0.0012  
Z -0.0018 0.0020 -0.0018 -0.0003 0.0004 -0.0009  
AT. 147 H X -0.0099 0.0130 0.0108 0.0019 0.0001 -0.0001  
Y -0.0065 0.0188 0.0201 0.0016 0.0000 -0.0003  
Z -0.0102 -0.0049 -0.0057 0.0008 -0.0007 -0.0010  
AT. 148 H X -0.0099 0.0130 -0.0108 -0.0019 -0.0001 -0.0001  
Y -0.0065 0.0188 -0.0201 -0.0016 -0.0000 -0.0003  
Z -0.0102 -0.0049 0.0057 -0.0008 0.0007 -0.0010  
AT. 149 H X -0.0061 0.0505 0.0519 0.0032 0.0016 0.0010  
Y -0.0042 0.0244 0.0258 0.0016 0.0009 0.0011  
Z -0.0063 0.0208 0.0218 0.0017 0.0010 0.0011  
AT. 150 H X -0.0061 0.0505 -0.0519 -0.0032 -0.0016 0.0010  
Y -0.0042 0.0244 -0.0258 -0.0016 -0.0009 0.0011  
Z -0.0063 0.0208 -0.0218 -0.0017 -0.0010 0.0011  
AT. 151 C X -0.0016 -0.0171 -0.0171 -0.0006 -0.0006 -0.0006  
Y -0.0018 0.0025 0.0023 -0.0003 -0.0002 0.0002  
Z 0.0105 -0.0183 -0.0143 -0.0026 0.0000 0.0009  
AT. 152 C X -0.0016 -0.0171 0.0171 0.0006 0.0006 -0.0006  
Y -0.0018 0.0025 -0.0023 0.0003 0.0002 0.0002  
Z 0.0105 -0.0183 0.0143 0.0026 -0.0000 0.0009  
AT. 153 H X -0.0018 -0.0396 -0.0410 -0.0018 -0.0019 -0.0017  
Y -0.0036 0.0087 0.0076 -0.0008 -0.0006 0.0006  
Z 0.0075 0.0015 0.0046 -0.0028 -0.0002 0.0019  
AT. 154 H X -0.0018 -0.0396 0.0410 0.0018 0.0019 -0.0017

Y -0.0036 0.0087 -0.0076 0.0008 0.0006 0.0006  
Z 0.0075 0.0015 -0.0046 0.0028 0.0002 0.0019  
AT. 155 H X -0.0072 -0.0273 -0.0269 -0.0004 -0.0010 -0.0009  
Y -0.0042 0.0140 0.0140 -0.0008 -0.0004 0.0013  
Z 0.0110 -0.0340 -0.0301 -0.0021 0.0001 -0.0003  
AT. 156 H X -0.0072 -0.0273 0.0269 0.0004 0.0010 -0.0009  
Y -0.0042 0.0140 -0.0140 0.0008 0.0004 0.0013  
Z 0.0110 -0.0340 0.0301 0.0021 -0.0001 -0.0003  
AT. 157 O X 0.0000 0.0000 0.0000 0.0001 0.0004 -0.0000  
Y -0.0040 -0.0008 -0.0001 0.0050 -0.0017 -0.0031  
Z -0.0004 -0.0001 -0.0001 -0.0000 -0.0005 -0.0001  
AT. 158 O X 0.0000 0.0000 -0.0000 -0.0001 -0.0004 -0.0000  
Y -0.0040 -0.0008 0.0001 -0.0050 0.0017 -0.0031  
Z -0.0004 -0.0001 0.0001 0.0000 0.0005 -0.0001  
AT. 159 O X 0.0006 0.0005 0.0002 -0.0007 0.0005 0.0013  
Y 0.0013 -0.0001 0.0002 -0.0008 0.0005 0.0005  
Z 0.0005 0.0004 0.0002 -0.0006 -0.0005 0.0012  
AT. 160 O X 0.0006 0.0005 -0.0002 0.0007 -0.0005 0.0013  
Y 0.0013 -0.0001 -0.0002 0.0008 -0.0005 0.0005  
Z 0.0005 0.0004 -0.0002 0.0006 0.0005 0.0012  
AT. 161 H X -0.0064 -0.0003 0.0001 0.0054 -0.0029 -0.0004  
Y -0.0024 -0.0008 -0.0002 0.0038 -0.0016 -0.0042  
Z -0.0104 -0.0000 0.0003 0.0075 -0.0045 0.0026  
AT. 162 H X -0.0064 -0.0003 -0.0001 -0.0054 0.0029 -0.0004  
Y -0.0024 -0.0008 0.0002 -0.0038 0.0016 -0.0042  
Z -0.0104 -0.0000 -0.0003 -0.0075 0.0045 0.0026  
AT. 163 H X -0.0011 0.0007 -0.0001 -0.0003 -0.0012 0.0014  
Y -0.0091 0.0009 -0.0034 0.0015 -0.0011 -0.0077  
Z -0.0012 0.0005 -0.0005 -0.0003 -0.0001 -0.0006  
AT. 164 H X -0.0011 0.0007 0.0001 0.0003 0.0012 0.0014  
Y -0.0091 0.0009 0.0034 -0.0015 0.0011 -0.0077  
Z -0.0012 0.0005 0.0005 0.0003 0.0001 -0.0006

AT.165 O X 0.0008 -0.0003 0.0009 -0.0002 0.0002 0.0002  
Y 0.0007 -0.0002 -0.0001 -0.0003 0.0001 0.0004  
Z 0.0003 0.0004 0.0004 -0.0000 0.0001 -0.0000

AT.166 O X 0.0008 -0.0003 -0.0009 0.0002 -0.0002 0.0002  
Y 0.0007 -0.0002 0.0001 0.0003 -0.0001 0.0004  
Z 0.0003 0.0004 -0.0004 0.0000 -0.0001 -0.0000

AT.167 H X 0.0018 -0.0033 0.0013 -0.0005 -0.0005 0.0003  
Y -0.0006 0.0070 -0.0005 0.0000 0.0016 0.0006  
Z -0.0003 -0.0029 0.0004 0.0001 -0.0008 -0.0005

AT.168 H X 0.0018 -0.0033 -0.0013 0.0005 0.0005 0.0003  
Y -0.0006 0.0070 0.0005 -0.0000 -0.0016 0.0006  
Z -0.0003 -0.0029 -0.0004 -0.0001 0.0008 -0.0005

AT.169 O X -0.0004 0.0009 -0.0010 -0.0001 -0.0000 0.0000  
Y 0.0005 -0.0002 0.0011 -0.0001 0.0001 -0.0001  
Z 0.0002 0.0005 -0.0002 0.0001 0.0000 0.0000

AT.170 O X -0.0004 0.0009 0.0010 0.0001 0.0000 0.0000  
Y 0.0005 -0.0002 -0.0011 0.0001 -0.0001 -0.0001  
Z 0.0002 0.0005 0.0002 -0.0001 -0.0000 0.0000

AT.171 H X 0.0031 -0.0101 0.0072 0.0012 -0.0008 0.0017  
Y 0.0020 -0.0053 0.0050 0.0004 -0.0005 0.0006  
Z 0.0002 0.0004 0.0003 -0.0001 -0.0005 0.0003

AT.172 H X 0.0031 -0.0101 -0.0072 -0.0012 0.0008 0.0017  
Y 0.0020 -0.0053 -0.0050 -0.0004 0.0005 0.0006  
Z 0.0002 0.0004 -0.0003 0.0001 0.0005 0.0003

FREQ(CM\*\*-1) 500.29 502.10 502.78 503.37 531.04 532.44

AT. 11 X 0.0013 0.0001 0.0008 -0.0002 -0.0005 -0.0005  
Y 0.0008 0.0001 0.0005 -0.0002 -0.0002 -0.0002  
Z 0.0003 -0.0000 0.0002 0.0000 -0.0001 -0.0001

AT. 21 X -0.0013 -0.0001 0.0008 -0.0002 -0.0005 0.0005  
Y -0.0008 -0.0001 0.0005 -0.0002 -0.0002 0.0002

Z -0.0003 0.0000 0.0002 0.0000 -0.0001 0.0001  
AT. 3 I X 0.0018 0.0002 0.0021 -0.0004 -0.0005 -0.0004  
Y 0.0009 -0.0000 0.0011 -0.0001 -0.0005 -0.0005  
Z 0.0007 0.0001 0.0009 -0.0002 0.0001 0.0001  
AT. 4 I X -0.0018 -0.0002 0.0021 -0.0004 -0.0005 0.0004  
Y -0.0009 0.0000 0.0011 -0.0001 -0.0005 0.0005  
Z -0.0007 -0.0001 0.0009 -0.0002 0.0001 -0.0001  
AT. 5 O X 0.0052 0.0000 0.0065 -0.0009 0.0031 0.0022  
Y -0.0064 0.0001 -0.0077 0.0005 0.0000 0.0010  
Z 0.0174 0.0004 0.0167 -0.0024 -0.0130 -0.0127  
AT. 6 O X -0.0052 -0.0000 0.0065 -0.0009 0.0031 -0.0022  
Y 0.0064 -0.0001 -0.0077 0.0005 0.0000 -0.0010  
Z -0.0174 -0.0004 0.0167 -0.0024 -0.0130 0.0127  
AT. 7 O X 0.0003 0.0001 0.0018 0.0000 -0.0203 -0.0204  
Y 0.0096 0.0001 0.0096 -0.0015 0.0109 0.0107  
Z -0.0152 -0.0006 -0.0138 0.0021 -0.0064 -0.0051  
AT. 8 O X -0.0003 -0.0001 0.0018 0.0000 -0.0203 0.0204  
Y -0.0096 -0.0001 0.0096 -0.0015 0.0109 -0.0107  
Z 0.0152 0.0006 -0.0138 0.0021 -0.0064 0.0051  
AT. 9 N X 0.0018 0.0005 0.0000 -0.0006 -0.0040 -0.0003  
Y 0.0173 0.0004 0.0149 -0.0025 -0.0016 -0.0016  
Z -0.0025 0.0001 -0.0028 0.0002 0.0007 0.0014  
AT. 10 N X -0.0018 -0.0005 0.0000 -0.0006 -0.0040 0.0003  
Y -0.0173 -0.0004 0.0149 -0.0025 -0.0016 0.0016  
Z 0.0025 -0.0001 -0.0028 0.0002 0.0007 -0.0014  
AT. 11 N X 0.0032 -0.0000 0.0033 -0.0006 0.0214 0.0225  
Y 0.0140 0.0006 0.0144 -0.0025 0.0019 0.0025  
Z 0.0065 0.0004 0.0078 -0.0013 -0.0158 -0.0160  
AT. 12 N X -0.0032 0.0000 0.0033 -0.0006 0.0214 -0.0225  
Y -0.0140 -0.0006 0.0144 -0.0025 0.0019 -0.0025  
Z -0.0065 -0.0004 0.0078 -0.0013 -0.0158 0.0160  
AT. 13 C X -0.0086 -0.0003 -0.0064 0.0013 0.0061 0.0067

Y -0.0009 -0.0002 -0.0002 0.0003 -0.0047 -0.0043  
Z -0.0003 0.0002 -0.0010 -0.0002 -0.0048 -0.0026  
AT. 14 C X 0.0086 0.0003 -0.0064 0.0013 0.0061 -0.0067  
Y 0.0009 0.0002 -0.0002 0.0003 -0.0047 0.0043  
Z 0.0003 -0.0002 -0.0010 -0.0002 -0.0048 0.0026  
AT. 15 C X -0.0167 -0.0008 -0.0129 0.0029 0.0081 0.0078  
Y -0.0054 -0.0007 -0.0016 0.0014 -0.0033 -0.0041  
Z 0.0051 0.0001 0.0066 -0.0008 0.0026 0.0056  
AT. 16 C X 0.0167 0.0008 -0.0129 0.0029 0.0081 -0.0078  
Y 0.0054 0.0007 -0.0016 0.0014 -0.0033 0.0041  
Z -0.0051 -0.0001 0.0066 -0.0008 0.0026 -0.0056  
AT. 17 H X -0.0148 -0.0004 -0.0127 0.0025 0.0083 0.0088  
Y -0.0128 -0.0003 -0.0121 0.0021 -0.0126 -0.0105  
Z 0.0153 -0.0002 0.0200 -0.0018 0.0141 0.0134  
AT. 18 H X 0.0148 0.0004 -0.0127 0.0025 0.0083 -0.0088  
Y 0.0128 0.0003 -0.0121 0.0021 -0.0126 0.0105  
Z -0.0153 0.0002 0.0200 -0.0018 0.0141 -0.0134  
AT. 19 H X -0.0173 -0.0004 -0.0165 0.0026 0.0028 0.0029  
Y 0.0129 -0.0007 0.0193 -0.0011 0.0106 0.0045  
Z 0.0119 0.0003 0.0134 -0.0018 0.0066 0.0076  
AT. 20 H X 0.0173 0.0004 -0.0165 0.0026 0.0028 -0.0029  
Y -0.0129 0.0007 0.0193 -0.0011 0.0106 -0.0045  
Z -0.0119 -0.0003 0.0134 -0.0018 0.0066 -0.0076  
AT. 21 C X -0.0088 -0.0004 -0.0099 0.0017 0.0021 0.0023  
Y 0.0015 -0.0003 -0.0019 0.0003 0.0271 0.0266  
Z -0.0057 -0.0003 -0.0062 0.0013 -0.0125 -0.0132  
AT. 22 C X 0.0088 0.0004 -0.0099 0.0017 0.0021 -0.0023  
Y -0.0015 0.0003 -0.0019 0.0003 0.0271 -0.0266  
Z 0.0057 0.0003 -0.0062 0.0013 -0.0125 0.0132  
AT. 23 C X -0.0175 -0.0011 -0.0205 0.0036 0.0062 0.0064  
Y -0.0049 -0.0005 -0.0072 0.0016 0.0031 0.0017  
Z -0.0143 -0.0013 -0.0185 0.0037 0.0019 0.0006

AT. 24 C X 0.0175 0.0011 -0.0205 0.0036 0.0062 -0.0064  
Y 0.0049 0.0005 -0.0072 0.0016 0.0031 -0.0017  
Z 0.0143 0.0013 -0.0185 0.0037 0.0019 -0.0006

AT. 25 H X -0.0145 -0.0010 -0.0158 0.0030 0.0006 0.0007  
Y -0.0041 -0.0003 -0.0051 0.0014 -0.0080 -0.0091  
Z -0.0165 -0.0024 -0.0269 0.0046 0.0730 0.0702

AT. 26 H X 0.0145 0.0010 -0.0158 0.0030 0.0006 -0.0007  
Y 0.0041 0.0003 -0.0051 0.0014 -0.0080 0.0091  
Z 0.0165 0.0024 -0.0269 0.0046 0.0730 -0.0702

AT. 27 H X -0.0133 -0.0015 -0.0157 0.0024 0.0201 0.0211  
Y 0.0049 0.0008 0.0097 -0.0009 -0.0622 -0.0620  
Z -0.0101 -0.0005 -0.0105 0.0026 -0.0352 -0.0356

AT. 28 H X 0.0133 0.0015 -0.0157 0.0024 0.0201 -0.0211  
Y -0.0049 -0.0008 0.0097 -0.0009 -0.0622 0.0620  
Z 0.0101 0.0005 -0.0105 0.0026 -0.0352 0.0356

AT. 29 C X -0.0027 0.0002 -0.0028 0.0002 -0.0024 -0.0013  
Y 0.0012 -0.0003 0.0008 0.0005 -0.0109 -0.0126  
Z -0.0105 -0.0003 -0.0112 0.0017 -0.0090 -0.0089

AT. 30 C X 0.0027 -0.0002 -0.0028 0.0002 -0.0024 0.0013  
Y -0.0012 0.0003 0.0008 0.0005 -0.0109 0.0126  
Z 0.0105 0.0003 -0.0112 0.0017 -0.0090 0.0089

AT. 31 H X -0.0048 -0.0004 -0.0030 0.0010 0.0032 0.0037  
Y -0.0285 -0.0006 -0.0285 0.0045 -0.0236 -0.0243  
Z -0.0556 -0.0010 -0.0546 0.0081 -0.0243 -0.0230

AT. 32 H X 0.0048 0.0004 -0.0030 0.0010 0.0032 -0.0037  
Y 0.0285 0.0006 -0.0285 0.0045 -0.0236 0.0243  
Z 0.0556 0.0010 -0.0546 0.0081 -0.0243 0.0230

AT. 33 H X 0.0093 0.0002 0.0081 -0.0010 -0.0047 -0.0025  
Y 0.0458 0.0005 0.0446 -0.0059 0.0072 0.0043  
Z -0.0216 -0.0007 -0.0226 0.0036 -0.0188 -0.0175

AT. 34 H X -0.0093 -0.0002 0.0081 -0.0010 -0.0047 0.0025  
Y -0.0458 -0.0005 0.0446 -0.0059 0.0072 -0.0043

Z 0.0216 0.0007 -0.0226 0.0036 -0.0188 0.0175  
AT. 35 C X -0.0058 0.0001 -0.0051 0.0005 -0.0002 -0.0031  
Y -0.0222 -0.0008 -0.0212 0.0040 -0.0148 -0.0134  
Z 0.0163 0.0003 0.0144 -0.0021 -0.0015 -0.0034  
AT. 36 C X 0.0058 -0.0001 -0.0051 0.0005 -0.0002 0.0031  
Y 0.0222 0.0008 -0.0212 0.0040 -0.0148 0.0134  
Z -0.0163 -0.0003 0.0144 -0.0021 -0.0015 0.0034  
AT. 37 C X -0.0122 -0.0003 -0.0112 0.0016 0.0182 0.0174  
Y -0.0106 -0.0002 -0.0095 0.0016 -0.0090 -0.0082  
Z 0.0140 0.0004 0.0135 -0.0021 0.0026 0.0024  
AT. 38 C X 0.0122 0.0003 -0.0112 0.0016 0.0182 -0.0174  
Y 0.0106 0.0002 -0.0095 0.0016 -0.0090 0.0082  
Z -0.0140 -0.0004 0.0135 -0.0021 0.0026 -0.0024  
AT. 39 H X -0.0055 -0.0002 -0.0047 0.0003 0.0491 0.0508  
Y -0.0035 0.0004 -0.0004 -0.0004 -0.0050 -0.0038  
Z 0.0155 0.0001 0.0139 -0.0021 0.0218 0.0231  
AT. 40 H X 0.0055 0.0002 -0.0047 0.0003 0.0491 -0.0508  
Y 0.0035 -0.0004 -0.0004 -0.0004 -0.0050 0.0038  
Z -0.0155 -0.0001 0.0139 -0.0021 0.0218 -0.0231  
AT. 41 H X -0.0170 -0.0006 -0.0161 0.0027 -0.0067 -0.0091  
Y -0.0165 -0.0005 -0.0157 0.0028 -0.0085 -0.0093  
Z 0.0232 0.0008 0.0230 -0.0041 0.0280 0.0307  
AT. 42 H X 0.0170 0.0006 -0.0161 0.0027 -0.0067 0.0091  
Y 0.0165 0.0005 -0.0157 0.0028 -0.0085 0.0093  
Z -0.0232 -0.0008 0.0230 -0.0041 0.0280 -0.0307  
AT. 43 C X 0.0000 -0.0002 -0.0014 0.0003 0.0090 0.0091  
Y -0.0048 0.0001 -0.0046 0.0003 -0.0112 -0.0140  
Z 0.0075 0.0005 0.0086 -0.0015 -0.0103 -0.0100  
AT. 44 C X -0.0000 0.0002 -0.0014 0.0003 0.0090 -0.0091  
Y 0.0048 -0.0001 -0.0046 0.0003 -0.0112 0.0140  
Z -0.0075 -0.0005 0.0086 -0.0015 -0.0103 0.0100  
AT. 45 H X 0.0016 -0.0001 -0.0016 0.0003 0.0081 0.0067

Y -0.0359 -0.0009 -0.0333 0.0050 -0.0056 -0.0074  
Z 0.0369 0.0014 0.0368 -0.0061 -0.0156 -0.0152  
AT. 46 H X -0.0016 0.0001 -0.0016 0.0003 0.0081 -0.0067  
Y 0.0359 0.0009 -0.0333 0.0050 -0.0056 0.0074  
Z -0.0369 -0.0014 0.0368 -0.0061 -0.0156 0.0152  
AT. 47 H X 0.0095 0.0001 0.0072 -0.0013 0.0148 0.0136  
Y 0.0229 0.0009 0.0206 -0.0039 -0.0107 -0.0149  
Z 0.0226 0.0009 0.0223 -0.0035 -0.0177 -0.0169  
AT. 48 H X -0.0095 -0.0001 0.0072 -0.0013 0.0148 -0.0136  
Y -0.0229 -0.0009 0.0206 -0.0039 -0.0107 0.0149  
Z -0.0226 -0.0009 0.0223 -0.0035 -0.0177 0.0169  
AT. 49 C X -0.0075 -0.0005 -0.0076 0.0018 -0.0146 -0.0143  
Y -0.0175 -0.0003 -0.0177 0.0024 0.0059 0.0034  
Z -0.0156 -0.0003 -0.0134 0.0020 0.0166 0.0179  
AT. 50 C X 0.0075 0.0005 -0.0076 0.0018 -0.0146 0.0143  
Y 0.0175 0.0003 -0.0177 0.0024 0.0059 -0.0034  
Z 0.0156 0.0003 -0.0134 0.0020 0.0166 -0.0179  
AT. 51 C X -0.0157 -0.0004 -0.0162 0.0026 -0.0131 -0.0112  
Y -0.0017 0.0000 -0.0008 0.0003 0.0055 0.0061  
Z -0.0156 -0.0006 -0.0154 0.0023 0.0053 0.0033  
AT. 52 C X 0.0157 0.0004 -0.0162 0.0026 -0.0131 0.0112  
Y 0.0017 -0.0000 -0.0008 0.0003 0.0055 -0.0061  
Z 0.0156 0.0006 -0.0154 0.0023 0.0053 -0.0033  
AT. 53 H X -0.0028 0.0003 -0.0011 0.0004 -0.0041 0.0037  
Y 0.0148 0.0005 0.0185 -0.0021 0.0123 0.0183  
Z -0.0192 -0.0014 -0.0196 0.0036 -0.0032 -0.0091  
AT. 54 H X 0.0028 -0.0003 -0.0011 0.0004 -0.0041 -0.0037  
Y -0.0148 -0.0005 0.0185 -0.0021 0.0123 -0.0183  
Z 0.0192 0.0014 -0.0196 0.0036 -0.0032 0.0091  
AT. 55 H X -0.0328 -0.0013 -0.0365 0.0054 -0.0251 -0.0311  
Y -0.0030 0.0000 -0.0011 0.0005 0.0042 0.0059  
Z -0.0283 -0.0011 -0.0290 0.0046 -0.0048 -0.0107



AT. 56 H X 0.0328 0.0013 -0.0365 0.0054 -0.0251 0.0311  
Y 0.0030 -0.0000 -0.0011 0.0005 0.0042 -0.0059  
Z 0.0283 0.0011 -0.0290 0.0046 -0.0048 0.0107

AT. 57 C X 0.0188 0.0008 0.0178 -0.0034 0.0140 0.0082  
Y -0.0110 -0.0007 -0.0103 0.0024 -0.0077 -0.0042  
Z 0.0084 0.0002 0.0090 -0.0015 0.0037 0.0023

AT. 58 C X -0.0188 -0.0008 0.0178 -0.0034 0.0140 -0.0082  
Y 0.0110 0.0007 -0.0103 0.0024 -0.0077 0.0042  
Z -0.0084 -0.0002 0.0090 -0.0015 0.0037 -0.0023

AT. 59 H X 0.0455 0.0013 0.0421 -0.0074 0.0301 0.0232  
Y -0.0206 -0.0005 -0.0180 0.0033 -0.0119 -0.0076  
Z 0.0130 0.0009 0.0149 -0.0030 0.0088 0.0077

AT. 60 H X -0.0455 -0.0013 0.0421 -0.0074 0.0301 -0.0232  
Y 0.0206 0.0005 -0.0180 0.0033 -0.0119 0.0076  
Z -0.0130 -0.0009 0.0149 -0.0030 0.0088 -0.0077

AT. 61 H X 0.0183 0.0006 0.0177 -0.0032 0.0185 0.0129  
Y 0.0055 -0.0005 0.0027 0.0004 0.0004 0.0022  
Z -0.0000 -0.0000 0.0027 -0.0004 0.0033 0.0028

AT. 62 H X -0.0183 -0.0006 0.0177 -0.0032 0.0185 -0.0129  
Y -0.0055 0.0005 0.0027 0.0004 0.0004 -0.0022  
Z 0.0000 0.0000 0.0027 -0.0004 0.0033 -0.0028

AT. 63 H X 0.0148 0.0011 0.0137 -0.0032 0.0075 0.0020  
Y 0.0040 -0.0005 0.0052 -0.0001 0.0053 0.0092  
Z -0.0003 -0.0003 -0.0002 0.0004 -0.0009 -0.0031

AT. 64 H X -0.0148 -0.0011 0.0137 -0.0032 0.0075 -0.0020  
Y -0.0040 0.0005 0.0052 -0.0001 0.0053 -0.0092  
Z 0.0003 0.0003 -0.0002 0.0004 -0.0009 0.0031

AT. 65 C X 0.0140 0.0001 0.0129 -0.0014 -0.0269 -0.0264  
Y -0.0067 0.0002 -0.0055 0.0005 0.0127 0.0125  
Z -0.0156 -0.0001 -0.0138 0.0015 0.0308 0.0308

AT. 66 C X -0.0140 -0.0001 0.0129 -0.0014 -0.0269 0.0264  
Y 0.0067 -0.0002 -0.0055 0.0005 0.0127 -0.0125

Z 0.0156 0.0001 -0.0138 0.0015 0.0308 -0.0308  
AT. 67 H X 0.0337 0.0010 0.0307 -0.0044 -0.0310 -0.0292  
Y -0.0085 0.0002 -0.0030 0.0002 0.0118 0.0111  
Z -0.0305 -0.0009 -0.0312 0.0043 0.0352 0.0346  
AT. 68 H X -0.0337 -0.0010 0.0307 -0.0044 -0.0310 0.0292  
Y 0.0085 -0.0002 -0.0030 0.0002 0.0118 -0.0111  
Z 0.0305 0.0009 -0.0312 0.0043 0.0352 -0.0346  
AT. 69 H X 0.0166 0.0002 0.0132 -0.0014 -0.0302 -0.0276  
Y 0.0019 0.0006 -0.0015 -0.0004 0.0107 0.0125  
Z -0.0075 0.0002 -0.0083 0.0003 0.0342 0.0329  
AT. 70 H X -0.0166 -0.0002 0.0132 -0.0014 -0.0302 0.0276  
Y -0.0019 -0.0006 -0.0015 -0.0004 0.0107 -0.0125  
Z 0.0075 -0.0002 -0.0083 0.0003 0.0342 -0.0329  
AT. 71 H X 0.0139 0.0001 0.0144 -0.0017 -0.0234 -0.0251  
Y 0.0043 0.0007 0.0068 -0.0013 0.0069 0.0086  
Z -0.0009 0.0006 0.0039 -0.0012 0.0258 0.0267  
AT. 72 H X -0.0139 -0.0001 0.0144 -0.0017 -0.0234 0.0251  
Y -0.0043 -0.0007 0.0068 -0.0013 0.0069 -0.0086  
Z 0.0009 -0.0006 0.0039 -0.0012 0.0258 -0.0267  
AT. 73 C X 0.0080 0.0002 0.0096 -0.0012 0.0009 0.0012  
Y 0.0148 0.0004 0.0149 -0.0023 0.0050 0.0048  
Z 0.0055 -0.0001 0.0052 -0.0004 0.0038 0.0042  
AT. 74 C X -0.0080 -0.0002 0.0096 -0.0012 0.0009 -0.0012  
Y -0.0148 -0.0004 0.0149 -0.0023 0.0050 -0.0048  
Z -0.0055 0.0001 0.0052 -0.0004 0.0038 -0.0042  
AT. 75 H X 0.0349 0.0009 0.0376 -0.0055 0.0183 0.0223  
Y 0.0534 0.0015 0.0512 -0.0082 0.0143 0.0147  
Z 0.0751 0.0019 0.0726 -0.0111 0.0282 0.0320  
AT. 76 H X -0.0349 -0.0009 0.0376 -0.0055 0.0183 -0.0223  
Y -0.0534 -0.0015 0.0512 -0.0082 0.0143 -0.0147  
Z -0.0751 -0.0019 0.0726 -0.0111 0.0282 -0.0320  
AT. 77 H X 0.0164 0.0005 0.0175 -0.0027 0.0144 0.0170

Y 0.0718 0.0020 0.0705 -0.0110 0.0174 0.0194  
Z -0.0551 -0.0019 -0.0536 0.0090 -0.0202 -0.0239  
AT. 78 H X -0.0164 -0.0005 0.0175 -0.0027 0.0144 -0.0170  
Y -0.0718 -0.0020 0.0705 -0.0110 0.0174 -0.0194  
Z 0.0551 0.0019 -0.0536 0.0090 -0.0202 0.0239  
AT. 79 I X -0.0000 0.0014 -0.0002 -0.0012 -0.0000 -0.0001  
Y -0.0000 -0.0017 0.0001 0.0016 -0.0000 0.0000  
Z 0.0000 -0.0002 0.0001 0.0002 0.0000 0.0000  
AT. 80 I X 0.0000 -0.0014 -0.0002 -0.0012 -0.0000 0.0001  
Y 0.0000 0.0017 0.0001 0.0016 -0.0000 -0.0000  
Z -0.0000 0.0002 0.0001 0.0002 0.0000 -0.0000  
AT. 81 I X 0.0000 0.0012 -0.0002 -0.0013 -0.0000 -0.0000  
Y -0.0000 -0.0012 0.0001 0.0012 0.0001 0.0001  
Z -0.0000 -0.0007 0.0001 0.0007 0.0000 -0.0000  
AT. 82 I X -0.0000 -0.0012 -0.0002 -0.0013 -0.0000 0.0000  
Y 0.0000 0.0012 0.0001 0.0012 0.0001 -0.0001  
Z 0.0000 0.0007 0.0001 0.0007 0.0000 0.0000  
AT. 83 O X 0.0004 0.0039 0.0000 -0.0041 -0.0003 0.0008  
Y -0.0003 0.0007 -0.0002 -0.0009 -0.0001 -0.0002  
Z 0.0009 -0.0172 0.0030 0.0170 0.0005 0.0017  
AT. 84 O X -0.0004 -0.0039 0.0000 -0.0041 -0.0003 -0.0008  
Y 0.0003 -0.0007 -0.0002 -0.0009 -0.0001 0.0002  
Z -0.0009 0.0172 0.0030 0.0170 0.0005 -0.0017  
AT. 85 O X 0.0000 -0.0009 0.0000 0.0009 -0.0010 -0.0028  
Y 0.0004 -0.0109 0.0020 0.0111 -0.0002 -0.0013  
Z -0.0007 0.0123 -0.0026 -0.0127 -0.0002 0.0007  
AT. 86 O X -0.0000 0.0009 0.0000 0.0009 -0.0010 0.0028  
Y -0.0004 0.0109 0.0020 0.0111 -0.0002 0.0013  
Z 0.0007 -0.0123 -0.0026 -0.0127 -0.0002 -0.0007  
AT. 87 N X -0.0001 -0.0036 0.0004 0.0040 0.0006 -0.0002  
Y 0.0008 -0.0168 0.0025 0.0159 -0.0003 -0.0001  
Z 0.0002 0.0038 -0.0001 -0.0036 -0.0005 -0.0001

AT. 88 N X 0.0001 0.0036 0.0004 0.0040 0.0006 0.0002  
Y -0.0008 0.0168 0.0025 0.0159 -0.0003 0.0001  
Z -0.0002 -0.0038 -0.0001 -0.0036 -0.0005 0.0001

AT. 89 N X 0.0002 -0.0015 0.0004 0.0009 0.0011 0.0031  
Y 0.0002 -0.0107 0.0017 0.0110 -0.0005 -0.0010  
Z -0.0003 -0.0050 0.0003 0.0049 0.0004 0.0015

AT. 90 N X -0.0002 0.0015 0.0004 0.0009 0.0011 -0.0031  
Y -0.0002 0.0107 0.0017 0.0110 -0.0005 0.0010  
Z 0.0003 0.0050 0.0003 0.0049 0.0004 -0.0015

AT. 91 C X 0.0005 -0.0083 0.0015 0.0079 0.0003 0.0012  
Y 0.0003 0.0075 -0.0002 -0.0070 -0.0001 0.0004  
Z 0.0004 0.0021 0.0002 -0.0022 -0.0004 0.0003

AT. 92 C X -0.0005 0.0083 0.0015 0.0079 0.0003 -0.0012  
Y -0.0003 -0.0075 -0.0002 -0.0070 -0.0001 -0.0004  
Z -0.0004 -0.0021 0.0002 -0.0022 -0.0004 -0.0003

AT. 93 C X 0.0003 -0.0169 0.0023 0.0158 0.0004 0.0011  
Y 0.0003 0.0162 -0.0012 -0.0146 0.0005 0.0004  
Z -0.0002 -0.0075 0.0004 0.0062 -0.0004 -0.0008

AT. 94 C X -0.0003 0.0169 0.0023 0.0158 0.0004 -0.0011  
Y -0.0003 -0.0162 -0.0012 -0.0146 0.0005 -0.0004  
Z 0.0002 0.0075 0.0004 0.0062 -0.0004 0.0008

AT. 95 H X 0.0007 -0.0137 0.0027 0.0132 0.0006 0.0014  
Y 0.0005 0.0237 -0.0018 -0.0222 -0.0002 0.0011  
Z -0.0011 -0.0252 0.0011 0.0232 0.0005 -0.0023

AT. 96 H X -0.0007 0.0137 0.0027 0.0132 0.0006 -0.0014  
Y -0.0005 -0.0237 -0.0018 -0.0222 -0.0002 -0.0011  
Z 0.0011 0.0252 0.0011 0.0232 0.0005 0.0023

AT. 97 H X -0.0002 -0.0244 0.0027 0.0233 0.0009 -0.0002  
Y -0.0006 -0.0100 0.0007 0.0116 0.0013 -0.0010  
Z -0.0003 -0.0111 0.0007 0.0100 -0.0004 -0.0008

AT. 98 H X 0.0002 0.0244 0.0027 0.0233 0.0009 0.0002  
Y 0.0006 0.0100 0.0007 0.0116 0.0013 0.0010

Z 0.0003 0.0111 0.0007 0.0100 -0.0004 0.0008  
AT. 99 C X 0.0000 -0.0079 0.0011 0.0080 -0.0000 -0.0006  
Y 0.0007 -0.0018 0.0009 0.0016 -0.0009 -0.0030  
Z -0.0001 0.0056 -0.0011 -0.0064 0.0004 0.0017  
AT. 100 C X -0.0000 0.0079 0.0011 0.0080 -0.0000 0.0006  
Y -0.0007 0.0018 0.0009 0.0016 -0.0009 0.0030  
Z 0.0001 -0.0056 -0.0011 -0.0064 0.0004 -0.0017  
AT. 101 C X -0.0003 -0.0129 0.0015 0.0140 0.0001 0.0001  
Y -0.0000 0.0079 -0.0011 -0.0081 0.0003 0.0008  
Z 0.0007 0.0111 -0.0012 -0.0127 -0.0000 0.0000  
AT. 102 C X 0.0003 0.0129 0.0015 0.0140 0.0001 -0.0001  
Y 0.0000 -0.0079 -0.0011 -0.0081 0.0003 -0.0008  
Z -0.0007 -0.0111 -0.0012 -0.0127 -0.0000 -0.0000  
AT. 103 H X 0.0002 -0.0120 0.0019 0.0130 -0.0003 -0.0011  
Y -0.0003 0.0075 -0.0013 -0.0076 0.0006 0.0014  
Z 0.0020 0.0064 0.0005 -0.0090 -0.0028 -0.0087  
AT. 104 H X -0.0002 0.0120 0.0019 0.0130 -0.0003 0.0011  
Y 0.0003 -0.0075 -0.0013 -0.0076 0.0006 -0.0014  
Z -0.0020 -0.0064 0.0005 -0.0090 -0.0028 0.0087  
AT. 105 H X -0.0008 -0.0074 0.0002 0.0082 0.0013 0.0041  
Y -0.0008 0.0038 -0.0010 -0.0028 0.0026 0.0076  
Z 0.0003 0.0106 -0.0013 -0.0116 0.0011 0.0033  
AT. 106 H X 0.0008 0.0074 0.0002 0.0082 0.0013 -0.0041  
Y 0.0008 -0.0038 -0.0010 -0.0028 0.0026 -0.0076  
Z -0.0003 -0.0106 -0.0013 -0.0116 0.0011 -0.0033  
AT. 107 C X -0.0003 -0.0009 -0.0005 0.0008 0.0004 0.0003  
Y 0.0001 -0.0025 0.0002 0.0022 0.0008 0.0017  
Z -0.0002 0.0126 -0.0016 -0.0123 0.0001 0.0011  
AT. 108 C X 0.0003 0.0009 -0.0005 0.0008 0.0004 -0.0003  
Y -0.0001 0.0025 0.0002 0.0022 0.0008 -0.0017  
Z 0.0002 -0.0126 -0.0016 -0.0123 0.0001 -0.0011  
AT. 109 H X -0.0014 0.0174 -0.0039 -0.0179 0.0003 0.0013

Y -0.0012 0.0277 -0.0048 -0.0280 0.0008 0.0028  
Z -0.0021 0.0595 -0.0094 -0.0590 0.0002 0.0028  
AT. 110 H X 0.0014 -0.0174 -0.0039 -0.0179 0.0003 -0.0013  
Y 0.0012 -0.0277 -0.0048 -0.0280 0.0008 -0.0028  
Z 0.0021 -0.0595 -0.0094 -0.0590 0.0002 -0.0028  
AT. 111 H X -0.0004 -0.0024 -0.0002 0.0025 0.0004 -0.0003  
Y 0.0021 -0.0527 0.0084 0.0522 0.0006 -0.0003  
Z -0.0005 0.0245 -0.0036 -0.0244 0.0002 0.0023  
AT. 112 H X 0.0004 0.0024 -0.0002 0.0025 0.0004 0.0003  
Y -0.0021 0.0527 0.0084 0.0522 0.0006 0.0003  
Z 0.0005 -0.0245 -0.0036 -0.0244 0.0002 -0.0023  
AT. 113 C X 0.0005 -0.0039 0.0005 0.0031 -0.0005 0.0003  
Y -0.0007 0.0225 -0.0037 -0.0226 0.0004 0.0019  
Z 0.0008 -0.0174 0.0032 0.0178 0.0007 0.0005  
AT. 114 C X -0.0005 0.0039 0.0005 0.0031 -0.0005 -0.0003  
Y 0.0007 -0.0225 -0.0037 -0.0226 0.0004 -0.0019  
Z -0.0008 0.0174 0.0032 0.0178 0.0007 -0.0005  
AT. 115 C X 0.0007 -0.0106 0.0018 0.0098 0.0006 0.0025  
Y -0.0007 0.0166 -0.0027 -0.0164 0.0001 0.0006  
Z 0.0003 -0.0121 0.0019 0.0123 -0.0002 -0.0008  
AT. 116 C X -0.0007 0.0106 0.0018 0.0098 0.0006 -0.0025  
Y 0.0007 -0.0166 -0.0027 -0.0164 0.0001 -0.0006  
Z -0.0003 0.0121 0.0019 0.0123 -0.0002 0.0008  
AT. 117 H X 0.0005 -0.0073 0.0011 0.0063 0.0019 0.0061  
Y -0.0011 0.0137 -0.0023 -0.0133 -0.0007 -0.0016  
Z 0.0007 -0.0147 0.0025 0.0149 -0.0014 -0.0041  
AT. 118 H X -0.0005 0.0073 0.0011 0.0063 0.0019 -0.0061  
Y 0.0011 -0.0137 -0.0023 -0.0133 -0.0007 0.0016  
Z -0.0007 0.0147 0.0025 0.0149 -0.0014 0.0041  
AT. 119 H X 0.0007 -0.0118 0.0022 0.0112 -0.0007 -0.0013  
Y -0.0008 0.0215 -0.0034 -0.0212 0.0008 0.0016  
Z 0.0003 -0.0171 0.0026 0.0173 -0.0015 -0.0039

AT.120 H X -0.0007 0.0118 0.0022 0.0112 -0.0007 0.0013  
Y 0.0008 -0.0215 -0.0034 -0.0212 0.0008 -0.0016  
Z -0.0003 0.0171 0.0026 0.0173 -0.0015 0.0039

AT.121 C X -0.0005 0.0008 -0.0003 -0.0009 0.0006 0.0018  
Y -0.0002 0.0066 -0.0008 -0.0060 0.0008 0.0013  
Z 0.0001 -0.0041 0.0006 0.0037 0.0007 0.0015

AT.122 C X 0.0005 -0.0008 -0.0003 -0.0009 0.0006 -0.0018  
Y 0.0002 -0.0066 -0.0008 -0.0060 0.0008 -0.0013  
Z -0.0001 0.0041 0.0006 0.0037 0.0007 -0.0015

AT.123 H X -0.0016 0.0074 -0.0026 -0.0072 0.0003 0.0017  
Y -0.0019 0.0327 -0.0064 -0.0318 0.0006 0.0007  
Z 0.0017 -0.0303 0.0060 0.0296 0.0010 0.0022

AT.124 H X 0.0016 -0.0074 -0.0026 -0.0072 0.0003 -0.0017  
Y 0.0019 -0.0327 -0.0064 -0.0318 0.0006 -0.0007  
Z -0.0017 0.0303 0.0060 0.0296 0.0010 -0.0022

AT.125 H X -0.0001 -0.0008 0.0001 0.0002 0.0009 0.0029  
Y 0.0017 -0.0191 0.0050 0.0198 0.0014 0.0012  
Z 0.0016 -0.0188 0.0040 0.0177 0.0013 0.0027

AT.126 H X 0.0001 0.0008 0.0001 0.0002 0.0009 -0.0029  
Y -0.0017 0.0191 0.0050 0.0198 0.0014 -0.0012  
Z -0.0016 0.0188 0.0040 0.0177 0.0013 -0.0027

AT.127 C X -0.0002 0.0026 -0.0000 -0.0017 -0.0005 -0.0024  
Y -0.0006 0.0179 -0.0028 -0.0172 0.0000 -0.0002  
Z -0.0010 0.0162 -0.0032 -0.0159 -0.0009 -0.0020

AT.128 C X 0.0002 -0.0026 -0.0000 -0.0017 -0.0005 0.0024  
Y 0.0006 -0.0179 -0.0028 -0.0172 0.0000 0.0002  
Z 0.0010 -0.0162 -0.0032 -0.0159 -0.0009 0.0020

AT.129 C X -0.0001 -0.0103 0.0016 0.0109 0.0001 -0.0018  
Y -0.0004 0.0057 -0.0014 -0.0062 -0.0004 -0.0004  
Z -0.0005 0.0172 -0.0026 -0.0165 -0.0002 -0.0005

AT.130 C X 0.0001 0.0103 0.0016 0.0109 0.0001 0.0018  
Y 0.0004 -0.0057 -0.0014 -0.0062 -0.0004 0.0004

Z 0.0005 -0.0172 -0.0026 -0.0165 -0.0002 0.0005  
AT. 131 H X -0.0001 -0.0036 0.0007 0.0046 0.0010 -0.0007  
Y -0.0005 -0.0150 0.0005 0.0130 -0.0015 -0.0019  
Z -0.0006 0.0165 -0.0030 -0.0161 0.0005 0.0004  
AT. 132 H X 0.0001 0.0036 0.0007 0.0046 0.0010 0.0007  
Y 0.0005 0.0150 0.0005 0.0130 -0.0015 0.0019  
Z 0.0006 -0.0165 -0.0030 -0.0161 0.0005 -0.0004  
AT. 133 H X 0.0001 -0.0230 0.0030 0.0225 -0.0010 -0.0028  
Y -0.0005 0.0112 -0.0020 -0.0115 -0.0000 0.0003  
Z -0.0006 0.0318 -0.0042 -0.0303 0.0010 0.0012  
AT. 134 H X -0.0001 0.0230 0.0030 0.0225 -0.0010 0.0028  
Y 0.0005 -0.0112 -0.0020 -0.0115 -0.0000 -0.0003  
Z 0.0006 -0.0318 -0.0042 -0.0303 0.0010 -0.0012  
AT. 135 C X -0.0003 0.0170 -0.0033 -0.0183 -0.0008 0.0013  
Y -0.0000 0.0034 -0.0009 -0.0037 -0.0003 -0.0000  
Z 0.0001 -0.0106 0.0019 0.0114 0.0006 -0.0004  
AT. 136 C X 0.0003 -0.0170 -0.0033 -0.0183 -0.0008 -0.0013  
Y 0.0000 -0.0034 -0.0009 -0.0037 -0.0003 0.0000  
Z -0.0001 0.0106 0.0019 0.0114 0.0006 0.0004  
AT. 137 H X -0.0012 0.0451 -0.0079 -0.0466 -0.0003 0.0031  
Y -0.0003 0.0027 -0.0011 -0.0030 -0.0004 -0.0005  
Z 0.0001 -0.0222 0.0033 0.0231 0.0002 -0.0017  
AT. 138 H X 0.0012 -0.0451 -0.0079 -0.0466 -0.0003 -0.0031  
Y 0.0003 -0.0027 -0.0011 -0.0030 -0.0004 0.0005  
Z -0.0001 0.0222 0.0033 0.0231 0.0002 0.0017  
AT. 139 H X 0.0005 0.0111 -0.0018 -0.0123 -0.0007 0.0017  
Y 0.0001 -0.0106 0.0015 0.0102 -0.0005 -0.0009  
Z -0.0008 0.0007 -0.0006 -0.0001 0.0006 -0.0007  
AT. 140 H X -0.0005 -0.0111 -0.0018 -0.0123 -0.0007 -0.0017  
Y -0.0001 0.0106 0.0015 0.0102 -0.0005 0.0009  
Z 0.0008 -0.0007 -0.0006 -0.0001 0.0006 0.0007  
AT. 141 H X -0.0006 0.0123 -0.0029 -0.0140 -0.0012 -0.0001



Y 0.0003 -0.0109 0.0010 0.0105 -0.0008 -0.0017  
Z -0.0003 0.0020 0.0002 -0.0014 0.0010 0.0007  
AT. 142 H X 0.0006 -0.0123 -0.0029 -0.0140 -0.0012 0.0001  
Y -0.0003 0.0109 0.0010 0.0105 -0.0008 0.0017  
Z 0.0003 -0.0020 0.0002 -0.0014 0.0010 -0.0007  
AT. 143 C X -0.0012 0.0196 -0.0032 -0.0184 -0.0014 -0.0047  
Y -0.0003 0.0025 -0.0004 -0.0022 -0.0001 -0.0003  
Z -0.0007 0.0135 -0.0020 -0.0121 -0.0010 -0.0034  
AT. 144 C X 0.0012 -0.0196 -0.0032 -0.0184 -0.0014 0.0047  
Y 0.0003 -0.0025 -0.0004 -0.0022 -0.0001 0.0003  
Z 0.0007 -0.0135 -0.0020 -0.0121 -0.0010 0.0034  
AT. 145 H X -0.0024 0.0408 -0.0071 -0.0382 -0.0019 -0.0056  
Y -0.0003 -0.0024 -0.0000 0.0026 0.0000 0.0002  
Z -0.0009 0.0242 -0.0034 -0.0225 -0.0013 -0.0041  
AT. 146 H X 0.0024 -0.0408 -0.0071 -0.0382 -0.0019 0.0056  
Y 0.0003 0.0024 -0.0000 0.0026 0.0000 -0.0002  
Z 0.0009 -0.0242 -0.0034 -0.0225 -0.0013 0.0041  
AT. 147 H X -0.0008 0.0151 -0.0020 -0.0133 -0.0014 -0.0049  
Y -0.0002 -0.0035 0.0005 0.0025 0.0001 0.0000  
Z -0.0000 0.0038 0.0002 -0.0022 -0.0009 -0.0035  
AT. 148 H X 0.0008 -0.0151 -0.0020 -0.0133 -0.0014 0.0049  
Y 0.0002 0.0035 0.0005 0.0025 0.0001 -0.0000  
Z 0.0000 -0.0038 0.0002 -0.0022 -0.0009 0.0035  
AT. 149 H X -0.0015 0.0160 -0.0032 -0.0158 -0.0012 -0.0038  
Y -0.0001 -0.0075 0.0010 0.0073 0.0001 0.0006  
Z -0.0003 -0.0013 0.0003 0.0026 -0.0008 -0.0024  
AT. 150 H X 0.0015 -0.0160 -0.0032 -0.0158 -0.0012 0.0038  
Y 0.0001 0.0075 0.0010 0.0073 0.0001 -0.0006  
Z 0.0003 0.0013 0.0003 0.0026 -0.0008 0.0024  
AT. 151 C X 0.0003 0.0006 0.0003 -0.0003 -0.0001 -0.0001  
Y 0.0008 -0.0171 0.0030 0.0169 -0.0001 -0.0007  
Z 0.0003 -0.0087 0.0011 0.0084 -0.0001 -0.0004

AT.152 C X -0.0003 -0.0006 0.0003 -0.0003 -0.0001 0.0001  
Y -0.0008 0.0171 0.0030 0.0169 -0.0001 0.0007  
Z -0.0003 0.0087 0.0011 0.0084 -0.0001 0.0004

AT.153 H X 0.0006 0.0005 0.0005 0.0001 0.0005 0.0011  
Y 0.0022 -0.0593 0.0100 0.0582 -0.0005 -0.0024  
Z 0.0025 -0.0765 0.0122 0.0746 -0.0009 -0.0039

AT.154 H X -0.0006 -0.0005 0.0005 0.0001 0.0005 -0.0011  
Y -0.0022 0.0593 0.0100 0.0582 -0.0005 0.0024  
Z -0.0025 0.0765 0.0122 0.0746 -0.0009 0.0039

AT.155 H X 0.0006 0.0010 0.0007 -0.0004 0.0011 0.0023  
Y 0.0028 -0.0760 0.0127 0.0745 -0.0004 -0.0029  
Z -0.0018 0.0532 -0.0089 -0.0521 0.0006 0.0027

AT.156 H X -0.0006 -0.0010 0.0007 -0.0004 0.0011 -0.0023  
Y -0.0028 0.0760 0.0127 0.0745 -0.0004 0.0029  
Z 0.0018 -0.0532 -0.0089 -0.0521 0.0006 -0.0027

AT.157 O X 0.0003 0.0000 0.0002 0.0001 0.0001 -0.0001  
Y 0.0018 -0.0000 0.0020 0.0001 -0.0002 0.0003  
Z -0.0002 0.0002 0.0006 -0.0000 0.0011 -0.0002

AT.158 O X -0.0003 -0.0000 0.0002 0.0001 0.0001 0.0001  
Y -0.0018 0.0000 0.0020 0.0001 -0.0002 -0.0003  
Z 0.0002 -0.0002 0.0006 -0.0000 0.0011 0.0002

AT.159 O X -0.0007 -0.0002 0.0007 -0.0003 0.0004 -0.0009  
Y -0.0001 0.0004 -0.0009 -0.0003 -0.0006 0.0010  
Z -0.0019 -0.0001 0.0014 -0.0005 0.0014 -0.0011

AT.160 O X 0.0007 0.0002 0.0007 -0.0003 0.0004 0.0009  
Y 0.0001 -0.0004 -0.0009 -0.0003 -0.0006 -0.0010  
Z 0.0019 0.0001 0.0014 -0.0005 0.0014 0.0011

AT.161 H X 0.0033 -0.0005 0.0005 0.0004 -0.0036 -0.0006  
Y 0.0001 0.0001 0.0017 0.0002 0.0024 0.0012  
Z 0.0058 -0.0008 0.0013 0.0001 -0.0074 -0.0043

AT.162 H X -0.0033 0.0005 0.0005 0.0004 -0.0036 0.0006  
Y -0.0001 -0.0001 0.0017 0.0002 0.0024 -0.0012

Z -0.0058 0.0008 0.0013 0.0001 -0.0074 0.0043  
AT.163 H X -0.0026 -0.0006 0.0021 -0.0005 0.0013 -0.0015  
Y -0.0011 -0.0004 -0.0016 -0.0020 0.0054 -0.0056  
Z -0.0018 -0.0001 0.0013 -0.0010 0.0031 -0.0031  
AT.164 H X 0.0026 0.0006 0.0021 -0.0005 0.0013 0.0015  
Y 0.0011 0.0004 -0.0016 -0.0020 0.0054 0.0056  
Z 0.0018 0.0001 0.0013 -0.0010 0.0031 0.0031  
AT.165 O X 0.0001 0.0005 -0.0004 -0.0010 -0.0001 0.0001  
Y 0.0000 -0.0004 0.0001 0.0005 0.0002 -0.0001  
Z -0.0003 0.0002 0.0002 0.0007 -0.0001 -0.0001  
AT.166 O X -0.0001 -0.0005 -0.0004 -0.0010 -0.0001 -0.0001  
Y -0.0000 0.0004 0.0001 0.0005 0.0002 0.0001  
Z 0.0003 -0.0002 0.0002 0.0007 -0.0001 0.0001  
AT.167 H X 0.0009 -0.0035 0.0016 0.0016 0.0007 0.0014  
Y -0.0019 0.0086 -0.0039 -0.0050 -0.0012 -0.0034  
Z 0.0008 -0.0013 0.0016 0.0009 0.0004 0.0013  
AT.168 H X -0.0009 0.0035 0.0016 0.0016 0.0007 -0.0014  
Y 0.0019 -0.0086 -0.0039 -0.0050 -0.0012 0.0034  
Z -0.0008 0.0013 0.0016 0.0009 0.0004 -0.0013  
AT.169 O X -0.0000 0.0006 0.0000 0.0009 -0.0000 0.0000  
Y 0.0007 -0.0020 -0.0011 -0.0013 -0.0004 0.0002  
Z -0.0002 0.0003 0.0006 0.0011 0.0002 -0.0001  
AT.170 O X 0.0000 -0.0006 0.0000 0.0009 -0.0000 -0.0000  
Y -0.0007 0.0020 -0.0011 -0.0013 -0.0004 -0.0002  
Z 0.0002 -0.0003 0.0006 0.0011 0.0002 0.0001  
AT.171 H X -0.0042 -0.0024 0.0045 -0.0014 -0.0003 0.0020  
Y -0.0012 -0.0042 0.0007 -0.0036 -0.0007 0.0013  
Z 0.0004 -0.0008 -0.0003 -0.0000 -0.0003 0.0005  
AT.172 H X 0.0042 0.0024 0.0045 -0.0014 -0.0003 -0.0020  
Y 0.0012 0.0042 0.0007 -0.0036 -0.0007 -0.0013  
Z -0.0004 0.0008 -0.0003 -0.0000 -0.0003 -0.0005

FREQ(CM\*\*-1) 535.59 535.95 546.11 546.36 546.75 547.18

AT. 1 I X 0.0001 0.0000 0.0000 -0.0004 -0.0001 0.0002

Y 0.0000 0.0000 0.0001 -0.0003 -0.0001 0.0004

Z -0.0000 -0.0000 -0.0001 0.0003 0.0001 -0.0005

AT. 2 I X -0.0001 0.0000 0.0000 0.0004 0.0001 0.0002

Y -0.0000 0.0000 0.0001 0.0003 0.0001 0.0004

Z 0.0000 -0.0000 -0.0001 -0.0003 -0.0001 -0.0005

AT. 3 I X 0.0001 0.0000 -0.0001 0.0003 0.0000 -0.0003

Y 0.0001 0.0000 -0.0000 0.0001 0.0000 -0.0001

Z -0.0000 -0.0000 -0.0000 0.0000 -0.0000 -0.0000

AT. 4 I X -0.0001 0.0000 -0.0001 -0.0003 -0.0000 -0.0003

Y -0.0001 0.0000 -0.0000 -0.0001 -0.0000 -0.0001

Z 0.0000 -0.0000 -0.0000 -0.0000 0.0000 -0.0000

AT. 5 O X -0.0004 -0.0005 -0.0017 0.0142 0.0041 -0.0142

Y 0.0002 0.0005 0.0018 -0.0119 -0.0031 0.0123

Z 0.0015 0.0005 0.0000 -0.0046 -0.0016 0.0037

AT. 6 O X 0.0004 -0.0005 -0.0017 -0.0142 -0.0041 -0.0142

Y -0.0002 0.0005 0.0018 0.0119 0.0031 0.0123

Z -0.0015 0.0005 0.0000 0.0046 0.0016 0.0037

AT. 7 O X 0.0028 0.0007 -0.0010 0.0005 -0.0000 -0.0033

Y -0.0014 -0.0005 0.0001 0.0035 0.0012 -0.0019

Z 0.0008 0.0005 0.0008 -0.0078 -0.0021 0.0068

AT. 8 O X -0.0028 0.0007 -0.0010 -0.0005 0.0000 -0.0033

Y 0.0014 -0.0005 0.0001 -0.0035 -0.0012 -0.0019

Z -0.0008 0.0005 0.0008 0.0078 0.0021 0.0068

AT. 9 N X 0.0004 0.0011 0.0037 -0.0306 -0.0089 0.0315

Y 0.0003 0.0003 0.0007 -0.0059 -0.0020 0.0067

Z -0.0000 0.0004 0.0016 -0.0123 -0.0035 0.0129

AT. 10 N X -0.0004 0.0011 0.0037 0.0306 0.0089 0.0315

Y -0.0003 0.0003 0.0007 0.0059 0.0020 0.0067

Z 0.0000 0.0004 0.0016 0.0123 0.0035 0.0129

AT. 11 N X -0.0028 -0.0006 0.0015 -0.0057 -0.0014 0.0084  
Y -0.0006 -0.0002 0.0005 -0.0029 -0.0009 0.0034  
Z 0.0021 0.0005 -0.0010 0.0018 0.0002 -0.0038

AT. 12 N X 0.0028 -0.0006 0.0015 0.0057 0.0014 0.0084  
Y 0.0006 -0.0002 0.0005 0.0029 0.0009 0.0034  
Z -0.0021 0.0005 -0.0010 -0.0018 -0.0002 -0.0038

AT. 13 C X -0.0008 -0.0001 0.0006 -0.0039 -0.0010 0.0044  
Y 0.0006 0.0002 0.0004 -0.0047 -0.0012 0.0039  
Z 0.0006 0.0009 0.0028 -0.0230 -0.0065 0.0233

AT. 14 C X 0.0008 -0.0001 0.0006 0.0039 0.0010 0.0044  
Y -0.0006 0.0002 0.0004 0.0047 0.0012 0.0039  
Z -0.0006 0.0009 0.0028 0.0230 0.0065 0.0233

AT. 15 C X -0.0012 -0.0005 -0.0001 0.0017 0.0005 -0.0010  
Y 0.0002 -0.0005 -0.0016 0.0108 0.0031 -0.0119  
Z -0.0006 0.0001 0.0009 -0.0070 -0.0021 0.0078

AT. 16 C X 0.0012 -0.0005 -0.0001 -0.0017 -0.0005 -0.0010  
Y -0.0002 -0.0005 -0.0016 -0.0108 -0.0031 -0.0119  
Z 0.0006 0.0001 0.0009 0.0070 0.0021 0.0078

AT. 17 H X -0.0011 -0.0002 0.0001 -0.0006 -0.0002 0.0011  
Y 0.0016 0.0013 0.0033 -0.0305 -0.0087 0.0294  
Z -0.0024 -0.0020 -0.0052 0.0442 0.0125 -0.0435

AT. 18 H X 0.0011 -0.0002 0.0001 0.0006 0.0002 0.0011  
Y -0.0016 0.0013 0.0033 0.0305 0.0087 0.0294  
Z 0.0024 -0.0020 -0.0052 -0.0442 -0.0125 -0.0435

AT. 19 H X -0.0003 0.0002 0.0022 -0.0151 -0.0042 0.0158  
Y -0.0019 -0.0028 -0.0079 0.0650 0.0186 -0.0661  
Z -0.0011 -0.0006 -0.0008 0.0089 0.0025 -0.0079

AT. 20 H X 0.0003 0.0002 0.0022 0.0151 0.0042 0.0158  
Y 0.0019 -0.0028 -0.0079 -0.0650 -0.0186 -0.0661  
Z 0.0011 -0.0006 -0.0008 -0.0089 -0.0025 -0.0079

AT. 21 C X -0.0003 0.0000 0.0008 -0.0056 -0.0016 0.0059  
Y -0.0035 -0.0009 0.0013 -0.0001 0.0001 0.0041

Z 0.0019 0.0004 -0.0007 0.0020 0.0005 -0.0034  
AT. 22 C X 0.0003 0.0000 0.0008 0.0056 0.0016 0.0059  
Y 0.0035 -0.0009 0.0013 0.0001 -0.0001 0.0041  
Z -0.0019 0.0004 -0.0007 -0.0020 -0.0005 -0.0034  
AT. 23 C X -0.0012 -0.0003 0.0016 -0.0061 -0.0013 0.0069  
Y -0.0005 -0.0005 0.0003 0.0009 0.0008 -0.0013  
Z -0.0002 -0.0003 0.0001 0.0060 0.0022 -0.0049  
AT. 24 C X 0.0012 -0.0003 0.0016 0.0061 0.0013 0.0069  
Y 0.0005 -0.0005 0.0003 -0.0009 -0.0008 -0.0013  
Z 0.0002 -0.0003 0.0001 -0.0060 -0.0022 -0.0049  
AT. 25 H X -0.0004 -0.0001 0.0014 -0.0060 -0.0011 0.0054  
Y 0.0010 -0.0002 -0.0004 0.0016 0.0009 -0.0035  
Z -0.0095 -0.0025 0.0041 0.0016 0.0016 0.0082  
AT. 26 H X 0.0004 -0.0001 0.0014 0.0060 0.0011 0.0054  
Y -0.0010 -0.0002 -0.0004 -0.0016 -0.0009 -0.0035  
Z 0.0095 -0.0025 0.0041 -0.0016 -0.0016 0.0082  
AT. 27 H X -0.0033 -0.0005 0.0023 -0.0050 -0.0012 0.0074  
Y 0.0081 0.0018 -0.0034 0.0044 0.0008 -0.0129  
Z 0.0047 0.0009 -0.0020 0.0077 0.0022 -0.0114  
AT. 28 H X 0.0033 -0.0005 0.0023 0.0050 0.0012 0.0074  
Y -0.0081 0.0018 -0.0034 -0.0044 -0.0008 -0.0129  
Z -0.0047 0.0009 -0.0020 -0.0077 -0.0022 -0.0114  
AT. 29 C X 0.0003 0.0004 0.0012 -0.0098 -0.0028 0.0096  
Y 0.0015 -0.0002 -0.0024 0.0148 0.0040 -0.0164  
Z 0.0012 0.0004 0.0001 -0.0027 -0.0006 0.0015  
AT. 30 C X -0.0003 0.0004 0.0012 0.0098 0.0028 0.0096  
Y -0.0015 -0.0002 -0.0024 -0.0148 -0.0040 -0.0164  
Z -0.0012 0.0004 0.0001 0.0027 0.0006 0.0015  
AT. 31 H X -0.0003 -0.0001 0.0008 -0.0044 -0.0010 0.0045  
Y 0.0032 0.0005 -0.0026 0.0115 0.0031 -0.0153  
Z 0.0033 0.0011 -0.0005 -0.0048 -0.0013 0.0007  
AT. 32 H X 0.0003 -0.0001 0.0008 0.0044 0.0010 0.0045

Y -0.0032 0.0005 -0.0026 -0.0115 -0.0031 -0.0153  
Z -0.0033 0.0011 -0.0005 0.0048 0.0013 0.0007  
AT. 33 H X 0.0006 0.0005 0.0019 -0.0143 -0.0039 0.0142  
Y -0.0007 -0.0009 -0.0017 0.0157 0.0042 -0.0140  
Z 0.0024 0.0007 0.0003 -0.0056 -0.0013 0.0030  
AT. 34 H X -0.0006 0.0005 0.0019 0.0143 0.0039 0.0142  
Y 0.0007 -0.0009 -0.0017 -0.0157 -0.0042 -0.0140  
Z -0.0024 0.0007 0.0003 0.0056 0.0013 0.0030  
AT. 35 C X 0.0002 -0.0005 -0.0026 0.0194 0.0056 -0.0206  
Y 0.0018 0.0005 0.0001 -0.0045 -0.0012 0.0025  
Z 0.0003 -0.0003 -0.0014 0.0115 0.0032 -0.0116  
AT. 36 C X -0.0002 -0.0005 -0.0026 -0.0194 -0.0056 -0.0206  
Y -0.0018 0.0005 0.0001 0.0045 0.0012 0.0025  
Z -0.0003 -0.0003 -0.0014 -0.0115 -0.0032 -0.0116  
AT. 37 C X -0.0021 -0.0009 -0.0006 0.0094 0.0030 -0.0081  
Y 0.0009 0.0002 -0.0002 -0.0016 -0.0006 0.0002  
Z -0.0004 -0.0000 0.0001 -0.0007 -0.0003 0.0012  
AT. 38 C X 0.0021 -0.0009 -0.0006 -0.0094 -0.0030 -0.0081  
Y -0.0009 0.0002 -0.0002 0.0016 0.0006 0.0002  
Z 0.0004 -0.0000 0.0001 0.0007 0.0003 0.0012  
AT. 39 H X -0.0063 -0.0011 0.0034 -0.0119 -0.0029 0.0180  
Y 0.0004 0.0004 0.0006 -0.0083 -0.0027 0.0076  
Z -0.0029 -0.0003 0.0025 -0.0121 -0.0034 0.0156  
AT. 40 H X 0.0063 -0.0011 0.0034 0.0119 0.0029 0.0180  
Y -0.0004 0.0004 0.0006 0.0083 0.0027 0.0076  
Z 0.0029 -0.0003 0.0025 0.0121 0.0034 0.0156  
AT. 41 H X 0.0011 -0.0006 -0.0036 0.0247 0.0071 -0.0270  
Y 0.0009 -0.0002 -0.0013 0.0085 0.0024 -0.0102  
Z -0.0037 0.0001 0.0042 -0.0252 -0.0072 0.0298  
AT. 42 H X -0.0011 -0.0006 -0.0036 -0.0247 -0.0071 -0.0270  
Y -0.0009 -0.0002 -0.0013 -0.0085 -0.0024 -0.0102  
Z 0.0037 0.0001 0.0042 0.0252 0.0072 0.0298

AT. 43 C X -0.0010 -0.0001 0.0006 -0.0013 -0.0003 0.0027  
Y 0.0017 0.0001 -0.0025 0.0161 0.0045 -0.0184  
Z 0.0013 0.0006 -0.0003 -0.0022 -0.0010 0.0008

AT. 44 C X 0.0010 -0.0001 0.0006 0.0013 0.0003 0.0027  
Y -0.0017 0.0001 -0.0025 -0.0161 -0.0045 -0.0184  
Z -0.0013 0.0006 -0.0003 0.0022 0.0010 0.0008

AT. 45 H X -0.0006 0.0002 0.0007 -0.0003 -0.0000 0.0017  
Y 0.0006 -0.0009 -0.0033 0.0234 0.0071 -0.0261  
Z 0.0019 0.0011 0.0005 -0.0100 -0.0036 0.0091

AT. 46 H X 0.0006 0.0002 0.0007 0.0003 0.0000 0.0017  
Y -0.0006 -0.0009 -0.0033 -0.0234 -0.0071 -0.0261  
Z -0.0019 0.0011 0.0005 0.0100 0.0036 0.0091

AT. 47 H X -0.0013 0.0002 0.0006 -0.0004 -0.0002 0.0028  
Y 0.0022 0.0009 -0.0018 0.0107 0.0025 -0.0119  
Z 0.0022 0.0011 0.0005 -0.0095 -0.0033 0.0081

AT. 48 H X 0.0013 0.0002 0.0006 0.0004 0.0002 0.0028  
Y -0.0022 0.0009 -0.0018 -0.0107 -0.0025 -0.0119  
Z -0.0022 0.0011 0.0005 0.0095 0.0033 0.0081

AT. 49 C X 0.0019 0.0003 -0.0007 0.0030 0.0009 -0.0047  
Y -0.0002 -0.0003 -0.0015 0.0143 0.0043 -0.0144  
Z -0.0024 -0.0006 0.0009 -0.0030 -0.0006 0.0045

AT. 50 C X -0.0019 0.0003 -0.0007 -0.0030 -0.0009 -0.0047  
Y 0.0002 -0.0003 -0.0015 -0.0143 -0.0043 -0.0144  
Z 0.0024 -0.0006 0.0009 0.0030 0.0006 0.0045

AT. 51 C X 0.0016 0.0008 0.0008 -0.0103 -0.0030 0.0090  
Y -0.0006 -0.0002 0.0002 0.0002 0.0002 0.0003  
Z -0.0004 -0.0004 -0.0011 0.0107 0.0032 -0.0105

AT. 52 C X -0.0016 0.0008 0.0008 0.0103 0.0030 0.0090  
Y 0.0006 -0.0002 0.0002 -0.0002 -0.0002 0.0003  
Z 0.0004 -0.0004 -0.0011 -0.0107 -0.0032 -0.0105

AT. 53 H X -0.0001 0.0012 0.0056 -0.0446 -0.0125 0.0454  
Y -0.0021 -0.0002 0.0038 -0.0247 -0.0067 0.0271



Z 0.0009 -0.0010 -0.0055 0.0430 0.0123 -0.0445  
AT. 54 H X 0.0001 0.0012 0.0056 0.0446 0.0125 0.0454  
Y 0.0021 -0.0002 0.0038 0.0247 0.0067 0.0271  
Z -0.0009 -0.0010 -0.0055 -0.0430 -0.0123 -0.0445  
AT. 55 H X 0.0041 0.0004 -0.0055 0.0348 0.0096 -0.0389  
Y -0.0005 -0.0000 0.0010 -0.0064 -0.0015 0.0068  
Z 0.0015 -0.0005 -0.0043 0.0325 0.0093 -0.0343  
AT. 56 H X -0.0041 0.0004 -0.0055 -0.0348 -0.0096 -0.0389  
Y 0.0005 -0.0000 0.0010 0.0064 0.0015 0.0068  
Z -0.0015 -0.0005 -0.0043 -0.0325 -0.0093 -0.0343  
AT. 57 C X -0.0016 -0.0013 -0.0036 0.0327 0.0094 -0.0322  
Y 0.0007 0.0007 0.0024 -0.0195 -0.0056 0.0193  
Z -0.0007 -0.0007 -0.0020 0.0161 0.0044 -0.0160  
AT. 58 C X 0.0016 -0.0013 -0.0036 -0.0327 -0.0094 -0.0322  
Y -0.0007 0.0007 0.0024 0.0195 0.0056 0.0193  
Z 0.0007 -0.0007 -0.0020 -0.0161 -0.0044 -0.0160  
AT. 59 H X -0.0035 -0.0018 -0.0036 0.0342 0.0092 -0.0308  
Y 0.0013 0.0010 0.0023 -0.0208 -0.0059 0.0201  
Z -0.0011 -0.0006 -0.0021 0.0155 0.0038 -0.0140  
AT. 60 H X 0.0035 -0.0018 -0.0036 -0.0342 -0.0092 -0.0308  
Y -0.0013 0.0010 0.0023 0.0208 0.0059 0.0201  
Z 0.0011 -0.0006 -0.0021 -0.0155 -0.0038 -0.0140  
AT. 61 H X -0.0024 -0.0017 -0.0037 0.0337 0.0097 -0.0332  
Y -0.0002 0.0003 0.0022 -0.0180 -0.0054 0.0185  
Z -0.0009 -0.0009 -0.0019 0.0165 0.0048 -0.0168  
AT. 62 H X 0.0024 -0.0017 -0.0037 -0.0337 -0.0097 -0.0332  
Y 0.0002 0.0003 0.0022 0.0180 0.0054 0.0185  
Z 0.0009 -0.0009 -0.0019 -0.0165 -0.0048 -0.0168  
AT. 63 H X -0.0003 -0.0007 -0.0039 0.0318 0.0088 -0.0315  
Y -0.0012 0.0004 0.0027 -0.0195 -0.0058 0.0213  
Z -0.0003 -0.0010 -0.0020 0.0169 0.0052 -0.0184  
AT. 64 H X 0.0003 -0.0007 -0.0039 -0.0318 -0.0088 -0.0315

Y 0.0012 0.0004 0.0027 0.0195 0.0058 0.0213  
Z 0.0003 -0.0010 -0.0020 -0.0169 -0.0052 -0.0184  
AT. 65 C X 0.0034 0.0009 -0.0004 -0.0043 -0.0016 0.0019  
Y -0.0017 -0.0004 0.0002 0.0018 0.0006 -0.0008  
Z -0.0040 -0.0010 0.0007 0.0023 0.0010 0.0004  
AT. 66 C X -0.0034 0.0009 -0.0004 0.0043 0.0016 0.0019  
Y 0.0017 -0.0004 0.0002 -0.0018 -0.0006 -0.0008  
Z 0.0040 -0.0010 0.0007 -0.0023 -0.0010 0.0004  
AT. 67 H X 0.0036 0.0013 0.0005 -0.0140 -0.0046 0.0114  
Y -0.0015 -0.0005 0.0004 0.0012 0.0005 0.0011  
Z -0.0043 -0.0013 -0.0002 0.0111 0.0037 -0.0094  
AT. 68 H X -0.0036 0.0013 0.0005 0.0140 0.0046 0.0114  
Y 0.0015 -0.0005 0.0004 -0.0012 -0.0005 0.0011  
Z 0.0043 -0.0013 -0.0002 -0.0111 -0.0037 -0.0094  
AT. 69 H X 0.0035 0.0010 -0.0001 -0.0094 -0.0032 0.0053  
Y -0.0016 -0.0002 0.0003 -0.0033 -0.0010 0.0021  
Z -0.0040 -0.0009 0.0006 0.0047 0.0017 -0.0017  
AT. 70 H X -0.0035 0.0010 -0.0001 0.0094 0.0032 0.0053  
Y 0.0016 -0.0002 0.0003 0.0033 0.0010 0.0021  
Z 0.0040 -0.0009 0.0006 -0.0047 -0.0017 -0.0017  
AT. 71 H X 0.0033 0.0008 -0.0006 0.0012 0.0002 -0.0014  
Y -0.0014 -0.0002 0.0009 -0.0080 -0.0024 0.0084  
Z -0.0036 -0.0007 0.0016 -0.0068 -0.0019 0.0103  
AT. 72 H X -0.0033 0.0008 -0.0006 -0.0012 -0.0002 -0.0014  
Y 0.0014 -0.0002 0.0009 0.0080 0.0024 0.0084  
Z 0.0036 -0.0007 0.0016 0.0068 0.0019 0.0103  
AT. 73 C X -0.0003 -0.0001 0.0002 -0.0010 -0.0004 0.0013  
Y -0.0006 0.0001 0.0008 -0.0046 -0.0015 0.0059  
Z -0.0007 -0.0004 -0.0000 0.0020 0.0007 -0.0015  
AT. 74 C X 0.0003 -0.0001 0.0002 0.0010 0.0004 0.0013  
Y 0.0006 0.0001 0.0008 0.0046 0.0015 0.0059  
Z 0.0007 -0.0004 -0.0000 -0.0020 -0.0007 -0.0015

AT. 75 H X -0.0032 -0.0001 0.0040 -0.0276 -0.0084 0.0312  
Y -0.0020 0.0001 0.0021 -0.0122 -0.0039 0.0154  
Z -0.0046 -0.0004 0.0043 -0.0264 -0.0081 0.0317

AT. 76 H X 0.0032 -0.0001 0.0040 0.0276 0.0084 0.0312  
Y 0.0020 0.0001 0.0021 0.0122 0.0039 0.0154  
Z 0.0046 -0.0004 0.0043 0.0264 0.0081 0.0317

AT. 77 H X -0.0022 0.0000 0.0025 -0.0161 -0.0047 0.0182  
Y -0.0028 0.0001 0.0036 -0.0240 -0.0075 0.0283  
Z 0.0030 -0.0005 -0.0048 0.0340 0.0103 -0.0379

AT. 78 H X 0.0022 0.0000 0.0025 0.0161 0.0047 0.0182  
Y 0.0028 0.0001 0.0036 0.0240 0.0075 0.0283  
Z -0.0030 -0.0005 -0.0048 -0.0340 -0.0103 -0.0379

AT. 79 I X -0.0004 -0.0004 -0.0000 -0.0000 -0.0000 0.0001  
Y 0.0003 0.0003 0.0000 -0.0000 0.0000 -0.0000  
Z 0.0000 0.0000 -0.0006 0.0002 -0.0006 0.0001

AT. 80 I X 0.0004 -0.0004 -0.0000 0.0000 0.0000 0.0001  
Y -0.0003 0.0003 0.0000 0.0000 -0.0000 -0.0000  
Z -0.0000 0.0000 -0.0006 -0.0002 0.0006 0.0001

AT. 81 I X 0.0001 0.0000 0.0002 -0.0000 0.0002 -0.0000  
Y 0.0001 0.0001 -0.0001 0.0000 -0.0002 0.0001  
Z -0.0003 -0.0002 0.0000 -0.0000 0.0000 0.0000

AT. 82 I X -0.0001 0.0000 0.0002 0.0000 -0.0002 -0.0000  
Y -0.0001 0.0001 -0.0001 -0.0000 0.0002 0.0001  
Z 0.0003 -0.0002 0.0000 0.0000 -0.0000 0.0000

AT. 83 O X 0.0058 0.0050 0.0192 -0.0050 0.0182 -0.0026  
Y -0.0001 -0.0017 0.0022 -0.0007 0.0018 -0.0001  
Z 0.0123 0.0130 0.0012 -0.0003 0.0013 -0.0004

AT. 84 O X -0.0058 0.0050 0.0192 0.0050 -0.0182 -0.0026  
Y 0.0001 -0.0017 0.0022 0.0007 -0.0018 -0.0001  
Z -0.0123 0.0130 0.0012 0.0003 -0.0013 -0.0004

AT. 85 O X -0.0213 -0.0220 0.0026 -0.0010 0.0030 0.0002  
Y -0.0111 -0.0109 -0.0026 0.0005 -0.0025 0.0008

Z 0.0071 0.0069 0.0049 -0.0012 0.0050 -0.0010  
AT. 86 O X 0.0213 -0.0220 0.0026 0.0010 -0.0030 0.0002  
Y 0.0111 -0.0109 -0.0026 -0.0005 0.0025 0.0008  
Z -0.0071 0.0069 0.0049 0.0012 -0.0050 -0.0010  
AT. 87 N X -0.0023 -0.0017 -0.0232 0.0064 -0.0230 0.0030  
Y 0.0005 0.0004 0.0152 -0.0038 0.0141 -0.0022  
Z 0.0002 -0.0003 0.0178 -0.0049 0.0171 -0.0022  
AT. 88 N X 0.0023 -0.0017 -0.0232 -0.0064 0.0230 0.0030  
Y -0.0005 0.0004 0.0152 0.0038 -0.0141 -0.0022  
Z -0.0002 -0.0003 0.0178 0.0049 -0.0171 -0.0022  
AT. 89 N X 0.0228 0.0232 -0.0081 0.0026 -0.0084 0.0005  
Y -0.0068 -0.0064 0.0068 -0.0020 0.0064 -0.0005  
Z 0.0132 0.0136 -0.0006 0.0004 -0.0010 -0.0004  
AT. 90 N X -0.0228 0.0232 -0.0081 -0.0026 0.0084 0.0005  
Y 0.0068 -0.0064 0.0068 0.0020 -0.0064 -0.0005  
Z -0.0132 0.0136 -0.0006 -0.0004 0.0010 -0.0004  
AT. 91 C X 0.0080 0.0084 0.0001 0.0000 0.0000 -0.0002  
Y 0.0039 0.0028 0.0137 -0.0038 0.0134 -0.0016  
Z 0.0037 0.0031 0.0245 -0.0068 0.0235 -0.0030  
AT. 92 C X -0.0080 0.0084 0.0001 -0.0000 -0.0000 -0.0002  
Y -0.0039 0.0028 0.0137 0.0038 -0.0134 -0.0016  
Z -0.0037 0.0031 0.0245 0.0068 -0.0235 -0.0030  
AT. 93 C X 0.0091 0.0087 -0.0036 0.0009 -0.0032 0.0003  
Y 0.0006 0.0007 -0.0055 0.0016 -0.0052 0.0009  
Z -0.0038 -0.0046 0.0084 -0.0022 0.0073 -0.0010  
AT. 94 C X -0.0091 0.0087 -0.0036 -0.0009 0.0032 0.0003  
Y -0.0006 0.0007 -0.0055 -0.0016 0.0052 0.0009  
Z 0.0038 -0.0046 0.0084 0.0022 -0.0073 -0.0010  
AT. 95 H X 0.0105 0.0097 -0.0013 0.0002 -0.0004 0.0001  
Y 0.0070 0.0062 0.0263 -0.0071 0.0255 -0.0033  
Z -0.0168 -0.0155 -0.0527 0.0147 -0.0526 0.0069  
AT. 96 H X -0.0105 0.0097 -0.0013 -0.0002 0.0004 0.0001

Y -0.0070 0.0062 0.0263 0.0071 -0.0255 -0.0033  
Z 0.0168 -0.0155 -0.0527 -0.0147 0.0526 0.0069  
AT. 97 H X -0.0005 0.0016 -0.0349 0.0094 -0.0330 0.0043  
Y -0.0118 -0.0094 -0.0659 0.0177 -0.0631 0.0086  
Z -0.0041 -0.0051 0.0032 -0.0009 0.0023 -0.0003  
AT. 98 H X 0.0005 0.0016 -0.0349 -0.0094 0.0330 0.0043  
Y 0.0118 -0.0094 -0.0659 -0.0177 0.0631 0.0086  
Z 0.0041 -0.0051 0.0032 0.0009 -0.0023 -0.0003  
AT. 99 C X -0.0050 -0.0049 -0.0045 0.0013 -0.0045 0.0007  
Y -0.0231 -0.0239 0.0036 -0.0014 0.0039 0.0003  
Z 0.0140 0.0133 -0.0024 0.0007 -0.0024 -0.0001  
AT. 100 C X 0.0050 -0.0049 -0.0045 -0.0013 0.0045 0.0007  
Y 0.0231 -0.0239 0.0036 0.0014 -0.0039 0.0003  
Z -0.0140 0.0133 -0.0024 -0.0007 0.0024 -0.0001  
AT. 101 C X 0.0019 0.0027 -0.0055 0.0015 -0.0056 0.0006  
Y 0.0058 0.0060 -0.0014 0.0005 -0.0011 -0.0002  
Z -0.0014 -0.0034 -0.0049 0.0012 -0.0044 0.0007  
AT. 102 C X -0.0019 0.0027 -0.0055 -0.0015 0.0056 0.0006  
Y -0.0058 0.0060 -0.0014 -0.0005 0.0011 -0.0002  
Z 0.0014 -0.0034 -0.0049 -0.0012 0.0044 0.0007  
AT. 103 H X -0.0067 -0.0073 -0.0036 0.0012 -0.0046 0.0006  
Y 0.0110 0.0118 -0.0026 0.0007 -0.0019 -0.0002  
Z -0.0705 -0.0735 0.0043 -0.0023 0.0054 0.0017  
AT. 104 H X 0.0067 -0.0073 -0.0036 -0.0012 0.0046 0.0006  
Y -0.0110 0.0118 -0.0026 -0.0007 0.0019 -0.0002  
Z 0.0705 -0.0735 0.0043 0.0023 -0.0054 0.0017  
AT. 105 H X 0.0351 0.0366 -0.0081 0.0028 -0.0087 -0.0001  
Y 0.0585 0.0600 -0.0077 0.0030 -0.0086 -0.0007  
Z 0.0249 0.0237 -0.0079 0.0024 -0.0079 0.0004  
AT. 106 H X -0.0351 0.0366 -0.0081 -0.0028 0.0087 -0.0001  
Y -0.0585 0.0600 -0.0077 -0.0030 0.0086 -0.0007  
Z -0.0249 0.0237 -0.0079 -0.0024 0.0079 0.0004

AT.107 C X 0.0015 0.0017 -0.0128 0.0038 -0.0130 0.0014  
Y 0.0110 0.0113 -0.0130 0.0038 -0.0133 0.0014  
Z 0.0077 0.0075 0.0044 -0.0011 0.0045 -0.0009

AT.108 C X -0.0015 0.0017 -0.0128 -0.0038 0.0130 0.0014  
Y -0.0110 0.0113 -0.0130 -0.0038 0.0133 0.0014  
Z -0.0077 0.0075 0.0044 0.0011 -0.0045 -0.0009

AT.109 H X 0.0088 0.0085 -0.0081 0.0026 -0.0077 0.0002  
Y 0.0187 0.0184 -0.0128 0.0038 -0.0123 0.0010  
Z 0.0191 0.0179 0.0036 -0.0008 0.0049 -0.0013

AT.110 H X -0.0088 0.0085 -0.0081 -0.0026 0.0077 0.0002  
Y -0.0187 0.0184 -0.0128 -0.0038 0.0123 0.0010  
Z -0.0191 0.0179 0.0036 0.0008 -0.0049 -0.0013

AT.111 H X -0.0030 -0.0028 -0.0165 0.0050 -0.0168 0.0018  
Y -0.0011 -0.0000 -0.0096 0.0028 -0.0110 0.0015  
Z 0.0158 0.0155 0.0073 -0.0020 0.0077 -0.0013

AT.112 H X 0.0030 -0.0028 -0.0165 -0.0050 0.0168 0.0018  
Y 0.0011 -0.0000 -0.0096 -0.0028 0.0110 0.0015  
Z -0.0158 0.0155 0.0073 0.0020 -0.0077 -0.0013

AT.113 C X 0.0040 0.0036 0.0177 -0.0050 0.0169 -0.0023  
Y 0.0133 0.0131 -0.0035 0.0011 -0.0032 0.0001  
Z 0.0018 0.0027 -0.0155 0.0043 -0.0153 0.0019

AT.114 C X -0.0040 0.0036 0.0177 0.0050 -0.0169 -0.0023  
Y -0.0133 0.0131 -0.0035 -0.0011 0.0032 0.0001  
Z -0.0018 0.0027 -0.0155 -0.0043 0.0153 0.0019

AT.115 C X 0.0201 0.0204 0.0071 -0.0017 0.0060 -0.0013  
Y 0.0036 0.0034 -0.0015 0.0004 -0.0013 0.0001  
Z -0.0048 -0.0044 0.0004 -0.0002 0.0003 0.0000

AT.116 C X -0.0201 0.0204 0.0071 0.0017 -0.0060 -0.0013  
Y -0.0036 0.0034 -0.0015 -0.0004 0.0013 0.0001  
Z 0.0048 -0.0044 0.0004 0.0002 -0.0003 0.0000

AT.117 H X 0.0460 0.0472 -0.0128 0.0043 -0.0138 0.0005  
Y -0.0098 -0.0104 0.0153 -0.0044 0.0153 -0.0018

Z -0.0298 -0.0303 0.0177 -0.0055 0.0175 -0.0014  
AT. 118 H X -0.0460 0.0472 -0.0128 -0.0043 0.0138 0.0005  
Y 0.0098 -0.0104 0.0153 0.0044 -0.0153 -0.0018  
Z 0.0298 -0.0303 0.0177 0.0055 -0.0175 -0.0014  
AT. 119 H X -0.0081 -0.0088 0.0251 -0.0073 0.0243 -0.0028  
Y 0.0093 0.0093 -0.0174 0.0048 -0.0166 0.0020  
Z -0.0252 -0.0255 0.0261 -0.0076 0.0256 -0.0027  
AT. 120 H X 0.0081 -0.0088 0.0251 0.0073 -0.0243 -0.0028  
Y -0.0093 0.0093 -0.0174 -0.0048 0.0166 0.0020  
Z 0.0252 -0.0255 0.0261 0.0076 -0.0256 -0.0027  
AT. 121 C X 0.0155 0.0161 -0.0079 0.0025 -0.0079 0.0005  
Y 0.0074 0.0082 -0.0172 0.0048 -0.0166 0.0020  
Z 0.0092 0.0096 0.0026 -0.0007 0.0022 -0.0004  
AT. 122 C X -0.0155 0.0161 -0.0079 -0.0025 0.0079 0.0005  
Y -0.0074 0.0082 -0.0172 -0.0048 0.0166 0.0020  
Z -0.0092 0.0096 0.0026 0.0007 -0.0022 -0.0004  
AT. 123 H X 0.0148 0.0156 -0.0080 0.0028 -0.0078 0.0002  
Y 0.0016 0.0020 -0.0261 0.0071 -0.0245 0.0032  
Z 0.0153 0.0160 0.0120 -0.0030 0.0104 -0.0017  
AT. 124 H X -0.0148 0.0156 -0.0080 -0.0028 0.0078 0.0002  
Y -0.0016 0.0020 -0.0261 -0.0071 0.0245 0.0032  
Z -0.0153 0.0160 0.0120 0.0030 -0.0104 -0.0017  
AT. 125 H X 0.0226 0.0232 -0.0058 0.0019 -0.0062 0.0002  
Y 0.0041 0.0050 -0.0100 0.0031 -0.0101 0.0010  
Z 0.0159 0.0163 0.0092 -0.0023 0.0079 -0.0012  
AT. 126 H X -0.0226 0.0232 -0.0058 -0.0019 0.0062 0.0002  
Y -0.0041 0.0050 -0.0100 -0.0031 0.0101 0.0010  
Z -0.0159 0.0163 0.0092 0.0023 -0.0079 -0.0012  
AT. 127 C X -0.0182 -0.0181 0.0009 -0.0006 0.0015 0.0004  
Y -0.0017 -0.0016 -0.0167 0.0045 -0.0158 0.0021  
Z -0.0134 -0.0135 0.0030 -0.0012 0.0036 -0.0001  
AT. 128 C X 0.0182 -0.0181 0.0009 0.0006 -0.0015 0.0004

Y 0.0017 -0.0016 -0.0167 -0.0045 0.0158 0.0021  
Z 0.0134 -0.0135 0.0030 0.0012 -0.0036 -0.0001  
AT. 129 C X -0.0139 -0.0134 -0.0103 0.0027 -0.0105 0.0018  
Y -0.0005 -0.0009 0.0012 -0.0004 0.0013 -0.0002  
Z -0.0035 -0.0036 -0.0071 0.0019 -0.0069 0.0010  
AT. 130 C X 0.0139 -0.0134 -0.0103 -0.0027 0.0105 0.0018  
Y 0.0005 -0.0009 0.0012 0.0004 -0.0013 -0.0002  
Z 0.0035 -0.0036 -0.0071 -0.0019 0.0069 0.0010  
AT. 131 H X -0.0080 -0.0069 -0.0403 0.0113 -0.0399 0.0052  
Y -0.0063 -0.0072 0.0356 -0.0101 0.0344 -0.0042  
Z 0.0022 0.0027 -0.0325 0.0093 -0.0320 0.0038  
AT. 132 H X 0.0080 -0.0069 -0.0403 -0.0113 0.0399 0.0052  
Y 0.0063 -0.0072 0.0356 0.0101 -0.0344 -0.0042  
Z -0.0022 0.0027 -0.0325 -0.0093 0.0320 0.0038  
AT. 133 H X -0.0181 -0.0184 0.0277 -0.0081 0.0267 -0.0026  
Y 0.0049 0.0045 -0.0066 0.0019 -0.0061 0.0006  
Z 0.0074 0.0076 -0.0376 0.0107 -0.0364 0.0043  
AT. 134 H X 0.0181 -0.0184 0.0277 0.0081 -0.0267 -0.0026  
Y -0.0049 0.0045 -0.0066 -0.0019 0.0061 0.0006  
Z -0.0074 0.0076 -0.0376 -0.0107 0.0364 0.0043  
AT. 135 C X 0.0126 0.0114 0.0333 -0.0092 0.0322 -0.0045  
Y 0.0018 0.0014 0.0092 -0.0026 0.0089 -0.0012  
Z -0.0052 -0.0043 -0.0221 0.0062 -0.0217 0.0028  
AT. 136 C X -0.0126 0.0114 0.0333 0.0092 -0.0322 -0.0045  
Y -0.0018 0.0014 0.0092 0.0026 -0.0089 -0.0012  
Z 0.0052 -0.0043 -0.0221 -0.0062 0.0217 0.0028  
AT. 137 H X 0.0271 0.0253 0.0314 -0.0083 0.0307 -0.0046  
Y -0.0004 -0.0009 0.0093 -0.0024 0.0091 -0.0014  
Z -0.0142 -0.0133 -0.0214 0.0063 -0.0210 0.0025  
AT. 138 H X -0.0271 0.0253 0.0314 0.0083 -0.0307 -0.0046  
Y 0.0004 -0.0009 0.0093 0.0024 -0.0091 -0.0014  
Z 0.0142 -0.0133 -0.0214 -0.0063 0.0210 0.0025



AT. 139 H X 0.0144 0.0135 0.0337 -0.0091 0.0328 -0.0047  
Y -0.0054 -0.0056 0.0096 -0.0030 0.0090 -0.0010  
Z -0.0056 -0.0053 -0.0231 0.0063 -0.0227 0.0032

AT. 140 H X -0.0144 0.0135 0.0337 0.0091 -0.0328 -0.0047  
Y 0.0054 -0.0056 0.0096 0.0030 -0.0090 -0.0010  
Z 0.0056 -0.0053 -0.0231 -0.0063 0.0227 0.0032

AT. 141 H X 0.0036 0.0021 0.0347 -0.0101 0.0332 -0.0041  
Y -0.0092 -0.0095 0.0105 -0.0027 0.0100 -0.0014  
Z 0.0024 0.0031 -0.0231 0.0061 -0.0226 0.0032

AT. 142 H X -0.0036 0.0021 0.0347 0.0101 -0.0332 -0.0041  
Y 0.0092 -0.0095 0.0105 0.0027 -0.0100 -0.0014  
Z -0.0024 0.0031 -0.0231 -0.0061 0.0226 0.0032

AT. 143 C X -0.0347 -0.0350 -0.0026 0.0000 -0.0010 0.0013  
Y -0.0018 -0.0020 -0.0003 -0.0001 -0.0003 0.0002  
Z -0.0258 -0.0253 0.0000 -0.0005 0.0011 0.0006

AT. 144 C X 0.0347 -0.0350 -0.0026 -0.0000 0.0010 0.0013  
Y 0.0018 -0.0020 -0.0003 0.0001 0.0003 0.0002  
Z 0.0258 -0.0253 0.0000 0.0005 -0.0011 0.0006

AT. 145 H X -0.0400 -0.0407 -0.0141 0.0032 -0.0123 0.0026  
Y 0.0026 0.0027 0.0047 -0.0014 0.0040 -0.0002  
Z -0.0319 -0.0319 -0.0084 0.0017 -0.0064 0.0013

AT. 146 H X 0.0400 -0.0407 -0.0141 -0.0032 0.0123 0.0026  
Y -0.0026 0.0027 0.0047 0.0014 -0.0040 -0.0002  
Z 0.0319 -0.0319 -0.0084 -0.0017 0.0064 0.0013

AT. 147 H X -0.0369 -0.0369 -0.0049 0.0006 -0.0034 0.0019  
Y -0.0005 -0.0006 0.0045 -0.0012 0.0051 -0.0011  
Z -0.0279 -0.0269 -0.0007 -0.0004 0.0007 0.0007

AT. 148 H X 0.0369 -0.0369 -0.0049 -0.0006 0.0034 0.0019  
Y 0.0005 -0.0006 0.0045 0.0012 -0.0051 -0.0011  
Z 0.0279 -0.0269 -0.0007 0.0004 -0.0007 0.0007

AT. 149 H X -0.0286 -0.0286 0.0065 -0.0022 0.0079 -0.0004  
Y 0.0049 0.0049 0.0084 -0.0023 0.0076 -0.0008

Z -0.0178 -0.0172 0.0100 -0.0031 0.0099 -0.0002  
AT. 150 H X 0.0286 -0.0286 0.0065 0.0022 -0.0079 -0.0004  
Y -0.0049 0.0049 0.0084 0.0023 -0.0076 -0.0008  
Z 0.0178 -0.0172 0.0100 0.0031 -0.0099 -0.0002  
AT. 151 C X -0.0019 -0.0020 0.0003 -0.0002 0.0005 0.0001  
Y -0.0039 -0.0036 0.0055 -0.0017 0.0052 -0.0005  
Z -0.0031 -0.0027 -0.0026 0.0006 -0.0025 0.0005  
AT. 152 C X 0.0019 -0.0020 0.0003 0.0002 -0.0005 0.0001  
Y 0.0039 -0.0036 0.0055 0.0017 -0.0052 -0.0005  
Z 0.0031 -0.0027 -0.0026 -0.0006 0.0025 0.0005  
AT. 153 H X 0.0063 0.0064 -0.0195 0.0054 -0.0188 0.0023  
Y -0.0156 -0.0153 0.0239 -0.0069 0.0223 -0.0023  
Z -0.0256 -0.0253 0.0353 -0.0101 0.0332 -0.0033  
AT. 154 H X -0.0063 0.0064 -0.0195 -0.0054 0.0188 0.0023  
Y 0.0156 -0.0153 0.0239 0.0069 -0.0223 -0.0023  
Z 0.0256 -0.0253 0.0353 0.0101 -0.0332 -0.0033  
AT. 155 H X 0.0121 0.0122 -0.0147 0.0043 -0.0141 0.0015  
Y -0.0181 -0.0174 0.0356 -0.0101 0.0332 -0.0035  
Z 0.0168 0.0168 -0.0397 0.0111 -0.0374 0.0043  
AT. 156 H X -0.0121 0.0122 -0.0147 -0.0043 0.0141 0.0015  
Y 0.0181 -0.0174 0.0356 0.0101 -0.0332 -0.0035  
Z -0.0168 0.0168 -0.0397 -0.0111 0.0374 0.0043  
AT. 157 O X -0.0000 0.0001 -0.0002 0.0002 -0.0002 0.0002  
Y -0.0003 -0.0001 -0.0006 0.0030 0.0005 -0.0030  
Z -0.0000 0.0001 -0.0001 0.0001 -0.0002 -0.0003  
AT. 158 O X 0.0000 0.0001 -0.0002 -0.0002 0.0002 0.0002  
Y 0.0003 -0.0001 -0.0006 -0.0030 -0.0005 -0.0030  
Z 0.0000 0.0001 -0.0001 -0.0001 0.0002 -0.0003  
AT. 159 O X 0.0003 -0.0002 -0.0001 -0.0007 -0.0003 0.0006  
Y -0.0001 0.0002 -0.0002 0.0002 -0.0001 0.0003  
Z 0.0004 -0.0002 0.0003 -0.0007 0.0002 -0.0001  
AT. 160 O X -0.0003 -0.0002 -0.0001 0.0007 0.0003 0.0006

Y 0.0001 0.0002 -0.0002 -0.0002 0.0001 0.0003  
Z -0.0004 -0.0002 0.0003 0.0007 -0.0002 -0.0001  
AT. 161 H X -0.0002 -0.0004 -0.0007 0.0032 0.0012 -0.0056  
Y -0.0004 -0.0001 -0.0006 0.0028 0.0003 -0.0019  
Z 0.0005 -0.0005 0.0001 0.0014 0.0018 -0.0060  
AT. 162 H X 0.0002 -0.0004 -0.0007 -0.0032 -0.0012 -0.0056  
Y 0.0004 -0.0001 -0.0006 -0.0028 -0.0003 -0.0019  
Z -0.0005 -0.0005 0.0001 -0.0014 -0.0018 -0.0060  
AT. 163 H X 0.0007 -0.0006 -0.0001 -0.0016 -0.0002 -0.0015  
Y 0.0034 -0.0019 -0.0015 -0.0010 0.0001 -0.0068  
Z 0.0011 -0.0005 -0.0001 -0.0007 0.0002 -0.0012  
AT. 164 H X -0.0007 -0.0006 -0.0001 0.0016 0.0002 -0.0015  
Y -0.0034 -0.0019 -0.0015 0.0010 -0.0001 -0.0068  
Z -0.0011 -0.0005 -0.0001 0.0007 -0.0002 -0.0012  
AT. 165 O X -0.0009 -0.0010 -0.0015 0.0005 -0.0015 0.0001  
Y -0.0003 -0.0000 -0.0016 0.0005 -0.0012 0.0002  
Z 0.0003 -0.0006 -0.0001 0.0001 0.0002 0.0001  
AT. 166 O X 0.0009 -0.0010 -0.0015 -0.0005 0.0015 0.0001  
Y 0.0003 -0.0000 -0.0016 -0.0005 0.0012 0.0002  
Z -0.0003 -0.0006 -0.0001 -0.0001 -0.0002 0.0001  
AT. 167 H X 0.0020 -0.0010 -0.0016 0.0016 -0.0024 0.0001  
Y -0.0074 -0.0011 -0.0027 -0.0012 -0.0006 0.0004  
Z 0.0035 -0.0005 0.0022 -0.0006 0.0013 0.0002  
AT. 168 H X -0.0020 -0.0010 -0.0016 -0.0016 0.0024 0.0001  
Y 0.0074 -0.0011 -0.0027 0.0012 0.0006 0.0004  
Z -0.0035 -0.0005 0.0022 0.0006 -0.0013 0.0002  
AT. 169 O X -0.0005 0.0005 -0.0008 -0.0000 0.0001 -0.0000  
Y -0.0010 0.0007 0.0005 -0.0001 -0.0006 -0.0005  
Z 0.0002 -0.0004 -0.0006 0.0002 -0.0002 0.0003  
AT. 170 O X 0.0005 0.0005 -0.0008 0.0000 -0.0001 -0.0000  
Y 0.0010 0.0007 0.0005 0.0001 0.0006 -0.0005  
Z -0.0002 -0.0004 -0.0006 -0.0002 0.0002 0.0003

AT.171 H X 0.0119 -0.0108 0.0037 0.0036 -0.0040 0.0011

Y 0.0040 -0.0038 0.0032 0.0014 -0.0025 -0.0000

Z -0.0006 0.0004 0.0004 -0.0000 -0.0003 -0.0003

AT.172 H X -0.0119 -0.0108 0.0037 -0.0036 0.0040 0.0011

Y -0.0040 -0.0038 0.0032 -0.0014 0.0025 -0.0000

Z 0.0006 0.0004 0.0004 0.0000 0.0003 -0.0003

FREQ(CM\*\*-1) 620.44 621.24 621.68 623.32 624.42 625.71

AT. 1 I X 0.0001 0.0002 0.0004 -0.0001 -0.0014 -0.0014

Y 0.0001 0.0001 0.0001 -0.0000 -0.0007 -0.0008

Z 0.0000 0.0001 0.0001 -0.0000 -0.0005 -0.0004

AT. 2 I X 0.0001 -0.0002 0.0004 0.0001 -0.0014 0.0014

Y 0.0001 -0.0001 0.0001 0.0000 -0.0007 0.0008

Z 0.0000 -0.0001 0.0001 0.0000 -0.0005 0.0004

AT. 3 I X -0.0004 -0.0016 -0.0016 0.0000 -0.0002 -0.0002

Y -0.0003 -0.0009 -0.0008 -0.0000 -0.0001 -0.0000

Z -0.0001 -0.0005 -0.0005 -0.0000 -0.0001 -0.0001

AT. 4 I X -0.0004 0.0016 -0.0016 -0.0000 -0.0002 0.0002

Y -0.0003 0.0009 -0.0008 0.0000 -0.0001 0.0000

Z -0.0001 0.0005 -0.0005 0.0000 -0.0001 0.0001

AT. 5 O X 0.0006 0.0021 0.0018 -0.0004 -0.0067 -0.0067

Y -0.0009 -0.0027 -0.0032 0.0009 0.0131 0.0127

Z 0.0019 0.0050 0.0059 -0.0016 -0.0283 -0.0281

AT. 6 O X 0.0006 -0.0021 0.0018 0.0004 -0.0067 0.0067

Y -0.0009 0.0027 -0.0032 -0.0009 0.0131 -0.0127

Z 0.0019 -0.0050 0.0059 0.0016 -0.0283 0.0281

AT. 7 O X -0.0031 -0.0107 -0.0104 0.0000 -0.0006 -0.0009

Y -0.0023 -0.0086 -0.0078 -0.0000 -0.0025 -0.0013

Z 0.0091 0.0330 0.0318 -0.0001 0.0056 0.0052

AT. 8 O X -0.0031 0.0107 -0.0104 -0.0000 -0.0006 0.0009

Y -0.0023 0.0086 -0.0078 0.0000 -0.0025 0.0013

Z 0.0091 -0.0330 0.0318 0.0001 0.0056 -0.0052  
AT. 9 N X -0.0002 -0.0012 -0.0007 -0.0003 -0.0054 -0.0052  
Y -0.0006 -0.0010 -0.0012 0.0009 0.0176 0.0170  
Z -0.0012 -0.0035 -0.0037 0.0009 0.0171 0.0172  
AT. 10 N X -0.0002 0.0012 -0.0007 0.0003 -0.0054 0.0052  
Y -0.0006 0.0010 -0.0012 -0.0009 0.0176 -0.0170  
Z -0.0012 0.0035 -0.0037 -0.0009 0.0171 -0.0172  
AT. 11 N X -0.0020 -0.0076 -0.0069 -0.0000 -0.0036 -0.0023  
Y 0.0046 0.0164 0.0160 0.0000 0.0050 0.0054  
Z -0.0020 -0.0068 -0.0066 0.0001 0.0010 0.0009  
AT. 12 N X -0.0020 0.0076 -0.0069 0.0000 -0.0036 0.0023  
Y 0.0046 -0.0164 0.0160 -0.0000 0.0050 -0.0054  
Z -0.0020 0.0068 -0.0066 -0.0001 0.0010 -0.0009  
AT. 13 C X -0.0011 -0.0033 -0.0036 0.0006 0.0115 0.0120  
Y 0.0007 0.0017 0.0019 -0.0007 -0.0127 -0.0119  
Z -0.0010 -0.0032 -0.0036 0.0007 0.0099 0.0099  
AT. 14 C X -0.0011 0.0033 -0.0036 -0.0006 0.0115 -0.0120  
Y 0.0007 -0.0017 0.0019 0.0007 -0.0127 0.0119  
Z -0.0010 0.0032 -0.0036 -0.0007 0.0099 -0.0099  
AT. 15 C X -0.0029 -0.0078 -0.0088 0.0021 0.0393 0.0391  
Y 0.0013 0.0033 0.0039 -0.0009 -0.0167 -0.0163  
Z -0.0012 -0.0037 -0.0036 0.0007 0.0135 0.0133  
AT. 16 C X -0.0029 0.0078 -0.0088 -0.0021 0.0393 -0.0391  
Y 0.0013 -0.0033 0.0039 0.0009 -0.0167 0.0163  
Z -0.0012 0.0037 -0.0036 -0.0007 0.0135 -0.0133  
AT. 17 H X -0.0028 -0.0077 -0.0076 0.0026 0.0469 0.0470  
Y -0.0000 -0.0017 -0.0003 -0.0003 -0.0095 -0.0086  
Z 0.0005 0.0027 0.0022 0.0001 0.0065 0.0059  
AT. 18 H X -0.0028 0.0077 -0.0076 -0.0026 0.0469 -0.0470  
Y -0.0000 0.0017 -0.0003 0.0003 -0.0095 0.0086  
Z 0.0005 -0.0027 0.0022 -0.0001 0.0065 -0.0059  
AT. 19 H X -0.0033 -0.0086 -0.0098 0.0025 0.0444 0.0430

Y 0.0038 0.0127 0.0120 -0.0024 -0.0372 -0.0369  
Z -0.0004 -0.0005 -0.0010 0.0003 0.0081 0.0075  
AT. 20 H X -0.0033 0.0086 -0.0098 -0.0025 0.0444 -0.0430  
Y 0.0038 -0.0127 0.0120 0.0024 -0.0372 0.0369  
Z -0.0004 0.0005 -0.0010 -0.0003 0.0081 -0.0075  
AT. 21 C X 0.0036 0.0137 0.0124 -0.0002 0.0020 0.0002  
Y 0.0000 0.0004 -0.0003 -0.0003 -0.0014 -0.0026  
Z -0.0047 -0.0163 -0.0161 0.0001 -0.0015 -0.0024  
AT. 22 C X 0.0036 -0.0137 0.0124 0.0002 0.0020 -0.0002  
Y 0.0000 -0.0004 -0.0003 0.0003 -0.0014 0.0026  
Z -0.0047 0.0163 -0.0161 -0.0001 -0.0015 0.0024  
AT. 23 C X 0.0127 0.0457 0.0438 -0.0003 0.0070 0.0057  
Y -0.0007 -0.0022 -0.0024 0.0000 -0.0001 -0.0013  
Z -0.0058 -0.0214 -0.0206 0.0001 -0.0030 -0.0023  
AT. 24 C X 0.0127 -0.0457 0.0438 0.0003 0.0070 -0.0057  
Y -0.0007 0.0022 -0.0024 -0.0000 -0.0001 0.0013  
Z -0.0058 0.0214 -0.0206 -0.0001 -0.0030 0.0023  
AT. 25 H X 0.0149 0.0536 0.0518 -0.0002 0.0095 0.0085  
Y -0.0014 -0.0049 -0.0048 0.0001 0.0002 -0.0003  
Z 0.0010 0.0030 0.0016 -0.0006 -0.0035 -0.0068  
AT. 26 H X 0.0149 -0.0536 0.0518 0.0002 0.0095 -0.0085  
Y -0.0014 0.0049 -0.0048 -0.0001 0.0002 0.0003  
Z 0.0010 -0.0030 0.0016 0.0006 -0.0035 0.0068  
AT. 27 H X 0.0127 0.0445 0.0437 -0.0003 0.0041 0.0064  
Y -0.0092 -0.0338 -0.0309 0.0006 -0.0017 0.0015  
Z -0.0107 -0.0390 -0.0365 0.0005 -0.0037 -0.0009  
AT. 28 H X 0.0127 -0.0445 0.0437 0.0003 0.0041 -0.0064  
Y -0.0092 0.0338 -0.0309 -0.0006 -0.0017 -0.0015  
Z -0.0107 0.0390 -0.0365 -0.0005 -0.0037 0.0009  
AT. 29 C X 0.0008 0.0022 0.0021 -0.0005 -0.0096 -0.0094  
Y -0.0008 -0.0016 -0.0020 0.0007 0.0147 0.0140  
Z 0.0001 0.0003 0.0004 0.0000 0.0011 0.0011

AT. 30 C X 0.0008 -0.0022 0.0021 0.0005 -0.0096 0.0094  
Y -0.0008 0.0016 -0.0020 -0.0007 0.0147 -0.0140  
Z 0.0001 -0.0003 0.0004 -0.0000 0.0011 -0.0011

AT. 31 H X -0.0004 -0.0010 -0.0012 0.0003 0.0049 0.0054  
Y -0.0004 -0.0016 -0.0015 -0.0005 -0.0076 -0.0082  
Z 0.0000 -0.0017 -0.0009 -0.0012 -0.0231 -0.0228

AT. 32 H X -0.0004 0.0010 -0.0012 -0.0003 0.0049 -0.0054  
Y -0.0004 0.0016 -0.0015 0.0005 -0.0076 0.0082  
Z 0.0000 0.0017 -0.0009 0.0012 -0.0231 0.0228

AT. 33 H X 0.0013 0.0027 0.0032 -0.0007 -0.0186 -0.0180  
Y -0.0008 -0.0017 -0.0030 0.0030 0.0458 0.0451  
Z 0.0005 0.0009 0.0017 -0.0011 -0.0192 -0.0189

AT. 34 H X 0.0013 -0.0027 0.0032 0.0007 -0.0186 0.0180  
Y -0.0008 0.0017 -0.0030 -0.0030 0.0458 -0.0451  
Z 0.0005 -0.0009 0.0017 0.0011 -0.0192 0.0189

AT. 35 C X 0.0016 0.0056 0.0052 -0.0002 -0.0003 -0.0006  
Y -0.0004 -0.0014 -0.0013 -0.0003 -0.0054 -0.0054  
Z 0.0005 0.0020 0.0018 -0.0001 -0.0006 -0.0008

AT. 36 C X 0.0016 -0.0056 0.0052 0.0002 -0.0003 0.0006  
Y -0.0004 0.0014 -0.0013 0.0003 -0.0054 0.0054  
Z 0.0005 -0.0020 0.0018 0.0001 -0.0006 0.0008

AT. 37 C X -0.0061 -0.0226 -0.0214 -0.0003 -0.0109 -0.0098  
Y 0.0039 0.0141 0.0135 -0.0003 0.0002 -0.0001  
Z -0.0019 -0.0066 -0.0063 0.0001 0.0001 0.0002

AT. 38 C X -0.0061 0.0226 -0.0214 0.0003 -0.0109 0.0098  
Y 0.0039 -0.0141 0.0135 0.0003 0.0002 0.0001  
Z -0.0019 0.0066 -0.0063 -0.0001 0.0001 -0.0002

AT. 39 H X -0.0081 -0.0304 -0.0283 -0.0001 -0.0110 -0.0087  
Y 0.0039 0.0142 0.0136 0.0000 0.0050 0.0049  
Z -0.0031 -0.0117 -0.0108 0.0001 -0.0020 -0.0013

AT. 40 H X -0.0081 0.0304 -0.0283 0.0001 -0.0110 0.0087  
Y 0.0039 -0.0142 0.0136 -0.0000 0.0050 -0.0049

Z -0.0031 0.0117 -0.0108 -0.0001 -0.0020 0.0013  
AT. 41 H X -0.0034 -0.0123 -0.0120 -0.0004 -0.0101 -0.0099  
Y 0.0034 0.0119 0.0115 -0.0004 -0.0028 -0.0031  
Z -0.0041 -0.0151 -0.0139 0.0004 0.0016 0.0028  
AT. 42 H X -0.0034 0.0123 -0.0120 0.0004 -0.0101 0.0099  
Y 0.0034 -0.0119 0.0115 0.0004 -0.0028 0.0031  
Z -0.0041 0.0151 -0.0139 -0.0004 0.0016 -0.0028  
AT. 43 C X -0.0022 -0.0081 -0.0076 -0.0000 -0.0018 -0.0012  
Y 0.0035 0.0125 0.0118 0.0001 0.0031 0.0025  
Z 0.0019 0.0073 0.0070 -0.0002 0.0006 -0.0000  
AT. 44 C X -0.0022 0.0081 -0.0076 0.0000 -0.0018 0.0012  
Y 0.0035 -0.0125 0.0118 -0.0001 0.0031 -0.0025  
Z 0.0019 -0.0073 0.0070 0.0002 0.0006 0.0000  
AT. 45 H X 0.0013 0.0047 0.0044 -0.0000 0.0021 0.0019  
Y -0.0015 -0.0059 -0.0053 -0.0003 -0.0101 -0.0095  
Z 0.0044 0.0162 0.0151 0.0003 0.0109 0.0097  
AT. 46 H X 0.0013 -0.0047 0.0044 0.0000 0.0021 -0.0019  
Y -0.0015 0.0059 -0.0053 0.0003 -0.0101 0.0095  
Z 0.0044 -0.0162 0.0151 -0.0003 0.0109 -0.0097  
AT. 47 H X -0.0035 -0.0128 -0.0123 0.0001 -0.0006 0.0001  
Y 0.0067 0.0248 0.0232 0.0006 0.0139 0.0125  
Z 0.0076 0.0282 0.0267 0.0002 0.0103 0.0087  
AT. 48 H X -0.0035 0.0128 -0.0123 -0.0001 -0.0006 -0.0001  
Y 0.0067 -0.0248 0.0232 -0.0006 0.0139 -0.0125  
Z 0.0076 -0.0282 0.0267 -0.0002 0.0103 -0.0087  
AT. 49 C X -0.0008 -0.0027 -0.0027 0.0002 0.0032 0.0029  
Y -0.0015 -0.0056 -0.0055 -0.0000 -0.0028 -0.0027  
Z 0.0006 0.0017 0.0019 -0.0004 -0.0058 -0.0055  
AT. 50 C X -0.0008 0.0027 -0.0027 -0.0002 0.0032 -0.0029  
Y -0.0015 0.0056 -0.0055 0.0000 -0.0028 0.0027  
Z 0.0006 -0.0017 0.0019 0.0004 -0.0058 0.0055  
AT. 51 C X -0.0007 -0.0041 -0.0030 -0.0012 -0.0236 -0.0235



Y -0.0013 -0.0042 -0.0045 0.0004 0.0070 0.0070  
Z -0.0017 -0.0050 -0.0056 0.0012 0.0213 0.0211  
AT. 52 C X -0.0007 0.0041 -0.0030 0.0012 -0.0236 0.0235  
Y -0.0013 0.0042 -0.0045 -0.0004 0.0070 -0.0070  
Z -0.0017 0.0050 -0.0056 -0.0012 0.0213 -0.0211  
AT. 53 H X 0.0006 -0.0005 0.0010 -0.0016 -0.0329 -0.0320  
Y 0.0001 0.0004 0.0002 0.0003 0.0028 0.0029  
Z -0.0024 -0.0062 -0.0074 0.0018 0.0321 0.0309  
AT. 54 H X 0.0006 0.0005 0.0010 0.0016 -0.0329 0.0320  
Y 0.0001 -0.0004 0.0002 -0.0003 0.0028 -0.0029  
Z -0.0024 0.0062 -0.0074 -0.0018 0.0321 -0.0309  
AT. 55 H X -0.0029 -0.0098 -0.0096 -0.0002 -0.0042 -0.0049  
Y -0.0014 -0.0048 -0.0047 0.0000 0.0002 0.0005  
Z -0.0032 -0.0094 -0.0101 0.0014 0.0257 0.0253  
AT. 56 H X -0.0029 0.0098 -0.0096 0.0002 -0.0042 0.0049  
Y -0.0014 0.0048 -0.0047 -0.0000 0.0002 -0.0005  
Z -0.0032 0.0094 -0.0101 -0.0014 0.0257 -0.0253  
AT. 57 C X 0.0028 0.0103 0.0096 -0.0000 0.0034 0.0030  
Y -0.0028 -0.0099 -0.0094 -0.0000 -0.0024 -0.0021  
Z 0.0019 0.0070 0.0065 -0.0001 0.0028 0.0022  
AT. 58 C X 0.0028 -0.0103 0.0096 0.0000 0.0034 -0.0030  
Y -0.0028 0.0099 -0.0094 0.0000 -0.0024 0.0021  
Z 0.0019 -0.0070 0.0065 0.0001 0.0028 -0.0022  
AT. 59 H X -0.0009 -0.0032 -0.0034 0.0004 0.0051 0.0050  
Y -0.0013 -0.0053 -0.0049 0.0001 -0.0019 -0.0016  
Z 0.0015 0.0048 0.0045 0.0004 0.0047 0.0044  
AT. 60 H X -0.0009 0.0032 -0.0034 -0.0004 0.0051 -0.0050  
Y -0.0013 0.0053 -0.0049 -0.0001 -0.0019 0.0016  
Z 0.0015 -0.0048 0.0045 -0.0004 0.0047 -0.0044  
AT. 61 H X 0.0032 0.0123 0.0110 0.0003 0.0090 0.0082  
Y -0.0050 -0.0182 -0.0176 0.0003 -0.0021 -0.0018  
Z 0.0033 0.0128 0.0119 0.0000 0.0072 0.0063

AT. 62 H X 0.0032 -0.0123 0.0110 -0.0003 0.0090 -0.0082  
Y -0.0050 0.0182 -0.0176 -0.0003 -0.0021 0.0018  
Z 0.0033 -0.0128 0.0119 -0.0000 0.0072 -0.0063

AT. 63 H X 0.0032 0.0104 0.0101 -0.0002 -0.0040 -0.0042  
Y -0.0049 -0.0169 -0.0160 0.0005 0.0048 0.0051  
Z 0.0033 0.0127 0.0117 -0.0003 0.0038 0.0030

AT. 64 H X 0.0032 -0.0104 0.0101 0.0002 -0.0040 0.0042  
Y -0.0049 0.0169 -0.0160 -0.0005 0.0048 -0.0051  
Z 0.0033 -0.0127 0.0117 0.0003 0.0038 -0.0030

AT. 65 C X -0.0007 -0.0017 -0.0020 0.0005 0.0092 0.0085  
Y 0.0007 0.0021 0.0023 -0.0006 -0.0086 -0.0082  
Z 0.0009 0.0022 0.0025 -0.0009 -0.0151 -0.0144

AT. 66 C X -0.0007 0.0017 -0.0020 -0.0005 0.0092 -0.0085  
Y 0.0007 -0.0021 0.0023 0.0006 -0.0086 0.0082  
Z 0.0009 -0.0022 0.0025 0.0009 -0.0151 0.0144

AT. 67 H X 0.0008 0.0035 0.0030 -0.0003 -0.0018 -0.0022  
Y 0.0012 0.0038 0.0044 -0.0004 -0.0054 -0.0053  
Z -0.0008 -0.0037 -0.0035 -0.0004 -0.0091 -0.0083

AT. 68 H X 0.0008 -0.0035 0.0030 0.0003 -0.0018 0.0022  
Y 0.0012 -0.0038 0.0044 0.0004 -0.0054 0.0053  
Z -0.0008 0.0037 -0.0035 0.0004 -0.0091 0.0083

AT. 69 H X 0.0006 0.0032 0.0024 0.0005 0.0106 0.0099  
Y 0.0017 0.0059 0.0055 -0.0009 -0.0136 -0.0129  
Z -0.0002 -0.0022 -0.0016 -0.0013 -0.0258 -0.0246

AT. 70 H X 0.0006 -0.0032 0.0024 -0.0005 0.0106 -0.0099  
Y 0.0017 -0.0059 0.0055 0.0009 -0.0136 0.0129  
Z -0.0002 0.0022 -0.0016 0.0013 -0.0258 0.0246

AT. 71 H X -0.0022 -0.0076 -0.0076 0.0004 0.0049 0.0045  
Y 0.0032 0.0109 0.0108 -0.0009 -0.0100 -0.0102  
Z 0.0030 0.0095 0.0099 -0.0014 -0.0201 -0.0200

AT. 72 H X -0.0022 0.0076 -0.0076 -0.0004 0.0049 -0.0045  
Y 0.0032 -0.0109 0.0108 0.0009 -0.0100 0.0102

Z 0.0030 -0.0095 0.0099 0.0014 -0.0201 0.0200  
AT. 73 C X 0.0014 0.0051 0.0048 0.0001 0.0040 0.0037  
Y -0.0010 -0.0039 -0.0036 -0.0001 -0.0035 -0.0035  
Z 0.0012 0.0039 0.0039 -0.0005 -0.0069 -0.0065  
AT. 74 C X 0.0014 -0.0051 0.0048 -0.0001 0.0040 -0.0037  
Y -0.0010 0.0039 -0.0036 0.0001 -0.0035 0.0035  
Z 0.0012 -0.0039 0.0039 0.0005 -0.0069 0.0065  
AT. 75 H X 0.0028 0.0107 0.0102 0.0001 0.0046 0.0047  
Y -0.0005 -0.0015 -0.0017 0.0001 0.0022 0.0022  
Z 0.0028 0.0110 0.0103 -0.0002 0.0012 0.0019  
AT. 76 H X 0.0028 -0.0107 0.0102 -0.0001 0.0046 -0.0047  
Y -0.0005 0.0015 -0.0017 -0.0001 0.0022 -0.0022  
Z 0.0028 -0.0110 0.0103 0.0002 0.0012 -0.0019  
AT. 77 H X 0.0012 0.0043 0.0041 0.0002 0.0033 0.0035  
Y 0.0009 0.0036 0.0036 0.0001 0.0032 0.0033  
Z -0.0004 -0.0022 -0.0020 -0.0007 -0.0125 -0.0127  
AT. 78 H X 0.0012 -0.0043 0.0041 -0.0002 0.0033 -0.0035  
Y 0.0009 -0.0036 0.0036 -0.0001 0.0032 -0.0033  
Z -0.0004 0.0022 -0.0020 0.0007 -0.0125 0.0127  
AT. 79 I X -0.0012 -0.0000 0.0003 -0.0013 -0.0000 0.0000  
Y 0.0012 0.0000 -0.0003 0.0013 0.0000 -0.0001  
Z 0.0003 -0.0000 -0.0001 0.0004 0.0000 0.0000  
AT. 80 I X -0.0012 0.0000 0.0003 0.0013 -0.0000 -0.0000  
Y 0.0012 -0.0000 -0.0003 -0.0013 0.0000 0.0001  
Z 0.0003 0.0000 -0.0001 -0.0004 0.0000 -0.0000  
AT. 81 I X -0.0002 -0.0001 0.0000 0.0001 -0.0000 0.0003  
Y 0.0001 0.0001 -0.0000 -0.0002 0.0000 -0.0003  
Z 0.0001 0.0000 -0.0000 -0.0000 0.0000 -0.0001  
AT. 82 I X -0.0002 0.0001 0.0000 -0.0001 -0.0000 -0.0003  
Y 0.0001 -0.0001 -0.0000 0.0002 0.0000 0.0003  
Z 0.0001 -0.0000 -0.0000 0.0000 0.0000 0.0001  
AT. 83 O X -0.0054 -0.0001 0.0016 -0.0059 -0.0000 0.0002

Y -0.0063 -0.0001 0.0018 -0.0067 -0.0000 0.0003  
Z 0.0290 0.0004 -0.0084 0.0305 0.0001 -0.0015  
AT. 84 O X -0.0054 0.0001 0.0016 0.0059 -0.0000 -0.0002  
Y -0.0063 0.0001 0.0018 0.0067 -0.0000 -0.0003  
Z 0.0290 -0.0004 -0.0084 -0.0305 0.0001 0.0015  
AT. 85 O X -0.0003 -0.0008 -0.0001 0.0018 -0.0003 0.0024  
Y 0.0017 0.0004 -0.0004 0.0002 0.0002 -0.0019  
Z -0.0032 -0.0016 0.0004 0.0003 -0.0005 0.0054  
AT. 86 O X -0.0003 0.0008 -0.0001 -0.0018 -0.0003 -0.0024  
Y 0.0017 -0.0004 -0.0004 -0.0002 0.0002 0.0019  
Z -0.0032 0.0016 0.0004 -0.0003 -0.0005 -0.0054  
AT. 87 N X -0.0143 -0.0002 0.0042 -0.0140 -0.0001 0.0009  
Y -0.0121 -0.0003 0.0036 -0.0128 -0.0001 0.0010  
Z -0.0139 -0.0002 0.0040 -0.0156 -0.0001 0.0007  
AT. 88 N X -0.0143 0.0002 0.0042 0.0140 -0.0001 -0.0009  
Y -0.0121 0.0003 0.0036 0.0128 -0.0001 -0.0010  
Z -0.0139 0.0002 0.0040 0.0156 -0.0001 -0.0007  
AT. 89 N X -0.0039 -0.0004 0.0010 -0.0026 -0.0002 0.0017  
Y -0.0033 -0.0010 0.0009 -0.0017 -0.0004 0.0038  
Z -0.0012 0.0005 0.0006 -0.0020 0.0001 -0.0011  
AT. 90 N X -0.0039 0.0004 0.0010 0.0026 -0.0002 -0.0017  
Y -0.0033 0.0010 0.0009 0.0017 -0.0004 -0.0038  
Z -0.0012 -0.0005 0.0006 0.0020 0.0001 0.0011  
AT. 91 C X 0.0142 0.0001 -0.0041 0.0152 0.0000 -0.0007  
Y 0.0047 0.0003 -0.0013 0.0048 0.0000 -0.0005  
Z -0.0128 -0.0000 0.0037 -0.0141 -0.0001 0.0005  
AT. 92 C X 0.0142 -0.0001 -0.0041 -0.0152 0.0000 0.0007  
Y 0.0047 -0.0003 -0.0013 -0.0048 0.0000 0.0005  
Z -0.0128 0.0000 0.0037 0.0141 -0.0001 -0.0005  
AT. 93 C X 0.0409 0.0006 -0.0118 0.0431 0.0001 -0.0023  
Y -0.0003 0.0001 -0.0000 0.0002 -0.0001 -0.0000  
Z -0.0174 -0.0000 0.0050 -0.0180 -0.0001 0.0008

AT. 94 C X 0.0409 -0.0006 -0.0118 -0.0431 0.0001 0.0023  
Y -0.0003 -0.0001 -0.0000 -0.0002 -0.0001 0.0000  
Z -0.0174 0.0000 0.0050 0.0180 -0.0001 -0.0008

AT. 95 H X 0.0471 0.0011 -0.0134 0.0478 0.0002 -0.0029  
Y -0.0088 -0.0001 0.0024 -0.0085 -0.0002 0.0004  
Z -0.0079 -0.0003 0.0021 -0.0062 -0.0000 0.0007

AT. 96 H X 0.0471 -0.0011 -0.0134 -0.0478 0.0002 0.0029  
Y -0.0088 0.0001 0.0024 0.0085 -0.0002 -0.0004  
Z -0.0079 0.0003 0.0021 0.0062 -0.0000 -0.0007

AT. 97 H X 0.0495 0.0007 -0.0143 0.0501 0.0000 -0.0022  
Y 0.0208 -0.0003 -0.0061 0.0221 0.0002 -0.0006  
Z -0.0157 -0.0002 0.0045 -0.0158 -0.0000 0.0007

AT. 98 H X 0.0495 -0.0007 -0.0143 -0.0501 0.0000 0.0022  
Y 0.0208 0.0003 -0.0061 -0.0221 0.0002 0.0006  
Z -0.0157 0.0002 0.0045 0.0158 -0.0000 -0.0007

AT. 99 C X 0.0008 0.0007 -0.0001 -0.0006 0.0002 -0.0023  
Y 0.0014 -0.0005 -0.0006 0.0025 -0.0000 0.0001  
Z 0.0005 0.0012 0.0001 -0.0008 0.0004 -0.0035

AT. 100 C X 0.0008 -0.0007 -0.0001 0.0006 0.0002 0.0023  
Y 0.0014 0.0005 -0.0006 -0.0025 -0.0000 -0.0001  
Z 0.0005 -0.0012 0.0001 0.0008 0.0004 0.0035

AT. 101 C X 0.0042 0.0028 -0.0005 -0.0025 0.0009 -0.0090  
Y -0.0006 -0.0005 0.0000 0.0005 -0.0002 0.0016  
Z 0.0003 0.0006 -0.0000 -0.0003 0.0002 -0.0023

AT. 102 C X 0.0042 -0.0028 -0.0005 0.0025 0.0009 0.0090  
Y -0.0006 0.0005 0.0000 -0.0005 -0.0002 -0.0016  
Z 0.0003 -0.0006 -0.0000 0.0003 0.0002 0.0023

AT. 103 H X 0.0062 0.0027 -0.0014 -0.0007 0.0012 -0.0103  
Y -0.0015 -0.0004 0.0004 -0.0004 -0.0003 0.0019  
Z 0.0024 -0.0010 -0.0008 0.0092 -0.0005 0.0021

AT. 104 H X 0.0062 -0.0027 -0.0014 0.0007 0.0012 0.0103  
Y -0.0015 0.0004 0.0004 0.0004 -0.0003 -0.0019

Z 0.0024 0.0010 -0.0008 -0.0092 -0.0005 -0.0021  
AT. 105 H X 0.0031 0.0038 0.0001 -0.0059 0.0013 -0.0113  
Y -0.0011 0.0011 0.0003 -0.0069 0.0006 -0.0035  
Z 0.0004 0.0015 0.0000 -0.0042 0.0007 -0.0049  
AT. 106 H X 0.0031 -0.0038 0.0001 0.0059 0.0013 0.0113  
Y -0.0011 -0.0011 0.0003 0.0069 0.0006 0.0035  
Z 0.0004 -0.0015 0.0000 0.0042 0.0007 0.0049  
AT. 107 C X -0.0134 -0.0001 0.0039 -0.0134 -0.0000 0.0006  
Y -0.0105 -0.0001 0.0029 -0.0103 -0.0000 0.0006  
Z 0.0023 0.0001 -0.0007 0.0018 0.0000 -0.0001  
AT. 108 C X -0.0134 0.0001 0.0039 0.0134 -0.0000 -0.0006  
Y -0.0105 0.0001 0.0029 0.0103 -0.0000 -0.0006  
Z 0.0023 -0.0001 -0.0007 -0.0018 0.0000 0.0001  
AT. 109 H X 0.0124 0.0002 -0.0035 0.0137 0.0003 -0.0007  
Y 0.0054 0.0003 -0.0018 0.0060 0.0002 -0.0008  
Z 0.0219 0.0007 -0.0066 0.0217 0.0003 -0.0022  
AT. 110 H X 0.0124 -0.0002 -0.0035 -0.0137 0.0003 0.0007  
Y 0.0054 -0.0003 -0.0018 -0.0060 0.0002 0.0008  
Z 0.0219 -0.0007 -0.0066 -0.0217 0.0003 0.0022  
AT. 111 H X -0.0275 -0.0004 0.0080 -0.0279 -0.0001 0.0017  
Y -0.0371 -0.0006 0.0108 -0.0380 -0.0010 0.0021  
Z 0.0244 0.0006 -0.0072 0.0248 0.0004 -0.0017  
AT. 112 H X -0.0275 0.0004 0.0080 0.0279 -0.0001 -0.0017  
Y -0.0371 0.0006 0.0108 0.0380 -0.0010 -0.0021  
Z 0.0244 -0.0006 -0.0072 -0.0248 0.0004 0.0017  
AT. 113 C X 0.0007 0.0004 -0.0002 -0.0001 0.0001 -0.0009  
Y 0.0051 0.0002 -0.0016 0.0053 0.0001 -0.0005  
Z 0.0005 -0.0002 -0.0000 0.0012 -0.0001 0.0004  
AT. 114 C X 0.0007 -0.0004 -0.0002 0.0001 0.0001 0.0009  
Y 0.0051 -0.0002 -0.0016 -0.0053 0.0001 0.0005  
Z 0.0005 0.0002 -0.0000 -0.0012 -0.0001 -0.0004  
AT. 115 C X -0.0084 -0.0014 0.0022 -0.0060 -0.0005 0.0047

Y 0.0034 -0.0002 -0.0012 0.0042 -0.0000 0.0010  
Z 0.0003 0.0006 0.0002 -0.0010 0.0002 -0.0018  
AT. 116 C X -0.0084 0.0014 0.0022 0.0060 -0.0005 -0.0047  
Y 0.0034 0.0002 -0.0012 -0.0042 -0.0000 -0.0010  
Z 0.0003 -0.0006 0.0002 0.0010 0.0002 0.0018  
AT. 117 H X -0.0100 -0.0014 0.0029 -0.0062 -0.0006 0.0058  
Y 0.0002 -0.0003 -0.0004 -0.0006 0.0001 0.0008  
Z 0.0027 0.0006 -0.0007 0.0004 0.0003 -0.0029  
AT. 118 H X -0.0100 0.0014 0.0029 0.0062 -0.0006 -0.0058  
Y 0.0002 0.0003 -0.0004 0.0006 0.0001 -0.0008  
Z 0.0027 -0.0006 -0.0007 -0.0004 0.0003 0.0029  
AT. 119 H X -0.0063 -0.0008 0.0016 -0.0063 -0.0002 0.0022  
Y 0.0060 0.0003 -0.0016 0.0071 0.0001 0.0002  
Z -0.0012 0.0004 0.0002 -0.0040 0.0003 -0.0023  
AT. 120 H X -0.0063 0.0008 0.0016 0.0063 -0.0002 -0.0022  
Y 0.0060 -0.0003 -0.0016 -0.0071 0.0001 -0.0002  
Z -0.0012 -0.0004 0.0002 0.0040 0.0003 0.0023  
AT. 121 C X -0.0017 -0.0005 0.0004 0.0001 -0.0002 0.0022  
Y -0.0020 -0.0005 0.0006 -0.0008 -0.0003 0.0015  
Z 0.0003 -0.0001 -0.0001 0.0010 -0.0000 0.0007  
AT. 122 C X -0.0017 0.0005 0.0004 -0.0001 -0.0002 -0.0022  
Y -0.0020 0.0005 0.0006 0.0008 -0.0003 -0.0015  
Z 0.0003 0.0001 -0.0001 -0.0010 -0.0000 -0.0007  
AT. 123 H X 0.0018 -0.0002 -0.0007 0.0023 -0.0001 0.0001  
Y 0.0067 0.0005 -0.0019 0.0068 -0.0000 -0.0017  
Z -0.0083 -0.0010 0.0023 -0.0067 -0.0003 0.0036  
AT. 124 H X 0.0018 0.0002 -0.0007 -0.0023 -0.0001 -0.0001  
Y 0.0067 -0.0005 -0.0019 -0.0068 -0.0000 0.0017  
Z -0.0083 0.0010 0.0023 0.0067 -0.0003 -0.0036  
AT. 125 H X -0.0046 -0.0010 0.0012 -0.0015 -0.0003 0.0042  
Y -0.0091 -0.0018 0.0019 -0.0070 -0.0005 0.0036  
Z -0.0070 -0.0014 0.0015 -0.0043 -0.0003 0.0045

AT.126 H X -0.0046 0.0010 0.0012 0.0015 -0.0003 -0.0042  
Y -0.0091 0.0018 0.0019 0.0070 -0.0005 -0.0036  
Z -0.0070 0.0014 0.0015 0.0043 -0.0003 -0.0045

AT.127 C X 0.0056 -0.0000 -0.0016 0.0056 0.0001 -0.0002  
Y 0.0009 0.0005 -0.0002 0.0003 0.0001 -0.0015  
Z 0.0045 -0.0001 -0.0016 0.0046 0.0000 -0.0000

AT.128 C X 0.0056 0.0000 -0.0016 -0.0056 0.0001 0.0002  
Y 0.0009 -0.0005 -0.0002 -0.0003 0.0001 0.0015  
Z 0.0045 0.0001 -0.0016 -0.0046 0.0000 0.0000

AT.129 C X -0.0278 -0.0007 0.0080 -0.0285 -0.0003 0.0025  
Y 0.0003 0.0004 -0.0001 -0.0004 0.0001 -0.0011  
Z -0.0160 -0.0001 0.0046 -0.0174 0.0000 0.0004

AT.130 C X -0.0278 0.0007 0.0080 0.0285 -0.0003 -0.0025  
Y 0.0003 -0.0004 -0.0001 0.0004 0.0001 0.0011  
Z -0.0160 0.0001 0.0046 0.0174 0.0000 -0.0004

AT.131 H X -0.0360 -0.0005 0.0106 -0.0362 -0.0002 0.0025  
Y 0.0061 -0.0001 -0.0022 0.0056 -0.0003 -0.0003  
Z -0.0237 -0.0000 0.0069 -0.0243 0.0001 0.0007

AT.132 H X -0.0360 0.0005 0.0106 0.0362 -0.0002 -0.0025  
Y 0.0061 0.0001 -0.0022 -0.0056 -0.0003 0.0003  
Z -0.0237 0.0000 0.0069 0.0243 0.0001 -0.0007

AT.133 H X -0.0109 -0.0009 0.0027 -0.0115 -0.0004 0.0024  
Y 0.0007 0.0006 -0.0002 -0.0002 0.0003 -0.0015  
Z -0.0237 0.0004 0.0071 -0.0254 0.0004 -0.0002

AT.134 H X -0.0109 0.0009 0.0027 0.0115 -0.0004 -0.0024  
Y 0.0007 -0.0006 -0.0002 0.0002 0.0003 0.0015  
Z -0.0237 -0.0004 0.0071 0.0254 0.0004 0.0002

AT.135 C X 0.0021 0.0008 -0.0007 0.0002 0.0002 -0.0020  
Y 0.0008 0.0003 -0.0001 -0.0001 0.0001 -0.0012  
Z -0.0024 -0.0005 0.0007 -0.0011 -0.0002 0.0016

AT.136 C X 0.0021 -0.0008 -0.0007 -0.0002 0.0002 0.0020  
Y 0.0008 -0.0003 -0.0001 0.0001 0.0001 0.0012



Z -0.0024 0.0005 0.0007 0.0011 -0.0002 -0.0016  
AT. 137 H X 0.0038 -0.0004 -0.0009 0.0034 -0.0001 -0.0001  
Y -0.0008 0.0002 0.0003 -0.0016 0.0000 -0.0011  
Z -0.0057 -0.0002 0.0016 -0.0047 -0.0003 0.0011  
AT. 138 H X 0.0038 0.0004 -0.0009 -0.0034 -0.0001 0.0001  
Y -0.0008 -0.0002 0.0003 0.0016 0.0000 0.0011  
Z -0.0057 0.0002 0.0016 0.0047 -0.0003 -0.0011  
AT. 139 H X 0.0067 0.0012 -0.0018 0.0043 0.0003 -0.0031  
Y -0.0014 0.0010 0.0004 -0.0031 0.0001 -0.0022  
Z -0.0080 -0.0012 0.0021 -0.0058 -0.0002 0.0034  
AT. 140 H X 0.0067 -0.0012 -0.0018 -0.0043 0.0003 0.0031  
Y -0.0014 -0.0010 0.0004 0.0031 0.0001 0.0022  
Z -0.0080 0.0012 0.0021 0.0058 -0.0002 -0.0034  
AT. 141 H X -0.0069 0.0007 0.0016 -0.0088 0.0004 -0.0011  
Y -0.0043 0.0006 0.0015 -0.0059 0.0001 -0.0020  
Z -0.0010 -0.0009 0.0001 0.0011 -0.0000 0.0028  
AT. 142 H X -0.0069 -0.0007 0.0016 0.0088 0.0004 0.0011  
Y -0.0043 -0.0006 0.0015 0.0059 0.0001 0.0020  
Z -0.0010 0.0009 0.0001 -0.0011 -0.0000 -0.0028  
AT. 143 C X 0.0140 -0.0001 -0.0043 0.0144 0.0001 -0.0005  
Y 0.0047 0.0000 -0.0015 0.0049 0.0000 -0.0001  
Z 0.0129 0.0001 -0.0038 0.0133 0.0000 -0.0006  
AT. 144 C X 0.0140 0.0001 -0.0043 -0.0144 0.0001 0.0005  
Y 0.0047 -0.0000 -0.0015 -0.0049 0.0000 0.0001  
Z 0.0129 -0.0001 -0.0038 -0.0133 0.0000 0.0006  
AT. 145 H X 0.0017 0.0001 -0.0003 0.0011 -0.0000 -0.0006  
Y 0.0055 -0.0002 -0.0019 0.0061 0.0001 0.0004  
Z 0.0092 0.0003 -0.0024 0.0090 -0.0001 -0.0013  
AT. 146 H X 0.0017 -0.0001 -0.0003 -0.0011 -0.0000 0.0006  
Y 0.0055 0.0002 -0.0019 -0.0061 0.0001 -0.0004  
Z 0.0092 -0.0003 -0.0024 -0.0090 -0.0001 0.0013  
AT. 147 H X 0.0183 0.0001 -0.0055 0.0185 0.0003 -0.0015

Y 0.0090 0.0001 -0.0024 0.0100 -0.0002 0.0004  
Z 0.0213 0.0005 -0.0059 0.0218 0.0001 -0.0019  
AT. 148 H X 0.0183 -0.0001 -0.0055 -0.0185 0.0003 0.0015  
Y 0.0090 -0.0001 -0.0024 -0.0100 -0.0002 -0.0004  
Z 0.0213 -0.0005 -0.0059 -0.0218 0.0001 0.0019  
AT. 149 H X 0.0126 -0.0007 -0.0040 0.0142 -0.0002 0.0015  
Y 0.0077 -0.0005 -0.0027 0.0089 0.0001 0.0009  
Z 0.0188 -0.0005 -0.0061 0.0201 0.0002 0.0001  
AT. 150 H X 0.0126 0.0007 -0.0040 -0.0142 -0.0002 -0.0015  
Y 0.0077 0.0005 -0.0027 -0.0089 0.0001 -0.0009  
Z 0.0188 0.0005 -0.0061 -0.0201 0.0002 -0.0001  
AT. 151 C X 0.0061 0.0004 -0.0016 0.0055 0.0001 -0.0014  
Y 0.0019 0.0002 -0.0005 0.0017 0.0000 -0.0007  
Z 0.0051 -0.0004 -0.0016 0.0060 -0.0001 0.0006  
AT. 152 C X 0.0061 -0.0004 -0.0016 -0.0055 0.0001 0.0014  
Y 0.0019 -0.0002 -0.0005 -0.0017 0.0000 0.0007  
Z 0.0051 0.0004 -0.0016 -0.0060 -0.0001 -0.0006  
AT. 153 H X 0.0032 0.0006 -0.0004 0.0024 0.0002 -0.0019  
Y -0.0033 -0.0002 0.0010 -0.0035 -0.0001 0.0007  
Z -0.0021 -0.0012 0.0003 -0.0009 -0.0002 0.0031  
AT. 154 H X 0.0032 -0.0006 -0.0004 -0.0024 0.0002 0.0019  
Y -0.0033 0.0002 0.0010 0.0035 -0.0001 -0.0007  
Z -0.0021 0.0012 0.0003 0.0009 -0.0002 -0.0031  
AT. 155 H X 0.0057 0.0004 -0.0013 0.0057 0.0001 -0.0011  
Y -0.0039 -0.0005 0.0013 -0.0039 -0.0002 0.0015  
Z 0.0112 0.0003 -0.0034 0.0121 0.0002 -0.0015  
AT. 156 H X 0.0057 -0.0004 -0.0013 -0.0057 0.0001 0.0011  
Y -0.0039 0.0005 0.0013 0.0039 -0.0002 -0.0015  
Z 0.0112 -0.0003 -0.0034 -0.0121 0.0002 0.0015  
AT. 157 O X 0.0001 -0.0005 0.0005 -0.0001 0.0001 -0.0000  
Y 0.0001 0.0001 0.0007 -0.0002 -0.0018 -0.0017  
Z -0.0003 0.0003 -0.0005 -0.0001 0.0003 0.0006

AT.158 O X 0.0001 0.0005 0.0005 0.0001 0.0001 0.0000  
Y 0.0001 -0.0001 0.0007 0.0002 -0.0018 0.0017  
Z -0.0003 -0.0003 -0.0005 0.0001 0.0003 -0.0006

AT.159 O X -0.0001 0.0011 -0.0009 0.0001 -0.0003 -0.0002  
Y -0.0001 0.0006 -0.0006 0.0001 0.0005 0.0003  
Z -0.0006 0.0023 -0.0024 0.0000 -0.0000 0.0003

AT.160 O X -0.0001 -0.0011 -0.0009 -0.0001 -0.0003 0.0002  
Y -0.0001 -0.0006 -0.0006 -0.0001 0.0005 -0.0003  
Z -0.0006 -0.0023 -0.0024 -0.0000 -0.0000 -0.0003

AT.161 H X 0.0001 0.0008 0.0028 -0.0004 -0.0051 -0.0042  
Y 0.0000 -0.0002 -0.0007 0.0001 0.0016 0.0014  
Z 0.0007 0.0021 0.0055 -0.0004 -0.0122 -0.0106

AT.162 H X 0.0001 -0.0008 0.0028 0.0004 -0.0051 0.0042  
Y 0.0000 0.0002 -0.0007 -0.0001 0.0016 -0.0014  
Z 0.0007 -0.0021 0.0055 0.0004 -0.0122 0.0106

AT.163 H X -0.0010 0.0040 -0.0037 0.0000 -0.0014 0.0008  
Y 0.0045 -0.0177 0.0182 0.0001 -0.0018 0.0017  
Z 0.0008 -0.0035 0.0039 -0.0001 -0.0004 0.0002

AT.164 H X -0.0010 -0.0040 -0.0037 -0.0000 -0.0014 -0.0008  
Y 0.0045 0.0177 0.0182 -0.0001 -0.0018 -0.0017  
Z 0.0008 0.0035 0.0039 0.0001 -0.0004 -0.0002

AT.165 O X -0.0008 -0.0001 0.0003 -0.0007 0.0002 0.0002  
Y 0.0013 0.0002 -0.0005 0.0012 0.0002 0.0001  
Z -0.0000 -0.0000 -0.0000 -0.0001 0.0001 0.0001

AT.166 O X -0.0008 0.0001 0.0003 0.0007 0.0002 -0.0002  
Y 0.0013 -0.0002 -0.0005 -0.0012 0.0002 -0.0001  
Z -0.0000 0.0000 -0.0000 0.0001 0.0001 -0.0001

AT.167 H X 0.0057 0.0004 -0.0016 0.0067 0.0016 -0.0002  
Y -0.0128 -0.0007 0.0036 -0.0146 -0.0027 0.0008  
Z 0.0016 0.0004 -0.0004 0.0019 0.0007 -0.0004

AT.168 H X 0.0057 -0.0004 -0.0016 -0.0067 0.0016 0.0002  
Y -0.0128 0.0007 0.0036 0.0146 -0.0027 -0.0008

Z 0.0016 -0.0004 -0.0004 -0.0019 0.0007 0.0004  
AT. 169 O X 0.0004 -0.0001 -0.0001 0.0004 -0.0000 0.0003  
Y -0.0001 -0.0000 0.0001 0.0000 -0.0001 -0.0004  
Z 0.0004 0.0001 -0.0003 0.0004 0.0001 0.0002  
AT. 170 O X 0.0004 0.0001 -0.0001 -0.0004 -0.0000 -0.0003  
Y -0.0001 0.0000 0.0001 -0.0000 -0.0001 0.0004  
Z 0.0004 -0.0001 -0.0003 -0.0004 0.0001 -0.0002  
AT. 171 H X 0.0009 0.0019 -0.0008 0.0029 0.0017 -0.0058  
Y -0.0002 0.0010 -0.0002 0.0012 0.0007 -0.0037  
Z 0.0003 0.0002 -0.0004 0.0005 0.0002 -0.0006  
AT. 172 H X 0.0009 -0.0019 -0.0008 -0.0029 0.0017 0.0058  
Y -0.0002 -0.0010 -0.0002 -0.0012 0.0007 0.0037  
Z 0.0003 -0.0002 -0.0004 -0.0005 0.0002 0.0006

FREQ(CM\*\*-1) 626.44 627.43 702.04 702.88 710.73 711.57

AT. 1 I X -0.0003 0.0000 -0.0002 -0.0001 -0.0000 -0.0000  
Y -0.0002 0.0000 -0.0003 -0.0001 -0.0000 -0.0000  
Z -0.0001 0.0000 0.0000 -0.0000 -0.0000 -0.0000  
AT. 2 I X 0.0003 0.0000 0.0002 -0.0001 -0.0000 0.0000  
Y 0.0002 0.0000 0.0003 -0.0001 -0.0000 0.0000  
Z 0.0001 0.0000 -0.0000 -0.0000 -0.0000 0.0000  
AT. 3 I X 0.0001 0.0000 -0.0007 -0.0007 -0.0000 0.0000  
Y 0.0001 0.0000 -0.0006 -0.0006 -0.0000 0.0000  
Z 0.0000 0.0000 -0.0010 -0.0010 -0.0000 -0.0000  
AT. 4 I X -0.0001 0.0000 0.0007 -0.0007 -0.0000 -0.0000  
Y -0.0001 0.0000 0.0006 -0.0006 -0.0000 -0.0000  
Z -0.0000 0.0000 0.0010 -0.0010 -0.0000 0.0000  
AT. 5 O X -0.0014 0.0001 0.0015 -0.0000 0.0000 0.0000  
Y 0.0025 -0.0002 0.0029 0.0028 0.0003 0.0001  
Z -0.0056 0.0004 0.0032 -0.0002 0.0001 0.0001  
AT. 6 O X 0.0014 0.0001 -0.0015 -0.0000 0.0000 -0.0000

Y -0.0025 -0.0002 -0.0029 0.0028 0.0003 -0.0001  
Z 0.0056 0.0004 -0.0032 -0.0002 0.0001 -0.0001  
AT. 7 O X 0.0005 0.0003 0.0001 0.0003 0.0000 -0.0000  
Y 0.0003 0.0002 0.0198 0.0203 0.0000 0.0001  
Z -0.0010 -0.0005 0.0019 0.0015 -0.0001 -0.0001  
AT. 8 O X -0.0005 0.0003 -0.0001 0.0003 0.0000 0.0000  
Y -0.0003 0.0002 -0.0198 0.0203 0.0000 -0.0001  
Z 0.0010 -0.0005 -0.0019 0.0015 -0.0001 0.0001  
AT. 9 N X -0.0009 0.0001 0.0027 0.0019 0.0001 0.0002  
Y 0.0033 -0.0003 0.0018 0.0015 0.0002 0.0000  
Z 0.0035 -0.0002 -0.0004 0.0000 -0.0000 -0.0000  
AT. 10 N X 0.0009 0.0001 -0.0027 0.0019 0.0001 -0.0002  
Y -0.0033 -0.0003 -0.0018 0.0015 0.0002 -0.0000  
Z -0.0035 -0.0002 0.0004 0.0000 -0.0000 0.0000  
AT. 11 N X -0.0001 0.0001 0.0120 0.0124 -0.0001 0.0000  
Y 0.0000 -0.0003 0.0106 0.0107 -0.0001 -0.0000  
Z 0.0005 0.0000 0.0041 0.0045 0.0001 0.0000  
AT. 12 N X 0.0001 0.0001 -0.0120 0.0124 -0.0001 -0.0000  
Y -0.0000 -0.0003 -0.0106 0.0107 -0.0001 0.0000  
Z -0.0005 0.0000 -0.0041 0.0045 0.0001 -0.0000  
AT. 13 C X 0.0025 -0.0002 -0.0087 -0.0050 -0.0007 -0.0003  
Y -0.0024 0.0001 -0.0088 -0.0053 -0.0007 -0.0003  
Z 0.0020 -0.0001 -0.0006 -0.0002 -0.0000 -0.0001  
AT. 14 C X -0.0025 -0.0002 0.0087 -0.0050 -0.0007 0.0003  
Y 0.0024 0.0001 0.0088 -0.0053 -0.0007 0.0003  
Z -0.0020 -0.0001 0.0006 -0.0002 -0.0000 0.0001  
AT. 15 C X 0.0079 -0.0005 0.0040 0.0032 0.0004 0.0001  
Y -0.0033 0.0002 0.0058 0.0025 0.0003 0.0002  
Z 0.0028 -0.0002 -0.0005 0.0001 0.0001 0.0001  
AT. 16 C X -0.0079 -0.0005 -0.0040 0.0032 0.0004 -0.0001  
Y 0.0033 0.0002 -0.0058 0.0025 0.0003 -0.0002  
Z -0.0028 -0.0002 0.0005 0.0001 0.0001 -0.0001

AT. 17 H X 0.0093 -0.0009 0.0071 0.0053 0.0010 0.0004  
Y -0.0016 0.0001 0.0045 0.0019 0.0003 0.0004  
Z 0.0010 -0.0001 0.0024 0.0017 0.0003 -0.0001

AT. 18 H X -0.0093 -0.0009 -0.0071 0.0053 0.0010 -0.0004  
Y 0.0016 0.0001 -0.0045 0.0019 0.0003 -0.0004  
Z -0.0010 -0.0001 -0.0024 0.0017 0.0003 0.0001

AT. 19 H X 0.0087 -0.0003 0.0104 0.0059 0.0009 0.0003  
Y -0.0075 0.0008 0.0047 0.0015 -0.0000 -0.0002  
Z 0.0016 0.0001 0.0010 0.0006 0.0001 -0.0000

AT. 20 H X -0.0087 -0.0003 -0.0104 0.0059 0.0009 -0.0003  
Y 0.0075 0.0008 -0.0047 0.0015 -0.0000 0.0002  
Z -0.0016 0.0001 -0.0010 0.0006 0.0001 0.0000

AT. 21 C X -0.0007 -0.0001 -0.0422 -0.0433 -0.0001 -0.0001  
Y -0.0003 0.0001 -0.0402 -0.0410 0.0000 -0.0001  
Z 0.0003 0.0001 -0.0225 -0.0229 -0.0001 -0.0001

AT. 22 C X 0.0007 -0.0001 0.0422 -0.0433 -0.0001 0.0001  
Y 0.0003 0.0001 0.0402 -0.0410 0.0000 0.0001  
Z -0.0003 0.0001 0.0225 -0.0229 -0.0001 0.0001

AT. 23 C X -0.0017 -0.0009 0.0215 0.0213 0.0002 -0.0001  
Y -0.0003 -0.0002 0.0080 0.0084 0.0000 0.0000  
Z 0.0007 0.0001 0.0228 0.0234 -0.0000 0.0002

AT. 24 C X 0.0017 -0.0009 -0.0215 0.0213 0.0002 0.0001  
Y 0.0003 -0.0002 -0.0080 0.0084 0.0000 -0.0000  
Z -0.0007 0.0001 -0.0228 0.0234 -0.0000 -0.0002

AT. 25 H X -0.0024 -0.0017 0.0541 0.0555 0.0003 -0.0003  
Y 0.0000 -0.0002 0.0194 0.0201 0.0000 0.0000  
Z -0.0022 -0.0009 -0.0204 -0.0197 0.0000 0.0000

AT. 26 H X 0.0024 -0.0017 -0.0541 0.0555 0.0003 0.0003  
Y -0.0000 -0.0002 -0.0194 0.0201 0.0000 -0.0000  
Z 0.0022 -0.0009 0.0204 -0.0197 0.0000 -0.0000

AT. 27 H X -0.0013 -0.0007 0.0357 0.0356 0.0002 -0.0001  
Y 0.0028 0.0010 0.0283 0.0279 0.0000 0.0001

Z 0.0023 0.0007 0.0310 0.0311 -0.0001 0.0002  
AT. 28 H X 0.0013 -0.0007 -0.0357 0.0356 0.0002 0.0001  
Y -0.0028 0.0010 -0.0283 0.0279 0.0000 -0.0001  
Z -0.0023 0.0007 -0.0310 0.0311 -0.0001 -0.0002  
AT. 29 C X -0.0020 0.0001 -0.0001 -0.0005 0.0000 -0.0001  
Y 0.0027 -0.0003 -0.0021 -0.0014 0.0000 0.0001  
Z 0.0002 -0.0001 -0.0014 -0.0000 -0.0000 -0.0000  
AT. 30 C X 0.0020 0.0001 0.0001 -0.0005 0.0000 0.0001  
Y -0.0027 -0.0003 0.0021 -0.0014 0.0000 -0.0001  
Z -0.0002 -0.0001 0.0014 -0.0000 -0.0000 0.0000  
AT. 31 H X 0.0009 -0.0001 -0.0034 -0.0016 0.0000 -0.0004  
Y -0.0015 -0.0000 0.0004 -0.0017 0.0000 0.0003  
Z -0.0043 0.0002 0.0004 -0.0012 -0.0000 0.0002  
AT. 32 H X -0.0009 -0.0001 0.0034 -0.0016 0.0000 0.0004  
Y 0.0015 -0.0000 -0.0004 -0.0017 0.0000 -0.0003  
Z 0.0043 0.0002 -0.0004 -0.0012 -0.0000 -0.0002  
AT. 33 H X -0.0037 0.0003 -0.0026 0.0025 0.0000 -0.0003  
Y 0.0085 -0.0007 -0.0057 -0.0002 0.0003 -0.0006  
Z -0.0037 0.0002 -0.0016 0.0015 -0.0001 0.0001  
AT. 34 H X 0.0037 0.0003 0.0026 0.0025 0.0000 0.0003  
Y -0.0085 -0.0007 0.0057 -0.0002 0.0003 0.0006  
Z 0.0037 0.0002 0.0016 0.0015 -0.0001 -0.0001  
AT. 35 C X -0.0004 -0.0001 -0.0015 -0.0018 0.0000 -0.0001  
Y -0.0010 -0.0000 -0.0005 -0.0012 0.0000 -0.0001  
Z -0.0002 -0.0000 0.0009 0.0001 -0.0000 0.0001  
AT. 36 C X 0.0004 -0.0001 0.0015 -0.0018 0.0000 0.0001  
Y 0.0010 -0.0000 0.0005 -0.0012 0.0000 0.0001  
Z 0.0002 -0.0000 -0.0009 0.0001 -0.0000 -0.0001  
AT. 37 C X -0.0007 0.0003 0.0085 0.0084 -0.0000 -0.0001  
Y -0.0006 -0.0001 -0.0016 -0.0025 0.0001 -0.0001  
Z 0.0006 0.0002 0.0018 0.0018 0.0001 0.0002  
AT. 38 C X 0.0007 0.0003 -0.0085 0.0084 -0.0000 0.0001

Y 0.0006 -0.0001 0.0016 -0.0025 0.0001 0.0001  
Z -0.0006 0.0002 -0.0018 0.0018 0.0001 -0.0002  
AT. 39 H X 0.0003 0.0009 0.0102 0.0123 0.0002 0.0001  
Y 0.0005 0.0002 -0.0011 0.0001 0.0003 -0.0001  
Z 0.0007 0.0004 0.0030 0.0034 0.0002 0.0003  
AT. 40 H X -0.0003 0.0009 -0.0102 0.0123 0.0002 -0.0001  
Y -0.0005 0.0002 0.0011 0.0001 0.0003 0.0001  
Z -0.0007 0.0004 -0.0030 0.0034 0.0002 -0.0003  
AT. 41 H X -0.0013 0.0002 0.0056 0.0039 0.0001 0.0000  
Y -0.0009 0.0002 -0.0031 -0.0049 0.0001 -0.0001  
Z 0.0015 0.0003 0.0055 0.0079 0.0001 0.0001  
AT. 42 H X 0.0013 0.0002 -0.0056 0.0039 0.0001 -0.0000  
Y 0.0009 0.0002 0.0031 -0.0049 0.0001 0.0001  
Z -0.0015 0.0003 -0.0055 0.0079 0.0001 -0.0001  
AT. 43 C X 0.0006 0.0004 0.0040 0.0041 0.0002 0.0003  
Y -0.0002 -0.0003 -0.0019 -0.0018 -0.0002 0.0002  
Z -0.0003 0.0000 -0.0024 -0.0024 0.0003 -0.0001  
AT. 44 C X -0.0006 0.0004 -0.0040 0.0041 0.0002 -0.0003  
Y 0.0002 -0.0003 0.0019 -0.0018 -0.0002 -0.0002  
Z 0.0003 0.0000 0.0024 -0.0024 0.0003 0.0001  
AT. 45 H X 0.0002 -0.0001 -0.0085 -0.0090 -0.0000 0.0002  
Y -0.0020 -0.0003 0.0078 0.0080 0.0000 0.0004  
Z 0.0016 0.0003 -0.0033 -0.0030 0.0003 -0.0003  
AT. 46 H X -0.0002 -0.0001 0.0085 -0.0090 -0.0000 -0.0002  
Y 0.0020 -0.0003 -0.0078 0.0080 0.0000 -0.0004  
Z -0.0016 0.0003 0.0033 -0.0030 0.0003 0.0003  
AT. 47 H X 0.0013 0.0006 0.0041 0.0045 0.0004 0.0005  
Y 0.0013 -0.0001 -0.0093 -0.0093 0.0003 0.0006  
Z 0.0002 -0.0003 -0.0104 -0.0110 0.0007 0.0001  
AT. 48 H X -0.0013 0.0006 -0.0041 0.0045 0.0004 -0.0005  
Y -0.0013 -0.0001 0.0093 -0.0093 0.0003 -0.0006  
Z -0.0002 -0.0003 0.0104 -0.0110 0.0007 -0.0001



AT. 49 C X 0.0007 -0.0001 -0.0003 -0.0003 -0.0001 -0.0000  
Y -0.0000 0.0002 -0.0007 -0.0006 -0.0001 0.0001  
Z -0.0011 0.0001 0.0005 0.0005 0.0000 -0.0000

AT. 50 C X -0.0007 -0.0001 0.0003 -0.0003 -0.0001 0.0000  
Y 0.0000 0.0002 0.0007 -0.0006 -0.0001 -0.0001  
Z 0.0011 0.0001 -0.0005 0.0005 0.0000 0.0000

AT. 51 C X -0.0042 0.0004 0.0012 -0.0004 -0.0002 0.0001  
Y 0.0015 -0.0000 -0.0016 -0.0009 0.0001 -0.0004  
Z 0.0043 -0.0004 -0.0021 -0.0007 -0.0004 -0.0001

AT. 52 C X 0.0042 0.0004 -0.0012 -0.0004 -0.0002 -0.0001  
Y -0.0015 -0.0000 0.0016 -0.0009 0.0001 0.0004  
Z -0.0043 -0.0004 0.0021 -0.0007 -0.0004 0.0001

AT. 53 H X -0.0061 0.0005 0.0035 0.0016 -0.0004 0.0003  
Y 0.0003 -0.0001 0.0002 0.0006 -0.0002 -0.0003  
Z 0.0062 -0.0006 -0.0042 -0.0026 -0.0003 -0.0003

AT. 54 H X 0.0061 0.0005 -0.0035 0.0016 -0.0004 -0.0003  
Y -0.0003 -0.0001 -0.0002 0.0006 -0.0002 0.0003  
Z -0.0062 -0.0006 0.0042 -0.0026 -0.0003 0.0003

AT. 55 H X -0.0004 0.0002 -0.0024 -0.0031 0.0006 -0.0005  
Y 0.0003 0.0001 -0.0014 -0.0010 0.0000 -0.0003  
Z 0.0053 -0.0003 -0.0041 -0.0025 -0.0001 -0.0003

AT. 56 H X 0.0004 0.0002 0.0024 -0.0031 0.0006 0.0005  
Y -0.0003 0.0001 0.0014 -0.0010 0.0000 0.0003  
Z -0.0053 -0.0003 0.0041 -0.0025 -0.0001 0.0003

AT. 57 C X 0.0000 -0.0001 -0.0016 -0.0019 0.0000 -0.0000  
Y 0.0001 0.0001 0.0013 0.0013 0.0000 -0.0000  
Z 0.0001 -0.0001 -0.0007 -0.0010 0.0001 -0.0001

AT. 58 C X -0.0000 -0.0001 0.0016 -0.0019 0.0000 0.0000  
Y -0.0001 0.0001 -0.0013 0.0013 0.0000 0.0000  
Z -0.0001 -0.0001 0.0007 -0.0010 0.0001 0.0001

AT. 59 H X 0.0015 0.0002 0.0031 0.0035 0.0000 0.0001  
Y -0.0002 -0.0000 -0.0006 -0.0003 -0.0001 0.0000

Z 0.0006 -0.0002 -0.0001 0.0004 0.0000 -0.0000  
AT. 60 H X -0.0015 0.0002 -0.0031 0.0035 0.0000 -0.0001  
Y 0.0002 -0.0000 0.0006 -0.0003 -0.0001 -0.0000  
Z -0.0006 -0.0002 0.0001 0.0004 0.0000 0.0000  
AT. 61 H X 0.0008 -0.0002 -0.0028 -0.0017 -0.0005 0.0004  
Y 0.0007 0.0002 0.0040 0.0042 -0.0002 0.0004  
Z 0.0005 -0.0003 -0.0030 -0.0024 -0.0002 0.0000  
AT. 62 H X -0.0008 -0.0002 0.0028 -0.0017 -0.0005 -0.0004  
Y -0.0007 0.0002 -0.0040 0.0042 -0.0002 -0.0004  
Z -0.0005 -0.0003 0.0030 -0.0024 -0.0002 -0.0000  
AT. 63 H X -0.0013 -0.0000 -0.0007 -0.0026 0.0002 -0.0002  
Y 0.0018 0.0001 0.0027 0.0045 0.0005 -0.0006  
Z -0.0001 -0.0002 -0.0027 -0.0031 -0.0004 0.0005  
AT. 64 H X 0.0013 -0.0000 0.0007 -0.0026 0.0002 0.0002  
Y -0.0018 0.0001 -0.0027 0.0045 0.0005 0.0006  
Z 0.0001 -0.0002 0.0027 -0.0031 -0.0004 -0.0005  
AT. 65 C X 0.0018 -0.0001 -0.0009 -0.0009 0.0000 0.0000  
Y -0.0016 0.0002 0.0004 0.0003 0.0000 -0.0000  
Z -0.0027 0.0004 0.0014 0.0012 0.0000 0.0001  
AT. 66 C X -0.0018 -0.0001 0.0009 -0.0009 0.0000 -0.0000  
Y 0.0016 0.0002 -0.0004 0.0003 0.0000 0.0000  
Z 0.0027 0.0004 -0.0014 0.0012 0.0000 -0.0001  
AT. 67 H X -0.0008 -0.0001 0.0006 -0.0006 -0.0000 -0.0001  
Y -0.0012 0.0001 -0.0004 0.0000 0.0000 0.0002  
Z -0.0010 0.0005 0.0008 0.0011 0.0001 -0.0001  
AT. 68 H X 0.0008 -0.0001 -0.0006 -0.0006 -0.0000 0.0001  
Y 0.0012 0.0001 0.0004 0.0000 0.0000 -0.0002  
Z 0.0010 0.0005 -0.0008 0.0011 0.0001 0.0001  
AT. 69 H X 0.0017 -0.0002 -0.0020 -0.0017 0.0002 0.0000  
Y -0.0029 0.0002 0.0008 0.0002 0.0002 -0.0000  
Z -0.0045 0.0005 0.0042 0.0027 -0.0001 0.0002  
AT. 70 H X -0.0017 -0.0002 0.0020 -0.0017 0.0002 -0.0000

Y 0.0029 0.0002 -0.0008 0.0002 0.0002 0.0000  
Z 0.0045 0.0005 -0.0042 0.0027 -0.0001 -0.0002  
AT. 71 H X 0.0013 0.0000 0.0007 0.0002 0.0001 0.0000  
Y -0.0026 0.0000 -0.0002 -0.0003 0.0001 0.0001  
Z -0.0043 0.0002 0.0018 0.0013 0.0002 0.0003  
AT. 72 H X -0.0013 0.0000 -0.0007 0.0002 0.0001 -0.0000  
Y 0.0026 0.0000 0.0002 -0.0003 0.0001 -0.0001  
Z 0.0043 0.0002 -0.0018 0.0013 0.0002 -0.0003  
AT. 73 C X 0.0004 -0.0001 -0.0018 -0.0011 0.0001 -0.0000  
Y -0.0002 0.0003 0.0008 0.0002 0.0001 0.0000  
Z -0.0015 -0.0000 0.0031 0.0013 -0.0001 -0.0000  
AT. 74 C X -0.0004 -0.0001 0.0018 -0.0011 0.0001 0.0000  
Y 0.0002 0.0003 -0.0008 0.0002 0.0001 -0.0000  
Z 0.0015 -0.0000 -0.0031 0.0013 -0.0001 0.0000  
AT. 75 H X 0.0003 0.0000 -0.0004 0.0009 0.0006 0.0000  
Y 0.0010 0.0007 0.0016 0.0009 0.0005 0.0002  
Z 0.0001 0.0005 0.0051 0.0037 0.0007 0.0003  
AT. 76 H X -0.0003 0.0000 0.0004 0.0009 0.0006 -0.0000  
Y -0.0010 0.0007 -0.0016 0.0009 0.0005 -0.0002  
Z -0.0001 0.0005 -0.0051 0.0037 0.0007 -0.0003  
AT. 77 H X 0.0008 0.0003 -0.0013 -0.0000 0.0005 0.0003  
Y 0.0004 0.0001 0.0026 0.0016 0.0003 -0.0003  
Z -0.0023 -0.0001 0.0010 -0.0011 -0.0005 -0.0000  
AT. 78 H X -0.0008 0.0003 0.0013 -0.0000 0.0005 -0.0003  
Y -0.0004 0.0001 -0.0026 0.0016 0.0003 0.0003  
Z 0.0023 -0.0001 -0.0010 -0.0011 -0.0005 0.0000  
AT. 79 I X 0.0000 0.0002 0.0000 -0.0000 0.0004 -0.0004  
Y -0.0000 -0.0002 -0.0000 -0.0000 -0.0012 0.0013  
Z -0.0001 -0.0001 0.0000 0.0000 0.0003 -0.0003  
AT. 80 I X -0.0000 0.0002 -0.0000 -0.0000 0.0004 0.0004  
Y 0.0000 -0.0002 0.0000 -0.0000 -0.0012 -0.0013  
Z 0.0001 -0.0001 -0.0000 0.0000 0.0003 0.0003

AT. 81 I X -0.0015 -0.0016 -0.0000 -0.0000 0.0001 -0.0000  
Y 0.0015 0.0015 0.0000 0.0000 -0.0004 0.0001  
Z 0.0006 0.0007 -0.0000 -0.0000 -0.0003 0.0001

AT. 82 I X 0.0015 -0.0016 0.0000 -0.0000 0.0001 0.0000  
Y -0.0015 0.0015 -0.0000 0.0000 -0.0004 -0.0001  
Z -0.0006 0.0007 0.0000 -0.0000 -0.0003 -0.0001

AT. 83 O X 0.0009 0.0013 -0.0000 -0.0001 0.0061 -0.0065  
Y 0.0006 0.0005 0.0001 0.0001 0.0160 -0.0178  
Z -0.0011 -0.0040 0.0000 0.0000 0.0078 -0.0084

AT. 84 O X -0.0009 0.0013 0.0000 -0.0001 0.0061 0.0065  
Y -0.0006 0.0005 -0.0001 0.0001 0.0160 0.0178  
Z 0.0011 -0.0040 -0.0000 0.0000 0.0078 0.0084

AT. 85 O X -0.0134 -0.0139 -0.0001 -0.0001 0.0011 0.0008  
Y 0.0104 0.0103 -0.0003 -0.0004 0.0080 -0.0026  
Z -0.0289 -0.0292 -0.0001 -0.0001 0.0013 0.0009

AT. 86 O X 0.0134 -0.0139 0.0001 -0.0001 0.0011 -0.0008  
Y -0.0104 0.0103 0.0003 -0.0004 0.0080 0.0026  
Z 0.0289 -0.0292 0.0001 -0.0001 0.0013 -0.0009

AT. 87 N X -0.0014 0.0002 0.0001 0.0000 -0.0074 0.0080  
Y -0.0014 -0.0002 0.0000 -0.0001 0.0136 -0.0148  
Z 0.0009 0.0023 0.0000 -0.0000 0.0020 -0.0020

AT. 88 N X 0.0014 0.0002 -0.0001 0.0000 -0.0074 -0.0080  
Y 0.0014 -0.0002 -0.0000 -0.0001 0.0136 0.0148  
Z -0.0009 0.0023 -0.0000 -0.0000 0.0020 0.0020

AT. 89 N X -0.0079 -0.0074 0.0002 0.0002 -0.0034 0.0015  
Y -0.0196 -0.0198 0.0002 0.0002 0.0043 -0.0013  
Z 0.0064 0.0069 0.0000 -0.0000 0.0031 -0.0013

AT. 90 N X 0.0079 -0.0074 -0.0002 0.0002 -0.0034 -0.0015  
Y 0.0196 -0.0198 -0.0002 0.0002 0.0043 0.0013  
Z -0.0064 0.0069 -0.0000 -0.0000 0.0031 0.0013

AT. 91 C X -0.0010 -0.0022 0.0002 0.0002 0.0240 -0.0263  
Y 0.0013 0.0006 -0.0004 -0.0004 -0.0532 0.0582

Z 0.0010 0.0031 -0.0001 -0.0001 -0.0050 0.0057  
AT. 92 C X 0.0010 -0.0022 -0.0002 0.0002 0.0240 0.0263  
Y -0.0013 0.0006 0.0004 -0.0004 -0.0532 -0.0582  
Z -0.0010 0.0031 0.0001 -0.0001 -0.0050 -0.0057  
AT. 93 C X -0.0012 -0.0068 -0.0001 0.0001 -0.0120 0.0128  
Y -0.0007 0.0001 0.0001 0.0003 0.0257 -0.0276  
Z 0.0014 0.0022 -0.0003 -0.0003 -0.0080 0.0086  
AT. 94 C X 0.0012 -0.0068 0.0001 0.0001 -0.0120 -0.0128  
Y 0.0007 0.0001 -0.0001 0.0003 0.0257 0.0276  
Z -0.0014 0.0022 0.0003 -0.0003 -0.0080 -0.0086  
AT. 95 H X 0.0011 -0.0054 -0.0001 -0.0000 -0.0413 0.0457  
Y -0.0002 0.0026 -0.0002 -0.0001 0.0293 -0.0323  
Z -0.0021 -0.0039 0.0005 0.0005 0.0196 -0.0214  
AT. 96 H X -0.0011 -0.0054 0.0001 -0.0000 -0.0413 -0.0457  
Y 0.0002 0.0026 0.0002 -0.0001 0.0293 0.0323  
Z 0.0021 -0.0039 -0.0005 0.0005 0.0196 0.0214  
AT. 97 H X -0.0039 -0.0086 -0.0001 0.0001 -0.0286 0.0305  
Y -0.0041 -0.0066 0.0010 0.0009 0.0335 -0.0360  
Z 0.0013 0.0014 -0.0001 -0.0002 -0.0012 0.0014  
AT. 98 H X 0.0039 -0.0086 0.0001 0.0001 -0.0286 -0.0305  
Y 0.0041 -0.0066 -0.0010 0.0009 0.0335 0.0360  
Z -0.0013 0.0014 0.0001 -0.0002 -0.0012 -0.0014  
AT. 99 C X 0.0123 0.0123 -0.0005 -0.0006 0.0124 -0.0031  
Y -0.0005 -0.0006 0.0005 0.0007 -0.0183 0.0050  
Z 0.0181 0.0188 0.0004 0.0006 -0.0110 0.0030  
AT. 100 C X -0.0123 0.0123 0.0005 -0.0006 0.0124 0.0031  
Y 0.0005 -0.0006 -0.0005 0.0007 -0.0183 -0.0050  
Z -0.0181 0.0188 -0.0004 0.0006 -0.0110 -0.0030  
AT. 101 C X 0.0479 0.0489 0.0001 0.0003 -0.0043 0.0006  
Y -0.0089 -0.0089 -0.0003 -0.0004 0.0087 -0.0019  
Z 0.0128 0.0128 -0.0002 -0.0001 0.0072 -0.0025  
AT. 102 C X -0.0479 0.0489 -0.0001 0.0003 -0.0043 -0.0006

Y 0.0089 -0.0089 0.0003 -0.0004 0.0087 0.0019  
Z -0.0128 0.0128 0.0002 -0.0001 0.0072 0.0025  
AT. 103 H X 0.0555 0.0555 0.0005 0.0010 -0.0192 0.0025  
Y -0.0108 -0.0104 -0.0005 -0.0007 0.0153 -0.0030  
Z -0.0127 -0.0122 -0.0005 -0.0008 0.0048 0.0007  
AT. 104 H X -0.0555 0.0555 -0.0005 0.0010 -0.0192 -0.0025  
Y 0.0108 -0.0104 0.0005 -0.0007 0.0153 0.0030  
Z 0.0127 -0.0122 0.0005 -0.0008 0.0048 -0.0007  
AT. 105 H X 0.0606 0.0617 0.0003 0.0008 -0.0108 0.0015  
Y 0.0203 0.0197 0.0003 0.0006 0.0043 -0.0044  
Z 0.0275 0.0270 0.0001 0.0004 0.0041 -0.0034  
AT. 106 H X -0.0606 0.0617 -0.0003 0.0008 -0.0108 -0.0015  
Y -0.0203 0.0197 -0.0003 0.0006 0.0043 0.0044  
Z -0.0275 0.0270 -0.0001 0.0004 0.0041 0.0034  
AT. 107 C X 0.0010 0.0019 -0.0001 -0.0002 -0.0036 0.0040  
Y -0.0000 0.0012 -0.0000 -0.0001 -0.0013 0.0008  
Z -0.0001 -0.0004 0.0001 0.0001 0.0014 -0.0018  
AT. 108 C X -0.0010 0.0019 0.0001 -0.0002 -0.0036 -0.0040  
Y 0.0000 0.0012 0.0000 -0.0001 -0.0013 -0.0008  
Z 0.0001 -0.0004 -0.0001 0.0001 0.0014 0.0018  
AT. 109 H X 0.0024 0.0006 -0.0002 -0.0003 0.0109 -0.0120  
Y 0.0037 0.0032 0.0001 -0.0001 0.0032 -0.0043  
Z 0.0061 0.0036 0.0003 -0.0000 0.0055 -0.0065  
AT. 110 H X -0.0024 0.0006 0.0002 -0.0003 0.0109 0.0120  
Y -0.0037 0.0032 -0.0001 -0.0001 0.0032 0.0043  
Z -0.0061 0.0036 -0.0003 -0.0000 0.0055 0.0065  
AT. 111 H X -0.0010 0.0012 -0.0001 -0.0003 -0.0064 0.0070  
Y -0.0045 -0.0005 -0.0002 0.0001 -0.0112 0.0119  
Z 0.0030 0.0007 0.0001 0.0001 0.0069 -0.0077  
AT. 112 H X 0.0010 0.0012 0.0001 -0.0003 -0.0064 -0.0070  
Y 0.0045 -0.0005 0.0002 0.0001 -0.0112 -0.0119  
Z -0.0030 0.0007 -0.0001 0.0001 0.0069 0.0077

AT. 113 C X 0.0045 0.0046 -0.0000 0.0000 0.0008 -0.0004  
Y 0.0010 0.0006 0.0000 0.0001 -0.0013 0.0010  
Z -0.0025 -0.0025 0.0001 0.0001 -0.0005 0.0007

AT. 114 C X -0.0045 0.0046 0.0000 0.0000 0.0008 0.0004  
Y -0.0010 0.0006 -0.0000 0.0001 -0.0013 -0.0010  
Z 0.0025 -0.0025 -0.0001 0.0001 -0.0005 -0.0007

AT. 115 C X -0.0229 -0.0225 0.0004 0.0004 -0.0037 0.0008  
Y -0.0060 -0.0066 0.0001 -0.0000 -0.0013 0.0016  
Z 0.0095 0.0097 -0.0000 -0.0000 0.0020 -0.0009

AT. 116 C X 0.0229 -0.0225 -0.0004 0.0004 -0.0037 -0.0008  
Y 0.0060 -0.0066 -0.0001 -0.0000 -0.0013 -0.0016  
Z -0.0095 0.0097 0.0000 -0.0000 0.0020 0.0009

AT. 117 H X -0.0289 -0.0279 0.0008 0.0008 -0.0059 0.0026  
Y -0.0032 -0.0039 -0.0001 -0.0002 0.0011 -0.0008  
Z 0.0150 0.0146 -0.0004 -0.0003 0.0041 -0.0025

AT. 118 H X 0.0289 -0.0279 -0.0008 0.0008 -0.0059 -0.0026  
Y 0.0032 -0.0039 0.0001 -0.0002 0.0011 0.0008  
Z -0.0150 0.0146 0.0004 -0.0003 0.0041 0.0025

AT. 119 H X -0.0102 -0.0104 -0.0002 -0.0000 -0.0005 -0.0016  
Y -0.0034 -0.0042 -0.0000 -0.0001 -0.0038 0.0036  
Z 0.0134 0.0134 -0.0002 -0.0002 0.0059 -0.0041

AT. 120 H X 0.0102 -0.0104 0.0002 -0.0000 -0.0005 0.0016  
Y 0.0034 -0.0042 0.0000 -0.0001 -0.0038 -0.0036  
Z -0.0134 0.0134 0.0002 -0.0002 0.0059 0.0041

AT. 121 C X -0.0116 -0.0113 0.0004 0.0003 -0.0018 0.0009  
Y -0.0086 -0.0085 -0.0006 -0.0002 -0.0013 0.0011  
Z -0.0039 -0.0038 -0.0004 -0.0006 0.0001 0.0002

AT. 122 C X 0.0116 -0.0113 -0.0004 0.0003 -0.0018 -0.0009  
Y 0.0086 -0.0085 0.0006 -0.0002 -0.0013 -0.0011  
Z 0.0039 -0.0038 0.0004 -0.0006 0.0001 -0.0002

AT. 123 H X -0.0009 -0.0006 -0.0010 -0.0013 0.0061 -0.0023  
Y 0.0050 0.0046 -0.0020 -0.0014 0.0013 0.0002

Z -0.0161 -0.0154 0.0006 0.0002 -0.0015 0.0006  
AT. 124 H X 0.0009 -0.0006 0.0010 -0.0013 0.0061 0.0023  
Y -0.0050 0.0046 0.0020 -0.0014 0.0013 -0.0002  
Z 0.0161 -0.0154 -0.0006 0.0002 -0.0015 -0.0006  
AT. 125 H X -0.0216 -0.0213 0.0007 0.0005 -0.0033 0.0017  
Y -0.0176 -0.0170 -0.0004 0.0000 -0.0048 0.0020  
Z -0.0216 -0.0213 -0.0000 -0.0003 -0.0036 0.0017  
AT. 126 H X 0.0216 -0.0213 -0.0007 0.0005 -0.0033 -0.0017  
Y 0.0176 -0.0170 0.0004 0.0000 -0.0048 -0.0020  
Z 0.0216 -0.0213 0.0000 -0.0003 -0.0036 -0.0017  
AT. 127 C X -0.0003 -0.0011 -0.0001 -0.0002 0.0007 -0.0008  
Y 0.0076 0.0077 0.0002 0.0004 -0.0004 0.0004  
Z -0.0012 -0.0018 -0.0001 -0.0000 -0.0001 0.0000  
AT. 128 C X 0.0003 -0.0011 0.0001 -0.0002 0.0007 0.0008  
Y -0.0076 0.0077 -0.0002 0.0004 -0.0004 -0.0004  
Z 0.0012 -0.0018 0.0001 -0.0000 -0.0001 -0.0000  
AT. 129 C X -0.0060 -0.0027 -0.0002 -0.0001 -0.0075 0.0081  
Y 0.0057 0.0058 0.0006 0.0003 0.0005 -0.0005  
Z 0.0032 0.0053 0.0003 0.0003 -0.0028 0.0031  
AT. 130 C X 0.0060 -0.0027 0.0002 -0.0001 -0.0075 -0.0081  
Y -0.0057 0.0058 -0.0006 0.0003 0.0005 0.0005  
Z -0.0032 0.0053 -0.0003 0.0003 -0.0028 -0.0031  
AT. 131 H X -0.0032 0.0010 0.0001 -0.0002 -0.0112 0.0121  
Y -0.0018 -0.0025 0.0002 0.0008 0.0026 -0.0030  
Z 0.0037 0.0067 0.0006 0.0003 -0.0068 0.0073  
AT. 132 H X 0.0032 0.0010 -0.0001 -0.0002 -0.0112 -0.0121  
Y 0.0018 -0.0025 -0.0002 0.0008 0.0026 0.0030  
Z -0.0037 0.0067 -0.0006 0.0003 -0.0068 -0.0073  
AT. 133 H X -0.0100 -0.0094 -0.0004 0.0002 -0.0029 0.0032  
Y 0.0088 0.0088 0.0009 0.0003 -0.0004 0.0005  
Z 0.0101 0.0132 0.0009 0.0000 -0.0058 0.0064  
AT. 134 H X 0.0100 -0.0094 0.0004 0.0002 -0.0029 -0.0032



Y -0.0088 0.0088 -0.0009 0.0003 -0.0004 -0.0005  
Z -0.0101 0.0132 -0.0009 0.0000 -0.0058 -0.0064  
AT. 135 C X 0.0106 0.0107 0.0000 -0.0002 0.0025 -0.0021  
Y 0.0060 0.0061 -0.0001 0.0001 0.0007 -0.0005  
Z -0.0083 -0.0084 0.0002 0.0000 -0.0019 0.0016  
AT. 136 C X -0.0106 0.0107 -0.0000 -0.0002 0.0025 0.0021  
Y -0.0060 0.0061 0.0001 0.0001 0.0007 0.0005  
Z 0.0083 -0.0084 -0.0002 0.0000 -0.0019 -0.0016  
AT. 137 H X -0.0018 -0.0020 -0.0004 0.0005 -0.0007 -0.0007  
Y 0.0054 0.0057 -0.0002 -0.0001 0.0007 -0.0005  
Z -0.0051 -0.0047 0.0001 -0.0004 -0.0008 0.0011  
AT. 138 H X 0.0018 -0.0020 0.0004 0.0005 -0.0007 0.0007  
Y -0.0054 0.0057 0.0002 -0.0001 0.0007 0.0005  
Z 0.0051 -0.0047 -0.0001 -0.0004 -0.0008 -0.0011  
AT. 139 H X 0.0146 0.0145 0.0003 -0.0003 0.0040 -0.0032  
Y 0.0126 0.0129 0.0002 -0.0006 0.0021 -0.0010  
Z -0.0156 -0.0154 -0.0003 0.0004 -0.0042 0.0032  
AT. 140 H X -0.0146 0.0145 -0.0003 -0.0003 0.0040 0.0032  
Y -0.0126 0.0129 -0.0002 -0.0006 0.0021 0.0010  
Z 0.0156 -0.0154 0.0003 0.0004 -0.0042 -0.0032  
AT. 141 H X 0.0101 0.0111 -0.0003 -0.0003 0.0018 -0.0013  
Y 0.0105 0.0112 -0.0001 -0.0001 0.0019 -0.0010  
Z -0.0132 -0.0135 0.0001 0.0001 -0.0035 0.0025  
AT. 142 H X -0.0101 0.0111 0.0003 -0.0003 0.0018 0.0013  
Y -0.0105 0.0112 0.0001 -0.0001 0.0019 0.0010  
Z 0.0132 -0.0135 -0.0001 0.0001 -0.0035 -0.0025  
AT. 143 C X -0.0013 -0.0032 -0.0002 -0.0002 0.0013 -0.0015  
Y -0.0006 -0.0012 -0.0000 -0.0000 0.0004 -0.0005  
Z -0.0002 -0.0020 0.0001 0.0002 0.0011 -0.0012  
AT. 144 C X 0.0013 -0.0032 0.0002 -0.0002 0.0013 0.0015  
Y 0.0006 -0.0012 0.0000 -0.0000 0.0004 0.0005  
Z 0.0002 -0.0020 -0.0001 0.0002 0.0011 0.0012

AT.145 H X 0.0028 0.0023 0.0008 0.0010 -0.0019 0.0020  
Y -0.0035 -0.0044 -0.0003 -0.0003 0.0008 -0.0009  
Z 0.0039 0.0027 0.0007 0.0008 -0.0001 0.0001

AT.146 H X -0.0028 0.0023 -0.0008 0.0010 -0.0019 -0.0020  
Y 0.0035 -0.0044 0.0003 -0.0003 0.0008 0.0009  
Z -0.0039 0.0027 -0.0007 0.0008 -0.0001 -0.0001

AT.147 H X 0.0029 0.0005 -0.0004 -0.0002 0.0024 -0.0024  
Y -0.0049 -0.0058 0.0009 0.0006 0.0013 -0.0016  
Z 0.0037 0.0010 0.0003 0.0005 0.0031 -0.0030

AT.148 H X -0.0029 0.0005 0.0004 -0.0002 0.0024 0.0024  
Y 0.0049 -0.0058 -0.0009 0.0006 0.0013 0.0016  
Z -0.0037 0.0010 -0.0003 0.0005 0.0031 0.0030

AT.149 H X -0.0117 -0.0135 -0.0001 -0.0001 0.0008 -0.0014  
Y -0.0068 -0.0076 -0.0009 -0.0010 0.0013 -0.0016  
Z -0.0053 -0.0075 -0.0014 -0.0015 0.0030 -0.0032

AT.150 H X 0.0117 -0.0135 0.0001 -0.0001 0.0008 0.0014  
Y 0.0068 -0.0076 0.0009 -0.0010 0.0013 0.0016  
Z 0.0053 -0.0075 0.0014 -0.0015 0.0030 0.0032

AT.151 C X 0.0061 0.0056 0.0000 0.0000 0.0019 -0.0013  
Y 0.0030 0.0028 0.0001 0.0002 0.0003 -0.0001  
Z -0.0052 -0.0060 -0.0004 -0.0000 -0.0010 0.0010

AT.152 C X -0.0061 0.0056 -0.0000 0.0000 0.0019 0.0013  
Y -0.0030 0.0028 -0.0001 0.0002 0.0003 0.0001  
Z 0.0052 -0.0060 0.0004 -0.0000 -0.0010 -0.0010

AT.153 H X 0.0103 0.0102 0.0005 0.0007 0.0017 -0.0011  
Y -0.0027 -0.0022 0.0000 -0.0002 0.0016 -0.0012  
Z -0.0162 -0.0162 -0.0007 -0.0009 0.0012 -0.0008

AT.154 H X -0.0103 0.0102 -0.0005 0.0007 0.0017 0.0011  
Y 0.0027 -0.0022 -0.0000 -0.0002 0.0016 0.0012  
Z 0.0162 -0.0162 0.0007 -0.0009 0.0012 0.0008

AT.155 H X 0.0046 0.0040 0.0001 -0.0001 0.0001 0.0008  
Y -0.0072 -0.0070 -0.0005 -0.0003 0.0016 -0.0011

Z 0.0048 0.0036 0.0002 0.0005 -0.0030 0.0028  
AT. 156 H X -0.0046 0.0040 -0.0001 -0.0001 0.0001 -0.0008  
Y 0.0072 -0.0070 0.0005 -0.0003 0.0016 0.0011  
Z -0.0048 0.0036 -0.0002 0.0005 -0.0030 -0.0028  
AT. 157 O X 0.0001 0.0000 0.0011 -0.0010 -0.0000 0.0001  
Y -0.0004 -0.0001 -0.0008 -0.0001 -0.0000 -0.0000  
Z 0.0002 0.0001 0.0013 -0.0010 0.0000 0.0001  
AT. 158 O X -0.0001 0.0000 -0.0011 -0.0010 -0.0000 -0.0001  
Y 0.0004 -0.0001 0.0008 -0.0001 -0.0000 0.0000  
Z -0.0002 0.0001 -0.0013 -0.0010 0.0000 -0.0001  
AT. 159 O X -0.0003 -0.0001 -0.0004 0.0003 0.0000 -0.0000  
Y 0.0001 -0.0001 0.0016 -0.0013 -0.0000 0.0001  
Z -0.0001 0.0001 0.0000 0.0001 0.0000 -0.0000  
AT. 160 O X 0.0003 -0.0001 0.0004 0.0003 0.0000 0.0000  
Y -0.0001 -0.0001 -0.0016 -0.0013 -0.0000 -0.0001  
Z 0.0001 0.0001 -0.0000 0.0001 0.0000 0.0000  
AT. 161 H X -0.0018 0.0001 -0.0225 0.0173 -0.0003 -0.0008  
Y 0.0006 -0.0001 0.0079 -0.0065 0.0001 0.0003  
Z -0.0039 0.0002 -0.0382 0.0288 -0.0004 -0.0015  
AT. 162 H X 0.0018 0.0001 0.0225 0.0173 -0.0003 0.0008  
Y -0.0006 -0.0001 -0.0079 -0.0065 0.0001 -0.0003  
Z 0.0039 0.0002 0.0382 0.0288 -0.0004 0.0015  
AT. 163 H X -0.0004 0.0000 -0.0028 0.0027 0.0001 -0.0001  
Y -0.0004 0.0011 -0.0357 0.0330 0.0006 -0.0014  
Z -0.0001 0.0004 -0.0086 0.0077 0.0001 -0.0003  
AT. 164 H X 0.0004 0.0000 0.0028 0.0027 0.0001 0.0001  
Y 0.0004 0.0011 0.0357 0.0330 0.0006 0.0014  
Z 0.0001 0.0004 0.0086 0.0077 0.0001 0.0003  
AT. 165 O X 0.0002 0.0001 0.0000 -0.0000 -0.0011 0.0011  
Y -0.0000 -0.0002 -0.0000 0.0001 -0.0027 0.0028  
Z -0.0009 0.0010 -0.0000 -0.0000 0.0005 -0.0003  
AT. 166 O X -0.0002 0.0001 -0.0000 -0.0000 -0.0011 -0.0011

|                                                        |   |         |         |         |         |         |         |
|--------------------------------------------------------|---|---------|---------|---------|---------|---------|---------|
|                                                        | Y | 0.0000  | -0.0002 | 0.0000  | 0.0001  | -0.0027 | -0.0028 |
|                                                        | Z | 0.0009  | 0.0010  | 0.0000  | -0.0000 | 0.0005  | 0.0003  |
| AT. 167 H X                                            |   | 0.0042  | -0.0051 | -0.0001 | 0.0008  | -0.0244 | 0.0219  |
|                                                        | Y | -0.0093 | 0.0111  | 0.0001  | -0.0015 | 0.0476  | -0.0420 |
|                                                        | Z | 0.0028  | -0.0035 | -0.0001 | 0.0005  | -0.0142 | 0.0122  |
| AT. 168 H X                                            |   | -0.0042 | -0.0051 | 0.0001  | 0.0008  | -0.0244 | -0.0219 |
|                                                        | Y | 0.0093  | 0.0111  | -0.0001 | -0.0015 | 0.0476  | 0.0420  |
|                                                        | Z | -0.0028 | -0.0035 | 0.0001  | 0.0005  | -0.0142 | -0.0122 |
| AT. 169 O X                                            |   | -0.0019 | 0.0019  | 0.0000  | -0.0001 | 0.0015  | -0.0007 |
|                                                        | Y | 0.0021  | -0.0021 | 0.0001  | -0.0001 | -0.0001 | -0.0001 |
|                                                        | Z | -0.0006 | 0.0007  | -0.0001 | 0.0001  | -0.0008 | 0.0008  |
| AT. 170 O X                                            |   | 0.0019  | 0.0019  | -0.0000 | -0.0001 | 0.0015  | 0.0007  |
|                                                        | Y | -0.0021 | -0.0021 | -0.0001 | -0.0001 | -0.0001 | 0.0001  |
|                                                        | Z | 0.0006  | 0.0007  | 0.0001  | 0.0001  | -0.0008 | -0.0008 |
| AT. 171 H X                                            |   | 0.0258  | -0.0273 | -0.0012 | 0.0018  | -0.0370 | 0.0181  |
|                                                        | Y | 0.0162  | -0.0169 | -0.0006 | 0.0008  | -0.0185 | 0.0089  |
|                                                        | Z | 0.0031  | -0.0033 | -0.0001 | 0.0002  | -0.0033 | 0.0024  |
| AT. 172 H X                                            |   | -0.0258 | -0.0273 | 0.0012  | 0.0018  | -0.0370 | -0.0181 |
|                                                        | Y | -0.0162 | -0.0169 | 0.0006  | 0.0008  | -0.0185 | -0.0089 |
|                                                        | Z | -0.0031 | -0.0033 | 0.0001  | 0.0002  | -0.0033 | -0.0024 |
| FREQ(CM**-1) 716.09 716.57 721.99 722.29 741.02 741.12 |   |         |         |         |         |         |         |
| AT. 1 I X                                              |   | 0.0000  | 0.0000  | 0.0006  | 0.0006  | 0.0002  | 0.0001  |
|                                                        | Y | 0.0001  | 0.0000  | 0.0012  | 0.0012  | -0.0001 | 0.0001  |
|                                                        | Z | -0.0000 | -0.0000 | 0.0000  | 0.0000  | -0.0002 | 0.0002  |
| AT. 2 I X                                              |   | -0.0000 | 0.0000  | 0.0006  | -0.0006 | -0.0002 | 0.0001  |
|                                                        | Y | -0.0001 | 0.0000  | 0.0012  | -0.0012 | 0.0001  | 0.0001  |
|                                                        | Z | 0.0000  | -0.0000 | 0.0000  | -0.0000 | 0.0002  | 0.0002  |
| AT. 3 I X                                              |   | -0.0000 | 0.0000  | -0.0000 | -0.0002 | -0.0001 | 0.0002  |
|                                                        | Y | 0.0000  | 0.0000  | 0.0000  | -0.0001 | -0.0002 | 0.0002  |
|                                                        | Z | 0.0000  | 0.0000  | -0.0001 | -0.0002 | -0.0001 | 0.0001  |

AT. 4 I X 0.0000 0.0000 -0.0000 0.0002 0.0001 0.0002  
Y -0.0000 0.0000 0.0000 0.0001 0.0002 0.0002  
Z -0.0000 0.0000 -0.0001 0.0002 0.0001 0.0001

AT. 5 O X -0.0002 -0.0000 -0.0064 -0.0058 0.0005 -0.0017  
Y -0.0006 -0.0005 -0.0167 -0.0166 0.0041 0.0055  
Z -0.0005 -0.0003 -0.0099 -0.0090 0.0007 -0.0017

AT. 6 O X 0.0002 -0.0000 -0.0064 0.0058 -0.0005 -0.0017  
Y 0.0006 -0.0005 -0.0167 0.0166 -0.0041 0.0055  
Z 0.0005 -0.0003 -0.0099 0.0090 -0.0007 -0.0017

AT. 7 O X -0.0001 -0.0001 0.0001 0.0005 0.0008 -0.0007  
Y 0.0001 -0.0002 0.0012 0.0053 0.0070 -0.0074  
Z 0.0003 0.0001 0.0002 0.0013 0.0037 -0.0045

AT. 8 O X 0.0001 -0.0001 0.0001 -0.0005 -0.0008 -0.0007  
Y -0.0001 -0.0002 0.0012 -0.0053 -0.0070 -0.0074  
Z -0.0003 0.0001 0.0002 -0.0013 -0.0037 -0.0045

AT. 9 N X -0.0005 -0.0004 -0.0089 -0.0090 0.0010 0.0036  
Y -0.0004 -0.0003 -0.0094 -0.0093 0.0017 0.0023  
Z 0.0001 0.0001 0.0048 0.0038 -0.0039 0.0020

AT. 10 N X 0.0005 -0.0004 -0.0089 0.0090 -0.0010 0.0036  
Y 0.0004 -0.0003 -0.0094 0.0093 -0.0017 0.0023  
Z -0.0001 0.0001 0.0048 -0.0038 0.0039 0.0020

AT. 11 N X 0.0001 -0.0001 0.0007 0.0021 0.0012 -0.0003  
Y 0.0002 0.0000 0.0012 0.0024 0.0004 -0.0008  
Z -0.0000 -0.0001 0.0007 0.0015 0.0007 -0.0004

AT. 12 N X -0.0001 -0.0001 0.0007 -0.0021 -0.0012 -0.0003  
Y -0.0002 0.0000 0.0012 -0.0024 -0.0004 -0.0008  
Z 0.0000 -0.0001 0.0007 -0.0015 -0.0007 -0.0004

AT. 13 C X 0.0018 0.0013 0.0456 0.0444 -0.0102 -0.0085  
Y 0.0017 0.0013 0.0448 0.0437 -0.0097 -0.0076  
Z 0.0001 0.0001 0.0048 0.0045 -0.0023 -0.0015

AT. 14 C X -0.0018 0.0013 0.0456 -0.0444 0.0102 -0.0085  
Y -0.0017 0.0013 0.0448 -0.0437 0.0097 -0.0076

Z -0.0001 0.0001 0.0048 -0.0045 0.0023 -0.0015  
AT. 15 C X -0.0008 -0.0006 -0.0190 -0.0192 0.0023 0.0019  
Y -0.0009 -0.0006 -0.0232 -0.0222 0.0044 0.0004  
Z 0.0001 -0.0000 -0.0035 -0.0022 0.0084 -0.0064  
AT. 16 C X 0.0008 -0.0006 -0.0190 0.0192 -0.0023 0.0019  
Y 0.0009 -0.0006 -0.0232 0.0222 -0.0044 0.0004  
Z -0.0001 -0.0000 -0.0035 0.0022 -0.0084 -0.0064  
AT. 17 H X -0.0017 -0.0016 -0.0527 -0.0506 0.0244 -0.0023  
Y -0.0006 -0.0005 -0.0263 -0.0225 0.0201 -0.0131  
Z -0.0007 -0.0005 -0.0127 -0.0139 -0.0029 0.0088  
AT. 18 H X 0.0017 -0.0016 -0.0527 0.0506 -0.0244 -0.0023  
Y 0.0006 -0.0005 -0.0263 0.0225 -0.0201 -0.0131  
Z 0.0007 -0.0005 -0.0127 0.0139 0.0029 0.0088  
AT. 19 H X -0.0022 -0.0016 -0.0463 -0.0464 -0.0008 0.0145  
Y -0.0008 -0.0002 -0.0019 -0.0059 -0.0249 0.0210  
Z -0.0003 -0.0002 -0.0041 -0.0044 -0.0036 0.0052  
AT. 20 H X 0.0022 -0.0016 -0.0463 0.0464 0.0008 0.0145  
Y 0.0008 -0.0002 -0.0019 0.0059 0.0249 0.0210  
Z 0.0003 -0.0002 -0.0041 0.0044 0.0036 0.0052  
AT. 21 C X 0.0001 0.0006 -0.0039 -0.0106 -0.0067 0.0076  
Y -0.0001 0.0004 -0.0037 -0.0100 -0.0061 0.0071  
Z 0.0001 0.0003 -0.0019 -0.0054 -0.0031 0.0033  
AT. 22 C X -0.0001 0.0006 -0.0039 0.0106 0.0067 0.0076  
Y 0.0001 0.0004 -0.0037 0.0100 0.0061 0.0071  
Z -0.0001 0.0003 -0.0019 0.0054 0.0031 0.0033  
AT. 23 C X 0.0001 -0.0002 0.0017 0.0054 0.0036 -0.0052  
Y 0.0001 -0.0001 -0.0005 0.0018 0.0056 -0.0039  
Z -0.0002 -0.0004 0.0018 0.0050 0.0008 -0.0018  
AT. 24 C X -0.0001 -0.0002 0.0017 -0.0054 -0.0036 -0.0052  
Y -0.0001 -0.0001 -0.0005 -0.0018 -0.0056 -0.0039  
Z 0.0002 -0.0004 0.0018 -0.0050 -0.0008 -0.0018  
AT. 25 H X 0.0005 -0.0006 0.0047 0.0153 0.0194 -0.0189

Y 0.0001 -0.0003 0.0011 0.0047 0.0064 -0.0054  
Z 0.0003 0.0004 -0.0065 -0.0042 0.0137 -0.0060  
AT. 26 H X -0.0005 -0.0006 0.0047 -0.0153 -0.0194 -0.0189  
Y -0.0001 -0.0003 0.0011 -0.0047 -0.0064 -0.0054  
Z -0.0003 0.0004 -0.0065 0.0042 -0.0137 -0.0060  
AT. 27 H X -0.0003 -0.0005 0.0030 0.0082 0.0030 -0.0065  
Y -0.0006 -0.0007 0.0050 0.0049 -0.0104 0.0049  
Z -0.0005 -0.0006 0.0047 0.0057 -0.0089 0.0045  
AT. 28 H X 0.0003 -0.0005 0.0030 -0.0082 -0.0030 -0.0065  
Y 0.0006 -0.0007 0.0050 -0.0049 0.0104 0.0049  
Z 0.0005 -0.0006 0.0047 -0.0057 0.0089 0.0045  
AT. 29 C X -0.0001 -0.0000 0.0012 0.0005 -0.0035 0.0030  
Y -0.0002 -0.0002 -0.0016 -0.0014 0.0052 0.0006  
Z -0.0000 -0.0001 0.0035 0.0027 0.0004 0.0054  
AT. 30 C X 0.0001 -0.0000 0.0012 -0.0005 0.0035 0.0030  
Y 0.0002 -0.0002 -0.0016 0.0014 -0.0052 0.0006  
Z 0.0000 -0.0001 0.0035 -0.0027 -0.0004 0.0054  
AT. 31 H X 0.0003 0.0003 0.0163 0.0145 -0.0058 0.0044  
Y -0.0007 -0.0004 -0.0148 -0.0138 0.0056 -0.0020  
Z -0.0005 -0.0003 -0.0075 -0.0077 -0.0002 0.0025  
AT. 32 H X -0.0003 0.0003 0.0163 -0.0145 0.0058 0.0044  
Y 0.0007 -0.0004 -0.0148 0.0138 -0.0056 -0.0020  
Z 0.0005 -0.0003 -0.0075 0.0077 0.0002 0.0025  
AT. 33 H X 0.0001 -0.0000 0.0049 0.0039 0.0075 0.0141  
Y 0.0006 0.0003 0.0164 0.0153 0.0052 0.0063  
Z -0.0002 -0.0003 -0.0021 -0.0025 0.0083 0.0106  
AT. 34 H X -0.0001 -0.0000 0.0049 -0.0039 -0.0075 0.0141  
Y -0.0006 0.0003 0.0164 -0.0153 -0.0052 0.0063  
Z 0.0002 -0.0003 -0.0021 0.0025 -0.0083 0.0106  
AT. 35 C X 0.0000 -0.0000 -0.0002 -0.0002 -0.0005 -0.0005  
Y -0.0000 0.0000 -0.0002 -0.0002 -0.0014 -0.0014  
Z -0.0001 0.0000 -0.0001 -0.0000 -0.0013 -0.0015

AT. 36 C X -0.0000 -0.0000 -0.0002 0.0002 0.0005 -0.0005  
Y 0.0000 0.0000 -0.0002 0.0002 0.0014 -0.0014  
Z 0.0001 0.0000 -0.0001 0.0000 0.0013 -0.0015

AT. 37 C X 0.0001 -0.0000 0.0003 0.0018 0.0006 -0.0035  
Y 0.0001 0.0002 -0.0001 -0.0002 -0.0025 -0.0025  
Z -0.0003 -0.0002 -0.0001 0.0002 0.0006 -0.0002

AT. 38 C X -0.0001 -0.0000 0.0003 -0.0018 -0.0006 -0.0035  
Y -0.0001 0.0002 -0.0001 0.0002 0.0025 -0.0025  
Z 0.0003 -0.0002 -0.0001 -0.0002 -0.0006 -0.0002

AT. 39 H X -0.0002 -0.0004 0.0020 0.0029 0.0031 0.0034  
Y 0.0001 -0.0000 0.0017 0.0014 -0.0003 0.0022  
Z -0.0005 -0.0004 0.0001 0.0002 0.0013 0.0023

AT. 40 H X 0.0002 -0.0004 0.0020 -0.0029 -0.0031 0.0034  
Y -0.0001 -0.0000 0.0017 -0.0014 0.0003 0.0022  
Z 0.0005 -0.0004 0.0001 -0.0002 -0.0013 0.0023

AT. 41 H X -0.0001 0.0000 -0.0013 0.0007 -0.0012 -0.0086  
Y 0.0004 0.0005 -0.0004 -0.0007 -0.0038 -0.0050  
Z -0.0003 -0.0005 0.0018 0.0017 0.0034 0.0072

AT. 42 H X 0.0001 0.0000 -0.0013 -0.0007 0.0012 -0.0086  
Y -0.0004 0.0005 -0.0004 0.0007 0.0038 -0.0050  
Z 0.0003 -0.0005 0.0018 -0.0017 -0.0034 0.0072

AT. 43 C X -0.0005 -0.0003 -0.0001 0.0005 -0.0000 0.0003  
Y -0.0001 -0.0001 -0.0014 -0.0012 0.0032 -0.0005  
Z -0.0002 -0.0001 0.0005 0.0005 0.0003 -0.0006

AT. 44 C X 0.0005 -0.0003 -0.0001 -0.0005 0.0000 0.0003  
Y 0.0001 -0.0001 -0.0014 0.0012 -0.0032 -0.0005  
Z 0.0002 -0.0001 0.0005 -0.0005 -0.0003 -0.0006

AT. 45 H X -0.0001 0.0001 0.0005 -0.0010 -0.0017 0.0012  
Y -0.0010 -0.0010 -0.0045 -0.0023 0.0079 -0.0028  
Z 0.0002 0.0003 0.0031 0.0025 -0.0031 0.0012

AT. 46 H X 0.0001 0.0001 0.0005 0.0010 0.0017 0.0012  
Y 0.0010 -0.0010 -0.0045 0.0023 -0.0079 -0.0028



Z -0.0002 0.0003 0.0031 -0.0025 0.0031 0.0012  
AT. 47 H X -0.0005 -0.0003 0.0009 0.0014 -0.0002 0.0009  
Y -0.0003 0.0001 0.0006 -0.0007 0.0000 0.0010  
Z -0.0002 0.0001 0.0012 -0.0004 -0.0028 0.0003  
AT. 48 H X 0.0005 -0.0003 0.0009 -0.0014 0.0002 0.0009  
Y 0.0003 0.0001 0.0006 0.0007 -0.0000 0.0010  
Z 0.0002 0.0001 0.0012 0.0004 0.0028 0.0003  
AT. 49 C X 0.0001 0.0001 -0.0002 -0.0002 0.0005 -0.0002  
Y 0.0000 0.0000 -0.0005 -0.0005 0.0002 0.0000  
Z -0.0000 -0.0000 -0.0007 -0.0006 0.0006 -0.0000  
AT. 50 C X -0.0001 0.0001 -0.0002 0.0002 -0.0005 -0.0002  
Y -0.0000 0.0000 -0.0005 0.0005 -0.0002 0.0000  
Z 0.0000 -0.0000 -0.0007 0.0006 -0.0006 -0.0000  
AT. 51 C X 0.0000 0.0000 -0.0086 -0.0079 0.0018 -0.0002  
Y 0.0005 0.0003 0.0040 0.0034 -0.0030 0.0004  
Z 0.0006 0.0005 0.0101 0.0089 -0.0059 0.0013  
AT. 52 C X -0.0000 0.0000 -0.0086 0.0079 -0.0018 -0.0002  
Y -0.0005 0.0003 0.0040 -0.0034 0.0030 0.0004  
Z -0.0006 0.0005 0.0101 -0.0089 0.0059 0.0013  
AT. 53 H X -0.0001 0.0000 -0.0082 -0.0079 -0.0007 0.0025  
Y 0.0005 0.0005 0.0056 0.0046 -0.0060 0.0021  
Z 0.0008 0.0007 0.0109 0.0101 -0.0048 -0.0016  
AT. 54 H X 0.0001 0.0000 -0.0082 0.0079 0.0007 0.0025  
Y -0.0005 0.0005 0.0056 -0.0046 0.0060 0.0021  
Z -0.0008 0.0007 0.0109 -0.0101 0.0048 -0.0016  
AT. 55 H X 0.0004 0.0001 -0.0077 -0.0066 0.0046 -0.0039  
Y 0.0004 0.0003 0.0054 0.0044 -0.0048 0.0020  
Z 0.0008 0.0005 0.0119 0.0104 -0.0060 0.0010  
AT. 56 H X -0.0004 0.0001 -0.0077 0.0066 -0.0046 -0.0039  
Y -0.0004 0.0003 0.0054 -0.0044 0.0048 0.0020  
Z -0.0008 0.0005 0.0119 -0.0104 0.0060 0.0010  
AT. 57 C X 0.0002 -0.0000 -0.0007 -0.0006 0.0002 -0.0013

Y -0.0001 -0.0001 0.0004 0.0004 -0.0005 0.0004  
Z 0.0001 0.0001 -0.0003 -0.0003 -0.0002 -0.0010  
AT. 58 C X -0.0002 -0.0000 -0.0007 0.0006 -0.0002 -0.0013  
Y 0.0001 -0.0001 0.0004 -0.0004 0.0005 0.0004  
Z -0.0001 0.0001 -0.0003 0.0003 0.0002 -0.0010  
AT. 59 H X -0.0001 0.0003 -0.0011 -0.0001 0.0032 -0.0017  
Y 0.0001 -0.0002 -0.0003 -0.0004 0.0003 0.0010  
Z 0.0002 0.0001 -0.0017 -0.0013 0.0032 -0.0004  
AT. 60 H X 0.0001 0.0003 -0.0011 0.0001 -0.0032 -0.0017  
Y -0.0001 -0.0002 -0.0003 0.0004 -0.0003 0.0010  
Z -0.0002 0.0001 -0.0017 0.0013 -0.0032 -0.0004  
AT. 61 H X 0.0003 -0.0001 -0.0015 -0.0012 0.0049 0.0001  
Y -0.0002 -0.0002 0.0009 0.0012 -0.0003 0.0003  
Z 0.0002 0.0001 -0.0012 -0.0011 0.0034 0.0001  
AT. 62 H X -0.0003 -0.0001 -0.0015 0.0012 -0.0049 0.0001  
Y 0.0002 -0.0002 0.0009 -0.0012 0.0003 0.0003  
Z -0.0002 0.0001 -0.0012 0.0011 -0.0034 0.0001  
AT. 63 H X 0.0001 0.0002 -0.0001 -0.0002 -0.0046 -0.0028  
Y 0.0000 0.0001 -0.0011 -0.0003 0.0061 0.0017  
Z 0.0001 -0.0002 0.0005 0.0000 -0.0012 -0.0007  
AT. 64 H X -0.0001 0.0002 -0.0001 0.0002 0.0046 -0.0028  
Y -0.0000 0.0001 -0.0011 0.0003 -0.0061 0.0017  
Z -0.0001 -0.0002 0.0005 -0.0000 0.0012 -0.0007  
AT. 65 C X -0.0001 0.0000 0.0020 0.0017 -0.0016 -0.0005  
Y 0.0000 0.0000 -0.0019 -0.0016 0.0013 0.0003  
Z -0.0001 -0.0001 -0.0029 -0.0025 0.0023 0.0007  
AT. 66 C X 0.0001 0.0000 0.0020 -0.0017 0.0016 -0.0005  
Y -0.0000 0.0000 -0.0019 0.0016 -0.0013 0.0003  
Z 0.0001 -0.0001 -0.0029 0.0025 -0.0023 0.0007  
AT. 67 H X 0.0001 -0.0000 -0.0029 -0.0024 -0.0007 -0.0027  
Y -0.0003 -0.0002 -0.0008 -0.0007 0.0024 0.0013  
Z 0.0000 0.0001 0.0001 0.0000 0.0005 0.0016

AT. 68 H X -0.0001 -0.0000 -0.0029 0.0024 0.0007 -0.0027  
Y 0.0003 -0.0002 -0.0008 0.0007 -0.0024 0.0013  
Z -0.0000 0.0001 0.0001 -0.0000 -0.0005 0.0016

AT. 69 H X -0.0003 -0.0001 0.0022 0.0019 -0.0006 0.0002  
Y 0.0000 -0.0001 -0.0041 -0.0034 0.0021 -0.0004  
Z 0.0002 0.0000 -0.0069 -0.0058 0.0015 -0.0020

AT. 70 H X 0.0003 -0.0001 0.0022 -0.0019 0.0006 0.0002  
Y -0.0000 -0.0001 -0.0041 0.0034 -0.0021 -0.0004  
Z -0.0002 0.0000 -0.0069 0.0058 -0.0015 -0.0020

AT. 71 H X 0.0001 -0.0000 0.0004 0.0004 -0.0027 -0.0021  
Y -0.0002 -0.0002 -0.0031 -0.0028 0.0033 0.0008  
Z -0.0002 -0.0003 -0.0058 -0.0050 0.0042 0.0001

AT. 72 H X -0.0001 -0.0000 0.0004 -0.0004 0.0027 -0.0021  
Y 0.0002 -0.0002 -0.0031 0.0028 -0.0033 0.0008  
Z 0.0002 -0.0003 -0.0058 0.0050 -0.0042 0.0001

AT. 73 C X -0.0001 -0.0001 -0.0003 -0.0004 0.0031 0.0014  
Y -0.0002 -0.0001 -0.0000 0.0001 -0.0021 -0.0012  
Z 0.0001 0.0000 -0.0041 -0.0033 -0.0007 -0.0050

AT. 74 C X 0.0001 -0.0001 -0.0003 0.0004 -0.0031 0.0014  
Y 0.0002 -0.0001 -0.0000 -0.0001 0.0021 -0.0012  
Z -0.0001 0.0000 -0.0041 0.0033 0.0007 -0.0050

AT. 75 H X -0.0005 -0.0005 0.0012 0.0010 0.0035 0.0030  
Y -0.0003 -0.0003 0.0001 0.0003 -0.0035 -0.0016  
Z -0.0002 -0.0004 -0.0029 -0.0019 -0.0023 -0.0044

AT. 76 H X 0.0005 -0.0005 0.0012 -0.0010 -0.0035 0.0030  
Y 0.0003 -0.0003 0.0001 -0.0003 0.0035 -0.0016  
Z 0.0002 -0.0004 -0.0029 0.0019 0.0023 -0.0044

AT. 77 H X -0.0006 -0.0004 -0.0015 -0.0015 0.0051 0.0033  
Y 0.0003 0.0001 0.0016 0.0017 -0.0047 -0.0023  
Z 0.0001 0.0001 -0.0044 -0.0037 -0.0002 -0.0059

AT. 78 H X 0.0006 -0.0004 -0.0015 0.0015 -0.0051 0.0033  
Y -0.0003 0.0001 0.0016 -0.0017 0.0047 -0.0023

Z -0.0001 0.0001 -0.0044 0.0037 0.0002 -0.0059  
AT. 79 I X 0.0000 0.0001 -0.0000 -0.0000 0.0000 0.0000  
Y -0.0001 -0.0005 -0.0000 0.0000 0.0000 0.0000  
Z 0.0000 0.0002 -0.0000 -0.0000 0.0000 0.0000  
AT. 80 I X -0.0000 0.0001 -0.0000 0.0000 -0.0000 0.0000  
Y 0.0001 -0.0005 -0.0000 -0.0000 -0.0000 0.0000  
Z -0.0000 0.0002 -0.0000 0.0000 -0.0000 0.0000  
AT. 81 I X -0.0004 -0.0003 0.0000 0.0000 -0.0000 -0.0000  
Y 0.0010 0.0009 -0.0000 -0.0000 0.0000 0.0000  
Z 0.0009 0.0008 -0.0000 -0.0000 -0.0000 0.0000  
AT. 82 I X 0.0004 -0.0003 0.0000 -0.0000 0.0000 -0.0000  
Y -0.0010 0.0009 -0.0000 0.0000 -0.0000 0.0000  
Z -0.0009 0.0008 -0.0000 0.0000 0.0000 0.0000  
AT. 83 O X -0.0001 0.0019 0.0001 0.0000 -0.0000 -0.0002  
Y 0.0008 0.0075 0.0002 -0.0001 -0.0001 -0.0001  
Z 0.0006 0.0033 0.0000 -0.0001 -0.0002 0.0003  
AT. 84 O X 0.0001 0.0019 0.0001 -0.0000 0.0000 -0.0002  
Y -0.0008 0.0075 0.0002 0.0001 0.0001 -0.0001  
Z -0.0006 0.0033 0.0000 0.0001 0.0002 0.0003  
AT. 85 O X -0.0005 0.0002 -0.0001 -0.0001 -0.0005 0.0004  
Y -0.0205 -0.0192 0.0007 0.0009 0.0003 -0.0004  
Z -0.0019 -0.0012 -0.0000 0.0000 -0.0000 0.0003  
AT. 86 O X 0.0005 0.0002 -0.0001 0.0001 0.0005 0.0004  
Y 0.0205 -0.0192 0.0007 -0.0009 -0.0003 -0.0004  
Z 0.0019 -0.0012 -0.0000 -0.0000 0.0000 0.0003  
AT. 87 N X -0.0004 -0.0030 -0.0001 0.0001 0.0001 -0.0002  
Y 0.0013 0.0059 0.0000 -0.0002 0.0001 -0.0000  
Z -0.0001 0.0005 -0.0000 0.0000 0.0002 -0.0001  
AT. 88 N X 0.0004 -0.0030 -0.0001 -0.0001 -0.0001 -0.0002  
Y -0.0013 0.0059 0.0000 0.0002 -0.0001 -0.0000  
Z 0.0001 0.0005 -0.0000 -0.0000 -0.0002 -0.0001  
AT. 89 N X 0.0063 0.0056 -0.0002 -0.0002 -0.0003 -0.0001

Y -0.0083 -0.0073 0.0002 0.0004 0.0005 -0.0003  
Z -0.0080 -0.0076 0.0002 0.0004 0.0002 -0.0005  
AT. 90 N X -0.0063 0.0056 -0.0002 0.0002 0.0003 -0.0001  
Y 0.0083 -0.0073 0.0002 -0.0004 -0.0005 -0.0003  
Z 0.0080 -0.0076 0.0002 -0.0004 -0.0002 -0.0005  
AT. 91 C X 0.0023 0.0110 0.0002 -0.0003 -0.0003 0.0002  
Y -0.0051 -0.0238 -0.0003 0.0006 0.0004 -0.0000  
Z -0.0010 -0.0030 0.0000 0.0000 0.0000 0.0002  
AT. 92 C X -0.0023 0.0110 0.0002 0.0003 0.0003 0.0002  
Y 0.0051 -0.0238 -0.0003 -0.0006 -0.0004 -0.0000  
Z 0.0010 -0.0030 0.0000 -0.0000 -0.0000 0.0002  
AT. 93 C X 0.0003 -0.0045 -0.0002 -0.0001 -0.0002 0.0007  
Y 0.0023 0.0109 0.0002 -0.0003 -0.0003 0.0003  
Z -0.0009 -0.0039 0.0001 0.0001 -0.0002 -0.0005  
AT. 94 C X -0.0003 -0.0045 -0.0002 0.0001 0.0002 0.0007  
Y -0.0023 0.0109 0.0002 0.0003 0.0003 0.0003  
Z 0.0009 -0.0039 0.0001 -0.0001 0.0002 -0.0005  
AT. 95 H X -0.0052 -0.0207 -0.0005 0.0004 0.0007 0.0009  
Y 0.0040 0.0142 0.0004 -0.0006 -0.0013 0.0002  
Z 0.0024 0.0092 -0.0001 -0.0000 0.0006 -0.0006  
AT. 96 H X 0.0052 -0.0207 -0.0005 -0.0004 -0.0007 0.0009  
Y -0.0040 0.0142 0.0004 0.0006 0.0013 0.0002  
Z -0.0024 0.0092 -0.0001 0.0000 -0.0006 -0.0006  
AT. 97 H X 0.0001 -0.0121 -0.0006 -0.0000 -0.0001 0.0003  
Y 0.0020 0.0148 -0.0002 0.0001 0.0017 0.0004  
Z -0.0008 -0.0007 0.0001 0.0002 0.0002 -0.0003  
AT. 98 H X -0.0001 -0.0121 -0.0006 0.0000 0.0001 0.0003  
Y -0.0020 0.0148 -0.0002 -0.0001 -0.0017 0.0004  
Z 0.0008 -0.0007 0.0001 -0.0002 -0.0002 -0.0003  
AT. 99 C X -0.0326 -0.0305 0.0010 0.0014 0.0008 -0.0007  
Y 0.0484 0.0452 -0.0016 -0.0020 -0.0013 0.0008  
Z 0.0284 0.0264 -0.0009 -0.0011 -0.0005 0.0005

AT.100 C X 0.0326 -0.0305 0.0010 -0.0014 -0.0008 -0.0007  
Y -0.0484 0.0452 -0.0016 0.0020 0.0013 0.0008  
Z -0.0284 0.0264 -0.0009 0.0011 0.0005 0.0005

AT.101 C X 0.0117 0.0105 -0.0003 -0.0003 0.0007 0.0001  
Y -0.0202 -0.0179 0.0005 0.0007 -0.0001 0.0000  
Z -0.0200 -0.0189 0.0007 0.0011 0.0016 -0.0007

AT.102 C X -0.0117 0.0105 -0.0003 0.0003 -0.0007 0.0001  
Y 0.0202 -0.0179 0.0005 -0.0007 0.0001 0.0000  
Z 0.0200 -0.0189 0.0007 -0.0011 -0.0016 -0.0007

AT.103 H X 0.0493 0.0458 -0.0014 -0.0016 0.0010 0.0003  
Y -0.0367 -0.0335 0.0010 0.0013 -0.0001 -0.0001  
Z -0.0025 -0.0007 -0.0002 -0.0004 -0.0022 0.0013

AT.104 H X -0.0493 0.0458 -0.0014 0.0016 -0.0010 0.0003  
Y 0.0367 -0.0335 0.0010 -0.0013 0.0001 -0.0001  
Z 0.0025 -0.0007 -0.0002 0.0004 0.0022 0.0013

AT.105 H X 0.0257 0.0238 -0.0006 -0.0008 0.0009 0.0006  
Y -0.0183 -0.0194 0.0009 0.0014 0.0032 -0.0019  
Z -0.0163 -0.0166 0.0008 0.0013 0.0029 -0.0013

AT.106 H X -0.0257 0.0238 -0.0006 0.0008 -0.0009 0.0006  
Y 0.0183 -0.0194 0.0009 -0.0014 -0.0032 -0.0019  
Z 0.0163 -0.0166 0.0008 -0.0013 -0.0029 -0.0013

AT.107 C X -0.0010 -0.0021 0.0002 0.0003 -0.0001 -0.0004  
Y 0.0014 0.0010 -0.0001 -0.0003 -0.0007 0.0002  
Z 0.0008 0.0014 -0.0001 -0.0001 -0.0003 0.0005

AT.108 C X 0.0010 -0.0021 0.0002 -0.0003 0.0001 -0.0004  
Y -0.0014 0.0010 -0.0001 0.0003 0.0007 0.0002  
Z -0.0008 0.0014 -0.0001 0.0001 0.0003 0.0005

AT.109 H X -0.0000 0.0042 0.0006 -0.0000 -0.0007 -0.0002  
Y 0.0017 0.0032 -0.0002 -0.0006 -0.0010 -0.0001  
Z 0.0011 0.0035 -0.0004 -0.0005 -0.0008 -0.0003

AT.110 H X 0.0000 0.0042 0.0006 0.0000 0.0007 -0.0002  
Y -0.0017 0.0032 -0.0002 0.0006 0.0010 -0.0001

Z -0.0011 0.0035 -0.0004 0.0005 0.0008 -0.0003  
AT. 111 H X -0.0008 -0.0030 0.0002 0.0004 0.0000 -0.0010  
Y 0.0001 -0.0036 -0.0001 0.0001 0.0002 0.0012  
Z 0.0010 0.0036 -0.0002 -0.0004 -0.0006 0.0009  
AT. 112 H X 0.0008 -0.0030 0.0002 -0.0004 -0.0000 -0.0010  
Y -0.0001 -0.0036 -0.0001 -0.0001 -0.0002 0.0012  
Z -0.0010 0.0036 -0.0002 0.0004 0.0006 0.0009  
AT. 113 C X -0.0014 -0.0013 0.0001 -0.0000 -0.0002 0.0003  
Y 0.0014 0.0011 -0.0001 -0.0000 0.0001 0.0001  
Z -0.0003 -0.0005 0.0001 0.0000 -0.0004 0.0005  
AT. 114 C X 0.0014 -0.0013 0.0001 0.0000 0.0002 0.0003  
Y -0.0014 0.0011 -0.0001 0.0000 -0.0001 0.0001  
Z 0.0003 -0.0005 0.0001 -0.0000 0.0004 0.0005  
AT. 115 C X 0.0127 0.0124 -0.0005 -0.0005 0.0001 0.0004  
Y 0.0002 -0.0001 0.0000 0.0002 0.0004 -0.0006  
Z -0.0053 -0.0051 0.0002 0.0002 -0.0005 0.0003  
AT. 116 C X -0.0127 0.0124 -0.0005 0.0005 -0.0001 0.0004  
Y -0.0002 -0.0001 0.0000 -0.0002 -0.0004 -0.0006  
Z 0.0053 -0.0051 0.0002 -0.0002 0.0005 0.0003  
AT. 117 H X 0.0137 0.0126 -0.0005 -0.0004 0.0000 -0.0001  
Y -0.0009 -0.0004 -0.0001 0.0003 0.0013 -0.0012  
Z -0.0064 -0.0055 0.0002 0.0000 -0.0005 0.0009  
AT. 118 H X -0.0137 0.0126 -0.0005 0.0004 -0.0000 -0.0001  
Y 0.0009 -0.0004 -0.0001 -0.0003 -0.0013 -0.0012  
Z 0.0064 -0.0055 0.0002 -0.0000 0.0005 0.0009  
AT. 119 H X 0.0092 0.0100 -0.0004 -0.0005 0.0006 0.0006  
Y 0.0016 0.0005 0.0001 0.0002 0.0002 -0.0003  
Z -0.0081 -0.0067 0.0002 0.0002 0.0001 0.0000  
AT. 120 H X -0.0092 0.0100 -0.0004 0.0005 -0.0006 0.0006  
Y -0.0016 0.0005 0.0001 -0.0002 -0.0002 -0.0003  
Z 0.0081 -0.0067 0.0002 -0.0002 -0.0001 0.0000  
AT. 121 C X 0.0030 0.0027 -0.0001 -0.0002 -0.0009 0.0002

Y 0.0014 0.0012 0.0001 0.0001 0.0010 0.0009  
Z -0.0018 -0.0019 0.0000 -0.0002 -0.0012 -0.0000  
AT. 122 C X -0.0030 0.0027 -0.0001 0.0002 0.0009 0.0002  
Y -0.0014 0.0012 0.0001 -0.0001 -0.0010 0.0009  
Z 0.0018 -0.0019 0.0000 0.0002 0.0012 -0.0000  
AT. 123 H X -0.0152 -0.0141 0.0006 0.0001 -0.0017 0.0003  
Y -0.0059 -0.0056 0.0005 0.0004 0.0018 0.0005  
Z 0.0031 0.0026 -0.0002 -0.0005 -0.0020 0.0003  
AT. 124 H X 0.0152 -0.0141 0.0006 -0.0001 0.0017 0.0003  
Y 0.0059 -0.0056 0.0005 -0.0004 -0.0018 0.0005  
Z -0.0031 0.0026 -0.0002 0.0005 0.0020 0.0003  
AT. 125 H X 0.0069 0.0063 -0.0002 -0.0005 -0.0018 0.0003  
Y 0.0118 0.0109 -0.0004 -0.0003 0.0013 0.0013  
Z 0.0083 0.0077 -0.0004 -0.0008 -0.0022 0.0004  
AT. 126 H X -0.0069 0.0063 -0.0002 0.0005 0.0018 0.0003  
Y -0.0118 0.0109 -0.0004 0.0003 -0.0013 0.0013  
Z -0.0083 0.0077 -0.0004 0.0008 0.0022 0.0004  
AT. 127 C X -0.0001 0.0001 -0.0000 0.0001 0.0001 -0.0004  
Y -0.0003 -0.0005 0.0001 0.0002 0.0004 0.0002  
Z 0.0003 0.0003 -0.0001 0.0000 0.0002 -0.0002  
AT. 128 C X 0.0001 0.0001 -0.0000 -0.0001 -0.0001 -0.0004  
Y 0.0003 -0.0005 0.0001 -0.0002 -0.0004 0.0002  
Z -0.0003 0.0003 -0.0001 -0.0000 -0.0002 -0.0002  
AT. 129 C X 0.0005 -0.0024 -0.0002 -0.0001 0.0006 0.0005  
Y -0.0006 -0.0005 -0.0002 -0.0001 -0.0007 -0.0011  
Z -0.0003 -0.0016 -0.0001 0.0001 0.0003 -0.0002  
AT. 130 C X -0.0005 -0.0024 -0.0002 0.0001 -0.0006 0.0005  
Y 0.0006 -0.0005 -0.0002 0.0001 0.0007 -0.0011  
Z 0.0003 -0.0016 -0.0001 -0.0001 -0.0003 -0.0002  
AT. 131 H X -0.0000 -0.0042 -0.0003 -0.0001 -0.0006 -0.0001  
Y 0.0007 0.0014 -0.0002 -0.0000 0.0014 0.0001  
Z -0.0004 -0.0031 -0.0002 0.0000 -0.0004 -0.0007



AT.132 H X 0.0000 -0.0042 -0.0003 0.0001 0.0006 -0.0001  
Y -0.0007 0.0014 -0.0002 0.0000 -0.0014 0.0001  
Z 0.0004 -0.0031 -0.0002 -0.0000 0.0004 -0.0007

AT.133 H X 0.0009 -0.0002 -0.0002 -0.0000 0.0020 0.0009  
Y -0.0011 -0.0013 -0.0004 -0.0003 -0.0017 -0.0023  
Z -0.0013 -0.0036 -0.0005 -0.0003 -0.0019 -0.0023

AT.134 H X -0.0009 -0.0002 -0.0002 0.0000 -0.0020 0.0009  
Y 0.0011 -0.0013 -0.0004 0.0003 0.0017 -0.0023  
Z 0.0013 -0.0036 -0.0005 0.0003 0.0019 -0.0023

AT.135 C X -0.0027 -0.0021 -0.0001 -0.0001 -0.0003 -0.0001  
Y -0.0011 -0.0010 0.0000 0.0001 0.0002 0.0002  
Z 0.0017 0.0013 -0.0001 -0.0000 -0.0004 -0.0003

AT.136 C X 0.0027 -0.0021 -0.0001 0.0001 0.0003 -0.0001  
Y 0.0011 -0.0010 0.0000 -0.0001 -0.0002 0.0002  
Z -0.0017 0.0013 -0.0001 0.0000 0.0004 -0.0003

AT.137 H X 0.0059 0.0059 0.0002 0.0003 0.0023 0.0012  
Y -0.0010 -0.0009 0.0001 0.0001 0.0004 -0.0000  
Z -0.0011 -0.0014 -0.0000 -0.0000 -0.0009 -0.0009

AT.138 H X -0.0059 0.0059 0.0002 -0.0003 -0.0023 0.0012  
Y 0.0010 -0.0009 0.0001 -0.0001 -0.0004 -0.0000  
Z 0.0011 -0.0014 -0.0000 0.0000 0.0009 -0.0009

AT.139 H X -0.0047 -0.0038 -0.0002 -0.0002 -0.0016 -0.0005  
Y -0.0056 -0.0052 0.0003 0.0002 -0.0015 -0.0004  
Z 0.0057 0.0048 -0.0001 0.0000 0.0018 0.0004

AT.140 H X 0.0047 -0.0038 -0.0002 0.0002 0.0016 -0.0005  
Y 0.0056 -0.0052 0.0003 -0.0002 0.0015 -0.0004  
Z -0.0057 0.0048 -0.0001 -0.0000 -0.0018 0.0004

AT.141 H X -0.0030 -0.0026 -0.0000 -0.0001 0.0009 0.0000  
Y -0.0047 -0.0044 -0.0001 -0.0001 -0.0000 0.0001  
Z 0.0052 0.0045 0.0000 0.0002 0.0005 -0.0002

AT.142 H X 0.0030 -0.0026 -0.0000 0.0001 -0.0009 0.0000  
Y 0.0047 -0.0044 -0.0001 0.0001 0.0000 0.0001

Z -0.0052 0.0045 0.0000 -0.0002 -0.0005 -0.0002  
AT. 143 C X 0.0008 0.0015 -0.0002 0.0003 0.0015 -0.0017  
Y 0.0003 0.0004 -0.0001 0.0001 0.0003 -0.0003  
Z 0.0004 0.0009 0.0001 -0.0001 -0.0009 0.0012  
AT. 144 C X -0.0008 0.0015 -0.0002 -0.0003 -0.0015 -0.0017  
Y -0.0003 0.0004 -0.0001 -0.0001 -0.0003 -0.0003  
Z -0.0004 0.0009 0.0001 0.0001 0.0009 0.0012  
AT. 145 H X 0.0010 0.0005 0.0004 -0.0004 -0.0031 0.0048  
Y 0.0001 0.0004 -0.0001 0.0001 0.0002 0.0000  
Z 0.0007 0.0008 0.0003 -0.0003 -0.0018 0.0025  
AT. 146 H X -0.0010 0.0005 0.0004 0.0004 0.0031 0.0048  
Y -0.0001 0.0004 -0.0001 -0.0001 -0.0002 0.0000  
Z -0.0007 0.0008 0.0003 0.0003 0.0018 0.0025  
AT. 147 H X 0.0001 0.0010 -0.0003 0.0008 0.0045 -0.0040  
Y 0.0005 0.0012 0.0005 -0.0009 -0.0048 0.0038  
Z -0.0006 0.0006 0.0003 0.0002 0.0008 0.0001  
AT. 148 H X -0.0001 0.0010 -0.0003 -0.0008 -0.0045 -0.0040  
Y -0.0005 0.0012 0.0005 0.0009 0.0048 0.0038  
Z 0.0006 0.0006 0.0003 -0.0002 -0.0008 0.0001  
AT. 149 H X 0.0023 0.0030 0.0002 -0.0005 -0.0023 0.0024  
Y 0.0006 0.0010 -0.0003 0.0004 0.0026 -0.0037  
Z 0.0001 0.0011 -0.0005 0.0009 0.0051 -0.0064  
AT. 150 H X -0.0023 0.0030 0.0002 0.0005 0.0023 0.0024  
Y -0.0006 0.0010 -0.0003 -0.0004 -0.0026 -0.0037  
Z -0.0001 0.0011 -0.0005 -0.0009 -0.0051 -0.0064  
AT. 151 C X -0.0030 -0.0026 0.0002 0.0001 -0.0004 0.0001  
Y -0.0009 -0.0009 0.0001 0.0001 0.0001 0.0004  
Z 0.0008 0.0006 0.0000 0.0003 0.0019 -0.0005  
AT. 152 C X 0.0030 -0.0026 0.0002 -0.0001 0.0004 0.0001  
Y 0.0009 -0.0009 0.0001 -0.0001 -0.0001 0.0004  
Z -0.0008 0.0006 0.0000 -0.0003 -0.0019 -0.0005  
AT. 153 H X -0.0034 -0.0031 0.0006 0.0002 -0.0010 0.0004

Y -0.0013 -0.0010 -0.0000 -0.0002 -0.0014 -0.0003  
Z 0.0003 0.0006 -0.0002 -0.0001 0.0005 -0.0011  
AT. 154 H X 0.0034 -0.0031 0.0006 -0.0002 0.0010 0.0004  
Y 0.0013 -0.0010 -0.0000 0.0002 0.0014 -0.0003  
Z -0.0003 0.0006 -0.0002 0.0001 -0.0005 -0.0011  
AT. 155 H X -0.0035 -0.0037 0.0004 -0.0001 -0.0016 0.0005  
Y -0.0013 -0.0010 -0.0001 -0.0002 -0.0002 0.0010  
Z 0.0010 0.0002 0.0002 0.0006 0.0019 -0.0010  
AT. 156 H X 0.0035 -0.0037 0.0004 0.0001 0.0016 0.0005  
Y 0.0013 -0.0010 -0.0001 0.0002 0.0002 0.0010  
Z -0.0010 0.0002 0.0002 -0.0006 -0.0019 -0.0010  
AT. 157 O X -0.0001 0.0000 -0.0007 -0.0006 -0.0039 -0.0039  
Y 0.0001 0.0000 0.0025 0.0025 0.0012 0.0011  
Z -0.0001 -0.0000 -0.0013 -0.0011 -0.0034 -0.0034  
AT. 158 O X 0.0001 0.0000 -0.0007 0.0006 0.0039 -0.0039  
Y -0.0001 0.0000 0.0025 -0.0025 -0.0012 0.0011  
Z 0.0001 -0.0000 -0.0013 0.0011 0.0034 -0.0034  
AT. 159 O X 0.0001 0.0000 0.0004 0.0000 0.0003 0.0006  
Y -0.0003 0.0002 -0.0014 -0.0020 -0.0087 -0.0088  
Z -0.0000 -0.0000 -0.0000 -0.0003 -0.0012 -0.0014  
AT. 160 O X -0.0001 0.0000 0.0004 -0.0000 -0.0003 0.0006  
Y 0.0003 0.0002 -0.0014 0.0020 0.0087 -0.0088  
Z 0.0000 -0.0000 -0.0000 0.0003 0.0012 -0.0014  
AT. 161 H X 0.0024 -0.0005 0.0218 0.0214 0.0762 0.0759  
Y -0.0008 0.0003 -0.0067 -0.0067 -0.0276 -0.0273  
Z 0.0042 -0.0008 0.0381 0.0379 0.1293 0.1286  
AT. 162 H X -0.0024 -0.0005 0.0218 -0.0214 -0.0762 0.0759  
Y 0.0008 0.0003 -0.0067 0.0067 0.0276 -0.0273  
Z -0.0042 -0.0008 0.0381 -0.0379 -0.1293 0.1286  
AT. 163 H X 0.0007 -0.0004 0.0014 0.0028 0.0176 0.0185  
Y 0.0068 -0.0039 0.0182 0.0315 0.2036 0.2090  
Z 0.0014 -0.0008 0.0044 0.0070 0.0439 0.0447

AT.164 H X -0.0007 -0.0004 0.0014 -0.0028 -0.0176 0.0185

Y -0.0068 -0.0039 0.0182 -0.0315 -0.2036 0.2090

Z -0.0014 -0.0008 0.0044 -0.0070 -0.0439 0.0447

AT.165 O X -0.0003 -0.0003 -0.0000 0.0001 0.0000 -0.0001

Y -0.0005 -0.0006 0.0001 0.0001 0.0001 0.0000

Z 0.0007 -0.0005 0.0000 -0.0000 -0.0002 -0.0000

AT.166 O X 0.0003 -0.0003 -0.0000 -0.0001 -0.0000 -0.0001

Y 0.0005 -0.0006 0.0001 -0.0001 -0.0001 0.0000

Z -0.0007 -0.0005 0.0000 0.0000 0.0002 -0.0000

AT.167 H X -0.0102 -0.0010 0.0012 0.0015 0.0011 -0.0008

Y 0.0213 0.0007 -0.0024 -0.0031 -0.0024 0.0019

Z -0.0069 0.0002 0.0006 0.0008 0.0006 -0.0004

AT.168 H X 0.0102 -0.0010 0.0012 -0.0015 -0.0011 -0.0008

Y -0.0213 0.0007 -0.0024 0.0031 0.0024 0.0019

Z 0.0069 0.0002 0.0006 -0.0008 -0.0006 -0.0004

AT.169 O X 0.0019 -0.0013 -0.0000 -0.0001 -0.0000 0.0001

Y -0.0002 0.0003 -0.0001 0.0001 0.0001 0.0001

Z -0.0003 -0.0001 0.0000 0.0000 0.0001 -0.0001

AT.170 O X -0.0019 -0.0013 -0.0000 0.0001 0.0000 0.0001

Y 0.0002 0.0003 -0.0001 -0.0001 -0.0001 0.0001

Z 0.0003 -0.0001 0.0000 -0.0000 -0.0001 -0.0001

AT.171 H X -0.0425 0.0251 0.0016 0.0009 -0.0008 -0.0046

Y -0.0216 0.0131 0.0007 0.0004 -0.0004 -0.0022

Z -0.0028 0.0015 0.0003 0.0001 0.0002 0.0001

AT.172 H X 0.0425 0.0251 0.0016 -0.0009 0.0008 -0.0046

Y 0.0216 0.0131 0.0007 -0.0004 0.0004 -0.0022

Z 0.0028 0.0015 0.0003 -0.0001 -0.0002 0.0001

FREQ(CM\*\*-1) 754.68 755.68 772.25 773.73 777.90 779.01

AT. 1 I X 0.0000 -0.0000 0.0000 -0.0000 -0.0001 -0.0001

Y -0.0000 -0.0000 0.0000 0.0000 0.0001 -0.0000

Z -0.0000 0.0000 -0.0000 0.0000 0.0006 0.0008  
AT. 2 I X -0.0000 -0.0000 0.0000 0.0000 0.0001 -0.0001  
Y 0.0000 -0.0000 0.0000 -0.0000 -0.0001 -0.0000  
Z 0.0000 0.0000 -0.0000 -0.0000 -0.0006 0.0008  
AT. 3 I X 0.0000 -0.0000 -0.0000 -0.0000 -0.0000 -0.0000  
Y -0.0000 0.0000 -0.0000 0.0000 0.0001 -0.0001  
Z -0.0000 0.0000 0.0000 0.0000 -0.0000 0.0001  
AT. 4 I X -0.0000 -0.0000 -0.0000 0.0000 0.0000 -0.0000  
Y 0.0000 0.0000 -0.0000 -0.0000 -0.0001 -0.0001  
Z 0.0000 0.0000 0.0000 -0.0000 0.0000 0.0001  
AT. 5 O X 0.0000 0.0005 -0.0003 0.0000 0.0046 0.0045  
Y -0.0001 0.0002 -0.0001 0.0000 0.0012 0.0003  
Z 0.0001 -0.0000 0.0003 -0.0003 -0.0064 -0.0052  
AT. 6 O X -0.0000 0.0005 -0.0003 -0.0000 -0.0046 0.0045  
Y 0.0001 0.0002 -0.0001 -0.0000 -0.0012 0.0003  
Z -0.0001 -0.0000 0.0003 0.0003 0.0064 -0.0052  
AT. 7 O X 0.0001 -0.0001 -0.0001 0.0001 0.0010 0.0006  
Y 0.0000 -0.0005 0.0001 -0.0002 -0.0007 0.0014  
Z -0.0002 0.0003 -0.0002 -0.0000 0.0016 -0.0006  
AT. 8 O X -0.0001 -0.0001 -0.0001 -0.0001 -0.0010 0.0006  
Y -0.0000 -0.0005 0.0001 0.0002 0.0007 0.0014  
Z 0.0002 0.0003 -0.0002 0.0000 -0.0016 -0.0006  
AT. 9 N X 0.0005 0.0006 -0.0004 0.0002 0.0080 0.0062  
Y -0.0001 0.0001 -0.0005 0.0001 0.0053 0.0037  
Z -0.0001 0.0001 -0.0004 0.0005 0.0117 0.0115  
AT. 10 N X -0.0005 0.0006 -0.0004 -0.0002 -0.0080 0.0062  
Y 0.0001 0.0001 -0.0005 -0.0001 -0.0053 0.0037  
Z 0.0001 0.0001 -0.0004 -0.0005 -0.0117 0.0115  
AT. 11 N X -0.0004 0.0005 -0.0004 0.0000 0.0039 0.0007  
Y -0.0004 0.0004 -0.0006 0.0001 0.0061 0.0009  
Z 0.0002 -0.0006 0.0002 -0.0000 -0.0003 0.0036  
AT. 12 N X 0.0004 0.0005 -0.0004 -0.0000 -0.0039 0.0007

Y 0.0004 0.0004 -0.0006 -0.0001 -0.0061 0.0009  
Z -0.0002 -0.0006 0.0002 0.0000 0.0003 0.0036  
AT. 13 C X -0.0001 -0.0013 0.0006 -0.0002 -0.0082 -0.0063  
Y -0.0001 -0.0012 0.0008 -0.0002 -0.0110 -0.0087  
Z -0.0000 -0.0005 0.0005 -0.0002 -0.0081 -0.0071  
AT. 14 C X 0.0001 -0.0013 0.0006 0.0002 0.0082 -0.0063  
Y 0.0001 -0.0012 0.0008 0.0002 0.0110 -0.0087  
Z 0.0000 -0.0005 0.0005 0.0002 0.0081 -0.0071  
AT. 15 C X -0.0004 -0.0004 0.0002 -0.0000 -0.0045 -0.0035  
Y 0.0004 0.0013 -0.0007 0.0002 0.0115 0.0101  
Z 0.0000 -0.0015 0.0009 -0.0013 -0.0301 -0.0305  
AT. 16 C X 0.0004 -0.0004 0.0002 0.0000 0.0045 -0.0035  
Y -0.0004 0.0013 -0.0007 -0.0002 -0.0115 0.0101  
Z -0.0000 -0.0015 0.0009 0.0013 0.0301 -0.0305  
AT. 17 H X -0.0001 -0.0017 0.0012 -0.0019 -0.0477 -0.0496  
Y 0.0010 -0.0016 0.0013 -0.0027 -0.0538 -0.0564  
Z -0.0005 0.0016 -0.0012 0.0017 0.0359 0.0360  
AT. 18 H X 0.0001 -0.0017 0.0012 0.0019 0.0477 -0.0496  
Y -0.0010 -0.0016 0.0013 0.0027 0.0538 -0.0564  
Z 0.0005 0.0016 -0.0012 -0.0017 -0.0359 0.0360  
AT. 19 H X -0.0005 0.0008 0.0005 0.0005 0.0060 0.0084  
Y -0.0003 0.0048 -0.0032 0.0043 0.0998 0.1007  
Z -0.0003 0.0002 0.0001 0.0005 0.0066 0.0074  
AT. 20 H X 0.0005 0.0008 0.0005 -0.0005 -0.0060 0.0084  
Y 0.0003 0.0048 -0.0032 -0.0043 -0.0998 0.1007  
Z 0.0003 0.0002 0.0001 -0.0005 -0.0066 0.0074  
AT. 21 C X -0.0003 0.0010 0.0001 0.0004 0.0007 -0.0019  
Y -0.0001 0.0003 0.0003 0.0002 -0.0007 -0.0016  
Z -0.0003 0.0007 0.0000 0.0002 0.0008 -0.0007  
AT. 22 C X 0.0003 0.0010 0.0001 -0.0004 -0.0007 -0.0019  
Y 0.0001 0.0003 0.0003 -0.0002 0.0007 -0.0016  
Z 0.0003 0.0007 0.0000 -0.0002 -0.0008 -0.0007

AT. 23 C X -0.0001 -0.0005 0.0002 -0.0003 -0.0012 0.0017  
Y 0.0005 -0.0005 0.0006 0.0002 -0.0030 0.0045  
Z 0.0001 0.0002 -0.0008 -0.0001 0.0047 -0.0054

AT. 24 C X 0.0001 -0.0005 0.0002 0.0003 0.0012 0.0017  
Y -0.0005 -0.0005 0.0006 -0.0002 0.0030 0.0045  
Z -0.0001 0.0002 -0.0008 0.0001 -0.0047 -0.0054

AT. 25 H X 0.0002 -0.0014 0.0017 0.0005 -0.0092 0.0169  
Y 0.0005 -0.0005 0.0004 0.0002 -0.0018 0.0040  
Z 0.0011 -0.0007 0.0025 0.0010 -0.0126 0.0148

AT. 26 H X -0.0002 -0.0014 0.0017 -0.0005 0.0092 0.0169  
Y -0.0005 -0.0005 0.0004 -0.0002 0.0018 0.0040  
Z -0.0011 -0.0007 0.0025 -0.0010 0.0126 0.0148

AT. 27 H X -0.0006 -0.0001 -0.0005 -0.0008 -0.0003 -0.0049  
Y -0.0007 0.0013 -0.0026 -0.0007 0.0125 -0.0159  
Z -0.0004 0.0011 -0.0024 -0.0005 0.0125 -0.0154

AT. 28 H X 0.0006 -0.0001 -0.0005 0.0008 0.0003 -0.0049  
Y 0.0007 0.0013 -0.0026 0.0007 -0.0125 -0.0159  
Z 0.0004 0.0011 -0.0024 0.0005 -0.0125 -0.0154

AT. 29 C X 0.0007 0.0012 -0.0009 0.0007 0.0213 0.0211  
Y 0.0011 -0.0004 0.0008 -0.0007 -0.0170 -0.0157  
Z 0.0008 0.0005 -0.0005 0.0006 0.0147 0.0123

AT. 30 C X -0.0007 0.0012 -0.0009 -0.0007 -0.0213 0.0211  
Y -0.0011 -0.0004 0.0008 0.0007 0.0170 -0.0157  
Z -0.0008 0.0005 -0.0005 -0.0006 -0.0147 0.0123

AT. 31 H X 0.0007 0.0007 -0.0014 0.0009 0.0283 0.0271  
Y 0.0017 0.0004 0.0011 -0.0011 -0.0248 -0.0184  
Z 0.0015 0.0014 -0.0003 0.0001 0.0075 0.0119

AT. 32 H X -0.0007 0.0007 -0.0014 -0.0009 -0.0283 0.0271  
Y -0.0017 0.0004 0.0011 0.0011 0.0248 -0.0184  
Z -0.0015 0.0014 -0.0003 -0.0001 -0.0075 0.0119

AT. 33 H X 0.0018 0.0021 -0.0012 0.0010 0.0281 0.0201  
Y 0.0003 -0.0013 0.0004 0.0005 -0.0016 -0.0087

Z 0.0019 0.0015 -0.0006 0.0002 0.0120 0.0080  
AT. 34 H X -0.0018 0.0021 -0.0012 -0.0010 -0.0281 0.0201  
Y -0.0003 -0.0013 0.0004 -0.0005 0.0016 -0.0087  
Z -0.0019 0.0015 -0.0006 -0.0002 -0.0120 0.0080  
AT. 35 C X -0.0003 -0.0001 -0.0000 0.0000 0.0000 0.0004  
Y -0.0000 0.0002 0.0000 0.0001 0.0000 0.0009  
Z 0.0001 -0.0002 0.0000 -0.0000 0.0002 0.0014  
AT. 36 C X 0.0003 -0.0001 -0.0000 -0.0000 -0.0000 0.0004  
Y 0.0000 0.0002 0.0000 -0.0001 -0.0000 0.0009  
Z -0.0001 -0.0002 0.0000 0.0000 -0.0002 0.0014  
AT. 37 C X -0.0009 -0.0006 0.0011 -0.0004 -0.0122 -0.0031  
Y -0.0005 -0.0005 -0.0005 0.0000 0.0016 -0.0040  
Z 0.0012 -0.0007 0.0004 -0.0001 -0.0034 0.0022  
AT. 38 C X 0.0009 -0.0006 0.0011 0.0004 0.0122 -0.0031  
Y 0.0005 -0.0005 -0.0005 -0.0000 -0.0016 -0.0040  
Z -0.0012 -0.0007 0.0004 0.0001 0.0034 0.0022  
AT. 39 H X -0.0002 0.0000 0.0003 -0.0000 0.0010 0.0009  
Y -0.0004 -0.0005 -0.0011 0.0003 0.0111 -0.0015  
Z 0.0016 -0.0002 0.0001 0.0000 0.0017 0.0039  
AT. 40 H X 0.0002 0.0000 0.0003 0.0000 -0.0010 0.0009  
Y 0.0004 -0.0005 -0.0011 -0.0003 -0.0111 -0.0015  
Z -0.0016 -0.0002 0.0001 -0.0000 -0.0017 0.0039  
AT. 41 H X 0.0002 -0.0027 0.0016 -0.0009 -0.0218 -0.0061  
Y -0.0009 -0.0004 -0.0002 -0.0000 -0.0025 -0.0076  
Z 0.0006 0.0011 -0.0004 0.0003 0.0104 0.0082  
AT. 42 H X -0.0002 -0.0027 0.0016 0.0009 0.0218 -0.0061  
Y 0.0009 -0.0004 -0.0002 0.0000 0.0025 -0.0076  
Z -0.0006 0.0011 -0.0004 -0.0003 -0.0104 0.0082  
AT. 43 C X 0.0017 -0.0007 -0.0006 -0.0000 0.0036 -0.0047  
Y 0.0011 0.0007 0.0006 -0.0004 -0.0124 -0.0116  
Z 0.0004 -0.0013 0.0009 -0.0001 -0.0055 0.0049  
AT. 44 C X -0.0017 -0.0007 -0.0006 0.0000 -0.0036 -0.0047



Y -0.0011 0.0007 0.0006 0.0004 0.0124 -0.0116  
Z -0.0004 -0.0013 0.0009 0.0001 0.0055 0.0049  
AT. 45 H X 0.0010 0.0010 -0.0009 0.0003 0.0055 -0.0053  
Y 0.0027 -0.0008 0.0012 -0.0011 -0.0256 -0.0227  
Z -0.0007 -0.0010 0.0004 0.0003 0.0063 0.0161  
AT. 46 H X -0.0010 0.0010 -0.0009 -0.0003 -0.0055 -0.0053  
Y -0.0027 -0.0008 0.0012 0.0011 0.0256 -0.0227  
Z 0.0007 -0.0010 0.0004 -0.0003 -0.0063 0.0161  
AT. 47 H X 0.0030 -0.0019 -0.0010 0.0001 0.0088 -0.0023  
Y 0.0040 -0.0024 0.0001 0.0000 0.0007 -0.0027  
Z 0.0016 -0.0028 0.0008 0.0001 0.0013 0.0107  
AT. 48 H X -0.0030 -0.0019 -0.0010 -0.0001 -0.0088 -0.0023  
Y -0.0040 -0.0024 0.0001 -0.0000 -0.0007 -0.0027  
Z -0.0016 -0.0028 0.0008 -0.0001 -0.0013 0.0107  
AT. 49 C X 0.0002 0.0007 0.0000 0.0000 -0.0007 -0.0013  
Y 0.0003 0.0002 0.0000 -0.0000 -0.0004 -0.0009  
Z 0.0002 0.0003 0.0000 -0.0000 -0.0002 0.0001  
AT. 50 C X -0.0002 0.0007 0.0000 -0.0000 0.0007 -0.0013  
Y -0.0003 0.0002 0.0000 0.0000 0.0004 -0.0009  
Z -0.0002 0.0003 0.0000 0.0000 0.0002 0.0001  
AT. 51 C X -0.0013 0.0003 0.0008 -0.0003 -0.0096 -0.0041  
Y -0.0017 -0.0003 -0.0003 0.0003 0.0102 0.0133  
Z -0.0005 0.0017 -0.0009 0.0009 0.0240 0.0253  
AT. 52 C X 0.0013 0.0003 0.0008 0.0003 0.0096 -0.0041  
Y 0.0017 -0.0003 -0.0003 -0.0003 -0.0102 0.0133  
Z 0.0005 0.0017 -0.0009 -0.0009 -0.0240 0.0253  
AT. 53 H X -0.0001 0.0028 0.0002 0.0003 0.0043 0.0066  
Y -0.0009 0.0028 -0.0010 0.0011 0.0275 0.0287  
Z -0.0018 0.0006 -0.0005 0.0006 0.0179 0.0230  
AT. 54 H X 0.0001 0.0028 0.0002 -0.0003 -0.0043 0.0066  
Y 0.0009 0.0028 -0.0010 -0.0011 -0.0275 0.0287  
Z 0.0018 0.0006 -0.0005 -0.0006 -0.0179 0.0230

AT. 55 H X -0.0039 -0.0042 0.0014 -0.0011 -0.0269 -0.0180  
Y -0.0015 0.0002 -0.0006 0.0007 0.0178 0.0214  
Z -0.0017 -0.0006 -0.0008 0.0007 0.0213 0.0255

AT. 56 H X 0.0039 -0.0042 0.0014 0.0011 0.0269 -0.0180  
Y 0.0015 0.0002 -0.0006 -0.0007 -0.0178 0.0214  
Z 0.0017 -0.0006 -0.0008 -0.0007 -0.0213 0.0255

AT. 57 C X -0.0012 -0.0009 0.0000 -0.0001 -0.0031 -0.0047  
Y 0.0003 0.0001 -0.0000 0.0001 0.0026 0.0040  
Z -0.0001 -0.0001 0.0000 -0.0001 -0.0012 -0.0014

AT. 58 C X 0.0012 -0.0009 0.0000 0.0001 0.0031 -0.0047  
Y -0.0003 0.0001 -0.0000 -0.0001 -0.0026 0.0040  
Z 0.0001 -0.0001 0.0000 0.0001 0.0012 -0.0014

AT. 59 H X 0.0027 0.0018 0.0008 -0.0008 -0.0141 -0.0084  
Y -0.0011 -0.0007 -0.0001 0.0003 0.0010 -0.0013  
Z 0.0004 0.0002 0.0006 -0.0003 -0.0114 -0.0120

AT. 60 H X -0.0027 0.0018 0.0008 0.0008 0.0141 -0.0084  
Y 0.0011 -0.0007 -0.0001 -0.0003 -0.0010 -0.0013  
Z -0.0004 0.0002 0.0006 0.0003 0.0114 -0.0120

AT. 61 H X -0.0011 -0.0002 0.0005 -0.0004 -0.0150 -0.0204  
Y 0.0009 -0.0002 0.0004 -0.0001 0.0003 0.0077  
Z -0.0002 0.0006 0.0001 -0.0002 -0.0094 -0.0156

AT. 62 H X 0.0011 -0.0002 0.0005 0.0004 0.0150 -0.0204  
Y -0.0009 -0.0002 0.0004 0.0001 -0.0003 0.0077  
Z 0.0002 0.0006 0.0001 0.0002 0.0094 -0.0156

AT. 63 H X -0.0008 -0.0000 -0.0003 0.0004 0.0088 0.0101  
Y 0.0007 -0.0006 0.0007 -0.0008 -0.0156 -0.0133  
Z -0.0009 -0.0003 -0.0003 0.0002 0.0026 -0.0013

AT. 64 H X 0.0008 -0.0000 -0.0003 -0.0004 -0.0088 0.0101  
Y -0.0007 -0.0006 0.0007 0.0008 0.0156 -0.0133  
Z 0.0009 -0.0003 -0.0003 -0.0002 -0.0026 -0.0013

AT. 65 C X 0.0006 -0.0002 0.0001 0.0001 0.0025 0.0052  
Y -0.0002 0.0001 -0.0001 -0.0000 -0.0020 -0.0040

Z 0.0004 0.0001 -0.0000 -0.0001 -0.0029 -0.0058  
AT. 66 C X -0.0006 -0.0002 0.0001 -0.0001 -0.0025 0.0052  
Y 0.0002 0.0001 -0.0001 0.0000 0.0020 -0.0040  
Z -0.0004 0.0001 -0.0000 0.0001 0.0029 -0.0058  
AT. 67 H X -0.0019 -0.0002 0.0006 -0.0005 -0.0107 -0.0044  
Y 0.0014 0.0003 0.0002 -0.0000 -0.0010 -0.0007  
Z 0.0011 0.0000 -0.0007 0.0003 0.0071 -0.0012  
AT. 68 H X 0.0019 -0.0002 0.0006 0.0005 0.0107 -0.0044  
Y -0.0014 0.0003 0.0002 0.0000 0.0010 -0.0007  
Z -0.0011 0.0000 -0.0007 -0.0003 -0.0071 -0.0012  
AT. 69 H X 0.0012 -0.0006 0.0004 0.0000 0.0015 0.0072  
Y -0.0010 -0.0006 0.0003 -0.0003 -0.0086 -0.0089  
Z -0.0020 -0.0003 -0.0002 -0.0003 -0.0110 -0.0173  
AT. 70 H X -0.0012 -0.0006 0.0004 -0.0000 -0.0015 0.0072  
Y 0.0010 -0.0006 0.0003 0.0003 0.0086 -0.0089  
Z 0.0020 -0.0003 -0.0002 0.0003 0.0110 -0.0173  
AT. 71 H X -0.0009 -0.0011 -0.0002 0.0001 0.0011 0.0004  
Y 0.0005 -0.0004 0.0005 -0.0003 -0.0092 -0.0054  
Z 0.0002 -0.0011 0.0005 -0.0004 -0.0136 -0.0113  
AT. 72 H X 0.0009 -0.0011 -0.0002 -0.0001 -0.0011 0.0004  
Y -0.0005 -0.0004 0.0005 0.0003 0.0092 -0.0054  
Z -0.0002 -0.0011 0.0005 0.0004 0.0136 -0.0113  
AT. 73 C X 0.0010 -0.0000 0.0001 -0.0002 -0.0055 -0.0089  
Y 0.0002 -0.0002 0.0001 0.0001 0.0021 0.0055  
Z -0.0014 -0.0002 0.0001 -0.0005 -0.0122 -0.0166  
AT. 74 C X -0.0010 -0.0000 0.0001 0.0002 0.0055 -0.0089  
Y -0.0002 -0.0002 0.0001 -0.0001 -0.0021 0.0055  
Z 0.0014 -0.0002 0.0001 0.0005 0.0122 -0.0166  
AT. 75 H X 0.0021 -0.0012 -0.0006 -0.0003 -0.0013 -0.0066  
Y 0.0003 -0.0023 -0.0001 0.0001 0.0062 0.0090  
Z -0.0006 -0.0038 -0.0006 -0.0006 -0.0039 -0.0105  
AT. 76 H X -0.0021 -0.0012 -0.0006 0.0003 0.0013 -0.0066

Y -0.0003 -0.0023 -0.0001 -0.0001 -0.0062 0.0090  
Z 0.0006 -0.0038 -0.0006 0.0006 0.0039 -0.0105  
AT. 77 H X 0.0038 -0.0015 -0.0001 -0.0004 -0.0053 -0.0114  
Y -0.0029 -0.0003 -0.0005 0.0001 0.0080 0.0105  
Z -0.0008 0.0011 0.0009 -0.0003 -0.0179 -0.0191  
AT. 78 H X -0.0038 -0.0015 -0.0001 0.0004 0.0053 -0.0114  
Y 0.0029 -0.0003 -0.0005 -0.0001 -0.0080 0.0105  
Z 0.0008 0.0011 0.0009 0.0003 0.0179 -0.0191  
AT. 79 I X -0.0001 -0.0000 0.0003 0.0002 -0.0000 0.0000  
Y -0.0004 -0.0004 0.0004 0.0004 -0.0000 0.0000  
Z 0.0001 0.0001 0.0008 0.0008 -0.0000 0.0000  
AT. 80 I X 0.0001 -0.0000 0.0003 -0.0002 0.0000 0.0000  
Y 0.0004 -0.0004 0.0004 -0.0004 0.0000 0.0000  
Z -0.0001 0.0001 0.0008 -0.0008 0.0000 0.0000  
AT. 81 I X -0.0001 0.0001 0.0000 0.0000 -0.0000 -0.0000  
Y -0.0001 0.0001 0.0000 0.0001 0.0000 -0.0000  
Z 0.0002 -0.0002 0.0000 -0.0001 -0.0000 0.0000  
AT. 82 I X 0.0001 0.0001 0.0000 -0.0000 0.0000 -0.0000  
Y 0.0001 0.0001 0.0000 -0.0001 -0.0000 -0.0000  
Z -0.0002 -0.0002 0.0000 0.0001 0.0000 0.0000  
AT. 83 O X 0.0009 0.0008 -0.0039 -0.0039 0.0003 0.0000  
Y 0.0068 0.0070 -0.0008 -0.0008 0.0001 -0.0002  
Z -0.0015 -0.0012 -0.0067 -0.0062 0.0002 -0.0002  
AT. 84 O X -0.0009 0.0008 -0.0039 0.0039 -0.0003 0.0000  
Y -0.0068 0.0070 -0.0008 0.0008 -0.0001 -0.0002  
Z 0.0015 -0.0012 -0.0067 0.0062 -0.0002 -0.0002  
AT. 85 O X 0.0044 -0.0045 -0.0005 -0.0012 -0.0002 0.0003  
Y -0.0054 0.0051 -0.0008 -0.0004 -0.0001 -0.0001  
Z 0.0042 -0.0042 0.0010 0.0005 0.0002 0.0001  
AT. 86 O X -0.0044 -0.0045 -0.0005 0.0012 0.0002 0.0003  
Y 0.0054 0.0051 -0.0008 0.0004 0.0001 -0.0001  
Z -0.0042 -0.0042 0.0010 -0.0005 -0.0002 0.0001

AT. 87 N X -0.0016 -0.0015 -0.0031 -0.0030 0.0001 0.0001  
Y 0.0027 0.0027 0.0057 0.0055 -0.0001 -0.0001  
Z 0.0012 0.0007 0.0137 0.0131 -0.0005 0.0004

AT. 88 N X 0.0016 -0.0015 -0.0031 0.0030 -0.0001 0.0001  
Y -0.0027 0.0027 0.0057 -0.0055 0.0001 -0.0001  
Z -0.0012 0.0007 0.0137 -0.0131 0.0005 0.0004

AT. 89 N X 0.0004 -0.0008 -0.0014 -0.0015 -0.0001 0.0002  
Y -0.0003 0.0009 0.0049 0.0052 0.0004 -0.0000  
Z -0.0014 0.0014 0.0012 0.0014 -0.0003 0.0001

AT. 90 N X -0.0004 -0.0008 -0.0014 0.0015 0.0001 0.0002  
Y 0.0003 0.0009 0.0049 -0.0052 -0.0004 -0.0000  
Z 0.0014 0.0014 0.0012 -0.0014 0.0003 0.0001

AT. 91 C X 0.0043 0.0047 -0.0031 -0.0028 0.0001 -0.0002  
Y -0.0098 -0.0103 0.0014 0.0015 0.0001 0.0005  
Z -0.0013 -0.0011 -0.0046 -0.0050 0.0003 -0.0001

AT. 92 C X -0.0043 0.0047 -0.0031 0.0028 -0.0001 -0.0002  
Y 0.0098 -0.0103 0.0014 -0.0015 -0.0001 0.0005  
Z 0.0013 -0.0011 -0.0046 0.0050 -0.0003 -0.0001

AT. 93 C X -0.0051 -0.0054 0.0025 0.0032 -0.0004 -0.0001  
Y 0.0038 0.0041 -0.0031 -0.0030 -0.0000 -0.0004  
Z -0.0024 -0.0017 -0.0342 -0.0343 0.0012 -0.0009

AT. 94 C X 0.0051 -0.0054 0.0025 -0.0032 0.0004 -0.0001  
Y -0.0038 0.0041 -0.0031 0.0030 0.0000 -0.0004  
Z 0.0024 -0.0017 -0.0342 0.0343 -0.0012 -0.0009

AT. 95 H X -0.0080 -0.0086 0.0519 0.0522 -0.0018 0.0016  
Y 0.0007 0.0022 -0.0763 -0.0763 0.0021 -0.0028  
Z 0.0066 0.0056 0.0432 0.0442 -0.0013 0.0015

AT. 96 H X 0.0080 -0.0086 0.0519 -0.0522 0.0018 0.0016  
Y -0.0007 0.0022 -0.0763 0.0763 -0.0021 -0.0028  
Z -0.0066 0.0056 0.0432 -0.0442 0.0013 0.0015

AT. 97 H X -0.0094 -0.0111 0.0184 0.0185 -0.0014 0.0006  
Y 0.0134 0.0102 0.1139 0.1134 -0.0031 0.0033

Z 0.0011 0.0015 -0.0121 -0.0122 0.0008 -0.0002  
AT. 98 H X 0.0094 -0.0111 0.0184 -0.0185 0.0014 0.0006  
Y -0.0134 0.0102 0.1139 -0.1134 0.0031 0.0033  
Z -0.0011 0.0015 -0.0121 0.0122 -0.0008 -0.0002  
AT. 99 C X -0.0046 0.0042 -0.0005 0.0001 -0.0000 -0.0001  
Y 0.0074 -0.0072 -0.0007 -0.0016 -0.0004 0.0003  
Z 0.0048 -0.0045 0.0005 -0.0004 0.0001 0.0001  
AT. 100 C X 0.0046 0.0042 -0.0005 -0.0001 0.0000 -0.0001  
Y -0.0074 -0.0072 -0.0007 0.0016 0.0004 0.0003  
Z -0.0048 -0.0045 0.0005 0.0004 -0.0001 0.0001  
AT. 101 C X 0.0031 -0.0025 0.0007 0.0002 0.0003 -0.0002  
Y 0.0049 -0.0049 -0.0006 -0.0018 -0.0005 0.0002  
Z -0.0085 0.0090 0.0012 0.0024 0.0012 -0.0005  
AT. 102 C X -0.0031 -0.0025 0.0007 -0.0002 -0.0003 -0.0002  
Y -0.0049 -0.0049 -0.0006 0.0018 0.0005 0.0002  
Z 0.0085 0.0090 0.0012 -0.0024 -0.0012 -0.0005  
AT. 103 H X -0.0001 0.0024 -0.0003 0.0042 0.0014 -0.0006  
Y 0.0052 -0.0060 0.0000 -0.0032 -0.0008 0.0003  
Z 0.0250 -0.0267 -0.0052 -0.0091 -0.0022 0.0011  
AT. 104 H X 0.0001 0.0024 -0.0003 -0.0042 -0.0014 -0.0006  
Y -0.0052 -0.0060 0.0000 0.0032 0.0008 0.0003  
Z -0.0250 -0.0267 -0.0052 0.0091 0.0022 0.0011  
AT. 105 H X -0.0012 0.0028 0.0031 0.0020 0.0008 -0.0007  
Y -0.0319 0.0345 0.0032 0.0099 0.0029 -0.0015  
Z -0.0240 0.0258 0.0031 0.0072 0.0025 -0.0013  
AT. 106 H X 0.0012 0.0028 0.0031 -0.0020 -0.0008 -0.0007  
Y 0.0319 0.0345 0.0032 -0.0099 -0.0029 -0.0015  
Z 0.0240 0.0258 0.0031 -0.0072 -0.0025 -0.0013  
AT. 107 C X -0.0009 -0.0001 -0.0222 -0.0223 0.0010 -0.0003  
Y 0.0004 -0.0012 -0.0084 -0.0090 -0.0005 -0.0004  
Z 0.0027 0.0011 0.0188 0.0183 -0.0010 0.0003  
AT. 108 C X 0.0009 -0.0001 -0.0222 0.0223 -0.0010 -0.0003

Y -0.0004 -0.0012 -0.0084 0.0090 0.0005 -0.0004  
Z -0.0027 0.0011 0.0188 -0.0183 0.0010 0.0003  
AT. 109 H X 0.0003 0.0024 -0.0355 -0.0347 0.0011 -0.0010  
Y 0.0013 -0.0004 -0.0132 -0.0137 -0.0009 -0.0007  
Z 0.0040 0.0020 0.0142 0.0136 -0.0017 0.0002  
AT. 110 H X -0.0003 0.0024 -0.0355 0.0347 -0.0011 -0.0010  
Y -0.0013 -0.0004 -0.0132 0.0137 0.0009 -0.0007  
Z -0.0040 0.0020 0.0142 -0.0136 0.0017 0.0002  
AT. 111 H X -0.0018 -0.0013 -0.0214 -0.0217 0.0013 -0.0000  
Y 0.0018 0.0001 0.0064 0.0054 0.0005 0.0005  
Z 0.0031 0.0018 0.0139 0.0138 -0.0015 -0.0003  
AT. 112 H X 0.0018 -0.0013 -0.0214 0.0217 -0.0013 -0.0000  
Y -0.0018 0.0001 0.0064 -0.0054 -0.0005 0.0005  
Z -0.0031 0.0018 0.0139 -0.0138 0.0015 -0.0003  
AT. 113 C X -0.0004 0.0002 -0.0000 0.0001 -0.0001 -0.0000  
Y 0.0003 -0.0006 0.0002 0.0003 0.0001 0.0001  
Z -0.0004 -0.0000 0.0008 0.0009 -0.0001 0.0001  
AT. 114 C X 0.0004 0.0002 -0.0000 -0.0001 0.0001 -0.0000  
Y -0.0003 -0.0006 0.0002 -0.0003 -0.0001 0.0001  
Z 0.0004 -0.0000 0.0008 -0.0009 0.0001 0.0001  
AT. 115 C X 0.0042 -0.0027 0.0086 0.0083 0.0004 -0.0001  
Y -0.0011 -0.0000 -0.0038 -0.0032 0.0009 0.0001  
Z -0.0011 0.0006 -0.0026 -0.0028 -0.0007 -0.0000  
AT. 116 C X -0.0042 -0.0027 0.0086 -0.0083 -0.0004 -0.0001  
Y 0.0011 -0.0000 -0.0038 0.0032 -0.0009 0.0001  
Z 0.0011 0.0006 -0.0026 0.0028 0.0007 -0.0000  
AT. 117 H X 0.0031 -0.0040 0.0014 0.0013 0.0004 -0.0001  
Y -0.0010 0.0034 0.0061 0.0070 0.0013 0.0004  
Z 0.0001 0.0012 0.0030 0.0025 -0.0008 -0.0001  
AT. 118 H X -0.0031 -0.0040 0.0014 -0.0013 -0.0004 -0.0001  
Y 0.0010 0.0034 0.0061 -0.0070 -0.0013 0.0004  
Z -0.0001 0.0012 0.0030 -0.0025 0.0008 -0.0001

AT.119 H X 0.0042 0.0005 0.0155 0.0148 0.0006 -0.0002  
Y -0.0021 -0.0010 -0.0095 -0.0089 0.0012 -0.0000  
Z -0.0001 0.0032 0.0071 0.0066 -0.0008 0.0001

AT.120 H X -0.0042 0.0005 0.0155 -0.0148 -0.0006 -0.0002  
Y 0.0021 -0.0010 -0.0095 0.0089 -0.0012 -0.0000  
Z 0.0001 0.0032 0.0071 -0.0066 0.0008 0.0001

AT.121 C X 0.0016 -0.0025 -0.0040 -0.0045 -0.0009 0.0003  
Y 0.0017 -0.0014 -0.0088 -0.0095 0.0008 -0.0008  
Z -0.0003 -0.0006 -0.0026 -0.0027 -0.0008 0.0005

AT.122 C X -0.0016 -0.0025 -0.0040 0.0045 0.0009 0.0003  
Y -0.0017 -0.0014 -0.0088 0.0095 -0.0008 -0.0008  
Z 0.0003 -0.0006 -0.0026 0.0027 0.0008 0.0005

AT.123 H X -0.0024 0.0014 -0.0081 -0.0078 -0.0011 -0.0000  
Y 0.0003 -0.0001 -0.0194 -0.0202 0.0012 -0.0013  
Z 0.0004 -0.0011 0.0079 0.0081 -0.0013 0.0009

AT.124 H X 0.0024 0.0014 -0.0081 0.0078 0.0011 -0.0000  
Y -0.0003 -0.0001 -0.0194 0.0202 -0.0012 -0.0013  
Z -0.0004 -0.0011 0.0079 -0.0081 0.0013 0.0009

AT.125 H X 0.0026 -0.0039 -0.0044 -0.0049 -0.0010 0.0008  
Y 0.0035 -0.0029 0.0036 0.0027 0.0005 -0.0008  
Z 0.0022 -0.0032 0.0036 0.0035 -0.0010 0.0010

AT.126 H X -0.0026 -0.0039 -0.0044 0.0049 0.0010 0.0008  
Y -0.0035 -0.0029 0.0036 -0.0027 -0.0005 -0.0008  
Z -0.0022 -0.0032 0.0036 -0.0035 0.0010 0.0010

AT.127 C X -0.0002 0.0001 0.0004 0.0004 -0.0000 0.0000  
Y -0.0003 0.0005 -0.0011 -0.0011 0.0003 -0.0001  
Z 0.0002 -0.0000 0.0000 -0.0001 0.0000 -0.0000

AT.128 C X 0.0002 0.0001 0.0004 -0.0004 0.0000 0.0000  
Y 0.0003 0.0005 -0.0011 0.0011 -0.0003 -0.0001  
Z -0.0002 -0.0000 0.0000 0.0001 -0.0000 -0.0000

AT.129 C X 0.0006 -0.0012 0.0175 0.0168 -0.0003 0.0000  
Y -0.0010 0.0004 0.0061 0.0066 -0.0009 0.0007



Z -0.0005 0.0002 0.0212 0.0215 -0.0012 0.0006  
AT. 130 C X -0.0006 -0.0012 0.0175 -0.0168 0.0003 0.0000  
Y 0.0010 0.0004 0.0061 -0.0066 0.0009 0.0007  
Z 0.0005 0.0002 0.0212 -0.0215 0.0012 0.0006  
AT. 131 H X -0.0012 -0.0021 0.0082 0.0079 -0.0006 0.0003  
Y 0.0003 0.0011 0.0262 0.0269 -0.0009 0.0005  
Z -0.0024 -0.0008 0.0163 0.0173 -0.0015 0.0009  
AT. 132 H X 0.0012 -0.0021 0.0082 -0.0079 0.0006 0.0003  
Y -0.0003 0.0011 0.0262 -0.0269 0.0009 0.0005  
Z 0.0024 -0.0008 0.0163 -0.0173 0.0015 0.0009  
AT. 133 H X 0.0030 0.0000 0.0357 0.0347 -0.0004 0.0001  
Y -0.0010 0.0006 0.0078 0.0081 -0.0014 0.0012  
Z -0.0016 -0.0001 0.0147 0.0148 -0.0020 0.0013  
AT. 134 H X -0.0030 0.0000 0.0357 -0.0347 0.0004 0.0001  
Y 0.0010 0.0006 0.0078 -0.0081 0.0014 0.0012  
Z 0.0016 -0.0001 0.0147 -0.0148 0.0020 0.0013  
AT. 135 C X 0.0002 0.0009 0.0052 0.0048 -0.0005 0.0002  
Y 0.0001 0.0001 0.0022 0.0021 -0.0000 -0.0000  
Z -0.0002 -0.0005 -0.0023 -0.0020 0.0002 0.0002  
AT. 136 C X -0.0002 0.0009 0.0052 -0.0048 0.0005 0.0002  
Y -0.0001 0.0001 0.0022 -0.0021 0.0000 -0.0000  
Z 0.0002 -0.0005 -0.0023 0.0020 -0.0002 0.0002  
AT. 137 H X 0.0036 -0.0016 0.0102 0.0095 0.0010 -0.0007  
Y 0.0001 0.0000 -0.0040 -0.0042 0.0003 -0.0003  
Z -0.0014 0.0003 -0.0145 -0.0143 0.0002 0.0001  
AT. 138 H X -0.0036 -0.0016 0.0102 -0.0095 -0.0010 -0.0007  
Y -0.0001 0.0000 -0.0040 0.0042 -0.0003 -0.0003  
Z 0.0014 0.0003 -0.0145 0.0143 -0.0002 0.0001  
AT. 139 H X -0.0004 0.0015 0.0157 0.0158 -0.0014 0.0011  
Y -0.0017 0.0016 -0.0024 -0.0024 -0.0009 0.0004  
Z 0.0011 -0.0018 -0.0150 -0.0154 0.0016 -0.0012  
AT. 140 H X 0.0004 0.0015 0.0157 -0.0158 0.0014 0.0011

Y 0.0017 0.0016 -0.0024 0.0024 0.0009 0.0004  
Z -0.0011 -0.0018 -0.0150 0.0154 -0.0016 -0.0012  
AT. 141 H X 0.0001 0.0008 -0.0115 -0.0125 -0.0000 -0.0011  
Y -0.0014 0.0011 -0.0108 -0.0111 -0.0002 -0.0003  
Z 0.0013 -0.0015 0.0037 0.0039 0.0006 -0.0000  
AT. 142 H X -0.0001 0.0008 -0.0115 0.0125 0.0000 -0.0011  
Y 0.0014 0.0011 -0.0108 0.0111 0.0002 -0.0003  
Z -0.0013 -0.0015 0.0037 -0.0039 -0.0006 -0.0000  
AT. 143 C X 0.0003 0.0004 -0.0049 -0.0048 0.0006 -0.0002  
Y 0.0002 0.0000 -0.0013 -0.0013 0.0002 0.0000  
Z 0.0003 0.0004 -0.0035 -0.0034 0.0002 -0.0002  
AT. 144 C X -0.0003 0.0004 -0.0049 0.0048 -0.0006 -0.0002  
Y -0.0002 0.0000 -0.0013 0.0013 -0.0002 0.0000  
Z -0.0003 0.0004 -0.0035 0.0034 -0.0002 -0.0002  
AT. 145 H X 0.0016 0.0004 0.0089 0.0082 -0.0003 0.0000  
Y 0.0003 -0.0003 -0.0036 -0.0035 -0.0002 -0.0002  
Z 0.0005 0.0007 0.0022 0.0019 0.0005 0.0001  
AT. 146 H X -0.0016 0.0004 0.0089 -0.0082 0.0003 0.0000  
Y -0.0003 -0.0003 -0.0036 0.0035 0.0002 -0.0002  
Z -0.0005 0.0007 0.0022 -0.0019 -0.0005 0.0001  
AT. 147 H X -0.0006 0.0008 -0.0088 -0.0083 0.0018 -0.0003  
Y 0.0002 -0.0003 -0.0070 -0.0070 -0.0007 -0.0004  
Z -0.0011 0.0009 -0.0120 -0.0114 0.0013 -0.0007  
AT. 148 H X 0.0006 0.0008 -0.0088 0.0083 -0.0018 -0.0003  
Y -0.0002 -0.0003 -0.0070 0.0070 0.0007 -0.0004  
Z 0.0011 0.0009 -0.0120 0.0114 -0.0013 -0.0007  
AT. 149 H X 0.0018 -0.0008 -0.0057 -0.0060 -0.0007 -0.0004  
Y 0.0003 -0.0005 -0.0072 -0.0070 0.0002 -0.0000  
Z -0.0003 0.0000 -0.0130 -0.0124 0.0009 -0.0003  
AT. 150 H X -0.0018 -0.0008 -0.0057 0.0060 0.0007 -0.0004  
Y -0.0003 -0.0005 -0.0072 0.0070 -0.0002 -0.0000  
Z 0.0003 0.0000 -0.0130 0.0124 -0.0009 -0.0003

AT.151 C X -0.0023 0.0011 0.0021 0.0030 -0.0002 0.0004  
Y -0.0006 0.0003 0.0004 0.0006 0.0001 0.0003  
Z -0.0008 -0.0005 -0.0134 -0.0133 0.0017 -0.0008

AT.152 C X 0.0023 0.0011 0.0021 -0.0030 0.0002 0.0004  
Y 0.0006 0.0003 0.0004 -0.0006 -0.0001 0.0003  
Z 0.0008 -0.0005 -0.0134 0.0133 -0.0017 -0.0008

AT.153 H X -0.0031 0.0015 0.0008 0.0019 -0.0001 0.0005  
Y -0.0010 0.0004 0.0046 0.0050 -0.0006 0.0003  
Z -0.0010 -0.0005 -0.0064 -0.0060 0.0007 -0.0011

AT.154 H X 0.0031 0.0015 0.0008 -0.0019 0.0001 0.0005  
Y 0.0010 0.0004 0.0046 -0.0050 0.0006 0.0003  
Z 0.0010 -0.0005 -0.0064 0.0060 -0.0007 -0.0011

AT.155 H X -0.0034 0.0007 0.0019 0.0031 -0.0003 0.0008  
Y -0.0011 0.0001 0.0051 0.0056 -0.0004 -0.0000  
Z -0.0007 -0.0005 -0.0186 -0.0187 0.0023 -0.0003

AT.156 H X 0.0034 0.0007 0.0019 -0.0031 0.0003 0.0008  
Y 0.0011 0.0001 0.0051 -0.0056 0.0004 -0.0000  
Z 0.0007 -0.0005 -0.0186 0.0187 -0.0023 -0.0003

AT.157 O X -0.0001 -0.0001 -0.0000 -0.0001 -0.0009 0.0015  
Y 0.0000 -0.0000 -0.0000 0.0000 0.0003 -0.0003  
Z -0.0001 -0.0001 0.0000 -0.0001 -0.0006 0.0014

AT.158 O X 0.0001 -0.0001 -0.0000 0.0001 0.0009 0.0015  
Y -0.0000 -0.0000 -0.0000 -0.0000 -0.0003 -0.0003  
Z 0.0001 -0.0001 0.0000 0.0001 0.0006 0.0014

AT.159 O X 0.0000 0.0000 -0.0000 -0.0000 0.0006 -0.0005  
Y 0.0001 0.0001 -0.0001 -0.0000 -0.0011 0.0009  
Z -0.0000 -0.0001 0.0001 -0.0000 -0.0002 -0.0003

AT.160 O X -0.0000 0.0000 -0.0000 0.0000 -0.0006 -0.0005  
Y -0.0001 0.0001 -0.0001 0.0000 0.0011 0.0009  
Z 0.0000 -0.0001 0.0001 0.0000 0.0002 -0.0003

AT.161 H X 0.0009 0.0018 -0.0007 0.0011 0.0184 -0.0229  
Y -0.0003 -0.0006 0.0002 -0.0003 -0.0055 0.0090

Z 0.0014 0.0030 -0.0009 0.0014 0.0280 -0.0406  
AT.162 H X -0.0009 0.0018 -0.0007 -0.0011 -0.0184 -0.0229  
Y 0.0003 -0.0006 0.0002 0.0003 0.0055 0.0090  
Z -0.0014 0.0030 -0.0009 -0.0014 -0.0280 -0.0406  
AT.163 H X -0.0002 -0.0000 0.0002 -0.0000 0.0031 -0.0007  
Y -0.0020 0.0009 0.0004 -0.0005 0.0314 -0.0148  
Z -0.0003 0.0003 0.0002 -0.0000 0.0067 -0.0036  
AT.164 H X 0.0002 -0.0000 0.0002 0.0000 -0.0031 -0.0007  
Y 0.0020 0.0009 0.0004 0.0005 -0.0314 -0.0148  
Z 0.0003 0.0003 0.0002 0.0000 -0.0067 -0.0036  
AT.165 O X -0.0016 -0.0017 -0.0005 -0.0005 -0.0000 0.0001  
Y 0.0059 0.0059 0.0007 0.0007 0.0002 -0.0002  
Z -0.0026 -0.0026 -0.0006 -0.0004 -0.0001 0.0003  
AT.166 O X 0.0016 -0.0017 -0.0005 0.0005 0.0000 0.0001  
Y -0.0059 0.0059 0.0007 -0.0007 -0.0002 -0.0002  
Z 0.0026 -0.0026 -0.0006 0.0004 0.0001 0.0003  
AT.167 H X 0.0743 0.0749 0.0008 0.0015 0.0023 -0.0028  
Y -0.1534 -0.1544 -0.0015 -0.0028 -0.0047 0.0057  
Z 0.0471 0.0473 -0.0007 -0.0003 0.0013 -0.0019  
AT.168 H X -0.0743 0.0749 0.0008 -0.0015 -0.0023 -0.0028  
Y 0.1534 -0.1544 -0.0015 0.0028 0.0047 0.0057  
Z -0.0471 0.0473 -0.0007 0.0003 -0.0013 -0.0019  
AT.169 O X -0.0048 -0.0048 0.0006 0.0007 0.0001 0.0002  
Y -0.0022 -0.0022 0.0000 -0.0001 0.0001 0.0000  
Z 0.0022 0.0021 -0.0001 -0.0001 0.0001 -0.0002  
AT.170 O X 0.0048 -0.0048 0.0006 -0.0007 -0.0001 0.0002  
Y 0.0022 -0.0022 0.0000 0.0001 -0.0001 0.0000  
Z -0.0022 0.0021 -0.0001 0.0001 -0.0001 -0.0002  
AT.171 H X 0.1715 0.1698 -0.0098 -0.0118 -0.0023 -0.0051  
Y 0.0832 0.0825 -0.0050 -0.0063 -0.0010 -0.0025  
Z 0.0137 0.0139 -0.0004 -0.0014 0.0002 -0.0005  
AT.172 H X -0.1715 0.1698 -0.0098 0.0118 0.0023 -0.0051

Y -0.0832 0.0825 -0.0050 0.0063 0.0010 -0.0025  
Z -0.0137 0.0139 -0.0004 0.0014 -0.0002 -0.0005

FREQ(CM\*\*-1) 782.16 782.21 791.48 792.09 792.31 793.28

AT. 1 I X -0.0001 0.0000 -0.0001 -0.0000 -0.0001 0.0000

Y -0.0001 0.0000 0.0000 0.0000 0.0000 0.0000

Z 0.0001 -0.0001 0.0000 0.0000 -0.0000 -0.0000

AT. 2 I X 0.0001 0.0000 0.0001 0.0000 -0.0001 0.0000

Y 0.0001 0.0000 -0.0000 -0.0000 0.0000 0.0000

Z -0.0001 -0.0001 -0.0000 -0.0000 -0.0000 -0.0000

AT. 3 I X -0.0000 -0.0001 -0.0001 -0.0001 -0.0001 -0.0000

Y -0.0006 -0.0006 0.0000 0.0001 0.0001 0.0000

Z 0.0002 0.0002 -0.0000 -0.0000 -0.0000 0.0000

AT. 4 I X 0.0000 -0.0001 0.0001 0.0001 -0.0001 -0.0000

Y 0.0006 -0.0006 -0.0000 -0.0001 0.0001 0.0000

Z -0.0002 0.0002 0.0000 0.0000 -0.0000 0.0000

AT. 5 O X -0.0005 -0.0026 -0.0008 -0.0006 -0.0022 -0.0001

Y 0.0017 0.0009 0.0014 0.0014 0.0025 -0.0001

Z -0.0012 0.0029 0.0008 0.0002 0.0013 0.0002

AT. 6 O X 0.0005 -0.0026 0.0008 0.0006 -0.0022 -0.0001

Y -0.0017 0.0009 -0.0014 -0.0014 0.0025 -0.0001

Z 0.0012 0.0029 -0.0008 -0.0002 0.0013 0.0002

AT. 7 O X -0.0028 -0.0033 -0.0023 -0.0017 -0.0015 0.0005

Y 0.0059 0.0063 0.0017 0.0019 -0.0002 -0.0003

Z -0.0069 -0.0067 0.0004 0.0007 0.0006 0.0000

AT. 8 O X 0.0028 -0.0033 0.0023 0.0017 -0.0015 0.0005

Y -0.0059 0.0063 -0.0017 -0.0019 -0.0002 -0.0003

Z 0.0069 -0.0067 -0.0004 -0.0007 0.0006 0.0000

AT. 9 N X -0.0006 -0.0039 -0.0027 -0.0019 -0.0035 0.0001

Y -0.0026 -0.0046 0.0007 0.0009 0.0013 -0.0001

Z 0.0018 -0.0027 -0.0010 -0.0002 -0.0017 -0.0001

AT. 10 N X 0.0006 -0.0039 0.0027 0.0019 -0.0035 0.0001  
Y 0.0026 -0.0046 -0.0007 -0.0009 0.0013 -0.0001  
Z -0.0018 -0.0027 0.0010 0.0002 -0.0017 -0.0001

AT. 11 N X -0.0056 -0.0071 -0.0038 -0.0030 -0.0041 0.0002  
Y -0.0118 -0.0135 -0.0008 -0.0003 0.0007 0.0001  
Z 0.0093 0.0086 0.0012 0.0013 0.0007 -0.0001

AT. 12 N X 0.0056 -0.0071 0.0038 0.0030 -0.0041 0.0002  
Y 0.0118 -0.0135 0.0008 0.0003 0.0007 0.0001  
Z -0.0093 0.0086 -0.0012 -0.0013 0.0007 -0.0001

AT. 13 C X -0.0020 0.0017 -0.0008 -0.0012 -0.0004 0.0003  
Y -0.0021 0.0030 0.0009 0.0000 0.0024 0.0004  
Z -0.0012 0.0028 0.0012 0.0004 0.0026 0.0003

AT. 14 C X 0.0020 0.0017 0.0008 0.0012 -0.0004 0.0003  
Y 0.0021 0.0030 -0.0009 -0.0000 0.0024 0.0004  
Z 0.0012 0.0028 -0.0012 -0.0004 0.0026 0.0003

AT. 15 C X 0.0012 0.0027 0.0049 0.0040 0.0074 -0.0001  
Y 0.0016 -0.0044 -0.0047 -0.0035 -0.0083 -0.0002  
Z -0.0065 0.0047 0.0011 -0.0004 0.0029 0.0003

AT. 16 C X -0.0012 0.0027 -0.0049 -0.0040 0.0074 -0.0001  
Y -0.0016 -0.0044 0.0047 0.0035 -0.0083 -0.0002  
Z 0.0065 0.0047 -0.0011 0.0004 0.0029 0.0003

AT. 17 H X -0.0101 0.0065 0.0033 0.0010 0.0052 0.0000  
Y -0.0146 0.0059 -0.0073 -0.0087 -0.0102 0.0006  
Z 0.0095 -0.0070 0.0033 0.0048 0.0039 -0.0007

AT. 18 H X 0.0101 0.0065 -0.0033 -0.0010 0.0052 0.0000  
Y 0.0146 0.0059 0.0073 0.0087 -0.0102 0.0006  
Z -0.0095 -0.0070 -0.0033 -0.0048 0.0039 -0.0007

AT. 19 H X 0.0064 0.0049 0.0060 0.0051 0.0109 -0.0001  
Y 0.0223 -0.0170 -0.0031 0.0018 -0.0077 -0.0011  
Z 0.0029 0.0007 0.0023 0.0022 0.0045 -0.0000

AT. 20 H X -0.0064 0.0049 -0.0060 -0.0051 0.0109 -0.0001  
Y -0.0223 -0.0170 0.0031 -0.0018 -0.0077 -0.0011

Z -0.0029 0.0007 -0.0023 -0.0022 0.0045 -0.0000  
AT. 21 C X -0.0064 -0.0062 0.0000 -0.0005 0.0004 -0.0002  
Y 0.0002 0.0009 0.0035 0.0028 0.0031 -0.0005  
Z -0.0039 -0.0038 0.0010 0.0007 0.0015 -0.0002  
AT. 22 C X 0.0064 -0.0062 -0.0000 0.0005 0.0004 -0.0002  
Y -0.0002 0.0009 -0.0035 -0.0028 0.0031 -0.0005  
Z 0.0039 -0.0038 -0.0010 -0.0007 0.0015 -0.0002  
AT. 23 C X 0.0069 0.0077 0.0074 0.0066 0.0077 -0.0007  
Y 0.0165 0.0157 -0.0057 -0.0052 -0.0083 0.0006  
Z -0.0213 -0.0221 -0.0052 -0.0043 -0.0027 0.0007  
AT. 24 C X -0.0069 0.0077 -0.0074 -0.0066 0.0077 -0.0007  
Y -0.0165 0.0157 0.0057 0.0052 -0.0083 0.0006  
Z 0.0213 -0.0221 0.0052 0.0043 -0.0027 0.0007  
AT. 25 H X 0.0574 0.0566 -0.0005 0.0003 -0.0059 0.0009  
Y 0.0130 0.0120 -0.0056 -0.0049 -0.0075 0.0007  
Z 0.0603 0.0591 -0.0171 -0.0153 -0.0263 0.0017  
AT. 26 H X -0.0574 0.0566 0.0005 -0.0003 -0.0059 0.0009  
Y -0.0130 0.0120 0.0056 0.0049 -0.0075 0.0007  
Z -0.0603 0.0591 0.0171 0.0153 -0.0263 0.0017  
AT. 27 H X -0.0090 -0.0064 0.0119 0.0113 0.0110 -0.0017  
Y -0.0670 -0.0661 0.0060 0.0059 0.0142 -0.0006  
Z -0.0629 -0.0631 -0.0002 0.0003 0.0081 0.0003  
AT. 28 H X 0.0090 -0.0064 -0.0119 -0.0113 0.0110 -0.0017  
Y 0.0670 -0.0661 -0.0060 -0.0059 0.0142 -0.0006  
Z 0.0629 -0.0631 0.0002 -0.0003 0.0081 0.0003  
AT. 29 C X 0.0068 -0.0030 -0.0102 -0.0081 -0.0161 0.0000  
Y 0.0093 0.0142 -0.0126 -0.0118 -0.0182 0.0006  
Z 0.0071 -0.0010 -0.0132 -0.0106 -0.0195 -0.0000  
AT. 30 C X -0.0068 -0.0030 0.0102 0.0081 -0.0161 0.0000  
Y -0.0093 0.0142 0.0126 0.0118 -0.0182 0.0006  
Z -0.0071 -0.0010 0.0132 0.0106 -0.0195 -0.0000  
AT. 31 H X 0.0098 -0.0039 -0.0150 -0.0117 -0.0231 -0.0003

Y 0.0148 0.0234 -0.0104 -0.0109 -0.0165 0.0011  
Z 0.0168 0.0121 -0.0126 -0.0109 -0.0207 0.0005  
AT. 32 H X -0.0098 -0.0039 0.0150 0.0117 -0.0231 -0.0003  
Y -0.0148 0.0234 0.0104 0.0109 -0.0165 0.0011  
Z -0.0168 0.0121 0.0126 0.0109 -0.0207 0.0005  
AT. 33 H X 0.0091 -0.0071 -0.0179 -0.0136 -0.0261 -0.0004  
Y 0.0006 -0.0018 -0.0151 -0.0122 -0.0192 0.0001  
Z 0.0126 0.0036 -0.0173 -0.0141 -0.0256 -0.0001  
AT. 34 H X -0.0091 -0.0071 0.0179 0.0136 -0.0261 -0.0004  
Y -0.0006 -0.0018 0.0151 0.0122 -0.0192 0.0001  
Z -0.0126 0.0036 0.0173 0.0141 -0.0256 -0.0001  
AT. 35 C X -0.0001 -0.0002 -0.0003 -0.0003 -0.0001 0.0001  
Y -0.0010 -0.0005 0.0016 0.0013 0.0021 0.0000  
Z 0.0004 0.0008 0.0019 0.0015 0.0017 -0.0001  
AT. 36 C X 0.0001 -0.0002 0.0003 0.0003 -0.0001 0.0001  
Y 0.0010 -0.0005 -0.0016 -0.0013 0.0021 0.0000  
Z -0.0004 0.0008 -0.0019 -0.0015 0.0017 -0.0001  
AT. 37 C X 0.0150 0.0202 0.0154 0.0128 0.0186 -0.0008  
Y -0.0225 -0.0202 0.0117 0.0104 0.0199 0.0001  
Z 0.0152 0.0152 -0.0052 -0.0048 -0.0100 0.0000  
AT. 38 C X -0.0150 0.0202 -0.0154 -0.0128 0.0186 -0.0008  
Y 0.0225 -0.0202 -0.0117 -0.0104 0.0199 0.0001  
Z -0.0152 0.0152 0.0052 0.0048 -0.0100 0.0000  
AT. 39 H X 0.0076 0.0060 0.0041 0.0037 0.0046 -0.0010  
Y -0.0299 -0.0322 0.0089 0.0088 0.0183 -0.0001  
Z 0.0128 0.0102 -0.0117 -0.0103 -0.0189 0.0000  
AT. 40 H X -0.0076 0.0060 -0.0041 -0.0037 0.0046 -0.0010  
Y 0.0299 -0.0322 -0.0089 -0.0088 0.0183 -0.0001  
Z -0.0128 0.0102 0.0117 0.0103 -0.0189 0.0000  
AT. 41 H X 0.0198 0.0299 0.0224 0.0185 0.0274 -0.0004  
Y -0.0267 -0.0215 0.0169 0.0143 0.0269 -0.0001  
Z 0.0124 0.0048 -0.0167 -0.0139 -0.0246 -0.0001



AT. 42 H X -0.0198 0.0299 -0.0224 -0.0185 0.0274 -0.0004  
Y 0.0267 -0.0215 -0.0169 -0.0143 0.0269 -0.0001  
Z -0.0124 0.0048 0.0167 0.0139 -0.0246 -0.0001

AT. 43 C X -0.0176 -0.0183 -0.0089 -0.0077 -0.0090 0.0007  
Y 0.0052 0.0088 -0.0161 -0.0153 -0.0218 0.0010  
Z 0.0226 0.0238 0.0102 0.0084 0.0095 -0.0011

AT. 44 C X 0.0176 -0.0183 0.0089 0.0077 -0.0090 0.0007  
Y -0.0052 0.0088 0.0161 0.0153 -0.0218 0.0010  
Z -0.0226 0.0238 -0.0102 -0.0084 0.0095 -0.0011

AT. 45 H X -0.0239 -0.0247 -0.0112 -0.0098 -0.0115 0.0010  
Y 0.0108 0.0189 -0.0210 -0.0205 -0.0290 0.0010  
Z 0.0209 0.0177 0.0161 0.0149 0.0181 -0.0011

AT. 46 H X 0.0239 -0.0247 0.0112 0.0098 -0.0115 0.0010  
Y -0.0108 0.0189 0.0210 0.0205 -0.0290 0.0010  
Z -0.0209 0.0177 -0.0161 -0.0149 0.0181 -0.0011

AT. 47 H X -0.0227 -0.0256 -0.0131 -0.0108 -0.0131 0.0012  
Y -0.0058 -0.0066 -0.0137 -0.0122 -0.0174 0.0010  
Z 0.0174 0.0169 0.0186 0.0157 0.0198 -0.0020

AT. 48 H X 0.0227 -0.0256 0.0131 0.0108 -0.0131 0.0012  
Y 0.0058 -0.0066 0.0137 0.0122 -0.0174 0.0010  
Z -0.0174 0.0169 -0.0186 -0.0157 0.0198 -0.0020

AT. 49 C X -0.0006 -0.0005 -0.0022 -0.0020 -0.0032 0.0001  
Y -0.0008 -0.0007 -0.0004 -0.0004 -0.0002 0.0000  
Z 0.0012 0.0011 -0.0011 -0.0009 -0.0019 0.0001

AT. 50 C X 0.0006 -0.0005 0.0022 0.0020 -0.0032 0.0001  
Y 0.0008 -0.0007 0.0004 0.0004 -0.0002 0.0000  
Z -0.0012 0.0011 0.0011 0.0009 -0.0019 0.0001

AT. 51 C X 0.0070 0.0124 0.0187 0.0163 0.0241 -0.0008  
Y 0.0057 0.0014 0.0109 0.0104 0.0133 -0.0010  
Z 0.0044 -0.0055 0.0078 0.0081 0.0082 -0.0007

AT. 52 C X -0.0070 0.0124 -0.0187 -0.0163 0.0241 -0.0008  
Y -0.0057 0.0014 -0.0109 -0.0104 0.0133 -0.0010

Z -0.0044 -0.0055 -0.0078 -0.0081 0.0082 -0.0007  
AT. 53 H X 0.0026 0.0031 0.0149 0.0136 0.0191 -0.0002  
Y 0.0026 -0.0078 0.0133 0.0133 0.0155 -0.0007  
Z 0.0090 0.0013 0.0181 0.0170 0.0209 -0.0016  
AT. 54 H X -0.0026 0.0031 -0.0149 -0.0136 0.0191 -0.0002  
Y -0.0026 -0.0078 -0.0133 -0.0133 0.0155 -0.0007  
Z -0.0090 0.0013 -0.0181 -0.0170 0.0209 -0.0016  
AT. 55 H X 0.0117 0.0228 0.0215 0.0183 0.0281 -0.0016  
Y 0.0084 0.0014 0.0122 0.0118 0.0141 -0.0011  
Z 0.0109 0.0017 0.0109 0.0109 0.0114 -0.0014  
AT. 56 H X -0.0117 0.0228 -0.0215 -0.0183 0.0281 -0.0016  
Y -0.0084 0.0014 -0.0122 -0.0118 0.0141 -0.0011  
Z -0.0109 0.0017 -0.0109 -0.0109 0.0114 -0.0014  
AT. 57 C X -0.0070 -0.0050 0.0040 0.0035 0.0067 -0.0002  
Y 0.0043 0.0029 -0.0029 -0.0025 -0.0046 0.0000  
Z -0.0028 -0.0018 0.0031 0.0027 0.0044 -0.0001  
AT. 58 C X 0.0070 -0.0050 -0.0040 -0.0035 0.0067 -0.0002  
Y -0.0043 0.0029 0.0029 0.0025 -0.0046 0.0000  
Z 0.0028 -0.0018 -0.0031 -0.0027 0.0044 -0.0001  
AT. 59 H X 0.0117 0.0175 0.0138 0.0113 0.0155 -0.0002  
Y -0.0030 -0.0038 -0.0093 -0.0080 -0.0106 0.0004  
Z -0.0012 0.0035 0.0006 0.0002 0.0020 0.0004  
AT. 60 H X -0.0117 0.0175 -0.0138 -0.0113 0.0155 -0.0002  
Y 0.0030 -0.0038 0.0093 0.0080 -0.0106 0.0004  
Z 0.0012 0.0035 -0.0006 -0.0002 0.0020 0.0004  
AT. 61 H X -0.0112 -0.0059 -0.0034 -0.0034 -0.0008 0.0006  
Y 0.0183 0.0168 0.0038 0.0034 0.0007 -0.0004  
Z -0.0132 -0.0095 -0.0062 -0.0059 -0.0044 0.0007  
AT. 62 H X 0.0112 -0.0059 0.0034 0.0034 -0.0008 0.0006  
Y -0.0183 0.0168 -0.0038 -0.0034 0.0007 -0.0004  
Z 0.0132 -0.0095 0.0062 0.0059 -0.0044 0.0007  
AT. 63 H X -0.0052 -0.0063 0.0132 0.0121 0.0170 -0.0006

Y 0.0132 0.0172 -0.0079 -0.0074 -0.0112 0.0002  
Z -0.0121 -0.0125 -0.0012 -0.0012 0.0005 0.0001  
AT. 64 H X 0.0052 -0.0063 -0.0132 -0.0121 0.0170 -0.0006  
Y -0.0132 0.0172 0.0079 0.0074 -0.0112 0.0002  
Z 0.0121 -0.0125 0.0012 0.0012 0.0005 0.0001  
AT. 65 C X 0.0046 0.0036 0.0027 0.0023 0.0025 -0.0002  
Y -0.0035 -0.0028 -0.0025 -0.0022 -0.0026 0.0002  
Z -0.0047 -0.0034 -0.0057 -0.0050 -0.0066 0.0004  
AT. 66 C X -0.0046 0.0036 -0.0027 -0.0023 0.0025 -0.0002  
Y 0.0035 -0.0028 0.0025 0.0022 -0.0026 0.0002  
Z 0.0047 -0.0034 0.0057 0.0050 -0.0066 0.0004  
AT. 67 H X 0.0059 0.0114 0.0160 0.0135 0.0223 -0.0006  
Y 0.0053 0.0045 -0.0081 -0.0073 -0.0123 0.0002  
Z -0.0142 -0.0170 -0.0118 -0.0098 -0.0144 0.0007  
AT. 68 H X -0.0059 0.0114 -0.0160 -0.0135 0.0223 -0.0006  
Y -0.0053 0.0045 0.0081 0.0073 -0.0123 0.0002  
Z 0.0142 -0.0170 0.0118 0.0098 -0.0144 0.0007  
AT. 69 H X 0.0154 0.0140 0.0007 0.0004 -0.0029 -0.0004  
Y -0.0013 0.0028 0.0020 0.0013 0.0037 -0.0001  
Z -0.0232 -0.0159 0.0059 0.0047 0.0147 0.0002  
AT. 70 H X -0.0154 0.0140 -0.0007 -0.0004 -0.0029 -0.0004  
Y 0.0013 0.0028 -0.0020 -0.0013 0.0037 -0.0001  
Z 0.0232 -0.0159 -0.0059 -0.0047 0.0147 0.0002  
AT. 71 H X -0.0082 -0.0073 0.0104 0.0089 0.0158 -0.0005  
Y 0.0112 0.0138 -0.0033 -0.0032 -0.0066 0.0002  
Z 0.0052 0.0103 -0.0014 -0.0016 -0.0024 0.0003  
AT. 72 H X 0.0082 -0.0073 -0.0104 -0.0089 0.0158 -0.0005  
Y -0.0112 0.0138 0.0033 0.0032 -0.0066 0.0002  
Z -0.0052 0.0103 0.0014 0.0016 -0.0024 0.0003  
AT. 73 C X -0.0013 -0.0007 -0.0187 -0.0166 -0.0241 0.0010  
Y 0.0030 0.0030 0.0128 0.0112 0.0161 -0.0007  
Z -0.0208 -0.0135 0.0033 0.0020 0.0093 0.0006

AT. 74 C X 0.0013 -0.0007 0.0187 0.0166 -0.0241 0.0010  
Y -0.0030 0.0030 -0.0128 -0.0112 0.0161 -0.0007  
Z 0.0208 -0.0135 -0.0033 -0.0020 0.0093 0.0006

AT. 75 H X -0.0022 -0.0041 -0.0273 -0.0240 -0.0352 0.0012  
Y 0.0003 -0.0005 0.0188 0.0168 0.0245 -0.0010  
Z -0.0250 -0.0204 0.0053 0.0042 0.0127 0.0003

AT. 76 H X 0.0022 -0.0041 0.0273 0.0240 -0.0352 0.0012  
Y -0.0003 -0.0005 -0.0188 -0.0168 0.0245 -0.0010  
Z 0.0250 -0.0204 -0.0053 -0.0042 0.0127 0.0003

AT. 77 H X -0.0031 -0.0029 -0.0283 -0.0252 -0.0370 0.0014  
Y -0.0019 -0.0032 0.0196 0.0178 0.0258 -0.0011  
Z -0.0148 -0.0059 0.0058 0.0037 0.0122 0.0007

AT. 78 H X 0.0031 -0.0029 0.0283 0.0252 -0.0370 0.0014  
Y 0.0019 -0.0032 -0.0196 -0.0178 0.0258 -0.0011  
Z 0.0148 -0.0059 -0.0058 -0.0037 0.0122 0.0007

AT. 79 I X -0.0000 -0.0000 -0.0000 0.0000 0.0000 0.0001  
Y -0.0000 -0.0000 -0.0000 0.0000 0.0000 -0.0001  
Z -0.0000 -0.0000 -0.0000 0.0000 0.0000 0.0001

AT. 80 I X 0.0000 -0.0000 0.0000 -0.0000 0.0000 0.0001  
Y 0.0000 -0.0000 0.0000 -0.0000 0.0000 -0.0001  
Z 0.0000 -0.0000 0.0000 -0.0000 0.0000 0.0001

AT. 81 I X 0.0000 0.0000 -0.0000 -0.0000 0.0000 0.0001  
Y -0.0000 -0.0000 0.0003 -0.0003 0.0000 -0.0004  
Z 0.0000 0.0000 -0.0001 0.0002 -0.0000 0.0002

AT. 82 I X -0.0000 0.0000 0.0000 0.0000 0.0000 0.0001  
Y 0.0000 -0.0000 -0.0003 0.0003 0.0000 -0.0004  
Z -0.0000 0.0000 0.0001 -0.0002 -0.0000 0.0002

AT. 83 O X -0.0001 0.0001 -0.0006 0.0009 0.0001 0.0021  
Y -0.0002 0.0001 0.0006 -0.0003 -0.0001 0.0016  
Z 0.0000 0.0002 0.0001 -0.0003 0.0001 0.0002

AT. 84 O X 0.0001 0.0001 0.0006 -0.0009 0.0001 0.0021  
Y 0.0002 0.0001 -0.0006 0.0003 -0.0001 0.0016

Z -0.0000 0.0002 -0.0001 0.0003 0.0001 0.0002  
AT. 85 O X 0.0000 -0.0000 -0.0034 0.0040 0.0001 0.0066  
Y 0.0000 0.0001 -0.0034 0.0038 0.0004 0.0053  
Z -0.0002 -0.0003 0.0045 -0.0047 -0.0003 -0.0061  
AT. 86 O X -0.0000 -0.0000 0.0034 -0.0040 0.0001 0.0066  
Y -0.0000 0.0001 0.0034 -0.0038 0.0004 0.0053  
Z 0.0002 -0.0003 -0.0045 0.0047 -0.0003 -0.0061  
AT. 87 N X 0.0001 0.0001 -0.0012 0.0011 0.0001 0.0021  
Y -0.0002 -0.0003 0.0029 -0.0032 -0.0002 -0.0042  
Z -0.0001 -0.0006 -0.0001 0.0003 -0.0001 0.0001  
AT. 88 N X -0.0001 0.0001 0.0012 -0.0011 0.0001 0.0021  
Y 0.0002 -0.0003 -0.0029 0.0032 -0.0002 -0.0042  
Z 0.0001 -0.0006 0.0001 -0.0003 -0.0001 0.0001  
AT. 89 N X 0.0000 0.0001 -0.0035 0.0039 0.0002 0.0058  
Y -0.0000 -0.0002 0.0107 -0.0120 -0.0004 -0.0154  
Z -0.0000 0.0000 -0.0038 0.0042 0.0001 0.0051  
AT. 90 N X -0.0000 0.0001 0.0035 -0.0039 0.0002 0.0058  
Y 0.0000 -0.0002 -0.0107 0.0120 -0.0004 -0.0154  
Z 0.0000 0.0000 0.0038 -0.0042 0.0001 0.0051  
AT. 91 C X -0.0001 0.0002 0.0001 -0.0001 0.0001 0.0008  
Y 0.0001 -0.0003 -0.0010 0.0010 0.0001 0.0002  
Z -0.0001 0.0001 -0.0001 0.0001 0.0001 0.0001  
AT. 92 C X 0.0001 0.0002 -0.0001 0.0001 0.0001 0.0008  
Y -0.0001 -0.0003 0.0010 -0.0010 0.0001 0.0002  
Z 0.0001 0.0001 0.0001 -0.0001 0.0001 0.0001  
AT. 93 C X 0.0003 -0.0001 0.0013 -0.0017 -0.0001 -0.0046  
Y 0.0001 0.0003 0.0010 -0.0011 -0.0002 -0.0015  
Z 0.0005 0.0015 0.0019 -0.0025 0.0001 -0.0025  
AT. 94 C X -0.0003 -0.0001 -0.0013 0.0017 -0.0001 -0.0046  
Y -0.0001 0.0003 -0.0010 0.0011 -0.0002 -0.0015  
Z -0.0005 0.0015 -0.0019 0.0025 0.0001 -0.0025  
AT. 95 H X -0.0004 -0.0021 -0.0021 0.0031 0.0002 0.0027

Y 0.0013 0.0036 0.0062 -0.0081 -0.0002 -0.0125  
Z -0.0009 -0.0022 -0.0036 0.0047 -0.0001 0.0090  
AT. 96 H X 0.0004 -0.0021 0.0021 -0.0031 0.0002 0.0027  
Y -0.0013 0.0036 -0.0062 0.0081 -0.0002 -0.0125  
Z 0.0009 -0.0022 0.0036 -0.0047 -0.0001 0.0090  
AT. 97 H X 0.0003 -0.0007 -0.0005 -0.0001 -0.0002 -0.0070  
Y -0.0021 -0.0052 -0.0070 0.0097 -0.0003 0.0152  
Z -0.0001 0.0004 0.0005 -0.0005 0.0001 0.0020  
AT. 98 H X -0.0003 -0.0007 0.0005 0.0001 -0.0002 -0.0070  
Y 0.0021 -0.0052 0.0070 -0.0097 -0.0003 0.0152  
Z 0.0001 0.0004 -0.0005 0.0005 0.0001 0.0020  
AT. 99 C X -0.0001 0.0000 -0.0013 0.0015 0.0002 0.0019  
Y 0.0001 0.0001 -0.0062 0.0067 0.0000 0.0104  
Z -0.0000 -0.0002 0.0003 -0.0005 -0.0003 -0.0003  
AT. 100 C X 0.0001 0.0000 0.0013 -0.0015 0.0002 0.0019  
Y -0.0001 0.0001 0.0062 -0.0067 0.0000 0.0104  
Z 0.0000 -0.0002 -0.0003 0.0005 -0.0003 -0.0003  
AT. 101 C X 0.0001 -0.0001 0.0062 -0.0064 -0.0008 -0.0126  
Y -0.0002 -0.0002 -0.0065 0.0083 -0.0001 0.0076  
Z 0.0002 0.0001 0.0159 -0.0184 -0.0003 -0.0231  
AT. 102 C X -0.0001 -0.0001 -0.0062 0.0064 -0.0008 -0.0126  
Y 0.0002 -0.0002 0.0065 -0.0083 -0.0001 0.0076  
Z -0.0002 0.0001 -0.0159 0.0184 -0.0003 -0.0231  
AT. 103 H X 0.0008 0.0009 0.0251 -0.0291 -0.0007 -0.0337  
Y -0.0005 -0.0006 -0.0131 0.0161 -0.0002 0.0145  
Z -0.0007 -0.0007 -0.0365 0.0450 -0.0001 0.0434  
AT. 104 H X -0.0008 0.0009 -0.0251 0.0291 -0.0007 -0.0337  
Y 0.0005 -0.0006 0.0131 -0.0161 -0.0002 0.0145  
Z 0.0007 -0.0007 0.0365 -0.0450 -0.0001 0.0434  
AT. 105 H X 0.0002 -0.0001 0.0164 -0.0186 -0.0011 -0.0283  
Y 0.0007 0.0008 0.0394 -0.0479 0.0005 -0.0504  
Z 0.0006 0.0005 0.0355 -0.0424 -0.0001 -0.0486

AT.106 H X -0.0002 -0.0001 -0.0164 0.0186 -0.0011 -0.0283  
Y -0.0007 0.0008 -0.0394 0.0479 0.0005 -0.0504  
Z -0.0006 0.0005 -0.0355 0.0424 -0.0001 -0.0486

AT.107 C X 0.0003 0.0009 -0.0006 0.0006 0.0002 0.0030  
Y 0.0002 0.0005 -0.0058 0.0073 0.0001 0.0054  
Z 0.0000 -0.0006 -0.0015 0.0024 -0.0003 -0.0009

AT.108 C X -0.0003 0.0009 0.0006 -0.0006 0.0002 0.0030  
Y -0.0002 0.0005 0.0058 -0.0073 0.0001 0.0054  
Z -0.0000 -0.0006 0.0015 -0.0024 -0.0003 -0.0009

AT.109 H X 0.0001 0.0015 -0.0021 0.0021 0.0007 0.0061  
Y 0.0001 0.0009 -0.0100 0.0122 0.0005 0.0114  
Z -0.0000 -0.0002 -0.0083 0.0107 0.0002 0.0089

AT.110 H X -0.0001 0.0015 0.0021 -0.0021 0.0007 0.0061  
Y -0.0001 0.0009 0.0100 -0.0122 0.0005 0.0114  
Z 0.0000 -0.0002 0.0083 -0.0107 0.0002 0.0089

AT.111 H X 0.0002 0.0008 0.0003 -0.0009 0.0000 0.0026  
Y 0.0007 -0.0001 0.0015 -0.0006 -0.0003 -0.0045  
Z -0.0000 -0.0004 -0.0043 0.0059 0.0000 0.0019

AT.112 H X -0.0002 0.0008 -0.0003 0.0009 0.0000 0.0026  
Y -0.0007 -0.0001 -0.0015 0.0006 -0.0003 -0.0045  
Z 0.0000 -0.0004 0.0043 -0.0059 0.0000 0.0019

AT.113 C X 0.0001 0.0000 -0.0004 0.0004 0.0001 0.0008  
Y 0.0000 -0.0000 0.0006 -0.0008 -0.0001 -0.0010  
Z 0.0001 0.0000 -0.0013 0.0012 0.0001 0.0018

AT.114 C X -0.0001 0.0000 0.0004 -0.0004 0.0001 0.0008  
Y -0.0000 -0.0000 -0.0006 0.0008 -0.0001 -0.0010  
Z -0.0001 0.0000 0.0013 -0.0012 0.0001 0.0018

AT.115 C X 0.0001 -0.0003 0.0142 -0.0155 -0.0009 -0.0233  
Y -0.0002 -0.0001 0.0085 -0.0103 -0.0001 -0.0089  
Z 0.0000 0.0001 -0.0123 0.0140 0.0005 0.0165

AT.116 C X -0.0001 -0.0003 -0.0142 0.0155 -0.0009 -0.0233  
Y 0.0002 -0.0001 -0.0085 0.0103 -0.0001 -0.0089

Z -0.0000 0.0001 0.0123 -0.0140 0.0005 0.0165  
AT. 117 H X -0.0003 -0.0004 0.0086 -0.0098 -0.0007 -0.0145  
Y 0.0003 0.0003 0.0207 -0.0237 -0.0005 -0.0254  
Z 0.0003 0.0001 -0.0087 0.0103 0.0003 0.0101  
AT. 118 H X 0.0003 -0.0004 -0.0086 0.0098 -0.0007 -0.0145  
Y -0.0003 0.0003 -0.0207 0.0237 -0.0005 -0.0254  
Z -0.0003 0.0001 0.0087 -0.0103 0.0003 0.0101  
AT. 119 H X -0.0001 -0.0007 0.0213 -0.0227 -0.0009 -0.0326  
Y -0.0007 -0.0005 0.0069 -0.0084 0.0003 -0.0054  
Z 0.0005 0.0004 -0.0062 0.0074 -0.0000 0.0072  
AT. 120 H X 0.0001 -0.0007 -0.0213 0.0227 -0.0009 -0.0326  
Y 0.0007 -0.0005 -0.0069 0.0084 0.0003 -0.0054  
Z -0.0005 0.0004 0.0062 -0.0074 -0.0000 0.0072  
AT. 121 C X -0.0000 0.0002 -0.0158 0.0176 0.0005 0.0238  
Y -0.0002 -0.0002 0.0032 -0.0025 -0.0004 -0.0088  
Z 0.0000 0.0002 -0.0143 0.0163 0.0010 0.0229  
AT. 122 C X 0.0000 0.0002 0.0158 -0.0176 0.0005 0.0238  
Y 0.0002 -0.0002 -0.0032 0.0025 -0.0004 -0.0088  
Z -0.0000 0.0002 0.0143 -0.0163 0.0010 0.0229  
AT. 123 H X -0.0004 0.0001 -0.0194 0.0220 0.0013 0.0293  
Y -0.0007 -0.0004 0.0018 0.0000 -0.0001 -0.0077  
Z 0.0004 0.0004 -0.0130 0.0138 0.0008 0.0219  
AT. 124 H X 0.0004 0.0001 0.0194 -0.0220 0.0013 0.0293  
Y 0.0007 -0.0004 -0.0018 -0.0000 -0.0001 -0.0077  
Z -0.0004 0.0004 0.0130 -0.0138 0.0008 0.0219  
AT. 125 H X 0.0002 0.0003 -0.0183 0.0206 0.0010 0.0292  
Y 0.0000 -0.0002 0.0109 -0.0126 -0.0017 -0.0208  
Z 0.0004 0.0003 -0.0128 0.0140 0.0009 0.0225  
AT. 126 H X -0.0002 0.0003 0.0183 -0.0206 0.0010 0.0292  
Y -0.0000 -0.0002 -0.0109 0.0126 -0.0017 -0.0208  
Z -0.0004 0.0003 0.0128 -0.0140 0.0009 0.0225  
AT. 127 C X -0.0001 0.0000 -0.0003 0.0004 0.0000 0.0011



Y 0.0002 0.0000 0.0009 -0.0010 -0.0000 -0.0018  
Z 0.0000 -0.0001 -0.0007 0.0009 -0.0000 0.0006  
AT. 128 C X 0.0001 0.0000 0.0003 -0.0004 0.0000 0.0011  
Y -0.0002 0.0000 -0.0009 0.0010 -0.0000 -0.0018  
Z -0.0000 -0.0001 0.0007 -0.0009 -0.0000 0.0006  
AT. 129 C X -0.0002 -0.0009 0.0058 -0.0060 -0.0006 -0.0131  
Y -0.0000 0.0001 -0.0074 0.0076 0.0005 0.0145  
Z -0.0000 -0.0008 -0.0041 0.0040 0.0001 0.0073  
AT. 130 C X 0.0002 -0.0009 -0.0058 0.0060 -0.0006 -0.0131  
Y 0.0000 0.0001 0.0074 -0.0076 0.0005 0.0145  
Z 0.0000 -0.0008 0.0041 -0.0040 0.0001 0.0073  
AT. 131 H X -0.0001 -0.0003 0.0010 -0.0010 -0.0002 -0.0050  
Y -0.0001 -0.0012 -0.0024 0.0018 -0.0000 0.0067  
Z 0.0001 -0.0004 -0.0085 0.0083 0.0004 0.0154  
AT. 132 H X 0.0001 -0.0003 -0.0010 0.0010 -0.0002 -0.0050  
Y 0.0001 -0.0012 0.0024 -0.0018 -0.0000 0.0067  
Z -0.0001 -0.0004 0.0085 -0.0083 0.0004 0.0154  
AT. 133 H X -0.0005 -0.0021 0.0096 -0.0100 -0.0011 -0.0182  
Y -0.0002 0.0004 -0.0100 0.0107 0.0006 0.0192  
Z -0.0002 0.0003 -0.0102 0.0109 0.0006 0.0177  
AT. 134 H X 0.0005 -0.0021 -0.0096 0.0100 -0.0011 -0.0182  
Y 0.0002 0.0004 0.0100 -0.0107 0.0006 0.0192  
Z 0.0002 0.0003 0.0102 -0.0109 0.0006 0.0177  
AT. 135 C X -0.0001 -0.0003 -0.0038 0.0046 -0.0000 0.0042  
Y 0.0000 -0.0001 -0.0009 0.0010 -0.0001 0.0006  
Z 0.0001 0.0001 0.0015 -0.0019 0.0000 -0.0010  
AT. 136 C X 0.0001 -0.0003 0.0038 -0.0046 -0.0000 0.0042  
Y -0.0000 -0.0001 0.0009 -0.0010 -0.0001 0.0006  
Z -0.0001 0.0001 -0.0015 0.0019 0.0000 -0.0010  
AT. 137 H X -0.0002 -0.0007 0.0121 -0.0135 -0.0012 -0.0224  
Y -0.0001 0.0002 -0.0001 0.0003 -0.0001 -0.0009  
Z 0.0000 0.0007 -0.0027 0.0032 0.0003 0.0058

AT. 138 H X 0.0002 -0.0007 -0.0121 0.0135 -0.0012 -0.0224  
Y 0.0001 0.0002 0.0001 -0.0003 -0.0001 -0.0009  
Z -0.0000 0.0007 0.0027 -0.0032 0.0003 0.0058

AT. 139 H X -0.0000 -0.0006 -0.0101 0.0111 0.0002 0.0143  
Y -0.0000 0.0003 -0.0099 0.0111 0.0005 0.0152  
Z -0.0001 0.0004 0.0123 -0.0134 -0.0004 -0.0185

AT. 140 H X 0.0000 -0.0006 0.0101 -0.0111 0.0002 0.0143  
Y 0.0000 0.0003 0.0099 -0.0111 0.0005 0.0152  
Z 0.0001 0.0004 -0.0123 0.0134 -0.0004 -0.0185

AT. 141 H X -0.0004 0.0001 -0.0019 0.0035 0.0002 0.0002  
Y 0.0001 0.0003 -0.0075 0.0089 0.0005 0.0106  
Z -0.0001 -0.0001 0.0092 -0.0106 -0.0005 -0.0130

AT. 142 H X 0.0004 0.0001 0.0019 -0.0035 0.0002 0.0002  
Y -0.0001 0.0003 0.0075 -0.0089 0.0005 0.0106  
Z 0.0001 -0.0001 -0.0092 0.0106 -0.0005 -0.0130

AT. 143 C X -0.0003 -0.0000 0.0046 -0.0045 -0.0004 -0.0067  
Y 0.0000 0.0001 0.0013 -0.0012 -0.0001 -0.0021  
Z 0.0004 0.0004 0.0027 -0.0031 -0.0000 -0.0047

AT. 144 C X 0.0003 -0.0000 -0.0046 0.0045 -0.0004 -0.0067  
Y -0.0000 0.0001 -0.0013 0.0012 -0.0001 -0.0021  
Z -0.0004 0.0004 -0.0027 0.0031 -0.0000 -0.0047

AT. 145 H X 0.0016 0.0004 0.0064 -0.0081 -0.0001 -0.0158  
Y -0.0000 0.0002 -0.0046 0.0053 0.0003 0.0062  
Z 0.0009 0.0004 0.0095 -0.0112 -0.0003 -0.0162

AT. 146 H X -0.0016 0.0004 -0.0064 0.0081 -0.0001 -0.0158  
Y 0.0000 0.0002 0.0046 -0.0053 0.0003 0.0062  
Z -0.0009 0.0004 -0.0095 0.0112 -0.0003 -0.0162

AT. 147 H X -0.0012 -0.0004 0.0127 -0.0131 -0.0007 -0.0163  
Y 0.0006 0.0008 -0.0038 0.0032 0.0006 0.0057  
Z -0.0007 0.0002 0.0115 -0.0128 -0.0002 -0.0141

AT. 148 H X 0.0012 -0.0004 -0.0127 0.0131 -0.0007 -0.0163  
Y -0.0006 0.0008 0.0038 -0.0032 0.0006 0.0057

Z 0.0007 0.0002 -0.0115 0.0128 -0.0002 -0.0141  
AT. 149 H X 0.0005 0.0005 -0.0077 0.0086 0.0003 0.0091  
Y -0.0009 -0.0004 -0.0057 0.0074 -0.0002 0.0094  
Z -0.0015 -0.0006 -0.0023 0.0042 -0.0006 0.0059  
AT. 150 H X -0.0005 0.0005 0.0077 -0.0086 0.0003 0.0091  
Y 0.0009 -0.0004 0.0057 -0.0074 -0.0002 0.0094  
Z 0.0015 -0.0006 0.0023 -0.0042 -0.0006 0.0059  
AT. 151 C X 0.0001 0.0002 -0.0017 0.0008 0.0007 0.0074  
Y 0.0002 0.0001 -0.0026 0.0026 0.0002 0.0055  
Z -0.0004 0.0001 0.0138 -0.0155 -0.0007 -0.0200  
AT. 152 C X -0.0001 0.0002 0.0017 -0.0008 0.0007 0.0074  
Y -0.0002 0.0001 0.0026 -0.0026 0.0002 0.0055  
Z 0.0004 0.0001 -0.0138 0.0155 -0.0007 -0.0200  
AT. 153 H X 0.0006 0.0002 -0.0033 0.0018 0.0009 0.0115  
Y 0.0001 0.0001 -0.0017 0.0014 0.0004 0.0043  
Z -0.0010 0.0002 0.0163 -0.0179 -0.0004 -0.0240  
AT. 154 H X -0.0006 0.0002 0.0033 -0.0018 0.0009 0.0115  
Y -0.0001 0.0001 0.0017 -0.0014 0.0004 0.0043  
Z 0.0010 0.0002 -0.0163 0.0179 -0.0004 -0.0240  
AT. 155 H X 0.0005 0.0004 -0.0035 0.0018 0.0009 0.0131  
Y -0.0004 0.0002 0.0006 -0.0007 0.0007 0.0013  
Z 0.0004 0.0000 0.0100 -0.0120 -0.0011 -0.0139  
AT. 156 H X -0.0005 0.0004 0.0035 -0.0018 0.0009 0.0131  
Y 0.0004 0.0002 -0.0006 0.0007 0.0007 0.0013  
Z -0.0004 0.0000 -0.0100 0.0120 -0.0011 -0.0139  
AT. 157 O X -0.0008 0.0004 0.0004 0.0000 0.0000 0.0002  
Y 0.0001 -0.0004 -0.0001 -0.0001 -0.0002 -0.0001  
Z -0.0018 0.0013 0.0007 0.0002 0.0001 0.0003  
AT. 158 O X 0.0008 0.0004 -0.0004 -0.0000 0.0000 0.0002  
Y -0.0001 -0.0004 0.0001 0.0001 -0.0002 -0.0001  
Z 0.0018 0.0013 -0.0007 -0.0002 0.0001 0.0003  
AT. 159 O X 0.0002 0.0000 -0.0002 -0.0002 0.0000 -0.0001

Y 0.0024 -0.0019 -0.0012 -0.0016 -0.0014 -0.0003  
Z 0.0002 -0.0001 -0.0003 -0.0002 -0.0002 -0.0001  
AT.160 O X -0.0002 0.0000 0.0002 0.0002 0.0000 -0.0001  
Y -0.0024 -0.0019 0.0012 0.0016 -0.0014 -0.0003  
Z -0.0002 -0.0001 0.0003 0.0002 -0.0002 -0.0001  
AT.161 H X 0.0173 -0.0108 -0.0087 -0.0008 -0.0014 -0.0041  
Y -0.0058 0.0032 0.0028 -0.0001 -0.0001 0.0014  
Z 0.0243 -0.0143 -0.0129 -0.0001 -0.0005 -0.0063  
AT.162 H X -0.0173 -0.0108 0.0087 0.0008 -0.0014 -0.0041  
Y 0.0058 0.0032 -0.0028 0.0001 -0.0001 0.0014  
Z -0.0243 -0.0143 0.0129 0.0001 -0.0005 -0.0063  
AT.163 H X -0.0055 0.0044 0.0029 0.0035 0.0024 0.0008  
Y -0.0453 0.0361 0.0237 0.0342 0.0282 0.0061  
Z -0.0094 0.0076 0.0045 0.0069 0.0060 0.0011  
AT.164 H X 0.0055 0.0044 -0.0029 -0.0035 0.0024 0.0008  
Y 0.0453 0.0361 -0.0237 -0.0342 0.0282 0.0061  
Z 0.0094 0.0076 -0.0045 -0.0069 0.0060 0.0011  
AT.165 O X -0.0000 -0.0001 -0.0003 0.0002 0.0000 -0.0005  
Y -0.0001 0.0000 0.0009 -0.0007 -0.0004 0.0007  
Z 0.0001 -0.0000 -0.0000 -0.0003 0.0000 0.0000  
AT.166 O X 0.0000 -0.0001 0.0003 -0.0002 0.0000 -0.0005  
Y 0.0001 0.0000 -0.0009 0.0007 -0.0004 0.0007  
Z -0.0001 -0.0000 0.0000 0.0003 0.0000 0.0000  
AT.167 H X -0.0011 0.0014 0.0106 -0.0060 -0.0028 0.0089  
Y 0.0024 -0.0030 -0.0211 0.0116 0.0049 -0.0185  
Z -0.0008 0.0009 0.0059 -0.0040 -0.0009 0.0061  
AT.168 H X 0.0011 0.0014 -0.0106 0.0060 -0.0028 0.0089  
Y -0.0024 -0.0030 0.0211 -0.0116 0.0049 -0.0185  
Z 0.0008 0.0009 -0.0059 0.0040 -0.0009 0.0061  
AT.169 O X 0.0001 -0.0002 -0.0003 -0.0002 -0.0002 -0.0002  
Y 0.0000 0.0000 -0.0003 0.0003 -0.0002 -0.0005  
Z -0.0001 0.0001 0.0001 0.0001 -0.0000 -0.0000

AT.170 O X -0.0001 -0.0002 0.0003 0.0002 -0.0002 -0.0002

Y -0.0000 0.0000 0.0003 -0.0003 -0.0002 -0.0005

Z 0.0001 0.0001 -0.0001 -0.0001 -0.0000 -0.0000

AT.171 H X -0.0021 0.0050 0.0120 -0.0013 0.0099 0.0123

Y -0.0009 0.0024 0.0054 -0.0001 0.0048 0.0052

Z 0.0000 0.0001 0.0005 0.0006 0.0006 0.0001

AT.172 H X 0.0021 0.0050 -0.0120 0.0013 0.0099 0.0123

Y 0.0009 0.0024 -0.0054 0.0001 0.0048 0.0052

Z -0.0000 0.0001 -0.0005 -0.0006 0.0006 0.0001

FREQ(CM\*\*-1) 797.24 797.56 818.29 823.10 824.80 827.25

AT. 1 I X 0.0000 0.0000 0.0001 -0.0000 -0.0000 0.0003

Y 0.0000 0.0000 -0.0002 0.0000 0.0000 0.0001

Z -0.0000 -0.0000 -0.0003 0.0001 0.0000 -0.0002

AT. 2 I X -0.0000 0.0000 0.0001 -0.0000 0.0000 -0.0003

Y -0.0000 0.0000 -0.0002 0.0000 -0.0000 -0.0001

Z 0.0000 -0.0000 -0.0003 0.0001 -0.0000 0.0002

AT. 3 I X -0.0000 -0.0000 -0.0003 0.0000 0.0000 -0.0003

Y -0.0000 0.0000 0.0004 -0.0001 -0.0001 0.0005

Z 0.0000 -0.0000 -0.0002 0.0000 0.0000 -0.0003

AT. 4 I X 0.0000 -0.0000 -0.0003 0.0000 -0.0000 0.0003

Y 0.0000 0.0000 0.0004 -0.0001 0.0001 -0.0005

Z -0.0000 -0.0000 -0.0002 0.0000 -0.0000 0.0003

AT. 5 O X 0.0000 -0.0001 0.0065 -0.0011 -0.0010 0.0060

Y -0.0000 0.0001 -0.0025 0.0006 0.0007 -0.0045

Z 0.0001 0.0001 -0.0050 0.0009 0.0002 -0.0021

AT. 6 O X -0.0000 -0.0001 0.0065 -0.0011 0.0010 -0.0060

Y 0.0000 0.0001 -0.0025 0.0006 -0.0007 0.0045

Z -0.0001 0.0001 -0.0050 0.0009 -0.0002 0.0021

AT. 7 O X -0.0002 -0.0001 -0.0115 0.0018 0.0020 -0.0140

Y 0.0001 -0.0001 0.0079 -0.0012 -0.0012 0.0090

Z 0.0000 -0.0001 -0.0012 0.0002 0.0003 -0.0019  
AT. 8 O X 0.0002 -0.0001 -0.0115 0.0018 -0.0020 0.0140  
Y -0.0001 -0.0001 0.0079 -0.0012 0.0012 -0.0090  
Z -0.0000 -0.0001 -0.0012 0.0002 -0.0003 0.0019  
AT. 9 N X -0.0001 -0.0001 -0.0012 0.0005 0.0000 -0.0006  
Y -0.0001 -0.0001 -0.0018 0.0007 0.0002 -0.0024  
Z -0.0002 -0.0001 -0.0010 0.0001 0.0001 -0.0001  
AT. 10 N X 0.0001 -0.0001 -0.0012 0.0005 -0.0000 0.0006  
Y 0.0001 -0.0001 -0.0018 0.0007 -0.0002 0.0024  
Z 0.0002 -0.0001 -0.0010 0.0001 -0.0001 0.0001  
AT. 11 N X -0.0002 0.0001 -0.0012 -0.0003 0.0005 -0.0022  
Y -0.0001 0.0001 -0.0009 -0.0004 0.0008 -0.0032  
Z -0.0000 -0.0001 -0.0008 0.0002 0.0003 -0.0020  
AT. 12 N X 0.0002 0.0001 -0.0012 -0.0003 -0.0005 0.0022  
Y 0.0001 0.0001 -0.0009 -0.0004 -0.0008 0.0032  
Z 0.0000 -0.0001 -0.0008 0.0002 -0.0003 0.0020  
AT. 13 C X -0.0001 -0.0001 -0.0023 0.0001 -0.0001 0.0009  
Y 0.0000 -0.0000 -0.0070 0.0010 0.0004 -0.0028  
Z 0.0001 0.0000 -0.0069 0.0012 0.0003 -0.0037  
AT. 14 C X 0.0001 -0.0001 -0.0023 0.0001 0.0001 -0.0009  
Y -0.0000 -0.0000 -0.0070 0.0010 -0.0004 0.0028  
Z -0.0001 0.0000 -0.0069 0.0012 -0.0003 0.0037  
AT. 15 C X 0.0001 0.0000 -0.0088 0.0016 0.0015 -0.0098  
Y -0.0000 -0.0000 0.0113 -0.0019 -0.0012 0.0079  
Z 0.0003 0.0002 0.0084 -0.0015 -0.0008 0.0047  
AT. 16 C X -0.0001 0.0000 -0.0088 0.0016 -0.0015 0.0098  
Y 0.0000 -0.0000 0.0113 -0.0019 0.0012 -0.0079  
Z -0.0003 0.0002 0.0084 -0.0015 0.0008 -0.0047  
AT. 17 H X 0.0004 0.0003 0.0293 -0.0052 -0.0019 0.0152  
Y 0.0005 0.0004 0.0414 -0.0073 -0.0050 0.0323  
Z -0.0003 -0.0002 -0.0141 0.0026 0.0026 -0.0156  
AT. 18 H X -0.0004 0.0003 0.0293 -0.0052 0.0019 -0.0152

Y -0.0005 0.0004 0.0414 -0.0073 0.0050 -0.0323  
Z 0.0003 -0.0002 -0.0141 0.0026 -0.0026 0.0156  
AT. 19 H X -0.0001 0.0001 -0.0290 0.0051 0.0034 -0.0237  
Y -0.0010 -0.0007 -0.0328 0.0059 0.0036 -0.0226  
Z -0.0001 -0.0000 -0.0150 0.0026 0.0017 -0.0115  
AT. 20 H X 0.0001 0.0001 -0.0290 0.0051 -0.0034 0.0237  
Y 0.0010 -0.0007 -0.0328 0.0059 -0.0036 0.0226  
Z 0.0001 -0.0000 -0.0150 0.0026 -0.0017 0.0115  
AT. 21 C X 0.0003 0.0004 0.0006 -0.0003 -0.0001 0.0007  
Y 0.0005 0.0004 0.0134 -0.0022 -0.0020 0.0155  
Z 0.0002 0.0001 0.0008 -0.0002 -0.0001 0.0008  
AT. 22 C X -0.0003 0.0004 0.0006 -0.0003 0.0001 -0.0007  
Y -0.0005 0.0004 0.0134 -0.0022 0.0020 -0.0155  
Z -0.0002 0.0001 0.0008 -0.0002 0.0001 -0.0008  
AT. 23 C X 0.0002 -0.0002 0.0156 -0.0023 -0.0024 0.0179  
Y -0.0002 -0.0002 -0.0202 0.0033 0.0030 -0.0238  
Z -0.0003 0.0002 -0.0029 0.0001 0.0007 -0.0017  
AT. 24 C X -0.0002 -0.0002 0.0156 -0.0023 0.0024 -0.0179  
Y 0.0002 -0.0002 -0.0202 0.0033 -0.0030 0.0238  
Z 0.0003 0.0002 -0.0029 0.0001 -0.0007 0.0017  
AT. 25 H X -0.0008 -0.0020 -0.0373 0.0066 0.0055 -0.0492  
Y -0.0004 -0.0004 -0.0205 0.0033 0.0031 -0.0247  
Z -0.0003 -0.0005 -0.0650 0.0110 0.0096 -0.0770  
AT. 26 H X 0.0008 -0.0020 -0.0373 0.0066 -0.0055 0.0492  
Y 0.0004 -0.0004 -0.0205 0.0033 -0.0031 0.0247  
Z 0.0003 -0.0005 -0.0650 0.0110 -0.0096 0.0770  
AT. 27 H X 0.0005 0.0002 0.0497 -0.0078 -0.0080 0.0586  
Y 0.0000 0.0007 0.0467 -0.0083 -0.0070 0.0592  
Z -0.0003 0.0006 0.0258 -0.0050 -0.0036 0.0340  
AT. 28 H X -0.0005 0.0002 0.0497 -0.0078 0.0080 -0.0586  
Y -0.0000 0.0007 0.0467 -0.0083 0.0070 -0.0592  
Z 0.0003 0.0006 0.0258 -0.0050 0.0036 -0.0340

AT. 29 C X -0.0002 0.0000 0.0045 -0.0011 -0.0013 0.0087  
Y 0.0002 0.0007 0.0083 -0.0024 -0.0010 0.0097  
Z -0.0004 0.0002 0.0100 -0.0021 -0.0010 0.0086

AT. 30 C X 0.0002 0.0000 0.0045 -0.0011 0.0013 -0.0087  
Y -0.0002 0.0007 0.0083 -0.0024 0.0010 -0.0097  
Z 0.0004 0.0002 0.0100 -0.0021 0.0010 -0.0086

AT. 31 H X -0.0006 0.0001 0.0100 -0.0025 -0.0013 0.0113  
Y 0.0010 0.0009 0.0034 -0.0019 -0.0014 0.0120  
Z 0.0005 0.0005 0.0059 -0.0022 -0.0015 0.0132

AT. 32 H X 0.0006 0.0001 0.0100 -0.0025 0.0013 -0.0113  
Y -0.0010 0.0009 0.0034 -0.0019 0.0014 -0.0120  
Z -0.0005 0.0005 0.0059 -0.0022 0.0015 -0.0132

AT. 33 H X -0.0002 0.0006 0.0207 -0.0034 -0.0009 0.0088  
Y -0.0007 0.0006 0.0159 -0.0032 -0.0001 0.0045  
Z -0.0001 0.0007 0.0178 -0.0034 -0.0011 0.0107

AT. 34 H X 0.0002 0.0006 0.0207 -0.0034 0.0009 -0.0088  
Y 0.0007 0.0006 0.0159 -0.0032 0.0001 -0.0045  
Z 0.0001 0.0007 0.0178 -0.0034 0.0011 -0.0107

AT. 35 C X -0.0001 -0.0001 -0.0029 0.0005 0.0001 -0.0019  
Y 0.0000 -0.0001 -0.0026 0.0005 0.0002 -0.0023  
Z 0.0000 -0.0001 0.0011 0.0001 -0.0004 0.0023

AT. 36 C X 0.0001 -0.0001 -0.0029 0.0005 -0.0001 0.0019  
Y -0.0000 -0.0001 -0.0026 0.0005 -0.0002 0.0023  
Z -0.0000 -0.0001 0.0011 0.0001 0.0004 -0.0023

AT. 37 C X 0.0003 -0.0004 0.0045 0.0007 -0.0017 0.0063  
Y -0.0000 -0.0004 -0.0140 0.0028 0.0028 -0.0185  
Z 0.0000 0.0001 0.0042 -0.0006 -0.0015 0.0088

AT. 38 C X -0.0003 -0.0004 0.0045 0.0007 0.0017 -0.0063  
Y 0.0000 -0.0004 -0.0140 0.0028 -0.0028 0.0185  
Z -0.0000 0.0001 0.0042 -0.0006 0.0015 -0.0088

AT. 39 H X 0.0000 0.0002 0.0169 -0.0021 -0.0018 0.0136  
Y -0.0002 -0.0002 -0.0070 0.0012 0.0035 -0.0186



Z -0.0001 0.0004 0.0091 -0.0018 -0.0017 0.0131  
AT. 40 H X -0.0000 0.0002 0.0169 -0.0021 0.0018 -0.0136  
Y 0.0002 -0.0002 -0.0070 0.0012 -0.0035 0.0186  
Z 0.0001 0.0004 0.0091 -0.0018 0.0017 -0.0131  
AT. 41 H X 0.0004 -0.0009 -0.0090 0.0039 -0.0006 -0.0037  
Y 0.0001 -0.0005 -0.0153 0.0034 0.0025 -0.0179  
Z -0.0002 0.0006 0.0189 -0.0043 -0.0021 0.0180  
AT. 42 H X -0.0004 -0.0009 -0.0090 0.0039 0.0006 0.0037  
Y -0.0001 -0.0005 -0.0153 0.0034 -0.0025 0.0179  
Z 0.0002 0.0006 0.0189 -0.0043 0.0021 -0.0180  
AT. 43 C X -0.0004 0.0001 -0.0080 0.0012 0.0013 -0.0064  
Y -0.0004 0.0001 -0.0074 0.0020 -0.0017 0.0036  
Z 0.0003 -0.0002 0.0083 -0.0006 -0.0012 0.0071  
AT. 44 C X 0.0004 0.0001 -0.0080 0.0012 -0.0013 0.0064  
Y 0.0004 0.0001 -0.0074 0.0020 0.0017 -0.0036  
Z -0.0003 -0.0002 0.0083 -0.0006 0.0012 -0.0071  
AT. 45 H X -0.0002 0.0002 -0.0086 0.0009 0.0006 -0.0052  
Y -0.0010 -0.0001 -0.0100 0.0036 -0.0021 0.0055  
Z 0.0006 -0.0001 0.0108 -0.0019 -0.0003 0.0039  
AT. 46 H X 0.0002 0.0002 -0.0086 0.0009 -0.0006 0.0052  
Y 0.0010 -0.0001 -0.0100 0.0036 0.0021 -0.0055  
Z -0.0006 -0.0001 0.0108 -0.0019 0.0003 -0.0039  
AT. 47 H X -0.0005 0.0002 -0.0125 0.0018 0.0023 -0.0117  
Y 0.0002 0.0004 -0.0068 0.0016 -0.0001 -0.0006  
Z 0.0010 0.0001 0.0152 -0.0020 -0.0010 0.0099  
AT. 48 H X 0.0005 0.0002 -0.0125 0.0018 -0.0023 0.0117  
Y -0.0002 0.0004 -0.0068 0.0016 0.0001 0.0006  
Z -0.0010 0.0001 0.0152 -0.0020 0.0010 -0.0099  
AT. 49 C X 0.0000 0.0000 0.0013 -0.0002 -0.0004 0.0019  
Y 0.0000 0.0000 0.0002 0.0000 -0.0001 0.0003  
Z -0.0000 -0.0000 0.0010 0.0001 -0.0004 0.0019  
AT. 50 C X -0.0000 0.0000 0.0013 -0.0002 0.0004 -0.0019

Y -0.0000 0.0000 0.0002 0.0000 0.0001 -0.0003  
Z 0.0000 -0.0000 0.0010 0.0001 0.0004 -0.0019  
AT. 51 C X 0.0008 0.0001 0.0053 -0.0014 0.0012 -0.0033  
Y 0.0002 -0.0001 0.0072 -0.0017 0.0003 0.0014  
Z 0.0002 -0.0004 0.0082 -0.0013 -0.0003 0.0037  
AT. 52 C X -0.0008 0.0001 0.0053 -0.0014 -0.0012 0.0033  
Y -0.0002 -0.0001 0.0072 -0.0017 -0.0003 -0.0014  
Z -0.0002 -0.0004 0.0082 -0.0013 0.0003 -0.0037  
AT. 53 H X 0.0009 -0.0001 0.0009 0.0002 0.0010 -0.0051  
Y 0.0005 -0.0005 0.0062 -0.0006 0.0001 -0.0003  
Z 0.0005 -0.0004 0.0148 -0.0029 -0.0001 0.0047  
AT. 54 H X -0.0009 -0.0001 0.0009 0.0002 -0.0010 0.0051  
Y -0.0005 -0.0005 0.0062 -0.0006 -0.0001 0.0003  
Z -0.0005 -0.0004 0.0148 -0.0029 0.0001 -0.0047  
AT. 55 H X 0.0005 0.0004 0.0130 -0.0039 0.0009 0.0018  
Y 0.0003 -0.0002 0.0076 -0.0018 0.0004 0.0013  
Z 0.0001 -0.0003 0.0136 -0.0030 -0.0003 0.0068  
AT. 56 H X -0.0005 0.0004 0.0130 -0.0039 -0.0009 -0.0018  
Y -0.0003 -0.0002 0.0076 -0.0018 -0.0004 -0.0013  
Z -0.0001 -0.0003 0.0136 -0.0030 0.0003 -0.0068  
AT. 57 C X 0.0000 0.0001 -0.0015 -0.0003 0.0010 -0.0046  
Y -0.0001 -0.0000 -0.0010 0.0004 -0.0006 0.0016  
Z 0.0001 -0.0001 0.0006 -0.0001 0.0002 -0.0005  
AT. 58 C X -0.0000 0.0001 -0.0015 -0.0003 -0.0010 0.0046  
Y 0.0001 -0.0000 -0.0010 0.0004 0.0006 -0.0016  
Z -0.0001 -0.0001 0.0006 -0.0001 -0.0002 0.0005  
AT. 59 H X 0.0010 -0.0003 0.0152 -0.0012 -0.0014 0.0110  
Y -0.0005 0.0001 -0.0078 0.0007 0.0005 -0.0049  
Z 0.0001 -0.0001 0.0019 -0.0005 0.0002 0.0002  
AT. 60 H X -0.0010 -0.0003 0.0152 -0.0012 0.0014 -0.0110  
Y 0.0005 0.0001 -0.0078 0.0007 -0.0005 0.0049  
Z -0.0001 -0.0001 0.0019 -0.0005 -0.0002 -0.0002

AT. 61 H X 0.0003 0.0007 -0.0051 -0.0003 0.0018 -0.0088  
Y -0.0000 -0.0004 0.0117 -0.0011 -0.0020 0.0139  
Z 0.0001 0.0006 -0.0086 0.0007 0.0015 -0.0099

AT. 62 H X -0.0003 0.0007 -0.0051 -0.0003 -0.0018 0.0088  
Y 0.0000 -0.0004 0.0117 -0.0011 0.0020 -0.0139  
Z -0.0001 0.0006 -0.0086 0.0007 -0.0015 0.0099

AT. 63 H X -0.0002 -0.0008 -0.0007 0.0005 0.0006 -0.0035  
Y 0.0001 0.0006 0.0067 -0.0011 -0.0015 0.0092  
Z 0.0001 0.0003 -0.0070 0.0006 0.0014 -0.0081

AT. 64 H X 0.0002 -0.0008 -0.0007 0.0005 -0.0006 0.0035  
Y -0.0001 0.0006 0.0067 -0.0011 0.0015 -0.0092  
Z -0.0001 0.0003 -0.0070 0.0006 -0.0014 0.0081

AT. 65 C X 0.0000 -0.0002 0.0012 0.0003 -0.0005 0.0021  
Y -0.0000 0.0001 -0.0007 -0.0002 0.0002 -0.0010  
Z -0.0001 0.0002 0.0007 -0.0003 0.0002 0.0006

AT. 66 C X -0.0000 -0.0002 0.0012 0.0003 0.0005 -0.0021  
Y 0.0000 0.0001 -0.0007 -0.0002 -0.0002 0.0010  
Z 0.0001 0.0002 0.0007 -0.0003 -0.0002 -0.0006

AT. 67 H X 0.0004 -0.0002 -0.0054 0.0009 0.0010 -0.0078  
Y -0.0001 0.0002 0.0051 -0.0005 -0.0010 0.0072  
Z -0.0003 0.0002 0.0005 -0.0005 -0.0000 0.0012

AT. 68 H X -0.0004 -0.0002 -0.0054 0.0009 -0.0010 0.0078  
Y 0.0001 0.0002 0.0051 -0.0005 0.0010 -0.0072  
Z 0.0003 0.0002 0.0005 -0.0005 0.0000 -0.0012

AT. 69 H X 0.0000 -0.0001 0.0061 0.0000 -0.0013 0.0085  
Y 0.0002 0.0003 -0.0033 -0.0001 0.0007 -0.0046  
Z 0.0003 0.0003 -0.0132 0.0004 0.0026 -0.0179

AT. 70 H X -0.0000 -0.0001 0.0061 0.0000 0.0013 -0.0085  
Y -0.0002 0.0003 -0.0033 -0.0001 -0.0007 0.0046  
Z -0.0003 0.0003 -0.0132 0.0004 -0.0026 0.0179

AT. 71 H X 0.0002 -0.0001 -0.0060 0.0007 0.0013 -0.0085  
Y 0.0000 0.0001 0.0032 -0.0005 -0.0009 0.0047

Z 0.0001 0.0002 0.0001 -0.0003 0.0001 0.0003  
AT. 72 H X -0.0002 -0.0001 -0.0060 0.0007 -0.0013 0.0085  
Y -0.0000 0.0001 0.0032 -0.0005 0.0009 -0.0047  
Z -0.0001 0.0002 0.0001 -0.0003 -0.0001 -0.0003  
AT. 73 C X -0.0005 0.0003 -0.0030 0.0002 -0.0009 0.0027  
Y 0.0004 -0.0003 0.0036 -0.0001 0.0002 -0.0003  
Z -0.0002 -0.0001 -0.0180 0.0032 0.0013 -0.0135  
AT. 74 C X 0.0005 0.0003 -0.0030 0.0002 0.0009 -0.0027  
Y -0.0004 -0.0003 0.0036 -0.0001 -0.0002 0.0003  
Z 0.0002 -0.0001 -0.0180 0.0032 -0.0013 0.0135  
AT. 75 H X -0.0010 0.0003 -0.0054 0.0002 -0.0003 0.0025  
Y 0.0005 -0.0002 0.0025 0.0003 0.0010 -0.0023  
Z -0.0003 -0.0001 -0.0214 0.0038 0.0027 -0.0163  
AT. 76 H X 0.0010 0.0003 -0.0054 0.0002 0.0003 -0.0025  
Y -0.0005 -0.0002 0.0025 0.0003 -0.0010 0.0023  
Z 0.0003 -0.0001 -0.0214 0.0038 -0.0027 0.0163  
AT. 77 H X -0.0005 0.0007 -0.0038 0.0005 -0.0009 0.0045  
Y 0.0001 -0.0005 -0.0012 -0.0001 0.0014 -0.0059  
Z 0.0001 -0.0002 -0.0131 0.0029 0.0003 -0.0102  
AT. 78 H X 0.0005 0.0007 -0.0038 0.0005 0.0009 -0.0045  
Y -0.0001 -0.0005 -0.0012 -0.0001 -0.0014 0.0059  
Z -0.0001 -0.0002 -0.0131 0.0029 -0.0003 0.0102  
AT. 79 I X 0.0002 0.0002 0.0001 0.0006 -0.0006 -0.0001  
Y -0.0001 0.0000 0.0000 0.0000 -0.0001 -0.0000  
Z 0.0001 0.0000 0.0001 0.0007 -0.0007 -0.0001  
AT. 80 I X -0.0002 0.0002 0.0001 0.0006 0.0006 0.0001  
Y 0.0001 0.0000 0.0000 0.0000 0.0001 0.0000  
Z -0.0001 0.0000 0.0001 0.0007 0.0007 0.0001  
AT. 81 I X 0.0002 0.0002 -0.0000 -0.0001 -0.0000 0.0000  
Y 0.0001 0.0001 -0.0000 0.0000 -0.0001 -0.0000  
Z -0.0000 -0.0000 0.0000 0.0001 -0.0000 -0.0000  
AT. 82 I X -0.0002 0.0002 -0.0000 -0.0001 0.0000 -0.0000

Y -0.0001 0.0001 -0.0000 0.0000 0.0001 0.0000  
Z 0.0000 -0.0000 0.0000 0.0001 0.0000 0.0000  
AT. 83 O X 0.0034 0.0027 0.0029 0.0194 -0.0198 -0.0030  
Y 0.0022 0.0007 0.0004 0.0030 -0.0025 -0.0003  
Z 0.0003 0.0004 0.0008 0.0060 -0.0062 -0.0011  
AT. 84 O X -0.0034 0.0027 0.0029 0.0194 0.0198 0.0030  
Y -0.0022 0.0007 0.0004 0.0030 0.0025 0.0003  
Z -0.0003 0.0004 0.0008 0.0060 0.0062 0.0011  
AT. 85 O X 0.0015 -0.0007 0.0001 -0.0016 0.0008 0.0006  
Y -0.0010 -0.0022 -0.0000 -0.0018 0.0004 0.0004  
Z 0.0017 0.0030 -0.0001 0.0011 0.0003 -0.0002  
AT. 86 O X -0.0015 -0.0007 0.0001 -0.0016 -0.0008 -0.0006  
Y 0.0010 -0.0022 -0.0000 -0.0018 -0.0004 -0.0004  
Z -0.0017 0.0030 -0.0001 0.0011 -0.0003 0.0002  
AT. 87 N X 0.0033 0.0030 0.0000 0.0002 -0.0002 -0.0001  
Y 0.0008 0.0017 -0.0002 -0.0023 0.0027 0.0005  
Z -0.0011 -0.0011 0.0003 0.0001 -0.0004 0.0003  
AT. 88 N X -0.0033 0.0030 0.0000 0.0002 0.0002 0.0001  
Y -0.0008 0.0017 -0.0002 -0.0023 -0.0027 -0.0005  
Z 0.0011 -0.0011 0.0003 0.0001 0.0004 -0.0003  
AT. 89 N X 0.0037 0.0025 0.0002 -0.0002 -0.0001 0.0000  
Y 0.0007 0.0042 -0.0014 -0.0023 0.0034 0.0003  
Z -0.0004 -0.0012 -0.0001 -0.0017 0.0018 0.0001  
AT. 90 N X -0.0037 0.0025 0.0002 -0.0002 0.0001 -0.0000  
Y -0.0007 0.0042 -0.0014 -0.0023 -0.0034 -0.0003  
Z 0.0004 -0.0012 -0.0001 -0.0017 -0.0018 -0.0001  
AT. 91 C X 0.0022 0.0016 0.0007 0.0059 -0.0058 -0.0010  
Y 0.0008 0.0019 0.0018 0.0113 -0.0116 -0.0019  
Z 0.0019 0.0018 0.0017 0.0109 -0.0114 -0.0019  
AT. 92 C X -0.0022 0.0016 0.0007 0.0059 0.0058 0.0010  
Y -0.0008 0.0019 0.0018 0.0113 0.0116 0.0019  
Z -0.0019 0.0018 0.0017 0.0109 0.0114 0.0019

AT. 93 C X -0.0112 -0.0093 -0.0046 -0.0302 0.0304 0.0047  
Y -0.0046 -0.0048 -0.0022 -0.0141 0.0146 0.0023  
Z 0.0015 0.0013 -0.0023 -0.0115 0.0122 0.0014

AT. 94 C X 0.0112 -0.0093 -0.0046 -0.0302 -0.0304 -0.0047  
Y 0.0046 -0.0048 -0.0022 -0.0141 -0.0146 -0.0023  
Z -0.0015 0.0013 -0.0023 -0.0115 -0.0122 -0.0014

AT. 95 H X -0.0040 -0.0027 0.0059 0.0321 -0.0355 -0.0047  
Y -0.0150 -0.0145 -0.0144 -0.0860 0.0896 0.0129  
Z 0.0115 0.0106 0.0076 0.0463 -0.0473 -0.0067

AT. 96 H X 0.0040 -0.0027 0.0059 0.0321 0.0355 0.0047  
Y 0.0150 -0.0145 -0.0144 -0.0860 -0.0896 -0.0129  
Z -0.0115 0.0106 0.0076 0.0463 0.0473 0.0067

AT. 97 H X -0.0131 -0.0104 -0.0072 -0.0484 0.0464 0.0073  
Y 0.0113 0.0097 0.0162 0.0941 -0.0967 -0.0133  
Z 0.0059 0.0052 0.0027 0.0189 -0.0182 -0.0030

AT. 98 H X 0.0131 -0.0104 -0.0072 -0.0484 -0.0464 -0.0073  
Y -0.0113 0.0097 0.0162 0.0941 0.0967 0.0133  
Z -0.0059 0.0052 0.0027 0.0189 0.0182 0.0030

AT. 99 C X -0.0006 -0.0010 -0.0001 -0.0011 0.0005 0.0002  
Y 0.0038 0.0011 0.0002 -0.0011 0.0004 0.0005  
Z 0.0025 0.0026 0.0001 0.0004 0.0006 -0.0000

AT. 100 C X 0.0006 -0.0010 -0.0001 -0.0011 -0.0005 -0.0002  
Y -0.0038 0.0011 0.0002 -0.0011 -0.0004 -0.0005  
Z -0.0025 0.0026 0.0001 0.0004 -0.0006 0.0000

AT. 101 C X -0.0093 -0.0059 0.0005 0.0058 -0.0020 -0.0014  
Y -0.0062 -0.0073 0.0012 0.0039 -0.0002 -0.0010  
Z -0.0014 0.0034 -0.0013 -0.0001 -0.0014 0.0001

AT. 102 C X 0.0093 -0.0059 0.0005 0.0058 0.0020 0.0014  
Y 0.0062 -0.0073 0.0012 0.0039 0.0002 0.0010  
Z 0.0014 0.0034 -0.0013 -0.0001 0.0014 -0.0001

AT. 103 H X 0.0036 0.0087 -0.0024 -0.0035 -0.0033 0.0009  
Y -0.0114 -0.0127 0.0023 0.0075 0.0003 -0.0018

Z -0.0278 -0.0346 0.0061 0.0175 -0.0053 -0.0048  
AT. 104 H X -0.0036 0.0087 -0.0024 -0.0035 0.0033 -0.0009  
Y 0.0114 -0.0127 0.0023 0.0075 -0.0003 0.0018  
Z 0.0278 -0.0346 0.0061 0.0175 0.0053 0.0048  
AT. 105 H X -0.0059 0.0017 -0.0007 0.0042 -0.0011 -0.0015  
Y 0.0174 0.0260 -0.0060 -0.0158 0.0009 0.0040  
Z 0.0078 0.0171 -0.0042 -0.0076 -0.0009 0.0019  
AT. 106 H X 0.0059 0.0017 -0.0007 0.0042 0.0011 0.0015  
Y -0.0174 0.0260 -0.0060 -0.0158 -0.0009 -0.0040  
Z -0.0078 0.0171 -0.0042 -0.0076 0.0009 -0.0019  
AT. 107 C X 0.0056 0.0043 0.0012 0.0094 -0.0094 -0.0017  
Y -0.0236 -0.0258 -0.0002 0.0027 -0.0050 -0.0002  
Z -0.0194 -0.0195 -0.0013 -0.0074 0.0063 0.0019  
AT. 108 C X -0.0056 0.0043 0.0012 0.0094 0.0094 0.0017  
Y 0.0236 -0.0258 -0.0002 0.0027 0.0050 0.0002  
Z 0.0194 -0.0195 -0.0013 -0.0074 -0.0063 -0.0019  
AT. 109 H X 0.0120 0.0099 0.0020 0.0145 -0.0144 -0.0032  
Y -0.0254 -0.0292 0.0002 0.0051 -0.0078 -0.0008  
Z -0.0244 -0.0272 -0.0008 -0.0047 0.0027 0.0014  
AT. 110 H X -0.0120 0.0099 0.0020 0.0145 0.0144 0.0032  
Y 0.0254 -0.0292 0.0002 0.0051 0.0078 0.0008  
Z 0.0244 -0.0272 -0.0008 -0.0047 -0.0027 -0.0014  
AT. 111 H X 0.0132 0.0122 0.0020 0.0129 -0.0123 -0.0021  
Y -0.0233 -0.0236 -0.0009 -0.0039 0.0028 0.0013  
Z -0.0278 -0.0288 -0.0020 -0.0094 0.0075 0.0019  
AT. 112 H X -0.0132 0.0122 0.0020 0.0129 0.0123 0.0021  
Y 0.0233 -0.0236 -0.0009 -0.0039 -0.0028 -0.0013  
Z 0.0278 -0.0288 -0.0020 -0.0094 -0.0075 -0.0019  
AT. 113 C X 0.0007 0.0006 -0.0003 -0.0011 0.0010 0.0001  
Y 0.0017 0.0022 -0.0000 -0.0001 0.0008 -0.0003  
Z 0.0004 0.0002 -0.0003 -0.0016 0.0015 0.0002  
AT. 114 C X -0.0007 0.0006 -0.0003 -0.0011 -0.0010 -0.0001

Y -0.0017 0.0022 -0.0000 -0.0001 -0.0008 0.0003  
Z -0.0004 0.0002 -0.0003 -0.0016 -0.0015 -0.0002  
AT. 115 C X -0.0115 -0.0060 -0.0020 -0.0021 0.0047 -0.0000  
Y 0.0251 0.0278 0.0000 0.0025 -0.0003 -0.0003  
Z -0.0102 -0.0141 0.0009 -0.0000 -0.0020 0.0000  
AT. 116 C X 0.0115 -0.0060 -0.0020 -0.0021 -0.0047 0.0000  
Y -0.0251 0.0278 0.0000 0.0025 0.0003 0.0003  
Z 0.0102 -0.0141 0.0009 -0.0000 0.0020 -0.0000  
AT. 117 H X -0.0023 0.0017 -0.0010 0.0007 0.0022 -0.0003  
Y 0.0260 0.0320 -0.0020 -0.0022 0.0048 0.0003  
Z -0.0200 -0.0229 0.0003 -0.0021 -0.0003 0.0002  
AT. 118 H X 0.0023 0.0017 -0.0010 0.0007 -0.0022 0.0003  
Y -0.0260 0.0320 -0.0020 -0.0022 -0.0048 -0.0003  
Z 0.0200 -0.0229 0.0003 -0.0021 0.0003 -0.0002  
AT. 119 H X -0.0156 -0.0089 -0.0025 -0.0060 0.0078 0.0015  
Y 0.0317 0.0336 0.0016 0.0048 -0.0028 0.0002  
Z -0.0184 -0.0207 -0.0009 -0.0045 0.0025 0.0003  
AT. 120 H X 0.0156 -0.0089 -0.0025 -0.0060 -0.0078 -0.0015  
Y -0.0317 0.0336 0.0016 0.0048 0.0028 -0.0002  
Z 0.0184 -0.0207 -0.0009 -0.0045 -0.0025 -0.0003  
AT. 121 C X 0.0022 -0.0033 0.0014 0.0013 -0.0027 -0.0003  
Y -0.0228 -0.0221 0.0031 0.0127 -0.0139 -0.0015  
Z 0.0079 0.0030 0.0008 -0.0029 0.0017 0.0007  
AT. 122 C X -0.0022 -0.0033 0.0014 0.0013 0.0027 0.0003  
Y 0.0228 -0.0221 0.0031 0.0127 0.0139 0.0015  
Z -0.0079 0.0030 0.0008 -0.0029 -0.0017 -0.0007  
AT. 123 H X 0.0030 -0.0035 0.0021 0.0005 -0.0029 0.0007  
Y -0.0298 -0.0298 0.0052 0.0177 -0.0198 -0.0013  
Z 0.0150 0.0110 -0.0013 -0.0083 0.0079 0.0007  
AT. 124 H X -0.0030 -0.0035 0.0021 0.0005 0.0029 -0.0007  
Y 0.0298 -0.0298 0.0052 0.0177 0.0198 0.0013  
Z -0.0150 0.0110 -0.0013 -0.0083 -0.0079 -0.0007



AT.125 H X 0.0092 0.0026 0.0007 -0.0032 0.0016 0.0004  
Y -0.0210 -0.0171 0.0009 0.0105 -0.0097 -0.0022  
Z 0.0173 0.0129 -0.0012 -0.0096 0.0095 0.0011

AT.126 H X -0.0092 0.0026 0.0007 -0.0032 -0.0016 -0.0004  
Y 0.0210 -0.0171 0.0009 0.0105 0.0097 0.0022  
Z -0.0173 0.0129 -0.0012 -0.0096 -0.0095 -0.0011

AT.127 C X 0.0028 0.0025 0.0004 0.0012 -0.0012 0.0000  
Y -0.0017 -0.0013 -0.0004 -0.0018 0.0020 -0.0000  
Z -0.0021 -0.0023 -0.0001 -0.0021 0.0020 0.0003

AT.128 C X -0.0028 0.0025 0.0004 0.0012 0.0012 -0.0000  
Y 0.0017 -0.0013 -0.0004 -0.0018 -0.0020 0.0000  
Z 0.0021 -0.0023 -0.0001 -0.0021 -0.0020 -0.0003

AT.129 C X -0.0161 -0.0130 -0.0017 -0.0130 0.0132 0.0024  
Y 0.0194 0.0171 -0.0014 -0.0087 0.0088 0.0014  
Z 0.0125 0.0120 -0.0022 -0.0192 0.0195 0.0027

AT.130 C X 0.0161 -0.0130 -0.0017 -0.0130 -0.0132 -0.0024  
Y -0.0194 0.0171 -0.0014 -0.0087 -0.0088 -0.0014  
Z -0.0125 0.0120 -0.0022 -0.0192 -0.0195 -0.0027

AT.131 H X -0.0092 -0.0078 -0.0025 -0.0150 0.0149 0.0031  
Y 0.0201 0.0202 -0.0013 -0.0152 0.0161 0.0009  
Z 0.0226 0.0208 -0.0030 -0.0233 0.0237 0.0032

AT.132 H X 0.0092 -0.0078 -0.0025 -0.0150 -0.0149 -0.0031  
Y -0.0201 0.0202 -0.0013 -0.0152 -0.0161 -0.0009  
Z -0.0226 0.0208 -0.0030 -0.0233 -0.0237 -0.0032

AT.133 H X -0.0174 -0.0129 -0.0003 -0.0076 0.0085 0.0010  
Y 0.0215 0.0181 -0.0021 -0.0094 0.0092 0.0024  
Z 0.0165 0.0136 -0.0040 -0.0224 0.0220 0.0048

AT.134 H X 0.0174 -0.0129 -0.0003 -0.0076 -0.0085 -0.0010  
Y -0.0215 0.0181 -0.0021 -0.0094 -0.0092 -0.0024  
Z -0.0165 0.0136 -0.0040 -0.0224 -0.0220 -0.0048

AT.135 C X -0.0075 -0.0086 0.0002 -0.0004 -0.0007 0.0008  
Y -0.0025 -0.0025 0.0005 -0.0006 0.0007 -0.0003

Z 0.0060 0.0065 -0.0008 -0.0019 0.0024 0.0004  
AT. 136 C X 0.0075 -0.0086 0.0002 -0.0004 0.0007 -0.0008  
Y 0.0025 -0.0025 0.0005 -0.0006 -0.0007 0.0003  
Z -0.0060 0.0065 -0.0008 -0.0019 -0.0024 -0.0004  
AT. 137 H X -0.0165 -0.0115 0.0021 0.0044 -0.0018 -0.0029  
Y -0.0059 -0.0061 0.0011 0.0047 -0.0050 -0.0009  
Z 0.0039 0.0018 -0.0002 0.0053 -0.0068 0.0005  
AT. 138 H X 0.0165 -0.0115 0.0021 0.0044 0.0018 0.0029  
Y 0.0059 -0.0061 0.0011 0.0047 0.0050 0.0009  
Z -0.0039 0.0018 -0.0002 0.0053 0.0068 -0.0005  
AT. 139 H X -0.0010 -0.0035 -0.0015 -0.0115 0.0103 0.0030  
Y -0.0004 -0.0040 -0.0004 -0.0016 -0.0008 0.0017  
Z -0.0037 -0.0004 0.0017 0.0131 -0.0117 -0.0033  
AT. 140 H X 0.0010 -0.0035 -0.0015 -0.0115 -0.0103 -0.0030  
Y 0.0004 -0.0040 -0.0004 -0.0016 0.0008 -0.0017  
Z 0.0037 -0.0004 0.0017 0.0131 0.0117 0.0033  
AT. 141 H X -0.0195 -0.0215 0.0023 0.0137 -0.0163 -0.0014  
Y -0.0066 -0.0100 0.0012 0.0060 -0.0086 -0.0001  
Z 0.0056 0.0093 -0.0007 -0.0026 0.0053 -0.0007  
AT. 142 H X 0.0195 -0.0215 0.0023 0.0137 0.0163 0.0014  
Y 0.0066 -0.0100 0.0012 0.0060 0.0086 0.0001  
Z -0.0056 0.0093 -0.0007 -0.0026 -0.0053 0.0007  
AT. 143 C X -0.0044 -0.0035 0.0006 0.0041 -0.0042 -0.0000  
Y -0.0018 -0.0014 -0.0003 -0.0001 0.0005 0.0001  
Z -0.0059 -0.0051 -0.0008 0.0016 -0.0015 -0.0006  
AT. 144 C X 0.0044 -0.0035 0.0006 0.0041 0.0042 0.0000  
Y 0.0018 -0.0014 -0.0003 -0.0001 -0.0005 -0.0001  
Z 0.0059 -0.0051 -0.0008 0.0016 0.0015 0.0006  
AT. 145 H X -0.0271 -0.0231 -0.0060 -0.0122 0.0136 -0.0006  
Y -0.0041 -0.0059 0.0000 0.0017 -0.0022 -0.0002  
Z -0.0095 -0.0055 -0.0029 -0.0042 0.0056 -0.0006  
AT. 146 H X 0.0271 -0.0231 -0.0060 -0.0122 -0.0136 0.0006

Y 0.0041 -0.0059 0.0000 0.0017 0.0022 0.0002  
Z 0.0095 -0.0055 -0.0029 -0.0042 -0.0056 0.0006  
AT. 147 H X 0.0063 0.0091 0.0020 0.0094 -0.0082 0.0003  
Y 0.0024 0.0008 0.0006 0.0073 -0.0081 -0.0018  
Z 0.0122 0.0146 0.0017 0.0129 -0.0116 -0.0011  
AT. 148 H X -0.0063 0.0091 0.0020 0.0094 0.0082 -0.0003  
Y -0.0024 0.0008 0.0006 0.0073 0.0081 0.0018  
Z -0.0122 0.0146 0.0017 0.0129 0.0116 0.0011  
AT. 149 H X -0.0161 -0.0188 0.0008 0.0055 -0.0073 -0.0011  
Y -0.0007 -0.0030 0.0032 0.0063 -0.0078 0.0004  
Z 0.0017 -0.0002 0.0050 0.0118 -0.0138 0.0005  
AT. 150 H X 0.0161 -0.0188 0.0008 0.0055 0.0073 0.0011  
Y 0.0007 -0.0030 0.0032 0.0063 0.0078 -0.0004  
Z -0.0017 -0.0002 0.0050 0.0118 0.0138 -0.0005  
AT. 151 C X 0.0297 0.0292 -0.0006 -0.0054 0.0064 0.0000  
Y 0.0083 0.0075 -0.0004 -0.0029 0.0035 -0.0002  
Z 0.0052 0.0092 0.0022 0.0142 -0.0127 -0.0021  
AT. 152 C X -0.0297 0.0292 -0.0006 -0.0054 -0.0064 -0.0000  
Y -0.0083 0.0075 -0.0004 -0.0029 -0.0035 0.0002  
Z -0.0052 0.0092 0.0022 0.0142 0.0127 0.0021  
AT. 153 H X 0.0413 0.0402 -0.0011 -0.0089 0.0103 -0.0010  
Y 0.0112 0.0110 -0.0008 -0.0051 0.0050 0.0005  
Z 0.0051 0.0102 0.0018 0.0127 -0.0123 -0.0004  
AT. 154 H X -0.0413 0.0402 -0.0011 -0.0089 -0.0103 0.0010  
Y -0.0112 0.0110 -0.0008 -0.0051 -0.0050 -0.0005  
Z -0.0051 0.0102 0.0018 0.0127 0.0123 0.0004  
AT. 155 H X 0.0481 0.0473 -0.0009 -0.0072 0.0094 -0.0008  
Y 0.0138 0.0144 -0.0009 -0.0030 0.0032 0.0011  
Z 0.0061 0.0085 0.0026 0.0137 -0.0115 -0.0039  
AT. 156 H X -0.0481 0.0473 -0.0009 -0.0072 -0.0094 0.0008  
Y -0.0138 0.0144 -0.0009 -0.0030 -0.0032 -0.0011  
Z -0.0061 0.0085 0.0026 0.0137 0.0115 0.0039

AT.157 O X 0.0000 -0.0000 -0.0031 0.0004 -0.0004 0.0029  
Y -0.0002 -0.0000 0.0008 -0.0001 0.0000 -0.0000  
Z 0.0000 -0.0001 -0.0032 0.0003 -0.0005 0.0026

AT.158 O X -0.0000 -0.0000 -0.0031 0.0004 0.0004 -0.0029  
Y 0.0002 -0.0000 0.0008 -0.0001 -0.0000 0.0000  
Z -0.0000 -0.0001 -0.0032 0.0003 0.0005 -0.0026

AT.159 O X 0.0000 -0.0000 0.0014 -0.0002 0.0001 -0.0019  
Y -0.0001 -0.0001 0.0040 -0.0006 0.0003 -0.0031  
Z -0.0001 -0.0001 0.0011 -0.0002 0.0000 -0.0005

AT.160 O X -0.0000 -0.0000 0.0014 -0.0002 -0.0001 0.0019  
Y 0.0001 -0.0001 0.0040 -0.0006 -0.0003 0.0031  
Z 0.0001 -0.0001 0.0011 -0.0002 -0.0000 0.0005

AT.161 H X -0.0007 0.0022 0.0532 -0.0064 0.0096 -0.0454  
Y 0.0003 -0.0007 -0.0171 0.0020 -0.0033 0.0157  
Z -0.0018 0.0028 0.0801 -0.0091 0.0144 -0.0705

AT.162 H X 0.0007 0.0022 0.0532 -0.0064 -0.0096 0.0454  
Y -0.0003 -0.0007 -0.0171 0.0020 0.0033 -0.0157  
Z 0.0018 0.0028 0.0801 -0.0091 -0.0144 0.0705

AT.163 H X 0.0003 0.0003 -0.0098 0.0013 -0.0010 0.0078  
Y 0.0033 0.0039 -0.0800 0.0114 -0.0061 0.0638  
Z 0.0006 0.0008 -0.0152 0.0022 -0.0010 0.0121

AT.164 H X -0.0003 0.0003 -0.0098 0.0013 0.0010 -0.0078  
Y -0.0033 0.0039 -0.0800 0.0114 0.0061 -0.0638  
Z -0.0006 0.0008 -0.0152 0.0022 0.0010 -0.0121

AT.165 O X -0.0007 -0.0001 -0.0004 -0.0020 0.0018 0.0002  
Y 0.0006 -0.0010 0.0002 0.0011 -0.0002 0.0003  
Z -0.0000 0.0002 0.0002 0.0000 -0.0003 -0.0000

AT.166 O X 0.0007 -0.0001 -0.0004 -0.0020 -0.0018 -0.0002  
Y -0.0006 -0.0010 0.0002 0.0011 0.0002 -0.0003  
Z 0.0000 0.0002 0.0002 0.0000 0.0003 0.0000

AT.167 H X 0.0088 -0.0081 0.0020 0.0152 -0.0061 0.0017  
Y -0.0181 0.0160 -0.0043 -0.0335 0.0155 -0.0029

Z 0.0045 -0.0055 0.0008 0.0081 -0.0036 0.0005  
 AT. 168 H X -0.0088 -0.0081 0.0020 0.0152 0.0061 -0.0017  
 Y 0.0181 0.0160 -0.0043 -0.0335 -0.0155 0.0029  
 Z -0.0045 -0.0055 0.0008 0.0081 0.0036 -0.0005  
 AT. 169 O X 0.0001 0.0001 0.0003 0.0015 -0.0014 0.0001  
 Y -0.0003 0.0003 -0.0001 -0.0000 0.0001 0.0001  
 Z -0.0000 -0.0001 -0.0002 -0.0010 0.0011 0.0001  
 AT. 170 O X -0.0001 0.0001 0.0003 0.0015 0.0014 -0.0001  
 Y 0.0003 0.0003 -0.0001 -0.0000 -0.0001 -0.0001  
 Z 0.0000 -0.0001 -0.0002 -0.0010 -0.0011 -0.0001  
 AT. 171 H X 0.0049 -0.0044 -0.0053 -0.0302 0.0256 -0.0024  
 Y 0.0024 -0.0018 -0.0026 -0.0144 0.0124 -0.0011  
 Z 0.0007 -0.0006 -0.0004 -0.0019 0.0023 0.0000  
 AT. 172 H X -0.0049 -0.0044 -0.0053 -0.0302 -0.0256 0.0024  
 Y -0.0024 -0.0018 -0.0026 -0.0144 -0.0124 0.0011  
 Z -0.0007 -0.0006 -0.0004 -0.0019 -0.0023 -0.0000  
  
 FREQ(CM\*\*-1) 832.84 835.62 836.07 840.82 841.97 844.28  
  
 AT. 1 I X -0.0005 0.0005 -0.0001 -0.0002 -0.0001 -0.0001  
 Y 0.0002 -0.0001 0.0000 -0.0001 -0.0000 0.0000  
 Z 0.0007 -0.0007 0.0001 0.0001 0.0001 0.0001  
 AT. 2 I X 0.0005 0.0005 0.0001 0.0002 -0.0001 -0.0001  
 Y -0.0002 -0.0001 -0.0000 0.0001 -0.0000 0.0000  
 Z -0.0007 -0.0007 -0.0001 -0.0001 0.0001 0.0001  
 AT. 3 I X -0.0001 0.0002 0.0000 -0.0001 0.0000 0.0001  
 Y 0.0003 -0.0004 -0.0000 0.0002 0.0000 -0.0001  
 Z -0.0001 0.0002 0.0000 -0.0001 0.0000 0.0001  
 AT. 4 I X 0.0001 0.0002 -0.0000 0.0001 0.0000 0.0001  
 Y -0.0003 -0.0004 0.0000 -0.0002 0.0000 -0.0001  
 Z 0.0001 0.0002 -0.0000 0.0001 0.0000 0.0001  
 AT. 5 O X -0.0146 0.0136 -0.0016 -0.0052 -0.0038 -0.0046

Y 0.0087 -0.0083 0.0009 0.0032 0.0020 0.0023  
Z 0.0087 -0.0078 0.0011 0.0029 0.0025 0.0035  
AT. 6 O X 0.0146 0.0136 0.0016 0.0052 -0.0038 -0.0046  
Y -0.0087 -0.0083 -0.0009 -0.0032 0.0020 0.0023  
Z -0.0087 -0.0078 -0.0011 -0.0029 0.0025 0.0035  
AT. 7 O X -0.0057 0.0080 0.0004 -0.0022 0.0013 0.0042  
Y 0.0034 -0.0048 -0.0004 0.0002 -0.0006 -0.0019  
Z -0.0004 0.0005 0.0004 -0.0007 0.0004 0.0010  
AT. 8 O X 0.0057 0.0080 -0.0004 0.0022 0.0013 0.0042  
Y -0.0034 -0.0048 0.0004 -0.0002 -0.0006 -0.0019  
Z 0.0004 0.0005 -0.0004 0.0007 0.0004 0.0010  
AT. 9 N X 0.0008 -0.0003 0.0003 -0.0066 -0.0038 -0.0065  
Y -0.0009 0.0016 0.0000 -0.0084 -0.0046 -0.0078  
Z 0.0017 -0.0014 -0.0001 -0.0031 -0.0013 -0.0030  
AT. 10 N X -0.0008 -0.0003 -0.0003 0.0066 -0.0038 -0.0065  
Y 0.0009 0.0016 -0.0000 0.0084 -0.0046 -0.0078  
Z -0.0017 -0.0014 0.0001 0.0031 -0.0013 -0.0030  
AT. 11 N X -0.0032 0.0029 -0.0002 0.0059 0.0040 0.0065  
Y -0.0050 0.0043 -0.0004 0.0086 0.0048 0.0086  
Z -0.0026 0.0030 -0.0005 0.0013 0.0010 0.0028  
AT. 12 N X 0.0032 0.0029 0.0002 -0.0059 0.0040 0.0065  
Y 0.0050 0.0043 0.0004 -0.0086 0.0048 0.0086  
Z 0.0026 0.0030 0.0005 -0.0013 0.0010 0.0028  
AT. 13 C X -0.0011 0.0014 -0.0001 -0.0005 -0.0000 0.0001  
Y 0.0082 -0.0073 0.0012 0.0025 0.0027 0.0040  
Z 0.0108 -0.0095 0.0015 0.0014 0.0018 0.0018  
AT. 14 C X 0.0011 0.0014 0.0001 0.0005 -0.0000 0.0001  
Y -0.0082 -0.0073 -0.0012 -0.0025 0.0027 0.0040  
Z -0.0108 -0.0095 -0.0015 -0.0014 0.0018 0.0018  
AT. 15 C X 0.0210 -0.0200 0.0025 0.0070 0.0055 0.0072  
Y -0.0178 0.0157 -0.0021 -0.0055 -0.0045 -0.0061  
Z -0.0203 0.0192 -0.0023 0.0005 -0.0022 -0.0007

AT. 16 C X -0.0210 -0.0200 -0.0025 -0.0070 0.0055 0.0072  
Y 0.0178 0.0157 0.0021 0.0055 -0.0045 -0.0061  
Z 0.0203 0.0192 0.0023 -0.0005 -0.0022 -0.0007

AT. 17 H X -0.0594 0.0559 -0.0075 0.0012 -0.0075 -0.0046  
Y -0.0931 0.0888 -0.0112 -0.0105 -0.0166 -0.0160  
Z 0.0418 -0.0420 0.0050 0.0040 0.0075 0.0067

AT. 18 H X 0.0594 0.0559 0.0075 -0.0012 -0.0075 -0.0046  
Y 0.0931 0.0888 0.0112 0.0105 -0.0166 -0.0160  
Z -0.0418 -0.0420 -0.0050 -0.0040 0.0075 0.0067

AT. 19 H X 0.0617 -0.0568 0.0070 0.0157 0.0124 0.0146  
Y 0.0807 -0.0768 0.0091 0.0003 0.0095 0.0043  
Z 0.0305 -0.0279 0.0034 0.0056 0.0054 0.0059

AT. 20 H X -0.0617 -0.0568 -0.0070 -0.0157 0.0124 0.0146  
Y -0.0807 -0.0768 -0.0091 -0.0003 0.0095 0.0043  
Z -0.0305 -0.0279 -0.0034 -0.0056 0.0054 0.0059

AT. 21 C X 0.0004 -0.0005 0.0005 0.0000 -0.0000 -0.0006  
Y 0.0061 -0.0086 -0.0005 0.0018 -0.0016 -0.0047  
Z 0.0007 -0.0005 0.0004 -0.0010 -0.0008 -0.0017

AT. 22 C X -0.0004 -0.0005 -0.0005 -0.0000 -0.0000 -0.0006  
Y -0.0061 -0.0086 0.0005 -0.0018 -0.0016 -0.0047  
Z -0.0007 -0.0005 -0.0004 0.0010 -0.0008 -0.0017

AT. 23 C X 0.0062 -0.0099 -0.0011 0.0037 -0.0023 -0.0057  
Y -0.0094 0.0148 0.0011 -0.0082 0.0016 0.0059  
Z 0.0012 -0.0014 -0.0001 0.0051 0.0010 0.0010

AT. 24 C X -0.0062 -0.0099 0.0011 -0.0037 -0.0023 -0.0057  
Y 0.0094 0.0148 -0.0011 0.0082 0.0016 0.0059  
Z -0.0012 -0.0014 0.0001 -0.0051 0.0010 0.0010

AT. 25 H X -0.0200 0.0338 0.0028 -0.0208 0.0024 0.0111  
Y -0.0094 0.0152 0.0012 -0.0071 0.0020 0.0064  
Z -0.0309 0.0484 0.0043 -0.0318 0.0044 0.0176

AT. 26 H X 0.0200 0.0338 -0.0028 0.0208 0.0024 0.0111  
Y 0.0094 0.0152 -0.0012 0.0071 0.0020 0.0064

Z 0.0309 0.0484 -0.0043 0.0318 0.0044 0.0176  
AT. 27 H X 0.0228 -0.0343 -0.0016 0.0092 -0.0048 -0.0155  
Y 0.0237 -0.0394 -0.0031 0.0277 -0.0019 -0.0118  
Z 0.0152 -0.0250 -0.0021 0.0223 -0.0002 -0.0061  
AT. 28 H X -0.0228 -0.0343 0.0016 -0.0092 -0.0048 -0.0155  
Y -0.0237 -0.0394 0.0031 -0.0277 -0.0019 -0.0118  
Z -0.0152 -0.0250 0.0021 -0.0223 -0.0002 -0.0061  
AT. 29 C X -0.0052 0.0040 -0.0008 -0.0026 -0.0003 -0.0009  
Y 0.0046 -0.0072 -0.0003 0.0276 0.0143 0.0229  
Z -0.0027 0.0003 -0.0018 0.0078 0.0035 0.0031  
AT. 30 C X 0.0052 0.0040 0.0008 0.0026 -0.0003 -0.0009  
Y -0.0046 -0.0072 0.0003 -0.0276 0.0143 0.0229  
Z 0.0027 0.0003 0.0018 -0.0078 0.0035 0.0031  
AT. 31 H X -0.0078 0.0055 -0.0024 0.0022 0.0015 0.0003  
Y 0.0067 -0.0086 0.0017 0.0297 0.0174 0.0316  
Z -0.0010 -0.0008 0.0003 0.0135 0.0090 0.0163  
AT. 32 H X 0.0078 0.0055 0.0024 -0.0022 0.0015 0.0003  
Y -0.0067 -0.0086 -0.0017 -0.0297 0.0174 0.0316  
Z 0.0010 -0.0008 -0.0003 -0.0135 0.0090 0.0163  
AT. 33 H X -0.0101 0.0056 -0.0027 0.0077 0.0005 -0.0007  
Y 0.0006 -0.0042 -0.0031 0.0219 0.0080 0.0070  
Z -0.0040 -0.0002 -0.0018 0.0180 0.0070 0.0107  
AT. 34 H X 0.0101 0.0056 0.0027 -0.0077 0.0005 -0.0007  
Y -0.0006 -0.0042 0.0031 -0.0219 0.0080 0.0070  
Z 0.0040 -0.0002 0.0018 -0.0180 0.0070 0.0107  
AT. 35 C X -0.0003 0.0010 0.0001 -0.0031 -0.0006 -0.0016  
Y -0.0022 0.0027 0.0001 -0.0006 0.0006 0.0019  
Z 0.0001 -0.0000 -0.0001 -0.0051 -0.0029 -0.0047  
AT. 36 C X 0.0003 0.0010 -0.0001 0.0031 -0.0006 -0.0016  
Y 0.0022 0.0027 -0.0001 0.0006 0.0006 0.0019  
Z -0.0001 -0.0000 0.0001 0.0051 -0.0029 -0.0047  
AT. 37 C X 0.0112 -0.0106 0.0013 -0.0211 -0.0142 -0.0255



Y -0.0041 0.0070 0.0005 -0.0090 -0.0045 -0.0038  
Z 0.0021 -0.0025 -0.0004 -0.0003 0.0006 0.0009  
AT. 38 C X -0.0112 -0.0106 -0.0013 0.0211 -0.0142 -0.0255  
Y 0.0041 0.0070 -0.0005 0.0090 -0.0045 -0.0038  
Z -0.0021 -0.0025 0.0004 0.0003 0.0006 0.0009  
AT. 39 H X 0.0083 -0.0120 -0.0003 0.0010 -0.0052 -0.0135  
Y -0.0071 0.0074 -0.0005 0.0062 0.0004 0.0034  
Z 0.0009 -0.0030 -0.0010 0.0082 0.0048 0.0064  
AT. 40 H X -0.0083 -0.0120 0.0003 -0.0010 -0.0052 -0.0135  
Y 0.0071 0.0074 0.0005 -0.0062 0.0004 0.0034  
Z -0.0009 -0.0030 0.0010 -0.0082 0.0048 0.0064  
AT. 41 H X 0.0113 -0.0066 0.0017 -0.0376 -0.0204 -0.0308  
Y -0.0005 0.0041 0.0013 -0.0173 -0.0094 -0.0123  
Z -0.0013 -0.0038 -0.0017 0.0239 0.0111 0.0138  
AT. 42 H X -0.0113 -0.0066 -0.0017 0.0376 -0.0204 -0.0308  
Y 0.0005 0.0041 -0.0013 0.0173 -0.0094 -0.0123  
Z 0.0013 -0.0038 0.0017 -0.0239 0.0111 0.0138  
AT. 43 C X -0.0004 0.0016 -0.0005 0.0017 0.0011 0.0037  
Y 0.0161 -0.0135 0.0030 -0.0236 -0.0115 -0.0236  
Z 0.0025 -0.0035 -0.0008 -0.0037 -0.0036 -0.0058  
AT. 44 C X 0.0004 0.0016 0.0005 -0.0017 0.0011 0.0037  
Y -0.0161 -0.0135 -0.0030 0.0236 -0.0115 -0.0236  
Z -0.0025 -0.0035 0.0008 0.0037 -0.0036 -0.0058  
AT. 45 H X 0.0009 0.0004 0.0014 -0.0020 0.0002 0.0006  
Y 0.0249 -0.0208 0.0018 -0.0351 -0.0195 -0.0367  
Z -0.0072 0.0048 -0.0009 0.0104 0.0050 0.0094  
AT. 46 H X -0.0009 0.0004 -0.0014 0.0020 0.0002 0.0006  
Y -0.0249 -0.0208 -0.0018 0.0351 -0.0195 -0.0367  
Z 0.0072 0.0048 0.0009 -0.0104 0.0050 0.0094  
AT. 47 H X -0.0023 0.0042 -0.0003 0.0038 0.0031 0.0087  
Y 0.0057 -0.0042 0.0023 -0.0122 -0.0057 -0.0088  
Z -0.0063 0.0032 -0.0016 0.0058 0.0003 0.0032

AT. 48 H X 0.0023 0.0042 0.0003 -0.0038 0.0031 0.0087  
Y -0.0057 -0.0042 -0.0023 0.0122 -0.0057 -0.0088  
Z 0.0063 0.0032 0.0016 -0.0058 0.0003 0.0032

AT. 49 C X -0.0018 0.0015 -0.0000 -0.0007 -0.0009 -0.0010  
Y -0.0013 0.0014 -0.0001 -0.0012 -0.0012 -0.0014  
Z -0.0006 0.0006 0.0000 -0.0052 -0.0034 -0.0053

AT. 50 C X 0.0018 0.0015 0.0000 0.0007 -0.0009 -0.0010  
Y 0.0013 0.0014 0.0001 0.0012 -0.0012 -0.0014  
Z 0.0006 0.0006 -0.0000 0.0052 -0.0034 -0.0053

AT. 51 C X 0.0028 -0.0048 0.0003 0.0274 0.0138 0.0250  
Y -0.0100 0.0085 -0.0020 0.0064 0.0039 0.0067  
Z -0.0176 0.0159 -0.0011 -0.0048 -0.0039 -0.0024

AT. 52 C X -0.0028 -0.0048 -0.0003 -0.0274 0.0138 0.0250  
Y 0.0100 0.0085 0.0020 -0.0064 0.0039 0.0067  
Z 0.0176 0.0159 0.0011 0.0048 -0.0039 -0.0024

AT. 53 H X 0.0034 -0.0047 0.0028 0.0179 0.0074 0.0180  
Y -0.0146 0.0126 0.0003 0.0004 -0.0011 0.0039  
Z -0.0229 0.0195 -0.0029 0.0070 0.0029 0.0087

AT. 54 H X -0.0034 -0.0047 -0.0028 -0.0179 0.0074 0.0180  
Y 0.0146 0.0126 -0.0003 -0.0004 -0.0011 0.0039  
Z 0.0229 0.0195 0.0029 -0.0070 0.0029 0.0087

AT. 55 H X -0.0044 0.0017 -0.0047 0.0356 0.0204 0.0298  
Y -0.0085 0.0067 -0.0014 0.0086 0.0048 0.0090  
Z -0.0199 0.0175 -0.0036 0.0037 0.0018 0.0038

AT. 56 H X 0.0044 0.0017 0.0047 -0.0356 0.0204 0.0298  
Y 0.0085 0.0067 0.0014 -0.0086 0.0048 0.0090  
Z 0.0199 0.0175 0.0036 -0.0037 0.0018 0.0038

AT. 57 C X -0.0038 0.0036 -0.0007 0.0088 0.0055 0.0098  
Y 0.0009 -0.0003 0.0001 -0.0085 -0.0037 -0.0074  
Z -0.0022 0.0018 -0.0002 0.0022 0.0008 0.0024

AT. 58 C X 0.0038 0.0036 0.0007 -0.0088 0.0055 0.0098  
Y -0.0009 -0.0003 -0.0001 0.0085 -0.0037 -0.0074

Z 0.0022 0.0018 0.0002 -0.0022 0.0008 0.0024  
AT. 59 H X 0.0059 -0.0091 0.0019 0.0087 -0.0037 0.0011  
Y 0.0014 0.0003 -0.0001 -0.0034 0.0021 -0.0006  
Z 0.0053 -0.0060 0.0013 0.0096 0.0031 0.0063  
AT. 60 H X -0.0059 -0.0091 -0.0019 -0.0087 -0.0037 0.0011  
Y -0.0014 0.0003 0.0001 0.0034 0.0021 -0.0006  
Z -0.0053 -0.0060 -0.0013 -0.0096 0.0031 0.0063  
AT. 61 H X 0.0046 -0.0042 0.0008 0.0209 0.0114 0.0183  
Y 0.0044 -0.0053 0.0001 -0.0108 -0.0095 -0.0154  
Z 0.0026 -0.0017 0.0009 0.0130 0.0083 0.0131  
AT. 62 H X -0.0046 -0.0042 -0.0008 -0.0209 0.0114 0.0183  
Y -0.0044 -0.0053 -0.0001 0.0108 -0.0095 -0.0154  
Z -0.0026 -0.0017 -0.0009 -0.0130 0.0083 0.0131  
AT. 63 H X -0.0124 0.0121 -0.0010 -0.0036 -0.0008 0.0018  
Y 0.0149 -0.0160 0.0006 0.0052 -0.0000 -0.0034  
Z -0.0056 0.0069 -0.0005 0.0023 0.0037 0.0066  
AT. 64 H X 0.0124 0.0121 0.0010 0.0036 -0.0008 0.0018  
Y -0.0149 -0.0160 -0.0006 -0.0052 -0.0000 -0.0034  
Z 0.0056 0.0069 0.0005 -0.0023 0.0037 0.0066  
AT. 65 C X -0.0016 0.0018 -0.0000 -0.0096 -0.0059 -0.0089  
Y -0.0006 0.0004 -0.0001 0.0054 0.0032 0.0049  
Z 0.0003 -0.0008 -0.0003 0.0074 0.0039 0.0068  
AT. 66 C X 0.0016 0.0018 0.0000 0.0096 -0.0059 -0.0089  
Y 0.0006 0.0004 0.0001 -0.0054 0.0032 0.0049  
Z -0.0003 -0.0008 0.0003 -0.0074 0.0039 0.0068  
AT. 67 H X 0.0118 -0.0104 0.0019 0.0049 0.0038 0.0048  
Y -0.0008 -0.0001 -0.0007 -0.0015 -0.0017 -0.0026  
Z -0.0106 0.0098 -0.0015 0.0016 0.0002 0.0024  
AT. 68 H X -0.0118 -0.0104 -0.0019 -0.0049 0.0038 0.0048  
Y 0.0008 -0.0001 0.0007 0.0015 -0.0017 -0.0026  
Z 0.0106 0.0098 0.0015 -0.0016 0.0002 0.0024  
AT. 69 H X 0.0015 -0.0020 -0.0005 -0.0130 -0.0083 -0.0135

Y 0.0074 -0.0071 0.0007 0.0109 0.0075 0.0097  
Z 0.0063 -0.0042 0.0021 0.0228 0.0156 0.0236  
AT. 70 H X -0.0015 -0.0020 0.0005 0.0130 -0.0083 -0.0135  
Y -0.0074 -0.0071 -0.0007 -0.0109 0.0075 0.0097  
Z -0.0063 -0.0042 -0.0021 -0.0228 0.0156 0.0236  
AT. 71 H X -0.0027 0.0037 0.0001 -0.0002 0.0004 0.0014  
Y 0.0089 -0.0095 0.0007 0.0030 0.0019 0.0010  
Z 0.0124 -0.0126 0.0009 0.0112 0.0070 0.0091  
AT. 72 H X 0.0027 0.0037 -0.0001 0.0002 0.0004 0.0014  
Y -0.0089 -0.0095 -0.0007 -0.0030 0.0019 0.0010  
Z -0.0124 -0.0126 -0.0009 -0.0112 0.0070 0.0091  
AT. 73 C X 0.0055 -0.0048 0.0005 -0.0020 0.0005 -0.0032  
Y -0.0048 0.0039 -0.0004 0.0027 -0.0005 0.0027  
Z 0.0091 -0.0050 0.0025 -0.0163 -0.0067 -0.0134  
AT. 74 C X -0.0055 -0.0048 -0.0005 0.0020 0.0005 -0.0032  
Y 0.0048 0.0039 0.0004 -0.0027 -0.0005 0.0027  
Z -0.0091 -0.0050 -0.0025 0.0163 -0.0067 -0.0134  
AT. 75 H X 0.0087 -0.0071 -0.0001 -0.0020 0.0021 -0.0008  
Y -0.0064 0.0057 -0.0014 0.0003 -0.0020 0.0021  
Z 0.0093 -0.0045 0.0008 -0.0198 -0.0080 -0.0131  
AT. 76 H X -0.0087 -0.0071 0.0001 0.0020 0.0021 -0.0008  
Y 0.0064 0.0057 0.0014 -0.0003 -0.0020 0.0021  
Z -0.0093 -0.0045 -0.0008 0.0198 -0.0080 -0.0131  
AT. 77 H X 0.0088 -0.0077 0.0000 -0.0038 -0.0011 -0.0037  
Y -0.0055 0.0054 -0.0007 0.0010 0.0017 0.0036  
Z 0.0067 -0.0038 0.0032 -0.0137 -0.0076 -0.0142  
AT. 78 H X -0.0088 -0.0077 -0.0000 0.0038 -0.0011 -0.0037  
Y 0.0055 0.0054 0.0007 -0.0010 0.0017 0.0036  
Z -0.0067 -0.0038 -0.0032 0.0137 -0.0076 -0.0142  
AT. 79 I X 0.0000 0.0000 -0.0000 0.0000 0.0002 -0.0001  
Y 0.0000 0.0000 -0.0002 -0.0000 0.0003 -0.0001  
Z 0.0000 0.0000 -0.0001 0.0000 0.0002 -0.0001

AT. 80 I X -0.0000 0.0000 0.0000 -0.0000 0.0002 -0.0001  
Y -0.0000 0.0000 0.0002 0.0000 0.0003 -0.0001  
Z -0.0000 0.0000 0.0001 -0.0000 0.0002 -0.0001

AT. 81 I X -0.0000 0.0000 0.0004 0.0000 0.0003 -0.0002  
Y -0.0001 0.0000 0.0004 0.0000 0.0003 -0.0002  
Z 0.0000 -0.0000 -0.0004 -0.0000 -0.0003 0.0002

AT. 82 I X 0.0000 0.0000 -0.0004 -0.0000 0.0003 -0.0002  
Y 0.0001 0.0000 -0.0004 -0.0000 0.0003 -0.0002  
Z -0.0000 -0.0000 0.0004 0.0000 -0.0003 0.0002

AT. 83 O X -0.0003 0.0009 0.0001 0.0007 0.0054 -0.0025  
Y -0.0003 -0.0002 0.0030 0.0002 -0.0025 0.0013  
Z -0.0000 0.0004 -0.0005 0.0003 0.0027 -0.0013

AT. 84 O X 0.0003 0.0009 -0.0001 -0.0007 0.0054 -0.0025  
Y 0.0003 -0.0002 -0.0030 -0.0002 -0.0025 0.0013  
Z 0.0000 0.0004 0.0005 -0.0003 0.0027 -0.0013

AT. 85 O X -0.0010 0.0003 0.0106 0.0006 0.0057 -0.0039  
Y -0.0006 0.0003 0.0062 0.0002 0.0042 -0.0024  
Z 0.0003 -0.0001 -0.0036 -0.0001 -0.0029 0.0014

AT. 86 O X 0.0010 0.0003 -0.0106 -0.0006 0.0057 -0.0039  
Y 0.0006 0.0003 -0.0062 -0.0002 0.0042 -0.0024  
Z -0.0003 -0.0001 0.0036 0.0001 -0.0029 0.0014

AT. 87 N X -0.0001 0.0002 0.0008 0.0000 0.0013 -0.0011  
Y 0.0009 -0.0010 -0.0052 -0.0003 -0.0053 0.0041  
Z 0.0002 -0.0002 -0.0014 -0.0002 -0.0010 0.0010

AT. 88 N X 0.0001 0.0002 -0.0008 -0.0000 0.0013 -0.0011  
Y -0.0009 -0.0010 0.0052 0.0003 -0.0053 0.0041  
Z -0.0002 -0.0002 0.0014 0.0002 -0.0010 0.0010

AT. 89 N X 0.0002 -0.0002 -0.0000 -0.0001 -0.0002 0.0004  
Y -0.0006 0.0008 0.0009 0.0002 0.0008 -0.0016  
Z 0.0000 0.0001 -0.0010 -0.0004 -0.0008 0.0002

AT. 90 N X -0.0002 -0.0002 0.0000 0.0001 -0.0002 0.0004  
Y 0.0006 0.0008 -0.0009 -0.0002 0.0008 -0.0016

Z -0.0000 0.0001 0.0010 0.0004 -0.0008 0.0002  
AT. 91 C X -0.0001 0.0002 0.0006 0.0003 0.0012 -0.0006  
Y 0.0000 0.0007 -0.0023 0.0003 0.0056 -0.0028  
Z 0.0001 0.0003 -0.0010 0.0004 0.0033 -0.0015  
AT. 92 C X 0.0001 0.0002 -0.0006 -0.0003 0.0012 -0.0006  
Y -0.0000 0.0007 0.0023 -0.0003 0.0056 -0.0028  
Z -0.0001 0.0003 0.0010 -0.0004 0.0033 -0.0015  
AT. 93 C X 0.0004 -0.0011 -0.0008 -0.0010 -0.0059 0.0028  
Y -0.0001 -0.0007 0.0022 -0.0003 -0.0052 0.0024  
Z -0.0002 -0.0003 0.0018 -0.0002 -0.0036 0.0012  
AT. 94 C X -0.0004 -0.0011 0.0008 0.0010 -0.0059 0.0028  
Y 0.0001 -0.0007 -0.0022 0.0003 -0.0052 0.0024  
Z 0.0002 -0.0003 -0.0018 0.0002 -0.0036 0.0012  
AT. 95 H X 0.0003 0.0010 -0.0050 0.0008 0.0090 -0.0032  
Y -0.0000 -0.0031 0.0075 -0.0022 -0.0231 0.0096  
Z -0.0001 0.0016 -0.0029 0.0011 0.0114 -0.0047  
AT. 96 H X -0.0003 0.0010 0.0050 -0.0008 0.0090 -0.0032  
Y 0.0000 -0.0031 -0.0075 0.0022 -0.0231 0.0096  
Z 0.0001 0.0016 0.0029 -0.0011 0.0114 -0.0047  
AT. 97 H X 0.0010 -0.0017 -0.0047 -0.0018 -0.0086 0.0045  
Y -0.0000 0.0029 -0.0059 0.0023 0.0227 -0.0088  
Z -0.0003 0.0007 0.0011 0.0006 0.0036 -0.0019  
AT. 98 H X -0.0010 -0.0017 0.0047 0.0018 -0.0086 0.0045  
Y 0.0000 0.0029 0.0059 -0.0023 0.0227 -0.0088  
Z 0.0003 0.0007 -0.0011 -0.0006 0.0036 -0.0019  
AT. 99 C X -0.0004 0.0002 0.0034 0.0000 0.0022 -0.0014  
Y -0.0005 0.0000 0.0078 0.0003 0.0044 -0.0030  
Z 0.0003 -0.0003 -0.0022 -0.0000 -0.0019 0.0011  
AT. 100 C X 0.0004 0.0002 -0.0034 -0.0000 0.0022 -0.0014  
Y 0.0005 0.0000 -0.0078 -0.0003 0.0044 -0.0030  
Z -0.0003 -0.0003 0.0022 0.0000 -0.0019 0.0011  
AT. 101 C X 0.0019 -0.0007 -0.0211 -0.0009 -0.0129 0.0083

Y 0.0016 -0.0010 -0.0178 -0.0009 -0.0131 0.0084  
Z -0.0009 0.0010 0.0075 0.0006 0.0068 -0.0042  
AT.102 C X -0.0019 -0.0007 0.0211 0.0009 -0.0129 0.0083  
Y -0.0016 -0.0010 0.0178 0.0009 -0.0131 0.0084  
Z 0.0009 0.0010 -0.0075 -0.0006 0.0068 -0.0042  
AT.103 H X -0.0032 0.0022 0.0320 0.0021 0.0199 -0.0141  
Y 0.0036 -0.0021 -0.0386 -0.0021 -0.0256 0.0170  
Z 0.0081 -0.0050 -0.0859 -0.0043 -0.0581 0.0396  
AT.104 H X 0.0032 0.0022 -0.0320 -0.0021 0.0199 -0.0141  
Y -0.0036 -0.0021 0.0386 0.0021 -0.0256 0.0170  
Z -0.0081 -0.0050 0.0859 0.0043 -0.0581 0.0396  
AT.105 H X 0.0020 -0.0005 -0.0246 -0.0013 -0.0130 0.0080  
Y -0.0077 0.0051 0.0801 0.0045 0.0585 -0.0379  
Z -0.0043 0.0033 0.0429 0.0025 0.0330 -0.0213  
AT.106 H X -0.0020 -0.0005 0.0246 0.0013 -0.0130 0.0080  
Y 0.0077 0.0051 -0.0801 -0.0045 0.0585 -0.0379  
Z 0.0043 0.0033 -0.0429 -0.0025 0.0330 -0.0213  
AT.107 C X -0.0008 0.0008 0.0050 0.0007 0.0039 -0.0026  
Y -0.0024 0.0024 0.0170 0.0010 0.0139 -0.0104  
Z -0.0009 0.0003 0.0076 0.0003 0.0030 -0.0021  
AT.108 C X 0.0008 0.0008 -0.0050 -0.0007 0.0039 -0.0026  
Y 0.0024 0.0024 -0.0170 -0.0010 0.0139 -0.0104  
Z 0.0009 0.0003 -0.0076 -0.0003 0.0030 -0.0021  
AT.109 H X -0.0006 0.0013 0.0024 0.0007 0.0046 -0.0037  
Y -0.0028 0.0032 0.0190 0.0008 0.0168 -0.0131  
Z -0.0017 0.0016 0.0121 -0.0000 0.0079 -0.0067  
AT.110 H X 0.0006 0.0013 -0.0024 -0.0007 0.0046 -0.0037  
Y 0.0028 0.0032 -0.0190 -0.0008 0.0168 -0.0131  
Z 0.0017 0.0016 -0.0121 0.0000 0.0079 -0.0067  
AT.111 H X -0.0002 0.0003 -0.0011 0.0004 0.0011 -0.0002  
Y -0.0020 0.0007 0.0171 0.0016 0.0064 -0.0042  
Z -0.0017 0.0012 0.0143 0.0005 0.0083 -0.0065

AT.112 H X 0.0002 0.0003 0.0011 -0.0004 0.0011 -0.0002  
Y 0.0020 0.0007 -0.0171 -0.0016 0.0064 -0.0042  
Z 0.0017 0.0012 -0.0143 -0.0005 0.0083 -0.0065

AT.113 C X -0.0003 0.0002 0.0022 0.0002 0.0013 -0.0011  
Y 0.0003 -0.0002 -0.0032 -0.0000 -0.0022 0.0013  
Z -0.0000 -0.0002 0.0004 0.0000 -0.0004 0.0005

AT.114 C X 0.0003 0.0002 -0.0022 -0.0002 0.0013 -0.0011  
Y -0.0003 -0.0002 0.0032 0.0000 -0.0022 0.0013  
Z 0.0000 -0.0002 -0.0004 -0.0000 -0.0004 0.0005

AT.115 C X -0.0006 0.0014 -0.0024 0.0002 -0.0003 -0.0021  
Y 0.0018 -0.0013 -0.0141 -0.0010 -0.0093 0.0067  
Z -0.0004 -0.0001 0.0060 0.0002 0.0041 -0.0022

AT.116 C X 0.0006 0.0014 0.0024 -0.0002 -0.0003 -0.0021  
Y -0.0018 -0.0013 0.0141 0.0010 -0.0093 0.0067  
Z 0.0004 -0.0001 -0.0060 -0.0002 0.0041 -0.0022

AT.117 H X 0.0007 0.0002 -0.0103 -0.0008 -0.0046 0.0012  
Y 0.0005 0.0002 -0.0061 -0.0002 -0.0062 0.0039  
Z -0.0015 0.0008 0.0122 0.0011 0.0076 -0.0049

AT.118 H X -0.0007 0.0002 0.0103 0.0008 -0.0046 0.0012  
Y -0.0005 0.0002 0.0061 0.0002 -0.0062 0.0039  
Z 0.0015 0.0008 -0.0122 -0.0011 0.0076 -0.0049

AT.119 H X -0.0021 0.0022 0.0098 0.0017 0.0055 -0.0062  
Y 0.0029 -0.0025 -0.0187 -0.0010 -0.0119 0.0090  
Z -0.0022 0.0016 0.0166 0.0009 0.0095 -0.0065

AT.120 H X 0.0021 0.0022 -0.0098 -0.0017 0.0055 -0.0062  
Y -0.0029 -0.0025 0.0187 0.0010 -0.0119 0.0090  
Z 0.0022 0.0016 -0.0166 -0.0009 0.0095 -0.0065

AT.121 C X 0.0004 -0.0009 0.0012 -0.0003 -0.0008 0.0016  
Y 0.0013 -0.0015 -0.0068 0.0001 -0.0027 0.0046  
Z -0.0002 -0.0003 0.0031 0.0002 0.0007 0.0001

AT.122 C X -0.0004 -0.0009 -0.0012 0.0003 -0.0008 0.0016  
Y -0.0013 -0.0015 0.0068 -0.0001 -0.0027 0.0046



Z 0.0002 -0.0003 -0.0031 -0.0002 0.0007 0.0001  
AT. 123 H X 0.0004 -0.0010 0.0025 0.0003 0.0011 0.0008  
Y 0.0015 -0.0021 -0.0080 0.0003 -0.0023 0.0062  
Z -0.0003 0.0003 0.0045 0.0000 0.0006 -0.0018  
AT. 124 H X -0.0004 -0.0010 -0.0025 -0.0003 0.0011 0.0008  
Y -0.0015 -0.0021 0.0080 -0.0003 -0.0023 0.0062  
Z 0.0003 0.0003 -0.0045 -0.0000 0.0006 -0.0018  
AT. 125 H X -0.0003 -0.0005 0.0052 0.0003 0.0008 0.0004  
Y 0.0019 -0.0011 -0.0097 -0.0011 -0.0053 0.0039  
Z -0.0009 0.0004 0.0065 0.0003 0.0012 -0.0017  
AT. 126 H X 0.0003 -0.0005 -0.0052 -0.0003 0.0008 0.0004  
Y -0.0019 -0.0011 0.0097 0.0011 -0.0053 0.0039  
Z 0.0009 0.0004 -0.0065 -0.0003 0.0012 -0.0017  
AT. 127 C X 0.0002 -0.0002 -0.0013 -0.0003 -0.0005 0.0006  
Y 0.0000 0.0000 -0.0001 0.0001 -0.0007 0.0005  
Z 0.0002 -0.0004 -0.0005 -0.0000 -0.0013 0.0011  
AT. 128 C X -0.0002 -0.0002 0.0013 0.0003 -0.0005 0.0006  
Y -0.0000 0.0000 0.0001 -0.0001 -0.0007 0.0005  
Z -0.0002 -0.0004 0.0005 0.0000 -0.0013 0.0011  
AT. 129 C X 0.0016 -0.0019 -0.0093 -0.0009 -0.0089 0.0068  
Y -0.0009 0.0009 0.0054 -0.0004 0.0030 -0.0037  
Z 0.0001 -0.0005 -0.0005 -0.0008 -0.0040 0.0009  
AT. 130 C X -0.0016 -0.0019 0.0093 0.0009 -0.0089 0.0068  
Y 0.0009 0.0009 -0.0054 0.0004 0.0030 -0.0037  
Z -0.0001 -0.0005 0.0005 0.0008 -0.0040 0.0009  
AT. 131 H X 0.0007 -0.0012 -0.0044 -0.0009 -0.0050 0.0038  
Y 0.0005 -0.0005 -0.0016 -0.0006 -0.0048 0.0004  
Z -0.0005 -0.0000 0.0035 -0.0008 -0.0015 -0.0018  
AT. 132 H X -0.0007 -0.0012 0.0044 0.0009 -0.0050 0.0038  
Y -0.0005 -0.0005 0.0016 0.0006 -0.0048 0.0004  
Z 0.0005 -0.0000 -0.0035 0.0008 -0.0015 -0.0018  
AT. 133 H X 0.0024 -0.0023 -0.0142 -0.0010 -0.0125 0.0091

Y -0.0013 0.0013 0.0081 -0.0008 0.0047 -0.0049  
Z -0.0008 0.0005 0.0063 -0.0014 0.0007 -0.0022  
AT. 134 H X -0.0024 -0.0023 0.0142 0.0010 -0.0125 0.0091  
Y 0.0013 0.0013 -0.0081 0.0008 0.0047 -0.0049  
Z 0.0008 0.0005 -0.0063 0.0014 0.0007 -0.0022  
AT. 135 C X 0.0005 -0.0007 -0.0004 -0.0004 -0.0009 0.0017  
Y 0.0003 -0.0005 -0.0025 0.0001 -0.0022 0.0018  
Z -0.0003 0.0003 0.0009 -0.0000 0.0002 -0.0007  
AT. 136 C X -0.0005 -0.0007 0.0004 0.0004 -0.0009 0.0017  
Y -0.0003 -0.0005 0.0025 -0.0001 -0.0022 0.0018  
Z 0.0003 0.0003 -0.0009 0.0000 0.0002 -0.0007  
AT. 137 H X 0.0013 -0.0012 -0.0155 0.0007 -0.0091 0.0061  
Y 0.0002 0.0000 -0.0008 0.0002 0.0006 0.0000  
Z -0.0010 0.0014 0.0090 -0.0002 0.0077 -0.0051  
AT. 138 H X -0.0013 -0.0012 0.0155 -0.0007 -0.0091 0.0061  
Y -0.0002 0.0000 0.0008 -0.0002 0.0006 0.0000  
Z 0.0010 0.0014 -0.0090 0.0002 0.0077 -0.0051  
AT. 139 H X 0.0004 -0.0013 0.0008 -0.0009 -0.0036 0.0034  
Y -0.0008 0.0004 0.0081 -0.0003 0.0043 -0.0021  
Z 0.0002 0.0008 -0.0034 0.0008 0.0021 -0.0021  
AT. 140 H X -0.0004 -0.0013 -0.0008 0.0009 -0.0036 0.0034  
Y 0.0008 0.0004 -0.0081 0.0003 0.0043 -0.0021  
Z -0.0002 0.0008 0.0034 -0.0008 0.0021 -0.0021  
AT. 141 H X -0.0002 0.0005 0.0065 -0.0000 0.0082 -0.0042  
Y -0.0008 0.0004 0.0089 -0.0001 0.0076 -0.0043  
Z 0.0005 -0.0001 -0.0081 0.0003 -0.0062 0.0031  
AT. 142 H X 0.0002 0.0005 -0.0065 0.0000 0.0082 -0.0042  
Y 0.0008 0.0004 -0.0089 0.0001 0.0076 -0.0043  
Z -0.0005 -0.0001 0.0081 -0.0003 -0.0062 0.0031  
AT. 143 C X -0.0006 0.0006 0.0038 -0.0000 0.0042 -0.0032  
Y -0.0001 0.0002 0.0006 0.0000 0.0002 -0.0003  
Z -0.0007 0.0009 0.0033 0.0006 0.0025 -0.0021

AT. 144 C X 0.0006 0.0006 -0.0038 0.0000 0.0042 -0.0032  
Y 0.0001 0.0002 -0.0006 -0.0000 0.0002 -0.0003  
Z 0.0007 0.0009 -0.0033 -0.0006 0.0025 -0.0021

AT. 145 H X -0.0014 0.0017 0.0040 0.0022 -0.0016 -0.0003  
Y -0.0004 0.0003 0.0033 0.0003 0.0020 -0.0012  
Z -0.0006 0.0010 0.0005 0.0010 -0.0009 -0.0004

AT. 146 H X 0.0014 0.0017 -0.0040 -0.0022 -0.0016 -0.0003  
Y 0.0004 0.0003 -0.0033 -0.0003 0.0020 -0.0012  
Z 0.0006 0.0010 -0.0005 -0.0010 -0.0009 -0.0004

AT. 147 H X 0.0002 0.0004 -0.0007 -0.0010 0.0035 -0.0029  
Y -0.0007 0.0007 0.0022 0.0008 0.0033 -0.0020  
Z 0.0001 0.0007 -0.0022 -0.0005 0.0032 -0.0026

AT. 148 H X -0.0002 0.0004 0.0007 0.0010 0.0035 -0.0029  
Y 0.0007 0.0007 -0.0022 -0.0008 0.0033 -0.0020  
Z -0.0001 0.0007 0.0022 0.0005 0.0032 -0.0026

AT. 149 H X -0.0013 0.0008 0.0093 0.0012 0.0066 -0.0040  
Y 0.0001 -0.0006 0.0034 -0.0007 0.0036 -0.0015  
Z -0.0000 -0.0005 0.0052 -0.0013 0.0069 -0.0036

AT. 150 H X 0.0013 0.0008 -0.0093 -0.0012 0.0066 -0.0040  
Y -0.0001 -0.0006 -0.0034 0.0007 0.0036 -0.0015  
Z 0.0000 -0.0005 -0.0052 0.0013 0.0069 -0.0036

AT. 151 C X 0.0002 -0.0000 -0.0036 -0.0001 -0.0032 0.0012  
Y -0.0001 0.0000 0.0006 0.0002 -0.0012 0.0004  
Z 0.0022 -0.0014 -0.0148 -0.0007 -0.0068 0.0063

AT. 152 C X -0.0002 -0.0000 0.0036 0.0001 -0.0032 0.0012  
Y 0.0001 0.0000 -0.0006 -0.0002 -0.0012 0.0004  
Z -0.0022 -0.0014 0.0148 0.0007 -0.0068 0.0063

AT. 153 H X 0.0004 -0.0002 -0.0042 0.0003 -0.0052 0.0020  
Y -0.0002 0.0002 0.0000 0.0000 0.0001 -0.0007  
Z 0.0020 -0.0009 -0.0158 -0.0014 -0.0042 0.0044

AT. 154 H X -0.0004 -0.0002 0.0042 -0.0003 -0.0052 0.0020  
Y 0.0002 0.0002 -0.0000 -0.0000 0.0001 -0.0007

Z -0.0020 -0.0009 0.0158 0.0014 -0.0042 0.0044  
AT. 155 H X 0.0004 -0.0002 -0.0070 0.0003 -0.0067 0.0033  
Y 0.0002 0.0004 -0.0023 -0.0006 -0.0002 -0.0006  
Z 0.0020 -0.0019 -0.0133 0.0002 -0.0094 0.0083  
AT. 156 H X -0.0004 -0.0002 0.0070 -0.0003 -0.0067 0.0033  
Y -0.0002 0.0004 0.0023 0.0006 -0.0002 -0.0006  
Z -0.0020 -0.0019 0.0133 -0.0002 -0.0094 0.0083  
AT. 157 O X 0.0001 0.0002 0.0000 -0.0021 0.0001 0.0003  
Y -0.0007 0.0006 -0.0002 0.0002 -0.0001 -0.0001  
Z 0.0004 0.0007 0.0003 -0.0022 -0.0003 -0.0003  
AT. 158 O X -0.0001 0.0002 -0.0000 0.0021 0.0001 0.0003  
Y 0.0007 0.0006 0.0002 -0.0002 -0.0001 -0.0001  
Z -0.0004 0.0007 -0.0003 0.0022 -0.0003 -0.0003  
AT. 159 O X 0.0005 -0.0005 0.0002 0.0011 -0.0000 -0.0003  
Y -0.0017 -0.0017 -0.0005 0.0030 0.0004 0.0005  
Z -0.0007 0.0000 -0.0001 0.0002 0.0001 0.0002  
AT. 160 O X -0.0005 -0.0005 -0.0002 -0.0011 -0.0000 -0.0003  
Y 0.0017 -0.0017 0.0005 -0.0030 0.0004 0.0005  
Z 0.0007 0.0000 0.0001 -0.0002 0.0001 0.0002  
AT. 161 H X -0.0030 -0.0062 -0.0044 0.0425 0.0024 0.0016  
Y -0.0006 0.0033 0.0013 -0.0146 -0.0012 -0.0011  
Z -0.0011 -0.0097 -0.0059 0.0648 0.0035 0.0019  
AT. 162 H X 0.0030 -0.0062 0.0044 -0.0425 0.0024 0.0016  
Y 0.0006 0.0033 -0.0013 0.0146 -0.0012 -0.0011  
Z 0.0011 -0.0097 0.0059 -0.0648 0.0035 0.0019  
AT. 163 H X 0.0037 0.0043 0.0011 -0.0073 -0.0012 -0.0015  
Y 0.0300 0.0393 0.0092 -0.0597 -0.0104 -0.0128  
Z 0.0052 0.0081 0.0017 -0.0120 -0.0023 -0.0028  
AT. 164 H X -0.0037 0.0043 -0.0011 0.0073 -0.0012 -0.0015  
Y -0.0300 0.0393 -0.0092 0.0597 -0.0104 -0.0128  
Z -0.0052 0.0081 -0.0017 0.0120 -0.0023 -0.0028  
AT. 165 O X 0.0002 0.0002 -0.0019 -0.0002 0.0019 -0.0011

|                                                        |     |         |         |         |         |         |         |
|--------------------------------------------------------|-----|---------|---------|---------|---------|---------|---------|
|                                                        | Y   | -0.0005 | -0.0005 | 0.0058  | 0.0002  | -0.0064 | 0.0030  |
|                                                        | Z   | 0.0001  | 0.0001  | 0.0001  | -0.0002 | -0.0001 | 0.0004  |
| AT. 166                                                | O X | -0.0002 | 0.0002  | 0.0019  | 0.0002  | 0.0019  | -0.0011 |
|                                                        | Y   | 0.0005  | -0.0005 | -0.0058 | -0.0002 | -0.0064 | 0.0030  |
|                                                        | Z   | -0.0001 | 0.0001  | -0.0001 | 0.0002  | -0.0001 | 0.0004  |
| AT. 167                                                | H X | -0.0053 | -0.0043 | 0.0530  | 0.0027  | -0.0581 | 0.0286  |
|                                                        | Y   | 0.0104  | 0.0082  | -0.1039 | -0.0056 | 0.1122  | -0.0552 |
|                                                        | Z   | -0.0023 | -0.0021 | 0.0259  | 0.0012  | -0.0262 | 0.0129  |
| AT. 168                                                | H X | 0.0053  | -0.0043 | -0.0530 | -0.0027 | -0.0581 | 0.0286  |
|                                                        | Y   | -0.0104 | 0.0082  | 0.1039  | 0.0056  | 0.1122  | -0.0552 |
|                                                        | Z   | 0.0023  | -0.0021 | -0.0259 | -0.0012 | -0.0262 | 0.0129  |
| AT. 169                                                | O X | -0.0003 | -0.0002 | 0.0029  | 0.0002  | -0.0035 | 0.0016  |
|                                                        | Y   | -0.0001 | -0.0001 | 0.0006  | 0.0000  | -0.0010 | 0.0004  |
|                                                        | Z   | -0.0000 | -0.0001 | -0.0009 | 0.0000  | 0.0008  | -0.0006 |
| AT. 170                                                | O X | 0.0003  | -0.0002 | -0.0029 | -0.0002 | -0.0035 | 0.0016  |
|                                                        | Y   | 0.0001  | -0.0001 | -0.0006 | -0.0000 | -0.0010 | 0.0004  |
|                                                        | Z   | 0.0000  | -0.0001 | 0.0009  | -0.0000 | 0.0008  | -0.0006 |
| AT. 171                                                | H X | 0.0067  | 0.0065  | -0.0669 | -0.0025 | 0.0829  | -0.0354 |
|                                                        | Y   | 0.0031  | 0.0031  | -0.0310 | -0.0009 | 0.0386  | -0.0165 |
|                                                        | Z   | 0.0001  | 0.0001  | -0.0020 | 0.0006  | 0.0017  | -0.0014 |
| AT. 172                                                | H X | -0.0067 | 0.0065  | 0.0669  | 0.0025  | 0.0829  | -0.0354 |
|                                                        | Y   | -0.0031 | 0.0031  | 0.0310  | 0.0009  | 0.0386  | -0.0165 |
|                                                        | Z   | -0.0001 | 0.0001  | 0.0020  | -0.0006 | 0.0017  | -0.0014 |
| FREQ(CM**-1) 846.06 847.05 855.14 858.18 860.78 862.89 |     |         |         |         |         |         |         |
| AT. 1                                                  | I X | -0.0000 | -0.0000 | -0.0001 | -0.0002 | -0.0000 | 0.0000  |
|                                                        | Y   | 0.0000  | -0.0000 | -0.0002 | -0.0002 | -0.0000 | 0.0000  |
|                                                        | Z   | 0.0000  | 0.0000  | -0.0001 | 0.0001  | 0.0000  | 0.0000  |
| AT. 2                                                  | I X | -0.0000 | 0.0000  | 0.0001  | -0.0002 | -0.0000 | -0.0000 |
|                                                        | Y   | 0.0000  | 0.0000  | 0.0002  | -0.0002 | -0.0000 | -0.0000 |
|                                                        | Z   | 0.0000  | -0.0000 | 0.0001  | 0.0001  | 0.0000  | -0.0000 |

AT. 3 I X -0.0000 -0.0000 -0.0002 0.0002 0.0000 0.0000  
Y 0.0001 0.0001 0.0002 -0.0004 -0.0001 -0.0000  
Z -0.0000 -0.0000 -0.0001 0.0002 0.0000 -0.0000

AT. 4 I X -0.0000 0.0000 0.0002 0.0002 0.0000 -0.0000  
Y 0.0001 -0.0001 -0.0002 -0.0004 -0.0001 0.0000  
Z -0.0000 0.0000 0.0001 0.0002 0.0000 0.0000

AT. 5 O X -0.0007 -0.0002 0.0021 -0.0030 -0.0008 -0.0003  
Y 0.0002 0.0001 0.0002 0.0031 0.0006 0.0000  
Z 0.0006 0.0000 -0.0034 -0.0001 0.0003 0.0003

AT. 6 O X -0.0007 0.0002 -0.0021 -0.0030 -0.0008 0.0003  
Y 0.0002 -0.0001 -0.0002 0.0031 0.0006 -0.0000  
Z 0.0006 -0.0000 0.0034 -0.0001 0.0003 -0.0003

AT. 7 O X -0.0009 -0.0006 -0.0054 0.0075 0.0015 0.0003  
Y 0.0003 0.0004 0.0009 -0.0028 -0.0006 0.0003  
Z -0.0002 -0.0001 -0.0017 0.0028 0.0006 -0.0001

AT. 8 O X -0.0009 0.0006 0.0054 0.0075 0.0015 -0.0003  
Y 0.0003 -0.0004 -0.0009 -0.0028 -0.0006 -0.0003  
Z -0.0002 0.0001 0.0017 0.0028 0.0006 0.0001

AT. 9 N X -0.0007 0.0002 0.0046 0.0023 0.0000 -0.0005  
Y -0.0013 0.0002 0.0052 0.0036 0.0001 -0.0002  
Z -0.0004 0.0002 0.0018 0.0016 -0.0002 0.0000

AT. 10 N X -0.0007 -0.0002 -0.0046 0.0023 0.0000 0.0005  
Y -0.0013 -0.0002 -0.0052 0.0036 0.0001 0.0002  
Z -0.0004 -0.0002 -0.0018 0.0016 -0.0002 -0.0000

AT. 11 N X 0.0004 -0.0003 -0.0041 -0.0000 -0.0000 -0.0001  
Y 0.0009 -0.0003 -0.0037 -0.0009 0.0003 -0.0002  
Z -0.0001 -0.0003 -0.0025 0.0002 0.0004 0.0008

AT. 12 N X 0.0004 0.0003 0.0041 -0.0000 -0.0000 0.0001  
Y 0.0009 0.0003 0.0037 -0.0009 0.0003 0.0002  
Z -0.0001 0.0003 0.0025 0.0002 0.0004 -0.0008

AT. 13 C X 0.0001 -0.0000 -0.0011 -0.0024 -0.0004 0.0001  
Y 0.0008 -0.0001 -0.0055 -0.0028 -0.0000 0.0004

Z 0.0004 0.0000 -0.0027 -0.0007 0.0000 0.0001  
AT. 14 C X 0.0001 0.0000 0.0011 -0.0024 -0.0004 -0.0001  
Y 0.0008 0.0001 0.0055 -0.0028 -0.0000 -0.0004  
Z 0.0004 -0.0000 0.0027 -0.0007 0.0000 -0.0001  
AT. 15 C X 0.0010 0.0001 -0.0049 0.0049 0.0014 0.0004  
Y -0.0010 -0.0001 0.0052 -0.0004 -0.0006 -0.0005  
Z -0.0004 -0.0006 0.0027 -0.0042 -0.0005 -0.0004  
AT. 16 C X 0.0010 -0.0001 0.0049 0.0049 0.0014 -0.0004  
Y -0.0010 0.0001 -0.0052 -0.0004 -0.0006 0.0005  
Z -0.0004 0.0006 -0.0027 -0.0042 -0.0005 0.0004  
AT. 17 H X -0.0016 -0.0012 0.0142 -0.0051 -0.0008 -0.0014  
Y -0.0033 -0.0015 0.0208 -0.0160 -0.0035 -0.0021  
Z 0.0014 0.0007 -0.0091 0.0114 0.0022 0.0009  
AT. 18 H X -0.0016 0.0012 -0.0142 -0.0051 -0.0008 0.0014  
Y -0.0033 0.0015 -0.0208 -0.0160 -0.0035 0.0021  
Z 0.0014 -0.0007 0.0091 0.0114 0.0022 -0.0009  
AT. 19 H X 0.0024 0.0006 -0.0094 0.0046 0.0020 0.0008  
Y 0.0017 0.0020 -0.0109 0.0167 0.0024 0.0015  
Z 0.0011 0.0004 -0.0050 0.0024 0.0009 0.0005  
AT. 20 H X 0.0024 -0.0006 0.0094 0.0046 0.0020 -0.0008  
Y 0.0017 -0.0020 0.0109 0.0167 0.0024 -0.0015  
Z 0.0011 -0.0004 0.0050 0.0024 0.0009 -0.0005  
AT. 21 C X 0.0003 0.0003 0.0003 0.0005 -0.0001 -0.0005  
Y 0.0012 0.0009 0.0054 -0.0067 -0.0013 -0.0001  
Z 0.0000 0.0002 0.0015 0.0003 -0.0002 -0.0005  
AT. 22 C X 0.0003 -0.0003 -0.0003 0.0005 -0.0001 0.0005  
Y 0.0012 -0.0009 -0.0054 -0.0067 -0.0013 0.0001  
Z 0.0000 -0.0002 -0.0015 0.0003 -0.0002 0.0005  
AT. 23 C X 0.0012 0.0008 0.0098 -0.0111 -0.0019 -0.0003  
Y -0.0021 -0.0011 -0.0129 0.0157 0.0027 0.0007  
Z 0.0008 0.0002 0.0046 -0.0055 -0.0009 -0.0006  
AT. 24 C X 0.0012 -0.0008 -0.0098 -0.0111 -0.0019 0.0003

Y -0.0021 0.0011 0.0129 0.0157 0.0027 -0.0007  
Z 0.0008 -0.0002 -0.0046 -0.0055 -0.0009 0.0006  
AT. 25 H X -0.0061 -0.0033 -0.0299 0.0382 0.0068 0.0016  
Y -0.0021 -0.0013 -0.0125 0.0152 0.0027 0.0006  
Z -0.0079 -0.0035 -0.0461 0.0575 0.0098 0.0026  
AT. 26 H X -0.0061 0.0033 0.0299 0.0382 0.0068 -0.0016  
Y -0.0021 0.0013 0.0125 0.0152 0.0027 -0.0006  
Z -0.0079 0.0035 0.0461 0.0575 0.0098 -0.0026  
AT. 27 H X 0.0035 0.0024 0.0198 -0.0263 -0.0054 -0.0007  
Y 0.0067 0.0028 0.0351 -0.0473 -0.0081 -0.0023  
Z 0.0049 0.0018 0.0265 -0.0340 -0.0056 -0.0020  
AT. 28 H X 0.0035 -0.0024 -0.0198 -0.0263 -0.0054 0.0007  
Y 0.0067 -0.0028 -0.0351 -0.0473 -0.0081 0.0023  
Z 0.0049 -0.0018 -0.0265 -0.0340 -0.0056 0.0020  
AT. 29 C X 0.0001 -0.0000 -0.0062 -0.0070 -0.0015 0.0012  
Y 0.0037 -0.0004 -0.0125 -0.0092 -0.0001 0.0001  
Z 0.0006 0.0006 0.0033 -0.0004 -0.0006 0.0005  
AT. 30 C X 0.0001 0.0000 0.0062 -0.0070 -0.0015 -0.0012  
Y 0.0037 0.0004 0.0125 -0.0092 -0.0001 -0.0001  
Z 0.0006 -0.0006 -0.0033 -0.0004 -0.0006 -0.0005  
AT. 31 H X -0.0000 0.0005 -0.0006 -0.0031 -0.0014 0.0014  
Y 0.0056 -0.0016 -0.0330 -0.0221 -0.0006 0.0009  
Z 0.0032 -0.0007 -0.0232 -0.0168 -0.0012 0.0018  
AT. 32 H X -0.0000 -0.0005 0.0006 -0.0031 -0.0014 -0.0014  
Y 0.0056 0.0016 0.0330 -0.0221 -0.0006 -0.0009  
Z 0.0032 0.0007 0.0232 -0.0168 -0.0012 -0.0018  
AT. 33 H X -0.0003 0.0007 0.0130 0.0066 0.0007 -0.0006  
Y 0.0008 0.0018 0.0212 0.0126 0.0007 -0.0013  
Z 0.0016 0.0001 0.0015 -0.0006 0.0005 -0.0002  
AT. 34 H X -0.0003 -0.0007 -0.0130 0.0066 0.0007 0.0006  
Y 0.0008 -0.0018 -0.0212 0.0126 0.0007 0.0013  
Z 0.0016 -0.0001 -0.0015 -0.0006 0.0005 0.0002



AT. 35 C X -0.0006 -0.0001 -0.0012 0.0008 -0.0005 0.0001  
Y -0.0001 -0.0003 -0.0036 -0.0002 0.0001 0.0001  
Z -0.0003 0.0002 0.0025 -0.0010 -0.0000 0.0004

AT. 36 C X -0.0006 0.0001 0.0012 0.0008 -0.0005 -0.0001  
Y -0.0001 0.0003 0.0036 -0.0002 0.0001 -0.0001  
Z -0.0003 -0.0002 -0.0025 -0.0010 -0.0000 -0.0004

AT. 37 C X -0.0022 0.0010 0.0196 0.0037 -0.0009 -0.0021  
Y -0.0012 -0.0001 0.0029 0.0082 0.0026 0.0014  
Z 0.0004 -0.0002 -0.0068 -0.0070 -0.0007 0.0014

AT. 38 C X -0.0022 -0.0010 -0.0196 0.0037 -0.0009 0.0021  
Y -0.0012 0.0001 -0.0029 0.0082 0.0026 -0.0014  
Z 0.0004 0.0002 0.0068 -0.0070 -0.0007 -0.0014

AT. 39 H X -0.0002 0.0015 0.0266 0.0061 -0.0016 -0.0053  
Y 0.0000 0.0002 0.0131 0.0130 0.0028 -0.0013  
Z 0.0013 -0.0001 -0.0071 -0.0073 -0.0012 0.0005

AT. 40 H X -0.0002 -0.0015 -0.0266 0.0061 -0.0016 0.0053  
Y 0.0000 -0.0002 -0.0131 0.0130 0.0028 0.0013  
Z 0.0013 0.0001 0.0071 -0.0073 -0.0012 -0.0005

AT. 41 H X -0.0035 0.0005 0.0095 0.0026 0.0015 0.0027  
Y -0.0016 0.0004 0.0078 0.0090 0.0022 0.0006  
Z 0.0022 0.0001 -0.0002 -0.0062 -0.0026 -0.0027

AT. 42 H X -0.0035 -0.0005 -0.0095 0.0026 0.0015 -0.0027  
Y -0.0016 -0.0004 -0.0078 0.0090 0.0022 -0.0006  
Z 0.0022 -0.0001 0.0002 -0.0062 -0.0026 0.0027

AT. 43 C X 0.0006 0.0000 -0.0033 -0.0021 0.0010 0.0025  
Y -0.0026 0.0007 0.0105 0.0035 -0.0017 -0.0025  
Z -0.0002 0.0006 0.0052 0.0008 0.0000 0.0007

AT. 44 C X 0.0006 -0.0000 0.0033 -0.0021 0.0010 -0.0025  
Y -0.0026 -0.0007 -0.0105 0.0035 -0.0017 0.0025  
Z -0.0002 -0.0006 -0.0052 0.0008 0.0000 -0.0007

AT. 45 H X 0.0002 -0.0001 -0.0030 0.0006 -0.0004 -0.0021  
Y -0.0034 0.0020 0.0187 0.0013 -0.0006 0.0038

Z 0.0008 -0.0007 -0.0031 0.0010 -0.0000 -0.0022  
AT. 46 H X 0.0002 0.0001 0.0030 0.0006 -0.0004 0.0021  
Y -0.0034 -0.0020 -0.0187 0.0013 -0.0006 -0.0038  
Z 0.0008 0.0007 0.0031 0.0010 -0.0000 0.0022  
AT. 47 H X 0.0008 -0.0004 -0.0072 0.0014 0.0019 0.0011  
Y -0.0006 -0.0002 0.0018 0.0058 0.0015 -0.0039  
Z 0.0015 0.0003 0.0011 -0.0018 0.0022 0.0013  
AT. 48 H X 0.0008 0.0004 0.0072 0.0014 0.0019 -0.0011  
Y -0.0006 0.0002 -0.0018 0.0058 0.0015 0.0039  
Z 0.0015 -0.0003 -0.0011 -0.0018 0.0022 -0.0013  
AT. 49 C X 0.0000 -0.0001 0.0009 -0.0017 -0.0001 -0.0003  
Y -0.0001 -0.0000 0.0015 -0.0006 -0.0001 -0.0001  
Z -0.0004 0.0001 0.0031 -0.0001 0.0001 -0.0002  
AT. 50 C X 0.0000 0.0001 -0.0009 -0.0017 -0.0001 0.0003  
Y -0.0001 0.0000 -0.0015 -0.0006 -0.0001 0.0001  
Z -0.0004 -0.0001 -0.0031 -0.0001 0.0001 0.0002  
AT. 51 C X 0.0032 -0.0007 -0.0101 0.0004 0.0020 -0.0006  
Y 0.0002 -0.0001 -0.0048 -0.0018 -0.0005 0.0020  
Z -0.0005 -0.0007 -0.0003 -0.0011 0.0001 -0.0015  
AT. 52 C X 0.0032 0.0007 0.0101 0.0004 0.0020 0.0006  
Y 0.0002 0.0001 0.0048 -0.0018 -0.0005 -0.0020  
Z -0.0005 0.0007 0.0003 -0.0011 0.0001 0.0015  
AT. 53 H X 0.0031 -0.0014 -0.0063 0.0037 0.0032 -0.0060  
Y 0.0005 -0.0011 -0.0034 0.0017 0.0014 -0.0044  
Z 0.0003 -0.0007 -0.0063 -0.0028 0.0001 0.0008  
AT. 54 H X 0.0031 0.0014 0.0063 0.0037 0.0032 0.0060  
Y 0.0005 0.0011 0.0034 0.0017 0.0014 0.0044  
Z 0.0003 0.0007 0.0063 -0.0028 0.0001 -0.0008  
AT. 55 H X 0.0025 0.0005 -0.0133 -0.0057 -0.0009 0.0077  
Y 0.0009 -0.0002 -0.0059 -0.0007 0.0002 0.0010  
Z -0.0001 0.0001 -0.0035 -0.0036 -0.0010 0.0028  
AT. 56 H X 0.0025 -0.0005 0.0133 -0.0057 -0.0009 -0.0077

Y 0.0009 0.0002 0.0059 -0.0007 0.0002 -0.0010  
Z -0.0001 -0.0001 0.0035 -0.0036 -0.0010 -0.0028  
AT. 57 C X 0.0006 -0.0004 -0.0059 0.0001 0.0004 0.0008  
Y -0.0013 0.0001 0.0019 0.0004 -0.0009 0.0001  
Z 0.0005 -0.0000 -0.0008 -0.0007 0.0006 0.0003  
AT. 58 C X 0.0006 0.0004 0.0059 0.0001 0.0004 -0.0008  
Y -0.0013 -0.0001 -0.0019 0.0004 -0.0009 -0.0001  
Z 0.0005 0.0000 0.0008 -0.0007 0.0006 -0.0003  
AT. 59 H X 0.0039 0.0004 0.0115 -0.0043 0.0037 -0.0036  
Y -0.0017 -0.0003 -0.0051 0.0025 -0.0021 0.0008  
Z 0.0020 0.0001 0.0010 -0.0006 0.0011 -0.0016  
AT. 60 H X 0.0039 -0.0004 -0.0115 -0.0043 0.0037 0.0036  
Y -0.0017 0.0003 0.0051 0.0025 -0.0021 -0.0008  
Z 0.0020 -0.0001 -0.0010 -0.0006 0.0011 0.0016  
AT. 61 H X 0.0014 -0.0008 -0.0073 0.0027 0.0004 -0.0014  
Y 0.0003 0.0012 0.0132 -0.0036 0.0001 -0.0008  
Z 0.0004 -0.0009 -0.0078 0.0031 0.0001 -0.0009  
AT. 62 H X 0.0014 0.0008 0.0073 0.0027 0.0004 0.0014  
Y 0.0003 -0.0012 -0.0132 -0.0036 0.0001 0.0008  
Z 0.0004 0.0009 0.0078 0.0031 0.0001 0.0009  
AT. 63 H X 0.0002 -0.0001 -0.0048 -0.0009 0.0010 0.0018  
Y 0.0007 0.0008 0.0085 -0.0015 -0.0006 -0.0016  
Z -0.0008 -0.0010 -0.0074 0.0019 -0.0003 0.0008  
AT. 64 H X 0.0002 0.0001 0.0048 -0.0009 0.0010 -0.0018  
Y 0.0007 -0.0008 -0.0085 -0.0015 -0.0006 0.0016  
Z -0.0008 0.0010 0.0074 0.0019 -0.0003 -0.0008  
AT. 65 C X -0.0008 0.0002 0.0051 0.0003 -0.0000 -0.0003  
Y 0.0004 -0.0002 -0.0026 -0.0009 -0.0001 0.0001  
Z 0.0011 -0.0000 -0.0031 -0.0022 0.0005 0.0007  
AT. 66 C X -0.0008 -0.0002 -0.0051 0.0003 -0.0000 0.0003  
Y 0.0004 0.0002 0.0026 -0.0009 -0.0001 -0.0001  
Z 0.0011 0.0000 0.0031 -0.0022 0.0005 -0.0007

AT. 67 H X -0.0001 -0.0002 -0.0029 0.0068 0.0001 -0.0014  
Y 0.0004 0.0004 0.0022 -0.0035 0.0005 0.0012  
Z 0.0006 -0.0002 -0.0008 -0.0052 -0.0002 0.0006

AT. 68 H X -0.0001 0.0002 0.0029 0.0068 0.0001 0.0014  
Y 0.0004 -0.0004 -0.0022 -0.0035 0.0005 -0.0012  
Z 0.0006 0.0002 0.0008 -0.0052 -0.0002 -0.0006

AT. 69 H X -0.0007 0.0007 0.0079 -0.0002 0.0008 0.0013  
Y 0.0007 0.0000 -0.0058 0.0023 0.0001 0.0006  
Z 0.0012 -0.0009 -0.0137 0.0039 -0.0006 -0.0016

AT. 70 H X -0.0007 -0.0007 -0.0079 -0.0002 0.0008 -0.0013  
Y 0.0007 -0.0000 0.0058 0.0023 0.0001 -0.0006  
Z 0.0012 0.0009 0.0137 0.0039 -0.0006 0.0016

AT. 71 H X -0.0006 -0.0003 -0.0012 0.0027 0.0001 0.0001  
Y 0.0005 0.0002 -0.0000 0.0003 0.0000 -0.0004  
Z 0.0013 0.0002 -0.0044 0.0012 0.0006 0.0004

AT. 72 H X -0.0006 0.0003 0.0012 0.0027 0.0001 -0.0001  
Y 0.0005 -0.0002 0.0000 0.0003 0.0000 0.0004  
Z 0.0013 -0.0002 0.0044 0.0012 0.0006 -0.0004

AT. 73 C X -0.0007 0.0003 0.0010 -0.0000 -0.0016 -0.0009  
Y 0.0007 -0.0003 0.0018 0.0011 0.0012 -0.0013  
Z -0.0025 0.0000 0.0058 0.0065 -0.0011 -0.0017

AT. 74 C X -0.0007 -0.0003 -0.0010 -0.0000 -0.0016 0.0009  
Y 0.0007 0.0003 -0.0018 0.0011 0.0012 0.0013  
Z -0.0025 -0.0000 -0.0058 0.0065 -0.0011 0.0017

AT. 75 H X -0.0003 0.0007 -0.0059 -0.0035 -0.0011 0.0037  
Y 0.0010 -0.0001 -0.0015 -0.0015 0.0023 0.0026  
Z -0.0020 0.0006 -0.0031 0.0008 0.0006 0.0066

AT. 76 H X -0.0003 -0.0007 0.0059 -0.0035 -0.0011 -0.0037  
Y 0.0010 0.0001 0.0015 -0.0015 0.0023 -0.0026  
Z -0.0020 -0.0006 0.0031 0.0008 0.0006 -0.0066

AT. 77 H X 0.0003 0.0008 -0.0014 -0.0039 -0.0001 0.0024  
Y -0.0003 -0.0003 -0.0060 -0.0010 -0.0000 0.0027

Z -0.0025 -0.0005 0.0154 0.0121 -0.0011 -0.0082  
AT. 78 H X 0.0003 -0.0008 0.0014 -0.0039 -0.0001 -0.0024  
Y -0.0003 0.0003 0.0060 -0.0010 -0.0000 -0.0027  
Z -0.0025 0.0005 -0.0154 0.0121 -0.0011 0.0082  
AT. 79 I X 0.0000 0.0001 0.0000 0.0000 -0.0001 0.0001  
Y -0.0002 0.0000 0.0000 0.0000 -0.0001 0.0003  
Z -0.0001 0.0000 0.0000 -0.0000 -0.0000 0.0001  
AT. 80 I X 0.0000 -0.0001 -0.0000 0.0000 -0.0001 -0.0001  
Y -0.0002 -0.0000 -0.0000 0.0000 -0.0001 -0.0003  
Z -0.0001 -0.0000 -0.0000 -0.0000 -0.0000 -0.0001  
AT. 81 I X -0.0001 -0.0002 0.0001 -0.0001 0.0004 0.0003  
Y -0.0000 -0.0001 0.0000 -0.0001 0.0004 0.0003  
Z 0.0001 0.0001 -0.0001 0.0001 -0.0003 -0.0002  
AT. 82 I X -0.0001 0.0002 -0.0001 -0.0001 0.0004 -0.0003  
Y -0.0000 0.0001 -0.0000 -0.0001 0.0004 -0.0003  
Z 0.0001 -0.0001 0.0001 0.0001 -0.0003 0.0002  
AT. 83 O X 0.0022 0.0044 0.0002 -0.0003 -0.0010 0.0021  
Y 0.0015 -0.0005 -0.0001 -0.0002 0.0014 -0.0027  
Z 0.0007 0.0022 0.0002 0.0000 -0.0013 0.0016  
AT. 84 O X 0.0022 -0.0044 -0.0002 -0.0003 -0.0010 -0.0021  
Y 0.0015 0.0005 0.0001 -0.0002 0.0014 0.0027  
Z 0.0007 -0.0022 -0.0002 0.0000 -0.0013 -0.0016  
AT. 85 O X -0.0031 -0.0053 0.0018 -0.0024 0.0146 0.0124  
Y -0.0019 -0.0024 0.0005 -0.0004 0.0038 0.0024  
Z 0.0020 0.0020 -0.0002 -0.0000 -0.0002 0.0007  
AT. 86 O X -0.0031 0.0053 -0.0018 -0.0024 0.0146 -0.0124  
Y -0.0019 0.0024 -0.0005 -0.0004 0.0038 -0.0024  
Z 0.0020 -0.0020 0.0002 -0.0000 -0.0002 -0.0007  
AT. 87 N X 0.0036 0.0041 -0.0000 0.0007 -0.0007 0.0004  
Y -0.0101 -0.0108 -0.0001 -0.0010 0.0002 -0.0017  
Z -0.0035 -0.0035 -0.0002 -0.0003 0.0004 0.0002  
AT. 88 N X 0.0036 -0.0041 0.0000 0.0007 -0.0007 -0.0004

Y -0.0101 0.0108 0.0001 -0.0010 0.0002 0.0017  
Z -0.0035 0.0035 0.0002 -0.0003 0.0004 -0.0002  
AT. 89 N X -0.0042 -0.0043 0.0001 -0.0005 0.0009 0.0004  
Y 0.0119 0.0119 -0.0003 0.0009 -0.0011 -0.0003  
Z 0.0043 0.0047 -0.0006 0.0015 -0.0041 -0.0035  
AT. 90 N X -0.0042 0.0043 -0.0001 -0.0005 0.0009 -0.0004  
Y 0.0119 -0.0119 0.0003 0.0009 -0.0011 0.0003  
Z 0.0043 -0.0047 0.0006 0.0015 -0.0041 0.0035  
AT. 91 C X 0.0009 0.0012 0.0002 -0.0001 -0.0002 0.0003  
Y 0.0011 0.0042 0.0003 0.0003 -0.0023 0.0035  
Z -0.0007 0.0011 0.0003 -0.0002 -0.0005 0.0018  
AT. 92 C X 0.0009 -0.0012 -0.0002 -0.0001 -0.0002 -0.0003  
Y 0.0011 -0.0042 -0.0003 0.0003 -0.0023 -0.0035  
Z -0.0007 -0.0011 -0.0003 -0.0002 -0.0005 -0.0018  
AT. 93 C X -0.0045 -0.0068 -0.0003 0.0001 0.0011 -0.0008  
Y -0.0003 -0.0033 -0.0002 -0.0000 0.0019 -0.0029  
Z 0.0034 0.0017 -0.0001 0.0005 0.0003 -0.0031  
AT. 94 C X -0.0045 0.0068 0.0003 0.0001 0.0011 0.0008  
Y -0.0003 0.0033 0.0002 -0.0000 0.0019 0.0029  
Z 0.0034 -0.0017 0.0001 0.0005 0.0003 0.0031  
AT. 95 H X -0.0054 -0.0004 0.0002 -0.0010 -0.0011 0.0042  
Y 0.0019 -0.0098 -0.0008 0.0012 0.0047 -0.0111  
Z 0.0000 0.0055 0.0003 -0.0007 -0.0021 0.0058  
AT. 96 H X -0.0054 0.0004 -0.0002 -0.0010 -0.0011 -0.0042  
Y 0.0019 0.0098 0.0008 0.0012 0.0047 0.0111  
Z 0.0000 -0.0055 -0.0003 -0.0007 -0.0021 -0.0058  
AT. 97 H X -0.0079 -0.0098 -0.0007 0.0003 -0.0004 -0.0001  
Y -0.0062 0.0041 0.0009 -0.0020 -0.0024 0.0125  
Z 0.0032 0.0044 0.0003 -0.0000 -0.0003 0.0003  
AT. 98 H X -0.0079 0.0098 0.0007 0.0003 -0.0004 0.0001  
Y -0.0062 -0.0041 -0.0009 -0.0020 -0.0024 -0.0125  
Z 0.0032 -0.0044 -0.0003 -0.0000 -0.0003 -0.0003

AT. 99 C X -0.0008 -0.0013 0.0002 -0.0002 0.0030 0.0022  
Y -0.0036 -0.0050 0.0012 -0.0018 0.0098 0.0085  
Z -0.0011 -0.0016 0.0003 -0.0006 0.0026 0.0027

AT. 100 C X -0.0008 0.0013 -0.0002 -0.0002 0.0030 -0.0022  
Y -0.0036 0.0050 -0.0012 -0.0018 0.0098 -0.0085  
Z -0.0011 0.0016 -0.0003 -0.0006 0.0026 -0.0027

AT. 101 C X 0.0067 0.0098 -0.0026 0.0035 -0.0209 -0.0156  
Y 0.0043 0.0062 -0.0022 0.0031 -0.0160 -0.0121  
Z 0.0000 -0.0006 0.0007 -0.0012 0.0047 0.0025

AT. 102 C X 0.0067 -0.0098 0.0026 0.0035 -0.0209 0.0156  
Y 0.0043 -0.0062 0.0022 0.0031 -0.0160 0.0121  
Z 0.0000 0.0006 -0.0007 -0.0012 0.0047 -0.0025

AT. 103 H X -0.0034 -0.0106 0.0048 -0.0078 0.0439 0.0353  
Y 0.0083 0.0144 -0.0051 0.0076 -0.0421 -0.0326  
Z 0.0136 0.0271 -0.0118 0.0169 -0.0954 -0.0737

AT. 104 H X -0.0034 0.0106 -0.0048 -0.0078 0.0439 -0.0353  
Y 0.0083 -0.0144 0.0051 0.0076 -0.0421 0.0326  
Z 0.0136 -0.0271 0.0118 0.0169 -0.0954 0.0737

AT. 105 H X 0.0091 0.0154 -0.0036 0.0048 -0.0290 -0.0246  
Y -0.0142 -0.0244 0.0099 -0.0138 0.0745 0.0546  
Z -0.0062 -0.0106 0.0049 -0.0072 0.0365 0.0255

AT. 106 H X 0.0091 -0.0154 0.0036 0.0048 -0.0290 0.0246  
Y -0.0142 0.0244 -0.0099 -0.0138 0.0745 -0.0546  
Z -0.0062 0.0106 -0.0049 -0.0072 0.0365 -0.0255

AT. 107 C X 0.0080 0.0081 0.0005 0.0006 0.0025 0.0010  
Y 0.0228 0.0231 0.0001 0.0013 0.0033 0.0056  
Z 0.0039 0.0019 -0.0005 -0.0010 0.0054 0.0032

AT. 108 C X 0.0080 -0.0081 -0.0005 0.0006 0.0025 -0.0010  
Y 0.0228 -0.0231 -0.0001 0.0013 0.0033 -0.0056  
Z 0.0039 -0.0019 0.0005 -0.0010 0.0054 -0.0032

AT. 109 H X 0.0092 0.0113 0.0011 0.0016 -0.0047 -0.0022  
Y 0.0305 0.0322 -0.0000 0.0028 -0.0027 0.0034

Z 0.0171 0.0170 -0.0010 0.0013 -0.0027 0.0002  
AT. 110 H X 0.0092 -0.0113 -0.0011 0.0016 -0.0047 0.0022  
Y 0.0305 -0.0322 0.0000 0.0028 -0.0027 -0.0034  
Z 0.0171 -0.0170 0.0010 0.0013 -0.0027 -0.0002  
AT. 111 H X 0.0037 0.0048 -0.0002 0.0006 -0.0011 -0.0015  
Y 0.0110 0.0062 0.0005 -0.0013 0.0171 0.0076  
Z 0.0118 0.0100 0.0001 -0.0003 0.0062 0.0057  
AT. 112 H X 0.0037 -0.0048 0.0002 0.0006 -0.0011 0.0015  
Y 0.0110 -0.0062 -0.0005 -0.0013 0.0171 -0.0076  
Z 0.0118 -0.0100 -0.0001 -0.0003 0.0062 -0.0057  
AT. 113 C X 0.0017 0.0016 0.0004 -0.0002 0.0014 0.0011  
Y 0.0017 0.0021 -0.0001 0.0012 -0.0035 -0.0028  
Z -0.0044 -0.0048 0.0004 -0.0010 0.0015 0.0006  
AT. 114 C X 0.0017 -0.0016 -0.0004 -0.0002 0.0014 -0.0011  
Y 0.0017 -0.0021 0.0001 0.0012 -0.0035 0.0028  
Z -0.0044 0.0048 -0.0004 -0.0010 0.0015 -0.0006  
AT. 115 C X 0.0271 0.0286 -0.0013 0.0035 -0.0114 -0.0068  
Y -0.0123 -0.0113 -0.0011 -0.0018 -0.0056 -0.0049  
Z -0.0039 -0.0037 0.0008 0.0002 0.0005 0.0008  
AT. 116 C X 0.0271 -0.0286 0.0013 0.0035 -0.0114 0.0068  
Y -0.0123 0.0113 0.0011 -0.0018 -0.0056 0.0049  
Z -0.0039 0.0037 -0.0008 0.0002 0.0005 -0.0008  
AT. 117 H X 0.0174 0.0208 -0.0021 0.0031 -0.0208 -0.0133  
Y -0.0010 -0.0036 -0.0008 -0.0020 0.0096 0.0040  
Z 0.0046 0.0035 0.0015 0.0007 0.0065 0.0052  
AT. 118 H X 0.0174 -0.0208 0.0021 0.0031 -0.0208 0.0133  
Y -0.0010 0.0036 0.0008 -0.0020 0.0096 -0.0040  
Z 0.0046 -0.0035 -0.0015 0.0007 0.0065 -0.0052  
AT. 119 H X 0.0324 0.0301 0.0003 0.0018 0.0079 0.0062  
Y -0.0229 -0.0212 -0.0008 -0.0036 -0.0067 -0.0050  
Z 0.0100 0.0074 0.0012 0.0012 0.0115 0.0075  
AT. 120 H X 0.0324 -0.0301 -0.0003 0.0018 0.0079 -0.0062



Y -0.0229 0.0212 0.0008 -0.0036 -0.0067 0.0050  
Z 0.0100 -0.0074 -0.0012 0.0012 0.0115 -0.0075  
AT. 121 C X -0.0138 -0.0145 0.0008 -0.0009 0.0056 0.0035  
Y -0.0251 -0.0246 0.0006 -0.0027 0.0027 0.0020  
Z -0.0048 -0.0055 0.0001 -0.0008 0.0030 0.0017  
AT. 122 C X -0.0138 0.0145 -0.0008 -0.0009 0.0056 -0.0035  
Y -0.0251 0.0246 -0.0006 -0.0027 0.0027 -0.0020  
Z -0.0048 0.0055 -0.0001 -0.0008 0.0030 -0.0017  
AT. 123 H X -0.0125 -0.0129 0.0001 -0.0023 0.0025 0.0010  
Y -0.0377 -0.0370 -0.0004 -0.0052 0.0049 0.0041  
Z 0.0088 0.0080 0.0009 0.0016 -0.0001 -0.0012  
AT. 124 H X -0.0125 0.0129 -0.0001 -0.0023 0.0025 -0.0010  
Y -0.0377 0.0370 0.0004 -0.0052 0.0049 -0.0041  
Z 0.0088 -0.0080 -0.0009 0.0016 -0.0001 0.0012  
AT. 125 H X -0.0115 -0.0132 0.0012 -0.0019 0.0094 0.0067  
Y -0.0122 -0.0113 0.0011 0.0014 -0.0019 -0.0019  
Z 0.0052 0.0037 0.0008 0.0001 0.0052 0.0036  
AT. 126 H X -0.0115 0.0132 -0.0012 -0.0019 0.0094 -0.0067  
Y -0.0122 0.0113 -0.0011 0.0014 -0.0019 0.0019  
Z 0.0052 -0.0037 -0.0008 0.0001 0.0052 -0.0036  
AT. 127 C X -0.0012 -0.0009 -0.0006 0.0001 -0.0009 -0.0004  
Y -0.0016 -0.0020 0.0003 -0.0003 0.0008 -0.0001  
Z -0.0052 -0.0056 0.0006 -0.0005 0.0014 0.0002  
AT. 128 C X -0.0012 0.0009 0.0006 0.0001 -0.0009 0.0004  
Y -0.0016 0.0020 -0.0003 -0.0003 0.0008 0.0001  
Z -0.0052 0.0056 -0.0006 -0.0005 0.0014 -0.0002  
AT. 129 C X -0.0207 -0.0220 -0.0004 -0.0025 -0.0001 -0.0014  
Y 0.0170 0.0172 -0.0015 0.0020 -0.0029 -0.0009  
Z 0.0041 0.0033 0.0003 0.0029 -0.0020 -0.0028  
AT. 130 C X -0.0207 0.0220 0.0004 -0.0025 -0.0001 0.0014  
Y 0.0170 -0.0172 0.0015 0.0020 -0.0029 0.0009  
Z 0.0041 -0.0033 -0.0003 0.0029 -0.0020 0.0028

AT. 131 H X -0.0102 -0.0114 -0.0021 -0.0031 -0.0015 -0.0006  
Y 0.0074 0.0072 0.0027 0.0066 -0.0012 -0.0042  
Z 0.0151 0.0143 -0.0002 0.0041 -0.0030 -0.0030

AT. 132 H X -0.0102 0.0114 0.0021 -0.0031 -0.0015 0.0006  
Y 0.0074 -0.0072 -0.0027 0.0066 -0.0012 0.0042  
Z 0.0151 -0.0143 0.0002 0.0041 -0.0030 0.0030

AT. 133 H X -0.0278 -0.0288 0.0023 -0.0001 0.0011 -0.0027  
Y 0.0220 0.0220 -0.0034 0.0008 -0.0033 -0.0005  
Z 0.0156 0.0143 -0.0042 -0.0003 -0.0031 -0.0016

AT. 134 H X -0.0278 0.0288 -0.0023 -0.0001 0.0011 0.0027  
Y 0.0220 -0.0220 0.0034 0.0008 -0.0033 0.0005  
Z 0.0156 -0.0143 0.0042 -0.0003 -0.0031 0.0016

AT. 135 C X -0.0125 -0.0132 -0.0003 -0.0022 0.0029 0.0016  
Y -0.0040 -0.0039 0.0004 0.0007 -0.0013 -0.0015  
Z 0.0051 0.0050 -0.0001 0.0001 -0.0006 -0.0006

AT. 136 C X -0.0125 0.0132 0.0003 -0.0022 0.0029 -0.0016  
Y -0.0040 0.0039 -0.0004 0.0007 -0.0013 0.0015  
Z 0.0051 -0.0050 0.0001 0.0001 -0.0006 0.0006

AT. 137 H X 0.0018 0.0039 0.0007 0.0058 -0.0134 -0.0098  
Y -0.0011 -0.0005 0.0001 0.0007 -0.0009 -0.0001  
Z 0.0049 0.0047 -0.0008 -0.0025 0.0059 0.0058

AT. 138 H X 0.0018 -0.0039 -0.0007 0.0058 -0.0134 0.0098  
Y -0.0011 0.0005 -0.0001 0.0007 -0.0009 0.0001  
Z 0.0049 -0.0047 0.0008 -0.0025 0.0059 -0.0058

AT. 139 H X -0.0199 -0.0217 0.0002 -0.0038 0.0053 0.0014  
Y -0.0102 -0.0119 0.0002 -0.0042 0.0092 0.0062  
Z 0.0170 0.0190 -0.0005 0.0037 -0.0066 -0.0023

AT. 140 H X -0.0199 0.0217 -0.0002 -0.0038 0.0053 -0.0014  
Y -0.0102 0.0119 -0.0002 -0.0042 0.0092 -0.0062  
Z 0.0170 -0.0190 0.0005 0.0037 -0.0066 0.0023

AT. 141 H X -0.0047 -0.0045 -0.0005 -0.0022 0.0070 0.0076  
Y -0.0045 -0.0051 -0.0003 -0.0029 0.0080 0.0072

Z 0.0088 0.0098 0.0005 0.0038 -0.0084 -0.0070  
AT. 142 H X -0.0047 0.0045 0.0005 -0.0022 0.0070 -0.0076  
Y -0.0045 0.0051 0.0003 -0.0029 0.0080 -0.0072  
Z 0.0088 -0.0098 -0.0005 0.0038 -0.0084 0.0070  
AT. 143 C X 0.0119 0.0124 -0.0012 0.0016 -0.0010 0.0002  
Y 0.0023 0.0021 -0.0002 -0.0002 -0.0002 -0.0002  
Z 0.0057 0.0057 0.0007 -0.0006 0.0003 0.0004  
AT. 144 C X 0.0119 -0.0124 0.0012 0.0016 -0.0010 -0.0002  
Y 0.0023 -0.0021 0.0002 -0.0002 -0.0002 0.0002  
Z 0.0057 -0.0057 -0.0007 -0.0006 0.0003 -0.0004  
AT. 145 H X -0.0000 -0.0022 0.0047 -0.0059 0.0022 -0.0002  
Y -0.0014 -0.0014 0.0006 -0.0013 0.0018 0.0014  
Z 0.0067 0.0058 0.0015 -0.0015 -0.0011 -0.0014  
AT. 146 H X -0.0000 0.0022 -0.0047 -0.0059 0.0022 0.0002  
Y -0.0014 0.0014 -0.0006 -0.0013 0.0018 -0.0014  
Z 0.0067 -0.0058 -0.0015 -0.0015 -0.0011 0.0014  
AT. 147 H X 0.0198 0.0216 -0.0042 0.0038 -0.0055 -0.0017  
Y 0.0034 0.0042 0.0006 0.0004 0.0002 0.0011  
Z 0.0177 0.0201 -0.0033 0.0029 -0.0058 -0.0016  
AT. 148 H X 0.0198 -0.0216 0.0042 0.0038 -0.0055 0.0017  
Y 0.0034 -0.0042 -0.0006 0.0004 0.0002 -0.0011  
Z 0.0177 -0.0201 0.0033 0.0029 -0.0058 0.0016  
AT. 149 H X 0.0011 0.0012 0.0022 -0.0003 0.0042 0.0032  
Y -0.0004 0.0002 -0.0015 0.0026 0.0019 0.0017  
Z 0.0067 0.0081 -0.0032 0.0050 0.0010 0.0020  
AT. 150 H X 0.0011 -0.0012 -0.0022 -0.0003 0.0042 -0.0032  
Y -0.0004 -0.0002 0.0015 0.0026 0.0019 -0.0017  
Z 0.0067 -0.0081 0.0032 0.0050 0.0010 -0.0020  
AT. 151 C X 0.0012 0.0016 0.0006 0.0010 -0.0019 -0.0017  
Y 0.0012 0.0004 0.0013 0.0013 0.0022 -0.0002  
Z -0.0176 -0.0161 -0.0010 -0.0014 -0.0025 -0.0011  
AT. 152 C X 0.0012 -0.0016 -0.0006 0.0010 -0.0019 0.0017

Y 0.0012 -0.0004 -0.0013 0.0013 0.0022 0.0002  
Z -0.0176 0.0161 0.0010 -0.0014 -0.0025 0.0011  
AT. 153 H X -0.0005 -0.0008 0.0029 0.0018 0.0002 -0.0018  
Y 0.0032 0.0036 0.0000 -0.0002 -0.0030 -0.0012  
Z -0.0147 -0.0108 -0.0044 -0.0047 -0.0116 -0.0026  
AT. 154 H X -0.0005 0.0008 -0.0029 0.0018 0.0002 0.0018  
Y 0.0032 -0.0036 -0.0000 -0.0002 -0.0030 0.0012  
Z -0.0147 0.0108 0.0044 -0.0047 -0.0116 0.0026  
AT. 155 H X 0.0031 0.0030 0.0016 0.0023 -0.0024 -0.0034  
Y 0.0046 0.0062 -0.0023 -0.0015 -0.0068 -0.0020  
Z -0.0211 -0.0223 0.0030 0.0019 0.0067 0.0000  
AT. 156 H X 0.0031 -0.0030 -0.0016 0.0023 -0.0024 0.0034  
Y 0.0046 -0.0062 0.0023 -0.0015 -0.0068 0.0020  
Z -0.0211 0.0223 -0.0030 0.0019 0.0067 -0.0000  
AT. 157 O X 0.0001 -0.0001 -0.0054 -0.0054 -0.0009 0.0007  
Y -0.0000 0.0000 0.0007 0.0006 0.0001 0.0000  
Z 0.0003 -0.0000 -0.0038 -0.0043 -0.0007 0.0001  
AT. 158 O X 0.0001 0.0001 0.0054 -0.0054 -0.0009 -0.0007  
Y -0.0000 -0.0000 -0.0007 0.0006 0.0001 -0.0000  
Z 0.0003 0.0000 0.0038 -0.0043 -0.0007 -0.0001  
AT. 159 O X 0.0001 0.0001 0.0032 0.0030 0.0005 -0.0006  
Y -0.0004 -0.0001 0.0057 0.0059 0.0011 -0.0006  
Z -0.0001 -0.0002 0.0000 -0.0001 0.0000 0.0001  
AT. 160 O X 0.0001 -0.0001 -0.0032 0.0030 0.0005 0.0006  
Y -0.0004 0.0001 -0.0057 0.0059 0.0011 0.0006  
Z -0.0001 0.0002 -0.0000 -0.0001 0.0000 -0.0001  
AT. 161 H X -0.0056 0.0022 0.0845 0.0923 0.0153 -0.0061  
Y 0.0017 -0.0008 -0.0268 -0.0301 -0.0050 0.0017  
Z -0.0084 0.0034 0.1271 0.1389 0.0232 -0.0090  
AT. 162 H X -0.0056 -0.0022 -0.0845 0.0923 0.0153 0.0061  
Y 0.0017 0.0008 0.0268 -0.0301 -0.0050 -0.0017  
Z -0.0084 -0.0034 -0.1271 0.1389 0.0232 0.0090

AT.163 H X 0.0009 0.0001 -0.0143 -0.0150 -0.0028 0.0013  
Y 0.0060 0.0021 -0.1063 -0.1119 -0.0207 0.0108  
Z 0.0010 0.0004 -0.0212 -0.0225 -0.0042 0.0024  
AT.164 H X 0.0009 -0.0001 0.0143 -0.0150 -0.0028 -0.0013  
Y 0.0060 -0.0021 0.1063 -0.1119 -0.0207 -0.0108  
Z 0.0010 -0.0004 0.0212 -0.0225 -0.0042 -0.0024  
AT.165 O X -0.0010 0.0008 0.0000 0.0003 -0.0022 0.0033  
Y 0.0030 -0.0023 -0.0002 -0.0006 0.0051 -0.0074  
Z 0.0003 -0.0004 0.0002 -0.0003 0.0021 -0.0033  
AT.166 O X -0.0010 -0.0008 -0.0000 0.0003 -0.0022 -0.0033  
Y 0.0030 0.0023 0.0002 -0.0006 0.0051 0.0074  
Z 0.0003 0.0004 -0.0002 -0.0003 0.0021 0.0033  
AT.167 H X 0.0278 -0.0191 -0.0027 -0.0061 0.0436 -0.0627  
Y -0.0545 0.0360 0.0052 0.0115 -0.0825 0.1187  
Z 0.0127 -0.0082 -0.0006 -0.0020 0.0159 -0.0248  
AT.168 H X 0.0278 0.0191 0.0027 -0.0061 0.0436 0.0627  
Y -0.0545 -0.0360 -0.0052 0.0115 -0.0825 -0.1187  
Z 0.0127 0.0082 0.0006 -0.0020 0.0159 0.0248  
AT.169 O X 0.0020 -0.0012 -0.0002 -0.0007 0.0049 -0.0062  
Y 0.0004 -0.0001 -0.0002 -0.0003 0.0013 -0.0012  
Z -0.0006 0.0006 -0.0001 0.0003 -0.0023 0.0037  
AT.170 O X 0.0020 0.0012 0.0002 -0.0007 0.0049 0.0062  
Y 0.0004 0.0001 0.0002 -0.0003 0.0013 0.0012  
Z -0.0006 -0.0006 0.0001 0.0003 -0.0023 -0.0037  
AT.171 H X -0.0496 0.0247 0.0069 0.0157 -0.1164 0.1373  
Y -0.0232 0.0112 0.0033 0.0075 -0.0552 0.0644  
Z -0.0018 0.0005 -0.0002 0.0010 -0.0052 0.0057  
AT.172 H X -0.0496 -0.0247 -0.0069 0.0157 -0.1164 -0.1373  
Y -0.0232 -0.0112 -0.0033 0.0075 -0.0552 -0.0644  
Z -0.0018 -0.0005 0.0002 0.0010 -0.0052 -0.0057

FREQ(CM\*\*-1) 883.54 884.00 884.91 889.24 894.23 894.40

AT. 1 I X -0.0000 0.0000 0.0000 0.0001 0.0000 0.0000  
Y -0.0000 0.0000 0.0000 0.0000 -0.0000 -0.0000  
Z 0.0000 0.0000 0.0000 0.0000 0.0000 0.0000

AT. 2 I X -0.0000 -0.0000 -0.0000 0.0001 -0.0000 0.0000  
Y -0.0000 -0.0000 -0.0000 0.0000 0.0000 -0.0000  
Z 0.0000 -0.0000 -0.0000 0.0000 -0.0000 0.0000

AT. 3 I X 0.0000 0.0000 0.0000 -0.0000 -0.0000 -0.0000  
Y -0.0000 -0.0000 -0.0001 -0.0000 -0.0000 -0.0000  
Z 0.0000 0.0000 0.0001 0.0000 0.0000 0.0000

AT. 4 I X 0.0000 -0.0000 -0.0000 -0.0000 0.0000 -0.0000  
Y -0.0000 0.0000 0.0001 -0.0000 0.0000 -0.0000  
Z 0.0000 -0.0000 -0.0001 0.0000 -0.0000 0.0000

AT. 5 O X -0.0001 0.0001 0.0008 0.0019 -0.0000 -0.0002  
Y 0.0001 -0.0001 -0.0006 -0.0011 0.0000 0.0001  
Z -0.0001 -0.0003 -0.0009 -0.0020 0.0001 0.0002

AT. 6 O X -0.0001 -0.0001 -0.0008 0.0019 0.0000 -0.0002  
Y 0.0001 0.0001 0.0006 -0.0011 -0.0000 0.0001  
Z -0.0001 0.0003 0.0009 -0.0020 -0.0001 0.0002

AT. 7 O X 0.0006 0.0006 0.0017 0.0011 -0.0000 -0.0000  
Y -0.0003 -0.0004 -0.0013 -0.0015 -0.0001 -0.0002  
Z 0.0003 0.0003 0.0013 0.0012 0.0000 0.0000

AT. 8 O X 0.0006 -0.0006 -0.0017 0.0011 0.0000 -0.0000  
Y -0.0003 0.0004 0.0013 -0.0015 0.0001 -0.0002  
Z 0.0003 -0.0003 -0.0013 0.0012 -0.0000 0.0000

AT. 9 N X 0.0003 0.0006 0.0019 0.0020 -0.0001 -0.0002  
Y 0.0001 0.0005 0.0021 0.0016 -0.0001 -0.0002  
Z 0.0003 0.0007 0.0025 0.0035 -0.0001 -0.0002

AT. 10 N X 0.0003 -0.0006 -0.0019 0.0020 0.0001 -0.0002  
Y 0.0001 -0.0005 -0.0021 0.0016 0.0001 -0.0002  
Z 0.0003 -0.0007 -0.0025 0.0035 0.0001 -0.0002

AT. 11 N X 0.0001 0.0006 0.0035 0.0033 0.0003 0.0003

Y 0.0002 0.0008 0.0039 0.0040 0.0002 0.0002  
Z -0.0000 -0.0001 -0.0007 -0.0016 -0.0002 -0.0004  
AT. 12 N X 0.0001 -0.0006 -0.0035 0.0033 -0.0003 0.0003  
Y 0.0002 -0.0008 -0.0039 0.0040 -0.0002 0.0002  
Z -0.0000 0.0001 0.0007 -0.0016 0.0002 -0.0004  
AT. 13 C X -0.0000 0.0001 0.0007 0.0011 -0.0000 -0.0000  
Y -0.0002 -0.0003 -0.0002 -0.0013 0.0001 0.0002  
Z -0.0001 -0.0002 -0.0008 -0.0011 0.0001 0.0000  
AT. 14 C X -0.0000 -0.0001 -0.0007 0.0011 0.0000 -0.0000  
Y -0.0002 0.0003 0.0002 -0.0013 -0.0001 0.0002  
Z -0.0001 0.0002 0.0008 -0.0011 -0.0001 0.0000  
AT. 15 C X 0.0001 -0.0003 -0.0012 -0.0032 0.0001 0.0002  
Y 0.0001 0.0002 0.0004 0.0020 -0.0001 -0.0002  
Z -0.0003 -0.0004 -0.0012 -0.0010 0.0000 0.0001  
AT. 16 C X 0.0001 0.0003 0.0012 -0.0032 -0.0001 0.0002  
Y 0.0001 -0.0002 -0.0004 0.0020 0.0001 -0.0002  
Z -0.0003 0.0004 0.0012 -0.0010 -0.0000 0.0001  
AT. 17 H X -0.0008 -0.0010 -0.0029 -0.0014 -0.0004 -0.0000  
Y -0.0008 -0.0005 -0.0019 0.0038 -0.0003 -0.0002  
Z 0.0005 0.0002 0.0011 -0.0023 0.0001 0.0000  
AT. 18 H X -0.0008 0.0010 0.0029 -0.0014 0.0004 -0.0000  
Y -0.0008 0.0005 0.0019 0.0038 0.0003 -0.0002  
Z 0.0005 -0.0002 -0.0011 -0.0023 -0.0001 0.0000  
AT. 19 H X -0.0000 -0.0001 -0.0016 -0.0040 0.0002 0.0003  
Y 0.0013 0.0018 0.0058 0.0036 -0.0000 -0.0003  
Z 0.0001 0.0002 0.0007 -0.0007 0.0001 0.0001  
AT. 20 H X -0.0000 0.0001 0.0016 -0.0040 -0.0002 0.0003  
Y 0.0013 -0.0018 -0.0058 0.0036 0.0000 -0.0003  
Z 0.0001 -0.0002 -0.0007 -0.0007 -0.0001 0.0001  
AT. 21 C X -0.0001 -0.0000 0.0008 0.0009 0.0004 0.0004  
Y -0.0007 -0.0008 -0.0023 -0.0019 0.0001 0.0002  
Z -0.0002 -0.0002 0.0007 0.0006 0.0003 0.0001

AT. 22 C X -0.0001 0.0000 -0.0008 0.0009 -0.0004 0.0004  
Y -0.0007 0.0008 0.0023 -0.0019 -0.0001 0.0002  
Z -0.0002 0.0002 -0.0007 0.0006 -0.0003 0.0001

AT. 23 C X -0.0007 -0.0006 -0.0024 -0.0010 -0.0002 -0.0001  
Y 0.0009 0.0007 0.0027 0.0003 0.0003 0.0002  
Z 0.0000 0.0002 -0.0001 0.0022 -0.0001 0.0002

AT. 24 C X -0.0007 0.0006 0.0024 -0.0010 0.0002 -0.0001  
Y 0.0009 -0.0007 -0.0027 0.0003 -0.0003 0.0002  
Z 0.0000 -0.0002 0.0001 0.0022 0.0001 0.0002

AT. 25 H X 0.0017 0.0011 0.0061 -0.0022 -0.0013 -0.0017  
Y 0.0009 0.0007 0.0026 0.0004 0.0000 -0.0001  
Z 0.0027 0.0023 0.0105 0.0004 0.0008 0.0001

AT. 26 H X 0.0017 -0.0011 -0.0061 -0.0022 0.0013 -0.0017  
Y 0.0009 -0.0007 -0.0026 0.0004 -0.0000 -0.0001  
Z 0.0027 -0.0023 -0.0105 0.0004 -0.0008 0.0001

AT. 27 H X -0.0021 -0.0021 -0.0062 -0.0036 -0.0003 -0.0009  
Y -0.0024 -0.0019 -0.0079 0.0004 -0.0008 -0.0002  
Z -0.0013 -0.0008 -0.0045 0.0026 -0.0006 0.0001

AT. 28 H X -0.0021 0.0021 0.0062 -0.0036 0.0003 -0.0009  
Y -0.0024 0.0019 0.0079 0.0004 0.0008 -0.0002  
Z -0.0013 0.0008 0.0045 0.0026 0.0006 0.0001

AT. 29 C X -0.0011 -0.0033 -0.0141 -0.0138 0.0000 -0.0001  
Y -0.0001 -0.0007 -0.0030 -0.0005 0.0006 0.0007  
Z 0.0006 0.0017 0.0064 0.0091 0.0001 0.0002

AT. 30 C X -0.0011 0.0033 0.0141 -0.0138 -0.0000 -0.0001  
Y -0.0001 0.0007 0.0030 -0.0005 -0.0006 0.0007  
Z 0.0006 -0.0017 -0.0064 0.0091 -0.0001 0.0002

AT. 31 H X -0.0004 -0.0006 -0.0023 0.0008 -0.0002 -0.0004  
Y -0.0022 -0.0083 -0.0362 -0.0359 0.0006 0.0006  
Z -0.0021 -0.0079 -0.0355 -0.0345 -0.0000 -0.0002

AT. 32 H X -0.0004 0.0006 0.0023 0.0008 0.0002 -0.0004  
Y -0.0022 0.0083 0.0362 -0.0359 -0.0006 0.0006



Z -0.0021 0.0079 0.0355 -0.0345 0.0000 -0.0002  
AT. 33 H X 0.0008 0.0014 0.0028 0.0044 -0.0000 0.0002  
Y 0.0037 0.0116 0.0475 0.0532 0.0003 0.0006  
Z 0.0001 -0.0006 -0.0047 -0.0025 0.0002 0.0004  
AT. 34 H X 0.0008 -0.0014 -0.0028 0.0044 0.0000 0.0002  
Y 0.0037 -0.0116 -0.0475 0.0532 -0.0003 0.0006  
Z 0.0001 0.0006 0.0047 -0.0025 -0.0002 0.0004  
AT. 35 C X -0.0002 0.0003 0.0028 0.0022 -0.0002 -0.0005  
Y -0.0001 0.0005 0.0041 0.0023 0.0003 0.0003  
Z 0.0001 -0.0001 -0.0014 -0.0028 -0.0003 0.0001  
AT. 36 C X -0.0002 -0.0003 -0.0028 0.0022 0.0002 -0.0005  
Y -0.0001 -0.0005 -0.0041 0.0023 -0.0003 0.0003  
Z 0.0001 0.0001 0.0014 -0.0028 0.0003 0.0001  
AT. 37 C X 0.0003 0.0005 -0.0002 0.0031 -0.0008 -0.0008  
Y 0.0002 -0.0025 -0.0152 -0.0159 -0.0004 -0.0000  
Z -0.0009 -0.0027 -0.0116 -0.0146 -0.0010 -0.0013  
AT. 38 C X 0.0003 -0.0005 0.0002 0.0031 0.0008 -0.0008  
Y 0.0002 0.0025 0.0152 -0.0159 0.0004 -0.0000  
Z -0.0009 0.0027 0.0116 -0.0146 0.0010 -0.0013  
AT. 39 H X 0.0020 0.0108 0.0517 0.0609 0.0025 0.0026  
Y 0.0020 0.0060 0.0247 0.0294 0.0015 0.0017  
Z -0.0005 0.0005 0.0058 0.0044 0.0004 0.0003  
AT. 40 H X 0.0020 -0.0108 -0.0517 0.0609 -0.0025 0.0026  
Y 0.0020 -0.0060 -0.0247 0.0294 -0.0015 0.0017  
Z -0.0005 -0.0005 -0.0058 0.0044 -0.0004 0.0003  
AT. 41 H X -0.0011 -0.0084 -0.0450 -0.0477 -0.0036 -0.0036  
Y 0.0002 -0.0031 -0.0182 -0.0182 -0.0002 0.0005  
Z 0.0006 0.0071 0.0383 0.0409 0.0018 0.0014  
AT. 42 H X -0.0011 0.0084 0.0450 -0.0477 0.0036 -0.0036  
Y 0.0002 0.0031 0.0182 -0.0182 0.0002 0.0005  
Z 0.0006 -0.0071 -0.0383 0.0409 -0.0018 0.0014  
AT. 43 C X -0.0006 -0.0030 -0.0151 -0.0166 0.0007 0.0013

Y 0.0003 0.0004 0.0004 0.0029 -0.0002 -0.0001  
Z -0.0002 -0.0003 -0.0012 -0.0012 0.0009 0.0012  
AT. 44 C X -0.0006 0.0030 0.0151 -0.0166 -0.0007 0.0013  
Y 0.0003 -0.0004 -0.0004 0.0029 0.0002 -0.0001  
Z -0.0002 0.0003 0.0012 -0.0012 -0.0009 0.0012  
AT. 45 H X 0.0004 0.0006 0.0031 0.0028 -0.0003 -0.0005  
Y -0.0017 -0.0078 -0.0406 -0.0397 0.0031 0.0053  
Z 0.0011 0.0053 0.0260 0.0266 -0.0017 -0.0029  
AT. 46 H X 0.0004 -0.0006 -0.0031 0.0028 0.0003 -0.0005  
Y -0.0017 0.0078 0.0406 -0.0397 -0.0031 0.0053  
Z 0.0011 -0.0053 -0.0260 0.0266 0.0017 -0.0029  
AT. 47 H X 0.0005 0.0016 0.0083 0.0081 -0.0006 -0.0013  
Y 0.0024 0.0086 0.0428 0.0466 -0.0028 -0.0050  
Z 0.0004 0.0020 0.0105 0.0101 -0.0000 -0.0002  
AT. 48 H X 0.0005 -0.0016 -0.0083 0.0081 0.0006 -0.0013  
Y 0.0024 -0.0086 -0.0428 0.0466 0.0028 -0.0050  
Z 0.0004 -0.0020 -0.0105 0.0101 0.0000 -0.0002  
AT. 49 C X 0.0001 0.0001 0.0001 -0.0012 0.0002 0.0006  
Y -0.0001 0.0001 0.0007 0.0005 -0.0004 -0.0006  
Z 0.0001 0.0000 -0.0005 -0.0011 0.0006 0.0011  
AT. 50 C X 0.0001 -0.0001 -0.0001 -0.0012 -0.0002 0.0006  
Y -0.0001 -0.0001 -0.0007 0.0005 0.0004 -0.0006  
Z 0.0001 -0.0000 0.0005 -0.0011 -0.0006 0.0011  
AT. 51 C X 0.0006 0.0010 0.0047 0.0062 0.0002 0.0001  
Y -0.0011 -0.0031 -0.0136 -0.0129 -0.0005 -0.0007  
Z 0.0002 0.0003 0.0009 0.0023 0.0000 -0.0003  
AT. 52 C X 0.0006 -0.0010 -0.0047 0.0062 -0.0002 0.0001  
Y -0.0011 0.0031 0.0136 -0.0129 0.0005 -0.0007  
Z 0.0002 -0.0003 -0.0009 0.0023 -0.0000 -0.0003  
AT. 53 H X 0.0032 0.0084 0.0366 0.0386 0.0011 0.0007  
Y 0.0021 0.0061 0.0281 0.0292 0.0008 0.0003  
Z -0.0007 -0.0020 -0.0074 -0.0062 -0.0000 -0.0002

AT. 54 H X 0.0032 -0.0084 -0.0366 0.0386 -0.0011 0.0007  
Y 0.0021 -0.0061 -0.0281 0.0292 -0.0008 0.0003  
Z -0.0007 0.0020 0.0074 -0.0062 0.0000 -0.0002

AT. 55 H X -0.0029 -0.0084 -0.0368 -0.0355 -0.0008 -0.0006  
Y -0.0007 -0.0022 -0.0090 -0.0072 -0.0006 -0.0010  
Z -0.0017 -0.0049 -0.0212 -0.0185 -0.0008 -0.0012

AT. 56 H X -0.0029 0.0084 0.0368 -0.0355 0.0008 -0.0006  
Y -0.0007 0.0022 0.0090 -0.0072 0.0006 -0.0010  
Z -0.0017 0.0049 0.0212 -0.0185 0.0008 -0.0012

AT. 57 C X -0.0001 0.0003 0.0031 0.0021 0.0006 0.0006  
Y -0.0004 -0.0001 0.0013 0.0002 -0.0003 -0.0005  
Z 0.0002 0.0001 -0.0002 -0.0013 0.0003 0.0007

AT. 58 C X -0.0001 -0.0003 -0.0031 0.0021 -0.0006 0.0006  
Y -0.0004 0.0001 -0.0013 0.0002 0.0003 -0.0005  
Z 0.0002 -0.0001 0.0002 -0.0013 -0.0003 0.0007

AT. 59 H X 0.0017 -0.0002 -0.0112 -0.0076 0.0002 0.0019  
Y -0.0008 0.0000 0.0047 0.0047 -0.0005 -0.0017  
Z 0.0008 -0.0001 -0.0051 -0.0016 -0.0002 -0.0001

AT. 60 H X 0.0017 0.0002 0.0112 -0.0076 -0.0002 0.0019  
Y -0.0008 -0.0000 -0.0047 0.0047 0.0005 -0.0017  
Z 0.0008 0.0001 0.0051 -0.0016 0.0002 -0.0001

AT. 61 H X 0.0001 0.0007 0.0040 0.0089 0.0002 -0.0009  
Y 0.0009 0.0004 -0.0049 -0.0051 -0.0005 0.0006  
Z -0.0003 0.0002 0.0036 0.0066 0.0001 -0.0010

AT. 62 H X 0.0001 -0.0007 -0.0040 0.0089 -0.0002 -0.0009  
Y 0.0009 -0.0004 0.0049 -0.0051 0.0005 0.0006  
Z -0.0003 -0.0002 -0.0036 0.0066 -0.0001 -0.0010

AT. 63 H X 0.0002 0.0006 0.0035 -0.0031 0.0013 0.0023  
Y 0.0004 -0.0007 -0.0078 -0.0006 -0.0012 -0.0016  
Z -0.0007 0.0003 0.0071 0.0046 0.0004 -0.0000

AT. 64 H X 0.0002 -0.0006 -0.0035 -0.0031 -0.0013 0.0023  
Y 0.0004 0.0007 0.0078 -0.0006 0.0012 -0.0016

Z -0.0007 -0.0003 -0.0071 0.0046 -0.0004 -0.0000  
AT. 65 C X 0.0001 0.0001 0.0001 -0.0012 0.0003 0.0006  
Y -0.0001 0.0000 0.0006 -0.0007 -0.0003 -0.0005  
Z 0.0002 -0.0001 -0.0009 -0.0023 0.0002 0.0007  
AT. 66 C X 0.0001 -0.0001 -0.0001 -0.0012 -0.0003 0.0006  
Y -0.0001 -0.0000 -0.0006 -0.0007 0.0003 -0.0005  
Z 0.0002 0.0001 0.0009 -0.0023 -0.0002 0.0007  
AT. 67 H X -0.0001 0.0008 0.0058 0.0136 -0.0002 -0.0018  
Y 0.0003 -0.0003 -0.0031 -0.0071 0.0006 0.0019  
Z -0.0000 -0.0004 -0.0023 -0.0086 -0.0004 0.0004  
AT. 68 H X -0.0001 -0.0008 -0.0058 0.0136 0.0002 -0.0018  
Y 0.0003 0.0003 0.0031 -0.0071 -0.0006 0.0019  
Z -0.0000 0.0004 0.0023 -0.0086 0.0004 0.0004  
AT. 69 H X 0.0006 0.0003 -0.0008 0.0010 0.0013 0.0026  
Y 0.0001 0.0004 0.0032 0.0100 -0.0004 -0.0014  
Z -0.0006 0.0002 0.0051 0.0098 -0.0020 -0.0046  
AT. 70 H X 0.0006 -0.0003 0.0008 0.0010 -0.0013 0.0026  
Y 0.0001 -0.0004 -0.0032 0.0100 0.0004 -0.0014  
Z -0.0006 -0.0002 -0.0051 0.0098 0.0020 -0.0046  
AT. 71 H X -0.0006 -0.0001 0.0021 0.0022 -0.0010 -0.0026  
Y 0.0005 0.0004 0.0005 0.0024 0.0008 0.0014  
Z 0.0004 0.0003 0.0005 0.0043 0.0007 0.0008  
AT. 72 H X -0.0006 0.0001 -0.0021 0.0022 0.0010 -0.0026  
Y 0.0005 -0.0004 -0.0005 0.0024 -0.0008 0.0014  
Z 0.0004 -0.0003 -0.0005 0.0043 -0.0007 0.0008  
AT. 73 C X 0.0003 0.0027 0.0140 0.0126 -0.0012 -0.0019  
Y 0.0010 0.0046 0.0228 0.0201 0.0010 0.0012  
Z -0.0003 0.0006 0.0052 0.0076 -0.0005 -0.0015  
AT. 74 C X 0.0003 -0.0027 -0.0140 0.0126 0.0012 -0.0019  
Y 0.0010 -0.0046 -0.0228 0.0201 -0.0010 0.0012  
Z -0.0003 -0.0006 -0.0052 0.0076 0.0005 -0.0015  
AT. 75 H X -0.0021 -0.0074 -0.0343 -0.0351 -0.0011 -0.0010

Y -0.0004 -0.0040 -0.0210 -0.0196 0.0007 0.0014  
Z -0.0038 -0.0178 -0.0864 -0.0780 -0.0009 -0.0007  
AT. 76 H X -0.0021 0.0074 0.0343 -0.0351 0.0011 -0.0010  
Y -0.0004 0.0040 0.0210 -0.0196 -0.0007 0.0014  
Z -0.0038 0.0178 0.0864 -0.0780 0.0009 -0.0007  
AT. 77 H X -0.0004 -0.0029 -0.0155 -0.0130 -0.0021 -0.0027  
Y -0.0019 -0.0082 -0.0389 -0.0390 0.0013 0.0024  
Z 0.0031 0.0177 0.0896 0.0860 0.0000 -0.0019  
AT. 78 H X -0.0004 0.0029 0.0155 -0.0130 0.0021 -0.0027  
Y -0.0019 0.0082 0.0389 -0.0390 -0.0013 0.0024  
Z 0.0031 -0.0177 -0.0896 0.0860 -0.0000 -0.0019  
AT. 79 I X 0.0000 0.0000 0.0000 -0.0000 0.0000 0.0000  
Y -0.0000 -0.0000 0.0000 -0.0000 -0.0000 -0.0000  
Z 0.0000 0.0000 0.0000 -0.0000 -0.0000 -0.0001  
AT. 80 I X 0.0000 -0.0000 -0.0000 -0.0000 -0.0000 0.0000  
Y -0.0000 0.0000 -0.0000 -0.0000 0.0000 -0.0000  
Z 0.0000 -0.0000 -0.0000 -0.0000 0.0000 -0.0001  
AT. 81 I X 0.0000 0.0000 -0.0000 -0.0000 -0.0000 -0.0000  
Y 0.0000 0.0000 -0.0000 -0.0000 0.0001 0.0001  
Z -0.0001 -0.0001 -0.0000 -0.0000 -0.0000 -0.0000  
AT. 82 I X 0.0000 -0.0000 0.0000 -0.0000 0.0000 -0.0000  
Y 0.0000 -0.0000 0.0000 -0.0000 -0.0001 0.0001  
Z -0.0001 0.0001 0.0000 -0.0000 0.0000 -0.0000  
AT. 83 O X 0.0016 0.0015 -0.0002 -0.0001 -0.0002 -0.0004  
Y 0.0004 0.0002 -0.0003 -0.0000 -0.0003 -0.0003  
Z 0.0014 0.0013 -0.0001 -0.0000 0.0003 0.0001  
AT. 84 O X 0.0016 -0.0015 0.0002 -0.0001 0.0002 -0.0004  
Y 0.0004 -0.0002 0.0003 -0.0000 0.0003 -0.0003  
Z 0.0014 -0.0013 0.0001 -0.0000 -0.0003 0.0001  
AT. 85 O X 0.0020 0.0016 0.0004 0.0002 0.0009 0.0011  
Y 0.0012 0.0012 -0.0001 -0.0001 0.0004 0.0005  
Z -0.0011 -0.0012 0.0003 0.0001 0.0016 0.0015

AT. 86 O X 0.0020 -0.0016 -0.0004 0.0002 -0.0009 0.0011  
Y 0.0012 -0.0012 0.0001 -0.0001 -0.0004 0.0005  
Z -0.0011 0.0012 -0.0003 0.0001 -0.0016 0.0015

AT. 87 N X 0.0005 0.0008 -0.0000 -0.0000 -0.0007 -0.0008  
Y -0.0023 -0.0023 0.0005 0.0002 -0.0009 -0.0010  
Z -0.0027 -0.0025 0.0005 0.0000 -0.0020 -0.0020

AT. 88 N X 0.0005 -0.0008 0.0000 -0.0000 0.0007 -0.0008  
Y -0.0023 0.0023 -0.0005 0.0002 0.0009 -0.0010  
Z -0.0027 0.0025 -0.0005 0.0000 0.0020 -0.0020

AT. 89 N X 0.0026 0.0024 -0.0004 -0.0000 0.0011 0.0012  
Y -0.0058 -0.0058 0.0013 0.0004 0.0025 0.0024  
Z -0.0005 -0.0005 0.0001 -0.0001 -0.0024 -0.0022

AT. 90 N X 0.0026 -0.0024 0.0004 -0.0000 -0.0011 0.0012  
Y -0.0058 0.0058 -0.0013 0.0004 -0.0025 0.0024  
Z -0.0005 0.0005 -0.0001 -0.0001 0.0024 -0.0022

AT. 91 C X 0.0013 0.0013 -0.0002 -0.0001 0.0011 0.0010  
Y 0.0004 0.0005 0.0001 -0.0001 0.0015 0.0014  
Z 0.0012 0.0014 -0.0002 -0.0000 -0.0014 -0.0015

AT. 92 C X 0.0013 -0.0013 0.0002 -0.0001 -0.0011 0.0010  
Y 0.0004 -0.0005 -0.0001 -0.0001 -0.0015 0.0014  
Z 0.0012 -0.0014 0.0002 -0.0000 0.0014 -0.0015

AT. 93 C X -0.0018 -0.0017 0.0004 0.0001 -0.0028 -0.0027  
Y -0.0003 -0.0005 -0.0001 0.0001 -0.0011 -0.0009  
Z 0.0008 0.0007 -0.0002 0.0001 0.0024 0.0023

AT. 94 C X -0.0018 0.0017 -0.0004 0.0001 0.0028 -0.0027  
Y -0.0003 0.0005 0.0001 0.0001 0.0011 -0.0009  
Z 0.0008 -0.0007 0.0002 0.0001 -0.0024 0.0023

AT. 95 H X -0.0009 -0.0008 0.0001 -0.0001 -0.0056 -0.0057  
Y -0.0012 -0.0012 -0.0001 0.0004 0.0008 0.0012  
Z 0.0012 0.0009 0.0001 -0.0003 0.0017 0.0017

AT. 96 H X -0.0009 0.0008 -0.0001 -0.0001 0.0056 -0.0057  
Y -0.0012 0.0012 0.0001 0.0004 -0.0008 0.0012

Z 0.0012 -0.0009 -0.0001 -0.0003 -0.0017 0.0017  
AT. 97 H X -0.0040 -0.0031 0.0007 0.0002 -0.0013 -0.0010  
Y -0.0009 -0.0013 0.0007 -0.0004 -0.0038 -0.0040  
Z 0.0013 0.0010 -0.0001 -0.0000 0.0014 0.0012  
AT. 98 H X -0.0040 0.0031 -0.0007 0.0002 0.0013 -0.0010  
Y -0.0009 0.0013 -0.0007 -0.0004 0.0038 -0.0040  
Z 0.0013 -0.0010 0.0001 -0.0000 -0.0014 0.0012  
AT. 99 C X 0.0013 0.0011 -0.0001 -0.0001 -0.0011 -0.0009  
Y 0.0026 0.0022 -0.0001 -0.0001 -0.0016 -0.0015  
Z -0.0003 -0.0005 0.0005 0.0002 -0.0035 -0.0034  
AT. 100 C X 0.0013 -0.0011 0.0001 -0.0001 0.0011 -0.0009  
Y 0.0026 -0.0022 0.0001 -0.0001 0.0016 -0.0015  
Z -0.0003 0.0005 -0.0005 0.0002 0.0035 -0.0034  
AT. 101 C X -0.0034 -0.0026 -0.0003 -0.0002 0.0028 0.0023  
Y -0.0015 -0.0014 -0.0000 0.0000 -0.0014 -0.0017  
Z -0.0009 -0.0003 -0.0000 0.0000 0.0038 0.0037  
AT. 102 C X -0.0034 0.0026 0.0003 -0.0002 -0.0028 0.0023  
Y -0.0015 0.0014 0.0000 0.0000 0.0014 -0.0017  
Z -0.0009 0.0003 0.0000 0.0000 -0.0038 0.0037  
AT. 103 H X 0.0040 0.0044 0.0008 0.0006 0.0111 0.0114  
Y -0.0046 -0.0043 -0.0005 -0.0004 -0.0045 -0.0052  
Z -0.0104 -0.0085 -0.0014 -0.0005 -0.0065 -0.0082  
AT. 104 H X 0.0040 -0.0044 -0.0008 0.0006 -0.0111 0.0114  
Y -0.0046 0.0043 0.0005 -0.0004 0.0045 -0.0052  
Z -0.0104 0.0085 0.0014 -0.0005 0.0065 -0.0082  
AT. 105 H X -0.0047 -0.0054 -0.0000 -0.0001 -0.0002 -0.0008  
Y 0.0069 0.0073 0.0000 -0.0000 0.0116 0.0129  
Z 0.0020 0.0022 0.0001 0.0000 0.0081 0.0087  
AT. 106 H X -0.0047 0.0054 0.0000 -0.0001 0.0002 -0.0008  
Y 0.0069 -0.0073 -0.0000 -0.0000 -0.0116 0.0129  
Z 0.0020 -0.0022 -0.0001 0.0000 -0.0081 0.0087  
AT. 107 C X -0.0141 -0.0143 0.0028 0.0004 -0.0008 -0.0015

Y 0.0046 0.0041 -0.0007 -0.0003 -0.0025 -0.0019  
Z -0.0035 -0.0042 0.0011 0.0003 -0.0155 -0.0153  
AT. 108 C X -0.0141 0.0143 -0.0028 0.0004 0.0008 -0.0015  
Y 0.0046 -0.0041 0.0007 -0.0003 0.0025 -0.0019  
Z -0.0035 0.0042 -0.0011 0.0003 0.0155 -0.0153  
AT. 109 H X 0.0139 0.0142 -0.0038 -0.0012 0.0264 0.0265  
Y 0.0295 0.0295 -0.0062 -0.0015 0.0163 0.0179  
Z 0.0314 0.0313 -0.0065 -0.0014 0.0092 0.0110  
AT. 110 H X 0.0139 -0.0142 0.0038 -0.0012 -0.0264 0.0265  
Y 0.0295 -0.0295 0.0062 -0.0015 -0.0163 0.0179  
Z 0.0314 -0.0313 0.0065 -0.0014 -0.0092 0.0110  
AT. 111 H X -0.0100 -0.0097 0.0018 0.0001 0.0002 -0.0006  
Y -0.0448 -0.0464 0.0095 0.0018 -0.0428 -0.0440  
Z 0.0033 0.0024 -0.0001 0.0001 -0.0072 -0.0065  
AT. 112 H X -0.0100 0.0097 -0.0018 0.0001 -0.0002 -0.0006  
Y -0.0448 0.0464 -0.0095 0.0018 0.0428 -0.0440  
Z 0.0033 -0.0024 0.0001 0.0001 0.0072 -0.0065  
AT. 113 C X 0.0015 0.0011 -0.0003 -0.0001 0.0024 0.0021  
Y -0.0031 -0.0027 0.0005 -0.0000 0.0007 0.0004  
Z 0.0017 0.0015 -0.0003 -0.0001 0.0081 0.0076  
AT. 114 C X 0.0015 -0.0011 0.0003 -0.0001 -0.0024 0.0021  
Y -0.0031 0.0027 -0.0005 -0.0000 -0.0007 0.0004  
Z 0.0017 -0.0015 0.0003 -0.0001 -0.0081 0.0076  
AT. 115 C X 0.0069 0.0069 -0.0016 -0.0006 0.0013 0.0012  
Y 0.0153 0.0148 -0.0033 -0.0006 0.0080 0.0079  
Z 0.0098 0.0103 -0.0023 -0.0007 0.0245 0.0246  
AT. 116 C X 0.0069 -0.0069 0.0016 -0.0006 -0.0013 0.0012  
Y 0.0153 -0.0148 0.0033 -0.0006 -0.0080 0.0079  
Z 0.0098 -0.0103 0.0023 -0.0007 -0.0245 0.0246  
AT. 117 H X 0.0399 0.0399 -0.0090 -0.0024 0.0470 0.0470  
Y -0.0395 -0.0408 0.0093 0.0027 -0.0672 -0.0670  
Z -0.0128 -0.0122 0.0027 0.0004 -0.0075 -0.0077



AT. 118 H X 0.0399 -0.0399 0.0090 -0.0024 -0.0470 0.0470  
Y -0.0395 0.0408 -0.0093 0.0027 0.0672 -0.0670  
Z -0.0128 0.0122 -0.0027 0.0004 0.0075 -0.0077

AT. 119 H X -0.0381 -0.0387 0.0089 0.0021 -0.0619 -0.0620  
Y 0.0303 0.0295 -0.0064 -0.0013 0.0243 0.0238  
Z -0.0293 -0.0290 0.0065 0.0015 -0.0264 -0.0261

AT. 120 H X -0.0381 0.0387 -0.0089 0.0021 0.0619 -0.0620  
Y 0.0303 -0.0295 0.0064 -0.0013 -0.0243 0.0238  
Z -0.0293 0.0290 -0.0065 0.0015 0.0264 -0.0261

AT. 121 C X -0.0165 -0.0160 0.0033 0.0010 0.0094 0.0094  
Y 0.0039 0.0049 -0.0014 -0.0004 0.0017 0.0015  
Z 0.0077 0.0066 -0.0009 -0.0003 -0.0261 -0.0261

AT. 122 C X -0.0165 0.0160 -0.0033 0.0010 -0.0094 0.0094  
Y 0.0039 -0.0049 0.0014 -0.0004 -0.0017 0.0015  
Z 0.0077 -0.0066 0.0009 -0.0003 0.0261 -0.0261

AT. 123 H X 0.0166 0.0151 -0.0033 -0.0012 -0.0481 -0.0477  
Y 0.0435 0.0428 -0.0085 -0.0023 -0.0500 -0.0502  
Z -0.0276 -0.0273 0.0052 0.0013 0.0182 0.0183

AT. 124 H X 0.0166 -0.0151 0.0033 -0.0012 0.0481 -0.0477  
Y 0.0435 -0.0428 0.0085 -0.0023 0.0500 -0.0502  
Z -0.0276 0.0273 -0.0052 0.0013 -0.0182 0.0183

AT. 125 H X -0.0061 -0.0068 0.0023 0.0012 0.0024 0.0023  
Y -0.0552 -0.0511 0.0086 0.0018 0.0838 0.0836  
Z -0.0102 -0.0112 0.0030 0.0012 0.0081 0.0080

AT. 126 H X -0.0061 0.0068 -0.0023 0.0012 -0.0024 0.0023  
Y -0.0552 0.0511 -0.0086 0.0018 -0.0838 0.0836  
Z -0.0102 0.0112 -0.0030 0.0012 -0.0081 0.0080

AT. 127 C X -0.0004 0.0003 -0.0000 0.0000 -0.0016 -0.0013  
Y 0.0010 0.0002 0.0004 0.0004 -0.0048 -0.0046  
Z 0.0004 -0.0001 -0.0001 -0.0001 -0.0015 -0.0018

AT. 128 C X -0.0004 -0.0003 0.0000 0.0000 0.0016 -0.0013  
Y 0.0010 -0.0002 -0.0004 0.0004 0.0048 -0.0046

Z 0.0004 0.0001 0.0001 -0.0001 0.0015 -0.0018  
AT. 129 C X 0.0103 0.0100 -0.0017 0.0001 -0.0068 -0.0062  
Y 0.0109 0.0118 -0.0023 -0.0006 -0.0022 -0.0017  
Z -0.0060 -0.0049 0.0002 -0.0004 0.0166 0.0169  
AT. 130 C X 0.0103 -0.0100 0.0017 0.0001 0.0068 -0.0062  
Y 0.0109 -0.0118 0.0023 -0.0006 0.0022 -0.0017  
Z -0.0060 0.0049 -0.0002 -0.0004 -0.0166 0.0169  
AT. 131 H X 0.0328 0.0328 -0.0053 -0.0002 -0.0291 -0.0280  
Y -0.0486 -0.0471 0.0069 -0.0001 0.0574 0.0564  
Z -0.0020 -0.0004 -0.0005 -0.0006 0.0126 0.0128  
AT. 132 H X 0.0328 -0.0328 0.0053 -0.0002 0.0291 -0.0280  
Y -0.0486 0.0471 -0.0069 -0.0001 -0.0574 0.0564  
Z -0.0020 0.0004 0.0005 -0.0006 -0.0126 0.0128  
AT. 133 H X -0.0317 -0.0316 0.0053 0.0009 0.0352 0.0346  
Y 0.0188 0.0199 -0.0033 -0.0004 -0.0097 -0.0088  
Z 0.0270 0.0281 -0.0048 -0.0006 -0.0157 -0.0145  
AT. 134 H X -0.0317 0.0316 -0.0053 0.0009 -0.0352 0.0346  
Y 0.0188 -0.0199 0.0033 -0.0004 0.0097 -0.0088  
Z 0.0270 -0.0281 0.0048 -0.0006 0.0157 -0.0145  
AT. 135 C X 0.0020 0.0019 -0.0002 0.0001 0.0053 0.0053  
Y -0.0014 -0.0006 0.0001 -0.0000 0.0016 0.0013  
Z 0.0004 0.0002 -0.0000 -0.0001 0.0036 0.0030  
AT. 136 C X 0.0020 -0.0019 0.0002 0.0001 -0.0053 0.0053  
Y -0.0014 0.0006 -0.0001 -0.0000 -0.0016 0.0013  
Z 0.0004 -0.0002 0.0000 -0.0001 -0.0036 0.0030  
AT. 137 H X -0.0072 -0.0035 0.0005 -0.0002 -0.0152 -0.0146  
Y -0.0012 -0.0006 0.0001 0.0001 -0.0043 -0.0036  
Z 0.0042 0.0022 -0.0005 0.0002 0.0010 0.0018  
AT. 138 H X -0.0072 0.0035 -0.0005 -0.0002 0.0152 -0.0146  
Y -0.0012 0.0006 -0.0001 0.0001 0.0043 -0.0036  
Z 0.0042 -0.0022 0.0005 0.0002 -0.0010 0.0018  
AT. 139 H X 0.0061 0.0064 -0.0011 -0.0002 0.0237 0.0217

Y 0.0016 -0.0007 0.0001 0.0002 0.0103 0.0101  
Z -0.0059 -0.0058 0.0012 0.0002 -0.0231 -0.0211  
AT. 140 H X 0.0061 -0.0064 0.0011 -0.0002 -0.0237 0.0217  
Y 0.0016 0.0007 -0.0001 0.0002 -0.0103 0.0101  
Z -0.0059 0.0058 -0.0012 0.0002 0.0231 -0.0211  
AT. 141 H X -0.0010 -0.0021 0.0010 0.0010 -0.0141 -0.0112  
Y 0.0028 0.0013 0.0000 0.0003 0.0008 0.0020  
Z -0.0052 -0.0035 0.0006 -0.0001 -0.0037 -0.0046  
AT. 142 H X -0.0010 0.0021 -0.0010 0.0010 0.0141 -0.0112  
Y 0.0028 -0.0013 -0.0000 0.0003 -0.0008 0.0020  
Z -0.0052 0.0035 -0.0006 -0.0001 0.0037 -0.0046  
AT. 143 C X -0.0010 -0.0001 0.0001 -0.0001 0.0042 0.0043  
Y 0.0012 -0.0002 0.0004 0.0003 -0.0018 -0.0017  
Z 0.0013 0.0007 -0.0003 -0.0001 0.0045 0.0040  
AT. 144 C X -0.0010 0.0001 -0.0001 -0.0001 -0.0042 0.0043  
Y 0.0012 0.0002 -0.0004 0.0003 0.0018 -0.0017  
Z 0.0013 -0.0007 0.0003 -0.0001 -0.0045 0.0040  
AT. 145 H X 0.0143 0.0064 -0.0012 0.0005 0.0045 0.0031  
Y 0.0010 0.0009 -0.0006 -0.0003 0.0032 0.0026  
Z 0.0054 0.0010 0.0004 0.0007 -0.0009 -0.0010  
AT. 146 H X 0.0143 -0.0064 0.0012 0.0005 -0.0045 0.0031  
Y 0.0010 -0.0009 0.0006 -0.0003 -0.0032 0.0026  
Z 0.0054 -0.0010 -0.0004 0.0007 0.0009 -0.0010  
AT. 147 H X -0.0025 -0.0010 0.0013 0.0005 -0.0054 -0.0038  
Y -0.0083 -0.0056 0.0005 -0.0002 0.0046 0.0044  
Z -0.0058 -0.0033 0.0014 0.0005 -0.0060 -0.0045  
AT. 148 H X -0.0025 0.0010 -0.0013 0.0005 0.0054 -0.0038  
Y -0.0083 0.0056 -0.0005 -0.0002 -0.0046 0.0044  
Z -0.0058 0.0033 -0.0014 0.0005 0.0060 -0.0045  
AT. 149 H X -0.0045 -0.0016 -0.0013 -0.0012 0.0196 0.0176  
Y -0.0041 -0.0018 0.0000 -0.0006 0.0044 0.0040  
Z -0.0056 -0.0012 -0.0002 -0.0011 0.0071 0.0068

AT.150 H X -0.0045 0.0016 0.0013 -0.0012 -0.0196 0.0176  
Y -0.0041 0.0018 -0.0000 -0.0006 -0.0044 0.0040  
Z -0.0056 0.0012 0.0002 -0.0011 -0.0071 0.0068

AT.151 C X 0.0062 0.0055 -0.0015 -0.0006 -0.0108 -0.0107  
Y -0.0249 -0.0251 0.0052 0.0012 -0.0032 -0.0037  
Z -0.0056 -0.0044 0.0014 0.0009 -0.0081 -0.0072

AT.152 C X 0.0062 -0.0055 0.0015 -0.0006 0.0108 -0.0107  
Y -0.0249 0.0251 -0.0052 0.0012 0.0032 -0.0037  
Z -0.0056 0.0044 -0.0014 0.0009 0.0081 -0.0072

AT.153 H X -0.0117 -0.0134 0.0021 0.0006 -0.0003 -0.0003  
Y 0.0273 0.0264 -0.0057 -0.0014 0.0008 0.0011  
Z 0.0857 0.0864 -0.0177 -0.0037 -0.0063 -0.0041

AT.154 H X -0.0117 0.0134 -0.0021 0.0006 0.0003 -0.0003  
Y 0.0273 -0.0264 0.0057 -0.0014 -0.0008 0.0011  
Z 0.0857 -0.0864 0.0177 -0.0037 0.0063 -0.0041

AT.155 H X -0.0162 -0.0168 0.0029 0.0002 -0.0298 -0.0298  
Y 0.0476 0.0472 -0.0099 -0.0025 -0.0087 -0.0081  
Z -0.0897 -0.0883 0.0188 0.0051 -0.0091 -0.0094

AT.156 H X -0.0162 0.0168 -0.0029 0.0002 0.0298 -0.0298  
Y 0.0476 -0.0472 0.0099 -0.0025 0.0087 -0.0081  
Z -0.0897 0.0883 -0.0188 0.0051 0.0091 -0.0094

AT.157 O X -0.0008 -0.0004 0.0028 0.0056 0.0024 0.0014  
Y -0.0001 -0.0001 0.0002 0.0004 0.0001 0.0001  
Z 0.0001 0.0002 -0.0002 -0.0018 -0.0013 -0.0008

AT.158 O X -0.0008 0.0004 -0.0028 0.0056 -0.0024 0.0014  
Y -0.0001 0.0001 -0.0002 0.0004 -0.0001 0.0001  
Z 0.0001 -0.0002 0.0002 -0.0018 0.0013 -0.0008

AT.159 O X 0.0008 0.0005 -0.0023 -0.0054 -0.0025 -0.0015  
Y 0.0002 -0.0001 -0.0010 -0.0009 -0.0003 -0.0002  
Z -0.0005 -0.0003 0.0012 0.0023 0.0013 0.0009

AT.160 O X 0.0008 -0.0005 0.0023 -0.0054 0.0025 -0.0015  
Y 0.0002 0.0001 0.0010 -0.0009 0.0003 -0.0002

Z -0.0005 0.0003 -0.0012 0.0023 -0.0013 0.0009  
AT.161 H X 0.0044 0.0005 -0.0165 -0.0153 -0.0014 -0.0010  
Y -0.0014 -0.0002 0.0050 0.0042 -0.0001 -0.0000  
Z 0.0065 0.0006 -0.0261 -0.0253 -0.0023 -0.0016  
AT.162 H X 0.0044 -0.0005 0.0165 -0.0153 0.0014 -0.0010  
Y -0.0014 0.0002 -0.0050 0.0042 0.0001 -0.0000  
Z 0.0065 -0.0006 0.0261 -0.0253 0.0023 -0.0016  
AT.163 H X -0.0009 -0.0001 0.0025 0.0021 0.0003 0.0001  
Y -0.0051 0.0007 0.0162 0.0133 0.0015 0.0008  
Z -0.0011 -0.0000 0.0035 0.0040 0.0010 0.0006  
AT.164 H X -0.0009 0.0001 -0.0025 0.0021 -0.0003 0.0001  
Y -0.0051 -0.0007 -0.0162 0.0133 -0.0015 0.0008  
Z -0.0011 0.0000 -0.0035 0.0040 -0.0010 0.0006  
AT.165 O X -0.0012 -0.0001 0.0007 -0.0006 0.0002 -0.0013  
Y 0.0012 -0.0003 -0.0009 0.0008 -0.0004 0.0014  
Z 0.0036 -0.0008 -0.0016 0.0034 -0.0010 0.0056  
AT.166 O X -0.0012 0.0001 -0.0007 -0.0006 -0.0002 -0.0013  
Y 0.0012 0.0003 0.0009 0.0008 0.0004 0.0014  
Z 0.0036 0.0008 0.0016 0.0034 0.0010 0.0056  
AT.167 H X 0.0069 -0.0004 -0.0056 0.0005 -0.0010 0.0040  
Y -0.0113 0.0004 0.0100 0.0008 0.0016 -0.0044  
Z 0.0024 -0.0002 -0.0022 0.0004 -0.0009 0.0005  
AT.168 H X 0.0069 0.0004 0.0056 0.0005 0.0010 0.0040  
Y -0.0113 -0.0004 -0.0100 0.0008 -0.0016 -0.0044  
Z 0.0024 0.0002 0.0022 0.0004 0.0009 0.0005  
AT.169 O X 0.0013 -0.0003 -0.0007 0.0008 -0.0004 0.0014  
Y -0.0006 0.0002 0.0002 -0.0007 0.0001 -0.0010  
Z -0.0035 0.0006 0.0018 -0.0034 0.0011 -0.0055  
AT.170 O X 0.0013 0.0003 0.0007 0.0008 0.0004 0.0014  
Y -0.0006 -0.0002 -0.0002 -0.0007 -0.0001 -0.0010  
Z -0.0035 -0.0006 -0.0018 -0.0034 -0.0011 -0.0055  
AT.171 H X -0.0132 0.0059 0.0101 -0.0039 0.0066 -0.0067

Y -0.0057 0.0031 0.0044 -0.0014 0.0030 -0.0020  
Z -0.0023 0.0018 0.0009 -0.0017 0.0007 -0.0015  
AT. 172 H X -0.0132 -0.0059 -0.0101 -0.0039 -0.0066 -0.0067  
Y -0.0057 -0.0031 -0.0044 -0.0014 -0.0030 -0.0020  
Z -0.0023 -0.0018 -0.0009 -0.0017 -0.0007 -0.0015

FREQ(CM\*\*-1) 896.37 896.59 898.92 899.01 900.98 901.43

AT. 1 I X -0.0000 0.0000 0.0001 0.0001 -0.0000 0.0000  
Y -0.0000 0.0000 0.0001 0.0001 -0.0000 -0.0000  
Z 0.0000 0.0000 0.0000 0.0000 -0.0000 -0.0000

AT. 2 I X -0.0000 -0.0000 0.0001 -0.0001 -0.0000 -0.0000  
Y -0.0000 -0.0000 0.0001 -0.0001 -0.0000 0.0000  
Z 0.0000 -0.0000 0.0000 -0.0000 -0.0000 0.0000

AT. 3 I X -0.0000 0.0000 0.0000 -0.0000 0.0000 0.0000  
Y -0.0000 0.0000 -0.0000 -0.0000 0.0001 0.0001  
Z 0.0000 0.0000 0.0000 0.0000 -0.0000 -0.0000

AT. 4 I X -0.0000 -0.0000 0.0000 0.0000 0.0000 -0.0000  
Y -0.0000 -0.0000 -0.0000 0.0000 0.0001 -0.0001  
Z 0.0000 -0.0000 0.0000 -0.0000 -0.0000 0.0000

AT. 5 O X -0.0001 -0.0001 -0.0005 -0.0003 0.0002 0.0011  
Y 0.0001 0.0001 0.0009 0.0009 -0.0004 -0.0006  
Z 0.0002 0.0001 0.0002 0.0001 -0.0004 -0.0014

AT. 6 O X -0.0001 0.0001 -0.0005 0.0003 0.0002 -0.0011  
Y 0.0001 -0.0001 0.0009 -0.0009 -0.0004 0.0006  
Z 0.0002 -0.0001 0.0002 -0.0001 -0.0004 0.0014

AT. 7 O X -0.0002 0.0000 0.0006 0.0002 -0.0005 -0.0010  
Y 0.0002 0.0002 -0.0004 -0.0002 0.0003 0.0007  
Z -0.0003 -0.0000 -0.0000 -0.0001 0.0015 0.0008

AT. 8 O X -0.0002 -0.0000 0.0006 -0.0002 -0.0005 0.0010  
Y 0.0002 -0.0002 -0.0004 0.0002 0.0003 -0.0007  
Z -0.0003 0.0000 -0.0000 0.0001 0.0015 -0.0008

AT. 9 N X -0.0003 0.0001 0.0000 0.0002 0.0006 0.0007  
Y 0.0000 0.0003 0.0000 0.0004 -0.0007 -0.0008  
Z -0.0001 0.0001 0.0001 0.0007 -0.0015 0.0006

AT. 10 N X -0.0003 -0.0001 0.0000 -0.0002 0.0006 -0.0007  
Y 0.0000 -0.0003 0.0000 -0.0004 -0.0007 0.0008  
Z -0.0001 -0.0001 0.0001 -0.0007 -0.0015 -0.0006

AT. 11 N X -0.0001 -0.0001 -0.0003 -0.0002 -0.0004 -0.0010  
Y -0.0007 0.0001 -0.0003 -0.0010 0.0021 0.0011  
Z 0.0005 0.0004 -0.0007 0.0009 -0.0031 -0.0013

AT. 12 N X -0.0001 0.0001 -0.0003 0.0002 -0.0004 0.0010  
Y -0.0007 -0.0001 -0.0003 0.0010 0.0021 -0.0011  
Z 0.0005 -0.0004 -0.0007 -0.0009 -0.0031 0.0013

AT. 13 C X -0.0000 -0.0001 -0.0005 -0.0004 -0.0006 0.0001  
Y -0.0001 0.0000 -0.0004 -0.0008 0.0019 -0.0000  
Z 0.0002 -0.0001 0.0001 0.0004 -0.0016 -0.0012

AT. 14 C X -0.0000 0.0001 -0.0005 0.0004 -0.0006 -0.0001  
Y -0.0001 -0.0000 -0.0004 0.0008 0.0019 0.0000  
Z 0.0002 0.0001 0.0001 -0.0004 -0.0016 0.0012

AT. 15 C X -0.0001 0.0002 0.0001 -0.0004 0.0023 -0.0002  
Y 0.0001 -0.0002 -0.0001 0.0004 -0.0021 0.0003  
Z -0.0000 -0.0000 -0.0001 -0.0006 0.0015 0.0005

AT. 16 C X -0.0001 -0.0002 0.0001 0.0004 0.0023 0.0002  
Y 0.0001 0.0002 -0.0001 -0.0004 -0.0021 -0.0003  
Z -0.0000 0.0000 -0.0001 0.0006 0.0015 -0.0005

AT. 17 H X -0.0002 -0.0005 -0.0010 -0.0030 0.0080 0.0050  
Y 0.0001 -0.0007 -0.0006 -0.0008 -0.0013 0.0023  
Z -0.0001 0.0003 0.0000 -0.0002 0.0025 0.0001

AT. 18 H X -0.0002 0.0005 -0.0010 0.0030 0.0080 -0.0050  
Y 0.0001 0.0007 -0.0006 0.0008 -0.0013 -0.0023  
Z -0.0001 -0.0003 0.0000 0.0002 0.0025 -0.0001

AT. 19 H X 0.0002 0.0003 0.0009 0.0010 -0.0019 -0.0045  
Y -0.0002 0.0005 -0.0002 0.0013 -0.0033 -0.0018

Z -0.0001 0.0003 0.0001 0.0002 -0.0001 -0.0017  
AT. 20 H X 0.0002 -0.0003 0.0009 -0.0010 -0.0019 0.0045  
Y -0.0002 -0.0005 -0.0002 -0.0013 -0.0033 0.0018  
Z -0.0001 -0.0003 0.0001 -0.0002 -0.0001 0.0017  
AT. 21 C X -0.0003 -0.0002 0.0003 -0.0005 0.0015 0.0005  
Y 0.0004 0.0000 -0.0002 0.0004 -0.0013 -0.0005  
Z 0.0004 -0.0000 -0.0003 0.0012 -0.0036 -0.0018  
AT. 22 C X -0.0003 0.0002 0.0003 0.0005 0.0015 -0.0005  
Y 0.0004 -0.0000 -0.0002 -0.0004 -0.0013 0.0005  
Z 0.0004 0.0000 -0.0003 -0.0012 -0.0036 0.0018  
AT. 23 C X 0.0006 0.0001 -0.0008 0.0011 -0.0034 -0.0009  
Y -0.0002 0.0001 0.0007 -0.0001 0.0000 -0.0010  
Z -0.0005 -0.0002 0.0002 -0.0010 0.0037 0.0021  
AT. 24 C X 0.0006 -0.0001 -0.0008 -0.0011 -0.0034 0.0009  
Y -0.0002 -0.0001 0.0007 0.0001 0.0000 0.0010  
Z -0.0005 0.0002 0.0002 0.0010 0.0037 -0.0021  
AT. 25 H X 0.0011 0.0003 0.0013 0.0028 -0.0108 -0.0079  
Y -0.0001 0.0000 0.0006 0.0002 -0.0006 -0.0012  
Z -0.0005 0.0001 0.0036 -0.0016 0.0005 -0.0038  
AT. 26 H X 0.0011 -0.0003 0.0013 -0.0028 -0.0108 0.0079  
Y -0.0001 -0.0000 0.0006 -0.0002 -0.0006 0.0012  
Z -0.0005 -0.0001 0.0036 0.0016 0.0005 0.0038  
AT. 27 H X 0.0007 -0.0001 -0.0020 -0.0003 0.0032 0.0041  
Y -0.0004 -0.0004 -0.0016 -0.0018 0.0073 0.0067  
Z -0.0007 -0.0005 -0.0006 -0.0018 0.0065 0.0052  
AT. 28 H X 0.0007 0.0001 -0.0020 0.0003 0.0032 -0.0041  
Y -0.0004 0.0004 -0.0016 0.0018 0.0073 -0.0067  
Z -0.0007 0.0005 -0.0006 0.0018 0.0065 -0.0052  
AT. 29 C X 0.0018 -0.0015 -0.0002 -0.0004 -0.0012 0.0017  
Y -0.0003 -0.0011 -0.0001 -0.0008 0.0004 0.0017  
Z 0.0008 0.0007 0.0023 0.0044 -0.0163 -0.0096  
AT. 30 C X 0.0018 0.0015 -0.0002 0.0004 -0.0012 -0.0017



Y -0.0003 0.0011 -0.0001 0.0008 0.0004 -0.0017  
Z 0.0008 -0.0007 0.0023 -0.0044 -0.0163 0.0096  
AT. 31 H X 0.0023 -0.0003 0.0014 0.0040 -0.0165 -0.0061  
Y -0.0001 -0.0047 -0.0033 -0.0089 0.0287 0.0221  
Z 0.0015 -0.0039 -0.0013 -0.0050 0.0168 0.0161  
AT. 32 H X 0.0023 0.0003 0.0014 -0.0040 -0.0165 0.0061  
Y -0.0001 0.0047 -0.0033 0.0089 0.0287 -0.0221  
Z 0.0015 0.0039 -0.0013 0.0050 0.0168 -0.0161  
AT. 33 H X 0.0008 0.0001 0.0024 0.0037 -0.0134 -0.0081  
Y -0.0006 0.0045 0.0056 0.0126 -0.0440 -0.0309  
Z 0.0003 -0.0007 0.0016 0.0012 -0.0047 -0.0018  
AT. 34 H X 0.0008 -0.0001 0.0024 -0.0037 -0.0134 0.0081  
Y -0.0006 -0.0045 0.0056 -0.0126 -0.0440 0.0309  
Z 0.0003 0.0007 0.0016 -0.0012 -0.0047 0.0018  
AT. 35 C X 0.0004 0.0002 -0.0015 -0.0002 -0.0001 0.0009  
Y -0.0002 0.0004 -0.0009 -0.0006 0.0011 -0.0020  
Z -0.0008 0.0010 0.0012 -0.0009 0.0064 0.0009  
AT. 36 C X 0.0004 -0.0002 -0.0015 0.0002 -0.0001 -0.0009  
Y -0.0002 -0.0004 -0.0009 0.0006 0.0011 0.0020  
Z -0.0008 -0.0010 0.0012 0.0009 0.0064 -0.0009  
AT. 37 C X -0.0004 -0.0005 0.0007 -0.0003 0.0030 0.0046  
Y 0.0001 0.0006 0.0037 0.0016 0.0023 0.0003  
Z -0.0014 0.0010 -0.0021 -0.0054 0.0227 0.0153  
AT. 38 C X -0.0004 0.0005 0.0007 0.0003 0.0030 -0.0046  
Y 0.0001 -0.0006 0.0037 -0.0016 0.0023 -0.0003  
Z -0.0014 -0.0010 -0.0021 0.0054 0.0227 -0.0153  
AT. 39 H X 0.0023 -0.0022 0.0002 0.0104 -0.0555 -0.0351  
Y 0.0019 -0.0004 0.0026 0.0111 -0.0445 -0.0284  
Z -0.0004 0.0003 -0.0019 -0.0023 0.0036 0.0008  
AT. 40 H X 0.0023 0.0022 0.0002 -0.0104 -0.0555 0.0351  
Y 0.0019 0.0004 0.0026 -0.0111 -0.0445 0.0284  
Z -0.0004 -0.0003 -0.0019 0.0023 0.0036 -0.0008

AT. 41 H X -0.0031 0.0015 0.0009 -0.0097 0.0538 0.0387  
Y 0.0004 0.0000 0.0052 0.0017 0.0030 -0.0005  
Z 0.0015 -0.0008 -0.0034 0.0047 -0.0322 -0.0206

AT. 42 H X -0.0031 -0.0015 0.0009 0.0097 0.0538 -0.0387  
Y 0.0004 -0.0000 0.0052 -0.0017 0.0030 0.0005  
Z 0.0015 0.0008 -0.0034 -0.0047 -0.0322 0.0206

AT. 43 C X 0.0019 0.0000 0.0036 0.0038 -0.0106 -0.0110  
Y -0.0005 -0.0015 -0.0001 -0.0021 0.0095 0.0063  
Z 0.0024 -0.0003 0.0029 0.0054 -0.0222 -0.0163

AT. 44 C X 0.0019 -0.0000 0.0036 -0.0038 -0.0106 0.0110  
Y -0.0005 0.0015 -0.0001 0.0021 0.0095 -0.0063  
Z 0.0024 0.0003 0.0029 -0.0054 -0.0222 0.0163

AT. 45 H X -0.0037 0.0002 -0.0026 -0.0074 0.0302 0.0198  
Y 0.0093 -0.0028 0.0143 0.0175 -0.0590 -0.0502  
Z -0.0034 0.0010 -0.0071 -0.0059 0.0166 0.0177

AT. 46 H X -0.0037 -0.0002 -0.0026 0.0074 0.0302 -0.0198  
Y 0.0093 0.0028 0.0143 -0.0175 -0.0590 0.0502  
Z -0.0034 -0.0010 -0.0071 0.0059 0.0166 -0.0177

AT. 47 H X -0.0035 0.0010 -0.0051 -0.0064 0.0258 0.0201  
Y -0.0120 0.0010 -0.0157 -0.0234 0.0832 0.0669  
Z -0.0020 0.0010 -0.0013 -0.0026 0.0041 0.0038

AT. 48 H X -0.0035 -0.0010 -0.0051 0.0064 0.0258 -0.0201  
Y -0.0120 -0.0010 -0.0157 0.0234 0.0832 -0.0669  
Z -0.0020 -0.0010 -0.0013 0.0026 0.0041 -0.0038

AT. 49 C X -0.0003 0.0004 0.0010 0.0005 -0.0016 -0.0048  
Y 0.0006 0.0002 -0.0007 0.0014 -0.0064 -0.0024  
Z -0.0001 -0.0004 0.0014 0.0005 -0.0018 -0.0054

AT. 50 C X -0.0003 -0.0004 0.0010 -0.0005 -0.0016 0.0048  
Y 0.0006 -0.0002 -0.0007 -0.0014 -0.0064 0.0024  
Z -0.0001 0.0004 0.0014 -0.0005 -0.0018 0.0054

AT. 51 C X -0.0017 0.0002 -0.0005 -0.0020 0.0084 0.0066  
Y 0.0028 -0.0002 0.0013 0.0021 -0.0077 -0.0011

Z -0.0023 -0.0009 -0.0030 -0.0053 0.0186 0.0145  
AT. 52 C X -0.0017 -0.0002 -0.0005 0.0020 0.0084 -0.0066  
Y 0.0028 0.0002 0.0013 -0.0021 -0.0077 0.0011  
Z -0.0023 0.0009 -0.0030 0.0053 0.0186 -0.0145  
AT. 53 H X -0.0112 -0.0002 -0.0087 -0.0153 0.0559 0.0345  
Y -0.0093 -0.0005 -0.0094 -0.0157 0.0542 0.0347  
Z 0.0005 -0.0006 -0.0008 -0.0022 0.0057 0.0061  
AT. 54 H X -0.0112 0.0002 -0.0087 0.0153 0.0559 -0.0345  
Y -0.0093 0.0005 -0.0094 0.0157 0.0542 -0.0347  
Z 0.0005 0.0006 -0.0008 0.0022 0.0057 -0.0061  
AT. 55 H X 0.0104 0.0005 0.0095 0.0145 -0.0518 -0.0287  
Y 0.0013 -0.0004 -0.0004 -0.0004 0.0019 0.0068  
Z 0.0039 -0.0010 0.0017 0.0029 -0.0104 0.0003  
AT. 56 H X 0.0104 -0.0005 0.0095 -0.0145 -0.0518 0.0287  
Y 0.0013 0.0004 -0.0004 0.0004 0.0019 -0.0068  
Z 0.0039 0.0010 0.0017 -0.0029 -0.0104 -0.0003  
AT. 57 C X 0.0002 0.0001 -0.0005 0.0003 -0.0029 -0.0036  
Y 0.0003 0.0006 -0.0009 -0.0003 0.0015 0.0005  
Z -0.0007 0.0006 0.0012 -0.0003 0.0027 -0.0023  
AT. 58 C X 0.0002 -0.0001 -0.0005 -0.0003 -0.0029 0.0036  
Y 0.0003 -0.0006 -0.0009 0.0003 0.0015 -0.0005  
Z -0.0007 -0.0006 0.0012 0.0003 0.0027 0.0023  
AT. 59 H X -0.0034 -0.0011 0.0068 -0.0007 0.0094 0.0029  
Y 0.0020 -0.0003 -0.0045 0.0002 -0.0052 0.0029  
Z -0.0007 -0.0016 0.0010 -0.0001 0.0010 0.0056  
AT. 60 H X -0.0034 0.0011 0.0068 0.0007 0.0094 -0.0029  
Y 0.0020 0.0003 -0.0045 -0.0002 -0.0052 -0.0029  
Z -0.0007 0.0016 0.0010 0.0001 0.0010 -0.0056  
AT. 61 H X 0.0016 -0.0029 -0.0032 0.0018 -0.0145 0.0034  
Y -0.0026 0.0011 0.0043 -0.0018 0.0132 0.0028  
Z 0.0019 -0.0020 -0.0035 0.0016 -0.0122 0.0020  
AT. 62 H X 0.0016 0.0029 -0.0032 -0.0018 -0.0145 -0.0034

Y -0.0026 -0.0011 0.0043 0.0018 0.0132 -0.0028  
Z 0.0019 0.0020 -0.0035 -0.0016 -0.0122 -0.0020  
AT. 63 H X -0.0014 0.0025 0.0018 -0.0012 0.0080 -0.0112  
Y -0.0000 -0.0021 0.0004 -0.0001 -0.0000 0.0133  
Z 0.0012 0.0005 -0.0021 0.0009 -0.0065 -0.0058  
AT. 64 H X -0.0014 -0.0025 0.0018 0.0012 0.0080 0.0112  
Y -0.0000 0.0021 0.0004 0.0001 -0.0000 -0.0133  
Z 0.0012 -0.0005 -0.0021 -0.0009 -0.0065 0.0058  
AT. 65 C X 0.0002 -0.0002 0.0010 0.0010 -0.0040 -0.0053  
Y 0.0000 0.0005 -0.0005 0.0005 -0.0022 -0.0004  
Z -0.0007 0.0006 0.0013 -0.0005 0.0039 -0.0014  
AT. 66 C X 0.0002 0.0002 0.0010 -0.0010 -0.0040 0.0053  
Y 0.0000 -0.0005 -0.0005 -0.0005 -0.0022 0.0004  
Z -0.0007 -0.0006 0.0013 0.0005 0.0039 0.0014  
AT. 67 H X 0.0007 -0.0017 -0.0046 -0.0018 0.0035 0.0165  
Y -0.0009 0.0006 0.0040 0.0002 0.0025 -0.0087  
Z -0.0003 0.0018 0.0018 0.0022 -0.0068 -0.0120  
AT. 68 H X 0.0007 0.0017 -0.0046 0.0018 0.0035 -0.0165  
Y -0.0009 -0.0006 0.0040 -0.0002 0.0025 0.0087  
Z -0.0003 -0.0018 0.0018 -0.0022 -0.0068 0.0120  
AT. 69 H X -0.0013 -0.0005 0.0032 -0.0011 0.0068 -0.0064  
Y -0.0005 -0.0001 -0.0032 -0.0018 0.0061 0.0113  
Z 0.0016 0.0002 -0.0076 0.0001 -0.0052 0.0187  
AT. 70 H X -0.0013 0.0005 0.0032 0.0011 0.0068 0.0064  
Y -0.0005 0.0001 -0.0032 0.0018 0.0061 -0.0113  
Z 0.0016 -0.0002 -0.0076 -0.0001 -0.0052 -0.0187  
AT. 71 H X 0.0021 -0.0002 -0.0039 0.0030 -0.0168 0.0013  
Y -0.0012 -0.0003 0.0019 -0.0028 0.0139 0.0040  
Z -0.0009 -0.0006 0.0008 -0.0035 0.0162 0.0094  
AT. 72 H X 0.0021 0.0002 -0.0039 -0.0030 -0.0168 -0.0013  
Y -0.0012 0.0003 0.0019 0.0028 0.0139 -0.0040  
Z -0.0009 0.0006 0.0008 0.0035 0.0162 -0.0094

AT. 73 C X -0.0011 0.0018 -0.0032 -0.0019 0.0061 0.0069  
Y -0.0019 0.0008 -0.0022 -0.0008 -0.0026 -0.0059  
Z 0.0018 -0.0015 -0.0033 0.0009 -0.0076 0.0033

AT. 74 C X -0.0011 -0.0018 -0.0032 0.0019 0.0061 -0.0069  
Y -0.0019 -0.0008 -0.0022 0.0008 -0.0026 0.0059  
Z 0.0018 0.0015 -0.0033 -0.0009 -0.0076 -0.0033

AT. 75 H X 0.0046 0.0000 0.0052 0.0036 -0.0058 -0.0002  
Y 0.0002 -0.0013 0.0029 0.0003 0.0016 -0.0014  
Z 0.0086 -0.0055 0.0093 0.0062 -0.0102 0.0047

AT. 76 H X 0.0046 -0.0000 0.0052 -0.0036 -0.0058 0.0002  
Y 0.0002 0.0013 0.0029 -0.0003 0.0016 0.0014  
Z 0.0086 0.0055 0.0093 -0.0062 -0.0102 -0.0047

AT. 77 H X -0.0011 0.0013 -0.0013 -0.0031 0.0168 0.0174  
Y 0.0058 -0.0030 0.0075 0.0054 -0.0151 -0.0126  
Z -0.0055 0.0026 -0.0141 -0.0038 -0.0060 -0.0004

AT. 78 H X -0.0011 -0.0013 -0.0013 0.0031 0.0168 -0.0174  
Y 0.0058 0.0030 0.0075 -0.0054 -0.0151 0.0126  
Z -0.0055 -0.0026 -0.0141 0.0038 -0.0060 0.0004

AT. 79 I X 0.0000 0.0000 -0.0000 0.0000 0.0000 0.0001  
Y -0.0000 -0.0000 -0.0000 -0.0000 0.0000 0.0000  
Z 0.0000 0.0000 0.0000 0.0000 0.0000 0.0000

AT. 80 I X 0.0000 -0.0000 -0.0000 -0.0000 0.0000 -0.0001  
Y -0.0000 0.0000 -0.0000 0.0000 0.0000 -0.0000  
Z 0.0000 -0.0000 0.0000 -0.0000 0.0000 -0.0000

AT. 81 I X 0.0000 0.0000 0.0000 0.0000 -0.0000 0.0000  
Y -0.0000 0.0000 -0.0000 -0.0000 -0.0000 0.0000  
Z 0.0000 -0.0000 0.0000 0.0000 -0.0000 -0.0000

AT. 82 I X 0.0000 -0.0000 0.0000 -0.0000 -0.0000 -0.0000  
Y -0.0000 -0.0000 -0.0000 0.0000 -0.0000 -0.0000  
Z 0.0000 0.0000 0.0000 -0.0000 -0.0000 0.0000

AT. 83 O X -0.0002 0.0001 -0.0009 0.0006 -0.0005 0.0036  
Y -0.0003 -0.0005 -0.0001 0.0002 -0.0002 0.0001

Z 0.0003 0.0005 -0.0007 0.0004 -0.0002 0.0026  
AT. 84 O X -0.0002 -0.0001 -0.0009 -0.0006 -0.0005 -0.0036  
Y -0.0003 0.0005 -0.0001 -0.0002 -0.0002 -0.0001  
Z 0.0003 -0.0005 -0.0007 -0.0004 -0.0002 -0.0026  
AT. 85 O X -0.0006 0.0008 0.0000 -0.0002 0.0001 0.0001  
Y -0.0003 0.0004 -0.0000 -0.0000 0.0001 0.0001  
Z -0.0002 -0.0000 -0.0000 -0.0002 -0.0000 -0.0002  
AT. 86 O X -0.0006 -0.0008 0.0000 0.0002 0.0001 -0.0001  
Y -0.0003 -0.0004 -0.0000 0.0000 0.0001 -0.0001  
Z -0.0002 0.0000 -0.0000 0.0002 -0.0000 0.0002  
AT. 87 N X 0.0001 0.0002 -0.0000 -0.0001 -0.0001 0.0001  
Y 0.0004 -0.0003 -0.0005 0.0001 -0.0003 0.0014  
Z -0.0003 -0.0010 0.0010 -0.0005 0.0003 -0.0038  
AT. 88 N X 0.0001 -0.0002 -0.0000 0.0001 -0.0001 -0.0001  
Y 0.0004 0.0003 -0.0005 -0.0001 -0.0003 -0.0014  
Z -0.0003 0.0010 0.0010 0.0005 0.0003 0.0038  
AT. 89 N X -0.0003 -0.0000 -0.0001 0.0001 -0.0001 0.0002  
Y -0.0003 0.0005 -0.0003 -0.0004 0.0001 0.0001  
Z 0.0012 -0.0005 0.0000 0.0004 0.0001 0.0003  
AT. 90 N X -0.0003 0.0000 -0.0001 -0.0001 -0.0001 -0.0002  
Y -0.0003 -0.0005 -0.0003 0.0004 0.0001 -0.0001  
Z 0.0012 0.0005 0.0000 -0.0004 0.0001 -0.0003  
AT. 91 C X -0.0001 0.0002 -0.0007 0.0004 -0.0003 0.0024  
Y 0.0004 0.0009 -0.0006 0.0002 -0.0001 0.0023  
Z 0.0000 -0.0001 0.0001 0.0002 0.0000 0.0000  
AT. 92 C X -0.0001 -0.0002 -0.0007 -0.0004 -0.0003 -0.0024  
Y 0.0004 -0.0009 -0.0006 -0.0002 -0.0001 -0.0023  
Z 0.0000 0.0001 0.0001 -0.0002 0.0000 -0.0000  
AT. 93 C X 0.0002 -0.0005 0.0014 -0.0007 0.0005 -0.0051  
Y -0.0002 -0.0004 0.0007 -0.0002 0.0002 -0.0025  
Z -0.0001 0.0003 -0.0007 0.0003 -0.0002 0.0024  
AT. 94 C X 0.0002 0.0005 0.0014 0.0007 0.0005 0.0051

Y -0.0002 0.0004 0.0007 0.0002 0.0002 0.0025  
Z -0.0001 -0.0003 -0.0007 -0.0003 -0.0002 -0.0024  
AT. 95 H X -0.0010 -0.0019 0.0010 0.0003 0.0004 -0.0020  
Y 0.0003 0.0001 0.0013 -0.0010 0.0005 -0.0057  
Z 0.0003 0.0009 -0.0011 0.0004 -0.0006 0.0042  
AT. 96 H X -0.0010 0.0019 0.0010 -0.0003 0.0004 0.0020  
Y 0.0003 -0.0001 0.0013 0.0010 0.0005 0.0057  
Z 0.0003 -0.0009 -0.0011 -0.0004 -0.0006 -0.0042  
AT. 97 H X -0.0001 -0.0005 0.0022 -0.0015 0.0010 -0.0076  
Y 0.0010 0.0004 -0.0003 0.0007 -0.0002 0.0021  
Z 0.0002 0.0005 -0.0012 0.0007 -0.0005 0.0043  
AT. 98 H X -0.0001 0.0005 0.0022 0.0015 0.0010 0.0076  
Y 0.0010 -0.0004 -0.0003 -0.0007 -0.0002 -0.0021  
Z 0.0002 -0.0005 -0.0012 -0.0007 -0.0005 -0.0043  
AT. 99 C X 0.0003 0.0000 0.0000 0.0001 0.0001 0.0002  
Y 0.0001 0.0002 0.0001 0.0002 -0.0003 0.0003  
Z 0.0005 0.0001 0.0001 0.0003 -0.0000 0.0002  
AT. 100 C X 0.0003 -0.0000 0.0000 -0.0001 0.0001 -0.0002  
Y 0.0001 -0.0002 0.0001 -0.0002 -0.0003 -0.0003  
Z 0.0005 -0.0001 0.0001 -0.0003 -0.0000 -0.0002  
AT. 101 C X -0.0002 -0.0003 -0.0000 -0.0002 -0.0002 -0.0007  
Y 0.0004 -0.0004 0.0001 0.0001 0.0001 -0.0001  
Z -0.0008 0.0002 -0.0001 -0.0004 0.0001 -0.0004  
AT. 102 C X -0.0002 0.0003 -0.0000 0.0002 -0.0002 0.0007  
Y 0.0004 0.0004 0.0001 -0.0001 0.0001 0.0001  
Z -0.0008 -0.0002 -0.0001 0.0004 0.0001 0.0004  
AT. 103 H X -0.0048 0.0029 -0.0004 -0.0019 0.0003 -0.0000  
Y 0.0022 -0.0017 0.0002 0.0008 -0.0001 -0.0003  
Z 0.0027 -0.0030 0.0006 0.0007 0.0003 -0.0020  
AT. 104 H X -0.0048 -0.0029 -0.0004 0.0019 0.0003 0.0000  
Y 0.0022 0.0017 0.0002 -0.0008 -0.0001 0.0003  
Z 0.0027 0.0030 0.0006 -0.0007 0.0003 0.0020

AT.105 H X 0.0010 -0.0012 -0.0001 0.0001 0.0004 0.0005  
Y -0.0030 0.0021 -0.0008 -0.0009 -0.0003 0.0006  
Z -0.0018 0.0009 -0.0004 -0.0007 0.0001 0.0001

AT.106 H X 0.0010 0.0012 -0.0001 -0.0001 0.0004 -0.0005  
Y -0.0030 -0.0021 -0.0008 0.0009 -0.0003 -0.0006  
Z -0.0018 -0.0009 -0.0004 0.0007 0.0001 -0.0001

AT.107 C X 0.0007 -0.0003 -0.0016 -0.0000 -0.0011 0.0037  
Y -0.0011 -0.0001 0.0032 -0.0002 0.0017 -0.0081  
Z 0.0014 -0.0005 0.0012 -0.0001 -0.0005 -0.0039

AT.108 C X 0.0007 0.0003 -0.0016 0.0000 -0.0011 -0.0037  
Y -0.0011 0.0001 0.0032 0.0002 0.0017 0.0081  
Z 0.0014 0.0005 0.0012 0.0001 -0.0005 0.0039

AT.109 H X -0.0036 0.0011 -0.0005 0.0008 0.0014 0.0042  
Y -0.0052 0.0000 0.0065 -0.0004 0.0046 -0.0155  
Z -0.0046 -0.0007 0.0066 -0.0007 0.0038 -0.0173

AT.110 H X -0.0036 -0.0011 -0.0005 -0.0008 0.0014 -0.0042  
Y -0.0052 -0.0000 0.0065 0.0004 0.0046 0.0155  
Z -0.0046 0.0007 0.0066 0.0007 0.0038 0.0173

AT.111 H X 0.0002 -0.0009 -0.0014 -0.0003 -0.0010 0.0028  
Y 0.0069 -0.0014 -0.0024 0.0003 -0.0042 0.0044  
Z 0.0001 0.0006 0.0022 0.0001 0.0006 -0.0055

AT.112 H X 0.0002 0.0009 -0.0014 0.0003 -0.0010 -0.0028  
Y 0.0069 0.0014 -0.0024 -0.0003 -0.0042 -0.0044  
Z 0.0001 -0.0006 0.0022 -0.0001 0.0006 0.0055

AT.113 C X -0.0005 0.0007 -0.0014 0.0004 -0.0008 0.0045  
Y 0.0012 0.0004 -0.0016 0.0004 -0.0004 0.0053  
Z -0.0007 0.0010 -0.0031 0.0001 -0.0016 0.0081

AT.114 C X -0.0005 -0.0007 -0.0014 -0.0004 -0.0008 -0.0045  
Y 0.0012 -0.0004 -0.0016 -0.0004 -0.0004 -0.0053  
Z -0.0007 -0.0010 -0.0031 -0.0001 -0.0016 -0.0081

AT.115 C X 0.0009 0.0002 -0.0015 0.0012 -0.0006 0.0071  
Y -0.0024 -0.0002 -0.0011 0.0000 -0.0013 0.0021



Z -0.0033 0.0006 -0.0014 -0.0012 0.0003 0.0012  
AT. 116 C X 0.0009 -0.0002 -0.0015 -0.0012 -0.0006 -0.0071  
Y -0.0024 0.0002 -0.0011 -0.0000 -0.0013 -0.0021  
Z -0.0033 -0.0006 -0.0014 0.0012 0.0003 -0.0012  
AT. 117 H X -0.0063 0.0003 -0.0044 -0.0006 -0.0011 0.0101  
Y 0.0098 -0.0019 0.0045 0.0028 -0.0000 -0.0073  
Z 0.0017 0.0009 0.0002 0.0001 0.0005 0.0005  
AT. 118 H X -0.0063 -0.0003 -0.0044 0.0006 -0.0011 -0.0101  
Y 0.0098 0.0019 0.0045 -0.0028 -0.0000 0.0073  
Z 0.0017 -0.0009 0.0002 -0.0001 0.0005 -0.0005  
AT. 119 H X 0.0101 0.0003 0.0027 0.0034 0.0002 0.0015  
Y -0.0060 0.0009 -0.0028 -0.0005 -0.0021 0.0061  
Z 0.0055 -0.0006 0.0025 0.0005 0.0014 -0.0053  
AT. 120 H X 0.0101 -0.0003 0.0027 -0.0034 0.0002 -0.0015  
Y -0.0060 -0.0009 -0.0028 0.0005 -0.0021 -0.0061  
Z 0.0055 0.0006 0.0025 -0.0005 0.0014 0.0053  
AT. 121 C X -0.0012 -0.0004 0.0013 -0.0023 0.0012 -0.0093  
Y -0.0012 -0.0005 0.0011 -0.0005 0.0004 -0.0024  
Z 0.0030 0.0003 0.0001 0.0027 -0.0011 0.0057  
AT. 122 C X -0.0012 0.0004 0.0013 0.0023 0.0012 0.0093  
Y -0.0012 0.0005 0.0011 0.0005 0.0004 0.0024  
Z 0.0030 -0.0003 0.0001 -0.0027 -0.0011 -0.0057  
AT. 123 H X 0.0055 -0.0008 0.0018 0.0042 -0.0014 0.0053  
Y 0.0032 0.0004 0.0008 0.0059 -0.0025 0.0153  
Z -0.0004 -0.0007 0.0005 -0.0028 0.0015 -0.0100  
AT. 124 H X 0.0055 0.0008 0.0018 -0.0042 -0.0014 -0.0053  
Y 0.0032 -0.0004 0.0008 -0.0059 -0.0025 -0.0153  
Z -0.0004 0.0007 0.0005 0.0028 0.0015 0.0100  
AT. 125 H X -0.0015 0.0011 -0.0000 -0.0009 0.0005 -0.0023  
Y -0.0082 -0.0022 0.0020 -0.0106 0.0048 -0.0300  
Z -0.0011 0.0013 -0.0012 -0.0008 0.0004 0.0004  
AT. 126 H X -0.0015 -0.0011 -0.0000 0.0009 0.0005 0.0023

Y -0.0082 0.0022 0.0020 0.0106 0.0048 0.0300  
Z -0.0011 -0.0013 -0.0012 0.0008 0.0004 -0.0004  
AT. 127 C X -0.0002 -0.0009 0.0021 -0.0011 0.0010 -0.0076  
Y 0.0012 0.0002 -0.0008 0.0011 -0.0002 0.0033  
Z 0.0006 0.0009 -0.0017 0.0015 -0.0009 0.0080  
AT. 128 C X -0.0002 0.0009 0.0021 0.0011 0.0010 0.0076  
Y 0.0012 -0.0002 -0.0008 -0.0011 -0.0002 -0.0033  
Z 0.0006 -0.0009 -0.0017 -0.0015 -0.0009 -0.0080  
AT. 129 C X 0.0010 0.0004 0.0003 0.0009 0.0001 0.0008  
Y -0.0013 -0.0006 0.0026 -0.0019 0.0006 -0.0106  
Z -0.0020 -0.0004 0.0022 -0.0021 0.0019 -0.0086  
AT. 130 C X 0.0010 -0.0004 0.0003 -0.0009 0.0001 -0.0008  
Y -0.0013 0.0006 0.0026 0.0019 0.0006 0.0106  
Z -0.0020 0.0004 0.0022 0.0021 0.0019 0.0086  
AT. 131 H X 0.0020 0.0005 0.0012 0.0011 -0.0013 -0.0020  
Y -0.0036 0.0000 0.0001 -0.0038 0.0039 -0.0041  
Z -0.0016 0.0000 0.0022 -0.0027 0.0014 -0.0093  
AT. 132 H X 0.0020 -0.0005 0.0012 -0.0011 -0.0013 0.0020  
Y -0.0036 -0.0000 0.0001 0.0038 0.0039 0.0041  
Z -0.0016 -0.0000 0.0022 0.0027 0.0014 0.0093  
AT. 133 H X -0.0015 -0.0000 -0.0009 -0.0006 0.0024 0.0028  
Y -0.0016 -0.0012 0.0039 -0.0022 0.0006 -0.0152  
Z -0.0013 -0.0013 0.0048 -0.0021 0.0008 -0.0169  
AT. 134 H X -0.0015 0.0000 -0.0009 0.0006 0.0024 -0.0028  
Y -0.0016 0.0012 0.0039 0.0022 0.0006 0.0152  
Z -0.0013 0.0013 0.0048 0.0021 0.0008 0.0169  
AT. 135 C X -0.0010 0.0002 -0.0011 -0.0008 -0.0006 0.0004  
Y 0.0007 0.0003 -0.0014 0.0001 -0.0004 0.0040  
Z 0.0001 0.0012 -0.0030 0.0008 -0.0016 0.0099  
AT. 136 C X -0.0010 -0.0002 -0.0011 0.0008 -0.0006 -0.0004  
Y 0.0007 -0.0003 -0.0014 -0.0001 -0.0004 -0.0040  
Z 0.0001 -0.0012 -0.0030 -0.0008 -0.0016 -0.0099

AT.137 H X 0.0045 -0.0025 0.0042 -0.0005 0.0037 -0.0116  
Y 0.0001 -0.0015 0.0038 -0.0008 0.0022 -0.0121  
Z -0.0029 -0.0009 0.0039 -0.0008 0.0011 -0.0127

AT.138 H X 0.0045 0.0025 0.0042 0.0005 0.0037 0.0116  
Y 0.0001 0.0015 0.0038 0.0008 0.0022 0.0121  
Z -0.0029 0.0009 0.0039 0.0008 0.0011 0.0127

AT.139 H X -0.0016 0.0041 -0.0118 0.0007 -0.0063 0.0328  
Y -0.0025 0.0010 -0.0023 -0.0004 -0.0019 0.0045  
Z 0.0018 -0.0041 0.0115 -0.0012 0.0064 -0.0332

AT.140 H X -0.0016 -0.0041 -0.0118 -0.0007 -0.0063 -0.0328  
Y -0.0025 -0.0010 -0.0023 0.0004 -0.0019 -0.0045  
Z 0.0018 0.0041 0.0115 0.0012 0.0064 0.0332

AT.141 H X -0.0024 -0.0047 0.0136 -0.0035 0.0064 -0.0455  
Y -0.0029 -0.0014 0.0049 -0.0019 0.0020 -0.0182  
Z 0.0032 0.0009 -0.0034 0.0016 -0.0011 0.0135

AT.142 H X -0.0024 0.0047 0.0136 0.0035 0.0064 0.0455  
Y -0.0029 0.0014 0.0049 0.0019 0.0020 0.0182  
Z 0.0032 -0.0009 -0.0034 -0.0016 -0.0011 -0.0135

AT.143 C X -0.0007 -0.0003 0.0005 -0.0013 0.0002 -0.0030  
Y 0.0006 0.0005 -0.0013 0.0009 -0.0005 0.0041  
Z -0.0002 0.0010 -0.0027 0.0011 -0.0014 0.0085

AT.144 C X -0.0007 0.0003 0.0005 0.0013 0.0002 0.0030  
Y 0.0006 -0.0005 -0.0013 -0.0009 -0.0005 -0.0041  
Z -0.0002 -0.0010 -0.0027 -0.0011 -0.0014 -0.0085

AT.145 H X 0.0019 0.0053 -0.0137 0.0091 -0.0064 0.0468  
Y -0.0005 0.0008 -0.0019 0.0004 -0.0012 0.0059  
Z 0.0016 0.0021 -0.0058 0.0044 -0.0024 0.0194

AT.146 H X 0.0019 -0.0053 -0.0137 -0.0091 -0.0064 -0.0468  
Y -0.0005 -0.0008 -0.0019 -0.0004 -0.0012 -0.0059  
Z 0.0016 -0.0021 -0.0058 -0.0044 -0.0024 -0.0194

AT.147 H X -0.0001 -0.0028 0.0062 -0.0042 0.0035 -0.0233  
Y -0.0011 -0.0014 0.0029 -0.0030 0.0014 -0.0127

Z -0.0003 -0.0036 0.0079 -0.0051 0.0043 -0.0296  
AT. 148 H X -0.0001 0.0028 0.0062 0.0042 0.0035 0.0233  
Y -0.0011 0.0014 0.0029 0.0030 0.0014 0.0127  
Z -0.0003 0.0036 0.0079 0.0051 0.0043 0.0296  
AT. 149 H X -0.0027 0.0012 -0.0032 -0.0004 -0.0024 0.0095  
Y -0.0013 -0.0008 0.0021 -0.0022 0.0006 -0.0064  
Z -0.0024 -0.0018 0.0049 -0.0046 0.0018 -0.0156  
AT. 150 H X -0.0027 -0.0012 -0.0032 0.0004 -0.0024 -0.0095  
Y -0.0013 0.0008 0.0021 0.0022 0.0006 0.0064  
Z -0.0024 0.0018 0.0049 0.0046 0.0018 0.0156  
AT. 151 C X 0.0007 -0.0001 0.0021 0.0018 0.0009 -0.0009  
Y 0.0034 0.0006 -0.0024 0.0012 -0.0004 0.0081  
Z 0.0006 -0.0022 0.0051 -0.0017 0.0029 -0.0179  
AT. 152 C X 0.0007 0.0001 0.0021 -0.0018 0.0009 0.0009  
Y 0.0034 -0.0006 -0.0024 -0.0012 -0.0004 -0.0081  
Z 0.0006 0.0022 0.0051 0.0017 0.0029 0.0179  
AT. 153 H X 0.0011 0.0001 0.0020 0.0035 0.0017 0.0015  
Y -0.0025 0.0004 0.0013 0.0016 -0.0000 0.0005  
Z -0.0091 -0.0026 0.0111 -0.0020 0.0032 -0.0319  
AT. 154 H X 0.0011 -0.0001 0.0020 -0.0035 0.0017 -0.0015  
Y -0.0025 -0.0004 0.0013 -0.0016 -0.0000 -0.0005  
Z -0.0091 0.0026 0.0111 0.0020 0.0032 0.0319  
AT. 155 H X 0.0052 -0.0006 0.0014 0.0026 0.0005 0.0016  
Y -0.0036 -0.0002 0.0038 0.0008 0.0004 -0.0065  
Z 0.0096 -0.0015 -0.0017 -0.0011 0.0019 -0.0013  
AT. 156 H X 0.0052 0.0006 0.0014 -0.0026 0.0005 -0.0016  
Y -0.0036 0.0002 0.0038 -0.0008 0.0004 0.0065  
Z 0.0096 0.0015 -0.0017 0.0011 0.0019 0.0013  
AT. 157 O X -0.0016 0.0032 0.0376 0.0376 0.0028 0.0038  
Y -0.0001 0.0002 0.0025 0.0024 0.0003 0.0003  
Z 0.0009 -0.0017 -0.0219 -0.0218 -0.0024 -0.0028  
AT. 158 O X -0.0016 -0.0032 0.0376 -0.0376 0.0028 -0.0038

Y -0.0001 -0.0002 0.0025 -0.0024 0.0003 -0.0003  
Z 0.0009 0.0017 -0.0219 0.0218 -0.0024 0.0028  
AT. 159 O X 0.0016 -0.0033 -0.0384 -0.0383 -0.0031 -0.0043  
Y 0.0001 -0.0003 -0.0021 -0.0021 0.0001 -0.0000  
Z -0.0008 0.0017 0.0208 0.0207 0.0018 0.0024  
AT. 160 O X 0.0016 0.0033 -0.0384 0.0383 -0.0031 0.0043  
Y 0.0001 0.0003 -0.0021 0.0021 0.0001 0.0000  
Z -0.0008 -0.0017 0.0208 -0.0207 0.0018 -0.0024  
AT. 161 H X -0.0004 -0.0004 0.0093 0.0070 0.0096 0.0094  
Y 0.0005 -0.0007 -0.0122 -0.0113 -0.0040 -0.0038  
Z -0.0003 -0.0010 0.0085 0.0049 0.0145 0.0132  
AT. 162 H X -0.0004 0.0004 0.0093 -0.0070 0.0096 -0.0094  
Y 0.0005 0.0007 -0.0122 0.0113 -0.0040 0.0038  
Z -0.0003 0.0010 0.0085 -0.0049 0.0145 -0.0132  
AT. 163 H X 0.0001 0.0004 0.0008 0.0010 -0.0011 -0.0005  
Y 0.0003 0.0026 -0.0049 -0.0040 -0.0054 -0.0024  
Z -0.0004 0.0014 0.0096 0.0098 0.0001 0.0007  
AT. 164 H X 0.0001 -0.0004 0.0008 -0.0010 -0.0011 0.0005  
Y 0.0003 -0.0026 -0.0049 0.0040 -0.0054 0.0024  
Z -0.0004 -0.0014 0.0096 -0.0098 0.0001 -0.0007  
AT. 165 O X -0.0089 -0.0089 -0.0002 0.0006 -0.0009 0.0006  
Y 0.0088 0.0087 0.0003 -0.0005 0.0009 -0.0011  
Z 0.0425 0.0431 0.0011 -0.0035 0.0052 -0.0023  
AT. 166 O X -0.0089 0.0089 -0.0002 -0.0006 -0.0009 -0.0006  
Y 0.0088 -0.0087 0.0003 0.0005 0.0009 0.0011  
Z 0.0425 -0.0431 0.0011 0.0035 0.0052 0.0023  
AT. 167 H X 0.0048 0.0027 0.0006 0.0018 -0.0024 -0.0046  
Y 0.0125 0.0168 -0.0003 -0.0053 0.0074 0.0073  
Z 0.0037 0.0026 0.0003 0.0007 -0.0005 -0.0022  
AT. 168 H X 0.0048 -0.0027 0.0006 -0.0018 -0.0024 0.0046  
Y 0.0125 -0.0168 -0.0003 0.0053 0.0074 -0.0073  
Z 0.0037 -0.0026 0.0003 -0.0007 -0.0005 0.0022

AT. 169 O X 0.0079 0.0079 0.0002 -0.0005 0.0010 -0.0008

Y -0.0097 -0.0098 -0.0003 0.0008 -0.0012 0.0005

Z -0.0427 -0.0433 -0.0011 0.0035 -0.0052 0.0022

AT. 170 O X 0.0079 -0.0079 0.0002 0.0005 0.0010 0.0008

Y -0.0097 0.0098 -0.0003 -0.0008 -0.0012 -0.0005

Z -0.0427 0.0433 -0.0011 -0.0035 -0.0052 -0.0022

AT. 171 H X 0.0179 0.0210 0.0013 -0.0054 0.0038 0.0056

Y 0.0173 0.0188 0.0010 -0.0032 0.0029 0.0021

Z -0.0096 -0.0097 0.0002 0.0006 -0.0010 0.0008

AT. 172 H X 0.0179 -0.0210 0.0013 0.0054 0.0038 -0.0056

Y 0.0173 -0.0188 0.0010 0.0032 0.0029 -0.0021

Z -0.0096 0.0097 0.0002 -0.0006 -0.0010 -0.0008

FREQ(CM\*\*-1) 901.85 902.09 903.10 903.45 911.92 913.40

AT. 1 I X -0.0000 0.0001 0.0000 0.0001 -0.0001 0.0000

Y -0.0000 -0.0000 0.0000 0.0000 -0.0000 -0.0000

Z -0.0000 -0.0000 0.0000 -0.0000 0.0000 -0.0000

AT. 2 I X 0.0000 0.0001 0.0000 -0.0001 0.0001 0.0000

Y 0.0000 -0.0000 0.0000 -0.0000 0.0000 -0.0000

Z 0.0000 -0.0000 0.0000 0.0000 -0.0000 -0.0000

AT. 3 I X 0.0000 -0.0000 -0.0000 -0.0000 -0.0001 0.0000

Y 0.0001 -0.0000 -0.0000 -0.0000 0.0000 -0.0000

Z -0.0000 0.0000 0.0000 0.0000 -0.0000 0.0000

AT. 4 I X -0.0000 -0.0000 -0.0000 0.0000 0.0001 0.0000

Y -0.0001 -0.0000 -0.0000 0.0000 -0.0000 -0.0000

Z 0.0000 0.0000 0.0000 -0.0000 0.0000 0.0000

AT. 5 O X 0.0005 0.0031 0.0006 0.0036 -0.0024 0.0016

Y -0.0003 -0.0013 -0.0005 -0.0016 0.0015 -0.0015

Z -0.0009 -0.0036 -0.0006 -0.0041 0.0029 -0.0021

AT. 6 O X -0.0005 0.0031 0.0006 -0.0036 0.0024 0.0016

Y 0.0003 -0.0013 -0.0005 0.0016 -0.0015 -0.0015

Z 0.0009 -0.0036 -0.0006 0.0041 -0.0029 -0.0021  
AT. 7 O X -0.0002 -0.0019 -0.0001 -0.0006 -0.0056 0.0032  
Y -0.0003 0.0018 0.0000 0.0006 0.0059 -0.0037  
Z 0.0012 -0.0011 -0.0002 -0.0006 -0.0046 0.0027  
AT. 8 O X 0.0002 -0.0019 -0.0001 0.0006 0.0056 0.0032  
Y 0.0003 0.0018 0.0000 -0.0006 -0.0059 -0.0037  
Z -0.0012 -0.0011 -0.0002 0.0006 0.0046 0.0027  
AT. 9 N X 0.0008 0.0004 0.0001 0.0006 -0.0006 0.0014  
Y -0.0007 -0.0014 -0.0003 -0.0010 0.0028 -0.0036  
Z -0.0001 0.0043 0.0009 0.0059 -0.0036 0.0014  
AT. 10 N X -0.0008 0.0004 0.0001 -0.0006 0.0006 0.0014  
Y 0.0007 -0.0014 -0.0003 0.0010 -0.0028 -0.0036  
Z 0.0001 0.0043 0.0009 -0.0059 0.0036 0.0014  
AT. 11 N X -0.0005 -0.0018 0.0000 -0.0011 -0.0023 0.0016  
Y 0.0016 -0.0014 -0.0003 -0.0011 -0.0026 0.0012  
Z -0.0026 0.0027 0.0005 0.0018 0.0103 -0.0067  
AT. 12 N X 0.0005 -0.0018 0.0000 0.0011 0.0023 0.0016  
Y -0.0016 -0.0014 -0.0003 0.0011 0.0026 0.0012  
Z 0.0026 0.0027 0.0005 -0.0018 -0.0103 -0.0067  
AT. 13 C X -0.0002 0.0014 0.0004 0.0018 -0.0015 0.0013  
Y 0.0005 -0.0035 -0.0006 -0.0047 0.0023 -0.0006  
Z -0.0013 -0.0002 -0.0000 -0.0001 0.0004 -0.0007  
AT. 14 C X 0.0002 0.0014 0.0004 -0.0018 0.0015 0.0013  
Y -0.0005 -0.0035 -0.0006 0.0047 -0.0023 -0.0006  
Z 0.0013 -0.0002 -0.0000 0.0001 -0.0004 -0.0007  
AT. 15 C X 0.0007 -0.0049 -0.0011 -0.0064 0.0037 -0.0018  
Y -0.0006 0.0050 0.0010 0.0063 -0.0040 0.0021  
Z 0.0007 -0.0018 -0.0006 -0.0026 0.0015 -0.0002  
AT. 16 C X -0.0007 -0.0049 -0.0011 0.0064 -0.0037 -0.0018  
Y 0.0006 0.0050 0.0010 -0.0063 0.0040 0.0021  
Z -0.0007 -0.0018 -0.0006 0.0026 -0.0015 -0.0002  
AT. 17 H X 0.0050 -0.0013 -0.0004 -0.0039 0.0036 0.0007

Y 0.0008 0.0080 0.0012 0.0095 -0.0054 0.0044  
Z 0.0007 -0.0036 -0.0005 -0.0049 0.0030 -0.0020  
AT. 18 H X -0.0050 -0.0013 -0.0004 0.0039 -0.0036 0.0007  
Y -0.0008 0.0080 0.0012 -0.0095 0.0054 0.0044  
Z -0.0007 -0.0036 -0.0005 0.0049 -0.0030 -0.0020  
AT. 19 H X -0.0024 -0.0087 -0.0017 -0.0107 0.0062 -0.0037  
Y -0.0016 0.0017 0.0011 0.0034 -0.0028 0.0009  
Z -0.0006 -0.0044 -0.0008 -0.0053 0.0030 -0.0014  
AT. 20 H X 0.0024 -0.0087 -0.0017 0.0107 -0.0062 -0.0037  
Y 0.0016 0.0017 0.0011 -0.0034 0.0028 0.0009  
Z 0.0006 -0.0044 -0.0008 0.0053 -0.0030 -0.0014  
AT. 21 C X 0.0012 -0.0012 -0.0001 -0.0009 -0.0045 0.0030  
Y -0.0009 0.0012 0.0002 0.0005 0.0044 -0.0024  
Z -0.0026 0.0018 0.0006 0.0019 0.0044 -0.0026  
AT. 22 C X -0.0012 -0.0012 -0.0001 0.0009 0.0045 0.0030  
Y 0.0009 0.0012 0.0002 -0.0005 -0.0044 -0.0024  
Z 0.0026 0.0018 0.0006 -0.0019 -0.0044 -0.0026  
AT. 23 C X -0.0020 0.0028 0.0005 0.0020 0.0088 -0.0050  
Y -0.0005 -0.0010 -0.0000 -0.0001 -0.0044 0.0024  
Z 0.0036 -0.0029 -0.0005 -0.0023 -0.0081 0.0055  
AT. 24 C X 0.0020 0.0028 0.0005 -0.0020 -0.0088 -0.0050  
Y 0.0005 -0.0010 -0.0000 0.0001 0.0044 0.0024  
Z -0.0036 -0.0029 -0.0005 0.0023 0.0081 0.0055  
AT. 25 H X -0.0106 0.0037 0.0009 0.0050 0.0094 -0.0080  
Y -0.0009 -0.0011 -0.0000 -0.0001 -0.0035 0.0017  
Z -0.0026 -0.0026 -0.0004 0.0005 -0.0160 0.0082  
AT. 26 H X 0.0106 0.0037 0.0009 -0.0050 -0.0094 -0.0080  
Y 0.0009 -0.0011 -0.0000 0.0001 0.0035 0.0017  
Z 0.0026 -0.0026 -0.0004 -0.0005 0.0160 0.0082  
AT. 27 H X 0.0016 0.0037 -0.0000 0.0004 0.0114 -0.0063  
Y 0.0070 -0.0015 -0.0009 -0.0045 0.0031 -0.0004  
Z 0.0068 -0.0034 -0.0009 -0.0044 -0.0054 0.0046



AT. 28 H X -0.0016 0.0037 -0.0000 -0.0004 -0.0114 -0.0063  
Y -0.0070 -0.0015 -0.0009 0.0045 -0.0031 -0.0004  
Z -0.0068 -0.0034 -0.0009 0.0044 0.0054 0.0046

AT. 29 C X -0.0011 0.0114 0.0023 0.0079 -0.0002 0.0102  
Y 0.0018 0.0051 0.0014 0.0049 -0.0152 0.0184  
Z -0.0092 0.0007 0.0012 0.0087 -0.0099 -0.0030

AT. 30 C X 0.0011 0.0114 0.0023 -0.0079 0.0002 0.0102  
Y -0.0018 0.0051 0.0014 -0.0049 0.0152 0.0184  
Z 0.0092 0.0007 0.0012 -0.0087 0.0099 -0.0030

AT. 31 H X -0.0096 0.0149 0.0036 0.0202 -0.0069 0.0024  
Y 0.0189 0.0196 0.0025 0.0013 -0.0089 0.0457  
Z 0.0113 0.0243 0.0036 0.0107 -0.0048 0.0328

AT. 32 H X 0.0096 0.0149 0.0036 -0.0202 0.0069 0.0024  
Y -0.0189 0.0196 0.0025 -0.0013 0.0089 0.0457  
Z -0.0113 0.0243 0.0036 -0.0107 0.0048 0.0328

AT. 33 H X -0.0074 -0.0006 0.0004 0.0048 -0.0071 -0.0005  
Y -0.0252 -0.0190 -0.0005 0.0083 -0.0205 -0.0284  
Z -0.0014 0.0031 0.0007 0.0049 -0.0123 0.0107

AT. 34 H X 0.0074 -0.0006 0.0004 -0.0048 0.0071 -0.0005  
Y 0.0252 -0.0190 -0.0005 -0.0083 0.0205 -0.0284  
Z 0.0014 0.0031 0.0007 -0.0049 0.0123 0.0107

AT. 35 C X -0.0012 0.0039 0.0005 0.0027 0.0101 -0.0071  
Y -0.0008 -0.0077 -0.0011 -0.0084 0.0077 -0.0063  
Z 0.0038 -0.0120 -0.0029 -0.0121 0.0031 -0.0117

AT. 36 C X 0.0012 0.0039 0.0005 -0.0027 -0.0101 -0.0071  
Y 0.0008 -0.0077 -0.0011 0.0084 -0.0077 -0.0063  
Z -0.0038 -0.0120 -0.0029 0.0121 -0.0031 -0.0117

AT. 37 C X 0.0036 0.0061 0.0002 0.0075 -0.0073 0.0020  
Y 0.0029 -0.0053 -0.0016 -0.0047 -0.0055 -0.0023  
Z 0.0135 0.0022 -0.0024 -0.0075 0.0197 -0.0149

AT. 38 C X -0.0036 0.0061 0.0002 -0.0075 0.0073 0.0020  
Y -0.0029 -0.0053 -0.0016 0.0047 0.0055 -0.0023

Z -0.0135 0.0022 -0.0024 0.0075 -0.0197 -0.0149  
AT. 39 H X -0.0341 0.0024 0.0074 0.0259 -0.0405 0.0348  
Y -0.0261 -0.0010 0.0049 0.0163 -0.0263 0.0197  
Z 0.0006 -0.0026 -0.0005 -0.0046 0.0066 -0.0026  
AT. 40 H X 0.0341 0.0024 0.0074 -0.0259 0.0405 0.0348  
Y 0.0261 -0.0010 0.0049 -0.0163 0.0263 0.0197  
Z -0.0006 -0.0026 -0.0005 0.0046 -0.0066 -0.0026  
AT. 41 H X 0.0362 0.0086 -0.0061 -0.0093 0.0224 -0.0269  
Y 0.0036 -0.0099 -0.0023 -0.0084 -0.0125 0.0011  
Z -0.0220 0.0026 0.0048 0.0128 -0.0061 0.0128  
AT. 42 H X -0.0362 0.0086 -0.0061 0.0093 -0.0224 -0.0269  
Y -0.0036 -0.0099 -0.0023 0.0084 0.0125 0.0011  
Z 0.0220 0.0026 0.0048 -0.0128 0.0061 0.0128  
AT. 43 C X -0.0072 -0.0110 -0.0005 -0.0098 -0.0023 0.0047  
Y 0.0076 0.0002 -0.0002 0.0005 -0.0199 0.0174  
Z -0.0152 -0.0035 0.0015 0.0015 -0.0011 0.0027  
AT. 44 C X 0.0072 -0.0110 -0.0005 0.0098 0.0023 0.0047  
Y -0.0076 0.0002 -0.0002 -0.0005 0.0199 0.0174  
Z 0.0152 -0.0035 0.0015 -0.0015 0.0011 0.0027  
AT. 45 H X 0.0207 -0.0020 -0.0028 -0.0079 -0.0046 0.0012  
Y -0.0389 -0.0284 0.0022 -0.0148 -0.0327 0.0364  
Z 0.0109 0.0180 0.0007 0.0149 0.0136 -0.0138  
AT. 46 H X -0.0207 -0.0020 -0.0028 0.0079 0.0046 0.0012  
Y 0.0389 -0.0284 0.0022 0.0148 0.0327 0.0364  
Z -0.0109 0.0180 0.0007 -0.0149 -0.0136 -0.0138  
AT. 47 H X 0.0180 0.0078 -0.0007 0.0025 0.0036 -0.0046  
Y 0.0579 0.0312 -0.0023 0.0170 -0.0042 -0.0045  
Z 0.0022 0.0021 -0.0006 0.0010 0.0071 -0.0075  
AT. 48 H X -0.0180 0.0078 -0.0007 -0.0025 -0.0036 -0.0046  
Y -0.0579 0.0312 -0.0023 -0.0170 0.0042 -0.0045  
Z -0.0022 0.0021 -0.0006 -0.0010 -0.0071 -0.0075  
AT. 49 C X -0.0017 -0.0125 -0.0018 -0.0128 0.0032 -0.0015

Y -0.0049 0.0053 0.0010 0.0048 0.0136 -0.0086  
Z -0.0013 -0.0128 -0.0013 -0.0119 -0.0079 0.0107  
AT. 50 C X 0.0017 -0.0125 -0.0018 0.0128 -0.0032 -0.0015  
Y 0.0049 0.0053 0.0010 -0.0048 -0.0136 -0.0086  
Z 0.0013 -0.0128 -0.0013 0.0119 0.0079 0.0107  
AT. 51 C X 0.0070 0.0020 -0.0004 0.0031 -0.0107 0.0024  
Y -0.0055 0.0143 0.0021 0.0149 0.0056 -0.0105  
Z 0.0135 0.0083 0.0006 0.0041 -0.0086 0.0134  
AT. 52 C X -0.0070 0.0020 -0.0004 -0.0031 0.0107 0.0024  
Y 0.0055 0.0143 0.0021 -0.0149 -0.0056 -0.0105  
Z -0.0135 0.0083 0.0006 -0.0041 0.0086 0.0134  
AT. 53 H X 0.0408 -0.0113 -0.0039 -0.0185 -0.0334 0.0401  
Y 0.0382 -0.0044 -0.0028 -0.0133 -0.0255 0.0351  
Z 0.0038 0.0096 0.0010 0.0094 -0.0052 -0.0009  
AT. 54 H X -0.0408 -0.0113 -0.0039 0.0185 0.0334 0.0401  
Y -0.0382 -0.0044 -0.0028 0.0133 0.0255 0.0351  
Z -0.0038 0.0096 0.0010 -0.0094 0.0052 -0.0009  
AT. 55 H X -0.0360 0.0189 0.0042 0.0298 0.0182 -0.0434  
Y 0.0019 0.0191 0.0025 0.0178 -0.0004 -0.0010  
Z -0.0065 0.0254 0.0041 0.0256 0.0028 -0.0055  
AT. 56 H X 0.0360 0.0189 0.0042 -0.0298 -0.0182 -0.0434  
Y -0.0019 0.0191 0.0025 -0.0178 0.0004 -0.0010  
Z 0.0065 0.0254 0.0041 -0.0256 -0.0028 -0.0055  
AT. 57 C X -0.0030 -0.0042 -0.0000 -0.0041 0.0020 0.0028  
Y -0.0007 -0.0009 -0.0007 -0.0025 0.0139 -0.0144  
Z 0.0016 -0.0132 -0.0022 -0.0131 -0.0020 -0.0028  
AT. 58 C X 0.0030 -0.0042 -0.0000 0.0041 -0.0020 0.0028  
Y 0.0007 -0.0009 -0.0007 0.0025 -0.0139 -0.0144  
Z -0.0016 -0.0132 -0.0022 0.0131 0.0020 -0.0028  
AT. 59 H X 0.0137 -0.0171 -0.0030 -0.0117 -0.0536 0.0343  
Y -0.0063 0.0238 0.0040 0.0207 0.0249 -0.0101  
Z 0.0048 0.0143 0.0027 0.0162 -0.0249 0.0258

AT. 60 H X -0.0137 -0.0171 -0.0030 0.0117 0.0536 0.0343  
Y 0.0063 0.0238 0.0040 -0.0207 -0.0249 -0.0101  
Z -0.0048 0.0143 0.0027 -0.0162 0.0249 0.0258

AT. 61 H X -0.0064 0.0416 0.0086 0.0435 -0.0178 0.0364  
Y 0.0118 -0.0253 -0.0054 -0.0226 -0.0171 -0.0053  
Z -0.0073 0.0347 0.0068 0.0340 -0.0017 0.0187

AT. 62 H X 0.0064 0.0416 0.0086 -0.0435 0.0178 0.0364  
Y -0.0118 -0.0253 -0.0054 0.0226 0.0171 -0.0053  
Z 0.0073 0.0347 0.0068 -0.0340 0.0017 0.0187

AT. 63 H X 0.0005 -0.0491 -0.0080 -0.0516 0.0229 -0.0314  
Y 0.0067 0.0382 0.0058 0.0402 -0.0370 0.0381  
Z -0.0079 -0.0030 -0.0001 -0.0034 0.0208 -0.0141

AT. 64 H X -0.0005 -0.0491 -0.0080 0.0516 -0.0229 -0.0314  
Y -0.0067 0.0382 0.0058 -0.0402 0.0370 0.0381  
Z 0.0079 -0.0030 -0.0001 0.0034 -0.0208 -0.0141

AT. 65 C X -0.0031 -0.0087 -0.0007 -0.0085 0.0005 0.0058  
Y -0.0021 0.0031 0.0001 0.0014 0.0129 -0.0107  
Z 0.0025 -0.0141 -0.0026 -0.0141 -0.0021 -0.0011

AT. 66 C X 0.0031 -0.0087 -0.0007 0.0085 -0.0005 0.0058  
Y 0.0021 0.0031 0.0001 -0.0014 -0.0129 -0.0107  
Z -0.0025 -0.0141 -0.0026 0.0141 0.0021 -0.0011

AT. 67 H X 0.0052 0.0474 0.0075 0.0522 -0.0235 0.0108  
Y 0.0011 -0.0348 -0.0054 -0.0344 -0.0065 0.0056  
Z -0.0075 -0.0259 -0.0043 -0.0319 0.0363 -0.0208

AT. 68 H X -0.0052 0.0474 0.0075 -0.0522 0.0235 0.0108  
Y -0.0011 -0.0348 -0.0054 0.0344 0.0065 0.0056  
Z 0.0075 -0.0259 -0.0043 0.0319 -0.0363 -0.0208

AT. 69 H X 0.0052 -0.0341 -0.0046 -0.0311 -0.0320 0.0266  
Y 0.0051 0.0240 0.0030 0.0261 -0.0069 -0.0047  
Z -0.0034 0.0699 0.0097 0.0700 0.0331 -0.0337

AT. 70 H X -0.0052 -0.0341 -0.0046 0.0311 0.0320 0.0266  
Y -0.0051 0.0240 0.0030 -0.0261 0.0069 -0.0047

Z 0.0034 0.0699 0.0097 -0.0700 -0.0331 -0.0337  
AT. 71 H X -0.0122 0.0409 0.0068 0.0378 0.0348 -0.0209  
Y 0.0113 -0.0164 -0.0029 -0.0127 -0.0372 0.0197  
Z 0.0137 -0.0031 -0.0010 0.0015 -0.0435 0.0196  
AT. 72 H X 0.0122 0.0409 0.0068 -0.0378 -0.0348 -0.0209  
Y -0.0113 -0.0164 -0.0029 0.0127 0.0372 0.0197  
Z -0.0137 -0.0031 -0.0010 -0.0015 0.0435 0.0196  
AT. 73 C X 0.0030 0.0066 -0.0006 0.0055 0.0191 -0.0267  
Y -0.0025 -0.0141 -0.0010 -0.0122 -0.0005 0.0077  
Z -0.0052 0.0279 0.0052 0.0284 0.0042 0.0062  
AT. 74 C X -0.0030 0.0066 -0.0006 -0.0055 -0.0191 -0.0267  
Y 0.0025 -0.0141 -0.0010 0.0122 0.0005 0.0077  
Z 0.0052 0.0279 0.0052 -0.0284 -0.0042 0.0062  
AT. 75 H X -0.0039 0.0142 0.0011 0.0141 0.0059 -0.0235  
Y 0.0022 -0.0050 -0.0002 -0.0088 -0.0146 0.0273  
Z -0.0034 0.0455 0.0074 0.0391 -0.0243 0.0349  
AT. 76 H X 0.0039 0.0142 0.0011 -0.0141 -0.0059 -0.0235  
Y -0.0022 -0.0050 -0.0002 0.0088 0.0146 0.0273  
Z 0.0034 0.0455 0.0074 -0.0391 0.0243 0.0349  
AT. 77 H X 0.0112 0.0182 -0.0004 0.0122 0.0190 -0.0249  
Y -0.0092 -0.0019 0.0018 -0.0006 -0.0237 0.0292  
Z -0.0066 0.0058 0.0024 0.0113 0.0264 -0.0159  
AT. 78 H X -0.0112 0.0182 -0.0004 -0.0122 -0.0190 -0.0249  
Y 0.0092 -0.0019 0.0018 0.0006 0.0237 0.0292  
Z 0.0066 0.0058 0.0024 -0.0113 -0.0264 -0.0159  
AT. 79 I X -0.0000 0.0000 -0.0001 -0.0000 -0.0000 -0.0000  
Y 0.0000 -0.0000 0.0000 0.0000 -0.0000 0.0000  
Z -0.0000 -0.0000 -0.0000 -0.0000 -0.0000 0.0000  
AT. 80 I X 0.0000 0.0000 -0.0001 0.0000 0.0000 -0.0000  
Y -0.0000 -0.0000 0.0000 -0.0000 0.0000 0.0000  
Z 0.0000 -0.0000 -0.0000 0.0000 0.0000 0.0000  
AT. 81 I X -0.0000 -0.0000 -0.0000 -0.0000 -0.0000 0.0000

Y -0.0000 0.0000 -0.0000 -0.0000 0.0000 -0.0000  
Z -0.0000 -0.0000 0.0000 -0.0000 -0.0000 0.0000  
AT. 82 I X 0.0000 -0.0000 -0.0000 0.0000 0.0000 0.0000  
Y 0.0000 0.0000 -0.0000 0.0000 -0.0000 -0.0000  
Z 0.0000 -0.0000 0.0000 0.0000 0.0000 0.0000  
AT. 83 O X -0.0034 0.0006 -0.0047 -0.0010 -0.0004 0.0002  
Y -0.0004 0.0002 -0.0003 -0.0001 0.0001 -0.0001  
Z -0.0024 0.0003 -0.0035 -0.0007 -0.0002 0.0002  
AT. 84 O X 0.0034 0.0006 -0.0047 0.0010 0.0004 0.0002  
Y 0.0004 0.0002 -0.0003 0.0001 -0.0001 -0.0001  
Z 0.0024 0.0003 -0.0035 0.0007 0.0002 0.0002  
AT. 85 O X 0.0004 0.0002 0.0003 0.0001 0.0003 -0.0004  
Y 0.0001 0.0001 -0.0000 0.0000 0.0003 -0.0003  
Z 0.0002 0.0001 0.0004 0.0002 -0.0003 0.0001  
AT. 86 O X -0.0004 0.0002 0.0003 -0.0001 -0.0003 -0.0004  
Y -0.0001 0.0001 -0.0000 -0.0000 -0.0003 -0.0003  
Z -0.0002 0.0001 0.0004 -0.0002 0.0003 0.0001  
AT. 87 N X -0.0004 -0.0000 -0.0003 -0.0000 -0.0002 0.0002  
Y -0.0017 0.0001 -0.0022 -0.0004 -0.0004 0.0003  
Z 0.0036 -0.0006 0.0054 0.0011 0.0000 0.0002  
AT. 88 N X 0.0004 -0.0000 -0.0003 0.0000 0.0002 0.0002  
Y 0.0017 0.0001 -0.0022 0.0004 0.0004 0.0003  
Z -0.0036 -0.0006 0.0054 -0.0011 -0.0000 0.0002  
AT. 89 N X -0.0002 0.0001 -0.0000 0.0000 0.0001 -0.0001  
Y 0.0001 0.0002 -0.0001 0.0002 -0.0003 0.0001  
Z -0.0004 -0.0003 -0.0006 -0.0004 0.0002 -0.0001  
AT. 90 N X 0.0002 0.0001 -0.0000 -0.0000 -0.0001 -0.0001  
Y -0.0001 0.0002 -0.0001 -0.0002 0.0003 0.0001  
Z 0.0004 -0.0003 -0.0006 0.0004 -0.0002 -0.0001  
AT. 91 C X -0.0023 0.0005 -0.0033 -0.0007 -0.0000 -0.0001  
Y -0.0020 0.0002 -0.0032 -0.0007 -0.0001 -0.0001  
Z 0.0000 -0.0001 0.0003 -0.0002 -0.0001 0.0001

AT. 92 C X 0.0023 0.0005 -0.0033 0.0007 0.0000 -0.0001  
Y 0.0020 0.0002 -0.0032 0.0007 0.0001 -0.0001  
Z -0.0000 -0.0001 0.0003 0.0002 0.0001 0.0001

AT. 93 C X 0.0048 -0.0010 0.0067 0.0014 0.0002 0.0001  
Y 0.0023 -0.0004 0.0034 0.0006 0.0001 -0.0001  
Z -0.0023 0.0004 -0.0035 -0.0007 0.0001 -0.0002

AT. 94 C X -0.0048 -0.0010 0.0067 -0.0014 -0.0002 0.0001  
Y -0.0023 -0.0004 0.0034 -0.0006 -0.0001 -0.0001  
Z 0.0023 0.0004 -0.0035 0.0007 -0.0001 -0.0002

AT. 95 H X 0.0028 -0.0006 0.0044 0.0002 -0.0010 0.0009  
Y 0.0046 -0.0009 0.0061 0.0014 0.0012 -0.0006  
Z -0.0037 0.0008 -0.0053 -0.0008 -0.0004 -0.0002

AT. 96 H X -0.0028 -0.0006 0.0044 -0.0002 0.0010 0.0009  
Y -0.0046 -0.0009 0.0061 -0.0014 -0.0012 -0.0006  
Z 0.0037 0.0008 -0.0053 0.0008 0.0004 -0.0002

AT. 97 H X 0.0076 -0.0018 0.0109 0.0023 0.0001 0.0003  
Y -0.0017 0.0005 -0.0018 -0.0003 -0.0005 0.0003  
Z -0.0042 0.0009 -0.0061 -0.0012 0.0000 -0.0002

AT. 98 H X -0.0076 -0.0018 0.0109 -0.0023 -0.0001 0.0003  
Y 0.0017 0.0005 -0.0018 0.0003 0.0005 0.0003  
Z 0.0042 0.0009 -0.0061 0.0012 -0.0000 -0.0002

AT. 99 C X -0.0000 -0.0000 -0.0001 -0.0000 0.0001 -0.0001  
Y -0.0004 0.0000 -0.0005 -0.0001 0.0001 -0.0000  
Z -0.0000 -0.0002 0.0001 -0.0002 0.0001 -0.0001

AT. 100 C X 0.0000 -0.0000 -0.0001 0.0000 -0.0001 -0.0001  
Y 0.0004 0.0000 -0.0005 0.0001 -0.0001 -0.0000  
Z 0.0000 -0.0002 0.0001 0.0002 -0.0001 -0.0001

AT. 101 C X 0.0001 -0.0000 0.0003 0.0002 -0.0004 0.0003  
Y -0.0000 -0.0002 0.0001 -0.0000 -0.0002 0.0001  
Z 0.0005 0.0003 0.0005 0.0003 -0.0001 0.0001

AT. 102 C X -0.0001 -0.0000 0.0003 -0.0002 0.0004 0.0003  
Y 0.0000 -0.0002 0.0001 0.0000 0.0002 0.0001

Z -0.0005 0.0003 0.0005 -0.0003 0.0001 0.0001  
AT. 103 H X 0.0020 0.0014 0.0017 0.0015 -0.0008 0.0002  
Y -0.0008 -0.0007 -0.0006 -0.0005 -0.0000 0.0002  
Z 0.0000 -0.0014 0.0007 -0.0000 -0.0003 0.0009  
AT. 104 H X -0.0020 0.0014 0.0017 -0.0015 0.0008 0.0002  
Y 0.0008 -0.0007 -0.0006 0.0005 0.0000 0.0002  
Z -0.0000 -0.0014 0.0007 0.0000 0.0003 0.0009  
AT. 105 H X -0.0009 -0.0003 -0.0006 -0.0003 -0.0009 0.0008  
Y 0.0002 0.0012 -0.0007 0.0002 0.0009 -0.0008  
Z 0.0004 0.0007 0.0001 0.0003 0.0001 -0.0002  
AT. 106 H X 0.0009 -0.0003 -0.0006 0.0003 0.0009 0.0008  
Y -0.0002 0.0012 -0.0007 -0.0002 -0.0009 -0.0008  
Z -0.0004 0.0007 0.0001 -0.0003 -0.0001 -0.0002  
AT. 107 C X -0.0050 0.0010 -0.0060 -0.0007 -0.0018 0.0014  
Y 0.0097 -0.0016 0.0120 0.0021 0.0019 -0.0013  
Z 0.0023 -0.0008 0.0050 0.0014 -0.0015 0.0017  
AT. 108 C X 0.0050 0.0010 -0.0060 0.0007 0.0018 0.0014  
Y -0.0097 -0.0016 0.0120 -0.0021 -0.0019 -0.0013  
Z -0.0023 -0.0008 0.0050 -0.0014 0.0015 0.0017  
AT. 109 H X -0.0003 0.0015 -0.0047 -0.0016 0.0040 -0.0039  
Y 0.0214 -0.0029 0.0240 0.0035 0.0072 -0.0060  
Z 0.0213 -0.0032 0.0260 0.0042 0.0060 -0.0050  
AT. 110 H X 0.0003 0.0015 -0.0047 0.0016 -0.0040 -0.0039  
Y -0.0214 -0.0029 0.0240 -0.0035 -0.0072 -0.0060  
Z -0.0213 -0.0032 0.0260 -0.0042 -0.0060 -0.0050  
AT. 111 H X -0.0041 0.0010 -0.0044 -0.0005 -0.0016 0.0015  
Y -0.0113 0.0006 -0.0092 -0.0002 -0.0086 0.0075  
Z 0.0059 -0.0012 0.0078 0.0016 0.0005 -0.0004  
AT. 112 H X 0.0041 0.0010 -0.0044 0.0005 0.0016 0.0015  
Y 0.0113 0.0006 -0.0092 0.0002 0.0086 0.0075  
Z -0.0059 -0.0012 0.0078 -0.0016 -0.0005 -0.0004  
AT. 113 C X -0.0047 0.0011 -0.0063 -0.0009 -0.0009 0.0005



Y -0.0054 0.0007 -0.0080 -0.0018 -0.0001 0.0001  
Z -0.0092 0.0022 -0.0117 -0.0016 -0.0019 0.0012  
AT. 114 C X 0.0047 0.0011 -0.0063 0.0009 0.0009 0.0005  
Y 0.0054 0.0007 -0.0080 0.0018 0.0001 0.0001  
Z 0.0092 0.0022 -0.0117 0.0016 0.0019 0.0012  
AT. 115 C X -0.0068 0.0012 -0.0099 -0.0021 0.0000 -0.0001  
Y -0.0034 0.0015 -0.0023 0.0003 -0.0013 0.0008  
Z -0.0006 0.0016 -0.0013 0.0001 0.0014 -0.0013  
AT. 116 C X 0.0068 0.0012 -0.0099 0.0021 -0.0000 -0.0001  
Y 0.0034 0.0015 -0.0023 -0.0003 0.0013 0.0008  
Z 0.0006 0.0016 -0.0013 -0.0001 -0.0014 -0.0013  
AT. 117 H X -0.0097 0.0048 -0.0126 -0.0016 0.0012 -0.0016  
Y 0.0059 -0.0052 0.0090 0.0007 -0.0031 0.0031  
Z 0.0001 -0.0008 -0.0015 -0.0007 0.0005 -0.0002  
AT. 118 H X 0.0097 0.0048 -0.0126 0.0016 -0.0012 -0.0016  
Y -0.0059 -0.0052 0.0090 -0.0007 0.0031 0.0031  
Z -0.0001 -0.0008 -0.0015 0.0007 -0.0005 -0.0002  
AT. 119 H X -0.0013 -0.0039 -0.0039 -0.0024 -0.0016 0.0018  
Y -0.0074 0.0035 -0.0072 -0.0002 -0.0014 0.0006  
Z 0.0059 -0.0032 0.0061 0.0003 0.0005 0.0001  
AT. 120 H X 0.0013 -0.0039 -0.0039 0.0024 0.0016 0.0018  
Y 0.0074 0.0035 -0.0072 0.0002 0.0014 0.0006  
Z -0.0059 -0.0032 0.0061 -0.0003 -0.0005 0.0001  
AT. 121 C X 0.0093 -0.0013 0.0127 0.0028 0.0005 -0.0004  
Y 0.0028 -0.0002 0.0031 0.0008 0.0003 -0.0002  
Z -0.0062 -0.0005 -0.0081 -0.0023 -0.0009 0.0009  
AT. 122 C X -0.0093 -0.0013 0.0127 -0.0028 -0.0005 -0.0004  
Y -0.0028 -0.0002 0.0031 -0.0008 -0.0003 -0.0002  
Z 0.0062 -0.0005 -0.0081 0.0023 0.0009 0.0009  
AT. 123 H X -0.0063 -0.0019 -0.0078 -0.0030 -0.0011 0.0017  
Y -0.0156 0.0005 -0.0215 -0.0052 -0.0019 0.0019  
Z 0.0100 -0.0012 0.0136 0.0029 0.0012 -0.0009

AT.124 H X 0.0063 -0.0019 -0.0078 0.0030 0.0011 0.0017  
Y 0.0156 0.0005 -0.0215 0.0052 0.0019 0.0019  
Z -0.0100 -0.0012 0.0136 -0.0029 -0.0012 -0.0009

AT.125 H X 0.0031 -0.0000 0.0041 0.0011 0.0001 -0.0004  
Y 0.0308 -0.0013 0.0407 0.0098 0.0036 -0.0032  
Z 0.0004 0.0006 0.0005 0.0004 0.0004 -0.0007

AT.126 H X -0.0031 -0.0000 0.0041 -0.0011 -0.0001 -0.0004  
Y -0.0308 -0.0013 0.0407 -0.0098 -0.0036 -0.0032  
Z -0.0004 0.0006 0.0005 -0.0004 -0.0004 -0.0007

AT.127 C X 0.0076 -0.0015 0.0108 0.0020 0.0008 -0.0003  
Y -0.0029 0.0001 -0.0041 -0.0011 0.0002 -0.0003  
Z -0.0075 0.0011 -0.0115 -0.0024 -0.0004 -0.0000

AT.128 C X -0.0076 -0.0015 0.0108 -0.0020 -0.0008 -0.0003  
Y 0.0029 0.0001 -0.0041 0.0011 -0.0002 -0.0003  
Z 0.0075 0.0011 -0.0115 0.0024 0.0004 -0.0000

AT.129 C X -0.0003 -0.0005 -0.0006 -0.0005 0.0005 -0.0003  
Y 0.0092 -0.0014 0.0149 0.0032 0.0001 0.0005  
Z 0.0097 -0.0009 0.0115 0.0025 0.0022 -0.0019

AT.130 C X 0.0003 -0.0005 -0.0006 0.0005 -0.0005 -0.0003  
Y -0.0092 -0.0014 0.0149 -0.0032 -0.0001 0.0005  
Z -0.0097 -0.0009 0.0115 -0.0025 -0.0022 -0.0019

AT.131 H X -0.0004 -0.0015 0.0037 0.0004 -0.0019 0.0023  
Y 0.0089 0.0010 0.0038 0.0013 0.0047 -0.0050  
Z 0.0091 -0.0010 0.0121 0.0028 0.0010 -0.0006

AT.132 H X 0.0004 -0.0015 0.0037 -0.0004 0.0019 0.0023  
Y -0.0089 0.0010 0.0038 -0.0013 -0.0047 -0.0050  
Z -0.0091 -0.0010 0.0121 -0.0028 -0.0010 -0.0006

AT.133 H X 0.0018 0.0007 -0.0046 -0.0011 0.0041 -0.0049  
Y 0.0129 -0.0024 0.0215 0.0046 -0.0003 0.0009  
Z 0.0145 -0.0030 0.0240 0.0050 -0.0003 0.0011

AT.134 H X -0.0018 0.0007 -0.0046 0.0011 -0.0041 -0.0049  
Y -0.0129 -0.0024 0.0215 -0.0046 0.0003 0.0009

Z -0.0145 -0.0030 0.0240 -0.0050 0.0003 0.0011  
AT. 135 C X -0.0014 0.0007 -0.0008 0.0004 -0.0010 0.0008  
Y -0.0042 0.0006 -0.0060 -0.0013 -0.0002 0.0002  
Z -0.0106 0.0021 -0.0146 -0.0024 -0.0017 0.0009  
AT. 136 C X 0.0014 0.0007 -0.0008 -0.0004 0.0010 0.0008  
Y 0.0042 0.0006 -0.0060 0.0013 0.0002 0.0002  
Z 0.0106 0.0021 -0.0146 0.0024 0.0017 0.0009  
AT. 137 H X 0.0137 -0.0043 0.0166 0.0009 0.0049 -0.0027  
Y 0.0133 -0.0026 0.0179 0.0028 0.0025 -0.0015  
Z 0.0133 -0.0016 0.0192 0.0043 0.0007 -0.0005  
AT. 138 H X -0.0137 -0.0043 0.0166 -0.0009 -0.0049 -0.0027  
Y -0.0133 -0.0026 0.0179 -0.0028 -0.0025 -0.0015  
Z -0.0133 -0.0016 0.0192 -0.0043 -0.0007 -0.0005  
AT. 139 H X -0.0368 0.0080 -0.0482 -0.0071 -0.0071 0.0043  
Y -0.0059 0.0023 -0.0067 0.0002 -0.0029 0.0018  
Z 0.0370 -0.0081 0.0487 0.0072 0.0072 -0.0042  
AT. 140 H X 0.0368 0.0080 -0.0482 0.0071 0.0071 0.0043  
Y 0.0059 0.0023 -0.0067 -0.0002 0.0029 0.0018  
Z -0.0370 -0.0081 0.0487 -0.0072 -0.0072 -0.0042  
AT. 141 H X 0.0480 -0.0090 0.0669 0.0120 0.0061 -0.0037  
Y 0.0187 -0.0027 0.0268 0.0056 0.0015 -0.0009  
Z -0.0135 0.0015 -0.0200 -0.0046 -0.0004 0.0002  
AT. 142 H X -0.0480 -0.0090 0.0669 -0.0120 -0.0061 -0.0037  
Y -0.0187 -0.0027 0.0268 -0.0056 -0.0015 -0.0009  
Z 0.0135 0.0015 -0.0200 0.0046 0.0004 0.0002  
AT. 143 C X 0.0022 0.0001 0.0034 0.0012 -0.0004 0.0004  
Y -0.0039 0.0005 -0.0051 -0.0012 -0.0001 -0.0001  
Z -0.0086 0.0019 -0.0120 -0.0021 -0.0010 0.0005  
AT. 144 C X -0.0022 0.0001 0.0034 -0.0012 0.0004 0.0004  
Y 0.0039 0.0005 -0.0051 0.0012 0.0001 -0.0001  
Z 0.0086 0.0019 -0.0120 0.0021 0.0010 0.0005  
AT. 145 H X -0.0448 0.0079 -0.0621 -0.0130 -0.0030 0.0005

Y -0.0064 0.0014 -0.0090 -0.0015 -0.0011 0.0008  
Z -0.0180 0.0029 -0.0248 -0.0055 -0.0006 -0.0004  
AT. 146 H X 0.0448 0.0079 -0.0621 0.0130 0.0030 0.0005  
Y 0.0064 0.0014 -0.0090 0.0015 0.0011 0.0008  
Z 0.0180 0.0029 -0.0248 0.0055 0.0006 -0.0004  
AT. 147 H X 0.0225 -0.0041 0.0333 0.0065 0.0018 -0.0007  
Y 0.0119 -0.0015 0.0157 0.0038 0.0002 0.0005  
Z 0.0289 -0.0053 0.0419 0.0081 0.0024 -0.0008  
AT. 148 H X -0.0225 -0.0041 0.0333 -0.0065 -0.0018 -0.0007  
Y -0.0119 -0.0015 0.0157 -0.0038 -0.0002 0.0005  
Z -0.0289 -0.0053 0.0419 -0.0081 -0.0024 -0.0008  
AT. 149 H X -0.0112 0.0035 -0.0160 -0.0016 -0.0028 0.0021  
Y 0.0050 -0.0004 0.0078 0.0021 -0.0007 0.0008  
Z 0.0132 -0.0015 0.0197 0.0050 -0.0007 0.0012  
AT. 150 H X 0.0112 0.0035 -0.0160 0.0016 0.0028 0.0021  
Y -0.0050 -0.0004 0.0078 -0.0021 0.0007 0.0008  
Z -0.0132 -0.0015 0.0197 -0.0050 0.0007 0.0012  
AT. 151 C X 0.0027 -0.0013 0.0021 -0.0006 0.0019 -0.0015  
Y -0.0077 0.0005 -0.0121 -0.0028 -0.0004 -0.0000  
Z 0.0187 -0.0042 0.0261 0.0042 0.0024 -0.0013  
AT. 152 C X -0.0027 -0.0013 0.0021 0.0006 -0.0019 -0.0015  
Y 0.0077 0.0005 -0.0121 0.0028 0.0004 -0.0000  
Z -0.0187 -0.0042 0.0261 -0.0042 -0.0024 -0.0013  
AT. 153 H X 0.0028 -0.0008 -0.0014 -0.0015 0.0035 -0.0034  
Y 0.0008 0.0004 0.0005 -0.0001 0.0012 -0.0011  
Z 0.0328 -0.0046 0.0487 0.0092 0.0042 -0.0023  
AT. 154 H X -0.0028 -0.0008 -0.0014 0.0015 -0.0035 -0.0034  
Y -0.0008 0.0004 0.0005 0.0001 -0.0012 -0.0011  
Z -0.0328 -0.0046 0.0487 -0.0092 -0.0042 -0.0023  
AT. 155 H X -0.0005 -0.0024 -0.0031 -0.0023 0.0010 -0.0003  
Y 0.0069 -0.0010 0.0110 0.0018 0.0014 -0.0007  
Z 0.0019 -0.0030 -0.0005 -0.0013 0.0001 -0.0001

AT.156 H X 0.0005 -0.0024 -0.0031 0.0023 -0.0010 -0.0003  
Y -0.0069 -0.0010 0.0110 -0.0018 -0.0014 -0.0007  
Z -0.0019 -0.0030 -0.0005 0.0013 -0.0001 -0.0001

AT.157 O X 0.0087 0.0044 -0.0072 -0.0005 0.0000 -0.0006  
Y 0.0007 0.0003 -0.0003 0.0001 0.0000 -0.0000  
Z -0.0060 -0.0028 0.0044 0.0005 -0.0010 0.0003

AT.158 O X -0.0087 0.0044 -0.0072 0.0005 -0.0000 -0.0006  
Y -0.0007 0.0003 -0.0003 -0.0001 -0.0000 -0.0000  
Z 0.0060 -0.0028 0.0044 -0.0005 0.0010 0.0003

AT.159 O X -0.0092 -0.0047 0.0073 0.0006 -0.0003 0.0005  
Y 0.0001 -0.0001 -0.0001 0.0001 0.0005 0.0002  
Z 0.0053 0.0027 -0.0043 -0.0003 0.0001 -0.0005

AT.160 O X 0.0092 -0.0047 0.0073 -0.0006 0.0003 0.0005  
Y -0.0001 -0.0001 -0.0001 -0.0001 -0.0005 0.0002  
Z -0.0053 0.0027 -0.0043 0.0003 -0.0001 -0.0005

AT.161 H X 0.0126 0.0045 -0.0033 -0.0026 0.0112 0.0002  
Y -0.0064 -0.0020 0.0028 0.0016 -0.0042 0.0004  
Z 0.0178 0.0051 -0.0038 -0.0057 0.0179 -0.0003

AT.162 H X -0.0126 0.0045 -0.0033 0.0026 -0.0112 0.0002  
Y 0.0064 -0.0020 0.0028 -0.0016 0.0042 0.0004  
Z -0.0178 0.0051 -0.0038 0.0057 -0.0179 -0.0003

AT.163 H X -0.0011 0.0000 0.0005 0.0002 -0.0018 -0.0002  
Y -0.0148 -0.0012 0.0080 0.0011 -0.0096 -0.0008  
Z -0.0004 0.0013 -0.0003 0.0001 -0.0018 -0.0004

AT.164 H X 0.0011 0.0000 0.0005 -0.0002 0.0018 -0.0002  
Y 0.0148 -0.0012 0.0080 -0.0011 0.0096 -0.0008  
Z 0.0004 0.0013 -0.0003 -0.0001 0.0018 -0.0004

AT.165 O X 0.0000 -0.0001 -0.0002 -0.0004 0.0002 0.0003  
Y 0.0003 0.0001 0.0007 0.0005 -0.0000 -0.0003  
Z 0.0011 -0.0010 0.0012 0.0018 -0.0015 0.0000

AT.166 O X -0.0000 -0.0001 -0.0002 0.0004 -0.0002 0.0003  
Y -0.0003 0.0001 0.0007 -0.0005 0.0000 -0.0003

Z -0.0011 -0.0010 0.0012 -0.0018 0.0015 0.0000  
 AT.167 H X -0.0007 0.0033 0.0026 0.0013 0.0028 -0.0038  
 Y 0.0026 -0.0072 -0.0038 -0.0018 -0.0060 0.0077  
 Z -0.0004 0.0013 0.0012 0.0002 0.0008 -0.0020  
 AT.168 H X 0.0007 0.0033 0.0026 -0.0013 -0.0028 -0.0038  
 Y -0.0026 -0.0072 -0.0038 0.0018 0.0060 0.0077  
 Z 0.0004 0.0013 0.0012 -0.0002 -0.0008 -0.0020  
 AT.169 O X 0.0001 0.0002 0.0003 0.0001 -0.0002 -0.0002  
 Y -0.0002 0.0003 -0.0002 -0.0004 0.0004 -0.0000  
 Z -0.0010 0.0012 -0.0012 -0.0020 0.0014 -0.0000  
 AT.170 O X -0.0001 0.0002 0.0003 -0.0001 0.0002 -0.0002  
 Y 0.0002 0.0003 -0.0002 0.0004 -0.0004 -0.0000  
 Z 0.0010 0.0012 -0.0012 0.0020 -0.0014 -0.0000  
 AT.171 H X 0.0019 -0.0075 -0.0015 0.0060 -0.0040 0.0021  
 Y 0.0011 -0.0041 -0.0004 0.0036 -0.0019 0.0009  
 Z -0.0002 -0.0010 0.0000 0.0010 0.0011 0.0003  
 AT.172 H X -0.0019 -0.0075 -0.0015 -0.0060 0.0040 0.0021  
 Y -0.0011 -0.0041 -0.0004 -0.0036 0.0019 0.0009  
 Z 0.0002 -0.0010 0.0000 -0.0010 -0.0011 0.0003  
  
 FREQ(CM\*\*-1) 914.23 914.67 915.98 916.05 916.70 916.71  
  
 AT. 1 I X 0.0001 -0.0000 -0.0000 -0.0000 0.0000 0.0000  
 Y 0.0000 -0.0000 -0.0000 0.0000 0.0000 0.0000  
 Z 0.0000 -0.0000 0.0000 -0.0000 0.0000 0.0000  
 AT. 2 I X 0.0001 0.0000 -0.0000 0.0000 0.0000 -0.0000  
 Y 0.0000 0.0000 -0.0000 -0.0000 0.0000 -0.0000  
 Z 0.0000 0.0000 0.0000 0.0000 0.0000 -0.0000  
 AT. 3 I X 0.0001 -0.0000 0.0000 -0.0000 0.0000 0.0000  
 Y -0.0000 0.0000 -0.0000 0.0000 0.0000 -0.0000  
 Z 0.0000 -0.0000 -0.0000 0.0000 0.0000 0.0000  
 AT. 4 I X 0.0001 0.0000 0.0000 0.0000 0.0000 -0.0000

Y -0.0000 -0.0000 -0.0000 -0.0000 0.0000 0.0000  
Z 0.0000 0.0000 -0.0000 -0.0000 0.0000 -0.0000  
AT. 5 O X 0.0024 -0.0008 0.0000 0.0000 0.0008 0.0005  
Y -0.0008 -0.0003 -0.0001 0.0001 -0.0005 -0.0003  
Z -0.0027 0.0006 -0.0000 -0.0000 -0.0009 -0.0004  
AT. 6 O X 0.0024 0.0008 0.0000 -0.0000 0.0008 -0.0005  
Y -0.0008 0.0003 -0.0001 -0.0001 -0.0005 0.0003  
Z -0.0027 -0.0006 -0.0000 0.0000 -0.0009 0.0004  
AT. 7 O X 0.0041 -0.0023 0.0001 -0.0002 0.0012 0.0009  
Y -0.0042 0.0017 0.0000 -0.0000 -0.0013 -0.0008  
Z 0.0036 -0.0019 0.0001 -0.0000 0.0010 0.0007  
AT. 8 O X 0.0041 0.0023 0.0001 0.0002 0.0012 -0.0009  
Y -0.0042 -0.0017 0.0000 0.0000 -0.0013 0.0008  
Z 0.0036 0.0019 0.0001 0.0000 0.0010 -0.0007  
AT. 9 N X -0.0001 0.0013 0.0000 0.0000 0.0002 -0.0005  
Y -0.0009 -0.0015 -0.0001 -0.0001 -0.0009 -0.0001  
Z 0.0051 -0.0027 0.0002 0.0001 0.0016 0.0010  
AT. 10 N X -0.0001 -0.0013 0.0000 -0.0000 0.0002 0.0005  
Y -0.0009 0.0015 -0.0001 0.0001 -0.0009 0.0001  
Z 0.0051 0.0027 0.0002 -0.0001 0.0016 -0.0010  
AT. 11 N X -0.0003 0.0004 0.0001 -0.0002 -0.0003 0.0001  
Y 0.0028 -0.0018 0.0000 0.0001 0.0008 0.0006  
Z -0.0068 0.0026 -0.0000 -0.0002 -0.0016 -0.0013  
AT. 12 N X -0.0003 -0.0004 0.0001 0.0002 -0.0003 -0.0001  
Y 0.0028 0.0018 0.0000 -0.0001 0.0008 -0.0006  
Z -0.0068 -0.0026 -0.0000 0.0002 -0.0016 0.0013  
AT. 13 C X 0.0014 -0.0001 0.0001 -0.0000 0.0007 0.0004  
Y -0.0043 0.0027 -0.0001 -0.0001 -0.0014 -0.0009  
Z 0.0006 -0.0009 0.0001 0.0001 0.0004 0.0003  
AT. 14 C X 0.0014 0.0001 0.0001 0.0000 0.0007 -0.0004  
Y -0.0043 -0.0027 -0.0001 0.0001 -0.0014 0.0009  
Z 0.0006 0.0009 0.0001 -0.0001 0.0004 -0.0003

AT. 15 C X -0.0054 0.0026 0.0000 -0.0001 -0.0018 -0.0013  
Y 0.0052 -0.0024 0.0002 0.0001 0.0018 0.0011  
Z -0.0027 0.0019 -0.0002 0.0000 -0.0010 -0.0007

AT. 16 C X -0.0054 -0.0026 0.0000 0.0001 -0.0018 0.0013  
Y 0.0052 0.0024 0.0002 -0.0001 0.0018 -0.0011  
Z -0.0027 -0.0019 -0.0002 -0.0000 -0.0010 0.0007

AT. 17 H X -0.0075 0.0065 -0.0014 0.0010 -0.0032 -0.0025  
Y 0.0068 -0.0014 -0.0002 0.0004 0.0020 0.0011  
Z -0.0051 0.0020 -0.0002 -0.0000 -0.0017 -0.0011

AT. 18 H X -0.0075 -0.0065 -0.0014 -0.0010 -0.0032 0.0025  
Y 0.0068 0.0014 -0.0002 -0.0004 0.0020 -0.0011  
Z -0.0051 -0.0020 -0.0002 0.0000 -0.0017 0.0011

AT. 19 H X -0.0038 0.0009 -0.0008 0.0001 -0.0013 -0.0009  
Y 0.0038 -0.0024 0.0006 -0.0002 0.0019 0.0010  
Z -0.0030 0.0015 -0.0003 -0.0000 -0.0009 -0.0007

AT. 20 H X -0.0038 -0.0009 -0.0008 -0.0001 -0.0013 0.0009  
Y 0.0038 0.0024 0.0006 0.0002 0.0019 -0.0010  
Z -0.0030 -0.0015 -0.0003 0.0000 -0.0009 0.0007

AT. 21 C X 0.0028 -0.0010 -0.0002 0.0003 0.0007 0.0005  
Y -0.0036 0.0020 -0.0001 0.0002 -0.0009 -0.0006  
Z -0.0032 0.0017 -0.0001 0.0001 -0.0005 -0.0006

AT. 22 C X 0.0028 0.0010 -0.0002 -0.0003 0.0007 -0.0005  
Y -0.0036 -0.0020 -0.0001 -0.0002 -0.0009 0.0006  
Z -0.0032 -0.0017 -0.0001 -0.0001 -0.0005 0.0006

AT. 23 C X -0.0055 0.0032 0.0002 0.0002 -0.0014 -0.0012  
Y 0.0022 -0.0017 -0.0001 -0.0001 0.0005 0.0007  
Z 0.0063 -0.0019 0.0001 -0.0000 0.0016 0.0007

AT. 24 C X -0.0055 -0.0032 0.0002 -0.0002 -0.0014 0.0012  
Y 0.0022 0.0017 -0.0001 0.0001 0.0005 -0.0007  
Z 0.0063 0.0019 0.0001 0.0000 0.0016 -0.0007

AT. 25 H X -0.0073 -0.0004 0.0006 -0.0004 -0.0015 0.0011  
Y 0.0020 -0.0017 0.0000 -0.0001 0.0005 0.0008



Z 0.0067 -0.0068 -0.0006 -0.0006 0.0015 0.0032  
AT. 26 H X -0.0073 0.0004 0.0006 0.0004 -0.0015 -0.0011  
Y 0.0020 0.0017 0.0000 0.0001 0.0005 -0.0008  
Z 0.0067 0.0068 -0.0006 0.0006 0.0015 -0.0032  
AT. 27 H X -0.0095 0.0052 -0.0007 -0.0008 -0.0015 -0.0024  
Y -0.0000 0.0028 -0.0000 0.0002 0.0001 -0.0015  
Z 0.0061 -0.0003 0.0003 0.0003 0.0014 -0.0001  
AT. 28 H X -0.0095 -0.0052 -0.0007 0.0008 -0.0015 0.0024  
Y -0.0000 -0.0028 -0.0000 -0.0002 0.0001 0.0015  
Z 0.0061 0.0003 0.0003 -0.0003 0.0014 0.0001  
AT. 29 C X -0.0099 0.0147 0.0005 -0.0004 -0.0011 -0.0023  
Y 0.0032 0.0085 0.0010 -0.0002 0.0031 -0.0000  
Z 0.0209 -0.0183 0.0003 0.0003 0.0059 0.0056  
AT. 30 C X -0.0099 -0.0147 0.0005 0.0004 -0.0011 0.0023  
Y 0.0032 -0.0085 0.0010 0.0002 0.0031 0.0000  
Z 0.0209 0.0183 0.0003 -0.0003 0.0059 -0.0056  
AT. 31 H X 0.0114 -0.0064 0.0006 -0.0001 0.0043 0.0033  
Y -0.0382 0.0586 0.0013 -0.0009 -0.0058 -0.0120  
Z -0.0270 0.0426 0.0007 -0.0005 -0.0040 -0.0087  
AT. 32 H X 0.0114 0.0064 0.0006 0.0001 0.0043 -0.0033  
Y -0.0382 -0.0586 0.0013 0.0009 -0.0058 0.0120  
Z -0.0270 -0.0426 0.0007 0.0005 -0.0040 0.0087  
AT. 33 H X 0.0141 -0.0114 -0.0003 0.0005 0.0037 0.0029  
Y 0.0651 -0.0702 -0.0003 0.0012 0.0152 0.0175  
Z 0.0097 -0.0012 0.0004 0.0002 0.0039 0.0014  
AT. 34 H X 0.0141 0.0114 -0.0003 -0.0005 0.0037 -0.0029  
Y 0.0651 0.0702 -0.0003 -0.0012 0.0152 -0.0175  
Z 0.0097 0.0012 0.0004 -0.0002 0.0039 -0.0014  
AT. 35 C X -0.0092 0.0033 -0.0002 -0.0003 -0.0032 -0.0014  
Y -0.0100 0.0030 -0.0003 -0.0004 -0.0038 -0.0014  
Z 0.0097 -0.0156 -0.0007 0.0006 0.0010 0.0024  
AT. 36 C X -0.0092 -0.0033 -0.0002 0.0003 -0.0032 0.0014

Y -0.0100 -0.0030 -0.0003 0.0004 -0.0038 0.0014  
Z 0.0097 0.0156 -0.0007 -0.0006 0.0010 -0.0024  
AT. 37 C X 0.0135 -0.0085 -0.0001 0.0007 0.0037 0.0021  
Y 0.0178 -0.0152 -0.0004 0.0010 0.0048 0.0031  
Z -0.0094 -0.0003 -0.0010 0.0006 -0.0040 -0.0026  
AT. 38 C X 0.0135 0.0085 -0.0001 -0.0007 0.0037 -0.0021  
Y 0.0178 0.0152 -0.0004 -0.0010 0.0048 -0.0031  
Z -0.0094 0.0003 -0.0010 -0.0006 -0.0040 0.0026  
AT. 39 H X 0.0053 0.0138 0.0026 -0.0023 0.0042 0.0032  
Y 0.0141 0.0005 0.0018 -0.0011 0.0071 0.0038  
Z -0.0132 0.0077 -0.0001 -0.0005 -0.0046 -0.0021  
AT. 40 H X 0.0053 -0.0138 0.0026 0.0023 0.0042 -0.0032  
Y 0.0141 -0.0005 0.0018 0.0011 0.0071 -0.0038  
Z -0.0132 -0.0077 -0.0001 0.0005 -0.0046 0.0021  
AT. 41 H X 0.0182 -0.0265 -0.0024 0.0030 0.0024 0.0007  
Y 0.0243 -0.0192 -0.0007 0.0014 0.0065 0.0045  
Z -0.0194 0.0217 0.0017 -0.0022 -0.0039 -0.0021  
AT. 42 H X 0.0182 0.0265 -0.0024 -0.0030 0.0024 -0.0007  
Y 0.0243 0.0192 -0.0007 -0.0014 0.0065 -0.0045  
Z -0.0194 -0.0217 0.0017 0.0022 -0.0039 0.0021  
AT. 43 C X -0.0046 0.0055 0.0002 -0.0004 -0.0009 -0.0008  
Y 0.0062 0.0035 0.0003 -0.0004 0.0012 0.0004  
Z -0.0046 0.0049 0.0003 -0.0004 -0.0004 0.0001  
AT. 44 C X -0.0046 -0.0055 0.0002 0.0004 -0.0009 0.0008  
Y 0.0062 -0.0035 0.0003 0.0004 0.0012 -0.0004  
Z -0.0046 -0.0049 0.0003 0.0004 -0.0004 -0.0001  
AT. 45 H X 0.0082 -0.0066 -0.0007 0.0008 0.0011 0.0001  
Y -0.0085 0.0232 0.0014 -0.0019 -0.0005 0.0000  
Z 0.0003 -0.0057 -0.0001 0.0003 -0.0001 -0.0002  
AT. 46 H X 0.0082 0.0066 -0.0007 -0.0008 0.0011 -0.0001  
Y -0.0085 -0.0232 0.0014 0.0019 -0.0005 -0.0000  
Z 0.0003 0.0057 -0.0001 -0.0003 -0.0001 0.0002

AT. 47 H X 0.0021 -0.0035 -0.0001 -0.0001 -0.0005 -0.0010  
Y 0.0205 -0.0170 -0.0007 0.0010 0.0026 0.0002  
Z 0.0011 -0.0043 -0.0004 0.0008 0.0006 0.0003

AT. 48 H X 0.0021 0.0035 -0.0001 0.0001 -0.0005 0.0010  
Y 0.0205 0.0170 -0.0007 -0.0010 0.0026 -0.0002  
Z 0.0011 0.0043 -0.0004 -0.0008 0.0006 -0.0003

AT. 49 C X -0.0043 0.0019 -0.0002 0.0001 -0.0009 -0.0009  
Y -0.0081 0.0035 -0.0000 0.0001 -0.0014 -0.0015  
Z -0.0047 0.0084 0.0001 -0.0003 -0.0008 -0.0014

AT. 50 C X -0.0043 -0.0019 -0.0002 -0.0001 -0.0009 0.0009  
Y -0.0081 -0.0035 -0.0000 -0.0001 -0.0014 0.0015  
Z -0.0047 -0.0084 0.0001 0.0003 -0.0008 0.0014

AT. 51 C X 0.0140 -0.0106 0.0001 0.0002 0.0032 0.0029  
Y 0.0079 -0.0118 -0.0004 0.0004 0.0013 0.0030  
Z -0.0029 0.0103 0.0002 -0.0003 -0.0005 -0.0021

AT. 52 C X 0.0140 0.0106 0.0001 -0.0002 0.0032 -0.0029  
Y 0.0079 0.0118 -0.0004 -0.0004 0.0013 -0.0030  
Z -0.0029 -0.0103 0.0002 0.0003 -0.0005 0.0021

AT. 53 H X -0.0037 0.0247 0.0011 -0.0009 0.0004 -0.0056  
Y -0.0104 0.0272 0.0009 -0.0012 -0.0021 -0.0061  
Z 0.0085 -0.0084 -0.0002 -0.0002 0.0008 0.0028

AT. 54 H X -0.0037 -0.0247 0.0011 0.0009 0.0004 0.0056  
Y -0.0104 -0.0272 0.0009 0.0012 -0.0021 0.0061  
Z 0.0085 0.0084 -0.0002 0.0002 0.0008 -0.0028

AT. 55 H X 0.0336 -0.0517 -0.0011 0.0014 0.0064 0.0131  
Y 0.0059 -0.0041 -0.0002 0.0003 0.0012 0.0011  
Z 0.0083 -0.0080 -0.0003 0.0003 0.0017 0.0025

AT. 56 H X 0.0336 0.0517 -0.0011 -0.0014 0.0064 -0.0131  
Y 0.0059 0.0041 -0.0002 -0.0003 0.0012 -0.0011  
Z 0.0083 0.0080 -0.0003 -0.0003 0.0017 -0.0025

AT. 57 C X -0.0112 0.0097 -0.0000 -0.0004 -0.0032 -0.0022  
Y -0.0068 -0.0033 -0.0007 0.0000 -0.0037 -0.0007

Z 0.0045 -0.0068 -0.0002 0.0001 0.0005 0.0013  
AT. 58 C X -0.0112 -0.0097 -0.0000 0.0004 -0.0032 0.0022  
Y -0.0068 0.0033 -0.0007 -0.0000 -0.0037 0.0007  
Z 0.0045 0.0068 -0.0002 -0.0001 0.0005 -0.0013  
AT. 59 H X 0.0579 -0.0261 0.0015 0.0015 0.0201 0.0095  
Y -0.0299 0.0200 -0.0003 -0.0008 -0.0089 -0.0057  
Z 0.0186 0.0028 0.0014 0.0002 0.0090 0.0019  
AT. 60 H X 0.0579 0.0261 0.0015 -0.0015 0.0201 -0.0095  
Y -0.0299 -0.0200 -0.0003 0.0008 -0.0089 0.0057  
Z 0.0186 -0.0028 0.0014 -0.0002 0.0090 -0.0019  
AT. 61 H X -0.0116 0.0349 0.0020 -0.0008 0.0026 -0.0046  
Y 0.0370 -0.0349 -0.0002 0.0012 0.0093 0.0078  
Z -0.0179 0.0287 0.0011 -0.0008 -0.0016 -0.0048  
AT. 62 H X -0.0116 -0.0349 0.0020 0.0008 0.0026 0.0046  
Y 0.0370 0.0349 -0.0002 -0.0012 0.0093 -0.0078  
Z -0.0179 -0.0287 0.0011 0.0008 -0.0016 0.0048  
AT. 63 H X -0.0154 -0.0125 -0.0014 -0.0007 -0.0096 0.0000  
Y 0.0337 0.0014 0.0020 0.0010 0.0154 0.0033  
Z -0.0257 0.0107 -0.0011 -0.0005 -0.0094 -0.0043  
AT. 64 H X -0.0154 0.0125 -0.0014 0.0007 -0.0096 -0.0000  
Y 0.0337 -0.0014 0.0020 -0.0010 0.0154 -0.0033  
Z -0.0257 -0.0107 -0.0011 0.0005 -0.0094 0.0043  
AT. 65 C X -0.0086 0.0099 0.0000 -0.0001 -0.0014 -0.0024  
Y -0.0034 -0.0018 -0.0002 0.0004 -0.0005 -0.0005  
Z 0.0039 -0.0055 -0.0003 0.0003 0.0006 0.0007  
AT. 66 C X -0.0086 -0.0099 0.0000 0.0001 -0.0014 0.0024  
Y -0.0034 0.0018 -0.0002 -0.0004 -0.0005 0.0005  
Z 0.0039 0.0055 -0.0003 -0.0003 0.0006 -0.0007  
AT. 67 H X 0.0216 -0.0099 0.0010 -0.0011 0.0043 0.0056  
Y 0.0006 -0.0008 -0.0004 0.0003 -0.0001 -0.0005  
Z -0.0253 0.0102 -0.0010 0.0013 -0.0046 -0.0059  
AT. 68 H X 0.0216 0.0099 0.0010 0.0011 0.0043 -0.0056

Y 0.0006 0.0008 -0.0004 -0.0003 -0.0001 0.0005  
Z -0.0253 -0.0102 -0.0010 -0.0013 -0.0046 0.0059  
AT. 69 H X 0.0049 0.0051 0.0002 -0.0006 0.0005 0.0001  
Y 0.0151 -0.0141 0.0004 -0.0004 0.0025 0.0043  
Z 0.0048 -0.0142 0.0004 0.0002 0.0014 0.0029  
AT. 70 H X 0.0049 -0.0051 0.0002 0.0006 0.0005 -0.0001  
Y 0.0151 0.0141 0.0004 0.0004 0.0025 -0.0043  
Z 0.0048 0.0142 0.0004 -0.0002 0.0014 -0.0029  
AT. 71 H X -0.0183 0.0103 0.0003 0.0001 -0.0026 -0.0031  
Y 0.0246 -0.0143 0.0000 -0.0005 0.0039 0.0052  
Z 0.0342 -0.0219 0.0003 -0.0009 0.0056 0.0077  
AT. 72 H X -0.0183 -0.0103 0.0003 -0.0001 -0.0026 0.0031  
Y 0.0246 0.0143 0.0000 0.0005 0.0039 -0.0052  
Z 0.0342 0.0219 0.0003 0.0009 0.0056 -0.0077  
AT. 73 C X 0.0062 -0.0190 -0.0006 0.0005 -0.0001 0.0024  
Y -0.0154 0.0156 0.0004 -0.0009 -0.0034 -0.0035  
Z -0.0118 0.0164 0.0007 -0.0006 -0.0018 -0.0029  
AT. 74 C X 0.0062 0.0190 -0.0006 -0.0005 -0.0001 -0.0024  
Y -0.0154 -0.0156 0.0004 0.0009 -0.0034 0.0035  
Z -0.0118 -0.0164 0.0007 0.0006 -0.0018 0.0029  
AT. 75 H X 0.0251 -0.0340 -0.0010 0.0009 0.0035 0.0076  
Y -0.0086 0.0222 0.0004 0.0001 0.0005 -0.0040  
Z 0.0109 0.0145 0.0004 0.0008 0.0060 0.0001  
AT. 76 H X 0.0251 0.0340 -0.0010 -0.0009 0.0035 -0.0076  
Y -0.0086 -0.0222 0.0004 -0.0001 0.0005 0.0040  
Z 0.0109 -0.0145 0.0004 -0.0008 0.0060 -0.0001  
AT. 77 H X 0.0145 -0.0212 -0.0008 0.0016 0.0033 0.0026  
Y -0.0008 0.0151 0.0004 -0.0004 0.0009 -0.0006  
Z -0.0334 0.0190 0.0008 -0.0021 -0.0090 -0.0059  
AT. 78 H X 0.0145 0.0212 -0.0008 -0.0016 0.0033 -0.0026  
Y -0.0008 -0.0151 0.0004 0.0004 0.0009 0.0006  
Z -0.0334 -0.0190 0.0008 0.0021 -0.0090 0.0059

AT. 79 I X -0.0000 0.0000 0.0000 0.0000 0.0000 0.0001  
Y 0.0000 0.0000 -0.0000 0.0000 -0.0000 -0.0000  
Z 0.0000 0.0000 -0.0000 0.0000 0.0000 -0.0000

AT. 80 I X -0.0000 -0.0000 0.0000 -0.0000 0.0000 -0.0001  
Y 0.0000 -0.0000 -0.0000 -0.0000 -0.0000 0.0000  
Z 0.0000 -0.0000 -0.0000 -0.0000 0.0000 0.0000

AT. 81 I X -0.0000 0.0000 -0.0001 0.0001 0.0001 0.0001  
Y -0.0000 0.0000 0.0000 -0.0000 -0.0000 0.0000  
Z 0.0000 -0.0000 0.0000 -0.0001 -0.0001 -0.0001

AT. 82 I X -0.0000 -0.0000 -0.0001 -0.0001 0.0001 -0.0001  
Y -0.0000 -0.0000 0.0000 0.0000 -0.0000 -0.0000  
Z 0.0000 0.0000 0.0000 0.0001 -0.0001 0.0001

AT. 83 O X -0.0005 0.0006 -0.0009 0.0016 0.0023 0.0022  
Y 0.0000 -0.0002 -0.0008 0.0007 -0.0003 -0.0004  
Z -0.0006 0.0006 -0.0008 0.0013 0.0023 0.0020

AT. 84 O X -0.0005 -0.0006 -0.0009 -0.0016 0.0023 -0.0022  
Y 0.0000 0.0002 -0.0008 -0.0007 -0.0003 0.0004  
Z -0.0006 -0.0006 -0.0008 -0.0013 0.0023 -0.0020

AT. 85 O X -0.0017 0.0012 -0.0036 0.0048 0.0056 0.0044  
Y -0.0012 0.0009 -0.0035 0.0046 0.0046 0.0036  
Z 0.0012 -0.0009 0.0027 -0.0037 -0.0042 -0.0035

AT. 86 O X -0.0017 -0.0012 -0.0036 -0.0048 0.0056 -0.0044  
Y -0.0012 -0.0009 -0.0035 -0.0046 0.0046 -0.0036  
Z 0.0012 0.0009 0.0027 0.0037 -0.0042 0.0035

AT. 87 N X 0.0001 -0.0003 -0.0028 0.0020 -0.0015 -0.0023  
Y 0.0001 -0.0001 -0.0021 0.0021 0.0005 -0.0001  
Z 0.0014 -0.0011 0.0005 -0.0015 -0.0047 -0.0045

AT. 88 N X 0.0001 0.0003 -0.0028 -0.0020 -0.0015 0.0023  
Y 0.0001 0.0001 -0.0021 -0.0021 0.0005 0.0001  
Z 0.0014 0.0011 0.0005 0.0015 -0.0047 0.0045

AT. 89 N X -0.0000 0.0000 -0.0015 0.0019 0.0006 0.0005  
Y 0.0012 -0.0009 0.0021 -0.0030 -0.0039 -0.0033

Z -0.0017 0.0014 -0.0062 0.0082 0.0071 0.0057  
AT. 90 N X -0.0000 -0.0000 -0.0015 -0.0019 0.0006 -0.0005  
Y 0.0012 0.0009 0.0021 0.0030 -0.0039 0.0033  
Z -0.0017 -0.0014 -0.0062 -0.0082 0.0071 -0.0057  
AT. 91 C X -0.0007 0.0006 -0.0006 0.0012 0.0025 0.0023  
Y -0.0007 0.0008 0.0010 -0.0001 0.0031 0.0034  
Z 0.0003 -0.0002 -0.0007 0.0004 -0.0009 -0.0011  
AT. 92 C X -0.0007 -0.0006 -0.0006 -0.0012 0.0025 -0.0023  
Y -0.0007 -0.0008 0.0010 0.0001 0.0031 -0.0034  
Z 0.0003 0.0002 -0.0007 -0.0004 -0.0009 0.0011  
AT. 93 C X 0.0013 -0.0012 -0.0001 -0.0015 -0.0051 -0.0054  
Y 0.0007 -0.0007 0.0003 -0.0009 -0.0023 -0.0022  
Z -0.0010 0.0006 -0.0000 0.0007 0.0035 0.0034  
AT. 94 C X 0.0013 0.0012 -0.0001 0.0015 -0.0051 0.0054  
Y 0.0007 0.0007 0.0003 0.0009 -0.0023 0.0022  
Z -0.0010 -0.0006 -0.0000 -0.0007 0.0035 -0.0034  
AT. 95 H X 0.0025 -0.0019 -0.0004 -0.0014 -0.0063 -0.0066  
Y 0.0003 -0.0008 0.0004 -0.0016 -0.0022 -0.0023  
Z -0.0015 0.0014 0.0001 0.0018 0.0043 0.0044  
AT. 96 H X 0.0025 0.0019 -0.0004 0.0014 -0.0063 0.0066  
Y 0.0003 0.0008 0.0004 0.0016 -0.0022 0.0023  
Z -0.0015 -0.0014 0.0001 -0.0018 0.0043 -0.0044  
AT. 97 H X 0.0015 -0.0008 0.0012 -0.0016 -0.0062 -0.0048  
Y 0.0005 0.0002 0.0016 -0.0011 -0.0012 -0.0007  
Z -0.0011 0.0007 -0.0001 0.0008 0.0042 0.0038  
AT. 98 H X 0.0015 0.0008 0.0012 0.0016 -0.0062 0.0048  
Y 0.0005 -0.0002 0.0016 0.0011 -0.0012 0.0007  
Z -0.0011 -0.0007 -0.0001 -0.0008 0.0042 -0.0038  
AT. 99 C X -0.0011 0.0009 -0.0038 0.0049 0.0045 0.0034  
Y -0.0009 0.0008 -0.0016 0.0022 0.0030 0.0024  
Z -0.0008 0.0007 -0.0025 0.0035 0.0031 0.0024  
AT. 100 C X -0.0011 -0.0009 -0.0038 -0.0049 0.0045 -0.0034

Y -0.0009 -0.0008 -0.0016 -0.0022 0.0030 -0.0024  
Z -0.0008 -0.0007 -0.0025 -0.0035 0.0031 -0.0024  
AT. 101 C X 0.0023 -0.0018 0.0067 -0.0086 -0.0086 -0.0066  
Y 0.0006 -0.0004 0.0016 -0.0019 -0.0019 -0.0014  
Z 0.0014 -0.0011 0.0048 -0.0063 -0.0056 -0.0042  
AT. 102 C X 0.0023 0.0018 0.0067 0.0086 -0.0086 0.0066  
Y 0.0006 0.0004 0.0016 0.0019 -0.0019 0.0014  
Z 0.0014 0.0011 0.0048 0.0063 -0.0056 0.0042  
AT. 103 H X 0.0015 -0.0009 0.0089 -0.0121 -0.0078 -0.0058  
Y 0.0010 -0.0008 0.0008 -0.0006 -0.0024 -0.0019  
Z 0.0040 -0.0031 0.0095 -0.0116 -0.0128 -0.0098  
AT. 104 H X 0.0015 0.0009 0.0089 0.0121 -0.0078 0.0058  
Y 0.0010 0.0008 0.0008 0.0006 -0.0024 0.0019  
Z 0.0040 0.0031 0.0095 0.0116 -0.0128 0.0098  
AT. 105 H X 0.0036 -0.0031 0.0075 -0.0103 -0.0118 -0.0100  
Y -0.0025 0.0017 -0.0030 0.0033 0.0063 0.0052  
Z 0.0006 -0.0007 0.0036 -0.0052 -0.0035 -0.0028  
AT. 106 H X 0.0036 0.0031 0.0075 0.0103 -0.0118 0.0100  
Y -0.0025 -0.0017 -0.0030 -0.0033 0.0063 -0.0052  
Z 0.0006 0.0007 0.0036 0.0052 -0.0035 0.0028  
AT. 107 C X 0.0041 -0.0036 -0.0012 -0.0028 -0.0152 -0.0151  
Y -0.0009 0.0015 0.0183 -0.0164 0.0022 0.0070  
Z 0.0046 -0.0036 -0.0040 -0.0005 -0.0183 -0.0189  
AT. 108 C X 0.0041 0.0036 -0.0012 0.0028 -0.0152 0.0151  
Y -0.0009 -0.0015 0.0183 0.0164 0.0022 -0.0070  
Z 0.0046 0.0036 -0.0040 0.0005 -0.0183 0.0189  
AT. 109 H X -0.0085 0.0072 0.0237 -0.0147 0.0314 0.0369  
Y -0.0105 0.0098 0.0388 -0.0263 0.0393 0.0485  
Z -0.0080 0.0073 0.0246 -0.0148 0.0314 0.0372  
AT. 110 H X -0.0085 -0.0072 0.0237 0.0147 0.0314 -0.0369  
Y -0.0105 -0.0098 0.0388 0.0263 0.0393 -0.0485  
Z -0.0080 -0.0073 0.0246 0.0148 0.0314 -0.0372



AT. 111 H X 0.0031 -0.0029 -0.0072 0.0038 -0.0112 -0.0130  
Y 0.0188 -0.0159 -0.0243 0.0052 -0.0711 -0.0757  
Z 0.0014 -0.0005 0.0125 -0.0129 -0.0064 -0.0026

AT. 112 H X 0.0031 0.0029 -0.0072 -0.0038 -0.0112 0.0130  
Y 0.0188 0.0159 -0.0243 -0.0052 -0.0711 0.0757  
Z 0.0014 0.0005 0.0125 0.0129 -0.0064 0.0026

AT. 113 C X 0.0020 -0.0016 0.0052 -0.0070 -0.0077 -0.0059  
Y -0.0028 0.0018 -0.0071 0.0085 0.0095 0.0071  
Z 0.0026 -0.0026 -0.0081 0.0048 -0.0100 -0.0116

AT. 114 C X 0.0020 0.0016 0.0052 0.0070 -0.0077 0.0059  
Y -0.0028 -0.0018 -0.0071 -0.0085 0.0095 -0.0071  
Z 0.0026 0.0026 -0.0081 -0.0048 -0.0100 0.0116

AT. 115 C X -0.0024 0.0018 -0.0024 0.0042 0.0082 0.0078  
Y 0.0054 -0.0044 0.0005 -0.0048 -0.0191 -0.0176  
Z -0.0032 0.0019 -0.0112 0.0138 0.0116 0.0088

AT. 116 C X -0.0024 -0.0018 -0.0024 -0.0042 0.0082 -0.0078  
Y 0.0054 0.0044 0.0005 0.0048 -0.0191 0.0176  
Z -0.0032 -0.0019 -0.0112 -0.0138 0.0116 -0.0088

AT. 117 H X -0.0023 0.0010 -0.0180 0.0208 0.0096 0.0070  
Y 0.0069 -0.0038 0.0228 -0.0275 -0.0232 -0.0177  
Z -0.0035 0.0026 0.0005 0.0011 0.0108 0.0093

AT. 118 H X -0.0023 -0.0010 -0.0180 -0.0208 0.0096 -0.0070  
Y 0.0069 0.0038 0.0228 0.0275 -0.0232 0.0177  
Z -0.0035 -0.0026 0.0005 -0.0011 0.0108 -0.0093

AT. 119 H X -0.0014 0.0022 0.0199 -0.0196 0.0033 0.0065  
Y 0.0066 -0.0057 -0.0009 -0.0047 -0.0245 -0.0225  
Z -0.0038 0.0035 0.0021 0.0010 0.0140 0.0128

AT. 120 H X -0.0014 -0.0022 0.0199 0.0196 0.0033 -0.0065  
Y 0.0066 0.0057 -0.0009 0.0047 -0.0245 0.0225  
Z -0.0038 -0.0035 0.0021 -0.0010 0.0140 -0.0128

AT. 121 C X 0.0015 -0.0012 -0.0017 0.0010 -0.0042 -0.0052  
Y 0.0010 -0.0008 0.0179 -0.0201 -0.0059 -0.0019

Z -0.0012 0.0012 0.0025 -0.0021 0.0031 0.0035  
AT. 122 C X 0.0015 0.0012 -0.0017 -0.0010 -0.0042 0.0052  
Y 0.0010 0.0008 0.0179 0.0201 -0.0059 0.0019  
Z -0.0012 -0.0012 0.0025 0.0021 0.0031 -0.0035  
AT. 123 H X -0.0023 0.0025 0.0065 -0.0063 0.0050 0.0061  
Y -0.0010 0.0012 0.0351 -0.0382 -0.0035 0.0049  
Z 0.0001 -0.0002 -0.0141 0.0158 0.0026 -0.0011  
AT. 124 H X -0.0023 -0.0025 0.0065 0.0063 0.0050 -0.0061  
Y -0.0010 -0.0012 0.0351 0.0382 -0.0035 -0.0049  
Z 0.0001 0.0002 -0.0141 -0.0158 0.0026 0.0011  
AT. 125 H X 0.0014 -0.0012 0.0001 -0.0007 -0.0043 -0.0045  
Y 0.0042 -0.0041 -0.0067 0.0056 -0.0103 -0.0125  
Z 0.0004 -0.0005 -0.0078 0.0090 0.0005 -0.0012  
AT. 126 H X 0.0014 0.0012 0.0001 0.0007 -0.0043 0.0045  
Y 0.0042 0.0041 -0.0067 -0.0056 -0.0103 0.0125  
Z 0.0004 0.0005 -0.0078 -0.0090 0.0005 0.0012  
AT. 127 C X -0.0002 0.0001 -0.0034 0.0034 0.0007 -0.0005  
Y -0.0020 0.0019 -0.0075 0.0107 0.0096 0.0080  
Z -0.0007 0.0009 0.0144 -0.0133 0.0028 0.0066  
AT. 128 C X -0.0002 -0.0001 -0.0034 -0.0034 0.0007 0.0005  
Y -0.0020 -0.0019 -0.0075 -0.0107 0.0096 -0.0080  
Z -0.0007 -0.0009 0.0144 0.0133 0.0028 -0.0066  
AT. 129 C X -0.0027 0.0024 -0.0046 0.0073 0.0112 0.0098  
Y 0.0020 -0.0023 -0.0163 0.0124 -0.0105 -0.0150  
Z -0.0009 0.0006 0.0137 -0.0127 0.0025 0.0058  
AT. 130 C X -0.0027 -0.0024 -0.0046 -0.0073 0.0112 -0.0098  
Y 0.0020 0.0023 -0.0163 -0.0124 -0.0105 0.0150  
Z -0.0009 -0.0006 0.0137 0.0127 0.0025 -0.0058  
AT. 131 H X 0.0003 -0.0007 -0.0373 0.0341 -0.0028 -0.0131  
Y -0.0039 0.0035 0.0584 -0.0522 0.0137 0.0289  
Z 0.0008 -0.0013 0.0025 -0.0053 -0.0067 -0.0065  
AT. 132 H X 0.0003 0.0007 -0.0373 -0.0341 -0.0028 0.0131

Y -0.0039 -0.0035 0.0584 0.0522 0.0137 -0.0289  
Z 0.0008 0.0013 0.0025 0.0053 -0.0067 0.0065  
AT. 133 H X -0.0063 0.0060 0.0499 -0.0391 0.0292 0.0424  
Y 0.0030 -0.0032 -0.0248 0.0197 -0.0135 -0.0203  
Z 0.0025 -0.0027 -0.0261 0.0211 -0.0117 -0.0190  
AT. 134 H X -0.0063 -0.0060 0.0499 0.0391 0.0292 -0.0424  
Y 0.0030 0.0032 -0.0248 -0.0197 -0.0135 0.0203  
Z 0.0025 0.0027 -0.0261 -0.0211 -0.0117 0.0190  
AT. 135 C X 0.0025 -0.0022 -0.0070 0.0047 -0.0083 -0.0097  
Y -0.0025 0.0014 -0.0125 0.0131 0.0084 0.0042  
Z 0.0016 -0.0015 0.0027 -0.0047 -0.0060 -0.0050  
AT. 136 C X 0.0025 0.0022 -0.0070 -0.0047 -0.0083 0.0097  
Y -0.0025 -0.0014 -0.0125 -0.0131 0.0084 -0.0042  
Z 0.0016 0.0015 0.0027 0.0047 -0.0060 0.0050  
AT. 137 H X -0.0171 0.0124 -0.0435 0.0545 0.0588 0.0427  
Y -0.0032 0.0028 -0.0033 0.0066 0.0117 0.0101  
Z 0.0076 -0.0044 0.0314 -0.0338 -0.0250 -0.0142  
AT. 138 H X -0.0171 -0.0124 -0.0435 -0.0545 0.0588 -0.0427  
Y -0.0032 -0.0028 -0.0033 -0.0066 0.0117 -0.0101  
Z 0.0076 0.0044 0.0314 0.0338 -0.0250 0.0142  
AT. 139 H X 0.0076 -0.0078 -0.0178 0.0076 -0.0277 -0.0312  
Y 0.0093 -0.0069 0.0130 -0.0189 -0.0314 -0.0254  
Z -0.0084 0.0082 0.0098 0.0006 0.0307 0.0318  
AT. 140 H X 0.0076 0.0078 -0.0178 -0.0076 -0.0277 0.0312  
Y 0.0093 0.0069 0.0130 0.0189 -0.0314 0.0254  
Z -0.0084 -0.0082 0.0098 -0.0006 0.0307 -0.0318  
AT. 141 H X 0.0026 0.0002 0.0226 -0.0186 -0.0054 0.0020  
Y 0.0062 -0.0035 0.0221 -0.0234 -0.0197 -0.0118  
Z -0.0073 0.0045 -0.0203 0.0231 0.0240 0.0164  
AT. 142 H X 0.0026 -0.0002 0.0226 0.0186 -0.0054 -0.0020  
Y 0.0062 0.0035 0.0221 0.0234 -0.0197 0.0118  
Z -0.0073 -0.0045 -0.0203 -0.0231 0.0240 -0.0164

AT. 143 C X 0.0014 -0.0018 -0.0095 0.0072 -0.0067 -0.0088  
Y -0.0012 0.0012 -0.0063 0.0090 0.0065 0.0055  
Z 0.0011 -0.0007 0.0039 -0.0048 -0.0036 -0.0023

AT. 144 C X 0.0014 0.0018 -0.0095 -0.0072 -0.0067 0.0088  
Y -0.0012 -0.0012 -0.0063 -0.0090 0.0065 -0.0055  
Z 0.0011 0.0007 0.0039 0.0048 -0.0036 0.0023

AT. 145 H X -0.0029 0.0046 0.0091 0.0001 0.0205 0.0246  
Y 0.0022 -0.0017 0.0106 -0.0135 -0.0090 -0.0064  
Z -0.0037 0.0040 -0.0094 0.0175 0.0200 0.0188

AT. 146 H X -0.0029 -0.0046 0.0091 -0.0001 0.0205 -0.0246  
Y 0.0022 0.0017 0.0106 0.0135 -0.0090 0.0064  
Z -0.0037 -0.0040 -0.0094 -0.0175 0.0200 -0.0188

AT. 147 H X -0.0014 0.0001 -0.0418 0.0433 0.0051 -0.0048  
Y 0.0030 -0.0033 -0.0005 -0.0057 -0.0145 -0.0164  
Z -0.0008 -0.0005 -0.0391 0.0390 0.0022 -0.0080

AT. 148 H X -0.0014 -0.0001 -0.0418 -0.0433 0.0051 0.0048  
Y 0.0030 0.0033 -0.0005 0.0057 -0.0145 0.0164  
Z -0.0008 0.0005 -0.0391 -0.0390 0.0022 0.0080

AT. 149 H X 0.0081 -0.0072 0.0344 -0.0474 -0.0367 -0.0292  
Y 0.0036 -0.0038 0.0096 -0.0163 -0.0185 -0.0167  
Z 0.0057 -0.0064 0.0079 -0.0189 -0.0299 -0.0288

AT. 150 H X 0.0081 0.0072 0.0344 0.0474 -0.0367 0.0292  
Y 0.0036 0.0038 0.0096 0.0163 -0.0185 0.0167  
Z 0.0057 0.0064 0.0079 0.0189 -0.0299 0.0288

AT. 151 C X -0.0032 0.0034 0.0270 -0.0233 0.0111 0.0175  
Y -0.0024 0.0022 0.0019 0.0012 0.0111 0.0116  
Z -0.0027 0.0025 -0.0090 0.0125 0.0121 0.0088

AT. 152 C X -0.0032 -0.0034 0.0270 0.0233 0.0111 -0.0175  
Y -0.0024 -0.0022 0.0019 -0.0012 0.0111 -0.0116  
Z -0.0027 -0.0025 -0.0090 -0.0125 0.0121 -0.0088

AT. 153 H X -0.0058 0.0063 0.0381 -0.0284 0.0248 0.0342  
Y -0.0008 0.0010 0.0170 -0.0159 0.0012 0.0057

Z 0.0012 -0.0007 0.0106 -0.0131 -0.0099 -0.0079  
AT. 154 H X -0.0058 -0.0063 0.0381 0.0284 0.0248 -0.0342  
Y -0.0008 -0.0010 0.0170 0.0159 0.0012 -0.0057  
Z 0.0012 0.0007 0.0106 0.0131 -0.0099 0.0079  
AT. 155 H X -0.0045 0.0046 0.0249 -0.0217 0.0142 0.0191  
Y 0.0001 0.0002 0.0163 -0.0181 -0.0052 -0.0013  
Z -0.0058 0.0051 -0.0251 0.0336 0.0307 0.0232  
AT. 156 H X -0.0045 -0.0046 0.0249 0.0217 0.0142 -0.0191  
Y 0.0001 -0.0002 0.0163 0.0181 -0.0052 0.0013  
Z -0.0058 -0.0051 -0.0251 -0.0336 0.0307 -0.0232  
AT. 157 O X -0.0022 0.0005 -0.0012 0.0009 -0.0011 -0.0019  
Y -0.0001 0.0001 0.0000 -0.0001 0.0000 -0.0000  
Z 0.0024 -0.0014 0.0009 -0.0005 0.0012 0.0019  
AT. 158 O X -0.0022 -0.0005 -0.0012 -0.0009 -0.0011 0.0019  
Y -0.0001 -0.0001 0.0000 0.0001 0.0000 0.0000  
Z 0.0024 0.0014 0.0009 0.0005 0.0012 -0.0019  
AT. 159 O X 0.0026 -0.0009 0.0012 -0.0008 0.0013 0.0021  
Y -0.0002 0.0004 0.0001 0.0002 -0.0001 -0.0004  
Z -0.0019 0.0006 -0.0007 0.0005 -0.0008 -0.0013  
AT. 160 O X 0.0026 0.0009 0.0012 0.0008 0.0013 -0.0021  
Y -0.0002 -0.0004 0.0001 -0.0002 -0.0001 0.0004  
Z -0.0019 -0.0006 -0.0007 -0.0005 -0.0008 0.0013  
AT. 161 H X -0.0140 0.0124 -0.0022 0.0013 -0.0073 -0.0093  
Y 0.0058 -0.0045 0.0011 -0.0006 0.0029 0.0037  
Z -0.0228 0.0194 -0.0029 0.0013 -0.0116 -0.0143  
AT. 162 H X -0.0140 -0.0124 -0.0022 -0.0013 -0.0073 0.0093  
Y 0.0058 0.0045 0.0011 0.0006 0.0029 -0.0037  
Z -0.0228 -0.0194 -0.0029 -0.0013 -0.0116 0.0143  
AT. 163 H X 0.0009 -0.0015 0.0002 -0.0004 0.0009 0.0015  
Y 0.0093 -0.0086 -0.0018 -0.0028 0.0036 0.0082  
Z 0.0010 -0.0013 -0.0008 -0.0002 0.0002 0.0010  
AT. 164 H X 0.0009 0.0015 0.0002 0.0004 0.0009 -0.0015

|                                                        |     |         |         |         |         |         |         |
|--------------------------------------------------------|-----|---------|---------|---------|---------|---------|---------|
|                                                        | Y   | 0.0093  | 0.0086  | -0.0018 | 0.0028  | 0.0036  | -0.0082 |
|                                                        | Z   | 0.0010  | 0.0013  | -0.0008 | 0.0002  | 0.0002  | -0.0010 |
| AT. 165                                                | O X | -0.0002 | -0.0002 | -0.0000 | -0.0002 | -0.0001 | -0.0002 |
|                                                        | Y   | 0.0002  | 0.0001  | 0.0002  | -0.0001 | -0.0004 | -0.0001 |
|                                                        | Z   | 0.0006  | 0.0017  | 0.0006  | 0.0001  | -0.0014 | -0.0004 |
| AT. 166                                                | O X | -0.0002 | 0.0002  | -0.0000 | 0.0002  | -0.0001 | 0.0002  |
|                                                        | Y   | 0.0002  | -0.0001 | 0.0002  | 0.0001  | -0.0004 | 0.0001  |
|                                                        | Z   | 0.0006  | -0.0017 | 0.0006  | -0.0001 | -0.0014 | 0.0004  |
| AT. 167                                                | H X | -0.0004 | -0.0020 | 0.0004  | 0.0001  | 0.0018  | 0.0023  |
|                                                        | Y   | 0.0012  | 0.0047  | -0.0004 | -0.0001 | -0.0040 | -0.0045 |
|                                                        | Z   | -0.0002 | -0.0008 | 0.0004  | -0.0007 | -0.0007 | -0.0002 |
| AT. 168                                                | H X | -0.0004 | 0.0020  | 0.0004  | -0.0001 | 0.0018  | -0.0023 |
|                                                        | Y   | 0.0012  | -0.0047 | -0.0004 | 0.0001  | -0.0040 | 0.0045  |
|                                                        | Z   | -0.0002 | 0.0008  | 0.0004  | 0.0007  | -0.0007 | 0.0002  |
| AT. 169                                                | O X | 0.0001  | 0.0002  | 0.0001  | 0.0000  | -0.0000 | 0.0000  |
|                                                        | Y   | -0.0002 | -0.0005 | -0.0001 | 0.0002  | 0.0003  | 0.0003  |
|                                                        | Z   | -0.0007 | -0.0017 | -0.0008 | -0.0002 | 0.0017  | 0.0003  |
| AT. 170                                                | O X | 0.0001  | -0.0002 | 0.0001  | -0.0000 | -0.0000 | -0.0000 |
|                                                        | Y   | -0.0002 | 0.0005  | -0.0001 | -0.0002 | 0.0003  | -0.0003 |
|                                                        | Z   | -0.0007 | 0.0017  | -0.0008 | 0.0002  | 0.0017  | -0.0003 |
| AT. 171                                                | H X | 0.0016  | 0.0041  | -0.0003 | -0.0006 | -0.0030 | -0.0016 |
|                                                        | Y   | 0.0012  | 0.0023  | 0.0003  | 0.0001  | -0.0019 | -0.0004 |
|                                                        | Z   | 0.0004  | -0.0001 | 0.0002  | 0.0003  | 0.0001  | 0.0004  |
| AT. 172                                                | H X | 0.0016  | -0.0041 | -0.0003 | 0.0006  | -0.0030 | 0.0016  |
|                                                        | Y   | 0.0012  | -0.0023 | 0.0003  | -0.0001 | -0.0019 | 0.0004  |
|                                                        | Z   | 0.0004  | 0.0001  | 0.0002  | -0.0003 | 0.0001  | -0.0004 |
| FREQ(CM**-1) 921.67 923.61 926.67 927.01 966.30 966.61 |     |         |         |         |         |         |         |
| AT. 11                                                 | X   | -0.0000 | 0.0000  | -0.0000 | 0.0000  | 0.0001  | 0.0000  |
|                                                        | Y   | 0.0000  | 0.0000  | 0.0000  | 0.0000  | 0.0001  | 0.0001  |
|                                                        | Z   | 0.0001  | 0.0001  | -0.0000 | 0.0000  | 0.0001  | 0.0001  |

AT. 2 I X -0.0000 -0.0000 0.0000 0.0000 0.0001 -0.0000  
Y 0.0000 -0.0000 -0.0000 0.0000 0.0001 -0.0001  
Z 0.0001 -0.0001 0.0000 0.0000 0.0001 -0.0001

AT. 3 I X -0.0000 -0.0000 0.0000 0.0000 -0.0001 -0.0001  
Y -0.0001 -0.0001 -0.0000 0.0000 -0.0001 -0.0001  
Z 0.0000 0.0001 0.0000 -0.0000 -0.0000 -0.0000

AT. 4 I X -0.0000 0.0000 -0.0000 0.0000 -0.0001 0.0001  
Y -0.0001 0.0001 0.0000 0.0000 -0.0001 0.0001  
Z 0.0000 -0.0001 -0.0000 -0.0000 -0.0000 0.0000

AT. 5 O X -0.0006 -0.0000 0.0001 0.0003 0.0056 0.0058  
Y -0.0000 -0.0004 0.0000 -0.0001 -0.0028 -0.0029  
Z 0.0003 -0.0003 -0.0001 -0.0002 -0.0080 -0.0080

AT. 6 O X -0.0006 0.0000 -0.0001 0.0003 0.0056 -0.0058  
Y -0.0000 0.0004 -0.0000 -0.0001 -0.0028 0.0029  
Z 0.0003 0.0003 0.0001 -0.0002 -0.0080 0.0080

AT. 7 O X 0.0001 0.0011 0.0000 0.0002 -0.0054 -0.0053  
Y 0.0005 -0.0003 0.0001 -0.0002 0.0054 0.0054  
Z -0.0006 0.0002 0.0000 0.0000 -0.0052 -0.0052

AT. 8 O X 0.0001 -0.0011 -0.0000 0.0002 -0.0054 0.0053  
Y 0.0005 0.0003 -0.0001 -0.0002 0.0054 -0.0054  
Z -0.0006 -0.0002 -0.0000 0.0000 -0.0052 0.0052

AT. 9 N X 0.0047 0.0046 0.0000 0.0000 0.0065 0.0065  
Y -0.0025 -0.0030 0.0000 0.0000 0.0002 0.0002  
Z 0.0007 0.0015 0.0002 0.0003 0.0136 0.0134

AT. 10 N X 0.0047 -0.0046 -0.0000 0.0000 0.0065 -0.0065  
Y -0.0025 0.0030 -0.0000 0.0000 0.0002 -0.0002  
Z 0.0007 -0.0015 -0.0002 0.0003 0.0136 -0.0134

AT. 11 N X -0.0050 -0.0047 0.0000 0.0000 -0.0057 -0.0056  
Y 0.0022 0.0025 -0.0001 -0.0000 -0.0093 -0.0093  
Z 0.0054 0.0040 0.0001 0.0001 0.0120 0.0118

AT. 12 N X -0.0050 0.0047 -0.0000 0.0000 -0.0057 0.0056  
Y 0.0022 -0.0025 0.0001 -0.0000 -0.0093 0.0093

Z 0.0054 -0.0040 -0.0001 0.0001 0.0120 -0.0118  
AT. 13 C X 0.0010 0.0014 0.0000 0.0001 0.0055 0.0055  
Y -0.0008 -0.0014 -0.0001 -0.0002 -0.0093 -0.0095  
Z 0.0012 0.0016 0.0001 0.0001 0.0032 0.0037  
AT. 14 C X 0.0010 -0.0014 -0.0000 0.0001 0.0055 -0.0055  
Y -0.0008 0.0014 0.0001 -0.0002 -0.0093 0.0095  
Z 0.0012 -0.0016 -0.0001 0.0001 0.0032 -0.0037  
AT. 15 C X -0.0008 -0.0018 -0.0001 -0.0005 -0.0082 -0.0082  
Y 0.0010 0.0019 0.0001 0.0002 0.0095 0.0095  
Z -0.0017 -0.0021 -0.0001 -0.0001 -0.0034 -0.0033  
AT. 16 C X -0.0008 0.0018 0.0001 -0.0005 -0.0082 0.0082  
Y 0.0010 -0.0019 -0.0001 0.0002 0.0095 -0.0095  
Z -0.0017 0.0021 0.0001 -0.0001 -0.0034 0.0033  
AT. 17 H X -0.0116 -0.0140 -0.0003 -0.0004 -0.0364 -0.0376  
Y -0.0028 -0.0015 0.0000 0.0007 0.0109 0.0119  
Z -0.0010 -0.0023 -0.0000 -0.0006 -0.0154 -0.0168  
AT. 18 H X -0.0116 0.0140 0.0003 -0.0004 -0.0364 0.0376  
Y -0.0028 0.0015 -0.0000 0.0007 0.0109 -0.0119  
Z -0.0010 0.0023 0.0000 -0.0006 -0.0154 0.0168  
AT. 19 H X 0.0060 0.0056 0.0001 0.0004 0.0002 -0.0000  
Y 0.0084 0.0088 0.0003 0.0001 0.0101 0.0096  
Z 0.0031 0.0026 0.0000 0.0001 -0.0012 -0.0014  
AT. 20 H X 0.0060 -0.0056 -0.0001 0.0004 0.0002 0.0000  
Y 0.0084 -0.0088 -0.0003 0.0001 0.0101 -0.0096  
Z 0.0031 -0.0026 -0.0000 0.0001 -0.0012 0.0014  
AT. 21 C X -0.0019 -0.0013 -0.0002 -0.0002 -0.0054 -0.0053  
Y 0.0005 -0.0002 -0.0000 -0.0002 0.0053 0.0053  
Z 0.0035 0.0030 -0.0001 -0.0002 0.0090 0.0088  
AT. 22 C X -0.0019 0.0013 0.0002 -0.0002 -0.0054 0.0053  
Y 0.0005 0.0002 0.0000 -0.0002 0.0053 -0.0053  
Z 0.0035 -0.0030 0.0001 -0.0002 0.0090 -0.0088  
AT. 23 C X 0.0028 0.0013 0.0001 -0.0002 0.0082 0.0076



Y -0.0004 0.0006 -0.0001 -0.0001 -0.0036 -0.0033  
Z -0.0045 -0.0037 -0.0001 0.0003 -0.0085 -0.0089  
AT. 24 C X 0.0028 -0.0013 -0.0001 -0.0002 0.0082 -0.0076  
Y -0.0004 -0.0006 0.0001 -0.0001 -0.0036 0.0033  
Z -0.0045 0.0037 0.0001 0.0003 -0.0085 0.0089  
AT. 25 H X 0.0167 0.0173 0.0017 0.0001 0.0257 0.0281  
Y 0.0013 0.0022 0.0002 -0.0000 -0.0004 -0.0001  
Z -0.0015 0.0023 -0.0003 -0.0002 -0.0142 -0.0111  
AT. 26 H X 0.0167 -0.0173 -0.0017 0.0001 0.0257 -0.0281  
Y 0.0013 -0.0022 -0.0002 -0.0000 -0.0004 0.0001  
Z -0.0015 -0.0023 0.0003 -0.0002 -0.0142 0.0111  
AT. 27 H X -0.0055 -0.0078 -0.0010 0.0006 0.0043 0.0038  
Y -0.0070 -0.0090 -0.0001 0.0006 -0.0026 -0.0039  
Z -0.0067 -0.0071 0.0002 0.0005 -0.0079 -0.0090  
AT. 28 H X -0.0055 0.0078 0.0010 0.0006 0.0043 -0.0038  
Y -0.0070 0.0090 0.0001 0.0006 -0.0026 0.0039  
Z -0.0067 0.0071 -0.0002 0.0005 -0.0079 0.0090  
AT. 29 C X 0.0026 0.0026 -0.0004 -0.0005 -0.0196 -0.0198  
Y 0.0089 0.0110 -0.0002 -0.0001 0.0043 0.0040  
Z 0.0027 0.0058 0.0002 0.0007 0.0037 0.0036  
AT. 30 C X 0.0026 -0.0026 0.0004 -0.0005 -0.0196 0.0198  
Y 0.0089 -0.0110 0.0002 -0.0001 0.0043 -0.0040  
Z 0.0027 -0.0058 -0.0002 0.0007 0.0037 -0.0036  
AT. 31 H X 0.0016 0.0040 -0.0001 0.0002 0.0037 0.0034  
Y 0.0138 0.0122 -0.0010 -0.0018 -0.0209 -0.0213  
Z 0.0096 0.0087 -0.0008 -0.0014 -0.0186 -0.0191  
AT. 32 H X 0.0016 -0.0040 0.0001 0.0002 0.0037 -0.0034  
Y 0.0138 -0.0122 0.0010 -0.0018 -0.0209 0.0213  
Z 0.0096 -0.0087 0.0008 -0.0014 -0.0186 0.0191  
AT. 33 H X 0.0067 0.0085 -0.0001 0.0000 -0.0254 -0.0256  
Y -0.0016 0.0054 0.0012 0.0027 0.0405 0.0408  
Z 0.0100 0.0122 -0.0003 -0.0002 -0.0161 -0.0165

AT. 34 H X 0.0067 -0.0085 0.0001 0.0000 -0.0254 0.0256  
Y -0.0016 -0.0054 -0.0012 0.0027 0.0405 -0.0408  
Z 0.0100 -0.0122 0.0003 -0.0002 -0.0161 0.0165

AT. 35 C X -0.0078 -0.0098 0.0001 -0.0000 0.0012 0.0013  
Y -0.0113 -0.0135 0.0001 -0.0000 0.0013 0.0016  
Z -0.0018 -0.0015 0.0002 0.0003 -0.0045 -0.0042

AT. 36 C X -0.0078 0.0098 -0.0001 -0.0000 0.0012 -0.0013  
Y -0.0113 0.0135 -0.0001 -0.0000 0.0013 -0.0016  
Z -0.0018 0.0015 -0.0002 0.0003 -0.0045 0.0042

AT. 37 C X 0.0058 0.0074 0.0000 0.0001 -0.0055 -0.0058  
Y 0.0129 0.0153 0.0000 0.0002 0.0095 0.0096  
Z 0.0002 -0.0027 0.0002 -0.0002 0.0119 0.0122

AT. 38 C X 0.0058 -0.0074 -0.0000 0.0001 -0.0055 0.0058  
Y 0.0129 -0.0153 -0.0000 0.0002 0.0095 -0.0096  
Z 0.0002 0.0027 -0.0002 -0.0002 0.0119 -0.0122

AT. 39 H X -0.0198 -0.0158 -0.0002 0.0005 -0.0449 -0.0457  
Y 0.0127 0.0168 -0.0002 0.0007 -0.0012 -0.0019  
Z -0.0168 -0.0188 0.0001 -0.0002 -0.0094 -0.0092

AT. 40 H X -0.0198 0.0158 0.0002 0.0005 -0.0449 0.0457  
Y 0.0127 -0.0168 0.0002 0.0007 -0.0012 0.0019  
Z -0.0168 0.0188 -0.0001 -0.0002 -0.0094 0.0092

AT. 41 H X 0.0245 0.0239 0.0003 -0.0000 0.0265 0.0268  
Y 0.0105 0.0138 -0.0003 0.0000 0.0019 0.0020  
Z -0.0179 -0.0191 0.0001 0.0001 -0.0157 -0.0161

AT. 42 H X 0.0245 -0.0239 -0.0003 -0.0000 0.0265 -0.0268  
Y 0.0105 -0.0138 0.0003 0.0000 0.0019 -0.0020  
Z -0.0179 0.0191 -0.0001 0.0001 -0.0157 0.0161

AT. 43 C X -0.0048 -0.0046 0.0001 0.0001 0.0228 0.0228  
Y -0.0177 -0.0159 0.0002 0.0002 -0.0007 -0.0008  
Z -0.0008 -0.0005 -0.0001 -0.0002 -0.0011 -0.0010

AT. 44 C X -0.0048 0.0046 -0.0001 0.0001 0.0228 -0.0228  
Y -0.0177 0.0159 -0.0002 0.0002 -0.0007 0.0008

Z -0.0008 0.0005 0.0001 -0.0002 -0.0011 0.0010  
AT. 45 H X 0.0014 0.0017 -0.0002 -0.0002 -0.0061 -0.0060  
Y -0.0365 -0.0329 0.0001 0.0000 0.0410 0.0410  
Z 0.0138 0.0120 0.0001 0.0001 -0.0207 -0.0208  
AT. 46 H X 0.0014 -0.0017 0.0002 -0.0002 -0.0061 0.0060  
Y -0.0365 0.0329 -0.0001 0.0000 0.0410 -0.0410  
Z 0.0138 -0.0120 -0.0001 0.0001 -0.0207 0.0208  
AT. 47 H X -0.0026 -0.0034 0.0004 0.0006 0.0175 0.0171  
Y 0.0022 0.0018 0.0004 0.0006 -0.0394 -0.0397  
Z 0.0173 0.0167 -0.0003 -0.0005 -0.0346 -0.0343  
AT. 48 H X -0.0026 0.0034 -0.0004 0.0006 0.0175 -0.0171  
Y 0.0022 -0.0018 -0.0004 0.0006 -0.0394 0.0397  
Z 0.0173 -0.0167 0.0003 -0.0005 -0.0346 0.0343  
AT. 49 C X 0.0109 0.0101 -0.0002 -0.0003 -0.0015 -0.0012  
Y 0.0155 0.0139 -0.0002 -0.0003 -0.0010 -0.0011  
Z -0.0000 0.0001 -0.0002 -0.0003 -0.0016 -0.0014  
AT. 50 C X 0.0109 -0.0101 0.0002 -0.0003 -0.0015 0.0012  
Y 0.0155 -0.0139 0.0002 -0.0003 -0.0010 0.0011  
Z -0.0000 -0.0001 0.0002 -0.0003 -0.0016 0.0014  
AT. 51 C X -0.0090 -0.0073 0.0003 0.0005 0.0071 0.0069  
Y -0.0126 -0.0113 0.0002 0.0003 -0.0155 -0.0153  
Z -0.0052 -0.0052 0.0001 0.0000 0.0056 0.0052  
AT. 52 C X -0.0090 0.0073 -0.0003 0.0005 0.0071 -0.0069  
Y -0.0126 0.0113 -0.0002 0.0003 -0.0155 0.0153  
Z -0.0052 0.0052 -0.0001 0.0000 0.0056 -0.0052  
AT. 53 H X 0.0084 0.0077 0.0002 0.0001 0.0440 0.0429  
Y -0.0037 -0.0050 0.0000 -0.0001 0.0155 0.0145  
Z -0.0266 -0.0250 0.0002 0.0004 -0.0238 -0.0238  
AT. 54 H X 0.0084 -0.0077 -0.0002 0.0001 0.0440 -0.0429  
Y -0.0037 0.0050 -0.0000 -0.0001 0.0155 -0.0145  
Z -0.0266 0.0250 -0.0002 0.0004 -0.0238 0.0238  
AT. 55 H X -0.0285 -0.0239 0.0004 0.0010 -0.0364 -0.0351

Y -0.0085 -0.0076 0.0002 0.0002 -0.0004 -0.0008  
Z -0.0136 -0.0119 0.0002 0.0003 -0.0044 -0.0046  
AT. 56 H X -0.0285 0.0239 -0.0004 0.0010 -0.0364 0.0351  
Y -0.0085 0.0076 -0.0002 0.0002 -0.0004 0.0008  
Z -0.0136 0.0119 -0.0002 0.0003 -0.0044 0.0046  
AT. 57 C X -0.0083 -0.0093 0.0000 -0.0002 0.0054 0.0053  
Y -0.0135 -0.0152 0.0003 0.0001 -0.0020 -0.0022  
Z -0.0020 -0.0016 -0.0000 0.0001 -0.0055 -0.0056  
AT. 58 C X -0.0083 0.0093 -0.0000 -0.0002 0.0054 -0.0053  
Y -0.0135 0.0152 -0.0003 0.0001 -0.0020 0.0022  
Z -0.0020 0.0016 0.0000 0.0001 -0.0055 0.0056  
AT. 59 H X 0.0584 0.0681 -0.0007 0.0003 -0.0173 -0.0166  
Y -0.0215 -0.0254 0.0003 -0.0002 0.0157 0.0154  
Z 0.0327 0.0374 -0.0005 -0.0001 0.0051 0.0055  
AT. 60 H X 0.0584 -0.0681 0.0007 0.0003 -0.0173 0.0166  
Y -0.0215 0.0254 -0.0003 -0.0002 0.0157 -0.0154  
Z 0.0327 -0.0374 0.0005 -0.0001 0.0051 -0.0055  
AT. 61 H X 0.0243 0.0237 -0.0003 -0.0004 0.0260 0.0263  
Y 0.0221 0.0230 -0.0001 0.0004 -0.0229 -0.0214  
Z 0.0055 0.0048 -0.0001 -0.0003 0.0211 0.0206  
AT. 62 H X 0.0243 -0.0237 0.0003 -0.0004 0.0260 -0.0263  
Y 0.0221 -0.0230 0.0001 0.0004 -0.0229 0.0214  
Z 0.0055 -0.0048 0.0001 -0.0003 0.0211 -0.0206  
AT. 63 H X -0.0427 -0.0468 0.0003 0.0000 -0.0143 -0.0147  
Y 0.0570 0.0647 -0.0007 -0.0000 0.0057 0.0056  
Z -0.0282 -0.0329 0.0005 -0.0000 0.0071 0.0072  
AT. 64 H X -0.0427 0.0468 -0.0003 0.0000 -0.0143 0.0147  
Y 0.0570 -0.0647 0.0007 -0.0000 0.0057 -0.0056  
Z -0.0282 0.0329 -0.0005 -0.0000 0.0071 -0.0072  
AT. 65 C X 0.0105 0.0094 -0.0004 -0.0005 -0.0076 -0.0077  
Y 0.0147 0.0130 -0.0002 -0.0002 -0.0008 -0.0007  
Z 0.0022 0.0025 -0.0000 -0.0000 -0.0033 -0.0031

AT. 66 C X 0.0105 -0.0094 0.0004 -0.0005 -0.0076 0.0077  
Y 0.0147 -0.0130 0.0002 -0.0002 -0.0008 0.0007  
Z 0.0022 -0.0025 0.0000 -0.0000 -0.0033 0.0031

AT. 67 H X -0.0596 -0.0539 0.0014 0.0019 0.0263 0.0259  
Y 0.0093 0.0094 -0.0003 -0.0005 -0.0139 -0.0139  
Z 0.0662 0.0593 -0.0013 -0.0018 -0.0192 -0.0188

AT. 68 H X -0.0596 0.0539 -0.0014 0.0019 0.0263 -0.0259  
Y 0.0093 -0.0094 0.0003 -0.0005 -0.0139 0.0139  
Z 0.0662 -0.0593 0.0013 -0.0018 -0.0192 0.0188

AT. 69 H X -0.0207 -0.0189 0.0001 0.0000 -0.0102 -0.0098  
Y -0.0284 -0.0275 0.0009 0.0012 0.0163 0.0161  
Z -0.0009 -0.0025 0.0007 0.0011 0.0288 0.0275

AT. 70 H X -0.0207 0.0189 -0.0001 0.0000 -0.0102 0.0098  
Y -0.0284 0.0275 -0.0009 0.0012 0.0163 -0.0161  
Z -0.0009 0.0025 -0.0007 0.0011 0.0288 -0.0275

AT. 71 H X 0.0283 0.0239 -0.0003 -0.0004 0.0077 0.0073  
Y -0.0466 -0.0407 0.0008 0.0010 0.0040 0.0046  
Z -0.0666 -0.0589 0.0013 0.0017 0.0148 0.0155

AT. 72 H X 0.0283 -0.0239 0.0003 -0.0004 0.0077 -0.0073  
Y -0.0466 0.0407 -0.0008 0.0010 0.0040 -0.0046  
Z -0.0666 0.0589 -0.0013 0.0017 0.0148 -0.0155

AT. 73 C X 0.0027 0.0015 0.0004 0.0005 -0.0024 -0.0019  
Y 0.0053 0.0036 -0.0001 -0.0002 0.0042 0.0044  
Z 0.0001 -0.0008 -0.0001 -0.0002 -0.0075 -0.0080

AT. 74 C X 0.0027 -0.0015 -0.0004 0.0005 -0.0024 0.0019  
Y 0.0053 -0.0036 0.0001 -0.0002 0.0042 -0.0044  
Z 0.0001 0.0008 0.0001 -0.0002 -0.0075 0.0080

AT. 75 H X -0.0350 -0.0337 0.0007 0.0009 -0.0017 -0.0011  
Y 0.0172 0.0192 -0.0006 -0.0009 -0.0001 -0.0005  
Z -0.0102 -0.0043 -0.0005 -0.0009 -0.0127 -0.0140

AT. 76 H X -0.0350 0.0337 -0.0007 0.0009 -0.0017 0.0011  
Y 0.0172 -0.0192 0.0006 -0.0009 -0.0001 0.0005

Z -0.0102 0.0043 0.0005 -0.0009 -0.0127 0.0140  
AT. 77 H X 0.0218 0.0232 -0.0000 0.0002 -0.0073 -0.0086  
Y -0.0240 -0.0221 -0.0002 -0.0005 0.0038 0.0038  
Z 0.0098 0.0030 0.0003 0.0003 -0.0026 -0.0013  
AT. 78 H X 0.0218 -0.0232 0.0000 0.0002 -0.0073 0.0086  
Y -0.0240 0.0221 0.0002 -0.0005 0.0038 -0.0038  
Z 0.0098 -0.0030 -0.0003 0.0003 -0.0026 0.0013  
AT. 79 I X -0.0000 -0.0000 -0.0000 -0.0000 0.0000 0.0000  
Y 0.0000 0.0000 -0.0000 -0.0000 -0.0000 -0.0000  
Z 0.0000 0.0000 -0.0001 -0.0001 0.0000 0.0000  
AT. 80 I X -0.0000 0.0000 0.0000 -0.0000 0.0000 -0.0000  
Y 0.0000 -0.0000 0.0000 -0.0000 -0.0000 0.0000  
Z 0.0000 -0.0000 0.0001 -0.0001 0.0000 -0.0000  
AT. 81 I X -0.0000 -0.0000 0.0000 -0.0000 0.0000 0.0000  
Y 0.0000 0.0000 0.0001 0.0001 0.0000 0.0000  
Z -0.0000 -0.0000 -0.0001 -0.0001 0.0000 0.0000  
AT. 82 I X -0.0000 0.0000 -0.0000 -0.0000 0.0000 -0.0000  
Y 0.0000 -0.0000 -0.0001 0.0001 0.0000 -0.0000  
Z -0.0000 0.0000 0.0001 -0.0001 0.0000 -0.0000  
AT. 83 O X -0.0001 0.0001 -0.0003 -0.0003 0.0000 0.0002  
Y -0.0002 -0.0002 0.0001 0.0001 0.0000 0.0001  
Z -0.0001 0.0000 0.0001 -0.0001 0.0001 0.0002  
AT. 84 O X -0.0001 -0.0001 0.0003 -0.0003 0.0000 -0.0002  
Y -0.0002 0.0002 -0.0001 0.0001 0.0000 -0.0001  
Z -0.0001 -0.0000 -0.0001 -0.0001 0.0001 -0.0002  
AT. 85 O X -0.0005 -0.0001 0.0009 0.0006 -0.0000 -0.0001  
Y -0.0002 -0.0001 0.0001 -0.0003 0.0001 -0.0001  
Z 0.0003 0.0002 -0.0001 0.0003 -0.0001 0.0000  
AT. 86 O X -0.0005 0.0001 -0.0009 0.0006 -0.0000 0.0001  
Y -0.0002 0.0001 -0.0001 -0.0003 0.0001 0.0001  
Z 0.0003 -0.0002 0.0001 0.0003 -0.0001 -0.0000  
AT. 87 N X 0.0002 0.0000 0.0048 0.0047 0.0000 0.0001

Y 0.0000 0.0001 0.0010 0.0007 0.0001 0.0000  
Z 0.0003 0.0001 -0.0023 -0.0023 -0.0001 -0.0005  
AT. 88 N X 0.0002 -0.0000 -0.0048 0.0047 0.0000 -0.0001  
Y 0.0000 -0.0001 -0.0010 0.0007 0.0001 -0.0000  
Z 0.0003 -0.0001 0.0023 -0.0023 -0.0001 0.0005  
AT. 89 N X -0.0001 -0.0001 -0.0061 -0.0061 -0.0000 -0.0001  
Y 0.0004 0.0002 -0.0009 -0.0006 -0.0001 0.0001  
Z -0.0005 -0.0003 -0.0038 -0.0048 0.0002 0.0001  
AT. 90 N X -0.0001 0.0001 0.0061 -0.0061 -0.0000 0.0001  
Y 0.0004 -0.0002 0.0009 -0.0006 -0.0001 -0.0001  
Z -0.0005 0.0003 0.0038 -0.0048 0.0002 -0.0001  
AT. 91 C X -0.0003 -0.0002 0.0014 0.0013 0.0001 0.0003  
Y -0.0000 0.0002 0.0010 0.0009 0.0000 0.0001  
Z 0.0000 -0.0001 -0.0018 -0.0017 -0.0000 -0.0001  
AT. 92 C X -0.0003 0.0002 -0.0014 0.0013 0.0001 -0.0003  
Y -0.0000 -0.0002 -0.0010 0.0009 0.0000 -0.0001  
Z 0.0000 0.0001 0.0018 -0.0017 -0.0000 0.0001  
AT. 93 C X 0.0003 0.0000 -0.0023 -0.0022 -0.0000 -0.0003  
Y 0.0001 0.0000 -0.0010 -0.0008 -0.0001 -0.0001  
Z -0.0002 0.0001 0.0026 0.0024 -0.0000 0.0002  
AT. 94 C X 0.0003 -0.0000 0.0023 -0.0022 -0.0000 0.0003  
Y 0.0001 -0.0000 0.0010 -0.0008 -0.0001 0.0001  
Z -0.0002 -0.0001 -0.0026 0.0024 -0.0000 -0.0002  
AT. 95 H X 0.0006 0.0004 -0.0100 -0.0090 -0.0005 -0.0007  
Y -0.0001 -0.0001 0.0038 0.0032 0.0001 -0.0000  
Z -0.0003 -0.0001 0.0025 0.0025 0.0003 0.0005  
AT. 96 H X 0.0006 -0.0004 0.0100 -0.0090 -0.0005 0.0007  
Y -0.0001 0.0001 -0.0038 0.0032 0.0001 0.0000  
Z -0.0003 0.0001 -0.0025 0.0025 0.0003 -0.0005  
AT. 97 H X 0.0010 0.0004 0.0020 0.0019 -0.0001 -0.0003  
Y -0.0002 -0.0003 -0.0082 -0.0077 0.0001 -0.0004  
Z -0.0004 -0.0001 -0.0000 -0.0002 0.0000 0.0002

AT. 98 H X 0.0010 -0.0004 -0.0020 0.0019 -0.0001 0.0003  
Y -0.0002 0.0003 0.0082 -0.0077 0.0001 0.0004  
Z -0.0004 0.0001 0.0000 -0.0002 0.0000 -0.0002

AT. 99 C X -0.0003 -0.0001 -0.0016 -0.0021 0.0002 0.0000  
Y -0.0003 -0.0002 -0.0001 -0.0003 0.0001 0.0001  
Z -0.0003 -0.0002 -0.0032 -0.0037 0.0001 0.0000

AT. 100 C X -0.0003 0.0001 0.0016 -0.0021 0.0002 -0.0000  
Y -0.0003 0.0002 0.0001 -0.0003 0.0001 -0.0001  
Z -0.0003 0.0002 0.0032 -0.0037 0.0001 -0.0000

AT. 101 C X 0.0006 0.0003 0.0022 0.0029 -0.0001 0.0001  
Y 0.0001 0.0000 -0.0004 -0.0004 -0.0002 -0.0001  
Z 0.0005 0.0003 0.0039 0.0047 -0.0002 -0.0000

AT. 102 C X 0.0006 -0.0003 -0.0022 0.0029 -0.0001 -0.0001  
Y 0.0001 -0.0000 0.0004 -0.0004 -0.0002 0.0001  
Z 0.0005 -0.0003 -0.0039 0.0047 -0.0002 0.0000

AT. 103 H X 0.0006 0.0005 0.0168 0.0194 -0.0018 -0.0011  
Y 0.0001 -0.0001 -0.0063 -0.0071 0.0006 0.0004  
Z 0.0012 0.0003 -0.0032 -0.0033 -0.0003 -0.0001

AT. 104 H X 0.0006 -0.0005 -0.0168 0.0194 -0.0018 0.0011  
Y 0.0001 0.0001 0.0063 -0.0071 0.0006 -0.0004  
Z 0.0012 -0.0003 0.0032 -0.0033 -0.0003 0.0001

AT. 105 H X 0.0007 0.0000 -0.0045 -0.0037 0.0002 0.0001  
Y -0.0001 0.0002 0.0110 0.0121 0.0002 0.0001  
Z 0.0005 0.0003 0.0070 0.0083 0.0000 0.0001

AT. 106 H X 0.0007 -0.0000 0.0045 -0.0037 0.0002 -0.0001  
Y -0.0001 -0.0002 -0.0110 0.0121 0.0002 -0.0001  
Z 0.0005 -0.0003 -0.0070 0.0083 0.0000 -0.0001

AT. 107 C X 0.0008 0.0001 -0.0007 -0.0013 0.0000 -0.0006  
Y -0.0003 0.0001 -0.0094 -0.0083 -0.0001 0.0001  
Z 0.0008 -0.0003 -0.0065 -0.0060 0.0002 -0.0002

AT. 108 C X 0.0008 -0.0001 0.0007 -0.0013 0.0000 0.0006  
Y -0.0003 -0.0001 0.0094 -0.0083 -0.0001 -0.0001



Z 0.0008 0.0003 0.0065 -0.0060 0.0002 0.0002  
AT. 109 H X -0.0021 -0.0000 0.0024 0.0029 -0.0006 0.0006  
Y -0.0024 0.0003 -0.0092 -0.0071 -0.0006 0.0006  
Z -0.0019 0.0001 -0.0076 -0.0057 -0.0006 0.0002  
AT. 110 H X -0.0021 0.0000 -0.0024 0.0029 -0.0006 -0.0006  
Y -0.0024 -0.0003 0.0092 -0.0071 -0.0006 -0.0006  
Z -0.0019 -0.0001 0.0076 -0.0057 -0.0006 -0.0002  
AT. 111 H X 0.0009 0.0003 0.0054 0.0042 -0.0003 -0.0014  
Y 0.0036 -0.0006 -0.0094 -0.0103 0.0003 -0.0015  
Z -0.0001 -0.0003 -0.0133 -0.0117 0.0006 0.0011  
AT. 112 H X 0.0009 -0.0003 -0.0054 0.0042 -0.0003 0.0014  
Y 0.0036 0.0006 0.0094 -0.0103 0.0003 0.0015  
Z -0.0001 0.0003 0.0133 -0.0117 0.0006 -0.0011  
AT. 113 C X 0.0003 0.0001 -0.0037 -0.0030 0.0001 0.0002  
Y -0.0004 0.0001 0.0156 0.0142 -0.0002 -0.0001  
Z 0.0006 0.0001 0.0020 0.0022 0.0001 0.0002  
AT. 114 C X 0.0003 -0.0001 0.0037 -0.0030 0.0001 -0.0002  
Y -0.0004 -0.0001 -0.0156 0.0142 -0.0002 0.0001  
Z 0.0006 -0.0001 -0.0020 0.0022 0.0001 -0.0002  
AT. 115 C X -0.0006 -0.0001 0.0027 0.0025 0.0002 0.0001  
Y 0.0007 -0.0003 -0.0178 -0.0159 0.0003 0.0000  
Z -0.0005 -0.0001 0.0015 0.0010 -0.0001 -0.0006  
AT. 116 C X -0.0006 0.0001 -0.0027 0.0025 0.0002 -0.0001  
Y 0.0007 0.0003 0.0178 -0.0159 0.0003 -0.0000  
Z -0.0005 0.0001 -0.0015 0.0010 -0.0001 0.0006  
AT. 117 H X -0.0010 -0.0007 -0.0207 -0.0197 0.0004 -0.0007  
Y 0.0010 0.0002 -0.0101 -0.0102 0.0003 0.0014  
Z -0.0001 0.0004 0.0246 0.0232 -0.0004 -0.0000  
AT. 118 H X -0.0010 0.0007 0.0207 -0.0197 0.0004 0.0007  
Y 0.0010 -0.0002 0.0101 -0.0102 0.0003 -0.0014  
Z -0.0001 -0.0004 -0.0246 0.0232 -0.0004 0.0000  
AT. 119 H X 0.0001 0.0007 0.0250 0.0234 -0.0001 0.0013

Y 0.0010 -0.0001 -0.0202 -0.0172 0.0001 -0.0002  
Z -0.0005 0.0002 0.0159 0.0135 -0.0001 0.0002  
AT. 120 H X 0.0001 -0.0007 -0.0250 0.0234 -0.0001 -0.0013  
Y 0.0010 0.0001 0.0202 -0.0172 0.0001 0.0002  
Z -0.0005 -0.0002 -0.0159 0.0135 -0.0001 -0.0002  
AT. 121 C X 0.0005 0.0002 0.0002 -0.0002 -0.0002 -0.0000  
Y 0.0006 0.0006 0.0187 0.0204 -0.0004 -0.0005  
Z -0.0004 -0.0002 0.0018 0.0017 -0.0001 0.0001  
AT. 122 C X 0.0005 -0.0002 -0.0002 -0.0002 -0.0002 0.0000  
Y 0.0006 -0.0006 -0.0187 0.0204 -0.0004 0.0005  
Z -0.0004 0.0002 -0.0018 0.0017 -0.0001 -0.0001  
AT. 123 H X -0.0008 -0.0006 0.0116 0.0119 0.0006 0.0008  
Y -0.0003 0.0005 0.0344 0.0378 -0.0007 -0.0008  
Z 0.0002 -0.0002 -0.0130 -0.0149 0.0003 0.0005  
AT. 124 H X -0.0008 0.0006 -0.0116 0.0119 0.0006 -0.0008  
Y -0.0003 -0.0005 -0.0344 0.0378 -0.0007 0.0008  
Z 0.0002 0.0002 0.0130 -0.0149 0.0003 -0.0005  
AT. 125 H X 0.0006 0.0003 -0.0071 -0.0071 -0.0012 -0.0008  
Y 0.0018 0.0009 -0.0006 -0.0016 0.0012 0.0009  
Z 0.0003 0.0001 -0.0171 -0.0182 -0.0005 -0.0002  
AT. 126 H X 0.0006 -0.0003 0.0071 -0.0071 -0.0012 0.0008  
Y 0.0018 -0.0009 0.0006 -0.0016 0.0012 -0.0009  
Z 0.0003 -0.0001 0.0171 -0.0182 -0.0005 0.0002  
AT. 127 C X 0.0001 0.0000 0.0042 0.0043 -0.0000 -0.0000  
Y -0.0008 -0.0004 -0.0165 -0.0181 0.0000 0.0002  
Z -0.0004 0.0002 0.0005 0.0008 -0.0001 -0.0000  
AT. 128 C X 0.0001 -0.0000 -0.0042 0.0043 -0.0000 0.0000  
Y -0.0008 0.0004 0.0165 -0.0181 0.0000 -0.0002  
Z -0.0004 -0.0002 -0.0005 0.0008 -0.0001 0.0000  
AT. 129 C X -0.0007 -0.0002 -0.0033 -0.0034 -0.0000 0.0003  
Y 0.0007 -0.0004 0.0095 0.0106 0.0001 0.0001  
Z 0.0000 0.0004 0.0076 0.0082 -0.0002 -0.0001

AT.130 C X -0.0007 0.0002 0.0033 -0.0034 -0.0000 -0.0003  
Y 0.0007 0.0004 -0.0095 0.0106 0.0001 -0.0001  
Z 0.0000 -0.0004 -0.0076 0.0082 -0.0002 0.0001

AT.131 H X 0.0001 -0.0010 0.0063 0.0073 0.0005 0.0009  
Y -0.0003 0.0018 0.0104 0.0099 -0.0006 -0.0004  
Z 0.0007 0.0002 0.0210 0.0224 0.0002 0.0005

AT.132 H X 0.0001 0.0010 -0.0063 0.0073 0.0005 -0.0009  
Y -0.0003 -0.0018 -0.0104 0.0099 -0.0006 0.0004  
Z 0.0007 -0.0002 -0.0210 0.0224 0.0002 -0.0005

AT.133 H X -0.0014 0.0015 -0.0097 -0.0111 -0.0005 -0.0002  
Y 0.0010 -0.0003 0.0092 0.0105 0.0001 0.0001  
Z 0.0009 -0.0003 0.0106 0.0122 -0.0000 0.0001

AT.134 H X -0.0014 -0.0015 0.0097 -0.0111 -0.0005 0.0002  
Y 0.0010 0.0003 -0.0092 0.0105 0.0001 -0.0001  
Z 0.0009 0.0003 -0.0106 0.0122 -0.0000 -0.0001

AT.135 C X 0.0006 0.0000 -0.0043 -0.0038 0.0000 0.0004  
Y -0.0002 0.0000 0.0175 0.0157 -0.0002 -0.0003  
Z 0.0004 0.0003 0.0040 0.0043 -0.0001 0.0005

AT.136 C X 0.0006 -0.0000 0.0043 -0.0038 0.0000 -0.0004  
Y -0.0002 -0.0000 -0.0175 0.0157 -0.0002 0.0003  
Z 0.0004 -0.0003 -0.0040 0.0043 -0.0001 -0.0005

AT.137 H X -0.0026 -0.0009 0.0600 0.0526 -0.0006 -0.0028  
Y -0.0007 -0.0004 -0.0006 -0.0014 0.0000 -0.0008  
Z 0.0008 -0.0001 -0.0498 -0.0450 0.0005 0.0007

AT.138 H X -0.0026 0.0009 -0.0600 0.0526 -0.0006 0.0028  
Y -0.0007 0.0004 0.0006 -0.0014 0.0000 0.0008  
Z 0.0008 0.0001 0.0498 -0.0450 0.0005 -0.0007

AT.139 H X 0.0020 0.0009 0.0172 0.0175 -0.0004 0.0018  
Y 0.0015 0.0003 -0.0310 -0.0275 0.0001 0.0012  
Z -0.0020 -0.0009 -0.0110 -0.0121 0.0004 -0.0018

AT.140 H X 0.0020 -0.0009 -0.0172 0.0175 -0.0004 -0.0018  
Y 0.0015 -0.0003 0.0310 -0.0275 0.0001 -0.0012

Z -0.0020 0.0009 0.0110 -0.0121 0.0004 0.0018  
AT. 141 H X -0.0003 -0.0010 -0.0622 -0.0584 0.0014 -0.0004  
Y 0.0006 -0.0001 -0.0466 -0.0427 0.0008 0.0006  
Z -0.0009 0.0000 0.0454 0.0412 -0.0006 -0.0007  
AT. 142 H X -0.0003 0.0010 0.0622 -0.0584 0.0014 0.0004  
Y 0.0006 0.0001 0.0466 -0.0427 0.0008 -0.0006  
Z -0.0009 -0.0000 -0.0454 0.0412 -0.0006 0.0007  
AT. 143 C X 0.0005 0.0000 0.0037 0.0037 -0.0001 0.0000  
Y -0.0006 -0.0003 -0.0155 -0.0164 -0.0001 0.0001  
Z 0.0000 0.0000 -0.0030 -0.0026 0.0003 -0.0001  
AT. 144 C X 0.0005 -0.0000 -0.0037 0.0037 -0.0001 -0.0000  
Y -0.0006 0.0003 0.0155 -0.0164 -0.0001 -0.0001  
Z 0.0000 -0.0000 0.0030 -0.0026 0.0003 0.0001  
AT. 145 H X -0.0027 -0.0010 -0.0616 -0.0637 0.0007 0.0000  
Y 0.0005 0.0003 0.0094 0.0105 0.0004 -0.0002  
Z -0.0019 -0.0009 -0.0462 -0.0487 -0.0000 0.0002  
AT. 146 H X -0.0027 0.0010 0.0616 -0.0637 0.0007 -0.0000  
Y 0.0005 -0.0003 -0.0094 0.0105 0.0004 0.0002  
Z -0.0019 0.0009 0.0462 -0.0487 -0.0000 -0.0002  
AT. 147 H X 0.0002 -0.0006 -0.0105 -0.0124 -0.0007 0.0004  
Y 0.0015 0.0006 0.0298 0.0292 0.0001 -0.0001  
Z 0.0006 -0.0004 0.0010 -0.0012 -0.0005 0.0004  
AT. 148 H X 0.0002 0.0006 0.0105 -0.0124 -0.0007 -0.0004  
Y 0.0015 -0.0006 -0.0298 0.0292 0.0001 0.0001  
Z 0.0006 0.0004 -0.0010 -0.0012 -0.0005 -0.0004  
AT. 149 H X 0.0025 0.0014 0.0501 0.0547 0.0008 -0.0006  
Y 0.0015 0.0007 0.0313 0.0337 -0.0001 -0.0003  
Z 0.0026 0.0011 0.0512 0.0545 -0.0002 -0.0004  
AT. 150 H X 0.0025 -0.0014 -0.0501 0.0547 0.0008 0.0006  
Y 0.0015 -0.0007 -0.0313 0.0337 -0.0001 0.0003  
Z 0.0026 -0.0011 -0.0512 0.0545 -0.0002 0.0004  
AT. 151 C X -0.0010 0.0001 0.0014 0.0020 -0.0002 -0.0004

Y -0.0005 0.0002 -0.0026 -0.0041 0.0003 0.0004  
Z -0.0004 -0.0002 -0.0021 -0.0029 0.0001 0.0002  
AT. 152 C X -0.0010 -0.0001 -0.0014 0.0020 -0.0002 0.0004  
Y -0.0005 -0.0002 0.0026 -0.0041 0.0003 -0.0004  
Z -0.0004 0.0002 0.0021 -0.0029 0.0001 -0.0002  
AT. 153 H X -0.0021 -0.0001 -0.0313 -0.0331 0.0003 -0.0004  
Y -0.0006 -0.0002 -0.0065 -0.0050 -0.0002 -0.0005  
Z -0.0000 -0.0008 0.0057 0.0107 -0.0010 -0.0011  
AT. 154 H X -0.0021 0.0001 0.0313 -0.0331 0.0003 0.0004  
Y -0.0006 0.0002 0.0065 -0.0050 -0.0002 0.0005  
Z -0.0000 0.0008 -0.0057 0.0107 -0.0010 0.0011  
AT. 155 H X -0.0006 0.0004 0.0297 0.0312 0.0003 -0.0008  
Y -0.0002 -0.0002 0.0128 0.0168 -0.0004 -0.0009  
Z -0.0006 0.0004 -0.0081 -0.0146 0.0010 0.0014  
AT. 156 H X -0.0006 -0.0004 -0.0297 0.0312 0.0003 0.0008  
Y -0.0002 0.0002 -0.0128 0.0168 -0.0004 0.0009  
Z -0.0006 -0.0004 0.0081 -0.0146 0.0010 -0.0014  
AT. 157 O X -0.0000 -0.0002 0.0009 -0.0003 -0.0000 -0.0006  
Y -0.0000 -0.0001 -0.0000 -0.0001 0.0004 0.0003  
Z 0.0001 0.0007 -0.0005 0.0005 0.0002 0.0007  
AT. 158 O X -0.0000 0.0002 -0.0009 -0.0003 -0.0000 0.0006  
Y -0.0000 0.0001 0.0000 -0.0001 0.0004 -0.0003  
Z 0.0001 -0.0007 0.0005 0.0005 0.0002 -0.0007  
AT. 159 O X 0.0001 0.0004 -0.0007 0.0003 -0.0000 0.0005  
Y 0.0000 -0.0003 0.0001 -0.0004 0.0000 0.0002  
Z -0.0000 -0.0004 0.0006 -0.0005 0.0005 -0.0008  
AT. 160 O X 0.0001 -0.0004 0.0007 0.0003 -0.0000 -0.0005  
Y 0.0000 0.0003 -0.0001 -0.0004 0.0000 -0.0002  
Z -0.0000 0.0004 -0.0006 -0.0005 0.0005 0.0008  
AT. 161 H X -0.0004 -0.0082 -0.0012 -0.0038 0.0018 -0.0007  
Y 0.0002 0.0028 0.0001 0.0014 0.0006 0.0017  
Z -0.0010 -0.0126 -0.0017 -0.0057 -0.0016 -0.0052

AT.162 H X -0.0004 0.0082 0.0012 -0.0038 0.0018 0.0007  
Y 0.0002 -0.0028 -0.0001 0.0014 0.0006 -0.0017  
Z -0.0010 0.0126 0.0017 -0.0057 -0.0016 0.0052

AT.163 H X -0.0001 0.0012 -0.0002 0.0006 0.0009 -0.0004  
Y -0.0006 0.0066 -0.0021 0.0070 0.0020 0.0023  
Z -0.0002 0.0011 -0.0002 0.0014 -0.0000 0.0008

AT.164 H X -0.0001 -0.0012 0.0002 0.0006 0.0009 0.0004  
Y -0.0006 -0.0066 0.0021 0.0070 0.0020 -0.0023  
Z -0.0002 -0.0011 0.0002 0.0014 -0.0000 -0.0008

AT.165 O X -0.0001 0.0001 0.0000 -0.0001 0.0000 0.0002  
Y -0.0000 -0.0002 -0.0001 0.0000 0.0000 -0.0000  
Z 0.0012 -0.0002 -0.0001 0.0001 0.0003 -0.0004

AT.166 O X -0.0001 -0.0001 -0.0000 -0.0001 0.0000 -0.0002  
Y -0.0000 0.0002 0.0001 0.0000 0.0000 0.0000  
Z 0.0012 0.0002 0.0001 0.0001 0.0003 0.0004

AT.167 H X -0.0025 -0.0018 0.0002 0.0010 -0.0011 0.0000  
Y 0.0055 0.0036 -0.0002 -0.0015 0.0021 -0.0002  
Z -0.0010 -0.0013 -0.0004 -0.0005 0.0004 0.0005

AT.168 H X -0.0025 0.0018 -0.0002 0.0010 -0.0011 -0.0000  
Y 0.0055 -0.0036 0.0002 -0.0015 0.0021 0.0002  
Z -0.0010 0.0013 0.0004 -0.0005 0.0004 -0.0005

AT.169 O X 0.0000 -0.0000 -0.0001 0.0002 -0.0001 0.0000  
Y -0.0002 0.0001 0.0000 0.0001 -0.0001 0.0001  
Z -0.0011 0.0002 0.0002 -0.0000 -0.0004 0.0005

AT.170 O X 0.0000 0.0000 0.0001 0.0002 -0.0001 -0.0000  
Y -0.0002 -0.0001 -0.0000 0.0001 -0.0001 -0.0001  
Z -0.0011 -0.0002 -0.0002 -0.0000 -0.0004 -0.0005

AT.171 H X 0.0050 -0.0010 0.0024 -0.0037 0.0023 -0.0026  
Y 0.0026 -0.0008 0.0012 -0.0017 0.0011 -0.0015  
Z -0.0005 -0.0003 -0.0001 0.0002 0.0001 -0.0005

AT.172 H X 0.0050 0.0010 -0.0024 -0.0037 0.0023 0.0026  
Y 0.0026 0.0008 -0.0012 -0.0017 0.0011 0.0015

Z -0.0005 0.0003 0.0001 0.0002 0.0001 0.0005

FREQ(CM\*\*-1) 968.98 969.55 976.69 976.78 977.75 978.69

AT. 1 I X 0.0000 -0.0000 -0.0000 0.0000 -0.0000 -0.0000

Y 0.0000 0.0000 0.0000 0.0000 -0.0000 -0.0000

Z 0.0000 -0.0000 0.0000 0.0000 -0.0000 -0.0000

AT. 2 I X 0.0000 0.0000 -0.0000 -0.0000 -0.0000 0.0000

Y 0.0000 -0.0000 0.0000 -0.0000 -0.0000 0.0000

Z 0.0000 0.0000 0.0000 -0.0000 -0.0000 0.0000

AT. 3 I X 0.0000 0.0000 -0.0000 -0.0000 -0.0000 -0.0000

Y -0.0000 -0.0000 0.0000 0.0000 -0.0000 -0.0000

Z 0.0000 0.0000 -0.0000 -0.0000 0.0000 0.0000

AT. 4 I X 0.0000 -0.0000 -0.0000 0.0000 -0.0000 0.0000

Y -0.0000 0.0000 0.0000 -0.0000 -0.0000 0.0000

Z 0.0000 -0.0000 -0.0000 0.0000 0.0000 -0.0000

AT. 5 O X 0.0001 0.0002 0.0002 0.0002 -0.0009 -0.0009

Y -0.0001 -0.0001 0.0000 -0.0001 -0.0001 -0.0001

Z 0.0000 -0.0002 -0.0002 -0.0002 0.0011 0.0012

AT. 6 O X 0.0001 -0.0002 0.0002 -0.0002 -0.0009 0.0009

Y -0.0001 0.0001 0.0000 0.0001 -0.0001 0.0001

Z 0.0000 0.0002 -0.0002 0.0002 0.0011 -0.0012

AT. 7 O X 0.0002 -0.0001 -0.0000 -0.0003 -0.0000 -0.0003

Y -0.0001 0.0001 0.0001 0.0002 -0.0003 -0.0001

Z 0.0000 -0.0001 0.0002 -0.0000 -0.0006 -0.0008

AT. 8 O X 0.0002 0.0001 -0.0000 0.0003 -0.0000 0.0003

Y -0.0001 -0.0001 0.0001 -0.0002 -0.0003 0.0001

Z 0.0000 0.0001 0.0002 0.0000 -0.0006 0.0008

AT. 9 N X -0.0001 0.0001 0.0001 0.0001 -0.0008 -0.0009

Y 0.0001 0.0001 -0.0002 -0.0001 0.0006 0.0009

Z -0.0001 0.0003 0.0006 0.0004 -0.0030 -0.0035

AT. 10 N X -0.0001 -0.0001 0.0001 -0.0001 -0.0008 0.0009

Y 0.0001 -0.0001 -0.0002 0.0001 0.0006 -0.0009  
Z -0.0001 -0.0003 0.0006 -0.0004 -0.0030 0.0035  
AT. 11 N X 0.0001 -0.0001 0.0004 -0.0000 -0.0016 -0.0018  
Y 0.0001 -0.0001 0.0001 -0.0000 -0.0004 -0.0006  
Z 0.0000 0.0002 -0.0006 -0.0001 0.0021 0.0027  
AT. 12 N X 0.0001 0.0001 0.0004 0.0000 -0.0016 0.0018  
Y 0.0001 0.0001 0.0001 0.0000 -0.0004 0.0006  
Z 0.0000 -0.0002 -0.0006 0.0001 0.0021 -0.0027  
AT. 13 C X -0.0000 0.0001 0.0003 0.0001 -0.0013 -0.0014  
Y 0.0000 -0.0003 -0.0007 -0.0002 0.0034 0.0037  
Z 0.0000 0.0002 0.0005 0.0001 -0.0021 -0.0021  
AT. 14 C X -0.0000 -0.0001 0.0003 -0.0001 -0.0013 0.0014  
Y 0.0000 0.0003 -0.0007 0.0002 0.0034 -0.0037  
Z 0.0000 -0.0002 0.0005 -0.0001 -0.0021 0.0021  
AT. 15 C X -0.0001 -0.0002 -0.0006 -0.0004 0.0028 0.0028  
Y -0.0001 0.0003 0.0006 0.0002 -0.0027 -0.0029  
Z 0.0001 -0.0000 -0.0004 -0.0002 0.0017 0.0019  
AT. 16 C X -0.0001 0.0002 -0.0006 0.0004 0.0028 -0.0028  
Y -0.0001 -0.0003 0.0006 -0.0002 -0.0027 0.0029  
Z 0.0001 0.0000 -0.0004 0.0002 0.0017 -0.0019  
AT. 17 H X -0.0004 -0.0014 -0.0023 -0.0003 0.0131 0.0135  
Y 0.0003 0.0004 0.0004 0.0003 -0.0021 -0.0020  
Z -0.0005 -0.0006 -0.0008 -0.0002 0.0048 0.0047  
AT. 18 H X -0.0004 0.0014 -0.0023 0.0003 0.0131 -0.0135  
Y 0.0003 -0.0004 0.0004 -0.0003 -0.0021 0.0020  
Z -0.0005 0.0006 -0.0008 0.0002 0.0048 -0.0047  
AT. 19 H X 0.0006 0.0001 0.0011 -0.0002 -0.0042 -0.0036  
Y -0.0003 0.0001 0.0008 0.0004 -0.0035 -0.0041  
Z 0.0002 -0.0000 0.0002 -0.0001 -0.0006 -0.0004  
AT. 20 H X 0.0006 -0.0001 0.0011 0.0002 -0.0042 0.0036  
Y -0.0003 -0.0001 0.0008 -0.0004 -0.0035 0.0041  
Z 0.0002 0.0000 0.0002 0.0001 -0.0006 0.0004



AT. 21 C X -0.0000 -0.0001 0.0003 0.0001 -0.0007 -0.0010  
Y -0.0002 -0.0001 -0.0001 0.0003 0.0010 0.0011  
Z -0.0003 0.0001 -0.0004 0.0003 0.0028 0.0032

AT. 22 C X -0.0000 0.0001 0.0003 -0.0001 -0.0007 0.0010  
Y -0.0002 0.0001 -0.0001 -0.0003 0.0010 -0.0011  
Z -0.0003 -0.0001 -0.0004 -0.0003 0.0028 -0.0032

AT. 23 C X -0.0002 0.0002 -0.0004 0.0003 0.0015 0.0020  
Y 0.0001 0.0000 0.0000 -0.0002 -0.0002 -0.0004  
Z 0.0001 -0.0002 0.0004 -0.0001 -0.0018 -0.0021

AT. 24 C X -0.0002 -0.0002 -0.0004 -0.0003 0.0015 -0.0020  
Y 0.0001 -0.0000 0.0000 0.0002 -0.0002 0.0004  
Z 0.0001 0.0002 0.0004 0.0001 -0.0018 0.0021

AT. 25 H X -0.0011 0.0007 -0.0023 0.0009 0.0090 0.0094  
Y -0.0001 0.0001 -0.0003 -0.0000 0.0008 0.0008  
Z 0.0005 -0.0003 0.0004 -0.0008 -0.0011 -0.0026

AT. 26 H X -0.0011 -0.0007 -0.0023 -0.0009 0.0090 -0.0094  
Y -0.0001 -0.0001 -0.0003 0.0000 0.0008 -0.0008  
Z 0.0005 0.0003 0.0004 0.0008 -0.0011 0.0026

AT. 27 H X 0.0003 -0.0013 0.0024 -0.0005 -0.0031 -0.0036  
Y -0.0001 -0.0005 0.0010 0.0002 -0.0031 -0.0031  
Z -0.0001 -0.0001 0.0004 0.0003 -0.0025 -0.0026

AT. 28 H X 0.0003 0.0013 0.0024 0.0005 -0.0031 0.0036  
Y -0.0001 0.0005 0.0010 -0.0002 -0.0031 0.0031  
Z -0.0001 0.0001 0.0004 -0.0003 -0.0025 0.0026

AT. 29 C X 0.0002 -0.0005 -0.0013 -0.0005 0.0062 0.0070  
Y -0.0000 0.0002 -0.0008 -0.0000 0.0041 0.0035  
Z -0.0000 0.0002 0.0017 0.0006 -0.0085 -0.0087

AT. 30 C X 0.0002 0.0005 -0.0013 0.0005 0.0062 -0.0070  
Y -0.0000 -0.0002 -0.0008 0.0000 0.0041 -0.0035  
Z -0.0000 -0.0002 0.0017 -0.0006 -0.0085 0.0087

AT. 31 H X 0.0002 0.0005 0.0026 0.0007 -0.0134 -0.0134  
Y 0.0000 -0.0008 -0.0051 -0.0014 0.0261 0.0262

Z -0.0001 -0.0006 -0.0024 -0.0007 0.0122 0.0125  
AT. 32 H X 0.0002 -0.0005 0.0026 -0.0007 -0.0134 0.0134  
Y 0.0000 0.0008 -0.0051 0.0014 0.0261 -0.0262  
Z -0.0001 0.0006 -0.0024 0.0007 0.0122 -0.0125  
AT. 33 H X -0.0000 -0.0008 -0.0007 -0.0005 0.0040 0.0052  
Y -0.0005 0.0011 0.0063 0.0022 -0.0309 -0.0324  
Z 0.0001 -0.0004 -0.0010 -0.0004 0.0055 0.0060  
AT. 34 H X -0.0000 0.0008 -0.0007 0.0005 0.0040 -0.0052  
Y -0.0005 -0.0011 0.0063 -0.0022 -0.0309 0.0324  
Z 0.0001 0.0004 -0.0010 0.0004 0.0055 -0.0060  
AT. 35 C X -0.0001 0.0000 0.0008 0.0001 -0.0042 -0.0041  
Y 0.0000 -0.0000 -0.0001 -0.0001 0.0006 0.0005  
Z 0.0000 -0.0002 -0.0009 -0.0001 0.0047 0.0050  
AT. 36 C X -0.0001 -0.0000 0.0008 -0.0001 -0.0042 0.0041  
Y 0.0000 0.0000 -0.0001 0.0001 0.0006 -0.0005  
Z 0.0000 0.0002 -0.0009 0.0001 0.0047 -0.0050  
AT. 37 C X -0.0001 -0.0001 0.0008 0.0002 -0.0036 -0.0041  
Y -0.0001 0.0002 0.0002 0.0002 -0.0007 -0.0003  
Z -0.0001 0.0005 0.0023 0.0005 -0.0115 -0.0114  
AT. 38 C X -0.0001 0.0001 0.0008 -0.0002 -0.0036 0.0041  
Y -0.0001 -0.0002 0.0002 -0.0002 -0.0007 0.0003  
Z -0.0001 -0.0005 0.0023 -0.0005 -0.0115 0.0114  
AT. 39 H X 0.0001 -0.0015 -0.0048 -0.0012 0.0235 0.0221  
Y 0.0002 -0.0004 -0.0043 -0.0008 0.0200 0.0212  
Z -0.0000 -0.0002 0.0005 -0.0000 -0.0021 -0.0029  
AT. 40 H X 0.0001 0.0015 -0.0048 0.0012 0.0235 -0.0221  
Y 0.0002 0.0004 -0.0043 0.0008 0.0200 -0.0212  
Z -0.0000 0.0002 0.0005 0.0000 -0.0021 0.0029  
AT. 41 H X -0.0003 0.0010 0.0059 0.0013 -0.0284 -0.0283  
Y -0.0000 0.0000 -0.0013 -0.0000 0.0077 0.0081  
Z 0.0001 -0.0005 -0.0019 -0.0005 0.0083 0.0079  
AT. 42 H X -0.0003 -0.0010 0.0059 -0.0013 -0.0284 0.0283

Y -0.0000 -0.0000 -0.0013 0.0000 0.0077 -0.0081  
Z 0.0001 0.0005 -0.0019 0.0005 0.0083 -0.0079  
AT. 43 C X -0.0001 0.0004 -0.0021 -0.0002 0.0089 0.0099  
Y -0.0001 -0.0001 -0.0003 -0.0000 0.0014 0.0009  
Z 0.0000 -0.0002 -0.0018 -0.0005 0.0084 0.0081  
AT. 44 C X -0.0001 -0.0004 -0.0021 0.0002 0.0089 -0.0099  
Y -0.0001 0.0001 -0.0003 0.0000 0.0014 -0.0009  
Z 0.0000 0.0002 -0.0018 0.0005 0.0084 -0.0081  
AT. 45 H X 0.0001 0.0005 0.0036 0.0010 -0.0158 -0.0161  
Y -0.0004 0.0002 -0.0072 -0.0012 0.0327 0.0334  
Z 0.0003 -0.0005 0.0008 -0.0003 -0.0047 -0.0053  
AT. 46 H X 0.0001 -0.0005 0.0036 -0.0010 -0.0158 0.0161  
Y -0.0004 -0.0002 -0.0072 0.0012 0.0327 -0.0334  
Z 0.0003 0.0005 0.0008 0.0003 -0.0047 0.0053  
AT. 47 H X -0.0004 0.0002 0.0009 0.0006 -0.0035 -0.0022  
Y -0.0003 -0.0004 0.0076 0.0017 -0.0326 -0.0340  
Z 0.0002 -0.0004 0.0024 0.0002 -0.0101 -0.0118  
AT. 48 H X -0.0004 -0.0002 0.0009 -0.0006 -0.0035 0.0022  
Y -0.0003 0.0004 0.0076 -0.0017 -0.0326 0.0340  
Z 0.0002 0.0004 0.0024 -0.0002 -0.0101 0.0118  
AT. 49 C X 0.0000 -0.0000 0.0004 0.0001 -0.0017 -0.0017  
Y -0.0001 -0.0002 -0.0004 -0.0001 0.0020 0.0020  
Z 0.0001 0.0001 0.0003 -0.0000 -0.0016 -0.0019  
AT. 50 C X 0.0000 0.0000 0.0004 -0.0001 -0.0017 0.0017  
Y -0.0001 0.0002 -0.0004 0.0001 0.0020 -0.0020  
Z 0.0001 -0.0001 0.0003 0.0000 -0.0016 0.0019  
AT. 51 C X -0.0002 0.0002 0.0007 0.0003 -0.0033 -0.0040  
Y -0.0000 -0.0003 0.0017 0.0002 -0.0081 -0.0077  
Z -0.0000 -0.0000 -0.0022 -0.0004 0.0106 0.0107  
AT. 52 C X -0.0002 -0.0002 0.0007 -0.0003 -0.0033 0.0040  
Y -0.0000 0.0003 0.0017 -0.0002 -0.0081 0.0077  
Z -0.0000 0.0000 -0.0022 0.0004 0.0106 -0.0107

AT. 53 H X -0.0003 0.0007 -0.0050 -0.0004 0.0240 0.0225  
Y 0.0001 0.0002 -0.0057 -0.0010 0.0269 0.0271  
Z 0.0004 -0.0004 -0.0005 -0.0004 0.0019 0.0033

AT. 54 H X -0.0003 -0.0007 -0.0050 0.0004 0.0240 -0.0225  
Y 0.0001 -0.0002 -0.0057 0.0010 0.0269 -0.0271  
Z 0.0004 0.0004 -0.0005 0.0004 0.0019 -0.0033

AT. 55 H X -0.0001 -0.0005 0.0078 0.0012 -0.0371 -0.0367  
Y -0.0001 0.0001 -0.0003 0.0000 0.0019 0.0020  
Z 0.0000 -0.0000 0.0000 0.0000 -0.0001 0.0004

AT. 56 H X -0.0001 0.0005 0.0078 -0.0012 -0.0371 0.0367  
Y -0.0001 -0.0001 -0.0003 -0.0000 0.0019 -0.0020  
Z 0.0000 0.0000 0.0000 -0.0000 -0.0001 -0.0004

AT. 57 C X -0.0002 0.0002 0.0014 0.0003 -0.0066 -0.0073  
Y -0.0002 -0.0003 0.0001 0.0000 -0.0005 -0.0010  
Z 0.0001 -0.0004 -0.0037 -0.0008 0.0182 0.0181

AT. 58 C X -0.0002 -0.0002 0.0014 -0.0003 -0.0066 0.0073  
Y -0.0002 0.0003 0.0001 -0.0000 -0.0005 0.0010  
Z 0.0001 0.0004 -0.0037 0.0008 0.0182 -0.0181

AT. 59 H X 0.0015 -0.0001 -0.0105 -0.0021 0.0506 0.0534  
Y -0.0009 0.0004 0.0089 0.0018 -0.0431 -0.0441  
Z 0.0002 0.0004 0.0010 0.0003 -0.0054 -0.0038

AT. 60 H X 0.0015 0.0001 -0.0105 0.0021 0.0506 -0.0534  
Y -0.0009 -0.0004 0.0089 -0.0018 -0.0431 0.0441  
Z 0.0002 -0.0004 0.0010 -0.0003 -0.0054 0.0038

AT. 61 H X -0.0002 0.0017 0.0113 0.0025 -0.0554 -0.0560  
Y 0.0005 -0.0013 -0.0109 -0.0023 0.0524 0.0550  
Z -0.0003 0.0013 0.0096 0.0021 -0.0467 -0.0484

AT. 62 H X -0.0002 -0.0017 0.0113 -0.0025 -0.0554 0.0560  
Y 0.0005 0.0013 -0.0109 0.0023 0.0524 -0.0550  
Z -0.0003 -0.0013 0.0096 -0.0021 -0.0467 0.0484

AT. 63 H X -0.0007 -0.0020 -0.0089 -0.0022 0.0431 0.0414  
Y 0.0010 0.0016 0.0032 0.0009 -0.0159 -0.0143

Z -0.0004 0.0001 0.0037 0.0008 -0.0168 -0.0177  
AT. 64 H X -0.0007 0.0020 -0.0089 0.0022 0.0431 -0.0414  
Y 0.0010 -0.0016 0.0032 -0.0009 -0.0159 0.0143  
Z -0.0004 -0.0001 0.0037 -0.0008 -0.0168 0.0177  
AT. 65 C X -0.0001 -0.0001 0.0023 0.0004 -0.0104 -0.0110  
Y -0.0001 -0.0003 -0.0013 -0.0003 0.0067 0.0062  
Z -0.0001 0.0001 0.0031 0.0007 -0.0143 -0.0144  
AT. 66 C X -0.0001 0.0001 0.0023 -0.0004 -0.0104 0.0110  
Y -0.0001 0.0003 -0.0013 0.0003 0.0067 -0.0062  
Z -0.0001 -0.0001 0.0031 -0.0007 -0.0143 0.0144  
AT. 67 H X 0.0006 0.0006 -0.0088 -0.0016 0.0390 0.0413  
Y -0.0002 0.0001 0.0078 0.0015 -0.0360 -0.0368  
Z -0.0005 -0.0008 0.0038 0.0006 -0.0157 -0.0178  
AT. 68 H X 0.0006 -0.0006 -0.0088 0.0016 0.0390 -0.0413  
Y -0.0002 -0.0001 0.0078 -0.0015 -0.0360 0.0368  
Z -0.0005 0.0008 0.0038 -0.0006 -0.0157 0.0178  
AT. 69 H X 0.0001 0.0006 0.0082 0.0016 -0.0389 -0.0393  
Y 0.0002 0.0002 -0.0055 -0.0009 0.0252 0.0259  
Z 0.0001 -0.0006 -0.0156 -0.0028 0.0726 0.0740  
AT. 70 H X 0.0001 -0.0006 0.0082 -0.0016 -0.0389 0.0393  
Y 0.0002 -0.0002 -0.0055 0.0009 0.0252 -0.0259  
Z 0.0001 0.0006 -0.0156 0.0028 0.0726 -0.0740  
AT. 71 H X -0.0003 -0.0009 -0.0098 -0.0020 0.0468 0.0463  
Y 0.0003 0.0010 0.0042 0.0009 -0.0210 -0.0196  
Z 0.0004 0.0012 0.0014 0.0005 -0.0082 -0.0058  
AT. 72 H X -0.0003 0.0009 -0.0098 0.0020 0.0468 -0.0463  
Y 0.0003 -0.0010 0.0042 -0.0009 -0.0210 0.0196  
Z 0.0004 -0.0012 0.0014 -0.0005 -0.0082 0.0058  
AT. 73 C X 0.0003 -0.0000 -0.0017 -0.0004 0.0080 0.0090  
Y 0.0005 0.0006 0.0004 -0.0000 -0.0030 -0.0022  
Z -0.0000 -0.0001 0.0007 0.0000 -0.0038 -0.0038  
AT. 74 C X 0.0003 0.0000 -0.0017 0.0004 0.0080 -0.0090

Y 0.0005 -0.0006 0.0004 0.0000 -0.0030 0.0022  
Z -0.0000 0.0001 0.0007 -0.0000 -0.0038 0.0038  
AT. 75 H X -0.0006 -0.0009 -0.0048 -0.0008 0.0238 0.0234  
Y -0.0004 0.0002 0.0042 0.0009 -0.0193 -0.0202  
Z -0.0019 -0.0013 0.0035 0.0009 -0.0143 -0.0175  
AT. 76 H X -0.0006 0.0009 -0.0048 0.0008 0.0238 -0.0234  
Y -0.0004 -0.0002 0.0042 -0.0009 -0.0193 0.0202  
Z -0.0019 0.0013 0.0035 -0.0009 -0.0143 0.0175  
AT. 77 H X -0.0001 -0.0008 -0.0056 -0.0010 0.0275 0.0271  
Y -0.0008 0.0000 0.0048 0.0010 -0.0224 -0.0237  
Z 0.0016 0.0012 0.0003 -0.0004 -0.0040 -0.0007  
AT. 78 H X -0.0001 0.0008 -0.0056 0.0010 0.0275 -0.0271  
Y -0.0008 -0.0000 0.0048 -0.0010 -0.0224 0.0237  
Z 0.0016 -0.0012 0.0003 0.0004 -0.0040 0.0007  
AT. 79 I X -0.0000 -0.0000 0.0000 0.0000 0.0000 -0.0000  
Y 0.0001 0.0001 -0.0000 -0.0000 0.0000 0.0000  
Z 0.0001 0.0001 0.0000 0.0000 0.0000 0.0000  
AT. 80 I X -0.0000 0.0000 0.0000 -0.0000 0.0000 0.0000  
Y 0.0001 -0.0001 -0.0000 0.0000 0.0000 -0.0000  
Z 0.0001 -0.0001 0.0000 -0.0000 0.0000 -0.0000  
AT. 81 I X 0.0001 0.0001 -0.0000 -0.0000 0.0000 0.0000  
Y -0.0001 -0.0001 0.0001 0.0001 0.0000 0.0000  
Z -0.0000 -0.0000 -0.0000 -0.0000 0.0000 0.0000  
AT. 82 I X 0.0001 -0.0001 -0.0000 0.0000 0.0000 -0.0000  
Y -0.0001 0.0001 0.0001 -0.0001 0.0000 -0.0000  
Z -0.0000 0.0000 -0.0000 0.0000 0.0000 -0.0000  
AT. 83 O X -0.0064 -0.0063 0.0013 0.0018 0.0004 0.0000  
Y -0.0002 -0.0002 0.0006 0.0006 0.0000 -0.0001  
Z -0.0059 -0.0058 0.0011 0.0016 0.0003 0.0000  
AT. 84 O X -0.0064 0.0063 0.0013 -0.0018 0.0004 -0.0000  
Y -0.0002 0.0002 0.0006 -0.0006 0.0000 0.0001  
Z -0.0059 0.0058 0.0011 -0.0016 0.0003 -0.0000

AT. 85 O X 0.0053 0.0054 -0.0021 -0.0024 -0.0005 -0.0000  
Y 0.0050 0.0050 -0.0019 -0.0021 -0.0004 0.0000  
Z -0.0049 -0.0048 0.0026 0.0029 0.0005 0.0000

AT. 86 O X 0.0053 -0.0054 -0.0021 0.0024 -0.0005 0.0000  
Y 0.0050 -0.0050 -0.0019 0.0021 -0.0004 -0.0000  
Z -0.0049 0.0048 0.0026 -0.0029 0.0005 -0.0000

AT. 87 N X -0.0033 -0.0032 0.0008 0.0011 0.0002 -0.0000  
Y 0.0032 0.0031 -0.0007 -0.0008 -0.0001 0.0000  
Z 0.0142 0.0138 -0.0014 -0.0024 -0.0002 0.0002

AT. 88 N X -0.0033 0.0032 0.0008 -0.0011 0.0002 0.0000  
Y 0.0032 -0.0031 -0.0007 0.0008 -0.0001 -0.0000  
Z 0.0142 -0.0138 -0.0014 0.0024 -0.0002 -0.0002

AT. 89 N X 0.0040 0.0039 -0.0034 -0.0036 -0.0007 -0.0001  
Y -0.0108 -0.0105 0.0048 0.0053 0.0009 -0.0000  
Z 0.0091 0.0088 -0.0058 -0.0062 -0.0011 -0.0000

AT. 90 N X 0.0040 -0.0039 -0.0034 0.0036 -0.0007 0.0001  
Y -0.0108 0.0105 0.0048 -0.0053 0.0009 0.0000  
Z 0.0091 -0.0088 -0.0058 0.0062 -0.0011 0.0000

AT. 91 C X -0.0070 -0.0069 0.0007 0.0012 -0.0000 -0.0002  
Y -0.0063 -0.0063 -0.0004 0.0000 0.0000 -0.0001  
Z 0.0046 0.0047 0.0005 0.0001 0.0002 0.0001

AT. 92 C X -0.0070 0.0069 0.0007 -0.0012 -0.0000 0.0002  
Y -0.0063 0.0063 -0.0004 -0.0000 0.0000 0.0001  
Z 0.0046 -0.0047 0.0005 -0.0001 0.0002 -0.0001

AT. 93 C X 0.0098 0.0098 -0.0002 -0.0008 -0.0000 0.0002  
Y 0.0047 0.0047 -0.0003 -0.0006 -0.0000 0.0001  
Z -0.0063 -0.0065 -0.0002 0.0003 -0.0001 -0.0002

AT. 94 C X 0.0098 -0.0098 -0.0002 0.0008 -0.0000 -0.0002  
Y 0.0047 -0.0047 -0.0003 0.0006 -0.0000 -0.0001  
Z -0.0063 0.0065 -0.0002 -0.0003 -0.0001 0.0002

AT. 95 H X 0.0255 0.0263 -0.0004 -0.0025 0.0005 0.0010  
Y -0.0006 -0.0012 -0.0007 -0.0003 -0.0005 -0.0003

Z -0.0134 -0.0134 0.0007 0.0016 0.0000 -0.0003  
AT. 96 H X 0.0255 -0.0263 -0.0004 0.0025 0.0005 -0.0010  
Y -0.0006 0.0012 -0.0007 0.0003 -0.0005 0.0003  
Z -0.0134 0.0134 0.0007 -0.0016 0.0000 0.0003  
AT. 97 H X 0.0073 0.0057 -0.0022 -0.0026 -0.0003 0.0004  
Y 0.0071 0.0082 0.0002 -0.0006 0.0002 -0.0000  
Z -0.0056 -0.0050 0.0005 0.0008 0.0000 -0.0003  
AT. 98 H X 0.0073 -0.0057 -0.0022 0.0026 -0.0003 -0.0004  
Y 0.0071 -0.0082 0.0002 0.0006 0.0002 0.0000  
Z -0.0056 0.0050 0.0005 -0.0008 0.0000 0.0003  
AT. 99 C X 0.0066 0.0066 -0.0039 -0.0043 -0.0007 0.0000  
Y 0.0032 0.0032 -0.0020 -0.0022 -0.0002 0.0001  
Z 0.0070 0.0068 -0.0061 -0.0066 -0.0013 -0.0002  
AT. 100 C X 0.0066 -0.0066 -0.0039 0.0043 -0.0007 -0.0000  
Y 0.0032 -0.0032 -0.0020 0.0022 -0.0002 -0.0001  
Z 0.0070 -0.0068 -0.0061 0.0066 -0.0013 0.0002  
AT. 101 C X -0.0082 -0.0084 0.0052 0.0057 0.0011 0.0001  
Y -0.0022 -0.0022 0.0007 0.0009 0.0001 -0.0000  
Z -0.0064 -0.0066 0.0045 0.0049 0.0009 0.0000  
AT. 102 C X -0.0082 0.0084 0.0052 -0.0057 0.0011 -0.0001  
Y -0.0022 0.0022 0.0007 -0.0009 0.0001 0.0000  
Z -0.0064 0.0066 0.0045 -0.0049 0.0009 -0.0000  
AT. 103 H X -0.0254 -0.0260 0.0221 0.0235 0.0039 0.0003  
Y 0.0048 0.0050 -0.0062 -0.0064 -0.0011 -0.0001  
Z -0.0116 -0.0119 0.0045 0.0057 0.0010 -0.0000  
AT. 104 H X -0.0254 0.0260 0.0221 -0.0235 0.0039 -0.0003  
Y 0.0048 -0.0050 -0.0062 0.0064 -0.0011 0.0001  
Z -0.0116 0.0119 0.0045 -0.0057 0.0010 0.0000  
AT. 105 H X -0.0074 -0.0049 -0.0012 -0.0010 -0.0003 -0.0006  
Y 0.0010 -0.0001 0.0058 0.0054 0.0014 0.0004  
Z -0.0057 -0.0054 0.0055 0.0056 0.0012 0.0000  
AT. 106 H X -0.0074 0.0049 -0.0012 0.0010 -0.0003 0.0006



Y 0.0010 0.0001 0.0058 -0.0054 0.0014 -0.0004  
Z -0.0057 0.0054 0.0055 -0.0056 0.0012 -0.0000  
AT. 107 C X 0.0195 0.0193 0.0006 -0.0011 0.0002 0.0004  
Y -0.0058 -0.0061 -0.0061 -0.0062 -0.0015 -0.0006  
Z 0.0037 0.0043 0.0077 0.0074 0.0016 0.0004  
AT. 108 C X 0.0195 -0.0193 0.0006 0.0011 0.0002 -0.0004  
Y -0.0058 0.0061 -0.0061 0.0062 -0.0015 0.0006  
Z 0.0037 -0.0043 0.0077 -0.0074 0.0016 -0.0004  
AT. 109 H X -0.0236 -0.0246 -0.0207 -0.0198 -0.0047 -0.0018  
Y -0.0274 -0.0285 -0.0180 -0.0165 -0.0040 -0.0015  
Z -0.0201 -0.0208 -0.0067 -0.0050 -0.0014 -0.0006  
AT. 110 H X -0.0236 0.0246 -0.0207 0.0198 -0.0047 0.0018  
Y -0.0274 0.0285 -0.0180 0.0165 -0.0040 0.0015  
Z -0.0201 0.0208 -0.0067 0.0050 -0.0014 0.0006  
AT. 111 H X 0.0349 0.0343 0.0027 -0.0001 0.0008 0.0009  
Y 0.0385 0.0399 0.0216 0.0185 0.0052 0.0023  
Z -0.0235 -0.0229 -0.0010 0.0006 -0.0007 -0.0009  
AT. 112 H X 0.0349 -0.0343 0.0027 0.0001 0.0008 -0.0009  
Y 0.0385 -0.0399 0.0216 -0.0185 0.0052 -0.0023  
Z -0.0235 0.0229 -0.0010 -0.0006 -0.0007 0.0009  
AT. 113 C X -0.0025 -0.0026 -0.0026 -0.0026 -0.0006 -0.0002  
Y 0.0017 0.0016 0.0017 0.0017 0.0004 0.0001  
Z -0.0036 -0.0036 -0.0014 -0.0013 -0.0002 0.0001  
AT. 114 C X -0.0025 0.0026 -0.0026 0.0026 -0.0006 0.0002  
Y 0.0017 -0.0016 0.0017 -0.0017 0.0004 -0.0001  
Z -0.0036 0.0036 -0.0014 0.0013 -0.0002 -0.0001  
AT. 115 C X 0.0101 0.0098 -0.0036 -0.0037 -0.0008 -0.0000  
Y 0.0095 0.0095 -0.0006 -0.0010 -0.0001 0.0001  
Z 0.0145 0.0148 0.0081 0.0077 0.0014 0.0003  
AT. 116 C X 0.0101 -0.0098 -0.0036 0.0037 -0.0008 0.0000  
Y 0.0095 -0.0095 -0.0006 0.0010 -0.0001 -0.0001  
Z 0.0145 -0.0148 0.0081 -0.0077 0.0014 -0.0003

AT.117 H X 0.0478 0.0476 0.0015 0.0002 -0.0001 0.0003  
Y -0.0271 -0.0278 -0.0226 -0.0220 -0.0040 -0.0006  
Z -0.0172 -0.0169 0.0072 0.0079 0.0015 0.0000

AT.118 H X 0.0478 -0.0476 0.0015 -0.0002 -0.0001 -0.0003  
Y -0.0271 0.0278 -0.0226 0.0220 -0.0040 0.0006  
Z -0.0172 0.0169 0.0072 -0.0079 0.0015 -0.0000

AT.119 H X -0.0364 -0.0372 -0.0188 -0.0176 -0.0036 -0.0010  
Y 0.0127 0.0124 -0.0021 -0.0026 -0.0008 -0.0002  
Z -0.0138 -0.0135 0.0009 0.0013 0.0005 0.0001

AT.120 H X -0.0364 0.0372 -0.0188 0.0176 -0.0036 0.0010  
Y 0.0127 -0.0124 -0.0021 0.0026 -0.0008 0.0002  
Z -0.0138 0.0135 0.0009 -0.0013 0.0005 -0.0001

AT.121 C X -0.0199 -0.0192 0.0121 0.0128 0.0026 0.0003  
Y 0.0056 0.0051 -0.0045 -0.0049 -0.0012 -0.0003  
Z -0.0003 -0.0008 -0.0082 -0.0083 -0.0016 -0.0003

AT.122 C X -0.0199 0.0192 0.0121 -0.0128 0.0026 -0.0003  
Y 0.0056 -0.0051 -0.0045 0.0049 -0.0012 0.0003  
Z -0.0003 0.0008 -0.0082 0.0083 -0.0016 0.0003

AT.123 H X 0.0061 0.0047 -0.0255 -0.0261 -0.0048 -0.0004  
Y 0.0284 0.0266 -0.0263 -0.0275 -0.0058 -0.0010  
Z -0.0189 -0.0182 0.0078 0.0084 0.0019 0.0003

AT.124 H X 0.0061 -0.0047 -0.0255 0.0261 -0.0048 0.0004  
Y 0.0284 -0.0266 -0.0263 0.0275 -0.0058 0.0010  
Z -0.0189 0.0182 0.0078 -0.0084 0.0019 -0.0003

AT.125 H X -0.0311 -0.0301 0.0203 0.0214 0.0038 -0.0001  
Y -0.0191 -0.0174 0.0283 0.0292 0.0063 0.0013  
Z -0.0267 -0.0256 0.0191 0.0201 0.0037 0.0000

AT.126 H X -0.0311 0.0301 0.0203 -0.0214 0.0038 0.0001  
Y -0.0191 0.0174 0.0283 -0.0292 0.0063 -0.0013  
Z -0.0267 0.0256 0.0191 -0.0201 0.0037 -0.0000

AT.127 C X -0.0000 -0.0004 -0.0044 -0.0042 -0.0009 -0.0001  
Y -0.0023 -0.0023 -0.0021 -0.0022 -0.0003 -0.0001

Z -0.0015 -0.0013 0.0055 0.0057 0.0012 0.0002  
AT. 128 C X -0.0000 0.0004 -0.0044 0.0042 -0.0009 0.0001  
Y -0.0023 0.0023 -0.0021 0.0022 -0.0003 0.0001  
Z -0.0015 0.0013 0.0055 -0.0057 0.0012 -0.0002  
AT. 129 C X -0.0101 -0.0099 0.0005 0.0016 0.0002 -0.0001  
Y -0.0092 -0.0087 0.0104 0.0115 0.0023 0.0005  
Z 0.0033 0.0026 -0.0120 -0.0124 -0.0028 -0.0008  
AT. 130 C X -0.0101 0.0099 0.0005 -0.0016 0.0002 0.0001  
Y -0.0092 0.0087 0.0104 -0.0115 0.0023 -0.0005  
Z 0.0033 -0.0026 -0.0120 0.0124 -0.0028 0.0008  
AT. 131 H X -0.0315 -0.0297 0.0247 0.0281 0.0056 0.0010  
Y 0.0180 0.0161 -0.0382 -0.0407 -0.0089 -0.0021  
Z -0.0129 -0.0126 -0.0004 0.0008 -0.0004 -0.0005  
AT. 132 H X -0.0315 0.0297 0.0247 -0.0281 0.0056 -0.0010  
Y 0.0180 -0.0161 -0.0382 0.0407 -0.0089 0.0021  
Z -0.0129 0.0126 -0.0004 -0.0008 -0.0004 0.0005  
AT. 133 H X 0.0195 0.0171 -0.0404 -0.0426 -0.0093 -0.0022  
Y -0.0084 -0.0081 0.0091 0.0102 0.0021 0.0004  
Z -0.0095 -0.0093 0.0060 0.0073 0.0014 0.0004  
AT. 134 H X 0.0195 -0.0171 -0.0404 0.0426 -0.0093 0.0022  
Y -0.0084 0.0081 0.0091 -0.0102 0.0021 -0.0004  
Z -0.0095 0.0093 0.0060 -0.0073 0.0014 -0.0004  
AT. 135 C X -0.0081 -0.0084 -0.0075 -0.0072 -0.0014 -0.0003  
Y -0.0009 -0.0008 0.0026 0.0022 0.0006 0.0002  
Z -0.0103 -0.0110 -0.0139 -0.0139 -0.0028 -0.0006  
AT. 136 C X -0.0081 0.0084 -0.0075 0.0072 -0.0014 0.0003  
Y -0.0009 0.0008 0.0026 -0.0022 0.0006 -0.0002  
Z -0.0103 0.0110 -0.0139 0.0139 -0.0028 0.0006  
AT. 137 H X 0.0340 0.0360 0.0507 0.0490 0.0104 0.0025  
Y 0.0162 0.0171 0.0197 0.0194 0.0039 0.0009  
Z 0.0032 0.0031 -0.0061 -0.0052 -0.0015 -0.0004  
AT. 138 H X 0.0340 -0.0360 0.0507 -0.0490 0.0104 -0.0025

Y 0.0162 -0.0171 0.0197 -0.0194 0.0039 -0.0009  
Z 0.0032 -0.0031 -0.0061 0.0052 -0.0015 0.0004  
AT. 139 H X -0.0443 -0.0464 -0.0463 -0.0457 -0.0089 -0.0019  
Y -0.0187 -0.0199 -0.0268 -0.0259 -0.0053 -0.0011  
Z 0.0433 0.0454 0.0463 0.0455 0.0090 0.0019  
AT. 140 H X -0.0443 0.0464 -0.0463 0.0457 -0.0089 0.0019  
Y -0.0187 0.0199 -0.0268 0.0259 -0.0053 0.0011  
Z 0.0433 -0.0454 0.0463 -0.0455 0.0090 -0.0019  
AT. 141 H X 0.0346 0.0366 0.0340 0.0348 0.0062 0.0012  
Y 0.0038 0.0040 -0.0018 -0.0009 -0.0007 -0.0002  
Z 0.0029 0.0030 0.0080 0.0069 0.0018 0.0004  
AT. 142 H X 0.0346 -0.0366 0.0340 -0.0348 0.0062 -0.0012  
Y 0.0038 -0.0040 -0.0018 0.0009 -0.0007 0.0002  
Z 0.0029 -0.0030 0.0080 -0.0069 0.0018 -0.0004  
AT. 143 C X 0.0043 0.0037 -0.0112 -0.0117 -0.0025 -0.0005  
Y -0.0050 -0.0052 -0.0021 -0.0023 -0.0004 -0.0001  
Z 0.0009 0.0018 0.0170 0.0172 0.0036 0.0008  
AT. 144 C X 0.0043 -0.0037 -0.0112 0.0117 -0.0025 0.0005  
Y -0.0050 0.0052 -0.0021 0.0023 -0.0004 0.0001  
Z 0.0009 -0.0018 0.0170 -0.0172 0.0036 -0.0008  
AT. 145 H X -0.0189 -0.0154 0.0621 0.0628 0.0135 0.0029  
Y 0.0026 0.0035 0.0228 0.0233 0.0049 0.0011  
Z -0.0130 -0.0123 0.0089 0.0085 0.0021 0.0004  
AT. 146 H X -0.0189 0.0154 0.0621 -0.0628 0.0135 -0.0029  
Y 0.0026 -0.0035 0.0228 -0.0233 0.0049 -0.0011  
Z -0.0130 0.0123 0.0089 -0.0085 0.0021 -0.0004  
AT. 147 H X 0.0016 -0.0019 -0.0672 -0.0689 -0.0145 -0.0032  
Y 0.0100 0.0100 -0.0137 -0.0141 -0.0031 -0.0006  
Z 0.0052 0.0018 -0.0700 -0.0718 -0.0151 -0.0033  
AT. 148 H X 0.0016 0.0019 -0.0672 0.0689 -0.0145 0.0032  
Y 0.0100 -0.0100 -0.0137 0.0141 -0.0031 0.0006  
Z 0.0052 -0.0018 -0.0700 0.0718 -0.0151 0.0033

AT.149 H X 0.0167 0.0196 0.0530 0.0545 0.0112 0.0026  
Y 0.0097 0.0101 0.0032 0.0035 0.0006 0.0002  
Z 0.0192 0.0191 -0.0075 -0.0074 -0.0018 -0.0003

AT.150 H X 0.0167 -0.0196 0.0530 -0.0545 0.0112 -0.0026  
Y 0.0097 -0.0101 0.0032 -0.0035 0.0006 -0.0002  
Z 0.0192 -0.0191 -0.0075 0.0074 -0.0018 0.0003

AT.151 C X 0.0029 0.0031 0.0095 0.0097 0.0019 0.0003  
Y 0.0050 0.0052 0.0005 0.0009 0.0001 0.0001  
Z -0.0077 -0.0077 -0.0002 0.0007 0.0001 -0.0000

AT.152 C X 0.0029 -0.0031 0.0095 -0.0097 0.0019 -0.0003  
Y 0.0050 -0.0052 0.0005 -0.0009 0.0001 -0.0001  
Z -0.0077 0.0077 -0.0002 -0.0007 0.0001 0.0000

AT.153 H X 0.0075 0.0095 0.0266 0.0256 0.0054 0.0009  
Y 0.0015 0.0020 0.0096 0.0090 0.0019 0.0003  
Z -0.0155 -0.0158 0.0072 0.0069 0.0015 0.0001

AT.154 H X 0.0075 -0.0095 0.0266 -0.0256 0.0054 -0.0009  
Y 0.0015 -0.0020 0.0096 -0.0090 0.0019 -0.0003  
Z -0.0155 0.0158 0.0072 -0.0069 0.0015 -0.0001

AT.155 H X 0.0179 0.0194 0.0371 0.0379 0.0076 0.0018  
Y 0.0024 0.0024 0.0139 0.0142 0.0028 0.0006  
Z 0.0005 0.0010 -0.0045 -0.0032 -0.0007 0.0000

AT.156 H X 0.0179 -0.0194 0.0371 -0.0379 0.0076 -0.0018  
Y 0.0024 -0.0024 0.0139 -0.0142 0.0028 -0.0006  
Z 0.0005 -0.0010 -0.0045 0.0032 -0.0007 -0.0000

AT.157 O X -0.0001 0.0001 0.0003 -0.0003 0.0001 0.0000  
Y 0.0001 0.0001 0.0001 0.0001 -0.0000 -0.0001  
Z 0.0003 0.0001 -0.0001 0.0004 -0.0003 -0.0002

AT.158 O X -0.0001 -0.0001 0.0003 0.0003 0.0001 -0.0000  
Y 0.0001 -0.0001 0.0001 -0.0001 -0.0000 0.0001  
Z 0.0003 -0.0001 -0.0001 -0.0004 -0.0003 0.0002

AT.159 O X 0.0001 -0.0000 -0.0002 0.0003 -0.0002 -0.0000  
Y -0.0002 0.0000 0.0002 -0.0004 0.0000 0.0000

Z -0.0002 0.0001 0.0003 -0.0004 0.0002 -0.0001  
AT.160 O X 0.0001 0.0000 -0.0002 -0.0003 -0.0002 0.0000  
Y -0.0002 -0.0000 0.0002 0.0004 0.0000 -0.0000  
Z -0.0002 -0.0001 0.0003 0.0004 0.0002 0.0001  
AT.161 H X -0.0028 -0.0021 -0.0004 -0.0020 0.0015 0.0004  
Y 0.0010 0.0007 0.0000 0.0007 -0.0008 -0.0004  
Z -0.0037 -0.0026 -0.0005 -0.0027 0.0037 0.0021  
AT.162 H X -0.0028 0.0021 -0.0004 0.0020 0.0015 -0.0004  
Y 0.0010 -0.0007 0.0000 -0.0007 -0.0008 0.0004  
Z -0.0037 0.0026 -0.0005 0.0027 0.0037 -0.0021  
AT.163 H X 0.0008 0.0006 0.0001 0.0006 -0.0001 -0.0003  
Y 0.0028 -0.0007 -0.0057 0.0068 -0.0026 -0.0011  
Z 0.0004 -0.0004 -0.0014 0.0014 -0.0007 -0.0000  
AT.164 H X 0.0008 -0.0006 0.0001 -0.0006 -0.0001 0.0003  
Y 0.0028 0.0007 -0.0057 -0.0068 -0.0026 0.0011  
Z 0.0004 0.0004 -0.0014 -0.0014 -0.0007 0.0000  
AT.165 O X 0.0004 0.0002 -0.0001 -0.0000 -0.0000 0.0001  
Y 0.0003 0.0005 0.0000 -0.0001 -0.0001 -0.0002  
Z 0.0000 0.0007 0.0001 -0.0002 0.0003 0.0001  
AT.166 O X 0.0004 -0.0002 -0.0001 0.0000 -0.0000 -0.0001  
Y 0.0003 -0.0005 0.0000 0.0001 -0.0001 0.0002  
Z 0.0000 -0.0007 0.0001 0.0002 0.0003 -0.0001  
AT.167 H X -0.0003 -0.0012 -0.0001 -0.0003 -0.0018 -0.0019  
Y 0.0009 0.0033 -0.0000 0.0001 0.0037 0.0039  
Z -0.0002 -0.0005 -0.0000 0.0001 -0.0008 -0.0011  
AT.168 H X -0.0003 0.0012 -0.0001 0.0003 -0.0018 0.0019  
Y 0.0009 -0.0033 -0.0000 -0.0001 0.0037 -0.0039  
Z -0.0002 0.0005 -0.0000 -0.0001 -0.0008 0.0011  
AT.169 O X 0.0000 -0.0001 0.0000 -0.0000 -0.0001 0.0000  
Y -0.0002 -0.0000 0.0001 -0.0001 0.0000 -0.0000  
Z 0.0004 -0.0010 -0.0003 0.0003 -0.0002 -0.0001  
AT.170 O X 0.0000 0.0001 0.0000 0.0000 -0.0001 -0.0000

Y -0.0002 0.0000 0.0001 0.0001 0.0000 0.0000  
 Z 0.0004 0.0010 -0.0003 -0.0003 -0.0002 0.0001  
 AT. 171 H X 0.0008 0.0028 -0.0008 0.0009 0.0006 0.0012  
 Y -0.0002 0.0019 -0.0002 0.0002 0.0000 0.0007  
 Z -0.0016 0.0016 0.0007 -0.0008 -0.0006 0.0003  
 AT. 172 H X 0.0008 -0.0028 -0.0008 -0.0009 0.0006 -0.0012  
 Y -0.0002 -0.0019 -0.0002 -0.0002 0.0000 -0.0007  
 Z -0.0016 -0.0016 0.0007 0.0008 -0.0006 -0.0003  
  
 FREQ(CM\*\*-1) 995.06 996.56 997.13 997.38 1021.11 1021.34

AT. 1 I X 0.0000 0.0000 -0.0000 0.0000 0.0000 0.0000  
 Y 0.0001 0.0000 -0.0000 0.0000 -0.0000 -0.0000  
 Z 0.0001 0.0000 -0.0000 0.0001 -0.0000 -0.0000  
 AT. 2 I X -0.0000 0.0000 0.0000 0.0000 -0.0000 0.0000  
 Y -0.0001 0.0000 0.0000 0.0000 0.0000 -0.0000  
 Z -0.0001 0.0000 0.0000 0.0001 0.0000 -0.0000  
 AT. 3 I X 0.0000 0.0000 -0.0000 0.0000 -0.0000 -0.0000  
 Y 0.0001 0.0000 -0.0000 0.0001 -0.0000 -0.0000  
 Z -0.0000 0.0000 -0.0000 -0.0000 0.0000 0.0000  
 AT. 4 I X -0.0000 0.0000 0.0000 0.0000 0.0000 -0.0000  
 Y -0.0001 0.0000 0.0000 0.0001 0.0000 -0.0000  
 Z 0.0000 0.0000 0.0000 -0.0000 -0.0000 0.0000  
 AT. 5 O X 0.0040 0.0011 -0.0006 0.0043 -0.0005 -0.0004  
 Y -0.0020 -0.0006 0.0003 -0.0022 0.0003 0.0002  
 Z -0.0058 -0.0017 0.0008 -0.0061 0.0007 0.0005  
 AT. 6 O X -0.0040 0.0011 0.0006 0.0043 0.0005 -0.0004  
 Y 0.0020 -0.0006 -0.0003 -0.0022 -0.0003 0.0002  
 Z 0.0058 -0.0017 -0.0008 -0.0061 -0.0007 0.0005  
 AT. 7 O X 0.0035 0.0011 -0.0002 0.0037 -0.0006 -0.0003  
 Y -0.0036 -0.0011 0.0003 -0.0037 0.0006 0.0003  
 Z 0.0035 0.0011 -0.0003 0.0037 -0.0005 -0.0002

AT. 8 O X -0.0035 0.0011 0.0002 0.0037 0.0006 -0.0003  
Y 0.0036 -0.0011 -0.0003 -0.0037 -0.0006 0.0003  
Z -0.0035 0.0011 0.0003 0.0037 0.0005 -0.0002

AT. 9 N X 0.0036 0.0010 -0.0006 0.0038 -0.0005 -0.0003  
Y -0.0038 -0.0012 0.0004 -0.0039 0.0002 0.0001  
Z 0.0101 0.0027 -0.0015 0.0102 -0.0007 -0.0004

AT. 10 N X -0.0036 0.0010 0.0006 0.0038 0.0005 -0.0003  
Y 0.0038 -0.0012 -0.0004 -0.0039 -0.0002 0.0001  
Z -0.0101 0.0027 0.0015 0.0102 0.0007 -0.0004

AT. 11 N X 0.0022 0.0008 -0.0001 0.0024 -0.0006 -0.0004  
Y 0.0033 0.0012 -0.0002 0.0034 -0.0002 -0.0000  
Z -0.0099 -0.0032 0.0010 -0.0104 0.0012 0.0006

AT. 12 N X -0.0022 0.0008 0.0001 0.0024 0.0006 -0.0004  
Y -0.0033 0.0012 0.0002 0.0034 0.0002 -0.0000  
Z 0.0099 -0.0032 -0.0010 -0.0104 -0.0012 0.0006

AT. 13 C X 0.0044 0.0013 -0.0006 0.0047 -0.0006 -0.0004  
Y -0.0075 -0.0021 0.0011 -0.0080 0.0012 0.0008  
Z 0.0036 0.0011 -0.0005 0.0041 -0.0010 -0.0007

AT. 14 C X -0.0044 0.0013 0.0006 0.0047 0.0006 -0.0004  
Y 0.0075 -0.0021 -0.0011 -0.0080 -0.0012 0.0008  
Z -0.0036 0.0011 0.0005 0.0041 0.0010 -0.0007

AT. 15 C X -0.0057 -0.0017 0.0009 -0.0063 0.0006 0.0005  
Y 0.0067 0.0019 -0.0009 0.0070 -0.0009 -0.0006  
Z -0.0025 -0.0006 0.0004 -0.0025 0.0000 -0.0000

AT. 16 C X 0.0057 -0.0017 -0.0009 -0.0063 -0.0006 0.0005  
Y -0.0067 0.0019 0.0009 0.0070 0.0009 -0.0006  
Z 0.0025 -0.0006 -0.0004 -0.0025 -0.0000 -0.0000

AT. 17 H X -0.0329 -0.0099 0.0041 -0.0367 0.0083 0.0059  
Y 0.0070 0.0024 -0.0011 0.0083 -0.0012 -0.0010  
Z -0.0130 -0.0042 0.0017 -0.0152 0.0032 0.0025

AT. 18 H X 0.0329 -0.0099 -0.0041 -0.0367 -0.0083 0.0059  
Y -0.0070 0.0024 0.0011 0.0083 0.0012 -0.0010



Z 0.0130 -0.0042 -0.0017 -0.0152 -0.0032 0.0025  
AT. 19 H X 0.0063 0.0028 -0.0006 0.0101 -0.0033 -0.0030  
Y 0.0096 0.0024 -0.0014 0.0092 -0.0002 0.0000  
Z 0.0018 0.0008 -0.0002 0.0028 -0.0008 -0.0008  
AT. 20 H X -0.0063 0.0028 0.0006 0.0101 0.0033 -0.0030  
Y -0.0096 0.0024 0.0014 0.0092 0.0002 0.0000  
Z -0.0018 0.0008 0.0002 0.0028 0.0008 -0.0008  
AT. 21 C X 0.0036 0.0012 -0.0003 0.0038 -0.0006 -0.0003  
Y -0.0034 -0.0011 0.0001 -0.0036 0.0005 0.0003  
Z -0.0074 -0.0026 0.0006 -0.0083 0.0020 0.0012  
AT. 22 C X -0.0036 0.0012 0.0003 0.0038 0.0006 -0.0003  
Y 0.0034 -0.0011 -0.0001 -0.0036 -0.0005 0.0003  
Z 0.0074 -0.0026 -0.0006 -0.0083 -0.0020 0.0012  
AT. 23 C X -0.0052 -0.0014 0.0003 -0.0052 0.0008 0.0004  
Y 0.0024 0.0007 -0.0001 0.0026 -0.0006 -0.0003  
Z 0.0057 0.0019 -0.0004 0.0063 -0.0010 -0.0005  
AT. 24 C X 0.0052 -0.0014 -0.0003 -0.0052 -0.0008 0.0004  
Y -0.0024 0.0007 0.0001 0.0026 0.0006 -0.0003  
Z -0.0057 0.0019 0.0004 0.0063 0.0010 -0.0005  
AT. 25 H X -0.0235 -0.0085 0.0010 -0.0299 0.0078 0.0042  
Y -0.0009 -0.0004 -0.0000 -0.0015 0.0007 0.0004  
Z 0.0103 0.0025 -0.0005 0.0095 -0.0025 -0.0015  
AT. 26 H X 0.0235 -0.0085 -0.0010 -0.0299 -0.0078 0.0042  
Y 0.0009 -0.0004 0.0000 -0.0015 -0.0007 0.0004  
Z -0.0103 0.0025 0.0005 0.0095 0.0025 -0.0015  
AT. 27 H X 0.0039 0.0002 0.0008 0.0060 -0.0027 -0.0009  
Y 0.0037 0.0012 -0.0003 0.0047 -0.0006 -0.0002  
Z 0.0050 0.0020 -0.0007 0.0057 -0.0003 -0.0002  
AT. 28 H X -0.0039 0.0002 -0.0008 0.0060 0.0027 -0.0009  
Y -0.0037 0.0012 0.0003 0.0047 0.0006 -0.0002  
Z -0.0050 0.0020 0.0007 0.0057 0.0003 -0.0002  
AT. 29 C X -0.0149 -0.0039 0.0021 -0.0146 0.0001 -0.0001

Y 0.0116 0.0030 -0.0015 0.0107 0.0001 0.0000  
Z -0.0017 -0.0007 0.0001 -0.0026 0.0015 0.0010  
AT. 30 C X 0.0149 -0.0039 -0.0021 -0.0146 -0.0001 -0.0001  
Y -0.0116 0.0030 0.0015 0.0107 -0.0001 0.0000  
Z 0.0017 -0.0007 -0.0001 -0.0026 -0.0015 0.0010  
AT. 31 H X -0.0044 -0.0013 0.0001 -0.0037 0.0003 0.0003  
Y 0.0036 0.0014 -0.0001 0.0037 -0.0018 -0.0013  
Z -0.0065 -0.0014 0.0010 -0.0056 -0.0011 -0.0007  
AT. 32 H X 0.0044 -0.0013 -0.0001 -0.0037 -0.0003 0.0003  
Y -0.0036 0.0014 0.0001 0.0037 0.0018 -0.0013  
Z 0.0065 -0.0014 -0.0010 -0.0056 0.0011 -0.0007  
AT. 33 H X -0.0326 -0.0088 0.0049 -0.0333 0.0023 0.0014  
Y 0.0190 0.0046 -0.0027 0.0169 0.0031 0.0022  
Z -0.0165 -0.0047 0.0025 -0.0175 0.0017 0.0010  
AT. 34 H X 0.0326 -0.0088 -0.0049 -0.0333 -0.0023 0.0014  
Y -0.0190 0.0046 0.0027 0.0169 -0.0031 0.0022  
Z 0.0165 -0.0047 -0.0025 -0.0175 -0.0017 0.0010  
AT. 35 C X -0.0008 -0.0002 0.0000 -0.0006 0.0002 0.0001  
Y 0.0027 0.0009 -0.0004 0.0033 -0.0006 -0.0004  
Z -0.0004 -0.0001 0.0002 -0.0007 0.0002 0.0001  
AT. 36 C X 0.0008 -0.0002 -0.0000 -0.0006 -0.0002 0.0001  
Y -0.0027 0.0009 0.0004 0.0033 0.0006 -0.0004  
Z 0.0004 -0.0001 -0.0002 -0.0007 -0.0002 0.0001  
AT. 37 C X 0.0071 0.0020 -0.0007 0.0063 0.0009 0.0007  
Y -0.0070 -0.0022 0.0007 -0.0067 -0.0002 -0.0003  
Z -0.0034 -0.0006 0.0003 -0.0017 -0.0011 -0.0007  
AT. 38 C X -0.0071 0.0020 0.0007 0.0063 -0.0009 0.0007  
Y 0.0070 -0.0022 -0.0007 -0.0067 0.0002 -0.0003  
Z 0.0034 -0.0006 -0.0003 -0.0017 0.0011 -0.0007  
AT. 39 H X 0.0257 0.0068 -0.0026 0.0213 0.0024 0.0018  
Y -0.0182 -0.0063 0.0019 -0.0211 0.0038 0.0022  
Z 0.0134 0.0043 -0.0014 0.0141 -0.0018 -0.0010

AT. 40 H X -0.0257 0.0068 0.0026 0.0213 -0.0024 0.0018  
Y 0.0182 -0.0063 -0.0019 -0.0211 -0.0038 0.0022  
Z -0.0134 0.0043 0.0014 0.0141 0.0018 -0.0010

AT. 41 H X -0.0061 -0.0012 0.0006 -0.0035 -0.0014 -0.0008  
Y -0.0024 -0.0008 0.0004 -0.0027 -0.0003 -0.0002  
Z 0.0064 0.0016 -0.0008 0.0049 0.0012 0.0008

AT. 42 H X 0.0061 -0.0012 -0.0006 -0.0035 0.0014 -0.0008  
Y 0.0024 -0.0008 -0.0004 -0.0027 0.0003 -0.0002  
Z -0.0064 0.0016 0.0008 0.0049 -0.0012 0.0008

AT. 43 C X -0.0129 -0.0040 0.0011 -0.0123 -0.0002 -0.0004  
Y 0.0057 0.0015 -0.0008 0.0055 0.0005 0.0003  
Z 0.0086 0.0025 -0.0009 0.0084 -0.0016 -0.0009

AT. 44 C X 0.0129 -0.0040 -0.0011 -0.0123 0.0002 -0.0004  
Y -0.0057 0.0015 0.0008 0.0055 -0.0005 0.0003  
Z -0.0086 0.0025 0.0009 0.0084 0.0016 -0.0009

AT. 45 H X -0.0042 -0.0006 0.0007 -0.0035 0.0011 0.0011  
Y -0.0050 -0.0020 -0.0001 -0.0043 -0.0022 -0.0018  
Z 0.0119 0.0033 -0.0011 0.0107 0.0004 0.0003

AT. 46 H X 0.0042 -0.0006 -0.0007 -0.0035 -0.0011 0.0011  
Y 0.0050 -0.0020 0.0001 -0.0043 0.0022 -0.0018  
Z -0.0119 0.0033 0.0011 0.0107 -0.0004 0.0003

AT. 47 H X -0.0271 -0.0086 0.0025 -0.0279 0.0034 0.0018  
Y 0.0069 0.0022 -0.0006 0.0056 0.0041 0.0031  
Z 0.0301 0.0097 -0.0027 0.0307 -0.0031 -0.0014

AT. 48 H X 0.0271 -0.0086 -0.0025 -0.0279 -0.0034 0.0018  
Y -0.0069 0.0022 0.0006 0.0056 -0.0041 0.0031  
Z -0.0301 0.0097 0.0027 0.0307 0.0031 -0.0014

AT. 49 C X 0.0016 0.0004 -0.0001 0.0013 -0.0001 -0.0000  
Y 0.0036 0.0009 -0.0004 0.0030 -0.0004 -0.0003  
Z 0.0003 0.0001 -0.0001 0.0007 -0.0004 -0.0002

AT. 50 C X -0.0016 0.0004 0.0001 0.0013 0.0001 -0.0000  
Y -0.0036 0.0009 0.0004 0.0030 0.0004 -0.0003

Z -0.0003 0.0001 0.0001 0.0007 0.0004 -0.0002  
AT. 51 C X 0.0092 0.0024 -0.0012 0.0085 0.0011 0.0009  
Y -0.0100 -0.0021 0.0014 -0.0084 -0.0007 -0.0005  
Z 0.0007 0.0001 -0.0000 0.0002 0.0004 0.0003  
AT. 52 C X -0.0092 0.0024 0.0012 0.0085 -0.0011 0.0009  
Y 0.0100 -0.0021 -0.0014 -0.0084 0.0007 -0.0005  
Z -0.0007 0.0001 0.0000 0.0002 -0.0004 0.0003  
AT. 53 H X 0.0316 0.0074 -0.0042 0.0270 0.0031 0.0023  
Y -0.0025 -0.0016 0.0005 -0.0058 0.0033 0.0021  
Z -0.0298 -0.0079 0.0041 -0.0293 0.0015 0.0007  
AT. 54 H X -0.0316 0.0074 0.0042 0.0270 -0.0031 0.0023  
Y 0.0025 -0.0016 -0.0005 -0.0058 -0.0033 0.0021  
Z 0.0298 -0.0079 -0.0041 -0.0293 -0.0015 0.0007  
AT. 55 H X -0.0185 -0.0035 0.0026 -0.0140 -0.0019 -0.0013  
Y 0.0006 0.0002 -0.0003 0.0011 -0.0004 -0.0002  
Z -0.0044 -0.0010 0.0003 -0.0029 -0.0012 -0.0007  
AT. 56 H X 0.0185 -0.0035 -0.0026 -0.0140 0.0019 -0.0013  
Y -0.0006 0.0002 0.0003 0.0011 0.0004 -0.0002  
Z 0.0044 -0.0010 -0.0003 -0.0029 0.0012 -0.0007  
AT. 57 C X 0.0082 0.0022 -0.0010 0.0077 0.0002 0.0002  
Y 0.0099 0.0026 -0.0011 0.0086 0.0008 0.0006  
Z 0.0048 0.0012 -0.0005 0.0040 -0.0002 -0.0002  
AT. 58 C X -0.0082 0.0022 0.0010 0.0077 -0.0002 0.0002  
Y -0.0099 0.0026 0.0011 0.0086 -0.0008 0.0006  
Z -0.0048 0.0012 0.0005 0.0040 0.0002 -0.0002  
AT. 59 H X -0.0333 -0.0094 0.0039 -0.0314 -0.0034 -0.0025  
Y 0.0103 0.0031 -0.0012 0.0102 0.0016 0.0013  
Z -0.0232 -0.0060 0.0028 -0.0209 -0.0015 -0.0010  
AT. 60 H X 0.0333 -0.0094 -0.0039 -0.0314 0.0034 -0.0025  
Y -0.0103 0.0031 0.0012 0.0102 -0.0016 0.0013  
Z 0.0232 -0.0060 -0.0028 -0.0209 0.0015 -0.0010  
AT. 61 H X -0.0226 -0.0052 0.0024 -0.0171 -0.0009 -0.0006

Y -0.0127 -0.0029 0.0020 -0.0116 -0.0012 -0.0007  
Z -0.0079 -0.0019 0.0006 -0.0053 -0.0001 -0.0001  
AT. 62 H X 0.0226 -0.0052 -0.0024 -0.0171 0.0009 -0.0006  
Y 0.0127 -0.0029 -0.0020 -0.0116 0.0012 -0.0007  
Z 0.0079 -0.0019 -0.0006 -0.0053 0.0001 -0.0001  
AT. 63 H X 0.0382 0.0101 -0.0042 0.0338 0.0011 0.0008  
Y -0.0431 -0.0117 0.0048 -0.0394 -0.0019 -0.0015  
Z 0.0204 0.0056 -0.0024 0.0193 0.0012 0.0010  
AT. 64 H X -0.0382 0.0101 0.0042 0.0338 -0.0011 0.0008  
Y 0.0431 -0.0117 -0.0048 -0.0394 0.0019 -0.0015  
Z -0.0204 0.0056 0.0024 0.0193 -0.0012 0.0010  
AT. 65 C X 0.0054 0.0017 -0.0006 0.0058 0.0005 0.0005  
Y 0.0133 0.0037 -0.0014 0.0126 0.0007 0.0007  
Z -0.0041 -0.0010 0.0005 -0.0035 0.0005 0.0003  
AT. 66 C X -0.0054 0.0017 0.0006 0.0058 -0.0005 0.0005  
Y -0.0133 0.0037 0.0014 0.0126 -0.0007 0.0007  
Z 0.0041 -0.0010 -0.0005 -0.0035 -0.0005 0.0003  
AT. 67 H X -0.0253 -0.0077 0.0027 -0.0254 -0.0031 -0.0025  
Y -0.0057 -0.0011 0.0006 -0.0039 0.0008 0.0004  
Z 0.0394 0.0114 -0.0042 0.0380 0.0035 0.0031  
AT. 68 H X 0.0253 -0.0077 -0.0027 -0.0254 0.0031 -0.0025  
Y 0.0057 -0.0011 -0.0006 -0.0039 -0.0008 0.0004  
Z -0.0394 0.0114 0.0042 0.0380 -0.0035 0.0031  
AT. 69 H X -0.0261 -0.0073 0.0027 -0.0246 -0.0008 -0.0010  
Y -0.0127 -0.0047 0.0013 -0.0155 -0.0018 -0.0018  
Z 0.0201 0.0045 -0.0022 0.0154 -0.0009 -0.0007  
AT. 70 H X 0.0261 -0.0073 -0.0027 -0.0246 0.0008 -0.0010  
Y 0.0127 -0.0047 -0.0013 -0.0155 0.0018 -0.0018  
Z -0.0201 0.0045 0.0022 0.0154 0.0009 -0.0007  
AT. 71 H X 0.0352 0.0094 -0.0039 0.0319 -0.0000 0.0004  
Y -0.0367 -0.0101 0.0039 -0.0341 -0.0013 -0.0012  
Z -0.0484 -0.0137 0.0051 -0.0460 -0.0025 -0.0022

AT. 72 H X -0.0352 0.0094 0.0039 0.0319 0.0000 0.0004  
Y 0.0367 -0.0101 -0.0039 -0.0341 0.0013 -0.0012  
Z 0.0484 -0.0137 -0.0051 -0.0460 0.0025 -0.0022

AT. 73 C X -0.0101 -0.0028 0.0013 -0.0098 -0.0011 -0.0009  
Y -0.0167 -0.0046 0.0019 -0.0153 -0.0015 -0.0011  
Z -0.0024 -0.0007 0.0002 -0.0023 0.0000 -0.0000

AT. 74 C X 0.0101 -0.0028 -0.0013 -0.0098 0.0011 -0.0009  
Y 0.0167 -0.0046 -0.0019 -0.0153 0.0015 -0.0011  
Z 0.0024 -0.0007 -0.0002 -0.0023 -0.0000 -0.0000

AT. 75 H X 0.0192 0.0066 -0.0024 0.0225 0.0007 0.0010  
Y 0.0067 0.0013 -0.0008 0.0043 0.0010 0.0007  
Z 0.0491 0.0137 -0.0058 0.0461 0.0047 0.0036

AT. 76 H X -0.0192 0.0066 0.0024 0.0225 -0.0007 0.0010  
Y -0.0067 0.0013 0.0008 0.0043 -0.0010 0.0007  
Z -0.0491 0.0137 0.0058 0.0461 -0.0047 0.0036

AT. 77 H X 0.0126 0.0023 -0.0011 0.0068 -0.0004 -0.0005  
Y 0.0141 0.0049 -0.0019 0.0174 0.0020 0.0017  
Z -0.0521 -0.0143 0.0059 -0.0482 -0.0040 -0.0031

AT. 78 H X -0.0126 0.0023 0.0011 0.0068 0.0004 -0.0005  
Y -0.0141 0.0049 0.0019 0.0174 -0.0020 0.0017  
Z 0.0521 -0.0143 -0.0059 -0.0482 0.0040 -0.0031

AT. 79 I X -0.0000 0.0000 0.0000 -0.0000 -0.0000 -0.0000  
Y -0.0000 -0.0001 -0.0001 0.0000 -0.0000 -0.0000  
Z -0.0000 -0.0001 -0.0001 0.0000 -0.0000 -0.0000

AT. 80 I X 0.0000 0.0000 -0.0000 -0.0000 0.0000 -0.0000  
Y 0.0000 -0.0001 0.0001 0.0000 0.0000 -0.0000  
Z 0.0000 -0.0001 0.0001 0.0000 0.0000 -0.0000

AT. 81 I X 0.0000 0.0000 0.0000 -0.0000 0.0000 0.0000  
Y -0.0000 -0.0001 -0.0001 0.0000 -0.0003 -0.0003  
Z -0.0000 0.0000 0.0000 -0.0000 0.0001 0.0001

AT. 82 I X -0.0000 0.0000 -0.0000 -0.0000 -0.0000 0.0000  
Y 0.0000 -0.0001 0.0001 0.0000 0.0003 -0.0003

Z 0.0000 0.0000 -0.0000 -0.0000 -0.0001 0.0001  
AT. 83 O X 0.0006 0.0048 0.0053 -0.0015 0.0023 0.0017  
Y 0.0001 0.0003 0.0004 -0.0000 0.0004 0.0003  
Z 0.0005 0.0048 0.0050 -0.0014 0.0018 0.0018  
AT. 84 O X -0.0006 0.0048 -0.0053 -0.0015 -0.0023 0.0017  
Y -0.0001 0.0003 -0.0004 -0.0000 -0.0004 0.0003  
Z -0.0005 0.0048 -0.0050 -0.0014 -0.0018 0.0018  
AT. 85 O X 0.0004 0.0026 0.0026 -0.0007 0.0074 0.0075  
Y 0.0003 0.0025 0.0026 -0.0007 0.0061 0.0062  
Z -0.0003 -0.0024 -0.0027 0.0007 -0.0064 -0.0065  
AT. 86 O X -0.0004 0.0026 -0.0026 -0.0007 -0.0074 0.0075  
Y -0.0003 0.0025 -0.0026 -0.0007 -0.0061 0.0062  
Z 0.0003 -0.0024 0.0027 0.0007 0.0064 -0.0065  
AT. 87 N X 0.0003 0.0024 0.0026 -0.0007 0.0021 0.0021  
Y 0.0002 0.0014 0.0014 -0.0003 -0.0020 -0.0021  
Z -0.0012 -0.0115 -0.0119 0.0034 -0.0032 -0.0034  
AT. 88 N X -0.0003 0.0024 -0.0026 -0.0007 -0.0021 0.0021  
Y -0.0002 0.0014 -0.0014 -0.0003 0.0020 -0.0021  
Z 0.0012 -0.0115 0.0119 0.0034 0.0032 -0.0034  
AT. 89 N X 0.0002 0.0015 0.0016 -0.0004 0.0048 0.0049  
Y -0.0003 -0.0024 -0.0028 0.0007 -0.0044 -0.0046  
Z 0.0008 0.0066 0.0073 -0.0019 0.0138 0.0140  
AT. 90 N X -0.0002 0.0015 -0.0016 -0.0004 -0.0048 0.0049  
Y 0.0003 -0.0024 0.0028 0.0007 0.0044 -0.0046  
Z -0.0008 0.0066 -0.0073 -0.0019 -0.0138 0.0140  
AT. 91 C X 0.0007 0.0057 0.0060 -0.0016 0.0016 0.0018  
Y 0.0005 0.0050 0.0053 -0.0016 0.0019 0.0019  
Z -0.0006 -0.0041 -0.0044 0.0012 -0.0037 -0.0032  
AT. 92 C X -0.0007 0.0057 -0.0060 -0.0016 -0.0016 0.0018  
Y -0.0005 0.0050 -0.0053 -0.0016 -0.0019 0.0019  
Z 0.0006 -0.0041 0.0044 0.0012 0.0037 -0.0032  
AT. 93 C X -0.0009 -0.0070 -0.0079 0.0021 -0.0030 -0.0025

Y -0.0004 -0.0035 -0.0037 0.0010 -0.0013 -0.0014  
Z 0.0005 0.0047 0.0050 -0.0014 0.0016 0.0019  
AT. 94 C X 0.0009 -0.0070 0.0079 0.0021 0.0030 -0.0025  
Y 0.0004 -0.0035 0.0037 0.0010 0.0013 -0.0014  
Z -0.0005 0.0047 -0.0050 -0.0014 -0.0016 0.0019  
AT. 95 H X -0.0029 -0.0211 -0.0231 0.0062 -0.0113 -0.0115  
Y 0.0002 0.0016 0.0014 -0.0004 0.0006 0.0027  
Z 0.0017 0.0107 0.0122 -0.0033 0.0074 0.0045  
AT. 96 H X 0.0029 -0.0211 0.0231 0.0062 0.0113 -0.0115  
Y -0.0002 0.0016 -0.0014 -0.0004 -0.0006 0.0027  
Z -0.0017 0.0107 -0.0122 -0.0033 -0.0074 0.0045  
AT. 97 H X 0.0002 -0.0028 -0.0000 0.0008 0.0046 0.0028  
Y -0.0008 -0.0081 -0.0094 0.0025 -0.0042 -0.0042  
Z 0.0002 0.0028 0.0019 -0.0008 -0.0009 -0.0001  
AT. 98 H X -0.0002 -0.0028 0.0000 0.0008 -0.0046 0.0028  
Y 0.0008 -0.0081 0.0094 0.0025 0.0042 -0.0042  
Z -0.0002 0.0028 -0.0019 -0.0008 0.0009 -0.0001  
AT. 99 C X 0.0004 0.0034 0.0037 -0.0010 0.0107 0.0109  
Y 0.0002 0.0015 0.0015 -0.0005 0.0027 0.0028  
Z 0.0006 0.0043 0.0049 -0.0012 0.0209 0.0209  
AT. 100 C X -0.0004 0.0034 -0.0037 -0.0010 -0.0107 0.0109  
Y -0.0002 0.0015 -0.0015 -0.0005 -0.0027 0.0028  
Z -0.0006 0.0043 -0.0049 -0.0012 -0.0209 0.0209  
AT. 101 C X -0.0005 -0.0042 -0.0041 0.0012 -0.0106 -0.0107  
Y -0.0001 -0.0008 -0.0010 0.0003 -0.0058 -0.0058  
Z -0.0004 -0.0036 -0.0035 0.0010 -0.0090 -0.0093  
AT. 102 C X 0.0005 -0.0042 0.0041 0.0012 0.0106 -0.0107  
Y 0.0001 -0.0008 0.0010 0.0003 0.0058 -0.0058  
Z 0.0004 -0.0036 0.0035 0.0010 0.0090 -0.0093  
AT. 103 H X -0.0020 -0.0194 -0.0195 0.0061 -0.1007 -0.1013  
Y 0.0005 0.0055 0.0054 -0.0017 0.0325 0.0328  
Z -0.0007 -0.0051 -0.0052 0.0015 -0.0240 -0.0235



AT.104 H X 0.0020 -0.0194 0.0195 0.0061 0.1007 -0.1013  
Y -0.0005 0.0055 -0.0054 -0.0017 -0.0325 0.0328  
Z 0.0007 -0.0051 0.0052 0.0015 0.0240 -0.0235

AT.105 H X -0.0001 0.0042 0.0002 -0.0015 0.0298 0.0302  
Y -0.0005 -0.0054 -0.0036 0.0015 -0.0126 -0.0134  
Z -0.0006 -0.0037 -0.0041 0.0010 -0.0043 -0.0047

AT.106 H X 0.0001 0.0042 -0.0002 -0.0015 -0.0298 0.0302  
Y 0.0005 -0.0054 0.0036 0.0015 0.0126 -0.0134  
Z 0.0006 -0.0037 0.0041 0.0010 0.0043 -0.0047

AT.107 C X -0.0020 -0.0184 -0.0190 0.0056 0.0016 0.0018  
Y -0.0006 -0.0050 -0.0052 0.0014 0.0042 0.0041  
Z 0.0004 0.0024 0.0022 -0.0007 0.0045 0.0043

AT.108 C X 0.0020 -0.0184 0.0190 0.0056 -0.0016 0.0018  
Y 0.0006 -0.0050 0.0052 0.0014 -0.0042 0.0041  
Z -0.0004 0.0024 -0.0022 -0.0007 -0.0045 0.0043

AT.109 H X -0.0004 -0.0006 0.0001 -0.0001 0.0013 0.0018  
Y -0.0001 0.0025 0.0027 -0.0010 -0.0004 -0.0009  
Z 0.0008 0.0092 0.0092 -0.0030 -0.0035 -0.0044

AT.110 H X 0.0004 -0.0006 -0.0001 -0.0001 -0.0013 0.0018  
Y 0.0001 0.0025 -0.0027 -0.0010 0.0004 -0.0009  
Z -0.0008 0.0092 -0.0092 -0.0030 0.0035 -0.0044

AT.111 H X -0.0038 -0.0345 -0.0356 0.0102 -0.0014 -0.0016  
Y -0.0015 -0.0157 -0.0166 0.0049 0.0102 0.0107  
Z 0.0026 0.0227 0.0232 -0.0066 0.0065 0.0066

AT.112 H X 0.0038 -0.0345 0.0356 0.0102 0.0014 -0.0016  
Y 0.0015 -0.0157 0.0166 0.0049 -0.0102 0.0107  
Z -0.0026 0.0227 -0.0232 -0.0066 -0.0065 0.0066

AT.113 C X -0.0000 -0.0008 -0.0011 0.0003 -0.0025 -0.0026  
Y -0.0002 -0.0025 -0.0021 0.0007 -0.0031 -0.0027  
Z 0.0002 0.0022 0.0026 -0.0007 0.0007 0.0009

AT.114 C X 0.0000 -0.0008 0.0011 0.0003 0.0025 -0.0026  
Y 0.0002 -0.0025 0.0021 0.0007 0.0031 -0.0027

Z -0.0002 0.0022 -0.0026 -0.0007 -0.0007 0.0009  
AT. 115 C X 0.0011 0.0093 0.0098 -0.0027 -0.0063 -0.0061  
Y 0.0005 0.0040 0.0036 -0.0011 -0.0018 -0.0020  
Z 0.0002 0.0011 0.0004 -0.0001 -0.0122 -0.0122  
AT. 116 C X -0.0011 0.0093 -0.0098 -0.0027 0.0063 -0.0061  
Y -0.0005 0.0040 -0.0036 -0.0011 0.0018 -0.0020  
Z -0.0002 0.0011 -0.0004 -0.0001 0.0122 -0.0122  
AT. 117 H X 0.0031 0.0240 0.0238 -0.0066 -0.0126 -0.0125  
Y 0.0008 0.0077 0.0099 -0.0028 0.0523 0.0527  
Z -0.0018 -0.0150 -0.0155 0.0043 -0.0172 -0.0172  
AT. 118 H X -0.0031 0.0240 -0.0238 -0.0066 0.0126 -0.0125  
Y -0.0008 0.0077 -0.0099 -0.0028 -0.0523 0.0527  
Z 0.0018 -0.0150 0.0155 0.0043 0.0172 -0.0172  
AT. 119 H X -0.0003 -0.0031 -0.0014 0.0008 0.0206 0.0208  
Y 0.0007 0.0044 0.0039 -0.0009 -0.0101 -0.0105  
Z -0.0007 -0.0056 -0.0053 0.0013 0.0105 0.0107  
AT. 120 H X 0.0003 -0.0031 0.0014 0.0008 -0.0206 0.0208  
Y -0.0007 0.0044 -0.0039 -0.0009 0.0101 -0.0105  
Z 0.0007 -0.0056 0.0053 0.0013 -0.0105 0.0107  
AT. 121 C X -0.0016 -0.0128 -0.0135 0.0036 -0.0018 -0.0020  
Y 0.0001 -0.0015 -0.0012 0.0007 0.0030 0.0033  
Z -0.0004 -0.0042 -0.0045 0.0014 -0.0188 -0.0188  
AT. 122 C X 0.0016 -0.0128 0.0135 0.0036 0.0018 -0.0020  
Y -0.0001 -0.0015 0.0012 0.0007 -0.0030 0.0033  
Z 0.0004 -0.0042 0.0045 0.0014 0.0188 -0.0188  
AT. 123 H X -0.0013 -0.0059 -0.0048 0.0013 -0.0194 -0.0187  
Y 0.0015 0.0066 0.0070 -0.0011 -0.0170 -0.0169  
Z -0.0018 -0.0108 -0.0108 0.0026 0.0000 0.0003  
AT. 124 H X 0.0013 -0.0059 0.0048 0.0013 0.0194 -0.0187  
Y -0.0015 0.0066 -0.0070 -0.0011 0.0170 -0.0169  
Z 0.0018 -0.0108 0.0108 0.0026 -0.0000 0.0003  
AT. 125 H X -0.0031 -0.0263 -0.0288 0.0080 -0.0318 -0.0328

Y -0.0008 0.0001 0.0010 -0.0014 0.0544 0.0546  
Z -0.0027 -0.0196 -0.0218 0.0056 -0.0291 -0.0302  
AT. 126 H X 0.0031 -0.0263 0.0288 0.0080 0.0318 -0.0328  
Y 0.0008 0.0001 -0.0010 -0.0014 -0.0544 0.0546  
Z 0.0027 -0.0196 0.0218 0.0056 0.0291 -0.0302  
AT. 127 C X 0.0000 -0.0001 -0.0001 -0.0000 0.0009 0.0009  
Y -0.0006 -0.0040 -0.0045 0.0011 -0.0015 -0.0019  
Z 0.0002 0.0006 -0.0001 -0.0001 -0.0001 -0.0004  
AT. 128 C X -0.0000 -0.0001 0.0001 -0.0000 -0.0009 0.0009  
Y 0.0006 -0.0040 0.0045 0.0011 0.0015 -0.0019  
Z -0.0002 0.0006 0.0001 -0.0001 0.0001 -0.0004  
AT. 129 C X 0.0014 0.0132 0.0133 -0.0039 -0.0056 -0.0056  
Y 0.0008 0.0078 0.0080 -0.0026 0.0020 0.0022  
Z -0.0003 -0.0028 -0.0025 0.0009 0.0009 0.0012  
AT. 130 C X -0.0014 0.0132 -0.0133 -0.0039 0.0056 -0.0056  
Y -0.0008 0.0078 -0.0080 -0.0026 -0.0020 0.0022  
Z 0.0003 -0.0028 0.0025 0.0009 -0.0009 0.0012  
AT. 131 H X 0.0041 0.0382 0.0387 -0.0116 -0.0038 -0.0039  
Y -0.0010 -0.0111 -0.0096 0.0037 0.0064 0.0070  
Z 0.0024 0.0218 0.0232 -0.0064 0.0054 0.0058  
AT. 132 H X -0.0041 0.0382 -0.0387 -0.0116 0.0038 -0.0039  
Y 0.0010 -0.0111 0.0096 0.0037 -0.0064 0.0070  
Z -0.0024 0.0218 -0.0232 -0.0064 -0.0054 0.0058  
AT. 133 H X -0.0017 -0.0178 -0.0175 0.0057 -0.0039 -0.0044  
Y 0.0006 0.0062 0.0065 -0.0021 -0.0008 -0.0009  
Z 0.0010 0.0095 0.0098 -0.0029 -0.0042 -0.0041  
AT. 134 H X 0.0017 -0.0178 0.0175 0.0057 0.0039 -0.0044  
Y -0.0006 0.0062 -0.0065 -0.0021 0.0008 -0.0009  
Z -0.0010 0.0095 -0.0098 -0.0029 0.0042 -0.0041  
AT. 135 C X 0.0005 0.0049 0.0056 -0.0015 0.0026 0.0027  
Y -0.0014 -0.0121 -0.0123 0.0035 0.0066 0.0066  
Z -0.0005 -0.0036 -0.0031 0.0010 0.0033 0.0034

AT. 136 C X -0.0005 0.0049 -0.0056 -0.0015 -0.0026 0.0027  
Y 0.0014 -0.0121 0.0123 0.0035 -0.0066 0.0066  
Z 0.0005 -0.0036 0.0031 0.0010 -0.0033 0.0034

AT. 137 H X -0.0043 -0.0366 -0.0384 0.0105 0.0097 0.0095  
Y 0.0000 -0.0003 -0.0012 0.0001 -0.0040 -0.0042  
Z 0.0036 0.0311 0.0311 -0.0091 -0.0172 -0.0173

AT. 138 H X 0.0043 -0.0366 0.0384 0.0105 -0.0097 0.0095  
Y -0.0000 -0.0003 0.0012 0.0001 0.0040 -0.0042  
Z -0.0036 0.0311 -0.0311 -0.0091 0.0172 -0.0173

AT. 139 H X -0.0012 -0.0065 -0.0045 0.0015 0.0193 0.0195  
Y 0.0023 0.0224 0.0244 -0.0068 -0.0050 -0.0045  
Z 0.0007 0.0021 0.0001 -0.0002 -0.0158 -0.0159

AT. 140 H X 0.0012 -0.0065 0.0045 0.0015 -0.0193 0.0195  
Y -0.0023 0.0224 -0.0244 -0.0068 0.0050 -0.0045  
Z -0.0007 0.0021 -0.0001 -0.0002 0.0158 -0.0159

AT. 141 H X 0.0049 0.0388 0.0370 -0.0108 -0.0242 -0.0247  
Y 0.0034 0.0286 0.0286 -0.0080 -0.0130 -0.0130  
Z -0.0035 -0.0311 -0.0318 0.0089 0.0119 0.0118

AT. 142 H X -0.0049 0.0388 -0.0370 -0.0108 0.0242 -0.0247  
Y -0.0034 0.0286 -0.0286 -0.0080 0.0130 -0.0130  
Z 0.0035 -0.0311 0.0318 0.0089 -0.0119 0.0118

AT. 143 C X 0.0003 0.0019 0.0023 -0.0004 -0.0054 -0.0051  
Y -0.0018 -0.0145 -0.0151 0.0042 0.0008 0.0007  
Z 0.0002 0.0027 0.0025 -0.0010 0.0077 0.0078

AT. 144 C X -0.0003 0.0019 -0.0023 -0.0004 0.0054 -0.0051  
Y 0.0018 -0.0145 0.0151 0.0042 -0.0008 0.0007  
Z -0.0002 0.0027 -0.0025 -0.0010 -0.0077 0.0078

AT. 145 H X -0.0045 -0.0312 -0.0334 0.0082 0.0322 0.0316  
Y 0.0014 0.0125 0.0126 -0.0038 0.0079 0.0081  
Z -0.0045 -0.0346 -0.0360 0.0097 0.0095 0.0090

AT. 146 H X 0.0045 -0.0312 0.0334 0.0082 -0.0322 0.0316  
Y -0.0014 0.0125 -0.0126 -0.0038 -0.0079 0.0081

Z 0.0045 -0.0346 0.0360 0.0097 -0.0095 0.0090  
AT. 147 H X -0.0026 -0.0229 -0.0224 0.0072 -0.0256 -0.0255  
Y 0.0028 0.0210 0.0242 -0.0058 -0.0103 -0.0093  
Z -0.0015 -0.0141 -0.0122 0.0047 -0.0277 -0.0272  
AT. 148 H X 0.0026 -0.0229 0.0224 0.0072 0.0256 -0.0255  
Y -0.0028 0.0210 -0.0242 -0.0058 0.0103 -0.0093  
Z 0.0015 -0.0141 0.0122 0.0047 0.0277 -0.0272  
AT. 149 H X 0.0064 0.0531 0.0541 -0.0156 0.0162 0.0168  
Y 0.0031 0.0240 0.0247 -0.0067 -0.0031 -0.0027  
Z 0.0053 0.0403 0.0422 -0.0112 -0.0099 -0.0091  
AT. 150 H X -0.0064 0.0531 -0.0541 -0.0156 -0.0162 0.0168  
Y -0.0031 0.0240 -0.0247 -0.0067 0.0031 -0.0027  
Z -0.0053 0.0403 -0.0422 -0.0112 0.0099 -0.0091  
AT. 151 C X -0.0006 -0.0054 -0.0062 0.0016 0.0048 0.0044  
Y 0.0024 0.0190 0.0193 -0.0053 -0.0134 -0.0133  
Z 0.0001 0.0024 0.0025 -0.0009 0.0047 0.0045  
AT. 152 C X 0.0006 -0.0054 0.0062 0.0016 -0.0048 0.0044  
Y -0.0024 0.0190 -0.0193 -0.0053 0.0134 -0.0133  
Z -0.0001 0.0024 -0.0025 -0.0009 -0.0047 0.0045  
AT. 153 H X 0.0007 0.0068 0.0058 -0.0020 0.0007 -0.0001  
Y -0.0012 -0.0097 -0.0106 0.0027 0.0054 0.0050  
Z -0.0062 -0.0490 -0.0506 0.0136 0.0371 0.0365  
AT. 154 H X -0.0007 0.0068 -0.0058 -0.0020 -0.0007 -0.0001  
Y 0.0012 -0.0097 0.0106 0.0027 -0.0054 0.0050  
Z 0.0062 -0.0490 0.0506 0.0136 -0.0371 0.0365  
AT. 155 H X 0.0018 0.0140 0.0146 -0.0040 0.0008 0.0025  
Y -0.0026 -0.0213 -0.0222 0.0061 0.0140 0.0140  
Z 0.0062 0.0514 0.0534 -0.0148 -0.0254 -0.0248  
AT. 156 H X -0.0018 0.0140 -0.0146 -0.0040 -0.0008 0.0025  
Y 0.0026 -0.0213 0.0222 0.0061 -0.0140 0.0140  
Z -0.0062 0.0514 -0.0534 -0.0148 0.0254 -0.0248  
AT. 157 O X -0.0001 -0.0002 0.0001 -0.0004 -0.0001 0.0001

Y 0.0003 0.0001 -0.0000 0.0003 -0.0000 -0.0001  
Z 0.0001 0.0001 -0.0002 0.0003 0.0001 -0.0001  
AT. 158 O X 0.0001 -0.0002 -0.0001 -0.0004 0.0001 0.0001  
Y -0.0003 0.0001 0.0000 0.0003 0.0000 -0.0001  
Z -0.0001 0.0001 0.0002 0.0003 -0.0001 -0.0001  
AT. 159 O X 0.0001 0.0001 -0.0001 0.0002 0.0001 -0.0000  
Y 0.0000 0.0000 0.0001 0.0003 -0.0002 0.0000  
Z 0.0004 -0.0002 0.0001 -0.0004 -0.0002 0.0001  
AT. 160 O X -0.0001 0.0001 0.0001 0.0002 -0.0001 -0.0000  
Y -0.0000 0.0000 -0.0001 0.0003 0.0002 0.0000  
Z -0.0004 -0.0002 -0.0001 -0.0004 0.0002 0.0001  
AT. 161 H X 0.0031 0.0009 0.0002 0.0025 -0.0009 -0.0001  
Y -0.0002 0.0000 -0.0003 0.0003 0.0002 -0.0001  
Z 0.0011 0.0008 0.0016 -0.0005 -0.0014 -0.0002  
AT. 162 H X -0.0031 0.0009 -0.0002 0.0025 0.0009 -0.0001  
Y 0.0002 0.0000 0.0003 0.0003 -0.0002 -0.0001  
Z -0.0011 0.0008 -0.0016 -0.0005 0.0014 -0.0002  
AT. 163 H X 0.0004 -0.0001 -0.0003 -0.0003 -0.0002 -0.0002  
Y 0.0023 0.0010 -0.0021 -0.0011 0.0016 -0.0017  
Z 0.0002 0.0003 -0.0004 0.0000 0.0005 -0.0003  
AT. 164 H X -0.0004 -0.0001 0.0003 -0.0003 0.0002 -0.0002  
Y -0.0023 0.0010 0.0021 -0.0011 -0.0016 -0.0017  
Z -0.0002 0.0003 0.0004 0.0000 -0.0005 -0.0003  
AT. 165 O X 0.0000 -0.0002 -0.0003 0.0001 -0.0001 0.0001  
Y -0.0001 -0.0003 -0.0003 0.0002 -0.0001 -0.0001  
Z 0.0001 -0.0004 -0.0002 0.0002 0.0001 -0.0002  
AT. 166 O X -0.0000 -0.0002 0.0003 0.0001 0.0001 0.0001  
Y 0.0001 -0.0003 0.0003 0.0002 0.0001 -0.0001  
Z -0.0001 -0.0004 0.0002 0.0002 -0.0001 -0.0002  
AT. 167 H X -0.0002 0.0008 0.0005 0.0003 0.0000 -0.0003  
Y 0.0002 -0.0020 -0.0012 -0.0005 -0.0004 -0.0003  
Z 0.0004 0.0009 0.0005 0.0001 0.0003 0.0011

AT.168 H X 0.0002 0.0008 -0.0005 0.0003 -0.0000 -0.0003  
Y -0.0002 -0.0020 0.0012 -0.0005 0.0004 -0.0003  
Z -0.0004 0.0009 -0.0005 0.0001 -0.0003 0.0011

AT.169 O X -0.0001 0.0000 -0.0000 0.0000 -0.0000 -0.0000  
Y 0.0000 -0.0000 0.0002 -0.0001 0.0003 -0.0003  
Z -0.0002 0.0005 -0.0001 -0.0002 -0.0003 0.0003

AT.170 O X 0.0001 0.0000 0.0000 0.0000 0.0000 -0.0000  
Y -0.0000 -0.0000 -0.0002 -0.0001 -0.0003 -0.0003  
Z 0.0002 0.0005 0.0001 -0.0002 0.0003 0.0003

AT.171 H X 0.0019 -0.0018 -0.0017 -0.0007 -0.0027 0.0016  
Y 0.0011 -0.0011 -0.0006 -0.0004 -0.0014 0.0006  
Z 0.0004 -0.0009 0.0008 0.0000 -0.0003 -0.0004

AT.172 H X -0.0019 -0.0018 0.0017 -0.0007 0.0027 0.0016  
Y -0.0011 -0.0011 0.0006 -0.0004 0.0014 0.0006  
Z -0.0004 -0.0009 -0.0008 0.0000 0.0003 -0.0004

FREQ(CM\*\*-1) 1023.27 1023.79 1028.07 1028.42 1037.76 1038.81

AT. 1 I X 0.0000 0.0000 -0.0000 0.0000 0.0000 -0.0000  
Y -0.0001 -0.0001 0.0001 -0.0001 -0.0000 -0.0000  
Z -0.0002 -0.0002 0.0002 -0.0002 0.0000 0.0000

AT. 2 I X -0.0000 0.0000 0.0000 0.0000 -0.0000 -0.0000  
Y 0.0001 -0.0001 -0.0001 -0.0001 0.0000 -0.0000  
Z 0.0002 -0.0002 -0.0002 -0.0002 -0.0000 0.0000

AT. 3 I X -0.0001 -0.0001 -0.0001 0.0001 -0.0000 0.0000  
Y -0.0002 -0.0002 -0.0002 0.0002 0.0000 0.0000  
Z 0.0001 0.0000 0.0000 -0.0000 -0.0000 -0.0000

AT. 4 I X 0.0001 -0.0001 0.0001 0.0001 0.0000 0.0000  
Y 0.0002 -0.0002 0.0002 0.0002 -0.0000 0.0000  
Z -0.0001 0.0000 -0.0000 -0.0000 0.0000 -0.0000

AT. 5 O X -0.0049 -0.0050 0.0049 -0.0044 0.0000 0.0000  
Y 0.0023 0.0026 -0.0023 0.0020 -0.0000 0.0000

Z 0.0062 0.0064 -0.0059 0.0053 -0.0001 -0.0001  
AT. 6 O X 0.0049 -0.0050 -0.0049 -0.0044 -0.0000 0.0000  
Y -0.0023 0.0026 0.0023 0.0020 0.0000 0.0000  
Z -0.0062 0.0064 0.0059 0.0053 0.0001 -0.0001  
AT. 7 O X -0.0052 -0.0046 -0.0042 0.0046 -0.0000 -0.0001  
Y 0.0046 0.0040 0.0034 -0.0038 0.0001 0.0000  
Z -0.0046 -0.0041 -0.0037 0.0040 -0.0001 0.0000  
AT. 8 O X 0.0052 -0.0046 0.0042 0.0046 0.0000 -0.0001  
Y -0.0046 0.0040 -0.0034 -0.0038 -0.0001 0.0000  
Z 0.0046 -0.0041 0.0037 0.0040 0.0001 0.0000  
AT. 9 N X -0.0049 -0.0047 0.0025 -0.0022 -0.0000 0.0001  
Y 0.0021 0.0020 -0.0058 0.0056 -0.0001 -0.0000  
Z -0.0064 -0.0056 0.0056 -0.0052 0.0000 0.0001  
AT. 10 N X 0.0049 -0.0047 -0.0025 -0.0022 0.0000 0.0001  
Y -0.0021 0.0020 0.0058 0.0056 0.0001 -0.0000  
Z 0.0064 -0.0056 -0.0056 -0.0052 -0.0000 0.0001  
AT. 11 N X -0.0051 -0.0049 -0.0013 0.0017 0.0000 0.0001  
Y -0.0034 -0.0030 0.0004 -0.0001 -0.0000 0.0001  
Z 0.0112 0.0095 0.0098 -0.0106 0.0002 -0.0003  
AT. 12 N X 0.0051 -0.0049 0.0013 0.0017 -0.0000 0.0001  
Y 0.0034 -0.0030 -0.0004 -0.0001 0.0000 0.0001  
Z -0.0112 0.0095 -0.0098 -0.0106 -0.0002 -0.0003  
AT. 13 C X -0.0053 -0.0057 0.0056 -0.0052 0.0000 0.0001  
Y 0.0103 0.0105 -0.0102 0.0097 -0.0001 -0.0003  
Z -0.0088 -0.0090 0.0076 -0.0071 0.0001 0.0002  
AT. 14 C X 0.0053 -0.0057 -0.0056 -0.0052 -0.0000 0.0001  
Y -0.0103 0.0105 0.0102 0.0097 0.0001 -0.0003  
Z 0.0088 -0.0090 -0.0076 -0.0071 -0.0001 0.0002  
AT. 15 C X 0.0055 0.0061 -0.0061 0.0052 0.0000 0.0000  
Y -0.0081 -0.0083 0.0079 -0.0075 0.0001 0.0002  
Z 0.0003 -0.0001 0.0006 -0.0005 0.0000 -0.0000  
AT. 16 C X -0.0055 0.0061 0.0061 0.0052 -0.0000 0.0000



Y 0.0081 -0.0083 -0.0079 -0.0075 -0.0001 0.0002  
Z -0.0003 -0.0001 -0.0006 -0.0005 -0.0000 -0.0000  
AT. 17 H X 0.0735 0.0791 -0.0770 0.0734 -0.0016 -0.0023  
Y -0.0106 -0.0122 0.0137 -0.0109 0.0000 0.0000  
Z 0.0293 0.0326 -0.0335 0.0297 -0.0005 -0.0007  
AT. 18 H X -0.0735 0.0791 0.0770 0.0734 0.0016 -0.0023  
Y 0.0106 -0.0122 -0.0137 -0.0109 -0.0000 0.0000  
Z -0.0293 0.0326 0.0335 0.0297 0.0005 -0.0007  
AT. 19 H X -0.0309 -0.0384 0.0394 -0.0342 0.0005 0.0000  
Y -0.0022 -0.0008 -0.0003 0.0003 -0.0001 -0.0000  
Z -0.0078 -0.0101 0.0106 -0.0089 0.0001 -0.0001  
AT. 20 H X 0.0309 -0.0384 -0.0394 -0.0342 -0.0005 0.0000  
Y 0.0022 -0.0008 0.0003 0.0003 0.0001 -0.0000  
Z 0.0078 -0.0101 -0.0106 -0.0089 -0.0001 -0.0001  
AT. 21 C X -0.0052 -0.0044 -0.0038 0.0043 -0.0001 0.0002  
Y 0.0042 0.0039 0.0042 -0.0043 0.0000 0.0000  
Z 0.0173 0.0152 0.0141 -0.0156 0.0002 -0.0001  
AT. 22 C X 0.0052 -0.0044 0.0038 0.0043 0.0001 0.0002  
Y -0.0042 0.0039 -0.0042 -0.0043 -0.0000 0.0000  
Z -0.0173 0.0152 -0.0141 -0.0156 -0.0002 -0.0001  
AT. 23 C X 0.0065 0.0054 0.0047 -0.0053 0.0000 0.0001  
Y -0.0053 -0.0050 -0.0048 0.0050 -0.0000 -0.0001  
Z -0.0082 -0.0068 -0.0061 0.0069 -0.0001 0.0002  
AT. 24 C X -0.0065 0.0054 -0.0047 -0.0053 -0.0000 0.0001  
Y 0.0053 -0.0050 0.0048 0.0050 0.0000 -0.0001  
Z 0.0082 -0.0068 0.0061 0.0069 0.0001 0.0002  
AT. 25 H X 0.0706 0.0646 0.0639 -0.0679 -0.0007 -0.0003  
Y 0.0065 0.0061 0.0062 -0.0066 -0.0002 -0.0000  
Z -0.0208 -0.0196 -0.0187 0.0199 0.0002 -0.0004  
AT. 26 H X -0.0706 0.0646 -0.0639 -0.0679 0.0007 -0.0003  
Y -0.0065 0.0061 -0.0062 -0.0066 0.0002 -0.0000  
Z 0.0208 -0.0196 0.0187 0.0199 -0.0002 -0.0004

AT. 27 H X -0.0227 -0.0207 -0.0206 0.0221 0.0013 -0.0011  
Y -0.0048 -0.0032 -0.0027 0.0035 0.0001 0.0001  
Z -0.0028 -0.0014 -0.0006 0.0013 -0.0003 0.0005

AT. 28 H X 0.0227 -0.0207 0.0206 0.0221 -0.0013 -0.0011  
Y 0.0048 -0.0032 0.0027 0.0035 -0.0001 0.0001  
Z 0.0028 -0.0014 0.0006 0.0013 0.0003 0.0005

AT. 29 C X 0.0013 0.0005 -0.0024 0.0023 -0.0000 -0.0001  
Y 0.0001 -0.0000 0.0093 -0.0094 0.0001 -0.0001  
Z 0.0139 0.0142 -0.0131 0.0120 -0.0002 -0.0004

AT. 30 C X -0.0013 0.0005 0.0024 0.0023 0.0000 -0.0001  
Y -0.0001 -0.0000 -0.0093 -0.0094 -0.0001 -0.0001  
Z -0.0139 0.0142 0.0131 0.0120 0.0002 -0.0004

AT. 31 H X 0.0012 0.0019 -0.0080 0.0080 0.0001 0.0002  
Y -0.0172 -0.0184 0.0277 -0.0264 0.0004 0.0004  
Z -0.0121 -0.0125 0.0111 -0.0100 0.0005 0.0006

AT. 32 H X -0.0012 0.0019 0.0080 0.0080 -0.0001 0.0002  
Y 0.0172 -0.0184 -0.0277 -0.0264 -0.0004 0.0004  
Z 0.0121 -0.0125 -0.0111 -0.0100 -0.0005 0.0006

AT. 33 H X 0.0223 0.0211 -0.0283 0.0268 -0.0003 -0.0005  
Y 0.0260 0.0277 -0.0226 0.0206 -0.0001 -0.0003  
Z 0.0166 0.0159 -0.0163 0.0151 -0.0003 -0.0005

AT. 34 H X -0.0223 0.0211 0.0283 0.0268 0.0003 -0.0005  
Y -0.0260 0.0277 0.0226 0.0206 0.0001 -0.0003  
Z -0.0166 0.0159 0.0163 0.0151 0.0003 -0.0005

AT. 35 C X 0.0013 0.0015 0.0014 -0.0014 0.0002 0.0001  
Y -0.0052 -0.0047 -0.0002 0.0008 0.0001 0.0003  
Z 0.0017 0.0016 -0.0006 0.0003 -0.0002 -0.0002

AT. 36 C X -0.0013 0.0015 -0.0014 -0.0014 -0.0002 0.0001  
Y 0.0052 -0.0047 0.0002 0.0008 -0.0001 0.0003  
Z -0.0017 0.0016 0.0006 0.0003 0.0002 -0.0002

AT. 37 C X 0.0068 0.0072 -0.0017 0.0012 -0.0001 -0.0002  
Y -0.0007 -0.0011 -0.0047 0.0045 -0.0002 -0.0001

Z -0.0103 -0.0092 -0.0107 0.0116 -0.0001 0.0004  
AT. 38 C X -0.0068 0.0072 0.0017 0.0012 0.0001 -0.0002  
Y 0.0007 -0.0011 0.0047 0.0045 0.0002 -0.0001  
Z 0.0103 -0.0092 0.0107 0.0116 0.0001 0.0004  
AT. 39 H X 0.0206 0.0201 0.0208 -0.0220 0.0003 -0.0007  
Y 0.0337 0.0289 0.0317 -0.0344 0.0005 -0.0012  
Z -0.0158 -0.0135 -0.0113 0.0128 -0.0001 0.0005  
AT. 40 H X -0.0206 0.0201 -0.0208 -0.0220 -0.0003 -0.0007  
Y -0.0337 0.0289 -0.0317 -0.0344 -0.0005 -0.0012  
Z 0.0158 -0.0135 0.0113 0.0128 0.0001 0.0005  
AT. 41 H X -0.0120 -0.0100 -0.0265 0.0271 -0.0003 0.0003  
Y -0.0021 -0.0022 -0.0036 0.0034 -0.0004 -0.0001  
Z 0.0103 0.0095 0.0147 -0.0151 0.0003 -0.0001  
AT. 42 H X 0.0120 -0.0100 0.0265 0.0271 0.0003 0.0003  
Y 0.0021 -0.0022 0.0036 0.0034 0.0004 -0.0001  
Z -0.0103 0.0095 -0.0147 -0.0151 -0.0003 -0.0001  
AT. 43 C X 0.0013 0.0007 -0.0015 0.0013 -0.0001 -0.0001  
Y 0.0053 0.0062 -0.0022 0.0018 -0.0001 -0.0002  
Z -0.0128 -0.0114 -0.0143 0.0153 -0.0003 0.0001  
AT. 44 C X -0.0013 0.0007 0.0015 0.0013 0.0001 -0.0001  
Y -0.0053 0.0062 0.0022 0.0018 0.0001 -0.0002  
Z 0.0128 -0.0114 0.0143 0.0153 0.0003 0.0001  
AT. 45 H X 0.0036 0.0025 0.0103 -0.0108 0.0003 0.0004  
Y -0.0107 -0.0087 -0.0277 0.0282 -0.0006 -0.0000  
Z 0.0020 0.0026 0.0031 -0.0029 -0.0001 -0.0004  
AT. 46 H X -0.0036 0.0025 -0.0103 -0.0108 -0.0003 0.0004  
Y 0.0107 -0.0087 0.0277 0.0282 0.0006 -0.0000  
Z -0.0020 0.0026 -0.0031 -0.0029 0.0001 -0.0004  
AT. 47 H X 0.0290 0.0242 0.0325 -0.0346 0.0007 -0.0008  
Y 0.0303 0.0284 0.0331 -0.0351 0.0010 -0.0004  
Z -0.0265 -0.0222 -0.0254 0.0274 -0.0002 0.0009  
AT. 48 H X -0.0290 0.0242 -0.0325 -0.0346 -0.0007 -0.0008

Y -0.0303 0.0284 -0.0331 -0.0351 -0.0010 -0.0004  
Z 0.0265 -0.0222 0.0254 0.0274 0.0002 0.0009  
AT. 49 C X 0.0005 0.0003 -0.0042 0.0039 -0.0002 0.0000  
Y -0.0026 -0.0031 0.0021 -0.0018 0.0001 0.0001  
Z -0.0032 -0.0032 0.0008 -0.0007 0.0001 0.0001  
AT. 50 C X -0.0005 0.0003 0.0042 0.0039 0.0002 0.0000  
Y 0.0026 -0.0031 -0.0021 -0.0018 -0.0001 0.0001  
Z 0.0032 -0.0032 -0.0008 -0.0007 -0.0001 0.0001  
AT. 51 C X 0.0085 0.0094 0.0003 -0.0010 0.0001 -0.0001  
Y -0.0073 -0.0078 0.0091 -0.0083 0.0003 0.0003  
Z 0.0040 0.0043 -0.0034 0.0033 -0.0001 -0.0002  
AT. 52 C X -0.0085 0.0094 -0.0003 -0.0010 -0.0001 -0.0001  
Y 0.0073 -0.0078 -0.0091 -0.0083 -0.0003 0.0003  
Z -0.0040 0.0043 0.0034 0.0033 0.0001 -0.0002  
AT. 53 H X 0.0265 0.0287 -0.0169 0.0147 -0.0005 -0.0010  
Y 0.0301 0.0299 -0.0297 0.0275 -0.0006 -0.0011  
Z 0.0152 0.0136 -0.0174 0.0165 -0.0000 -0.0003  
AT. 54 H X -0.0265 0.0287 0.0169 0.0147 0.0005 -0.0010  
Y -0.0301 0.0299 0.0297 0.0275 0.0006 -0.0011  
Z -0.0152 0.0136 0.0174 0.0165 0.0000 -0.0003  
AT. 55 H X -0.0188 -0.0201 0.0230 -0.0211 0.0007 0.0008  
Y -0.0064 -0.0061 0.0070 -0.0064 -0.0003 -0.0002  
Z -0.0132 -0.0133 0.0092 -0.0078 -0.0004 -0.0002  
AT. 56 H X 0.0188 -0.0201 -0.0230 -0.0211 -0.0007 0.0008  
Y 0.0064 -0.0061 -0.0070 -0.0064 0.0003 -0.0002  
Z 0.0132 -0.0133 -0.0092 -0.0078 0.0004 -0.0002  
AT. 57 C X 0.0018 0.0023 -0.0033 0.0032 -0.0000 0.0000  
Y 0.0077 0.0077 0.0029 -0.0037 0.0001 -0.0000  
Z -0.0019 -0.0026 0.0108 -0.0106 0.0001 -0.0000  
AT. 58 C X -0.0018 0.0023 0.0033 0.0032 0.0000 0.0000  
Y -0.0077 0.0077 -0.0029 -0.0037 -0.0001 -0.0000  
Z 0.0019 -0.0026 -0.0108 -0.0106 -0.0001 -0.0000

AT. 59 H X -0.0291 -0.0317 0.0185 -0.0164 -0.0001 0.0001  
Y 0.0139 0.0156 -0.0209 0.0197 -0.0002 -0.0001  
Z -0.0141 -0.0142 -0.0097 0.0106 -0.0005 -0.0001

AT. 60 H X 0.0291 -0.0317 -0.0185 -0.0164 0.0001 0.0001  
Y -0.0139 0.0156 0.0209 0.0197 0.0002 -0.0001  
Z 0.0141 -0.0142 0.0097 0.0106 0.0005 -0.0001

AT. 61 H X -0.0084 -0.0059 -0.0343 0.0361 -0.0003 0.0004  
Y -0.0121 -0.0133 0.0260 -0.0254 -0.0005 -0.0007  
Z 0.0002 0.0018 -0.0253 0.0263 0.0002 0.0006

AT. 62 H X 0.0084 -0.0059 0.0343 0.0361 0.0003 0.0004  
Y 0.0121 -0.0133 -0.0260 -0.0254 0.0005 -0.0007  
Z -0.0002 0.0018 0.0253 0.0263 -0.0002 0.0006

AT. 63 H X 0.0097 0.0089 0.0295 -0.0302 0.0007 0.0002  
Y -0.0182 -0.0187 -0.0152 0.0169 -0.0004 0.0000  
Z 0.0118 0.0130 -0.0057 0.0044 -0.0002 -0.0002

AT. 64 H X -0.0097 0.0089 -0.0295 -0.0302 -0.0007 0.0002  
Y 0.0182 -0.0187 0.0152 0.0169 0.0004 0.0000  
Z -0.0118 0.0130 0.0057 0.0044 0.0002 -0.0002

AT. 65 C X 0.0029 0.0035 0.0059 -0.0060 0.0002 0.0000  
Y 0.0053 0.0071 -0.0074 0.0067 -0.0001 -0.0001  
Z 0.0037 0.0033 0.0057 -0.0060 0.0001 -0.0000

AT. 66 C X -0.0029 0.0035 -0.0059 -0.0060 -0.0002 0.0000  
Y -0.0053 0.0071 0.0074 0.0067 0.0001 -0.0001  
Z -0.0037 0.0033 -0.0057 -0.0060 -0.0001 -0.0000

AT. 67 H X -0.0224 -0.0242 -0.0124 0.0142 -0.0004 0.0001  
Y 0.0064 0.0055 0.0171 -0.0172 0.0003 0.0001  
Z 0.0240 0.0278 -0.0020 -0.0004 0.0001 -0.0003

AT. 68 H X 0.0224 -0.0242 0.0124 0.0142 0.0004 0.0001  
Y -0.0064 0.0055 -0.0171 -0.0172 -0.0003 0.0001  
Z -0.0240 0.0278 0.0020 -0.0004 -0.0001 -0.0003

AT. 69 H X -0.0052 -0.0100 0.0262 -0.0250 0.0005 0.0002  
Y -0.0099 -0.0133 -0.0100 0.0114 -0.0003 0.0000

Z -0.0036 -0.0010 -0.0399 0.0402 -0.0007 -0.0002  
AT. 70 H X 0.0052 -0.0100 -0.0262 -0.0250 -0.0005 0.0002  
Y 0.0099 -0.0133 0.0100 0.0114 0.0003 0.0000  
Z 0.0036 -0.0010 0.0399 0.0402 0.0007 -0.0002  
AT. 71 H X 0.0018 0.0057 -0.0269 0.0264 -0.0002 -0.0001  
Y -0.0100 -0.0136 0.0143 -0.0135 0.0000 0.0001  
Z -0.0172 -0.0223 0.0099 -0.0085 -0.0001 0.0001  
AT. 72 H X -0.0018 0.0057 0.0269 0.0264 0.0002 -0.0001  
Y 0.0100 -0.0136 -0.0143 -0.0135 -0.0000 0.0001  
Z 0.0172 -0.0223 -0.0099 -0.0085 0.0001 0.0001  
AT. 73 C X -0.0096 -0.0105 0.0014 -0.0008 -0.0001 0.0001  
Y -0.0133 -0.0143 -0.0034 0.0046 -0.0001 0.0002  
Z -0.0004 -0.0011 0.0107 -0.0103 0.0003 0.0001  
AT. 74 C X 0.0096 -0.0105 -0.0014 -0.0008 0.0001 0.0001  
Y 0.0133 -0.0143 0.0034 0.0046 0.0001 0.0002  
Z 0.0004 -0.0011 -0.0107 -0.0103 -0.0003 0.0001  
AT. 75 H X 0.0046 0.0103 0.0081 -0.0080 0.0004 0.0000  
Y 0.0101 0.0082 -0.0055 0.0039 -0.0000 -0.0002  
Z 0.0406 0.0435 0.0125 -0.0163 0.0008 -0.0005  
AT. 76 H X -0.0046 0.0103 -0.0081 -0.0080 -0.0004 0.0000  
Y -0.0101 0.0082 0.0055 0.0039 0.0000 -0.0002  
Z -0.0406 0.0435 -0.0125 -0.0163 -0.0008 -0.0005  
AT. 77 H X -0.0002 -0.0039 0.0028 -0.0026 -0.0001 -0.0003  
Y 0.0148 0.0200 -0.0008 -0.0003 0.0002 0.0000  
Z -0.0353 -0.0392 0.0072 -0.0042 -0.0000 0.0006  
AT. 78 H X 0.0002 -0.0039 -0.0028 -0.0026 0.0001 -0.0003  
Y -0.0148 0.0200 0.0008 -0.0003 -0.0002 0.0000  
Z 0.0353 -0.0392 -0.0072 -0.0042 0.0000 0.0006  
AT. 79 I X 0.0000 0.0000 -0.0000 0.0000 0.0000 0.0000  
Y 0.0000 0.0000 -0.0000 -0.0000 0.0002 0.0002  
Z 0.0000 0.0000 -0.0000 -0.0000 0.0002 0.0002  
AT. 80 I X -0.0000 0.0000 0.0000 0.0000 -0.0000 0.0000

Y -0.0000 0.0000 0.0000 -0.0000 -0.0002 0.0002  
Z -0.0000 0.0000 0.0000 -0.0000 -0.0002 0.0002  
AT. 81 I X -0.0000 -0.0000 -0.0000 0.0000 -0.0000 0.0000  
Y 0.0000 0.0000 0.0000 -0.0000 -0.0000 -0.0000  
Z -0.0000 -0.0000 -0.0000 0.0000 0.0000 -0.0000  
AT. 82 I X 0.0000 -0.0000 0.0000 0.0000 0.0000 0.0000  
Y -0.0000 0.0000 -0.0000 -0.0000 0.0000 -0.0000  
Z 0.0000 -0.0000 0.0000 0.0000 -0.0000 -0.0000  
AT. 83 O X -0.0004 -0.0004 0.0002 -0.0001 -0.0086 -0.0082  
Y -0.0000 0.0000 -0.0000 0.0000 -0.0000 0.0000  
Z -0.0003 -0.0004 0.0001 -0.0000 -0.0074 -0.0074  
AT. 84 O X 0.0004 -0.0004 -0.0002 -0.0001 0.0086 -0.0082  
Y 0.0000 0.0000 0.0000 0.0000 0.0000 0.0000  
Z 0.0003 -0.0004 -0.0001 -0.0000 0.0074 -0.0074  
AT. 85 O X -0.0008 -0.0006 -0.0000 -0.0000 0.0006 0.0004  
Y -0.0006 -0.0004 0.0000 -0.0000 0.0004 0.0003  
Z 0.0007 0.0004 0.0000 0.0000 -0.0004 -0.0003  
AT. 86 O X 0.0008 -0.0006 0.0000 -0.0000 -0.0006 0.0004  
Y 0.0006 -0.0004 -0.0000 -0.0000 -0.0004 0.0003  
Z -0.0007 0.0004 -0.0000 0.0000 0.0004 -0.0003  
AT. 87 N X -0.0002 -0.0003 0.0000 -0.0000 -0.0060 -0.0061  
Y 0.0003 0.0002 0.0001 -0.0001 -0.0040 -0.0041  
Z 0.0004 0.0009 -0.0002 0.0000 0.0142 0.0154  
AT. 88 N X 0.0002 -0.0003 -0.0000 -0.0000 0.0060 -0.0061  
Y -0.0003 0.0002 -0.0001 -0.0001 0.0040 -0.0041  
Z -0.0004 0.0009 0.0002 0.0000 -0.0142 0.0154  
AT. 89 N X -0.0005 -0.0003 0.0000 -0.0000 -0.0015 -0.0015  
Y 0.0002 0.0001 -0.0001 0.0000 0.0023 0.0023  
Z -0.0014 -0.0008 0.0000 -0.0000 0.0021 0.0023  
AT. 90 N X 0.0005 -0.0003 -0.0000 -0.0000 0.0015 -0.0015  
Y -0.0002 0.0001 0.0001 0.0000 -0.0023 0.0023  
Z 0.0014 -0.0008 -0.0000 -0.0000 -0.0021 0.0023

AT. 91 C X -0.0001 -0.0004 0.0001 -0.0000 -0.0104 -0.0107  
Y -0.0002 -0.0004 0.0003 -0.0001 -0.0127 -0.0125  
Z 0.0004 0.0005 -0.0003 0.0001 0.0147 0.0151

AT. 92 C X 0.0001 -0.0004 -0.0001 -0.0000 0.0104 -0.0107  
Y 0.0002 -0.0004 -0.0003 -0.0001 0.0127 -0.0125  
Z -0.0004 0.0005 0.0003 0.0001 -0.0147 0.0151

AT. 93 C X 0.0004 0.0005 -0.0002 0.0001 0.0125 0.0120  
Y 0.0001 0.0002 -0.0001 0.0000 0.0082 0.0083  
Z -0.0002 -0.0004 0.0001 -0.0000 -0.0052 -0.0058

AT. 94 C X -0.0004 0.0005 0.0002 0.0001 -0.0125 0.0120  
Y -0.0001 0.0002 0.0001 0.0000 -0.0082 0.0083  
Z 0.0002 -0.0004 -0.0001 -0.0000 0.0052 -0.0058

AT. 95 H X 0.0010 0.0015 -0.0012 -0.0001 0.0846 0.0797  
Y 0.0001 -0.0003 0.0001 0.0001 -0.0152 -0.0149  
Z -0.0008 -0.0006 0.0007 -0.0001 -0.0438 -0.0394

AT. 96 H X -0.0010 0.0015 0.0012 -0.0001 -0.0846 0.0797  
Y -0.0001 -0.0003 -0.0001 0.0001 0.0152 -0.0149  
Z 0.0008 -0.0006 -0.0007 -0.0001 0.0438 -0.0394

AT. 97 H X -0.0006 -0.0000 0.0006 -0.0004 -0.0327 -0.0233  
Y 0.0006 0.0007 -0.0002 0.0001 0.0137 0.0114  
Z 0.0001 -0.0002 -0.0001 0.0001 0.0076 0.0037

AT. 98 H X 0.0006 -0.0000 -0.0006 -0.0004 0.0327 -0.0233  
Y -0.0006 0.0007 0.0002 0.0001 -0.0137 0.0114  
Z -0.0001 -0.0002 0.0001 0.0001 -0.0076 0.0037

AT. 99 C X -0.0011 -0.0007 0.0001 -0.0001 0.0006 0.0004  
Y -0.0003 -0.0002 -0.0001 0.0001 0.0006 0.0003  
Z -0.0023 -0.0016 0.0000 -0.0001 0.0008 0.0009

AT. 100 C X 0.0011 -0.0007 -0.0001 -0.0001 -0.0006 0.0004  
Y 0.0003 -0.0002 0.0001 0.0001 -0.0006 0.0003  
Z 0.0023 -0.0016 -0.0000 -0.0001 -0.0008 0.0009

AT. 101 C X 0.0010 0.0007 -0.0001 0.0002 -0.0009 -0.0002  
Y 0.0008 0.0005 0.0001 -0.0001 -0.0004 -0.0003



Z 0.0009 0.0007 -0.0000 0.0000 -0.0006 -0.0003  
AT.102 C X -0.0010 0.0007 0.0001 0.0002 0.0009 -0.0002  
Y -0.0008 0.0005 -0.0001 -0.0001 0.0004 -0.0003  
Z -0.0009 0.0007 0.0000 0.0000 0.0006 -0.0003  
AT.103 H X 0.0124 0.0088 0.0010 -0.0009 -0.0062 -0.0048  
Y -0.0041 -0.0029 -0.0004 0.0004 0.0018 0.0016  
Z 0.0028 0.0019 0.0002 -0.0000 -0.0020 -0.0011  
AT.104 H X -0.0124 0.0088 -0.0010 -0.0009 0.0062 -0.0048  
Y 0.0041 -0.0029 0.0004 0.0004 -0.0018 0.0016  
Z -0.0028 0.0019 -0.0002 -0.0000 0.0020 -0.0011  
AT.105 H X -0.0035 -0.0031 0.0000 -0.0002 0.0041 -0.0009  
Y 0.0010 0.0010 -0.0004 0.0004 -0.0017 0.0001  
Z 0.0002 0.0001 -0.0002 0.0002 -0.0000 -0.0004  
AT.106 H X 0.0035 -0.0031 -0.0000 -0.0002 -0.0041 -0.0009  
Y -0.0010 0.0010 0.0004 0.0004 0.0017 0.0001  
Z -0.0002 0.0001 0.0002 0.0002 0.0000 -0.0004  
AT.107 C X -0.0001 0.0003 -0.0002 -0.0000 0.0044 0.0048  
Y -0.0004 -0.0003 -0.0002 0.0002 0.0070 0.0073  
Z -0.0006 -0.0007 0.0002 -0.0000 -0.0197 -0.0199  
AT.108 C X 0.0001 0.0003 0.0002 -0.0000 -0.0044 0.0048  
Y 0.0004 -0.0003 0.0002 0.0002 -0.0070 0.0073  
Z 0.0006 -0.0007 -0.0002 -0.0000 0.0197 -0.0199  
AT.109 H X -0.0003 -0.0002 -0.0002 0.0004 0.0207 0.0204  
Y 0.0003 0.0003 -0.0002 0.0000 0.0305 0.0312  
Z 0.0007 0.0005 0.0002 -0.0005 0.0171 0.0178  
AT.110 H X 0.0003 -0.0002 0.0002 0.0004 -0.0207 0.0204  
Y -0.0003 0.0003 0.0002 0.0000 -0.0305 0.0312  
Z -0.0007 0.0005 -0.0002 -0.0005 -0.0171 0.0178  
AT.111 H X 0.0004 0.0016 -0.0006 -0.0000 0.0281 0.0300  
Y -0.0015 -0.0014 0.0008 -0.0005 -0.0417 -0.0421  
Z -0.0009 -0.0019 0.0005 0.0002 -0.0352 -0.0369  
AT.112 H X -0.0004 0.0016 0.0006 -0.0000 -0.0281 0.0300

Y 0.0015 -0.0014 -0.0008 -0.0005 0.0417 -0.0421  
Z 0.0009 -0.0019 -0.0005 0.0002 0.0352 -0.0369  
AT. 113 C X 0.0002 0.0000 0.0000 0.0000 -0.0004 -0.0004  
Y 0.0003 0.0005 -0.0002 -0.0001 0.0030 0.0026  
Z -0.0001 -0.0002 0.0002 -0.0000 -0.0040 -0.0043  
AT. 114 C X -0.0002 0.0000 -0.0000 0.0000 0.0004 -0.0004  
Y -0.0003 0.0005 0.0002 -0.0001 -0.0030 0.0026  
Z 0.0001 -0.0002 -0.0002 -0.0000 0.0040 -0.0043  
AT. 115 C X 0.0009 0.0008 0.0001 -0.0001 0.0041 0.0042  
Y 0.0004 0.0002 0.0003 -0.0001 -0.0052 -0.0049  
Z 0.0014 0.0010 0.0000 -0.0001 -0.0024 -0.0024  
AT. 116 C X -0.0009 0.0008 -0.0001 -0.0001 -0.0041 0.0042  
Y -0.0004 0.0002 -0.0003 -0.0001 0.0052 -0.0049  
Z -0.0014 0.0010 -0.0000 -0.0001 0.0024 -0.0024  
AT. 117 H X 0.0020 0.0015 0.0004 -0.0004 -0.0007 0.0000  
Y -0.0055 -0.0036 -0.0000 0.0003 0.0080 0.0081  
Z 0.0015 0.0010 -0.0003 0.0001 -0.0002 -0.0008  
AT. 118 H X -0.0020 0.0015 -0.0004 -0.0004 0.0007 0.0000  
Y 0.0055 -0.0036 0.0000 0.0003 -0.0080 0.0081  
Z -0.0015 0.0010 0.0003 0.0001 0.0002 -0.0008  
AT. 119 H X -0.0029 -0.0023 -0.0005 0.0004 0.0116 0.0113  
Y 0.0008 -0.0000 0.0002 -0.0000 -0.0080 -0.0076  
Z -0.0011 -0.0004 -0.0002 0.0001 0.0048 0.0044  
AT. 120 H X 0.0029 -0.0023 0.0005 0.0004 -0.0116 0.0113  
Y -0.0008 -0.0000 -0.0002 -0.0000 0.0080 -0.0076  
Z 0.0011 -0.0004 0.0002 0.0001 -0.0048 0.0044  
AT. 121 C X -0.0002 -0.0002 -0.0002 0.0002 -0.0000 -0.0002  
Y -0.0003 -0.0002 -0.0000 0.0000 -0.0054 -0.0055  
Z 0.0021 0.0013 0.0001 0.0000 -0.0041 -0.0041  
AT. 122 C X 0.0002 -0.0002 0.0002 0.0002 0.0000 -0.0002  
Y 0.0003 -0.0002 0.0000 0.0000 0.0054 -0.0055  
Z -0.0021 0.0013 -0.0001 0.0000 0.0041 -0.0041

AT.123 H X 0.0031 0.0021 0.0001 0.0001 -0.0121 -0.0126  
Y 0.0023 0.0015 0.0004 -0.0003 -0.0097 -0.0095  
Z -0.0001 -0.0001 -0.0003 0.0004 -0.0013 -0.0019

AT.124 H X -0.0031 0.0021 -0.0001 0.0001 0.0121 -0.0126  
Y -0.0023 0.0015 -0.0004 -0.0003 0.0097 -0.0095  
Z 0.0001 -0.0001 0.0003 0.0004 0.0013 -0.0019

AT.125 H X 0.0028 0.0016 -0.0001 -0.0000 -0.0070 -0.0072  
Y -0.0058 -0.0036 -0.0002 0.0000 0.0114 0.0112  
Z 0.0029 0.0018 0.0002 -0.0003 -0.0038 -0.0040

AT.126 H X -0.0028 0.0016 0.0001 -0.0000 0.0070 -0.0072  
Y 0.0058 -0.0036 0.0002 0.0000 -0.0114 0.0112  
Z -0.0029 0.0018 -0.0002 -0.0003 0.0038 -0.0040

AT.127 C X -0.0001 0.0001 -0.0000 -0.0000 0.0061 0.0064  
Y 0.0001 0.0002 0.0000 0.0000 0.0023 0.0024  
Z -0.0001 0.0001 -0.0002 0.0001 0.0042 0.0044

AT.128 C X 0.0001 0.0001 0.0000 -0.0000 -0.0061 0.0064  
Y -0.0001 0.0002 -0.0000 0.0000 -0.0023 0.0024  
Z 0.0001 0.0001 0.0002 0.0001 -0.0042 0.0044

AT.129 C X 0.0005 0.0003 0.0001 0.0000 0.0047 0.0042  
Y -0.0004 -0.0002 -0.0001 0.0000 0.0084 0.0084  
Z 0.0000 -0.0002 0.0001 -0.0001 -0.0080 -0.0084

AT.130 C X -0.0005 0.0003 -0.0001 0.0000 -0.0047 0.0042  
Y 0.0004 -0.0002 0.0001 0.0000 -0.0084 0.0084  
Z -0.0000 -0.0002 -0.0001 -0.0001 0.0080 -0.0084

AT.131 H X -0.0001 -0.0005 0.0001 0.0001 0.0044 0.0031  
Y -0.0002 -0.0014 0.0007 -0.0003 -0.0536 -0.0555  
Z -0.0007 -0.0017 0.0005 -0.0001 -0.0352 -0.0376

AT.132 H X 0.0001 -0.0005 -0.0001 0.0001 -0.0044 0.0031  
Y 0.0002 -0.0014 -0.0007 -0.0003 0.0536 -0.0555  
Z 0.0007 -0.0017 -0.0005 -0.0001 0.0352 -0.0376

AT.133 H X 0.0011 0.0008 0.0002 0.0001 -0.0187 -0.0181  
Y 0.0002 0.0006 -0.0003 0.0002 0.0168 0.0174

Z 0.0006 0.0008 -0.0002 0.0002 0.0169 0.0170  
AT. 134 H X -0.0011 0.0008 -0.0002 0.0001 0.0187 -0.0181  
Y -0.0002 0.0006 0.0003 0.0002 -0.0168 0.0174  
Z -0.0006 0.0008 0.0002 0.0002 -0.0169 0.0170  
AT. 135 C X -0.0003 -0.0002 0.0001 -0.0000 0.0038 0.0038  
Y -0.0009 -0.0005 -0.0001 0.0000 -0.0023 -0.0024  
Z -0.0002 -0.0001 -0.0001 0.0001 0.0098 0.0100  
AT. 136 C X 0.0003 -0.0002 -0.0001 -0.0000 -0.0038 0.0038  
Y 0.0009 -0.0005 0.0001 0.0000 0.0023 -0.0024  
Z 0.0002 -0.0001 0.0001 0.0001 -0.0098 0.0100  
AT. 137 H X -0.0015 -0.0010 -0.0002 0.0001 -0.0339 -0.0348  
Y 0.0003 0.0004 0.0000 0.0000 -0.0127 -0.0129  
Z 0.0022 0.0017 0.0001 0.0000 0.0057 0.0060  
AT. 138 H X 0.0015 -0.0010 0.0002 0.0001 0.0339 -0.0348  
Y -0.0003 0.0004 -0.0000 0.0000 0.0127 -0.0129  
Z -0.0022 0.0017 -0.0001 0.0000 -0.0057 0.0060  
AT. 139 H X -0.0021 -0.0012 -0.0001 0.0001 0.0261 0.0268  
Y 0.0011 0.0008 -0.0000 0.0002 0.0170 0.0170  
Z 0.0016 0.0009 0.0002 -0.0002 -0.0258 -0.0267  
AT. 140 H X 0.0021 -0.0012 0.0001 0.0001 -0.0261 0.0268  
Y -0.0011 0.0008 0.0000 0.0002 -0.0170 0.0170  
Z -0.0016 0.0009 -0.0002 -0.0002 0.0258 -0.0267  
AT. 141 H X 0.0029 0.0013 0.0005 -0.0002 -0.0222 -0.0222  
Y 0.0021 0.0006 0.0003 -0.0001 0.0027 0.0028  
Z -0.0020 -0.0007 -0.0003 0.0001 -0.0060 -0.0061  
AT. 142 H X -0.0029 0.0013 -0.0005 -0.0002 0.0222 -0.0222  
Y -0.0021 0.0006 -0.0003 -0.0001 -0.0027 0.0028  
Z 0.0020 -0.0007 0.0003 0.0001 0.0060 -0.0061  
AT. 143 C X 0.0007 0.0003 0.0002 -0.0001 -0.0068 -0.0070  
Y -0.0001 -0.0002 -0.0000 -0.0000 -0.0073 -0.0073  
Z -0.0009 -0.0005 -0.0001 0.0000 0.0030 0.0031  
AT. 144 C X -0.0007 0.0003 -0.0002 -0.0001 0.0068 -0.0070

Y 0.0001 -0.0002 0.0000 -0.0000 0.0073 -0.0073  
Z 0.0009 -0.0005 0.0001 0.0000 -0.0030 0.0031  
AT. 145 H X -0.0042 -0.0025 -0.0006 0.0003 -0.0004 -0.0003  
Y -0.0010 -0.0005 -0.0002 0.0002 0.0105 0.0105  
Z -0.0012 -0.0008 -0.0001 -0.0000 -0.0146 -0.0145  
AT. 146 H X 0.0042 -0.0025 0.0006 0.0003 0.0004 -0.0003  
Y 0.0010 -0.0005 0.0002 0.0002 -0.0105 0.0105  
Z 0.0012 -0.0008 0.0001 -0.0000 0.0146 -0.0145  
AT. 147 H X 0.0032 0.0013 0.0006 -0.0004 -0.0323 -0.0328  
Y 0.0015 0.0007 0.0002 -0.0001 0.0047 0.0038  
Z 0.0036 0.0014 0.0006 -0.0004 -0.0273 -0.0280  
AT. 148 H X -0.0032 0.0013 -0.0006 -0.0004 0.0323 -0.0328  
Y -0.0015 0.0007 -0.0002 -0.0001 -0.0047 0.0038  
Z -0.0036 0.0014 -0.0006 -0.0004 0.0273 -0.0280  
AT. 149 H X -0.0019 -0.0008 -0.0002 0.0002 0.0290 0.0293  
Y 0.0004 0.0003 -0.0000 0.0000 0.0080 0.0081  
Z 0.0013 0.0008 0.0002 -0.0000 0.0095 0.0095  
AT. 150 H X 0.0019 -0.0008 0.0002 0.0002 -0.0290 0.0293  
Y -0.0004 0.0003 0.0000 0.0000 -0.0080 0.0081  
Z -0.0013 0.0008 -0.0002 -0.0000 -0.0095 0.0095  
AT. 151 C X -0.0006 -0.0002 -0.0002 0.0000 -0.0017 -0.0016  
Y 0.0016 0.0011 0.0001 -0.0000 0.0060 0.0060  
Z -0.0005 -0.0002 -0.0001 -0.0000 0.0093 0.0093  
AT. 152 C X 0.0006 -0.0002 0.0002 0.0000 0.0017 -0.0016  
Y -0.0016 0.0011 -0.0001 -0.0000 -0.0060 0.0060  
Z 0.0005 -0.0002 0.0001 -0.0000 -0.0093 0.0093  
AT. 153 H X -0.0003 -0.0006 0.0002 0.0003 -0.0074 -0.0071  
Y -0.0007 -0.0005 0.0000 0.0001 -0.0061 -0.0057  
Z -0.0044 -0.0026 -0.0004 0.0001 -0.0075 -0.0067  
AT. 154 H X 0.0003 -0.0006 -0.0002 0.0003 0.0074 -0.0071  
Y 0.0007 -0.0005 -0.0000 0.0001 0.0061 -0.0057  
Z 0.0044 -0.0026 0.0004 0.0001 0.0075 -0.0067

AT.155 H X 0.0001 0.0003 -0.0004 -0.0000 -0.0003 -0.0006  
Y -0.0016 -0.0011 -0.0002 -0.0000 -0.0080 -0.0081  
Z 0.0031 0.0023 0.0001 -0.0000 0.0246 0.0244

AT.156 H X -0.0001 0.0003 0.0004 -0.0000 0.0003 -0.0006  
Y 0.0016 -0.0011 0.0002 -0.0000 0.0080 -0.0081  
Z -0.0031 0.0023 -0.0001 -0.0000 -0.0246 0.0244

AT.157 O X -0.0000 0.0002 -0.0002 0.0001 -0.0000 0.0000  
Y -0.0002 -0.0002 0.0002 -0.0002 -0.0001 -0.0001  
Z 0.0004 0.0004 -0.0002 0.0003 -0.0001 -0.0001

AT.158 O X 0.0000 0.0002 0.0002 0.0001 0.0000 0.0000  
Y 0.0002 -0.0002 -0.0002 -0.0002 0.0001 -0.0001  
Z -0.0004 0.0004 0.0002 0.0003 0.0001 -0.0001

AT.159 O X 0.0001 0.0001 -0.0001 0.0000 0.0000 -0.0000  
Y -0.0001 -0.0004 0.0003 -0.0002 -0.0000 0.0001  
Z -0.0005 0.0001 -0.0002 -0.0004 -0.0000 0.0001

AT.160 O X -0.0001 0.0001 0.0001 0.0000 -0.0000 -0.0000  
Y 0.0001 -0.0004 -0.0003 -0.0002 0.0000 0.0001  
Z 0.0005 0.0001 0.0002 -0.0004 0.0000 0.0001

AT.161 H X -0.0086 -0.0081 0.0061 -0.0078 0.0013 0.0017  
Y 0.0015 0.0016 -0.0009 0.0014 -0.0004 -0.0005  
Z -0.0095 -0.0093 0.0060 -0.0079 0.0016 0.0019

AT.162 H X 0.0086 -0.0081 -0.0061 -0.0078 -0.0013 0.0017  
Y -0.0015 0.0016 0.0009 0.0014 0.0004 -0.0005  
Z 0.0095 -0.0093 -0.0060 -0.0079 -0.0016 0.0019

AT.163 H X -0.0001 0.0011 -0.0005 0.0001 -0.0005 -0.0005  
Y -0.0012 0.0040 -0.0011 0.0003 0.0009 -0.0011  
Z -0.0006 0.0005 0.0001 -0.0001 0.0004 -0.0001

AT.164 H X 0.0001 0.0011 0.0005 0.0001 0.0005 -0.0005  
Y 0.0012 0.0040 0.0011 0.0003 -0.0009 -0.0011  
Z 0.0006 0.0005 -0.0001 -0.0001 -0.0004 -0.0001

AT.165 O X 0.0000 0.0000 -0.0001 0.0000 -0.0001 -0.0001  
Y 0.0000 0.0001 -0.0000 0.0001 0.0004 0.0005

Z 0.0001 0.0000 0.0002 0.0001 0.0002 0.0001  
AT.166 O X -0.0000 0.0000 0.0001 0.0000 0.0001 -0.0001  
Y -0.0000 0.0001 0.0000 0.0001 -0.0004 0.0005  
Z -0.0001 0.0000 -0.0002 0.0001 -0.0002 0.0001

AT.167 H X -0.0001 0.0004 -0.0001 -0.0001 0.0010 0.0013  
Y -0.0001 -0.0006 0.0002 0.0000 0.0001 -0.0007  
Z 0.0007 -0.0001 -0.0004 0.0008 -0.0022 -0.0021

AT.168 H X 0.0001 0.0004 0.0001 -0.0001 -0.0010 0.0013  
Y 0.0001 -0.0006 -0.0002 0.0000 -0.0001 -0.0007  
Z -0.0007 -0.0001 0.0004 0.0008 0.0022 -0.0021

AT.169 O X -0.0000 -0.0000 0.0000 -0.0000 0.0001 0.0001  
Y -0.0000 -0.0001 -0.0000 -0.0000 0.0000 0.0000  
Z -0.0001 -0.0000 -0.0002 -0.0002 -0.0000 0.0000

AT.170 O X 0.0000 -0.0000 -0.0000 -0.0000 -0.0001 0.0001  
Y 0.0000 -0.0001 0.0000 -0.0000 -0.0000 0.0000  
Z 0.0001 -0.0000 0.0002 -0.0002 0.0000 0.0000

AT.171 H X 0.0010 -0.0004 0.0007 0.0002 0.0021 0.0010  
Y 0.0006 -0.0002 0.0003 -0.0000 0.0011 0.0007  
Z -0.0001 0.0000 -0.0000 -0.0005 0.0007 0.0008

AT.172 H X -0.0010 -0.0004 -0.0007 0.0002 -0.0021 0.0010  
Y -0.0006 -0.0002 -0.0003 -0.0000 -0.0011 0.0007  
Z 0.0001 0.0000 0.0000 -0.0005 -0.0007 0.0008

FREQ(CM\*\*-1) 1075.89 1075.94 1078.40 1078.79 1081.30 1081.53

AT. 1 I X 0.0001 0.0001 0.0000 -0.0000 0.0000 0.0001  
Y -0.0001 -0.0001 -0.0000 -0.0000 -0.0000 -0.0001  
Z -0.0003 -0.0003 0.0000 0.0000 -0.0001 -0.0001

AT. 2 I X 0.0001 -0.0001 -0.0000 -0.0000 -0.0000 0.0001  
Y -0.0001 0.0001 0.0000 -0.0000 0.0000 -0.0001  
Z -0.0003 0.0003 -0.0000 0.0000 0.0001 -0.0001

AT. 3 I X 0.0000 0.0000 0.0000 0.0000 0.0000 0.0000

Y 0.0000 0.0001 0.0000 0.0000 0.0001 0.0001  
Z 0.0000 0.0000 -0.0000 -0.0000 0.0000 0.0000  
AT. 4 I X 0.0000 -0.0000 -0.0000 0.0000 -0.0000 0.0000  
Y 0.0000 -0.0001 -0.0000 0.0000 -0.0001 0.0001  
Z 0.0000 -0.0000 0.0000 -0.0000 -0.0000 0.0000  
AT. 5 O X -0.0032 -0.0034 0.0000 0.0000 0.0001 -0.0002  
Y 0.0026 0.0026 -0.0000 0.0000 -0.0001 0.0001  
Z 0.0001 0.0003 -0.0000 0.0000 -0.0022 -0.0023  
AT. 6 O X -0.0032 0.0034 -0.0000 0.0000 -0.0001 -0.0002  
Y 0.0026 -0.0026 0.0000 0.0000 0.0001 0.0001  
Z 0.0001 -0.0003 0.0000 0.0000 0.0022 -0.0023  
AT. 7 O X -0.0002 0.0003 0.0001 0.0001 0.0023 0.0020  
Y 0.0008 0.0009 -0.0000 -0.0000 -0.0017 -0.0017  
Z -0.0005 -0.0006 -0.0000 -0.0000 0.0010 0.0011  
AT. 8 O X -0.0002 -0.0003 -0.0001 0.0001 -0.0023 0.0020  
Y 0.0008 -0.0009 0.0000 -0.0000 0.0017 -0.0017  
Z -0.0005 0.0006 0.0000 -0.0000 -0.0010 0.0011  
AT. 9 N X 0.0057 0.0050 -0.0000 -0.0001 -0.0011 -0.0004  
Y -0.0049 -0.0047 0.0000 0.0001 -0.0001 -0.0005  
Z 0.0167 0.0162 0.0000 -0.0003 0.0091 0.0112  
AT. 10 N X 0.0057 -0.0050 0.0000 -0.0001 0.0011 -0.0004  
Y -0.0049 0.0047 -0.0000 0.0001 0.0001 -0.0005  
Z 0.0167 -0.0162 -0.0000 -0.0003 -0.0091 0.0112  
AT. 11 N X 0.0032 0.0026 0.0000 0.0000 -0.0048 -0.0044  
Y -0.0013 -0.0023 -0.0002 -0.0002 0.0032 0.0040  
Z 0.0016 0.0044 0.0003 0.0001 0.0042 0.0024  
AT. 12 N X 0.0032 -0.0026 -0.0000 0.0000 0.0048 -0.0044  
Y -0.0013 0.0023 0.0002 -0.0002 -0.0032 0.0040  
Z 0.0016 -0.0044 -0.0003 0.0001 -0.0042 0.0024  
AT. 13 C X 0.0030 0.0030 -0.0000 -0.0001 0.0022 0.0028  
Y -0.0003 -0.0005 -0.0001 -0.0001 -0.0016 -0.0015  
Z 0.0015 0.0015 -0.0001 -0.0000 0.0022 0.0023



AT. 14 C X 0.0030 -0.0030 0.0000 -0.0001 -0.0022 0.0028  
Y -0.0003 0.0005 0.0001 -0.0001 0.0016 -0.0015  
Z 0.0015 -0.0015 0.0001 -0.0000 -0.0022 0.0023

AT. 15 C X -0.0034 -0.0023 -0.0000 0.0002 -0.0010 -0.0024  
Y 0.0001 0.0000 0.0000 0.0000 0.0015 0.0015  
Z -0.0121 -0.0119 0.0000 0.0002 -0.0040 -0.0055

AT. 16 C X -0.0034 0.0023 0.0000 0.0002 0.0010 -0.0024  
Y 0.0001 -0.0000 -0.0000 0.0000 -0.0015 0.0015  
Z -0.0121 0.0119 -0.0000 0.0002 0.0040 -0.0055

AT. 17 H X 0.1074 0.1027 -0.0007 -0.0023 0.0259 0.0422  
Y -0.0117 -0.0142 0.0000 -0.0001 -0.0034 -0.0029  
Z 0.0472 0.0479 -0.0003 -0.0007 0.0131 0.0181

AT. 18 H X 0.1074 -0.1027 0.0007 -0.0023 -0.0259 0.0422  
Y -0.0117 0.0142 -0.0000 -0.0001 0.0034 -0.0029  
Z 0.0472 -0.0479 0.0003 -0.0007 -0.0131 0.0181

AT. 19 H X -0.0882 -0.0949 -0.0000 0.0003 -0.0356 -0.0396  
Y 0.0339 0.0321 -0.0001 -0.0007 0.0108 0.0158  
Z -0.0246 -0.0273 -0.0000 -0.0000 -0.0108 -0.0113

AT. 20 H X -0.0882 0.0949 0.0000 0.0003 0.0356 -0.0396  
Y 0.0339 -0.0321 0.0001 -0.0007 -0.0108 0.0158  
Z -0.0246 0.0273 0.0000 -0.0000 0.0108 -0.0113

AT. 21 C X -0.0002 -0.0017 -0.0002 -0.0001 -0.0013 -0.0003  
Y -0.0007 -0.0019 -0.0001 -0.0000 -0.0021 -0.0015  
Z -0.0018 -0.0012 -0.0002 -0.0001 -0.0023 -0.0027

AT. 22 C X -0.0002 0.0017 0.0002 -0.0001 0.0013 -0.0003  
Y -0.0007 0.0019 0.0001 -0.0000 0.0021 -0.0015  
Z -0.0018 0.0012 0.0002 -0.0001 0.0023 -0.0027

AT. 23 C X 0.0007 0.0026 0.0001 0.0000 0.0026 0.0016  
Y 0.0007 0.0025 0.0002 0.0001 0.0038 0.0028  
Z -0.0003 -0.0020 -0.0001 -0.0000 -0.0016 -0.0006

AT. 24 C X 0.0007 -0.0026 -0.0001 0.0000 -0.0026 0.0016  
Y 0.0007 -0.0025 -0.0002 0.0001 -0.0038 0.0028

Z -0.0003 0.0020 0.0001 -0.0000 0.0016 -0.0006  
AT. 25 H X -0.0187 -0.0399 -0.0022 -0.0007 -0.0483 -0.0358  
Y -0.0029 -0.0061 -0.0003 -0.0001 -0.0065 -0.0046  
Z 0.0028 0.0088 0.0008 0.0005 0.0117 0.0082  
AT. 26 H X -0.0187 0.0399 0.0022 -0.0007 0.0483 -0.0358  
Y -0.0029 0.0061 0.0003 -0.0001 0.0065 -0.0046  
Z 0.0028 -0.0088 -0.0008 0.0005 -0.0117 0.0082  
AT. 27 H X 0.0057 0.0139 0.0013 0.0007 0.0141 0.0080  
Y -0.0007 -0.0070 -0.0003 -0.0002 -0.0101 -0.0067  
Z -0.0020 -0.0092 -0.0005 -0.0003 -0.0113 -0.0069  
AT. 28 H X 0.0057 -0.0139 -0.0013 0.0007 -0.0141 0.0080  
Y -0.0007 0.0070 0.0003 -0.0002 0.0101 -0.0067  
Z -0.0020 0.0092 0.0005 -0.0003 0.0113 -0.0069  
AT. 29 C X -0.0061 -0.0058 -0.0000 0.0001 0.0005 -0.0001  
Y 0.0033 0.0037 0.0000 -0.0001 0.0053 0.0056  
Z -0.0041 -0.0037 0.0002 0.0001 -0.0060 -0.0068  
AT. 30 C X -0.0061 0.0058 0.0000 0.0001 -0.0005 -0.0001  
Y 0.0033 -0.0037 -0.0000 -0.0001 -0.0053 0.0056  
Z -0.0041 0.0037 -0.0002 0.0001 0.0060 -0.0068  
AT. 31 H X 0.0200 0.0183 0.0004 -0.0001 -0.0097 -0.0074  
Y 0.0044 0.0044 -0.0002 -0.0002 0.0128 0.0137  
Z 0.0146 0.0130 0.0000 -0.0002 -0.0006 0.0015  
AT. 32 H X 0.0200 -0.0183 -0.0004 -0.0001 0.0097 -0.0074  
Y 0.0044 -0.0044 0.0002 -0.0002 -0.0128 0.0137  
Z 0.0146 -0.0130 -0.0000 -0.0002 0.0006 0.0015  
AT. 33 H X -0.0368 -0.0369 -0.0000 0.0009 -0.0405 -0.0456  
Y 0.0012 0.0015 0.0003 0.0002 -0.0145 -0.0153  
Z -0.0237 -0.0236 0.0000 0.0006 -0.0248 -0.0281  
AT. 34 H X -0.0368 0.0369 0.0000 0.0009 0.0405 -0.0456  
Y 0.0012 -0.0015 -0.0003 0.0002 0.0145 -0.0153  
Z -0.0237 0.0236 -0.0000 0.0006 0.0248 -0.0281  
AT. 35 C X -0.0055 -0.0038 -0.0002 -0.0002 0.0265 0.0262

Y 0.0073 0.0060 0.0001 0.0002 -0.0178 -0.0174  
Z -0.0094 -0.0086 -0.0003 -0.0001 0.0127 0.0123  
AT. 36 C X -0.0055 0.0038 0.0002 -0.0002 -0.0265 0.0262  
Y 0.0073 -0.0060 -0.0001 0.0002 0.0178 -0.0174  
Z -0.0094 0.0086 0.0003 -0.0001 -0.0127 0.0123  
AT. 37 C X -0.0042 -0.0047 -0.0001 0.0000 -0.0031 -0.0032  
Y 0.0011 0.0014 0.0001 0.0001 -0.0052 -0.0054  
Z 0.0031 0.0018 -0.0001 -0.0001 -0.0039 -0.0030  
AT. 38 C X -0.0042 0.0047 0.0001 0.0000 0.0031 -0.0032  
Y 0.0011 -0.0014 -0.0001 0.0001 0.0052 -0.0054  
Z 0.0031 -0.0018 0.0001 -0.0001 0.0039 -0.0030  
AT. 39 H X -0.0107 -0.0100 0.0001 0.0000 0.0110 0.0100  
Y -0.0031 0.0044 0.0005 0.0001 0.0255 0.0210  
Z 0.0005 -0.0031 -0.0002 -0.0001 -0.0081 -0.0059  
AT. 40 H X -0.0107 0.0100 -0.0001 0.0000 -0.0110 0.0100  
Y -0.0031 -0.0044 -0.0005 0.0001 -0.0255 0.0210  
Z 0.0005 0.0031 0.0002 -0.0001 0.0081 -0.0059  
AT. 41 H X 0.0053 0.0037 0.0002 0.0001 -0.0150 -0.0144  
Y -0.0084 -0.0086 -0.0005 -0.0003 0.0147 0.0156  
Z 0.0008 0.0012 0.0002 0.0002 -0.0065 -0.0074  
AT. 42 H X 0.0053 -0.0037 -0.0002 0.0001 0.0150 -0.0144  
Y -0.0084 0.0086 0.0005 -0.0003 -0.0147 0.0156  
Z 0.0008 -0.0012 -0.0002 0.0002 0.0065 -0.0074  
AT. 43 C X -0.0018 -0.0010 0.0000 0.0000 0.0057 0.0053  
Y -0.0045 -0.0043 0.0000 0.0001 -0.0008 -0.0014  
Z -0.0016 -0.0024 -0.0000 -0.0000 0.0011 0.0017  
AT. 44 C X -0.0018 0.0010 -0.0000 0.0000 -0.0057 0.0053  
Y -0.0045 0.0043 -0.0000 0.0001 0.0008 -0.0014  
Z -0.0016 0.0024 0.0000 -0.0000 -0.0011 0.0017  
AT. 45 H X 0.0078 0.0052 -0.0007 -0.0006 -0.0194 -0.0177  
Y -0.0035 -0.0040 -0.0002 -0.0000 0.0045 0.0053  
Z -0.0091 -0.0067 0.0007 0.0005 0.0139 0.0116

AT. 46 H X 0.0078 -0.0052 0.0007 -0.0006 0.0194 -0.0177  
Y -0.0035 0.0040 0.0002 -0.0000 -0.0045 0.0053  
Z -0.0091 0.0067 -0.0007 0.0005 -0.0139 0.0116

AT. 47 H X 0.0124 0.0179 0.0008 0.0005 -0.0083 -0.0124  
Y 0.0080 0.0094 0.0003 0.0002 -0.0170 -0.0190  
Z -0.0088 -0.0151 -0.0008 -0.0006 0.0036 0.0083

AT. 48 H X 0.0124 -0.0179 -0.0008 0.0005 0.0083 -0.0124  
Y 0.0080 -0.0094 -0.0003 0.0002 0.0170 -0.0190  
Z -0.0088 0.0151 0.0008 -0.0006 -0.0036 0.0083

AT. 49 C X -0.0137 -0.0136 -0.0002 -0.0001 0.0145 0.0144  
Y 0.0098 0.0092 0.0002 0.0001 -0.0084 -0.0076  
Z 0.0135 0.0119 0.0002 0.0002 -0.0234 -0.0228

AT. 50 C X -0.0137 0.0136 0.0002 -0.0001 -0.0145 0.0144  
Y 0.0098 -0.0092 -0.0002 0.0001 0.0084 -0.0076  
Z 0.0135 -0.0119 -0.0002 0.0002 0.0234 -0.0228

AT. 51 C X 0.0047 0.0055 0.0001 0.0000 0.0009 0.0008  
Y 0.0024 0.0019 -0.0000 0.0000 -0.0033 -0.0033  
Z -0.0062 -0.0061 -0.0000 0.0001 -0.0012 -0.0019

AT. 52 C X 0.0047 -0.0055 -0.0001 0.0000 -0.0009 0.0008  
Y 0.0024 -0.0019 0.0000 0.0000 0.0033 -0.0033  
Z -0.0062 0.0061 0.0000 0.0001 0.0012 -0.0019

AT. 53 H X -0.0043 -0.0022 0.0000 -0.0000 0.0064 0.0055  
Y -0.0456 -0.0427 0.0000 0.0005 -0.0013 -0.0065  
Z -0.0472 -0.0454 0.0001 0.0007 -0.0085 -0.0139

AT. 54 H X -0.0043 0.0022 -0.0000 -0.0000 -0.0064 0.0055  
Y -0.0456 0.0427 -0.0000 0.0005 0.0013 -0.0065  
Z -0.0472 0.0454 -0.0001 0.0007 0.0085 -0.0139

AT. 55 H X 0.0023 0.0014 0.0000 0.0001 -0.0043 -0.0044  
Y 0.0123 0.0118 -0.0003 -0.0006 0.0143 0.0166  
Z 0.0057 0.0047 -0.0005 -0.0006 0.0176 0.0198

AT. 56 H X 0.0023 -0.0014 -0.0000 0.0001 0.0043 -0.0044  
Y 0.0123 -0.0118 0.0003 -0.0006 -0.0143 0.0166

Z 0.0057 -0.0047 0.0005 -0.0006 -0.0176 0.0198  
AT. 57 C X 0.0019 0.0009 0.0001 0.0001 -0.0148 -0.0147  
Y -0.0045 -0.0036 0.0001 -0.0000 0.0095 0.0092  
Z 0.0072 0.0071 0.0001 0.0000 -0.0041 -0.0038  
AT. 58 C X 0.0019 -0.0009 -0.0001 0.0001 0.0148 -0.0147  
Y -0.0045 0.0036 -0.0001 -0.0000 -0.0095 0.0092  
Z 0.0072 -0.0071 -0.0001 0.0000 0.0041 -0.0038  
AT. 59 H X 0.0223 0.0215 0.0000 -0.0001 -0.0110 -0.0095  
Y -0.0173 -0.0171 -0.0002 0.0000 0.0067 0.0057  
Z 0.0026 0.0014 -0.0003 -0.0001 -0.0069 -0.0066  
AT. 60 H X 0.0223 -0.0215 -0.0000 -0.0001 0.0110 -0.0095  
Y -0.0173 0.0171 0.0002 0.0000 -0.0067 0.0057  
Z 0.0026 -0.0014 0.0003 -0.0001 0.0069 -0.0066  
AT. 61 H X -0.0055 -0.0080 -0.0002 0.0002 -0.0220 -0.0228  
Y 0.0100 0.0118 -0.0003 -0.0004 0.0206 0.0215  
Z -0.0063 -0.0080 0.0001 0.0003 -0.0149 -0.0159  
AT. 62 H X -0.0055 0.0080 0.0002 0.0002 0.0220 -0.0228  
Y 0.0100 -0.0118 0.0003 -0.0004 -0.0206 0.0215  
Z -0.0063 0.0080 -0.0001 0.0003 0.0149 -0.0159  
AT. 63 H X 0.0150 0.0152 0.0006 0.0002 -0.0140 -0.0134  
Y -0.0050 -0.0050 -0.0006 -0.0003 0.0163 0.0163  
Z -0.0047 -0.0052 0.0002 0.0002 -0.0115 -0.0118  
AT. 64 H X 0.0150 -0.0152 -0.0006 0.0002 0.0140 -0.0134  
Y -0.0050 0.0050 0.0006 -0.0003 -0.0163 0.0163  
Z -0.0047 0.0052 -0.0002 0.0002 0.0115 -0.0118  
AT. 65 C X 0.0079 0.0082 0.0002 0.0001 -0.0075 -0.0077  
Y -0.0070 -0.0064 -0.0001 0.0000 0.0037 0.0030  
Z -0.0055 -0.0045 -0.0002 -0.0001 0.0131 0.0129  
AT. 66 C X 0.0079 -0.0082 -0.0002 0.0001 0.0075 -0.0077  
Y -0.0070 0.0064 0.0001 0.0000 -0.0037 0.0030  
Z -0.0055 0.0045 0.0002 -0.0001 -0.0131 0.0129  
AT. 67 H X 0.0068 0.0035 -0.0001 -0.0000 -0.0169 -0.0149

Y 0.0008 0.0022 0.0000 -0.0000 0.0131 0.0131  
Z -0.0123 -0.0092 -0.0000 -0.0000 0.0130 0.0102  
AT. 68 H X 0.0068 -0.0035 0.0001 -0.0000 0.0169 -0.0149  
Y 0.0008 -0.0022 -0.0000 -0.0000 -0.0131 0.0131  
Z -0.0123 0.0092 0.0000 -0.0000 -0.0130 0.0102  
AT. 69 H X 0.0174 0.0169 0.0002 0.0000 -0.0040 -0.0030  
Y -0.0073 -0.0086 -0.0000 -0.0000 0.0043 0.0055  
Z -0.0242 -0.0248 -0.0002 -0.0000 0.0050 0.0055  
AT. 70 H X 0.0174 -0.0169 -0.0002 0.0000 0.0040 -0.0030  
Y -0.0073 0.0086 0.0000 -0.0000 -0.0043 0.0055  
Z -0.0242 0.0248 0.0002 -0.0000 -0.0050 0.0055  
AT. 71 H X -0.0022 -0.0033 0.0002 0.0003 -0.0202 -0.0210  
Y -0.0001 -0.0002 -0.0001 -0.0003 0.0137 0.0146  
Z -0.0044 -0.0053 -0.0001 -0.0003 0.0174 0.0188  
AT. 72 H X -0.0022 0.0033 -0.0002 0.0003 0.0202 -0.0210  
Y -0.0001 0.0002 0.0001 -0.0003 -0.0137 0.0146  
Z -0.0044 0.0053 0.0001 -0.0003 -0.0174 0.0188  
AT. 73 C X 0.0017 0.0013 -0.0001 -0.0001 0.0017 0.0022  
Y 0.0015 0.0007 -0.0001 -0.0001 -0.0001 0.0004  
Z 0.0053 0.0056 0.0001 -0.0000 0.0029 0.0027  
AT. 74 C X 0.0017 -0.0013 0.0001 -0.0001 -0.0017 0.0022  
Y 0.0015 -0.0007 0.0001 -0.0001 0.0001 0.0004  
Z 0.0053 -0.0056 -0.0001 -0.0000 -0.0029 0.0027  
AT. 75 H X 0.0221 0.0218 0.0001 0.0003 -0.0376 -0.0387  
Y -0.0176 -0.0165 0.0001 -0.0002 0.0267 0.0271  
Z -0.0059 -0.0030 0.0004 0.0002 0.0113 0.0100  
AT. 76 H X 0.0221 -0.0218 -0.0001 0.0003 0.0376 -0.0387  
Y -0.0176 0.0165 -0.0001 -0.0002 -0.0267 0.0271  
Z -0.0059 0.0030 -0.0004 0.0002 -0.0113 0.0100  
AT. 77 H X 0.0177 0.0148 0.0008 0.0003 -0.0370 -0.0355  
Y -0.0140 -0.0115 -0.0005 -0.0001 0.0258 0.0241  
Z 0.0051 0.0047 -0.0003 -0.0004 0.0148 0.0160

AT. 78 H X 0.0177 -0.0148 -0.0008 0.0003 0.0370 -0.0355  
Y -0.0140 0.0115 0.0005 -0.0001 -0.0258 0.0241  
Z 0.0051 -0.0047 0.0003 -0.0004 -0.0148 0.0160

AT. 79 I X -0.0000 0.0000 0.0000 0.0000 0.0000 -0.0000  
Y -0.0000 0.0000 0.0000 0.0000 0.0000 0.0000  
Z -0.0000 0.0000 0.0000 0.0000 0.0000 -0.0000

AT. 80 I X -0.0000 -0.0000 -0.0000 0.0000 -0.0000 -0.0000  
Y -0.0000 -0.0000 -0.0000 0.0000 -0.0000 0.0000  
Z -0.0000 -0.0000 -0.0000 0.0000 -0.0000 -0.0000

AT. 81 I X 0.0000 -0.0000 -0.0000 -0.0000 -0.0000 0.0000  
Y 0.0000 -0.0000 -0.0000 0.0000 -0.0000 0.0000  
Z -0.0000 -0.0000 0.0000 0.0000 0.0000 0.0000

AT. 82 I X 0.0000 0.0000 0.0000 -0.0000 0.0000 0.0000  
Y 0.0000 0.0000 0.0000 0.0000 0.0000 0.0000  
Z -0.0000 0.0000 -0.0000 0.0000 -0.0000 0.0000

AT. 83 O X 0.0002 0.0001 -0.0024 -0.0022 -0.0000 0.0001  
Y -0.0000 0.0000 -0.0003 -0.0003 0.0001 0.0000  
Z 0.0000 0.0001 -0.0018 -0.0019 0.0001 0.0000

AT. 84 O X 0.0002 -0.0001 0.0024 -0.0022 0.0000 0.0001  
Y -0.0000 -0.0000 0.0003 -0.0003 -0.0001 0.0000  
Z 0.0000 -0.0001 0.0018 -0.0019 -0.0001 0.0000

AT. 85 O X -0.0002 0.0002 -0.0008 -0.0012 0.0005 -0.0001  
Y -0.0001 -0.0000 -0.0017 -0.0017 -0.0000 -0.0000  
Z -0.0000 0.0000 0.0012 0.0012 0.0001 -0.0000

AT. 86 O X -0.0002 -0.0002 0.0008 -0.0012 -0.0005 -0.0001  
Y -0.0001 0.0000 0.0017 -0.0017 0.0000 -0.0000  
Z -0.0000 -0.0000 -0.0012 0.0012 -0.0001 -0.0000

AT. 87 N X -0.0001 0.0000 0.0016 0.0018 -0.0001 -0.0000  
Y 0.0001 0.0002 0.0003 0.0002 0.0002 -0.0000  
Z 0.0004 -0.0003 0.0011 0.0022 -0.0004 0.0001

AT. 88 N X -0.0001 -0.0000 -0.0016 0.0018 0.0001 -0.0000  
Y 0.0001 -0.0002 -0.0003 0.0002 -0.0002 -0.0000

Z 0.0004 0.0003 -0.0011 0.0022 0.0004 0.0001  
AT. 89 N X 0.0001 -0.0001 0.0073 0.0074 -0.0002 0.0001  
Y -0.0003 0.0002 0.0035 0.0032 0.0010 -0.0002  
Z 0.0004 -0.0005 -0.0022 -0.0011 -0.0018 0.0005  
AT. 90 N X 0.0001 0.0001 -0.0073 0.0074 0.0002 0.0001  
Y -0.0003 -0.0002 -0.0035 0.0032 -0.0010 -0.0002  
Z 0.0004 0.0005 0.0022 -0.0011 0.0018 0.0005  
AT. 91 C X -0.0000 0.0001 -0.0012 -0.0014 -0.0000 -0.0000  
Y 0.0002 -0.0000 -0.0022 -0.0019 -0.0004 -0.0000  
Z -0.0003 -0.0000 0.0019 0.0022 0.0000 -0.0001  
AT. 92 C X -0.0000 -0.0001 0.0012 -0.0014 0.0000 -0.0000  
Y 0.0002 0.0000 0.0022 -0.0019 0.0004 -0.0000  
Z -0.0003 0.0000 -0.0019 0.0022 -0.0000 -0.0001  
AT. 93 C X -0.0002 -0.0002 0.0011 0.0011 -0.0001 -0.0002  
Y -0.0001 0.0001 0.0018 0.0017 0.0003 0.0001  
Z -0.0002 0.0002 0.0009 0.0002 0.0003 -0.0000  
AT. 94 C X -0.0002 0.0002 -0.0011 0.0011 0.0001 -0.0002  
Y -0.0001 -0.0001 -0.0018 0.0017 -0.0003 0.0001  
Z -0.0002 -0.0002 -0.0009 0.0002 -0.0003 -0.0000  
AT. 95 H X -0.0026 0.0019 0.0239 0.0181 0.0047 0.0002  
Y 0.0003 -0.0009 -0.0053 -0.0042 -0.0017 -0.0004  
Z 0.0017 -0.0005 -0.0125 -0.0086 -0.0017 0.0003  
AT. 96 H X -0.0026 -0.0019 -0.0239 0.0181 -0.0047 0.0002  
Y 0.0003 0.0009 0.0053 -0.0042 0.0017 -0.0004  
Z 0.0017 0.0005 0.0125 -0.0086 0.0017 0.0003  
AT. 97 H X 0.0028 -0.0004 -0.0122 -0.0055 -0.0019 0.0014  
Y -0.0001 -0.0006 -0.0006 -0.0010 -0.0006 -0.0006  
Z -0.0010 0.0001 0.0039 0.0012 0.0006 -0.0006  
AT. 98 H X 0.0028 0.0004 0.0122 -0.0055 0.0019 0.0014  
Y -0.0001 0.0006 0.0006 -0.0010 0.0006 -0.0006  
Z -0.0010 -0.0001 -0.0039 0.0012 -0.0006 -0.0006  
AT. 99 C X 0.0000 -0.0002 -0.0013 -0.0011 -0.0006 0.0001



Y -0.0001 0.0000 0.0007 0.0003 0.0004 -0.0002  
Z -0.0002 0.0002 -0.0004 -0.0006 0.0003 0.0000  
AT.100 C X 0.0000 0.0002 0.0013 -0.0011 0.0006 0.0001  
Y -0.0001 -0.0000 -0.0007 0.0003 -0.0004 -0.0002  
Z -0.0002 -0.0002 0.0004 -0.0006 -0.0003 0.0000  
AT.101 C X -0.0000 0.0001 0.0006 0.0004 0.0007 -0.0002  
Y 0.0003 -0.0003 0.0000 0.0008 -0.0012 0.0004  
Z -0.0001 0.0002 0.0006 0.0002 0.0007 -0.0003  
AT.102 C X -0.0000 -0.0001 -0.0006 0.0004 -0.0007 -0.0002  
Y 0.0003 0.0003 -0.0000 0.0008 0.0012 0.0004  
Z -0.0001 -0.0002 -0.0006 0.0002 -0.0007 -0.0003  
AT.103 H X 0.0037 -0.0034 -0.0057 0.0032 -0.0143 0.0043  
Y -0.0014 0.0013 0.0028 -0.0005 0.0054 -0.0016  
Z 0.0009 -0.0010 -0.0006 0.0019 -0.0034 0.0009  
AT.104 H X 0.0037 0.0034 0.0057 0.0032 0.0143 0.0043  
Y -0.0014 -0.0013 -0.0028 -0.0005 -0.0054 -0.0016  
Z 0.0009 0.0010 0.0006 0.0019 0.0034 0.0009  
AT.105 H X -0.0026 0.0025 0.0077 0.0014 0.0085 -0.0032  
Y 0.0002 0.0001 -0.0021 -0.0024 0.0010 -0.0001  
Z -0.0007 0.0009 0.0013 -0.0008 0.0031 -0.0011  
AT.106 H X -0.0026 -0.0025 -0.0077 0.0014 -0.0085 -0.0032  
Y 0.0002 -0.0001 0.0021 -0.0024 -0.0010 -0.0001  
Z -0.0007 -0.0009 -0.0013 -0.0008 -0.0031 -0.0011  
AT.107 C X 0.0001 -0.0001 -0.0012 -0.0011 -0.0003 0.0000  
Y -0.0002 -0.0004 0.0015 0.0022 -0.0005 0.0001  
Z -0.0001 0.0000 -0.0070 -0.0071 -0.0001 -0.0000  
AT.108 C X 0.0001 0.0001 0.0012 -0.0011 0.0003 0.0000  
Y -0.0002 0.0004 -0.0015 0.0022 0.0005 0.0001  
Z -0.0001 -0.0000 0.0070 -0.0071 0.0001 -0.0000  
AT.109 H X -0.0003 -0.0012 0.0216 0.0216 -0.0004 0.0003  
Y 0.0002 0.0000 0.0039 0.0051 -0.0001 0.0002  
Z 0.0007 0.0012 -0.0098 -0.0089 0.0006 0.0001

AT.110 H X -0.0003 0.0012 -0.0216 0.0216 0.0004 0.0003  
Y 0.0002 -0.0000 -0.0039 0.0051 0.0001 0.0002  
Z 0.0007 -0.0012 0.0098 -0.0089 -0.0006 0.0001

AT.111 H X 0.0010 -0.0003 0.0089 0.0115 -0.0010 0.0005  
Y 0.0000 0.0004 -0.0207 -0.0219 0.0001 -0.0000  
Z -0.0012 0.0001 -0.0134 -0.0158 0.0006 -0.0006

AT.112 H X 0.0010 0.0003 -0.0089 0.0115 0.0010 0.0005  
Y 0.0000 -0.0004 0.0207 -0.0219 -0.0001 -0.0000  
Z -0.0012 -0.0001 0.0134 -0.0158 -0.0006 -0.0006

AT.113 C X -0.0006 0.0004 -0.0252 -0.0263 0.0009 -0.0006  
Y -0.0001 0.0004 -0.0042 -0.0050 0.0004 -0.0003  
Z 0.0003 -0.0003 0.0192 0.0192 -0.0000 0.0003

AT.114 C X -0.0006 -0.0004 0.0252 -0.0263 -0.0009 -0.0006  
Y -0.0001 -0.0004 0.0042 -0.0050 -0.0004 -0.0003  
Z 0.0003 0.0003 -0.0192 0.0192 0.0000 0.0003

AT.115 C X 0.0002 -0.0000 -0.0019 -0.0014 -0.0005 0.0001  
Y 0.0001 -0.0001 -0.0080 -0.0078 -0.0003 0.0000  
Z -0.0001 0.0003 -0.0014 -0.0018 0.0007 -0.0003

AT.116 C X 0.0002 0.0000 0.0019 -0.0014 0.0005 0.0001  
Y 0.0001 0.0001 0.0080 -0.0078 0.0003 0.0000  
Z -0.0001 -0.0003 0.0014 -0.0018 -0.0007 -0.0003

AT.117 H X 0.0005 -0.0002 -0.0084 -0.0072 -0.0014 0.0003  
Y 0.0014 -0.0015 0.0157 0.0186 -0.0045 0.0016  
Z -0.0007 0.0008 -0.0001 -0.0019 0.0026 -0.0008

AT.118 H X 0.0005 0.0002 0.0084 -0.0072 0.0014 0.0003  
Y 0.0014 0.0015 -0.0157 0.0186 0.0045 0.0016  
Z -0.0007 -0.0008 0.0001 -0.0019 -0.0026 -0.0008

AT.119 H X -0.0003 0.0000 0.0194 0.0192 0.0008 0.0003  
Y -0.0003 0.0005 0.0109 0.0106 0.0016 0.0002  
Z 0.0000 -0.0002 -0.0084 -0.0087 -0.0007 -0.0002

AT.120 H X -0.0003 -0.0000 -0.0194 0.0192 -0.0008 0.0003  
Y -0.0003 -0.0005 -0.0109 0.0106 -0.0016 0.0002

Z 0.0000 0.0002 0.0084 -0.0087 0.0007 -0.0002  
AT. 121 C X -0.0003 0.0000 -0.0047 -0.0050 0.0004 -0.0002  
Y 0.0001 0.0001 0.0057 0.0049 0.0001 -0.0000  
Z -0.0000 0.0001 0.0017 0.0017 0.0004 -0.0001  
AT. 122 C X -0.0003 -0.0000 0.0047 -0.0050 -0.0004 -0.0002  
Y 0.0001 -0.0001 -0.0057 0.0049 -0.0001 -0.0000  
Z -0.0000 -0.0001 -0.0017 0.0017 -0.0004 -0.0001  
AT. 123 H X 0.0014 -0.0002 0.0213 0.0217 -0.0019 0.0005  
Y -0.0003 0.0005 0.0006 -0.0003 0.0013 -0.0004  
Z 0.0007 -0.0004 0.0111 0.0115 -0.0013 0.0004  
AT. 124 H X 0.0014 0.0002 -0.0213 0.0217 0.0019 0.0005  
Y -0.0003 -0.0005 -0.0006 -0.0003 -0.0013 -0.0004  
Z 0.0007 0.0004 -0.0111 0.0115 0.0013 0.0004  
AT. 125 H X -0.0013 0.0009 0.0147 0.0127 0.0046 -0.0011  
Y 0.0005 -0.0005 -0.0231 -0.0222 -0.0031 0.0005  
Z -0.0010 0.0008 0.0106 0.0093 0.0039 -0.0009  
AT. 126 H X -0.0013 -0.0009 -0.0147 0.0127 -0.0046 -0.0011  
Y 0.0005 0.0005 0.0231 -0.0222 0.0031 0.0005  
Z -0.0010 -0.0008 -0.0106 0.0093 -0.0039 -0.0009  
AT. 127 C X 0.0001 0.0000 -0.0239 -0.0239 -0.0007 -0.0001  
Y -0.0000 -0.0001 -0.0093 -0.0085 -0.0001 0.0001  
Z -0.0002 0.0003 -0.0233 -0.0235 0.0003 -0.0003  
AT. 128 C X 0.0001 -0.0000 0.0239 -0.0239 0.0007 -0.0001  
Y -0.0000 0.0001 0.0093 -0.0085 0.0001 0.0001  
Z -0.0002 -0.0003 0.0233 -0.0235 -0.0003 -0.0003  
AT. 129 C X -0.0002 0.0001 0.0003 0.0000 0.0005 -0.0000  
Y -0.0001 -0.0001 -0.0013 -0.0016 -0.0001 -0.0001  
Z -0.0001 -0.0001 0.0041 0.0035 -0.0002 -0.0001  
AT. 130 C X -0.0002 -0.0001 -0.0003 0.0000 -0.0005 -0.0000  
Y -0.0001 0.0001 0.0013 -0.0016 0.0001 -0.0001  
Z -0.0001 0.0001 -0.0041 0.0035 0.0002 -0.0001  
AT. 131 H X -0.0009 0.0003 -0.0018 -0.0030 0.0012 -0.0003

Y -0.0005 0.0007 0.0160 0.0143 0.0004 -0.0000  
Z -0.0012 0.0006 0.0092 0.0068 0.0009 -0.0004  
AT. 132 H X -0.0009 -0.0003 0.0018 -0.0030 -0.0012 -0.0003  
Y -0.0005 -0.0007 -0.0160 0.0143 -0.0004 -0.0000  
Z -0.0012 -0.0006 -0.0092 0.0068 -0.0009 -0.0004  
AT. 133 H X 0.0008 -0.0003 0.0093 0.0100 -0.0005 0.0003  
Y 0.0006 -0.0003 0.0094 0.0100 -0.0002 0.0002  
Z 0.0007 -0.0002 0.0164 0.0167 0.0002 0.0003  
AT. 134 H X 0.0008 0.0003 -0.0093 0.0100 0.0005 0.0003  
Y 0.0006 0.0003 -0.0094 0.0100 0.0002 0.0002  
Z 0.0007 0.0002 -0.0164 0.0167 -0.0002 0.0003  
AT. 135 C X 0.0004 -0.0002 0.0144 0.0152 -0.0005 0.0004  
Y 0.0000 -0.0002 0.0016 0.0020 -0.0002 0.0002  
Z -0.0001 0.0001 -0.0089 -0.0088 -0.0002 -0.0001  
AT. 136 C X 0.0004 0.0002 -0.0144 0.0152 0.0005 0.0004  
Y 0.0000 0.0002 -0.0016 0.0020 0.0002 0.0002  
Z -0.0001 -0.0001 0.0089 -0.0088 0.0002 -0.0001  
AT. 137 H X -0.0003 -0.0006 0.0096 0.0093 0.0001 0.0003  
Y 0.0001 -0.0001 0.0054 0.0052 0.0004 0.0000  
Z 0.0002 0.0004 -0.0020 -0.0026 0.0007 -0.0003  
AT. 138 H X -0.0003 0.0006 -0.0096 0.0093 -0.0001 0.0003  
Y 0.0001 0.0001 -0.0054 0.0052 -0.0004 0.0000  
Z 0.0002 -0.0004 0.0020 -0.0026 -0.0007 -0.0003  
AT. 139 H X 0.0008 -0.0008 0.0156 0.0174 -0.0018 0.0008  
Y 0.0008 0.0001 0.0129 0.0135 -0.0005 0.0003  
Z -0.0007 0.0007 -0.0129 -0.0142 0.0016 -0.0007  
AT. 140 H X 0.0008 0.0008 -0.0156 0.0174 0.0018 0.0008  
Y 0.0008 -0.0001 -0.0129 0.0135 0.0005 0.0003  
Z -0.0007 -0.0007 0.0129 -0.0142 -0.0016 -0.0007  
AT. 141 H X -0.0002 -0.0000 0.0283 0.0272 0.0008 -0.0002  
Y -0.0001 0.0004 0.0156 0.0154 -0.0000 -0.0001  
Z -0.0002 -0.0004 -0.0182 -0.0183 0.0001 -0.0000

AT. 142 H X -0.0002 0.0000 -0.0283 0.0272 -0.0008 -0.0002  
Y -0.0001 -0.0004 -0.0156 0.0154 0.0000 -0.0001  
Z -0.0002 0.0004 0.0182 -0.0183 -0.0001 -0.0000

AT. 143 C X -0.0001 0.0001 0.0128 0.0127 0.0005 -0.0000  
Y -0.0000 0.0000 0.0062 0.0056 -0.0000 -0.0001  
Z 0.0002 -0.0002 0.0118 0.0121 -0.0003 0.0002

AT. 144 C X -0.0001 -0.0001 -0.0128 0.0127 -0.0005 -0.0000  
Y -0.0000 -0.0000 -0.0062 0.0056 0.0000 -0.0001  
Z 0.0002 0.0002 -0.0118 0.0121 0.0003 0.0002

AT. 145 H X 0.0005 -0.0007 0.0340 0.0337 -0.0016 0.0005  
Y 0.0003 -0.0001 0.0029 0.0038 -0.0004 0.0003  
Z -0.0000 -0.0003 0.0216 0.0202 -0.0005 -0.0001

AT. 146 H X 0.0005 0.0007 -0.0340 0.0337 0.0016 0.0005  
Y 0.0003 0.0001 -0.0029 0.0038 0.0004 0.0003  
Z -0.0000 0.0003 -0.0216 0.0202 0.0005 -0.0001

AT. 147 H X -0.0008 0.0004 0.0168 0.0150 0.0016 -0.0006  
Y 0.0000 0.0003 -0.0046 -0.0032 0.0007 0.0002  
Z -0.0008 0.0005 0.0105 0.0095 0.0017 -0.0005

AT. 148 H X -0.0008 -0.0004 -0.0168 0.0150 -0.0016 -0.0006  
Y 0.0000 -0.0003 0.0046 -0.0032 -0.0007 0.0002  
Z -0.0008 -0.0005 -0.0105 0.0095 -0.0017 -0.0005

AT. 149 H X 0.0006 -0.0007 0.0139 0.0165 -0.0008 0.0009  
Y 0.0001 -0.0001 -0.0001 0.0007 0.0002 0.0002  
Z 0.0001 -0.0000 0.0019 0.0033 0.0008 0.0003

AT. 150 H X 0.0006 0.0007 -0.0139 0.0165 0.0008 0.0009  
Y 0.0001 0.0001 0.0001 0.0007 -0.0002 0.0002  
Z 0.0001 0.0000 -0.0019 0.0033 -0.0008 0.0003

AT. 151 C X -0.0001 0.0001 -0.0025 -0.0025 -0.0000 -0.0000  
Y 0.0001 0.0002 -0.0006 -0.0003 0.0004 -0.0000  
Z 0.0001 -0.0002 0.0008 0.0014 -0.0005 0.0001

AT. 152 C X -0.0001 -0.0001 0.0025 -0.0025 0.0000 -0.0000  
Y 0.0001 -0.0002 0.0006 -0.0003 -0.0004 -0.0000

Z 0.0001 0.0002 -0.0008 0.0014 0.0005 0.0001  
AT. 153 H X 0.0002 -0.0011 0.0141 0.0195 -0.0004 0.0013  
Y 0.0001 -0.0003 0.0044 0.0057 -0.0001 0.0004  
Z 0.0002 -0.0005 0.0017 0.0016 -0.0012 0.0003  
AT. 154 H X 0.0002 0.0011 -0.0141 0.0195 0.0004 0.0013  
Y 0.0001 0.0003 -0.0044 0.0057 0.0001 0.0004  
Z 0.0002 0.0005 -0.0017 0.0016 0.0012 0.0003  
AT. 155 H X 0.0005 0.0000 0.0831 0.0800 -0.0002 -0.0000  
Y -0.0001 -0.0000 0.0247 0.0231 -0.0002 -0.0001  
Z 0.0005 0.0000 0.0047 0.0063 -0.0001 0.0001  
AT. 156 H X 0.0005 -0.0000 -0.0831 0.0800 0.0002 -0.0000  
Y -0.0001 0.0000 -0.0247 0.0231 0.0002 -0.0001  
Z 0.0005 -0.0000 -0.0047 0.0063 0.0001 0.0001  
AT. 157 O X -0.0002 -0.0003 -0.0001 -0.0000 -0.0002 -0.0002  
Y -0.0001 -0.0001 0.0000 -0.0000 0.0001 0.0000  
Z 0.0001 0.0000 0.0001 0.0000 -0.0001 -0.0000  
AT. 158 O X -0.0002 0.0003 0.0001 -0.0000 0.0002 -0.0002  
Y -0.0001 0.0001 -0.0000 -0.0000 -0.0001 0.0000  
Z 0.0001 -0.0000 -0.0001 0.0000 0.0001 -0.0000  
AT. 159 O X -0.0001 0.0001 -0.0000 -0.0000 0.0001 -0.0001  
Y 0.0000 0.0001 -0.0001 0.0001 0.0001 0.0001  
Z 0.0001 0.0001 -0.0001 0.0000 0.0002 0.0000  
AT. 160 O X -0.0001 -0.0001 0.0000 -0.0000 -0.0001 -0.0001  
Y 0.0000 -0.0001 0.0001 0.0001 -0.0001 0.0001  
Z 0.0001 -0.0001 0.0001 0.0000 -0.0002 0.0000  
AT. 161 H X 0.0016 0.0024 0.0002 0.0002 0.0034 0.0041  
Y -0.0003 -0.0006 -0.0001 -0.0001 -0.0007 -0.0010  
Z -0.0007 -0.0001 0.0002 0.0005 0.0028 0.0040  
AT. 162 H X 0.0016 -0.0024 -0.0002 0.0002 -0.0034 0.0041  
Y -0.0003 0.0006 0.0001 -0.0001 0.0007 -0.0010  
Z -0.0007 0.0001 -0.0002 0.0005 -0.0028 0.0040  
AT. 163 H X 0.0001 -0.0009 0.0000 0.0001 -0.0007 -0.0001

|        |     |         |         |         |         |         |         |
|--------|-----|---------|---------|---------|---------|---------|---------|
|        | Y   | 0.0013  | 0.0006  | 0.0010  | -0.0014 | 0.0005  | -0.0008 |
|        | Z   | 0.0003  | 0.0005  | 0.0003  | -0.0004 | 0.0006  | -0.0002 |
| AT.164 | H X | 0.0001  | 0.0009  | -0.0000 | 0.0001  | 0.0007  | -0.0001 |
|        | Y   | 0.0013  | -0.0006 | -0.0010 | -0.0014 | -0.0005 | -0.0008 |
|        | Z   | 0.0003  | -0.0005 | -0.0003 | -0.0004 | -0.0006 | -0.0002 |
| AT.165 | O X | -0.0000 | -0.0001 | -0.0001 | -0.0001 | -0.0001 | 0.0000  |
|        | Y   | -0.0001 | -0.0000 | 0.0000  | 0.0001  | -0.0000 | -0.0001 |
|        | Z   | -0.0000 | -0.0001 | 0.0001  | 0.0001  | 0.0000  | -0.0001 |
| AT.166 | O X | -0.0000 | 0.0001  | 0.0001  | -0.0001 | 0.0001  | 0.0000  |
|        | Y   | -0.0001 | 0.0000  | -0.0000 | 0.0001  | 0.0000  | -0.0001 |
|        | Z   | -0.0000 | 0.0001  | -0.0001 | 0.0001  | -0.0000 | -0.0001 |
| AT.167 | H X | 0.0001  | 0.0003  | 0.0003  | 0.0004  | 0.0002  | 0.0002  |
|        | Y   | -0.0002 | -0.0004 | 0.0000  | 0.0000  | -0.0001 | -0.0006 |
|        | Z   | -0.0006 | -0.0000 | -0.0009 | -0.0010 | -0.0004 | -0.0003 |
| AT.168 | H X | 0.0001  | -0.0003 | -0.0003 | 0.0004  | -0.0002 | 0.0002  |
|        | Y   | -0.0002 | 0.0004  | -0.0000 | 0.0000  | 0.0001  | -0.0006 |
|        | Z   | -0.0006 | 0.0000  | 0.0009  | -0.0010 | 0.0004  | -0.0003 |
| AT.169 | O X | -0.0000 | 0.0001  | 0.0000  | 0.0000  | -0.0000 | 0.0000  |
|        | Y   | 0.0001  | 0.0000  | -0.0000 | 0.0001  | -0.0000 | 0.0001  |
|        | Z   | 0.0000  | 0.0001  | 0.0001  | -0.0001 | 0.0001  | 0.0001  |
| AT.170 | O X | -0.0000 | -0.0001 | -0.0000 | 0.0000  | 0.0000  | 0.0000  |
|        | Y   | 0.0001  | -0.0000 | 0.0000  | 0.0001  | 0.0000  | 0.0001  |
|        | Z   | 0.0000  | -0.0001 | -0.0001 | -0.0001 | -0.0001 | 0.0001  |
| AT.171 | H X | 0.0014  | -0.0013 | 0.0009  | 0.0001  | 0.0010  | -0.0001 |
|        | Y   | 0.0007  | -0.0006 | 0.0003  | 0.0003  | 0.0005  | -0.0002 |
|        | Z   | -0.0003 | -0.0002 | -0.0004 | 0.0008  | -0.0002 | -0.0003 |
| AT.172 | H X | 0.0014  | 0.0013  | -0.0009 | 0.0001  | -0.0010 | -0.0001 |
|        | Y   | 0.0007  | 0.0006  | -0.0003 | 0.0003  | -0.0005 | -0.0002 |
|        | Z   | -0.0003 | 0.0002  | 0.0004  | 0.0008  | 0.0002  | -0.0003 |

FREQ(CM\*\*-1) 1083.47 1084.05 1086.65 1087.91 1092.78 1096.56

AT. 1 I X 0.0000 0.0000 0.0000 0.0001 -0.0000 -0.0000  
Y 0.0000 -0.0000 -0.0000 -0.0001 0.0000 -0.0000  
Z -0.0000 -0.0000 -0.0001 -0.0001 0.0000 -0.0000

AT. 2 I X 0.0000 -0.0000 0.0000 -0.0001 0.0000 -0.0000  
Y 0.0000 0.0000 -0.0000 0.0001 -0.0000 -0.0000  
Z -0.0000 0.0000 -0.0001 0.0001 -0.0000 -0.0000

AT. 3 I X -0.0000 -0.0000 -0.0001 -0.0001 0.0000 0.0000  
Y -0.0001 -0.0001 -0.0004 -0.0004 0.0000 0.0000  
Z -0.0000 -0.0000 -0.0000 -0.0000 0.0000 0.0000

AT. 4 I X -0.0000 0.0000 -0.0001 0.0001 -0.0000 0.0000  
Y -0.0001 0.0001 -0.0004 0.0004 -0.0000 0.0000  
Z -0.0000 0.0000 -0.0000 0.0000 -0.0000 0.0000

AT. 5 O X -0.0000 -0.0004 -0.0005 -0.0012 0.0001 -0.0001  
Y 0.0002 0.0003 0.0009 0.0011 -0.0001 -0.0002  
Z -0.0001 -0.0003 -0.0004 -0.0003 -0.0001 -0.0006

AT. 6 O X -0.0000 0.0004 -0.0005 0.0012 -0.0001 -0.0001  
Y 0.0002 -0.0003 0.0009 -0.0011 0.0001 -0.0002  
Z -0.0001 0.0003 -0.0004 0.0003 0.0001 -0.0006

AT. 7 O X -0.0009 -0.0005 -0.0032 -0.0032 0.0002 0.0006  
Y -0.0001 -0.0003 -0.0005 -0.0004 0.0001 0.0003  
Z 0.0004 0.0005 0.0014 0.0014 -0.0001 -0.0004

AT. 8 O X -0.0009 0.0005 -0.0032 0.0032 -0.0002 0.0006  
Y -0.0001 0.0003 -0.0005 0.0004 -0.0001 0.0003  
Z 0.0004 -0.0005 0.0014 -0.0014 0.0001 -0.0004

AT. 9 N X 0.0005 0.0007 0.0014 0.0022 -0.0003 -0.0032  
Y 0.0002 -0.0002 0.0006 -0.0001 0.0000 0.0016  
Z 0.0007 0.0034 0.0056 0.0080 -0.0003 0.0015

AT. 10 N X 0.0005 -0.0007 0.0014 -0.0022 0.0003 -0.0032  
Y 0.0002 0.0002 0.0006 0.0001 -0.0000 0.0016  
Z 0.0007 -0.0034 0.0056 -0.0080 0.0003 0.0015

AT. 11 N X 0.0007 0.0001 0.0010 0.0006 0.0002 0.0035  
Y 0.0020 0.0024 0.0078 0.0082 -0.0005 -0.0030



Z -0.0045 -0.0032 -0.0157 -0.0151 0.0008 0.0006  
AT. 12 N X 0.0007 -0.0001 0.0010 -0.0006 -0.0002 0.0035  
Y 0.0020 -0.0024 0.0078 -0.0082 0.0005 -0.0030  
Z -0.0045 0.0032 -0.0157 0.0151 -0.0008 0.0006  
AT. 13 C X 0.0002 0.0010 0.0015 0.0027 -0.0000 0.0008  
Y -0.0006 -0.0006 -0.0019 -0.0013 0.0001 -0.0000  
Z 0.0004 0.0007 0.0016 0.0010 -0.0001 0.0004  
AT. 14 C X 0.0002 -0.0010 0.0015 -0.0027 0.0000 0.0008  
Y -0.0006 0.0006 -0.0019 0.0013 -0.0001 -0.0000  
Z 0.0004 -0.0007 0.0016 -0.0010 0.0001 0.0004  
AT. 15 C X 0.0001 -0.0010 -0.0003 -0.0028 -0.0001 -0.0005  
Y 0.0003 0.0003 0.0009 0.0004 -0.0000 0.0002  
Z -0.0003 -0.0021 -0.0029 -0.0049 0.0003 -0.0003  
AT. 16 C X 0.0001 0.0010 -0.0003 0.0028 0.0001 -0.0005  
Y 0.0003 -0.0003 0.0009 -0.0004 0.0000 0.0002  
Z -0.0003 0.0021 -0.0029 0.0049 -0.0003 -0.0003  
AT. 17 H X -0.0014 0.0155 0.0145 0.0401 -0.0018 0.0034  
Y -0.0006 -0.0013 -0.0033 -0.0018 0.0005 0.0005  
Z 0.0002 0.0067 0.0085 0.0155 -0.0010 0.0011  
AT. 18 H X -0.0014 -0.0155 0.0145 -0.0401 0.0018 0.0034  
Y -0.0006 0.0013 -0.0033 0.0018 -0.0005 0.0005  
Z 0.0002 -0.0067 0.0085 -0.0155 0.0010 0.0011  
AT. 19 H X -0.0035 -0.0135 -0.0275 -0.0297 0.0030 -0.0005  
Y 0.0007 0.0058 0.0084 0.0148 -0.0007 0.0016  
Z -0.0012 -0.0038 -0.0082 -0.0075 0.0009 0.0002  
AT. 20 H X -0.0035 0.0135 -0.0275 0.0297 -0.0030 -0.0005  
Y 0.0007 -0.0058 0.0084 -0.0148 0.0007 0.0016  
Z -0.0012 0.0038 -0.0082 0.0075 -0.0009 0.0002  
AT. 21 C X 0.0022 0.0017 0.0084 0.0084 -0.0006 -0.0016  
Y 0.0018 0.0011 0.0066 0.0063 -0.0003 -0.0009  
Z 0.0005 0.0002 0.0009 0.0006 -0.0001 0.0005  
AT. 22 C X 0.0022 -0.0017 0.0084 -0.0084 0.0006 -0.0016

Y 0.0018 -0.0011 0.0066 -0.0063 0.0003 -0.0009  
Z 0.0005 -0.0002 0.0009 -0.0006 0.0001 0.0005  
AT. 23 C X -0.0030 -0.0020 -0.0107 -0.0103 0.0007 0.0013  
Y -0.0029 -0.0019 -0.0103 -0.0099 0.0005 0.0008  
Z 0.0022 0.0016 0.0080 0.0078 -0.0004 -0.0009  
AT. 24 C X -0.0030 0.0020 -0.0107 0.0103 -0.0007 0.0013  
Y -0.0029 0.0019 -0.0103 0.0099 -0.0005 0.0008  
Z 0.0022 -0.0016 0.0080 -0.0078 0.0004 -0.0009  
AT. 25 H X 0.0408 0.0268 0.1478 0.1431 -0.0084 -0.0148  
Y 0.0061 0.0041 0.0222 0.0216 -0.0013 -0.0024  
Z -0.0090 -0.0060 -0.0328 -0.0319 0.0017 0.0026  
AT. 26 H X 0.0408 -0.0268 0.1478 -0.1431 0.0084 -0.0148  
Y 0.0061 -0.0041 0.0222 -0.0216 0.0013 -0.0024  
Z -0.0090 0.0060 -0.0328 0.0319 -0.0017 0.0026  
AT. 27 H X -0.0145 -0.0109 -0.0592 -0.0594 0.0021 0.0043  
Y 0.0086 0.0056 0.0295 0.0281 -0.0019 -0.0038  
Z 0.0106 0.0073 0.0388 0.0377 -0.0020 -0.0040  
AT. 28 H X -0.0145 0.0109 -0.0592 0.0594 -0.0021 0.0043  
Y 0.0086 -0.0056 0.0295 -0.0281 0.0019 -0.0038  
Z 0.0106 -0.0073 0.0388 -0.0377 0.0020 -0.0040  
AT. 29 C X 0.0001 -0.0004 0.0002 -0.0007 0.0005 0.0062  
Y -0.0004 0.0006 -0.0004 -0.0004 0.0006 0.0075  
Z -0.0007 -0.0019 -0.0029 -0.0042 0.0007 0.0058  
AT. 30 C X 0.0001 0.0004 0.0002 0.0007 -0.0005 0.0062  
Y -0.0004 -0.0006 -0.0004 0.0004 -0.0006 0.0075  
Z -0.0007 0.0019 -0.0029 0.0042 -0.0007 0.0058  
AT. 31 H X 0.0003 0.0010 0.0057 0.0080 -0.0008 0.0014  
Y 0.0007 0.0026 0.0037 0.0043 0.0001 0.0093  
Z 0.0011 0.0022 0.0068 0.0085 -0.0010 0.0056  
AT. 32 H X 0.0003 -0.0010 0.0057 -0.0080 0.0008 0.0014  
Y 0.0007 -0.0026 0.0037 -0.0043 -0.0001 0.0093  
Z 0.0011 -0.0022 0.0068 -0.0085 0.0010 0.0056

AT. 33 H X -0.0008 -0.0105 -0.0139 -0.0213 0.0014 -0.0013  
Y -0.0015 -0.0034 -0.0064 -0.0078 -0.0001 0.0009  
Z -0.0008 -0.0069 -0.0097 -0.0147 0.0016 0.0038

AT. 34 H X -0.0008 0.0105 -0.0139 0.0213 -0.0014 -0.0013  
Y -0.0015 0.0034 -0.0064 0.0078 0.0001 0.0009  
Z -0.0008 0.0069 -0.0097 0.0147 -0.0016 0.0038

AT. 35 C X -0.0011 0.0030 -0.0012 0.0014 -0.0008 -0.0116  
Y 0.0006 -0.0015 0.0005 0.0009 -0.0010 -0.0157  
Z 0.0005 0.0016 0.0014 0.0014 -0.0002 -0.0025

AT. 36 C X -0.0011 -0.0030 -0.0012 -0.0014 0.0008 -0.0116  
Y 0.0006 0.0015 0.0005 -0.0009 0.0010 -0.0157  
Z 0.0005 -0.0016 0.0014 -0.0014 0.0002 -0.0025

AT. 37 C X 0.0009 -0.0000 0.0032 0.0021 0.0002 0.0043  
Y -0.0007 -0.0015 -0.0037 -0.0048 0.0008 0.0095  
Z 0.0013 0.0010 0.0049 0.0055 -0.0006 -0.0050

AT. 38 C X 0.0009 0.0000 0.0032 -0.0021 -0.0002 0.0043  
Y -0.0007 0.0015 -0.0037 0.0048 -0.0008 0.0095  
Z 0.0013 -0.0010 0.0049 -0.0055 0.0006 -0.0050

AT. 39 H X 0.0001 0.0007 0.0014 0.0008 0.0002 -0.0006  
Y -0.0110 -0.0059 -0.0351 -0.0333 0.0020 0.0054  
Z 0.0053 0.0033 0.0175 0.0170 -0.0011 -0.0064

AT. 40 H X 0.0001 -0.0007 0.0014 -0.0008 -0.0002 -0.0006  
Y -0.0110 0.0059 -0.0351 0.0333 -0.0020 0.0054  
Z 0.0053 -0.0033 0.0175 -0.0170 0.0011 -0.0064

AT. 41 H X 0.0003 -0.0017 0.0007 -0.0004 0.0006 0.0096  
Y 0.0028 0.0042 0.0104 0.0106 -0.0008 0.0001  
Z -0.0011 -0.0020 -0.0048 -0.0051 0.0002 -0.0034

AT. 42 H X 0.0003 0.0017 0.0007 0.0004 -0.0006 0.0096  
Y 0.0028 -0.0042 0.0104 -0.0106 0.0008 0.0001  
Z -0.0011 0.0020 -0.0048 0.0051 -0.0002 -0.0034

AT. 43 C X -0.0009 -0.0001 -0.0019 -0.0012 -0.0003 -0.0050  
Y -0.0002 -0.0007 -0.0007 -0.0007 -0.0006 -0.0080

Z 0.0013 0.0011 0.0043 0.0037 0.0000 0.0040  
AT. 44 C X -0.0009 0.0001 -0.0019 0.0012 0.0003 -0.0050  
Y -0.0002 0.0007 -0.0007 0.0007 0.0006 -0.0080  
Z 0.0013 -0.0011 0.0043 -0.0037 -0.0000 0.0040  
AT. 45 H X 0.0042 0.0022 0.0125 0.0124 -0.0003 0.0018  
Y 0.0016 0.0020 0.0052 0.0063 -0.0008 -0.0115  
Z -0.0044 -0.0035 -0.0124 -0.0135 0.0003 0.0027  
AT. 46 H X 0.0042 -0.0022 0.0125 -0.0124 0.0003 0.0018  
Y 0.0016 -0.0020 0.0052 -0.0063 0.0008 -0.0115  
Z -0.0044 0.0035 -0.0124 0.0135 -0.0003 0.0027  
AT. 47 H X -0.0116 -0.0110 -0.0407 -0.0403 0.0019 0.0029  
Y -0.0040 -0.0053 -0.0164 -0.0165 0.0012 -0.0002  
Z 0.0128 0.0119 0.0430 0.0426 -0.0012 0.0013  
AT. 48 H X -0.0116 0.0110 -0.0407 0.0403 -0.0019 0.0029  
Y -0.0040 0.0053 -0.0164 0.0165 -0.0012 -0.0002  
Z 0.0128 -0.0119 0.0430 -0.0426 0.0012 0.0013  
AT. 49 C X 0.0023 0.0032 0.0085 0.0070 0.0002 0.0099  
Y -0.0003 -0.0009 -0.0015 -0.0020 0.0010 0.0141  
Z -0.0004 -0.0028 -0.0022 -0.0025 0.0004 0.0022  
AT. 50 C X 0.0023 -0.0032 0.0085 -0.0070 -0.0002 0.0099  
Y -0.0003 0.0009 -0.0015 0.0020 -0.0010 0.0141  
Z -0.0004 0.0028 -0.0022 0.0025 -0.0004 0.0022  
AT. 51 C X -0.0014 -0.0006 -0.0036 -0.0026 -0.0003 -0.0051  
Y -0.0002 -0.0005 -0.0009 -0.0005 -0.0003 -0.0063  
Z -0.0006 -0.0013 -0.0034 -0.0036 -0.0001 -0.0056  
AT. 52 C X -0.0014 0.0006 -0.0036 0.0026 0.0003 -0.0051  
Y -0.0002 0.0005 -0.0009 0.0005 0.0003 -0.0063  
Z -0.0006 0.0013 -0.0034 0.0036 0.0001 -0.0056  
AT. 53 H X -0.0020 -0.0011 -0.0067 -0.0065 -0.0001 -0.0024  
Y -0.0015 -0.0054 -0.0095 -0.0147 0.0008 -0.0008  
Z -0.0010 -0.0061 -0.0078 -0.0135 0.0008 -0.0042  
AT. 54 H X -0.0020 0.0011 -0.0067 0.0065 0.0001 -0.0024

Y -0.0015 0.0054 -0.0095 0.0147 -0.0008 -0.0008  
Z -0.0010 0.0061 -0.0078 0.0135 -0.0008 -0.0042  
AT. 55 H X 0.0003 -0.0001 0.0014 0.0017 -0.0006 -0.0083  
Y 0.0009 0.0041 0.0054 0.0088 -0.0008 -0.0031  
Z 0.0019 0.0049 0.0081 0.0113 -0.0009 -0.0037  
AT. 56 H X 0.0003 0.0001 0.0014 -0.0017 0.0006 -0.0083  
Y 0.0009 -0.0041 0.0054 -0.0088 0.0008 -0.0031  
Z 0.0019 -0.0049 0.0081 -0.0113 0.0009 -0.0037  
AT. 57 C X 0.0006 -0.0018 0.0006 -0.0012 0.0006 0.0077  
Y -0.0005 0.0006 -0.0010 -0.0014 0.0007 0.0107  
Z -0.0007 -0.0007 -0.0017 -0.0014 0.0001 0.0018  
AT. 58 C X 0.0006 0.0018 0.0006 0.0012 -0.0006 0.0077  
Y -0.0005 -0.0006 -0.0010 0.0014 -0.0007 0.0107  
Z -0.0007 0.0007 -0.0017 0.0014 -0.0001 0.0018  
AT. 59 H X -0.0007 0.0001 -0.0007 0.0036 -0.0025 -0.0366  
Y 0.0013 0.0006 0.0026 0.0001 0.0008 0.0132  
Z 0.0012 0.0003 0.0027 0.0040 -0.0019 -0.0247  
AT. 60 H X -0.0007 -0.0001 -0.0007 -0.0036 0.0025 -0.0366  
Y 0.0013 -0.0006 0.0026 -0.0001 -0.0008 0.0132  
Z 0.0012 -0.0003 0.0027 -0.0040 0.0019 -0.0247  
AT. 61 H X 0.0029 -0.0012 0.0057 0.0046 -0.0014 -0.0187  
Y -0.0022 0.0025 -0.0036 0.0016 -0.0016 -0.0205  
Z 0.0020 -0.0011 0.0037 0.0018 -0.0002 -0.0031  
AT. 62 H X 0.0029 0.0012 0.0057 -0.0046 0.0014 -0.0187  
Y -0.0022 -0.0025 -0.0036 -0.0016 0.0016 -0.0205  
Z 0.0020 0.0011 0.0037 -0.0018 0.0002 -0.0031  
AT. 63 H X -0.0019 -0.0029 -0.0058 -0.0069 0.0017 0.0269  
Y 0.0007 0.0031 0.0041 0.0073 -0.0025 -0.0365  
Z 0.0008 -0.0018 0.0001 -0.0032 0.0018 0.0221  
AT. 64 H X -0.0019 0.0029 -0.0058 0.0069 -0.0017 0.0269  
Y 0.0007 -0.0031 0.0041 -0.0073 0.0025 -0.0365  
Z 0.0008 0.0018 0.0001 0.0032 -0.0018 0.0221

AT. 65 C X -0.0017 -0.0020 -0.0059 -0.0049 -0.0002 -0.0067  
Y -0.0000 0.0001 -0.0004 -0.0002 -0.0007 -0.0101  
Z -0.0001 0.0015 0.0004 0.0007 -0.0002 -0.0009

AT. 66 C X -0.0017 0.0020 -0.0059 0.0049 0.0002 -0.0067  
Y -0.0000 -0.0001 -0.0004 0.0002 0.0007 -0.0101  
Z -0.0001 -0.0015 0.0004 -0.0007 0.0002 -0.0009

AT. 67 H X 0.0030 0.0003 0.0103 0.0077 0.0013 0.0269  
Y -0.0014 0.0010 -0.0046 -0.0032 -0.0001 -0.0029  
Z -0.0027 -0.0011 -0.0090 -0.0067 -0.0020 -0.0352

AT. 68 H X 0.0030 -0.0003 0.0103 -0.0077 -0.0013 0.0269  
Y -0.0014 -0.0010 -0.0046 0.0032 0.0001 -0.0029  
Z -0.0027 0.0011 -0.0090 0.0067 0.0020 -0.0352

AT. 69 H X -0.0011 -0.0004 -0.0037 -0.0035 0.0013 0.0159  
Y 0.0035 0.0028 0.0110 0.0084 0.0012 0.0205  
Z 0.0043 0.0026 0.0135 0.0111 -0.0003 0.0006

AT. 70 H X -0.0011 0.0004 -0.0037 0.0035 -0.0013 0.0159  
Y 0.0035 -0.0028 0.0110 -0.0084 -0.0012 0.0205  
Z 0.0043 -0.0026 0.0135 -0.0111 0.0003 0.0006

AT. 71 H X 0.0009 -0.0023 0.0003 -0.0004 -0.0002 -0.0135  
Y 0.0010 0.0027 0.0060 0.0051 0.0010 0.0218  
Z 0.0032 0.0048 0.0136 0.0113 0.0019 0.0359

AT. 72 H X 0.0009 0.0023 0.0003 0.0004 0.0002 -0.0135  
Y 0.0010 -0.0027 0.0060 -0.0051 -0.0010 0.0218  
Z 0.0032 -0.0048 0.0136 -0.0113 -0.0019 0.0359

AT. 73 C X 0.0005 0.0006 0.0010 0.0012 -0.0000 -0.0001  
Y 0.0010 0.0010 0.0039 0.0039 -0.0001 -0.0002  
Z -0.0010 -0.0000 -0.0025 -0.0016 -0.0000 -0.0001

AT. 74 C X 0.0005 -0.0006 0.0010 -0.0012 0.0000 -0.0001  
Y 0.0010 -0.0010 0.0039 -0.0039 0.0001 -0.0002  
Z -0.0010 0.0000 -0.0025 0.0016 0.0000 -0.0001

AT. 75 H X -0.0032 -0.0057 -0.0137 -0.0065 -0.0051 -0.0897  
Y 0.0017 0.0035 0.0083 0.0030 0.0037 0.0646

Z -0.0027 -0.0012 -0.0071 -0.0083 0.0017 0.0239  
AT. 76 H X -0.0032 0.0057 -0.0137 0.0065 0.0051 -0.0897  
Y 0.0017 -0.0035 0.0083 -0.0030 -0.0037 0.0646  
Z -0.0027 0.0012 -0.0071 0.0083 -0.0017 0.0239  
AT. 77 H X 0.0010 -0.0047 0.0023 -0.0058 0.0054 0.0851  
Y -0.0012 0.0029 -0.0035 0.0024 -0.0042 -0.0598  
Z 0.0005 0.0032 0.0030 0.0064 -0.0013 -0.0240  
AT. 78 H X 0.0010 0.0047 0.0023 0.0058 -0.0054 0.0851  
Y -0.0012 -0.0029 -0.0035 -0.0024 0.0042 -0.0598  
Z 0.0005 -0.0032 0.0030 -0.0064 0.0013 -0.0240  
AT. 79 I X 0.0000 -0.0000 -0.0000 0.0000 0.0002 0.0000  
Y -0.0000 -0.0000 0.0000 0.0000 0.0002 0.0000  
Z -0.0000 -0.0001 -0.0000 0.0000 0.0002 0.0000  
AT. 80 I X 0.0000 0.0000 -0.0000 -0.0000 -0.0002 0.0000  
Y -0.0000 0.0000 0.0000 -0.0000 -0.0002 0.0000  
Z -0.0000 0.0001 -0.0000 -0.0000 -0.0002 0.0000  
AT. 81 I X 0.0001 0.0001 -0.0000 -0.0000 0.0000 0.0000  
Y 0.0003 0.0003 -0.0001 -0.0001 0.0001 0.0000  
Z -0.0001 -0.0001 0.0000 0.0000 -0.0000 -0.0000  
AT. 82 I X 0.0001 -0.0001 -0.0000 0.0000 -0.0000 0.0000  
Y 0.0003 -0.0003 -0.0001 0.0001 -0.0001 0.0000  
Z -0.0001 0.0001 0.0000 -0.0000 0.0000 -0.0000  
AT. 83 O X 0.0007 0.0000 -0.0001 -0.0003 -0.0042 -0.0007  
Y -0.0003 -0.0005 0.0001 0.0001 -0.0002 0.0000  
Z 0.0002 -0.0004 -0.0000 0.0001 0.0007 0.0000  
AT. 84 O X 0.0007 -0.0000 -0.0001 0.0003 0.0042 -0.0007  
Y -0.0003 0.0005 0.0001 -0.0001 0.0002 0.0000  
Z 0.0002 0.0004 -0.0000 -0.0001 -0.0007 0.0000  
AT. 85 O X -0.0037 -0.0037 0.0010 0.0007 -0.0011 -0.0001  
Y 0.0007 0.0005 -0.0002 -0.0002 0.0002 0.0000  
Z -0.0014 -0.0012 0.0004 0.0004 -0.0007 -0.0001  
AT. 86 O X -0.0037 0.0037 0.0010 -0.0007 0.0011 -0.0001

Y 0.0007 -0.0005 -0.0002 0.0002 -0.0002 0.0000  
Z -0.0014 0.0012 0.0004 -0.0004 0.0007 -0.0001  
AT. 87 N X 0.0012 0.0007 -0.0003 -0.0000 -0.0001 -0.0001  
Y -0.0012 -0.0017 0.0004 0.0005 0.0009 0.0001  
Z -0.0001 0.0022 0.0002 -0.0014 -0.0176 -0.0023  
AT. 88 N X 0.0012 -0.0007 -0.0003 0.0000 0.0001 -0.0001  
Y -0.0012 0.0017 0.0004 -0.0005 -0.0009 0.0001  
Z -0.0001 -0.0022 0.0002 0.0014 0.0176 -0.0023  
AT. 89 N X 0.0018 0.0022 -0.0002 -0.0003 -0.0003 -0.0000  
Y -0.0093 -0.0087 0.0023 0.0017 -0.0046 -0.0005  
Z 0.0167 0.0164 -0.0046 -0.0038 0.0044 0.0004  
AT. 90 N X 0.0018 -0.0022 -0.0002 0.0003 0.0003 -0.0000  
Y -0.0093 0.0087 0.0023 -0.0017 0.0046 -0.0005  
Z 0.0167 -0.0164 -0.0046 0.0038 -0.0044 0.0004  
AT. 91 C X 0.0010 0.0007 -0.0002 -0.0000 0.0047 0.0006  
Y 0.0022 0.0023 -0.0004 -0.0010 -0.0065 -0.0013  
Z -0.0022 0.0000 0.0004 0.0000 -0.0014 -0.0000  
AT. 92 C X 0.0010 -0.0007 -0.0002 0.0000 -0.0047 0.0006  
Y 0.0022 -0.0023 -0.0004 0.0010 0.0065 -0.0013  
Z -0.0022 -0.0000 0.0004 -0.0000 0.0014 -0.0000  
AT. 93 C X -0.0002 0.0002 -0.0001 -0.0001 -0.0036 -0.0006  
Y -0.0011 -0.0015 0.0002 0.0007 0.0052 0.0011  
Z -0.0006 -0.0019 0.0000 0.0012 0.0128 0.0018  
AT. 94 C X -0.0002 -0.0002 -0.0001 0.0001 0.0036 -0.0006  
Y -0.0011 0.0015 0.0002 -0.0007 -0.0052 0.0011  
Z -0.0006 0.0019 0.0000 -0.0012 -0.0128 0.0018  
AT. 95 H X -0.0192 -0.0304 0.0026 0.0150 0.1252 0.0206  
Y 0.0046 0.0100 -0.0008 -0.0043 -0.0341 -0.0063  
Z 0.0106 0.0127 -0.0013 -0.0073 -0.0655 -0.0094  
AT. 96 H X -0.0192 0.0304 0.0026 -0.0150 -0.1252 0.0206  
Y 0.0046 -0.0100 -0.0008 0.0043 0.0341 -0.0063  
Z 0.0106 -0.0127 -0.0013 0.0073 0.0655 -0.0094



AT. 97 H X 0.0035 0.0176 0.0012 -0.0097 -0.0906 -0.0119  
Y 0.0013 0.0021 -0.0005 -0.0011 -0.0136 -0.0032  
Z -0.0010 -0.0059 -0.0005 0.0034 0.0322 0.0039

AT. 98 H X 0.0035 -0.0176 0.0012 0.0097 0.0906 -0.0119  
Y 0.0013 -0.0021 -0.0005 0.0011 0.0136 -0.0032  
Z -0.0010 0.0059 -0.0005 -0.0034 -0.0322 0.0039

AT. 99 C X 0.0051 0.0049 -0.0014 -0.0010 0.0029 0.0003  
Y -0.0052 -0.0050 0.0017 0.0015 -0.0010 -0.0001  
Z -0.0015 -0.0017 0.0001 0.0001 0.0016 0.0004

AT. 100 C X 0.0051 -0.0049 -0.0014 0.0010 -0.0029 0.0003  
Y -0.0052 0.0050 0.0017 -0.0015 0.0010 -0.0001  
Z -0.0015 0.0017 0.0001 -0.0001 -0.0016 0.0004

AT. 101 C X -0.0069 -0.0066 0.0021 0.0017 -0.0027 -0.0002  
Y 0.0114 0.0111 -0.0031 -0.0026 0.0027 0.0002  
Z -0.0075 -0.0074 0.0022 0.0018 -0.0027 -0.0003

AT. 102 C X -0.0069 0.0066 0.0021 -0.0017 0.0027 -0.0002  
Y 0.0114 -0.0111 -0.0031 0.0026 -0.0027 0.0002  
Z -0.0075 0.0074 0.0022 -0.0018 0.0027 -0.0003

AT. 103 H X 0.1352 0.1326 -0.0377 -0.0312 0.0309 0.0017  
Y -0.0516 -0.0505 0.0145 0.0119 -0.0123 -0.0007  
Z 0.0310 0.0312 -0.0083 -0.0069 0.0079 0.0007

AT. 104 H X 0.1352 -0.1326 -0.0377 0.0312 -0.0309 0.0017  
Y -0.0516 0.0505 0.0145 -0.0119 0.0123 -0.0007  
Z 0.0310 -0.0312 -0.0083 0.0069 -0.0079 0.0007

AT. 105 H X -0.0831 -0.0812 0.0224 0.0180 -0.0242 -0.0020  
Y -0.0089 -0.0089 0.0029 0.0024 -0.0018 -0.0002  
Z -0.0307 -0.0300 0.0086 0.0069 -0.0090 -0.0008

AT. 106 H X -0.0831 0.0812 0.0224 -0.0180 0.0242 -0.0020  
Y -0.0089 0.0089 0.0029 -0.0024 0.0018 -0.0002  
Z -0.0307 0.0300 0.0086 -0.0069 0.0090 -0.0008

AT. 107 C X 0.0014 0.0025 -0.0002 -0.0009 -0.0027 -0.0004  
Y 0.0021 0.0028 -0.0011 -0.0003 -0.0003 0.0001

Z 0.0024 0.0006 -0.0008 -0.0000 0.0056 0.0006  
AT.108 C X 0.0014 -0.0025 -0.0002 0.0009 0.0027 -0.0004  
Y 0.0021 -0.0028 -0.0011 0.0003 0.0003 0.0001  
Z 0.0024 -0.0006 -0.0008 0.0000 -0.0056 0.0006  
AT.109 H X -0.0004 0.0025 -0.0011 0.0002 0.0108 0.0022  
Y -0.0016 0.0001 -0.0000 0.0004 -0.0117 -0.0014  
Z -0.0035 -0.0041 0.0013 0.0009 -0.0191 -0.0029  
AT.110 H X -0.0004 -0.0025 -0.0011 -0.0002 -0.0108 0.0022  
Y -0.0016 -0.0001 -0.0000 -0.0004 0.0117 -0.0014  
Z -0.0035 0.0041 0.0013 -0.0009 0.0191 -0.0029  
AT.111 H X 0.0043 0.0090 -0.0004 -0.0037 -0.0369 -0.0051  
Y 0.0043 0.0010 -0.0012 -0.0003 0.0198 0.0022  
Z -0.0015 -0.0064 -0.0005 0.0032 0.0396 0.0055  
AT.112 H X 0.0043 -0.0090 -0.0004 0.0037 0.0369 -0.0051  
Y 0.0043 -0.0010 -0.0012 0.0003 -0.0198 0.0022  
Z -0.0015 0.0064 -0.0005 -0.0032 -0.0396 0.0055  
AT.113 C X -0.0070 -0.0090 0.0014 0.0021 0.0078 0.0012  
Y -0.0025 -0.0026 0.0017 -0.0003 -0.0028 -0.0004  
Z -0.0001 0.0012 -0.0001 0.0001 0.0015 0.0003  
AT.114 C X -0.0070 0.0090 0.0014 -0.0021 -0.0078 0.0012  
Y -0.0025 0.0026 0.0017 0.0003 0.0028 -0.0004  
Z -0.0001 -0.0012 -0.0001 -0.0001 -0.0015 0.0003  
AT.115 C X 0.0048 0.0049 -0.0011 -0.0013 -0.0021 -0.0004  
Y 0.0019 0.0010 -0.0007 0.0004 0.0050 0.0006  
Z -0.0057 -0.0057 0.0019 0.0010 -0.0041 -0.0005  
AT.116 C X 0.0048 -0.0049 -0.0011 0.0013 0.0021 -0.0004  
Y 0.0019 -0.0010 -0.0007 -0.0004 -0.0050 0.0006  
Z -0.0057 0.0057 0.0019 -0.0010 0.0041 -0.0005  
AT.117 H X 0.0126 0.0120 -0.0030 -0.0028 -0.0030 -0.0007  
Y 0.0393 0.0401 -0.0107 -0.0079 0.0091 0.0008  
Z -0.0227 -0.0224 0.0062 0.0046 -0.0040 -0.0002  
AT.118 H X 0.0126 -0.0120 -0.0030 0.0028 0.0030 -0.0007

Y 0.0393 -0.0401 -0.0107 0.0079 -0.0091 0.0008  
Z -0.0227 0.0224 0.0062 -0.0046 0.0040 -0.0002  
AT. 119 H X -0.0033 -0.0015 -0.0007 -0.0012 -0.0033 -0.0001  
Y -0.0105 -0.0098 0.0005 0.0009 -0.0018 0.0002  
Z 0.0034 0.0027 0.0006 0.0003 0.0023 0.0001  
AT. 120 H X -0.0033 0.0015 -0.0007 0.0012 0.0033 -0.0001  
Y -0.0105 0.0098 0.0005 -0.0009 0.0018 0.0002  
Z 0.0034 -0.0027 0.0006 -0.0003 -0.0023 0.0001  
AT. 121 C X -0.0034 -0.0038 0.0008 0.0009 0.0015 0.0002  
Y -0.0001 -0.0001 0.0005 -0.0000 0.0013 0.0002  
Z -0.0041 -0.0040 0.0010 0.0011 -0.0001 -0.0000  
AT. 122 C X -0.0034 0.0038 0.0008 -0.0009 -0.0015 0.0002  
Y -0.0001 0.0001 0.0005 0.0000 -0.0013 0.0002  
Z -0.0041 0.0040 0.0010 -0.0011 0.0001 -0.0000  
AT. 123 H X 0.0139 0.0154 -0.0031 -0.0024 0.0076 0.0007  
Y -0.0099 -0.0101 0.0029 0.0015 -0.0066 -0.0008  
Z 0.0099 0.0105 -0.0024 -0.0012 0.0092 0.0011  
AT. 124 H X 0.0139 -0.0154 -0.0031 0.0024 -0.0076 0.0007  
Y -0.0099 0.0101 0.0029 -0.0015 0.0066 -0.0008  
Z 0.0099 -0.0105 -0.0024 0.0012 -0.0092 0.0011  
AT. 125 H X -0.0424 -0.0407 0.0109 0.0087 -0.0130 -0.0010  
Y 0.0296 0.0273 -0.0074 -0.0060 0.0113 0.0010  
Z -0.0365 -0.0350 0.0093 0.0076 -0.0125 -0.0011  
AT. 126 H X -0.0424 0.0407 0.0109 -0.0087 0.0130 -0.0010  
Y 0.0296 -0.0273 -0.0074 0.0060 -0.0113 0.0010  
Z -0.0365 0.0350 0.0093 -0.0076 0.0125 -0.0011  
AT. 127 C X 0.0071 0.0057 -0.0017 -0.0022 -0.0035 -0.0007  
Y 0.0000 -0.0003 -0.0007 0.0001 0.0004 0.0001  
Z -0.0010 -0.0026 0.0000 -0.0001 -0.0007 -0.0002  
AT. 128 C X 0.0071 -0.0057 -0.0017 0.0022 0.0035 -0.0007  
Y 0.0000 0.0003 -0.0007 -0.0001 -0.0004 0.0001  
Z -0.0010 0.0026 0.0000 0.0001 0.0007 -0.0002

AT. 129 C X -0.0043 -0.0047 0.0008 0.0015 0.0050 0.0008  
Y 0.0011 0.0012 -0.0000 -0.0004 -0.0009 -0.0001  
Z 0.0017 0.0016 -0.0002 -0.0002 0.0047 0.0006

AT. 130 C X -0.0043 0.0047 0.0008 -0.0015 -0.0050 0.0008  
Y 0.0011 -0.0012 -0.0000 0.0004 0.0009 -0.0001  
Z 0.0017 -0.0016 -0.0002 0.0002 -0.0047 0.0006

AT. 131 H X -0.0070 -0.0101 0.0013 0.0035 0.0168 0.0024  
Y 0.0028 -0.0005 -0.0005 0.0023 0.0328 0.0043  
Z -0.0013 -0.0066 0.0003 0.0037 0.0354 0.0047

AT. 132 H X -0.0070 0.0101 0.0013 -0.0035 -0.0168 0.0024  
Y 0.0028 0.0005 -0.0005 -0.0023 -0.0328 0.0043  
Z -0.0013 0.0066 0.0003 -0.0037 -0.0354 0.0047

AT. 133 H X 0.0017 0.0024 -0.0005 -0.0009 -0.0069 -0.0009  
Y -0.0010 0.0009 0.0004 -0.0005 -0.0130 -0.0017  
Z -0.0043 -0.0022 0.0011 0.0006 -0.0097 -0.0011

AT. 134 H X 0.0017 -0.0024 -0.0005 0.0009 0.0069 -0.0009  
Y -0.0010 -0.0009 0.0004 0.0005 0.0130 -0.0017  
Z -0.0043 0.0022 0.0011 -0.0006 0.0097 -0.0011

AT. 135 C X 0.0041 0.0052 -0.0008 -0.0011 -0.0050 -0.0007  
Y 0.0019 0.0019 -0.0010 -0.0002 0.0032 0.0004  
Z 0.0014 0.0013 -0.0005 -0.0002 -0.0019 -0.0003

AT. 136 C X 0.0041 -0.0052 -0.0008 0.0011 0.0050 -0.0007  
Y 0.0019 -0.0019 -0.0010 0.0002 -0.0032 0.0004  
Z 0.0014 -0.0013 -0.0005 0.0002 0.0019 -0.0003

AT. 137 H X -0.0011 -0.0019 -0.0013 0.0012 0.0182 0.0025  
Y -0.0031 -0.0033 0.0009 0.0005 0.0047 0.0007  
Z -0.0053 -0.0051 0.0028 0.0002 -0.0072 -0.0009

AT. 138 H X -0.0011 0.0019 -0.0013 -0.0012 -0.0182 0.0025  
Y -0.0031 0.0033 0.0009 -0.0005 -0.0047 0.0007  
Z -0.0053 0.0051 0.0028 -0.0002 0.0072 -0.0009

AT. 139 H X 0.0129 0.0153 -0.0037 -0.0029 -0.0115 -0.0017  
Y 0.0033 0.0051 0.0000 -0.0014 -0.0138 -0.0019

Z -0.0109 -0.0131 0.0030 0.0025 0.0117 0.0017  
AT. 140 H X 0.0129 -0.0153 -0.0037 0.0029 0.0115 -0.0017  
Y 0.0033 -0.0051 0.0000 0.0014 0.0138 -0.0019  
Z -0.0109 0.0131 0.0030 -0.0025 -0.0117 0.0017  
AT. 141 H X -0.0071 -0.0057 0.0028 0.0009 -0.0021 -0.0003  
Y -0.0010 0.0006 0.0009 0.0003 -0.0093 -0.0013  
Z -0.0004 -0.0022 -0.0007 0.0002 0.0121 0.0017  
AT. 142 H X -0.0071 0.0057 0.0028 -0.0009 0.0021 -0.0003  
Y -0.0010 -0.0006 0.0009 -0.0003 0.0093 -0.0013  
Z -0.0004 0.0022 -0.0007 -0.0002 -0.0121 0.0017  
AT. 143 C X -0.0050 -0.0044 0.0012 0.0015 0.0020 0.0004  
Y 0.0008 0.0010 0.0005 -0.0003 0.0008 0.0000  
Z 0.0023 0.0034 -0.0005 -0.0005 -0.0007 -0.0001  
AT. 144 C X -0.0050 0.0044 0.0012 -0.0015 -0.0020 0.0004  
Y 0.0008 -0.0010 0.0005 0.0003 -0.0008 0.0000  
Z 0.0023 -0.0034 -0.0005 0.0005 0.0007 -0.0001  
AT. 145 H X 0.0138 0.0166 -0.0021 -0.0043 -0.0015 -0.0004  
Y 0.0038 0.0041 -0.0015 -0.0009 -0.0018 -0.0002  
Z 0.0037 0.0051 0.0009 -0.0013 0.0012 -0.0000  
AT. 146 H X 0.0138 -0.0166 -0.0021 0.0043 0.0015 -0.0004  
Y 0.0038 -0.0041 -0.0015 0.0009 0.0018 -0.0002  
Z 0.0037 -0.0051 0.0009 0.0013 -0.0012 -0.0000  
AT. 147 H X -0.0137 -0.0139 0.0041 0.0037 0.0065 0.0010  
Y -0.0065 -0.0070 0.0001 0.0019 0.0010 0.0004  
Z -0.0143 -0.0149 0.0034 0.0038 0.0060 0.0010  
AT. 148 H X -0.0137 0.0139 0.0041 -0.0037 -0.0065 0.0010  
Y -0.0065 0.0070 0.0001 -0.0019 -0.0010 0.0004  
Z -0.0143 0.0149 0.0034 -0.0038 -0.0060 0.0010  
AT. 149 H X 0.0036 0.0057 -0.0026 -0.0002 -0.0037 -0.0002  
Y -0.0032 -0.0028 0.0000 0.0012 -0.0002 0.0002  
Z -0.0089 -0.0083 0.0007 0.0030 0.0006 0.0005  
AT. 150 H X 0.0036 -0.0057 -0.0026 0.0002 0.0037 -0.0002

Y -0.0032 0.0028 0.0000 -0.0012 0.0002 0.0002  
Z -0.0089 0.0083 0.0007 -0.0030 -0.0006 0.0005  
AT. 151 C X 0.0004 0.0002 -0.0001 -0.0001 -0.0002 -0.0001  
Y -0.0035 -0.0033 0.0008 0.0008 -0.0028 -0.0003  
Z 0.0040 0.0045 -0.0010 -0.0010 -0.0035 -0.0005  
AT. 152 C X 0.0004 -0.0002 -0.0001 0.0001 0.0002 -0.0001  
Y -0.0035 0.0033 0.0008 -0.0008 0.0028 -0.0003  
Z 0.0040 -0.0045 -0.0010 0.0010 0.0035 -0.0005  
AT. 153 H X -0.0005 -0.0004 -0.0046 0.0035 0.0145 0.0023  
Y -0.0002 -0.0001 -0.0012 0.0009 0.0047 0.0007  
Z 0.0101 0.0103 -0.0023 -0.0025 0.0021 0.0002  
AT. 154 H X -0.0005 0.0004 -0.0046 -0.0035 -0.0145 0.0023  
Y -0.0002 0.0001 -0.0012 -0.0009 -0.0047 0.0007  
Z 0.0101 -0.0103 -0.0023 0.0025 -0.0021 0.0002  
AT. 155 H X 0.0022 0.0086 0.0046 -0.0038 -0.0207 -0.0030  
Y 0.0021 0.0038 0.0010 -0.0014 -0.0038 -0.0006  
Z -0.0009 0.0001 0.0004 -0.0001 -0.0099 -0.0013  
AT. 156 H X 0.0022 -0.0086 0.0046 0.0038 0.0207 -0.0030  
Y 0.0021 -0.0038 0.0010 0.0014 0.0038 -0.0006  
Z -0.0009 -0.0001 0.0004 0.0001 0.0099 -0.0013  
AT. 157 O X -0.0000 -0.0000 -0.0002 0.0000 -0.0000 0.0000  
Y -0.0001 -0.0001 -0.0000 -0.0001 0.0000 -0.0000  
Z -0.0002 -0.0000 -0.0002 0.0001 0.0001 0.0001  
AT. 158 O X -0.0000 0.0000 -0.0002 -0.0000 0.0000 0.0000  
Y -0.0001 0.0001 -0.0000 0.0001 -0.0000 -0.0000  
Z -0.0002 0.0000 -0.0002 -0.0001 -0.0001 0.0001  
AT. 159 O X 0.0000 -0.0001 0.0003 -0.0004 0.0001 -0.0000  
Y 0.0001 -0.0000 0.0001 -0.0000 -0.0000 -0.0000  
Z 0.0001 0.0001 0.0000 0.0002 -0.0001 -0.0000  
AT. 160 O X 0.0000 0.0001 0.0003 0.0004 -0.0001 -0.0000  
Y 0.0001 0.0000 0.0001 0.0000 0.0000 -0.0000  
Z 0.0001 -0.0001 0.0000 -0.0002 0.0001 -0.0000

AT.161 H X 0.0009 0.0015 0.0019 0.0024 -0.0010 -0.0006  
Y -0.0000 -0.0003 0.0002 -0.0010 0.0003 0.0002  
Z 0.0003 0.0015 -0.0006 0.0037 -0.0016 -0.0010

AT.162 H X 0.0009 -0.0015 0.0019 -0.0024 0.0010 -0.0006  
Y -0.0000 0.0003 0.0002 0.0010 -0.0003 0.0002  
Z 0.0003 -0.0015 -0.0006 -0.0037 0.0016 -0.0010

AT.163 H X -0.0004 -0.0000 -0.0019 0.0016 0.0001 0.0003  
Y -0.0004 0.0007 -0.0001 0.0008 0.0003 0.0005  
Z 0.0002 -0.0001 0.0016 -0.0013 0.0001 -0.0001

AT.164 H X -0.0004 0.0000 -0.0019 -0.0016 -0.0001 0.0003  
Y -0.0004 -0.0007 -0.0001 -0.0008 -0.0003 0.0005  
Z 0.0002 0.0001 0.0016 0.0013 -0.0001 -0.0001

AT.165 O X 0.0001 0.0001 -0.0001 -0.0000 -0.0003 -0.0001  
Y -0.0002 0.0002 0.0001 -0.0001 0.0000 0.0000  
Z 0.0000 0.0001 -0.0000 0.0000 -0.0002 0.0001

AT.166 O X 0.0001 -0.0001 -0.0001 0.0000 0.0003 -0.0001  
Y -0.0002 -0.0002 0.0001 0.0001 -0.0000 0.0000  
Z 0.0000 -0.0001 -0.0000 -0.0000 0.0002 0.0001

AT.167 H X -0.0012 0.0006 0.0006 -0.0004 -0.0013 0.0002  
Y 0.0019 -0.0011 -0.0008 0.0008 0.0031 -0.0002  
Z 0.0004 -0.0006 -0.0003 -0.0002 0.0003 -0.0004

AT.168 H X -0.0012 -0.0006 0.0006 0.0004 0.0013 0.0002  
Y 0.0019 0.0011 -0.0008 -0.0008 -0.0031 -0.0002  
Z 0.0004 0.0006 -0.0003 0.0002 -0.0003 -0.0004

AT.169 O X -0.0002 0.0002 0.0001 -0.0001 0.0000 -0.0001  
Y -0.0000 0.0000 -0.0000 0.0000 -0.0001 -0.0000  
Z 0.0002 -0.0002 -0.0000 0.0000 -0.0002 -0.0001

AT.170 O X -0.0002 -0.0002 0.0001 0.0001 -0.0000 -0.0001  
Y -0.0000 -0.0000 -0.0000 -0.0000 0.0001 -0.0000  
Z 0.0002 0.0002 -0.0000 -0.0000 0.0002 -0.0001

AT.171 H X 0.0073 -0.0065 -0.0036 0.0032 -0.0010 0.0023  
Y 0.0031 -0.0025 -0.0015 0.0012 -0.0001 0.0011

Z -0.0017 0.0021 0.0006 -0.0005 0.0017 -0.0001  
 AT. 172 H X 0.0073 0.0065 -0.0036 -0.0032 0.0010 0.0023  
 Y 0.0031 0.0025 -0.0015 -0.0012 0.0001 0.0011  
 Z -0.0017 -0.0021 0.0006 0.0005 -0.0017 -0.0001  
  
 FREQ(CM\*\*-1) 1097.33 1097.83 1099.83 1100.24 1127.26 1128.49  
  
 AT. 1 I X 0.0000 0.0000 0.0000 0.0000 -0.0000 -0.0001  
 Y -0.0000 -0.0000 0.0000 -0.0000 -0.0000 -0.0001  
 Z -0.0000 -0.0000 0.0000 -0.0000 0.0000 0.0000  
 AT. 2 I X -0.0000 0.0000 0.0000 -0.0000 -0.0000 0.0001  
 Y 0.0000 -0.0000 0.0000 0.0000 -0.0000 0.0001  
 Z 0.0000 -0.0000 0.0000 0.0000 0.0000 -0.0000  
 AT. 3 I X 0.0000 -0.0000 -0.0000 0.0000 0.0000 -0.0000  
 Y 0.0000 -0.0000 -0.0000 0.0000 -0.0000 -0.0000  
 Z 0.0000 -0.0000 -0.0000 0.0000 0.0000 -0.0000  
 AT. 4 I X -0.0000 -0.0000 -0.0000 -0.0000 0.0000 0.0000  
 Y -0.0000 -0.0000 -0.0000 -0.0000 -0.0000 0.0000  
 Z -0.0000 -0.0000 -0.0000 -0.0000 0.0000 0.0000  
 AT. 5 O X 0.0000 -0.0000 0.0000 -0.0000 -0.0002 -0.0008  
 Y 0.0000 0.0001 0.0000 -0.0002 -0.0001 -0.0002  
 Z 0.0000 0.0001 0.0000 -0.0009 0.0004 0.0015  
 AT. 6 O X -0.0000 -0.0000 0.0000 0.0000 -0.0002 0.0008  
 Y -0.0000 0.0001 0.0000 0.0002 -0.0001 0.0002  
 Z -0.0000 0.0001 0.0000 0.0009 0.0004 -0.0015  
 AT. 7 O X 0.0000 -0.0002 -0.0001 0.0003 -0.0004 -0.0009  
 Y 0.0001 0.0000 -0.0000 0.0003 0.0003 0.0008  
 Z -0.0000 0.0001 0.0000 -0.0004 -0.0003 -0.0008  
 AT. 8 O X -0.0000 -0.0002 -0.0001 -0.0003 -0.0004 0.0009  
 Y -0.0001 0.0000 -0.0000 -0.0003 0.0003 -0.0008  
 Z 0.0000 0.0001 0.0000 0.0004 -0.0003 0.0008  
 AT. 9 N X -0.0000 0.0005 -0.0001 -0.0035 0.0026 0.0091



Y -0.0000 -0.0004 0.0001 0.0021 -0.0020 -0.0071  
Z -0.0000 0.0003 0.0001 0.0023 -0.0011 -0.0034  
AT. 10 N X 0.0000 0.0005 -0.0001 0.0035 0.0026 -0.0091  
Y 0.0000 -0.0004 0.0001 -0.0021 -0.0020 0.0071  
Z 0.0000 0.0003 0.0001 -0.0023 -0.0011 0.0034  
AT. 11 N X -0.0001 -0.0004 0.0001 0.0041 0.0016 0.0065  
Y -0.0001 0.0006 0.0002 -0.0027 -0.0011 -0.0046  
Z 0.0003 -0.0004 -0.0005 -0.0005 -0.0005 -0.0018  
AT. 12 N X 0.0001 -0.0004 0.0001 -0.0041 0.0016 -0.0065  
Y 0.0001 0.0006 0.0002 0.0027 -0.0011 0.0046  
Z -0.0003 -0.0004 -0.0005 0.0005 -0.0005 0.0018  
AT. 13 C X -0.0001 0.0001 -0.0001 0.0010 0.0003 0.0008  
Y -0.0000 -0.0000 -0.0001 -0.0005 0.0011 0.0030  
Z 0.0001 0.0001 -0.0000 0.0008 -0.0004 -0.0011  
AT. 14 C X 0.0001 0.0001 -0.0001 -0.0010 0.0003 -0.0008  
Y 0.0000 -0.0000 -0.0001 0.0005 0.0011 -0.0030  
Z -0.0001 0.0001 -0.0000 -0.0008 -0.0004 0.0011  
AT. 15 C X 0.0001 -0.0002 0.0003 -0.0003 -0.0023 -0.0062  
Y 0.0000 -0.0000 0.0000 0.0005 -0.0004 -0.0012  
Z -0.0000 -0.0004 0.0001 -0.0004 -0.0006 -0.0020  
AT. 16 C X -0.0001 -0.0002 0.0003 0.0003 -0.0023 0.0062  
Y -0.0000 -0.0000 0.0000 -0.0005 -0.0004 0.0012  
Z 0.0000 -0.0004 0.0001 0.0004 -0.0006 0.0020  
AT. 17 H X -0.0002 0.0030 -0.0017 0.0023 0.0121 0.0363  
Y -0.0003 -0.0003 -0.0003 0.0001 0.0024 0.0060  
Z 0.0002 0.0012 -0.0003 0.0012 0.0017 0.0064  
AT. 18 H X 0.0002 0.0030 -0.0017 -0.0023 0.0121 -0.0363  
Y 0.0003 -0.0003 -0.0003 -0.0001 0.0024 -0.0060  
Z -0.0002 0.0012 -0.0003 -0.0012 0.0017 -0.0064  
AT. 19 H X -0.0016 -0.0022 -0.0019 -0.0041 0.0153 0.0398  
Y -0.0001 0.0010 -0.0003 0.0019 0.0034 0.0110  
Z -0.0006 -0.0006 -0.0007 -0.0010 0.0060 0.0159

AT. 20 H X 0.0016 -0.0022 -0.0019 0.0041 0.0153 -0.0398  
Y 0.0001 0.0010 -0.0003 -0.0019 0.0034 -0.0110  
Z 0.0006 -0.0006 -0.0007 0.0010 0.0060 -0.0159

AT. 21 C X -0.0002 0.0004 0.0004 -0.0008 0.0002 0.0007  
Y -0.0001 0.0002 0.0003 -0.0003 -0.0000 0.0003  
Z -0.0000 0.0002 0.0002 0.0003 0.0001 0.0002

AT. 22 C X 0.0002 0.0004 0.0004 0.0008 0.0002 -0.0007  
Y 0.0001 0.0002 0.0003 0.0003 -0.0000 -0.0003  
Z 0.0000 0.0002 0.0002 -0.0003 0.0001 -0.0002

AT. 23 C X 0.0006 -0.0003 -0.0006 0.0003 0.0002 -0.0013  
Y 0.0003 -0.0004 -0.0004 0.0001 -0.0002 -0.0007  
Z -0.0002 0.0003 0.0003 -0.0002 0.0001 0.0006

AT. 24 C X -0.0006 -0.0003 -0.0006 -0.0003 0.0002 0.0013  
Y -0.0003 -0.0004 -0.0004 -0.0001 -0.0002 0.0007  
Z 0.0002 0.0003 0.0003 0.0002 0.0001 -0.0006

AT. 25 H X -0.0044 0.0060 0.0066 -0.0037 0.0004 0.0084  
Y -0.0007 0.0009 0.0010 -0.0008 -0.0001 0.0012  
Z 0.0005 -0.0015 -0.0014 0.0008 -0.0009 -0.0006

AT. 26 H X 0.0044 0.0060 0.0066 0.0037 0.0004 -0.0084  
Y 0.0007 0.0009 0.0010 0.0008 -0.0001 -0.0012  
Z -0.0005 -0.0015 -0.0014 -0.0008 -0.0009 0.0006

AT. 27 H X -0.0010 -0.0031 -0.0008 0.0015 -0.0025 0.0049  
Y -0.0012 0.0011 0.0014 -0.0012 0.0004 0.0044  
Z -0.0007 0.0016 0.0013 -0.0011 0.0009 0.0022

AT. 28 H X 0.0010 -0.0031 -0.0008 -0.0015 -0.0025 -0.0049  
Y 0.0012 0.0011 0.0014 0.0012 0.0004 -0.0044  
Z 0.0007 0.0016 0.0013 0.0011 0.0009 -0.0022

AT. 29 C X -0.0001 -0.0009 0.0002 0.0064 -0.0020 -0.0069  
Y -0.0001 -0.0009 -0.0000 0.0066 0.0010 0.0040  
Z 0.0000 -0.0008 0.0001 0.0051 -0.0018 -0.0068

AT. 30 C X 0.0001 -0.0009 0.0002 -0.0064 -0.0020 0.0069  
Y 0.0001 -0.0009 -0.0000 -0.0066 0.0010 -0.0040

Z -0.0000 -0.0008 0.0001 -0.0051 -0.0018 0.0068  
AT. 31 H X 0.0002 -0.0002 0.0006 0.0033 -0.0089 -0.0342  
Y -0.0003 -0.0014 -0.0000 0.0092 0.0018 0.0084  
Z -0.0001 -0.0014 0.0005 0.0071 -0.0047 -0.0167  
AT. 32 H X -0.0002 -0.0002 0.0006 -0.0033 -0.0089 0.0342  
Y 0.0003 -0.0014 -0.0000 -0.0092 0.0018 -0.0084  
Z 0.0001 -0.0014 0.0005 -0.0071 -0.0047 0.0167  
AT. 33 H X -0.0002 -0.0007 -0.0004 -0.0048 0.0077 0.0277  
Y 0.0003 -0.0007 0.0001 -0.0003 -0.0020 -0.0078  
Z -0.0002 -0.0008 -0.0003 0.0008 0.0060 0.0214  
AT. 34 H X 0.0002 -0.0007 -0.0004 0.0048 0.0077 -0.0277  
Y -0.0003 -0.0007 0.0001 0.0003 -0.0020 0.0078  
Z 0.0002 -0.0008 -0.0003 -0.0008 0.0060 -0.0214  
AT. 35 C X 0.0002 0.0014 -0.0004 -0.0106 -0.0009 -0.0030  
Y 0.0003 0.0024 0.0000 -0.0148 0.0000 -0.0005  
Z -0.0001 0.0003 -0.0001 -0.0024 0.0031 0.0118  
AT. 36 C X -0.0002 0.0014 -0.0004 0.0106 -0.0009 0.0030  
Y -0.0003 0.0024 0.0000 0.0148 0.0000 0.0005  
Z 0.0001 0.0003 -0.0001 0.0024 0.0031 -0.0118  
AT. 37 C X -0.0001 -0.0006 0.0002 0.0034 -0.0007 -0.0031  
Y -0.0001 -0.0015 -0.0000 0.0090 0.0012 0.0049  
Z 0.0000 0.0008 0.0001 -0.0042 -0.0014 -0.0057  
AT. 38 C X 0.0001 -0.0006 0.0002 -0.0034 -0.0007 0.0031  
Y 0.0001 -0.0015 -0.0000 -0.0090 0.0012 -0.0049  
Z -0.0000 0.0008 0.0001 0.0042 -0.0014 0.0057  
AT. 39 H X -0.0002 -0.0000 0.0000 -0.0011 0.0026 0.0106  
Y 0.0006 -0.0016 -0.0013 0.0019 -0.0036 -0.0134  
Z -0.0003 0.0013 0.0006 -0.0041 0.0030 0.0117  
AT. 40 H X 0.0002 -0.0000 0.0000 0.0011 0.0026 -0.0106  
Y -0.0006 -0.0016 -0.0013 -0.0019 -0.0036 0.0134  
Z 0.0003 0.0013 0.0006 0.0041 0.0030 -0.0117  
AT. 41 H X -0.0001 -0.0015 0.0002 0.0087 -0.0033 -0.0132

Y -0.0004 0.0001 0.0003 0.0014 0.0063 0.0248  
Z 0.0002 0.0005 -0.0001 -0.0041 -0.0025 -0.0101  
AT. 42 H X 0.0001 -0.0015 0.0002 -0.0087 -0.0033 0.0132  
Y 0.0004 0.0001 0.0003 -0.0014 0.0063 -0.0248  
Z -0.0002 0.0005 -0.0001 0.0041 -0.0025 0.0101  
AT. 43 C X 0.0002 0.0007 -0.0001 -0.0050 -0.0004 -0.0023  
Y 0.0001 0.0011 -0.0000 -0.0083 -0.0003 -0.0012  
Z -0.0002 -0.0007 0.0001 0.0047 0.0022 0.0089  
AT. 44 C X -0.0002 0.0007 -0.0001 0.0050 -0.0004 0.0023  
Y -0.0001 0.0011 -0.0000 0.0083 -0.0003 0.0012  
Z 0.0002 -0.0007 0.0001 -0.0047 0.0022 -0.0089  
AT. 45 H X -0.0004 0.0002 0.0007 0.0021 -0.0059 -0.0226  
Y 0.0002 0.0018 -0.0001 -0.0107 0.0020 0.0063  
Z 0.0002 -0.0012 -0.0004 0.0021 0.0037 0.0152  
AT. 46 H X 0.0004 0.0002 0.0007 -0.0021 -0.0059 0.0226  
Y -0.0002 0.0018 -0.0001 0.0107 0.0020 -0.0063  
Z -0.0002 -0.0012 -0.0004 -0.0021 0.0037 -0.0152  
AT. 47 H X 0.0008 -0.0014 -0.0014 0.0013 0.0038 0.0159  
Y 0.0002 -0.0001 -0.0005 -0.0018 -0.0022 -0.0068  
Z -0.0010 0.0011 0.0015 0.0029 -0.0057 -0.0228  
AT. 48 H X -0.0008 -0.0014 -0.0014 -0.0013 0.0038 -0.0159  
Y -0.0002 -0.0001 -0.0005 0.0018 -0.0022 0.0068  
Z 0.0010 0.0011 0.0015 -0.0029 -0.0057 0.0228  
AT. 49 C X -0.0003 -0.0015 0.0004 0.0107 -0.0019 -0.0071  
Y -0.0001 -0.0020 0.0001 0.0138 0.0015 0.0054  
Z 0.0000 -0.0001 0.0001 0.0019 -0.0017 -0.0069  
AT. 50 C X 0.0003 -0.0015 0.0004 -0.0107 -0.0019 0.0071  
Y 0.0001 -0.0020 0.0001 -0.0138 0.0015 -0.0054  
Z -0.0000 -0.0001 0.0001 -0.0019 -0.0017 0.0069  
AT. 51 C X 0.0002 0.0008 -0.0002 -0.0056 -0.0008 -0.0026  
Y 0.0000 0.0009 -0.0001 -0.0062 0.0009 0.0031  
Z 0.0000 0.0006 -0.0002 -0.0064 0.0029 0.0103

AT. 52 C X -0.0002 0.0008 -0.0002 0.0056 -0.0008 0.0026  
Y -0.0000 0.0009 -0.0001 0.0062 0.0009 -0.0031  
Z -0.0000 0.0006 -0.0002 0.0064 0.0029 -0.0103

AT. 53 H X 0.0002 -0.0000 -0.0003 -0.0040 0.0019 0.0077  
Y 0.0002 -0.0009 0.0001 -0.0013 -0.0038 -0.0131  
Z 0.0001 -0.0001 0.0002 -0.0035 -0.0077 -0.0285

AT. 54 H X -0.0002 -0.0000 -0.0003 0.0040 0.0019 -0.0077  
Y -0.0002 -0.0009 0.0001 0.0013 -0.0038 0.0131  
Z -0.0001 -0.0001 0.0002 0.0035 -0.0077 0.0285

AT. 55 H X 0.0001 0.0012 0.0001 -0.0068 -0.0040 -0.0142  
Y -0.0001 0.0004 -0.0001 -0.0030 0.0059 0.0220  
Z -0.0003 0.0004 -0.0000 -0.0032 0.0070 0.0258

AT. 56 H X -0.0001 0.0012 0.0001 0.0068 -0.0040 0.0142  
Y 0.0001 0.0004 -0.0001 0.0030 0.0059 -0.0220  
Z 0.0003 0.0004 -0.0000 0.0032 0.0070 -0.0258

AT. 57 C X -0.0002 -0.0010 0.0002 0.0070 0.0005 0.0019  
Y -0.0002 -0.0016 -0.0000 0.0101 0.0001 0.0002  
Z 0.0000 -0.0002 -0.0000 0.0017 -0.0013 -0.0045

AT. 58 C X 0.0002 -0.0010 0.0002 -0.0070 0.0005 -0.0019  
Y 0.0002 -0.0016 -0.0000 -0.0101 0.0001 -0.0002  
Z -0.0000 -0.0002 -0.0000 -0.0017 -0.0013 0.0045

AT. 59 H X 0.0007 0.0055 -0.0003 -0.0353 -0.0032 -0.0121  
Y -0.0004 -0.0023 0.0002 0.0126 0.0033 0.0115  
Z 0.0003 0.0033 -0.0000 -0.0235 0.0009 0.0029

AT. 60 H X -0.0007 0.0055 -0.0003 0.0353 -0.0032 0.0121  
Y 0.0004 -0.0023 0.0002 -0.0126 0.0033 -0.0115  
Z -0.0003 0.0033 -0.0000 0.0235 0.0009 -0.0029

AT. 61 H X 0.0001 0.0026 0.0003 -0.0163 0.0034 0.0119  
Y 0.0004 0.0026 -0.0005 -0.0168 -0.0037 -0.0122  
Z -0.0000 0.0005 0.0003 -0.0029 0.0030 0.0100

AT. 62 H X -0.0001 0.0026 0.0003 0.0163 0.0034 -0.0119  
Y -0.0004 0.0026 -0.0005 0.0168 -0.0037 0.0122

Z 0.0000 0.0005 0.0003 0.0029 0.0030 -0.0100  
AT. 63 H X -0.0000 -0.0041 0.0003 0.0261 -0.0029 -0.0114  
Y 0.0004 0.0056 -0.0005 -0.0353 0.0005 0.0033  
Z -0.0005 -0.0032 0.0003 0.0207 0.0018 0.0058  
AT. 64 H X 0.0000 -0.0041 0.0003 -0.0261 -0.0029 0.0114  
Y -0.0004 0.0056 -0.0005 0.0353 0.0005 -0.0033  
Z 0.0005 -0.0032 0.0003 -0.0207 0.0018 -0.0058  
AT. 65 C X 0.0002 0.0009 -0.0003 -0.0078 0.0006 0.0024  
Y 0.0002 0.0014 -0.0001 -0.0110 -0.0006 -0.0022  
Z 0.0000 0.0000 -0.0001 -0.0008 0.0004 0.0019  
AT. 66 C X -0.0002 0.0009 -0.0003 0.0078 0.0006 -0.0024  
Y -0.0002 0.0014 -0.0001 0.0110 -0.0006 0.0022  
Z -0.0000 0.0000 -0.0001 0.0008 0.0004 -0.0019  
AT. 67 H X -0.0008 -0.0037 0.0008 0.0309 -0.0011 -0.0054  
Y 0.0002 0.0005 -0.0003 -0.0033 0.0017 0.0074  
Z 0.0008 0.0047 -0.0008 -0.0398 -0.0004 -0.0009  
AT. 68 H X 0.0008 -0.0037 0.0008 -0.0309 -0.0011 0.0054  
Y -0.0002 0.0005 -0.0003 0.0033 0.0017 -0.0074  
Z -0.0008 0.0047 -0.0008 0.0398 -0.0004 0.0009  
AT. 69 H X -0.0001 -0.0021 0.0000 0.0163 0.0022 0.0085  
Y -0.0005 -0.0027 0.0006 0.0219 -0.0011 -0.0048  
Z -0.0003 0.0001 0.0005 0.0010 -0.0037 -0.0147  
AT. 70 H X 0.0001 -0.0021 0.0000 -0.0163 0.0022 -0.0085  
Y 0.0005 -0.0027 0.0006 -0.0219 -0.0011 0.0048  
Z 0.0003 0.0001 0.0005 -0.0010 -0.0037 0.0147  
AT. 71 H X 0.0002 0.0023 0.0000 -0.0149 -0.0025 -0.0102  
Y -0.0005 -0.0035 0.0004 0.0254 0.0008 0.0037  
Z -0.0009 -0.0054 0.0009 0.0418 -0.0001 -0.0001  
AT. 72 H X -0.0002 0.0023 0.0000 0.0149 -0.0025 0.0102  
Y 0.0005 -0.0035 0.0004 -0.0254 0.0008 -0.0037  
Z 0.0009 -0.0054 0.0009 -0.0418 -0.0001 0.0001  
AT. 73 C X -0.0001 0.0001 -0.0001 0.0009 0.0020 0.0075

Y -0.0001 0.0001 0.0001 0.0014 -0.0012 -0.0044  
Z 0.0001 -0.0000 -0.0001 -0.0000 -0.0008 -0.0029  
AT. 74 C X 0.0001 0.0001 -0.0001 -0.0009 0.0020 -0.0075  
Y 0.0001 0.0001 0.0001 -0.0014 -0.0012 0.0044  
Z -0.0001 -0.0000 -0.0001 0.0000 -0.0008 0.0029  
AT. 75 H X 0.0017 0.0132 -0.0012 -0.0942 0.0005 0.0003  
Y -0.0012 -0.0097 0.0009 0.0650 -0.0004 -0.0005  
Z -0.0001 -0.0038 0.0001 0.0185 -0.0007 -0.0027  
AT. 76 H X -0.0017 0.0132 -0.0012 0.0942 0.0005 -0.0003  
Y 0.0012 -0.0097 0.0009 -0.0650 -0.0004 0.0005  
Z 0.0001 -0.0038 0.0001 -0.0185 -0.0007 0.0027  
AT. 77 H X -0.0013 -0.0123 0.0013 0.0852 0.0003 0.0018  
Y 0.0011 0.0086 -0.0009 -0.0626 -0.0006 -0.0022  
Z 0.0001 0.0036 -0.0005 -0.0190 0.0001 0.0005  
AT. 78 H X 0.0013 -0.0123 0.0013 -0.0852 0.0003 -0.0018  
Y -0.0011 0.0086 -0.0009 0.0626 -0.0006 0.0022  
Z -0.0001 0.0036 -0.0005 0.0190 0.0001 -0.0005  
AT. 79 I X -0.0000 0.0001 -0.0000 -0.0000 -0.0001 -0.0000  
Y -0.0000 0.0003 -0.0001 -0.0000 0.0003 0.0001  
Z -0.0000 0.0002 -0.0000 -0.0000 -0.0001 -0.0000  
AT. 80 I X 0.0000 0.0001 -0.0000 0.0000 -0.0001 0.0000  
Y 0.0000 0.0003 -0.0001 0.0000 0.0003 -0.0001  
Z 0.0000 0.0002 -0.0000 0.0000 -0.0001 0.0000  
AT. 81 I X -0.0000 0.0000 -0.0000 -0.0000 -0.0000 0.0000  
Y 0.0000 0.0000 -0.0000 -0.0000 0.0000 0.0000  
Z 0.0000 -0.0000 0.0000 0.0000 0.0000 0.0000  
AT. 82 I X 0.0000 0.0000 -0.0000 0.0000 -0.0000 -0.0000  
Y -0.0000 0.0000 -0.0000 0.0000 0.0000 -0.0000  
Z -0.0000 -0.0000 0.0000 -0.0000 0.0000 -0.0000  
AT. 83 O X -0.0005 -0.0040 -0.0000 0.0002 -0.0007 -0.0016  
Y -0.0003 -0.0000 -0.0003 0.0001 0.0009 0.0002  
Z -0.0016 0.0004 -0.0016 -0.0001 -0.0011 -0.0014

AT. 84 O X 0.0005 -0.0040 -0.0000 -0.0002 -0.0007 0.0016  
Y 0.0003 -0.0000 -0.0003 -0.0001 0.0009 -0.0002  
Z 0.0016 0.0004 -0.0016 0.0001 -0.0011 0.0014

AT. 85 O X -0.0011 -0.0009 -0.0008 0.0001 -0.0008 -0.0009  
Y -0.0006 -0.0001 -0.0004 0.0001 -0.0009 -0.0008  
Z 0.0005 -0.0004 0.0005 0.0000 0.0009 0.0008

AT. 86 O X 0.0011 -0.0009 -0.0008 -0.0001 -0.0008 0.0009  
Y 0.0006 -0.0001 -0.0004 -0.0001 -0.0009 0.0008  
Z -0.0005 -0.0004 0.0005 -0.0000 0.0009 -0.0008

AT. 87 N X 0.0063 0.0001 0.0066 0.0002 0.0154 0.0113  
Y 0.0012 0.0011 0.0011 -0.0000 0.0054 0.0039  
Z 0.0041 -0.0158 0.0055 0.0011 0.0019 0.0004

AT. 88 N X -0.0063 0.0001 0.0066 -0.0002 0.0154 -0.0113  
Y -0.0012 0.0011 0.0011 0.0000 0.0054 -0.0039  
Z -0.0041 -0.0158 0.0055 -0.0011 0.0019 -0.0004

AT. 89 N X -0.0005 -0.0007 -0.0010 0.0001 0.0090 0.0081  
Y 0.0011 -0.0032 0.0010 0.0004 0.0036 0.0029  
Z -0.0004 0.0020 -0.0007 -0.0003 0.0013 0.0012

AT. 90 N X 0.0005 -0.0007 -0.0010 -0.0001 0.0090 -0.0081  
Y -0.0011 -0.0032 0.0010 -0.0004 0.0036 -0.0029  
Z 0.0004 0.0020 -0.0007 0.0003 0.0013 -0.0012

AT. 91 C X -0.0019 0.0035 -0.0021 -0.0003 0.0018 0.0007  
Y 0.0004 -0.0078 0.0012 0.0002 -0.0036 -0.0017  
Z 0.0018 -0.0004 0.0017 0.0001 -0.0015 -0.0002

AT. 92 C X 0.0019 0.0035 -0.0021 0.0003 0.0018 -0.0007  
Y -0.0004 -0.0078 0.0012 -0.0002 -0.0036 0.0017  
Z -0.0018 -0.0004 0.0017 -0.0001 -0.0015 0.0002

AT. 93 C X 0.0013 -0.0042 0.0016 0.0001 -0.0111 -0.0028  
Y -0.0000 0.0071 -0.0008 -0.0002 0.0053 0.0021  
Z -0.0018 0.0122 -0.0029 -0.0008 0.0040 0.0022

AT. 94 C X -0.0013 -0.0042 0.0016 -0.0001 -0.0111 0.0028  
Y 0.0000 0.0071 -0.0008 0.0002 0.0053 -0.0021



Z 0.0018 0.0122 -0.0029 0.0008 0.0040 -0.0022  
AT. 95 H X -0.0124 0.1377 -0.0265 -0.0068 0.0527 0.0243  
Y 0.0045 -0.0424 0.0089 0.0015 -0.0326 -0.0112  
Z 0.0062 -0.0627 0.0123 0.0042 -0.0026 -0.0058  
AT. 96 H X 0.0124 0.1377 -0.0265 0.0068 0.0527 -0.0243  
Y -0.0045 -0.0424 0.0089 -0.0015 -0.0326 0.0112  
Z -0.0062 -0.0627 0.0123 -0.0042 -0.0026 0.0058  
AT. 97 H X 0.0113 -0.0793 0.0188 0.0070 0.0586 0.0087  
Y 0.0022 -0.0223 0.0046 -0.0002 -0.0443 -0.0152  
Z -0.0041 0.0258 -0.0063 -0.0026 -0.0249 -0.0045  
AT. 98 H X -0.0113 -0.0793 0.0188 -0.0070 0.0586 -0.0087  
Y -0.0022 -0.0223 0.0046 0.0002 -0.0443 0.0152  
Z 0.0041 0.0258 -0.0063 0.0026 -0.0249 0.0045  
AT. 99 C X 0.0001 0.0020 -0.0001 -0.0001 0.0000 0.0002  
Y -0.0003 -0.0005 -0.0001 0.0001 -0.0004 -0.0003  
Z -0.0006 0.0022 -0.0007 -0.0001 -0.0007 -0.0005  
AT. 100 C X -0.0001 0.0020 -0.0001 0.0001 0.0000 -0.0002  
Y 0.0003 -0.0005 -0.0001 -0.0001 -0.0004 0.0003  
Z 0.0006 0.0022 -0.0007 0.0001 -0.0007 0.0005  
AT. 101 C X -0.0001 -0.0008 0.0000 0.0001 -0.0010 -0.0007  
Y 0.0005 0.0012 0.0002 -0.0002 0.0013 0.0012  
Z 0.0000 -0.0016 0.0003 0.0002 -0.0006 -0.0006  
AT. 102 C X 0.0001 -0.0008 0.0000 -0.0001 -0.0010 0.0007  
Y -0.0005 0.0012 0.0002 0.0002 0.0013 -0.0012  
Z -0.0000 -0.0016 0.0003 -0.0002 -0.0006 0.0006  
AT. 103 H X 0.0053 0.0121 0.0022 -0.0030 0.0116 0.0103  
Y -0.0019 -0.0047 -0.0008 0.0012 -0.0044 -0.0037  
Z 0.0011 0.0043 0.0005 -0.0006 0.0016 0.0015  
AT. 104 H X -0.0053 0.0121 0.0022 0.0030 0.0116 -0.0103  
Y 0.0019 -0.0047 -0.0008 -0.0012 -0.0044 0.0037  
Z -0.0011 0.0043 0.0005 0.0006 0.0016 -0.0015  
AT. 105 H X 0.0016 -0.0188 0.0036 0.0032 0.0023 -0.0012

Y -0.0031 0.0014 -0.0027 -0.0003 -0.0065 -0.0052  
Z -0.0010 -0.0050 -0.0002 0.0008 -0.0031 -0.0032  
AT. 106 H X -0.0016 -0.0188 0.0036 -0.0032 0.0023 0.0012  
Y 0.0031 0.0014 -0.0027 0.0003 -0.0065 0.0052  
Z 0.0010 -0.0050 -0.0002 -0.0008 -0.0031 0.0032  
AT. 107 C X -0.0037 -0.0031 -0.0036 0.0000 -0.0083 -0.0061  
Y 0.0091 0.0005 0.0091 0.0002 -0.0029 -0.0019  
Z 0.0047 0.0045 0.0049 -0.0002 0.0114 0.0091  
AT. 108 C X 0.0037 -0.0031 -0.0036 -0.0000 -0.0083 0.0061  
Y -0.0091 0.0005 0.0091 -0.0002 -0.0029 0.0019  
Z -0.0047 0.0045 0.0049 0.0002 0.0114 -0.0091  
AT. 109 H X 0.0042 0.0123 0.0023 -0.0006 -0.0445 -0.0339  
Y 0.0117 -0.0086 0.0124 0.0009 0.0037 0.0023  
Z 0.0072 -0.0166 0.0093 0.0012 0.0334 0.0245  
AT. 110 H X -0.0042 0.0123 0.0023 0.0006 -0.0445 0.0339  
Y -0.0117 -0.0086 0.0124 -0.0009 0.0037 -0.0023  
Z -0.0072 -0.0166 0.0093 -0.0012 0.0334 -0.0245  
AT. 111 H X 0.0154 -0.0340 0.0183 0.0026 0.0348 0.0263  
Y -0.0096 0.0152 -0.0103 -0.0014 -0.0016 0.0003  
Z -0.0124 0.0360 -0.0152 -0.0027 -0.0369 -0.0276  
AT. 112 H X -0.0154 -0.0340 0.0183 -0.0026 0.0348 -0.0263  
Y 0.0096 0.0152 -0.0103 0.0014 -0.0016 -0.0003  
Z 0.0124 0.0360 -0.0152 0.0027 -0.0369 0.0276  
AT. 113 C X -0.0067 0.0078 -0.0059 -0.0005 -0.0101 -0.0078  
Y -0.0194 -0.0042 -0.0194 -0.0001 0.0021 0.0013  
Z 0.0030 0.0022 0.0020 -0.0002 -0.0135 -0.0113  
AT. 114 C X 0.0067 0.0078 -0.0059 0.0005 -0.0101 0.0078  
Y 0.0194 -0.0042 -0.0194 0.0001 0.0021 -0.0013  
Z -0.0030 0.0022 0.0020 0.0002 -0.0135 0.0113  
AT. 115 C X -0.0027 -0.0026 -0.0023 0.0000 -0.0030 -0.0030  
Y 0.0059 0.0052 0.0063 -0.0003 -0.0062 -0.0049  
Z -0.0037 -0.0039 -0.0033 0.0003 0.0088 0.0074

AT.116 C X 0.0027 -0.0026 -0.0023 -0.0000 -0.0030 0.0030  
Y -0.0059 0.0052 0.0063 0.0003 -0.0062 0.0049  
Z 0.0037 -0.0039 -0.0033 -0.0003 0.0088 -0.0074

AT.117 H X -0.0003 -0.0049 0.0008 0.0002 0.0182 0.0158  
Y 0.0111 0.0045 0.0097 -0.0004 0.0136 0.0132  
Z -0.0074 -0.0011 -0.0074 0.0001 -0.0189 -0.0172

AT.118 H X 0.0003 -0.0049 0.0008 -0.0002 0.0182 -0.0158  
Y -0.0111 0.0045 0.0097 0.0004 0.0136 -0.0132  
Z 0.0074 -0.0011 -0.0074 -0.0001 -0.0189 0.0172

AT.119 H X -0.0041 -0.0014 -0.0051 -0.0000 -0.0218 -0.0197  
Y 0.0065 0.0014 0.0062 0.0000 -0.0248 -0.0220  
Z -0.0051 0.0006 -0.0050 -0.0001 0.0160 0.0144

AT.120 H X 0.0041 -0.0014 -0.0051 0.0000 -0.0218 0.0197  
Y -0.0065 0.0014 0.0062 -0.0000 -0.0248 0.0220  
Z 0.0051 0.0006 -0.0050 0.0001 0.0160 -0.0144

AT.121 C X 0.0007 0.0019 0.0007 -0.0001 -0.0042 -0.0038  
Y -0.0087 0.0008 -0.0084 -0.0002 0.0025 0.0022  
Z 0.0032 0.0009 0.0032 -0.0001 -0.0101 -0.0088

AT.122 C X -0.0007 0.0019 0.0007 0.0001 -0.0042 0.0038  
Y 0.0087 0.0008 -0.0084 0.0002 0.0025 -0.0022  
Z -0.0032 0.0009 0.0032 0.0001 -0.0101 0.0088

AT.123 H X -0.0034 0.0060 -0.0039 -0.0009 -0.0368 -0.0315  
Y -0.0099 -0.0058 -0.0085 0.0002 0.0073 0.0064  
Z 0.0038 0.0084 0.0027 -0.0007 -0.0199 -0.0172

AT.124 H X 0.0034 0.0060 -0.0039 0.0009 -0.0368 0.0315  
Y 0.0099 -0.0058 -0.0085 -0.0002 0.0073 -0.0064  
Z -0.0038 0.0084 0.0027 0.0007 -0.0199 0.0172

AT.125 H X 0.0100 -0.0070 0.0090 0.0012 0.0273 0.0241  
Y -0.0119 0.0059 -0.0113 -0.0008 -0.0044 -0.0042  
Z 0.0132 -0.0072 0.0120 0.0012 0.0248 0.0220

AT.126 H X -0.0100 -0.0070 0.0090 -0.0012 0.0273 -0.0241  
Y 0.0119 0.0059 -0.0113 0.0008 -0.0044 0.0042

Z -0.0132 -0.0072 0.0120 -0.0012 0.0248 -0.0220  
AT. 127 C X -0.0136 -0.0062 -0.0117 0.0001 -0.0066 -0.0063  
Y 0.0143 0.0010 0.0136 0.0003 -0.0038 -0.0033  
Z -0.0035 -0.0018 -0.0025 0.0002 0.0117 0.0096  
AT. 128 C X 0.0136 -0.0062 -0.0117 -0.0001 -0.0066 0.0063  
Y -0.0143 0.0010 0.0136 -0.0003 -0.0038 0.0033  
Z 0.0035 -0.0018 -0.0025 -0.0002 0.0117 -0.0096  
AT. 129 C X 0.0010 0.0055 0.0001 -0.0004 -0.0082 -0.0054  
Y -0.0085 -0.0015 -0.0080 -0.0001 -0.0030 -0.0022  
Z -0.0083 0.0033 -0.0086 -0.0005 -0.0117 -0.0088  
AT. 130 C X -0.0010 0.0055 0.0001 0.0004 -0.0082 0.0054  
Y 0.0085 -0.0015 -0.0080 0.0001 -0.0030 0.0022  
Z 0.0083 0.0033 -0.0086 0.0005 -0.0117 0.0088  
AT. 131 H X 0.0021 0.0176 0.0007 -0.0009 0.0171 0.0152  
Y -0.0007 0.0303 -0.0034 -0.0020 0.0117 0.0105  
Z -0.0031 0.0338 -0.0054 -0.0021 0.0300 0.0252  
AT. 132 H X -0.0021 0.0176 0.0007 0.0009 0.0171 -0.0152  
Y 0.0007 0.0303 -0.0034 0.0020 0.0117 -0.0105  
Z 0.0031 0.0338 -0.0054 0.0021 0.0300 -0.0252  
AT. 133 H X 0.0059 -0.0061 0.0055 0.0002 -0.0276 -0.0234  
Y -0.0002 -0.0114 0.0003 0.0006 -0.0189 -0.0156  
Z 0.0023 -0.0078 0.0019 0.0004 -0.0268 -0.0208  
AT. 134 H X -0.0059 -0.0061 0.0055 -0.0002 -0.0276 0.0234  
Y 0.0002 -0.0114 0.0003 -0.0006 -0.0189 0.0156  
Z -0.0023 -0.0078 0.0019 -0.0004 -0.0268 0.0208  
AT. 135 C X 0.0025 -0.0048 0.0020 0.0003 0.0046 0.0035  
Y 0.0127 0.0038 0.0126 0.0000 -0.0017 -0.0010  
Z -0.0014 -0.0021 -0.0006 0.0002 0.0049 0.0041  
AT. 136 C X -0.0025 -0.0048 0.0020 -0.0003 0.0046 -0.0035  
Y -0.0127 0.0038 0.0126 -0.0000 -0.0017 0.0010  
Z 0.0014 -0.0021 -0.0006 -0.0002 0.0049 -0.0041  
AT. 137 H X 0.0355 0.0199 0.0343 -0.0006 -0.0196 -0.0153

Y 0.0022 0.0049 0.0015 -0.0003 -0.0091 -0.0074  
Z -0.0307 -0.0086 -0.0308 -0.0001 0.0006 -0.0002  
AT. 138 H X -0.0355 0.0199 0.0343 0.0006 -0.0196 0.0153  
Y -0.0022 0.0049 0.0015 0.0003 -0.0091 0.0074  
Z 0.0307 -0.0086 -0.0308 0.0001 0.0006 0.0002  
AT. 139 H X 0.0151 -0.0105 0.0159 0.0009 0.0180 0.0146  
Y -0.0182 -0.0147 -0.0185 0.0005 0.0131 0.0100  
Z -0.0093 0.0110 -0.0102 -0.0008 -0.0178 -0.0143  
AT. 140 H X -0.0151 -0.0105 0.0159 -0.0009 0.0180 -0.0146  
Y 0.0182 -0.0147 -0.0185 -0.0005 0.0131 -0.0100  
Z 0.0093 0.0110 -0.0102 0.0008 -0.0178 0.0143  
AT. 141 H X -0.0203 -0.0027 -0.0217 -0.0005 -0.0124 -0.0110  
Y -0.0189 -0.0101 -0.0193 0.0002 0.0046 0.0031  
Z 0.0207 0.0131 0.0212 -0.0003 -0.0090 -0.0065  
AT. 142 H X 0.0203 -0.0027 -0.0217 0.0005 -0.0124 0.0110  
Y 0.0189 -0.0101 -0.0193 -0.0002 0.0046 -0.0031  
Z -0.0207 0.0131 0.0212 0.0003 -0.0090 0.0065  
AT. 143 C X 0.0074 0.0035 0.0066 -0.0001 0.0029 0.0029  
Y -0.0115 -0.0003 -0.0116 -0.0003 0.0022 0.0017  
Z 0.0024 -0.0003 0.0017 0.0000 -0.0039 -0.0032  
AT. 144 C X -0.0074 0.0035 0.0066 0.0001 0.0029 -0.0029  
Y 0.0115 -0.0003 -0.0116 0.0003 0.0022 -0.0017  
Z -0.0024 -0.0003 0.0017 -0.0000 -0.0039 0.0032  
AT. 145 H X -0.0274 -0.0045 -0.0297 -0.0006 -0.0108 -0.0097  
Y 0.0082 -0.0013 0.0076 0.0002 -0.0077 -0.0065  
Z -0.0268 -0.0012 -0.0274 -0.0007 0.0035 0.0026  
AT. 146 H X 0.0274 -0.0045 -0.0297 0.0006 -0.0108 0.0097  
Y -0.0082 -0.0013 0.0076 -0.0002 -0.0077 0.0065  
Z 0.0268 -0.0012 -0.0274 0.0007 0.0035 -0.0026  
AT. 147 H X -0.0042 0.0075 -0.0047 -0.0005 0.0166 0.0144  
Y 0.0263 0.0040 0.0243 0.0004 0.0011 0.0015  
Z 0.0055 0.0076 0.0044 -0.0002 0.0158 0.0137

AT. 148 H X 0.0042 0.0075 -0.0047 0.0005 0.0166 -0.0144  
Y -0.0263 0.0040 0.0243 -0.0004 0.0011 -0.0015  
Z -0.0055 0.0076 0.0044 0.0002 0.0158 -0.0137

AT. 149 H X 0.0371 0.0008 0.0368 0.0007 -0.0181 -0.0147  
Y 0.0194 0.0025 0.0200 0.0003 -0.0021 -0.0015  
Z 0.0382 0.0058 0.0384 0.0006 0.0002 0.0010

AT. 150 H X -0.0371 0.0008 0.0368 -0.0007 -0.0181 0.0147  
Y -0.0194 0.0025 0.0200 -0.0003 -0.0021 0.0015  
Z -0.0382 0.0058 0.0384 -0.0006 0.0002 -0.0010

AT. 151 C X 0.0032 -0.0003 0.0034 0.0001 0.0115 0.0095  
Y 0.0022 -0.0018 0.0022 0.0002 0.0022 0.0019  
Z 0.0013 -0.0035 0.0014 0.0002 0.0014 0.0010

AT. 152 C X -0.0032 -0.0003 0.0034 -0.0001 0.0115 -0.0095  
Y -0.0022 -0.0018 0.0022 -0.0002 0.0022 -0.0019  
Z -0.0013 -0.0035 0.0014 -0.0002 0.0014 -0.0010

AT. 153 H X 0.1146 0.0247 0.1115 0.0008 -0.0064 -0.0052  
Y 0.0329 0.0076 0.0324 0.0002 -0.0015 -0.0013  
Z 0.0029 0.0008 0.0036 -0.0000 0.0030 0.0021

AT. 154 H X -0.1146 0.0247 0.1115 -0.0008 -0.0064 0.0052  
Y -0.0329 0.0076 0.0324 -0.0002 -0.0015 0.0013  
Z -0.0029 0.0008 0.0036 0.0000 0.0030 -0.0021

AT. 155 H X -0.0877 -0.0263 -0.0897 -0.0006 0.0128 0.0120  
Y -0.0266 -0.0060 -0.0269 -0.0003 0.0052 0.0046  
Z -0.0008 -0.0087 -0.0014 0.0005 -0.0011 -0.0009

AT. 156 H X 0.0877 -0.0263 -0.0897 0.0006 0.0128 -0.0120  
Y 0.0266 -0.0060 -0.0269 0.0003 0.0052 -0.0046  
Z 0.0008 -0.0087 -0.0014 -0.0005 -0.0011 0.0009

AT. 157 O X -0.0002 -0.0001 -0.0003 -0.0000 0.0000 0.0001  
Y -0.0000 0.0000 -0.0000 -0.0000 -0.0000 -0.0001  
Z 0.0001 0.0001 0.0002 -0.0000 -0.0001 0.0000

AT. 158 O X 0.0002 -0.0001 -0.0003 0.0000 0.0000 -0.0001  
Y 0.0000 0.0000 -0.0000 0.0000 -0.0000 0.0001

Z -0.0001 0.0001 0.0002 0.0000 -0.0001 -0.0000  
AT.159 O X 0.0000 0.0001 0.0001 0.0000 0.0000 -0.0001  
Y -0.0000 -0.0000 -0.0002 0.0000 -0.0000 -0.0000  
Z -0.0000 -0.0001 -0.0002 -0.0000 0.0000 -0.0001  
AT.160 O X -0.0000 0.0001 0.0001 -0.0000 0.0000 0.0001  
Y 0.0000 -0.0000 -0.0002 -0.0000 -0.0000 0.0000  
Z 0.0000 -0.0001 -0.0002 0.0000 0.0000 0.0001  
AT.161 H X -0.0001 -0.0009 0.0000 0.0002 -0.0002 -0.0021  
Y 0.0003 0.0004 0.0004 0.0000 0.0001 0.0006  
Z -0.0009 -0.0015 -0.0014 -0.0002 -0.0002 -0.0019  
AT.162 H X 0.0001 -0.0009 0.0000 -0.0002 -0.0002 0.0021  
Y -0.0003 0.0004 0.0004 -0.0000 0.0001 -0.0006  
Z 0.0009 -0.0015 -0.0014 0.0002 -0.0002 0.0019  
AT.163 H X 0.0003 -0.0000 0.0002 -0.0001 -0.0006 0.0001  
Y -0.0003 0.0002 0.0023 -0.0001 0.0008 0.0002  
Z -0.0002 0.0003 0.0005 0.0000 0.0003 -0.0001  
AT.164 H X -0.0003 -0.0000 0.0002 0.0001 -0.0006 -0.0001  
Y 0.0003 0.0002 0.0023 0.0001 0.0008 -0.0002  
Z 0.0002 0.0003 0.0005 -0.0000 0.0003 0.0001  
AT.165 O X 0.0001 -0.0002 0.0001 0.0000 -0.0001 -0.0001  
Y 0.0001 -0.0001 0.0001 0.0000 0.0001 0.0000  
Z 0.0001 -0.0001 0.0000 -0.0001 0.0002 0.0002  
AT.166 O X -0.0001 -0.0002 0.0001 -0.0000 -0.0001 0.0001  
Y -0.0001 -0.0001 0.0001 -0.0000 0.0001 -0.0000  
Z -0.0001 -0.0001 0.0000 0.0001 0.0002 -0.0002  
AT.167 H X 0.0003 -0.0015 0.0003 0.0007 0.0000 0.0002  
Y -0.0005 0.0036 -0.0008 -0.0015 0.0005 0.0004  
Z -0.0003 -0.0000 -0.0001 -0.0001 -0.0018 -0.0017  
AT.168 H X -0.0003 -0.0015 0.0003 -0.0007 0.0000 -0.0002  
Y 0.0005 0.0036 -0.0008 0.0015 0.0005 -0.0004  
Z 0.0003 -0.0000 -0.0001 0.0001 -0.0018 0.0017  
AT.169 O X 0.0000 -0.0000 -0.0000 0.0001 -0.0000 0.0001

Y 0.0000 -0.0000 0.0000 -0.0000 0.0001 -0.0000  
Z -0.0000 -0.0001 0.0000 0.0001 -0.0001 0.0001  
AT. 170 O X -0.0000 -0.0000 -0.0000 -0.0001 -0.0000 -0.0001

Y -0.0000 -0.0000 0.0000 0.0000 0.0001 0.0000  
Z 0.0000 -0.0001 0.0000 -0.0001 -0.0001 -0.0001

AT. 171 H X -0.0003 0.0021 -0.0000 -0.0022 0.0014 -0.0000

Y -0.0001 0.0009 0.0001 -0.0010 0.0010 0.0001  
Z 0.0000 -0.0002 0.0001 0.0004 0.0011 0.0002

AT. 172 H X 0.0003 0.0021 -0.0000 0.0022 0.0014 0.0000

Y 0.0001 0.0009 0.0001 0.0010 0.0010 -0.0001  
Z -0.0000 -0.0002 0.0001 -0.0004 0.0011 -0.0002

FREQ(CM\*\*-1) 1129.00 1129.20 1134.22 1134.34 1140.01 1140.64

AT. 1 I X 0.0001 -0.0000 -0.0003 0.0000 -0.0003 0.0000

Y 0.0001 -0.0000 -0.0005 0.0001 -0.0005 0.0000  
Z -0.0000 0.0000 0.0001 -0.0000 0.0002 -0.0000

AT. 2 I X -0.0001 -0.0000 0.0003 0.0000 -0.0003 -0.0000

Y -0.0001 -0.0000 0.0005 0.0001 -0.0005 -0.0000  
Z 0.0000 0.0000 -0.0001 -0.0000 0.0002 0.0000

AT. 3 I X 0.0000 -0.0000 0.0000 -0.0000 0.0000 0.0000

Y 0.0000 -0.0000 0.0000 0.0000 -0.0000 -0.0000  
Z 0.0000 -0.0001 0.0000 -0.0000 0.0000 -0.0000

AT. 4 I X -0.0000 -0.0000 -0.0000 -0.0000 0.0000 -0.0000

Y -0.0000 -0.0000 -0.0000 0.0000 -0.0000 0.0000  
Z -0.0000 -0.0001 -0.0000 -0.0000 0.0000 0.0000

AT. 5 O X 0.0009 -0.0015 0.0017 0.0000 0.0006 -0.0001

Y 0.0000 0.0005 -0.0026 0.0002 -0.0021 0.0001  
Z -0.0017 0.0028 -0.0027 -0.0000 -0.0011 0.0002

AT. 6 O X -0.0009 -0.0015 -0.0017 0.0000 0.0006 0.0001

Y -0.0000 0.0005 0.0026 0.0002 -0.0021 -0.0001  
Z 0.0017 0.0028 0.0027 -0.0000 -0.0011 -0.0002



AT. 7 O X 0.0008 -0.0012 0.0009 0.0002 0.0004 0.0001  
Y -0.0009 0.0011 -0.0003 -0.0002 -0.0001 -0.0000  
Z 0.0008 -0.0012 0.0007 0.0001 0.0005 0.0000

AT. 8 O X -0.0008 -0.0012 -0.0009 0.0002 0.0004 -0.0001  
Y 0.0009 0.0011 0.0003 -0.0002 -0.0001 0.0000  
Z -0.0008 -0.0012 -0.0007 0.0001 0.0005 -0.0000

AT. 9 N X -0.0091 0.0125 -0.0004 -0.0013 0.0045 0.0001  
Y 0.0072 -0.0095 -0.0006 0.0010 -0.0039 -0.0001  
Z 0.0033 -0.0049 0.0006 0.0003 -0.0021 -0.0002

AT. 10 N X 0.0091 0.0125 0.0004 -0.0013 0.0045 -0.0001  
Y -0.0072 -0.0095 0.0006 0.0010 -0.0039 0.0001  
Z -0.0033 -0.0049 -0.0006 0.0003 -0.0021 0.0002

AT. 11 N X -0.0074 0.0105 -0.0056 -0.0002 -0.0046 -0.0001  
Y 0.0053 -0.0077 0.0045 -0.0001 0.0044 0.0002  
Z 0.0021 -0.0030 0.0019 0.0002 0.0003 0.0000

AT. 12 N X 0.0074 0.0105 0.0056 -0.0002 -0.0046 0.0001  
Y -0.0053 -0.0077 -0.0045 -0.0001 0.0044 -0.0002  
Z -0.0021 -0.0030 -0.0019 0.0002 0.0003 -0.0000

AT. 13 C X -0.0005 -0.0005 0.0047 -0.0006 0.0055 -0.0003  
Y -0.0023 0.0017 0.0066 -0.0008 0.0063 -0.0002  
Z 0.0010 -0.0013 0.0008 -0.0002 0.0008 -0.0003

AT. 14 C X 0.0005 -0.0005 -0.0047 -0.0006 0.0055 0.0003  
Y 0.0023 0.0017 -0.0066 -0.0008 0.0063 0.0002  
Z -0.0010 -0.0013 -0.0008 -0.0002 0.0008 0.0003

AT. 15 C X 0.0045 -0.0007 -0.0234 0.0027 -0.0237 0.0010  
Y 0.0010 -0.0011 -0.0013 0.0003 -0.0018 -0.0000  
Z 0.0019 -0.0011 -0.0051 0.0008 -0.0055 0.0003

AT. 16 C X -0.0045 -0.0007 0.0234 0.0027 -0.0237 -0.0010  
Y -0.0010 -0.0011 0.0013 0.0003 -0.0018 0.0000  
Z -0.0019 -0.0011 0.0051 0.0008 -0.0055 -0.0003

AT. 17 H X -0.0295 0.0146 0.1026 -0.0139 0.1054 -0.0049  
Y -0.0036 -0.0005 0.0261 -0.0027 0.0259 -0.0010

Z -0.0062 0.0044 0.0123 -0.0022 0.0130 -0.0009  
AT. 18 H X 0.0295 0.0146 -0.1026 -0.0139 0.1054 0.0049  
Y 0.0036 -0.0005 -0.0261 -0.0027 0.0259 0.0010  
Z 0.0062 0.0044 -0.0123 -0.0022 0.0130 0.0009  
AT. 19 H X -0.0264 0.0056 0.1456 -0.0152 0.1479 -0.0048  
Y -0.0094 0.0064 0.0266 -0.0041 0.0292 -0.0014  
Z -0.0109 0.0034 0.0544 -0.0060 0.0556 -0.0019  
AT. 20 H X 0.0264 0.0056 -0.1456 -0.0152 0.1479 0.0048  
Y 0.0094 0.0064 -0.0266 -0.0041 0.0292 0.0014  
Z 0.0109 0.0034 -0.0544 -0.0060 0.0556 0.0019  
AT. 21 C X -0.0006 0.0009 -0.0004 -0.0000 -0.0004 -0.0001  
Y -0.0005 0.0010 -0.0014 0.0002 -0.0008 0.0000  
Z 0.0001 0.0003 -0.0006 -0.0003 0.0007 -0.0001  
AT. 22 C X 0.0006 0.0009 0.0004 -0.0000 -0.0004 0.0001  
Y 0.0005 0.0010 0.0014 0.0002 -0.0008 -0.0000  
Z -0.0001 0.0003 0.0006 -0.0003 0.0007 0.0001  
AT. 23 C X 0.0014 -0.0025 0.0014 -0.0006 0.0015 0.0000  
Y 0.0008 -0.0015 0.0016 0.0001 0.0000 -0.0000  
Z -0.0007 0.0009 -0.0004 0.0001 -0.0004 0.0001  
AT. 24 C X -0.0014 -0.0025 -0.0014 -0.0006 0.0015 -0.0000  
Y -0.0008 -0.0015 -0.0016 0.0001 0.0000 0.0000  
Z 0.0007 0.0009 0.0004 0.0001 -0.0004 -0.0001  
AT. 25 H X -0.0108 0.0188 -0.0171 0.0011 -0.0017 0.0005  
Y -0.0014 0.0024 -0.0019 0.0002 -0.0001 0.0001  
Z -0.0001 -0.0001 0.0011 0.0013 -0.0028 0.0000  
AT. 26 H X 0.0108 0.0188 0.0171 0.0011 -0.0017 -0.0005  
Y 0.0014 0.0024 0.0019 0.0002 -0.0001 -0.0001  
Z 0.0001 -0.0001 -0.0011 0.0013 -0.0028 -0.0000  
AT. 27 H X -0.0056 0.0107 -0.0052 0.0056 -0.0161 -0.0007  
Y -0.0056 0.0097 -0.0082 0.0010 -0.0045 0.0000  
Z -0.0029 0.0045 -0.0044 -0.0006 0.0004 0.0002  
AT. 28 H X 0.0056 0.0107 0.0052 0.0056 -0.0161 0.0007

Y 0.0056 0.0097 0.0082 0.0010 -0.0045 -0.0000  
Z 0.0029 0.0045 0.0044 -0.0006 0.0004 -0.0002  
AT. 29 C X 0.0067 -0.0093 0.0001 0.0009 -0.0030 -0.0001  
Y -0.0042 0.0054 0.0007 -0.0006 0.0025 -0.0001  
Z 0.0072 -0.0104 0.0032 0.0009 -0.0002 0.0001  
AT. 30 C X -0.0067 -0.0093 -0.0001 0.0009 -0.0030 0.0001  
Y 0.0042 0.0054 -0.0007 -0.0006 0.0025 0.0001  
Z -0.0072 -0.0104 -0.0032 0.0009 -0.0002 -0.0001  
AT. 31 H X 0.0360 -0.0511 0.0124 0.0039 -0.0064 -0.0005  
Y -0.0093 0.0131 -0.0045 -0.0013 -0.0002 -0.0006  
Z 0.0172 -0.0240 0.0031 0.0016 -0.0061 -0.0009  
AT. 32 H X -0.0360 -0.0511 -0.0124 0.0039 -0.0064 0.0005  
Y 0.0093 0.0131 0.0045 -0.0013 -0.0002 0.0006  
Z -0.0172 -0.0240 -0.0031 0.0016 -0.0061 0.0009  
AT. 33 H X -0.0286 0.0428 -0.0158 -0.0027 0.0037 0.0010  
Y 0.0086 -0.0128 0.0074 0.0003 0.0034 -0.0003  
Z -0.0220 0.0324 -0.0104 -0.0019 0.0037 0.0009  
AT. 34 H X 0.0286 0.0428 0.0158 -0.0027 0.0037 -0.0010  
Y -0.0086 -0.0128 -0.0074 0.0003 0.0034 0.0003  
Z 0.0220 0.0324 0.0104 -0.0019 0.0037 -0.0009  
AT. 35 C X 0.0035 -0.0054 0.0034 0.0005 -0.0003 0.0002  
Y 0.0006 0.0003 -0.0027 0.0001 -0.0017 0.0001  
Z -0.0125 0.0180 -0.0064 -0.0011 -0.0019 0.0000  
AT. 36 C X -0.0035 -0.0054 -0.0034 0.0005 -0.0003 -0.0002  
Y -0.0006 0.0003 0.0027 0.0001 -0.0017 -0.0001  
Z 0.0125 0.0180 0.0064 -0.0011 -0.0019 -0.0000  
AT. 37 C X 0.0035 -0.0050 0.0028 -0.0000 0.0036 0.0001  
Y -0.0055 0.0078 -0.0037 -0.0001 -0.0028 -0.0001  
Z 0.0063 -0.0093 0.0044 0.0003 0.0025 0.0000  
AT. 38 C X -0.0035 -0.0050 -0.0028 -0.0000 0.0036 -0.0001  
Y 0.0055 0.0078 0.0037 -0.0001 -0.0028 0.0001  
Z -0.0063 -0.0093 -0.0044 0.0003 0.0025 -0.0000

AT. 39 H X -0.0115 0.0175 -0.0084 -0.0011 -0.0031 0.0001  
Y 0.0154 -0.0234 0.0178 0.0005 0.0123 0.0002  
Z -0.0131 0.0197 -0.0126 -0.0006 -0.0086 -0.0001

AT. 40 H X 0.0115 0.0175 0.0084 -0.0011 -0.0031 -0.0001  
Y -0.0154 -0.0234 -0.0178 0.0005 0.0123 -0.0002  
Z 0.0131 0.0197 0.0126 -0.0006 -0.0086 0.0001

AT. 41 H X 0.0145 -0.0217 0.0119 0.0010 0.0081 0.0002  
Y -0.0267 0.0385 -0.0175 -0.0025 -0.0110 -0.0010  
Z 0.0107 -0.0149 0.0054 0.0011 0.0037 0.0007

AT. 42 H X -0.0145 -0.0217 -0.0119 0.0010 0.0081 -0.0002  
Y 0.0267 0.0385 0.0175 -0.0025 -0.0110 0.0010  
Z -0.0107 -0.0149 -0.0054 0.0011 0.0037 -0.0007

AT. 43 C X 0.0029 -0.0042 0.0028 -0.0001 0.0024 -0.0001  
Y 0.0011 -0.0012 -0.0013 0.0004 -0.0017 -0.0001  
Z -0.0099 0.0142 -0.0069 -0.0004 -0.0048 -0.0002

AT. 44 C X -0.0029 -0.0042 -0.0028 -0.0001 0.0024 0.0001  
Y -0.0011 -0.0012 0.0013 0.0004 -0.0017 0.0001  
Z 0.0099 0.0142 0.0069 -0.0004 -0.0048 0.0002

AT. 45 H X 0.0249 -0.0364 0.0193 0.0009 0.0156 0.0009  
Y -0.0059 0.0081 -0.0010 -0.0010 0.0009 -0.0003  
Z -0.0179 0.0268 -0.0182 0.0003 -0.0164 -0.0006

AT. 46 H X -0.0249 -0.0364 -0.0193 0.0009 0.0156 -0.0009  
Y 0.0059 0.0081 0.0010 -0.0010 0.0009 0.0003  
Z 0.0179 0.0268 0.0182 0.0003 -0.0164 0.0006

AT. 47 H X -0.0183 0.0266 -0.0160 0.0001 -0.0171 -0.0006  
Y 0.0066 -0.0091 0.0015 0.0011 -0.0019 0.0004  
Z 0.0261 -0.0379 0.0226 0.0001 0.0223 0.0010

AT. 48 H X 0.0183 0.0266 0.0160 0.0001 -0.0171 0.0006  
Y -0.0066 -0.0091 -0.0015 0.0011 -0.0019 -0.0004  
Z -0.0261 -0.0379 -0.0226 0.0001 0.0223 -0.0010

AT. 49 C X 0.0078 -0.0108 0.0037 0.0002 0.0029 -0.0002  
Y -0.0057 0.0078 -0.0014 -0.0006 0.0000 0.0000

Z 0.0076 -0.0110 0.0053 0.0006 0.0020 0.0001  
AT. 50 C X -0.0078 -0.0108 -0.0037 0.0002 0.0029 0.0002  
Y 0.0057 0.0078 0.0014 -0.0006 0.0000 -0.0000  
Z -0.0076 -0.0110 -0.0053 0.0006 0.0020 -0.0001  
AT. 51 C X 0.0023 -0.0032 -0.0011 0.0006 -0.0037 0.0000  
Y -0.0031 0.0042 0.0001 -0.0004 0.0019 0.0001  
Z -0.0104 0.0145 -0.0018 -0.0011 0.0027 0.0001  
AT. 52 C X -0.0023 -0.0032 0.0011 0.0006 -0.0037 -0.0000  
Y 0.0031 0.0042 -0.0001 -0.0004 0.0019 -0.0001  
Z 0.0104 0.0145 0.0018 -0.0011 0.0027 -0.0001  
AT. 53 H X -0.0086 0.0120 -0.0045 -0.0006 -0.0034 -0.0002  
Y 0.0128 -0.0169 -0.0013 0.0021 -0.0060 -0.0002  
Z 0.0289 -0.0389 0.0022 0.0041 -0.0080 0.0001  
AT. 54 H X 0.0086 0.0120 0.0045 -0.0006 -0.0034 0.0002  
Y -0.0128 -0.0169 0.0013 0.0021 -0.0060 0.0002  
Z -0.0289 -0.0389 -0.0022 0.0041 -0.0080 -0.0001  
AT. 55 H X 0.0146 -0.0205 0.0048 0.0014 -0.0003 -0.0001  
Y -0.0227 0.0312 -0.0052 -0.0028 0.0043 0.0001  
Z -0.0263 0.0360 -0.0045 -0.0035 0.0078 -0.0000  
AT. 56 H X -0.0146 -0.0205 -0.0048 0.0014 -0.0003 0.0001  
Y 0.0227 0.0312 0.0052 -0.0028 0.0043 -0.0001  
Z 0.0263 0.0360 0.0045 -0.0035 0.0078 0.0000  
AT. 57 C X -0.0021 0.0032 -0.0015 -0.0003 0.0004 -0.0001  
Y -0.0002 -0.0003 0.0015 0.0001 0.0013 0.0001  
Z 0.0047 -0.0069 0.0024 0.0003 0.0005 -0.0002  
AT. 58 C X 0.0021 0.0032 0.0015 -0.0003 0.0004 0.0001  
Y 0.0002 -0.0003 -0.0015 0.0001 0.0013 -0.0001  
Z -0.0047 -0.0069 -0.0024 0.0003 0.0005 0.0002  
AT. 59 H X 0.0127 -0.0174 0.0033 0.0011 -0.0014 0.0000  
Y -0.0120 0.0174 -0.0050 -0.0009 -0.0002 0.0002  
Z -0.0029 0.0056 -0.0042 -0.0002 -0.0030 0.0000  
AT. 60 H X -0.0127 -0.0174 -0.0033 0.0011 -0.0014 -0.0000

Y 0.0120 0.0174 0.0050 -0.0009 -0.0002 -0.0002  
Z 0.0029 0.0056 0.0042 -0.0002 -0.0030 -0.0000  
AT. 61 H X -0.0125 0.0187 -0.0092 -0.0011 -0.0026 0.0002  
Y 0.0126 -0.0183 0.0069 0.0007 -0.0008 -0.0007  
Z -0.0103 0.0150 -0.0065 -0.0007 -0.0008 0.0005  
AT. 62 H X 0.0125 0.0187 0.0092 -0.0011 -0.0026 -0.0002  
Y -0.0126 -0.0183 -0.0069 0.0007 -0.0008 0.0007  
Z 0.0103 0.0150 0.0065 -0.0007 -0.0008 -0.0005  
AT. 63 H X 0.0122 -0.0182 0.0079 0.0010 0.0040 -0.0001  
Y -0.0038 0.0054 -0.0034 -0.0007 -0.0035 -0.0004  
Z -0.0061 0.0093 -0.0028 -0.0003 0.0010 0.0003  
AT. 64 H X -0.0122 -0.0182 -0.0079 0.0010 0.0040 0.0001  
Y 0.0038 0.0054 0.0034 -0.0007 -0.0035 0.0004  
Z 0.0061 0.0093 0.0028 -0.0003 0.0010 -0.0003  
AT. 65 C X -0.0028 0.0040 -0.0019 0.0000 -0.0019 0.0001  
Y 0.0022 -0.0028 -0.0003 0.0004 -0.0010 0.0000  
Z -0.0022 0.0032 -0.0019 -0.0002 -0.0009 -0.0001  
AT. 66 C X 0.0028 0.0040 0.0019 0.0000 -0.0019 -0.0001  
Y -0.0022 -0.0028 0.0003 0.0004 -0.0010 -0.0000  
Z 0.0022 0.0032 0.0019 -0.0002 -0.0009 0.0001  
AT. 67 H X 0.0060 -0.0097 0.0067 0.0002 0.0051 -0.0005  
Y -0.0080 0.0114 -0.0055 -0.0007 -0.0031 0.0002  
Z 0.0004 0.0009 -0.0041 0.0007 -0.0046 0.0002  
AT. 68 H X -0.0060 -0.0097 -0.0067 0.0002 0.0051 0.0005  
Y 0.0080 0.0114 0.0055 -0.0007 -0.0031 -0.0002  
Z -0.0004 0.0009 0.0041 0.0007 -0.0046 -0.0002  
AT. 69 H X -0.0089 0.0120 -0.0028 -0.0010 -0.0004 0.0002  
Y 0.0058 -0.0084 0.0045 -0.0002 0.0040 0.0001  
Z 0.0161 -0.0224 0.0077 0.0010 0.0041 -0.0000  
AT. 70 H X 0.0089 0.0120 0.0028 -0.0010 -0.0004 -0.0002  
Y -0.0058 -0.0084 -0.0045 -0.0002 0.0040 -0.0001  
Z -0.0161 -0.0224 -0.0077 0.0010 0.0041 0.0000

AT. 71 H X 0.0115 -0.0156 0.0053 0.0010 0.0014 0.0003  
Y -0.0040 0.0052 -0.0006 -0.0007 0.0015 -0.0003  
Z 0.0006 -0.0015 0.0032 -0.0008 0.0048 -0.0004

AT. 72 H X -0.0115 -0.0156 -0.0053 0.0010 0.0014 -0.0003  
Y 0.0040 0.0052 0.0006 -0.0007 0.0015 0.0003  
Z -0.0006 -0.0015 -0.0032 -0.0008 0.0048 0.0004

AT. 73 C X -0.0081 0.0114 -0.0042 -0.0005 -0.0014 -0.0000  
Y 0.0047 -0.0068 0.0027 0.0003 0.0012 -0.0001  
Z 0.0029 -0.0042 0.0014 0.0003 -0.0001 -0.0000

AT. 74 C X 0.0081 0.0114 0.0042 -0.0005 -0.0014 0.0000  
Y -0.0047 -0.0068 -0.0027 0.0003 0.0012 0.0001  
Z -0.0029 -0.0042 -0.0014 0.0003 -0.0001 0.0000

AT. 75 H X 0.0010 0.0001 0.0016 -0.0009 0.0052 0.0007  
Y -0.0000 -0.0010 -0.0007 0.0008 -0.0035 -0.0004  
Z 0.0029 -0.0043 0.0009 0.0008 -0.0018 0.0002

AT. 76 H X -0.0010 0.0001 -0.0016 -0.0009 0.0052 -0.0007  
Y 0.0000 -0.0010 0.0007 0.0008 -0.0035 0.0004  
Z -0.0029 -0.0043 -0.0009 0.0008 -0.0018 -0.0002

AT. 77 H X -0.0034 0.0046 -0.0057 0.0004 -0.0070 -0.0007  
Y 0.0033 -0.0042 0.0040 -0.0005 0.0047 0.0003  
Z -0.0003 -0.0001 0.0016 0.0001 0.0018 0.0003

AT. 78 H X 0.0034 0.0046 0.0057 0.0004 -0.0070 0.0007  
Y -0.0033 -0.0042 -0.0040 -0.0005 0.0047 -0.0003  
Z 0.0003 -0.0001 -0.0016 0.0001 0.0018 -0.0003

AT. 79 I X -0.0000 -0.0000 -0.0000 -0.0002 -0.0000 -0.0001  
Y 0.0001 -0.0000 0.0000 0.0004 0.0000 0.0004  
Z -0.0000 0.0000 -0.0000 -0.0003 -0.0000 -0.0002

AT. 80 I X 0.0000 -0.0000 0.0000 -0.0002 -0.0000 0.0001  
Y -0.0001 -0.0000 -0.0000 0.0004 0.0000 -0.0004  
Z 0.0000 0.0000 0.0000 -0.0003 -0.0000 0.0002

AT. 81 I X -0.0000 0.0000 -0.0000 0.0000 -0.0000 0.0001  
Y 0.0000 -0.0000 -0.0000 0.0000 -0.0000 -0.0000

Z 0.0000 -0.0000 -0.0000 -0.0000 -0.0000 -0.0001  
AT. 82 I X 0.0000 0.0000 0.0000 0.0000 -0.0000 -0.0001  
Y -0.0000 -0.0000 0.0000 0.0000 -0.0000 0.0000  
Z -0.0000 -0.0000 0.0000 -0.0000 -0.0000 0.0001  
AT. 83 O X -0.0015 0.0004 0.0002 0.0039 0.0002 0.0017  
Y 0.0001 -0.0000 0.0000 0.0017 0.0001 0.0017  
Z -0.0014 0.0003 0.0001 0.0022 0.0001 0.0008  
AT. 84 O X 0.0015 0.0004 -0.0002 0.0039 0.0002 -0.0017  
Y -0.0001 -0.0000 -0.0000 0.0017 0.0001 -0.0017  
Z 0.0014 0.0003 -0.0001 0.0022 0.0001 -0.0008  
AT. 85 O X -0.0009 0.0004 0.0001 0.0014 0.0004 0.0006  
Y -0.0008 0.0002 0.0001 0.0008 0.0003 0.0001  
Z 0.0008 -0.0002 -0.0001 -0.0009 -0.0003 -0.0006  
AT. 86 O X 0.0009 0.0004 -0.0001 0.0014 0.0004 -0.0006  
Y 0.0008 0.0002 -0.0001 0.0008 0.0003 -0.0001  
Z -0.0008 -0.0002 0.0001 -0.0009 -0.0003 0.0006  
AT. 87 N X 0.0109 -0.0029 -0.0007 -0.0012 -0.0006 0.0066  
Y 0.0037 -0.0010 -0.0002 -0.0003 -0.0002 0.0023  
Z 0.0002 -0.0000 0.0002 0.0040 0.0004 0.0039  
AT. 88 N X -0.0109 -0.0029 0.0007 -0.0012 -0.0006 -0.0066  
Y -0.0037 -0.0010 0.0002 -0.0003 -0.0002 -0.0023  
Z -0.0002 -0.0000 -0.0002 0.0040 0.0004 -0.0039  
AT. 89 N X 0.0080 -0.0022 -0.0009 -0.0091 -0.0025 -0.0088  
Y 0.0030 -0.0009 -0.0004 -0.0032 -0.0010 -0.0034  
Z 0.0013 -0.0005 -0.0003 -0.0013 -0.0004 -0.0010  
AT. 90 N X -0.0080 -0.0022 0.0009 -0.0091 -0.0025 0.0088  
Y -0.0030 -0.0009 0.0004 -0.0032 -0.0010 0.0034  
Z -0.0013 -0.0005 0.0003 -0.0013 -0.0004 0.0010  
AT. 91 C X 0.0008 -0.0003 -0.0001 0.0024 0.0001 0.0023  
Y -0.0014 0.0002 0.0000 -0.0039 -0.0001 -0.0055  
Z -0.0004 0.0001 0.0001 -0.0030 0.0001 -0.0024  
AT. 92 C X -0.0008 -0.0003 0.0001 0.0024 0.0001 -0.0023



Y 0.0014 0.0002 -0.0000 -0.0039 -0.0001 0.0055  
Z 0.0004 0.0001 -0.0001 -0.0030 0.0001 0.0024  
AT. 93 C X -0.0027 0.0008 -0.0003 -0.0201 -0.0008 -0.0195  
Y 0.0018 -0.0005 0.0001 0.0073 0.0002 0.0093  
Z 0.0022 -0.0006 -0.0002 0.0027 -0.0001 0.0040  
AT. 94 C X 0.0027 0.0008 0.0003 -0.0201 -0.0008 0.0195  
Y -0.0018 -0.0005 -0.0001 0.0073 0.0002 -0.0093  
Z -0.0022 -0.0006 0.0002 0.0027 -0.0001 -0.0040  
AT. 95 H X 0.0226 -0.0056 -0.0008 0.0548 -0.0000 0.0778  
Y -0.0100 0.0027 -0.0004 -0.0483 -0.0013 -0.0558  
Z -0.0060 0.0012 0.0013 0.0143 0.0016 0.0071  
AT. 96 H X -0.0226 -0.0056 0.0008 0.0548 -0.0000 -0.0778  
Y 0.0100 0.0027 0.0004 -0.0483 -0.0013 0.0558  
Z 0.0060 0.0012 -0.0013 0.0143 0.0016 -0.0071  
AT. 97 H X 0.0066 -0.0016 0.0037 0.1331 0.0074 0.1215  
Y -0.0140 0.0036 -0.0009 -0.0674 -0.0023 -0.0771  
Z -0.0035 0.0009 -0.0015 -0.0535 -0.0028 -0.0516  
AT. 98 H X -0.0066 -0.0016 -0.0037 0.1331 0.0074 -0.1215  
Y 0.0140 0.0036 0.0009 -0.0674 -0.0023 0.0771  
Z 0.0035 0.0009 0.0015 -0.0535 -0.0028 0.0516  
AT. 99 C X 0.0002 -0.0001 -0.0001 -0.0010 -0.0002 -0.0015  
Y -0.0005 0.0002 0.0001 0.0009 0.0001 0.0021  
Z -0.0004 0.0001 -0.0000 -0.0011 -0.0002 -0.0009  
AT. 100 C X -0.0002 -0.0001 0.0001 -0.0010 -0.0002 0.0015  
Y 0.0005 0.0002 -0.0001 0.0009 0.0001 -0.0021  
Z 0.0004 0.0001 0.0000 -0.0011 -0.0002 0.0009  
AT. 101 C X -0.0008 0.0003 0.0002 0.0002 0.0000 0.0055  
Y 0.0013 -0.0005 -0.0002 -0.0012 -0.0003 -0.0025  
Z -0.0006 0.0002 0.0002 0.0008 0.0002 0.0015  
AT. 102 C X 0.0008 0.0003 -0.0002 0.0002 0.0000 -0.0055  
Y -0.0013 -0.0005 0.0002 -0.0012 -0.0003 0.0025  
Z 0.0006 0.0002 -0.0002 0.0008 0.0002 -0.0015

AT.103 H X 0.0117 -0.0043 -0.0017 -0.0062 -0.0019 -0.0207  
Y -0.0043 0.0016 0.0007 0.0017 0.0006 0.0091  
Z 0.0016 -0.0008 -0.0003 -0.0010 -0.0005 0.0025

AT.104 H X -0.0117 -0.0043 0.0017 -0.0062 -0.0019 0.0207  
Y 0.0043 0.0016 -0.0007 0.0017 0.0006 -0.0091  
Z -0.0016 -0.0008 0.0003 -0.0010 -0.0005 -0.0025

AT.105 H X -0.0003 -0.0000 0.0002 0.0052 0.0022 -0.0327  
Y -0.0060 0.0020 0.0009 0.0055 0.0009 0.0232  
Z -0.0034 0.0011 0.0006 0.0044 0.0011 0.0041

AT.106 H X 0.0003 -0.0000 -0.0002 0.0052 0.0022 0.0327  
Y 0.0060 0.0020 -0.0009 0.0055 0.0009 -0.0232  
Z 0.0034 0.0011 -0.0006 0.0044 0.0011 -0.0041

AT.107 C X -0.0059 0.0016 0.0004 0.0007 0.0004 -0.0037  
Y -0.0021 0.0007 0.0000 -0.0003 0.0001 -0.0018  
Z 0.0089 -0.0024 -0.0009 -0.0044 -0.0015 0.0004

AT.108 C X 0.0059 0.0016 -0.0004 0.0007 0.0004 0.0037  
Y 0.0021 0.0007 -0.0000 -0.0003 0.0001 0.0018  
Z -0.0089 -0.0024 0.0009 -0.0044 -0.0015 -0.0004

AT.109 H X -0.0335 0.0092 0.0023 0.0120 0.0025 -0.0082  
Y 0.0017 -0.0004 0.0006 0.0016 0.0014 0.0039  
Z 0.0237 -0.0065 -0.0004 -0.0042 0.0004 0.0119

AT.110 H X 0.0335 0.0092 -0.0023 0.0120 0.0025 0.0082  
Y -0.0017 -0.0004 -0.0006 0.0016 0.0014 -0.0039  
Z -0.0237 -0.0065 0.0004 -0.0042 0.0004 -0.0119

AT.111 H X 0.0250 -0.0064 -0.0015 -0.0056 -0.0012 0.0113  
Y 0.0009 -0.0006 0.0001 -0.0071 -0.0016 -0.0096  
Z -0.0262 0.0068 0.0011 0.0042 0.0007 -0.0144

AT.112 H X -0.0250 -0.0064 0.0015 -0.0056 -0.0012 -0.0113  
Y -0.0009 -0.0006 -0.0001 -0.0071 -0.0016 0.0096  
Z 0.0262 0.0068 -0.0011 0.0042 0.0007 0.0144

AT.113 C X -0.0076 0.0021 0.0008 0.0025 0.0009 -0.0012  
Y 0.0013 -0.0004 -0.0000 0.0009 0.0001 0.0021

Z -0.0109 0.0028 0.0010 0.0084 0.0019 0.0035  
AT. 114 C X 0.0076 0.0021 -0.0008 0.0025 0.0009 0.0012  
Y -0.0013 -0.0004 0.0000 0.0009 0.0001 -0.0021  
Z 0.0109 0.0028 -0.0010 0.0084 0.0019 -0.0035  
AT. 115 C X -0.0031 0.0009 0.0004 0.0055 0.0014 0.0063  
Y -0.0049 0.0014 0.0005 0.0032 0.0009 0.0019  
Z 0.0072 -0.0019 -0.0008 -0.0059 -0.0017 -0.0041  
AT. 116 C X 0.0031 0.0009 -0.0004 0.0055 0.0014 -0.0063  
Y 0.0049 0.0014 -0.0005 0.0032 0.0009 -0.0019  
Z -0.0072 -0.0019 0.0008 -0.0059 -0.0017 0.0041  
AT. 117 H X 0.0155 -0.0040 -0.0019 -0.0129 -0.0040 -0.0082  
Y 0.0132 -0.0036 -0.0018 -0.0177 -0.0050 -0.0183  
Z -0.0171 0.0045 0.0023 0.0187 0.0055 0.0161  
AT. 118 H X -0.0155 -0.0040 0.0019 -0.0129 -0.0040 0.0082  
Y -0.0132 -0.0036 0.0018 -0.0177 -0.0050 0.0183  
Z 0.0171 0.0045 -0.0023 0.0187 0.0055 -0.0161  
AT. 119 H X -0.0191 0.0048 0.0023 0.0199 0.0058 0.0167  
Y -0.0215 0.0055 0.0025 0.0208 0.0065 0.0160  
Z 0.0141 -0.0036 -0.0017 -0.0146 -0.0046 -0.0116  
AT. 120 H X 0.0191 0.0048 -0.0023 0.0199 0.0058 -0.0167  
Y 0.0215 0.0055 -0.0025 0.0208 0.0065 -0.0160  
Z -0.0141 -0.0036 0.0017 -0.0146 -0.0046 0.0116  
AT. 121 C X -0.0037 0.0009 0.0005 0.0044 0.0012 0.0048  
Y 0.0021 -0.0005 -0.0002 -0.0016 -0.0003 0.0000  
Z -0.0088 0.0024 0.0011 0.0089 0.0025 0.0069  
AT. 122 C X 0.0037 0.0009 -0.0005 0.0044 0.0012 -0.0048  
Y -0.0021 -0.0005 0.0002 -0.0016 -0.0003 -0.0000  
Z 0.0088 0.0024 -0.0011 0.0089 0.0025 -0.0069  
AT. 123 H X -0.0323 0.0092 0.0046 0.0331 0.0108 0.0282  
Y 0.0066 -0.0019 -0.0011 -0.0071 -0.0025 -0.0071  
Z -0.0176 0.0050 0.0026 0.0189 0.0063 0.0177  
AT. 124 H X 0.0323 0.0092 -0.0046 0.0331 0.0108 -0.0282

Y -0.0066 -0.0019 0.0011 -0.0071 -0.0025 0.0071  
Z 0.0176 0.0050 -0.0026 0.0189 0.0063 -0.0177  
AT. 125 H X 0.0240 -0.0064 -0.0031 -0.0289 -0.0083 -0.0252  
Y -0.0044 0.0012 0.0007 0.0090 0.0029 0.0118  
Z 0.0217 -0.0057 -0.0028 -0.0263 -0.0075 -0.0237  
AT. 126 H X -0.0240 -0.0064 0.0031 -0.0289 -0.0083 0.0252  
Y 0.0044 0.0012 -0.0007 0.0090 0.0029 -0.0118  
Z -0.0217 -0.0057 0.0028 -0.0263 -0.0075 0.0237  
AT. 127 C X -0.0059 0.0015 0.0004 0.0080 0.0011 0.0046  
Y -0.0033 0.0009 0.0003 0.0021 0.0005 -0.0006  
Z 0.0097 -0.0026 -0.0011 -0.0067 -0.0024 -0.0035  
AT. 128 C X 0.0059 0.0015 -0.0004 0.0080 0.0011 -0.0046  
Y 0.0033 0.0009 -0.0003 0.0021 0.0005 0.0006  
Z -0.0097 -0.0026 0.0011 -0.0067 -0.0024 0.0035  
AT. 129 C X -0.0052 0.0014 0.0002 -0.0025 -0.0001 -0.0063  
Y -0.0019 0.0004 0.0001 0.0005 0.0000 -0.0006  
Z -0.0085 0.0022 0.0006 0.0027 0.0010 -0.0022  
AT. 130 C X 0.0052 0.0014 -0.0002 -0.0025 -0.0001 0.0063  
Y 0.0019 0.0004 -0.0001 0.0005 0.0000 0.0006  
Z 0.0085 0.0022 -0.0006 0.0027 0.0010 0.0022  
AT. 131 H X 0.0153 -0.0041 -0.0016 -0.0144 -0.0029 -0.0042  
Y 0.0098 -0.0024 -0.0007 -0.0070 -0.0001 0.0037  
Z 0.0249 -0.0067 -0.0023 -0.0166 -0.0029 0.0031  
AT. 132 H X -0.0153 -0.0041 0.0016 -0.0144 -0.0029 0.0042  
Y -0.0098 -0.0024 0.0007 -0.0070 -0.0001 -0.0037  
Z -0.0249 -0.0067 0.0023 -0.0166 -0.0029 -0.0031  
AT. 133 H X -0.0231 0.0062 0.0021 0.0163 0.0031 0.0010  
Y -0.0154 0.0042 0.0015 0.0093 0.0019 -0.0010  
Z -0.0207 0.0058 0.0019 0.0079 0.0022 -0.0059  
AT. 134 H X 0.0231 0.0062 -0.0021 0.0163 0.0031 -0.0010  
Y 0.0154 0.0042 -0.0015 0.0093 0.0019 0.0010  
Z 0.0207 0.0058 -0.0019 0.0079 0.0022 0.0059

AT. 135 C X 0.0035 -0.0010 -0.0004 -0.0008 -0.0004 0.0010  
Y -0.0010 0.0003 -0.0001 -0.0010 -0.0002 -0.0021  
Z 0.0039 -0.0009 -0.0003 -0.0030 -0.0005 -0.0011

AT. 136 C X -0.0035 -0.0010 0.0004 -0.0008 -0.0004 -0.0010  
Y 0.0010 0.0003 0.0001 -0.0010 -0.0002 0.0021  
Z -0.0039 -0.0009 0.0003 -0.0030 -0.0005 0.0011

AT. 137 H X -0.0149 0.0038 0.0013 0.0059 0.0020 -0.0022  
Y -0.0070 0.0018 0.0006 0.0043 0.0007 0.0008  
Z -0.0001 -0.0000 0.0003 0.0036 0.0004 0.0047

AT. 138 H X 0.0149 0.0038 -0.0013 0.0059 0.0020 0.0022  
Y 0.0070 0.0018 -0.0006 0.0043 0.0007 -0.0008  
Z 0.0001 -0.0000 -0.0003 0.0036 0.0004 -0.0047

AT. 139 H X 0.0141 -0.0036 -0.0012 -0.0082 -0.0020 -0.0019  
Y 0.0095 -0.0025 -0.0001 -0.0021 -0.0004 0.0034  
Z -0.0138 0.0035 0.0010 0.0076 0.0017 0.0012

AT. 140 H X -0.0141 -0.0036 0.0012 -0.0082 -0.0020 0.0019  
Y -0.0095 -0.0025 0.0001 -0.0021 -0.0004 -0.0034  
Z 0.0138 0.0035 -0.0010 0.0076 0.0017 -0.0012

AT. 141 H X -0.0108 0.0029 0.0010 0.0112 0.0025 0.0073  
Y 0.0026 -0.0006 0.0001 0.0017 0.0012 0.0039  
Z -0.0060 0.0016 0.0001 -0.0004 -0.0006 -0.0045

AT. 142 H X 0.0108 0.0029 -0.0010 0.0112 0.0025 -0.0073  
Y -0.0026 -0.0006 -0.0001 0.0017 0.0012 -0.0039  
Z 0.0060 0.0016 -0.0001 -0.0004 -0.0006 0.0045

AT. 143 C X 0.0027 -0.0007 -0.0002 -0.0038 -0.0006 -0.0025  
Y 0.0017 -0.0005 -0.0002 -0.0002 -0.0001 0.0015  
Z -0.0033 0.0009 0.0004 0.0026 0.0010 0.0016

AT. 144 C X -0.0027 -0.0007 0.0002 -0.0038 -0.0006 0.0025  
Y -0.0017 -0.0005 0.0002 -0.0002 -0.0001 -0.0015  
Z 0.0033 0.0009 -0.0004 0.0026 0.0010 -0.0016

AT. 145 H X -0.0095 0.0024 0.0011 0.0103 0.0030 0.0088  
Y -0.0066 0.0018 0.0008 0.0055 0.0016 0.0024

Z 0.0027 -0.0008 -0.0003 -0.0002 0.0001 0.0033  
AT. 146 H X 0.0095 0.0024 -0.0011 0.0103 0.0030 -0.0088  
Y 0.0066 0.0018 -0.0008 0.0055 0.0016 -0.0024  
Z -0.0027 -0.0008 0.0003 -0.0002 0.0001 -0.0033  
AT. 147 H X 0.0142 -0.0038 -0.0015 -0.0132 -0.0031 -0.0059  
Y 0.0011 -0.0003 0.0001 -0.0035 -0.0008 -0.0045  
Z 0.0134 -0.0036 -0.0014 -0.0130 -0.0032 -0.0067  
AT. 148 H X -0.0142 -0.0038 0.0015 -0.0132 -0.0031 0.0059  
Y -0.0011 -0.0003 -0.0001 -0.0035 -0.0008 0.0045  
Z -0.0134 -0.0036 0.0014 -0.0130 -0.0032 0.0067  
AT. 149 H X -0.0149 0.0041 0.0018 0.0089 0.0032 0.0016  
Y -0.0016 0.0005 0.0003 -0.0006 0.0002 -0.0018  
Z 0.0006 -0.0001 0.0001 -0.0049 -0.0007 -0.0060  
AT. 150 H X 0.0149 0.0041 -0.0018 0.0089 0.0032 -0.0016  
Y 0.0016 0.0005 -0.0003 -0.0006 0.0002 0.0018  
Z -0.0006 -0.0001 -0.0001 -0.0049 -0.0007 0.0060  
AT. 151 C X 0.0092 -0.0024 -0.0009 -0.0066 -0.0015 -0.0024  
Y 0.0018 -0.0004 -0.0001 -0.0013 -0.0003 -0.0005  
Z 0.0008 -0.0002 0.0000 0.0002 0.0002 0.0008  
AT. 152 C X -0.0092 -0.0024 0.0009 -0.0066 -0.0015 0.0024  
Y -0.0018 -0.0004 0.0001 -0.0013 -0.0003 0.0005  
Z -0.0008 -0.0002 -0.0000 0.0002 0.0002 -0.0008  
AT. 153 H X -0.0061 0.0019 0.0011 0.0064 0.0038 0.0099  
Y -0.0015 0.0005 0.0001 0.0018 0.0009 0.0029  
Z 0.0021 -0.0006 -0.0004 -0.0004 -0.0001 0.0010  
AT. 154 H X 0.0061 0.0019 -0.0011 0.0064 0.0038 -0.0099  
Y 0.0015 0.0005 -0.0001 0.0018 0.0009 -0.0029  
Z -0.0021 -0.0006 0.0004 -0.0004 -0.0001 -0.0010  
AT. 155 H X 0.0124 -0.0035 -0.0019 -0.0141 -0.0045 -0.0133  
Y 0.0046 -0.0014 -0.0005 -0.0050 -0.0012 -0.0041  
Z -0.0010 0.0004 0.0001 0.0015 0.0002 0.0007  
AT. 156 H X -0.0124 -0.0035 0.0019 -0.0141 -0.0045 0.0133

Y -0.0046 -0.0014 0.0005 -0.0050 -0.0012 0.0041  
Z 0.0010 0.0004 -0.0001 0.0015 0.0002 -0.0007  
AT. 157 O X -0.0000 0.0001 0.0001 -0.0000 -0.0001 -0.0000  
Y 0.0001 -0.0001 0.0001 0.0000 -0.0000 0.0000  
Z -0.0001 0.0001 -0.0000 0.0000 -0.0001 -0.0000  
AT. 158 O X 0.0000 0.0001 -0.0001 -0.0000 -0.0001 0.0000  
Y -0.0001 -0.0001 -0.0001 0.0000 -0.0000 -0.0000  
Z 0.0001 0.0001 0.0000 0.0000 -0.0001 0.0000  
AT. 159 O X 0.0000 -0.0000 -0.0002 -0.0000 -0.0002 0.0000  
Y 0.0002 -0.0001 -0.0003 0.0000 0.0003 -0.0000  
Z 0.0001 0.0000 -0.0000 0.0000 -0.0001 -0.0000  
AT. 160 O X -0.0000 -0.0000 0.0002 -0.0000 -0.0002 -0.0000  
Y -0.0002 -0.0001 0.0003 0.0000 0.0003 0.0000  
Z -0.0001 0.0000 0.0000 0.0000 -0.0001 0.0000  
AT. 161 H X 0.0026 -0.0042 -0.0009 0.0002 0.0017 0.0001  
Y -0.0006 0.0010 0.0001 -0.0002 -0.0002 -0.0000  
Z 0.0029 -0.0049 0.0006 0.0004 0.0016 0.0000  
AT. 162 H X -0.0026 -0.0042 0.0009 0.0002 0.0017 -0.0001  
Y 0.0006 0.0010 -0.0001 -0.0002 -0.0002 0.0000  
Z -0.0029 -0.0049 -0.0006 0.0004 0.0016 -0.0000  
AT. 163 H X -0.0005 0.0008 0.0009 0.0006 -0.0006 -0.0001  
Y -0.0021 0.0000 0.0044 -0.0003 -0.0064 0.0006  
Z -0.0003 -0.0004 0.0005 -0.0004 -0.0017 0.0002  
AT. 164 H X 0.0005 0.0008 -0.0009 0.0006 -0.0006 0.0001  
Y 0.0021 0.0000 -0.0044 -0.0003 -0.0064 -0.0006  
Z 0.0003 -0.0004 -0.0005 -0.0004 -0.0017 -0.0002  
AT. 165 O X -0.0001 0.0001 -0.0000 -0.0001 -0.0000 -0.0001  
Y 0.0001 -0.0001 0.0000 0.0001 0.0000 0.0002  
Z 0.0000 -0.0001 -0.0000 0.0002 -0.0000 0.0002  
AT. 166 O X 0.0001 0.0001 0.0000 -0.0001 -0.0000 0.0001  
Y -0.0001 -0.0001 -0.0000 0.0001 0.0000 -0.0002  
Z -0.0000 -0.0001 0.0000 0.0002 -0.0000 -0.0002

AT.167 H X 0.0004 -0.0002 0.0002 -0.0001 -0.0001 -0.0004  
Y 0.0001 -0.0001 -0.0003 -0.0010 0.0001 -0.0002  
Z -0.0019 0.0002 0.0001 0.0012 0.0005 0.0005

AT.168 H X -0.0004 -0.0002 -0.0002 -0.0001 -0.0001 0.0004  
Y -0.0001 -0.0001 0.0003 -0.0010 0.0001 0.0002  
Z 0.0019 0.0002 -0.0001 0.0012 0.0005 -0.0005

AT.169 O X 0.0001 -0.0000 0.0000 -0.0001 0.0000 -0.0001  
Y 0.0000 0.0000 0.0000 -0.0000 -0.0000 -0.0002  
Z 0.0001 0.0000 -0.0000 -0.0001 -0.0000 -0.0002

AT.170 O X -0.0001 -0.0000 -0.0000 -0.0001 0.0000 0.0001  
Y -0.0000 0.0000 -0.0000 -0.0000 -0.0000 0.0002  
Z -0.0001 0.0000 0.0000 -0.0001 -0.0000 0.0002

AT.171 H X -0.0003 -0.0005 -0.0001 -0.0008 -0.0004 0.0022  
Y 0.0001 -0.0004 -0.0000 0.0002 -0.0000 0.0019  
Z 0.0004 -0.0003 -0.0000 0.0012 0.0005 0.0021

AT.172 H X 0.0003 -0.0005 0.0001 -0.0008 -0.0004 -0.0022  
Y -0.0001 -0.0004 0.0000 0.0002 -0.0000 -0.0019  
Z -0.0004 -0.0003 0.0000 0.0012 0.0005 -0.0021

FREQ(CM\*\*-1) 1152.00 1152.15 1153.06 1155.15 1163.23 1163.65

AT. 1 I X 0.0000 -0.0001 -0.0001 -0.0000 0.0000 0.0000  
Y 0.0000 -0.0001 -0.0001 -0.0000 0.0000 0.0001  
Z -0.0000 0.0000 0.0000 0.0000 0.0000 0.0000

AT. 2 I X 0.0000 0.0001 -0.0001 0.0000 -0.0000 0.0000  
Y 0.0000 0.0001 -0.0001 0.0000 -0.0000 0.0001  
Z -0.0000 -0.0000 0.0000 -0.0000 -0.0000 0.0000

AT. 3 I X 0.0000 -0.0001 -0.0001 -0.0000 0.0000 0.0000  
Y 0.0000 -0.0001 -0.0001 -0.0000 -0.0000 -0.0000  
Z 0.0001 -0.0002 -0.0001 -0.0000 0.0000 0.0000

AT. 4 I X 0.0000 0.0001 -0.0001 0.0000 -0.0000 0.0000  
Y 0.0000 0.0001 -0.0001 0.0000 0.0000 -0.0000



Z 0.0001 0.0002 -0.0001 0.0000 -0.0000 0.0000  
AT. 5 O X -0.0013 0.0026 0.0024 0.0005 0.0002 0.0002  
Y 0.0007 -0.0014 -0.0016 -0.0003 -0.0002 -0.0002  
Z 0.0017 -0.0034 -0.0034 -0.0007 0.0010 0.0014  
AT. 6 O X -0.0013 -0.0026 0.0024 -0.0005 -0.0002 0.0002  
Y 0.0007 0.0014 -0.0016 0.0003 0.0002 -0.0002  
Z 0.0017 0.0034 -0.0034 0.0007 -0.0010 0.0014  
AT. 7 O X 0.0010 -0.0023 -0.0023 -0.0008 -0.0005 -0.0002  
Y -0.0007 0.0016 0.0016 0.0006 -0.0000 -0.0005  
Z 0.0007 -0.0015 -0.0015 -0.0004 0.0008 0.0012  
AT. 8 O X 0.0010 0.0023 -0.0023 0.0008 0.0005 -0.0002  
Y -0.0007 -0.0016 0.0016 -0.0006 0.0000 -0.0005  
Z 0.0007 0.0015 -0.0015 0.0004 -0.0008 0.0012  
AT. 9 N X 0.0063 -0.0135 -0.0116 -0.0028 -0.0025 -0.0024  
Y -0.0036 0.0078 0.0065 0.0015 -0.0037 -0.0049  
Z -0.0021 0.0047 0.0040 0.0010 -0.0030 -0.0040  
AT. 10 N X 0.0063 0.0135 -0.0116 0.0028 0.0025 -0.0024  
Y -0.0036 -0.0078 0.0065 -0.0015 0.0037 -0.0049  
Z -0.0021 -0.0047 0.0040 -0.0010 0.0030 -0.0040  
AT. 11 N X -0.0067 0.0141 0.0126 0.0029 0.0012 0.0005  
Y 0.0048 -0.0103 -0.0090 -0.0019 0.0055 0.0073  
Z 0.0011 -0.0023 -0.0023 -0.0006 -0.0010 -0.0009  
AT. 12 N X -0.0067 -0.0141 0.0126 -0.0029 -0.0012 0.0005  
Y 0.0048 0.0103 -0.0090 0.0019 -0.0055 0.0073  
Z 0.0011 0.0023 -0.0023 0.0006 0.0010 -0.0009  
AT. 13 C X -0.0000 -0.0001 0.0007 -0.0000 -0.0030 -0.0038  
Y -0.0008 0.0012 0.0020 0.0003 0.0017 0.0021  
Z 0.0005 -0.0012 -0.0007 -0.0003 -0.0040 -0.0052  
AT. 14 C X -0.0000 0.0001 0.0007 0.0000 0.0030 -0.0038  
Y -0.0008 -0.0012 0.0020 -0.0003 -0.0017 0.0021  
Z 0.0005 0.0012 -0.0007 0.0003 0.0040 -0.0052  
AT. 15 C X 0.0021 -0.0037 -0.0066 -0.0008 0.0033 0.0042

Y 0.0001 -0.0002 -0.0004 -0.0001 -0.0010 -0.0012  
Z -0.0006 0.0013 0.0004 0.0002 0.0027 0.0034  
AT. 16 C X 0.0021 0.0037 -0.0066 0.0008 -0.0033 0.0042  
Y 0.0001 0.0002 -0.0004 0.0001 0.0010 -0.0012  
Z -0.0006 -0.0013 0.0004 -0.0002 -0.0027 0.0034  
AT. 17 H X -0.0056 0.0087 0.0216 0.0021 -0.0174 -0.0221  
Y -0.0037 0.0068 0.0096 0.0014 -0.0021 -0.0029  
Z 0.0011 -0.0024 -0.0004 -0.0004 -0.0046 -0.0056  
AT. 18 H X -0.0056 -0.0087 0.0216 -0.0021 0.0174 -0.0221  
Y -0.0037 -0.0068 0.0096 -0.0014 0.0021 -0.0029  
Z 0.0011 0.0024 -0.0004 0.0004 0.0046 -0.0056  
AT. 19 H X -0.0177 0.0307 0.0486 0.0065 -0.0002 -0.0004  
Y 0.0013 -0.0034 0.0009 -0.0005 -0.0080 -0.0102  
Z -0.0060 0.0101 0.0169 0.0022 -0.0008 -0.0011  
AT. 20 H X -0.0177 -0.0307 0.0486 -0.0065 0.0002 -0.0004  
Y 0.0013 0.0034 0.0009 0.0005 0.0080 -0.0102  
Z -0.0060 -0.0101 0.0169 -0.0022 0.0008 -0.0011  
AT. 21 C X -0.0016 0.0037 0.0033 0.0008 0.0027 0.0034  
Y -0.0012 0.0024 0.0022 0.0004 0.0004 0.0007  
Z 0.0015 -0.0028 -0.0023 -0.0006 -0.0038 -0.0049  
AT. 22 C X -0.0016 -0.0037 0.0033 -0.0008 -0.0027 0.0034  
Y -0.0012 -0.0024 0.0022 -0.0004 -0.0004 0.0007  
Z 0.0015 0.0028 -0.0023 0.0006 0.0038 -0.0049  
AT. 23 C X 0.0041 -0.0087 -0.0075 -0.0006 0.0001 -0.0012  
Y 0.0010 -0.0022 -0.0022 -0.0005 -0.0005 -0.0005  
Z -0.0011 0.0023 0.0021 0.0005 0.0020 0.0026  
AT. 24 C X 0.0041 0.0087 -0.0075 0.0006 -0.0001 -0.0012  
Y 0.0010 0.0022 -0.0022 0.0005 0.0005 -0.0005  
Z -0.0011 -0.0023 0.0021 -0.0005 -0.0020 0.0026  
AT. 25 H X -0.0185 0.0379 0.0354 0.0046 0.0022 0.0056  
Y -0.0027 0.0055 0.0051 0.0006 0.0007 0.0016  
Z -0.0036 0.0068 0.0043 -0.0008 -0.0045 -0.0035

AT. 26 H X -0.0185 -0.0379 0.0354 -0.0046 -0.0022 0.0056  
Y -0.0027 -0.0055 0.0051 -0.0006 -0.0007 0.0016  
Z -0.0036 -0.0068 0.0043 0.0008 0.0045 -0.0035

AT. 27 H X -0.0235 0.0498 0.0396 0.0004 -0.0224 -0.0166  
Y -0.0110 0.0230 0.0201 0.0026 -0.0017 -0.0005  
Z -0.0025 0.0051 0.0055 0.0021 0.0057 0.0055

AT. 28 H X -0.0235 -0.0498 0.0396 -0.0004 0.0224 -0.0166  
Y -0.0110 -0.0230 0.0201 -0.0026 0.0017 -0.0005  
Z -0.0025 -0.0051 0.0055 -0.0021 -0.0057 0.0055

AT. 29 C X -0.0036 0.0079 0.0068 0.0016 -0.0004 -0.0010  
Y 0.0026 -0.0060 -0.0050 -0.0013 0.0043 0.0057  
Z -0.0023 0.0049 0.0044 0.0009 0.0017 0.0020

AT. 30 C X -0.0036 -0.0079 0.0068 -0.0016 0.0004 -0.0010  
Y 0.0026 0.0060 -0.0050 0.0013 -0.0043 0.0057  
Z -0.0023 -0.0049 0.0044 -0.0009 -0.0017 0.0020

AT. 31 H X -0.0174 0.0374 0.0324 0.0070 -0.0229 -0.0299  
Y 0.0038 -0.0084 -0.0075 -0.0019 0.0004 0.0007  
Z -0.0092 0.0194 0.0165 0.0034 -0.0176 -0.0228

AT. 32 H X -0.0174 -0.0374 0.0324 -0.0070 0.0229 -0.0299  
Y 0.0038 0.0084 -0.0075 0.0019 -0.0004 0.0007  
Z -0.0092 -0.0194 0.0165 -0.0034 0.0176 -0.0228

AT. 33 H X 0.0249 -0.0529 -0.0480 -0.0111 0.0008 0.0038  
Y -0.0004 0.0003 0.0006 -0.0002 -0.0000 0.0005  
Z 0.0180 -0.0384 -0.0346 -0.0080 0.0043 0.0073

AT. 34 H X 0.0249 0.0529 -0.0480 0.0111 -0.0008 0.0038  
Y -0.0004 -0.0003 0.0006 0.0002 0.0000 0.0005  
Z 0.0180 0.0384 -0.0346 0.0080 -0.0043 0.0073

AT. 35 C X -0.0059 0.0128 0.0114 0.0031 0.0196 0.0241  
Y 0.0011 -0.0018 -0.0019 -0.0003 -0.0173 -0.0219  
Z -0.0010 0.0023 0.0021 0.0010 0.0113 0.0136

AT. 36 C X -0.0059 -0.0128 0.0114 -0.0031 -0.0196 0.0241  
Y 0.0011 0.0018 -0.0019 0.0003 0.0173 -0.0219

Z -0.0010 -0.0023 0.0021 -0.0010 -0.0113 0.0136  
AT. 37 C X 0.0062 -0.0134 -0.0118 -0.0028 -0.0021 -0.0020  
Y -0.0027 0.0055 0.0048 0.0009 -0.0015 -0.0021  
Z 0.0010 -0.0020 -0.0016 -0.0003 0.0019 0.0027  
AT. 38 C X 0.0062 0.0134 -0.0118 0.0028 0.0021 -0.0020  
Y -0.0027 -0.0055 0.0048 -0.0009 0.0015 -0.0021  
Z 0.0010 0.0020 -0.0016 0.0003 -0.0019 0.0027  
AT. 39 H X 0.0002 -0.0005 -0.0004 0.0002 -0.0045 -0.0063  
Y 0.0119 -0.0255 -0.0226 -0.0057 0.0217 0.0300  
Z -0.0093 0.0201 0.0180 0.0046 -0.0101 -0.0146  
AT. 40 H X 0.0002 0.0005 -0.0004 -0.0002 0.0045 -0.0063  
Y 0.0119 0.0255 -0.0226 0.0057 -0.0217 0.0300  
Z -0.0093 -0.0201 0.0180 -0.0046 0.0101 -0.0146  
AT. 41 H X 0.0074 -0.0162 -0.0141 -0.0038 0.0017 0.0039  
Y -0.0155 0.0340 0.0307 0.0083 0.0076 0.0062  
Z 0.0092 -0.0202 -0.0185 -0.0048 -0.0086 -0.0093  
AT. 42 H X 0.0074 0.0162 -0.0141 0.0038 -0.0017 0.0039  
Y -0.0155 -0.0340 0.0307 -0.0083 -0.0076 0.0062  
Z 0.0092 0.0202 -0.0185 0.0048 0.0086 -0.0093  
AT. 43 C X 0.0031 -0.0060 -0.0053 -0.0010 0.0004 0.0009  
Y -0.0017 0.0039 0.0032 0.0007 -0.0047 -0.0059  
Z -0.0052 0.0109 0.0096 0.0022 -0.0019 -0.0030  
AT. 44 C X 0.0031 0.0060 -0.0053 0.0010 -0.0004 0.0009  
Y -0.0017 -0.0039 0.0032 -0.0007 0.0047 -0.0059  
Z -0.0052 -0.0109 0.0096 -0.0022 0.0019 -0.0030  
AT. 45 H X 0.0135 -0.0303 -0.0264 -0.0067 0.0269 0.0350  
Y -0.0012 0.0044 0.0044 0.0017 0.0035 0.0038  
Z -0.0128 0.0270 0.0227 0.0051 -0.0282 -0.0360  
AT. 46 H X 0.0135 0.0303 -0.0264 0.0067 -0.0269 0.0350  
Y -0.0012 -0.0044 0.0044 -0.0017 -0.0035 0.0038  
Z -0.0128 -0.0270 0.0227 -0.0051 0.0282 -0.0360  
AT. 47 H X -0.0202 0.0427 0.0368 0.0086 -0.0035 -0.0072

Y -0.0046 0.0092 0.0081 0.0015 0.0017 0.0011  
Z 0.0247 -0.0524 -0.0447 -0.0105 0.0102 0.0156  
AT. 48 H X -0.0202 -0.0427 0.0368 -0.0086 0.0035 -0.0072  
Y -0.0046 -0.0092 0.0081 -0.0015 -0.0017 0.0011  
Z 0.0247 0.0524 -0.0447 0.0105 -0.0102 0.0156  
AT. 49 C X 0.0051 -0.0109 -0.0091 -0.0025 -0.0137 -0.0168  
Y 0.0003 -0.0012 -0.0005 0.0002 0.0108 0.0135  
Z -0.0022 0.0052 0.0052 0.0018 0.0227 0.0278  
AT. 50 C X 0.0051 0.0109 -0.0091 0.0025 0.0137 -0.0168  
Y 0.0003 0.0012 -0.0005 -0.0002 -0.0108 0.0135  
Z -0.0022 -0.0052 0.0052 -0.0018 -0.0227 0.0278  
AT. 51 C X -0.0047 0.0101 0.0084 0.0020 0.0028 0.0031  
Y 0.0018 -0.0038 -0.0034 -0.0009 0.0001 0.0003  
Z 0.0037 -0.0081 -0.0071 -0.0017 0.0014 0.0023  
AT. 52 C X -0.0047 -0.0101 0.0084 -0.0020 -0.0028 0.0031  
Y 0.0018 0.0038 -0.0034 0.0009 -0.0001 0.0003  
Z 0.0037 0.0081 -0.0071 0.0017 -0.0014 0.0023  
AT. 53 H X -0.0026 0.0052 0.0043 0.0011 0.0034 0.0042  
Y -0.0102 0.0220 0.0193 0.0041 -0.0140 -0.0183  
Z -0.0144 0.0316 0.0276 0.0060 -0.0171 -0.0225  
AT. 54 H X -0.0026 -0.0052 0.0043 -0.0011 -0.0034 0.0042  
Y -0.0102 -0.0220 0.0193 -0.0041 0.0140 -0.0183  
Z -0.0144 -0.0316 0.0276 -0.0060 0.0171 -0.0225  
AT. 55 H X -0.0052 0.0116 0.0104 0.0022 -0.0063 -0.0085  
Y 0.0115 -0.0249 -0.0225 -0.0053 -0.0049 -0.0047  
Z 0.0153 -0.0330 -0.0293 -0.0070 -0.0105 -0.0112  
AT. 56 H X -0.0052 -0.0116 0.0104 -0.0022 0.0063 -0.0085  
Y 0.0115 0.0249 -0.0225 0.0053 0.0049 -0.0047  
Z 0.0153 0.0330 -0.0293 0.0070 0.0105 -0.0112  
AT. 57 C X 0.0030 -0.0065 -0.0057 -0.0015 -0.0063 -0.0078  
Y 0.0005 -0.0015 -0.0010 -0.0003 0.0062 0.0080  
Z 0.0003 -0.0008 -0.0008 -0.0005 -0.0055 -0.0066

AT. 58 C X 0.0030 0.0065 -0.0057 0.0015 0.0063 -0.0078  
Y 0.0005 0.0015 -0.0010 0.0003 -0.0062 0.0080  
Z 0.0003 0.0008 -0.0008 0.0005 0.0055 -0.0066

AT. 59 H X -0.0022 0.0069 0.0049 0.0013 -0.0198 -0.0246  
Y 0.0011 -0.0032 -0.0024 -0.0003 0.0130 0.0160  
Z -0.0020 0.0051 0.0039 0.0013 -0.0055 -0.0075

AT. 60 H X -0.0022 -0.0069 0.0049 -0.0013 0.0198 -0.0246  
Y 0.0011 0.0032 -0.0024 0.0003 -0.0130 0.0160  
Z -0.0020 -0.0051 0.0039 -0.0013 0.0055 -0.0075

AT. 61 H X 0.0014 -0.0031 -0.0024 -0.0004 -0.0089 -0.0115  
Y -0.0062 0.0129 0.0115 0.0025 0.0045 0.0049  
Z 0.0025 -0.0053 -0.0044 -0.0009 -0.0059 -0.0070

AT. 62 H X 0.0014 0.0031 -0.0024 0.0004 0.0089 -0.0115  
Y -0.0062 -0.0129 0.0115 -0.0025 -0.0045 0.0049  
Z 0.0025 0.0053 -0.0044 0.0009 0.0059 -0.0070

AT. 63 H X 0.0037 -0.0097 -0.0081 -0.0031 -0.0151 -0.0178  
Y -0.0055 0.0136 0.0112 0.0034 0.0115 0.0137  
Z 0.0048 -0.0106 -0.0089 -0.0020 -0.0024 -0.0028

AT. 64 H X 0.0037 0.0097 -0.0081 0.0031 0.0151 -0.0178  
Y -0.0055 -0.0136 0.0112 -0.0034 -0.0115 0.0137  
Z 0.0048 0.0106 -0.0089 0.0020 0.0024 -0.0028

AT. 65 C X -0.0026 0.0056 0.0046 0.0012 0.0037 0.0045  
Y -0.0013 0.0031 0.0023 0.0005 -0.0035 -0.0045  
Z 0.0009 -0.0022 -0.0022 -0.0008 -0.0094 -0.0117

AT. 66 C X -0.0026 -0.0056 0.0046 -0.0012 -0.0037 0.0045  
Y -0.0013 -0.0031 0.0023 -0.0005 0.0035 -0.0045  
Z 0.0009 0.0022 -0.0022 0.0008 0.0094 -0.0117

AT. 67 H X 0.0022 -0.0048 -0.0031 -0.0006 0.0187 0.0227  
Y -0.0001 -0.0002 -0.0004 -0.0002 -0.0112 -0.0140  
Z -0.0039 0.0090 0.0063 0.0012 -0.0155 -0.0188

AT. 68 H X 0.0022 0.0048 -0.0031 0.0006 -0.0187 0.0227  
Y -0.0001 0.0002 -0.0004 0.0002 0.0112 -0.0140

Z -0.0039 -0.0090 0.0063 -0.0012 0.0155 -0.0188  
AT. 69 H X 0.0009 -0.0029 -0.0017 -0.0002 0.0051 0.0060  
Y 0.0049 -0.0110 -0.0079 -0.0018 -0.0009 -0.0012  
Z 0.0031 -0.0061 -0.0047 -0.0011 -0.0061 -0.0070  
AT. 70 H X 0.0009 0.0029 -0.0017 0.0002 -0.0051 0.0060  
Y 0.0049 0.0110 -0.0079 0.0018 0.0009 -0.0012  
Z 0.0031 0.0061 -0.0047 0.0011 0.0061 -0.0070  
AT. 71 H X -0.0025 0.0069 0.0067 0.0023 0.0156 0.0187  
Y 0.0040 -0.0097 -0.0084 -0.0025 -0.0098 -0.0113  
Z 0.0080 -0.0183 -0.0150 -0.0039 -0.0096 -0.0110  
AT. 72 H X -0.0025 -0.0069 0.0067 -0.0023 -0.0156 0.0187  
Y 0.0040 0.0097 -0.0084 0.0025 0.0098 -0.0113  
Z 0.0080 0.0183 -0.0150 0.0039 0.0096 -0.0110  
AT. 73 C X -0.0002 0.0004 0.0002 -0.0000 -0.0015 -0.0021  
Y -0.0001 0.0004 0.0004 0.0001 0.0015 0.0021  
Z 0.0001 -0.0004 -0.0006 -0.0004 -0.0065 -0.0079  
AT. 74 C X -0.0002 -0.0004 0.0002 0.0000 0.0015 -0.0021  
Y -0.0001 -0.0004 0.0004 -0.0001 -0.0015 0.0021  
Z 0.0001 0.0004 -0.0006 0.0004 0.0065 -0.0079  
AT. 75 H X 0.0098 -0.0177 -0.0167 -0.0026 0.0067 0.0104  
Y -0.0071 0.0132 0.0127 0.0024 -0.0004 -0.0019  
Z -0.0024 0.0044 0.0043 0.0009 -0.0025 -0.0034  
AT. 76 H X 0.0098 0.0177 -0.0167 0.0026 -0.0067 0.0104  
Y -0.0071 -0.0132 0.0127 -0.0024 0.0004 -0.0019  
Z -0.0024 -0.0044 0.0043 -0.0009 0.0025 -0.0034  
AT. 77 H X -0.0078 0.0139 0.0133 0.0025 -0.0084 -0.0112  
Y 0.0061 -0.0114 -0.0107 -0.0023 0.0017 0.0022  
Z 0.0011 -0.0018 -0.0022 -0.0005 0.0005 0.0014  
AT. 78 H X -0.0078 -0.0139 0.0133 -0.0025 0.0084 -0.0112  
Y 0.0061 0.0114 -0.0107 0.0023 -0.0017 0.0022  
Z 0.0011 0.0018 -0.0022 0.0005 -0.0005 0.0014  
AT. 79 I X -0.0000 0.0000 -0.0000 -0.0001 0.0000 0.0000

Y 0.0001 -0.0000 0.0000 0.0002 0.0000 0.0000  
Z -0.0001 0.0000 -0.0000 -0.0001 0.0000 0.0000  
AT. 80 I X -0.0000 -0.0000 -0.0000 0.0001 -0.0000 0.0000  
Y 0.0001 0.0000 0.0000 -0.0002 -0.0000 0.0000  
Z -0.0001 -0.0000 -0.0000 0.0001 -0.0000 0.0000  
AT. 81 I X -0.0001 0.0000 -0.0001 -0.0000 -0.0001 0.0000  
Y 0.0001 -0.0000 0.0001 0.0001 0.0000 0.0000  
Z 0.0002 -0.0000 0.0001 0.0001 0.0001 -0.0000  
AT. 82 I X -0.0001 -0.0000 -0.0001 0.0000 0.0001 0.0000  
Y 0.0001 0.0000 0.0001 -0.0001 -0.0000 0.0000  
Z 0.0002 0.0000 0.0001 -0.0001 -0.0001 -0.0000  
AT. 83 O X 0.0033 -0.0009 0.0017 0.0048 -0.0004 -0.0001  
Y 0.0004 -0.0002 0.0002 0.0009 -0.0001 -0.0000  
Z 0.0028 -0.0007 0.0015 0.0037 0.0003 0.0001  
AT. 84 O X 0.0033 0.0009 0.0017 -0.0048 0.0004 -0.0001  
Y 0.0004 0.0002 0.0002 -0.0009 0.0001 -0.0000  
Z 0.0028 0.0007 0.0015 -0.0037 -0.0003 0.0001  
AT. 85 O X -0.0016 0.0005 -0.0009 -0.0029 0.0013 0.0001  
Y -0.0008 0.0003 -0.0004 -0.0019 0.0006 -0.0001  
Z 0.0013 -0.0003 0.0007 0.0016 0.0002 0.0001  
AT. 86 O X -0.0016 -0.0005 -0.0009 0.0029 -0.0013 0.0001  
Y -0.0008 -0.0003 -0.0004 0.0019 -0.0006 -0.0001  
Z 0.0013 0.0003 0.0007 -0.0016 -0.0002 0.0001  
AT. 87 N X -0.0135 0.0030 -0.0071 -0.0149 0.0017 0.0002  
Y -0.0041 0.0010 -0.0020 -0.0040 -0.0027 -0.0009  
Z -0.0012 0.0001 -0.0007 -0.0006 -0.0020 -0.0006  
AT. 88 N X -0.0135 -0.0030 -0.0071 0.0149 -0.0017 0.0002  
Y -0.0041 -0.0010 -0.0020 0.0040 0.0027 -0.0009  
Z -0.0012 -0.0001 -0.0007 0.0006 0.0020 -0.0006  
AT. 89 N X 0.0131 -0.0027 0.0070 0.0140 -0.0020 -0.0005  
Y 0.0055 -0.0015 0.0026 0.0056 0.0034 0.0009  
Z 0.0010 -0.0002 0.0005 0.0014 -0.0010 -0.0001



AT. 90 N X 0.0131 0.0027 0.0070 -0.0140 0.0020 -0.0005  
Y 0.0055 0.0015 0.0026 -0.0056 -0.0034 0.0009  
Z 0.0010 0.0002 0.0005 -0.0014 0.0010 -0.0001

AT. 91 C X 0.0004 -0.0001 0.0001 0.0003 0.0018 0.0005  
Y -0.0005 0.0003 -0.0002 -0.0019 0.0002 0.0000  
Z 0.0006 0.0004 0.0005 -0.0004 -0.0033 -0.0007

AT. 92 C X 0.0004 0.0001 0.0001 -0.0003 -0.0018 0.0005  
Y -0.0005 -0.0003 -0.0002 0.0019 -0.0002 0.0000  
Z 0.0006 -0.0004 0.0005 0.0004 0.0033 -0.0007

AT. 93 C X -0.0049 0.0017 -0.0023 -0.0098 -0.0012 -0.0001  
Y 0.0014 -0.0007 0.0007 0.0041 0.0001 -0.0000  
Z -0.0009 -0.0000 -0.0006 -0.0002 0.0021 0.0005

AT. 94 C X -0.0049 -0.0017 -0.0023 0.0098 0.0012 -0.0001  
Y 0.0014 0.0007 0.0007 -0.0041 -0.0001 -0.0000  
Z -0.0009 0.0000 -0.0006 0.0002 -0.0021 0.0005

AT. 95 H X 0.0081 -0.0048 0.0036 0.0288 0.0089 0.0018  
Y -0.0110 0.0047 -0.0054 -0.0267 -0.0035 -0.0003  
Z 0.0061 -0.0020 0.0033 0.0101 -0.0034 -0.0011

AT. 96 H X 0.0081 0.0048 0.0036 -0.0288 -0.0089 0.0018  
Y -0.0110 -0.0047 -0.0054 0.0267 0.0035 -0.0003  
Z 0.0061 0.0020 0.0033 -0.0101 0.0034 -0.0011

AT. 97 H X 0.0367 -0.0119 0.0182 0.0700 -0.0085 -0.0035  
Y -0.0109 0.0058 -0.0051 -0.0334 -0.0034 -0.0001  
Z -0.0145 0.0050 -0.0072 -0.0292 0.0033 0.0014

AT. 98 H X 0.0367 0.0119 0.0182 -0.0700 0.0085 -0.0035  
Y -0.0109 -0.0058 -0.0051 0.0334 0.0034 -0.0001  
Z -0.0145 -0.0050 -0.0072 0.0292 -0.0033 0.0014

AT. 99 C X 0.0027 -0.0004 0.0015 0.0027 -0.0023 -0.0007  
Y -0.0029 0.0004 -0.0015 -0.0017 0.0001 0.0004  
Z 0.0007 -0.0001 0.0005 0.0018 -0.0035 -0.0009

AT. 100 C X 0.0027 0.0004 0.0015 -0.0027 0.0023 -0.0007  
Y -0.0029 -0.0004 -0.0015 0.0017 -0.0001 0.0004

Z 0.0007 0.0001 0.0005 -0.0018 0.0035 -0.0009  
AT.101 C X -0.0093 0.0014 -0.0048 -0.0042 -0.0026 0.0006  
Y 0.0047 -0.0007 0.0025 0.0030 0.0005 -0.0003  
Z -0.0018 0.0003 -0.0010 -0.0020 0.0017 0.0005  
AT.102 C X -0.0093 -0.0014 -0.0048 0.0042 0.0026 0.0006  
Y 0.0047 0.0007 0.0025 -0.0030 -0.0005 -0.0003  
Z -0.0018 -0.0003 -0.0010 0.0020 -0.0017 0.0005  
AT.103 H X 0.0406 -0.0058 0.0213 0.0248 0.0065 -0.0024  
Y -0.0174 0.0024 -0.0092 -0.0100 -0.0033 0.0011  
Z -0.0072 0.0010 -0.0035 -0.0003 -0.0065 -0.0001  
AT.104 H X 0.0406 0.0058 0.0213 -0.0248 -0.0065 -0.0024  
Y -0.0174 -0.0024 -0.0092 0.0100 0.0033 0.0011  
Z -0.0072 -0.0010 -0.0035 0.0003 0.0065 -0.0001  
AT.105 H X 0.0534 -0.0087 0.0260 0.0118 0.0380 0.0009  
Y -0.0405 0.0064 -0.0206 -0.0189 -0.0147 0.0011  
Z -0.0070 0.0011 -0.0038 -0.0075 0.0039 0.0011  
AT.106 H X 0.0534 0.0087 0.0260 -0.0118 -0.0380 0.0009  
Y -0.0405 -0.0064 -0.0206 0.0189 0.0147 0.0011  
Z -0.0070 -0.0011 -0.0038 0.0075 -0.0039 0.0011  
AT.107 C X 0.0079 -0.0017 0.0041 0.0085 0.0007 0.0004  
Y 0.0043 -0.0011 0.0022 0.0044 0.0022 0.0008  
Z -0.0053 0.0012 -0.0029 -0.0060 0.0011 0.0003  
AT.108 C X 0.0079 0.0017 0.0041 -0.0085 -0.0007 0.0004  
Y 0.0043 0.0011 0.0022 -0.0044 -0.0022 0.0008  
Z -0.0053 -0.0012 -0.0029 0.0060 -0.0011 0.0003  
AT.109 H X 0.0330 -0.0084 0.0157 0.0346 0.0120 0.0042  
Y -0.0061 0.0015 -0.0025 -0.0060 -0.0048 -0.0017  
Z -0.0309 0.0077 -0.0144 -0.0319 -0.0145 -0.0052  
AT.110 H X 0.0330 0.0084 0.0157 -0.0346 -0.0120 0.0042  
Y -0.0061 -0.0015 -0.0025 0.0060 0.0048 -0.0017  
Z -0.0309 -0.0077 -0.0144 0.0319 0.0145 -0.0052  
AT.111 H X -0.0357 0.0077 -0.0189 -0.0403 0.0039 0.0006

Y 0.0135 -0.0023 0.0071 0.0147 -0.0020 -0.0002  
Z 0.0412 -0.0090 0.0217 0.0461 -0.0016 0.0003  
AT. 112 H X -0.0357 -0.0077 -0.0189 0.0403 -0.0039 0.0006  
Y 0.0135 0.0023 0.0071 -0.0147 0.0020 -0.0002  
Z 0.0412 0.0090 0.0217 -0.0461 0.0016 0.0003  
AT. 113 C X 0.0057 -0.0004 0.0040 0.0072 -0.0164 -0.0048  
Y -0.0043 0.0011 -0.0022 -0.0041 -0.0062 -0.0018  
Z -0.0002 -0.0007 -0.0008 -0.0012 0.0127 0.0033  
AT. 114 C X 0.0057 0.0004 0.0040 -0.0072 0.0164 -0.0048  
Y -0.0043 -0.0011 -0.0022 0.0041 0.0062 -0.0018  
Z -0.0002 0.0007 -0.0008 0.0012 -0.0127 0.0033  
AT. 115 C X -0.0103 0.0021 -0.0055 -0.0109 0.0029 0.0008  
Y -0.0014 0.0005 -0.0005 -0.0012 -0.0012 -0.0003  
Z 0.0038 -0.0007 0.0020 0.0037 0.0002 0.0001  
AT. 116 C X -0.0103 -0.0021 -0.0055 0.0109 -0.0029 0.0008  
Y -0.0014 -0.0005 -0.0005 0.0012 0.0012 -0.0003  
Z 0.0038 0.0007 0.0020 -0.0037 -0.0002 0.0001  
AT. 117 H X 0.0069 -0.0011 0.0039 0.0076 0.0039 0.0017  
Y 0.0270 -0.0058 0.0144 0.0302 0.0065 0.0027  
Z -0.0212 0.0042 -0.0115 -0.0233 -0.0030 -0.0016  
AT. 118 H X 0.0069 0.0011 0.0039 -0.0076 -0.0039 0.0017  
Y 0.0270 0.0058 0.0144 -0.0302 -0.0065 0.0027  
Z -0.0212 -0.0042 -0.0115 0.0233 0.0030 -0.0016  
AT. 119 H X -0.0209 0.0032 -0.0120 -0.0237 0.0053 0.0005  
Y -0.0217 0.0032 -0.0127 -0.0260 0.0116 0.0020  
Z 0.0171 -0.0026 0.0099 0.0201 -0.0104 -0.0021  
AT. 120 H X -0.0209 -0.0032 -0.0120 0.0237 -0.0053 0.0005  
Y -0.0217 -0.0032 -0.0127 0.0260 -0.0116 0.0020  
Z 0.0171 0.0026 0.0099 -0.0201 0.0104 -0.0021  
AT. 121 C X -0.0071 0.0014 -0.0039 -0.0076 0.0000 0.0001  
Y -0.0023 0.0007 -0.0010 -0.0025 -0.0029 -0.0008  
Z -0.0078 0.0015 -0.0042 -0.0087 0.0011 0.0001

AT.122 C X -0.0071 -0.0014 -0.0039 0.0076 -0.0000 0.0001  
Y -0.0023 -0.0007 -0.0010 0.0025 0.0029 -0.0008  
Z -0.0078 -0.0015 -0.0042 0.0087 -0.0011 0.0001

AT.123 H X -0.0378 0.0095 -0.0179 -0.0421 -0.0133 -0.0050  
Y 0.0098 -0.0028 0.0044 0.0100 0.0089 0.0025  
Z -0.0248 0.0063 -0.0119 -0.0268 -0.0132 -0.0041

AT.124 H X -0.0378 -0.0095 -0.0179 0.0421 0.0133 -0.0050  
Y 0.0098 0.0028 0.0044 -0.0100 -0.0089 0.0025  
Z -0.0248 -0.0063 -0.0119 0.0268 0.0132 -0.0041

AT.125 H X 0.0359 -0.0079 0.0187 0.0425 -0.0050 -0.0003  
Y -0.0223 0.0053 -0.0112 -0.0255 0.0026 0.0003  
Z 0.0344 -0.0074 0.0182 0.0404 -0.0023 0.0002

AT.126 H X 0.0359 0.0079 0.0187 -0.0425 0.0050 -0.0003  
Y -0.0223 -0.0053 -0.0112 0.0255 -0.0026 0.0003  
Z 0.0344 0.0074 0.0182 -0.0404 0.0023 0.0002

AT.127 C X -0.0031 -0.0002 -0.0024 -0.0046 0.0156 0.0040  
Y 0.0049 -0.0012 0.0024 0.0056 0.0034 0.0010  
Z 0.0015 -0.0010 -0.0001 0.0004 0.0135 0.0039

AT.128 C X -0.0031 0.0002 -0.0024 0.0046 -0.0156 0.0040  
Y 0.0049 0.0012 0.0024 -0.0056 -0.0034 0.0010  
Z 0.0015 0.0010 -0.0001 -0.0004 -0.0135 0.0039

AT.129 C X 0.0090 -0.0019 0.0048 0.0097 -0.0028 -0.0005  
Y 0.0006 -0.0001 0.0004 0.0005 0.0006 0.0002  
Z 0.0055 -0.0013 0.0029 0.0058 0.0010 0.0003

AT.130 C X 0.0090 0.0019 0.0048 -0.0097 0.0028 -0.0005  
Y 0.0006 0.0001 0.0004 -0.0005 -0.0006 0.0002  
Z 0.0055 0.0013 0.0029 -0.0058 -0.0010 0.0003

AT.131 H X -0.0107 0.0029 -0.0052 -0.0124 -0.0068 -0.0017  
Y -0.0228 0.0057 -0.0115 -0.0264 -0.0055 -0.0017  
Z -0.0317 0.0079 -0.0160 -0.0362 -0.0074 -0.0022

AT.132 H X -0.0107 -0.0029 -0.0052 0.0124 0.0068 -0.0017  
Y -0.0228 -0.0057 -0.0115 0.0264 0.0055 -0.0017

Z -0.0317 -0.0079 -0.0160 0.0362 0.0074 -0.0022  
AT. 133 H X 0.0234 -0.0058 0.0121 0.0285 0.0002 0.0001  
Y 0.0150 -0.0036 0.0081 0.0188 -0.0060 -0.0016  
Z 0.0209 -0.0048 0.0113 0.0255 -0.0104 -0.0026  
AT. 134 H X 0.0234 0.0058 0.0121 -0.0285 -0.0002 0.0001  
Y 0.0150 0.0036 0.0081 -0.0188 0.0060 -0.0016  
Z 0.0209 0.0048 0.0113 -0.0255 0.0104 -0.0026  
AT. 135 C X -0.0031 0.0004 -0.0020 -0.0036 0.0054 0.0015  
Y 0.0041 -0.0008 0.0019 0.0039 0.0021 0.0007  
Z -0.0001 0.0003 0.0005 0.0005 -0.0057 -0.0015  
AT. 136 C X -0.0031 -0.0004 -0.0020 0.0036 -0.0054 0.0015  
Y 0.0041 0.0008 0.0019 -0.0039 -0.0021 0.0007  
Z -0.0001 -0.0003 0.0005 -0.0005 0.0057 -0.0015  
AT. 137 H X 0.0105 -0.0027 0.0046 0.0090 0.0154 0.0045  
Y 0.0024 -0.0005 0.0006 0.0018 0.0049 0.0013  
Z -0.0074 0.0018 -0.0039 -0.0072 -0.0052 -0.0018  
AT. 138 H X 0.0105 0.0027 0.0046 -0.0090 -0.0154 0.0045  
Y 0.0024 0.0005 0.0006 -0.0018 -0.0049 0.0013  
Z -0.0074 -0.0018 -0.0039 0.0072 0.0052 -0.0018  
AT. 139 H X -0.0029 0.0003 -0.0014 -0.0031 0.0053 0.0016  
Y -0.0105 0.0019 -0.0052 -0.0106 0.0016 0.0002  
Z 0.0038 -0.0004 0.0017 0.0039 -0.0044 -0.0013  
AT. 140 H X -0.0029 -0.0003 -0.0014 0.0031 -0.0053 0.0016  
Y -0.0105 -0.0019 -0.0052 0.0106 -0.0016 0.0002  
Z 0.0038 0.0004 0.0017 -0.0039 0.0044 -0.0013  
AT. 141 H X -0.0060 -0.0002 -0.0043 -0.0076 0.0162 0.0040  
Y -0.0079 0.0007 -0.0037 -0.0081 0.0058 0.0012  
Z 0.0108 -0.0015 0.0052 0.0111 -0.0054 -0.0012  
AT. 142 H X -0.0060 0.0002 -0.0043 0.0076 -0.0162 0.0040  
Y -0.0079 -0.0007 -0.0037 0.0081 -0.0058 0.0012  
Z 0.0108 0.0015 0.0052 -0.0111 0.0054 -0.0012  
AT. 143 C X 0.0021 -0.0001 0.0014 0.0027 -0.0050 -0.0013

Y -0.0041 0.0009 -0.0021 -0.0047 -0.0006 -0.0002  
Z -0.0009 0.0005 0.0000 -0.0004 -0.0060 -0.0017  
AT. 144 C X 0.0021 0.0001 0.0014 -0.0027 0.0050 -0.0013  
Y -0.0041 -0.0009 -0.0021 0.0047 0.0006 -0.0002  
Z -0.0009 -0.0005 0.0000 0.0004 0.0060 -0.0017  
AT. 145 H X -0.0107 0.0028 -0.0047 -0.0102 -0.0151 -0.0045  
Y 0.0003 0.0002 0.0007 0.0013 -0.0033 -0.0012  
Z -0.0087 0.0020 -0.0044 -0.0096 -0.0062 -0.0016  
AT. 146 H X -0.0107 -0.0028 -0.0047 0.0102 0.0151 -0.0045  
Y 0.0003 -0.0002 0.0007 -0.0013 0.0033 -0.0012  
Z -0.0087 -0.0020 -0.0044 0.0096 0.0062 -0.0016  
AT. 147 H X 0.0002 0.0003 0.0001 -0.0001 -0.0041 -0.0009  
Y 0.0075 -0.0015 0.0040 0.0095 -0.0015 -0.0003  
Z 0.0027 -0.0003 0.0013 0.0033 -0.0039 -0.0009  
AT. 148 H X 0.0002 -0.0003 0.0001 0.0001 0.0041 -0.0009  
Y 0.0075 0.0015 0.0040 -0.0095 0.0015 -0.0003  
Z 0.0027 0.0003 0.0013 -0.0033 0.0039 -0.0009  
AT. 149 H X 0.0071 -0.0008 0.0047 0.0091 -0.0148 -0.0044  
Y 0.0045 -0.0009 0.0023 0.0051 -0.0037 -0.0009  
Z 0.0106 -0.0020 0.0056 0.0122 -0.0064 -0.0014  
AT. 150 H X 0.0071 0.0008 0.0047 -0.0091 0.0148 -0.0044  
Y 0.0045 0.0009 0.0023 -0.0051 0.0037 -0.0009  
Z 0.0106 0.0020 0.0056 -0.0122 0.0064 -0.0014  
AT. 151 C X -0.0007 0.0002 -0.0004 -0.0008 -0.0001 0.0001  
Y -0.0004 0.0000 -0.0002 -0.0005 0.0003 0.0001  
Z -0.0015 0.0006 -0.0004 -0.0009 -0.0054 -0.0015  
AT. 152 C X -0.0007 -0.0002 -0.0004 0.0008 0.0001 0.0001  
Y -0.0004 -0.0000 -0.0002 0.0005 -0.0003 0.0001  
Z -0.0015 -0.0006 -0.0004 0.0009 0.0054 -0.0015  
AT. 153 H X -0.0189 0.0049 -0.0101 -0.0221 -0.0021 -0.0004  
Y -0.0053 0.0012 -0.0031 -0.0066 0.0026 0.0008  
Z -0.0014 0.0005 -0.0009 -0.0016 -0.0003 0.0000

AT.154 H X -0.0189 -0.0049 -0.0101 0.0221 0.0021 -0.0004  
Y -0.0053 -0.0012 -0.0031 0.0066 -0.0026 0.0008  
Z -0.0014 -0.0005 -0.0009 0.0016 0.0003 0.0000

AT.155 H X 0.0178 -0.0048 0.0091 0.0214 0.0041 0.0021  
Y 0.0055 -0.0013 0.0029 0.0068 -0.0011 -0.0000  
Z -0.0012 0.0001 -0.0003 -0.0007 -0.0016 -0.0005

AT.156 H X 0.0178 0.0048 0.0091 -0.0214 -0.0041 0.0021  
Y 0.0055 0.0013 0.0029 -0.0068 0.0011 -0.0000  
Z -0.0012 -0.0001 -0.0003 0.0007 0.0016 -0.0005

AT.157 O X 0.0000 -0.0002 -0.0002 -0.0000 0.0000 -0.0000  
Y -0.0001 0.0001 0.0002 0.0000 0.0001 0.0001  
Z 0.0000 -0.0002 -0.0001 -0.0000 0.0001 0.0000

AT.158 O X 0.0000 0.0002 -0.0002 0.0000 -0.0000 -0.0000  
Y -0.0001 -0.0001 0.0002 -0.0000 -0.0001 0.0001  
Z 0.0000 0.0002 -0.0001 0.0000 -0.0001 0.0000

AT.159 O X 0.0000 0.0001 -0.0001 -0.0001 -0.0001 0.0001  
Y -0.0000 0.0001 -0.0000 0.0000 -0.0001 -0.0000  
Z -0.0001 -0.0000 0.0001 -0.0000 -0.0000 -0.0001

AT.160 O X 0.0000 -0.0001 -0.0001 0.0001 0.0001 0.0001  
Y -0.0000 -0.0001 -0.0000 -0.0000 0.0001 -0.0000  
Z -0.0001 0.0000 0.0001 0.0000 0.0000 -0.0001

AT.161 H X -0.0011 0.0060 0.0021 0.0009 -0.0021 -0.0010  
Y 0.0005 -0.0012 -0.0009 -0.0003 -0.0000 0.0001  
Z -0.0022 0.0064 0.0036 0.0012 -0.0008 -0.0012

AT.162 H X -0.0011 -0.0060 0.0021 -0.0009 0.0021 -0.0010  
Y 0.0005 0.0012 -0.0009 0.0003 0.0000 0.0001  
Z -0.0022 -0.0064 0.0036 -0.0012 0.0008 -0.0012

AT.163 H X -0.0003 -0.0013 0.0002 0.0004 0.0013 -0.0007  
Y 0.0005 -0.0016 -0.0002 -0.0007 0.0007 -0.0004  
Z 0.0005 0.0003 -0.0005 -0.0003 -0.0007 0.0004

AT.164 H X -0.0003 0.0013 0.0002 -0.0004 -0.0013 -0.0007  
Y 0.0005 0.0016 -0.0002 0.0007 -0.0007 -0.0004

Z 0.0005 -0.0003 -0.0005 0.0003 0.0007 0.0004  
AT. 165 O X 0.0002 -0.0001 0.0001 -0.0000 -0.0000 0.0000  
Y 0.0001 0.0001 0.0001 0.0000 -0.0001 0.0000  
Z -0.0002 -0.0000 -0.0001 -0.0001 0.0001 -0.0000  
AT. 166 O X 0.0002 0.0001 0.0001 0.0000 0.0000 0.0000  
Y 0.0001 -0.0001 0.0001 -0.0000 0.0001 0.0000  
Z -0.0002 0.0000 -0.0001 0.0001 -0.0001 -0.0000  
AT. 167 H X -0.0017 0.0003 -0.0008 -0.0007 -0.0000 -0.0002  
Y 0.0008 -0.0000 0.0003 -0.0007 0.0004 0.0001  
Z 0.0044 -0.0003 0.0025 0.0031 -0.0006 0.0004  
AT. 168 H X -0.0017 -0.0003 -0.0008 0.0007 0.0000 -0.0002  
Y 0.0008 0.0000 0.0003 0.0007 -0.0004 0.0001  
Z 0.0044 0.0003 0.0025 -0.0031 0.0006 0.0004  
AT. 169 O X -0.0003 0.0000 -0.0002 -0.0000 0.0000 -0.0000  
Y -0.0003 -0.0000 -0.0001 -0.0001 0.0001 -0.0000  
Z -0.0003 -0.0000 -0.0002 -0.0001 0.0001 -0.0001  
AT. 170 O X -0.0003 -0.0000 -0.0002 0.0000 -0.0000 -0.0000  
Y -0.0003 0.0000 -0.0001 0.0001 -0.0001 -0.0000  
Z -0.0003 0.0000 -0.0002 0.0001 -0.0001 -0.0001  
AT. 171 H X 0.0022 0.0001 0.0014 -0.0023 0.0006 0.0002  
Y 0.0015 0.0002 0.0008 -0.0010 -0.0001 0.0003  
Z 0.0015 0.0004 0.0004 0.0001 -0.0016 0.0004  
AT. 172 H X 0.0022 -0.0001 0.0014 0.0023 -0.0006 0.0002  
Y 0.0015 -0.0002 0.0008 0.0010 0.0001 0.0003  
Z 0.0015 -0.0004 0.0004 -0.0001 0.0016 0.0004  
  
FREQ(CM\*\*-1) 1163.71 1164.21 1167.43 1167.70 1174.78 1175.67  
  
AT. 1 I X 0.0000 -0.0000 0.0000 0.0000 0.0000 0.0000  
Y 0.0000 -0.0000 0.0000 0.0000 -0.0000 -0.0000  
Z 0.0000 0.0000 -0.0000 -0.0000 -0.0000 -0.0000  
AT. 2 I X -0.0000 -0.0000 0.0000 -0.0000 0.0000 -0.0000



Y -0.0000 -0.0000 0.0000 -0.0000 -0.0000 0.0000  
Z -0.0000 0.0000 -0.0000 0.0000 -0.0000 0.0000  
AT. 3 I X -0.0000 0.0000 0.0000 0.0000 -0.0003 -0.0003  
Y -0.0000 -0.0000 0.0000 -0.0000 -0.0001 -0.0001  
Z 0.0000 0.0000 0.0000 -0.0000 -0.0004 -0.0004  
AT. 4 I X 0.0000 0.0000 0.0000 -0.0000 -0.0003 0.0003  
Y 0.0000 -0.0000 0.0000 0.0000 -0.0001 0.0001  
Z -0.0000 0.0000 0.0000 0.0000 -0.0004 0.0004  
AT. 5 O X -0.0001 0.0001 0.0001 0.0000 -0.0011 -0.0012  
Y -0.0000 -0.0001 0.0000 -0.0000 0.0005 0.0008  
Z 0.0011 -0.0004 -0.0001 -0.0001 0.0013 0.0019  
AT. 6 O X 0.0001 0.0001 0.0001 -0.0000 -0.0011 0.0012  
Y 0.0000 -0.0001 0.0000 0.0000 0.0005 -0.0008  
Z -0.0011 -0.0004 -0.0001 0.0001 0.0013 -0.0019  
AT. 7 O X 0.0002 -0.0003 -0.0003 -0.0001 0.0039 0.0038  
Y -0.0006 0.0003 0.0004 0.0001 -0.0044 -0.0043  
Z 0.0009 -0.0003 -0.0001 -0.0001 0.0013 0.0012  
AT. 8 O X -0.0002 -0.0003 -0.0003 0.0001 0.0039 -0.0038  
Y 0.0006 0.0003 0.0004 -0.0001 -0.0044 0.0043  
Z -0.0009 -0.0003 -0.0001 0.0001 0.0013 -0.0012  
AT. 9 N X -0.0008 -0.0001 -0.0006 -0.0001 0.0045 0.0044  
Y -0.0034 0.0010 0.0004 0.0004 -0.0034 -0.0035  
Z -0.0027 0.0008 0.0003 0.0002 -0.0019 -0.0023  
AT. 10 N X 0.0008 -0.0001 -0.0006 0.0001 0.0045 -0.0044  
Y 0.0034 0.0010 0.0004 -0.0004 -0.0034 0.0035  
Z 0.0027 0.0008 0.0003 -0.0002 -0.0019 0.0023  
AT. 11 N X -0.0004 0.0004 0.0009 0.0006 -0.0033 -0.0030  
Y 0.0049 -0.0014 -0.0003 -0.0007 -0.0014 -0.0015  
Z -0.0002 -0.0001 -0.0003 -0.0001 0.0041 0.0038  
AT. 12 N X 0.0004 0.0004 0.0009 -0.0006 -0.0033 0.0030  
Y -0.0049 -0.0014 -0.0003 0.0007 -0.0014 0.0015  
Z 0.0002 -0.0001 -0.0003 0.0001 0.0041 -0.0038

AT. 13 C X -0.0024 0.0007 -0.0001 0.0000 -0.0001 0.0003  
Y 0.0011 -0.0002 -0.0002 -0.0000 0.0003 -0.0004  
Z -0.0031 0.0009 0.0002 -0.0000 -0.0004 -0.0006

AT. 14 C X 0.0024 0.0007 -0.0001 -0.0000 -0.0001 -0.0003  
Y -0.0011 -0.0002 -0.0002 0.0000 0.0003 0.0004  
Z 0.0031 0.0009 0.0002 0.0000 -0.0004 0.0006

AT. 15 C X 0.0031 -0.0013 0.0006 -0.0000 0.0007 0.0006  
Y -0.0007 0.0002 0.0001 -0.0000 -0.0002 -0.0000  
Z 0.0021 -0.0007 0.0001 0.0000 -0.0004 -0.0005

AT. 16 C X -0.0031 -0.0013 0.0006 0.0000 0.0007 -0.0006  
Y 0.0007 0.0002 0.0001 0.0000 -0.0002 0.0000  
Z -0.0021 -0.0007 0.0001 -0.0000 -0.0004 0.0005

AT. 17 H X -0.0153 0.0061 -0.0021 -0.0003 0.0007 0.0010  
Y -0.0022 0.0012 -0.0007 0.0000 -0.0012 -0.0017  
Z -0.0038 0.0011 -0.0001 -0.0001 0.0011 0.0020

AT. 18 H X 0.0153 0.0061 -0.0021 0.0003 0.0007 -0.0010  
Y 0.0022 0.0012 -0.0007 -0.0000 -0.0012 0.0017  
Z 0.0038 0.0011 -0.0001 0.0001 0.0011 -0.0020

AT. 19 H X -0.0038 0.0039 -0.0045 0.0002 -0.0049 -0.0072  
Y -0.0065 0.0024 -0.0006 -0.0001 0.0011 0.0010  
Z -0.0019 0.0016 -0.0016 0.0001 -0.0016 -0.0025

AT. 20 H X 0.0038 0.0039 -0.0045 -0.0002 -0.0049 0.0072  
Y 0.0065 0.0024 -0.0006 0.0001 0.0011 -0.0010  
Z 0.0019 0.0016 -0.0016 -0.0001 -0.0016 0.0025

AT. 21 C X 0.0019 -0.0004 -0.0003 -0.0002 0.0020 0.0022  
Y 0.0005 -0.0002 -0.0002 0.0001 0.0040 0.0041  
Z -0.0028 0.0008 0.0001 0.0000 -0.0017 -0.0018

AT. 22 C X -0.0019 -0.0004 -0.0003 0.0002 0.0020 -0.0022  
Y -0.0005 -0.0002 -0.0002 -0.0001 0.0040 -0.0041  
Z 0.0028 0.0008 0.0001 -0.0000 -0.0017 0.0018

AT. 23 C X -0.0012 0.0005 0.0016 0.0002 -0.0209 -0.0210  
Y -0.0002 -0.0001 -0.0000 -0.0001 -0.0005 -0.0006

Z 0.0013 -0.0003 0.0001 0.0001 -0.0005 -0.0003  
AT. 24 C X 0.0012 0.0005 0.0016 -0.0002 -0.0209 0.0210  
Y 0.0002 -0.0001 -0.0000 0.0001 -0.0005 0.0006  
Z -0.0013 -0.0003 0.0001 -0.0001 -0.0005 0.0003  
AT. 25 H X 0.0042 -0.0007 -0.0041 0.0003 0.0608 0.0627  
Y 0.0009 -0.0002 -0.0007 0.0000 0.0093 0.0097  
Z -0.0003 -0.0007 -0.0024 -0.0006 0.0328 0.0320  
AT. 26 H X -0.0042 -0.0007 -0.0041 -0.0003 0.0608 -0.0627  
Y -0.0009 -0.0002 -0.0007 -0.0000 0.0093 -0.0097  
Z 0.0003 -0.0007 -0.0024 0.0006 0.0328 -0.0320  
AT. 27 H X -0.0040 -0.0017 -0.0134 -0.0014 0.1708 0.1695  
Y 0.0009 -0.0004 -0.0027 0.0000 0.0406 0.0404  
Z 0.0025 -0.0001 0.0015 0.0005 -0.0141 -0.0136  
AT. 28 H X 0.0040 -0.0017 -0.0134 0.0014 0.1708 -0.1695  
Y -0.0009 -0.0004 -0.0027 -0.0000 0.0406 -0.0404  
Z -0.0025 -0.0001 0.0015 -0.0005 -0.0141 0.0136  
AT. 29 C X -0.0010 0.0004 0.0003 0.0001 -0.0024 -0.0021  
Y 0.0039 -0.0011 -0.0004 -0.0005 0.0040 0.0043  
Z 0.0011 -0.0002 -0.0001 -0.0000 0.0007 0.0006  
AT. 30 C X 0.0010 0.0004 0.0003 -0.0001 -0.0024 0.0021  
Y -0.0039 -0.0011 -0.0004 0.0005 0.0040 -0.0043  
Z -0.0011 -0.0002 -0.0001 0.0000 0.0007 -0.0006  
AT. 31 H X -0.0202 0.0059 0.0005 0.0017 -0.0110 -0.0134  
Y 0.0011 -0.0005 -0.0003 -0.0005 0.0017 0.0020  
Z -0.0148 0.0041 0.0002 0.0010 -0.0080 -0.0097  
AT. 32 H X 0.0202 0.0059 0.0005 -0.0017 -0.0110 0.0134  
Y -0.0011 -0.0005 -0.0003 0.0005 0.0017 -0.0020  
Z 0.0148 0.0041 0.0002 -0.0010 -0.0080 0.0097  
AT. 33 H X 0.0053 -0.0026 -0.0016 -0.0013 0.0171 0.0192  
Y 0.0005 -0.0003 -0.0007 -0.0001 0.0039 0.0029  
Z 0.0066 -0.0025 -0.0012 -0.0012 0.0135 0.0152  
AT. 34 H X -0.0053 -0.0026 -0.0016 0.0013 0.0171 -0.0192

Y -0.0005 -0.0003 -0.0007 0.0001 0.0039 -0.0029  
Z -0.0066 -0.0025 -0.0012 0.0012 0.0135 -0.0152  
AT. 35 C X 0.0142 -0.0036 0.0005 -0.0003 -0.0008 -0.0008  
Y -0.0137 0.0036 0.0005 0.0011 -0.0051 -0.0061  
Z 0.0080 -0.0020 0.0008 -0.0002 -0.0064 -0.0058  
AT. 36 C X -0.0142 -0.0036 0.0005 0.0003 -0.0008 0.0008  
Y 0.0137 0.0036 0.0005 -0.0011 -0.0051 0.0061  
Z -0.0080 -0.0020 0.0008 0.0002 -0.0064 0.0058  
AT. 37 C X -0.0005 -0.0001 -0.0007 -0.0005 0.0015 0.0015  
Y -0.0014 0.0004 0.0001 0.0003 0.0017 0.0020  
Z 0.0016 -0.0005 -0.0003 -0.0002 0.0014 0.0014  
AT. 38 C X 0.0005 -0.0001 -0.0007 0.0005 0.0015 -0.0015  
Y 0.0014 0.0004 0.0001 -0.0003 0.0017 -0.0020  
Z -0.0016 -0.0005 -0.0003 0.0002 0.0014 -0.0014  
AT. 39 H X -0.0042 0.0014 0.0012 0.0008 -0.0107 -0.0112  
Y 0.0205 -0.0063 -0.0031 -0.0025 0.0305 0.0319  
Z -0.0106 0.0035 0.0024 0.0018 -0.0192 -0.0200  
AT. 40 H X 0.0042 0.0014 0.0012 -0.0008 -0.0107 0.0112  
Y -0.0205 -0.0063 -0.0031 0.0025 0.0305 -0.0319  
Z 0.0106 0.0035 0.0024 -0.0018 -0.0192 0.0200  
AT. 41 H X 0.0036 -0.0015 -0.0017 -0.0008 0.0167 0.0174  
Y 0.0013 0.0010 0.0029 0.0006 -0.0316 -0.0320  
Z -0.0043 0.0004 -0.0013 -0.0001 0.0120 0.0119  
AT. 42 H X -0.0036 -0.0015 -0.0017 0.0008 0.0167 -0.0174  
Y -0.0013 0.0010 0.0029 -0.0006 -0.0316 0.0320  
Z 0.0043 0.0004 -0.0013 0.0001 0.0120 -0.0119  
AT. 43 C X 0.0007 -0.0003 -0.0004 -0.0003 0.0015 0.0014  
Y -0.0038 0.0011 -0.0003 0.0000 -0.0003 -0.0002  
Z -0.0025 0.0009 0.0007 0.0005 -0.0039 -0.0037  
AT. 44 C X -0.0007 -0.0003 -0.0004 0.0003 0.0015 -0.0014  
Y 0.0038 0.0011 -0.0003 -0.0000 -0.0003 0.0002  
Z 0.0025 0.0009 0.0007 -0.0005 -0.0039 0.0037

AT. 45 H X 0.0239 -0.0069 -0.0019 -0.0032 0.0091 0.0097  
Y 0.0014 -0.0002 0.0015 0.0012 -0.0030 -0.0026  
Z -0.0236 0.0068 -0.0001 0.0013 -0.0063 -0.0071

AT. 46 H X -0.0239 -0.0069 -0.0019 0.0032 0.0091 -0.0097  
Y -0.0014 -0.0002 0.0015 -0.0012 -0.0030 0.0026  
Z 0.0236 0.0068 -0.0001 -0.0013 -0.0063 0.0071

AT. 47 H X -0.0066 0.0028 0.0018 0.0010 -0.0140 -0.0139  
Y 0.0004 0.0001 0.0013 0.0010 -0.0008 -0.0008  
Z 0.0121 -0.0045 -0.0007 -0.0001 0.0174 0.0172

AT. 48 H X 0.0066 0.0028 0.0018 -0.0010 -0.0140 0.0139  
Y -0.0004 0.0001 0.0013 -0.0010 -0.0008 0.0008  
Z -0.0121 -0.0045 -0.0007 0.0001 0.0174 -0.0172

AT. 49 C X -0.0097 0.0023 -0.0002 0.0007 0.0030 0.0023  
Y 0.0083 -0.0022 0.0005 -0.0001 -0.0016 -0.0015  
Z 0.0170 -0.0043 0.0001 -0.0009 -0.0008 -0.0002

AT. 50 C X 0.0097 0.0023 -0.0002 -0.0007 0.0030 -0.0023  
Y -0.0083 -0.0022 0.0005 0.0001 -0.0016 0.0015  
Z -0.0170 -0.0043 0.0001 0.0009 -0.0008 0.0002

AT. 51 C X 0.0014 -0.0002 0.0003 -0.0001 -0.0027 -0.0027  
Y 0.0005 -0.0002 -0.0003 -0.0002 0.0020 0.0021  
Z 0.0018 -0.0006 -0.0003 -0.0002 0.0026 0.0026

AT. 52 C X -0.0014 -0.0002 0.0003 0.0001 -0.0027 0.0027  
Y -0.0005 -0.0002 -0.0003 0.0002 0.0020 -0.0021  
Z -0.0018 -0.0006 -0.0003 0.0002 0.0026 -0.0026

AT. 53 H X 0.0020 -0.0004 0.0005 -0.0000 -0.0028 -0.0030  
Y -0.0126 0.0039 0.0006 0.0010 -0.0072 -0.0066  
Z -0.0154 0.0047 0.0005 0.0011 -0.0082 -0.0073

AT. 54 H X -0.0020 -0.0004 0.0005 0.0000 -0.0028 0.0030  
Y 0.0126 0.0039 0.0006 -0.0010 -0.0072 0.0066  
Z 0.0154 0.0047 0.0005 -0.0011 -0.0082 0.0073

AT. 55 H X -0.0057 0.0018 0.0001 0.0003 -0.0022 -0.0021  
Y -0.0019 0.0001 -0.0011 -0.0004 0.0071 0.0070

Z -0.0056 0.0010 -0.0015 -0.0003 0.0093 0.0091  
AT. 56 H X 0.0057 0.0018 0.0001 -0.0003 -0.0022 0.0021  
Y 0.0019 0.0001 -0.0011 0.0004 0.0071 -0.0070  
Z 0.0056 0.0010 -0.0015 0.0003 0.0093 -0.0091  
AT. 57 C X -0.0044 0.0011 -0.0003 -0.0000 0.0005 0.0005  
Y 0.0051 -0.0014 -0.0002 -0.0005 0.0026 0.0030  
Z -0.0040 0.0010 -0.0003 0.0000 0.0028 0.0025  
AT. 58 C X 0.0044 0.0011 -0.0003 0.0000 0.0005 -0.0005  
Y -0.0051 -0.0014 -0.0002 0.0005 0.0026 -0.0030  
Z 0.0040 0.0010 -0.0003 -0.0000 0.0028 -0.0025  
AT. 59 H X -0.0157 0.0041 0.0004 0.0013 -0.0010 -0.0023  
Y 0.0099 -0.0026 0.0002 -0.0004 -0.0037 -0.0028  
Z -0.0053 0.0015 0.0007 0.0011 -0.0075 -0.0080  
AT. 60 H X 0.0157 0.0041 0.0004 -0.0013 -0.0010 0.0023  
Y -0.0099 -0.0026 0.0002 0.0004 -0.0037 0.0028  
Z 0.0053 0.0015 0.0007 -0.0011 -0.0075 0.0080  
AT. 61 H X -0.0075 0.0020 0.0012 0.0011 -0.0096 -0.0097  
Y 0.0027 -0.0005 -0.0001 0.0002 0.0009 0.0003  
Z -0.0045 0.0011 0.0008 0.0006 -0.0046 -0.0044  
AT. 62 H X 0.0075 0.0020 0.0012 -0.0011 -0.0096 0.0097  
Y -0.0027 -0.0005 -0.0001 -0.0002 0.0009 -0.0003  
Z 0.0045 0.0011 0.0008 -0.0006 -0.0046 0.0044  
AT. 63 H X -0.0098 0.0022 -0.0012 -0.0001 0.0106 0.0103  
Y 0.0071 -0.0016 0.0012 0.0002 -0.0077 -0.0079  
Z -0.0011 0.0003 -0.0006 -0.0004 0.0014 0.0019  
AT. 64 H X 0.0098 0.0022 -0.0012 0.0001 0.0106 -0.0103  
Y -0.0071 -0.0016 0.0012 -0.0002 -0.0077 0.0079  
Z 0.0011 0.0003 -0.0006 0.0004 0.0014 -0.0019  
AT. 65 C X 0.0024 -0.0006 -0.0000 -0.0002 -0.0011 -0.0009  
Y -0.0029 0.0008 0.0000 0.0002 -0.0002 -0.0002  
Z -0.0071 0.0018 -0.0000 0.0003 0.0005 0.0001  
AT. 66 C X -0.0024 -0.0006 -0.0000 0.0002 -0.0011 0.0009

Y 0.0029 0.0008 0.0000 -0.0002 -0.0002 0.0002  
Z 0.0071 0.0018 -0.0000 -0.0003 0.0005 -0.0001  
AT. 67 H X 0.0147 -0.0038 0.0001 -0.0009 -0.0002 -0.0001  
Y -0.0087 0.0023 0.0005 0.0007 -0.0002 -0.0007  
Z -0.0123 0.0033 -0.0006 0.0005 -0.0001 0.0001  
AT. 68 H X -0.0147 -0.0038 0.0001 0.0009 -0.0002 0.0001  
Y 0.0087 0.0023 0.0005 -0.0007 -0.0002 0.0007  
Z 0.0123 0.0033 -0.0006 -0.0005 -0.0001 -0.0001  
AT. 69 H X 0.0039 -0.0010 0.0005 0.0001 -0.0004 -0.0004  
Y -0.0001 -0.0002 0.0004 0.0006 0.0020 0.0020  
Z -0.0042 0.0008 -0.0003 0.0003 0.0023 0.0021  
AT. 70 H X -0.0039 -0.0010 0.0005 -0.0001 -0.0004 0.0004  
Y 0.0001 -0.0002 0.0004 -0.0006 0.0020 -0.0020  
Z 0.0042 0.0008 -0.0003 -0.0003 0.0023 -0.0021  
AT. 71 H X 0.0112 -0.0028 0.0009 0.0004 -0.0002 0.0007  
Y -0.0066 0.0015 -0.0009 -0.0003 0.0009 0.0006  
Z -0.0060 0.0012 -0.0007 0.0002 0.0028 0.0025  
AT. 72 H X -0.0112 -0.0028 0.0009 -0.0004 -0.0002 -0.0007  
Y 0.0066 0.0015 -0.0009 0.0003 0.0009 -0.0006  
Z 0.0060 0.0012 -0.0007 -0.0002 0.0028 -0.0025  
AT. 73 C X -0.0013 0.0004 0.0001 0.0000 -0.0010 -0.0009  
Y 0.0012 -0.0003 -0.0003 -0.0002 0.0014 0.0016  
Z -0.0047 0.0012 -0.0003 0.0001 0.0026 0.0023  
AT. 74 C X 0.0013 0.0004 0.0001 -0.0000 -0.0010 0.0009  
Y -0.0012 -0.0003 -0.0003 0.0002 0.0014 -0.0016  
Z 0.0047 0.0012 -0.0003 -0.0001 0.0026 -0.0023  
AT. 75 H X 0.0060 -0.0021 0.0002 0.0002 0.0036 0.0043  
Y -0.0012 0.0007 0.0002 0.0001 -0.0041 -0.0046  
Z -0.0022 0.0006 0.0004 0.0007 -0.0014 -0.0022  
AT. 76 H X -0.0060 -0.0021 0.0002 -0.0002 0.0036 -0.0043  
Y 0.0012 0.0007 0.0002 -0.0001 -0.0041 0.0046  
Z 0.0022 0.0006 0.0004 -0.0007 -0.0014 0.0022

AT. 77 H X -0.0079 0.0026 0.0004 -0.0002 -0.0133 -0.0136  
Y 0.0024 -0.0009 -0.0000 0.0003 0.0087 0.0086  
Z 0.0009 -0.0004 -0.0008 -0.0002 0.0070 0.0073

AT. 78 H X 0.0079 0.0026 0.0004 0.0002 -0.0133 0.0136  
Y -0.0024 -0.0009 -0.0000 -0.0003 0.0087 -0.0086  
Z -0.0009 -0.0004 -0.0008 0.0002 0.0070 -0.0073

AT. 79 I X -0.0000 0.0000 0.0000 -0.0000 0.0000 -0.0000  
Y -0.0000 0.0000 -0.0000 0.0001 -0.0000 0.0000  
Z -0.0000 0.0000 0.0001 -0.0000 0.0000 -0.0000

AT. 80 I X 0.0000 0.0000 0.0000 0.0000 0.0000 0.0000  
Y 0.0000 0.0000 -0.0000 -0.0001 -0.0000 -0.0000  
Z 0.0000 0.0000 0.0001 0.0000 0.0000 0.0000

AT. 81 I X 0.0001 0.0000 -0.0003 -0.0003 -0.0000 -0.0000  
Y -0.0000 -0.0000 0.0002 0.0003 0.0000 0.0000  
Z -0.0001 0.0000 0.0005 0.0005 0.0000 0.0000

AT. 82 I X -0.0001 0.0000 -0.0003 0.0003 -0.0000 0.0000  
Y 0.0000 -0.0000 0.0002 -0.0003 0.0000 -0.0000  
Z 0.0001 0.0000 0.0005 -0.0005 0.0000 -0.0000

AT. 83 O X 0.0004 -0.0008 -0.0035 0.0001 -0.0004 0.0002  
Y 0.0001 -0.0002 -0.0006 0.0002 -0.0001 0.0000  
Z -0.0006 0.0007 -0.0022 -0.0008 -0.0002 0.0002

AT. 84 O X -0.0004 -0.0008 -0.0035 -0.0001 -0.0004 -0.0002  
Y -0.0001 -0.0002 -0.0006 -0.0002 -0.0001 -0.0000  
Z 0.0006 0.0007 -0.0022 0.0008 -0.0002 -0.0002

AT. 85 O X -0.0015 0.0010 0.0039 0.0030 0.0004 0.0001  
Y -0.0006 -0.0001 0.0036 0.0031 0.0002 0.0000  
Z -0.0004 0.0006 -0.0011 -0.0009 0.0001 0.0002

AT. 86 O X 0.0015 0.0010 0.0039 -0.0030 0.0004 -0.0001  
Y 0.0006 -0.0001 0.0036 -0.0031 0.0002 -0.0000  
Z 0.0004 0.0006 -0.0011 0.0009 0.0001 -0.0002

AT. 87 N X -0.0016 0.0013 0.0074 0.0037 0.0007 -0.0004  
Y 0.0037 -0.0052 0.0019 0.0031 -0.0001 -0.0005



Z 0.0028 -0.0039 0.0004 0.0018 -0.0002 -0.0005  
AT. 88 N X 0.0016 0.0013 0.0074 -0.0037 0.0007 0.0004  
Y -0.0037 -0.0052 0.0019 -0.0031 -0.0001 0.0005  
Z -0.0028 -0.0039 0.0004 -0.0018 -0.0002 0.0005  
AT. 89 N X 0.0023 -0.0032 -0.0027 0.0011 0.0005 0.0005  
Y -0.0046 0.0055 0.0003 -0.0000 0.0000 0.0004  
Z 0.0011 -0.0009 -0.0023 -0.0021 -0.0008 -0.0005  
AT. 90 N X -0.0023 -0.0032 -0.0027 -0.0011 0.0005 -0.0005  
Y 0.0046 0.0055 0.0003 0.0000 0.0000 -0.0004  
Z -0.0011 -0.0009 -0.0023 0.0021 -0.0008 0.0005  
AT. 91 C X -0.0026 0.0030 0.0009 -0.0005 0.0001 0.0003  
Y -0.0001 0.0003 -0.0001 -0.0007 -0.0001 -0.0001  
Z 0.0047 -0.0049 0.0025 -0.0005 0.0001 -0.0004  
AT. 92 C X 0.0026 0.0030 0.0009 0.0005 0.0001 -0.0003  
Y 0.0001 0.0003 -0.0001 0.0007 -0.0001 0.0001  
Z -0.0047 -0.0049 0.0025 0.0005 0.0001 0.0004  
AT. 93 C X 0.0023 -0.0012 0.0027 -0.0020 0.0004 -0.0006  
Y -0.0004 -0.0000 -0.0006 0.0012 0.0000 0.0003  
Z -0.0030 0.0033 0.0003 0.0005 0.0002 0.0003  
AT. 94 C X -0.0023 -0.0012 0.0027 0.0020 0.0004 0.0006  
Y 0.0004 -0.0000 -0.0006 -0.0012 0.0000 -0.0003  
Z 0.0030 0.0033 0.0003 -0.0005 0.0002 -0.0003  
AT. 95 H X -0.0148 0.0139 0.0002 0.0090 0.0014 0.0028  
Y 0.0064 -0.0037 0.0056 -0.0073 0.0002 -0.0018  
Z 0.0051 -0.0079 -0.0081 0.0025 -0.0014 -0.0001  
AT. 96 H X 0.0148 0.0139 0.0002 -0.0090 0.0014 -0.0028  
Y -0.0064 -0.0037 0.0056 0.0073 0.0002 0.0018  
Z -0.0051 -0.0079 -0.0081 -0.0025 -0.0014 0.0001  
AT. 97 H X 0.0080 -0.0198 -0.0226 0.0156 -0.0050 0.0024  
Y 0.0066 -0.0024 0.0097 -0.0112 0.0010 -0.0024  
Z -0.0031 0.0078 0.0091 -0.0067 0.0018 -0.0010  
AT. 98 H X -0.0080 -0.0198 -0.0226 -0.0156 -0.0050 -0.0024

Y -0.0066 -0.0024 0.0097 0.0112 0.0010 0.0024  
Z 0.0031 0.0078 0.0091 0.0067 0.0018 0.0010  
AT. 99 C X 0.0031 -0.0044 0.0012 0.0028 -0.0005 -0.0004  
Y -0.0004 0.0019 -0.0046 -0.0053 0.0000 0.0000  
Z 0.0043 -0.0050 -0.0024 -0.0006 -0.0012 -0.0007  
AT. 100 C X -0.0031 -0.0044 0.0012 -0.0028 -0.0005 0.0004  
Y 0.0004 0.0019 -0.0046 0.0053 0.0000 -0.0000  
Z -0.0043 -0.0050 -0.0024 0.0006 -0.0012 0.0007  
AT. 101 C X 0.0025 0.0026 -0.0194 -0.0211 -0.0013 -0.0007  
Y -0.0004 -0.0015 0.0063 0.0071 0.0004 0.0002  
Z -0.0021 0.0028 0.0013 -0.0004 0.0007 0.0004  
AT. 102 C X -0.0025 0.0026 -0.0194 0.0211 -0.0013 0.0007  
Y 0.0004 -0.0015 0.0063 -0.0071 0.0004 -0.0002  
Z 0.0021 0.0028 0.0013 0.0004 0.0007 -0.0004  
AT. 103 H X -0.0058 -0.0121 0.0601 0.0688 0.0036 0.0022  
Y 0.0030 0.0053 -0.0282 -0.0322 -0.0017 -0.0010  
Z 0.0070 -0.0024 -0.0291 -0.0264 -0.0032 -0.0014  
AT. 104 H X 0.0058 -0.0121 0.0601 -0.0688 0.0036 -0.0022  
Y -0.0030 0.0053 -0.0282 0.0322 -0.0017 0.0010  
Z -0.0070 -0.0024 -0.0291 0.0264 -0.0032 0.0014  
AT. 105 H X -0.0412 0.0113 0.1508 0.1504 0.0154 0.0086  
Y 0.0153 0.0023 -0.0789 -0.0802 -0.0071 -0.0037  
Z -0.0047 0.0061 0.0019 -0.0002 0.0011 0.0006  
AT. 106 H X 0.0412 0.0113 0.1508 -0.1504 0.0154 -0.0086  
Y -0.0153 0.0023 -0.0789 0.0802 -0.0071 0.0037  
Z 0.0047 0.0061 0.0019 0.0002 0.0011 -0.0006  
AT. 107 C X -0.0014 0.0022 -0.0041 -0.0032 -0.0004 0.0006  
Y -0.0030 0.0044 -0.0029 -0.0034 0.0003 0.0005  
Z -0.0013 0.0017 0.0014 -0.0000 0.0005 0.0001  
AT. 108 C X 0.0014 0.0022 -0.0041 0.0032 -0.0004 -0.0006  
Y 0.0030 0.0044 -0.0029 0.0034 0.0003 -0.0005  
Z 0.0013 0.0017 0.0014 0.0000 0.0005 -0.0001

AT.109 H X -0.0163 0.0232 -0.0128 -0.0148 -0.0007 0.0027  
Y 0.0065 -0.0090 0.0024 0.0045 0.0004 -0.0011  
Z 0.0194 -0.0277 0.0131 0.0173 0.0008 -0.0034

AT.110 H X 0.0163 0.0232 -0.0128 0.0148 -0.0007 -0.0027  
Y -0.0065 -0.0090 0.0024 -0.0045 0.0004 0.0011  
Z -0.0194 -0.0277 0.0131 -0.0173 0.0008 0.0034

AT.111 H X -0.0036 0.0034 0.0170 0.0073 0.0013 -0.0018  
Y 0.0012 -0.0007 -0.0081 -0.0054 -0.0004 0.0013  
Z 0.0004 0.0012 -0.0207 -0.0112 -0.0013 0.0026

AT.112 H X 0.0036 0.0034 0.0170 -0.0073 0.0013 0.0018  
Y -0.0012 -0.0007 -0.0081 0.0054 -0.0004 -0.0013  
Z -0.0004 0.0012 -0.0207 0.0112 -0.0013 -0.0026

AT.113 C X 0.0217 -0.0283 -0.0002 0.0091 -0.0009 -0.0019  
Y 0.0085 -0.0114 0.0044 0.0060 -0.0012 -0.0012  
Z -0.0168 0.0209 0.0034 -0.0028 -0.0000 0.0010

AT.114 C X -0.0217 -0.0283 -0.0002 -0.0091 -0.0009 0.0019  
Y -0.0085 -0.0114 0.0044 -0.0060 -0.0012 0.0012  
Z 0.0168 0.0209 0.0034 0.0028 -0.0000 -0.0010

AT.115 C X -0.0036 0.0048 0.0015 -0.0019 0.0000 -0.0000  
Y 0.0015 -0.0017 -0.0015 -0.0010 0.0004 0.0003  
Z -0.0004 0.0004 -0.0009 -0.0003 0.0007 0.0005

AT.116 C X 0.0036 0.0048 0.0015 0.0019 0.0000 0.0000  
Y -0.0015 -0.0017 -0.0015 0.0010 0.0004 -0.0003  
Z 0.0004 0.0004 -0.0009 0.0003 0.0007 -0.0005

AT.117 H X -0.0059 0.0095 -0.0112 -0.0125 0.0025 0.0022  
Y -0.0104 0.0169 -0.0224 -0.0215 0.0012 0.0025  
Z 0.0053 -0.0094 0.0173 0.0156 -0.0022 -0.0024

AT.118 H X 0.0059 0.0095 -0.0112 0.0125 0.0025 -0.0022  
Y 0.0104 0.0169 -0.0224 0.0215 0.0012 -0.0025  
Z -0.0053 -0.0094 0.0173 -0.0156 -0.0022 0.0024

AT.119 H X -0.0057 0.0045 0.0190 0.0127 -0.0032 -0.0033  
Y -0.0141 0.0148 0.0194 0.0108 -0.0026 -0.0028

Z 0.0130 -0.0148 -0.0121 -0.0045 0.0018 0.0017  
AT. 120 H X 0.0057 0.0045 0.0190 -0.0127 -0.0032 0.0033  
Y 0.0141 0.0148 0.0194 -0.0108 -0.0026 0.0028  
Z -0.0130 -0.0148 -0.0121 0.0045 0.0018 -0.0017  
AT. 121 C X 0.0004 -0.0002 0.0016 -0.0001 -0.0007 -0.0006  
Y 0.0039 -0.0049 0.0006 0.0011 0.0002 -0.0006  
Z -0.0009 0.0004 0.0042 0.0029 0.0000 -0.0002  
AT. 122 C X -0.0004 -0.0002 0.0016 0.0001 -0.0007 0.0006  
Y -0.0039 -0.0049 0.0006 -0.0011 0.0002 0.0006  
Z 0.0009 0.0004 0.0042 -0.0029 0.0000 0.0002  
AT. 123 H X 0.0188 -0.0282 0.0245 0.0244 0.0030 -0.0009  
Y -0.0120 0.0153 -0.0044 -0.0059 0.0000 0.0007  
Z 0.0183 -0.0248 0.0131 0.0142 0.0008 -0.0015  
AT. 124 H X -0.0188 -0.0282 0.0245 -0.0244 0.0030 0.0009  
Y 0.0120 0.0153 -0.0044 0.0059 0.0000 -0.0007  
Z -0.0183 -0.0248 0.0131 -0.0142 0.0008 0.0015  
AT. 125 H X 0.0043 -0.0012 -0.0267 -0.0178 -0.0017 0.0010  
Y -0.0026 0.0022 0.0135 0.0060 0.0012 -0.0003  
Z 0.0007 0.0027 -0.0237 -0.0162 -0.0008 0.0020  
AT. 126 H X -0.0043 -0.0012 -0.0267 0.0178 -0.0017 -0.0010  
Y 0.0026 0.0022 0.0135 -0.0060 0.0012 0.0003  
Z -0.0007 0.0027 -0.0237 0.0162 -0.0008 -0.0020  
AT. 127 C X -0.0207 0.0252 0.0032 -0.0031 0.0013 0.0016  
Y -0.0048 0.0061 -0.0019 -0.0019 -0.0008 0.0010  
Z -0.0181 0.0239 -0.0005 -0.0084 0.0008 0.0012  
AT. 128 C X 0.0207 0.0252 0.0032 0.0031 0.0013 -0.0016  
Y 0.0048 0.0061 -0.0019 0.0019 -0.0008 -0.0010  
Z 0.0181 0.0239 -0.0005 0.0084 0.0008 -0.0012  
AT. 129 C X 0.0033 -0.0034 -0.0048 -0.0023 -0.0005 0.0000  
Y -0.0009 0.0012 -0.0001 -0.0006 0.0004 0.0000  
Z -0.0016 0.0019 -0.0023 -0.0010 -0.0001 0.0006  
AT. 130 C X -0.0033 -0.0034 -0.0048 0.0023 -0.0005 -0.0000

Y 0.0009 0.0012 -0.0001 0.0006 0.0004 -0.0000  
Z 0.0016 0.0019 -0.0023 0.0010 -0.0001 -0.0006  
AT. 131 H X 0.0095 -0.0108 0.0043 0.0018 0.0008 -0.0019  
Y 0.0086 -0.0108 0.0127 0.0077 0.0009 -0.0017  
Z 0.0113 -0.0137 0.0159 0.0082 0.0020 -0.0028  
AT. 132 H X -0.0095 -0.0108 0.0043 -0.0018 0.0008 0.0019  
Y -0.0086 -0.0108 0.0127 -0.0077 0.0009 0.0017  
Z -0.0113 -0.0137 0.0159 -0.0082 0.0020 0.0028  
AT. 133 H X -0.0015 0.0003 -0.0135 -0.0008 -0.0020 0.0019  
Y 0.0074 -0.0101 -0.0108 0.0008 -0.0016 0.0001  
Z 0.0131 -0.0168 -0.0150 0.0004 -0.0024 -0.0002  
AT. 134 H X 0.0015 0.0003 -0.0135 0.0008 -0.0020 -0.0019  
Y -0.0074 -0.0101 -0.0108 -0.0008 -0.0016 -0.0001  
Z -0.0131 -0.0168 -0.0150 -0.0004 -0.0024 0.0002  
AT. 135 C X -0.0070 0.0091 0.0003 -0.0028 0.0002 0.0006  
Y -0.0030 0.0042 -0.0023 -0.0026 0.0000 0.0009  
Z 0.0075 -0.0093 -0.0016 0.0011 0.0003 -0.0008  
AT. 136 C X 0.0070 0.0091 0.0003 0.0028 0.0002 -0.0006  
Y 0.0030 0.0042 -0.0023 0.0026 0.0000 -0.0009  
Z -0.0075 -0.0093 -0.0016 -0.0011 0.0003 0.0008  
AT. 137 H X -0.0208 0.0271 -0.0015 -0.0074 0.0003 0.0024  
Y -0.0066 0.0079 0.0018 -0.0003 -0.0008 0.0010  
Z 0.0073 -0.0106 0.0057 0.0069 -0.0011 -0.0013  
AT. 138 H X 0.0208 0.0271 -0.0015 0.0074 0.0003 -0.0024  
Y 0.0066 0.0079 0.0018 0.0003 -0.0008 -0.0010  
Z -0.0073 -0.0106 0.0057 -0.0069 -0.0011 0.0013  
AT. 139 H X -0.0071 0.0100 -0.0041 -0.0073 0.0020 0.0004  
Y -0.0018 0.0022 0.0035 0.0007 0.0010 -0.0016  
Z 0.0060 -0.0082 0.0029 0.0059 -0.0022 0.0003  
AT. 140 H X 0.0071 0.0100 -0.0041 0.0073 0.0020 -0.0004  
Y 0.0018 0.0022 0.0035 -0.0007 0.0010 0.0016  
Z -0.0060 -0.0082 0.0029 -0.0059 -0.0022 -0.0003

AT. 141 H X -0.0210 0.0253 0.0075 -0.0010 0.0003 0.0005  
Y -0.0072 0.0088 0.0035 -0.0004 0.0015 -0.0013  
Z 0.0066 -0.0082 -0.0042 0.0001 -0.0013 0.0014

AT. 142 H X 0.0210 0.0253 0.0075 0.0010 0.0003 -0.0005  
Y 0.0072 0.0088 0.0035 0.0004 0.0015 0.0013  
Z -0.0066 -0.0082 -0.0042 -0.0001 -0.0013 -0.0014

AT. 143 C X 0.0066 -0.0079 -0.0017 0.0004 -0.0004 -0.0004  
Y 0.0011 -0.0013 0.0018 0.0008 0.0003 -0.0004  
Z 0.0080 -0.0106 0.0002 0.0035 -0.0003 -0.0005

AT. 144 C X -0.0066 -0.0079 -0.0017 -0.0004 -0.0004 0.0004  
Y -0.0011 -0.0013 0.0018 -0.0008 0.0003 0.0004  
Z -0.0080 -0.0106 0.0002 -0.0035 -0.0003 0.0005

AT. 145 H X 0.0206 -0.0274 0.0050 0.0116 -0.0003 -0.0022  
Y 0.0044 -0.0068 -0.0000 0.0030 -0.0002 0.0003  
Z 0.0087 -0.0105 0.0037 0.0040 0.0002 -0.0018

AT. 146 H X -0.0206 -0.0274 0.0050 -0.0116 -0.0003 0.0022  
Y -0.0044 -0.0068 -0.0000 -0.0030 -0.0002 -0.0003  
Z -0.0087 -0.0105 0.0037 -0.0040 0.0002 0.0018

AT. 147 H X 0.0054 -0.0057 -0.0010 -0.0016 0.0001 -0.0009  
Y 0.0013 -0.0013 -0.0041 -0.0025 -0.0007 0.0007  
Z 0.0050 -0.0054 -0.0020 -0.0019 -0.0002 -0.0005

AT. 148 H X -0.0054 -0.0057 -0.0010 0.0016 0.0001 0.0009  
Y -0.0013 -0.0013 -0.0041 0.0025 -0.0007 -0.0007  
Z -0.0050 -0.0054 -0.0020 0.0019 -0.0002 0.0005

AT. 149 H X 0.0194 -0.0264 -0.0023 0.0095 -0.0019 -0.0006  
Y 0.0047 -0.0056 -0.0019 0.0010 -0.0011 -0.0004  
Z 0.0081 -0.0090 -0.0056 -0.0007 -0.0018 -0.0005

AT. 150 H X -0.0194 -0.0264 -0.0023 -0.0095 -0.0019 0.0006  
Y -0.0047 -0.0056 -0.0019 -0.0010 -0.0011 0.0004  
Z -0.0081 -0.0090 -0.0056 0.0007 -0.0018 0.0005

AT. 151 C X 0.0002 0.0004 -0.0005 -0.0013 0.0001 0.0000  
Y -0.0004 0.0005 -0.0003 -0.0006 0.0006 -0.0001

Z 0.0072 -0.0093 -0.0008 0.0023 -0.0001 -0.0004  
AT. 152 C X -0.0002 0.0004 -0.0005 0.0013 0.0001 -0.0000  
Y 0.0004 0.0005 -0.0003 0.0006 0.0006 0.0001  
Z -0.0072 -0.0093 -0.0008 -0.0023 -0.0001 0.0004  
AT. 153 H X 0.0037 -0.0046 0.0083 0.0035 -0.0013 -0.0002  
Y -0.0033 0.0043 0.0029 -0.0003 -0.0004 0.0003  
Z 0.0003 -0.0002 0.0004 0.0005 -0.0009 0.0003  
AT. 154 H X -0.0037 -0.0046 0.0083 -0.0035 -0.0013 0.0002  
Y 0.0033 0.0043 0.0029 0.0003 -0.0004 -0.0003  
Z -0.0003 -0.0002 0.0004 -0.0005 -0.0009 -0.0003  
AT. 155 H X -0.0064 0.0110 -0.0176 -0.0167 0.0005 0.0008  
Y 0.0012 -0.0005 -0.0051 -0.0035 -0.0007 0.0001  
Z 0.0022 -0.0032 -0.0018 -0.0004 0.0013 -0.0002  
AT. 156 H X 0.0064 0.0110 -0.0176 0.0167 0.0005 -0.0008  
Y -0.0012 -0.0005 -0.0051 0.0035 -0.0007 -0.0001  
Z -0.0022 -0.0032 -0.0018 0.0004 0.0013 0.0002  
AT. 157 O X 0.0000 -0.0000 0.0000 -0.0000 0.0002 -0.0001  
Y 0.0000 0.0000 -0.0000 0.0000 0.0001 -0.0002  
Z 0.0001 -0.0000 0.0000 -0.0000 0.0004 -0.0003  
AT. 158 O X -0.0000 -0.0000 0.0000 0.0000 0.0002 0.0001  
Y -0.0000 0.0000 -0.0000 -0.0000 0.0001 0.0002  
Z -0.0001 -0.0000 0.0000 0.0000 0.0004 0.0003  
AT. 159 O X 0.0001 -0.0000 0.0000 0.0000 -0.0004 0.0003  
Y -0.0001 -0.0000 0.0000 -0.0000 -0.0003 0.0003  
Z -0.0000 0.0000 -0.0000 0.0000 -0.0003 0.0003  
AT. 160 O X -0.0001 -0.0000 0.0000 -0.0000 -0.0004 -0.0003  
Y 0.0001 -0.0000 0.0000 0.0000 -0.0003 -0.0003  
Z 0.0000 0.0000 -0.0000 -0.0000 -0.0003 -0.0003  
AT. 161 H X -0.0011 0.0000 -0.0000 0.0003 -0.0080 0.0049  
Y 0.0001 -0.0000 0.0001 -0.0001 0.0006 0.0002  
Z -0.0011 0.0004 -0.0001 0.0004 -0.0042 -0.0001  
AT. 162 H X 0.0011 0.0000 -0.0000 -0.0003 -0.0080 -0.0049

Y -0.0001 -0.0000 0.0001 0.0001 0.0006 -0.0002  
Z 0.0011 0.0004 -0.0001 -0.0004 -0.0042 0.0001  
AT.163 H X 0.0002 0.0001 -0.0004 -0.0000 0.0036 -0.0033  
Y 0.0003 0.0007 -0.0009 0.0005 0.0046 -0.0043  
Z -0.0001 0.0001 0.0002 0.0001 -0.0013 0.0012  
AT.164 H X -0.0002 0.0001 -0.0004 0.0000 0.0036 0.0033  
Y -0.0003 0.0007 -0.0009 -0.0005 0.0046 0.0043  
Z 0.0001 0.0001 0.0002 -0.0001 -0.0013 -0.0012  
AT.165 O X 0.0001 -0.0000 0.0002 -0.0003 0.0000 -0.0000  
Y 0.0001 -0.0000 0.0002 -0.0002 -0.0000 -0.0000  
Z -0.0001 0.0000 -0.0002 0.0003 0.0000 0.0000  
AT.166 O X -0.0001 -0.0000 0.0002 0.0003 0.0000 0.0000  
Y -0.0001 -0.0000 0.0002 0.0002 -0.0000 0.0000  
Z 0.0001 0.0000 -0.0002 -0.0003 0.0000 -0.0000  
AT.167 H X 0.0002 0.0001 -0.0007 0.0012 0.0001 -0.0001  
Y -0.0005 0.0001 0.0012 -0.0007 -0.0001 0.0002  
Z 0.0010 -0.0010 0.0003 -0.0035 -0.0004 0.0000  
AT.168 H X -0.0002 0.0001 -0.0007 -0.0012 0.0001 0.0001  
Y 0.0005 0.0001 0.0012 0.0007 -0.0001 -0.0002  
Z -0.0010 -0.0010 0.0003 0.0035 -0.0004 -0.0000  
AT.169 O X 0.0000 0.0001 -0.0000 0.0002 0.0000 -0.0000  
Y -0.0001 0.0000 -0.0004 0.0005 0.0000 -0.0000  
Z -0.0001 -0.0000 -0.0001 0.0002 0.0000 -0.0000  
AT.170 O X -0.0000 0.0001 -0.0000 -0.0002 0.0000 0.0000  
Y 0.0001 0.0000 -0.0004 -0.0005 0.0000 0.0000  
Z 0.0001 -0.0000 -0.0001 -0.0002 0.0000 0.0000  
AT.171 H X -0.0019 -0.0021 0.0013 -0.0013 -0.0004 0.0005  
Y -0.0006 -0.0010 0.0015 -0.0014 -0.0005 0.0004  
Z 0.0011 0.0003 0.0025 -0.0026 -0.0008 0.0004  
AT.172 H X 0.0019 -0.0021 0.0013 0.0013 -0.0004 -0.0005  
Y 0.0006 -0.0010 0.0015 0.0014 -0.0005 -0.0004  
Z -0.0011 0.0003 0.0025 0.0026 -0.0008 -0.0004



FREQ(CM\*\*-1) 1200.54 1200.68 1202.69 1204.10 1210.32 1210.37

AT. 1 I X 0.0000 -0.0000 -0.0000 -0.0000 0.0000 -0.0000

Y 0.0000 0.0000 0.0000 0.0000 0.0000 0.0000

Z -0.0000 -0.0000 0.0000 0.0000 0.0001 0.0001

AT. 2 I X 0.0000 0.0000 0.0000 -0.0000 -0.0000 -0.0000

Y 0.0000 -0.0000 -0.0000 0.0000 -0.0000 0.0000

Z -0.0000 0.0000 -0.0000 0.0000 -0.0001 0.0001

AT. 3 I X -0.0000 0.0000 -0.0001 -0.0001 0.0000 0.0000

Y -0.0000 -0.0000 0.0000 0.0000 -0.0000 -0.0000

Z -0.0000 0.0000 -0.0001 -0.0001 0.0000 0.0000

AT. 4 I X -0.0000 -0.0000 0.0001 -0.0001 -0.0000 0.0000

Y -0.0000 0.0000 -0.0000 0.0000 0.0000 -0.0000

Z -0.0000 -0.0000 0.0001 -0.0001 -0.0000 0.0000

AT. 5 O X -0.0001 -0.0002 0.0018 0.0016 0.0036 0.0038

Y 0.0000 0.0001 -0.0013 -0.0011 -0.0029 -0.0031

Z 0.0002 0.0003 -0.0012 -0.0015 -0.0018 -0.0020

AT. 6 O X -0.0001 0.0002 -0.0018 0.0016 -0.0036 0.0038

Y 0.0000 -0.0001 0.0013 -0.0011 0.0029 -0.0031

Z 0.0002 -0.0003 0.0012 -0.0015 0.0018 -0.0020

AT. 7 O X -0.0003 -0.0007 0.0042 0.0046 -0.0013 -0.0005

Y 0.0001 0.0004 -0.0036 -0.0039 0.0010 0.0002

Z 0.0002 0.0002 0.0003 0.0005 0.0005 0.0009

AT. 8 O X -0.0003 0.0007 -0.0042 0.0046 0.0013 -0.0005

Y 0.0001 -0.0004 0.0036 -0.0039 -0.0010 0.0002

Z 0.0002 -0.0002 -0.0003 0.0005 -0.0005 0.0009

AT. 9 N X 0.0005 0.0006 -0.0047 -0.0049 -0.0099 -0.0103

Y -0.0005 -0.0009 0.0069 0.0063 0.0112 0.0118

Z -0.0003 -0.0003 0.0015 0.0022 0.0008 0.0010

AT. 10 N X 0.0005 -0.0006 0.0047 -0.0049 0.0099 -0.0103

Y -0.0005 0.0009 -0.0069 0.0063 -0.0112 0.0118

Z -0.0003 0.0003 -0.0015 0.0022 -0.0008 0.0010  
AT. 11 N X 0.0000 0.0000 -0.0063 -0.0075 0.0017 -0.0009  
Y -0.0012 -0.0017 0.0120 0.0133 -0.0035 -0.0009  
Z -0.0007 -0.0012 0.0062 0.0065 -0.0037 -0.0031  
AT. 12 N X 0.0000 -0.0000 0.0063 -0.0075 -0.0017 -0.0009  
Y -0.0012 0.0017 -0.0120 0.0133 0.0035 -0.0009  
Z -0.0007 0.0012 -0.0062 0.0065 0.0037 -0.0031  
AT. 13 C X -0.0001 0.0001 -0.0038 -0.0027 -0.0098 -0.0099  
Y 0.0002 -0.0002 0.0043 0.0031 0.0105 0.0109  
Z -0.0005 -0.0001 -0.0052 -0.0031 -0.0142 -0.0149  
AT. 14 C X -0.0001 -0.0001 0.0038 -0.0027 0.0098 -0.0099  
Y 0.0002 0.0002 -0.0043 0.0031 -0.0105 0.0109  
Z -0.0005 0.0001 0.0052 -0.0031 0.0142 -0.0149  
AT. 15 C X 0.0001 0.0000 0.0017 0.0010 0.0054 0.0050  
Y -0.0001 0.0001 -0.0024 -0.0020 -0.0048 -0.0050  
Z 0.0000 -0.0001 0.0031 0.0022 0.0078 0.0081  
AT. 16 C X 0.0001 -0.0000 -0.0017 0.0010 -0.0054 0.0050  
Y -0.0001 -0.0001 0.0024 -0.0020 0.0048 -0.0050  
Z 0.0000 0.0001 -0.0031 0.0022 -0.0078 0.0081  
AT. 17 H X -0.0001 0.0003 -0.0061 -0.0027 -0.0206 -0.0197  
Y -0.0002 -0.0001 0.0006 0.0017 -0.0002 0.0004  
Z 0.0001 0.0002 -0.0041 -0.0040 -0.0095 -0.0096  
AT. 18 H X -0.0001 -0.0003 0.0061 -0.0027 0.0206 -0.0197  
Y -0.0002 0.0001 -0.0006 0.0017 0.0002 0.0004  
Z 0.0001 -0.0002 0.0041 -0.0040 0.0095 -0.0096  
AT. 19 H X 0.0003 -0.0007 0.0101 0.0071 0.0229 0.0287  
Y -0.0003 0.0001 -0.0042 -0.0012 -0.0178 -0.0181  
Z 0.0000 -0.0004 0.0051 0.0044 0.0085 0.0105  
AT. 20 H X 0.0003 0.0007 -0.0101 0.0071 -0.0229 0.0287  
Y -0.0003 -0.0001 0.0042 -0.0012 0.0178 -0.0181  
Z 0.0000 0.0004 -0.0051 0.0044 -0.0085 0.0105  
AT. 21 C X 0.0013 0.0018 -0.0067 -0.0073 0.0040 0.0034

Y 0.0005 0.0006 -0.0011 -0.0013 0.0009 0.0011  
Z -0.0020 -0.0032 0.0125 0.0137 -0.0084 -0.0076  
AT. 22 C X 0.0013 -0.0018 0.0067 -0.0073 -0.0040 0.0034  
Y 0.0005 -0.0006 0.0011 -0.0013 -0.0009 0.0011  
Z -0.0020 0.0032 -0.0125 0.0137 0.0084 -0.0076  
AT. 23 C X -0.0014 -0.0010 -0.0003 0.0002 -0.0013 -0.0015  
Y -0.0002 -0.0004 0.0015 0.0017 -0.0009 -0.0006  
Z 0.0010 0.0016 -0.0069 -0.0075 0.0037 0.0033  
AT. 24 C X -0.0014 0.0010 0.0003 0.0002 0.0013 -0.0015  
Y -0.0002 0.0004 -0.0015 0.0017 0.0009 -0.0006  
Z 0.0010 -0.0016 0.0069 -0.0075 -0.0037 0.0033  
AT. 25 H X 0.0059 0.0054 -0.0038 -0.0057 0.0053 0.0061  
Y 0.0013 0.0013 -0.0021 -0.0025 0.0015 0.0020  
Z -0.0003 -0.0022 0.0144 0.0149 -0.0045 -0.0049  
AT. 26 H X 0.0059 -0.0054 0.0038 -0.0057 -0.0053 0.0061  
Y 0.0013 -0.0013 0.0021 -0.0025 -0.0015 0.0020  
Z -0.0003 0.0022 -0.0144 0.0149 0.0045 -0.0049  
AT. 27 H X 0.0020 -0.0068 0.0537 0.0538 -0.0212 -0.0174  
Y 0.0021 0.0010 0.0044 0.0035 0.0016 0.0007  
Z 0.0016 0.0034 -0.0157 -0.0168 0.0089 0.0071  
AT. 28 H X 0.0020 0.0068 -0.0537 0.0538 0.0212 -0.0174  
Y 0.0021 -0.0010 -0.0044 0.0035 -0.0016 0.0007  
Z 0.0016 -0.0034 0.0157 -0.0168 -0.0089 0.0071  
AT. 29 C X -0.0001 0.0001 -0.0005 0.0001 0.0041 0.0041  
Y 0.0009 0.0015 -0.0093 -0.0087 -0.0046 -0.0054  
Z 0.0006 0.0007 -0.0013 -0.0022 0.0081 0.0079  
AT. 30 C X -0.0001 -0.0001 0.0005 0.0001 -0.0041 0.0041  
Y 0.0009 -0.0015 0.0093 -0.0087 0.0046 -0.0054  
Z 0.0006 -0.0007 0.0013 -0.0022 -0.0081 0.0079  
AT. 31 H X -0.0006 -0.0018 0.0177 0.0148 0.0195 0.0225  
Y 0.0000 0.0008 -0.0086 -0.0059 -0.0110 -0.0116  
Z -0.0010 -0.0014 0.0105 0.0106 0.0071 0.0090

AT. 32 H X -0.0006 0.0018 -0.0177 0.0148 -0.0195 0.0225  
Y 0.0000 -0.0008 0.0086 -0.0059 0.0110 -0.0116  
Z -0.0010 0.0014 -0.0105 0.0106 -0.0071 0.0090

AT. 33 H X 0.0016 0.0027 -0.0151 -0.0158 0.0007 -0.0017  
Y 0.0008 0.0006 0.0007 -0.0021 0.0113 0.0107  
Z 0.0017 0.0027 -0.0150 -0.0153 -0.0011 -0.0031

AT. 34 H X 0.0016 -0.0027 0.0151 -0.0158 -0.0007 -0.0017  
Y 0.0008 -0.0006 -0.0007 -0.0021 -0.0113 0.0107  
Z 0.0017 -0.0027 0.0150 -0.0153 0.0011 -0.0031

AT. 35 C X -0.0001 -0.0005 0.0037 0.0017 0.0051 0.0046  
Y -0.0020 -0.0035 0.0194 0.0183 0.0005 0.0023  
Z -0.0020 -0.0028 0.0120 0.0141 -0.0131 -0.0116

AT. 36 C X -0.0001 0.0005 -0.0037 0.0017 -0.0051 0.0046  
Y -0.0020 0.0035 -0.0194 0.0183 -0.0005 0.0023  
Z -0.0020 0.0028 -0.0120 0.0141 0.0131 -0.0116

AT. 37 C X -0.0001 -0.0000 0.0024 0.0037 -0.0028 -0.0014  
Y 0.0011 0.0017 -0.0123 -0.0127 0.0025 0.0003  
Z 0.0010 0.0014 -0.0052 -0.0059 0.0053 0.0048

AT. 38 C X -0.0001 0.0000 -0.0024 0.0037 0.0028 -0.0014  
Y 0.0011 -0.0017 0.0123 -0.0127 -0.0025 0.0003  
Z 0.0010 -0.0014 0.0052 -0.0059 -0.0053 0.0048

AT. 39 H X -0.0048 -0.0069 0.0382 0.0414 -0.0210 -0.0150  
Y 0.0053 0.0072 -0.0363 -0.0396 0.0187 0.0124  
Z -0.0040 -0.0057 0.0298 0.0316 -0.0143 -0.0098

AT. 40 H X -0.0048 0.0069 -0.0382 0.0414 0.0210 -0.0150  
Y 0.0053 -0.0072 0.0363 -0.0396 -0.0187 0.0124  
Z -0.0040 0.0057 -0.0298 0.0316 0.0143 -0.0098

AT. 41 H X 0.0049 0.0073 -0.0356 -0.0382 0.0201 0.0154  
Y -0.0076 -0.0109 0.0564 0.0637 -0.0429 -0.0337  
Z 0.0025 0.0037 -0.0199 -0.0228 0.0173 0.0141

AT. 42 H X 0.0049 -0.0073 0.0356 -0.0382 -0.0201 0.0154  
Y -0.0076 0.0109 -0.0564 0.0637 0.0429 -0.0337

Z 0.0025 -0.0037 0.0199 -0.0228 -0.0173 0.0141  
AT. 43 C X 0.0005 0.0008 0.0009 0.0019 -0.0000 0.0016  
Y 0.0006 0.0011 -0.0075 -0.0068 -0.0047 -0.0056  
Z 0.0007 0.0012 -0.0076 -0.0088 0.0067 0.0053  
AT. 44 C X 0.0005 -0.0008 -0.0009 0.0019 0.0000 0.0016  
Y 0.0006 -0.0011 0.0075 -0.0068 0.0047 -0.0056  
Z 0.0007 -0.0012 0.0076 -0.0088 -0.0067 0.0053  
AT. 45 H X -0.0043 -0.0069 0.0176 0.0172 -0.0077 -0.0101  
Y 0.0007 0.0015 -0.0108 -0.0102 0.0040 0.0035  
Z 0.0039 0.0060 -0.0148 -0.0148 0.0028 0.0041  
AT. 46 H X -0.0043 0.0069 -0.0176 0.0172 0.0077 -0.0101  
Y 0.0007 -0.0015 0.0108 -0.0102 -0.0040 0.0035  
Z 0.0039 -0.0060 0.0148 -0.0148 -0.0028 0.0041  
AT. 47 H X 0.0005 0.0020 -0.0155 -0.0141 -0.0132 -0.0144  
Y -0.0021 -0.0027 0.0023 0.0031 -0.0173 -0.0187  
Z -0.0021 -0.0045 0.0255 0.0239 0.0119 0.0138  
AT. 48 H X 0.0005 -0.0020 0.0155 -0.0141 0.0132 -0.0144  
Y -0.0021 0.0027 -0.0023 0.0031 0.0173 -0.0187  
Z -0.0021 0.0045 -0.0255 0.0239 -0.0119 0.0138  
AT. 49 C X -0.0011 -0.0020 0.0077 0.0072 -0.0075 -0.0082  
Y -0.0008 -0.0019 0.0164 0.0139 0.0152 0.0166  
Z -0.0006 -0.0008 0.0025 0.0041 -0.0161 -0.0162  
AT. 50 C X -0.0011 0.0020 -0.0077 0.0072 0.0075 -0.0082  
Y -0.0008 0.0019 -0.0164 0.0139 -0.0152 0.0166  
Z -0.0006 0.0008 -0.0025 0.0041 0.0161 -0.0162  
AT. 51 C X 0.0001 0.0003 -0.0003 -0.0002 0.0079 0.0082  
Y 0.0005 0.0011 -0.0080 -0.0068 -0.0106 -0.0110  
Z 0.0006 0.0007 -0.0017 -0.0026 0.0045 0.0045  
AT. 52 C X 0.0001 -0.0003 0.0003 -0.0002 -0.0079 0.0082  
Y 0.0005 -0.0011 0.0080 -0.0068 0.0106 -0.0110  
Z 0.0006 -0.0007 0.0017 -0.0026 -0.0045 0.0045  
AT. 53 H X -0.0001 -0.0009 0.0121 0.0089 0.0334 0.0340

Y -0.0002 0.0005 -0.0114 -0.0096 -0.0229 -0.0233  
Z -0.0000 0.0021 -0.0289 -0.0229 -0.0581 -0.0590  
AT. 54 H X -0.0001 0.0009 -0.0121 0.0089 -0.0334 0.0340  
Y -0.0002 -0.0005 0.0114 -0.0096 0.0229 -0.0233  
Z -0.0000 -0.0021 0.0289 -0.0229 0.0581 -0.0590  
AT. 55 H X -0.0001 0.0009 -0.0139 -0.0097 -0.0320 -0.0328  
Y 0.0008 -0.0003 0.0123 0.0073 0.0446 0.0450  
Z 0.0009 -0.0006 0.0144 0.0087 0.0472 0.0474  
AT. 56 H X -0.0001 -0.0009 0.0139 -0.0097 0.0320 -0.0328  
Y 0.0008 0.0003 -0.0123 0.0073 -0.0446 0.0450  
Z 0.0009 0.0006 -0.0144 0.0087 -0.0472 0.0474  
AT. 57 C X -0.0000 0.0001 -0.0013 -0.0005 -0.0032 -0.0029  
Y 0.0008 0.0013 -0.0072 -0.0068 -0.0000 -0.0006  
Z 0.0008 0.0011 -0.0051 -0.0059 0.0053 0.0046  
AT. 58 C X -0.0000 -0.0001 0.0013 -0.0005 0.0032 -0.0029  
Y 0.0008 -0.0013 0.0072 -0.0068 0.0000 -0.0006  
Z 0.0008 -0.0011 0.0051 -0.0059 -0.0053 0.0046  
AT. 59 H X -0.0005 -0.0012 0.0080 0.0058 0.0100 0.0103  
Y -0.0010 -0.0011 0.0048 0.0068 -0.0124 -0.0114  
Z -0.0021 -0.0035 0.0189 0.0185 -0.0044 -0.0026  
AT. 60 H X -0.0005 0.0012 -0.0080 0.0058 -0.0100 0.0103  
Y -0.0010 0.0011 -0.0048 0.0068 0.0124 -0.0114  
Z -0.0021 0.0035 -0.0189 0.0185 0.0044 -0.0026  
AT. 61 H X -0.0028 -0.0045 0.0238 0.0240 -0.0098 -0.0078  
Y 0.0007 -0.0001 0.0034 -0.0011 0.0134 0.0122  
Z -0.0015 -0.0020 0.0099 0.0112 -0.0076 -0.0066  
AT. 62 H X -0.0028 0.0045 -0.0238 0.0240 0.0098 -0.0078  
Y 0.0007 0.0001 -0.0034 -0.0011 -0.0134 0.0122  
Z -0.0015 0.0020 -0.0099 0.0112 0.0076 -0.0066  
AT. 63 H X 0.0030 0.0044 -0.0200 -0.0221 0.0138 0.0113  
Y -0.0021 -0.0035 0.0173 0.0172 -0.0023 -0.0008  
Z 0.0002 0.0009 -0.0066 -0.0042 -0.0092 -0.0088

AT. 64 H X 0.0030 -0.0044 0.0200 -0.0221 -0.0138 0.0113  
Y -0.0021 0.0035 -0.0173 0.0172 0.0023 -0.0008  
Z 0.0002 -0.0009 0.0066 -0.0042 0.0092 -0.0088

AT. 65 C X 0.0005 0.0008 -0.0036 -0.0037 0.0033 0.0034  
Y 0.0003 0.0007 -0.0065 -0.0055 -0.0058 -0.0064  
Z 0.0002 0.0002 -0.0002 -0.0009 0.0058 0.0061

AT. 66 C X 0.0005 -0.0008 0.0036 -0.0037 -0.0033 0.0034  
Y 0.0003 -0.0007 0.0065 -0.0055 0.0058 -0.0064  
Z 0.0002 -0.0002 0.0002 -0.0009 -0.0058 0.0061

AT. 67 H X -0.0013 -0.0023 0.0123 0.0133 -0.0102 -0.0088  
Y 0.0005 0.0003 0.0012 -0.0017 0.0175 0.0189  
Z 0.0014 0.0031 -0.0199 -0.0181 -0.0047 -0.0074

AT. 68 H X -0.0013 0.0023 -0.0123 0.0133 0.0102 -0.0088  
Y 0.0005 -0.0003 -0.0012 -0.0017 -0.0175 0.0189  
Z 0.0014 -0.0031 0.0199 -0.0181 0.0047 -0.0074

AT. 69 H X -0.0002 -0.0011 0.0118 0.0090 0.0176 0.0185  
Y -0.0012 -0.0025 0.0127 0.0110 -0.0022 -0.0026  
Z -0.0007 -0.0009 -0.0017 -0.0006 -0.0203 -0.0213

AT. 70 H X -0.0002 0.0011 -0.0118 0.0090 -0.0176 0.0185  
Y -0.0012 0.0025 -0.0127 0.0110 0.0022 -0.0026  
Z -0.0007 0.0009 0.0017 -0.0006 0.0203 -0.0213

AT. 71 H X -0.0004 -0.0002 -0.0058 -0.0032 -0.0227 -0.0252  
Y -0.0003 -0.0007 0.0090 0.0084 0.0108 0.0116  
Z -0.0012 -0.0023 0.0175 0.0171 0.0074 0.0078

AT. 72 H X -0.0004 0.0002 0.0058 -0.0032 0.0227 -0.0252  
Y -0.0003 0.0007 -0.0090 0.0084 -0.0108 0.0116  
Z -0.0012 0.0023 -0.0175 0.0171 -0.0074 0.0078

AT. 73 C X 0.0004 0.0007 -0.0044 -0.0044 0.0012 0.0010  
Y 0.0006 0.0012 -0.0072 -0.0063 -0.0042 -0.0046  
Z 0.0009 0.0012 -0.0046 -0.0056 0.0097 0.0097

AT. 74 C X 0.0004 -0.0007 0.0044 -0.0044 -0.0012 0.0010  
Y 0.0006 -0.0012 0.0072 -0.0063 0.0042 -0.0046

Z 0.0009 -0.0012 0.0046 -0.0056 -0.0097 0.0097  
AT. 75 H X -0.0007 -0.0019 0.0157 0.0148 0.0187 0.0193  
Y -0.0005 -0.0003 -0.0017 -0.0011 -0.0129 -0.0140  
Z -0.0012 -0.0023 0.0155 0.0136 0.0096 0.0093  
AT. 76 H X -0.0007 0.0019 -0.0157 0.0148 -0.0187 0.0193  
Y -0.0005 0.0003 0.0017 -0.0011 0.0129 -0.0140  
Z -0.0012 0.0023 -0.0155 0.0136 -0.0096 0.0093  
AT. 77 H X -0.0021 -0.0027 0.0213 0.0243 -0.0051 0.0014  
Y 0.0008 0.0006 -0.0072 -0.0096 0.0069 0.0043  
Z 0.0029 0.0048 -0.0270 -0.0279 0.0053 0.0013  
AT. 78 H X -0.0021 0.0027 -0.0213 0.0243 0.0051 0.0014  
Y 0.0008 -0.0006 0.0072 -0.0096 -0.0069 0.0043  
Z 0.0029 -0.0048 0.0270 -0.0279 -0.0053 0.0013  
AT. 79 I X 0.0000 0.0000 0.0000 0.0000 0.0000 0.0000  
Y 0.0000 -0.0000 0.0000 0.0000 0.0000 0.0000  
Z 0.0000 0.0000 0.0000 0.0000 0.0000 0.0000  
AT. 80 I X 0.0000 -0.0000 -0.0000 0.0000 -0.0000 0.0000  
Y 0.0000 0.0000 -0.0000 0.0000 -0.0000 0.0000  
Z 0.0000 -0.0000 -0.0000 0.0000 -0.0000 0.0000  
AT. 81 I X 0.0001 0.0001 0.0000 -0.0000 0.0000 -0.0000  
Y 0.0000 0.0000 -0.0000 -0.0000 0.0000 0.0000  
Z -0.0001 -0.0001 -0.0000 -0.0000 0.0000 0.0000  
AT. 82 I X 0.0001 -0.0001 -0.0000 -0.0000 -0.0000 -0.0000  
Y 0.0000 -0.0000 0.0000 -0.0000 -0.0000 0.0000  
Z -0.0001 0.0001 0.0000 -0.0000 -0.0000 0.0000  
AT. 83 O X -0.0016 -0.0021 -0.0004 -0.0003 -0.0001 -0.0003  
Y -0.0003 -0.0004 -0.0001 -0.0001 -0.0001 -0.0002  
Z -0.0010 -0.0013 -0.0001 -0.0001 0.0002 0.0002  
AT. 84 O X -0.0016 0.0021 0.0004 -0.0003 0.0001 -0.0003  
Y -0.0003 0.0004 0.0001 -0.0001 0.0001 -0.0002  
Z -0.0010 0.0013 0.0001 -0.0001 -0.0002 0.0002  
AT. 85 O X -0.0045 -0.0043 -0.0009 -0.0007 0.0007 0.0006



Y -0.0024 -0.0023 -0.0006 -0.0005 0.0007 0.0005  
Z 0.0003 0.0002 0.0003 0.0003 -0.0006 -0.0004  
AT. 86 O X -0.0045 0.0043 0.0009 -0.0007 -0.0007 0.0006  
Y -0.0024 0.0023 0.0006 -0.0005 -0.0007 0.0005  
Z 0.0003 -0.0002 -0.0003 0.0003 0.0006 -0.0004  
AT. 87 N X 0.0052 0.0051 0.0008 0.0008 -0.0006 -0.0004  
Y 0.0039 0.0037 0.0008 0.0005 0.0004 0.0007  
Z 0.0015 0.0014 -0.0000 0.0001 -0.0005 -0.0007  
AT. 88 N X 0.0052 -0.0051 -0.0008 0.0008 0.0006 -0.0004  
Y 0.0039 -0.0037 -0.0008 0.0005 -0.0004 0.0007  
Z 0.0015 -0.0014 0.0000 0.0001 0.0005 -0.0007  
AT. 89 N X 0.0113 0.0107 0.0024 0.0021 -0.0035 -0.0025  
Y 0.0106 0.0102 0.0018 0.0012 -0.0013 -0.0009  
Z 0.0061 0.0062 0.0008 0.0003 0.0002 -0.0001  
AT. 90 N X 0.0113 -0.0107 -0.0024 0.0021 0.0035 -0.0025  
Y 0.0106 -0.0102 -0.0018 0.0012 0.0013 -0.0009  
Z 0.0061 -0.0062 -0.0008 0.0003 -0.0002 -0.0001  
AT. 91 C X 0.0017 0.0020 0.0008 0.0005 0.0009 0.0014  
Y 0.0010 0.0010 0.0004 0.0002 0.0005 0.0008  
Z -0.0024 -0.0017 -0.0012 -0.0008 -0.0015 -0.0025  
AT. 92 C X 0.0017 -0.0020 -0.0008 0.0005 -0.0009 0.0014  
Y 0.0010 -0.0010 -0.0004 0.0002 -0.0005 0.0008  
Z -0.0024 0.0017 0.0012 -0.0008 0.0015 -0.0025  
AT. 93 C X -0.0005 -0.0002 -0.0003 -0.0002 -0.0004 -0.0007  
Y -0.0009 -0.0010 -0.0003 -0.0001 -0.0002 -0.0003  
Z 0.0015 0.0015 0.0007 0.0004 0.0006 0.0012  
AT. 94 C X -0.0005 0.0002 0.0003 -0.0002 0.0004 -0.0007  
Y -0.0009 0.0010 0.0003 -0.0001 0.0002 -0.0003  
Z 0.0015 -0.0015 -0.0007 0.0004 -0.0006 0.0012  
AT. 95 H X 0.0001 -0.0005 0.0008 0.0012 0.0010 0.0027  
Y 0.0005 0.0022 0.0001 -0.0005 -0.0004 -0.0009  
Z -0.0015 -0.0038 -0.0012 -0.0005 -0.0007 -0.0018

AT. 96 H X 0.0001 0.0005 -0.0008 0.0012 -0.0010 0.0027  
Y 0.0005 -0.0022 -0.0001 -0.0005 0.0004 -0.0009  
Z -0.0015 0.0038 0.0012 -0.0005 0.0007 -0.0018

AT. 97 H X -0.0048 -0.0065 -0.0028 -0.0016 -0.0027 -0.0051  
Y 0.0011 0.0033 0.0003 -0.0004 -0.0003 -0.0007  
Z 0.0031 0.0041 0.0015 0.0007 0.0012 0.0023

AT. 98 H X -0.0048 0.0065 0.0028 -0.0016 0.0027 -0.0051  
Y 0.0011 -0.0033 -0.0003 -0.0004 0.0003 -0.0007  
Z 0.0031 -0.0041 -0.0015 0.0007 -0.0012 0.0023

AT. 99 C X 0.0083 0.0081 0.0012 0.0006 -0.0002 -0.0004  
Y -0.0036 -0.0036 -0.0002 0.0000 -0.0003 -0.0001  
Z 0.0138 0.0136 0.0016 0.0007 0.0000 -0.0004

AT. 100 C X 0.0083 -0.0081 -0.0012 0.0006 0.0002 -0.0004  
Y -0.0036 0.0036 0.0002 0.0000 0.0003 -0.0001  
Z 0.0138 -0.0136 -0.0016 0.0007 -0.0000 -0.0004

AT. 101 C X -0.0031 -0.0029 -0.0001 0.0000 -0.0002 -0.0002  
Y 0.0023 0.0022 0.0002 0.0001 -0.0001 -0.0000  
Z -0.0074 -0.0072 -0.0010 -0.0005 0.0002 0.0004

AT. 102 C X -0.0031 0.0029 0.0001 0.0000 0.0002 -0.0002  
Y 0.0023 -0.0022 -0.0002 0.0001 0.0001 -0.0000  
Z -0.0074 0.0072 0.0010 -0.0005 -0.0002 0.0004

AT. 103 H X 0.0146 0.0142 0.0003 -0.0001 0.0006 0.0004  
Y -0.0062 -0.0059 -0.0000 0.0001 -0.0004 -0.0003  
Z 0.0107 0.0100 0.0017 0.0012 -0.0007 -0.0012

AT. 104 H X 0.0146 -0.0142 -0.0003 -0.0001 -0.0006 0.0004  
Y -0.0062 0.0059 0.0000 0.0001 0.0004 -0.0003  
Z 0.0107 -0.0100 -0.0017 0.0012 0.0007 -0.0012

AT. 105 H X -0.0375 -0.0386 -0.0060 -0.0032 0.0015 0.0035  
Y 0.0051 0.0054 0.0017 0.0011 -0.0008 -0.0014  
Z -0.0134 -0.0134 -0.0016 -0.0008 0.0003 0.0006

AT. 106 H X -0.0375 0.0386 0.0060 -0.0032 -0.0015 0.0035  
Y 0.0051 -0.0054 -0.0017 0.0011 0.0008 -0.0014

Z -0.0134 0.0134 0.0016 -0.0008 -0.0003 0.0006  
AT. 107 C X -0.0027 -0.0026 -0.0002 -0.0004 0.0006 0.0007  
Y -0.0088 -0.0088 -0.0016 -0.0009 -0.0003 -0.0005  
Z -0.0039 -0.0038 -0.0004 -0.0001 0.0005 0.0008  
AT. 108 C X -0.0027 0.0026 0.0002 -0.0004 -0.0006 0.0007  
Y -0.0088 0.0088 0.0016 -0.0009 0.0003 -0.0005  
Z -0.0039 0.0038 0.0004 -0.0001 -0.0005 0.0008  
AT. 109 H X -0.0092 -0.0095 -0.0027 -0.0017 -0.0028 -0.0046  
Y -0.0002 -0.0003 -0.0004 -0.0000 0.0000 -0.0001  
Z 0.0125 0.0126 0.0024 0.0017 0.0021 0.0032  
AT. 110 H X -0.0092 0.0095 0.0027 -0.0017 0.0028 -0.0046  
Y -0.0002 0.0003 0.0004 -0.0000 -0.0000 -0.0001  
Z 0.0125 -0.0126 -0.0024 0.0017 -0.0021 0.0032  
AT. 111 H X 0.0115 0.0124 0.0023 0.0015 0.0002 0.0008  
Y -0.0097 -0.0094 -0.0010 -0.0012 0.0026 0.0029  
Z -0.0191 -0.0200 -0.0033 -0.0021 0.0001 -0.0002  
AT. 112 H X 0.0115 -0.0124 -0.0023 0.0015 -0.0002 0.0008  
Y -0.0097 0.0094 0.0010 -0.0012 -0.0026 0.0029  
Z -0.0191 0.0200 0.0033 -0.0021 -0.0001 -0.0002  
AT. 113 C X 0.0062 0.0057 0.0004 0.0005 -0.0012 -0.0014  
Y 0.0195 0.0197 0.0036 0.0018 0.0002 0.0005  
Z 0.0157 0.0157 0.0024 0.0014 -0.0016 -0.0018  
AT. 114 C X 0.0062 -0.0057 -0.0004 0.0005 0.0012 -0.0014  
Y 0.0195 -0.0197 -0.0036 0.0018 -0.0002 0.0005  
Z 0.0157 -0.0157 -0.0024 0.0014 0.0016 -0.0018  
AT. 115 C X -0.0078 -0.0073 -0.0014 -0.0012 0.0021 0.0016  
Y -0.0109 -0.0108 -0.0020 -0.0012 0.0008 0.0004  
Z -0.0060 -0.0060 -0.0007 -0.0003 -0.0000 0.0003  
AT. 116 C X -0.0078 0.0073 0.0014 -0.0012 -0.0021 0.0016  
Y -0.0109 0.0108 0.0020 -0.0012 -0.0008 0.0004  
Z -0.0060 0.0060 0.0007 -0.0003 0.0000 0.0003  
AT. 117 H X -0.0472 -0.0468 -0.0079 -0.0048 0.0043 0.0036

Y -0.0262 -0.0264 -0.0045 -0.0025 0.0019 0.0013  
Z 0.0406 0.0406 0.0069 0.0039 -0.0027 -0.0021  
AT. 118 H X -0.0472 0.0468 0.0079 -0.0048 -0.0043 0.0036  
Y -0.0262 0.0264 0.0045 -0.0025 -0.0019 0.0013  
Z 0.0406 -0.0406 -0.0069 0.0039 0.0027 -0.0021  
AT. 119 H X 0.0552 0.0553 0.0082 0.0047 -0.0037 -0.0035  
Y 0.0490 0.0489 0.0069 0.0042 -0.0045 -0.0042  
Z -0.0311 -0.0311 -0.0043 -0.0025 0.0023 0.0023  
AT. 120 H X 0.0552 -0.0553 -0.0082 0.0047 0.0037 -0.0035  
Y 0.0490 -0.0489 -0.0069 0.0042 0.0045 -0.0042  
Z -0.0311 0.0311 0.0043 -0.0025 -0.0023 0.0023  
AT. 121 C X -0.0045 -0.0041 -0.0012 -0.0012 0.0023 0.0015  
Y -0.0055 -0.0053 -0.0011 -0.0005 -0.0005 -0.0008  
Z -0.0085 -0.0083 -0.0012 -0.0008 0.0010 0.0011  
AT. 122 C X -0.0045 0.0041 0.0012 -0.0012 -0.0023 0.0015  
Y -0.0055 0.0053 0.0011 -0.0005 0.0005 -0.0008  
Z -0.0085 0.0083 0.0012 -0.0008 -0.0010 0.0011  
AT. 123 H X -0.0268 -0.0261 -0.0019 0.0004 -0.0059 -0.0035  
Y -0.0020 -0.0025 -0.0012 -0.0009 0.0019 0.0011  
Z -0.0145 -0.0136 -0.0010 0.0000 -0.0031 -0.0019  
AT. 124 H X -0.0268 0.0261 0.0019 0.0004 0.0059 -0.0035  
Y -0.0020 0.0025 0.0012 -0.0009 -0.0019 0.0011  
Z -0.0145 0.0136 0.0010 0.0000 0.0031 -0.0019  
AT. 125 H X 0.0170 0.0157 0.0026 0.0009 0.0024 0.0022  
Y -0.0028 -0.0014 -0.0013 -0.0011 -0.0003 -0.0014  
Z 0.0190 0.0176 0.0032 0.0015 0.0015 0.0017  
AT. 126 H X 0.0170 -0.0157 -0.0026 0.0009 -0.0024 0.0022  
Y -0.0028 0.0014 0.0013 -0.0011 0.0003 -0.0014  
Z 0.0190 -0.0176 -0.0032 0.0015 -0.0015 0.0017  
AT. 127 C X -0.0035 -0.0037 0.0001 0.0004 -0.0007 0.0001  
Y 0.0139 0.0136 0.0031 0.0016 0.0011 0.0018  
Z 0.0054 0.0060 0.0006 0.0002 -0.0008 -0.0017

AT. 128 C X -0.0035 0.0037 -0.0001 0.0004 0.0007 0.0001  
Y 0.0139 -0.0136 -0.0031 0.0016 -0.0011 0.0018  
Z 0.0054 -0.0060 -0.0006 0.0002 0.0008 -0.0017

AT. 129 C X -0.0010 -0.0010 -0.0003 -0.0004 0.0002 -0.0001  
Y -0.0059 -0.0057 -0.0013 -0.0007 -0.0007 -0.0010  
Z -0.0027 -0.0028 -0.0001 -0.0001 0.0005 0.0010

AT. 130 C X -0.0010 0.0010 0.0003 -0.0004 -0.0002 -0.0001  
Y -0.0059 0.0057 0.0013 -0.0007 0.0007 -0.0010  
Z -0.0027 0.0028 0.0001 -0.0001 -0.0005 0.0010

AT. 131 H X -0.0109 -0.0100 -0.0035 -0.0022 -0.0028 -0.0050  
Y -0.0046 -0.0037 -0.0011 -0.0006 -0.0008 -0.0014  
Z -0.0156 -0.0141 -0.0043 -0.0026 -0.0036 -0.0058

AT. 132 H X -0.0109 0.0100 0.0035 -0.0022 0.0028 -0.0050  
Y -0.0046 0.0037 0.0011 -0.0006 0.0008 -0.0014  
Z -0.0156 0.0141 0.0043 -0.0026 0.0036 -0.0058

AT. 133 H X 0.0095 0.0073 0.0035 0.0022 0.0047 0.0071  
Y 0.0025 0.0007 0.0013 0.0011 0.0033 0.0046  
Z 0.0050 0.0029 0.0020 0.0015 0.0047 0.0062

AT. 134 H X 0.0095 -0.0073 -0.0035 0.0022 -0.0047 0.0071  
Y 0.0025 -0.0007 -0.0013 0.0011 -0.0033 0.0046  
Z 0.0050 -0.0029 -0.0020 0.0015 -0.0047 0.0062

AT. 135 C X -0.0024 -0.0022 -0.0001 -0.0002 0.0005 0.0006  
Y -0.0072 -0.0074 -0.0012 -0.0008 -0.0002 -0.0002  
Z -0.0062 -0.0062 -0.0011 -0.0005 0.0007 0.0007

AT. 136 C X -0.0024 0.0022 0.0001 -0.0002 -0.0005 0.0006  
Y -0.0072 0.0074 0.0012 -0.0008 0.0002 -0.0002  
Z -0.0062 0.0062 0.0011 -0.0005 -0.0007 0.0007

AT. 137 H X -0.0007 -0.0015 -0.0003 -0.0001 -0.0018 -0.0020  
Y 0.0092 0.0092 0.0017 0.0007 -0.0011 -0.0012  
Z 0.0203 0.0211 0.0037 0.0019 -0.0000 -0.0001

AT. 138 H X -0.0007 0.0015 0.0003 -0.0001 0.0018 -0.0020  
Y 0.0092 -0.0092 -0.0017 0.0007 0.0011 -0.0012

Z 0.0203 -0.0211 -0.0037 0.0019 0.0000 -0.0001  
AT. 139 H X -0.0212 -0.0210 -0.0034 -0.0018 0.0018 0.0017  
Y 0.0085 0.0089 0.0016 0.0013 0.0015 0.0015  
Z 0.0158 0.0154 0.0026 0.0011 -0.0016 -0.0015  
AT. 140 H X -0.0212 0.0210 0.0034 -0.0018 -0.0018 0.0017  
Y 0.0085 -0.0089 -0.0016 0.0013 -0.0015 0.0015  
Z 0.0158 -0.0154 -0.0026 0.0011 0.0016 -0.0015  
AT. 141 H X 0.0259 0.0266 0.0041 0.0024 -0.0018 -0.0019  
Y 0.0094 0.0099 0.0013 0.0014 0.0005 0.0006  
Z -0.0101 -0.0106 -0.0017 -0.0014 -0.0010 -0.0012  
AT. 142 H X 0.0259 -0.0266 -0.0041 0.0024 0.0018 -0.0019  
Y 0.0094 -0.0099 -0.0013 0.0014 -0.0005 0.0006  
Z -0.0101 0.0106 0.0017 -0.0014 0.0010 -0.0012  
AT. 143 C X 0.0020 0.0021 0.0001 -0.0000 0.0001 -0.0002  
Y -0.0058 -0.0054 -0.0013 -0.0007 -0.0003 -0.0007  
Z -0.0016 -0.0018 -0.0002 0.0000 0.0002 0.0005  
AT. 144 C X 0.0020 -0.0021 -0.0001 -0.0000 -0.0001 -0.0002  
Y -0.0058 0.0054 0.0013 -0.0007 0.0003 -0.0007  
Z -0.0016 0.0018 0.0002 0.0000 -0.0002 0.0005  
AT. 145 H X -0.0161 -0.0159 -0.0027 -0.0014 0.0005 0.0008  
Y 0.0016 0.0013 0.0007 0.0004 0.0006 0.0014  
Z -0.0137 -0.0130 -0.0028 -0.0015 -0.0007 -0.0014  
AT. 146 H X -0.0161 0.0159 0.0027 -0.0014 -0.0005 0.0008  
Y 0.0016 -0.0013 -0.0007 0.0004 -0.0006 0.0014  
Z -0.0137 0.0130 0.0028 -0.0015 0.0007 -0.0014  
AT. 147 H X -0.0017 -0.0012 -0.0013 -0.0010 -0.0004 -0.0019  
Y 0.0128 0.0129 0.0024 0.0010 0.0011 0.0010  
Z 0.0034 0.0037 -0.0002 -0.0005 0.0002 -0.0013  
AT. 148 H X -0.0017 0.0012 0.0013 -0.0010 0.0004 -0.0019  
Y 0.0128 -0.0129 -0.0024 0.0010 -0.0011 0.0010  
Z 0.0034 -0.0037 0.0002 -0.0005 -0.0002 -0.0013  
AT. 149 H X 0.0082 0.0059 0.0023 0.0015 0.0012 0.0030

Y 0.0070 0.0059 0.0013 0.0007 0.0004 0.0006  
Z 0.0158 0.0144 0.0028 0.0014 0.0008 0.0010  
AT. 150 H X 0.0082 -0.0059 -0.0023 0.0015 -0.0012 0.0030  
Y 0.0070 -0.0059 -0.0013 0.0007 -0.0004 0.0006  
Z 0.0158 -0.0144 -0.0028 0.0014 -0.0008 0.0010  
AT. 151 C X 0.0015 0.0014 0.0003 0.0002 -0.0003 -0.0003  
Y -0.0069 -0.0070 -0.0014 -0.0006 -0.0005 -0.0008  
Z -0.0065 -0.0068 -0.0009 -0.0004 0.0007 0.0011  
AT. 152 C X 0.0015 -0.0014 -0.0003 0.0002 0.0003 -0.0003  
Y -0.0069 0.0070 0.0014 -0.0006 0.0005 -0.0008  
Z -0.0065 0.0068 0.0009 -0.0004 -0.0007 0.0011  
AT. 153 H X -0.0105 -0.0101 -0.0021 -0.0023 0.0013 0.0006  
Y 0.0025 0.0029 0.0004 -0.0001 0.0003 0.0001  
Z 0.0127 0.0131 0.0030 0.0013 0.0014 0.0021  
AT. 154 H X -0.0105 0.0101 0.0021 -0.0023 -0.0013 0.0006  
Y 0.0025 -0.0029 -0.0004 -0.0001 -0.0003 0.0001  
Z 0.0127 -0.0131 -0.0030 0.0013 -0.0014 0.0021  
AT. 155 H X -0.0292 -0.0268 -0.0054 -0.0040 0.0058 0.0041  
Y 0.0006 0.0011 0.0001 -0.0004 0.0022 0.0019  
Z -0.0240 -0.0241 -0.0042 -0.0020 0.0001 -0.0001  
AT. 156 H X -0.0292 0.0268 0.0054 -0.0040 -0.0058 0.0041  
Y 0.0006 -0.0011 -0.0001 -0.0004 -0.0022 0.0019  
Z -0.0240 0.0241 0.0042 -0.0020 -0.0001 -0.0001  
AT. 157 O X -0.0000 0.0000 -0.0001 0.0000 0.0001 -0.0000  
Y 0.0001 0.0000 0.0001 0.0001 0.0003 0.0003  
Z 0.0000 0.0001 -0.0003 0.0002 0.0003 -0.0000  
AT. 158 O X -0.0000 -0.0000 0.0001 0.0000 -0.0001 -0.0000  
Y 0.0001 -0.0000 -0.0001 0.0001 -0.0003 0.0003  
Z 0.0000 -0.0001 0.0003 0.0002 -0.0003 -0.0000  
AT. 159 O X 0.0001 -0.0001 0.0003 -0.0002 0.0000 0.0003  
Y -0.0001 -0.0000 0.0000 -0.0001 -0.0003 -0.0002  
Z -0.0001 -0.0000 0.0002 -0.0003 -0.0003 -0.0001

AT.160 O X 0.0001 0.0001 -0.0003 -0.0002 -0.0000 0.0003  
Y -0.0001 0.0000 -0.0000 -0.0001 0.0003 -0.0002  
Z -0.0001 0.0000 -0.0002 -0.0003 0.0003 -0.0001

AT.161 H X -0.0008 -0.0009 0.0016 -0.0021 -0.0052 -0.0026  
Y -0.0001 -0.0001 -0.0005 -0.0004 -0.0003 -0.0005  
Z -0.0004 0.0000 0.0024 0.0023 0.0003 0.0010

AT.162 H X -0.0008 0.0009 -0.0016 -0.0021 0.0052 -0.0026  
Y -0.0001 0.0001 0.0005 -0.0004 0.0003 -0.0005  
Z -0.0004 -0.0000 -0.0024 0.0023 -0.0003 0.0010

AT.163 H X -0.0004 0.0009 -0.0024 0.0023 0.0018 -0.0011  
Y 0.0005 -0.0005 -0.0028 0.0016 0.0008 -0.0023  
Z 0.0004 -0.0004 0.0006 -0.0009 -0.0009 -0.0004

AT.164 H X -0.0004 -0.0009 0.0024 0.0023 -0.0018 -0.0011  
Y 0.0005 0.0005 0.0028 0.0016 -0.0008 -0.0023  
Z 0.0004 0.0004 -0.0006 -0.0009 0.0009 -0.0004

AT.165 O X -0.0001 -0.0000 0.0000 -0.0001 -0.0000 0.0001  
Y -0.0001 -0.0000 -0.0001 0.0000 -0.0001 -0.0001  
Z 0.0000 0.0001 0.0001 -0.0001 -0.0000 0.0001

AT.166 O X -0.0001 0.0000 -0.0000 -0.0001 0.0000 0.0001  
Y -0.0001 0.0000 0.0001 0.0000 0.0001 -0.0001  
Z 0.0000 -0.0001 -0.0001 -0.0001 0.0000 0.0001

AT.167 H X -0.0001 0.0011 -0.0002 -0.0000 -0.0000 -0.0003  
Y 0.0011 -0.0008 0.0003 0.0005 0.0002 0.0007  
Z -0.0013 -0.0023 0.0000 -0.0011 -0.0004 -0.0012

AT.168 H X -0.0001 -0.0011 0.0002 -0.0000 0.0000 -0.0003  
Y 0.0011 0.0008 -0.0003 0.0005 -0.0002 0.0007  
Z -0.0013 0.0023 -0.0000 -0.0011 0.0004 -0.0012

AT.169 O X -0.0001 0.0002 0.0000 0.0000 0.0001 -0.0000  
Y 0.0000 0.0001 0.0001 -0.0001 0.0000 0.0000  
Z -0.0001 0.0003 0.0000 -0.0000 0.0001 -0.0000

AT.170 O X -0.0001 -0.0002 -0.0000 0.0000 -0.0001 -0.0000  
Y 0.0000 -0.0001 -0.0001 -0.0001 -0.0000 0.0000



Z -0.0001 -0.0003 -0.0000 -0.0000 -0.0001 -0.0000  
AT. 171 H X 0.0042 -0.0044 0.0001 -0.0001 -0.0010 0.0010  
Y 0.0026 -0.0026 -0.0007 0.0008 -0.0002 0.0002  
Z 0.0017 -0.0015 -0.0015 0.0020 0.0002 -0.0002

AT. 172 H X 0.0042 0.0044 -0.0001 -0.0001 0.0010 0.0010  
Y 0.0026 0.0026 0.0007 0.0008 0.0002 0.0002  
Z 0.0017 0.0015 0.0015 0.0020 -0.0002 -0.0002

FREQ(CM\*\*-1) 1214.65 1215.06 1215.29 1215.45 1219.72 1219.93

AT. 1 I X 0.0000 -0.0000 0.0000 0.0000 -0.0000 -0.0000  
Y 0.0000 0.0000 0.0000 0.0000 -0.0000 -0.0000  
Z -0.0000 0.0000 0.0000 -0.0000 -0.0000 0.0000

AT. 2 I X -0.0000 -0.0000 -0.0000 0.0000 0.0000 -0.0000  
Y -0.0000 0.0000 -0.0000 0.0000 0.0000 -0.0000  
Z 0.0000 0.0000 -0.0000 -0.0000 0.0000 0.0000

AT. 3 I X -0.0000 0.0000 0.0000 0.0000 0.0000 0.0000  
Y 0.0000 -0.0000 0.0000 0.0000 -0.0000 -0.0000  
Z 0.0000 0.0000 0.0000 0.0000 -0.0000 -0.0000

AT. 4 I X 0.0000 0.0000 -0.0000 0.0000 -0.0000 0.0000  
Y -0.0000 -0.0000 -0.0000 0.0000 0.0000 -0.0000  
Z -0.0000 0.0000 -0.0000 0.0000 0.0000 -0.0000

AT. 5 O X -0.0006 0.0004 0.0000 -0.0005 0.0009 0.0002  
Y 0.0004 -0.0003 -0.0000 0.0004 -0.0003 0.0001  
Z 0.0006 -0.0004 0.0001 0.0006 -0.0017 -0.0010

AT. 6 O X 0.0006 0.0004 -0.0000 -0.0005 -0.0009 0.0002  
Y -0.0004 -0.0003 0.0000 0.0004 0.0003 0.0001  
Z -0.0006 -0.0004 -0.0001 0.0006 0.0017 -0.0010

AT. 7 O X -0.0001 -0.0001 -0.0005 -0.0003 0.0038 0.0036  
Y 0.0001 0.0002 0.0008 0.0005 -0.0058 -0.0057  
Z -0.0001 -0.0000 -0.0006 -0.0005 0.0055 0.0055

AT. 8 O X 0.0001 -0.0001 0.0005 -0.0003 -0.0038 0.0036

Y -0.0001 0.0002 -0.0008 0.0005 0.0058 -0.0057  
Z 0.0001 -0.0000 0.0006 -0.0005 -0.0055 0.0055  
AT. 9 N X 0.0022 -0.0015 0.0004 0.0022 -0.0062 -0.0036  
Y -0.0019 0.0013 -0.0000 -0.0017 0.0021 -0.0000  
Z -0.0006 0.0003 -0.0004 -0.0007 0.0024 0.0015  
AT. 10 N X -0.0022 -0.0015 -0.0004 0.0022 0.0062 -0.0036  
Y 0.0019 0.0013 0.0000 -0.0017 -0.0021 -0.0000  
Z 0.0006 0.0003 0.0004 -0.0007 -0.0024 0.0015  
AT. 11 N X 0.0003 0.0005 0.0034 0.0023 -0.0259 -0.0259  
Y -0.0000 -0.0005 -0.0023 -0.0015 0.0160 0.0155  
Z 0.0003 -0.0006 -0.0004 0.0001 -0.0009 -0.0009  
AT. 12 N X -0.0003 0.0005 -0.0034 0.0023 0.0259 -0.0259  
Y 0.0000 -0.0005 0.0023 -0.0015 -0.0160 0.0155  
Z -0.0003 -0.0006 0.0004 0.0001 0.0009 -0.0009  
AT. 13 C X 0.0009 -0.0007 -0.0003 0.0007 0.0009 0.0018  
Y -0.0010 0.0008 0.0003 -0.0008 -0.0013 -0.0022  
Z 0.0012 -0.0010 -0.0003 0.0009 0.0018 0.0027  
AT. 14 C X -0.0009 -0.0007 0.0003 0.0007 -0.0009 0.0018  
Y 0.0010 0.0008 -0.0003 -0.0008 0.0013 -0.0022  
Z -0.0012 -0.0010 0.0003 0.0009 -0.0018 0.0027  
AT. 15 C X -0.0004 0.0003 0.0003 -0.0001 -0.0010 -0.0014  
Y 0.0005 -0.0003 -0.0001 0.0004 0.0007 0.0012  
Z -0.0008 0.0007 0.0002 -0.0006 -0.0003 -0.0010  
AT. 16 C X 0.0004 0.0003 -0.0003 -0.0001 0.0010 -0.0014  
Y -0.0005 -0.0003 0.0001 0.0004 -0.0007 0.0012  
Z 0.0008 0.0007 -0.0002 -0.0006 0.0003 -0.0010  
AT. 17 H X 0.0017 -0.0018 -0.0014 0.0001 0.0021 0.0028  
Y -0.0002 0.0001 -0.0003 -0.0005 0.0010 0.0006  
Z 0.0009 -0.0008 -0.0003 0.0006 0.0008 0.0017  
AT. 18 H X -0.0017 -0.0018 0.0014 0.0001 -0.0021 0.0028  
Y 0.0002 0.0001 0.0003 -0.0005 -0.0010 0.0006  
Z -0.0009 -0.0008 0.0003 0.0006 -0.0008 0.0017

AT. 19 H X -0.0024 0.0024 0.0001 -0.0028 0.0014 -0.0000  
Y 0.0017 -0.0016 -0.0009 0.0007 -0.0001 0.0006  
Z -0.0010 0.0008 -0.0001 -0.0013 0.0000 -0.0010

AT. 20 H X 0.0024 0.0024 -0.0001 -0.0028 -0.0014 -0.0000  
Y -0.0017 -0.0016 0.0009 0.0007 0.0001 0.0006  
Z 0.0010 0.0008 0.0001 -0.0013 -0.0000 -0.0010

AT. 21 C X -0.0003 0.0002 -0.0004 -0.0006 0.0044 0.0048  
Y -0.0001 0.0001 -0.0002 -0.0002 0.0020 0.0022  
Z 0.0007 -0.0007 0.0006 0.0010 -0.0104 -0.0111

AT. 22 C X 0.0003 0.0002 0.0004 -0.0006 -0.0044 0.0048  
Y 0.0001 0.0001 0.0002 -0.0002 -0.0020 0.0022  
Z -0.0007 -0.0007 -0.0006 0.0010 0.0104 -0.0111

AT. 23 C X 0.0003 0.0004 0.0008 0.0008 -0.0036 -0.0036  
Y -0.0000 -0.0000 -0.0000 0.0000 0.0004 0.0003  
Z -0.0002 0.0005 0.0001 -0.0002 0.0021 0.0024

AT. 24 C X -0.0003 0.0004 -0.0008 0.0008 0.0036 -0.0036  
Y 0.0000 -0.0000 0.0000 0.0000 -0.0004 0.0003  
Z 0.0002 0.0005 -0.0001 -0.0002 -0.0021 0.0024

AT. 25 H X -0.0016 -0.0006 -0.0026 -0.0029 0.0089 0.0093  
Y -0.0003 0.0000 -0.0005 -0.0006 0.0028 0.0029  
Z -0.0004 -0.0012 -0.0013 -0.0008 0.0042 0.0038

AT. 26 H X 0.0016 -0.0006 0.0026 -0.0029 -0.0089 0.0093  
Y 0.0003 0.0000 0.0005 -0.0006 -0.0028 0.0029  
Z 0.0004 -0.0012 0.0013 -0.0008 -0.0042 0.0038

AT. 27 H X 0.0001 -0.0064 -0.0046 -0.0021 0.0001 -0.0016  
Y -0.0006 -0.0011 -0.0017 -0.0014 0.0071 0.0073  
Z -0.0005 0.0011 0.0002 -0.0004 0.0051 0.0058

AT. 28 H X -0.0001 -0.0064 0.0046 -0.0021 -0.0001 -0.0016  
Y 0.0006 -0.0011 0.0017 -0.0014 -0.0071 0.0073  
Z 0.0005 0.0011 -0.0002 -0.0004 -0.0051 0.0058

AT. 29 C X -0.0012 0.0008 -0.0003 -0.0012 0.0050 0.0037  
Y 0.0006 -0.0003 0.0000 0.0005 0.0009 0.0018

Z -0.0009 0.0007 0.0002 -0.0007 0.0006 0.0002  
AT. 30 C X 0.0012 0.0008 0.0003 -0.0012 -0.0050 0.0037  
Y -0.0006 -0.0003 -0.0000 0.0005 -0.0009 0.0018  
Z 0.0009 0.0007 -0.0002 -0.0007 -0.0006 0.0002  
AT. 31 H X -0.0005 0.0004 -0.0000 -0.0006 -0.0022 -0.0021  
Y 0.0012 -0.0007 -0.0002 0.0009 0.0050 0.0049  
Z 0.0007 -0.0003 0.0000 0.0004 0.0024 0.0016  
AT. 32 H X 0.0005 0.0004 0.0000 -0.0006 0.0022 -0.0021  
Y -0.0012 -0.0007 0.0002 0.0009 -0.0050 0.0049  
Z -0.0007 -0.0003 -0.0000 0.0004 -0.0024 0.0016  
AT. 33 H X -0.0004 0.0005 0.0007 0.0002 -0.0018 -0.0020  
Y 0.0006 0.0000 0.0014 0.0011 -0.0064 -0.0057  
Z -0.0004 0.0004 0.0002 -0.0001 -0.0005 -0.0001  
AT. 34 H X 0.0004 0.0005 -0.0007 0.0002 0.0018 -0.0020  
Y -0.0006 0.0000 -0.0014 0.0011 0.0064 -0.0057  
Z 0.0004 0.0004 -0.0002 -0.0001 0.0005 -0.0001  
AT. 35 C X 0.0001 0.0002 0.0010 0.0006 -0.0086 -0.0080  
Y -0.0002 -0.0002 -0.0001 -0.0001 -0.0071 -0.0077  
Z 0.0009 -0.0011 -0.0011 0.0003 0.0028 0.0022  
AT. 36 C X -0.0001 0.0002 -0.0010 0.0006 0.0086 -0.0080  
Y 0.0002 -0.0002 0.0001 -0.0001 0.0071 -0.0077  
Z -0.0009 -0.0011 0.0011 0.0003 -0.0028 0.0022  
AT. 37 C X -0.0001 -0.0003 -0.0018 -0.0012 0.0144 0.0142  
Y -0.0001 0.0005 0.0017 0.0009 -0.0091 -0.0090  
Z -0.0004 0.0004 -0.0000 -0.0004 0.0033 0.0035  
AT. 38 C X 0.0001 -0.0003 0.0018 -0.0012 -0.0144 0.0142  
Y 0.0001 0.0005 -0.0017 0.0009 0.0091 -0.0090  
Z 0.0004 0.0004 0.0000 -0.0004 -0.0033 0.0035  
AT. 39 H X 0.0014 -0.0025 -0.0039 -0.0006 0.0116 0.0112  
Y -0.0015 0.0017 0.0028 0.0002 -0.0094 -0.0091  
Z 0.0012 -0.0016 -0.0020 0.0002 0.0015 0.0015  
AT. 40 H X -0.0014 -0.0025 0.0039 -0.0006 -0.0116 0.0112

Y 0.0015 0.0017 -0.0028 0.0002 0.0094 -0.0091  
Z -0.0012 -0.0016 0.0020 0.0002 -0.0015 0.0015  
AT. 41 H X -0.0017 0.0020 0.0017 -0.0005 -0.0001 0.0004  
Y 0.0038 -0.0047 -0.0057 -0.0000 0.0204 0.0202  
Z -0.0018 0.0022 0.0023 -0.0002 -0.0076 -0.0078  
AT. 42 H X 0.0017 0.0020 -0.0017 -0.0005 0.0001 0.0004  
Y -0.0038 -0.0047 0.0057 -0.0000 -0.0204 0.0202  
Z 0.0018 0.0022 -0.0023 -0.0002 0.0076 -0.0078  
AT. 43 C X -0.0003 -0.0002 -0.0024 -0.0018 0.0206 0.0206  
Y 0.0007 -0.0003 0.0006 0.0009 -0.0032 -0.0026  
Z -0.0006 0.0008 0.0012 0.0002 -0.0053 -0.0053  
AT. 44 C X 0.0003 -0.0002 0.0024 -0.0018 -0.0206 0.0206  
Y -0.0007 -0.0003 -0.0006 0.0009 0.0032 -0.0026  
Z 0.0006 0.0008 -0.0012 0.0002 0.0053 -0.0053  
AT. 45 H X 0.0006 0.0006 0.0075 0.0052 -0.0634 -0.0669  
Y -0.0006 0.0007 0.0000 -0.0005 0.0071 0.0066  
Z 0.0002 -0.0008 -0.0056 -0.0034 0.0456 0.0493  
AT. 46 H X -0.0006 0.0006 -0.0075 0.0052 0.0634 -0.0669  
Y 0.0006 0.0007 -0.0000 -0.0005 -0.0071 0.0066  
Z -0.0002 -0.0008 0.0056 -0.0034 -0.0456 0.0493  
AT. 47 H X 0.0020 -0.0015 -0.0016 0.0009 0.0124 0.0154  
Y 0.0022 -0.0014 0.0021 0.0036 -0.0252 -0.0238  
Z -0.0021 0.0013 0.0018 -0.0007 -0.0184 -0.0218  
AT. 48 H X -0.0020 -0.0015 0.0016 0.0009 -0.0124 0.0154  
Y -0.0022 -0.0014 -0.0021 0.0036 0.0252 -0.0238  
Z 0.0021 0.0013 -0.0018 -0.0007 0.0184 -0.0218  
AT. 49 C X 0.0012 -0.0011 0.0012 0.0020 -0.0196 -0.0190  
Y -0.0020 0.0012 -0.0002 -0.0019 -0.0002 -0.0017  
Z 0.0022 -0.0018 -0.0003 0.0017 -0.0046 -0.0037  
AT. 50 C X -0.0012 -0.0011 -0.0012 0.0020 0.0196 -0.0190  
Y 0.0020 0.0012 0.0002 -0.0019 0.0002 -0.0017  
Z -0.0022 -0.0018 0.0003 0.0017 0.0046 -0.0037

AT. 51 C X -0.0015 0.0011 -0.0004 -0.0016 0.0072 0.0058  
Y 0.0015 -0.0011 -0.0003 0.0011 0.0018 0.0033  
Z -0.0002 0.0003 0.0002 -0.0002 0.0003 0.0005

AT. 52 C X 0.0015 0.0011 0.0004 -0.0016 -0.0072 0.0058  
Y -0.0015 -0.0011 0.0003 0.0011 -0.0018 0.0033  
Z 0.0002 0.0003 -0.0002 -0.0002 -0.0003 0.0005

AT. 53 H X -0.0045 0.0033 0.0006 -0.0037 0.0042 -0.0001  
Y 0.0031 -0.0019 -0.0004 0.0026 0.0047 0.0089  
Z 0.0073 -0.0050 -0.0018 0.0057 0.0087 0.0174

AT. 54 H X 0.0045 0.0033 -0.0006 -0.0037 -0.0042 -0.0001  
Y -0.0031 -0.0019 0.0004 0.0026 -0.0047 0.0089  
Z -0.0073 -0.0050 0.0018 0.0057 -0.0087 0.0174

AT. 55 H X 0.0039 -0.0029 -0.0009 0.0030 0.0023 0.0056  
Y -0.0052 0.0041 0.0023 -0.0034 -0.0094 -0.0145  
Z -0.0051 0.0040 0.0031 -0.0027 -0.0164 -0.0216

AT. 56 H X -0.0039 -0.0029 0.0009 0.0030 -0.0023 0.0056  
Y 0.0052 0.0041 -0.0023 -0.0034 0.0094 -0.0145  
Z 0.0051 0.0040 -0.0031 -0.0027 0.0164 -0.0216

AT. 57 C X 0.0002 -0.0002 -0.0004 -0.0001 0.0032 0.0031  
Y 0.0000 0.0001 -0.0001 -0.0001 0.0037 0.0039  
Z -0.0004 0.0005 0.0006 -0.0001 -0.0020 -0.0018

AT. 58 C X -0.0002 -0.0002 0.0004 -0.0001 -0.0032 0.0031  
Y -0.0000 0.0001 0.0001 -0.0001 -0.0037 0.0039  
Z 0.0004 0.0005 -0.0006 -0.0001 0.0020 -0.0018

AT. 59 H X -0.0010 0.0006 0.0008 -0.0003 -0.0119 -0.0121  
Y 0.0013 -0.0011 -0.0010 0.0005 0.0071 0.0072  
Z 0.0008 -0.0007 -0.0001 0.0008 -0.0064 -0.0066

AT. 60 H X 0.0010 0.0006 -0.0008 -0.0003 0.0119 -0.0121  
Y -0.0013 -0.0011 0.0010 0.0005 -0.0071 0.0072  
Z -0.0008 -0.0007 0.0001 0.0008 0.0064 -0.0066

AT. 61 H X 0.0007 -0.0012 -0.0011 0.0003 -0.0016 -0.0019  
Y -0.0002 0.0007 0.0021 0.0009 -0.0127 -0.0118

Z 0.0002 -0.0007 -0.0012 -0.0003 0.0027 0.0023  
AT. 62 H X -0.0007 -0.0012 0.0011 0.0003 0.0016 -0.0019  
Y 0.0002 0.0007 -0.0021 0.0009 0.0127 -0.0118  
Z -0.0002 -0.0007 0.0012 -0.0003 -0.0027 0.0023  
AT. 63 H X -0.0009 0.0012 0.0011 -0.0002 0.0013 0.0021  
Y -0.0000 -0.0003 0.0002 0.0001 -0.0081 -0.0089  
Z 0.0007 -0.0006 -0.0011 -0.0000 0.0093 0.0095  
AT. 64 H X 0.0009 0.0012 -0.0011 -0.0002 -0.0013 0.0021  
Y 0.0000 -0.0003 -0.0002 0.0001 0.0081 -0.0089  
Z -0.0007 -0.0006 0.0011 -0.0000 -0.0093 0.0095  
AT. 65 C X -0.0005 0.0005 -0.0003 -0.0007 0.0061 0.0060  
Y 0.0007 -0.0004 0.0001 0.0008 -0.0006 0.0000  
Z -0.0008 0.0006 -0.0000 -0.0008 0.0029 0.0024  
AT. 66 C X 0.0005 0.0005 0.0003 -0.0007 -0.0061 0.0060  
Y -0.0007 -0.0004 -0.0001 0.0008 0.0006 0.0000  
Z 0.0008 0.0006 0.0000 -0.0008 -0.0029 0.0024  
AT. 67 H X 0.0014 -0.0014 0.0000 0.0012 -0.0091 -0.0101  
Y -0.0023 0.0020 -0.0000 -0.0024 0.0089 0.0076  
Z 0.0005 -0.0001 -0.0001 0.0006 0.0055 0.0078  
AT. 68 H X -0.0014 -0.0014 -0.0000 0.0012 0.0091 -0.0101  
Y 0.0023 0.0020 0.0000 -0.0024 -0.0089 0.0076  
Z -0.0005 -0.0001 0.0001 0.0006 -0.0055 0.0078  
AT. 69 H X -0.0022 0.0014 -0.0003 -0.0022 0.0052 0.0043  
Y 0.0005 -0.0007 0.0008 0.0010 -0.0144 -0.0136  
Z 0.0027 -0.0019 0.0010 0.0032 -0.0176 -0.0162  
AT. 70 H X 0.0022 0.0014 0.0003 -0.0022 -0.0052 0.0043  
Y -0.0005 -0.0007 -0.0008 0.0010 0.0144 -0.0136  
Z -0.0027 -0.0019 -0.0010 0.0032 0.0176 -0.0162  
AT. 71 H X 0.0031 -0.0025 0.0004 0.0033 -0.0107 -0.0080  
Y -0.0014 0.0009 -0.0000 -0.0011 -0.0020 -0.0036  
Z -0.0007 0.0001 0.0003 -0.0001 -0.0116 -0.0129  
AT. 72 H X -0.0031 -0.0025 -0.0004 0.0033 0.0107 -0.0080

Y 0.0014 0.0009 0.0000 -0.0011 0.0020 -0.0036  
Z 0.0007 0.0001 -0.0003 -0.0001 0.0116 -0.0129  
AT. 73 C X -0.0002 0.0003 0.0000 -0.0002 0.0021 0.0020  
Y 0.0004 -0.0003 -0.0004 0.0001 0.0055 0.0060  
Z -0.0010 0.0010 0.0003 -0.0009 0.0026 0.0028  
AT. 74 C X 0.0002 0.0003 -0.0000 -0.0002 -0.0021 0.0020  
Y -0.0004 -0.0003 0.0004 0.0001 -0.0055 0.0060  
Z 0.0010 0.0010 -0.0003 -0.0009 -0.0026 0.0028  
AT. 75 H X -0.0040 0.0020 -0.0011 -0.0039 0.0097 0.0060  
Y 0.0028 -0.0018 0.0009 0.0033 -0.0128 -0.0118  
Z -0.0004 0.0002 0.0011 0.0007 -0.0155 -0.0171  
AT. 76 H X 0.0040 0.0020 0.0011 -0.0039 -0.0097 0.0060  
Y -0.0028 -0.0018 -0.0009 0.0033 0.0128 -0.0118  
Z 0.0004 0.0002 -0.0011 0.0007 0.0155 -0.0171  
AT. 77 H X -0.0002 -0.0007 -0.0052 -0.0036 0.0404 0.0405  
Y -0.0001 0.0008 0.0042 0.0022 -0.0346 -0.0339  
Z -0.0005 0.0009 0.0008 0.0003 0.0036 0.0033  
AT. 78 H X 0.0002 -0.0007 0.0052 -0.0036 -0.0404 0.0405  
Y 0.0001 0.0008 -0.0042 0.0022 0.0346 -0.0339  
Z 0.0005 0.0009 -0.0008 0.0003 -0.0036 0.0033  
AT. 79 I X 0.0000 -0.0000 0.0000 0.0000 0.0000 0.0000  
Y 0.0000 -0.0000 0.0000 0.0000 -0.0000 0.0000  
Z 0.0000 -0.0000 0.0000 0.0001 0.0000 0.0000  
AT. 80 I X -0.0000 -0.0000 -0.0000 0.0000 -0.0000 0.0000  
Y -0.0000 -0.0000 -0.0000 0.0000 0.0000 0.0000  
Z -0.0000 -0.0000 -0.0000 0.0001 -0.0000 0.0000  
AT. 81 I X -0.0000 0.0000 0.0000 -0.0000 0.0000 -0.0000  
Y 0.0000 -0.0000 -0.0000 -0.0000 0.0000 0.0000  
Z 0.0000 -0.0000 -0.0000 0.0000 0.0000 0.0000  
AT. 82 I X 0.0000 0.0000 -0.0000 -0.0000 -0.0000 -0.0000  
Y -0.0000 -0.0000 0.0000 -0.0000 -0.0000 0.0000  
Z -0.0000 -0.0000 0.0000 0.0000 -0.0000 0.0000



AT. 83 O X -0.0037 0.0011 -0.0035 -0.0052 -0.0006 -0.0006  
Y -0.0012 0.0005 -0.0008 -0.0013 -0.0001 -0.0001  
Z -0.0006 0.0000 -0.0010 -0.0012 -0.0004 -0.0003

AT. 84 O X 0.0037 0.0011 0.0035 -0.0052 0.0006 -0.0006  
Y 0.0012 0.0005 0.0008 -0.0013 0.0001 -0.0001  
Z 0.0006 0.0000 0.0010 -0.0012 0.0004 -0.0003

AT. 85 O X 0.0029 -0.0040 -0.0029 -0.0005 -0.0000 0.0001  
Y 0.0036 -0.0058 -0.0048 -0.0015 -0.0003 0.0000  
Z -0.0029 0.0053 0.0048 0.0019 0.0004 0.0001

AT. 86 O X -0.0029 -0.0040 0.0029 -0.0005 0.0000 0.0001  
Y -0.0036 -0.0058 0.0048 -0.0015 0.0003 0.0000  
Z 0.0029 0.0053 -0.0048 0.0019 -0.0004 0.0001

AT. 87 N X 0.0077 -0.0011 0.0093 0.0118 0.0022 0.0016  
Y 0.0071 -0.0031 0.0040 0.0074 0.0006 0.0006  
Z -0.0016 0.0004 -0.0013 -0.0021 -0.0000 -0.0000

AT. 88 N X -0.0077 -0.0011 -0.0093 0.0118 -0.0022 0.0016  
Y -0.0071 -0.0031 -0.0040 0.0074 -0.0006 0.0006  
Z 0.0016 0.0004 0.0013 -0.0021 0.0000 -0.0000

AT. 89 N X -0.0196 0.0301 0.0237 0.0066 0.0016 0.0003  
Y -0.0062 0.0091 0.0070 0.0018 0.0004 0.0001  
Z 0.0017 -0.0050 -0.0058 -0.0038 -0.0009 -0.0005

AT. 90 N X 0.0196 0.0301 -0.0237 0.0066 -0.0016 0.0003  
Y 0.0062 0.0091 -0.0070 0.0018 -0.0004 0.0001  
Z -0.0017 -0.0050 0.0058 -0.0038 0.0009 -0.0005

AT. 91 C X 0.0089 -0.0031 0.0065 0.0105 0.0008 0.0007  
Y 0.0048 -0.0019 0.0030 0.0051 0.0003 0.0003  
Z -0.0144 0.0044 -0.0101 -0.0168 -0.0009 -0.0010

AT. 92 C X -0.0089 -0.0031 -0.0065 0.0105 -0.0008 0.0007  
Y -0.0048 -0.0019 -0.0030 0.0051 -0.0003 0.0003  
Z 0.0144 0.0044 0.0101 -0.0168 0.0009 -0.0010

AT. 93 C X -0.0039 0.0014 -0.0022 -0.0040 -0.0003 -0.0002  
Y -0.0022 0.0009 -0.0015 -0.0022 -0.0001 -0.0002

Z 0.0073 -0.0023 0.0053 0.0089 0.0006 0.0006  
AT. 94 C X 0.0039 0.0014 0.0022 -0.0040 0.0003 -0.0002  
Y 0.0022 0.0009 0.0015 -0.0022 0.0001 -0.0002  
Z -0.0073 -0.0023 -0.0053 0.0089 -0.0006 0.0006  
AT. 95 H X 0.0115 -0.0032 0.0088 0.0172 0.0013 0.0012  
Y -0.0031 0.0008 -0.0018 -0.0041 -0.0003 -0.0001  
Z -0.0098 0.0034 -0.0075 -0.0131 -0.0009 -0.0011  
AT. 96 H X -0.0115 -0.0032 -0.0088 0.0172 -0.0013 0.0012  
Y 0.0031 0.0008 0.0018 -0.0041 0.0003 -0.0001  
Z 0.0098 0.0034 0.0075 -0.0131 0.0009 -0.0011  
AT. 97 H X -0.0277 0.0075 -0.0247 -0.0387 -0.0023 -0.0032  
Y -0.0027 -0.0003 -0.0021 -0.0045 -0.0004 -0.0001  
Z 0.0138 -0.0042 0.0113 0.0178 0.0011 0.0015  
AT. 98 H X 0.0277 0.0075 0.0247 -0.0387 0.0023 -0.0032  
Y 0.0027 -0.0003 0.0021 -0.0045 0.0004 -0.0001  
Z -0.0138 -0.0042 -0.0113 0.0178 -0.0011 0.0015  
AT. 99 C X 0.0009 -0.0046 -0.0061 -0.0042 -0.0010 -0.0005  
Y -0.0012 0.0036 0.0043 0.0027 0.0000 -0.0002  
Z 0.0010 -0.0068 -0.0096 -0.0076 -0.0010 -0.0004  
AT. 100 C X -0.0009 -0.0046 0.0061 -0.0042 0.0010 -0.0005  
Y 0.0012 0.0036 -0.0043 0.0027 -0.0000 -0.0002  
Z -0.0010 -0.0068 0.0096 -0.0076 0.0010 -0.0004  
AT. 101 C X -0.0012 0.0042 0.0052 0.0025 0.0002 -0.0001  
Y -0.0004 -0.0006 -0.0014 -0.0011 -0.0000 0.0000  
Z 0.0005 0.0010 0.0023 0.0028 0.0003 0.0002  
AT. 102 C X 0.0012 0.0042 -0.0052 0.0025 -0.0002 -0.0001  
Y 0.0004 -0.0006 0.0014 -0.0011 0.0000 0.0000  
Z -0.0005 0.0010 -0.0023 0.0028 -0.0003 0.0002  
AT. 103 H X 0.0017 -0.0106 -0.0151 -0.0089 0.0003 0.0010  
Y -0.0018 0.0064 0.0081 0.0044 -0.0001 -0.0004  
Z -0.0030 0.0053 0.0041 -0.0020 0.0002 -0.0004  
AT. 104 H X -0.0017 -0.0106 0.0151 -0.0089 -0.0003 0.0010

Y 0.0018 0.0064 -0.0081 0.0044 0.0001 -0.0004  
Z 0.0030 0.0053 -0.0041 -0.0020 -0.0002 -0.0004  
AT.105 H X 0.0069 -0.0078 -0.0025 0.0126 0.0017 0.0026  
Y -0.0032 0.0106 0.0119 0.0020 0.0000 -0.0010  
Z 0.0010 0.0029 0.0060 0.0061 0.0006 0.0003  
AT.106 H X -0.0069 -0.0078 0.0025 0.0126 -0.0017 0.0026  
Y 0.0032 0.0106 -0.0119 0.0020 -0.0000 -0.0010  
Z -0.0010 0.0029 -0.0060 0.0061 -0.0006 0.0003  
AT.107 C X -0.0016 -0.0001 -0.0029 -0.0032 -0.0009 -0.0007  
Y -0.0046 0.0030 -0.0009 -0.0034 0.0003 0.0001  
Z 0.0055 -0.0006 0.0060 0.0082 0.0010 0.0008  
AT.108 C X 0.0016 -0.0001 0.0029 -0.0032 0.0009 -0.0007  
Y 0.0046 0.0030 0.0009 -0.0034 -0.0003 0.0001  
Z -0.0055 -0.0006 -0.0060 0.0082 -0.0010 0.0008  
AT.109 H X -0.0188 0.0038 -0.0150 -0.0234 -0.0000 -0.0008  
Y -0.0053 0.0039 -0.0008 -0.0037 -0.0002 -0.0002  
Z 0.0085 0.0005 0.0097 0.0129 -0.0003 0.0002  
AT.110 H X 0.0188 0.0038 0.0150 -0.0234 0.0000 -0.0008  
Y 0.0053 0.0039 0.0008 -0.0037 0.0002 -0.0002  
Z -0.0085 0.0005 -0.0097 0.0129 0.0003 0.0002  
AT.111 H X 0.0032 -0.0002 0.0027 0.0043 -0.0009 -0.0002  
Y 0.0085 -0.0033 0.0048 0.0091 0.0001 0.0000  
Z -0.0027 0.0009 -0.0014 -0.0029 0.0011 0.0004  
AT.112 H X -0.0032 -0.0002 -0.0027 0.0043 0.0009 -0.0002  
Y -0.0085 -0.0033 -0.0048 0.0091 -0.0001 0.0000  
Z 0.0027 0.0009 0.0014 -0.0029 -0.0011 0.0004  
AT.113 C X -0.0062 0.0039 -0.0014 -0.0051 -0.0000 -0.0001  
Y 0.0091 -0.0090 -0.0029 0.0032 -0.0014 -0.0007  
Z -0.0073 0.0018 -0.0058 -0.0090 -0.0013 -0.0010  
AT.114 C X 0.0062 0.0039 0.0014 -0.0051 0.0000 -0.0001  
Y -0.0091 -0.0090 0.0029 0.0032 0.0014 -0.0007  
Z 0.0073 0.0018 0.0058 -0.0090 0.0013 -0.0010

AT. 115 C X 0.0122 -0.0163 -0.0109 -0.0012 -0.0007 -0.0001  
Y 0.0028 -0.0057 -0.0056 -0.0027 -0.0000 0.0001  
Z -0.0015 0.0064 0.0082 0.0057 0.0011 0.0006

AT. 116 C X -0.0122 -0.0163 0.0109 -0.0012 0.0007 -0.0001  
Y -0.0028 -0.0057 0.0056 -0.0027 0.0000 0.0001  
Z 0.0015 0.0064 -0.0082 0.0057 -0.0011 0.0006

AT. 117 H X 0.0164 -0.0129 -0.0005 0.0094 0.0026 0.0020  
Y 0.0072 -0.0045 0.0021 0.0052 0.0018 0.0010  
Z -0.0073 0.0026 -0.0049 -0.0079 -0.0029 -0.0019

AT. 118 H X -0.0164 -0.0129 0.0005 0.0094 -0.0026 0.0020  
Y -0.0072 -0.0045 -0.0021 0.0052 -0.0018 0.0010  
Z 0.0073 0.0026 0.0049 -0.0079 0.0029 -0.0019

AT. 119 H X -0.0177 0.0089 -0.0080 -0.0172 -0.0029 -0.0019  
Y -0.0293 0.0233 0.0002 -0.0181 -0.0014 -0.0012  
Z 0.0158 -0.0113 0.0019 0.0116 0.0010 0.0008

AT. 120 H X 0.0177 0.0089 0.0080 -0.0172 0.0029 -0.0019  
Y 0.0293 0.0233 -0.0002 -0.0181 0.0014 -0.0012  
Z -0.0158 -0.0113 -0.0019 0.0116 -0.0010 0.0008

AT. 121 C X 0.0125 -0.0214 -0.0186 -0.0070 -0.0016 -0.0006  
Y -0.0061 0.0037 -0.0019 -0.0053 -0.0001 -0.0002  
Z 0.0060 -0.0044 0.0003 0.0040 0.0004 0.0004

AT. 122 C X -0.0125 -0.0214 0.0186 -0.0070 0.0016 -0.0006  
Y 0.0061 0.0037 0.0019 -0.0053 0.0001 -0.0002  
Z -0.0060 -0.0044 -0.0003 0.0040 -0.0004 0.0004

AT. 123 H X -0.0391 0.0658 0.0557 0.0210 0.0046 0.0014  
Y 0.0098 -0.0158 -0.0129 -0.0044 -0.0004 0.0001  
Z -0.0207 0.0324 0.0254 0.0080 0.0017 0.0003

AT. 124 H X 0.0391 0.0658 -0.0557 0.0210 -0.0046 0.0014  
Y -0.0098 -0.0158 0.0129 -0.0044 0.0004 0.0001  
Z 0.0207 0.0324 -0.0254 0.0080 -0.0017 0.0003

AT. 125 H X 0.0256 -0.0271 -0.0102 0.0069 -0.0006 0.0006  
Y -0.0108 -0.0048 -0.0215 -0.0230 -0.0028 -0.0020

Z 0.0200 -0.0169 -0.0009 0.0110 0.0002 0.0009  
AT. 126 H X -0.0256 -0.0271 0.0102 0.0069 0.0006 0.0006  
Y 0.0108 -0.0048 0.0215 -0.0230 0.0028 -0.0020  
Z -0.0200 -0.0169 0.0009 0.0110 -0.0002 0.0009  
AT. 127 C X -0.0024 0.0142 0.0199 0.0143 0.0028 0.0018  
Y 0.0167 -0.0105 0.0048 0.0140 -0.0000 0.0003  
Z -0.0092 -0.0019 -0.0146 -0.0170 -0.0025 -0.0019  
AT. 128 C X 0.0024 0.0142 -0.0199 0.0143 -0.0028 0.0018  
Y -0.0167 -0.0105 -0.0048 0.0140 0.0000 0.0003  
Z 0.0092 -0.0019 0.0146 -0.0170 0.0025 -0.0019  
AT. 129 C X -0.0050 -0.0012 -0.0088 -0.0098 -0.0017 -0.0012  
Y -0.0101 0.0073 -0.0014 -0.0072 -0.0001 -0.0003  
Z 0.0037 0.0009 0.0057 0.0068 0.0007 0.0006  
AT. 130 C X 0.0050 -0.0012 0.0088 -0.0098 0.0017 -0.0012  
Y 0.0101 0.0073 0.0014 -0.0072 0.0001 -0.0003  
Z -0.0037 0.0009 -0.0057 0.0068 -0.0007 0.0006  
AT. 131 H X -0.0420 0.0150 -0.0297 -0.0485 -0.0047 -0.0039  
Y -0.0121 0.0066 -0.0042 -0.0104 -0.0004 -0.0005  
Z -0.0479 0.0224 -0.0247 -0.0481 -0.0036 -0.0032  
AT. 132 H X 0.0420 0.0150 0.0297 -0.0485 0.0047 -0.0039  
Y 0.0121 0.0066 0.0042 -0.0104 0.0004 -0.0005  
Z 0.0479 0.0224 0.0247 -0.0481 0.0036 -0.0032  
AT. 133 H X 0.0516 -0.0236 0.0268 0.0521 0.0038 0.0035  
Y 0.0331 -0.0166 0.0146 0.0311 0.0024 0.0021  
Z 0.0439 -0.0253 0.0142 0.0373 0.0022 0.0021  
AT. 134 H X -0.0516 -0.0236 -0.0268 0.0521 -0.0038 0.0035  
Y -0.0331 -0.0166 -0.0146 0.0311 -0.0024 0.0021  
Z -0.0439 -0.0253 -0.0142 0.0373 -0.0022 0.0021  
AT. 135 C X 0.0027 -0.0015 0.0009 0.0024 0.0001 0.0001  
Y -0.0043 0.0046 0.0020 -0.0010 0.0005 0.0002  
Z 0.0035 -0.0018 0.0012 0.0031 0.0004 0.0004  
AT. 136 C X -0.0027 -0.0015 -0.0009 0.0024 -0.0001 0.0001

Y 0.0043 0.0046 -0.0020 -0.0010 -0.0005 0.0002  
Z -0.0035 -0.0018 -0.0012 0.0031 -0.0004 0.0004  
AT. 137 H X -0.0161 0.0114 -0.0014 -0.0106 -0.0001 -0.0003  
Y -0.0056 0.0027 -0.0024 -0.0054 -0.0007 -0.0007  
Z 0.0072 -0.0089 -0.0050 0.0000 -0.0015 -0.0010  
AT. 138 H X 0.0161 0.0114 0.0014 -0.0106 0.0001 -0.0003  
Y 0.0056 0.0027 0.0024 -0.0054 0.0007 -0.0007  
Z -0.0072 -0.0089 0.0050 0.0000 0.0015 -0.0010  
AT. 139 H X 0.0070 -0.0019 0.0048 0.0081 0.0013 0.0011  
Y 0.0126 -0.0113 -0.0018 0.0061 -0.0009 -0.0004  
Z -0.0077 0.0032 -0.0035 -0.0074 -0.0008 -0.0009  
AT. 140 H X -0.0070 -0.0019 -0.0048 0.0081 -0.0013 0.0011  
Y -0.0126 -0.0113 0.0018 0.0061 0.0009 -0.0004  
Z 0.0077 0.0032 0.0035 -0.0074 0.0008 -0.0009  
AT. 141 H X -0.0023 -0.0023 -0.0069 -0.0073 -0.0018 -0.0010  
Y 0.0072 -0.0067 -0.0020 0.0027 -0.0007 -0.0000  
Z -0.0101 0.0091 0.0018 -0.0046 0.0008 0.0001  
AT. 142 H X 0.0023 -0.0023 0.0069 -0.0073 0.0018 -0.0010  
Y -0.0072 -0.0067 0.0020 0.0027 0.0007 -0.0000  
Z 0.0101 0.0091 -0.0018 -0.0046 -0.0008 0.0001  
AT. 143 C X 0.0001 -0.0045 -0.0073 -0.0056 -0.0011 -0.0007  
Y -0.0055 0.0026 -0.0031 -0.0058 -0.0001 -0.0002  
Z 0.0029 0.0019 0.0063 0.0069 0.0011 0.0008  
AT. 144 C X -0.0001 -0.0045 0.0073 -0.0056 0.0011 -0.0007  
Y 0.0055 0.0026 0.0031 -0.0058 0.0001 -0.0002  
Z -0.0029 0.0019 -0.0063 0.0069 -0.0011 0.0008  
AT. 145 H X 0.0008 0.0103 0.0169 0.0125 0.0033 0.0023  
Y 0.0090 0.0012 0.0128 0.0166 0.0021 0.0017  
Z -0.0119 0.0061 -0.0054 -0.0128 -0.0004 -0.0006  
AT. 146 H X -0.0008 0.0103 -0.0169 0.0125 -0.0033 0.0023  
Y -0.0090 0.0012 -0.0128 0.0166 -0.0021 0.0017  
Z 0.0119 0.0061 0.0054 -0.0128 0.0004 -0.0006

AT. 147 H X -0.0106 -0.0078 -0.0254 -0.0267 -0.0035 -0.0025  
Y 0.0115 -0.0117 -0.0039 0.0036 -0.0011 -0.0005  
Z -0.0045 -0.0106 -0.0220 -0.0205 -0.0032 -0.0022

AT. 148 H X 0.0106 -0.0078 0.0254 -0.0267 0.0035 -0.0025  
Y -0.0115 -0.0117 0.0039 0.0036 0.0011 -0.0005  
Z 0.0045 -0.0106 0.0220 -0.0205 0.0032 -0.0022

AT. 149 H X 0.0202 -0.0024 0.0227 0.0304 0.0030 0.0024  
Y 0.0064 -0.0063 -0.0007 0.0026 -0.0006 -0.0004  
Z 0.0114 -0.0141 -0.0063 0.0010 -0.0019 -0.0012

AT. 150 H X -0.0202 -0.0024 -0.0227 0.0304 -0.0030 0.0024  
Y -0.0064 -0.0063 0.0007 0.0026 0.0006 -0.0004  
Z -0.0114 -0.0141 0.0063 0.0010 0.0019 -0.0012

AT. 151 C X -0.0018 0.0020 0.0010 -0.0005 -0.0001 -0.0002  
Y -0.0074 0.0067 0.0014 -0.0035 0.0005 0.0001  
Z 0.0051 0.0010 0.0079 0.0092 0.0013 0.0010

AT. 152 C X 0.0018 0.0020 -0.0010 -0.0005 0.0001 -0.0002  
Y 0.0074 0.0067 -0.0014 -0.0035 -0.0005 0.0001  
Z -0.0051 0.0010 -0.0079 0.0092 -0.0013 0.0010

AT. 153 H X -0.0095 -0.0086 -0.0266 -0.0249 -0.0042 -0.0028  
Y -0.0013 -0.0054 -0.0106 -0.0086 -0.0020 -0.0013  
Z 0.0173 -0.0131 0.0007 0.0112 -0.0008 -0.0001

AT. 154 H X 0.0095 -0.0086 0.0266 -0.0249 0.0042 -0.0028  
Y 0.0013 -0.0054 0.0106 -0.0086 0.0020 -0.0013  
Z -0.0173 -0.0131 -0.0007 0.0112 0.0008 -0.0001

AT. 155 H X 0.0315 -0.0467 -0.0368 -0.0101 -0.0030 -0.0010  
Y 0.0171 -0.0213 -0.0128 0.0002 -0.0015 -0.0005  
Z -0.0080 0.0122 0.0091 0.0024 0.0022 0.0013

AT. 156 H X -0.0315 -0.0467 0.0368 -0.0101 0.0030 -0.0010  
Y -0.0171 -0.0213 0.0128 0.0002 0.0015 -0.0005  
Z 0.0080 0.0122 -0.0091 0.0024 -0.0022 0.0013

AT. 157 O X -0.0000 0.0001 -0.0000 -0.0000 0.0000 -0.0001  
Y -0.0001 0.0000 0.0000 -0.0001 -0.0001 0.0000

Z -0.0001 -0.0000 -0.0001 -0.0001 0.0001 -0.0002  
AT. 158 O X 0.0000 0.0001 0.0000 -0.0000 -0.0000 -0.0001  
Y 0.0001 0.0000 -0.0000 -0.0001 0.0001 0.0000  
Z 0.0001 -0.0000 0.0001 -0.0001 -0.0001 -0.0002  
AT. 159 O X -0.0000 -0.0000 0.0000 -0.0001 -0.0002 0.0001  
Y 0.0001 0.0001 -0.0000 0.0001 -0.0000 0.0001  
Z 0.0001 0.0000 0.0000 0.0001 0.0001 0.0000  
AT. 160 O X 0.0000 -0.0000 -0.0000 -0.0001 0.0002 0.0001  
Y -0.0001 0.0001 0.0000 0.0001 0.0000 0.0001  
Z -0.0001 0.0000 -0.0000 0.0001 -0.0001 0.0000  
AT. 161 H X 0.0014 -0.0005 -0.0004 0.0012 0.0005 0.0021  
Y -0.0002 0.0001 -0.0000 -0.0002 0.0001 -0.0001  
Z 0.0008 0.0000 0.0001 0.0006 0.0002 0.0003  
AT. 162 H X -0.0014 -0.0005 0.0004 0.0012 -0.0005 0.0021  
Y 0.0002 0.0001 0.0000 -0.0002 -0.0001 -0.0001  
Z -0.0008 0.0000 -0.0001 0.0006 -0.0002 0.0003  
AT. 163 H X -0.0001 0.0003 -0.0004 0.0005 0.0024 -0.0027  
Y -0.0003 -0.0009 0.0009 -0.0009 0.0021 -0.0020  
Z 0.0000 -0.0005 0.0003 -0.0004 -0.0003 0.0005  
AT. 164 H X 0.0001 0.0003 0.0004 0.0005 -0.0024 -0.0027  
Y 0.0003 -0.0009 -0.0009 -0.0009 -0.0021 -0.0020  
Z -0.0000 -0.0005 -0.0003 -0.0004 0.0003 0.0005  
AT. 165 O X 0.0001 -0.0001 0.0002 0.0001 0.0001 0.0001  
Y -0.0002 0.0001 -0.0001 -0.0002 0.0000 -0.0000  
Z 0.0002 0.0000 0.0001 0.0002 -0.0001 0.0001  
AT. 166 O X -0.0001 -0.0001 -0.0002 0.0001 -0.0001 0.0001  
Y 0.0002 0.0001 0.0001 -0.0002 -0.0000 -0.0000  
Z -0.0002 0.0000 -0.0001 0.0002 0.0001 0.0001  
AT. 167 H X -0.0005 0.0009 -0.0012 -0.0002 -0.0003 -0.0001  
Y 0.0017 -0.0014 0.0024 0.0016 0.0002 0.0002  
Z -0.0017 -0.0009 0.0000 -0.0025 0.0011 0.0005  
AT. 168 H X 0.0005 0.0009 0.0012 -0.0002 0.0003 -0.0001



|                                                              |     |         |         |         |         |         |         |
|--------------------------------------------------------------|-----|---------|---------|---------|---------|---------|---------|
|                                                              | Y   | -0.0017 | -0.0014 | -0.0024 | 0.0016  | -0.0002 | 0.0002  |
|                                                              | Z   | 0.0017  | -0.0009 | -0.0000 | -0.0025 | -0.0011 | 0.0005  |
| AT. 169                                                      | O X | 0.0000  | 0.0001  | -0.0001 | 0.0001  | 0.0001  | -0.0001 |
|                                                              | Y   | 0.0001  | 0.0002  | -0.0002 | 0.0001  | -0.0001 | 0.0000  |
|                                                              | Z   | -0.0000 | -0.0000 | -0.0000 | 0.0001  | 0.0000  | -0.0000 |
| AT. 170                                                      | O X | -0.0000 | 0.0001  | 0.0001  | 0.0001  | -0.0001 | -0.0001 |
|                                                              | Y   | -0.0001 | 0.0002  | 0.0002  | 0.0001  | 0.0001  | 0.0000  |
|                                                              | Z   | 0.0000  | -0.0000 | 0.0000  | 0.0001  | -0.0000 | -0.0000 |
| AT. 171                                                      | H X | -0.0006 | -0.0032 | 0.0044  | -0.0025 | -0.0018 | 0.0018  |
|                                                              | Y   | -0.0007 | -0.0014 | 0.0018  | -0.0019 | -0.0006 | 0.0004  |
|                                                              | Z   | -0.0012 | -0.0002 | -0.0002 | -0.0020 | 0.0006  | -0.0014 |
| AT. 172                                                      | H X | 0.0006  | -0.0032 | -0.0044 | -0.0025 | 0.0018  | 0.0018  |
|                                                              | Y   | 0.0007  | -0.0014 | -0.0018 | -0.0019 | 0.0006  | 0.0004  |
|                                                              | Z   | 0.0012  | -0.0002 | 0.0002  | -0.0020 | -0.0006 | -0.0014 |
| FREQ(CM**-1) 1234.33 1234.59 1235.93 1236.27 1268.55 1269.92 |     |         |         |         |         |         |         |
| AT. 1                                                        | I X | 0.0000  | -0.0000 | 0.0000  | 0.0000  | -0.0000 | -0.0000 |
|                                                              | Y   | 0.0000  | -0.0000 | 0.0000  | 0.0000  | -0.0000 | 0.0000  |
|                                                              | Z   | -0.0000 | -0.0000 | 0.0000  | 0.0000  | -0.0000 | -0.0000 |
| AT. 2                                                        | I X | 0.0000  | 0.0000  | -0.0000 | 0.0000  | 0.0000  | -0.0000 |
|                                                              | Y   | 0.0000  | 0.0000  | -0.0000 | 0.0000  | 0.0000  | 0.0000  |
|                                                              | Z   | -0.0000 | 0.0000  | -0.0000 | 0.0000  | 0.0000  | -0.0000 |
| AT. 3                                                        | I X | 0.0000  | -0.0000 | 0.0000  | 0.0000  | 0.0000  | -0.0000 |
|                                                              | Y   | -0.0000 | 0.0000  | -0.0000 | 0.0000  | -0.0000 | 0.0000  |
|                                                              | Z   | -0.0000 | 0.0000  | -0.0000 | 0.0000  | -0.0000 | 0.0000  |
| AT. 4                                                        | I X | 0.0000  | 0.0000  | -0.0000 | 0.0000  | -0.0000 | -0.0000 |
|                                                              | Y   | -0.0000 | -0.0000 | 0.0000  | 0.0000  | 0.0000  | 0.0000  |
|                                                              | Z   | -0.0000 | -0.0000 | 0.0000  | 0.0000  | 0.0000  | 0.0000  |
| AT. 5                                                        | O X | -0.0013 | 0.0012  | -0.0031 | -0.0030 | -0.0001 | -0.0009 |
|                                                              | Y   | 0.0006  | -0.0006 | 0.0013  | 0.0013  | 0.0004  | 0.0004  |
|                                                              | Z   | 0.0028  | -0.0028 | 0.0074  | 0.0074  | -0.0019 | 0.0023  |

AT. 6 O X -0.0013 -0.0012 0.0031 -0.0030 0.0001 -0.0009  
Y 0.0006 0.0006 -0.0013 0.0013 -0.0004 0.0004  
Z 0.0028 0.0028 -0.0074 0.0074 0.0019 0.0023

AT. 7 O X 0.0001 -0.0001 -0.0002 -0.0002 -0.0016 0.0009  
Y -0.0004 0.0004 -0.0006 -0.0005 0.0005 -0.0000  
Z 0.0005 -0.0007 0.0012 0.0009 0.0009 -0.0011

AT. 8 O X 0.0001 0.0001 0.0002 -0.0002 0.0016 0.0009  
Y -0.0004 -0.0004 0.0006 -0.0005 -0.0005 -0.0000  
Z 0.0005 0.0007 -0.0012 0.0009 -0.0009 -0.0011

AT. 9 N X 0.0090 -0.0087 0.0228 0.0231 -0.0079 0.0099  
Y -0.0052 0.0051 -0.0130 -0.0130 0.0037 -0.0060  
Z -0.0048 0.0048 -0.0131 -0.0130 0.0010 -0.0030

AT. 10 N X 0.0090 0.0087 -0.0228 0.0231 0.0079 0.0099  
Y -0.0052 -0.0051 0.0130 -0.0130 -0.0037 -0.0060  
Z -0.0048 -0.0048 0.0131 -0.0130 -0.0010 -0.0030

AT. 11 N X -0.0020 0.0027 -0.0049 -0.0037 -0.0046 0.0065  
Y 0.0016 -0.0018 0.0034 0.0032 -0.0033 0.0001  
Z 0.0001 0.0002 -0.0004 -0.0002 0.0021 -0.0016

AT. 12 N X -0.0020 -0.0027 0.0049 -0.0037 0.0046 0.0065  
Y 0.0016 0.0018 -0.0034 0.0032 0.0033 0.0001  
Z 0.0001 -0.0002 0.0004 -0.0002 -0.0021 -0.0016

AT. 13 C X -0.0017 0.0017 -0.0051 -0.0054 0.0053 -0.0019  
Y 0.0016 -0.0016 0.0050 0.0054 -0.0053 0.0019  
Z -0.0032 0.0029 -0.0086 -0.0094 0.0094 -0.0040

AT. 14 C X -0.0017 -0.0017 0.0051 -0.0054 -0.0053 -0.0019  
Y 0.0016 0.0016 -0.0050 0.0054 0.0053 0.0019  
Z -0.0032 -0.0029 0.0086 -0.0094 -0.0094 -0.0040

AT. 15 C X 0.0012 -0.0012 0.0033 0.0034 -0.0026 0.0011  
Y -0.0004 0.0004 -0.0014 -0.0015 0.0015 0.0000  
Z 0.0004 -0.0004 0.0014 0.0017 -0.0024 0.0004

AT. 16 C X 0.0012 0.0012 -0.0033 0.0034 0.0026 0.0011  
Y -0.0004 -0.0004 0.0014 -0.0015 -0.0015 0.0000

Z 0.0004 0.0004 -0.0014 0.0017 0.0024 0.0004  
AT. 17 H X -0.0045 0.0039 -0.0103 -0.0109 0.0103 -0.0048  
Y -0.0024 0.0024 -0.0064 -0.0063 0.0033 -0.0025  
Z 0.0002 -0.0004 0.0010 0.0006 0.0015 0.0005  
AT. 18 H X -0.0045 -0.0039 0.0103 -0.0109 -0.0103 -0.0048  
Y -0.0024 -0.0024 0.0064 -0.0063 -0.0033 -0.0025  
Z 0.0002 0.0004 -0.0010 0.0006 -0.0015 0.0005  
AT. 19 H X 0.0003 -0.0009 0.0027 0.0048 -0.0070 0.0011  
Y -0.0044 0.0043 -0.0121 -0.0126 0.0110 -0.0068  
Z -0.0013 0.0011 -0.0027 -0.0019 -0.0003 -0.0021  
AT. 20 H X 0.0003 0.0009 -0.0027 0.0048 0.0070 0.0011  
Y -0.0044 -0.0043 0.0121 -0.0126 -0.0110 -0.0068  
Z -0.0013 -0.0011 0.0027 -0.0019 0.0003 -0.0021  
AT. 21 C X 0.0008 -0.0012 0.0030 0.0023 0.0060 -0.0044  
Y 0.0003 -0.0003 0.0007 0.0005 0.0021 -0.0010  
Z -0.0016 0.0023 -0.0056 -0.0042 -0.0124 0.0083  
AT. 22 C X 0.0008 0.0012 -0.0030 0.0023 -0.0060 -0.0044  
Y 0.0003 0.0003 -0.0007 0.0005 -0.0021 -0.0010  
Z -0.0016 -0.0023 0.0056 -0.0042 0.0124 0.0083  
AT. 23 C X -0.0003 0.0004 -0.0010 -0.0005 -0.0027 0.0015  
Y 0.0000 0.0000 -0.0003 -0.0001 -0.0005 0.0004  
Z 0.0004 -0.0006 0.0013 0.0011 0.0040 -0.0020  
AT. 24 C X -0.0003 -0.0004 0.0010 -0.0005 0.0027 0.0015  
Y 0.0000 -0.0000 0.0003 -0.0001 0.0005 0.0004  
Z 0.0004 0.0006 -0.0013 0.0011 -0.0040 -0.0020  
AT. 25 H X 0.0010 -0.0014 0.0035 0.0019 0.0094 -0.0053  
Y 0.0003 -0.0004 0.0007 0.0007 0.0029 -0.0013  
Z 0.0003 -0.0004 0.0012 -0.0005 -0.0040 -0.0008  
AT. 26 H X 0.0010 0.0014 -0.0035 0.0019 -0.0094 -0.0053  
Y 0.0003 0.0004 -0.0007 0.0007 -0.0029 -0.0013  
Z 0.0003 0.0004 -0.0012 -0.0005 0.0040 -0.0008  
AT. 27 H X -0.0016 0.0036 -0.0081 -0.0084 -0.0105 0.0086

Y 0.0011 -0.0017 0.0051 0.0023 0.0034 -0.0053  
Z 0.0012 -0.0021 0.0056 0.0039 0.0077 -0.0065  
AT. 28 H X -0.0016 -0.0036 0.0081 -0.0084 0.0105 0.0086  
Y 0.0011 0.0017 -0.0051 0.0023 -0.0034 -0.0053  
Z 0.0012 0.0021 -0.0056 0.0039 -0.0077 -0.0065  
AT. 29 C X -0.0064 0.0063 -0.0171 -0.0172 0.0010 0.0000  
Y 0.0012 -0.0013 0.0029 0.0028 -0.0042 0.0041  
Z 0.0016 -0.0017 0.0051 0.0051 -0.0025 0.0021  
AT. 30 C X -0.0064 -0.0063 0.0171 -0.0172 -0.0010 0.0000  
Y 0.0012 0.0013 -0.0029 0.0028 0.0042 0.0041  
Z 0.0016 0.0017 -0.0051 0.0051 0.0025 0.0021  
AT. 31 H X 0.0193 -0.0186 0.0510 0.0537 -0.0447 0.0213  
Y -0.0068 0.0068 -0.0203 -0.0205 0.0013 -0.0018  
Z 0.0060 -0.0055 0.0135 0.0151 -0.0246 0.0083  
AT. 32 H X 0.0193 0.0186 -0.0510 0.0537 0.0447 0.0213  
Y -0.0068 -0.0068 0.0203 -0.0205 -0.0013 -0.0018  
Z 0.0060 0.0055 -0.0135 0.0151 0.0246 0.0083  
AT. 33 H X -0.0086 0.0082 -0.0204 -0.0221 0.0378 -0.0499  
Y 0.0115 -0.0117 0.0320 0.0320 -0.0020 -0.0008  
Z -0.0047 0.0044 -0.0106 -0.0117 0.0212 -0.0293  
AT. 34 H X -0.0086 -0.0082 0.0204 -0.0221 -0.0378 -0.0499  
Y 0.0115 0.0117 -0.0320 0.0320 0.0020 -0.0008  
Z -0.0047 -0.0044 0.0106 -0.0117 -0.0212 -0.0293  
AT. 35 C X 0.0049 -0.0050 0.0152 0.0150 0.0091 -0.0049  
Y 0.0016 -0.0012 0.0055 0.0058 0.0122 -0.0066  
Z -0.0043 0.0047 -0.0140 -0.0137 0.0004 0.0055  
AT. 36 C X 0.0049 0.0050 -0.0152 0.0150 -0.0091 -0.0049  
Y 0.0016 0.0012 -0.0055 0.0058 -0.0122 -0.0066  
Z -0.0043 -0.0047 0.0140 -0.0137 -0.0004 0.0055  
AT. 37 C X -0.0004 0.0001 -0.0020 -0.0024 -0.0011 -0.0007  
Y -0.0025 0.0027 -0.0068 -0.0067 -0.0016 0.0014  
Z 0.0015 -0.0019 0.0051 0.0046 0.0004 -0.0008

AT. 38 C X -0.0004 -0.0001 0.0020 -0.0024 0.0011 -0.0007  
Y -0.0025 -0.0027 0.0068 -0.0067 0.0016 0.0014  
Z 0.0015 0.0019 -0.0051 0.0046 -0.0004 -0.0008

AT. 39 H X 0.0017 -0.0007 0.0013 0.0027 -0.0033 -0.0005  
Y -0.0065 0.0056 -0.0135 -0.0163 0.0129 0.0117  
Z 0.0045 -0.0035 0.0097 0.0116 -0.0072 -0.0053

AT. 40 H X 0.0017 0.0007 -0.0013 0.0027 0.0033 -0.0005  
Y -0.0065 -0.0056 0.0135 -0.0163 -0.0129 0.0117  
Z 0.0045 0.0035 -0.0097 0.0116 0.0072 -0.0053

AT. 41 H X -0.0024 0.0014 -0.0036 -0.0057 0.0052 0.0001  
Y 0.0076 -0.0062 0.0137 0.0176 -0.0351 0.0114  
Z -0.0046 0.0039 -0.0099 -0.0114 0.0210 -0.0090

AT. 42 H X -0.0024 -0.0014 0.0036 -0.0057 -0.0052 0.0001  
Y 0.0076 0.0062 -0.0137 0.0176 0.0351 0.0114  
Z -0.0046 -0.0039 0.0099 -0.0114 -0.0210 -0.0090

AT. 43 C X 0.0014 -0.0021 0.0036 0.0026 0.0000 -0.0006  
Y -0.0006 0.0008 -0.0024 -0.0023 -0.0016 -0.0001  
Z -0.0003 0.0002 0.0001 0.0001 -0.0021 0.0031

AT. 44 C X 0.0014 0.0021 -0.0036 0.0026 -0.0000 -0.0006  
Y -0.0006 -0.0008 0.0024 -0.0023 0.0016 -0.0001  
Z -0.0003 -0.0002 -0.0001 0.0001 0.0021 0.0031

AT. 45 H X -0.0094 0.0121 -0.0284 -0.0231 -0.0506 0.0441  
Y -0.0013 0.0007 -0.0041 -0.0043 -0.0222 0.0183  
Z 0.0083 -0.0102 0.0253 0.0211 0.0558 -0.0486

AT. 46 H X -0.0094 -0.0121 0.0284 -0.0231 0.0506 0.0441  
Y -0.0013 -0.0007 0.0041 -0.0043 0.0222 0.0183  
Z 0.0083 0.0102 -0.0253 0.0211 -0.0558 -0.0486

AT. 47 H X 0.0054 -0.0059 0.0129 0.0112 0.0254 -0.0351  
Y -0.0001 0.0014 -0.0032 -0.0019 0.0096 -0.0138  
Z -0.0056 0.0064 -0.0142 -0.0118 -0.0255 0.0365

AT. 48 H X 0.0054 0.0059 -0.0129 0.0112 -0.0254 -0.0351  
Y -0.0001 -0.0014 0.0032 -0.0019 -0.0096 -0.0138

Z -0.0056 -0.0064 0.0142 -0.0118 0.0255 0.0365  
AT. 49 C X 0.0005 0.0005 0.0012 0.0021 0.0159 -0.0157  
Y 0.0010 -0.0012 0.0059 0.0059 0.0110 -0.0006  
Z 0.0012 -0.0008 0.0012 0.0015 0.0096 -0.0146  
AT. 50 C X 0.0005 -0.0005 -0.0012 0.0021 -0.0159 -0.0157  
Y 0.0010 0.0012 -0.0059 0.0059 -0.0110 -0.0006  
Z 0.0012 0.0008 -0.0012 0.0015 -0.0096 -0.0146  
AT. 51 C X -0.0039 0.0035 -0.0096 -0.0098 -0.0016 -0.0009  
Y 0.0025 -0.0025 0.0059 0.0058 -0.0025 -0.0013  
Z 0.0029 -0.0030 0.0087 0.0087 -0.0029 0.0002  
AT. 52 C X -0.0039 -0.0035 0.0096 -0.0098 0.0016 -0.0009  
Y 0.0025 0.0025 -0.0059 0.0058 0.0025 -0.0013  
Z 0.0029 0.0030 -0.0087 0.0087 0.0029 0.0002  
AT. 53 H X -0.0053 0.0047 -0.0111 -0.0113 -0.0004 0.0025  
Y 0.0059 -0.0061 0.0125 0.0116 -0.0112 0.0469  
Z 0.0093 -0.0092 0.0187 0.0175 -0.0151 0.0512  
AT. 54 H X -0.0053 -0.0047 0.0111 -0.0113 0.0004 0.0025  
Y 0.0059 0.0061 -0.0125 0.0116 0.0112 0.0469  
Z 0.0093 0.0092 -0.0187 0.0175 0.0151 0.0512  
AT. 55 H X 0.0010 -0.0007 -0.0016 -0.0020 -0.0015 0.0077  
Y -0.0046 0.0047 -0.0110 -0.0101 -0.0155 0.0057  
Z -0.0033 0.0037 -0.0090 -0.0077 -0.0192 0.0136  
AT. 56 H X 0.0010 0.0007 0.0016 -0.0020 0.0015 0.0077  
Y -0.0046 -0.0047 0.0110 -0.0101 0.0155 0.0057  
Z -0.0033 -0.0037 0.0090 -0.0077 0.0192 0.0136  
AT. 57 C X -0.0013 0.0014 -0.0045 -0.0044 -0.0026 0.0015  
Y -0.0003 0.0001 -0.0011 -0.0012 -0.0037 0.0018  
Z 0.0015 -0.0016 0.0052 0.0051 -0.0004 -0.0016  
AT. 58 C X -0.0013 -0.0014 0.0045 -0.0044 0.0026 0.0015  
Y -0.0003 -0.0001 0.0011 -0.0012 0.0037 0.0018  
Z 0.0015 0.0016 -0.0052 0.0051 0.0004 -0.0016  
AT. 59 H X 0.0036 -0.0033 0.0136 0.0138 0.0059 -0.0052

Y -0.0033 0.0035 -0.0132 -0.0133 -0.0008 0.0045  
Z 0.0000 0.0005 -0.0017 -0.0016 0.0084 -0.0011  
AT. 60 H X 0.0036 0.0033 -0.0136 0.0138 -0.0059 -0.0052  
Y -0.0033 -0.0035 0.0132 -0.0133 0.0008 0.0045  
Z 0.0000 -0.0005 0.0017 -0.0016 -0.0084 -0.0011  
AT. 61 H X -0.0019 0.0024 -0.0074 -0.0074 0.0105 -0.0028  
Y 0.0061 -0.0063 0.0188 0.0180 0.0117 -0.0079  
Z -0.0025 0.0028 -0.0081 -0.0079 0.0020 0.0004  
AT. 62 H X -0.0019 -0.0024 0.0074 -0.0074 -0.0105 -0.0028  
Y 0.0061 0.0063 -0.0188 0.0180 -0.0117 -0.0079  
Z -0.0025 -0.0028 0.0081 -0.0079 -0.0020 0.0004  
AT. 63 H X 0.0033 -0.0039 0.0102 0.0093 -0.0019 -0.0037  
Y 0.0011 -0.0008 0.0047 0.0055 0.0081 -0.0038  
Z -0.0042 0.0043 -0.0139 -0.0138 -0.0099 0.0081  
AT. 64 H X 0.0033 0.0039 -0.0102 0.0093 0.0019 -0.0037  
Y 0.0011 0.0008 -0.0047 0.0055 -0.0081 -0.0038  
Z -0.0042 -0.0043 0.0139 -0.0138 0.0099 0.0081  
AT. 65 C X -0.0003 -0.0001 -0.0006 -0.0009 -0.0046 0.0049  
Y -0.0007 0.0008 -0.0030 -0.0031 -0.0033 0.0002  
Z -0.0006 0.0004 -0.0010 -0.0009 -0.0030 0.0047  
AT. 66 C X -0.0003 0.0001 0.0006 -0.0009 0.0046 0.0049  
Y -0.0007 -0.0008 0.0030 -0.0031 0.0033 0.0002  
Z -0.0006 -0.0004 0.0010 -0.0009 0.0030 0.0047  
AT. 67 H X 0.0014 -0.0006 0.0029 0.0040 0.0078 -0.0103  
Y -0.0005 -0.0001 0.0002 0.0012 -0.0044 0.0128  
Z -0.0021 0.0016 -0.0064 -0.0086 -0.0102 0.0037  
AT. 68 H X 0.0014 0.0006 -0.0029 0.0040 -0.0078 -0.0103  
Y -0.0005 0.0001 -0.0002 0.0012 0.0044 0.0128  
Z -0.0021 -0.0016 0.0064 -0.0086 0.0102 0.0037  
AT. 69 H X 0.0007 -0.0012 0.0047 0.0042 0.0066 0.0026  
Y 0.0013 -0.0007 0.0039 0.0047 0.0172 -0.0121  
Z 0.0006 0.0006 -0.0015 0.0005 0.0075 -0.0125

AT. 70 H X 0.0007 0.0012 -0.0047 0.0042 -0.0066 0.0026  
Y 0.0013 0.0007 -0.0039 0.0047 -0.0172 -0.0121  
Z 0.0006 -0.0006 0.0015 0.0005 -0.0075 -0.0125

AT. 71 H X 0.0003 0.0002 -0.0017 -0.0027 0.0098 -0.0160  
Y 0.0004 -0.0004 0.0037 0.0033 0.0043 -0.0015  
Z 0.0013 -0.0010 0.0068 0.0059 0.0169 -0.0134

AT. 72 H X 0.0003 -0.0002 0.0017 -0.0027 -0.0098 -0.0160  
Y 0.0004 0.0004 -0.0037 0.0033 -0.0043 -0.0015  
Z 0.0013 0.0010 -0.0068 0.0059 -0.0169 -0.0134

AT. 73 C X -0.0007 0.0005 -0.0020 -0.0021 -0.0052 -0.0006  
Y -0.0012 0.0010 -0.0042 -0.0047 -0.0060 0.0053  
Z 0.0008 -0.0012 0.0038 0.0033 -0.0028 0.0044

AT. 74 C X -0.0007 -0.0005 0.0020 -0.0021 0.0052 -0.0006  
Y -0.0012 -0.0010 0.0042 -0.0047 0.0060 0.0053  
Z 0.0008 0.0012 -0.0038 0.0033 0.0028 0.0044

AT. 75 H X -0.0131 0.0131 -0.0333 -0.0336 0.0036 0.0245  
Y 0.0107 -0.0099 0.0271 0.0281 0.0054 -0.0242  
Z 0.0079 -0.0069 0.0230 0.0245 0.0171 -0.0168

AT. 76 H X -0.0131 -0.0131 0.0333 -0.0336 -0.0036 0.0245  
Y 0.0107 0.0099 -0.0271 0.0281 -0.0054 -0.0242  
Z 0.0079 0.0069 -0.0230 0.0245 -0.0171 -0.0168

AT. 77 H X 0.0039 -0.0050 0.0084 0.0074 -0.0132 0.0367  
Y -0.0015 0.0024 -0.0016 0.0001 0.0150 -0.0273  
Z -0.0030 0.0024 -0.0077 -0.0092 -0.0133 -0.0008

AT. 78 H X 0.0039 0.0050 -0.0084 0.0074 0.0132 0.0367  
Y -0.0015 -0.0024 0.0016 0.0001 -0.0150 -0.0273  
Z -0.0030 -0.0024 0.0077 -0.0092 0.0133 -0.0008

AT. 79 I X 0.0000 -0.0000 -0.0000 -0.0000 0.0000 -0.0000  
Y 0.0000 -0.0000 -0.0000 -0.0000 0.0000 -0.0000  
Z -0.0000 0.0000 0.0000 0.0000 0.0000 -0.0000

AT. 80 I X 0.0000 0.0000 0.0000 -0.0000 -0.0000 -0.0000  
Y 0.0000 0.0000 0.0000 -0.0000 -0.0000 -0.0000



Z -0.0000 -0.0000 -0.0000 0.0000 -0.0000 -0.0000  
AT. 81 I X -0.0000 -0.0000 0.0000 0.0000 0.0000 -0.0000  
Y 0.0000 -0.0000 0.0000 0.0000 0.0000 -0.0000  
Z 0.0000 -0.0000 0.0000 0.0000 -0.0000 -0.0000  
AT. 82 I X -0.0000 0.0000 -0.0000 0.0000 -0.0000 -0.0000  
Y 0.0000 0.0000 -0.0000 0.0000 -0.0000 -0.0000  
Z 0.0000 0.0000 -0.0000 0.0000 0.0000 -0.0000  
AT. 83 O X 0.0051 -0.0051 -0.0017 -0.0016 -0.0005 -0.0001  
Y 0.0004 -0.0003 -0.0001 -0.0001 -0.0001 0.0000  
Z 0.0069 -0.0070 -0.0025 -0.0024 0.0006 -0.0010  
AT. 84 O X 0.0051 0.0051 0.0017 -0.0016 0.0005 -0.0001  
Y 0.0004 0.0003 0.0001 -0.0001 0.0001 0.0000  
Z 0.0069 0.0070 0.0025 -0.0024 -0.0006 -0.0010  
AT. 85 O X 0.0004 -0.0003 -0.0001 -0.0001 -0.0007 0.0005  
Y -0.0002 0.0004 0.0001 0.0001 0.0000 -0.0003  
Z 0.0004 -0.0005 -0.0001 -0.0001 -0.0006 0.0008  
AT. 86 O X 0.0004 0.0003 0.0001 -0.0001 0.0007 0.0005  
Y -0.0002 -0.0004 -0.0001 0.0001 -0.0000 -0.0003  
Z 0.0004 0.0005 0.0001 -0.0001 0.0006 0.0008  
AT. 87 N X -0.0295 0.0293 0.0102 0.0100 -0.0028 0.0050  
Y -0.0050 0.0050 0.0016 0.0016 0.0001 0.0007  
Z -0.0080 0.0081 0.0029 0.0030 0.0008 -0.0001  
AT. 88 N X -0.0295 -0.0293 -0.0102 0.0100 0.0028 0.0050  
Y -0.0050 -0.0050 -0.0016 0.0016 -0.0001 0.0007  
Z -0.0080 -0.0081 -0.0029 0.0030 -0.0008 -0.0001  
AT. 89 N X 0.0023 -0.0028 -0.0007 -0.0006 -0.0026 0.0043  
Y 0.0016 -0.0018 -0.0004 -0.0004 0.0025 -0.0018  
Z -0.0005 0.0007 0.0000 0.0001 -0.0005 0.0004  
AT. 90 N X 0.0023 0.0028 0.0007 -0.0006 0.0026 0.0043  
Y 0.0016 0.0018 0.0004 -0.0004 -0.0025 -0.0018  
Z -0.0005 -0.0007 -0.0000 0.0001 0.0005 0.0004  
AT. 91 C X 0.0047 -0.0048 -0.0019 -0.0019 0.0031 -0.0023

Y 0.0029 -0.0029 -0.0011 -0.0011 0.0016 -0.0012  
Z -0.0099 0.0101 0.0038 0.0036 -0.0062 0.0048  
AT. 92 C X 0.0047 0.0048 0.0019 -0.0019 -0.0031 -0.0023  
Y 0.0029 0.0029 0.0011 -0.0011 -0.0016 -0.0012  
Z -0.0099 -0.0101 -0.0038 0.0036 0.0062 0.0048  
AT. 93 C X -0.0032 0.0034 0.0013 0.0013 -0.0013 0.0011  
Y -0.0003 0.0003 0.0001 0.0002 -0.0004 0.0002  
Z 0.0016 -0.0016 -0.0007 -0.0007 0.0017 -0.0011  
AT. 94 C X -0.0032 -0.0034 -0.0013 0.0013 0.0013 0.0011  
Y -0.0003 -0.0003 -0.0001 0.0002 0.0004 0.0002  
Z 0.0016 0.0016 0.0007 -0.0007 -0.0017 -0.0011  
AT. 95 H X 0.0051 -0.0053 -0.0024 -0.0020 0.0034 -0.0024  
Y -0.0064 0.0070 0.0028 0.0024 -0.0020 0.0017  
Z 0.0017 -0.0023 -0.0007 -0.0006 -0.0012 0.0005  
AT. 96 H X 0.0051 0.0053 0.0024 -0.0020 -0.0034 -0.0024  
Y -0.0064 -0.0070 -0.0028 0.0024 0.0020 0.0017  
Z 0.0017 0.0023 0.0007 -0.0006 0.0012 0.0005  
AT. 97 H X -0.0072 0.0068 0.0023 0.0026 -0.0076 0.0051  
Y -0.0077 0.0086 0.0034 0.0029 -0.0030 0.0029  
Z 0.0011 -0.0008 -0.0003 -0.0005 0.0029 -0.0017  
AT. 98 H X -0.0072 -0.0068 -0.0023 0.0026 0.0076 0.0051  
Y -0.0077 -0.0086 -0.0034 0.0029 0.0030 0.0029  
Z 0.0011 0.0008 0.0003 -0.0005 -0.0029 -0.0017  
AT. 99 C X -0.0019 0.0022 0.0006 0.0007 0.0036 -0.0036  
Y 0.0006 -0.0006 -0.0004 -0.0005 -0.0027 0.0024  
Z -0.0024 0.0024 0.0011 0.0012 0.0073 -0.0066  
AT. 100 C X -0.0019 -0.0022 -0.0006 0.0007 -0.0036 -0.0036  
Y 0.0006 0.0006 0.0004 -0.0005 0.0027 0.0024  
Z -0.0024 -0.0024 -0.0011 0.0012 -0.0073 -0.0066  
AT. 101 C X 0.0002 -0.0006 -0.0002 -0.0002 -0.0015 0.0017  
Y -0.0001 0.0002 0.0001 0.0001 0.0006 -0.0006  
Z 0.0005 -0.0005 -0.0002 -0.0003 -0.0022 0.0017

AT.102 C X 0.0002 0.0006 0.0002 -0.0002 0.0015 0.0017  
Y -0.0001 -0.0002 -0.0001 0.0001 -0.0006 -0.0006  
Z 0.0005 0.0005 0.0002 -0.0003 0.0022 0.0017

AT.103 H X -0.0003 0.0010 0.0008 0.0009 0.0055 -0.0056  
Y 0.0003 -0.0006 -0.0004 -0.0004 -0.0027 0.0029  
Z -0.0002 -0.0013 -0.0001 0.0000 0.0022 -0.0003

AT.104 H X -0.0003 -0.0010 -0.0008 0.0009 -0.0055 -0.0056  
Y 0.0003 0.0006 0.0004 -0.0004 0.0027 0.0029  
Z -0.0002 0.0013 0.0001 0.0000 -0.0022 -0.0003

AT.105 H X 0.0072 -0.0033 -0.0023 -0.0029 -0.0107 0.0056  
Y 0.0010 -0.0033 -0.0010 -0.0007 -0.0003 0.0029  
Z 0.0025 -0.0023 -0.0010 -0.0012 -0.0044 0.0039

AT.106 H X 0.0072 0.0033 0.0023 -0.0029 0.0107 0.0056  
Y 0.0010 0.0033 0.0010 -0.0007 0.0003 0.0029  
Z 0.0025 0.0023 0.0010 -0.0012 0.0044 0.0039

AT.107 C X 0.0193 -0.0193 -0.0068 -0.0067 0.0017 -0.0017  
Y -0.0023 0.0022 0.0011 0.0011 0.0017 -0.0017  
Z 0.0008 -0.0011 -0.0006 -0.0006 0.0002 -0.0002

AT.108 C X 0.0193 0.0193 0.0068 -0.0067 -0.0017 -0.0017  
Y -0.0023 -0.0022 -0.0011 0.0011 -0.0017 -0.0017  
Z 0.0008 0.0011 0.0006 -0.0006 -0.0002 -0.0002

AT.109 H X -0.0563 0.0572 0.0198 0.0195 -0.0245 0.0194  
Y -0.0002 0.0001 0.0012 0.0013 0.0111 -0.0090  
Z 0.0291 -0.0296 -0.0089 -0.0086 0.0259 -0.0207

AT.110 H X -0.0563 -0.0572 -0.0198 0.0195 0.0245 0.0194  
Y -0.0002 -0.0001 -0.0012 0.0013 -0.0111 -0.0090  
Z 0.0291 0.0296 0.0089 -0.0086 -0.0259 -0.0207

AT.111 H X 0.0284 -0.0283 -0.0104 -0.0101 0.0115 -0.0177  
Y 0.0234 -0.0238 -0.0085 -0.0086 -0.0028 0.0051  
Z -0.0165 0.0162 0.0061 0.0058 -0.0098 0.0163

AT.112 H X 0.0284 0.0283 0.0104 -0.0101 -0.0115 -0.0177  
Y 0.0234 0.0238 0.0085 -0.0086 0.0028 0.0051

Z -0.0165 -0.0162 -0.0061 0.0058 0.0098 0.0163  
AT. 113 C X -0.0151 0.0152 0.0060 0.0061 0.0031 -0.0025  
Y 0.0080 -0.0074 -0.0042 -0.0042 -0.0103 0.0077  
Z -0.0104 0.0109 0.0041 0.0042 -0.0009 -0.0017  
AT. 114 C X -0.0151 -0.0152 -0.0060 0.0061 -0.0031 -0.0025  
Y 0.0080 0.0074 0.0042 -0.0042 0.0103 0.0077  
Z -0.0104 -0.0109 -0.0041 0.0042 0.0009 -0.0017  
AT. 115 C X 0.0017 -0.0015 -0.0010 -0.0010 -0.0005 -0.0003  
Y -0.0061 0.0060 0.0024 0.0024 0.0017 -0.0011  
Z 0.0037 -0.0040 -0.0013 -0.0014 -0.0006 0.0008  
AT. 116 C X 0.0017 0.0015 0.0010 -0.0010 0.0005 -0.0003  
Y -0.0061 -0.0060 -0.0024 0.0024 -0.0017 -0.0011  
Z 0.0037 0.0040 0.0013 -0.0014 0.0006 0.0008  
AT. 117 H X -0.0045 0.0038 0.0021 0.0017 -0.0030 0.0000  
Y -0.0159 0.0160 0.0065 0.0059 -0.0083 -0.0005  
Z 0.0119 -0.0113 -0.0053 -0.0048 0.0044 0.0003  
AT. 118 H X -0.0045 -0.0038 -0.0021 0.0017 0.0030 0.0000  
Y -0.0159 -0.0160 -0.0065 0.0059 0.0083 -0.0005  
Z 0.0119 0.0113 0.0053 -0.0048 -0.0044 0.0003  
AT. 119 H X 0.0112 -0.0111 -0.0038 -0.0034 0.0107 -0.0075  
Y 0.0162 -0.0170 -0.0044 -0.0041 0.0227 -0.0167  
Z -0.0133 0.0138 0.0039 0.0037 -0.0156 0.0122  
AT. 120 H X 0.0112 0.0111 0.0038 -0.0034 -0.0107 -0.0075  
Y 0.0162 0.0170 0.0044 -0.0041 -0.0227 -0.0167  
Z -0.0133 -0.0138 -0.0039 0.0037 0.0156 0.0122  
AT. 121 C X -0.0014 0.0019 0.0003 0.0004 0.0003 -0.0005  
Y -0.0018 0.0017 0.0011 0.0012 0.0023 -0.0023  
Z 0.0004 -0.0005 -0.0002 -0.0003 0.0006 -0.0010  
AT. 122 C X -0.0014 -0.0019 -0.0003 0.0004 -0.0003 -0.0005  
Y -0.0018 -0.0017 -0.0011 0.0012 -0.0023 -0.0023  
Z 0.0004 0.0005 0.0002 -0.0003 -0.0006 -0.0010  
AT. 123 H X 0.0189 -0.0205 -0.0073 -0.0074 -0.0278 0.0307

Y -0.0107 0.0107 0.0048 0.0047 0.0198 -0.0207  
Z 0.0137 -0.0143 -0.0057 -0.0056 -0.0235 0.0248  
AT. 124 H X 0.0189 0.0205 0.0073 -0.0074 0.0278 0.0307  
Y -0.0107 -0.0107 -0.0048 0.0047 -0.0198 -0.0207  
Z 0.0137 0.0143 0.0057 -0.0056 0.0235 0.0248  
AT. 125 H X -0.0114 0.0122 0.0038 0.0036 0.0138 -0.0212  
Y 0.0062 -0.0057 -0.0022 -0.0020 -0.0119 0.0183  
Z -0.0076 0.0082 0.0024 0.0020 0.0096 -0.0155  
AT. 126 H X -0.0114 -0.0122 -0.0038 0.0036 -0.0138 -0.0212  
Y 0.0062 0.0057 0.0022 -0.0020 0.0119 0.0183  
Z -0.0076 -0.0082 -0.0024 0.0020 -0.0096 -0.0155  
AT. 127 C X -0.0026 0.0020 0.0015 0.0013 0.0057 -0.0076  
Y 0.0058 -0.0054 -0.0036 -0.0038 -0.0105 0.0089  
Z 0.0025 -0.0020 -0.0008 -0.0007 -0.0052 0.0084  
AT. 128 C X -0.0026 -0.0020 -0.0015 0.0013 -0.0057 -0.0076  
Y 0.0058 0.0054 0.0036 -0.0038 0.0105 0.0089  
Z 0.0025 0.0020 0.0008 -0.0007 0.0052 0.0084  
AT. 129 C X 0.0136 -0.0133 -0.0048 -0.0047 -0.0007 0.0003  
Y 0.0025 -0.0026 -0.0004 -0.0003 0.0029 -0.0019  
Z 0.0061 -0.0063 -0.0023 -0.0023 0.0026 -0.0022  
AT. 130 C X 0.0136 0.0133 0.0048 -0.0047 0.0007 0.0003  
Y 0.0025 0.0026 0.0004 -0.0003 -0.0029 -0.0019  
Z 0.0061 0.0063 0.0023 -0.0023 -0.0026 -0.0022  
AT. 131 H X 0.0181 -0.0173 -0.0048 -0.0046 -0.0013 -0.0047  
Y 0.0064 -0.0062 -0.0014 -0.0018 -0.0036 -0.0097  
Z 0.0134 -0.0128 -0.0025 -0.0025 -0.0012 -0.0122  
AT. 132 H X 0.0181 0.0173 0.0048 -0.0046 0.0013 -0.0047  
Y 0.0064 0.0062 0.0014 -0.0018 0.0036 -0.0097  
Z 0.0134 0.0128 0.0025 -0.0025 0.0012 -0.0122  
AT. 133 H X -0.0046 0.0040 0.0003 0.0002 0.0043 -0.0006  
Y -0.0092 0.0089 0.0034 0.0033 0.0063 -0.0047  
Z -0.0054 0.0053 0.0019 0.0017 0.0061 -0.0061

AT. 134 H X -0.0046 -0.0040 -0.0003 0.0002 -0.0043 -0.0006  
Y -0.0092 -0.0089 -0.0034 0.0033 -0.0063 -0.0047  
Z -0.0054 -0.0053 -0.0019 0.0017 -0.0061 -0.0061

AT. 135 C X 0.0044 -0.0044 -0.0017 -0.0017 -0.0008 0.0007  
Y -0.0020 0.0019 0.0013 0.0012 0.0030 -0.0022  
Z 0.0042 -0.0043 -0.0017 -0.0018 0.0004 0.0004

AT. 136 C X 0.0044 0.0044 0.0017 -0.0017 0.0008 0.0007  
Y -0.0020 -0.0019 -0.0013 0.0012 -0.0030 -0.0022  
Z 0.0042 0.0043 0.0017 -0.0018 -0.0004 0.0004

AT. 137 H X -0.0133 0.0136 0.0062 0.0060 0.0032 -0.0038  
Y -0.0074 0.0076 0.0030 0.0031 -0.0009 -0.0006  
Z 0.0002 -0.0000 -0.0011 -0.0008 -0.0067 0.0040

AT. 138 H X -0.0133 -0.0136 -0.0062 0.0060 -0.0032 -0.0038  
Y -0.0074 -0.0076 -0.0030 0.0031 0.0009 -0.0006  
Z 0.0002 0.0000 0.0011 -0.0008 0.0067 0.0040

AT. 139 H X 0.0112 -0.0120 -0.0044 -0.0045 0.0033 -0.0017  
Y 0.0145 -0.0140 -0.0064 -0.0067 -0.0094 0.0078  
Z -0.0106 0.0114 0.0045 0.0046 -0.0015 0.0006

AT. 140 H X 0.0112 0.0120 0.0044 -0.0045 -0.0033 -0.0017  
Y 0.0145 0.0140 0.0064 -0.0067 0.0094 0.0078  
Z -0.0106 -0.0114 -0.0045 0.0046 0.0015 0.0006

AT. 141 H X -0.0091 0.0090 0.0024 0.0029 -0.0018 -0.0012  
Y 0.0078 -0.0077 -0.0040 -0.0039 -0.0049 0.0037  
Z -0.0116 0.0113 0.0054 0.0055 0.0073 -0.0062

AT. 142 H X -0.0091 -0.0090 -0.0024 0.0029 0.0018 -0.0012  
Y 0.0078 0.0077 0.0040 -0.0039 0.0049 0.0037  
Z -0.0116 -0.0113 -0.0054 0.0055 -0.0073 -0.0062

AT. 143 C X 0.0005 -0.0003 -0.0004 -0.0003 -0.0016 0.0024  
Y -0.0030 0.0028 0.0015 0.0017 0.0031 -0.0025  
Z -0.0014 0.0012 0.0005 0.0004 0.0016 -0.0027

AT. 144 C X 0.0005 0.0003 0.0004 -0.0003 0.0016 0.0024  
Y -0.0030 -0.0028 -0.0015 0.0017 -0.0031 -0.0025

Z -0.0014 -0.0012 -0.0005 0.0004 -0.0016 -0.0027  
AT. 145 H X -0.0064 0.0049 0.0029 0.0029 0.0060 -0.0089  
Y 0.0003 -0.0007 -0.0005 -0.0008 0.0001 -0.0037  
Z -0.0063 0.0058 0.0032 0.0037 0.0056 -0.0032  
AT. 146 H X -0.0064 -0.0049 -0.0029 0.0029 -0.0060 -0.0089  
Y 0.0003 0.0007 0.0005 -0.0008 -0.0001 -0.0037  
Z -0.0063 -0.0058 -0.0032 0.0037 -0.0056 -0.0032  
AT. 147 H X -0.0006 0.0012 0.0006 0.0009 0.0004 0.0023  
Y 0.0067 -0.0061 -0.0035 -0.0038 -0.0113 0.0107  
Z 0.0020 -0.0013 -0.0008 -0.0008 -0.0037 0.0051  
AT. 148 H X -0.0006 -0.0012 -0.0006 0.0009 -0.0004 0.0023  
Y 0.0067 0.0061 0.0035 -0.0038 0.0113 0.0107  
Z 0.0020 0.0013 0.0008 -0.0008 0.0037 0.0051  
AT. 149 H X 0.0031 -0.0030 -0.0019 -0.0025 0.0005 -0.0043  
Y 0.0036 -0.0028 -0.0018 -0.0019 -0.0046 0.0057  
Z 0.0081 -0.0066 -0.0040 -0.0043 -0.0117 0.0141  
AT. 150 H X 0.0031 0.0030 0.0019 -0.0025 -0.0005 -0.0043  
Y 0.0036 0.0028 0.0018 -0.0019 0.0046 0.0057  
Z 0.0081 0.0066 0.0040 -0.0043 0.0117 0.0141  
AT. 151 C X 0.0021 -0.0021 -0.0009 -0.0009 -0.0030 0.0009  
Y -0.0043 0.0040 0.0023 0.0023 0.0046 -0.0043  
Z 0.0030 -0.0032 -0.0012 -0.0013 0.0014 -0.0018  
AT. 152 C X 0.0021 0.0021 0.0009 -0.0009 0.0030 0.0009  
Y -0.0043 -0.0040 -0.0023 0.0023 -0.0046 -0.0043  
Z 0.0030 0.0032 0.0012 -0.0013 -0.0014 -0.0018  
AT. 153 H X 0.0421 -0.0408 -0.0147 -0.0145 0.0057 0.0054  
Y 0.0135 -0.0130 -0.0050 -0.0049 -0.0007 0.0037  
Z 0.0138 -0.0134 -0.0066 -0.0066 -0.0100 0.0084  
AT. 154 H X 0.0421 0.0408 0.0147 -0.0145 -0.0057 0.0054  
Y 0.0135 0.0130 0.0050 -0.0049 0.0007 0.0037  
Z 0.0138 0.0134 0.0066 -0.0066 0.0100 0.0084  
AT. 155 H X -0.0052 0.0048 0.0004 0.0011 -0.0022 0.0169

Y 0.0040 -0.0037 -0.0028 -0.0027 -0.0061 0.0095  
Z -0.0076 0.0068 0.0042 0.0042 0.0118 -0.0097  
AT. 156 H X -0.0052 -0.0048 -0.0004 0.0011 0.0022 0.0169  
Y 0.0040 0.0037 0.0028 -0.0027 0.0061 0.0095  
Z -0.0076 -0.0068 -0.0042 0.0042 -0.0118 -0.0097  
AT. 157 O X -0.0001 -0.0000 0.0001 0.0001 0.0001 -0.0001  
Y 0.0000 0.0000 0.0001 0.0002 -0.0003 0.0001  
Z 0.0000 -0.0001 0.0002 0.0000 0.0002 0.0001  
AT. 158 O X -0.0001 0.0000 -0.0001 0.0001 -0.0001 -0.0001  
Y 0.0000 -0.0000 -0.0001 0.0002 0.0003 0.0001  
Z 0.0000 0.0001 -0.0002 0.0000 -0.0002 0.0001  
AT. 159 O X 0.0001 0.0000 0.0000 0.0002 -0.0003 -0.0001  
Y -0.0001 0.0000 -0.0002 -0.0001 0.0001 -0.0001  
Z -0.0001 0.0000 -0.0002 -0.0000 -0.0002 -0.0002  
AT. 160 O X 0.0001 -0.0000 -0.0000 0.0002 0.0003 -0.0001  
Y -0.0001 -0.0000 0.0002 -0.0001 -0.0001 -0.0001  
Z -0.0001 -0.0000 0.0002 -0.0000 0.0002 -0.0002  
AT. 161 H X 0.0002 0.0004 -0.0039 -0.0027 -0.0013 0.0016  
Y -0.0002 0.0002 -0.0007 -0.0008 0.0014 -0.0010  
Z -0.0001 -0.0000 -0.0004 -0.0001 -0.0023 0.0022  
AT. 162 H X 0.0002 -0.0004 0.0039 -0.0027 0.0013 0.0016  
Y -0.0002 -0.0002 0.0007 -0.0008 -0.0014 -0.0010  
Z -0.0001 0.0000 0.0004 -0.0001 0.0023 0.0022  
AT. 163 H X -0.0005 -0.0005 0.0015 -0.0008 0.0025 0.0016  
Y 0.0002 -0.0002 0.0008 -0.0011 0.0018 0.0014  
Z 0.0001 0.0003 -0.0005 -0.0000 0.0001 -0.0002  
AT. 164 H X -0.0005 0.0005 -0.0015 -0.0008 -0.0025 0.0016  
Y 0.0002 0.0002 -0.0008 -0.0011 -0.0018 0.0014  
Z 0.0001 -0.0003 0.0005 -0.0000 -0.0001 -0.0002  
AT. 165 O X -0.0001 0.0001 -0.0000 0.0000 -0.0001 0.0001  
Y -0.0002 0.0002 0.0001 0.0001 -0.0000 0.0001  
Z 0.0001 -0.0001 -0.0001 -0.0000 0.0002 -0.0001



AT.166 O X -0.0001 -0.0001 0.0000 0.0000 0.0001 0.0001  
Y -0.0002 -0.0002 -0.0001 0.0001 0.0000 0.0001  
Z 0.0001 0.0001 0.0001 -0.0000 -0.0002 -0.0001

AT.167 H X -0.0001 0.0006 0.0003 0.0002 0.0009 -0.0003  
Y 0.0001 -0.0006 -0.0003 -0.0000 -0.0004 -0.0001  
Z -0.0027 0.0017 0.0004 -0.0001 -0.0041 0.0027

AT.168 H X -0.0001 -0.0006 -0.0003 0.0002 -0.0009 -0.0003  
Y 0.0001 0.0006 0.0003 -0.0000 0.0004 -0.0001  
Z -0.0027 -0.0017 -0.0004 -0.0001 0.0041 0.0027

AT.169 O X 0.0001 0.0000 0.0001 -0.0001 0.0002 -0.0000  
Y 0.0000 -0.0000 0.0000 -0.0000 0.0001 -0.0000  
Z 0.0001 -0.0001 0.0000 -0.0000 0.0001 -0.0001

AT.170 O X 0.0001 -0.0000 -0.0001 -0.0001 -0.0002 -0.0000  
Y 0.0000 0.0000 -0.0000 -0.0000 -0.0001 -0.0000  
Z 0.0001 0.0001 -0.0000 -0.0000 -0.0001 -0.0001

AT.171 H X -0.0005 -0.0012 -0.0014 0.0011 -0.0022 -0.0022  
Y -0.0004 -0.0001 -0.0005 0.0006 -0.0009 -0.0009  
Z -0.0003 0.0013 0.0003 0.0003 -0.0006 -0.0002

AT.172 H X -0.0005 0.0012 0.0014 0.0011 0.0022 -0.0022  
Y -0.0004 0.0001 0.0005 0.0006 0.0009 -0.0009  
Z -0.0003 -0.0013 -0.0003 0.0003 0.0006 -0.0002

FREQ(CM\*\*-1) 1270.20 1270.46 1270.96 1271.70 1271.84 1273.91

AT. 1 I X 0.0000 -0.0000 -0.0000 0.0000 0.0000 -0.0000  
Y 0.0000 0.0000 -0.0000 -0.0000 0.0000 0.0000  
Z 0.0000 -0.0000 -0.0000 0.0000 0.0000 0.0000

AT. 2 I X -0.0000 -0.0000 0.0000 -0.0000 0.0000 -0.0000  
Y -0.0000 0.0000 0.0000 0.0000 0.0000 0.0000  
Z -0.0000 -0.0000 0.0000 -0.0000 0.0000 0.0000

AT. 3 I X -0.0000 -0.0000 0.0000 0.0000 -0.0000 -0.0000  
Y -0.0000 0.0000 -0.0000 -0.0000 0.0000 0.0000

Z -0.0000 0.0000 0.0000 -0.0000 -0.0000 0.0000  
AT. 4 I X 0.0000 -0.0000 -0.0000 -0.0000 -0.0000 -0.0000  
Y 0.0000 0.0000 0.0000 0.0000 0.0000 0.0000  
Z 0.0000 0.0000 -0.0000 0.0000 -0.0000 0.0000  
AT. 5 O X 0.0003 -0.0002 -0.0018 0.0007 0.0017 0.0009  
Y -0.0003 0.0001 0.0012 -0.0003 -0.0010 -0.0007  
Z 0.0003 0.0004 0.0012 -0.0015 -0.0011 0.0006  
AT. 6 O X -0.0003 -0.0002 0.0018 -0.0007 0.0017 0.0009  
Y 0.0003 0.0001 -0.0012 0.0003 -0.0010 -0.0007  
Z -0.0003 0.0004 -0.0012 0.0015 -0.0011 0.0006  
AT. 7 O X 0.0004 0.0001 -0.0009 -0.0001 0.0011 0.0012  
Y -0.0002 0.0001 0.0008 -0.0004 -0.0011 -0.0005  
Z -0.0004 -0.0001 -0.0002 0.0010 0.0005 -0.0009  
AT. 8 O X -0.0004 0.0001 0.0009 0.0001 0.0011 0.0012  
Y 0.0002 0.0001 -0.0008 0.0004 -0.0011 -0.0005  
Z 0.0004 -0.0001 0.0002 -0.0010 0.0005 -0.0009  
AT. 9 N X 0.0012 0.0017 0.0055 -0.0069 -0.0049 0.0030  
Y -0.0003 -0.0011 -0.0049 0.0043 0.0042 -0.0006  
Z 0.0004 -0.0006 -0.0041 0.0020 0.0033 0.0013  
AT. 10 N X -0.0012 0.0017 -0.0055 0.0069 -0.0049 0.0030  
Y 0.0003 -0.0011 0.0049 -0.0043 0.0042 -0.0006  
Z -0.0004 -0.0006 0.0041 -0.0020 0.0033 0.0013  
AT. 11 N X 0.0012 0.0012 0.0034 -0.0056 -0.0040 0.0033  
Y 0.0013 -0.0004 -0.0046 0.0017 0.0053 0.0031  
Z -0.0005 -0.0002 0.0004 0.0007 -0.0007 -0.0017  
AT. 12 N X -0.0012 0.0012 -0.0034 0.0056 -0.0040 0.0033  
Y -0.0013 -0.0004 0.0046 -0.0017 0.0053 0.0031  
Z 0.0005 -0.0002 -0.0004 -0.0007 -0.0007 -0.0017  
AT. 13 C X -0.0021 -0.0001 0.0048 0.0009 -0.0042 -0.0055  
Y 0.0022 0.0001 -0.0048 -0.0010 0.0041 0.0055  
Z -0.0036 -0.0003 0.0074 0.0021 -0.0063 -0.0090  
AT. 14 C X 0.0021 -0.0001 -0.0048 -0.0009 -0.0042 -0.0055

Y -0.0022 0.0001 0.0048 0.0010 0.0041 0.0055  
Z 0.0036 -0.0003 -0.0074 -0.0021 -0.0063 -0.0090  
AT. 15 C X 0.0010 0.0000 -0.0022 -0.0005 0.0017 0.0025  
Y -0.0008 0.0001 0.0024 -0.0001 -0.0021 -0.0022  
Z 0.0011 -0.0001 -0.0030 -0.0000 0.0026 0.0028  
AT. 16 C X -0.0010 0.0000 0.0022 0.0005 0.0017 0.0025  
Y 0.0008 0.0001 -0.0024 0.0001 -0.0021 -0.0022  
Z -0.0011 -0.0001 0.0030 0.0000 0.0026 0.0028  
AT. 17 H X -0.0034 -0.0004 0.0069 0.0018 -0.0059 -0.0077  
Y -0.0007 -0.0005 0.0001 0.0015 0.0006 -0.0007  
Z -0.0011 0.0004 0.0035 -0.0006 -0.0039 -0.0038  
AT. 18 H X 0.0034 -0.0004 -0.0069 -0.0018 -0.0059 -0.0077  
Y 0.0007 -0.0005 -0.0001 -0.0015 0.0006 -0.0007  
Z 0.0011 0.0004 -0.0035 0.0006 -0.0039 -0.0038  
AT. 19 H X 0.0030 0.0004 -0.0074 -0.0008 0.0079 0.0074  
Y -0.0032 -0.0009 0.0044 0.0033 -0.0035 -0.0069  
Z 0.0008 -0.0004 -0.0039 0.0012 0.0040 0.0026  
AT. 20 H X -0.0030 0.0004 0.0074 0.0008 0.0079 0.0074  
Y 0.0032 -0.0009 -0.0044 -0.0033 -0.0035 -0.0069  
Z -0.0008 -0.0004 0.0039 -0.0012 0.0040 0.0026  
AT. 21 C X -0.0019 -0.0006 0.0022 0.0023 -0.0020 -0.0052  
Y -0.0009 0.0000 0.0013 0.0007 -0.0011 -0.0019  
Z 0.0045 0.0009 -0.0056 -0.0048 0.0047 0.0113  
AT. 22 C X 0.0019 -0.0006 -0.0022 -0.0023 -0.0020 -0.0052  
Y 0.0009 0.0000 -0.0013 -0.0007 -0.0011 -0.0019  
Z -0.0045 0.0009 0.0056 0.0048 0.0047 0.0113  
AT. 23 C X 0.0007 0.0002 -0.0013 -0.0006 0.0013 0.0021  
Y 0.0002 -0.0000 -0.0003 -0.0001 0.0003 0.0005  
Z -0.0015 -0.0001 0.0025 0.0011 -0.0020 -0.0033  
AT. 24 C X -0.0007 0.0002 0.0013 0.0006 0.0013 0.0021  
Y -0.0002 -0.0000 0.0003 0.0001 0.0003 0.0005  
Z 0.0015 -0.0001 -0.0025 -0.0011 -0.0020 -0.0033

AT. 25 H X -0.0024 -0.0010 0.0044 0.0021 -0.0048 -0.0071  
Y -0.0008 -0.0002 0.0016 0.0006 -0.0013 -0.0018  
Z 0.0020 -0.0007 -0.0051 0.0008 0.0033 0.0011

AT. 26 H X 0.0024 -0.0010 -0.0044 -0.0021 -0.0048 -0.0071  
Y 0.0008 -0.0002 -0.0016 -0.0006 -0.0013 -0.0018  
Z -0.0020 -0.0007 0.0051 -0.0008 0.0033 0.0011

AT. 27 H X 0.0056 0.0010 -0.0061 -0.0061 0.0035 0.0110  
Y -0.0007 -0.0009 -0.0020 0.0032 0.0007 -0.0043  
Z -0.0029 -0.0008 0.0025 0.0039 -0.0023 -0.0077

AT. 28 H X -0.0056 0.0010 0.0061 0.0061 0.0035 0.0110  
Y 0.0007 -0.0009 0.0020 -0.0032 0.0007 -0.0043  
Z 0.0029 -0.0008 -0.0025 -0.0039 -0.0023 -0.0077

AT. 29 C X -0.0001 -0.0000 0.0011 -0.0006 -0.0013 -0.0004  
Y 0.0010 0.0007 0.0006 -0.0026 -0.0004 0.0027  
Z 0.0006 0.0004 0.0001 -0.0013 -0.0000 0.0012

AT. 30 C X 0.0001 -0.0000 -0.0011 0.0006 -0.0013 -0.0004  
Y -0.0010 0.0007 -0.0006 0.0026 -0.0004 0.0027  
Z -0.0006 0.0004 -0.0001 0.0013 -0.0000 0.0012

AT. 31 H X 0.0156 0.0020 -0.0318 -0.0089 0.0297 0.0423  
Y 0.0008 -0.0010 -0.0022 0.0008 0.0017 0.0020  
Z 0.0106 -0.0005 -0.0245 -0.0026 0.0222 0.0280

AT. 32 H X -0.0156 0.0020 0.0318 0.0089 0.0297 0.0423  
Y -0.0008 -0.0010 0.0022 -0.0008 0.0017 0.0020  
Z -0.0106 -0.0005 0.0245 0.0026 0.0222 0.0280

AT. 33 H X -0.0065 -0.0090 -0.0289 0.0372 0.0260 -0.0165  
Y 0.0010 -0.0006 -0.0030 0.0015 0.0032 0.0013  
Z -0.0037 -0.0051 -0.0185 0.0223 0.0167 -0.0089

AT. 34 H X 0.0065 -0.0090 0.0289 -0.0372 0.0260 -0.0165  
Y -0.0010 -0.0006 0.0030 -0.0015 0.0032 0.0013  
Z 0.0037 -0.0051 0.0185 -0.0223 0.0167 -0.0089

AT. 35 C X -0.0037 -0.0003 0.0063 0.0031 -0.0056 -0.0102  
Y -0.0047 -0.0005 0.0084 0.0033 -0.0075 -0.0128

Z -0.0011 0.0013 0.0099 -0.0061 -0.0095 -0.0024  
AT. 36 C X 0.0037 -0.0003 -0.0063 -0.0031 -0.0056 -0.0102  
Y 0.0047 -0.0005 -0.0084 -0.0033 -0.0075 -0.0128  
Z 0.0011 0.0013 -0.0099 0.0061 -0.0095 -0.0024  
AT. 37 C X 0.0006 -0.0003 -0.0029 0.0011 0.0031 0.0016  
Y 0.0004 0.0003 -0.0002 -0.0010 0.0002 0.0013  
Z -0.0001 -0.0002 -0.0006 0.0008 0.0007 -0.0001  
AT. 38 C X -0.0006 -0.0003 0.0029 -0.0011 0.0031 0.0016  
Y -0.0004 0.0003 0.0002 0.0010 0.0002 0.0013  
Z 0.0001 -0.0002 0.0006 -0.0008 0.0007 -0.0001  
AT. 39 H X 0.0018 -0.0006 -0.0064 0.0011 0.0050 0.0047  
Y -0.0075 0.0036 0.0404 -0.0175 -0.0396 -0.0183  
Z 0.0042 -0.0019 -0.0205 0.0080 0.0193 0.0103  
AT. 40 H X -0.0018 -0.0006 0.0064 -0.0011 0.0050 0.0047  
Y 0.0075 0.0036 -0.0404 0.0175 -0.0396 -0.0183  
Z -0.0042 -0.0019 0.0205 -0.0080 0.0193 0.0103  
AT. 41 H X -0.0027 0.0003 0.0088 -0.0012 -0.0077 -0.0064  
Y 0.0160 -0.0004 -0.0370 -0.0048 0.0304 0.0410  
Z -0.0093 -0.0001 0.0183 0.0055 -0.0138 -0.0241  
AT. 42 H X 0.0027 0.0003 -0.0088 0.0012 -0.0077 -0.0064  
Y -0.0160 -0.0004 0.0370 0.0048 0.0304 0.0410  
Z 0.0093 -0.0001 -0.0183 -0.0055 -0.0138 -0.0241  
AT. 43 C X 0.0000 -0.0001 -0.0009 0.0005 0.0010 0.0002  
Y 0.0012 -0.0001 -0.0033 -0.0006 0.0019 0.0034  
Z 0.0001 0.0003 0.0023 -0.0013 -0.0010 0.0004  
AT. 44 C X -0.0000 -0.0001 0.0009 -0.0005 0.0010 0.0002  
Y -0.0012 -0.0001 0.0033 0.0006 0.0019 0.0034  
Z -0.0001 0.0003 -0.0023 0.0013 -0.0010 0.0004  
AT. 45 H X 0.0155 0.0046 -0.0030 -0.0254 0.0062 0.0382  
Y 0.0059 0.0018 -0.0026 -0.0081 0.0061 0.0161  
Z -0.0160 -0.0051 0.0028 0.0257 -0.0084 -0.0403  
AT. 46 H X -0.0155 0.0046 0.0030 0.0254 0.0062 0.0382

Y -0.0059 0.0018 0.0026 0.0081 0.0061 0.0161  
Z 0.0160 -0.0051 -0.0028 -0.0257 -0.0084 -0.0403  
AT. 47 H X -0.0058 -0.0064 -0.0193 0.0276 0.0192 -0.0148  
Y -0.0019 -0.0024 -0.0090 0.0106 0.0076 -0.0046  
Z 0.0049 0.0067 0.0219 -0.0275 -0.0207 0.0128  
AT. 48 H X 0.0058 -0.0064 0.0193 -0.0276 0.0192 -0.0148  
Y 0.0019 -0.0024 0.0090 -0.0106 0.0076 -0.0046  
Z -0.0049 0.0067 -0.0219 0.0275 -0.0207 0.0128  
AT. 49 C X -0.0040 -0.0019 -0.0022 0.0086 -0.0004 -0.0108  
Y -0.0057 0.0010 0.0171 -0.0013 -0.0151 -0.0155  
Z -0.0011 -0.0023 -0.0104 0.0092 0.0078 -0.0026  
AT. 50 C X 0.0040 -0.0019 0.0022 -0.0086 -0.0004 -0.0108  
Y 0.0057 0.0010 -0.0171 0.0013 -0.0151 -0.0155  
Z 0.0011 -0.0023 0.0104 -0.0092 0.0078 -0.0026  
AT. 51 C X 0.0010 -0.0004 -0.0043 0.0015 0.0044 0.0028  
Y 0.0015 -0.0006 -0.0064 0.0018 0.0060 0.0041  
Z 0.0011 -0.0002 -0.0038 0.0009 0.0041 0.0028  
AT. 52 C X -0.0010 -0.0004 0.0043 -0.0015 0.0044 0.0028  
Y -0.0015 -0.0006 0.0064 -0.0018 0.0060 0.0041  
Z -0.0011 -0.0002 0.0038 -0.0009 0.0041 0.0028  
AT. 53 H X -0.0004 0.0004 0.0046 -0.0020 -0.0034 -0.0013  
Y -0.0059 0.0093 0.0653 -0.0358 -0.0558 -0.0157  
Z -0.0052 0.0101 0.0654 -0.0377 -0.0554 -0.0132  
AT. 54 H X 0.0004 0.0004 -0.0046 0.0020 -0.0034 -0.0013  
Y 0.0059 0.0093 -0.0653 0.0358 -0.0558 -0.0157  
Z 0.0052 0.0101 -0.0654 0.0377 -0.0554 -0.0132  
AT. 55 H X -0.0007 0.0013 0.0108 -0.0066 -0.0097 -0.0012  
Y 0.0071 0.0000 -0.0144 -0.0045 0.0094 0.0172  
Z 0.0074 0.0014 -0.0061 -0.0116 0.0009 0.0176  
AT. 56 H X 0.0007 0.0013 -0.0108 0.0066 -0.0097 -0.0012  
Y -0.0071 0.0000 0.0144 0.0045 0.0094 0.0172  
Z -0.0074 0.0014 0.0061 0.0116 0.0009 0.0176

AT. 57 C X 0.0010 0.0001 -0.0014 -0.0010 0.0013 0.0026  
Y 0.0014 0.0002 -0.0028 -0.0009 0.0025 0.0039  
Z 0.0004 -0.0004 -0.0032 0.0021 0.0033 0.0007

AT. 58 C X -0.0010 0.0001 0.0014 0.0010 0.0013 0.0026  
Y -0.0014 0.0002 0.0028 0.0009 0.0025 0.0039  
Z -0.0004 -0.0004 0.0032 -0.0021 0.0033 0.0007

AT. 59 H X -0.0025 -0.0002 0.0010 0.0037 -0.0014 -0.0062  
Y 0.0002 0.0006 0.0060 -0.0051 -0.0060 0.0006  
Z -0.0033 0.0001 0.0112 -0.0017 -0.0110 -0.0091

AT. 60 H X 0.0025 -0.0002 -0.0010 -0.0037 -0.0014 -0.0062  
Y -0.0002 0.0006 -0.0060 0.0051 -0.0060 0.0006  
Z 0.0033 0.0001 -0.0112 0.0017 -0.0110 -0.0091

AT. 61 H X -0.0034 -0.0001 0.0104 -0.0010 -0.0106 -0.0090  
Y -0.0037 -0.0015 0.0050 0.0060 -0.0033 -0.0111  
Z -0.0006 0.0004 0.0029 -0.0019 -0.0038 -0.0009

AT. 62 H X 0.0034 -0.0001 -0.0104 0.0010 -0.0106 -0.0090  
Y 0.0037 -0.0015 -0.0050 -0.0060 -0.0033 -0.0111  
Z 0.0006 0.0004 -0.0029 0.0019 -0.0038 -0.0009

AT. 63 H X 0.0021 -0.0013 -0.0099 0.0043 0.0092 0.0053  
Y -0.0037 -0.0001 0.0073 0.0024 -0.0060 -0.0108  
Z 0.0030 0.0012 -0.0022 -0.0059 0.0015 0.0094

AT. 64 H X -0.0021 -0.0013 0.0099 -0.0043 0.0092 0.0053  
Y 0.0037 -0.0001 -0.0073 -0.0024 -0.0060 -0.0108  
Z -0.0030 0.0012 0.0022 0.0059 0.0015 0.0094

AT. 65 C X 0.0011 0.0006 0.0013 -0.0028 -0.0004 0.0029  
Y 0.0017 -0.0004 -0.0052 0.0005 0.0046 0.0047  
Z 0.0002 0.0008 0.0040 -0.0032 -0.0028 0.0006

AT. 66 C X -0.0011 0.0006 -0.0013 0.0028 -0.0004 0.0029  
Y -0.0017 -0.0004 0.0052 -0.0005 0.0046 0.0047  
Z -0.0002 0.0008 -0.0040 0.0032 -0.0028 0.0006

AT. 67 H X -0.0013 -0.0015 -0.0032 0.0051 0.0012 -0.0051  
Y -0.0016 0.0028 0.0170 -0.0092 -0.0111 -0.0033

Z 0.0048 -0.0005 -0.0131 0.0004 0.0105 0.0135  
AT. 68 H X 0.0013 -0.0015 0.0032 -0.0051 0.0012 -0.0051  
Y 0.0016 0.0028 -0.0170 0.0092 -0.0111 -0.0033  
Z -0.0048 -0.0005 0.0131 -0.0004 0.0105 0.0135  
AT. 69 H X -0.0043 0.0014 0.0149 -0.0027 -0.0126 -0.0106  
Y -0.0059 -0.0008 0.0057 0.0062 -0.0054 -0.0141  
Z -0.0005 -0.0020 -0.0100 0.0076 0.0089 -0.0011  
AT. 70 H X 0.0043 0.0014 -0.0149 0.0027 -0.0126 -0.0106  
Y 0.0059 -0.0008 -0.0057 -0.0062 -0.0054 -0.0141  
Z 0.0005 -0.0020 0.0100 -0.0076 0.0089 -0.0011  
AT. 71 H X -0.0008 -0.0026 -0.0144 0.0112 0.0102 -0.0005  
Y -0.0015 -0.0001 0.0036 0.0004 -0.0053 -0.0058  
Z -0.0050 -0.0014 0.0022 0.0074 -0.0065 -0.0147  
AT. 72 H X 0.0008 -0.0026 0.0144 -0.0112 0.0102 -0.0005  
Y 0.0015 -0.0001 -0.0036 -0.0004 -0.0053 -0.0058  
Z 0.0050 -0.0014 -0.0022 -0.0074 -0.0065 -0.0147  
AT. 73 C X 0.0025 -0.0007 -0.0094 0.0026 0.0099 0.0070  
Y 0.0020 0.0007 -0.0005 -0.0040 0.0000 0.0056  
Z 0.0003 0.0007 0.0023 -0.0021 -0.0022 0.0007  
AT. 74 C X -0.0025 -0.0007 0.0094 -0.0026 0.0099 0.0070  
Y -0.0020 0.0007 0.0005 0.0040 0.0000 0.0056  
Z -0.0003 0.0007 -0.0023 0.0021 -0.0022 0.0007  
AT. 75 H X -0.0072 0.0068 0.0502 -0.0273 -0.0485 -0.0177  
Y 0.0020 -0.0055 -0.0298 0.0209 0.0301 0.0039  
Z -0.0059 -0.0023 0.0038 0.0099 -0.0019 -0.0174  
AT. 76 H X 0.0072 0.0068 -0.0502 0.0273 -0.0485 -0.0177  
Y -0.0020 -0.0055 0.0298 -0.0209 0.0301 0.0039  
Z 0.0059 -0.0023 -0.0038 -0.0099 -0.0019 -0.0174  
AT. 77 H X -0.0011 0.0067 0.0419 -0.0290 -0.0392 -0.0047  
Y -0.0011 -0.0046 -0.0271 0.0227 0.0229 -0.0029  
Z 0.0060 -0.0013 -0.0198 0.0028 0.0212 0.0181  
AT. 78 H X 0.0011 0.0067 -0.0419 0.0290 -0.0392 -0.0047



Y 0.0011 -0.0046 0.0271 -0.0227 0.0229 -0.0029  
Z -0.0060 -0.0013 0.0198 -0.0028 0.0212 0.0181  
AT. 79 I X -0.0000 0.0000 -0.0000 -0.0000 -0.0000 0.0000  
Y 0.0000 -0.0000 -0.0000 -0.0000 -0.0000 0.0000  
Z 0.0000 -0.0000 0.0000 -0.0000 -0.0000 0.0000  
AT. 80 I X 0.0000 0.0000 0.0000 0.0000 -0.0000 0.0000  
Y -0.0000 -0.0000 0.0000 0.0000 -0.0000 0.0000  
Z -0.0000 -0.0000 -0.0000 0.0000 -0.0000 0.0000  
AT. 81 I X 0.0000 -0.0000 -0.0000 -0.0000 -0.0000 0.0000  
Y 0.0000 -0.0000 -0.0000 -0.0000 -0.0000 0.0000  
Z -0.0000 0.0000 -0.0000 -0.0000 -0.0000 0.0000  
AT. 82 I X -0.0000 -0.0000 0.0000 0.0000 -0.0000 0.0000  
Y -0.0000 -0.0000 0.0000 0.0000 -0.0000 0.0000  
Z 0.0000 0.0000 0.0000 0.0000 -0.0000 0.0000  
AT. 83 O X -0.0025 0.0024 -0.0005 -0.0003 0.0004 -0.0005  
Y -0.0004 0.0004 -0.0000 0.0000 0.0001 -0.0001  
Z -0.0010 0.0014 -0.0009 -0.0015 -0.0008 0.0009  
AT. 84 O X 0.0025 0.0024 0.0005 0.0003 0.0004 -0.0005  
Y 0.0004 0.0004 0.0000 -0.0000 0.0001 -0.0001  
Z 0.0010 0.0014 0.0009 0.0015 -0.0008 0.0009  
AT. 85 O X -0.0018 0.0013 0.0004 0.0011 0.0011 -0.0014  
Y -0.0011 0.0012 -0.0002 -0.0002 0.0000 -0.0001  
Z 0.0005 -0.0008 0.0005 0.0010 0.0006 -0.0005  
AT. 86 O X 0.0018 0.0013 -0.0004 -0.0011 0.0011 -0.0014  
Y 0.0011 0.0012 0.0002 0.0002 0.0000 -0.0001  
Z -0.0005 -0.0008 -0.0005 -0.0010 0.0006 -0.0005  
AT. 87 N X 0.0076 -0.0104 0.0052 0.0087 0.0035 -0.0047  
Y 0.0034 -0.0038 0.0012 0.0014 -0.0001 -0.0002  
Z 0.0028 -0.0023 0.0004 -0.0003 -0.0008 0.0007  
AT. 88 N X -0.0076 -0.0104 -0.0052 -0.0087 0.0035 -0.0047  
Y -0.0034 -0.0038 -0.0012 -0.0014 -0.0001 -0.0002  
Z -0.0028 -0.0023 -0.0004 0.0003 -0.0008 0.0007

AT. 89 N X 0.0056 -0.0075 0.0038 0.0063 0.0029 -0.0031  
Y 0.0048 -0.0039 -0.0005 -0.0021 -0.0029 0.0030  
Z -0.0010 0.0011 0.0000 -0.0000 0.0005 -0.0005

AT. 90 N X -0.0056 -0.0075 -0.0038 -0.0063 0.0029 -0.0031  
Y -0.0048 -0.0039 0.0005 0.0021 -0.0029 0.0030  
Z 0.0010 0.0011 -0.0000 0.0000 0.0005 -0.0005

AT. 91 C X 0.0048 -0.0034 -0.0008 -0.0032 -0.0035 0.0038  
Y 0.0022 -0.0015 -0.0005 -0.0017 -0.0018 0.0019  
Z -0.0085 0.0054 0.0019 0.0067 0.0067 -0.0071

AT. 92 C X -0.0048 -0.0034 0.0008 0.0032 -0.0035 0.0038  
Y -0.0022 -0.0015 0.0005 0.0017 -0.0018 0.0019  
Z 0.0085 0.0054 -0.0019 -0.0067 0.0067 -0.0071

AT. 93 C X -0.0018 0.0013 0.0005 0.0014 0.0016 -0.0016  
Y -0.0012 0.0011 -0.0001 0.0001 0.0005 -0.0005  
Z 0.0034 -0.0028 -0.0002 -0.0014 -0.0019 0.0019

AT. 94 C X 0.0018 0.0013 -0.0005 -0.0014 0.0016 -0.0016  
Y 0.0012 0.0011 0.0001 -0.0001 0.0005 -0.0005  
Z -0.0034 -0.0028 0.0002 0.0014 -0.0019 0.0019

AT. 95 H X 0.0051 -0.0036 -0.0014 -0.0039 -0.0038 0.0039  
Y -0.0014 -0.0000 0.0012 0.0029 0.0021 -0.0024  
Z -0.0042 0.0045 -0.0001 0.0003 0.0017 -0.0014

AT. 96 H X -0.0051 -0.0036 0.0014 0.0039 -0.0038 0.0039  
Y 0.0014 -0.0000 -0.0012 -0.0029 0.0021 -0.0024  
Z 0.0042 0.0045 0.0001 -0.0003 0.0017 -0.0014

AT. 97 H X -0.0114 0.0076 0.0012 0.0072 0.0072 -0.0081  
Y -0.0012 -0.0008 0.0021 0.0047 0.0032 -0.0035  
Z 0.0061 -0.0050 0.0001 -0.0020 -0.0029 0.0031

AT. 98 H X 0.0114 0.0076 -0.0012 -0.0072 0.0072 -0.0081  
Y 0.0012 -0.0008 -0.0021 -0.0047 0.0032 -0.0035  
Z -0.0061 -0.0050 -0.0001 0.0020 -0.0029 0.0031

AT. 99 C X 0.0035 -0.0015 -0.0023 -0.0055 -0.0046 0.0054  
Y -0.0022 0.0011 0.0011 0.0027 0.0026 -0.0025

Z 0.0066 -0.0032 -0.0035 -0.0087 -0.0078 0.0081  
AT.100 C X -0.0035 -0.0015 0.0023 0.0055 -0.0046 0.0054  
Y 0.0022 0.0011 -0.0011 -0.0027 0.0026 -0.0025  
Z -0.0066 -0.0032 0.0035 0.0087 -0.0078 0.0081  
AT.101 C X -0.0017 0.0011 0.0009 0.0020 0.0021 -0.0025  
Y 0.0006 -0.0002 -0.0004 -0.0009 -0.0007 0.0008  
Z -0.0029 0.0019 0.0008 0.0024 0.0023 -0.0024  
AT.102 C X 0.0017 0.0011 -0.0009 -0.0020 0.0021 -0.0025  
Y -0.0006 -0.0002 0.0004 0.0009 -0.0007 0.0008  
Z 0.0029 0.0019 -0.0008 -0.0024 0.0023 -0.0024  
AT.103 H X 0.0059 -0.0031 -0.0034 -0.0070 -0.0062 0.0076  
Y -0.0028 0.0014 0.0018 0.0035 0.0032 -0.0039  
Z 0.0048 -0.0037 0.0005 -0.0006 -0.0012 0.0006  
AT.104 H X -0.0059 -0.0031 0.0034 0.0070 -0.0062 0.0076  
Y 0.0028 0.0014 -0.0018 -0.0035 0.0032 -0.0039  
Z -0.0048 -0.0037 -0.0005 0.0006 -0.0012 0.0006  
AT.105 H X -0.0086 0.0028 0.0042 0.0117 0.0068 -0.0053  
Y 0.0034 -0.0040 0.0023 0.0033 0.0022 -0.0035  
Z -0.0032 0.0008 0.0025 0.0060 0.0045 -0.0048  
AT.106 H X 0.0086 0.0028 -0.0042 -0.0117 0.0068 -0.0053  
Y -0.0034 -0.0040 -0.0023 -0.0033 0.0022 -0.0035  
Z 0.0032 0.0008 -0.0025 -0.0060 0.0045 -0.0048  
AT.107 C X 0.0003 0.0002 -0.0008 -0.0019 -0.0018 0.0016  
Y 0.0009 0.0001 -0.0012 -0.0024 -0.0018 0.0020  
Z 0.0001 -0.0001 -0.0002 -0.0001 -0.0001 0.0001  
AT.108 C X -0.0003 0.0002 0.0008 0.0019 -0.0018 0.0016  
Y -0.0009 0.0001 0.0012 0.0024 -0.0018 0.0020  
Z -0.0001 -0.0001 0.0002 0.0001 -0.0001 0.0001  
AT.109 H X -0.0308 0.0219 0.0062 0.0244 0.0275 -0.0267  
Y 0.0148 -0.0097 -0.0037 -0.0124 -0.0126 0.0134  
Z 0.0345 -0.0236 -0.0074 -0.0275 -0.0295 0.0303  
AT.110 H X 0.0308 0.0219 -0.0062 -0.0244 0.0275 -0.0267

Y -0.0148 -0.0097 0.0037 0.0124 -0.0126 0.0134  
Z -0.0345 -0.0236 0.0074 0.0275 -0.0295 0.0303  
AT. 111 H X -0.0206 0.0321 -0.0182 -0.0327 -0.0146 0.0195  
Y 0.0078 -0.0121 0.0062 0.0113 0.0042 -0.0061  
Z 0.0221 -0.0333 0.0176 0.0313 0.0128 -0.0180  
AT. 112 H X 0.0206 0.0321 0.0182 0.0327 -0.0146 0.0195  
Y -0.0078 -0.0121 -0.0062 -0.0113 0.0042 -0.0061  
Z -0.0221 -0.0333 -0.0176 -0.0313 0.0128 -0.0180  
AT. 113 C X 0.0040 -0.0019 -0.0013 -0.0045 -0.0037 0.0041  
Y -0.0161 0.0121 0.0025 0.0092 0.0110 -0.0113  
Z -0.0110 0.0130 -0.0039 -0.0059 0.0001 0.0014  
AT. 114 C X -0.0040 -0.0019 0.0013 0.0045 -0.0037 0.0041  
Y 0.0161 0.0121 -0.0025 -0.0092 0.0110 -0.0113  
Z 0.0110 0.0130 0.0039 0.0059 0.0001 0.0014  
AT. 115 C X -0.0035 0.0033 -0.0007 -0.0004 0.0006 -0.0006  
Y 0.0040 -0.0033 -0.0002 -0.0016 -0.0021 0.0025  
Z -0.0001 -0.0007 0.0008 0.0020 0.0011 -0.0016  
AT. 116 C X 0.0035 0.0033 0.0007 0.0004 0.0006 -0.0006  
Y -0.0040 -0.0033 0.0002 0.0016 -0.0021 0.0025  
Z 0.0001 -0.0007 -0.0008 -0.0020 0.0011 -0.0016  
AT. 117 H X -0.0180 0.0178 -0.0026 -0.0006 0.0046 -0.0053  
Y -0.0483 0.0503 -0.0091 -0.0079 0.0100 -0.0091  
Z 0.0274 -0.0284 0.0048 0.0035 -0.0061 0.0061  
AT. 118 H X 0.0180 0.0178 0.0026 0.0006 0.0046 -0.0053  
Y 0.0483 0.0503 0.0091 0.0079 0.0100 -0.0091  
Z -0.0274 -0.0284 -0.0048 -0.0035 -0.0061 0.0061  
AT. 119 H X 0.0198 -0.0167 -0.0013 -0.0073 -0.0111 0.0104  
Y 0.0359 -0.0295 -0.0039 -0.0157 -0.0224 0.0203  
Z -0.0212 0.0167 0.0036 0.0117 0.0152 -0.0136  
AT. 120 H X -0.0198 -0.0167 0.0013 0.0073 -0.0111 0.0104  
Y -0.0359 -0.0295 0.0039 0.0157 -0.0224 0.0203  
Z 0.0212 0.0167 -0.0036 -0.0117 0.0152 -0.0136

AT.121 C X 0.0002 0.0003 -0.0005 -0.0012 -0.0008 0.0011  
Y 0.0009 0.0005 -0.0016 -0.0034 -0.0023 0.0026  
Z -0.0007 0.0014 -0.0011 -0.0017 -0.0010 0.0016

AT.122 C X -0.0002 0.0003 0.0005 0.0012 -0.0008 0.0011  
Y -0.0009 0.0005 0.0016 0.0034 -0.0023 0.0026  
Z 0.0007 0.0014 0.0011 0.0017 -0.0010 0.0016

AT.123 H X -0.0096 -0.0100 0.0229 0.0492 0.0342 -0.0407  
Y 0.0112 0.0018 -0.0144 -0.0320 -0.0241 0.0284  
Z -0.0125 -0.0030 0.0173 0.0386 0.0288 -0.0337

AT.124 H X 0.0096 -0.0100 -0.0229 -0.0492 0.0342 -0.0407  
Y -0.0112 0.0018 0.0144 0.0320 -0.0241 0.0284  
Z 0.0125 -0.0030 -0.0173 -0.0386 0.0288 -0.0337

AT.125 H X -0.0229 0.0337 -0.0193 -0.0333 -0.0159 0.0177  
Y 0.0181 -0.0283 0.0174 0.0296 0.0140 -0.0173  
Z -0.0201 0.0274 -0.0142 -0.0238 -0.0109 0.0113

AT.126 H X 0.0229 0.0337 0.0193 0.0333 -0.0159 0.0177  
Y -0.0181 -0.0283 -0.0174 -0.0296 0.0140 -0.0173  
Z 0.0201 0.0274 0.0142 0.0238 -0.0109 0.0113

AT.127 C X -0.0040 0.0076 -0.0062 -0.0110 -0.0066 0.0076  
Y -0.0126 0.0066 0.0047 0.0128 0.0115 -0.0131  
Z 0.0100 -0.0146 0.0081 0.0134 0.0062 -0.0075

AT.128 C X 0.0040 0.0076 0.0062 0.0110 -0.0066 0.0076  
Y 0.0126 0.0066 -0.0047 -0.0128 0.0115 -0.0131  
Z -0.0100 -0.0146 -0.0081 -0.0134 0.0062 -0.0075

AT.129 C X -0.0021 0.0019 -0.0002 0.0001 0.0007 -0.0006  
Y 0.0055 -0.0044 -0.0003 -0.0020 -0.0030 0.0029  
Z 0.0035 -0.0026 -0.0007 -0.0022 -0.0028 0.0027

AT.130 C X 0.0021 0.0019 0.0002 -0.0001 0.0007 -0.0006  
Y -0.0055 -0.0044 0.0003 0.0020 -0.0030 0.0029  
Z -0.0035 -0.0026 0.0007 0.0022 -0.0028 0.0027

AT.131 H X -0.0258 0.0286 -0.0086 -0.0107 0.0007 0.0008  
Y -0.0553 0.0603 -0.0184 -0.0214 0.0019 0.0024

Z -0.0558 0.0623 -0.0200 -0.0253 -0.0004 0.0043  
AT. 132 H X 0.0258 0.0286 0.0086 0.0107 0.0007 0.0008  
Y 0.0553 0.0603 0.0184 0.0214 0.0019 0.0024  
Z 0.0558 0.0623 0.0200 0.0253 -0.0004 0.0043  
AT. 133 H X 0.0171 -0.0158 0.0022 0.0000 -0.0041 0.0044  
Y 0.0092 -0.0044 -0.0035 -0.0093 -0.0068 0.0098  
Z 0.0028 0.0035 -0.0065 -0.0135 -0.0070 0.0116  
AT. 134 H X -0.0171 -0.0158 -0.0022 -0.0000 -0.0041 0.0044  
Y -0.0092 -0.0044 0.0035 0.0093 -0.0068 0.0098  
Z -0.0028 0.0035 0.0065 0.0135 -0.0070 0.0116  
AT. 135 C X -0.0006 0.0000 0.0003 0.0010 0.0008 -0.0007  
Y 0.0049 -0.0036 -0.0008 -0.0028 -0.0033 0.0034  
Z 0.0037 -0.0043 0.0013 0.0019 -0.0002 -0.0005  
AT. 136 C X 0.0006 0.0000 -0.0003 -0.0010 0.0008 -0.0007  
Y -0.0049 -0.0036 0.0008 0.0028 -0.0033 0.0034  
Z -0.0037 -0.0043 -0.0013 -0.0019 -0.0002 -0.0005  
AT. 137 H X 0.0000 0.0027 -0.0026 -0.0052 -0.0031 0.0030  
Y -0.0070 0.0079 -0.0020 -0.0031 0.0004 0.0006  
Z -0.0157 0.0138 -0.0003 0.0023 0.0065 -0.0054  
AT. 138 H X -0.0000 0.0027 0.0026 0.0052 -0.0031 0.0030  
Y 0.0070 0.0079 0.0020 0.0031 0.0004 0.0006  
Z 0.0157 0.0138 0.0003 -0.0023 0.0065 -0.0054  
AT. 139 H X 0.0091 -0.0091 0.0018 0.0013 -0.0032 0.0017  
Y -0.0135 0.0087 0.0032 0.0104 0.0110 -0.0115  
Z -0.0052 0.0058 -0.0021 -0.0029 0.0012 0.0005  
AT. 140 H X -0.0091 -0.0091 -0.0018 -0.0013 -0.0032 0.0017  
Y 0.0135 0.0087 -0.0032 -0.0104 0.0110 -0.0115  
Z 0.0052 0.0058 0.0021 0.0029 0.0012 0.0005  
AT. 141 H X -0.0119 0.0128 -0.0025 -0.0031 0.0010 -0.0008  
Y -0.0058 0.0031 0.0020 0.0066 0.0056 -0.0067  
Z 0.0080 -0.0040 -0.0029 -0.0093 -0.0085 0.0092  
AT. 142 H X 0.0119 0.0128 0.0025 0.0031 0.0010 -0.0008

Y 0.0058 0.0031 -0.0020 -0.0066 0.0056 -0.0067  
Z -0.0080 -0.0040 0.0029 0.0093 -0.0085 0.0092  
AT. 143 C X 0.0025 -0.0034 0.0022 0.0036 0.0018 -0.0021  
Y 0.0040 -0.0023 -0.0013 -0.0037 -0.0035 0.0040  
Z -0.0034 0.0052 -0.0025 -0.0040 -0.0019 0.0023  
AT. 144 C X -0.0025 -0.0034 -0.0022 -0.0036 0.0018 -0.0021  
Y -0.0040 -0.0023 0.0013 0.0037 -0.0035 0.0040  
Z 0.0034 0.0052 0.0025 0.0040 -0.0019 0.0023  
AT. 145 H X -0.0087 0.0121 -0.0080 -0.0131 -0.0069 0.0076  
Y -0.0114 0.0139 -0.0037 -0.0043 -0.0010 0.0008  
Z 0.0103 -0.0090 -0.0015 -0.0059 -0.0057 0.0070  
AT. 146 H X 0.0087 0.0121 0.0080 0.0131 -0.0069 0.0076  
Y 0.0114 0.0139 0.0037 0.0043 -0.0010 0.0008  
Z -0.0103 -0.0090 0.0015 0.0059 -0.0057 0.0070  
AT. 147 H X 0.0113 -0.0123 0.0032 0.0033 -0.0005 0.0002  
Y -0.0082 0.0011 0.0072 0.0168 0.0124 -0.0151  
Z 0.0049 -0.0082 0.0046 0.0080 0.0038 -0.0053  
AT. 148 H X -0.0113 -0.0123 -0.0032 -0.0033 -0.0005 0.0002  
Y 0.0082 0.0011 -0.0072 -0.0168 0.0124 -0.0151  
Z -0.0049 -0.0082 -0.0046 -0.0080 0.0038 -0.0053  
AT. 149 H X -0.0159 0.0183 -0.0065 -0.0082 -0.0005 0.0013  
Y -0.0019 -0.0020 0.0029 0.0066 0.0060 -0.0066  
Z -0.0021 -0.0068 0.0090 0.0188 0.0145 -0.0164  
AT. 150 H X 0.0159 0.0183 0.0065 0.0082 -0.0005 0.0013  
Y 0.0019 -0.0020 -0.0029 -0.0066 0.0060 -0.0066  
Z 0.0021 -0.0068 -0.0090 -0.0188 0.0145 -0.0164  
AT. 151 C X -0.0116 0.0115 -0.0018 -0.0004 0.0036 -0.0031  
Y 0.0035 -0.0008 -0.0027 -0.0063 -0.0049 0.0056  
Z -0.0008 0.0015 -0.0013 -0.0021 -0.0014 0.0013  
AT. 152 C X 0.0116 0.0115 0.0018 0.0004 0.0036 -0.0031  
Y -0.0035 -0.0008 0.0027 0.0063 -0.0049 0.0056  
Z 0.0008 0.0015 0.0013 0.0021 -0.0014 0.0013

AT. 153 H X 0.0516 -0.0549 0.0141 0.0150 -0.0058 0.0033  
Y 0.0129 -0.0150 0.0053 0.0070 0.0008 -0.0015  
Z -0.0120 0.0067 0.0043 0.0117 0.0110 -0.0118

AT. 154 H X -0.0516 -0.0549 -0.0141 -0.0150 -0.0058 0.0033  
Y -0.0129 -0.0150 -0.0053 -0.0070 0.0008 -0.0015  
Z 0.0120 0.0067 -0.0043 -0.0117 0.0110 -0.0118

AT. 155 H X 0.0642 -0.0772 0.0269 0.0365 0.0021 -0.0088  
Y 0.0128 -0.0195 0.0102 0.0171 0.0065 -0.0092  
Z 0.0152 -0.0098 -0.0042 -0.0123 -0.0128 0.0137

AT. 156 H X -0.0642 -0.0772 -0.0269 -0.0365 0.0021 -0.0088  
Y -0.0128 -0.0195 -0.0102 -0.0171 0.0065 -0.0092  
Z -0.0152 -0.0098 0.0042 0.0123 -0.0128 0.0137

AT. 157 O X -0.0001 0.0001 -0.0000 0.0001 0.0000 -0.0000  
Y 0.0000 0.0000 -0.0002 -0.0001 0.0001 0.0001  
Z -0.0001 0.0000 -0.0000 0.0001 0.0001 0.0002

AT. 158 O X 0.0001 0.0001 0.0000 -0.0001 0.0000 -0.0000  
Y -0.0000 0.0000 0.0002 0.0001 0.0001 0.0001  
Z 0.0001 0.0000 0.0000 -0.0001 0.0001 0.0002

AT. 159 O X 0.0001 -0.0000 -0.0001 -0.0001 0.0000 -0.0001  
Y 0.0000 0.0001 0.0001 -0.0000 -0.0001 -0.0001  
Z 0.0001 0.0000 -0.0000 -0.0001 -0.0002 -0.0002

AT. 160 O X -0.0001 -0.0000 0.0001 0.0001 0.0000 -0.0001  
Y -0.0000 0.0001 -0.0001 0.0000 -0.0001 -0.0001  
Z -0.0001 0.0000 0.0000 0.0001 -0.0002 -0.0002

AT. 161 H X 0.0010 -0.0002 0.0026 -0.0023 -0.0030 -0.0013  
Y -0.0003 -0.0003 0.0002 0.0008 0.0001 -0.0008  
Z 0.0004 0.0005 0.0006 -0.0019 -0.0010 0.0014

AT. 162 H X -0.0010 -0.0002 -0.0026 0.0023 -0.0030 -0.0013  
Y 0.0003 -0.0003 -0.0002 -0.0008 0.0001 -0.0008  
Z -0.0004 0.0005 -0.0006 0.0019 -0.0010 0.0014

AT. 163 H X -0.0005 0.0000 0.0002 0.0013 0.0006 0.0028  
Y -0.0012 -0.0012 0.0004 0.0005 0.0002 0.0008



Z -0.0003 -0.0002 0.0004 -0.0002 -0.0001 -0.0010  
AT.164 H X 0.0005 0.0000 -0.0002 -0.0013 0.0006 0.0028  
Y 0.0012 -0.0012 -0.0004 -0.0005 0.0002 0.0008  
Z 0.0003 -0.0002 -0.0004 0.0002 -0.0001 -0.0010  
AT.165 O X 0.0001 -0.0002 0.0002 0.0002 0.0000 -0.0001  
Y -0.0002 0.0000 0.0001 0.0002 0.0001 -0.0000  
Z 0.0002 0.0001 -0.0002 -0.0004 -0.0002 0.0000  
AT.166 O X -0.0001 -0.0002 -0.0002 -0.0002 0.0000 -0.0001  
Y 0.0002 0.0000 -0.0001 -0.0002 0.0001 -0.0000  
Z -0.0002 0.0001 0.0002 0.0004 -0.0002 0.0000  
AT.167 H X 0.0001 0.0010 -0.0015 -0.0019 0.0003 0.0003  
Y 0.0002 -0.0011 0.0012 0.0013 -0.0012 0.0004  
Z -0.0013 -0.0024 0.0049 0.0072 0.0025 -0.0036  
AT.168 H X -0.0001 0.0010 0.0015 0.0019 0.0003 0.0003  
Y -0.0002 -0.0011 -0.0012 -0.0013 -0.0012 0.0004  
Z 0.0013 -0.0024 -0.0049 -0.0072 0.0025 -0.0036  
AT.169 O X 0.0000 0.0001 -0.0000 -0.0003 0.0001 0.0001  
Y 0.0001 0.0001 -0.0002 -0.0003 -0.0000 -0.0001  
Z 0.0002 0.0002 -0.0002 -0.0005 0.0000 -0.0001  
AT.170 O X -0.0000 0.0001 0.0000 0.0003 0.0001 0.0001  
Y -0.0001 0.0001 0.0002 0.0003 -0.0000 -0.0001  
Z -0.0002 0.0002 0.0002 0.0005 0.0000 -0.0001  
AT.171 H X -0.0009 -0.0001 -0.0004 0.0024 -0.0036 0.0018  
Y -0.0021 -0.0001 0.0007 0.0024 -0.0017 0.0022  
Z -0.0046 -0.0002 0.0023 0.0039 -0.0007 0.0036  
AT.172 H X 0.0009 -0.0001 0.0004 -0.0024 -0.0036 0.0018  
Y 0.0021 -0.0001 -0.0007 -0.0024 -0.0017 0.0022  
Z 0.0046 -0.0002 -0.0023 -0.0039 -0.0007 0.0036

FREQ(CM\*\*-1) 1290.16 1290.65 1296.90 1296.98 1301.31 1301.33

AT. 11 X 0.0000 0.0000 0.0000 -0.0000 -0.0000 -0.0000

Y 0.0000 0.0000 0.0000 0.0000 0.0000 0.0000  
Z 0.0000 0.0000 -0.0000 -0.0000 -0.0000 -0.0000  
AT. 2 I X 0.0000 -0.0000 0.0000 0.0000 0.0000 -0.0000  
Y 0.0000 -0.0000 0.0000 -0.0000 -0.0000 0.0000  
Z 0.0000 -0.0000 -0.0000 0.0000 0.0000 -0.0000  
AT. 3 I X -0.0000 -0.0000 0.0000 0.0000 -0.0000 -0.0000  
Y -0.0000 -0.0000 -0.0000 -0.0000 0.0000 0.0000  
Z 0.0000 0.0000 -0.0000 -0.0000 0.0000 0.0000  
AT. 4 I X -0.0000 0.0000 0.0000 -0.0000 0.0000 -0.0000  
Y -0.0000 0.0000 -0.0000 0.0000 -0.0000 0.0000  
Z 0.0000 -0.0000 -0.0000 0.0000 -0.0000 0.0000  
AT. 5 O X 0.0002 0.0002 0.0002 0.0001 -0.0005 -0.0001  
Y -0.0003 -0.0003 -0.0001 -0.0000 0.0004 0.0000  
Z 0.0005 0.0005 0.0000 -0.0000 -0.0001 0.0000  
AT. 6 O X 0.0002 -0.0002 0.0002 -0.0001 0.0005 -0.0001  
Y -0.0003 0.0003 -0.0001 0.0000 -0.0004 0.0000  
Z 0.0005 -0.0005 0.0000 0.0000 0.0001 0.0000  
AT. 7 O X -0.0021 -0.0021 0.0002 0.0002 0.0003 0.0001  
Y 0.0022 0.0021 -0.0001 -0.0002 -0.0002 -0.0001  
Z -0.0017 -0.0017 0.0001 0.0001 -0.0001 0.0001  
AT. 8 O X -0.0021 0.0021 0.0002 -0.0002 -0.0003 0.0001  
Y 0.0022 -0.0021 -0.0001 0.0002 0.0002 -0.0001  
Z -0.0017 0.0017 0.0001 -0.0001 0.0001 0.0001  
AT. 9 N X 0.0014 0.0014 0.0006 0.0001 -0.0016 -0.0000  
Y 0.0003 0.0002 -0.0004 -0.0002 0.0005 -0.0002  
Z 0.0005 0.0003 -0.0000 -0.0001 -0.0005 -0.0003  
AT. 10 N X 0.0014 -0.0014 0.0006 -0.0001 0.0016 -0.0000  
Y 0.0003 -0.0002 -0.0004 0.0002 -0.0005 -0.0002  
Z 0.0005 -0.0003 -0.0000 0.0001 0.0005 -0.0003  
AT. 11 N X 0.0107 0.0108 -0.0006 -0.0004 0.0008 -0.0005  
Y -0.0086 -0.0086 0.0003 0.0004 0.0012 0.0010  
Z -0.0007 -0.0007 -0.0000 -0.0001 -0.0006 -0.0002

AT. 12 N X 0.0107 -0.0108 -0.0006 0.0004 -0.0008 -0.0005  
Y -0.0086 0.0086 0.0003 -0.0004 -0.0012 0.0010  
Z -0.0007 0.0007 -0.0000 0.0001 0.0006 -0.0002

AT. 13 C X -0.0025 -0.0023 -0.0006 -0.0002 0.0021 0.0003  
Y 0.0027 0.0024 0.0006 0.0002 -0.0021 -0.0003  
Z -0.0042 -0.0038 -0.0007 -0.0001 0.0026 0.0003

AT. 14 C X -0.0025 0.0023 -0.0006 0.0002 -0.0021 0.0003  
Y 0.0027 -0.0024 0.0006 -0.0002 0.0021 -0.0003  
Z -0.0042 0.0038 -0.0007 0.0001 -0.0026 0.0003

AT. 15 C X 0.0013 0.0012 0.0003 0.0001 -0.0006 -0.0001  
Y -0.0010 -0.0009 -0.0001 -0.0000 0.0006 0.0001  
Z 0.0013 0.0012 0.0002 0.0001 -0.0007 -0.0001

AT. 16 C X 0.0013 -0.0012 0.0003 -0.0001 0.0006 -0.0001  
Y -0.0010 0.0009 -0.0001 0.0000 -0.0006 0.0001  
Z 0.0013 -0.0012 0.0002 -0.0001 0.0007 -0.0001

AT. 17 H X -0.0041 -0.0038 -0.0013 -0.0007 0.0014 -0.0004  
Y -0.0008 -0.0006 -0.0006 -0.0004 0.0009 -0.0000  
Z -0.0014 -0.0016 0.0001 0.0001 -0.0000 0.0000

AT. 18 H X -0.0041 0.0038 -0.0013 0.0007 -0.0014 -0.0004  
Y -0.0008 0.0006 -0.0006 0.0004 -0.0009 -0.0000  
Z -0.0014 0.0016 0.0001 -0.0001 0.0000 0.0000

AT. 19 H X 0.0027 0.0020 0.0004 0.0000 -0.0024 0.0000  
Y -0.0029 -0.0023 -0.0014 -0.0006 0.0028 0.0001  
Z 0.0011 0.0010 -0.0002 -0.0002 -0.0004 -0.0001

AT. 20 H X 0.0027 -0.0020 0.0004 -0.0000 0.0024 0.0000  
Y -0.0029 0.0023 -0.0014 0.0006 -0.0028 0.0001  
Z 0.0011 -0.0010 -0.0002 0.0002 0.0004 -0.0001

AT. 21 C X 0.0006 0.0006 -0.0002 -0.0003 -0.0010 -0.0002  
Y -0.0005 -0.0005 0.0001 0.0001 -0.0003 -0.0002  
Z 0.0012 0.0011 0.0001 0.0004 0.0018 0.0004

AT. 22 C X 0.0006 -0.0006 -0.0002 0.0003 0.0010 -0.0002  
Y -0.0005 0.0005 0.0001 -0.0001 0.0003 -0.0002

Z 0.0012 -0.0011 0.0001 -0.0004 -0.0018 0.0004  
AT. 23 C X 0.0006 0.0006 0.0001 0.0001 0.0007 0.0004  
Y 0.0002 0.0002 0.0001 0.0001 -0.0001 -0.0001  
Z 0.0010 0.0009 -0.0000 -0.0002 -0.0007 -0.0002  
AT. 24 C X 0.0006 -0.0006 0.0001 -0.0001 -0.0007 0.0004  
Y 0.0002 -0.0002 0.0001 -0.0001 0.0001 -0.0001  
Z 0.0010 -0.0009 -0.0000 0.0002 0.0007 -0.0002  
AT. 25 H X -0.0015 -0.0015 0.0001 0.0003 -0.0026 -0.0022  
Y 0.0004 0.0002 -0.0000 -0.0000 -0.0009 -0.0006  
Z -0.0050 -0.0042 0.0007 0.0010 0.0013 0.0005  
AT. 26 H X -0.0015 0.0015 0.0001 -0.0003 0.0026 -0.0022  
Y 0.0004 -0.0002 -0.0000 0.0000 0.0009 -0.0006  
Z -0.0050 0.0042 0.0007 -0.0010 -0.0013 0.0005  
AT. 27 H X -0.0030 -0.0031 -0.0006 0.0000 -0.0005 -0.0011  
Y -0.0052 -0.0046 0.0003 0.0005 0.0006 0.0005  
Z -0.0012 -0.0009 0.0002 0.0001 -0.0002 0.0003  
AT. 28 H X -0.0030 0.0031 -0.0006 -0.0000 0.0005 -0.0011  
Y -0.0052 0.0046 0.0003 -0.0005 -0.0006 0.0005  
Z -0.0012 0.0009 0.0002 -0.0001 0.0002 0.0003  
AT. 29 C X -0.0007 -0.0007 0.0007 0.0005 0.0006 0.0014  
Y 0.0021 0.0023 0.0002 0.0002 0.0008 0.0009  
Z 0.0021 0.0022 0.0004 0.0003 0.0016 0.0018  
AT. 30 C X -0.0007 0.0007 0.0007 -0.0005 -0.0006 0.0014  
Y 0.0021 -0.0023 0.0002 -0.0002 -0.0008 0.0009  
Z 0.0021 -0.0022 0.0004 -0.0003 -0.0016 0.0018  
AT. 31 H X 0.0137 0.0136 -0.0015 -0.0022 -0.0158 -0.0133  
Y -0.0012 -0.0012 0.0002 0.0002 -0.0018 -0.0019  
Z 0.0067 0.0066 -0.0009 -0.0013 -0.0129 -0.0117  
AT. 32 H X 0.0137 -0.0136 -0.0015 0.0022 0.0158 -0.0133  
Y -0.0012 0.0012 0.0002 -0.0002 0.0018 -0.0019  
Z 0.0067 -0.0066 -0.0009 0.0013 0.0129 -0.0117  
AT. 33 H X 0.0040 0.0037 -0.0058 -0.0022 0.0147 0.0006

Y 0.0027 0.0027 -0.0006 -0.0002 0.0008 -0.0008  
Z 0.0049 0.0048 -0.0037 -0.0014 0.0108 0.0019  
AT. 34 H X 0.0040 -0.0037 -0.0058 0.0022 -0.0147 0.0006  
Y 0.0027 -0.0027 -0.0006 0.0002 -0.0008 -0.0008  
Z 0.0049 -0.0048 -0.0037 0.0014 -0.0108 0.0019  
AT. 35 C X -0.0031 -0.0034 -0.0005 -0.0002 0.0021 0.0009  
Y -0.0119 -0.0122 -0.0002 -0.0003 -0.0025 -0.0016  
Z -0.0041 -0.0042 0.0009 -0.0001 -0.0074 -0.0035  
AT. 36 C X -0.0031 0.0034 -0.0005 0.0002 -0.0021 0.0009  
Y -0.0119 0.0122 -0.0002 0.0003 0.0025 -0.0016  
Z -0.0041 0.0042 0.0009 0.0001 0.0074 -0.0035  
AT. 37 C X -0.0040 -0.0040 0.0004 0.0003 -0.0007 0.0001  
Y -0.0052 -0.0052 0.0008 0.0005 -0.0011 -0.0000  
Z 0.0063 0.0064 -0.0006 -0.0003 0.0023 0.0009  
AT. 38 C X -0.0040 0.0040 0.0004 -0.0003 0.0007 0.0001  
Y -0.0052 0.0052 0.0008 -0.0005 0.0011 -0.0000  
Z 0.0063 -0.0064 -0.0006 0.0003 -0.0023 0.0009  
AT. 39 H X -0.0030 -0.0032 -0.0000 0.0000 0.0004 -0.0001  
Y 0.0422 0.0425 -0.0034 -0.0044 -0.0122 -0.0101  
Z -0.0150 -0.0152 0.0010 0.0017 0.0075 0.0050  
AT. 40 H X -0.0030 0.0032 -0.0000 -0.0000 -0.0004 -0.0001  
Y 0.0422 -0.0425 -0.0034 0.0044 0.0122 -0.0101  
Z -0.0150 0.0152 0.0010 -0.0017 -0.0075 0.0050  
AT. 41 H X -0.0038 -0.0041 0.0000 -0.0004 -0.0026 -0.0015  
Y 0.0774 0.0788 -0.0045 -0.0017 0.0215 0.0088  
Z -0.0586 -0.0595 0.0039 0.0020 -0.0141 -0.0048  
AT. 42 H X -0.0038 0.0041 0.0000 0.0004 0.0026 -0.0015  
Y 0.0774 -0.0788 -0.0045 0.0017 -0.0215 0.0088  
Z -0.0586 0.0595 0.0039 -0.0020 0.0141 -0.0048  
AT. 43 C X -0.0001 -0.0001 0.0000 0.0001 -0.0005 -0.0007  
Y 0.0078 0.0075 0.0000 -0.0001 -0.0008 -0.0004  
Z -0.0070 -0.0069 0.0000 0.0000 0.0007 0.0004

AT. 44 C X -0.0001 0.0001 0.0000 -0.0001 0.0005 -0.0007  
Y 0.0078 -0.0075 0.0000 0.0001 0.0008 -0.0004  
Z -0.0070 0.0069 0.0000 -0.0000 -0.0007 0.0004

AT. 45 H X -0.0489 -0.0496 0.0016 0.0019 0.0013 -0.0009  
Y -0.0294 -0.0298 0.0010 0.0014 0.0012 -0.0005  
Z 0.0643 0.0649 -0.0021 -0.0028 -0.0026 0.0007

AT. 46 H X -0.0489 0.0496 0.0016 -0.0019 -0.0013 -0.0009  
Y -0.0294 0.0298 0.0010 -0.0014 -0.0012 -0.0005  
Z 0.0643 -0.0649 -0.0021 0.0028 0.0026 0.0007

AT. 47 H X -0.0184 -0.0192 0.0019 0.0005 0.0007 0.0064  
Y 0.0016 0.0010 0.0009 0.0003 0.0003 0.0028  
Z 0.0145 0.0156 -0.0018 -0.0002 0.0001 -0.0063

AT. 48 H X -0.0184 0.0192 0.0019 -0.0005 -0.0007 0.0064  
Y 0.0016 -0.0010 0.0009 -0.0003 -0.0003 0.0028  
Z 0.0145 -0.0156 -0.0018 0.0002 -0.0001 -0.0063

AT. 49 C X 0.0149 0.0149 -0.0002 -0.0006 -0.0004 0.0015  
Y -0.0035 -0.0020 -0.0011 -0.0005 0.0020 -0.0005  
Z 0.0054 0.0052 0.0006 0.0001 -0.0013 0.0007

AT. 50 C X 0.0149 -0.0149 -0.0002 0.0006 0.0004 0.0015  
Y -0.0035 0.0020 -0.0011 0.0005 -0.0020 -0.0005  
Z 0.0054 -0.0052 0.0006 -0.0001 0.0013 0.0007

AT. 51 C X -0.0031 -0.0032 -0.0002 0.0000 0.0001 -0.0006  
Y 0.0009 0.0006 -0.0001 -0.0001 -0.0013 -0.0009  
Z -0.0015 -0.0014 -0.0004 -0.0001 -0.0008 -0.0013

AT. 52 C X -0.0031 0.0032 -0.0002 -0.0000 -0.0001 -0.0006  
Y 0.0009 -0.0006 -0.0001 0.0001 0.0013 -0.0009  
Z -0.0015 0.0014 -0.0004 0.0001 0.0008 -0.0013

AT. 53 H X -0.0049 -0.0044 -0.0001 0.0002 0.0023 0.0006  
Y -0.0220 -0.0193 0.0003 0.0007 0.0066 0.0025  
Z -0.0246 -0.0222 -0.0000 0.0004 0.0048 0.0008

AT. 54 H X -0.0049 0.0044 -0.0001 -0.0002 -0.0023 0.0006  
Y -0.0220 0.0193 0.0003 -0.0007 -0.0066 0.0025

Z -0.0246 0.0222 -0.0000 -0.0004 -0.0048 0.0008  
AT. 55 H X 0.0000 0.0003 0.0007 0.0004 0.0014 0.0018  
Y 0.0155 0.0128 0.0038 0.0016 -0.0005 0.0070  
Z 0.0193 0.0164 0.0053 0.0022 0.0009 0.0104  
AT. 56 H X 0.0000 -0.0003 0.0007 -0.0004 -0.0014 0.0018  
Y 0.0155 -0.0128 0.0038 -0.0016 0.0005 0.0070  
Z 0.0193 -0.0164 0.0053 -0.0022 -0.0009 0.0104  
AT. 57 C X 0.0020 0.0021 0.0001 -0.0000 -0.0004 -0.0002  
Y 0.0031 0.0032 -0.0001 -0.0001 0.0004 0.0001  
Z -0.0002 -0.0001 -0.0004 0.0000 0.0023 0.0009  
AT. 58 C X 0.0020 -0.0021 0.0001 0.0000 0.0004 -0.0002  
Y 0.0031 -0.0032 -0.0001 0.0001 -0.0004 0.0001  
Z -0.0002 0.0001 -0.0004 -0.0000 -0.0023 0.0009  
AT. 59 H X -0.0064 -0.0070 -0.0009 -0.0010 -0.0024 -0.0020  
Y -0.0011 -0.0009 0.0015 0.0007 -0.0042 -0.0013  
Z -0.0110 -0.0114 0.0014 0.0003 -0.0065 -0.0028  
AT. 60 H X -0.0064 0.0070 -0.0009 0.0010 0.0024 -0.0020  
Y -0.0011 0.0009 0.0015 -0.0007 0.0042 -0.0013  
Z -0.0110 0.0114 0.0014 -0.0003 0.0065 -0.0028  
AT. 61 H X -0.0066 -0.0068 0.0014 0.0006 -0.0033 -0.0007  
Y -0.0112 -0.0112 0.0004 0.0009 0.0035 0.0017  
Z 0.0004 0.0002 0.0004 -0.0000 -0.0023 -0.0007  
AT. 62 H X -0.0066 0.0068 0.0014 -0.0006 0.0033 -0.0007  
Y -0.0112 0.0112 0.0004 -0.0009 -0.0035 0.0017  
Z 0.0004 -0.0002 0.0004 0.0000 0.0023 -0.0007  
AT. 63 H X 0.0017 0.0019 -0.0000 0.0008 0.0067 0.0034  
Y -0.0034 -0.0036 -0.0007 -0.0003 0.0015 0.0006  
Z 0.0042 0.0043 0.0003 -0.0005 -0.0062 -0.0032  
AT. 64 H X 0.0017 -0.0019 -0.0000 -0.0008 -0.0067 0.0034  
Y -0.0034 0.0036 -0.0007 0.0003 -0.0015 0.0006  
Z 0.0042 -0.0043 0.0003 0.0005 0.0062 -0.0032  
AT. 65 C X -0.0032 -0.0030 0.0000 0.0001 0.0004 -0.0001

Y -0.0001 -0.0008 0.0003 0.0001 -0.0007 0.0000  
Z -0.0013 -0.0012 -0.0003 -0.0000 0.0006 -0.0002  
AT. 66 C X -0.0032 0.0030 0.0000 -0.0001 -0.0004 -0.0001  
Y -0.0001 0.0008 0.0003 -0.0001 0.0007 0.0000  
Z -0.0013 0.0012 -0.0003 0.0000 -0.0006 -0.0002  
AT. 67 H X 0.0019 0.0010 -0.0003 -0.0002 -0.0016 -0.0008  
Y -0.0091 -0.0055 -0.0010 0.0001 0.0028 -0.0007  
Z 0.0042 0.0013 0.0013 0.0003 -0.0010 0.0012  
AT. 68 H X 0.0019 -0.0010 -0.0003 0.0002 0.0016 -0.0008  
Y -0.0091 0.0055 -0.0010 -0.0001 -0.0028 -0.0007  
Z 0.0042 -0.0013 0.0013 -0.0003 0.0010 0.0012  
AT. 69 H X 0.0011 0.0021 -0.0007 -0.0002 0.0026 0.0004  
Y 0.0075 0.0097 -0.0004 -0.0003 0.0012 0.0009  
Z 0.0032 0.0058 0.0004 -0.0001 -0.0015 0.0004  
AT. 70 H X 0.0011 -0.0021 -0.0007 0.0002 -0.0026 0.0004  
Y 0.0075 -0.0097 -0.0004 0.0003 -0.0012 0.0009  
Z 0.0032 -0.0058 0.0004 0.0001 0.0015 0.0004  
AT. 71 H X 0.0107 0.0085 0.0011 0.0003 -0.0013 0.0014  
Y 0.0037 0.0036 -0.0003 -0.0006 0.0001 0.0003  
Z 0.0143 0.0131 -0.0001 -0.0008 0.0001 0.0015  
AT. 72 H X 0.0107 -0.0085 0.0011 -0.0003 0.0013 0.0014  
Y 0.0037 -0.0036 -0.0003 0.0006 -0.0001 0.0003  
Z 0.0143 -0.0131 -0.0001 0.0008 -0.0001 0.0015  
AT. 73 C X -0.0156 -0.0155 0.0002 0.0005 -0.0013 -0.0021  
Y 0.0123 0.0119 0.0003 0.0000 0.0007 0.0015  
Z 0.0031 0.0028 -0.0004 -0.0001 0.0025 0.0011  
AT. 74 C X -0.0156 0.0155 0.0002 -0.0005 0.0013 -0.0021  
Y 0.0123 -0.0119 0.0003 -0.0000 -0.0007 0.0015  
Z 0.0031 -0.0028 -0.0004 0.0001 -0.0025 0.0011  
AT. 75 H X 0.0636 0.0663 -0.0007 -0.0017 0.0047 0.0060  
Y -0.0473 -0.0477 0.0007 0.0010 -0.0046 -0.0050  
Z -0.0210 -0.0195 -0.0005 -0.0002 -0.0006 -0.0020



AT. 76 H X 0.0636 -0.0663 -0.0007 0.0017 -0.0047 0.0060  
Y -0.0473 0.0477 0.0007 -0.0010 0.0046 -0.0050  
Z -0.0210 0.0195 -0.0005 0.0002 0.0006 -0.0020

AT. 77 H X 0.0195 0.0173 0.0003 -0.0007 -0.0020 0.0013  
Y -0.0147 -0.0140 -0.0010 0.0003 0.0028 -0.0005  
Z -0.0047 -0.0038 0.0007 0.0007 0.0009 -0.0002

AT. 78 H X 0.0195 -0.0173 0.0003 0.0007 0.0020 0.0013  
Y -0.0147 0.0140 -0.0010 -0.0003 -0.0028 -0.0005  
Z -0.0047 0.0038 0.0007 -0.0007 -0.0009 -0.0002

AT. 79 I X 0.0000 0.0000 -0.0000 -0.0000 -0.0000 -0.0000  
Y -0.0000 -0.0000 0.0000 0.0000 0.0000 0.0000  
Z -0.0000 -0.0000 0.0000 0.0000 0.0000 0.0000

AT. 80 I X 0.0000 -0.0000 -0.0000 0.0000 0.0000 -0.0000  
Y -0.0000 0.0000 0.0000 -0.0000 -0.0000 0.0000  
Z -0.0000 0.0000 0.0000 -0.0000 -0.0000 0.0000

AT. 81 I X -0.0000 -0.0000 0.0000 0.0000 0.0000 0.0000  
Y -0.0000 -0.0000 -0.0000 -0.0000 -0.0000 -0.0000  
Z -0.0000 -0.0000 0.0000 0.0000 0.0000 0.0000

AT. 82 I X -0.0000 0.0000 0.0000 -0.0000 -0.0000 0.0000  
Y -0.0000 0.0000 -0.0000 0.0000 0.0000 -0.0000  
Z -0.0000 0.0000 0.0000 -0.0000 -0.0000 0.0000

AT. 83 O X 0.0001 0.0000 -0.0014 -0.0012 -0.0009 -0.0010  
Y 0.0000 0.0000 -0.0003 -0.0003 -0.0001 -0.0000  
Z -0.0002 -0.0002 -0.0000 -0.0000 0.0000 -0.0000

AT. 84 O X 0.0001 -0.0000 -0.0014 0.0012 0.0009 -0.0010  
Y 0.0000 -0.0000 -0.0003 0.0003 0.0001 -0.0000  
Z -0.0002 0.0002 -0.0000 0.0000 -0.0000 -0.0000

AT. 85 O X 0.0003 0.0003 0.0025 0.0027 -0.0000 -0.0000  
Y 0.0002 0.0002 0.0022 0.0022 -0.0005 -0.0006  
Z -0.0001 -0.0001 -0.0019 -0.0019 0.0010 0.0011

AT. 86 O X 0.0003 -0.0003 0.0025 -0.0027 0.0000 -0.0000  
Y 0.0002 -0.0002 0.0022 -0.0022 0.0005 -0.0006

Z -0.0001 0.0001 -0.0019 0.0019 -0.0010 0.0011  
AT. 87 N X 0.0009 0.0010 0.0015 0.0016 -0.0002 -0.0002  
Y -0.0000 -0.0000 0.0018 0.0018 0.0009 0.0009  
Z -0.0001 -0.0002 0.0016 0.0016 0.0008 0.0010  
AT. 88 N X 0.0009 -0.0010 0.0015 -0.0016 0.0002 -0.0002  
Y -0.0000 0.0000 0.0018 -0.0018 -0.0009 0.0009  
Z -0.0001 0.0002 0.0016 -0.0016 -0.0008 0.0010  
AT. 89 N X -0.0005 -0.0006 -0.0136 -0.0136 0.0048 0.0052  
Y -0.0004 -0.0003 -0.0076 -0.0076 -0.0021 -0.0022  
Z -0.0000 -0.0000 0.0016 0.0016 0.0001 0.0002  
AT. 90 N X -0.0005 0.0006 -0.0136 0.0136 -0.0048 0.0052  
Y -0.0004 0.0003 -0.0076 0.0076 0.0021 -0.0022  
Z -0.0000 0.0000 0.0016 -0.0016 -0.0001 0.0002  
AT. 91 C X -0.0006 -0.0005 0.0040 0.0036 0.0025 0.0024  
Y -0.0003 -0.0003 0.0018 0.0016 0.0009 0.0009  
Z 0.0011 0.0011 -0.0059 -0.0056 -0.0024 -0.0025  
AT. 92 C X -0.0006 0.0005 0.0040 -0.0036 -0.0025 0.0024  
Y -0.0003 0.0003 0.0018 -0.0016 -0.0009 0.0009  
Z 0.0011 -0.0011 -0.0059 0.0056 0.0024 -0.0025  
AT. 93 C X 0.0002 0.0001 -0.0015 -0.0014 -0.0005 -0.0005  
Y 0.0001 0.0000 -0.0009 -0.0008 -0.0005 -0.0005  
Z -0.0003 -0.0002 0.0022 0.0020 0.0007 0.0007  
AT. 94 C X 0.0002 -0.0001 -0.0015 0.0014 0.0005 -0.0005  
Y 0.0001 -0.0000 -0.0009 0.0008 0.0005 -0.0005  
Z -0.0003 0.0002 0.0022 -0.0020 -0.0007 0.0007  
AT. 95 H X -0.0003 -0.0003 0.0033 0.0032 -0.0005 -0.0002  
Y 0.0002 0.0003 -0.0012 -0.0013 -0.0004 -0.0005  
Z 0.0001 -0.0001 -0.0029 -0.0027 0.0004 0.0002  
AT. 96 H X -0.0003 0.0003 0.0033 -0.0032 0.0005 -0.0002  
Y 0.0002 -0.0003 -0.0012 0.0013 0.0004 -0.0005  
Z 0.0001 0.0001 -0.0029 0.0027 -0.0004 0.0002  
AT. 97 H X 0.0014 0.0014 -0.0057 -0.0046 -0.0033 -0.0032

Y 0.0005 0.0007 -0.0006 -0.0007 -0.0010 -0.0013  
Z -0.0005 -0.0004 0.0035 0.0030 0.0014 0.0013  
AT. 98 H X 0.0014 -0.0014 -0.0057 0.0046 0.0033 -0.0032  
Y 0.0005 -0.0007 -0.0006 0.0007 0.0010 -0.0013  
Z -0.0005 0.0004 0.0035 -0.0030 -0.0014 0.0013  
AT. 99 C X -0.0006 -0.0005 -0.0011 -0.0014 -0.0031 -0.0033  
Y -0.0001 -0.0002 -0.0001 -0.0001 0.0023 0.0024  
Z -0.0003 -0.0002 -0.0004 -0.0006 -0.0063 -0.0066  
AT. 100 C X -0.0006 0.0005 -0.0011 0.0014 0.0031 -0.0033  
Y -0.0001 0.0002 -0.0001 0.0001 -0.0023 0.0024  
Z -0.0003 0.0002 -0.0004 0.0006 0.0063 -0.0066  
AT. 101 C X 0.0001 0.0001 0.0002 0.0002 0.0019 0.0021  
Y -0.0000 -0.0000 0.0003 0.0003 -0.0005 -0.0005  
Z 0.0002 0.0001 0.0019 0.0018 0.0020 0.0021  
AT. 102 C X 0.0001 -0.0001 0.0002 -0.0002 -0.0019 0.0021  
Y -0.0000 0.0000 0.0003 -0.0003 0.0005 -0.0005  
Z 0.0002 -0.0001 0.0019 -0.0018 -0.0020 0.0021  
AT. 103 H X -0.0004 -0.0004 -0.0005 -0.0005 -0.0054 -0.0056  
Y 0.0002 0.0002 0.0004 0.0003 0.0029 0.0030  
Z 0.0000 -0.0001 -0.0065 -0.0056 -0.0025 -0.0026  
AT. 104 H X -0.0004 0.0004 -0.0005 0.0005 0.0054 -0.0056  
Y 0.0002 -0.0002 0.0004 -0.0003 -0.0029 0.0030  
Z 0.0000 0.0001 -0.0065 0.0056 0.0025 -0.0026  
AT. 105 H X 0.0002 0.0004 0.0011 0.0017 0.0026 0.0019  
Y 0.0002 0.0000 -0.0080 -0.0075 -0.0009 -0.0007  
Z 0.0003 0.0002 -0.0010 -0.0008 0.0020 0.0021  
AT. 106 H X 0.0002 -0.0004 0.0011 -0.0017 -0.0026 0.0019  
Y 0.0002 -0.0000 -0.0080 0.0075 0.0009 -0.0007  
Z 0.0003 -0.0002 -0.0010 0.0008 -0.0020 0.0021  
AT. 107 C X -0.0002 -0.0001 0.0030 0.0030 0.0014 0.0011  
Y -0.0002 -0.0001 -0.0025 -0.0024 -0.0048 -0.0049  
Z 0.0003 0.0003 -0.0045 -0.0045 -0.0091 -0.0093

AT. 108 C X -0.0002 0.0001 0.0030 -0.0030 -0.0014 0.0011  
Y -0.0002 0.0001 -0.0025 0.0024 0.0048 -0.0049  
Z 0.0003 -0.0003 -0.0045 0.0045 0.0091 -0.0093

AT. 109 H X 0.0052 0.0045 -0.0355 -0.0346 -0.0456 -0.0446  
Y -0.0025 -0.0024 0.0165 0.0161 0.0282 0.0284  
Z -0.0059 -0.0054 0.0418 0.0408 0.0646 0.0645

AT. 110 H X 0.0052 -0.0045 -0.0355 0.0346 0.0456 -0.0446  
Y -0.0025 0.0024 0.0165 -0.0161 -0.0282 0.0284  
Z -0.0059 0.0054 0.0418 -0.0408 -0.0646 0.0645

AT. 111 H X -0.0047 -0.0050 -0.0060 -0.0070 0.0135 0.0139  
Y 0.0022 0.0023 0.0031 0.0035 -0.0077 -0.0083  
Z 0.0048 0.0052 0.0052 0.0062 -0.0204 -0.0213

AT. 112 H X -0.0047 0.0050 -0.0060 0.0070 -0.0135 0.0139  
Y 0.0022 -0.0023 0.0031 -0.0035 0.0077 -0.0083  
Z 0.0048 -0.0052 0.0052 -0.0062 0.0204 -0.0213

AT. 113 C X -0.0014 -0.0014 0.0045 0.0043 0.0136 0.0140  
Y 0.0011 0.0008 -0.0051 -0.0051 0.0055 0.0059  
Z -0.0015 -0.0018 0.0074 0.0072 0.0190 0.0196

AT. 114 C X -0.0014 0.0014 0.0045 -0.0043 -0.0136 0.0140  
Y 0.0011 -0.0008 -0.0051 0.0051 -0.0055 0.0059  
Z -0.0015 0.0018 0.0074 -0.0072 -0.0190 0.0196

AT. 115 C X 0.0004 0.0005 0.0021 0.0021 -0.0036 -0.0037  
Y -0.0007 -0.0007 -0.0066 -0.0068 0.0024 0.0026  
Z 0.0008 0.0008 0.0034 0.0037 -0.0061 -0.0064

AT. 116 C X 0.0004 -0.0005 0.0021 -0.0021 0.0036 -0.0037  
Y -0.0007 0.0007 -0.0066 0.0068 -0.0024 0.0026  
Z 0.0008 -0.0008 0.0034 -0.0037 0.0061 -0.0064

AT. 117 H X 0.0012 0.0011 0.0247 0.0252 0.0056 0.0052  
Y 0.0004 -0.0001 0.0668 0.0678 0.0392 0.0392  
Z -0.0005 -0.0002 -0.0384 -0.0390 -0.0229 -0.0229

AT. 118 H X 0.0012 -0.0011 0.0247 -0.0252 -0.0056 0.0052  
Y 0.0004 0.0001 0.0668 -0.0678 -0.0392 0.0392

Z -0.0005 0.0002 -0.0384 0.0390 0.0229 -0.0229  
AT. 119 H X 0.0008 0.0014 0.0083 0.0082 -0.0270 -0.0280  
Y 0.0032 0.0044 0.0434 0.0442 -0.0654 -0.0686  
Z -0.0029 -0.0038 -0.0406 -0.0414 0.0492 0.0518  
AT. 120 H X 0.0008 -0.0014 0.0083 -0.0082 0.0270 -0.0280  
Y 0.0032 -0.0044 0.0434 -0.0442 0.0654 -0.0686  
Z -0.0029 0.0038 -0.0406 0.0414 -0.0492 0.0518  
AT. 121 C X -0.0002 -0.0001 -0.0015 -0.0016 -0.0022 -0.0023  
Y 0.0005 0.0006 0.0111 0.0109 -0.0017 -0.0017  
Z -0.0005 -0.0005 -0.0093 -0.0093 0.0021 0.0020  
AT. 122 C X -0.0002 0.0001 -0.0015 0.0016 0.0022 -0.0023  
Y 0.0005 -0.0006 0.0111 -0.0109 0.0017 -0.0017  
Z -0.0005 0.0005 -0.0093 0.0093 -0.0021 0.0020  
AT. 123 H X 0.0051 0.0047 0.0482 0.0492 -0.0013 -0.0012  
Y -0.0050 -0.0049 -0.0469 -0.0476 0.0074 0.0074  
Z 0.0061 0.0059 0.0588 0.0595 -0.0069 -0.0069  
AT. 124 H X 0.0051 -0.0047 0.0482 -0.0492 0.0013 -0.0012  
Y -0.0050 0.0049 -0.0469 0.0476 -0.0074 0.0074  
Z 0.0061 -0.0059 0.0588 -0.0595 0.0069 -0.0069  
AT. 125 H X -0.0001 0.0004 0.0378 0.0373 -0.0023 -0.0034  
Y -0.0003 -0.0007 -0.0175 -0.0170 -0.0035 -0.0027  
Z -0.0006 -0.0002 0.0260 0.0258 0.0005 -0.0003  
AT. 126 H X -0.0001 -0.0004 0.0378 -0.0373 0.0023 -0.0034  
Y -0.0003 0.0007 -0.0175 0.0170 0.0035 -0.0027  
Z -0.0006 0.0002 0.0260 -0.0258 -0.0005 -0.0003  
AT. 127 C X -0.0006 -0.0006 -0.0103 -0.0104 0.0054 0.0053  
Y 0.0006 0.0006 -0.0036 -0.0030 0.0035 0.0035  
Z 0.0006 0.0005 0.0079 0.0081 -0.0015 -0.0010  
AT. 128 C X -0.0006 0.0006 -0.0103 0.0104 -0.0054 0.0053  
Y 0.0006 -0.0006 -0.0036 0.0030 -0.0035 0.0035  
Z 0.0006 -0.0005 0.0079 -0.0081 0.0015 -0.0010  
AT. 129 C X -0.0001 -0.0001 0.0021 0.0021 0.0002 0.0002

Y 0.0000 0.0001 0.0055 0.0052 0.0038 0.0038  
Z -0.0001 0.0001 0.0034 0.0032 0.0058 0.0057  
AT. 130 C X -0.0001 0.0001 0.0021 -0.0021 -0.0002 0.0002  
Y 0.0000 -0.0001 0.0055 -0.0052 -0.0038 0.0038  
Z -0.0001 -0.0001 0.0034 -0.0032 -0.0058 0.0057  
AT. 131 H X -0.0006 -0.0009 -0.0142 -0.0138 -0.0031 -0.0028  
Y -0.0015 -0.0019 -0.0462 -0.0453 -0.0099 -0.0101  
Z -0.0015 -0.0019 -0.0417 -0.0409 -0.0058 -0.0057  
AT. 132 H X -0.0006 0.0009 -0.0142 0.0138 0.0031 -0.0028  
Y -0.0015 0.0019 -0.0462 0.0453 0.0099 -0.0101  
Z -0.0015 0.0019 -0.0417 0.0409 0.0058 -0.0057  
AT. 133 H X -0.0002 -0.0004 0.0055 0.0052 -0.0120 -0.0121  
Y -0.0010 -0.0015 -0.0061 -0.0060 -0.0338 -0.0339  
Z -0.0016 -0.0024 -0.0152 -0.0149 -0.0474 -0.0476  
AT. 134 H X -0.0002 0.0004 0.0055 -0.0052 0.0120 -0.0121  
Y -0.0010 0.0015 -0.0061 0.0060 0.0338 -0.0339  
Z -0.0016 0.0024 -0.0152 0.0149 0.0474 -0.0476  
AT. 135 C X 0.0004 0.0003 -0.0019 -0.0018 -0.0025 -0.0025  
Y -0.0003 -0.0003 0.0018 0.0018 -0.0008 -0.0009  
Z 0.0004 0.0005 -0.0030 -0.0030 -0.0050 -0.0053  
AT. 136 C X 0.0004 -0.0003 -0.0019 0.0018 0.0025 -0.0025  
Y -0.0003 0.0003 0.0018 -0.0018 0.0008 -0.0009  
Z 0.0004 -0.0005 -0.0030 0.0030 0.0050 -0.0053  
AT. 137 H X -0.0010 -0.0007 0.0072 0.0070 0.0054 0.0053  
Y -0.0010 -0.0012 0.0052 0.0052 0.0149 0.0153  
Z -0.0005 -0.0009 0.0007 0.0008 0.0196 0.0204  
AT. 138 H X -0.0010 0.0007 0.0072 -0.0070 -0.0054 0.0053  
Y -0.0010 0.0012 0.0052 -0.0052 -0.0149 0.0153  
Z -0.0005 0.0009 0.0007 -0.0008 -0.0196 0.0204  
AT. 139 H X 0.0002 0.0006 -0.0051 -0.0053 -0.0088 -0.0099  
Y 0.0017 0.0016 -0.0079 -0.0076 -0.0012 -0.0006  
Z -0.0002 -0.0006 0.0051 0.0054 0.0057 0.0068

AT. 140 H X 0.0002 -0.0006 -0.0051 0.0053 0.0088 -0.0099  
Y 0.0017 -0.0016 -0.0079 0.0076 0.0012 -0.0006  
Z -0.0002 0.0006 0.0051 -0.0054 -0.0057 0.0068

AT. 141 H X -0.0014 -0.0014 0.0053 0.0047 0.0132 0.0130  
Y 0.0012 0.0014 -0.0063 -0.0064 -0.0115 -0.0117  
Z -0.0020 -0.0020 0.0082 0.0081 0.0142 0.0140

AT. 142 H X -0.0014 0.0014 0.0053 -0.0047 -0.0132 0.0130  
Y 0.0012 -0.0014 -0.0063 0.0064 0.0115 -0.0117  
Z -0.0020 0.0020 0.0082 -0.0081 -0.0142 0.0140

AT. 143 C X 0.0001 0.0001 0.0025 0.0024 0.0001 -0.0003  
Y -0.0002 -0.0003 0.0004 0.0001 -0.0006 -0.0007  
Z -0.0001 -0.0001 -0.0024 -0.0025 -0.0005 -0.0010

AT. 144 C X 0.0001 -0.0001 0.0025 -0.0024 -0.0001 -0.0003  
Y -0.0002 0.0003 0.0004 -0.0001 0.0006 -0.0007  
Z -0.0001 0.0001 -0.0024 0.0025 0.0005 -0.0010

AT. 145 H X -0.0003 -0.0003 -0.0063 -0.0061 -0.0035 -0.0021  
Y -0.0004 -0.0001 -0.0092 -0.0087 0.0035 0.0025  
Z 0.0001 -0.0002 0.0063 0.0056 -0.0057 -0.0049

AT. 146 H X -0.0003 0.0003 -0.0063 0.0061 0.0035 -0.0021  
Y -0.0004 0.0001 -0.0092 0.0087 -0.0035 0.0025  
Z 0.0001 0.0002 0.0063 -0.0056 0.0057 -0.0049

AT. 147 H X -0.0002 -0.0002 0.0064 0.0066 0.0004 0.0018  
Y 0.0008 0.0008 0.0003 0.0014 0.0007 0.0012  
Z 0.0000 0.0001 0.0047 0.0056 0.0006 0.0028

AT. 148 H X -0.0002 0.0002 0.0064 -0.0066 -0.0004 0.0018  
Y 0.0008 -0.0008 0.0003 -0.0014 -0.0007 0.0012  
Z 0.0000 -0.0001 0.0047 -0.0056 -0.0006 0.0028

AT. 149 H X 0.0001 0.0002 -0.0052 -0.0047 0.0007 0.0015  
Y 0.0008 0.0006 0.0052 0.0055 -0.0020 -0.0006  
Z 0.0016 0.0012 0.0100 0.0107 -0.0037 -0.0021

AT. 150 H X 0.0001 -0.0002 -0.0052 0.0047 -0.0007 0.0015  
Y 0.0008 -0.0006 0.0052 -0.0055 0.0020 -0.0006

Z 0.0016 -0.0012 0.0100 -0.0107 0.0037 -0.0021  
AT. 151 C X 0.0011 0.0010 0.0101 0.0103 -0.0176 -0.0181  
Y -0.0002 -0.0002 0.0045 0.0045 -0.0060 -0.0063  
Z 0.0003 0.0004 -0.0036 -0.0036 -0.0047 -0.0049  
AT. 152 C X 0.0011 -0.0010 0.0101 -0.0103 0.0176 -0.0181  
Y -0.0002 0.0002 0.0045 -0.0045 0.0060 -0.0063  
Z 0.0003 -0.0004 -0.0036 0.0036 0.0047 -0.0049  
AT. 153 H X -0.0006 -0.0005 -0.0409 -0.0421 0.0496 0.0517  
Y -0.0002 -0.0003 -0.0114 -0.0115 0.0176 0.0180  
Z 0.0009 0.0007 -0.0069 -0.0064 0.0045 0.0041  
AT. 154 H X -0.0006 0.0005 -0.0409 0.0421 -0.0496 0.0517  
Y -0.0002 0.0003 -0.0114 0.0115 -0.0176 0.0180  
Z 0.0009 -0.0007 -0.0069 0.0064 -0.0045 0.0041  
AT. 155 H X -0.0018 -0.0013 -0.0247 -0.0245 0.0297 0.0305  
Y 0.0001 0.0003 -0.0092 -0.0093 0.0085 0.0091  
Z -0.0010 -0.0009 -0.0016 -0.0016 -0.0024 -0.0030  
AT. 156 H X -0.0018 0.0013 -0.0247 0.0245 -0.0297 0.0305  
Y 0.0001 -0.0003 -0.0092 0.0093 -0.0085 0.0091  
Z -0.0010 0.0009 -0.0016 0.0016 0.0024 -0.0030  
AT. 157 O X 0.0000 0.0000 0.0000 0.0001 -0.0001 -0.0001  
Y 0.0000 0.0001 0.0001 0.0001 -0.0000 0.0000  
Z 0.0001 -0.0001 -0.0001 -0.0001 0.0001 0.0001  
AT. 158 O X 0.0000 -0.0000 0.0000 -0.0001 0.0001 -0.0001  
Y 0.0000 -0.0001 0.0001 -0.0001 0.0000 0.0000  
Z 0.0001 0.0001 -0.0001 0.0001 -0.0001 0.0001  
AT. 159 O X -0.0001 0.0001 0.0000 0.0001 0.0000 -0.0000  
Y -0.0000 -0.0001 -0.0001 -0.0000 -0.0000 -0.0000  
Z -0.0001 -0.0000 -0.0000 0.0001 0.0000 -0.0000  
AT. 160 O X -0.0001 -0.0001 0.0000 -0.0001 -0.0000 -0.0000  
Y -0.0000 0.0001 -0.0001 0.0000 0.0000 -0.0000  
Z -0.0001 0.0000 -0.0000 -0.0001 -0.0000 -0.0000  
AT. 161 H X -0.0014 -0.0014 -0.0008 -0.0010 -0.0002 -0.0000



Y -0.0001 -0.0002 -0.0002 -0.0001 0.0006 0.0002  
Z -0.0001 -0.0002 0.0009 0.0006 -0.0020 -0.0006  
AT.162 H X -0.0014 0.0014 -0.0008 0.0010 0.0002 -0.0000  
Y -0.0001 0.0002 -0.0002 0.0001 -0.0006 0.0002  
Z -0.0001 0.0002 0.0009 -0.0006 0.0020 -0.0006  
AT.163 H X 0.0018 -0.0016 0.0002 -0.0004 0.0001 0.0005  
Y -0.0001 -0.0000 0.0002 -0.0004 0.0005 0.0001  
Z -0.0006 0.0003 -0.0001 0.0001 0.0001 -0.0002  
AT.164 H X 0.0018 0.0016 0.0002 0.0004 -0.0001 0.0005  
Y -0.0001 0.0000 0.0002 0.0004 -0.0005 0.0001  
Z -0.0006 -0.0003 -0.0001 -0.0001 -0.0001 -0.0002  
AT.165 O X 0.0001 0.0000 0.0000 0.0000 -0.0002 -0.0002  
Y 0.0000 0.0000 -0.0001 -0.0001 -0.0001 -0.0002  
Z -0.0001 -0.0000 0.0000 0.0001 0.0001 0.0002  
AT.166 O X 0.0001 -0.0000 0.0000 -0.0000 0.0002 -0.0002  
Y 0.0000 -0.0000 -0.0001 0.0001 0.0001 -0.0002  
Z -0.0001 0.0000 0.0000 -0.0001 -0.0001 0.0002  
AT.167 H X -0.0004 -0.0002 -0.0005 0.0001 0.0006 0.0017  
Y -0.0000 0.0001 0.0009 0.0003 0.0005 -0.0006  
Z 0.0017 0.0011 0.0004 -0.0011 -0.0029 -0.0050  
AT.168 H X -0.0004 0.0002 -0.0005 -0.0001 -0.0006 0.0017  
Y -0.0000 -0.0001 0.0009 -0.0003 -0.0005 -0.0006  
Z 0.0017 -0.0011 0.0004 0.0011 0.0029 -0.0050  
AT.169 O X 0.0000 -0.0001 -0.0000 0.0000 0.0000 0.0001  
Y -0.0000 -0.0000 -0.0001 0.0001 0.0000 0.0002  
Z -0.0000 -0.0000 -0.0000 0.0001 0.0000 0.0003  
AT.170 O X 0.0000 0.0001 -0.0000 -0.0000 -0.0000 0.0001  
Y -0.0000 0.0000 -0.0001 -0.0001 -0.0000 0.0002  
Z -0.0000 0.0000 -0.0000 -0.0001 -0.0000 0.0003  
AT.171 H X -0.0003 0.0000 0.0007 -0.0003 0.0017 -0.0010  
Y 0.0001 -0.0000 0.0001 -0.0008 0.0010 -0.0014  
Z 0.0001 0.0001 0.0001 -0.0021 0.0010 -0.0025

AT. 172 H X -0.0003 -0.0000 0.0007 0.0003 -0.0017 -0.0010  
Y 0.0001 0.0000 0.0001 0.0008 -0.0010 -0.0014  
Z 0.0001 -0.0001 0.0001 0.0021 -0.0010 -0.0025

FREQ(CM\*\*-1) 1302.16 1303.01 1305.41 1305.42 1306.54 1306.70

AT. 1 I X -0.0000 -0.0000 0.0000 0.0000 0.0000 -0.0000  
Y -0.0000 -0.0000 0.0000 0.0000 0.0000 -0.0000  
Z -0.0000 -0.0000 0.0000 0.0000 -0.0000 -0.0000

AT. 2 I X -0.0000 0.0000 0.0000 -0.0000 0.0000 0.0000  
Y -0.0000 0.0000 0.0000 -0.0000 0.0000 0.0000  
Z -0.0000 0.0000 0.0000 -0.0000 -0.0000 0.0000

AT. 3 I X 0.0000 0.0000 -0.0000 -0.0000 0.0000 0.0000  
Y 0.0000 0.0000 -0.0000 -0.0000 -0.0000 -0.0000  
Z -0.0000 0.0000 0.0000 0.0000 0.0000 0.0000

AT. 4 I X 0.0000 -0.0000 -0.0000 0.0000 0.0000 -0.0000  
Y 0.0000 -0.0000 -0.0000 0.0000 -0.0000 0.0000  
Z -0.0000 -0.0000 0.0000 -0.0000 0.0000 -0.0000

AT. 5 O X -0.0018 -0.0016 0.0007 0.0012 0.0004 0.0001  
Y 0.0017 0.0016 -0.0002 -0.0005 -0.0002 0.0001  
Z -0.0007 -0.0007 -0.0003 -0.0003 0.0001 -0.0000

AT. 6 O X -0.0018 0.0016 0.0007 -0.0012 0.0004 -0.0001  
Y 0.0017 -0.0016 -0.0002 0.0005 -0.0002 -0.0001  
Z -0.0007 0.0007 -0.0003 0.0003 0.0001 0.0000

AT. 7 O X 0.0006 0.0005 -0.0010 -0.0010 0.0001 0.0002  
Y -0.0001 -0.0000 0.0011 0.0012 0.0001 0.0000  
Z -0.0011 -0.0011 -0.0008 -0.0007 -0.0001 -0.0002

AT. 8 O X 0.0006 -0.0005 -0.0010 0.0010 0.0001 -0.0002  
Y -0.0001 0.0000 0.0011 -0.0012 0.0001 -0.0000  
Z -0.0011 0.0011 -0.0008 0.0007 -0.0001 0.0002

AT. 9 N X -0.0085 -0.0086 -0.0018 -0.0006 0.0009 -0.0003  
Y 0.0039 0.0043 0.0017 0.0011 -0.0005 -0.0000

Z -0.0007 -0.0004 0.0013 0.0013 0.0001 0.0000  
AT. 10 N X -0.0085 0.0086 -0.0018 0.0006 0.0009 0.0003  
Y 0.0039 -0.0043 0.0017 -0.0011 -0.0005 0.0000  
Z -0.0007 0.0004 0.0013 -0.0013 0.0001 -0.0000  
AT. 11 N X 0.0077 0.0082 0.0058 0.0049 0.0010 0.0014  
Y 0.0002 -0.0009 -0.0081 -0.0082 -0.0020 -0.0011  
Z -0.0016 -0.0016 0.0006 0.0008 0.0003 0.0000  
AT. 12 N X 0.0077 -0.0082 0.0058 -0.0049 0.0010 -0.0014  
Y 0.0002 0.0009 -0.0081 0.0082 -0.0020 0.0011  
Z -0.0016 0.0016 0.0006 -0.0008 0.0003 -0.0000  
AT. 13 C X 0.0090 0.0087 -0.0015 -0.0033 -0.0018 -0.0001  
Y -0.0093 -0.0089 0.0010 0.0027 0.0017 -0.0000  
Z 0.0114 0.0108 -0.0014 -0.0032 -0.0019 0.0001  
AT. 14 C X 0.0090 -0.0087 -0.0015 0.0033 -0.0018 0.0001  
Y -0.0093 0.0089 0.0010 -0.0027 0.0017 0.0000  
Z 0.0114 -0.0108 -0.0014 0.0032 -0.0019 -0.0001  
AT. 15 C X -0.0029 -0.0030 0.0001 0.0009 0.0007 0.0000  
Y 0.0021 0.0019 -0.0006 -0.0013 -0.0006 -0.0001  
Z -0.0031 -0.0030 0.0005 0.0012 0.0006 0.0000  
AT. 16 C X -0.0029 0.0030 0.0001 -0.0009 0.0007 -0.0000  
Y 0.0021 -0.0019 -0.0006 0.0013 -0.0006 0.0001  
Z -0.0031 0.0030 0.0005 -0.0012 0.0006 -0.0000  
AT. 17 H X 0.0083 0.0084 -0.0008 -0.0023 -0.0010 0.0003  
Y 0.0055 0.0057 -0.0003 -0.0002 -0.0007 0.0003  
Z -0.0016 -0.0018 -0.0003 -0.0017 -0.0000 -0.0004  
AT. 18 H X 0.0083 -0.0084 -0.0008 0.0023 -0.0010 -0.0003  
Y 0.0055 -0.0057 -0.0003 0.0002 -0.0007 -0.0003  
Z -0.0016 0.0018 -0.0003 0.0017 -0.0000 0.0004  
AT. 19 H X -0.0116 -0.0095 0.0028 0.0027 0.0007 -0.0002  
Y 0.0151 0.0148 -0.0009 -0.0020 -0.0019 0.0005  
Z -0.0011 -0.0003 0.0012 0.0015 0.0002 0.0002  
AT. 20 H X -0.0116 0.0095 0.0028 -0.0027 0.0007 0.0002

Y 0.0151 -0.0148 -0.0009 0.0020 -0.0019 -0.0005  
Z -0.0011 0.0003 0.0012 -0.0015 0.0002 -0.0002  
AT. 21 C X -0.0039 -0.0038 0.0006 0.0010 -0.0005 -0.0010  
Y -0.0002 -0.0000 0.0010 0.0011 0.0004 0.0003  
Z 0.0070 0.0065 -0.0022 -0.0029 -0.0001 0.0010  
AT. 22 C X -0.0039 0.0038 0.0006 -0.0010 -0.0005 0.0010  
Y -0.0002 0.0000 0.0010 -0.0011 0.0004 -0.0003  
Z 0.0070 -0.0065 -0.0022 0.0029 -0.0001 -0.0010  
AT. 23 C X 0.0015 0.0012 -0.0007 -0.0009 -0.0001 0.0001  
Y -0.0000 0.0002 0.0002 0.0002 0.0000 0.0001  
Z -0.0019 -0.0013 0.0023 0.0025 0.0002 -0.0001  
AT. 24 C X 0.0015 -0.0012 -0.0007 0.0009 -0.0001 -0.0001  
Y -0.0000 -0.0002 0.0002 -0.0002 0.0000 -0.0001  
Z -0.0019 0.0013 0.0023 -0.0025 0.0002 0.0001  
AT. 25 H X -0.0024 -0.0019 0.0021 0.0026 0.0011 0.0003  
Y -0.0013 -0.0005 0.0020 0.0022 0.0003 0.0002  
Z 0.0008 -0.0025 -0.0103 -0.0104 -0.0012 -0.0016  
AT. 26 H X -0.0024 0.0019 0.0021 -0.0026 0.0011 -0.0003  
Y -0.0013 0.0005 0.0020 -0.0022 0.0003 -0.0002  
Z 0.0008 0.0025 -0.0103 0.0104 -0.0012 0.0016  
AT. 27 H X 0.0035 0.0038 -0.0006 -0.0003 0.0003 0.0005  
Y -0.0006 -0.0043 -0.0092 -0.0088 -0.0014 -0.0017  
Z -0.0027 -0.0043 -0.0028 -0.0024 -0.0006 -0.0011  
AT. 28 H X 0.0035 -0.0038 -0.0006 0.0003 0.0003 -0.0005  
Y -0.0006 0.0043 -0.0092 0.0088 -0.0014 0.0017  
Z -0.0027 0.0043 -0.0028 0.0024 -0.0006 0.0011  
AT. 29 C X -0.0046 -0.0058 -0.0067 -0.0061 -0.0006 -0.0007  
Y -0.0015 -0.0024 -0.0043 -0.0041 -0.0002 -0.0001  
Z -0.0021 -0.0038 -0.0090 -0.0084 -0.0010 -0.0007  
AT. 30 C X -0.0046 0.0058 -0.0067 0.0061 -0.0006 0.0007  
Y -0.0015 0.0024 -0.0043 0.0041 -0.0002 0.0001  
Z -0.0021 0.0038 -0.0090 0.0084 -0.0010 0.0007

AT. 31 H X -0.0115 -0.0005 0.0654 0.0658 0.0172 0.0072  
Y 0.0013 0.0030 0.0084 0.0074 -0.0003 -0.0007  
Z -0.0043 0.0057 0.0557 0.0546 0.0102 0.0033

AT. 32 H X -0.0115 0.0005 0.0654 -0.0658 0.0172 -0.0072  
Y 0.0013 -0.0030 0.0084 -0.0074 -0.0003 0.0007  
Z -0.0043 -0.0057 0.0557 -0.0546 0.0102 -0.0033

AT. 33 H X 0.0757 0.0759 0.0062 -0.0050 -0.0120 0.0005  
Y 0.0075 0.0083 0.0013 0.0003 -0.0028 -0.0017  
Z 0.0475 0.0462 -0.0017 -0.0085 -0.0072 0.0009

AT. 34 H X 0.0757 -0.0759 0.0062 0.0050 -0.0120 -0.0005  
Y 0.0075 -0.0083 0.0013 -0.0003 -0.0028 0.0017  
Z 0.0475 -0.0462 -0.0017 0.0085 -0.0072 -0.0009

AT. 35 C X 0.0069 0.0062 -0.0050 -0.0054 -0.0023 -0.0003  
Y -0.0022 -0.0004 0.0074 0.0082 0.0016 0.0011  
Z -0.0180 -0.0147 0.0172 0.0195 0.0055 0.0011

AT. 36 C X 0.0069 -0.0062 -0.0050 0.0054 -0.0023 0.0003  
Y -0.0022 0.0004 0.0074 -0.0082 0.0016 -0.0011  
Z -0.0180 0.0147 0.0172 -0.0195 0.0055 -0.0011

AT. 37 C X -0.0045 -0.0046 -0.0015 -0.0011 0.0001 -0.0005  
Y -0.0057 -0.0062 -0.0025 -0.0019 0.0009 0.0001  
Z 0.0068 0.0063 -0.0025 -0.0034 -0.0019 -0.0005

AT. 38 C X -0.0045 0.0046 -0.0015 0.0011 0.0001 0.0005  
Y -0.0057 0.0062 -0.0025 0.0019 0.0009 -0.0001  
Z 0.0068 -0.0063 -0.0025 0.0034 -0.0019 0.0005

AT. 39 H X 0.0021 0.0016 -0.0030 -0.0030 -0.0004 0.0001  
Y -0.0040 0.0076 0.0703 0.0707 0.0109 0.0037  
Z 0.0092 0.0033 -0.0350 -0.0358 -0.0063 -0.0016

AT. 40 H X 0.0021 -0.0016 -0.0030 0.0030 -0.0004 -0.0001  
Y -0.0040 -0.0076 0.0703 -0.0707 0.0109 -0.0037  
Z 0.0092 -0.0033 -0.0350 0.0358 -0.0063 0.0016

AT. 41 H X -0.0060 -0.0047 0.0054 0.0062 0.0009 -0.0003  
Y 0.0617 0.0546 -0.0243 -0.0329 -0.0124 -0.0021

Z -0.0454 -0.0417 0.0098 0.0158 0.0082 0.0012  
AT. 42 H X -0.0060 0.0047 0.0054 -0.0062 0.0009 0.0003  
Y 0.0617 -0.0546 -0.0243 0.0329 -0.0124 0.0021  
Z -0.0454 0.0417 0.0098 -0.0158 0.0082 -0.0012  
AT. 43 C X 0.0015 0.0023 0.0054 0.0052 0.0014 0.0010  
Y -0.0010 -0.0001 0.0056 0.0062 0.0017 0.0010  
Z 0.0008 0.0003 -0.0053 -0.0056 -0.0017 -0.0009  
AT. 44 C X 0.0015 -0.0023 0.0054 -0.0052 0.0014 -0.0010  
Y -0.0010 0.0001 0.0056 -0.0062 0.0017 -0.0010  
Z 0.0008 -0.0003 -0.0053 0.0056 -0.0017 0.0009  
AT. 45 H X 0.0098 0.0094 -0.0198 -0.0200 -0.0034 0.0011  
Y 0.0066 0.0066 -0.0081 -0.0087 -0.0022 -0.0001  
Z -0.0133 -0.0123 0.0253 0.0262 0.0053 -0.0002  
AT. 46 H X 0.0098 -0.0094 -0.0198 0.0200 -0.0034 -0.0011  
Y 0.0066 -0.0066 -0.0081 0.0087 -0.0022 0.0001  
Z -0.0133 0.0123 0.0253 -0.0262 0.0053 0.0002  
AT. 47 H X -0.0355 -0.0413 -0.0436 -0.0394 -0.0112 -0.0113  
Y -0.0147 -0.0172 -0.0164 -0.0144 -0.0040 -0.0044  
Z 0.0382 0.0436 0.0421 0.0372 0.0103 0.0109  
AT. 48 H X -0.0355 0.0413 -0.0436 0.0394 -0.0112 0.0113  
Y -0.0147 0.0172 -0.0164 0.0144 -0.0040 0.0044  
Z 0.0382 -0.0436 0.0421 -0.0372 0.0103 -0.0109  
AT. 49 C X -0.0098 -0.0113 -0.0049 -0.0037 -0.0011 -0.0023  
Y 0.0116 0.0106 0.0005 -0.0029 -0.0009 0.0005  
Z -0.0103 -0.0107 -0.0016 -0.0002 0.0002 -0.0011  
AT. 50 C X -0.0098 0.0113 -0.0049 0.0037 -0.0011 0.0023  
Y 0.0116 -0.0106 0.0005 0.0029 -0.0009 -0.0005  
Z -0.0103 0.0107 -0.0016 0.0002 0.0002 0.0011  
AT. 51 C X 0.0044 0.0051 0.0038 0.0033 0.0007 0.0009  
Y -0.0007 0.0004 0.0074 0.0081 0.0022 0.0011  
Z 0.0032 0.0044 0.0087 0.0088 0.0025 0.0017  
AT. 52 C X 0.0044 -0.0051 0.0038 -0.0033 0.0007 -0.0009

Y -0.0007 -0.0004 0.0074 -0.0081 0.0022 -0.0011  
Z 0.0032 -0.0044 0.0087 -0.0088 0.0025 -0.0017  
AT. 53 H X 0.0072 0.0064 -0.0048 -0.0062 -0.0021 -0.0005  
Y 0.0166 0.0122 -0.0302 -0.0363 -0.0097 -0.0028  
Z 0.0176 0.0145 -0.0224 -0.0286 -0.0072 -0.0009  
AT. 54 H X 0.0072 -0.0064 -0.0048 0.0062 -0.0021 0.0005  
Y 0.0166 -0.0122 -0.0302 0.0363 -0.0097 0.0028  
Z 0.0176 -0.0145 -0.0224 0.0286 -0.0072 0.0009  
AT. 55 H X -0.0030 -0.0045 -0.0114 -0.0114 -0.0036 -0.0023  
Y -0.0419 -0.0462 -0.0430 -0.0357 -0.0074 -0.0082  
Z -0.0546 -0.0617 -0.0645 -0.0557 -0.0124 -0.0122  
AT. 56 H X -0.0030 0.0045 -0.0114 0.0114 -0.0036 0.0023  
Y -0.0419 0.0462 -0.0430 0.0357 -0.0074 0.0082  
Z -0.0546 0.0617 -0.0645 0.0557 -0.0124 0.0122  
AT. 57 C X -0.0013 -0.0013 0.0010 0.0011 0.0005 0.0001  
Y 0.0007 0.0003 -0.0013 -0.0015 -0.0004 -0.0003  
Z 0.0066 0.0056 -0.0049 -0.0057 -0.0015 -0.0001  
AT. 58 C X -0.0013 0.0013 0.0010 -0.0011 0.0005 -0.0001  
Y 0.0007 -0.0003 -0.0013 0.0015 -0.0004 0.0003  
Z 0.0066 -0.0056 -0.0049 0.0057 -0.0015 0.0001  
AT. 59 H X -0.0015 -0.0006 0.0018 0.0020 -0.0000 0.0001  
Y -0.0131 -0.0108 0.0126 0.0144 0.0035 0.0005  
Z -0.0155 -0.0118 0.0173 0.0197 0.0042 0.0010  
AT. 60 H X -0.0015 0.0006 0.0018 -0.0020 -0.0000 -0.0001  
Y -0.0131 0.0108 0.0126 -0.0144 0.0035 -0.0005  
Z -0.0155 0.0118 0.0173 -0.0197 0.0042 -0.0010  
AT. 61 H X -0.0118 -0.0092 0.0107 0.0122 0.0026 0.0003  
Y 0.0100 0.0099 -0.0029 -0.0036 -0.0023 0.0001  
Z -0.0081 -0.0069 0.0050 0.0057 0.0016 -0.0000  
AT. 62 H X -0.0118 0.0092 0.0107 -0.0122 0.0026 -0.0003  
Y 0.0100 -0.0099 -0.0029 0.0036 -0.0023 -0.0001  
Z -0.0081 0.0069 0.0050 -0.0057 0.0016 0.0000

AT. 63 H X 0.0146 0.0125 -0.0117 -0.0140 -0.0044 -0.0011  
Y 0.0052 0.0041 -0.0057 -0.0058 -0.0006 0.0006  
Z -0.0141 -0.0120 0.0125 0.0140 0.0038 0.0004

AT. 64 H X 0.0146 -0.0125 -0.0117 0.0140 -0.0044 0.0011  
Y 0.0052 -0.0041 -0.0057 0.0058 -0.0006 -0.0006  
Z -0.0141 0.0120 0.0125 -0.0140 0.0038 -0.0004

AT. 65 C X 0.0028 0.0028 0.0000 -0.0004 -0.0000 0.0004  
Y -0.0034 -0.0029 -0.0000 0.0011 0.0002 -0.0001  
Z 0.0038 0.0037 0.0002 0.0002 -0.0002 0.0002

AT. 66 C X 0.0028 -0.0028 0.0000 0.0004 -0.0000 -0.0004  
Y -0.0034 0.0029 -0.0000 -0.0011 0.0002 0.0001  
Z 0.0038 -0.0037 0.0002 -0.0002 -0.0002 -0.0002

AT. 67 H X -0.0026 -0.0025 0.0033 0.0057 0.0008 0.0002  
Y 0.0180 0.0152 0.0008 -0.0018 -0.0006 0.0009  
Z -0.0123 -0.0097 -0.0037 -0.0028 -0.0002 -0.0006

AT. 68 H X -0.0026 0.0025 0.0033 -0.0057 0.0008 -0.0002  
Y 0.0180 -0.0152 0.0008 0.0018 -0.0006 -0.0009  
Z -0.0123 0.0097 -0.0037 0.0028 -0.0002 0.0006

AT. 69 H X 0.0090 0.0083 -0.0018 -0.0043 -0.0014 -0.0004  
Y -0.0008 -0.0026 -0.0028 -0.0048 -0.0009 -0.0016  
Z -0.0082 -0.0102 -0.0005 -0.0005 0.0009 -0.0008

AT. 70 H X 0.0090 -0.0083 -0.0018 0.0043 -0.0014 0.0004  
Y -0.0008 0.0026 -0.0028 0.0048 -0.0009 0.0016  
Z -0.0082 0.0102 -0.0005 0.0005 0.0009 0.0008

AT. 71 H X -0.0164 -0.0148 -0.0035 -0.0017 -0.0004 -0.0022  
Y -0.0006 -0.0001 -0.0005 -0.0022 -0.0001 0.0003  
Z -0.0082 -0.0071 -0.0034 -0.0051 -0.0009 -0.0012

AT. 72 H X -0.0164 0.0148 -0.0035 0.0017 -0.0004 0.0022  
Y -0.0006 0.0001 -0.0005 0.0022 -0.0001 -0.0003  
Z -0.0082 0.0071 -0.0034 0.0051 -0.0009 0.0012

AT. 73 C X 0.0034 0.0049 0.0074 0.0065 0.0023 0.0019  
Y -0.0045 -0.0053 -0.0055 -0.0043 -0.0011 -0.0012



Z 0.0068 0.0056 -0.0053 -0.0059 -0.0018 -0.0004  
AT. 74 C X 0.0034 -0.0049 0.0074 -0.0065 0.0023 -0.0019  
Y -0.0045 0.0053 -0.0055 0.0043 -0.0011 0.0012  
Z 0.0068 -0.0056 -0.0053 0.0059 -0.0018 0.0004  
AT. 75 H X -0.0109 -0.0173 -0.0245 -0.0263 -0.0064 -0.0063  
Y 0.0035 0.0094 0.0197 0.0200 0.0049 0.0046  
Z 0.0066 0.0090 0.0062 0.0039 0.0004 0.0017  
AT. 76 H X -0.0109 0.0173 -0.0245 0.0263 -0.0064 0.0063  
Y 0.0035 -0.0094 0.0197 -0.0200 0.0049 -0.0046  
Z 0.0066 -0.0090 0.0062 -0.0039 0.0004 -0.0017  
AT. 77 H X -0.0110 -0.0093 0.0019 0.0080 -0.0006 -0.0010  
Y 0.0147 0.0117 -0.0027 -0.0068 -0.0005 0.0006  
Z 0.0019 0.0025 -0.0023 -0.0045 0.0004 0.0007  
AT. 78 H X -0.0110 0.0093 0.0019 -0.0080 -0.0006 0.0010  
Y 0.0147 -0.0117 -0.0027 0.0068 -0.0005 -0.0006  
Z 0.0019 -0.0025 -0.0023 0.0045 0.0004 -0.0007  
AT. 79 I X 0.0000 0.0000 -0.0000 -0.0000 0.0000 0.0000  
Y -0.0000 -0.0000 0.0000 0.0000 -0.0000 -0.0000  
Z -0.0000 -0.0000 0.0000 -0.0000 -0.0000 -0.0000  
AT. 80 I X 0.0000 -0.0000 -0.0000 0.0000 0.0000 -0.0000  
Y -0.0000 0.0000 0.0000 -0.0000 -0.0000 0.0000  
Z -0.0000 0.0000 0.0000 0.0000 -0.0000 0.0000  
AT. 81 I X 0.0000 0.0000 0.0000 0.0000 -0.0000 -0.0000  
Y -0.0000 -0.0000 -0.0000 -0.0000 0.0000 0.0000  
Z 0.0000 0.0000 0.0000 0.0000 0.0000 0.0000  
AT. 82 I X 0.0000 -0.0000 0.0000 -0.0000 -0.0000 0.0000  
Y -0.0000 0.0000 -0.0000 0.0000 0.0000 -0.0000  
Z 0.0000 -0.0000 0.0000 -0.0000 0.0000 -0.0000  
AT. 83 O X 0.0001 0.0000 -0.0006 -0.0004 0.0022 0.0022  
Y 0.0000 -0.0000 -0.0002 -0.0001 0.0008 0.0009  
Z 0.0001 0.0001 0.0001 0.0001 -0.0005 -0.0005  
AT. 84 O X 0.0001 -0.0000 -0.0006 0.0004 0.0022 -0.0022

Y 0.0000 0.0000 -0.0002 0.0001 0.0008 -0.0009  
Z 0.0001 -0.0001 0.0001 -0.0001 -0.0005 0.0005  
AT. 85 O X -0.0001 -0.0000 0.0004 0.0004 -0.0009 -0.0012  
Y 0.0001 0.0001 0.0000 -0.0000 -0.0000 -0.0001  
Z -0.0002 -0.0001 0.0003 0.0003 -0.0007 -0.0008  
AT. 86 O X -0.0001 0.0000 0.0004 -0.0004 -0.0009 0.0012  
Y 0.0001 -0.0001 0.0000 0.0000 -0.0000 0.0001  
Z -0.0002 0.0001 0.0003 -0.0003 -0.0007 0.0008  
AT. 87 N X 0.0003 -0.0010 -0.0019 -0.0009 0.0073 0.0075  
Y 0.0001 -0.0002 0.0001 0.0002 0.0003 0.0003  
Z -0.0002 0.0002 0.0008 0.0005 -0.0023 -0.0024  
AT. 88 N X 0.0003 0.0010 -0.0019 0.0009 0.0073 -0.0075  
Y 0.0001 0.0002 0.0001 -0.0002 0.0003 -0.0003  
Z -0.0002 -0.0002 0.0008 -0.0005 -0.0023 0.0024  
AT. 89 N X -0.0018 -0.0008 0.0024 0.0019 -0.0070 -0.0077  
Y -0.0003 0.0002 -0.0007 -0.0007 0.0006 0.0007  
Z 0.0002 0.0002 0.0000 -0.0001 -0.0001 -0.0000  
AT. 90 N X -0.0018 0.0008 0.0024 -0.0019 -0.0070 0.0077  
Y -0.0003 -0.0002 -0.0007 0.0007 0.0006 -0.0007  
Z 0.0002 -0.0002 0.0000 0.0001 -0.0001 0.0000  
AT. 91 C X -0.0002 0.0005 0.0024 0.0014 -0.0082 -0.0083  
Y -0.0001 0.0003 0.0011 0.0007 -0.0042 -0.0043  
Z 0.0002 -0.0011 -0.0032 -0.0017 0.0114 0.0114  
AT. 92 C X -0.0002 -0.0005 0.0024 -0.0014 -0.0082 0.0083  
Y -0.0001 -0.0003 0.0011 -0.0007 -0.0042 0.0043  
Z 0.0002 0.0011 -0.0032 0.0017 0.0114 -0.0114  
AT. 93 C X -0.0000 -0.0003 -0.0007 -0.0004 0.0027 0.0026  
Y -0.0000 0.0000 -0.0003 -0.0002 0.0008 0.0008  
Z -0.0000 0.0003 0.0009 0.0005 -0.0033 -0.0031  
AT. 94 C X -0.0000 0.0003 -0.0007 0.0004 0.0027 -0.0026  
Y -0.0000 -0.0000 -0.0003 0.0002 0.0008 -0.0008  
Z -0.0000 -0.0003 0.0009 -0.0005 -0.0033 0.0031

AT. 95 H X -0.0001 0.0007 0.0008 0.0003 -0.0040 -0.0037  
Y 0.0001 -0.0004 -0.0008 -0.0006 0.0037 0.0042  
Z -0.0001 -0.0001 -0.0002 0.0003 0.0000 -0.0011

AT. 96 H X -0.0001 -0.0007 0.0008 -0.0003 -0.0040 0.0037  
Y 0.0001 0.0004 -0.0008 0.0006 0.0037 -0.0042  
Z -0.0001 0.0001 -0.0002 -0.0003 0.0000 0.0011

AT. 97 H X 0.0010 -0.0007 -0.0036 -0.0023 0.0124 0.0127  
Y -0.0000 -0.0007 -0.0014 -0.0007 0.0063 0.0066  
Z -0.0003 0.0003 0.0015 0.0009 -0.0049 -0.0047

AT. 98 H X 0.0010 0.0007 -0.0036 0.0023 0.0124 -0.0127  
Y -0.0000 0.0007 -0.0014 0.0007 0.0063 -0.0066  
Z -0.0003 -0.0003 0.0015 -0.0009 -0.0049 0.0047

AT. 99 C X 0.0008 0.0006 -0.0019 -0.0018 0.0041 0.0051  
Y -0.0000 -0.0002 0.0006 0.0005 -0.0009 -0.0011  
Z 0.0007 0.0009 -0.0025 -0.0023 0.0048 0.0057

AT. 100 C X 0.0008 -0.0006 -0.0019 0.0018 0.0041 -0.0051  
Y -0.0000 0.0002 0.0006 -0.0005 -0.0009 0.0011  
Z 0.0007 -0.0009 -0.0025 0.0023 0.0048 -0.0057

AT. 101 C X -0.0001 -0.0003 0.0008 0.0008 -0.0013 -0.0017  
Y 0.0001 0.0001 -0.0002 -0.0002 0.0004 0.0005  
Z -0.0002 -0.0003 0.0008 0.0007 -0.0012 -0.0015

AT. 102 C X -0.0001 0.0003 0.0008 -0.0008 -0.0013 0.0017  
Y 0.0001 -0.0001 -0.0002 0.0002 0.0004 -0.0005  
Z -0.0002 0.0003 0.0008 -0.0007 -0.0012 0.0015

AT. 103 H X -0.0002 0.0007 -0.0019 -0.0018 0.0024 0.0034  
Y 0.0000 -0.0004 0.0011 0.0011 -0.0016 -0.0021  
Z -0.0004 0.0002 -0.0005 -0.0004 -0.0010 -0.0011

AT. 104 H X -0.0002 -0.0007 -0.0019 0.0018 0.0024 -0.0034  
Y 0.0000 0.0004 0.0011 -0.0011 -0.0016 0.0021  
Z -0.0004 -0.0002 -0.0005 0.0004 -0.0010 0.0011

AT. 105 H X -0.0010 -0.0003 0.0014 0.0010 -0.0039 -0.0025  
Y -0.0005 -0.0000 0.0000 0.0001 -0.0023 -0.0034

Z -0.0005 -0.0004 0.0010 0.0009 -0.0029 -0.0031  
AT.106 H X -0.0010 0.0003 0.0014 -0.0010 -0.0039 0.0025  
Y -0.0005 0.0000 0.0000 -0.0001 -0.0023 0.0034  
Z -0.0005 0.0004 0.0010 -0.0009 -0.0029 0.0031  
AT.107 C X 0.0009 -0.0001 -0.0005 -0.0000 0.0030 0.0030  
Y -0.0002 0.0010 -0.0002 -0.0007 -0.0015 -0.0013  
Z -0.0005 0.0019 -0.0006 -0.0016 -0.0044 -0.0040  
AT.108 C X 0.0009 0.0001 -0.0005 0.0000 0.0030 -0.0030  
Y -0.0002 -0.0010 -0.0002 0.0007 -0.0015 0.0013  
Z -0.0005 -0.0019 -0.0006 0.0016 -0.0044 0.0040  
AT.109 H X -0.0066 0.0061 -0.0045 -0.0087 -0.0182 -0.0174  
Y 0.0014 -0.0051 0.0030 0.0053 0.0072 0.0062  
Z 0.0047 -0.0109 0.0068 0.0119 0.0170 0.0151  
AT.110 H X -0.0066 -0.0061 -0.0045 0.0087 -0.0182 0.0174  
Y 0.0014 0.0051 0.0030 -0.0053 0.0072 -0.0062  
Z 0.0047 0.0109 0.0068 -0.0119 0.0170 -0.0151  
AT.111 H X -0.0032 0.0020 0.0122 0.0074 -0.0408 -0.0417  
Y 0.0014 -0.0005 -0.0061 -0.0045 0.0142 0.0149  
Z 0.0038 -0.0004 -0.0132 -0.0087 0.0414 0.0426  
AT.112 H X -0.0032 -0.0020 0.0122 -0.0074 -0.0408 0.0417  
Y 0.0014 0.0005 -0.0061 0.0045 0.0142 -0.0149  
Z 0.0038 0.0004 -0.0132 0.0087 0.0414 -0.0426  
AT.113 C X -0.0003 -0.0021 0.0034 0.0038 -0.0024 -0.0031  
Y -0.0009 -0.0009 0.0019 0.0015 -0.0054 -0.0059  
Z -0.0006 -0.0024 0.0054 0.0053 -0.0084 -0.0095  
AT.114 C X -0.0003 0.0021 0.0034 -0.0038 -0.0024 0.0031  
Y -0.0009 0.0009 0.0019 -0.0015 -0.0054 0.0059  
Z -0.0006 0.0024 0.0054 -0.0053 -0.0084 0.0095  
AT.115 C X 0.0005 0.0006 -0.0013 -0.0013 0.0023 0.0027  
Y -0.0007 -0.0003 0.0006 0.0004 -0.0018 -0.0016  
Z 0.0004 0.0007 -0.0014 -0.0013 0.0022 0.0022  
AT.116 C X 0.0005 -0.0006 -0.0013 0.0013 0.0023 -0.0027

Y -0.0007 0.0003 0.0006 -0.0004 -0.0018 0.0016  
Z 0.0004 -0.0007 -0.0014 0.0013 0.0022 -0.0022  
AT. 117 H X 0.0009 -0.0014 0.0018 0.0027 0.0011 -0.0004  
Y 0.0029 -0.0061 0.0097 0.0119 -0.0038 -0.0082  
Z -0.0011 0.0040 -0.0064 -0.0078 0.0032 0.0062  
AT. 118 H X 0.0009 0.0014 0.0018 -0.0027 0.0011 0.0004  
Y 0.0029 0.0061 0.0097 -0.0119 -0.0038 0.0082  
Z -0.0011 -0.0040 -0.0064 0.0078 0.0032 -0.0062  
AT. 119 H X 0.0025 0.0043 -0.0073 -0.0072 0.0137 0.0156  
Y 0.0078 0.0100 -0.0186 -0.0172 0.0362 0.0398  
Z -0.0067 -0.0074 0.0146 0.0132 -0.0294 -0.0321  
AT. 120 H X 0.0025 -0.0043 -0.0073 0.0072 0.0137 -0.0156  
Y 0.0078 -0.0100 -0.0186 0.0172 0.0362 -0.0398  
Z -0.0067 0.0074 0.0146 -0.0132 -0.0294 0.0321  
AT. 121 C X -0.0002 0.0007 0.0003 -0.0002 -0.0031 -0.0031  
Y 0.0007 0.0006 -0.0000 -0.0003 -0.0008 -0.0003  
Z -0.0006 -0.0005 0.0001 0.0003 -0.0002 -0.0005  
AT. 122 C X -0.0002 -0.0007 0.0003 0.0002 -0.0031 0.0031  
Y 0.0007 -0.0006 -0.0000 0.0003 -0.0008 0.0003  
Z -0.0006 0.0005 0.0001 -0.0003 -0.0002 0.0005  
AT. 123 H X 0.0014 -0.0011 0.0014 0.0024 0.0045 0.0027  
Y -0.0022 -0.0010 -0.0000 -0.0002 -0.0049 -0.0045  
Z 0.0026 0.0008 0.0005 0.0008 0.0048 0.0042  
AT. 124 H X 0.0014 0.0011 0.0014 -0.0024 0.0045 -0.0027  
Y -0.0022 0.0010 -0.0000 0.0002 -0.0049 0.0045  
Z 0.0026 -0.0008 0.0005 -0.0008 0.0048 -0.0042  
AT. 125 H X 0.0074 -0.0005 -0.0101 -0.0063 0.0393 0.0424  
Y -0.0050 0.0015 0.0074 0.0041 -0.0307 -0.0329  
Z 0.0059 -0.0014 -0.0086 -0.0049 0.0358 0.0380  
AT. 126 H X 0.0074 0.0005 -0.0101 0.0063 0.0393 -0.0424  
Y -0.0050 -0.0015 0.0074 -0.0041 -0.0307 0.0329  
Z 0.0059 0.0014 -0.0086 0.0049 0.0358 -0.0380

AT.127 C X 0.0007 -0.0019 -0.0022 -0.0006 0.0124 0.0128  
Y 0.0011 -0.0021 -0.0031 -0.0006 0.0179 0.0172  
Z -0.0009 0.0009 0.0031 0.0017 -0.0106 -0.0111

AT.128 C X 0.0007 0.0019 -0.0022 0.0006 0.0124 -0.0128  
Y 0.0011 0.0021 -0.0031 0.0006 0.0179 -0.0172  
Z -0.0009 -0.0009 0.0031 -0.0017 -0.0106 0.0111

AT.129 C X -0.0001 0.0003 0.0008 0.0005 -0.0028 -0.0030  
Y 0.0004 -0.0006 0.0004 0.0005 -0.0001 0.0002  
Z 0.0009 -0.0013 -0.0005 0.0004 0.0045 0.0048

AT.130 C X -0.0001 -0.0003 0.0008 -0.0005 -0.0028 0.0030  
Y 0.0004 0.0006 0.0004 -0.0005 -0.0001 -0.0002  
Z 0.0009 0.0013 -0.0005 -0.0004 0.0045 -0.0048

AT.131 H X -0.0004 0.0007 -0.0014 -0.0012 0.0042 0.0039  
Y -0.0008 -0.0000 -0.0067 -0.0041 0.0248 0.0239  
Z -0.0003 -0.0001 -0.0065 -0.0040 0.0239 0.0235

AT.132 H X -0.0004 -0.0007 -0.0014 0.0012 0.0042 -0.0039  
Y -0.0008 0.0000 -0.0067 0.0041 0.0248 -0.0239  
Z -0.0003 0.0001 -0.0065 0.0040 0.0239 -0.0235

AT.133 H X -0.0016 0.0048 0.0047 0.0004 -0.0303 -0.0299  
Y -0.0050 0.0105 0.0082 -0.0005 -0.0570 -0.0569  
Z -0.0070 0.0141 0.0104 -0.0009 -0.0735 -0.0739

AT.134 H X -0.0016 -0.0048 0.0047 -0.0004 -0.0303 0.0299  
Y -0.0050 -0.0105 0.0082 0.0005 -0.0570 0.0569  
Z -0.0070 -0.0141 0.0104 0.0009 -0.0735 0.0739

AT.135 C X -0.0001 0.0002 -0.0008 -0.0007 0.0011 0.0009  
Y 0.0003 0.0001 -0.0005 -0.0003 0.0019 0.0019  
Z 0.0003 0.0005 -0.0019 -0.0017 0.0036 0.0043

AT.136 C X -0.0001 -0.0002 -0.0008 0.0007 0.0011 -0.0009  
Y 0.0003 -0.0001 -0.0005 0.0003 0.0019 -0.0019  
Z 0.0003 -0.0005 -0.0019 0.0017 0.0036 -0.0043

AT.137 H X 0.0001 -0.0004 0.0023 0.0021 -0.0030 -0.0021  
Y -0.0007 -0.0019 0.0046 0.0044 -0.0070 -0.0085

Z -0.0015 -0.0026 0.0059 0.0056 -0.0100 -0.0123  
AT. 138 H X 0.0001 0.0004 0.0023 -0.0021 -0.0030 0.0021  
Y -0.0007 0.0019 0.0046 -0.0044 -0.0070 0.0085  
Z -0.0015 0.0026 0.0059 -0.0056 -0.0100 0.0123  
AT. 139 H X 0.0014 0.0013 -0.0044 -0.0037 0.0088 0.0106  
Y -0.0012 -0.0002 0.0007 0.0002 -0.0031 -0.0036  
Z -0.0012 -0.0010 0.0032 0.0027 -0.0063 -0.0084  
AT. 140 H X 0.0014 -0.0013 -0.0044 0.0037 0.0088 -0.0106  
Y -0.0012 0.0002 0.0007 -0.0002 -0.0031 0.0036  
Z -0.0012 0.0010 0.0032 -0.0027 -0.0063 0.0084  
AT. 141 H X 0.0004 -0.0005 0.0034 0.0029 -0.0083 -0.0075  
Y 0.0003 0.0018 -0.0028 -0.0033 0.0012 0.0031  
Z 0.0004 -0.0017 0.0029 0.0035 -0.0010 -0.0022  
AT. 142 H X 0.0004 0.0005 0.0034 -0.0029 -0.0083 0.0075  
Y 0.0003 -0.0018 -0.0028 0.0033 0.0012 -0.0031  
Z 0.0004 0.0017 0.0029 -0.0035 -0.0010 0.0022  
AT. 143 C X -0.0003 0.0001 0.0007 0.0005 -0.0033 -0.0037  
Y -0.0004 0.0006 0.0010 0.0003 -0.0054 -0.0053  
Z 0.0003 -0.0002 -0.0013 -0.0007 0.0033 0.0032  
AT. 144 C X -0.0003 -0.0001 0.0007 -0.0005 -0.0033 0.0037  
Y -0.0004 -0.0006 0.0010 -0.0003 -0.0054 0.0053  
Z 0.0003 0.0002 -0.0013 0.0007 0.0033 -0.0032  
AT. 145 H X 0.0002 0.0003 -0.0015 -0.0016 0.0056 0.0078  
Y 0.0014 -0.0025 -0.0046 -0.0014 0.0195 0.0185  
Z -0.0015 0.0031 0.0042 0.0007 -0.0209 -0.0191  
AT. 146 H X 0.0002 -0.0003 -0.0015 0.0016 0.0056 -0.0078  
Y 0.0014 0.0025 -0.0046 0.0014 0.0195 -0.0185  
Z -0.0015 -0.0031 0.0042 -0.0007 -0.0209 0.0191  
AT. 147 H X -0.0007 0.0013 0.0036 0.0017 -0.0131 -0.0130  
Y 0.0005 -0.0018 -0.0018 -0.0000 0.0121 0.0118  
Z -0.0001 0.0003 0.0021 0.0012 -0.0040 -0.0038  
AT. 148 H X -0.0007 -0.0013 0.0036 -0.0017 -0.0131 0.0130

Y 0.0005 0.0018 -0.0018 0.0000 0.0121 -0.0118  
Z -0.0001 -0.0003 0.0021 -0.0012 -0.0040 0.0038  
AT. 149 H X 0.0018 -0.0007 -0.0040 -0.0022 0.0169 0.0172  
Y -0.0000 0.0009 0.0010 0.0000 -0.0020 -0.0013  
Z -0.0003 0.0011 0.0017 0.0005 -0.0040 -0.0035  
AT. 150 H X 0.0018 0.0007 -0.0040 0.0022 0.0169 -0.0172  
Y -0.0000 -0.0009 0.0010 -0.0000 -0.0020 0.0013  
Z -0.0003 -0.0011 0.0017 -0.0005 -0.0040 0.0035  
AT. 151 C X -0.0000 0.0041 -0.0009 -0.0028 -0.0096 -0.0093  
Y -0.0000 0.0016 0.0000 -0.0009 -0.0051 -0.0048  
Z 0.0004 0.0004 -0.0022 -0.0019 0.0048 0.0053  
AT. 152 C X -0.0000 -0.0041 -0.0009 0.0028 -0.0096 0.0093  
Y -0.0000 -0.0016 0.0000 0.0009 -0.0051 0.0048  
Z 0.0004 -0.0004 -0.0022 0.0019 0.0048 -0.0053  
AT. 153 H X -0.0027 -0.0102 0.0077 0.0096 -0.0008 -0.0011  
Y -0.0011 -0.0033 0.0033 0.0038 -0.0018 -0.0025  
Z -0.0001 -0.0013 -0.0006 0.0005 0.0058 0.0047  
AT. 154 H X -0.0027 0.0102 0.0077 -0.0096 -0.0008 0.0011  
Y -0.0011 0.0033 0.0033 -0.0038 -0.0018 0.0025  
Z -0.0001 0.0013 -0.0006 -0.0005 0.0058 -0.0047  
AT. 155 H X 0.0014 -0.0097 -0.0038 0.0033 0.0476 0.0471  
Y 0.0007 -0.0032 -0.0020 0.0005 0.0176 0.0176  
Z 0.0001 0.0004 -0.0009 -0.0009 0.0014 0.0019  
AT. 156 H X 0.0014 0.0097 -0.0038 -0.0033 0.0476 -0.0471  
Y 0.0007 0.0032 -0.0020 -0.0005 0.0176 -0.0176  
Z 0.0001 -0.0004 -0.0009 0.0009 0.0014 -0.0019  
AT. 157 O X 0.0001 0.0000 0.0000 0.0000 0.0001 0.0000  
Y -0.0003 -0.0003 0.0001 0.0002 0.0001 0.0001  
Z 0.0002 -0.0000 0.0001 -0.0000 0.0000 0.0000  
AT. 158 O X 0.0001 -0.0000 0.0000 -0.0000 0.0001 -0.0000  
Y -0.0003 0.0003 0.0001 -0.0002 0.0001 -0.0001  
Z 0.0002 0.0000 0.0001 0.0000 0.0000 -0.0000



AT.159 O X -0.0003 0.0000 -0.0000 0.0001 0.0001 0.0001  
Y 0.0001 0.0002 -0.0000 -0.0001 -0.0000 -0.0001  
Z -0.0000 0.0002 -0.0000 -0.0001 -0.0000 -0.0000

AT.160 O X -0.0003 -0.0000 -0.0000 -0.0001 0.0001 -0.0001  
Y 0.0001 -0.0002 -0.0000 0.0001 -0.0000 0.0001  
Z -0.0000 -0.0002 -0.0000 0.0001 -0.0000 0.0000

AT.161 H X -0.0005 0.0008 -0.0007 -0.0018 -0.0018 -0.0014  
Y 0.0018 0.0018 -0.0002 -0.0004 0.0001 0.0003  
Z -0.0062 -0.0061 0.0010 0.0013 0.0003 -0.0007

AT.162 H X -0.0005 -0.0008 -0.0007 0.0018 -0.0018 0.0014  
Y 0.0018 -0.0018 -0.0002 0.0004 0.0001 -0.0003  
Z -0.0062 0.0061 0.0010 -0.0013 0.0003 0.0007

AT.163 H X 0.0027 -0.0018 0.0013 -0.0009 -0.0004 -0.0009  
Y 0.0013 0.0001 -0.0003 0.0001 -0.0013 0.0012  
Z -0.0006 0.0011 -0.0007 0.0005 -0.0002 0.0006

AT.164 H X 0.0027 0.0018 0.0013 0.0009 -0.0004 0.0009  
Y 0.0013 -0.0001 -0.0003 -0.0001 -0.0013 -0.0012  
Z -0.0006 -0.0011 -0.0007 -0.0005 -0.0002 -0.0006

AT.165 O X 0.0002 0.0001 -0.0000 -0.0001 0.0004 0.0003  
Y 0.0002 -0.0000 -0.0001 0.0001 0.0002 0.0003  
Z -0.0003 0.0001 0.0002 -0.0001 -0.0004 -0.0003

AT.166 O X 0.0002 -0.0001 -0.0000 0.0001 0.0004 -0.0003  
Y 0.0002 0.0000 -0.0001 -0.0001 0.0002 -0.0003  
Z -0.0003 -0.0001 0.0002 0.0001 -0.0004 0.0003

AT.167 H X -0.0016 -0.0007 0.0003 -0.0002 -0.0025 -0.0019  
Y 0.0013 0.0006 0.0003 0.0008 0.0004 -0.0002  
Z 0.0038 0.0022 -0.0015 -0.0009 0.0094 0.0085

AT.168 H X -0.0016 0.0007 0.0003 0.0002 -0.0025 0.0019  
Y 0.0013 -0.0006 0.0003 -0.0008 0.0004 0.0002  
Z 0.0038 -0.0022 -0.0015 0.0009 0.0094 -0.0085

AT.169 O X -0.0000 -0.0001 0.0000 0.0001 -0.0003 -0.0002  
Y -0.0003 0.0001 0.0002 -0.0002 -0.0002 -0.0002

Z -0.0003 0.0001 0.0001 -0.0001 -0.0003 -0.0003  
AT. 170 O X -0.0000 0.0001 0.0000 -0.0001 -0.0003 0.0002  
Y -0.0003 -0.0001 0.0002 0.0002 -0.0002 0.0002  
Z -0.0003 -0.0001 0.0001 0.0001 -0.0003 0.0003

AT. 171 H X -0.0013 0.0007 0.0000 0.0002 0.0008 -0.0022  
Y 0.0013 -0.0012 -0.0014 0.0014 0.0006 -0.0006  
Z 0.0046 -0.0037 -0.0032 0.0030 0.0003 0.0013

AT. 172 H X -0.0013 -0.0007 0.0000 -0.0002 0.0008 0.0022  
Y 0.0013 0.0012 -0.0014 -0.0014 0.0006 0.0006  
Z 0.0046 0.0037 -0.0032 -0.0030 0.0003 -0.0013

FREQ(CM\*\*-1) 1311.81 1311.99 1315.75 1317.13 1323.56 1323.82

AT. 1 I X -0.0000 -0.0000 0.0000 0.0000 0.0000 0.0000  
Y 0.0000 0.0000 0.0000 -0.0000 -0.0000 0.0000  
Z -0.0000 -0.0000 0.0000 0.0000 -0.0000 -0.0000

AT. 2 I X -0.0000 0.0000 -0.0000 0.0000 -0.0000 0.0000  
Y 0.0000 -0.0000 -0.0000 -0.0000 0.0000 0.0000  
Z -0.0000 0.0000 -0.0000 0.0000 0.0000 -0.0000

AT. 3 I X -0.0000 -0.0000 -0.0000 -0.0000 0.0000 0.0000  
Y -0.0000 -0.0000 -0.0000 -0.0000 0.0000 0.0000  
Z 0.0000 0.0000 -0.0000 -0.0000 -0.0000 0.0000

AT. 4 I X -0.0000 0.0000 0.0000 -0.0000 -0.0000 0.0000  
Y -0.0000 0.0000 0.0000 -0.0000 -0.0000 0.0000  
Z 0.0000 -0.0000 0.0000 -0.0000 0.0000 0.0000

AT. 5 O X 0.0000 0.0000 0.0006 0.0006 0.0003 0.0004  
Y 0.0000 -0.0000 -0.0004 -0.0004 -0.0002 -0.0002  
Z -0.0001 -0.0001 -0.0008 -0.0008 0.0005 0.0005

AT. 6 O X 0.0000 -0.0000 -0.0006 0.0006 -0.0003 0.0004  
Y 0.0000 0.0000 0.0004 -0.0004 0.0002 -0.0002  
Z -0.0001 0.0001 0.0008 -0.0008 -0.0005 0.0005

AT. 7 O X 0.0000 0.0000 -0.0010 -0.0010 0.0023 0.0022

Y -0.0000 -0.0000 0.0010 0.0010 -0.0010 -0.0010  
Z 0.0000 0.0001 -0.0007 -0.0007 -0.0011 -0.0011  
AT. 8 O X 0.0000 -0.0000 0.0010 -0.0010 -0.0023 0.0022  
Y -0.0000 0.0000 -0.0010 0.0010 0.0010 -0.0010  
Z 0.0000 -0.0001 0.0007 -0.0007 0.0011 -0.0011  
AT. 9 N X -0.0002 -0.0001 -0.0018 -0.0021 0.0001 0.0001  
Y 0.0001 0.0001 0.0004 0.0005 -0.0050 -0.0049  
Z 0.0001 0.0001 0.0009 0.0008 -0.0038 -0.0038  
AT. 10 N X -0.0002 0.0001 0.0018 -0.0021 -0.0001 0.0001  
Y 0.0001 -0.0001 -0.0004 0.0005 0.0050 -0.0049  
Z 0.0001 -0.0001 -0.0009 0.0008 0.0038 -0.0038  
AT. 11 N X 0.0002 0.0001 0.0028 0.0029 0.0041 0.0039  
Y -0.0000 0.0001 -0.0021 -0.0023 -0.0054 -0.0052  
Z -0.0001 -0.0000 0.0008 0.0007 -0.0015 -0.0014  
AT. 12 N X 0.0002 -0.0001 -0.0028 0.0029 -0.0041 0.0039  
Y -0.0000 -0.0001 0.0021 -0.0023 0.0054 -0.0052  
Z -0.0001 0.0000 -0.0008 0.0007 0.0015 -0.0014  
AT. 13 C X 0.0001 -0.0000 -0.0003 -0.0003 -0.0026 -0.0028  
Y -0.0001 -0.0000 0.0001 -0.0001 0.0020 0.0020  
Z 0.0001 0.0000 0.0001 0.0003 -0.0013 -0.0014  
AT. 14 C X 0.0001 0.0000 0.0003 -0.0003 0.0026 -0.0028  
Y -0.0001 0.0000 -0.0001 -0.0001 -0.0020 0.0020  
Z 0.0001 -0.0000 -0.0001 0.0003 0.0013 -0.0014  
AT. 15 C X 0.0000 0.0001 0.0004 0.0003 0.0008 0.0009  
Y 0.0000 -0.0000 -0.0005 -0.0005 -0.0000 -0.0003  
Z 0.0000 0.0000 0.0004 0.0004 0.0005 0.0006  
AT. 16 C X 0.0000 -0.0001 -0.0004 0.0003 -0.0008 0.0009  
Y 0.0000 0.0000 0.0005 -0.0005 0.0000 -0.0003  
Z 0.0000 -0.0000 -0.0004 0.0004 -0.0005 0.0006  
AT. 17 H X -0.0004 -0.0004 -0.0011 -0.0009 -0.0006 -0.0005  
Y -0.0000 0.0001 0.0020 0.0018 -0.0037 -0.0025  
Z -0.0002 -0.0003 -0.0030 -0.0026 0.0043 0.0026

AT. 18 H X -0.0004 0.0004 0.0011 -0.0009 0.0006 -0.0005  
Y -0.0000 -0.0001 -0.0020 0.0018 0.0037 -0.0025  
Z -0.0002 0.0003 0.0030 -0.0026 -0.0043 0.0026

AT. 19 H X -0.0004 -0.0002 -0.0012 -0.0007 0.0021 0.0017  
Y 0.0001 0.0001 0.0032 0.0030 -0.0059 -0.0044  
Z -0.0001 0.0000 0.0014 0.0014 -0.0013 -0.0006

AT. 20 H X -0.0004 0.0002 0.0012 -0.0007 -0.0021 0.0017  
Y 0.0001 -0.0001 -0.0032 0.0030 0.0059 -0.0044  
Z -0.0001 -0.0000 -0.0014 0.0014 0.0013 -0.0006

AT. 21 C X -0.0001 -0.0000 0.0004 0.0001 -0.0091 -0.0089  
Y 0.0001 0.0001 -0.0001 -0.0001 0.0009 0.0009  
Z 0.0000 -0.0001 0.0005 0.0008 0.0106 0.0102

AT. 22 C X -0.0001 0.0000 -0.0004 0.0001 0.0091 -0.0089  
Y 0.0001 -0.0001 0.0001 -0.0001 -0.0009 0.0009  
Z 0.0000 0.0001 -0.0005 0.0008 -0.0106 0.0102

AT. 23 C X 0.0001 0.0000 -0.0001 -0.0000 0.0031 0.0031  
Y 0.0000 0.0000 0.0002 0.0001 -0.0002 -0.0002  
Z 0.0000 0.0000 0.0006 0.0005 -0.0033 -0.0034

AT. 24 C X 0.0001 -0.0000 0.0001 -0.0000 -0.0031 0.0031  
Y 0.0000 -0.0000 -0.0002 0.0001 0.0002 -0.0002  
Z 0.0000 -0.0000 -0.0006 0.0005 0.0033 -0.0034

AT. 25 H X -0.0003 -0.0001 0.0008 0.0006 -0.0038 -0.0042  
Y -0.0000 0.0000 0.0007 0.0006 -0.0018 -0.0021  
Z -0.0003 -0.0000 -0.0042 -0.0041 -0.0007 0.0012

AT. 26 H X -0.0003 0.0001 -0.0008 0.0006 0.0038 -0.0042  
Y -0.0000 -0.0000 -0.0007 0.0006 0.0018 -0.0021  
Z -0.0003 0.0000 0.0042 -0.0041 0.0007 0.0012

AT. 27 H X -0.0010 0.0000 0.0006 0.0003 0.0031 0.0020  
Y -0.0003 0.0000 -0.0037 -0.0036 -0.0014 -0.0008  
Z 0.0001 0.0000 -0.0016 -0.0016 -0.0042 -0.0037

AT. 28 H X -0.0010 -0.0000 -0.0006 0.0003 -0.0031 0.0020  
Y -0.0003 -0.0000 0.0037 -0.0036 0.0014 -0.0008

Z 0.0001 -0.0000 0.0016 -0.0016 0.0042 -0.0037  
AT. 29 C X 0.0001 0.0000 -0.0002 -0.0006 0.0100 0.0097  
Y -0.0001 -0.0001 -0.0032 -0.0034 0.0040 0.0041  
Z 0.0001 0.0001 0.0022 0.0018 0.0105 0.0102  
AT. 30 C X 0.0001 -0.0000 0.0002 -0.0006 -0.0100 0.0097  
Y -0.0001 0.0001 0.0032 -0.0034 -0.0040 0.0041  
Z 0.0001 -0.0001 -0.0022 0.0018 -0.0105 0.0102  
AT. 31 H X -0.0030 -0.0020 -0.0567 -0.0534 -0.0495 -0.0464  
Y 0.0005 0.0006 -0.0057 -0.0054 -0.0125 -0.0121  
Z -0.0008 -0.0001 -0.0387 -0.0362 -0.0504 -0.0480  
AT. 32 H X -0.0030 0.0020 0.0567 -0.0534 0.0495 -0.0464  
Y 0.0005 -0.0006 0.0057 -0.0054 0.0125 -0.0121  
Z -0.0008 0.0001 0.0387 -0.0362 0.0504 -0.0480  
AT. 33 H X 0.0025 0.0020 0.0193 0.0200 -0.0503 -0.0496  
Y 0.0013 0.0013 0.0067 0.0068 -0.0090 -0.0091  
Z 0.0011 0.0007 0.0105 0.0108 -0.0254 -0.0250  
AT. 34 H X 0.0025 -0.0020 -0.0193 0.0200 0.0503 -0.0496  
Y 0.0013 -0.0013 -0.0067 0.0068 0.0090 -0.0091  
Z 0.0011 -0.0007 -0.0105 0.0108 0.0254 -0.0250  
AT. 35 C X 0.0006 0.0004 0.0147 0.0148 0.0022 0.0018  
Y -0.0003 -0.0005 0.0164 0.0168 -0.0027 -0.0032  
Z -0.0006 -0.0004 -0.0038 -0.0032 -0.0052 -0.0048  
AT. 36 C X 0.0006 -0.0004 -0.0147 0.0148 -0.0022 0.0018  
Y -0.0003 0.0005 -0.0164 0.0168 0.0027 -0.0032  
Z -0.0006 0.0004 0.0038 -0.0032 0.0052 -0.0048  
AT. 37 C X -0.0002 -0.0001 -0.0046 -0.0046 -0.0007 -0.0007  
Y -0.0003 -0.0003 -0.0069 -0.0066 0.0132 0.0130  
Z 0.0004 0.0004 0.0039 0.0034 -0.0067 -0.0067  
AT. 38 C X -0.0002 0.0001 0.0046 -0.0046 0.0007 -0.0007  
Y -0.0003 0.0003 0.0069 -0.0066 -0.0132 0.0130  
Z 0.0004 -0.0004 -0.0039 0.0034 0.0067 -0.0067  
AT. 39 H X 0.0001 0.0003 0.0036 0.0036 -0.0080 -0.0074

Y 0.0000 0.0004 0.0261 0.0264 -0.0762 -0.0746  
Z 0.0003 0.0002 -0.0056 -0.0060 0.0290 0.0286  
AT. 40 H X 0.0001 -0.0003 -0.0036 0.0036 0.0080 -0.0074  
Y 0.0000 -0.0004 -0.0261 0.0264 0.0762 -0.0746  
Z 0.0003 -0.0002 0.0056 -0.0060 -0.0290 0.0286  
AT. 41 H X -0.0000 0.0001 0.0046 0.0047 -0.0122 -0.0116  
Y 0.0028 0.0029 -0.0007 -0.0042 -0.0246 -0.0243  
Z -0.0022 -0.0024 -0.0088 -0.0064 0.0331 0.0322  
AT. 42 H X -0.0000 -0.0001 -0.0046 0.0047 0.0122 -0.0116  
Y 0.0028 -0.0029 0.0007 -0.0042 0.0246 -0.0243  
Z -0.0022 0.0024 0.0088 -0.0064 -0.0331 0.0322  
AT. 43 C X -0.0001 -0.0002 0.0028 0.0033 0.0073 0.0070  
Y 0.0002 0.0000 0.0069 0.0072 0.0073 0.0070  
Z -0.0001 0.0000 -0.0032 -0.0035 -0.0106 -0.0103  
AT. 44 C X -0.0001 0.0002 -0.0028 0.0033 -0.0073 0.0070  
Y 0.0002 -0.0000 -0.0069 0.0072 -0.0073 0.0070  
Z -0.0001 -0.0000 0.0032 -0.0035 0.0106 -0.0103  
AT. 45 H X -0.0007 -0.0007 0.0122 0.0119 -0.0338 -0.0327  
Y -0.0003 -0.0002 0.0025 0.0026 -0.0184 -0.0179  
Z 0.0008 0.0006 -0.0069 -0.0066 0.0428 0.0415  
AT. 46 H X -0.0007 0.0007 -0.0122 0.0119 0.0338 -0.0327  
Y -0.0003 0.0002 -0.0025 0.0026 0.0184 -0.0179  
Z 0.0008 -0.0006 0.0069 -0.0066 -0.0428 0.0415  
AT. 47 H X 0.0007 0.0015 -0.0162 -0.0194 -0.0512 -0.0491  
Y 0.0008 0.0011 -0.0067 -0.0084 -0.0165 -0.0156  
Z -0.0006 -0.0012 0.0100 0.0130 0.0490 0.0470  
AT. 48 H X 0.0007 -0.0015 0.0162 -0.0194 0.0512 -0.0491  
Y 0.0008 -0.0011 0.0067 -0.0084 0.0165 -0.0156  
Z -0.0006 0.0012 -0.0100 0.0130 -0.0490 0.0470  
AT. 49 C X 0.0004 0.0005 -0.0079 -0.0088 -0.0022 -0.0019  
Y -0.0008 -0.0007 -0.0226 -0.0224 0.0019 0.0018  
Z 0.0001 0.0002 0.0004 -0.0001 0.0002 0.0002

AT. 50 C X 0.0004 -0.0005 0.0079 -0.0088 0.0022 -0.0019  
Y -0.0008 0.0007 0.0226 -0.0224 -0.0019 0.0018  
Z 0.0001 -0.0002 -0.0004 -0.0001 -0.0002 0.0002

AT. 51 C X -0.0000 -0.0001 0.0028 0.0032 0.0023 0.0022  
Y 0.0001 -0.0001 0.0047 0.0053 0.0067 0.0066  
Z -0.0002 -0.0004 0.0004 0.0013 0.0091 0.0089

AT. 52 C X -0.0000 0.0001 -0.0028 0.0032 -0.0023 0.0022  
Y 0.0001 0.0001 -0.0047 0.0053 -0.0067 0.0066  
Z -0.0002 0.0004 -0.0004 0.0013 -0.0091 0.0089

AT. 53 H X -0.0001 -0.0000 -0.0049 -0.0053 -0.0076 -0.0073  
Y -0.0008 -0.0004 -0.0256 -0.0275 -0.0302 -0.0298  
Z -0.0010 -0.0008 -0.0211 -0.0218 -0.0195 -0.0198

AT. 54 H X -0.0001 0.0000 0.0049 -0.0053 0.0076 -0.0073  
Y -0.0008 0.0004 0.0256 -0.0275 0.0302 -0.0298  
Z -0.0010 0.0008 0.0211 -0.0218 0.0195 -0.0198

AT. 55 H X 0.0004 0.0006 -0.0001 -0.0014 -0.0175 -0.0167  
Y 0.0017 0.0021 0.0322 0.0275 -0.0268 -0.0264  
Z 0.0022 0.0029 0.0353 0.0282 -0.0457 -0.0447

AT. 56 H X 0.0004 -0.0006 0.0001 -0.0014 0.0175 -0.0167  
Y 0.0017 -0.0021 -0.0322 0.0275 0.0268 -0.0264  
Z 0.0022 -0.0029 -0.0353 0.0282 0.0457 -0.0447

AT. 57 C X -0.0004 -0.0004 -0.0031 -0.0033 -0.0005 -0.0006  
Y 0.0003 0.0003 -0.0053 -0.0054 -0.0012 -0.0008  
Z -0.0001 -0.0001 0.0007 0.0006 0.0021 0.0019

AT. 58 C X -0.0004 0.0004 0.0031 -0.0033 0.0005 -0.0006  
Y 0.0003 -0.0003 0.0053 -0.0054 0.0012 -0.0008  
Z -0.0001 0.0001 -0.0007 0.0006 -0.0021 0.0019

AT. 59 H X 0.0010 0.0010 0.0028 0.0025 -0.0026 -0.0014  
Y -0.0004 -0.0003 -0.0011 0.0000 -0.0047 -0.0048  
Z -0.0000 -0.0001 0.0083 0.0097 -0.0056 -0.0055

AT. 60 H X 0.0010 -0.0010 -0.0028 0.0025 0.0026 -0.0014  
Y -0.0004 0.0003 0.0011 0.0000 0.0047 -0.0048

Z -0.0000 0.0001 -0.0083 0.0097 0.0056 -0.0055  
AT. 61 H X 0.0011 0.0010 0.0125 0.0142 -0.0045 -0.0044  
Y -0.0001 -0.0005 0.0208 0.0226 0.0042 0.0027  
Z 0.0012 0.0013 -0.0005 -0.0001 -0.0041 -0.0033  
AT. 62 H X 0.0011 -0.0010 -0.0125 0.0142 0.0045 -0.0044  
Y -0.0001 0.0005 -0.0208 0.0226 -0.0042 0.0027  
Z 0.0012 -0.0013 0.0005 -0.0001 0.0041 -0.0033  
AT. 63 H X 0.0017 0.0016 0.0017 0.0025 0.0002 0.0002  
Y -0.0015 -0.0017 0.0128 0.0115 0.0084 0.0071  
Z -0.0006 -0.0002 -0.0176 -0.0176 -0.0071 -0.0060  
AT. 64 H X 0.0017 -0.0016 -0.0017 0.0025 -0.0002 0.0002  
Y -0.0015 0.0017 -0.0128 0.0115 -0.0084 0.0071  
Z -0.0006 0.0002 0.0176 -0.0176 0.0071 -0.0060  
AT. 65 C X -0.0001 -0.0000 0.0031 0.0030 -0.0001 -0.0003  
Y 0.0003 0.0001 0.0062 0.0060 -0.0015 -0.0014  
Z 0.0001 -0.0001 0.0000 0.0001 0.0002 0.0003  
AT. 66 C X -0.0001 0.0000 -0.0031 0.0030 0.0001 -0.0003  
Y 0.0003 -0.0001 -0.0062 0.0060 0.0015 -0.0014  
Z 0.0001 0.0001 -0.0000 0.0001 -0.0002 0.0003  
AT. 67 H X 0.0004 -0.0003 0.0005 -0.0007 0.0019 0.0021  
Y -0.0008 -0.0004 -0.0133 -0.0125 0.0017 0.0024  
Z 0.0005 0.0007 0.0180 0.0183 -0.0044 -0.0049  
AT. 68 H X 0.0004 0.0003 -0.0005 -0.0007 -0.0019 0.0021  
Y -0.0008 0.0004 0.0133 -0.0125 -0.0017 0.0024  
Z 0.0005 -0.0007 -0.0180 0.0183 0.0044 -0.0049  
AT. 69 H X -0.0002 -0.0002 -0.0202 -0.0178 0.0027 0.0030  
Y -0.0004 0.0000 -0.0245 -0.0224 0.0011 0.0017  
Z -0.0005 0.0002 0.0008 -0.0006 -0.0021 -0.0020  
AT. 70 H X -0.0002 0.0002 0.0202 -0.0178 -0.0027 0.0030  
Y -0.0004 -0.0000 0.0245 -0.0224 -0.0011 0.0017  
Z -0.0005 -0.0002 -0.0008 -0.0006 0.0021 -0.0020  
AT. 71 H X 0.0007 0.0006 -0.0042 -0.0025 -0.0018 -0.0013



Y -0.0004 -0.0000 -0.0003 -0.0016 0.0006 -0.0004  
Z -0.0001 0.0003 -0.0115 -0.0117 0.0012 0.0003  
AT. 72 H X 0.0007 -0.0006 0.0042 -0.0025 0.0018 -0.0013  
Y -0.0004 0.0000 0.0003 -0.0016 -0.0006 -0.0004  
Z -0.0001 -0.0003 0.0115 -0.0117 -0.0012 0.0003  
AT. 73 C X -0.0010 -0.0009 -0.0081 -0.0072 0.0006 0.0007  
Y 0.0008 0.0008 0.0059 0.0050 0.0013 0.0015  
Z 0.0003 0.0002 0.0023 0.0022 0.0016 0.0015  
AT. 74 C X -0.0010 0.0009 0.0081 -0.0072 -0.0006 0.0007  
Y 0.0008 -0.0008 -0.0059 0.0050 -0.0013 0.0015  
Z 0.0003 -0.0002 -0.0023 0.0022 -0.0016 0.0015  
AT. 75 H X 0.0015 0.0022 -0.0446 -0.0496 0.0021 0.0031  
Y -0.0013 -0.0018 0.0291 0.0324 -0.0028 -0.0042  
Z -0.0007 -0.0009 0.0076 0.0088 -0.0033 -0.0046  
AT. 76 H X 0.0015 -0.0022 0.0446 -0.0496 -0.0021 0.0031  
Y -0.0013 0.0018 -0.0291 0.0324 0.0028 -0.0042  
Z -0.0007 0.0009 -0.0076 0.0088 0.0033 -0.0046  
AT. 77 H X 0.0034 0.0025 0.0870 0.0876 -0.0046 -0.0057  
Y -0.0023 -0.0018 -0.0600 -0.0591 0.0031 0.0040  
Z -0.0009 -0.0006 -0.0251 -0.0265 0.0048 0.0052  
AT. 78 H X 0.0034 -0.0025 -0.0870 0.0876 0.0046 -0.0057  
Y -0.0023 0.0018 0.0600 -0.0591 -0.0031 0.0040  
Z -0.0009 0.0006 0.0251 -0.0265 -0.0048 0.0052  
AT. 79 I X 0.0000 0.0000 -0.0000 -0.0000 0.0000 0.0000  
Y 0.0000 0.0000 0.0000 -0.0000 -0.0000 -0.0000  
Z -0.0000 -0.0000 0.0000 -0.0000 0.0000 0.0000  
AT. 80 I X 0.0000 -0.0000 0.0000 -0.0000 -0.0000 0.0000  
Y 0.0000 -0.0000 -0.0000 -0.0000 0.0000 -0.0000  
Z -0.0000 0.0000 -0.0000 -0.0000 -0.0000 0.0000  
AT. 81 I X 0.0000 0.0000 0.0000 0.0000 -0.0000 -0.0000  
Y -0.0000 -0.0000 0.0000 0.0000 -0.0000 -0.0000  
Z 0.0000 -0.0000 0.0000 0.0000 -0.0000 0.0000

AT. 82 I X 0.0000 -0.0000 -0.0000 0.0000 0.0000 -0.0000  
Y -0.0000 0.0000 -0.0000 0.0000 0.0000 -0.0000  
Z 0.0000 0.0000 -0.0000 0.0000 0.0000 0.0000

AT. 83 O X 0.0007 0.0007 0.0001 0.0001 -0.0001 -0.0003  
Y -0.0001 -0.0001 0.0000 0.0000 -0.0001 -0.0001  
Z 0.0010 0.0010 -0.0000 -0.0000 0.0001 0.0002

AT. 84 O X 0.0007 -0.0007 -0.0001 0.0001 0.0001 -0.0003  
Y -0.0001 0.0001 -0.0000 0.0000 0.0001 -0.0001  
Z 0.0010 -0.0010 0.0000 -0.0000 -0.0001 0.0002

AT. 85 O X -0.0001 -0.0002 -0.0001 -0.0001 0.0000 -0.0006  
Y -0.0004 -0.0005 -0.0000 -0.0000 0.0000 -0.0001  
Z 0.0007 0.0007 0.0000 -0.0000 -0.0000 -0.0001

AT. 86 O X -0.0001 0.0002 0.0001 -0.0001 -0.0000 -0.0006  
Y -0.0004 0.0005 0.0000 -0.0000 -0.0000 -0.0001  
Z 0.0007 -0.0007 -0.0000 -0.0000 0.0000 -0.0001

AT. 87 N X -0.0069 -0.0067 0.0003 0.0004 -0.0008 -0.0017  
Y 0.0001 0.0002 0.0001 0.0001 -0.0003 -0.0012  
Z 0.0005 0.0005 0.0000 -0.0000 -0.0001 -0.0007

AT. 88 N X -0.0069 0.0067 -0.0003 0.0004 0.0008 -0.0017  
Y 0.0001 -0.0002 -0.0001 0.0001 0.0003 -0.0012  
Z 0.0005 -0.0005 -0.0000 -0.0000 0.0001 -0.0007

AT. 89 N X 0.0025 0.0026 -0.0000 -0.0001 0.0003 -0.0004  
Y 0.0010 0.0011 0.0000 0.0000 -0.0001 -0.0008  
Z -0.0010 -0.0011 0.0000 0.0000 -0.0002 -0.0004

AT. 90 N X 0.0025 -0.0026 0.0000 -0.0001 -0.0003 -0.0004  
Y 0.0010 -0.0011 -0.0000 0.0000 0.0001 -0.0008  
Z -0.0010 0.0011 -0.0000 0.0000 0.0002 -0.0004

AT. 91 C X 0.0013 0.0011 -0.0004 -0.0005 0.0007 0.0019  
Y 0.0013 0.0012 -0.0002 -0.0002 0.0004 0.0008  
Z -0.0028 -0.0026 0.0003 0.0005 -0.0008 -0.0018

AT. 92 C X 0.0013 -0.0011 0.0004 -0.0005 -0.0007 0.0019  
Y 0.0013 -0.0012 0.0002 -0.0002 -0.0004 0.0008

Z -0.0028 0.0026 -0.0003 0.0005 0.0008 -0.0018  
AT. 93 C X -0.0003 -0.0003 0.0001 0.0002 -0.0001 -0.0005  
Y 0.0003 0.0003 0.0000 0.0001 -0.0000 -0.0001  
Z -0.0001 -0.0001 -0.0001 -0.0001 0.0002 0.0005  
AT. 94 C X -0.0003 0.0003 -0.0001 0.0002 0.0001 -0.0005  
Y 0.0003 -0.0003 -0.0000 0.0001 0.0000 -0.0001  
Z -0.0001 0.0001 0.0001 -0.0001 -0.0002 0.0005  
AT. 95 H X -0.0004 -0.0004 -0.0001 -0.0001 -0.0001 -0.0002  
Y -0.0021 -0.0019 0.0003 0.0003 -0.0005 -0.0007  
Z 0.0035 0.0032 -0.0003 -0.0001 0.0009 0.0012  
AT. 96 H X -0.0004 0.0004 0.0001 -0.0001 0.0001 -0.0002  
Y -0.0021 0.0019 -0.0003 0.0003 0.0005 -0.0007  
Z 0.0035 -0.0032 0.0003 -0.0001 -0.0009 0.0012  
AT. 97 H X -0.0036 -0.0034 0.0005 0.0004 -0.0014 -0.0022  
Y -0.0044 -0.0040 0.0003 0.0004 -0.0009 -0.0017  
Z -0.0001 -0.0001 -0.0001 -0.0001 0.0003 0.0007  
AT. 98 H X -0.0036 0.0034 -0.0005 0.0004 0.0014 -0.0022  
Y -0.0044 0.0040 -0.0003 0.0004 0.0009 -0.0017  
Z -0.0001 0.0001 0.0001 -0.0001 -0.0003 0.0007  
AT. 99 C X -0.0024 -0.0022 0.0001 0.0001 0.0001 0.0021  
Y 0.0004 0.0004 0.0001 0.0000 -0.0002 -0.0003  
Z -0.0025 -0.0024 -0.0001 -0.0001 0.0004 0.0020  
AT. 100 C X -0.0024 0.0022 -0.0001 0.0001 -0.0001 0.0021  
Y 0.0004 -0.0004 -0.0001 0.0000 0.0002 -0.0003  
Z -0.0025 0.0024 0.0001 -0.0001 -0.0004 0.0020  
AT. 101 C X 0.0005 0.0007 -0.0001 -0.0002 -0.0001 -0.0007  
Y -0.0002 -0.0002 0.0000 0.0000 0.0000 0.0001  
Z 0.0004 0.0004 0.0000 -0.0000 -0.0002 -0.0007  
AT. 102 C X 0.0005 -0.0007 0.0001 -0.0002 0.0001 -0.0007  
Y -0.0002 0.0002 -0.0000 0.0000 -0.0000 0.0001  
Z 0.0004 -0.0004 -0.0000 -0.0000 0.0002 -0.0007  
AT. 103 H X 0.0004 0.0001 0.0006 0.0006 -0.0005 0.0000

Y 0.0001 0.0003 -0.0003 -0.0003 0.0002 -0.0002  
Z 0.0025 0.0022 0.0001 0.0001 0.0005 0.0004  
AT. 104 H X 0.0004 -0.0001 -0.0006 0.0006 0.0005 0.0000  
Y 0.0001 -0.0003 0.0003 -0.0003 -0.0002 -0.0002  
Z 0.0025 -0.0022 -0.0001 0.0001 -0.0005 0.0004  
AT. 105 H X 0.0032 0.0004 0.0009 0.0008 -0.0003 -0.0006  
Y 0.0020 0.0026 -0.0001 -0.0002 0.0005 0.0001  
Z 0.0018 0.0015 0.0001 0.0001 -0.0001 -0.0007  
AT. 106 H X 0.0032 -0.0004 -0.0009 0.0008 0.0003 -0.0006  
Y 0.0020 -0.0026 0.0001 -0.0002 -0.0005 0.0001  
Z 0.0018 -0.0015 -0.0001 0.0001 0.0001 -0.0007  
AT. 107 C X -0.0020 -0.0018 0.0001 0.0002 -0.0006 -0.0018  
Y 0.0052 0.0051 -0.0002 -0.0003 0.0007 0.0020  
Z 0.0013 0.0011 -0.0002 -0.0002 0.0012 0.0034  
AT. 108 C X -0.0020 0.0018 -0.0001 0.0002 0.0006 -0.0018  
Y 0.0052 -0.0051 0.0002 -0.0003 -0.0007 0.0020  
Z 0.0013 -0.0011 0.0002 -0.0002 -0.0012 0.0034  
AT. 109 H X -0.0205 -0.0210 0.0012 0.0017 0.0028 0.0082  
Y 0.0165 0.0168 -0.0006 -0.0009 -0.0021 -0.0053  
Z 0.0291 0.0297 -0.0012 -0.0018 -0.0047 -0.0122  
AT. 110 H X -0.0205 0.0210 -0.0012 0.0017 -0.0028 0.0082  
Y 0.0165 -0.0168 0.0006 -0.0009 0.0021 -0.0053  
Z 0.0291 -0.0297 0.0012 -0.0018 0.0047 -0.0122  
AT. 111 H X 0.0338 0.0321 -0.0021 -0.0029 0.0056 0.0162  
Y -0.0170 -0.0165 0.0010 0.0015 -0.0027 -0.0073  
Z -0.0335 -0.0319 0.0020 0.0029 -0.0051 -0.0150  
AT. 112 H X 0.0338 -0.0321 0.0021 -0.0029 -0.0056 0.0162  
Y -0.0170 0.0165 -0.0010 0.0015 0.0027 -0.0073  
Z -0.0335 0.0319 -0.0020 0.0029 0.0051 -0.0150  
AT. 113 C X 0.0115 0.0113 -0.0006 -0.0007 0.0000 0.0001  
Y -0.0209 -0.0210 0.0006 0.0007 -0.0003 -0.0011  
Z 0.0033 0.0030 -0.0002 -0.0004 -0.0001 -0.0002

AT.114 C X 0.0115 -0.0113 0.0006 -0.0007 -0.0000 0.0001  
Y -0.0209 0.0210 -0.0006 0.0007 0.0003 -0.0011  
Z 0.0033 -0.0030 0.0002 -0.0004 0.0001 -0.0002

AT.115 C X -0.0037 -0.0037 0.0001 0.0002 0.0000 0.0004  
Y 0.0047 0.0047 -0.0002 -0.0003 0.0010 0.0035  
Z -0.0007 -0.0006 0.0001 0.0002 -0.0005 -0.0022

AT.116 C X -0.0037 0.0037 -0.0001 0.0002 -0.0000 0.0004  
Y 0.0047 -0.0047 0.0002 -0.0003 -0.0010 0.0035  
Z -0.0007 0.0006 -0.0001 0.0002 0.0005 -0.0022

AT.117 H X 0.0024 0.0024 -0.0000 -0.0000 -0.0011 -0.0035  
Y -0.0024 -0.0030 0.0001 -0.0000 -0.0048 -0.0172  
Z -0.0053 -0.0051 0.0002 0.0003 0.0022 0.0074

AT.118 H X 0.0024 -0.0024 0.0000 -0.0000 0.0011 -0.0035  
Y -0.0024 0.0030 -0.0001 -0.0000 0.0048 -0.0172  
Z -0.0053 0.0051 -0.0002 0.0003 -0.0022 0.0074

AT.119 H X 0.0084 0.0085 -0.0002 -0.0000 -0.0003 0.0007  
Y 0.0174 0.0177 -0.0000 0.0005 -0.0034 -0.0107  
Z -0.0079 -0.0081 -0.0002 -0.0007 0.0034 0.0114

AT.120 H X 0.0084 -0.0085 0.0002 -0.0000 0.0003 0.0007  
Y 0.0174 -0.0177 0.0000 0.0005 0.0034 -0.0107  
Z -0.0079 0.0081 0.0002 -0.0007 -0.0034 0.0114

AT.121 C X 0.0028 0.0028 0.0002 0.0001 -0.0001 -0.0013  
Y -0.0083 -0.0084 0.0000 0.0001 0.0001 0.0019  
Z 0.0025 0.0026 0.0001 0.0000 -0.0004 -0.0022

AT.122 C X 0.0028 -0.0028 -0.0002 0.0001 0.0001 -0.0013  
Y -0.0083 0.0084 -0.0000 0.0001 -0.0001 0.0019  
Z 0.0025 -0.0026 -0.0001 0.0000 0.0004 -0.0022

AT.123 H X 0.0189 0.0185 -0.0009 -0.0010 0.0021 0.0081  
Y -0.0087 -0.0081 0.0000 0.0001 -0.0009 -0.0073  
Z 0.0075 0.0069 -0.0001 -0.0002 0.0010 0.0087

AT.124 H X 0.0189 -0.0185 0.0009 -0.0010 -0.0021 0.0081  
Y -0.0087 0.0081 -0.0000 0.0001 0.0009 -0.0073

Z 0.0075 -0.0069 0.0001 -0.0002 -0.0010 0.0087  
AT. 125 H X -0.0272 -0.0271 -0.0003 0.0005 -0.0008 0.0072  
Y 0.0280 0.0278 -0.0003 -0.0009 0.0022 -0.0032  
Z -0.0161 -0.0160 -0.0006 0.0001 0.0000 0.0059  
AT. 126 H X -0.0272 0.0271 0.0003 0.0005 0.0008 0.0072  
Y 0.0280 -0.0278 0.0003 -0.0009 -0.0022 -0.0032  
Z -0.0161 0.0160 0.0006 0.0001 -0.0000 0.0059  
AT. 127 C X -0.0049 -0.0045 -0.0002 0.0001 -0.0007 -0.0003  
Y 0.0198 0.0198 -0.0002 -0.0002 -0.0003 -0.0003  
Z 0.0056 0.0055 -0.0002 -0.0003 0.0007 0.0012  
AT. 128 C X -0.0049 0.0045 0.0002 0.0001 0.0007 -0.0003  
Y 0.0198 -0.0198 0.0002 -0.0002 0.0003 -0.0003  
Z 0.0056 -0.0055 0.0002 -0.0003 -0.0007 0.0012  
AT. 129 C X 0.0021 0.0020 -0.0001 -0.0002 0.0003 0.0007  
Y -0.0108 -0.0108 0.0000 0.0000 0.0001 0.0013  
Z -0.0092 -0.0093 -0.0000 0.0000 -0.0000 0.0015  
AT. 130 C X 0.0021 -0.0020 0.0001 -0.0002 -0.0003 0.0007  
Y -0.0108 0.0108 -0.0000 0.0000 -0.0001 0.0013  
Z -0.0092 0.0093 0.0000 0.0000 0.0000 0.0015  
AT. 131 H X 0.0144 0.0146 0.0001 0.0002 -0.0000 -0.0012  
Y 0.0440 0.0448 -0.0002 0.0000 -0.0017 -0.0077  
Z 0.0328 0.0336 0.0001 0.0005 -0.0012 -0.0054  
AT. 132 H X 0.0144 -0.0146 -0.0001 0.0002 0.0000 -0.0012  
Y 0.0440 -0.0448 0.0002 0.0000 0.0017 -0.0077  
Z 0.0328 -0.0336 -0.0001 0.0005 0.0012 -0.0054  
AT. 133 H X -0.0041 -0.0046 0.0002 -0.0000 0.0017 0.0025  
Y 0.0161 0.0158 -0.0000 -0.0004 0.0021 -0.0018  
Z 0.0335 0.0332 -0.0002 -0.0008 0.0025 -0.0040  
AT. 134 H X -0.0041 0.0046 -0.0002 -0.0000 -0.0017 0.0025  
Y 0.0161 -0.0158 0.0000 -0.0004 -0.0021 -0.0018  
Z 0.0335 -0.0332 0.0002 -0.0008 -0.0025 -0.0040  
AT. 135 C X -0.0034 -0.0036 -0.0000 0.0000 -0.0001 -0.0002

Y 0.0062 0.0062 -0.0002 -0.0002 -0.0001 -0.0001  
Z -0.0012 -0.0009 0.0001 0.0002 0.0001 0.0001  
AT. 136 C X -0.0034 0.0036 0.0000 0.0000 0.0001 -0.0002  
Y 0.0062 -0.0062 0.0002 -0.0002 0.0001 -0.0001  
Z -0.0012 0.0009 -0.0001 0.0002 -0.0001 0.0001  
AT. 137 H X 0.0049 0.0055 0.0001 0.0002 0.0002 0.0002  
Y 0.0011 0.0009 -0.0002 -0.0004 -0.0002 -0.0002  
Z -0.0098 -0.0103 -0.0001 -0.0003 -0.0001 -0.0002  
AT. 138 H X 0.0049 -0.0055 -0.0001 0.0002 -0.0002 0.0002  
Y 0.0011 -0.0009 0.0002 -0.0004 0.0002 -0.0002  
Z -0.0098 0.0103 0.0001 -0.0003 0.0001 -0.0002  
AT. 139 H X 0.0052 0.0062 0.0004 0.0005 0.0005 0.0013  
Y -0.0288 -0.0289 0.0005 0.0008 -0.0002 -0.0008  
Z -0.0016 -0.0029 -0.0006 -0.0007 -0.0006 -0.0016  
AT. 140 H X 0.0052 -0.0062 -0.0004 0.0005 -0.0005 0.0013  
Y -0.0288 0.0289 -0.0005 0.0008 0.0002 -0.0008  
Z -0.0016 0.0029 0.0006 -0.0007 0.0006 -0.0016  
AT. 141 H X 0.0090 0.0094 0.0006 0.0004 0.0008 0.0020  
Y -0.0110 -0.0106 0.0008 0.0012 0.0005 0.0007  
Z 0.0197 0.0198 -0.0006 -0.0010 -0.0001 0.0002  
AT. 142 H X 0.0090 -0.0094 -0.0006 0.0004 -0.0008 0.0020  
Y -0.0110 0.0106 -0.0008 0.0012 -0.0005 0.0007  
Z 0.0197 -0.0198 0.0006 -0.0010 0.0001 0.0002  
AT. 143 C X 0.0010 0.0008 -0.0000 -0.0001 0.0002 0.0002  
Y -0.0052 -0.0054 0.0001 0.0000 0.0000 -0.0002  
Z -0.0017 -0.0018 0.0001 0.0001 -0.0002 -0.0003  
AT. 144 C X 0.0010 -0.0008 0.0000 -0.0001 -0.0002 0.0002  
Y -0.0052 0.0054 -0.0001 0.0000 -0.0000 -0.0002  
Z -0.0017 0.0018 -0.0001 0.0001 0.0002 -0.0003  
AT. 145 H X -0.0005 0.0011 0.0002 0.0004 -0.0006 -0.0010  
Y 0.0045 0.0049 -0.0001 0.0001 -0.0005 -0.0007  
Z -0.0106 -0.0108 0.0002 0.0001 0.0003 0.0001

AT.146 H X -0.0005 -0.0011 -0.0002 0.0004 0.0006 -0.0010  
Y 0.0045 -0.0049 0.0001 0.0001 0.0005 -0.0007  
Z -0.0106 0.0108 -0.0002 0.0001 -0.0003 0.0001

AT.147 H X -0.0046 -0.0049 0.0001 0.0001 0.0003 0.0002  
Y 0.0218 0.0236 -0.0004 -0.0004 0.0005 0.0006  
Z 0.0046 0.0055 0.0000 0.0001 0.0003 0.0003

AT.148 H X -0.0046 0.0049 -0.0001 0.0001 -0.0003 0.0002  
Y 0.0218 -0.0236 0.0004 -0.0004 -0.0005 0.0006  
Z 0.0046 -0.0055 -0.0000 0.0001 -0.0003 0.0003

AT.149 H X -0.0010 -0.0012 0.0004 0.0006 -0.0011 -0.0008  
Y 0.0057 0.0059 0.0001 0.0001 0.0000 0.0003  
Z 0.0158 0.0162 -0.0001 -0.0003 0.0005 0.0010

AT.150 H X -0.0010 0.0012 -0.0004 0.0006 0.0011 -0.0008  
Y 0.0057 -0.0059 -0.0001 0.0001 -0.0000 0.0003  
Z 0.0158 -0.0162 0.0001 -0.0003 -0.0005 0.0010

AT.151 C X -0.0008 -0.0011 0.0005 0.0004 0.0004 0.0001  
Y 0.0002 0.0002 0.0000 -0.0001 0.0003 0.0006  
Z -0.0024 -0.0023 0.0001 0.0002 -0.0001 -0.0002

AT.152 C X -0.0008 0.0011 -0.0005 0.0004 -0.0004 0.0001  
Y 0.0002 -0.0002 -0.0000 -0.0001 -0.0003 0.0006  
Z -0.0024 0.0023 -0.0001 0.0002 0.0001 -0.0002

AT.153 H X -0.0824 -0.0817 0.0000 0.0009 -0.0017 -0.0027  
Y -0.0215 -0.0212 -0.0000 0.0002 -0.0004 -0.0005  
Z -0.0016 -0.0015 0.0002 0.0004 -0.0003 -0.0008

AT.154 H X -0.0824 0.0817 -0.0000 0.0009 0.0017 -0.0027  
Y -0.0215 0.0212 0.0000 0.0002 0.0004 -0.0005  
Z -0.0016 0.0015 -0.0002 0.0004 0.0003 -0.0008

AT.155 H X 0.0710 0.0723 -0.0025 -0.0026 0.0002 0.0027  
Y 0.0177 0.0178 -0.0006 -0.0006 -0.0001 -0.0002  
Z 0.0051 0.0057 -0.0003 -0.0003 0.0003 0.0016

AT.156 H X 0.0710 -0.0723 0.0025 -0.0026 -0.0002 0.0027  
Y 0.0177 -0.0178 0.0006 -0.0006 0.0001 -0.0002



Z 0.0051 -0.0057 0.0003 -0.0003 -0.0003 0.0016  
AT. 157 O X 0.0001 0.0001 0.0000 0.0001 -0.0001 -0.0000  
Y -0.0000 0.0000 0.0000 -0.0000 -0.0000 -0.0000  
Z -0.0001 -0.0001 -0.0000 0.0001 -0.0003 -0.0000  
AT. 158 O X 0.0001 -0.0001 -0.0000 0.0001 0.0001 -0.0000  
Y -0.0000 -0.0000 -0.0000 -0.0000 0.0000 -0.0000  
Z -0.0001 0.0001 0.0000 0.0001 0.0003 -0.0000  
AT. 159 O X 0.0000 0.0000 0.0001 -0.0001 0.0002 -0.0001  
Y 0.0000 0.0000 -0.0000 -0.0000 0.0000 -0.0000  
Z 0.0000 0.0001 0.0000 -0.0001 -0.0001 0.0001  
AT. 160 O X 0.0000 -0.0000 -0.0001 -0.0001 -0.0002 -0.0001  
Y 0.0000 -0.0000 0.0000 -0.0000 -0.0000 -0.0000  
Z 0.0000 -0.0001 -0.0000 -0.0001 0.0001 0.0001  
AT. 161 H X -0.0005 -0.0007 -0.0016 -0.0017 0.0021 0.0016  
Y -0.0002 -0.0002 0.0004 0.0005 -0.0005 -0.0006  
Z 0.0003 0.0005 -0.0015 -0.0013 0.0035 0.0035  
AT. 162 H X -0.0005 0.0007 0.0016 -0.0017 -0.0021 0.0016  
Y -0.0002 0.0002 -0.0004 0.0005 0.0005 -0.0006  
Z 0.0003 -0.0005 0.0015 -0.0013 -0.0035 0.0035  
AT. 163 H X -0.0006 -0.0002 -0.0012 0.0015 -0.0033 0.0016  
Y -0.0001 0.0000 0.0001 -0.0000 -0.0010 0.0001  
Z 0.0003 0.0000 0.0004 -0.0005 0.0020 -0.0017  
AT. 164 H X -0.0006 0.0002 0.0012 0.0015 0.0033 0.0016  
Y -0.0001 -0.0000 -0.0001 -0.0000 0.0010 0.0001  
Z 0.0003 -0.0000 -0.0004 -0.0005 -0.0020 -0.0017  
AT. 165 O X -0.0004 -0.0003 -0.0000 -0.0001 0.0001 -0.0001  
Y -0.0001 -0.0001 -0.0000 -0.0001 0.0000 -0.0000  
Z 0.0003 0.0003 -0.0000 0.0002 -0.0001 0.0001  
AT. 166 O X -0.0004 0.0003 0.0000 -0.0001 -0.0001 -0.0001  
Y -0.0001 0.0001 0.0000 -0.0001 -0.0000 -0.0000  
Z 0.0003 -0.0003 0.0000 0.0002 0.0001 0.0001  
AT. 167 H X 0.0025 0.0021 0.0002 0.0009 -0.0009 0.0006

|             |   |         |         |         |         |         |         |
|-------------|---|---------|---------|---------|---------|---------|---------|
|             | Y | -0.0012 | -0.0009 | -0.0005 | -0.0005 | 0.0007  | 0.0001  |
|             | Z | -0.0091 | -0.0080 | -0.0009 | -0.0028 | 0.0025  | -0.0012 |
| AT. 168 H X |   | 0.0025  | -0.0021 | -0.0002 | 0.0009  | 0.0009  | 0.0006  |
|             | Y | -0.0012 | 0.0009  | 0.0005  | -0.0005 | -0.0007 | 0.0001  |
|             | Z | -0.0091 | 0.0080  | 0.0009  | -0.0028 | -0.0025 | -0.0012 |
| AT. 169 O X |   | 0.0002  | 0.0002  | 0.0001  | -0.0000 | -0.0001 | 0.0001  |
|             | Y | 0.0002  | 0.0001  | -0.0000 | 0.0002  | -0.0000 | 0.0000  |
|             | Z | 0.0003  | 0.0003  | 0.0000  | 0.0001  | -0.0001 | 0.0002  |
| AT. 170 O X |   | 0.0002  | -0.0002 | -0.0001 | -0.0000 | 0.0001  | 0.0001  |
|             | Y | 0.0002  | -0.0001 | 0.0000  | 0.0002  | 0.0000  | 0.0000  |
|             | Z | 0.0003  | -0.0003 | -0.0000 | 0.0001  | 0.0001  | 0.0002  |
| AT. 171 H X |   | -0.0002 | 0.0013  | -0.0009 | 0.0013  | 0.0006  | -0.0004 |
|             | Y | 0.0001  | 0.0006  | -0.0004 | 0.0002  | 0.0005  | -0.0007 |
|             | Z | 0.0007  | -0.0003 | 0.0007  | -0.0011 | 0.0006  | -0.0019 |
| AT. 172 H X |   | -0.0002 | -0.0013 | 0.0009  | 0.0013  | -0.0006 | -0.0004 |
|             | Y | 0.0001  | -0.0006 | 0.0004  | 0.0002  | -0.0005 | -0.0007 |
|             | Z | 0.0007  | 0.0003  | -0.0007 | -0.0011 | -0.0006 | -0.0019 |

FREQ(CM\*\*-1) 1324.84 1324.94 1350.89 1351.18 1351.23 1351.34

|           |   |         |         |         |         |         |         |
|-----------|---|---------|---------|---------|---------|---------|---------|
| AT. 1 I X |   | -0.0000 | -0.0000 | -0.0000 | 0.0000  | 0.0000  | 0.0000  |
|           | Y | -0.0000 | 0.0000  | -0.0000 | 0.0000  | 0.0000  | -0.0000 |
|           | Z | 0.0000  | -0.0000 | -0.0000 | 0.0000  | -0.0000 | -0.0000 |
| AT. 2 I X |   | -0.0000 | 0.0000  | -0.0000 | -0.0000 | 0.0000  | -0.0000 |
|           | Y | -0.0000 | -0.0000 | -0.0000 | -0.0000 | 0.0000  | 0.0000  |
|           | Z | 0.0000  | 0.0000  | -0.0000 | -0.0000 | -0.0000 | 0.0000  |
| AT. 3 I X |   | -0.0000 | 0.0000  | 0.0000  | -0.0000 | 0.0000  | -0.0000 |
|           | Y | -0.0000 | -0.0000 | -0.0000 | 0.0000  | -0.0000 | 0.0000  |
|           | Z | 0.0000  | -0.0000 | -0.0000 | 0.0000  | 0.0000  | 0.0000  |
| AT. 4 I X |   | -0.0000 | -0.0000 | 0.0000  | 0.0000  | 0.0000  | 0.0000  |
|           | Y | -0.0000 | 0.0000  | -0.0000 | -0.0000 | -0.0000 | -0.0000 |
|           | Z | 0.0000  | 0.0000  | -0.0000 | -0.0000 | 0.0000  | -0.0000 |

AT. 5 O X -0.0000 -0.0000 -0.0002 0.0005 0.0003 -0.0000  
Y 0.0001 0.0000 0.0002 -0.0004 -0.0004 0.0001  
Z -0.0001 0.0000 0.0001 -0.0005 -0.0005 0.0002

AT. 6 O X -0.0000 0.0000 -0.0002 -0.0005 0.0003 0.0000  
Y 0.0001 -0.0000 0.0002 0.0004 -0.0004 -0.0001  
Z -0.0001 -0.0000 0.0001 0.0005 -0.0005 -0.0002

AT. 7 O X -0.0005 0.0001 0.0002 -0.0003 0.0001 -0.0003  
Y 0.0002 -0.0001 -0.0001 0.0002 -0.0000 0.0002  
Z 0.0003 -0.0001 -0.0001 -0.0001 -0.0002 0.0002

AT. 8 O X -0.0005 -0.0001 0.0002 0.0003 0.0001 0.0003  
Y 0.0002 0.0001 -0.0001 -0.0002 -0.0000 -0.0002  
Z 0.0003 0.0001 -0.0001 0.0001 -0.0002 -0.0002

AT. 9 N X 0.0000 -0.0001 -0.0008 0.0022 0.0022 -0.0008  
Y 0.0012 -0.0003 0.0008 -0.0011 -0.0007 -0.0005  
Z 0.0008 0.0000 0.0004 0.0004 0.0013 -0.0016

AT. 10 N X 0.0000 0.0001 -0.0008 -0.0022 0.0022 0.0008  
Y 0.0012 0.0003 0.0008 0.0011 -0.0007 0.0005  
Z 0.0008 -0.0000 0.0004 -0.0004 0.0013 0.0016

AT. 11 N X -0.0009 0.0003 -0.0008 0.0026 0.0030 -0.0015  
Y 0.0013 -0.0003 0.0007 -0.0025 -0.0031 0.0019  
Z 0.0003 0.0000 0.0000 0.0001 0.0001 -0.0003

AT. 12 N X -0.0009 -0.0003 -0.0008 -0.0026 0.0030 0.0015  
Y 0.0013 0.0003 0.0007 0.0025 -0.0031 -0.0019  
Z 0.0003 -0.0000 0.0000 -0.0001 0.0001 0.0003

AT. 13 C X 0.0006 -0.0000 0.0006 -0.0009 -0.0003 -0.0004  
Y -0.0004 -0.0000 -0.0006 0.0012 0.0009 -0.0000  
Z 0.0004 -0.0001 0.0001 -0.0003 -0.0002 0.0001

AT. 14 C X 0.0006 0.0000 0.0006 0.0009 -0.0003 0.0004  
Y -0.0004 0.0000 -0.0006 -0.0012 0.0009 0.0000  
Z 0.0004 0.0001 0.0001 0.0003 -0.0002 -0.0001

AT. 15 C X -0.0003 0.0001 0.0000 -0.0001 -0.0004 0.0003  
Y 0.0001 -0.0001 -0.0004 0.0007 0.0010 -0.0002

Z -0.0001 0.0001 0.0001 -0.0001 -0.0003 0.0001  
AT. 16 C X -0.0003 -0.0001 0.0000 0.0001 -0.0004 -0.0003  
Y 0.0001 0.0001 -0.0004 -0.0007 0.0010 0.0002  
Z -0.0001 -0.0001 0.0001 0.0001 -0.0003 -0.0001  
AT. 17 H X 0.0003 -0.0001 0.0010 -0.0016 -0.0012 -0.0000  
Y 0.0005 0.0003 0.0026 -0.0039 -0.0047 0.0001  
Z -0.0004 -0.0005 -0.0031 0.0044 0.0059 -0.0002  
AT. 18 H X 0.0003 0.0001 0.0010 0.0016 -0.0012 0.0000  
Y 0.0005 -0.0003 0.0026 0.0039 -0.0047 -0.0001  
Z -0.0004 0.0005 -0.0031 -0.0044 0.0059 0.0002  
AT. 19 H X 0.0004 -0.0002 -0.0012 0.0021 0.0026 -0.0005  
Y 0.0007 0.0005 0.0042 -0.0070 -0.0081 0.0006  
Z 0.0003 0.0002 0.0014 -0.0023 -0.0028 0.0002  
AT. 20 H X 0.0004 0.0002 -0.0012 -0.0021 0.0026 0.0005  
Y 0.0007 -0.0005 0.0042 0.0070 -0.0081 -0.0006  
Z 0.0003 -0.0002 0.0014 0.0023 -0.0028 -0.0002  
AT. 21 C X 0.0020 -0.0005 -0.0008 0.0003 -0.0008 0.0015  
Y -0.0000 -0.0000 -0.0001 0.0006 0.0008 -0.0006  
Z -0.0027 0.0008 0.0009 -0.0008 0.0004 -0.0012  
AT. 22 C X 0.0020 0.0005 -0.0008 -0.0003 -0.0008 -0.0015  
Y -0.0000 0.0000 -0.0001 -0.0006 0.0008 0.0006  
Z -0.0027 -0.0008 0.0009 0.0008 0.0004 0.0012  
AT. 23 C X -0.0006 0.0000 0.0005 -0.0005 -0.0002 -0.0003  
Y 0.0000 0.0000 -0.0002 0.0004 0.0004 -0.0002  
Z 0.0008 -0.0002 -0.0008 0.0014 0.0012 0.0001  
AT. 24 C X -0.0006 -0.0000 0.0005 0.0005 -0.0002 0.0003  
Y 0.0000 -0.0000 -0.0002 -0.0004 0.0004 0.0002  
Z 0.0008 0.0002 -0.0008 -0.0014 0.0012 -0.0001  
AT. 25 H X 0.0006 0.0001 -0.0002 0.0007 0.0004 0.0001  
Y 0.0003 0.0000 -0.0008 0.0017 0.0018 -0.0003  
Z 0.0002 -0.0004 0.0041 -0.0089 -0.0100 0.0024  
AT. 26 H X 0.0006 -0.0001 -0.0002 -0.0007 0.0004 -0.0001

Y 0.0003 -0.0000 -0.0008 -0.0017 0.0018 0.0003  
Z 0.0002 0.0004 0.0041 0.0089 -0.0100 -0.0024  
AT. 27 H X -0.0019 0.0014 -0.0015 0.0011 0.0019 -0.0015  
Y 0.0004 -0.0002 0.0036 -0.0078 -0.0090 0.0023  
Z 0.0013 -0.0006 0.0016 -0.0033 -0.0044 0.0017  
AT. 28 H X -0.0019 -0.0014 -0.0015 -0.0011 0.0019 0.0015  
Y 0.0004 0.0002 0.0036 0.0078 -0.0090 -0.0023  
Z 0.0013 0.0006 0.0016 0.0033 -0.0044 -0.0017  
AT. 29 C X -0.0026 0.0007 -0.0037 0.0057 0.0040 0.0015  
Y -0.0010 0.0002 -0.0000 -0.0006 -0.0007 0.0005  
Z -0.0024 0.0004 -0.0024 0.0028 0.0015 0.0020  
AT. 30 C X -0.0026 -0.0007 -0.0037 -0.0057 0.0040 -0.0015  
Y -0.0010 -0.0002 -0.0000 0.0006 -0.0007 -0.0005  
Z -0.0024 -0.0004 -0.0024 -0.0028 0.0015 -0.0020  
AT. 31 H X 0.0122 -0.0033 0.0151 -0.0253 -0.0223 -0.0023  
Y 0.0022 0.0000 0.0013 0.0019 0.0041 -0.0044  
Z 0.0113 -0.0022 0.0114 -0.0131 -0.0084 -0.0073  
AT. 32 H X 0.0122 0.0033 0.0151 0.0253 -0.0223 0.0023  
Y 0.0022 -0.0000 0.0013 -0.0019 0.0041 0.0044  
Z 0.0113 0.0022 0.0114 0.0131 -0.0084 0.0073  
AT. 33 H X 0.0122 -0.0019 0.0170 -0.0252 -0.0142 -0.0096  
Y 0.0019 -0.0004 0.0019 0.0007 0.0032 -0.0035  
Z 0.0065 -0.0012 0.0106 -0.0183 -0.0122 -0.0039  
AT. 34 H X 0.0122 0.0019 0.0170 0.0252 -0.0142 0.0096  
Y 0.0019 0.0004 0.0019 -0.0007 0.0032 0.0035  
Z 0.0065 0.0012 0.0106 0.0183 -0.0122 0.0039  
AT. 35 C X -0.0001 -0.0002 0.0060 -0.0114 -0.0086 -0.0005  
Y 0.0010 -0.0005 -0.0041 0.0075 0.0056 0.0003  
Z 0.0011 -0.0002 0.0013 -0.0019 -0.0025 -0.0004  
AT. 36 C X -0.0001 0.0002 0.0060 0.0114 -0.0086 0.0005  
Y 0.0010 0.0005 -0.0041 -0.0075 0.0056 -0.0003  
Z 0.0011 0.0002 0.0013 0.0019 -0.0025 0.0004

AT. 37 C X 0.0001 -0.0000 -0.0005 0.0007 0.0003 0.0004  
Y -0.0034 0.0009 0.0038 -0.0059 -0.0038 -0.0015  
Z 0.0017 -0.0005 -0.0023 0.0033 0.0021 0.0013

AT. 38 C X 0.0001 0.0000 -0.0005 -0.0007 0.0003 -0.0004  
Y -0.0034 -0.0009 0.0038 0.0059 -0.0038 0.0015  
Z 0.0017 0.0005 -0.0023 -0.0033 0.0021 -0.0013

AT. 39 H X 0.0015 -0.0000 -0.0004 -0.0002 -0.0020 0.0019  
Y 0.0189 -0.0055 -0.0224 0.0373 0.0239 0.0064  
Z -0.0074 0.0024 0.0095 -0.0166 -0.0117 -0.0014

AT. 40 H X 0.0015 0.0000 -0.0004 0.0002 -0.0020 -0.0019  
Y 0.0189 0.0055 -0.0224 -0.0373 0.0239 -0.0064  
Z -0.0074 -0.0024 0.0095 0.0166 -0.0117 0.0014

AT. 41 H X 0.0028 -0.0008 -0.0017 0.0010 -0.0019 0.0036  
Y 0.0060 -0.0008 -0.0139 0.0241 0.0201 0.0019  
Z -0.0079 0.0016 0.0126 -0.0203 -0.0144 -0.0045

AT. 42 H X 0.0028 0.0008 -0.0017 -0.0010 -0.0019 -0.0036  
Y 0.0060 0.0008 -0.0139 -0.0241 0.0201 -0.0019  
Z -0.0079 -0.0016 0.0126 0.0203 -0.0144 0.0045

AT. 43 C X -0.0018 0.0003 -0.0008 0.0041 0.0054 -0.0036  
Y -0.0016 0.0003 -0.0001 0.0017 0.0028 -0.0022  
Z 0.0026 -0.0006 0.0009 -0.0053 -0.0073 0.0051

AT. 44 C X -0.0018 -0.0003 -0.0008 -0.0041 0.0054 0.0036  
Y -0.0016 -0.0003 -0.0001 -0.0017 0.0028 0.0022  
Z 0.0026 0.0006 0.0009 0.0053 -0.0073 -0.0051

AT. 45 H X 0.0088 -0.0017 0.0063 -0.0220 -0.0273 0.0157  
Y 0.0042 -0.0007 0.0008 -0.0055 -0.0085 0.0062  
Z -0.0103 0.0018 -0.0053 0.0208 0.0274 -0.0168

AT. 46 H X 0.0088 0.0017 0.0063 0.0220 -0.0273 -0.0157  
Y 0.0042 0.0007 0.0008 0.0055 -0.0085 -0.0062  
Z -0.0103 -0.0018 -0.0053 -0.0208 0.0274 0.0168

AT. 47 H X 0.0116 -0.0027 0.0028 -0.0180 -0.0248 0.0172  
Y 0.0031 -0.0001 -0.0002 -0.0022 -0.0041 0.0034

Z -0.0118 0.0032 -0.0044 0.0220 0.0285 -0.0188  
AT. 48 H X 0.0116 0.0027 0.0028 0.0180 -0.0248 -0.0172  
Y 0.0031 0.0001 -0.0002 0.0022 -0.0041 -0.0034  
Z -0.0118 -0.0032 -0.0044 -0.0220 0.0285 0.0188  
AT. 49 C X 0.0003 -0.0000 0.0018 -0.0081 -0.0097 0.0059  
Y -0.0006 0.0003 -0.0014 0.0038 0.0037 -0.0013  
Z -0.0002 0.0000 -0.0024 0.0092 0.0112 -0.0063  
AT. 50 C X 0.0003 0.0000 0.0018 0.0081 -0.0097 -0.0059  
Y -0.0006 -0.0003 -0.0014 -0.0038 0.0037 0.0013  
Z -0.0002 -0.0000 -0.0024 -0.0092 0.0112 0.0063  
AT. 51 C X -0.0005 0.0001 -0.0002 -0.0001 -0.0002 0.0004  
Y -0.0016 0.0003 0.0009 -0.0052 -0.0067 0.0042  
Z -0.0021 0.0004 0.0012 -0.0074 -0.0099 0.0066  
AT. 52 C X -0.0005 -0.0001 -0.0002 0.0001 -0.0002 -0.0004  
Y -0.0016 -0.0003 0.0009 0.0052 -0.0067 -0.0042  
Z -0.0021 -0.0004 0.0012 0.0074 -0.0099 -0.0066  
AT. 53 H X 0.0017 -0.0004 0.0013 0.0002 0.0013 -0.0027  
Y 0.0067 -0.0008 -0.0031 0.0230 0.0302 -0.0206  
Z 0.0044 -0.0003 -0.0061 0.0262 0.0321 -0.0183  
AT. 54 H X 0.0017 0.0004 0.0013 -0.0002 0.0013 0.0027  
Y 0.0067 0.0008 -0.0031 -0.0230 0.0302 0.0206  
Z 0.0044 0.0003 -0.0061 -0.0262 0.0321 0.0183  
AT. 55 H X 0.0037 -0.0004 0.0017 0.0046 0.0082 -0.0091  
Y 0.0068 -0.0019 -0.0062 0.0284 0.0366 -0.0215  
Z 0.0111 -0.0027 -0.0068 0.0383 0.0506 -0.0322  
AT. 56 H X 0.0037 0.0004 0.0017 -0.0046 0.0082 0.0091  
Y 0.0068 0.0019 -0.0062 -0.0284 0.0366 0.0215  
Z 0.0111 0.0027 -0.0068 -0.0383 0.0506 0.0322  
AT. 57 C X 0.0002 -0.0000 -0.0061 0.0111 0.0082 0.0015  
Y 0.0001 0.0000 0.0045 -0.0081 -0.0060 -0.0011  
Z -0.0003 0.0000 -0.0028 0.0057 0.0042 0.0002  
AT. 58 C X 0.0002 0.0000 -0.0061 -0.0111 0.0082 -0.0015

Y 0.0001 -0.0000 0.0045 0.0081 -0.0060 0.0011  
Z -0.0003 -0.0000 -0.0028 -0.0057 0.0042 -0.0002  
AT. 59 H X 0.0009 -0.0008 0.0255 -0.0481 -0.0329 -0.0058  
Y 0.0007 0.0001 -0.0072 0.0112 0.0096 0.0028  
Z 0.0012 -0.0004 0.0035 -0.0101 -0.0038 0.0005  
AT. 60 H X 0.0009 0.0008 0.0255 0.0481 -0.0329 0.0058  
Y 0.0007 -0.0001 -0.0072 -0.0112 0.0096 -0.0028  
Z 0.0012 0.0004 0.0035 0.0101 -0.0038 -0.0005  
AT. 61 H X 0.0002 0.0005 0.0135 -0.0252 -0.0207 -0.0033  
Y -0.0005 0.0000 -0.0110 0.0194 0.0161 0.0025  
Z 0.0002 0.0004 0.0187 -0.0337 -0.0273 -0.0049  
AT. 62 H X 0.0002 -0.0005 0.0135 0.0252 -0.0207 0.0033  
Y -0.0005 -0.0000 -0.0110 -0.0194 0.0161 -0.0025  
Z 0.0002 -0.0004 0.0187 0.0337 -0.0273 0.0049  
AT. 63 H X -0.0007 0.0007 0.0132 -0.0232 -0.0177 -0.0046  
Y -0.0012 -0.0000 -0.0214 0.0416 0.0273 0.0048  
Z 0.0017 -0.0006 0.0022 -0.0063 -0.0013 0.0008  
AT. 64 H X -0.0007 -0.0007 0.0132 0.0232 -0.0177 0.0046  
Y -0.0012 0.0000 -0.0214 -0.0416 0.0273 -0.0048  
Z 0.0017 0.0006 0.0022 0.0063 -0.0013 -0.0008  
AT. 65 C X 0.0002 -0.0001 -0.0017 0.0067 0.0078 -0.0045  
Y 0.0004 -0.0001 0.0012 -0.0039 -0.0041 0.0022  
Z -0.0001 -0.0001 0.0025 -0.0091 -0.0099 0.0056  
AT. 66 C X 0.0002 0.0001 -0.0017 -0.0067 0.0078 0.0045  
Y 0.0004 0.0001 0.0012 0.0039 -0.0041 -0.0022  
Z -0.0001 0.0001 0.0025 0.0091 -0.0099 -0.0056  
AT. 67 H X -0.0004 -0.0002 0.0085 -0.0321 -0.0343 0.0200  
Y -0.0007 0.0002 -0.0017 0.0030 0.0038 -0.0002  
Z 0.0014 -0.0002 -0.0043 0.0198 0.0209 -0.0142  
AT. 68 H X -0.0004 0.0002 0.0085 0.0321 -0.0343 -0.0200  
Y -0.0007 -0.0002 -0.0017 -0.0030 0.0038 0.0002  
Z 0.0014 0.0002 -0.0043 -0.0198 0.0209 0.0142



AT. 69 H X -0.0012 0.0004 0.0033 -0.0106 -0.0128 0.0065  
Y -0.0010 0.0006 -0.0018 0.0048 0.0038 -0.0015  
Z 0.0006 0.0001 -0.0111 0.0356 0.0397 -0.0200

AT. 70 H X -0.0012 -0.0004 0.0033 0.0106 -0.0128 -0.0065  
Y -0.0010 -0.0006 -0.0018 -0.0048 0.0038 0.0015  
Z 0.0006 -0.0001 -0.0111 -0.0356 0.0397 0.0200

AT. 71 H X -0.0003 0.0003 0.0044 -0.0135 -0.0164 0.0074  
Y 0.0003 0.0000 -0.0072 0.0269 0.0287 -0.0166  
Z -0.0003 0.0004 -0.0048 0.0196 0.0191 -0.0126

AT. 72 H X -0.0003 -0.0003 0.0044 0.0135 -0.0164 -0.0074  
Y 0.0003 -0.0000 -0.0072 -0.0269 0.0287 0.0166  
Z -0.0003 -0.0004 -0.0048 -0.0196 0.0191 0.0126

AT. 73 C X -0.0003 0.0001 -0.0050 0.0128 0.0121 -0.0037  
Y -0.0003 0.0001 0.0036 -0.0087 -0.0079 0.0021  
Z -0.0002 -0.0000 0.0012 -0.0037 -0.0044 0.0023

AT. 74 C X -0.0003 -0.0001 -0.0050 -0.0128 0.0121 0.0037  
Y -0.0003 -0.0001 0.0036 0.0087 -0.0079 -0.0021  
Z -0.0002 0.0000 0.0012 0.0037 -0.0044 -0.0023

AT. 75 H X -0.0015 0.0009 0.0144 -0.0371 -0.0345 0.0110  
Y 0.0011 -0.0004 -0.0093 0.0265 0.0287 -0.0120  
Z 0.0009 -0.0002 -0.0024 0.0087 0.0126 -0.0070

AT. 76 H X -0.0015 -0.0009 0.0144 0.0371 -0.0345 -0.0110  
Y 0.0011 0.0004 -0.0093 -0.0265 0.0287 0.0120  
Z 0.0009 0.0002 -0.0024 -0.0087 0.0126 0.0070

AT. 77 H X 0.0027 -0.0016 0.0157 -0.0400 -0.0394 0.0119  
Y -0.0014 0.0007 -0.0125 0.0285 0.0230 -0.0033  
Z -0.0020 0.0010 -0.0030 0.0109 0.0151 -0.0076

AT. 78 H X 0.0027 0.0016 0.0157 0.0400 -0.0394 -0.0119  
Y -0.0014 -0.0007 -0.0125 -0.0285 0.0230 0.0033  
Z -0.0020 -0.0010 -0.0030 -0.0109 0.0151 0.0076

AT. 79 I X -0.0000 0.0000 -0.0000 -0.0000 -0.0000 0.0000  
Y 0.0000 -0.0000 0.0000 -0.0000 -0.0000 -0.0000

Z 0.0000 -0.0000 -0.0000 -0.0000 0.0000 0.0000  
AT. 80 I X -0.0000 -0.0000 -0.0000 0.0000 -0.0000 -0.0000  
Y 0.0000 0.0000 0.0000 0.0000 -0.0000 0.0000  
Z 0.0000 0.0000 -0.0000 0.0000 0.0000 -0.0000  
AT. 81 I X -0.0000 0.0000 0.0000 0.0000 -0.0000 0.0000  
Y 0.0000 -0.0000 -0.0000 0.0000 0.0000 0.0000  
Z 0.0000 -0.0000 0.0000 0.0000 0.0000 -0.0000  
AT. 82 I X -0.0000 -0.0000 0.0000 -0.0000 -0.0000 -0.0000  
Y 0.0000 0.0000 -0.0000 -0.0000 0.0000 -0.0000  
Z 0.0000 0.0000 0.0000 -0.0000 0.0000 0.0000  
AT. 83 O X -0.0009 0.0010 -0.0004 -0.0000 -0.0003 0.0005  
Y -0.0003 0.0003 -0.0002 0.0001 -0.0000 0.0002  
Z 0.0006 -0.0007 -0.0003 0.0000 -0.0003 0.0003  
AT. 84 O X -0.0009 -0.0010 -0.0004 0.0000 -0.0003 -0.0005  
Y -0.0003 -0.0003 -0.0002 -0.0001 -0.0000 -0.0002  
Z 0.0006 0.0007 -0.0003 -0.0000 -0.0003 -0.0003  
AT. 85 O X -0.0028 0.0027 0.0004 0.0001 0.0003 -0.0005  
Y -0.0008 0.0008 0.0002 0.0000 0.0002 -0.0003  
Z -0.0004 0.0004 -0.0003 0.0001 -0.0001 0.0002  
AT. 86 O X -0.0028 -0.0027 0.0004 -0.0001 0.0003 0.0005  
Y -0.0008 -0.0008 0.0002 -0.0000 0.0002 0.0003  
Z -0.0004 -0.0004 -0.0003 -0.0001 -0.0001 -0.0002  
AT. 87 N X -0.0046 0.0050 -0.0019 0.0003 -0.0009 0.0019  
Y -0.0049 0.0050 -0.0001 -0.0003 -0.0002 0.0002  
Z -0.0028 0.0029 0.0010 -0.0006 0.0004 -0.0009  
AT. 88 N X -0.0046 -0.0050 -0.0019 -0.0003 -0.0009 -0.0019  
Y -0.0049 -0.0050 -0.0001 0.0003 -0.0002 -0.0002  
Z -0.0028 -0.0029 0.0010 0.0006 0.0004 0.0009  
AT. 89 N X -0.0035 0.0034 -0.0033 0.0012 -0.0011 0.0028  
Y -0.0037 0.0037 -0.0014 0.0007 -0.0004 0.0012  
Z -0.0010 0.0012 0.0006 -0.0004 0.0001 -0.0004  
AT. 90 N X -0.0035 -0.0034 -0.0033 -0.0012 -0.0011 -0.0028

Y -0.0037 -0.0037 -0.0014 -0.0007 -0.0004 -0.0012  
Z -0.0010 -0.0012 0.0006 0.0004 0.0001 0.0004  
AT. 91 C X 0.0051 -0.0055 0.0005 0.0003 0.0005 -0.0007  
Y 0.0018 -0.0021 0.0005 -0.0001 0.0002 -0.0005  
Z -0.0041 0.0047 -0.0003 0.0002 0.0000 0.0003  
AT. 92 C X 0.0051 0.0055 0.0005 -0.0003 0.0005 0.0007  
Y 0.0018 0.0021 0.0005 0.0001 0.0002 0.0005  
Z -0.0041 -0.0047 -0.0003 -0.0002 0.0000 -0.0003  
AT. 93 C X -0.0013 0.0014 0.0003 -0.0002 0.0001 -0.0001  
Y 0.0001 0.0000 0.0004 -0.0001 0.0002 -0.0003  
Z 0.0011 -0.0013 -0.0003 0.0001 -0.0002 0.0002  
AT. 94 C X -0.0013 -0.0014 0.0003 0.0002 0.0001 0.0001  
Y 0.0001 -0.0000 0.0004 0.0001 0.0002 0.0003  
Z 0.0011 0.0013 -0.0003 -0.0001 -0.0002 -0.0002  
AT. 95 H X 0.0007 -0.0004 0.0000 -0.0001 -0.0002 0.0001  
Y -0.0035 0.0036 -0.0021 0.0002 -0.0010 0.0015  
Z 0.0047 -0.0050 0.0040 -0.0004 0.0022 -0.0029  
AT. 96 H X 0.0007 0.0004 0.0000 0.0001 -0.0002 -0.0001  
Y -0.0035 -0.0036 -0.0021 -0.0002 -0.0010 -0.0015  
Z 0.0047 0.0050 0.0040 0.0004 0.0022 0.0029  
AT. 97 H X -0.0058 0.0071 -0.0029 0.0009 -0.0013 0.0026  
Y -0.0061 0.0065 -0.0040 0.0004 -0.0020 0.0030  
Z 0.0011 -0.0016 -0.0004 -0.0001 -0.0003 0.0002  
AT. 98 H X -0.0058 -0.0071 -0.0029 -0.0009 -0.0013 -0.0026  
Y -0.0061 -0.0065 -0.0040 -0.0004 -0.0020 -0.0030  
Z 0.0011 0.0016 -0.0004 0.0001 -0.0003 -0.0002  
AT. 99 C X 0.0093 -0.0093 0.0001 -0.0007 -0.0004 0.0006  
Y -0.0009 0.0009 0.0003 -0.0002 -0.0001 -0.0002  
Z 0.0079 -0.0080 0.0000 -0.0003 -0.0001 0.0004  
AT. 100 C X 0.0093 0.0093 0.0001 0.0007 -0.0004 -0.0006  
Y -0.0009 -0.0009 0.0003 0.0002 -0.0001 0.0002  
Z 0.0079 0.0080 0.0000 0.0003 -0.0001 -0.0004

AT.101 C X -0.0030 0.0029 0.0004 0.0001 0.0002 -0.0006  
Y 0.0005 -0.0005 0.0003 -0.0001 0.0001 -0.0003  
Z -0.0026 0.0024 0.0009 -0.0001 0.0004 -0.0010

AT.102 C X -0.0030 -0.0029 0.0004 -0.0001 0.0002 0.0006  
Y 0.0005 0.0005 0.0003 0.0001 0.0001 0.0003  
Z -0.0026 -0.0024 0.0009 0.0001 0.0004 0.0010

AT.103 H X 0.0032 -0.0027 -0.0005 0.0001 -0.0000 0.0006  
Y -0.0024 0.0021 0.0005 -0.0001 0.0001 -0.0007  
Z -0.0009 0.0028 -0.0059 0.0016 -0.0020 0.0058

AT.104 H X 0.0032 0.0027 -0.0005 -0.0001 -0.0000 -0.0006  
Y -0.0024 -0.0021 0.0005 0.0001 0.0001 0.0007  
Z -0.0009 -0.0028 -0.0059 -0.0016 -0.0020 -0.0058

AT.105 H X -0.0029 0.0032 -0.0028 0.0009 -0.0004 0.0032  
Y -0.0022 0.0030 -0.0060 0.0016 -0.0023 0.0056  
Z -0.0037 0.0041 -0.0022 0.0007 -0.0007 0.0020

AT.106 H X -0.0029 -0.0032 -0.0028 -0.0009 -0.0004 -0.0032  
Y -0.0022 -0.0030 -0.0060 -0.0016 -0.0023 -0.0056  
Z -0.0037 -0.0041 -0.0022 -0.0007 -0.0007 -0.0020

AT.107 C X -0.0074 0.0078 -0.0036 0.0001 -0.0019 0.0040  
Y 0.0070 -0.0073 -0.0002 0.0003 -0.0001 0.0003  
Z 0.0119 -0.0124 0.0027 0.0003 0.0014 -0.0029

AT.108 C X -0.0074 -0.0078 -0.0036 -0.0001 -0.0019 -0.0040  
Y 0.0070 0.0073 -0.0002 -0.0003 -0.0001 -0.0003  
Z 0.0119 0.0124 0.0027 -0.0003 0.0014 0.0029

AT.109 H X 0.0326 -0.0334 0.0237 -0.0018 0.0132 -0.0257  
Y -0.0171 0.0176 -0.0050 0.0008 -0.0013 0.0048  
Z -0.0418 0.0429 -0.0155 0.0021 -0.0058 0.0155

AT.110 H X 0.0326 0.0334 0.0237 0.0018 0.0132 0.0257  
Y -0.0171 -0.0176 -0.0050 -0.0008 -0.0013 -0.0048  
Z -0.0418 -0.0429 -0.0155 -0.0021 -0.0058 -0.0155

AT.111 H X 0.0540 -0.0574 0.0112 0.0011 0.0061 -0.0127  
Y -0.0240 0.0254 0.0012 -0.0000 0.0023 -0.0016

Z -0.0513 0.0546 -0.0139 -0.0010 -0.0081 0.0160  
AT. 112 H X 0.0540 0.0574 0.0112 -0.0011 0.0061 0.0127  
Y -0.0240 -0.0254 0.0012 0.0000 0.0023 0.0016  
Z -0.0513 -0.0546 -0.0139 0.0010 -0.0081 -0.0160  
AT. 113 C X 0.0010 -0.0014 0.0089 -0.0015 0.0038 -0.0092  
Y -0.0045 0.0047 0.0059 -0.0017 0.0022 -0.0063  
Z -0.0010 0.0008 -0.0046 0.0007 -0.0020 0.0044  
AT. 114 C X 0.0010 0.0014 0.0089 0.0015 0.0038 0.0092  
Y -0.0045 -0.0047 0.0059 0.0017 0.0022 0.0063  
Z -0.0010 -0.0008 -0.0046 -0.0007 -0.0020 -0.0044  
AT. 115 C X 0.0020 -0.0018 -0.0017 0.0001 -0.0008 0.0020  
Y 0.0129 -0.0132 -0.0058 0.0009 -0.0023 0.0061  
Z -0.0084 0.0086 0.0038 -0.0003 0.0017 -0.0041  
AT. 116 C X 0.0020 0.0018 -0.0017 -0.0001 -0.0008 -0.0020  
Y 0.0129 0.0132 -0.0058 -0.0009 -0.0023 -0.0061  
Z -0.0084 -0.0086 0.0038 0.0003 0.0017 0.0041  
AT. 117 H X -0.0114 0.0111 0.0108 -0.0015 0.0047 -0.0114  
Y -0.0632 0.0640 0.0288 -0.0046 0.0118 -0.0310  
Z 0.0257 -0.0254 -0.0179 0.0027 -0.0075 0.0192  
AT. 118 H X -0.0114 -0.0111 0.0108 0.0015 0.0047 0.0114  
Y -0.0632 -0.0640 0.0288 0.0046 0.0118 0.0310  
Z 0.0257 0.0254 -0.0179 -0.0027 -0.0075 -0.0192  
AT. 119 H X 0.0063 -0.0062 0.0069 -0.0017 0.0025 -0.0059  
Y -0.0360 0.0378 0.0229 -0.0033 0.0095 -0.0221  
Z 0.0400 -0.0420 -0.0194 0.0028 -0.0080 0.0190  
AT. 120 H X 0.0063 0.0062 0.0069 0.0017 0.0025 0.0059  
Y -0.0360 -0.0378 0.0229 0.0033 0.0095 0.0221  
Z 0.0400 0.0420 -0.0194 -0.0028 -0.0080 -0.0190  
AT. 121 C X -0.0062 0.0063 -0.0049 0.0021 -0.0016 0.0042  
Y 0.0084 -0.0086 0.0042 -0.0020 0.0014 -0.0036  
Z -0.0092 0.0094 -0.0052 0.0025 -0.0017 0.0045  
AT. 122 C X -0.0062 -0.0063 -0.0049 -0.0021 -0.0016 -0.0042

Y 0.0084 0.0086 0.0042 0.0020 0.0014 0.0036  
Z -0.0092 -0.0094 -0.0052 -0.0025 -0.0017 -0.0045  
AT. 123 H X 0.0334 -0.0352 0.0191 -0.0076 0.0068 -0.0171  
Y -0.0343 0.0353 -0.0115 0.0050 -0.0047 0.0102  
Z 0.0411 -0.0424 0.0153 -0.0064 0.0061 -0.0136  
AT. 124 H X 0.0334 0.0352 0.0191 0.0076 0.0068 0.0171  
Y -0.0343 -0.0353 -0.0115 -0.0050 -0.0047 -0.0102  
Z 0.0411 0.0424 0.0153 0.0064 0.0061 0.0136  
AT. 125 H X 0.0413 -0.0409 0.0235 -0.0109 0.0069 -0.0189  
Y -0.0281 0.0272 -0.0112 0.0052 -0.0034 0.0086  
Z 0.0313 -0.0312 0.0216 -0.0097 0.0062 -0.0176  
AT. 126 H X 0.0413 0.0409 0.0235 0.0109 0.0069 0.0189  
Y -0.0281 -0.0272 -0.0112 -0.0052 -0.0034 -0.0086  
Z 0.0313 0.0312 0.0216 0.0097 0.0062 0.0176  
AT. 127 C X 0.0018 -0.0015 0.0115 -0.0044 0.0042 -0.0104  
Y 0.0035 -0.0032 -0.0032 0.0015 -0.0009 0.0030  
Z 0.0020 -0.0026 0.0074 -0.0030 0.0029 -0.0072  
AT. 128 C X 0.0018 0.0015 0.0115 0.0044 0.0042 0.0104  
Y 0.0035 0.0032 -0.0032 -0.0015 -0.0009 -0.0030  
Z 0.0020 0.0026 0.0074 0.0030 0.0029 0.0072  
AT. 129 C X 0.0021 -0.0022 -0.0027 0.0011 -0.0010 0.0024  
Y 0.0056 -0.0058 -0.0041 0.0017 -0.0017 0.0037  
Z 0.0076 -0.0077 -0.0070 0.0030 -0.0028 0.0065  
AT. 130 C X 0.0021 0.0022 -0.0027 -0.0011 -0.0010 -0.0024  
Y 0.0056 0.0058 -0.0041 -0.0017 -0.0017 -0.0037  
Z 0.0076 0.0077 -0.0070 -0.0030 -0.0028 -0.0065  
AT. 131 H X -0.0036 0.0041 0.0094 -0.0034 0.0039 -0.0090  
Y -0.0264 0.0284 0.0218 -0.0089 0.0087 -0.0190  
Z -0.0160 0.0178 0.0216 -0.0081 0.0088 -0.0197  
AT. 132 H X -0.0036 -0.0041 0.0094 0.0034 0.0039 0.0090  
Y -0.0264 -0.0284 0.0218 0.0089 0.0087 0.0190  
Z -0.0160 -0.0178 0.0216 0.0081 0.0088 0.0197

AT. 133 H X 0.0009 -0.0022 0.0087 -0.0026 0.0033 -0.0089  
Y -0.0265 0.0250 0.0310 -0.0124 0.0119 -0.0290  
Z -0.0415 0.0399 0.0431 -0.0175 0.0166 -0.0401

AT. 134 H X 0.0009 0.0022 0.0087 0.0026 0.0033 0.0089  
Y -0.0265 -0.0250 0.0310 0.0124 0.0119 0.0290  
Z -0.0415 -0.0399 0.0431 0.0175 0.0166 0.0401

AT. 135 C X -0.0003 0.0005 -0.0095 0.0019 -0.0039 0.0101  
Y -0.0001 0.0001 -0.0039 0.0010 -0.0015 0.0040  
Z 0.0005 -0.0006 0.0062 -0.0013 0.0025 -0.0065

AT. 136 C X -0.0003 -0.0005 -0.0095 -0.0019 -0.0039 -0.0101  
Y -0.0001 -0.0001 -0.0039 -0.0010 -0.0015 -0.0040  
Z 0.0005 0.0006 0.0062 0.0013 0.0025 0.0065

AT. 137 H X -0.0016 0.0006 0.0360 -0.0082 0.0139 -0.0381  
Y -0.0019 0.0019 -0.0020 0.0000 -0.0009 0.0022  
Z -0.0020 0.0024 -0.0101 0.0015 -0.0042 0.0111

AT. 138 H X -0.0016 -0.0006 0.0360 0.0082 0.0139 0.0381  
Y -0.0019 -0.0019 -0.0020 -0.0000 -0.0009 -0.0022  
Z -0.0020 -0.0024 -0.0101 -0.0015 -0.0042 -0.0111

AT. 139 H X 0.0034 -0.0036 0.0187 -0.0039 0.0078 -0.0200  
Y -0.0043 0.0045 0.0108 -0.0036 0.0034 -0.0105  
Z -0.0030 0.0034 -0.0325 0.0071 -0.0132 0.0345

AT. 140 H X 0.0034 0.0036 0.0187 0.0039 0.0078 0.0200  
Y -0.0043 -0.0045 0.0108 0.0036 0.0034 0.0105  
Z -0.0030 -0.0034 -0.0325 -0.0071 -0.0132 -0.0345

AT. 141 H X 0.0047 -0.0053 0.0278 -0.0055 0.0117 -0.0306  
Y 0.0019 -0.0023 0.0240 -0.0051 0.0095 -0.0257  
Z 0.0002 -0.0002 -0.0090 0.0022 -0.0032 0.0093

AT. 142 H X 0.0047 0.0053 0.0278 0.0055 0.0117 0.0306  
Y 0.0019 0.0023 0.0240 0.0051 0.0095 0.0257  
Z 0.0002 0.0002 -0.0090 -0.0022 -0.0032 -0.0093

AT. 143 C X -0.0003 0.0004 -0.0105 0.0041 -0.0039 0.0097  
Y -0.0021 0.0021 -0.0004 0.0001 -0.0002 0.0003

Z -0.0008 0.0011 -0.0079 0.0030 -0.0030 0.0073  
AT. 144 C X -0.0003 -0.0004 -0.0105 -0.0041 -0.0039 -0.0097  
Y -0.0021 -0.0021 -0.0004 -0.0001 -0.0002 -0.0003  
Z -0.0008 -0.0011 -0.0079 -0.0030 -0.0030 -0.0073  
AT. 145 H X -0.0018 0.0012 0.0383 -0.0146 0.0148 -0.0349  
Y 0.0010 -0.0006 -0.0101 0.0039 -0.0038 0.0085  
Z -0.0037 0.0035 0.0167 -0.0066 0.0063 -0.0145  
AT. 146 H X -0.0018 -0.0012 0.0383 0.0146 0.0148 0.0349  
Y 0.0010 0.0006 -0.0101 -0.0039 -0.0038 -0.0085  
Z -0.0037 -0.0035 0.0167 0.0066 0.0063 0.0145  
AT. 147 H X -0.0017 0.0010 0.0242 -0.0095 0.0091 -0.0234  
Y 0.0045 -0.0053 -0.0046 0.0024 -0.0012 0.0048  
Z 0.0005 -0.0017 0.0365 -0.0141 0.0140 -0.0349  
AT. 148 H X -0.0017 -0.0010 0.0242 0.0095 0.0091 0.0234  
Y 0.0045 0.0053 -0.0046 -0.0024 -0.0012 -0.0048  
Z 0.0005 0.0017 0.0365 0.0141 0.0140 0.0349  
AT. 149 H X 0.0024 -0.0021 0.0293 -0.0117 0.0109 -0.0277  
Y 0.0024 -0.0028 0.0216 -0.0083 0.0084 -0.0193  
Z 0.0047 -0.0054 0.0120 -0.0043 0.0051 -0.0097  
AT. 150 H X 0.0024 0.0021 0.0293 0.0117 0.0109 0.0277  
Y 0.0024 0.0028 0.0216 0.0083 0.0084 0.0193  
Z 0.0047 0.0054 0.0120 0.0043 0.0051 0.0097  
AT. 151 C X -0.0021 0.0021 -0.0137 0.0040 -0.0053 0.0133  
Y 0.0010 -0.0012 -0.0035 0.0010 -0.0014 0.0036  
Z -0.0001 0.0002 -0.0014 0.0006 -0.0005 0.0008  
AT. 152 C X -0.0021 -0.0021 -0.0137 -0.0040 -0.0053 -0.0133  
Y 0.0010 0.0012 -0.0035 -0.0010 -0.0014 -0.0036  
Z -0.0001 -0.0002 -0.0014 -0.0006 -0.0005 -0.0008  
AT. 153 H X -0.0092 0.0088 0.0575 -0.0189 0.0211 -0.0574  
Y -0.0023 0.0024 0.0190 -0.0063 0.0070 -0.0164  
Z -0.0025 0.0032 0.0048 -0.0015 0.0019 -0.0014  
AT. 154 H X -0.0092 -0.0088 0.0575 0.0189 0.0211 0.0574



Y -0.0023 -0.0024 0.0190 0.0063 0.0070 0.0164  
Z -0.0025 -0.0032 0.0048 0.0015 0.0019 0.0014  
AT. 155 H X 0.0196 -0.0198 0.0283 -0.0070 0.0124 -0.0265  
Y 0.0034 -0.0035 0.0052 -0.0010 0.0025 -0.0080  
Z 0.0054 -0.0055 0.0044 -0.0013 0.0017 -0.0010  
AT. 156 H X 0.0196 0.0198 0.0283 0.0070 0.0124 0.0265  
Y 0.0034 0.0035 0.0052 0.0010 0.0025 0.0080  
Z 0.0054 0.0055 0.0044 0.0013 0.0017 0.0010  
AT. 157 O X 0.0000 -0.0000 -0.0001 -0.0000 -0.0000 0.0001  
Y 0.0001 -0.0001 -0.0002 0.0001 -0.0001 0.0002  
Z 0.0000 0.0000 0.0000 -0.0002 0.0000 -0.0001  
AT. 158 O X 0.0000 0.0000 -0.0001 0.0000 -0.0000 -0.0001  
Y 0.0001 0.0001 -0.0002 -0.0001 -0.0001 -0.0002  
Z 0.0000 -0.0000 0.0000 0.0002 0.0000 0.0001  
AT. 159 O X 0.0000 -0.0000 0.0000 0.0001 -0.0001 0.0001  
Y 0.0000 0.0001 0.0001 -0.0000 0.0001 -0.0000  
Z -0.0000 -0.0000 0.0001 0.0001 0.0000 0.0001  
AT. 160 O X 0.0000 0.0000 0.0000 -0.0001 -0.0001 -0.0001  
Y 0.0000 -0.0001 0.0001 0.0000 0.0001 0.0000  
Z -0.0000 0.0000 0.0001 -0.0001 0.0000 -0.0001  
AT. 161 H X -0.0014 0.0015 0.0018 0.0008 0.0019 -0.0027  
Y 0.0003 -0.0001 0.0007 -0.0006 -0.0001 -0.0005  
Z -0.0007 0.0000 -0.0024 0.0019 0.0008 0.0019  
AT. 162 H X -0.0014 -0.0015 0.0018 -0.0008 0.0019 0.0027  
Y 0.0003 0.0001 0.0007 0.0006 -0.0001 0.0005  
Z -0.0007 -0.0000 -0.0024 -0.0019 0.0008 -0.0019  
AT. 163 H X 0.0002 -0.0001 -0.0005 -0.0020 0.0010 -0.0007  
Y -0.0003 -0.0006 -0.0001 -0.0003 -0.0000 -0.0008  
Z -0.0001 0.0001 -0.0001 0.0006 -0.0005 -0.0001  
AT. 164 H X 0.0002 0.0001 -0.0005 0.0020 0.0010 0.0007  
Y -0.0003 0.0006 -0.0001 0.0003 -0.0000 0.0008  
Z -0.0001 -0.0001 -0.0001 -0.0006 -0.0005 0.0001

AT.165 O X -0.0006 0.0008 -0.0001 -0.0003 -0.0003 0.0005  
Y -0.0003 0.0002 -0.0000 -0.0000 -0.0001 0.0002  
Z 0.0004 -0.0003 0.0001 0.0000 0.0002 -0.0004

AT.166 O X -0.0006 -0.0008 -0.0001 0.0003 -0.0003 -0.0005  
Y -0.0003 -0.0002 -0.0000 0.0000 -0.0001 -0.0002  
Z 0.0004 0.0003 0.0001 -0.0000 0.0002 0.0004

AT.167 H X 0.0040 -0.0047 0.0006 0.0020 0.0022 -0.0033  
Y -0.0016 0.0016 0.0008 -0.0018 -0.0023 0.0012  
Z -0.0118 0.0140 -0.0041 -0.0041 -0.0043 0.0110

AT.168 H X 0.0040 0.0047 0.0006 -0.0020 0.0022 0.0033  
Y -0.0016 -0.0016 0.0008 0.0018 -0.0023 -0.0012  
Z -0.0118 -0.0140 -0.0041 0.0041 -0.0043 -0.0110

AT.169 O X 0.0002 -0.0005 0.0001 0.0001 0.0001 -0.0003  
Y 0.0003 -0.0003 0.0000 0.0001 0.0002 -0.0002  
Z 0.0006 -0.0003 0.0001 0.0002 0.0002 -0.0003

AT.170 O X 0.0002 0.0005 0.0001 -0.0001 0.0001 0.0003  
Y 0.0003 0.0003 0.0000 -0.0001 0.0002 0.0002  
Z 0.0006 0.0003 0.0001 -0.0002 0.0002 0.0003

AT.171 H X 0.0027 0.0014 0.0009 0.0003 0.0006 -0.0002  
Y 0.0002 -0.0002 0.0007 0.0006 -0.0006 -0.0002  
Z -0.0039 -0.0040 0.0012 0.0011 -0.0022 -0.0001

AT.172 H X 0.0027 -0.0014 0.0009 -0.0003 0.0006 0.0002  
Y 0.0002 0.0002 0.0007 -0.0006 -0.0006 0.0002  
Z -0.0039 0.0040 0.0012 -0.0011 -0.0022 0.0001

FREQ(CM\*\*-1) 1352.88 1352.89 1354.47 1355.46 1369.81 1370.19

AT. 1 I X -0.0000 -0.0000 0.0000 0.0000 -0.0000 -0.0000  
Y -0.0000 -0.0000 0.0000 0.0000 -0.0000 -0.0000  
Z 0.0000 0.0000 0.0000 0.0000 -0.0000 -0.0000

AT. 2 I X 0.0000 -0.0000 -0.0000 0.0000 -0.0000 0.0000  
Y 0.0000 -0.0000 -0.0000 0.0000 -0.0000 0.0000

Z -0.0000 0.0000 -0.0000 0.0000 -0.0000 0.0000  
AT. 3 I X 0.0000 0.0000 -0.0000 -0.0000 0.0000 0.0000  
Y 0.0000 0.0000 -0.0000 0.0000 0.0000 0.0000  
Z 0.0000 -0.0000 0.0000 0.0000 -0.0000 0.0000  
AT. 4 I X -0.0000 0.0000 0.0000 -0.0000 0.0000 -0.0000  
Y -0.0000 0.0000 0.0000 0.0000 0.0000 -0.0000  
Z -0.0000 -0.0000 -0.0000 0.0000 -0.0000 -0.0000  
AT. 5 O X -0.0004 -0.0006 0.0002 0.0000 -0.0008 -0.0008  
Y 0.0001 0.0003 -0.0001 -0.0000 0.0005 0.0006  
Z -0.0001 -0.0000 -0.0001 -0.0000 0.0004 0.0005  
AT. 6 O X 0.0004 -0.0006 -0.0002 0.0000 -0.0008 0.0008  
Y -0.0001 0.0003 0.0001 -0.0000 0.0005 -0.0006  
Z 0.0001 -0.0000 0.0001 -0.0000 0.0004 -0.0005  
AT. 7 O X 0.0009 0.0011 -0.0003 -0.0001 0.0012 0.0011  
Y -0.0004 -0.0006 0.0001 -0.0000 -0.0007 -0.0007  
Z -0.0003 -0.0003 0.0001 0.0001 0.0000 0.0000  
AT. 8 O X -0.0009 0.0011 0.0003 -0.0001 0.0012 -0.0011  
Y 0.0004 -0.0006 -0.0001 -0.0000 -0.0007 0.0007  
Z 0.0003 -0.0003 -0.0001 0.0001 0.0000 -0.0000  
AT. 9 N X 0.0000 -0.0002 0.0002 -0.0001 -0.0002 -0.0004  
Y 0.0021 0.0024 -0.0007 -0.0004 0.0030 0.0031  
Z 0.0035 0.0037 -0.0008 -0.0006 0.0008 0.0010  
AT. 10 N X -0.0000 -0.0002 -0.0002 -0.0001 -0.0002 0.0004  
Y -0.0021 0.0024 0.0007 -0.0004 0.0030 -0.0031  
Z -0.0035 0.0037 0.0008 -0.0006 0.0008 -0.0010  
AT. 11 N X 0.0018 0.0016 -0.0002 -0.0004 -0.0005 -0.0009  
Y -0.0029 -0.0027 0.0004 0.0006 -0.0009 -0.0007  
Z 0.0006 0.0004 -0.0003 -0.0004 -0.0016 -0.0013  
AT. 12 N X -0.0018 0.0016 0.0002 -0.0004 -0.0005 0.0009  
Y 0.0029 -0.0027 -0.0004 0.0006 -0.0009 0.0007  
Z -0.0006 0.0004 0.0003 -0.0004 -0.0016 0.0013  
AT. 13 C X 0.0019 0.0022 -0.0005 -0.0001 0.0022 0.0023

Y -0.0010 -0.0013 0.0003 0.0000 -0.0016 -0.0017  
Z -0.0002 -0.0002 0.0001 0.0001 0.0006 0.0005  
AT. 14 C X -0.0019 0.0022 0.0005 -0.0001 0.0022 -0.0023  
Y 0.0010 -0.0013 -0.0003 0.0000 -0.0016 0.0017  
Z 0.0002 -0.0002 -0.0001 0.0001 0.0006 -0.0005  
AT. 15 C X -0.0005 -0.0006 0.0000 -0.0001 -0.0003 -0.0004  
Y -0.0001 -0.0001 0.0002 0.0003 -0.0010 -0.0008  
Z -0.0002 -0.0002 0.0000 -0.0000 -0.0001 -0.0001  
AT. 16 C X 0.0005 -0.0006 -0.0000 -0.0001 -0.0003 0.0004  
Y 0.0001 -0.0001 -0.0002 0.0003 -0.0010 0.0008  
Z 0.0002 -0.0002 -0.0000 -0.0000 -0.0001 0.0001  
AT. 17 H X 0.0014 0.0016 -0.0006 -0.0005 0.0032 0.0031  
Y 0.0027 0.0034 -0.0011 -0.0011 0.0070 0.0060  
Z -0.0028 -0.0035 0.0013 0.0014 -0.0080 -0.0068  
AT. 18 H X -0.0014 0.0016 0.0006 -0.0005 0.0032 -0.0031  
Y -0.0027 0.0034 0.0011 -0.0011 0.0070 -0.0060  
Z 0.0028 -0.0035 -0.0013 0.0014 -0.0080 0.0068  
AT. 19 H X 0.0000 -0.0005 0.0003 0.0010 -0.0020 -0.0021  
Y 0.0040 0.0050 -0.0020 -0.0019 0.0115 0.0103  
Z 0.0013 0.0015 -0.0007 -0.0005 0.0039 0.0034  
AT. 20 H X -0.0000 -0.0005 -0.0003 0.0010 -0.0020 0.0021  
Y -0.0040 0.0050 0.0020 -0.0019 0.0115 -0.0103  
Z -0.0013 0.0015 0.0007 -0.0005 0.0039 -0.0034  
AT. 21 C X -0.0037 -0.0040 0.0010 0.0006 -0.0033 -0.0032  
Y 0.0009 0.0009 -0.0002 -0.0000 0.0003 0.0001  
Z 0.0030 0.0035 -0.0008 -0.0005 0.0034 0.0033  
AT. 22 C X 0.0037 -0.0040 -0.0010 0.0006 -0.0033 0.0032  
Y -0.0009 0.0009 0.0002 -0.0000 0.0003 -0.0001  
Z -0.0030 0.0035 0.0008 -0.0005 0.0034 -0.0033  
AT. 23 C X 0.0014 0.0013 -0.0002 -0.0003 0.0009 0.0011  
Y -0.0002 -0.0001 0.0001 0.0002 -0.0001 -0.0002  
Z -0.0013 -0.0011 0.0005 0.0004 -0.0010 -0.0015

AT. 24 C X -0.0014 0.0013 0.0002 -0.0003 0.0009 -0.0011  
Y 0.0002 -0.0001 -0.0001 0.0002 -0.0001 0.0002  
Z 0.0013 -0.0011 -0.0005 0.0004 -0.0010 0.0015

AT. 25 H X -0.0026 -0.0023 0.0001 0.0000 -0.0013 -0.0015  
Y -0.0013 -0.0005 0.0003 0.0005 -0.0004 -0.0013  
Z 0.0016 -0.0022 -0.0009 -0.0020 -0.0005 0.0044

AT. 26 H X 0.0026 -0.0023 -0.0001 0.0000 -0.0013 0.0015  
Y 0.0013 -0.0005 -0.0003 0.0005 -0.0004 0.0013  
Z -0.0016 -0.0022 0.0009 -0.0020 -0.0005 -0.0044

AT. 27 H X -0.0018 0.0006 -0.0008 0.0012 0.0013 -0.0002  
Y 0.0007 -0.0012 -0.0008 -0.0017 -0.0004 0.0030  
Z -0.0003 -0.0016 0.0000 -0.0008 -0.0013 0.0004

AT. 28 H X 0.0018 0.0006 0.0008 0.0012 0.0013 0.0002  
Y -0.0007 -0.0012 0.0008 -0.0017 -0.0004 -0.0030  
Z 0.0003 -0.0016 -0.0000 -0.0008 -0.0013 -0.0004

AT. 29 C X -0.0078 -0.0089 0.0028 0.0018 -0.0083 -0.0093  
Y -0.0005 -0.0005 -0.0002 -0.0003 -0.0011 -0.0010  
Z -0.0070 -0.0076 0.0020 0.0012 -0.0064 -0.0070

AT. 30 C X 0.0078 -0.0089 -0.0028 0.0018 -0.0083 0.0093  
Y 0.0005 -0.0005 0.0002 -0.0003 -0.0011 0.0010  
Z 0.0070 -0.0076 -0.0020 0.0012 -0.0064 0.0070

AT. 31 H X 0.0274 0.0310 -0.0119 -0.0081 0.0412 0.0454  
Y 0.0071 0.0070 0.0001 0.0005 0.0017 0.0011  
Z 0.0255 0.0276 -0.0065 -0.0037 0.0292 0.0309

AT. 32 H X -0.0274 0.0310 0.0119 -0.0081 0.0412 -0.0454  
Y -0.0071 0.0070 -0.0001 0.0005 0.0017 -0.0011  
Z -0.0255 0.0276 0.0065 -0.0037 0.0292 -0.0309

AT. 33 H X 0.0406 0.0467 -0.0125 -0.0069 0.0348 0.0389  
Y 0.0040 0.0040 0.0013 0.0015 0.0008 -0.0000  
Z 0.0239 0.0280 -0.0090 -0.0055 0.0214 0.0246

AT. 34 H X -0.0406 0.0467 0.0125 -0.0069 0.0348 -0.0389  
Y -0.0040 0.0040 -0.0013 0.0015 0.0008 0.0000

Z -0.0239 0.0280 0.0090 -0.0055 0.0214 -0.0246  
AT. 35 C X 0.0086 0.0103 -0.0035 -0.0018 0.0058 0.0070  
Y -0.0058 -0.0068 0.0020 0.0011 -0.0038 -0.0047  
Z 0.0026 0.0022 -0.0007 -0.0005 0.0022 0.0022  
AT. 36 C X -0.0086 0.0103 0.0035 -0.0018 0.0058 -0.0070  
Y 0.0058 -0.0068 -0.0020 0.0011 -0.0038 0.0047  
Z -0.0026 0.0022 0.0007 -0.0005 0.0022 -0.0022  
AT. 37 C X -0.0012 -0.0012 0.0005 0.0004 0.0003 0.0001  
Y 0.0074 0.0084 -0.0024 -0.0014 0.0075 0.0082  
Z -0.0053 -0.0057 0.0017 0.0011 -0.0046 -0.0051  
AT. 38 C X 0.0012 -0.0012 -0.0005 0.0004 0.0003 -0.0001  
Y -0.0074 0.0084 0.0024 -0.0014 0.0075 -0.0082  
Z 0.0053 -0.0057 -0.0017 0.0011 -0.0046 0.0051  
AT. 39 H X -0.0051 -0.0058 0.0004 -0.0001 -0.0046 -0.0027  
Y -0.0384 -0.0458 0.0135 0.0076 -0.0345 -0.0384  
Z 0.0130 0.0159 -0.0056 -0.0033 0.0108 0.0137  
AT. 40 H X 0.0051 -0.0058 -0.0004 -0.0001 -0.0046 0.0027  
Y 0.0384 -0.0458 -0.0135 0.0076 -0.0345 0.0384  
Z -0.0130 0.0159 0.0056 -0.0033 0.0108 -0.0137  
AT. 41 H X -0.0092 -0.0103 0.0021 0.0013 -0.0029 -0.0016  
Y -0.0211 -0.0238 0.0078 0.0041 -0.0305 -0.0337  
Z 0.0248 0.0281 -0.0078 -0.0041 0.0286 0.0299  
AT. 42 H X 0.0092 -0.0103 -0.0021 0.0013 -0.0029 0.0016  
Y 0.0211 -0.0238 -0.0078 0.0041 -0.0305 0.0337  
Z -0.0248 0.0281 0.0078 -0.0041 0.0286 -0.0299  
AT. 43 C X 0.0054 0.0053 -0.0008 -0.0008 0.0021 0.0015  
Y 0.0040 0.0039 -0.0007 -0.0006 0.0023 0.0021  
Z -0.0083 -0.0082 0.0014 0.0014 -0.0031 -0.0026  
AT. 44 C X -0.0054 0.0053 0.0008 -0.0008 0.0021 -0.0015  
Y -0.0040 0.0039 0.0007 -0.0006 0.0023 -0.0021  
Z 0.0083 -0.0082 -0.0014 0.0014 -0.0031 0.0026  
AT. 45 H X -0.0233 -0.0224 0.0024 0.0028 -0.0117 -0.0087

Y -0.0116 -0.0117 0.0016 0.0014 -0.0052 -0.0056  
Z 0.0270 0.0265 -0.0030 -0.0032 0.0139 0.0119  
AT. 46 H X 0.0233 -0.0224 -0.0024 0.0028 -0.0117 0.0087  
Y 0.0116 -0.0117 -0.0016 0.0014 -0.0052 0.0056  
Z -0.0270 0.0265 0.0030 -0.0032 0.0139 -0.0119  
AT. 47 H X -0.0277 -0.0268 0.0048 0.0047 -0.0082 -0.0055  
Y -0.0064 -0.0064 0.0009 0.0006 -0.0019 -0.0018  
Z 0.0284 0.0271 -0.0051 -0.0052 0.0069 0.0033  
AT. 48 H X 0.0277 -0.0268 -0.0048 0.0047 -0.0082 0.0055  
Y 0.0064 -0.0064 -0.0009 0.0006 -0.0019 0.0018  
Z -0.0284 0.0271 0.0051 -0.0052 0.0069 -0.0033  
AT. 49 C X -0.0075 -0.0072 0.0010 0.0012 -0.0005 0.0006  
Y 0.0007 0.0005 0.0002 0.0001 -0.0018 -0.0023  
Z 0.0083 0.0081 -0.0008 -0.0012 0.0011 0.0009  
AT. 50 C X 0.0075 -0.0072 -0.0010 0.0012 -0.0005 -0.0006  
Y -0.0007 0.0005 -0.0002 0.0001 -0.0018 0.0023  
Z -0.0083 0.0081 0.0008 -0.0012 0.0011 -0.0009  
AT. 51 C X -0.0010 -0.0010 0.0002 0.0002 -0.0014 -0.0012  
Y -0.0059 -0.0059 0.0009 0.0009 -0.0028 -0.0022  
Z -0.0098 -0.0099 0.0015 0.0014 -0.0045 -0.0039  
AT. 52 C X 0.0010 -0.0010 -0.0002 0.0002 -0.0014 0.0012  
Y 0.0059 -0.0059 -0.0009 0.0009 -0.0028 0.0022  
Z 0.0098 -0.0099 -0.0015 0.0014 -0.0045 0.0039  
AT. 53 H X 0.0066 0.0068 -0.0017 -0.0013 0.0046 0.0038  
Y 0.0311 0.0311 -0.0054 -0.0048 0.0140 0.0102  
Z 0.0223 0.0221 -0.0029 -0.0030 0.0055 0.0028  
AT. 54 H X -0.0066 0.0068 0.0017 -0.0013 0.0046 -0.0038  
Y -0.0311 0.0311 0.0054 -0.0048 0.0140 -0.0102  
Z -0.0223 0.0221 0.0029 -0.0030 0.0055 -0.0028  
AT. 55 H X 0.0186 0.0191 -0.0040 -0.0033 0.0122 0.0110  
Y 0.0282 0.0280 -0.0036 -0.0042 0.0141 0.0119  
Z 0.0462 0.0461 -0.0069 -0.0072 0.0255 0.0214

AT. 56 H X -0.0186 0.0191 0.0040 -0.0033 0.0122 -0.0110  
Y -0.0282 0.0280 0.0036 -0.0042 0.0141 -0.0119  
Z -0.0462 0.0461 0.0069 -0.0072 0.0255 -0.0214

AT. 57 C X -0.0107 -0.0118 0.0040 0.0022 0.0113 0.0122  
Y 0.0075 0.0083 -0.0028 -0.0017 -0.0086 -0.0092  
Z -0.0043 -0.0050 0.0017 0.0010 0.0065 0.0064

AT. 58 C X 0.0107 -0.0118 -0.0040 0.0022 0.0113 -0.0122  
Y -0.0075 0.0083 0.0028 -0.0017 -0.0086 0.0092  
Z 0.0043 -0.0050 -0.0017 0.0010 0.0065 -0.0064

AT. 59 H X 0.0428 0.0492 -0.0175 -0.0107 -0.0686 -0.0716  
Y -0.0118 -0.0113 0.0049 0.0030 0.0160 0.0194  
Z 0.0070 0.0114 -0.0029 -0.0017 -0.0166 -0.0137

AT. 60 H X -0.0428 0.0492 0.0175 -0.0107 -0.0686 0.0716  
Y 0.0118 -0.0113 -0.0049 0.0030 0.0160 -0.0194  
Z -0.0070 0.0114 0.0029 -0.0017 -0.0166 0.0137

AT. 61 H X 0.0266 0.0272 -0.0088 -0.0046 -0.0384 -0.0435  
Y -0.0159 -0.0161 0.0068 0.0043 0.0303 0.0332  
Z 0.0338 0.0347 -0.0121 -0.0069 -0.0491 -0.0551

AT. 62 H X -0.0266 0.0272 0.0088 -0.0046 -0.0384 0.0435  
Y 0.0159 -0.0161 -0.0068 0.0043 0.0303 -0.0332  
Z -0.0338 0.0347 0.0121 -0.0069 -0.0491 0.0551

AT. 63 H X 0.0274 0.0283 -0.0088 -0.0048 -0.0344 -0.0397  
Y -0.0392 -0.0455 0.0145 0.0085 0.0612 0.0631  
Z 0.0013 0.0049 -0.0016 -0.0015 -0.0118 -0.0083

AT. 64 H X -0.0274 0.0283 0.0088 -0.0048 -0.0344 0.0397  
Y 0.0392 -0.0455 -0.0145 0.0085 0.0612 -0.0631  
Z -0.0013 0.0049 0.0016 -0.0015 -0.0118 0.0083

AT. 65 C X 0.0055 0.0058 -0.0004 -0.0008 -0.0053 -0.0030  
Y -0.0023 -0.0026 -0.0000 0.0003 0.0043 0.0026  
Z -0.0066 -0.0066 0.0003 0.0008 0.0069 0.0050

AT. 66 C X -0.0055 0.0058 0.0004 -0.0008 -0.0053 0.0030  
Y 0.0023 -0.0026 0.0000 0.0003 0.0043 -0.0026



Z 0.0066 -0.0066 -0.0003 0.0008 0.0069 -0.0050  
AT. 67 H X -0.0229 -0.0243 0.0006 0.0029 0.0346 0.0226  
Y -0.0025 -0.0004 0.0014 0.0001 -0.0104 -0.0021  
Z 0.0191 0.0182 -0.0018 -0.0023 -0.0154 -0.0140  
AT. 68 H X 0.0229 -0.0243 -0.0006 0.0029 0.0346 -0.0226  
Y 0.0025 -0.0004 -0.0014 0.0001 -0.0104 0.0021  
Z -0.0191 0.0182 0.0018 -0.0023 -0.0154 0.0140  
AT. 69 H X -0.0080 -0.0086 0.0006 0.0013 0.0097 0.0047  
Y -0.0005 -0.0000 0.0013 0.0004 -0.0096 -0.0062  
Z 0.0209 0.0238 0.0004 -0.0029 -0.0412 -0.0222  
AT. 70 H X 0.0080 -0.0086 -0.0006 0.0013 0.0097 -0.0047  
Y 0.0005 -0.0000 -0.0013 0.0004 -0.0096 0.0062  
Z -0.0209 0.0238 -0.0004 -0.0029 -0.0412 0.0222  
AT. 71 H X -0.0081 -0.0106 0.0001 0.0015 0.0196 0.0080  
Y 0.0202 0.0210 -0.0012 -0.0025 -0.0278 -0.0191  
Z 0.0159 0.0151 -0.0011 -0.0015 -0.0194 -0.0172  
AT. 72 H X 0.0081 -0.0106 -0.0001 0.0015 0.0196 -0.0080  
Y -0.0202 0.0210 0.0012 -0.0025 -0.0278 0.0191  
Z -0.0159 0.0151 0.0011 -0.0015 -0.0194 0.0172  
AT. 73 C X -0.0002 -0.0014 0.0014 0.0002 -0.0044 -0.0062  
Y 0.0011 0.0018 -0.0011 -0.0003 0.0036 0.0048  
Z -0.0028 -0.0024 0.0002 0.0003 -0.0010 -0.0004  
AT. 74 C X 0.0002 -0.0014 -0.0014 0.0002 -0.0044 0.0062  
Y -0.0011 0.0018 0.0011 -0.0003 0.0036 -0.0048  
Z 0.0028 -0.0024 -0.0002 0.0003 -0.0010 0.0004  
AT. 75 H X 0.0005 0.0032 -0.0040 -0.0002 0.0184 0.0228  
Y 0.0094 0.0077 0.0002 -0.0011 -0.0003 -0.0045  
Z 0.0103 0.0100 -0.0020 -0.0012 0.0121 0.0097  
AT. 76 H X -0.0005 0.0032 0.0040 -0.0002 0.0184 -0.0228  
Y -0.0094 0.0077 -0.0002 -0.0011 -0.0003 0.0045  
Z -0.0103 0.0100 0.0020 -0.0012 0.0121 -0.0097  
AT. 77 H X -0.0004 0.0025 -0.0045 -0.0011 0.0111 0.0164

Y -0.0117 -0.0139 0.0062 0.0023 -0.0229 -0.0253  
Z 0.0101 0.0094 -0.0012 -0.0011 0.0109 0.0082  
AT. 78 H X 0.0004 0.0025 0.0045 -0.0011 0.0111 -0.0164  
Y 0.0117 -0.0139 -0.0062 0.0023 -0.0229 0.0253  
Z -0.0101 0.0094 0.0012 -0.0011 0.0109 -0.0082  
AT. 79 I X -0.0000 -0.0000 0.0000 0.0000 -0.0000 -0.0000  
Y -0.0000 0.0000 -0.0000 0.0000 -0.0000 -0.0000  
Z -0.0000 0.0000 -0.0000 0.0000 -0.0000 -0.0000  
AT. 80 I X 0.0000 -0.0000 -0.0000 0.0000 -0.0000 0.0000  
Y 0.0000 0.0000 0.0000 0.0000 -0.0000 0.0000  
Z 0.0000 0.0000 0.0000 0.0000 -0.0000 0.0000  
AT. 81 I X -0.0000 -0.0000 -0.0000 -0.0000 0.0000 0.0000  
Y 0.0000 0.0000 0.0000 0.0000 -0.0000 -0.0000  
Z 0.0000 0.0000 0.0000 0.0000 -0.0000 -0.0000  
AT. 82 I X 0.0000 -0.0000 0.0000 -0.0000 0.0000 -0.0000  
Y -0.0000 0.0000 -0.0000 0.0000 -0.0000 0.0000  
Z -0.0000 0.0000 -0.0000 0.0000 -0.0000 0.0000  
AT. 83 O X 0.0005 0.0004 0.0005 0.0005 -0.0005 -0.0005  
Y 0.0001 0.0000 0.0001 0.0001 -0.0001 -0.0000  
Z 0.0002 0.0001 -0.0002 -0.0001 -0.0002 -0.0002  
AT. 84 O X -0.0005 0.0004 -0.0005 0.0005 -0.0005 0.0005  
Y -0.0001 0.0000 -0.0001 0.0001 -0.0001 0.0000  
Z -0.0002 0.0001 0.0002 -0.0001 -0.0002 0.0002  
AT. 85 O X -0.0004 -0.0002 -0.0013 -0.0014 0.0007 0.0005  
Y -0.0001 -0.0001 -0.0004 -0.0004 0.0003 0.0002  
Z 0.0000 0.0000 -0.0000 -0.0000 -0.0002 -0.0001  
AT. 86 O X 0.0004 -0.0002 0.0013 -0.0014 0.0007 -0.0005  
Y 0.0001 -0.0001 0.0004 -0.0004 0.0003 -0.0002  
Z -0.0000 0.0000 0.0000 -0.0000 -0.0002 0.0001  
AT. 87 N X 0.0014 0.0010 0.0014 0.0015 -0.0006 -0.0005  
Y 0.0006 0.0004 0.0021 0.0022 -0.0009 -0.0008  
Z 0.0002 0.0003 0.0036 0.0037 0.0000 -0.0000

AT. 88 N X -0.0014 0.0010 -0.0014 0.0015 -0.0006 0.0005  
Y -0.0006 0.0004 -0.0021 0.0022 -0.0009 0.0008  
Z -0.0002 0.0003 -0.0036 0.0037 0.0000 0.0000

AT. 89 N X 0.0010 0.0006 -0.0009 -0.0011 -0.0001 0.0000  
Y -0.0001 -0.0000 -0.0023 -0.0022 0.0003 0.0003  
Z -0.0002 -0.0002 0.0011 0.0008 0.0007 0.0006

AT. 90 N X -0.0010 0.0006 0.0009 -0.0011 -0.0001 -0.0000  
Y 0.0001 -0.0000 0.0023 -0.0022 0.0003 -0.0003  
Z 0.0002 -0.0002 -0.0011 0.0008 0.0007 -0.0006

AT. 91 C X -0.0012 -0.0011 -0.0022 -0.0023 0.0011 0.0012  
Y -0.0004 -0.0004 -0.0003 -0.0004 0.0003 0.0003  
Z 0.0003 0.0003 -0.0002 -0.0001 -0.0003 -0.0002

AT. 92 C X 0.0012 -0.0011 0.0022 -0.0023 0.0011 -0.0012  
Y 0.0004 -0.0004 0.0003 -0.0004 0.0003 -0.0003  
Z -0.0003 0.0003 0.0002 -0.0001 -0.0003 0.0002

AT. 93 C X 0.0002 0.0001 0.0005 0.0005 -0.0000 -0.0002  
Y -0.0002 -0.0002 -0.0001 -0.0002 0.0003 0.0002  
Z -0.0000 0.0000 -0.0003 -0.0002 -0.0001 0.0000

AT. 94 C X -0.0002 0.0001 -0.0005 0.0005 -0.0000 0.0002  
Y 0.0002 -0.0002 0.0001 -0.0002 0.0003 -0.0002  
Z 0.0000 0.0000 0.0003 -0.0002 -0.0001 -0.0000

AT. 95 H X -0.0005 -0.0001 -0.0005 -0.0003 0.0002 0.0004  
Y 0.0016 0.0014 0.0019 0.0024 -0.0020 -0.0013  
Z -0.0022 -0.0024 -0.0024 -0.0038 0.0037 0.0018

AT. 96 H X 0.0005 -0.0001 0.0005 -0.0003 0.0002 -0.0004  
Y -0.0016 0.0014 -0.0019 0.0024 -0.0020 0.0013  
Z 0.0022 -0.0024 0.0024 -0.0038 0.0037 -0.0018

AT. 97 H X 0.0014 0.0012 0.0010 0.0018 -0.0021 -0.0010  
Y 0.0026 0.0025 0.0025 0.0036 -0.0035 -0.0020  
Z 0.0002 0.0002 0.0001 0.0001 -0.0003 -0.0002

AT. 98 H X -0.0014 0.0012 -0.0010 0.0018 -0.0021 0.0010  
Y -0.0026 0.0025 -0.0025 0.0036 -0.0035 0.0020

Z -0.0002 0.0002 -0.0001 0.0001 -0.0003 0.0002  
AT. 99 C X 0.0010 0.0006 0.0042 0.0045 -0.0016 -0.0014  
Y -0.0003 -0.0002 0.0004 0.0003 -0.0001 0.0001  
Z 0.0009 0.0007 0.0022 0.0026 -0.0010 -0.0009  
AT. 100 C X -0.0010 0.0006 -0.0042 0.0045 -0.0016 0.0014  
Y 0.0003 -0.0002 -0.0004 0.0003 -0.0001 -0.0001  
Z -0.0009 0.0007 -0.0022 0.0026 -0.0010 0.0009  
AT. 101 C X -0.0006 -0.0003 -0.0015 -0.0015 0.0004 0.0004  
Y -0.0001 -0.0000 -0.0000 0.0001 0.0000 0.0000  
Z -0.0007 -0.0004 -0.0012 -0.0009 0.0003 0.0004  
AT. 102 C X 0.0006 -0.0003 0.0015 -0.0015 0.0004 -0.0004  
Y 0.0001 -0.0000 0.0000 0.0001 0.0000 -0.0000  
Z 0.0007 -0.0004 0.0012 -0.0009 0.0003 -0.0004  
AT. 103 H X 0.0006 0.0004 0.0018 0.0020 -0.0003 -0.0004  
Y -0.0006 -0.0003 -0.0014 -0.0013 0.0003 0.0004  
Z 0.0029 0.0009 0.0012 -0.0019 0.0005 -0.0007  
AT. 104 H X -0.0006 0.0004 -0.0018 0.0020 -0.0003 0.0004  
Y 0.0006 -0.0003 0.0014 -0.0013 0.0003 -0.0004  
Z -0.0029 0.0009 -0.0012 -0.0019 0.0005 0.0007  
AT. 105 H X 0.0015 0.0007 0.0011 0.0010 0.0002 -0.0004  
Y 0.0028 0.0010 0.0012 -0.0011 0.0000 -0.0005  
Z 0.0008 0.0002 -0.0002 -0.0011 0.0003 0.0000  
AT. 106 H X -0.0015 0.0007 -0.0011 0.0010 0.0002 0.0004  
Y -0.0028 0.0010 -0.0012 -0.0011 0.0000 0.0005  
Z -0.0008 0.0002 0.0002 -0.0011 0.0003 -0.0000  
AT. 107 C X 0.0031 0.0019 0.0068 0.0071 -0.0022 -0.0018  
Y -0.0007 -0.0005 -0.0024 -0.0024 0.0007 0.0007  
Z -0.0034 -0.0023 -0.0089 -0.0092 0.0023 0.0019  
AT. 108 C X -0.0031 0.0019 -0.0068 0.0071 -0.0022 0.0018  
Y 0.0007 -0.0005 0.0024 -0.0024 0.0007 -0.0007  
Z 0.0034 -0.0023 0.0089 -0.0092 0.0023 -0.0019  
AT. 109 H X -0.0156 -0.0088 -0.0271 -0.0285 0.0137 0.0110

Y 0.0053 0.0033 0.0123 0.0128 -0.0020 -0.0015  
Z 0.0132 0.0080 0.0272 0.0284 -0.0078 -0.0061  
AT. 110 H X 0.0156 -0.0088 0.0271 -0.0285 0.0137 -0.0110  
Y -0.0053 0.0033 -0.0123 0.0128 -0.0020 0.0015  
Z -0.0132 0.0080 -0.0272 0.0284 -0.0078 0.0061  
AT. 111 H X -0.0138 -0.0099 -0.0343 -0.0361 0.0087 0.0079  
Y 0.0030 0.0025 0.0099 0.0105 0.0010 0.0003  
Z 0.0148 0.0103 0.0348 0.0368 -0.0098 -0.0088  
AT. 112 H X 0.0138 -0.0099 0.0343 -0.0361 0.0087 -0.0079  
Y -0.0030 0.0025 -0.0099 0.0105 0.0010 -0.0003  
Z -0.0148 0.0103 -0.0348 0.0368 -0.0098 0.0088  
AT. 113 C X -0.0063 -0.0040 -0.0099 -0.0107 0.0020 0.0017  
Y -0.0029 -0.0016 -0.0025 -0.0030 0.0004 0.0001  
Z 0.0033 0.0020 0.0052 0.0055 -0.0013 -0.0009  
AT. 114 C X 0.0063 -0.0040 0.0099 -0.0107 0.0020 -0.0017  
Y 0.0029 -0.0016 0.0025 -0.0030 0.0004 -0.0001  
Z -0.0033 0.0020 -0.0052 0.0055 -0.0013 0.0009  
AT. 115 C X 0.0016 0.0010 0.0032 0.0033 -0.0006 -0.0006  
Y 0.0045 0.0028 0.0077 0.0081 -0.0024 -0.0020  
Z -0.0034 -0.0021 -0.0068 -0.0070 0.0018 0.0015  
AT. 116 C X -0.0016 0.0010 -0.0032 0.0033 -0.0006 0.0006  
Y -0.0045 0.0028 -0.0077 0.0081 -0.0024 0.0020  
Z 0.0034 -0.0021 0.0068 -0.0070 0.0018 -0.0015  
AT. 117 H X -0.0069 -0.0043 -0.0114 -0.0110 0.0033 0.0025  
Y -0.0224 -0.0139 -0.0382 -0.0410 0.0102 0.0084  
Z 0.0124 0.0077 0.0203 0.0207 -0.0054 -0.0043  
AT. 118 H X 0.0069 -0.0043 0.0114 -0.0110 0.0033 -0.0025  
Y 0.0224 -0.0139 0.0382 -0.0410 0.0102 -0.0084  
Z -0.0124 0.0077 -0.0203 0.0207 -0.0054 0.0043  
AT. 119 H X -0.0038 -0.0023 -0.0029 -0.0021 0.0032 0.0026  
Y -0.0193 -0.0120 -0.0325 -0.0340 0.0117 0.0097  
Z 0.0168 0.0104 0.0288 0.0308 -0.0102 -0.0084

AT. 120 H X 0.0038 -0.0023 0.0029 -0.0021 0.0032 -0.0026  
Y 0.0193 -0.0120 0.0325 -0.0340 0.0117 -0.0097  
Z -0.0168 0.0104 -0.0288 0.0308 -0.0102 0.0084

AT. 121 C X 0.0003 0.0001 -0.0052 -0.0053 0.0004 0.0006  
Y 0.0000 0.0001 0.0058 0.0060 -0.0010 -0.0011  
Z -0.0001 -0.0002 -0.0077 -0.0079 0.0009 0.0010

AT. 122 C X -0.0003 0.0001 0.0052 -0.0053 0.0004 -0.0006  
Y -0.0000 0.0001 -0.0058 0.0060 -0.0010 0.0011  
Z 0.0001 -0.0002 0.0077 -0.0079 0.0009 -0.0010

AT. 123 H X -0.0011 -0.0002 0.0187 0.0200 -0.0029 -0.0039  
Y -0.0016 -0.0013 -0.0215 -0.0225 0.0039 0.0039  
Z 0.0010 0.0010 0.0241 0.0254 -0.0047 -0.0049

AT. 124 H X 0.0011 -0.0002 -0.0187 0.0200 -0.0029 0.0039  
Y 0.0016 -0.0013 0.0215 -0.0225 0.0039 -0.0039  
Z -0.0010 0.0010 -0.0241 0.0254 -0.0047 0.0049

AT. 125 H X -0.0022 -0.0009 0.0246 0.0256 -0.0018 -0.0028  
Y 0.0006 0.0003 -0.0152 -0.0160 0.0022 0.0023  
Z -0.0026 -0.0011 0.0186 0.0194 -0.0004 -0.0015

AT. 126 H X 0.0022 -0.0009 -0.0246 0.0256 -0.0018 0.0028  
Y -0.0006 0.0003 0.0152 -0.0160 0.0022 -0.0023  
Z 0.0026 -0.0011 -0.0186 0.0194 -0.0004 0.0015

AT. 127 C X -0.0022 -0.0012 0.0082 0.0082 0.0001 -0.0001  
Y 0.0005 0.0004 -0.0025 -0.0024 0.0005 0.0005  
Z -0.0008 -0.0004 0.0082 0.0079 -0.0004 -0.0005

AT. 128 C X 0.0022 -0.0012 -0.0082 0.0082 0.0001 0.0001  
Y -0.0005 0.0004 0.0025 -0.0024 0.0005 -0.0005  
Z 0.0008 -0.0004 -0.0082 0.0079 -0.0004 0.0005

AT. 129 C X 0.0003 0.0002 -0.0027 -0.0027 0.0000 0.0002  
Y 0.0002 -0.0000 -0.0054 -0.0059 0.0008 0.0009  
Z 0.0004 0.0000 -0.0098 -0.0102 0.0011 0.0013

AT. 130 C X -0.0003 0.0002 0.0027 -0.0027 0.0000 -0.0002  
Y -0.0002 -0.0000 0.0054 -0.0059 0.0008 -0.0009

Z -0.0004 0.0000 0.0098 -0.0102 0.0011 -0.0013  
AT. 131 H X -0.0024 -0.0011 0.0073 0.0077 0.0006 -0.0001  
Y -0.0013 0.0003 0.0286 0.0311 -0.0035 -0.0034  
Z -0.0039 -0.0015 0.0205 0.0219 -0.0003 -0.0012  
AT. 132 H X 0.0024 -0.0011 -0.0073 0.0077 0.0006 0.0001  
Y 0.0013 0.0003 -0.0286 0.0311 -0.0035 0.0034  
Z 0.0039 -0.0015 -0.0205 0.0219 -0.0003 0.0012  
AT. 133 H X -0.0038 -0.0028 -0.0007 -0.0014 0.0014 0.0001  
Y -0.0041 -0.0023 0.0334 0.0343 -0.0042 -0.0050  
Z -0.0047 -0.0024 0.0497 0.0517 -0.0073 -0.0078  
AT. 134 H X 0.0038 -0.0028 0.0007 -0.0014 0.0014 -0.0001  
Y 0.0041 -0.0023 -0.0334 0.0343 -0.0042 0.0050  
Z 0.0047 -0.0024 -0.0497 0.0517 -0.0073 0.0078  
AT. 135 C X 0.0072 0.0046 0.0101 0.0118 0.0048 0.0035  
Y 0.0024 0.0015 0.0029 0.0034 0.0016 0.0012  
Z -0.0044 -0.0028 -0.0059 -0.0067 -0.0030 -0.0022  
AT. 136 C X -0.0072 0.0046 -0.0101 0.0118 0.0048 -0.0035  
Y -0.0024 0.0015 -0.0029 0.0034 0.0016 -0.0012  
Z 0.0044 -0.0028 0.0059 -0.0067 -0.0030 0.0022  
AT. 137 H X -0.0266 -0.0169 -0.0354 -0.0410 -0.0235 -0.0176  
Y 0.0020 0.0013 0.0048 0.0044 0.0017 0.0009  
Z 0.0090 0.0058 0.0161 0.0168 0.0088 0.0059  
AT. 138 H X 0.0266 -0.0169 0.0354 -0.0410 -0.0235 0.0176  
Y -0.0020 0.0013 -0.0048 0.0044 0.0017 -0.0009  
Z -0.0090 0.0058 -0.0161 0.0168 0.0088 -0.0059  
AT. 139 H X -0.0144 -0.0094 -0.0182 -0.0223 -0.0140 -0.0107  
Y -0.0051 -0.0029 -0.0026 -0.0032 -0.0041 -0.0037  
Z 0.0241 0.0155 0.0304 0.0369 0.0219 0.0168  
AT. 140 H X 0.0144 -0.0094 0.0182 -0.0223 -0.0140 0.0107  
Y 0.0051 -0.0029 0.0026 -0.0032 -0.0041 0.0037  
Z -0.0241 0.0155 -0.0304 0.0369 0.0219 -0.0168  
AT. 141 H X -0.0223 -0.0145 -0.0315 -0.0381 -0.0211 -0.0157

Y -0.0179 -0.0114 -0.0259 -0.0292 -0.0161 -0.0117  
Z 0.0058 0.0035 0.0088 0.0089 0.0057 0.0039  
AT. 142 H X 0.0223 -0.0145 0.0315 -0.0381 -0.0211 0.0157  
Y 0.0179 -0.0114 0.0259 -0.0292 -0.0161 0.0117  
Z -0.0058 0.0035 -0.0088 0.0089 0.0057 -0.0039  
AT. 143 C X 0.0020 0.0014 -0.0110 -0.0090 -0.0013 -0.0022  
Y -0.0001 -0.0000 -0.0010 -0.0007 -0.0004 -0.0006  
Z 0.0014 0.0010 -0.0082 -0.0067 -0.0010 -0.0016  
AT. 144 C X -0.0020 0.0014 0.0110 -0.0090 -0.0013 0.0022  
Y 0.0001 -0.0000 0.0010 -0.0007 -0.0004 0.0006  
Z -0.0014 0.0010 0.0082 -0.0067 -0.0010 0.0016  
AT. 145 H X -0.0070 -0.0056 0.0429 0.0337 0.0066 0.0116  
Y 0.0012 0.0010 -0.0122 -0.0111 -0.0004 -0.0009  
Z -0.0025 -0.0021 0.0196 0.0169 0.0013 0.0027  
AT. 146 H X 0.0070 -0.0056 -0.0429 0.0337 0.0066 -0.0116  
Y -0.0012 0.0010 0.0122 -0.0111 -0.0004 0.0009  
Z 0.0025 -0.0021 -0.0196 0.0169 0.0013 -0.0027  
AT. 147 H X -0.0055 -0.0039 0.0246 0.0184 0.0040 0.0064  
Y 0.0017 0.0009 -0.0029 -0.0029 0.0010 0.0018  
Z -0.0077 -0.0056 0.0389 0.0291 0.0068 0.0112  
AT. 148 H X 0.0055 -0.0039 -0.0246 0.0184 0.0040 -0.0064  
Y -0.0017 0.0009 0.0029 -0.0029 0.0010 -0.0018  
Z 0.0077 -0.0056 -0.0389 0.0291 0.0068 -0.0112  
AT. 149 H X -0.0065 -0.0046 0.0328 0.0252 0.0055 0.0088  
Y -0.0037 -0.0029 0.0258 0.0210 0.0034 0.0059  
Z -0.0011 -0.0013 0.0176 0.0148 0.0022 0.0041  
AT. 150 H X 0.0065 -0.0046 -0.0328 0.0252 0.0055 -0.0088  
Y 0.0037 -0.0029 -0.0258 0.0210 0.0034 -0.0059  
Z 0.0011 -0.0013 -0.0176 0.0148 0.0022 -0.0041  
AT. 151 C X 0.0053 0.0031 0.0004 0.0011 -0.0020 -0.0014  
Y 0.0016 0.0009 0.0008 0.0011 -0.0006 -0.0004  
Z -0.0005 -0.0003 -0.0031 -0.0034 0.0005 0.0005



AT.152 C X -0.0053 0.0031 -0.0004 0.0011 -0.0020 0.0014  
Y -0.0016 0.0009 -0.0008 0.0011 -0.0006 0.0004  
Z 0.0005 -0.0003 0.0031 -0.0034 0.0005 -0.0005

AT.153 H X -0.0210 -0.0116 0.0048 0.0009 0.0066 0.0043  
Y -0.0041 -0.0023 0.0087 0.0092 -0.0003 -0.0011  
Z 0.0018 0.0011 0.0089 0.0111 -0.0034 -0.0037

AT.154 H X 0.0210 -0.0116 -0.0048 0.0009 0.0066 -0.0043  
Y 0.0041 -0.0023 -0.0087 0.0092 -0.0003 0.0011  
Z -0.0018 0.0011 -0.0089 0.0111 -0.0034 0.0037

AT.155 H X -0.0112 -0.0067 -0.0016 -0.0033 0.0056 0.0045  
Y -0.0057 -0.0032 -0.0094 -0.0124 0.0044 0.0043  
Z 0.0016 0.0006 0.0081 0.0104 -0.0027 -0.0031

AT.156 H X 0.0112 -0.0067 0.0016 -0.0033 0.0056 -0.0045  
Y 0.0057 -0.0032 0.0094 -0.0124 0.0044 -0.0043  
Z -0.0016 0.0006 -0.0081 0.0104 -0.0027 0.0031

AT.157 O X 0.0001 0.0000 0.0000 0.0000 0.0000 0.0001  
Y 0.0002 0.0001 0.0002 0.0002 0.0001 0.0001  
Z 0.0001 0.0003 0.0000 -0.0001 0.0002 0.0001

AT.158 O X -0.0001 0.0000 -0.0000 0.0000 0.0000 -0.0001  
Y -0.0002 0.0001 -0.0002 0.0002 0.0001 -0.0001  
Z -0.0001 0.0003 -0.0000 -0.0001 0.0002 -0.0001

AT.159 O X 0.0000 -0.0001 -0.0001 -0.0000 -0.0001 -0.0000  
Y -0.0001 -0.0001 -0.0001 -0.0000 -0.0001 -0.0001  
Z -0.0001 -0.0000 -0.0001 -0.0000 -0.0000 -0.0001

AT.160 O X -0.0000 -0.0001 0.0001 -0.0000 -0.0001 0.0000  
Y 0.0001 -0.0001 0.0001 -0.0000 -0.0001 0.0001  
Z 0.0001 -0.0000 0.0001 -0.0000 -0.0000 0.0001

AT.161 H X -0.0034 -0.0026 -0.0012 -0.0013 -0.0026 -0.0033  
Y -0.0000 0.0002 -0.0008 -0.0009 0.0001 0.0001  
Z -0.0021 -0.0030 0.0031 0.0027 -0.0017 -0.0016

AT.162 H X 0.0034 -0.0026 0.0012 -0.0013 -0.0026 0.0033  
Y 0.0000 0.0002 0.0008 -0.0009 0.0001 -0.0001

Z 0.0021 -0.0030 -0.0031 0.0027 -0.0017 0.0016  
AT.163 H X 0.0000 0.0024 0.0015 0.0001 0.0020 0.0008  
Y 0.0004 0.0001 0.0001 -0.0003 -0.0001 0.0004  
Z 0.0006 -0.0015 -0.0006 -0.0002 -0.0012 0.0001  
AT.164 H X -0.0000 0.0024 -0.0015 0.0001 0.0020 -0.0008  
Y -0.0004 0.0001 -0.0001 -0.0003 -0.0001 -0.0004  
Z -0.0006 -0.0015 0.0006 -0.0002 -0.0012 -0.0001  
AT.165 O X 0.0001 0.0001 0.0006 0.0007 -0.0004 -0.0002  
Y 0.0000 -0.0001 0.0003 0.0002 -0.0001 0.0001  
Z -0.0001 0.0002 -0.0004 -0.0003 0.0003 -0.0001  
AT.166 O X -0.0001 0.0001 -0.0006 0.0007 -0.0004 0.0002  
Y -0.0000 -0.0001 -0.0003 0.0002 -0.0001 -0.0001  
Z 0.0001 0.0002 0.0004 -0.0003 0.0003 0.0001  
AT.167 H X -0.0015 -0.0003 -0.0040 -0.0044 0.0036 0.0017  
Y 0.0015 0.0004 0.0013 0.0013 -0.0024 -0.0021  
Z 0.0025 -0.0004 0.0115 0.0131 -0.0087 -0.0022  
AT.168 H X 0.0015 -0.0003 0.0040 -0.0044 0.0036 -0.0017  
Y -0.0015 0.0004 -0.0013 0.0013 -0.0024 0.0021  
Z -0.0025 -0.0004 -0.0115 0.0131 -0.0087 0.0022  
AT.169 O X 0.0000 -0.0001 -0.0003 -0.0004 0.0001 0.0002  
Y -0.0001 0.0001 -0.0003 -0.0003 0.0003 -0.0001  
Z -0.0002 0.0001 -0.0006 -0.0003 0.0003 0.0001  
AT.170 O X -0.0000 -0.0001 0.0003 -0.0004 0.0001 -0.0002  
Y 0.0001 0.0001 0.0003 -0.0003 0.0003 0.0001  
Z 0.0002 0.0001 0.0006 -0.0003 0.0003 -0.0001  
AT.171 H X -0.0006 0.0009 -0.0009 0.0000 0.0012 -0.0013  
Y 0.0007 -0.0012 0.0005 -0.0008 -0.0000 0.0010  
Z 0.0027 -0.0036 0.0030 -0.0032 -0.0009 0.0030  
AT.172 H X 0.0006 0.0009 0.0009 0.0000 0.0012 0.0013  
Y -0.0007 -0.0012 -0.0005 -0.0008 -0.0000 -0.0010  
Z -0.0027 -0.0036 -0.0030 -0.0032 -0.0009 -0.0030

FREQ(CM\*\*-1) 1370.59 1370.69 1375.38 1375.60 1375.96 1377.32

AT. 1 I X 0.0000 0.0000 0.0000 -0.0000 0.0000 -0.0000

Y 0.0000 -0.0000 0.0000 0.0000 0.0000 -0.0000

Z 0.0000 0.0000 0.0000 -0.0000 0.0000 -0.0000

AT. 2 I X -0.0000 0.0000 -0.0000 0.0000 0.0000 -0.0000

Y -0.0000 -0.0000 -0.0000 -0.0000 0.0000 -0.0000

Z -0.0000 0.0000 -0.0000 0.0000 0.0000 -0.0000

AT. 3 I X 0.0000 -0.0000 0.0000 0.0000 0.0000 -0.0000

Y -0.0000 -0.0000 0.0000 0.0000 0.0000 0.0000

Z 0.0000 0.0000 0.0000 0.0000 0.0000 0.0000

AT. 4 I X -0.0000 -0.0000 -0.0000 -0.0000 0.0000 -0.0000

Y 0.0000 -0.0000 -0.0000 -0.0000 0.0000 0.0000

Z -0.0000 0.0000 -0.0000 -0.0000 0.0000 0.0000

AT. 5 O X 0.0001 0.0002 0.0001 0.0003 0.0003 0.0001

Y -0.0001 -0.0001 -0.0003 -0.0001 -0.0004 -0.0000

Z -0.0001 -0.0001 -0.0003 -0.0003 -0.0005 -0.0001

AT. 6 O X -0.0001 0.0002 -0.0001 -0.0003 0.0003 0.0001

Y 0.0001 -0.0001 0.0003 0.0001 -0.0004 -0.0000

Z 0.0001 -0.0001 0.0003 0.0003 -0.0005 -0.0001

AT. 7 O X -0.0004 -0.0004 0.0002 0.0001 0.0001 -0.0001

Y 0.0003 0.0002 -0.0002 -0.0001 -0.0002 0.0001

Z -0.0001 -0.0000 -0.0001 -0.0001 -0.0001 -0.0001

AT. 8 O X 0.0004 -0.0004 -0.0002 -0.0001 0.0001 -0.0001

Y -0.0003 0.0002 0.0002 0.0001 -0.0002 0.0001

Z 0.0001 -0.0000 0.0001 0.0001 -0.0001 -0.0001

AT. 9 N X 0.0001 0.0001 0.0014 0.0008 0.0016 0.0003

Y -0.0008 -0.0010 -0.0001 0.0001 -0.0006 0.0001

Z -0.0001 -0.0003 0.0004 0.0004 0.0011 0.0001

AT. 10 N X -0.0001 0.0001 -0.0014 -0.0008 0.0016 0.0003

Y 0.0008 -0.0010 0.0001 -0.0001 -0.0006 0.0001

Z 0.0001 -0.0003 -0.0004 -0.0004 0.0011 0.0001

AT. 11 N X 0.0003 0.0003 0.0019 0.0008 0.0021 0.0003  
Y 0.0001 0.0002 -0.0021 -0.0010 -0.0020 -0.0005  
Z 0.0005 0.0005 -0.0005 -0.0004 -0.0003 0.0001

AT. 12 N X -0.0003 0.0003 -0.0019 -0.0008 0.0021 0.0003  
Y -0.0001 0.0002 0.0021 0.0010 -0.0020 -0.0005  
Z -0.0005 0.0005 0.0005 0.0004 -0.0003 0.0001

AT. 13 C X -0.0004 -0.0004 0.0000 -0.0003 -0.0004 -0.0002  
Y 0.0003 0.0003 0.0004 0.0004 0.0009 0.0002  
Z -0.0002 -0.0002 0.0003 0.0004 -0.0002 0.0002

AT. 14 C X 0.0004 -0.0004 -0.0000 0.0003 -0.0004 -0.0002  
Y -0.0003 0.0003 -0.0004 -0.0004 0.0009 0.0002  
Z 0.0002 -0.0002 -0.0003 -0.0004 -0.0002 0.0002

AT. 15 C X -0.0000 -0.0001 -0.0003 0.0001 -0.0004 0.0001  
Y 0.0002 0.0004 0.0007 0.0000 0.0014 -0.0002  
Z -0.0000 -0.0001 -0.0003 -0.0001 -0.0004 0.0000

AT. 16 C X 0.0000 -0.0001 0.0003 -0.0001 -0.0004 0.0001  
Y -0.0002 0.0004 -0.0007 -0.0000 0.0014 -0.0002  
Z 0.0000 -0.0001 0.0003 0.0001 -0.0004 0.0000

AT. 17 H X 0.0001 -0.0001 -0.0007 -0.0002 -0.0017 0.0003  
Y -0.0010 -0.0022 -0.0030 -0.0003 -0.0070 0.0005  
Z 0.0014 0.0032 0.0038 0.0001 0.0088 -0.0008

AT. 18 H X -0.0001 -0.0001 0.0007 0.0002 -0.0017 0.0003  
Y 0.0010 -0.0022 0.0030 0.0003 -0.0070 0.0005  
Z -0.0014 0.0032 -0.0038 -0.0001 0.0088 -0.0008

AT. 19 H X 0.0004 0.0017 0.0014 -0.0002 0.0030 -0.0008  
Y -0.0018 -0.0038 -0.0051 -0.0003 -0.0111 0.0010  
Z -0.0006 -0.0011 -0.0019 -0.0003 -0.0039 0.0002

AT. 20 H X -0.0004 0.0017 -0.0014 0.0002 0.0030 -0.0008  
Y 0.0018 -0.0038 0.0051 0.0003 -0.0111 0.0010  
Z 0.0006 -0.0011 0.0019 0.0003 -0.0039 0.0002

AT. 21 C X 0.0010 0.0011 -0.0009 -0.0004 -0.0003 -0.0000  
Y -0.0001 -0.0000 0.0007 0.0002 0.0008 -0.0000

Z -0.0008 -0.0009 0.0007 0.0007 0.0002 0.0001  
AT. 22 C X -0.0010 0.0011 0.0009 0.0004 -0.0003 -0.0000  
Y 0.0001 -0.0000 -0.0007 -0.0002 0.0008 -0.0000  
Z 0.0008 -0.0009 -0.0007 -0.0007 0.0002 0.0001  
AT. 23 C X -0.0004 -0.0007 -0.0002 -0.0004 -0.0007 0.0000  
Y 0.0000 0.0002 0.0005 0.0005 0.0008 -0.0000  
Z 0.0004 0.0006 0.0011 0.0008 0.0020 0.0000  
AT. 24 C X 0.0004 -0.0007 0.0002 0.0004 -0.0007 0.0000  
Y -0.0000 0.0002 -0.0005 -0.0005 0.0008 -0.0000  
Z -0.0004 0.0006 -0.0011 -0.0008 0.0020 0.0000  
AT. 25 H X 0.0013 0.0017 0.0001 -0.0004 0.0002 -0.0002  
Y 0.0005 0.0011 0.0018 0.0016 0.0031 -0.0000  
Z -0.0011 -0.0031 -0.0102 -0.0093 -0.0169 -0.0005  
AT. 26 H X -0.0013 0.0017 -0.0001 0.0004 0.0002 -0.0002  
Y -0.0005 0.0011 -0.0018 -0.0016 0.0031 -0.0000  
Z 0.0011 -0.0031 0.0102 0.0093 -0.0169 -0.0005  
AT. 27 H X -0.0001 0.0025 0.0018 0.0035 0.0041 0.0001  
Y -0.0007 -0.0023 -0.0090 -0.0079 -0.0147 -0.0004  
Z -0.0001 -0.0013 -0.0045 -0.0043 -0.0074 -0.0003  
AT. 28 H X 0.0001 0.0025 -0.0018 -0.0035 0.0041 0.0001  
Y 0.0007 -0.0023 0.0090 0.0079 -0.0147 -0.0004  
Z 0.0001 -0.0013 0.0045 0.0043 -0.0074 -0.0003  
AT. 29 C X 0.0024 0.0030 0.0027 0.0003 0.0038 -0.0002  
Y 0.0005 0.0005 -0.0006 -0.0001 -0.0006 0.0001  
Z 0.0019 0.0024 0.0013 -0.0001 0.0018 -0.0002  
AT. 30 C X -0.0024 0.0030 -0.0027 -0.0003 0.0038 -0.0002  
Y -0.0005 0.0005 0.0006 0.0001 -0.0006 0.0001  
Z -0.0019 0.0024 -0.0013 0.0001 0.0018 -0.0002  
AT. 31 H X -0.0119 -0.0157 -0.0171 -0.0017 -0.0240 0.0018  
Y -0.0019 -0.0018 0.0034 0.0013 0.0049 -0.0001  
Z -0.0107 -0.0128 -0.0060 0.0003 -0.0085 0.0006  
AT. 32 H X 0.0119 -0.0157 0.0171 0.0017 -0.0240 0.0018

Y 0.0019 -0.0018 -0.0034 -0.0013 0.0049 -0.0001  
Z 0.0107 -0.0128 0.0060 -0.0003 -0.0085 0.0006  
AT. 33 H X -0.0103 -0.0125 -0.0075 -0.0005 -0.0112 -0.0000  
Y -0.0021 -0.0015 0.0046 0.0008 0.0054 -0.0007  
Z -0.0053 -0.0070 -0.0075 -0.0009 -0.0106 0.0004  
AT. 34 H X 0.0103 -0.0125 0.0075 0.0005 -0.0112 -0.0000  
Y 0.0021 -0.0015 -0.0046 -0.0008 0.0054 -0.0007  
Z 0.0053 -0.0070 0.0075 0.0009 -0.0106 0.0004  
AT. 35 C X -0.0016 -0.0019 -0.0037 -0.0011 -0.0047 -0.0003  
Y 0.0015 0.0018 0.0030 0.0007 0.0038 0.0000  
Z -0.0008 -0.0011 -0.0028 -0.0008 -0.0022 0.0000  
AT. 36 C X 0.0016 -0.0019 0.0037 0.0011 -0.0047 -0.0003  
Y -0.0015 0.0018 -0.0030 -0.0007 0.0038 0.0000  
Z 0.0008 -0.0011 0.0028 0.0008 -0.0022 0.0000  
AT. 37 C X -0.0002 -0.0001 0.0004 0.0005 0.0010 0.0001  
Y -0.0022 -0.0026 -0.0026 -0.0004 -0.0037 0.0001  
Z 0.0013 0.0017 0.0017 0.0003 0.0023 -0.0001  
AT. 38 C X 0.0002 -0.0001 -0.0004 -0.0005 0.0010 0.0001  
Y 0.0022 -0.0026 0.0026 0.0004 -0.0037 0.0001  
Z -0.0013 0.0017 -0.0017 -0.0003 0.0023 -0.0001  
AT. 39 H X 0.0014 0.0008 -0.0056 -0.0049 -0.0097 -0.0014  
Y 0.0095 0.0112 0.0118 0.0014 0.0161 -0.0002  
Z -0.0028 -0.0039 -0.0086 -0.0040 -0.0134 -0.0010  
AT. 40 H X -0.0014 0.0008 0.0056 0.0049 -0.0097 -0.0014  
Y -0.0095 0.0112 -0.0118 -0.0014 0.0161 -0.0002  
Z 0.0028 -0.0039 0.0086 0.0040 -0.0134 -0.0010  
AT. 41 H X 0.0006 0.0001 -0.0045 -0.0041 -0.0083 -0.0015  
Y 0.0088 0.0111 0.0140 0.0040 0.0201 0.0009  
Z -0.0082 -0.0095 -0.0067 0.0012 -0.0076 0.0007  
AT. 42 H X -0.0006 0.0001 0.0045 0.0041 -0.0083 -0.0015  
Y -0.0088 0.0111 -0.0140 -0.0040 0.0201 0.0009  
Z 0.0082 -0.0095 0.0067 -0.0012 -0.0076 0.0007

AT. 43 C X -0.0003 -0.0004 0.0033 0.0017 0.0033 0.0006  
Y -0.0005 -0.0007 0.0018 0.0010 0.0017 0.0004  
Z 0.0005 0.0008 -0.0044 -0.0024 -0.0041 -0.0009

AT. 44 C X 0.0003 -0.0004 -0.0033 -0.0017 0.0033 0.0006  
Y 0.0005 -0.0007 -0.0018 -0.0010 0.0017 0.0004  
Z -0.0005 0.0008 0.0044 0.0024 -0.0041 -0.0009

AT. 45 H X 0.0021 0.0027 -0.0223 -0.0117 -0.0210 -0.0037  
Y 0.0016 0.0020 -0.0014 -0.0020 -0.0013 -0.0011  
Z -0.0031 -0.0039 0.0183 0.0107 0.0174 0.0038

AT. 46 H X -0.0021 0.0027 0.0223 0.0117 -0.0210 -0.0037  
Y -0.0016 0.0020 0.0014 0.0020 -0.0013 -0.0011  
Z 0.0031 -0.0039 -0.0183 -0.0107 0.0174 0.0038

AT. 47 H X 0.0007 0.0018 -0.0126 -0.0065 -0.0131 -0.0030  
Y 0.0007 0.0009 0.0030 0.0008 0.0019 -0.0001  
Z 0.0002 -0.0008 0.0186 0.0087 0.0185 0.0035

AT. 48 H X -0.0007 0.0018 0.0126 0.0065 -0.0131 -0.0030  
Y -0.0007 0.0009 -0.0030 -0.0008 0.0019 -0.0001  
Z -0.0002 -0.0008 -0.0186 -0.0087 0.0185 0.0035

AT. 49 C X -0.0002 -0.0001 -0.0028 -0.0013 -0.0031 -0.0006  
Y 0.0007 0.0007 0.0013 0.0007 0.0014 0.0002  
Z -0.0002 -0.0002 0.0045 0.0024 0.0045 0.0008

AT. 50 C X 0.0002 -0.0001 0.0028 0.0013 -0.0031 -0.0006  
Y -0.0007 0.0007 -0.0013 -0.0007 0.0014 0.0002  
Z 0.0002 -0.0002 -0.0045 -0.0024 0.0045 0.0008

AT. 51 C X 0.0003 0.0005 -0.0010 -0.0007 -0.0010 -0.0003  
Y 0.0004 0.0007 -0.0049 -0.0025 -0.0047 -0.0008  
Z 0.0009 0.0012 -0.0063 -0.0034 -0.0061 -0.0011

AT. 52 C X -0.0003 0.0005 0.0010 0.0007 -0.0010 -0.0003  
Y -0.0004 0.0007 0.0049 0.0025 -0.0047 -0.0008  
Z -0.0009 0.0012 0.0063 0.0034 -0.0061 -0.0011

AT. 53 H X -0.0010 -0.0016 0.0002 0.0011 -0.0000 0.0011  
Y -0.0020 -0.0038 0.0185 0.0107 0.0188 0.0041

Z 0.0001 -0.0008 0.0191 0.0090 0.0197 0.0023  
AT. 54 H X 0.0010 -0.0016 -0.0002 -0.0011 -0.0000 0.0011  
Y 0.0020 -0.0038 -0.0185 -0.0107 0.0188 0.0041  
Z -0.0001 -0.0008 -0.0191 -0.0090 0.0197 0.0023  
AT. 55 H X -0.0029 -0.0043 0.0026 0.0036 0.0023 0.0023  
Y -0.0028 -0.0036 0.0255 0.0126 0.0236 0.0038  
Z -0.0052 -0.0071 0.0353 0.0189 0.0327 0.0065  
AT. 56 H X 0.0029 -0.0043 -0.0026 -0.0036 0.0023 0.0023  
Y 0.0028 -0.0036 -0.0255 -0.0126 0.0236 0.0038  
Z 0.0052 -0.0071 -0.0353 -0.0189 0.0327 0.0065  
AT. 57 C X -0.0036 -0.0042 -0.0022 -0.0007 -0.0053 -0.0004  
Y 0.0027 0.0032 0.0019 0.0006 0.0040 0.0003  
Z -0.0018 -0.0022 -0.0011 -0.0004 -0.0016 -0.0001  
AT. 58 C X 0.0036 -0.0042 0.0022 0.0007 -0.0053 -0.0004  
Y -0.0027 0.0032 -0.0019 -0.0006 0.0040 0.0003  
Z 0.0018 -0.0022 0.0011 0.0004 -0.0016 -0.0001  
AT. 59 H X 0.0222 0.0261 0.0214 0.0064 0.0320 0.0021  
Y -0.0065 -0.0071 -0.0030 -0.0001 -0.0125 -0.0008  
Z 0.0038 0.0051 0.0091 0.0039 0.0015 0.0001  
AT. 60 H X -0.0222 0.0261 -0.0214 -0.0064 0.0320 0.0021  
Y 0.0065 -0.0071 0.0030 0.0001 -0.0125 -0.0008  
Z -0.0038 0.0051 -0.0091 -0.0039 0.0015 0.0001  
AT. 61 H X 0.0117 0.0132 0.0039 0.0009 0.0184 0.0017  
Y -0.0103 -0.0119 -0.0063 -0.0009 -0.0162 -0.0010  
Z 0.0158 0.0179 0.0072 0.0015 0.0253 0.0021  
AT. 62 H X -0.0117 0.0132 -0.0039 -0.0009 0.0184 0.0017  
Y 0.0103 -0.0119 0.0063 0.0009 -0.0162 -0.0010  
Z -0.0158 0.0179 -0.0072 -0.0015 0.0253 0.0021  
AT. 63 H X 0.0107 0.0122 0.0061 0.0020 0.0204 0.0020  
Y -0.0180 -0.0215 -0.0187 -0.0066 -0.0258 -0.0021  
Z 0.0029 0.0041 0.0090 0.0033 0.0004 -0.0003  
AT. 64 H X -0.0107 0.0122 -0.0061 -0.0020 0.0204 0.0020



Y 0.0180 -0.0215 0.0187 0.0066 -0.0258 -0.0021  
Z -0.0029 0.0041 -0.0090 -0.0033 0.0004 -0.0003  
AT. 65 C X 0.0004 0.0009 -0.0109 -0.0050 -0.0111 -0.0015  
Y -0.0004 -0.0008 0.0080 0.0038 0.0079 0.0012  
Z -0.0008 -0.0011 0.0129 0.0060 0.0134 0.0018  
AT. 66 C X -0.0004 0.0009 0.0109 0.0050 -0.0111 -0.0015  
Y 0.0004 -0.0008 -0.0080 -0.0038 0.0079 0.0012  
Z 0.0008 -0.0011 -0.0129 -0.0060 0.0134 0.0018  
AT. 67 H X -0.0030 -0.0055 0.0732 0.0345 0.0741 0.0105  
Y -0.0004 0.0023 -0.0195 -0.0096 -0.0166 -0.0031  
Z 0.0024 0.0018 -0.0366 -0.0168 -0.0400 -0.0049  
AT. 68 H X 0.0030 -0.0055 -0.0732 -0.0345 0.0741 0.0105  
Y 0.0004 0.0023 0.0195 0.0096 -0.0166 -0.0031  
Z -0.0024 0.0018 0.0366 0.0168 -0.0400 -0.0049  
AT. 69 H X -0.0007 -0.0017 0.0181 0.0081 0.0192 0.0022  
Y 0.0006 0.0018 -0.0187 -0.0093 -0.0172 -0.0032  
Z 0.0028 0.0073 -0.0791 -0.0370 -0.0790 -0.0113  
AT. 70 H X 0.0007 -0.0017 -0.0181 -0.0081 0.0192 0.0022  
Y -0.0006 0.0018 0.0187 0.0093 -0.0172 -0.0032  
Z -0.0028 0.0073 0.0791 0.0370 -0.0790 -0.0113  
AT. 71 H X -0.0010 -0.0038 0.0361 0.0166 0.0356 0.0048  
Y 0.0032 0.0045 -0.0558 -0.0257 -0.0585 -0.0076  
Z 0.0032 0.0027 -0.0414 -0.0191 -0.0448 -0.0058  
AT. 72 H X 0.0010 -0.0038 -0.0361 -0.0166 0.0356 0.0048  
Y -0.0032 0.0045 0.0558 0.0257 -0.0585 -0.0076  
Z -0.0032 0.0027 0.0414 0.0191 -0.0448 -0.0058  
AT. 73 C X 0.0018 0.0019 0.0071 0.0029 0.0081 0.0009  
Y -0.0014 -0.0016 -0.0050 -0.0020 -0.0055 -0.0005  
Z 0.0002 0.0003 -0.0015 -0.0009 -0.0034 -0.0006  
AT. 74 C X -0.0018 0.0019 -0.0071 -0.0029 0.0081 0.0009  
Y 0.0014 -0.0016 0.0050 0.0020 -0.0055 -0.0005  
Z -0.0002 0.0003 0.0015 0.0009 -0.0034 -0.0006

AT. 75 H X -0.0068 -0.0080 -0.0229 -0.0084 -0.0215 -0.0017  
Y 0.0017 0.0016 0.0164 0.0074 0.0229 0.0031  
Z -0.0022 -0.0033 0.0071 0.0043 0.0149 0.0027

AT. 76 H X 0.0068 -0.0080 0.0229 0.0084 -0.0215 -0.0017  
Y -0.0017 0.0016 -0.0164 -0.0074 0.0229 0.0031  
Z 0.0022 -0.0033 -0.0071 -0.0043 0.0149 0.0027

AT. 77 H X -0.0043 -0.0050 -0.0237 -0.0104 -0.0291 -0.0037  
Y 0.0069 0.0085 0.0166 0.0058 0.0121 0.0004  
Z -0.0024 -0.0032 0.0076 0.0047 0.0155 0.0031

AT. 78 H X 0.0043 -0.0050 0.0237 0.0104 -0.0291 -0.0037  
Y -0.0069 0.0085 -0.0166 -0.0058 0.0121 0.0004  
Z 0.0024 -0.0032 -0.0076 -0.0047 0.0155 0.0031

AT. 79 I X -0.0000 -0.0000 0.0000 0.0000 -0.0000 0.0000  
Y 0.0000 0.0000 0.0000 -0.0000 0.0000 -0.0000  
Z 0.0000 0.0000 0.0000 -0.0000 -0.0000 -0.0000

AT. 80 I X 0.0000 -0.0000 -0.0000 -0.0000 -0.0000 0.0000  
Y -0.0000 0.0000 -0.0000 0.0000 0.0000 -0.0000  
Z -0.0000 0.0000 -0.0000 0.0000 -0.0000 -0.0000

AT. 81 I X 0.0000 0.0000 -0.0000 -0.0000 -0.0000 0.0000  
Y -0.0000 -0.0000 -0.0000 -0.0000 -0.0000 -0.0000  
Z -0.0000 -0.0000 0.0000 -0.0000 0.0000 -0.0000

AT. 82 I X -0.0000 0.0000 0.0000 0.0000 -0.0000 0.0000  
Y 0.0000 -0.0000 0.0000 0.0000 -0.0000 -0.0000  
Z 0.0000 -0.0000 -0.0000 0.0000 0.0000 -0.0000

AT. 83 O X -0.0009 -0.0009 -0.0001 0.0004 0.0004 0.0004  
Y -0.0002 -0.0002 -0.0001 0.0002 -0.0000 0.0002  
Z -0.0001 -0.0002 -0.0001 0.0003 0.0002 0.0003

AT. 84 O X 0.0009 -0.0009 0.0001 -0.0004 0.0004 0.0004  
Y 0.0002 -0.0002 0.0001 -0.0002 -0.0000 0.0002  
Z 0.0001 -0.0002 0.0001 -0.0003 0.0002 0.0003

AT. 85 O X 0.0017 0.0017 0.0002 -0.0002 0.0001 0.0003  
Y 0.0007 0.0008 0.0001 -0.0001 0.0000 0.0001

Z -0.0002 -0.0003 -0.0002 0.0003 -0.0001 0.0002  
AT. 86 O X -0.0017 0.0017 -0.0002 0.0002 0.0001 0.0003  
Y -0.0007 0.0008 -0.0001 0.0001 0.0000 0.0001  
Z 0.0002 -0.0003 0.0002 -0.0003 -0.0001 0.0002  
AT. 87 N X -0.0010 -0.0015 -0.0006 0.0018 0.0002 0.0016  
Y -0.0026 -0.0025 -0.0000 0.0003 0.0003 -0.0003  
Z -0.0009 -0.0007 0.0005 -0.0006 0.0001 -0.0012  
AT. 88 N X 0.0010 -0.0015 0.0006 -0.0018 0.0002 0.0016  
Y 0.0026 -0.0025 0.0000 -0.0003 0.0003 -0.0003  
Z 0.0009 -0.0007 -0.0005 0.0006 0.0001 -0.0012  
AT. 89 N X 0.0008 -0.0003 -0.0014 0.0033 -0.0002 0.0034  
Y 0.0014 0.0008 -0.0006 0.0011 -0.0003 0.0014  
Z 0.0021 0.0022 -0.0001 -0.0001 -0.0002 0.0007  
AT. 90 N X -0.0008 -0.0003 0.0014 -0.0033 -0.0002 0.0034  
Y -0.0014 0.0008 0.0006 -0.0011 -0.0003 0.0014  
Z -0.0021 0.0022 0.0001 0.0001 -0.0002 0.0007  
AT. 91 C X 0.0024 0.0024 -0.0000 -0.0007 -0.0009 -0.0003  
Y 0.0007 0.0008 0.0001 -0.0006 -0.0002 -0.0006  
Z -0.0013 -0.0014 0.0001 0.0001 0.0001 -0.0002  
AT. 92 C X -0.0024 0.0024 0.0000 0.0007 -0.0009 -0.0003  
Y -0.0007 0.0008 -0.0001 0.0006 -0.0002 -0.0006  
Z 0.0013 -0.0014 -0.0001 -0.0001 0.0001 -0.0002  
AT. 93 C X -0.0001 0.0000 0.0001 -0.0003 0.0001 -0.0008  
Y 0.0005 0.0007 0.0002 -0.0006 -0.0001 -0.0009  
Z 0.0001 -0.0001 -0.0002 0.0004 0.0000 0.0008  
AT. 94 C X 0.0001 0.0000 -0.0001 0.0003 0.0001 -0.0008  
Y -0.0005 0.0007 -0.0002 0.0006 -0.0001 -0.0009  
Z -0.0001 -0.0001 0.0002 -0.0004 0.0000 0.0008  
AT. 95 H X 0.0006 0.0005 0.0000 -0.0001 -0.0003 0.0002  
Y -0.0035 -0.0045 -0.0008 0.0026 0.0012 0.0042  
Z 0.0061 0.0083 0.0015 -0.0049 -0.0018 -0.0088  
AT. 96 H X -0.0006 0.0005 -0.0000 0.0001 -0.0003 0.0002

Y 0.0035 -0.0045 0.0008 -0.0026 0.0012 0.0042  
Z -0.0061 0.0083 -0.0015 0.0049 -0.0018 -0.0088  
AT. 97 H X -0.0052 -0.0062 -0.0010 0.0035 0.0011 0.0054  
Y -0.0063 -0.0085 -0.0015 0.0050 0.0016 0.0078  
Z 0.0001 -0.0002 -0.0003 0.0005 0.0001 0.0010  
AT. 98 H X 0.0052 -0.0062 0.0010 -0.0035 0.0011 0.0054  
Y 0.0063 -0.0085 0.0015 -0.0050 0.0016 0.0078  
Z -0.0001 -0.0002 0.0003 -0.0005 0.0001 0.0010  
AT. 99 C X -0.0050 -0.0045 0.0000 -0.0003 0.0000 -0.0016  
Y 0.0004 0.0003 -0.0001 -0.0002 -0.0003 -0.0001  
Z -0.0038 -0.0035 0.0004 -0.0004 0.0005 -0.0014  
AT. 100 C X 0.0050 -0.0045 -0.0000 0.0003 0.0000 -0.0016  
Y -0.0004 0.0003 0.0001 0.0002 -0.0003 -0.0001  
Z 0.0038 -0.0035 -0.0004 0.0004 0.0005 -0.0014  
AT. 101 C X 0.0014 0.0012 0.0003 -0.0004 0.0000 -0.0002  
Y -0.0002 -0.0002 0.0003 -0.0005 0.0001 -0.0006  
Z 0.0011 0.0010 0.0004 -0.0010 -0.0000 -0.0009  
AT. 102 C X -0.0014 0.0012 -0.0003 0.0004 0.0000 -0.0002  
Y 0.0002 -0.0002 -0.0003 0.0005 0.0001 -0.0006  
Z -0.0011 0.0010 -0.0004 0.0010 -0.0000 -0.0009  
AT. 103 H X -0.0020 -0.0017 -0.0002 -0.0003 -0.0002 -0.0004  
Y 0.0013 0.0011 0.0004 -0.0003 0.0002 -0.0003  
Z 0.0010 0.0011 -0.0039 0.0079 -0.0003 0.0100  
AT. 104 H X 0.0020 -0.0017 0.0002 0.0003 -0.0002 -0.0004  
Y -0.0013 0.0011 -0.0004 0.0003 0.0002 -0.0003  
Z -0.0010 0.0011 0.0039 -0.0079 -0.0003 0.0100  
AT. 105 H X 0.0007 0.0009 -0.0023 0.0035 -0.0007 0.0043  
Y 0.0019 0.0011 -0.0037 0.0079 -0.0004 0.0099  
Z 0.0018 0.0016 -0.0016 0.0031 -0.0004 0.0041  
AT. 106 H X -0.0007 0.0009 0.0023 -0.0035 -0.0007 0.0043  
Y -0.0019 0.0011 0.0037 -0.0079 -0.0004 0.0099  
Z -0.0018 0.0016 0.0016 -0.0031 -0.0004 0.0041

AT.107 C X -0.0053 -0.0059 -0.0013 0.0032 0.0002 0.0021  
Y 0.0029 0.0028 -0.0001 -0.0004 -0.0003 0.0003  
Z 0.0071 0.0076 0.0008 -0.0029 -0.0005 -0.0010

AT.108 C X 0.0053 -0.0059 0.0013 -0.0032 0.0002 0.0021  
Y -0.0029 0.0028 0.0001 0.0004 -0.0003 0.0003  
Z -0.0071 0.0076 -0.0008 0.0029 -0.0005 -0.0010

AT.109 H X 0.0289 0.0343 0.0111 -0.0232 -0.0001 -0.0167  
Y -0.0101 -0.0104 -0.0004 0.0028 0.0005 0.0003  
Z -0.0269 -0.0292 -0.0042 0.0127 0.0009 0.0063

AT.110 H X -0.0289 0.0343 -0.0111 0.0232 -0.0001 -0.0167  
Y 0.0101 -0.0104 0.0004 -0.0028 0.0005 0.0003  
Z 0.0269 -0.0292 0.0042 -0.0127 0.0009 0.0063

AT.111 H X 0.0251 0.0272 0.0025 -0.0110 -0.0026 -0.0056  
Y -0.0056 -0.0038 0.0041 -0.0044 0.0013 -0.0048  
Z -0.0248 -0.0276 -0.0041 0.0132 0.0022 0.0082

AT.112 H X -0.0251 0.0272 -0.0025 0.0110 -0.0026 -0.0056  
Y 0.0056 -0.0038 -0.0041 0.0044 0.0013 -0.0048  
Z 0.0248 -0.0276 0.0041 -0.0132 0.0022 0.0082

AT.113 C X 0.0044 0.0053 0.0015 -0.0043 -0.0002 -0.0039  
Y 0.0007 0.0015 0.0015 -0.0032 0.0005 -0.0034  
Z -0.0033 -0.0040 -0.0014 0.0033 -0.0000 0.0023

AT.114 C X -0.0044 0.0053 -0.0015 0.0043 -0.0002 -0.0039  
Y -0.0007 0.0015 -0.0015 0.0032 0.0005 -0.0034  
Z 0.0033 -0.0040 0.0014 -0.0033 -0.0000 0.0023

AT.115 C X -0.0017 -0.0019 -0.0006 0.0015 0.0000 0.0013  
Y -0.0064 -0.0073 -0.0017 0.0046 0.0004 0.0032  
Z 0.0048 0.0053 0.0012 -0.0031 -0.0003 -0.0020

AT.116 C X 0.0017 -0.0019 0.0006 -0.0015 0.0000 0.0013  
Y 0.0064 -0.0073 0.0017 -0.0046 0.0004 0.0032  
Z -0.0048 0.0053 -0.0012 0.0031 -0.0003 -0.0020

AT.117 H X 0.0066 0.0096 0.0058 -0.0135 0.0006 -0.0118  
Y 0.0262 0.0296 0.0060 -0.0174 -0.0017 -0.0132

Z -0.0119 -0.0156 -0.0073 0.0177 -0.0004 0.0154  
AT. 118 H X -0.0066 0.0096 -0.0058 0.0135 0.0006 -0.0118  
Y -0.0262 0.0296 -0.0060 0.0174 -0.0017 -0.0132  
Z 0.0119 -0.0156 0.0073 -0.0177 -0.0004 0.0154  
AT. 119 H X 0.0063 0.0095 0.0060 -0.0142 0.0005 -0.0117  
Y 0.0305 0.0347 0.0070 -0.0202 -0.0024 -0.0121  
Z -0.0273 -0.0300 -0.0042 0.0135 0.0026 0.0067  
AT. 120 H X -0.0063 0.0095 -0.0060 0.0142 0.0005 -0.0117  
Y -0.0305 0.0347 -0.0070 0.0202 -0.0024 -0.0121  
Z 0.0273 -0.0300 0.0042 -0.0135 0.0026 0.0067  
AT. 121 C X 0.0033 0.0017 -0.0019 0.0038 -0.0007 0.0044  
Y -0.0045 -0.0030 0.0016 -0.0029 0.0009 -0.0037  
Z 0.0046 0.0028 -0.0019 0.0038 -0.0009 0.0047  
AT. 122 C X -0.0033 0.0017 0.0019 -0.0038 -0.0007 0.0044  
Y 0.0045 -0.0030 -0.0016 0.0029 0.0009 -0.0037  
Z -0.0046 0.0028 0.0019 -0.0038 -0.0009 0.0047  
AT. 123 H X -0.0195 -0.0117 0.0108 -0.0222 0.0042 -0.0279  
Y 0.0151 0.0111 -0.0050 0.0076 -0.0033 0.0097  
Z -0.0194 -0.0137 0.0073 -0.0123 0.0043 -0.0157  
AT. 124 H X 0.0195 -0.0117 -0.0108 0.0222 0.0042 -0.0279  
Y -0.0151 0.0111 0.0050 -0.0076 -0.0033 0.0097  
Z 0.0194 -0.0137 -0.0073 0.0123 0.0043 -0.0157  
AT. 125 H X -0.0152 -0.0071 0.0091 -0.0197 0.0031 -0.0224  
Y 0.0078 0.0049 -0.0027 0.0043 -0.0018 0.0038  
Z -0.0116 -0.0040 0.0090 -0.0205 0.0024 -0.0234  
AT. 126 H X 0.0152 -0.0071 -0.0091 0.0197 0.0031 -0.0224  
Y -0.0078 0.0049 0.0027 -0.0043 -0.0018 0.0038  
Z 0.0116 -0.0040 -0.0090 0.0205 0.0024 -0.0234  
AT. 127 C X -0.0023 -0.0000 0.0031 -0.0065 0.0008 -0.0065  
Y 0.0021 0.0013 -0.0001 0.0004 -0.0001 0.0010  
Z -0.0028 -0.0014 0.0019 -0.0038 0.0007 -0.0043  
AT. 128 C X 0.0023 -0.0000 -0.0031 0.0065 0.0008 -0.0065

Y -0.0021 0.0013 0.0001 -0.0004 -0.0001 0.0010  
Z 0.0028 -0.0014 -0.0019 0.0038 0.0007 -0.0043  
AT. 129 C X 0.0007 0.0001 -0.0009 0.0018 -0.0003 0.0021  
Y 0.0043 0.0028 -0.0022 0.0042 -0.0008 0.0051  
Z 0.0063 0.0041 -0.0029 0.0055 -0.0011 0.0071  
AT. 130 C X -0.0007 0.0001 0.0009 -0.0018 -0.0003 0.0021  
Y -0.0043 0.0028 0.0022 -0.0042 -0.0008 0.0051  
Z -0.0063 0.0041 0.0029 -0.0055 -0.0011 0.0071  
AT. 131 H X -0.0025 0.0003 0.0046 -0.0093 0.0012 -0.0115  
Y -0.0211 -0.0144 0.0097 -0.0180 0.0034 -0.0208  
Z -0.0100 -0.0038 0.0098 -0.0194 0.0027 -0.0228  
AT. 132 H X 0.0025 0.0003 -0.0046 0.0093 0.0012 -0.0115  
Y 0.0211 -0.0144 -0.0097 0.0180 0.0034 -0.0208  
Z 0.0100 -0.0038 -0.0098 0.0194 0.0027 -0.0228  
AT. 133 H X 0.0020 0.0053 0.0040 -0.0099 0.0007 -0.0118  
Y -0.0232 -0.0136 0.0113 -0.0226 0.0040 -0.0279  
Z -0.0374 -0.0238 0.0161 -0.0315 0.0060 -0.0389  
AT. 134 H X -0.0020 0.0053 -0.0040 0.0099 0.0007 -0.0118  
Y 0.0232 -0.0136 -0.0113 0.0226 0.0040 -0.0279  
Z 0.0374 -0.0238 -0.0161 0.0315 0.0060 -0.0389  
AT. 135 C X 0.0112 0.0137 0.0042 -0.0097 -0.0001 -0.0058  
Y 0.0038 0.0044 0.0011 -0.0025 -0.0002 -0.0010  
Z -0.0072 -0.0086 -0.0022 0.0053 0.0002 0.0028  
AT. 136 C X -0.0112 0.0137 -0.0042 0.0097 -0.0001 -0.0058  
Y -0.0038 0.0044 -0.0011 0.0025 -0.0002 -0.0010  
Z 0.0072 -0.0086 0.0022 -0.0053 0.0002 0.0028  
AT. 137 H X -0.0565 -0.0685 -0.0208 0.0477 0.0006 0.0279  
Y 0.0040 0.0050 0.0010 -0.0029 -0.0002 -0.0011  
Z 0.0211 0.0263 0.0078 -0.0187 -0.0001 -0.0108  
AT. 138 H X 0.0565 -0.0685 0.0208 -0.0477 0.0006 0.0279  
Y -0.0040 0.0050 -0.0010 0.0029 -0.0002 -0.0011  
Z -0.0211 0.0263 -0.0078 0.0187 -0.0001 -0.0108

AT. 139 H X -0.0323 -0.0393 -0.0113 0.0268 0.0006 0.0172  
Y -0.0113 -0.0119 -0.0025 0.0056 0.0008 0.0012  
Z 0.0512 0.0621 0.0180 -0.0421 -0.0009 -0.0262

AT. 140 H X 0.0323 -0.0393 0.0113 -0.0268 0.0006 0.0172  
Y 0.0113 -0.0119 0.0025 -0.0056 0.0008 0.0012  
Z -0.0512 0.0621 -0.0180 0.0421 -0.0009 -0.0262

AT. 141 H X -0.0483 -0.0598 -0.0180 0.0424 0.0008 0.0266  
Y -0.0384 -0.0467 -0.0131 0.0313 0.0009 0.0174  
Z 0.0143 0.0169 0.0042 -0.0103 -0.0006 -0.0043

AT. 142 H X 0.0483 -0.0598 0.0180 -0.0424 0.0008 0.0266  
Y 0.0384 -0.0467 0.0131 -0.0313 0.0009 0.0174  
Z -0.0143 0.0169 -0.0042 0.0103 -0.0006 -0.0043

AT. 143 C X -0.0100 -0.0063 0.0048 -0.0099 0.0024 -0.0146  
Y -0.0029 -0.0017 0.0015 -0.0031 0.0006 -0.0044  
Z -0.0074 -0.0047 0.0033 -0.0069 0.0016 -0.0096

AT. 144 C X 0.0100 -0.0063 -0.0048 0.0099 0.0024 -0.0146  
Y 0.0029 -0.0017 -0.0015 0.0031 0.0006 -0.0044  
Z 0.0074 -0.0047 -0.0033 0.0069 0.0016 -0.0096

AT. 145 H X 0.0541 0.0321 -0.0284 0.0590 -0.0129 0.0824  
Y -0.0047 -0.0031 0.0021 -0.0044 0.0008 -0.0037  
Z 0.0134 0.0081 -0.0071 0.0146 -0.0030 0.0179

AT. 146 H X -0.0541 0.0321 0.0284 -0.0590 -0.0129 0.0824  
Y 0.0047 -0.0031 -0.0021 0.0044 0.0008 -0.0037  
Z -0.0134 0.0081 0.0071 -0.0146 -0.0030 0.0179

AT. 147 H X 0.0293 0.0186 -0.0139 0.0285 -0.0069 0.0416  
Y 0.0078 0.0033 -0.0054 0.0119 -0.0016 0.0141  
Z 0.0512 0.0315 -0.0253 0.0522 -0.0120 0.0751

AT. 148 H X -0.0293 0.0186 0.0139 -0.0285 -0.0069 0.0416  
Y -0.0078 0.0033 0.0054 -0.0119 -0.0016 0.0141  
Z -0.0512 0.0315 0.0253 -0.0522 -0.0120 0.0751

AT. 149 H X 0.0415 0.0265 -0.0194 0.0396 -0.0097 0.0595  
Y 0.0280 0.0171 -0.0138 0.0287 -0.0062 0.0390



Z 0.0203 0.0113 -0.0109 0.0231 -0.0042 0.0280  
AT. 150 H X -0.0415 0.0265 0.0194 -0.0396 -0.0097 0.0595  
Y -0.0280 0.0171 0.0138 -0.0287 -0.0062 0.0390  
Z -0.0203 0.0113 0.0109 -0.0231 -0.0042 0.0280  
AT. 151 C X -0.0021 -0.0049 -0.0046 0.0104 -0.0008 0.0102  
Y -0.0010 -0.0016 -0.0014 0.0031 -0.0003 0.0031  
Z 0.0021 0.0016 -0.0005 0.0009 -0.0002 0.0005  
AT. 152 C X 0.0021 -0.0049 0.0046 -0.0104 -0.0008 0.0102  
Y 0.0010 -0.0016 0.0014 -0.0031 -0.0003 0.0031  
Z -0.0021 0.0016 0.0005 -0.0009 -0.0002 0.0005  
AT. 153 H X 0.0059 0.0171 0.0180 -0.0401 0.0037 -0.0415  
Y -0.0078 -0.0025 0.0073 -0.0149 0.0021 -0.0137  
Z -0.0145 -0.0113 0.0041 -0.0068 0.0020 -0.0050  
AT. 154 H X -0.0059 0.0171 -0.0180 0.0401 0.0037 -0.0415  
Y 0.0078 -0.0025 -0.0073 0.0149 0.0021 -0.0137  
Z 0.0145 -0.0113 -0.0041 0.0068 0.0020 -0.0050  
AT. 155 H X 0.0073 0.0134 0.0124 -0.0274 0.0019 -0.0244  
Y 0.0143 0.0131 0.0014 -0.0044 -0.0005 -0.0057  
Z -0.0129 -0.0095 0.0028 -0.0048 0.0012 -0.0033  
AT. 156 H X -0.0073 0.0134 -0.0124 0.0274 0.0019 -0.0244  
Y -0.0143 0.0131 -0.0014 0.0044 -0.0005 -0.0057  
Z 0.0129 -0.0095 -0.0028 0.0048 0.0012 -0.0033  
AT. 157 O X 0.0001 0.0001 -0.0001 0.0001 -0.0000 0.0002  
Y 0.0004 0.0003 0.0000 0.0001 -0.0000 0.0001  
Z 0.0001 -0.0001 -0.0002 -0.0000 0.0001 -0.0002  
AT. 158 O X -0.0001 0.0001 0.0001 -0.0001 -0.0000 0.0002  
Y -0.0004 0.0003 -0.0000 -0.0001 -0.0000 0.0001  
Z -0.0001 -0.0001 0.0002 0.0000 0.0001 -0.0002  
AT. 159 O X 0.0000 0.0001 0.0001 0.0001 -0.0002 0.0003  
Y -0.0002 -0.0002 0.0000 -0.0001 0.0000 -0.0000  
Z -0.0002 -0.0000 0.0001 -0.0001 -0.0001 0.0002  
AT. 160 O X -0.0000 0.0001 -0.0001 -0.0001 -0.0002 0.0003

Y 0.0002 -0.0002 -0.0000 0.0001 0.0000 -0.0000  
Z 0.0002 -0.0000 -0.0001 0.0001 -0.0001 0.0002  
AT.161 H X -0.0043 -0.0035 0.0015 -0.0023 0.0008 -0.0038  
Y -0.0009 -0.0008 -0.0002 0.0000 -0.0002 -0.0001  
Z 0.0032 0.0026 0.0001 0.0008 0.0012 0.0007  
AT.162 H X 0.0043 -0.0035 -0.0015 0.0023 0.0008 -0.0038  
Y 0.0009 -0.0008 0.0002 -0.0000 -0.0002 -0.0001  
Z -0.0032 0.0026 -0.0001 -0.0008 0.0012 0.0007  
AT.163 H X 0.0014 -0.0014 -0.0027 -0.0005 0.0024 -0.0037  
Y -0.0001 -0.0005 -0.0001 0.0002 0.0003 -0.0009  
Z -0.0006 0.0006 0.0012 0.0003 -0.0009 0.0009  
AT.164 H X -0.0014 -0.0014 0.0027 0.0005 0.0024 -0.0037  
Y 0.0001 -0.0005 0.0001 -0.0002 0.0003 -0.0009  
Z 0.0006 0.0006 -0.0012 -0.0003 -0.0009 0.0009  
AT.165 O X -0.0005 -0.0006 -0.0005 0.0002 -0.0003 -0.0001  
Y -0.0003 -0.0001 -0.0003 0.0000 -0.0001 -0.0000  
Z 0.0005 0.0002 0.0005 -0.0001 0.0001 0.0000  
AT.166 O X 0.0005 -0.0006 0.0005 -0.0002 -0.0003 -0.0001  
Y 0.0003 -0.0001 0.0003 -0.0000 -0.0001 -0.0000  
Z -0.0005 0.0002 -0.0005 0.0001 0.0001 0.0000  
AT.167 H X 0.0039 0.0036 0.0036 -0.0012 0.0020 0.0006  
Y -0.0011 -0.0006 -0.0019 0.0001 -0.0002 -0.0005  
Z -0.0125 -0.0121 -0.0112 0.0043 -0.0092 -0.0013  
AT.168 H X -0.0039 0.0036 -0.0036 0.0012 0.0020 0.0006  
Y 0.0011 -0.0006 0.0019 -0.0001 -0.0002 -0.0005  
Z 0.0125 -0.0121 0.0112 -0.0043 -0.0092 -0.0013  
AT.169 O X 0.0002 0.0004 0.0002 -0.0002 0.0004 0.0001  
Y 0.0004 0.0001 0.0004 -0.0000 -0.0001 0.0000  
Z 0.0006 0.0002 0.0004 -0.0002 0.0001 0.0000  
AT.170 O X -0.0002 0.0004 -0.0002 0.0002 0.0004 0.0001  
Y -0.0004 0.0001 -0.0004 0.0000 -0.0001 0.0000  
Z -0.0006 0.0002 -0.0004 0.0002 0.0001 0.0000

AT.171 H X 0.0023 -0.0007 0.0010 0.0005 -0.0005 -0.0011  
Y -0.0007 0.0011 -0.0010 -0.0002 0.0021 -0.0002  
Z -0.0045 0.0043 -0.0031 -0.0009 0.0060 0.0009

AT.172 H X -0.0023 -0.0007 -0.0010 -0.0005 -0.0005 -0.0011  
Y 0.0007 0.0011 0.0010 0.0002 0.0021 -0.0002  
Z 0.0045 0.0043 0.0031 0.0009 0.0060 0.0009

FREQ(CM\*\*-1) 1395.92 1398.40 1403.94 1405.32 1405.50 1407.24

AT. 1 I X 0.0001 0.0001 0.0000 0.0001 0.0001 -0.0000  
Y 0.0000 0.0001 0.0000 0.0001 0.0001 -0.0000  
Z -0.0000 -0.0000 -0.0000 -0.0000 0.0000 -0.0000

AT. 2 I X -0.0001 0.0001 0.0000 0.0001 -0.0001 0.0000  
Y -0.0000 0.0001 0.0000 0.0001 -0.0001 0.0000  
Z 0.0000 -0.0000 -0.0000 -0.0000 -0.0000 0.0000

AT. 3 I X -0.0001 0.0001 -0.0000 -0.0001 0.0001 -0.0000  
Y -0.0000 0.0000 -0.0000 -0.0000 0.0000 -0.0000  
Z -0.0000 0.0000 -0.0000 -0.0000 0.0000 -0.0000

AT. 4 I X 0.0001 0.0001 -0.0000 -0.0001 -0.0001 0.0000  
Y 0.0000 0.0000 -0.0000 -0.0000 -0.0000 0.0000  
Z 0.0000 0.0000 -0.0000 -0.0000 -0.0000 0.0000

AT. 5 O X 0.0023 0.0021 0.0010 0.0031 0.0029 -0.0016  
Y -0.0019 -0.0015 -0.0007 -0.0023 -0.0021 0.0011  
Z -0.0026 -0.0022 -0.0009 -0.0030 -0.0027 0.0015

AT. 6 O X -0.0023 0.0021 0.0010 0.0031 -0.0029 0.0016  
Y 0.0019 -0.0015 -0.0007 -0.0023 0.0021 -0.0011  
Z 0.0026 -0.0022 -0.0009 -0.0030 0.0027 -0.0015

AT. 7 O X -0.0024 0.0031 -0.0004 -0.0025 0.0029 -0.0019  
Y 0.0023 -0.0031 0.0005 0.0025 -0.0029 0.0019  
Z -0.0009 0.0009 -0.0002 -0.0010 0.0008 -0.0005

AT. 8 O X 0.0024 0.0031 -0.0004 -0.0025 -0.0029 0.0019  
Y -0.0023 -0.0031 0.0005 0.0025 0.0029 -0.0019

Z 0.0009 0.0009 -0.0002 -0.0010 -0.0008 0.0005  
AT. 9 N X 0.0012 0.0007 0.0006 0.0017 0.0013 -0.0005  
Y -0.0012 -0.0011 -0.0004 -0.0013 -0.0014 0.0008  
Z 0.0069 0.0070 0.0018 0.0066 0.0069 -0.0037  
AT. 10 N X -0.0012 0.0007 0.0006 0.0017 -0.0013 0.0005  
Y 0.0012 -0.0011 -0.0004 -0.0013 0.0014 -0.0008  
Z -0.0069 0.0070 0.0018 0.0066 -0.0069 0.0037  
AT. 11 N X -0.0003 0.0003 -0.0002 -0.0007 0.0008 -0.0003  
Y -0.0024 0.0024 -0.0008 -0.0028 0.0022 -0.0016  
Z 0.0062 -0.0059 0.0020 0.0080 -0.0064 0.0044  
AT. 12 N X 0.0003 0.0003 -0.0002 -0.0007 -0.0008 0.0003  
Y 0.0024 0.0024 -0.0008 -0.0028 -0.0022 0.0016  
Z -0.0062 -0.0059 0.0020 0.0080 0.0064 -0.0044  
AT. 13 C X -0.0015 -0.0012 -0.0010 -0.0030 -0.0031 0.0016  
Y 0.0038 0.0035 0.0015 0.0047 0.0045 -0.0024  
Z -0.0005 -0.0011 0.0001 0.0000 -0.0005 0.0000  
AT. 14 C X 0.0015 -0.0012 -0.0010 -0.0030 0.0031 -0.0016  
Y -0.0038 0.0035 0.0015 0.0047 -0.0045 0.0024  
Z 0.0005 -0.0011 0.0001 0.0000 0.0005 -0.0000  
AT. 15 C X -0.0042 -0.0042 -0.0010 -0.0034 -0.0029 0.0018  
Y 0.0099 0.0096 0.0025 0.0086 0.0077 -0.0046  
Z -0.0031 -0.0031 -0.0008 -0.0027 -0.0025 0.0015  
AT. 16 C X 0.0042 -0.0042 -0.0010 -0.0034 0.0029 -0.0018  
Y -0.0099 0.0096 0.0025 0.0086 -0.0077 0.0046  
Z 0.0031 -0.0031 -0.0008 -0.0027 0.0025 -0.0015  
AT. 17 H X -0.0081 -0.0059 -0.0020 -0.0072 -0.0060 0.0034  
Y -0.0511 -0.0499 -0.0134 -0.0453 -0.0414 0.0247  
Z 0.0677 0.0671 0.0176 0.0596 0.0546 -0.0327  
AT. 18 H X 0.0081 -0.0059 -0.0020 -0.0072 0.0060 -0.0034  
Y 0.0511 -0.0499 -0.0134 -0.0453 0.0414 -0.0247  
Z -0.0677 0.0671 0.0176 0.0596 -0.0546 0.0327  
AT. 19 H X 0.0263 0.0258 0.0065 0.0233 0.0206 -0.0121

Y -0.0798 -0.0783 -0.0213 -0.0727 -0.0664 0.0394  
Z -0.0266 -0.0259 -0.0072 -0.0242 -0.0223 0.0134  
AT. 20 H X -0.0263 0.0258 0.0065 0.0233 -0.0206 0.0121  
Y 0.0798 -0.0783 -0.0213 -0.0727 0.0664 -0.0394  
Z 0.0266 -0.0259 -0.0072 -0.0242 0.0223 -0.0134  
AT. 21 C X 0.0020 -0.0035 0.0003 0.0028 -0.0037 0.0026  
Y -0.0019 0.0029 -0.0002 -0.0018 0.0027 -0.0016  
Z -0.0035 0.0038 -0.0012 -0.0046 0.0039 -0.0030  
AT. 22 C X -0.0020 -0.0035 0.0003 0.0028 0.0037 -0.0026  
Y 0.0019 0.0029 -0.0002 -0.0018 -0.0027 0.0016  
Z 0.0035 0.0038 -0.0012 -0.0046 -0.0039 0.0030  
AT. 23 C X 0.0042 -0.0041 0.0010 0.0035 -0.0032 0.0018  
Y -0.0042 0.0041 -0.0009 -0.0035 0.0030 -0.0018  
Z -0.0088 0.0085 -0.0019 -0.0075 0.0068 -0.0040  
AT. 24 C X -0.0042 -0.0041 0.0010 0.0035 0.0032 -0.0018  
Y 0.0042 0.0041 -0.0009 -0.0035 -0.0030 0.0018  
Z 0.0088 0.0085 -0.0019 -0.0075 -0.0068 0.0040  
AT. 25 H X -0.0004 0.0015 -0.0001 -0.0004 0.0015 -0.0009  
Y -0.0165 0.0165 -0.0036 -0.0142 0.0132 -0.0080  
Z 0.0856 -0.0864 0.0188 0.0768 -0.0710 0.0432  
AT. 26 H X 0.0004 0.0015 -0.0001 -0.0004 -0.0015 0.0009  
Y 0.0165 0.0165 -0.0036 -0.0142 -0.0132 0.0080  
Z -0.0856 -0.0864 0.0188 0.0768 0.0710 -0.0432  
AT. 27 H X -0.0254 0.0263 -0.0064 -0.0235 0.0216 -0.0131  
Y 0.0734 -0.0735 0.0157 0.0642 -0.0587 0.0357  
Z 0.0392 -0.0396 0.0086 0.0347 -0.0317 0.0195  
AT. 28 H X 0.0254 0.0263 -0.0064 -0.0235 -0.0216 0.0131  
Y -0.0734 -0.0735 0.0157 0.0642 0.0587 -0.0357  
Z -0.0392 -0.0396 0.0086 0.0347 0.0317 -0.0195  
AT. 29 C X -0.0016 -0.0029 -0.0005 -0.0021 -0.0027 0.0016  
Y -0.0007 -0.0003 -0.0004 -0.0008 -0.0002 0.0001  
Z -0.0032 -0.0034 -0.0010 -0.0032 -0.0030 0.0016

AT. 30 C X 0.0016 -0.0029 -0.0005 -0.0021 0.0027 -0.0016  
Y 0.0007 -0.0003 -0.0004 -0.0008 0.0002 -0.0001  
Z 0.0032 -0.0034 -0.0010 -0.0032 0.0030 -0.0016

AT. 31 H X -0.0087 -0.0035 -0.0029 -0.0063 -0.0039 0.0024  
Y 0.0081 0.0044 0.0042 0.0092 0.0048 -0.0023  
Z 0.0052 0.0031 0.0040 0.0087 0.0034 -0.0015

AT. 32 H X 0.0087 -0.0035 -0.0029 -0.0063 0.0039 -0.0024  
Y -0.0081 0.0044 0.0042 0.0092 -0.0048 0.0023  
Z -0.0052 0.0031 0.0040 0.0087 -0.0034 0.0015

AT. 33 H X 0.0160 0.0197 0.0045 0.0166 0.0170 -0.0100  
Y 0.0048 0.0002 0.0042 0.0081 0.0019 -0.0012  
Z 0.0065 0.0114 0.0006 0.0058 0.0093 -0.0055

AT. 34 H X -0.0160 0.0197 0.0045 0.0166 -0.0170 0.0100  
Y -0.0048 0.0002 0.0042 0.0081 -0.0019 0.0012  
Z -0.0065 0.0114 0.0006 0.0058 -0.0093 0.0055

AT. 35 C X -0.0001 0.0035 -0.0001 0.0001 0.0026 -0.0020  
Y 0.0006 -0.0003 0.0001 -0.0003 0.0002 0.0002  
Z 0.0001 -0.0001 0.0000 0.0001 -0.0001 0.0000

AT. 36 C X 0.0001 0.0035 -0.0001 0.0001 -0.0026 0.0020  
Y -0.0006 -0.0003 0.0001 -0.0003 -0.0002 -0.0002  
Z -0.0001 -0.0001 0.0000 0.0001 0.0001 -0.0000

AT. 37 C X -0.0040 0.0034 -0.0015 -0.0047 0.0038 -0.0019  
Y 0.0012 -0.0000 0.0005 0.0021 -0.0010 0.0002  
Z -0.0021 0.0012 -0.0008 -0.0029 0.0018 -0.0010

AT. 38 C X 0.0040 0.0034 -0.0015 -0.0047 -0.0038 0.0019  
Y -0.0012 -0.0000 0.0005 0.0021 0.0010 -0.0002  
Z 0.0021 0.0012 -0.0008 -0.0029 -0.0018 0.0010

AT. 39 H X 0.0305 -0.0281 0.0120 0.0374 -0.0319 0.0165  
Y 0.0061 -0.0156 0.0008 -0.0000 -0.0086 0.0060  
Z 0.0181 -0.0126 0.0079 0.0253 -0.0181 0.0085

AT. 40 H X -0.0305 -0.0281 0.0120 0.0374 0.0319 -0.0165  
Y -0.0061 -0.0156 0.0008 -0.0000 0.0086 -0.0060

Z -0.0181 -0.0126 0.0079 0.0253 0.0181 -0.0085  
AT. 41 H X 0.0219 -0.0220 0.0082 0.0249 -0.0235 0.0113  
Y -0.0097 0.0046 -0.0041 -0.0116 0.0077 -0.0017  
Z -0.0184 0.0225 -0.0065 -0.0206 0.0215 -0.0124  
AT. 42 H X -0.0219 -0.0220 0.0082 0.0249 0.0235 -0.0113  
Y 0.0097 0.0046 -0.0041 -0.0116 -0.0077 0.0017  
Z 0.0184 0.0225 -0.0065 -0.0206 -0.0215 0.0124  
AT. 43 C X 0.0009 -0.0021 0.0004 0.0010 -0.0016 0.0010  
Y 0.0008 -0.0016 0.0003 0.0008 -0.0013 0.0008  
Z -0.0026 0.0035 -0.0011 -0.0032 0.0030 -0.0021  
AT. 44 C X -0.0009 -0.0021 0.0004 0.0010 0.0016 -0.0010  
Y -0.0008 -0.0016 0.0003 0.0008 0.0013 -0.0008  
Z 0.0026 0.0035 -0.0011 -0.0032 -0.0030 0.0021  
AT. 45 H X 0.0026 0.0008 0.0001 0.0037 -0.0024 0.0008  
Y -0.0023 0.0047 -0.0009 -0.0017 0.0043 -0.0024  
Z -0.0006 -0.0048 0.0004 -0.0023 -0.0020 0.0013  
AT. 46 H X -0.0026 0.0008 0.0001 0.0037 0.0024 -0.0008  
Y 0.0023 0.0047 -0.0009 -0.0017 -0.0043 0.0024  
Z 0.0006 -0.0048 0.0004 -0.0023 0.0020 -0.0013  
AT. 47 H X -0.0101 0.0119 -0.0035 -0.0110 0.0105 -0.0068  
Y -0.0009 0.0036 0.0000 0.0002 0.0035 -0.0012  
Z 0.0112 -0.0114 0.0041 0.0131 -0.0095 0.0070  
AT. 48 H X 0.0101 0.0119 -0.0035 -0.0110 -0.0105 0.0068  
Y 0.0009 0.0036 0.0000 0.0002 -0.0035 0.0012  
Z -0.0112 -0.0114 0.0041 0.0131 0.0095 -0.0070  
AT. 49 C X 0.0005 0.0024 -0.0001 0.0003 0.0014 -0.0011  
Y 0.0002 0.0003 -0.0001 -0.0002 0.0002 -0.0003  
Z -0.0005 -0.0017 0.0001 -0.0003 -0.0007 0.0009  
AT. 50 C X -0.0005 0.0024 -0.0001 0.0003 -0.0014 0.0011  
Y -0.0002 0.0003 -0.0001 -0.0002 -0.0002 0.0003  
Z 0.0005 -0.0017 0.0001 -0.0003 0.0007 -0.0009  
AT. 51 C X 0.0037 0.0035 0.0010 0.0038 0.0031 -0.0018

Y -0.0003 0.0008 -0.0004 -0.0005 0.0001 -0.0004  
Z -0.0037 -0.0022 -0.0015 -0.0039 -0.0031 0.0010  
AT. 52 C X -0.0037 0.0035 0.0010 0.0038 -0.0031 0.0018  
Y 0.0003 0.0008 -0.0004 -0.0005 -0.0001 0.0004  
Z 0.0037 -0.0022 -0.0015 -0.0039 0.0031 -0.0010  
AT. 53 H X -0.0226 -0.0216 -0.0068 -0.0234 -0.0198 0.0107  
Y -0.0122 -0.0166 -0.0027 -0.0125 -0.0119 0.0079  
Z 0.0283 0.0213 0.0094 0.0296 0.0231 -0.0109  
AT. 54 H X 0.0226 -0.0216 -0.0068 -0.0234 0.0198 -0.0107  
Y 0.0122 -0.0166 -0.0027 -0.0125 0.0119 -0.0079  
Z -0.0283 0.0213 0.0094 0.0296 -0.0231 0.0109  
AT. 55 H X -0.0316 -0.0305 -0.0089 -0.0327 -0.0263 0.0156  
Y 0.0120 0.0052 0.0069 0.0146 0.0090 -0.0013  
Z -0.0102 -0.0182 0.0013 -0.0078 -0.0104 0.0108  
AT. 56 H X 0.0316 -0.0305 -0.0089 -0.0327 0.0263 -0.0156  
Y -0.0120 0.0052 0.0069 0.0146 -0.0090 0.0013  
Z 0.0102 -0.0182 0.0013 -0.0078 0.0104 -0.0108  
AT. 57 C X 0.0010 0.0002 0.0000 0.0013 -0.0003 0.0000  
Y -0.0000 -0.0006 0.0003 0.0003 -0.0001 0.0003  
Z 0.0002 0.0004 0.0002 0.0005 0.0003 -0.0001  
AT. 58 C X -0.0010 0.0002 0.0000 0.0013 0.0003 -0.0000  
Y 0.0000 -0.0006 0.0003 0.0003 0.0001 -0.0003  
Z -0.0002 0.0004 0.0002 0.0005 -0.0003 0.0001  
AT. 59 H X 0.0022 -0.0047 0.0017 0.0022 -0.0012 0.0022  
Y -0.0020 0.0002 -0.0027 -0.0044 -0.0020 -0.0006  
Z -0.0017 -0.0022 -0.0030 -0.0055 -0.0033 0.0003  
AT. 60 H X -0.0022 -0.0047 0.0017 0.0022 0.0012 -0.0022  
Y 0.0020 0.0002 -0.0027 -0.0044 0.0020 0.0006  
Z 0.0017 -0.0022 -0.0030 -0.0055 0.0033 -0.0003  
AT. 61 H X -0.0058 -0.0013 -0.0009 -0.0090 0.0008 -0.0000  
Y -0.0054 0.0028 -0.0034 -0.0093 0.0002 -0.0018  
Z -0.0026 -0.0027 0.0012 -0.0030 0.0008 0.0010



AT. 62 H X 0.0058 -0.0013 -0.0009 -0.0090 -0.0008 0.0000  
Y 0.0054 0.0028 -0.0034 -0.0093 -0.0002 0.0018  
Z 0.0026 -0.0027 0.0012 -0.0030 -0.0008 -0.0010

AT. 63 H X -0.0062 -0.0024 -0.0003 -0.0082 0.0003 0.0008  
Y 0.0036 0.0064 0.0016 0.0063 0.0040 -0.0022  
Z 0.0038 -0.0031 -0.0006 0.0040 -0.0038 0.0013

AT. 64 H X 0.0062 -0.0024 -0.0003 -0.0082 -0.0003 -0.0008  
Y -0.0036 0.0064 0.0016 0.0063 -0.0040 0.0022  
Z -0.0038 -0.0031 -0.0006 0.0040 0.0038 -0.0013

AT. 65 C X -0.0008 0.0004 -0.0005 -0.0007 0.0000 -0.0002  
Y 0.0002 -0.0012 0.0006 0.0003 -0.0006 0.0008  
Z 0.0012 -0.0008 0.0008 0.0013 -0.0003 0.0003

AT. 66 C X 0.0008 0.0004 -0.0005 -0.0007 -0.0000 0.0002  
Y -0.0002 -0.0012 0.0006 0.0003 0.0006 -0.0008  
Z -0.0012 -0.0008 0.0008 0.0013 0.0003 -0.0003

AT. 67 H X 0.0029 -0.0095 0.0042 0.0027 -0.0056 0.0060  
Y 0.0020 0.0049 -0.0022 0.0028 0.0035 -0.0045  
Z -0.0037 0.0024 -0.0010 -0.0042 0.0010 -0.0003

AT. 68 H X -0.0029 -0.0095 0.0042 0.0027 0.0056 -0.0060  
Y -0.0020 0.0049 -0.0022 0.0028 -0.0035 0.0045  
Z 0.0037 0.0024 -0.0010 -0.0042 -0.0010 0.0003

AT. 69 H X 0.0025 0.0026 0.0003 0.0025 0.0028 -0.0025  
Y 0.0016 0.0075 -0.0023 0.0019 0.0058 -0.0056  
Z -0.0035 0.0073 -0.0050 -0.0031 0.0035 -0.0043

AT. 70 H X -0.0025 0.0026 0.0003 0.0025 -0.0028 0.0025  
Y -0.0016 0.0075 -0.0023 0.0019 -0.0058 0.0056  
Z 0.0035 0.0073 -0.0050 -0.0031 -0.0035 0.0043

AT. 71 H X 0.0020 0.0004 0.0016 0.0021 0.0021 -0.0004  
Y -0.0045 0.0031 -0.0023 -0.0056 0.0004 -0.0009  
Z -0.0034 0.0049 -0.0017 -0.0050 0.0024 -0.0019

AT. 72 H X -0.0020 0.0004 0.0016 0.0021 -0.0021 0.0004  
Y 0.0045 0.0031 -0.0023 -0.0056 -0.0004 0.0009

Z 0.0034 0.0049 -0.0017 -0.0050 -0.0024 0.0019  
AT. 73 C X -0.0001 -0.0032 0.0001 -0.0002 -0.0020 0.0017  
Y -0.0002 0.0016 -0.0000 0.0001 0.0008 -0.0008  
Z 0.0008 0.0013 -0.0006 0.0011 0.0002 -0.0006  
AT. 74 C X 0.0001 -0.0032 0.0001 -0.0002 0.0020 -0.0017  
Y 0.0002 0.0016 -0.0000 0.0001 -0.0008 0.0008  
Z -0.0008 0.0013 -0.0006 0.0011 -0.0002 0.0006  
AT. 75 H X -0.0024 0.0072 0.0009 -0.0033 0.0046 -0.0041  
Y -0.0025 -0.0068 0.0027 -0.0044 -0.0014 0.0036  
Z -0.0042 -0.0031 0.0038 -0.0072 0.0016 0.0015  
AT. 76 H X 0.0024 0.0072 0.0009 -0.0033 -0.0046 0.0041  
Y 0.0025 -0.0068 0.0027 -0.0044 0.0014 -0.0036  
Z 0.0042 -0.0031 0.0038 -0.0072 -0.0016 -0.0015  
AT. 77 H X 0.0022 0.0098 -0.0011 0.0031 0.0051 -0.0056  
Y 0.0035 -0.0036 -0.0030 0.0052 -0.0048 0.0021  
Z -0.0050 -0.0060 0.0034 -0.0069 -0.0008 0.0034  
AT. 78 H X -0.0022 0.0098 -0.0011 0.0031 -0.0051 0.0056  
Y -0.0035 -0.0036 -0.0030 0.0052 0.0048 -0.0021  
Z 0.0050 -0.0060 0.0034 -0.0069 0.0008 -0.0034  
AT. 79 I X 0.0000 0.0000 -0.0001 0.0000 -0.0000 -0.0000  
Y -0.0000 -0.0000 0.0001 -0.0000 0.0000 0.0001  
Z -0.0000 0.0000 0.0000 -0.0000 0.0000 0.0000  
AT. 80 I X -0.0000 0.0000 -0.0001 0.0000 0.0000 0.0000  
Y 0.0000 -0.0000 0.0001 -0.0000 -0.0000 -0.0001  
Z 0.0000 0.0000 0.0000 -0.0000 -0.0000 -0.0000  
AT. 81 I X -0.0000 0.0000 -0.0000 0.0000 0.0000 0.0000  
Y -0.0000 -0.0000 0.0000 -0.0000 -0.0000 -0.0000  
Z -0.0000 0.0000 0.0000 -0.0000 -0.0000 -0.0000  
AT. 82 I X 0.0000 0.0000 -0.0000 0.0000 -0.0000 -0.0000  
Y 0.0000 -0.0000 0.0000 -0.0000 0.0000 0.0000  
Z 0.0000 0.0000 0.0000 -0.0000 0.0000 0.0000  
AT. 83 O X 0.0001 0.0001 -0.0043 0.0015 -0.0024 -0.0045

Y 0.0000 0.0000 -0.0009 0.0003 -0.0005 -0.0010  
Z 0.0001 0.0000 -0.0023 0.0009 -0.0012 -0.0025  
AT. 84 O X -0.0001 0.0001 -0.0043 0.0015 0.0024 0.0045  
Y -0.0000 0.0000 -0.0009 0.0003 0.0005 0.0010  
Z -0.0001 0.0000 -0.0023 0.0009 0.0012 0.0025  
AT. 85 O X 0.0000 -0.0001 -0.0018 0.0004 0.0006 0.0008  
Y 0.0000 -0.0001 -0.0013 0.0002 0.0005 0.0006  
Z 0.0000 0.0000 0.0005 -0.0001 -0.0002 -0.0003  
AT. 86 O X -0.0000 -0.0001 -0.0018 0.0004 -0.0006 -0.0008  
Y -0.0000 -0.0001 -0.0013 0.0002 -0.0005 -0.0006  
Z -0.0000 0.0000 0.0005 -0.0001 0.0002 0.0003  
AT. 87 N X 0.0001 0.0001 -0.0009 0.0002 -0.0010 -0.0015  
Y 0.0001 0.0000 -0.0009 0.0003 -0.0006 -0.0010  
Z -0.0002 -0.0004 0.0062 -0.0026 0.0030 0.0059  
AT. 88 N X -0.0001 0.0001 -0.0009 0.0002 0.0010 0.0015  
Y -0.0001 0.0000 -0.0009 0.0003 0.0006 0.0010  
Z 0.0002 -0.0004 0.0062 -0.0026 -0.0030 -0.0059  
AT. 89 N X 0.0002 -0.0002 -0.0009 0.0003 0.0001 0.0005  
Y 0.0002 -0.0000 0.0016 -0.0001 -0.0012 -0.0013  
Z -0.0002 0.0000 -0.0041 0.0005 0.0027 0.0032  
AT. 90 N X -0.0002 -0.0002 -0.0009 0.0003 -0.0001 -0.0005  
Y -0.0002 -0.0000 0.0016 -0.0001 0.0012 0.0013  
Z 0.0002 0.0000 -0.0041 0.0005 -0.0027 -0.0032  
AT. 91 C X -0.0001 -0.0000 0.0050 -0.0015 0.0032 0.0057  
Y -0.0001 -0.0001 0.0036 -0.0013 0.0019 0.0036  
Z 0.0001 0.0002 -0.0015 0.0004 -0.0010 -0.0012  
AT. 92 C X 0.0001 -0.0000 0.0050 -0.0015 -0.0032 -0.0057  
Y 0.0001 -0.0001 0.0036 -0.0013 -0.0019 -0.0036  
Z -0.0001 0.0002 -0.0015 0.0004 0.0010 0.0012  
AT. 93 C X -0.0000 -0.0001 0.0067 -0.0027 0.0028 0.0058  
Y -0.0001 -0.0001 0.0073 -0.0029 0.0030 0.0062  
Z 0.0000 0.0001 -0.0062 0.0025 -0.0024 -0.0051

AT. 94 C X 0.0000 -0.0001 0.0067 -0.0027 -0.0028 -0.0058  
Y 0.0001 -0.0001 0.0073 -0.0029 -0.0030 -0.0062  
Z -0.0000 0.0001 -0.0062 0.0025 0.0024 0.0051

AT. 95 H X -0.0001 0.0002 -0.0046 0.0019 -0.0017 -0.0043  
Y 0.0004 0.0006 -0.0397 0.0155 -0.0167 -0.0340  
Z -0.0006 -0.0014 0.0875 -0.0344 0.0363 0.0751

AT. 96 H X 0.0001 0.0002 -0.0046 0.0019 0.0017 0.0043  
Y -0.0004 0.0006 -0.0397 0.0155 0.0167 0.0340  
Z 0.0006 -0.0014 0.0875 -0.0344 -0.0363 -0.0751

AT. 97 H X 0.0005 0.0008 -0.0549 0.0216 -0.0254 -0.0518  
Y 0.0008 0.0013 -0.0749 0.0294 -0.0311 -0.0638  
Z 0.0001 0.0001 -0.0063 0.0026 -0.0017 -0.0038

AT. 98 H X -0.0005 0.0008 -0.0549 0.0216 0.0254 0.0518  
Y -0.0008 0.0013 -0.0749 0.0294 0.0311 0.0638  
Z -0.0001 0.0001 -0.0063 0.0026 0.0017 0.0038

AT. 99 C X -0.0001 0.0004 0.0028 -0.0007 -0.0008 -0.0011  
Y -0.0001 0.0001 0.0006 -0.0002 0.0003 -0.0000  
Z 0.0001 0.0001 0.0026 -0.0003 -0.0016 -0.0018

AT. 100 C X 0.0001 0.0004 0.0028 -0.0007 0.0008 0.0011  
Y 0.0001 0.0001 0.0006 -0.0002 -0.0003 0.0000  
Z -0.0001 0.0001 0.0026 -0.0003 0.0016 0.0018

AT. 101 C X 0.0001 -0.0002 0.0020 -0.0001 -0.0010 -0.0016  
Y 0.0000 -0.0001 0.0013 -0.0001 -0.0007 -0.0010  
Z 0.0000 -0.0002 0.0029 -0.0003 -0.0013 -0.0020

AT. 102 C X -0.0001 -0.0002 0.0020 -0.0001 0.0010 0.0016  
Y -0.0000 -0.0001 0.0013 -0.0001 0.0007 0.0010  
Z -0.0000 -0.0002 0.0029 -0.0003 0.0013 0.0020

AT. 103 H X -0.0001 0.0001 -0.0030 0.0004 0.0005 0.0010  
Y 0.0001 -0.0002 0.0036 -0.0004 -0.0014 -0.0021  
Z -0.0002 0.0011 -0.0330 0.0043 0.0150 0.0225

AT. 104 H X 0.0001 0.0001 -0.0030 0.0004 -0.0005 -0.0010  
Y -0.0001 -0.0002 0.0036 -0.0004 0.0014 0.0021

Z 0.0002 0.0011 -0.0330 0.0043 -0.0150 -0.0225  
AT.105 H X -0.0003 0.0008 -0.0170 0.0010 0.0087 0.0119  
Y -0.0001 0.0009 -0.0257 0.0034 0.0118 0.0177  
Z -0.0001 0.0004 -0.0112 0.0012 0.0053 0.0077  
AT.106 H X 0.0003 0.0008 -0.0170 0.0010 -0.0087 -0.0119  
Y 0.0001 0.0009 -0.0257 0.0034 -0.0118 -0.0177  
Z 0.0001 0.0004 -0.0112 0.0012 -0.0053 -0.0077  
AT.107 C X 0.0002 -0.0000 0.0014 -0.0005 -0.0001 0.0002  
Y 0.0001 0.0001 0.0003 0.0004 0.0003 -0.0002  
Z -0.0000 0.0002 -0.0027 0.0012 -0.0007 -0.0020  
AT.108 C X -0.0002 -0.0000 0.0014 -0.0005 0.0001 -0.0002  
Y -0.0001 0.0001 0.0003 0.0004 -0.0003 0.0002  
Z 0.0000 0.0002 -0.0027 0.0012 0.0007 0.0020  
AT.109 H X -0.0027 -0.0011 -0.0017 -0.0028 0.0029 0.0074  
Y -0.0003 -0.0005 -0.0005 -0.0012 -0.0000 0.0021  
Z 0.0003 -0.0004 -0.0027 -0.0009 -0.0021 -0.0001  
AT.110 H X 0.0027 -0.0011 -0.0017 -0.0028 -0.0029 -0.0074  
Y 0.0003 -0.0005 -0.0005 -0.0012 0.0000 -0.0021  
Z -0.0003 -0.0004 -0.0027 -0.0009 0.0021 0.0001  
AT.111 H X -0.0002 0.0006 -0.0063 0.0049 0.0011 -0.0028  
Y -0.0016 -0.0010 -0.0055 -0.0032 -0.0027 0.0020  
Z 0.0007 -0.0002 0.0076 -0.0041 -0.0010 0.0015  
AT.112 H X 0.0002 0.0006 -0.0063 0.0049 -0.0011 0.0028  
Y 0.0016 -0.0010 -0.0055 -0.0032 0.0027 -0.0020  
Z -0.0007 -0.0002 0.0076 -0.0041 0.0010 -0.0015  
AT.113 C X -0.0001 0.0000 -0.0008 0.0005 0.0011 0.0008  
Y -0.0001 -0.0002 0.0004 -0.0000 -0.0000 -0.0000  
Z 0.0000 -0.0004 0.0008 0.0001 0.0000 -0.0001  
AT.114 C X 0.0001 0.0000 -0.0008 0.0005 -0.0011 -0.0008  
Y 0.0001 -0.0002 0.0004 -0.0000 0.0000 0.0000  
Z -0.0000 -0.0004 0.0008 0.0001 -0.0000 0.0001  
AT.115 C X -0.0001 0.0004 -0.0015 -0.0002 0.0011 0.0015

Y 0.0000 -0.0001 0.0004 -0.0002 -0.0002 0.0000  
Z 0.0000 0.0001 0.0009 0.0000 -0.0009 -0.0012  
AT. 116 C X 0.0001 0.0004 -0.0015 -0.0002 -0.0011 -0.0015  
Y -0.0000 -0.0001 0.0004 -0.0002 0.0002 -0.0000  
Z -0.0000 0.0001 0.0009 0.0000 0.0009 0.0012  
AT. 117 H X 0.0001 -0.0019 0.0115 0.0004 -0.0087 -0.0118  
Y -0.0002 0.0011 -0.0081 0.0018 0.0043 0.0044  
Z -0.0001 0.0020 -0.0104 -0.0010 0.0081 0.0114  
AT. 118 H X -0.0001 -0.0019 0.0115 0.0004 0.0087 0.0118  
Y 0.0002 0.0011 -0.0081 0.0018 -0.0043 -0.0044  
Z 0.0001 0.0020 -0.0104 -0.0010 -0.0081 -0.0114  
AT. 119 H X -0.0001 -0.0019 0.0117 0.0004 -0.0070 -0.0108  
Y -0.0003 0.0014 -0.0031 0.0010 0.0022 0.0010  
Z 0.0003 -0.0025 0.0107 -0.0008 -0.0069 -0.0079  
AT. 120 H X 0.0001 -0.0019 0.0117 0.0004 0.0070 0.0108  
Y 0.0003 0.0014 -0.0031 0.0010 -0.0022 -0.0010  
Z -0.0003 -0.0025 0.0107 -0.0008 0.0069 0.0079  
AT. 121 C X 0.0003 -0.0001 0.0007 0.0000 -0.0006 -0.0003  
Y 0.0000 -0.0004 -0.0024 0.0006 -0.0003 0.0003  
Z 0.0003 0.0001 0.0019 -0.0002 -0.0009 -0.0011  
AT. 122 C X -0.0003 -0.0001 0.0007 0.0000 0.0006 0.0003  
Y -0.0000 -0.0004 -0.0024 0.0006 0.0003 -0.0003  
Z -0.0003 0.0001 0.0019 -0.0002 0.0009 0.0011  
AT. 123 H X -0.0030 0.0015 0.0081 -0.0039 0.0030 -0.0015  
Y -0.0006 0.0028 0.0079 -0.0026 0.0038 0.0001  
Z 0.0002 -0.0027 -0.0072 0.0023 -0.0041 -0.0010  
AT. 124 H X 0.0030 0.0015 0.0081 -0.0039 -0.0030 0.0015  
Y 0.0006 0.0028 0.0079 -0.0026 -0.0038 -0.0001  
Z -0.0002 -0.0027 -0.0072 0.0023 0.0041 0.0010  
AT. 125 H X -0.0015 0.0005 -0.0055 -0.0000 0.0052 0.0044  
Y -0.0016 0.0028 0.0124 -0.0044 0.0041 -0.0011  
Z -0.0026 0.0023 0.0012 -0.0026 0.0081 0.0040

AT. 126 H X 0.0015 0.0005 -0.0055 -0.0000 -0.0052 -0.0044  
Y 0.0016 0.0028 0.0124 -0.0044 -0.0041 0.0011  
Z 0.0026 0.0023 0.0012 -0.0026 -0.0081 -0.0040

AT. 127 C X -0.0002 -0.0002 -0.0015 0.0006 -0.0003 -0.0005  
Y 0.0001 -0.0001 0.0010 -0.0002 -0.0000 0.0004  
Z -0.0002 -0.0004 -0.0008 0.0003 -0.0003 -0.0003

AT. 128 C X 0.0002 -0.0002 -0.0015 0.0006 0.0003 0.0005  
Y -0.0001 -0.0001 0.0010 -0.0002 0.0000 -0.0004  
Z 0.0002 -0.0004 -0.0008 0.0003 0.0003 0.0003

AT. 129 C X 0.0001 0.0002 -0.0032 0.0014 -0.0015 -0.0033  
Y 0.0001 0.0002 0.0013 -0.0005 0.0005 0.0009  
Z 0.0002 0.0005 -0.0017 0.0009 -0.0011 -0.0024

AT. 130 C X -0.0001 0.0002 -0.0032 0.0014 0.0015 0.0033  
Y -0.0001 0.0002 0.0013 -0.0005 -0.0005 -0.0009  
Z -0.0002 0.0005 -0.0017 0.0009 0.0011 0.0024

AT. 131 H X -0.0008 -0.0013 0.0187 -0.0080 0.0102 0.0206  
Y -0.0002 -0.0002 -0.0188 0.0072 -0.0074 -0.0155  
Z -0.0011 -0.0018 0.0183 -0.0081 0.0108 0.0219

AT. 132 H X 0.0008 -0.0013 0.0187 -0.0080 -0.0102 -0.0206  
Y 0.0002 -0.0002 -0.0188 0.0072 0.0074 0.0155  
Z 0.0011 -0.0018 0.0183 -0.0081 -0.0108 -0.0219

AT. 133 H X -0.0008 -0.0015 0.0258 -0.0106 0.0125 0.0261  
Y -0.0008 -0.0014 -0.0017 0.0002 0.0005 0.0011  
Z -0.0008 -0.0013 -0.0194 0.0071 -0.0072 -0.0147

AT. 134 H X 0.0008 -0.0015 0.0258 -0.0106 -0.0125 -0.0261  
Y 0.0008 -0.0014 -0.0017 0.0002 -0.0005 -0.0011  
Z 0.0008 -0.0013 -0.0194 0.0071 0.0072 0.0147

AT. 135 C X -0.0004 -0.0006 -0.0005 0.0006 -0.0001 -0.0009  
Y -0.0002 -0.0002 -0.0005 0.0003 0.0003 0.0001  
Z 0.0001 0.0002 0.0003 -0.0004 0.0001 0.0005

AT. 136 C X 0.0004 -0.0006 -0.0005 0.0006 0.0001 0.0009  
Y 0.0002 -0.0002 -0.0005 0.0003 -0.0003 -0.0001

Z -0.0001 0.0002 0.0003 -0.0004 -0.0001 -0.0005  
AT. 137 H X 0.0021 0.0025 0.0046 -0.0030 -0.0025 0.0001  
Y 0.0007 0.0015 -0.0003 0.0002 -0.0018 -0.0016  
Z 0.0005 0.0017 -0.0015 0.0010 -0.0023 -0.0027  
AT. 138 H X -0.0021 0.0025 0.0046 -0.0030 0.0025 -0.0001  
Y -0.0007 0.0015 -0.0003 0.0002 0.0018 0.0016  
Z -0.0005 0.0017 -0.0015 0.0010 0.0023 0.0027  
AT. 139 H X 0.0013 0.0022 0.0003 -0.0017 -0.0003 0.0023  
Y 0.0010 0.0013 0.0031 -0.0012 -0.0042 -0.0040  
Z -0.0022 -0.0037 -0.0016 0.0029 0.0014 -0.0026  
AT. 140 H X -0.0013 0.0022 0.0003 -0.0017 0.0003 -0.0023  
Y -0.0010 0.0013 0.0031 -0.0012 0.0042 0.0040  
Z 0.0022 -0.0037 -0.0016 0.0029 -0.0014 0.0026  
AT. 141 H X 0.0017 0.0026 0.0011 -0.0023 0.0013 0.0051  
Y 0.0004 -0.0004 0.0031 -0.0021 0.0010 0.0026  
Z 0.0004 0.0016 -0.0027 0.0010 -0.0002 0.0001  
AT. 142 H X -0.0017 0.0026 0.0011 -0.0023 -0.0013 -0.0051  
Y -0.0004 -0.0004 0.0031 -0.0021 -0.0010 -0.0026  
Z -0.0004 0.0016 -0.0027 0.0010 0.0002 -0.0001  
AT. 143 C X -0.0003 -0.0001 -0.0005 -0.0000 0.0005 0.0006  
Y -0.0001 0.0000 -0.0008 0.0003 0.0000 -0.0004  
Z -0.0002 -0.0001 -0.0005 -0.0000 0.0004 0.0006  
AT. 144 C X 0.0003 -0.0001 -0.0005 -0.0000 -0.0005 -0.0006  
Y 0.0001 0.0000 -0.0008 0.0003 -0.0000 0.0004  
Z 0.0002 -0.0001 -0.0005 -0.0000 -0.0004 -0.0006  
AT. 145 H X 0.0017 0.0007 0.0077 -0.0023 -0.0012 0.0012  
Y 0.0000 -0.0002 0.0008 -0.0012 0.0011 0.0036  
Z 0.0003 0.0004 0.0003 0.0008 -0.0013 -0.0035  
AT. 146 H X -0.0017 0.0007 0.0077 -0.0023 0.0012 -0.0012  
Y -0.0000 -0.0002 0.0008 -0.0012 -0.0011 -0.0036  
Z -0.0003 0.0004 0.0003 0.0008 0.0013 0.0035  
AT. 147 H X 0.0010 0.0005 0.0006 0.0003 -0.0011 -0.0017



Y -0.0000 -0.0003 0.0063 -0.0031 0.0012 0.0053  
Z 0.0016 0.0007 0.0045 -0.0012 -0.0013 -0.0000  
AT. 148 H X -0.0010 0.0005 0.0006 0.0003 0.0011 0.0017  
Y 0.0000 -0.0003 0.0063 -0.0031 -0.0012 -0.0053  
Z -0.0016 0.0007 0.0045 -0.0012 0.0013 0.0000  
AT. 149 H X 0.0016 0.0009 0.0005 0.0010 -0.0022 -0.0039  
Y 0.0008 0.0005 0.0023 0.0002 -0.0015 -0.0027  
Z 0.0004 0.0002 0.0040 -0.0006 -0.0010 -0.0015  
AT. 150 H X -0.0016 0.0009 0.0005 0.0010 0.0022 0.0039  
Y -0.0008 0.0005 0.0023 0.0002 0.0015 0.0027  
Z -0.0004 0.0002 0.0040 -0.0006 0.0010 0.0015  
AT. 151 C X 0.0002 0.0002 0.0015 -0.0007 -0.0005 -0.0001  
Y 0.0000 0.0001 0.0002 -0.0001 -0.0000 -0.0000  
Z 0.0000 0.0001 0.0005 -0.0002 0.0005 0.0008  
AT. 152 C X -0.0002 0.0002 0.0015 -0.0007 0.0005 0.0001  
Y -0.0000 0.0001 0.0002 -0.0001 0.0000 0.0000  
Z -0.0000 0.0001 0.0005 -0.0002 -0.0005 -0.0008  
AT. 153 H X -0.0012 -0.0008 -0.0053 0.0025 0.0013 -0.0006  
Y -0.0002 -0.0003 -0.0039 0.0010 -0.0022 -0.0037  
Z 0.0001 -0.0002 -0.0037 0.0004 -0.0040 -0.0053  
AT. 154 H X 0.0012 -0.0008 -0.0053 0.0025 -0.0013 0.0006  
Y 0.0002 -0.0003 -0.0039 0.0010 0.0022 0.0037  
Z -0.0001 -0.0002 -0.0037 0.0004 0.0040 0.0053  
AT. 155 H X -0.0005 -0.0002 -0.0041 0.0015 0.0009 0.0002  
Y -0.0002 -0.0001 0.0023 -0.0001 0.0032 0.0043  
Z 0.0000 0.0002 -0.0039 0.0006 -0.0027 -0.0040  
AT. 156 H X 0.0005 -0.0002 -0.0041 0.0015 -0.0009 -0.0002  
Y 0.0002 -0.0001 0.0023 -0.0001 -0.0032 -0.0043  
Z -0.0000 0.0002 -0.0039 0.0006 0.0027 0.0040  
AT. 157 O X 0.0001 0.0003 0.0001 0.0001 -0.0000 0.0000  
Y -0.0001 -0.0000 0.0002 0.0005 0.0004 -0.0002  
Z 0.0011 0.0004 -0.0003 -0.0010 -0.0004 0.0003

AT.158 O X -0.0001 0.0003 0.0001 0.0001 0.0000 -0.0000  
Y 0.0001 -0.0000 0.0002 0.0005 -0.0004 0.0002  
Z -0.0011 0.0004 -0.0003 -0.0010 0.0004 -0.0003

AT.159 O X -0.0011 -0.0003 0.0004 0.0013 0.0005 -0.0003  
Y 0.0002 -0.0002 -0.0001 -0.0004 -0.0001 0.0000  
Z -0.0007 -0.0003 0.0001 0.0005 0.0000 -0.0001

AT.160 O X 0.0011 -0.0003 0.0004 0.0013 -0.0005 0.0003  
Y -0.0002 -0.0002 -0.0001 -0.0004 0.0001 -0.0000  
Z 0.0007 -0.0003 0.0001 0.0005 -0.0000 0.0001

AT.161 H X -0.0043 -0.0067 -0.0026 -0.0033 -0.0032 0.0007  
Y -0.0003 -0.0001 -0.0002 -0.0004 -0.0004 0.0000  
Z 0.0032 0.0024 0.0007 -0.0002 0.0003 0.0005

AT.162 H X 0.0043 -0.0067 -0.0026 -0.0033 0.0032 -0.0007  
Y 0.0003 -0.0001 -0.0002 -0.0004 0.0004 -0.0000  
Z -0.0032 0.0024 0.0007 -0.0002 -0.0003 -0.0005

AT.163 H X 0.0218 0.0074 -0.0059 -0.0215 -0.0067 0.0052  
Y -0.0021 0.0016 -0.0001 0.0011 -0.0015 0.0011  
Z -0.0095 -0.0029 0.0024 0.0090 0.0028 -0.0022

AT.164 H X -0.0218 0.0074 -0.0059 -0.0215 0.0067 -0.0052  
Y 0.0021 0.0016 -0.0001 0.0011 0.0015 -0.0011  
Z 0.0095 -0.0029 0.0024 0.0090 -0.0028 0.0022

AT.165 O X 0.0000 0.0000 0.0043 -0.0003 0.0030 0.0039  
Y 0.0001 0.0000 0.0012 -0.0001 0.0010 0.0015  
Z -0.0001 -0.0001 -0.0027 0.0002 -0.0021 -0.0029

AT.166 O X -0.0000 0.0000 0.0043 -0.0003 -0.0030 -0.0039  
Y -0.0001 0.0000 0.0012 -0.0001 -0.0010 -0.0015  
Z 0.0001 -0.0001 -0.0027 0.0002 0.0021 0.0029

AT.167 H X -0.0003 -0.0004 -0.0306 0.0017 -0.0219 -0.0289  
Y 0.0004 0.0004 0.0113 -0.0006 0.0082 0.0106  
Z 0.0005 0.0014 0.0983 -0.0061 0.0695 0.0932

AT.168 H X 0.0003 -0.0004 -0.0306 0.0017 0.0219 0.0289  
Y -0.0004 0.0004 0.0113 -0.0006 -0.0082 -0.0106

Z -0.0005 0.0014 0.0983 -0.0061 -0.0695 -0.0932  
 AT. 169 O X 0.0001 -0.0000 -0.0024 0.0001 -0.0015 -0.0020  
 Y -0.0002 -0.0001 -0.0020 0.0002 -0.0016 -0.0024  
 Z -0.0001 -0.0000 -0.0030 0.0002 -0.0023 -0.0031  
 AT. 170 O X -0.0001 -0.0000 -0.0024 0.0001 0.0015 0.0020  
 Y 0.0002 -0.0001 -0.0020 0.0002 0.0016 0.0024  
 Z 0.0001 -0.0000 -0.0030 0.0002 0.0023 0.0031  
 AT. 171 H X -0.0009 -0.0006 -0.0028 0.0007 -0.0033 -0.0058  
 Y 0.0008 0.0003 -0.0014 -0.0001 0.0006 0.0020  
 Z 0.0024 0.0007 -0.0023 -0.0005 0.0037 0.0085  
 AT. 172 H X 0.0009 -0.0006 -0.0028 0.0007 0.0033 0.0058  
 Y -0.0008 0.0003 -0.0014 -0.0001 -0.0006 -0.0020  
 Z -0.0024 0.0007 -0.0023 -0.0005 -0.0037 -0.0085  
  
 FREQ(CM\*\*-1) 1409.34 1412.48 1419.23 1420.43 1428.67 1428.83  
  
 AT. 1 I X -0.0000 0.0000 -0.0000 -0.0000 -0.0000 -0.0000  
 Y -0.0000 0.0000 -0.0000 -0.0000 -0.0000 -0.0000  
 Z 0.0000 0.0000 0.0000 -0.0000 0.0000 0.0000  
 AT. 2 I X -0.0000 -0.0000 0.0000 -0.0000 -0.0000 0.0000  
 Y -0.0000 -0.0000 0.0000 -0.0000 -0.0000 0.0000  
 Z 0.0000 -0.0000 -0.0000 -0.0000 0.0000 -0.0000  
 AT. 3 I X 0.0000 0.0000 0.0000 -0.0000 0.0000 0.0000  
 Y 0.0000 0.0000 -0.0000 0.0000 0.0000 0.0000  
 Z 0.0000 0.0000 0.0000 -0.0000 0.0000 0.0000  
 AT. 4 I X 0.0000 -0.0000 -0.0000 -0.0000 0.0000 -0.0000  
 Y 0.0000 -0.0000 0.0000 0.0000 0.0000 -0.0000  
 Z 0.0000 -0.0000 -0.0000 -0.0000 0.0000 -0.0000  
 AT. 5 O X -0.0004 0.0003 -0.0000 -0.0000 0.0001 0.0000  
 Y 0.0003 -0.0002 0.0000 -0.0000 -0.0001 0.0000  
 Z 0.0004 -0.0003 0.0000 0.0000 -0.0001 -0.0000  
 AT. 6 O X -0.0004 -0.0003 0.0000 -0.0000 0.0001 -0.0000

Y 0.0003 0.0002 -0.0000 -0.0000 -0.0001 -0.0000  
Z 0.0004 0.0003 -0.0000 0.0000 -0.0001 0.0000  
AT. 7 O X 0.0004 0.0008 0.0001 -0.0004 0.0020 0.0020  
Y -0.0004 -0.0006 -0.0000 0.0003 -0.0016 -0.0016  
Z 0.0002 0.0002 0.0001 -0.0001 0.0006 0.0006  
AT. 8 O X 0.0004 -0.0008 -0.0001 -0.0004 0.0020 -0.0020  
Y -0.0004 0.0006 0.0000 0.0003 -0.0016 0.0016  
Z 0.0002 -0.0002 -0.0001 -0.0001 0.0006 -0.0006  
AT. 9 N X -0.0001 -0.0000 0.0002 0.0001 0.0004 0.0003  
Y 0.0002 -0.0001 -0.0000 -0.0001 -0.0005 -0.0004  
Z -0.0010 0.0006 -0.0002 -0.0000 -0.0013 -0.0017  
AT. 10 N X -0.0001 0.0000 -0.0002 0.0001 0.0004 -0.0003  
Y 0.0002 0.0001 0.0000 -0.0001 -0.0005 0.0004  
Z -0.0010 -0.0006 0.0002 -0.0000 -0.0013 0.0017  
AT. 11 N X -0.0000 0.0000 0.0001 -0.0001 0.0000 -0.0002  
Y 0.0004 0.0005 -0.0002 -0.0000 0.0010 0.0010  
Z -0.0011 -0.0013 0.0007 0.0002 -0.0037 -0.0035  
AT. 12 N X -0.0000 -0.0000 -0.0001 -0.0001 0.0000 0.0002  
Y 0.0004 -0.0005 0.0002 -0.0000 0.0010 -0.0010  
Z -0.0011 0.0013 -0.0007 0.0002 -0.0037 0.0035  
AT. 13 C X 0.0003 -0.0003 -0.0001 -0.0002 -0.0004 -0.0000  
Y -0.0006 0.0004 -0.0001 0.0001 0.0000 -0.0002  
Z -0.0001 0.0000 0.0000 -0.0002 0.0008 0.0010  
AT. 14 C X 0.0003 0.0003 0.0001 -0.0002 -0.0004 0.0000  
Y -0.0006 -0.0004 0.0001 0.0001 0.0000 0.0002  
Z -0.0001 -0.0000 -0.0000 -0.0002 0.0008 -0.0010  
AT. 15 C X 0.0006 -0.0003 0.0002 0.0002 0.0004 0.0002  
Y -0.0015 0.0009 -0.0005 -0.0004 -0.0007 -0.0005  
Z 0.0005 -0.0003 0.0001 0.0002 0.0001 0.0001  
AT. 16 C X 0.0006 0.0003 -0.0002 0.0002 0.0004 -0.0002  
Y -0.0015 -0.0009 0.0005 -0.0004 -0.0007 0.0005  
Z 0.0005 0.0003 -0.0001 0.0002 0.0001 -0.0001

AT. 17 H X 0.0012 -0.0007 0.0004 0.0002 0.0005 0.0006  
Y 0.0078 -0.0050 0.0025 0.0020 0.0034 0.0027  
Z -0.0103 0.0066 -0.0033 -0.0027 -0.0046 -0.0036

AT. 18 H X 0.0012 0.0007 -0.0004 0.0002 0.0005 -0.0006  
Y 0.0078 0.0050 -0.0025 0.0020 0.0034 -0.0027  
Z -0.0103 -0.0066 0.0033 -0.0027 -0.0046 0.0036

AT. 19 H X -0.0041 0.0023 -0.0010 -0.0011 -0.0023 -0.0017  
Y 0.0124 -0.0076 0.0038 0.0030 0.0057 0.0047  
Z 0.0041 -0.0026 0.0013 0.0010 0.0017 0.0014

AT. 20 H X -0.0041 -0.0023 0.0010 -0.0011 -0.0023 0.0017  
Y 0.0124 0.0076 -0.0038 0.0030 0.0057 -0.0047  
Z 0.0041 0.0026 -0.0013 0.0010 0.0017 -0.0014

AT. 21 C X -0.0004 -0.0013 -0.0000 0.0008 -0.0039 -0.0040  
Y 0.0003 0.0006 0.0002 -0.0004 0.0014 0.0014  
Z 0.0007 0.0010 -0.0007 -0.0001 0.0026 0.0026

AT. 22 C X -0.0004 0.0013 0.0000 0.0008 -0.0039 0.0040  
Y 0.0003 -0.0006 -0.0002 -0.0004 0.0014 -0.0014  
Z 0.0007 -0.0010 0.0007 -0.0001 0.0026 -0.0026

AT. 23 C X -0.0006 -0.0002 0.0000 -0.0002 0.0007 0.0008  
Y 0.0006 0.0003 -0.0000 0.0001 -0.0001 -0.0001  
Z 0.0013 0.0005 0.0000 0.0002 -0.0004 -0.0005

AT. 24 C X -0.0006 0.0002 -0.0000 -0.0002 0.0007 -0.0008  
Y 0.0006 -0.0003 0.0000 0.0001 -0.0001 0.0001  
Z 0.0013 -0.0005 -0.0000 0.0002 -0.0004 0.0005

AT. 25 H X 0.0005 0.0003 0.0003 -0.0000 0.0002 0.0002  
Y 0.0025 0.0013 0.0000 0.0002 0.0001 -0.0001  
Z -0.0130 -0.0078 0.0003 -0.0009 -0.0029 -0.0023

AT. 26 H X 0.0005 -0.0003 -0.0003 -0.0000 0.0002 -0.0002  
Y 0.0025 -0.0013 -0.0000 0.0002 0.0001 0.0001  
Z -0.0130 0.0078 -0.0003 -0.0009 -0.0029 0.0023

AT. 27 H X 0.0042 0.0022 -0.0009 0.0010 0.0001 -0.0003  
Y -0.0107 -0.0062 0.0003 -0.0008 -0.0021 -0.0013

Z -0.0058 -0.0035 0.0004 -0.0005 -0.0015 -0.0011  
AT. 28 H X 0.0042 -0.0022 0.0009 0.0010 0.0001 0.0003  
Y -0.0107 0.0062 -0.0003 -0.0008 -0.0021 0.0013  
Z -0.0058 0.0035 -0.0004 -0.0005 -0.0015 0.0011  
AT. 29 C X 0.0004 -0.0004 0.0003 0.0001 0.0010 0.0010  
Y -0.0003 0.0001 -0.0004 -0.0002 -0.0030 -0.0030  
Z 0.0005 -0.0003 0.0000 0.0000 -0.0002 -0.0002  
AT. 30 C X 0.0004 0.0004 -0.0003 0.0001 0.0010 -0.0010  
Y -0.0003 -0.0001 0.0004 -0.0002 -0.0030 0.0030  
Z 0.0005 0.0003 -0.0000 0.0000 -0.0002 0.0002  
AT. 31 H X -0.0012 0.0008 -0.0025 -0.0010 -0.0148 -0.0140  
Y 0.0004 -0.0002 0.0023 0.0011 0.0172 0.0171  
Z 0.0003 0.0000 0.0022 0.0011 0.0186 0.0189  
AT. 32 H X -0.0012 -0.0008 0.0025 -0.0010 -0.0148 0.0140  
Y 0.0004 0.0002 -0.0023 0.0011 0.0172 -0.0171  
Z 0.0003 -0.0000 -0.0022 0.0011 0.0186 -0.0189  
AT. 33 H X -0.0024 0.0022 -0.0005 -0.0006 0.0015 0.0016  
Y 0.0019 -0.0007 0.0036 0.0016 0.0275 0.0275  
Z -0.0023 0.0018 -0.0022 -0.0012 -0.0125 -0.0124  
AT. 34 H X -0.0024 -0.0022 0.0005 -0.0006 0.0015 -0.0016  
Y 0.0019 0.0007 -0.0036 0.0016 0.0275 -0.0275  
Z -0.0023 -0.0018 0.0022 -0.0012 -0.0125 0.0124  
AT. 35 C X -0.0000 0.0005 -0.0003 -0.0001 0.0004 0.0005  
Y 0.0004 -0.0005 0.0002 0.0005 -0.0005 -0.0008  
Z -0.0001 -0.0001 -0.0001 0.0003 0.0001 0.0001  
AT. 36 C X -0.0000 -0.0005 0.0003 -0.0001 0.0004 -0.0005  
Y 0.0004 0.0005 -0.0002 0.0005 -0.0005 0.0008  
Z -0.0001 0.0001 0.0001 0.0003 0.0001 -0.0001  
AT. 37 C X 0.0004 -0.0003 -0.0003 0.0004 -0.0023 -0.0032  
Y -0.0003 0.0002 -0.0001 -0.0001 0.0001 0.0005  
Z 0.0004 0.0003 -0.0000 -0.0001 0.0011 0.0009  
AT. 38 C X 0.0004 0.0003 0.0003 0.0004 -0.0023 0.0032

Y -0.0003 -0.0002 0.0001 -0.0001 0.0001 -0.0005  
Z 0.0004 -0.0003 0.0000 -0.0001 0.0011 -0.0009  
AT. 39 H X -0.0030 0.0014 0.0026 -0.0028 0.0148 0.0221  
Y 0.0004 -0.0009 0.0007 0.0001 0.0071 0.0071  
Z -0.0021 0.0018 0.0015 -0.0022 0.0088 0.0141  
AT. 40 H X -0.0030 -0.0014 -0.0026 -0.0028 0.0148 -0.0221  
Y 0.0004 0.0009 -0.0007 0.0001 0.0071 -0.0071  
Z -0.0021 -0.0018 -0.0015 -0.0022 0.0088 -0.0141  
AT. 41 H X -0.0017 0.0022 0.0015 -0.0026 0.0171 0.0231  
Y 0.0003 -0.0024 0.0008 0.0004 -0.0108 -0.0142  
Z 0.0020 -0.0002 -0.0024 0.0025 -0.0099 -0.0140  
AT. 42 H X -0.0017 -0.0022 -0.0015 -0.0026 0.0171 -0.0231  
Y 0.0003 0.0024 -0.0008 0.0004 -0.0108 0.0142  
Z 0.0020 0.0002 0.0024 0.0025 -0.0099 0.0140  
AT. 43 C X -0.0001 -0.0002 -0.0001 0.0001 0.0001 0.0002  
Y -0.0001 -0.0002 -0.0000 0.0001 -0.0002 -0.0001  
Z 0.0003 0.0005 -0.0002 -0.0001 0.0005 0.0003  
AT. 44 C X -0.0001 0.0002 0.0001 0.0001 0.0001 -0.0002  
Y -0.0001 0.0002 0.0000 0.0001 -0.0002 0.0001  
Z 0.0003 -0.0005 0.0002 -0.0001 0.0005 -0.0003  
AT. 45 H X -0.0008 -0.0009 0.0007 -0.0000 -0.0049 -0.0047  
Y 0.0001 0.0014 -0.0005 -0.0003 0.0008 0.0003  
Z 0.0006 -0.0007 -0.0002 0.0004 0.0027 0.0030  
AT. 46 H X -0.0008 0.0009 -0.0007 -0.0000 -0.0049 0.0047  
Y 0.0001 -0.0014 0.0005 -0.0003 0.0008 -0.0003  
Z 0.0006 0.0007 0.0002 0.0004 0.0027 -0.0030  
AT. 47 H X 0.0016 0.0019 -0.0009 0.0000 0.0031 0.0026  
Y 0.0001 0.0010 0.0001 -0.0005 0.0012 0.0008  
Z -0.0019 -0.0012 0.0010 -0.0004 -0.0024 -0.0022  
AT. 48 H X 0.0016 -0.0019 0.0009 0.0000 0.0031 -0.0026  
Y 0.0001 -0.0010 -0.0001 -0.0005 0.0012 -0.0008  
Z -0.0019 0.0012 -0.0010 -0.0004 -0.0024 0.0022

AT. 49 C X -0.0001 0.0003 0.0000 -0.0003 -0.0001 -0.0001  
Y -0.0003 -0.0001 0.0004 -0.0005 -0.0000 0.0001  
Z 0.0002 -0.0004 0.0002 -0.0001 0.0005 0.0005

AT. 50 C X -0.0001 -0.0003 -0.0000 -0.0003 -0.0001 0.0001  
Y -0.0003 0.0001 -0.0004 -0.0005 -0.0000 -0.0001  
Z 0.0002 0.0004 -0.0002 -0.0001 0.0005 -0.0005

AT. 51 C X -0.0006 0.0002 -0.0000 -0.0000 -0.0000 0.0001  
Y -0.0001 0.0003 -0.0003 0.0000 0.0001 0.0001  
Z 0.0002 0.0002 -0.0004 -0.0000 0.0003 0.0004

AT. 52 C X -0.0006 -0.0002 0.0000 -0.0000 -0.0000 -0.0001  
Y -0.0001 -0.0003 0.0003 0.0000 0.0001 -0.0001  
Z 0.0002 -0.0002 0.0004 -0.0000 0.0003 -0.0004

AT. 53 H X 0.0030 -0.0008 -0.0006 0.0001 -0.0006 -0.0008  
Y 0.0022 -0.0015 0.0008 0.0000 -0.0008 -0.0015  
Z -0.0032 -0.0003 0.0020 -0.0002 0.0002 0.0001

AT. 54 H X 0.0030 0.0008 0.0006 0.0001 -0.0006 0.0008  
Y 0.0022 0.0015 -0.0008 0.0000 -0.0008 0.0015  
Z -0.0032 0.0003 -0.0020 -0.0002 0.0002 -0.0001

AT. 55 H X 0.0051 -0.0017 -0.0003 0.0009 -0.0013 -0.0025  
Y 0.0006 -0.0023 0.0026 0.0013 0.0023 0.0022  
Z 0.0045 -0.0041 0.0030 0.0020 0.0022 0.0015

AT. 56 H X 0.0051 0.0017 0.0003 0.0009 -0.0013 0.0025  
Y 0.0006 0.0023 -0.0026 0.0013 0.0023 -0.0022  
Z 0.0045 0.0041 -0.0030 0.0020 0.0022 -0.0015

AT. 57 C X -0.0001 -0.0000 0.0001 -0.0003 0.0001 0.0003  
Y -0.0000 -0.0003 0.0004 0.0000 0.0006 0.0006  
Z 0.0003 -0.0003 0.0003 0.0004 0.0001 -0.0001

AT. 58 C X -0.0001 0.0000 -0.0001 -0.0003 0.0001 -0.0003  
Y -0.0000 0.0003 -0.0004 0.0000 0.0006 -0.0006  
Z 0.0003 0.0003 -0.0003 0.0004 0.0001 0.0001

AT. 59 H X -0.0005 -0.0011 0.0017 -0.0010 0.0035 0.0044  
Y -0.0020 0.0033 -0.0034 -0.0027 -0.0038 -0.0024



Z -0.0030 0.0041 -0.0041 -0.0044 -0.0038 -0.0014  
AT. 60 H X -0.0005 0.0011 -0.0017 -0.0010 0.0035 -0.0044  
Y -0.0020 -0.0033 0.0034 -0.0027 -0.0038 0.0024  
Z -0.0030 -0.0041 0.0041 -0.0044 -0.0038 0.0014  
AT. 61 H X 0.0007 0.0005 -0.0016 0.0026 -0.0040 -0.0060  
Y -0.0009 0.0039 -0.0045 -0.0015 -0.0065 -0.0063  
Z 0.0014 -0.0019 0.0013 0.0032 0.0005 -0.0015  
AT. 62 H X 0.0007 -0.0005 0.0016 0.0026 -0.0040 0.0060  
Y -0.0009 -0.0039 0.0045 -0.0015 -0.0065 0.0063  
Z 0.0014 0.0019 -0.0013 0.0032 0.0005 0.0015  
AT. 63 H X 0.0012 -0.0002 -0.0006 0.0026 -0.0030 -0.0052  
Y 0.0021 -0.0022 0.0022 0.0024 0.0022 0.0011  
Z -0.0028 0.0017 -0.0008 -0.0045 0.0014 0.0045  
AT. 64 H X 0.0012 0.0002 0.0006 0.0026 -0.0030 0.0052  
Y 0.0021 0.0022 -0.0022 0.0024 0.0022 -0.0011  
Z -0.0028 -0.0017 0.0008 -0.0045 0.0014 -0.0045  
AT. 65 C X -0.0000 0.0002 -0.0000 -0.0002 -0.0000 -0.0000  
Y 0.0002 -0.0005 0.0007 -0.0002 -0.0001 -0.0002  
Z 0.0000 -0.0001 0.0000 0.0001 -0.0002 -0.0002  
AT. 66 C X -0.0000 -0.0002 0.0000 -0.0002 -0.0000 0.0000  
Y 0.0002 0.0005 -0.0007 -0.0002 -0.0001 0.0002  
Z 0.0000 0.0001 -0.0000 0.0001 -0.0002 0.0002  
AT. 67 H X 0.0011 -0.0034 0.0049 -0.0022 -0.0008 -0.0012  
Y -0.0012 0.0037 -0.0059 0.0024 -0.0001 0.0006  
Z 0.0003 -0.0008 0.0017 -0.0006 0.0006 0.0002  
AT. 68 H X 0.0011 0.0034 -0.0049 -0.0022 -0.0008 0.0012  
Y -0.0012 -0.0037 0.0059 0.0024 -0.0001 -0.0006  
Z 0.0003 0.0008 -0.0017 -0.0006 0.0006 -0.0002  
AT. 69 H X -0.0005 0.0015 -0.0035 0.0026 0.0009 0.0014  
Y -0.0013 0.0034 -0.0063 0.0034 0.0010 0.0017  
Z -0.0010 0.0028 -0.0031 0.0000 -0.0003 -0.0000  
AT. 70 H X -0.0005 -0.0015 0.0035 0.0026 0.0009 -0.0014

Y -0.0013 -0.0034 0.0063 0.0034 0.0010 -0.0017  
Z -0.0010 -0.0028 0.0031 0.0000 -0.0003 0.0000  
AT. 71 H X 0.0000 -0.0001 -0.0019 0.0027 0.0015 0.0016  
Y -0.0000 -0.0004 0.0024 -0.0023 -0.0003 -0.0005  
Z -0.0001 -0.0003 0.0013 -0.0007 0.0006 0.0006  
AT. 72 H X 0.0000 0.0001 0.0019 0.0027 0.0015 -0.0016  
Y -0.0000 0.0004 -0.0024 -0.0023 -0.0003 0.0005  
Z -0.0001 0.0003 -0.0013 -0.0007 0.0006 -0.0006  
AT. 73 C X -0.0001 -0.0006 0.0003 -0.0001 -0.0001 -0.0001  
Y 0.0001 0.0005 -0.0003 0.0002 0.0003 0.0003  
Z -0.0012 0.0004 -0.0003 -0.0014 -0.0006 0.0001  
AT. 74 C X -0.0001 0.0006 -0.0003 -0.0001 -0.0001 0.0001  
Y 0.0001 -0.0005 0.0003 0.0002 0.0003 -0.0003  
Z -0.0012 -0.0004 0.0003 -0.0014 -0.0006 -0.0001  
AT. 75 H X 0.0034 0.0015 -0.0000 0.0040 0.0026 0.0007  
Y 0.0050 -0.0024 0.0014 0.0056 0.0015 -0.0014  
Z 0.0082 -0.0020 0.0017 0.0092 0.0034 -0.0014  
AT. 76 H X 0.0034 -0.0015 0.0000 0.0040 0.0026 -0.0007  
Y 0.0050 0.0024 -0.0014 0.0056 0.0015 0.0014  
Z 0.0082 0.0020 -0.0017 0.0092 0.0034 0.0014  
AT. 77 H X -0.0019 0.0025 -0.0022 -0.0016 -0.0015 -0.0002  
Y -0.0069 0.0000 -0.0000 -0.0083 -0.0030 0.0007  
Z 0.0073 -0.0022 0.0020 0.0082 0.0039 -0.0004  
AT. 78 H X -0.0019 -0.0025 0.0022 -0.0016 -0.0015 0.0002  
Y -0.0069 -0.0000 0.0000 -0.0083 -0.0030 -0.0007  
Z 0.0073 0.0022 -0.0020 0.0082 0.0039 0.0004  
AT. 79 I X 0.0000 -0.0000 0.0000 -0.0000 -0.0000 0.0000  
Y -0.0000 0.0000 0.0000 0.0000 0.0000 -0.0000  
Z 0.0000 -0.0000 0.0000 0.0000 0.0000 -0.0000  
AT. 80 I X 0.0000 0.0000 -0.0000 -0.0000 -0.0000 -0.0000  
Y -0.0000 -0.0000 -0.0000 0.0000 0.0000 0.0000  
Z 0.0000 0.0000 -0.0000 0.0000 0.0000 0.0000

AT. 81 I X -0.0000 -0.0000 -0.0000 0.0000 0.0000 0.0000  
Y 0.0000 0.0000 0.0001 -0.0000 -0.0000 -0.0000  
Z 0.0000 0.0000 0.0000 -0.0000 -0.0000 -0.0000

AT. 82 I X -0.0000 0.0000 0.0000 0.0000 0.0000 -0.0000  
Y 0.0000 -0.0000 -0.0001 -0.0000 -0.0000 0.0000  
Z 0.0000 -0.0000 -0.0000 -0.0000 -0.0000 0.0000

AT. 83 O X 0.0024 -0.0033 -0.0001 -0.0005 0.0002 0.0008  
Y 0.0008 -0.0009 0.0000 -0.0002 0.0001 0.0002  
Z 0.0015 -0.0019 0.0001 -0.0002 0.0001 0.0004

AT. 84 O X 0.0024 0.0033 0.0001 -0.0005 0.0002 -0.0008  
Y 0.0008 0.0009 -0.0000 -0.0002 0.0001 -0.0002  
Z 0.0015 0.0019 -0.0001 -0.0002 0.0001 -0.0004

AT. 85 O X -0.0025 -0.0030 -0.0043 0.0043 0.0040 0.0036  
Y -0.0018 -0.0020 -0.0026 0.0026 0.0024 0.0022  
Z 0.0008 0.0008 0.0011 -0.0010 -0.0014 -0.0013

AT. 86 O X -0.0025 0.0030 0.0043 0.0043 0.0040 -0.0036  
Y -0.0018 0.0020 0.0026 0.0026 0.0024 -0.0022  
Z 0.0008 -0.0008 -0.0011 -0.0010 -0.0014 0.0013

AT. 87 N X -0.0001 0.0008 0.0005 -0.0016 0.0006 0.0008  
Y 0.0004 -0.0006 0.0003 -0.0002 0.0005 0.0006  
Z -0.0059 0.0080 -0.0011 -0.0025 -0.0009 -0.0014

AT. 88 N X -0.0001 -0.0008 -0.0005 -0.0016 0.0006 -0.0008  
Y 0.0004 0.0006 -0.0003 -0.0002 0.0005 -0.0006  
Z -0.0059 -0.0080 0.0011 -0.0025 -0.0009 0.0014

AT. 89 N X -0.0019 -0.0019 -0.0047 0.0045 -0.0012 -0.0011  
Y 0.0029 0.0026 0.0039 -0.0037 -0.0062 -0.0059  
Z -0.0073 -0.0075 -0.0107 0.0104 0.0118 0.0110

AT. 90 N X -0.0019 0.0019 0.0047 0.0045 -0.0012 0.0011  
Y 0.0029 -0.0026 -0.0039 -0.0037 -0.0062 0.0059  
Z -0.0073 0.0075 0.0107 0.0104 0.0118 -0.0110

AT. 91 C X -0.0014 0.0025 0.0007 0.0013 -0.0005 -0.0015  
Y -0.0024 0.0030 -0.0003 -0.0001 -0.0004 -0.0005

Z 0.0005 -0.0015 -0.0003 0.0011 0.0003 0.0009  
AT. 92 C X -0.0014 -0.0025 -0.0007 0.0013 -0.0005 0.0015  
Y -0.0024 -0.0030 0.0003 -0.0001 -0.0004 0.0005  
Z 0.0005 0.0015 0.0003 0.0011 0.0003 -0.0009  
AT. 93 C X -0.0051 0.0057 -0.0008 -0.0005 -0.0001 0.0001  
Y -0.0057 0.0061 -0.0011 -0.0008 -0.0002 0.0001  
Z 0.0049 -0.0051 0.0009 0.0006 0.0001 -0.0002  
AT. 94 C X -0.0051 -0.0057 0.0008 -0.0005 -0.0001 -0.0001  
Y -0.0057 -0.0061 0.0011 -0.0008 -0.0002 -0.0001  
Z 0.0049 0.0051 -0.0009 0.0006 0.0001 0.0002  
AT. 95 H X 0.0042 -0.0050 0.0008 0.0005 0.0022 0.0017  
Y 0.0290 -0.0314 0.0045 0.0035 0.0002 -0.0008  
Z -0.0655 0.0714 -0.0105 -0.0084 -0.0030 -0.0002  
AT. 96 H X 0.0042 0.0050 -0.0008 0.0005 0.0022 -0.0017  
Y 0.0290 0.0314 -0.0045 0.0035 0.0002 0.0008  
Z -0.0655 -0.0714 0.0105 -0.0084 -0.0030 0.0002  
AT. 97 H X 0.0411 -0.0502 0.0055 0.0044 0.0010 0.0008  
Y 0.0557 -0.0607 0.0096 0.0080 0.0022 -0.0001  
Z 0.0050 -0.0035 0.0013 0.0010 0.0003 -0.0004  
AT. 98 H X 0.0411 0.0502 -0.0055 0.0044 0.0010 -0.0008  
Y 0.0557 0.0607 -0.0096 0.0080 0.0022 0.0001  
Z 0.0050 0.0035 -0.0013 0.0010 0.0003 0.0004  
AT. 99 C X 0.0038 0.0054 0.0075 -0.0076 -0.0076 -0.0067  
Y 0.0004 0.0003 0.0006 -0.0004 0.0008 0.0009  
Z 0.0044 0.0051 0.0069 -0.0070 -0.0077 -0.0071  
AT. 100 C X 0.0038 -0.0054 -0.0075 -0.0076 -0.0076 0.0067  
Y 0.0004 -0.0003 -0.0006 -0.0004 0.0008 -0.0009  
Z 0.0044 -0.0051 -0.0069 -0.0070 -0.0077 0.0071  
AT. 101 C X 0.0030 0.0017 0.0025 -0.0021 -0.0006 -0.0007  
Y 0.0021 0.0017 0.0024 -0.0022 -0.0013 -0.0013  
Z 0.0040 0.0025 0.0044 -0.0038 -0.0013 -0.0013  
AT. 102 C X 0.0030 -0.0017 -0.0025 -0.0021 -0.0006 0.0007

Y 0.0021 -0.0017 -0.0024 -0.0022 -0.0013 0.0013  
Z 0.0040 -0.0025 -0.0044 -0.0038 -0.0013 0.0013  
AT. 103 H X -0.0017 -0.0014 -0.0004 0.0007 0.0009 0.0004  
Y 0.0040 0.0028 0.0035 -0.0032 -0.0017 -0.0015  
Z -0.0454 -0.0350 -0.0517 0.0463 0.0261 0.0244  
AT. 104 H X -0.0017 0.0014 0.0004 0.0007 0.0009 -0.0004  
Y 0.0040 -0.0028 -0.0035 -0.0032 -0.0017 0.0015  
Z -0.0454 0.0350 0.0517 0.0463 0.0261 -0.0244  
AT. 105 H X -0.0299 -0.0232 -0.0300 0.0282 0.0174 0.0164  
Y -0.0366 -0.0283 -0.0471 0.0421 0.0232 0.0224  
Z -0.0176 -0.0142 -0.0218 0.0199 0.0121 0.0116  
AT. 106 H X -0.0299 0.0232 0.0300 0.0282 0.0174 -0.0164  
Y -0.0366 0.0283 0.0471 0.0421 0.0232 -0.0224  
Z -0.0176 0.0142 0.0218 0.0199 0.0121 -0.0116  
AT. 107 C X -0.0017 0.0033 0.0014 -0.0029 0.0015 0.0013  
Y 0.0018 -0.0010 0.0028 -0.0014 0.0026 0.0016  
Z 0.0037 -0.0048 0.0008 0.0018 0.0006 0.0004  
AT. 108 C X -0.0017 -0.0033 -0.0014 -0.0029 0.0015 -0.0013  
Y 0.0018 0.0010 -0.0028 -0.0014 0.0026 -0.0016  
Z 0.0037 0.0048 -0.0008 0.0018 0.0006 -0.0004  
AT. 109 H X -0.0080 -0.0020 -0.0246 0.0196 -0.0224 -0.0168  
Y -0.0068 0.0014 -0.0120 0.0077 -0.0109 -0.0073  
Z -0.0087 0.0012 -0.0153 0.0093 -0.0136 -0.0084  
AT. 110 H X -0.0080 0.0020 0.0246 0.0196 -0.0224 0.0168  
Y -0.0068 -0.0014 0.0120 0.0077 -0.0109 0.0073  
Z -0.0087 -0.0012 0.0153 0.0093 -0.0136 0.0084  
AT. 111 H X 0.0177 -0.0249 0.0032 0.0143 -0.0001 -0.0016  
Y -0.0158 0.0048 -0.0307 0.0170 -0.0272 -0.0178  
Z -0.0143 0.0252 0.0056 -0.0206 0.0079 0.0069  
AT. 112 H X 0.0177 0.0249 -0.0032 0.0143 -0.0001 0.0016  
Y -0.0158 -0.0048 0.0307 0.0170 -0.0272 0.0178  
Z -0.0143 -0.0252 -0.0056 -0.0206 0.0079 -0.0069

AT. 113 C X 0.0009 -0.0033 -0.0003 0.0021 0.0002 -0.0003  
Y 0.0005 0.0011 0.0011 -0.0011 0.0001 -0.0001  
Z 0.0002 0.0009 0.0011 -0.0011 -0.0001 -0.0001

AT. 114 C X 0.0009 0.0033 0.0003 0.0021 0.0002 0.0003  
Y 0.0005 -0.0011 -0.0011 -0.0011 0.0001 0.0001  
Z 0.0002 -0.0009 -0.0011 -0.0011 -0.0001 0.0001

AT. 115 C X -0.0047 -0.0022 -0.0084 0.0073 0.0008 0.0019  
Y -0.0007 0.0006 0.0001 -0.0006 0.0024 0.0022  
Z 0.0032 0.0018 0.0041 -0.0035 -0.0044 -0.0043

AT. 116 C X -0.0047 0.0022 0.0084 0.0073 0.0008 -0.0019  
Y -0.0007 -0.0006 -0.0001 -0.0006 0.0024 -0.0022  
Z 0.0032 -0.0018 -0.0041 -0.0035 -0.0044 0.0043

AT. 117 H X 0.0323 0.0212 0.0592 -0.0539 -0.0071 -0.0124  
Y -0.0087 -0.0113 -0.0243 0.0249 -0.0114 -0.0079  
Z -0.0328 -0.0195 -0.0593 0.0531 0.0076 0.0133

AT. 118 H X 0.0323 -0.0212 -0.0592 -0.0539 -0.0071 0.0124  
Y -0.0087 0.0113 0.0243 0.0249 -0.0114 0.0079  
Z -0.0328 0.0195 0.0593 0.0531 0.0076 -0.0133

AT. 119 H X 0.0320 0.0178 0.0651 -0.0584 0.0111 0.0025  
Y 0.0022 -0.0068 0.0021 0.0009 0.0038 0.0025  
Z 0.0178 0.0185 0.0376 -0.0366 0.0002 -0.0034

AT. 120 H X 0.0320 -0.0178 -0.0651 -0.0584 0.0111 -0.0025  
Y 0.0022 0.0068 -0.0021 0.0009 0.0038 -0.0025  
Z 0.0178 -0.0185 -0.0376 -0.0366 0.0002 0.0034

AT. 121 C X 0.0010 0.0005 0.0005 -0.0004 -0.0066 -0.0066  
Y -0.0017 -0.0030 -0.0053 0.0053 -0.0081 -0.0083  
Z 0.0027 0.0025 0.0038 -0.0037 -0.0044 -0.0042

AT. 122 C X 0.0010 -0.0005 -0.0005 -0.0004 -0.0066 0.0066  
Y -0.0017 0.0030 0.0053 0.0053 -0.0081 0.0083  
Z 0.0027 -0.0025 -0.0038 -0.0037 -0.0044 0.0042

AT. 123 H X 0.0074 0.0166 0.0307 -0.0305 0.0665 0.0670  
Y 0.0037 0.0099 0.0218 -0.0219 0.0514 0.0513

Z -0.0017 -0.0077 -0.0179 0.0181 -0.0486 -0.0485  
AT. 124 H X 0.0074 -0.0166 -0.0307 -0.0305 0.0665 -0.0670  
Y 0.0037 -0.0099 -0.0218 -0.0219 0.0514 -0.0513  
Z -0.0017 0.0077 0.0179 0.0181 -0.0486 0.0485  
AT. 125 H X -0.0094 -0.0070 -0.0078 0.0072 0.0290 0.0283  
Y 0.0083 0.0183 0.0367 -0.0363 0.0787 0.0789  
Z -0.0051 0.0034 0.0133 -0.0138 0.0787 0.0782  
AT. 126 H X -0.0094 0.0070 0.0078 0.0072 0.0290 -0.0283  
Y 0.0083 -0.0183 -0.0367 -0.0363 0.0787 -0.0789  
Z -0.0051 -0.0034 -0.0133 -0.0138 0.0787 -0.0782  
AT. 127 C X 0.0003 -0.0013 -0.0008 0.0011 -0.0015 -0.0015  
Y 0.0002 0.0011 0.0002 -0.0004 -0.0017 -0.0012  
Z 0.0002 -0.0008 -0.0005 0.0011 -0.0009 -0.0012  
AT. 128 C X 0.0003 0.0013 0.0008 0.0011 -0.0015 0.0015  
Y 0.0002 -0.0011 -0.0002 -0.0004 -0.0017 0.0012  
Z 0.0002 0.0008 0.0005 0.0011 -0.0009 0.0012  
AT. 129 C X 0.0034 -0.0036 0.0015 -0.0001 0.0015 0.0014  
Y -0.0003 0.0007 0.0003 -0.0003 0.0003 0.0002  
Z 0.0027 -0.0027 0.0012 -0.0000 0.0009 0.0010  
AT. 130 C X 0.0034 0.0036 -0.0015 -0.0001 0.0015 -0.0014  
Y -0.0003 -0.0007 -0.0003 -0.0003 0.0003 -0.0002  
Z 0.0027 0.0027 -0.0012 -0.0000 0.0009 -0.0010  
AT. 131 H X -0.0184 0.0196 -0.0096 0.0022 -0.0077 -0.0075  
Y 0.0127 -0.0151 0.0042 0.0001 0.0043 0.0036  
Z -0.0203 0.0212 -0.0115 0.0029 -0.0090 -0.0089  
AT. 132 H X -0.0184 -0.0196 0.0096 0.0022 -0.0077 0.0075  
Y 0.0127 0.0151 -0.0042 0.0001 0.0043 -0.0036  
Z -0.0203 -0.0212 0.0115 0.0029 -0.0090 0.0089  
AT. 133 H X -0.0238 0.0232 -0.0128 0.0049 -0.0111 -0.0094  
Y -0.0030 -0.0013 -0.0037 0.0039 -0.0024 -0.0023  
Z 0.0101 -0.0177 0.0011 0.0045 0.0024 0.0019  
AT. 134 H X -0.0238 -0.0232 0.0128 0.0049 -0.0111 0.0094

Y -0.0030 0.0013 0.0037 0.0039 -0.0024 0.0023  
Z 0.0101 0.0177 -0.0011 0.0045 0.0024 -0.0019  
AT. 135 C X 0.0008 0.0002 0.0006 -0.0008 -0.0013 -0.0012  
Y -0.0005 -0.0012 -0.0018 0.0021 0.0005 0.0007  
Z -0.0011 0.0006 -0.0007 -0.0001 -0.0003 -0.0003  
AT. 136 C X 0.0008 -0.0002 -0.0006 -0.0008 -0.0013 0.0012  
Y -0.0005 0.0012 0.0018 0.0021 0.0005 -0.0007  
Z -0.0011 -0.0006 0.0007 -0.0001 -0.0003 0.0003  
AT. 137 H X 0.0015 0.0094 0.0141 -0.0176 -0.0039 -0.0056  
Y 0.0052 -0.0008 0.0067 -0.0037 0.0037 0.0025  
Z 0.0082 -0.0030 0.0078 -0.0022 0.0067 0.0053  
AT. 138 H X 0.0015 -0.0094 -0.0141 -0.0176 -0.0039 0.0056  
Y 0.0052 0.0008 -0.0067 -0.0037 0.0037 -0.0025  
Z 0.0082 0.0030 -0.0078 -0.0022 0.0067 -0.0053  
AT. 139 H X -0.0032 -0.0022 -0.0062 0.0076 0.0073 0.0079  
Y 0.0084 0.0112 0.0229 -0.0258 -0.0077 -0.0102  
Z 0.0022 0.0001 0.0019 -0.0034 -0.0088 -0.0087  
AT. 140 H X -0.0032 0.0022 0.0062 0.0076 0.0073 -0.0079  
Y 0.0084 -0.0112 -0.0229 -0.0258 -0.0077 0.0102  
Z 0.0022 -0.0001 -0.0019 -0.0034 -0.0088 0.0087  
AT. 141 H X -0.0069 -0.0046 -0.0137 0.0164 0.0119 0.0133  
Y -0.0064 0.0060 -0.0030 -0.0022 -0.0048 -0.0040  
Z 0.0025 -0.0085 -0.0043 0.0105 0.0104 0.0102  
AT. 142 H X -0.0069 0.0046 0.0137 0.0164 0.0119 -0.0133  
Y -0.0064 -0.0060 0.0030 -0.0022 -0.0048 0.0040  
Z 0.0025 0.0085 0.0043 0.0105 0.0104 -0.0102  
AT. 143 C X -0.0006 -0.0000 -0.0011 0.0009 -0.0007 -0.0002  
Y 0.0002 -0.0008 0.0005 -0.0001 0.0026 0.0029  
Z -0.0009 -0.0001 -0.0012 0.0011 0.0004 0.0004  
AT. 144 C X -0.0006 0.0000 0.0011 0.0009 -0.0007 0.0002  
Y 0.0002 0.0008 -0.0005 -0.0001 0.0026 -0.0029  
Z -0.0009 0.0001 0.0012 0.0011 0.0004 -0.0004



AT. 145 H X -0.0002 0.0059 0.0006 -0.0032 -0.0171 -0.0214  
Y -0.0049 0.0011 -0.0077 0.0072 -0.0088 -0.0127  
Z 0.0048 -0.0003 0.0081 -0.0080 0.0073 0.0103

AT. 146 H X -0.0002 -0.0059 -0.0006 -0.0032 -0.0171 0.0214  
Y -0.0049 -0.0011 0.0077 0.0072 -0.0088 0.0127  
Z 0.0048 0.0003 -0.0081 -0.0080 0.0073 -0.0103

AT. 147 H X 0.0015 -0.0017 0.0037 -0.0018 0.0103 0.0091  
Y -0.0044 0.0076 -0.0081 0.0041 -0.0314 -0.0354  
Z 0.0002 0.0018 0.0015 -0.0008 -0.0022 -0.0063

AT. 148 H X 0.0015 0.0017 -0.0037 -0.0018 0.0103 -0.0091  
Y -0.0044 -0.0076 0.0081 0.0041 -0.0314 0.0354  
Z 0.0002 -0.0018 -0.0015 -0.0008 -0.0022 0.0063

AT. 149 H X 0.0040 -0.0024 0.0091 -0.0062 0.0223 0.0226  
Y 0.0043 0.0011 0.0074 -0.0073 0.0044 0.0065  
Z 0.0039 0.0040 0.0062 -0.0080 -0.0069 -0.0038

AT. 150 H X 0.0040 0.0024 -0.0091 -0.0062 0.0223 -0.0226  
Y 0.0043 -0.0011 -0.0074 -0.0073 0.0044 -0.0065  
Z 0.0039 -0.0040 -0.0062 -0.0080 -0.0069 0.0038

AT. 151 C X -0.0008 0.0026 0.0007 -0.0020 0.0008 0.0010  
Y -0.0002 -0.0002 -0.0001 0.0001 0.0004 0.0005  
Z -0.0006 0.0002 -0.0001 0.0002 0.0034 0.0034

AT. 152 C X -0.0008 -0.0026 -0.0007 -0.0020 0.0008 -0.0010  
Y -0.0002 0.0002 0.0001 0.0001 0.0004 -0.0005  
Z -0.0006 -0.0002 0.0001 0.0002 0.0034 -0.0034

AT. 153 H X 0.0014 -0.0057 -0.0009 0.0040 0.0049 0.0035  
Y 0.0033 -0.0024 0.0001 -0.0003 -0.0153 -0.0156  
Z 0.0041 -0.0002 0.0006 -0.0028 -0.0251 -0.0248

AT. 154 H X 0.0014 0.0057 0.0009 0.0040 0.0049 -0.0035  
Y 0.0033 0.0024 -0.0001 -0.0003 -0.0153 0.0156  
Z 0.0041 0.0002 -0.0006 -0.0028 -0.0251 0.0248

AT. 155 H X 0.0029 -0.0080 -0.0033 0.0071 -0.0088 -0.0090  
Y -0.0024 0.0000 -0.0005 0.0027 0.0171 0.0167

Z 0.0032 -0.0034 -0.0010 0.0003 -0.0193 -0.0191  
AT.156 H X 0.0029 0.0080 0.0033 0.0071 -0.0088 0.0090  
Y -0.0024 -0.0000 0.0005 0.0027 0.0171 -0.0167  
Z 0.0032 0.0034 0.0010 0.0003 -0.0193 0.0191  
AT.157 O X 0.0000 -0.0000 -0.0000 0.0001 0.0002 0.0002  
Y -0.0001 0.0000 -0.0000 0.0001 0.0003 0.0003  
Z 0.0002 -0.0000 0.0000 0.0000 -0.0000 -0.0002  
AT.158 O X 0.0000 0.0000 0.0000 0.0001 0.0002 -0.0002  
Y -0.0001 -0.0000 0.0000 0.0001 0.0003 -0.0003  
Z 0.0002 0.0000 -0.0000 0.0000 -0.0000 0.0002  
AT.159 O X -0.0002 -0.0000 -0.0000 0.0000 0.0002 0.0003  
Y 0.0000 -0.0000 0.0000 -0.0001 -0.0002 -0.0001  
Z -0.0001 -0.0000 0.0000 -0.0001 -0.0001 0.0001  
AT.160 O X -0.0002 0.0000 0.0000 0.0000 0.0002 -0.0003  
Y 0.0000 0.0000 -0.0000 -0.0001 -0.0002 0.0001  
Z -0.0001 0.0000 -0.0000 -0.0001 -0.0001 -0.0001  
AT.161 H X 0.0003 -0.0002 0.0009 -0.0021 -0.0054 -0.0043  
Y 0.0000 0.0001 0.0002 -0.0005 -0.0011 -0.0008  
Z 0.0001 -0.0000 -0.0004 0.0013 0.0032 0.0026  
AT.162 H X 0.0003 0.0002 -0.0009 -0.0021 -0.0054 0.0043  
Y 0.0000 -0.0001 -0.0002 -0.0005 -0.0011 0.0008  
Z 0.0001 0.0000 0.0004 0.0013 0.0032 -0.0026  
AT.163 H X 0.0030 0.0005 0.0000 0.0005 -0.0010 -0.0044  
Y 0.0000 -0.0000 -0.0001 -0.0006 0.0001 -0.0013  
Z -0.0011 -0.0001 -0.0000 -0.0002 0.0001 0.0017  
AT.164 H X 0.0030 -0.0005 -0.0000 0.0005 -0.0010 0.0044  
Y 0.0000 0.0000 0.0001 -0.0006 0.0001 0.0013  
Z -0.0011 0.0001 0.0000 -0.0002 0.0001 -0.0017  
AT.165 O X 0.0048 -0.0048 0.0033 0.0041 0.0007 -0.0010  
Y 0.0016 -0.0014 0.0016 0.0019 0.0003 -0.0002  
Z -0.0034 0.0032 -0.0030 -0.0035 -0.0005 0.0004  
AT.166 O X 0.0048 0.0048 -0.0033 0.0041 0.0007 0.0010

|                                                              |   |         |         |         |         |         |         |
|--------------------------------------------------------------|---|---------|---------|---------|---------|---------|---------|
|                                                              | Y | 0.0016  | 0.0014  | -0.0016 | 0.0019  | 0.0003  | 0.0002  |
|                                                              | Z | -0.0034 | -0.0032 | 0.0030  | -0.0035 | -0.0005 | -0.0004 |
| AT. 167 H X                                                  |   | -0.0355 | 0.0350  | -0.0253 | -0.0314 | -0.0052 | 0.0067  |
|                                                              | Y | 0.0123  | -0.0119 | 0.0079  | 0.0104  | 0.0009  | -0.0018 |
|                                                              | Z | 0.1128  | -0.1110 | 0.0821  | 0.1004  | 0.0180  | -0.0220 |
| AT. 168 H X                                                  |   | -0.0355 | -0.0350 | 0.0253  | -0.0314 | -0.0052 | -0.0067 |
|                                                              | Y | 0.0123  | 0.0119  | -0.0079 | 0.0104  | 0.0009  | 0.0018  |
|                                                              | Z | 0.1128  | 0.1110  | -0.0821 | 0.1004  | 0.0180  | 0.0220  |
| AT. 169 O X                                                  |   | -0.0026 | 0.0026  | -0.0012 | -0.0016 | -0.0003 | 0.0005  |
|                                                              | Y | -0.0026 | 0.0024  | -0.0025 | -0.0029 | -0.0003 | 0.0002  |
|                                                              | Z | -0.0035 | 0.0034  | -0.0030 | -0.0036 | -0.0006 | 0.0006  |
| AT. 170 O X                                                  |   | -0.0026 | -0.0026 | 0.0012  | -0.0016 | -0.0003 | -0.0005 |
|                                                              | Y | -0.0026 | -0.0024 | 0.0025  | -0.0029 | -0.0003 | -0.0002 |
|                                                              | Z | -0.0035 | -0.0034 | 0.0030  | -0.0036 | -0.0006 | -0.0006 |
| AT. 171 H X                                                  |   | -0.0040 | 0.0039  | -0.0133 | -0.0141 | -0.0030 | 0.0021  |
|                                                              | Y | 0.0014  | 0.0000  | 0.0037  | 0.0033  | -0.0015 | 0.0030  |
|                                                              | Z | 0.0047  | -0.0011 | 0.0205  | 0.0199  | 0.0002  | 0.0039  |
| AT. 172 H X                                                  |   | -0.0040 | -0.0039 | 0.0133  | -0.0141 | -0.0030 | -0.0021 |
|                                                              | Y | 0.0014  | -0.0000 | -0.0037 | 0.0033  | -0.0015 | -0.0030 |
|                                                              | Z | 0.0047  | 0.0011  | -0.0205 | 0.0199  | 0.0002  | -0.0039 |
| FREQ(CM**-1) 1431.12 1431.17 1433.15 1433.21 1436.43 1437.43 |   |         |         |         |         |         |         |
| AT. 1 I X                                                    |   | 0.0000  | 0.0000  | -0.0000 | -0.0000 | 0.0000  | 0.0000  |
|                                                              | Y | 0.0000  | 0.0000  | 0.0000  | 0.0000  | -0.0000 | 0.0000  |
|                                                              | Z | -0.0000 | -0.0000 | -0.0000 | -0.0000 | -0.0000 | 0.0000  |
| AT. 2 I X                                                    |   | 0.0000  | -0.0000 | -0.0000 | 0.0000  | 0.0000  | -0.0000 |
|                                                              | Y | 0.0000  | -0.0000 | 0.0000  | -0.0000 | -0.0000 | -0.0000 |
|                                                              | Z | -0.0000 | 0.0000  | -0.0000 | 0.0000  | -0.0000 | -0.0000 |
| AT. 3 I X                                                    |   | -0.0000 | -0.0000 | 0.0000  | 0.0000  | -0.0000 | -0.0000 |
|                                                              | Y | -0.0000 | -0.0000 | 0.0000  | 0.0000  | -0.0000 | -0.0000 |
|                                                              | Z | -0.0000 | -0.0000 | 0.0000  | 0.0000  | -0.0000 | -0.0000 |

AT. 4 I X -0.0000 0.0000 0.0000 -0.0000 -0.0000 0.0000  
Y -0.0000 0.0000 0.0000 -0.0000 -0.0000 0.0000  
Z -0.0000 0.0000 0.0000 -0.0000 -0.0000 0.0000

AT. 5 O X -0.0003 -0.0006 -0.0001 -0.0002 0.0003 0.0002  
Y 0.0003 0.0005 0.0001 0.0001 -0.0003 -0.0002  
Z 0.0005 0.0007 0.0002 0.0002 -0.0006 -0.0004

AT. 6 O X -0.0003 0.0006 -0.0001 0.0002 0.0003 -0.0002  
Y 0.0003 -0.0005 0.0001 -0.0001 -0.0003 0.0002  
Z 0.0005 -0.0007 0.0002 -0.0002 -0.0006 0.0004

AT. 7 O X -0.0023 -0.0021 0.0022 0.0019 -0.0043 -0.0055  
Y 0.0020 0.0019 -0.0018 -0.0016 0.0038 0.0048  
Z -0.0004 -0.0004 0.0005 0.0005 -0.0010 -0.0010

AT. 8 O X -0.0023 0.0021 0.0022 -0.0019 -0.0043 0.0055  
Y 0.0020 -0.0019 -0.0018 0.0016 0.0038 -0.0048  
Z -0.0004 0.0004 0.0005 -0.0005 -0.0010 0.0010

AT. 9 N X -0.0011 -0.0015 0.0001 -0.0001 -0.0004 0.0000  
Y 0.0019 0.0021 -0.0001 0.0001 0.0001 -0.0001  
Z 0.0044 0.0033 -0.0003 0.0003 -0.0035 -0.0037

AT. 10 N X -0.0011 0.0015 0.0001 0.0001 -0.0004 -0.0000  
Y 0.0019 -0.0021 -0.0001 -0.0001 0.0001 0.0001  
Z 0.0044 -0.0033 -0.0003 -0.0003 -0.0035 0.0037

AT. 11 N X 0.0009 0.0013 -0.0001 -0.0000 0.0014 0.0008  
Y -0.0031 -0.0022 0.0014 0.0013 -0.0031 -0.0049  
Z 0.0075 0.0050 -0.0047 -0.0042 0.0106 0.0160

AT. 12 N X 0.0009 -0.0013 -0.0001 0.0000 0.0014 -0.0008  
Y -0.0031 0.0022 0.0014 -0.0013 -0.0031 0.0049  
Z 0.0075 -0.0050 -0.0047 0.0042 0.0106 -0.0160

AT. 13 C X 0.0006 0.0013 0.0002 0.0003 0.0002 0.0001  
Y 0.0001 -0.0005 -0.0002 -0.0002 -0.0003 -0.0004  
Z -0.0033 -0.0026 -0.0001 -0.0005 0.0033 0.0031

AT. 14 C X 0.0006 -0.0013 0.0002 -0.0003 0.0002 -0.0001  
Y 0.0001 0.0005 -0.0002 0.0002 -0.0003 0.0004

Z -0.0033 0.0026 -0.0001 0.0005 0.0033 -0.0031  
AT. 15 C X -0.0004 -0.0006 0.0001 0.0000 -0.0007 -0.0003  
Y 0.0009 0.0012 -0.0003 -0.0000 0.0017 0.0007  
Z 0.0001 -0.0001 0.0001 0.0001 -0.0009 -0.0006  
AT. 16 C X -0.0004 0.0006 0.0001 -0.0000 -0.0007 0.0003  
Y 0.0009 -0.0012 -0.0003 0.0000 0.0017 -0.0007  
Z 0.0001 0.0001 0.0001 -0.0001 -0.0009 0.0006  
AT. 17 H X -0.0024 -0.0022 -0.0002 -0.0004 -0.0001 -0.0001  
Y -0.0049 -0.0061 0.0018 0.0005 -0.0083 -0.0036  
Z 0.0061 0.0079 -0.0024 -0.0008 0.0113 0.0047  
AT. 18 H X -0.0024 0.0022 -0.0002 0.0004 -0.0001 0.0001  
Y -0.0049 0.0061 0.0018 -0.0005 -0.0083 0.0036  
Z 0.0061 -0.0079 -0.0024 0.0008 0.0113 -0.0047  
AT. 19 H X 0.0042 0.0044 -0.0008 -0.0001 0.0014 -0.0009  
Y -0.0093 -0.0103 0.0024 0.0003 -0.0105 -0.0032  
Z -0.0023 -0.0028 0.0008 0.0002 -0.0046 -0.0021  
AT. 20 H X 0.0042 -0.0044 -0.0008 0.0001 0.0014 0.0009  
Y -0.0093 0.0103 0.0024 -0.0003 -0.0105 0.0032  
Z -0.0023 0.0028 0.0008 -0.0002 -0.0046 0.0021  
AT. 21 C X 0.0051 0.0044 -0.0045 -0.0040 0.0092 0.0123  
Y -0.0007 -0.0013 0.0014 0.0012 -0.0028 -0.0025  
Z -0.0066 -0.0048 0.0036 0.0031 -0.0091 -0.0136  
AT. 22 C X 0.0051 -0.0044 -0.0045 0.0040 0.0092 -0.0123  
Y -0.0007 0.0013 0.0014 -0.0012 -0.0028 0.0025  
Z -0.0066 0.0048 0.0036 -0.0031 -0.0091 0.0136  
AT. 23 C X -0.0006 -0.0001 0.0008 0.0008 -0.0008 -0.0020  
Y -0.0003 -0.0005 -0.0001 -0.0001 -0.0007 -0.0001  
Z 0.0005 -0.0005 -0.0006 -0.0006 -0.0004 0.0018  
AT. 24 C X -0.0006 0.0001 0.0008 -0.0008 -0.0008 0.0020  
Y -0.0003 0.0005 -0.0001 0.0001 -0.0007 0.0001  
Z 0.0005 0.0005 -0.0006 0.0006 -0.0004 -0.0018  
AT. 25 H X -0.0005 -0.0012 -0.0003 -0.0004 -0.0014 -0.0004

Y -0.0012 -0.0027 -0.0001 -0.0003 -0.0038 -0.0007  
Z 0.0096 0.0166 -0.0034 -0.0021 0.0260 0.0119  
AT. 26 H X -0.0005 0.0012 -0.0003 0.0004 -0.0014 0.0004  
Y -0.0012 0.0027 -0.0001 0.0003 -0.0038 0.0007  
Z 0.0096 -0.0166 -0.0034 0.0021 0.0260 -0.0119  
AT. 27 H X -0.0040 -0.0054 0.0006 -0.0004 -0.0068 -0.0055  
Y 0.0083 0.0130 -0.0026 -0.0018 0.0200 0.0104  
Z 0.0059 0.0081 -0.0020 -0.0014 0.0123 0.0085  
AT. 28 H X -0.0040 0.0054 0.0006 0.0004 -0.0068 0.0055  
Y 0.0083 -0.0130 -0.0026 0.0018 0.0200 -0.0104  
Z 0.0059 -0.0081 -0.0020 0.0014 0.0123 -0.0085  
AT. 29 C X -0.0038 -0.0035 0.0003 -0.0002 0.0015 0.0020  
Y 0.0111 0.0110 -0.0009 0.0007 -0.0029 -0.0049  
Z 0.0006 0.0010 -0.0001 -0.0000 0.0010 0.0007  
AT. 30 C X -0.0038 0.0035 0.0003 0.0002 0.0015 -0.0020  
Y 0.0111 -0.0110 -0.0009 -0.0007 -0.0029 0.0049  
Z 0.0006 -0.0010 -0.0001 0.0000 0.0010 -0.0007  
AT. 31 H X 0.0581 0.0575 -0.0047 0.0035 -0.0133 -0.0236  
Y -0.0633 -0.0635 0.0053 -0.0035 0.0135 0.0245  
Z -0.0661 -0.0665 0.0055 -0.0036 0.0146 0.0259  
AT. 32 H X 0.0581 -0.0575 -0.0047 -0.0035 -0.0133 0.0236  
Y -0.0633 0.0635 0.0053 0.0035 0.0135 -0.0245  
Z -0.0661 0.0665 0.0055 0.0036 0.0146 -0.0259  
AT. 33 H X -0.0073 -0.0088 0.0007 -0.0005 -0.0019 0.0006  
Y -0.1013 -0.1004 0.0083 -0.0058 0.0248 0.0419  
Z 0.0451 0.0439 -0.0036 0.0026 -0.0131 -0.0201  
AT. 34 H X -0.0073 0.0088 0.0007 0.0005 -0.0019 -0.0006  
Y -0.1013 0.1004 0.0083 0.0058 0.0248 -0.0419  
Z 0.0451 -0.0439 -0.0036 -0.0026 -0.0131 0.0201  
AT. 35 C X -0.0013 -0.0013 0.0005 0.0003 -0.0019 -0.0017  
Y 0.0019 0.0021 -0.0004 -0.0002 0.0007 0.0004  
Z 0.0005 0.0002 0.0000 0.0003 -0.0008 -0.0013

AT. 36 C X -0.0013 0.0013 0.0005 -0.0003 -0.0019 0.0017  
Y 0.0019 -0.0021 -0.0004 0.0002 0.0007 -0.0004  
Z 0.0005 -0.0002 0.0000 -0.0003 -0.0008 0.0013

AT. 37 C X 0.0035 0.0051 -0.0028 -0.0023 0.0093 0.0084  
Y -0.0007 -0.0016 -0.0000 -0.0002 -0.0015 -0.0003  
Z -0.0019 -0.0010 0.0013 0.0012 -0.0023 -0.0040

AT. 38 C X 0.0035 -0.0051 -0.0028 0.0023 0.0093 -0.0084  
Y -0.0007 0.0016 -0.0000 0.0002 -0.0015 0.0003  
Z -0.0019 0.0010 0.0013 -0.0012 -0.0023 0.0040

AT. 39 H X -0.0231 -0.0369 0.0187 0.0152 -0.0638 -0.0544  
Y -0.0065 -0.0044 0.0091 0.0088 -0.0203 -0.0286  
Z -0.0160 -0.0264 0.0110 0.0085 -0.0409 -0.0319

AT. 40 H X -0.0231 0.0369 0.0187 -0.0152 -0.0638 0.0544  
Y -0.0065 0.0044 0.0091 -0.0088 -0.0203 0.0286  
Z -0.0160 0.0264 0.0110 -0.0085 -0.0409 0.0319

AT. 41 H X -0.0285 -0.0372 0.0215 0.0180 -0.0669 -0.0655  
Y 0.0197 0.0242 -0.0134 -0.0111 0.0450 0.0459  
Z 0.0147 0.0213 -0.0127 -0.0105 0.0373 0.0340

AT. 42 H X -0.0285 0.0372 0.0215 -0.0180 -0.0669 0.0655  
Y 0.0197 -0.0242 -0.0134 0.0111 0.0450 -0.0459  
Z 0.0147 -0.0213 -0.0127 0.0105 0.0373 -0.0340

AT. 43 C X 0.0005 0.0001 0.0001 0.0000 -0.0013 -0.0009  
Y -0.0017 -0.0017 0.0003 0.0001 -0.0001 -0.0005  
Z -0.0021 -0.0009 0.0006 0.0006 -0.0000 -0.0020

AT. 44 C X 0.0005 -0.0001 0.0001 -0.0000 -0.0013 0.0009  
Y -0.0017 0.0017 0.0003 -0.0001 -0.0001 0.0005  
Z -0.0021 0.0009 0.0006 -0.0006 -0.0000 0.0020

AT. 45 H X -0.0085 -0.0063 -0.0033 -0.0032 0.0170 0.0135  
Y 0.0138 0.0122 -0.0024 -0.0014 0.0004 0.0040  
Z -0.0091 -0.0086 0.0052 0.0040 -0.0132 -0.0152

AT. 46 H X -0.0085 0.0063 -0.0033 0.0032 0.0170 -0.0135  
Y 0.0138 -0.0122 -0.0024 0.0014 0.0004 -0.0040

Z -0.0091 0.0086 0.0052 -0.0040 -0.0132 0.0152  
AT. 47 H X -0.0015 -0.0005 0.0026 0.0024 -0.0077 -0.0088  
Y 0.0183 0.0142 -0.0024 -0.0015 -0.0024 0.0059  
Z 0.0207 0.0158 -0.0056 -0.0044 0.0065 0.0157  
AT. 48 H X -0.0015 0.0005 0.0026 -0.0024 -0.0077 0.0088  
Y 0.0183 -0.0142 -0.0024 0.0015 -0.0024 -0.0059  
Z 0.0207 -0.0158 -0.0056 0.0044 0.0065 -0.0157  
AT. 49 C X 0.0003 -0.0002 0.0001 -0.0000 -0.0000 0.0015  
Y -0.0005 -0.0000 0.0007 0.0007 -0.0011 -0.0016  
Z 0.0009 -0.0004 0.0007 0.0005 -0.0037 -0.0017  
AT. 50 C X 0.0003 0.0002 0.0001 0.0000 -0.0000 -0.0015  
Y -0.0005 0.0000 0.0007 -0.0007 -0.0011 0.0016  
Z 0.0009 0.0004 0.0007 -0.0005 -0.0037 0.0017  
AT. 51 C X -0.0007 -0.0009 0.0000 0.0001 -0.0006 -0.0009  
Y -0.0010 -0.0007 -0.0002 -0.0002 0.0013 0.0010  
Z -0.0024 -0.0014 -0.0002 -0.0004 0.0032 0.0026  
AT. 52 C X -0.0007 0.0009 0.0000 -0.0001 -0.0006 0.0009  
Y -0.0010 0.0007 -0.0002 0.0002 0.0013 -0.0010  
Z -0.0024 0.0014 -0.0002 0.0004 0.0032 -0.0026  
AT. 53 H X 0.0043 0.0075 -0.0010 -0.0010 0.0073 0.0051  
Y 0.0068 0.0078 -0.0001 0.0001 -0.0012 -0.0023  
Z -0.0015 -0.0058 0.0016 0.0020 -0.0137 -0.0117  
AT. 54 H X 0.0043 -0.0075 -0.0010 0.0010 0.0073 -0.0051  
Y 0.0068 -0.0078 -0.0001 -0.0001 -0.0012 0.0023  
Z -0.0015 0.0058 0.0016 -0.0020 -0.0137 0.0117  
AT. 55 H X 0.0113 0.0140 -0.0015 -0.0012 0.0049 0.0027  
Y -0.0015 -0.0053 0.0007 0.0005 -0.0075 -0.0034  
Z 0.0046 0.0020 0.0001 -0.0002 -0.0050 -0.0007  
AT. 56 H X 0.0113 -0.0140 -0.0015 0.0012 0.0049 -0.0027  
Y -0.0015 0.0053 0.0007 -0.0005 -0.0075 0.0034  
Z 0.0046 -0.0020 0.0001 0.0002 -0.0050 0.0007  
AT. 57 C X -0.0002 -0.0005 -0.0001 -0.0002 -0.0001 0.0008



Y -0.0019 -0.0022 0.0003 0.0001 -0.0001 0.0008  
Z -0.0003 -0.0004 -0.0006 -0.0005 0.0015 0.0011  
AT. 58 C X -0.0002 0.0005 -0.0001 0.0002 -0.0001 -0.0008  
Y -0.0019 0.0022 0.0003 -0.0001 -0.0001 -0.0008  
Z -0.0003 0.0004 -0.0006 0.0005 0.0015 -0.0011  
AT. 59 H X -0.0096 -0.0117 0.0045 0.0022 -0.0103 -0.0011  
Y 0.0112 0.0135 0.0013 0.0019 -0.0058 -0.0087  
Z 0.0117 0.0141 0.0045 0.0041 -0.0148 -0.0141  
AT. 60 H X -0.0096 0.0117 0.0045 -0.0022 -0.0103 0.0011  
Y 0.0112 -0.0135 0.0013 -0.0019 -0.0058 0.0087  
Z 0.0117 -0.0141 0.0045 -0.0041 -0.0148 0.0141  
AT. 61 H X 0.0116 0.0146 -0.0028 -0.0002 0.0093 -0.0026  
Y 0.0192 0.0238 -0.0012 0.0010 -0.0004 -0.0110  
Z -0.0014 -0.0014 -0.0017 -0.0008 0.0083 0.0039  
AT. 62 H X 0.0116 -0.0146 -0.0028 0.0002 0.0093 0.0026  
Y 0.0192 -0.0238 -0.0012 -0.0010 -0.0004 0.0110  
Z -0.0014 0.0014 -0.0017 0.0008 0.0083 -0.0039  
AT. 63 H X 0.0087 0.0113 -0.0031 -0.0010 0.0110 0.0005  
Y -0.0068 -0.0085 -0.0034 -0.0030 0.0079 0.0077  
Z -0.0039 -0.0053 0.0056 0.0031 -0.0165 -0.0055  
AT. 64 H X 0.0087 -0.0113 -0.0031 0.0010 0.0110 -0.0005  
Y -0.0068 0.0085 -0.0034 0.0030 0.0079 -0.0077  
Z -0.0039 0.0053 0.0056 -0.0031 -0.0165 0.0055  
AT. 65 C X 0.0001 0.0001 -0.0003 -0.0002 0.0011 0.0018  
Y 0.0010 0.0012 0.0001 0.0002 0.0003 0.0005  
Z 0.0008 -0.0003 0.0002 -0.0003 -0.0008 0.0016  
AT. 66 C X 0.0001 -0.0001 -0.0003 0.0002 0.0011 -0.0018  
Y 0.0010 -0.0012 0.0001 -0.0002 0.0003 -0.0005  
Z 0.0008 0.0003 0.0002 0.0003 -0.0008 -0.0016  
AT. 67 H X 0.0094 0.0053 0.0029 0.0010 -0.0044 0.0091  
Y -0.0029 -0.0115 -0.0018 -0.0039 -0.0042 0.0097  
Z -0.0041 0.0069 -0.0008 0.0026 0.0080 -0.0147

AT. 68 H X 0.0094 -0.0053 0.0029 -0.0010 -0.0044 -0.0091  
Y -0.0029 0.0115 -0.0018 0.0039 -0.0042 -0.0097  
Z -0.0041 -0.0069 -0.0008 -0.0026 0.0080 0.0147

AT. 69 H X -0.0070 -0.0058 0.0003 0.0001 -0.0058 -0.0148  
Y -0.0092 -0.0106 -0.0013 -0.0016 -0.0055 -0.0114  
Z -0.0007 -0.0057 -0.0028 -0.0032 0.0039 0.0147

AT. 70 H X -0.0070 0.0058 0.0003 -0.0001 -0.0058 0.0148  
Y -0.0092 0.0106 -0.0013 0.0016 -0.0055 0.0114  
Z -0.0007 0.0057 -0.0028 0.0032 0.0039 -0.0147

AT. 71 H X -0.0074 -0.0018 0.0009 0.0018 -0.0061 -0.0258  
Y -0.0001 0.0059 -0.0008 0.0015 0.0089 0.0003  
Z -0.0060 0.0053 -0.0003 0.0031 0.0062 -0.0190

AT. 72 H X -0.0074 0.0018 0.0009 -0.0018 -0.0061 0.0258  
Y -0.0001 -0.0059 -0.0008 -0.0015 0.0089 -0.0003  
Z -0.0060 -0.0053 -0.0003 -0.0031 0.0062 0.0190

AT. 73 C X 0.0014 0.0010 0.0002 0.0003 -0.0016 -0.0012  
Y -0.0016 -0.0013 -0.0003 -0.0004 0.0019 0.0014  
Z 0.0036 0.0021 0.0009 0.0011 -0.0068 -0.0051

AT. 74 C X 0.0014 -0.0010 0.0002 -0.0003 -0.0016 0.0012  
Y -0.0016 0.0013 -0.0003 0.0004 0.0019 -0.0014  
Z 0.0036 -0.0021 0.0009 -0.0011 -0.0068 0.0051

AT. 75 H X -0.0218 -0.0126 -0.0042 -0.0048 0.0342 0.0237  
Y -0.0104 -0.0051 -0.0039 -0.0045 0.0253 0.0194  
Z -0.0262 -0.0138 -0.0072 -0.0085 0.0520 0.0386

AT. 76 H X -0.0218 0.0126 -0.0042 0.0048 0.0342 -0.0237  
Y -0.0104 0.0051 -0.0039 0.0045 0.0253 -0.0194  
Z -0.0262 0.0138 -0.0072 0.0085 0.0520 -0.0386

AT. 77 H X 0.0077 0.0052 0.0005 0.0015 -0.0115 -0.0105  
Y 0.0237 0.0126 0.0071 0.0077 -0.0471 -0.0325  
Z -0.0269 -0.0154 -0.0066 -0.0079 0.0502 0.0371

AT. 78 H X 0.0077 -0.0052 0.0005 -0.0015 -0.0115 0.0105  
Y 0.0237 -0.0126 0.0071 -0.0077 -0.0471 0.0325

Z -0.0269 0.0154 -0.0066 0.0079 0.0502 -0.0371  
AT. 79 I X -0.0000 -0.0000 0.0000 0.0000 0.0000 0.0000  
Y 0.0000 0.0000 0.0000 -0.0000 -0.0000 -0.0000  
Z 0.0000 0.0000 0.0000 -0.0000 -0.0000 -0.0000  
AT. 80 I X -0.0000 0.0000 0.0000 -0.0000 0.0000 -0.0000  
Y 0.0000 -0.0000 0.0000 0.0000 -0.0000 0.0000  
Z 0.0000 -0.0000 0.0000 0.0000 -0.0000 0.0000  
AT. 81 I X 0.0000 0.0000 -0.0000 -0.0000 -0.0000 -0.0000  
Y -0.0000 -0.0000 0.0000 0.0000 0.0000 0.0000  
Z -0.0000 -0.0000 0.0000 0.0000 -0.0000 -0.0000  
AT. 82 I X 0.0000 -0.0000 -0.0000 0.0000 -0.0000 0.0000  
Y -0.0000 0.0000 0.0000 -0.0000 0.0000 -0.0000  
Z -0.0000 0.0000 0.0000 -0.0000 -0.0000 0.0000  
AT. 83 O X -0.0002 -0.0000 -0.0004 0.0002 0.0001 0.0000  
Y -0.0001 0.0000 -0.0001 0.0000 0.0000 0.0001  
Z -0.0001 -0.0001 -0.0001 0.0001 0.0001 0.0001  
AT. 84 O X -0.0002 0.0000 -0.0004 -0.0002 0.0001 -0.0000  
Y -0.0001 -0.0000 -0.0001 -0.0000 0.0000 -0.0001  
Z -0.0001 0.0001 -0.0001 -0.0001 0.0001 -0.0001  
AT. 85 O X 0.0002 0.0007 -0.0076 -0.0081 -0.0020 -0.0021  
Y 0.0001 0.0004 -0.0044 -0.0047 -0.0012 -0.0013  
Z -0.0002 -0.0004 0.0018 0.0019 0.0003 0.0003  
AT. 86 O X 0.0002 -0.0007 -0.0076 0.0081 -0.0020 0.0021  
Y 0.0001 -0.0004 -0.0044 0.0047 -0.0012 0.0013  
Z -0.0002 0.0004 0.0018 -0.0019 0.0003 -0.0003  
AT. 87 N X -0.0002 0.0000 -0.0009 -0.0008 0.0001 0.0000  
Y -0.0001 0.0001 -0.0012 -0.0008 -0.0001 -0.0002  
Z -0.0011 -0.0009 0.0006 -0.0017 0.0005 0.0012  
AT. 88 N X -0.0002 -0.0000 -0.0009 0.0008 0.0001 -0.0000  
Y -0.0001 -0.0001 -0.0012 0.0008 -0.0001 0.0002  
Z -0.0011 0.0009 0.0006 0.0017 0.0005 -0.0012  
AT. 89 N X -0.0008 -0.0008 -0.0030 -0.0030 -0.0014 -0.0011

Y -0.0011 -0.0016 0.0059 0.0062 0.0017 0.0016  
Z 0.0011 0.0025 -0.0183 -0.0187 -0.0056 -0.0054  
AT. 90 N X -0.0008 0.0008 -0.0030 0.0030 -0.0014 0.0011  
Y -0.0011 0.0016 0.0059 -0.0062 0.0017 -0.0016  
Z 0.0011 -0.0025 -0.0183 0.0187 -0.0056 0.0054  
AT. 91 C X 0.0005 -0.0000 0.0013 0.0002 -0.0000 0.0000  
Y 0.0000 -0.0001 0.0002 -0.0002 0.0000 0.0001  
Z 0.0008 0.0009 -0.0006 0.0006 -0.0004 -0.0010  
AT. 92 C X 0.0005 0.0000 0.0013 -0.0002 -0.0000 -0.0000  
Y 0.0000 0.0001 0.0002 0.0002 0.0000 -0.0001  
Z 0.0008 -0.0009 -0.0006 -0.0006 -0.0004 0.0010  
AT. 93 C X -0.0001 0.0001 -0.0011 -0.0008 -0.0001 -0.0003  
Y -0.0001 0.0001 -0.0010 -0.0009 -0.0001 -0.0003  
Z -0.0001 -0.0002 0.0009 0.0007 0.0001 0.0004  
AT. 94 C X -0.0001 -0.0001 -0.0011 0.0008 -0.0001 0.0003  
Y -0.0001 -0.0001 -0.0010 0.0009 -0.0001 0.0003  
Z -0.0001 0.0002 0.0009 -0.0007 0.0001 -0.0004  
AT. 95 H X 0.0002 0.0002 0.0005 -0.0000 0.0001 0.0005  
Y 0.0001 -0.0004 0.0045 0.0046 0.0003 0.0013  
Z -0.0006 0.0007 -0.0102 -0.0092 -0.0007 -0.0032  
AT. 96 H X 0.0002 -0.0002 0.0005 0.0000 0.0001 -0.0005  
Y 0.0001 0.0004 0.0045 -0.0046 0.0003 -0.0013  
Z -0.0006 -0.0007 -0.0102 0.0092 -0.0007 0.0032  
AT. 97 H X 0.0008 0.0002 0.0063 0.0064 -0.0001 0.0014  
Y 0.0011 -0.0001 0.0082 0.0082 0.0005 0.0019  
Z -0.0000 -0.0002 0.0008 0.0005 0.0002 0.0003  
AT. 98 H X 0.0008 -0.0002 0.0063 -0.0064 -0.0001 -0.0014  
Y 0.0011 0.0001 0.0082 -0.0082 0.0005 -0.0019  
Z -0.0000 0.0002 0.0008 -0.0005 0.0002 -0.0003  
AT. 99 C X -0.0000 -0.0013 0.0172 0.0179 0.0052 0.0051  
Y 0.0003 0.0003 -0.0004 0.0001 -0.0006 -0.0002  
Z -0.0004 -0.0015 0.0143 0.0143 0.0045 0.0043

AT.100 C X -0.0000 0.0013 0.0172 -0.0179 0.0052 -0.0051  
Y 0.0003 -0.0003 -0.0004 -0.0001 -0.0006 0.0002  
Z -0.0004 0.0015 0.0143 -0.0143 0.0045 -0.0043

AT.101 C X -0.0002 -0.0001 -0.0029 -0.0024 -0.0016 -0.0011  
Y -0.0002 -0.0003 0.0005 0.0008 -0.0003 -0.0000  
Z -0.0004 -0.0002 -0.0023 -0.0014 -0.0017 -0.0011

AT.102 C X -0.0002 0.0001 -0.0029 0.0024 -0.0016 0.0011  
Y -0.0002 0.0003 0.0005 -0.0008 -0.0003 0.0000  
Z -0.0004 0.0002 -0.0023 0.0014 -0.0017 0.0011

AT.103 H X -0.0001 0.0001 0.0001 -0.0005 0.0011 0.0003  
Y -0.0002 -0.0003 -0.0014 -0.0006 -0.0017 -0.0008  
Z 0.0034 0.0045 -0.0100 -0.0184 0.0078 0.0010

AT.104 H X -0.0001 -0.0001 0.0001 0.0005 0.0011 -0.0003  
Y -0.0002 0.0003 -0.0014 0.0006 -0.0017 0.0008  
Z 0.0034 -0.0045 -0.0100 0.0184 0.0078 -0.0010

AT.105 H X 0.0018 0.0029 -0.0098 -0.0125 0.0018 -0.0014  
Y 0.0034 0.0041 -0.0086 -0.0155 0.0056 0.0008  
Z 0.0015 0.0021 -0.0074 -0.0101 0.0011 -0.0009

AT.106 H X 0.0018 -0.0029 -0.0098 0.0125 0.0018 0.0014  
Y 0.0034 -0.0041 -0.0086 0.0155 0.0056 -0.0008  
Z 0.0015 -0.0021 -0.0074 0.0101 0.0011 0.0009

AT.107 C X -0.0007 -0.0003 -0.0027 -0.0031 0.0005 0.0003  
Y -0.0011 -0.0008 -0.0043 -0.0047 0.0008 0.0006  
Z 0.0001 0.0000 -0.0006 -0.0000 -0.0001 -0.0002

AT.108 C X -0.0007 0.0003 -0.0027 0.0031 0.0005 -0.0003  
Y -0.0011 0.0008 -0.0043 0.0047 0.0008 -0.0006  
Z 0.0001 -0.0000 -0.0006 0.0000 -0.0001 0.0002

AT.109 H X 0.0073 0.0045 0.0396 0.0402 -0.0051 -0.0022  
Y 0.0045 0.0030 0.0187 0.0196 -0.0026 -0.0022  
Z 0.0067 0.0048 0.0239 0.0262 -0.0038 -0.0039

AT.110 H X 0.0073 -0.0045 0.0396 -0.0402 -0.0051 0.0022  
Y 0.0045 -0.0030 0.0187 -0.0196 -0.0026 0.0022

Z 0.0067 -0.0048 0.0239 -0.0262 -0.0038 0.0039  
AT. 111 H X 0.0019 0.0001 0.0029 0.0061 -0.0005 -0.0012  
Y 0.0109 0.0081 0.0467 0.0495 -0.0071 -0.0052  
Z -0.0050 -0.0023 -0.0166 -0.0205 0.0027 0.0027  
AT. 112 H X 0.0019 -0.0001 0.0029 -0.0061 -0.0005 0.0012  
Y 0.0109 -0.0081 0.0467 -0.0495 -0.0071 0.0052  
Z -0.0050 0.0023 -0.0166 0.0205 0.0027 -0.0027  
AT. 113 C X -0.0006 -0.0006 -0.0026 -0.0030 -0.0004 -0.0008  
Y -0.0004 -0.0003 -0.0007 -0.0006 -0.0002 0.0003  
Z 0.0000 -0.0002 0.0007 0.0004 0.0004 0.0001  
AT. 114 C X -0.0006 0.0006 -0.0026 0.0030 -0.0004 0.0008  
Y -0.0004 0.0003 -0.0007 0.0006 -0.0002 -0.0003  
Z 0.0000 0.0002 0.0007 -0.0004 0.0004 -0.0001  
AT. 115 C X 0.0011 0.0002 0.0090 0.0088 0.0018 0.0028  
Y 0.0007 0.0010 -0.0029 -0.0032 -0.0007 -0.0010  
Z -0.0008 -0.0011 0.0041 0.0044 0.0013 0.0012  
AT. 116 C X 0.0011 -0.0002 0.0090 -0.0088 0.0018 -0.0028  
Y 0.0007 -0.0010 -0.0029 0.0032 -0.0007 0.0010  
Z -0.0008 0.0011 0.0041 -0.0044 0.0013 -0.0012  
AT. 117 H X -0.0043 -0.0003 -0.0310 -0.0301 -0.0040 -0.0092  
Y -0.0004 -0.0051 0.0438 0.0428 0.0119 0.0139  
Z 0.0051 0.0009 0.0331 0.0324 0.0041 0.0097  
AT. 118 H X -0.0043 0.0003 -0.0310 0.0301 -0.0040 0.0092  
Y -0.0004 0.0051 0.0438 -0.0428 0.0119 -0.0139  
Z 0.0051 -0.0009 0.0331 -0.0324 0.0041 -0.0097  
AT. 119 H X -0.0042 0.0042 -0.0791 -0.0774 -0.0175 -0.0238  
Y -0.0014 0.0002 -0.0183 -0.0173 -0.0053 -0.0059  
Z -0.0015 0.0017 -0.0262 -0.0262 -0.0044 -0.0076  
AT. 120 H X -0.0042 -0.0042 -0.0791 0.0774 -0.0175 0.0238  
Y -0.0014 -0.0002 -0.0183 0.0173 -0.0053 0.0059  
Z -0.0015 -0.0017 -0.0262 0.0262 -0.0044 0.0076  
AT. 121 C X -0.0024 -0.0023 -0.0019 -0.0014 -0.0010 -0.0011

Y -0.0031 -0.0032 -0.0044 -0.0037 -0.0020 -0.0019  
Z -0.0011 -0.0012 0.0027 0.0027 0.0009 0.0006  
AT. 122 C X -0.0024 0.0023 -0.0019 0.0014 -0.0010 0.0011  
Y -0.0031 0.0032 -0.0044 0.0037 -0.0020 0.0019  
Z -0.0011 0.0012 0.0027 -0.0027 0.0009 -0.0006  
AT. 123 H X 0.0276 0.0260 0.0467 0.0422 0.0187 0.0202  
Y 0.0181 0.0182 0.0177 0.0140 0.0087 0.0084  
Z -0.0163 -0.0168 -0.0116 -0.0080 -0.0064 -0.0059  
AT. 124 H X 0.0276 -0.0260 0.0467 -0.0422 0.0187 -0.0202  
Y 0.0181 -0.0182 0.0177 -0.0140 0.0087 -0.0084  
Z -0.0163 0.0168 -0.0116 0.0080 -0.0064 0.0059  
AT. 125 H X 0.0079 0.0088 -0.0084 -0.0102 -0.0006 -0.0008  
Y 0.0301 0.0293 0.0401 0.0353 0.0161 0.0176  
Z 0.0266 0.0271 0.0157 0.0104 0.0095 0.0100  
AT. 126 H X 0.0079 -0.0088 -0.0084 0.0102 -0.0006 0.0008  
Y 0.0301 -0.0293 0.0401 -0.0353 0.0161 -0.0176  
Z 0.0266 -0.0271 0.0157 -0.0104 0.0095 -0.0100  
AT. 127 C X -0.0002 -0.0005 0.0006 0.0004 0.0008 0.0001  
Y -0.0006 -0.0003 -0.0001 -0.0006 0.0005 0.0004  
Z -0.0000 -0.0002 0.0007 0.0016 -0.0005 0.0003  
AT. 128 C X -0.0002 0.0005 0.0006 -0.0004 0.0008 -0.0001  
Y -0.0006 0.0003 -0.0001 0.0006 0.0005 -0.0004  
Z -0.0000 0.0002 0.0007 -0.0016 -0.0005 -0.0003  
AT. 129 C X 0.0009 0.0009 0.0004 0.0006 -0.0001 -0.0001  
Y -0.0000 -0.0001 0.0006 0.0004 -0.0001 0.0000  
Z 0.0002 0.0002 0.0002 0.0006 -0.0001 -0.0004  
AT. 130 C X 0.0009 -0.0009 0.0004 -0.0006 -0.0001 0.0001  
Y -0.0000 0.0001 0.0006 -0.0004 -0.0001 -0.0000  
Z 0.0002 -0.0002 0.0002 -0.0006 -0.0001 0.0004  
AT. 131 H X -0.0045 -0.0045 0.0011 -0.0018 0.0001 0.0019  
Y 0.0036 0.0035 0.0000 -0.0008 0.0017 -0.0000  
Z -0.0050 -0.0051 0.0011 -0.0030 0.0009 0.0023

AT.132 H X -0.0045 0.0045 0.0011 0.0018 0.0001 -0.0019  
Y 0.0036 -0.0035 0.0000 0.0008 0.0017 0.0000  
Z -0.0050 0.0051 0.0011 0.0030 0.0009 -0.0023

AT.133 H X -0.0052 -0.0053 -0.0020 -0.0005 -0.0018 -0.0003  
Y 0.0016 0.0010 -0.0017 0.0012 -0.0012 -0.0011  
Z 0.0053 0.0046 -0.0020 0.0026 -0.0012 -0.0018

AT.134 H X -0.0052 0.0053 -0.0020 0.0005 -0.0018 0.0003  
Y 0.0016 -0.0010 -0.0017 -0.0012 -0.0012 0.0011  
Z 0.0053 -0.0046 -0.0020 -0.0026 -0.0012 0.0018

AT.135 C X -0.0002 -0.0003 0.0010 0.0008 0.0003 -0.0001  
Y 0.0003 0.0002 0.0002 0.0007 -0.0006 0.0001  
Z -0.0001 -0.0000 -0.0005 -0.0010 -0.0003 -0.0007

AT.136 C X -0.0002 0.0003 0.0010 -0.0008 0.0003 0.0001  
Y 0.0003 -0.0002 0.0002 -0.0007 -0.0006 -0.0001  
Z -0.0001 0.0000 -0.0005 0.0010 -0.0003 0.0007

AT.137 H X -0.0024 -0.0014 -0.0049 -0.0100 0.0042 -0.0030  
Y 0.0003 0.0009 -0.0004 0.0021 0.0027 0.0038  
Z 0.0011 0.0018 0.0008 0.0060 0.0035 0.0071

AT.138 H X -0.0024 0.0014 -0.0049 0.0100 0.0042 0.0030  
Y 0.0003 -0.0009 -0.0004 -0.0021 0.0027 -0.0038  
Z 0.0011 -0.0018 0.0008 -0.0060 0.0035 -0.0071

AT.139 H X 0.0027 0.0031 0.0006 0.0044 -0.0018 0.0029  
Y -0.0039 -0.0028 -0.0028 -0.0084 0.0076 -0.0013  
Z -0.0025 -0.0035 0.0010 -0.0029 0.0004 -0.0037

AT.140 H X 0.0027 -0.0031 0.0006 -0.0044 -0.0018 -0.0029  
Y -0.0039 0.0028 -0.0028 0.0084 0.0076 0.0013  
Z -0.0025 0.0035 0.0010 0.0029 0.0004 0.0037

AT.141 H X 0.0040 0.0042 0.0010 0.0073 -0.0045 0.0042  
Y -0.0011 -0.0012 -0.0009 -0.0055 -0.0018 -0.0049  
Z 0.0030 0.0033 0.0007 0.0080 -0.0006 0.0064

AT.142 H X 0.0040 -0.0042 0.0010 -0.0073 -0.0045 -0.0042  
Y -0.0011 0.0012 -0.0009 0.0055 -0.0018 0.0049



Z 0.0030 -0.0033 0.0007 -0.0080 -0.0006 -0.0064  
AT. 143 C X -0.0003 -0.0003 0.0002 -0.0001 0.0004 0.0002  
Y 0.0010 0.0012 -0.0009 -0.0008 0.0004 0.0003  
Z -0.0003 -0.0001 -0.0019 -0.0013 -0.0013 -0.0003  
AT. 144 C X -0.0003 0.0003 0.0002 0.0001 0.0004 -0.0002  
Y 0.0010 -0.0012 -0.0009 0.0008 0.0004 -0.0003  
Z -0.0003 0.0001 -0.0019 0.0013 -0.0013 0.0003  
AT. 145 H X -0.0051 -0.0088 0.0102 0.0082 -0.0004 -0.0029  
Y -0.0059 -0.0065 -0.0086 -0.0024 -0.0139 -0.0045  
Z 0.0055 0.0055 0.0098 0.0033 0.0141 0.0040  
AT. 146 H X -0.0051 0.0088 0.0102 -0.0082 -0.0004 0.0029  
Y -0.0059 0.0065 -0.0086 0.0024 -0.0139 0.0045  
Z 0.0055 -0.0055 0.0098 -0.0033 0.0141 -0.0040  
AT. 147 H X 0.0029 0.0041 -0.0064 -0.0031 -0.0051 -0.0009  
Y -0.0112 -0.0156 0.0120 0.0105 -0.0027 -0.0034  
Z -0.0020 -0.0026 -0.0036 0.0008 -0.0097 -0.0035  
AT. 148 H X 0.0029 -0.0041 -0.0064 0.0031 -0.0051 0.0009  
Y -0.0112 0.0156 0.0120 -0.0105 -0.0027 0.0034  
Z -0.0020 0.0026 -0.0036 -0.0008 -0.0097 0.0035  
AT. 149 H X 0.0072 0.0105 -0.0119 -0.0090 -0.0040 -0.0001  
Y 0.0037 0.0039 0.0071 0.0026 0.0089 0.0026  
Z 0.0012 -0.0002 0.0178 0.0087 0.0159 0.0040  
AT. 150 H X 0.0072 -0.0105 -0.0119 0.0090 -0.0040 0.0001  
Y 0.0037 -0.0039 0.0071 -0.0026 0.0089 -0.0026  
Z 0.0012 0.0002 0.0178 -0.0087 0.0159 -0.0040  
AT. 151 C X 0.0005 0.0007 0.0008 0.0008 -0.0002 -0.0000  
Y 0.0003 0.0003 0.0004 0.0005 -0.0001 -0.0002  
Z 0.0008 0.0007 0.0016 0.0014 0.0018 0.0019  
AT. 152 C X 0.0005 -0.0007 0.0008 -0.0008 -0.0002 0.0000  
Y 0.0003 -0.0003 0.0004 -0.0005 -0.0001 0.0002  
Z 0.0008 -0.0007 0.0016 -0.0014 0.0018 -0.0019  
AT. 153 H X 0.0001 -0.0008 -0.0000 0.0014 0.0023 0.0033

Y -0.0042 -0.0030 -0.0098 -0.0089 -0.0083 -0.0089  
Z -0.0065 -0.0042 -0.0151 -0.0144 -0.0132 -0.0145  
AT. 154 H X 0.0001 0.0008 -0.0000 -0.0014 0.0023 -0.0033  
Y -0.0042 0.0030 -0.0098 0.0089 -0.0083 0.0089  
Z -0.0065 0.0042 -0.0151 0.0144 -0.0132 0.0145  
AT. 155 H X -0.0027 -0.0025 -0.0041 -0.0034 -0.0024 -0.0025  
Y 0.0040 0.0025 0.0101 0.0096 0.0100 0.0112  
Z -0.0046 -0.0031 -0.0118 -0.0110 -0.0106 -0.0119  
AT. 156 H X -0.0027 0.0025 -0.0041 0.0034 -0.0024 0.0025  
Y 0.0040 -0.0025 0.0101 -0.0096 0.0100 -0.0112  
Z -0.0046 0.0031 -0.0118 0.0110 -0.0106 0.0119  
AT. 157 O X -0.0003 -0.0004 0.0001 -0.0000 0.0003 0.0002  
Y -0.0006 -0.0009 0.0001 0.0000 0.0005 0.0003  
Z -0.0003 0.0005 -0.0001 -0.0001 -0.0010 0.0003  
AT. 158 O X -0.0003 0.0004 0.0001 0.0000 0.0003 -0.0002  
Y -0.0006 0.0009 0.0001 -0.0000 0.0005 -0.0003  
Z -0.0003 -0.0005 -0.0001 0.0001 -0.0010 -0.0003  
AT. 159 O X 0.0001 -0.0009 0.0002 0.0002 0.0013 -0.0002  
Y 0.0004 0.0006 -0.0001 -0.0000 -0.0004 -0.0002  
Z 0.0004 0.0002 0.0001 0.0001 0.0003 -0.0002  
AT. 160 O X 0.0001 0.0009 0.0002 -0.0002 0.0013 0.0002  
Y 0.0004 -0.0006 -0.0001 0.0000 -0.0004 0.0002  
Z 0.0004 -0.0002 0.0001 -0.0001 0.0003 0.0002  
AT. 161 H X 0.0113 0.0123 -0.0011 0.0005 -0.0050 -0.0073  
Y 0.0026 0.0026 -0.0003 0.0000 -0.0009 -0.0016  
Z -0.0075 -0.0071 0.0003 -0.0007 0.0025 0.0053  
AT. 162 H X 0.0113 -0.0123 -0.0011 -0.0005 -0.0050 0.0073  
Y 0.0026 -0.0026 -0.0003 -0.0000 -0.0009 0.0016  
Z -0.0075 0.0071 0.0003 0.0007 0.0025 -0.0053  
AT. 163 H X -0.0068 0.0102 -0.0030 -0.0040 -0.0218 0.0076  
Y 0.0010 0.0002 -0.0000 0.0003 0.0003 -0.0002  
Z 0.0035 -0.0047 0.0007 0.0021 0.0100 -0.0044

AT.164 H X -0.0068 -0.0102 -0.0030 0.0040 -0.0218 -0.0076  
Y 0.0010 -0.0002 -0.0000 -0.0003 0.0003 0.0002  
Z 0.0035 0.0047 0.0007 -0.0021 0.0100 0.0044

AT.165 O X 0.0006 -0.0001 0.0002 0.0003 -0.0006 -0.0001  
Y 0.0003 -0.0003 -0.0006 0.0010 0.0005 -0.0006  
Z -0.0007 0.0004 0.0009 -0.0015 -0.0005 0.0009

AT.166 O X 0.0006 0.0001 0.0002 -0.0003 -0.0006 0.0001  
Y 0.0003 0.0003 -0.0006 -0.0010 0.0005 0.0006  
Z -0.0007 -0.0004 0.0009 0.0015 -0.0005 -0.0009

AT.167 H X -0.0048 0.0014 0.0006 -0.0055 0.0027 0.0026  
Y 0.0016 -0.0010 -0.0002 0.0029 -0.0003 -0.0015  
Z 0.0157 -0.0030 -0.0016 0.0150 -0.0102 -0.0067

AT.168 H X -0.0048 -0.0014 0.0006 0.0055 0.0027 -0.0026  
Y 0.0016 0.0010 -0.0002 -0.0029 -0.0003 0.0015  
Z 0.0157 0.0030 -0.0016 -0.0150 -0.0102 0.0067

AT.169 O X -0.0002 -0.0002 -0.0005 0.0004 0.0006 -0.0002  
Y -0.0006 0.0006 0.0010 -0.0016 -0.0009 0.0011  
Z -0.0005 0.0003 0.0007 -0.0013 -0.0002 0.0006

AT.170 O X -0.0002 0.0002 -0.0005 -0.0004 0.0006 0.0002  
Y -0.0006 -0.0006 0.0010 0.0016 -0.0009 -0.0011  
Z -0.0005 -0.0003 0.0007 0.0013 -0.0002 -0.0006

AT.171 H X -0.0025 0.0030 0.0075 -0.0103 -0.0044 0.0045  
Y 0.0014 -0.0034 -0.0069 0.0093 0.0086 -0.0073  
Z 0.0048 -0.0099 -0.0244 0.0325 0.0216 -0.0187

AT.172 H X -0.0025 -0.0030 0.0075 0.0103 -0.0044 -0.0045  
Y 0.0014 0.0034 -0.0069 -0.0093 0.0086 0.0073  
Z 0.0048 0.0099 -0.0244 -0.0325 0.0216 0.0187

FREQ(CM\*\*-1) 1439.60 1440.10 1440.56 1441.61 1441.75 1443.59

AT. 1 I X 0.0000 0.0000 0.0000 0.0000 0.0000 -0.0000  
Y 0.0000 0.0000 0.0000 0.0000 0.0000 -0.0000

Z -0.0000 -0.0000 0.0000 0.0000 0.0000 0.0000  
AT. 2 I X 0.0000 -0.0000 0.0000 0.0000 -0.0000 0.0000  
Y 0.0000 -0.0000 0.0000 0.0000 -0.0000 0.0000  
Z -0.0000 0.0000 0.0000 0.0000 -0.0000 -0.0000  
AT. 3 I X -0.0000 0.0000 -0.0000 -0.0000 -0.0000 0.0000  
Y -0.0000 0.0000 -0.0000 -0.0000 -0.0000 0.0000  
Z -0.0000 -0.0000 -0.0000 -0.0000 -0.0000 -0.0000  
AT. 4 I X -0.0000 -0.0000 -0.0000 -0.0000 0.0000 -0.0000  
Y -0.0000 -0.0000 -0.0000 -0.0000 0.0000 -0.0000  
Z -0.0000 0.0000 -0.0000 -0.0000 0.0000 0.0000  
AT. 5 O X 0.0009 0.0006 0.0021 0.0001 0.0012 0.0003  
Y -0.0005 -0.0003 -0.0013 -0.0001 -0.0008 -0.0001  
Z -0.0008 -0.0005 -0.0015 -0.0001 -0.0009 -0.0002  
AT. 6 O X 0.0009 -0.0006 0.0021 0.0001 -0.0012 -0.0003  
Y -0.0005 0.0003 -0.0013 -0.0001 0.0008 0.0001  
Z -0.0008 0.0005 -0.0015 -0.0001 0.0009 0.0002  
AT. 7 O X 0.0007 -0.0012 0.0047 0.0018 0.0038 -0.0004  
Y -0.0005 0.0009 -0.0037 -0.0015 -0.0029 0.0002  
Z 0.0001 -0.0002 0.0006 0.0002 0.0004 -0.0000  
AT. 8 O X 0.0007 0.0012 0.0047 0.0018 -0.0038 0.0004  
Y -0.0005 -0.0009 -0.0037 -0.0015 0.0029 -0.0002  
Z 0.0001 0.0002 0.0006 0.0002 -0.0004 0.0000  
AT. 9 N X 0.0003 0.0003 0.0010 -0.0003 0.0007 0.0001  
Y -0.0009 -0.0006 -0.0020 0.0001 -0.0021 -0.0001  
Z 0.0017 0.0005 0.0085 0.0005 0.0065 0.0014  
AT. 10 N X 0.0003 -0.0003 0.0010 -0.0003 -0.0007 -0.0001  
Y -0.0009 0.0006 -0.0020 0.0001 0.0021 0.0001  
Z 0.0017 -0.0005 0.0085 0.0005 -0.0065 -0.0014  
AT. 11 N X 0.0006 -0.0003 0.0013 0.0008 0.0017 -0.0003  
Y 0.0013 -0.0011 0.0060 0.0024 0.0054 0.0006  
Z -0.0039 0.0038 -0.0189 -0.0075 -0.0173 -0.0013  
AT. 12 N X 0.0006 0.0003 0.0013 0.0008 -0.0017 0.0003

Y 0.0013 0.0011 0.0060 0.0024 -0.0054 -0.0006  
Z -0.0039 -0.0038 -0.0189 -0.0075 0.0173 0.0013  
AT. 13 C X -0.0016 -0.0009 -0.0048 -0.0000 -0.0036 -0.0007  
Y 0.0014 0.0007 0.0044 0.0002 0.0033 0.0006  
Z -0.0003 0.0002 -0.0045 -0.0001 -0.0044 -0.0008  
AT. 14 C X -0.0016 0.0009 -0.0048 -0.0000 0.0036 0.0007  
Y 0.0014 -0.0007 0.0044 0.0002 -0.0033 -0.0006  
Z -0.0003 -0.0002 -0.0045 -0.0001 0.0044 0.0008  
AT. 15 C X 0.0000 0.0002 0.0008 -0.0004 0.0010 0.0001  
Y 0.0003 -0.0001 -0.0006 0.0007 -0.0013 -0.0002  
Z -0.0000 0.0000 0.0008 -0.0002 0.0010 0.0001  
AT. 16 C X 0.0000 -0.0002 0.0008 -0.0004 -0.0010 -0.0001  
Y 0.0003 0.0001 -0.0006 0.0007 0.0013 0.0002  
Z -0.0000 -0.0000 0.0008 -0.0002 -0.0010 -0.0001  
AT. 17 H X -0.0001 -0.0001 -0.0001 0.0002 0.0007 0.0005  
Y -0.0035 -0.0005 -0.0020 -0.0038 0.0022 0.0003  
Z 0.0044 0.0004 0.0017 0.0054 -0.0035 -0.0004  
AT. 18 H X -0.0001 0.0001 -0.0001 0.0002 -0.0007 -0.0005  
Y -0.0035 0.0005 -0.0020 -0.0038 -0.0022 -0.0003  
Z 0.0044 -0.0004 0.0017 0.0054 0.0035 0.0004  
AT. 19 H X 0.0013 -0.0005 0.0031 0.0023 0.0009 0.0005  
Y -0.0053 -0.0005 -0.0054 -0.0060 0.0028 0.0002  
Z -0.0016 -0.0003 -0.0003 -0.0019 0.0025 0.0004  
AT. 20 H X 0.0013 0.0005 0.0031 0.0023 -0.0009 -0.0005  
Y -0.0053 0.0005 -0.0054 -0.0060 -0.0028 -0.0002  
Z -0.0016 0.0003 -0.0003 -0.0019 -0.0025 -0.0004  
AT. 21 C X -0.0021 0.0027 -0.0117 -0.0046 -0.0099 0.0002  
Y -0.0004 -0.0004 -0.0001 -0.0000 -0.0008 -0.0008  
Z 0.0031 -0.0029 0.0152 0.0059 0.0138 0.0013  
AT. 22 C X -0.0021 -0.0027 -0.0117 -0.0046 0.0099 -0.0002  
Y -0.0004 0.0004 -0.0001 -0.0000 0.0008 0.0008  
Z 0.0031 0.0029 0.0152 0.0059 -0.0138 -0.0013

AT. 23 C X 0.0010 -0.0007 0.0038 0.0016 0.0037 -0.0000  
Y -0.0006 0.0003 -0.0016 -0.0008 -0.0018 0.0001  
Z -0.0019 0.0010 -0.0061 -0.0029 -0.0064 -0.0000

AT. 24 C X 0.0010 0.0007 0.0038 0.0016 -0.0037 0.0000  
Y -0.0006 -0.0003 -0.0016 -0.0008 0.0018 -0.0001  
Z -0.0019 -0.0010 -0.0061 -0.0029 0.0064 0.0000

AT. 25 H X -0.0007 0.0005 -0.0019 -0.0008 -0.0024 -0.0000  
Y -0.0030 0.0013 -0.0079 -0.0039 -0.0090 0.0003  
Z 0.0143 -0.0045 0.0333 0.0177 0.0402 -0.0015

AT. 26 H X -0.0007 -0.0005 -0.0019 -0.0008 0.0024 0.0000  
Y -0.0030 -0.0013 -0.0079 -0.0039 0.0090 -0.0003  
Z 0.0143 0.0045 0.0333 0.0177 -0.0402 0.0015

AT. 27 H X -0.0021 0.0005 -0.0022 -0.0009 -0.0030 0.0000  
Y 0.0102 -0.0029 0.0229 0.0126 0.0280 -0.0016  
Z 0.0046 -0.0009 0.0082 0.0050 0.0111 -0.0010

AT. 28 H X -0.0021 -0.0005 -0.0022 -0.0009 0.0030 -0.0000  
Y 0.0102 0.0029 0.0229 0.0126 -0.0280 0.0016  
Z 0.0046 0.0009 0.0082 0.0050 -0.0111 0.0010

AT. 29 C X 0.0004 0.0005 -0.0011 -0.0003 0.0008 -0.0006  
Y -0.0004 -0.0012 0.0039 0.0016 0.0010 0.0015  
Z -0.0001 -0.0001 -0.0009 0.0003 -0.0003 -0.0001

AT. 30 C X 0.0004 -0.0005 -0.0011 -0.0003 -0.0008 0.0006  
Y -0.0004 0.0012 0.0039 0.0016 -0.0010 -0.0015  
Z -0.0001 0.0001 -0.0009 0.0003 0.0003 0.0001

AT. 31 H X -0.0066 -0.0083 0.0073 0.0073 -0.0101 0.0064  
Y 0.0043 0.0078 -0.0164 -0.0090 -0.0012 -0.0077  
Z 0.0022 0.0071 -0.0241 -0.0102 -0.0101 -0.0088

AT. 32 H X -0.0066 0.0083 0.0073 0.0073 0.0101 -0.0064  
Y 0.0043 -0.0078 -0.0164 -0.0090 0.0012 0.0077  
Z 0.0022 -0.0071 -0.0241 -0.0102 0.0101 0.0088

AT. 33 H X 0.0010 0.0015 0.0017 -0.0017 0.0008 0.0001  
Y 0.0053 0.0117 -0.0324 -0.0143 -0.0072 -0.0130

Z -0.0021 -0.0048 0.0164 0.0061 0.0033 0.0064  
AT. 34 H X 0.0010 -0.0015 0.0017 -0.0017 -0.0008 -0.0001  
Y 0.0053 -0.0117 -0.0324 -0.0143 0.0072 0.0130  
Z -0.0021 0.0048 0.0164 0.0061 -0.0033 -0.0064  
AT. 35 C X -0.0007 -0.0004 -0.0008 0.0000 -0.0014 0.0002  
Y 0.0001 -0.0002 0.0015 0.0006 0.0015 0.0004  
Z 0.0000 -0.0003 0.0009 -0.0003 -0.0005 -0.0003  
AT. 36 C X -0.0007 0.0004 -0.0008 0.0000 0.0014 -0.0002  
Y 0.0001 0.0002 0.0015 0.0006 -0.0015 -0.0004  
Z 0.0000 0.0003 0.0009 -0.0003 0.0005 0.0003  
AT. 37 C X 0.0016 0.0002 0.0008 0.0009 0.0035 -0.0003  
Y -0.0012 0.0004 -0.0036 -0.0017 -0.0043 -0.0001  
Z 0.0014 -0.0010 0.0058 0.0025 0.0058 0.0004  
AT. 38 C X 0.0016 -0.0002 0.0008 0.0009 -0.0035 0.0003  
Y -0.0012 -0.0004 -0.0036 -0.0017 0.0043 0.0001  
Z 0.0014 0.0010 0.0058 0.0025 -0.0058 -0.0004  
AT. 39 H X -0.0128 0.0009 -0.0140 -0.0115 -0.0333 0.0020  
Y 0.0055 -0.0057 0.0304 0.0109 0.0256 0.0014  
Z -0.0108 0.0021 -0.0187 -0.0111 -0.0311 0.0013  
AT. 40 H X -0.0128 -0.0009 -0.0140 -0.0115 0.0333 -0.0020  
Y 0.0055 0.0057 0.0304 0.0109 -0.0256 -0.0014  
Z -0.0108 -0.0021 -0.0187 -0.0111 0.0311 -0.0013  
AT. 41 H X -0.0064 -0.0039 0.0104 -0.0010 -0.0083 0.0031  
Y 0.0036 0.0049 -0.0121 -0.0013 0.0013 -0.0026  
Z 0.0049 -0.0001 0.0011 0.0033 0.0110 -0.0013  
AT. 42 H X -0.0064 0.0039 0.0104 -0.0010 0.0083 -0.0031  
Y 0.0036 -0.0049 -0.0121 -0.0013 -0.0013 0.0026  
Z 0.0049 0.0001 0.0011 0.0033 -0.0110 0.0013  
AT. 43 C X -0.0005 -0.0000 -0.0007 -0.0004 -0.0010 0.0001  
Y 0.0006 -0.0003 0.0031 0.0007 0.0039 0.0007  
Z 0.0015 -0.0006 0.0046 0.0020 0.0043 0.0001  
AT. 44 C X -0.0005 0.0000 -0.0007 -0.0004 0.0010 -0.0001

Y 0.0006 0.0003 0.0031 0.0007 -0.0039 -0.0007  
Z 0.0015 0.0006 0.0046 0.0020 -0.0043 -0.0001  
AT. 45 H X 0.0033 0.0019 0.0038 0.0005 0.0069 0.0018  
Y -0.0036 0.0021 -0.0177 -0.0054 -0.0206 -0.0041  
Z 0.0022 -0.0039 0.0191 0.0063 0.0204 0.0034  
AT. 46 H X 0.0033 -0.0019 0.0038 0.0005 -0.0069 -0.0018  
Y -0.0036 -0.0021 -0.0177 -0.0054 0.0206 0.0041  
Z 0.0022 0.0039 0.0191 0.0063 -0.0204 -0.0034  
AT. 47 H X 0.0012 -0.0015 0.0058 0.0030 0.0050 -0.0004  
Y -0.0065 0.0029 -0.0258 -0.0083 -0.0275 -0.0049  
Z -0.0081 0.0047 -0.0340 -0.0120 -0.0357 -0.0046  
AT. 48 H X 0.0012 0.0015 0.0058 0.0030 -0.0050 0.0004  
Y -0.0065 -0.0029 -0.0258 -0.0083 0.0275 0.0049  
Z -0.0081 -0.0047 -0.0340 -0.0120 0.0357 0.0046  
AT. 49 C X -0.0001 0.0006 -0.0014 -0.0004 -0.0002 -0.0000  
Y -0.0002 -0.0005 -0.0011 0.0005 -0.0027 -0.0002  
Z -0.0010 -0.0004 0.0005 -0.0003 0.0019 0.0005  
AT. 50 C X -0.0001 -0.0006 -0.0014 -0.0004 0.0002 0.0000  
Y -0.0002 0.0005 -0.0011 0.0005 0.0027 0.0002  
Z -0.0010 0.0004 0.0005 -0.0003 -0.0019 -0.0005  
AT. 51 C X -0.0004 -0.0001 -0.0002 -0.0002 -0.0018 0.0001  
Y 0.0008 0.0005 0.0007 0.0000 0.0012 -0.0001  
Z 0.0005 0.0005 -0.0023 -0.0000 -0.0010 -0.0007  
AT. 52 C X -0.0004 0.0001 -0.0002 -0.0002 0.0018 -0.0001  
Y 0.0008 -0.0005 0.0007 0.0000 -0.0012 0.0001  
Z 0.0005 -0.0005 -0.0023 -0.0000 0.0010 0.0007  
AT. 53 H X 0.0017 -0.0005 -0.0011 0.0024 0.0056 -0.0008  
Y 0.0014 -0.0010 0.0060 0.0020 0.0076 0.0007  
Z -0.0025 -0.0007 0.0060 -0.0023 -0.0059 0.0019  
AT. 54 H X 0.0017 0.0005 -0.0011 0.0024 -0.0056 0.0008  
Y 0.0014 0.0010 0.0060 0.0020 -0.0076 -0.0007  
Z -0.0025 0.0007 0.0060 -0.0023 0.0059 -0.0019



AT. 55 H X 0.0041 -0.0003 0.0094 0.0037 0.0190 0.0006  
Y -0.0070 -0.0027 -0.0074 -0.0022 -0.0106 0.0008  
Z -0.0064 -0.0035 -0.0060 -0.0007 -0.0019 0.0007

AT. 56 H X 0.0041 0.0003 0.0094 0.0037 -0.0190 -0.0006  
Y -0.0070 0.0027 -0.0074 -0.0022 0.0106 -0.0008  
Z -0.0064 0.0035 -0.0060 -0.0007 0.0019 -0.0007

AT. 57 C X -0.0010 -0.0000 -0.0027 -0.0006 -0.0027 0.0001  
Y -0.0006 0.0004 -0.0022 -0.0007 -0.0022 0.0000  
Z 0.0002 0.0001 0.0004 -0.0005 -0.0004 -0.0002

AT. 58 C X -0.0010 0.0000 -0.0027 -0.0006 0.0027 -0.0001  
Y -0.0006 -0.0004 -0.0022 -0.0007 0.0022 -0.0000  
Z 0.0002 -0.0001 0.0004 -0.0005 0.0004 0.0002

AT. 59 H X -0.0070 0.0010 -0.0182 -0.0017 -0.0138 0.0030  
Y 0.0023 -0.0024 0.0087 0.0063 0.0135 0.0002  
Z -0.0005 -0.0032 0.0035 0.0088 0.0131 0.0022

AT. 60 H X -0.0070 -0.0010 -0.0182 -0.0017 0.0138 -0.0030  
Y 0.0023 0.0024 0.0087 0.0063 -0.0135 -0.0002  
Z -0.0005 0.0032 0.0035 0.0088 -0.0131 -0.0022

AT. 61 H X 0.0122 0.0002 0.0307 0.0051 0.0290 -0.0028  
Y 0.0085 -0.0038 0.0273 0.0104 0.0309 -0.0010  
Z 0.0056 0.0021 0.0111 -0.0013 0.0077 -0.0018

AT. 62 H X 0.0122 -0.0002 0.0307 0.0051 -0.0290 0.0028  
Y 0.0085 0.0038 0.0273 0.0104 -0.0309 0.0010  
Z 0.0056 -0.0021 0.0111 -0.0013 -0.0077 0.0018

AT. 63 H X 0.0110 0.0006 0.0268 0.0039 0.0253 -0.0027  
Y -0.0019 0.0009 -0.0055 -0.0062 -0.0132 -0.0012  
Z -0.0098 -0.0011 -0.0237 0.0005 -0.0163 0.0036

AT. 64 H X 0.0110 -0.0006 0.0268 0.0039 -0.0253 0.0027  
Y -0.0019 -0.0009 -0.0055 -0.0062 0.0132 0.0012  
Z -0.0098 0.0011 -0.0237 0.0005 0.0163 -0.0036

AT. 65 C X -0.0004 0.0004 -0.0019 -0.0005 -0.0004 0.0001  
Y -0.0008 -0.0003 -0.0034 -0.0001 -0.0038 -0.0006

Z -0.0002 0.0007 -0.0002 -0.0006 0.0022 0.0004  
AT. 66 C X -0.0004 -0.0004 -0.0019 -0.0005 0.0004 -0.0001  
Y -0.0008 0.0003 -0.0034 -0.0001 0.0038 0.0006  
Z -0.0002 -0.0007 -0.0002 -0.0006 -0.0022 -0.0004  
AT. 67 H X -0.0074 0.0010 -0.0268 -0.0028 -0.0179 -0.0016  
Y 0.0055 0.0070 0.0276 -0.0041 0.0512 0.0079  
Z 0.0004 -0.0070 -0.0059 0.0056 -0.0333 -0.0060  
AT. 68 H X -0.0074 -0.0010 -0.0268 -0.0028 0.0179 0.0016  
Y 0.0055 -0.0070 0.0276 -0.0041 -0.0512 -0.0079  
Z 0.0004 0.0070 -0.0059 0.0056 0.0333 0.0060  
AT. 69 H X 0.0067 -0.0022 0.0303 0.0037 0.0201 0.0019  
Y 0.0096 0.0005 0.0432 0.0023 0.0409 0.0048  
Z 0.0014 0.0060 0.0054 -0.0045 0.0259 0.0043  
AT. 70 H X 0.0067 0.0022 0.0303 0.0037 -0.0201 -0.0019  
Y 0.0096 -0.0005 0.0432 0.0023 -0.0409 -0.0048  
Z 0.0014 -0.0060 0.0054 -0.0045 -0.0259 -0.0043  
AT. 71 H X 0.0064 -0.0068 0.0293 0.0070 0.0035 -0.0017  
Y -0.0026 -0.0024 -0.0191 0.0015 -0.0296 -0.0039  
Z 0.0019 -0.0078 -0.0004 0.0072 -0.0328 -0.0059  
AT. 72 H X 0.0064 0.0068 0.0293 0.0070 -0.0035 0.0017  
Y -0.0026 0.0024 -0.0191 0.0015 0.0296 0.0039  
Z 0.0019 0.0078 -0.0004 0.0072 0.0328 0.0059  
AT. 73 C X -0.0004 -0.0003 0.0003 0.0000 0.0003 0.0001  
Y 0.0006 0.0005 -0.0001 -0.0001 0.0005 -0.0001  
Z -0.0029 -0.0012 -0.0044 -0.0018 -0.0071 -0.0005  
AT. 74 C X -0.0004 0.0003 0.0003 0.0000 -0.0003 -0.0001  
Y 0.0006 -0.0005 -0.0001 -0.0001 -0.0005 0.0001  
Z -0.0029 0.0012 -0.0044 -0.0018 0.0071 0.0005  
AT. 75 H X 0.0128 0.0056 0.0119 0.0069 0.0188 0.0001  
Y 0.0100 0.0040 0.0162 0.0074 0.0278 0.0023  
Z 0.0200 0.0082 0.0268 0.0134 0.0448 0.0027  
AT. 76 H X 0.0128 -0.0056 0.0119 0.0069 -0.0188 -0.0001

Y 0.0100 -0.0040 0.0162 0.0074 -0.0278 -0.0023  
Z 0.0200 -0.0082 0.0268 0.0134 -0.0448 -0.0027  
AT. 77 H X -0.0055 -0.0027 -0.0083 -0.0045 -0.0163 -0.0013  
Y -0.0173 -0.0072 -0.0212 -0.0101 -0.0347 -0.0015  
Z 0.0192 0.0084 0.0240 0.0122 0.0430 0.0023  
AT. 78 H X -0.0055 0.0027 -0.0083 -0.0045 0.0163 0.0013  
Y -0.0173 0.0072 -0.0212 -0.0101 0.0347 0.0015  
Z 0.0192 -0.0084 0.0240 0.0122 -0.0430 -0.0023  
AT. 79 I X -0.0000 -0.0000 0.0000 0.0000 -0.0000 0.0000  
Y -0.0000 -0.0000 0.0000 -0.0000 0.0000 -0.0000  
Z -0.0000 -0.0000 0.0000 -0.0000 0.0000 -0.0000  
AT. 80 I X -0.0000 0.0000 0.0000 0.0000 0.0000 -0.0000  
Y -0.0000 0.0000 0.0000 -0.0000 -0.0000 0.0000  
Z -0.0000 0.0000 0.0000 -0.0000 -0.0000 0.0000  
AT. 81 I X -0.0000 -0.0000 0.0000 -0.0000 -0.0000 -0.0000  
Y 0.0000 0.0000 -0.0000 0.0000 0.0000 0.0000  
Z 0.0000 0.0000 -0.0000 0.0000 0.0000 0.0000  
AT. 82 I X -0.0000 0.0000 0.0000 -0.0000 0.0000 0.0000  
Y 0.0000 -0.0000 -0.0000 0.0000 -0.0000 -0.0000  
Z 0.0000 -0.0000 -0.0000 0.0000 -0.0000 -0.0000  
AT. 83 O X 0.0013 0.0012 -0.0007 0.0012 -0.0002 0.0024  
Y 0.0002 0.0000 -0.0001 0.0003 -0.0000 0.0005  
Z 0.0002 0.0001 -0.0003 0.0006 -0.0001 0.0011  
AT. 84 O X 0.0013 -0.0012 -0.0007 0.0012 0.0002 -0.0024  
Y 0.0002 -0.0000 -0.0001 0.0003 0.0000 -0.0005  
Z 0.0002 -0.0001 -0.0003 0.0006 0.0001 -0.0011  
AT. 85 O X 0.0013 0.0013 0.0004 -0.0019 -0.0000 -0.0015  
Y 0.0006 0.0006 0.0003 -0.0012 -0.0000 -0.0009  
Z -0.0002 -0.0000 -0.0003 0.0006 -0.0001 0.0007  
AT. 86 O X 0.0013 -0.0013 0.0004 -0.0019 0.0000 0.0015  
Y 0.0006 -0.0006 0.0003 -0.0012 0.0000 0.0009  
Z -0.0002 0.0000 -0.0003 0.0006 0.0001 -0.0007

AT. 87 N X -0.0002 -0.0001 -0.0001 0.0009 -0.0001 0.0015  
Y 0.0004 0.0006 -0.0003 0.0008 -0.0002 0.0017  
Z -0.0086 -0.0099 0.0022 -0.0006 0.0003 -0.0049

AT. 88 N X -0.0002 0.0001 -0.0001 0.0009 0.0001 -0.0015  
Y 0.0004 -0.0006 -0.0003 0.0008 0.0002 -0.0017  
Z -0.0086 0.0099 0.0022 -0.0006 -0.0003 0.0049

AT. 89 N X 0.0003 0.0007 -0.0002 -0.0002 -0.0003 0.0007  
Y -0.0023 -0.0023 0.0004 0.0018 0.0001 0.0015  
Z 0.0061 0.0070 -0.0009 -0.0042 -0.0003 -0.0020

AT. 90 N X 0.0003 -0.0007 -0.0002 -0.0002 0.0003 -0.0007  
Y -0.0023 0.0023 0.0004 0.0018 -0.0001 -0.0015  
Z 0.0061 -0.0070 -0.0009 -0.0042 0.0003 0.0020

AT. 91 C X -0.0033 -0.0035 0.0015 -0.0025 0.0004 -0.0054  
Y -0.0015 -0.0016 0.0006 -0.0007 0.0000 -0.0016  
Z 0.0070 0.0083 -0.0016 0.0004 -0.0002 0.0035

AT. 92 C X -0.0033 0.0035 0.0015 -0.0025 -0.0004 0.0054  
Y -0.0015 0.0016 0.0006 -0.0007 -0.0000 0.0016  
Z 0.0070 -0.0083 -0.0016 0.0004 0.0002 -0.0035

AT. 93 C X 0.0013 0.0019 -0.0003 0.0005 -0.0002 0.0020  
Y 0.0010 0.0015 -0.0002 0.0003 -0.0001 0.0014  
Z -0.0016 -0.0022 0.0003 -0.0004 0.0001 -0.0017

AT. 94 C X 0.0013 -0.0019 -0.0003 0.0005 0.0002 -0.0020  
Y 0.0010 -0.0015 -0.0002 0.0003 0.0001 -0.0014  
Z -0.0016 0.0022 0.0003 -0.0004 -0.0001 0.0017

AT. 95 H X -0.0009 -0.0017 -0.0001 -0.0003 0.0002 -0.0013  
Y -0.0029 -0.0051 0.0000 -0.0002 0.0006 -0.0044  
Z 0.0079 0.0136 -0.0003 0.0017 -0.0017 0.0123

AT. 96 H X -0.0009 0.0017 -0.0001 -0.0003 -0.0002 0.0013  
Y -0.0029 0.0051 0.0000 -0.0002 -0.0006 0.0044  
Z 0.0079 -0.0136 -0.0003 0.0017 0.0017 -0.0123

AT. 97 H X 0.0012 -0.0035 -0.0013 -0.0009 0.0011 -0.0070  
Y -0.0044 -0.0081 0.0001 -0.0014 0.0014 -0.0088

Z -0.0027 -0.0027 0.0006 -0.0004 0.0001 -0.0014  
AT. 98 H X 0.0012 0.0035 -0.0013 -0.0009 -0.0011 0.0070  
Y -0.0044 0.0081 0.0001 -0.0014 -0.0014 0.0088  
Z -0.0027 0.0027 0.0006 -0.0004 -0.0001 0.0014  
AT. 99 C X -0.0045 -0.0048 0.0000 0.0036 0.0002 0.0021  
Y 0.0019 0.0024 -0.0011 0.0005 -0.0000 0.0010  
Z -0.0051 -0.0062 0.0011 0.0027 0.0003 0.0007  
AT. 100 C X -0.0045 0.0048 0.0000 0.0036 -0.0002 -0.0021  
Y 0.0019 -0.0024 -0.0011 0.0005 0.0000 -0.0010  
Z -0.0051 0.0062 0.0011 0.0027 -0.0003 -0.0007  
AT. 101 C X 0.0031 0.0033 -0.0013 0.0008 -0.0001 0.0011  
Y 0.0012 0.0012 -0.0007 0.0009 -0.0000 0.0008  
Z 0.0041 0.0045 -0.0019 0.0016 -0.0001 0.0017  
AT. 102 C X 0.0031 -0.0033 -0.0013 0.0008 0.0001 -0.0011  
Y 0.0012 -0.0012 -0.0007 0.0009 0.0000 -0.0008  
Z 0.0041 -0.0045 -0.0019 0.0016 0.0001 -0.0017  
AT. 103 H X -0.0025 -0.0026 0.0015 -0.0012 0.0003 -0.0016  
Y 0.0039 0.0041 -0.0020 0.0017 -0.0002 0.0019  
Z -0.0306 -0.0326 0.0175 -0.0215 0.0004 -0.0200  
AT. 104 H X -0.0025 0.0026 0.0015 -0.0012 -0.0003 0.0016  
Y 0.0039 -0.0041 -0.0020 0.0017 0.0002 -0.0019  
Z -0.0306 0.0326 0.0175 -0.0215 -0.0004 0.0200  
AT. 105 H X -0.0127 -0.0119 0.0075 -0.0108 0.0002 -0.0095  
Y -0.0240 -0.0258 0.0135 -0.0174 -0.0001 -0.0158  
Z -0.0089 -0.0092 0.0054 -0.0081 -0.0001 -0.0069  
AT. 106 H X -0.0127 0.0119 0.0075 -0.0108 -0.0002 0.0095  
Y -0.0240 0.0258 0.0135 -0.0174 0.0001 0.0158  
Z -0.0089 0.0092 0.0054 -0.0081 0.0001 0.0069  
AT. 107 C X -0.0048 -0.0046 0.0006 0.0022 -0.0004 0.0025  
Y -0.0093 -0.0091 0.0018 0.0024 -0.0004 0.0035  
Z 0.0002 0.0005 -0.0001 0.0006 0.0001 0.0017  
AT. 108 C X -0.0048 0.0046 0.0006 0.0022 0.0004 -0.0025

Y -0.0093 0.0091 0.0018 0.0024 0.0004 -0.0035  
Z 0.0002 -0.0005 -0.0001 0.0006 -0.0001 -0.0017  
AT. 109 H X 0.0602 0.0564 -0.0102 -0.0200 0.0051 -0.0340  
Y 0.0327 0.0321 -0.0053 -0.0142 0.0013 -0.0185  
Z 0.0478 0.0478 -0.0078 -0.0208 0.0011 -0.0243  
AT. 110 H X 0.0602 -0.0564 -0.0102 -0.0200 -0.0051 0.0340  
Y 0.0327 -0.0321 -0.0053 -0.0142 -0.0013 0.0185  
Z 0.0478 -0.0478 -0.0078 -0.0208 -0.0011 0.0243  
AT. 111 H X 0.0061 0.0073 0.0002 -0.0062 0.0006 -0.0023  
Y 0.0876 0.0851 -0.0160 -0.0258 0.0045 -0.0387  
Z -0.0308 -0.0312 0.0042 0.0147 -0.0020 0.0144  
AT. 112 H X 0.0061 -0.0073 0.0002 -0.0062 -0.0006 0.0023  
Y 0.0876 -0.0851 -0.0160 -0.0258 -0.0045 0.0387  
Z -0.0308 0.0312 0.0042 0.0147 0.0020 -0.0144  
AT. 113 C X -0.0027 -0.0027 0.0019 -0.0043 0.0001 -0.0037  
Y 0.0010 0.0009 -0.0012 0.0033 -0.0001 0.0030  
Z -0.0003 -0.0006 0.0009 -0.0035 -0.0000 -0.0037  
AT. 114 C X -0.0027 0.0027 0.0019 -0.0043 -0.0001 0.0037  
Y 0.0010 -0.0009 -0.0012 0.0033 0.0001 -0.0030  
Z -0.0003 0.0006 0.0009 -0.0035 0.0000 0.0037  
AT. 115 C X -0.0019 -0.0025 -0.0008 0.0018 -0.0004 0.0013  
Y 0.0018 0.0017 0.0002 -0.0019 0.0001 -0.0020  
Z -0.0018 -0.0018 0.0002 0.0020 0.0001 0.0016  
AT. 116 C X -0.0019 0.0025 -0.0008 0.0018 0.0004 -0.0013  
Y 0.0018 -0.0017 0.0002 -0.0019 -0.0001 0.0020  
Z -0.0018 0.0018 0.0002 0.0020 -0.0001 -0.0016  
AT. 117 H X 0.0088 0.0107 0.0035 -0.0035 0.0029 -0.0039  
Y -0.0230 -0.0257 0.0028 0.0029 -0.0016 0.0014  
Z -0.0069 -0.0089 -0.0047 0.0060 -0.0028 0.0060  
AT. 118 H X 0.0088 -0.0107 0.0035 -0.0035 -0.0029 0.0039  
Y -0.0230 0.0257 0.0028 0.0029 0.0016 -0.0014  
Z -0.0069 0.0089 -0.0047 0.0060 0.0028 -0.0060

AT.119 H X 0.0267 0.0315 0.0013 -0.0097 0.0035 -0.0061  
Y 0.0035 0.0051 0.0001 -0.0013 0.0007 0.0012  
Z 0.0112 0.0124 0.0013 -0.0049 0.0016 -0.0054

AT.120 H X 0.0267 -0.0315 0.0013 -0.0097 -0.0035 0.0061  
Y 0.0035 -0.0051 0.0001 -0.0013 -0.0007 -0.0012  
Z 0.0112 -0.0124 0.0013 -0.0049 -0.0016 0.0054

AT.121 C X -0.0003 0.0006 -0.0001 0.0011 -0.0001 0.0020  
Y -0.0019 -0.0011 -0.0001 0.0019 -0.0007 0.0027  
Z -0.0006 -0.0004 0.0004 0.0002 0.0002 0.0006

AT.122 C X -0.0003 -0.0006 -0.0001 0.0011 0.0001 -0.0020  
Y -0.0019 0.0011 -0.0001 0.0019 0.0007 -0.0027  
Z -0.0006 0.0004 0.0004 0.0002 -0.0002 -0.0006

AT.123 H X 0.0037 -0.0069 -0.0000 -0.0060 0.0039 -0.0225  
Y 0.0102 0.0045 0.0010 -0.0130 0.0034 -0.0196  
Z -0.0116 -0.0071 -0.0011 0.0141 -0.0032 0.0183

AT.124 H X 0.0037 0.0069 -0.0000 -0.0060 -0.0039 0.0225  
Y 0.0102 -0.0045 0.0010 -0.0130 -0.0034 0.0196  
Z -0.0116 0.0071 -0.0011 0.0141 0.0032 -0.0183

AT.125 H X 0.0046 0.0029 0.0004 -0.0080 0.0003 -0.0085  
Y 0.0129 0.0027 -0.0009 -0.0112 0.0051 -0.0268  
Z 0.0121 0.0042 0.0005 -0.0163 0.0034 -0.0254

AT.126 H X 0.0046 -0.0029 0.0004 -0.0080 -0.0003 0.0085  
Y 0.0129 -0.0027 -0.0009 -0.0112 -0.0051 0.0268  
Z 0.0121 -0.0042 0.0005 -0.0163 -0.0034 0.0254

AT.127 C X -0.0020 -0.0018 0.0010 -0.0011 -0.0002 0.0001  
Y 0.0002 0.0009 0.0002 0.0002 0.0001 0.0023  
Z -0.0008 -0.0012 -0.0013 0.0043 -0.0002 0.0018

AT.128 C X -0.0020 0.0018 0.0010 -0.0011 0.0002 -0.0001  
Y 0.0002 -0.0009 0.0002 0.0002 -0.0001 -0.0023  
Z -0.0008 0.0012 -0.0013 0.0043 0.0002 -0.0018

AT.129 C X 0.0008 0.0006 0.0001 -0.0006 0.0003 -0.0011  
Y 0.0005 0.0004 0.0001 -0.0009 0.0001 -0.0012

Z 0.0034 0.0037 -0.0003 -0.0016 0.0001 -0.0002  
AT. 130 C X 0.0008 -0.0006 0.0001 -0.0006 -0.0003 0.0011  
Y 0.0005 -0.0004 0.0001 -0.0009 -0.0001 0.0012  
Z 0.0034 -0.0037 -0.0003 -0.0016 -0.0001 0.0002  
AT. 131 H X -0.0072 -0.0070 -0.0003 0.0024 -0.0009 0.0005  
Y -0.0064 -0.0079 0.0042 -0.0038 0.0013 -0.0048  
Z -0.0105 -0.0105 0.0010 0.0013 -0.0009 0.0001  
AT. 132 H X -0.0072 0.0070 -0.0003 0.0024 0.0009 -0.0005  
Y -0.0064 0.0079 0.0042 -0.0038 -0.0013 0.0048  
Z -0.0105 0.0105 0.0010 0.0013 0.0009 -0.0001  
AT. 133 H X 0.0076 0.0108 -0.0058 0.0071 -0.0027 0.0122  
Y 0.0009 0.0014 -0.0022 0.0068 -0.0013 0.0066  
Z 0.0005 -0.0001 -0.0014 0.0074 -0.0007 0.0054  
AT. 134 H X 0.0076 -0.0108 -0.0058 0.0071 0.0027 -0.0122  
Y 0.0009 -0.0014 -0.0022 0.0068 0.0013 -0.0066  
Z 0.0005 0.0001 -0.0014 0.0074 0.0007 -0.0054  
AT. 135 C X -0.0002 -0.0007 0.0011 -0.0033 0.0001 -0.0037  
Y 0.0037 0.0039 -0.0020 0.0026 -0.0002 0.0029  
Z 0.0011 0.0008 0.0012 -0.0053 0.0003 -0.0053  
AT. 136 C X -0.0002 0.0007 0.0011 -0.0033 -0.0001 0.0037  
Y 0.0037 -0.0039 -0.0020 0.0026 0.0002 -0.0029  
Z 0.0011 -0.0008 0.0012 -0.0053 -0.0003 0.0053  
AT. 137 H X -0.0320 -0.0324 0.0206 -0.0347 0.0022 -0.0361  
Y -0.0175 -0.0148 -0.0039 0.0325 -0.0014 0.0329  
Z -0.0209 -0.0167 -0.0113 0.0617 -0.0028 0.0624  
AT. 138 H X -0.0320 0.0324 0.0206 -0.0347 -0.0022 0.0361  
Y -0.0175 0.0148 -0.0039 0.0325 0.0014 -0.0329  
Z -0.0209 0.0167 -0.0113 0.0617 0.0028 -0.0624  
AT. 139 H X 0.0115 0.0148 -0.0146 0.0377 -0.0017 0.0398  
Y -0.0495 -0.0510 0.0259 -0.0325 0.0023 -0.0357  
Z -0.0004 -0.0048 0.0132 -0.0450 0.0018 -0.0471  
AT. 140 H X 0.0115 -0.0148 -0.0146 0.0377 0.0017 -0.0398



Y -0.0495 0.0510 0.0259 -0.0325 -0.0023 0.0357  
Z -0.0004 0.0048 0.0132 -0.0450 -0.0018 0.0471  
AT. 141 H X 0.0286 0.0332 -0.0261 0.0563 -0.0029 0.0599  
Y 0.0109 0.0080 0.0099 -0.0459 0.0023 -0.0469  
Z 0.0036 0.0086 -0.0217 0.0700 -0.0036 0.0728  
AT. 142 H X 0.0286 -0.0332 -0.0261 0.0563 0.0029 -0.0599  
Y 0.0109 -0.0080 0.0099 -0.0459 -0.0023 0.0469  
Z 0.0036 -0.0086 -0.0217 0.0700 0.0036 -0.0728  
AT. 143 C X -0.0014 -0.0018 0.0010 -0.0021 -0.0001 -0.0009  
Y 0.0018 0.0023 -0.0003 0.0005 0.0001 0.0026  
Z 0.0010 0.0005 -0.0015 0.0030 -0.0001 0.0008  
AT. 144 C X -0.0014 0.0018 0.0010 -0.0021 0.0001 0.0009  
Y 0.0018 -0.0023 -0.0003 0.0005 -0.0001 -0.0026  
Z 0.0010 -0.0005 -0.0015 0.0030 0.0001 -0.0008  
AT. 145 H X -0.0150 -0.0176 0.0066 -0.0146 -0.0008 -0.0280  
Y 0.0014 -0.0052 -0.0133 0.0288 -0.0016 -0.0062  
Z -0.0033 0.0031 0.0146 -0.0321 0.0015 0.0017  
AT. 146 H X -0.0150 0.0176 0.0066 -0.0146 0.0008 0.0280  
Y 0.0014 0.0052 -0.0133 0.0288 0.0016 0.0062  
Z -0.0033 -0.0031 0.0146 -0.0321 -0.0015 -0.0017  
AT. 147 H X 0.0137 0.0146 -0.0099 0.0201 0.0006 0.0121  
Y -0.0277 -0.0352 0.0087 -0.0168 -0.0021 -0.0393  
Z 0.0063 0.0036 -0.0110 0.0228 -0.0002 -0.0028  
AT. 148 H X 0.0137 -0.0146 -0.0099 0.0201 -0.0006 -0.0121  
Y -0.0277 0.0352 0.0087 -0.0168 0.0021 0.0393  
Z 0.0063 -0.0036 -0.0110 0.0228 0.0002 0.0028  
AT. 149 H X 0.0261 0.0311 -0.0133 0.0259 0.0019 0.0274  
Y -0.0007 0.0043 0.0086 -0.0189 0.0013 0.0021  
Z -0.0166 -0.0116 0.0212 -0.0449 0.0010 -0.0135  
AT. 150 H X 0.0261 -0.0311 -0.0133 0.0259 -0.0019 -0.0274  
Y -0.0007 -0.0043 0.0086 -0.0189 -0.0013 -0.0021  
Z -0.0166 0.0116 0.0212 -0.0449 -0.0010 0.0135

AT.151 C X 0.0025 0.0025 -0.0009 0.0006 0.0001 0.0001  
Y 0.0007 0.0007 -0.0000 -0.0007 0.0000 -0.0009  
Z -0.0047 -0.0045 -0.0000 0.0038 -0.0001 0.0043

AT.152 C X 0.0025 -0.0025 -0.0009 0.0006 -0.0001 -0.0001  
Y 0.0007 -0.0007 -0.0000 -0.0007 -0.0000 0.0009  
Z -0.0047 0.0045 -0.0000 0.0038 0.0001 -0.0043

AT.153 H X -0.0121 -0.0134 -0.0007 0.0122 -0.0009 0.0091  
Y 0.0209 0.0208 -0.0000 -0.0151 0.0003 -0.0152  
Z 0.0363 0.0369 0.0000 -0.0264 0.0008 -0.0248

AT.154 H X -0.0121 0.0134 -0.0007 0.0122 0.0009 -0.0091  
Y 0.0209 -0.0208 -0.0000 -0.0151 -0.0003 0.0152  
Z 0.0363 -0.0369 0.0000 -0.0264 -0.0008 0.0248

AT.155 H X -0.0001 0.0000 0.0018 -0.0047 0.0001 -0.0036  
Y -0.0288 -0.0293 -0.0002 0.0225 -0.0006 0.0217  
Z 0.0277 0.0286 0.0010 -0.0234 0.0006 -0.0212

AT.156 H X -0.0001 -0.0000 0.0018 -0.0047 -0.0001 0.0036  
Y -0.0288 0.0293 -0.0002 0.0225 0.0006 -0.0217  
Z 0.0277 -0.0286 0.0010 -0.0234 -0.0006 0.0212

AT.157 O X 0.0005 0.0005 0.0000 -0.0000 -0.0000 0.0004  
Y 0.0008 0.0009 0.0001 0.0000 -0.0000 0.0006  
Z -0.0003 -0.0003 -0.0003 -0.0002 0.0004 -0.0010

AT.158 O X 0.0005 -0.0005 0.0000 -0.0000 0.0000 -0.0004  
Y 0.0008 -0.0009 0.0001 0.0000 0.0000 -0.0006  
Z -0.0003 0.0003 -0.0003 -0.0002 -0.0004 0.0010

AT.159 O X 0.0006 0.0006 0.0004 0.0002 -0.0005 0.0012  
Y -0.0006 -0.0006 -0.0001 -0.0000 0.0000 -0.0004  
Z -0.0003 -0.0002 0.0002 0.0001 -0.0003 0.0004

AT.160 O X 0.0006 -0.0006 0.0004 0.0002 0.0005 -0.0012  
Y -0.0006 0.0006 -0.0001 -0.0000 -0.0000 0.0004  
Z -0.0003 0.0002 0.0002 0.0001 0.0003 -0.0004

AT.161 H X -0.0148 -0.0157 -0.0007 0.0003 -0.0017 -0.0078  
Y -0.0030 -0.0031 0.0002 -0.0001 -0.0005 -0.0015

Z 0.0082 0.0086 -0.0010 0.0001 0.0024 0.0038  
AT.162 H X -0.0148 0.0157 -0.0007 0.0003 0.0017 0.0078  
Y -0.0030 0.0031 0.0002 -0.0001 0.0005 0.0015  
Z 0.0082 -0.0086 -0.0010 0.0001 -0.0024 -0.0038  
AT.163 H X -0.0034 -0.0042 -0.0078 -0.0047 0.0107 -0.0207  
Y -0.0001 -0.0011 0.0012 -0.0005 -0.0013 -0.0011  
Z 0.0012 0.0012 0.0026 0.0014 -0.0044 0.0077  
AT.164 H X -0.0034 0.0042 -0.0078 -0.0047 -0.0107 0.0207  
Y -0.0001 0.0011 0.0012 -0.0005 0.0013 0.0011  
Z 0.0012 -0.0012 0.0026 0.0014 0.0044 -0.0077  
AT.165 O X -0.0004 -0.0001 -0.0001 -0.0005 0.0003 -0.0004  
Y -0.0004 0.0007 0.0005 -0.0004 -0.0001 0.0006  
Z 0.0007 -0.0009 -0.0007 0.0007 0.0002 -0.0007  
AT.166 O X -0.0004 0.0001 -0.0001 -0.0005 -0.0003 0.0004  
Y -0.0004 -0.0007 0.0005 -0.0004 0.0001 -0.0006  
Z 0.0007 0.0009 -0.0007 0.0007 -0.0002 0.0007  
AT.167 H X 0.0031 -0.0023 -0.0005 0.0044 -0.0015 0.0009  
Y -0.0001 0.0022 0.0002 -0.0020 0.0002 -0.0007  
Z -0.0107 0.0044 0.0010 -0.0135 0.0057 -0.0040  
AT.168 H X 0.0031 0.0023 -0.0005 0.0044 0.0015 -0.0009  
Y -0.0001 -0.0022 0.0002 -0.0020 -0.0002 0.0007  
Z -0.0107 -0.0044 0.0010 -0.0135 -0.0057 0.0040  
AT.169 O X -0.0001 0.0005 0.0005 0.0000 -0.0003 0.0006  
Y 0.0007 -0.0012 -0.0010 0.0006 0.0003 -0.0009  
Z 0.0006 -0.0007 -0.0006 0.0007 0.0000 -0.0004  
AT.170 O X -0.0001 -0.0005 0.0005 0.0000 0.0003 -0.0006  
Y 0.0007 0.0012 -0.0010 0.0006 -0.0003 0.0009  
Z 0.0006 0.0007 -0.0006 0.0007 -0.0000 0.0004  
AT.171 H X 0.0043 -0.0064 -0.0060 0.0042 0.0022 -0.0058  
Y -0.0037 0.0086 0.0070 -0.0025 -0.0028 0.0082  
Z -0.0113 0.0246 0.0209 -0.0100 -0.0080 0.0235  
AT.172 H X 0.0043 0.0064 -0.0060 0.0042 -0.0022 0.0058

Y -0.0037 -0.0086 0.0070 -0.0025 0.0028 -0.0082  
Z -0.0113 -0.0246 0.0209 -0.0100 0.0080 -0.0235

FREQ(CM\*\*-1) 1444.00 1446.42 1447.65 1449.37 1449.41 1450.87

AT. 1 I X 0.0000 0.0000 -0.0000 0.0000 0.0000 -0.0000  
Y -0.0000 0.0000 -0.0000 -0.0000 -0.0000 -0.0000  
Z 0.0000 -0.0000 0.0000 0.0000 0.0000 -0.0000

AT. 2 I X 0.0000 -0.0000 -0.0000 0.0000 -0.0000 -0.0000  
Y -0.0000 -0.0000 -0.0000 -0.0000 0.0000 -0.0000  
Z 0.0000 0.0000 0.0000 0.0000 -0.0000 -0.0000

AT. 3 I X 0.0000 0.0000 -0.0000 -0.0000 -0.0000 -0.0000  
Y 0.0000 0.0000 0.0000 -0.0000 0.0000 -0.0000  
Z 0.0000 0.0000 -0.0000 -0.0000 0.0000 0.0000

AT. 4 I X 0.0000 -0.0000 -0.0000 -0.0000 0.0000 -0.0000  
Y 0.0000 -0.0000 0.0000 -0.0000 -0.0000 -0.0000  
Z 0.0000 -0.0000 -0.0000 -0.0000 -0.0000 0.0000

AT. 5 O X 0.0025 -0.0000 0.0006 0.0028 0.0026 -0.0012  
Y -0.0015 0.0000 -0.0002 -0.0017 -0.0015 0.0006  
Z -0.0018 0.0002 -0.0006 -0.0024 -0.0019 0.0010

AT. 6 O X 0.0025 0.0000 0.0006 0.0028 -0.0026 -0.0012  
Y -0.0015 -0.0000 -0.0002 -0.0017 0.0015 0.0006  
Z -0.0018 -0.0002 -0.0006 -0.0024 0.0019 0.0010

AT. 7 O X -0.0035 -0.0021 0.0001 0.0014 -0.0042 -0.0010  
Y 0.0029 0.0016 -0.0001 -0.0011 0.0036 0.0009  
Z -0.0005 -0.0002 -0.0002 0.0000 -0.0005 0.0001

AT. 8 O X -0.0035 0.0021 0.0001 0.0014 0.0042 -0.0010  
Y 0.0029 -0.0016 -0.0001 -0.0011 -0.0036 0.0009  
Z -0.0005 0.0002 -0.0002 0.0000 0.0005 0.0001

AT. 9 N X 0.0025 -0.0005 0.0008 0.0027 0.0025 -0.0000  
Y -0.0029 0.0009 -0.0007 -0.0032 -0.0024 0.0009  
Z 0.0103 0.0004 0.0014 0.0068 0.0100 -0.0022

AT. 10 N X 0.0025 0.0005 0.0008 0.0027 -0.0025 -0.0000  
Y -0.0029 -0.0009 -0.0007 -0.0032 0.0024 0.0009  
Z 0.0103 -0.0004 0.0014 0.0068 -0.0100 -0.0022

AT. 11 N X -0.0019 -0.0022 0.0003 0.0029 -0.0027 -0.0007  
Y -0.0032 -0.0018 0.0008 0.0004 -0.0029 -0.0003  
Z 0.0109 0.0087 -0.0029 -0.0069 0.0125 0.0033

AT. 12 N X -0.0019 0.0022 0.0003 0.0029 0.0027 -0.0007  
Y -0.0032 0.0018 0.0008 0.0004 0.0029 -0.0003  
Z 0.0109 -0.0087 -0.0029 -0.0069 -0.0125 0.0033

AT. 13 C X -0.0070 0.0004 -0.0013 -0.0066 -0.0067 0.0021  
Y 0.0056 -0.0001 0.0007 0.0050 0.0053 -0.0019  
Z -0.0065 -0.0003 -0.0003 -0.0026 -0.0055 0.0005

AT. 14 C X -0.0070 -0.0004 -0.0013 -0.0066 0.0067 0.0021  
Y 0.0056 0.0001 0.0007 0.0050 -0.0053 -0.0019  
Z -0.0065 0.0003 -0.0003 -0.0026 0.0055 0.0005

AT. 15 C X 0.0024 -0.0003 0.0007 0.0020 0.0021 -0.0000  
Y -0.0041 0.0008 -0.0016 -0.0035 -0.0035 -0.0006  
Z 0.0021 -0.0002 0.0005 0.0013 0.0018 0.0002

AT. 16 C X 0.0024 0.0003 0.0007 0.0020 -0.0021 -0.0000  
Y -0.0041 -0.0008 -0.0016 -0.0035 0.0035 -0.0006  
Z 0.0021 0.0002 0.0005 0.0013 -0.0018 0.0002

AT. 17 H X 0.0001 -0.0007 0.0012 0.0005 0.0005 0.0011  
Y 0.0137 -0.0036 0.0075 0.0121 0.0118 0.0062  
Z -0.0206 0.0048 -0.0102 -0.0181 -0.0178 -0.0076

AT. 18 H X 0.0001 0.0007 0.0012 0.0005 -0.0005 0.0011  
Y 0.0137 0.0036 0.0075 0.0121 -0.0118 0.0062  
Z -0.0206 -0.0048 -0.0102 -0.0181 0.0178 -0.0076

AT. 19 H X -0.0022 0.0019 -0.0027 -0.0035 -0.0025 -0.0023  
Y 0.0186 -0.0064 0.0109 0.0174 0.0146 0.0080  
Z 0.0090 -0.0021 0.0039 0.0072 0.0070 0.0026

AT. 20 H X -0.0022 -0.0019 -0.0027 -0.0035 0.0025 -0.0023  
Y 0.0186 0.0064 0.0109 0.0174 -0.0146 0.0080

Z 0.0090 0.0021 0.0039 0.0072 -0.0070 0.0026  
AT. 21 C X 0.0080 0.0054 -0.0008 -0.0041 0.0094 0.0024  
Y -0.0012 0.0002 -0.0009 -0.0001 -0.0020 -0.0005  
Z -0.0086 -0.0065 0.0026 0.0048 -0.0093 -0.0027  
AT. 22 C X 0.0080 -0.0054 -0.0008 -0.0041 -0.0094 0.0024  
Y -0.0012 -0.0002 -0.0009 -0.0001 0.0020 -0.0005  
Z -0.0086 0.0065 0.0026 0.0048 0.0093 -0.0027  
AT. 23 C X -0.0022 -0.0023 0.0004 0.0020 -0.0025 -0.0006  
Y 0.0011 0.0014 -0.0001 -0.0014 0.0012 0.0002  
Z 0.0037 0.0042 -0.0008 -0.0038 0.0038 0.0007  
AT. 24 C X -0.0022 0.0023 0.0004 0.0020 0.0025 -0.0006  
Y 0.0011 -0.0014 -0.0001 -0.0014 -0.0012 0.0002  
Z 0.0037 -0.0042 -0.0008 -0.0038 -0.0038 0.0007  
AT. 25 H X 0.0008 0.0016 -0.0008 -0.0018 0.0009 0.0002  
Y 0.0049 0.0067 -0.0011 -0.0064 0.0051 0.0008  
Z -0.0206 -0.0317 0.0050 0.0308 -0.0204 -0.0027  
AT. 26 H X 0.0008 -0.0016 -0.0008 -0.0018 -0.0009 0.0002  
Y 0.0049 -0.0067 -0.0011 -0.0064 -0.0051 0.0008  
Z -0.0206 0.0317 0.0050 0.0308 0.0204 -0.0027  
AT. 27 H X 0.0009 0.0040 0.0008 -0.0056 0.0013 -0.0000  
Y -0.0145 -0.0227 0.0031 0.0222 -0.0142 -0.0013  
Z -0.0054 -0.0102 0.0008 0.0106 -0.0052 -0.0001  
AT. 28 H X 0.0009 -0.0040 0.0008 -0.0056 -0.0013 -0.0000  
Y -0.0145 0.0227 0.0031 0.0222 0.0142 -0.0013  
Z -0.0054 0.0102 0.0008 0.0106 0.0052 -0.0001  
AT. 29 C X -0.0005 -0.0007 -0.0005 -0.0005 -0.0015 -0.0003  
Y -0.0003 0.0041 -0.0009 -0.0042 0.0020 -0.0002  
Z -0.0027 0.0016 -0.0009 -0.0029 -0.0022 0.0001  
AT. 30 C X -0.0005 0.0007 -0.0005 -0.0005 0.0015 -0.0003  
Y -0.0003 -0.0041 -0.0009 -0.0042 -0.0020 -0.0002  
Z -0.0027 -0.0016 -0.0009 -0.0029 0.0022 0.0001  
AT. 31 H X -0.0097 0.0137 -0.0064 -0.0280 0.0032 0.0025

Y 0.0066 -0.0227 0.0065 0.0290 -0.0064 -0.0002  
Z 0.0030 -0.0282 0.0061 0.0279 -0.0100 0.0014  
AT. 32 H X -0.0097 -0.0137 -0.0064 -0.0280 -0.0032 0.0025  
Y 0.0066 0.0227 0.0065 0.0290 0.0064 -0.0002  
Z 0.0030 0.0282 0.0061 0.0279 0.0100 0.0014  
AT. 33 H X 0.0073 -0.0019 0.0054 0.0154 0.0053 -0.0004  
Y 0.0010 -0.0328 0.0092 0.0399 -0.0184 0.0015  
Z 0.0024 0.0159 -0.0013 -0.0108 0.0111 -0.0007  
AT. 34 H X 0.0073 0.0019 0.0054 0.0154 -0.0053 -0.0004  
Y 0.0010 0.0328 0.0092 0.0399 0.0184 0.0015  
Z 0.0024 -0.0159 -0.0013 -0.0108 -0.0111 -0.0007  
AT. 35 C X -0.0021 0.0006 0.0018 0.0020 -0.0025 0.0008  
Y 0.0007 0.0008 -0.0000 -0.0010 0.0011 0.0004  
Z 0.0036 -0.0045 -0.0005 0.0008 0.0026 -0.0004  
AT. 36 C X -0.0021 -0.0006 0.0018 0.0020 0.0025 0.0008  
Y 0.0007 -0.0008 -0.0000 -0.0010 -0.0011 0.0004  
Z 0.0036 0.0045 -0.0005 0.0008 -0.0026 -0.0004  
AT. 37 C X -0.0007 -0.0053 0.0010 0.0067 -0.0021 -0.0002  
Y 0.0018 0.0010 0.0001 -0.0008 0.0019 0.0002  
Z -0.0037 -0.0013 0.0005 0.0010 -0.0038 -0.0009  
AT. 38 C X -0.0007 0.0053 0.0010 0.0067 0.0021 -0.0002  
Y 0.0018 -0.0010 0.0001 -0.0008 -0.0019 0.0002  
Z -0.0037 0.0013 0.0005 0.0010 0.0038 -0.0009  
AT. 39 H X 0.0173 0.0419 -0.0115 -0.0571 0.0299 0.0026  
Y -0.0091 -0.0076 -0.0015 -0.0039 -0.0081 -0.0043  
Z 0.0130 0.0325 -0.0069 -0.0385 0.0214 0.0028  
AT. 40 H X 0.0173 -0.0419 -0.0115 -0.0571 -0.0299 0.0026  
Y -0.0091 0.0076 -0.0015 -0.0039 0.0081 -0.0043  
Z 0.0130 -0.0325 -0.0069 -0.0385 -0.0214 0.0028  
AT. 41 H X 0.0025 0.0258 -0.0065 -0.0421 0.0124 -0.0010  
Y 0.0010 -0.0048 -0.0014 0.0150 -0.0027 0.0002  
Z -0.0045 -0.0273 0.0087 0.0364 -0.0129 0.0003

AT. 42 H X 0.0025 -0.0258 -0.0065 -0.0421 -0.0124 -0.0010  
Y 0.0010 0.0048 -0.0014 0.0150 0.0027 0.0002  
Z -0.0045 0.0273 0.0087 0.0364 0.0129 0.0003

AT. 43 C X 0.0004 0.0001 0.0002 0.0004 0.0006 -0.0003  
Y 0.0028 0.0025 -0.0000 -0.0041 0.0042 0.0031  
Z -0.0029 -0.0024 0.0003 0.0008 -0.0026 -0.0004

AT. 44 C X 0.0004 -0.0001 0.0002 0.0004 -0.0006 -0.0003  
Y 0.0028 -0.0025 -0.0000 -0.0041 -0.0042 0.0031  
Z -0.0029 0.0024 0.0003 0.0008 0.0026 -0.0004

AT. 45 H X 0.0146 0.0157 -0.0045 -0.0342 0.0293 0.0193  
Y -0.0097 -0.0151 -0.0003 0.0306 -0.0207 -0.0191  
Z -0.0002 0.0038 0.0040 -0.0066 0.0006 0.0063

AT. 46 H X 0.0146 -0.0157 -0.0045 -0.0342 -0.0293 0.0193  
Y -0.0097 0.0151 -0.0003 0.0306 0.0207 -0.0191  
Z -0.0002 -0.0038 0.0040 -0.0066 -0.0006 0.0063

AT. 47 H X -0.0101 -0.0085 0.0015 0.0154 -0.0188 -0.0100  
Y -0.0080 -0.0130 -0.0004 0.0363 -0.0257 -0.0229  
Z 0.0013 -0.0052 -0.0018 0.0201 -0.0055 -0.0127

AT. 48 H X -0.0101 0.0085 0.0015 0.0154 0.0188 -0.0100  
Y -0.0080 0.0130 -0.0004 0.0363 0.0257 -0.0229  
Z 0.0013 0.0052 -0.0018 0.0201 0.0055 -0.0127

AT. 49 C X 0.0004 0.0021 -0.0003 0.0008 -0.0028 -0.0017  
Y -0.0048 -0.0021 0.0010 -0.0003 -0.0032 -0.0003  
Z 0.0023 0.0027 0.0006 0.0016 -0.0013 -0.0002

AT. 50 C X 0.0004 -0.0021 -0.0003 0.0008 0.0028 -0.0017  
Y -0.0048 0.0021 0.0010 -0.0003 0.0032 -0.0003  
Z 0.0023 -0.0027 0.0006 0.0016 0.0013 -0.0002

AT. 51 C X -0.0002 -0.0001 0.0013 0.0007 0.0025 0.0031  
Y 0.0010 -0.0005 -0.0005 0.0003 0.0005 -0.0007  
Z -0.0030 -0.0009 -0.0014 -0.0028 -0.0034 -0.0005

AT. 52 C X -0.0002 0.0001 0.0013 0.0007 -0.0025 0.0031  
Y 0.0010 0.0005 -0.0005 0.0003 -0.0005 -0.0007



Z -0.0030 0.0009 -0.0014 -0.0028 0.0034 -0.0005  
AT. 53 H X -0.0073 -0.0001 -0.0090 -0.0127 -0.0166 -0.0136  
Y 0.0025 -0.0026 -0.0033 -0.0017 -0.0024 -0.0113  
Z 0.0118 -0.0027 0.0132 0.0188 0.0264 0.0157  
AT. 54 H X -0.0073 0.0001 -0.0090 -0.0127 0.0166 -0.0136  
Y 0.0025 0.0026 -0.0033 -0.0017 0.0024 -0.0113  
Z 0.0118 0.0027 0.0132 0.0188 -0.0264 0.0157  
AT. 55 H X 0.0045 -0.0003 -0.0114 -0.0083 -0.0128 -0.0242  
Y -0.0030 0.0052 0.0058 0.0022 0.0028 0.0145  
Z -0.0033 0.0062 -0.0014 -0.0048 -0.0092 0.0011  
AT. 56 H X 0.0045 0.0003 -0.0114 -0.0083 0.0128 -0.0242  
Y -0.0030 -0.0052 0.0058 0.0022 -0.0028 0.0145  
Z -0.0033 -0.0062 -0.0014 -0.0048 0.0092 0.0011  
AT. 57 C X -0.0010 0.0024 0.0008 -0.0006 -0.0011 0.0011  
Y 0.0006 0.0014 0.0001 -0.0013 0.0002 0.0007  
Z 0.0040 -0.0033 -0.0012 -0.0004 0.0041 -0.0010  
AT. 58 C X -0.0010 -0.0024 0.0008 -0.0006 0.0011 0.0011  
Y 0.0006 -0.0014 0.0001 -0.0013 -0.0002 0.0007  
Z 0.0040 0.0033 -0.0012 -0.0004 -0.0041 -0.0010  
AT. 59 H X -0.0210 0.0338 0.0090 -0.0093 -0.0205 0.0115  
Y -0.0260 0.0092 0.0053 0.0101 -0.0240 0.0003  
Z -0.0512 0.0332 0.0131 0.0096 -0.0475 0.0070  
AT. 60 H X -0.0210 -0.0338 0.0090 -0.0093 0.0205 0.0115  
Y -0.0260 -0.0092 0.0053 0.0101 0.0240 0.0003  
Z -0.0512 -0.0332 0.0131 0.0096 0.0475 0.0070  
AT. 61 H X 0.0207 -0.0340 -0.0128 0.0067 0.0222 -0.0140  
Y -0.0180 -0.0112 -0.0006 0.0173 -0.0140 -0.0084  
Z 0.0274 -0.0233 -0.0106 -0.0037 0.0264 -0.0076  
AT. 62 H X 0.0207 0.0340 -0.0128 0.0067 -0.0222 -0.0140  
Y -0.0180 0.0112 -0.0006 0.0173 0.0140 -0.0084  
Z 0.0274 0.0233 -0.0106 -0.0037 -0.0264 -0.0076  
AT. 63 H X 0.0222 -0.0325 -0.0134 0.0047 0.0234 -0.0146

Y 0.0309 -0.0216 -0.0052 -0.0035 0.0286 -0.0023  
Z -0.0453 0.0498 0.0172 -0.0027 -0.0450 0.0164  
AT. 64 H X 0.0222 0.0325 -0.0134 0.0047 -0.0234 -0.0146  
Y 0.0309 0.0216 -0.0052 -0.0035 -0.0286 -0.0023  
Z -0.0453 -0.0498 0.0172 -0.0027 0.0450 0.0164  
AT. 65 C X 0.0002 0.0040 -0.0006 -0.0005 -0.0043 -0.0014  
Y -0.0052 -0.0028 0.0002 -0.0005 -0.0029 -0.0008  
Z 0.0033 0.0038 -0.0004 0.0001 0.0011 -0.0006  
AT. 66 C X 0.0002 -0.0040 -0.0006 -0.0005 0.0043 -0.0014  
Y -0.0052 0.0028 0.0002 -0.0005 0.0029 -0.0008  
Z 0.0033 -0.0038 -0.0004 0.0001 -0.0011 -0.0006  
AT. 67 H X -0.0251 0.0058 0.0007 -0.0016 -0.0315 -0.0130  
Y 0.0730 0.0542 -0.0063 0.0056 0.0290 0.0024  
Z -0.0473 -0.0529 0.0050 -0.0042 -0.0031 0.0075  
AT. 68 H X -0.0251 -0.0058 0.0007 -0.0016 0.0315 -0.0130  
Y 0.0730 -0.0542 -0.0063 0.0056 -0.0290 0.0024  
Z -0.0473 0.0529 0.0050 -0.0042 0.0031 0.0075  
AT. 69 H X 0.0231 -0.0157 0.0027 0.0042 0.0447 0.0163  
Y 0.0538 0.0047 -0.0001 0.0070 0.0566 0.0180  
Z 0.0407 0.0475 -0.0066 0.0020 -0.0067 -0.0066  
AT. 70 H X 0.0231 0.0157 0.0027 0.0042 -0.0447 0.0163  
Y 0.0538 -0.0047 -0.0001 0.0070 -0.0566 0.0180  
Z 0.0407 -0.0475 -0.0066 0.0020 0.0067 -0.0066  
AT. 71 H X -0.0024 -0.0522 0.0070 0.0041 0.0519 0.0229  
Y -0.0389 -0.0163 0.0008 -0.0052 -0.0314 -0.0065  
Z -0.0481 -0.0582 0.0062 -0.0031 0.0012 0.0093  
AT. 72 H X -0.0024 0.0522 0.0070 0.0041 -0.0519 0.0229  
Y -0.0389 0.0163 0.0008 -0.0052 0.0314 -0.0065  
Z -0.0481 0.0582 0.0062 -0.0031 -0.0012 0.0093  
AT. 73 C X 0.0001 -0.0005 0.0002 -0.0001 0.0014 0.0004  
Y 0.0004 0.0007 -0.0009 -0.0010 -0.0001 -0.0004  
Z 0.0000 -0.0037 0.0038 0.0078 -0.0003 0.0011

AT. 74 C X 0.0001 0.0005 0.0002 -0.0001 -0.0014 0.0004  
Y 0.0004 -0.0007 -0.0009 -0.0010 0.0001 -0.0004  
Z 0.0000 0.0037 0.0038 0.0078 0.0003 0.0011

AT. 75 H X -0.0075 0.0107 -0.0154 -0.0318 -0.0062 -0.0058  
Y -0.0039 0.0158 -0.0120 -0.0271 0.0013 -0.0016  
Z -0.0108 0.0250 -0.0232 -0.0517 -0.0034 -0.0051

AT. 76 H X -0.0075 -0.0107 -0.0154 -0.0318 0.0062 -0.0058  
Y -0.0039 -0.0158 -0.0120 -0.0271 -0.0013 -0.0016  
Z -0.0108 -0.0250 -0.0232 -0.0517 0.0034 -0.0051

AT. 77 H X 0.0055 -0.0120 0.0079 0.0190 0.0028 0.0028  
Y 0.0056 -0.0172 0.0205 0.0423 -0.0007 0.0045  
Z -0.0104 0.0247 -0.0241 -0.0524 -0.0016 -0.0060

AT. 78 H X 0.0055 0.0120 0.0079 0.0190 -0.0028 0.0028  
Y 0.0056 0.0172 0.0205 0.0423 0.0007 0.0045  
Z -0.0104 -0.0247 -0.0241 -0.0524 0.0016 -0.0060

AT. 79 I X 0.0000 0.0000 0.0000 0.0000 -0.0000 0.0000  
Y -0.0000 -0.0000 -0.0000 0.0000 0.0000 0.0000  
Z -0.0000 0.0000 -0.0000 -0.0000 0.0000 -0.0000

AT. 80 I X 0.0000 -0.0000 0.0000 0.0000 0.0000 0.0000  
Y -0.0000 0.0000 -0.0000 0.0000 -0.0000 0.0000  
Z -0.0000 -0.0000 -0.0000 -0.0000 -0.0000 -0.0000

AT. 81 I X -0.0000 0.0000 -0.0000 -0.0000 0.0000 0.0000  
Y 0.0000 0.0000 -0.0000 -0.0000 0.0000 -0.0000  
Z 0.0000 0.0000 -0.0000 -0.0000 -0.0000 -0.0000

AT. 82 I X -0.0000 -0.0000 -0.0000 -0.0000 -0.0000 0.0000  
Y 0.0000 -0.0000 -0.0000 -0.0000 -0.0000 -0.0000  
Z 0.0000 -0.0000 -0.0000 -0.0000 0.0000 -0.0000

AT. 83 O X 0.0004 -0.0000 0.0045 -0.0017 -0.0005 -0.0006  
Y 0.0001 -0.0000 0.0009 -0.0003 -0.0001 -0.0003  
Z 0.0002 0.0001 0.0019 -0.0007 -0.0003 -0.0005

AT. 84 O X 0.0004 0.0000 0.0045 -0.0017 0.0005 -0.0006  
Y 0.0001 0.0000 0.0009 -0.0003 0.0001 -0.0003

Z 0.0002 -0.0001 0.0019 -0.0007 0.0003 -0.0005  
AT. 85 O X -0.0010 0.0002 -0.0004 -0.0003 -0.0003 -0.0007  
Y -0.0006 0.0002 -0.0003 -0.0002 -0.0002 -0.0004  
Z 0.0003 0.0001 -0.0000 -0.0001 -0.0003 -0.0007  
AT. 86 O X -0.0010 -0.0002 -0.0004 -0.0003 0.0003 -0.0007  
Y -0.0006 -0.0002 -0.0003 -0.0002 0.0002 -0.0004  
Z 0.0003 -0.0001 -0.0000 -0.0001 0.0003 -0.0007  
AT. 87 N X 0.0002 0.0000 0.0017 -0.0006 -0.0001 0.0004  
Y 0.0003 0.0001 0.0024 -0.0009 -0.0004 -0.0004  
Z -0.0011 0.0000 -0.0129 0.0049 0.0007 -0.0017  
AT. 88 N X 0.0002 -0.0000 0.0017 -0.0006 0.0001 0.0004  
Y 0.0003 -0.0001 0.0024 -0.0009 0.0004 -0.0004  
Z -0.0011 -0.0000 -0.0129 0.0049 -0.0007 -0.0017  
AT. 89 N X -0.0003 0.0001 0.0001 -0.0003 -0.0007 -0.0027  
Y 0.0008 -0.0004 0.0018 0.0001 0.0010 0.0031  
Z -0.0021 0.0009 -0.0024 -0.0010 -0.0031 -0.0089  
AT. 90 N X -0.0003 -0.0001 0.0001 -0.0003 0.0007 -0.0027  
Y 0.0008 0.0004 0.0018 0.0001 -0.0010 0.0031  
Z -0.0021 -0.0009 -0.0024 -0.0010 0.0031 -0.0089  
AT. 91 C X -0.0010 0.0002 -0.0099 0.0037 0.0009 0.0006  
Y -0.0002 0.0001 -0.0034 0.0013 0.0003 0.0004  
Z 0.0009 -0.0003 0.0092 -0.0034 -0.0002 0.0018  
AT. 92 C X -0.0010 -0.0002 -0.0099 0.0037 -0.0009 0.0006  
Y -0.0002 -0.0001 -0.0034 0.0013 -0.0003 0.0004  
Z 0.0009 0.0003 0.0092 -0.0034 0.0002 0.0018  
AT. 93 C X 0.0004 -0.0000 0.0033 -0.0013 -0.0001 0.0010  
Y 0.0003 -0.0001 0.0025 -0.0010 0.0000 0.0011  
Z -0.0004 0.0001 -0.0032 0.0012 -0.0000 -0.0012  
AT. 94 C X 0.0004 0.0000 0.0033 -0.0013 0.0001 0.0010  
Y 0.0003 0.0001 0.0025 -0.0010 -0.0000 0.0011  
Z -0.0004 -0.0001 -0.0032 0.0012 0.0000 -0.0012  
AT. 95 H X -0.0006 -0.0003 -0.0014 0.0005 -0.0004 -0.0013

Y -0.0011 0.0001 -0.0074 0.0028 -0.0004 -0.0065  
Z 0.0033 0.0001 0.0197 -0.0073 0.0012 0.0150  
AT. 96 H X -0.0006 0.0003 -0.0014 0.0005 0.0004 -0.0013  
Y -0.0011 -0.0001 -0.0074 0.0028 0.0004 -0.0065  
Z 0.0033 -0.0001 0.0197 -0.0073 -0.0012 0.0150  
AT. 97 H X -0.0010 -0.0003 -0.0060 0.0024 -0.0004 -0.0077  
Y -0.0026 0.0004 -0.0133 0.0048 -0.0008 -0.0106  
Z -0.0007 0.0002 -0.0040 0.0015 -0.0001 -0.0011  
AT. 98 H X -0.0010 0.0003 -0.0060 0.0024 0.0004 -0.0077  
Y -0.0026 -0.0004 -0.0133 0.0048 0.0008 -0.0106  
Z -0.0007 -0.0002 -0.0040 0.0015 0.0001 -0.0011  
AT. 99 C X 0.0019 -0.0005 0.0013 0.0007 0.0016 0.0049  
Y 0.0002 0.0001 -0.0008 -0.0000 -0.0013 -0.0038  
Z 0.0015 -0.0007 0.0018 0.0008 0.0028 0.0078  
AT. 100 C X 0.0019 0.0005 0.0013 0.0007 -0.0016 0.0049  
Y 0.0002 -0.0001 -0.0008 -0.0000 0.0013 -0.0038  
Z 0.0015 0.0007 0.0018 0.0008 -0.0028 0.0078  
AT. 101 C X 0.0001 -0.0003 -0.0006 0.0002 -0.0012 -0.0044  
Y 0.0002 -0.0002 -0.0003 0.0001 -0.0005 -0.0021  
Z 0.0002 -0.0004 -0.0010 0.0002 -0.0019 -0.0064  
AT. 102 C X 0.0001 0.0003 -0.0006 0.0002 0.0012 -0.0044  
Y 0.0002 0.0002 -0.0003 0.0001 0.0005 -0.0021  
Z 0.0002 0.0004 -0.0010 0.0002 0.0019 -0.0064  
AT. 103 H X -0.0008 0.0001 0.0009 -0.0007 0.0013 0.0051  
Y 0.0006 -0.0004 -0.0010 0.0005 -0.0017 -0.0066  
Z -0.0059 0.0049 0.0070 -0.0032 0.0143 0.0528  
AT. 104 H X -0.0008 -0.0001 0.0009 -0.0007 -0.0013 0.0051  
Y 0.0006 0.0004 -0.0010 0.0005 0.0017 -0.0066  
Z -0.0059 -0.0049 0.0070 -0.0032 -0.0143 0.0528  
AT. 105 H X -0.0036 0.0035 0.0022 -0.0030 0.0040 0.0185  
Y -0.0050 0.0043 0.0049 -0.0025 0.0108 0.0399  
Z -0.0026 0.0022 0.0014 -0.0015 0.0036 0.0146

AT.106 H X -0.0036 -0.0035 0.0022 -0.0030 -0.0040 0.0185  
Y -0.0050 -0.0043 0.0049 -0.0025 -0.0108 0.0399  
Z -0.0026 -0.0022 0.0014 -0.0015 -0.0036 0.0146

AT.107 C X 0.0004 0.0002 -0.0001 0.0003 -0.0004 -0.0013  
Y 0.0002 0.0006 -0.0004 0.0004 -0.0005 -0.0018  
Z 0.0001 0.0000 0.0022 -0.0009 -0.0002 0.0007

AT.108 C X 0.0004 -0.0002 -0.0001 0.0003 0.0004 -0.0013  
Y 0.0002 -0.0006 -0.0004 0.0004 0.0005 -0.0018  
Z 0.0001 -0.0000 0.0022 -0.0009 0.0002 0.0007

AT.109 H X -0.0040 -0.0052 -0.0146 0.0030 0.0068 0.0176  
Y -0.0017 -0.0008 -0.0005 -0.0019 0.0026 0.0072  
Z -0.0019 -0.0002 0.0057 -0.0053 0.0026 0.0086

AT.110 H X -0.0040 0.0052 -0.0146 0.0030 -0.0068 0.0176  
Y -0.0017 0.0008 -0.0005 -0.0019 -0.0026 0.0072  
Z -0.0019 0.0002 0.0057 -0.0053 -0.0026 0.0086

AT.111 H X -0.0008 0.0012 0.0085 -0.0031 -0.0005 0.0004  
Y -0.0031 -0.0055 -0.0025 -0.0033 0.0072 0.0232  
Z 0.0019 0.0002 -0.0073 0.0038 -0.0015 -0.0060

AT.112 H X -0.0008 -0.0012 0.0085 -0.0031 0.0005 0.0004  
Y -0.0031 0.0055 -0.0025 -0.0033 -0.0072 0.0232  
Z 0.0019 -0.0002 -0.0073 0.0038 0.0015 -0.0060

AT.113 C X -0.0011 0.0010 -0.0015 0.0004 -0.0004 -0.0017  
Y 0.0006 -0.0010 0.0002 0.0010 -0.0004 -0.0000  
Z -0.0004 0.0006 -0.0003 0.0003 -0.0002 -0.0021

AT.114 C X -0.0011 -0.0010 -0.0015 0.0004 0.0004 -0.0017  
Y 0.0006 0.0010 0.0002 0.0010 0.0004 -0.0000  
Z -0.0004 -0.0006 -0.0003 0.0003 0.0002 -0.0021

AT.115 C X 0.0006 0.0001 -0.0005 0.0001 -0.0002 -0.0020  
Y -0.0004 0.0002 -0.0003 -0.0003 0.0002 -0.0005  
Z 0.0006 -0.0004 0.0008 0.0003 0.0007 0.0030

AT.116 C X 0.0006 -0.0001 -0.0005 0.0001 0.0002 -0.0020  
Y -0.0004 -0.0002 -0.0003 -0.0003 -0.0002 -0.0005

Z 0.0006 0.0004 0.0008 0.0003 -0.0007 0.0030  
AT. 117 H X -0.0007 -0.0023 0.0051 0.0003 0.0049 0.0241  
Y 0.0017 0.0018 -0.0010 0.0023 0.0006 -0.0010  
Z 0.0014 0.0017 -0.0049 -0.0004 -0.0047 -0.0240  
AT. 118 H X -0.0007 0.0023 0.0051 0.0003 -0.0049 0.0241  
Y 0.0017 -0.0018 -0.0010 0.0023 -0.0006 -0.0010  
Z 0.0014 -0.0017 -0.0049 -0.0004 0.0047 -0.0240  
AT. 119 H X -0.0044 -0.0021 0.0026 -0.0020 -0.0003 0.0130  
Y -0.0020 0.0003 -0.0020 -0.0010 -0.0029 -0.0030  
Z -0.0005 -0.0015 0.0037 -0.0000 0.0032 0.0111  
AT. 120 H X -0.0044 0.0021 0.0026 -0.0020 0.0003 0.0130  
Y -0.0020 -0.0003 -0.0020 -0.0010 0.0029 -0.0030  
Z -0.0005 0.0015 0.0037 -0.0000 -0.0032 0.0111  
AT. 121 C X 0.0001 -0.0002 0.0012 -0.0002 -0.0004 -0.0002  
Y -0.0002 0.0001 0.0005 -0.0002 -0.0009 -0.0016  
Z 0.0003 -0.0004 0.0016 0.0000 0.0005 0.0017  
AT. 122 C X 0.0001 0.0002 0.0012 -0.0002 0.0004 -0.0002  
Y -0.0002 -0.0001 0.0005 -0.0002 0.0009 -0.0016  
Z 0.0003 0.0004 0.0016 0.0000 -0.0005 0.0017  
AT. 123 H X 0.0021 0.0008 -0.0180 0.0057 0.0090 0.0209  
Y -0.0011 0.0007 -0.0104 0.0026 0.0024 0.0062  
Z 0.0016 -0.0008 0.0080 -0.0015 -0.0012 -0.0028  
AT. 124 H X 0.0021 -0.0008 -0.0180 0.0057 -0.0090 0.0209  
Y -0.0011 -0.0007 -0.0104 0.0026 -0.0024 0.0062  
Z 0.0016 0.0008 0.0080 -0.0015 0.0012 -0.0028  
AT. 125 H X -0.0023 0.0015 -0.0046 -0.0004 -0.0012 -0.0056  
Y 0.0009 0.0010 -0.0213 0.0056 0.0066 0.0171  
Z -0.0020 0.0020 -0.0156 0.0026 0.0030 0.0041  
AT. 126 H X -0.0023 -0.0015 -0.0046 -0.0004 0.0012 -0.0056  
Y 0.0009 -0.0010 -0.0213 0.0056 -0.0066 0.0171  
Z -0.0020 -0.0020 -0.0156 0.0026 -0.0030 0.0041  
AT. 127 C X -0.0000 0.0003 0.0034 -0.0010 0.0000 -0.0017

Y 0.0006 -0.0006 0.0045 -0.0013 0.0006 -0.0009  
Z 0.0005 -0.0000 -0.0036 0.0012 -0.0000 0.0012  
AT. 128 C X -0.0000 -0.0003 0.0034 -0.0010 -0.0000 -0.0017  
Y 0.0006 0.0006 0.0045 -0.0013 -0.0006 -0.0009  
Z 0.0005 0.0000 -0.0036 0.0012 0.0000 0.0012  
AT. 129 C X -0.0003 0.0006 -0.0011 0.0001 0.0006 0.0027  
Y -0.0002 -0.0001 -0.0010 0.0004 -0.0001 0.0001  
Z -0.0000 0.0000 0.0034 -0.0012 -0.0001 0.0012  
AT. 130 C X -0.0003 -0.0006 -0.0011 0.0001 -0.0006 0.0027  
Y -0.0002 0.0001 -0.0010 0.0004 0.0001 0.0001  
Z -0.0000 -0.0000 0.0034 -0.0012 0.0001 0.0012  
AT. 131 H X 0.0002 -0.0037 -0.0071 0.0042 -0.0020 -0.0145  
Y -0.0017 0.0037 -0.0020 -0.0008 0.0032 0.0078  
Z -0.0001 -0.0038 -0.0059 0.0039 -0.0020 -0.0177  
AT. 132 H X 0.0002 0.0037 -0.0071 0.0042 0.0020 -0.0145  
Y -0.0017 -0.0037 -0.0020 -0.0008 -0.0032 0.0078  
Z -0.0001 0.0038 -0.0059 0.0039 0.0020 -0.0177  
AT. 133 H X 0.0032 -0.0056 0.0134 -0.0027 -0.0053 -0.0185  
Y 0.0016 0.0004 0.0036 -0.0019 -0.0015 -0.0027  
Z 0.0012 0.0035 0.0022 -0.0030 0.0004 0.0062  
AT. 134 H X 0.0032 0.0056 0.0134 -0.0027 0.0053 -0.0185  
Y 0.0016 -0.0004 0.0036 -0.0019 0.0015 -0.0027  
Z 0.0012 -0.0035 0.0022 -0.0030 -0.0004 0.0062  
AT. 135 C X -0.0006 0.0006 -0.0009 0.0003 -0.0000 -0.0005  
Y 0.0006 -0.0009 0.0011 0.0004 -0.0007 -0.0018  
Z -0.0009 0.0005 -0.0014 0.0007 -0.0004 -0.0025  
AT. 136 C X -0.0006 -0.0006 -0.0009 0.0003 0.0000 -0.0005  
Y 0.0006 0.0009 0.0011 0.0004 0.0007 -0.0018  
Z -0.0009 -0.0005 -0.0014 0.0007 0.0004 -0.0025  
AT. 137 H X -0.0076 0.0103 -0.0106 -0.0051 0.0065 0.0113  
Y 0.0052 -0.0020 0.0083 -0.0071 0.0050 0.0231  
Z 0.0103 -0.0060 0.0158 -0.0102 0.0066 0.0352



AT. 138 H X -0.0076 -0.0103 -0.0106 -0.0051 -0.0065 0.0113  
Y 0.0052 0.0020 0.0083 -0.0071 -0.0050 0.0231  
Z 0.0103 0.0060 0.0158 -0.0102 -0.0066 0.0352

AT. 139 H X 0.0077 -0.0078 0.0126 -0.0022 -0.0007 0.0046  
Y -0.0081 0.0128 -0.0122 -0.0079 0.0104 0.0257  
Z -0.0086 0.0073 -0.0140 0.0056 -0.0021 -0.0148

AT. 140 H X 0.0077 0.0078 0.0126 -0.0022 0.0007 0.0046  
Y -0.0081 -0.0128 -0.0122 -0.0079 -0.0104 0.0257  
Z -0.0086 -0.0073 -0.0140 0.0056 0.0021 -0.0148

AT. 141 H X 0.0120 -0.0138 0.0188 0.0003 -0.0044 -0.0033  
Y -0.0077 0.0047 -0.0123 0.0068 -0.0038 -0.0230  
Z 0.0130 -0.0109 0.0205 -0.0064 0.0014 0.0200

AT. 142 H X 0.0120 0.0138 0.0188 0.0003 0.0044 -0.0033  
Y -0.0077 -0.0047 -0.0123 0.0068 0.0038 -0.0230  
Z 0.0130 0.0109 0.0205 -0.0064 -0.0014 0.0200

AT. 143 C X -0.0004 0.0003 0.0012 -0.0005 0.0000 -0.0012  
Y 0.0007 -0.0003 0.0047 -0.0015 0.0004 -0.0007  
Z -0.0001 -0.0002 -0.0050 0.0017 -0.0003 0.0019

AT. 144 C X -0.0004 -0.0003 0.0012 -0.0005 -0.0000 -0.0012  
Y 0.0007 0.0003 0.0047 -0.0015 -0.0004 -0.0007  
Z -0.0001 0.0002 -0.0050 0.0017 0.0003 0.0019

AT. 145 H X -0.0058 0.0040 -0.0266 0.0077 -0.0042 0.0008  
Y -0.0030 -0.0003 -0.0727 0.0240 -0.0053 0.0230  
Z 0.0022 0.0010 0.0708 -0.0236 0.0047 -0.0237

AT. 146 H X -0.0058 -0.0040 -0.0266 0.0077 0.0042 0.0008  
Y -0.0030 0.0003 -0.0727 0.0240 0.0053 0.0230  
Z 0.0022 -0.0010 0.0708 -0.0236 -0.0047 -0.0237

AT. 147 H X 0.0032 -0.0029 -0.0126 0.0048 0.0002 0.0103  
Y -0.0100 0.0063 -0.0510 0.0152 -0.0064 0.0026  
Z -0.0005 -0.0011 -0.0488 0.0163 -0.0033 0.0183

AT. 148 H X 0.0032 0.0029 -0.0126 0.0048 -0.0002 0.0103  
Y -0.0100 -0.0063 -0.0510 0.0152 0.0064 0.0026

Z -0.0005 0.0011 -0.0488 0.0163 0.0033 0.0183  
AT. 149 H X 0.0073 -0.0059 0.0088 -0.0016 0.0032 0.0102  
Y 0.0018 0.0000 0.0440 -0.0145 0.0033 -0.0134  
Z -0.0016 0.0035 0.0620 -0.0213 0.0034 -0.0265  
AT. 150 H X 0.0073 0.0059 0.0088 -0.0016 -0.0032 0.0102  
Y 0.0018 -0.0000 0.0440 -0.0145 -0.0033 -0.0134  
Z -0.0016 -0.0035 0.0620 -0.0213 -0.0034 -0.0265  
AT. 151 C X 0.0002 -0.0004 -0.0005 -0.0000 0.0002 0.0013  
Y -0.0002 0.0002 -0.0009 0.0001 -0.0000 0.0005  
Z 0.0012 -0.0003 0.0028 -0.0010 0.0001 -0.0050  
AT. 152 C X 0.0002 0.0004 -0.0005 -0.0000 -0.0002 0.0013  
Y -0.0002 -0.0002 -0.0009 0.0001 0.0000 0.0005  
Z 0.0012 0.0003 0.0028 -0.0010 -0.0001 -0.0050  
AT. 153 H X 0.0018 -0.0003 -0.0013 0.0021 -0.0008 -0.0076  
Y -0.0052 0.0005 -0.0082 0.0034 -0.0003 0.0239  
Z -0.0082 0.0005 -0.0098 0.0036 0.0002 0.0387  
AT. 154 H X 0.0018 0.0003 -0.0013 0.0021 0.0008 -0.0076  
Y -0.0052 -0.0005 -0.0082 0.0034 0.0003 0.0239  
Z -0.0082 -0.0005 -0.0098 0.0036 -0.0002 0.0387  
AT. 155 H X -0.0018 0.0012 -0.0014 -0.0000 0.0003 0.0052  
Y 0.0067 -0.0009 0.0097 -0.0032 0.0002 -0.0297  
Z -0.0071 0.0012 -0.0089 0.0026 -0.0001 0.0300  
AT. 156 H X -0.0018 -0.0012 -0.0014 -0.0000 -0.0003 0.0052  
Y 0.0067 0.0009 0.0097 -0.0032 -0.0002 -0.0297  
Z -0.0071 -0.0012 -0.0089 0.0026 0.0001 0.0300  
AT. 157 O X 0.0002 -0.0002 0.0005 0.0008 0.0007 -0.0006  
Y 0.0004 -0.0003 0.0010 0.0014 0.0010 -0.0009  
Z 0.0006 -0.0005 -0.0003 -0.0008 -0.0015 0.0009  
AT. 158 O X 0.0002 0.0002 0.0005 0.0008 -0.0007 -0.0006  
Y 0.0004 0.0003 0.0010 0.0014 -0.0010 -0.0009  
Z 0.0006 0.0005 -0.0003 -0.0008 0.0015 0.0009  
AT. 159 O X -0.0006 0.0004 0.0007 0.0013 0.0020 -0.0013

Y -0.0002 0.0001 -0.0008 -0.0009 -0.0009 0.0007  
Z -0.0007 0.0004 -0.0004 -0.0002 0.0005 -0.0001  
AT.160 O X -0.0006 -0.0004 0.0007 0.0013 -0.0020 -0.0013  
Y -0.0002 -0.0001 -0.0008 -0.0009 0.0009 0.0007  
Z -0.0007 -0.0004 -0.0004 -0.0002 -0.0005 -0.0001  
AT.161 H X -0.0106 0.0071 -0.0182 -0.0231 -0.0155 0.0154  
Y -0.0023 0.0018 -0.0036 -0.0047 -0.0027 0.0029  
Z 0.0077 -0.0056 0.0101 0.0125 0.0064 -0.0085  
AT.162 H X -0.0106 -0.0071 -0.0182 -0.0231 0.0155 0.0154  
Y -0.0023 -0.0018 -0.0036 -0.0047 0.0027 0.0029  
Z 0.0077 0.0056 0.0101 0.0125 -0.0064 -0.0085  
AT.163 H X 0.0179 -0.0121 -0.0044 -0.0148 -0.0328 0.0169  
Y -0.0019 0.0011 0.0024 -0.0025 0.0004 -0.0006  
Z -0.0073 0.0049 0.0020 0.0049 0.0120 -0.0062  
AT.164 H X 0.0179 0.0121 -0.0044 -0.0148 0.0328 0.0169  
Y -0.0019 -0.0011 0.0024 -0.0025 -0.0004 -0.0006  
Z -0.0073 -0.0049 0.0020 0.0049 -0.0120 -0.0062  
AT.165 O X -0.0003 -0.0002 -0.0004 0.0002 0.0003 -0.0006  
Y -0.0003 0.0005 0.0009 0.0005 -0.0008 0.0021  
Z 0.0004 -0.0008 -0.0011 -0.0008 0.0011 -0.0030  
AT.166 O X -0.0003 0.0002 -0.0004 0.0002 -0.0003 -0.0006  
Y -0.0003 -0.0005 0.0009 0.0005 0.0008 0.0021  
Z 0.0004 0.0008 -0.0011 -0.0008 -0.0011 -0.0030  
AT.167 H X 0.0025 -0.0007 -0.0006 -0.0026 0.0010 -0.0030  
Y -0.0014 0.0015 0.0004 0.0016 -0.0015 0.0033  
Z -0.0069 -0.0004 -0.0012 0.0075 0.0013 0.0023  
AT.168 H X 0.0025 0.0007 -0.0006 -0.0026 -0.0010 -0.0030  
Y -0.0014 -0.0015 0.0004 0.0016 0.0015 0.0033  
Z -0.0069 0.0004 -0.0012 0.0075 -0.0013 0.0023  
AT.169 O X -0.0000 0.0006 0.0008 0.0002 -0.0007 0.0020  
Y 0.0004 -0.0011 -0.0014 -0.0010 0.0014 -0.0039  
Z 0.0004 -0.0005 -0.0007 -0.0005 0.0008 -0.0021

AT.170 O X -0.0000 -0.0006 0.0008 0.0002 0.0007 0.0020  
Y 0.0004 0.0011 -0.0014 -0.0010 -0.0014 -0.0039  
Z 0.0004 0.0005 -0.0007 -0.0005 -0.0008 -0.0021

AT.171 H X 0.0019 -0.0052 -0.0077 -0.0044 0.0073 -0.0218  
Y -0.0020 0.0090 0.0117 0.0060 -0.0121 0.0307  
Z -0.0061 0.0233 0.0319 0.0161 -0.0329 0.0852

AT.172 H X 0.0019 0.0052 -0.0077 -0.0044 -0.0073 -0.0218  
Y -0.0020 -0.0090 0.0117 0.0060 0.0121 0.0307  
Z -0.0061 -0.0233 0.0319 0.0161 0.0329 0.0852

FREQ(CM\*\*-1) 1452.36 1454.09 1454.52 1455.43 1455.85 1456.68

AT. 1 I X -0.0000 -0.0000 -0.0000 -0.0000 -0.0000 0.0000  
Y -0.0000 -0.0000 -0.0000 -0.0000 -0.0000 0.0000  
Z -0.0000 0.0000 -0.0000 -0.0000 -0.0000 0.0000

AT. 2 I X 0.0000 0.0000 -0.0000 0.0000 0.0000 0.0000  
Y 0.0000 0.0000 -0.0000 0.0000 0.0000 0.0000  
Z 0.0000 -0.0000 -0.0000 0.0000 0.0000 0.0000

AT. 3 I X 0.0000 -0.0000 -0.0000 -0.0000 0.0000 -0.0000  
Y 0.0000 -0.0000 -0.0000 -0.0000 -0.0000 0.0000  
Z 0.0000 -0.0000 -0.0000 -0.0000 -0.0000 0.0000

AT. 4 I X -0.0000 0.0000 -0.0000 0.0000 -0.0000 -0.0000  
Y -0.0000 0.0000 -0.0000 0.0000 0.0000 0.0000  
Z -0.0000 0.0000 -0.0000 0.0000 0.0000 0.0000

AT. 5 O X -0.0016 0.0010 -0.0019 -0.0016 -0.0046 0.0022  
Y 0.0009 -0.0004 0.0012 0.0007 0.0026 -0.0012  
Z 0.0013 -0.0009 0.0016 0.0014 0.0038 -0.0018

AT. 6 O X 0.0016 -0.0010 -0.0019 0.0016 0.0046 0.0022  
Y -0.0009 0.0004 0.0012 -0.0007 -0.0026 -0.0012  
Z -0.0013 0.0009 0.0016 -0.0014 -0.0038 -0.0018

AT. 7 O X 0.0010 -0.0011 -0.0021 -0.0004 0.0005 -0.0005  
Y -0.0007 0.0009 0.0019 0.0005 -0.0000 0.0003

Z 0.0002 -0.0001 -0.0003 -0.0004 -0.0003 0.0003  
AT. 8 O X -0.0010 0.0011 -0.0021 0.0004 -0.0005 -0.0005  
Y 0.0007 -0.0009 0.0019 -0.0005 0.0000 0.0003  
Z -0.0002 0.0001 -0.0003 0.0004 0.0003 0.0003  
AT. 9 N X -0.0007 0.0018 -0.0003 0.0000 -0.0026 0.0014  
Y 0.0013 -0.0015 0.0018 0.0010 0.0046 -0.0021  
Z -0.0041 0.0046 -0.0041 -0.0029 -0.0128 0.0074  
AT. 10 N X 0.0007 -0.0018 -0.0003 -0.0000 0.0026 0.0014  
Y -0.0013 0.0015 0.0018 -0.0010 -0.0046 -0.0021  
Z 0.0041 -0.0046 -0.0041 0.0029 0.0128 0.0074  
AT. 11 N X 0.0001 0.0007 -0.0005 0.0010 -0.0005 -0.0001  
Y 0.0012 0.0006 -0.0001 -0.0003 0.0007 0.0010  
Z -0.0024 -0.0012 0.0041 0.0001 0.0013 -0.0024  
AT. 12 N X -0.0001 -0.0007 -0.0005 -0.0010 0.0005 -0.0001  
Y -0.0012 -0.0006 -0.0001 0.0003 -0.0007 0.0010  
Z 0.0024 0.0012 0.0041 -0.0001 -0.0013 -0.0024  
AT. 13 C X 0.0035 -0.0028 0.0040 0.0026 0.0103 -0.0050  
Y -0.0029 0.0018 -0.0036 -0.0023 -0.0084 0.0041  
Z 0.0016 -0.0025 0.0013 0.0003 0.0051 -0.0032  
AT. 14 C X -0.0035 0.0028 0.0040 -0.0026 -0.0103 -0.0050  
Y 0.0029 -0.0018 -0.0036 0.0023 0.0084 0.0041  
Z -0.0016 0.0025 0.0013 -0.0003 -0.0051 -0.0032  
AT. 15 C X -0.0007 0.0017 -0.0001 0.0002 -0.0022 0.0011  
Y 0.0007 -0.0039 -0.0011 -0.0013 0.0026 -0.0017  
Z -0.0005 0.0014 0.0001 0.0004 -0.0014 0.0009  
AT. 16 C X 0.0007 -0.0017 -0.0001 -0.0002 0.0022 0.0011  
Y -0.0007 0.0039 -0.0011 0.0013 -0.0026 -0.0017  
Z 0.0005 -0.0014 0.0001 -0.0004 0.0014 0.0009  
AT. 17 H X 0.0010 0.0024 0.0025 0.0006 0.0014 0.0004  
Y 0.0005 0.0190 0.0116 0.0101 -0.0021 0.0042  
Z 0.0007 -0.0258 -0.0139 -0.0129 0.0062 -0.0068  
AT. 18 H X -0.0010 -0.0024 0.0025 -0.0006 -0.0014 0.0004

Y -0.0005 -0.0190 0.0116 -0.0101 0.0021 0.0042  
Z -0.0007 0.0258 -0.0139 0.0129 -0.0062 -0.0068  
AT. 19 H X -0.0004 -0.0059 -0.0045 -0.0036 -0.0001 -0.0001  
Y 0.0005 0.0263 0.0151 0.0136 -0.0040 0.0051  
Z -0.0005 0.0100 0.0046 0.0045 -0.0034 0.0031  
AT. 20 H X 0.0004 0.0059 -0.0045 0.0036 0.0001 -0.0001  
Y -0.0005 -0.0263 0.0151 -0.0136 0.0040 0.0051  
Z 0.0005 -0.0100 0.0046 -0.0045 0.0034 0.0031  
AT. 21 C X -0.0020 0.0011 0.0044 0.0009 0.0004 -0.0000  
Y 0.0005 -0.0020 -0.0019 -0.0009 0.0004 -0.0012  
Z 0.0018 0.0011 -0.0029 0.0001 -0.0009 0.0015  
AT. 22 C X 0.0020 -0.0011 0.0044 -0.0009 -0.0004 -0.0000  
Y -0.0005 0.0020 -0.0019 0.0009 -0.0004 -0.0012  
Z -0.0018 -0.0011 -0.0029 -0.0001 0.0009 0.0015  
AT. 23 C X 0.0003 0.0006 -0.0008 0.0002 -0.0005 0.0005  
Y -0.0001 -0.0006 0.0002 -0.0002 0.0004 -0.0003  
Z -0.0004 -0.0019 0.0007 -0.0006 0.0011 -0.0010  
AT. 24 C X -0.0003 -0.0006 -0.0008 -0.0002 0.0005 0.0005  
Y 0.0001 0.0006 0.0002 0.0002 -0.0004 -0.0003  
Z 0.0004 0.0019 0.0007 0.0006 -0.0011 -0.0010  
AT. 25 H X 0.0001 -0.0016 -0.0009 -0.0015 -0.0005 -0.0006  
Y -0.0003 -0.0036 0.0003 -0.0015 0.0016 -0.0015  
Z 0.0005 0.0195 0.0004 0.0082 -0.0085 0.0074  
AT. 26 H X -0.0001 0.0016 -0.0009 0.0015 0.0005 -0.0006  
Y 0.0003 0.0036 0.0003 0.0015 -0.0016 -0.0015  
Z -0.0005 -0.0195 0.0004 -0.0082 0.0085 0.0074  
AT. 27 H X -0.0003 -0.0025 -0.0001 -0.0007 0.0020 -0.0031  
Y -0.0005 0.0142 0.0003 0.0048 -0.0077 0.0053  
Z -0.0005 0.0069 0.0007 0.0024 -0.0038 0.0028  
AT. 28 H X 0.0003 0.0025 -0.0001 0.0007 -0.0020 -0.0031  
Y 0.0005 -0.0142 0.0003 -0.0048 0.0077 0.0053  
Z 0.0005 -0.0069 0.0007 -0.0024 0.0038 0.0028

AT. 29 C X 0.0000 -0.0013 -0.0008 -0.0003 0.0004 -0.0008  
Y -0.0008 -0.0007 0.0008 -0.0013 0.0004 0.0015  
Z 0.0006 -0.0013 0.0009 0.0001 0.0023 -0.0010

AT. 30 C X -0.0000 0.0013 -0.0008 0.0003 -0.0004 -0.0008  
Y 0.0008 0.0007 0.0008 0.0013 -0.0004 0.0015  
Z -0.0006 0.0013 0.0009 -0.0001 -0.0023 -0.0010

AT. 31 H X 0.0008 -0.0123 0.0087 -0.0024 0.0215 -0.0033  
Y 0.0017 0.0072 -0.0085 0.0039 -0.0120 -0.0065  
Z 0.0038 0.0025 -0.0078 0.0056 -0.0034 -0.0136

AT. 32 H X -0.0008 0.0123 0.0087 0.0024 -0.0215 -0.0033  
Y -0.0017 -0.0072 -0.0085 -0.0039 0.0120 -0.0065  
Z -0.0038 -0.0025 -0.0078 -0.0056 0.0034 -0.0136

AT. 33 H X -0.0008 0.0126 -0.0014 0.0006 -0.0143 0.0054  
Y 0.0064 0.0096 -0.0089 0.0094 -0.0099 -0.0143  
Z -0.0031 0.0031 0.0042 -0.0040 -0.0032 0.0096

AT. 34 H X 0.0008 -0.0126 -0.0014 -0.0006 0.0143 0.0054  
Y -0.0064 -0.0096 -0.0089 -0.0094 0.0099 -0.0143  
Z 0.0031 -0.0031 0.0042 0.0040 0.0032 0.0096

AT. 35 C X 0.0018 0.0037 0.0020 0.0017 0.0004 0.0010  
Y 0.0002 0.0003 0.0015 0.0009 0.0013 0.0024  
Z -0.0012 -0.0033 -0.0024 -0.0001 0.0011 -0.0009

AT. 36 C X -0.0018 -0.0037 0.0020 -0.0017 -0.0004 0.0010  
Y -0.0002 -0.0003 0.0015 -0.0009 -0.0013 0.0024  
Z 0.0012 0.0033 -0.0024 0.0001 -0.0011 -0.0009

AT. 37 C X 0.0001 0.0034 0.0021 0.0032 0.0003 0.0004  
Y -0.0005 -0.0006 -0.0009 -0.0007 -0.0009 -0.0010  
Z 0.0008 0.0005 -0.0006 -0.0000 -0.0001 0.0011

AT. 38 C X -0.0001 -0.0034 0.0021 -0.0032 -0.0003 0.0004  
Y 0.0005 0.0006 -0.0009 0.0007 0.0009 -0.0010  
Z -0.0008 -0.0005 -0.0006 0.0000 0.0001 0.0011

AT. 39 H X -0.0045 -0.0319 -0.0159 -0.0274 -0.0011 -0.0062  
Y -0.0001 -0.0097 -0.0095 -0.0057 0.0008 0.0034

Z -0.0025 -0.0184 -0.0084 -0.0174 -0.0017 -0.0050  
AT. 40 H X 0.0045 0.0319 -0.0159 0.0274 0.0011 -0.0062  
Y 0.0001 0.0097 -0.0095 0.0057 -0.0008 0.0034  
Z 0.0025 0.0184 -0.0084 0.0174 0.0017 -0.0050  
AT. 41 H X -0.0012 -0.0263 -0.0187 -0.0245 -0.0026 -0.0022  
Y -0.0021 0.0115 0.0126 0.0126 0.0015 -0.0001  
Z 0.0030 0.0199 0.0098 0.0170 0.0012 0.0028  
AT. 42 H X 0.0012 0.0263 -0.0187 0.0245 0.0026 -0.0022  
Y 0.0021 -0.0115 0.0126 -0.0126 -0.0015 -0.0001  
Z -0.0030 -0.0199 0.0098 -0.0170 -0.0012 0.0028  
AT. 43 C X -0.0007 -0.0002 -0.0006 0.0001 -0.0009 -0.0004  
Y 0.0021 0.0013 0.0052 0.0004 0.0058 -0.0003  
Z 0.0009 0.0003 -0.0001 0.0000 0.0004 0.0010  
AT. 44 C X 0.0007 0.0002 -0.0006 -0.0001 0.0009 -0.0004  
Y -0.0021 -0.0013 0.0052 -0.0004 -0.0058 -0.0003  
Z -0.0009 -0.0003 -0.0001 -0.0000 -0.0004 0.0010  
AT. 45 H X 0.0123 0.0044 0.0338 0.0007 0.0364 0.0007  
Y -0.0167 -0.0070 -0.0308 0.0023 -0.0370 -0.0038  
Z 0.0088 0.0050 0.0088 -0.0021 0.0133 0.0035  
AT. 46 H X -0.0123 -0.0044 0.0338 -0.0007 -0.0364 0.0007  
Y 0.0167 0.0070 -0.0308 -0.0023 0.0370 -0.0038  
Z -0.0088 -0.0050 0.0088 0.0021 -0.0133 0.0035  
AT. 47 H X -0.0039 -0.0021 -0.0162 -0.0008 -0.0158 0.0022  
Y -0.0193 -0.0087 -0.0387 0.0008 -0.0449 -0.0040  
Z -0.0159 -0.0066 -0.0222 0.0017 -0.0295 -0.0062  
AT. 48 H X 0.0039 0.0021 -0.0162 0.0008 0.0158 0.0022  
Y 0.0193 0.0087 -0.0387 -0.0008 0.0449 -0.0040  
Z 0.0159 0.0066 -0.0222 -0.0017 0.0295 -0.0062  
AT. 49 C X -0.0002 -0.0007 -0.0035 -0.0019 -0.0030 0.0020  
Y 0.0012 0.0001 -0.0012 -0.0020 -0.0006 0.0021  
Z 0.0003 0.0005 -0.0008 0.0001 0.0001 -0.0004  
AT. 50 C X 0.0002 0.0007 -0.0035 0.0019 0.0030 0.0020



Y -0.0012 -0.0001 -0.0012 0.0020 0.0006 0.0021  
Z -0.0003 -0.0005 -0.0008 -0.0001 -0.0001 -0.0004  
AT. 51 C X 0.0017 0.0046 0.0063 0.0039 0.0038 -0.0001  
Y -0.0006 -0.0005 -0.0011 -0.0004 -0.0013 0.0001  
Z 0.0004 -0.0032 -0.0010 -0.0003 0.0022 -0.0021  
AT. 52 C X -0.0017 -0.0046 0.0063 -0.0039 -0.0038 -0.0001  
Y 0.0006 0.0005 -0.0011 0.0004 0.0013 0.0001  
Z -0.0004 0.0032 -0.0010 0.0003 -0.0022 -0.0021  
AT. 53 H X -0.0060 -0.0280 -0.0267 -0.0171 -0.0081 -0.0061  
Y -0.0079 -0.0152 -0.0228 -0.0159 -0.0175 0.0025  
Z 0.0049 0.0363 0.0306 0.0179 0.0029 0.0113  
AT. 54 H X 0.0060 0.0280 -0.0267 0.0171 0.0081 -0.0061  
Y 0.0079 0.0152 -0.0228 0.0159 0.0175 0.0025  
Z -0.0049 -0.0363 0.0306 -0.0179 -0.0029 0.0113  
AT. 55 H X -0.0151 -0.0367 -0.0476 -0.0300 -0.0295 -0.0011  
Y 0.0099 0.0175 0.0285 0.0184 0.0243 -0.0059  
Z 0.0028 -0.0062 0.0017 0.0019 0.0124 -0.0103  
AT. 56 H X 0.0151 0.0367 -0.0476 0.0300 0.0295 -0.0011  
Y -0.0099 -0.0175 0.0285 -0.0184 -0.0243 -0.0059  
Z -0.0028 0.0062 0.0017 -0.0019 -0.0124 -0.0103  
AT. 57 C X 0.0015 0.0024 0.0022 0.0007 0.0007 0.0013  
Y 0.0007 -0.0002 0.0010 0.0008 0.0016 0.0015  
Z -0.0021 -0.0042 -0.0028 -0.0007 -0.0001 0.0002  
AT. 58 C X -0.0015 -0.0024 0.0022 -0.0007 -0.0007 0.0013  
Y -0.0007 0.0002 0.0010 -0.0008 -0.0016 0.0015  
Z 0.0021 0.0042 -0.0028 0.0007 0.0001 0.0002  
AT. 59 H X 0.0180 0.0274 0.0267 0.0113 0.0119 0.0168  
Y 0.0064 0.0214 0.0067 -0.0029 -0.0110 -0.0123  
Z 0.0198 0.0481 0.0255 0.0023 -0.0098 -0.0081  
AT. 60 H X -0.0180 -0.0274 0.0267 -0.0113 -0.0119 0.0168  
Y -0.0064 -0.0214 0.0067 0.0029 0.0110 -0.0123  
Z -0.0198 -0.0481 0.0255 -0.0023 0.0098 -0.0081

AT. 61 H X -0.0221 -0.0340 -0.0305 -0.0128 -0.0122 -0.0197  
Y -0.0061 0.0054 -0.0108 -0.0108 -0.0216 -0.0241  
Z -0.0156 -0.0324 -0.0205 -0.0050 0.0015 -0.0032

AT. 62 H X 0.0221 0.0340 -0.0305 0.0128 0.0122 -0.0197  
Y 0.0061 -0.0054 -0.0108 0.0108 0.0216 -0.0241  
Z 0.0156 0.0324 -0.0205 0.0050 -0.0015 -0.0032

AT. 63 H X -0.0228 -0.0366 -0.0318 -0.0134 -0.0121 -0.0176  
Y -0.0095 -0.0240 -0.0123 0.0009 0.0070 0.0078  
Z 0.0300 0.0546 0.0413 0.0125 0.0067 0.0120

AT. 64 H X 0.0228 0.0366 -0.0318 0.0134 0.0121 -0.0176  
Y 0.0095 0.0240 -0.0123 -0.0009 -0.0070 0.0078  
Z -0.0300 -0.0546 0.0413 -0.0125 -0.0067 0.0120

AT. 65 C X 0.0005 -0.0003 -0.0036 -0.0017 -0.0020 0.0017  
Y 0.0001 -0.0023 -0.0023 -0.0021 -0.0008 0.0014  
Z -0.0009 -0.0005 -0.0007 -0.0003 -0.0012 0.0005

AT. 66 C X -0.0005 0.0003 -0.0036 0.0017 0.0020 0.0017  
Y -0.0001 0.0023 -0.0023 0.0021 0.0008 0.0014  
Z 0.0009 0.0005 -0.0007 0.0003 0.0012 0.0005

AT. 67 H X 0.0008 -0.0170 -0.0308 -0.0224 -0.0168 0.0185  
Y -0.0070 0.0152 0.0123 0.0164 -0.0006 -0.0102  
Z 0.0057 -0.0013 0.0117 0.0017 0.0130 -0.0045

AT. 68 H X -0.0008 0.0170 -0.0308 0.0224 0.0168 0.0185  
Y 0.0070 -0.0152 0.0123 -0.0164 0.0006 -0.0102  
Z -0.0057 0.0013 0.0117 -0.0017 -0.0130 -0.0045

AT. 69 H X -0.0035 0.0150 0.0403 0.0255 0.0216 -0.0220  
Y -0.0056 0.0225 0.0457 0.0330 0.0220 -0.0271  
Z -0.0010 0.0058 -0.0136 -0.0013 -0.0118 0.0041

AT. 70 H X 0.0035 -0.0150 0.0403 -0.0255 -0.0216 -0.0220  
Y 0.0056 -0.0225 0.0457 -0.0330 -0.0220 -0.0271  
Z 0.0010 -0.0058 -0.0136 0.0013 0.0118 0.0041

AT. 71 H X -0.0021 0.0123 0.0522 0.0289 0.0325 -0.0279  
Y 0.0064 -0.0069 -0.0191 -0.0147 -0.0073 0.0120

Z 0.0063 0.0017 0.0162 0.0041 0.0153 -0.0063  
AT. 72 H X 0.0021 -0.0123 0.0522 -0.0289 -0.0325 -0.0279  
Y -0.0064 0.0069 -0.0191 0.0147 0.0073 0.0120  
Z -0.0063 -0.0017 0.0162 -0.0041 -0.0153 -0.0063  
AT. 73 C X -0.0004 -0.0005 0.0004 -0.0001 0.0007 -0.0007  
Y -0.0001 -0.0007 -0.0006 -0.0001 -0.0002 -0.0003  
Z 0.0006 0.0059 0.0009 0.0020 -0.0019 -0.0017  
AT. 74 C X 0.0004 0.0005 0.0004 0.0001 -0.0007 -0.0007  
Y 0.0001 0.0007 -0.0006 0.0001 0.0002 -0.0003  
Z -0.0006 -0.0059 0.0009 -0.0020 0.0019 -0.0017  
AT. 75 H X -0.0004 -0.0217 -0.0064 -0.0115 0.0025 0.0089  
Y -0.0006 -0.0160 0.0030 -0.0045 0.0085 0.0067  
Z -0.0003 -0.0314 0.0011 -0.0125 0.0118 0.0142  
AT. 76 H X 0.0004 0.0217 -0.0064 0.0115 -0.0025 0.0089  
Y 0.0006 0.0160 0.0030 0.0045 -0.0085 0.0067  
Z 0.0003 0.0314 0.0011 0.0125 -0.0118 0.0142  
AT. 77 H X 0.0011 0.0140 0.0028 0.0084 -0.0020 -0.0041  
Y 0.0010 0.0257 0.0005 0.0077 -0.0103 -0.0098  
Z -0.0017 -0.0335 -0.0021 -0.0136 0.0108 0.0115  
AT. 78 H X -0.0011 -0.0140 0.0028 -0.0084 0.0020 -0.0041  
Y -0.0010 -0.0257 0.0005 -0.0077 0.0103 -0.0098  
Z 0.0017 0.0335 -0.0021 0.0136 -0.0108 0.0115  
AT. 79 I X -0.0000 -0.0000 0.0000 0.0000 0.0000 -0.0000  
Y 0.0000 0.0000 -0.0000 -0.0000 -0.0000 0.0000  
Z 0.0000 0.0000 0.0000 -0.0000 0.0000 0.0000  
AT. 80 I X 0.0000 0.0000 0.0000 -0.0000 -0.0000 -0.0000  
Y -0.0000 -0.0000 -0.0000 0.0000 0.0000 0.0000  
Z -0.0000 -0.0000 0.0000 0.0000 -0.0000 0.0000  
AT. 81 I X 0.0000 -0.0000 -0.0000 -0.0000 -0.0000 0.0000  
Y -0.0000 0.0000 0.0000 -0.0000 0.0000 0.0000  
Z -0.0000 0.0000 0.0000 0.0000 0.0000 -0.0000  
AT. 82 I X -0.0000 0.0000 -0.0000 0.0000 0.0000 0.0000

Y 0.0000 -0.0000 0.0000 0.0000 -0.0000 0.0000  
Z 0.0000 -0.0000 0.0000 -0.0000 -0.0000 -0.0000  
AT. 83 O X -0.0010 -0.0007 -0.0008 0.0029 0.0008 -0.0010  
Y -0.0002 -0.0001 -0.0001 0.0005 0.0001 -0.0001  
Z -0.0007 -0.0003 -0.0002 0.0013 0.0004 -0.0003  
AT. 84 O X 0.0010 0.0007 -0.0008 -0.0029 -0.0008 -0.0010  
Y 0.0002 0.0001 -0.0001 -0.0005 -0.0001 -0.0001  
Z 0.0007 0.0003 -0.0002 -0.0013 -0.0004 -0.0003  
AT. 85 O X -0.0001 -0.0006 0.0002 -0.0010 0.0009 -0.0023  
Y -0.0001 -0.0004 -0.0000 -0.0005 0.0004 -0.0013  
Z -0.0008 -0.0000 0.0001 0.0009 -0.0002 0.0007  
AT. 86 O X 0.0001 0.0006 0.0002 0.0010 -0.0009 -0.0023  
Y 0.0001 0.0004 -0.0000 0.0005 -0.0004 -0.0013  
Z 0.0008 0.0000 0.0001 -0.0009 0.0002 0.0007  
AT. 87 N X 0.0002 -0.0004 -0.0006 0.0016 -0.0005 0.0010  
Y -0.0012 -0.0003 -0.0003 0.0016 0.0006 -0.0002  
Z 0.0014 0.0032 0.0045 -0.0099 -0.0008 0.0023  
AT. 88 N X -0.0002 0.0004 -0.0006 -0.0016 0.0005 0.0010  
Y 0.0012 0.0003 -0.0003 -0.0016 -0.0006 -0.0002  
Z -0.0014 -0.0032 0.0045 0.0099 0.0008 0.0023  
AT. 89 N X -0.0020 -0.0003 0.0008 0.0009 0.0003 -0.0006  
Y 0.0025 0.0009 -0.0014 -0.0007 -0.0013 0.0022  
Z -0.0065 -0.0027 0.0029 0.0029 0.0030 -0.0062  
AT. 90 N X 0.0020 0.0003 0.0008 -0.0009 -0.0003 -0.0006  
Y -0.0025 -0.0009 -0.0014 0.0007 0.0013 0.0022  
Z 0.0065 0.0027 0.0029 -0.0029 -0.0030 -0.0062  
AT. 91 C X 0.0017 0.0016 0.0023 -0.0065 -0.0013 0.0018  
Y 0.0006 0.0004 0.0007 -0.0019 -0.0007 0.0010  
Z -0.0001 -0.0021 -0.0034 0.0063 0.0003 -0.0017  
AT. 92 C X -0.0017 -0.0016 0.0023 0.0065 0.0013 0.0018  
Y -0.0006 -0.0004 0.0007 0.0019 0.0007 0.0010  
Z 0.0001 0.0021 -0.0034 -0.0063 -0.0003 -0.0017

AT. 93 C X 0.0003 -0.0008 -0.0014 0.0032 -0.0007 0.0006  
Y 0.0007 -0.0008 -0.0014 0.0028 -0.0011 0.0009  
Z -0.0004 0.0008 0.0015 -0.0030 0.0007 -0.0005

AT. 94 C X -0.0003 0.0008 -0.0014 -0.0032 0.0007 0.0006  
Y -0.0007 0.0008 -0.0014 -0.0028 0.0011 0.0009  
Z 0.0004 -0.0008 0.0015 0.0030 -0.0007 -0.0005

AT. 95 H X 0.0002 0.0004 0.0007 -0.0018 0.0009 -0.0009  
Y -0.0043 0.0035 0.0060 -0.0117 0.0069 -0.0065  
Z 0.0083 -0.0081 -0.0139 0.0282 -0.0149 0.0139

AT. 96 H X -0.0002 -0.0004 0.0007 0.0018 -0.0009 -0.0009  
Y 0.0043 -0.0035 0.0060 0.0117 -0.0069 -0.0065  
Z -0.0083 0.0081 -0.0139 -0.0282 0.0149 0.0139

AT. 97 H X -0.0035 0.0035 0.0053 -0.0134 0.0077 -0.0080  
Y -0.0070 0.0059 0.0099 -0.0203 0.0115 -0.0109  
Z -0.0009 0.0010 0.0020 -0.0032 0.0009 -0.0005

AT. 98 H X 0.0035 -0.0035 0.0053 0.0134 -0.0077 -0.0080  
Y 0.0070 -0.0059 0.0099 0.0203 -0.0115 -0.0109  
Z 0.0009 -0.0010 0.0020 0.0032 -0.0009 -0.0005

AT. 99 C X 0.0031 0.0014 -0.0018 0.0007 -0.0026 0.0053  
Y -0.0033 -0.0004 0.0016 0.0023 0.0007 -0.0002  
Z 0.0061 0.0018 -0.0028 -0.0029 -0.0024 0.0039

AT. 100 C X -0.0031 -0.0014 -0.0018 -0.0007 0.0026 0.0053  
Y 0.0033 0.0004 0.0016 -0.0023 -0.0007 -0.0002  
Z -0.0061 -0.0018 -0.0028 0.0029 0.0024 0.0039

AT. 101 C X -0.0035 -0.0001 0.0023 0.0002 0.0017 -0.0017  
Y -0.0017 0.0001 0.0012 -0.0000 0.0008 -0.0005  
Z -0.0052 -0.0001 0.0035 0.0005 0.0025 -0.0019

AT. 102 C X 0.0035 0.0001 0.0023 -0.0002 -0.0017 -0.0017  
Y 0.0017 -0.0001 0.0012 0.0000 -0.0008 -0.0005  
Z 0.0052 0.0001 0.0035 -0.0005 -0.0025 -0.0019

AT. 103 H X 0.0044 0.0001 -0.0025 -0.0017 -0.0007 0.0004  
Y -0.0054 -0.0001 0.0035 0.0009 0.0020 -0.0016

Z 0.0441 -0.0017 -0.0310 -0.0042 -0.0204 0.0109  
AT. 104 H X -0.0044 -0.0001 -0.0025 0.0017 0.0007 0.0004  
Y 0.0054 0.0001 0.0035 -0.0009 -0.0020 -0.0016  
Z -0.0441 0.0017 -0.0310 0.0042 0.0204 0.0109  
AT. 105 H X 0.0142 -0.0024 -0.0126 0.0020 -0.0080 0.0044  
Y 0.0335 -0.0023 -0.0240 -0.0016 -0.0166 0.0085  
Z 0.0121 -0.0015 -0.0094 0.0004 -0.0063 0.0029  
AT. 106 H X -0.0142 0.0024 -0.0126 -0.0020 0.0080 0.0044  
Y -0.0335 0.0023 -0.0240 0.0016 0.0166 0.0085  
Z -0.0121 0.0015 -0.0094 -0.0004 0.0063 0.0029  
AT. 107 C X -0.0018 0.0006 0.0010 -0.0010 0.0004 0.0015  
Y -0.0020 -0.0001 0.0006 0.0011 -0.0013 0.0039  
Z 0.0004 -0.0015 -0.0016 0.0030 -0.0011 0.0008  
AT. 108 C X 0.0018 -0.0006 0.0010 0.0010 -0.0004 0.0015  
Y 0.0020 0.0001 0.0006 -0.0011 0.0013 0.0039  
Z -0.0004 0.0015 -0.0016 -0.0030 0.0011 0.0008  
AT. 109 H X 0.0283 -0.0028 -0.0070 -0.0119 0.0009 -0.0297  
Y 0.0088 -0.0016 -0.0035 0.0002 0.0034 -0.0183  
Z 0.0077 -0.0023 -0.0051 0.0049 0.0063 -0.0258  
AT. 110 H X -0.0283 0.0028 -0.0070 0.0119 -0.0009 -0.0297  
Y -0.0088 0.0016 -0.0035 -0.0002 -0.0034 -0.0183  
Z -0.0077 0.0023 -0.0051 -0.0049 -0.0063 -0.0258  
AT. 111 H X -0.0028 -0.0027 -0.0039 0.0110 -0.0015 0.0007  
Y 0.0305 -0.0061 -0.0118 -0.0052 0.0062 -0.0450  
Z -0.0050 0.0035 0.0064 -0.0089 -0.0004 0.0113  
AT. 112 H X 0.0028 0.0027 -0.0039 -0.0110 0.0015 0.0007  
Y -0.0305 0.0061 -0.0118 0.0052 -0.0062 -0.0450  
Z 0.0050 -0.0035 0.0064 0.0089 0.0004 0.0113  
AT. 113 C X -0.0024 0.0003 0.0006 0.0019 -0.0012 0.0023  
Y -0.0004 0.0024 0.0018 -0.0049 0.0015 0.0037  
Z -0.0043 0.0027 0.0024 -0.0009 0.0015 0.0015  
AT. 114 C X 0.0024 -0.0003 0.0006 -0.0019 0.0012 0.0023

Y 0.0004 -0.0024 0.0018 0.0049 -0.0015 0.0037  
Z 0.0043 -0.0027 0.0024 0.0009 -0.0015 0.0015  
AT. 115 C X -0.0018 -0.0005 0.0011 0.0017 -0.0005 0.0019  
Y -0.0003 -0.0002 0.0003 -0.0001 0.0009 -0.0030  
Z 0.0027 0.0005 -0.0014 -0.0007 -0.0014 0.0024  
AT. 116 C X 0.0018 0.0005 0.0011 -0.0017 0.0005 0.0019  
Y 0.0003 0.0002 0.0003 0.0001 -0.0009 -0.0030  
Z -0.0027 -0.0005 -0.0014 0.0007 0.0014 0.0024  
AT. 117 H X 0.0202 0.0054 -0.0097 -0.0164 0.0017 -0.0055  
Y -0.0056 0.0030 0.0017 0.0069 -0.0086 0.0247  
Z -0.0192 -0.0061 0.0098 0.0158 -0.0010 0.0036  
AT. 118 H X -0.0202 -0.0054 -0.0097 0.0164 -0.0017 -0.0055  
Y 0.0056 -0.0030 0.0017 -0.0069 0.0086 0.0247  
Z 0.0192 0.0061 0.0098 -0.0158 0.0010 0.0036  
AT. 119 H X 0.0142 0.0002 -0.0075 -0.0153 0.0094 -0.0247  
Y 0.0007 -0.0058 -0.0028 0.0062 -0.0015 -0.0048  
Z 0.0080 0.0065 -0.0018 -0.0150 0.0064 -0.0091  
AT. 120 H X -0.0142 -0.0002 -0.0075 0.0153 -0.0094 -0.0247  
Y -0.0007 0.0058 -0.0028 -0.0062 0.0015 -0.0048  
Z -0.0080 -0.0065 -0.0018 0.0150 -0.0064 -0.0091  
AT. 121 C X 0.0002 0.0002 -0.0006 0.0006 -0.0005 0.0006  
Y -0.0014 -0.0003 -0.0003 0.0002 0.0001 -0.0008  
Z 0.0016 0.0007 -0.0009 -0.0003 -0.0009 0.0016  
AT. 122 C X -0.0002 -0.0002 -0.0006 -0.0006 0.0005 0.0006  
Y 0.0014 0.0003 -0.0003 -0.0002 -0.0001 -0.0008  
Z -0.0016 -0.0007 -0.0009 0.0003 0.0009 0.0016  
AT. 123 H X 0.0126 0.0008 0.0026 -0.0101 0.0022 0.0036  
Y 0.0041 -0.0022 0.0029 -0.0025 0.0030 -0.0025  
Z -0.0021 0.0027 -0.0029 0.0003 -0.0029 0.0032  
AT. 124 H X -0.0126 -0.0008 0.0026 0.0101 -0.0022 0.0036  
Y -0.0041 0.0022 0.0029 0.0025 -0.0030 -0.0025  
Z 0.0021 -0.0027 -0.0029 -0.0003 0.0029 0.0032

AT. 125 H X -0.0049 -0.0029 0.0030 0.0007 0.0036 -0.0074  
Y 0.0106 -0.0017 0.0044 -0.0065 0.0036 0.0016  
Z 0.0013 -0.0036 0.0056 -0.0035 0.0057 -0.0068

AT. 126 H X 0.0049 0.0029 0.0030 -0.0007 -0.0036 -0.0074  
Y -0.0106 0.0017 0.0044 0.0065 -0.0036 0.0016  
Z -0.0013 0.0036 0.0056 0.0035 -0.0057 -0.0068

AT. 127 C X -0.0018 0.0003 -0.0000 0.0002 0.0008 -0.0016  
Y 0.0004 0.0018 -0.0002 0.0012 -0.0015 0.0021  
Z -0.0003 0.0001 0.0005 -0.0010 0.0003 0.0006

AT. 128 C X 0.0018 -0.0003 -0.0000 -0.0002 -0.0008 -0.0016  
Y -0.0004 -0.0018 -0.0002 -0.0012 0.0015 0.0021  
Z 0.0003 -0.0001 0.0005 0.0010 -0.0003 0.0006

AT. 129 C X 0.0025 -0.0010 -0.0017 0.0033 -0.0039 0.0042  
Y 0.0004 -0.0001 0.0003 -0.0010 0.0007 -0.0007  
Z 0.0007 -0.0012 -0.0016 0.0034 -0.0007 0.0000

AT. 130 C X -0.0025 0.0010 -0.0017 -0.0033 0.0039 0.0042  
Y -0.0004 0.0001 0.0003 0.0010 -0.0007 -0.0007  
Z -0.0007 0.0012 -0.0016 -0.0034 0.0007 0.0000

AT. 131 H X -0.0093 0.0081 0.0121 -0.0253 0.0186 -0.0192  
Y 0.0081 -0.0026 -0.0066 0.0142 -0.0198 0.0208  
Z -0.0111 0.0095 0.0135 -0.0277 0.0198 -0.0208

AT. 132 H X 0.0093 -0.0081 0.0121 0.0253 -0.0186 -0.0192  
Y -0.0081 0.0026 -0.0066 -0.0142 0.0198 0.0208  
Z 0.0111 -0.0095 0.0135 0.0277 -0.0198 -0.0208

AT. 133 H X -0.0193 0.0053 0.0105 -0.0209 0.0339 -0.0381  
Y -0.0072 -0.0014 0.0005 -0.0008 0.0075 -0.0085  
Z -0.0014 -0.0061 -0.0063 0.0137 -0.0065 0.0061

AT. 134 H X 0.0193 -0.0053 0.0105 0.0209 -0.0339 -0.0381  
Y 0.0072 0.0014 0.0005 0.0008 -0.0075 -0.0085  
Z 0.0014 0.0061 -0.0063 -0.0137 0.0065 0.0061

AT. 135 C X -0.0019 0.0009 0.0008 0.0005 -0.0001 0.0014  
Y -0.0021 0.0024 0.0025 -0.0037 0.0023 0.0023



Z -0.0038 0.0023 0.0025 -0.0008 0.0004 0.0024  
AT. 136 C X 0.0019 -0.0009 0.0008 -0.0005 0.0001 0.0014  
Y 0.0021 -0.0024 0.0025 0.0037 -0.0023 0.0023  
Z 0.0038 -0.0023 0.0025 0.0008 -0.0004 0.0024  
AT. 137 H X 0.0129 -0.0223 -0.0219 0.0409 -0.0219 -0.0267  
Y 0.0365 -0.0263 -0.0266 0.0178 -0.0110 -0.0281  
Z 0.0566 -0.0371 -0.0378 0.0183 -0.0125 -0.0383  
AT. 138 H X -0.0129 0.0223 -0.0219 -0.0409 0.0219 -0.0267  
Y -0.0365 0.0263 -0.0266 -0.0178 0.0110 -0.0281  
Z -0.0566 0.0371 -0.0378 -0.0183 0.0125 -0.0383  
AT. 139 H X 0.0136 -0.0019 -0.0020 -0.0142 0.0070 -0.0050  
Y 0.0305 -0.0377 -0.0382 0.0581 -0.0330 -0.0389  
Z -0.0296 0.0150 0.0150 0.0020 0.0002 0.0200  
AT. 140 H X -0.0136 0.0019 -0.0020 0.0142 -0.0070 -0.0050  
Y -0.0305 0.0377 -0.0382 -0.0581 0.0330 -0.0389  
Z 0.0296 -0.0150 0.0150 -0.0020 -0.0002 0.0200  
AT. 141 H X 0.0056 0.0112 0.0111 -0.0380 0.0204 0.0066  
Y -0.0374 0.0245 0.0246 -0.0106 0.0067 0.0244  
Z 0.0383 -0.0183 -0.0183 -0.0074 0.0029 -0.0201  
AT. 142 H X -0.0056 -0.0112 0.0111 0.0380 -0.0204 0.0066  
Y 0.0374 -0.0245 0.0246 0.0106 -0.0067 0.0244  
Z -0.0383 0.0183 -0.0183 0.0074 -0.0029 -0.0201  
AT. 143 C X -0.0012 0.0001 -0.0000 -0.0001 0.0007 -0.0013  
Y -0.0002 0.0012 -0.0004 0.0020 -0.0015 0.0027  
Z 0.0011 -0.0008 -0.0001 -0.0009 -0.0003 0.0008  
AT. 144 C X 0.0012 -0.0001 -0.0000 0.0001 -0.0007 -0.0013  
Y 0.0002 -0.0012 -0.0004 -0.0020 0.0015 0.0027  
Z -0.0011 0.0008 -0.0001 0.0009 0.0003 0.0008  
AT. 145 H X -0.0018 -0.0122 0.0033 -0.0143 0.0152 -0.0284  
Y 0.0120 -0.0135 0.0027 -0.0187 0.0051 -0.0043  
Z -0.0126 0.0116 -0.0023 0.0172 -0.0028 -0.0003  
AT. 146 H X 0.0018 0.0122 0.0033 0.0143 -0.0152 -0.0284

Y -0.0120 0.0135 0.0027 0.0187 -0.0051 -0.0043  
Z 0.0126 -0.0116 -0.0023 -0.0172 0.0028 -0.0003  
AT. 147 H X 0.0092 0.0015 -0.0001 0.0017 -0.0085 0.0179  
Y -0.0055 -0.0180 0.0050 -0.0250 0.0245 -0.0437  
Z 0.0120 -0.0081 0.0023 -0.0114 0.0005 0.0030  
AT. 148 H X -0.0092 -0.0015 -0.0001 -0.0017 0.0085 0.0179  
Y 0.0055 0.0180 0.0050 0.0250 -0.0245 -0.0437  
Z -0.0120 0.0081 0.0023 0.0114 -0.0005 0.0030  
AT. 149 H X 0.0140 0.0090 -0.0024 0.0126 -0.0198 0.0362  
Y -0.0055 0.0080 -0.0012 0.0111 -0.0032 0.0021  
Z -0.0162 0.0073 -0.0004 0.0098 0.0063 -0.0180  
AT. 150 H X -0.0140 -0.0090 -0.0024 -0.0126 0.0198 0.0362  
Y 0.0055 -0.0080 -0.0012 -0.0111 0.0032 0.0021  
Z 0.0162 -0.0073 -0.0004 -0.0098 -0.0063 -0.0180  
AT. 151 C X 0.0017 -0.0005 -0.0003 -0.0004 0.0003 -0.0010  
Y 0.0005 -0.0008 -0.0004 0.0007 -0.0003 -0.0005  
Z -0.0043 0.0015 0.0022 -0.0018 0.0034 -0.0060  
AT. 152 C X -0.0017 0.0005 -0.0003 0.0004 -0.0003 -0.0010  
Y -0.0005 0.0008 -0.0004 -0.0007 0.0003 -0.0005  
Z 0.0043 -0.0015 0.0022 0.0018 -0.0034 -0.0060  
AT. 153 H X -0.0104 0.0045 0.0057 -0.0099 0.0069 -0.0050  
Y 0.0233 -0.0085 -0.0125 0.0072 -0.0160 0.0263  
Z 0.0400 -0.0142 -0.0214 0.0141 -0.0267 0.0401  
AT. 154 H X 0.0104 -0.0045 0.0057 0.0099 -0.0069 -0.0050  
Y -0.0233 0.0085 -0.0125 -0.0072 0.0160 0.0263  
Z -0.0400 0.0142 -0.0214 -0.0141 0.0267 0.0401  
AT. 155 H X 0.0060 -0.0037 -0.0053 0.0089 -0.0087 0.0084  
Y -0.0297 0.0119 0.0160 -0.0110 0.0195 -0.0290  
Z 0.0313 -0.0133 -0.0178 0.0142 -0.0219 0.0297  
AT. 156 H X -0.0060 0.0037 -0.0053 -0.0089 0.0087 0.0084  
Y 0.0297 -0.0119 0.0160 0.0110 -0.0195 -0.0290  
Z -0.0313 0.0133 -0.0178 -0.0142 0.0219 0.0297

AT.157 O X -0.0007 0.0013 -0.0004 -0.0013 -0.0021 0.0002  
Y -0.0010 0.0019 -0.0005 -0.0019 -0.0029 0.0007  
Z 0.0007 -0.0016 0.0007 0.0017 0.0032 0.0021

AT.158 O X 0.0007 -0.0013 -0.0004 0.0013 0.0021 0.0002  
Y 0.0010 -0.0019 -0.0005 0.0019 0.0029 0.0007  
Z -0.0007 0.0016 0.0007 -0.0017 -0.0032 0.0021

AT.159 O X -0.0011 0.0025 -0.0010 -0.0024 -0.0046 -0.0022  
Y 0.0007 -0.0014 0.0004 0.0014 0.0022 -0.0003  
Z 0.0001 0.0002 -0.0002 0.0001 -0.0005 -0.0019

AT.160 O X 0.0011 -0.0025 -0.0010 0.0024 0.0046 -0.0022  
Y -0.0007 0.0014 0.0004 -0.0014 -0.0022 -0.0003  
Z -0.0001 -0.0002 -0.0002 -0.0001 0.0005 -0.0019

AT.161 H X 0.0186 -0.0320 0.0075 0.0336 0.0483 -0.0232  
Y 0.0034 -0.0063 0.0014 0.0066 0.0089 -0.0050  
Z -0.0104 0.0163 -0.0041 -0.0187 -0.0245 0.0167

AT.162 H X -0.0186 0.0320 0.0075 -0.0336 -0.0483 -0.0232  
Y -0.0034 0.0063 0.0014 -0.0066 -0.0089 -0.0050  
Z 0.0104 -0.0163 -0.0041 0.0187 0.0245 0.0167

AT.163 H X 0.0116 -0.0337 0.0155 0.0315 0.0687 0.0564  
Y 0.0016 -0.0015 -0.0002 0.0007 0.0016 -0.0019  
Z -0.0040 0.0123 -0.0053 -0.0122 -0.0264 -0.0230

AT.164 H X -0.0116 0.0337 0.0155 -0.0315 -0.0687 0.0564  
Y -0.0016 0.0015 -0.0002 -0.0007 -0.0016 -0.0019  
Z 0.0040 -0.0123 -0.0053 0.0122 0.0264 -0.0230

AT.165 O X 0.0010 0.0006 -0.0001 -0.0013 0.0003 0.0002  
Y -0.0020 -0.0007 -0.0001 0.0016 -0.0002 -0.0004  
Z 0.0027 0.0008 0.0001 -0.0022 0.0003 0.0006

AT.166 O X -0.0010 -0.0006 -0.0001 0.0013 -0.0003 0.0002  
Y 0.0020 0.0007 -0.0001 -0.0016 0.0002 -0.0004  
Z -0.0027 -0.0008 0.0001 0.0022 -0.0003 0.0006

AT.167 H X -0.0004 -0.0020 0.0009 0.0022 -0.0017 0.0007  
Y -0.0010 -0.0001 0.0002 0.0009 0.0003 -0.0009

Z 0.0066 0.0081 -0.0033 -0.0139 0.0052 0.0012  
 AT. 168 H X 0.0004 0.0020 0.0009 -0.0022 0.0017 0.0007  
 Y 0.0010 0.0001 0.0002 -0.0009 -0.0003 -0.0009  
 Z -0.0066 -0.0081 -0.0033 0.0139 -0.0052 0.0012  
 AT. 169 O X -0.0020 -0.0009 0.0000 0.0019 -0.0004 -0.0004  
 Y 0.0035 0.0013 0.0000 -0.0030 0.0004 0.0008  
 Z 0.0017 0.0004 0.0002 -0.0014 0.0001 0.0004  
 AT. 170 O X 0.0020 0.0009 0.0000 -0.0019 0.0004 -0.0004  
 Y -0.0035 -0.0013 0.0000 0.0030 -0.0004 0.0008  
 Z -0.0017 -0.0004 0.0002 0.0014 -0.0001 0.0004  
 AT. 171 H X 0.0204 0.0074 0.0005 -0.0152 0.0026 0.0036  
 Y -0.0297 -0.0114 -0.0004 0.0278 -0.0039 -0.0066  
 Z -0.0822 -0.0306 -0.0018 0.0741 -0.0108 -0.0184  
 AT. 172 H X -0.0204 -0.0074 0.0005 0.0152 -0.0026 0.0036  
 Y 0.0297 0.0114 -0.0004 -0.0278 0.0039 -0.0066  
 Z 0.0822 0.0306 -0.0018 -0.0741 0.0108 -0.0184

FREQ(CM\*\*-1) 1457.25 1457.28 1458.37 1459.03 1459.96 1460.12

AT. 1 I X -0.0000 0.0000 0.0000 0.0000 0.0000 0.0000  
 Y 0.0000 0.0000 -0.0000 0.0000 0.0000 0.0000  
 Z -0.0000 0.0000 0.0000 -0.0000 0.0000 -0.0000  
 AT. 2 I X -0.0000 -0.0000 -0.0000 0.0000 0.0000 -0.0000  
 Y 0.0000 -0.0000 0.0000 0.0000 0.0000 -0.0000  
 Z -0.0000 -0.0000 -0.0000 -0.0000 0.0000 0.0000  
 AT. 3 I X -0.0000 -0.0000 0.0000 -0.0000 -0.0000 0.0000  
 Y -0.0000 -0.0000 -0.0000 0.0000 0.0000 0.0000  
 Z -0.0000 -0.0000 -0.0000 0.0000 0.0000 0.0000  
 AT. 4 I X -0.0000 0.0000 -0.0000 -0.0000 -0.0000 -0.0000  
 Y -0.0000 0.0000 0.0000 0.0000 0.0000 -0.0000  
 Z -0.0000 0.0000 0.0000 0.0000 0.0000 -0.0000  
 AT. 5 O X -0.0005 0.0020 -0.0001 -0.0009 0.0029 -0.0023

Y -0.0001 -0.0013 0.0002 0.0004 -0.0020 0.0013  
Z 0.0005 -0.0015 0.0001 0.0006 -0.0023 0.0018  
AT. 6 O X -0.0005 -0.0020 0.0001 -0.0009 0.0029 0.0023  
Y -0.0001 0.0013 -0.0002 0.0004 -0.0020 -0.0013  
Z 0.0005 0.0015 -0.0001 0.0006 -0.0023 -0.0018  
AT. 7 O X -0.0006 -0.0002 0.0004 -0.0024 -0.0011 -0.0012  
Y 0.0003 0.0003 -0.0002 0.0016 0.0006 0.0009  
Z 0.0001 -0.0003 -0.0001 0.0001 0.0006 -0.0004  
AT. 8 O X -0.0006 0.0002 -0.0004 -0.0024 -0.0011 0.0012  
Y 0.0003 -0.0003 0.0002 0.0016 0.0006 -0.0009  
Z 0.0001 0.0003 0.0001 0.0001 0.0006 0.0004  
AT. 9 N X 0.0005 0.0020 -0.0000 -0.0006 0.0026 -0.0021  
Y -0.0001 -0.0025 0.0003 0.0005 -0.0035 0.0026  
Z 0.0007 0.0073 -0.0002 -0.0037 0.0116 -0.0108  
AT. 10 N X 0.0005 -0.0020 0.0000 -0.0006 0.0026 0.0021  
Y -0.0001 0.0025 -0.0003 0.0005 -0.0035 -0.0026  
Z 0.0007 -0.0073 0.0002 -0.0037 0.0116 0.0108  
AT. 11 N X 0.0009 0.0008 0.0001 -0.0009 -0.0003 -0.0006  
Y 0.0006 -0.0020 -0.0001 -0.0016 0.0009 -0.0023  
Z -0.0022 0.0029 0.0005 0.0056 -0.0018 0.0068  
AT. 12 N X 0.0009 -0.0008 -0.0001 -0.0009 -0.0003 0.0006  
Y 0.0006 0.0020 0.0001 -0.0016 0.0009 0.0023  
Z -0.0022 -0.0029 -0.0005 0.0056 -0.0018 -0.0068  
AT. 13 C X 0.0001 -0.0055 0.0003 0.0022 -0.0077 0.0063  
Y 0.0000 0.0043 -0.0004 -0.0015 0.0065 -0.0051  
Z -0.0011 -0.0041 -0.0001 0.0018 -0.0058 0.0058  
AT. 14 C X 0.0001 0.0055 -0.0003 0.0022 -0.0077 -0.0063  
Y 0.0000 -0.0043 0.0004 -0.0015 0.0065 0.0051  
Z -0.0011 0.0041 0.0001 0.0018 -0.0058 -0.0058  
AT. 15 C X 0.0003 0.0019 0.0001 -0.0009 0.0018 -0.0021  
Y -0.0010 -0.0033 -0.0005 0.0020 -0.0028 0.0039  
Z 0.0005 0.0015 0.0002 -0.0008 0.0016 -0.0018

AT. 16 C X 0.0003 -0.0019 -0.0001 -0.0009 0.0018 0.0021  
Y -0.0010 0.0033 0.0005 0.0020 -0.0028 -0.0039  
Z 0.0005 -0.0015 -0.0002 -0.0008 0.0016 0.0018

AT. 17 H X -0.0006 -0.0002 0.0010 -0.0019 -0.0003 -0.0016  
Y 0.0054 0.0113 0.0037 -0.0087 0.0071 -0.0144  
Z -0.0076 -0.0169 -0.0045 0.0117 -0.0117 0.0208

AT. 18 H X -0.0006 0.0002 -0.0010 -0.0019 -0.0003 0.0016  
Y 0.0054 -0.0113 -0.0037 -0.0087 0.0071 0.0144  
Z -0.0076 0.0169 0.0045 0.0117 -0.0117 -0.0208

AT. 19 H X -0.0009 -0.0034 -0.0012 0.0020 0.0003 0.0029  
Y 0.0060 0.0156 0.0049 -0.0121 0.0077 -0.0191  
Z 0.0026 0.0068 0.0017 -0.0049 0.0051 -0.0087

AT. 20 H X -0.0009 0.0034 0.0012 0.0020 0.0003 -0.0029  
Y 0.0060 -0.0156 -0.0049 -0.0121 0.0077 0.0191  
Z 0.0026 -0.0068 -0.0017 -0.0049 0.0051 0.0087

AT. 21 C X -0.0002 0.0010 -0.0002 0.0042 0.0006 0.0033  
Y -0.0012 0.0006 0.0005 -0.0012 -0.0015 0.0004  
Z 0.0015 -0.0023 -0.0005 -0.0040 0.0009 -0.0046

AT. 22 C X -0.0002 -0.0010 0.0002 0.0042 0.0006 -0.0033  
Y -0.0012 -0.0006 -0.0005 -0.0012 -0.0015 -0.0004  
Z 0.0015 0.0023 0.0005 -0.0040 0.0009 0.0046

AT. 23 C X 0.0008 -0.0003 -0.0001 -0.0007 0.0005 -0.0013  
Y -0.0008 0.0000 0.0001 0.0002 -0.0005 0.0008  
Z -0.0020 0.0006 0.0004 0.0007 -0.0014 0.0025

AT. 24 C X 0.0008 0.0003 0.0001 -0.0007 0.0005 0.0013  
Y -0.0008 -0.0000 -0.0001 0.0002 -0.0005 -0.0008  
Z -0.0020 -0.0006 -0.0004 0.0007 -0.0014 -0.0025

AT. 25 H X -0.0013 0.0001 -0.0002 0.0003 0.0000 0.0006  
Y -0.0036 0.0004 0.0004 0.0007 -0.0021 0.0036  
Z 0.0182 -0.0009 -0.0025 -0.0016 0.0112 -0.0172

AT. 26 H X -0.0013 -0.0001 0.0002 0.0003 0.0000 -0.0006  
Y -0.0036 -0.0004 -0.0004 0.0007 -0.0021 -0.0036

Z 0.0182 0.0009 0.0025 -0.0016 0.0112 0.0172  
AT. 27 H X -0.0032 -0.0002 0.0013 -0.0029 -0.0043 0.0017  
Y 0.0142 -0.0006 -0.0022 0.0003 0.0092 -0.0123  
Z 0.0070 0.0002 -0.0012 0.0013 0.0049 -0.0053  
AT. 28 H X -0.0032 0.0002 -0.0013 -0.0029 -0.0043 -0.0017  
Y 0.0142 0.0006 0.0022 0.0003 0.0092 0.0123  
Z 0.0070 -0.0002 0.0012 0.0013 0.0049 0.0053  
AT. 29 C X -0.0003 -0.0005 -0.0003 0.0013 -0.0009 0.0017  
Y -0.0008 -0.0008 0.0007 -0.0014 0.0011 -0.0020  
Z -0.0003 -0.0016 0.0002 0.0006 -0.0022 0.0021  
AT. 30 C X -0.0003 0.0005 0.0003 0.0013 -0.0009 -0.0017  
Y -0.0008 0.0008 -0.0007 -0.0014 0.0011 0.0020  
Z -0.0003 0.0016 -0.0002 0.0006 -0.0022 -0.0021  
AT. 31 H X -0.0050 -0.0147 0.0054 -0.0025 -0.0101 0.0013  
Y 0.0023 0.0101 -0.0061 0.0113 -0.0004 0.0123  
Z 0.0008 0.0057 -0.0060 0.0164 -0.0093 0.0217  
AT. 32 H X -0.0050 0.0147 -0.0054 -0.0025 -0.0101 -0.0013  
Y 0.0023 -0.0101 0.0061 0.0113 -0.0004 -0.0123  
Z 0.0008 -0.0057 0.0060 0.0164 -0.0093 -0.0217  
AT. 33 H X 0.0027 0.0103 -0.0022 -0.0036 0.0095 -0.0066  
Y 0.0046 0.0113 -0.0091 0.0179 -0.0089 0.0257  
Z -0.0008 0.0006 0.0029 -0.0103 0.0089 -0.0148  
AT. 34 H X 0.0027 -0.0103 0.0022 -0.0036 0.0095 0.0066  
Y 0.0046 -0.0113 0.0091 0.0179 -0.0089 -0.0257  
Z -0.0008 -0.0006 -0.0029 -0.0103 0.0089 0.0148  
AT. 35 C X 0.0014 0.0004 0.0001 -0.0037 0.0002 -0.0024  
Y 0.0018 -0.0010 0.0013 -0.0046 0.0020 -0.0064  
Z -0.0002 -0.0012 0.0005 0.0003 -0.0001 -0.0015  
AT. 36 C X 0.0014 -0.0004 -0.0001 -0.0037 0.0002 0.0024  
Y 0.0018 0.0010 -0.0013 -0.0046 0.0020 0.0064  
Z -0.0002 0.0012 -0.0005 0.0003 -0.0001 0.0015  
AT. 37 C X 0.0029 0.0009 0.0002 -0.0011 0.0004 -0.0015

Y -0.0014 0.0008 -0.0005 0.0023 -0.0007 0.0027  
Z 0.0009 -0.0010 0.0001 -0.0022 0.0007 -0.0024  
AT. 38 C X 0.0029 -0.0009 -0.0002 -0.0011 0.0004 0.0015  
Y -0.0014 -0.0008 0.0005 0.0023 -0.0007 -0.0027  
Z 0.0009 0.0010 -0.0001 -0.0022 0.0007 0.0024  
AT. 39 H X -0.0256 -0.0074 -0.0016 0.0183 -0.0038 0.0193  
Y 0.0001 -0.0086 0.0012 -0.0058 0.0035 -0.0121  
Z -0.0180 -0.0023 -0.0018 0.0135 -0.0037 0.0170  
AT. 40 H X -0.0256 0.0074 0.0016 0.0183 -0.0038 -0.0193  
Y 0.0001 0.0086 -0.0012 -0.0058 0.0035 0.0121  
Z -0.0180 0.0023 0.0018 0.0135 -0.0037 -0.0170  
AT. 41 H X -0.0199 -0.0104 -0.0021 0.0098 -0.0004 0.0084  
Y 0.0098 0.0079 0.0018 -0.0006 -0.0018 0.0021  
Z 0.0145 0.0048 0.0008 -0.0106 0.0024 -0.0117  
AT. 42 H X -0.0199 0.0104 0.0021 0.0098 -0.0004 -0.0084  
Y 0.0098 -0.0079 -0.0018 -0.0006 -0.0018 -0.0021  
Z 0.0145 -0.0048 -0.0008 -0.0106 0.0024 0.0117  
AT. 43 C X -0.0002 0.0008 -0.0002 0.0011 -0.0003 0.0010  
Y -0.0006 -0.0030 0.0011 -0.0022 -0.0014 -0.0003  
Z 0.0007 -0.0014 0.0001 -0.0015 0.0012 -0.0024  
AT. 44 C X -0.0002 -0.0008 0.0002 0.0011 -0.0003 -0.0010  
Y -0.0006 0.0030 -0.0011 -0.0022 -0.0014 0.0003  
Z 0.0007 0.0014 -0.0001 -0.0015 0.0012 0.0024  
AT. 45 H X -0.0040 -0.0211 0.0073 -0.0078 -0.0027 -0.0039  
Y 0.0050 0.0264 -0.0066 0.0157 0.0019 0.0099  
Z -0.0018 -0.0126 0.0018 -0.0120 -0.0003 -0.0080  
AT. 46 H X -0.0040 0.0211 -0.0073 -0.0078 -0.0027 0.0039  
Y 0.0050 -0.0264 0.0066 0.0157 0.0019 -0.0099  
Z -0.0018 0.0126 -0.0018 -0.0120 -0.0003 0.0080  
AT. 47 H X 0.0034 0.0069 -0.0032 -0.0011 0.0035 -0.0029  
Y 0.0046 0.0315 -0.0081 0.0162 0.0013 0.0123  
Z 0.0011 0.0248 -0.0050 0.0194 -0.0013 0.0154



AT. 48 H X 0.0034 -0.0069 0.0032 -0.0011 0.0035 0.0029  
Y 0.0046 -0.0315 0.0081 0.0162 0.0013 -0.0123  
Z 0.0011 -0.0248 0.0050 0.0194 -0.0013 -0.0154

AT. 49 C X -0.0002 0.0003 -0.0005 -0.0027 0.0019 -0.0023  
Y -0.0005 -0.0026 -0.0001 -0.0003 0.0033 -0.0039  
Z -0.0002 0.0005 -0.0001 -0.0024 -0.0019 0.0008

AT. 50 C X -0.0002 -0.0003 0.0005 -0.0027 0.0019 0.0023  
Y -0.0005 0.0026 0.0001 -0.0003 0.0033 0.0039  
Z -0.0002 -0.0005 0.0001 -0.0024 -0.0019 -0.0008

AT. 51 C X 0.0027 0.0007 0.0007 -0.0006 0.0010 -0.0017  
Y -0.0002 0.0007 -0.0002 0.0004 0.0005 0.0002  
Z -0.0009 -0.0021 -0.0003 0.0020 -0.0029 0.0034

AT. 52 C X 0.0027 -0.0007 -0.0007 -0.0006 0.0010 0.0017  
Y -0.0002 -0.0007 0.0002 0.0004 0.0005 -0.0002  
Z -0.0009 0.0021 0.0003 0.0020 -0.0029 -0.0034

AT. 53 H X -0.0142 -0.0094 -0.0031 0.0079 -0.0146 0.0175  
Y -0.0107 -0.0017 -0.0020 0.0038 0.0000 0.0024  
Z 0.0161 0.0133 0.0042 -0.0092 0.0235 -0.0274

AT. 54 H X -0.0142 0.0094 0.0031 0.0079 -0.0146 -0.0175  
Y -0.0107 0.0017 0.0020 0.0038 0.0000 -0.0024  
Z 0.0161 -0.0133 -0.0042 -0.0092 0.0235 0.0274

AT. 55 H X -0.0219 -0.0040 -0.0051 0.0080 -0.0100 0.0164  
Y 0.0103 -0.0003 0.0035 -0.0040 -0.0080 0.0028  
Z -0.0030 -0.0054 0.0005 0.0017 -0.0204 0.0182

AT. 56 H X -0.0219 0.0040 0.0051 0.0080 -0.0100 -0.0164  
Y 0.0103 0.0003 -0.0035 -0.0040 -0.0080 -0.0028  
Z -0.0030 0.0054 -0.0005 0.0017 -0.0204 -0.0182

AT. 57 C X 0.0008 -0.0001 0.0002 -0.0034 0.0007 -0.0026  
Y 0.0012 -0.0012 0.0010 -0.0044 0.0011 -0.0052  
Z -0.0003 -0.0009 0.0008 0.0006 0.0011 -0.0025

AT. 58 C X 0.0008 0.0001 -0.0002 -0.0034 0.0007 0.0026  
Y 0.0012 0.0012 -0.0010 -0.0044 0.0011 0.0052

Z -0.0003 0.0009 -0.0008 0.0006 0.0011 0.0025  
AT. 59 H X 0.0135 -0.0033 0.0047 -0.0435 0.0073 -0.0348  
Y -0.0082 0.0129 -0.0116 0.0284 -0.0142 0.0506  
Z -0.0043 0.0174 -0.0143 0.0169 -0.0165 0.0549  
AT. 60 H X 0.0135 0.0033 -0.0047 -0.0435 0.0073 0.0348  
Y -0.0082 -0.0129 0.0116 0.0284 -0.0142 -0.0506  
Z -0.0043 -0.0174 0.0143 0.0169 -0.0165 -0.0549  
AT. 61 H X -0.0144 0.0030 -0.0047 0.0517 -0.0087 0.0407  
Y -0.0178 0.0171 -0.0154 0.0625 -0.0203 0.0803  
Z -0.0024 -0.0072 0.0047 0.0093 0.0038 -0.0102  
AT. 62 H X -0.0144 -0.0030 0.0047 0.0517 -0.0087 -0.0407  
Y -0.0178 -0.0171 0.0154 0.0625 -0.0203 -0.0803  
Z -0.0024 0.0072 -0.0047 0.0093 0.0038 0.0102  
AT. 63 H X -0.0139 0.0015 -0.0035 0.0483 -0.0072 0.0353  
Y 0.0045 -0.0104 0.0094 -0.0173 0.0125 -0.0400  
Z 0.0104 0.0063 -0.0036 -0.0355 -0.0021 -0.0053  
AT. 64 H X -0.0139 -0.0015 0.0035 0.0483 -0.0072 -0.0353  
Y 0.0045 0.0104 -0.0094 -0.0173 0.0125 0.0400  
Z 0.0104 -0.0063 0.0036 -0.0355 -0.0021 0.0053  
AT. 65 C X -0.0007 -0.0002 -0.0006 -0.0036 0.0009 -0.0011  
Y -0.0007 -0.0022 -0.0001 0.0002 0.0022 -0.0022  
Z 0.0002 0.0013 -0.0000 -0.0025 -0.0008 0.0002  
AT. 66 C X -0.0007 0.0002 0.0006 -0.0036 0.0009 0.0011  
Y -0.0007 0.0022 0.0001 0.0002 0.0022 0.0022  
Z 0.0002 -0.0013 0.0000 -0.0025 -0.0008 -0.0002  
AT. 67 H X -0.0065 -0.0136 -0.0027 -0.0192 0.0173 -0.0239  
Y 0.0062 0.0297 0.0004 -0.0226 -0.0277 0.0247  
Z -0.0009 -0.0167 0.0016 0.0346 0.0123 -0.0040  
AT. 68 H X -0.0065 0.0136 0.0027 -0.0192 0.0173 0.0239  
Y 0.0062 -0.0297 -0.0004 -0.0226 -0.0277 -0.0247  
Z -0.0009 0.0167 -0.0016 0.0346 0.0123 0.0040  
AT. 69 H X 0.0083 0.0126 0.0047 0.0268 -0.0207 0.0246

Y 0.0108 0.0253 0.0048 0.0190 -0.0316 0.0352  
Z -0.0003 0.0150 -0.0028 -0.0305 -0.0080 0.0048  
AT. 70 H X 0.0083 -0.0126 -0.0047 0.0268 -0.0207 -0.0246  
Y 0.0108 -0.0253 -0.0048 0.0190 -0.0316 -0.0352  
Z -0.0003 -0.0150 0.0028 -0.0305 -0.0080 -0.0048  
AT. 71 H X 0.0086 0.0035 0.0068 0.0508 -0.0169 0.0245  
Y -0.0055 -0.0164 -0.0022 0.0018 0.0205 -0.0193  
Z -0.0001 -0.0170 0.0023 0.0408 0.0126 -0.0055  
AT. 72 H X 0.0086 -0.0035 -0.0068 0.0508 -0.0169 -0.0245  
Y -0.0055 0.0164 0.0022 0.0018 0.0205 0.0193  
Z -0.0001 0.0170 -0.0023 0.0408 0.0126 0.0055  
AT. 73 C X -0.0004 -0.0003 0.0002 0.0014 -0.0005 0.0007  
Y -0.0003 0.0004 -0.0003 0.0002 -0.0004 0.0014  
Z 0.0000 0.0034 -0.0007 0.0017 -0.0015 0.0028  
AT. 74 C X -0.0004 0.0003 -0.0002 0.0014 -0.0005 -0.0007  
Y -0.0003 -0.0004 0.0003 0.0002 -0.0004 -0.0014  
Z 0.0000 -0.0034 0.0007 0.0017 -0.0015 -0.0028  
AT. 75 H X -0.0017 -0.0137 0.0005 -0.0035 0.0100 -0.0090  
Y 0.0018 -0.0108 0.0031 -0.0071 0.0051 -0.0106  
Z 0.0017 -0.0220 0.0040 -0.0109 0.0128 -0.0194  
AT. 76 H X -0.0017 0.0137 -0.0005 -0.0035 0.0100 0.0090  
Y 0.0018 0.0108 -0.0031 -0.0071 0.0051 0.0106  
Z 0.0017 0.0220 -0.0040 -0.0109 0.0128 0.0194  
AT. 77 H X 0.0024 0.0089 -0.0006 -0.0011 -0.0042 0.0035  
Y -0.0012 0.0154 -0.0030 0.0086 -0.0087 0.0117  
Z -0.0014 -0.0206 0.0030 -0.0052 0.0106 -0.0113  
AT. 78 H X 0.0024 -0.0089 0.0006 -0.0011 -0.0042 -0.0035  
Y -0.0012 -0.0154 0.0030 0.0086 -0.0087 -0.0117  
Z -0.0014 0.0206 -0.0030 -0.0052 0.0106 0.0113  
AT. 79 I X -0.0000 0.0000 -0.0000 -0.0000 0.0000 -0.0000  
Y 0.0000 -0.0000 0.0000 0.0000 -0.0000 0.0000  
Z 0.0000 -0.0000 0.0000 -0.0000 -0.0000 -0.0000

AT. 80 I X -0.0000 -0.0000 0.0000 -0.0000 0.0000 0.0000  
Y 0.0000 0.0000 -0.0000 0.0000 -0.0000 -0.0000  
Z 0.0000 0.0000 -0.0000 -0.0000 -0.0000 0.0000

AT. 81 I X -0.0000 -0.0000 0.0000 -0.0000 0.0000 -0.0000  
Y 0.0000 -0.0000 0.0000 -0.0000 -0.0000 -0.0000  
Z 0.0000 0.0000 0.0000 -0.0000 -0.0000 -0.0000

AT. 82 I X -0.0000 0.0000 -0.0000 -0.0000 0.0000 0.0000  
Y 0.0000 0.0000 -0.0000 -0.0000 -0.0000 0.0000  
Z 0.0000 -0.0000 -0.0000 -0.0000 -0.0000 0.0000

AT. 83 O X 0.0017 -0.0004 -0.0029 -0.0010 0.0002 -0.0019  
Y 0.0004 -0.0001 -0.0005 -0.0001 -0.0000 -0.0003  
Z 0.0008 -0.0002 -0.0011 -0.0004 0.0000 -0.0009

AT. 84 O X 0.0017 0.0004 0.0029 -0.0010 0.0002 0.0019  
Y 0.0004 0.0001 0.0005 -0.0001 -0.0000 0.0003  
Z 0.0008 0.0002 0.0011 -0.0004 0.0000 0.0009

AT. 85 O X 0.0003 0.0017 -0.0012 -0.0005 0.0007 -0.0007  
Y 0.0002 0.0011 -0.0007 -0.0004 0.0004 -0.0004  
Z 0.0005 -0.0004 0.0004 0.0001 -0.0004 0.0001

AT. 86 O X 0.0003 -0.0017 0.0012 -0.0005 0.0007 0.0007  
Y 0.0002 -0.0011 0.0007 -0.0004 0.0004 0.0004  
Z 0.0005 0.0004 -0.0004 0.0001 -0.0004 -0.0001

AT. 87 N X 0.0009 -0.0005 0.0007 -0.0001 -0.0014 -0.0004  
Y 0.0007 -0.0002 -0.0012 -0.0007 -0.0000 -0.0013  
Z -0.0068 0.0016 0.0074 0.0032 0.0013 0.0057

AT. 88 N X 0.0009 0.0005 -0.0007 -0.0001 -0.0014 0.0004  
Y 0.0007 0.0002 0.0012 -0.0007 -0.0000 0.0013  
Z -0.0068 -0.0016 -0.0074 0.0032 0.0013 -0.0057

AT. 89 N X 0.0017 0.0000 -0.0005 0.0003 -0.0005 -0.0001  
Y -0.0022 -0.0024 0.0008 0.0006 -0.0003 0.0010  
Z 0.0065 0.0054 -0.0033 -0.0014 0.0007 -0.0023

AT. 90 N X 0.0017 -0.0000 0.0005 0.0003 -0.0005 0.0001  
Y -0.0022 0.0024 -0.0008 0.0006 -0.0003 -0.0010

Z 0.0065 -0.0054 0.0033 -0.0014 0.0007 0.0023  
AT. 91 C X -0.0038 0.0012 0.0059 0.0020 0.0001 0.0041  
Y -0.0012 0.0001 0.0024 0.0007 -0.0002 0.0013  
Z 0.0043 -0.0014 -0.0052 -0.0019 -0.0009 -0.0034  
AT. 92 C X -0.0038 -0.0012 -0.0059 0.0020 0.0001 -0.0041  
Y -0.0012 -0.0001 -0.0024 0.0007 -0.0002 -0.0013  
Z 0.0043 0.0014 0.0052 -0.0019 -0.0009 0.0034  
AT. 93 C X 0.0019 -0.0013 -0.0006 -0.0004 -0.0014 -0.0011  
Y 0.0019 -0.0014 0.0001 -0.0002 -0.0018 -0.0007  
Z -0.0020 0.0012 0.0006 0.0004 0.0015 0.0009  
AT. 94 C X 0.0019 0.0013 0.0006 -0.0004 -0.0014 0.0011  
Y 0.0019 0.0014 -0.0001 -0.0002 -0.0018 0.0007  
Z -0.0020 -0.0012 -0.0006 0.0004 0.0015 -0.0009  
AT. 95 H X -0.0005 0.0009 -0.0008 0.0001 0.0011 0.0001  
Y -0.0085 0.0065 -0.0047 -0.0004 0.0104 0.0012  
Z 0.0191 -0.0147 0.0089 -0.0000 -0.0224 -0.0036  
AT. 96 H X -0.0005 -0.0009 0.0008 0.0001 0.0011 -0.0001  
Y -0.0085 -0.0065 0.0047 -0.0004 0.0104 -0.0012  
Z 0.0191 0.0147 -0.0089 -0.0000 -0.0224 0.0036  
AT. 97 H X -0.0066 0.0073 -0.0071 -0.0005 0.0100 0.0011  
Y -0.0139 0.0116 -0.0076 -0.0005 0.0170 0.0023  
Z -0.0029 0.0015 0.0009 0.0004 0.0022 0.0010  
AT. 98 H X -0.0066 -0.0073 0.0071 -0.0005 0.0100 -0.0011  
Y -0.0139 -0.0116 0.0076 -0.0005 0.0170 -0.0023  
Z -0.0029 -0.0015 -0.0009 0.0004 0.0022 -0.0010  
AT. 99 C X -0.0026 -0.0042 0.0027 0.0010 -0.0011 0.0016  
Y 0.0027 0.0006 0.0002 0.0000 -0.0006 -0.0003  
Z -0.0053 -0.0034 0.0020 0.0009 -0.0002 0.0016  
AT. 100 C X -0.0026 0.0042 -0.0027 0.0010 -0.0011 -0.0016  
Y 0.0027 -0.0006 -0.0002 0.0000 -0.0006 0.0003  
Z -0.0053 0.0034 -0.0020 0.0009 -0.0002 -0.0016  
AT. 101 C X 0.0020 0.0018 -0.0004 0.0003 -0.0005 -0.0003

Y 0.0009 0.0007 0.0002 0.0002 -0.0004 -0.0001  
Z 0.0031 0.0023 0.0000 0.0003 -0.0008 -0.0004  
AT.102 C X 0.0020 -0.0018 0.0004 0.0003 -0.0005 0.0003  
Y 0.0009 -0.0007 -0.0002 0.0002 -0.0004 0.0001  
Z 0.0031 -0.0023 -0.0000 0.0003 -0.0008 0.0004  
AT.103 H X -0.0031 -0.0013 -0.0010 -0.0009 0.0017 -0.0004  
Y 0.0034 0.0023 0.0003 0.0007 -0.0013 -0.0000  
Z -0.0254 -0.0164 -0.0045 -0.0051 0.0099 0.0015  
AT.104 H X -0.0031 0.0013 0.0010 -0.0009 0.0017 0.0004  
Y 0.0034 -0.0023 -0.0003 0.0007 -0.0013 0.0000  
Z -0.0254 0.0164 0.0045 -0.0051 0.0099 -0.0015  
AT.105 H X -0.0061 -0.0055 -0.0014 -0.0032 0.0038 -0.0005  
Y -0.0183 -0.0127 -0.0031 -0.0039 0.0074 0.0009  
Z -0.0060 -0.0043 -0.0017 -0.0020 0.0030 -0.0002  
AT.106 H X -0.0061 0.0055 0.0014 -0.0032 0.0038 0.0005  
Y -0.0183 0.0127 0.0031 -0.0039 0.0074 -0.0009  
Z -0.0060 0.0043 0.0017 -0.0020 0.0030 0.0002  
AT.107 C X -0.0017 0.0001 0.0020 0.0002 -0.0002 -0.0000  
Y 0.0001 -0.0005 0.0044 0.0011 -0.0026 0.0005  
Z 0.0025 -0.0001 0.0004 -0.0000 -0.0018 -0.0006  
AT.108 C X -0.0017 -0.0001 -0.0020 0.0002 -0.0002 0.0000  
Y 0.0001 0.0005 -0.0044 0.0011 -0.0026 -0.0005  
Z 0.0025 0.0001 -0.0004 -0.0000 -0.0018 0.0006  
AT.109 H X 0.0030 0.0084 -0.0270 -0.0017 0.0172 0.0059  
Y 0.0056 0.0014 -0.0222 -0.0052 0.0113 -0.0031  
Z 0.0102 -0.0001 -0.0344 -0.0093 0.0154 -0.0079  
AT.110 H X 0.0030 -0.0084 0.0270 -0.0017 0.0172 -0.0059  
Y 0.0056 -0.0014 0.0222 -0.0052 0.0113 0.0031  
Z 0.0102 0.0001 0.0344 -0.0093 0.0154 0.0079  
AT.111 H X 0.0091 -0.0032 -0.0049 -0.0017 -0.0038 -0.0035  
Y 0.0095 0.0088 -0.0484 -0.0095 0.0259 -0.0031  
Z -0.0112 0.0015 0.0182 0.0041 -0.0033 0.0039

AT.112 H X 0.0091 0.0032 0.0049 -0.0017 -0.0038 0.0035  
Y 0.0095 -0.0088 0.0484 -0.0095 0.0259 0.0031  
Z -0.0112 -0.0015 -0.0182 0.0041 -0.0033 -0.0039

AT.113 C X 0.0011 -0.0017 0.0017 0.0004 -0.0017 0.0002  
Y -0.0063 0.0001 0.0054 0.0005 -0.0006 0.0009  
Z -0.0023 -0.0028 -0.0003 -0.0003 0.0004 -0.0005

AT.114 C X 0.0011 0.0017 -0.0017 0.0004 -0.0017 -0.0002  
Y -0.0063 -0.0001 -0.0054 0.0005 -0.0006 -0.0009  
Z -0.0023 0.0028 0.0003 -0.0003 0.0004 0.0005

AT.115 C X 0.0025 -0.0001 0.0027 0.0011 -0.0021 0.0000  
Y 0.0009 0.0008 -0.0031 -0.0006 0.0014 -0.0006  
Z -0.0020 -0.0014 0.0018 0.0006 -0.0006 0.0010

AT.116 C X 0.0025 0.0001 -0.0027 0.0011 -0.0021 -0.0000  
Y 0.0009 -0.0008 0.0031 -0.0006 0.0014 0.0006  
Z -0.0020 0.0014 -0.0018 0.0006 -0.0006 -0.0010

AT.117 H X -0.0247 -0.0015 -0.0104 -0.0055 0.0129 0.0014  
Y 0.0008 -0.0124 0.0220 0.0062 -0.0137 0.0029  
Z 0.0255 0.0031 0.0096 0.0057 -0.0125 -0.0013

AT.118 H X -0.0247 0.0015 0.0104 -0.0055 0.0129 -0.0014  
Y 0.0008 0.0124 -0.0220 0.0062 -0.0137 -0.0029  
Z 0.0255 -0.0031 -0.0096 0.0057 -0.0125 0.0013

AT.119 H X -0.0172 0.0119 -0.0249 -0.0108 0.0205 -0.0030  
Y 0.0083 0.0061 -0.0024 -0.0010 -0.0003 -0.0006  
Z -0.0186 -0.0007 -0.0126 -0.0049 0.0123 -0.0005

AT.120 H X -0.0172 -0.0119 0.0249 -0.0108 0.0205 0.0030  
Y 0.0083 -0.0061 0.0024 -0.0010 -0.0003 0.0006  
Z -0.0186 0.0007 0.0126 -0.0049 0.0123 0.0005

AT.121 C X 0.0000 -0.0014 -0.0003 0.0003 -0.0003 0.0007  
Y 0.0004 0.0000 -0.0010 -0.0004 -0.0003 -0.0001  
Z -0.0014 -0.0018 0.0006 0.0006 -0.0002 0.0009

AT.122 C X 0.0000 0.0014 0.0003 0.0003 -0.0003 -0.0007  
Y 0.0004 -0.0000 0.0010 -0.0004 -0.0003 0.0001

Z -0.0014 0.0018 -0.0006 0.0006 -0.0002 -0.0009  
AT. 123 H X -0.0081 0.0107 0.0120 -0.0019 0.0033 -0.0037  
Y 0.0001 0.0125 0.0056 -0.0022 0.0029 -0.0042  
Z -0.0023 -0.0115 -0.0040 0.0019 -0.0025 0.0040  
AT. 124 H X -0.0081 -0.0107 -0.0120 -0.0019 0.0033 0.0037  
Y 0.0001 -0.0125 -0.0056 -0.0022 0.0029 0.0042  
Z -0.0023 0.0115 0.0040 0.0019 -0.0025 -0.0040  
AT. 125 H X 0.0044 0.0089 -0.0026 -0.0027 0.0019 -0.0039  
Y -0.0026 0.0154 0.0128 -0.0023 0.0037 -0.0050  
Z 0.0023 0.0175 0.0043 -0.0038 0.0043 -0.0067  
AT. 126 H X 0.0044 -0.0089 0.0026 -0.0027 0.0019 0.0039  
Y -0.0026 -0.0154 -0.0128 -0.0023 0.0037 0.0050  
Z 0.0023 -0.0175 -0.0043 -0.0038 0.0043 0.0067  
AT. 127 C X -0.0006 -0.0004 -0.0027 -0.0006 0.0007 -0.0007  
Y -0.0001 -0.0062 -0.0017 0.0023 -0.0002 0.0025  
Z -0.0002 0.0006 0.0009 -0.0004 0.0001 -0.0004  
AT. 128 C X -0.0006 0.0004 0.0027 -0.0006 0.0007 0.0007  
Y -0.0001 0.0062 0.0017 0.0023 -0.0002 -0.0025  
Z -0.0002 -0.0006 -0.0009 -0.0004 0.0001 0.0004  
AT. 129 C X 0.0039 -0.0020 0.0050 0.0011 -0.0058 0.0014  
Y -0.0008 0.0013 0.0001 -0.0003 0.0010 -0.0002  
Z 0.0026 -0.0005 -0.0008 -0.0006 -0.0014 -0.0012  
AT. 130 C X 0.0039 0.0020 -0.0050 0.0011 -0.0058 -0.0014  
Y -0.0008 -0.0013 -0.0001 -0.0003 0.0010 0.0002  
Z 0.0026 0.0005 0.0008 -0.0006 -0.0014 0.0012  
AT. 131 H X -0.0240 0.0091 -0.0203 -0.0017 0.0314 -0.0006  
Y 0.0165 -0.0126 0.0234 0.0067 -0.0294 0.0087  
Z -0.0265 0.0084 -0.0229 -0.0012 0.0337 0.0002  
AT. 132 H X -0.0240 -0.0091 0.0203 -0.0017 0.0314 0.0006  
Y 0.0165 0.0126 -0.0234 0.0067 -0.0294 -0.0087  
Z -0.0265 -0.0084 0.0229 -0.0012 0.0337 -0.0002  
AT. 133 H X -0.0264 0.0156 -0.0488 -0.0123 0.0504 -0.0162



Y -0.0020 0.0054 -0.0109 -0.0062 0.0079 -0.0081  
Z 0.0140 -0.0010 0.0060 -0.0038 -0.0149 -0.0055  
AT. 134 H X -0.0264 -0.0156 0.0488 -0.0123 0.0504 0.0162  
Y -0.0020 -0.0054 0.0109 -0.0062 0.0079 0.0081  
Z 0.0140 0.0010 -0.0060 -0.0038 -0.0149 0.0055  
AT. 135 C X -0.0003 -0.0018 0.0004 0.0002 -0.0005 0.0001  
Y -0.0046 -0.0002 0.0033 0.0003 -0.0002 0.0005  
Z -0.0020 -0.0026 0.0017 0.0005 -0.0005 0.0004  
AT. 136 C X -0.0003 0.0018 -0.0004 0.0002 -0.0005 -0.0001  
Y -0.0046 0.0002 -0.0033 0.0003 -0.0002 -0.0005  
Z -0.0020 0.0026 -0.0017 0.0005 -0.0005 -0.0004  
AT. 137 H X 0.0496 -0.0010 -0.0396 -0.0042 0.0032 -0.0059  
Y 0.0311 0.0219 -0.0246 -0.0047 0.0053 -0.0039  
Z 0.0377 0.0359 -0.0292 -0.0062 0.0076 -0.0045  
AT. 138 H X 0.0496 0.0010 0.0396 -0.0042 0.0032 0.0059  
Y 0.0311 -0.0219 0.0246 -0.0047 0.0053 0.0039  
Z 0.0377 -0.0359 0.0292 -0.0062 0.0076 0.0045  
AT. 139 H X -0.0105 0.0138 0.0045 -0.0006 0.0040 0.0009  
Y 0.0725 0.0053 -0.0542 -0.0059 0.0036 -0.0080  
Z -0.0083 -0.0222 0.0107 0.0029 -0.0069 0.0012  
AT. 140 H X -0.0105 -0.0138 -0.0045 -0.0006 0.0040 -0.0009  
Y 0.0725 -0.0053 0.0542 -0.0059 0.0036 0.0080  
Z -0.0083 0.0222 -0.0107 0.0029 -0.0069 -0.0012  
AT. 141 H X -0.0386 0.0153 0.0234 0.0006 0.0041 0.0033  
Y -0.0234 -0.0252 0.0172 0.0041 -0.0045 0.0029  
Z 0.0047 0.0311 -0.0053 -0.0035 0.0061 -0.0011  
AT. 142 H X -0.0386 -0.0153 -0.0234 0.0006 0.0041 -0.0033  
Y -0.0234 0.0252 -0.0172 0.0041 -0.0045 -0.0029  
Z 0.0047 -0.0311 0.0053 -0.0035 0.0061 0.0011  
AT. 143 C X -0.0004 0.0006 -0.0017 -0.0006 0.0003 -0.0005  
Y 0.0009 -0.0052 -0.0006 0.0018 -0.0016 0.0018  
Z 0.0005 0.0022 0.0026 -0.0002 -0.0007 0.0000

AT. 144 C X -0.0004 -0.0006 0.0017 -0.0006 0.0003 0.0005  
Y 0.0009 0.0052 0.0006 0.0018 -0.0016 -0.0018  
Z 0.0005 -0.0022 -0.0026 -0.0002 -0.0007 -0.0000

AT. 145 H X -0.0073 0.0476 0.0002 -0.0175 0.0154 -0.0188  
Y 0.0001 0.0469 0.0309 -0.0110 0.0017 -0.0099  
Z -0.0009 -0.0401 -0.0319 0.0085 0.0008 0.0069

AT. 146 H X -0.0073 -0.0476 -0.0002 -0.0175 0.0154 0.0188  
Y 0.0001 -0.0469 -0.0309 -0.0110 0.0017 0.0099  
Z -0.0009 0.0401 0.0319 0.0085 0.0008 -0.0069

AT. 147 H X 0.0047 -0.0105 0.0167 0.0079 -0.0077 0.0077  
Y -0.0118 0.0751 -0.0003 -0.0286 0.0220 -0.0289  
Z 0.0008 0.0264 0.0260 -0.0040 0.0003 -0.0042

AT. 148 H X 0.0047 0.0105 -0.0167 0.0079 -0.0077 -0.0077  
Y -0.0118 -0.0751 0.0003 -0.0286 0.0220 0.0289  
Z 0.0008 -0.0264 -0.0260 -0.0040 0.0003 0.0042

AT. 149 H X 0.0098 -0.0437 0.0173 0.0208 -0.0162 0.0212  
Y -0.0008 -0.0285 -0.0179 0.0069 0.0003 0.0063  
Z -0.0070 -0.0192 -0.0378 -0.0013 0.0103 -0.0022

AT. 150 H X 0.0098 0.0437 -0.0173 0.0208 -0.0162 -0.0212  
Y -0.0008 0.0285 0.0179 0.0069 0.0003 -0.0063  
Z -0.0070 0.0192 0.0378 -0.0013 0.0103 0.0022

AT. 151 C X 0.0003 0.0010 -0.0003 -0.0001 0.0008 -0.0001  
Y 0.0012 0.0010 0.0001 -0.0003 -0.0003 -0.0004  
Z -0.0005 0.0001 -0.0083 -0.0004 0.0039 0.0000

AT. 152 C X 0.0003 -0.0010 0.0003 -0.0001 0.0008 0.0001  
Y 0.0012 -0.0010 -0.0001 -0.0003 -0.0003 0.0004  
Z -0.0005 -0.0001 0.0083 -0.0004 0.0039 -0.0000

AT. 153 H X -0.0097 0.0050 -0.0042 -0.0031 0.0037 -0.0019  
Y 0.0014 0.0024 0.0384 0.0016 -0.0184 0.0003  
Z 0.0053 0.0011 0.0574 0.0037 -0.0282 0.0016

AT. 154 H X -0.0097 -0.0050 0.0042 -0.0031 0.0037 0.0019  
Y 0.0014 -0.0024 -0.0384 0.0016 -0.0184 -0.0003

Z 0.0053 -0.0011 -0.0574 0.0037 -0.0282 -0.0016  
AT. 155 H X 0.0071 -0.0050 0.0070 0.0025 -0.0069 0.0020  
Y -0.0054 -0.0040 -0.0444 -0.0016 0.0214 0.0003  
Z 0.0085 0.0027 0.0441 0.0022 -0.0231 0.0004  
AT. 156 H X 0.0071 0.0050 -0.0070 0.0025 -0.0069 -0.0020  
Y -0.0054 0.0040 0.0444 -0.0016 0.0214 -0.0003  
Z 0.0085 -0.0027 -0.0441 0.0022 -0.0231 -0.0004  
AT. 157 O X -0.0017 -0.0003 0.0000 -0.0012 -0.0013 -0.0006  
Y -0.0025 -0.0001 0.0002 -0.0015 -0.0014 -0.0008  
Z 0.0023 0.0015 0.0015 0.0036 0.0043 0.0009  
AT. 158 O X -0.0017 0.0003 -0.0000 -0.0012 -0.0013 0.0006  
Y -0.0025 0.0001 -0.0002 -0.0015 -0.0014 0.0008  
Z 0.0023 -0.0015 -0.0015 0.0036 0.0043 -0.0009  
AT. 159 O X -0.0033 -0.0017 -0.0017 -0.0045 -0.0053 -0.0013  
Y 0.0018 0.0001 -0.0001 0.0013 0.0013 0.0007  
Z -0.0002 -0.0010 -0.0012 -0.0016 -0.0022 -0.0001  
AT. 160 O X -0.0033 0.0017 0.0017 -0.0045 -0.0053 0.0013  
Y 0.0018 -0.0001 0.0001 0.0013 0.0013 -0.0007  
Z -0.0002 0.0010 0.0012 -0.0016 -0.0022 0.0001  
AT. 161 H X 0.0429 -0.0032 -0.0106 0.0180 0.0111 0.0146  
Y 0.0084 -0.0008 -0.0026 0.0031 0.0021 0.0027  
Z -0.0230 0.0038 0.0086 -0.0061 -0.0015 -0.0079  
AT. 162 H X 0.0429 0.0032 0.0106 0.0180 0.0111 -0.0146  
Y 0.0084 0.0008 0.0026 0.0031 0.0021 -0.0027  
Z -0.0230 -0.0038 -0.0086 -0.0061 -0.0015 0.0079  
AT. 163 H X 0.0456 0.0363 0.0404 0.0831 0.1036 0.0184  
Y 0.0016 0.0018 -0.0000 0.0001 -0.0024 -0.0002  
Z -0.0173 -0.0143 -0.0162 -0.0323 -0.0413 -0.0072  
AT. 164 H X 0.0456 -0.0363 -0.0404 0.0831 0.1036 -0.0184  
Y 0.0016 -0.0018 0.0000 0.0001 -0.0024 0.0002  
Z -0.0173 0.0143 0.0162 -0.0323 -0.0413 0.0072  
AT. 165 O X 0.0008 -0.0001 -0.0005 -0.0000 -0.0002 0.0005

Y -0.0016 0.0006 0.0004 0.0001 0.0005 -0.0000  
Z 0.0022 -0.0008 -0.0006 -0.0001 -0.0006 -0.0000  
AT. 166 O X 0.0008 0.0001 0.0005 -0.0000 -0.0002 -0.0005

Y -0.0016 -0.0006 -0.0004 0.0001 0.0005 0.0000  
Z 0.0022 0.0008 0.0006 -0.0001 -0.0006 0.0000

AT. 167 H X 0.0003 -0.0014 0.0023 0.0004 -0.0005 -0.0028  
Y -0.0017 0.0007 -0.0003 -0.0007 0.0012 0.0004  
Z 0.0049 0.0029 -0.0064 -0.0009 -0.0016 0.0105

AT. 168 H X 0.0003 0.0014 -0.0023 0.0004 -0.0005 0.0028  
Y -0.0017 -0.0007 0.0003 -0.0007 0.0012 -0.0004  
Z 0.0049 -0.0029 0.0064 -0.0009 -0.0016 -0.0105

AT. 169 O X -0.0017 0.0005 0.0007 0.0001 0.0005 -0.0003  
Y 0.0030 -0.0010 -0.0008 -0.0002 -0.0009 0.0001  
Z 0.0015 -0.0006 -0.0003 -0.0001 -0.0005 -0.0002

AT. 170 O X -0.0017 -0.0005 -0.0007 0.0001 0.0005 0.0003  
Y 0.0030 0.0010 0.0008 -0.0002 -0.0009 -0.0001  
Z 0.0015 0.0006 0.0003 -0.0001 -0.0005 0.0002

AT. 171 H X 0.0161 -0.0067 -0.0053 0.0002 -0.0048 0.0002  
Y -0.0257 0.0075 0.0081 0.0021 0.0074 -0.0028  
Z -0.0695 0.0211 0.0224 0.0043 0.0201 -0.0058

AT. 172 H X 0.0161 0.0067 0.0053 0.0002 -0.0048 -0.0002  
Y -0.0257 -0.0075 -0.0081 0.0021 0.0074 0.0028  
Z -0.0695 -0.0211 -0.0224 0.0043 0.0201 0.0058

FREQ(CM\*\*-1) 1461.64 1462.12 1462.69 1464.11 1465.55 1466.67

AT. 1 I X 0.0000 -0.0000 -0.0000 -0.0000 0.0000 0.0000  
Y 0.0000 -0.0000 0.0000 -0.0000 -0.0000 0.0000  
Z 0.0000 0.0000 -0.0000 -0.0000 0.0000 0.0000

AT. 2 I X -0.0000 -0.0000 -0.0000 -0.0000 -0.0000 0.0000  
Y -0.0000 -0.0000 0.0000 -0.0000 0.0000 0.0000  
Z -0.0000 0.0000 -0.0000 -0.0000 -0.0000 0.0000

AT. 3 I X 0.0000 0.0000 -0.0000 0.0000 -0.0000 0.0000  
Y 0.0000 0.0000 -0.0000 -0.0000 -0.0000 0.0000  
Z -0.0000 -0.0000 0.0000 -0.0000 0.0000 0.0000

AT. 4 I X -0.0000 0.0000 -0.0000 0.0000 0.0000 0.0000  
Y -0.0000 0.0000 -0.0000 -0.0000 0.0000 0.0000  
Z 0.0000 -0.0000 0.0000 -0.0000 -0.0000 0.0000

AT. 5 O X 0.0026 0.0010 -0.0038 -0.0035 0.0008 0.0011  
Y -0.0017 -0.0004 0.0020 0.0021 -0.0004 -0.0005  
Z -0.0020 -0.0006 0.0031 0.0028 -0.0007 -0.0010

AT. 6 O X -0.0026 0.0010 -0.0038 -0.0035 -0.0008 0.0011  
Y 0.0017 -0.0004 0.0020 0.0021 0.0004 -0.0005  
Z 0.0020 -0.0006 0.0031 0.0028 0.0007 -0.0010

AT. 7 O X 0.0018 0.0007 0.0015 0.0017 -0.0010 -0.0004  
Y -0.0012 -0.0004 -0.0015 -0.0016 0.0010 0.0001  
Z -0.0006 -0.0001 0.0006 0.0002 -0.0000 -0.0000

AT. 8 O X -0.0018 0.0007 0.0015 0.0017 0.0010 -0.0004  
Y 0.0012 -0.0004 -0.0015 -0.0016 -0.0010 0.0001  
Z 0.0006 -0.0001 0.0006 0.0002 0.0000 -0.0000

AT. 9 N X 0.0020 0.0012 -0.0025 -0.0025 0.0008 -0.0004  
Y -0.0031 -0.0012 0.0040 0.0040 -0.0011 -0.0004  
Z 0.0096 0.0052 -0.0119 -0.0115 0.0025 0.0014

AT. 10 N X -0.0020 0.0012 -0.0025 -0.0025 -0.0008 -0.0004  
Y 0.0031 -0.0012 0.0040 0.0040 0.0011 -0.0004  
Z -0.0096 0.0052 -0.0119 -0.0115 -0.0025 0.0014

AT. 11 N X 0.0003 0.0001 0.0009 0.0014 -0.0012 0.0012  
Y -0.0011 -0.0006 0.0012 0.0010 0.0002 -0.0019  
Z -0.0001 0.0009 -0.0058 -0.0060 0.0041 0.0013

AT. 12 N X -0.0003 0.0001 0.0009 0.0014 0.0012 0.0012  
Y 0.0011 -0.0006 0.0012 0.0010 -0.0002 -0.0019  
Z 0.0001 0.0009 -0.0058 -0.0060 -0.0041 0.0013

AT. 13 C X -0.0071 -0.0029 0.0089 0.0084 -0.0016 -0.0019  
Y 0.0058 0.0020 -0.0068 -0.0068 0.0013 0.0014

Z -0.0052 -0.0032 0.0052 0.0054 -0.0009 0.0001  
AT. 14 C X 0.0071 -0.0029 0.0089 0.0084 0.0016 -0.0019  
Y -0.0058 0.0020 -0.0068 -0.0068 -0.0013 0.0014  
Z 0.0052 -0.0032 0.0052 0.0054 0.0009 0.0001  
AT. 15 C X 0.0021 0.0014 -0.0023 -0.0020 0.0002 0.0003  
Y -0.0031 -0.0028 0.0039 0.0029 -0.0002 -0.0000  
Z 0.0017 0.0012 -0.0018 -0.0016 0.0002 -0.0000  
AT. 16 C X -0.0021 0.0014 -0.0023 -0.0020 -0.0002 0.0003  
Y 0.0031 -0.0028 0.0039 0.0029 0.0002 -0.0000  
Z -0.0017 0.0012 -0.0018 -0.0016 -0.0002 -0.0000  
AT. 17 H X -0.0001 0.0007 -0.0012 -0.0004 0.0008 -0.0018  
Y 0.0089 0.0127 -0.0118 -0.0070 0.0003 -0.0026  
Z -0.0139 -0.0178 0.0180 0.0116 -0.0005 0.0023  
AT. 18 H X 0.0001 0.0007 -0.0012 -0.0004 -0.0008 -0.0018  
Y -0.0089 0.0127 -0.0118 -0.0070 -0.0003 -0.0026  
Z 0.0139 -0.0178 0.0180 0.0116 0.0005 0.0023  
AT. 19 H X -0.0025 -0.0035 0.0019 0.0004 0.0001 0.0007  
Y 0.0119 0.0172 -0.0169 -0.0095 -0.0002 -0.0023  
Z 0.0058 0.0069 -0.0080 -0.0054 0.0002 -0.0006  
AT. 20 H X 0.0025 -0.0035 0.0019 0.0004 -0.0001 0.0007  
Y -0.0119 0.0172 -0.0169 -0.0095 0.0002 -0.0023  
Z -0.0058 0.0069 -0.0080 -0.0054 -0.0002 -0.0006  
AT. 21 C X -0.0018 -0.0003 -0.0042 -0.0042 0.0027 0.0003  
Y 0.0019 0.0011 0.0006 0.0006 -0.0005 0.0005  
Z 0.0003 -0.0010 0.0039 0.0044 -0.0029 -0.0010  
AT. 22 C X 0.0018 -0.0003 -0.0042 -0.0042 -0.0027 0.0003  
Y -0.0019 0.0011 0.0006 0.0006 0.0005 0.0005  
Z -0.0003 -0.0010 0.0039 0.0044 0.0029 -0.0010  
AT. 23 C X -0.0005 -0.0004 0.0014 0.0012 -0.0007 0.0000  
Y 0.0006 0.0004 -0.0009 -0.0007 0.0003 -0.0000  
Z 0.0017 0.0012 -0.0025 -0.0020 0.0009 0.0002  
AT. 24 C X 0.0005 -0.0004 0.0014 0.0012 0.0007 0.0000

Y -0.0006 0.0004 -0.0009 -0.0007 -0.0003 -0.0000  
Z -0.0017 0.0012 -0.0025 -0.0020 -0.0009 0.0002  
AT. 25 H X 0.0006 0.0004 -0.0005 -0.0005 0.0004 0.0002  
Y 0.0030 0.0019 -0.0037 -0.0029 0.0013 0.0001  
Z -0.0163 -0.0103 0.0164 0.0123 -0.0046 -0.0008  
AT. 26 H X -0.0006 0.0004 -0.0005 -0.0005 -0.0004 0.0002  
Y -0.0030 0.0019 -0.0037 -0.0029 -0.0013 0.0001  
Z 0.0163 -0.0103 0.0164 0.0123 0.0046 -0.0008  
AT. 27 H X 0.0066 0.0022 -0.0023 -0.0002 0.0006 -0.0018  
Y -0.0134 -0.0079 0.0126 0.0089 -0.0031 -0.0000  
Z -0.0074 -0.0039 0.0057 0.0034 -0.0012 0.0005  
AT. 28 H X -0.0066 0.0022 -0.0023 -0.0002 -0.0006 -0.0018  
Y 0.0134 -0.0079 0.0126 0.0089 0.0031 -0.0000  
Z 0.0074 -0.0039 0.0057 0.0034 0.0012 0.0005  
AT. 29 C X -0.0005 -0.0010 0.0005 -0.0000 0.0004 -0.0000  
Y 0.0001 0.0012 -0.0013 -0.0008 0.0001 0.0007  
Z -0.0018 -0.0014 0.0013 0.0013 -0.0002 0.0007  
AT. 30 C X 0.0005 -0.0010 0.0005 -0.0000 -0.0004 -0.0000  
Y -0.0001 0.0012 -0.0013 -0.0008 -0.0001 0.0007  
Z 0.0018 -0.0014 0.0013 0.0013 0.0002 0.0007  
AT. 31 H X -0.0116 0.0055 0.0163 0.0183 -0.0061 -0.0030  
Y 0.0043 -0.0075 -0.0022 -0.0071 0.0056 -0.0051  
Z -0.0019 -0.0091 0.0094 0.0031 0.0037 -0.0098  
AT. 32 H X 0.0116 0.0055 0.0163 0.0183 0.0061 -0.0030  
Y -0.0043 -0.0075 -0.0022 -0.0071 -0.0056 -0.0051  
Z 0.0019 -0.0091 0.0094 0.0031 -0.0037 -0.0098  
AT. 33 H X 0.0084 0.0004 -0.0124 -0.0124 0.0036 0.0021  
Y 0.0003 -0.0164 0.0035 -0.0034 0.0059 -0.0062  
Z 0.0042 0.0070 -0.0091 -0.0058 -0.0004 0.0047  
AT. 34 H X -0.0084 0.0004 -0.0124 -0.0124 -0.0036 0.0021  
Y -0.0003 -0.0164 0.0035 -0.0034 -0.0059 -0.0062  
Z -0.0042 0.0070 -0.0091 -0.0058 0.0004 0.0047

AT. 35 C X 0.0003 -0.0007 0.0004 0.0016 -0.0022 0.0015  
Y 0.0004 0.0029 0.0003 0.0025 -0.0031 0.0018  
Z 0.0000 0.0035 0.0044 0.0045 -0.0023 -0.0030

AT. 36 C X -0.0003 -0.0007 0.0004 0.0016 0.0022 0.0015  
Y -0.0004 0.0029 0.0003 0.0025 0.0031 0.0018  
Z -0.0000 0.0035 0.0044 0.0045 0.0023 -0.0030

AT. 37 C X -0.0019 -0.0009 0.0012 0.0013 0.0005 -0.0016  
Y 0.0009 -0.0001 -0.0007 -0.0012 0.0006 -0.0001  
Z -0.0002 -0.0004 0.0008 0.0010 -0.0007 0.0001

AT. 38 C X 0.0019 -0.0009 0.0012 0.0013 -0.0005 -0.0016  
Y -0.0009 -0.0001 -0.0007 -0.0012 -0.0006 -0.0001  
Z 0.0002 -0.0004 0.0008 0.0010 0.0007 0.0001

AT. 39 H X 0.0121 0.0081 -0.0119 -0.0161 0.0047 0.0050  
Y 0.0001 0.0058 0.0098 0.0101 -0.0076 -0.0007  
Z 0.0092 0.0031 -0.0118 -0.0145 0.0052 0.0045

AT. 40 H X -0.0121 0.0081 -0.0119 -0.0161 -0.0047 0.0050  
Y -0.0001 0.0058 0.0098 0.0101 0.0076 -0.0007  
Z -0.0092 0.0031 -0.0118 -0.0145 -0.0052 0.0045

AT. 41 H X 0.0105 0.0065 -0.0037 -0.0077 -0.0002 0.0021  
Y -0.0070 -0.0057 -0.0057 -0.0037 0.0066 0.0024  
Z -0.0062 -0.0025 0.0094 0.0118 -0.0046 -0.0060

AT. 42 H X -0.0105 0.0065 -0.0037 -0.0077 0.0002 0.0021  
Y 0.0070 -0.0057 -0.0057 -0.0037 -0.0066 0.0024  
Z 0.0062 -0.0025 0.0094 0.0118 0.0046 -0.0060

AT. 43 C X 0.0006 0.0004 0.0000 0.0004 -0.0012 0.0017  
Y -0.0025 -0.0020 -0.0002 -0.0015 0.0040 -0.0066  
Z -0.0008 0.0004 0.0006 0.0007 0.0003 -0.0011

AT. 44 C X -0.0006 0.0004 0.0000 0.0004 0.0012 0.0017  
Y 0.0025 -0.0020 -0.0002 -0.0015 -0.0040 -0.0066  
Z 0.0008 0.0004 0.0006 0.0007 -0.0003 -0.0011

AT. 45 H X -0.0192 -0.0037 -0.0096 -0.0157 0.0325 -0.0413  
Y 0.0180 0.0096 0.0030 0.0137 -0.0321 0.0529



Z -0.0054 -0.0082 0.0044 -0.0023 0.0099 -0.0262  
AT. 46 H X 0.0192 -0.0037 -0.0096 -0.0157 -0.0325 -0.0413  
Y -0.0180 0.0096 0.0030 0.0137 0.0321 0.0529  
Z 0.0054 -0.0082 0.0044 -0.0023 -0.0099 -0.0262  
AT. 47 H X 0.0071 -0.0004 0.0062 0.0083 -0.0142 0.0162  
Y 0.0229 0.0068 0.0052 0.0150 -0.0373 0.0590  
Z 0.0157 0.0098 -0.0025 0.0061 -0.0230 0.0439  
AT. 48 H X -0.0071 -0.0004 0.0062 0.0083 0.0142 0.0162  
Y -0.0229 0.0068 0.0052 0.0150 0.0373 0.0590  
Z -0.0157 0.0098 -0.0025 0.0061 0.0230 0.0439  
AT. 49 C X 0.0018 -0.0028 0.0002 -0.0016 0.0003 -0.0018  
Y -0.0002 0.0025 -0.0013 -0.0019 0.0032 -0.0050  
Z 0.0006 -0.0038 0.0033 0.0019 -0.0016 -0.0021  
AT. 50 C X -0.0018 -0.0028 0.0002 -0.0016 -0.0003 -0.0018  
Y 0.0002 0.0025 -0.0013 -0.0019 -0.0032 -0.0050  
Z -0.0006 -0.0038 0.0033 0.0019 0.0016 -0.0021  
AT. 51 C X -0.0017 0.0029 0.0000 0.0011 0.0002 -0.0013  
Y 0.0007 0.0000 -0.0009 -0.0008 -0.0002 0.0015  
Z -0.0021 -0.0014 0.0024 0.0024 -0.0008 0.0013  
AT. 52 C X 0.0017 0.0029 0.0000 0.0011 -0.0002 -0.0013  
Y -0.0007 0.0000 -0.0009 -0.0008 0.0002 0.0015  
Z 0.0021 -0.0014 0.0024 0.0024 0.0008 0.0013  
AT. 53 H X 0.0006 -0.0136 0.0066 0.0042 -0.0044 0.0119  
Y 0.0087 -0.0024 -0.0071 -0.0084 0.0018 0.0060  
Z 0.0039 0.0238 -0.0163 -0.0117 0.0087 -0.0152  
AT. 54 H X -0.0006 -0.0136 0.0066 0.0042 0.0044 0.0119  
Y -0.0087 -0.0024 -0.0071 -0.0084 -0.0018 0.0060  
Z -0.0039 0.0238 -0.0163 -0.0117 -0.0087 -0.0152  
AT. 55 H X 0.0135 -0.0172 -0.0037 -0.0082 -0.0035 0.0194  
Y -0.0124 -0.0001 0.0137 0.0146 -0.0031 -0.0094  
Z -0.0081 -0.0146 0.0181 0.0153 -0.0068 0.0005  
AT. 56 H X -0.0135 -0.0172 -0.0037 -0.0082 0.0035 0.0194

Y 0.0124 -0.0001 0.0137 0.0146 0.0031 -0.0094  
Z 0.0081 -0.0146 0.0181 0.0153 0.0068 0.0005  
AT. 57 C X 0.0003 -0.0007 -0.0008 -0.0002 -0.0009 0.0019  
Y 0.0003 0.0025 0.0014 0.0034 -0.0035 0.0006  
Z 0.0008 0.0047 0.0019 0.0024 -0.0013 -0.0021  
AT. 58 C X -0.0003 -0.0007 -0.0008 -0.0002 0.0009 0.0019  
Y -0.0003 0.0025 0.0014 0.0034 0.0035 0.0006  
Z -0.0008 0.0047 0.0019 0.0024 0.0013 -0.0021  
AT. 59 H X 0.0006 -0.0050 -0.0066 0.0095 -0.0211 0.0230  
Y -0.0069 -0.0421 -0.0193 -0.0365 0.0321 0.0052  
Z -0.0097 -0.0655 -0.0333 -0.0492 0.0354 0.0216  
AT. 60 H X -0.0006 -0.0050 -0.0066 0.0095 0.0211 0.0230  
Y 0.0069 -0.0421 -0.0193 -0.0365 -0.0321 0.0052  
Z 0.0097 -0.0655 -0.0333 -0.0492 -0.0354 0.0216  
AT. 61 H X -0.0028 0.0063 0.0072 -0.0084 0.0215 -0.0264  
Y -0.0081 -0.0430 -0.0190 -0.0476 0.0495 -0.0090  
Z 0.0022 0.0296 0.0170 0.0197 -0.0094 -0.0177  
AT. 62 H X 0.0028 0.0063 0.0072 -0.0084 -0.0215 -0.0264  
Y 0.0081 -0.0430 -0.0190 -0.0476 -0.0495 -0.0090  
Z -0.0022 0.0296 0.0170 0.0197 0.0094 -0.0177  
AT. 63 H X -0.0014 0.0102 0.0081 -0.0058 0.0189 -0.0267  
Y 0.0071 0.0408 0.0202 0.0311 -0.0243 -0.0104  
Z -0.0039 -0.0412 -0.0238 -0.0183 -0.0002 0.0347  
AT. 64 H X 0.0014 0.0102 0.0081 -0.0058 -0.0189 -0.0267  
Y -0.0071 0.0408 0.0202 0.0311 0.0243 -0.0104  
Z 0.0039 -0.0412 -0.0238 -0.0183 0.0002 0.0347  
AT. 65 C X 0.0010 -0.0035 0.0018 -0.0002 -0.0000 -0.0025  
Y -0.0002 0.0022 -0.0005 -0.0008 0.0018 -0.0026  
Z 0.0012 -0.0046 0.0003 -0.0007 -0.0007 0.0001  
AT. 66 C X -0.0010 -0.0035 0.0018 -0.0002 0.0000 -0.0025  
Y 0.0002 0.0022 -0.0005 -0.0008 -0.0018 -0.0026  
Z -0.0012 -0.0046 0.0003 -0.0007 0.0007 0.0001

AT. 67 H X 0.0076 -0.0126 0.0020 -0.0112 0.0107 -0.0311  
Y 0.0101 -0.0544 0.0142 0.0080 -0.0255 0.0237  
Z -0.0149 0.0588 -0.0143 0.0012 0.0154 0.0018

AT. 68 H X -0.0076 -0.0126 0.0020 -0.0112 -0.0107 -0.0311  
Y -0.0101 -0.0544 0.0142 0.0080 0.0255 0.0237  
Z 0.0149 0.0588 -0.0143 0.0012 -0.0154 0.0018

AT. 69 H X -0.0094 0.0162 -0.0079 0.0092 -0.0090 0.0338  
Y -0.0056 -0.0028 -0.0012 0.0137 -0.0206 0.0449  
Z 0.0119 -0.0451 0.0168 0.0028 -0.0151 -0.0000

AT. 70 H X 0.0094 0.0162 -0.0079 0.0092 0.0090 0.0338  
Y 0.0056 -0.0028 -0.0012 0.0137 0.0206 0.0449  
Z -0.0119 -0.0451 0.0168 0.0028 0.0151 -0.0000

AT. 71 H X -0.0190 0.0521 -0.0169 0.0112 -0.0016 0.0377  
Y -0.0016 0.0211 -0.0037 -0.0063 0.0137 -0.0200  
Z -0.0159 0.0649 -0.0179 -0.0001 0.0157 0.0041

AT. 72 H X 0.0190 0.0521 -0.0169 0.0112 0.0016 0.0377  
Y 0.0016 0.0211 -0.0037 -0.0063 -0.0137 -0.0200  
Z 0.0159 0.0649 -0.0179 -0.0001 -0.0157 0.0041

AT. 73 C X -0.0003 0.0014 0.0001 0.0003 0.0003 -0.0011  
Y -0.0001 -0.0015 -0.0001 -0.0005 -0.0001 0.0013  
Z 0.0013 0.0000 0.0004 0.0002 0.0003 -0.0024

AT. 74 C X 0.0003 0.0014 0.0001 0.0003 -0.0003 -0.0011  
Y 0.0001 -0.0015 -0.0001 -0.0005 0.0001 0.0013  
Z -0.0013 0.0000 0.0004 0.0002 -0.0003 -0.0024

AT. 75 H X -0.0050 -0.0035 -0.0091 -0.0111 0.0078 0.0093  
Y -0.0056 0.0008 -0.0056 -0.0017 -0.0022 0.0146  
Z -0.0103 -0.0011 -0.0140 -0.0102 0.0034 0.0242

AT. 76 H X 0.0050 -0.0035 -0.0091 -0.0111 -0.0078 0.0093  
Y 0.0056 0.0008 -0.0056 -0.0017 0.0022 0.0146  
Z 0.0103 -0.0011 -0.0140 -0.0102 -0.0034 0.0242

AT. 77 H X 0.0031 0.0011 0.0058 0.0077 -0.0071 -0.0000  
Y 0.0084 0.0020 0.0092 0.0058 0.0012 -0.0243

Z -0.0104 -0.0033 -0.0141 -0.0129 0.0065 0.0209  
AT. 78 H X -0.0031 0.0011 0.0058 0.0077 0.0071 -0.0000  
Y -0.0084 0.0020 0.0092 0.0058 -0.0012 -0.0243  
Z 0.0104 -0.0033 -0.0141 -0.0129 -0.0065 0.0209  
AT. 79 I X 0.0000 0.0000 0.0000 -0.0000 0.0000 -0.0000  
Y -0.0000 -0.0000 -0.0000 0.0000 -0.0000 0.0000  
Z -0.0000 -0.0000 -0.0000 0.0000 -0.0000 0.0000  
AT. 80 I X -0.0000 0.0000 0.0000 -0.0000 -0.0000 -0.0000  
Y 0.0000 -0.0000 -0.0000 0.0000 0.0000 0.0000  
Z 0.0000 -0.0000 -0.0000 0.0000 0.0000 0.0000  
AT. 81 I X 0.0000 -0.0000 -0.0000 0.0000 0.0000 0.0000  
Y -0.0000 0.0000 0.0000 -0.0000 -0.0000 -0.0000  
Z -0.0000 -0.0000 0.0000 -0.0000 -0.0000 -0.0000  
AT. 82 I X -0.0000 -0.0000 -0.0000 0.0000 -0.0000 0.0000  
Y 0.0000 0.0000 0.0000 -0.0000 0.0000 -0.0000  
Z 0.0000 -0.0000 0.0000 -0.0000 0.0000 -0.0000  
AT. 83 O X 0.0028 0.0018 0.0057 -0.0052 0.0072 0.0018  
Y 0.0006 0.0004 0.0012 -0.0012 0.0016 0.0004  
Z 0.0012 0.0008 0.0026 -0.0024 0.0031 0.0008  
AT. 84 O X -0.0028 0.0018 0.0057 -0.0052 -0.0072 0.0018  
Y -0.0006 0.0004 0.0012 -0.0012 -0.0016 0.0004  
Z -0.0012 0.0008 0.0026 -0.0024 -0.0031 0.0008  
AT. 85 O X -0.0013 -0.0002 -0.0001 -0.0008 -0.0010 -0.0006  
Y -0.0008 -0.0001 -0.0002 -0.0002 -0.0006 -0.0002  
Z 0.0001 0.0001 -0.0003 0.0004 0.0002 0.0002  
AT. 86 O X 0.0013 -0.0002 -0.0001 -0.0008 0.0010 -0.0006  
Y 0.0008 -0.0001 -0.0002 -0.0002 0.0006 -0.0002  
Z -0.0001 0.0001 -0.0003 0.0004 -0.0002 0.0002  
AT. 87 N X 0.0007 0.0010 0.0022 -0.0023 0.0029 0.0007  
Y 0.0013 0.0011 0.0033 -0.0029 0.0042 0.0012  
Z -0.0058 -0.0053 -0.0139 0.0133 -0.0192 -0.0044  
AT. 88 N X -0.0007 0.0010 0.0022 -0.0023 -0.0029 0.0007

Y -0.0013 0.0011 0.0033 -0.0029 -0.0042 0.0012  
Z 0.0058 -0.0053 -0.0139 0.0133 0.0192 -0.0044  
AT. 89 N X -0.0011 -0.0000 -0.0003 -0.0008 -0.0014 -0.0015  
Y 0.0024 -0.0002 0.0001 0.0015 0.0006 0.0010  
Z -0.0058 0.0000 -0.0010 -0.0029 -0.0022 -0.0026  
AT. 90 N X 0.0011 -0.0000 -0.0003 -0.0008 0.0014 -0.0015  
Y -0.0024 -0.0002 0.0001 0.0015 -0.0006 0.0010  
Z 0.0058 0.0000 -0.0010 -0.0029 0.0022 -0.0026  
AT. 91 C X -0.0058 -0.0038 -0.0118 0.0110 -0.0156 -0.0039  
Y -0.0020 -0.0012 -0.0040 0.0037 -0.0054 -0.0015  
Z 0.0038 0.0032 0.0081 -0.0077 0.0121 0.0029  
AT. 92 C X 0.0058 -0.0038 -0.0118 0.0110 0.0156 -0.0039  
Y 0.0020 -0.0012 -0.0040 0.0037 0.0054 -0.0015  
Z -0.0038 0.0032 0.0081 -0.0077 -0.0121 0.0029  
AT. 93 C X 0.0013 0.0012 0.0028 -0.0030 0.0044 0.0008  
Y 0.0007 0.0010 0.0019 -0.0023 0.0033 0.0004  
Z -0.0011 -0.0012 -0.0025 0.0027 -0.0039 -0.0008  
AT. 94 C X -0.0013 0.0012 0.0028 -0.0030 -0.0044 0.0008  
Y -0.0007 0.0010 0.0019 -0.0023 -0.0033 0.0004  
Z 0.0011 -0.0012 -0.0025 0.0027 0.0039 -0.0008  
AT. 95 H X 0.0000 -0.0004 0.0001 -0.0001 0.0001 0.0003  
Y -0.0003 -0.0036 -0.0043 0.0073 -0.0093 0.0003  
Z 0.0025 0.0088 0.0119 -0.0177 0.0233 0.0003  
AT. 96 H X -0.0000 -0.0004 0.0001 -0.0001 -0.0001 0.0003  
Y 0.0003 -0.0036 -0.0043 0.0073 0.0093 0.0003  
Z -0.0025 0.0088 0.0119 -0.0177 -0.0233 0.0003  
AT. 97 H X -0.0001 -0.0028 -0.0028 0.0055 -0.0086 0.0008  
Y -0.0016 -0.0061 -0.0078 0.0122 -0.0164 0.0002  
Z -0.0013 -0.0016 -0.0031 0.0035 -0.0046 -0.0009  
AT. 98 H X 0.0001 -0.0028 -0.0028 0.0055 0.0086 0.0008  
Y 0.0016 -0.0061 -0.0078 0.0122 0.0164 0.0002  
Z 0.0013 -0.0016 -0.0031 0.0035 0.0046 -0.0009

AT. 99 C X 0.0040 0.0002 0.0004 0.0023 0.0029 0.0023  
Y -0.0015 0.0002 -0.0001 -0.0008 -0.0000 -0.0009  
Z 0.0044 0.0000 0.0011 0.0018 0.0016 0.0023

AT. 100 C X -0.0040 0.0002 0.0004 0.0023 -0.0029 0.0023  
Y 0.0015 0.0002 -0.0001 -0.0008 0.0000 -0.0009  
Z -0.0044 0.0000 0.0011 0.0018 -0.0016 0.0023

AT. 101 C X -0.0022 0.0003 0.0007 -0.0023 -0.0019 -0.0020  
Y -0.0011 0.0003 0.0006 -0.0013 -0.0009 -0.0011  
Z -0.0034 0.0006 0.0012 -0.0035 -0.0024 -0.0031

AT. 102 C X 0.0022 0.0003 0.0007 -0.0023 0.0019 -0.0020  
Y 0.0011 0.0003 0.0006 -0.0013 0.0009 -0.0011  
Z 0.0034 0.0006 0.0012 -0.0035 0.0024 -0.0031

AT. 103 H X 0.0020 -0.0004 -0.0005 0.0019 0.0024 0.0015  
Y -0.0031 0.0006 0.0010 -0.0032 -0.0029 -0.0027  
Z 0.0263 -0.0059 -0.0135 0.0321 0.0208 0.0269

AT. 104 H X -0.0020 -0.0004 -0.0005 0.0019 -0.0024 0.0015  
Y 0.0031 0.0006 0.0010 -0.0032 0.0029 -0.0027  
Z -0.0263 -0.0059 -0.0135 0.0321 -0.0208 0.0269

AT. 105 H X 0.0076 -0.0024 -0.0065 0.0128 0.0081 0.0113  
Y 0.0203 -0.0047 -0.0112 0.0251 0.0164 0.0211  
Z 0.0071 -0.0020 -0.0052 0.0102 0.0066 0.0084

AT. 106 H X -0.0076 -0.0024 -0.0065 0.0128 -0.0081 0.0113  
Y -0.0203 -0.0047 -0.0112 0.0251 -0.0164 0.0211  
Z -0.0071 -0.0020 -0.0052 0.0102 -0.0066 0.0084

AT. 107 C X 0.0000 0.0001 0.0005 0.0001 0.0000 0.0006  
Y 0.0000 0.0006 0.0012 -0.0014 0.0012 0.0008  
Z 0.0007 0.0012 0.0027 -0.0032 0.0039 0.0010

AT. 108 C X -0.0000 0.0001 0.0005 0.0001 -0.0000 0.0006  
Y -0.0000 0.0006 0.0012 -0.0014 -0.0012 0.0008  
Z -0.0007 0.0012 0.0027 -0.0032 -0.0039 0.0010

AT. 109 H X -0.0097 -0.0125 -0.0314 0.0243 -0.0334 -0.0124  
Y -0.0015 -0.0033 -0.0082 0.0061 -0.0085 -0.0055

Z 0.0008 -0.0016 -0.0036 0.0017 -0.0026 -0.0061  
AT. 110 H X 0.0097 -0.0125 -0.0314 0.0243 0.0334 -0.0124  
Y 0.0015 -0.0033 -0.0082 0.0061 0.0085 -0.0055  
Z -0.0008 -0.0016 -0.0036 0.0017 0.0026 -0.0061  
AT. 111 H X 0.0043 0.0045 0.0113 -0.0124 0.0156 0.0023  
Y -0.0064 -0.0098 -0.0246 0.0186 -0.0241 -0.0118  
Z -0.0029 -0.0016 -0.0044 0.0071 -0.0088 0.0013  
AT. 112 H X -0.0043 0.0045 0.0113 -0.0124 -0.0156 0.0023  
Y 0.0064 -0.0098 -0.0246 0.0186 0.0241 -0.0118  
Z 0.0029 -0.0016 -0.0044 0.0071 0.0088 0.0013  
AT. 113 C X -0.0002 0.0003 0.0003 -0.0008 0.0006 -0.0005  
Y 0.0012 0.0003 0.0019 0.0011 0.0014 0.0024  
Z 0.0015 0.0006 0.0026 -0.0010 0.0020 -0.0006  
AT. 114 C X 0.0002 0.0003 0.0003 -0.0008 -0.0006 -0.0005  
Y -0.0012 0.0003 0.0019 0.0011 -0.0014 0.0024  
Z -0.0015 0.0006 0.0026 -0.0010 -0.0020 -0.0006  
AT. 115 C X -0.0010 0.0007 0.0013 -0.0027 -0.0004 -0.0012  
Y -0.0008 -0.0003 -0.0006 -0.0003 -0.0012 -0.0013  
Z 0.0016 -0.0001 -0.0002 0.0015 0.0007 0.0013  
AT. 116 C X 0.0010 0.0007 0.0013 -0.0027 0.0004 -0.0012  
Y 0.0008 -0.0003 -0.0006 -0.0003 0.0012 -0.0013  
Z -0.0016 -0.0001 -0.0002 0.0015 -0.0007 0.0013  
AT. 117 H X 0.0115 -0.0039 -0.0052 0.0186 0.0063 0.0122  
Y 0.0049 0.0039 0.0082 -0.0067 0.0076 0.0011  
Z -0.0125 0.0037 0.0048 -0.0190 -0.0079 -0.0129  
AT. 118 H X -0.0115 -0.0039 -0.0052 0.0186 -0.0063 0.0122  
Y -0.0049 0.0039 0.0082 -0.0067 -0.0076 0.0011  
Z 0.0125 0.0037 0.0048 -0.0190 0.0079 -0.0129  
AT. 119 H X 0.0023 -0.0056 -0.0100 0.0189 0.0019 0.0108  
Y -0.0051 -0.0009 -0.0043 0.0012 -0.0011 0.0013  
Z 0.0071 -0.0026 -0.0021 0.0106 0.0015 0.0041  
AT. 120 H X -0.0023 -0.0056 -0.0100 0.0189 -0.0019 0.0108

Y 0.0051 -0.0009 -0.0043 0.0012 0.0011 0.0013  
Z -0.0071 -0.0026 -0.0021 0.0106 -0.0015 0.0041  
AT. 121 C X 0.0007 -0.0003 -0.0009 0.0014 -0.0006 -0.0002  
Y -0.0002 0.0004 -0.0002 -0.0003 -0.0002 -0.0005  
Z 0.0016 -0.0004 -0.0004 0.0016 -0.0000 0.0007  
AT. 122 C X -0.0007 -0.0003 -0.0009 0.0014 0.0006 -0.0002  
Y 0.0002 0.0004 -0.0002 -0.0003 0.0002 -0.0005  
Z -0.0016 -0.0004 -0.0004 0.0016 0.0000 0.0007  
AT. 123 H X -0.0019 0.0022 0.0087 -0.0079 0.0093 0.0056  
Y -0.0059 0.0009 0.0061 -0.0059 0.0068 0.0063  
Z 0.0063 -0.0005 -0.0052 0.0054 -0.0056 -0.0056  
AT. 124 H X 0.0019 0.0022 0.0087 -0.0079 -0.0093 0.0056  
Y 0.0059 0.0009 0.0061 -0.0059 -0.0068 0.0063  
Z -0.0063 -0.0005 -0.0052 0.0054 0.0056 -0.0056  
AT. 125 H X -0.0060 0.0012 0.0018 -0.0057 0.0016 0.0006  
Y -0.0068 0.0015 0.0090 -0.0085 0.0096 0.0063  
Z -0.0094 0.0019 0.0071 -0.0106 0.0070 0.0046  
AT. 126 H X 0.0060 0.0012 0.0018 -0.0057 -0.0016 0.0006  
Y 0.0068 0.0015 0.0090 -0.0085 -0.0096 0.0063  
Z 0.0094 0.0019 0.0071 -0.0106 -0.0070 0.0046  
AT. 127 C X 0.0013 0.0005 0.0014 -0.0012 0.0021 0.0011  
Y 0.0028 -0.0019 -0.0038 0.0046 -0.0044 -0.0025  
Z -0.0007 0.0006 0.0010 -0.0014 0.0007 -0.0012  
AT. 128 C X -0.0013 0.0005 0.0014 -0.0012 -0.0021 0.0011  
Y -0.0028 -0.0019 -0.0038 0.0046 0.0044 -0.0025  
Z 0.0007 0.0006 0.0010 -0.0014 -0.0007 -0.0012  
AT. 129 C X -0.0022 0.0008 -0.0014 -0.0012 -0.0011 -0.0022  
Y -0.0002 -0.0003 0.0001 0.0005 -0.0002 0.0007  
Z 0.0011 0.0014 0.0034 -0.0035 0.0047 0.0013  
AT. 130 C X 0.0022 0.0008 -0.0014 -0.0012 0.0011 -0.0022  
Y 0.0002 -0.0003 0.0001 0.0005 0.0002 0.0007  
Z -0.0011 0.0014 0.0034 -0.0035 -0.0047 0.0013



AT.131 H X 0.0059 -0.0105 -0.0091 0.0214 -0.0157 0.0039  
Y -0.0104 0.0032 -0.0107 -0.0034 -0.0090 -0.0113  
Z 0.0067 -0.0119 -0.0116 0.0244 -0.0184 0.0038

AT.132 H X -0.0059 -0.0105 -0.0091 0.0214 0.0157 0.0039  
Y 0.0104 0.0032 -0.0107 -0.0034 0.0090 -0.0113  
Z -0.0067 -0.0119 -0.0116 0.0244 0.0184 0.0038

AT.133 H X 0.0212 -0.0042 0.0189 0.0036 0.0192 0.0182  
Y 0.0040 0.0043 0.0124 -0.0099 0.0155 0.0055  
Z -0.0033 0.0104 0.0128 -0.0213 0.0189 -0.0009

AT.134 H X -0.0212 -0.0042 0.0189 0.0036 -0.0192 0.0182  
Y -0.0040 0.0043 0.0124 -0.0099 -0.0155 0.0055  
Z 0.0033 0.0104 0.0128 -0.0213 -0.0189 -0.0009

AT.135 C X 0.0005 0.0003 0.0010 -0.0005 0.0007 -0.0005  
Y 0.0010 0.0003 0.0023 0.0003 0.0011 0.0012  
Z 0.0004 0.0001 0.0007 0.0002 -0.0001 -0.0009

AT.136 C X -0.0005 0.0003 0.0010 -0.0005 -0.0007 -0.0005  
Y -0.0010 0.0003 0.0023 0.0003 -0.0011 0.0012  
Z -0.0004 0.0001 0.0007 0.0002 0.0001 -0.0009

AT.137 H X -0.0105 -0.0030 -0.0227 -0.0050 -0.0109 -0.0161  
Y -0.0082 -0.0029 -0.0175 -0.0002 -0.0071 0.0022  
Z -0.0106 -0.0041 -0.0230 0.0014 -0.0092 0.0079

AT.138 H X 0.0105 -0.0030 -0.0227 -0.0050 0.0109 -0.0161  
Y 0.0082 -0.0029 -0.0175 -0.0002 0.0071 0.0022  
Z 0.0106 -0.0041 -0.0230 0.0014 0.0092 0.0079

AT.139 H X 0.0008 -0.0011 -0.0008 0.0047 -0.0013 0.0088  
Y -0.0151 -0.0044 -0.0330 -0.0068 -0.0145 -0.0180  
Z 0.0042 0.0030 0.0117 -0.0046 0.0067 -0.0069

AT.140 H X -0.0008 -0.0011 -0.0008 0.0047 0.0013 0.0088  
Y 0.0151 -0.0044 -0.0330 -0.0068 0.0145 -0.0180  
Z -0.0042 0.0030 0.0117 -0.0046 -0.0067 -0.0069

AT.141 H X 0.0060 0.0004 0.0111 0.0078 0.0043 0.0171  
Y 0.0066 0.0022 0.0130 -0.0003 0.0045 -0.0071

Z -0.0036 -0.0020 -0.0077 0.0040 -0.0027 0.0145  
AT. 142 H X -0.0060 0.0004 0.0111 0.0078 -0.0043 0.0171  
Y -0.0066 0.0022 0.0130 -0.0003 -0.0045 -0.0071  
Z 0.0036 -0.0020 -0.0077 0.0040 0.0027 0.0145  
AT. 143 C X 0.0005 0.0003 0.0002 -0.0004 0.0006 0.0012  
Y 0.0022 -0.0010 -0.0025 0.0028 -0.0022 -0.0022  
Z -0.0020 0.0002 -0.0007 -0.0003 -0.0012 -0.0012  
AT. 144 C X -0.0005 0.0003 0.0002 -0.0004 -0.0006 0.0012  
Y -0.0022 -0.0010 -0.0025 0.0028 0.0022 -0.0022  
Z 0.0020 0.0002 -0.0007 -0.0003 0.0012 -0.0012  
AT. 145 H X -0.0169 0.0102 0.0278 -0.0282 0.0298 0.0255  
Y -0.0305 0.0081 0.0121 -0.0209 0.0060 0.0007  
Z 0.0284 -0.0067 -0.0079 0.0168 -0.0008 0.0036  
AT. 146 H X 0.0169 0.0102 0.0278 -0.0282 -0.0298 0.0255  
Y 0.0305 0.0081 0.0121 -0.0209 -0.0060 0.0007  
Z -0.0284 -0.0067 -0.0079 0.0168 0.0008 0.0036  
AT. 147 H X -0.0034 -0.0035 -0.0089 0.0089 -0.0133 -0.0149  
Y -0.0271 0.0164 0.0392 -0.0439 0.0410 0.0370  
Z -0.0205 0.0039 0.0082 -0.0110 0.0026 -0.0024  
AT. 148 H X 0.0034 -0.0035 -0.0089 0.0089 0.0133 -0.0149  
Y 0.0271 0.0164 0.0392 -0.0439 -0.0410 0.0370  
Z 0.0205 0.0039 0.0082 -0.0110 -0.0026 -0.0024  
AT. 149 H X 0.0080 -0.0117 -0.0271 0.0297 -0.0334 -0.0316  
Y 0.0183 -0.0053 -0.0062 0.0130 -0.0036 0.0004  
Z 0.0237 -0.0018 0.0055 0.0035 0.0127 0.0189  
AT. 150 H X -0.0080 -0.0117 -0.0271 0.0297 0.0334 -0.0316  
Y -0.0183 -0.0053 -0.0062 0.0130 0.0036 0.0004  
Z -0.0237 -0.0018 0.0055 0.0035 -0.0127 0.0189  
AT. 151 C X -0.0005 -0.0004 -0.0005 0.0006 -0.0009 -0.0002  
Y -0.0008 0.0003 0.0003 -0.0009 0.0003 0.0000  
Z 0.0005 -0.0010 -0.0016 0.0006 -0.0024 -0.0028  
AT. 152 C X 0.0005 -0.0004 -0.0005 0.0006 0.0009 -0.0002

Y 0.0008 0.0003 0.0003 -0.0009 -0.0003 0.0000  
Z -0.0005 -0.0010 -0.0016 0.0006 0.0024 -0.0028  
AT. 153 H X -0.0001 0.0022 0.0045 -0.0046 0.0054 0.0012  
Y -0.0021 0.0041 0.0055 -0.0014 0.0109 0.0161  
Z -0.0026 0.0046 0.0047 0.0015 0.0128 0.0236  
AT. 154 H X 0.0001 0.0022 0.0045 -0.0046 -0.0054 0.0012  
Y 0.0021 0.0041 0.0055 -0.0014 -0.0109 0.0161  
Z 0.0026 0.0046 0.0047 0.0015 -0.0128 0.0236  
AT. 155 H X 0.0003 -0.0002 -0.0031 0.0012 -0.0012 0.0002  
Y 0.0035 -0.0046 -0.0062 0.0022 -0.0122 -0.0189  
Z -0.0035 0.0044 0.0042 -0.0016 0.0109 0.0184  
AT. 156 H X -0.0003 -0.0002 -0.0031 0.0012 0.0012 0.0002  
Y -0.0035 -0.0046 -0.0062 0.0022 0.0122 -0.0189  
Z 0.0035 0.0044 0.0042 -0.0016 -0.0109 0.0184  
AT. 157 O X -0.0011 0.0009 -0.0019 -0.0008 0.0006 0.0003  
Y -0.0010 0.0012 -0.0028 -0.0013 0.0011 0.0006  
Z 0.0051 -0.0022 0.0022 0.0003 -0.0005 0.0005  
AT. 158 O X 0.0011 0.0009 -0.0019 -0.0008 -0.0006 0.0003  
Y 0.0010 0.0012 -0.0028 -0.0013 -0.0011 0.0006  
Z -0.0051 -0.0022 0.0022 0.0003 0.0005 0.0005  
AT. 159 O X -0.0061 0.0028 -0.0033 -0.0007 0.0009 -0.0004  
Y 0.0011 -0.0009 0.0020 0.0008 -0.0008 -0.0003  
Z -0.0030 0.0008 0.0002 0.0006 -0.0003 -0.0007  
AT. 160 O X 0.0061 0.0028 -0.0033 -0.0007 -0.0009 -0.0004  
Y -0.0011 -0.0009 0.0020 0.0008 0.0008 -0.0003  
Z 0.0030 0.0008 0.0002 0.0006 0.0003 -0.0007  
AT. 161 H X -0.0011 -0.0152 0.0499 0.0269 -0.0196 -0.0152  
Y -0.0007 -0.0029 0.0096 0.0054 -0.0044 -0.0031  
Z 0.0069 0.0064 -0.0271 -0.0158 0.0111 0.0100  
AT. 162 H X 0.0011 -0.0152 0.0499 0.0269 0.0196 -0.0152  
Y 0.0007 -0.0029 0.0096 0.0054 0.0044 -0.0031  
Z -0.0069 0.0064 -0.0271 -0.0158 -0.0111 0.0100

AT.163 H X 0.1263 -0.0500 0.0424 0.0010 -0.0090 0.0169  
           Y -0.0038 -0.0008 0.0018 0.0038 0.0004 -0.0013  
           Z -0.0506 0.0193 -0.0160 0.0003 0.0033 -0.0072  
 AT.164 H X -0.1263 -0.0500 0.0424 0.0010 0.0090 0.0169  
           Y 0.0038 -0.0008 0.0018 0.0038 -0.0004 -0.0013  
           Z 0.0506 0.0193 -0.0160 0.0003 -0.0033 -0.0072  
 AT.165 O X 0.0003 -0.0003 -0.0007 0.0008 -0.0003 0.0006  
           Y -0.0006 -0.0002 0.0009 -0.0008 0.0001 -0.0009  
           Z 0.0009 0.0003 -0.0011 0.0010 0.0001 0.0014  
 AT.166 O X -0.0003 -0.0003 -0.0007 0.0008 0.0003 0.0006  
           Y 0.0006 -0.0002 0.0009 -0.0008 -0.0001 -0.0009  
           Z -0.0009 0.0003 -0.0011 0.0010 -0.0001 0.0014  
 AT.167 H X 0.0002 0.0027 0.0012 -0.0023 0.0014 -0.0009  
           Y -0.0014 -0.0014 -0.0003 0.0006 -0.0017 -0.0017  
           Z 0.0017 -0.0073 -0.0079 0.0113 -0.0053 0.0069  
 AT.168 H X -0.0002 0.0027 0.0012 -0.0023 -0.0014 -0.0009  
           Y 0.0014 -0.0014 -0.0003 0.0006 0.0017 -0.0017  
           Z -0.0017 -0.0073 -0.0079 0.0113 0.0053 0.0069  
 AT.169 O X -0.0007 -0.0000 0.0009 -0.0010 0.0000 -0.0013  
           Y 0.0013 0.0004 -0.0016 0.0014 -0.0000 0.0019  
           Z 0.0007 0.0004 -0.0006 0.0005 0.0001 0.0007  
 AT.170 O X 0.0007 -0.0000 0.0009 -0.0010 -0.0000 -0.0013  
           Y -0.0013 0.0004 -0.0016 0.0014 0.0000 0.0019  
           Z -0.0007 0.0004 -0.0006 0.0005 -0.0001 0.0007  
 AT.171 H X 0.0067 0.0029 -0.0075 0.0063 0.0023 0.0122  
           Y -0.0111 -0.0014 0.0145 -0.0142 0.0021 -0.0157  
           Z -0.0296 -0.0057 0.0373 -0.0358 0.0027 -0.0436  
 AT.172 H X -0.0067 0.0029 -0.0075 0.0063 -0.0023 0.0122  
           Y 0.0111 -0.0014 0.0145 -0.0142 -0.0021 -0.0157  
           Z 0.0296 -0.0057 0.0373 -0.0358 -0.0027 -0.0436

FREQ(CM\*\*-1) 1467.03 1468.42 1469.35 1471.22 1473.19 1474.69

AT. 1 I X -0.0000 -0.0000 0.0000 -0.0000 0.0000 0.0000  
Y -0.0000 -0.0000 0.0000 0.0000 0.0000 0.0000  
Z -0.0000 -0.0000 0.0000 -0.0000 0.0000 0.0000

AT. 2 I X 0.0000 -0.0000 -0.0000 -0.0000 -0.0000 0.0000  
Y 0.0000 -0.0000 -0.0000 0.0000 -0.0000 0.0000  
Z 0.0000 -0.0000 -0.0000 -0.0000 -0.0000 0.0000

AT. 3 I X 0.0000 -0.0000 0.0000 0.0000 -0.0000 -0.0000  
Y -0.0000 -0.0000 0.0000 0.0000 0.0000 -0.0000  
Z 0.0000 -0.0000 0.0000 -0.0000 -0.0000 0.0000

AT. 4 I X -0.0000 -0.0000 -0.0000 0.0000 0.0000 -0.0000  
Y 0.0000 -0.0000 -0.0000 0.0000 -0.0000 -0.0000  
Z -0.0000 -0.0000 -0.0000 -0.0000 0.0000 0.0000

AT. 5 O X -0.0023 -0.0009 -0.0001 0.0000 0.0028 0.0012  
Y 0.0015 0.0005 -0.0000 0.0000 -0.0011 -0.0002  
Z 0.0017 0.0007 0.0001 -0.0001 -0.0027 -0.0014

AT. 6 O X 0.0023 -0.0009 0.0001 0.0000 -0.0028 0.0012  
Y -0.0015 0.0005 0.0000 0.0000 0.0011 -0.0002  
Z -0.0017 0.0007 -0.0001 -0.0001 0.0027 -0.0014

AT. 7 O X 0.0007 -0.0007 0.0006 0.0001 -0.0002 -0.0008  
Y -0.0009 0.0008 -0.0007 -0.0001 0.0003 0.0008  
Z 0.0004 -0.0001 0.0002 -0.0001 -0.0003 -0.0000

AT. 8 O X -0.0007 -0.0007 -0.0006 0.0001 0.0002 -0.0008  
Y 0.0009 0.0008 0.0007 -0.0001 -0.0003 0.0008  
Z -0.0004 -0.0001 -0.0002 -0.0001 0.0003 -0.0000

AT. 9 N X -0.0027 0.0006 -0.0006 -0.0002 -0.0008 -0.0014  
Y 0.0033 0.0002 0.0002 0.0001 -0.0011 0.0007  
Z -0.0096 -0.0010 -0.0003 -0.0003 0.0026 -0.0027

AT. 10 N X 0.0027 0.0006 0.0006 -0.0002 0.0008 -0.0014  
Y -0.0033 0.0002 -0.0002 0.0001 0.0011 0.0007  
Z 0.0096 -0.0010 0.0003 -0.0003 -0.0026 -0.0027

AT. 11 N X 0.0016 -0.0006 0.0004 0.0002 0.0001 -0.0003

Y -0.0006 0.0007 -0.0006 -0.0003 -0.0003 0.0007  
Z -0.0032 0.0019 -0.0011 0.0004 0.0023 0.0004  
AT. 12 N X -0.0016 -0.0006 -0.0004 0.0002 -0.0001 -0.0003  
Y 0.0006 0.0007 0.0006 -0.0003 0.0003 0.0007  
Z 0.0032 0.0019 0.0011 0.0004 -0.0023 0.0004  
AT. 13 C X 0.0065 0.0015 0.0002 0.0001 -0.0040 -0.0001  
Y -0.0053 -0.0012 -0.0000 -0.0001 0.0027 -0.0003  
Z 0.0052 -0.0003 -0.0001 0.0003 0.0019 0.0043  
AT. 14 C X -0.0065 0.0015 -0.0002 0.0001 0.0040 -0.0001  
Y 0.0053 -0.0012 0.0000 -0.0001 -0.0027 -0.0003  
Z -0.0052 -0.0003 0.0001 0.0003 -0.0019 0.0043  
AT. 15 C X -0.0019 -0.0000 -0.0001 0.0000 -0.0001 -0.0011  
Y 0.0031 -0.0006 0.0006 0.0002 0.0013 0.0026  
Z -0.0016 0.0002 -0.0001 -0.0001 -0.0006 -0.0014  
AT. 16 C X 0.0019 -0.0000 0.0001 0.0000 0.0001 -0.0011  
Y -0.0031 -0.0006 -0.0006 0.0002 -0.0013 0.0026  
Z 0.0016 0.0002 0.0001 -0.0001 0.0006 -0.0014  
AT. 17 H X -0.0017 0.0016 -0.0015 -0.0004 0.0007 0.0012  
Y -0.0106 0.0057 -0.0035 -0.0012 -0.0118 -0.0147  
Z 0.0155 -0.0068 0.0043 0.0014 0.0153 0.0203  
AT. 18 H X 0.0017 0.0016 0.0015 -0.0004 -0.0007 0.0012  
Y 0.0106 0.0057 0.0035 -0.0012 0.0118 -0.0147  
Z -0.0155 -0.0068 -0.0043 0.0014 -0.0153 0.0203  
AT. 19 H X 0.0025 -0.0012 0.0014 -0.0006 0.0015 0.0029  
Y -0.0133 0.0067 -0.0046 -0.0012 -0.0135 -0.0174  
Z -0.0063 0.0024 -0.0015 -0.0007 -0.0053 -0.0072  
AT. 20 H X -0.0025 -0.0012 -0.0014 -0.0006 -0.0015 0.0029  
Y 0.0133 0.0067 0.0046 -0.0012 0.0135 -0.0174  
Z 0.0063 0.0024 0.0015 -0.0007 0.0053 -0.0072  
AT. 21 C X -0.0026 0.0018 -0.0015 -0.0000 0.0009 0.0011  
Y 0.0008 -0.0009 0.0010 0.0003 0.0002 -0.0011  
Z 0.0020 -0.0013 0.0006 -0.0002 -0.0012 -0.0002

AT. 22 C X 0.0026 0.0018 0.0015 -0.0000 -0.0009 0.0011  
Y -0.0008 -0.0009 -0.0010 0.0003 -0.0002 -0.0011  
Z -0.0020 -0.0013 -0.0006 -0.0002 0.0012 -0.0002

AT. 23 C X 0.0010 -0.0003 0.0003 -0.0001 -0.0006 0.0002  
Y -0.0006 -0.0000 -0.0001 0.0002 0.0002 -0.0002  
Z -0.0014 0.0000 -0.0001 0.0004 0.0008 -0.0006

AT. 24 C X -0.0010 -0.0003 -0.0003 -0.0001 0.0006 0.0002  
Y 0.0006 -0.0000 0.0001 0.0002 -0.0002 -0.0002  
Z 0.0014 0.0000 0.0001 0.0004 -0.0008 -0.0006

AT. 25 H X -0.0004 -0.0004 0.0002 0.0000 0.0012 -0.0003  
Y -0.0023 -0.0004 -0.0000 0.0007 0.0014 -0.0012  
Z 0.0093 0.0034 -0.0014 -0.0036 -0.0056 0.0068

AT. 26 H X 0.0004 -0.0004 -0.0002 0.0000 -0.0012 -0.0003  
Y 0.0023 -0.0004 0.0000 0.0007 -0.0014 -0.0012  
Z -0.0093 0.0034 0.0014 -0.0036 0.0056 0.0068

AT. 27 H X -0.0039 0.0000 -0.0008 0.0002 0.0037 -0.0033  
Y 0.0076 0.0025 -0.0004 -0.0032 -0.0037 0.0047  
Z 0.0039 0.0013 -0.0001 -0.0015 -0.0022 0.0027

AT. 28 H X 0.0039 0.0000 0.0008 0.0002 -0.0037 -0.0033  
Y -0.0076 0.0025 0.0004 -0.0032 0.0037 0.0047  
Z -0.0039 0.0013 0.0001 -0.0015 0.0022 0.0027

AT. 29 C X 0.0003 0.0002 0.0002 0.0001 0.0002 -0.0000  
Y -0.0004 -0.0004 -0.0002 0.0000 0.0007 -0.0003  
Z 0.0017 -0.0002 0.0002 0.0002 0.0006 0.0004

AT. 30 C X -0.0003 0.0002 -0.0002 0.0001 -0.0002 -0.0000  
Y 0.0004 -0.0004 0.0002 0.0000 -0.0007 -0.0003  
Z -0.0017 -0.0002 -0.0002 0.0002 -0.0006 0.0004

AT. 31 H X 0.0135 0.0000 -0.0005 -0.0007 -0.0060 0.0036  
Y -0.0077 0.0053 -0.0011 -0.0001 -0.0045 -0.0024  
Z -0.0011 0.0078 -0.0017 -0.0005 -0.0106 0.0000

AT. 32 H X -0.0135 0.0000 0.0005 -0.0007 0.0060 0.0036  
Y 0.0077 0.0053 0.0011 -0.0001 0.0045 -0.0024

Z 0.0011 0.0078 0.0017 -0.0005 0.0106 0.0000  
AT. 33 H X -0.0096 -0.0002 -0.0002 0.0002 0.0029 -0.0022  
Y -0.0046 0.0071 -0.0007 0.0003 -0.0063 -0.0014  
Z -0.0033 -0.0035 0.0002 0.0001 0.0049 -0.0008  
AT. 34 H X 0.0096 -0.0002 0.0002 0.0002 -0.0029 -0.0022  
Y 0.0046 0.0071 0.0007 0.0003 0.0063 -0.0014  
Z 0.0033 -0.0035 -0.0002 0.0001 -0.0049 -0.0008  
AT. 35 C X 0.0016 -0.0019 0.0008 0.0001 0.0013 0.0009  
Y 0.0021 -0.0026 0.0010 -0.0002 0.0020 0.0010  
Z 0.0018 0.0002 -0.0003 -0.0007 -0.0035 0.0007  
AT. 36 C X -0.0016 -0.0019 -0.0008 0.0001 -0.0013 0.0009  
Y -0.0021 -0.0026 -0.0010 -0.0002 -0.0020 0.0010  
Z -0.0018 0.0002 0.0003 -0.0007 0.0035 0.0007  
AT. 37 C X -0.0001 0.0026 -0.0019 -0.0002 -0.0006 0.0014  
Y -0.0006 -0.0000 0.0002 0.0001 -0.0007 -0.0005  
Z 0.0006 -0.0005 0.0002 -0.0000 0.0002 -0.0002  
AT. 38 C X 0.0001 0.0026 0.0019 -0.0002 0.0006 0.0014  
Y 0.0006 -0.0000 -0.0002 0.0001 0.0007 -0.0005  
Z -0.0006 -0.0005 -0.0002 -0.0000 -0.0002 -0.0002  
AT. 39 H X -0.0064 -0.0119 0.0096 0.0011 0.0020 -0.0089  
Y 0.0068 -0.0060 0.0041 -0.0011 -0.0032 -0.0012  
Z -0.0064 -0.0073 0.0059 0.0012 0.0028 -0.0063  
AT. 40 H X 0.0064 -0.0119 -0.0096 0.0011 -0.0020 -0.0089  
Y -0.0068 -0.0060 -0.0041 -0.0011 0.0032 -0.0012  
Z 0.0064 -0.0073 -0.0059 0.0012 -0.0028 -0.0063  
AT. 41 H X -0.0027 -0.0127 0.0099 0.0002 -0.0012 -0.0082  
Y -0.0024 0.0110 -0.0080 0.0011 0.0048 0.0029  
Z 0.0042 0.0064 -0.0054 -0.0013 -0.0035 0.0071  
AT. 42 H X 0.0027 -0.0127 -0.0099 0.0002 0.0012 -0.0082  
Y 0.0024 0.0110 0.0080 0.0011 -0.0048 0.0029  
Z -0.0042 0.0064 0.0054 -0.0013 0.0035 0.0071  
AT. 43 C X 0.0014 -0.0014 0.0010 0.0002 0.0002 -0.0002



Y -0.0046 0.0047 -0.0030 -0.0007 0.0014 0.0046  
Z -0.0005 0.0006 -0.0005 -0.0002 0.0001 -0.0000  
AT. 44 C X -0.0014 -0.0014 -0.0010 0.0002 -0.0002 -0.0002  
Y 0.0046 0.0047 0.0030 -0.0007 -0.0014 0.0046  
Z 0.0005 0.0006 0.0005 -0.0002 -0.0001 -0.0000  
AT. 45 H X -0.0359 0.0343 -0.0229 -0.0046 0.0130 0.0255  
Y 0.0404 -0.0362 0.0232 0.0064 -0.0061 -0.0282  
Z -0.0160 0.0135 -0.0082 -0.0034 -0.0029 0.0120  
AT. 46 H X 0.0359 0.0343 0.0229 -0.0046 -0.0130 0.0255  
Y -0.0404 -0.0362 -0.0232 0.0064 0.0061 -0.0282  
Z 0.0160 0.0135 0.0082 -0.0034 0.0029 0.0120  
AT. 47 H X 0.0151 -0.0136 0.0086 0.0015 -0.0082 -0.0135  
Y 0.0457 -0.0415 0.0271 0.0072 -0.0116 -0.0342  
Z 0.0304 -0.0284 0.0187 0.0057 -0.0022 -0.0206  
AT. 48 H X -0.0151 -0.0136 -0.0086 0.0015 0.0082 -0.0135  
Y -0.0457 -0.0415 -0.0271 0.0072 0.0116 -0.0342  
Z -0.0304 -0.0284 -0.0187 0.0057 0.0022 -0.0206  
AT. 49 C X -0.0021 0.0008 -0.0007 -0.0004 -0.0038 -0.0026  
Y -0.0052 0.0031 -0.0022 -0.0008 -0.0013 -0.0001  
Z 0.0011 0.0005 -0.0001 -0.0003 -0.0035 0.0007  
AT. 50 C X 0.0021 0.0008 0.0007 -0.0004 0.0038 -0.0026  
Y 0.0052 0.0031 0.0022 -0.0008 0.0013 -0.0001  
Z -0.0011 0.0005 0.0001 -0.0003 0.0035 0.0007  
AT. 51 C X -0.0010 0.0026 -0.0013 -0.0005 -0.0054 -0.0053  
Y 0.0003 -0.0012 0.0007 0.0002 0.0014 -0.0001  
Z 0.0032 -0.0013 0.0008 0.0003 0.0019 0.0016  
AT. 52 C X 0.0010 0.0026 0.0013 -0.0005 0.0054 -0.0053  
Y -0.0003 -0.0012 -0.0007 0.0002 -0.0014 -0.0001  
Z -0.0032 -0.0013 -0.0008 0.0003 -0.0019 0.0016  
AT. 53 H X 0.0165 -0.0173 0.0093 0.0036 0.0358 0.0340  
Y 0.0002 -0.0106 0.0048 0.0021 0.0293 0.0257  
Z -0.0266 0.0212 -0.0122 -0.0042 -0.0362 -0.0359

AT. 54 H X -0.0165 -0.0173 -0.0093 0.0036 -0.0358 0.0340  
Y -0.0002 -0.0106 -0.0048 0.0021 -0.0293 0.0257  
Z 0.0266 0.0212 0.0122 -0.0042 0.0362 -0.0359

AT. 55 H X 0.0139 -0.0271 0.0143 0.0053 0.0569 0.0493  
Y 0.0036 0.0133 -0.0051 -0.0019 -0.0306 -0.0187  
Z 0.0164 -0.0018 0.0036 0.0014 0.0006 0.0125

AT. 56 H X -0.0139 -0.0271 -0.0143 0.0053 -0.0569 0.0493  
Y -0.0036 0.0133 0.0051 -0.0019 0.0306 -0.0187  
Z -0.0164 -0.0018 -0.0036 0.0014 -0.0006 0.0125

AT. 57 C X 0.0007 -0.0019 0.0009 0.0002 0.0026 0.0008  
Y 0.0021 -0.0022 0.0005 -0.0003 0.0007 0.0013  
Z 0.0005 0.0002 -0.0004 -0.0005 -0.0020 0.0006

AT. 58 C X -0.0007 -0.0019 -0.0009 0.0002 -0.0026 0.0008  
Y -0.0021 -0.0022 -0.0005 -0.0003 -0.0007 0.0013  
Z -0.0005 0.0002 0.0004 -0.0005 0.0020 0.0006

AT. 59 H X 0.0140 -0.0232 0.0095 0.0007 0.0250 0.0077  
Y -0.0187 0.0159 -0.0028 0.0051 0.0046 -0.0107  
Z -0.0199 0.0101 0.0014 0.0079 0.0221 -0.0117

AT. 60 H X -0.0140 -0.0232 -0.0095 0.0007 -0.0250 0.0077  
Y 0.0187 0.0159 0.0028 0.0051 -0.0046 -0.0107  
Z 0.0199 0.0101 -0.0014 0.0079 -0.0221 -0.0117

AT. 61 H X -0.0155 0.0282 -0.0122 -0.0015 -0.0326 -0.0126  
Y -0.0310 0.0343 -0.0100 0.0049 -0.0121 -0.0182  
Z 0.0042 0.0050 -0.0048 -0.0040 -0.0210 -0.0001

AT. 62 H X 0.0155 0.0282 0.0122 -0.0015 0.0326 -0.0126  
Y 0.0310 0.0343 0.0100 0.0049 0.0121 -0.0182  
Z -0.0042 0.0050 0.0048 -0.0040 0.0210 -0.0001

AT. 63 H X -0.0144 0.0268 -0.0121 -0.0018 -0.0321 -0.0103  
Y 0.0144 -0.0106 0.0014 -0.0047 -0.0083 0.0093  
Z 0.0031 -0.0187 0.0110 0.0055 0.0387 0.0033

AT. 64 H X 0.0144 0.0268 0.0121 -0.0018 0.0321 -0.0103  
Y -0.0144 -0.0106 -0.0014 -0.0047 0.0083 0.0093

Z -0.0031 -0.0187 -0.0110 0.0055 -0.0387 0.0033  
AT. 65 C X -0.0013 0.0003 -0.0007 -0.0006 -0.0033 -0.0009  
Y -0.0026 0.0011 -0.0010 -0.0005 -0.0002 0.0000  
Z 0.0002 0.0005 -0.0004 0.0000 -0.0026 -0.0009  
AT. 66 C X 0.0013 0.0003 0.0007 -0.0006 0.0033 -0.0009  
Y 0.0026 0.0011 0.0010 -0.0005 0.0002 0.0000  
Z -0.0002 0.0005 0.0004 0.0000 0.0026 -0.0009  
AT. 67 H X -0.0253 0.0150 -0.0119 -0.0054 -0.0232 -0.0057  
Y 0.0302 -0.0116 0.0085 0.0036 -0.0191 -0.0058  
Z -0.0085 -0.0009 0.0012 0.0008 0.0349 0.0096  
AT. 68 H X 0.0253 0.0150 0.0119 -0.0054 0.0232 -0.0057  
Y -0.0302 -0.0116 -0.0085 0.0036 0.0191 -0.0058  
Z 0.0085 -0.0009 -0.0012 0.0008 -0.0349 0.0096  
AT. 69 H X 0.0258 -0.0107 0.0108 0.0071 0.0287 0.0094  
Y 0.0398 -0.0179 0.0160 0.0085 0.0223 0.0066  
Z 0.0097 -0.0062 0.0026 -0.0016 -0.0281 -0.0100  
AT. 70 H X -0.0258 -0.0107 -0.0108 0.0071 -0.0287 0.0094  
Y -0.0398 -0.0179 -0.0160 0.0085 -0.0223 0.0066  
Z -0.0097 -0.0062 -0.0026 -0.0016 0.0281 -0.0100  
AT. 71 H X 0.0245 -0.0114 0.0127 0.0084 0.0516 0.0172  
Y -0.0215 0.0064 -0.0061 -0.0040 0.0010 -0.0020  
Z -0.0083 -0.0004 0.0020 0.0015 0.0402 0.0101  
AT. 72 H X -0.0245 -0.0114 -0.0127 0.0084 -0.0516 0.0172  
Y 0.0215 0.0064 0.0061 -0.0040 -0.0010 -0.0020  
Z 0.0083 -0.0004 -0.0020 0.0015 -0.0402 0.0101  
AT. 73 C X -0.0002 0.0008 -0.0003 -0.0001 0.0004 0.0015  
Y 0.0007 -0.0009 0.0006 0.0002 0.0003 -0.0012  
Z -0.0007 0.0018 -0.0009 -0.0000 -0.0011 0.0033  
AT. 74 C X 0.0002 0.0008 0.0003 -0.0001 -0.0004 0.0015  
Y -0.0007 -0.0009 -0.0006 0.0002 -0.0003 -0.0012  
Z 0.0007 0.0018 0.0009 -0.0000 0.0011 0.0033  
AT. 75 H X -0.0065 -0.0044 0.0014 0.0003 0.0051 -0.0193

Y 0.0049 -0.0093 0.0054 0.0011 0.0123 -0.0082  
Z 0.0007 -0.0138 0.0073 0.0018 0.0201 -0.0216  
AT. 76 H X 0.0065 -0.0044 -0.0014 0.0003 -0.0051 -0.0193  
Y -0.0049 -0.0093 -0.0054 0.0011 -0.0123 -0.0082  
Z -0.0007 -0.0138 -0.0073 0.0018 -0.0201 -0.0216  
AT. 77 H X 0.0070 -0.0027 0.0015 -0.0000 -0.0006 0.0080  
Y -0.0069 0.0158 -0.0089 -0.0019 -0.0185 0.0185  
Z -0.0008 -0.0106 0.0061 0.0018 0.0184 -0.0219  
AT. 78 H X -0.0070 -0.0027 -0.0015 -0.0000 0.0006 0.0080  
Y 0.0069 0.0158 0.0089 -0.0019 0.0185 0.0185  
Z 0.0008 -0.0106 -0.0061 0.0018 -0.0184 -0.0219  
AT. 79 I X 0.0000 -0.0000 -0.0000 0.0000 0.0000 0.0000  
Y -0.0000 0.0000 0.0000 -0.0000 -0.0000 -0.0000  
Z -0.0000 0.0000 0.0000 -0.0000 -0.0000 -0.0000  
AT. 80 I X -0.0000 -0.0000 0.0000 0.0000 -0.0000 0.0000  
Y 0.0000 0.0000 -0.0000 -0.0000 0.0000 -0.0000  
Z 0.0000 0.0000 -0.0000 -0.0000 0.0000 -0.0000  
AT. 81 I X 0.0000 0.0000 -0.0000 0.0000 -0.0000 -0.0000  
Y -0.0000 -0.0000 0.0000 -0.0000 0.0000 0.0000  
Z -0.0000 -0.0000 0.0000 -0.0000 0.0000 0.0000  
AT. 82 I X -0.0000 0.0000 0.0000 0.0000 0.0000 -0.0000  
Y 0.0000 -0.0000 -0.0000 -0.0000 -0.0000 0.0000  
Z 0.0000 -0.0000 -0.0000 -0.0000 -0.0000 0.0000  
AT. 83 O X 0.0040 0.0013 0.0021 0.0057 -0.0003 0.0021  
Y 0.0009 0.0003 0.0004 0.0011 -0.0001 0.0005  
Z 0.0017 0.0005 0.0009 0.0026 -0.0000 0.0012  
AT. 84 O X -0.0040 0.0013 -0.0021 0.0057 0.0003 0.0021  
Y -0.0009 0.0003 -0.0004 0.0011 0.0001 0.0005  
Z -0.0017 0.0005 -0.0009 0.0026 0.0000 0.0012  
AT. 85 O X -0.0016 -0.0012 0.0013 -0.0025 0.0002 0.0001  
Y -0.0007 -0.0003 0.0003 -0.0013 0.0001 -0.0000  
Z 0.0002 0.0009 -0.0009 0.0008 0.0001 0.0000

AT. 86 O X 0.0016 -0.0012 -0.0013 -0.0025 -0.0002 0.0001  
Y 0.0007 -0.0003 -0.0003 -0.0013 -0.0001 -0.0000  
Z -0.0002 0.0009 0.0009 0.0008 -0.0001 0.0000

AT. 87 N X 0.0013 0.0004 0.0019 0.0007 -0.0009 -0.0008  
Y 0.0020 0.0011 0.0015 0.0033 -0.0003 0.0009  
Z -0.0080 -0.0043 -0.0092 -0.0138 0.0024 -0.0014

AT. 88 N X -0.0013 0.0004 -0.0019 0.0007 0.0009 -0.0008  
Y -0.0020 0.0011 -0.0015 0.0033 0.0003 0.0009  
Z 0.0080 -0.0043 0.0092 -0.0138 -0.0024 -0.0014

AT. 89 N X -0.0025 -0.0020 0.0019 -0.0013 0.0005 0.0007  
Y 0.0025 0.0008 -0.0015 0.0022 -0.0007 -0.0009  
Z -0.0066 -0.0020 0.0037 -0.0064 0.0021 0.0021

AT. 90 N X 0.0025 -0.0020 -0.0019 -0.0013 -0.0005 0.0007  
Y -0.0025 0.0008 0.0015 0.0022 0.0007 -0.0009  
Z 0.0066 -0.0020 -0.0037 -0.0064 -0.0021 0.0021

AT. 91 C X -0.0082 -0.0030 -0.0054 -0.0119 0.0011 -0.0036  
Y -0.0027 -0.0015 -0.0018 -0.0042 0.0003 -0.0014  
Z 0.0045 0.0032 0.0063 0.0081 -0.0020 -0.0003

AT. 92 C X 0.0082 -0.0030 0.0054 -0.0119 -0.0011 -0.0036  
Y 0.0027 -0.0015 0.0018 -0.0042 -0.0003 -0.0014  
Z -0.0045 0.0032 -0.0063 0.0081 0.0020 -0.0003

AT. 93 C X 0.0016 0.0005 0.0031 0.0025 -0.0010 -0.0005  
Y 0.0008 0.0002 0.0028 0.0013 -0.0010 -0.0011  
Z -0.0012 -0.0006 -0.0030 -0.0022 0.0010 0.0009

AT. 94 C X -0.0016 0.0005 -0.0031 0.0025 0.0010 -0.0005  
Y -0.0008 0.0002 -0.0028 0.0013 0.0010 -0.0011  
Z 0.0012 -0.0006 0.0030 -0.0022 -0.0010 0.0009

AT. 95 H X 0.0002 0.0010 -0.0011 0.0005 0.0005 0.0019  
Y 0.0004 0.0011 -0.0123 -0.0005 0.0053 0.0082  
Z 0.0015 -0.0025 0.0280 0.0040 -0.0116 -0.0178

AT. 96 H X -0.0002 0.0010 0.0011 0.0005 -0.0005 0.0019  
Y -0.0004 0.0011 0.0123 -0.0005 -0.0053 0.0082

Z -0.0015 -0.0025 -0.0280 0.0040 0.0116 -0.0178  
AT. 97 H X 0.0005 0.0024 -0.0133 0.0005 0.0050 0.0076  
Y -0.0004 0.0025 -0.0205 -0.0016 0.0085 0.0126  
Z -0.0013 -0.0007 -0.0032 -0.0024 0.0013 0.0013  
AT. 98 H X -0.0005 0.0024 0.0133 0.0005 -0.0050 0.0076  
Y 0.0004 0.0025 0.0205 -0.0016 -0.0085 0.0126  
Z 0.0013 -0.0007 0.0032 -0.0024 -0.0013 0.0013  
AT. 99 C X 0.0053 0.0034 -0.0041 0.0062 -0.0011 -0.0010  
Y -0.0018 -0.0000 0.0009 -0.0005 0.0007 0.0010  
Z 0.0053 0.0009 -0.0021 0.0040 -0.0017 -0.0017  
AT. 100 C X -0.0053 0.0034 0.0041 0.0062 0.0011 -0.0010  
Y 0.0018 -0.0000 -0.0009 -0.0005 -0.0007 0.0010  
Z -0.0053 0.0009 0.0021 0.0040 0.0017 -0.0017  
AT. 101 C X -0.0038 -0.0038 0.0048 -0.0032 0.0008 0.0010  
Y -0.0020 -0.0020 0.0028 -0.0015 0.0003 0.0006  
Z -0.0057 -0.0049 0.0066 -0.0041 0.0012 0.0017  
AT. 102 C X 0.0038 -0.0038 -0.0048 -0.0032 -0.0008 0.0010  
Y 0.0020 -0.0020 -0.0028 -0.0015 -0.0003 0.0006  
Z 0.0057 -0.0049 -0.0066 -0.0041 -0.0012 0.0017  
AT. 103 H X 0.0033 0.0041 -0.0042 0.0027 -0.0011 -0.0009  
Y -0.0053 -0.0056 0.0067 -0.0043 0.0013 0.0014  
Z 0.0484 0.0458 -0.0616 0.0331 -0.0098 -0.0156  
AT. 104 H X -0.0033 0.0041 0.0042 0.0027 0.0011 -0.0009  
Y 0.0053 -0.0056 -0.0067 -0.0043 -0.0013 0.0014  
Z -0.0484 0.0458 0.0616 0.0331 0.0098 -0.0156  
AT. 105 H X 0.0175 0.0239 -0.0297 0.0150 -0.0028 -0.0052  
Y 0.0378 0.0361 -0.0495 0.0258 -0.0073 -0.0114  
Z 0.0145 0.0158 -0.0212 0.0101 -0.0025 -0.0044  
AT. 106 H X -0.0175 0.0239 0.0297 0.0150 0.0028 -0.0052  
Y -0.0378 0.0361 0.0495 0.0258 0.0073 -0.0114  
Z -0.0145 0.0158 0.0212 0.0101 0.0025 -0.0044  
AT. 107 C X 0.0002 0.0003 -0.0005 -0.0007 0.0003 0.0008

Y 0.0000 0.0006 0.0009 -0.0011 0.0008 0.0021  
Z 0.0012 0.0011 0.0024 0.0012 -0.0002 0.0008  
AT. 108 C X -0.0002 0.0003 0.0005 -0.0007 -0.0003 0.0008  
Y -0.0000 0.0006 -0.0009 -0.0011 -0.0008 0.0021  
Z -0.0012 0.0011 -0.0024 0.0012 0.0002 0.0008  
AT. 109 H X -0.0148 -0.0094 -0.0159 -0.0125 0.0005 -0.0125  
Y -0.0037 -0.0052 -0.0037 0.0063 -0.0002 -0.0048  
Z -0.0013 -0.0063 -0.0001 0.0173 -0.0021 -0.0072  
AT. 110 H X 0.0148 -0.0094 0.0159 -0.0125 -0.0005 -0.0125  
Y 0.0037 -0.0052 0.0037 0.0063 0.0002 -0.0048  
Z 0.0013 -0.0063 0.0001 0.0173 0.0021 -0.0072  
AT. 111 H X 0.0048 0.0032 0.0098 0.0130 -0.0010 0.0028  
Y -0.0100 -0.0101 -0.0126 0.0024 -0.0019 -0.0157  
Z -0.0022 -0.0002 -0.0064 -0.0144 0.0018 0.0020  
AT. 112 H X -0.0048 0.0032 -0.0098 0.0130 0.0010 0.0028  
Y 0.0100 -0.0101 0.0126 0.0024 0.0019 -0.0157  
Z 0.0022 -0.0002 0.0064 -0.0144 -0.0018 0.0020  
AT. 113 C X -0.0003 -0.0001 0.0006 0.0010 0.0006 0.0013  
Y 0.0030 0.0025 -0.0012 -0.0026 -0.0014 -0.0020  
Z 0.0016 -0.0004 0.0008 0.0054 -0.0016 -0.0018  
AT. 114 C X 0.0003 -0.0001 -0.0006 0.0010 -0.0006 0.0013  
Y -0.0030 0.0025 0.0012 -0.0026 0.0014 -0.0020  
Z -0.0016 -0.0004 -0.0008 0.0054 0.0016 -0.0018  
AT. 115 C X -0.0025 -0.0024 0.0037 -0.0020 0.0009 0.0023  
Y -0.0014 -0.0016 0.0007 0.0005 0.0001 -0.0003  
Z 0.0022 0.0015 -0.0018 0.0009 -0.0005 -0.0005  
AT. 116 C X 0.0025 -0.0024 -0.0037 -0.0020 -0.0009 0.0023  
Y 0.0014 -0.0016 -0.0007 0.0005 -0.0001 -0.0003  
Z -0.0022 0.0015 0.0018 0.0009 0.0005 -0.0005  
AT. 117 H X 0.0236 0.0193 -0.0262 0.0147 -0.0086 -0.0168  
Y 0.0025 -0.0001 0.0061 0.0029 0.0010 0.0070  
Z -0.0251 -0.0211 0.0277 -0.0166 0.0089 0.0170

AT.118 H X -0.0236 0.0193 0.0262 0.0147 0.0086 -0.0168  
Y -0.0025 -0.0001 -0.0061 0.0029 -0.0010 0.0070  
Z 0.0251 -0.0211 -0.0277 -0.0166 -0.0089 0.0170

AT.119 H X 0.0168 0.0204 -0.0271 0.0060 -0.0065 -0.0177  
Y -0.0025 0.0043 -0.0031 -0.0067 0.0029 0.0029  
Z 0.0122 0.0068 -0.0130 0.0120 -0.0069 -0.0136

AT.120 H X -0.0168 0.0204 0.0271 0.0060 0.0065 -0.0177  
Y 0.0025 0.0043 0.0031 -0.0067 -0.0029 0.0029  
Z -0.0122 0.0068 0.0130 0.0120 0.0069 -0.0136

AT.121 C X 0.0003 0.0003 -0.0011 0.0011 -0.0002 -0.0006  
Y -0.0006 -0.0005 0.0007 0.0007 -0.0007 -0.0019  
Z 0.0015 0.0008 -0.0014 0.0006 -0.0002 -0.0003

AT.122 C X -0.0003 0.0003 0.0011 0.0011 0.0002 -0.0006  
Y 0.0006 -0.0005 -0.0007 0.0007 0.0007 -0.0019  
Z -0.0015 0.0008 0.0014 0.0006 0.0002 -0.0003

AT.123 H X 0.0071 0.0042 -0.0014 0.0014 0.0007 0.0085  
Y 0.0040 0.0059 0.0000 -0.0106 0.0029 0.0074  
Z -0.0025 -0.0053 -0.0008 0.0124 -0.0036 -0.0079

AT.124 H X -0.0071 0.0042 0.0014 0.0014 -0.0007 0.0085  
Y -0.0040 0.0059 -0.0000 -0.0106 -0.0029 0.0074  
Z 0.0025 -0.0053 0.0008 0.0124 0.0036 -0.0079

AT.125 H X -0.0036 0.0002 0.0042 -0.0091 0.0019 0.0015  
Y 0.0059 0.0067 -0.0020 -0.0040 0.0029 0.0129  
Z -0.0002 0.0038 0.0035 -0.0130 0.0040 0.0094

AT.126 H X 0.0036 0.0002 -0.0042 -0.0091 -0.0019 0.0015  
Y -0.0059 0.0067 0.0020 -0.0040 -0.0029 0.0129  
Z 0.0002 0.0038 -0.0035 -0.0130 -0.0040 0.0094

AT.127 C X 0.0012 0.0008 0.0013 -0.0009 -0.0001 -0.0013  
Y -0.0017 -0.0020 -0.0021 0.0020 0.0010 0.0014  
Z -0.0001 -0.0010 0.0003 0.0059 -0.0014 -0.0008

AT.128 C X -0.0012 0.0008 -0.0013 -0.0009 0.0001 -0.0013  
Y 0.0017 -0.0020 0.0021 0.0020 -0.0010 0.0014



Z 0.0001 -0.0010 -0.0003 0.0059 0.0014 -0.0008  
AT. 129 C X -0.0028 -0.0021 0.0040 -0.0034 -0.0025 -0.0061  
Y 0.0005 0.0007 -0.0009 -0.0011 0.0006 0.0011  
Z 0.0019 0.0011 0.0028 0.0013 -0.0007 -0.0001  
AT. 130 C X 0.0028 -0.0021 -0.0040 -0.0034 0.0025 -0.0061  
Y -0.0005 0.0007 0.0009 -0.0011 -0.0006 0.0011  
Z -0.0019 0.0011 -0.0028 0.0013 0.0007 -0.0001  
AT. 131 H X 0.0043 0.0053 -0.0301 0.0084 0.0151 0.0309  
Y -0.0162 -0.0115 0.0207 -0.0245 -0.0121 -0.0349  
Z 0.0036 0.0055 -0.0322 0.0061 0.0165 0.0319  
AT. 132 H X -0.0043 0.0053 0.0301 0.0084 -0.0151 0.0309  
Y 0.0162 -0.0115 -0.0207 -0.0245 0.0121 -0.0349  
Z -0.0036 0.0055 0.0322 0.0061 -0.0165 0.0319  
AT. 133 H X 0.0274 0.0191 -0.0315 0.0465 0.0201 0.0569  
Y 0.0088 0.0051 0.0009 0.0178 0.0009 0.0076  
Z 0.0007 -0.0019 0.0209 0.0086 -0.0103 -0.0183  
AT. 134 H X -0.0274 0.0191 0.0315 0.0465 -0.0201 0.0569  
Y -0.0088 0.0051 -0.0009 0.0178 -0.0009 0.0076  
Z -0.0007 -0.0019 -0.0209 0.0086 0.0103 -0.0183  
AT. 135 C X 0.0004 -0.0004 0.0005 0.0024 -0.0006 -0.0006  
Y 0.0018 0.0012 0.0003 -0.0013 -0.0015 -0.0021  
Z 0.0002 -0.0008 0.0003 0.0020 -0.0004 -0.0007  
AT. 136 C X -0.0004 -0.0004 -0.0005 0.0024 0.0006 -0.0006  
Y -0.0018 0.0012 -0.0003 -0.0013 0.0015 -0.0021  
Z -0.0002 -0.0008 -0.0003 0.0020 0.0004 -0.0007  
AT. 137 H X -0.0202 -0.0153 -0.0004 0.0207 0.0153 0.0205  
Y -0.0105 0.0010 -0.0039 -0.0160 0.0110 0.0139  
Z -0.0120 0.0056 -0.0064 -0.0323 0.0140 0.0174  
AT. 138 H X 0.0202 -0.0153 0.0004 0.0207 -0.0153 0.0205  
Y 0.0105 0.0010 0.0039 -0.0160 -0.0110 0.0139  
Z 0.0120 0.0056 0.0064 -0.0323 -0.0140 0.0174  
AT. 139 H X 0.0033 0.0072 -0.0031 -0.0220 -0.0008 -0.0038

Y -0.0275 -0.0174 -0.0019 0.0201 0.0224 0.0309  
Z 0.0041 -0.0050 0.0052 0.0258 -0.0059 -0.0046  
AT. 140 H X -0.0033 0.0072 0.0031 -0.0220 0.0008 -0.0038  
Y 0.0275 -0.0174 0.0019 0.0201 -0.0224 0.0309  
Z -0.0041 -0.0050 -0.0052 0.0258 0.0059 -0.0046  
AT. 141 H X 0.0148 0.0152 -0.0036 -0.0322 -0.0091 -0.0152  
Y 0.0069 -0.0055 0.0034 0.0241 -0.0083 -0.0105  
Z -0.0002 0.0121 -0.0049 -0.0385 0.0040 0.0033  
AT. 142 H X -0.0148 0.0152 0.0036 -0.0322 0.0091 -0.0152  
Y -0.0069 -0.0055 -0.0034 0.0241 0.0083 -0.0105  
Z 0.0002 0.0121 0.0049 -0.0385 -0.0040 0.0033  
AT. 143 C X 0.0002 0.0010 0.0004 -0.0035 0.0008 0.0001  
Y -0.0012 -0.0016 -0.0007 0.0021 0.0004 0.0004  
Z -0.0014 -0.0009 -0.0006 0.0027 -0.0004 0.0007  
AT. 144 C X -0.0002 0.0010 -0.0004 -0.0035 -0.0008 0.0001  
Y 0.0012 -0.0016 0.0007 0.0021 -0.0004 0.0004  
Z 0.0014 -0.0009 0.0006 0.0027 0.0004 0.0007  
AT. 145 H X 0.0175 0.0194 0.0102 -0.0283 -0.0027 -0.0057  
Y -0.0020 0.0004 -0.0002 0.0227 -0.0100 0.0010  
Z 0.0052 0.0029 0.0020 -0.0284 0.0101 -0.0019  
AT. 146 H X -0.0175 0.0194 -0.0102 -0.0283 0.0027 -0.0057  
Y 0.0020 0.0004 0.0002 0.0227 0.0100 0.0010  
Z -0.0052 0.0029 -0.0020 -0.0284 -0.0101 -0.0019  
AT. 147 H X -0.0079 -0.0115 -0.0062 0.0298 -0.0041 0.0036  
Y 0.0215 0.0280 0.0144 -0.0418 -0.0036 -0.0077  
Z -0.0002 -0.0021 -0.0015 0.0239 -0.0086 0.0011  
AT. 148 H X 0.0079 -0.0115 0.0062 0.0298 0.0041 0.0036  
Y -0.0215 0.0280 -0.0144 -0.0418 0.0036 -0.0077  
Z 0.0002 -0.0021 0.0015 0.0239 0.0086 0.0011  
AT. 149 H X -0.0179 -0.0243 -0.0138 0.0481 -0.0025 0.0075  
Y 0.0024 0.0003 -0.0003 -0.0148 0.0057 -0.0008  
Z 0.0137 0.0143 0.0071 -0.0515 0.0106 -0.0051

AT. 150 H X 0.0179 -0.0243 0.0138 0.0481 0.0025 0.0075  
Y -0.0024 0.0003 0.0003 -0.0148 -0.0057 -0.0008  
Z -0.0137 0.0143 -0.0071 -0.0515 -0.0106 -0.0051

AT. 151 C X -0.0003 -0.0002 -0.0006 -0.0001 -0.0001 0.0003  
Y -0.0003 -0.0001 0.0006 -0.0003 0.0001 0.0004  
Z -0.0023 -0.0024 0.0004 0.0033 -0.0015 -0.0048

AT. 152 C X 0.0003 -0.0002 0.0006 -0.0001 0.0001 0.0003  
Y 0.0003 -0.0001 -0.0006 -0.0003 -0.0001 0.0004  
Z 0.0023 -0.0024 -0.0004 0.0033 0.0015 -0.0048

AT. 153 H X 0.0029 0.0015 0.0025 0.0037 -0.0053 -0.0126  
Y 0.0113 0.0138 -0.0025 -0.0259 0.0085 0.0215  
Z 0.0155 0.0202 -0.0058 -0.0420 0.0151 0.0365

AT. 154 H X -0.0029 0.0015 -0.0025 0.0037 0.0053 -0.0126  
Y -0.0113 0.0138 0.0025 -0.0259 -0.0085 0.0215  
Z -0.0155 0.0202 0.0058 -0.0420 -0.0151 0.0365

AT. 155 H X -0.0017 0.0003 -0.0008 -0.0019 0.0054 0.0110  
Y -0.0122 -0.0158 0.0025 0.0325 -0.0107 -0.0269  
Z 0.0107 0.0153 -0.0024 -0.0339 0.0126 0.0295

AT. 156 H X 0.0017 0.0003 0.0008 -0.0019 -0.0054 0.0110  
Y 0.0122 -0.0158 -0.0025 0.0325 0.0107 -0.0269  
Z -0.0107 0.0153 0.0024 -0.0339 -0.0126 0.0295

AT. 157 O X 0.0004 -0.0001 -0.0003 0.0003 0.0020 0.0018  
Y 0.0004 -0.0001 -0.0006 0.0004 0.0033 0.0030  
Z -0.0018 -0.0002 -0.0001 -0.0005 0.0003 0.0000

AT. 158 O X -0.0004 -0.0001 0.0003 0.0003 -0.0020 0.0018  
Y -0.0004 -0.0001 0.0006 0.0004 -0.0033 0.0030  
Z 0.0018 -0.0002 0.0001 -0.0005 -0.0003 0.0000

AT. 159 O X 0.0021 0.0002 0.0000 0.0007 0.0006 0.0007  
Y -0.0004 0.0001 0.0004 -0.0003 -0.0022 -0.0020  
Z 0.0009 0.0002 0.0004 0.0002 -0.0022 -0.0019

AT. 160 O X -0.0021 0.0002 -0.0000 0.0007 -0.0006 0.0007  
Y 0.0004 0.0001 -0.0004 -0.0003 0.0022 -0.0020

Z -0.0009 0.0002 -0.0004 0.0002 0.0022 -0.0019  
AT.161 H X -0.0005 0.0050 0.0126 -0.0055 -0.0738 -0.0649  
Y 0.0000 0.0007 0.0026 -0.0010 -0.0153 -0.0136  
Z -0.0012 -0.0031 -0.0076 0.0027 0.0454 0.0402  
AT.162 H X 0.0005 0.0050 -0.0126 -0.0055 0.0738 -0.0649  
Y -0.0000 0.0007 -0.0026 -0.0010 0.0153 -0.0136  
Z 0.0012 -0.0031 0.0076 0.0027 -0.0454 0.0402  
AT.163 H X -0.0438 -0.0060 -0.0066 -0.0125 0.0260 0.0199  
Y 0.0008 0.0002 0.0009 -0.0014 -0.0050 -0.0033  
Z 0.0180 0.0025 0.0033 0.0049 -0.0121 -0.0090  
AT.164 H X 0.0438 -0.0060 0.0066 -0.0125 -0.0260 0.0199  
Y -0.0008 0.0002 -0.0009 -0.0014 0.0050 -0.0033  
Z -0.0180 0.0025 -0.0033 0.0049 0.0121 -0.0090  
AT.165 O X -0.0003 0.0018 0.0017 0.0007 -0.0001 0.0001  
Y 0.0003 -0.0020 -0.0020 -0.0002 0.0004 0.0001  
Z -0.0003 0.0027 0.0028 0.0004 -0.0005 -0.0001  
AT.166 O X 0.0003 0.0018 -0.0017 0.0007 0.0001 0.0001  
Y -0.0003 -0.0020 0.0020 -0.0002 -0.0004 0.0001  
Z 0.0003 0.0027 -0.0028 0.0004 0.0005 -0.0001  
AT.167 H X 0.0007 -0.0041 -0.0036 -0.0035 -0.0008 -0.0010  
Y -0.0006 -0.0024 -0.0030 -0.0009 0.0004 -0.0004  
Z -0.0041 0.0232 0.0232 0.0115 0.0017 0.0029  
AT.168 H X -0.0007 -0.0041 0.0036 -0.0035 0.0008 -0.0010  
Y 0.0006 -0.0024 0.0030 -0.0009 -0.0004 -0.0004  
Z 0.0041 0.0232 -0.0232 0.0115 -0.0017 0.0029  
AT.169 O X 0.0003 -0.0025 -0.0026 -0.0007 0.0003 -0.0000  
Y -0.0005 0.0041 0.0042 0.0007 -0.0007 -0.0001  
Z -0.0000 0.0017 0.0017 0.0002 -0.0004 0.0000  
AT.170 O X -0.0003 -0.0025 0.0026 -0.0007 -0.0003 -0.0000  
Y 0.0005 0.0041 -0.0042 0.0007 0.0007 -0.0001  
Z 0.0000 0.0017 -0.0017 0.0002 0.0004 0.0000  
AT.171 H X -0.0026 0.0178 0.0186 0.0035 -0.0041 -0.0011

Y 0.0036 -0.0393 -0.0403 -0.0079 0.0053 -0.0007  
Z 0.0101 -0.0994 -0.1018 -0.0210 0.0151 -0.0008  
AT. 172 H X 0.0026 0.0178 -0.0186 0.0035 0.0041 -0.0011  
Y -0.0036 -0.0393 0.0403 -0.0079 -0.0053 -0.0007  
Z -0.0101 -0.0994 0.1018 -0.0210 -0.0151 -0.0008

FREQ(CM\*\*-1) 1475.51 1476.76 1476.99 1477.61 1483.35 1483.59

AT. 1 I X -0.0000 0.0000 -0.0000 0.0000 0.0000 0.0000  
Y -0.0000 0.0000 -0.0000 0.0000 0.0000 0.0000  
Z -0.0000 -0.0000 0.0000 -0.0000 0.0000 0.0000

AT. 2 I X 0.0000 -0.0000 -0.0000 -0.0000 0.0000 -0.0000  
Y 0.0000 -0.0000 -0.0000 -0.0000 0.0000 -0.0000  
Z 0.0000 0.0000 0.0000 0.0000 0.0000 -0.0000

AT. 3 I X -0.0000 -0.0000 0.0000 -0.0000 -0.0000 -0.0000  
Y -0.0000 -0.0000 -0.0000 0.0000 0.0000 0.0000  
Z 0.0000 -0.0000 -0.0000 -0.0000 -0.0000 0.0000

AT. 4 I X 0.0000 0.0000 0.0000 0.0000 -0.0000 0.0000  
Y 0.0000 0.0000 -0.0000 -0.0000 0.0000 -0.0000  
Z -0.0000 0.0000 -0.0000 0.0000 -0.0000 -0.0000

AT. 5 O X -0.0010 -0.0003 -0.0016 0.0007 0.0026 0.0028  
Y 0.0008 0.0004 0.0008 -0.0004 -0.0028 -0.0030  
Z 0.0007 0.0001 0.0015 -0.0008 -0.0016 -0.0018

AT. 6 O X 0.0010 0.0003 -0.0016 -0.0007 0.0026 -0.0028  
Y -0.0008 -0.0004 0.0008 0.0004 -0.0028 0.0030  
Z -0.0007 -0.0001 0.0015 0.0008 -0.0016 0.0018

AT. 7 O X 0.0002 0.0000 0.0010 0.0002 -0.0002 -0.0021  
Y -0.0001 0.0000 -0.0009 -0.0000 0.0003 0.0019  
Z 0.0002 -0.0001 0.0000 -0.0001 -0.0003 -0.0003

AT. 8 O X -0.0002 -0.0000 0.0010 -0.0002 -0.0002 0.0021  
Y 0.0001 -0.0000 -0.0009 0.0000 0.0003 -0.0019  
Z -0.0002 0.0001 0.0000 0.0001 -0.0003 0.0003

AT. 9 N X -0.0009 -0.0007 0.0009 -0.0011 0.0014 0.0015  
Y 0.0018 0.0009 0.0005 0.0001 -0.0041 -0.0041  
Z -0.0053 -0.0030 -0.0006 -0.0009 0.0119 0.0119

AT. 10 N X 0.0009 0.0007 0.0009 0.0011 0.0014 -0.0015  
Y -0.0018 -0.0009 0.0005 -0.0001 -0.0041 0.0041  
Z 0.0053 0.0030 -0.0006 0.0009 0.0119 -0.0119

AT. 11 N X -0.0003 -0.0001 0.0002 -0.0000 -0.0003 -0.0007  
Y 0.0007 0.0007 -0.0007 0.0004 -0.0003 0.0001  
Z -0.0013 -0.0009 0.0001 -0.0000 0.0019 0.0016

AT. 12 N X 0.0003 0.0001 0.0002 0.0000 -0.0003 0.0007  
Y -0.0007 -0.0007 -0.0007 -0.0004 -0.0003 -0.0001  
Z 0.0013 0.0009 0.0001 0.0000 0.0019 -0.0016

AT. 13 C X 0.0032 0.0015 0.0020 -0.0006 -0.0085 -0.0088  
Y -0.0027 -0.0014 -0.0018 0.0006 0.0085 0.0088  
Z 0.0032 0.0022 -0.0018 0.0019 -0.0071 -0.0067

AT. 14 C X -0.0032 -0.0015 0.0020 0.0006 -0.0085 0.0088  
Y 0.0027 0.0014 -0.0018 -0.0006 0.0085 -0.0088  
Z -0.0032 -0.0022 -0.0018 -0.0019 -0.0071 0.0067

AT. 15 C X -0.0010 -0.0007 0.0006 -0.0007 0.0015 0.0015  
Y 0.0015 0.0012 -0.0022 0.0021 -0.0011 -0.0009  
Z -0.0009 -0.0006 0.0008 -0.0008 0.0015 0.0013

AT. 16 C X 0.0010 0.0007 0.0006 0.0007 0.0015 -0.0015  
Y -0.0015 -0.0012 -0.0022 -0.0021 -0.0011 0.0009  
Z 0.0009 0.0006 0.0008 0.0008 0.0015 -0.0013

AT. 17 H X 0.0010 0.0011 -0.0005 0.0004 -0.0010 -0.0012  
Y -0.0047 -0.0047 0.0148 -0.0129 -0.0046 -0.0058  
Z 0.0075 0.0072 -0.0197 0.0176 0.0039 0.0052

AT. 18 H X -0.0010 -0.0011 -0.0005 -0.0004 -0.0010 0.0012  
Y 0.0047 0.0047 0.0148 0.0129 -0.0046 0.0058  
Z -0.0075 -0.0072 -0.0197 -0.0176 0.0039 -0.0052

AT. 19 H X 0.0005 0.0005 -0.0037 0.0030 0.0051 0.0053  
Y -0.0054 -0.0056 0.0186 -0.0162 -0.0079 -0.0088

Z -0.0030 -0.0027 0.0068 -0.0062 0.0002 -0.0001  
AT. 20 H X -0.0005 -0.0005 -0.0037 -0.0030 0.0051 -0.0053  
Y 0.0054 0.0056 0.0186 0.0162 -0.0079 0.0088  
Z 0.0030 0.0027 0.0068 0.0062 0.0002 0.0001  
AT. 21 C X -0.0005 -0.0002 -0.0012 -0.0002 0.0011 0.0035  
Y -0.0003 -0.0004 0.0014 0.0001 -0.0001 -0.0026  
Z 0.0009 0.0009 -0.0005 0.0001 -0.0010 -0.0007  
AT. 22 C X 0.0005 0.0002 -0.0012 0.0002 0.0011 -0.0035  
Y 0.0003 0.0004 0.0014 -0.0001 -0.0001 0.0026  
Z -0.0009 -0.0009 -0.0005 -0.0001 -0.0010 0.0007  
AT. 23 C X 0.0002 0.0000 -0.0001 -0.0000 -0.0006 -0.0002  
Y -0.0002 -0.0001 0.0001 -0.0000 0.0004 0.0001  
Z -0.0006 -0.0003 0.0007 -0.0000 0.0008 -0.0001  
AT. 24 C X -0.0002 -0.0000 -0.0001 0.0000 -0.0006 0.0002  
Y 0.0002 0.0001 0.0001 0.0000 0.0004 -0.0001  
Z 0.0006 0.0003 0.0007 0.0000 0.0008 0.0001  
AT. 25 H X -0.0004 0.0002 -0.0000 0.0001 0.0001 -0.0006  
Y -0.0009 -0.0004 0.0011 -0.0001 0.0013 -0.0003  
Z 0.0042 0.0024 -0.0068 0.0007 -0.0052 0.0030  
AT. 26 H X 0.0004 -0.0002 -0.0000 -0.0001 0.0001 0.0006  
Y 0.0009 0.0004 0.0011 0.0001 0.0013 0.0003  
Z -0.0042 -0.0024 -0.0068 -0.0007 -0.0052 -0.0030  
AT. 27 H X -0.0003 0.0013 0.0022 0.0010 0.0050 -0.0033  
Y 0.0030 0.0015 -0.0044 0.0003 -0.0048 0.0024  
Z 0.0013 0.0004 -0.0023 -0.0001 -0.0030 0.0019  
AT. 28 H X 0.0003 -0.0013 0.0022 -0.0010 0.0050 0.0033  
Y -0.0030 -0.0015 -0.0044 -0.0003 -0.0048 -0.0024  
Z -0.0013 -0.0004 -0.0023 0.0001 -0.0030 -0.0019  
AT. 29 C X -0.0002 -0.0000 -0.0002 0.0001 0.0003 0.0001  
Y -0.0007 -0.0007 0.0011 -0.0017 -0.0017 -0.0017  
Z 0.0001 0.0001 0.0000 -0.0002 -0.0019 -0.0020  
AT. 30 C X 0.0002 0.0000 -0.0002 -0.0001 0.0003 -0.0001

Y 0.0007 0.0007 0.0011 0.0017 -0.0017 0.0017  
Z -0.0001 -0.0001 0.0000 0.0002 -0.0019 0.0020  
AT. 31 H X 0.0089 0.0030 0.0057 -0.0038 -0.0240 -0.0238  
Y 0.0005 0.0013 -0.0029 0.0049 0.0129 0.0132  
Z 0.0077 0.0051 -0.0025 0.0075 0.0046 0.0053  
AT. 32 H X -0.0089 -0.0030 0.0057 0.0038 -0.0240 0.0238  
Y -0.0005 -0.0013 -0.0029 -0.0049 0.0129 -0.0132  
Z -0.0077 -0.0051 -0.0025 -0.0075 0.0046 -0.0053  
AT. 33 H X -0.0043 -0.0021 -0.0020 0.0016 0.0142 0.0146  
Y 0.0029 0.0041 -0.0061 0.0097 0.0146 0.0153  
Z -0.0040 -0.0033 0.0020 -0.0040 0.0008 0.0008  
AT. 34 H X 0.0043 0.0021 -0.0020 -0.0016 0.0142 -0.0146  
Y -0.0029 -0.0041 -0.0061 -0.0097 0.0146 -0.0153  
Z 0.0040 0.0033 0.0020 0.0040 0.0008 -0.0008  
AT. 35 C X 0.0003 0.0006 -0.0013 0.0015 0.0009 0.0010  
Y -0.0009 -0.0001 -0.0013 0.0007 0.0012 0.0010  
Z 0.0030 0.0016 -0.0000 0.0014 -0.0018 -0.0017  
AT. 36 C X -0.0003 -0.0006 -0.0013 -0.0015 0.0009 -0.0010  
Y 0.0009 0.0001 -0.0013 -0.0007 0.0012 -0.0010  
Z -0.0030 -0.0016 -0.0000 -0.0014 -0.0018 0.0017  
AT. 37 C X 0.0013 0.0012 -0.0014 0.0018 0.0005 0.0008  
Y 0.0002 -0.0001 0.0005 -0.0002 0.0001 0.0002  
Z -0.0003 -0.0001 -0.0000 -0.0003 -0.0003 -0.0004  
AT. 38 C X -0.0013 -0.0012 -0.0014 -0.0018 0.0005 -0.0008  
Y -0.0002 0.0001 0.0005 0.0002 0.0001 -0.0002  
Z 0.0003 0.0001 -0.0000 0.0003 -0.0003 0.0004  
AT. 39 H X -0.0078 -0.0083 0.0103 -0.0129 -0.0030 -0.0044  
Y 0.0005 -0.0007 0.0020 -0.0033 -0.0053 -0.0056  
Z -0.0061 -0.0058 0.0067 -0.0082 -0.0003 -0.0012  
AT. 40 H X 0.0078 0.0083 0.0103 0.0129 -0.0030 0.0044  
Y -0.0005 0.0007 0.0020 0.0033 -0.0053 0.0056  
Z 0.0061 0.0058 0.0067 0.0082 -0.0003 0.0012



AT. 41 H X -0.0052 -0.0064 0.0090 -0.0115 -0.0048 -0.0053  
Y -0.0019 0.0009 -0.0034 0.0032 0.0033 0.0025  
Z 0.0082 0.0070 -0.0076 0.0109 0.0027 0.0040

AT. 42 H X 0.0052 0.0064 0.0090 0.0115 -0.0048 0.0053  
Y 0.0019 -0.0009 -0.0034 -0.0032 0.0033 -0.0025  
Z -0.0082 -0.0070 -0.0076 -0.0109 0.0027 -0.0040

AT. 43 C X -0.0002 -0.0003 0.0001 -0.0004 -0.0001 0.0002  
Y 0.0034 0.0028 -0.0036 0.0048 0.0022 0.0019  
Z -0.0003 0.0001 -0.0002 -0.0002 -0.0001 -0.0001

AT. 44 C X 0.0002 0.0003 0.0001 0.0004 -0.0001 -0.0002  
Y -0.0034 -0.0028 -0.0036 -0.0048 0.0022 -0.0019  
Z 0.0003 -0.0001 -0.0002 0.0002 -0.0001 0.0001

AT. 45 H X 0.0124 0.0138 -0.0204 0.0233 0.0136 0.0115  
Y -0.0212 -0.0180 0.0215 -0.0277 -0.0128 -0.0119  
Z 0.0141 0.0096 -0.0088 0.0136 0.0040 0.0046

AT. 46 H X -0.0124 -0.0138 -0.0204 -0.0233 0.0136 -0.0115  
Y 0.0212 0.0180 0.0215 0.0277 -0.0128 0.0119  
Z -0.0141 -0.0096 -0.0088 -0.0136 0.0040 -0.0046

AT. 47 H X -0.0059 -0.0059 0.0108 -0.0117 -0.0081 -0.0075  
Y -0.0216 -0.0201 0.0271 -0.0316 -0.0161 -0.0153  
Z -0.0171 -0.0149 0.0161 -0.0209 -0.0077 -0.0070

AT. 48 H X 0.0059 0.0059 0.0108 0.0117 -0.0081 0.0075  
Y 0.0216 0.0201 0.0271 0.0316 -0.0161 0.0153  
Z 0.0171 0.0149 0.0161 0.0209 -0.0077 0.0070

AT. 49 C X 0.0006 0.0000 0.0022 -0.0009 -0.0007 -0.0005  
Y -0.0000 0.0002 0.0001 -0.0007 0.0002 0.0004  
Z 0.0042 0.0021 -0.0001 0.0025 -0.0014 -0.0013

AT. 50 C X -0.0006 -0.0000 0.0022 0.0009 -0.0007 0.0005  
Y 0.0000 -0.0002 0.0001 0.0007 0.0002 -0.0004  
Z -0.0042 -0.0021 -0.0001 -0.0025 -0.0014 0.0013

AT. 51 C X -0.0013 -0.0017 0.0059 -0.0062 -0.0059 -0.0058  
Y -0.0012 -0.0006 -0.0004 -0.0001 0.0013 0.0013

Z 0.0001 0.0005 -0.0014 0.0011 -0.0007 -0.0008  
AT. 52 C X 0.0013 0.0017 0.0059 0.0062 -0.0059 0.0058  
Y 0.0012 0.0006 -0.0004 0.0001 0.0013 -0.0013  
Z -0.0001 -0.0005 -0.0014 -0.0011 -0.0007 0.0008  
AT. 53 H X 0.0075 0.0101 -0.0353 0.0344 0.0261 0.0253  
Y 0.0029 0.0063 -0.0285 0.0267 0.0299 0.0292  
Z -0.0103 -0.0119 0.0366 -0.0372 -0.0224 -0.0217  
AT. 54 H X -0.0075 -0.0101 -0.0353 -0.0344 0.0261 -0.0253  
Y -0.0029 -0.0063 -0.0285 -0.0267 0.0299 -0.0292  
Z 0.0103 0.0119 0.0366 0.0372 -0.0224 0.0217  
AT. 55 H X 0.0071 0.0127 -0.0545 0.0527 0.0531 0.0518  
Y 0.0061 -0.0016 0.0252 -0.0204 -0.0336 -0.0328  
Z 0.0150 0.0084 -0.0076 0.0135 -0.0064 -0.0065  
AT. 56 H X -0.0071 -0.0127 -0.0545 -0.0527 0.0531 -0.0518  
Y -0.0061 0.0016 0.0252 0.0204 -0.0336 0.0328  
Z -0.0150 -0.0084 -0.0076 -0.0135 -0.0064 0.0065  
AT. 57 C X -0.0009 -0.0004 -0.0009 0.0005 0.0013 0.0013  
Y 0.0007 0.0008 -0.0013 0.0015 0.0002 0.0001  
Z 0.0014 0.0008 -0.0002 0.0008 -0.0003 -0.0004  
AT. 58 C X 0.0009 0.0004 -0.0009 -0.0005 0.0013 -0.0013  
Y -0.0007 -0.0008 -0.0013 -0.0015 0.0002 -0.0001  
Z -0.0014 -0.0008 -0.0002 -0.0008 -0.0003 0.0004  
AT. 59 H X -0.0084 -0.0006 -0.0115 0.0068 0.0098 0.0091  
Y -0.0097 -0.0086 0.0102 -0.0140 -0.0010 0.0000  
Z -0.0201 -0.0134 0.0083 -0.0171 0.0049 0.0059  
AT. 60 H X 0.0084 0.0006 -0.0115 -0.0068 0.0098 -0.0091  
Y 0.0097 0.0086 0.0102 0.0140 -0.0010 -0.0000  
Z 0.0201 0.0134 0.0083 0.0171 0.0049 -0.0059  
AT. 61 H X 0.0086 0.0010 0.0157 -0.0114 -0.0157 -0.0152  
Y -0.0062 -0.0091 0.0192 -0.0213 -0.0075 -0.0060  
Z 0.0111 0.0062 0.0023 0.0026 -0.0091 -0.0094  
AT. 62 H X -0.0086 -0.0010 0.0157 0.0114 -0.0157 0.0152

Y 0.0062 0.0091 0.0192 0.0213 -0.0075 0.0060  
Z -0.0111 -0.0062 0.0023 -0.0026 -0.0091 0.0094  
AT. 63 H X 0.0099 0.0021 0.0136 -0.0090 -0.0146 -0.0142  
Y 0.0109 0.0077 -0.0076 0.0127 0.0009 0.0004  
Z -0.0184 -0.0081 -0.0078 -0.0008 0.0139 0.0139  
AT. 64 H X -0.0099 -0.0021 0.0136 0.0090 -0.0146 0.0142  
Y -0.0109 -0.0077 -0.0076 -0.0127 0.0009 -0.0004  
Z 0.0184 0.0081 -0.0078 0.0008 0.0139 -0.0139  
AT. 65 C X 0.0022 0.0011 0.0011 0.0008 -0.0012 -0.0009  
Y -0.0007 -0.0003 -0.0000 -0.0010 0.0001 -0.0001  
Z 0.0018 0.0008 0.0007 0.0010 -0.0004 -0.0003  
AT. 66 C X -0.0022 -0.0011 0.0011 -0.0008 -0.0012 0.0009  
Y 0.0007 0.0003 -0.0000 0.0010 0.0001 0.0001  
Z -0.0018 -0.0008 0.0007 -0.0010 -0.0004 0.0003  
AT. 67 H X 0.0104 0.0059 0.0052 0.0008 -0.0025 -0.0018  
Y 0.0228 0.0095 0.0061 0.0170 -0.0078 -0.0060  
Z -0.0288 -0.0132 -0.0094 -0.0164 0.0088 0.0066  
AT. 68 H X -0.0104 -0.0059 0.0052 -0.0008 -0.0025 0.0018  
Y -0.0228 -0.0095 0.0061 -0.0170 -0.0078 0.0060  
Z 0.0288 0.0132 -0.0094 0.0164 0.0088 -0.0066  
AT. 69 H X -0.0128 -0.0068 -0.0095 -0.0000 0.0066 0.0049  
Y -0.0049 -0.0038 -0.0064 0.0058 0.0033 0.0023  
Z 0.0221 0.0096 0.0107 0.0109 -0.0102 -0.0077  
AT. 70 H X 0.0128 0.0068 -0.0095 0.0000 0.0066 -0.0049  
Y 0.0049 0.0038 -0.0064 -0.0058 0.0033 -0.0023  
Z -0.0221 -0.0096 0.0107 -0.0109 -0.0102 0.0077  
AT. 71 H X -0.0299 -0.0146 -0.0171 -0.0085 0.0132 0.0093  
Y -0.0079 -0.0030 0.0018 -0.0089 0.0008 0.0014  
Z -0.0326 -0.0149 -0.0105 -0.0176 0.0113 0.0092  
AT. 72 H X 0.0299 0.0146 -0.0171 0.0085 0.0132 -0.0093  
Y 0.0079 0.0030 0.0018 0.0089 0.0008 -0.0014  
Z 0.0326 0.0149 -0.0105 0.0176 0.0113 -0.0092

AT. 73 C X 0.0009 0.0006 -0.0011 0.0011 0.0004 0.0003  
Y -0.0010 -0.0007 0.0011 -0.0012 -0.0006 -0.0005  
Z 0.0044 0.0029 -0.0030 0.0056 0.0022 0.0023

AT. 74 C X -0.0009 -0.0006 -0.0011 -0.0011 0.0004 -0.0003  
Y 0.0010 0.0007 0.0011 0.0012 -0.0006 0.0005  
Z -0.0044 -0.0029 -0.0030 -0.0056 0.0022 -0.0023

AT. 75 H X -0.0244 -0.0156 0.0170 -0.0291 -0.0083 -0.0080  
Y -0.0191 -0.0116 0.0068 -0.0187 -0.0035 -0.0044  
Z -0.0398 -0.0244 0.0181 -0.0411 -0.0080 -0.0090

AT. 76 H X 0.0244 0.0156 0.0170 0.0291 -0.0083 0.0080  
Y 0.0191 0.0116 0.0068 0.0187 -0.0035 0.0044  
Z 0.0398 0.0244 0.0181 0.0411 -0.0080 0.0090

AT. 77 H X 0.0104 0.0071 -0.0077 0.0146 0.0045 0.0053  
Y 0.0332 0.0204 -0.0155 0.0331 0.0076 0.0076  
Z -0.0382 -0.0239 0.0190 -0.0408 -0.0093 -0.0100

AT. 78 H X -0.0104 -0.0071 -0.0077 -0.0146 0.0045 -0.0053  
Y -0.0332 -0.0204 -0.0155 -0.0331 0.0076 -0.0076  
Z 0.0382 0.0239 0.0190 0.0408 -0.0093 0.0100

AT. 79 I X 0.0000 -0.0000 0.0000 -0.0000 0.0000 0.0000  
Y -0.0000 0.0000 -0.0000 0.0000 -0.0000 0.0000  
Z 0.0000 0.0000 -0.0000 -0.0000 -0.0000 -0.0000

AT. 80 I X -0.0000 0.0000 0.0000 0.0000 0.0000 -0.0000  
Y 0.0000 -0.0000 -0.0000 -0.0000 -0.0000 -0.0000  
Z -0.0000 -0.0000 -0.0000 0.0000 -0.0000 0.0000

AT. 81 I X -0.0000 0.0000 -0.0000 0.0000 -0.0000 -0.0000  
Y 0.0000 0.0000 0.0000 0.0000 0.0000 0.0000  
Z 0.0000 0.0000 0.0000 -0.0000 0.0000 0.0000

AT. 82 I X 0.0000 -0.0000 -0.0000 -0.0000 -0.0000 0.0000  
Y -0.0000 -0.0000 0.0000 -0.0000 0.0000 -0.0000  
Z -0.0000 -0.0000 0.0000 0.0000 0.0000 -0.0000

AT. 83 O X 0.0027 -0.0039 0.0019 0.0012 0.0003 -0.0003  
Y 0.0006 -0.0008 0.0005 0.0002 0.0001 -0.0000

Z 0.0014 -0.0019 0.0011 0.0004 0.0002 -0.0001  
AT. 84 O X -0.0027 0.0039 0.0019 -0.0012 0.0003 0.0003  
Y -0.0006 0.0008 0.0005 -0.0002 0.0001 0.0000  
Z -0.0014 0.0019 0.0011 -0.0004 0.0002 0.0001  
AT. 85 O X 0.0001 0.0011 -0.0001 -0.0007 -0.0004 -0.0002  
Y -0.0002 0.0008 -0.0002 -0.0004 -0.0002 -0.0001  
Z -0.0001 -0.0002 -0.0001 0.0002 0.0001 0.0001  
AT. 86 O X -0.0001 -0.0011 -0.0001 0.0007 -0.0004 0.0002  
Y 0.0002 -0.0008 -0.0002 0.0004 -0.0002 0.0001  
Z 0.0001 0.0002 -0.0001 -0.0002 0.0001 -0.0001  
AT. 87 N X -0.0006 0.0003 -0.0009 0.0010 -0.0001 -0.0003  
Y 0.0012 -0.0021 0.0007 0.0008 0.0001 -0.0002  
Z -0.0024 0.0065 0.0002 -0.0050 0.0005 0.0018  
AT. 88 N X 0.0006 -0.0003 -0.0009 -0.0010 -0.0001 0.0003  
Y -0.0012 0.0021 0.0007 -0.0008 0.0001 0.0002  
Z 0.0024 -0.0065 0.0002 0.0050 0.0005 -0.0018  
AT. 89 N X 0.0011 -0.0000 0.0007 -0.0006 -0.0001 -0.0001  
Y -0.0010 -0.0007 -0.0001 0.0003 0.0002 -0.0000  
Z 0.0024 0.0030 0.0003 -0.0016 -0.0005 0.0001  
AT. 90 N X -0.0011 0.0000 0.0007 0.0006 -0.0001 0.0001  
Y 0.0010 0.0007 -0.0001 -0.0003 0.0002 0.0000  
Z -0.0024 -0.0030 0.0003 0.0016 -0.0005 -0.0001  
AT. 91 C X -0.0049 0.0073 -0.0031 -0.0029 -0.0004 0.0008  
Y -0.0019 0.0026 -0.0012 -0.0008 -0.0002 0.0002  
Z 0.0003 -0.0029 -0.0013 0.0033 -0.0005 -0.0012  
AT. 92 C X 0.0049 -0.0073 -0.0031 0.0029 -0.0004 -0.0008  
Y 0.0019 -0.0026 -0.0012 0.0008 -0.0002 -0.0002  
Z -0.0003 0.0029 -0.0013 -0.0033 -0.0005 0.0012  
AT. 93 C X -0.0002 -0.0006 -0.0007 0.0015 -0.0002 -0.0005  
Y -0.0008 0.0003 -0.0013 0.0015 -0.0003 -0.0006  
Z 0.0005 0.0002 0.0011 -0.0015 0.0003 0.0006  
AT. 94 C X 0.0002 0.0006 -0.0007 -0.0015 -0.0002 0.0005

Y 0.0008 -0.0003 -0.0013 -0.0015 -0.0003 0.0006  
Z -0.0005 -0.0002 0.0011 0.0015 0.0003 -0.0006  
AT. 95 H X 0.0023 -0.0009 0.0016 -0.0006 0.0004 0.0003  
Y 0.0074 -0.0059 0.0092 -0.0068 0.0021 0.0026  
Z -0.0164 0.0109 -0.0196 0.0152 -0.0046 -0.0058  
AT. 96 H X -0.0023 0.0009 0.0016 0.0006 0.0004 -0.0003  
Y -0.0074 0.0059 0.0092 0.0068 0.0021 -0.0026  
Z 0.0164 -0.0109 -0.0196 -0.0152 -0.0046 0.0058  
AT. 97 H X 0.0069 -0.0054 0.0075 -0.0062 0.0016 0.0024  
Y 0.0112 -0.0086 0.0137 -0.0110 0.0032 0.0041  
Z 0.0009 -0.0000 0.0017 -0.0018 0.0005 0.0007  
AT. 98 H X -0.0069 0.0054 0.0075 0.0062 0.0016 -0.0024  
Y -0.0112 0.0086 0.0137 0.0110 0.0032 -0.0041  
Z -0.0009 0.0000 0.0017 0.0018 0.0005 -0.0007  
AT. 99 C X -0.0014 -0.0025 -0.0003 0.0018 0.0007 0.0003  
Y 0.0014 0.0000 0.0004 0.0001 0.0003 0.0003  
Z -0.0020 -0.0019 -0.0002 0.0008 0.0001 -0.0003  
AT. 100 C X 0.0014 0.0025 -0.0003 -0.0018 0.0007 -0.0003  
Y -0.0014 -0.0000 0.0004 -0.0001 0.0003 -0.0003  
Z 0.0020 0.0019 -0.0002 -0.0008 0.0001 0.0003  
AT. 101 C X 0.0021 0.0003 0.0011 -0.0011 -0.0002 -0.0001  
Y 0.0012 0.0001 0.0006 -0.0005 -0.0001 -0.0000  
Z 0.0031 0.0004 0.0017 -0.0012 -0.0001 0.0000  
AT. 102 C X -0.0021 -0.0003 0.0011 0.0011 -0.0002 0.0001  
Y -0.0012 -0.0001 0.0006 0.0005 -0.0001 0.0000  
Z -0.0031 -0.0004 0.0017 0.0012 -0.0001 -0.0000  
AT. 103 H X -0.0016 0.0001 -0.0014 0.0012 0.0000 -0.0001  
Y 0.0028 0.0002 0.0018 -0.0015 -0.0002 0.0000  
Z -0.0297 -0.0002 -0.0169 0.0111 0.0004 -0.0003  
AT. 104 H X 0.0016 -0.0001 -0.0014 -0.0012 0.0000 0.0001  
Y -0.0028 -0.0002 0.0018 0.0015 -0.0002 -0.0000  
Z 0.0297 0.0002 -0.0169 -0.0111 0.0004 0.0003

AT.105 H X -0.0124 0.0024 -0.0079 0.0048 0.0006 0.0006  
Y -0.0232 -0.0006 -0.0125 0.0083 0.0005 -0.0001  
Z -0.0094 0.0004 -0.0055 0.0034 0.0003 0.0002

AT.106 H X 0.0124 -0.0024 -0.0079 -0.0048 0.0006 -0.0006  
Y 0.0232 0.0006 -0.0125 -0.0083 0.0005 0.0001  
Z 0.0094 -0.0004 -0.0055 -0.0034 0.0003 -0.0002

AT.107 C X 0.0010 -0.0004 0.0012 -0.0010 0.0004 0.0005  
Y 0.0027 -0.0008 0.0025 -0.0018 0.0007 0.0007  
Z 0.0012 -0.0007 0.0004 0.0003 -0.0000 -0.0002

AT.108 C X -0.0010 0.0004 0.0012 0.0010 0.0004 -0.0005  
Y -0.0027 0.0008 0.0025 0.0018 0.0007 -0.0007  
Z -0.0012 0.0007 0.0004 -0.0003 -0.0000 0.0002

AT.109 H X -0.0181 0.0141 -0.0149 0.0043 -0.0054 -0.0034  
Y -0.0077 -0.0000 -0.0074 0.0066 -0.0035 -0.0036  
Z -0.0108 -0.0039 -0.0117 0.0131 -0.0053 -0.0062

AT.110 H X 0.0181 -0.0141 -0.0149 -0.0043 -0.0054 0.0034  
Y 0.0077 0.0000 -0.0074 -0.0066 -0.0035 0.0036  
Z 0.0108 0.0039 -0.0117 -0.0131 -0.0053 0.0062

AT.111 H X 0.0040 -0.0069 0.0006 0.0037 -0.0004 -0.0016  
Y -0.0232 0.0092 -0.0210 0.0134 -0.0084 -0.0075  
Z 0.0028 0.0045 0.0056 -0.0078 0.0025 0.0036

AT.112 H X -0.0040 0.0069 0.0006 -0.0037 -0.0004 0.0016  
Y 0.0232 -0.0092 -0.0210 -0.0134 -0.0084 0.0075  
Z -0.0028 -0.0045 0.0056 0.0078 0.0025 -0.0036

AT.113 C X 0.0017 -0.0009 0.0012 -0.0005 0.0002 0.0000  
Y -0.0015 0.0025 -0.0008 -0.0011 0.0011 0.0015  
Z -0.0014 -0.0026 -0.0014 0.0025 0.0003 -0.0002

AT.114 C X -0.0017 0.0009 0.0012 0.0005 0.0002 -0.0000  
Y 0.0015 -0.0025 -0.0008 0.0011 0.0011 -0.0015  
Z 0.0014 0.0026 -0.0014 -0.0025 0.0003 0.0002

AT.115 C X 0.0031 -0.0008 0.0026 -0.0016 0.0004 0.0004  
Y -0.0005 -0.0004 -0.0007 0.0008 -0.0006 -0.0006

Z -0.0006 -0.0001 0.0000 -0.0000 0.0003 0.0002  
AT. 116 C X -0.0031 0.0008 0.0026 0.0016 0.0004 -0.0004  
Y 0.0005 0.0004 -0.0007 -0.0008 -0.0006 0.0006  
Z 0.0006 0.0001 0.0000 0.0000 0.0003 -0.0002  
AT. 117 H X -0.0221 0.0041 -0.0166 0.0105 -0.0013 -0.0011  
Y 0.0099 -0.0058 0.0095 -0.0046 0.0032 0.0024  
Z 0.0225 -0.0038 0.0170 -0.0109 0.0012 0.0010  
AT. 118 H X 0.0221 -0.0041 -0.0166 -0.0105 -0.0013 0.0011  
Y -0.0099 0.0058 0.0095 0.0046 0.0032 -0.0024  
Z -0.0225 0.0038 0.0170 0.0109 0.0012 -0.0010  
AT. 119 H X -0.0244 0.0115 -0.0214 0.0109 -0.0033 -0.0020  
Y 0.0019 0.0046 0.0004 -0.0022 -0.0006 0.0001  
Z -0.0165 0.0011 -0.0131 0.0093 -0.0016 -0.0016  
AT. 120 H X 0.0244 -0.0115 -0.0214 -0.0109 -0.0033 0.0020  
Y -0.0019 -0.0046 0.0004 0.0022 -0.0006 -0.0001  
Z 0.0165 -0.0011 -0.0131 -0.0093 -0.0016 0.0016  
AT. 121 C X -0.0007 -0.0002 -0.0003 0.0005 0.0000 -0.0001  
Y -0.0023 0.0005 -0.0020 0.0016 -0.0007 -0.0009  
Z -0.0001 0.0001 0.0003 -0.0005 0.0004 0.0003  
AT. 122 C X 0.0007 0.0002 -0.0003 -0.0005 0.0000 0.0001  
Y 0.0023 -0.0005 -0.0020 -0.0016 -0.0007 0.0009  
Z 0.0001 -0.0001 0.0003 0.0005 0.0004 -0.0003  
AT. 123 H X 0.0081 -0.0085 0.0069 -0.0011 0.0023 0.0027  
Y 0.0081 0.0038 0.0045 -0.0063 0.0017 0.0037  
Z -0.0090 -0.0055 -0.0050 0.0079 -0.0017 -0.0040  
AT. 124 H X -0.0081 0.0085 0.0069 0.0011 0.0023 -0.0027  
Y -0.0081 -0.0038 0.0045 0.0063 0.0017 -0.0037  
Z 0.0090 0.0055 -0.0050 -0.0079 -0.0017 0.0040  
AT. 125 H X 0.0015 0.0064 -0.0012 -0.0028 -0.0009 0.0005  
Y 0.0130 -0.0068 0.0094 -0.0037 0.0031 0.0043  
Z 0.0098 0.0038 0.0050 -0.0067 0.0011 0.0034  
AT. 126 H X -0.0015 -0.0064 -0.0012 0.0028 -0.0009 -0.0005



Y -0.0130 0.0068 0.0094 0.0037 0.0031 -0.0043  
Z -0.0098 -0.0038 0.0050 0.0067 0.0011 -0.0034  
AT. 127 C X -0.0011 0.0033 -0.0016 -0.0009 -0.0005 -0.0001  
Y 0.0021 -0.0019 0.0031 -0.0016 0.0011 0.0005  
Z -0.0016 -0.0054 -0.0011 0.0045 -0.0006 -0.0013  
AT. 128 C X 0.0011 -0.0033 -0.0016 0.0009 -0.0005 0.0001  
Y -0.0021 0.0019 0.0031 0.0016 0.0011 -0.0005  
Z 0.0016 0.0054 -0.0011 -0.0045 -0.0006 0.0013  
AT. 129 C X -0.0069 0.0052 -0.0070 0.0035 -0.0017 -0.0014  
Y 0.0013 0.0001 0.0013 -0.0014 0.0005 0.0007  
Z 0.0003 0.0002 -0.0005 0.0006 -0.0000 -0.0001  
AT. 130 C X 0.0069 -0.0052 -0.0070 -0.0035 -0.0017 0.0014  
Y -0.0013 -0.0001 0.0013 0.0014 0.0005 -0.0007  
Z -0.0003 -0.0002 -0.0005 -0.0006 -0.0000 0.0001  
AT. 131 H X 0.0336 -0.0241 0.0369 -0.0208 0.0090 0.0083  
Y -0.0386 0.0358 -0.0394 0.0148 -0.0096 -0.0076  
Z 0.0350 -0.0219 0.0383 -0.0236 0.0093 0.0088  
AT. 132 H X -0.0336 0.0241 0.0369 0.0208 0.0090 -0.0083  
Y 0.0386 -0.0358 -0.0394 -0.0148 -0.0096 0.0076  
Z -0.0350 0.0219 0.0383 0.0236 0.0093 -0.0088  
AT. 133 H X 0.0633 -0.0586 0.0634 -0.0230 0.0142 0.0102  
Y 0.0073 -0.0143 0.0058 0.0037 -0.0007 -0.0022  
Z -0.0223 0.0057 -0.0253 0.0209 -0.0091 -0.0099  
AT. 134 H X -0.0633 0.0586 0.0634 0.0230 0.0142 -0.0102  
Y -0.0073 0.0143 0.0058 -0.0037 -0.0007 0.0022  
Z 0.0223 -0.0057 -0.0253 -0.0209 -0.0091 0.0099  
AT. 135 C X -0.0003 -0.0014 -0.0002 0.0010 0.0004 0.0001  
Y -0.0014 0.0014 -0.0009 -0.0003 0.0012 0.0014  
Z -0.0002 -0.0008 -0.0004 0.0005 0.0000 -0.0001  
AT. 136 C X 0.0003 0.0014 -0.0002 -0.0010 0.0004 -0.0001  
Y 0.0014 -0.0014 -0.0009 0.0003 0.0012 -0.0014  
Z 0.0002 0.0008 -0.0004 -0.0005 0.0000 0.0001

AT. 137 H X 0.0140 -0.0176 0.0080 0.0064 -0.0131 -0.0156  
Y 0.0073 0.0052 0.0064 -0.0054 -0.0063 -0.0055  
Z 0.0084 0.0134 0.0085 -0.0108 -0.0065 -0.0046

AT. 138 H X -0.0140 0.0176 0.0080 -0.0064 -0.0131 0.0156  
Y -0.0073 -0.0052 0.0064 0.0054 -0.0063 0.0055  
Z -0.0084 -0.0134 0.0085 0.0108 -0.0065 0.0046

AT. 139 H X -0.0045 0.0153 -0.0028 -0.0069 0.0008 0.0030  
Y 0.0206 -0.0212 0.0135 0.0057 -0.0171 -0.0202  
Z -0.0004 -0.0151 -0.0009 0.0083 0.0037 0.0016

AT. 140 H X 0.0045 -0.0153 -0.0028 0.0069 0.0008 -0.0030  
Y -0.0206 0.0212 0.0135 -0.0057 -0.0171 0.0202  
Z 0.0004 0.0151 -0.0009 -0.0083 0.0037 -0.0016

AT. 141 H X -0.0123 0.0252 -0.0076 -0.0101 0.0073 0.0110  
Y -0.0049 -0.0103 -0.0055 0.0079 0.0030 0.0016  
Z -0.0009 0.0217 0.0018 -0.0124 0.0003 0.0034

AT. 142 H X 0.0123 -0.0252 -0.0076 0.0101 0.0073 -0.0110  
Y 0.0049 0.0103 -0.0055 -0.0079 0.0030 -0.0016  
Z 0.0009 -0.0217 0.0018 0.0124 0.0003 -0.0034

AT. 143 C X -0.0000 0.0040 -0.0005 -0.0020 -0.0003 0.0002  
Y 0.0009 -0.0011 0.0018 -0.0006 0.0008 0.0001  
Z -0.0003 -0.0050 0.0005 0.0033 -0.0002 -0.0011

AT. 144 C X 0.0000 -0.0040 -0.0005 0.0020 -0.0003 -0.0002  
Y -0.0009 0.0011 0.0018 0.0006 0.0008 -0.0001  
Z 0.0003 0.0050 0.0005 -0.0033 -0.0002 0.0011

AT. 145 H X -0.0067 0.0258 -0.0176 -0.0045 -0.0061 0.0024  
Y -0.0093 -0.0459 -0.0070 0.0375 -0.0053 -0.0095  
Z 0.0086 0.0524 0.0044 -0.0398 0.0045 0.0104

AT. 146 H X 0.0067 -0.0258 -0.0176 0.0045 -0.0061 -0.0024  
Y 0.0093 0.0459 -0.0070 -0.0375 -0.0053 0.0095  
Z -0.0086 -0.0524 0.0044 0.0398 0.0045 -0.0104

AT. 147 H X 0.0025 -0.0378 0.0090 0.0172 0.0032 -0.0028  
Y -0.0134 0.0354 -0.0280 -0.0011 -0.0116 -0.0002

Z -0.0039 -0.0400 -0.0017 0.0271 -0.0015 -0.0048  
AT. 148 H X -0.0025 0.0378 0.0090 -0.0172 0.0032 0.0028  
Y 0.0134 -0.0354 -0.0280 0.0011 -0.0116 0.0002  
Z 0.0039 0.0400 -0.0017 -0.0271 -0.0015 0.0048  
AT. 149 H X 0.0097 -0.0553 0.0225 0.0171 0.0091 -0.0017  
Y 0.0066 0.0280 0.0046 -0.0243 0.0039 0.0073  
Z 0.0053 0.0757 -0.0055 -0.0484 0.0009 0.0129  
AT. 150 H X -0.0097 0.0553 0.0225 -0.0171 0.0091 0.0017  
Y -0.0066 -0.0280 0.0046 0.0243 0.0039 -0.0073  
Z -0.0053 -0.0757 -0.0055 0.0484 0.0009 -0.0129  
AT. 151 C X 0.0001 -0.0008 0.0004 0.0003 0.0002 0.0002  
Y 0.0003 -0.0002 0.0001 0.0001 -0.0001 -0.0001  
Z -0.0059 0.0011 -0.0058 0.0043 -0.0019 -0.0021  
AT. 152 C X -0.0001 0.0008 0.0004 -0.0003 0.0002 -0.0002  
Y -0.0003 0.0002 0.0001 -0.0001 -0.0001 0.0001  
Z 0.0059 -0.0011 -0.0058 -0.0043 -0.0019 0.0021  
AT. 153 H X -0.0150 0.0067 -0.0157 0.0091 -0.0046 -0.0040  
Y 0.0265 0.0051 0.0258 -0.0252 0.0082 0.0106  
Z 0.0448 0.0074 0.0441 -0.0422 0.0138 0.0174  
AT. 154 H X 0.0150 -0.0067 -0.0157 -0.0091 -0.0046 0.0040  
Y -0.0265 -0.0051 0.0258 0.0252 0.0082 -0.0106  
Z -0.0448 -0.0074 0.0441 0.0422 0.0138 -0.0174  
AT. 155 H X 0.0129 -0.0046 0.0124 -0.0075 0.0023 0.0016  
Y -0.0328 -0.0059 -0.0317 0.0308 -0.0099 -0.0129  
Z 0.0358 0.0061 0.0344 -0.0331 0.0100 0.0130  
AT. 156 H X -0.0129 0.0046 0.0124 0.0075 0.0023 -0.0016  
Y 0.0328 0.0059 -0.0317 -0.0308 -0.0099 0.0129  
Z -0.0358 -0.0061 0.0344 0.0331 0.0100 -0.0130  
AT. 157 O X 0.0007 0.0008 -0.0006 0.0005 -0.0033 -0.0033  
Y 0.0010 0.0012 -0.0010 0.0008 -0.0054 -0.0055  
Z -0.0007 -0.0000 -0.0011 0.0004 -0.0003 -0.0001  
AT. 158 O X -0.0007 -0.0008 -0.0006 -0.0005 -0.0033 0.0033

Y -0.0010 -0.0012 -0.0010 -0.0008 -0.0054 0.0055  
Z 0.0007 0.0000 -0.0011 -0.0004 -0.0003 0.0001  
AT.159 O X 0.0010 0.0005 0.0009 -0.0002 -0.0013 -0.0015  
Y -0.0007 -0.0007 0.0005 -0.0005 0.0035 0.0035  
Z -0.0001 -0.0007 0.0014 -0.0007 0.0033 0.0033  
AT.160 O X -0.0010 -0.0005 0.0009 0.0002 -0.0013 0.0015  
Y 0.0007 0.0007 0.0005 0.0005 0.0035 -0.0035  
Z 0.0001 0.0007 0.0014 0.0007 0.0033 -0.0033  
AT.161 H X -0.0190 -0.0246 0.0274 -0.0181 0.1166 0.1164  
Y -0.0039 -0.0054 0.0059 -0.0040 0.0261 0.0260  
Z 0.0109 0.0151 -0.0182 0.0119 -0.0711 -0.0708  
AT.162 H X 0.0190 0.0246 0.0274 0.0181 0.1166 -0.1164  
Y 0.0039 0.0054 0.0059 0.0040 0.0261 -0.0260  
Z -0.0109 -0.0151 -0.0182 -0.0119 -0.0711 0.0708  
AT.163 H X -0.0116 0.0039 -0.0338 0.0134 -0.0359 -0.0310  
Y -0.0009 -0.0025 0.0028 -0.0009 0.0067 0.0062  
Z 0.0041 -0.0024 0.0137 -0.0055 0.0167 0.0139  
AT.164 H X 0.0116 -0.0039 -0.0338 -0.0134 -0.0359 0.0310  
Y 0.0009 0.0025 0.0028 0.0009 0.0067 -0.0062  
Z -0.0041 0.0024 0.0137 0.0055 0.0167 -0.0139  
AT.165 O X 0.0007 -0.0003 -0.0004 -0.0000 0.0001 -0.0001  
Y -0.0005 0.0002 0.0004 0.0001 0.0001 0.0003  
Z 0.0007 -0.0003 -0.0005 -0.0001 -0.0001 -0.0003  
AT.166 O X -0.0007 0.0003 -0.0004 0.0000 0.0001 0.0001  
Y 0.0005 -0.0002 0.0004 -0.0001 0.0001 -0.0003  
Z -0.0007 0.0003 -0.0005 0.0001 -0.0001 0.0003  
AT.167 H X -0.0028 0.0010 0.0013 -0.0001 -0.0009 0.0000  
Y -0.0010 0.0007 0.0000 -0.0003 -0.0003 -0.0002  
Z 0.0099 -0.0036 -0.0081 -0.0003 0.0038 -0.0002  
AT.168 H X 0.0028 -0.0010 0.0013 0.0001 -0.0009 -0.0000  
Y 0.0010 -0.0007 0.0000 0.0003 -0.0003 0.0002  
Z -0.0099 0.0036 -0.0081 0.0003 0.0038 0.0002

AT. 169 O X -0.0009 0.0003 0.0005 -0.0001 -0.0001 0.0002  
Y 0.0011 -0.0005 -0.0008 -0.0001 -0.0001 -0.0004  
Z 0.0002 -0.0002 -0.0003 -0.0001 -0.0000 -0.0002

AT. 170 O X 0.0009 -0.0003 0.0005 0.0001 -0.0001 -0.0002  
Y -0.0011 0.0005 -0.0008 0.0001 -0.0001 0.0004  
Z -0.0002 0.0002 -0.0003 0.0001 -0.0000 0.0002

AT. 171 H X 0.0067 -0.0014 -0.0021 0.0019 -0.0007 -0.0016  
Y -0.0102 0.0054 0.0088 0.0015 -0.0006 0.0038  
Z -0.0268 0.0128 0.0200 0.0027 -0.0011 0.0097

AT. 172 H X -0.0067 0.0014 -0.0021 -0.0019 -0.0007 0.0016  
Y 0.0102 -0.0054 0.0088 -0.0015 -0.0006 -0.0038  
Z 0.0268 -0.0128 0.0200 -0.0027 -0.0011 -0.0097

FREQ(CM\*\*-1) 1610.01 1610.04 1615.02 1617.34 1619.49 1623.52

AT. 1 I X -0.0000 0.0000 0.0000 -0.0000 -0.0000 0.0000  
Y -0.0000 0.0000 0.0000 -0.0000 -0.0000 0.0000  
Z -0.0000 0.0000 0.0000 0.0000 0.0000 -0.0000

AT. 2 I X -0.0000 -0.0000 0.0000 0.0000 -0.0000 -0.0000  
Y -0.0000 -0.0000 0.0000 0.0000 -0.0000 -0.0000  
Z -0.0000 -0.0000 0.0000 -0.0000 0.0000 0.0000

AT. 3 I X -0.0000 -0.0000 0.0000 0.0000 0.0000 -0.0000  
Y 0.0000 0.0000 -0.0000 0.0000 -0.0000 -0.0000  
Z -0.0000 -0.0000 0.0000 0.0000 -0.0000 -0.0000

AT. 4 I X -0.0000 0.0000 0.0000 -0.0000 0.0000 0.0000  
Y 0.0000 -0.0000 -0.0000 -0.0000 -0.0000 0.0000  
Z -0.0000 0.0000 0.0000 -0.0000 -0.0000 0.0000

AT. 5 O X -0.0049 -0.0048 0.0036 -0.0005 -0.0132 0.0106  
Y 0.0031 0.0030 -0.0023 0.0003 0.0083 -0.0066  
Z 0.0049 0.0049 -0.0037 0.0005 0.0141 -0.0113

AT. 6 O X -0.0049 0.0048 0.0036 0.0005 -0.0132 -0.0106  
Y 0.0031 -0.0030 -0.0023 -0.0003 0.0083 0.0066

Z 0.0049 -0.0049 -0.0037 -0.0005 0.0141 0.0113  
AT. 7 O X -0.0138 -0.0145 0.0048 0.0009 0.0054 -0.0005  
Y 0.0135 0.0142 -0.0047 -0.0009 -0.0053 0.0004  
Z -0.0056 -0.0059 0.0020 0.0004 0.0023 -0.0003  
AT. 8 O X -0.0138 0.0145 0.0048 -0.0009 0.0054 0.0005  
Y 0.0135 -0.0142 -0.0047 0.0009 -0.0053 -0.0004  
Z -0.0056 0.0059 0.0020 -0.0004 0.0023 0.0003  
AT. 9 N X -0.0011 -0.0012 0.0007 -0.0001 -0.0019 0.0016  
Y 0.0000 0.0001 -0.0000 0.0000 0.0000 -0.0000  
Z 0.0035 0.0030 -0.0031 0.0003 0.0124 -0.0095  
AT. 10 N X -0.0011 0.0012 0.0007 0.0001 -0.0019 -0.0016  
Y 0.0000 -0.0001 -0.0000 -0.0000 0.0000 0.0000  
Z 0.0035 -0.0030 -0.0031 -0.0003 0.0124 0.0095  
AT. 11 N X -0.0033 -0.0036 0.0011 0.0002 0.0013 0.0000  
Y 0.0055 0.0057 -0.0019 -0.0004 -0.0025 0.0004  
Z -0.0090 -0.0092 0.0030 0.0005 0.0039 -0.0010  
AT. 12 N X -0.0033 0.0036 0.0011 -0.0002 0.0013 -0.0000  
Y 0.0055 -0.0057 -0.0019 0.0004 -0.0025 -0.0004  
Z -0.0090 0.0092 0.0030 -0.0005 0.0039 0.0010  
AT. 13 C X 0.0081 0.0083 -0.0058 0.0008 0.0210 -0.0170  
Y -0.0048 -0.0053 0.0035 -0.0005 -0.0124 0.0101  
Z -0.0104 -0.0098 0.0083 -0.0011 -0.0324 0.0255  
AT. 14 C X 0.0081 -0.0083 -0.0058 -0.0008 0.0210 0.0170  
Y -0.0048 0.0053 0.0035 0.0005 -0.0124 -0.0101  
Z -0.0104 0.0098 0.0083 0.0011 -0.0324 -0.0255  
AT. 15 C X -0.0008 -0.0009 0.0006 -0.0001 -0.0018 0.0015  
Y 0.0011 0.0013 -0.0006 0.0001 0.0019 -0.0018  
Z 0.0007 0.0005 -0.0006 0.0001 0.0023 -0.0017  
AT. 16 C X -0.0008 0.0009 0.0006 0.0001 -0.0018 -0.0015  
Y 0.0011 -0.0013 -0.0006 -0.0001 0.0019 0.0018  
Z 0.0007 -0.0005 -0.0006 -0.0001 0.0023 0.0017  
AT. 17 H X -0.0048 -0.0055 0.0030 -0.0004 -0.0096 0.0083

Y -0.0016 -0.0022 0.0001 0.0001 0.0024 -0.0009  
Z 0.0015 0.0021 -0.0002 -0.0001 -0.0024 0.0009  
AT. 18 H X -0.0048 0.0055 0.0030 0.0004 -0.0096 -0.0083  
Y -0.0016 0.0022 0.0001 -0.0001 0.0024 0.0009  
Z 0.0015 -0.0021 -0.0002 0.0001 -0.0024 -0.0009  
AT. 19 H X 0.0047 0.0051 -0.0042 0.0006 0.0148 -0.0133  
Y -0.0074 -0.0082 0.0043 -0.0006 -0.0129 0.0117  
Z -0.0009 -0.0014 0.0001 -0.0000 0.0007 -0.0004  
AT. 20 H X 0.0047 -0.0051 -0.0042 -0.0006 0.0148 0.0133  
Y -0.0074 0.0082 0.0043 0.0006 -0.0129 -0.0117  
Z -0.0009 0.0014 0.0001 0.0000 0.0007 0.0004  
AT. 21 C X 0.0226 0.0239 -0.0078 -0.0015 -0.0090 0.0004  
Y -0.0261 -0.0273 0.0091 0.0017 0.0102 -0.0009  
Z 0.0168 0.0174 -0.0058 -0.0012 -0.0072 0.0013  
AT. 22 C X 0.0226 -0.0239 -0.0078 0.0015 -0.0090 -0.0004  
Y -0.0261 0.0273 0.0091 -0.0017 0.0102 0.0009  
Z 0.0168 -0.0174 -0.0058 0.0012 -0.0072 -0.0013  
AT. 23 C X -0.0019 -0.0023 0.0006 0.0002 0.0012 0.0001  
Y 0.0025 0.0030 -0.0008 -0.0002 -0.0014 -0.0002  
Z -0.0005 -0.0003 0.0002 0.0000 -0.0001 -0.0003  
AT. 24 C X -0.0019 0.0023 0.0006 -0.0002 0.0012 -0.0001  
Y 0.0025 -0.0030 -0.0008 0.0002 -0.0014 0.0002  
Z -0.0005 0.0003 0.0002 -0.0000 -0.0001 0.0003  
AT. 25 H X -0.0090 -0.0097 0.0035 0.0002 0.0007 0.0023  
Y 0.0003 0.0009 0.0001 -0.0001 -0.0017 0.0000  
Z 0.0031 -0.0003 -0.0020 -0.0002 0.0045 0.0027  
AT. 26 H X -0.0090 0.0097 0.0035 -0.0002 0.0007 -0.0023  
Y 0.0003 -0.0009 0.0001 0.0001 -0.0017 -0.0000  
Z 0.0031 0.0003 -0.0020 0.0002 0.0045 -0.0027  
AT. 27 H X 0.0187 0.0203 -0.0061 -0.0014 -0.0088 0.0006  
Y -0.0071 -0.0118 0.0015 0.0004 0.0091 0.0037  
Z -0.0088 -0.0115 0.0026 0.0006 0.0068 0.0016

AT. 28 H X 0.0187 -0.0203 -0.0061 0.0014 -0.0088 -0.0006  
Y -0.0071 0.0118 0.0015 -0.0004 0.0091 -0.0037  
Z -0.0088 0.0115 0.0026 -0.0006 0.0068 -0.0016

AT. 29 C X 0.0008 0.0007 -0.0006 0.0001 0.0022 -0.0017  
Y -0.0005 -0.0006 0.0004 -0.0001 -0.0017 0.0013  
Z -0.0006 -0.0005 0.0004 -0.0001 -0.0017 0.0013

AT. 30 C X 0.0008 -0.0007 -0.0006 -0.0001 0.0022 0.0017  
Y -0.0005 0.0006 0.0004 0.0001 -0.0017 -0.0013  
Z -0.0006 0.0005 0.0004 0.0001 -0.0017 -0.0013

AT. 31 H X -0.0065 -0.0064 0.0048 -0.0010 -0.0188 0.0150  
Y 0.0032 0.0030 -0.0017 0.0008 0.0084 -0.0069  
Z 0.0004 0.0004 0.0003 0.0004 0.0010 -0.0010

AT. 32 H X -0.0065 0.0064 0.0048 0.0010 -0.0188 -0.0150  
Y 0.0032 -0.0030 -0.0017 -0.0008 0.0084 0.0069  
Z 0.0004 -0.0004 0.0003 -0.0004 0.0010 0.0010

AT. 33 H X 0.0006 0.0008 -0.0005 0.0001 0.0026 -0.0020  
Y 0.0022 0.0024 -0.0009 0.0007 0.0057 -0.0051  
Z -0.0022 -0.0022 0.0014 -0.0004 -0.0056 0.0046

AT. 34 H X 0.0006 -0.0008 -0.0005 -0.0001 0.0026 0.0020  
Y 0.0022 -0.0024 -0.0009 -0.0007 0.0057 0.0051  
Z -0.0022 0.0022 0.0014 0.0004 -0.0056 -0.0046

AT. 35 C X 0.0005 0.0006 0.0000 0.0000 -0.0011 0.0006  
Y 0.0001 0.0001 -0.0002 0.0001 0.0015 -0.0011  
Z 0.0004 0.0004 -0.0001 0.0000 -0.0002 0.0001

AT. 36 C X 0.0005 -0.0006 0.0000 -0.0000 -0.0011 -0.0006  
Y 0.0001 -0.0001 -0.0002 -0.0001 0.0015 0.0011  
Z 0.0004 -0.0004 -0.0001 -0.0000 -0.0002 -0.0001

AT. 37 C X -0.0001 -0.0001 -0.0003 -0.0001 0.0004 -0.0004  
Y 0.0011 0.0012 -0.0003 -0.0000 -0.0005 0.0000  
Z 0.0002 0.0001 -0.0000 -0.0000 -0.0002 0.0001

AT. 38 C X -0.0001 0.0001 -0.0003 0.0001 0.0004 0.0004  
Y 0.0011 -0.0012 -0.0003 0.0000 -0.0005 -0.0000



Z 0.0002 -0.0001 -0.0000 0.0000 -0.0002 -0.0001  
AT. 39 H X 0.0027 0.0031 0.0007 0.0002 -0.0028 0.0018  
Y 0.0009 0.0010 0.0003 0.0002 -0.0006 0.0009  
Z 0.0022 0.0025 0.0002 -0.0000 -0.0024 0.0013  
AT. 40 H X 0.0027 -0.0031 0.0007 -0.0002 -0.0028 -0.0018  
Y 0.0009 -0.0010 0.0003 -0.0002 -0.0006 -0.0009  
Z 0.0022 -0.0025 0.0002 0.0000 -0.0024 -0.0013  
AT. 41 H X 0.0081 0.0087 -0.0010 0.0000 -0.0047 0.0024  
Y -0.0135 -0.0142 0.0030 -0.0003 0.0055 -0.0020  
Z 0.0014 0.0014 -0.0015 0.0002 0.0012 -0.0013  
AT. 42 H X 0.0081 -0.0087 -0.0010 -0.0000 -0.0047 -0.0024  
Y -0.0135 0.0142 0.0030 0.0003 0.0055 0.0020  
Z 0.0014 -0.0014 -0.0015 -0.0002 0.0012 0.0013  
AT. 43 C X 0.0026 0.0027 -0.0008 -0.0001 -0.0010 0.0001  
Y -0.0014 -0.0015 0.0004 0.0000 0.0007 -0.0002  
Z 0.0002 0.0002 -0.0003 -0.0002 -0.0001 -0.0001  
AT. 44 C X 0.0026 -0.0027 -0.0008 0.0001 -0.0010 -0.0001  
Y -0.0014 0.0015 0.0004 -0.0000 0.0007 0.0002  
Z 0.0002 -0.0002 -0.0003 0.0002 -0.0001 0.0001  
AT. 45 H X -0.0172 -0.0179 0.0037 -0.0009 0.0061 -0.0025  
Y 0.0040 0.0042 -0.0015 -0.0001 -0.0013 -0.0002  
Z 0.0082 0.0085 -0.0013 0.0008 -0.0026 0.0017  
AT. 46 H X -0.0172 0.0179 0.0037 0.0009 0.0061 0.0025  
Y 0.0040 -0.0042 -0.0015 0.0001 -0.0013 0.0002  
Z 0.0082 -0.0085 -0.0013 -0.0008 -0.0026 -0.0017  
AT. 47 H X 0.0008 0.0010 -0.0000 0.0001 -0.0005 0.0003  
Y 0.0008 0.0008 0.0005 0.0010 0.0002 0.0005  
Z 0.0063 0.0065 -0.0017 0.0004 -0.0019 0.0003  
AT. 48 H X 0.0008 -0.0010 -0.0000 -0.0001 -0.0005 -0.0003  
Y 0.0008 -0.0008 0.0005 -0.0010 0.0002 -0.0005  
Z 0.0063 -0.0065 -0.0017 -0.0004 -0.0019 -0.0003  
AT. 49 C X -0.0006 -0.0006 0.0001 0.0001 0.0011 -0.0006

Y 0.0012 0.0013 -0.0003 -0.0001 -0.0006 0.0002  
Z 0.0004 0.0004 0.0001 0.0001 -0.0010 0.0007  
AT. 50 C X -0.0006 0.0006 0.0001 -0.0001 0.0011 0.0006  
Y 0.0012 -0.0013 -0.0003 0.0001 -0.0006 -0.0002  
Z 0.0004 -0.0004 0.0001 -0.0001 -0.0010 -0.0007  
AT. 51 C X -0.0000 0.0000 -0.0000 -0.0001 -0.0008 0.0006  
Y 0.0000 0.0000 -0.0001 0.0000 0.0004 -0.0003  
Z -0.0000 0.0001 0.0000 0.0000 -0.0000 -0.0001  
AT. 52 C X -0.0000 -0.0000 -0.0000 0.0001 -0.0008 -0.0006  
Y 0.0000 -0.0000 -0.0001 -0.0000 0.0004 0.0003  
Z -0.0000 -0.0001 0.0000 -0.0000 -0.0000 0.0001  
AT. 53 H X 0.0009 0.0007 -0.0003 0.0003 0.0030 -0.0027  
Y 0.0010 0.0007 -0.0005 0.0002 0.0034 -0.0030  
Z -0.0004 -0.0003 0.0002 -0.0004 -0.0034 0.0026  
AT. 54 H X 0.0009 -0.0007 -0.0003 -0.0003 0.0030 0.0027  
Y 0.0010 -0.0007 -0.0005 -0.0002 0.0034 0.0030  
Z -0.0004 0.0003 0.0002 0.0004 -0.0034 -0.0026  
AT. 55 H X 0.0022 0.0017 -0.0014 0.0006 0.0092 -0.0072  
Y -0.0031 -0.0030 0.0031 -0.0001 -0.0108 0.0085  
Z -0.0021 -0.0024 0.0027 0.0004 -0.0059 0.0047  
AT. 56 H X 0.0022 -0.0017 -0.0014 -0.0006 0.0092 0.0072  
Y -0.0031 0.0030 0.0031 0.0001 -0.0108 -0.0085  
Z -0.0021 0.0024 0.0027 -0.0004 -0.0059 -0.0047  
AT. 57 C X -0.0004 -0.0003 -0.0001 -0.0001 0.0003 -0.0001  
Y -0.0002 -0.0002 0.0002 0.0000 -0.0004 0.0004  
Z 0.0000 -0.0000 -0.0001 -0.0001 -0.0002 0.0001  
AT. 58 C X -0.0004 0.0003 -0.0001 0.0001 0.0003 0.0001  
Y -0.0002 0.0002 0.0002 -0.0000 -0.0004 -0.0004  
Z 0.0000 0.0000 -0.0001 0.0001 -0.0002 -0.0001  
AT. 59 H X 0.0014 0.0017 0.0006 0.0012 0.0013 -0.0011  
Y -0.0009 -0.0008 0.0005 -0.0002 0.0002 0.0004  
Z 0.0000 0.0003 0.0011 0.0007 0.0017 -0.0006

AT. 60 H X 0.0014 -0.0017 0.0006 -0.0012 0.0013 0.0011  
Y -0.0009 0.0008 0.0005 0.0002 0.0002 -0.0004  
Z 0.0000 -0.0003 0.0011 -0.0007 0.0017 0.0006

AT. 61 H X 0.0001 -0.0005 0.0007 0.0002 -0.0020 0.0008  
Y -0.0003 -0.0005 0.0007 -0.0000 -0.0007 0.0005  
Z 0.0003 0.0000 0.0003 0.0002 -0.0017 0.0007

AT. 62 H X 0.0001 0.0005 0.0007 -0.0002 -0.0020 -0.0008  
Y -0.0003 0.0005 0.0007 0.0000 -0.0007 -0.0005  
Z 0.0003 -0.0000 0.0003 -0.0002 -0.0017 -0.0007

AT. 63 H X -0.0004 -0.0010 0.0011 0.0000 -0.0034 0.0019  
Y 0.0008 0.0009 -0.0018 -0.0006 0.0011 -0.0013  
Z -0.0007 -0.0001 0.0006 0.0004 0.0022 -0.0005

AT. 64 H X -0.0004 0.0010 0.0011 -0.0000 -0.0034 -0.0019  
Y 0.0008 -0.0009 -0.0018 0.0006 0.0011 0.0013  
Z -0.0007 0.0001 0.0006 -0.0004 0.0022 0.0005

AT. 65 C X -0.0001 -0.0000 -0.0000 -0.0000 -0.0005 0.0003  
Y -0.0004 -0.0004 0.0002 -0.0001 0.0001 0.0001  
Z 0.0001 -0.0001 0.0001 0.0000 -0.0000 -0.0001

AT. 66 C X -0.0001 0.0000 -0.0000 0.0000 -0.0005 -0.0003  
Y -0.0004 0.0004 0.0002 0.0001 0.0001 -0.0001  
Z 0.0001 0.0001 0.0001 -0.0000 -0.0000 0.0001

AT. 67 H X 0.0015 0.0015 -0.0002 -0.0005 0.0004 -0.0009  
Y -0.0006 -0.0015 0.0001 0.0009 -0.0008 0.0001  
Z -0.0011 -0.0003 0.0001 -0.0004 0.0005 0.0007

AT. 68 H X 0.0015 -0.0015 -0.0002 0.0005 0.0004 0.0009  
Y -0.0006 0.0015 0.0001 -0.0009 -0.0008 -0.0001  
Z -0.0011 0.0003 0.0001 0.0004 0.0005 -0.0007

AT. 69 H X -0.0004 -0.0006 0.0005 0.0004 0.0005 -0.0002  
Y -0.0012 -0.0016 0.0002 0.0010 0.0009 -0.0006  
Z -0.0005 -0.0007 -0.0006 0.0005 -0.0006 0.0001

AT. 70 H X -0.0004 0.0006 0.0005 -0.0004 0.0005 0.0002  
Y -0.0012 0.0016 0.0002 -0.0010 0.0009 0.0006

Z -0.0005 0.0007 -0.0006 -0.0005 -0.0006 -0.0001  
AT. 71 H X -0.0017 -0.0017 0.0009 0.0003 0.0016 -0.0003  
Y 0.0012 0.0020 -0.0009 -0.0006 -0.0001 0.0002  
Z 0.0007 0.0018 -0.0007 -0.0005 0.0015 -0.0003  
AT. 72 H X -0.0017 0.0017 0.0009 -0.0003 0.0016 0.0003  
Y 0.0012 -0.0020 -0.0009 0.0006 -0.0001 -0.0002  
Z 0.0007 -0.0018 -0.0007 0.0005 0.0015 0.0003  
AT. 73 C X 0.0002 0.0001 -0.0001 -0.0000 0.0001 -0.0001  
Y -0.0001 -0.0001 0.0000 -0.0000 -0.0001 0.0002  
Z -0.0001 -0.0002 -0.0001 0.0000 0.0002 -0.0004  
AT. 74 C X 0.0002 -0.0001 -0.0001 0.0000 0.0001 0.0001  
Y -0.0001 0.0001 0.0000 0.0000 -0.0001 -0.0002  
Z -0.0001 0.0002 -0.0001 -0.0000 0.0002 0.0004  
AT. 75 H X -0.0006 0.0000 0.0002 -0.0003 0.0003 0.0008  
Y 0.0005 0.0008 0.0002 -0.0001 0.0002 0.0004  
Z -0.0001 0.0008 0.0006 -0.0002 0.0011 0.0008  
AT. 76 H X -0.0006 -0.0000 0.0002 0.0003 0.0003 -0.0008  
Y 0.0005 -0.0008 0.0002 0.0001 0.0002 -0.0004  
Z -0.0001 -0.0008 0.0006 0.0002 0.0011 -0.0008  
AT. 77 H X -0.0002 -0.0003 -0.0003 0.0002 -0.0002 -0.0004  
Y 0.0006 -0.0001 -0.0007 0.0001 0.0001 -0.0014  
Z -0.0003 0.0003 0.0009 -0.0003 0.0006 0.0014  
AT. 78 H X -0.0002 0.0003 -0.0003 -0.0002 -0.0002 0.0004  
Y 0.0006 0.0001 -0.0007 -0.0001 0.0001 0.0014  
Z -0.0003 -0.0003 0.0009 0.0003 0.0006 -0.0014  
AT. 79 I X -0.0000 0.0000 -0.0001 -0.0000 -0.0000 0.0000  
Y 0.0000 -0.0000 0.0000 0.0000 0.0000 -0.0000  
Z 0.0000 -0.0000 -0.0000 -0.0000 -0.0000 0.0000  
AT. 80 I X -0.0000 -0.0000 -0.0001 0.0000 -0.0000 -0.0000  
Y 0.0000 0.0000 0.0000 -0.0000 0.0000 0.0000  
Z 0.0000 0.0000 -0.0000 0.0000 -0.0000 -0.0000  
AT. 81 I X -0.0000 -0.0000 -0.0000 -0.0000 0.0000 -0.0000

Y -0.0000 -0.0000 -0.0000 -0.0000 0.0000 -0.0000  
Z -0.0000 0.0000 -0.0000 0.0000 -0.0000 0.0000  
AT. 82 I X -0.0000 0.0000 -0.0000 0.0000 0.0000 0.0000  
Y -0.0000 0.0000 -0.0000 0.0000 0.0000 0.0000  
Z -0.0000 -0.0000 -0.0000 -0.0000 -0.0000 -0.0000  
AT. 83 O X -0.0050 0.0016 -0.0163 -0.0172 -0.0034 0.0051  
Y -0.0010 0.0003 -0.0031 -0.0032 -0.0006 0.0009  
Z -0.0031 0.0010 -0.0102 -0.0108 -0.0022 0.0033  
AT. 84 O X -0.0050 -0.0016 -0.0163 0.0172 -0.0034 -0.0051  
Y -0.0010 -0.0003 -0.0031 0.0032 -0.0006 -0.0009  
Z -0.0031 -0.0010 -0.0102 0.0108 -0.0022 -0.0033  
AT. 85 O X -0.0056 -0.0049 -0.0066 -0.0079 0.0018 -0.0110  
Y -0.0041 -0.0036 -0.0049 -0.0056 0.0013 -0.0082  
Z 0.0024 0.0021 0.0029 0.0032 -0.0008 0.0049  
AT. 86 O X -0.0056 0.0049 -0.0066 0.0079 0.0018 0.0110  
Y -0.0041 0.0036 -0.0049 0.0056 0.0013 0.0082  
Z 0.0024 -0.0021 0.0029 -0.0032 -0.0008 -0.0049  
AT. 87 N X -0.0012 0.0003 -0.0037 -0.0040 -0.0007 0.0010  
Y 0.0002 -0.0000 0.0007 0.0006 0.0001 -0.0001  
Z -0.0032 0.0013 -0.0113 -0.0115 -0.0024 0.0043  
AT. 88 N X -0.0012 -0.0003 -0.0037 0.0040 -0.0007 -0.0010  
Y 0.0002 0.0000 0.0007 -0.0006 0.0001 0.0001  
Z -0.0032 -0.0013 -0.0113 0.0115 -0.0024 -0.0043  
AT. 89 N X -0.0014 -0.0012 -0.0013 -0.0019 0.0004 -0.0022  
Y -0.0019 -0.0017 -0.0018 -0.0020 0.0006 -0.0038  
Z 0.0030 0.0027 0.0036 0.0036 -0.0010 0.0067  
AT. 90 N X -0.0014 0.0012 -0.0013 0.0019 0.0004 0.0022  
Y -0.0019 0.0017 -0.0018 0.0020 0.0006 0.0038  
Z 0.0030 -0.0027 0.0036 -0.0036 -0.0010 -0.0067  
AT. 91 C X 0.0083 -0.0026 0.0269 0.0287 0.0056 -0.0080  
Y 0.0013 -0.0004 0.0043 0.0046 0.0009 -0.0011  
Z 0.0077 -0.0029 0.0261 0.0270 0.0056 -0.0092

AT. 92 C X 0.0083 0.0026 0.0269 -0.0287 0.0056 0.0080  
Y 0.0013 0.0004 0.0043 -0.0046 0.0009 0.0011  
Z 0.0077 0.0029 0.0261 -0.0270 0.0056 0.0092

AT. 93 C X -0.0008 0.0002 -0.0024 -0.0029 -0.0005 0.0007  
Y -0.0004 0.0001 -0.0014 -0.0017 -0.0003 0.0003  
Z -0.0005 0.0002 -0.0017 -0.0015 -0.0004 0.0008

AT. 94 C X -0.0008 -0.0002 -0.0024 0.0029 -0.0005 -0.0007  
Y -0.0004 -0.0001 -0.0014 0.0017 -0.0003 -0.0003  
Z -0.0005 -0.0002 -0.0017 0.0015 -0.0004 -0.0008

AT. 95 H X -0.0031 0.0006 -0.0096 -0.0100 -0.0019 0.0020  
Y 0.0010 0.0002 0.0021 0.0033 0.0003 0.0003  
Z 0.0002 -0.0005 0.0016 -0.0004 0.0003 -0.0013

AT. 96 H X -0.0031 -0.0006 -0.0096 0.0100 -0.0019 -0.0020  
Y 0.0010 -0.0002 0.0021 -0.0033 0.0003 -0.0003  
Z 0.0002 0.0005 0.0016 0.0004 0.0003 0.0013

AT. 97 H X 0.0061 -0.0020 0.0204 0.0234 0.0041 -0.0064  
Y 0.0026 -0.0004 0.0077 0.0097 0.0017 -0.0018  
Z -0.0013 0.0006 -0.0047 -0.0050 -0.0009 0.0018

AT. 98 H X 0.0061 0.0020 0.0204 -0.0234 0.0041 0.0064  
Y 0.0026 0.0004 0.0077 -0.0097 0.0017 0.0018  
Z -0.0013 -0.0006 -0.0047 0.0050 -0.0009 -0.0018

AT. 99 C X 0.0093 0.0081 0.0108 0.0134 -0.0030 0.0179  
Y 0.0082 0.0072 0.0097 0.0113 -0.0026 0.0165  
Z -0.0064 -0.0058 -0.0074 -0.0085 0.0022 -0.0137

AT. 100 C X 0.0093 -0.0081 0.0108 -0.0134 -0.0030 -0.0179  
Y 0.0082 -0.0072 0.0097 -0.0113 -0.0026 -0.0165  
Z -0.0064 0.0058 -0.0074 0.0085 0.0022 0.0137

AT. 101 C X -0.0007 -0.0008 -0.0004 -0.0017 0.0004 -0.0016  
Y -0.0007 -0.0007 -0.0007 -0.0014 0.0003 -0.0015  
Z 0.0001 0.0001 0.0001 0.0003 -0.0000 0.0005

AT. 102 C X -0.0007 0.0008 -0.0004 0.0017 0.0004 0.0016  
Y -0.0007 0.0007 -0.0007 0.0014 0.0003 0.0015

Z 0.0001 -0.0001 0.0001 -0.0003 -0.0000 -0.0005  
AT. 103 H X -0.0044 -0.0027 -0.0071 -0.0078 0.0005 -0.0056  
Y 0.0011 0.0004 0.0024 0.0017 0.0002 0.0008  
Z -0.0008 -0.0004 -0.0018 0.0008 -0.0003 -0.0015  
AT. 104 H X -0.0044 0.0027 -0.0071 0.0078 0.0005 0.0056  
Y 0.0011 -0.0004 0.0024 -0.0017 0.0002 -0.0008  
Z -0.0008 0.0004 -0.0018 -0.0008 -0.0003 0.0015  
AT. 105 H X 0.0048 0.0056 0.0011 0.0150 -0.0033 0.0117  
Y 0.0018 0.0018 0.0014 0.0050 -0.0010 0.0041  
Z 0.0023 0.0022 0.0022 0.0045 -0.0010 0.0051  
AT. 106 H X 0.0048 -0.0056 0.0011 -0.0150 -0.0033 -0.0117  
Y 0.0018 -0.0018 0.0014 -0.0050 -0.0010 -0.0041  
Z 0.0023 -0.0022 0.0022 -0.0045 -0.0010 -0.0051  
AT. 107 C X 0.0008 -0.0003 0.0027 0.0028 0.0006 -0.0009  
Y 0.0003 -0.0001 0.0007 0.0008 0.0002 -0.0004  
Z 0.0003 -0.0001 0.0012 0.0012 0.0002 -0.0004  
AT. 108 C X 0.0008 0.0003 0.0027 -0.0028 0.0006 0.0009  
Y 0.0003 0.0001 0.0007 -0.0008 0.0002 0.0004  
Z 0.0003 0.0001 0.0012 -0.0012 0.0002 0.0004  
AT. 109 H X -0.0063 0.0021 -0.0194 -0.0206 -0.0045 0.0066  
Y -0.0008 0.0004 -0.0022 -0.0024 -0.0009 0.0007  
Z 0.0006 0.0001 0.0025 0.0024 -0.0001 -0.0005  
AT. 110 H X -0.0063 -0.0021 -0.0194 0.0206 -0.0045 -0.0066  
Y -0.0008 -0.0004 -0.0022 0.0024 -0.0009 -0.0007  
Z 0.0006 -0.0001 0.0025 -0.0024 -0.0001 0.0005  
AT. 111 H X 0.0004 -0.0002 0.0014 0.0014 0.0001 -0.0005  
Y -0.0024 0.0009 -0.0066 -0.0074 -0.0023 0.0026  
Z 0.0017 -0.0006 0.0051 0.0056 0.0014 -0.0017  
AT. 112 H X 0.0004 0.0002 0.0014 -0.0014 0.0001 0.0005  
Y -0.0024 -0.0009 -0.0066 0.0074 -0.0023 -0.0026  
Z 0.0017 0.0006 0.0051 -0.0056 0.0014 0.0017  
AT. 113 C X -0.0001 0.0004 -0.0009 -0.0008 -0.0002 0.0008

Y -0.0003 0.0001 -0.0008 -0.0009 -0.0003 0.0005  
Z -0.0001 -0.0001 0.0001 0.0000 0.0001 -0.0004  
AT. 114 C X -0.0001 -0.0004 -0.0009 0.0008 -0.0002 -0.0008  
Y -0.0003 -0.0001 -0.0008 0.0009 -0.0003 -0.0005  
Z -0.0001 0.0001 0.0001 -0.0000 0.0001 0.0004  
AT. 115 C X 0.0001 -0.0001 0.0003 0.0002 0.0001 -0.0003  
Y -0.0004 -0.0004 -0.0007 -0.0009 0.0002 -0.0009  
Z -0.0001 -0.0001 0.0000 0.0001 0.0000 -0.0001  
AT. 116 C X 0.0001 0.0001 0.0003 -0.0002 0.0001 0.0003  
Y -0.0004 0.0004 -0.0007 0.0009 0.0002 0.0009  
Z -0.0001 0.0001 0.0000 -0.0001 0.0000 0.0001  
AT. 117 H X -0.0001 0.0005 -0.0008 -0.0002 -0.0005 0.0015  
Y 0.0001 -0.0002 0.0011 0.0006 0.0002 -0.0009  
Z -0.0000 -0.0008 0.0008 0.0002 0.0007 -0.0022  
AT. 118 H X -0.0001 -0.0005 -0.0008 0.0002 -0.0005 -0.0015  
Y 0.0001 0.0002 0.0011 -0.0006 0.0002 0.0009  
Z -0.0000 0.0008 0.0008 -0.0002 0.0007 0.0022  
AT. 119 H X 0.0031 0.0034 0.0024 0.0039 -0.0015 0.0084  
Y 0.0036 0.0030 0.0043 0.0056 -0.0009 0.0073  
Z -0.0020 -0.0011 -0.0032 -0.0035 0.0000 -0.0024  
AT. 120 H X 0.0031 -0.0034 0.0024 -0.0039 -0.0015 -0.0084  
Y 0.0036 -0.0030 0.0043 -0.0056 -0.0009 -0.0073  
Z -0.0020 0.0011 -0.0032 0.0035 0.0000 0.0024  
AT. 121 C X 0.0005 0.0005 0.0010 0.0013 -0.0002 0.0016  
Y -0.0001 -0.0000 0.0001 0.0001 -0.0000 0.0005  
Z -0.0002 -0.0002 -0.0004 -0.0003 0.0001 -0.0006  
AT. 122 C X 0.0005 -0.0005 0.0010 -0.0013 -0.0002 -0.0016  
Y -0.0001 0.0000 0.0001 -0.0001 -0.0000 -0.0005  
Z -0.0002 0.0002 -0.0004 0.0003 0.0001 0.0006  
AT. 123 H X 0.0007 0.0014 -0.0073 -0.0071 -0.0004 -0.0087  
Y 0.0033 0.0032 0.0004 0.0016 -0.0009 0.0021  
Z -0.0031 -0.0027 -0.0019 -0.0029 0.0007 -0.0032



AT. 124 H X 0.0007 -0.0014 -0.0073 0.0071 -0.0004 0.0087  
Y 0.0033 -0.0032 0.0004 -0.0016 -0.0009 -0.0021  
Z -0.0031 0.0027 -0.0019 0.0029 0.0007 0.0032

AT. 125 H X 0.0011 0.0012 -0.0005 -0.0002 -0.0004 0.0005  
Y 0.0040 0.0040 -0.0003 0.0008 -0.0012 0.0013  
Z 0.0015 0.0017 -0.0028 -0.0024 -0.0004 -0.0025

AT. 126 H X 0.0011 -0.0012 -0.0005 0.0002 -0.0004 -0.0005  
Y 0.0040 -0.0040 -0.0003 -0.0008 -0.0012 -0.0013  
Z 0.0015 -0.0017 -0.0028 0.0024 -0.0004 0.0025

AT. 127 C X -0.0002 -0.0005 0.0003 0.0003 0.0003 -0.0012  
Y -0.0004 -0.0004 -0.0004 -0.0007 0.0002 -0.0007  
Z -0.0000 -0.0002 0.0004 0.0004 0.0001 -0.0004

AT. 128 C X -0.0002 0.0005 0.0003 -0.0003 0.0003 0.0012  
Y -0.0004 0.0004 -0.0004 0.0007 0.0002 0.0007  
Z -0.0000 0.0002 0.0004 -0.0004 0.0001 0.0004

AT. 129 C X -0.0002 0.0002 -0.0006 -0.0007 -0.0003 0.0005  
Y -0.0000 0.0000 -0.0005 -0.0003 0.0000 -0.0000  
Z 0.0001 0.0000 0.0002 0.0002 0.0000 -0.0001

AT. 130 C X -0.0002 -0.0002 -0.0006 0.0007 -0.0003 -0.0005  
Y -0.0000 -0.0000 -0.0005 0.0003 0.0000 0.0000  
Z 0.0001 -0.0000 0.0002 -0.0002 0.0000 0.0001

AT. 131 H X 0.0008 -0.0005 0.0015 0.0021 0.0009 -0.0012  
Y -0.0014 0.0006 -0.0030 -0.0041 -0.0012 0.0019  
Z 0.0009 -0.0006 0.0020 0.0023 0.0010 -0.0015

AT. 132 H X 0.0008 0.0005 0.0015 -0.0021 0.0009 0.0012  
Y -0.0014 -0.0006 -0.0030 0.0041 -0.0012 -0.0019  
Z 0.0009 0.0006 0.0020 -0.0023 0.0010 0.0015

AT. 133 H X 0.0041 -0.0018 0.0119 0.0129 0.0030 -0.0052  
Y 0.0018 -0.0009 0.0076 0.0077 0.0010 -0.0021  
Z 0.0007 -0.0002 0.0053 0.0048 -0.0002 -0.0002

AT. 134 H X 0.0041 0.0018 0.0119 -0.0129 0.0030 0.0052  
Y 0.0018 0.0009 0.0076 -0.0077 0.0010 0.0021

Z 0.0007 0.0002 0.0053 -0.0048 -0.0002 0.0002  
AT. 135 C X -0.0001 -0.0001 0.0002 0.0001 -0.0001 -0.0001  
Y 0.0001 -0.0000 0.0004 0.0004 0.0000 0.0000  
Z 0.0001 0.0000 0.0000 0.0000 0.0001 -0.0001  
AT. 136 C X -0.0001 0.0001 0.0002 -0.0001 -0.0001 0.0001  
Y 0.0001 0.0000 0.0004 -0.0004 0.0000 -0.0000  
Z 0.0001 -0.0000 0.0000 -0.0000 0.0001 0.0001  
AT. 137 H X 0.0012 0.0011 0.0008 0.0014 0.0015 -0.0011  
Y 0.0004 0.0002 0.0002 0.0004 0.0001 -0.0002  
Z -0.0001 -0.0001 -0.0006 -0.0005 -0.0006 0.0002  
AT. 138 H X 0.0012 -0.0011 0.0008 -0.0014 0.0015 0.0011  
Y 0.0004 -0.0002 0.0002 -0.0004 0.0001 0.0002  
Z -0.0001 0.0001 -0.0006 0.0005 -0.0006 -0.0002  
AT. 139 H X 0.0002 -0.0002 -0.0007 -0.0003 0.0004 -0.0004  
Y 0.0008 0.0005 0.0010 0.0010 0.0006 -0.0010  
Z -0.0003 -0.0001 0.0011 0.0006 -0.0006 0.0004  
AT. 140 H X 0.0002 0.0002 -0.0007 0.0003 0.0004 0.0004  
Y 0.0008 -0.0005 0.0010 -0.0010 0.0006 0.0010  
Z -0.0003 0.0001 0.0011 -0.0006 -0.0006 -0.0004  
AT. 141 H X -0.0006 -0.0002 -0.0026 -0.0024 -0.0001 0.0005  
Y -0.0003 0.0001 -0.0011 -0.0012 0.0003 -0.0002  
Z 0.0002 -0.0001 0.0001 0.0004 -0.0003 0.0004  
AT. 142 H X -0.0006 0.0002 -0.0026 0.0024 -0.0001 -0.0005  
Y -0.0003 -0.0001 -0.0011 0.0012 0.0003 0.0002  
Z 0.0002 0.0001 0.0001 -0.0004 -0.0003 -0.0004  
AT. 143 C X -0.0001 0.0002 -0.0002 -0.0003 -0.0002 0.0003  
Y -0.0000 -0.0002 0.0003 0.0004 0.0001 0.0001  
Z 0.0002 0.0003 -0.0000 0.0000 -0.0001 0.0001  
AT. 144 C X -0.0001 -0.0002 -0.0002 0.0003 -0.0002 -0.0003  
Y -0.0000 0.0002 0.0003 -0.0004 0.0001 -0.0001  
Z 0.0002 -0.0003 -0.0000 -0.0000 -0.0001 -0.0001  
AT. 145 H X 0.0021 0.0015 0.0011 0.0020 -0.0001 0.0008

Y 0.0026 0.0029 -0.0003 0.0003 -0.0008 0.0010  
Z -0.0019 -0.0025 0.0007 0.0005 0.0007 -0.0007  
AT. 146 H X 0.0021 -0.0015 0.0011 -0.0020 -0.0001 -0.0008  
Y 0.0026 -0.0029 -0.0003 -0.0003 -0.0008 -0.0010  
Z -0.0019 0.0025 0.0007 -0.0005 0.0007 0.0007  
AT. 147 H X -0.0002 -0.0004 -0.0000 0.0001 0.0003 -0.0005  
Y 0.0026 0.0031 -0.0003 0.0004 -0.0012 0.0021  
Z 0.0010 0.0008 0.0001 0.0006 -0.0000 -0.0000  
AT. 148 H X -0.0002 0.0004 -0.0000 -0.0001 0.0003 0.0005  
Y 0.0026 -0.0031 -0.0003 -0.0004 -0.0012 -0.0021  
Z 0.0010 -0.0008 0.0001 -0.0006 -0.0000 0.0000  
AT. 149 H X -0.0014 -0.0022 -0.0008 -0.0012 0.0011 -0.0027  
Y -0.0014 -0.0018 -0.0004 -0.0007 0.0006 -0.0013  
Z -0.0018 -0.0018 -0.0009 -0.0013 0.0004 -0.0009  
AT. 150 H X -0.0014 0.0022 -0.0008 0.0012 0.0011 0.0027  
Y -0.0014 0.0018 -0.0004 0.0007 0.0006 0.0013  
Z -0.0018 0.0018 -0.0009 0.0013 0.0004 0.0009  
AT. 151 C X 0.0001 0.0001 0.0002 0.0002 -0.0000 0.0001  
Y 0.0001 -0.0000 0.0001 0.0002 0.0000 -0.0001  
Z -0.0001 0.0001 -0.0001 -0.0002 0.0000 0.0002  
AT. 152 C X 0.0001 -0.0001 0.0002 -0.0002 -0.0000 -0.0001  
Y 0.0001 0.0000 0.0001 -0.0002 0.0000 0.0001  
Z -0.0001 -0.0001 -0.0001 0.0002 0.0000 -0.0002  
AT. 153 H X -0.0006 -0.0001 -0.0002 -0.0004 -0.0001 -0.0001  
Y 0.0000 -0.0002 -0.0000 0.0001 -0.0003 -0.0003  
Z 0.0004 -0.0003 -0.0002 0.0000 -0.0006 -0.0002  
AT. 154 H X -0.0006 0.0001 -0.0002 0.0004 -0.0001 0.0001  
Y 0.0000 0.0002 -0.0000 -0.0001 -0.0003 0.0003  
Z 0.0004 0.0003 -0.0002 -0.0000 -0.0006 0.0002  
AT. 155 H X 0.0001 0.0000 -0.0005 -0.0003 0.0000 -0.0001  
Y -0.0006 0.0003 -0.0006 -0.0010 0.0002 0.0003  
Z 0.0006 -0.0003 -0.0000 0.0006 -0.0003 -0.0002

AT.156 H X 0.0001 -0.0000 -0.0005 0.0003 0.0000 0.0001  
Y -0.0006 -0.0003 -0.0006 0.0010 0.0002 -0.0003  
Z 0.0006 0.0003 -0.0000 -0.0006 -0.0003 0.0002

AT.157 O X 0.0001 0.0001 -0.0001 0.0000 0.0003 -0.0002  
Y 0.0004 0.0007 -0.0003 0.0000 0.0013 -0.0010  
Z -0.0001 0.0003 0.0001 0.0000 0.0004 -0.0002

AT.158 O X 0.0001 -0.0001 -0.0001 -0.0000 0.0003 0.0002  
Y 0.0004 -0.0007 -0.0003 -0.0000 0.0013 0.0010  
Z -0.0001 -0.0003 0.0001 -0.0000 0.0004 0.0002

AT.159 O X 0.0003 0.0001 -0.0002 0.0000 0.0003 -0.0003  
Y -0.0001 -0.0003 0.0001 -0.0000 -0.0005 0.0004  
Z -0.0005 0.0004 0.0002 -0.0001 0.0000 0.0001

AT.160 O X 0.0003 -0.0001 -0.0002 -0.0000 0.0003 0.0003  
Y -0.0001 0.0003 0.0001 0.0000 -0.0005 -0.0004  
Z -0.0005 -0.0004 0.0002 0.0001 0.0000 -0.0001

AT.161 H X -0.0034 -0.0084 0.0032 -0.0004 -0.0137 0.0094  
Y -0.0021 -0.0051 0.0020 -0.0003 -0.0091 0.0070  
Z -0.0001 0.0040 -0.0008 -0.0002 0.0039 -0.0016

AT.162 H X -0.0034 0.0084 0.0032 0.0004 -0.0137 -0.0094  
Y -0.0021 0.0051 0.0020 0.0003 -0.0091 -0.0070  
Z -0.0001 -0.0040 -0.0008 0.0002 0.0039 0.0016

AT.163 H X -0.0079 0.0079 0.0029 -0.0006 0.0037 0.0010  
Y 0.0024 -0.0018 -0.0011 0.0001 0.0000 -0.0013  
Z 0.0095 -0.0101 -0.0030 0.0008 -0.0041 -0.0005

AT.164 H X -0.0079 -0.0079 0.0029 0.0006 0.0037 -0.0010  
Y 0.0024 0.0018 -0.0011 -0.0001 0.0000 0.0013  
Z 0.0095 0.0101 -0.0030 -0.0008 -0.0041 0.0005

AT.165 O X -0.0002 0.0001 -0.0008 -0.0008 -0.0002 0.0002  
Y 0.0000 -0.0001 -0.0003 -0.0007 -0.0001 -0.0002  
Z -0.0002 0.0002 -0.0003 0.0003 -0.0001 0.0005

AT.166 O X -0.0002 -0.0001 -0.0008 0.0008 -0.0002 -0.0002  
Y 0.0000 0.0001 -0.0003 0.0007 -0.0001 0.0002

Z -0.0002 -0.0002 -0.0003 -0.0003 -0.0001 -0.0005  
AT. 167 H X 0.0019 -0.0006 0.0065 0.0080 0.0014 -0.0014  
Y 0.0004 0.0001 0.0014 0.0015 0.0000 -0.0000  
Z -0.0017 0.0005 -0.0060 -0.0062 -0.0005 0.0009

AT. 168 H X 0.0019 0.0006 0.0065 -0.0080 0.0014 0.0014  
Y 0.0004 -0.0001 0.0014 -0.0015 0.0000 0.0000  
Z -0.0017 -0.0005 -0.0060 0.0062 -0.0005 -0.0009

AT. 169 O X 0.0003 -0.0003 0.0005 -0.0002 -0.0000 -0.0005  
Y -0.0004 0.0004 -0.0003 0.0010 0.0001 0.0008  
Z 0.0001 -0.0001 0.0002 0.0002 -0.0000 -0.0001

AT. 170 O X 0.0003 0.0003 0.0005 0.0002 -0.0000 0.0005  
Y -0.0004 -0.0004 -0.0003 -0.0010 0.0001 -0.0008  
Z 0.0001 0.0001 0.0002 -0.0002 -0.0000 0.0001

AT. 171 H X -0.0043 0.0040 -0.0047 0.0053 0.0011 0.0079  
Y 0.0027 -0.0026 0.0033 -0.0060 -0.0003 -0.0060  
Z 0.0051 -0.0046 0.0069 -0.0088 -0.0003 -0.0104

AT. 172 H X -0.0043 -0.0040 -0.0047 -0.0053 0.0011 -0.0079  
Y 0.0027 0.0026 0.0033 0.0060 -0.0003 0.0060  
Z 0.0051 0.0046 0.0069 0.0088 -0.0003 0.0104

FREQ(CM\*\*-1) 1627.37 1634.50 2942.52 2942.57 2956.62 2957.18

AT. 1 I X -0.0000 -0.0000 -0.0000 0.0000 0.0000 0.0000  
Y 0.0000 -0.0000 -0.0000 0.0000 0.0000 0.0000  
Z 0.0000 0.0000 0.0000 0.0000 0.0000 0.0000

AT. 2 I X -0.0000 0.0000 0.0000 0.0000 0.0000 -0.0000  
Y 0.0000 0.0000 0.0000 0.0000 0.0000 -0.0000  
Z 0.0000 -0.0000 -0.0000 0.0000 0.0000 -0.0000

AT. 3 I X 0.0000 0.0000 -0.0000 -0.0000 -0.0000 -0.0000  
Y -0.0000 -0.0000 -0.0000 -0.0000 0.0000 0.0000  
Z 0.0000 0.0000 0.0000 0.0000 0.0000 0.0000

AT. 4 I X 0.0000 -0.0000 0.0000 -0.0000 -0.0000 0.0000

Y -0.0000 0.0000 0.0000 -0.0000 0.0000 -0.0000  
Z 0.0000 -0.0000 -0.0000 0.0000 0.0000 -0.0000  
AT. 5 O X -0.0013 -0.0087 -0.0000 -0.0000 0.0000 -0.0000  
Y 0.0008 0.0054 0.0000 0.0000 -0.0000 0.0000  
Z 0.0014 0.0094 0.0000 0.0000 -0.0000 0.0000  
AT. 6 O X -0.0013 0.0087 0.0000 -0.0000 0.0000 0.0000  
Y 0.0008 -0.0054 -0.0000 0.0000 -0.0000 -0.0000  
Z 0.0014 -0.0094 -0.0000 0.0000 -0.0000 -0.0000  
AT. 7 O X 0.0035 0.0065 0.0000 0.0000 0.0000 -0.0000  
Y -0.0035 -0.0065 -0.0000 0.0000 -0.0000 0.0000  
Z 0.0015 0.0029 0.0000 0.0000 0.0000 -0.0000  
AT. 8 O X 0.0035 -0.0065 -0.0000 0.0000 0.0000 0.0000  
Y -0.0035 0.0065 0.0000 0.0000 -0.0000 -0.0000  
Z 0.0015 -0.0029 -0.0000 0.0000 0.0000 0.0000  
AT. 9 N X -0.0001 -0.0011 0.0000 0.0000 0.0000 0.0000  
Y 0.0001 -0.0001 -0.0000 -0.0000 -0.0000 -0.0000  
Z 0.0014 0.0088 0.0000 0.0000 0.0000 0.0000  
AT. 10 N X -0.0001 0.0011 -0.0000 0.0000 0.0000 -0.0000  
Y 0.0001 0.0001 0.0000 -0.0000 -0.0000 0.0000  
Z 0.0014 -0.0088 -0.0000 0.0000 0.0000 -0.0000  
AT. 11 N X 0.0008 0.0012 -0.0000 -0.0000 -0.0000 -0.0000  
Y -0.0016 -0.0031 -0.0000 -0.0000 -0.0000 0.0000  
Z 0.0024 0.0052 0.0000 0.0000 0.0000 0.0000  
AT. 12 N X 0.0008 -0.0012 0.0000 -0.0000 -0.0000 0.0000  
Y -0.0016 0.0031 0.0000 -0.0000 -0.0000 -0.0000  
Z 0.0024 -0.0052 -0.0000 0.0000 0.0000 -0.0000  
AT. 13 C X 0.0020 0.0134 0.0000 0.0000 -0.0000 0.0000  
Y -0.0012 -0.0077 -0.0000 -0.0000 0.0000 -0.0000  
Z -0.0034 -0.0221 -0.0000 -0.0000 -0.0000 -0.0000  
AT. 14 C X 0.0020 -0.0134 -0.0000 0.0000 -0.0000 -0.0000  
Y -0.0012 0.0077 0.0000 -0.0000 0.0000 0.0000  
Z -0.0034 0.0221 0.0000 -0.0000 -0.0000 0.0000

AT. 15 C X -0.0002 -0.0011 -0.0000 -0.0000 0.0000 -0.0000  
Y 0.0001 0.0011 0.0000 0.0000 0.0000 0.0000  
Z 0.0003 0.0016 0.0000 0.0000 -0.0000 0.0000

AT. 16 C X -0.0002 0.0011 0.0000 -0.0000 0.0000 0.0000  
Y 0.0001 -0.0011 -0.0000 0.0000 0.0000 -0.0000  
Z 0.0003 -0.0016 -0.0000 0.0000 -0.0000 -0.0000

AT. 17 H X -0.0007 -0.0058 0.0000 0.0000 0.0000 0.0000  
Y 0.0009 0.0026 -0.0000 -0.0000 -0.0000 -0.0001  
Z -0.0009 -0.0028 -0.0000 -0.0000 -0.0000 -0.0001

AT. 18 H X -0.0007 0.0058 -0.0000 0.0000 0.0000 -0.0000  
Y 0.0009 -0.0026 0.0000 -0.0000 -0.0000 0.0001  
Z -0.0009 0.0028 0.0000 -0.0000 -0.0000 0.0001

AT. 19 H X 0.0020 0.0113 -0.0000 -0.0000 -0.0000 -0.0000  
Y -0.0006 -0.0074 -0.0000 -0.0000 -0.0000 -0.0000  
Z 0.0005 0.0014 0.0000 0.0000 0.0001 0.0000

AT. 20 H X 0.0020 -0.0113 0.0000 -0.0000 -0.0000 0.0000  
Y -0.0006 0.0074 0.0000 -0.0000 -0.0000 0.0000  
Z 0.0005 -0.0014 -0.0000 0.0000 0.0001 -0.0000

AT. 21 C X -0.0058 -0.0103 -0.0000 0.0000 -0.0000 0.0000  
Y 0.0067 0.0125 0.0000 0.0000 0.0000 -0.0000  
Z -0.0046 -0.0092 -0.0000 -0.0000 -0.0000 -0.0000

AT. 22 C X -0.0058 0.0103 0.0000 0.0000 -0.0000 -0.0000  
Y 0.0067 -0.0125 -0.0000 0.0000 0.0000 0.0000  
Z -0.0046 0.0092 0.0000 -0.0000 -0.0000 0.0000

AT. 23 C X 0.0006 0.0008 -0.0000 -0.0000 -0.0000 0.0000  
Y -0.0008 -0.0011 -0.0000 -0.0000 0.0000 0.0000  
Z 0.0001 0.0005 -0.0000 0.0000 -0.0000 0.0000

AT. 24 C X 0.0006 -0.0008 0.0000 -0.0000 -0.0000 -0.0000  
Y -0.0008 0.0011 0.0000 -0.0000 0.0000 -0.0000  
Z 0.0001 -0.0005 0.0000 0.0000 -0.0000 -0.0000

AT. 25 H X 0.0016 0.0015 -0.0000 -0.0000 0.0000 0.0000  
Y -0.0004 -0.0004 0.0000 0.0000 -0.0000 -0.0001

Z 0.0001 -0.0026 -0.0000 -0.0000 -0.0000 -0.0000  
AT. 26 H X 0.0016 -0.0015 0.0000 -0.0000 0.0000 -0.0000  
Y -0.0004 0.0004 -0.0000 0.0000 -0.0000 0.0001  
Z 0.0001 0.0026 0.0000 -0.0000 -0.0000 0.0000  
AT. 27 H X -0.0053 -0.0089 0.0000 -0.0000 -0.0000 -0.0000  
Y 0.0030 0.0017 -0.0000 0.0000 -0.0000 0.0001  
Z 0.0029 0.0036 0.0000 -0.0000 0.0001 -0.0001  
AT. 28 H X -0.0053 0.0089 -0.0000 -0.0000 -0.0000 0.0000  
Y 0.0030 -0.0017 0.0000 0.0000 -0.0000 -0.0001  
Z 0.0029 -0.0036 -0.0000 -0.0000 0.0001 0.0001  
AT. 29 C X 0.0002 0.0013 0.0000 -0.0000 -0.0000 -0.0000  
Y -0.0001 -0.0009 0.0000 0.0000 -0.0001 -0.0000  
Z -0.0002 -0.0011 -0.0000 0.0000 0.0000 0.0000  
AT. 30 C X 0.0002 -0.0013 -0.0000 -0.0000 -0.0000 0.0000  
Y -0.0001 0.0009 -0.0000 0.0000 -0.0001 0.0000  
Z -0.0002 0.0011 0.0000 0.0000 0.0000 -0.0000  
AT. 31 H X -0.0012 -0.0114 -0.0000 0.0000 0.0006 0.0001  
Y 0.0003 0.0046 -0.0001 0.0000 0.0013 0.0002  
Z -0.0002 -0.0000 0.0001 -0.0000 -0.0009 -0.0001  
AT. 32 H X -0.0012 0.0114 0.0000 0.0000 0.0006 -0.0001  
Y 0.0003 -0.0046 0.0001 0.0000 0.0013 -0.0002  
Z -0.0002 0.0000 -0.0001 -0.0000 -0.0009 0.0001  
AT. 33 H X 0.0002 0.0015 -0.0000 -0.0000 -0.0002 -0.0000  
Y -0.0002 0.0026 0.0000 0.0000 0.0001 0.0000  
Z -0.0003 -0.0032 -0.0000 0.0000 0.0004 0.0000  
AT. 34 H X 0.0002 -0.0015 0.0000 -0.0000 -0.0002 0.0000  
Y -0.0002 -0.0026 -0.0000 0.0000 0.0001 -0.0000  
Z -0.0003 0.0032 0.0000 0.0000 0.0004 -0.0000  
AT. 35 C X -0.0003 -0.0009 0.0000 0.0000 -0.0000 -0.0000  
Y 0.0002 0.0010 -0.0000 0.0000 0.0000 -0.0000  
Z -0.0000 -0.0002 -0.0000 0.0000 0.0000 -0.0000  
AT. 36 C X -0.0003 0.0009 -0.0000 0.0000 -0.0000 0.0000



Y 0.0002 -0.0010 0.0000 0.0000 0.0000 0.0000  
Z -0.0000 0.0002 0.0000 0.0000 0.0000 0.0000  
AT. 37 C X -0.0002 -0.0001 0.0000 0.0000 0.0000 -0.0000  
Y -0.0002 -0.0003 0.0000 0.0000 0.0000 -0.0000  
Z -0.0001 -0.0003 0.0000 0.0000 0.0000 -0.0000  
AT. 38 C X -0.0002 0.0001 -0.0000 0.0000 0.0000 0.0000  
Y -0.0002 0.0003 -0.0000 0.0000 0.0000 0.0000  
Z -0.0001 0.0003 -0.0000 0.0000 0.0000 0.0000  
AT. 39 H X 0.0006 -0.0002 -0.0001 -0.0001 -0.0000 0.0001  
Y 0.0003 -0.0004 0.0001 0.0001 0.0000 -0.0001  
Z 0.0000 -0.0006 0.0001 0.0001 0.0000 -0.0002  
AT. 40 H X 0.0006 0.0002 0.0001 -0.0001 -0.0000 -0.0001  
Y 0.0003 0.0004 -0.0001 0.0001 0.0000 0.0001  
Z 0.0000 0.0006 -0.0001 0.0001 0.0000 0.0002  
AT. 41 H X -0.0004 -0.0025 -0.0002 -0.0003 -0.0001 0.0004  
Y 0.0012 0.0043 -0.0002 -0.0002 -0.0001 0.0003  
Z -0.0006 -0.0006 -0.0002 -0.0003 -0.0001 0.0004  
AT. 42 H X -0.0004 0.0025 0.0002 -0.0003 -0.0001 -0.0004  
Y 0.0012 -0.0043 0.0002 -0.0002 -0.0001 -0.0003  
Z -0.0006 0.0006 0.0002 -0.0003 -0.0001 -0.0004  
AT. 43 C X -0.0005 -0.0008 0.0000 0.0000 0.0000 0.0000  
Y 0.0003 0.0006 0.0000 0.0000 0.0000 0.0000  
Z -0.0004 -0.0005 0.0000 0.0000 0.0000 0.0000  
AT. 44 C X -0.0005 0.0008 -0.0000 0.0000 0.0000 -0.0000  
Y 0.0003 -0.0006 -0.0000 0.0000 0.0000 -0.0000  
Z -0.0004 0.0005 -0.0000 0.0000 0.0000 -0.0000  
AT. 45 H X 0.0007 0.0043 -0.0002 -0.0002 -0.0003 -0.0003  
Y -0.0011 -0.0017 -0.0003 -0.0002 -0.0004 -0.0005  
Z 0.0007 -0.0012 -0.0003 -0.0002 -0.0004 -0.0005  
AT. 46 H X 0.0007 -0.0043 0.0002 -0.0002 -0.0003 0.0003  
Y -0.0011 0.0017 0.0003 -0.0002 -0.0004 0.0005  
Z 0.0007 0.0012 0.0003 -0.0002 -0.0004 0.0005

AT. 47 H X 0.0001 -0.0001 0.0001 0.0001 0.0002 0.0002  
Y 0.0013 0.0009 -0.0001 -0.0001 -0.0001 -0.0001  
Z -0.0006 -0.0018 0.0001 0.0001 0.0001 0.0001

AT. 48 H X 0.0001 0.0001 -0.0001 0.0001 0.0002 -0.0002  
Y 0.0013 -0.0009 0.0001 -0.0001 -0.0001 0.0001  
Z -0.0006 0.0018 -0.0001 0.0001 0.0001 -0.0001

AT. 49 C X 0.0003 0.0009 0.0000 0.0000 0.0000 0.0000  
Y -0.0003 -0.0005 0.0000 0.0000 0.0000 0.0000  
Z -0.0000 -0.0006 0.0000 0.0000 0.0000 0.0000

AT. 50 C X 0.0003 -0.0009 -0.0000 0.0000 0.0000 -0.0000  
Y -0.0003 0.0005 -0.0000 0.0000 0.0000 -0.0000  
Z -0.0000 0.0006 -0.0000 0.0000 0.0000 -0.0000

AT. 51 C X -0.0001 -0.0004 0.0000 -0.0000 -0.0000 0.0000  
Y 0.0000 0.0002 0.0000 -0.0000 -0.0000 -0.0000  
Z -0.0001 -0.0003 -0.0000 0.0000 0.0000 0.0000

AT. 52 C X -0.0001 0.0004 -0.0000 -0.0000 -0.0000 -0.0000  
Y 0.0000 -0.0002 -0.0000 -0.0000 -0.0000 0.0000  
Z -0.0001 0.0003 0.0000 0.0000 0.0000 -0.0000

AT. 53 H X 0.0003 0.0014 -0.0000 0.0000 0.0000 -0.0000  
Y 0.0004 0.0021 0.0000 -0.0000 -0.0000 0.0000  
Z -0.0005 -0.0014 -0.0000 0.0000 0.0000 -0.0000

AT. 54 H X 0.0003 -0.0014 0.0000 0.0000 0.0000 0.0000  
Y 0.0004 -0.0021 -0.0000 -0.0000 -0.0000 -0.0000  
Z -0.0005 0.0014 0.0000 0.0000 0.0000 0.0000

AT. 55 H X 0.0013 0.0055 -0.0000 0.0000 0.0001 0.0000  
Y -0.0008 -0.0067 -0.0000 0.0000 0.0002 0.0000  
Z -0.0000 -0.0040 0.0000 -0.0000 -0.0002 0.0000

AT. 56 H X 0.0013 -0.0055 0.0000 0.0000 0.0001 -0.0000  
Y -0.0008 0.0067 0.0000 0.0000 0.0002 -0.0000  
Z -0.0000 0.0040 -0.0000 -0.0000 -0.0002 -0.0000

AT. 57 C X 0.0002 0.0003 0.0000 -0.0000 0.0000 0.0000  
Y 0.0000 -0.0002 -0.0000 0.0000 -0.0000 -0.0000

Z 0.0000 -0.0000 -0.0000 -0.0000 -0.0000 0.0000  
AT. 58 C X 0.0002 -0.0003 -0.0000 -0.0000 0.0000 -0.0000  
Y 0.0000 0.0002 0.0000 0.0000 -0.0000 0.0000  
Z 0.0000 0.0000 0.0000 -0.0000 -0.0000 -0.0000  
AT. 59 H X -0.0009 0.0001 0.0000 -0.0000 0.0001 0.0001  
Y 0.0001 -0.0004 0.0001 -0.0000 0.0003 0.0003  
Z -0.0005 -0.0004 -0.0000 0.0000 -0.0002 -0.0002  
AT. 60 H X -0.0009 -0.0001 -0.0000 -0.0000 0.0001 -0.0001  
Y 0.0001 0.0004 -0.0001 -0.0000 0.0003 -0.0003  
Z -0.0005 0.0004 0.0000 0.0000 -0.0002 0.0002  
AT. 61 H X -0.0004 -0.0011 -0.0000 -0.0000 -0.0003 -0.0003  
Y -0.0004 -0.0011 0.0000 0.0000 0.0002 0.0002  
Z -0.0003 -0.0008 0.0000 0.0000 0.0004 0.0003  
AT. 62 H X -0.0004 0.0011 0.0000 -0.0000 -0.0003 0.0003  
Y -0.0004 0.0011 -0.0000 0.0000 0.0002 -0.0002  
Z -0.0003 0.0008 -0.0000 0.0000 0.0004 -0.0003  
AT. 63 H X -0.0005 -0.0017 0.0000 0.0000 -0.0001 -0.0002  
Y 0.0004 0.0014 -0.0000 0.0000 -0.0001 -0.0002  
Z 0.0002 0.0005 0.0000 0.0000 -0.0001 -0.0002  
AT. 64 H X -0.0005 0.0017 -0.0000 0.0000 -0.0001 0.0002  
Y 0.0004 -0.0014 0.0000 0.0000 -0.0001 0.0002  
Z 0.0002 -0.0005 -0.0000 0.0000 -0.0001 0.0002  
AT. 65 C X -0.0001 -0.0003 0.0000 0.0000 -0.0000 0.0000  
Y 0.0001 0.0001 -0.0000 -0.0000 -0.0000 -0.0000  
Z 0.0000 0.0001 -0.0000 0.0000 -0.0000 -0.0000  
AT. 66 C X -0.0001 0.0003 -0.0000 0.0000 -0.0000 -0.0000  
Y 0.0001 -0.0001 0.0000 -0.0000 -0.0000 0.0000  
Z 0.0000 -0.0001 0.0000 0.0000 -0.0000 0.0000  
AT. 67 H X -0.0005 0.0003 0.0001 -0.0000 0.0001 0.0001  
Y 0.0003 -0.0001 0.0001 0.0000 0.0001 0.0001  
Z 0.0002 -0.0000 0.0001 -0.0000 0.0001 0.0001  
AT. 68 H X -0.0005 -0.0003 -0.0001 -0.0000 0.0001 -0.0001

Y 0.0003 0.0001 -0.0001 0.0000 0.0001 -0.0001  
Z 0.0002 0.0000 -0.0001 -0.0000 0.0001 -0.0001  
AT. 69 H X 0.0005 0.0005 -0.0001 -0.0000 -0.0000 -0.0002  
Y 0.0008 0.0009 0.0001 0.0000 0.0000 0.0001  
Z -0.0001 -0.0005 -0.0001 -0.0000 -0.0000 -0.0001  
AT. 70 H X 0.0005 -0.0005 0.0001 -0.0000 -0.0000 0.0002  
Y 0.0008 -0.0009 -0.0001 0.0000 0.0000 -0.0001  
Z -0.0001 0.0005 0.0001 -0.0000 -0.0000 0.0001  
AT. 71 H X 0.0009 0.0012 -0.0001 0.0000 -0.0000 -0.0001  
Y -0.0006 -0.0006 -0.0001 -0.0000 -0.0000 -0.0002  
Z -0.0000 0.0002 0.0001 0.0000 0.0000 0.0001  
AT. 72 H X 0.0009 -0.0012 0.0001 0.0000 -0.0000 0.0001  
Y -0.0006 0.0006 0.0001 -0.0000 -0.0000 0.0002  
Z -0.0000 -0.0002 -0.0001 0.0000 0.0000 -0.0001  
AT. 73 C X -0.0000 0.0000 -0.0000 -0.0000 -0.0000 0.0000  
Y 0.0000 -0.0001 -0.0000 0.0000 0.0000 0.0000  
Z -0.0001 0.0001 -0.0000 -0.0000 -0.0000 -0.0000  
AT. 74 C X -0.0000 -0.0000 0.0000 -0.0000 -0.0000 -0.0000  
Y 0.0000 0.0001 0.0000 0.0000 0.0000 -0.0000  
Z -0.0001 -0.0001 0.0000 -0.0000 -0.0000 0.0000  
AT. 75 H X 0.0003 0.0004 -0.0001 -0.0001 -0.0001 -0.0000  
Y 0.0002 -0.0000 -0.0001 -0.0001 -0.0002 -0.0001  
Z 0.0007 0.0006 0.0001 0.0001 0.0002 0.0001  
AT. 76 H X 0.0003 -0.0004 0.0001 -0.0001 -0.0001 0.0000  
Y 0.0002 0.0000 0.0001 -0.0001 -0.0002 0.0001  
Z 0.0007 -0.0006 -0.0001 0.0001 0.0002 -0.0001  
AT. 77 H X -0.0004 -0.0006 0.0001 0.0001 0.0002 0.0000  
Y -0.0005 0.0002 0.0001 0.0001 0.0002 0.0000  
Z 0.0008 0.0006 0.0001 0.0001 0.0002 0.0000  
AT. 78 H X -0.0004 0.0006 -0.0001 0.0001 0.0002 -0.0000  
Y -0.0005 -0.0002 -0.0001 0.0001 0.0002 -0.0000  
Z 0.0008 -0.0006 -0.0001 0.0001 0.0002 -0.0000

AT. 79 I X 0.0000 0.0000 0.0000 -0.0000 -0.0000 0.0000  
Y -0.0000 -0.0000 -0.0000 0.0000 0.0000 -0.0000  
Z 0.0000 -0.0000 -0.0000 0.0000 0.0000 -0.0000

AT. 80 I X 0.0000 -0.0000 -0.0000 -0.0000 -0.0000 -0.0000  
Y -0.0000 0.0000 0.0000 0.0000 0.0000 0.0000  
Z 0.0000 0.0000 0.0000 0.0000 0.0000 0.0000

AT. 81 I X -0.0000 -0.0000 0.0000 0.0000 -0.0000 0.0000  
Y 0.0000 0.0000 -0.0000 -0.0000 0.0000 0.0000  
Z 0.0000 0.0000 0.0000 0.0000 0.0000 0.0000

AT. 82 I X -0.0000 0.0000 -0.0000 0.0000 -0.0000 -0.0000  
Y 0.0000 -0.0000 0.0000 -0.0000 0.0000 -0.0000  
Z 0.0000 -0.0000 -0.0000 0.0000 0.0000 -0.0000

AT. 83 O X 0.0078 0.0060 0.0000 -0.0000 -0.0000 -0.0000  
Y 0.0014 0.0011 -0.0000 -0.0000 -0.0000 -0.0000  
Z 0.0051 0.0040 0.0000 -0.0000 -0.0000 -0.0000

AT. 84 O X 0.0078 -0.0060 -0.0000 -0.0000 -0.0000 0.0000  
Y 0.0014 -0.0011 0.0000 -0.0000 -0.0000 0.0000  
Z 0.0051 -0.0040 -0.0000 -0.0000 -0.0000 0.0000

AT. 85 O X -0.0154 -0.0102 0.0000 0.0000 0.0000 -0.0000  
Y -0.0113 -0.0076 0.0000 0.0000 0.0000 -0.0000  
Z 0.0067 0.0046 -0.0000 -0.0000 -0.0000 -0.0000

AT. 86 O X -0.0154 0.0102 -0.0000 0.0000 0.0000 0.0000  
Y -0.0113 0.0076 -0.0000 0.0000 0.0000 0.0000  
Z 0.0067 -0.0046 0.0000 -0.0000 -0.0000 0.0000

AT. 87 N X 0.0017 0.0012 0.0000 0.0000 0.0000 0.0000  
Y -0.0001 -0.0002 0.0000 0.0000 0.0000 0.0000  
Z 0.0062 0.0055 -0.0000 -0.0000 -0.0000 -0.0000

AT. 88 N X 0.0017 -0.0012 -0.0000 0.0000 0.0000 -0.0000  
Y -0.0001 0.0002 -0.0000 0.0000 0.0000 -0.0000  
Z 0.0062 -0.0055 0.0000 -0.0000 -0.0000 0.0000

AT. 89 N X -0.0031 -0.0018 0.0003 0.0003 0.0000 0.0001  
Y -0.0052 -0.0037 0.0002 0.0002 0.0000 0.0000

Z 0.0092 0.0067 -0.0002 -0.0002 -0.0000 0.0000  
AT. 90 N X -0.0031 0.0018 -0.0003 0.0003 0.0000 -0.0001  
Y -0.0052 0.0037 -0.0002 0.0002 0.0000 -0.0000  
Z 0.0092 -0.0067 0.0002 -0.0002 -0.0000 -0.0000  
AT. 91 C X -0.0127 -0.0095 0.0000 0.0000 0.0000 0.0000  
Y -0.0020 -0.0012 0.0000 -0.0000 -0.0000 -0.0000  
Z -0.0135 -0.0113 -0.0000 0.0000 0.0000 0.0000  
AT. 92 C X -0.0127 0.0095 -0.0000 0.0000 0.0000 -0.0000  
Y -0.0020 0.0012 -0.0000 -0.0000 -0.0000 0.0000  
Z -0.0135 0.0113 0.0000 0.0000 0.0000 -0.0000  
AT. 93 C X 0.0012 0.0007 -0.0000 -0.0000 -0.0000 -0.0000  
Y 0.0006 0.0003 -0.0000 -0.0000 -0.0000 -0.0000  
Z 0.0009 0.0010 0.0000 -0.0000 -0.0000 -0.0000  
AT. 94 C X 0.0012 -0.0007 0.0000 -0.0000 -0.0000 0.0000  
Y 0.0006 -0.0003 0.0000 -0.0000 -0.0000 0.0000  
Z 0.0009 -0.0010 -0.0000 -0.0000 -0.0000 0.0000  
AT. 95 H X 0.0037 0.0022 0.0001 0.0001 0.0002 0.0001  
Y 0.0002 0.0008 0.0002 0.0001 0.0002 0.0002  
Z -0.0018 -0.0022 0.0001 0.0001 0.0001 0.0001  
AT. 96 H X 0.0037 -0.0022 -0.0001 0.0001 0.0002 -0.0001  
Y 0.0002 -0.0008 -0.0002 0.0001 0.0002 -0.0002  
Z -0.0018 0.0022 -0.0001 0.0001 0.0001 -0.0001  
AT. 97 H X -0.0102 -0.0077 -0.0000 0.0000 -0.0000 -0.0000  
Y -0.0029 -0.0013 0.0001 -0.0000 0.0000 0.0000  
Z 0.0025 0.0023 -0.0001 -0.0000 -0.0001 -0.0001  
AT. 98 H X -0.0102 0.0077 0.0000 0.0000 -0.0000 0.0000  
Y -0.0029 0.0013 -0.0001 -0.0000 0.0000 -0.0000  
Z 0.0025 -0.0023 0.0001 -0.0000 -0.0001 0.0001  
AT. 99 C X 0.0250 0.0163 0.0000 0.0000 -0.0000 0.0000  
Y 0.0229 0.0154 -0.0001 -0.0001 0.0000 0.0000  
Z -0.0190 -0.0132 0.0002 0.0002 0.0000 -0.0000  
AT. 100 C X 0.0250 -0.0163 -0.0000 0.0000 -0.0000 -0.0000

Y 0.0229 -0.0154 0.0001 -0.0001 0.0000 -0.0000  
Z -0.0190 0.0132 -0.0002 0.0002 0.0000 0.0000  
AT. 101 C X -0.0027 -0.0014 -0.0000 -0.0000 -0.0000 -0.0000  
Y -0.0023 -0.0014 -0.0001 -0.0001 -0.0000 -0.0000  
Z 0.0007 0.0005 -0.0000 -0.0000 0.0000 -0.0000  
AT. 102 C X -0.0027 0.0014 0.0000 -0.0000 -0.0000 0.0000  
Y -0.0023 0.0014 0.0001 -0.0001 -0.0000 0.0000  
Z 0.0007 -0.0005 0.0000 -0.0000 0.0000 0.0000  
AT. 103 H X -0.0071 -0.0049 0.0002 0.0002 -0.0000 0.0000  
Y 0.0004 0.0007 0.0007 0.0006 -0.0000 0.0001  
Z -0.0008 -0.0018 0.0002 0.0002 0.0000 0.0000  
AT. 104 H X -0.0071 0.0049 -0.0002 0.0002 -0.0000 -0.0000  
Y 0.0004 -0.0007 -0.0007 0.0006 -0.0000 -0.0001  
Z -0.0008 0.0018 -0.0002 0.0002 0.0000 -0.0000  
AT. 105 H X 0.0211 0.0101 -0.0001 -0.0001 0.0001 -0.0000  
Y 0.0070 0.0039 -0.0001 -0.0001 0.0001 -0.0001  
Z 0.0078 0.0048 0.0002 0.0002 -0.0002 0.0001  
AT. 106 H X 0.0211 -0.0101 0.0001 -0.0001 0.0001 0.0000  
Y 0.0070 -0.0039 0.0001 -0.0001 0.0001 0.0001  
Z 0.0078 -0.0048 -0.0002 0.0002 -0.0002 -0.0001  
AT. 107 C X -0.0013 -0.0009 -0.0000 -0.0000 -0.0001 -0.0001  
Y -0.0004 -0.0002 -0.0001 -0.0001 -0.0002 -0.0003  
Z -0.0005 -0.0005 0.0001 0.0001 0.0002 0.0002  
AT. 108 C X -0.0013 0.0009 0.0000 -0.0000 -0.0001 0.0001  
Y -0.0004 0.0002 0.0001 -0.0001 -0.0002 0.0003  
Z -0.0005 0.0005 -0.0001 0.0001 0.0002 -0.0002  
AT. 109 H X 0.0090 0.0065 -0.0002 -0.0002 -0.0006 -0.0007  
Y 0.0006 0.0000 0.0014 0.0015 0.0034 0.0038  
Z -0.0014 -0.0018 -0.0009 -0.0010 -0.0021 -0.0023  
AT. 110 H X 0.0090 -0.0065 0.0002 -0.0002 -0.0006 0.0007  
Y 0.0006 -0.0000 -0.0014 0.0015 0.0034 -0.0038  
Z -0.0014 0.0018 0.0009 -0.0010 -0.0021 0.0023

AT.111 H X -0.0008 -0.0009 0.0002 0.0002 0.0011 0.0012  
Y 0.0027 0.0012 0.0000 0.0000 0.0000 0.0001  
Z -0.0023 -0.0013 0.0001 0.0001 0.0009 0.0010

AT.112 H X -0.0008 0.0009 -0.0002 0.0002 0.0011 -0.0012  
Y 0.0027 -0.0012 -0.0000 0.0000 0.0000 -0.0001  
Z -0.0023 0.0013 -0.0001 0.0001 0.0009 -0.0010

AT.113 C X 0.0012 0.0009 0.0000 0.0000 0.0001 0.0001  
Y 0.0006 0.0004 -0.0001 -0.0001 -0.0001 -0.0001  
Z -0.0007 -0.0005 -0.0002 -0.0002 -0.0001 -0.0001

AT.114 C X 0.0012 -0.0009 -0.0000 0.0000 0.0001 -0.0001  
Y 0.0006 -0.0004 0.0001 -0.0001 -0.0001 0.0001  
Z -0.0007 0.0005 0.0002 -0.0002 -0.0001 0.0001

AT.115 C X -0.0004 -0.0002 0.0052 0.0052 0.0004 0.0005  
Y -0.0012 -0.0007 -0.0069 -0.0069 -0.0005 -0.0006  
Z -0.0001 -0.0002 -0.0058 -0.0058 -0.0003 -0.0004

AT.116 C X -0.0004 0.0002 -0.0052 0.0052 0.0004 -0.0005  
Y -0.0012 0.0007 0.0069 -0.0069 -0.0005 0.0006  
Z -0.0001 0.0002 0.0058 -0.0058 -0.0003 0.0004

AT.117 H X 0.0022 0.0011 -0.0190 -0.0190 -0.0014 -0.0019  
Y -0.0011 -0.0011 -0.0064 -0.0064 -0.0003 -0.0005  
Z -0.0032 -0.0018 -0.0199 -0.0199 -0.0013 -0.0018

AT.118 H X 0.0022 -0.0011 0.0190 -0.0190 -0.0014 0.0019  
Y -0.0011 0.0011 0.0064 -0.0064 -0.0003 0.0005  
Z -0.0032 0.0018 0.0199 -0.0199 -0.0013 0.0018

AT.119 H X 0.0114 0.0073 -0.0462 -0.0463 -0.0032 -0.0042  
Y 0.0101 0.0065 0.0873 0.0875 0.0060 0.0079  
Z -0.0034 -0.0022 0.0900 0.0902 0.0057 0.0076

AT.120 H X 0.0114 -0.0073 0.0462 -0.0463 -0.0032 0.0042  
Y 0.0101 -0.0065 -0.0873 0.0875 0.0060 -0.0079  
Z -0.0034 0.0022 -0.0900 0.0902 0.0057 -0.0076

AT.121 C X 0.0023 0.0015 -0.0000 -0.0000 0.0000 0.0000  
Y 0.0007 0.0005 0.0006 0.0006 0.0011 0.0012



Z -0.0008 -0.0006 0.0004 0.0004 0.0009 0.0009  
AT. 122 C X 0.0023 -0.0015 0.0000 -0.0000 0.0000 -0.0000  
Y 0.0007 -0.0005 -0.0006 0.0006 0.0011 -0.0012  
Z -0.0008 0.0006 -0.0004 0.0004 0.0009 -0.0009  
AT. 123 H X -0.0133 -0.0099 0.0016 0.0016 0.0023 0.0025  
Y 0.0023 0.0009 -0.0068 -0.0069 -0.0126 -0.0136  
Z -0.0041 -0.0023 -0.0065 -0.0066 -0.0129 -0.0138  
AT. 124 H X -0.0133 0.0099 -0.0016 0.0016 0.0023 -0.0025  
Y 0.0023 -0.0009 0.0068 -0.0069 -0.0126 0.0136  
Z -0.0041 0.0023 0.0065 -0.0066 -0.0129 0.0138  
AT. 125 H X 0.0003 0.0001 -0.0018 -0.0018 -0.0032 -0.0034  
Y 0.0011 -0.0001 -0.0005 -0.0005 -0.0009 -0.0009  
Z -0.0042 -0.0033 0.0016 0.0016 0.0029 0.0031  
AT. 126 H X 0.0003 -0.0001 0.0018 -0.0018 -0.0032 0.0034  
Y 0.0011 0.0001 0.0005 -0.0005 -0.0009 0.0009  
Z -0.0042 0.0033 -0.0016 0.0016 0.0029 -0.0031  
AT. 127 C X -0.0016 -0.0011 0.0000 0.0000 -0.0001 -0.0001  
Y -0.0009 -0.0005 0.0000 0.0000 -0.0001 -0.0001  
Z -0.0007 -0.0005 0.0000 0.0000 -0.0001 -0.0001  
AT. 128 C X -0.0016 0.0011 -0.0000 0.0000 -0.0001 0.0001  
Y -0.0009 0.0005 -0.0000 0.0000 -0.0001 0.0001  
Z -0.0007 0.0005 -0.0000 0.0000 -0.0001 0.0001  
AT. 129 C X 0.0006 0.0003 0.0000 0.0000 0.0002 0.0002  
Y 0.0001 0.0002 -0.0001 -0.0001 -0.0002 -0.0003  
Z -0.0001 -0.0003 0.0000 0.0000 0.0002 0.0002  
AT. 130 C X 0.0006 -0.0003 -0.0000 0.0000 0.0002 -0.0002  
Y 0.0001 -0.0002 0.0001 -0.0001 -0.0002 0.0003  
Z -0.0001 0.0003 -0.0000 0.0000 0.0002 -0.0002  
AT. 131 H X -0.0014 -0.0001 -0.0003 -0.0004 -0.0013 -0.0013  
Y 0.0022 0.0010 -0.0001 -0.0001 -0.0006 -0.0006  
Z -0.0019 -0.0006 0.0002 0.0003 0.0009 0.0010  
AT. 132 H X -0.0014 0.0001 0.0003 -0.0004 -0.0013 0.0013

Y 0.0022 -0.0010 0.0001 -0.0001 -0.0006 0.0006  
Z -0.0019 0.0006 -0.0002 0.0003 0.0009 -0.0010  
AT. 133 H X -0.0071 -0.0048 -0.0002 -0.0003 -0.0012 -0.0013  
Y -0.0036 -0.0033 0.0007 0.0009 0.0041 0.0042  
Z -0.0014 -0.0025 -0.0005 -0.0006 -0.0027 -0.0028  
AT. 134 H X -0.0071 0.0048 0.0002 -0.0003 -0.0012 0.0013  
Y -0.0036 0.0033 -0.0007 0.0009 0.0041 -0.0042  
Z -0.0014 0.0025 0.0005 -0.0006 -0.0027 0.0028  
AT. 135 C X -0.0004 -0.0004 -0.0002 -0.0002 -0.0003 -0.0002  
Y 0.0000 -0.0001 0.0001 0.0001 0.0000 -0.0000  
Z -0.0001 0.0001 0.0002 0.0002 0.0002 0.0002  
AT. 136 C X -0.0004 0.0004 0.0002 -0.0002 -0.0003 0.0002  
Y 0.0000 0.0001 -0.0001 0.0001 0.0000 0.0000  
Z -0.0001 -0.0001 -0.0002 0.0002 0.0002 -0.0002  
AT. 137 H X -0.0000 0.0006 -0.0006 -0.0005 -0.0009 -0.0007  
Y 0.0003 0.0002 0.0018 0.0016 0.0033 0.0022  
Z 0.0006 0.0001 -0.0007 -0.0006 -0.0019 -0.0013  
AT. 138 H X -0.0000 -0.0006 0.0006 -0.0005 -0.0009 0.0007  
Y 0.0003 -0.0002 -0.0018 0.0016 0.0033 -0.0022  
Z 0.0006 -0.0001 0.0007 -0.0006 -0.0019 0.0013  
AT. 139 H X 0.0005 0.0008 0.0018 0.0018 0.0034 0.0018  
Y -0.0012 -0.0006 0.0003 0.0003 0.0008 0.0005  
Z -0.0009 -0.0014 0.0015 0.0015 0.0030 0.0018  
AT. 140 H X 0.0005 -0.0008 -0.0018 0.0018 0.0034 -0.0018  
Y -0.0012 0.0006 -0.0003 0.0003 0.0008 -0.0005  
Z -0.0009 0.0014 -0.0015 0.0015 0.0030 -0.0018  
AT. 141 H X 0.0017 0.0017 0.0008 0.0007 0.0011 0.0004  
Y -0.0004 0.0002 -0.0032 -0.0029 -0.0041 -0.0023  
Z 0.0013 0.0005 -0.0025 -0.0022 -0.0037 -0.0020  
AT. 142 H X 0.0017 -0.0017 -0.0008 0.0007 0.0011 -0.0004  
Y -0.0004 -0.0002 0.0032 -0.0029 -0.0041 0.0023  
Z 0.0013 -0.0005 0.0025 -0.0022 -0.0037 0.0020

AT. 143 C X 0.0005 0.0003 0.0001 0.0002 0.0002 0.0006  
Y 0.0002 0.0002 -0.0000 -0.0000 0.0002 0.0002  
Z -0.0001 -0.0001 -0.0000 -0.0000 0.0001 0.0003

AT. 144 C X 0.0005 -0.0003 -0.0001 0.0002 0.0002 -0.0006  
Y 0.0002 -0.0002 0.0000 -0.0000 0.0002 -0.0002  
Z -0.0001 0.0001 0.0000 -0.0000 0.0001 -0.0003

AT. 145 H X 0.0009 -0.0000 0.0001 0.0001 0.0010 0.0019  
Y -0.0011 -0.0010 -0.0000 -0.0002 -0.0025 -0.0056  
Z 0.0016 0.0012 -0.0001 -0.0002 -0.0023 -0.0053

AT. 146 H X 0.0009 0.0000 -0.0001 0.0001 0.0010 -0.0019  
Y -0.0011 0.0010 0.0000 -0.0002 -0.0025 0.0056  
Z 0.0016 -0.0012 0.0001 -0.0002 -0.0023 0.0053

AT. 147 H X -0.0009 -0.0003 -0.0014 -0.0016 -0.0030 -0.0068  
Y 0.0018 0.0002 -0.0003 -0.0004 -0.0010 -0.0024  
Z -0.0011 -0.0008 0.0010 0.0011 0.0024 0.0052

AT. 148 H X -0.0009 0.0003 0.0014 -0.0016 -0.0030 0.0068  
Y 0.0018 -0.0002 0.0003 -0.0004 -0.0010 0.0024  
Z -0.0011 0.0008 -0.0010 0.0011 0.0024 -0.0052

AT. 149 H X -0.0034 -0.0012 -0.0003 -0.0003 -0.0003 -0.0016  
Y -0.0000 0.0003 0.0008 0.0008 0.0017 0.0057  
Z 0.0016 0.0009 -0.0005 -0.0005 -0.0009 -0.0034

AT. 150 H X -0.0034 0.0012 0.0003 -0.0003 -0.0003 0.0016  
Y -0.0000 -0.0003 -0.0008 0.0008 0.0017 -0.0057  
Z 0.0016 -0.0009 0.0005 -0.0005 -0.0009 0.0034

AT. 151 C X 0.0001 0.0001 -0.0002 -0.0001 0.0013 0.0012  
Y -0.0000 0.0000 0.0003 0.0003 -0.0029 -0.0028  
Z 0.0002 0.0002 0.0009 0.0007 -0.0092 -0.0091

AT. 152 C X 0.0001 -0.0001 0.0002 -0.0001 0.0013 -0.0012  
Y -0.0000 -0.0000 -0.0003 0.0003 -0.0029 0.0028  
Z 0.0002 -0.0002 -0.0009 0.0007 -0.0092 0.0091

AT. 153 H X -0.0003 -0.0005 -0.0014 -0.0011 0.0141 0.0142  
Y 0.0002 -0.0002 0.0053 0.0042 -0.0523 -0.0523

Z 0.0010 0.0003 -0.0028 -0.0021 0.0292 0.0292  
AT. 154 H X -0.0003 0.0005 0.0014 -0.0011 0.0141 -0.0142  
Y 0.0002 0.0002 -0.0053 0.0042 -0.0523 0.0523  
Z 0.0010 -0.0003 0.0028 -0.0021 0.0292 -0.0292  
AT. 155 H X 0.0002 0.0001 0.0034 0.0027 -0.0293 -0.0290  
Y -0.0005 -0.0002 -0.0091 -0.0072 0.0867 0.0861  
Z 0.0011 0.0004 -0.0082 -0.0064 0.0793 0.0787  
AT. 156 H X 0.0002 -0.0001 -0.0034 0.0027 -0.0293 0.0290  
Y -0.0005 0.0002 0.0091 -0.0072 0.0867 -0.0861  
Z 0.0011 -0.0004 0.0082 -0.0064 0.0793 -0.0787  
AT. 157 O X 0.0000 0.0002 0.0000 0.0000 -0.0000 -0.0000  
Y 0.0002 0.0007 -0.0000 -0.0000 0.0000 -0.0000  
Z 0.0000 -0.0000 -0.0000 -0.0000 0.0000 0.0000  
AT. 158 O X 0.0000 -0.0002 -0.0000 0.0000 -0.0000 0.0000  
Y 0.0002 -0.0007 0.0000 -0.0000 0.0000 0.0000  
Z 0.0000 0.0000 0.0000 -0.0000 0.0000 -0.0000  
AT. 159 O X 0.0000 0.0004 0.0000 0.0000 -0.0000 -0.0000  
Y -0.0001 -0.0002 -0.0000 -0.0000 0.0000 0.0000  
Z 0.0001 -0.0002 0.0000 0.0000 -0.0001 -0.0001  
AT. 160 O X 0.0000 -0.0004 -0.0000 0.0000 -0.0000 0.0000  
Y -0.0001 0.0002 0.0000 -0.0000 0.0000 -0.0000  
Z 0.0001 0.0002 -0.0000 0.0000 -0.0001 0.0001  
AT. 161 H X -0.0022 -0.0059 -0.0000 -0.0000 0.0001 0.0000  
Y -0.0012 -0.0044 0.0002 0.0001 -0.0005 0.0001  
Z 0.0012 0.0001 0.0000 0.0000 -0.0002 -0.0000  
AT. 162 H X -0.0022 0.0059 0.0000 -0.0000 0.0001 -0.0000  
Y -0.0012 0.0044 -0.0002 0.0001 -0.0005 -0.0001  
Z 0.0012 -0.0001 -0.0000 0.0000 -0.0002 0.0000  
AT. 163 H X 0.0019 -0.0050 -0.0001 -0.0000 0.0007 0.0004  
Y 0.0002 0.0012 0.0001 0.0000 -0.0005 -0.0004  
Z -0.0026 0.0043 -0.0003 -0.0000 0.0016 0.0010  
AT. 164 H X 0.0019 0.0050 0.0001 -0.0000 0.0007 -0.0004

|                                                              |     |         |         |         |         |         |         |
|--------------------------------------------------------------|-----|---------|---------|---------|---------|---------|---------|
|                                                              | Y   | 0.0002  | -0.0012 | -0.0001 | 0.0000  | -0.0005 | 0.0004  |
|                                                              | Z   | -0.0026 | -0.0043 | 0.0003  | -0.0000 | 0.0016  | -0.0010 |
| AT. 165                                                      | O X | 0.0004  | 0.0001  | -0.0000 | 0.0000  | 0.0000  | 0.0000  |
|                                                              | Y   | 0.0006  | -0.0001 | -0.0000 | 0.0000  | 0.0000  | 0.0000  |
|                                                              | Z   | -0.0006 | 0.0003  | 0.0000  | 0.0000  | 0.0000  | 0.0000  |
| AT. 166                                                      | O X | 0.0004  | -0.0001 | 0.0000  | 0.0000  | 0.0000  | -0.0000 |
|                                                              | Y   | 0.0006  | 0.0001  | 0.0000  | 0.0000  | 0.0000  | -0.0000 |
|                                                              | Z   | -0.0006 | -0.0003 | -0.0000 | 0.0000  | 0.0000  | -0.0000 |
| AT. 167                                                      | H X | -0.0038 | -0.0011 | 0.0001  | -0.0003 | -0.0004 | -0.0002 |
|                                                              | Y   | -0.0012 | -0.0008 | 0.0000  | -0.0001 | -0.0002 | -0.0001 |
|                                                              | Z   | 0.0027  | 0.0011  | 0.0000  | -0.0001 | -0.0001 | -0.0000 |
| AT. 168                                                      | H X | -0.0038 | 0.0011  | -0.0001 | -0.0003 | -0.0004 | 0.0002  |
|                                                              | Y   | -0.0012 | 0.0008  | -0.0000 | -0.0001 | -0.0002 | 0.0001  |
|                                                              | Z   | 0.0027  | -0.0011 | -0.0000 | -0.0001 | -0.0001 | 0.0000  |
| AT. 169                                                      | O X | 0.0005  | -0.0004 | -0.0000 | 0.0000  | 0.0000  | 0.0000  |
|                                                              | Y   | -0.0013 | 0.0006  | 0.0001  | -0.0001 | -0.0000 | -0.0000 |
|                                                              | Z   | -0.0000 | -0.0001 | -0.0000 | 0.0000  | 0.0000  | 0.0000  |
| AT. 170                                                      | O X | 0.0005  | 0.0004  | 0.0000  | 0.0000  | 0.0000  | -0.0000 |
|                                                              | Y   | -0.0013 | -0.0006 | -0.0001 | -0.0001 | -0.0000 | 0.0000  |
|                                                              | Z   | -0.0000 | 0.0001  | 0.0000  | 0.0000  | 0.0000  | -0.0000 |
| AT. 171                                                      | H X | -0.0099 | 0.0059  | 0.0003  | -0.0004 | -0.0002 | -0.0000 |
|                                                              | Y   | 0.0086  | -0.0045 | -0.0007 | 0.0009  | 0.0005  | 0.0001  |
|                                                              | Z   | 0.0135  | -0.0076 | 0.0004  | -0.0004 | -0.0002 | -0.0000 |
| AT. 172                                                      | H X | -0.0099 | -0.0059 | -0.0003 | -0.0004 | -0.0002 | 0.0000  |
|                                                              | Y   | 0.0086  | 0.0045  | 0.0007  | 0.0009  | 0.0005  | -0.0001 |
|                                                              | Z   | 0.0135  | 0.0076  | -0.0004 | -0.0004 | -0.0002 | 0.0000  |
| FREQ(CM**-1) 2965.00 2965.10 2966.44 2966.59 2969.84 2969.97 |     |         |         |         |         |         |         |
| AT. 1                                                        | I X | -0.0000 | -0.0000 | -0.0000 | 0.0000  | -0.0000 | -0.0000 |
|                                                              | Y   | -0.0000 | 0.0000  | 0.0000  | -0.0000 | -0.0000 | 0.0000  |
|                                                              | Z   | 0.0000  | -0.0000 | -0.0000 | -0.0000 | -0.0000 | -0.0000 |

AT. 2 I X 0.0000 -0.0000 -0.0000 -0.0000 -0.0000 0.0000  
Y 0.0000 0.0000 0.0000 0.0000 -0.0000 -0.0000  
Z -0.0000 -0.0000 -0.0000 0.0000 -0.0000 0.0000

AT. 3 I X -0.0000 -0.0000 0.0000 -0.0000 -0.0000 0.0000  
Y -0.0000 -0.0000 0.0000 0.0000 -0.0000 -0.0000  
Z 0.0000 0.0000 -0.0000 -0.0000 -0.0000 -0.0000

AT. 4 I X 0.0000 -0.0000 0.0000 0.0000 -0.0000 -0.0000  
Y 0.0000 -0.0000 0.0000 -0.0000 -0.0000 0.0000  
Z -0.0000 0.0000 -0.0000 0.0000 -0.0000 0.0000

AT. 5 O X -0.0000 -0.0000 -0.0000 -0.0000 -0.0000 -0.0000  
Y 0.0000 0.0000 0.0000 0.0000 0.0000 0.0000  
Z 0.0000 -0.0000 0.0000 0.0000 0.0000 0.0000

AT. 6 O X 0.0000 -0.0000 -0.0000 0.0000 -0.0000 0.0000  
Y -0.0000 0.0000 0.0000 -0.0000 0.0000 -0.0000  
Z -0.0000 -0.0000 0.0000 -0.0000 0.0000 -0.0000

AT. 7 O X -0.0000 -0.0000 0.0000 0.0000 -0.0000 0.0000  
Y 0.0000 0.0000 -0.0000 -0.0000 0.0000 -0.0000  
Z -0.0000 -0.0000 0.0000 0.0000 -0.0000 -0.0000

AT. 8 O X 0.0000 -0.0000 0.0000 -0.0000 -0.0000 -0.0000  
Y -0.0000 0.0000 -0.0000 0.0000 0.0000 0.0000  
Z 0.0000 -0.0000 0.0000 -0.0000 -0.0000 0.0000

AT. 9 N X 0.0001 0.0000 0.0002 0.0002 -0.0000 -0.0000  
Y -0.0000 -0.0000 -0.0001 -0.0001 -0.0000 0.0000  
Z 0.0000 0.0000 0.0001 0.0001 0.0000 -0.0000

AT. 10 N X -0.0001 0.0000 0.0002 -0.0002 -0.0000 0.0000  
Y 0.0000 -0.0000 -0.0001 0.0001 -0.0000 -0.0000  
Z -0.0000 0.0000 0.0001 -0.0001 0.0000 0.0000

AT. 11 N X -0.0002 -0.0002 0.0000 0.0001 0.0001 -0.0000  
Y 0.0002 0.0002 -0.0001 -0.0001 -0.0000 -0.0000  
Z -0.0001 -0.0001 0.0000 0.0000 -0.0001 0.0000

AT. 12 N X 0.0002 -0.0002 0.0000 -0.0001 0.0001 0.0000  
Y -0.0002 0.0002 -0.0001 0.0001 -0.0000 0.0000

Z 0.0001 -0.0001 0.0000 -0.0000 -0.0001 -0.0000  
AT. 13 C X -0.0000 -0.0000 -0.0000 -0.0000 0.0000 0.0000  
Y 0.0000 0.0000 -0.0000 -0.0000 -0.0000 -0.0000  
Z -0.0001 -0.0000 -0.0002 -0.0002 -0.0000 0.0000  
AT. 14 C X 0.0000 -0.0000 -0.0000 0.0000 0.0000 -0.0000  
Y -0.0000 0.0000 -0.0000 0.0000 -0.0000 0.0000  
Z 0.0001 -0.0000 -0.0002 0.0002 -0.0000 -0.0000  
AT. 15 C X 0.0000 -0.0000 -0.0000 -0.0000 -0.0000 -0.0000  
Y -0.0000 -0.0000 0.0000 0.0000 0.0000 0.0000  
Z -0.0000 -0.0000 0.0000 0.0000 0.0000 0.0000  
AT. 16 C X -0.0000 -0.0000 -0.0000 0.0000 -0.0000 0.0000  
Y 0.0000 -0.0000 0.0000 -0.0000 0.0000 -0.0000  
Z 0.0000 -0.0000 0.0000 -0.0000 0.0000 -0.0000  
AT. 17 H X -0.0000 -0.0000 0.0000 0.0000 0.0000 0.0000  
Y 0.0002 0.0002 -0.0001 -0.0001 -0.0001 -0.0001  
Z 0.0002 0.0002 -0.0001 -0.0001 -0.0001 -0.0001  
AT. 18 H X 0.0000 -0.0000 0.0000 -0.0000 0.0000 -0.0000  
Y -0.0002 0.0002 -0.0001 0.0001 -0.0001 0.0001  
Z -0.0002 0.0002 -0.0001 0.0001 -0.0001 0.0001  
AT. 19 H X 0.0000 0.0001 0.0000 0.0000 -0.0000 -0.0000  
Y 0.0000 0.0000 -0.0001 -0.0001 -0.0000 -0.0000  
Z -0.0001 -0.0001 0.0001 0.0001 0.0000 0.0001  
AT. 20 H X -0.0000 0.0001 0.0000 -0.0000 -0.0000 0.0000  
Y -0.0000 0.0000 -0.0001 0.0001 -0.0000 0.0000  
Z 0.0001 -0.0001 0.0001 -0.0001 0.0000 -0.0001  
AT. 21 C X -0.0000 -0.0000 0.0000 0.0000 0.0000 -0.0000  
Y -0.0001 -0.0001 0.0000 0.0000 -0.0000 0.0000  
Z 0.0002 0.0002 -0.0001 -0.0001 0.0001 -0.0000  
AT. 22 C X 0.0000 -0.0000 0.0000 -0.0000 0.0000 0.0000  
Y 0.0001 -0.0001 0.0000 -0.0000 -0.0000 -0.0000  
Z -0.0002 0.0002 -0.0001 0.0001 0.0001 0.0000  
AT. 23 C X 0.0000 0.0000 -0.0000 -0.0000 0.0000 -0.0000

Y -0.0001 -0.0001 0.0000 0.0000 -0.0000 -0.0000  
Z -0.0001 -0.0001 0.0000 0.0000 0.0000 -0.0000  
AT. 24 C X -0.0000 0.0000 -0.0000 0.0000 0.0000 0.0000  
Y 0.0001 -0.0001 0.0000 -0.0000 -0.0000 0.0000  
Z 0.0001 -0.0001 0.0000 -0.0000 0.0000 0.0000  
AT. 25 H X -0.0001 -0.0001 0.0000 0.0000 0.0000 -0.0000  
Y 0.0012 0.0012 -0.0003 -0.0003 -0.0000 0.0001  
Z 0.0004 0.0004 -0.0001 -0.0001 0.0000 0.0000  
AT. 26 H X 0.0001 -0.0001 0.0000 -0.0000 0.0000 0.0000  
Y -0.0012 0.0012 -0.0003 0.0003 -0.0000 -0.0001  
Z -0.0004 0.0004 -0.0001 0.0001 0.0000 -0.0000  
AT. 27 H X 0.0001 0.0001 -0.0000 -0.0000 0.0000 0.0000  
Y -0.0003 -0.0003 0.0001 0.0001 0.0000 -0.0001  
Z 0.0004 0.0003 -0.0001 -0.0001 -0.0001 0.0002  
AT. 28 H X -0.0001 0.0001 -0.0000 0.0000 0.0000 -0.0000  
Y 0.0003 -0.0003 0.0001 -0.0001 0.0000 0.0001  
Z -0.0004 0.0003 -0.0001 0.0001 -0.0001 -0.0002  
AT. 29 C X -0.0006 -0.0005 -0.0019 -0.0019 0.0001 0.0003  
Y -0.0028 -0.0025 -0.0087 -0.0087 0.0004 0.0013  
Z 0.0010 0.0009 0.0031 0.0031 -0.0002 -0.0005  
AT. 30 C X 0.0006 -0.0005 -0.0019 0.0019 0.0001 -0.0003  
Y 0.0028 -0.0025 -0.0087 0.0087 0.0004 -0.0013  
Z -0.0010 0.0009 0.0031 -0.0031 -0.0002 0.0005  
AT. 31 H X 0.0131 0.0117 0.0403 0.0405 -0.0018 -0.0060  
Y 0.0304 0.0270 0.0931 0.0935 -0.0041 -0.0137  
Z -0.0210 -0.0187 -0.0643 -0.0646 0.0030 0.0096  
AT. 32 H X -0.0131 0.0117 0.0403 -0.0405 -0.0018 0.0060  
Y -0.0304 0.0270 0.0931 -0.0935 -0.0041 0.0137  
Z 0.0210 -0.0187 -0.0643 0.0646 0.0030 -0.0096  
AT. 33 H X -0.0060 -0.0053 -0.0183 -0.0184 0.0005 0.0025  
Y 0.0033 0.0029 0.0099 0.0100 -0.0003 -0.0013  
Z 0.0087 0.0078 0.0267 0.0268 -0.0008 -0.0037



AT. 34 H X 0.0060 -0.0053 -0.0183 0.0184 0.0005 -0.0025  
Y -0.0033 0.0029 0.0099 -0.0100 -0.0003 0.0013  
Z -0.0087 0.0078 0.0267 -0.0268 -0.0008 0.0037

AT. 35 C X -0.0001 -0.0001 -0.0001 -0.0001 0.0000 0.0000  
Y -0.0001 -0.0001 -0.0001 -0.0001 -0.0000 0.0000  
Z -0.0001 -0.0001 0.0002 0.0002 0.0000 -0.0000

AT. 36 C X 0.0001 -0.0001 -0.0001 0.0001 0.0000 -0.0000  
Y 0.0001 -0.0001 -0.0001 0.0001 -0.0000 -0.0000  
Z 0.0001 -0.0001 0.0002 -0.0002 0.0000 0.0000

AT. 37 C X -0.0077 -0.0078 0.0019 0.0021 -0.0003 0.0000  
Y -0.0038 -0.0038 0.0010 0.0011 -0.0001 0.0000  
Z -0.0036 -0.0036 0.0008 0.0009 -0.0002 0.0000

AT. 38 C X 0.0077 -0.0078 0.0019 -0.0021 -0.0003 -0.0000  
Y 0.0038 -0.0038 0.0010 -0.0011 -0.0001 -0.0000  
Z 0.0036 -0.0036 0.0008 -0.0009 -0.0002 -0.0000

AT. 39 H X 0.0181 0.0183 -0.0045 -0.0050 0.0006 -0.0001  
Y -0.0144 -0.0145 0.0036 0.0040 -0.0005 0.0000  
Z -0.0304 -0.0307 0.0075 0.0084 -0.0009 0.0001

AT. 40 H X -0.0181 0.0183 -0.0045 0.0050 0.0006 0.0001  
Y 0.0144 -0.0145 0.0036 -0.0040 -0.0005 -0.0000  
Z 0.0304 -0.0307 0.0075 -0.0084 -0.0009 -0.0001

AT. 41 H X 0.0755 0.0762 -0.0184 -0.0205 0.0028 -0.0004  
Y 0.0585 0.0591 -0.0142 -0.0159 0.0020 -0.0003  
Z 0.0746 0.0753 -0.0181 -0.0203 0.0027 -0.0004

AT. 42 H X -0.0755 0.0762 -0.0184 0.0205 0.0028 0.0004  
Y -0.0585 0.0591 -0.0142 0.0159 0.0020 0.0003  
Z -0.0746 0.0753 -0.0181 0.0203 0.0027 0.0004

AT. 43 C X 0.0005 0.0005 -0.0000 -0.0002 -0.0007 0.0000  
Y 0.0017 0.0017 -0.0000 -0.0005 -0.0024 0.0002  
Z 0.0009 0.0009 0.0000 -0.0003 -0.0014 0.0001

AT. 44 C X -0.0005 0.0005 -0.0000 0.0002 -0.0007 -0.0000  
Y -0.0017 0.0017 -0.0000 0.0005 -0.0024 -0.0002

Z -0.0009 0.0009 0.0000 0.0003 -0.0014 -0.0001  
AT. 45 H X -0.0124 -0.0123 0.0002 0.0036 0.0170 -0.0011  
Y -0.0158 -0.0157 0.0001 0.0047 0.0226 -0.0015  
Z -0.0164 -0.0164 0.0000 0.0048 0.0238 -0.0015  
AT. 46 H X 0.0124 -0.0123 0.0002 -0.0036 0.0170 0.0011  
Y 0.0158 -0.0157 0.0001 -0.0047 0.0226 0.0015  
Z 0.0164 -0.0164 0.0000 -0.0048 0.0238 0.0015  
AT. 47 H X 0.0067 0.0067 0.0000 -0.0020 -0.0092 0.0006  
Y -0.0044 -0.0044 0.0000 0.0013 0.0061 -0.0004  
Z 0.0048 0.0048 -0.0000 -0.0014 -0.0065 0.0004  
AT. 48 H X -0.0067 0.0067 0.0000 0.0020 -0.0092 -0.0006  
Y 0.0044 -0.0044 0.0000 -0.0013 0.0061 0.0004  
Z -0.0048 0.0048 -0.0000 0.0014 -0.0065 -0.0004  
AT. 49 C X 0.0000 0.0000 0.0000 0.0000 -0.0001 -0.0000  
Y 0.0000 0.0000 -0.0000 -0.0000 -0.0000 0.0000  
Z 0.0000 0.0000 -0.0000 -0.0000 -0.0000 0.0000  
AT. 50 C X -0.0000 0.0000 0.0000 -0.0000 -0.0001 0.0000  
Y -0.0000 0.0000 -0.0000 0.0000 -0.0000 -0.0000  
Z -0.0000 0.0000 -0.0000 0.0000 -0.0000 -0.0000  
AT. 51 C X 0.0002 0.0002 0.0002 0.0003 0.0001 0.0000  
Y 0.0002 0.0002 0.0003 0.0004 0.0002 -0.0000  
Z -0.0002 -0.0002 -0.0001 -0.0002 -0.0001 -0.0000  
AT. 52 C X -0.0002 0.0002 0.0002 -0.0003 0.0001 -0.0000  
Y -0.0002 0.0002 0.0003 -0.0004 0.0002 0.0000  
Z 0.0002 -0.0002 -0.0001 0.0002 -0.0001 0.0000  
AT. 53 H X -0.0009 -0.0009 -0.0007 -0.0011 -0.0005 -0.0001  
Y 0.0008 0.0008 0.0006 0.0009 0.0004 0.0000  
Z -0.0007 -0.0006 -0.0006 -0.0008 -0.0004 -0.0000  
AT. 54 H X 0.0009 -0.0009 -0.0007 0.0011 -0.0005 0.0001  
Y -0.0008 0.0008 0.0006 -0.0009 0.0004 -0.0000  
Z 0.0007 -0.0006 -0.0006 0.0008 -0.0004 0.0000  
AT. 55 H X -0.0016 -0.0015 -0.0014 -0.0021 -0.0012 -0.0001

Y -0.0033 -0.0032 -0.0037 -0.0049 -0.0023 0.0000  
Z 0.0024 0.0024 0.0024 0.0034 0.0020 0.0001  
AT. 56 H X 0.0016 -0.0015 -0.0014 0.0021 -0.0012 0.0001  
Y 0.0033 -0.0032 -0.0037 0.0049 -0.0023 -0.0000  
Z -0.0024 0.0024 0.0024 -0.0034 0.0020 -0.0001  
AT. 57 C X 0.0008 0.0008 -0.0008 -0.0010 -0.0003 0.0002  
Y -0.0004 -0.0004 0.0009 0.0011 0.0002 -0.0002  
Z 0.0001 0.0002 -0.0002 -0.0003 -0.0000 0.0000  
AT. 58 C X -0.0008 0.0008 -0.0008 0.0010 -0.0003 -0.0002  
Y 0.0004 -0.0004 0.0009 -0.0011 0.0002 0.0002  
Z -0.0001 0.0002 -0.0002 0.0003 -0.0000 -0.0000  
AT. 59 H X 0.0033 0.0036 -0.0059 -0.0071 -0.0015 0.0014  
Y 0.0063 0.0068 -0.0110 -0.0134 -0.0029 0.0026  
Z -0.0042 -0.0045 0.0073 0.0089 0.0020 -0.0018  
AT. 60 H X -0.0033 0.0036 -0.0059 0.0071 -0.0015 -0.0014  
Y -0.0063 0.0068 -0.0110 0.0134 -0.0029 -0.0026  
Z 0.0042 -0.0045 0.0073 -0.0089 0.0020 0.0018  
AT. 61 H X -0.0065 -0.0069 0.0090 0.0110 0.0026 -0.0022  
Y 0.0040 0.0043 -0.0058 -0.0071 -0.0017 0.0014  
Z 0.0087 0.0093 -0.0121 -0.0149 -0.0036 0.0030  
AT. 62 H X 0.0065 -0.0069 0.0090 -0.0110 0.0026 0.0022  
Y -0.0040 0.0043 -0.0058 0.0071 -0.0017 -0.0014  
Z -0.0087 0.0093 -0.0121 0.0149 -0.0036 -0.0030  
AT. 63 H X -0.0056 -0.0059 0.0066 0.0082 0.0020 -0.0016  
Y -0.0057 -0.0060 0.0065 0.0080 0.0020 -0.0015  
Z -0.0061 -0.0064 0.0069 0.0086 0.0022 -0.0016  
AT. 64 H X 0.0056 -0.0059 0.0066 -0.0082 0.0020 0.0016  
Y 0.0057 -0.0060 0.0065 -0.0080 0.0020 0.0015  
Z 0.0061 -0.0064 0.0069 -0.0086 0.0022 0.0016  
AT. 65 C X 0.0000 -0.0000 0.0000 -0.0002 -0.0002 0.0001  
Y -0.0001 -0.0000 0.0000 0.0001 0.0002 -0.0000  
Z -0.0002 -0.0000 -0.0001 0.0002 0.0003 -0.0001

AT. 66 C X -0.0000 -0.0000 0.0000 0.0002 -0.0002 -0.0001  
Y 0.0001 -0.0000 0.0000 -0.0001 0.0002 0.0000  
Z 0.0002 -0.0000 -0.0001 -0.0002 0.0003 0.0001

AT. 67 H X 0.0014 0.0004 0.0004 -0.0021 -0.0026 0.0006  
Y 0.0014 0.0004 0.0005 -0.0021 -0.0027 0.0006  
Z 0.0014 0.0003 0.0006 -0.0023 -0.0028 0.0007

AT. 68 H X -0.0014 0.0004 0.0004 0.0021 -0.0026 -0.0006  
Y -0.0014 0.0004 0.0005 0.0021 -0.0027 -0.0006  
Z -0.0014 0.0003 0.0006 0.0023 -0.0028 -0.0007

AT. 69 H X -0.0011 0.0001 -0.0003 0.0025 0.0032 -0.0008  
Y 0.0009 0.0000 0.0002 -0.0019 -0.0024 0.0006  
Z -0.0006 0.0000 -0.0001 0.0014 0.0017 -0.0005

AT. 70 H X 0.0011 0.0001 -0.0003 -0.0025 0.0032 0.0008  
Y -0.0009 0.0000 0.0002 0.0019 -0.0024 -0.0006  
Z 0.0006 0.0000 -0.0001 -0.0014 0.0017 0.0005

AT. 71 H X -0.0007 0.0000 -0.0004 0.0014 0.0017 -0.0004  
Y -0.0014 0.0001 -0.0006 0.0027 0.0031 -0.0009  
Z 0.0009 -0.0001 0.0006 -0.0019 -0.0022 0.0006

AT. 72 H X 0.0007 0.0000 -0.0004 -0.0014 0.0017 0.0004  
Y 0.0014 0.0001 -0.0006 -0.0027 0.0031 0.0009  
Z -0.0009 -0.0001 0.0006 0.0019 -0.0022 -0.0006

AT. 73 C X 0.0002 0.0002 -0.0004 -0.0002 0.0006 0.0000  
Y 0.0001 0.0001 0.0004 0.0004 -0.0003 -0.0001  
Z 0.0003 0.0004 -0.0025 -0.0015 0.0029 0.0003

AT. 74 C X -0.0002 0.0002 -0.0004 0.0002 0.0006 -0.0000  
Y -0.0001 0.0001 0.0004 -0.0004 -0.0003 0.0001  
Z -0.0003 0.0004 -0.0025 0.0015 0.0029 -0.0003

AT. 75 H X 0.0009 0.0014 -0.0105 -0.0068 0.0115 0.0013  
Y 0.0014 0.0024 -0.0201 -0.0131 0.0217 0.0026  
Z -0.0010 -0.0017 0.0141 0.0090 -0.0156 -0.0018

AT. 76 H X -0.0009 0.0014 -0.0105 0.0068 0.0115 -0.0013  
Y -0.0014 0.0024 -0.0201 0.0131 0.0217 -0.0026

Z 0.0010 -0.0017 0.0141 -0.0090 -0.0156 0.0018  
AT. 77 H X -0.0024 -0.0032 0.0150 0.0091 -0.0181 -0.0018  
Y -0.0021 -0.0030 0.0153 0.0093 -0.0184 -0.0019  
Z -0.0021 -0.0029 0.0154 0.0092 -0.0188 -0.0019  
AT. 78 H X 0.0024 -0.0032 0.0150 -0.0091 -0.0181 0.0018  
Y 0.0021 -0.0030 0.0153 -0.0093 -0.0184 0.0019  
Z 0.0021 -0.0029 0.0154 -0.0092 -0.0188 0.0019  
AT. 79 I X -0.0000 -0.0000 -0.0000 -0.0000 -0.0000 0.0000  
Y -0.0000 -0.0000 -0.0000 -0.0000 -0.0000 0.0000  
Z 0.0000 0.0000 0.0000 0.0000 -0.0000 -0.0000  
AT. 80 I X 0.0000 -0.0000 -0.0000 0.0000 -0.0000 -0.0000  
Y 0.0000 -0.0000 -0.0000 0.0000 -0.0000 -0.0000  
Z -0.0000 0.0000 0.0000 -0.0000 -0.0000 0.0000  
AT. 81 I X -0.0000 -0.0000 -0.0000 -0.0000 -0.0000 -0.0000  
Y -0.0000 -0.0000 0.0000 0.0000 0.0000 -0.0000  
Z 0.0000 0.0000 0.0000 0.0000 -0.0000 -0.0000  
AT. 82 I X 0.0000 -0.0000 -0.0000 0.0000 -0.0000 0.0000  
Y 0.0000 -0.0000 0.0000 -0.0000 0.0000 0.0000  
Z -0.0000 0.0000 0.0000 -0.0000 -0.0000 0.0000  
AT. 83 O X 0.0000 -0.0000 0.0000 0.0000 0.0000 0.0000  
Y -0.0000 -0.0000 0.0000 -0.0000 -0.0000 -0.0000  
Z 0.0000 0.0000 0.0000 0.0000 0.0000 0.0000  
AT. 84 O X -0.0000 -0.0000 0.0000 -0.0000 0.0000 -0.0000  
Y 0.0000 -0.0000 0.0000 0.0000 -0.0000 0.0000  
Z -0.0000 0.0000 0.0000 -0.0000 0.0000 -0.0000  
AT. 85 O X -0.0000 -0.0000 0.0000 -0.0000 -0.0000 0.0000  
Y -0.0000 -0.0000 0.0000 0.0000 -0.0000 0.0000  
Z 0.0000 0.0000 -0.0000 -0.0000 -0.0000 0.0000  
AT. 86 O X 0.0000 -0.0000 0.0000 0.0000 -0.0000 -0.0000  
Y 0.0000 -0.0000 0.0000 -0.0000 -0.0000 -0.0000  
Z -0.0000 0.0000 -0.0000 0.0000 -0.0000 -0.0000  
AT. 87 N X 0.0000 0.0000 0.0000 0.0000 0.0001 0.0001

Y -0.0000 0.0000 0.0000 0.0000 0.0001 0.0001  
Z 0.0000 0.0000 0.0000 0.0000 0.0001 0.0002  
AT. 88 N X -0.0000 0.0000 0.0000 -0.0000 0.0001 -0.0001  
Y 0.0000 0.0000 0.0000 -0.0000 0.0001 -0.0001  
Z -0.0000 0.0000 0.0000 -0.0000 0.0001 -0.0002  
AT. 89 N X -0.0000 -0.0000 -0.0000 -0.0000 -0.0000 -0.0000  
Y -0.0000 -0.0000 0.0000 -0.0000 0.0000 0.0000  
Z 0.0000 0.0000 -0.0000 -0.0000 -0.0000 -0.0000  
AT. 90 N X 0.0000 -0.0000 -0.0000 0.0000 -0.0000 0.0000  
Y 0.0000 -0.0000 0.0000 0.0000 0.0000 -0.0000  
Z -0.0000 0.0000 -0.0000 0.0000 -0.0000 0.0000  
AT. 91 C X -0.0000 0.0000 -0.0000 -0.0000 -0.0000 -0.0000  
Y 0.0000 0.0000 0.0000 0.0000 0.0000 0.0000  
Z -0.0000 -0.0000 -0.0001 -0.0000 -0.0002 -0.0002  
AT. 92 C X 0.0000 0.0000 -0.0000 0.0000 -0.0000 0.0000  
Y -0.0000 0.0000 0.0000 -0.0000 0.0000 -0.0000  
Z 0.0000 -0.0000 -0.0001 0.0000 -0.0002 0.0002  
AT. 93 C X -0.0000 -0.0000 -0.0000 -0.0000 -0.0001 -0.0001  
Y -0.0000 -0.0000 -0.0000 -0.0000 -0.0001 -0.0001  
Z 0.0000 -0.0000 -0.0000 0.0000 -0.0000 -0.0000  
AT. 94 C X 0.0000 -0.0000 -0.0000 0.0000 -0.0001 0.0001  
Y 0.0000 -0.0000 -0.0000 0.0000 -0.0001 0.0001  
Z -0.0000 -0.0000 -0.0000 -0.0000 -0.0000 0.0000  
AT. 95 H X 0.0001 -0.0000 0.0001 0.0001 0.0007 0.0009  
Y 0.0001 0.0000 0.0002 0.0002 0.0013 0.0015  
Z 0.0001 -0.0000 0.0001 0.0001 0.0005 0.0006  
AT. 96 H X -0.0001 -0.0000 0.0001 -0.0001 0.0007 -0.0009  
Y -0.0001 0.0000 0.0002 -0.0002 0.0013 -0.0015  
Z -0.0001 -0.0000 0.0001 -0.0001 0.0005 -0.0006  
AT. 97 H X -0.0000 -0.0000 -0.0001 -0.0001 -0.0002 -0.0002  
Y 0.0000 0.0000 0.0000 0.0001 0.0000 0.0000  
Z -0.0001 -0.0000 -0.0001 -0.0002 -0.0004 -0.0005

AT. 98 H X 0.0000 -0.0000 -0.0001 0.0001 -0.0002 0.0002  
Y -0.0000 0.0000 0.0000 -0.0001 0.0000 -0.0000  
Z 0.0001 -0.0000 -0.0001 0.0002 -0.0004 0.0005

AT. 99 C X 0.0000 0.0000 -0.0000 -0.0000 0.0000 0.0000  
Y 0.0000 0.0000 -0.0000 -0.0000 -0.0000 -0.0000  
Z -0.0000 -0.0000 0.0000 -0.0000 0.0000 0.0000

AT. 100 C X -0.0000 0.0000 -0.0000 0.0000 0.0000 -0.0000  
Y -0.0000 0.0000 -0.0000 0.0000 -0.0000 0.0000  
Z 0.0000 -0.0000 0.0000 0.0000 0.0000 -0.0000

AT. 101 C X -0.0000 -0.0000 0.0000 -0.0000 -0.0000 -0.0000  
Y -0.0000 -0.0000 -0.0000 -0.0000 0.0000 -0.0000  
Z -0.0000 -0.0000 -0.0000 0.0000 0.0000 0.0000

AT. 102 C X 0.0000 -0.0000 0.0000 0.0000 -0.0000 0.0000  
Y 0.0000 -0.0000 -0.0000 0.0000 0.0000 0.0000  
Z 0.0000 -0.0000 -0.0000 -0.0000 0.0000 -0.0000

AT. 103 H X 0.0001 -0.0000 0.0000 0.0000 0.0000 -0.0000  
Y 0.0002 0.0001 0.0001 0.0000 -0.0001 0.0000  
Z -0.0000 0.0000 -0.0000 -0.0000 0.0000 0.0000

AT. 104 H X -0.0001 -0.0000 0.0000 -0.0000 0.0000 0.0000  
Y -0.0002 0.0001 0.0001 -0.0000 -0.0001 -0.0000  
Z 0.0000 0.0000 -0.0000 0.0000 0.0000 -0.0000

AT. 105 H X -0.0000 -0.0000 -0.0000 0.0000 0.0000 0.0000  
Y -0.0000 -0.0000 -0.0001 -0.0000 0.0000 0.0001  
Z 0.0001 0.0001 0.0001 -0.0000 -0.0000 -0.0001

AT. 106 H X 0.0000 -0.0000 -0.0000 -0.0000 0.0000 -0.0000  
Y 0.0000 -0.0000 -0.0001 0.0000 0.0000 -0.0001  
Z -0.0001 0.0001 0.0001 0.0000 -0.0000 0.0001

AT. 107 C X -0.0000 -0.0000 -0.0000 -0.0000 -0.0000 -0.0000  
Y -0.0001 -0.0000 -0.0001 -0.0000 0.0005 0.0006  
Z 0.0000 0.0000 0.0000 0.0000 -0.0001 -0.0002

AT. 108 C X 0.0000 -0.0000 -0.0000 0.0000 -0.0000 0.0000  
Y 0.0001 -0.0000 -0.0001 0.0000 0.0005 -0.0006

Z -0.0000 0.0000 0.0000 -0.0000 -0.0001 0.0002  
AT. 109 H X -0.0002 -0.0001 -0.0001 -0.0000 0.0016 0.0017  
Y 0.0009 0.0005 0.0007 0.0004 -0.0059 -0.0064  
Z -0.0005 -0.0003 -0.0004 -0.0002 0.0033 0.0036  
AT. 110 H X 0.0002 -0.0001 -0.0001 0.0000 0.0016 -0.0017  
Y -0.0009 0.0005 0.0007 -0.0004 -0.0059 0.0064  
Z 0.0005 -0.0003 -0.0004 0.0002 0.0033 -0.0036  
AT. 111 H X 0.0003 0.0002 0.0003 0.0001 -0.0016 -0.0017  
Y 0.0001 0.0000 0.0001 0.0000 -0.0001 -0.0001  
Z 0.0002 0.0001 0.0002 0.0001 -0.0015 -0.0016  
AT. 112 H X -0.0003 0.0002 0.0003 -0.0001 -0.0016 0.0017  
Y -0.0001 0.0000 0.0001 -0.0000 -0.0001 0.0001  
Z -0.0002 0.0001 0.0002 -0.0001 -0.0015 0.0016  
AT. 113 C X -0.0000 -0.0000 -0.0000 0.0000 0.0000 0.0000  
Y -0.0000 -0.0000 -0.0000 -0.0000 0.0000 0.0000  
Z -0.0000 -0.0000 0.0000 -0.0000 0.0000 0.0000  
AT. 114 C X 0.0000 -0.0000 -0.0000 -0.0000 0.0000 -0.0000  
Y 0.0000 -0.0000 -0.0000 0.0000 0.0000 -0.0000  
Z 0.0000 -0.0000 0.0000 0.0000 0.0000 -0.0000  
AT. 115 C X 0.0000 0.0000 -0.0000 -0.0000 0.0001 0.0001  
Y -0.0000 -0.0000 0.0000 0.0000 -0.0001 -0.0001  
Z -0.0000 -0.0000 0.0000 0.0000 -0.0001 -0.0000  
AT. 116 C X -0.0000 0.0000 -0.0000 0.0000 0.0001 -0.0001  
Y 0.0000 -0.0000 0.0000 -0.0000 -0.0001 0.0001  
Z 0.0000 -0.0000 0.0000 -0.0000 -0.0001 0.0000  
AT. 117 H X 0.0001 -0.0000 0.0000 -0.0000 -0.0004 -0.0004  
Y 0.0000 -0.0000 0.0000 0.0000 -0.0001 -0.0001  
Z 0.0000 -0.0000 0.0000 -0.0000 -0.0003 -0.0003  
AT. 118 H X -0.0001 -0.0000 0.0000 0.0000 -0.0004 0.0004  
Y -0.0000 -0.0000 0.0000 -0.0000 -0.0001 0.0001  
Z -0.0000 -0.0000 0.0000 0.0000 -0.0003 0.0003  
AT. 119 H X -0.0001 -0.0001 0.0001 0.0000 -0.0006 -0.0005



Y 0.0002 0.0003 -0.0002 -0.0000 0.0009 0.0008  
Z 0.0002 0.0003 -0.0001 -0.0000 0.0010 0.0009  
AT. 120 H X 0.0001 -0.0001 0.0001 -0.0000 -0.0006 0.0005  
Y -0.0002 0.0003 -0.0002 0.0000 0.0009 -0.0008  
Z -0.0002 0.0003 -0.0001 0.0000 0.0010 -0.0009  
AT. 121 C X -0.0000 -0.0000 -0.0000 -0.0000 -0.0001 -0.0001  
Y -0.0001 -0.0001 -0.0002 -0.0001 -0.0015 -0.0016  
Z -0.0001 -0.0001 -0.0001 -0.0001 -0.0011 -0.0011  
AT. 122 C X 0.0000 -0.0000 -0.0000 0.0000 -0.0001 0.0001  
Y 0.0001 -0.0001 -0.0002 0.0001 -0.0015 0.0016  
Z 0.0001 -0.0001 -0.0001 0.0001 -0.0011 0.0011  
AT. 123 H X -0.0003 -0.0002 -0.0003 -0.0002 -0.0031 -0.0033  
Y 0.0013 0.0010 0.0020 0.0010 0.0174 0.0182  
Z 0.0013 0.0010 0.0020 0.0010 0.0172 0.0179  
AT. 124 H X 0.0003 -0.0002 -0.0003 0.0002 -0.0031 0.0033  
Y -0.0013 0.0010 0.0020 -0.0010 0.0174 -0.0182  
Z -0.0013 0.0010 0.0020 -0.0010 0.0172 -0.0179  
AT. 125 H X 0.0003 0.0002 0.0006 0.0003 0.0048 0.0051  
Y 0.0001 0.0001 0.0002 0.0001 0.0016 0.0017  
Z -0.0003 -0.0002 -0.0005 -0.0003 -0.0041 -0.0044  
AT. 126 H X -0.0003 0.0002 0.0006 -0.0003 0.0048 -0.0051  
Y -0.0001 0.0001 0.0002 -0.0001 0.0016 -0.0017  
Z 0.0003 -0.0002 -0.0005 0.0003 -0.0041 0.0044  
AT. 127 C X 0.0000 0.0000 0.0000 0.0000 0.0000 0.0000  
Y -0.0000 -0.0000 -0.0000 -0.0000 -0.0002 -0.0002  
Z 0.0000 0.0000 0.0000 0.0000 0.0001 0.0001  
AT. 128 C X -0.0000 0.0000 0.0000 -0.0000 0.0000 -0.0000  
Y 0.0000 -0.0000 -0.0000 0.0000 -0.0002 0.0002  
Z -0.0000 0.0000 0.0000 -0.0000 0.0001 -0.0001  
AT. 129 C X 0.0002 0.0001 0.0006 0.0007 0.0043 0.0048  
Y -0.0003 -0.0002 -0.0010 -0.0011 -0.0070 -0.0077  
Z 0.0001 0.0001 0.0005 0.0006 0.0034 0.0038

AT.130 C X -0.0002 0.0001 0.0006 -0.0007 0.0043 -0.0048  
Y 0.0003 -0.0002 -0.0010 0.0011 -0.0070 0.0077  
Z -0.0001 0.0001 0.0005 -0.0006 0.0034 -0.0038

AT.131 H X -0.0009 -0.0008 -0.0036 -0.0039 -0.0250 -0.0276  
Y -0.0004 -0.0003 -0.0014 -0.0016 -0.0099 -0.0109  
Z 0.0007 0.0006 0.0027 0.0030 0.0192 0.0212

AT.132 H X 0.0009 -0.0008 -0.0036 0.0039 -0.0250 0.0276  
Y 0.0004 -0.0003 -0.0014 0.0016 -0.0099 0.0109  
Z -0.0007 0.0006 0.0027 -0.0030 0.0192 -0.0212

AT.133 H X -0.0010 -0.0010 -0.0041 -0.0044 -0.0273 -0.0301  
Y 0.0035 0.0033 0.0139 0.0151 0.0934 0.1031  
Z -0.0022 -0.0021 -0.0088 -0.0095 -0.0599 -0.0661

AT.134 H X 0.0010 -0.0010 -0.0041 0.0044 -0.0273 0.0301  
Y -0.0035 0.0033 0.0139 -0.0151 0.0934 -0.1031  
Z 0.0022 -0.0021 -0.0088 0.0095 -0.0599 0.0661

AT.135 C X -0.0000 0.0000 -0.0000 -0.0000 0.0000 0.0000  
Y -0.0000 -0.0000 -0.0000 -0.0000 -0.0000 -0.0000  
Z -0.0000 -0.0000 -0.0000 -0.0000 0.0000 0.0001

AT.136 C X 0.0000 0.0000 -0.0000 0.0000 0.0000 -0.0000  
Y 0.0000 -0.0000 -0.0000 0.0000 -0.0000 0.0000  
Z 0.0000 -0.0000 -0.0000 0.0000 0.0000 -0.0001

AT.137 H X -0.0000 0.0000 0.0000 -0.0000 -0.0000 0.0000  
Y 0.0002 -0.0001 0.0000 0.0002 0.0003 0.0003  
Z -0.0001 0.0000 0.0000 -0.0001 -0.0001 -0.0001

AT.138 H X 0.0000 0.0000 0.0000 0.0000 -0.0000 -0.0000  
Y -0.0002 -0.0001 0.0000 -0.0002 0.0003 -0.0003  
Z 0.0001 0.0000 0.0000 0.0001 -0.0001 0.0001

AT.139 H X 0.0003 -0.0000 0.0001 0.0002 -0.0005 -0.0006  
Y 0.0001 0.0000 0.0001 0.0001 0.0000 -0.0000  
Z 0.0002 -0.0000 0.0001 0.0002 -0.0004 -0.0005

AT.140 H X -0.0003 -0.0000 0.0001 -0.0002 -0.0005 0.0006  
Y -0.0001 0.0000 0.0001 -0.0001 0.0000 0.0000

Z -0.0002 -0.0000 0.0001 -0.0002 -0.0004 0.0005  
AT. 141 H X -0.0000 -0.0001 -0.0001 -0.0000 0.0000 0.0001  
Y -0.0000 0.0001 0.0002 -0.0000 -0.0001 -0.0002  
Z -0.0000 0.0001 0.0002 -0.0000 -0.0001 -0.0002  
AT. 142 H X 0.0000 -0.0001 -0.0001 0.0000 0.0000 -0.0001  
Y 0.0000 0.0001 0.0002 0.0000 -0.0001 0.0002  
Z 0.0000 0.0001 0.0002 0.0000 -0.0001 0.0002  
AT. 143 C X -0.0000 -0.0000 -0.0002 -0.0001 -0.0010 -0.0010  
Y -0.0000 -0.0000 -0.0000 -0.0000 -0.0002 -0.0002  
Z -0.0000 -0.0000 -0.0001 -0.0000 -0.0003 -0.0003  
AT. 144 C X 0.0000 -0.0000 -0.0002 0.0001 -0.0010 0.0010  
Y 0.0000 -0.0000 -0.0000 0.0000 -0.0002 0.0002  
Z 0.0000 -0.0000 -0.0001 0.0000 -0.0003 0.0003  
AT. 145 H X -0.0001 -0.0001 -0.0004 -0.0002 -0.0022 -0.0021  
Y 0.0002 0.0003 0.0013 0.0008 0.0076 0.0072  
Z 0.0002 0.0003 0.0012 0.0007 0.0069 0.0066  
AT. 146 H X 0.0001 -0.0001 -0.0004 0.0002 -0.0022 0.0021  
Y -0.0002 0.0003 0.0013 -0.0008 0.0076 -0.0072  
Z -0.0002 0.0003 0.0012 -0.0007 0.0069 -0.0066  
AT. 147 H X 0.0003 0.0004 0.0020 0.0012 0.0118 0.0115  
Y 0.0001 0.0001 0.0007 0.0005 0.0043 0.0042  
Z -0.0002 -0.0003 -0.0015 -0.0009 -0.0087 -0.0085  
AT. 148 H X -0.0003 0.0004 0.0020 -0.0012 0.0118 -0.0115  
Y -0.0001 0.0001 0.0007 -0.0005 0.0043 -0.0042  
Z 0.0002 -0.0003 -0.0015 0.0009 -0.0087 0.0085  
AT. 149 H X 0.0001 0.0001 0.0004 0.0002 0.0024 0.0024  
Y -0.0002 -0.0004 -0.0015 -0.0010 -0.0095 -0.0093  
Z 0.0001 0.0002 0.0009 0.0005 0.0052 0.0051  
AT. 150 H X -0.0001 0.0001 0.0004 -0.0002 0.0024 -0.0024  
Y 0.0002 -0.0004 -0.0015 0.0010 -0.0095 0.0093  
Z -0.0001 0.0002 0.0009 -0.0005 0.0052 -0.0051  
AT. 151 C X -0.0000 -0.0000 -0.0000 -0.0000 -0.0001 -0.0001

Y 0.0000 -0.0000 0.0001 0.0000 0.0002 0.0002  
Z 0.0001 0.0000 0.0001 0.0000 -0.0000 -0.0001  
AT. 152 C X 0.0000 -0.0000 -0.0000 0.0000 -0.0001 0.0001  
Y -0.0000 -0.0000 0.0001 -0.0000 0.0002 -0.0002  
Z -0.0001 0.0000 0.0001 -0.0000 -0.0000 0.0001  
AT. 153 H X -0.0001 -0.0001 -0.0001 0.0000 0.0007 0.0008  
Y 0.0003 0.0003 0.0006 0.0000 -0.0017 -0.0020  
Z -0.0002 -0.0002 -0.0003 -0.0000 0.0008 0.0010  
AT. 154 H X 0.0001 -0.0001 -0.0001 -0.0000 0.0007 -0.0008  
Y -0.0003 0.0003 0.0006 -0.0000 -0.0017 0.0020  
Z 0.0002 -0.0002 -0.0003 0.0000 0.0008 -0.0010  
AT. 155 H X 0.0002 0.0001 0.0004 0.0000 0.0000 -0.0001  
Y -0.0006 -0.0002 -0.0012 -0.0001 -0.0004 -0.0001  
Z -0.0005 -0.0002 -0.0011 -0.0001 -0.0005 -0.0002  
AT. 156 H X -0.0002 0.0001 0.0004 -0.0000 0.0000 0.0001  
Y 0.0006 -0.0002 -0.0012 0.0001 -0.0004 0.0001  
Z 0.0005 -0.0002 -0.0011 0.0001 -0.0005 0.0002  
AT. 157 O X 0.0000 0.0000 0.0000 0.0000 0.0000 0.0000  
Y -0.0000 -0.0000 -0.0001 -0.0001 -0.0001 -0.0001  
Z -0.0000 -0.0000 -0.0000 -0.0000 -0.0000 -0.0000  
AT. 158 O X -0.0000 0.0000 0.0000 -0.0000 0.0000 -0.0000  
Y 0.0000 -0.0000 -0.0001 0.0001 -0.0001 0.0001  
Z 0.0000 -0.0000 -0.0000 0.0000 -0.0000 0.0000  
AT. 159 O X -0.0000 0.0000 -0.0000 0.0000 0.0000 -0.0000  
Y 0.0000 -0.0000 0.0000 -0.0000 -0.0000 -0.0000  
Z -0.0001 0.0001 -0.0000 0.0000 0.0000 0.0000  
AT. 160 O X 0.0000 0.0000 -0.0000 -0.0000 0.0000 0.0000  
Y -0.0000 -0.0000 0.0000 0.0000 -0.0000 0.0000  
Z 0.0001 0.0001 -0.0000 -0.0000 0.0000 -0.0000  
AT. 161 H X -0.0001 -0.0001 -0.0003 -0.0003 -0.0001 -0.0001  
Y 0.0006 0.0002 0.0017 0.0017 0.0016 0.0015  
Z 0.0002 0.0001 0.0005 0.0005 0.0004 0.0004

AT.162 H X 0.0001 -0.0001 -0.0003 0.0003 -0.0001 0.0001  
Y -0.0006 0.0002 0.0017 -0.0017 0.0016 -0.0015  
Z -0.0002 0.0001 0.0005 -0.0005 0.0004 -0.0004

AT.163 H X 0.0003 -0.0004 0.0001 -0.0001 -0.0001 0.0000  
Y -0.0002 0.0002 -0.0001 0.0000 0.0002 0.0001  
Z 0.0009 -0.0011 0.0003 -0.0002 -0.0006 -0.0002

AT.164 H X -0.0003 -0.0004 0.0001 0.0001 -0.0001 -0.0000  
Y 0.0002 0.0002 -0.0001 -0.0000 0.0002 -0.0001  
Z -0.0009 -0.0011 0.0003 0.0002 -0.0006 0.0002

AT.165 O X -0.0000 0.0000 -0.0000 0.0000 -0.0000 -0.0000  
Y -0.0000 0.0000 -0.0000 0.0000 -0.0000 -0.0000  
Z 0.0000 -0.0000 -0.0000 -0.0000 -0.0000 -0.0000

AT.166 O X 0.0000 0.0000 -0.0000 -0.0000 -0.0000 0.0000  
Y 0.0000 0.0000 -0.0000 -0.0000 -0.0000 0.0000  
Z -0.0000 -0.0000 -0.0000 0.0000 -0.0000 0.0000

AT.167 H X 0.0004 -0.0003 0.0003 -0.0001 0.0001 0.0003  
Y 0.0002 -0.0001 0.0002 -0.0000 0.0001 0.0002  
Z 0.0001 -0.0001 0.0001 -0.0000 0.0000 0.0001

AT.168 H X -0.0004 -0.0003 0.0003 0.0001 0.0001 -0.0003  
Y -0.0002 -0.0001 0.0002 0.0000 0.0001 -0.0002  
Z -0.0001 -0.0001 0.0001 0.0000 0.0000 -0.0001

AT.169 O X -0.0000 -0.0000 0.0000 -0.0000 -0.0000 -0.0000  
Y 0.0000 0.0000 -0.0000 0.0000 0.0001 0.0000  
Z -0.0000 0.0000 0.0000 -0.0000 -0.0000 -0.0000

AT.170 O X 0.0000 -0.0000 0.0000 0.0000 -0.0000 0.0000  
Y -0.0000 0.0000 -0.0000 -0.0000 0.0001 -0.0000  
Z 0.0000 0.0000 0.0000 0.0000 -0.0000 0.0000

AT.171 H X -0.0000 0.0001 -0.0001 0.0002 0.0003 0.0000  
Y -0.0002 -0.0000 0.0002 -0.0004 -0.0008 -0.0001  
Z 0.0001 0.0001 -0.0001 0.0002 0.0004 0.0000

AT.172 H X 0.0000 0.0001 -0.0001 -0.0002 0.0003 -0.0000  
Y 0.0002 -0.0000 0.0002 0.0004 -0.0008 0.0001

Z -0.0001 0.0001 -0.0001 -0.0002 0.0004 -0.0000

FREQ(CM\*\*-1) 2970.11 2971.03 2972.31 2972.75 2972.99 2973.78

AT. 1 I X -0.0000 -0.0000 0.0000 -0.0000 0.0000 -0.0000

Y 0.0000 -0.0000 -0.0000 0.0000 -0.0000 0.0000

Z 0.0000 0.0000 -0.0000 0.0000 0.0000 0.0000

AT. 2 I X -0.0000 0.0000 0.0000 -0.0000 -0.0000 -0.0000

Y 0.0000 0.0000 -0.0000 0.0000 0.0000 0.0000

Z 0.0000 -0.0000 -0.0000 0.0000 -0.0000 0.0000

AT. 3 I X -0.0000 -0.0000 0.0000 0.0000 0.0000 -0.0000

Y 0.0000 -0.0000 -0.0000 -0.0000 -0.0000 -0.0000

Z 0.0000 0.0000 -0.0000 0.0000 -0.0000 -0.0000

AT. 4 I X -0.0000 0.0000 0.0000 0.0000 -0.0000 -0.0000

Y 0.0000 0.0000 -0.0000 -0.0000 0.0000 -0.0000

Z 0.0000 -0.0000 -0.0000 0.0000 0.0000 -0.0000

AT. 5 O X -0.0000 -0.0000 0.0000 0.0000 -0.0000 -0.0000

Y 0.0000 0.0000 -0.0000 -0.0000 0.0000 -0.0000

Z 0.0000 0.0000 -0.0000 -0.0000 0.0000 0.0000

AT. 6 O X -0.0000 0.0000 0.0000 0.0000 0.0000 -0.0000

Y 0.0000 -0.0000 -0.0000 -0.0000 -0.0000 -0.0000

Z 0.0000 -0.0000 -0.0000 -0.0000 -0.0000 0.0000

AT. 7 O X -0.0000 -0.0001 -0.0000 -0.0000 -0.0000 -0.0000

Y 0.0000 0.0000 0.0000 -0.0000 -0.0000 0.0000

Z 0.0000 -0.0000 -0.0000 -0.0000 -0.0000 -0.0000

AT. 8 O X -0.0000 0.0001 -0.0000 -0.0000 0.0000 -0.0000

Y 0.0000 -0.0000 0.0000 -0.0000 0.0000 0.0000

Z 0.0000 0.0000 -0.0000 -0.0000 0.0000 -0.0000

AT. 9 N X 0.0000 0.0000 -0.0000 0.0000 -0.0000 -0.0001

Y -0.0000 0.0000 0.0000 -0.0000 0.0000 0.0001

Z 0.0000 0.0000 0.0000 -0.0000 0.0000 0.0001

AT. 10 N X 0.0000 -0.0000 -0.0000 0.0000 0.0000 -0.0001

Y -0.0000 -0.0000 0.0000 -0.0000 -0.0000 0.0001  
Z 0.0000 -0.0000 0.0000 -0.0000 -0.0000 0.0001  
AT. 11 N X 0.0001 0.0002 0.0001 -0.0000 0.0000 -0.0000  
Y 0.0000 0.0000 0.0000 -0.0000 0.0000 0.0000  
Z -0.0002 -0.0003 -0.0002 0.0000 0.0000 -0.0000  
AT. 12 N X 0.0001 -0.0002 0.0001 -0.0000 -0.0000 -0.0000  
Y 0.0000 -0.0000 0.0000 -0.0000 -0.0000 0.0000  
Z -0.0002 0.0003 -0.0002 0.0000 -0.0000 -0.0000  
AT. 13 C X -0.0000 0.0000 -0.0000 -0.0000 0.0000 -0.0000  
Y 0.0000 -0.0000 -0.0000 0.0000 -0.0000 0.0000  
Z -0.0000 -0.0000 -0.0000 0.0000 -0.0000 -0.0001  
AT. 14 C X -0.0000 -0.0000 -0.0000 -0.0000 -0.0000 -0.0000  
Y 0.0000 0.0000 -0.0000 0.0000 0.0000 0.0000  
Z -0.0000 0.0000 -0.0000 0.0000 0.0000 -0.0001  
AT. 15 C X -0.0000 0.0000 0.0000 -0.0000 -0.0000 0.0000  
Y 0.0000 -0.0000 -0.0000 0.0000 0.0000 -0.0001  
Z 0.0000 -0.0000 -0.0000 0.0000 0.0000 -0.0001  
AT. 16 C X -0.0000 -0.0000 0.0000 -0.0000 0.0000 0.0000  
Y 0.0000 0.0000 -0.0000 0.0000 -0.0000 -0.0001  
Z 0.0000 0.0000 -0.0000 0.0000 -0.0000 -0.0001  
AT. 17 H X 0.0000 -0.0000 -0.0001 0.0000 0.0000 -0.0003  
Y -0.0001 0.0002 0.0005 -0.0001 -0.0000 0.0015  
Z -0.0001 0.0000 0.0003 -0.0001 -0.0000 0.0009  
AT. 18 H X 0.0000 0.0000 -0.0001 0.0000 -0.0000 -0.0003  
Y -0.0001 -0.0002 0.0005 -0.0001 0.0000 0.0015  
Z -0.0001 -0.0000 0.0003 -0.0001 0.0000 0.0009  
AT. 19 H X -0.0000 0.0000 0.0001 -0.0000 0.0000 0.0002  
Y -0.0000 0.0000 0.0001 -0.0000 -0.0000 0.0001  
Z 0.0001 -0.0001 -0.0002 0.0000 0.0000 -0.0006  
AT. 20 H X -0.0000 -0.0000 0.0001 -0.0000 -0.0000 0.0002  
Y -0.0000 -0.0000 0.0001 -0.0000 0.0000 0.0001  
Z 0.0001 0.0001 -0.0002 0.0000 -0.0000 -0.0006

AT. 21 C X 0.0000 0.0000 0.0000 -0.0000 -0.0000 -0.0000  
Y -0.0001 -0.0002 -0.0001 0.0000 -0.0000 -0.0000  
Z 0.0001 0.0002 0.0002 -0.0000 -0.0000 0.0000

AT. 22 C X 0.0000 -0.0000 0.0000 -0.0000 0.0000 -0.0000  
Y -0.0001 0.0002 -0.0001 0.0000 0.0000 -0.0000  
Z 0.0001 -0.0002 0.0002 -0.0000 0.0000 0.0000

AT. 23 C X 0.0000 0.0000 0.0000 -0.0000 -0.0000 0.0000  
Y -0.0000 -0.0000 -0.0000 -0.0000 -0.0000 -0.0000  
Z -0.0000 -0.0000 -0.0000 -0.0000 -0.0000 -0.0000

AT. 24 C X 0.0000 -0.0000 0.0000 -0.0000 0.0000 0.0000  
Y -0.0000 0.0000 -0.0000 -0.0000 0.0000 -0.0000  
Z -0.0000 0.0000 -0.0000 -0.0000 0.0000 -0.0000

AT. 25 H X -0.0000 -0.0000 0.0000 0.0000 0.0000 -0.0000  
Y 0.0000 0.0001 -0.0001 0.0001 0.0001 0.0002  
Z 0.0000 0.0001 0.0000 0.0000 0.0000 0.0001

AT. 26 H X -0.0000 0.0000 0.0000 0.0000 -0.0000 -0.0000  
Y 0.0000 -0.0001 -0.0001 0.0001 -0.0001 0.0002  
Z 0.0000 -0.0001 0.0000 0.0000 -0.0000 0.0001

AT. 27 H X 0.0000 0.0001 0.0000 0.0000 0.0000 0.0000  
Y -0.0001 -0.0000 0.0000 -0.0001 -0.0001 -0.0000  
Z 0.0000 -0.0000 -0.0001 0.0002 0.0002 0.0001

AT. 28 H X 0.0000 -0.0001 0.0000 0.0000 -0.0000 0.0000  
Y -0.0001 0.0000 0.0000 -0.0001 0.0001 -0.0000  
Z 0.0000 0.0000 -0.0001 0.0002 -0.0002 0.0001

AT. 29 C X -0.0005 -0.0001 0.0001 -0.0000 -0.0000 0.0003  
Y -0.0021 -0.0003 0.0006 -0.0001 -0.0000 0.0007  
Z 0.0007 0.0001 -0.0001 0.0000 0.0000 -0.0002

AT. 30 C X -0.0005 0.0001 0.0001 -0.0000 0.0000 0.0003  
Y -0.0021 0.0003 0.0006 -0.0001 0.0000 0.0007  
Z 0.0007 -0.0001 -0.0001 0.0000 -0.0000 -0.0002

AT. 31 H X 0.0096 0.0014 -0.0027 0.0004 0.0001 -0.0035  
Y 0.0220 0.0033 -0.0058 0.0008 0.0002 -0.0070



Z -0.0151 -0.0022 0.0039 -0.0006 -0.0001 0.0048  
AT. 32 H X 0.0096 -0.0014 -0.0027 0.0004 -0.0001 -0.0035  
Y 0.0220 -0.0033 -0.0058 0.0008 -0.0002 -0.0070  
Z -0.0151 0.0022 0.0039 -0.0006 0.0001 0.0048  
AT. 33 H X -0.0043 -0.0007 0.0015 -0.0002 -0.0000 0.0008  
Y 0.0024 0.0004 -0.0008 0.0001 0.0000 -0.0004  
Z 0.0063 0.0010 -0.0021 0.0003 0.0000 -0.0015  
AT. 34 H X -0.0043 0.0007 0.0015 -0.0002 0.0000 0.0008  
Y 0.0024 -0.0004 -0.0008 0.0001 -0.0000 -0.0004  
Z 0.0063 -0.0010 -0.0021 0.0003 -0.0000 -0.0015  
AT. 35 C X 0.0000 0.0000 -0.0001 0.0000 -0.0000 0.0000  
Y -0.0001 -0.0000 0.0000 -0.0000 0.0000 -0.0000  
Z 0.0000 -0.0000 -0.0001 0.0000 -0.0000 0.0000  
AT. 36 C X 0.0000 -0.0000 -0.0001 0.0000 0.0000 0.0000  
Y -0.0001 0.0000 0.0000 -0.0000 -0.0000 -0.0000  
Z 0.0000 0.0000 -0.0001 0.0000 0.0000 0.0000  
AT. 37 C X -0.0007 -0.0016 -0.0011 0.0001 0.0000 -0.0010  
Y -0.0003 -0.0007 -0.0005 0.0000 0.0000 -0.0006  
Z -0.0004 -0.0008 -0.0004 0.0000 0.0000 -0.0006  
AT. 38 C X -0.0007 0.0016 -0.0011 0.0001 -0.0000 -0.0010  
Y -0.0003 0.0007 -0.0005 0.0000 -0.0000 -0.0006  
Z -0.0004 0.0008 -0.0004 0.0000 -0.0000 -0.0006  
AT. 39 H X 0.0015 0.0037 0.0030 -0.0004 -0.0001 0.0017  
Y -0.0012 -0.0029 -0.0023 0.0003 0.0001 -0.0013  
Z -0.0025 -0.0061 -0.0048 0.0006 0.0002 -0.0031  
AT. 40 H X 0.0015 -0.0037 0.0030 -0.0004 0.0001 0.0017  
Y -0.0012 0.0029 -0.0023 0.0003 -0.0001 -0.0013  
Z -0.0025 0.0061 -0.0048 0.0006 -0.0002 -0.0031  
AT. 41 H X 0.0075 0.0161 0.0105 -0.0011 -0.0002 0.0103  
Y 0.0054 0.0119 0.0077 -0.0008 -0.0002 0.0081  
Z 0.0073 0.0157 0.0102 -0.0011 -0.0002 0.0101  
AT. 42 H X 0.0075 -0.0161 0.0105 -0.0011 0.0002 0.0103

Y 0.0054 -0.0119 0.0077 -0.0008 0.0002 0.0081  
Z 0.0073 -0.0157 0.0102 -0.0011 0.0002 0.0101  
AT. 43 C X -0.0015 -0.0021 -0.0014 0.0001 -0.0000 0.0001  
Y -0.0054 -0.0077 -0.0052 0.0004 -0.0001 0.0003  
Z -0.0032 -0.0045 -0.0029 0.0002 -0.0001 0.0001  
AT. 44 C X -0.0015 0.0021 -0.0014 0.0001 0.0000 0.0001  
Y -0.0054 0.0077 -0.0052 0.0004 0.0001 0.0003  
Z -0.0032 0.0045 -0.0029 0.0002 0.0001 0.0001  
AT. 45 H X 0.0388 0.0551 0.0367 -0.0030 0.0007 -0.0015  
Y 0.0514 0.0731 0.0488 -0.0039 0.0010 -0.0018  
Z 0.0540 0.0767 0.0509 -0.0040 0.0011 -0.0019  
AT. 46 H X 0.0388 -0.0551 0.0367 -0.0030 -0.0007 -0.0015  
Y 0.0514 -0.0731 0.0488 -0.0039 -0.0010 -0.0018  
Z 0.0540 -0.0767 0.0509 -0.0040 -0.0011 -0.0019  
AT. 47 H X -0.0211 -0.0301 -0.0205 0.0017 -0.0003 0.0011  
Y 0.0139 0.0200 0.0137 -0.0012 0.0002 -0.0007  
Z -0.0149 -0.0213 -0.0145 0.0012 -0.0002 0.0008  
AT. 48 H X -0.0211 0.0301 -0.0205 0.0017 0.0003 0.0011  
Y 0.0139 -0.0200 0.0137 -0.0012 -0.0002 -0.0007  
Z -0.0149 0.0213 -0.0145 0.0012 0.0002 0.0008  
AT. 49 C X -0.0001 -0.0001 -0.0000 0.0000 0.0000 -0.0000  
Y -0.0000 -0.0000 -0.0001 0.0000 -0.0000 -0.0001  
Z -0.0000 -0.0001 -0.0001 0.0000 -0.0000 0.0001  
AT. 50 C X -0.0001 0.0001 -0.0000 0.0000 -0.0000 -0.0000  
Y -0.0000 0.0000 -0.0001 0.0000 0.0000 -0.0001  
Z -0.0000 0.0001 -0.0001 0.0000 0.0000 0.0001  
AT. 51 C X 0.0002 -0.0007 -0.0017 0.0001 -0.0001 -0.0051  
Y 0.0003 -0.0006 -0.0017 0.0001 -0.0001 -0.0050  
Z -0.0002 0.0005 0.0014 -0.0001 0.0001 0.0039  
AT. 52 C X 0.0002 0.0007 -0.0017 0.0001 0.0001 -0.0051  
Y 0.0003 0.0006 -0.0017 0.0001 0.0001 -0.0050  
Z -0.0002 -0.0005 0.0014 -0.0001 -0.0001 0.0039

AT. 53 H X -0.0006 0.0032 0.0072 -0.0004 0.0006 0.0225  
Y 0.0005 -0.0024 -0.0055 0.0003 -0.0004 -0.0165  
Z -0.0005 0.0018 0.0044 -0.0002 0.0003 0.0133

AT. 54 H X -0.0006 -0.0032 0.0072 -0.0004 -0.0006 0.0225  
Y 0.0005 0.0024 -0.0055 0.0003 0.0004 -0.0165  
Z -0.0005 -0.0018 0.0044 -0.0002 -0.0003 0.0133

AT. 55 H X -0.0017 0.0051 0.0135 -0.0007 0.0011 0.0389  
Y -0.0035 0.0099 0.0265 -0.0014 0.0021 0.0756  
Z 0.0028 -0.0079 -0.0212 0.0011 -0.0017 -0.0599

AT. 56 H X -0.0017 -0.0051 0.0135 -0.0007 -0.0011 0.0389  
Y -0.0035 -0.0099 0.0265 -0.0014 -0.0021 0.0756  
Z 0.0028 0.0079 -0.0212 0.0011 0.0017 -0.0599

AT. 57 C X -0.0009 -0.0003 0.0020 -0.0002 0.0000 -0.0031  
Y 0.0008 0.0003 -0.0019 0.0002 -0.0000 0.0027  
Z -0.0002 -0.0001 0.0004 -0.0000 0.0000 -0.0003

AT. 58 C X -0.0009 0.0003 0.0020 -0.0002 -0.0000 -0.0031  
Y 0.0008 -0.0003 -0.0019 0.0002 0.0000 0.0027  
Z -0.0002 0.0001 0.0004 -0.0000 -0.0000 -0.0003

AT. 59 H X -0.0054 -0.0019 0.0121 -0.0012 0.0001 -0.0165  
Y -0.0102 -0.0036 0.0234 -0.0024 0.0002 -0.0322  
Z 0.0070 0.0026 -0.0160 0.0016 -0.0001 0.0221

AT. 60 H X -0.0054 0.0019 0.0121 -0.0012 -0.0001 -0.0165  
Y -0.0102 0.0036 0.0234 -0.0024 -0.0002 -0.0322  
Z 0.0070 -0.0026 -0.0160 0.0016 0.0001 0.0221

AT. 61 H X 0.0090 0.0033 -0.0204 0.0021 -0.0001 0.0311  
Y -0.0058 -0.0021 0.0130 -0.0013 0.0001 -0.0198  
Z -0.0123 -0.0045 0.0277 -0.0028 0.0002 -0.0414

AT. 62 H X 0.0090 -0.0033 -0.0204 0.0021 0.0001 0.0311  
Y -0.0058 0.0021 0.0130 -0.0013 -0.0001 -0.0198  
Z -0.0123 0.0045 0.0277 -0.0028 -0.0002 -0.0414

AT. 63 H X 0.0065 0.0023 -0.0152 0.0016 -0.0001 0.0218  
Y 0.0065 0.0022 -0.0148 0.0015 -0.0001 0.0205

Z 0.0072 0.0026 -0.0165 0.0017 -0.0001 0.0233  
AT. 64 H X 0.0065 -0.0023 -0.0152 0.0016 0.0001 0.0218  
Y 0.0065 -0.0022 -0.0148 0.0015 0.0001 0.0205  
Z 0.0072 -0.0026 -0.0165 0.0017 0.0001 0.0233  
AT. 65 C X -0.0004 -0.0004 -0.0006 0.0000 -0.0000 0.0007  
Y 0.0003 0.0005 0.0006 -0.0000 0.0000 -0.0004  
Z 0.0005 0.0005 0.0007 -0.0001 0.0000 -0.0008  
AT. 66 C X -0.0004 0.0004 -0.0006 0.0000 0.0000 0.0007  
Y 0.0003 -0.0005 0.0006 -0.0000 -0.0000 -0.0004  
Z 0.0005 -0.0005 0.0007 -0.0001 -0.0000 -0.0008  
AT. 67 H X -0.0050 -0.0052 -0.0077 0.0006 -0.0004 0.0071  
Y -0.0052 -0.0053 -0.0076 0.0006 -0.0004 0.0074  
Z -0.0053 -0.0052 -0.0079 0.0006 -0.0004 0.0077  
AT. 68 H X -0.0050 0.0052 -0.0077 0.0006 0.0004 0.0071  
Y -0.0052 0.0053 -0.0076 0.0006 0.0004 0.0074  
Z -0.0053 0.0052 -0.0079 0.0006 0.0004 0.0077  
AT. 69 H X 0.0062 0.0070 0.0104 -0.0007 0.0004 -0.0098  
Y -0.0048 -0.0054 -0.0079 0.0006 -0.0003 0.0074  
Z 0.0034 0.0038 0.0056 -0.0004 0.0003 -0.0052  
AT. 70 H X 0.0062 -0.0070 0.0104 -0.0007 -0.0004 -0.0098  
Y -0.0048 0.0054 -0.0079 0.0006 0.0003 0.0074  
Z 0.0034 -0.0038 0.0056 -0.0004 -0.0003 -0.0052  
AT. 71 H X 0.0033 0.0029 0.0044 -0.0003 0.0002 -0.0052  
Y 0.0060 0.0054 0.0088 -0.0006 0.0005 -0.0101  
Z -0.0042 -0.0036 -0.0059 0.0004 -0.0003 0.0069  
AT. 72 H X 0.0033 -0.0029 0.0044 -0.0003 -0.0002 -0.0052  
Y 0.0060 -0.0054 0.0088 -0.0006 -0.0005 -0.0101  
Z -0.0042 0.0036 -0.0059 0.0004 0.0003 0.0069  
AT. 73 C X 0.0010 0.0006 -0.0009 0.0001 -0.0001 0.0000  
Y -0.0004 -0.0001 0.0007 -0.0001 0.0001 0.0001  
Z 0.0052 0.0027 -0.0054 0.0003 -0.0006 -0.0005  
AT. 74 C X 0.0010 -0.0006 -0.0009 0.0001 0.0001 0.0000

Y -0.0004 0.0001 0.0007 -0.0001 -0.0001 0.0001  
Z 0.0052 -0.0027 -0.0054 0.0003 0.0006 -0.0005  
AT. 75 H X 0.0204 0.0104 -0.0220 0.0014 -0.0024 -0.0024  
Y 0.0385 0.0196 -0.0415 0.0027 -0.0045 -0.0039  
Z -0.0278 -0.0138 0.0300 -0.0020 0.0032 0.0029  
AT. 76 H X 0.0204 -0.0104 -0.0220 0.0014 0.0024 -0.0024  
Y 0.0385 -0.0196 -0.0415 0.0027 0.0045 -0.0039  
Z -0.0278 0.0138 0.0300 -0.0020 -0.0032 0.0029  
AT. 77 H X -0.0327 -0.0177 0.0328 -0.0021 0.0037 0.0023  
Y -0.0334 -0.0183 0.0331 -0.0021 0.0037 0.0024  
Z -0.0341 -0.0183 0.0341 -0.0022 0.0038 0.0023  
AT. 78 H X -0.0327 0.0177 0.0328 -0.0021 -0.0037 0.0023  
Y -0.0334 0.0183 0.0331 -0.0021 -0.0037 0.0024  
Z -0.0341 0.0183 0.0341 -0.0022 -0.0038 0.0023  
AT. 79 I X -0.0000 -0.0000 0.0000 -0.0000 -0.0000 0.0000  
Y -0.0000 -0.0000 -0.0000 0.0000 0.0000 0.0000  
Z 0.0000 -0.0000 -0.0000 0.0000 0.0000 -0.0000  
AT. 80 I X -0.0000 0.0000 0.0000 -0.0000 0.0000 0.0000  
Y -0.0000 0.0000 -0.0000 0.0000 -0.0000 0.0000  
Z 0.0000 0.0000 -0.0000 0.0000 -0.0000 -0.0000  
AT. 81 I X -0.0000 -0.0000 -0.0000 0.0000 0.0000 -0.0000  
Y 0.0000 0.0000 0.0000 -0.0000 -0.0000 -0.0000  
Z -0.0000 -0.0000 -0.0000 0.0000 0.0000 -0.0000  
AT. 82 I X -0.0000 0.0000 -0.0000 0.0000 -0.0000 -0.0000  
Y 0.0000 -0.0000 0.0000 -0.0000 0.0000 -0.0000  
Z -0.0000 0.0000 -0.0000 0.0000 -0.0000 -0.0000  
AT. 83 O X -0.0000 0.0000 0.0000 -0.0000 -0.0000 0.0000  
Y 0.0000 -0.0000 -0.0000 0.0000 0.0000 0.0000  
Z -0.0000 0.0000 0.0000 -0.0000 -0.0000 0.0000  
AT. 84 O X -0.0000 -0.0000 0.0000 -0.0000 0.0000 0.0000  
Y 0.0000 0.0000 -0.0000 0.0000 -0.0000 0.0000  
Z -0.0000 -0.0000 0.0000 -0.0000 0.0000 0.0000

AT. 85 O X -0.0000 -0.0000 -0.0000 0.0001 0.0001 0.0000  
Y -0.0000 -0.0000 -0.0000 0.0000 0.0000 0.0000  
Z -0.0000 -0.0000 -0.0000 -0.0000 -0.0000 -0.0000

AT. 86 O X -0.0000 0.0000 -0.0000 0.0001 -0.0001 0.0000  
Y -0.0000 0.0000 -0.0000 0.0000 -0.0000 0.0000  
Z -0.0000 0.0000 -0.0000 -0.0000 0.0000 -0.0000

AT. 87 N X -0.0000 0.0000 -0.0000 -0.0000 -0.0000 0.0000  
Y -0.0000 -0.0000 -0.0000 -0.0000 -0.0000 0.0000  
Z -0.0001 0.0000 0.0000 -0.0000 -0.0000 0.0000

AT. 88 N X -0.0000 -0.0000 -0.0000 -0.0000 0.0000 0.0000  
Y -0.0000 0.0000 -0.0000 -0.0000 0.0000 0.0000  
Z -0.0001 -0.0000 0.0000 -0.0000 0.0000 0.0000

AT. 89 N X 0.0000 0.0000 -0.0000 -0.0002 -0.0002 0.0000  
Y -0.0000 0.0000 0.0000 0.0001 0.0001 0.0000  
Z 0.0000 0.0000 -0.0000 -0.0002 -0.0002 -0.0000

AT. 90 N X 0.0000 -0.0000 -0.0000 -0.0002 0.0002 0.0000  
Y -0.0000 -0.0000 0.0000 0.0001 -0.0001 0.0000  
Z 0.0000 -0.0000 -0.0000 -0.0002 0.0002 -0.0000

AT. 91 C X 0.0000 -0.0000 -0.0000 0.0000 0.0000 -0.0000  
Y -0.0000 0.0000 0.0000 -0.0000 -0.0000 0.0000  
Z 0.0001 -0.0000 -0.0000 0.0000 0.0000 -0.0000

AT. 92 C X 0.0000 0.0000 -0.0000 0.0000 -0.0000 -0.0000  
Y -0.0000 -0.0000 0.0000 -0.0000 0.0000 0.0000  
Z 0.0001 0.0000 -0.0000 0.0000 -0.0000 -0.0000

AT. 93 C X 0.0000 0.0000 0.0000 0.0000 0.0000 -0.0000  
Y 0.0001 0.0000 0.0000 0.0000 0.0000 -0.0000  
Z 0.0000 0.0000 0.0000 0.0000 0.0000 -0.0000

AT. 94 C X 0.0000 -0.0000 0.0000 0.0000 -0.0000 -0.0000  
Y 0.0001 -0.0000 0.0000 0.0000 -0.0000 -0.0000  
Z 0.0000 -0.0000 0.0000 0.0000 -0.0000 -0.0000

AT. 95 H X -0.0005 -0.0001 -0.0001 -0.0001 -0.0001 0.0000  
Y -0.0009 -0.0002 -0.0001 -0.0002 -0.0002 0.0000

Z -0.0004 -0.0001 -0.0001 -0.0001 -0.0001 0.0000  
AT. 96 H X -0.0005 0.0001 -0.0001 -0.0001 0.0001 0.0000  
Y -0.0009 0.0002 -0.0001 -0.0002 0.0002 0.0000  
Z -0.0004 0.0001 -0.0001 -0.0001 0.0001 0.0000  
AT. 97 H X 0.0001 0.0000 0.0000 0.0000 0.0000 0.0000  
Y 0.0000 -0.0000 -0.0000 -0.0000 0.0000 -0.0000  
Z 0.0002 0.0001 0.0000 0.0000 0.0000 0.0000  
AT. 98 H X 0.0001 -0.0000 0.0000 0.0000 -0.0000 0.0000  
Y 0.0000 0.0000 -0.0000 -0.0000 -0.0000 -0.0000  
Z 0.0002 -0.0001 0.0000 0.0000 -0.0000 0.0000  
AT. 99 C X -0.0000 -0.0000 -0.0000 -0.0000 -0.0000 -0.0000  
Y 0.0000 -0.0000 -0.0000 -0.0002 -0.0002 -0.0000  
Z -0.0000 0.0000 0.0000 0.0002 0.0002 0.0000  
AT. 100 C X -0.0000 0.0000 -0.0000 -0.0000 0.0000 -0.0000  
Y 0.0000 0.0000 -0.0000 -0.0002 0.0002 -0.0000  
Z -0.0000 -0.0000 0.0000 0.0002 -0.0002 0.0000  
AT. 101 C X 0.0000 0.0000 0.0000 -0.0000 -0.0000 -0.0000  
Y 0.0000 0.0000 0.0000 0.0000 0.0000 0.0000  
Z 0.0000 0.0000 0.0000 -0.0000 -0.0000 0.0000  
AT. 102 C X 0.0000 -0.0000 0.0000 -0.0000 0.0000 -0.0000  
Y 0.0000 -0.0000 0.0000 0.0000 -0.0000 0.0000  
Z 0.0000 -0.0000 0.0000 -0.0000 0.0000 0.0000  
AT. 103 H X -0.0000 0.0000 0.0000 -0.0001 -0.0001 -0.0000  
Y -0.0003 -0.0002 -0.0002 -0.0003 -0.0003 -0.0000  
Z -0.0000 -0.0000 -0.0000 0.0000 0.0000 -0.0000  
AT. 104 H X -0.0000 -0.0000 0.0000 -0.0001 0.0001 -0.0000  
Y -0.0003 0.0002 -0.0002 -0.0003 0.0003 -0.0000  
Z -0.0000 0.0000 -0.0000 0.0000 -0.0000 -0.0000  
AT. 105 H X 0.0001 0.0000 -0.0000 -0.0000 -0.0000 0.0000  
Y 0.0001 0.0000 -0.0000 0.0001 0.0000 0.0000  
Z -0.0002 -0.0001 -0.0001 -0.0002 -0.0001 -0.0001  
AT. 106 H X 0.0001 -0.0000 -0.0000 -0.0000 0.0000 0.0000

Y 0.0001 -0.0000 -0.0000 0.0001 -0.0000 0.0000  
Z -0.0002 0.0001 -0.0001 -0.0002 0.0001 -0.0001  
AT. 107 C X 0.0000 -0.0000 -0.0000 0.0000 -0.0000 -0.0000  
Y -0.0002 -0.0000 -0.0003 -0.0003 -0.0003 0.0001  
Z 0.0000 0.0000 0.0001 0.0001 0.0001 -0.0000  
AT. 108 C X 0.0000 0.0000 -0.0000 0.0000 0.0000 -0.0000  
Y -0.0002 0.0000 -0.0003 -0.0003 0.0003 0.0001  
Z 0.0000 -0.0000 0.0001 0.0001 -0.0001 -0.0000  
AT. 109 H X -0.0006 -0.0001 -0.0006 -0.0007 -0.0008 0.0002  
Y 0.0019 0.0005 0.0033 0.0032 0.0041 -0.0008  
Z -0.0011 -0.0003 -0.0019 -0.0019 -0.0024 0.0005  
AT. 110 H X -0.0006 0.0001 -0.0006 -0.0007 0.0008 0.0002  
Y 0.0019 -0.0005 0.0033 0.0032 -0.0041 -0.0008  
Z -0.0011 0.0003 -0.0019 -0.0019 0.0024 0.0005  
AT. 111 H X 0.0005 0.0002 0.0010 0.0007 0.0010 0.0000  
Y -0.0000 0.0000 0.0002 0.0001 0.0001 0.0000  
Z 0.0005 0.0001 0.0009 0.0007 0.0009 -0.0000  
AT. 112 H X 0.0005 -0.0002 0.0010 0.0007 -0.0010 0.0000  
Y -0.0000 -0.0000 0.0002 0.0001 -0.0001 0.0000  
Z 0.0005 -0.0001 0.0009 0.0007 -0.0009 -0.0000  
AT. 113 C X -0.0000 0.0000 0.0000 0.0000 0.0000 -0.0000  
Y 0.0000 -0.0000 -0.0000 -0.0000 -0.0000 0.0000  
Z -0.0000 -0.0000 0.0000 -0.0000 -0.0000 -0.0000  
AT. 114 C X -0.0000 -0.0000 0.0000 0.0000 -0.0000 -0.0000  
Y 0.0000 0.0000 -0.0000 -0.0000 0.0000 0.0000  
Z -0.0000 0.0000 0.0000 -0.0000 0.0000 -0.0000  
AT. 115 C X -0.0000 0.0000 0.0000 0.0004 0.0004 -0.0000  
Y 0.0000 -0.0000 -0.0000 -0.0004 -0.0004 -0.0000  
Z -0.0000 -0.0000 -0.0000 -0.0004 -0.0004 0.0000  
AT. 116 C X -0.0000 -0.0000 0.0000 0.0004 -0.0004 -0.0000  
Y 0.0000 0.0000 -0.0000 -0.0004 0.0004 -0.0000  
Z -0.0000 0.0000 -0.0000 -0.0004 0.0004 0.0000



AT.117 H X 0.0000 -0.0001 -0.0002 -0.0014 -0.0015 -0.0000  
Y 0.0000 -0.0000 -0.0000 -0.0004 -0.0004 -0.0000  
Z 0.0000 -0.0001 -0.0002 -0.0013 -0.0014 -0.0000

AT.118 H X 0.0000 0.0001 -0.0002 -0.0014 0.0015 -0.0000  
Y 0.0000 0.0000 -0.0000 -0.0004 0.0004 -0.0000  
Z 0.0000 0.0001 -0.0002 -0.0013 0.0014 -0.0000

AT.119 H X 0.0000 -0.0002 -0.0003 -0.0033 -0.0036 0.0000  
Y -0.0000 0.0004 0.0005 0.0054 0.0059 -0.0000  
Z -0.0000 0.0005 0.0006 0.0057 0.0063 -0.0000

AT.120 H X 0.0000 0.0002 -0.0003 -0.0033 0.0036 0.0000  
Y -0.0000 -0.0004 0.0005 0.0054 -0.0059 -0.0000  
Z -0.0000 -0.0005 0.0006 0.0057 -0.0063 -0.0000

AT.121 C X 0.0001 0.0000 -0.0000 -0.0005 -0.0005 0.0000  
Y 0.0007 -0.0000 -0.0006 -0.0073 -0.0077 0.0000  
Z 0.0005 -0.0000 -0.0004 -0.0049 -0.0052 0.0000

AT.122 C X 0.0001 -0.0000 -0.0000 -0.0005 0.0005 0.0000  
Y 0.0007 0.0000 -0.0006 -0.0073 0.0077 0.0000  
Z 0.0005 0.0000 -0.0004 -0.0049 0.0052 0.0000

AT.123 H X 0.0014 -0.0000 -0.0012 -0.0145 -0.0153 0.0000  
Y -0.0076 0.0003 0.0069 0.0804 0.0845 -0.0002  
Z -0.0075 0.0003 0.0068 0.0792 0.0831 -0.0002

AT.124 H X 0.0014 0.0000 -0.0012 -0.0145 0.0153 0.0000  
Y -0.0076 -0.0003 0.0069 0.0804 -0.0845 -0.0002  
Z -0.0075 -0.0003 0.0068 0.0792 -0.0831 -0.0002

AT.125 H X -0.0022 -0.0001 0.0018 0.0226 0.0236 -0.0001  
Y -0.0007 0.0000 0.0006 0.0075 0.0078 -0.0000  
Z 0.0019 0.0001 -0.0015 -0.0193 -0.0201 0.0001

AT.126 H X -0.0022 0.0001 0.0018 0.0226 -0.0236 -0.0001  
Y -0.0007 -0.0000 0.0006 0.0075 -0.0078 -0.0000  
Z 0.0019 -0.0001 -0.0015 -0.0193 0.0201 0.0001

AT.127 C X -0.0000 -0.0000 0.0000 0.0000 0.0000 0.0000  
Y 0.0001 -0.0000 -0.0000 -0.0001 -0.0001 -0.0000

Z -0.0000 -0.0000 -0.0000 -0.0002 -0.0002 0.0000  
AT. 128 C X -0.0000 0.0000 0.0000 0.0000 -0.0000 0.0000  
Y 0.0001 0.0000 -0.0000 -0.0001 0.0001 -0.0000  
Z -0.0000 0.0000 -0.0000 -0.0002 0.0002 0.0000  
AT. 129 C X -0.0020 0.0001 0.0001 -0.0005 -0.0006 0.0001  
Y 0.0032 -0.0002 -0.0001 0.0008 0.0010 -0.0001  
Z -0.0016 0.0001 0.0001 -0.0003 -0.0004 0.0001  
AT. 130 C X -0.0020 -0.0001 0.0001 -0.0005 0.0006 0.0001  
Y 0.0032 0.0002 -0.0001 0.0008 -0.0010 -0.0001  
Z -0.0016 -0.0001 0.0001 -0.0003 0.0004 0.0001  
AT. 131 H X 0.0114 -0.0006 -0.0004 0.0030 0.0035 -0.0005  
Y 0.0045 -0.0002 -0.0001 0.0012 0.0014 -0.0002  
Z -0.0087 0.0004 0.0003 -0.0022 -0.0027 0.0004  
AT. 132 H X 0.0114 0.0006 -0.0004 0.0030 -0.0035 -0.0005  
Y 0.0045 0.0002 -0.0001 0.0012 -0.0014 -0.0002  
Z -0.0087 -0.0004 0.0003 -0.0022 0.0027 0.0004  
AT. 133 H X 0.0125 -0.0006 -0.0004 0.0030 0.0037 -0.0005  
Y -0.0426 0.0020 0.0013 -0.0102 -0.0128 0.0016  
Z 0.0273 -0.0013 -0.0008 0.0066 0.0081 -0.0010  
AT. 134 H X 0.0125 0.0006 -0.0004 0.0030 -0.0037 -0.0005  
Y -0.0426 -0.0020 0.0013 -0.0102 0.0128 0.0016  
Z 0.0273 0.0013 -0.0008 0.0066 -0.0081 -0.0010  
AT. 135 C X -0.0000 -0.0000 0.0000 0.0001 0.0000 -0.0000  
Y 0.0000 -0.0000 0.0000 -0.0000 -0.0000 -0.0000  
Z -0.0000 0.0000 -0.0000 0.0000 0.0000 0.0000  
AT. 136 C X -0.0000 0.0000 0.0000 0.0001 -0.0000 -0.0000  
Y 0.0000 0.0000 0.0000 -0.0000 0.0000 -0.0000  
Z -0.0000 -0.0000 -0.0000 0.0000 -0.0000 0.0000  
AT. 137 H X -0.0000 -0.0001 0.0001 0.0000 -0.0000 -0.0000  
Y 0.0001 0.0005 -0.0004 -0.0001 0.0000 0.0001  
Z -0.0001 -0.0003 0.0002 0.0001 -0.0000 -0.0001  
AT. 138 H X -0.0000 0.0001 0.0001 0.0000 0.0000 -0.0000

Y 0.0001 -0.0005 -0.0004 -0.0001 -0.0000 0.0001  
Z -0.0001 0.0003 0.0002 0.0001 0.0000 -0.0001  
AT. 139 H X 0.0004 0.0005 -0.0004 -0.0004 -0.0004 0.0001  
Y 0.0000 0.0001 -0.0001 -0.0001 -0.0001 0.0000  
Z 0.0003 0.0004 -0.0003 -0.0003 -0.0003 0.0001  
AT. 140 H X 0.0004 -0.0005 -0.0004 -0.0004 0.0004 0.0001  
Y 0.0000 -0.0001 -0.0001 -0.0001 0.0001 0.0000  
Z 0.0003 -0.0004 -0.0003 -0.0003 0.0003 0.0001  
AT. 141 H X 0.0000 0.0001 -0.0001 -0.0002 -0.0001 0.0000  
Y -0.0001 -0.0004 0.0004 0.0003 0.0003 -0.0001  
Z -0.0001 -0.0003 0.0003 0.0003 0.0003 -0.0001  
AT. 142 H X 0.0000 -0.0001 -0.0001 -0.0002 0.0001 0.0000  
Y -0.0001 0.0004 0.0004 0.0003 -0.0003 -0.0001  
Z -0.0001 0.0003 0.0003 0.0003 -0.0003 -0.0001  
AT. 143 C X 0.0005 0.0001 0.0002 0.0031 0.0026 -0.0001  
Y 0.0001 0.0000 0.0001 0.0011 0.0010 -0.0000  
Z 0.0002 0.0000 0.0001 0.0011 0.0008 -0.0000  
AT. 144 C X 0.0005 -0.0001 0.0002 0.0031 -0.0026 -0.0001  
Y 0.0001 -0.0000 0.0001 0.0011 -0.0010 -0.0000  
Z 0.0002 -0.0000 0.0001 0.0011 -0.0008 -0.0000  
AT. 145 H X 0.0010 0.0002 0.0004 0.0075 0.0061 -0.0002  
Y -0.0036 -0.0006 -0.0014 -0.0255 -0.0205 0.0008  
Z -0.0033 -0.0006 -0.0013 -0.0235 -0.0189 0.0007  
AT. 146 H X 0.0010 -0.0002 0.0004 0.0075 -0.0061 -0.0002  
Y -0.0036 0.0006 -0.0014 -0.0255 0.0205 0.0008  
Z -0.0033 0.0006 -0.0013 -0.0235 0.0189 0.0007  
AT. 147 H X -0.0055 -0.0008 -0.0019 -0.0370 -0.0303 0.0011  
Y -0.0020 -0.0003 -0.0007 -0.0138 -0.0113 0.0004  
Z 0.0041 0.0006 0.0014 0.0273 0.0224 -0.0008  
AT. 148 H X -0.0055 0.0008 -0.0019 -0.0370 0.0303 0.0011  
Y -0.0020 0.0003 -0.0007 -0.0138 0.0113 0.0004  
Z 0.0041 -0.0006 0.0014 0.0273 -0.0224 -0.0008

AT. 149 H X -0.0012 -0.0002 -0.0004 -0.0071 -0.0056 0.0002  
Y 0.0045 0.0007 0.0013 0.0263 0.0209 -0.0009  
Z -0.0025 -0.0004 -0.0007 -0.0150 -0.0118 0.0005

AT. 150 H X -0.0012 0.0002 -0.0004 -0.0071 0.0056 0.0002  
Y 0.0045 -0.0007 0.0013 0.0263 -0.0209 -0.0009  
Z -0.0025 0.0004 -0.0007 -0.0150 0.0118 0.0005

AT. 151 C X 0.0000 -0.0000 0.0000 0.0001 0.0001 -0.0000  
Y -0.0001 0.0000 -0.0000 -0.0002 -0.0001 0.0000  
Z -0.0000 -0.0000 -0.0001 -0.0009 -0.0009 -0.0000

AT. 152 C X 0.0000 0.0000 0.0000 0.0001 -0.0001 -0.0000  
Y -0.0001 -0.0000 -0.0000 -0.0002 0.0001 0.0000  
Z -0.0000 0.0000 -0.0001 -0.0009 0.0009 -0.0000

AT. 153 H X -0.0003 0.0001 0.0001 0.0015 0.0016 0.0000  
Y 0.0006 -0.0003 -0.0004 -0.0056 -0.0060 -0.0001  
Z -0.0003 0.0002 0.0003 0.0033 0.0036 0.0001

AT. 154 H X -0.0003 -0.0001 0.0001 0.0015 -0.0016 0.0000  
Y 0.0006 0.0003 -0.0004 -0.0056 0.0060 -0.0001  
Z -0.0003 -0.0002 0.0003 0.0033 -0.0036 0.0001

AT. 155 H X -0.0002 -0.0001 -0.0002 -0.0029 -0.0027 -0.0000  
Y 0.0007 0.0002 0.0005 0.0082 0.0075 0.0001  
Z 0.0007 0.0002 0.0005 0.0079 0.0073 0.0001

AT. 156 H X -0.0002 0.0001 -0.0002 -0.0029 0.0027 -0.0000  
Y 0.0007 -0.0002 0.0005 0.0082 -0.0075 0.0001  
Z 0.0007 -0.0002 0.0005 0.0079 -0.0073 0.0001

AT. 157 O X -0.0000 -0.0000 -0.0000 -0.0000 0.0000 0.0000  
Y 0.0000 -0.0000 0.0000 0.0000 -0.0000 -0.0000  
Z 0.0000 0.0000 0.0000 0.0000 -0.0000 -0.0000

AT. 158 O X -0.0000 0.0000 -0.0000 -0.0000 -0.0000 0.0000  
Y 0.0000 0.0000 0.0000 0.0000 0.0000 -0.0000  
Z 0.0000 -0.0000 0.0000 0.0000 0.0000 -0.0000

AT. 159 O X 0.0000 -0.0000 0.0000 -0.0000 -0.0000 0.0000  
Y 0.0000 0.0000 -0.0000 0.0000 0.0000 -0.0000

Z -0.0000 -0.0001 0.0001 -0.0000 -0.0000 0.0000  
AT.160 O X 0.0000 0.0000 0.0000 -0.0000 0.0000 0.0000  
Y 0.0000 -0.0000 -0.0000 0.0000 -0.0000 -0.0000  
Z -0.0000 0.0001 0.0001 -0.0000 0.0000 0.0000  
AT.161 H X -0.0000 -0.0000 0.0001 0.0000 0.0000 -0.0000  
Y -0.0004 0.0001 -0.0005 -0.0003 0.0002 0.0002  
Z -0.0001 0.0000 -0.0001 -0.0001 0.0000 0.0001  
AT.162 H X -0.0000 0.0000 0.0001 0.0000 -0.0000 -0.0000  
Y -0.0004 -0.0001 -0.0005 -0.0003 -0.0002 0.0002  
Z -0.0001 -0.0000 -0.0001 -0.0001 -0.0000 0.0001  
AT.163 H X -0.0000 0.0003 -0.0004 0.0001 -0.0000 -0.0001  
Y -0.0000 -0.0002 0.0003 -0.0000 -0.0001 0.0001  
Z 0.0000 0.0010 -0.0011 0.0002 0.0002 -0.0003  
AT.164 H X -0.0000 -0.0003 -0.0004 0.0001 0.0000 -0.0001  
Y -0.0000 0.0002 0.0003 -0.0000 0.0001 0.0001  
Z 0.0000 -0.0010 -0.0011 0.0002 -0.0002 -0.0003  
AT.165 O X 0.0000 -0.0000 -0.0000 0.0000 0.0000 -0.0001  
Y 0.0000 -0.0000 -0.0000 0.0000 0.0000 -0.0001  
Z 0.0000 -0.0000 -0.0000 0.0000 0.0000 -0.0000  
AT.166 O X 0.0000 0.0000 -0.0000 0.0000 -0.0000 -0.0001  
Y 0.0000 0.0000 -0.0000 0.0000 -0.0000 -0.0001  
Z 0.0000 0.0000 -0.0000 0.0000 -0.0000 -0.0000  
AT.167 H X -0.0003 0.0002 0.0004 -0.0002 -0.0001 0.0010  
Y -0.0002 0.0001 0.0003 -0.0001 -0.0000 0.0004  
Z -0.0001 0.0001 0.0001 -0.0001 -0.0000 0.0003  
AT.168 H X -0.0003 -0.0002 0.0004 -0.0002 0.0001 0.0010  
Y -0.0002 -0.0001 0.0003 -0.0001 0.0000 0.0004  
Z -0.0001 -0.0001 0.0001 -0.0001 0.0000 0.0003  
AT.169 O X -0.0001 0.0000 0.0000 0.0000 -0.0000 0.0000  
Y 0.0001 -0.0001 -0.0000 -0.0000 0.0000 -0.0000  
Z -0.0001 0.0001 0.0000 0.0000 -0.0000 0.0000  
AT.170 O X -0.0001 -0.0000 0.0000 0.0000 0.0000 0.0000

Y 0.0001 0.0001 -0.0000 -0.0000 -0.0000 -0.0000  
Z -0.0001 -0.0001 0.0000 0.0000 0.0000 0.0000  
AT. 171 H X 0.0007 -0.0006 -0.0002 -0.0003 0.0003 -0.0003  
Y -0.0016 0.0016 0.0004 0.0006 -0.0006 0.0007  
Z 0.0008 -0.0008 -0.0002 -0.0003 0.0003 -0.0004  
AT. 172 H X 0.0007 0.0006 -0.0002 -0.0003 -0.0003 -0.0003  
Y -0.0016 -0.0016 0.0004 0.0006 0.0006 0.0007  
Z 0.0008 0.0008 -0.0002 -0.0003 -0.0003 -0.0004

FREQ(CM\*\*<sup>-1</sup>) 2973.80 2973.98 2976.36 2976.45 2977.62 2977.85

AT. 1 I X 0.0000 0.0000 -0.0000 0.0000 0.0000 0.0000  
Y -0.0000 -0.0000 0.0000 0.0000 0.0000 -0.0000  
Z 0.0000 -0.0000 0.0000 0.0000 0.0000 0.0000  
AT. 2 I X -0.0000 -0.0000 0.0000 0.0000 0.0000 -0.0000  
Y 0.0000 0.0000 -0.0000 0.0000 0.0000 0.0000  
Z -0.0000 0.0000 -0.0000 0.0000 0.0000 -0.0000  
AT. 3 I X -0.0000 0.0000 0.0000 0.0000 0.0000 0.0000  
Y -0.0000 0.0000 0.0000 -0.0000 0.0000 -0.0000  
Z 0.0000 -0.0000 0.0000 0.0000 0.0000 -0.0000  
AT. 4 I X 0.0000 -0.0000 -0.0000 0.0000 0.0000 -0.0000  
Y 0.0000 -0.0000 -0.0000 -0.0000 0.0000 0.0000  
Z -0.0000 0.0000 -0.0000 0.0000 0.0000 0.0000  
AT. 5 O X -0.0000 0.0000 0.0000 0.0000 -0.0000 0.0000  
Y 0.0000 0.0000 -0.0000 -0.0000 0.0000 -0.0000  
Z 0.0000 -0.0000 -0.0000 -0.0000 0.0000 -0.0000  
AT. 6 O X 0.0000 -0.0000 -0.0000 0.0000 -0.0000 -0.0000  
Y -0.0000 -0.0000 0.0000 -0.0000 0.0000 0.0000  
Z -0.0000 0.0000 0.0000 -0.0000 0.0000 0.0000  
AT. 7 O X -0.0000 -0.0000 -0.0000 0.0000 0.0000 -0.0000  
Y 0.0000 0.0000 0.0000 -0.0000 -0.0000 -0.0000  
Z -0.0000 0.0000 -0.0000 0.0000 0.0000 -0.0000

AT. 8 O X 0.0000 0.0000 0.0000 0.0000 0.0000 0.0000  
Y -0.0000 -0.0000 -0.0000 -0.0000 -0.0000 0.0000  
Z 0.0000 -0.0000 0.0000 0.0000 0.0000 0.0000

AT. 9 N X -0.0000 0.0000 -0.0000 0.0000 0.0000 0.0000  
Y 0.0001 -0.0001 -0.0000 0.0000 0.0000 0.0000  
Z 0.0001 -0.0001 -0.0001 -0.0000 0.0002 -0.0000

AT. 10 N X 0.0000 -0.0000 0.0000 0.0000 0.0000 -0.0000  
Y -0.0001 0.0001 0.0000 0.0000 0.0000 -0.0000  
Z -0.0001 0.0001 0.0001 -0.0000 0.0002 0.0000

AT. 11 N X 0.0000 0.0001 -0.0000 0.0000 -0.0000 -0.0000  
Y 0.0000 -0.0000 0.0000 -0.0000 -0.0001 -0.0000  
Z -0.0000 -0.0000 -0.0000 0.0000 0.0001 0.0000

AT. 12 N X -0.0000 -0.0001 0.0000 0.0000 -0.0000 0.0000  
Y -0.0000 0.0000 -0.0000 -0.0000 -0.0001 0.0000  
Z 0.0000 0.0000 0.0000 0.0000 0.0001 -0.0000

AT. 13 C X -0.0000 0.0000 0.0000 -0.0000 0.0000 -0.0000  
Y 0.0000 -0.0000 -0.0000 0.0000 0.0000 0.0000  
Z -0.0001 0.0001 0.0001 0.0000 -0.0002 0.0000

AT. 14 C X 0.0000 -0.0000 -0.0000 -0.0000 0.0000 0.0000  
Y -0.0000 0.0000 0.0000 0.0000 0.0000 -0.0000  
Z 0.0001 -0.0001 -0.0001 0.0000 -0.0002 -0.0000

AT. 15 C X 0.0000 -0.0000 -0.0000 0.0000 0.0000 -0.0000  
Y -0.0001 0.0001 0.0001 0.0000 -0.0001 -0.0000  
Z -0.0001 0.0001 0.0000 -0.0000 -0.0000 0.0000

AT. 16 C X -0.0000 0.0000 0.0000 0.0000 0.0000 0.0000  
Y 0.0001 -0.0001 -0.0001 0.0000 -0.0001 0.0000  
Z 0.0001 -0.0001 -0.0000 -0.0000 -0.0000 -0.0000

AT. 17 H X -0.0003 0.0002 0.0002 0.0000 -0.0002 0.0000  
Y 0.0011 -0.0010 -0.0007 -0.0000 0.0008 0.0000  
Z 0.0007 -0.0007 -0.0005 -0.0000 0.0005 0.0000

AT. 18 H X 0.0003 -0.0002 -0.0002 0.0000 -0.0002 -0.0000  
Y -0.0011 0.0010 0.0007 -0.0000 0.0008 -0.0000

Z -0.0007 0.0007 0.0005 -0.0000 0.0005 -0.0000  
AT. 19 H X 0.0001 -0.0001 -0.0001 -0.0000 0.0001 0.0000  
Y 0.0001 -0.0001 -0.0000 0.0000 0.0000 0.0000  
Z -0.0004 0.0004 0.0003 0.0000 -0.0003 -0.0001  
AT. 20 H X -0.0001 0.0001 0.0001 -0.0000 0.0001 -0.0000  
Y -0.0001 0.0001 0.0000 0.0000 0.0000 -0.0000  
Z 0.0004 -0.0004 -0.0003 0.0000 -0.0003 0.0001  
AT. 21 C X 0.0000 0.0000 -0.0000 -0.0000 -0.0000 -0.0000  
Y -0.0000 -0.0000 -0.0000 0.0000 0.0001 0.0000  
Z 0.0000 0.0000 0.0001 -0.0000 -0.0001 -0.0000  
AT. 22 C X -0.0000 -0.0000 0.0000 -0.0000 -0.0000 0.0000  
Y 0.0000 0.0000 0.0000 0.0000 0.0001 -0.0000  
Z -0.0000 -0.0000 -0.0001 -0.0000 -0.0001 0.0000  
AT. 23 C X 0.0000 -0.0000 0.0000 -0.0000 -0.0000 0.0000  
Y -0.0000 0.0000 -0.0000 0.0000 0.0000 0.0000  
Z -0.0000 0.0000 -0.0000 -0.0000 0.0000 0.0000  
AT. 24 C X -0.0000 0.0000 -0.0000 -0.0000 -0.0000 -0.0000  
Y 0.0000 -0.0000 0.0000 0.0000 0.0000 -0.0000  
Z 0.0000 -0.0000 0.0000 -0.0000 0.0000 -0.0000  
AT. 25 H X -0.0000 0.0000 -0.0000 0.0000 -0.0000 0.0000  
Y 0.0001 -0.0002 0.0001 0.0000 0.0000 -0.0002  
Z 0.0000 -0.0000 0.0000 -0.0000 -0.0000 -0.0000  
AT. 26 H X 0.0000 -0.0000 0.0000 0.0000 -0.0000 -0.0000  
Y -0.0001 0.0002 -0.0001 0.0000 0.0000 0.0002  
Z -0.0000 0.0000 -0.0000 -0.0000 -0.0000 0.0000  
AT. 27 H X 0.0000 -0.0000 0.0000 0.0000 -0.0000 -0.0000  
Y -0.0000 0.0000 -0.0001 -0.0001 -0.0000 0.0001  
Z 0.0000 -0.0001 0.0001 0.0001 0.0000 -0.0001  
AT. 28 H X -0.0000 0.0000 -0.0000 0.0000 -0.0000 0.0000  
Y 0.0000 -0.0000 0.0001 -0.0001 -0.0000 -0.0001  
Z -0.0000 0.0001 -0.0001 0.0001 0.0000 0.0001  
AT. 29 C X 0.0002 -0.0003 0.0005 -0.0000 -0.0005 -0.0000



Y 0.0006 -0.0006 0.0019 -0.0001 -0.0020 -0.0000  
Z -0.0001 0.0003 -0.0007 0.0000 0.0007 0.0000  
AT. 30 C X -0.0002 0.0003 -0.0005 -0.0000 -0.0005 0.0000  
Y -0.0006 0.0006 -0.0019 -0.0001 -0.0020 0.0000  
Z 0.0001 -0.0003 0.0007 0.0000 0.0007 -0.0000  
AT. 31 H X -0.0031 0.0030 -0.0085 0.0004 0.0093 0.0002  
Y -0.0062 0.0062 -0.0200 0.0008 0.0219 0.0005  
Z 0.0042 -0.0043 0.0136 -0.0006 -0.0148 -0.0003  
AT. 32 H X 0.0031 -0.0030 0.0085 0.0004 0.0093 -0.0002  
Y 0.0062 -0.0062 0.0200 0.0008 0.0219 -0.0005  
Z -0.0042 0.0043 -0.0136 -0.0006 -0.0148 0.0003  
AT. 33 H X 0.0015 -0.0004 0.0034 -0.0001 -0.0036 0.0001  
Y -0.0008 0.0002 -0.0020 0.0001 0.0022 -0.0000  
Z -0.0022 0.0010 -0.0052 0.0002 0.0055 -0.0000  
AT. 34 H X -0.0015 0.0004 -0.0034 -0.0001 -0.0036 -0.0001  
Y 0.0008 -0.0002 0.0020 0.0001 0.0022 0.0000  
Z 0.0022 -0.0010 0.0052 0.0002 0.0055 0.0000  
AT. 35 C X -0.0001 -0.0001 0.0000 0.0000 -0.0000 0.0000  
Y 0.0000 0.0000 0.0000 0.0000 -0.0000 -0.0000  
Z -0.0001 -0.0001 -0.0000 0.0000 0.0000 -0.0000  
AT. 36 C X 0.0001 0.0001 -0.0000 0.0000 -0.0000 -0.0000  
Y -0.0000 -0.0000 -0.0000 0.0000 -0.0000 0.0000  
Z 0.0001 0.0001 0.0000 0.0000 0.0000 0.0000  
AT. 37 C X -0.0007 0.0006 -0.0012 0.0001 0.0015 -0.0000  
Y -0.0003 0.0005 -0.0007 0.0000 0.0009 -0.0000  
Z -0.0002 0.0004 -0.0006 0.0000 0.0008 -0.0000  
AT. 38 C X 0.0007 -0.0006 0.0012 0.0001 0.0015 0.0000  
Y 0.0003 -0.0005 0.0007 0.0000 0.0009 0.0000  
Z 0.0002 -0.0004 0.0006 0.0000 0.0008 0.0000  
AT. 39 H X 0.0018 -0.0007 0.0024 -0.0002 -0.0030 0.0001  
Y -0.0013 0.0005 -0.0018 0.0002 0.0022 -0.0000  
Z -0.0029 0.0015 -0.0041 0.0003 0.0051 -0.0001

AT. 40 H X -0.0018 0.0007 -0.0024 -0.0002 -0.0030 -0.0001  
Y 0.0013 -0.0005 0.0018 0.0002 0.0022 0.0000  
Z 0.0029 -0.0015 0.0041 0.0003 0.0051 0.0001

AT. 41 H X 0.0062 -0.0071 0.0119 -0.0008 -0.0152 0.0002  
Y 0.0048 -0.0057 0.0093 -0.0006 -0.0118 0.0001  
Z 0.0060 -0.0070 0.0116 -0.0008 -0.0148 0.0002

AT. 42 H X -0.0062 0.0071 -0.0119 -0.0008 -0.0152 -0.0002  
Y -0.0048 0.0057 -0.0093 -0.0006 -0.0118 -0.0001  
Z -0.0060 0.0070 -0.0116 -0.0008 -0.0148 -0.0002

AT. 43 C X -0.0002 -0.0005 0.0000 0.0000 0.0003 0.0000  
Y -0.0010 -0.0017 -0.0002 0.0001 0.0012 0.0000  
Z -0.0006 -0.0009 -0.0000 0.0000 0.0006 0.0000

AT. 44 C X 0.0002 0.0005 -0.0000 0.0000 0.0003 -0.0000  
Y 0.0010 0.0017 0.0002 0.0001 0.0012 -0.0000  
Z 0.0006 0.0009 0.0000 0.0000 0.0006 -0.0000

AT. 45 H X 0.0072 0.0118 0.0009 -0.0006 -0.0080 -0.0002  
Y 0.0097 0.0156 0.0013 -0.0008 -0.0108 -0.0002  
Z 0.0100 0.0162 0.0014 -0.0008 -0.0112 -0.0002

AT. 46 H X -0.0072 -0.0118 -0.0009 -0.0006 -0.0080 0.0002  
Y -0.0097 -0.0156 -0.0013 -0.0008 -0.0108 0.0002  
Z -0.0100 -0.0162 -0.0014 -0.0008 -0.0112 0.0002

AT. 47 H X -0.0045 -0.0069 -0.0012 0.0004 0.0047 -0.0000  
Y 0.0031 0.0046 0.0008 -0.0003 -0.0032 0.0000  
Z -0.0031 -0.0049 -0.0007 0.0003 0.0033 0.0000

AT. 48 H X 0.0045 0.0069 0.0012 0.0004 0.0047 0.0000  
Y -0.0031 -0.0046 -0.0008 -0.0003 -0.0032 -0.0000  
Z 0.0031 0.0049 0.0007 0.0003 0.0033 -0.0000

AT. 49 C X 0.0000 0.0000 0.0001 0.0000 -0.0000 0.0000  
Y -0.0001 0.0001 0.0000 0.0000 -0.0000 -0.0000  
Z -0.0000 -0.0001 -0.0001 0.0000 0.0001 -0.0000

AT. 50 C X -0.0000 -0.0000 -0.0001 0.0000 -0.0000 -0.0000  
Y 0.0001 -0.0001 -0.0000 0.0000 -0.0000 0.0000

Z 0.0000 0.0001 0.0001 0.0000 0.0001 0.0000  
AT. 51 C X -0.0041 0.0035 0.0029 -0.0000 -0.0030 -0.0000  
Y -0.0042 0.0034 0.0029 -0.0000 -0.0031 -0.0000  
Z 0.0032 -0.0026 -0.0022 0.0000 0.0024 0.0000  
AT. 52 C X 0.0041 -0.0035 -0.0029 -0.0000 -0.0030 0.0000  
Y 0.0042 -0.0034 -0.0029 -0.0000 -0.0031 0.0000  
Z -0.0032 0.0026 0.0022 0.0000 0.0024 -0.0000  
AT. 53 H X 0.0172 -0.0156 -0.0122 0.0001 0.0125 -0.0000  
Y -0.0128 0.0114 0.0091 -0.0001 -0.0092 0.0000  
Z 0.0104 -0.0092 -0.0072 0.0000 0.0074 0.0000  
AT. 54 H X -0.0172 0.0156 0.0122 0.0001 0.0125 0.0000  
Y 0.0128 -0.0114 -0.0091 -0.0001 -0.0092 -0.0000  
Z -0.0104 0.0092 0.0072 0.0000 0.0074 -0.0000  
AT. 55 H X 0.0317 -0.0263 -0.0223 0.0003 0.0236 0.0003  
Y 0.0618 -0.0510 -0.0431 0.0006 0.0458 0.0005  
Z -0.0491 0.0404 0.0343 -0.0004 -0.0363 -0.0003  
AT. 56 H X -0.0317 0.0263 0.0223 0.0003 0.0236 -0.0003  
Y -0.0618 0.0510 0.0431 0.0006 0.0458 -0.0005  
Z 0.0491 -0.0404 -0.0343 -0.0004 -0.0363 0.0003  
AT. 57 C X 0.0007 0.0040 -0.0026 0.0001 0.0034 -0.0001  
Y -0.0007 -0.0036 0.0024 -0.0001 -0.0032 0.0001  
Z 0.0002 0.0005 -0.0004 0.0000 0.0004 -0.0000  
AT. 58 C X -0.0007 -0.0040 0.0026 0.0001 0.0034 0.0001  
Y 0.0007 0.0036 -0.0024 -0.0001 -0.0032 -0.0001  
Z -0.0002 -0.0005 0.0004 0.0000 0.0004 0.0000  
AT. 59 H X 0.0050 0.0223 -0.0152 0.0006 0.0193 -0.0006  
Y 0.0095 0.0433 -0.0300 0.0011 0.0380 -0.0011  
Z -0.0065 -0.0297 0.0205 -0.0008 -0.0259 0.0008  
AT. 60 H X -0.0050 -0.0223 0.0152 0.0006 0.0193 0.0006  
Y -0.0095 -0.0433 0.0300 0.0011 0.0380 0.0011  
Z 0.0065 0.0297 -0.0205 -0.0008 -0.0259 -0.0008  
AT. 61 H X -0.0072 -0.0409 0.0267 -0.0011 -0.0352 0.0011

Y 0.0047 0.0260 -0.0171 0.0007 0.0225 -0.0007  
Z 0.0101 0.0547 -0.0359 0.0015 0.0472 -0.0015  
AT. 62 H X 0.0072 0.0409 -0.0267 -0.0011 -0.0352 -0.0011  
Y -0.0047 -0.0260 0.0171 0.0007 0.0225 0.0007  
Z -0.0101 -0.0547 0.0359 0.0015 0.0472 0.0015  
AT. 63 H X -0.0057 -0.0289 0.0197 -0.0007 -0.0247 0.0008  
Y -0.0058 -0.0275 0.0184 -0.0007 -0.0232 0.0008  
Z -0.0064 -0.0311 0.0211 -0.0008 -0.0264 0.0009  
AT. 64 H X 0.0057 0.0289 -0.0197 -0.0007 -0.0247 -0.0008  
Y 0.0058 0.0275 -0.0184 -0.0007 -0.0232 -0.0008  
Z 0.0064 0.0311 -0.0211 -0.0008 -0.0264 -0.0009  
AT. 65 C X -0.0008 -0.0005 -0.0028 0.0000 0.0015 -0.0004  
Y 0.0006 0.0004 0.0017 -0.0000 -0.0009 0.0002  
Z 0.0011 0.0007 0.0029 -0.0000 -0.0012 0.0004  
AT. 66 C X 0.0008 0.0005 0.0028 0.0000 0.0015 0.0004  
Y -0.0006 -0.0004 -0.0017 -0.0000 -0.0009 -0.0002  
Z -0.0011 -0.0007 -0.0029 -0.0000 -0.0012 -0.0004  
AT. 67 H X -0.0096 -0.0062 -0.0261 0.0002 0.0122 -0.0035  
Y -0.0098 -0.0063 -0.0269 0.0002 0.0124 -0.0037  
Z -0.0106 -0.0065 -0.0286 0.0002 0.0129 -0.0039  
AT. 68 H X 0.0096 0.0062 0.0261 0.0002 0.0122 0.0035  
Y 0.0098 0.0063 0.0269 0.0002 0.0124 0.0037  
Z 0.0106 0.0065 0.0286 0.0002 0.0129 0.0039  
AT. 69 H X 0.0125 0.0083 0.0389 -0.0004 -0.0199 0.0053  
Y -0.0095 -0.0063 -0.0295 0.0003 0.0151 -0.0040  
Z 0.0069 0.0045 0.0209 -0.0002 -0.0108 0.0028  
AT. 70 H X -0.0125 -0.0083 -0.0389 -0.0004 -0.0199 -0.0053  
Y 0.0095 0.0063 0.0295 0.0003 0.0151 0.0040  
Z -0.0069 -0.0045 -0.0209 -0.0002 -0.0108 -0.0028  
AT. 71 H X 0.0063 0.0042 0.0189 -0.0001 -0.0087 0.0026  
Y 0.0123 0.0082 0.0365 -0.0003 -0.0170 0.0049  
Z -0.0089 -0.0055 -0.0257 0.0002 0.0116 -0.0035

AT. 72 H X -0.0063 -0.0042 -0.0189 -0.0001 -0.0087 -0.0026  
Y -0.0123 -0.0082 -0.0365 -0.0003 -0.0170 -0.0049  
Z 0.0089 0.0055 0.0257 0.0002 0.0116 0.0035

AT. 73 C X -0.0011 -0.0005 -0.0006 0.0000 0.0007 0.0000  
Y 0.0008 0.0003 0.0002 -0.0000 -0.0003 -0.0000  
Z -0.0064 -0.0024 -0.0028 0.0002 0.0036 0.0000

AT. 74 C X 0.0011 0.0005 0.0006 0.0000 0.0007 -0.0000  
Y -0.0008 -0.0003 -0.0002 -0.0000 -0.0003 0.0000  
Z 0.0064 0.0024 0.0028 0.0002 0.0036 -0.0000

AT. 75 H X -0.0265 -0.0096 -0.0108 0.0007 0.0139 0.0002  
Y -0.0495 -0.0187 -0.0203 0.0012 0.0263 0.0004  
Z 0.0354 0.0133 0.0148 -0.0009 -0.0192 -0.0002

AT. 76 H X 0.0265 0.0096 0.0108 0.0007 0.0139 -0.0002  
Y 0.0495 0.0187 0.0203 0.0012 0.0263 -0.0004  
Z -0.0354 -0.0133 -0.0148 -0.0009 -0.0192 0.0002

AT. 77 H X 0.0397 0.0156 0.0177 -0.0009 -0.0224 -0.0003  
Y 0.0404 0.0157 0.0183 -0.0009 -0.0228 -0.0003  
Z 0.0410 0.0161 0.0188 -0.0009 -0.0237 -0.0003

AT. 78 H X -0.0397 -0.0156 -0.0177 -0.0009 -0.0224 0.0003  
Y -0.0404 -0.0157 -0.0183 -0.0009 -0.0228 0.0003  
Z -0.0410 -0.0161 -0.0188 -0.0009 -0.0237 0.0003

AT. 79 I X 0.0000 -0.0000 0.0000 0.0000 -0.0000 0.0000  
Y 0.0000 0.0000 0.0000 0.0000 -0.0000 -0.0000  
Z -0.0000 0.0000 -0.0000 0.0000 0.0000 0.0000

AT. 80 I X -0.0000 0.0000 -0.0000 0.0000 -0.0000 -0.0000  
Y -0.0000 -0.0000 -0.0000 0.0000 -0.0000 0.0000  
Z 0.0000 -0.0000 0.0000 0.0000 0.0000 -0.0000

AT. 81 I X -0.0000 0.0000 -0.0000 -0.0000 0.0000 -0.0000  
Y 0.0000 0.0000 0.0000 0.0000 -0.0000 0.0000  
Z 0.0000 -0.0000 -0.0000 0.0000 0.0000 0.0000

AT. 82 I X 0.0000 -0.0000 0.0000 -0.0000 0.0000 0.0000  
Y -0.0000 -0.0000 -0.0000 0.0000 -0.0000 -0.0000

Z -0.0000 0.0000 0.0000 0.0000 0.0000 -0.0000  
AT. 83 O X 0.0000 -0.0000 -0.0000 -0.0000 0.0000 -0.0000  
Y -0.0000 -0.0000 -0.0000 0.0000 0.0000 -0.0000  
Z 0.0000 -0.0000 -0.0000 -0.0000 0.0000 -0.0000  
AT. 84 O X -0.0000 0.0000 0.0000 -0.0000 0.0000 0.0000  
Y 0.0000 0.0000 0.0000 0.0000 0.0000 0.0000  
Z -0.0000 0.0000 0.0000 -0.0000 0.0000 0.0000  
AT. 85 O X -0.0000 -0.0000 0.0000 0.0000 -0.0000 0.0000  
Y -0.0000 0.0000 0.0000 0.0000 -0.0000 0.0000  
Z -0.0000 -0.0000 -0.0000 -0.0000 0.0000 -0.0000  
AT. 86 O X 0.0000 0.0000 -0.0000 0.0000 -0.0000 -0.0000  
Y 0.0000 -0.0000 -0.0000 0.0000 -0.0000 -0.0000  
Z 0.0000 0.0000 0.0000 -0.0000 0.0000 0.0000  
AT. 87 N X -0.0000 -0.0000 0.0000 -0.0000 -0.0000 -0.0000  
Y -0.0000 -0.0000 0.0000 -0.0000 -0.0000 -0.0000  
Z 0.0000 0.0000 -0.0000 -0.0001 0.0000 -0.0001  
AT. 88 N X 0.0000 0.0000 -0.0000 -0.0000 -0.0000 0.0000  
Y 0.0000 0.0000 -0.0000 -0.0000 -0.0000 0.0000  
Z -0.0000 -0.0000 0.0000 -0.0001 0.0000 0.0001  
AT. 89 N X 0.0000 0.0000 0.0000 -0.0001 0.0000 -0.0001  
Y -0.0000 0.0000 0.0000 0.0001 -0.0000 0.0000  
Z 0.0000 -0.0000 0.0000 -0.0001 0.0000 -0.0001  
AT. 90 N X -0.0000 -0.0000 -0.0000 -0.0001 0.0000 0.0001  
Y 0.0000 -0.0000 -0.0000 0.0001 -0.0000 -0.0000  
Z -0.0000 0.0000 -0.0000 -0.0001 0.0000 0.0001  
AT. 91 C X -0.0000 0.0000 0.0000 0.0000 0.0000 0.0000  
Y 0.0000 0.0000 -0.0000 -0.0000 0.0000 -0.0000  
Z -0.0000 -0.0000 0.0000 0.0001 -0.0000 0.0001  
AT. 92 C X 0.0000 -0.0000 -0.0000 0.0000 0.0000 -0.0000  
Y -0.0000 -0.0000 0.0000 -0.0000 0.0000 0.0000  
Z 0.0000 0.0000 -0.0000 0.0001 -0.0000 -0.0001  
AT. 93 C X -0.0000 0.0000 -0.0000 0.0000 0.0000 0.0000

Y -0.0000 -0.0000 -0.0000 0.0000 0.0000 0.0000  
Z 0.0000 0.0000 -0.0000 0.0000 0.0000 0.0000  
AT. 94 C X 0.0000 -0.0000 0.0000 0.0000 0.0000 -0.0000  
Y 0.0000 0.0000 0.0000 0.0000 0.0000 -0.0000  
Z -0.0000 -0.0000 0.0000 0.0000 0.0000 -0.0000  
AT. 95 H X 0.0000 -0.0000 0.0002 -0.0002 -0.0001 -0.0003  
Y 0.0000 0.0000 0.0004 -0.0003 -0.0001 -0.0005  
Z 0.0000 0.0000 0.0002 -0.0001 -0.0001 -0.0002  
AT. 96 H X -0.0000 0.0000 -0.0002 -0.0002 -0.0001 0.0003  
Y -0.0000 -0.0000 -0.0004 -0.0003 -0.0001 0.0005  
Z -0.0000 -0.0000 -0.0002 -0.0001 -0.0001 0.0002  
AT. 97 H X -0.0000 -0.0000 -0.0000 0.0001 -0.0000 0.0001  
Y -0.0000 0.0000 0.0000 -0.0000 -0.0000 -0.0000  
Z -0.0000 -0.0000 -0.0002 0.0001 0.0000 0.0003  
AT. 98 H X 0.0000 0.0000 0.0000 0.0001 -0.0000 -0.0001  
Y 0.0000 -0.0000 -0.0000 -0.0000 -0.0000 0.0000  
Z 0.0000 0.0000 0.0002 0.0001 0.0000 -0.0003  
AT. 99 C X -0.0000 -0.0000 -0.0000 -0.0000 0.0000 -0.0000  
Y 0.0000 -0.0000 -0.0000 -0.0001 0.0000 -0.0001  
Z -0.0000 0.0000 0.0000 0.0001 -0.0000 0.0001  
AT. 100 C X 0.0000 0.0000 0.0000 -0.0000 0.0000 0.0000  
Y -0.0000 0.0000 0.0000 -0.0001 0.0000 0.0001  
Z 0.0000 -0.0000 -0.0000 0.0001 -0.0000 -0.0001  
AT. 101 C X 0.0000 -0.0000 0.0000 0.0000 -0.0000 -0.0000  
Y -0.0000 -0.0000 -0.0000 0.0000 -0.0000 -0.0000  
Z -0.0000 0.0000 -0.0000 0.0000 -0.0000 -0.0000  
AT. 102 C X -0.0000 0.0000 -0.0000 0.0000 -0.0000 0.0000  
Y 0.0000 0.0000 0.0000 0.0000 -0.0000 0.0000  
Z 0.0000 -0.0000 0.0000 0.0000 -0.0000 0.0000  
AT. 103 H X 0.0000 -0.0000 -0.0000 -0.0001 0.0000 0.0000  
Y 0.0000 -0.0000 0.0000 -0.0002 0.0000 0.0001  
Z -0.0000 -0.0000 0.0000 0.0000 -0.0000 0.0000

AT.104 H X -0.0000 0.0000 0.0000 -0.0001 0.0000 -0.0000  
Y -0.0000 0.0000 -0.0000 -0.0002 0.0000 -0.0001  
Z 0.0000 0.0000 -0.0000 0.0000 -0.0000 -0.0000

AT.105 H X -0.0000 0.0000 -0.0000 0.0000 -0.0000 -0.0001  
Y -0.0000 0.0000 -0.0000 0.0001 -0.0000 -0.0000  
Z 0.0000 -0.0001 0.0000 -0.0003 0.0001 0.0001

AT.106 H X 0.0000 -0.0000 0.0000 0.0000 -0.0000 0.0001  
Y 0.0000 -0.0000 0.0000 0.0001 -0.0000 0.0000  
Z -0.0000 0.0001 -0.0000 -0.0003 0.0001 -0.0001

AT.107 C X -0.0000 -0.0000 0.0001 -0.0000 -0.0001 -0.0000  
Y -0.0003 -0.0003 0.0007 -0.0003 -0.0010 -0.0002  
Z 0.0001 0.0001 -0.0002 0.0001 0.0003 0.0001

AT.108 C X 0.0000 0.0000 -0.0001 -0.0000 -0.0001 0.0000  
Y 0.0003 0.0003 -0.0007 -0.0003 -0.0010 0.0002  
Z -0.0001 -0.0001 0.0002 0.0001 0.0003 -0.0001

AT.109 H X -0.0005 -0.0006 0.0016 -0.0008 -0.0021 -0.0006  
Y 0.0029 0.0030 -0.0081 0.0037 0.0109 0.0027  
Z -0.0017 -0.0017 0.0046 -0.0022 -0.0063 -0.0015

AT.110 H X 0.0005 0.0006 -0.0016 -0.0008 -0.0021 0.0006  
Y -0.0029 -0.0030 0.0081 0.0037 0.0109 -0.0027  
Z 0.0017 0.0017 -0.0046 -0.0022 -0.0063 0.0015

AT.111 H X 0.0010 0.0007 -0.0024 0.0012 0.0032 0.0008  
Y 0.0002 0.0001 -0.0004 0.0001 0.0005 0.0001  
Z 0.0009 0.0007 -0.0021 0.0011 0.0029 0.0007

AT.112 H X -0.0010 -0.0007 0.0024 0.0012 0.0032 -0.0008  
Y -0.0002 -0.0001 0.0004 0.0001 0.0005 -0.0001  
Z -0.0009 -0.0007 0.0021 0.0011 0.0029 -0.0007

AT.113 C X -0.0000 0.0000 -0.0000 0.0000 0.0000 0.0000  
Y -0.0000 -0.0000 0.0000 -0.0000 -0.0000 -0.0000  
Z 0.0000 0.0000 -0.0000 0.0000 0.0000 -0.0000

AT.114 C X 0.0000 -0.0000 0.0000 0.0000 0.0000 -0.0000  
Y 0.0000 0.0000 -0.0000 -0.0000 -0.0000 0.0000



Z -0.0000 -0.0000 0.0000 0.0000 0.0000 0.0000  
AT. 115 C X -0.0000 -0.0000 -0.0000 0.0003 -0.0000 0.0002  
Y 0.0000 0.0000 0.0000 -0.0003 0.0000 -0.0003  
Z 0.0000 0.0000 0.0000 -0.0003 0.0000 -0.0003  
AT. 116 C X 0.0000 0.0000 0.0000 0.0003 -0.0000 -0.0002  
Y -0.0000 -0.0000 -0.0000 -0.0003 0.0000 0.0003  
Z -0.0000 -0.0000 -0.0000 -0.0003 0.0000 0.0003  
AT. 117 H X 0.0001 0.0000 -0.0000 -0.0007 0.0001 -0.0007  
Y 0.0000 0.0000 -0.0000 -0.0002 0.0000 -0.0002  
Z 0.0001 0.0000 -0.0000 -0.0008 0.0001 -0.0007  
AT. 118 H X -0.0001 -0.0000 0.0000 -0.0007 0.0001 0.0007  
Y -0.0000 -0.0000 0.0000 -0.0002 0.0000 0.0002  
Z -0.0001 -0.0000 0.0000 -0.0008 0.0001 0.0007  
AT. 119 H X 0.0003 0.0001 0.0001 -0.0024 0.0001 -0.0022  
Y -0.0005 -0.0001 -0.0001 0.0043 -0.0002 0.0038  
Z -0.0005 -0.0001 -0.0001 0.0045 -0.0002 0.0040  
AT. 120 H X -0.0003 -0.0001 -0.0001 -0.0024 0.0001 0.0022  
Y 0.0005 0.0001 0.0001 0.0043 -0.0002 -0.0038  
Z 0.0005 0.0001 0.0001 0.0045 -0.0002 -0.0040  
AT. 121 C X 0.0000 0.0000 0.0000 -0.0001 0.0000 -0.0001  
Y 0.0005 0.0001 0.0002 -0.0038 0.0001 -0.0029  
Z 0.0003 0.0000 0.0002 -0.0025 0.0001 -0.0020  
AT. 122 C X -0.0000 -0.0000 -0.0000 -0.0001 0.0000 0.0001  
Y -0.0005 -0.0001 -0.0002 -0.0038 0.0001 0.0029  
Z -0.0003 -0.0000 -0.0002 -0.0025 0.0001 0.0020  
AT. 123 H X 0.0010 0.0002 0.0005 -0.0075 0.0002 -0.0058  
Y -0.0055 -0.0008 -0.0026 0.0410 -0.0010 0.0319  
Z -0.0054 -0.0008 -0.0026 0.0401 -0.0010 0.0311  
AT. 124 H X -0.0010 -0.0002 -0.0005 -0.0075 0.0002 0.0058  
Y 0.0055 0.0008 0.0026 0.0410 -0.0010 -0.0319  
Z 0.0054 0.0008 0.0026 0.0401 -0.0010 -0.0311  
AT. 125 H X -0.0016 -0.0003 -0.0007 0.0103 -0.0003 0.0077

Y -0.0005 -0.0001 -0.0002 0.0035 -0.0001 0.0027  
Z 0.0013 0.0002 0.0006 -0.0090 0.0002 -0.0068  
AT.126 H X 0.0016 0.0003 0.0007 0.0103 -0.0003 -0.0077  
Y 0.0005 0.0001 0.0002 0.0035 -0.0001 -0.0027  
Z -0.0013 -0.0002 -0.0006 -0.0090 0.0002 0.0068  
AT.127 C X -0.0000 -0.0000 -0.0000 0.0001 -0.0000 0.0001  
Y 0.0000 0.0000 -0.0000 -0.0000 0.0000 -0.0000  
Z 0.0000 0.0000 0.0000 -0.0000 0.0000 0.0000  
AT.128 C X 0.0000 0.0000 0.0000 0.0001 -0.0000 -0.0001  
Y -0.0000 -0.0000 0.0000 -0.0000 0.0000 0.0000  
Z -0.0000 -0.0000 -0.0000 -0.0000 0.0000 -0.0000  
AT.129 C X 0.0001 -0.0000 0.0001 -0.0011 0.0000 -0.0009  
Y -0.0002 0.0001 -0.0002 0.0021 -0.0000 0.0018  
Z 0.0001 -0.0000 0.0001 -0.0010 0.0000 -0.0008  
AT.130 C X -0.0001 0.0000 -0.0001 -0.0011 0.0000 0.0009  
Y 0.0002 -0.0001 0.0002 0.0021 -0.0000 -0.0018  
Z -0.0001 0.0000 -0.0001 -0.0010 0.0000 0.0008  
AT.131 H X -0.0008 0.0003 -0.0006 0.0059 -0.0001 0.0047  
Y -0.0003 0.0001 -0.0003 0.0022 -0.0000 0.0018  
Z 0.0006 -0.0002 0.0005 -0.0048 0.0001 -0.0039  
AT.132 H X 0.0008 -0.0003 0.0006 0.0059 -0.0001 -0.0047  
Y 0.0003 -0.0001 0.0003 0.0022 -0.0000 -0.0018  
Z -0.0006 0.0002 -0.0005 -0.0048 0.0001 0.0039  
AT.133 H X -0.0009 0.0003 -0.0008 0.0077 -0.0002 0.0065  
Y 0.0029 -0.0010 0.0027 -0.0266 0.0005 -0.0223  
Z -0.0019 0.0006 -0.0018 0.0169 -0.0003 0.0141  
AT.134 H X 0.0009 -0.0003 0.0008 0.0077 -0.0002 -0.0065  
Y -0.0029 0.0010 -0.0027 -0.0266 0.0005 0.0223  
Z 0.0019 -0.0006 0.0018 0.0169 -0.0003 -0.0141  
AT.135 C X 0.0000 0.0000 -0.0000 -0.0008 0.0002 -0.0012  
Y -0.0000 0.0000 -0.0000 -0.0001 0.0000 -0.0001  
Z -0.0000 -0.0000 0.0000 0.0003 -0.0001 0.0006

AT. 136 C X -0.0000 -0.0000 0.0000 -0.0008 0.0002 0.0012  
Y 0.0000 -0.0000 0.0000 -0.0001 0.0000 0.0001  
Z 0.0000 0.0000 -0.0000 0.0003 -0.0001 -0.0006

AT. 137 H X 0.0001 0.0001 -0.0002 -0.0017 0.0004 -0.0029  
Y -0.0002 -0.0005 0.0006 0.0063 -0.0017 0.0110  
Z 0.0001 0.0003 -0.0003 -0.0036 0.0009 -0.0063

AT. 138 H X -0.0001 -0.0001 0.0002 -0.0017 0.0004 0.0029  
Y 0.0002 0.0005 -0.0006 0.0063 -0.0017 -0.0110  
Z -0.0001 -0.0003 0.0003 -0.0036 0.0009 0.0063

AT. 139 H X -0.0002 -0.0004 0.0005 0.0081 -0.0017 0.0128  
Y -0.0000 -0.0001 0.0001 0.0016 -0.0003 0.0026  
Z -0.0002 -0.0004 0.0004 0.0065 -0.0013 0.0103

AT. 140 H X 0.0002 0.0004 -0.0005 0.0081 -0.0017 -0.0128  
Y 0.0000 0.0001 -0.0001 0.0016 -0.0003 -0.0026  
Z 0.0002 0.0004 -0.0004 0.0065 -0.0013 -0.0103

AT. 141 H X -0.0001 -0.0001 0.0002 0.0026 -0.0006 0.0043  
Y 0.0002 0.0004 -0.0005 -0.0073 0.0016 -0.0121  
Z 0.0002 0.0003 -0.0004 -0.0067 0.0015 -0.0113

AT. 142 H X 0.0001 0.0001 -0.0002 0.0026 -0.0006 -0.0043  
Y -0.0002 -0.0004 0.0005 -0.0073 0.0016 0.0121  
Z -0.0002 -0.0003 0.0004 -0.0067 0.0015 0.0113

AT. 143 C X -0.0001 -0.0001 0.0003 -0.0057 0.0002 -0.0060  
Y -0.0000 -0.0000 0.0001 -0.0018 0.0001 -0.0020  
Z -0.0000 -0.0000 0.0001 -0.0016 0.0000 -0.0014

AT. 144 C X 0.0001 0.0001 -0.0003 -0.0057 0.0002 0.0060  
Y 0.0000 0.0000 -0.0001 -0.0018 0.0001 0.0020  
Z 0.0000 0.0000 -0.0001 -0.0016 0.0000 0.0014

AT. 145 H X -0.0003 -0.0002 0.0006 -0.0120 0.0003 -0.0122  
Y 0.0008 0.0006 -0.0023 0.0427 -0.0012 0.0432  
Z 0.0008 0.0006 -0.0022 0.0401 -0.0012 0.0405

AT. 146 H X 0.0003 0.0002 -0.0006 -0.0120 0.0003 0.0122  
Y -0.0008 -0.0006 0.0023 0.0427 -0.0012 -0.0432

Z -0.0008 -0.0006 0.0022 0.0401 -0.0012 -0.0405  
AT. 147 H X 0.0012 0.0010 -0.0038 0.0666 -0.0020 0.0709  
Y 0.0004 0.0004 -0.0014 0.0248 -0.0007 0.0264  
Z -0.0009 -0.0007 0.0028 -0.0490 0.0015 -0.0520  
AT. 148 H X -0.0012 -0.0010 0.0038 0.0666 -0.0020 -0.0709  
Y -0.0004 -0.0004 0.0014 0.0248 -0.0007 -0.0264  
Z 0.0009 0.0007 -0.0028 -0.0490 0.0015 0.0520  
AT. 149 H X 0.0002 0.0002 -0.0007 0.0127 -0.0004 0.0126  
Y -0.0007 -0.0006 0.0027 -0.0462 0.0014 -0.0464  
Z 0.0004 0.0003 -0.0016 0.0271 -0.0008 0.0269  
AT. 150 H X -0.0002 -0.0002 0.0007 0.0127 -0.0004 -0.0126  
Y 0.0007 0.0006 -0.0027 -0.0462 0.0014 0.0464  
Z -0.0004 -0.0003 0.0016 0.0271 -0.0008 -0.0269  
AT. 151 C X -0.0000 -0.0000 -0.0000 0.0001 -0.0000 0.0002  
Y 0.0000 0.0000 0.0000 -0.0001 0.0001 -0.0003  
Z 0.0001 0.0000 0.0000 -0.0009 0.0001 -0.0013  
AT. 152 C X 0.0000 0.0000 0.0000 0.0001 -0.0000 -0.0002  
Y -0.0000 -0.0000 -0.0000 -0.0001 0.0001 0.0003  
Z -0.0001 -0.0000 -0.0000 -0.0009 0.0001 0.0013  
AT. 153 H X -0.0001 -0.0000 -0.0000 0.0014 -0.0001 0.0018  
Y 0.0005 0.0001 0.0003 -0.0060 0.0002 -0.0075  
Z -0.0003 -0.0000 -0.0001 0.0036 -0.0001 0.0043  
AT. 154 H X 0.0001 0.0000 0.0000 0.0014 -0.0001 -0.0018  
Y -0.0005 -0.0001 -0.0003 -0.0060 0.0002 0.0075  
Z 0.0003 0.0000 0.0001 0.0036 -0.0001 -0.0043  
AT. 155 H X 0.0003 0.0001 0.0001 -0.0028 0.0004 -0.0042  
Y -0.0008 -0.0002 -0.0003 0.0073 -0.0011 0.0115  
Z -0.0007 -0.0002 -0.0003 0.0071 -0.0010 0.0107  
AT. 156 H X -0.0003 -0.0001 -0.0001 -0.0028 0.0004 0.0042  
Y 0.0008 0.0002 0.0003 0.0073 -0.0011 -0.0115  
Z 0.0007 0.0002 0.0003 0.0071 -0.0010 -0.0107  
AT. 157 O X 0.0000 -0.0000 -0.0000 -0.0000 0.0000 -0.0000

Y -0.0000 0.0000 0.0000 0.0001 -0.0001 0.0001  
Z -0.0000 0.0000 0.0000 0.0000 -0.0000 0.0000  
AT. 158 O X -0.0000 0.0000 0.0000 -0.0000 0.0000 0.0000  
Y 0.0000 -0.0000 -0.0000 0.0001 -0.0001 -0.0001  
Z 0.0000 -0.0000 -0.0000 0.0000 -0.0000 -0.0000  
AT. 159 O X -0.0000 0.0000 -0.0000 0.0000 -0.0000 -0.0000  
Y 0.0000 -0.0000 0.0000 -0.0000 0.0000 0.0000  
Z -0.0000 0.0000 -0.0000 0.0000 -0.0001 -0.0001  
AT. 160 O X 0.0000 -0.0000 0.0000 0.0000 -0.0000 0.0000  
Y -0.0000 0.0000 -0.0000 -0.0000 0.0000 -0.0000  
Z 0.0000 -0.0000 0.0000 0.0000 -0.0001 0.0001  
AT. 161 H X -0.0000 0.0000 0.0001 0.0001 -0.0001 0.0000  
Y 0.0004 -0.0002 -0.0005 -0.0012 0.0013 -0.0011  
Z 0.0001 -0.0001 -0.0002 -0.0003 0.0004 -0.0003  
AT. 162 H X 0.0000 -0.0000 -0.0001 0.0001 -0.0001 -0.0000  
Y -0.0004 0.0002 0.0005 -0.0012 0.0013 0.0011  
Z -0.0001 0.0001 0.0002 -0.0003 0.0004 0.0003  
AT. 163 H X 0.0001 -0.0000 0.0001 -0.0002 0.0005 0.0005  
Y -0.0000 0.0000 -0.0000 0.0001 -0.0003 -0.0004  
Z 0.0002 -0.0001 0.0002 -0.0002 0.0013 0.0012  
AT. 164 H X -0.0001 0.0000 -0.0001 -0.0002 0.0005 -0.0005  
Y 0.0000 -0.0000 0.0000 0.0001 -0.0003 0.0004  
Z -0.0002 0.0001 -0.0002 -0.0002 0.0013 -0.0012  
AT. 165 O X -0.0000 0.0001 0.0000 0.0000 -0.0000 0.0000  
Y -0.0000 0.0000 0.0000 0.0000 -0.0000 0.0000  
Z -0.0000 0.0000 0.0000 0.0000 0.0000 0.0000  
AT. 166 O X 0.0000 -0.0001 -0.0000 0.0000 -0.0000 -0.0000  
Y 0.0000 -0.0000 -0.0000 0.0000 -0.0000 -0.0000  
Z 0.0000 -0.0000 -0.0000 0.0000 0.0000 -0.0000  
AT. 167 H X 0.0006 -0.0008 -0.0005 -0.0004 0.0006 -0.0002  
Y 0.0003 -0.0003 -0.0003 -0.0002 0.0004 -0.0001  
Z 0.0001 -0.0002 -0.0001 -0.0001 0.0001 -0.0000

AT.168 H X -0.0006 0.0008 0.0005 -0.0004 0.0006 0.0002  
Y -0.0003 0.0003 0.0003 -0.0002 0.0004 0.0001  
Z -0.0001 0.0002 0.0001 -0.0001 0.0001 0.0000

AT.169 O X -0.0000 -0.0000 -0.0000 0.0000 -0.0000 -0.0000  
Y 0.0001 0.0000 0.0000 -0.0000 0.0001 0.0000  
Z -0.0000 -0.0000 -0.0000 0.0000 -0.0000 -0.0000

AT.170 O X 0.0000 0.0000 0.0000 0.0000 -0.0000 0.0000  
Y -0.0001 -0.0000 -0.0000 -0.0000 0.0001 -0.0000  
Z 0.0000 0.0000 0.0000 0.0000 -0.0000 0.0000

AT.171 H X 0.0003 0.0002 0.0001 -0.0003 0.0004 0.0001  
Y -0.0006 -0.0005 -0.0004 0.0006 -0.0008 -0.0001  
Z 0.0002 0.0003 0.0002 -0.0003 0.0003 0.0001

AT.172 H X -0.0003 -0.0002 -0.0001 -0.0003 0.0004 -0.0001  
Y 0.0006 0.0005 0.0004 0.0006 -0.0008 0.0001  
Z -0.0002 -0.0003 -0.0002 -0.0003 0.0003 -0.0001

FREQ(CM\*\*-1) 2980.07 2982.19 2983.28 2983.47 2986.69 2986.73

AT. 1 I X 0.0000 0.0000 0.0000 0.0000 0.0000 0.0000  
Y 0.0000 -0.0000 0.0000 0.0000 -0.0000 -0.0000  
Z 0.0000 0.0000 -0.0000 -0.0000 0.0000 0.0000

AT. 2 I X 0.0000 -0.0000 0.0000 -0.0000 0.0000 -0.0000  
Y 0.0000 0.0000 0.0000 -0.0000 -0.0000 0.0000  
Z 0.0000 -0.0000 -0.0000 0.0000 0.0000 -0.0000

AT. 3 I X 0.0000 -0.0000 -0.0000 -0.0000 -0.0000 -0.0000  
Y 0.0000 0.0000 -0.0000 0.0000 -0.0000 0.0000  
Z 0.0000 0.0000 -0.0000 0.0000 -0.0000 0.0000

AT. 4 I X 0.0000 0.0000 -0.0000 0.0000 -0.0000 0.0000  
Y 0.0000 -0.0000 -0.0000 -0.0000 -0.0000 -0.0000  
Z 0.0000 -0.0000 -0.0000 -0.0000 -0.0000 -0.0000

AT. 5 O X -0.0000 -0.0000 0.0000 -0.0000 0.0000 0.0000  
Y 0.0000 0.0000 -0.0000 -0.0000 -0.0000 -0.0000

Z 0.0000 0.0000 -0.0000 -0.0000 -0.0000 -0.0000  
AT. 6 O X -0.0000 0.0000 0.0000 0.0000 0.0000 -0.0000  
Y 0.0000 -0.0000 -0.0000 0.0000 -0.0000 0.0000  
Z 0.0000 -0.0000 -0.0000 0.0000 -0.0000 0.0000  
AT. 7 O X 0.0000 0.0000 0.0000 0.0000 0.0000 -0.0000  
Y -0.0000 -0.0000 -0.0000 0.0000 -0.0000 0.0000  
Z 0.0000 0.0000 0.0000 -0.0000 0.0000 -0.0000  
AT. 8 O X 0.0000 -0.0000 0.0000 -0.0000 0.0000 0.0000  
Y -0.0000 0.0000 -0.0000 -0.0000 -0.0000 -0.0000  
Z 0.0000 -0.0000 0.0000 0.0000 0.0000 0.0000  
AT. 9 N X 0.0000 0.0000 0.0000 0.0000 -0.0000 -0.0000  
Y 0.0000 0.0000 0.0000 0.0000 -0.0000 -0.0000  
Z 0.0001 0.0001 0.0000 0.0000 -0.0000 -0.0000  
AT. 10 N X 0.0000 -0.0000 0.0000 -0.0000 -0.0000 0.0000  
Y 0.0000 -0.0000 0.0000 -0.0000 -0.0000 0.0000  
Z 0.0001 -0.0001 0.0000 -0.0000 -0.0000 0.0000  
AT. 11 N X -0.0001 -0.0000 -0.0000 -0.0000 0.0000 -0.0000  
Y -0.0000 -0.0000 -0.0000 -0.0000 -0.0000 0.0000  
Z 0.0001 0.0001 0.0000 0.0000 -0.0000 -0.0000  
AT. 12 N X -0.0001 0.0000 -0.0000 0.0000 0.0000 0.0000  
Y -0.0000 0.0000 -0.0000 0.0000 -0.0000 -0.0000  
Z 0.0001 -0.0001 0.0000 -0.0000 -0.0000 0.0000  
AT. 13 C X 0.0000 0.0000 -0.0000 -0.0000 -0.0000 -0.0000  
Y 0.0000 0.0000 0.0000 0.0000 0.0000 0.0000  
Z -0.0001 -0.0001 0.0000 -0.0000 0.0000 0.0000  
AT. 14 C X 0.0000 -0.0000 -0.0000 0.0000 -0.0000 0.0000  
Y 0.0000 -0.0000 0.0000 -0.0000 0.0000 -0.0000  
Z -0.0001 0.0001 0.0000 0.0000 0.0000 -0.0000  
AT. 15 C X 0.0000 0.0000 0.0000 0.0000 -0.0000 -0.0000  
Y -0.0000 -0.0000 -0.0000 -0.0000 -0.0000 -0.0000  
Z -0.0000 -0.0000 -0.0000 -0.0000 0.0000 0.0000  
AT. 16 C X 0.0000 -0.0000 0.0000 -0.0000 -0.0000 0.0000

Y -0.0000 0.0000 -0.0000 0.0000 -0.0000 0.0000  
Z -0.0000 0.0000 -0.0000 0.0000 0.0000 -0.0000  
AT. 17 H X -0.0001 -0.0001 -0.0000 -0.0000 0.0000 0.0000  
Y 0.0003 0.0003 0.0002 0.0002 -0.0000 0.0000  
Z 0.0002 0.0002 0.0001 0.0002 -0.0000 0.0000  
AT. 18 H X -0.0001 0.0001 -0.0000 0.0000 0.0000 -0.0000  
Y 0.0003 -0.0003 0.0002 -0.0002 -0.0000 -0.0000  
Z 0.0002 -0.0002 0.0001 -0.0002 -0.0000 -0.0000  
AT. 19 H X 0.0000 0.0001 0.0000 -0.0000 0.0001 0.0000  
Y -0.0000 0.0001 -0.0000 -0.0000 0.0001 0.0001  
Z -0.0000 -0.0002 -0.0000 0.0000 -0.0001 -0.0001  
AT. 20 H X 0.0000 -0.0001 0.0000 0.0000 0.0001 -0.0000  
Y -0.0000 -0.0001 -0.0000 0.0000 0.0001 -0.0001  
Z -0.0000 0.0002 -0.0000 -0.0000 -0.0001 0.0001  
AT. 21 C X -0.0000 -0.0000 -0.0000 0.0000 -0.0000 0.0000  
Y 0.0001 0.0001 0.0000 0.0000 0.0000 -0.0000  
Z -0.0001 -0.0001 -0.0000 -0.0000 -0.0000 0.0000  
AT. 22 C X -0.0000 0.0000 -0.0000 -0.0000 -0.0000 -0.0000  
Y 0.0001 -0.0001 0.0000 -0.0000 0.0000 0.0000  
Z -0.0001 0.0001 -0.0000 0.0000 -0.0000 -0.0000  
AT. 23 C X 0.0000 0.0000 -0.0000 0.0000 0.0000 0.0000  
Y -0.0000 0.0000 -0.0000 -0.0000 -0.0000 -0.0000  
Z -0.0000 0.0000 -0.0000 0.0000 -0.0000 0.0000  
AT. 24 C X 0.0000 -0.0000 -0.0000 -0.0000 0.0000 -0.0000  
Y -0.0000 -0.0000 -0.0000 0.0000 -0.0000 0.0000  
Z -0.0000 -0.0000 -0.0000 -0.0000 -0.0000 -0.0000  
AT. 25 H X -0.0000 0.0000 -0.0000 -0.0000 -0.0000 -0.0000  
Y 0.0001 -0.0001 0.0002 0.0000 0.0002 0.0001  
Z -0.0000 -0.0000 0.0000 -0.0000 0.0000 -0.0000  
AT. 26 H X -0.0000 -0.0000 -0.0000 0.0000 -0.0000 0.0000  
Y 0.0001 0.0001 0.0002 -0.0000 0.0002 -0.0001  
Z -0.0000 0.0000 0.0000 0.0000 0.0000 0.0000



AT. 27 H X -0.0000 -0.0000 0.0000 -0.0000 0.0000 -0.0000  
Y -0.0001 0.0001 -0.0001 0.0001 -0.0001 0.0000  
Z 0.0001 -0.0001 0.0002 -0.0001 0.0002 -0.0001

AT. 28 H X -0.0000 0.0000 0.0000 0.0000 0.0000 0.0000  
Y -0.0001 -0.0001 -0.0001 -0.0001 -0.0001 -0.0000  
Z 0.0001 0.0001 0.0002 0.0001 0.0002 0.0001

AT. 29 C X -0.0001 -0.0003 -0.0001 -0.0001 0.0001 0.0001  
Y -0.0005 -0.0011 -0.0002 -0.0004 0.0002 0.0003  
Z 0.0002 0.0004 0.0001 0.0002 -0.0001 -0.0001

AT. 30 C X -0.0001 0.0003 -0.0001 0.0001 0.0001 -0.0001  
Y -0.0005 0.0011 -0.0002 0.0004 0.0002 -0.0003  
Z 0.0002 -0.0004 0.0001 -0.0002 -0.0001 0.0001

AT. 31 H X 0.0023 0.0048 0.0011 0.0020 -0.0012 -0.0013  
Y 0.0055 0.0112 0.0025 0.0048 -0.0027 -0.0031  
Z -0.0037 -0.0075 -0.0017 -0.0032 0.0019 0.0021

AT. 32 H X 0.0023 -0.0048 0.0011 -0.0020 -0.0012 0.0013  
Y 0.0055 -0.0112 0.0025 -0.0048 -0.0027 0.0031  
Z -0.0037 0.0075 -0.0017 0.0032 0.0019 -0.0021

AT. 33 H X -0.0009 -0.0018 -0.0003 -0.0007 0.0003 0.0004  
Y 0.0005 0.0011 0.0002 0.0004 -0.0001 -0.0002  
Z 0.0013 0.0028 0.0005 0.0010 -0.0004 -0.0006

AT. 34 H X -0.0009 0.0018 -0.0003 0.0007 0.0003 -0.0004  
Y 0.0005 -0.0011 0.0002 -0.0004 -0.0001 0.0002  
Z 0.0013 -0.0028 0.0005 -0.0010 -0.0004 0.0006

AT. 35 C X -0.0000 0.0000 -0.0000 -0.0000 0.0000 0.0000  
Y -0.0000 -0.0000 0.0000 -0.0000 -0.0000 0.0000  
Z -0.0000 0.0000 0.0000 0.0000 -0.0000 -0.0000

AT. 36 C X -0.0000 -0.0000 -0.0000 0.0000 0.0000 -0.0000  
Y -0.0000 0.0000 0.0000 0.0000 -0.0000 -0.0000  
Z -0.0000 -0.0000 0.0000 -0.0000 -0.0000 0.0000

AT. 37 C X 0.0006 0.0009 0.0001 0.0003 -0.0001 -0.0000  
Y 0.0003 0.0005 0.0001 0.0002 -0.0001 -0.0000

Z 0.0003 0.0004 0.0001 0.0001 -0.0001 -0.0000  
AT. 38 C X 0.0006 -0.0009 0.0001 -0.0003 -0.0001 0.0000  
Y 0.0003 -0.0005 0.0001 -0.0002 -0.0001 0.0000  
Z 0.0003 -0.0004 0.0001 -0.0001 -0.0001 0.0000  
AT. 39 H X -0.0013 -0.0017 -0.0001 -0.0006 0.0001 -0.0000  
Y 0.0010 0.0013 0.0001 0.0004 -0.0001 0.0000  
Z 0.0021 0.0029 0.0003 0.0010 -0.0002 0.0000  
AT. 40 H X -0.0013 0.0017 -0.0001 0.0006 0.0001 0.0000  
Y 0.0010 -0.0013 0.0001 -0.0004 -0.0001 -0.0000  
Z 0.0021 -0.0029 0.0003 -0.0010 -0.0002 -0.0000  
AT. 41 H X -0.0060 -0.0088 -0.0010 -0.0030 0.0009 0.0004  
Y -0.0045 -0.0067 -0.0007 -0.0023 0.0007 0.0004  
Z -0.0058 -0.0085 -0.0009 -0.0029 0.0009 0.0004  
AT. 42 H X -0.0060 0.0088 -0.0010 0.0030 0.0009 -0.0004  
Y -0.0045 0.0067 -0.0007 0.0023 0.0007 -0.0004  
Z -0.0058 0.0085 -0.0009 0.0029 0.0009 -0.0004  
AT. 43 C X 0.0007 0.0006 0.0000 0.0002 -0.0000 -0.0000  
Y 0.0021 0.0019 0.0001 0.0005 -0.0001 -0.0000  
Z 0.0012 0.0011 0.0000 0.0003 -0.0000 0.0000  
AT. 44 C X 0.0007 -0.0006 0.0000 -0.0002 -0.0000 0.0000  
Y 0.0021 -0.0019 0.0001 -0.0005 -0.0001 0.0000  
Z 0.0012 -0.0011 0.0000 -0.0003 -0.0000 -0.0000  
AT. 45 H X -0.0150 -0.0136 -0.0005 -0.0036 0.0004 0.0000  
Y -0.0200 -0.0182 -0.0006 -0.0048 0.0005 0.0000  
Z -0.0207 -0.0187 -0.0007 -0.0050 0.0005 -0.0000  
AT. 46 H X -0.0150 0.0136 -0.0005 0.0036 0.0004 -0.0000  
Y -0.0200 0.0182 -0.0006 0.0048 0.0005 -0.0000  
Z -0.0207 0.0187 -0.0007 0.0050 0.0005 0.0000  
AT. 47 H X 0.0069 0.0064 0.0002 0.0017 -0.0002 0.0000  
Y -0.0048 -0.0045 -0.0002 -0.0012 0.0001 -0.0000  
Z 0.0051 0.0047 0.0002 0.0013 -0.0001 0.0000  
AT. 48 H X 0.0069 -0.0064 0.0002 -0.0017 -0.0002 -0.0000

Y -0.0048 0.0045 -0.0002 0.0012 0.0001 0.0000  
Z 0.0051 -0.0047 0.0002 -0.0013 -0.0001 -0.0000  
AT. 49 C X 0.0001 0.0000 -0.0000 0.0000 0.0000 0.0000  
Y -0.0001 -0.0001 -0.0000 -0.0000 0.0000 0.0000  
Z 0.0000 0.0000 0.0000 0.0000 -0.0000 -0.0000  
AT. 50 C X 0.0001 -0.0000 -0.0000 -0.0000 0.0000 -0.0000  
Y -0.0001 0.0001 -0.0000 0.0000 0.0000 -0.0000  
Z 0.0000 -0.0000 0.0000 -0.0000 -0.0000 0.0000  
AT. 51 C X -0.0016 -0.0017 -0.0003 -0.0006 0.0002 0.0003  
Y -0.0018 -0.0018 -0.0003 -0.0007 0.0003 0.0003  
Z 0.0012 0.0013 0.0002 0.0005 -0.0002 -0.0002  
AT. 52 C X -0.0016 0.0017 -0.0003 0.0006 0.0002 -0.0003  
Y -0.0018 0.0018 -0.0003 0.0007 0.0003 -0.0003  
Z 0.0012 -0.0013 0.0002 -0.0005 -0.0002 0.0002  
AT. 53 H X 0.0058 0.0061 0.0012 0.0024 -0.0010 -0.0011  
Y -0.0041 -0.0044 -0.0009 -0.0017 0.0008 0.0008  
Z 0.0037 0.0039 0.0007 0.0015 -0.0006 -0.0007  
AT. 54 H X 0.0058 -0.0061 0.0012 -0.0024 -0.0010 0.0011  
Y -0.0041 0.0044 -0.0009 0.0017 0.0008 -0.0008  
Z 0.0037 -0.0039 0.0007 -0.0015 -0.0006 0.0007  
AT. 55 H X 0.0125 0.0132 0.0022 0.0049 -0.0019 -0.0021  
Y 0.0242 0.0255 0.0044 0.0095 -0.0037 -0.0041  
Z -0.0191 -0.0200 -0.0035 -0.0076 0.0030 0.0033  
AT. 56 H X 0.0125 -0.0132 0.0022 -0.0049 -0.0019 0.0021  
Y 0.0242 -0.0255 0.0044 -0.0095 -0.0037 0.0041  
Z -0.0191 0.0200 -0.0035 0.0076 0.0030 -0.0033  
AT. 57 C X 0.0002 0.0013 0.0003 0.0006 -0.0003 -0.0003  
Y -0.0003 -0.0013 -0.0003 -0.0006 0.0002 0.0002  
Z 0.0002 -0.0000 0.0001 0.0001 -0.0001 -0.0001  
AT. 58 C X 0.0002 -0.0013 0.0003 -0.0006 -0.0003 0.0003  
Y -0.0003 0.0013 -0.0003 0.0006 0.0002 -0.0002  
Z 0.0002 0.0000 0.0001 -0.0001 -0.0001 0.0001

AT. 59 H X 0.0022 0.0071 0.0020 0.0035 -0.0017 -0.0017  
Y 0.0047 0.0142 0.0039 0.0070 -0.0034 -0.0032  
Z -0.0033 -0.0097 -0.0027 -0.0048 0.0023 0.0022

AT. 60 H X 0.0022 -0.0071 0.0020 -0.0035 -0.0017 0.0017  
Y 0.0047 -0.0142 0.0039 -0.0070 -0.0034 0.0032  
Z -0.0033 0.0097 -0.0027 0.0048 0.0023 -0.0022

AT. 61 H X -0.0025 -0.0142 -0.0031 -0.0064 0.0026 0.0024  
Y 0.0017 0.0092 0.0019 0.0040 -0.0015 -0.0015  
Z 0.0035 0.0189 0.0042 0.0085 -0.0035 -0.0033

AT. 62 H X -0.0025 0.0142 -0.0031 0.0064 0.0026 -0.0024  
Y 0.0017 -0.0092 0.0019 -0.0040 -0.0015 0.0015  
Z 0.0035 -0.0189 0.0042 -0.0085 -0.0035 0.0033

AT. 63 H X -0.0023 -0.0087 -0.0027 -0.0046 0.0025 0.0024  
Y -0.0021 -0.0082 -0.0025 -0.0043 0.0023 0.0022  
Z -0.0026 -0.0094 -0.0029 -0.0049 0.0026 0.0025

AT. 64 H X -0.0023 0.0087 -0.0027 0.0046 0.0025 -0.0024  
Y -0.0021 0.0082 -0.0025 0.0043 0.0023 -0.0022  
Z -0.0026 0.0094 -0.0029 0.0049 0.0026 -0.0025

AT. 65 C X -0.0043 -0.0034 0.0000 -0.0008 -0.0000 0.0001  
Y 0.0026 0.0021 0.0000 0.0005 -0.0000 -0.0001  
Z 0.0041 0.0030 0.0000 0.0007 -0.0000 -0.0001

AT. 66 C X -0.0043 0.0034 0.0000 0.0008 -0.0000 -0.0001  
Y 0.0026 -0.0021 0.0000 -0.0005 -0.0000 0.0001  
Z 0.0041 -0.0030 0.0000 -0.0007 -0.0000 0.0001

AT. 67 H X -0.0378 -0.0287 -0.0002 -0.0066 0.0001 0.0010  
Y -0.0394 -0.0301 -0.0002 -0.0070 0.0002 0.0010  
Z -0.0421 -0.0320 -0.0002 -0.0074 0.0002 0.0011

AT. 68 H X -0.0378 0.0287 -0.0002 0.0066 0.0001 -0.0010  
Y -0.0394 0.0301 -0.0002 0.0070 0.0002 -0.0010  
Z -0.0421 0.0320 -0.0002 0.0074 0.0002 -0.0011

AT. 69 H X 0.0593 0.0472 0.0001 0.0111 -0.0000 -0.0016  
Y -0.0450 -0.0358 -0.0001 -0.0084 0.0000 0.0012

Z 0.0315 0.0248 0.0000 0.0058 -0.0000 -0.0008  
AT. 70 H X 0.0593 -0.0472 0.0001 -0.0111 -0.0000 0.0016  
Y -0.0450 0.0358 -0.0001 0.0084 0.0000 -0.0012  
Z 0.0315 -0.0248 0.0000 -0.0058 -0.0000 0.0008  
AT. 71 H X 0.0283 0.0217 0.0001 0.0050 -0.0001 -0.0006  
Y 0.0537 0.0409 0.0002 0.0095 -0.0001 -0.0012  
Z -0.0383 -0.0292 -0.0002 -0.0068 0.0001 0.0008  
AT. 72 H X 0.0283 -0.0217 0.0001 -0.0050 -0.0001 0.0006  
Y 0.0537 -0.0409 0.0002 -0.0095 -0.0001 0.0012  
Z -0.0383 0.0292 -0.0002 0.0068 0.0001 -0.0008  
AT. 73 C X 0.0003 0.0008 0.0000 0.0002 -0.0000 -0.0001  
Y -0.0002 -0.0004 -0.0000 -0.0001 -0.0000 -0.0000  
Z 0.0013 0.0042 0.0001 0.0011 -0.0001 -0.0002  
AT. 74 C X 0.0003 -0.0008 0.0000 -0.0002 -0.0000 0.0001  
Y -0.0002 0.0004 -0.0000 0.0001 -0.0000 0.0000  
Z 0.0013 -0.0042 0.0001 -0.0011 -0.0001 0.0002  
AT. 75 H X 0.0048 0.0167 0.0005 0.0044 -0.0004 -0.0007  
Y 0.0095 0.0317 0.0009 0.0084 -0.0008 -0.0013  
Z -0.0071 -0.0228 -0.0007 -0.0061 0.0006 0.0009  
AT. 76 H X 0.0048 -0.0167 0.0005 -0.0044 -0.0004 0.0007  
Y 0.0095 -0.0317 0.0009 -0.0084 -0.0008 0.0013  
Z -0.0071 0.0228 -0.0007 0.0061 0.0006 -0.0009  
AT. 77 H X -0.0075 -0.0265 -0.0009 -0.0071 0.0007 0.0013  
Y -0.0073 -0.0267 -0.0009 -0.0072 0.0007 0.0013  
Z -0.0079 -0.0275 -0.0010 -0.0074 0.0008 0.0014  
AT. 78 H X -0.0075 0.0265 -0.0009 0.0071 0.0007 -0.0013  
Y -0.0073 0.0267 -0.0009 0.0072 0.0007 -0.0013  
Z -0.0079 0.0275 -0.0010 0.0074 0.0008 -0.0014  
AT. 79 I X 0.0000 -0.0000 -0.0000 -0.0000 -0.0000 0.0000  
Y 0.0000 -0.0000 -0.0000 -0.0000 -0.0000 -0.0000  
Z 0.0000 0.0000 0.0000 0.0000 -0.0000 -0.0000  
AT. 80 I X 0.0000 0.0000 -0.0000 0.0000 -0.0000 -0.0000

Y 0.0000 0.0000 -0.0000 0.0000 -0.0000 0.0000  
Z 0.0000 -0.0000 0.0000 -0.0000 -0.0000 0.0000  
AT. 81 I X 0.0000 -0.0000 -0.0000 0.0000 -0.0000 -0.0000  
Y 0.0000 0.0000 -0.0000 0.0000 -0.0000 -0.0000  
Z 0.0000 -0.0000 -0.0000 -0.0000 -0.0000 -0.0000  
AT. 82 I X 0.0000 0.0000 -0.0000 -0.0000 -0.0000 0.0000  
Y 0.0000 -0.0000 -0.0000 -0.0000 -0.0000 0.0000  
Z 0.0000 0.0000 -0.0000 0.0000 -0.0000 0.0000  
AT. 83 O X 0.0000 0.0000 -0.0000 -0.0000 0.0001 0.0001  
Y 0.0000 0.0000 -0.0000 -0.0000 0.0000 0.0000  
Z 0.0000 0.0000 0.0000 0.0000 0.0000 0.0000  
AT. 84 O X 0.0000 -0.0000 -0.0000 0.0000 0.0001 -0.0001  
Y 0.0000 -0.0000 -0.0000 0.0000 0.0000 -0.0000  
Z 0.0000 -0.0000 0.0000 -0.0000 0.0000 -0.0000  
AT. 85 O X 0.0000 -0.0000 -0.0000 -0.0000 -0.0000 -0.0000  
Y 0.0000 -0.0000 -0.0000 -0.0000 -0.0000 -0.0000  
Z 0.0000 0.0000 0.0000 0.0000 0.0000 0.0000  
AT. 86 O X 0.0000 0.0000 -0.0000 0.0000 -0.0000 0.0000  
Y 0.0000 0.0000 -0.0000 0.0000 -0.0000 0.0000  
Z 0.0000 -0.0000 0.0000 -0.0000 0.0000 -0.0000  
AT. 87 N X -0.0000 -0.0000 0.0001 0.0001 -0.0002 -0.0001  
Y 0.0000 0.0000 -0.0000 -0.0000 0.0000 0.0000  
Z 0.0000 0.0000 -0.0001 -0.0001 0.0002 0.0002  
AT. 88 N X -0.0000 0.0000 0.0001 -0.0001 -0.0002 0.0001  
Y 0.0000 -0.0000 -0.0000 0.0000 0.0000 -0.0000  
Z 0.0000 -0.0000 -0.0001 0.0001 0.0002 -0.0002  
AT. 89 N X 0.0000 -0.0000 0.0000 0.0000 0.0000 0.0000  
Y 0.0000 -0.0000 -0.0000 -0.0000 -0.0000 -0.0000  
Z 0.0000 0.0000 0.0000 0.0000 0.0000 0.0000  
AT. 90 N X 0.0000 0.0000 0.0000 -0.0000 0.0000 -0.0000  
Y 0.0000 0.0000 -0.0000 0.0000 -0.0000 0.0000  
Z 0.0000 -0.0000 0.0000 -0.0000 0.0000 -0.0000

AT. 91 C X -0.0000 0.0000 -0.0000 -0.0000 -0.0000 -0.0000  
Y 0.0000 0.0000 0.0000 0.0000 -0.0000 -0.0000  
Z -0.0000 -0.0000 0.0001 0.0001 -0.0002 -0.0002

AT. 92 C X -0.0000 -0.0000 -0.0000 0.0000 -0.0000 0.0000  
Y 0.0000 -0.0000 0.0000 -0.0000 -0.0000 0.0000  
Z -0.0000 0.0000 0.0001 -0.0001 -0.0002 0.0002

AT. 93 C X -0.0000 -0.0000 0.0000 -0.0000 -0.0000 -0.0000  
Y -0.0000 -0.0000 0.0000 -0.0000 -0.0000 -0.0000  
Z -0.0000 0.0000 -0.0000 -0.0000 0.0000 0.0000

AT. 94 C X -0.0000 0.0000 0.0000 0.0000 -0.0000 0.0000  
Y -0.0000 0.0000 0.0000 0.0000 -0.0000 0.0000  
Z -0.0000 -0.0000 -0.0000 0.0000 0.0000 -0.0000

AT. 95 H X 0.0001 0.0001 0.0000 0.0001 -0.0000 -0.0000  
Y 0.0001 0.0002 0.0000 0.0001 -0.0001 -0.0000  
Z 0.0000 0.0001 0.0000 0.0001 -0.0001 -0.0000

AT. 96 H X 0.0001 -0.0001 0.0000 -0.0001 -0.0000 0.0000  
Y 0.0001 -0.0002 0.0000 -0.0001 -0.0001 0.0000  
Z 0.0000 -0.0001 0.0000 -0.0001 -0.0001 0.0000

AT. 97 H X -0.0000 -0.0000 0.0000 -0.0000 -0.0000 -0.0000  
Y -0.0000 0.0000 0.0000 0.0000 -0.0000 -0.0001  
Z -0.0000 -0.0001 -0.0000 -0.0001 0.0001 0.0001

AT. 98 H X -0.0000 0.0000 0.0000 0.0000 -0.0000 0.0000  
Y -0.0000 -0.0000 0.0000 -0.0000 -0.0000 0.0001  
Z -0.0000 0.0001 -0.0000 0.0001 0.0001 -0.0001

AT. 99 C X 0.0000 0.0000 -0.0000 0.0000 0.0000 0.0000  
Y 0.0000 0.0000 0.0000 0.0000 0.0000 0.0000  
Z 0.0000 -0.0000 -0.0000 -0.0000 -0.0000 -0.0000

AT. 100 C X 0.0000 -0.0000 -0.0000 -0.0000 0.0000 -0.0000  
Y 0.0000 -0.0000 0.0000 -0.0000 0.0000 -0.0000  
Z 0.0000 0.0000 -0.0000 0.0000 -0.0000 0.0000

AT. 101 C X 0.0000 0.0000 -0.0000 -0.0000 -0.0000 -0.0000  
Y -0.0000 -0.0000 -0.0000 -0.0000 -0.0000 -0.0000

Z -0.0000 -0.0000 -0.0000 -0.0000 -0.0000 0.0000  
AT.102 C X 0.0000 -0.0000 -0.0000 0.0000 -0.0000 0.0000  
Y -0.0000 0.0000 -0.0000 0.0000 -0.0000 0.0000  
Z -0.0000 0.0000 -0.0000 0.0000 -0.0000 -0.0000  
AT.103 H X -0.0000 -0.0000 0.0000 0.0000 0.0001 0.0000  
Y 0.0001 0.0001 0.0001 0.0001 0.0002 0.0001  
Z 0.0000 0.0000 0.0000 0.0000 -0.0000 -0.0000  
AT.104 H X -0.0000 0.0000 0.0000 -0.0000 0.0001 -0.0000  
Y 0.0001 -0.0001 0.0001 -0.0001 0.0002 -0.0001  
Z 0.0000 -0.0000 0.0000 -0.0000 -0.0000 0.0000  
AT.105 H X -0.0000 0.0000 -0.0000 0.0000 -0.0001 0.0000  
Y -0.0000 0.0000 -0.0000 -0.0000 -0.0001 0.0000  
Z 0.0000 -0.0001 0.0000 0.0000 0.0003 -0.0001  
AT.106 H X -0.0000 -0.0000 -0.0000 -0.0000 -0.0001 -0.0000  
Y -0.0000 -0.0000 -0.0000 0.0000 -0.0001 -0.0000  
Z 0.0000 0.0001 0.0000 -0.0000 0.0003 0.0001  
AT.107 C X -0.0000 -0.0001 0.0004 0.0004 -0.0004 -0.0004  
Y -0.0003 -0.0019 0.0055 0.0053 -0.0077 -0.0077  
Z 0.0001 0.0006 -0.0018 -0.0018 0.0025 0.0025  
AT.108 C X -0.0000 0.0001 0.0004 -0.0004 -0.0004 0.0004  
Y -0.0003 0.0019 0.0055 -0.0053 -0.0077 0.0077  
Z 0.0001 -0.0006 -0.0018 0.0018 0.0025 -0.0025  
AT.109 H X -0.0007 -0.0043 0.0125 0.0120 -0.0173 -0.0171  
Y 0.0034 0.0224 -0.0648 -0.0624 0.0895 0.0887  
Z -0.0020 -0.0130 0.0378 0.0364 -0.0520 -0.0515  
AT.110 H X -0.0007 0.0043 0.0125 -0.0120 -0.0173 0.0171  
Y 0.0034 -0.0224 -0.0648 0.0624 0.0895 -0.0887  
Z -0.0020 0.0130 0.0378 -0.0364 -0.0520 0.0515  
AT.111 H X 0.0010 0.0062 -0.0181 -0.0174 0.0237 0.0235  
Y 0.0001 0.0008 -0.0023 -0.0022 0.0032 0.0031  
Z 0.0009 0.0055 -0.0161 -0.0155 0.0215 0.0213  
AT.112 H X 0.0010 -0.0062 -0.0181 0.0174 0.0237 -0.0235



Y 0.0001 -0.0008 -0.0023 0.0022 0.0032 -0.0031  
Z 0.0009 -0.0055 -0.0161 0.0155 0.0215 -0.0213  
AT. 113 C X 0.0000 0.0000 0.0000 0.0000 0.0001 0.0001  
Y -0.0000 -0.0000 0.0001 0.0001 -0.0001 -0.0000  
Z 0.0000 0.0000 -0.0001 -0.0001 0.0001 0.0001  
AT. 114 C X 0.0000 -0.0000 0.0000 -0.0000 0.0001 -0.0001  
Y -0.0000 0.0000 0.0001 -0.0001 -0.0001 0.0000  
Z 0.0000 -0.0000 -0.0001 0.0001 0.0001 -0.0001  
AT. 115 C X -0.0000 0.0000 -0.0001 -0.0001 -0.0002 -0.0002  
Y 0.0000 -0.0000 0.0002 0.0002 0.0004 0.0004  
Z 0.0000 -0.0000 0.0002 0.0002 0.0002 0.0002  
AT. 116 C X -0.0000 -0.0000 -0.0001 0.0001 -0.0002 0.0002  
Y 0.0000 0.0000 0.0002 -0.0002 0.0004 -0.0004  
Z 0.0000 0.0000 0.0002 -0.0002 0.0002 -0.0002  
AT. 117 H X 0.0001 0.0000 -0.0003 -0.0002 0.0004 0.0006  
Y 0.0000 0.0000 -0.0001 -0.0001 0.0001 0.0001  
Z 0.0001 -0.0000 -0.0002 -0.0001 0.0006 0.0008  
AT. 118 H X 0.0001 -0.0000 -0.0003 0.0002 0.0004 -0.0006  
Y 0.0000 -0.0000 -0.0001 0.0001 0.0001 -0.0001  
Z 0.0001 0.0000 -0.0002 0.0001 0.0006 -0.0008  
AT. 119 H X 0.0001 -0.0002 0.0012 0.0013 0.0018 0.0020  
Y -0.0001 0.0005 -0.0023 -0.0026 -0.0036 -0.0038  
Z -0.0001 0.0004 -0.0021 -0.0024 -0.0034 -0.0037  
AT. 120 H X 0.0001 0.0002 0.0012 -0.0013 0.0018 -0.0020  
Y -0.0001 -0.0005 -0.0023 0.0026 -0.0036 0.0038  
Z -0.0001 -0.0004 -0.0021 0.0024 -0.0034 0.0037  
AT. 121 C X -0.0000 -0.0000 -0.0000 -0.0000 0.0000 0.0000  
Y 0.0000 -0.0000 0.0001 0.0003 0.0004 0.0005  
Z 0.0000 0.0000 0.0001 0.0002 0.0002 0.0003  
AT. 122 C X -0.0000 0.0000 -0.0000 0.0000 0.0000 -0.0000  
Y 0.0000 0.0000 0.0001 -0.0003 0.0004 -0.0005  
Z 0.0000 -0.0000 0.0001 -0.0002 0.0002 -0.0003

AT.123 H X 0.0001 -0.0000 0.0003 0.0005 0.0007 0.0009  
Y -0.0005 0.0001 -0.0015 -0.0030 -0.0039 -0.0050  
Z -0.0005 0.0001 -0.0014 -0.0029 -0.0038 -0.0049

AT.124 H X 0.0001 0.0000 0.0003 -0.0005 0.0007 -0.0009  
Y -0.0005 -0.0001 -0.0015 0.0030 -0.0039 0.0050  
Z -0.0005 -0.0001 -0.0014 0.0029 -0.0038 0.0049

AT.125 H X -0.0001 0.0002 -0.0001 -0.0004 -0.0009 -0.0012  
Y -0.0000 0.0001 -0.0001 -0.0002 -0.0003 -0.0004  
Z 0.0000 -0.0002 0.0002 0.0004 0.0008 0.0010

AT.126 H X -0.0001 -0.0002 -0.0001 0.0004 -0.0009 0.0012  
Y -0.0000 -0.0001 -0.0001 0.0002 -0.0003 0.0004  
Z 0.0000 0.0002 0.0002 -0.0004 0.0008 -0.0010

AT.127 C X 0.0000 -0.0000 -0.0000 -0.0000 -0.0000 -0.0000  
Y 0.0000 0.0000 0.0000 0.0000 0.0000 0.0000  
Z 0.0000 0.0000 -0.0000 -0.0000 -0.0000 -0.0000

AT.128 C X 0.0000 0.0000 -0.0000 0.0000 -0.0000 0.0000  
Y 0.0000 -0.0000 0.0000 -0.0000 0.0000 -0.0000  
Z 0.0000 -0.0000 -0.0000 0.0000 -0.0000 0.0000

AT.129 C X -0.0000 0.0001 -0.0001 -0.0001 0.0003 0.0004  
Y 0.0000 -0.0001 0.0000 -0.0000 -0.0005 -0.0006  
Z -0.0000 0.0000 -0.0000 0.0000 0.0003 0.0003

AT.130 C X -0.0000 -0.0001 -0.0001 0.0001 0.0003 -0.0004  
Y 0.0000 0.0001 0.0000 0.0000 -0.0005 0.0006  
Z -0.0000 -0.0000 -0.0000 -0.0000 0.0003 -0.0003

AT.131 H X 0.0002 -0.0003 0.0010 0.0008 -0.0015 -0.0017  
Y 0.0001 -0.0001 0.0003 0.0002 -0.0005 -0.0006  
Z -0.0002 0.0002 -0.0006 -0.0005 0.0011 0.0012

AT.132 H X 0.0002 0.0003 0.0010 -0.0008 -0.0015 0.0017  
Y 0.0001 0.0001 0.0003 -0.0002 -0.0005 0.0006  
Z -0.0002 -0.0002 -0.0006 0.0005 0.0011 -0.0012

AT.133 H X 0.0002 -0.0004 0.0006 0.0003 -0.0025 -0.0027  
Y -0.0006 0.0010 -0.0010 -0.0001 0.0071 0.0078

Z 0.0004 -0.0006 0.0009 0.0003 -0.0047 -0.0052  
AT. 134 H X 0.0002 0.0004 0.0006 -0.0003 -0.0025 0.0027  
Y -0.0006 -0.0010 -0.0010 0.0001 0.0071 -0.0078  
Z 0.0004 0.0006 0.0009 -0.0003 -0.0047 0.0052  
AT. 135 C X 0.0000 0.0011 -0.0049 -0.0047 -0.0036 -0.0037  
Y 0.0000 0.0003 -0.0012 -0.0012 -0.0007 -0.0007  
Z -0.0000 -0.0006 0.0025 0.0024 0.0017 0.0017  
AT. 136 C X 0.0000 -0.0011 -0.0049 0.0047 -0.0036 0.0037  
Y 0.0000 -0.0003 -0.0012 0.0012 -0.0007 0.0007  
Z -0.0000 0.0006 0.0025 -0.0024 0.0017 -0.0017  
AT. 137 H X 0.0001 0.0029 -0.0124 -0.0119 -0.0083 -0.0083  
Y -0.0005 -0.0116 0.0491 0.0470 0.0337 0.0338  
Z 0.0003 0.0067 -0.0284 -0.0272 -0.0197 -0.0198  
AT. 138 H X 0.0001 -0.0029 -0.0124 0.0119 -0.0083 0.0083  
Y -0.0005 0.0116 0.0491 -0.0470 0.0337 -0.0338  
Z 0.0003 -0.0067 -0.0284 0.0272 -0.0197 0.0198  
AT. 139 H X -0.0005 -0.0127 0.0539 0.0516 0.0395 0.0398  
Y -0.0001 -0.0027 0.0114 0.0109 0.0083 0.0084  
Z -0.0004 -0.0101 0.0431 0.0412 0.0314 0.0316  
AT. 140 H X -0.0005 0.0127 0.0539 -0.0516 0.0395 -0.0398  
Y -0.0001 0.0027 0.0114 -0.0109 0.0083 -0.0084  
Z -0.0004 0.0101 0.0431 -0.0412 0.0314 -0.0316  
AT. 141 H X -0.0002 -0.0039 0.0166 0.0158 0.0124 0.0123  
Y 0.0005 0.0107 -0.0459 -0.0435 -0.0336 -0.0334  
Z 0.0004 0.0101 -0.0433 -0.0411 -0.0321 -0.0320  
AT. 142 H X -0.0002 0.0039 0.0166 -0.0158 0.0124 -0.0123  
Y 0.0005 -0.0107 -0.0459 0.0435 -0.0336 0.0334  
Z 0.0004 -0.0101 -0.0433 0.0411 -0.0321 0.0320  
AT. 143 C X 0.0000 0.0002 0.0005 0.0010 0.0004 0.0007  
Y -0.0000 0.0001 0.0003 0.0005 0.0002 0.0003  
Z 0.0000 -0.0000 0.0002 0.0002 0.0001 0.0001  
AT. 144 C X 0.0000 -0.0002 0.0005 -0.0010 0.0004 -0.0007

Y -0.0000 -0.0001 0.0003 -0.0005 0.0002 -0.0003  
Z 0.0000 0.0000 0.0002 -0.0002 0.0001 -0.0001  
AT. 145 H X 0.0000 0.0004 0.0013 0.0022 0.0009 0.0013  
Y -0.0001 -0.0015 -0.0048 -0.0079 -0.0034 -0.0050  
Z -0.0001 -0.0014 -0.0046 -0.0074 -0.0033 -0.0047  
AT. 146 H X 0.0000 -0.0004 0.0013 -0.0022 0.0009 -0.0013  
Y -0.0001 0.0015 -0.0048 0.0079 -0.0034 0.0050  
Z -0.0001 0.0014 -0.0046 0.0074 -0.0033 0.0047  
AT. 147 H X -0.0002 -0.0026 -0.0061 -0.0122 -0.0047 -0.0081  
Y -0.0001 -0.0009 -0.0023 -0.0046 -0.0018 -0.0031  
Z 0.0002 0.0019 0.0044 0.0089 0.0034 0.0059  
AT. 148 H X -0.0002 0.0026 -0.0061 0.0122 -0.0047 0.0081  
Y -0.0001 0.0009 -0.0023 0.0046 -0.0018 0.0031  
Z 0.0002 -0.0019 0.0044 -0.0089 0.0034 -0.0059  
AT. 149 H X -0.0001 -0.0002 -0.0010 -0.0019 -0.0008 -0.0012  
Y 0.0002 0.0009 0.0039 0.0072 0.0029 0.0046  
Z -0.0001 -0.0005 -0.0023 -0.0042 -0.0018 -0.0028  
AT. 150 H X -0.0001 0.0002 -0.0010 0.0019 -0.0008 0.0012  
Y 0.0002 -0.0009 0.0039 -0.0072 0.0029 -0.0046  
Z -0.0001 0.0005 -0.0023 0.0042 -0.0018 0.0028  
AT. 151 C X -0.0000 -0.0000 0.0000 0.0000 -0.0001 -0.0002  
Y 0.0000 0.0001 -0.0001 -0.0001 0.0005 0.0006  
Z 0.0000 0.0000 0.0004 0.0003 0.0006 0.0006  
AT. 152 C X -0.0000 0.0000 0.0000 -0.0000 -0.0001 0.0002  
Y 0.0000 -0.0001 -0.0001 0.0001 0.0005 -0.0006  
Z 0.0000 -0.0000 0.0004 -0.0003 0.0006 -0.0006  
AT. 153 H X -0.0000 0.0000 -0.0009 -0.0006 -0.0004 -0.0003  
Y 0.0000 -0.0002 0.0037 0.0024 0.0006 -0.0000  
Z -0.0000 0.0001 -0.0020 -0.0013 -0.0006 -0.0002  
AT. 154 H X -0.0000 -0.0000 -0.0009 0.0006 -0.0004 0.0003  
Y 0.0000 0.0002 0.0037 -0.0024 0.0006 0.0000  
Z -0.0000 -0.0001 -0.0020 0.0013 -0.0006 0.0002

AT.155 H X 0.0001 0.0002 0.0006 0.0004 0.0022 0.0022  
Y -0.0003 -0.0004 -0.0022 -0.0017 -0.0068 -0.0069  
Z -0.0003 -0.0005 -0.0019 -0.0014 -0.0065 -0.0066

AT.156 H X 0.0001 -0.0002 0.0006 -0.0004 0.0022 -0.0022  
Y -0.0003 0.0004 -0.0022 0.0017 -0.0068 0.0069  
Z -0.0003 0.0005 -0.0019 0.0014 -0.0065 0.0066

AT.157 O X 0.0000 0.0000 -0.0000 -0.0000 -0.0000 -0.0000  
Y -0.0001 -0.0000 0.0000 0.0000 0.0000 0.0000  
Z -0.0000 -0.0000 0.0000 0.0000 0.0000 0.0000

AT.158 O X 0.0000 -0.0000 -0.0000 0.0000 -0.0000 0.0000  
Y -0.0001 0.0000 0.0000 -0.0000 0.0000 -0.0000  
Z -0.0000 0.0000 0.0000 -0.0000 0.0000 -0.0000

AT.159 O X -0.0000 0.0000 -0.0000 -0.0000 -0.0000 -0.0000  
Y 0.0000 -0.0000 -0.0000 -0.0000 0.0000 0.0000  
Z -0.0001 0.0000 -0.0000 -0.0000 -0.0000 -0.0000

AT.160 O X -0.0000 -0.0000 -0.0000 0.0000 -0.0000 0.0000  
Y 0.0000 0.0000 -0.0000 0.0000 0.0000 -0.0000  
Z -0.0001 -0.0000 -0.0000 0.0000 -0.0000 0.0000

AT.161 H X -0.0001 -0.0001 0.0002 0.0001 0.0001 0.0001  
Y 0.0011 0.0007 -0.0004 -0.0001 -0.0004 -0.0004  
Z 0.0003 0.0002 -0.0001 -0.0001 -0.0002 -0.0002

AT.162 H X -0.0001 0.0001 0.0002 -0.0001 0.0001 -0.0001  
Y 0.0011 -0.0007 -0.0004 0.0001 -0.0004 0.0004  
Z 0.0003 -0.0002 -0.0001 0.0001 -0.0002 0.0002

AT.163 H X 0.0004 -0.0002 0.0001 -0.0000 0.0002 0.0002  
Y -0.0003 0.0002 -0.0000 0.0000 -0.0001 -0.0001  
Z 0.0012 -0.0007 0.0002 0.0001 0.0005 0.0005

AT.164 H X 0.0004 0.0002 0.0001 0.0000 0.0002 -0.0002  
Y -0.0003 -0.0002 -0.0000 -0.0000 -0.0001 0.0001  
Z 0.0012 0.0007 0.0002 -0.0001 0.0005 -0.0005

AT.165 O X -0.0000 -0.0001 0.0000 0.0000 -0.0001 -0.0001  
Y -0.0000 -0.0000 0.0000 -0.0000 -0.0000 -0.0000

Z -0.0000 -0.0000 0.0000 0.0000 -0.0000 -0.0000  
AT.166 O X -0.0000 0.0001 0.0000 -0.0000 -0.0001 0.0001  
Y -0.0000 0.0000 0.0000 0.0000 -0.0000 0.0000  
Z -0.0000 0.0000 0.0000 -0.0000 -0.0000 0.0000  
AT.167 H X 0.0005 0.0007 -0.0001 -0.0001 0.0008 0.0008  
Y 0.0002 0.0004 0.0000 0.0000 0.0004 0.0003  
Z 0.0001 0.0002 -0.0000 0.0000 0.0002 0.0002  
AT.168 H X 0.0005 -0.0007 -0.0001 0.0001 0.0008 -0.0008  
Y 0.0002 -0.0004 0.0000 -0.0000 0.0004 -0.0003  
Z 0.0001 -0.0002 -0.0000 -0.0000 0.0002 -0.0002  
AT.169 O X 0.0000 0.0000 -0.0000 0.0000 -0.0000 0.0000  
Y -0.0000 -0.0000 0.0000 -0.0000 0.0000 -0.0000  
Z 0.0000 0.0000 -0.0000 0.0000 -0.0000 0.0000  
AT.170 O X 0.0000 -0.0000 -0.0000 -0.0000 -0.0000 -0.0000  
Y -0.0000 0.0000 0.0000 0.0000 0.0000 0.0000  
Z 0.0000 -0.0000 -0.0000 -0.0000 -0.0000 -0.0000  
AT.171 H X -0.0002 -0.0002 0.0001 -0.0001 0.0003 -0.0001  
Y 0.0005 0.0005 -0.0001 0.0002 -0.0006 0.0002  
Z -0.0002 -0.0002 0.0001 -0.0001 0.0003 -0.0001  
AT.172 H X -0.0002 0.0002 0.0001 0.0001 0.0003 0.0001  
Y 0.0005 -0.0005 -0.0001 -0.0002 -0.0006 -0.0002  
Z -0.0002 0.0002 0.0001 0.0001 0.0003 0.0001

FREQ(CM\*\*-1) 3020.93 3021.01 3031.47 3033.33 3043.53 3044.49

AT. 1 I X -0.0000 -0.0000 0.0000 -0.0000 -0.0000 0.0000  
Y -0.0000 -0.0000 0.0000 0.0000 0.0000 0.0000  
Z -0.0000 -0.0000 0.0000 -0.0000 0.0000 0.0000  
AT. 2 I X -0.0000 0.0000 -0.0000 -0.0000 -0.0000 -0.0000  
Y -0.0000 0.0000 -0.0000 0.0000 0.0000 -0.0000  
Z -0.0000 0.0000 -0.0000 -0.0000 0.0000 -0.0000  
AT. 3 I X -0.0000 0.0000 -0.0000 0.0000 0.0000 0.0000

Y -0.0000 -0.0000 0.0000 0.0000 0.0000 0.0000  
Z 0.0000 -0.0000 0.0000 0.0000 0.0000 -0.0000  
AT. 4 I X -0.0000 -0.0000 0.0000 0.0000 0.0000 -0.0000  
Y -0.0000 0.0000 -0.0000 0.0000 0.0000 -0.0000  
Z 0.0000 0.0000 -0.0000 0.0000 0.0000 0.0000  
AT. 5 O X -0.0000 -0.0000 0.0000 -0.0000 -0.0000 0.0000  
Y 0.0000 0.0000 -0.0000 0.0000 0.0000 -0.0000  
Z 0.0000 0.0000 -0.0000 -0.0000 0.0000 -0.0000  
AT. 6 O X -0.0000 0.0000 -0.0000 -0.0000 -0.0000 -0.0000  
Y 0.0000 -0.0000 0.0000 0.0000 0.0000 0.0000  
Z 0.0000 -0.0000 0.0000 -0.0000 0.0000 0.0000  
AT. 7 O X -0.0000 0.0000 0.0000 0.0000 0.0000 0.0000  
Y 0.0000 -0.0000 -0.0000 -0.0000 -0.0000 -0.0000  
Z -0.0000 0.0000 0.0000 0.0000 0.0000 0.0000  
AT. 8 O X -0.0000 -0.0000 -0.0000 0.0000 0.0000 -0.0000  
Y 0.0000 0.0000 0.0000 -0.0000 -0.0000 0.0000  
Z -0.0000 -0.0000 -0.0000 0.0000 0.0000 -0.0000  
AT. 9 N X 0.0000 -0.0000 0.0000 0.0000 0.0000 0.0000  
Y -0.0000 -0.0000 0.0000 0.0000 0.0000 0.0000  
Z 0.0000 0.0000 0.0000 0.0000 0.0000 -0.0000  
AT. 10 N X 0.0000 0.0000 -0.0000 0.0000 0.0000 -0.0000  
Y -0.0000 0.0000 -0.0000 0.0000 0.0000 -0.0000  
Z 0.0000 -0.0000 -0.0000 0.0000 0.0000 0.0000  
AT. 11 N X -0.0000 0.0000 -0.0000 -0.0000 0.0000 0.0000  
Y 0.0000 -0.0000 -0.0000 -0.0000 0.0000 0.0000  
Z -0.0000 0.0000 0.0000 0.0000 0.0000 -0.0000  
AT. 12 N X -0.0000 -0.0000 0.0000 -0.0000 0.0000 -0.0000  
Y 0.0000 0.0000 0.0000 -0.0000 0.0000 -0.0000  
Z -0.0000 -0.0000 -0.0000 0.0000 0.0000 0.0000  
AT. 13 C X 0.0000 0.0000 -0.0000 -0.0000 0.0000 -0.0000  
Y -0.0000 -0.0000 -0.0000 -0.0000 0.0000 0.0000  
Z -0.0000 -0.0000 0.0000 -0.0000 -0.0000 0.0000

AT. 14 C X 0.0000 -0.0000 0.0000 -0.0000 0.0000 0.0000  
Y -0.0000 0.0000 0.0000 -0.0000 0.0000 -0.0000  
Z -0.0000 0.0000 -0.0000 -0.0000 -0.0000 -0.0000

AT. 15 C X 0.0000 -0.0000 0.0000 0.0000 0.0000 0.0000  
Y 0.0000 -0.0000 -0.0000 -0.0000 -0.0000 -0.0000  
Z -0.0000 0.0000 -0.0000 -0.0000 0.0000 -0.0000

AT. 16 C X 0.0000 0.0000 -0.0000 0.0000 0.0000 -0.0000  
Y 0.0000 0.0000 0.0000 -0.0000 -0.0000 0.0000  
Z -0.0000 -0.0000 0.0000 -0.0000 0.0000 0.0000

AT. 17 H X 0.0000 -0.0000 -0.0001 -0.0001 -0.0000 -0.0000  
Y -0.0002 0.0000 0.0002 0.0003 0.0001 0.0001  
Z -0.0001 -0.0000 0.0002 0.0002 0.0001 0.0001

AT. 18 H X 0.0000 0.0000 0.0001 -0.0001 -0.0000 0.0000  
Y -0.0002 -0.0000 -0.0002 0.0003 0.0001 -0.0001  
Z -0.0001 0.0000 -0.0002 0.0002 0.0001 -0.0001

AT. 19 H X -0.0001 0.0000 0.0000 0.0000 0.0000 0.0000  
Y -0.0001 0.0000 0.0000 0.0001 0.0000 0.0000  
Z 0.0002 -0.0001 -0.0001 -0.0002 -0.0001 -0.0000

AT. 20 H X -0.0001 -0.0000 -0.0000 0.0000 0.0000 -0.0000  
Y -0.0001 -0.0000 -0.0000 0.0001 0.0000 -0.0000  
Z 0.0002 0.0001 0.0001 -0.0002 -0.0001 0.0000

AT. 21 C X 0.0000 -0.0000 -0.0000 -0.0000 -0.0000 -0.0000  
Y -0.0000 0.0000 0.0000 0.0000 0.0000 0.0000  
Z 0.0000 -0.0000 -0.0000 -0.0000 0.0000 0.0000

AT. 22 C X 0.0000 0.0000 0.0000 -0.0000 -0.0000 0.0000  
Y -0.0000 -0.0000 -0.0000 0.0000 0.0000 -0.0000  
Z 0.0000 0.0000 0.0000 -0.0000 0.0000 -0.0000

AT. 23 C X -0.0000 0.0000 0.0000 0.0000 0.0000 -0.0000  
Y 0.0000 0.0000 -0.0000 -0.0001 -0.0001 -0.0000  
Z 0.0000 0.0000 -0.0000 -0.0000 -0.0001 -0.0000

AT. 24 C X -0.0000 -0.0000 -0.0000 0.0000 0.0000 0.0000  
Y 0.0000 -0.0000 0.0000 -0.0001 -0.0001 0.0000



Z 0.0000 -0.0000 0.0000 -0.0000 -0.0001 0.0000  
AT. 25 H X 0.0000 0.0000 -0.0001 -0.0001 -0.0002 -0.0001  
Y -0.0002 -0.0003 0.0004 0.0007 0.0012 0.0004  
Z -0.0000 -0.0000 0.0001 0.0001 0.0001 0.0001  
AT. 26 H X 0.0000 -0.0000 0.0001 -0.0001 -0.0002 0.0001  
Y -0.0002 0.0003 -0.0004 0.0007 0.0012 -0.0004  
Z -0.0000 0.0000 -0.0001 0.0001 0.0001 -0.0001  
AT. 27 H X 0.0000 -0.0000 0.0000 0.0000 0.0001 0.0001  
Y -0.0000 0.0001 -0.0001 -0.0001 -0.0003 -0.0002  
Z 0.0000 -0.0002 0.0002 0.0003 0.0006 0.0003  
AT. 28 H X 0.0000 0.0000 -0.0000 0.0000 0.0001 -0.0001  
Y -0.0000 -0.0001 0.0001 -0.0001 -0.0003 0.0002  
Z 0.0000 0.0002 -0.0002 0.0003 0.0006 -0.0003  
AT. 29 C X 0.0000 0.0000 0.0000 0.0000 -0.0000 -0.0000  
Y 0.0000 0.0000 -0.0001 -0.0001 -0.0000 -0.0000  
Z -0.0000 -0.0000 0.0001 0.0000 0.0000 0.0000  
AT. 30 C X 0.0000 -0.0000 -0.0000 0.0000 -0.0000 0.0000  
Y 0.0000 -0.0000 0.0001 -0.0001 -0.0000 0.0000  
Z -0.0000 0.0000 -0.0001 0.0000 0.0000 -0.0000  
AT. 31 H X -0.0001 -0.0001 0.0008 0.0007 0.0001 0.0001  
Y -0.0002 -0.0003 0.0019 0.0017 0.0001 0.0001  
Z 0.0002 0.0002 -0.0009 -0.0008 -0.0001 -0.0001  
AT. 32 H X -0.0001 0.0001 -0.0008 0.0007 0.0001 -0.0001  
Y -0.0002 0.0003 -0.0019 0.0017 0.0001 -0.0001  
Z 0.0002 -0.0002 0.0009 -0.0008 -0.0001 0.0001  
AT. 33 H X -0.0001 -0.0000 -0.0005 -0.0006 0.0001 0.0003  
Y 0.0001 0.0000 0.0004 0.0005 -0.0001 -0.0002  
Z 0.0001 0.0000 0.0007 0.0009 -0.0001 -0.0004  
AT. 34 H X -0.0001 0.0000 0.0005 -0.0006 0.0001 -0.0003  
Y 0.0001 -0.0000 -0.0004 0.0005 -0.0001 0.0002  
Z 0.0001 -0.0000 -0.0007 0.0009 -0.0001 0.0004  
AT. 35 C X -0.0000 0.0000 -0.0001 -0.0001 0.0000 -0.0000

Y -0.0000 -0.0000 -0.0002 -0.0002 -0.0000 -0.0000  
Z -0.0000 -0.0000 -0.0000 -0.0000 -0.0000 0.0000  
AT. 36 C X -0.0000 -0.0000 0.0001 -0.0001 0.0000 0.0000  
Y -0.0000 0.0000 0.0002 -0.0002 -0.0000 0.0000  
Z -0.0000 0.0000 0.0000 -0.0000 -0.0000 -0.0000  
AT. 37 C X 0.0000 -0.0000 -0.0001 -0.0001 -0.0000 0.0000  
Y 0.0000 0.0000 0.0001 0.0001 0.0000 0.0000  
Z 0.0000 0.0000 0.0001 0.0001 0.0000 0.0000  
AT. 38 C X 0.0000 0.0000 0.0001 -0.0001 -0.0000 -0.0000  
Y 0.0000 -0.0000 -0.0001 0.0001 0.0000 -0.0000  
Z 0.0000 -0.0000 -0.0001 0.0001 0.0000 -0.0000  
AT. 39 H X 0.0000 0.0000 0.0011 0.0011 0.0001 0.0000  
Y 0.0000 -0.0000 -0.0007 -0.0007 -0.0001 -0.0000  
Z -0.0000 -0.0001 -0.0015 -0.0015 -0.0002 -0.0000  
AT. 40 H X 0.0000 -0.0000 -0.0011 0.0011 0.0001 -0.0000  
Y 0.0000 0.0000 0.0007 -0.0007 -0.0001 0.0000  
Z -0.0000 0.0001 0.0015 -0.0015 -0.0002 0.0000  
AT. 41 H X -0.0002 0.0000 0.0004 0.0005 -0.0000 -0.0001  
Y -0.0001 0.0000 0.0003 0.0003 0.0000 -0.0000  
Z -0.0002 0.0000 0.0001 0.0002 0.0000 -0.0001  
AT. 42 H X -0.0002 -0.0000 -0.0004 0.0005 -0.0000 0.0001  
Y -0.0001 -0.0000 -0.0003 0.0003 0.0000 0.0000  
Z -0.0002 -0.0000 -0.0001 0.0002 0.0000 0.0001  
AT. 43 C X 0.0000 -0.0000 0.0001 0.0001 -0.0000 -0.0000  
Y 0.0000 -0.0000 -0.0001 -0.0001 -0.0000 -0.0000  
Z 0.0000 -0.0000 0.0000 -0.0000 -0.0000 -0.0000  
AT. 44 C X 0.0000 0.0000 -0.0001 0.0001 -0.0000 0.0000  
Y 0.0000 0.0000 0.0001 -0.0001 -0.0000 0.0000  
Z 0.0000 0.0000 -0.0000 -0.0000 -0.0000 0.0000  
AT. 45 H X -0.0001 0.0001 0.0005 0.0005 0.0002 0.0002  
Y -0.0001 0.0001 0.0010 0.0009 0.0003 0.0003  
Z -0.0001 0.0001 0.0006 0.0006 0.0003 0.0003

AT. 46 H X -0.0001 -0.0001 -0.0005 0.0005 0.0002 -0.0002  
Y -0.0001 -0.0001 -0.0010 0.0009 0.0003 -0.0003  
Z -0.0001 -0.0001 -0.0006 0.0006 0.0003 -0.0003

AT. 47 H X 0.0000 0.0000 -0.0017 -0.0014 0.0001 0.0002  
Y -0.0000 -0.0000 0.0013 0.0011 -0.0001 -0.0002  
Z 0.0000 -0.0000 -0.0011 -0.0009 0.0000 0.0001

AT. 48 H X 0.0000 -0.0000 0.0017 -0.0014 0.0001 -0.0002  
Y -0.0000 0.0000 -0.0013 0.0011 -0.0001 0.0002  
Z 0.0000 0.0000 0.0011 -0.0009 0.0000 -0.0001

AT. 49 C X -0.0000 -0.0000 -0.0001 -0.0001 -0.0000 -0.0000  
Y -0.0000 0.0000 -0.0002 -0.0002 0.0000 -0.0000  
Z 0.0000 -0.0000 -0.0000 -0.0000 -0.0000 -0.0000

AT. 50 C X -0.0000 0.0000 0.0001 -0.0001 -0.0000 0.0000  
Y -0.0000 -0.0000 0.0002 -0.0002 0.0000 0.0000  
Z 0.0000 0.0000 0.0000 -0.0000 -0.0000 0.0000

AT. 51 C X -0.0000 0.0000 -0.0001 -0.0001 -0.0000 -0.0000  
Y -0.0000 0.0000 -0.0000 -0.0000 0.0000 -0.0000  
Z 0.0000 -0.0000 0.0001 0.0000 -0.0000 0.0000

AT. 52 C X -0.0000 -0.0000 0.0001 -0.0001 -0.0000 0.0000  
Y -0.0000 -0.0000 0.0000 -0.0000 0.0000 0.0000  
Z 0.0000 0.0000 -0.0001 0.0000 -0.0000 -0.0000

AT. 53 H X 0.0000 -0.0001 0.0011 0.0012 0.0001 0.0001  
Y -0.0000 0.0001 -0.0006 -0.0007 -0.0001 -0.0001  
Z 0.0000 -0.0000 0.0005 0.0006 0.0001 0.0001

AT. 54 H X 0.0000 0.0001 -0.0011 0.0012 0.0001 -0.0001  
Y -0.0000 -0.0001 0.0006 -0.0007 -0.0001 0.0001  
Z 0.0000 0.0000 -0.0005 0.0006 0.0001 -0.0001

AT. 55 H X 0.0000 -0.0000 0.0009 0.0007 0.0000 0.0001  
Y 0.0001 -0.0001 0.0013 0.0011 0.0000 0.0001  
Z -0.0000 0.0001 -0.0008 -0.0006 -0.0000 -0.0001

AT. 56 H X 0.0000 0.0000 -0.0009 0.0007 0.0000 -0.0001  
Y 0.0001 0.0001 -0.0013 0.0011 0.0000 -0.0001

Z -0.0000 -0.0001 0.0008 -0.0006 -0.0000 0.0001  
AT. 57 C X 0.0000 -0.0000 0.0002 0.0002 0.0000 0.0000  
Y -0.0000 -0.0000 0.0003 0.0003 0.0000 0.0000  
Z -0.0000 -0.0000 0.0000 0.0000 -0.0000 0.0000  
AT. 58 C X 0.0000 0.0000 -0.0002 0.0002 0.0000 -0.0000  
Y -0.0000 0.0000 -0.0003 0.0003 0.0000 -0.0000  
Z -0.0000 0.0000 -0.0000 0.0000 -0.0000 -0.0000  
AT. 59 H X -0.0000 -0.0000 -0.0010 -0.0011 -0.0002 -0.0000  
Y -0.0001 -0.0001 -0.0016 -0.0016 -0.0004 0.0000  
Z 0.0001 0.0001 0.0012 0.0012 0.0003 -0.0000  
AT. 60 H X -0.0000 0.0000 0.0010 -0.0011 -0.0002 0.0000  
Y -0.0001 0.0001 0.0016 -0.0016 -0.0004 -0.0000  
Z 0.0001 -0.0001 -0.0012 0.0012 0.0003 0.0000  
AT. 61 H X -0.0001 -0.0000 -0.0001 -0.0000 -0.0002 0.0002  
Y 0.0001 0.0000 0.0004 0.0003 0.0002 -0.0001  
Z 0.0002 0.0000 0.0004 0.0002 0.0003 -0.0002  
AT. 62 H X -0.0001 0.0000 0.0001 -0.0000 -0.0002 -0.0002  
Y 0.0001 -0.0000 -0.0004 0.0003 0.0002 0.0001  
Z 0.0002 -0.0000 -0.0004 0.0002 0.0003 0.0002  
AT. 63 H X 0.0001 0.0001 -0.0013 -0.0013 -0.0001 -0.0003  
Y 0.0001 0.0001 -0.0016 -0.0015 -0.0001 -0.0003  
Z 0.0001 0.0001 -0.0017 -0.0016 -0.0001 -0.0003  
AT. 64 H X 0.0001 -0.0001 0.0013 -0.0013 -0.0001 0.0003  
Y 0.0001 -0.0001 0.0016 -0.0015 -0.0001 0.0003  
Z 0.0001 -0.0001 0.0017 -0.0016 -0.0001 0.0003  
AT. 65 C X 0.0000 -0.0000 0.0000 0.0005 -0.0000 0.0001  
Y 0.0000 -0.0000 0.0000 0.0005 0.0001 0.0001  
Z 0.0000 0.0000 0.0000 0.0002 -0.0001 -0.0000  
AT. 66 C X 0.0000 0.0000 -0.0000 0.0005 -0.0000 -0.0001  
Y 0.0000 0.0000 -0.0000 0.0005 0.0001 -0.0001  
Z 0.0000 -0.0000 -0.0000 0.0002 -0.0001 0.0000  
AT. 67 H X -0.0001 0.0000 -0.0003 -0.0034 0.0002 -0.0005

Y -0.0001 0.0000 -0.0000 -0.0033 0.0002 -0.0005  
Z -0.0001 0.0000 0.0000 -0.0036 0.0002 -0.0005  
AT. 68 H X -0.0001 -0.0000 0.0003 -0.0034 0.0002 0.0005  
Y -0.0001 -0.0000 0.0000 -0.0033 0.0002 0.0005  
Z -0.0001 -0.0000 -0.0000 -0.0036 0.0002 0.0005  
AT. 69 H X -0.0000 0.0000 -0.0002 -0.0012 0.0007 -0.0001  
Y 0.0000 -0.0000 0.0004 0.0014 -0.0006 0.0000  
Z -0.0000 -0.0000 -0.0002 -0.0007 0.0004 -0.0000  
AT. 70 H X -0.0000 -0.0000 0.0002 -0.0012 0.0007 0.0001  
Y 0.0000 0.0000 -0.0004 0.0014 -0.0006 -0.0000  
Z -0.0000 0.0000 0.0002 -0.0007 0.0004 0.0000  
AT. 71 H X -0.0000 0.0000 0.0004 -0.0015 -0.0004 -0.0006  
Y -0.0000 0.0000 -0.0001 -0.0035 -0.0007 -0.0011  
Z 0.0000 -0.0000 -0.0002 0.0024 0.0005 0.0008  
AT. 72 H X -0.0000 -0.0000 -0.0004 -0.0015 -0.0004 0.0006  
Y -0.0000 -0.0000 0.0001 -0.0035 -0.0007 0.0011  
Z 0.0000 0.0000 0.0002 0.0024 0.0005 -0.0008  
AT. 73 C X 0.0000 -0.0000 -0.0074 -0.0074 -0.0001 -0.0001  
Y 0.0000 -0.0000 -0.0103 -0.0102 -0.0001 -0.0001  
Z 0.0000 -0.0000 -0.0000 -0.0001 0.0000 0.0000  
AT. 74 C X 0.0000 0.0000 0.0074 -0.0074 -0.0001 0.0001  
Y 0.0000 0.0000 0.0103 -0.0102 -0.0001 0.0001  
Z 0.0000 0.0000 0.0000 -0.0001 0.0000 -0.0000  
AT. 75 H X -0.0001 0.0001 0.0378 0.0376 0.0003 0.0004  
Y -0.0002 0.0002 0.0724 0.0720 0.0006 0.0007  
Z 0.0002 -0.0001 -0.0545 -0.0541 -0.0004 -0.0006  
AT. 76 H X -0.0001 -0.0001 -0.0378 0.0376 0.0003 -0.0004  
Y -0.0002 -0.0002 -0.0724 0.0720 0.0006 -0.0007  
Z 0.0002 0.0001 0.0545 -0.0541 -0.0004 0.0006  
AT. 77 H X -0.0002 0.0001 0.0506 0.0507 0.0003 0.0004  
Y -0.0002 0.0001 0.0504 0.0506 0.0003 0.0004  
Z -0.0003 0.0002 0.0549 0.0551 0.0004 0.0005

AT. 78 H X -0.0002 -0.0001 -0.0506 0.0507 0.0003 -0.0004  
Y -0.0002 -0.0001 -0.0504 0.0506 0.0003 -0.0004  
Z -0.0003 -0.0002 -0.0549 0.0551 0.0004 -0.0005

AT. 79 I X 0.0000 -0.0000 -0.0000 -0.0000 0.0000 0.0000  
Y -0.0000 0.0000 -0.0000 -0.0000 0.0000 0.0000  
Z -0.0000 -0.0000 0.0000 -0.0000 -0.0000 -0.0000

AT. 80 I X 0.0000 0.0000 0.0000 -0.0000 0.0000 -0.0000  
Y -0.0000 -0.0000 0.0000 -0.0000 0.0000 -0.0000  
Z -0.0000 0.0000 -0.0000 -0.0000 -0.0000 0.0000

AT. 81 I X 0.0000 -0.0000 -0.0000 -0.0000 -0.0000 -0.0000  
Y -0.0000 0.0000 0.0000 0.0000 -0.0000 -0.0000  
Z 0.0000 -0.0000 0.0000 -0.0000 -0.0000 -0.0000

AT. 82 I X 0.0000 0.0000 0.0000 -0.0000 -0.0000 0.0000  
Y -0.0000 -0.0000 -0.0000 0.0000 -0.0000 0.0000  
Z 0.0000 0.0000 -0.0000 -0.0000 -0.0000 0.0000

AT. 83 O X -0.0000 -0.0000 -0.0000 0.0000 0.0001 0.0001  
Y -0.0000 -0.0000 -0.0000 0.0000 -0.0000 -0.0000  
Z -0.0000 -0.0000 -0.0000 0.0000 0.0000 0.0000

AT. 84 O X -0.0000 0.0000 0.0000 0.0000 0.0001 -0.0001  
Y -0.0000 0.0000 0.0000 0.0000 -0.0000 0.0000  
Z -0.0000 0.0000 0.0000 0.0000 0.0000 -0.0000

AT. 85 O X 0.0000 -0.0000 0.0000 0.0000 0.0000 0.0000  
Y -0.0000 -0.0000 0.0000 0.0000 -0.0000 -0.0000  
Z -0.0000 0.0000 -0.0000 -0.0000 -0.0000 -0.0000

AT. 86 O X 0.0000 0.0000 -0.0000 0.0000 0.0000 -0.0000  
Y -0.0000 0.0000 -0.0000 0.0000 -0.0000 0.0000  
Z -0.0000 -0.0000 0.0000 -0.0000 -0.0000 0.0000

AT. 87 N X -0.0000 -0.0000 0.0000 0.0000 -0.0000 -0.0000  
Y 0.0000 0.0000 -0.0000 0.0000 -0.0000 -0.0000  
Z 0.0000 0.0000 -0.0000 0.0000 -0.0000 -0.0000

AT. 88 N X -0.0000 0.0000 -0.0000 0.0000 -0.0000 0.0000  
Y 0.0000 -0.0000 0.0000 0.0000 -0.0000 0.0000

Z 0.0000 -0.0000 0.0000 0.0000 -0.0000 0.0000  
AT. 89 N X 0.0000 -0.0000 0.0000 0.0000 0.0000 0.0000  
Y -0.0000 -0.0000 0.0000 0.0000 -0.0000 -0.0000  
Z -0.0000 0.0000 -0.0000 -0.0000 0.0000 0.0000  
AT. 90 N X 0.0000 0.0000 -0.0000 0.0000 0.0000 -0.0000  
Y -0.0000 0.0000 -0.0000 0.0000 -0.0000 0.0000  
Z -0.0000 -0.0000 0.0000 -0.0000 0.0000 -0.0000  
AT. 91 C X 0.0000 0.0000 -0.0000 -0.0000 0.0002 0.0001  
Y -0.0000 -0.0000 -0.0000 -0.0000 0.0001 0.0001  
Z 0.0000 0.0000 0.0000 -0.0000 -0.0001 -0.0001  
AT. 92 C X 0.0000 -0.0000 0.0000 -0.0000 0.0002 -0.0001  
Y -0.0000 0.0000 0.0000 -0.0000 0.0001 -0.0001  
Z 0.0000 -0.0000 -0.0000 -0.0000 -0.0001 0.0001  
AT. 93 C X -0.0000 -0.0000 0.0000 0.0000 -0.0039 -0.0040  
Y -0.0001 -0.0001 0.0001 0.0001 -0.0088 -0.0088  
Z -0.0000 -0.0000 -0.0000 -0.0000 0.0004 0.0003  
AT. 94 C X -0.0000 0.0000 -0.0000 0.0000 -0.0039 0.0040  
Y -0.0001 0.0001 -0.0001 0.0001 -0.0088 0.0088  
Z -0.0000 0.0000 0.0000 -0.0000 0.0004 -0.0003  
AT. 95 H X 0.0005 0.0005 -0.0006 -0.0004 0.0592 0.0596  
Y 0.0007 0.0008 -0.0009 -0.0007 0.0918 0.0924  
Z 0.0004 0.0005 -0.0005 -0.0004 0.0528 0.0531  
AT. 96 H X 0.0005 -0.0005 0.0006 -0.0004 0.0592 -0.0596  
Y 0.0007 -0.0008 0.0009 -0.0007 0.0918 -0.0924  
Z 0.0004 -0.0005 0.0005 -0.0004 0.0528 -0.0531  
AT. 97 H X -0.0001 -0.0001 0.0002 0.0001 -0.0153 -0.0154  
Y 0.0001 0.0001 -0.0001 -0.0001 0.0107 0.0103  
Z -0.0004 -0.0004 0.0005 0.0004 -0.0559 -0.0552  
AT. 98 H X -0.0001 0.0001 -0.0002 0.0001 -0.0153 0.0154  
Y 0.0001 -0.0001 0.0001 -0.0001 0.0107 -0.0103  
Z -0.0004 0.0004 -0.0005 0.0004 -0.0559 0.0552  
AT. 99 C X -0.0000 0.0000 -0.0000 -0.0000 -0.0000 -0.0000

Y -0.0000 0.0000 -0.0000 -0.0000 -0.0000 -0.0000  
Z 0.0000 -0.0000 0.0000 0.0000 0.0000 -0.0000  
AT.100 C X -0.0000 -0.0000 0.0000 -0.0000 -0.0000 0.0000  
Y -0.0000 -0.0000 0.0000 -0.0000 -0.0000 0.0000  
Z 0.0000 0.0000 -0.0000 0.0000 0.0000 0.0000  
AT.101 C X -0.0000 -0.0000 0.0000 0.0000 -0.0003 -0.0002  
Y -0.0000 -0.0000 0.0000 0.0000 -0.0006 -0.0003  
Z 0.0000 -0.0000 0.0000 0.0000 -0.0005 -0.0002  
AT.102 C X -0.0000 0.0000 -0.0000 0.0000 -0.0003 0.0002  
Y -0.0000 0.0000 -0.0000 0.0000 -0.0006 0.0003  
Z 0.0000 0.0000 -0.0000 0.0000 -0.0005 0.0002  
AT.103 H X 0.0000 0.0001 -0.0000 -0.0002 0.0043 0.0021  
Y -0.0000 0.0003 -0.0001 -0.0004 0.0099 0.0048  
Z 0.0000 0.0000 -0.0000 -0.0000 0.0001 -0.0000  
AT.104 H X 0.0000 -0.0001 0.0000 -0.0002 0.0043 -0.0021  
Y -0.0000 -0.0003 0.0001 -0.0004 0.0099 -0.0048  
Z 0.0000 -0.0000 0.0000 -0.0000 0.0001 0.0000  
AT.105 H X 0.0001 -0.0001 -0.0000 0.0000 -0.0012 -0.0004  
Y 0.0001 -0.0001 -0.0000 0.0001 -0.0025 -0.0009  
Z -0.0002 0.0003 -0.0000 -0.0002 0.0060 0.0020  
AT.106 H X 0.0001 0.0001 0.0000 0.0000 -0.0012 0.0004  
Y 0.0001 0.0001 0.0000 0.0001 -0.0025 0.0009  
Z -0.0002 -0.0003 0.0000 -0.0002 0.0060 -0.0020  
AT.107 C X -0.0001 -0.0001 0.0000 -0.0000 -0.0000 -0.0000  
Y -0.0003 -0.0003 0.0000 0.0000 -0.0000 -0.0000  
Z 0.0001 0.0001 0.0000 -0.0000 -0.0000 0.0000  
AT.108 C X -0.0001 0.0001 -0.0000 -0.0000 -0.0000 0.0000  
Y -0.0003 0.0003 -0.0000 0.0000 -0.0000 0.0000  
Z 0.0001 -0.0001 -0.0000 -0.0000 -0.0000 -0.0000  
AT.109 H X -0.0006 -0.0006 0.0000 0.0000 -0.0000 -0.0000  
Y 0.0036 0.0036 -0.0000 -0.0000 0.0000 0.0001  
Z -0.0017 -0.0017 0.0000 0.0000 -0.0000 -0.0001



AT.110 H X -0.0006 0.0006 -0.0000 0.0000 -0.0000 0.0000  
Y 0.0036 -0.0036 0.0000 -0.0000 0.0000 -0.0001  
Z -0.0017 0.0017 -0.0000 0.0000 -0.0000 0.0001

AT.111 H X 0.0016 0.0015 -0.0001 0.0000 0.0003 0.0002  
Y 0.0004 0.0004 -0.0000 0.0000 0.0001 0.0000  
Z 0.0013 0.0013 -0.0001 0.0000 0.0002 0.0001

AT.112 H X 0.0016 -0.0015 0.0001 0.0000 0.0003 -0.0002  
Y 0.0004 -0.0004 0.0000 0.0000 0.0001 -0.0000  
Z 0.0013 -0.0013 0.0001 0.0000 0.0002 -0.0001

AT.113 C X 0.0000 0.0000 0.0000 0.0000 0.0000 0.0000  
Y -0.0002 -0.0002 0.0000 -0.0000 0.0000 0.0000  
Z -0.0000 -0.0000 -0.0000 -0.0000 0.0000 -0.0000

AT.114 C X 0.0000 -0.0000 -0.0000 0.0000 0.0000 -0.0000  
Y -0.0002 0.0002 -0.0000 -0.0000 0.0000 -0.0000  
Z -0.0000 0.0000 0.0000 -0.0000 0.0000 0.0000

AT.115 C X -0.0000 0.0000 -0.0000 0.0000 0.0000 0.0000  
Y 0.0001 0.0001 -0.0000 0.0000 0.0000 0.0000  
Z -0.0000 -0.0000 0.0000 0.0000 0.0001 0.0001

AT.116 C X -0.0000 -0.0000 0.0000 0.0000 0.0000 -0.0000  
Y 0.0001 -0.0001 0.0000 0.0000 0.0000 -0.0000  
Z -0.0000 0.0000 -0.0000 0.0000 0.0001 -0.0001

AT.117 H X -0.0006 -0.0007 0.0000 -0.0000 -0.0006 -0.0006  
Y -0.0000 -0.0000 0.0000 -0.0000 -0.0001 -0.0001  
Z -0.0005 -0.0005 0.0000 -0.0000 -0.0006 -0.0005

AT.118 H X -0.0006 0.0007 -0.0000 -0.0000 -0.0006 0.0006  
Y -0.0000 0.0000 -0.0000 -0.0000 -0.0001 0.0001  
Z -0.0005 0.0005 -0.0000 -0.0000 -0.0006 0.0005

AT.119 H X -0.0002 -0.0002 0.0000 0.0000 0.0001 0.0002  
Y 0.0002 0.0002 0.0000 -0.0000 -0.0002 -0.0003  
Z -0.0000 -0.0000 -0.0000 -0.0000 -0.0003 -0.0003

AT.120 H X -0.0002 0.0002 -0.0000 0.0000 0.0001 -0.0002  
Y 0.0002 -0.0002 -0.0000 -0.0000 -0.0002 0.0003

Z -0.0000 0.0000 0.0000 -0.0000 -0.0003 0.0003  
AT. 121 C X -0.0000 -0.0000 0.0000 -0.0000 0.0002 0.0002  
Y -0.0000 -0.0000 0.0000 0.0000 0.0000 0.0000  
Z -0.0001 -0.0001 -0.0000 0.0000 -0.0001 -0.0002  
AT. 122 C X -0.0000 0.0000 -0.0000 -0.0000 0.0002 -0.0002  
Y -0.0000 0.0000 -0.0000 0.0000 0.0000 -0.0000  
Z -0.0001 0.0001 0.0000 0.0000 -0.0001 0.0002  
AT. 123 H X -0.0001 -0.0002 0.0000 0.0000 -0.0001 -0.0001  
Y 0.0012 0.0013 0.0000 -0.0001 0.0004 0.0005  
Z 0.0009 0.0010 0.0000 -0.0001 0.0004 0.0005  
AT. 124 H X -0.0001 0.0002 -0.0000 0.0000 -0.0001 0.0001  
Y 0.0012 -0.0013 -0.0000 -0.0001 0.0004 -0.0005  
Z 0.0009 -0.0010 -0.0000 -0.0001 0.0004 -0.0005  
AT. 125 H X 0.0006 0.0006 -0.0001 0.0000 -0.0016 -0.0019  
Y 0.0004 0.0004 -0.0000 0.0000 -0.0008 -0.0009  
Z -0.0005 -0.0005 0.0001 -0.0000 0.0013 0.0016  
AT. 126 H X 0.0006 -0.0006 0.0001 0.0000 -0.0016 0.0019  
Y 0.0004 -0.0004 0.0000 0.0000 -0.0008 0.0009  
Z -0.0005 0.0005 -0.0001 -0.0000 0.0013 -0.0016  
AT. 127 C X 0.0001 0.0001 0.0000 0.0000 0.0000 0.0000  
Y -0.0002 -0.0002 0.0000 0.0000 0.0000 0.0000  
Z -0.0000 -0.0000 -0.0000 -0.0000 -0.0000 -0.0000  
AT. 128 C X 0.0001 -0.0001 -0.0000 0.0000 0.0000 -0.0000  
Y -0.0002 0.0002 -0.0000 0.0000 0.0000 -0.0000  
Z -0.0000 0.0000 0.0000 -0.0000 -0.0000 0.0000  
AT. 129 C X 0.0001 0.0001 0.0000 0.0000 0.0006 0.0006  
Y -0.0000 -0.0001 0.0000 -0.0000 0.0006 0.0006  
Z 0.0000 0.0000 -0.0000 -0.0000 -0.0007 -0.0007  
AT. 130 C X 0.0001 -0.0001 -0.0000 0.0000 0.0006 -0.0006  
Y -0.0000 0.0001 -0.0000 -0.0000 0.0006 -0.0006  
Z 0.0000 -0.0000 0.0000 -0.0000 -0.0007 0.0007  
AT. 131 H X -0.0013 -0.0013 -0.0001 -0.0001 -0.0080 -0.0084

Y -0.0003 -0.0003 -0.0000 -0.0000 -0.0024 -0.0025  
Z 0.0008 0.0008 0.0001 0.0001 0.0060 0.0063  
AT. 132 H X -0.0013 0.0013 0.0001 -0.0001 -0.0080 0.0084  
Y -0.0003 0.0003 0.0000 -0.0000 -0.0024 0.0025  
Z 0.0008 -0.0008 -0.0001 0.0001 0.0060 -0.0063  
AT. 133 H X -0.0006 -0.0006 0.0000 -0.0000 0.0013 0.0013  
Y 0.0016 0.0017 0.0000 0.0001 -0.0039 -0.0040  
Z -0.0006 -0.0007 0.0000 -0.0001 0.0024 0.0024  
AT. 134 H X -0.0006 0.0006 -0.0000 -0.0000 0.0013 -0.0013  
Y 0.0016 -0.0017 -0.0000 0.0001 -0.0039 0.0040  
Z -0.0006 0.0007 -0.0000 -0.0001 0.0024 -0.0024  
AT. 135 C X -0.0001 -0.0001 0.0000 -0.0000 -0.0000 -0.0000  
Y 0.0003 0.0002 -0.0000 -0.0000 -0.0000 -0.0001  
Z 0.0000 -0.0000 -0.0000 -0.0000 -0.0000 -0.0000  
AT. 136 C X -0.0001 0.0001 -0.0000 -0.0000 -0.0000 0.0000  
Y 0.0003 -0.0002 0.0000 -0.0000 -0.0000 0.0001  
Z 0.0000 0.0000 0.0000 -0.0000 -0.0000 0.0000  
AT. 137 H X 0.0008 0.0005 -0.0000 0.0000 -0.0001 -0.0001  
Y -0.0018 -0.0008 0.0001 -0.0000 0.0002 0.0004  
Z 0.0011 0.0005 -0.0000 0.0000 -0.0002 -0.0003  
AT. 138 H X 0.0008 -0.0005 0.0000 0.0000 -0.0001 0.0001  
Y -0.0018 0.0008 -0.0001 -0.0000 0.0002 -0.0004  
Z 0.0011 -0.0005 0.0000 0.0000 -0.0002 0.0003  
AT. 139 H X 0.0002 0.0010 -0.0000 0.0000 0.0002 0.0003  
Y 0.0003 0.0005 -0.0000 0.0000 0.0000 0.0000  
Z 0.0001 0.0008 -0.0000 0.0000 0.0001 0.0002  
AT. 140 H X 0.0002 -0.0010 0.0000 0.0000 0.0002 -0.0003  
Y 0.0003 -0.0005 0.0000 0.0000 0.0000 -0.0000  
Z 0.0001 -0.0008 0.0000 0.0000 0.0001 -0.0002  
AT. 141 H X 0.0004 0.0003 -0.0000 -0.0000 -0.0001 -0.0002  
Y -0.0015 -0.0013 0.0001 0.0000 0.0002 0.0004  
Z -0.0013 -0.0013 0.0001 0.0000 0.0002 0.0004

AT. 142 H X 0.0004 -0.0003 0.0000 -0.0000 -0.0001 0.0002  
Y -0.0015 0.0013 -0.0001 0.0000 0.0002 -0.0004  
Z -0.0013 0.0013 -0.0001 0.0000 0.0002 -0.0004

AT. 143 C X -0.0002 -0.0000 -0.0000 0.0000 -0.0001 -0.0001  
Y 0.0002 0.0002 0.0000 0.0000 -0.0001 -0.0001  
Z 0.0002 -0.0000 -0.0000 -0.0000 0.0002 0.0002

AT. 144 C X -0.0002 0.0000 0.0000 0.0000 -0.0001 0.0001  
Y 0.0002 -0.0002 -0.0000 0.0000 -0.0001 0.0001  
Z 0.0002 0.0000 0.0000 -0.0000 0.0002 -0.0002

AT. 145 H X 0.0005 0.0002 0.0000 0.0000 0.0002 0.0002  
Y -0.0015 -0.0004 -0.0000 -0.0001 -0.0008 -0.0009  
Z -0.0014 -0.0003 -0.0000 -0.0001 -0.0006 -0.0007

AT. 146 H X 0.0005 -0.0002 -0.0000 0.0000 0.0002 -0.0002  
Y -0.0015 0.0004 0.0000 -0.0001 -0.0008 0.0009  
Z -0.0014 0.0003 0.0000 -0.0001 -0.0006 0.0007

AT. 147 H X 0.0018 -0.0004 -0.0000 -0.0001 0.0009 0.0016  
Y 0.0009 0.0000 0.0000 -0.0000 0.0004 0.0006  
Z -0.0014 0.0002 0.0000 0.0001 -0.0007 -0.0012

AT. 148 H X 0.0018 0.0004 0.0000 -0.0001 0.0009 -0.0016  
Y 0.0009 -0.0000 -0.0000 -0.0000 0.0004 -0.0006  
Z -0.0014 -0.0002 -0.0000 0.0001 -0.0007 0.0012

AT. 149 H X 0.0001 0.0001 0.0000 0.0000 -0.0003 -0.0005  
Y -0.0013 -0.0012 -0.0001 -0.0001 0.0011 0.0016  
Z 0.0007 0.0006 0.0001 0.0001 -0.0006 -0.0009

AT. 150 H X 0.0001 -0.0001 -0.0000 0.0000 -0.0003 0.0005  
Y -0.0013 0.0012 0.0001 -0.0001 0.0011 -0.0016  
Z 0.0007 -0.0006 -0.0001 0.0001 -0.0006 0.0009

AT. 151 C X 0.0034 0.0034 -0.0000 0.0000 -0.0000 -0.0000  
Y -0.0117 -0.0117 0.0000 -0.0000 0.0001 0.0001  
Z 0.0019 0.0019 -0.0000 0.0000 0.0000 0.0000

AT. 152 C X 0.0034 -0.0034 0.0000 0.0000 -0.0000 0.0000  
Y -0.0117 0.0117 -0.0000 -0.0000 0.0001 -0.0001

Z 0.0019 -0.0019 0.0000 0.0000 0.0000 -0.0000  
AT. 153 H X -0.0266 -0.0266 0.0001 -0.0001 0.0002 0.0002  
Y 0.0996 0.0995 -0.0003 0.0004 -0.0007 -0.0008  
Z -0.0614 -0.0614 0.0002 -0.0003 0.0005 0.0005  
AT. 154 H X -0.0266 0.0266 -0.0001 -0.0001 0.0002 -0.0002  
Y 0.0996 -0.0995 0.0003 0.0004 -0.0007 0.0008  
Z -0.0614 0.0614 -0.0002 -0.0003 0.0005 -0.0005  
AT. 155 H X -0.0140 -0.0141 0.0000 -0.0000 0.0002 0.0002  
Y 0.0411 0.0414 -0.0001 0.0001 -0.0005 -0.0005  
Z 0.0400 0.0402 -0.0001 0.0001 -0.0005 -0.0005  
AT. 156 H X -0.0140 0.0141 -0.0000 -0.0000 0.0002 -0.0002  
Y 0.0411 -0.0414 0.0001 0.0001 -0.0005 0.0005  
Z 0.0400 -0.0402 0.0001 0.0001 -0.0005 0.0005  
AT. 157 O X 0.0000 0.0000 -0.0000 0.0000 0.0000 -0.0000  
Y -0.0000 -0.0000 0.0000 -0.0000 -0.0000 0.0000  
Z -0.0000 -0.0000 0.0000 -0.0000 -0.0000 0.0000  
AT. 158 O X 0.0000 -0.0000 0.0000 0.0000 0.0000 0.0000  
Y -0.0000 0.0000 -0.0000 -0.0000 -0.0000 -0.0000  
Z -0.0000 0.0000 -0.0000 -0.0000 -0.0000 -0.0000  
AT. 159 O X 0.0001 0.0001 0.0000 -0.0000 -0.0000 0.0000  
Y -0.0001 -0.0001 -0.0000 0.0000 0.0000 -0.0000  
Z 0.0002 0.0002 0.0001 -0.0001 -0.0000 0.0000  
AT. 160 O X 0.0001 -0.0001 -0.0000 -0.0000 -0.0000 -0.0000  
Y -0.0001 0.0001 0.0000 0.0000 0.0000 0.0000  
Z 0.0002 -0.0002 -0.0001 -0.0001 -0.0000 -0.0000  
AT. 161 H X -0.0001 -0.0001 0.0000 -0.0000 -0.0000 0.0000  
Y 0.0003 0.0003 -0.0004 0.0003 0.0002 -0.0002  
Z 0.0001 0.0001 -0.0001 0.0001 0.0001 -0.0000  
AT. 162 H X -0.0001 0.0001 -0.0000 -0.0000 -0.0000 -0.0000  
Y 0.0003 -0.0003 0.0004 0.0003 0.0002 0.0002  
Z 0.0001 -0.0001 0.0001 0.0001 0.0001 0.0000  
AT. 163 H X -0.0010 -0.0011 -0.0003 0.0003 0.0001 -0.0002

|            |         |         |         |         |         |         |
|------------|---------|---------|---------|---------|---------|---------|
| Y          | 0.0008  | 0.0009  | 0.0002  | -0.0002 | -0.0001 | 0.0001  |
| Z          | -0.0026 | -0.0027 | -0.0008 | 0.0007  | 0.0003  | -0.0005 |
| AT.164 H X | -0.0010 | 0.0011  | 0.0003  | 0.0003  | 0.0001  | 0.0002  |
| Y          | 0.0008  | -0.0009 | -0.0002 | -0.0002 | -0.0001 | -0.0001 |
| Z          | -0.0026 | 0.0027  | 0.0008  | 0.0007  | 0.0003  | 0.0005  |
| AT.165 O X | 0.0000  | 0.0000  | -0.0000 | -0.0000 | 0.0000  | 0.0000  |
| Y          | 0.0000  | 0.0000  | -0.0000 | -0.0000 | 0.0000  | 0.0000  |
| Z          | 0.0000  | 0.0000  | 0.0000  | -0.0000 | 0.0000  | 0.0000  |
| AT.166 O X | 0.0000  | -0.0000 | 0.0000  | -0.0000 | 0.0000  | -0.0000 |
| Y          | 0.0000  | -0.0000 | 0.0000  | -0.0000 | 0.0000  | -0.0000 |
| Z          | 0.0000  | -0.0000 | -0.0000 | -0.0000 | 0.0000  | -0.0000 |
| AT.167 H X | -0.0004 | -0.0004 | 0.0001  | 0.0003  | -0.0005 | -0.0002 |
| Y          | -0.0002 | -0.0002 | 0.0000  | 0.0001  | -0.0002 | -0.0001 |
| Z          | -0.0001 | -0.0001 | 0.0000  | 0.0001  | -0.0001 | -0.0001 |
| AT.168 H X | -0.0004 | 0.0004  | -0.0001 | 0.0003  | -0.0005 | 0.0002  |
| Y          | -0.0002 | 0.0002  | -0.0000 | 0.0001  | -0.0002 | 0.0001  |
| Z          | -0.0001 | 0.0001  | -0.0000 | 0.0001  | -0.0001 | 0.0001  |
| AT.169 O X | 0.0000  | 0.0000  | -0.0001 | 0.0000  | -0.0000 | -0.0000 |
| Y          | -0.0000 | -0.0000 | 0.0002  | -0.0001 | 0.0000  | 0.0000  |
| Z          | 0.0000  | 0.0000  | -0.0001 | 0.0001  | -0.0000 | -0.0000 |
| AT.170 O X | 0.0000  | -0.0000 | 0.0001  | 0.0000  | -0.0000 | 0.0000  |
| Y          | -0.0000 | 0.0000  | -0.0002 | -0.0001 | 0.0000  | -0.0000 |
| Z          | 0.0000  | -0.0000 | 0.0001  | 0.0001  | -0.0000 | 0.0000  |
| AT.171 H X | -0.0001 | -0.0002 | 0.0009  | -0.0007 | 0.0002  | 0.0003  |
| Y          | 0.0002  | 0.0003  | -0.0022 | 0.0018  | -0.0006 | -0.0004 |
| Z          | -0.0001 | -0.0002 | 0.0010  | -0.0008 | 0.0003  | 0.0002  |
| AT.172 H X | -0.0001 | 0.0002  | -0.0009 | -0.0007 | 0.0002  | -0.0003 |
| Y          | 0.0002  | -0.0003 | 0.0022  | 0.0018  | -0.0006 | 0.0004  |
| Z          | -0.0001 | 0.0002  | -0.0010 | -0.0008 | 0.0003  | -0.0002 |

FREQ(CM\*\*-1) 3049.63 3049.82 3051.41 3052.72 3052.72 3054.06

AT. 1 I X -0.0000 -0.0000 -0.0000 -0.0000 -0.0000 0.0000  
Y 0.0000 0.0000 0.0000 0.0000 0.0000 -0.0000  
Z -0.0000 0.0000 0.0000 0.0000 0.0000 0.0000

AT. 2 I X 0.0000 -0.0000 -0.0000 0.0000 -0.0000 -0.0000  
Y -0.0000 0.0000 0.0000 -0.0000 0.0000 0.0000  
Z 0.0000 0.0000 0.0000 -0.0000 0.0000 -0.0000

AT. 3 I X 0.0000 0.0000 -0.0000 -0.0000 -0.0000 0.0000  
Y 0.0000 0.0000 0.0000 0.0000 0.0000 -0.0000  
Z 0.0000 0.0000 0.0000 0.0000 0.0000 0.0000

AT. 4 I X -0.0000 0.0000 -0.0000 0.0000 -0.0000 -0.0000  
Y -0.0000 0.0000 0.0000 -0.0000 0.0000 0.0000  
Z -0.0000 0.0000 0.0000 -0.0000 0.0000 -0.0000

AT. 5 O X 0.0000 -0.0000 -0.0000 -0.0000 -0.0000 0.0000  
Y -0.0000 0.0000 0.0000 0.0000 0.0000 -0.0000  
Z 0.0000 -0.0000 0.0000 0.0000 0.0000 -0.0000

AT. 6 O X -0.0000 -0.0000 -0.0000 0.0000 -0.0000 -0.0000  
Y 0.0000 0.0000 0.0000 -0.0000 0.0000 0.0000  
Z -0.0000 -0.0000 0.0000 -0.0000 0.0000 0.0000

AT. 7 O X -0.0001 -0.0001 -0.0000 -0.0000 0.0000 -0.0000  
Y 0.0000 0.0000 0.0000 0.0000 -0.0000 -0.0000  
Z -0.0000 -0.0000 -0.0000 0.0000 0.0000 -0.0000

AT. 8 O X 0.0001 -0.0001 -0.0000 0.0000 0.0000 0.0000  
Y -0.0000 0.0000 0.0000 -0.0000 -0.0000 0.0000  
Z 0.0000 -0.0000 -0.0000 -0.0000 0.0000 0.0000

AT. 9 N X -0.0000 -0.0000 -0.0000 0.0000 0.0000 0.0000  
Y -0.0000 -0.0000 0.0000 -0.0000 0.0000 0.0000  
Z -0.0000 0.0000 0.0000 -0.0000 -0.0000 -0.0000

AT. 10 N X 0.0000 -0.0000 -0.0000 -0.0000 0.0000 -0.0000  
Y 0.0000 -0.0000 0.0000 0.0000 0.0000 -0.0000  
Z 0.0000 0.0000 0.0000 0.0000 -0.0000 0.0000

AT. 11 N X 0.0000 0.0000 -0.0000 -0.0000 -0.0000 0.0000  
Y -0.0000 -0.0000 0.0000 0.0000 0.0000 0.0000

Z 0.0000 0.0000 -0.0000 -0.0000 -0.0000 -0.0000  
AT. 12 N X -0.0000 0.0000 -0.0000 0.0000 -0.0000 -0.0000  
Y 0.0000 -0.0000 0.0000 -0.0000 0.0000 -0.0000  
Z -0.0000 0.0000 -0.0000 0.0000 -0.0000 0.0000  
AT. 13 C X -0.0000 0.0000 0.0000 0.0000 0.0000 -0.0000  
Y 0.0000 -0.0000 0.0000 -0.0000 0.0000 0.0000  
Z 0.0000 -0.0000 -0.0000 -0.0000 -0.0000 0.0000  
AT. 14 C X 0.0000 0.0000 0.0000 -0.0000 0.0000 0.0000  
Y -0.0000 -0.0000 0.0000 0.0000 0.0000 -0.0000  
Z -0.0000 -0.0000 -0.0000 0.0000 -0.0000 -0.0000  
AT. 15 C X -0.0000 0.0001 0.0000 0.0000 0.0000 0.0000  
Y -0.0004 0.0001 0.0000 -0.0001 -0.0001 -0.0000  
Z 0.0002 -0.0002 -0.0000 0.0000 -0.0000 0.0000  
AT. 16 C X 0.0000 0.0001 0.0000 -0.0000 0.0000 -0.0000  
Y 0.0004 0.0001 0.0000 0.0001 -0.0001 0.0000  
Z -0.0002 -0.0002 -0.0000 -0.0000 -0.0000 -0.0000  
AT. 17 H X -0.0011 -0.0000 -0.0000 -0.0002 -0.0002 -0.0000  
Y 0.0031 -0.0002 0.0000 0.0006 0.0008 0.0001  
Z 0.0027 -0.0002 0.0000 0.0005 0.0007 0.0001  
AT. 18 H X 0.0011 -0.0000 -0.0000 0.0002 -0.0002 0.0000  
Y -0.0031 -0.0002 0.0000 -0.0006 0.0008 -0.0001  
Z -0.0027 -0.0002 0.0000 -0.0005 0.0007 -0.0001  
AT. 19 H X 0.0015 -0.0007 -0.0000 0.0002 0.0002 0.0000  
Y 0.0017 -0.0008 -0.0000 0.0003 0.0002 0.0000  
Z -0.0048 0.0022 0.0000 -0.0008 -0.0006 -0.0001  
AT. 20 H X -0.0015 -0.0007 -0.0000 -0.0002 0.0002 -0.0000  
Y -0.0017 -0.0008 -0.0000 -0.0003 0.0002 -0.0000  
Z 0.0048 0.0022 0.0000 0.0008 -0.0006 0.0001  
AT. 21 C X -0.0001 -0.0001 0.0000 0.0000 -0.0000 -0.0000  
Y -0.0000 0.0000 -0.0000 -0.0000 0.0000 -0.0000  
Z 0.0002 0.0002 0.0000 0.0000 -0.0000 0.0000  
AT. 22 C X 0.0001 -0.0001 0.0000 -0.0000 -0.0000 0.0000



Y 0.0000 0.0000 -0.0000 0.0000 0.0000 0.0000  
Z -0.0002 0.0002 0.0000 -0.0000 -0.0000 -0.0000  
AT. 23 C X 0.0010 0.0010 -0.0000 0.0001 0.0001 0.0000  
Y -0.0074 -0.0074 0.0001 -0.0005 -0.0004 -0.0001  
Z -0.0060 -0.0060 0.0001 -0.0004 -0.0003 -0.0000  
AT. 24 C X -0.0010 0.0010 -0.0000 -0.0001 0.0001 -0.0000  
Y 0.0074 -0.0074 0.0001 0.0005 -0.0004 0.0001  
Z 0.0060 -0.0060 0.0001 0.0004 -0.0003 0.0000  
AT. 25 H X -0.0195 -0.0195 0.0003 -0.0014 -0.0011 -0.0002  
Y 0.1165 0.1167 -0.0016 0.0081 0.0064 0.0010  
Z 0.0146 0.0146 -0.0002 0.0010 0.0007 0.0001  
AT. 26 H X 0.0195 -0.0195 0.0003 0.0014 -0.0011 0.0002  
Y -0.1165 0.1167 -0.0016 -0.0081 0.0064 -0.0010  
Z -0.0146 0.0146 -0.0002 -0.0010 0.0007 -0.0001  
AT. 27 H X 0.0103 0.0104 -0.0001 0.0007 0.0006 0.0001  
Y -0.0304 -0.0305 0.0004 -0.0022 -0.0018 -0.0002  
Z 0.0539 0.0540 -0.0007 0.0039 0.0032 0.0004  
AT. 28 H X -0.0103 0.0104 -0.0001 -0.0007 0.0006 -0.0001  
Y 0.0304 -0.0305 0.0004 0.0022 -0.0018 0.0002  
Z -0.0539 0.0540 -0.0007 -0.0039 0.0032 -0.0004  
AT. 29 C X -0.0000 0.0000 0.0000 0.0003 0.0003 -0.0000  
Y 0.0000 0.0000 0.0000 -0.0002 -0.0002 0.0000  
Z 0.0001 -0.0000 -0.0000 -0.0005 -0.0005 0.0000  
AT. 30 C X 0.0000 0.0000 0.0000 -0.0003 0.0003 0.0000  
Y -0.0000 0.0000 0.0000 0.0002 -0.0002 -0.0000  
Z -0.0001 -0.0000 -0.0000 0.0005 -0.0005 -0.0000  
AT. 31 H X 0.0000 -0.0001 -0.0000 0.0000 0.0000 0.0000  
Y 0.0001 -0.0002 -0.0001 -0.0002 -0.0003 0.0001  
Z -0.0001 0.0001 0.0001 0.0003 0.0003 -0.0000  
AT. 32 H X -0.0000 -0.0001 -0.0000 -0.0000 0.0000 -0.0000  
Y -0.0001 -0.0002 -0.0001 0.0002 -0.0003 -0.0001  
Z 0.0001 0.0001 0.0001 -0.0003 0.0003 0.0000

AT. 33 H X 0.0003 -0.0001 -0.0000 -0.0037 -0.0038 0.0003  
Y -0.0002 -0.0000 0.0000 0.0022 0.0023 -0.0002  
Z -0.0005 0.0000 0.0000 0.0051 0.0052 -0.0005

AT. 34 H X -0.0003 -0.0001 -0.0000 0.0037 -0.0038 -0.0003  
Y 0.0002 -0.0000 0.0000 -0.0022 0.0023 0.0002  
Z 0.0005 0.0000 0.0000 -0.0051 0.0052 0.0005

AT. 35 C X 0.0000 0.0000 0.0000 -0.0001 -0.0001 0.0000  
Y 0.0000 0.0000 0.0000 -0.0000 -0.0000 0.0000  
Z 0.0000 0.0000 -0.0000 0.0002 0.0002 -0.0000

AT. 36 C X -0.0000 0.0000 0.0000 0.0001 -0.0001 -0.0000  
Y -0.0000 0.0000 0.0000 0.0000 -0.0000 -0.0000  
Z -0.0000 0.0000 -0.0000 -0.0002 0.0002 0.0000

AT. 37 C X -0.0003 -0.0004 0.0000 0.0004 0.0004 -0.0000  
Y 0.0006 0.0006 -0.0000 -0.0005 -0.0005 0.0000  
Z 0.0012 0.0012 -0.0000 -0.0010 -0.0011 0.0001

AT. 38 C X 0.0003 -0.0004 0.0000 -0.0004 0.0004 0.0000  
Y -0.0006 0.0006 -0.0000 0.0005 -0.0005 -0.0000  
Z -0.0012 0.0012 -0.0000 0.0010 -0.0011 -0.0001

AT. 39 H X 0.0071 0.0074 -0.0000 -0.0067 -0.0070 0.0005  
Y -0.0044 -0.0046 0.0000 0.0047 0.0049 -0.0004  
Z -0.0108 -0.0112 0.0000 0.0099 0.0105 -0.0008

AT. 40 H X -0.0071 0.0074 -0.0000 0.0067 -0.0070 -0.0005  
Y 0.0044 -0.0046 0.0000 -0.0047 0.0049 0.0004  
Z 0.0108 -0.0112 0.0000 -0.0099 0.0105 0.0008

AT. 41 H X -0.0035 -0.0035 -0.0000 0.0022 0.0024 -0.0001  
Y -0.0026 -0.0026 -0.0000 0.0016 0.0018 -0.0001  
Z -0.0032 -0.0032 -0.0000 0.0019 0.0022 -0.0001

AT. 42 H X 0.0035 -0.0035 -0.0000 -0.0022 0.0024 0.0001  
Y 0.0026 -0.0026 -0.0000 -0.0016 0.0018 0.0001  
Z 0.0032 -0.0032 -0.0000 -0.0019 0.0022 0.0001

AT. 43 C X 0.0001 0.0001 0.0000 0.0005 -0.0004 -0.0000  
Y -0.0001 -0.0001 -0.0000 -0.0002 0.0002 -0.0000

Z 0.0001 0.0001 0.0000 0.0004 -0.0003 -0.0000  
AT. 44 C X -0.0001 0.0001 0.0000 -0.0005 -0.0004 0.0000  
Y 0.0001 -0.0001 -0.0000 0.0002 0.0002 0.0000  
Z -0.0001 0.0001 0.0000 -0.0004 -0.0003 0.0000  
AT. 45 H X -0.0002 -0.0001 -0.0000 -0.0011 0.0006 0.0002  
Y -0.0003 -0.0002 -0.0000 -0.0016 0.0010 0.0002  
Z -0.0003 -0.0002 0.0000 -0.0015 0.0009 0.0002  
AT. 46 H X 0.0002 -0.0001 -0.0000 0.0011 0.0006 -0.0002  
Y 0.0003 -0.0002 -0.0000 0.0016 0.0010 -0.0002  
Z 0.0003 -0.0002 0.0000 0.0015 0.0009 -0.0002  
AT. 47 H X -0.0013 -0.0014 -0.0002 -0.0053 0.0040 0.0003  
Y 0.0009 0.0010 0.0001 0.0039 -0.0028 -0.0002  
Z -0.0009 -0.0009 -0.0001 -0.0037 0.0027 0.0002  
AT. 48 H X 0.0013 -0.0014 -0.0002 0.0053 0.0040 -0.0003  
Y -0.0009 0.0010 0.0001 -0.0039 -0.0028 0.0002  
Z 0.0009 -0.0009 -0.0001 0.0037 0.0027 -0.0002  
AT. 49 C X 0.0000 0.0000 -0.0000 -0.0000 0.0000 0.0000  
Y 0.0000 0.0000 0.0000 0.0000 -0.0000 -0.0000  
Z 0.0000 0.0000 -0.0000 -0.0000 0.0000 0.0000  
AT. 50 C X -0.0000 0.0000 -0.0000 0.0000 0.0000 -0.0000  
Y -0.0000 0.0000 0.0000 -0.0000 -0.0000 0.0000  
Z -0.0000 0.0000 -0.0000 0.0000 0.0000 -0.0000  
AT. 51 C X -0.0000 -0.0000 0.0000 -0.0002 -0.0003 0.0000  
Y 0.0001 0.0000 -0.0000 0.0003 0.0004 -0.0000  
Z -0.0000 -0.0000 0.0000 -0.0003 -0.0003 0.0000  
AT. 52 C X 0.0000 -0.0000 0.0000 0.0002 -0.0003 -0.0000  
Y -0.0001 0.0000 -0.0000 -0.0003 0.0004 0.0000  
Z 0.0000 -0.0000 0.0000 0.0003 -0.0003 -0.0000  
AT. 53 H X 0.0006 0.0001 -0.0002 0.0031 0.0041 -0.0002  
Y -0.0004 -0.0001 0.0001 -0.0020 -0.0027 0.0001  
Z 0.0003 0.0001 -0.0001 0.0017 0.0021 -0.0001  
AT. 54 H X -0.0006 0.0001 -0.0002 -0.0031 0.0041 0.0002

Y 0.0004 -0.0001 0.0001 0.0020 -0.0027 -0.0001  
Z -0.0003 0.0001 -0.0001 -0.0017 0.0021 0.0001  
AT. 55 H X -0.0001 -0.0001 0.0000 -0.0011 -0.0012 0.0000  
Y -0.0002 -0.0001 0.0000 -0.0021 -0.0024 0.0001  
Z 0.0001 0.0001 -0.0000 0.0016 0.0019 -0.0000  
AT. 56 H X 0.0001 -0.0001 0.0000 0.0011 -0.0012 -0.0000  
Y 0.0002 -0.0001 0.0000 0.0021 -0.0024 -0.0001  
Z -0.0001 0.0001 -0.0000 -0.0016 0.0019 0.0000  
AT. 57 C X 0.0003 0.0002 0.0001 -0.0054 -0.0054 0.0002  
Y 0.0000 0.0000 0.0000 -0.0019 -0.0018 0.0001  
Z -0.0007 -0.0005 -0.0001 0.0104 0.0105 -0.0005  
AT. 58 C X -0.0003 0.0002 0.0001 0.0054 -0.0054 -0.0002  
Y -0.0000 0.0000 0.0000 0.0019 -0.0018 -0.0001  
Z 0.0007 -0.0005 -0.0001 -0.0104 0.0105 0.0005  
AT. 59 H X -0.0019 -0.0014 -0.0004 0.0334 0.0334 -0.0016  
Y -0.0041 -0.0029 -0.0008 0.0699 0.0699 -0.0032  
Z 0.0026 0.0018 0.0005 -0.0450 -0.0449 0.0021  
AT. 60 H X 0.0019 -0.0014 -0.0004 -0.0334 0.0334 0.0016  
Y 0.0041 -0.0029 -0.0008 -0.0699 0.0699 0.0032  
Z -0.0026 0.0018 0.0005 0.0450 -0.0449 -0.0021  
AT. 61 H X -0.0031 -0.0021 -0.0007 0.0495 0.0500 -0.0021  
Y 0.0020 0.0014 0.0004 -0.0329 -0.0332 0.0014  
Z 0.0042 0.0029 0.0009 -0.0653 -0.0659 0.0028  
AT. 62 H X 0.0031 -0.0021 -0.0007 -0.0495 0.0500 0.0021  
Y -0.0020 0.0014 0.0004 0.0329 -0.0332 -0.0014  
Z -0.0042 0.0029 0.0009 0.0653 -0.0659 -0.0028  
AT. 63 H X 0.0017 0.0013 0.0003 -0.0172 -0.0179 0.0007  
Y 0.0015 0.0012 0.0003 -0.0149 -0.0155 0.0006  
Z 0.0015 0.0012 0.0003 -0.0145 -0.0152 0.0006  
AT. 64 H X -0.0017 0.0013 0.0003 0.0172 -0.0179 -0.0007  
Y -0.0015 0.0012 0.0003 0.0149 -0.0155 -0.0006  
Z -0.0015 0.0012 0.0003 0.0145 -0.0152 -0.0006

AT. 65 C X -0.0000 -0.0000 -0.0000 -0.0017 0.0015 0.0002  
Y -0.0000 -0.0000 0.0000 0.0007 -0.0007 -0.0001  
Z 0.0000 -0.0000 -0.0001 -0.0018 0.0016 0.0002

AT. 66 C X 0.0000 -0.0000 -0.0000 0.0017 0.0015 -0.0002  
Y 0.0000 -0.0000 0.0000 -0.0007 -0.0007 0.0001  
Z -0.0000 -0.0000 -0.0001 0.0018 0.0016 -0.0002

AT. 67 H X 0.0001 0.0003 0.0002 0.0080 -0.0068 -0.0009  
Y 0.0001 0.0003 0.0002 0.0091 -0.0078 -0.0010  
Z 0.0001 0.0003 0.0002 0.0092 -0.0078 -0.0010

AT. 68 H X -0.0001 0.0003 0.0002 -0.0080 -0.0068 0.0009  
Y -0.0001 0.0003 0.0002 -0.0091 -0.0078 0.0010  
Z -0.0001 0.0003 0.0002 -0.0092 -0.0078 0.0010

AT. 69 H X -0.0001 0.0002 0.0005 0.0160 -0.0145 -0.0018  
Y 0.0001 -0.0002 -0.0004 -0.0123 0.0112 0.0014  
Z -0.0000 0.0001 0.0003 0.0081 -0.0074 -0.0009

AT. 70 H X 0.0001 0.0002 0.0005 -0.0160 -0.0145 0.0018  
Y -0.0001 -0.0002 -0.0004 0.0123 0.0112 -0.0014  
Z 0.0000 0.0001 0.0003 -0.0081 -0.0074 0.0009

AT. 71 H X 0.0001 -0.0000 -0.0001 -0.0033 0.0032 0.0004  
Y 0.0002 -0.0000 -0.0002 -0.0053 0.0052 0.0006  
Z -0.0001 0.0000 0.0002 0.0037 -0.0036 -0.0004

AT. 72 H X -0.0001 -0.0000 -0.0001 0.0033 0.0032 -0.0004  
Y -0.0002 -0.0000 -0.0002 0.0053 0.0052 -0.0006  
Z 0.0001 0.0000 0.0002 -0.0037 -0.0036 0.0004

AT. 73 C X 0.0000 0.0001 0.0000 -0.0001 -0.0000 0.0000  
Y 0.0000 0.0001 0.0000 -0.0001 -0.0001 0.0000  
Z -0.0000 -0.0000 0.0000 -0.0000 -0.0000 -0.0000

AT. 74 C X -0.0000 0.0001 0.0000 0.0001 -0.0000 -0.0000  
Y -0.0000 0.0001 0.0000 0.0001 -0.0001 -0.0000  
Z 0.0000 -0.0000 0.0000 0.0000 -0.0000 0.0000

AT. 75 H X -0.0003 -0.0004 -0.0000 0.0008 0.0005 -0.0001  
Y -0.0004 -0.0006 0.0000 0.0008 0.0004 -0.0001

Z 0.0003 0.0005 0.0000 -0.0008 -0.0005 0.0001  
AT. 76 H X 0.0003 -0.0004 -0.0000 -0.0008 0.0005 0.0001  
Y 0.0004 -0.0006 0.0000 -0.0008 0.0004 0.0001  
Z -0.0003 0.0005 0.0000 0.0008 -0.0005 -0.0001  
AT. 77 H X -0.0003 -0.0003 -0.0001 0.0005 0.0001 0.0001  
Y -0.0003 -0.0003 -0.0001 0.0003 0.0001 0.0001  
Z -0.0003 -0.0003 -0.0001 0.0004 0.0001 0.0001  
AT. 78 H X 0.0003 -0.0003 -0.0001 -0.0005 0.0001 -0.0001  
Y 0.0003 -0.0003 -0.0001 -0.0003 0.0001 -0.0001  
Z 0.0003 -0.0003 -0.0001 -0.0004 0.0001 -0.0001  
AT. 79 I X 0.0000 -0.0000 -0.0000 -0.0000 -0.0000 0.0000  
Y 0.0000 0.0000 0.0000 -0.0000 0.0000 0.0000  
Z -0.0000 0.0000 0.0000 0.0000 0.0000 -0.0000  
AT. 80 I X -0.0000 -0.0000 -0.0000 0.0000 -0.0000 -0.0000  
Y -0.0000 0.0000 0.0000 0.0000 0.0000 -0.0000  
Z 0.0000 0.0000 0.0000 -0.0000 0.0000 0.0000  
AT. 81 I X 0.0000 0.0000 -0.0000 0.0000 -0.0000 0.0000  
Y 0.0000 0.0000 0.0000 0.0000 0.0000 0.0000  
Z 0.0000 0.0000 -0.0000 -0.0000 0.0000 0.0000  
AT. 82 I X -0.0000 0.0000 -0.0000 -0.0000 -0.0000 -0.0000  
Y -0.0000 0.0000 0.0000 -0.0000 0.0000 -0.0000  
Z -0.0000 0.0000 -0.0000 0.0000 0.0000 -0.0000  
AT. 83 O X -0.0000 0.0000 -0.0000 -0.0000 -0.0000 -0.0000  
Y -0.0000 0.0000 -0.0000 -0.0000 -0.0000 -0.0000  
Z -0.0000 0.0000 -0.0000 -0.0000 -0.0000 -0.0000  
AT. 84 O X 0.0000 0.0000 -0.0000 0.0000 -0.0000 0.0000  
Y 0.0000 0.0000 -0.0000 0.0000 -0.0000 0.0000  
Z 0.0000 0.0000 -0.0000 0.0000 -0.0000 0.0000  
AT. 85 O X 0.0000 -0.0000 0.0000 0.0000 0.0000 0.0000  
Y 0.0000 0.0000 0.0000 0.0000 -0.0000 -0.0000  
Z -0.0000 0.0000 -0.0000 -0.0000 -0.0000 0.0000  
AT. 86 O X -0.0000 -0.0000 0.0000 -0.0000 0.0000 -0.0000

Y -0.0000 0.0000 0.0000 -0.0000 -0.0000 0.0000  
Z 0.0000 0.0000 -0.0000 0.0000 -0.0000 -0.0000  
AT. 87 N X 0.0000 0.0000 -0.0000 -0.0000 -0.0000 0.0000  
Y 0.0000 0.0000 -0.0000 -0.0000 -0.0000 0.0000  
Z -0.0000 0.0000 0.0000 -0.0000 -0.0000 0.0000  
AT. 88 N X -0.0000 0.0000 -0.0000 0.0000 -0.0000 -0.0000  
Y -0.0000 0.0000 -0.0000 0.0000 -0.0000 -0.0000  
Z 0.0000 0.0000 0.0000 0.0000 -0.0000 -0.0000  
AT. 89 N X -0.0000 -0.0000 -0.0000 -0.0000 0.0000 -0.0000  
Y 0.0000 0.0000 0.0000 0.0000 0.0000 -0.0000  
Z -0.0000 0.0000 0.0000 -0.0000 -0.0000 0.0000  
AT. 90 N X 0.0000 -0.0000 -0.0000 0.0000 0.0000 0.0000  
Y -0.0000 0.0000 0.0000 -0.0000 0.0000 0.0000  
Z 0.0000 0.0000 0.0000 0.0000 -0.0000 -0.0000  
AT. 91 C X 0.0000 -0.0000 0.0000 0.0000 0.0000 0.0000  
Y 0.0000 0.0000 -0.0000 -0.0000 -0.0000 0.0000  
Z 0.0000 -0.0000 0.0000 0.0000 0.0000 0.0000  
AT. 92 C X -0.0000 -0.0000 0.0000 -0.0000 0.0000 -0.0000  
Y -0.0000 0.0000 -0.0000 0.0000 -0.0000 -0.0000  
Z -0.0000 -0.0000 0.0000 -0.0000 0.0000 -0.0000  
AT. 93 C X 0.0000 0.0000 -0.0001 0.0000 -0.0000 -0.0001  
Y 0.0000 0.0001 -0.0002 0.0000 -0.0001 -0.0002  
Z -0.0000 -0.0000 0.0000 -0.0000 0.0000 0.0000  
AT. 94 C X -0.0000 0.0000 -0.0001 -0.0000 -0.0000 0.0001  
Y -0.0000 0.0001 -0.0002 -0.0000 -0.0001 0.0002  
Z 0.0000 -0.0000 0.0000 0.0000 0.0000 -0.0000  
AT. 95 H X -0.0003 -0.0006 0.0012 -0.0001 0.0004 0.0014  
Y -0.0004 -0.0010 0.0018 -0.0001 0.0006 0.0021  
Z -0.0002 -0.0006 0.0011 -0.0000 0.0004 0.0013  
AT. 96 H X 0.0003 -0.0006 0.0012 0.0001 0.0004 -0.0014  
Y 0.0004 -0.0010 0.0018 0.0001 0.0006 -0.0021  
Z 0.0002 -0.0006 0.0011 0.0000 0.0004 -0.0013

AT. 97 H X 0.0001 0.0002 -0.0003 0.0000 -0.0001 -0.0003  
Y -0.0000 -0.0002 0.0002 -0.0000 0.0001 0.0002  
Z 0.0003 0.0008 -0.0012 0.0000 -0.0004 -0.0012

AT. 98 H X -0.0001 0.0002 -0.0003 -0.0000 -0.0001 0.0003  
Y 0.0000 -0.0002 0.0002 0.0000 0.0001 -0.0002  
Z -0.0003 0.0008 -0.0012 -0.0000 -0.0004 0.0012

AT. 99 C X 0.0000 0.0000 -0.0000 -0.0000 -0.0000 0.0000  
Y -0.0000 0.0000 -0.0000 -0.0000 -0.0000 0.0000  
Z 0.0000 -0.0000 0.0000 0.0000 -0.0000 0.0000

AT. 100 C X -0.0000 0.0000 -0.0000 0.0000 -0.0000 -0.0000  
Y 0.0000 0.0000 -0.0000 0.0000 -0.0000 -0.0000  
Z -0.0000 -0.0000 0.0000 -0.0000 -0.0000 -0.0000

AT. 101 C X -0.0000 -0.0000 0.0001 -0.0000 0.0000 -0.0001  
Y -0.0001 -0.0001 0.0001 -0.0000 0.0001 -0.0002  
Z -0.0001 -0.0001 0.0002 -0.0000 0.0001 -0.0002

AT. 102 C X 0.0000 -0.0000 0.0001 0.0000 0.0000 0.0001  
Y 0.0001 -0.0001 0.0001 0.0000 0.0001 0.0002  
Z 0.0001 -0.0001 0.0002 0.0000 0.0001 0.0002

AT. 103 H X 0.0004 0.0005 -0.0010 0.0000 -0.0007 0.0013  
Y 0.0009 0.0013 -0.0023 0.0001 -0.0016 0.0030  
Z 0.0000 0.0000 0.0000 0.0000 -0.0000 0.0000

AT. 104 H X -0.0004 0.0005 -0.0010 -0.0000 -0.0007 -0.0013  
Y -0.0009 0.0013 -0.0023 -0.0001 -0.0016 -0.0030  
Z -0.0000 0.0000 0.0000 -0.0000 -0.0000 -0.0000

AT. 105 H X -0.0002 -0.0002 0.0004 -0.0000 0.0003 -0.0004  
Y -0.0003 -0.0004 0.0008 -0.0000 0.0005 -0.0009  
Z 0.0008 0.0010 -0.0019 0.0000 -0.0012 0.0021

AT. 106 H X 0.0002 -0.0002 0.0004 0.0000 0.0003 0.0004  
Y 0.0003 -0.0004 0.0008 0.0000 0.0005 0.0009  
Z -0.0008 0.0010 -0.0019 -0.0000 -0.0012 -0.0021

AT. 107 C X 0.0000 0.0000 0.0000 -0.0000 -0.0000 0.0000  
Y -0.0000 0.0000 0.0000 -0.0001 -0.0001 0.0000



Z 0.0000 -0.0000 -0.0000 0.0000 0.0000 -0.0000  
AT. 108 C X -0.0000 0.0000 0.0000 0.0000 -0.0000 -0.0000  
Y 0.0000 0.0000 0.0000 0.0001 -0.0001 -0.0000  
Z -0.0000 -0.0000 -0.0000 -0.0000 0.0000 0.0000  
AT. 109 H X -0.0000 -0.0000 0.0000 -0.0001 -0.0001 0.0000  
Y 0.0000 -0.0001 0.0000 0.0007 0.0007 -0.0002  
Z 0.0000 0.0001 -0.0000 -0.0004 -0.0004 0.0001  
AT. 110 H X 0.0000 -0.0000 0.0000 0.0001 -0.0001 -0.0000  
Y -0.0000 -0.0001 0.0000 -0.0007 0.0007 0.0002  
Z -0.0000 0.0001 -0.0000 0.0004 -0.0004 -0.0001  
AT. 111 H X -0.0001 -0.0001 -0.0001 0.0003 0.0003 -0.0001  
Y -0.0000 -0.0000 0.0000 0.0000 0.0000 0.0000  
Z -0.0001 -0.0001 0.0000 0.0003 0.0003 -0.0001  
AT. 112 H X 0.0001 -0.0001 -0.0001 -0.0003 0.0003 0.0001  
Y 0.0000 -0.0000 0.0000 -0.0000 0.0000 -0.0000  
Z 0.0001 -0.0001 0.0000 -0.0003 0.0003 0.0001  
AT. 113 C X -0.0000 -0.0000 -0.0000 0.0000 0.0000 -0.0000  
Y 0.0000 0.0000 -0.0000 0.0000 0.0000 0.0000  
Z 0.0000 0.0000 -0.0000 -0.0000 -0.0000 -0.0000  
AT. 114 C X 0.0000 -0.0000 -0.0000 -0.0000 0.0000 0.0000  
Y -0.0000 0.0000 -0.0000 -0.0000 0.0000 -0.0000  
Z -0.0000 0.0000 -0.0000 0.0000 -0.0000 0.0000  
AT. 115 C X 0.0000 0.0000 0.0000 -0.0000 -0.0000 0.0001  
Y 0.0000 0.0000 0.0001 0.0000 -0.0000 0.0001  
Z 0.0000 0.0000 0.0001 0.0000 -0.0000 0.0001  
AT. 116 C X -0.0000 0.0000 0.0000 0.0000 -0.0000 -0.0001  
Y -0.0000 0.0000 0.0001 -0.0000 -0.0000 -0.0001  
Z -0.0000 0.0000 0.0001 -0.0000 -0.0000 -0.0001  
AT. 117 H X -0.0000 -0.0001 -0.0006 0.0000 0.0001 -0.0007  
Y 0.0000 -0.0000 -0.0001 0.0000 0.0000 -0.0001  
Z 0.0000 -0.0001 -0.0005 0.0000 0.0001 -0.0006  
AT. 118 H X 0.0000 -0.0001 -0.0006 -0.0000 0.0001 0.0007

Y -0.0000 -0.0000 -0.0001 -0.0000 0.0000 0.0001  
Z -0.0000 -0.0001 -0.0005 -0.0000 0.0001 0.0006  
AT. 119 H X -0.0000 -0.0000 0.0002 0.0000 -0.0000 0.0002  
Y -0.0001 -0.0001 -0.0006 -0.0000 0.0000 -0.0005  
Z -0.0000 -0.0000 -0.0006 -0.0000 0.0000 -0.0005  
AT. 120 H X 0.0000 -0.0000 0.0002 -0.0000 -0.0000 -0.0002  
Y 0.0001 -0.0001 -0.0006 0.0000 0.0000 0.0005  
Z 0.0000 -0.0000 -0.0006 0.0000 0.0000 0.0005  
AT. 121 C X 0.0000 -0.0000 -0.0004 -0.0000 0.0000 -0.0004  
Y 0.0000 0.0000 -0.0002 -0.0000 0.0000 -0.0002  
Z -0.0000 0.0000 0.0003 0.0000 -0.0000 0.0003  
AT. 122 C X -0.0000 -0.0000 -0.0004 0.0000 0.0000 0.0004  
Y -0.0000 0.0000 -0.0002 0.0000 0.0000 0.0002  
Z 0.0000 0.0000 0.0003 -0.0000 -0.0000 -0.0003  
AT. 123 H X 0.0000 0.0000 -0.0001 0.0000 -0.0000 -0.0001  
Y -0.0000 -0.0001 0.0000 -0.0000 0.0001 0.0002  
Z -0.0000 -0.0001 -0.0002 -0.0001 0.0000 -0.0000  
AT. 124 H X -0.0000 0.0000 -0.0001 -0.0000 -0.0000 0.0001  
Y 0.0000 -0.0001 0.0000 0.0000 0.0001 -0.0002  
Z 0.0000 -0.0001 -0.0002 0.0001 0.0000 0.0000  
AT. 125 H X -0.0002 0.0001 0.0045 0.0003 -0.0002 0.0049  
Y -0.0000 0.0001 0.0017 0.0001 -0.0001 0.0018  
Z 0.0001 -0.0001 -0.0035 -0.0002 0.0001 -0.0038  
AT. 126 H X 0.0002 0.0001 0.0045 -0.0003 -0.0002 -0.0049  
Y 0.0000 0.0001 0.0017 -0.0001 -0.0001 -0.0018  
Z -0.0001 -0.0001 -0.0035 0.0002 0.0001 0.0038  
AT. 127 C X -0.0000 0.0000 0.0001 0.0000 0.0000 0.0001  
Y -0.0000 0.0000 0.0000 0.0000 0.0000 -0.0000  
Z 0.0000 -0.0000 -0.0002 -0.0000 -0.0000 -0.0002  
AT. 128 C X 0.0000 0.0000 0.0001 -0.0000 0.0000 -0.0001  
Y 0.0000 0.0000 0.0000 -0.0000 0.0000 0.0000  
Z -0.0000 -0.0000 -0.0002 0.0000 -0.0000 0.0002

AT. 129 C X -0.0000 -0.0000 -0.0003 -0.0000 0.0000 -0.0003  
Y 0.0000 -0.0000 -0.0001 -0.0000 0.0000 -0.0001  
Z -0.0000 0.0000 0.0003 0.0000 -0.0000 0.0003

AT. 130 C X 0.0000 -0.0000 -0.0003 0.0000 0.0000 0.0003  
Y -0.0000 -0.0000 -0.0001 0.0000 0.0000 0.0001  
Z 0.0000 0.0000 0.0003 -0.0000 -0.0000 -0.0003

AT. 131 H X 0.0000 0.0001 0.0035 0.0001 -0.0003 0.0036  
Y 0.0000 0.0000 0.0014 0.0000 -0.0001 0.0014  
Z -0.0000 -0.0001 -0.0024 -0.0000 0.0002 -0.0024

AT. 132 H X -0.0000 0.0001 0.0035 -0.0001 -0.0003 -0.0036  
Y -0.0000 0.0000 0.0014 -0.0000 -0.0001 -0.0014  
Z 0.0000 -0.0001 -0.0024 0.0000 0.0002 0.0024

AT. 133 H X 0.0000 -0.0000 -0.0001 -0.0000 0.0000 -0.0001  
Y -0.0001 0.0001 0.0005 -0.0000 -0.0001 0.0002  
Z 0.0001 -0.0000 -0.0003 0.0000 0.0001 -0.0002

AT. 134 H X -0.0000 -0.0000 -0.0001 0.0000 0.0000 0.0001  
Y 0.0001 0.0001 0.0005 0.0000 -0.0001 -0.0002  
Z -0.0001 -0.0000 -0.0003 -0.0000 0.0001 0.0002

AT. 135 C X 0.0000 0.0000 -0.0000 0.0000 0.0000 0.0002  
Y 0.0001 -0.0000 -0.0002 0.0000 0.0000 0.0003  
Z 0.0001 0.0000 -0.0000 0.0000 0.0000 0.0006

AT. 136 C X -0.0000 0.0000 -0.0000 -0.0000 0.0000 -0.0002  
Y -0.0001 -0.0000 -0.0002 -0.0000 0.0000 -0.0003  
Z -0.0001 0.0000 -0.0000 -0.0000 0.0000 -0.0006

AT. 137 H X 0.0001 0.0000 -0.0003 0.0000 0.0000 -0.0001  
Y -0.0004 0.0000 0.0015 -0.0001 -0.0001 0.0009  
Z 0.0002 -0.0000 -0.0009 0.0000 0.0001 -0.0004

AT. 138 H X -0.0001 0.0000 -0.0003 -0.0000 0.0000 0.0001  
Y 0.0004 0.0000 0.0015 0.0001 -0.0001 -0.0009  
Z -0.0002 -0.0000 -0.0009 -0.0000 0.0001 0.0004

AT. 139 H X -0.0004 -0.0003 0.0006 -0.0001 -0.0003 -0.0041  
Y -0.0001 -0.0001 0.0001 -0.0000 -0.0001 -0.0008

Z -0.0003 -0.0002 0.0005 -0.0001 -0.0002 -0.0031  
AT. 140 H X 0.0004 -0.0003 0.0006 0.0001 -0.0003 0.0041  
Y 0.0001 -0.0001 0.0001 0.0000 -0.0001 0.0008  
Z 0.0003 -0.0002 0.0005 0.0001 -0.0002 0.0031  
AT. 141 H X 0.0003 -0.0000 -0.0003 0.0001 0.0001 0.0014  
Y -0.0007 0.0001 0.0007 -0.0002 -0.0003 -0.0034  
Z -0.0006 0.0001 0.0006 -0.0002 -0.0003 -0.0033  
AT. 142 H X -0.0003 -0.0000 -0.0003 -0.0001 0.0001 -0.0014  
Y 0.0007 0.0001 0.0007 0.0002 -0.0003 0.0034  
Z 0.0006 0.0001 0.0006 0.0002 -0.0003 0.0033  
AT. 143 C X -0.0001 0.0001 0.0060 0.0003 0.0001 0.0060  
Y 0.0000 0.0000 -0.0004 0.0000 -0.0000 -0.0012  
Z 0.0001 -0.0001 -0.0106 -0.0005 -0.0001 -0.0105  
AT. 144 C X 0.0001 0.0001 0.0060 -0.0003 0.0001 -0.0060  
Y -0.0000 0.0000 -0.0004 -0.0000 -0.0000 0.0012  
Z -0.0001 -0.0001 -0.0106 0.0005 -0.0001 0.0105  
AT. 145 H X 0.0002 -0.0002 -0.0155 -0.0007 -0.0002 -0.0167  
Y -0.0008 0.0009 0.0662 0.0030 0.0009 0.0705  
Z -0.0007 0.0008 0.0588 0.0027 0.0008 0.0627  
AT. 146 H X -0.0002 -0.0002 -0.0155 0.0007 -0.0002 0.0167  
Y 0.0008 0.0009 0.0662 -0.0030 0.0009 -0.0705  
Z 0.0007 0.0008 0.0588 -0.0027 0.0008 -0.0627  
AT. 147 H X 0.0010 -0.0009 -0.0687 -0.0033 -0.0009 -0.0653  
Y 0.0004 -0.0003 -0.0263 -0.0013 -0.0003 -0.0253  
Z -0.0007 0.0006 0.0488 0.0024 0.0006 0.0465  
AT. 148 H X -0.0010 -0.0009 -0.0687 0.0033 -0.0009 0.0653  
Y -0.0004 -0.0003 -0.0263 0.0013 -0.0003 0.0253  
Z 0.0007 0.0006 0.0488 -0.0024 0.0006 -0.0465  
AT. 149 H X -0.0001 0.0002 0.0120 0.0007 0.0002 0.0106  
Y 0.0004 -0.0006 -0.0362 -0.0020 -0.0005 -0.0314  
Z -0.0002 0.0003 0.0190 0.0011 0.0003 0.0158  
AT. 150 H X 0.0001 0.0002 0.0120 -0.0007 0.0002 -0.0106

Y -0.0004 -0.0006 -0.0362 0.0020 -0.0005 0.0314  
Z 0.0002 0.0003 0.0190 -0.0011 0.0003 -0.0158  
AT. 151 C X 0.0000 0.0000 0.0001 0.0000 0.0000 0.0000  
Y -0.0000 -0.0000 -0.0002 -0.0000 -0.0000 -0.0000  
Z -0.0000 -0.0000 0.0000 0.0000 0.0000 -0.0001  
AT. 152 C X -0.0000 0.0000 0.0001 -0.0000 0.0000 -0.0000  
Y 0.0000 -0.0000 -0.0002 0.0000 -0.0000 0.0000  
Z 0.0000 -0.0000 0.0000 -0.0000 0.0000 0.0001  
AT. 153 H X -0.0001 -0.0000 -0.0006 -0.0000 -0.0001 0.0001  
Y 0.0002 0.0001 0.0017 0.0001 0.0002 -0.0011  
Z -0.0002 -0.0001 -0.0011 -0.0000 -0.0001 0.0005  
AT. 154 H X 0.0001 -0.0000 -0.0006 0.0000 -0.0001 -0.0001  
Y -0.0002 0.0001 0.0017 -0.0001 0.0002 0.0011  
Z 0.0002 -0.0001 -0.0011 0.0000 -0.0001 -0.0005  
AT. 155 H X -0.0001 -0.0000 -0.0007 -0.0000 -0.0000 -0.0008  
Y 0.0002 0.0001 0.0010 0.0001 0.0001 0.0012  
Z 0.0002 0.0001 0.0011 0.0001 0.0001 0.0012  
AT. 156 H X 0.0001 -0.0000 -0.0007 0.0000 -0.0000 0.0008  
Y -0.0002 0.0001 0.0010 -0.0001 0.0001 -0.0012  
Z -0.0002 0.0001 0.0011 -0.0001 0.0001 -0.0012  
AT. 157 O X -0.0000 0.0000 0.0000 -0.0000 0.0000 -0.0000  
Y 0.0003 -0.0003 -0.0000 0.0000 -0.0001 0.0000  
Z 0.0001 -0.0001 -0.0000 0.0000 -0.0000 0.0000  
AT. 158 O X 0.0000 0.0000 0.0000 0.0000 0.0000 0.0000  
Y -0.0003 -0.0003 -0.0000 -0.0000 -0.0001 -0.0000  
Z -0.0001 -0.0001 -0.0000 -0.0000 -0.0000 -0.0000  
AT. 159 O X -0.0000 0.0000 0.0000 -0.0000 -0.0000 -0.0000  
Y 0.0000 -0.0000 -0.0000 0.0000 0.0000 0.0000  
Z -0.0001 0.0001 0.0000 -0.0000 -0.0001 -0.0000  
AT. 160 O X 0.0000 0.0000 0.0000 0.0000 -0.0000 0.0000  
Y -0.0000 -0.0000 -0.0000 -0.0000 0.0000 -0.0000  
Z 0.0001 0.0001 0.0000 0.0000 -0.0001 0.0000

AT.161 H X 0.0006 -0.0006 -0.0000 -0.0000 -0.0002 0.0000  
Y -0.0041 0.0038 0.0002 -0.0001 0.0013 -0.0006  
Z -0.0007 0.0007 0.0001 -0.0000 0.0003 -0.0002

AT.162 H X -0.0006 -0.0006 -0.0000 0.0000 -0.0002 -0.0000  
Y 0.0041 0.0038 0.0002 0.0001 0.0013 0.0006  
Z 0.0007 0.0007 0.0001 0.0000 0.0003 0.0002

AT.163 H X 0.0007 -0.0005 -0.0003 0.0001 0.0005 0.0003  
Y -0.0004 0.0003 0.0001 -0.0001 -0.0003 -0.0001  
Z 0.0019 -0.0013 -0.0006 0.0003 0.0014 0.0007

AT.164 H X -0.0007 -0.0005 -0.0003 -0.0001 0.0005 -0.0003  
Y 0.0004 0.0003 0.0001 0.0001 -0.0003 0.0001  
Z -0.0019 -0.0013 -0.0006 -0.0003 0.0014 -0.0007

AT.165 O X 0.0000 -0.0000 0.0000 0.0000 0.0000 -0.0000  
Y 0.0000 -0.0000 0.0000 0.0000 0.0000 -0.0000  
Z 0.0000 -0.0000 0.0000 0.0000 0.0000 -0.0000

AT.166 O X -0.0000 -0.0000 0.0000 -0.0000 0.0000 0.0000  
Y -0.0000 -0.0000 0.0000 -0.0000 0.0000 0.0000  
Z -0.0000 -0.0000 0.0000 -0.0000 0.0000 0.0000

AT.167 H X -0.0001 0.0002 -0.0003 -0.0002 -0.0002 0.0001  
Y -0.0001 0.0001 -0.0002 -0.0001 -0.0000 0.0000  
Z -0.0000 0.0000 -0.0001 -0.0000 0.0000 0.0000

AT.168 H X 0.0001 0.0002 -0.0003 0.0002 -0.0002 -0.0001  
Y 0.0001 0.0001 -0.0002 0.0001 -0.0000 -0.0000  
Z 0.0000 0.0000 -0.0001 0.0000 0.0000 -0.0000

AT.169 O X 0.0000 -0.0000 0.0000 -0.0000 0.0000 -0.0000  
Y -0.0000 0.0000 -0.0000 0.0000 -0.0000 0.0000  
Z 0.0000 -0.0000 0.0000 -0.0000 -0.0000 0.0000

AT.170 O X -0.0000 -0.0000 0.0000 0.0000 0.0000 0.0000  
Y 0.0000 0.0000 -0.0000 -0.0000 -0.0000 -0.0000  
Z -0.0000 -0.0000 0.0000 0.0000 -0.0000 -0.0000

AT.171 H X -0.0000 0.0001 -0.0003 0.0002 -0.0000 0.0000  
Y 0.0001 -0.0003 0.0006 -0.0004 0.0001 -0.0000

Z -0.0000 0.0001 -0.0003 0.0002 -0.0000 -0.0000  
 AT. 172 H X 0.0000 0.0001 -0.0003 -0.0002 -0.0000 -0.0000  
 Y -0.0001 -0.0003 0.0006 0.0004 0.0001 0.0000  
 Z 0.0000 0.0001 -0.0003 -0.0002 -0.0000 0.0000

FREQ(CM\*\*-1) 3055.64 3056.70 3057.16 3057.28 3060.87 3060.98

AT. 1 I X -0.0000 0.0000 0.0000 0.0000 0.0000 0.0000  
 Y -0.0000 0.0000 -0.0000 -0.0000 0.0000 -0.0000  
 Z -0.0000 0.0000 -0.0000 -0.0000 -0.0000 0.0000

AT. 2 I X -0.0000 -0.0000 0.0000 -0.0000 0.0000 -0.0000  
 Y -0.0000 -0.0000 -0.0000 0.0000 0.0000 0.0000  
 Z -0.0000 -0.0000 -0.0000 0.0000 -0.0000 -0.0000

AT. 3 I X -0.0000 -0.0000 0.0000 0.0000 -0.0000 -0.0000  
 Y -0.0000 0.0000 -0.0000 -0.0000 0.0000 0.0000  
 Z -0.0000 -0.0000 -0.0000 0.0000 -0.0000 0.0000

AT. 4 I X -0.0000 0.0000 0.0000 -0.0000 -0.0000 0.0000  
 Y -0.0000 -0.0000 -0.0000 0.0000 0.0000 -0.0000  
 Z -0.0000 0.0000 -0.0000 -0.0000 -0.0000 -0.0000

AT. 5 O X -0.0000 0.0000 0.0000 0.0000 0.0000 0.0000  
 Y 0.0000 -0.0000 -0.0000 0.0000 -0.0000 -0.0000  
 Z 0.0000 -0.0000 -0.0000 0.0000 -0.0000 -0.0000

AT. 6 O X -0.0000 -0.0000 0.0000 -0.0000 0.0000 -0.0000  
 Y 0.0000 0.0000 -0.0000 -0.0000 -0.0000 0.0000  
 Z 0.0000 0.0000 -0.0000 -0.0000 -0.0000 0.0000

AT. 7 O X 0.0000 0.0000 -0.0000 -0.0000 0.0001 0.0001  
 Y -0.0000 0.0000 0.0000 0.0000 0.0000 -0.0000  
 Z 0.0000 -0.0000 0.0000 0.0001 -0.0001 -0.0001

AT. 8 O X 0.0000 -0.0000 -0.0000 0.0000 0.0001 -0.0001  
 Y -0.0000 -0.0000 0.0000 -0.0000 0.0000 0.0000  
 Z 0.0000 0.0000 0.0000 -0.0001 -0.0001 0.0001

AT. 9 N X -0.0000 0.0000 0.0000 0.0000 0.0000 0.0000

Y -0.0000 0.0000 -0.0000 -0.0000 0.0000 0.0000  
Z 0.0000 -0.0000 -0.0000 0.0000 0.0000 0.0000  
AT. 10 N X -0.0000 -0.0000 0.0000 -0.0000 0.0000 -0.0000  
Y -0.0000 -0.0000 -0.0000 0.0000 0.0000 -0.0000  
Z 0.0000 0.0000 -0.0000 -0.0000 0.0000 -0.0000  
AT. 11 N X -0.0000 -0.0000 0.0000 0.0000 -0.0000 -0.0000  
Y 0.0000 0.0000 -0.0000 -0.0000 0.0000 0.0000  
Z 0.0000 -0.0000 0.0000 0.0000 -0.0000 0.0000  
AT. 12 N X -0.0000 0.0000 0.0000 -0.0000 -0.0000 0.0000  
Y 0.0000 -0.0000 -0.0000 0.0000 0.0000 -0.0000  
Z 0.0000 0.0000 0.0000 -0.0000 -0.0000 -0.0000  
AT. 13 C X 0.0000 -0.0000 -0.0000 0.0000 -0.0000 -0.0000  
Y -0.0000 0.0000 -0.0000 -0.0000 0.0000 0.0000  
Z -0.0000 0.0000 0.0000 -0.0000 0.0000 0.0000  
AT. 14 C X 0.0000 0.0000 -0.0000 -0.0000 -0.0000 0.0000  
Y -0.0000 -0.0000 -0.0000 0.0000 0.0000 -0.0000  
Z -0.0000 -0.0000 0.0000 0.0000 0.0000 -0.0000  
AT. 15 C X 0.0000 0.0000 -0.0000 -0.0000 0.0000 0.0000  
Y -0.0000 -0.0000 0.0002 0.0003 -0.0002 -0.0001  
Z -0.0000 -0.0000 0.0000 -0.0000 0.0000 -0.0000  
AT. 16 C X 0.0000 -0.0000 -0.0000 0.0000 0.0000 -0.0000  
Y -0.0000 0.0000 0.0002 -0.0003 -0.0002 0.0001  
Z -0.0000 0.0000 0.0000 0.0000 0.0000 0.0000  
AT. 17 H X -0.0000 -0.0000 0.0005 0.0008 -0.0006 -0.0003  
Y 0.0001 0.0001 -0.0016 -0.0025 0.0018 0.0010  
Z 0.0001 0.0001 -0.0014 -0.0022 0.0018 0.0011  
AT. 18 H X -0.0000 0.0000 0.0005 -0.0008 -0.0006 0.0003  
Y 0.0001 -0.0001 -0.0016 0.0025 0.0018 -0.0010  
Z 0.0001 -0.0001 -0.0014 0.0022 0.0018 -0.0011  
AT. 19 H X 0.0000 -0.0000 -0.0004 -0.0007 0.0006 0.0002  
Y 0.0000 -0.0000 -0.0004 -0.0008 0.0006 0.0003  
Z -0.0000 0.0000 0.0013 0.0024 -0.0019 -0.0008



AT. 20 H X 0.0000 0.0000 -0.0004 0.0007 0.0006 -0.0002  
Y 0.0000 0.0000 -0.0004 0.0008 0.0006 -0.0003  
Z -0.0000 -0.0000 0.0013 -0.0024 -0.0019 0.0008

AT. 21 C X -0.0000 -0.0000 0.0001 0.0001 -0.0001 -0.0001  
Y 0.0000 0.0000 -0.0001 -0.0000 0.0001 0.0001  
Z -0.0000 0.0000 0.0000 -0.0000 -0.0000 -0.0000

AT. 22 C X -0.0000 0.0000 0.0001 -0.0001 -0.0001 0.0001  
Y 0.0000 -0.0000 -0.0001 0.0000 0.0001 -0.0001  
Z -0.0000 -0.0000 0.0000 0.0000 -0.0000 0.0000

AT. 23 C X -0.0000 -0.0000 0.0000 -0.0000 0.0000 0.0000  
Y 0.0001 0.0001 0.0000 0.0002 -0.0001 -0.0001  
Z 0.0001 0.0000 0.0000 0.0001 -0.0001 -0.0000

AT. 24 C X -0.0000 0.0000 0.0000 0.0000 0.0000 -0.0000  
Y 0.0001 -0.0001 0.0000 -0.0002 -0.0001 0.0001  
Z 0.0001 -0.0000 0.0000 -0.0001 -0.0001 0.0000

AT. 25 H X 0.0003 0.0002 0.0000 0.0004 -0.0003 -0.0001  
Y -0.0015 -0.0011 -0.0003 -0.0026 0.0016 0.0006  
Z -0.0002 -0.0001 -0.0000 -0.0003 0.0002 0.0001

AT. 26 H X 0.0003 -0.0002 0.0000 -0.0004 -0.0003 0.0001  
Y -0.0015 0.0011 -0.0003 0.0026 0.0016 -0.0006  
Z -0.0002 0.0001 -0.0000 0.0003 0.0002 -0.0001

AT. 27 H X -0.0001 -0.0001 -0.0000 -0.0003 0.0001 0.0001  
Y 0.0003 0.0002 0.0001 0.0007 -0.0004 -0.0001  
Z -0.0006 -0.0004 -0.0002 -0.0013 0.0007 0.0003

AT. 28 H X -0.0001 0.0001 -0.0000 0.0003 0.0001 -0.0001  
Y 0.0003 -0.0002 0.0001 -0.0007 -0.0004 0.0001  
Z -0.0006 0.0004 -0.0002 0.0013 0.0007 -0.0003

AT. 29 C X 0.0000 -0.0000 0.0001 -0.0001 0.0000 -0.0001  
Y 0.0000 0.0000 -0.0000 0.0001 -0.0000 0.0000  
Z -0.0000 0.0000 -0.0001 0.0001 -0.0001 0.0001

AT. 30 C X 0.0000 0.0000 0.0001 0.0001 0.0000 0.0001  
Y 0.0000 -0.0000 -0.0000 -0.0001 -0.0000 -0.0000

Z -0.0000 -0.0000 -0.0001 -0.0001 -0.0001 -0.0001  
AT. 31 H X -0.0000 0.0000 0.0001 -0.0000 -0.0000 0.0000  
Y -0.0001 0.0000 0.0001 -0.0000 -0.0001 0.0000  
Z 0.0001 0.0000 -0.0000 -0.0000 0.0001 -0.0000  
AT. 32 H X -0.0000 -0.0000 0.0001 0.0000 -0.0000 -0.0000  
Y -0.0001 -0.0000 0.0001 0.0000 -0.0001 -0.0000  
Z 0.0001 -0.0000 -0.0000 0.0000 0.0001 0.0000  
AT. 33 H X -0.0001 0.0002 -0.0007 0.0010 -0.0004 0.0006  
Y 0.0001 -0.0001 0.0004 -0.0006 0.0003 -0.0003  
Z 0.0001 -0.0004 0.0010 -0.0014 0.0007 -0.0007  
AT. 34 H X -0.0001 -0.0002 -0.0007 -0.0010 -0.0004 -0.0006  
Y 0.0001 0.0001 0.0004 0.0006 0.0003 0.0003  
Z 0.0001 0.0004 0.0010 0.0014 0.0007 0.0007  
AT. 35 C X -0.0000 0.0000 -0.0000 0.0000 -0.0000 0.0000  
Y -0.0000 -0.0000 -0.0000 0.0000 -0.0000 -0.0000  
Z 0.0000 -0.0000 0.0000 -0.0000 -0.0000 -0.0000  
AT. 36 C X -0.0000 -0.0000 -0.0000 -0.0000 -0.0000 -0.0000  
Y -0.0000 0.0000 -0.0000 -0.0000 -0.0000 0.0000  
Z 0.0000 0.0000 0.0000 0.0000 -0.0000 0.0000  
AT. 37 C X 0.0000 0.0000 0.0000 -0.0002 0.0001 -0.0001  
Y -0.0000 -0.0000 -0.0000 0.0003 -0.0000 0.0001  
Z -0.0001 -0.0001 -0.0001 0.0005 0.0000 0.0003  
AT. 38 C X 0.0000 -0.0000 0.0000 0.0002 0.0001 0.0001  
Y -0.0000 0.0000 -0.0000 -0.0003 -0.0000 -0.0001  
Z -0.0001 0.0001 -0.0001 -0.0005 0.0000 -0.0003  
AT. 39 H X -0.0004 -0.0005 -0.0010 0.0029 0.0001 0.0022  
Y 0.0003 0.0003 0.0007 -0.0020 -0.0001 -0.0014  
Z 0.0006 0.0007 0.0015 -0.0044 -0.0001 -0.0031  
AT. 40 H X -0.0004 0.0005 -0.0010 -0.0029 0.0001 -0.0022  
Y 0.0003 -0.0003 0.0007 0.0020 -0.0001 0.0014  
Z 0.0006 -0.0007 0.0015 0.0044 -0.0001 0.0031  
AT. 41 H X 0.0002 0.0000 0.0002 -0.0011 -0.0002 -0.0009

Y 0.0001 0.0000 0.0002 -0.0008 -0.0003 -0.0008  
Z 0.0001 0.0000 0.0002 -0.0010 -0.0003 -0.0009  
AT. 42 H X 0.0002 -0.0000 0.0002 0.0011 -0.0002 0.0009  
Y 0.0001 -0.0000 0.0002 0.0008 -0.0003 0.0008  
Z 0.0001 -0.0000 0.0002 0.0010 -0.0003 0.0009  
AT. 43 C X -0.0003 -0.0003 0.0050 0.0053 -0.0074 -0.0073  
Y 0.0001 0.0001 -0.0019 -0.0020 0.0026 0.0026  
Z -0.0003 -0.0003 0.0041 0.0042 -0.0060 -0.0059  
AT. 44 C X -0.0003 0.0003 0.0050 -0.0053 -0.0074 0.0073  
Y 0.0001 -0.0001 -0.0019 0.0020 0.0026 -0.0026  
Z -0.0003 0.0003 0.0041 -0.0042 -0.0060 0.0059  
AT. 45 H X 0.0008 0.0008 -0.0101 -0.0104 0.0155 0.0153  
Y 0.0011 0.0011 -0.0146 -0.0150 0.0225 0.0221  
Z 0.0012 0.0011 -0.0142 -0.0146 0.0216 0.0212  
AT. 46 H X 0.0008 -0.0008 -0.0101 0.0104 0.0155 -0.0153  
Y 0.0011 -0.0011 -0.0146 0.0150 0.0225 -0.0221  
Z 0.0012 -0.0011 -0.0142 0.0146 0.0216 -0.0212  
AT. 47 H X 0.0030 0.0030 -0.0500 -0.0519 0.0726 0.0712  
Y -0.0023 -0.0023 0.0365 0.0379 -0.0537 -0.0526  
Z 0.0021 0.0021 -0.0351 -0.0364 0.0516 0.0506  
AT. 48 H X 0.0030 -0.0030 -0.0500 0.0519 0.0726 -0.0712  
Y -0.0023 0.0023 0.0365 -0.0379 -0.0537 0.0526  
Z 0.0021 -0.0021 -0.0351 0.0364 0.0516 -0.0506  
AT. 49 C X -0.0000 -0.0000 -0.0000 -0.0000 -0.0002 -0.0002  
Y -0.0000 -0.0000 0.0001 0.0001 -0.0000 -0.0000  
Z -0.0000 -0.0000 -0.0001 -0.0001 -0.0002 -0.0002  
AT. 50 C X -0.0000 0.0000 -0.0000 0.0000 -0.0002 0.0002  
Y -0.0000 0.0000 0.0001 -0.0001 -0.0000 0.0000  
Z -0.0000 0.0000 -0.0001 0.0001 -0.0002 0.0002  
AT. 51 C X -0.0000 0.0000 0.0000 0.0002 0.0006 0.0007  
Y 0.0000 -0.0000 0.0000 -0.0002 -0.0005 -0.0006  
Z -0.0000 0.0000 0.0000 0.0001 0.0004 0.0005

AT. 52 C X -0.0000 -0.0000 0.0000 -0.0002 0.0006 -0.0007  
Y 0.0000 0.0000 0.0000 0.0002 -0.0005 0.0006  
Z -0.0000 -0.0000 0.0000 -0.0001 0.0004 -0.0005

AT. 53 H X 0.0001 -0.0004 -0.0005 -0.0024 -0.0068 -0.0083  
Y -0.0000 0.0003 0.0003 0.0016 0.0051 0.0061  
Z 0.0000 -0.0002 -0.0001 -0.0011 -0.0037 -0.0045

AT. 54 H X 0.0001 0.0004 -0.0005 0.0024 -0.0068 0.0083  
Y -0.0000 -0.0003 0.0003 -0.0016 0.0051 -0.0061  
Z 0.0000 0.0002 -0.0001 0.0011 -0.0037 0.0045

AT. 55 H X 0.0000 0.0000 -0.0002 0.0002 0.0011 0.0013  
Y 0.0000 0.0000 -0.0003 0.0005 0.0015 0.0020  
Z -0.0000 -0.0000 0.0002 -0.0004 -0.0013 -0.0016

AT. 56 H X 0.0000 -0.0000 -0.0002 -0.0002 0.0011 -0.0013  
Y 0.0000 -0.0000 -0.0003 -0.0005 0.0015 -0.0020  
Z -0.0000 0.0000 0.0002 0.0004 -0.0013 0.0016

AT. 57 C X -0.0001 0.0000 -0.0012 0.0010 -0.0005 0.0003  
Y -0.0000 -0.0000 -0.0008 0.0003 -0.0004 0.0001  
Z 0.0002 -0.0001 0.0017 -0.0022 0.0006 -0.0007

AT. 58 C X -0.0001 -0.0000 -0.0012 -0.0010 -0.0005 -0.0003  
Y -0.0000 0.0000 -0.0008 -0.0003 -0.0004 -0.0001  
Z 0.0002 0.0001 0.0017 0.0022 0.0006 0.0007

AT. 59 H X 0.0006 -0.0002 0.0072 -0.0066 0.0032 -0.0023  
Y 0.0013 -0.0005 0.0151 -0.0138 0.0067 -0.0048  
Z -0.0008 0.0003 -0.0099 0.0087 -0.0044 0.0030

AT. 60 H X 0.0006 0.0002 0.0072 0.0066 0.0032 0.0023  
Y 0.0013 0.0005 0.0151 0.0138 0.0067 0.0048  
Z -0.0008 -0.0003 -0.0099 -0.0087 -0.0044 -0.0030

AT. 61 H X 0.0009 -0.0005 0.0079 -0.0100 0.0027 -0.0033  
Y -0.0006 0.0003 -0.0053 0.0066 -0.0018 0.0022  
Z -0.0012 0.0006 -0.0106 0.0132 -0.0036 0.0044

AT. 62 H X 0.0009 0.0005 0.0079 0.0100 0.0027 0.0033  
Y -0.0006 -0.0003 -0.0053 -0.0066 -0.0018 -0.0022

Z -0.0012 -0.0006 -0.0106 -0.0132 -0.0036 -0.0044  
AT. 63 H X -0.0002 0.0003 -0.0009 0.0049 0.0002 0.0014  
Y -0.0002 0.0003 -0.0008 0.0043 0.0002 0.0012  
Z -0.0002 0.0003 -0.0003 0.0042 0.0004 0.0011  
AT. 64 H X -0.0002 -0.0003 -0.0009 -0.0049 0.0002 -0.0014  
Y -0.0002 -0.0003 -0.0008 -0.0043 0.0002 -0.0012  
Z -0.0002 -0.0003 -0.0003 -0.0042 0.0004 -0.0011  
AT. 65 C X -0.0000 -0.0004 -0.0061 -0.0060 -0.0039 -0.0041  
Y 0.0002 0.0003 0.0033 0.0032 0.0029 0.0029  
Z -0.0001 -0.0005 -0.0071 -0.0069 -0.0048 -0.0050  
AT. 66 C X -0.0000 0.0004 -0.0061 0.0060 -0.0039 0.0041  
Y 0.0002 -0.0003 0.0033 -0.0032 0.0029 -0.0029  
Z -0.0001 0.0005 -0.0071 0.0069 -0.0048 0.0050  
AT. 67 H X -0.0000 0.0018 0.0306 0.0301 0.0177 0.0190  
Y -0.0000 0.0021 0.0351 0.0346 0.0208 0.0223  
Z -0.0000 0.0021 0.0346 0.0340 0.0203 0.0218  
AT. 68 H X -0.0000 -0.0018 0.0306 -0.0301 0.0177 -0.0190  
Y -0.0000 -0.0021 0.0351 -0.0346 0.0208 -0.0223  
Z -0.0000 -0.0021 0.0346 -0.0340 0.0203 -0.0218  
AT. 69 H X 0.0010 0.0040 0.0599 0.0582 0.0428 0.0441  
Y -0.0008 -0.0031 -0.0460 -0.0447 -0.0325 -0.0336  
Z 0.0005 0.0020 0.0305 0.0297 0.0213 0.0220  
AT. 70 H X 0.0010 -0.0040 0.0599 -0.0582 0.0428 -0.0441  
Y -0.0008 0.0031 -0.0460 0.0447 -0.0325 0.0336  
Z 0.0005 -0.0020 0.0305 -0.0297 0.0213 -0.0220  
AT. 71 H X -0.0007 -0.0013 -0.0175 -0.0169 -0.0135 -0.0135  
Y -0.0011 -0.0021 -0.0292 -0.0280 -0.0232 -0.0231  
Z 0.0009 0.0014 0.0200 0.0192 0.0161 0.0160  
AT. 72 H X -0.0007 0.0013 -0.0175 0.0169 -0.0135 0.0135  
Y -0.0011 0.0021 -0.0292 0.0280 -0.0232 0.0231  
Z 0.0009 -0.0014 0.0200 -0.0192 0.0161 -0.0160  
AT. 73 C X -0.0000 -0.0000 -0.0001 0.0000 -0.0001 -0.0001

Y -0.0000 -0.0000 -0.0001 0.0001 -0.0003 -0.0002  
Z 0.0000 0.0000 0.0001 -0.0001 0.0001 -0.0001  
AT. 74 C X -0.0000 0.0000 -0.0001 -0.0000 -0.0001 0.0001  
Y -0.0000 0.0000 -0.0001 -0.0001 -0.0003 0.0002  
Z 0.0000 -0.0000 0.0001 0.0001 0.0001 0.0001  
AT. 75 H X 0.0002 -0.0000 0.0011 -0.0010 0.0011 -0.0001  
Y 0.0003 -0.0000 0.0018 -0.0018 0.0017 -0.0003  
Z -0.0002 -0.0000 -0.0014 0.0011 -0.0012 0.0001  
AT. 76 H X 0.0002 0.0000 0.0011 0.0010 0.0011 0.0001  
Y 0.0003 0.0000 0.0018 0.0018 0.0017 0.0003  
Z -0.0002 0.0000 -0.0014 -0.0011 -0.0012 -0.0001  
AT. 77 H X 0.0001 0.0001 0.0003 0.0009 0.0011 0.0018  
Y 0.0001 0.0001 -0.0000 0.0007 0.0007 0.0015  
Z 0.0001 0.0001 0.0002 0.0006 0.0011 0.0017  
AT. 78 H X 0.0001 -0.0001 0.0003 -0.0009 0.0011 -0.0018  
Y 0.0001 -0.0001 -0.0000 -0.0007 0.0007 -0.0015  
Z 0.0001 -0.0001 0.0002 -0.0006 0.0011 -0.0017  
AT. 79 I X 0.0000 -0.0000 -0.0000 0.0000 0.0000 0.0000  
Y -0.0000 -0.0000 -0.0000 0.0000 -0.0000 0.0000  
Z -0.0000 0.0000 -0.0000 -0.0000 -0.0000 -0.0000  
AT. 80 I X 0.0000 0.0000 -0.0000 -0.0000 0.0000 -0.0000  
Y -0.0000 0.0000 -0.0000 -0.0000 -0.0000 -0.0000  
Z -0.0000 -0.0000 -0.0000 0.0000 -0.0000 0.0000  
AT. 81 I X -0.0000 -0.0000 0.0000 0.0000 -0.0000 -0.0000  
Y 0.0000 0.0000 0.0000 0.0000 0.0000 0.0000  
Z 0.0000 0.0000 -0.0000 -0.0000 -0.0000 0.0000  
AT. 82 I X -0.0000 0.0000 0.0000 -0.0000 -0.0000 0.0000  
Y 0.0000 -0.0000 0.0000 -0.0000 0.0000 -0.0000  
Z 0.0000 -0.0000 -0.0000 0.0000 -0.0000 -0.0000  
AT. 83 O X 0.0001 -0.0001 -0.0000 0.0000 -0.0000 0.0000  
Y -0.0000 -0.0000 -0.0000 0.0000 0.0000 0.0000  
Z -0.0000 -0.0000 -0.0000 0.0000 0.0000 -0.0000

AT. 84 O X 0.0001 0.0001 -0.0000 -0.0000 -0.0000 -0.0000  
Y -0.0000 0.0000 -0.0000 -0.0000 0.0000 -0.0000  
Z -0.0000 0.0000 -0.0000 -0.0000 0.0000 0.0000

AT. 85 O X 0.0001 0.0001 0.0000 0.0000 -0.0000 -0.0000  
Y 0.0000 0.0000 0.0000 0.0000 -0.0000 -0.0000  
Z -0.0000 -0.0000 0.0000 0.0000 -0.0000 -0.0000

AT. 86 O X 0.0001 -0.0001 0.0000 -0.0000 -0.0000 0.0000  
Y 0.0000 -0.0000 0.0000 -0.0000 -0.0000 0.0000  
Z -0.0000 0.0000 0.0000 -0.0000 -0.0000 0.0000

AT. 87 N X 0.0000 -0.0000 -0.0000 0.0000 -0.0000 0.0000  
Y -0.0000 -0.0000 -0.0000 0.0000 -0.0000 0.0000  
Z 0.0000 -0.0000 0.0000 0.0000 0.0000 0.0000

AT. 88 N X 0.0000 0.0000 -0.0000 -0.0000 -0.0000 -0.0000  
Y -0.0000 0.0000 -0.0000 -0.0000 -0.0000 -0.0000  
Z 0.0000 0.0000 0.0000 -0.0000 0.0000 -0.0000

AT. 89 N X -0.0000 0.0000 -0.0000 -0.0000 -0.0000 -0.0000  
Y -0.0000 -0.0000 -0.0000 -0.0000 -0.0000 0.0000  
Z 0.0000 0.0000 0.0000 0.0000 -0.0000 -0.0000

AT. 90 N X -0.0000 -0.0000 -0.0000 0.0000 -0.0000 0.0000  
Y -0.0000 0.0000 -0.0000 0.0000 -0.0000 -0.0000  
Z 0.0000 -0.0000 0.0000 -0.0000 -0.0000 0.0000

AT. 91 C X -0.0001 0.0001 0.0000 -0.0000 0.0000 -0.0000  
Y -0.0000 0.0000 0.0000 0.0000 0.0000 -0.0000  
Z -0.0000 0.0001 -0.0000 -0.0000 -0.0000 0.0000

AT. 92 C X -0.0001 -0.0001 0.0000 0.0000 0.0000 0.0000  
Y -0.0000 -0.0000 0.0000 -0.0000 0.0000 0.0000  
Z -0.0000 -0.0001 -0.0000 0.0000 -0.0000 -0.0000

AT. 93 C X 0.0004 0.0001 0.0000 -0.0000 0.0000 0.0000  
Y 0.0008 0.0004 0.0001 -0.0000 0.0000 0.0000  
Z 0.0000 -0.0002 -0.0000 -0.0000 -0.0000 0.0000

AT. 94 C X 0.0004 -0.0001 0.0000 0.0000 0.0000 -0.0000  
Y 0.0008 -0.0004 0.0001 0.0000 0.0000 -0.0000

Z 0.0000 0.0002 -0.0000 0.0000 -0.0000 -0.0000  
AT. 95 H X -0.0055 -0.0021 -0.0004 0.0002 -0.0002 -0.0000  
Y -0.0087 -0.0034 -0.0006 0.0004 -0.0003 -0.0001  
Z -0.0050 -0.0019 -0.0003 0.0002 -0.0002 -0.0000  
AT. 96 H X -0.0055 0.0021 -0.0004 -0.0002 -0.0002 0.0000  
Y -0.0087 0.0034 -0.0006 -0.0004 -0.0003 0.0001  
Z -0.0050 0.0019 -0.0003 -0.0002 -0.0002 0.0000  
AT. 97 H X 0.0013 0.0010 0.0001 -0.0001 0.0001 0.0000  
Y -0.0009 -0.0008 -0.0001 0.0000 -0.0001 -0.0000  
Z 0.0046 0.0035 0.0004 -0.0002 0.0004 0.0000  
AT. 98 H X 0.0013 -0.0010 0.0001 0.0001 0.0001 -0.0000  
Y -0.0009 0.0008 -0.0001 -0.0000 -0.0001 0.0000  
Z 0.0046 -0.0035 0.0004 0.0002 0.0004 -0.0000  
AT. 99 C X 0.0001 0.0001 0.0000 0.0000 0.0000 0.0000  
Y -0.0000 -0.0000 0.0000 0.0000 0.0000 0.0000  
Z 0.0002 0.0002 -0.0000 -0.0000 -0.0000 -0.0000  
AT. 100 C X 0.0001 -0.0001 0.0000 -0.0000 0.0000 -0.0000  
Y -0.0000 0.0000 0.0000 -0.0000 0.0000 -0.0000  
Z 0.0002 -0.0002 -0.0000 0.0000 -0.0000 0.0000  
AT. 101 C X -0.0027 -0.0027 -0.0000 0.0001 0.0001 0.0002  
Y -0.0059 -0.0060 -0.0000 0.0001 0.0002 0.0004  
Z -0.0064 -0.0063 -0.0000 0.0001 0.0002 0.0004  
AT. 102 C X -0.0027 0.0027 -0.0000 -0.0001 0.0001 -0.0002  
Y -0.0059 0.0060 -0.0000 -0.0001 0.0002 -0.0004  
Z -0.0064 0.0063 -0.0000 -0.0001 0.0002 -0.0004  
AT. 103 H X 0.0434 0.0435 0.0003 -0.0010 -0.0017 -0.0026  
Y 0.1001 0.1005 0.0006 -0.0023 -0.0036 -0.0058  
Z 0.0005 0.0004 -0.0000 -0.0000 0.0000 -0.0000  
AT. 104 H X 0.0434 -0.0435 0.0003 0.0010 -0.0017 0.0026  
Y 0.1001 -0.1005 0.0006 0.0023 -0.0036 0.0058  
Z 0.0005 -0.0004 -0.0000 0.0000 0.0000 0.0000  
AT. 105 H X -0.0150 -0.0151 -0.0001 0.0003 0.0006 0.0009



Y -0.0292 -0.0292 -0.0002 0.0007 0.0011 0.0018  
Z 0.0724 0.0722 0.0005 -0.0016 -0.0028 -0.0044  
AT.106 H X -0.0150 0.0151 -0.0001 -0.0003 0.0006 -0.0009  
Y -0.0292 0.0292 -0.0002 -0.0007 0.0011 -0.0018  
Z 0.0724 -0.0722 0.0005 0.0016 -0.0028 0.0044  
AT.107 C X 0.0001 0.0001 -0.0000 0.0000 -0.0000 0.0000  
Y 0.0000 -0.0000 -0.0000 0.0000 0.0000 -0.0000  
Z 0.0000 0.0001 -0.0000 -0.0000 -0.0000 0.0000  
AT.108 C X 0.0001 -0.0001 -0.0000 -0.0000 -0.0000 -0.0000  
Y 0.0000 0.0000 -0.0000 -0.0000 0.0000 0.0000  
Z 0.0000 -0.0001 -0.0000 0.0000 -0.0000 -0.0000  
AT.109 H X -0.0000 -0.0000 -0.0000 0.0000 0.0000 -0.0000  
Y 0.0001 0.0002 0.0000 -0.0001 -0.0001 0.0000  
Z -0.0000 -0.0002 -0.0000 0.0001 0.0000 -0.0000  
AT.110 H X -0.0000 0.0000 -0.0000 -0.0000 0.0000 0.0000  
Y 0.0001 -0.0002 0.0000 0.0001 -0.0001 -0.0000  
Z -0.0000 0.0002 -0.0000 -0.0001 0.0000 0.0000  
AT.111 H X -0.0005 -0.0007 0.0001 -0.0000 0.0001 -0.0000  
Y -0.0001 -0.0002 0.0000 -0.0000 0.0000 -0.0000  
Z -0.0005 -0.0006 0.0001 -0.0000 0.0001 -0.0000  
AT.112 H X -0.0005 0.0007 0.0001 0.0000 0.0001 0.0000  
Y -0.0001 0.0002 0.0000 0.0000 0.0000 0.0000  
Z -0.0005 0.0006 0.0001 0.0000 0.0001 0.0000  
AT.113 C X 0.0000 0.0000 -0.0000 -0.0000 -0.0000 -0.0000  
Y 0.0000 0.0000 0.0000 -0.0000 -0.0000 -0.0000  
Z 0.0000 0.0000 -0.0000 -0.0000 -0.0000 -0.0000  
AT.114 C X 0.0000 -0.0000 -0.0000 0.0000 -0.0000 0.0000  
Y 0.0000 -0.0000 0.0000 0.0000 -0.0000 0.0000  
Z 0.0000 -0.0000 -0.0000 0.0000 -0.0000 0.0000  
AT.115 C X 0.0005 0.0005 0.0000 -0.0000 -0.0000 -0.0001  
Y 0.0002 0.0002 -0.0000 -0.0000 -0.0000 -0.0000  
Z 0.0007 0.0006 -0.0000 -0.0000 -0.0000 -0.0001

AT.116 C X 0.0005 -0.0005 0.0000 0.0000 -0.0000 0.0001  
Y 0.0002 -0.0002 -0.0000 0.0000 -0.0000 0.0000  
Z 0.0007 -0.0006 -0.0000 0.0000 -0.0000 0.0001

AT.117 H X -0.0064 -0.0062 -0.0000 0.0002 0.0004 0.0007  
Y -0.0012 -0.0011 -0.0000 0.0000 0.0001 0.0001  
Z -0.0062 -0.0059 -0.0000 0.0002 0.0004 0.0007

AT.118 H X -0.0064 0.0062 -0.0000 -0.0002 0.0004 -0.0007  
Y -0.0012 0.0011 -0.0000 -0.0000 0.0001 -0.0001  
Z -0.0062 0.0059 -0.0000 -0.0002 0.0004 -0.0007

AT.119 H X 0.0009 0.0008 -0.0000 -0.0000 -0.0001 -0.0001  
Y -0.0015 -0.0015 0.0000 0.0000 0.0001 0.0002  
Z -0.0015 -0.0015 0.0000 0.0000 0.0001 0.0001

AT.120 H X 0.0009 -0.0008 -0.0000 0.0000 -0.0001 0.0001  
Y -0.0015 0.0015 0.0000 -0.0000 0.0001 -0.0002  
Z -0.0015 0.0015 0.0000 -0.0000 0.0001 -0.0001

AT.121 C X -0.0001 -0.0000 -0.0000 -0.0000 0.0001 0.0001  
Y -0.0001 -0.0000 -0.0000 -0.0000 0.0000 0.0000  
Z 0.0001 0.0000 0.0000 0.0000 -0.0001 -0.0001

AT.122 C X -0.0001 0.0000 -0.0000 0.0000 0.0001 -0.0001  
Y -0.0001 0.0000 -0.0000 0.0000 0.0000 -0.0000  
Z 0.0001 -0.0000 0.0000 -0.0000 -0.0001 0.0001

AT.123 H X -0.0001 -0.0000 0.0000 -0.0000 -0.0000 -0.0000  
Y 0.0001 0.0001 -0.0000 0.0000 0.0001 0.0002  
Z 0.0001 0.0001 0.0000 0.0000 0.0001 0.0001

AT.124 H X -0.0001 0.0000 0.0000 0.0000 -0.0000 0.0000  
Y 0.0001 -0.0001 -0.0000 -0.0000 0.0001 -0.0002  
Z 0.0001 -0.0001 0.0000 -0.0000 0.0001 -0.0001

AT.125 H X 0.0012 0.0005 0.0004 0.0003 -0.0007 -0.0010  
Y 0.0004 0.0002 0.0002 0.0001 -0.0003 -0.0004  
Z -0.0009 -0.0003 -0.0003 -0.0002 0.0006 0.0008

AT.126 H X 0.0012 -0.0005 0.0004 -0.0003 -0.0007 0.0010  
Y 0.0004 -0.0002 0.0002 -0.0001 -0.0003 0.0004

Z -0.0009 0.0003 -0.0003 0.0002 0.0006 -0.0008  
AT. 127 C X 0.0000 -0.0000 -0.0000 0.0000 0.0000 0.0000  
Y -0.0000 0.0000 0.0000 -0.0000 -0.0000 -0.0000  
Z -0.0000 0.0000 0.0000 -0.0000 -0.0000 -0.0000  
AT. 128 C X 0.0000 0.0000 -0.0000 -0.0000 0.0000 -0.0000  
Y -0.0000 -0.0000 0.0000 0.0000 -0.0000 0.0000  
Z -0.0000 -0.0000 0.0000 0.0000 -0.0000 0.0000  
AT. 129 C X -0.0001 -0.0000 0.0000 0.0000 -0.0000 -0.0000  
Y -0.0000 -0.0000 -0.0000 0.0000 -0.0000 -0.0000  
Z 0.0001 0.0001 0.0000 -0.0000 0.0000 0.0000  
AT. 130 C X -0.0001 0.0000 0.0000 -0.0000 -0.0000 0.0000  
Y -0.0000 0.0000 -0.0000 -0.0000 -0.0000 0.0000  
Z 0.0001 -0.0001 0.0000 0.0000 0.0000 -0.0000  
AT. 131 H X 0.0007 0.0007 0.0000 -0.0001 0.0003 0.0001  
Y 0.0003 0.0003 -0.0000 -0.0000 0.0001 0.0000  
Z -0.0005 -0.0005 -0.0000 0.0000 -0.0002 -0.0001  
AT. 132 H X 0.0007 -0.0007 0.0000 0.0001 0.0003 -0.0001  
Y 0.0003 -0.0003 -0.0000 0.0000 0.0001 -0.0000  
Z -0.0005 0.0005 -0.0000 -0.0000 -0.0002 0.0001  
AT. 133 H X -0.0000 -0.0001 -0.0000 0.0000 -0.0000 -0.0000  
Y 0.0001 0.0003 0.0001 -0.0000 0.0001 0.0001  
Z -0.0001 -0.0002 -0.0000 0.0000 -0.0001 -0.0000  
AT. 134 H X -0.0000 0.0001 -0.0000 -0.0000 -0.0000 0.0000  
Y 0.0001 -0.0003 0.0001 0.0000 0.0001 -0.0001  
Z -0.0001 0.0002 -0.0000 -0.0000 -0.0001 0.0000  
AT. 135 C X -0.0000 -0.0001 -0.0000 0.0000 -0.0000 -0.0000  
Y -0.0001 -0.0003 -0.0000 -0.0000 -0.0000 -0.0001  
Z -0.0001 -0.0004 -0.0000 0.0000 -0.0000 -0.0001  
AT. 136 C X -0.0000 0.0001 -0.0000 -0.0000 -0.0000 0.0000  
Y -0.0001 0.0003 -0.0000 0.0000 -0.0000 0.0001  
Z -0.0001 0.0004 -0.0000 -0.0000 -0.0000 0.0001  
AT. 137 H X -0.0001 -0.0001 0.0000 -0.0000 -0.0000 -0.0001

Y 0.0001 0.0000 -0.0002 0.0001 0.0001 0.0002  
Z -0.0001 -0.0002 0.0001 -0.0000 -0.0001 -0.0002  
AT. 138 H X -0.0001 0.0001 0.0000 0.0000 -0.0000 0.0001  
Y 0.0001 -0.0000 -0.0002 -0.0001 0.0001 -0.0002  
Z -0.0001 0.0002 0.0001 0.0000 -0.0001 0.0002  
AT. 139 H X 0.0004 0.0030 0.0004 -0.0000 0.0002 0.0008  
Y 0.0001 0.0005 0.0001 -0.0000 0.0000 0.0001  
Z 0.0003 0.0023 0.0003 -0.0000 0.0002 0.0006  
AT. 140 H X 0.0004 -0.0030 0.0004 0.0000 0.0002 -0.0008  
Y 0.0001 -0.0005 0.0001 0.0000 0.0000 -0.0001  
Z 0.0003 -0.0023 0.0003 0.0000 0.0002 -0.0006  
AT. 141 H X -0.0003 -0.0013 -0.0001 -0.0000 -0.0001 -0.0004  
Y 0.0009 0.0032 0.0002 0.0000 0.0003 0.0009  
Z 0.0008 0.0030 0.0002 0.0000 0.0003 0.0008  
AT. 142 H X -0.0003 0.0013 -0.0001 0.0000 -0.0001 0.0004  
Y 0.0009 -0.0032 0.0002 -0.0000 0.0003 -0.0009  
Z 0.0008 -0.0030 0.0002 -0.0000 0.0003 -0.0008  
AT. 143 C X 0.0001 -0.0002 -0.0000 0.0001 -0.0000 0.0001  
Y -0.0000 0.0001 0.0000 -0.0001 -0.0000 -0.0002  
Z -0.0003 0.0003 0.0000 -0.0001 0.0000 -0.0001  
AT. 144 C X 0.0001 0.0002 -0.0000 -0.0001 -0.0000 -0.0001  
Y -0.0000 -0.0001 0.0000 0.0001 -0.0000 0.0002  
Z -0.0003 -0.0003 0.0000 0.0001 0.0000 0.0001  
AT. 145 H X -0.0004 0.0005 0.0001 -0.0003 0.0000 -0.0003  
Y 0.0018 -0.0020 -0.0003 0.0012 0.0000 0.0014  
Z 0.0016 -0.0018 -0.0003 0.0011 0.0000 0.0013  
AT. 146 H X -0.0004 -0.0005 0.0001 0.0003 0.0000 0.0003  
Y 0.0018 0.0020 -0.0003 -0.0012 0.0000 -0.0014  
Z 0.0016 0.0018 -0.0003 -0.0011 0.0000 -0.0013  
AT. 147 H X -0.0015 0.0016 0.0003 -0.0006 0.0001 -0.0003  
Y -0.0006 0.0006 0.0001 -0.0002 0.0001 -0.0001  
Z 0.0011 -0.0012 -0.0002 0.0004 -0.0001 0.0002

AT. 148 H X -0.0015 -0.0016 0.0003 0.0006 0.0001 0.0003  
Y -0.0006 -0.0006 0.0001 0.0002 0.0001 0.0001  
Z 0.0011 0.0012 -0.0002 -0.0004 -0.0001 -0.0002

AT. 149 H X 0.0003 -0.0002 0.0000 -0.0001 -0.0001 -0.0003  
Y -0.0009 0.0006 -0.0000 0.0002 0.0003 0.0008  
Z 0.0005 -0.0002 0.0000 -0.0002 -0.0002 -0.0005

AT. 150 H X 0.0003 0.0002 0.0000 0.0001 -0.0001 0.0003  
Y -0.0009 -0.0006 -0.0000 -0.0002 0.0003 -0.0008  
Z 0.0005 0.0002 0.0000 0.0002 -0.0002 0.0005

AT. 151 C X 0.0000 -0.0000 0.0000 0.0000 0.0000 -0.0000  
Y -0.0000 0.0000 -0.0000 -0.0000 -0.0000 0.0000  
Z -0.0000 -0.0000 0.0000 -0.0000 0.0000 -0.0000

AT. 152 C X 0.0000 0.0000 0.0000 -0.0000 0.0000 0.0000  
Y -0.0000 -0.0000 -0.0000 0.0000 -0.0000 -0.0000  
Z -0.0000 0.0000 0.0000 0.0000 0.0000 0.0000

AT. 153 H X 0.0000 0.0001 -0.0000 -0.0000 -0.0000 0.0000  
Y 0.0001 -0.0002 0.0000 -0.0000 0.0001 -0.0000  
Z -0.0001 0.0002 -0.0000 -0.0000 -0.0000 0.0000

AT. 154 H X 0.0000 -0.0001 -0.0000 0.0000 -0.0000 -0.0000  
Y 0.0001 0.0002 0.0000 0.0000 0.0001 0.0000  
Z -0.0001 -0.0002 -0.0000 0.0000 -0.0000 -0.0000

AT. 155 H X -0.0001 0.0001 0.0000 -0.0000 0.0000 -0.0000  
Y 0.0003 -0.0002 0.0000 0.0000 -0.0000 0.0000  
Z 0.0002 -0.0002 0.0000 0.0000 -0.0000 0.0000

AT. 156 H X -0.0001 -0.0001 0.0000 0.0000 0.0000 0.0000  
Y 0.0003 0.0002 0.0000 -0.0000 -0.0000 -0.0000  
Z 0.0002 0.0002 0.0000 -0.0000 -0.0000 -0.0000

AT. 157 O X 0.0000 -0.0000 -0.0000 0.0000 -0.0000 -0.0000  
Y -0.0000 0.0000 0.0000 -0.0000 0.0000 0.0000  
Z -0.0000 0.0000 0.0000 -0.0000 0.0000 0.0000

AT. 158 O X 0.0000 0.0000 -0.0000 -0.0000 -0.0000 0.0000  
Y -0.0000 -0.0000 0.0000 0.0000 0.0000 -0.0000

Z -0.0000 -0.0000 0.0000 0.0000 0.0000 -0.0000  
AT. 159 O X -0.0000 0.0000 0.0000 -0.0000 0.0000 0.0000  
Y 0.0000 -0.0000 -0.0000 0.0000 -0.0000 -0.0000  
Z -0.0001 0.0000 0.0000 -0.0000 0.0000 0.0000  
AT. 160 O X -0.0000 -0.0000 0.0000 0.0000 0.0000 -0.0000  
Y 0.0000 0.0000 -0.0000 -0.0000 -0.0000 0.0000  
Z -0.0001 -0.0000 0.0000 0.0000 0.0000 -0.0000  
AT. 161 H X -0.0000 0.0000 0.0001 -0.0000 0.0000 0.0000  
Y 0.0004 -0.0002 -0.0006 0.0003 -0.0004 -0.0004  
Z 0.0001 -0.0001 -0.0002 0.0001 -0.0001 -0.0001  
AT. 162 H X -0.0000 -0.0000 0.0001 0.0000 0.0000 -0.0000  
Y 0.0004 0.0002 -0.0006 -0.0003 -0.0004 0.0004  
Z 0.0001 0.0001 -0.0002 -0.0001 -0.0001 0.0001  
AT. 163 H X 0.0004 -0.0001 -0.0002 0.0001 -0.0002 -0.0001  
Y -0.0003 0.0001 0.0002 -0.0001 0.0001 0.0001  
Z 0.0011 -0.0002 -0.0006 0.0002 -0.0006 -0.0002  
AT. 164 H X 0.0004 0.0001 -0.0002 -0.0001 -0.0002 0.0001  
Y -0.0003 -0.0001 0.0002 0.0001 0.0001 -0.0001  
Z 0.0011 0.0002 -0.0006 -0.0002 -0.0006 0.0002  
AT. 165 O X 0.0002 -0.0002 0.0000 -0.0000 -0.0000 0.0000  
Y 0.0001 -0.0001 0.0000 -0.0000 -0.0000 0.0000  
Z 0.0001 -0.0001 0.0000 -0.0000 -0.0000 0.0000  
AT. 166 O X 0.0002 0.0002 0.0000 0.0000 -0.0000 -0.0000  
Y 0.0001 0.0001 0.0000 0.0000 -0.0000 -0.0000  
Z 0.0001 0.0001 0.0000 0.0000 -0.0000 -0.0000  
AT. 167 H X -0.0031 0.0028 -0.0001 0.0002 0.0003 -0.0001  
Y -0.0016 0.0013 -0.0000 0.0001 0.0002 -0.0001  
Z -0.0012 0.0010 -0.0000 0.0000 0.0001 -0.0001  
AT. 168 H X -0.0031 -0.0028 -0.0001 -0.0002 0.0003 0.0001  
Y -0.0016 -0.0013 -0.0000 -0.0001 0.0002 0.0001  
Z -0.0012 -0.0010 -0.0000 -0.0000 0.0001 0.0001  
AT. 169 O X 0.0001 -0.0001 -0.0000 0.0000 -0.0000 0.0000

|              |     |         |         |         |         |         |         |
|--------------|-----|---------|---------|---------|---------|---------|---------|
|              | Y   | -0.0001 | 0.0001  | 0.0000  | 0.0000  | 0.0001  | -0.0001 |
|              | Z   | 0.0001  | -0.0001 | 0.0000  | -0.0000 | -0.0001 | 0.0000  |
| AT. 170      | O X | 0.0001  | 0.0001  | -0.0000 | -0.0000 | -0.0000 | -0.0000 |
|              | Y   | -0.0001 | -0.0001 | 0.0000  | -0.0000 | 0.0001  | 0.0001  |
|              | Z   | 0.0001  | 0.0001  | 0.0000  | 0.0000  | -0.0001 | -0.0000 |
| AT. 171      | H X | -0.0010 | 0.0010  | -0.0000 | 0.0000  | 0.0006  | -0.0006 |
|              | Y   | 0.0022  | -0.0021 | 0.0000  | -0.0001 | -0.0013 | 0.0012  |
|              | Z   | -0.0010 | 0.0010  | -0.0000 | 0.0000  | 0.0007  | -0.0006 |
| AT. 172      | H X | -0.0010 | -0.0010 | -0.0000 | -0.0000 | 0.0006  | 0.0006  |
|              | Y   | 0.0022  | 0.0021  | 0.0000  | 0.0001  | -0.0013 | -0.0012 |
|              | Z   | -0.0010 | -0.0010 | -0.0000 | -0.0000 | 0.0007  | 0.0006  |
|              |     |         |         |         |         |         |         |
| FREQ(CM**-1) |     | 3062.06 | 3062.45 | 3066.93 | 3067.02 | 3069.88 | 3070.10 |
|              |     |         |         |         |         |         |         |
| AT. 1        | I X | -0.0000 | -0.0000 | 0.0000  | 0.0000  | 0.0000  | -0.0000 |
|              | Y   | 0.0000  | -0.0000 | 0.0000  | 0.0000  | 0.0000  | 0.0000  |
|              | Z   | 0.0000  | 0.0000  | -0.0000 | -0.0000 | -0.0000 | -0.0000 |
| AT. 2        | I X | -0.0000 | 0.0000  | -0.0000 | 0.0000  | -0.0000 | -0.0000 |
|              | Y   | 0.0000  | 0.0000  | -0.0000 | 0.0000  | -0.0000 | 0.0000  |
|              | Z   | 0.0000  | -0.0000 | 0.0000  | -0.0000 | 0.0000  | -0.0000 |
| AT. 3        | I X | -0.0000 | -0.0000 | -0.0000 | -0.0000 | -0.0000 | 0.0000  |
|              | Y   | 0.0000  | -0.0000 | 0.0000  | 0.0000  | 0.0000  | 0.0000  |
|              | Z   | 0.0000  | 0.0000  | -0.0000 | -0.0000 | -0.0000 | -0.0000 |
| AT. 4        | I X | -0.0000 | 0.0000  | 0.0000  | -0.0000 | 0.0000  | 0.0000  |
|              | Y   | 0.0000  | 0.0000  | -0.0000 | 0.0000  | -0.0000 | 0.0000  |
|              | Z   | 0.0000  | -0.0000 | 0.0000  | -0.0000 | 0.0000  | -0.0000 |
| AT. 5        | O X | -0.0000 | -0.0000 | 0.0000  | -0.0000 | 0.0000  | -0.0000 |
|              | Y   | 0.0000  | 0.0000  | -0.0000 | -0.0000 | -0.0000 | 0.0000  |
|              | Z   | 0.0000  | 0.0000  | 0.0000  | -0.0000 | -0.0000 | -0.0000 |
| AT. 6        | O X | -0.0000 | 0.0000  | -0.0000 | -0.0000 | -0.0000 | -0.0000 |
|              | Y   | 0.0000  | -0.0000 | 0.0000  | -0.0000 | 0.0000  | 0.0000  |
|              | Z   | 0.0000  | -0.0000 | -0.0000 | -0.0000 | 0.0000  | -0.0000 |

AT. 7 O X 0.0000 -0.0000 -0.0000 -0.0000 0.0000 0.0000  
Y -0.0000 0.0000 -0.0000 -0.0000 -0.0000 -0.0000  
Z 0.0000 0.0000 0.0000 0.0000 0.0000 -0.0000

AT. 8 O X 0.0000 0.0000 0.0000 -0.0000 -0.0000 0.0000  
Y -0.0000 -0.0000 0.0000 -0.0000 0.0000 -0.0000  
Z 0.0000 -0.0000 -0.0000 0.0000 -0.0000 -0.0000

AT. 9 N X -0.0000 -0.0000 0.0000 0.0000 -0.0000 -0.0000  
Y -0.0000 -0.0000 0.0000 0.0000 0.0000 0.0000  
Z 0.0000 0.0000 0.0000 0.0000 -0.0000 -0.0000

AT. 10 N X -0.0000 0.0000 -0.0000 0.0000 0.0000 -0.0000  
Y -0.0000 0.0000 -0.0000 0.0000 -0.0000 0.0000  
Z 0.0000 -0.0000 -0.0000 0.0000 0.0000 -0.0000

AT. 11 N X 0.0000 -0.0000 -0.0000 -0.0000 0.0000 0.0000  
Y -0.0000 -0.0000 0.0000 0.0000 0.0000 -0.0000  
Z 0.0000 0.0000 -0.0000 -0.0000 0.0000 0.0000

AT. 12 N X 0.0000 0.0000 0.0000 -0.0000 -0.0000 0.0000  
Y -0.0000 0.0000 -0.0000 0.0000 -0.0000 -0.0000  
Z 0.0000 -0.0000 0.0000 -0.0000 -0.0000 0.0000

AT. 13 C X 0.0000 0.0000 0.0000 0.0000 -0.0000 -0.0000  
Y 0.0000 0.0000 -0.0000 -0.0000 0.0000 0.0000  
Z -0.0000 -0.0000 0.0000 0.0000 0.0000 0.0000

AT. 14 C X 0.0000 -0.0000 -0.0000 0.0000 0.0000 -0.0000  
Y 0.0000 -0.0000 0.0000 -0.0000 -0.0000 0.0000  
Z -0.0000 0.0000 -0.0000 0.0000 -0.0000 0.0000

AT. 15 C X 0.0000 -0.0000 -0.0000 0.0000 0.0000 -0.0000  
Y 0.0001 0.0000 0.0001 0.0004 -0.0002 -0.0006  
Z -0.0000 0.0000 0.0000 -0.0001 0.0000 0.0002

AT. 16 C X 0.0000 0.0000 0.0000 0.0000 -0.0000 -0.0000  
Y 0.0001 -0.0000 -0.0001 0.0004 0.0002 -0.0006  
Z -0.0000 -0.0000 -0.0000 -0.0001 -0.0000 0.0002

AT. 17 H X 0.0001 0.0001 0.0003 0.0010 -0.0006 -0.0015  
Y -0.0003 -0.0002 -0.0012 -0.0033 0.0018 0.0046



Z -0.0003 -0.0002 -0.0009 -0.0027 0.0016 0.0039  
AT. 18 H X 0.0001 -0.0001 -0.0003 0.0010 0.0006 -0.0015  
Y -0.0003 0.0002 0.0012 -0.0033 -0.0018 0.0046  
Z -0.0003 0.0002 0.0009 -0.0027 -0.0016 0.0039  
AT. 19 H X -0.0002 -0.0000 -0.0002 -0.0013 0.0006 0.0018  
Y -0.0002 -0.0001 -0.0003 -0.0015 0.0007 0.0021  
Z 0.0006 0.0001 0.0008 0.0043 -0.0020 -0.0060  
AT. 20 H X -0.0002 0.0000 0.0002 -0.0013 -0.0006 0.0018  
Y -0.0002 0.0001 0.0003 -0.0015 -0.0007 0.0021  
Z 0.0006 -0.0001 -0.0008 0.0043 0.0020 -0.0060  
AT. 21 C X -0.0000 0.0000 0.0000 0.0000 -0.0000 -0.0000  
Y 0.0000 -0.0000 0.0000 -0.0000 0.0000 0.0000  
Z -0.0000 -0.0000 -0.0000 -0.0000 -0.0000 -0.0000  
AT. 22 C X -0.0000 -0.0000 -0.0000 0.0000 0.0000 -0.0000  
Y 0.0000 0.0000 -0.0000 -0.0000 -0.0000 0.0000  
Z -0.0000 0.0000 0.0000 -0.0000 0.0000 -0.0000  
AT. 23 C X -0.0000 0.0000 0.0001 0.0001 0.0000 0.0000  
Y -0.0000 -0.0001 -0.0006 -0.0006 -0.0000 -0.0000  
Z -0.0000 -0.0000 -0.0008 -0.0008 -0.0001 0.0000  
AT. 24 C X -0.0000 -0.0000 -0.0001 0.0001 -0.0000 0.0000  
Y -0.0000 0.0001 0.0006 -0.0006 0.0000 -0.0000  
Z -0.0000 0.0000 0.0008 -0.0008 0.0001 0.0000  
AT. 25 H X -0.0000 -0.0002 -0.0020 -0.0021 -0.0001 -0.0000  
Y 0.0001 0.0008 0.0112 0.0120 0.0006 0.0000  
Z -0.0000 0.0001 0.0009 0.0010 0.0000 0.0000  
AT. 26 H X -0.0000 0.0002 0.0020 -0.0021 0.0001 -0.0000  
Y 0.0001 -0.0008 -0.0112 0.0120 -0.0006 0.0000  
Z -0.0000 -0.0001 -0.0009 0.0010 -0.0000 0.0000  
AT. 27 H X 0.0000 0.0001 0.0012 0.0013 0.0001 -0.0000  
Y -0.0001 -0.0002 -0.0038 -0.0039 -0.0003 0.0000  
Z 0.0001 0.0004 0.0070 0.0072 0.0007 -0.0000  
AT. 28 H X 0.0000 -0.0001 -0.0012 0.0013 -0.0001 -0.0000

Y -0.0001 0.0002 0.0038 -0.0039 0.0003 0.0000  
Z 0.0001 -0.0004 -0.0070 0.0072 -0.0007 -0.0000  
AT. 29 C X 0.0000 0.0000 -0.0008 -0.0008 -0.0002 0.0002  
Y 0.0000 0.0000 0.0002 0.0002 0.0000 -0.0000  
Z -0.0001 -0.0000 0.0012 0.0012 0.0003 -0.0002  
AT. 30 C X 0.0000 -0.0000 0.0008 -0.0008 0.0002 0.0002  
Y 0.0000 -0.0000 -0.0002 0.0002 -0.0000 -0.0000  
Z -0.0001 0.0000 -0.0012 0.0012 -0.0003 -0.0002  
AT. 31 H X -0.0002 -0.0001 0.0012 0.0011 0.0004 -0.0003  
Y -0.0004 -0.0003 0.0032 0.0032 0.0009 -0.0007  
Z 0.0003 0.0002 -0.0019 -0.0019 -0.0005 0.0005  
AT. 32 H X -0.0002 0.0001 -0.0012 0.0011 -0.0004 -0.0003  
Y -0.0004 0.0003 -0.0032 0.0032 -0.0009 -0.0007  
Z 0.0003 -0.0002 0.0019 -0.0019 0.0005 0.0005  
AT. 33 H X -0.0002 -0.0001 0.0084 0.0084 0.0019 -0.0017  
Y 0.0002 0.0001 -0.0051 -0.0051 -0.0011 0.0011  
Z 0.0003 0.0001 -0.0122 -0.0122 -0.0026 0.0025  
AT. 34 H X -0.0002 0.0001 -0.0084 0.0084 -0.0019 -0.0017  
Y 0.0002 -0.0001 0.0051 -0.0051 0.0011 0.0011  
Z 0.0003 -0.0001 0.0122 -0.0122 0.0026 0.0025  
AT. 35 C X 0.0000 -0.0000 0.0000 0.0000 -0.0000 0.0000  
Y -0.0000 0.0000 -0.0001 -0.0001 -0.0001 0.0000  
Z 0.0000 0.0000 -0.0001 -0.0001 -0.0000 0.0000  
AT. 36 C X 0.0000 0.0000 -0.0000 0.0000 0.0000 0.0000  
Y -0.0000 -0.0000 0.0001 -0.0001 0.0001 0.0000  
Z 0.0000 -0.0000 0.0001 -0.0001 0.0000 0.0000  
AT. 37 C X 0.0000 -0.0000 0.0036 0.0036 0.0004 0.0000  
Y -0.0000 0.0001 -0.0051 -0.0052 -0.0007 0.0000  
Z -0.0000 0.0001 -0.0097 -0.0098 -0.0012 0.0001  
AT. 38 C X 0.0000 0.0000 -0.0036 0.0036 -0.0004 0.0000  
Y -0.0000 -0.0001 0.0051 -0.0052 0.0007 0.0000  
Z -0.0000 -0.0001 0.0097 -0.0098 0.0012 0.0001

AT. 39 H X -0.0002 0.0009 -0.0639 -0.0643 -0.0081 0.0003  
Y 0.0001 -0.0006 0.0422 0.0424 0.0053 -0.0002  
Z 0.0003 -0.0013 0.0967 0.0972 0.0122 -0.0005

AT. 40 H X -0.0002 -0.0009 0.0639 -0.0643 0.0081 0.0003  
Y 0.0001 0.0006 -0.0422 0.0424 -0.0053 -0.0002  
Z 0.0003 0.0013 -0.0967 0.0972 -0.0122 -0.0005

AT. 41 H X 0.0001 -0.0004 0.0234 0.0235 0.0032 -0.0003  
Y 0.0001 -0.0003 0.0171 0.0172 0.0025 -0.0003  
Z 0.0001 -0.0004 0.0205 0.0206 0.0028 -0.0003

AT. 42 H X 0.0001 0.0004 -0.0234 0.0235 -0.0032 -0.0003  
Y 0.0001 0.0003 -0.0171 0.0172 -0.0025 -0.0003  
Z 0.0001 0.0004 -0.0205 0.0206 -0.0028 -0.0003

AT. 43 C X 0.0000 0.0001 -0.0001 -0.0001 -0.0004 -0.0004  
Y -0.0000 -0.0000 0.0000 0.0000 0.0001 0.0001  
Z 0.0000 0.0001 0.0000 0.0000 -0.0004 -0.0004

AT. 44 C X 0.0000 -0.0001 0.0001 -0.0001 0.0004 -0.0004  
Y -0.0000 0.0000 -0.0000 0.0000 -0.0001 0.0001  
Z 0.0000 -0.0001 -0.0000 0.0000 0.0004 -0.0004

AT. 45 H X -0.0000 -0.0002 -0.0002 -0.0000 0.0017 0.0018  
Y -0.0000 -0.0003 -0.0000 0.0002 0.0023 0.0024  
Z -0.0000 -0.0003 -0.0001 0.0001 0.0019 0.0020

AT. 46 H X -0.0000 0.0002 0.0002 -0.0000 -0.0017 0.0018  
Y -0.0000 0.0003 0.0000 0.0002 -0.0023 0.0024  
Z -0.0000 0.0003 0.0001 0.0001 -0.0019 0.0020

AT. 47 H X -0.0001 -0.0010 -0.0002 0.0002 0.0033 0.0035  
Y 0.0001 0.0007 0.0001 -0.0001 -0.0024 -0.0026  
Z -0.0001 -0.0007 -0.0001 0.0002 0.0022 0.0024

AT. 48 H X -0.0001 0.0010 0.0002 0.0002 -0.0033 0.0035  
Y 0.0001 -0.0007 -0.0001 -0.0001 0.0024 -0.0026  
Z -0.0001 0.0007 0.0001 0.0002 -0.0022 0.0024

AT. 49 C X 0.0000 0.0000 -0.0000 -0.0000 -0.0001 -0.0001  
Y 0.0000 -0.0000 0.0000 -0.0000 -0.0002 -0.0002

Z 0.0000 0.0000 -0.0000 -0.0000 0.0000 0.0000  
AT. 50 C X 0.0000 -0.0000 0.0000 -0.0000 0.0001 -0.0001  
Y 0.0000 0.0000 -0.0000 -0.0000 0.0002 -0.0002  
Z 0.0000 -0.0000 0.0000 -0.0000 -0.0000 0.0000  
AT. 51 C X 0.0000 0.0000 0.0001 0.0002 -0.0002 -0.0003  
Y -0.0000 -0.0000 -0.0002 -0.0002 0.0002 0.0003  
Z 0.0000 0.0000 0.0001 0.0001 -0.0001 -0.0002  
AT. 52 C X 0.0000 -0.0000 -0.0001 0.0002 0.0002 -0.0003  
Y -0.0000 0.0000 0.0002 -0.0002 -0.0002 0.0003  
Z 0.0000 -0.0000 -0.0001 0.0001 0.0001 -0.0002  
AT. 53 H X -0.0003 -0.0002 -0.0018 -0.0022 0.0023 0.0039  
Y 0.0002 0.0001 0.0012 0.0015 -0.0015 -0.0026  
Z -0.0001 -0.0001 -0.0009 -0.0012 0.0013 0.0022  
AT. 54 H X -0.0003 0.0002 0.0018 -0.0022 -0.0023 0.0039  
Y 0.0002 -0.0001 -0.0012 0.0015 0.0015 -0.0026  
Z -0.0001 0.0001 0.0009 -0.0012 -0.0013 0.0022  
AT. 55 H X 0.0000 0.0000 0.0003 0.0004 -0.0002 -0.0004  
Y 0.0000 0.0000 0.0005 0.0007 -0.0001 -0.0005  
Z 0.0000 0.0000 -0.0005 -0.0006 0.0004 0.0007  
AT. 56 H X 0.0000 -0.0000 -0.0003 0.0004 0.0002 -0.0004  
Y 0.0000 -0.0000 -0.0005 0.0007 0.0001 -0.0005  
Z 0.0000 -0.0000 0.0005 -0.0006 -0.0004 0.0007  
AT. 57 C X -0.0001 -0.0001 0.0016 0.0015 -0.0012 0.0007  
Y -0.0001 -0.0001 0.0017 0.0016 -0.0022 0.0012  
Z 0.0000 -0.0000 -0.0003 -0.0004 -0.0015 0.0007  
AT. 58 C X -0.0001 0.0001 -0.0016 0.0015 0.0012 0.0007  
Y -0.0001 0.0001 -0.0017 0.0016 0.0022 0.0012  
Z 0.0000 0.0000 0.0003 -0.0004 0.0015 0.0007  
AT. 59 H X 0.0002 0.0002 -0.0069 -0.0066 0.0044 -0.0026  
Y 0.0004 0.0005 -0.0141 -0.0134 0.0091 -0.0052  
Z -0.0003 -0.0004 0.0098 0.0094 -0.0067 0.0038  
AT. 60 H X 0.0002 -0.0002 0.0069 -0.0066 -0.0044 -0.0026

Y 0.0004 -0.0005 0.0141 -0.0134 -0.0091 -0.0052  
Z -0.0003 0.0004 -0.0098 0.0094 0.0067 0.0038  
AT. 61 H X 0.0001 0.0000 -0.0034 -0.0035 -0.0060 0.0026  
Y -0.0001 -0.0000 0.0029 0.0029 0.0032 -0.0013  
Z -0.0001 -0.0000 0.0045 0.0046 0.0073 -0.0031  
AT. 62 H X 0.0001 -0.0000 0.0034 -0.0035 0.0060 0.0026  
Y -0.0001 0.0000 -0.0029 0.0029 -0.0032 -0.0013  
Z -0.0001 0.0000 -0.0045 0.0046 -0.0073 -0.0031  
AT. 63 H X 0.0003 0.0005 -0.0092 -0.0085 0.0163 -0.0087  
Y 0.0003 0.0004 -0.0085 -0.0079 0.0145 -0.0080  
Z 0.0003 0.0005 -0.0101 -0.0094 0.0170 -0.0093  
AT. 64 H X 0.0003 -0.0005 0.0092 -0.0085 -0.0163 -0.0087  
Y 0.0003 -0.0004 0.0085 -0.0079 -0.0145 -0.0080  
Z 0.0003 -0.0005 0.0101 -0.0094 -0.0170 -0.0093  
AT. 65 C X 0.0000 0.0000 0.0003 -0.0001 -0.0061 -0.0064  
Y -0.0000 -0.0001 0.0011 0.0001 -0.0102 -0.0104  
Z 0.0001 0.0001 -0.0003 -0.0001 0.0003 0.0001  
AT. 66 C X 0.0000 -0.0000 -0.0003 -0.0001 0.0061 -0.0064  
Y -0.0000 0.0001 -0.0011 0.0001 0.0102 -0.0104  
Z 0.0001 -0.0001 0.0003 -0.0001 -0.0003 0.0001  
AT. 67 H X -0.0002 -0.0000 -0.0032 0.0001 0.0454 0.0471  
Y -0.0002 -0.0001 -0.0032 0.0002 0.0479 0.0498  
Z -0.0002 -0.0000 -0.0038 0.0001 0.0531 0.0551  
AT. 68 H X -0.0002 0.0000 0.0032 0.0001 -0.0454 0.0471  
Y -0.0002 0.0001 0.0032 0.0002 -0.0479 0.0498  
Z -0.0002 0.0000 0.0038 0.0001 -0.0531 0.0551  
AT. 69 H X -0.0005 -0.0009 0.0035 0.0013 -0.0096 -0.0086  
Y 0.0004 0.0006 -0.0024 -0.0010 0.0041 0.0033  
Z -0.0002 -0.0004 0.0017 0.0007 -0.0044 -0.0039  
AT. 70 H X -0.0005 0.0009 -0.0035 0.0013 0.0096 -0.0086  
Y 0.0004 -0.0006 0.0024 -0.0010 -0.0041 0.0033  
Z -0.0002 0.0004 -0.0017 0.0007 0.0044 -0.0039

AT. 71 H X 0.0002 0.0006 -0.0042 -0.0005 0.0375 0.0381  
Y 0.0003 0.0010 -0.0077 -0.0009 0.0698 0.0710  
Z -0.0002 -0.0008 0.0056 0.0006 -0.0519 -0.0528

AT. 72 H X 0.0002 -0.0006 0.0042 -0.0005 -0.0375 0.0381  
Y 0.0003 -0.0010 0.0077 -0.0009 -0.0698 0.0710  
Z -0.0002 0.0008 -0.0056 0.0006 0.0519 -0.0528

AT. 73 C X 0.0000 0.0000 -0.0001 -0.0001 -0.0000 -0.0004  
Y 0.0000 0.0000 -0.0001 -0.0001 -0.0000 -0.0005  
Z 0.0000 0.0000 0.0000 0.0001 -0.0000 -0.0000

AT. 74 C X 0.0000 -0.0000 0.0001 -0.0001 0.0000 -0.0004  
Y 0.0000 -0.0000 0.0001 -0.0001 0.0000 -0.0005  
Z 0.0000 -0.0000 -0.0000 0.0001 0.0000 -0.0000

AT. 75 H X -0.0000 0.0000 0.0002 0.0003 0.0000 0.0015  
Y -0.0000 0.0000 0.0004 0.0005 0.0003 0.0034  
Z 0.0000 -0.0000 -0.0002 -0.0003 -0.0002 -0.0025

AT. 76 H X -0.0000 -0.0000 -0.0002 0.0003 -0.0000 0.0015  
Y -0.0000 -0.0000 -0.0004 0.0005 -0.0003 0.0034  
Z 0.0000 0.0000 0.0002 -0.0003 0.0002 -0.0025

AT. 77 H X -0.0000 -0.0001 0.0004 0.0004 0.0007 0.0030  
Y -0.0000 -0.0001 0.0005 0.0004 0.0004 0.0025  
Z -0.0000 -0.0001 0.0007 0.0006 0.0007 0.0030

AT. 78 H X -0.0000 0.0001 -0.0004 0.0004 -0.0007 0.0030  
Y -0.0000 0.0001 -0.0005 0.0004 -0.0004 0.0025  
Z -0.0000 0.0001 -0.0007 0.0006 -0.0007 0.0030

AT. 79 I X -0.0000 -0.0000 0.0000 0.0000 0.0000 -0.0000  
Y 0.0000 0.0000 0.0000 0.0000 0.0000 0.0000  
Z 0.0000 0.0000 -0.0000 0.0000 0.0000 -0.0000

AT. 80 I X -0.0000 0.0000 -0.0000 0.0000 -0.0000 -0.0000  
Y 0.0000 -0.0000 -0.0000 0.0000 -0.0000 0.0000  
Z 0.0000 -0.0000 0.0000 0.0000 -0.0000 -0.0000

AT. 81 I X -0.0000 -0.0000 0.0000 0.0000 0.0000 0.0000  
Y 0.0000 -0.0000 0.0000 0.0000 -0.0000 0.0000

Z 0.0000 0.0000 0.0000 0.0000 0.0000 -0.0000  
AT. 82 I X -0.0000 0.0000 -0.0000 0.0000 -0.0000 0.0000  
Y 0.0000 0.0000 -0.0000 0.0000 0.0000 0.0000  
Z 0.0000 -0.0000 -0.0000 0.0000 -0.0000 -0.0000  
AT. 83 O X -0.0000 -0.0000 0.0000 -0.0000 0.0000 -0.0000  
Y -0.0000 -0.0000 0.0000 0.0000 -0.0000 -0.0000  
Z -0.0000 -0.0000 0.0000 -0.0000 0.0000 -0.0000  
AT. 84 O X -0.0000 0.0000 -0.0000 -0.0000 -0.0000 -0.0000  
Y -0.0000 0.0000 -0.0000 0.0000 0.0000 -0.0000  
Z -0.0000 0.0000 -0.0000 -0.0000 -0.0000 -0.0000  
AT. 85 O X 0.0000 -0.0000 -0.0000 -0.0000 -0.0000 -0.0000  
Y 0.0000 -0.0000 -0.0000 -0.0000 -0.0000 0.0000  
Z -0.0000 0.0000 0.0000 0.0000 0.0000 -0.0000  
AT. 86 O X 0.0000 0.0000 0.0000 -0.0000 0.0000 -0.0000  
Y 0.0000 0.0000 0.0000 -0.0000 0.0000 0.0000  
Z -0.0000 -0.0000 -0.0000 0.0000 -0.0000 -0.0000  
AT. 87 N X 0.0000 0.0000 0.0000 -0.0000 0.0000 -0.0000  
Y 0.0000 0.0000 0.0000 0.0000 -0.0000 0.0000  
Z 0.0000 0.0000 0.0000 -0.0000 0.0000 -0.0000  
AT. 88 N X 0.0000 -0.0000 -0.0000 -0.0000 -0.0000 -0.0000  
Y 0.0000 -0.0000 -0.0000 0.0000 0.0000 0.0000  
Z 0.0000 -0.0000 -0.0000 -0.0000 -0.0000 -0.0000  
AT. 89 N X 0.0000 0.0000 -0.0000 -0.0000 0.0000 0.0000  
Y 0.0000 0.0000 -0.0000 -0.0000 -0.0000 -0.0000  
Z 0.0000 0.0000 0.0000 0.0000 0.0000 0.0000  
AT. 90 N X 0.0000 -0.0000 0.0000 -0.0000 -0.0000 0.0000  
Y 0.0000 -0.0000 0.0000 -0.0000 0.0000 -0.0000  
Z 0.0000 -0.0000 -0.0000 0.0000 -0.0000 0.0000  
AT. 91 C X 0.0000 0.0000 -0.0000 0.0000 -0.0000 0.0000  
Y -0.0000 -0.0000 -0.0000 -0.0000 0.0000 0.0000  
Z 0.0000 0.0000 -0.0000 0.0000 -0.0000 0.0000  
AT. 92 C X 0.0000 -0.0000 0.0000 0.0000 0.0000 0.0000

Y -0.0000 0.0000 0.0000 -0.0000 -0.0000 0.0000  
Z 0.0000 -0.0000 0.0000 0.0000 0.0000 0.0000  
AT. 93 C X 0.0000 0.0000 0.0000 -0.0000 -0.0000 -0.0000  
Y 0.0000 0.0000 0.0000 0.0000 -0.0001 -0.0000  
Z -0.0000 0.0000 -0.0000 -0.0000 0.0000 0.0000  
AT. 94 C X 0.0000 -0.0000 -0.0000 -0.0000 0.0000 -0.0000  
Y 0.0000 -0.0000 -0.0000 0.0000 0.0001 -0.0000  
Z -0.0000 -0.0000 0.0000 -0.0000 -0.0000 0.0000  
AT. 95 H X -0.0000 -0.0001 -0.0001 -0.0000 0.0007 0.0001  
Y -0.0001 -0.0001 -0.0002 0.0000 0.0010 0.0002  
Z -0.0000 -0.0001 -0.0001 0.0000 0.0006 0.0001  
AT. 96 H X -0.0000 0.0001 0.0001 -0.0000 -0.0007 0.0001  
Y -0.0001 0.0001 0.0002 0.0000 -0.0010 0.0002  
Z -0.0000 0.0001 0.0001 0.0000 -0.0006 0.0001  
AT. 97 H X 0.0000 -0.0000 0.0000 0.0000 -0.0002 -0.0001  
Y -0.0000 0.0000 -0.0000 -0.0000 0.0001 0.0001  
Z 0.0001 -0.0000 0.0001 0.0001 -0.0006 -0.0002  
AT. 98 H X 0.0000 0.0000 -0.0000 0.0000 0.0002 -0.0001  
Y -0.0000 -0.0000 0.0000 -0.0000 -0.0001 0.0001  
Z 0.0001 0.0000 -0.0001 0.0001 0.0006 -0.0002  
AT. 99 C X -0.0000 0.0000 0.0000 0.0000 -0.0000 -0.0000  
Y -0.0000 0.0000 0.0000 0.0000 0.0000 -0.0000  
Z 0.0000 -0.0000 -0.0000 -0.0000 -0.0000 -0.0000  
AT. 100 C X -0.0000 -0.0000 -0.0000 0.0000 0.0000 -0.0000  
Y -0.0000 -0.0000 -0.0000 0.0000 -0.0000 -0.0000  
Z 0.0000 0.0000 0.0000 -0.0000 0.0000 -0.0000  
AT. 101 C X 0.0000 0.0001 0.0000 0.0000 -0.0000 -0.0000  
Y 0.0001 0.0003 0.0001 0.0000 -0.0000 -0.0000  
Z 0.0001 0.0003 0.0001 0.0000 0.0000 -0.0000  
AT. 102 C X 0.0000 -0.0001 -0.0000 0.0000 0.0000 -0.0000  
Y 0.0001 -0.0003 -0.0001 0.0000 0.0000 -0.0000  
Z 0.0001 -0.0003 -0.0001 0.0000 -0.0000 -0.0000



AT.103 H X -0.0006 -0.0020 -0.0004 -0.0001 0.0000 0.0003  
Y -0.0013 -0.0047 -0.0009 -0.0003 0.0000 0.0007  
Z 0.0000 0.0000 -0.0000 -0.0000 -0.0000 0.0000

AT.104 H X -0.0006 0.0020 0.0004 -0.0001 -0.0000 0.0003  
Y -0.0013 0.0047 0.0009 -0.0003 -0.0000 0.0007  
Z 0.0000 -0.0000 0.0000 -0.0000 0.0000 0.0000

AT.105 H X 0.0003 0.0007 0.0001 0.0000 0.0000 -0.0001  
Y 0.0005 0.0014 0.0003 0.0001 0.0000 -0.0002  
Z -0.0013 -0.0035 -0.0006 -0.0002 0.0000 0.0006

AT.106 H X 0.0003 -0.0007 -0.0001 0.0000 -0.0000 -0.0001  
Y 0.0005 -0.0014 -0.0003 0.0001 -0.0000 -0.0002  
Z -0.0013 0.0035 0.0006 -0.0002 -0.0000 0.0006

AT.107 C X 0.0003 0.0004 0.0000 0.0000 -0.0000 -0.0000  
Y -0.0000 -0.0000 -0.0000 0.0000 0.0000 -0.0000  
Z 0.0004 0.0004 0.0000 0.0000 -0.0000 -0.0000

AT.108 C X 0.0003 -0.0004 -0.0000 0.0000 0.0000 -0.0000  
Y -0.0000 0.0000 0.0000 0.0000 -0.0000 -0.0000  
Z 0.0004 -0.0004 -0.0000 0.0000 0.0000 -0.0000

AT.109 H X -0.0003 -0.0003 -0.0000 -0.0000 0.0001 0.0000  
Y 0.0015 0.0015 0.0000 -0.0000 -0.0004 0.0000  
Z -0.0008 -0.0008 -0.0000 0.0000 0.0002 -0.0000

AT.110 H X -0.0003 0.0003 0.0000 -0.0000 -0.0001 0.0000  
Y 0.0015 -0.0015 -0.0000 -0.0000 0.0004 0.0000  
Z -0.0008 0.0008 0.0000 0.0000 -0.0002 -0.0000

AT.111 H X -0.0040 -0.0042 -0.0001 -0.0001 0.0003 0.0001  
Y -0.0006 -0.0007 -0.0000 -0.0000 0.0001 0.0000  
Z -0.0032 -0.0034 -0.0001 -0.0001 0.0002 0.0001

AT.112 H X -0.0040 0.0042 0.0001 -0.0001 -0.0003 0.0001  
Y -0.0006 0.0007 0.0000 -0.0000 -0.0001 0.0000  
Z -0.0032 0.0034 0.0001 -0.0001 -0.0002 0.0001

AT.113 C X -0.0001 -0.0001 -0.0000 -0.0000 0.0000 0.0000  
Y -0.0001 -0.0001 -0.0000 0.0000 -0.0000 0.0000

Z -0.0002 -0.0002 -0.0000 0.0000 0.0000 0.0000  
AT. 114 C X -0.0001 0.0001 0.0000 -0.0000 -0.0000 0.0000  
Y -0.0001 0.0001 0.0000 0.0000 0.0000 0.0000  
Z -0.0002 0.0002 0.0000 0.0000 -0.0000 0.0000  
AT. 115 C X 0.0005 0.0006 -0.0000 -0.0000 -0.0000 0.0001  
Y 0.0002 0.0002 -0.0000 -0.0000 -0.0000 0.0000  
Z 0.0006 0.0006 -0.0000 -0.0000 -0.0000 0.0001  
AT. 116 C X 0.0005 -0.0006 0.0000 -0.0000 0.0000 0.0001  
Y 0.0002 -0.0002 0.0000 -0.0000 0.0000 0.0000  
Z 0.0006 -0.0006 0.0000 -0.0000 0.0000 0.0001  
AT. 117 H X -0.0068 -0.0071 0.0002 0.0001 0.0004 -0.0007  
Y -0.0017 -0.0018 0.0000 0.0000 0.0001 -0.0001  
Z -0.0063 -0.0066 0.0002 0.0001 0.0003 -0.0006  
AT. 118 H X -0.0068 0.0071 -0.0002 0.0001 -0.0004 -0.0007  
Y -0.0017 0.0018 -0.0000 0.0000 -0.0001 -0.0001  
Z -0.0063 0.0066 -0.0002 0.0001 -0.0003 -0.0006  
AT. 119 H X 0.0003 0.0002 -0.0000 -0.0000 -0.0000 0.0001  
Y -0.0002 -0.0000 0.0000 -0.0000 0.0001 -0.0001  
Z -0.0005 -0.0004 0.0000 -0.0000 0.0000 -0.0001  
AT. 120 H X 0.0003 -0.0002 0.0000 -0.0000 0.0000 0.0001  
Y -0.0002 0.0000 -0.0000 -0.0000 -0.0001 -0.0001  
Z -0.0005 0.0004 -0.0000 -0.0000 -0.0000 -0.0001  
AT. 121 C X -0.0000 -0.0001 0.0000 0.0000 0.0001 0.0000  
Y -0.0000 -0.0000 0.0000 0.0000 0.0000 0.0000  
Z 0.0000 0.0001 -0.0000 -0.0000 -0.0001 -0.0000  
AT. 122 C X -0.0000 0.0001 -0.0000 0.0000 -0.0001 0.0000  
Y -0.0000 0.0000 -0.0000 0.0000 -0.0000 0.0000  
Z 0.0000 -0.0001 0.0000 -0.0000 0.0001 -0.0000  
AT. 123 H X -0.0000 -0.0000 0.0000 0.0000 -0.0000 0.0000  
Y -0.0000 0.0001 0.0000 -0.0001 0.0003 0.0000  
Z -0.0000 0.0001 0.0000 -0.0001 0.0002 0.0000  
AT. 124 H X -0.0000 0.0000 -0.0000 0.0000 0.0000 0.0000

Y -0.0000 -0.0001 -0.0000 -0.0001 -0.0003 0.0000  
Z -0.0000 -0.0001 -0.0000 -0.0001 -0.0002 0.0000  
AT. 125 H X 0.0004 0.0011 -0.0004 -0.0002 -0.0010 -0.0000  
Y 0.0001 0.0004 -0.0002 -0.0001 -0.0004 -0.0000  
Z -0.0003 -0.0009 0.0004 0.0002 0.0008 0.0000  
AT. 126 H X 0.0004 -0.0011 0.0004 -0.0002 0.0010 -0.0000  
Y 0.0001 -0.0004 0.0002 -0.0001 0.0004 -0.0000  
Z -0.0003 0.0009 -0.0004 0.0002 -0.0008 0.0000  
AT. 127 C X 0.0000 0.0000 0.0000 -0.0000 0.0000 0.0000  
Y -0.0000 -0.0000 -0.0000 0.0000 0.0000 0.0000  
Z -0.0000 -0.0000 -0.0000 0.0000 -0.0000 -0.0000  
AT. 128 C X 0.0000 -0.0000 -0.0000 -0.0000 -0.0000 0.0000  
Y -0.0000 0.0000 0.0000 0.0000 -0.0000 0.0000  
Z -0.0000 0.0000 0.0000 0.0000 0.0000 -0.0000  
AT. 129 C X -0.0001 -0.0001 0.0000 0.0000 0.0001 0.0001  
Y -0.0001 -0.0001 0.0000 -0.0000 0.0001 0.0000  
Z 0.0001 0.0001 -0.0000 -0.0000 -0.0001 -0.0001  
AT. 130 C X -0.0001 0.0001 -0.0000 0.0000 -0.0001 0.0001  
Y -0.0001 0.0001 -0.0000 -0.0000 -0.0001 0.0000  
Z 0.0001 -0.0001 0.0000 -0.0000 0.0001 -0.0001  
AT. 131 H X 0.0009 0.0014 -0.0001 -0.0002 -0.0015 -0.0010  
Y 0.0003 0.0005 -0.0000 -0.0001 -0.0005 -0.0003  
Z -0.0006 -0.0009 0.0001 0.0002 0.0011 0.0008  
AT. 132 H X 0.0009 -0.0014 0.0001 -0.0002 0.0015 -0.0010  
Y 0.0003 -0.0005 0.0000 -0.0001 0.0005 -0.0003  
Z -0.0006 0.0009 -0.0001 0.0002 -0.0011 0.0008  
AT. 133 H X -0.0002 -0.0002 -0.0000 -0.0000 0.0001 0.0001  
Y 0.0007 0.0007 0.0000 0.0000 -0.0004 -0.0002  
Z -0.0004 -0.0004 -0.0000 -0.0000 0.0003 0.0001  
AT. 134 H X -0.0002 0.0002 0.0000 -0.0000 -0.0001 0.0001  
Y 0.0007 -0.0007 -0.0000 0.0000 0.0004 -0.0002  
Z -0.0004 0.0004 0.0000 -0.0000 -0.0003 0.0001

AT. 135 C X -0.0038 -0.0038 -0.0000 -0.0000 0.0001 -0.0000  
Y -0.0062 -0.0062 -0.0001 0.0000 -0.0002 0.0000  
Z -0.0099 -0.0098 -0.0001 -0.0000 0.0002 -0.0000

AT. 136 C X -0.0038 0.0038 0.0000 -0.0000 -0.0001 -0.0000  
Y -0.0062 0.0062 0.0001 0.0000 0.0002 0.0000  
Z -0.0099 0.0098 0.0001 -0.0000 -0.0002 -0.0000

AT. 137 H X 0.0002 0.0002 -0.0000 0.0001 -0.0005 0.0001  
Y -0.0061 -0.0064 0.0001 -0.0003 0.0020 -0.0003  
Z 0.0004 0.0005 -0.0001 0.0002 -0.0012 0.0002

AT. 138 H X 0.0002 -0.0002 0.0000 0.0001 0.0005 0.0001  
Y -0.0061 0.0064 -0.0001 -0.0003 -0.0020 -0.0003  
Z 0.0004 -0.0005 0.0001 0.0002 0.0012 0.0002

AT. 139 H X 0.0728 0.0725 0.0009 -0.0000 -0.0012 0.0001  
Y 0.0137 0.0137 0.0002 0.0000 -0.0003 0.0000  
Z 0.0555 0.0553 0.0007 -0.0000 -0.0010 0.0001

AT. 140 H X 0.0728 -0.0725 -0.0009 -0.0000 0.0012 0.0001  
Y 0.0137 -0.0137 -0.0002 0.0000 0.0003 0.0000  
Z 0.0555 -0.0553 -0.0007 -0.0000 0.0010 0.0001

AT. 141 H X -0.0267 -0.0267 -0.0004 0.0001 -0.0001 0.0000  
Y 0.0662 0.0660 0.0011 -0.0002 0.0003 -0.0001  
Z 0.0619 0.0618 0.0010 -0.0002 0.0003 -0.0001

AT. 142 H X -0.0267 0.0267 0.0004 0.0001 0.0001 0.0000  
Y 0.0662 -0.0660 -0.0011 -0.0002 -0.0003 -0.0001  
Z 0.0619 -0.0618 -0.0010 -0.0002 -0.0003 -0.0001

AT. 143 C X 0.0000 0.0003 0.0000 -0.0000 0.0000 -0.0000  
Y -0.0005 -0.0006 -0.0001 0.0000 -0.0000 0.0001  
Z 0.0002 -0.0005 -0.0000 -0.0000 -0.0000 -0.0000

AT. 144 C X 0.0000 -0.0003 -0.0000 -0.0000 -0.0000 -0.0000  
Y -0.0005 0.0006 0.0001 0.0000 0.0000 0.0001  
Z 0.0002 0.0005 0.0000 -0.0000 0.0000 -0.0000

AT. 145 H X -0.0004 -0.0015 -0.0002 0.0000 -0.0001 0.0001  
Y 0.0014 0.0060 0.0006 -0.0000 0.0003 -0.0003

Z 0.0014 0.0055 0.0006 -0.0000 0.0003 -0.0003  
AT. 146 H X -0.0004 0.0015 0.0002 0.0000 0.0001 0.0001  
Y 0.0014 -0.0060 -0.0006 -0.0000 -0.0003 -0.0003  
Z 0.0014 -0.0055 -0.0006 -0.0000 -0.0003 -0.0003  
AT. 147 H X 0.0015 -0.0021 0.0000 -0.0000 -0.0000 -0.0002  
Y 0.0005 -0.0009 -0.0000 -0.0000 -0.0000 -0.0000  
Z -0.0011 0.0014 -0.0000 0.0000 -0.0000 0.0001  
AT. 148 H X 0.0015 0.0021 -0.0000 -0.0000 0.0000 -0.0002  
Y 0.0005 0.0009 0.0000 -0.0000 0.0000 -0.0000  
Z -0.0011 -0.0014 0.0000 0.0000 0.0000 0.0001  
AT. 149 H X -0.0011 -0.0004 -0.0002 0.0000 -0.0001 0.0002  
Y 0.0038 0.0016 0.0006 -0.0001 0.0003 -0.0006  
Z -0.0022 -0.0011 -0.0004 0.0001 -0.0002 0.0004  
AT. 150 H X -0.0011 0.0004 0.0002 0.0000 0.0001 0.0002  
Y 0.0038 -0.0016 -0.0006 -0.0001 -0.0003 -0.0006  
Z -0.0022 0.0011 0.0004 0.0001 0.0002 0.0004  
AT. 151 C X 0.0000 0.0000 0.0000 0.0000 -0.0000 0.0000  
Y -0.0001 -0.0000 -0.0000 -0.0000 0.0000 -0.0000  
Z 0.0000 0.0000 -0.0000 0.0000 -0.0000 0.0000  
AT. 152 C X 0.0000 -0.0000 -0.0000 0.0000 0.0000 0.0000  
Y -0.0001 0.0000 0.0000 -0.0000 -0.0000 -0.0000  
Z 0.0000 -0.0000 0.0000 0.0000 0.0000 0.0000  
AT. 153 H X -0.0000 0.0001 -0.0000 -0.0000 0.0000 -0.0000  
Y 0.0006 0.0000 0.0001 0.0001 -0.0001 0.0001  
Z -0.0004 -0.0001 -0.0000 -0.0000 0.0000 -0.0001  
AT. 154 H X -0.0000 -0.0001 0.0000 -0.0000 -0.0000 -0.0000  
Y 0.0006 -0.0000 -0.0001 0.0001 0.0001 0.0001  
Z -0.0004 0.0001 0.0000 -0.0000 -0.0000 -0.0001  
AT. 155 H X 0.0000 0.0001 -0.0000 -0.0000 -0.0000 -0.0000  
Y 0.0011 0.0006 0.0001 0.0000 -0.0000 0.0000  
Z 0.0010 0.0005 0.0001 0.0000 0.0000 0.0000  
AT. 156 H X 0.0000 -0.0001 0.0000 -0.0000 0.0000 -0.0000

Y 0.0011 -0.0006 -0.0001 0.0000 0.0000 0.0000  
Z 0.0010 -0.0005 -0.0001 0.0000 -0.0000 0.0000  
AT. 157 O X 0.0000 0.0000 -0.0000 -0.0000 -0.0000 -0.0000  
Y -0.0001 -0.0001 0.0001 0.0001 0.0001 -0.0000  
Z -0.0000 -0.0000 0.0000 0.0000 0.0000 0.0000  
AT. 158 O X 0.0000 -0.0000 0.0000 -0.0000 0.0000 -0.0000  
Y -0.0001 0.0001 -0.0001 0.0001 -0.0001 -0.0000  
Z -0.0000 0.0000 -0.0000 0.0000 -0.0000 0.0000  
AT. 159 O X -0.0000 -0.0000 0.0000 0.0000 0.0000 -0.0000  
Y 0.0000 0.0000 -0.0000 -0.0000 -0.0000 0.0000  
Z -0.0001 -0.0001 0.0000 0.0000 0.0001 -0.0001  
AT. 160 O X -0.0000 0.0000 -0.0000 0.0000 -0.0000 -0.0000  
Y 0.0000 -0.0000 0.0000 -0.0000 0.0000 0.0000  
Z -0.0001 0.0001 -0.0000 0.0000 -0.0001 -0.0001  
AT. 161 H X 0.0000 -0.0000 0.0003 0.0001 0.0002 -0.0000  
Y 0.0011 0.0014 -0.0019 -0.0011 -0.0015 0.0001  
Z 0.0002 0.0003 -0.0005 -0.0003 -0.0004 0.0000  
AT. 162 H X 0.0000 0.0000 -0.0003 0.0001 -0.0002 -0.0000  
Y 0.0011 -0.0014 0.0019 -0.0011 0.0015 0.0001  
Z 0.0002 -0.0003 0.0005 -0.0003 0.0004 0.0000  
AT. 163 H X 0.0004 0.0003 -0.0002 -0.0002 -0.0005 0.0003  
Y -0.0003 -0.0003 0.0002 0.0001 0.0003 -0.0002  
Z 0.0014 0.0011 -0.0007 -0.0005 -0.0013 0.0008  
AT. 164 H X 0.0004 -0.0003 0.0002 -0.0002 0.0005 0.0003  
Y -0.0003 0.0003 -0.0002 0.0001 -0.0003 -0.0002  
Z 0.0014 -0.0011 0.0007 -0.0005 0.0013 0.0008  
AT. 165 O X 0.0000 0.0000 -0.0000 0.0000 -0.0000 0.0000  
Y 0.0000 0.0000 -0.0000 0.0000 -0.0000 0.0000  
Z 0.0000 0.0000 0.0000 0.0000 0.0000 0.0000  
AT. 166 O X 0.0000 -0.0000 0.0000 0.0000 0.0000 0.0000  
Y 0.0000 -0.0000 0.0000 0.0000 0.0000 0.0000  
Z 0.0000 -0.0000 -0.0000 0.0000 -0.0000 0.0000

AT.167 H X -0.0003 -0.0003 0.0001 -0.0002 0.0001 -0.0002  
Y -0.0002 -0.0002 0.0001 -0.0001 0.0001 -0.0001  
Z -0.0000 -0.0001 0.0001 -0.0001 0.0000 -0.0000

AT.168 H X -0.0003 0.0003 -0.0001 -0.0002 -0.0001 -0.0002  
Y -0.0002 0.0002 -0.0001 -0.0001 -0.0001 -0.0001  
Z -0.0000 0.0001 -0.0001 -0.0001 -0.0000 -0.0000

AT.169 O X 0.0000 0.0000 0.0000 -0.0000 0.0000 0.0000  
Y -0.0000 -0.0000 -0.0000 0.0000 -0.0000 -0.0000  
Z 0.0000 0.0000 0.0000 -0.0000 0.0000 0.0000

AT.170 O X 0.0000 -0.0000 -0.0000 -0.0000 -0.0000 0.0000  
Y -0.0000 0.0000 0.0000 0.0000 0.0000 -0.0000  
Z 0.0000 -0.0000 -0.0000 -0.0000 -0.0000 0.0000

AT.171 H X -0.0002 -0.0003 -0.0002 0.0001 -0.0000 -0.0002  
Y 0.0004 0.0006 0.0003 -0.0002 0.0001 0.0005  
Z -0.0002 -0.0003 -0.0002 0.0002 -0.0000 -0.0002

AT.172 H X -0.0002 0.0003 0.0002 0.0001 0.0000 -0.0002  
Y 0.0004 -0.0006 -0.0003 -0.0002 -0.0001 0.0005  
Z -0.0002 0.0003 0.0002 0.0002 0.0000 -0.0002

FREQ(CM\*\*-1) 3073.16 3073.59 3073.64 3074.02 3074.21 3074.41

AT. 1 I X -0.0000 0.0000 0.0000 0.0000 -0.0000 0.0000  
Y -0.0000 -0.0000 -0.0000 -0.0000 0.0000 -0.0000  
Z 0.0000 0.0000 0.0000 0.0000 -0.0000 0.0000

AT. 2 I X -0.0000 -0.0000 0.0000 -0.0000 -0.0000 -0.0000  
Y -0.0000 0.0000 -0.0000 0.0000 0.0000 0.0000  
Z 0.0000 -0.0000 0.0000 -0.0000 -0.0000 -0.0000

AT. 3 I X -0.0000 -0.0000 -0.0000 0.0000 -0.0000 0.0000  
Y 0.0000 -0.0000 -0.0000 0.0000 0.0000 0.0000  
Z 0.0000 -0.0000 0.0000 0.0000 0.0000 0.0000

AT. 4 I X -0.0000 0.0000 -0.0000 -0.0000 -0.0000 -0.0000  
Y 0.0000 0.0000 -0.0000 -0.0000 0.0000 -0.0000

Z 0.0000 0.0000 0.0000 -0.0000 0.0000 -0.0000  
AT. 5 O X 0.0000 -0.0000 0.0000 0.0000 0.0000 0.0000  
Y -0.0000 -0.0000 -0.0000 -0.0000 -0.0000 -0.0000  
Z -0.0000 -0.0000 -0.0000 -0.0000 -0.0000 0.0000  
AT. 6 O X 0.0000 0.0000 0.0000 -0.0000 0.0000 -0.0000  
Y -0.0000 0.0000 -0.0000 0.0000 -0.0000 0.0000  
Z -0.0000 0.0000 -0.0000 0.0000 -0.0000 -0.0000  
AT. 7 O X 0.0000 -0.0000 -0.0000 0.0000 0.0000 0.0000  
Y 0.0000 -0.0000 -0.0000 0.0000 0.0000 -0.0000  
Z -0.0000 -0.0000 -0.0000 0.0000 0.0000 0.0000  
AT. 8 O X 0.0000 0.0000 -0.0000 -0.0000 0.0000 -0.0000  
Y 0.0000 0.0000 -0.0000 -0.0000 0.0000 0.0000  
Z -0.0000 0.0000 -0.0000 -0.0000 0.0000 -0.0000  
AT. 9 N X 0.0000 0.0000 0.0000 0.0000 0.0000 0.0000  
Y 0.0000 -0.0000 -0.0000 0.0000 0.0000 0.0000  
Z 0.0000 -0.0000 -0.0000 0.0000 0.0000 0.0000  
AT. 10 N X 0.0000 -0.0000 0.0000 -0.0000 0.0000 -0.0000  
Y 0.0000 0.0000 -0.0000 -0.0000 0.0000 -0.0000  
Z 0.0000 0.0000 -0.0000 -0.0000 0.0000 -0.0000  
AT. 11 N X -0.0000 -0.0000 -0.0000 -0.0000 -0.0000 -0.0000  
Y 0.0000 -0.0000 0.0000 -0.0000 0.0000 0.0000  
Z -0.0000 0.0000 0.0000 -0.0000 0.0000 0.0000  
AT. 12 N X -0.0000 0.0000 -0.0000 0.0000 -0.0000 0.0000  
Y 0.0000 0.0000 0.0000 0.0000 0.0000 -0.0000  
Z -0.0000 -0.0000 0.0000 0.0000 0.0000 -0.0000  
AT. 13 C X 0.0002 -0.0001 -0.0000 0.0002 0.0000 0.0000  
Y -0.0002 0.0000 0.0000 -0.0002 -0.0000 -0.0000  
Z 0.0001 -0.0000 0.0000 0.0001 0.0000 0.0000  
AT. 14 C X 0.0002 0.0001 -0.0000 -0.0002 0.0000 -0.0000  
Y -0.0002 -0.0000 0.0000 0.0002 -0.0000 0.0000  
Z 0.0001 0.0000 0.0000 -0.0001 0.0000 -0.0000  
AT. 15 C X 0.0001 -0.0000 0.0000 0.0001 0.0000 0.0000



Y 0.0072 -0.0015 0.0001 0.0072 0.0018 0.0011  
Z -0.0026 0.0005 -0.0000 -0.0024 -0.0007 -0.0004  
AT. 16 C X 0.0001 0.0000 0.0000 -0.0001 0.0000 -0.0000  
Y 0.0072 0.0015 0.0001 -0.0072 0.0018 -0.0011  
Z -0.0026 -0.0005 -0.0000 0.0024 -0.0007 0.0004  
AT. 17 H X 0.0187 -0.0040 0.0002 0.0185 0.0047 0.0028  
Y -0.0569 0.0122 -0.0005 -0.0566 -0.0143 -0.0084  
Z -0.0476 0.0102 -0.0005 -0.0474 -0.0120 -0.0070  
AT. 18 H X 0.0187 0.0040 0.0002 -0.0185 0.0047 -0.0028  
Y -0.0569 -0.0122 -0.0005 0.0566 -0.0143 0.0084  
Z -0.0476 -0.0102 -0.0005 0.0474 -0.0120 0.0070  
AT. 19 H X -0.0229 0.0047 -0.0003 -0.0222 -0.0059 -0.0033  
Y -0.0275 0.0057 -0.0003 -0.0266 -0.0070 -0.0040  
Z 0.0775 -0.0159 0.0009 0.0749 0.0198 0.0113  
AT. 20 H X -0.0229 -0.0047 -0.0003 0.0222 -0.0059 0.0033  
Y -0.0275 -0.0057 -0.0003 0.0266 -0.0070 0.0040  
Z 0.0775 0.0159 0.0009 -0.0749 0.0198 -0.0113  
AT. 21 C X -0.0000 0.0000 0.0000 -0.0000 0.0000 -0.0000  
Y -0.0000 -0.0000 -0.0000 0.0000 0.0000 0.0000  
Z -0.0000 -0.0000 -0.0000 0.0000 -0.0000 -0.0000  
AT. 22 C X -0.0000 -0.0000 0.0000 0.0000 0.0000 0.0000  
Y -0.0000 0.0000 -0.0000 -0.0000 0.0000 -0.0000  
Z -0.0000 0.0000 -0.0000 -0.0000 -0.0000 0.0000  
AT. 23 C X -0.0000 0.0000 -0.0000 0.0000 -0.0000 0.0000  
Y 0.0001 0.0000 0.0000 -0.0003 -0.0000 -0.0000  
Z 0.0001 0.0001 -0.0000 -0.0003 -0.0000 -0.0001  
AT. 24 C X -0.0000 -0.0000 -0.0000 -0.0000 -0.0000 -0.0000  
Y 0.0001 -0.0000 0.0000 0.0003 -0.0000 0.0000  
Z 0.0001 -0.0001 -0.0000 0.0003 -0.0000 0.0001  
AT. 25 H X 0.0004 0.0000 0.0000 -0.0008 -0.0001 -0.0002  
Y -0.0021 -0.0004 -0.0002 0.0047 0.0005 0.0012  
Z -0.0003 -0.0001 -0.0000 0.0006 -0.0000 0.0001

AT. 26 H X 0.0004 -0.0000 0.0000 0.0008 -0.0001 0.0002  
Y -0.0021 0.0004 -0.0002 -0.0047 0.0005 -0.0012  
Z -0.0003 0.0001 -0.0000 -0.0006 -0.0000 -0.0001

AT. 27 H X -0.0001 -0.0002 0.0001 0.0006 0.0001 0.0002  
Y 0.0005 0.0003 -0.0001 -0.0018 -0.0002 -0.0005  
Z -0.0009 -0.0006 0.0003 0.0032 0.0003 0.0010

AT. 28 H X -0.0001 0.0002 0.0001 -0.0006 0.0001 -0.0002  
Y 0.0005 -0.0003 -0.0001 0.0018 -0.0002 0.0005  
Z -0.0009 0.0006 0.0003 -0.0032 0.0003 -0.0010

AT. 29 C X -0.0000 -0.0000 -0.0000 -0.0001 -0.0006 -0.0007  
Y 0.0000 -0.0000 0.0000 0.0000 0.0001 0.0001  
Z -0.0001 0.0000 0.0000 0.0000 0.0010 0.0011

AT. 30 C X -0.0000 0.0000 -0.0000 0.0001 -0.0006 0.0007  
Y 0.0000 0.0000 0.0000 -0.0000 0.0001 -0.0001  
Z -0.0001 -0.0000 0.0000 -0.0000 0.0010 -0.0011

AT. 31 H X -0.0002 0.0001 0.0001 -0.0001 0.0015 0.0017  
Y -0.0002 0.0001 0.0001 0.0001 0.0032 0.0037  
Z 0.0001 -0.0001 -0.0001 -0.0001 -0.0019 -0.0022

AT. 32 H X -0.0002 -0.0001 0.0001 0.0001 0.0015 -0.0017  
Y -0.0002 -0.0001 0.0001 -0.0001 0.0032 -0.0037  
Z 0.0001 0.0001 -0.0001 0.0001 -0.0019 0.0022

AT. 33 H X -0.0002 0.0001 0.0002 0.0003 0.0063 0.0075  
Y 0.0001 -0.0001 -0.0001 -0.0002 -0.0040 -0.0047  
Z 0.0003 -0.0001 -0.0003 -0.0005 -0.0091 -0.0109

AT. 34 H X -0.0002 -0.0001 0.0002 -0.0003 0.0063 -0.0075  
Y 0.0001 0.0001 -0.0001 0.0002 -0.0040 0.0047  
Z 0.0003 0.0001 -0.0003 0.0005 -0.0091 0.0109

AT. 35 C X 0.0000 -0.0000 -0.0000 0.0000 -0.0001 -0.0001  
Y 0.0000 -0.0000 -0.0000 0.0000 -0.0002 -0.0002  
Z 0.0000 -0.0000 -0.0000 0.0000 -0.0001 -0.0001

AT. 36 C X 0.0000 0.0000 -0.0000 -0.0000 -0.0001 0.0001  
Y 0.0000 0.0000 -0.0000 -0.0000 -0.0002 0.0002

Z 0.0000 0.0000 -0.0000 -0.0000 -0.0001 0.0001  
AT. 37 C X -0.0003 0.0000 0.0000 -0.0001 0.0003 0.0003  
Y 0.0004 -0.0001 -0.0001 0.0002 -0.0007 -0.0006  
Z 0.0008 -0.0001 -0.0001 0.0003 -0.0013 -0.0012  
AT. 38 C X -0.0003 -0.0000 0.0000 0.0001 0.0003 -0.0003  
Y 0.0004 0.0001 -0.0001 -0.0002 -0.0007 0.0006  
Z 0.0008 0.0001 -0.0001 -0.0003 -0.0013 0.0012  
AT. 39 H X 0.0053 -0.0007 -0.0006 0.0021 -0.0077 -0.0074  
Y -0.0035 0.0005 0.0004 -0.0014 0.0050 0.0048  
Z -0.0081 0.0011 0.0010 -0.0032 0.0116 0.0111  
AT. 40 H X 0.0053 0.0007 -0.0006 -0.0021 -0.0077 0.0074  
Y -0.0035 -0.0005 0.0004 0.0014 0.0050 -0.0048  
Z -0.0081 -0.0011 0.0010 0.0032 0.0116 -0.0111  
AT. 41 H X -0.0021 0.0003 0.0003 -0.0008 0.0042 0.0040  
Y -0.0016 0.0003 0.0002 -0.0006 0.0035 0.0034  
Z -0.0018 0.0002 0.0002 -0.0006 0.0036 0.0034  
AT. 42 H X -0.0021 -0.0003 0.0003 0.0008 0.0042 -0.0040  
Y -0.0016 -0.0003 0.0002 0.0006 0.0035 -0.0034  
Z -0.0018 -0.0002 0.0002 0.0006 0.0036 -0.0034  
AT. 43 C X -0.0000 0.0000 0.0000 0.0001 -0.0001 0.0000  
Y 0.0000 0.0000 -0.0000 -0.0000 0.0000 0.0000  
Z -0.0000 0.0000 0.0000 0.0000 -0.0001 0.0000  
AT. 44 C X -0.0000 -0.0000 0.0000 -0.0001 -0.0001 -0.0000  
Y 0.0000 -0.0000 -0.0000 0.0000 0.0000 -0.0000  
Z -0.0000 -0.0000 0.0000 -0.0000 -0.0001 -0.0000  
AT. 45 H X 0.0001 -0.0002 -0.0000 -0.0001 0.0003 -0.0003  
Y 0.0002 -0.0002 -0.0000 -0.0000 0.0004 -0.0003  
Z 0.0001 -0.0002 -0.0000 -0.0001 0.0003 -0.0002  
AT. 46 H X 0.0001 0.0002 -0.0000 0.0001 0.0003 0.0003  
Y 0.0002 0.0002 -0.0000 0.0000 0.0004 0.0003  
Z 0.0001 0.0002 -0.0000 0.0001 0.0003 0.0002  
AT. 47 H X 0.0003 -0.0002 -0.0002 -0.0005 0.0009 -0.0000

Y 0.0001 0.0001 0.0001 0.0007 -0.0005 0.0001  
Z 0.0001 -0.0001 -0.0001 -0.0005 0.0006 -0.0000  
AT. 48 H X 0.0003 0.0002 -0.0002 0.0005 0.0009 0.0000  
Y 0.0001 -0.0001 0.0001 -0.0007 -0.0005 -0.0001  
Z 0.0001 0.0001 -0.0001 0.0005 0.0006 0.0000  
AT. 49 C X 0.0000 0.0000 0.0000 0.0000 -0.0000 0.0000  
Y -0.0001 0.0000 -0.0000 -0.0001 -0.0000 0.0000  
Z 0.0000 -0.0000 0.0000 0.0001 0.0000 -0.0000  
AT. 50 C X 0.0000 -0.0000 0.0000 -0.0000 -0.0000 -0.0000  
Y -0.0001 -0.0000 -0.0000 0.0001 -0.0000 -0.0000  
Z 0.0000 0.0000 0.0000 -0.0001 0.0000 0.0000  
AT. 51 C X 0.0033 -0.0007 0.0000 0.0035 0.0006 0.0003  
Y -0.0036 0.0008 -0.0000 -0.0038 -0.0006 -0.0003  
Z 0.0029 -0.0006 0.0000 0.0031 0.0005 0.0002  
AT. 52 C X 0.0033 0.0007 0.0000 -0.0035 0.0006 -0.0003  
Y -0.0036 -0.0008 -0.0000 0.0038 -0.0006 0.0003  
Z 0.0029 0.0006 0.0000 -0.0031 0.0005 -0.0002  
AT. 53 H X -0.0456 0.0101 -0.0002 -0.0483 -0.0080 -0.0042  
Y 0.0300 -0.0066 0.0001 0.0318 0.0053 0.0028  
Z -0.0255 0.0056 -0.0001 -0.0270 -0.0045 -0.0024  
AT. 54 H X -0.0456 -0.0101 -0.0002 0.0483 -0.0080 0.0042  
Y 0.0300 0.0066 0.0001 -0.0318 0.0053 -0.0028  
Z -0.0255 -0.0056 -0.0001 0.0270 -0.0045 0.0024  
AT. 55 H X 0.0074 -0.0017 0.0000 0.0078 0.0013 0.0006  
Y 0.0127 -0.0029 -0.0000 0.0132 0.0020 0.0007  
Z -0.0098 0.0022 0.0000 -0.0102 -0.0015 -0.0007  
AT. 56 H X 0.0074 0.0017 0.0000 -0.0078 0.0013 -0.0006  
Y 0.0127 0.0029 -0.0000 -0.0132 0.0020 -0.0007  
Z -0.0098 -0.0022 0.0000 0.0102 -0.0015 0.0007  
AT. 57 C X 0.0012 -0.0005 -0.0003 0.0004 -0.0057 -0.0057  
Y 0.0022 -0.0009 -0.0004 0.0009 -0.0091 -0.0091  
Z 0.0015 -0.0005 -0.0002 0.0008 -0.0045 -0.0045

AT. 58 C X 0.0012 0.0005 -0.0003 -0.0004 -0.0057 0.0057  
Y 0.0022 0.0009 -0.0004 -0.0009 -0.0091 0.0091  
Z 0.0015 0.0005 -0.0002 -0.0008 -0.0045 0.0045

AT. 59 H X -0.0042 0.0020 0.0011 -0.0012 0.0216 0.0217  
Y -0.0086 0.0042 0.0022 -0.0024 0.0441 0.0444  
Z 0.0064 -0.0031 -0.0016 0.0019 -0.0320 -0.0321

AT. 60 H X -0.0042 -0.0020 0.0011 0.0012 0.0216 -0.0217  
Y -0.0086 -0.0042 0.0022 0.0024 0.0441 -0.0444  
Z 0.0064 0.0031 -0.0016 -0.0019 -0.0320 0.0321

AT. 61 H X 0.0062 -0.0020 -0.0007 0.0038 -0.0167 -0.0164  
Y -0.0034 0.0010 0.0004 -0.0023 0.0082 0.0080  
Z -0.0077 0.0024 0.0009 -0.0048 0.0198 0.0195

AT. 62 H X 0.0062 0.0020 -0.0007 -0.0038 -0.0167 0.0164  
Y -0.0034 -0.0010 0.0004 0.0023 0.0082 -0.0080  
Z -0.0077 -0.0024 0.0009 0.0048 0.0198 -0.0195

AT. 63 H X -0.0157 0.0064 0.0031 -0.0068 0.0632 0.0627  
Y -0.0141 0.0057 0.0028 -0.0061 0.0568 0.0564  
Z -0.0163 0.0067 0.0032 -0.0070 0.0665 0.0660

AT. 64 H X -0.0157 -0.0064 0.0031 0.0068 0.0632 -0.0627  
Y -0.0141 -0.0057 0.0028 0.0061 0.0568 -0.0564  
Z -0.0163 -0.0067 0.0032 0.0070 0.0665 -0.0660

AT. 65 C X -0.0001 0.0003 -0.0001 -0.0000 -0.0006 0.0017  
Y -0.0006 0.0006 -0.0001 -0.0008 -0.0017 0.0025  
Z 0.0001 -0.0001 0.0000 0.0004 0.0004 0.0000

AT. 66 C X -0.0001 -0.0003 -0.0001 0.0000 -0.0006 -0.0017  
Y -0.0006 -0.0006 -0.0001 0.0008 -0.0017 -0.0025  
Z 0.0001 0.0001 0.0000 -0.0004 0.0004 -0.0000

AT. 67 H X 0.0017 -0.0024 0.0004 0.0012 0.0050 -0.0118  
Y 0.0019 -0.0025 0.0004 0.0012 0.0052 -0.0124  
Z 0.0020 -0.0028 0.0005 0.0014 0.0060 -0.0138

AT. 68 H X 0.0017 0.0024 0.0004 -0.0012 0.0050 0.0118  
Y 0.0019 0.0025 0.0004 -0.0012 0.0052 0.0124

Z 0.0020 0.0028 0.0005 -0.0014 0.0060 0.0138  
AT. 69 H X -0.0021 0.0010 -0.0003 -0.0042 -0.0052 0.0009  
Y 0.0015 -0.0006 0.0002 0.0031 0.0035 0.0001  
Z -0.0009 0.0004 -0.0001 -0.0019 -0.0025 0.0004  
AT. 70 H X -0.0021 -0.0010 -0.0003 0.0042 -0.0052 -0.0009  
Y 0.0015 0.0006 0.0002 -0.0031 0.0035 -0.0001  
Z -0.0009 -0.0004 -0.0001 0.0019 -0.0025 -0.0004  
AT. 71 H X 0.0020 -0.0022 0.0004 0.0031 0.0066 -0.0095  
Y 0.0035 -0.0041 0.0008 0.0055 0.0120 -0.0178  
Z -0.0027 0.0030 -0.0006 -0.0041 -0.0088 0.0131  
AT. 72 H X 0.0020 0.0022 0.0004 -0.0031 0.0066 0.0095  
Y 0.0035 0.0041 0.0008 -0.0055 0.0120 0.0178  
Z -0.0027 -0.0030 -0.0006 0.0041 -0.0088 -0.0131  
AT. 73 C X -0.0000 0.0000 -0.0000 -0.0000 -0.0002 -0.0002  
Y 0.0000 -0.0000 -0.0000 0.0000 -0.0003 -0.0002  
Z -0.0000 0.0000 -0.0000 -0.0000 -0.0000 -0.0000  
AT. 74 C X -0.0000 -0.0000 -0.0000 0.0000 -0.0002 0.0002  
Y 0.0000 0.0000 -0.0000 -0.0000 -0.0003 0.0002  
Z -0.0000 -0.0000 -0.0000 0.0000 -0.0000 0.0000  
AT. 75 H X -0.0000 0.0001 0.0001 0.0000 0.0011 0.0009  
Y 0.0002 0.0000 0.0001 0.0003 0.0019 0.0014  
Z -0.0002 -0.0000 -0.0001 -0.0002 -0.0016 -0.0012  
AT. 76 H X -0.0000 -0.0001 0.0001 -0.0000 0.0011 -0.0009  
Y 0.0002 -0.0000 0.0001 -0.0003 0.0019 -0.0014  
Z -0.0002 0.0000 -0.0001 0.0002 -0.0016 0.0012  
AT. 77 H X 0.0002 -0.0000 0.0001 0.0000 0.0017 0.0012  
Y 0.0000 0.0001 0.0001 -0.0001 0.0020 0.0017  
Z 0.0000 0.0001 0.0001 -0.0001 0.0022 0.0017  
AT. 78 H X 0.0002 0.0000 0.0001 -0.0000 0.0017 -0.0012  
Y 0.0000 -0.0001 0.0001 0.0001 0.0020 -0.0017  
Z 0.0000 -0.0001 0.0001 0.0001 0.0022 -0.0017  
AT. 79 I X -0.0000 -0.0000 0.0000 0.0000 -0.0000 -0.0000

Y 0.0000 0.0000 -0.0000 0.0000 -0.0000 -0.0000  
Z 0.0000 -0.0000 -0.0000 -0.0000 0.0000 0.0000  
AT. 80 I X -0.0000 0.0000 0.0000 -0.0000 -0.0000 0.0000  
Y 0.0000 -0.0000 -0.0000 -0.0000 -0.0000 0.0000  
Z 0.0000 0.0000 -0.0000 0.0000 0.0000 -0.0000  
AT. 81 I X -0.0000 -0.0000 0.0000 0.0000 -0.0000 -0.0000  
Y 0.0000 0.0000 -0.0000 -0.0000 0.0000 0.0000  
Z 0.0000 0.0000 0.0000 0.0000 -0.0000 0.0000  
AT. 82 I X -0.0000 0.0000 0.0000 -0.0000 -0.0000 0.0000  
Y 0.0000 -0.0000 -0.0000 0.0000 0.0000 -0.0000  
Z 0.0000 -0.0000 0.0000 -0.0000 -0.0000 -0.0000  
AT. 83 O X 0.0000 0.0000 0.0000 0.0000 0.0000 0.0000  
Y 0.0000 0.0000 0.0000 -0.0000 -0.0000 -0.0000  
Z 0.0000 -0.0000 -0.0000 -0.0000 0.0000 0.0000  
AT. 84 O X 0.0000 -0.0000 0.0000 -0.0000 0.0000 -0.0000  
Y 0.0000 -0.0000 0.0000 0.0000 -0.0000 0.0000  
Z 0.0000 0.0000 -0.0000 0.0000 0.0000 -0.0000  
AT. 85 O X 0.0000 -0.0000 -0.0000 0.0000 -0.0000 -0.0000  
Y 0.0000 -0.0000 -0.0000 0.0000 -0.0000 -0.0000  
Z 0.0000 0.0000 0.0000 -0.0000 0.0000 -0.0000  
AT. 86 O X 0.0000 0.0000 -0.0000 -0.0000 -0.0000 0.0000  
Y 0.0000 0.0000 -0.0000 -0.0000 -0.0000 0.0000  
Z 0.0000 -0.0000 0.0000 0.0000 0.0000 0.0000  
AT. 87 N X -0.0000 -0.0000 -0.0000 -0.0000 0.0000 0.0000  
Y -0.0000 0.0000 0.0000 0.0000 -0.0000 -0.0000  
Z 0.0000 -0.0000 -0.0000 -0.0000 0.0000 0.0000  
AT. 88 N X -0.0000 0.0000 -0.0000 0.0000 0.0000 -0.0000  
Y -0.0000 -0.0000 0.0000 -0.0000 -0.0000 0.0000  
Z 0.0000 0.0000 -0.0000 0.0000 0.0000 -0.0000  
AT. 89 N X 0.0000 0.0000 0.0000 0.0000 -0.0000 -0.0000  
Y -0.0000 0.0000 0.0000 0.0000 -0.0000 -0.0000  
Z 0.0000 -0.0000 -0.0000 -0.0000 0.0000 0.0000

AT. 90 N X 0.0000 -0.0000 0.0000 -0.0000 -0.0000 0.0000  
Y -0.0000 -0.0000 0.0000 -0.0000 -0.0000 0.0000  
Z 0.0000 0.0000 -0.0000 0.0000 0.0000 -0.0000

AT. 91 C X -0.0000 0.0000 -0.0000 -0.0000 -0.0000 -0.0000  
Y -0.0000 0.0000 0.0000 -0.0000 0.0000 0.0000  
Z -0.0000 0.0000 -0.0000 0.0000 -0.0000 -0.0000

AT. 92 C X -0.0000 -0.0000 -0.0000 0.0000 -0.0000 0.0000  
Y -0.0000 -0.0000 0.0000 0.0000 0.0000 -0.0000  
Z -0.0000 -0.0000 -0.0000 -0.0000 -0.0000 0.0000

AT. 93 C X -0.0000 0.0000 0.0000 0.0000 -0.0000 -0.0000  
Y -0.0000 0.0001 0.0001 0.0000 -0.0000 -0.0000  
Z 0.0000 -0.0000 -0.0000 -0.0000 0.0000 0.0000

AT. 94 C X -0.0000 -0.0000 0.0000 -0.0000 -0.0000 0.0000  
Y -0.0000 -0.0001 0.0001 -0.0000 -0.0000 0.0000  
Z 0.0000 0.0000 -0.0000 0.0000 0.0000 -0.0000

AT. 95 H X 0.0001 -0.0006 -0.0004 -0.0000 0.0002 0.0001  
Y 0.0001 -0.0009 -0.0006 -0.0001 0.0003 0.0001  
Z 0.0001 -0.0005 -0.0004 -0.0000 0.0001 0.0001

AT. 96 H X 0.0001 0.0006 -0.0004 0.0000 0.0002 -0.0001  
Y 0.0001 0.0009 -0.0006 0.0001 0.0003 -0.0001  
Z 0.0001 0.0005 -0.0004 0.0000 0.0001 -0.0001

AT. 97 H X -0.0000 0.0002 0.0002 0.0000 -0.0001 -0.0000  
Y 0.0000 -0.0001 -0.0001 -0.0000 0.0001 0.0000  
Z -0.0001 0.0007 0.0006 0.0001 -0.0003 -0.0001

AT. 98 H X -0.0000 -0.0002 0.0002 -0.0000 -0.0001 0.0000  
Y 0.0000 0.0001 -0.0001 0.0000 0.0001 -0.0000  
Z -0.0001 -0.0007 0.0006 -0.0001 -0.0003 0.0001

AT. 99 C X -0.0000 0.0000 0.0000 -0.0000 0.0000 0.0000  
Y -0.0000 0.0000 0.0000 -0.0000 0.0000 0.0000  
Z 0.0000 -0.0000 -0.0000 0.0000 -0.0000 -0.0000

AT. 100 C X -0.0000 -0.0000 0.0000 0.0000 0.0000 -0.0000  
Y -0.0000 -0.0000 0.0000 0.0000 0.0000 -0.0000



Z 0.0000 0.0000 -0.0000 -0.0000 -0.0000 0.0000  
AT. 101 C X -0.0000 0.0000 0.0000 -0.0000 0.0000 0.0000  
Y -0.0000 0.0000 0.0000 -0.0000 0.0000 0.0000  
Z -0.0000 0.0000 0.0000 -0.0000 -0.0000 0.0000  
AT. 102 C X -0.0000 -0.0000 0.0000 0.0000 0.0000 -0.0000  
Y -0.0000 -0.0000 0.0000 0.0000 0.0000 -0.0000  
Z -0.0000 -0.0000 0.0000 0.0000 -0.0000 -0.0000  
AT. 103 H X 0.0001 -0.0001 -0.0001 0.0001 0.0000 -0.0001  
Y 0.0002 -0.0003 -0.0002 0.0002 0.0000 -0.0002  
Z -0.0000 -0.0000 -0.0000 -0.0000 -0.0000 -0.0000  
AT. 104 H X 0.0001 0.0001 -0.0001 -0.0001 0.0000 0.0001  
Y 0.0002 0.0003 -0.0002 -0.0002 0.0000 0.0002  
Z -0.0000 0.0000 -0.0000 0.0000 -0.0000 0.0000  
AT. 105 H X -0.0000 0.0000 0.0000 -0.0000 -0.0001 0.0000  
Y -0.0001 0.0001 0.0001 -0.0001 -0.0001 0.0001  
Z 0.0002 -0.0002 -0.0002 0.0002 0.0003 -0.0001  
AT. 106 H X -0.0000 -0.0000 0.0000 0.0000 -0.0001 -0.0000  
Y -0.0001 -0.0001 0.0001 0.0001 -0.0001 -0.0001  
Z 0.0002 0.0002 -0.0002 -0.0002 0.0003 0.0001  
AT. 107 C X -0.0000 -0.0005 -0.0005 -0.0002 -0.0001 -0.0000  
Y -0.0000 -0.0000 -0.0001 -0.0000 0.0001 0.0001  
Z -0.0000 -0.0004 -0.0005 -0.0001 -0.0001 -0.0000  
AT. 108 C X -0.0000 0.0005 -0.0005 0.0002 -0.0001 0.0000  
Y -0.0000 0.0000 -0.0001 0.0000 0.0001 -0.0001  
Z -0.0000 0.0004 -0.0005 0.0001 -0.0001 0.0000  
AT. 109 H X 0.0000 -0.0001 -0.0001 -0.0000 0.0001 0.0001  
Y 0.0000 -0.0003 -0.0002 -0.0001 -0.0008 -0.0007  
Z -0.0000 0.0004 0.0003 0.0001 0.0005 0.0004  
AT. 110 H X 0.0000 0.0001 -0.0001 0.0000 0.0001 -0.0001  
Y 0.0000 0.0003 -0.0002 0.0001 -0.0008 0.0007  
Z -0.0000 -0.0004 0.0003 -0.0001 0.0005 -0.0004  
AT. 111 H X 0.0006 0.0061 0.0063 0.0020 0.0005 0.0001

Y 0.0001 0.0011 0.0011 0.0004 0.0001 0.0001  
Z 0.0005 0.0054 0.0055 0.0018 0.0004 0.0002  
AT. 112 H X 0.0006 -0.0061 0.0063 -0.0020 0.0005 -0.0001  
Y 0.0001 -0.0011 0.0011 -0.0004 0.0001 -0.0001  
Z 0.0005 -0.0054 0.0055 -0.0018 0.0004 -0.0002  
AT. 113 C X 0.0000 0.0001 0.0001 0.0000 -0.0000 -0.0000  
Y 0.0000 -0.0002 -0.0002 -0.0000 0.0000 0.0000  
Z -0.0000 0.0000 0.0000 0.0000 -0.0000 -0.0000  
AT. 114 C X 0.0000 -0.0001 0.0001 -0.0000 -0.0000 0.0000  
Y 0.0000 0.0002 -0.0002 0.0000 0.0000 -0.0000  
Z -0.0000 -0.0000 0.0000 -0.0000 -0.0000 0.0000  
AT. 115 C X -0.0000 -0.0001 -0.0001 -0.0001 -0.0000 -0.0001  
Y -0.0000 -0.0001 -0.0000 -0.0000 -0.0000 -0.0000  
Z -0.0000 -0.0002 -0.0002 -0.0001 -0.0000 -0.0001  
AT. 116 C X -0.0000 0.0001 -0.0001 0.0001 -0.0000 0.0001  
Y -0.0000 0.0001 -0.0000 0.0000 -0.0000 0.0000  
Z -0.0000 0.0002 -0.0002 0.0001 -0.0000 0.0001  
AT. 117 H X 0.0004 0.0017 0.0010 0.0007 0.0004 0.0009  
Y 0.0001 0.0004 0.0003 0.0002 0.0001 0.0002  
Z 0.0004 0.0015 0.0008 0.0007 0.0004 0.0008  
AT. 118 H X 0.0004 -0.0017 0.0010 -0.0007 0.0004 -0.0009  
Y 0.0001 -0.0004 0.0003 -0.0002 0.0001 -0.0002  
Z 0.0004 -0.0015 0.0008 -0.0007 0.0004 -0.0008  
AT. 119 H X -0.0000 -0.0003 -0.0003 -0.0001 -0.0000 -0.0001  
Y 0.0000 0.0009 0.0009 0.0002 0.0000 0.0001  
Z 0.0000 0.0006 0.0005 0.0001 0.0000 0.0001  
AT. 120 H X -0.0000 0.0003 -0.0003 0.0001 -0.0000 0.0001  
Y 0.0000 -0.0009 0.0009 -0.0002 0.0000 -0.0001  
Z 0.0000 -0.0006 0.0005 -0.0001 0.0000 -0.0001  
AT. 121 C X 0.0000 -0.0001 -0.0002 -0.0000 0.0001 0.0002  
Y 0.0000 -0.0000 -0.0000 0.0000 0.0000 0.0000  
Z -0.0000 0.0001 0.0002 0.0000 -0.0001 -0.0002

AT.122 C X 0.0000 0.0001 -0.0002 0.0000 0.0001 -0.0002  
Y 0.0000 0.0000 -0.0000 -0.0000 0.0000 -0.0000  
Z -0.0000 -0.0001 0.0002 -0.0000 -0.0001 0.0002

AT.123 H X -0.0000 0.0000 0.0000 -0.0000 -0.0000 -0.0000  
Y -0.0000 -0.0004 -0.0004 -0.0001 0.0002 0.0004  
Z -0.0000 -0.0004 -0.0004 -0.0001 0.0002 0.0004

AT.124 H X -0.0000 -0.0000 0.0000 0.0000 -0.0000 0.0000  
Y -0.0000 0.0004 -0.0004 0.0001 0.0002 -0.0004  
Z -0.0000 0.0004 -0.0004 0.0001 0.0002 -0.0004

AT.125 H X -0.0002 0.0016 0.0022 0.0000 -0.0010 -0.0018  
Y -0.0001 0.0007 0.0009 0.0000 -0.0004 -0.0007  
Z 0.0002 -0.0014 -0.0018 -0.0000 0.0008 0.0015

AT.126 H X -0.0002 -0.0016 0.0022 -0.0000 -0.0010 0.0018  
Y -0.0001 -0.0007 0.0009 -0.0000 -0.0004 0.0007  
Z 0.0002 0.0014 -0.0018 0.0000 0.0008 -0.0015

AT.127 C X 0.0000 -0.0000 -0.0000 -0.0000 0.0000 0.0000  
Y -0.0000 -0.0000 -0.0000 -0.0000 0.0000 -0.0000  
Z 0.0000 0.0000 0.0000 0.0000 -0.0000 -0.0000

AT.128 C X 0.0000 0.0000 -0.0000 0.0000 0.0000 -0.0000  
Y -0.0000 0.0000 -0.0000 0.0000 0.0000 0.0000  
Z 0.0000 -0.0000 0.0000 -0.0000 -0.0000 0.0000

AT.129 C X 0.0000 0.0005 0.0005 0.0001 -0.0000 -0.0001  
Y -0.0000 0.0003 0.0004 0.0001 -0.0000 -0.0001  
Z 0.0000 -0.0004 -0.0005 -0.0001 0.0000 0.0001

AT.130 C X 0.0000 -0.0005 0.0005 -0.0001 -0.0000 0.0001  
Y -0.0000 -0.0003 0.0004 -0.0001 -0.0000 0.0001  
Z 0.0000 0.0004 -0.0005 0.0001 0.0000 -0.0001

AT.131 H X -0.0000 -0.0058 -0.0065 -0.0008 0.0002 0.0014  
Y -0.0000 -0.0020 -0.0022 -0.0003 0.0001 0.0005  
Z 0.0000 0.0043 0.0048 0.0006 -0.0002 -0.0010

AT.132 H X -0.0000 0.0058 -0.0065 0.0008 0.0002 -0.0014  
Y -0.0000 0.0020 -0.0022 0.0003 0.0001 -0.0005

Z 0.0000 -0.0043 0.0048 -0.0006 -0.0002 0.0010  
AT. 133 H X -0.0000 0.0006 0.0007 0.0001 -0.0000 -0.0001  
Y 0.0000 -0.0018 -0.0021 -0.0003 0.0001 0.0004  
Z -0.0000 0.0011 0.0013 0.0002 -0.0000 -0.0002  
AT. 134 H X -0.0000 -0.0006 0.0007 -0.0001 -0.0000 0.0001  
Y 0.0000 0.0018 -0.0021 0.0003 0.0001 -0.0004  
Z -0.0000 -0.0011 0.0013 -0.0002 -0.0000 0.0002  
AT. 135 C X 0.0000 0.0054 0.0056 0.0012 -0.0003 -0.0004  
Y 0.0000 -0.0097 -0.0100 -0.0021 0.0005 0.0008  
Z 0.0000 0.0039 0.0041 0.0009 -0.0001 -0.0003  
AT. 136 C X 0.0000 -0.0054 0.0056 -0.0012 -0.0003 0.0004  
Y 0.0000 0.0097 -0.0100 0.0021 0.0005 -0.0008  
Z 0.0000 -0.0039 0.0041 -0.0009 -0.0001 0.0003  
AT. 137 H X -0.0000 -0.0211 -0.0216 -0.0047 0.0011 0.0018  
Y 0.0001 0.0932 0.0958 0.0207 -0.0047 -0.0078  
Z -0.0000 -0.0548 -0.0563 -0.0122 0.0028 0.0046  
AT. 138 H X -0.0000 0.0211 -0.0216 0.0047 0.0011 -0.0018  
Y 0.0001 -0.0932 0.0958 -0.0207 -0.0047 0.0078  
Z -0.0000 0.0548 -0.0563 0.0122 0.0028 -0.0046  
AT. 139 H X -0.0002 -0.0328 -0.0338 -0.0075 0.0013 0.0025  
Y -0.0000 -0.0089 -0.0092 -0.0020 0.0004 0.0007  
Z -0.0002 -0.0259 -0.0268 -0.0060 0.0010 0.0020  
AT. 140 H X -0.0002 0.0328 -0.0338 0.0075 0.0013 -0.0025  
Y -0.0000 0.0089 -0.0092 0.0020 0.0004 -0.0007  
Z -0.0002 0.0259 -0.0268 0.0060 0.0010 -0.0020  
AT. 141 H X 0.0001 -0.0120 -0.0122 -0.0025 0.0008 0.0011  
Y -0.0003 0.0327 0.0333 0.0070 -0.0020 -0.0030  
Z -0.0003 0.0337 0.0344 0.0072 -0.0021 -0.0031  
AT. 142 H X 0.0001 0.0120 -0.0122 0.0025 0.0008 -0.0011  
Y -0.0003 -0.0327 0.0333 -0.0070 -0.0020 0.0030  
Z -0.0003 -0.0337 0.0344 -0.0072 -0.0021 0.0031  
AT. 143 C X 0.0000 0.0001 0.0001 0.0001 -0.0000 0.0000

Y -0.0001 -0.0014 -0.0013 -0.0005 0.0001 -0.0001  
Z 0.0000 0.0003 0.0003 0.0001 -0.0000 0.0000  
AT. 144 C X 0.0000 -0.0001 0.0001 -0.0001 -0.0000 -0.0000  
Y -0.0001 0.0014 -0.0013 0.0005 0.0001 0.0001  
Z 0.0000 -0.0003 0.0003 -0.0001 -0.0000 -0.0000  
AT. 145 H X -0.0001 -0.0014 -0.0013 -0.0005 0.0001 -0.0001  
Y 0.0005 0.0052 0.0050 0.0017 -0.0005 0.0005  
Z 0.0004 0.0052 0.0050 0.0017 -0.0005 0.0005  
AT. 146 H X -0.0001 0.0014 -0.0013 0.0005 0.0001 0.0001  
Y 0.0005 -0.0052 0.0050 -0.0017 -0.0005 -0.0005  
Z 0.0004 -0.0052 0.0050 -0.0017 -0.0005 -0.0005  
AT. 147 H X 0.0001 0.0030 0.0030 0.0009 -0.0002 0.0000  
Y 0.0000 0.0009 0.0009 0.0003 -0.0001 -0.0000  
Z -0.0001 -0.0022 -0.0022 -0.0007 0.0002 -0.0000  
AT. 148 H X 0.0001 -0.0030 0.0030 -0.0009 -0.0002 -0.0000  
Y 0.0000 -0.0009 0.0009 -0.0003 -0.0001 0.0000  
Z -0.0001 0.0022 -0.0022 0.0007 0.0002 0.0000  
AT. 149 H X -0.0003 -0.0032 -0.0031 -0.0011 0.0002 -0.0003  
Y 0.0009 0.0106 0.0101 0.0036 -0.0008 0.0009  
Z -0.0005 -0.0062 -0.0059 -0.0021 0.0005 -0.0005  
AT. 150 H X -0.0003 0.0032 -0.0031 0.0011 0.0002 0.0003  
Y 0.0009 -0.0106 0.0101 -0.0036 -0.0008 -0.0009  
Z -0.0005 0.0062 -0.0059 0.0021 0.0005 0.0005  
AT. 151 C X -0.0000 0.0000 0.0001 0.0000 -0.0000 -0.0000  
Y 0.0000 -0.0001 -0.0002 -0.0000 0.0000 0.0000  
Z -0.0000 0.0000 -0.0000 0.0000 0.0000 -0.0000  
AT. 152 C X -0.0000 -0.0000 0.0001 -0.0000 -0.0000 0.0000  
Y 0.0000 0.0001 -0.0002 0.0000 0.0000 -0.0000  
Z -0.0000 -0.0000 -0.0000 -0.0000 0.0000 0.0000  
AT. 153 H X 0.0001 -0.0007 -0.0008 -0.0002 0.0001 0.0001  
Y -0.0002 0.0015 0.0019 0.0005 -0.0002 -0.0002  
Z 0.0002 -0.0010 -0.0013 -0.0003 0.0001 0.0001

AT.154 H X 0.0001 0.0007 -0.0008 0.0002 0.0001 -0.0001  
Y -0.0002 -0.0015 0.0019 -0.0005 -0.0002 0.0002  
Z 0.0002 0.0010 -0.0013 0.0003 0.0001 -0.0001

AT.155 H X 0.0000 -0.0000 -0.0003 -0.0000 0.0001 0.0000  
Y -0.0001 0.0004 0.0010 0.0001 -0.0002 -0.0001  
Z -0.0001 0.0005 0.0011 0.0001 -0.0002 -0.0001

AT.156 H X 0.0000 0.0000 -0.0003 0.0000 0.0001 -0.0000  
Y -0.0001 -0.0004 0.0010 -0.0001 -0.0002 0.0001  
Z -0.0001 -0.0005 0.0011 -0.0001 -0.0002 0.0001

AT.157 O X -0.0000 -0.0000 -0.0000 -0.0000 -0.0000 -0.0000  
Y 0.0002 0.0001 0.0001 0.0000 0.0001 0.0000  
Z 0.0000 0.0000 0.0000 0.0000 0.0000 0.0000

AT.158 O X -0.0000 0.0000 -0.0000 0.0000 -0.0000 0.0000  
Y 0.0002 -0.0001 0.0001 -0.0000 0.0001 -0.0000  
Z 0.0000 -0.0000 0.0000 -0.0000 0.0000 -0.0000

AT.159 O X 0.0001 0.0000 0.0000 -0.0001 0.0000 0.0000  
Y -0.0001 -0.0000 -0.0000 0.0000 -0.0000 -0.0000  
Z 0.0003 0.0000 0.0001 -0.0002 0.0001 0.0000

AT.160 O X 0.0001 -0.0000 0.0000 0.0001 0.0000 -0.0000  
Y -0.0001 0.0000 -0.0000 -0.0000 -0.0000 0.0000  
Z 0.0003 -0.0000 0.0001 0.0002 0.0001 -0.0000

AT.161 H X 0.0003 0.0002 0.0003 -0.0000 0.0002 0.0001  
Y -0.0029 -0.0008 -0.0015 -0.0002 -0.0012 -0.0007  
Z -0.0008 -0.0002 -0.0004 0.0000 -0.0003 -0.0001

AT.162 H X 0.0003 -0.0002 0.0003 0.0000 0.0002 -0.0001  
Y -0.0029 0.0008 -0.0015 0.0002 -0.0012 0.0007  
Z -0.0008 0.0002 -0.0004 -0.0000 -0.0003 0.0001

AT.163 H X -0.0018 -0.0001 -0.0003 0.0009 -0.0005 -0.0002  
Y 0.0012 0.0001 0.0002 -0.0006 0.0003 0.0002  
Z -0.0050 -0.0003 -0.0009 0.0025 -0.0013 -0.0007

AT.164 H X -0.0018 0.0001 -0.0003 -0.0009 -0.0005 0.0002  
Y 0.0012 -0.0001 0.0002 0.0006 0.0003 -0.0002

Z -0.0050 0.0003 -0.0009 -0.0025 -0.0013 0.0007  
AT. 165 O X -0.0000 0.0000 -0.0000 -0.0000 -0.0000 -0.0001  
Y -0.0000 0.0000 -0.0000 -0.0000 -0.0000 -0.0000  
Z -0.0000 -0.0000 -0.0000 0.0000 -0.0000 -0.0000  
AT. 166 O X -0.0000 -0.0000 -0.0000 0.0000 -0.0000 0.0001  
Y -0.0000 -0.0000 -0.0000 0.0000 -0.0000 0.0000  
Z -0.0000 0.0000 -0.0000 -0.0000 -0.0000 0.0000  
AT. 167 H X 0.0002 -0.0001 0.0001 0.0001 0.0004 0.0007  
Y 0.0001 -0.0001 0.0000 0.0000 0.0003 0.0004  
Z 0.0001 -0.0000 0.0000 0.0000 0.0001 0.0002  
AT. 168 H X 0.0002 0.0001 0.0001 -0.0001 0.0004 -0.0007  
Y 0.0001 0.0001 0.0000 -0.0000 0.0003 -0.0004  
Z 0.0001 0.0000 0.0000 -0.0000 0.0001 -0.0002  
AT. 169 O X 0.0000 0.0000 -0.0000 -0.0000 -0.0000 0.0000  
Y -0.0000 -0.0000 0.0000 0.0000 0.0000 0.0000  
Z 0.0000 0.0000 -0.0000 -0.0000 -0.0000 0.0000  
AT. 170 O X 0.0000 -0.0000 -0.0000 0.0000 -0.0000 -0.0000  
Y -0.0000 0.0000 0.0000 -0.0000 0.0000 -0.0000  
Z 0.0000 -0.0000 -0.0000 0.0000 -0.0000 -0.0000  
AT. 171 H X -0.0001 -0.0002 0.0002 0.0001 0.0002 -0.0000  
Y 0.0002 0.0004 -0.0003 -0.0002 -0.0003 -0.0000  
Z -0.0001 -0.0002 0.0002 0.0001 0.0002 -0.0000  
AT. 172 H X -0.0001 0.0002 0.0002 -0.0001 0.0002 0.0000  
Y 0.0002 -0.0004 -0.0003 0.0002 -0.0003 0.0000  
Z -0.0001 0.0002 0.0002 -0.0001 0.0002 0.0000  
  
FREQ(CM\*\*-1) 3077.91 3077.92 3079.67 3079.74 3079.97 3080.28  
  
AT. 1 I X 0.0000 -0.0000 0.0000 0.0000 -0.0000 0.0000  
Y 0.0000 0.0000 0.0000 -0.0000 0.0000 -0.0000  
Z 0.0000 -0.0000 -0.0000 -0.0000 0.0000 0.0000  
AT. 2 I X 0.0000 0.0000 -0.0000 0.0000 0.0000 0.0000

Y 0.0000 -0.0000 -0.0000 -0.0000 -0.0000 -0.0000  
Z 0.0000 0.0000 0.0000 -0.0000 -0.0000 0.0000  
AT. 3 I X 0.0000 -0.0000 0.0000 0.0000 0.0000 0.0000  
Y 0.0000 0.0000 0.0000 0.0000 -0.0000 -0.0000  
Z -0.0000 -0.0000 -0.0000 0.0000 0.0000 -0.0000  
AT. 4 I X 0.0000 0.0000 -0.0000 0.0000 -0.0000 0.0000  
Y 0.0000 -0.0000 -0.0000 0.0000 0.0000 -0.0000  
Z -0.0000 0.0000 0.0000 0.0000 -0.0000 -0.0000  
AT. 5 O X 0.0000 0.0000 -0.0001 -0.0001 0.0000 0.0000  
Y -0.0000 -0.0000 0.0001 0.0001 -0.0000 -0.0000  
Z -0.0000 0.0000 -0.0000 -0.0000 0.0000 0.0000  
AT. 6 O X 0.0000 -0.0000 0.0001 -0.0001 -0.0000 0.0000  
Y -0.0000 0.0000 -0.0001 0.0001 0.0000 -0.0000  
Z -0.0000 -0.0000 0.0000 -0.0000 -0.0000 0.0000  
AT. 7 O X 0.0000 0.0000 -0.0000 0.0000 0.0000 0.0000  
Y -0.0000 -0.0000 0.0000 -0.0000 -0.0000 -0.0000  
Z -0.0000 -0.0000 -0.0000 0.0000 0.0000 -0.0000  
AT. 8 O X 0.0000 -0.0000 0.0000 0.0000 -0.0000 0.0000  
Y -0.0000 0.0000 -0.0000 -0.0000 0.0000 -0.0000  
Z -0.0000 0.0000 0.0000 0.0000 -0.0000 -0.0000  
AT. 9 N X -0.0000 -0.0000 0.0000 0.0000 -0.0000 -0.0000  
Y 0.0000 0.0000 -0.0000 -0.0000 0.0000 0.0000  
Z -0.0000 0.0000 0.0000 -0.0000 0.0000 0.0000  
AT. 10 N X -0.0000 0.0000 -0.0000 0.0000 0.0000 -0.0000  
Y 0.0000 -0.0000 0.0000 -0.0000 -0.0000 0.0000  
Z -0.0000 -0.0000 -0.0000 -0.0000 -0.0000 0.0000  
AT. 11 N X -0.0000 -0.0000 -0.0000 0.0000 -0.0000 -0.0000  
Y -0.0000 -0.0000 0.0000 0.0000 -0.0000 -0.0000  
Z 0.0000 0.0000 -0.0000 -0.0000 0.0000 0.0000  
AT. 12 N X -0.0000 0.0000 0.0000 0.0000 0.0000 -0.0000  
Y -0.0000 0.0000 -0.0000 0.0000 0.0000 -0.0000  
Z 0.0000 -0.0000 0.0000 -0.0000 -0.0000 0.0000



AT. 13 C X -0.0000 -0.0000 0.0001 0.0001 -0.0001 -0.0000  
Y 0.0000 0.0000 -0.0001 -0.0001 0.0000 0.0000  
Z 0.0000 0.0000 -0.0001 -0.0001 0.0001 0.0000

AT. 14 C X -0.0000 0.0000 -0.0001 0.0001 0.0001 -0.0000  
Y 0.0000 -0.0000 0.0001 -0.0001 -0.0000 0.0000  
Z 0.0000 -0.0000 0.0001 -0.0001 -0.0001 0.0000

AT. 15 C X 0.0000 -0.0000 -0.0000 -0.0000 0.0000 0.0000  
Y -0.0000 0.0000 -0.0000 0.0000 0.0001 0.0001  
Z 0.0000 0.0000 0.0001 0.0001 -0.0001 -0.0000

AT. 16 C X 0.0000 0.0000 0.0000 -0.0000 -0.0000 0.0000  
Y -0.0000 -0.0000 0.0000 0.0000 -0.0001 0.0001  
Z 0.0000 -0.0000 -0.0001 0.0001 0.0001 -0.0000

AT. 17 H X -0.0000 0.0000 0.0000 0.0001 0.0002 0.0001  
Y 0.0002 -0.0001 -0.0001 -0.0005 -0.0006 -0.0003  
Z 0.0001 -0.0001 -0.0001 -0.0004 -0.0006 -0.0003

AT. 18 H X -0.0000 -0.0000 -0.0000 0.0001 -0.0002 0.0001  
Y 0.0002 0.0001 0.0001 -0.0005 0.0006 -0.0003  
Z 0.0001 0.0001 0.0001 -0.0004 0.0006 -0.0003

AT. 19 H X 0.0001 0.0000 0.0002 -0.0000 -0.0005 -0.0002  
Y 0.0001 0.0000 0.0002 0.0000 -0.0007 -0.0003  
Z -0.0002 -0.0000 -0.0004 0.0000 0.0018 0.0008

AT. 20 H X 0.0001 -0.0000 -0.0002 -0.0000 0.0005 -0.0002  
Y 0.0001 -0.0000 -0.0002 0.0000 0.0007 -0.0003  
Z -0.0002 0.0000 0.0004 0.0000 -0.0018 0.0008

AT. 21 C X -0.0000 -0.0000 0.0000 -0.0000 -0.0000 -0.0000  
Y 0.0000 0.0000 -0.0000 0.0000 -0.0000 0.0000  
Z -0.0000 -0.0000 0.0000 0.0000 -0.0000 -0.0000

AT. 22 C X -0.0000 0.0000 -0.0000 -0.0000 0.0000 -0.0000  
Y 0.0000 -0.0000 0.0000 0.0000 0.0000 0.0000  
Z -0.0000 0.0000 -0.0000 0.0000 0.0000 -0.0000

AT. 23 C X 0.0000 0.0000 0.0000 0.0000 -0.0000 0.0000  
Y 0.0000 -0.0000 -0.0001 -0.0000 0.0000 0.0000

Z 0.0000 0.0000 -0.0001 -0.0001 0.0001 0.0000  
AT. 24 C X 0.0000 -0.0000 -0.0000 0.0000 0.0000 0.0000  
Y 0.0000 0.0000 0.0001 -0.0000 -0.0000 0.0000  
Z 0.0000 -0.0000 0.0001 -0.0001 -0.0001 0.0000  
AT. 25 H X 0.0000 -0.0000 -0.0003 -0.0002 0.0002 0.0000  
Y -0.0001 0.0001 0.0013 0.0009 -0.0009 -0.0001  
Z -0.0000 0.0000 0.0001 0.0001 -0.0001 -0.0000  
AT. 26 H X 0.0000 0.0000 0.0003 -0.0002 -0.0002 0.0000  
Y -0.0001 -0.0001 -0.0013 0.0009 0.0009 -0.0001  
Z -0.0000 -0.0000 -0.0001 0.0001 0.0001 -0.0000  
AT. 27 H X -0.0000 -0.0000 0.0002 0.0002 -0.0001 -0.0000  
Y 0.0000 0.0000 -0.0005 -0.0005 0.0003 0.0000  
Z -0.0001 -0.0001 0.0008 0.0010 -0.0007 -0.0001  
AT. 28 H X -0.0000 0.0000 -0.0002 0.0002 0.0001 -0.0000  
Y 0.0000 -0.0000 0.0005 -0.0005 -0.0003 0.0000  
Z -0.0001 0.0001 -0.0008 0.0010 0.0007 -0.0001  
AT. 29 C X -0.0003 -0.0003 0.0056 0.0064 -0.0032 -0.0007  
Y 0.0001 0.0001 -0.0013 -0.0015 0.0007 0.0002  
Z 0.0004 0.0004 -0.0082 -0.0095 0.0047 0.0010  
AT. 30 C X -0.0003 0.0003 -0.0056 0.0064 0.0032 -0.0007  
Y 0.0001 -0.0001 0.0013 -0.0015 -0.0007 0.0002  
Z 0.0004 -0.0004 0.0082 -0.0095 -0.0047 0.0010  
AT. 31 H X 0.0005 0.0005 -0.0092 -0.0107 0.0053 0.0011  
Y 0.0012 0.0013 -0.0222 -0.0259 0.0129 0.0028  
Z -0.0008 -0.0008 0.0140 0.0163 -0.0081 -0.0017  
AT. 32 H X 0.0005 -0.0005 0.0092 -0.0107 -0.0053 0.0011  
Y 0.0012 -0.0013 0.0222 -0.0259 -0.0129 0.0028  
Z -0.0008 0.0008 -0.0140 0.0163 0.0081 -0.0017  
AT. 33 H X 0.0029 0.0031 -0.0568 -0.0656 0.0324 0.0073  
Y -0.0019 -0.0020 0.0369 0.0426 -0.0211 -0.0047  
Z -0.0044 -0.0046 0.0852 0.0985 -0.0487 -0.0109  
AT. 34 H X 0.0029 -0.0031 0.0568 -0.0656 -0.0324 0.0073

Y -0.0019 0.0020 -0.0369 0.0426 0.0211 -0.0047  
Z -0.0044 0.0046 -0.0852 0.0985 0.0487 -0.0109  
AT. 35 C X -0.0000 -0.0000 0.0001 0.0001 -0.0000 -0.0000  
Y -0.0000 -0.0000 0.0000 0.0000 -0.0000 -0.0000  
Z 0.0000 0.0000 -0.0001 -0.0001 0.0001 0.0000  
AT. 36 C X -0.0000 0.0000 -0.0001 0.0001 0.0000 -0.0000  
Y -0.0000 0.0000 -0.0000 0.0000 0.0000 -0.0000  
Z 0.0000 -0.0000 0.0001 -0.0001 -0.0001 0.0000  
AT. 37 C X -0.0000 -0.0000 0.0004 0.0004 -0.0002 -0.0000  
Y 0.0000 0.0000 -0.0006 -0.0007 0.0004 0.0001  
Z 0.0000 0.0000 -0.0011 -0.0012 0.0007 0.0001  
AT. 38 C X -0.0000 0.0000 -0.0004 0.0004 0.0002 -0.0000  
Y 0.0000 -0.0000 0.0006 -0.0007 -0.0004 0.0001  
Z 0.0000 -0.0000 0.0011 -0.0012 -0.0007 0.0001  
AT. 39 H X 0.0003 0.0001 -0.0073 -0.0085 0.0047 0.0009  
Y -0.0002 -0.0000 0.0044 0.0051 -0.0029 -0.0005  
Z -0.0005 -0.0001 0.0108 0.0125 -0.0070 -0.0012  
AT. 40 H X 0.0003 -0.0001 0.0073 -0.0085 -0.0047 0.0009  
Y -0.0002 0.0000 -0.0044 0.0051 0.0029 -0.0005  
Z -0.0005 0.0001 -0.0108 0.0125 0.0070 -0.0012  
AT. 41 H X -0.0001 0.0001 0.0024 0.0029 -0.0017 -0.0003  
Y -0.0001 0.0000 0.0019 0.0023 -0.0014 -0.0002  
Z -0.0001 0.0001 0.0022 0.0027 -0.0016 -0.0003  
AT. 42 H X -0.0001 -0.0001 -0.0024 0.0029 0.0017 -0.0003  
Y -0.0001 -0.0000 -0.0019 0.0023 0.0014 -0.0002  
Z -0.0001 -0.0001 -0.0022 0.0027 0.0016 -0.0003  
AT. 43 C X -0.0001 -0.0001 0.0000 0.0000 0.0000 -0.0000  
Y 0.0000 0.0000 0.0000 -0.0000 0.0000 -0.0000  
Z -0.0001 -0.0001 0.0000 0.0000 0.0000 -0.0000  
AT. 44 C X -0.0001 0.0001 -0.0000 0.0000 -0.0000 -0.0000  
Y 0.0000 -0.0000 -0.0000 -0.0000 -0.0000 -0.0000  
Z -0.0001 0.0001 -0.0000 0.0000 -0.0000 -0.0000

AT. 45 H X 0.0002 0.0003 -0.0001 -0.0001 -0.0002 0.0002  
Y 0.0002 0.0003 -0.0001 -0.0001 -0.0003 0.0002  
Z 0.0003 0.0003 -0.0002 -0.0000 -0.0003 0.0002

AT. 46 H X 0.0002 -0.0003 0.0001 -0.0001 0.0002 0.0002  
Y 0.0002 -0.0003 0.0001 -0.0001 0.0003 0.0002  
Z 0.0003 -0.0003 0.0002 -0.0000 0.0003 0.0002

AT. 47 H X 0.0006 0.0007 -0.0002 -0.0004 -0.0001 0.0003  
Y -0.0005 -0.0005 0.0002 0.0003 0.0001 -0.0002  
Z 0.0004 0.0005 -0.0001 -0.0003 -0.0001 0.0002

AT. 48 H X 0.0006 -0.0007 0.0002 -0.0004 0.0001 0.0003  
Y -0.0005 0.0005 -0.0002 0.0003 -0.0001 -0.0002  
Z 0.0004 -0.0005 0.0001 -0.0003 0.0001 0.0002

AT. 49 C X 0.0000 -0.0000 0.0000 0.0000 -0.0000 -0.0000  
Y -0.0000 -0.0000 0.0000 0.0000 0.0000 0.0000  
Z 0.0000 0.0000 -0.0000 -0.0000 0.0000 -0.0000

AT. 50 C X 0.0000 0.0000 -0.0000 0.0000 0.0000 -0.0000  
Y -0.0000 0.0000 -0.0000 0.0000 -0.0000 0.0000  
Z 0.0000 -0.0000 0.0000 -0.0000 -0.0000 -0.0000

AT. 51 C X 0.0001 0.0001 0.0001 0.0003 -0.0004 -0.0001  
Y -0.0001 -0.0001 -0.0002 -0.0004 0.0004 0.0001  
Z 0.0000 0.0001 0.0002 0.0004 -0.0004 -0.0001

AT. 52 C X 0.0001 -0.0001 -0.0001 0.0003 0.0004 -0.0001  
Y -0.0001 0.0001 0.0002 -0.0004 -0.0004 0.0001  
Z 0.0000 -0.0001 -0.0002 0.0004 0.0004 -0.0001

AT. 53 H X -0.0007 -0.0012 -0.0027 -0.0053 0.0061 0.0020  
Y 0.0005 0.0008 0.0017 0.0034 -0.0040 -0.0013  
Z -0.0004 -0.0007 -0.0014 -0.0029 0.0034 0.0011

AT. 54 H X -0.0007 0.0012 0.0027 -0.0053 -0.0061 0.0020  
Y 0.0005 -0.0008 -0.0017 0.0034 0.0040 -0.0013  
Z -0.0004 0.0007 0.0014 -0.0029 -0.0034 0.0011

AT. 55 H X 0.0001 0.0002 0.0004 0.0007 -0.0008 -0.0003  
Y 0.0002 0.0002 0.0009 0.0015 -0.0015 -0.0005

Z -0.0001 -0.0002 -0.0006 -0.0011 0.0011 0.0004  
AT. 56 H X 0.0001 -0.0002 -0.0004 0.0007 0.0008 -0.0003  
Y 0.0002 -0.0002 -0.0009 0.0015 0.0015 -0.0005  
Z -0.0001 0.0002 0.0006 -0.0011 -0.0011 0.0004  
AT. 57 C X -0.0000 -0.0001 -0.0001 -0.0001 0.0001 0.0000  
Y -0.0000 -0.0001 -0.0007 -0.0007 0.0005 0.0001  
Z 0.0000 -0.0000 -0.0009 -0.0010 0.0006 0.0001  
AT. 58 C X -0.0000 0.0001 0.0001 -0.0001 -0.0001 0.0000  
Y -0.0000 0.0001 0.0007 -0.0007 -0.0005 0.0001  
Z 0.0000 0.0000 0.0009 -0.0010 -0.0006 0.0001  
AT. 59 H X 0.0002 0.0004 0.0004 0.0000 -0.0003 0.0000  
Y 0.0004 0.0007 0.0005 -0.0003 -0.0004 0.0001  
Z -0.0003 -0.0005 -0.0006 -0.0001 0.0005 -0.0000  
AT. 60 H X 0.0002 -0.0004 -0.0004 0.0000 0.0003 0.0000  
Y 0.0004 -0.0007 -0.0005 -0.0003 0.0004 0.0001  
Z -0.0003 0.0005 0.0006 -0.0001 -0.0005 -0.0000  
AT. 61 H X 0.0001 -0.0001 -0.0048 -0.0054 0.0032 0.0007  
Y -0.0001 0.0000 0.0028 0.0032 -0.0019 -0.0004  
Z -0.0001 0.0001 0.0056 0.0064 -0.0037 -0.0008  
AT. 62 H X 0.0001 0.0001 0.0048 -0.0054 -0.0032 0.0007  
Y -0.0001 -0.0000 -0.0028 0.0032 0.0019 -0.0004  
Z -0.0001 -0.0001 -0.0056 0.0064 0.0037 -0.0008  
AT. 63 H X 0.0002 0.0009 0.0053 0.0057 -0.0043 -0.0007  
Y 0.0002 0.0008 0.0049 0.0052 -0.0039 -0.0007  
Z 0.0002 0.0009 0.0056 0.0060 -0.0046 -0.0008  
AT. 64 H X 0.0002 -0.0009 -0.0053 0.0057 0.0043 -0.0007  
Y 0.0002 -0.0008 -0.0049 0.0052 0.0039 -0.0007  
Z 0.0002 -0.0009 -0.0056 0.0060 0.0046 -0.0008  
AT. 65 C X 0.0000 0.0000 0.0001 0.0001 0.0000 -0.0001  
Y 0.0000 0.0000 0.0001 0.0001 -0.0000 -0.0001  
Z -0.0000 -0.0000 0.0000 0.0001 0.0001 0.0000  
AT. 66 C X 0.0000 -0.0000 -0.0001 0.0001 -0.0000 -0.0001

Y 0.0000 -0.0000 -0.0001 0.0001 0.0000 -0.0001  
Z -0.0000 0.0000 -0.0000 0.0001 -0.0001 0.0000  
AT. 67 H X -0.0002 -0.0001 -0.0006 -0.0008 -0.0003 0.0005  
Y -0.0002 -0.0001 -0.0007 -0.0008 -0.0003 0.0005  
Z -0.0002 -0.0001 -0.0007 -0.0009 -0.0003 0.0006  
AT. 68 H X -0.0002 0.0001 0.0006 -0.0008 0.0003 0.0005  
Y -0.0002 0.0001 0.0007 -0.0008 0.0003 0.0005  
Z -0.0002 0.0001 0.0007 -0.0009 0.0003 0.0006  
AT. 69 H X 0.0001 0.0002 0.0003 -0.0003 -0.0003 -0.0002  
Y -0.0001 -0.0001 -0.0002 0.0002 0.0003 0.0001  
Z 0.0001 0.0001 0.0002 -0.0001 -0.0002 -0.0001  
AT. 70 H X 0.0001 -0.0002 -0.0003 -0.0003 0.0003 -0.0002  
Y -0.0001 0.0001 0.0002 0.0002 -0.0003 0.0001  
Z 0.0001 -0.0001 -0.0002 -0.0001 0.0002 -0.0001  
AT. 71 H X -0.0002 -0.0002 -0.0004 -0.0002 0.0003 0.0004  
Y -0.0003 -0.0004 -0.0007 -0.0004 0.0006 0.0007  
Z 0.0002 0.0003 0.0005 0.0003 -0.0004 -0.0005  
AT. 72 H X -0.0002 0.0002 0.0004 -0.0002 -0.0003 0.0004  
Y -0.0003 0.0004 0.0007 -0.0004 -0.0006 0.0007  
Z 0.0002 -0.0003 -0.0005 0.0003 0.0004 -0.0005  
AT. 73 C X 0.0000 -0.0000 -0.0000 -0.0000 0.0000 -0.0000  
Y 0.0000 -0.0000 0.0000 0.0001 -0.0000 -0.0000  
Z -0.0000 -0.0000 0.0001 0.0001 -0.0000 -0.0000  
AT. 74 C X 0.0000 0.0000 0.0000 -0.0000 -0.0000 -0.0000  
Y 0.0000 0.0000 -0.0000 0.0001 0.0000 -0.0000  
Z -0.0000 0.0000 -0.0001 0.0001 0.0000 -0.0000  
AT. 75 H X -0.0000 0.0000 0.0000 -0.0002 0.0001 0.0001  
Y -0.0001 -0.0000 0.0001 -0.0002 0.0002 0.0001  
Z 0.0000 -0.0000 0.0000 0.0003 -0.0002 -0.0001  
AT. 76 H X -0.0000 -0.0000 -0.0000 -0.0002 -0.0001 0.0001  
Y -0.0001 0.0000 -0.0001 -0.0002 -0.0002 0.0001  
Z 0.0000 0.0000 -0.0000 0.0003 0.0002 -0.0001

AT. 77 H X -0.0000 0.0000 0.0001 -0.0000 -0.0003 0.0001  
Y -0.0000 0.0000 0.0001 0.0000 -0.0003 0.0001  
Z -0.0000 0.0001 0.0002 0.0002 -0.0004 0.0000

AT. 78 H X -0.0000 -0.0000 -0.0001 -0.0000 0.0003 0.0001  
Y -0.0000 -0.0000 -0.0001 0.0000 0.0003 0.0001  
Z -0.0000 -0.0001 -0.0002 0.0002 0.0004 0.0000

AT. 79 I X -0.0000 -0.0000 -0.0000 0.0000 -0.0000 0.0000  
Y -0.0000 -0.0000 0.0000 0.0000 -0.0000 0.0000  
Z -0.0000 -0.0000 -0.0000 0.0000 -0.0000 0.0000

AT. 80 I X -0.0000 0.0000 0.0000 0.0000 0.0000 0.0000  
Y -0.0000 0.0000 -0.0000 0.0000 0.0000 0.0000  
Z -0.0000 0.0000 0.0000 0.0000 0.0000 0.0000

AT. 81 I X -0.0000 -0.0000 0.0000 0.0000 0.0000 -0.0000  
Y -0.0000 -0.0000 -0.0000 -0.0000 -0.0000 0.0000  
Z 0.0000 -0.0000 0.0000 0.0000 0.0000 -0.0000

AT. 82 I X -0.0000 0.0000 -0.0000 0.0000 -0.0000 -0.0000  
Y -0.0000 0.0000 0.0000 -0.0000 0.0000 0.0000  
Z 0.0000 0.0000 -0.0000 0.0000 -0.0000 -0.0000

AT. 83 O X 0.0000 0.0000 -0.0000 0.0000 -0.0000 0.0000  
Y 0.0000 0.0000 -0.0000 0.0000 0.0000 -0.0000  
Z 0.0000 0.0000 0.0000 0.0000 0.0000 -0.0000

AT. 84 O X 0.0000 -0.0000 0.0000 0.0000 0.0000 0.0000  
Y 0.0000 -0.0000 0.0000 0.0000 -0.0000 -0.0000  
Z 0.0000 -0.0000 -0.0000 0.0000 -0.0000 -0.0000

AT. 85 O X 0.0001 0.0001 -0.0000 0.0000 -0.0000 0.0000  
Y -0.0000 -0.0000 0.0000 -0.0000 0.0000 -0.0000  
Z 0.0000 0.0000 -0.0000 0.0000 -0.0000 0.0000

AT. 86 O X 0.0001 -0.0001 0.0000 0.0000 0.0000 0.0000  
Y -0.0000 0.0000 -0.0000 -0.0000 -0.0000 -0.0000  
Z 0.0000 -0.0000 0.0000 0.0000 0.0000 0.0000

AT. 87 N X -0.0000 -0.0000 0.0000 0.0000 -0.0000 0.0000  
Y -0.0000 -0.0000 0.0000 -0.0000 0.0000 0.0000

Z -0.0000 -0.0000 -0.0000 0.0000 -0.0000 0.0000  
AT. 88 N X -0.0000 0.0000 -0.0000 0.0000 0.0000 0.0000  
Y -0.0000 0.0000 -0.0000 -0.0000 -0.0000 0.0000  
Z -0.0000 0.0000 0.0000 0.0000 0.0000 0.0000  
AT. 89 N X -0.0000 -0.0000 -0.0000 -0.0000 0.0000 -0.0000  
Y -0.0000 0.0000 0.0000 -0.0000 0.0000 0.0000  
Z -0.0000 -0.0000 0.0000 0.0000 0.0000 -0.0000  
AT. 90 N X -0.0000 0.0000 0.0000 -0.0000 -0.0000 -0.0000  
Y -0.0000 -0.0000 -0.0000 -0.0000 -0.0000 0.0000  
Z -0.0000 0.0000 -0.0000 0.0000 -0.0000 -0.0000  
AT. 91 C X 0.0000 0.0000 0.0000 -0.0000 0.0000 -0.0000  
Y 0.0000 0.0000 0.0000 -0.0000 0.0000 -0.0000  
Z -0.0000 -0.0000 -0.0000 -0.0000 -0.0000 0.0000  
AT. 92 C X 0.0000 -0.0000 -0.0000 -0.0000 -0.0000 -0.0000  
Y 0.0000 -0.0000 -0.0000 -0.0000 -0.0000 -0.0000  
Z -0.0000 0.0000 0.0000 -0.0000 0.0000 0.0000  
AT. 93 C X 0.0001 0.0001 0.0000 -0.0000 0.0001 -0.0001  
Y 0.0003 0.0003 0.0001 -0.0001 0.0004 -0.0004  
Z -0.0002 -0.0002 -0.0001 0.0000 -0.0002 0.0003  
AT. 94 C X 0.0001 -0.0001 -0.0000 -0.0000 -0.0001 -0.0001  
Y 0.0003 -0.0003 -0.0001 -0.0001 -0.0004 -0.0004  
Z -0.0002 0.0002 0.0001 0.0000 0.0002 0.0003  
AT. 95 H X -0.0019 -0.0019 -0.0008 0.0005 -0.0026 0.0029  
Y -0.0026 -0.0026 -0.0012 0.0007 -0.0037 0.0041  
Z -0.0019 -0.0019 -0.0008 0.0005 -0.0023 0.0027  
AT. 96 H X -0.0019 0.0019 0.0008 0.0005 0.0026 0.0029  
Y -0.0026 0.0026 0.0012 0.0007 0.0037 0.0041  
Z -0.0019 0.0019 0.0008 0.0005 0.0023 0.0027  
AT. 97 H X 0.0008 0.0008 0.0003 -0.0002 0.0010 -0.0014  
Y -0.0007 -0.0007 -0.0003 0.0002 -0.0008 0.0012  
Z 0.0031 0.0031 0.0012 -0.0008 0.0037 -0.0053  
AT. 98 H X 0.0008 -0.0008 -0.0003 -0.0002 -0.0010 -0.0014



Y -0.0007 0.0007 0.0003 0.0002 0.0008 0.0012  
Z 0.0031 -0.0031 -0.0012 -0.0008 -0.0037 -0.0053  
AT. 99 C X -0.0001 -0.0001 0.0000 -0.0000 0.0001 -0.0001  
Y -0.0001 -0.0001 0.0000 -0.0000 0.0000 -0.0000  
Z 0.0000 0.0000 0.0000 -0.0000 0.0000 -0.0000  
AT. 100 C X -0.0001 0.0001 -0.0000 -0.0000 -0.0001 -0.0001  
Y -0.0001 0.0001 -0.0000 -0.0000 -0.0000 -0.0000  
Z 0.0000 -0.0000 -0.0000 -0.0000 -0.0000 -0.0000  
AT. 101 C X 0.0000 -0.0000 0.0000 0.0000 0.0000 -0.0001  
Y 0.0001 0.0000 0.0000 0.0000 0.0000 -0.0001  
Z 0.0000 0.0000 0.0001 -0.0000 0.0002 -0.0004  
AT. 102 C X 0.0000 0.0000 -0.0000 0.0000 -0.0000 -0.0001  
Y 0.0001 -0.0000 -0.0000 0.0000 -0.0000 -0.0001  
Z 0.0000 -0.0000 -0.0001 -0.0000 -0.0002 -0.0004  
AT. 103 H X -0.0003 -0.0001 -0.0002 -0.0000 -0.0007 0.0017  
Y -0.0008 -0.0002 -0.0004 -0.0000 -0.0014 0.0036  
Z 0.0000 0.0000 0.0001 -0.0000 0.0002 -0.0003  
AT. 104 H X -0.0003 0.0001 0.0002 -0.0000 0.0007 0.0017  
Y -0.0008 0.0002 0.0004 -0.0000 0.0014 0.0036  
Z 0.0000 -0.0000 -0.0001 -0.0000 -0.0002 -0.0003  
AT. 105 H X 0.0001 0.0001 0.0001 -0.0001 0.0003 -0.0008  
Y 0.0002 0.0002 0.0002 -0.0001 0.0007 -0.0016  
Z -0.0005 -0.0005 -0.0006 0.0003 -0.0019 0.0043  
AT. 106 H X 0.0001 -0.0001 -0.0001 -0.0001 -0.0003 -0.0008  
Y 0.0002 -0.0002 -0.0002 -0.0001 -0.0007 -0.0016  
Z -0.0005 0.0005 0.0006 0.0003 0.0019 0.0043  
AT. 107 C X -0.0000 -0.0000 0.0001 0.0002 -0.0003 0.0001  
Y -0.0000 -0.0000 0.0000 0.0000 0.0000 0.0000  
Z 0.0000 0.0001 0.0001 0.0002 -0.0002 0.0001  
AT. 108 C X -0.0000 0.0000 -0.0001 0.0002 0.0003 0.0001  
Y -0.0000 0.0000 -0.0000 0.0000 -0.0000 0.0000  
Z 0.0000 -0.0001 -0.0001 0.0002 0.0002 0.0001

AT.109 H X -0.0001 -0.0001 -0.0001 -0.0001 0.0001 0.0001  
Y -0.0001 0.0000 0.0001 0.0003 -0.0009 0.0004  
Z -0.0000 -0.0001 -0.0000 -0.0001 0.0004 -0.0001

AT.110 H X -0.0001 0.0001 0.0001 -0.0001 -0.0001 0.0001  
Y -0.0001 -0.0000 -0.0001 0.0003 0.0009 0.0004  
Z -0.0000 0.0001 0.0000 -0.0001 -0.0004 -0.0001

AT.111 H X -0.0003 -0.0005 -0.0015 -0.0020 0.0030 -0.0011  
Y -0.0001 -0.0001 -0.0004 -0.0004 0.0004 0.0001  
Z -0.0003 -0.0004 -0.0014 -0.0018 0.0026 -0.0007

AT.112 H X -0.0003 0.0005 0.0015 -0.0020 -0.0030 -0.0011  
Y -0.0001 0.0001 0.0004 -0.0004 -0.0004 0.0001  
Z -0.0003 0.0004 0.0014 -0.0018 -0.0026 -0.0007

AT.113 C X -0.0000 -0.0000 0.0000 0.0000 0.0000 -0.0000  
Y 0.0000 0.0000 0.0000 -0.0000 0.0001 -0.0001  
Z 0.0000 0.0000 0.0000 0.0000 0.0001 -0.0001

AT.114 C X -0.0000 0.0000 -0.0000 0.0000 -0.0000 -0.0000  
Y 0.0000 -0.0000 -0.0000 -0.0000 -0.0001 -0.0001  
Z 0.0000 -0.0000 -0.0000 0.0000 -0.0001 -0.0001

AT.115 C X 0.0001 0.0002 0.0011 -0.0003 0.0025 -0.0047  
Y 0.0001 0.0001 0.0005 -0.0001 0.0012 -0.0022  
Z 0.0001 0.0002 0.0014 -0.0003 0.0031 -0.0057

AT.116 C X 0.0001 -0.0002 -0.0011 -0.0003 -0.0025 -0.0047  
Y 0.0001 -0.0001 -0.0005 -0.0001 -0.0012 -0.0022  
Z 0.0001 -0.0002 -0.0014 -0.0003 -0.0031 -0.0057

AT.117 H X -0.0009 -0.0024 -0.0151 0.0035 -0.0337 0.0630  
Y -0.0002 -0.0005 -0.0034 0.0008 -0.0075 0.0141  
Z -0.0008 -0.0023 -0.0144 0.0033 -0.0320 0.0598

AT.118 H X -0.0009 0.0024 0.0151 0.0035 0.0337 0.0630  
Y -0.0002 0.0005 0.0034 0.0008 0.0075 0.0141  
Z -0.0008 0.0023 0.0144 0.0033 0.0320 0.0598

AT.119 H X 0.0002 0.0004 0.0017 -0.0004 0.0037 -0.0067  
Y -0.0004 -0.0006 -0.0029 0.0006 -0.0062 0.0112

Z -0.0003 -0.0005 -0.0027 0.0006 -0.0058 0.0104  
AT. 120 H X 0.0002 -0.0004 -0.0017 -0.0004 -0.0037 -0.0067  
Y -0.0004 0.0006 0.0029 0.0006 0.0062 0.0112  
Z -0.0003 0.0005 0.0027 0.0006 0.0058 0.0104  
AT. 121 C X -0.0067 -0.0067 0.0006 -0.0009 0.0025 -0.0035  
Y -0.0011 -0.0011 0.0001 -0.0001 0.0004 -0.0006  
Z 0.0066 0.0066 -0.0006 0.0009 -0.0026 0.0035  
AT. 122 C X -0.0067 0.0067 -0.0006 -0.0009 -0.0025 -0.0035  
Y -0.0011 0.0011 -0.0001 -0.0001 -0.0004 -0.0006  
Z 0.0066 -0.0066 0.0006 0.0009 0.0026 0.0035  
AT. 123 H X 0.0022 0.0022 -0.0003 0.0003 -0.0011 0.0013  
Y -0.0190 -0.0191 0.0020 -0.0024 0.0075 -0.0099  
Z -0.0167 -0.0168 0.0017 -0.0022 0.0065 -0.0088  
AT. 124 H X 0.0022 -0.0022 0.0003 0.0003 0.0011 0.0013  
Y -0.0190 0.0191 -0.0020 -0.0024 -0.0075 -0.0099  
Z -0.0167 0.0168 -0.0017 -0.0022 -0.0065 -0.0088  
AT. 125 H X 0.0763 0.0767 -0.0071 0.0099 -0.0295 0.0407  
Y 0.0313 0.0314 -0.0029 0.0041 -0.0122 0.0170  
Z -0.0632 -0.0636 0.0058 -0.0082 0.0244 -0.0338  
AT. 126 H X 0.0763 -0.0767 0.0071 0.0099 0.0295 0.0407  
Y 0.0313 -0.0314 0.0029 0.0041 0.0122 0.0170  
Z -0.0632 0.0636 -0.0058 -0.0082 -0.0244 -0.0338  
AT. 127 C X -0.0000 -0.0000 0.0000 -0.0000 0.0001 -0.0001  
Y 0.0001 0.0001 -0.0001 -0.0000 -0.0001 -0.0000  
Z 0.0000 0.0000 -0.0000 0.0000 -0.0000 0.0001  
AT. 128 C X -0.0000 0.0000 -0.0000 -0.0000 -0.0001 -0.0001  
Y 0.0001 -0.0001 0.0001 -0.0000 0.0001 -0.0000  
Z 0.0000 -0.0000 0.0000 0.0000 0.0000 0.0001  
AT. 129 C X 0.0046 0.0046 0.0010 -0.0005 0.0027 -0.0044  
Y 0.0030 0.0030 0.0007 -0.0003 0.0017 -0.0028  
Z -0.0044 -0.0043 -0.0010 0.0005 -0.0025 0.0041  
AT. 130 C X 0.0046 -0.0046 -0.0010 -0.0005 -0.0027 -0.0044

Y 0.0030 -0.0030 -0.0007 -0.0003 -0.0017 -0.0028  
Z -0.0044 0.0043 0.0010 0.0005 0.0025 0.0041  
AT. 131 H X -0.0584 -0.0579 -0.0133 0.0069 -0.0341 0.0556  
Y -0.0198 -0.0196 -0.0044 0.0023 -0.0114 0.0185  
Z 0.0436 0.0433 0.0099 -0.0051 0.0255 -0.0415  
AT. 132 H X -0.0584 0.0579 0.0133 0.0069 0.0341 0.0556  
Y -0.0198 0.0196 0.0044 0.0023 0.0114 0.0185  
Z 0.0436 -0.0433 -0.0099 -0.0051 -0.0255 -0.0415  
AT. 133 H X 0.0057 0.0057 0.0012 -0.0005 0.0029 -0.0052  
Y -0.0165 -0.0164 -0.0034 0.0015 -0.0084 0.0154  
Z 0.0099 0.0098 0.0023 -0.0008 0.0052 -0.0093  
AT. 134 H X 0.0057 -0.0057 -0.0012 -0.0005 -0.0029 -0.0052  
Y -0.0165 0.0164 0.0034 0.0015 0.0084 0.0154  
Z 0.0099 -0.0098 -0.0023 -0.0008 -0.0052 -0.0093  
AT. 135 C X -0.0004 -0.0003 -0.0003 0.0000 -0.0003 0.0001  
Y 0.0006 0.0005 0.0008 -0.0000 0.0011 -0.0007  
Z -0.0003 -0.0002 0.0001 0.0001 0.0001 -0.0003  
AT. 136 C X -0.0004 0.0003 0.0003 0.0000 0.0003 0.0001  
Y 0.0006 -0.0005 -0.0008 -0.0000 -0.0011 -0.0007  
Z -0.0003 0.0002 -0.0001 0.0001 -0.0001 -0.0003  
AT. 137 H X 0.0014 0.0011 0.0013 -0.0000 0.0017 -0.0008  
Y -0.0061 -0.0050 -0.0057 0.0003 -0.0075 0.0036  
Z 0.0036 0.0030 0.0034 -0.0001 0.0045 -0.0021  
AT. 138 H X 0.0014 -0.0011 -0.0013 -0.0000 -0.0017 -0.0008  
Y -0.0061 0.0050 0.0057 0.0003 0.0075 0.0036  
Z 0.0036 -0.0030 -0.0034 -0.0001 -0.0045 -0.0021  
AT. 139 H X 0.0023 0.0017 0.0002 -0.0004 -0.0000 0.0022  
Y 0.0006 0.0005 0.0002 -0.0001 0.0002 0.0004  
Z 0.0018 0.0014 0.0003 -0.0003 0.0002 0.0014  
AT. 140 H X 0.0023 -0.0017 -0.0002 -0.0004 0.0000 0.0022  
Y 0.0006 -0.0005 -0.0002 -0.0001 -0.0002 0.0004  
Z 0.0018 -0.0014 -0.0003 -0.0003 -0.0002 0.0014

AT.141 H X 0.0008 0.0008 0.0017 0.0001 0.0024 -0.0018  
Y -0.0023 -0.0020 -0.0043 -0.0002 -0.0060 0.0045  
Z -0.0024 -0.0021 -0.0043 -0.0001 -0.0060 0.0044

AT.142 H X 0.0008 -0.0008 -0.0017 0.0001 -0.0024 -0.0018  
Y -0.0023 0.0020 0.0043 -0.0002 0.0060 0.0045  
Z -0.0024 0.0021 0.0043 -0.0001 0.0060 0.0044

AT.143 C X 0.0000 -0.0001 0.0008 -0.0001 0.0013 -0.0006  
Y -0.0007 -0.0003 -0.0055 0.0001 -0.0076 0.0021  
Z 0.0002 0.0002 0.0009 0.0001 0.0011 0.0001

AT.144 C X 0.0000 0.0001 -0.0008 -0.0001 -0.0013 -0.0006  
Y -0.0007 0.0003 0.0055 0.0001 0.0076 0.0021  
Z 0.0002 -0.0002 -0.0009 0.0001 -0.0011 0.0001

AT.145 H X -0.0007 -0.0002 -0.0056 0.0002 -0.0078 0.0028  
Y 0.0018 -0.0001 0.0212 -0.0008 0.0295 -0.0106  
Z 0.0019 0.0001 0.0207 -0.0007 0.0289 -0.0102

AT.146 H X -0.0007 0.0002 0.0056 0.0002 0.0078 0.0028  
Y 0.0018 0.0001 -0.0212 -0.0008 -0.0295 -0.0106  
Z 0.0019 -0.0001 -0.0207 -0.0007 -0.0289 -0.0102

AT.147 H X 0.0020 0.0018 0.0082 0.0006 0.0102 0.0003  
Y 0.0004 0.0005 0.0020 0.0002 0.0023 0.0005  
Z -0.0013 -0.0012 -0.0059 -0.0004 -0.0074 0.0001

AT.148 H X 0.0020 -0.0018 -0.0082 0.0006 -0.0102 0.0003  
Y 0.0004 -0.0005 -0.0020 0.0002 -0.0023 0.0005  
Z -0.0013 0.0012 0.0059 -0.0004 0.0074 0.0001

AT.149 H X -0.0014 -0.0007 -0.0128 0.0001 -0.0177 0.0045  
Y 0.0055 0.0030 0.0432 -0.0004 0.0595 -0.0154  
Z -0.0033 -0.0018 -0.0255 0.0002 -0.0351 0.0091

AT.150 H X -0.0014 0.0007 0.0128 0.0001 0.0177 0.0045  
Y 0.0055 -0.0030 -0.0432 -0.0004 -0.0595 -0.0154  
Z -0.0033 0.0018 0.0255 0.0002 0.0351 0.0091

AT.151 C X -0.0000 -0.0000 -0.0000 0.0000 -0.0001 0.0001  
Y 0.0001 0.0001 -0.0000 0.0000 -0.0000 -0.0000

Z -0.0000 0.0000 0.0000 -0.0000 0.0000 -0.0000  
AT. 152 C X -0.0000 0.0000 0.0000 0.0000 0.0001 0.0001  
Y 0.0001 -0.0001 0.0000 0.0000 0.0000 -0.0000  
Z -0.0000 -0.0000 -0.0000 -0.0000 -0.0000 -0.0000  
AT. 153 H X 0.0001 0.0001 0.0001 0.0000 0.0001 -0.0001  
Y -0.0005 -0.0004 0.0003 -0.0001 0.0004 0.0004  
Z 0.0003 0.0003 -0.0002 0.0001 -0.0002 -0.0003  
AT. 154 H X 0.0001 -0.0001 -0.0001 0.0000 -0.0001 -0.0001  
Y -0.0005 0.0004 -0.0003 -0.0001 -0.0004 0.0004  
Z 0.0003 -0.0003 0.0002 0.0001 0.0002 -0.0003  
AT. 155 H X 0.0003 0.0003 -0.0001 0.0000 -0.0002 0.0001  
Y -0.0005 -0.0005 -0.0000 -0.0000 -0.0001 0.0002  
Z -0.0006 -0.0006 0.0001 -0.0001 0.0001 0.0001  
AT. 156 H X 0.0003 -0.0003 0.0001 0.0000 0.0002 0.0001  
Y -0.0005 0.0005 0.0000 -0.0000 0.0001 0.0002  
Z -0.0006 0.0006 -0.0001 -0.0001 -0.0001 0.0001  
AT. 157 O X -0.0000 -0.0000 0.0000 0.0000 -0.0000 -0.0000  
Y 0.0001 0.0000 -0.0003 -0.0002 0.0001 0.0000  
Z 0.0000 0.0000 -0.0001 -0.0001 0.0000 0.0000  
AT. 158 O X -0.0000 0.0000 -0.0000 0.0000 0.0000 -0.0000  
Y 0.0001 -0.0000 0.0003 -0.0002 -0.0001 0.0000  
Z 0.0000 -0.0000 0.0001 -0.0001 -0.0000 0.0000  
AT. 159 O X 0.0000 -0.0000 -0.0001 -0.0000 -0.0000 0.0000  
Y -0.0000 0.0000 0.0001 0.0000 0.0000 -0.0000  
Z 0.0001 -0.0001 -0.0003 -0.0001 -0.0001 0.0000  
AT. 160 O X 0.0000 0.0000 0.0001 -0.0000 0.0000 0.0000  
Y -0.0000 -0.0000 -0.0001 0.0000 -0.0000 -0.0000  
Z 0.0001 0.0001 0.0003 -0.0001 0.0001 0.0000  
AT. 161 H X 0.0001 0.0001 -0.0006 -0.0006 0.0003 0.0000  
Y -0.0011 -0.0004 0.0037 0.0030 -0.0012 -0.0001  
Z -0.0003 -0.0001 0.0009 0.0007 -0.0003 -0.0000  
AT. 162 H X 0.0001 -0.0001 0.0006 -0.0006 -0.0003 0.0000

Y -0.0011 0.0004 -0.0037 0.0030 0.0012 -0.0001  
Z -0.0003 0.0001 -0.0009 0.0007 0.0003 -0.0000  
AT. 163 H X -0.0004 0.0003 0.0014 0.0004 0.0003 -0.0000  
Y 0.0003 -0.0002 -0.0009 -0.0003 -0.0002 0.0000  
Z -0.0010 0.0009 0.0037 0.0012 0.0009 -0.0002  
AT. 164 H X -0.0004 -0.0003 -0.0014 0.0004 -0.0003 -0.0000  
Y 0.0003 0.0002 0.0009 -0.0003 0.0002 0.0000  
Z -0.0010 -0.0009 -0.0037 0.0012 -0.0009 -0.0002  
AT. 165 O X -0.0000 -0.0000 -0.0000 -0.0000 -0.0000 0.0001  
Y -0.0000 -0.0000 -0.0000 -0.0000 -0.0000 0.0000  
Z -0.0000 -0.0000 -0.0000 -0.0000 -0.0000 0.0000  
AT. 166 O X -0.0000 0.0000 0.0000 -0.0000 0.0000 0.0001  
Y -0.0000 0.0000 0.0000 -0.0000 0.0000 0.0000  
Z -0.0000 0.0000 0.0000 -0.0000 0.0000 0.0000  
AT. 167 H X 0.0006 0.0005 0.0003 0.0003 0.0002 -0.0009  
Y 0.0003 0.0003 0.0002 0.0002 0.0001 -0.0005  
Z 0.0002 0.0001 0.0001 0.0001 0.0000 -0.0002  
AT. 168 H X 0.0006 -0.0005 -0.0003 0.0003 -0.0002 -0.0009  
Y 0.0003 -0.0003 -0.0002 0.0002 -0.0001 -0.0005  
Z 0.0002 -0.0001 -0.0001 0.0001 -0.0000 -0.0002  
AT. 169 O X -0.0000 -0.0000 0.0000 -0.0000 -0.0000 -0.0000  
Y 0.0000 0.0000 0.0000 0.0000 0.0000 0.0000  
Z -0.0000 -0.0000 -0.0000 -0.0000 -0.0000 -0.0000  
AT. 170 O X -0.0000 0.0000 -0.0000 -0.0000 0.0000 -0.0000  
Y 0.0000 -0.0000 -0.0000 0.0000 -0.0000 0.0000  
Z -0.0000 0.0000 0.0000 -0.0000 0.0000 -0.0000  
AT. 171 H X 0.0002 0.0001 0.0000 0.0002 0.0003 0.0002  
Y -0.0003 -0.0003 -0.0001 -0.0003 -0.0007 -0.0004  
Z 0.0002 0.0001 0.0000 0.0002 0.0004 0.0002  
AT. 172 H X 0.0002 -0.0001 -0.0000 0.0002 -0.0003 0.0002  
Y -0.0003 0.0003 0.0001 -0.0003 0.0007 -0.0004  
Z 0.0002 -0.0001 -0.0000 0.0002 -0.0004 0.0002

FREQ(CM\*\*-1) 3080.56 3081.14 3081.15 3081.63 3082.79 3083.03

AT. 1 I X -0.0000 -0.0000 -0.0000 0.0000 0.0000 0.0000

Y 0.0000 0.0000 -0.0000 -0.0000 0.0000 -0.0000

Z 0.0000 -0.0000 0.0000 0.0000 0.0000 0.0000

AT. 2 I X 0.0000 -0.0000 0.0000 0.0000 0.0000 -0.0000

Y -0.0000 0.0000 0.0000 -0.0000 0.0000 0.0000

Z -0.0000 -0.0000 -0.0000 0.0000 0.0000 -0.0000

AT. 3 I X -0.0000 -0.0000 0.0000 0.0000 0.0000 -0.0000

Y -0.0000 -0.0000 0.0000 -0.0000 0.0000 0.0000

Z -0.0000 -0.0000 -0.0000 0.0000 0.0000 0.0000

AT. 4 I X 0.0000 -0.0000 -0.0000 0.0000 0.0000 0.0000

Y 0.0000 -0.0000 -0.0000 -0.0000 0.0000 -0.0000

Z 0.0000 -0.0000 0.0000 0.0000 0.0000 -0.0000

AT. 5 O X 0.0000 -0.0000 0.0000 -0.0000 0.0000 -0.0000

Y -0.0000 0.0000 -0.0000 0.0000 -0.0000 0.0000

Z 0.0000 -0.0000 0.0000 0.0000 0.0000 0.0000

AT. 6 O X -0.0000 -0.0000 -0.0000 -0.0000 0.0000 0.0000

Y 0.0000 0.0000 0.0000 0.0000 -0.0000 -0.0000

Z -0.0000 -0.0000 -0.0000 0.0000 0.0000 -0.0000

AT. 7 O X -0.0000 -0.0000 0.0000 -0.0000 0.0000 0.0000

Y -0.0000 0.0000 -0.0000 -0.0000 0.0000 0.0000

Z -0.0000 0.0000 -0.0000 -0.0000 -0.0000 -0.0000

AT. 8 O X 0.0000 -0.0000 -0.0000 -0.0000 0.0000 -0.0000

Y 0.0000 0.0000 0.0000 -0.0000 0.0000 -0.0000

Z 0.0000 0.0000 0.0000 -0.0000 -0.0000 0.0000

AT. 9 N X -0.0000 0.0000 -0.0000 -0.0000 0.0000 0.0000

Y 0.0000 -0.0000 0.0000 -0.0000 -0.0000 -0.0000

Z 0.0000 -0.0000 0.0000 -0.0000 -0.0000 -0.0000

AT. 10 N X 0.0000 0.0000 0.0000 -0.0000 0.0000 -0.0000

Y -0.0000 -0.0000 -0.0000 -0.0000 -0.0000 0.0000



Z -0.0000 -0.0000 -0.0000 -0.0000 -0.0000 0.0000  
AT. 11 N X -0.0000 -0.0000 -0.0000 -0.0000 -0.0000 -0.0000  
Y 0.0000 0.0000 0.0000 -0.0000 0.0000 0.0000  
Z 0.0000 -0.0000 0.0000 0.0000 -0.0000 -0.0000  
AT. 12 N X 0.0000 -0.0000 0.0000 -0.0000 -0.0000 0.0000  
Y -0.0000 0.0000 -0.0000 -0.0000 0.0000 -0.0000  
Z -0.0000 -0.0000 -0.0000 0.0000 -0.0000 0.0000  
AT. 13 C X -0.0000 0.0000 -0.0000 0.0000 0.0000 0.0001  
Y 0.0000 -0.0000 0.0000 -0.0000 -0.0000 -0.0000  
Z -0.0000 -0.0000 -0.0000 -0.0000 -0.0000 -0.0000  
AT. 14 C X 0.0000 0.0000 0.0000 0.0000 0.0000 -0.0001  
Y -0.0000 -0.0000 -0.0000 -0.0000 -0.0000 0.0000  
Z 0.0000 -0.0000 0.0000 -0.0000 -0.0000 0.0000  
AT. 15 C X 0.0000 -0.0000 0.0000 0.0000 0.0004 0.0004  
Y 0.0001 -0.0000 0.0001 0.0004 0.0038 0.0041  
Z -0.0001 0.0000 -0.0001 -0.0002 -0.0025 -0.0025  
AT. 16 C X -0.0000 -0.0000 -0.0000 0.0000 0.0004 -0.0004  
Y -0.0001 -0.0000 -0.0001 0.0004 0.0038 -0.0041  
Z 0.0001 0.0000 0.0001 -0.0002 -0.0025 0.0025  
AT. 17 H X 0.0002 -0.0001 0.0003 0.0009 0.0091 0.0101  
Y -0.0007 0.0003 -0.0008 -0.0026 -0.0262 -0.0292  
Z -0.0006 0.0002 -0.0007 -0.0023 -0.0228 -0.0253  
AT. 18 H X -0.0002 -0.0001 -0.0003 0.0009 0.0091 -0.0101  
Y 0.0007 0.0003 0.0008 -0.0026 -0.0262 0.0292  
Z 0.0006 0.0002 0.0007 -0.0023 -0.0228 0.0253  
AT. 19 H X -0.0005 0.0001 -0.0004 -0.0014 -0.0145 -0.0153  
Y -0.0006 0.0002 -0.0005 -0.0018 -0.0181 -0.0191  
Z 0.0016 -0.0005 0.0014 0.0049 0.0493 0.0521  
AT. 20 H X 0.0005 0.0001 0.0004 -0.0014 -0.0145 0.0153  
Y 0.0006 0.0002 0.0005 -0.0018 -0.0181 0.0191  
Z -0.0016 -0.0005 -0.0014 0.0049 0.0493 -0.0521  
AT. 21 C X 0.0000 0.0000 -0.0000 0.0000 -0.0000 -0.0000

Y 0.0000 -0.0000 0.0000 0.0000 0.0000 0.0000  
Z -0.0000 -0.0000 -0.0000 -0.0000 -0.0000 -0.0000  
AT. 22 C X -0.0000 0.0000 0.0000 0.0000 -0.0000 0.0000  
Y -0.0000 -0.0000 -0.0000 0.0000 0.0000 -0.0000  
Z 0.0000 -0.0000 0.0000 -0.0000 -0.0000 0.0000  
AT. 23 C X -0.0000 -0.0000 -0.0000 -0.0000 -0.0000 0.0000  
Y 0.0000 0.0000 -0.0000 0.0000 0.0001 -0.0001  
Z 0.0000 -0.0000 -0.0000 0.0000 0.0001 -0.0002  
AT. 24 C X 0.0000 -0.0000 0.0000 -0.0000 -0.0000 -0.0000  
Y -0.0000 0.0000 0.0000 0.0000 0.0001 0.0001  
Z -0.0000 -0.0000 0.0000 0.0000 0.0001 0.0002  
AT. 25 H X 0.0000 -0.0000 0.0000 0.0000 0.0002 -0.0003  
Y -0.0003 0.0000 0.0001 -0.0001 -0.0012 0.0022  
Z -0.0000 0.0000 0.0000 -0.0000 -0.0002 0.0003  
AT. 26 H X -0.0000 -0.0000 -0.0000 0.0000 0.0002 0.0003  
Y 0.0003 0.0000 -0.0001 -0.0001 -0.0012 -0.0022  
Z 0.0000 0.0000 -0.0000 -0.0000 -0.0002 -0.0003  
AT. 27 H X -0.0000 0.0000 0.0000 -0.0000 -0.0001 0.0003  
Y 0.0001 -0.0000 -0.0000 0.0000 0.0003 -0.0009  
Z -0.0001 0.0001 0.0000 -0.0000 -0.0005 0.0015  
AT. 28 H X 0.0000 0.0000 -0.0000 -0.0000 -0.0001 -0.0003  
Y -0.0001 -0.0000 0.0000 0.0000 0.0003 0.0009  
Z 0.0001 0.0001 -0.0000 -0.0000 -0.0005 -0.0015  
AT. 29 C X -0.0007 0.0003 -0.0005 -0.0001 0.0004 0.0004  
Y 0.0002 -0.0001 0.0001 0.0000 -0.0001 -0.0001  
Z 0.0010 -0.0005 0.0007 0.0002 -0.0005 -0.0005  
AT. 30 C X 0.0007 0.0003 0.0005 -0.0001 0.0004 -0.0004  
Y -0.0002 -0.0001 -0.0001 0.0000 -0.0001 0.0001  
Z -0.0010 -0.0005 -0.0007 0.0002 -0.0005 0.0005  
AT. 31 H X 0.0012 -0.0005 0.0007 0.0002 -0.0005 -0.0006  
Y 0.0028 -0.0013 0.0018 0.0005 -0.0015 -0.0016  
Z -0.0017 0.0008 -0.0011 -0.0003 0.0009 0.0010

AT. 32 H X -0.0012 -0.0005 -0.0007 0.0002 -0.0005 0.0006  
Y -0.0028 -0.0013 -0.0018 0.0005 -0.0015 0.0016  
Z 0.0017 0.0008 0.0011 -0.0003 0.0009 -0.0010

AT. 33 H X 0.0072 -0.0033 0.0046 0.0013 -0.0034 -0.0038  
Y -0.0047 0.0021 -0.0030 -0.0008 0.0022 0.0024  
Z -0.0108 0.0049 -0.0070 -0.0020 0.0051 0.0057

AT. 34 H X -0.0072 -0.0033 -0.0046 0.0013 -0.0034 0.0038  
Y 0.0047 0.0021 0.0030 -0.0008 0.0022 -0.0024  
Z 0.0108 0.0049 0.0070 -0.0020 0.0051 -0.0057

AT. 35 C X -0.0000 0.0000 -0.0000 -0.0000 0.0000 0.0000  
Y -0.0000 0.0000 -0.0000 -0.0000 0.0000 0.0000  
Z 0.0000 -0.0000 0.0000 0.0000 -0.0000 -0.0000

AT. 36 C X 0.0000 0.0000 0.0000 -0.0000 0.0000 -0.0000  
Y 0.0000 0.0000 0.0000 -0.0000 0.0000 -0.0000  
Z -0.0000 -0.0000 -0.0000 0.0000 -0.0000 0.0000

AT. 37 C X -0.0001 0.0000 -0.0000 -0.0000 -0.0000 0.0000  
Y 0.0001 -0.0000 0.0000 0.0000 0.0000 -0.0000  
Z 0.0002 -0.0000 0.0000 0.0000 0.0000 -0.0001

AT. 38 C X 0.0001 0.0000 0.0000 -0.0000 -0.0000 -0.0000  
Y -0.0001 -0.0000 -0.0000 0.0000 0.0000 0.0000  
Z -0.0002 -0.0000 -0.0000 0.0000 0.0000 0.0001

AT. 39 H X 0.0013 -0.0003 0.0003 0.0001 0.0002 -0.0004  
Y -0.0008 0.0002 -0.0002 -0.0000 -0.0002 0.0002  
Z -0.0019 0.0004 -0.0004 -0.0001 -0.0003 0.0006

AT. 40 H X -0.0013 -0.0003 -0.0003 0.0001 0.0002 0.0004  
Y 0.0008 0.0002 0.0002 -0.0000 -0.0002 -0.0002  
Z 0.0019 0.0004 0.0004 -0.0001 -0.0003 -0.0006

AT. 41 H X -0.0006 0.0001 -0.0000 0.0000 -0.0002 0.0001  
Y -0.0005 0.0000 -0.0000 0.0000 -0.0002 0.0000  
Z -0.0006 0.0001 -0.0000 0.0000 -0.0001 0.0001

AT. 42 H X 0.0006 0.0001 0.0000 0.0000 -0.0002 -0.0001  
Y 0.0005 0.0000 0.0000 0.0000 -0.0002 -0.0000

Z 0.0006 0.0001 0.0000 0.0000 -0.0001 -0.0001  
AT. 43 C X 0.0000 0.0000 -0.0001 -0.0001 -0.0005 -0.0006  
Y 0.0000 -0.0000 0.0000 0.0000 0.0002 0.0002  
Z 0.0000 0.0000 -0.0001 -0.0000 -0.0004 -0.0004  
AT. 44 C X -0.0000 0.0000 0.0001 -0.0001 -0.0005 0.0006  
Y -0.0000 -0.0000 -0.0000 0.0000 0.0002 -0.0002  
Z -0.0000 0.0000 0.0001 -0.0000 -0.0004 0.0004  
AT. 45 H X -0.0000 -0.0001 0.0002 0.0001 0.0010 0.0011  
Y -0.0001 -0.0001 0.0002 0.0002 0.0013 0.0014  
Z -0.0001 -0.0001 0.0002 0.0002 0.0013 0.0014  
AT. 46 H X 0.0000 -0.0001 -0.0002 0.0001 0.0010 -0.0011  
Y 0.0001 -0.0001 -0.0002 0.0002 0.0013 -0.0014  
Z 0.0001 -0.0001 -0.0002 0.0002 0.0013 -0.0014  
AT. 47 H X -0.0000 -0.0003 0.0006 0.0005 0.0054 0.0056  
Y -0.0000 0.0002 -0.0004 -0.0004 -0.0043 -0.0044  
Z -0.0000 -0.0002 0.0004 0.0004 0.0041 0.0042  
AT. 48 H X 0.0000 -0.0003 -0.0006 0.0005 0.0054 -0.0056  
Y 0.0000 0.0002 0.0004 -0.0004 -0.0043 0.0044  
Z 0.0000 -0.0002 -0.0004 0.0004 0.0041 -0.0042  
AT. 49 C X -0.0000 -0.0000 -0.0000 -0.0000 -0.0000 -0.0000  
Y 0.0000 0.0000 0.0000 0.0000 0.0002 0.0002  
Z -0.0000 -0.0000 -0.0000 -0.0000 -0.0001 -0.0001  
AT. 50 C X 0.0000 -0.0000 0.0000 -0.0000 -0.0000 0.0000  
Y -0.0000 0.0000 -0.0000 0.0000 0.0002 -0.0002  
Z 0.0000 -0.0000 0.0000 -0.0000 -0.0001 0.0001  
AT. 51 C X -0.0004 -0.0000 -0.0002 -0.0008 -0.0062 -0.0061  
Y 0.0004 0.0000 0.0002 0.0008 0.0064 0.0062  
Z -0.0003 -0.0000 -0.0002 -0.0006 -0.0050 -0.0049  
AT. 52 C X 0.0004 -0.0000 0.0002 -0.0008 -0.0062 0.0061  
Y -0.0004 0.0000 -0.0002 0.0008 0.0064 -0.0062  
Z 0.0003 -0.0000 0.0002 -0.0006 -0.0050 0.0049  
AT. 53 H X 0.0054 0.0003 0.0030 0.0102 0.0838 0.0822

Y -0.0036 -0.0002 -0.0020 -0.0068 -0.0558 -0.0547  
Z 0.0030 0.0002 0.0017 0.0057 0.0470 0.0461  
AT. 54 H X -0.0054 0.0003 -0.0030 0.0102 0.0838 -0.0822  
Y 0.0036 -0.0002 0.0020 -0.0068 -0.0558 0.0547  
Z -0.0030 0.0002 -0.0017 0.0057 0.0470 -0.0461  
AT. 55 H X -0.0007 -0.0001 -0.0004 -0.0015 -0.0121 -0.0118  
Y -0.0012 -0.0001 -0.0007 -0.0025 -0.0204 -0.0199  
Z 0.0009 0.0001 0.0005 0.0019 0.0157 0.0154  
AT. 56 H X 0.0007 -0.0001 0.0004 -0.0015 -0.0121 0.0118  
Y 0.0012 -0.0001 0.0007 -0.0025 -0.0204 0.0199  
Z -0.0009 0.0001 -0.0005 0.0019 0.0157 -0.0154  
AT. 57 C X 0.0001 0.0000 -0.0000 0.0000 0.0004 0.0004  
Y 0.0002 0.0000 -0.0000 -0.0000 0.0002 0.0002  
Z 0.0002 -0.0001 0.0000 -0.0000 -0.0002 -0.0003  
AT. 58 C X -0.0001 0.0000 0.0000 0.0000 0.0004 -0.0004  
Y -0.0002 0.0000 0.0000 -0.0000 0.0002 -0.0002  
Z -0.0002 -0.0001 -0.0000 -0.0000 -0.0002 0.0003  
AT. 59 H X -0.0002 -0.0002 0.0001 0.0000 -0.0014 -0.0015  
Y -0.0004 -0.0004 0.0003 0.0000 -0.0028 -0.0031  
Z 0.0004 0.0003 -0.0002 0.0000 0.0019 0.0020  
AT. 60 H X 0.0002 -0.0002 -0.0001 0.0000 -0.0014 0.0015  
Y 0.0004 -0.0004 -0.0003 0.0000 -0.0028 0.0031  
Z -0.0004 0.0003 0.0002 0.0000 0.0019 -0.0020  
AT. 61 H X 0.0009 -0.0003 0.0003 -0.0002 -0.0017 -0.0020  
Y -0.0005 0.0002 -0.0002 0.0001 0.0013 0.0015  
Z -0.0011 0.0004 -0.0003 0.0002 0.0024 0.0028  
AT. 62 H X -0.0009 -0.0003 -0.0003 -0.0002 -0.0017 0.0020  
Y 0.0005 0.0002 0.0002 0.0001 0.0013 -0.0015  
Z 0.0011 0.0004 0.0003 0.0002 0.0024 -0.0028  
AT. 63 H X -0.0019 0.0000 -0.0001 0.0000 -0.0015 -0.0011  
Y -0.0017 0.0001 -0.0001 0.0000 -0.0014 -0.0010  
Z -0.0020 0.0000 -0.0001 0.0000 -0.0018 -0.0014

AT. 64 H X 0.0019 0.0000 0.0001 0.0000 -0.0015 0.0011  
Y 0.0017 0.0001 0.0001 0.0000 -0.0014 0.0010  
Z 0.0020 0.0000 0.0001 0.0000 -0.0018 0.0014

AT. 65 C X -0.0000 0.0000 -0.0001 -0.0001 -0.0003 -0.0003  
Y -0.0001 0.0000 -0.0001 -0.0001 0.0003 0.0003  
Z 0.0001 0.0000 -0.0000 -0.0000 -0.0003 -0.0004

AT. 66 C X 0.0000 0.0000 0.0001 -0.0001 -0.0003 0.0003  
Y 0.0001 0.0000 0.0001 -0.0001 0.0003 -0.0003  
Z -0.0001 0.0000 0.0000 -0.0000 -0.0003 0.0004

AT. 67 H X 0.0001 -0.0000 0.0007 0.0005 0.0009 0.0012  
Y 0.0001 -0.0000 0.0008 0.0006 0.0008 0.0012  
Z 0.0001 -0.0000 0.0009 0.0006 0.0009 0.0013

AT. 68 H X -0.0001 -0.0000 -0.0007 0.0005 0.0009 -0.0012  
Y -0.0001 -0.0000 -0.0008 0.0006 0.0008 -0.0012  
Z -0.0001 -0.0000 -0.0009 0.0006 0.0009 -0.0013

AT. 69 H X -0.0004 -0.0000 0.0001 0.0003 0.0040 0.0042  
Y 0.0002 0.0000 -0.0001 -0.0003 -0.0031 -0.0033  
Z -0.0002 -0.0000 0.0000 0.0001 0.0017 0.0018

AT. 70 H X 0.0004 -0.0000 -0.0001 0.0003 0.0040 -0.0042  
Y -0.0002 0.0000 0.0001 -0.0003 -0.0031 0.0033  
Z 0.0002 -0.0000 -0.0000 0.0001 0.0017 -0.0018

AT. 71 H X 0.0006 0.0000 0.0005 0.0002 -0.0011 -0.0010  
Y 0.0010 0.0000 0.0009 0.0004 -0.0018 -0.0016  
Z -0.0007 -0.0000 -0.0006 -0.0003 0.0014 0.0012

AT. 72 H X -0.0006 0.0000 -0.0005 0.0002 -0.0011 0.0010  
Y -0.0010 0.0000 -0.0009 0.0004 -0.0018 0.0016  
Z 0.0007 -0.0000 0.0006 -0.0003 0.0014 -0.0012

AT. 73 C X 0.0000 -0.0000 -0.0000 -0.0000 0.0001 0.0001  
Y -0.0000 0.0000 -0.0000 -0.0000 0.0000 0.0000  
Z 0.0000 0.0000 0.0000 0.0000 0.0001 0.0000

AT. 74 C X -0.0000 -0.0000 0.0000 -0.0000 0.0001 -0.0001  
Y 0.0000 0.0000 0.0000 -0.0000 0.0000 -0.0000

Z -0.0000 0.0000 -0.0000 0.0000 0.0001 -0.0000  
AT. 75 H X 0.0002 -0.0000 0.0001 0.0001 -0.0001 -0.0001  
Y 0.0003 -0.0000 0.0002 0.0001 -0.0004 -0.0004  
Z -0.0002 0.0000 -0.0001 -0.0001 0.0004 0.0004  
AT. 76 H X -0.0002 -0.0000 -0.0001 0.0001 -0.0001 0.0001  
Y -0.0003 -0.0000 -0.0002 0.0001 -0.0004 0.0004  
Z 0.0002 0.0000 0.0001 -0.0001 0.0004 -0.0004  
AT. 77 H X -0.0001 0.0000 0.0001 0.0001 -0.0003 -0.0001  
Y -0.0001 0.0000 0.0001 0.0001 -0.0003 -0.0001  
Z -0.0002 0.0000 0.0001 0.0001 -0.0002 -0.0000  
AT. 78 H X 0.0001 0.0000 -0.0001 0.0001 -0.0003 0.0001  
Y 0.0001 0.0000 -0.0001 0.0001 -0.0003 0.0001  
Z 0.0002 0.0000 -0.0001 0.0001 -0.0002 0.0000  
AT. 79 I X 0.0000 -0.0000 0.0000 0.0000 0.0000 -0.0000  
Y 0.0000 0.0000 -0.0000 -0.0000 0.0000 0.0000  
Z 0.0000 -0.0000 0.0000 0.0000 0.0000 -0.0000  
AT. 80 I X -0.0000 -0.0000 -0.0000 0.0000 0.0000 0.0000  
Y -0.0000 0.0000 0.0000 -0.0000 0.0000 -0.0000  
Z -0.0000 -0.0000 -0.0000 0.0000 0.0000 0.0000  
AT. 81 I X -0.0000 0.0000 -0.0000 -0.0000 0.0000 -0.0000  
Y 0.0000 0.0000 -0.0000 -0.0000 0.0000 -0.0000  
Z -0.0000 -0.0000 0.0000 0.0000 0.0000 0.0000  
AT. 82 I X 0.0000 0.0000 0.0000 -0.0000 0.0000 0.0000  
Y -0.0000 0.0000 0.0000 -0.0000 0.0000 0.0000  
Z 0.0000 -0.0000 -0.0000 0.0000 0.0000 -0.0000  
AT. 83 O X -0.0000 0.0000 -0.0000 -0.0000 -0.0000 -0.0000  
Y -0.0000 -0.0000 0.0000 -0.0000 -0.0000 -0.0000  
Z -0.0000 0.0000 -0.0000 -0.0000 0.0000 -0.0000  
AT. 84 O X 0.0000 0.0000 0.0000 -0.0000 -0.0000 0.0000  
Y 0.0000 -0.0000 -0.0000 -0.0000 -0.0000 0.0000  
Z 0.0000 0.0000 0.0000 -0.0000 0.0000 0.0000  
AT. 85 O X 0.0000 -0.0000 0.0000 0.0000 -0.0000 -0.0000

Y -0.0000 -0.0000 0.0000 -0.0000 -0.0000 -0.0000  
Z 0.0000 -0.0000 0.0000 0.0000 0.0000 -0.0000  
AT. 86 O X -0.0000 -0.0000 -0.0000 0.0000 -0.0000 0.0000  
Y 0.0000 -0.0000 -0.0000 -0.0000 -0.0000 0.0000  
Z -0.0000 -0.0000 -0.0000 0.0000 0.0000 0.0000  
AT. 87 N X 0.0000 -0.0000 0.0000 0.0000 -0.0000 -0.0000  
Y 0.0000 -0.0000 0.0000 0.0000 -0.0000 -0.0000  
Z 0.0000 -0.0000 0.0000 0.0000 0.0000 -0.0000  
AT. 88 N X -0.0000 -0.0000 -0.0000 0.0000 -0.0000 0.0000  
Y -0.0000 -0.0000 -0.0000 0.0000 -0.0000 0.0000  
Z -0.0000 -0.0000 -0.0000 0.0000 0.0000 0.0000  
AT. 89 N X -0.0000 0.0000 -0.0000 -0.0000 0.0000 0.0000  
Y 0.0000 0.0000 0.0000 0.0000 -0.0000 0.0000  
Z -0.0000 -0.0000 0.0000 0.0000 0.0000 0.0000  
AT. 90 N X 0.0000 0.0000 0.0000 -0.0000 0.0000 -0.0000  
Y -0.0000 0.0000 -0.0000 0.0000 -0.0000 -0.0000  
Z 0.0000 -0.0000 -0.0000 0.0000 0.0000 -0.0000  
AT. 91 C X -0.0000 -0.0000 -0.0000 -0.0000 0.0000 0.0000  
Y -0.0000 0.0000 -0.0000 -0.0000 0.0000 0.0000  
Z 0.0000 -0.0000 0.0000 0.0000 -0.0000 0.0000  
AT. 92 C X 0.0000 -0.0000 0.0000 -0.0000 0.0000 -0.0000  
Y 0.0000 0.0000 0.0000 -0.0000 0.0000 -0.0000  
Z -0.0000 -0.0000 -0.0000 0.0000 -0.0000 -0.0000  
AT. 93 C X -0.0001 0.0001 -0.0001 -0.0000 0.0000 0.0000  
Y -0.0002 0.0004 -0.0005 -0.0002 0.0000 0.0000  
Z 0.0001 -0.0002 0.0003 0.0001 -0.0000 -0.0000  
AT. 94 C X 0.0001 0.0001 0.0001 -0.0000 0.0000 -0.0000  
Y 0.0002 0.0004 0.0005 -0.0002 0.0000 -0.0000  
Z -0.0001 -0.0002 -0.0003 0.0001 -0.0000 0.0000  
AT. 95 H X 0.0014 -0.0025 0.0032 0.0011 -0.0002 -0.0001  
Y 0.0020 -0.0037 0.0046 0.0016 -0.0003 -0.0001  
Z 0.0013 -0.0024 0.0030 0.0011 -0.0002 -0.0001



AT. 96 H X -0.0014 -0.0025 -0.0032 0.0011 -0.0002 0.0001  
Y -0.0020 -0.0037 -0.0046 0.0016 -0.0003 0.0001  
Z -0.0013 -0.0024 -0.0030 0.0011 -0.0002 0.0001

AT. 97 H X -0.0006 0.0011 -0.0015 -0.0005 0.0001 0.0000  
Y 0.0005 -0.0010 0.0013 0.0005 -0.0001 -0.0000  
Z -0.0025 0.0044 -0.0058 -0.0021 0.0005 0.0002

AT. 98 H X 0.0006 0.0011 0.0015 -0.0005 0.0001 -0.0000  
Y -0.0005 -0.0010 -0.0013 0.0005 -0.0001 0.0000  
Z 0.0025 0.0044 0.0058 -0.0021 0.0005 -0.0002

AT. 99 C X -0.0001 0.0000 -0.0000 -0.0000 0.0000 0.0000  
Y 0.0000 0.0001 -0.0001 -0.0000 0.0000 0.0000  
Z -0.0000 -0.0000 0.0000 0.0000 -0.0000 0.0000

AT. 100 C X 0.0001 0.0000 0.0000 -0.0000 0.0000 -0.0000  
Y -0.0000 0.0001 0.0001 -0.0000 0.0000 -0.0000  
Z 0.0000 -0.0000 -0.0000 0.0000 -0.0000 -0.0000

AT. 101 C X -0.0000 -0.0001 0.0000 0.0000 0.0000 0.0000  
Y -0.0001 -0.0001 0.0001 0.0000 0.0000 0.0000  
Z -0.0005 -0.0005 0.0004 0.0001 0.0000 0.0000

AT. 102 C X 0.0000 -0.0001 -0.0000 0.0000 0.0000 -0.0000  
Y 0.0001 -0.0001 -0.0001 0.0000 0.0000 -0.0000  
Z 0.0005 -0.0005 -0.0004 0.0001 0.0000 -0.0000

AT. 103 H X 0.0017 0.0019 -0.0014 -0.0002 -0.0001 -0.0001  
Y 0.0036 0.0042 -0.0032 -0.0006 -0.0002 -0.0001  
Z -0.0003 -0.0003 0.0003 0.0000 0.0000 0.0000

AT. 104 H X -0.0017 0.0019 0.0014 -0.0002 -0.0001 0.0001  
Y -0.0036 0.0042 0.0032 -0.0006 -0.0002 0.0001  
Z 0.0003 -0.0003 -0.0003 0.0000 0.0000 -0.0000

AT. 105 H X -0.0009 -0.0010 0.0007 0.0001 0.0000 0.0000  
Y -0.0019 -0.0020 0.0015 0.0003 0.0001 0.0001  
Z 0.0051 0.0054 -0.0041 -0.0007 -0.0002 -0.0002

AT. 106 H X 0.0009 -0.0010 -0.0007 0.0001 0.0000 -0.0000  
Y 0.0019 -0.0020 -0.0015 0.0003 0.0001 -0.0001

Z -0.0051 0.0054 0.0041 -0.0007 -0.0002 0.0002  
AT.107 C X 0.0001 0.0002 -0.0001 -0.0001 0.0000 0.0001  
Y 0.0000 -0.0000 0.0000 0.0000 -0.0000 -0.0000  
Z 0.0001 0.0003 -0.0002 -0.0001 0.0000 0.0001  
AT.108 C X -0.0001 0.0002 0.0001 -0.0001 0.0000 -0.0001  
Y -0.0000 -0.0000 -0.0000 0.0000 -0.0000 0.0000  
Z -0.0001 0.0003 0.0002 -0.0001 0.0000 -0.0001  
AT.109 H X 0.0002 -0.0001 0.0001 0.0002 -0.0000 -0.0001  
Y 0.0001 0.0007 -0.0004 -0.0006 0.0001 0.0003  
Z 0.0000 -0.0003 0.0001 0.0003 -0.0001 -0.0002  
AT.110 H X -0.0002 -0.0001 -0.0001 0.0002 -0.0000 0.0001  
Y -0.0001 0.0007 0.0004 -0.0006 0.0001 -0.0003  
Z -0.0000 -0.0003 -0.0001 0.0003 -0.0001 0.0002  
AT.111 H X -0.0011 -0.0032 0.0022 0.0015 -0.0001 -0.0007  
Y 0.0001 -0.0003 0.0002 0.0003 -0.0000 -0.0001  
Z -0.0007 -0.0026 0.0017 0.0013 -0.0001 -0.0006  
AT.112 H X 0.0011 -0.0032 -0.0022 0.0015 -0.0001 0.0007  
Y -0.0001 -0.0003 -0.0002 0.0003 -0.0000 0.0001  
Z 0.0007 -0.0026 -0.0017 0.0013 -0.0001 0.0006  
AT.113 C X -0.0001 -0.0001 0.0000 -0.0000 0.0000 0.0000  
Y -0.0001 -0.0001 0.0001 0.0000 -0.0000 -0.0000  
Z -0.0001 -0.0001 0.0001 0.0000 0.0000 0.0000  
AT.114 C X 0.0001 -0.0001 -0.0000 -0.0000 0.0000 -0.0000  
Y 0.0001 -0.0001 -0.0001 0.0000 -0.0000 0.0000  
Z 0.0001 -0.0001 -0.0001 0.0000 0.0000 -0.0000  
AT.115 C X -0.0051 -0.0052 0.0040 0.0005 0.0000 0.0000  
Y -0.0023 -0.0024 0.0018 0.0003 0.0000 0.0000  
Z -0.0061 -0.0062 0.0048 0.0006 0.0000 0.0000  
AT.116 C X 0.0051 -0.0052 -0.0040 0.0005 0.0000 -0.0000  
Y 0.0023 -0.0024 -0.0018 0.0003 0.0000 -0.0000  
Z 0.0061 -0.0062 -0.0048 0.0006 0.0000 -0.0000  
AT.117 H X 0.0672 0.0683 -0.0528 -0.0068 -0.0004 -0.0003

Y 0.0150 0.0152 -0.0118 -0.0015 -0.0001 -0.0001  
Z 0.0640 0.0651 -0.0504 -0.0065 -0.0004 -0.0003  
AT. 118 H X -0.0672 0.0683 0.0528 -0.0068 -0.0004 0.0003  
Y -0.0150 0.0152 0.0118 -0.0015 -0.0001 0.0001  
Z -0.0640 0.0651 0.0504 -0.0065 -0.0004 0.0003  
AT. 119 H X -0.0071 -0.0073 0.0057 0.0008 0.0000 0.0000  
Y 0.0117 0.0119 -0.0093 -0.0014 -0.0001 -0.0000  
Z 0.0108 0.0110 -0.0086 -0.0013 -0.0001 -0.0000  
AT. 120 H X 0.0071 -0.0073 -0.0057 0.0008 0.0000 -0.0000  
Y -0.0117 0.0119 0.0093 -0.0014 -0.0001 0.0000  
Z -0.0108 0.0110 0.0086 -0.0013 -0.0001 0.0000  
AT. 121 C X -0.0017 0.0032 -0.0037 -0.0011 0.0001 0.0000  
Y -0.0003 0.0005 -0.0006 -0.0002 0.0000 0.0000  
Z 0.0017 -0.0031 0.0036 0.0010 -0.0001 -0.0000  
AT. 122 C X 0.0017 0.0032 0.0037 -0.0011 0.0001 -0.0000  
Y 0.0003 0.0005 0.0006 -0.0002 0.0000 -0.0000  
Z -0.0017 -0.0031 -0.0036 0.0010 -0.0001 0.0000  
AT. 123 H X 0.0005 -0.0011 0.0012 0.0001 -0.0000 0.0000  
Y -0.0043 0.0089 -0.0102 -0.0024 0.0002 -0.0000  
Z -0.0040 0.0078 -0.0091 -0.0024 0.0002 -0.0000  
AT. 124 H X -0.0005 -0.0011 -0.0012 0.0001 -0.0000 -0.0000  
Y 0.0043 0.0089 0.0102 -0.0024 0.0002 0.0000  
Z 0.0040 0.0078 0.0091 -0.0024 0.0002 0.0000  
AT. 125 H X 0.0200 -0.0354 0.0423 0.0128 -0.0014 -0.0001  
Y 0.0084 -0.0147 0.0177 0.0054 -0.0006 -0.0001  
Z -0.0167 0.0294 -0.0351 -0.0108 0.0012 0.0001  
AT. 126 H X -0.0200 -0.0354 -0.0423 0.0128 -0.0014 0.0001  
Y -0.0084 -0.0147 -0.0177 0.0054 -0.0006 0.0001  
Z 0.0167 0.0294 0.0351 -0.0108 0.0012 -0.0001  
AT. 127 C X -0.0000 0.0001 -0.0001 -0.0000 0.0000 0.0000  
Y -0.0002 -0.0000 -0.0001 -0.0002 0.0000 0.0000  
Z 0.0001 -0.0001 0.0001 0.0001 -0.0000 -0.0000

AT.128 C X 0.0000 0.0001 0.0001 -0.0000 0.0000 -0.0000  
Y 0.0002 -0.0000 0.0001 -0.0002 0.0000 -0.0000  
Z -0.0001 -0.0001 -0.0001 0.0001 -0.0000 0.0000

AT.129 C X -0.0023 0.0039 -0.0051 -0.0021 0.0003 0.0002  
Y -0.0016 0.0025 -0.0033 -0.0015 0.0002 0.0002  
Z 0.0022 -0.0037 0.0048 0.0021 -0.0003 -0.0002

AT.130 C X 0.0023 0.0039 0.0051 -0.0021 0.0003 -0.0002  
Y 0.0016 0.0025 0.0033 -0.0015 0.0002 -0.0002  
Z -0.0022 -0.0037 -0.0048 0.0021 -0.0003 0.0002

AT.131 H X 0.0292 -0.0494 0.0649 0.0276 -0.0045 -0.0026  
Y 0.0097 -0.0164 0.0216 0.0091 -0.0015 -0.0009  
Z -0.0217 0.0370 -0.0486 -0.0206 0.0033 0.0019

AT.132 H X -0.0292 -0.0494 -0.0649 0.0276 -0.0045 0.0026  
Y -0.0097 -0.0164 -0.0216 0.0091 -0.0015 0.0009  
Z 0.0217 0.0370 0.0486 -0.0206 0.0033 -0.0019

AT.133 H X -0.0030 0.0045 -0.0061 -0.0028 0.0005 0.0003  
Y 0.0092 -0.0132 0.0183 0.0089 -0.0014 -0.0010  
Z -0.0054 0.0080 -0.0109 -0.0050 0.0008 0.0006

AT.134 H X 0.0030 0.0045 0.0061 -0.0028 0.0005 -0.0003  
Y -0.0092 -0.0132 -0.0183 0.0089 -0.0014 0.0010  
Z 0.0054 0.0080 0.0109 -0.0050 0.0008 -0.0006

AT.135 C X -0.0005 -0.0006 0.0004 -0.0004 0.0000 0.0000  
Y 0.0005 0.0003 0.0002 0.0011 -0.0001 -0.0001  
Z -0.0005 -0.0007 0.0007 0.0001 -0.0000 0.0000

AT.136 C X 0.0005 -0.0006 -0.0004 -0.0004 0.0000 -0.0000  
Y -0.0005 0.0003 -0.0002 0.0011 -0.0001 0.0001  
Z 0.0005 -0.0007 -0.0007 0.0001 -0.0000 -0.0000

AT.137 H X 0.0015 0.0013 -0.0004 0.0019 -0.0002 -0.0002  
Y -0.0062 -0.0053 0.0018 -0.0079 0.0007 0.0010  
Z 0.0036 0.0031 -0.0010 0.0047 -0.0004 -0.0006

AT.138 H X -0.0015 0.0013 0.0004 0.0019 -0.0002 0.0002  
Y 0.0062 -0.0053 -0.0018 -0.0079 0.0007 -0.0010

Z -0.0036 0.0031 0.0010 0.0047 -0.0004 0.0006  
AT. 139 H X 0.0048 0.0063 -0.0056 0.0002 0.0000 -0.0001  
Y 0.0012 0.0015 -0.0012 0.0003 -0.0000 -0.0001  
Z 0.0035 0.0046 -0.0041 0.0004 0.0000 -0.0001  
AT. 140 H X -0.0048 0.0063 0.0056 0.0002 0.0000 0.0001  
Y -0.0012 0.0015 0.0012 0.0003 -0.0000 0.0001  
Z -0.0035 0.0046 0.0041 0.0004 0.0000 0.0001  
AT. 141 H X 0.0002 -0.0004 0.0013 0.0024 -0.0002 -0.0002  
Y -0.0010 0.0004 -0.0031 -0.0062 0.0005 0.0006  
Z -0.0011 0.0003 -0.0029 -0.0062 0.0005 0.0006  
AT. 142 H X -0.0002 -0.0004 -0.0013 0.0024 -0.0002 0.0002  
Y 0.0010 0.0004 0.0031 -0.0062 0.0005 -0.0006  
Z 0.0011 0.0003 0.0029 -0.0062 0.0005 -0.0006  
AT. 143 C X 0.0009 0.0008 -0.0000 0.0018 -0.0002 -0.0001  
Y -0.0069 -0.0031 -0.0023 -0.0113 0.0013 0.0008  
Z 0.0013 -0.0000 0.0009 0.0015 -0.0002 -0.0002  
AT. 144 C X -0.0009 0.0008 0.0000 0.0018 -0.0002 0.0001  
Y 0.0069 -0.0031 0.0023 -0.0113 0.0013 -0.0008  
Z -0.0013 -0.0000 -0.0009 0.0015 -0.0002 0.0002  
AT. 145 H X -0.0066 -0.0040 -0.0016 -0.0121 0.0014 0.0007  
Y 0.0250 0.0151 0.0059 0.0460 -0.0051 -0.0027  
Z 0.0246 0.0146 0.0059 0.0447 -0.0050 -0.0027  
AT. 146 H X 0.0066 -0.0040 0.0016 -0.0121 0.0014 -0.0007  
Y -0.0250 0.0151 -0.0059 0.0460 -0.0051 0.0027  
Z -0.0246 0.0146 -0.0059 0.0447 -0.0050 0.0027  
AT. 147 H X 0.0124 0.0003 0.0084 0.0162 -0.0019 -0.0014  
Y 0.0032 -0.0005 0.0027 0.0038 -0.0004 -0.0004  
Z -0.0086 -0.0005 -0.0055 -0.0112 0.0013 0.0010  
AT. 148 H X -0.0124 0.0003 -0.0084 0.0162 -0.0019 0.0014  
Y -0.0032 -0.0005 -0.0027 0.0038 -0.0004 0.0004  
Z 0.0086 -0.0005 0.0055 -0.0112 0.0013 -0.0010  
AT. 149 H X -0.0163 -0.0068 -0.0058 -0.0256 0.0029 0.0019

Y 0.0546 0.0230 0.0193 0.0861 -0.0098 -0.0064  
Z -0.0323 -0.0137 -0.0113 -0.0511 0.0058 0.0037  
AT. 150 H X 0.0163 -0.0068 0.0058 -0.0256 0.0029 -0.0019  
Y -0.0546 0.0230 -0.0193 0.0861 -0.0098 0.0064  
Z 0.0323 -0.0137 0.0113 -0.0511 0.0058 -0.0037  
AT. 151 C X 0.0001 0.0000 0.0000 0.0001 -0.0000 -0.0000  
Y -0.0001 -0.0001 0.0000 -0.0001 0.0000 -0.0000  
Z 0.0000 0.0001 -0.0001 -0.0001 0.0000 0.0000  
AT. 152 C X -0.0001 0.0000 -0.0000 0.0001 -0.0000 0.0000  
Y 0.0001 -0.0001 -0.0000 -0.0001 0.0000 0.0000  
Z -0.0000 0.0001 0.0001 -0.0001 0.0000 -0.0000  
AT. 153 H X -0.0001 -0.0001 0.0001 0.0002 0.0000 -0.0000  
Y 0.0011 0.0004 0.0004 0.0009 -0.0003 0.0000  
Z -0.0007 -0.0001 -0.0004 -0.0006 0.0002 -0.0000  
AT. 154 H X 0.0001 -0.0001 -0.0001 0.0002 0.0000 0.0000  
Y -0.0011 0.0004 -0.0004 0.0009 -0.0003 -0.0000  
Z 0.0007 -0.0001 0.0004 -0.0006 0.0002 0.0000  
AT. 155 H X -0.0002 -0.0001 -0.0001 -0.0006 0.0001 0.0000  
Y 0.0004 0.0003 0.0000 0.0010 -0.0002 0.0000  
Z 0.0005 0.0006 -0.0002 0.0009 -0.0002 -0.0000  
AT. 156 H X 0.0002 -0.0001 0.0001 -0.0006 0.0001 -0.0000  
Y -0.0004 0.0003 -0.0000 0.0010 -0.0002 -0.0000  
Z -0.0005 0.0006 0.0002 0.0009 -0.0002 0.0000  
AT. 157 O X 0.0000 -0.0000 0.0000 0.0000 -0.0000 0.0000  
Y -0.0001 -0.0000 -0.0001 -0.0001 0.0001 -0.0001  
Z -0.0000 -0.0000 -0.0000 -0.0000 0.0000 -0.0000  
AT. 158 O X -0.0000 -0.0000 -0.0000 0.0000 -0.0000 -0.0000  
Y 0.0001 -0.0000 0.0001 -0.0001 0.0001 0.0001  
Z 0.0000 -0.0000 0.0000 -0.0000 0.0000 0.0000  
AT. 159 O X -0.0001 -0.0000 -0.0000 0.0001 0.0001 -0.0001  
Y 0.0000 -0.0000 0.0000 -0.0001 -0.0001 0.0000  
Z -0.0002 -0.0000 -0.0001 0.0002 0.0002 -0.0002

AT.160 O X 0.0001 -0.0000 0.0000 0.0001 0.0001 0.0001  
Y -0.0000 -0.0000 -0.0000 -0.0001 -0.0001 -0.0000  
Z 0.0002 -0.0000 0.0001 0.0002 0.0002 0.0002

AT.161 H X -0.0001 -0.0000 -0.0000 -0.0000 0.0001 -0.0002  
Y 0.0014 0.0002 0.0008 0.0008 -0.0009 0.0022  
Z 0.0004 0.0000 0.0002 0.0002 -0.0003 0.0006

AT.162 H X 0.0001 -0.0000 0.0000 -0.0000 0.0001 0.0002  
Y -0.0014 0.0002 -0.0008 0.0008 -0.0009 -0.0022  
Z -0.0004 0.0000 -0.0002 0.0002 -0.0003 -0.0006

AT.163 H X 0.0009 -0.0000 0.0005 -0.0010 -0.0012 0.0010  
Y -0.0006 0.0000 -0.0003 0.0007 0.0007 -0.0007  
Z 0.0025 0.0000 0.0012 -0.0027 -0.0033 0.0028

AT.164 H X -0.0009 -0.0000 -0.0005 -0.0010 -0.0012 -0.0010  
Y 0.0006 0.0000 0.0003 0.0007 0.0007 0.0007  
Z -0.0025 0.0000 -0.0012 -0.0027 -0.0033 -0.0028

AT.165 O X 0.0001 0.0000 0.0000 0.0000 0.0000 0.0000  
Y 0.0000 0.0000 0.0000 0.0000 0.0000 0.0000  
Z 0.0000 0.0000 0.0000 0.0000 0.0000 0.0000

AT.166 O X -0.0001 0.0000 -0.0000 0.0000 0.0000 -0.0000  
Y -0.0000 0.0000 -0.0000 0.0000 0.0000 -0.0000  
Z -0.0000 0.0000 -0.0000 0.0000 0.0000 -0.0000

AT.167 H X -0.0012 -0.0002 -0.0004 -0.0003 -0.0002 -0.0003  
Y -0.0007 -0.0001 -0.0002 -0.0002 -0.0001 -0.0002  
Z -0.0003 -0.0001 -0.0001 -0.0001 -0.0001 -0.0001

AT.168 H X 0.0012 -0.0002 0.0004 -0.0003 -0.0002 0.0003  
Y 0.0007 -0.0001 0.0002 -0.0002 -0.0001 0.0002  
Z 0.0003 -0.0001 0.0001 -0.0001 -0.0001 0.0001

AT.169 O X 0.0000 -0.0000 -0.0000 -0.0000 -0.0000 0.0000  
Y -0.0001 0.0000 0.0000 0.0000 0.0000 -0.0000  
Z 0.0000 -0.0000 -0.0000 -0.0000 -0.0000 0.0000

AT.170 O X -0.0000 -0.0000 0.0000 -0.0000 -0.0000 -0.0000  
Y 0.0001 0.0000 -0.0000 0.0000 0.0000 0.0000

Z -0.0000 -0.0000 0.0000 -0.0000 -0.0000 -0.0000  
AT. 171 H X -0.0005 0.0001 0.0001 0.0002 0.0002 -0.0001  
Y 0.0012 -0.0002 -0.0002 -0.0004 -0.0004 0.0001  
Z -0.0006 0.0001 0.0001 0.0002 0.0002 -0.0000

AT. 172 H X 0.0005 0.0001 -0.0001 0.0002 0.0002 0.0001  
Y -0.0012 -0.0002 0.0002 -0.0004 -0.0004 -0.0001  
Z 0.0006 0.0001 -0.0001 0.0002 0.0002 0.0000

FREQ(CM\*\*-1) 3086.94 3086.98 3119.22 3126.80 3135.68 3136.33

AT. 1 I X -0.0000 0.0000 -0.0000 -0.0000 0.0000 -0.0000  
Y 0.0000 0.0000 0.0000 -0.0000 -0.0000 0.0000  
Z -0.0000 -0.0000 0.0000 0.0000 0.0000 -0.0000

AT. 2 I X -0.0000 -0.0000 0.0000 -0.0000 -0.0000 -0.0000  
Y 0.0000 -0.0000 -0.0000 -0.0000 0.0000 0.0000  
Z -0.0000 0.0000 -0.0000 0.0000 -0.0000 -0.0000

AT. 3 I X -0.0000 -0.0000 -0.0000 0.0000 0.0000 -0.0000  
Y 0.0000 0.0000 0.0000 -0.0000 -0.0000 0.0000  
Z -0.0000 0.0000 0.0000 -0.0000 -0.0000 -0.0000

AT. 4 I X -0.0000 0.0000 0.0000 0.0000 -0.0000 -0.0000  
Y 0.0000 -0.0000 -0.0000 -0.0000 0.0000 0.0000  
Z -0.0000 -0.0000 -0.0000 -0.0000 0.0000 -0.0000

AT. 5 O X -0.0000 -0.0000 -0.0003 -0.0003 0.0000 -0.0000  
Y 0.0000 0.0000 0.0004 0.0003 -0.0000 0.0000  
Z 0.0000 0.0000 0.0004 0.0004 -0.0000 0.0000

AT. 6 O X -0.0000 0.0000 0.0003 -0.0003 -0.0000 -0.0000  
Y 0.0000 -0.0000 -0.0004 0.0003 0.0000 0.0000  
Z 0.0000 -0.0000 -0.0004 0.0004 0.0000 0.0000

AT. 7 O X 0.0000 -0.0000 -0.0005 0.0004 0.0000 0.0000  
Y -0.0000 0.0000 0.0004 -0.0004 -0.0000 -0.0000  
Z 0.0000 -0.0000 -0.0002 0.0002 0.0000 0.0000

AT. 8 O X 0.0000 0.0000 0.0005 0.0004 -0.0000 0.0000



Y -0.0000 -0.0000 -0.0004 -0.0004 0.0000 -0.0000  
Z 0.0000 0.0000 0.0002 0.0002 -0.0000 0.0000  
AT. 9 N X -0.0000 -0.0000 -0.0000 -0.0001 0.0000 -0.0000  
Y -0.0000 -0.0000 -0.0000 -0.0000 -0.0000 0.0000  
Z 0.0000 0.0000 0.0003 0.0002 0.0000 0.0000  
AT. 10 N X -0.0000 0.0000 0.0000 -0.0001 -0.0000 -0.0000  
Y -0.0000 0.0000 0.0000 -0.0000 0.0000 0.0000  
Z 0.0000 -0.0000 -0.0003 0.0002 -0.0000 0.0000  
AT. 11 N X 0.0000 0.0000 -0.0001 0.0001 0.0000 0.0000  
Y -0.0000 0.0000 0.0002 -0.0002 -0.0000 -0.0000  
Z 0.0000 -0.0000 -0.0002 0.0002 0.0000 0.0000  
AT. 12 N X 0.0000 -0.0000 0.0001 0.0001 -0.0000 0.0000  
Y -0.0000 -0.0000 -0.0002 -0.0002 0.0000 -0.0000  
Z 0.0000 0.0000 0.0002 0.0002 -0.0000 0.0000  
AT. 13 C X 0.0000 0.0000 0.0005 0.0005 -0.0000 0.0001  
Y -0.0000 -0.0000 -0.0002 -0.0002 0.0000 -0.0000  
Z -0.0000 -0.0000 -0.0008 -0.0007 -0.0000 -0.0001  
AT. 14 C X 0.0000 -0.0000 -0.0005 0.0005 0.0000 0.0001  
Y -0.0000 0.0000 0.0002 -0.0002 -0.0000 -0.0000  
Z -0.0000 0.0000 0.0008 -0.0007 0.0000 -0.0001  
AT. 15 C X -0.0000 -0.0000 -0.0002 -0.0005 -0.0000 -0.0001  
Y -0.0000 -0.0000 -0.0001 0.0010 0.0000 0.0002  
Z 0.0000 0.0000 0.0005 0.0013 0.0000 0.0003  
AT. 16 C X -0.0000 0.0000 0.0002 -0.0005 0.0000 -0.0001  
Y -0.0000 0.0000 0.0001 0.0010 -0.0000 0.0002  
Z 0.0000 -0.0000 -0.0005 0.0013 -0.0000 0.0003  
AT. 17 H X -0.0001 -0.0001 -0.0002 0.0039 0.0000 0.0007  
Y 0.0004 0.0002 -0.0006 -0.0125 -0.0001 -0.0024  
Z 0.0003 0.0002 -0.0004 -0.0106 -0.0001 -0.0020  
AT. 18 H X -0.0001 0.0001 0.0002 0.0039 -0.0000 0.0007  
Y 0.0004 -0.0002 0.0006 -0.0125 0.0001 -0.0024  
Z 0.0003 -0.0002 0.0004 -0.0106 0.0001 -0.0020

AT. 19 H X 0.0001 0.0001 0.0016 0.0016 0.0000 0.0005  
Y 0.0002 0.0001 0.0018 0.0017 0.0000 0.0006  
Z -0.0005 -0.0003 -0.0050 -0.0041 -0.0001 -0.0015

AT. 20 H X 0.0001 -0.0001 -0.0016 0.0016 -0.0000 0.0005  
Y 0.0002 -0.0001 -0.0018 0.0017 -0.0000 0.0006  
Z -0.0005 0.0003 0.0050 -0.0041 0.0001 -0.0015

AT. 21 C X -0.0000 0.0000 0.0007 -0.0006 -0.0000 -0.0001  
Y 0.0000 -0.0000 -0.0007 0.0006 0.0000 0.0001  
Z -0.0000 0.0000 0.0002 -0.0001 -0.0000 -0.0000

AT. 22 C X -0.0000 -0.0000 -0.0007 -0.0006 0.0000 -0.0001  
Y 0.0000 0.0000 0.0007 0.0006 -0.0000 0.0001  
Z -0.0000 -0.0000 -0.0002 -0.0001 0.0000 -0.0000

AT. 23 C X -0.0000 0.0000 -0.0001 0.0002 0.0000 0.0000  
Y 0.0000 -0.0000 0.0003 -0.0008 -0.0001 -0.0001  
Z -0.0000 -0.0000 -0.0003 0.0007 0.0001 0.0001

AT. 24 C X -0.0000 -0.0000 0.0001 0.0002 -0.0000 0.0000  
Y 0.0000 0.0000 -0.0003 -0.0008 0.0001 -0.0001  
Z -0.0000 0.0000 0.0003 0.0007 -0.0001 0.0001

AT. 25 H X -0.0000 -0.0000 -0.0001 -0.0005 -0.0001 -0.0001  
Y 0.0000 0.0002 -0.0013 0.0035 0.0006 0.0008  
Z -0.0000 0.0000 -0.0002 0.0008 0.0001 0.0001

AT. 26 H X -0.0000 0.0000 0.0001 -0.0005 0.0001 -0.0001  
Y 0.0000 -0.0002 0.0013 0.0035 -0.0006 0.0008  
Z -0.0000 -0.0000 0.0002 0.0008 -0.0001 0.0001

AT. 27 H X 0.0000 0.0000 0.0010 -0.0019 -0.0002 -0.0003  
Y -0.0000 -0.0001 -0.0027 0.0055 0.0005 0.0008  
Z 0.0001 0.0002 0.0038 -0.0087 -0.0009 -0.0014

AT. 28 H X 0.0000 -0.0000 -0.0010 -0.0019 0.0002 -0.0003  
Y -0.0000 0.0001 0.0027 0.0055 -0.0005 0.0008  
Z 0.0001 -0.0002 -0.0038 -0.0087 0.0009 -0.0014

AT. 29 C X 0.0001 0.0002 -0.0003 -0.0002 0.0000 -0.0000  
Y -0.0000 -0.0000 0.0002 0.0002 0.0000 0.0000

Z -0.0002 -0.0003 0.0003 0.0002 -0.0000 0.0000  
AT. 30 C X 0.0001 -0.0002 0.0003 -0.0002 -0.0000 -0.0000  
Y -0.0000 0.0000 -0.0002 0.0002 -0.0000 0.0000  
Z -0.0002 0.0003 -0.0003 0.0002 0.0000 0.0000  
AT. 31 H X -0.0003 -0.0003 0.0001 -0.0003 -0.0001 0.0000  
Y -0.0007 -0.0009 0.0003 -0.0004 -0.0001 0.0000  
Z 0.0004 0.0006 0.0001 0.0005 0.0001 -0.0000  
AT. 32 H X -0.0003 0.0003 -0.0001 -0.0003 0.0001 0.0000  
Y -0.0007 0.0009 -0.0003 -0.0004 0.0001 0.0000  
Z 0.0004 -0.0006 -0.0001 0.0005 -0.0001 -0.0000  
AT. 33 H X -0.0014 -0.0019 0.0023 0.0016 0.0000 0.0002  
Y 0.0009 0.0012 -0.0014 -0.0009 -0.0000 -0.0001  
Z 0.0021 0.0029 -0.0043 -0.0032 0.0000 -0.0003  
AT. 34 H X -0.0014 0.0019 -0.0023 0.0016 -0.0000 0.0002  
Y 0.0009 -0.0012 0.0014 -0.0009 0.0000 -0.0001  
Z 0.0021 -0.0029 0.0043 -0.0032 -0.0000 -0.0003  
AT. 35 C X 0.0000 0.0000 -0.0000 0.0000 0.0000 0.0000  
Y 0.0000 0.0000 -0.0000 -0.0000 0.0000 -0.0000  
Z -0.0000 -0.0000 -0.0000 -0.0000 -0.0000 -0.0000  
AT. 36 C X 0.0000 -0.0000 0.0000 0.0000 -0.0000 0.0000  
Y 0.0000 -0.0000 0.0000 -0.0000 -0.0000 -0.0000  
Z -0.0000 0.0000 0.0000 -0.0000 0.0000 -0.0000  
AT. 37 C X 0.0000 0.0000 0.0002 -0.0001 -0.0000 -0.0000  
Y -0.0000 -0.0000 -0.0001 -0.0000 0.0000 -0.0000  
Z -0.0000 -0.0000 -0.0001 -0.0001 -0.0000 -0.0000  
AT. 38 C X 0.0000 -0.0000 -0.0002 -0.0001 0.0000 -0.0000  
Y -0.0000 0.0000 0.0001 -0.0000 -0.0000 -0.0000  
Z -0.0000 0.0000 0.0001 -0.0001 0.0000 -0.0000  
AT. 39 H X -0.0002 -0.0002 -0.0009 -0.0001 0.0000 -0.0000  
Y 0.0001 0.0001 0.0005 -0.0000 0.0000 0.0000  
Z 0.0003 0.0003 0.0012 0.0001 0.0000 0.0001  
AT. 40 H X -0.0002 0.0002 0.0009 -0.0001 -0.0000 -0.0000

Y 0.0001 -0.0001 -0.0005 -0.0000 -0.0000 0.0000  
Z 0.0003 -0.0003 -0.0012 0.0001 -0.0000 0.0001  
AT. 41 H X 0.0001 0.0000 -0.0005 0.0012 0.0000 0.0001  
Y 0.0001 0.0000 0.0000 0.0006 -0.0000 0.0000  
Z 0.0001 0.0000 -0.0004 0.0011 -0.0000 0.0000  
AT. 42 H X 0.0001 -0.0000 0.0005 0.0012 -0.0000 0.0001  
Y 0.0001 -0.0000 -0.0000 0.0006 0.0000 0.0000  
Z 0.0001 -0.0000 0.0004 0.0011 0.0000 0.0000  
AT. 43 C X 0.0000 -0.0000 -0.0001 0.0000 -0.0000 -0.0000  
Y -0.0000 0.0000 0.0000 -0.0001 -0.0000 -0.0000  
Z 0.0000 -0.0000 0.0000 -0.0001 -0.0001 -0.0001  
AT. 44 C X 0.0000 0.0000 0.0001 0.0000 0.0000 -0.0000  
Y -0.0000 -0.0000 -0.0000 -0.0001 0.0000 -0.0000  
Z 0.0000 0.0000 -0.0000 -0.0001 0.0001 -0.0001  
AT. 45 H X -0.0000 0.0000 0.0000 0.0003 0.0004 0.0004  
Y -0.0000 0.0000 -0.0002 0.0006 0.0006 0.0005  
Z -0.0000 0.0000 -0.0004 0.0008 0.0004 0.0004  
AT. 46 H X -0.0000 -0.0000 -0.0000 0.0003 -0.0004 0.0004  
Y -0.0000 -0.0000 0.0002 0.0006 -0.0006 0.0005  
Z -0.0000 -0.0000 0.0004 0.0008 -0.0004 0.0004  
AT. 47 H X -0.0000 0.0001 0.0003 0.0001 0.0003 0.0003  
Y 0.0000 -0.0000 -0.0004 0.0000 -0.0002 -0.0002  
Z -0.0000 0.0001 0.0006 -0.0003 0.0002 0.0002  
AT. 48 H X -0.0000 -0.0001 -0.0003 0.0001 -0.0003 0.0003  
Y 0.0000 0.0000 0.0004 0.0000 0.0002 -0.0002  
Z -0.0000 -0.0001 -0.0006 -0.0003 -0.0002 0.0002  
AT. 49 C X 0.0000 -0.0000 -0.0000 -0.0000 -0.0000 -0.0000  
Y 0.0000 0.0000 -0.0000 0.0000 0.0000 0.0000  
Z 0.0000 0.0000 0.0000 -0.0000 -0.0000 -0.0000  
AT. 50 C X 0.0000 0.0000 0.0000 -0.0000 0.0000 -0.0000  
Y 0.0000 -0.0000 0.0000 0.0000 -0.0000 0.0000  
Z 0.0000 -0.0000 -0.0000 -0.0000 0.0000 -0.0000

AT. 51 C X 0.0000 -0.0000 0.0002 0.0000 -0.0000 -0.0000  
Y 0.0000 0.0001 -0.0001 0.0001 0.0000 0.0000  
Z -0.0000 -0.0001 0.0000 -0.0001 -0.0000 -0.0000

AT. 52 C X 0.0000 0.0000 -0.0002 0.0000 0.0000 -0.0000  
Y 0.0000 -0.0001 0.0001 0.0001 -0.0000 0.0000  
Z -0.0000 0.0001 -0.0000 -0.0001 0.0000 -0.0000

AT. 53 H X 0.0001 0.0006 -0.0015 0.0006 0.0002 0.0002  
Y -0.0001 -0.0004 0.0010 -0.0004 -0.0001 -0.0001  
Z 0.0001 0.0003 -0.0008 0.0004 0.0001 0.0001

AT. 54 H X 0.0001 -0.0006 0.0015 0.0006 -0.0002 0.0002  
Y -0.0001 0.0004 -0.0010 -0.0004 0.0001 -0.0001  
Z 0.0001 -0.0003 0.0008 0.0004 -0.0001 0.0001

AT. 55 H X -0.0002 -0.0002 -0.0000 -0.0004 -0.0001 -0.0000  
Y -0.0003 -0.0004 0.0002 -0.0006 -0.0002 -0.0000  
Z 0.0003 0.0004 0.0001 0.0006 0.0001 -0.0000

AT. 56 H X -0.0002 0.0002 0.0000 -0.0004 0.0001 -0.0000  
Y -0.0003 0.0004 -0.0002 -0.0006 0.0002 -0.0000  
Z 0.0003 -0.0004 -0.0001 0.0006 -0.0001 -0.0000

AT. 57 C X 0.0001 0.0001 -0.0000 0.0000 0.0000 -0.0000  
Y 0.0001 0.0001 -0.0001 0.0000 0.0000 -0.0000  
Z 0.0000 -0.0000 -0.0001 -0.0001 -0.0000 -0.0000

AT. 58 C X 0.0001 -0.0001 0.0000 0.0000 -0.0000 -0.0000  
Y 0.0001 -0.0001 0.0001 0.0000 -0.0000 -0.0000  
Z 0.0000 0.0000 0.0001 -0.0001 0.0000 -0.0000

AT. 59 H X -0.0003 -0.0003 0.0001 -0.0005 -0.0001 0.0000  
Y -0.0006 -0.0005 0.0004 -0.0011 -0.0002 -0.0000  
Z 0.0004 0.0004 -0.0003 0.0007 0.0001 -0.0000

AT. 60 H X -0.0003 0.0003 -0.0001 -0.0005 0.0001 0.0000  
Y -0.0006 0.0005 -0.0004 -0.0011 0.0002 -0.0000  
Z 0.0004 -0.0004 0.0003 0.0007 -0.0001 -0.0000

AT. 61 H X -0.0000 -0.0001 -0.0002 -0.0003 -0.0000 -0.0001  
Y 0.0000 0.0001 0.0001 0.0002 0.0000 0.0001

Z 0.0000 0.0001 0.0003 0.0004 0.0000 0.0002  
AT. 62 H X -0.0000 0.0001 0.0002 -0.0003 0.0000 -0.0001  
Y 0.0000 -0.0001 -0.0001 0.0002 -0.0000 0.0001  
Z 0.0000 -0.0001 -0.0003 0.0004 -0.0000 0.0002  
AT. 63 H X -0.0004 -0.0003 0.0006 0.0005 -0.0001 0.0001  
Y -0.0003 -0.0002 0.0004 0.0003 -0.0001 0.0001  
Z -0.0004 -0.0003 0.0006 0.0003 -0.0001 0.0001  
AT. 64 H X -0.0004 0.0003 -0.0006 0.0005 0.0001 0.0001  
Y -0.0003 0.0002 -0.0004 0.0003 0.0001 0.0001  
Z -0.0004 0.0003 -0.0006 0.0003 0.0001 0.0001  
AT. 65 C X 0.0000 -0.0000 -0.0000 -0.0000 -0.0000 -0.0000  
Y 0.0000 0.0000 -0.0001 0.0000 0.0000 0.0000  
Z 0.0000 -0.0000 0.0000 -0.0001 -0.0000 -0.0000  
AT. 66 C X 0.0000 0.0000 0.0000 -0.0000 0.0000 -0.0000  
Y 0.0000 -0.0000 0.0001 0.0000 -0.0000 0.0000  
Z 0.0000 0.0000 -0.0000 -0.0001 0.0000 -0.0000  
AT. 67 H X -0.0002 -0.0000 0.0004 0.0006 0.0001 0.0001  
Y -0.0002 -0.0000 0.0006 0.0007 0.0001 0.0001  
Z -0.0002 -0.0000 0.0007 0.0007 0.0001 0.0001  
AT. 68 H X -0.0002 0.0000 -0.0004 0.0006 -0.0001 0.0001  
Y -0.0002 0.0000 -0.0006 0.0007 -0.0001 0.0001  
Z -0.0002 0.0000 -0.0007 0.0007 -0.0001 0.0001  
AT. 69 H X -0.0000 0.0001 -0.0002 0.0004 0.0002 0.0003  
Y 0.0000 -0.0001 0.0000 -0.0004 -0.0001 -0.0002  
Z -0.0000 0.0001 -0.0001 0.0002 0.0001 0.0001  
AT. 70 H X -0.0000 -0.0001 0.0002 0.0004 -0.0002 0.0003  
Y 0.0000 0.0001 -0.0000 -0.0004 0.0001 -0.0002  
Z -0.0000 -0.0001 0.0001 0.0002 -0.0001 0.0001  
AT. 71 H X -0.0001 -0.0000 0.0004 -0.0005 -0.0000 -0.0002  
Y -0.0001 -0.0000 0.0008 -0.0007 -0.0001 -0.0004  
Z 0.0001 0.0000 -0.0006 0.0004 0.0000 0.0003  
AT. 72 H X -0.0001 0.0000 -0.0004 -0.0005 0.0000 -0.0002

Y -0.0001 0.0000 -0.0008 -0.0007 0.0001 -0.0004  
Z 0.0001 -0.0000 0.0006 0.0004 -0.0000 0.0003  
AT. 73 C X 0.0000 -0.0000 -0.0000 0.0000 0.0001 0.0000  
Y 0.0000 -0.0000 -0.0000 0.0000 0.0001 0.0001  
Z 0.0000 0.0000 0.0000 -0.0001 0.0000 0.0000  
AT. 74 C X 0.0000 0.0000 0.0000 0.0000 -0.0001 0.0000  
Y 0.0000 0.0000 0.0000 0.0000 -0.0001 0.0001  
Z 0.0000 -0.0000 -0.0000 -0.0001 -0.0000 0.0000  
AT. 75 H X -0.0000 0.0000 0.0003 -0.0005 -0.0001 -0.0001  
Y -0.0000 0.0001 0.0006 -0.0010 -0.0003 -0.0001  
Z 0.0000 -0.0000 -0.0005 0.0007 0.0003 0.0001  
AT. 76 H X -0.0000 -0.0000 -0.0003 -0.0005 0.0001 -0.0001  
Y -0.0000 -0.0001 -0.0006 -0.0010 0.0003 -0.0001  
Z 0.0000 0.0000 0.0005 0.0007 -0.0003 0.0001  
AT. 77 H X -0.0001 0.0000 0.0003 0.0005 -0.0008 -0.0006  
Y -0.0000 0.0000 0.0002 0.0005 -0.0008 -0.0006  
Z -0.0000 0.0000 0.0004 0.0004 -0.0007 -0.0006  
AT. 78 H X -0.0001 -0.0000 -0.0003 0.0005 0.0008 -0.0006  
Y -0.0000 -0.0000 -0.0002 0.0005 0.0008 -0.0006  
Z -0.0000 -0.0000 -0.0004 0.0004 0.0007 -0.0006  
AT. 79 I X -0.0000 -0.0000 0.0000 0.0000 -0.0000 0.0000  
Y 0.0000 -0.0000 -0.0000 -0.0000 0.0000 0.0000  
Z -0.0000 -0.0000 0.0000 0.0000 0.0000 -0.0000  
AT. 80 I X -0.0000 0.0000 -0.0000 0.0000 0.0000 0.0000  
Y 0.0000 0.0000 0.0000 -0.0000 -0.0000 0.0000  
Z -0.0000 0.0000 -0.0000 0.0000 -0.0000 -0.0000  
AT. 81 I X -0.0000 -0.0000 -0.0000 -0.0000 0.0000 0.0000  
Y 0.0000 0.0000 0.0000 -0.0000 -0.0000 -0.0000  
Z -0.0000 0.0000 0.0000 0.0000 0.0000 0.0000  
AT. 82 I X -0.0000 0.0000 0.0000 -0.0000 -0.0000 0.0000  
Y 0.0000 -0.0000 -0.0000 -0.0000 0.0000 -0.0000  
Z -0.0000 -0.0000 -0.0000 0.0000 -0.0000 0.0000

AT. 83 O X 0.0001 0.0001 0.0000 0.0001 0.0001 -0.0001  
Y 0.0000 0.0000 0.0000 0.0000 0.0001 -0.0000  
Z -0.0001 -0.0001 0.0000 0.0001 0.0001 -0.0001

AT. 84 O X 0.0001 -0.0001 -0.0000 0.0001 -0.0001 -0.0001  
Y 0.0000 -0.0000 -0.0000 0.0000 -0.0001 -0.0000  
Z -0.0001 0.0001 -0.0000 0.0001 -0.0001 -0.0001

AT. 85 O X -0.0000 0.0000 0.0000 -0.0001 0.0002 0.0001  
Y -0.0000 0.0000 0.0000 -0.0001 0.0002 0.0002  
Z -0.0000 -0.0000 -0.0000 0.0001 -0.0001 -0.0001

AT. 86 O X -0.0000 -0.0000 -0.0000 -0.0001 -0.0002 0.0001  
Y -0.0000 -0.0000 -0.0000 -0.0001 -0.0002 0.0002  
Z -0.0000 0.0000 0.0000 0.0001 0.0001 -0.0001

AT. 87 N X -0.0001 -0.0001 -0.0000 0.0000 0.0000 -0.0000  
Y -0.0000 -0.0000 -0.0000 -0.0000 -0.0000 0.0000  
Z -0.0000 -0.0000 0.0000 0.0000 0.0001 -0.0000

AT. 88 N X -0.0001 0.0001 0.0000 0.0000 -0.0000 -0.0000  
Y -0.0000 0.0000 0.0000 -0.0000 0.0000 0.0000  
Z -0.0000 0.0000 -0.0000 0.0000 -0.0001 -0.0000

AT. 89 N X -0.0000 -0.0000 0.0000 -0.0000 0.0001 0.0001  
Y -0.0000 0.0000 0.0000 -0.0000 0.0001 0.0001  
Z 0.0000 -0.0000 -0.0000 0.0000 -0.0001 -0.0001

AT. 90 N X -0.0000 0.0000 -0.0000 -0.0000 -0.0001 0.0001  
Y -0.0000 -0.0000 -0.0000 -0.0000 -0.0001 0.0001  
Z 0.0000 0.0000 0.0000 0.0000 0.0001 -0.0001

AT. 91 C X -0.0002 -0.0002 -0.0000 -0.0001 -0.0001 0.0001  
Y -0.0000 -0.0000 0.0000 0.0000 0.0000 -0.0000  
Z -0.0001 -0.0001 -0.0000 -0.0001 -0.0002 0.0001

AT. 92 C X -0.0002 0.0002 0.0000 -0.0001 0.0001 0.0001  
Y -0.0000 0.0000 -0.0000 0.0000 -0.0000 -0.0000  
Z -0.0001 0.0001 0.0000 -0.0001 0.0002 0.0001

AT. 93 C X 0.0000 0.0000 -0.0000 -0.0001 0.0004 -0.0000  
Y 0.0000 0.0000 -0.0000 0.0000 0.0000 -0.0001



Z 0.0001 0.0001 0.0000 -0.0002 0.0009 0.0001  
AT. 94 C X 0.0000 -0.0000 0.0000 -0.0001 -0.0004 -0.0000  
Y 0.0000 -0.0000 0.0000 0.0000 -0.0000 -0.0001  
Z 0.0001 -0.0001 -0.0000 -0.0002 -0.0009 0.0001  
AT. 95 H X -0.0004 -0.0002 0.0002 0.0002 -0.0016 0.0003  
Y -0.0006 -0.0003 0.0003 0.0004 -0.0028 0.0005  
Z -0.0003 -0.0002 0.0002 0.0002 -0.0015 0.0004  
AT. 96 H X -0.0004 0.0002 -0.0002 0.0002 0.0016 0.0003  
Y -0.0006 0.0003 -0.0003 0.0004 0.0028 0.0005  
Z -0.0003 0.0002 -0.0002 0.0002 0.0015 0.0004  
AT. 97 H X -0.0001 -0.0001 -0.0000 0.0005 -0.0026 -0.0003  
Y 0.0001 0.0001 -0.0000 -0.0005 0.0021 0.0002  
Z -0.0002 -0.0004 -0.0002 0.0020 -0.0096 -0.0011  
AT. 98 H X -0.0001 0.0001 0.0000 0.0005 0.0026 -0.0003  
Y 0.0001 -0.0001 0.0000 -0.0005 -0.0021 0.0002  
Z -0.0002 0.0004 0.0002 0.0020 0.0096 -0.0011  
AT. 99 C X 0.0000 -0.0000 -0.0000 0.0001 -0.0004 -0.0003  
Y -0.0000 -0.0000 -0.0000 0.0001 -0.0002 -0.0002  
Z 0.0000 0.0000 0.0000 -0.0001 0.0001 0.0001  
AT. 100 C X 0.0000 0.0000 0.0000 0.0001 0.0004 -0.0003  
Y -0.0000 0.0000 0.0000 0.0001 0.0002 -0.0002  
Z 0.0000 -0.0000 -0.0000 -0.0001 -0.0001 0.0001  
AT. 101 C X -0.0000 -0.0000 0.0000 -0.0001 0.0035 0.0037  
Y -0.0000 -0.0000 0.0000 -0.0002 0.0076 0.0080  
Z -0.0001 -0.0001 -0.0000 0.0002 -0.0067 -0.0071  
AT. 102 C X -0.0000 0.0000 -0.0000 -0.0001 -0.0035 0.0037  
Y -0.0000 0.0000 -0.0000 -0.0002 -0.0076 0.0080  
Z -0.0001 0.0001 0.0000 0.0002 0.0067 -0.0071  
AT. 103 H X 0.0002 0.0002 0.0000 0.0006 -0.0257 -0.0274  
Y 0.0004 0.0004 -0.0001 0.0015 -0.0600 -0.0637  
Z 0.0000 0.0000 -0.0000 0.0000 -0.0012 -0.0014  
AT. 104 H X 0.0002 -0.0002 -0.0000 0.0006 0.0257 -0.0274

Y 0.0004 -0.0004 0.0001 0.0015 0.0600 -0.0637  
Z 0.0000 -0.0000 0.0000 0.0000 0.0012 -0.0014  
AT. 105 H X -0.0002 -0.0002 -0.0001 0.0006 -0.0163 -0.0172  
Y -0.0003 -0.0003 -0.0002 0.0011 -0.0305 -0.0323  
Z 0.0010 0.0008 0.0004 -0.0029 0.0812 0.0860  
AT. 106 H X -0.0002 0.0002 0.0001 0.0006 0.0163 -0.0172  
Y -0.0003 0.0003 0.0002 0.0011 0.0305 -0.0323  
Z 0.0010 -0.0008 -0.0004 -0.0029 -0.0812 0.0860  
AT. 107 C X -0.0083 -0.0083 0.0001 0.0001 0.0001 0.0000  
Y 0.0011 0.0011 0.0000 0.0000 -0.0000 -0.0000  
Z -0.0083 -0.0083 0.0001 0.0001 0.0001 0.0000  
AT. 108 C X -0.0083 0.0083 -0.0001 0.0001 -0.0001 0.0000  
Y 0.0011 -0.0011 -0.0000 0.0000 0.0000 -0.0000  
Z -0.0083 0.0083 -0.0001 0.0001 -0.0001 0.0000  
AT. 109 H X 0.0054 0.0054 0.0000 0.0000 -0.0001 -0.0001  
Y -0.0322 -0.0322 0.0002 0.0001 0.0002 0.0003  
Z 0.0173 0.0173 -0.0001 0.0000 -0.0001 -0.0002  
AT. 110 H X 0.0054 -0.0054 -0.0000 0.0000 0.0001 -0.0001  
Y -0.0322 0.0322 -0.0002 0.0001 -0.0002 0.0003  
Z 0.0173 -0.0173 0.0001 0.0000 0.0001 -0.0002  
AT. 111 H X 0.0937 0.0937 -0.0007 -0.0010 -0.0007 -0.0002  
Y 0.0178 0.0178 -0.0001 -0.0002 -0.0001 -0.0000  
Z 0.0842 0.0842 -0.0007 -0.0010 -0.0007 -0.0001  
AT. 112 H X 0.0937 -0.0937 0.0007 -0.0010 0.0007 -0.0002  
Y 0.0178 -0.0178 0.0001 -0.0002 0.0001 -0.0000  
Z 0.0842 -0.0842 0.0007 -0.0010 0.0007 -0.0001  
AT. 113 C X -0.0001 -0.0001 0.0000 -0.0000 0.0000 0.0000  
Y 0.0001 0.0001 -0.0000 -0.0000 -0.0000 -0.0000  
Z -0.0001 -0.0001 0.0000 0.0000 -0.0000 0.0000  
AT. 114 C X -0.0001 0.0001 -0.0000 -0.0000 -0.0000 0.0000  
Y 0.0001 -0.0001 0.0000 -0.0000 0.0000 -0.0000  
Z -0.0001 0.0001 -0.0000 0.0000 0.0000 0.0000

AT. 115 C X -0.0002 -0.0001 0.0000 0.0000 0.0000 0.0001  
Y -0.0001 -0.0001 0.0000 -0.0000 0.0000 0.0000  
Z -0.0002 -0.0002 0.0000 -0.0000 0.0001 0.0001

AT. 116 C X -0.0002 0.0001 -0.0000 0.0000 -0.0000 0.0001  
Y -0.0001 0.0001 -0.0000 -0.0000 -0.0000 0.0000  
Z -0.0002 0.0002 -0.0000 -0.0000 -0.0001 0.0001

AT. 117 H X 0.0024 0.0019 -0.0002 -0.0000 -0.0010 -0.0015  
Y 0.0002 0.0001 -0.0000 0.0000 -0.0003 -0.0005  
Z 0.0025 0.0021 -0.0001 -0.0000 -0.0009 -0.0014

AT. 118 H X 0.0024 -0.0019 0.0002 -0.0000 0.0010 -0.0015  
Y 0.0002 -0.0001 0.0000 0.0000 0.0003 -0.0005  
Z 0.0025 -0.0021 0.0001 -0.0000 0.0009 -0.0014

AT. 119 H X -0.0002 -0.0002 0.0000 -0.0001 0.0003 0.0004  
Y 0.0006 0.0005 -0.0001 0.0000 -0.0002 -0.0004  
Z 0.0007 0.0006 -0.0001 0.0002 -0.0004 -0.0005

AT. 120 H X -0.0002 0.0002 -0.0000 -0.0001 -0.0003 0.0004  
Y 0.0006 -0.0005 0.0001 0.0000 0.0002 -0.0004  
Z 0.0007 -0.0006 0.0001 0.0002 0.0004 -0.0005

AT. 121 C X 0.0001 -0.0000 0.0001 -0.0001 0.0000 -0.0000  
Y 0.0000 -0.0000 0.0000 -0.0001 0.0000 0.0000  
Z -0.0001 0.0000 -0.0001 0.0000 0.0000 0.0001

AT. 122 C X 0.0001 0.0000 -0.0001 -0.0001 -0.0000 -0.0000  
Y 0.0000 0.0000 -0.0000 -0.0001 -0.0000 0.0000  
Z -0.0001 -0.0000 0.0001 0.0000 -0.0000 0.0001

AT. 123 H X -0.0000 0.0000 0.0002 -0.0002 -0.0001 -0.0001  
Y 0.0002 -0.0001 0.0000 0.0002 -0.0002 -0.0003  
Z 0.0002 -0.0000 -0.0001 0.0004 -0.0003 -0.0003

AT. 124 H X -0.0000 -0.0000 -0.0002 -0.0002 0.0001 -0.0001  
Y 0.0002 0.0001 -0.0000 0.0002 0.0002 -0.0003  
Z 0.0002 0.0000 0.0001 0.0004 0.0003 -0.0003

AT. 125 H X -0.0006 0.0004 -0.0010 0.0009 0.0002 0.0003  
Y -0.0003 0.0002 -0.0004 0.0003 -0.0000 0.0000

Z 0.0005 -0.0003 0.0010 -0.0009 -0.0000 -0.0001  
AT. 126 H X -0.0006 -0.0004 0.0010 0.0009 -0.0002 0.0003  
Y -0.0003 -0.0002 0.0004 0.0003 0.0000 0.0000  
Z 0.0005 0.0003 -0.0010 -0.0009 0.0000 -0.0001  
AT. 127 C X -0.0000 -0.0000 0.0000 0.0000 0.0000 0.0000  
Y 0.0000 0.0000 0.0000 -0.0000 -0.0000 -0.0000  
Z -0.0000 -0.0000 -0.0000 0.0000 -0.0000 0.0000  
AT. 128 C X -0.0000 0.0000 -0.0000 0.0000 -0.0000 0.0000  
Y 0.0000 -0.0000 -0.0000 -0.0000 0.0000 -0.0000  
Z -0.0000 0.0000 0.0000 0.0000 0.0000 0.0000  
AT. 129 C X 0.0001 0.0001 0.0000 -0.0000 -0.0000 0.0000  
Y 0.0001 0.0000 0.0001 0.0001 -0.0000 0.0000  
Z -0.0000 0.0000 -0.0001 -0.0001 0.0000 -0.0000  
AT. 130 C X 0.0001 -0.0001 -0.0000 -0.0000 0.0000 0.0000  
Y 0.0001 -0.0000 -0.0001 0.0001 0.0000 0.0000  
Z -0.0000 -0.0000 0.0001 -0.0001 -0.0000 -0.0000  
AT. 131 H X -0.0009 -0.0000 -0.0005 -0.0002 0.0002 -0.0001  
Y -0.0004 -0.0001 -0.0001 -0.0001 0.0000 -0.0000  
Z 0.0008 0.0001 0.0003 0.0001 -0.0001 0.0000  
AT. 132 H X -0.0009 0.0000 0.0005 -0.0002 -0.0002 -0.0001  
Y -0.0004 0.0001 0.0001 -0.0001 -0.0000 -0.0000  
Z 0.0008 -0.0001 -0.0003 0.0001 0.0001 0.0000  
AT. 133 H X 0.0003 0.0002 0.0002 0.0003 0.0000 -0.0000  
Y -0.0002 0.0000 -0.0009 -0.0009 0.0001 -0.0000  
Z 0.0002 0.0000 0.0006 0.0008 0.0000 0.0000  
AT. 134 H X 0.0003 -0.0002 -0.0002 0.0003 -0.0000 -0.0000  
Y -0.0002 -0.0000 0.0009 -0.0009 -0.0001 -0.0000  
Z 0.0002 -0.0000 -0.0006 0.0008 -0.0000 0.0000  
AT. 135 C X -0.0005 -0.0005 0.0001 0.0001 -0.0000 0.0000  
Y 0.0003 0.0003 0.0000 -0.0000 -0.0000 -0.0000  
Z -0.0006 -0.0007 0.0001 0.0002 -0.0000 0.0000  
AT. 136 C X -0.0005 0.0005 -0.0001 0.0001 0.0000 0.0000

Y 0.0003 -0.0003 -0.0000 -0.0000 0.0000 -0.0000  
Z -0.0006 0.0007 -0.0001 0.0002 0.0000 0.0000  
AT. 137 H X 0.0011 0.0012 -0.0001 -0.0002 -0.0000 -0.0001  
Y -0.0057 -0.0059 0.0007 0.0012 0.0002 0.0004  
Z 0.0033 0.0034 -0.0002 -0.0005 -0.0002 -0.0002  
AT. 138 H X 0.0011 -0.0012 0.0001 -0.0002 0.0000 -0.0001  
Y -0.0057 0.0059 -0.0007 0.0012 -0.0002 0.0004  
Z 0.0033 -0.0034 0.0002 -0.0005 0.0002 -0.0002  
AT. 139 H X 0.0059 0.0060 -0.0012 -0.0013 0.0001 -0.0002  
Y 0.0012 0.0012 -0.0002 -0.0003 0.0000 -0.0001  
Z 0.0041 0.0042 -0.0009 -0.0010 0.0001 -0.0001  
AT. 140 H X 0.0059 -0.0060 0.0012 -0.0013 -0.0001 -0.0002  
Y 0.0012 -0.0012 0.0002 -0.0003 -0.0000 -0.0001  
Z 0.0041 -0.0042 0.0009 -0.0010 -0.0001 -0.0001  
AT. 141 H X -0.0001 -0.0002 0.0002 0.0002 -0.0001 0.0001  
Y 0.0005 0.0006 -0.0006 -0.0007 0.0002 -0.0002  
Z 0.0004 0.0005 -0.0004 -0.0004 0.0002 -0.0001  
AT. 142 H X -0.0001 0.0002 -0.0002 0.0002 0.0001 0.0001  
Y 0.0005 -0.0006 0.0006 -0.0007 -0.0002 -0.0002  
Z 0.0004 -0.0005 0.0004 -0.0004 -0.0002 -0.0001  
AT. 143 C X 0.0000 0.0000 -0.0000 -0.0000 -0.0000 -0.0000  
Y 0.0002 0.0002 0.0004 -0.0001 -0.0000 -0.0000  
Z -0.0000 -0.0001 -0.0000 -0.0000 -0.0000 0.0000  
AT. 144 C X 0.0000 -0.0000 0.0000 -0.0000 0.0000 -0.0000  
Y 0.0002 -0.0002 -0.0004 -0.0001 0.0000 -0.0000  
Z -0.0000 0.0001 0.0000 -0.0000 0.0000 0.0000  
AT. 145 H X 0.0002 0.0002 0.0003 -0.0001 0.0000 0.0000  
Y -0.0007 -0.0007 -0.0016 0.0009 0.0001 -0.0001  
Z -0.0007 -0.0007 -0.0017 0.0011 0.0001 -0.0000  
AT. 146 H X 0.0002 -0.0002 -0.0003 -0.0001 -0.0000 0.0000  
Y -0.0007 0.0007 0.0016 0.0009 -0.0001 -0.0001  
Z -0.0007 0.0007 0.0017 0.0011 -0.0001 -0.0000

AT.147 H X -0.0006 -0.0007 -0.0007 0.0004 0.0000 0.0001  
Y -0.0002 -0.0002 -0.0001 0.0001 0.0000 0.0001  
Z 0.0004 0.0005 0.0005 -0.0004 -0.0000 -0.0001

AT.148 H X -0.0006 0.0007 0.0007 0.0004 -0.0000 0.0001  
Y -0.0002 0.0002 0.0001 0.0001 -0.0000 0.0001  
Z 0.0004 -0.0005 -0.0005 -0.0004 0.0000 -0.0001

AT.149 H X 0.0004 0.0005 0.0008 -0.0002 -0.0000 -0.0001  
Y -0.0011 -0.0017 -0.0029 0.0005 -0.0000 0.0002  
Z 0.0007 0.0010 0.0016 -0.0002 -0.0000 -0.0001

AT.150 H X 0.0004 -0.0005 -0.0008 -0.0002 0.0000 -0.0001  
Y -0.0011 0.0017 0.0029 0.0005 0.0000 0.0002  
Z 0.0007 -0.0010 -0.0016 -0.0002 0.0000 -0.0001

AT.151 C X 0.0000 0.0000 0.0000 0.0000 0.0000 -0.0000  
Y 0.0001 0.0001 -0.0002 -0.0001 -0.0000 0.0000  
Z 0.0001 0.0001 0.0001 0.0001 -0.0000 0.0000

AT.152 C X 0.0000 -0.0000 -0.0000 0.0000 -0.0000 -0.0000  
Y 0.0001 -0.0001 0.0002 -0.0001 0.0000 0.0000  
Z 0.0001 -0.0001 -0.0001 0.0001 0.0000 0.0000

AT.153 H X 0.0002 0.0002 -0.0005 -0.0005 -0.0000 -0.0001  
Y -0.0005 -0.0005 0.0019 0.0018 0.0001 0.0002  
Z 0.0005 0.0005 -0.0012 -0.0010 -0.0001 -0.0001

AT.154 H X 0.0002 -0.0002 0.0005 -0.0005 0.0000 -0.0001  
Y -0.0005 0.0005 -0.0019 0.0018 -0.0001 0.0002  
Z 0.0005 -0.0005 0.0012 -0.0010 0.0001 -0.0001

AT.155 H X 0.0002 0.0001 -0.0000 -0.0001 -0.0000 0.0000  
Y -0.0004 -0.0003 0.0001 0.0001 0.0001 -0.0002  
Z -0.0003 -0.0002 0.0001 0.0002 0.0001 -0.0001

AT.156 H X 0.0002 -0.0001 0.0000 -0.0001 0.0000 0.0000  
Y -0.0004 0.0003 -0.0001 0.0001 -0.0001 -0.0002  
Z -0.0003 0.0002 -0.0001 0.0002 -0.0001 -0.0001

AT.157 O X 0.0000 0.0000 0.0006 0.0006 -0.0000 0.0001  
Y -0.0001 -0.0001 -0.0053 -0.0054 0.0001 -0.0007

Z -0.0000 -0.0000 -0.0014 -0.0015 0.0000 -0.0002  
AT. 158 O X 0.0000 -0.0000 -0.0006 0.0006 0.0000 0.0001  
Y -0.0001 0.0001 0.0053 -0.0054 -0.0001 -0.0007  
Z -0.0000 0.0000 0.0014 -0.0015 -0.0000 -0.0002  
AT. 159 O X -0.0000 -0.0000 -0.0022 -0.0021 0.0001 -0.0002  
Y 0.0000 0.0000 0.0016 0.0015 -0.0000 0.0001  
Z -0.0001 -0.0000 -0.0063 -0.0060 0.0002 -0.0005  
AT. 160 O X -0.0000 0.0000 0.0022 -0.0021 -0.0001 -0.0002  
Y 0.0000 -0.0000 -0.0016 0.0015 0.0000 0.0001  
Z -0.0001 0.0000 0.0063 -0.0060 -0.0002 -0.0005  
AT. 161 H X -0.0001 -0.0001 -0.0080 -0.0081 0.0001 -0.0010  
Y 0.0014 0.0013 0.0806 0.0819 -0.0013 0.0102  
Z 0.0004 0.0004 0.0226 0.0231 -0.0004 0.0029  
AT. 162 H X -0.0001 0.0001 0.0080 -0.0081 -0.0001 -0.0010  
Y 0.0014 -0.0013 -0.0806 0.0819 0.0013 0.0102  
Z 0.0004 -0.0004 -0.0226 0.0231 0.0004 0.0029  
AT. 163 H X 0.0003 0.0001 0.0332 0.0313 -0.0011 0.0025  
Y -0.0002 -0.0001 -0.0229 -0.0219 0.0007 -0.0017  
Z 0.0009 0.0004 0.0949 0.0897 -0.0030 0.0071  
AT. 164 H X 0.0003 -0.0001 -0.0332 0.0313 0.0011 0.0025  
Y -0.0002 0.0001 0.0229 -0.0219 -0.0007 -0.0017  
Z 0.0009 -0.0004 -0.0949 0.0897 0.0030 0.0071  
AT. 165 O X -0.0000 -0.0001 -0.0001 -0.0006 -0.0021 0.0017  
Y -0.0000 -0.0000 -0.0001 -0.0004 -0.0013 0.0010  
Z -0.0000 -0.0000 -0.0000 -0.0001 -0.0006 0.0005  
AT. 166 O X -0.0000 0.0001 0.0001 -0.0006 0.0021 0.0017  
Y -0.0000 0.0000 0.0001 -0.0004 0.0013 0.0010  
Z -0.0000 0.0000 0.0000 -0.0001 0.0006 0.0005  
AT. 167 H X 0.0006 0.0009 0.0015 0.0089 0.0323 -0.0261  
Y 0.0002 0.0003 0.0009 0.0051 0.0182 -0.0145  
Z -0.0001 0.0000 0.0004 0.0026 0.0099 -0.0081  
AT. 168 H X 0.0006 -0.0009 -0.0015 0.0089 -0.0323 -0.0261

Y 0.0002 -0.0003 -0.0009 0.0051 -0.0182 -0.0145  
Z -0.0001 -0.0000 -0.0004 0.0026 -0.0099 -0.0081  
AT. 169 O X -0.0000 -0.0000 -0.0001 -0.0005 -0.0014 0.0012  
Y 0.0000 0.0000 0.0003 0.0011 0.0033 -0.0028  
Z -0.0000 -0.0000 -0.0002 -0.0006 -0.0018 0.0015  
AT. 170 O X -0.0000 0.0000 0.0001 -0.0005 0.0014 0.0012  
Y 0.0000 -0.0000 -0.0003 0.0011 -0.0033 -0.0028  
Z -0.0000 0.0000 0.0002 -0.0006 0.0018 0.0015  
AT. 171 H X 0.0002 0.0003 0.0021 0.0074 0.0225 -0.0189  
Y -0.0003 -0.0007 -0.0046 -0.0164 -0.0496 0.0416  
Z 0.0002 0.0003 0.0024 0.0084 0.0260 -0.0218  
AT. 172 H X 0.0002 -0.0003 -0.0021 0.0074 -0.0225 -0.0189  
Y -0.0003 0.0007 0.0046 -0.0164 0.0496 0.0416  
Z 0.0002 -0.0003 -0.0024 0.0084 -0.0260 -0.0218  
  
FREQ(CM\*\*-1) 3143.48 3143.73 3146.16 3146.38 3147.13 3151.45

AT. 1 I X 0.0000 0.0000 -0.0000 0.0000 -0.0000 0.0000  
Y 0.0000 0.0000 -0.0000 0.0000 -0.0000 -0.0000  
Z -0.0000 0.0000 -0.0000 0.0000 -0.0000 0.0000  
AT. 2 I X 0.0000 -0.0000 0.0000 0.0000 0.0000 0.0000  
Y 0.0000 -0.0000 0.0000 0.0000 0.0000 -0.0000  
Z -0.0000 -0.0000 0.0000 0.0000 0.0000 0.0000  
AT. 3 I X 0.0000 -0.0000 0.0000 0.0000 0.0000 -0.0000  
Y 0.0000 0.0000 -0.0000 -0.0000 -0.0000 0.0000  
Z -0.0000 0.0000 0.0000 0.0000 0.0000 -0.0000  
AT. 4 I X 0.0000 0.0000 -0.0000 0.0000 -0.0000 -0.0000  
Y 0.0000 -0.0000 0.0000 -0.0000 0.0000 0.0000  
Z -0.0000 -0.0000 -0.0000 0.0000 -0.0000 -0.0000  
AT. 5 O X -0.0000 -0.0000 0.0000 -0.0001 0.0001 0.0000  
Y 0.0000 0.0000 -0.0000 0.0001 -0.0001 0.0000  
Z 0.0000 0.0000 -0.0000 0.0001 -0.0001 -0.0000



AT. 6 O X -0.0000 0.0000 -0.0000 -0.0001 -0.0001 0.0000  
Y 0.0000 -0.0000 0.0000 0.0001 0.0001 0.0000  
Z 0.0000 -0.0000 0.0000 0.0001 0.0001 -0.0000

AT. 7 O X -0.0000 -0.0000 -0.0000 -0.0001 -0.0000 -0.0000  
Y -0.0000 0.0000 0.0000 0.0000 0.0000 0.0000  
Z -0.0000 -0.0000 -0.0000 0.0000 0.0000 -0.0000

AT. 8 O X -0.0000 0.0000 0.0000 -0.0001 0.0000 -0.0000  
Y -0.0000 -0.0000 -0.0000 0.0000 -0.0000 0.0000  
Z -0.0000 0.0000 0.0000 0.0000 -0.0000 -0.0000

AT. 9 N X -0.0000 0.0000 0.0000 -0.0000 0.0000 -0.0000  
Y 0.0000 0.0000 0.0000 0.0000 -0.0000 0.0000  
Z 0.0000 0.0000 -0.0000 0.0001 -0.0001 -0.0000

AT. 10 N X -0.0000 -0.0000 -0.0000 -0.0000 -0.0000 -0.0000  
Y 0.0000 -0.0000 -0.0000 0.0000 0.0000 0.0000  
Z 0.0000 -0.0000 0.0000 0.0001 0.0001 -0.0000

AT. 11 N X -0.0000 -0.0000 -0.0000 -0.0001 -0.0001 0.0000  
Y 0.0000 0.0000 0.0000 0.0000 0.0000 0.0000  
Z -0.0000 -0.0000 -0.0000 0.0000 0.0000 -0.0000

AT. 12 N X -0.0000 0.0000 0.0000 -0.0001 0.0001 0.0000  
Y 0.0000 -0.0000 -0.0000 0.0000 -0.0000 0.0000  
Z -0.0000 0.0000 0.0000 0.0000 -0.0000 -0.0000

AT. 13 C X 0.0000 0.0000 -0.0000 0.0002 -0.0002 0.0000  
Y -0.0000 -0.0000 0.0000 -0.0001 0.0001 -0.0001  
Z -0.0000 -0.0000 0.0001 -0.0003 0.0003 0.0001

AT. 14 C X 0.0000 -0.0000 0.0000 0.0002 0.0002 0.0000  
Y -0.0000 0.0000 -0.0000 -0.0001 -0.0001 -0.0001  
Z -0.0000 0.0000 -0.0001 -0.0003 -0.0003 0.0001

AT. 15 C X -0.0001 0.0000 0.0001 -0.0011 0.0003 -0.0019  
Y 0.0001 -0.0000 -0.0001 0.0010 -0.0003 0.0020  
Z 0.0002 -0.0000 -0.0002 0.0029 -0.0006 0.0055

AT. 16 C X -0.0001 -0.0000 -0.0001 -0.0011 -0.0003 -0.0019  
Y 0.0001 0.0000 0.0001 0.0010 0.0003 0.0020

Z 0.0002 0.0000 0.0002 0.0029 0.0006 0.0055  
AT. 17 H X 0.0005 -0.0001 -0.0005 0.0059 -0.0015 0.0118  
Y -0.0015 0.0003 0.0017 -0.0191 0.0050 -0.0374  
Z -0.0013 0.0002 0.0014 -0.0155 0.0041 -0.0301  
AT. 18 H X 0.0005 0.0001 0.0005 0.0059 0.0015 0.0118  
Y -0.0015 -0.0003 -0.0017 -0.0191 -0.0050 -0.0374  
Z -0.0013 -0.0002 -0.0014 -0.0155 -0.0041 -0.0301  
AT. 19 H X 0.0004 -0.0001 -0.0004 0.0058 -0.0010 0.0107  
Y 0.0005 -0.0001 -0.0006 0.0076 -0.0013 0.0142  
Z -0.0014 0.0003 0.0015 -0.0193 0.0033 -0.0362  
AT. 20 H X 0.0004 0.0001 0.0004 0.0058 0.0010 0.0107  
Y 0.0005 0.0001 0.0006 0.0076 0.0013 0.0142  
Z -0.0014 -0.0003 -0.0015 -0.0193 -0.0033 -0.0362  
AT. 21 C X -0.0000 0.0000 0.0000 0.0000 -0.0000 0.0000  
Y 0.0000 -0.0000 -0.0000 -0.0000 0.0000 -0.0000  
Z -0.0000 0.0000 0.0000 -0.0000 -0.0001 0.0000  
AT. 22 C X -0.0000 -0.0000 -0.0000 0.0000 0.0000 0.0000  
Y 0.0000 0.0000 0.0000 -0.0000 -0.0000 -0.0000  
Z -0.0000 -0.0000 -0.0000 -0.0000 0.0001 0.0000  
AT. 23 C X -0.0001 -0.0000 -0.0004 -0.0021 -0.0022 0.0005  
Y 0.0002 0.0000 0.0017 0.0086 0.0089 -0.0019  
Z -0.0002 -0.0000 -0.0014 -0.0072 -0.0074 0.0015  
AT. 24 C X -0.0001 0.0000 0.0004 -0.0021 0.0022 0.0005  
Y 0.0002 -0.0000 -0.0017 0.0086 -0.0089 -0.0019  
Z -0.0002 0.0000 0.0014 -0.0072 0.0074 0.0015  
AT. 25 H X 0.0002 0.0000 0.0018 0.0087 0.0091 -0.0020  
Y -0.0015 -0.0003 -0.0107 -0.0534 -0.0555 0.0120  
Z -0.0002 -0.0000 -0.0016 -0.0079 -0.0082 0.0018  
AT. 26 H X 0.0002 -0.0000 -0.0018 0.0087 -0.0091 -0.0020  
Y -0.0015 0.0003 0.0107 -0.0534 0.0555 0.0120  
Z -0.0002 0.0000 0.0016 -0.0079 0.0082 0.0018  
AT. 27 H X 0.0004 0.0001 0.0034 0.0173 0.0179 -0.0037

Y -0.0012 -0.0003 -0.0095 -0.0484 -0.0500 0.0104  
Z 0.0024 0.0005 0.0180 0.0919 0.0949 -0.0196  
AT. 28 H X 0.0004 -0.0001 -0.0034 0.0173 -0.0179 -0.0037  
Y -0.0012 0.0003 0.0095 -0.0484 0.0500 0.0104  
Z 0.0024 -0.0005 -0.0180 0.0919 -0.0949 -0.0196  
AT. 29 C X -0.0000 -0.0000 -0.0000 -0.0001 0.0000 0.0000  
Y -0.0000 -0.0000 -0.0000 0.0000 -0.0000 -0.0000  
Z 0.0000 0.0000 0.0000 0.0000 -0.0000 -0.0000  
AT. 30 C X -0.0000 0.0000 0.0000 -0.0001 -0.0000 0.0000  
Y -0.0000 0.0000 0.0000 0.0000 0.0000 -0.0000  
Z 0.0000 -0.0000 -0.0000 0.0000 0.0000 -0.0000  
AT. 31 H X 0.0001 0.0001 0.0001 -0.0000 0.0001 0.0001  
Y 0.0001 0.0002 0.0003 -0.0001 0.0002 0.0001  
Z -0.0001 -0.0001 -0.0002 0.0001 -0.0002 -0.0001  
AT. 32 H X 0.0001 -0.0001 -0.0001 -0.0000 -0.0001 0.0001  
Y 0.0001 -0.0002 -0.0003 -0.0001 -0.0002 0.0001  
Z -0.0001 0.0001 0.0002 0.0001 0.0002 -0.0001  
AT. 33 H X 0.0000 -0.0000 0.0000 0.0004 -0.0002 -0.0001  
Y -0.0000 -0.0000 -0.0000 -0.0002 0.0001 0.0001  
Z -0.0000 -0.0000 -0.0000 -0.0010 0.0006 0.0002  
AT. 34 H X 0.0000 0.0000 -0.0000 0.0004 0.0002 -0.0001  
Y -0.0000 0.0000 0.0000 -0.0002 -0.0001 0.0001  
Z -0.0000 0.0000 0.0000 -0.0010 -0.0006 0.0002  
AT. 35 C X 0.0000 -0.0000 -0.0000 -0.0000 -0.0000 0.0000  
Y -0.0000 -0.0000 -0.0000 -0.0000 0.0000 0.0000  
Z -0.0000 0.0000 0.0000 -0.0000 0.0000 -0.0000  
AT. 36 C X 0.0000 0.0000 0.0000 -0.0000 0.0000 0.0000  
Y -0.0000 0.0000 0.0000 -0.0000 -0.0000 0.0000  
Z -0.0000 -0.0000 -0.0000 -0.0000 -0.0000 -0.0000  
AT. 37 C X -0.0000 0.0000 0.0000 -0.0000 -0.0000 0.0000  
Y -0.0000 -0.0000 0.0000 0.0000 0.0001 -0.0000  
Z -0.0000 0.0000 0.0000 0.0001 0.0001 -0.0000

AT. 38 C X -0.0000 -0.0000 -0.0000 -0.0000 0.0000 0.0000  
Y -0.0000 0.0000 -0.0000 0.0000 -0.0001 -0.0000  
Z -0.0000 -0.0000 -0.0000 0.0001 -0.0001 -0.0000

AT. 39 H X 0.0000 -0.0000 0.0002 0.0007 0.0010 -0.0002  
Y -0.0000 -0.0000 -0.0002 -0.0006 -0.0008 0.0002  
Z 0.0000 -0.0000 -0.0003 -0.0010 -0.0014 0.0004

AT. 40 H X 0.0000 0.0000 -0.0002 0.0007 -0.0010 -0.0002  
Y -0.0000 0.0000 0.0002 -0.0006 0.0008 0.0002  
Z 0.0000 0.0000 0.0003 -0.0010 0.0014 0.0004

AT. 41 H X 0.0000 -0.0000 -0.0001 -0.0002 -0.0004 0.0001  
Y 0.0000 -0.0000 -0.0000 -0.0001 -0.0003 0.0001  
Z -0.0000 0.0000 0.0000 -0.0002 -0.0004 -0.0000

AT. 42 H X 0.0000 0.0000 0.0001 -0.0002 0.0004 0.0001  
Y 0.0000 0.0000 0.0000 -0.0001 0.0003 0.0001  
Z -0.0000 -0.0000 -0.0000 -0.0002 0.0004 -0.0000

AT. 43 C X -0.0000 0.0000 0.0001 -0.0000 -0.0000 -0.0001  
Y -0.0000 0.0000 0.0000 0.0000 -0.0000 -0.0000  
Z -0.0000 0.0000 0.0001 -0.0000 0.0000 -0.0001

AT. 44 C X -0.0000 -0.0000 -0.0001 -0.0000 0.0000 -0.0001  
Y -0.0000 -0.0000 -0.0000 0.0000 0.0000 -0.0000  
Z -0.0000 -0.0000 -0.0001 -0.0000 -0.0000 -0.0001

AT. 45 H X 0.0002 -0.0002 -0.0006 0.0001 0.0001 0.0006  
Y 0.0003 -0.0002 -0.0009 0.0000 0.0000 0.0009  
Z 0.0002 -0.0002 -0.0006 -0.0000 -0.0001 0.0005

AT. 46 H X 0.0002 0.0002 0.0006 0.0001 -0.0001 0.0006  
Y 0.0003 0.0002 0.0009 0.0000 -0.0000 0.0009  
Z 0.0002 0.0002 0.0006 -0.0000 0.0001 0.0005

AT. 47 H X 0.0000 -0.0001 -0.0003 0.0003 -0.0000 0.0009  
Y -0.0000 0.0001 0.0002 -0.0002 0.0000 -0.0006  
Z 0.0000 -0.0001 -0.0002 0.0002 -0.0000 0.0007

AT. 48 H X 0.0000 0.0001 0.0003 0.0003 0.0000 0.0009  
Y -0.0000 -0.0001 -0.0002 -0.0002 -0.0000 -0.0006

Z 0.0000 0.0001 0.0002 0.0002 0.0000 0.0007  
AT. 49 C X -0.0000 0.0000 0.0000 -0.0000 0.0000 -0.0000  
Y 0.0000 -0.0000 -0.0000 -0.0000 0.0000 0.0000  
Z -0.0000 0.0000 0.0000 0.0000 -0.0000 -0.0000  
AT. 50 C X -0.0000 -0.0000 -0.0000 -0.0000 -0.0000 -0.0000  
Y 0.0000 0.0000 0.0000 -0.0000 -0.0000 0.0000  
Z -0.0000 -0.0000 -0.0000 0.0000 0.0000 -0.0000  
AT. 51 C X -0.0000 0.0000 0.0000 -0.0001 -0.0000 -0.0003  
Y -0.0000 -0.0000 -0.0000 0.0001 0.0000 0.0002  
Z -0.0000 0.0000 0.0000 -0.0001 0.0000 -0.0001  
AT. 52 C X -0.0000 -0.0000 -0.0000 -0.0001 0.0000 -0.0003  
Y -0.0000 0.0000 0.0000 0.0001 -0.0000 0.0002  
Z -0.0000 -0.0000 -0.0000 -0.0001 -0.0000 -0.0001  
AT. 53 H X 0.0001 -0.0001 -0.0003 0.0014 0.0000 0.0032  
Y -0.0000 0.0000 0.0002 -0.0010 0.0000 -0.0022  
Z 0.0000 -0.0000 -0.0002 0.0008 -0.0000 0.0018  
AT. 54 H X 0.0001 0.0001 0.0003 0.0014 -0.0000 0.0032  
Y -0.0000 -0.0000 -0.0002 -0.0010 -0.0000 -0.0022  
Z 0.0000 0.0000 0.0002 0.0008 0.0000 0.0018  
AT. 55 H X 0.0000 0.0001 0.0002 -0.0002 0.0001 -0.0002  
Y -0.0000 0.0001 0.0002 -0.0002 0.0000 -0.0005  
Z -0.0000 -0.0001 -0.0001 0.0002 -0.0001 0.0003  
AT. 56 H X 0.0000 -0.0001 -0.0002 -0.0002 -0.0001 -0.0002  
Y -0.0000 -0.0001 -0.0002 -0.0002 -0.0000 -0.0005  
Z -0.0000 0.0001 0.0001 0.0002 0.0001 0.0003  
AT. 57 C X -0.0000 -0.0000 -0.0000 -0.0000 0.0000 -0.0000  
Y -0.0000 -0.0000 -0.0000 -0.0000 0.0000 -0.0000  
Z -0.0000 0.0000 0.0000 -0.0000 0.0000 -0.0000  
AT. 58 C X -0.0000 0.0000 0.0000 -0.0000 -0.0000 -0.0000  
Y -0.0000 0.0000 0.0000 -0.0000 -0.0000 -0.0000  
Z -0.0000 -0.0000 -0.0000 -0.0000 -0.0000 -0.0000  
AT. 59 H X 0.0001 0.0001 0.0002 0.0000 -0.0000 0.0002

Y 0.0001 0.0001 0.0003 0.0000 -0.0000 0.0002  
Z -0.0001 -0.0001 -0.0002 -0.0000 0.0000 -0.0002  
AT. 60 H X 0.0001 -0.0001 -0.0002 0.0000 0.0000 0.0002  
Y 0.0001 -0.0001 -0.0003 0.0000 0.0000 0.0002  
Z -0.0001 0.0001 0.0002 -0.0000 -0.0000 -0.0002  
AT. 61 H X -0.0001 -0.0000 0.0000 -0.0000 -0.0000 -0.0003  
Y 0.0000 -0.0000 -0.0001 0.0000 -0.0000 0.0002  
Z 0.0001 0.0000 -0.0000 0.0000 -0.0000 0.0004  
AT. 62 H X -0.0001 0.0000 -0.0000 -0.0000 0.0000 -0.0003  
Y 0.0000 0.0000 0.0001 0.0000 0.0000 0.0002  
Z 0.0001 -0.0000 0.0000 0.0000 0.0000 0.0004  
AT. 63 H X 0.0001 0.0000 0.0000 0.0001 -0.0001 0.0002  
Y 0.0001 0.0000 0.0001 0.0000 -0.0001 0.0001  
Z 0.0001 0.0000 0.0001 0.0001 -0.0001 0.0002  
AT. 64 H X 0.0001 -0.0000 -0.0000 0.0001 0.0001 0.0002  
Y 0.0001 -0.0000 -0.0001 0.0000 0.0001 0.0001  
Z 0.0001 -0.0000 -0.0001 0.0001 0.0001 0.0002  
AT. 65 C X 0.0000 0.0000 0.0000 -0.0000 0.0000 -0.0000  
Y -0.0000 -0.0000 -0.0000 -0.0000 0.0000 0.0000  
Z -0.0000 0.0000 0.0000 -0.0000 -0.0000 -0.0000  
AT. 66 C X 0.0000 -0.0000 -0.0000 -0.0000 -0.0000 -0.0000  
Y -0.0000 0.0000 0.0000 -0.0000 -0.0000 0.0000  
Z -0.0000 -0.0000 -0.0000 -0.0000 0.0000 -0.0000  
AT. 67 H X 0.0000 -0.0000 -0.0001 0.0001 -0.0001 0.0002  
Y 0.0000 -0.0001 -0.0001 0.0002 -0.0001 0.0002  
Z 0.0000 -0.0000 -0.0001 0.0002 -0.0001 0.0001  
AT. 68 H X 0.0000 0.0000 0.0001 0.0001 0.0001 0.0002  
Y 0.0000 0.0001 0.0001 0.0002 0.0001 0.0002  
Z 0.0000 0.0000 0.0001 0.0002 0.0001 0.0001  
AT. 69 H X -0.0001 -0.0001 -0.0002 0.0000 0.0001 0.0003  
Y 0.0000 0.0001 0.0001 -0.0000 -0.0001 -0.0002  
Z -0.0001 -0.0000 0.0000 0.0000 0.0000 0.0000

AT. 70 H X -0.0001 0.0001 0.0002 0.0000 -0.0001 0.0003  
Y 0.0000 -0.0001 -0.0001 -0.0000 0.0001 -0.0002  
Z -0.0001 0.0000 -0.0000 0.0000 -0.0000 0.0000

AT. 71 H X -0.0000 0.0000 0.0000 0.0000 -0.0001 -0.0002  
Y -0.0000 0.0001 0.0001 -0.0000 -0.0001 -0.0005  
Z 0.0000 -0.0000 -0.0000 -0.0000 0.0001 0.0003

AT. 72 H X -0.0000 -0.0000 -0.0000 0.0000 0.0001 -0.0002  
Y -0.0000 -0.0001 -0.0001 -0.0000 0.0001 -0.0005  
Z 0.0000 0.0000 0.0000 -0.0000 -0.0001 0.0003

AT. 73 C X 0.0000 -0.0000 -0.0001 -0.0000 0.0000 0.0001  
Y 0.0000 -0.0000 -0.0001 -0.0000 0.0000 0.0001  
Z 0.0000 -0.0000 -0.0001 -0.0000 0.0000 0.0001

AT. 74 C X 0.0000 0.0000 0.0001 -0.0000 -0.0000 0.0001  
Y 0.0000 0.0000 0.0001 -0.0000 -0.0000 0.0001  
Z 0.0000 0.0000 0.0001 -0.0000 -0.0000 0.0001

AT. 75 H X 0.0000 0.0001 0.0002 0.0000 -0.0000 0.0000  
Y 0.0000 0.0002 0.0004 0.0001 -0.0001 -0.0000  
Z 0.0000 -0.0001 -0.0004 -0.0001 0.0000 0.0001

AT. 76 H X 0.0000 -0.0001 -0.0002 0.0000 0.0000 0.0000  
Y 0.0000 -0.0002 -0.0004 0.0001 0.0001 -0.0000  
Z 0.0000 0.0001 0.0004 -0.0001 -0.0000 0.0001

AT. 77 H X -0.0003 0.0003 0.0012 0.0001 -0.0003 -0.0010  
Y -0.0003 0.0003 0.0012 0.0001 -0.0003 -0.0010  
Z -0.0002 0.0003 0.0011 0.0001 -0.0003 -0.0009

AT. 78 H X -0.0003 -0.0003 -0.0012 0.0001 0.0003 -0.0010  
Y -0.0003 -0.0003 -0.0012 0.0001 0.0003 -0.0010  
Z -0.0002 -0.0003 -0.0011 0.0001 0.0003 -0.0009

AT. 79 I X 0.0000 -0.0000 -0.0000 -0.0000 0.0000 -0.0000  
Y 0.0000 -0.0000 0.0000 -0.0000 -0.0000 0.0000  
Z 0.0000 0.0000 -0.0000 0.0000 0.0000 -0.0000

AT. 80 I X 0.0000 0.0000 0.0000 -0.0000 -0.0000 -0.0000  
Y 0.0000 0.0000 -0.0000 -0.0000 0.0000 0.0000

Z 0.0000 -0.0000 0.0000 0.0000 -0.0000 -0.0000  
AT. 81 I X 0.0000 -0.0000 -0.0000 0.0000 0.0000 0.0000  
Y -0.0000 -0.0000 -0.0000 -0.0000 0.0000 0.0000  
Z -0.0000 -0.0000 0.0000 0.0000 0.0000 -0.0000  
AT. 82 I X 0.0000 0.0000 0.0000 0.0000 -0.0000 0.0000  
Y -0.0000 0.0000 0.0000 -0.0000 -0.0000 0.0000  
Z -0.0000 0.0000 -0.0000 0.0000 -0.0000 -0.0000  
AT. 83 O X -0.0000 -0.0001 -0.0003 -0.0000 0.0001 -0.0003  
Y -0.0001 -0.0001 -0.0001 -0.0000 0.0000 -0.0001  
Z -0.0000 -0.0000 -0.0002 -0.0000 0.0001 -0.0002  
AT. 84 O X -0.0000 0.0001 0.0003 -0.0000 -0.0001 -0.0003  
Y -0.0001 0.0001 0.0001 -0.0000 -0.0000 -0.0001  
Z -0.0000 0.0000 0.0002 -0.0000 -0.0001 -0.0002  
AT. 85 O X 0.0001 -0.0001 -0.0004 0.0000 0.0001 0.0003  
Y 0.0001 -0.0001 -0.0004 0.0000 0.0001 0.0003  
Z -0.0000 0.0001 0.0002 -0.0000 -0.0000 -0.0002  
AT. 86 O X 0.0001 0.0001 0.0004 0.0000 -0.0001 0.0003  
Y 0.0001 0.0001 0.0004 0.0000 -0.0001 0.0003  
Z -0.0000 -0.0001 -0.0002 -0.0000 0.0000 -0.0002  
AT. 87 N X -0.0000 -0.0000 -0.0000 -0.0000 0.0000 -0.0001  
Y -0.0000 -0.0000 0.0000 0.0000 -0.0000 0.0000  
Z 0.0000 -0.0000 -0.0002 -0.0000 0.0001 -0.0001  
AT. 88 N X -0.0000 0.0000 0.0000 -0.0000 -0.0000 -0.0001  
Y -0.0000 0.0000 -0.0000 0.0000 0.0000 0.0000  
Z 0.0000 0.0000 0.0002 -0.0000 -0.0001 -0.0001  
AT. 89 N X 0.0000 -0.0000 -0.0001 0.0000 0.0000 0.0001  
Y 0.0000 -0.0001 -0.0002 0.0000 0.0000 0.0002  
Z -0.0000 0.0001 0.0002 -0.0000 -0.0000 -0.0002  
AT. 90 N X 0.0000 0.0000 0.0001 0.0000 -0.0000 0.0001  
Y 0.0000 0.0001 0.0002 0.0000 -0.0000 0.0002  
Z -0.0000 -0.0001 -0.0002 -0.0000 0.0000 -0.0002  
AT. 91 C X -0.0001 -0.0000 0.0005 0.0000 -0.0001 0.0004



Y -0.0000 -0.0000 0.0000 0.0000 -0.0000 0.0000  
Z -0.0001 -0.0000 0.0005 0.0000 -0.0001 0.0003  
AT. 92 C X -0.0001 0.0000 -0.0005 0.0000 0.0001 0.0004  
Y -0.0000 0.0000 -0.0000 0.0000 0.0000 0.0000  
Z -0.0001 0.0000 -0.0005 0.0000 0.0001 0.0003  
AT. 93 C X -0.0045 -0.0043 0.0015 0.0002 -0.0003 0.0009  
Y -0.0015 -0.0014 0.0004 0.0001 -0.0001 0.0003  
Z -0.0109 -0.0105 0.0038 0.0005 -0.0007 0.0023  
AT. 94 C X -0.0045 0.0043 -0.0015 0.0002 0.0003 0.0009  
Y -0.0015 0.0014 -0.0004 0.0001 0.0001 0.0003  
Z -0.0109 0.0105 -0.0038 0.0005 0.0007 0.0023  
AT. 95 H X 0.0261 0.0247 -0.0088 -0.0012 0.0016 -0.0056  
Y 0.0415 0.0398 -0.0137 -0.0019 0.0025 -0.0088  
Z 0.0221 0.0212 -0.0072 -0.0010 0.0013 -0.0046  
AT. 96 H X 0.0261 -0.0247 0.0088 -0.0012 -0.0016 -0.0056  
Y 0.0415 -0.0398 0.0137 -0.0019 -0.0025 -0.0088  
Z 0.0221 -0.0212 0.0072 -0.0010 -0.0013 -0.0046  
AT. 97 H X 0.0291 0.0282 -0.0101 -0.0013 0.0018 -0.0060  
Y -0.0241 -0.0233 0.0084 0.0011 -0.0015 0.0051  
Z 0.1090 0.1053 -0.0381 -0.0049 0.0070 -0.0233  
AT. 98 H X 0.0291 -0.0282 0.0101 -0.0013 -0.0018 -0.0060  
Y -0.0241 0.0233 -0.0084 0.0011 0.0015 0.0051  
Z 0.1090 -0.1053 0.0381 -0.0049 -0.0070 -0.0233  
AT. 99 C X -0.0002 0.0002 0.0008 -0.0000 -0.0001 -0.0007  
Y -0.0001 0.0002 0.0005 -0.0000 -0.0001 -0.0004  
Z 0.0001 -0.0001 -0.0003 0.0000 0.0001 0.0003  
AT. 100 C X -0.0002 -0.0002 -0.0008 -0.0000 0.0001 -0.0007  
Y -0.0001 -0.0002 -0.0005 -0.0000 0.0001 -0.0004  
Z 0.0001 0.0001 0.0003 0.0000 -0.0001 0.0003  
AT. 101 C X -0.0004 0.0010 0.0018 -0.0001 -0.0003 -0.0015  
Y -0.0009 0.0022 0.0040 -0.0001 -0.0007 -0.0032  
Z 0.0008 -0.0020 -0.0040 0.0001 0.0007 0.0032

AT.102 C X -0.0004 -0.0010 -0.0018 -0.0001 0.0003 -0.0015  
Y -0.0009 -0.0022 -0.0040 -0.0001 0.0007 -0.0032  
Z 0.0008 0.0020 0.0040 0.0001 -0.0007 0.0032

AT.103 H X 0.0031 -0.0077 -0.0136 0.0005 0.0023 0.0108  
Y 0.0071 -0.0177 -0.0304 0.0011 0.0052 0.0248  
Z 0.0002 -0.0005 -0.0010 0.0000 0.0002 0.0008

AT.104 H X 0.0031 0.0077 0.0136 0.0005 -0.0023 0.0108  
Y 0.0071 0.0177 0.0304 0.0011 -0.0052 0.0248  
Z 0.0002 0.0005 0.0010 0.0000 -0.0002 0.0008

AT.105 H X 0.0019 -0.0047 -0.0092 0.0003 0.0016 0.0074  
Y 0.0038 -0.0091 -0.0184 0.0006 0.0033 0.0149  
Z -0.0103 0.0242 0.0484 -0.0017 -0.0086 -0.0394

AT.106 H X 0.0019 0.0047 0.0092 0.0003 -0.0016 0.0074  
Y 0.0038 0.0091 0.0184 0.0006 -0.0033 0.0149  
Z -0.0103 -0.0242 -0.0484 -0.0017 0.0086 -0.0394

AT.107 C X -0.0001 -0.0001 -0.0000 0.0000 0.0000 -0.0000  
Y -0.0000 -0.0000 -0.0000 -0.0000 0.0000 -0.0001  
Z -0.0000 -0.0000 -0.0000 0.0000 -0.0000 -0.0000

AT.108 C X -0.0001 0.0001 0.0000 0.0000 -0.0000 -0.0000  
Y -0.0000 0.0000 0.0000 -0.0000 -0.0000 -0.0001  
Z -0.0000 0.0000 0.0000 0.0000 0.0000 -0.0000

AT.109 H X 0.0000 0.0001 -0.0000 0.0000 -0.0000 -0.0001  
Y -0.0000 -0.0001 0.0000 0.0001 -0.0001 0.0003  
Z -0.0000 0.0000 -0.0001 -0.0001 0.0000 -0.0002

AT.110 H X 0.0000 -0.0001 0.0000 0.0000 0.0000 -0.0001  
Y -0.0000 0.0001 -0.0000 0.0001 0.0001 0.0003  
Z -0.0000 -0.0000 0.0001 -0.0001 -0.0000 -0.0002

AT.111 H X 0.0006 0.0005 0.0003 -0.0002 0.0000 0.0003  
Y 0.0001 0.0001 0.0001 -0.0000 -0.0000 0.0000  
Z 0.0005 0.0005 0.0006 -0.0001 -0.0000 0.0006

AT.112 H X 0.0006 -0.0005 -0.0003 -0.0002 -0.0000 0.0003  
Y 0.0001 -0.0001 -0.0001 -0.0000 0.0000 0.0000

Z 0.0005 -0.0005 -0.0006 -0.0001 0.0000 0.0006  
AT. 113 C X 0.0000 -0.0000 -0.0000 0.0000 0.0000 0.0000  
Y 0.0000 0.0000 0.0000 0.0000 -0.0000 0.0000  
Z 0.0000 0.0000 0.0000 0.0000 -0.0000 0.0000  
AT. 114 C X 0.0000 0.0000 0.0000 0.0000 -0.0000 0.0000  
Y 0.0000 -0.0000 -0.0000 0.0000 0.0000 0.0000  
Z 0.0000 -0.0000 -0.0000 0.0000 0.0000 0.0000  
AT. 115 C X -0.0001 0.0001 0.0002 -0.0000 -0.0000 -0.0001  
Y -0.0000 0.0000 0.0001 -0.0000 -0.0000 -0.0000  
Z -0.0000 0.0001 0.0002 0.0000 -0.0000 -0.0000  
AT. 116 C X -0.0001 -0.0001 -0.0002 -0.0000 0.0000 -0.0001  
Y -0.0000 -0.0000 -0.0001 -0.0000 0.0000 -0.0000  
Z -0.0000 -0.0001 -0.0002 0.0000 0.0000 -0.0000  
AT. 117 H X 0.0004 -0.0009 -0.0021 -0.0000 0.0004 0.0010  
Y 0.0001 -0.0002 -0.0005 0.0000 0.0001 0.0003  
Z 0.0004 -0.0008 -0.0019 -0.0000 0.0004 0.0009  
AT. 118 H X 0.0004 0.0009 0.0021 -0.0000 -0.0004 0.0010  
Y 0.0001 0.0002 0.0005 0.0000 -0.0001 0.0003  
Z 0.0004 0.0008 0.0019 -0.0000 -0.0004 0.0009  
AT. 119 H X 0.0001 -0.0001 -0.0003 0.0000 0.0000 0.0004  
Y -0.0001 -0.0001 -0.0001 -0.0000 0.0001 -0.0003  
Z -0.0002 0.0001 0.0003 -0.0000 -0.0000 -0.0006  
AT. 120 H X 0.0001 0.0001 0.0003 0.0000 -0.0000 0.0004  
Y -0.0001 0.0001 0.0001 -0.0000 -0.0001 -0.0003  
Z -0.0002 -0.0001 -0.0003 -0.0000 0.0000 -0.0006  
AT. 121 C X -0.0001 -0.0001 -0.0000 0.0000 0.0000 0.0000  
Y 0.0000 -0.0000 -0.0000 0.0000 0.0000 0.0000  
Z 0.0001 0.0000 -0.0001 -0.0000 0.0000 0.0001  
AT. 122 C X -0.0001 0.0001 0.0000 0.0000 -0.0000 0.0000  
Y 0.0000 0.0000 0.0000 0.0000 -0.0000 0.0000  
Z 0.0001 -0.0000 0.0001 -0.0000 -0.0000 0.0001  
AT. 123 H X 0.0000 0.0001 0.0001 0.0000 0.0000 -0.0000

Y -0.0003 -0.0001 0.0002 -0.0001 -0.0001 -0.0004  
Z -0.0003 -0.0000 0.0004 -0.0001 -0.0002 -0.0005  
AT. 124 H X 0.0000 -0.0001 -0.0001 0.0000 -0.0000 -0.0000  
Y -0.0003 0.0001 -0.0002 -0.0001 0.0001 -0.0004  
Z -0.0003 0.0000 -0.0004 -0.0001 0.0002 -0.0005  
AT. 125 H X 0.0008 0.0005 -0.0005 -0.0001 0.0000 0.0002  
Y 0.0003 0.0003 0.0000 -0.0000 -0.0000 -0.0001  
Z -0.0006 -0.0005 0.0001 0.0001 0.0001 0.0002  
AT. 126 H X 0.0008 -0.0005 0.0005 -0.0001 -0.0000 0.0002  
Y 0.0003 -0.0003 -0.0000 -0.0000 0.0000 -0.0001  
Z -0.0006 0.0005 -0.0001 0.0001 -0.0001 0.0002  
AT. 127 C X -0.0000 -0.0000 -0.0000 -0.0000 0.0000 -0.0000  
Y 0.0000 0.0000 0.0000 0.0000 -0.0000 -0.0000  
Z 0.0000 0.0000 0.0000 0.0000 -0.0000 0.0000  
AT. 128 C X -0.0000 0.0000 0.0000 -0.0000 -0.0000 -0.0000  
Y 0.0000 -0.0000 -0.0000 0.0000 0.0000 -0.0000  
Z 0.0000 -0.0000 -0.0000 0.0000 0.0000 0.0000  
AT. 129 C X -0.0002 -0.0002 0.0002 0.0000 -0.0000 0.0001  
Y -0.0001 -0.0001 0.0001 0.0000 -0.0000 0.0000  
Z 0.0002 0.0002 -0.0001 -0.0000 0.0000 -0.0001  
AT. 130 C X -0.0002 0.0002 -0.0002 0.0000 0.0000 0.0001  
Y -0.0001 0.0001 -0.0001 0.0000 0.0000 0.0000  
Z 0.0002 -0.0002 0.0001 -0.0000 -0.0000 -0.0001  
AT. 131 H X 0.0026 0.0023 -0.0018 -0.0003 0.0004 -0.0010  
Y 0.0009 0.0008 -0.0006 -0.0001 0.0001 -0.0004  
Z -0.0018 -0.0016 0.0012 0.0002 -0.0003 0.0007  
AT. 132 H X 0.0026 -0.0023 0.0018 -0.0003 -0.0004 -0.0010  
Y 0.0009 -0.0008 0.0006 -0.0001 -0.0001 -0.0004  
Z -0.0018 0.0016 -0.0012 0.0002 0.0003 0.0007  
AT. 133 H X -0.0001 -0.0001 -0.0001 0.0001 -0.0001 -0.0001  
Y 0.0004 0.0004 -0.0003 -0.0005 0.0004 -0.0001  
Z -0.0003 -0.0003 -0.0000 0.0004 -0.0003 0.0001

AT. 134 H X -0.0001 0.0001 0.0001 0.0001 0.0001 -0.0001  
Y 0.0004 -0.0004 0.0003 -0.0005 -0.0004 -0.0001  
Z -0.0003 0.0003 0.0000 0.0004 0.0003 0.0001

AT. 135 C X 0.0000 0.0000 0.0000 -0.0000 0.0000 0.0000  
Y 0.0000 0.0000 0.0000 -0.0000 -0.0000 -0.0000  
Z 0.0000 0.0000 0.0000 0.0000 -0.0000 0.0001

AT. 136 C X 0.0000 -0.0000 -0.0000 -0.0000 -0.0000 0.0000  
Y 0.0000 -0.0000 -0.0000 -0.0000 0.0000 -0.0000  
Z 0.0000 -0.0000 -0.0000 0.0000 0.0000 0.0001

AT. 137 H X -0.0000 -0.0000 -0.0000 0.0000 -0.0000 -0.0001  
Y 0.0001 -0.0001 -0.0002 0.0002 -0.0000 0.0005  
Z -0.0000 0.0001 0.0002 -0.0001 0.0000 -0.0003

AT. 138 H X -0.0000 0.0000 0.0000 0.0000 0.0000 -0.0001  
Y 0.0001 0.0001 0.0002 0.0002 0.0000 0.0005  
Z -0.0000 -0.0001 -0.0002 -0.0001 -0.0000 -0.0003

AT. 139 H X -0.0001 -0.0001 -0.0003 -0.0000 0.0001 -0.0001  
Y -0.0000 -0.0000 -0.0000 -0.0000 0.0000 -0.0001  
Z -0.0000 -0.0001 -0.0002 0.0001 0.0000 -0.0001

AT. 140 H X -0.0001 0.0001 0.0003 -0.0000 -0.0001 -0.0001  
Y -0.0000 0.0000 0.0000 -0.0000 -0.0000 -0.0001  
Z -0.0000 0.0001 0.0002 0.0001 -0.0000 -0.0001

AT. 141 H X 0.0001 0.0001 0.0002 0.0000 -0.0001 0.0002  
Y -0.0001 -0.0001 -0.0004 -0.0001 0.0002 -0.0004  
Z -0.0001 -0.0001 -0.0004 -0.0001 0.0002 -0.0003

AT. 142 H X 0.0001 -0.0001 -0.0002 0.0000 0.0001 0.0002  
Y -0.0001 0.0001 0.0004 -0.0001 -0.0002 -0.0004  
Z -0.0001 0.0001 0.0004 -0.0001 -0.0002 -0.0003

AT. 143 C X -0.0000 -0.0000 0.0000 -0.0000 0.0000 -0.0000  
Y 0.0000 0.0000 0.0001 0.0001 0.0000 -0.0000  
Z 0.0000 0.0000 -0.0000 0.0000 0.0000 0.0001

AT. 144 C X -0.0000 0.0000 -0.0000 -0.0000 -0.0000 -0.0000  
Y 0.0000 -0.0000 -0.0001 0.0001 -0.0000 -0.0000

Z 0.0000 -0.0000 0.0000 0.0000 -0.0000 0.0001  
AT. 145 H X 0.0000 0.0000 0.0000 0.0000 0.0000 0.0001  
Y -0.0002 -0.0001 -0.0003 -0.0004 -0.0002 -0.0004  
Z -0.0002 -0.0001 -0.0004 -0.0004 -0.0002 -0.0003  
AT. 146 H X 0.0000 -0.0000 -0.0000 0.0000 -0.0000 0.0001  
Y -0.0002 0.0001 0.0003 -0.0004 0.0002 -0.0004  
Z -0.0002 0.0001 0.0004 -0.0004 0.0002 -0.0003  
AT. 147 H X 0.0001 0.0000 -0.0002 0.0000 -0.0001 0.0002  
Y 0.0001 0.0000 -0.0000 0.0001 -0.0000 0.0001  
Z -0.0001 -0.0000 0.0001 -0.0000 0.0001 -0.0002  
AT. 148 H X 0.0001 -0.0000 0.0002 0.0000 0.0001 0.0002  
Y 0.0001 -0.0000 0.0000 0.0001 0.0000 0.0001  
Z -0.0001 0.0000 -0.0001 -0.0000 -0.0001 -0.0002  
AT. 149 H X -0.0000 0.0000 0.0002 0.0001 -0.0000 -0.0002  
Y 0.0001 -0.0000 -0.0005 -0.0005 0.0001 0.0004  
Z -0.0000 0.0000 0.0003 0.0002 -0.0001 -0.0002  
AT. 150 H X -0.0000 -0.0000 -0.0002 0.0001 0.0000 -0.0002  
Y 0.0001 0.0000 0.0005 -0.0005 -0.0001 0.0004  
Z -0.0000 -0.0000 -0.0003 0.0002 0.0001 -0.0002  
AT. 151 C X -0.0000 -0.0000 -0.0000 -0.0000 0.0000 -0.0000  
Y 0.0000 0.0000 0.0000 0.0000 -0.0000 0.0000  
Z 0.0000 0.0000 0.0000 -0.0000 0.0000 0.0000  
AT. 152 C X -0.0000 0.0000 0.0000 -0.0000 -0.0000 -0.0000  
Y 0.0000 -0.0000 -0.0000 0.0000 0.0000 0.0000  
Z 0.0000 -0.0000 -0.0000 -0.0000 -0.0000 0.0000  
AT. 153 H X 0.0000 0.0000 -0.0000 0.0002 -0.0002 0.0001  
Y -0.0001 -0.0001 -0.0001 -0.0007 0.0006 -0.0000  
Z 0.0001 0.0001 0.0001 0.0004 -0.0004 0.0001  
AT. 154 H X 0.0000 -0.0000 0.0000 0.0002 0.0002 0.0001  
Y -0.0001 0.0001 0.0001 -0.0007 -0.0006 -0.0000  
Z 0.0001 -0.0001 -0.0001 0.0004 0.0004 0.0001  
AT. 155 H X 0.0001 0.0001 0.0001 -0.0000 -0.0000 0.0002

Y -0.0002 -0.0001 -0.0003 0.0001 0.0001 -0.0005  
Z -0.0002 -0.0002 -0.0003 0.0000 0.0001 -0.0004  
AT. 156 H X 0.0001 -0.0001 -0.0001 -0.0000 0.0000 0.0002  
Y -0.0002 0.0001 0.0003 0.0001 -0.0001 -0.0005  
Z -0.0002 0.0002 0.0003 0.0000 -0.0001 -0.0004  
AT. 157 O X 0.0000 0.0000 -0.0000 0.0003 -0.0003 0.0001  
Y -0.0003 -0.0001 0.0003 -0.0023 0.0020 -0.0006  
Z -0.0001 -0.0000 0.0001 -0.0007 0.0006 -0.0002  
AT. 158 O X 0.0000 -0.0000 0.0000 0.0003 0.0003 0.0001  
Y -0.0003 0.0001 -0.0003 -0.0023 -0.0020 -0.0006  
Z -0.0001 0.0000 -0.0001 -0.0007 -0.0006 -0.0002  
AT. 159 O X 0.0000 -0.0000 -0.0001 0.0004 -0.0003 0.0000  
Y -0.0000 0.0000 0.0001 -0.0003 0.0003 -0.0000  
Z 0.0000 -0.0000 -0.0005 0.0015 -0.0012 0.0001  
AT. 160 O X 0.0000 0.0000 0.0001 0.0004 0.0003 0.0000  
Y -0.0000 -0.0000 -0.0001 -0.0003 -0.0003 -0.0000  
Z 0.0000 0.0000 0.0005 0.0015 0.0012 0.0001  
AT. 161 H X -0.0004 -0.0001 0.0005 -0.0038 0.0034 -0.0009  
Y 0.0043 0.0013 -0.0039 0.0357 -0.0310 0.0097  
Z 0.0012 0.0004 -0.0009 0.0093 -0.0080 0.0029  
AT. 162 H X -0.0004 0.0001 -0.0005 -0.0038 -0.0034 -0.0009  
Y 0.0043 -0.0013 0.0039 0.0357 0.0310 0.0097  
Z 0.0012 -0.0004 0.0009 0.0093 0.0080 0.0029  
AT. 163 H X -0.0003 0.0002 0.0026 -0.0078 0.0064 -0.0006  
Y 0.0002 -0.0001 -0.0017 0.0052 -0.0043 0.0004  
Z -0.0007 0.0005 0.0072 -0.0219 0.0180 -0.0017  
AT. 164 H X -0.0003 -0.0002 -0.0026 -0.0078 -0.0064 -0.0006  
Y 0.0002 0.0001 0.0017 0.0052 0.0043 0.0004  
Z -0.0007 -0.0005 -0.0072 -0.0219 -0.0180 -0.0017  
AT. 165 O X 0.0008 0.0010 0.0028 0.0001 -0.0007 0.0024  
Y 0.0005 0.0006 0.0017 0.0000 -0.0004 0.0015  
Z 0.0002 0.0003 0.0007 0.0000 -0.0002 0.0006

AT.166 O X 0.0008 -0.0010 -0.0028 0.0001 0.0007 0.0024  
Y 0.0005 -0.0006 -0.0017 0.0000 0.0004 0.0015  
Z 0.0002 -0.0003 -0.0007 0.0000 0.0002 0.0006

AT.167 H X -0.0128 -0.0147 -0.0419 -0.0013 0.0099 -0.0366  
Y -0.0073 -0.0084 -0.0239 -0.0007 0.0056 -0.0210  
Z -0.0037 -0.0043 -0.0124 -0.0004 0.0029 -0.0109

AT.168 H X -0.0128 0.0147 0.0419 -0.0013 -0.0099 -0.0366  
Y -0.0073 0.0084 0.0239 -0.0007 -0.0056 -0.0210  
Z -0.0037 0.0043 0.0124 -0.0004 -0.0029 -0.0109

AT.169 O X 0.0006 0.0006 0.0022 0.0000 -0.0004 0.0020  
Y -0.0013 -0.0015 -0.0051 -0.0001 0.0010 -0.0047  
Z 0.0007 0.0008 0.0028 0.0001 -0.0005 0.0026

AT.170 O X 0.0006 -0.0006 -0.0022 0.0000 0.0004 0.0020  
Y -0.0013 0.0015 0.0051 -0.0001 -0.0010 -0.0047  
Z 0.0007 -0.0008 -0.0028 0.0001 0.0005 0.0026

AT.171 H X -0.0089 -0.0103 -0.0343 -0.0008 0.0064 -0.0316  
Y 0.0196 0.0230 0.0760 0.0017 -0.0144 0.0704  
Z -0.0104 -0.0121 -0.0400 -0.0009 0.0075 -0.0371

AT.172 H X -0.0089 0.0103 0.0343 -0.0008 -0.0064 -0.0316  
Y 0.0196 -0.0230 -0.0760 0.0017 0.0144 0.0704  
Z -0.0104 0.0121 0.0400 -0.0009 -0.0075 -0.0371

FREQ(CM\*\*-1) 3152.59 3153.43 3172.28 3173.96 3201.14 3205.22

AT. 1 I X -0.0000 0.0000 0.0000 0.0000 0.0000 0.0000  
Y 0.0000 0.0000 0.0000 0.0000 0.0000 0.0000  
Z 0.0000 0.0000 0.0000 0.0000 0.0000 0.0000

AT. 2 I X 0.0000 0.0000 0.0000 -0.0000 0.0000 -0.0000  
Y -0.0000 0.0000 0.0000 -0.0000 0.0000 -0.0000  
Z -0.0000 0.0000 0.0000 -0.0000 0.0000 -0.0000

AT. 3 I X -0.0000 0.0000 -0.0000 0.0000 0.0000 -0.0000  
Y -0.0000 -0.0000 0.0000 -0.0000 0.0000 0.0000



Z -0.0000 0.0000 -0.0000 0.0000 0.0000 -0.0000  
AT. 4 I X 0.0000 0.0000 -0.0000 -0.0000 0.0000 0.0000  
Y 0.0000 -0.0000 0.0000 0.0000 0.0000 -0.0000  
Z 0.0000 0.0000 -0.0000 -0.0000 0.0000 0.0000  
AT. 5 O X -0.0000 -0.0001 -0.0003 -0.0003 -0.0000 -0.0000  
Y -0.0000 0.0001 0.0003 0.0003 0.0000 0.0000  
Z 0.0000 0.0002 0.0004 0.0004 0.0000 0.0000  
AT. 6 O X 0.0000 -0.0001 -0.0003 0.0003 -0.0000 0.0000  
Y 0.0000 0.0001 0.0003 -0.0003 0.0000 -0.0000  
Z -0.0000 0.0002 0.0004 -0.0004 0.0000 -0.0000  
AT. 7 O X -0.0001 0.0000 -0.0003 0.0003 -0.0000 0.0000  
Y 0.0000 -0.0000 0.0003 -0.0002 -0.0000 0.0000  
Z -0.0000 0.0000 -0.0001 0.0001 0.0000 -0.0000  
AT. 8 O X 0.0001 0.0000 -0.0003 -0.0003 -0.0000 -0.0000  
Y -0.0000 -0.0000 0.0003 0.0002 -0.0000 -0.0000  
Z 0.0000 0.0000 -0.0001 -0.0001 0.0000 0.0000  
AT. 9 N X 0.0001 0.0000 -0.0000 -0.0000 0.0000 -0.0000  
Y -0.0000 -0.0000 0.0000 -0.0000 0.0000 0.0000  
Z 0.0000 0.0001 0.0002 0.0002 -0.0000 -0.0000  
AT. 10 N X -0.0001 0.0000 -0.0000 0.0000 0.0000 0.0000  
Y 0.0000 -0.0000 0.0000 0.0000 0.0000 -0.0000  
Z -0.0000 0.0001 0.0002 -0.0002 -0.0000 0.0000  
AT. 11 N X -0.0000 0.0000 -0.0001 0.0001 0.0000 0.0000  
Y 0.0000 -0.0000 0.0002 -0.0001 -0.0000 0.0000  
Z -0.0000 0.0000 -0.0002 0.0001 0.0000 -0.0000  
AT. 12 N X 0.0000 0.0000 -0.0001 -0.0001 0.0000 -0.0000  
Y -0.0000 -0.0000 0.0002 0.0001 -0.0000 -0.0000  
Z 0.0000 0.0000 -0.0002 -0.0001 0.0000 0.0000  
AT. 13 C X 0.0000 0.0002 0.0005 0.0006 0.0000 0.0001  
Y 0.0001 -0.0000 -0.0003 -0.0003 -0.0000 -0.0000  
Z -0.0002 -0.0004 -0.0006 -0.0007 0.0000 -0.0000  
AT. 14 C X -0.0000 0.0002 0.0005 -0.0006 0.0000 -0.0001

Y -0.0001 -0.0000 -0.0003 0.0003 -0.0000 0.0000  
Z 0.0002 -0.0004 -0.0006 0.0007 0.0000 0.0000  
AT. 15 C X 0.0039 0.0032 -0.0000 0.0003 -0.0000 -0.0000  
Y -0.0038 -0.0032 -0.0002 -0.0003 0.0000 0.0000  
Z -0.0112 -0.0093 -0.0002 -0.0013 0.0000 -0.0000  
AT. 16 C X -0.0039 0.0032 -0.0000 -0.0003 -0.0000 0.0000  
Y 0.0038 -0.0032 -0.0002 0.0003 0.0000 -0.0000  
Z 0.0112 -0.0093 -0.0002 0.0013 0.0000 0.0000  
AT. 17 H X -0.0237 -0.0197 -0.0014 -0.0029 0.0000 -0.0000  
Y 0.0746 0.0620 0.0030 0.0080 -0.0001 -0.0001  
Z 0.0600 0.0497 0.0023 0.0062 -0.0001 -0.0000  
AT. 18 H X 0.0237 -0.0197 -0.0014 0.0029 0.0000 0.0000  
Y -0.0746 0.0620 0.0030 -0.0080 -0.0001 0.0001  
Z -0.0600 0.0497 0.0023 -0.0062 -0.0001 0.0000  
AT. 19 H X -0.0221 -0.0183 -0.0002 -0.0026 0.0000 -0.0001  
Y -0.0294 -0.0244 -0.0002 -0.0039 0.0001 -0.0001  
Z 0.0749 0.0623 0.0003 0.0090 -0.0002 0.0001  
AT. 20 H X 0.0221 -0.0183 -0.0002 0.0026 0.0000 0.0001  
Y 0.0294 -0.0244 -0.0002 0.0039 0.0001 0.0001  
Z -0.0749 0.0623 0.0003 -0.0090 -0.0002 -0.0001  
AT. 21 C X 0.0001 -0.0001 0.0005 -0.0005 0.0000 -0.0000  
Y -0.0001 0.0001 -0.0005 0.0004 0.0000 -0.0000  
Z 0.0000 -0.0000 0.0001 -0.0001 -0.0000 0.0001  
AT. 22 C X -0.0001 -0.0001 0.0005 0.0005 0.0000 0.0000  
Y 0.0001 0.0001 -0.0005 -0.0004 0.0000 0.0000  
Z -0.0000 -0.0000 0.0001 0.0001 -0.0000 -0.0001  
AT. 23 C X 0.0002 -0.0004 0.0007 -0.0006 0.0000 -0.0000  
Y -0.0008 0.0016 -0.0028 0.0023 -0.0000 0.0001  
Z 0.0007 -0.0012 0.0027 -0.0024 0.0000 -0.0001  
AT. 24 C X -0.0002 -0.0004 0.0007 0.0006 0.0000 0.0000  
Y 0.0008 0.0016 -0.0028 -0.0023 -0.0000 -0.0001  
Z -0.0007 -0.0012 0.0027 0.0024 0.0000 0.0001

AT. 25 H X -0.0009 0.0017 -0.0028 0.0020 -0.0000 0.0001  
Y 0.0050 -0.0108 0.0157 -0.0123 0.0002 -0.0002  
Z 0.0008 -0.0015 0.0027 -0.0022 0.0000 -0.0000

AT. 26 H X 0.0009 0.0017 -0.0028 -0.0020 -0.0000 -0.0001  
Y -0.0050 -0.0108 0.0157 0.0123 0.0002 0.0002  
Z -0.0008 -0.0015 0.0027 0.0022 0.0000 0.0000

AT. 27 H X -0.0018 0.0029 -0.0065 0.0058 -0.0001 0.0003  
Y 0.0047 -0.0081 0.0185 -0.0164 0.0002 -0.0008  
Z -0.0090 0.0159 -0.0341 0.0299 -0.0004 0.0014

AT. 28 H X 0.0018 0.0029 -0.0065 -0.0058 -0.0001 -0.0003  
Y -0.0047 -0.0081 0.0185 0.0164 0.0002 0.0008  
Z 0.0090 0.0159 -0.0341 -0.0299 -0.0004 -0.0014

AT. 29 C X 0.0000 -0.0000 -0.0001 -0.0001 -0.0000 -0.0000  
Y -0.0000 0.0000 0.0001 0.0001 0.0000 0.0000  
Z 0.0000 0.0000 0.0001 0.0001 0.0000 0.0000

AT. 30 C X -0.0000 -0.0000 -0.0001 0.0001 -0.0000 0.0000  
Y 0.0000 0.0000 0.0001 -0.0001 0.0000 -0.0000  
Z -0.0000 0.0000 0.0001 -0.0001 0.0000 -0.0000

AT. 31 H X -0.0000 -0.0001 -0.0002 -0.0004 0.0000 -0.0000  
Y 0.0000 -0.0000 -0.0003 -0.0006 0.0001 0.0001  
Z -0.0000 0.0001 0.0005 0.0007 0.0000 0.0001

AT. 32 H X 0.0000 -0.0001 -0.0002 0.0004 0.0000 0.0000  
Y -0.0000 -0.0000 -0.0003 0.0006 0.0001 -0.0001  
Z 0.0000 0.0001 0.0005 -0.0007 0.0000 -0.0001

AT. 33 H X -0.0001 0.0002 0.0006 0.0007 0.0002 0.0002  
Y 0.0001 -0.0001 -0.0001 -0.0000 -0.0000 -0.0000  
Z 0.0001 -0.0006 -0.0015 -0.0016 -0.0002 -0.0004

AT. 34 H X 0.0001 0.0002 0.0006 -0.0007 0.0002 -0.0002  
Y -0.0001 -0.0001 -0.0001 0.0000 -0.0000 0.0000  
Z -0.0001 -0.0006 -0.0015 0.0016 -0.0002 0.0004

AT. 35 C X -0.0000 0.0000 -0.0000 0.0000 0.0000 -0.0000  
Y 0.0000 -0.0000 -0.0000 -0.0000 0.0000 0.0000

Z 0.0000 -0.0000 -0.0000 -0.0000 -0.0000 0.0000  
AT. 36 C X 0.0000 0.0000 -0.0000 -0.0000 0.0000 0.0000  
Y -0.0000 -0.0000 -0.0000 0.0000 0.0000 -0.0000  
Z -0.0000 -0.0000 -0.0000 0.0000 -0.0000 -0.0000  
AT. 37 C X 0.0000 -0.0000 0.0001 -0.0001 -0.0000 0.0000  
Y -0.0000 -0.0000 -0.0001 0.0000 -0.0000 0.0000  
Z -0.0000 -0.0000 -0.0001 -0.0000 -0.0000 0.0000  
AT. 38 C X -0.0000 -0.0000 0.0001 0.0001 -0.0000 -0.0000  
Y 0.0000 -0.0000 -0.0001 -0.0000 -0.0000 -0.0000  
Z 0.0000 -0.0000 -0.0001 0.0000 -0.0000 -0.0000  
AT. 39 H X -0.0003 -0.0001 -0.0008 0.0002 -0.0000 0.0001  
Y 0.0003 0.0000 0.0006 -0.0002 0.0001 -0.0001  
Z 0.0005 0.0002 0.0010 -0.0002 0.0002 -0.0003  
AT. 40 H X 0.0003 -0.0001 -0.0008 -0.0002 -0.0000 -0.0001  
Y -0.0003 0.0000 0.0006 0.0002 0.0001 0.0001  
Z -0.0005 0.0002 0.0010 0.0002 0.0002 0.0003  
AT. 41 H X -0.0001 0.0002 -0.0003 0.0005 0.0004 -0.0004  
Y -0.0000 0.0001 -0.0000 0.0002 0.0002 -0.0002  
Z -0.0001 0.0001 -0.0003 0.0005 0.0001 -0.0001  
AT. 42 H X 0.0001 0.0002 -0.0003 -0.0005 0.0004 0.0004  
Y 0.0000 0.0001 -0.0000 -0.0002 0.0002 0.0002  
Z 0.0001 0.0001 -0.0003 -0.0005 0.0001 0.0001  
AT. 43 C X 0.0001 0.0000 0.0000 0.0000 -0.0000 0.0000  
Y -0.0000 -0.0001 0.0000 -0.0001 -0.0000 0.0000  
Z 0.0001 0.0000 0.0001 -0.0000 -0.0000 0.0000  
AT. 44 C X -0.0001 0.0000 0.0000 -0.0000 -0.0000 -0.0000  
Y 0.0000 -0.0001 0.0000 0.0001 -0.0000 -0.0000  
Z -0.0001 0.0000 0.0001 0.0000 -0.0000 -0.0000  
AT. 45 H X -0.0002 0.0003 -0.0002 0.0002 0.0003 -0.0003  
Y -0.0003 0.0004 -0.0004 0.0003 0.0006 -0.0006  
Z -0.0003 0.0002 -0.0004 0.0004 0.0003 -0.0002  
AT. 46 H X 0.0002 0.0003 -0.0002 -0.0002 0.0003 0.0003

Y 0.0003 0.0004 -0.0004 -0.0003 0.0006 0.0006  
Z 0.0003 0.0002 -0.0004 -0.0004 0.0003 0.0002  
AT. 47 H X -0.0010 -0.0006 -0.0002 -0.0001 0.0002 -0.0002  
Y 0.0007 0.0004 0.0000 0.0001 -0.0001 0.0001  
Z -0.0007 -0.0005 0.0001 -0.0003 0.0001 -0.0002  
AT. 48 H X 0.0010 -0.0006 -0.0002 0.0001 0.0002 0.0002  
Y -0.0007 0.0004 0.0000 -0.0001 -0.0001 -0.0001  
Z 0.0007 -0.0005 0.0001 0.0003 0.0001 0.0002  
AT. 49 C X 0.0000 -0.0000 -0.0000 -0.0000 -0.0000 0.0000  
Y 0.0000 0.0000 -0.0000 0.0000 0.0000 -0.0000  
Z 0.0000 -0.0000 0.0000 0.0000 -0.0000 0.0000  
AT. 50 C X -0.0000 -0.0000 -0.0000 0.0000 -0.0000 -0.0000  
Y -0.0000 0.0000 -0.0000 -0.0000 0.0000 0.0000  
Z -0.0000 -0.0000 0.0000 -0.0000 -0.0000 -0.0000  
AT. 51 C X 0.0005 0.0004 0.0001 0.0001 0.0000 0.0000  
Y -0.0004 -0.0003 -0.0001 -0.0001 0.0001 0.0001  
Z 0.0003 0.0002 0.0000 0.0000 -0.0001 -0.0000  
AT. 52 C X -0.0005 0.0004 0.0001 -0.0001 0.0000 -0.0000  
Y 0.0004 -0.0003 -0.0001 0.0001 0.0001 -0.0001  
Z -0.0003 0.0002 0.0000 -0.0000 -0.0001 0.0000  
AT. 53 H X -0.0063 -0.0053 -0.0009 -0.0011 0.0002 -0.0000  
Y 0.0044 0.0038 0.0006 0.0008 0.0000 0.0001  
Z -0.0035 -0.0029 -0.0004 -0.0006 0.0000 -0.0001  
AT. 54 H X 0.0063 -0.0053 -0.0009 0.0011 0.0002 0.0000  
Y -0.0044 0.0038 0.0006 -0.0008 0.0000 -0.0001  
Z 0.0035 -0.0029 -0.0004 0.0006 0.0000 0.0001  
AT. 55 H X 0.0004 0.0003 -0.0000 -0.0001 -0.0006 -0.0004  
Y 0.0008 0.0005 0.0001 -0.0000 -0.0011 -0.0009  
Z -0.0006 -0.0004 0.0001 0.0001 0.0012 0.0010  
AT. 56 H X -0.0004 0.0003 -0.0000 0.0001 -0.0006 0.0004  
Y -0.0008 0.0005 0.0001 0.0000 -0.0011 0.0009  
Z 0.0006 -0.0004 0.0001 -0.0001 0.0012 -0.0010

AT. 57 C X -0.0000 -0.0000 -0.0000 -0.0000 0.0000 0.0000  
Y -0.0000 -0.0000 0.0000 0.0000 0.0000 0.0000  
Z 0.0000 -0.0000 0.0000 0.0000 0.0000 0.0001

AT. 58 C X 0.0000 -0.0000 -0.0000 0.0000 0.0000 -0.0000  
Y 0.0000 -0.0000 0.0000 -0.0000 0.0000 -0.0000  
Z -0.0000 -0.0000 0.0000 -0.0000 0.0000 -0.0001

AT. 59 H X 0.0000 0.0000 0.0001 -0.0001 0.0000 -0.0000  
Y 0.0001 -0.0000 0.0002 -0.0002 0.0002 0.0001  
Z -0.0001 -0.0001 -0.0001 0.0002 0.0000 0.0001

AT. 60 H X -0.0000 0.0000 0.0001 0.0001 0.0000 0.0000  
Y -0.0001 -0.0000 0.0002 0.0002 0.0002 -0.0001  
Z 0.0001 -0.0001 -0.0001 -0.0002 0.0000 -0.0001

AT. 61 H X 0.0000 -0.0002 0.0001 0.0002 0.0000 0.0003  
Y -0.0000 0.0001 -0.0001 -0.0000 0.0001 -0.0001  
Z -0.0001 0.0003 -0.0002 -0.0001 0.0001 -0.0004

AT. 62 H X -0.0000 -0.0002 0.0001 -0.0002 0.0000 -0.0003  
Y 0.0000 0.0001 -0.0001 0.0000 0.0001 0.0001  
Z 0.0001 0.0003 -0.0002 0.0001 0.0001 0.0004

AT. 63 H X 0.0000 0.0003 -0.0001 0.0000 -0.0001 -0.0005  
Y 0.0000 0.0002 -0.0001 -0.0001 -0.0004 -0.0005  
Z 0.0000 0.0003 -0.0000 -0.0000 -0.0002 -0.0005

AT. 64 H X -0.0000 0.0003 -0.0001 -0.0000 -0.0001 0.0005  
Y -0.0000 0.0002 -0.0001 0.0001 -0.0004 0.0005  
Z -0.0000 0.0003 -0.0000 0.0000 -0.0002 0.0005

AT. 65 C X 0.0000 -0.0000 0.0000 0.0000 -0.0000 0.0000  
Y 0.0000 0.0000 -0.0000 -0.0000 -0.0000 -0.0000  
Z 0.0000 -0.0000 0.0000 -0.0000 -0.0000 0.0000

AT. 66 C X -0.0000 -0.0000 0.0000 -0.0000 -0.0000 -0.0000  
Y -0.0000 0.0000 -0.0000 0.0000 -0.0000 0.0000  
Z -0.0000 -0.0000 0.0000 0.0000 -0.0000 -0.0000

AT. 67 H X -0.0002 0.0002 -0.0000 0.0001 0.0002 0.0001  
Y -0.0002 0.0002 0.0000 0.0001 0.0003 -0.0001

Z -0.0002 0.0001 0.0001 0.0002 0.0002 -0.0000  
AT. 68 H X 0.0002 0.0002 -0.0000 -0.0001 0.0002 -0.0001  
Y 0.0002 0.0002 0.0000 -0.0001 0.0003 0.0001  
Z 0.0002 0.0001 0.0001 -0.0002 0.0002 0.0000  
AT. 69 H X -0.0001 0.0002 -0.0002 -0.0001 0.0002 -0.0005  
Y 0.0001 -0.0001 0.0001 0.0000 -0.0000 0.0003  
Z -0.0000 0.0000 -0.0001 -0.0001 -0.0002 -0.0001  
AT. 70 H X 0.0001 0.0002 -0.0002 0.0001 0.0002 0.0005  
Y -0.0001 -0.0001 0.0001 -0.0000 -0.0000 -0.0003  
Z 0.0000 0.0000 -0.0001 0.0001 -0.0002 0.0001  
AT. 71 H X -0.0000 -0.0002 0.0002 -0.0000 -0.0001 0.0001  
Y -0.0001 -0.0004 0.0004 0.0000 -0.0004 0.0000  
Z 0.0000 0.0003 -0.0003 0.0000 0.0001 -0.0002  
AT. 72 H X 0.0000 -0.0002 0.0002 0.0000 -0.0001 -0.0001  
Y 0.0001 -0.0004 0.0004 -0.0000 -0.0004 -0.0000  
Z -0.0000 0.0003 -0.0003 -0.0000 0.0001 0.0002  
AT. 73 C X -0.0000 0.0000 -0.0000 0.0000 0.0001 -0.0001  
Y -0.0000 0.0001 -0.0000 0.0000 0.0001 -0.0001  
Z 0.0000 0.0000 -0.0000 -0.0000 0.0001 -0.0000  
AT. 74 C X 0.0000 0.0000 -0.0000 -0.0000 0.0001 0.0001  
Y 0.0000 0.0001 -0.0000 -0.0000 0.0001 0.0001  
Z -0.0000 0.0000 -0.0000 0.0000 0.0001 0.0000  
AT. 75 H X -0.0000 -0.0001 0.0002 -0.0001 -0.0001 -0.0002  
Y 0.0000 -0.0002 0.0004 -0.0002 0.0000 -0.0000  
Z -0.0000 0.0002 -0.0003 0.0002 0.0001 -0.0002  
AT. 76 H X 0.0000 -0.0001 0.0002 0.0001 -0.0001 0.0002  
Y -0.0000 -0.0002 0.0004 0.0002 0.0000 0.0000  
Z 0.0000 0.0002 -0.0003 -0.0002 0.0001 0.0002  
AT. 77 H X -0.0001 -0.0006 0.0002 -0.0001 -0.0010 0.0011  
Y -0.0000 -0.0005 0.0002 -0.0001 -0.0010 0.0010  
Z -0.0001 -0.0005 0.0003 -0.0001 -0.0009 0.0007  
AT. 78 H X 0.0001 -0.0006 0.0002 0.0001 -0.0010 -0.0011

Y 0.0000 -0.0005 0.0002 0.0001 -0.0010 -0.0010  
Z 0.0001 -0.0005 0.0003 0.0001 -0.0009 -0.0007  
AT. 79 I X -0.0000 -0.0000 0.0000 0.0000 -0.0000 -0.0000  
Y 0.0000 -0.0000 -0.0000 -0.0000 0.0000 0.0000  
Z 0.0000 -0.0000 -0.0000 -0.0000 0.0000 0.0000  
AT. 80 I X 0.0000 -0.0000 0.0000 -0.0000 -0.0000 0.0000  
Y -0.0000 -0.0000 -0.0000 0.0000 0.0000 -0.0000  
Z -0.0000 -0.0000 -0.0000 0.0000 0.0000 -0.0000  
AT. 81 I X -0.0000 0.0000 -0.0000 0.0000 0.0000 -0.0000  
Y 0.0000 -0.0000 -0.0000 -0.0000 0.0000 0.0000  
Z 0.0000 0.0000 -0.0000 -0.0000 0.0000 -0.0000  
AT. 82 I X 0.0000 0.0000 -0.0000 -0.0000 0.0000 0.0000  
Y -0.0000 -0.0000 -0.0000 0.0000 0.0000 -0.0000  
Z -0.0000 0.0000 -0.0000 0.0000 0.0000 0.0000  
AT. 83 O X 0.0000 -0.0002 0.0000 -0.0001 0.0005 0.0005  
Y 0.0000 -0.0001 0.0000 -0.0000 0.0001 0.0001  
Z 0.0000 -0.0001 -0.0000 -0.0001 0.0004 0.0003  
AT. 84 O X -0.0000 -0.0002 0.0000 0.0001 0.0005 -0.0005  
Y -0.0000 -0.0001 0.0000 0.0000 0.0001 -0.0001  
Z -0.0000 -0.0001 -0.0000 0.0001 0.0004 -0.0003  
AT. 85 O X 0.0000 0.0002 -0.0001 0.0000 0.0002 -0.0002  
Y 0.0000 0.0002 -0.0000 0.0000 0.0001 -0.0001  
Z -0.0000 -0.0001 0.0000 -0.0000 -0.0001 0.0001  
AT. 86 O X -0.0000 0.0002 -0.0001 -0.0000 0.0002 0.0002  
Y -0.0000 0.0002 -0.0000 -0.0000 0.0001 0.0001  
Z 0.0000 -0.0001 0.0000 0.0000 -0.0001 -0.0001  
AT. 87 N X 0.0000 -0.0000 0.0000 -0.0000 0.0001 0.0001  
Y -0.0000 0.0000 0.0000 0.0000 -0.0000 -0.0000  
Z 0.0000 -0.0001 -0.0000 -0.0001 0.0002 0.0002  
AT. 88 N X -0.0000 -0.0000 0.0000 0.0000 0.0001 -0.0001  
Y 0.0000 0.0000 0.0000 -0.0000 -0.0000 0.0000  
Z -0.0000 -0.0001 -0.0000 0.0001 0.0002 -0.0002



AT. 89 N X 0.0000 0.0000 -0.0000 0.0000 0.0000 -0.0001  
Y -0.0000 0.0001 -0.0000 0.0000 0.0001 -0.0001  
Z 0.0000 -0.0001 0.0000 -0.0000 -0.0001 0.0001

AT. 90 N X -0.0000 0.0000 -0.0000 -0.0000 0.0000 0.0001  
Y 0.0000 0.0001 -0.0000 -0.0000 0.0001 0.0001  
Z -0.0000 -0.0001 0.0000 0.0000 -0.0001 -0.0001

AT. 91 C X -0.0000 0.0002 -0.0000 0.0001 -0.0008 -0.0007  
Y 0.0000 0.0000 -0.0000 -0.0000 -0.0000 -0.0000  
Z -0.0000 0.0002 0.0000 0.0001 -0.0006 -0.0005

AT. 92 C X 0.0000 0.0002 -0.0000 -0.0001 -0.0008 0.0007  
Y -0.0000 0.0000 -0.0000 0.0000 -0.0000 0.0000  
Z 0.0000 0.0002 0.0000 -0.0001 -0.0006 0.0005

AT. 93 C X -0.0000 0.0005 -0.0001 0.0000 0.0001 0.0001  
Y -0.0000 0.0002 -0.0000 0.0000 -0.0001 -0.0001  
Z -0.0000 0.0013 -0.0002 0.0001 -0.0002 -0.0002

AT. 94 C X 0.0000 0.0005 -0.0001 -0.0000 0.0001 -0.0001  
Y 0.0000 0.0002 -0.0000 -0.0000 -0.0001 0.0001  
Z 0.0000 0.0013 -0.0002 -0.0001 -0.0002 0.0002

AT. 95 H X 0.0000 -0.0030 0.0003 -0.0004 0.0011 0.0009  
Y 0.0001 -0.0048 0.0005 -0.0007 0.0012 0.0010  
Z 0.0000 -0.0025 0.0003 -0.0003 0.0006 0.0004

AT. 96 H X -0.0000 -0.0030 0.0003 0.0004 0.0011 -0.0009  
Y -0.0001 -0.0048 0.0005 0.0007 0.0012 -0.0010  
Z -0.0000 -0.0025 0.0003 0.0003 0.0006 -0.0004

AT. 97 H X 0.0000 -0.0032 0.0004 -0.0002 0.0005 0.0004  
Y -0.0000 0.0028 -0.0003 0.0002 -0.0006 -0.0006  
Z 0.0001 -0.0126 0.0016 -0.0009 0.0019 0.0015

AT. 98 H X -0.0000 -0.0032 0.0004 0.0002 0.0005 -0.0004  
Y 0.0000 0.0028 -0.0003 -0.0002 -0.0006 0.0006  
Z -0.0001 -0.0126 0.0016 0.0009 0.0019 -0.0015

AT. 99 C X -0.0000 -0.0004 0.0001 -0.0001 -0.0003 0.0003  
Y -0.0000 -0.0003 0.0001 -0.0001 -0.0002 0.0002

Z -0.0000 0.0002 -0.0000 0.0001 0.0001 -0.0001  
AT.100 C X 0.0000 -0.0004 0.0001 0.0001 -0.0003 -0.0003  
Y 0.0000 -0.0003 0.0001 0.0001 -0.0002 -0.0002  
Z 0.0000 0.0002 -0.0000 -0.0001 0.0001 0.0001  
AT.101 C X -0.0000 -0.0008 0.0001 0.0000 0.0001 -0.0001  
Y -0.0000 -0.0018 0.0003 -0.0000 0.0002 -0.0002  
Z 0.0000 0.0018 -0.0004 -0.0000 -0.0003 0.0003  
AT.102 C X 0.0000 -0.0008 0.0001 -0.0000 0.0001 0.0001  
Y 0.0000 -0.0018 0.0003 0.0000 0.0002 0.0002  
Z -0.0000 0.0018 -0.0004 0.0000 -0.0003 -0.0003  
AT.103 H X 0.0001 0.0058 -0.0009 0.0000 0.0001 0.0004  
Y 0.0002 0.0134 -0.0021 0.0002 -0.0006 0.0008  
Z 0.0000 0.0004 -0.0001 0.0001 0.0001 -0.0001  
AT.104 H X -0.0001 0.0058 -0.0009 -0.0000 0.0001 -0.0004  
Y -0.0002 0.0134 -0.0021 -0.0002 -0.0006 -0.0008  
Z -0.0000 0.0004 -0.0001 -0.0001 0.0001 0.0001  
AT.105 H X 0.0001 0.0041 -0.0008 -0.0000 -0.0005 0.0004  
Y 0.0002 0.0083 -0.0017 0.0000 -0.0014 0.0011  
Z -0.0006 -0.0220 0.0045 0.0000 0.0042 -0.0035  
AT.106 H X -0.0001 0.0041 -0.0008 0.0000 -0.0005 -0.0004  
Y -0.0002 0.0083 -0.0017 -0.0000 -0.0014 -0.0011  
Z 0.0006 -0.0220 0.0045 -0.0000 0.0042 0.0035  
AT.107 C X -0.0000 -0.0000 0.0000 0.0000 0.0001 0.0001  
Y -0.0000 -0.0000 -0.0000 -0.0000 0.0000 0.0001  
Z -0.0000 0.0000 0.0000 0.0000 -0.0000 -0.0000  
AT.108 C X 0.0000 -0.0000 0.0000 -0.0000 0.0001 -0.0001  
Y 0.0000 -0.0000 -0.0000 0.0000 0.0000 -0.0001  
Z 0.0000 0.0000 0.0000 -0.0000 -0.0000 0.0000  
AT.109 H X -0.0000 -0.0001 0.0000 -0.0000 0.0001 0.0002  
Y 0.0000 0.0004 0.0004 0.0005 -0.0002 -0.0005  
Z -0.0000 -0.0002 -0.0001 -0.0002 0.0003 0.0004  
AT.110 H X 0.0000 -0.0001 0.0000 0.0000 0.0001 -0.0002

Y -0.0000 0.0004 0.0004 -0.0005 -0.0002 0.0005  
Z 0.0000 -0.0002 -0.0001 0.0002 0.0003 -0.0004  
AT. 111 H X 0.0000 0.0000 -0.0002 -0.0004 -0.0001 -0.0002  
Y -0.0000 -0.0000 0.0000 -0.0000 0.0001 0.0001  
Z 0.0000 0.0002 -0.0002 -0.0003 -0.0006 -0.0007  
AT. 112 H X -0.0000 0.0000 -0.0002 0.0004 -0.0001 0.0002  
Y 0.0000 -0.0000 0.0000 0.0000 0.0001 -0.0001  
Z -0.0000 0.0002 -0.0002 0.0003 -0.0006 0.0007  
AT. 113 C X -0.0000 0.0000 -0.0000 0.0000 0.0000 -0.0000  
Y -0.0000 0.0000 0.0000 0.0000 -0.0000 -0.0000  
Z -0.0000 0.0000 0.0000 0.0000 -0.0000 -0.0000  
AT. 114 C X 0.0000 0.0000 -0.0000 -0.0000 0.0000 0.0000  
Y 0.0000 0.0000 0.0000 -0.0000 -0.0000 0.0000  
Z 0.0000 0.0000 0.0000 -0.0000 -0.0000 0.0000  
AT. 115 C X 0.0000 -0.0001 0.0000 -0.0000 -0.0001 0.0000  
Y -0.0000 -0.0000 -0.0000 -0.0000 -0.0000 -0.0000  
Z -0.0000 -0.0000 -0.0000 0.0000 -0.0000 -0.0000  
AT. 116 C X -0.0000 -0.0001 0.0000 0.0000 -0.0001 -0.0000  
Y 0.0000 -0.0000 -0.0000 0.0000 -0.0000 0.0000  
Z 0.0000 -0.0000 -0.0000 -0.0000 -0.0000 0.0000  
AT. 117 H X 0.0000 0.0005 -0.0002 -0.0001 0.0006 0.0001  
Y -0.0000 0.0002 -0.0000 0.0000 0.0001 0.0000  
Z 0.0000 0.0005 -0.0001 -0.0001 0.0005 0.0000  
AT. 118 H X -0.0000 0.0005 -0.0002 0.0001 0.0006 -0.0001  
Y 0.0000 0.0002 -0.0000 -0.0000 0.0001 -0.0000  
Z -0.0000 0.0005 -0.0001 0.0001 0.0005 -0.0000  
AT. 119 H X -0.0000 0.0002 -0.0001 0.0001 0.0001 -0.0002  
Y 0.0000 -0.0002 0.0001 -0.0002 0.0001 0.0002  
Z 0.0000 -0.0003 0.0001 -0.0002 -0.0001 0.0003  
AT. 120 H X 0.0000 0.0002 -0.0001 -0.0001 0.0001 0.0002  
Y -0.0000 -0.0002 0.0001 0.0002 0.0001 -0.0002  
Z -0.0000 -0.0003 0.0001 0.0002 -0.0001 -0.0003

AT.121 C X 0.0000 0.0000 0.0000 -0.0000 0.0000 -0.0000  
Y -0.0000 0.0000 -0.0000 -0.0000 -0.0000 -0.0000  
Z -0.0000 0.0000 -0.0000 0.0000 0.0000 -0.0000

AT.122 C X -0.0000 0.0000 0.0000 0.0000 0.0000 0.0000  
Y 0.0000 0.0000 -0.0000 0.0000 -0.0000 0.0000  
Z 0.0000 0.0000 -0.0000 -0.0000 0.0000 0.0000

AT.123 H X 0.0000 -0.0000 0.0001 -0.0002 -0.0001 -0.0000  
Y 0.0000 -0.0002 0.0002 -0.0002 -0.0000 0.0002  
Z 0.0000 -0.0002 0.0001 0.0000 -0.0001 0.0003

AT.124 H X -0.0000 -0.0000 0.0001 0.0002 -0.0001 0.0000  
Y -0.0000 -0.0002 0.0002 0.0002 -0.0000 -0.0002  
Z -0.0000 -0.0002 0.0001 -0.0000 -0.0001 -0.0003

AT.125 H X -0.0000 0.0002 -0.0004 0.0004 0.0002 -0.0000  
Y -0.0000 -0.0000 -0.0000 0.0001 -0.0000 0.0001  
Z 0.0000 0.0000 0.0003 -0.0004 0.0000 -0.0002

AT.126 H X 0.0000 0.0002 -0.0004 -0.0004 0.0002 0.0000  
Y 0.0000 -0.0000 -0.0000 -0.0001 -0.0000 -0.0001  
Z -0.0000 0.0000 0.0003 0.0004 0.0000 0.0002

AT.127 C X 0.0000 -0.0000 -0.0000 0.0000 0.0000 0.0000  
Y 0.0000 -0.0000 0.0000 -0.0000 -0.0000 0.0000  
Z -0.0000 0.0000 -0.0000 0.0000 -0.0000 0.0000

AT.128 C X -0.0000 -0.0000 -0.0000 -0.0000 0.0000 -0.0000  
Y -0.0000 -0.0000 0.0000 0.0000 -0.0000 -0.0000  
Z 0.0000 0.0000 -0.0000 -0.0000 -0.0000 -0.0000

AT.129 C X -0.0000 0.0001 -0.0000 0.0000 -0.0001 -0.0001  
Y -0.0000 0.0000 0.0001 0.0001 -0.0000 -0.0000  
Z 0.0000 -0.0000 -0.0001 -0.0001 0.0000 0.0000

AT.130 C X 0.0000 0.0001 -0.0000 -0.0000 -0.0001 0.0001  
Y 0.0000 0.0000 0.0001 -0.0001 -0.0000 0.0000  
Z -0.0000 -0.0000 -0.0001 0.0001 0.0000 -0.0000

AT.131 H X 0.0000 -0.0006 -0.0001 -0.0003 0.0007 0.0005  
Y 0.0000 -0.0002 0.0001 -0.0000 0.0003 0.0002

Z -0.0000 0.0004 0.0000 0.0001 -0.0004 -0.0003  
AT. 132 H X -0.0000 -0.0006 -0.0001 0.0003 0.0007 -0.0005  
Y -0.0000 -0.0002 0.0001 0.0000 0.0003 -0.0002  
Z 0.0000 0.0004 0.0000 -0.0001 -0.0004 0.0003  
AT. 133 H X -0.0000 0.0000 0.0004 0.0003 0.0002 0.0002  
Y 0.0001 -0.0003 -0.0015 -0.0013 -0.0000 -0.0002  
Z -0.0001 0.0002 0.0012 0.0012 0.0002 0.0003  
AT. 134 H X 0.0000 0.0000 0.0004 -0.0003 0.0002 -0.0002  
Y -0.0001 -0.0003 -0.0015 0.0013 -0.0000 0.0002  
Z 0.0001 0.0002 0.0012 -0.0012 0.0002 -0.0003  
AT. 135 C X -0.0000 0.0000 -0.0000 0.0000 0.0000 0.0000  
Y 0.0000 0.0000 -0.0001 -0.0000 -0.0000 0.0000  
Z -0.0000 0.0001 -0.0000 0.0001 -0.0000 0.0000  
AT. 136 C X 0.0000 0.0000 -0.0000 -0.0000 0.0000 -0.0000  
Y -0.0000 0.0000 -0.0001 0.0000 -0.0000 -0.0000  
Z 0.0000 0.0001 -0.0000 -0.0001 -0.0000 -0.0000  
AT. 137 H X 0.0001 -0.0001 -0.0003 -0.0003 0.0000 0.0000  
Y -0.0003 0.0004 0.0009 0.0011 0.0001 -0.0000  
Z 0.0001 -0.0001 -0.0005 -0.0005 -0.0001 0.0001  
AT. 138 H X -0.0001 -0.0001 -0.0003 0.0003 0.0000 -0.0000  
Y 0.0003 0.0004 0.0009 -0.0011 0.0001 0.0000  
Z -0.0001 -0.0001 -0.0005 0.0005 -0.0001 -0.0001  
AT. 139 H X 0.0000 -0.0003 0.0003 -0.0001 -0.0000 -0.0002  
Y 0.0000 -0.0001 0.0000 -0.0000 0.0000 -0.0000  
Z -0.0000 -0.0002 0.0006 0.0003 0.0000 -0.0001  
AT. 140 H X -0.0000 -0.0003 0.0003 0.0001 -0.0000 0.0002  
Y -0.0000 -0.0001 0.0000 0.0000 0.0000 0.0000  
Z 0.0000 -0.0002 0.0006 -0.0003 0.0000 0.0001  
AT. 141 H X -0.0000 0.0002 -0.0001 0.0001 -0.0001 -0.0000  
Y 0.0001 -0.0005 -0.0000 -0.0006 0.0001 -0.0001  
Z 0.0001 -0.0003 0.0000 -0.0004 0.0002 -0.0000  
AT. 142 H X 0.0000 0.0002 -0.0001 -0.0001 -0.0001 0.0000

Y -0.0001 -0.0005 -0.0000 0.0006 0.0001 0.0001  
Z -0.0001 -0.0003 0.0000 0.0004 0.0002 0.0000  
AT. 143 C X -0.0000 -0.0000 -0.0000 -0.0000 -0.0000 -0.0000  
Y 0.0000 -0.0000 0.0002 -0.0001 -0.0000 -0.0000  
Z 0.0000 0.0000 0.0000 -0.0000 0.0000 0.0000  
AT. 144 C X 0.0000 -0.0000 -0.0000 0.0000 -0.0000 0.0000  
Y -0.0000 -0.0000 0.0002 0.0001 -0.0000 0.0000  
Z -0.0000 0.0000 0.0000 0.0000 0.0000 -0.0000  
AT. 145 H X 0.0000 0.0000 0.0000 -0.0002 0.0000 -0.0000  
Y -0.0002 -0.0002 -0.0009 0.0013 0.0001 0.0002  
Z -0.0002 -0.0001 -0.0012 0.0012 0.0001 0.0003  
AT. 146 H X -0.0000 0.0000 0.0000 0.0002 0.0000 0.0000  
Y 0.0002 -0.0002 -0.0009 -0.0013 0.0001 -0.0002  
Z 0.0002 -0.0001 -0.0012 -0.0012 0.0001 -0.0003  
AT. 147 H X -0.0000 0.0003 -0.0000 0.0004 0.0001 0.0002  
Y -0.0000 0.0001 0.0001 0.0001 0.0000 0.0000  
Z 0.0000 -0.0002 -0.0000 -0.0003 -0.0001 -0.0001  
AT. 148 H X 0.0000 0.0003 -0.0000 -0.0004 0.0001 -0.0002  
Y 0.0000 0.0001 0.0001 -0.0001 0.0000 -0.0000  
Z -0.0000 -0.0002 -0.0000 0.0003 -0.0001 0.0001  
AT. 149 H X 0.0000 -0.0002 0.0002 -0.0002 -0.0001 -0.0001  
Y -0.0001 0.0004 -0.0015 0.0003 0.0002 0.0003  
Z 0.0001 -0.0002 0.0007 -0.0003 -0.0001 -0.0001  
AT. 150 H X -0.0000 -0.0002 0.0002 0.0002 -0.0001 0.0001  
Y 0.0001 0.0004 -0.0015 -0.0003 0.0002 -0.0003  
Z -0.0001 -0.0002 0.0007 0.0003 -0.0001 0.0001  
AT. 151 C X 0.0000 -0.0000 -0.0000 -0.0000 0.0000 0.0000  
Y -0.0000 0.0000 0.0001 0.0001 -0.0000 -0.0000  
Z 0.0000 0.0000 -0.0001 -0.0001 -0.0000 -0.0000  
AT. 152 C X -0.0000 -0.0000 -0.0000 0.0000 0.0000 -0.0000  
Y 0.0000 0.0000 0.0001 -0.0001 -0.0000 0.0000  
Z -0.0000 0.0000 -0.0001 0.0001 -0.0000 0.0000

AT.153 H X -0.0001 0.0000 0.0006 0.0006 -0.0000 0.0000  
Y 0.0002 0.0001 -0.0021 -0.0018 0.0001 -0.0001  
Z -0.0001 -0.0000 0.0012 0.0011 -0.0001 0.0001

AT.154 H X 0.0001 0.0000 0.0006 -0.0006 -0.0000 -0.0000  
Y -0.0002 0.0001 -0.0021 0.0018 0.0001 0.0001  
Z 0.0001 -0.0000 0.0012 -0.0011 -0.0001 -0.0001

AT.155 H X -0.0000 0.0001 -0.0002 0.0000 -0.0001 -0.0001  
Y 0.0001 -0.0003 0.0005 -0.0001 0.0002 0.0002  
Z 0.0001 -0.0002 0.0003 -0.0002 0.0003 0.0002

AT.156 H X 0.0000 0.0001 -0.0002 -0.0000 -0.0001 0.0001  
Y -0.0001 -0.0003 0.0005 0.0001 0.0002 -0.0002  
Z -0.0001 -0.0002 0.0003 0.0002 0.0003 -0.0002

AT.157 O X -0.0001 0.0002 0.0008 0.0009 0.0000 0.0001  
Y 0.0004 -0.0017 -0.0055 -0.0060 -0.0001 -0.0006  
Z 0.0001 -0.0005 -0.0018 -0.0019 -0.0000 -0.0002

AT.158 O X 0.0001 0.0002 0.0008 -0.0009 0.0000 -0.0001  
Y -0.0004 -0.0017 -0.0055 0.0060 -0.0001 0.0006  
Z -0.0001 -0.0005 -0.0018 0.0019 -0.0000 0.0002

AT.159 O X -0.0002 -0.0002 0.0015 0.0014 0.0000 0.0001  
Y 0.0002 0.0001 -0.0012 -0.0012 -0.0000 -0.0001  
Z -0.0007 -0.0005 0.0054 0.0050 0.0001 0.0004

AT.160 O X 0.0002 -0.0002 0.0015 -0.0014 0.0000 -0.0001  
Y -0.0002 0.0001 -0.0012 0.0012 -0.0000 0.0001  
Z 0.0007 -0.0005 0.0054 -0.0050 0.0001 -0.0004

AT.161 H X 0.0005 -0.0026 -0.0080 -0.0087 -0.0002 -0.0009  
Y -0.0062 0.0266 0.0856 0.0929 0.0021 0.0096  
Z -0.0017 0.0074 0.0238 0.0259 0.0006 0.0027

AT.162 H X -0.0005 -0.0026 -0.0080 0.0087 -0.0002 0.0009  
Y 0.0062 0.0266 0.0856 -0.0929 0.0021 -0.0096  
Z 0.0017 0.0074 0.0238 -0.0259 0.0006 -0.0027

AT.163 H X 0.0035 0.0028 -0.0281 -0.0262 -0.0007 -0.0022  
Y -0.0025 -0.0020 0.0189 0.0177 0.0004 0.0015

Z 0.0100 0.0082 -0.0791 -0.0736 -0.0019 -0.0061  
 AT.164 H X -0.0035 0.0028 -0.0281 0.0262 -0.0007 0.0022  
 Y 0.0025 -0.0020 0.0189 -0.0177 0.0004 -0.0015  
 Z -0.0100 0.0082 -0.0791 0.0736 -0.0019 0.0061  
 AT.165 O X -0.0001 0.0014 -0.0003 0.0006 -0.0063 -0.0061  
 Y -0.0001 0.0009 -0.0002 0.0003 -0.0038 -0.0037  
 Z -0.0000 0.0004 -0.0001 0.0002 -0.0024 -0.0023  
 AT.166 O X 0.0001 0.0014 -0.0003 -0.0006 -0.0063 0.0061  
 Y 0.0001 0.0009 -0.0002 -0.0003 -0.0038 0.0037  
 Z 0.0000 0.0004 -0.0001 -0.0002 -0.0024 0.0023  
 AT.167 H X 0.0015 -0.0219 0.0043 -0.0090 0.0981 0.0958  
 Y 0.0008 -0.0126 0.0025 -0.0050 0.0557 0.0545  
 Z 0.0005 -0.0066 0.0013 -0.0026 0.0290 0.0283  
 AT.168 H X -0.0015 -0.0219 0.0043 0.0090 0.0981 -0.0958  
 Y -0.0008 -0.0126 0.0025 0.0050 0.0557 -0.0545  
 Z -0.0005 -0.0066 0.0013 0.0026 0.0290 -0.0283  
 AT.169 O X -0.0000 0.0012 -0.0004 -0.0001 0.0015 0.0016  
 Y 0.0000 -0.0028 0.0009 0.0003 -0.0032 -0.0034  
 Z -0.0000 0.0016 -0.0005 -0.0002 0.0021 0.0022  
 AT.170 O X 0.0000 0.0012 -0.0004 0.0001 0.0015 -0.0016  
 Y -0.0000 -0.0028 0.0009 -0.0003 -0.0032 0.0034  
 Z 0.0000 0.0016 -0.0005 0.0002 0.0021 -0.0022  
 AT.171 H X 0.0003 -0.0190 0.0060 0.0020 -0.0230 -0.0242  
 Y -0.0007 0.0423 -0.0135 -0.0042 0.0509 0.0539  
 Z 0.0004 -0.0224 0.0072 0.0022 -0.0264 -0.0280  
 AT.172 H X -0.0003 -0.0190 0.0060 -0.0020 -0.0230 0.0242  
 Y 0.0007 0.0423 -0.0135 0.0042 0.0509 -0.0539  
 Z -0.0004 -0.0224 0.0072 -0.0022 -0.0264 0.0280

ESTIMATED NUMBER OF IMAGINARY FREQS 1



\*\*\*\*\*

VIBRATIONAL TEMPERATURES (K) [MODE NUMBER;IRREP]

TO MODES

29.7 [ 5;Au ] 30.9 [ 6;Ag ] 35.6 [ 7;Au ] 36.6 [ 8;Ag ]  
41.5 [ 9;Au ] 44.7 [ 10;Ag ] 50.7 [ 11;Au ] 53.0 [ 12;Ag ]  
53.7 [ 13;Ag ] 54.0 [ 14;Au ] 59.7 [ 15;Ag ] 61.0 [ 16;Ag ]  
61.8 [ 17;Au ] 63.3 [ 18;Au ] 64.4 [ 19;Ag ] 66.2 [ 20;Ag ]  
69.3 [ 21;Ag ] 70.0 [ 22;Au ] 72.9 [ 23;Au ] 73.7 [ 24;Ag ]  
76.2 [ 25;Au ] 78.5 [ 26;Au ] 79.8 [ 27;Ag ] 88.2 [ 28;Ag ]  
89.0 [ 29;Au ] 91.3 [ 30;Ag ] 94.6 [ 31;Ag ] 97.5 [ 32;Au ]  
99.5 [ 33;Ag ] 101.6 [ 34;Au ] 102.0 [ 35;Au ] 103.4 [ 36;Ag ]  
105.0 [ 37;Ag ] 106.4 [ 38;Au ] 108.9 [ 39;Ag ] 109.0 [ 40;Au ]  
112.6 [ 41;Au ] 116.1 [ 42;Ag ] 117.6 [ 43;Au ] 120.2 [ 44;Ag ]  
121.8 [ 45;Au ] 122.2 [ 46;Ag ] 127.2 [ 47;Au ] 128.8 [ 48;Au ]  
131.9 [ 49;Ag ] 136.1 [ 50;Ag ] 142.3 [ 51;Ag ] 144.2 [ 52;Au ]  
149.8 [ 53;Ag ] 151.9 [ 54;Au ] 152.7 [ 55;Au ] 154.5 [ 56;Ag ]  
175.6 [ 57;Ag ] 178.0 [ 58;Ag ] 178.6 [ 59;Au ] 183.5 [ 60;Au ]  
189.7 [ 61;Au ] 190.4 [ 62;Ag ] 197.5 [ 63;Au ] 197.7 [ 64;Ag ]  
207.6 [ 65;Au ] 208.0 [ 66;Ag ] 210.2 [ 67;Au ] 213.9 [ 68;Ag ]  
217.3 [ 69;Ag ] 218.1 [ 70;Au ] 230.1 [ 71;Ag ] 239.5 [ 72;Au ]  
274.7 [ 73;Au ] 281.7 [ 74;Ag ] 289.5 [ 75;Au ] 292.0 [ 76;Ag ]  
317.8 [ 77;Ag ] 319.0 [ 78;Au ] 320.8 [ 79;Ag ] 324.4 [ 80;Au ]  
331.8 [ 81;Au ] 331.9 [ 82;Ag ] 337.3 [ 83;Au ] 339.4 [ 84;Au ]  
340.1 [ 85;Ag ] 340.7 [ 86;Ag ] 342.5 [ 87;Au ] 352.4 [ 88;Ag ]  
355.6 [ 89;Ag ] 357.1 [ 90;Au ] 359.2 [ 91;Ag ] 362.6 [ 92;Au ]  
371.6 [ 93;Ag ] 371.9 [ 94;Au ] 373.0 [ 95;Ag ] 373.7 [ 96;Au ]  
377.2 [ 97;Au ] 381.2 [ 98;Ag ] 387.8 [ 99;Au ] 390.7 [ 100;Ag ]  
404.4 [ 101;Ag ] 404.7 [ 102;Ag ] 405.1 [ 103;Au ] 423.3 [ 104;Au ]  
428.7 [ 105;Ag ] 431.2 [ 106;Au ] 435.1 [ 107;Ag ] 436.0 [ 108;Au ]  
452.8 [ 109;Ag ] 453.4 [ 110;Ag ] 455.2 [ 111;Au ] 457.6 [ 112;Au ]

468.0 [ 113;Au ] 468.9 [ 114;Ag ] 473.8 [ 115;Ag ] 478.5 [ 116;Au ]  
509.2 [ 117;Ag ] 509.3 [ 118;Au ] 511.3 [ 119;Au ] 511.8 [ 120;Ag ]  
528.0 [ 121;Ag ] 530.1 [ 122;Au ] 536.0 [ 123;Au ] 536.3 [ 124;Ag ]  
556.0 [ 125;Au ] 559.5 [ 126;Ag ] 560.8 [ 127;Ag ] 562.3 [ 128;Au ]  
568.2 [ 129;Au ] 569.1 [ 130;Ag ] 576.6 [ 131;Ag ] 576.7 [ 132;Au ]  
586.5 [ 133;Au ] 586.6 [ 134;Ag ] 594.9 [ 135;Au ] 596.4 [ 136;Ag ]  
613.9 [ 137;Ag ] 614.3 [ 138;Au ] 628.0 [ 139;Ag ] 628.6 [ 140;Au ]  
656.3 [ 141;Au ] 656.6 [ 142;Ag ] 656.8 [ 143;Au ] 658.7 [ 144;Ag ]  
662.8 [ 145;Au ] 663.3 [ 146;Ag ] 681.1 [ 147;Au ] 682.2 [ 148;Ag ]  
685.7 [ 149;Ag ] 686.4 [ 150;Au ] 687.2 [ 151;Au ] 689.0 [ 152;Au ]  
690.2 [ 153;Ag ] 692.4 [ 154;Ag ] 702.9 [ 155;Ag ] 704.2 [ 156;Au ]  
719.8 [ 157;Ag ] 722.4 [ 158;Ag ] 723.4 [ 159;Au ] 724.2 [ 160;Au ]  
764.0 [ 161;Au ] 766.1 [ 162;Ag ] 770.6 [ 163;Ag ] 771.1 [ 164;Au ]  
785.7 [ 165;Au ] 786.1 [ 166;Ag ] 786.7 [ 167;Ag ] 787.3 [ 168;Au ]  
892.7 [ 169;Au ] 893.8 [ 170;Ag ] 894.5 [ 171;Au ] 896.8 [ 172;Ag ]  
898.4 [ 173;Au ] 900.2 [ 174;Ag ] 901.3 [ 175;Ag ] 902.7 [ 176;Au ]  
1010.1 [ 177;Ag ] 1011.3 [ 178;Au ] 1022.6 [ 179;Au ] 1023.8 [ 180;Ag ]  
1030.3 [ 181;Ag ] 1031.0 [ 182;Au ] 1038.8 [ 183;Au ] 1039.2 [ 184;Ag ]  
1066.2 [ 185;Ag ] 1066.3 [ 186;Au ] 1085.8 [ 187;Ag ] 1087.2 [ 188;Au ]  
1111.1 [ 189;Au ] 1113.2 [ 190;Ag ] 1119.2 [ 191;Ag ] 1120.8 [ 192;Au ]  
1125.4 [ 193;Ag ] 1125.4 [ 194;Au ] 1138.8 [ 195;Ag ] 1139.6 [ 196;Ag ]  
1140.0 [ 197;Au ] 1141.4 [ 198;Au ] 1147.0 [ 199;Ag ] 1147.5 [ 200;Au ]  
1177.3 [ 201;Au ] 1184.3 [ 202;Au ] 1186.7 [ 203;Ag ] 1190.2 [ 204;Ag ]  
1198.3 [ 205;Ag ] 1202.3 [ 206;Au ] 1202.9 [ 207;Ag ] 1209.7 [ 208;Ag ]  
1211.4 [ 209;Au ] 1214.7 [ 210;Au ] 1217.3 [ 211;Au ] 1218.7 [ 212;Ag ]  
1230.3 [ 213;Ag ] 1234.7 [ 214;Au ] 1238.5 [ 215;Au ] 1241.5 [ 216;Ag ]  
1271.2 [ 217;Au ] 1271.9 [ 218;Ag ] 1273.2 [ 219;Ag ] 1279.4 [ 220;Au ]  
1286.6 [ 221;Ag ] 1286.8 [ 222;Au ] 1289.7 [ 223;Au ] 1290.0 [ 224;Ag ]  
1293.4 [ 225;Au ] 1293.5 [ 226;Ag ] 1296.3 [ 227;Au ] 1297.0 [ 228;Ag ]  
1297.6 [ 229;Ag ] 1297.9 [ 230;Au ] 1299.4 [ 231;Au ] 1299.9 [ 232;Ag ]  
1312.0 [ 233;Ag ] 1314.2 [ 234;Au ] 1315.4 [ 235;Au ] 1316.0 [ 236;Ag ]  
1317.9 [ 237;Au ] 1318.0 [ 238;Ag ] 1318.9 [ 239;Au ] 1318.9 [ 240;Ag ]

1326.1 [ 241;Au ] 1328.9 [ 242;Ag ] 1333.3 [ 243;Ag ] 1333.8 [ 244;Au ]  
1390.3 [ 245;Au ] 1390.7 [ 246;Ag ] 1394.1 [ 247;Au ] 1395.0 [ 248;Ag ]  
1405.2 [ 249;Au ] 1405.4 [ 250;Ag ] 1406.8 [ 251;Au ] 1408.1 [ 252;Ag ]  
1431.7 [ 253;Ag ] 1433.8 [ 254;Au ] 1434.6 [ 255;Ag ] 1435.0 [ 256;Au ]  
1469.2 [ 257;Ag ] 1469.5 [ 258;Au ] 1472.3 [ 259;Ag ] 1473.0 [ 260;Au ]  
1479.2 [ 261;Ag ] 1479.7 [ 262;Au ] 1493.1 [ 263;Ag ] 1494.6 [ 264;Au ]  
1548.0 [ 265;Au ] 1548.0 [ 266;Ag ] 1551.6 [ 267;Ag ] 1552.1 [ 268;Au ]  
1555.8 [ 269;Ag ] 1556.1 [ 270;Au ] 1558.9 [ 271;Au ] 1559.7 [ 272;Ag ]  
1563.5 [ 273;Au ] 1565.3 [ 274;Ag ] 1572.3 [ 275;Ag ] 1577.7 [ 276;Au ]  
1578.8 [ 277;Ag ] 1579.5 [ 278;Au ] 1582.4 [ 279;Au ] 1583.0 [ 280;Ag ]  
1621.9 [ 281;Au ] 1623.6 [ 282;Ag ] 1624.4 [ 283;Ag ] 1624.7 [ 284;Au ]  
1631.9 [ 285;Ag ] 1632.1 [ 286;Au ] 1640.2 [ 287;Au ] 1641.1 [ 288;Ag ]  
1657.5 [ 289;Au ] 1657.7 [ 290;Ag ] 1659.0 [ 291;Au ] 1662.0 [ 292;Ag ]  
1673.6 [ 293;Ag ] 1674.2 [ 294;Au ] 1674.3 [ 295;Ag ] 1675.0 [ 296;Au ]  
1679.7 [ 297;Au ] 1680.1 [ 298;Ag ] 1690.2 [ 299;Au ] 1691.5 [ 300;Ag ]  
1727.3 [ 301;Au ] 1727.5 [ 302;Ag ] 1730.4 [ 303;Ag ] 1732.4 [ 304;Au ]  
1741.4 [ 305;Ag ] 1741.5 [ 306;Au ] 1747.6 [ 307;Ag ] 1748.2 [ 308;Au ]  
1748.5 [ 309;Ag ] 1748.8 [ 310;Au ] 1754.9 [ 311;Ag ] 1755.2 [ 312;Au ]  
1775.9 [ 313;Au ] 1776.3 [ 314;Ag ] 1778.2 [ 315;Ag ] 1778.7 [ 316;Au ]  
1825.2 [ 317;Ag ] 1827.1 [ 318;Au ] 1827.5 [ 319;Ag ] 1827.9 [ 320;Au ]  
1828.6 [ 321;Ag ] 1829.7 [ 322;Ag ] 1829.9 [ 323;Au ] 1832.9 [ 324;Au ]  
1856.3 [ 325;Au ] 1857.0 [ 326;Ag ] 1866.0 [ 327;Au ] 1866.1 [ 328;Ag ]  
1872.3 [ 329;Ag ] 1872.3 [ 330;Au ] 1873.5 [ 331;Au ] 1874.7 [ 332;Ag ]  
1878.2 [ 333;Au ] 1878.2 [ 334;Ag ] 1879.8 [ 335;Au ] 1880.1 [ 336;Ag ]  
1887.4 [ 337;Au ] 1887.7 [ 338;Ag ] 1893.1 [ 339;Ag ] 1895.1 [ 340;Au ]  
1904.3 [ 341;Ag ] 1904.7 [ 342;Au ] 1906.1 [ 343;Au ] 1906.3 [ 344;Ag ]  
1943.6 [ 345;Au ] 1944.1 [ 346;Ag ] 1944.1 [ 347;Au ] 1944.3 [ 348;Ag ]  
1946.5 [ 349;Ag ] 1946.5 [ 350;Au ] 1948.8 [ 351;Ag ] 1950.2 [ 352;Au ]  
1970.8 [ 353;Au ] 1971.4 [ 354;Ag ] 1972.0 [ 355;Ag ] 1972.1 [ 356;Au ]  
1978.9 [ 357;Ag ] 1979.2 [ 358;Ag ] 1979.7 [ 359;Au ] 1981.7 [ 360;Au ]  
2008.4 [ 361;Ag ] 2012.0 [ 362;Au ] 2019.9 [ 363;Au ] 2021.9 [ 364;Au ]  
2022.2 [ 365;Ag ] 2024.7 [ 366;Ag ] 2027.7 [ 367;Au ] 2032.2 [ 368;Ag ]

2041.9 [ 369;Ag ] 2043.7 [ 370;Au ] 2055.5 [ 371;Au ] 2055.8 [ 372;Ag ]  
2059.1 [ 373;Au ] 2059.1 [ 374;Ag ] 2062.0 [ 375;Au ] 2062.1 [ 376;Ag ]  
2066.7 [ 377;Au ] 2068.1 [ 378;Ag ] 2071.3 [ 379;Au ] 2072.0 [ 380;Ag ]  
2072.6 [ 381;Au ] 2074.2 [ 382;Au ] 2074.3 [ 383;Ag ] 2077.0 [ 384;Ag ]  
2077.6 [ 385;Au ] 2081.1 [ 386;Ag ] 2082.8 [ 387;Au ] 2085.3 [ 388;Au ]  
2085.4 [ 389;Ag ] 2087.5 [ 390;Au ] 2089.6 [ 391;Ag ] 2092.1 [ 392;Ag ]  
2092.7 [ 393;Au ] 2094.0 [ 394;Ag ] 2094.6 [ 395;Ag ] 2095.8 [ 396;Au ]  
2096.7 [ 397;Au ] 2096.7 [ 398;Ag ] 2098.3 [ 399;Ag ] 2099.2 [ 400;Au ]  
2100.6 [ 401;Au ] 2100.8 [ 402;Ag ] 2103.0 [ 403;Ag ] 2103.7 [ 404;Au ]  
2104.5 [ 405;Au ] 2106.5 [ 406;Au ] 2108.6 [ 407;Ag ] 2110.2 [ 408;Au ]  
2110.7 [ 409;Ag ] 2112.7 [ 410;Au ] 2114.1 [ 411;Ag ] 2116.8 [ 412;Au ]  
2119.6 [ 413;Ag ] 2121.7 [ 414;Au ] 2122.9 [ 415;Ag ] 2124.7 [ 416;Ag ]  
2125.1 [ 417;Au ] 2125.9 [ 418;Ag ] 2134.2 [ 419;Au ] 2134.6 [ 420;Ag ]  
2316.4 [ 421;Au ] 2316.5 [ 422;Ag ] 2323.7 [ 423;Au ] 2327.0 [ 424;Ag ]  
2330.1 [ 425;Au ] 2335.9 [ 426;Ag ] 2341.4 [ 427;Au ] 2351.7 [ 428;Ag ]  
4233.6 [ 429;Ag ] 4233.7 [ 430;Au ] 4253.9 [ 431;Au ] 4254.7 [ 432;Ag ]  
4266.0 [ 433;Ag ] 4266.1 [ 434;Au ] 4268.0 [ 435;Au ] 4268.3 [ 436;Ag ]  
4272.9 [ 437;Au ] 4273.1 [ 438;Ag ] 4273.3 [ 439;Au ] 4274.6 [ 440;Ag ]  
4276.5 [ 441;Au ] 4277.1 [ 442;Au ] 4277.5 [ 443;Ag ] 4278.6 [ 444;Au ]  
4278.6 [ 445;Ag ] 4278.9 [ 446;Ag ] 4282.3 [ 447;Ag ] 4282.4 [ 448;Au ]  
4284.1 [ 449;Au ] 4284.5 [ 450;Ag ] 4287.7 [ 451;Au ] 4290.7 [ 452;Ag ]  
4292.3 [ 453;Au ] 4292.5 [ 454;Ag ] 4297.2 [ 455;Au ] 4297.2 [ 456;Ag ]  
4346.4 [ 457;Au ] 4346.6 [ 458;Ag ] 4361.6 [ 459;Ag ] 4364.3 [ 460;Au ]  
4379.0 [ 461;Au ] 4380.3 [ 462;Ag ] 4387.7 [ 463;Ag ] 4388.0 [ 464;Au ]  
4390.3 [ 465;Au ] 4392.2 [ 466;Ag ] 4392.2 [ 467;Au ] 4394.1 [ 468;Ag ]  
4396.4 [ 469;Au ] 4397.9 [ 470;Ag ] 4398.6 [ 471;Au ] 4398.7 [ 472;Ag ]  
4403.9 [ 473;Au ] 4404.1 [ 474;Ag ] 4405.6 [ 475;Au ] 4406.2 [ 476;Ag ]  
4412.6 [ 477;Ag ] 4412.7 [ 478;Au ] 4416.9 [ 479;Ag ] 4417.2 [ 480;Au ]  
4421.6 [ 481;Au ] 4422.2 [ 482;Ag ] 4422.3 [ 483;Au ] 4422.8 [ 484;Ag ]  
4423.1 [ 485;Au ] 4423.4 [ 486;Ag ] 4428.4 [ 487;Au ] 4428.4 [ 488;Ag ]  
4431.0 [ 489;Ag ] 4431.1 [ 490;Au ] 4431.4 [ 491;Ag ] 4431.8 [ 492;Au ]  
4432.2 [ 493;Ag ] 4433.1 [ 494;Au ] 4433.1 [ 495;Ag ] 4433.8 [ 496;Au ]

4435.4 [ 497;Au ] 4435.8 [ 498;Ag ] 4441.4 [ 499;Au ] 4441.5 [ 500;Ag ]  
 4487.9 [ 501;Ag ] 4498.8 [ 502;Au ] 4511.5 [ 503;Ag ] 4512.5 [ 504;Au ]  
 4522.8 [ 505;Au ] 4523.1 [ 506;Ag ] 4526.6 [ 507;Ag ] 4526.9 [ 508;Au ]  
 4528.0 [ 509;Ag ] 4534.2 [ 510;Au ] 4535.9 [ 511;Ag ] 4537.1 [ 512;Au ]  
 4564.2 [ 513;Au ] 4566.6 [ 514;Ag ] 4605.7 [ 515;Au ] 4611.6 [ 516;Ag ]

\*\*\*\*\*

HARMONIC VIBRATIONAL CONTRIBUTIONS TO THERMODYNAMIC FUNCTIONS AT GIVEN  
 TEMPERATURE AND PRESSURE:

(EL = ELECTRONIC ENERGY

E0 = ZERO-POINT ENERGY

ET = THERMAL CONTRIBUTION TO THE VIBRATIONAL ENERGY

PV = PRESSURE \* VOLUME

TS = TEMPERATURE \* ENTROPY)

|    | AU/CELL              | EV/CELL              | KJ/MOL             |
|----|----------------------|----------------------|--------------------|
| EL | : -6037.288647733500 | -164282.976089943782 | -15850899.11082750 |
| E0 | : 1.386594224932     | 37.731147074854      | 3640.50262452      |

\*\*\*\*\*

THERMODYNAMIC FUNCTIONS WITH VIBRATIONAL CONTRIBUTIONS

AT (T = 298.15 K, P = 0.10132500E+00 MPA):

|    | AU/CELL          | EV/CELL        | KJ/MOL       |
|----|------------------|----------------|--------------|
| ET | : 0.095929050466 | 2.610362171438 | 251.86168651 |
| PV | : 0.000039962227 | 0.001087427478 | 0.10492081   |
| TS | : 0.198697993409 | 5.406847279458 | 521.68150818 |

ET+PV-TS : -0.102728980716 -2.795397680542 -269.71490086

EL+E0+ET+PV-TS: -6036.004782489283 -164248.040340549458 -15847528.32310384

OTHER THERMODYNAMIC FUNCTIONS:

|                 | mHARTREE/(CELL*K) | mEV/(CELL*K)    | J/(MOL*K)     |
|-----------------|-------------------|-----------------|---------------|
| ENTROPY :       | 0.666436335431    | 18.134654635109 | 1749.72835209 |
| HEAT CAPACITY : | 0.575183902589    | 15.651549698855 | 1510.14512343 |

\*\*\*\*\*

TTTTTTTTTTTTTTTTTTTTTTTTTTTTTTTTTTTTTTTT END TELAPSE 777367.46 TCPU 770889.16

EEEEEEEEEE TERMINATION DATE 11 10 2023 TIME 11:35:51.8

NODE 0 CPU TIME = 770889.164  
NODE 1 CPU TIME = 771893.494  
NODE 2 CPU TIME = 771828.771  
NODE 3 CPU TIME = 771856.658  
NODE 4 CPU TIME = 771974.802  
NODE 5 CPU TIME = 771879.418  
NODE 6 CPU TIME = 772114.382  
NODE 7 CPU TIME = 771931.723  
NODE 8 CPU TIME = 772034.329  
NODE 9 CPU TIME = 771946.065  
NODE 10 CPU TIME = 773409.105  
NODE 11 CPU TIME = 773284.242  
NODE 12 CPU TIME = 773284.886  
NODE 13 CPU TIME = 773362.638  
NODE 14 CPU TIME = 773287.850  
NODE 15 CPU TIME = 773433.563  
NODE 16 CPU TIME = 773401.335  
NODE 17 CPU TIME = 773335.833  
NODE 18 CPU TIME = 773304.018  
NODE 19 CPU TIME = 773325.238

NODE 20 CPU TIME = 773295.689  
NODE 21 CPU TIME = 773325.853  
NODE 22 CPU TIME = 773310.812  
NODE 23 CPU TIME = 772416.784  
TOTAL CPU TIME = 18544126.652

### Crystal 3 CAM-B3LYP

PROCESS 2 OF 8 WORKING  
PROCESS 3 OF 8 WORKING  
PROCESS 4 OF 8 WORKING  
PROCESS 5 OF 8 WORKING  
PROCESS 6 OF 8 WORKING  
PROCESS 7 OF 8 WORKING  
PROCESS 0 OF 8 WORKING

\*\*\*\*\*

```
*
*
*          CRYSTAL17          *
*
*   public : 1.0.1 - Jun 21st, 2017          *
*
*   HTTP://WWW.CRYSTAL.UNITO.IT          *
*
*
*          MAIN AUTHORS          *
*
*
*   R. DOVESI(1,11), V.R. SAUNDERS(2), C. ROETTI(1,11), R. ORLANDO(1,11), *
*   C.M. ZICOVICH-WILSON(1,3), F. PASCALE(4), B. CIVALLERI(1,11),          *
*   K. DOLL(5), N.M. HARRISON(2,6), I.J. BUSH(7), Ph. D'ARCO(8),          *
*   M. LLUNELL(9), M. CAUSA'(10), Y. NOEL(8), L. MASCHIO(1,11), A. ERBA(1,11) *
*   M. RE'RAT(14), S. CASASSA(1,11)          *
*
*
*   CONTRIBUTIONS TO THE CODE HAVE ALSO BEEN GIVEN BY          *
```

\* \*  
\* M. FERRABONE(1,11), M. DE LA PIERRE(1,11), M. FERRERO(1,11), \*  
\* J. BAIMA(1,11), E. ALBANESE(1,11), M.F. PEINTINGER(12), R. BAST(13), \*  
\* B. KIRTMAN(15), V. LACIVITA(1,11), R. DEMICHELIS(1,16) \*  
\* G. BRANDEBURG(17), S. SALUSTRO(1,11), G. SANSONE(1,11) \*  
\* M.T. RUGGIERO(18) \*  
\* \*  
\* (1) THEORETICAL CHEMISTRY GROUP - UNIVERSITA' DI TORINO - TORINO (ITALY) \*  
  
\* (2) COMPUTATIONAL SCIENCE & ENGINEERING DEPARTMENT - STFC DARESURY (UK) \*  
\* (3) UNIVERSIDAD AUTONOMA DEL ESTADO DE MORELOS - CUERNAVACA (MEXICO) \*  
\* (4) UNIVERSITE' DE LORRAINE - NANCY (FRANCE) \*  
\* (5) UNIVERSITAET STUTT GART- STUTT GART (GERMANY) \*  
\* (6) IMPERIAL COLLEGE - LONDON (UK) \*  
\* (7) OXFORD E-RESEARCH CENTRE - OXFORD (UK) \*  
\* (8) UPMC - SORBONNE UNIVERSITES - PARIS (FRANCE) \*  
\* (9) UNIVERSIDAD DE BARCELONA - BARCELONA (SPAIN) \*  
\*(10) UNIVERSITA' DI NAPOLI "FEDERICO II" - NAPOLI (ITALY) \*  
\*(11) NIS - NANOSTRUCTURED INTERFACES AND SURFACES - TORINO (ITALY) \*  
\*(12) MPI FUER CHEMISCHE ENERGIEKONVERSION - MUELHEIM AN DER RUHR (GERMANY) \*  
\*(13) UNIVERSITY OF TROMSO - TROMSO (NORWAY) \*  
\*(14) UNIVERSITE' DE PAU ET DES PAYS DE L'ADOUR - PAU (FRANCE) \*  
\*(15) UNIVERSITY OF CALIFORNIA SANTA BARBARA - SANTA BARBARA (USA) \*  
\*(16) CURTIN UNIVERSITY - PERTH (AUSTRALIA) \*  
\*(17) UNIVERSITY COLLEGE LONDON - LONDON (UK) \*  
\*(18) CAMBRIDGE UNIVERSITY - CAMBRIDGE (UK) \*  
\* \*

\*\*\*\*\*

EEEEEEEEEE STARTING DATE 03 10 2023 TIME 12:19:33.5

\*\* Geometry was taken from 2048268.cif, del O4 H4 H5, B3LYP CHNO 6-31G\*\*\* I -pob

PROCESS 1 OF 8 WORKING



GEOMETRY INPUT FROM EXTERNAL FILE (FORTRAN UNIT 34)

3D - CRYSTAL

\*\*\*\*\*

LATTICE PARAMETERS (ANGSTROMS AND DEGREES) - PRIMITIVE CELL

| A        | B       | C        | ALPHA    | BETA      | GAMMA    | VOLUME      |
|----------|---------|----------|----------|-----------|----------|-------------|
| 13.65460 | 8.61060 | 15.39080 | 90.00000 | 104.96200 | 90.00000 | 1748.213406 |

NUMBER OF IRREDUCIBLE ATOMS IN THE CELL: 44

CARTESIAN COORDINATES (ANGSTROM) - IRREDUCIBLE ATOMS AND SYMMETRY RELATED

| AT.IRR. | AT | AT.N. | X                   | Y                   | Z                   |
|---------|----|-------|---------------------|---------------------|---------------------|
| 1       | 1  | 253   | -5.264491633083E+00 | 2.817360011251E+00  | -2.834921206098E+00 |
| 1       | 2  | 253   | -6.403322600301E+00 | -1.487939988749E+00 | -4.599583718749E+00 |
| 1       | 3  | 253   | 5.264491633083E+00  | -2.817360011251E+00 | 2.834921206098E+00  |
| 1       | 4  | 253   | 6.403322600301E+00  | 1.487939988749E+00  | 4.599583718749E+00  |
| 5       | 5  | 253   | -2.998697447700E+00 | 1.584865947449E+00  | 6.440202136160E+00  |
| 5       | 6  | 253   | 1.011911681085E+00  | -2.720434052550E+00 | 9.943027886870E-01  |
| 5       | 7  | 253   | 2.998697447700E+00  | -1.584865947449E+00 | -6.440202136160E+00 |
| 5       | 8  | 253   | -1.011911681085E+00 | 2.720434052550E+00  | -9.943027886870E-01 |
| 9       | 9  | 7     | -3.174294387619E+00 | 4.241350359650E+00  | -5.385772775359E+00 |
| 9       | 10 | 7     | 5.161080154234E+00  | -6.394964035000E-02 | -2.048732149489E+00 |
| 9       | 11 | 7     | 3.174294387619E+00  | -4.241350359650E+00 | 5.385772775359E+00  |
| 9       | 12 | 7     | -5.161080154234E+00 | 6.394964035000E-02  | 2.048732149489E+00  |
| 13      | 13 | 7     | -4.722733237170E-01 | 3.927029415311E+00  | -6.026723635976E+00 |
| 13      | 14 | 7     | 2.459059090332E+00  | -3.782705846890E-01 | -1.407781288871E+00 |
| 13      | 15 | 7     | 4.722733237170E-01  | -3.927029415311E+00 | 6.026723635976E+00  |
| 13      | 16 | 7     | -2.459059090332E+00 | 3.782705846890E-01  | 1.407781288871E+00  |
| 17      | 17 | 8     | -4.007745564028E+00 | 2.443427301887E+00  | -6.447807168450E+00 |
| 17      | 18 | 8     | 5.994531330643E+00  | -1.861872698113E+00 | -9.866977563980E-01 |
| 17      | 19 | 8     | 4.007745564028E+00  | -2.443427301887E+00 | 6.447807168450E+00  |

17 20 8 -5.994531330643E+00 1.861872698113E+00 9.866977563980E-01  
21 21 8 -4.495226961330E-01 1.939047236941E+00 -4.950283589763E+00  
21 22 8 2.436308462748E+00 -2.366252763059E+00 -2.484221335084E+00  
21 23 8 4.495226961330E-01 -1.939047236941E+00 4.950283589763E+00  
21 24 8 -2.436308462748E+00 2.366252763059E+00 2.484221335084E+00  
25 25 6 -3.649863883025E+00 2.182726992797E+00 -4.109086296812E+00  
25 26 6 5.636649649640E+00 -2.122573007203E+00 -3.325418628035E+00  
25 27 6 3.649863883025E+00 -2.182726992797E+00 4.109086296812E+00  
25 28 6 -5.636649649640E+00 2.122573007203E+00 3.325418628035E+00  
29 29 1 -2.736558309366E+00 2.268973929150E+00 -3.525910638282E+00  
29 30 1 4.723344075981E+00 -2.036326070850E+00 -3.908594286565E+00  
29 31 1 2.736558309366E+00 -2.268973929150E+00 3.525910638282E+00  
29 32 1 -4.723344075981E+00 2.036326070850E+00 3.908594286565E+00  
33 33 1 -3.823293713807E+00 1.137259774320E+00 -4.345603337205E+00  
33 34 1 5.810079480423E+00 -3.168040225680E+00 -3.088901587643E+00  
33 35 1 3.823293713807E+00 -1.137259774320E+00 4.345603337205E+00  
33 36 1 -5.810079480423E+00 3.168040225680E+00 3.088901587643E+00  
37 37 6 -3.621687933791E+00 2.980204951207E+00 -5.388702251316E+00  
37 38 6 5.608473700406E+00 -1.325095048793E+00 -2.045802673531E+00  
37 39 6 3.621687933791E+00 -2.980204951207E+00 5.388702251316E+00  
37 40 6 -5.608473700406E+00 1.325095048793E+00 2.045802673531E+00  
41 41 6 -2.676656935685E+00 -3.654098422648E+00 -4.213750128444E+00  
41 42 6 4.663442702301E+00 6.512015773520E-01 -3.220754796403E+00  
41 43 6 2.676656935685E+00 3.654098422648E+00 4.213750128444E+00  
41 44 6 -4.663442702301E+00 -6.512015773520E-01 3.220754796403E+00  
45 45 1 -2.551050868058E+00 4.265861661784E+00 -3.384387265424E+00  
45 46 1 4.537836634673E+00 -3.943833821700E-02 -4.050117659423E+00  
45 47 1 2.551050868058E+00 -4.265861661784E+00 3.384387265424E+00  
45 48 1 -4.537836634673E+00 3.943833821700E-02 4.050117659423E+00  
49 49 1 -3.420895029985E+00 -2.907294249263E+00 -3.924351038286E+00  
49 50 1 5.407680796600E+00 1.398005750737E+00 -3.510153886561E+00  
49 51 1 3.420895029985E+00 2.907294249263E+00 3.924351038286E+00

49 52 1 -5.407680796600E+00 -1.398005750737E+00 3.510153886561E+00  
53 53 6 -1.330850219207E+00 -2.939951670127E+00 -4.459617425727E+00  
53 54 6 3.317635985822E+00 1.365348329873E+00 -2.974887499120E+00  
53 55 6 1.330850219207E+00 2.939951670127E+00 4.459617425727E+00  
53 56 6 -3.317635985822E+00 -1.365348329873E+00 2.974887499120E+00  
57 57 6 -9.835993190140E-01 -2.237442316004E+00 -3.140369332521E+00  
57 58 6 2.970385085630E+00 2.067857683996E+00 -4.294135592326E+00  
57 59 6 9.835993190140E-01 2.237442316004E+00 3.140369332521E+00  
57 60 6 -2.970385085630E+00 -2.067857683996E+00 4.294135592326E+00  
61 61 1 -1.624220870566E+00 -1.367283172819E+00 -2.988888026317E+00  
61 62 1 3.611006637182E+00 2.938016827181E+00 -4.445616898530E+00  
61 63 1 1.624220870566E+00 1.367283172819E+00 2.988888026317E+00  
61 64 1 -3.611006637182E+00 -2.938016827181E+00 4.445616898530E+00  
65 65 1 5.153282757200E-02 -1.911144796772E+00 -3.129075125447E+00  
65 66 1 1.935252939043E+00 2.394155203228E+00 -4.305429799400E+00  
65 67 1 -5.153282757200E-02 1.911144796772E+00 3.129075125447E+00  
65 68 1 -1.935252939043E+00 -2.394155203228E+00 4.305429799400E+00  
69 69 1 -1.125570891276E+00 -2.934104281454E+00 -2.309100506029E+00  
69 70 1 3.112356657891E+00 1.371195718546E+00 -5.125404418818E+00  
69 71 1 1.125570891276E+00 2.934104281454E+00 2.309100506029E+00  
69 72 1 -3.112356657891E+00 -1.371195718546E+00 5.125404418818E+00  
73 73 6 -1.535459781737E+00 -1.984520714630E+00 -5.666386345149E+00  
73 74 6 3.522245548353E+00 2.320779285370E+00 -1.768118579699E+00  
73 75 6 1.535459781737E+00 1.984520714630E+00 5.666386345149E+00  
73 76 6 -3.522245548353E+00 -2.320779285370E+00 1.768118579699E+00  
77 77 6 -3.212432464082E+00 -3.592147008471E+00 -6.624008514952E+00  
77 78 6 5.199218230697E+00 7.131529915290E-01 -8.104964098950E-01  
77 79 6 3.212432464082E+00 3.592147008471E+00 6.624008514952E+00  
77 80 6 -5.199218230697E+00 -7.131529915290E-01 8.104964098950E-01  
81 81 1 -4.035079147208E+00 -2.875309460484E+00 -6.562748425335E+00  
81 82 1 6.021864913823E+00 1.429990539516E+00 -8.717564995120E-01  
81 83 1 4.035079147208E+00 2.875309460484E+00 6.562748425335E+00

81 84 1 -6.021864913823E+00 -1.429990539516E+00 8.717564995120E-01  
85 85 1 -3.440162363050E+00 -4.273626591327E+00 -7.440920507284E+00  
85 86 1 5.426948129665E+00 3.167340867300E-02 6.415582437000E-03  
85 87 1 3.440162363050E+00 4.273626591327E+00 7.440920507284E+00  
85 88 1 -5.426948129665E+00 -3.167340867300E-02 -6.415582437000E-03  
89 89 6 -1.898551450756E+00 -2.850475851602E+00 -6.910292037016E+00  
89 90 6 3.885337217371E+00 1.454824148398E+00 -5.242128878310E-01  
89 91 6 1.898551450756E+00 2.850475851602E+00 6.910292037016E+00  
89 92 6 -3.885337217371E+00 -1.454824148398E+00 5.242128878310E-01  
93 93 6 -2.089936365573E+00 -2.004888689428E+00 -8.173272838828E+00  
93 94 6 4.076722132188E+00 2.300411310572E+00 7.387679139800E-01  
93 95 6 2.089936365573E+00 2.004888689428E+00 8.173272838828E+00  
93 96 6 -4.076722132188E+00 -2.300411310572E+00 -7.387679139800E-01  
97 97 1 -5.141106537691E+00 -1.487999855132E+00 6.432145630452E+00  
97 98 1 3.154320771076E+00 2.817300144868E+00 1.002359294395E+00  
97 99 1 5.141106537691E+00 1.487999855132E+00 -6.432145630452E+00  
97 100 1 -3.154320771076E+00 -2.817300144868E+00 -1.002359294395E+00  
101 101 1 -2.881216387593E+00 -1.261777549769E+00 -8.066612884346E+00  
101 102 1 4.868002154208E+00 3.043522450231E+00 6.321079594990E-01  
101 103 1 2.881216387593E+00 1.261777549769E+00 8.066612884346E+00  
101 104 1 -4.868002154208E+00 -3.043522450231E+00 -6.321079594990E-01  
105 105 1 -6.351534206274E+00 -2.645549719443E+00 5.856432778962E+00  
105 106 1 4.364748439659E+00 1.659750280557E+00 1.578072145885E+00  
105 107 1 6.351534206274E+00 2.645549719443E+00 -5.856432778962E+00  
105 108 1 -4.364748439659E+00 -1.659750280557E+00 -1.578072145885E+00  
109 109 6 -2.130172395470E-01 -3.941705945776E+00 -4.792407726715E+00  
109 110 6 2.199803006162E+00 3.635940542240E-01 -2.642097198132E+00  
109 111 6 2.130172395470E-01 3.941705945776E+00 4.792407726715E+00  
109 112 6 -2.199803006162E+00 -3.635940542240E-01 2.642097198132E+00  
113 113 1 7.286104248380E-01 -3.396031545063E+00 -4.907469573260E+00  
113 114 1 1.258175341777E+00 9.092684549370E-01 -2.527035351587E+00  
113 115 1 -7.286104248380E-01 3.396031545063E+00 4.907469573260E+00

113 116 1 -1.258175341777E+00 -9.092684549370E-01 2.527035351587E+00  
117 117 1 -9.017916240500E-02 3.952504529059E+00 -3.983648935172E+00  
117 118 1 2.076964929020E+00 -3.527954709410E-01 -3.450855989675E+00  
117 119 1 9.017916240500E-02 -3.952504529059E+00 3.983648935172E+00  
117 120 1 -2.076964929020E+00 3.527954709410E-01 3.450855989675E+00  
121 121 6 -7.412610571140E-01 -3.836946731556E+00 -7.180808183372E+00  
121 122 6 2.728046823729E+00 4.683532684440E-01 -2.536967414760E-01  
121 123 6 7.412610571140E-01 3.836946731556E+00 7.180808183372E+00  
121 124 6 -2.728046823729E+00 -4.683532684440E-01 2.536967414760E-01  
125 125 1 -9.845145295960E-01 4.166167227512E+00 -8.050018687254E+00  
125 126 1 2.971300296211E+00 -1.391327724880E-01 6.155137624070E-01  
125 127 1 9.845145295960E-01 -4.166167227512E+00 8.050018687254E+00  
125 128 1 -2.971300296211E+00 1.391327724880E-01 -6.155137624070E-01  
129 129 1 1.635974588710E-01 -3.271006078779E+00 -7.417024059935E+00  
129 130 1 1.823188307745E+00 1.034293921221E+00 -1.748086491200E-02  
129 131 1 -1.635974588710E-01 3.271006078779E+00 7.417024059935E+00  
129 132 1 -1.823188307745E+00 -1.034293921221E+00 1.748086491200E-02  
133 133 6 -5.626062707940E-01 2.586045586656E+00 -6.005999745897E+00  
133 134 6 2.549392037410E+00 -1.719254413344E+00 -1.428505178950E+00  
133 135 6 5.626062707940E-01 -2.586045586656E+00 6.005999745897E+00  
133 136 6 -2.549392037410E+00 1.719254413344E+00 1.428505178950E+00  
137 137 6 -8.243425495180E-01 1.831111534520E+00 -7.284927180969E+00  
137 138 6 2.811128316133E+00 -2.474188465480E+00 -1.495777438780E-01  
137 139 6 8.243425495180E-01 -1.831111534520E+00 7.284927180969E+00  
137 140 6 -2.811128316133E+00 2.474188465480E+00 1.495777438780E-01  
141 141 1 -1.573350632256E+00 2.275434612060E+00 -7.930982130553E+00  
141 142 1 3.560136398871E+00 -2.029865387940E+00 4.964772057060E-01  
141 143 1 1.573350632256E+00 -2.275434612060E+00 7.930982130553E+00  
141 144 1 -3.560136398871E+00 2.029865387940E+00 -4.964772057060E-01  
145 145 1 -1.129672399954E+00 8.243737302050E-01 -7.019082184761E+00  
145 146 1 3.116458166570E+00 -3.480926269795E+00 -4.154227400860E-01  
145 147 1 1.129672399954E+00 -8.243737302050E-01 7.019082184761E+00

145 148 1 -3.116458166570E+00 3.480926269795E+00 4.154227400860E-01  
149 149 8 -2.522492062331E+00 -1.067908400091E+00 -5.318567481993E+00  
149 150 8 4.509277828946E+00 3.237391599909E+00 -2.115937442854E+00  
149 151 8 2.522492062331E+00 1.067908400091E+00 5.318567481993E+00  
149 152 8 -4.509277828946E+00 -3.237391599909E+00 2.115937442854E+00  
153 153 1 -3.046548236948E+00 -7.787027390850E-01 -6.086494858119E+00  
153 154 1 5.033334003563E+00 3.526597260915E+00 -1.348010066727E+00  
153 155 1 3.046548236948E+00 7.787027390850E-01 6.086494858119E+00  
153 156 1 -5.033334003563E+00 -3.526597260915E+00 1.348010066727E+00  
157 157 8 -3.641764790050E-01 -1.316987448972E+00 -6.101456284373E+00  
157 158 8 2.350962245620E+00 2.988312551028E+00 -1.333048640474E+00  
157 159 8 3.641764790050E-01 1.316987448972E+00 6.101456284373E+00  
157 160 8 -2.350962245620E+00 -2.988312551028E+00 1.333048640474E+00  
161 161 8 2.980290889590E-01 -6.319763463550E-01 -5.039770877223E+00  
161 162 8 1.688756677656E+00 3.673323653645E+00 -2.394734047624E+00  
161 163 8 -2.980290889590E-01 6.319763463550E-01 5.039770877223E+00  
161 164 8 -1.688756677656E+00 -3.673323653645E+00 2.394734047624E+00  
165 165 1 -9.499604897800E-02 2.807952357590E-01 -5.057424822773E+00  
165 166 1 2.081781815593E+00 -4.024504764241E+00 -2.377080102074E+00  
165 167 1 9.499604897800E-02 -2.807952357590E-01 5.057424822773E+00  
165 168 1 -2.081781815593E+00 4.024504764241E+00 2.377080102074E+00  
169 169 8 -4.655461874806E+00 -1.086397914700E-02 -6.738445257770E+00  
169 170 8 6.642247641421E+00 -4.316163979147E+00 -6.960596670770E-01  
169 171 8 4.655461874806E+00 1.086397914700E-02 6.738445257770E+00  
169 172 8 -6.642247641421E+00 4.316163979147E+00 6.960596670770E-01  
173 173 1 -4.424289274204E+00 9.595633829970E-01 -6.596699922733E+00  
173 174 1 6.411075040819E+00 -3.345736617003E+00 -8.378050021140E-01  
173 175 1 4.424289274204E+00 -9.595633829970E-01 6.596699922733E+00  
173 176 1 -6.411075040819E+00 3.345736617003E+00 8.378050021140E-01

SPACE GROUP N. : 14

NUMBER OF SYMMETRY OPERATORS : 4

\*\*\*\*\*

LATTICE PARAMETERS (ANGSTROMS AND DEGREES) - BOHR = 0.5291772083 ANGSTROM

PRIMITIVE CELL - CENTRING CODE 1/0 VOLUME= 1748.213406 - DENSITY 2.108 g/cm<sup>3</sup>

| A           | B          | C           | ALPHA     | BETA       | GAMMA     |
|-------------|------------|-------------|-----------|------------|-----------|
| 13.65460000 | 8.61060000 | 15.39080000 | 90.000000 | 104.962000 | 90.000000 |

\*\*\*\*\*

ATOMS IN THE ASYMMETRIC UNIT 44 - ATOMS IN THE UNIT CELL: 176

| ATOM | X/A | Y/B | Z/C |
|------|-----|-----|-----|
|------|-----|-----|-----|

\*\*\*\*\*

|           |                     |                     |                     |
|-----------|---------------------|---------------------|---------------------|
| 1 T 253 I | -4.410302503216E-01 | 3.271967123372E-01  | -1.906597167366E-01 |
| 2 F 253 I | 4.410302503217E-01  | -1.728032876628E-01 | -3.093402832632E-01 |
| 3 F 253 I | 4.410302503216E-01  | -3.271967123372E-01 | 1.906597167366E-01  |
| 4 F 253 I | -4.410302503217E-01 | 1.728032876628E-01  | 3.093402832632E-01  |
| 5 T 253 I | -9.356756280730E-02 | 1.840598735801E-01  | 4.331291862242E-01  |
| 6 F 253 I | 9.356756280724E-02  | -3.159401264198E-01 | 6.687081377561E-02  |
| 7 F 253 I | 9.356756280730E-02  | -1.840598735801E-01 | -4.331291862242E-01 |
| 8 F 253 I | -9.356756280724E-02 | 3.159401264198E-01  | -6.687081377561E-02 |
| 9 T 7 N   | -3.378773524441E-01 | 4.925731493334E-01  | -3.622146215383E-01 |
| 10 F 7 N  | 3.378773524442E-01  | -7.426850666620E-03 | -1.377853784615E-01 |
| 11 F 7 N  | 3.378773524441E-01  | -4.925731493334E-01 | 3.622146215383E-01  |
| 12 F 7 N  | -3.378773524442E-01 | 7.426850666620E-03  | 1.377853784615E-01  |
| 13 T 7 N  | -1.525380285049E-01 | 4.560691955626E-01  | -4.053211139744E-01 |
| 14 F 7 N  | 1.525380285049E-01  | -4.393080443744E-02 | -9.467888602545E-02 |
| 15 F 7 N  | 1.525380285049E-01  | -4.560691955626E-01 | 4.053211139744E-01  |
| 16 F 7 N  | -1.525380285049E-01 | 4.393080443744E-02  | 9.467888602545E-02  |
| 17 T 8 O  | -4.197008865774E-01 | 2.837696910653E-01  | -4.336406548671E-01 |
| 18 F 8 O  | 4.197008865774E-01  | -2.162303089347E-01 | -6.635934513272E-02 |
| 19 F 8 O  | 4.197008865774E-01  | -2.837696910653E-01 | 4.336406548671E-01  |
| 20 F 8 O  | -4.197008865774E-01 | 2.162303089347E-01  | 6.635934513272E-02  |
| 21 T 8 O  | -1.298045302597E-01 | 2.251930454255E-01  | -3.329262432268E-01 |
| 22 F 8 O  | 1.298045302598E-01  | -2.748069545745E-01 | -1.670737567730E-01 |
| 23 F 8 O  | 1.298045302597E-01  | -2.251930454255E-01 | 3.329262432268E-01  |

24 F 8 O -1.298045302598E-01 2.748069545745E-01 1.670737567730E-01  
25 T 6 C -3.477194383662E-01 2.534930193944E-01 -2.763523824618E-01  
26 F 6 C 3.477194383663E-01 -2.465069806056E-01 -2.236476175380E-01  
27 F 6 C 3.477194383662E-01 -2.534930193944E-01 2.763523824618E-01  
28 F 6 C -3.477194383663E-01 2.465069806056E-01 2.236476175380E-01  
29 T 1 H -2.694196311263E-01 2.635093871681E-01 -2.371315019576E-01  
30 F 1 H 2.694196311263E-01 -2.364906128319E-01 -2.628684980422E-01  
31 F 1 H 2.694196311263E-01 -2.635093871681E-01 2.371315019576E-01  
32 F 1 H -2.694196311263E-01 2.364906128319E-01 2.628684980422E-01  
33 T 1 H -3.650495896871E-01 1.320767164100E-01 -2.922590933177E-01  
34 F 1 H 3.650495896872E-01 -3.679232835900E-01 -2.077409066822E-01  
35 F 1 H 3.650495896871E-01 -1.320767164100E-01 2.922590933177E-01  
36 F 1 H -3.650495896872E-01 3.679232835900E-01 2.077409066822E-01  
37 T 6 C -3.706997284099E-01 3.461088601499E-01 -3.624116404378E-01  
38 F 6 C 3.706997284100E-01 -1.538911398501E-01 -1.375883595620E-01  
39 F 6 C 3.706997284099E-01 -3.461088601499E-01 3.624116404378E-01  
40 F 6 C -3.706997284100E-01 1.538911398501E-01 1.375883595620E-01  
41 T 6 C -2.784946537169E-01 -4.243721021355E-01 -2.833914410601E-01  
42 F 6 C 2.784946537170E-01 7.562789786449E-02 -2.166085589397E-01  
43 F 6 C 2.784946537169E-01 4.243721021355E-01 2.833914410601E-01  
44 F 6 C -2.784946537170E-01 -7.562789786449E-02 2.166085589397E-01  
45 T 1 H -2.530641222280E-01 4.954197920916E-01 -2.276134927365E-01  
46 F 1 H 2.530641222281E-01 -4.580207908508E-03 -2.723865072633E-01  
47 F 1 H 2.530641222280E-01 -4.954197920916E-01 2.276134927365E-01  
48 F 1 H -2.530641222281E-01 4.580207908508E-03 2.723865072633E-01  
49 T 1 H -3.273353024700E-01 -3.376413083017E-01 -2.639282022108E-01  
50 F 1 H 3.273353024700E-01 1.623586916983E-01 -2.360717977890E-01  
51 F 1 H 3.273353024700E-01 3.376413083017E-01 2.639282022108E-01  
52 F 1 H -3.273353024700E-01 -1.623586916983E-01 2.360717977890E-01  
53 T 6 C -1.847459159559E-01 -3.414340080978E-01 -2.999269938487E-01  
54 F 6 C 1.847459159560E-01 1.585659919022E-01 -2.000730061511E-01  
55 F 6 C 1.847459159559E-01 3.414340080978E-01 2.999269938487E-01



56 F 6 C -1.847459159560E-01 -1.585659919022E-01 2.000730061511E-01  
57 T 6 C -1.334954399106E-01 -2.598474340933E-01 -2.112023170517E-01  
58 F 6 C 1.334954399107E-01 2.401525659067E-01 -2.887976829481E-01  
59 F 6 C 1.334954399106E-01 2.598474340933E-01 2.112023170517E-01  
60 F 6 C -1.334954399107E-01 -2.401525659067E-01 2.887976829481E-01  
61 T 1 H -1.774469227900E-01 -1.587906966784E-01 -2.010145972415E-01  
62 F 1 H 1.774469227901E-01 3.412093033216E-01 -2.989854027583E-01  
63 F 1 H 1.774469227900E-01 1.587906966784E-01 2.010145972415E-01  
64 F 1 H -1.774469227901E-01 -3.412093033216E-01 2.989854027583E-01  
65 T 1 H -5.746608765762E-02 -2.219525697131E-01 -2.104427367442E-01  
66 F 1 H 5.746608765767E-02 2.780474302869E-01 -2.895572632556E-01  
67 F 1 H 5.746608765762E-02 2.219525697131E-01 2.104427367442E-01  
68 F 1 H -5.746608765767E-02 -2.780474302869E-01 2.895572632556E-01  
69 T 1 H -1.276237598795E-01 -3.407549162026E-01 -1.552961851105E-01  
70 F 1 H 1.276237598795E-01 1.592450837974E-01 -3.447038148893E-01  
71 F 1 H 1.276237598795E-01 3.407549162026E-01 1.552961851105E-01  
72 F 1 H -1.276237598795E-01 -1.592450837974E-01 3.447038148893E-01  
73 T 6 C -2.233486322238E-01 -2.304741498421E-01 -3.810869992304E-01  
74 F 6 C 2.233486322239E-01 2.695258501579E-01 -1.189130007695E-01  
75 F 6 C 2.233486322238E-01 2.304741498421E-01 3.810869992304E-01  
76 F 6 C -2.233486322239E-01 -2.695258501579E-01 1.189130007695E-01  
77 T 6 C -3.649043110188E-01 -4.171773173148E-01 -4.454908956218E-01  
78 F 6 C 3.649043110189E-01 8.282268268518E-02 -5.450910437801E-02  
79 F 6 C 3.649043110188E-01 4.171773173148E-01 4.454908956218E-01  
80 F 6 C -3.649043110189E-01 -8.282268268518E-02 5.450910437801E-02  
81 T 1 H -4.239522238198E-01 -3.339267252554E-01 -4.413709111550E-01  
82 F 1 H 4.239522238198E-01 1.660732747446E-01 -5.862908884478E-02  
83 F 1 H 4.239522238198E-01 3.339267252554E-01 4.413709111550E-01  
84 F 1 H -4.239522238198E-01 -1.660732747446E-01 5.862908884478E-02  
85 T 1 H -3.975702415404E-01 -4.963215793704E-01 4.995685265866E-01  
86 F 1 H 3.975702415405E-01 3.678420629573E-03 4.314734136200E-04  
87 F 1 H 3.975702415404E-01 4.963215793704E-01 -4.995685265866E-01

88 F 1 H -3.975702415405E-01 -3.678420629573E-03 -4.314734136200E-04  
89 T 6 C -2.742846633426E-01 -3.310426511047E-01 -4.647446001359E-01  
90 F 6 C 2.742846633427E-01 1.689573488953E-01 -3.525539986387E-02  
91 F 6 C 2.742846633426E-01 3.310426511047E-01 4.647446001359E-01  
92 F 6 C -2.742846633427E-01 -1.689573488953E-01 3.525539986387E-02  
93 T 6 C -3.130190077853E-01 -2.328396034455E-01 4.503149220126E-01  
94 F 6 C 3.130190077853E-01 2.671603965545E-01 4.968507798755E-02  
95 F 6 C 3.130190077853E-01 2.328396034455E-01 -4.503149220126E-01  
96 F 6 C -3.130190077853E-01 -2.671603965545E-01 -4.968507798755E-02  
97 T 1 H -2.506254113198E-01 -1.728102403006E-01 4.325873541998E-01  
98 F 1 H 2.506254113198E-01 3.271897596994E-01 6.741264580003E-02  
99 F 1 H 2.506254113198E-01 1.728102403006E-01 -4.325873541998E-01  
100 F 1 H -2.506254113198E-01 -3.271897596994E-01 -6.741264580003E-02  
101 T 1 H -3.688812357762E-01 -1.465377035014E-01 4.574882278050E-01  
102 F 1 H 3.688812357762E-01 3.534622964986E-01 4.251177219522E-02  
103 F 1 H 3.688812357762E-01 1.465377035014E-01 -4.574882278050E-01  
104 F 1 H -3.688812357762E-01 -3.534622964986E-01 -4.251177219522E-02  
105 T 1 H -3.505390150637E-01 -3.072433650899E-01 3.938683771253E-01  
106 F 1 H 3.505390150637E-01 1.927566349101E-01 1.061316228745E-01  
107 F 1 H 3.505390150637E-01 3.072433650899E-01 -3.938683771253E-01  
108 F 1 H -3.505390150637E-01 -1.927566349101E-01 -1.061316228745E-01  
109 T 6 C -1.093941219256E-01 -4.577736680111E-01 -3.223084640577E-01  
110 F 6 C 1.093941219257E-01 4.222633198894E-02 -1.776915359421E-01  
111 F 6 C 1.093941219256E-01 4.577736680111E-01 3.223084640577E-01  
112 F 6 C -1.093941219257E-01 -4.222633198894E-02 1.776915359421E-01  
113 T 1 H -4.268556130444E-02 -3.944012664696E-01 -3.300468304794E-01  
114 F 1 H 4.268556130450E-02 1.055987335304E-01 -1.699531695204E-01  
115 F 1 H 4.268556130444E-02 3.944012664696E-01 3.300468304794E-01  
116 F 1 H -4.268556130450E-02 -1.055987335304E-01 1.699531695204E-01  
117 T 1 H -8.456955407889E-02 4.590277714746E-01 -2.679162214189E-01  
118 F 1 H 8.456955407895E-02 -4.097222852542E-02 -2.320837785809E-01  
119 F 1 H 8.456955407889E-02 -4.590277714746E-01 2.679162214189E-01

120 F 1 H -8.456955407895E-02 4.097222852542E-02 2.320837785809E-01  
121 T 6 C -1.948244029958E-01 -4.456073597143E-01 -4.829378859761E-01  
122 F 6 C 1.948244029959E-01 5.439264028569E-02 -1.706211402376E-02  
123 F 6 C 1.948244029958E-01 4.456073597143E-01 4.829378859761E-01  
124 F 6 C -1.948244029959E-01 -5.439264028569E-02 1.706211402376E-02  
125 T 1 H -2.296507591646E-01 4.838416867015E-01 4.586042535027E-01  
126 F 1 H 2.296507591647E-01 -1.615831329849E-02 4.139574649750E-02  
127 F 1 H 2.296507591646E-01 -4.838416867015E-01 -4.586042535027E-01  
128 F 1 H -2.296507591647E-01 1.615831329849E-02 -4.139574649750E-02  
129 T 1 H -1.331797890852E-01 -3.798813182332E-01 -4.988243423677E-01  
130 F 1 H 1.331797890854E-01 1.201186817668E-01 -1.175657632129E-03  
131 F 1 H 1.331797890852E-01 3.798813182332E-01 4.988243423677E-01  
132 F 1 H -1.331797890854E-01 -1.201186817668E-01 1.175657632129E-03  
133 T 6 C -1.587480036249E-01 3.003327975584E-01 -4.039273500124E-01  
134 F 6 C 1.587480036250E-01 -1.996672024416E-01 -9.607264998744E-02  
135 F 6 C 1.587480036249E-01 -3.003327975584E-01 4.039273500124E-01  
136 F 6 C -1.587480036250E-01 1.996672024416E-01 9.607264998744E-02  
137 T 6 C -2.029466544462E-01 2.126578327317E-01 -4.899403023205E-01  
138 F 6 C 2.029466544463E-01 -2.873421672683E-01 -1.005969767927E-02  
139 F 6 C 2.029466544462E-01 -2.126578327317E-01 4.899403023205E-01  
140 F 6 C -2.029466544463E-01 2.873421672683E-01 1.005969767927E-02  
141 T 1 H -2.704447007410E-01 2.642597045572E-01 4.666099349774E-01  
142 F 1 H 2.704447007410E-01 -2.357402954428E-01 3.339006502279E-02  
143 F 1 H 2.704447007410E-01 -2.642597045572E-01 -4.666099349774E-01  
144 F 1 H -2.704447007410E-01 2.357402954428E-01 -3.339006502279E-02  
145 T 1 H -2.201046699701E-01 9.573940610468E-02 -4.720611698904E-01  
146 F 1 H 2.201046699702E-01 -4.042605938953E-01 -2.793883010942E-02  
147 F 1 H 2.201046699701E-01 -9.573940610468E-02 4.720611698904E-01  
148 F 1 H -2.201046699702E-01 4.042605938953E-01 2.793883010942E-02  
149 T 8 O -2.888270569047E-01 -1.240225303801E-01 -3.576947984939E-01  
150 F 8 O 2.888270569048E-01 3.759774696199E-01 -1.423052015058E-01  
151 F 8 O 2.888270569047E-01 1.240225303801E-01 3.576947984939E-01

152 F 8 O -2.888270569048E-01 -3.759774696199E-01 1.423052015058E-01  
153 T 1 H -3.422358653914E-01 -9.043536328305E-02 -4.093409661869E-01  
154 F 1 H 3.422358653915E-01 4.095646367170E-01 -9.065903381281E-02  
155 F 1 H 3.422358653914E-01 9.043536328305E-02 4.093409661869E-01  
156 F 1 H -3.422358653915E-01 -4.095646367170E-01 9.065903381281E-02  
157 T 8 O -1.460841297718E-01 -1.529495562414E-01 -4.103471815574E-01  
158 F 8 O 1.460841297719E-01 3.470504437586E-01 -8.965281844244E-02  
159 F 8 O 1.460841297718E-01 1.529495562414E-01 4.103471815574E-01  
160 F 8 O -1.460841297719E-01 -3.470504437586E-01 8.965281844244E-02  
161 T 8 O -7.680866522071E-02 -7.339515786995E-02 -3.389446189199E-01  
162 F 8 O 7.680866522077E-02 4.266048421300E-01 -1.610553810799E-01  
163 F 8 O 7.680866522071E-02 7.339515786995E-02 3.389446189199E-01  
164 F 8 O -7.680866522077E-02 -4.266048421300E-01 1.610553810799E-01  
165 T 1 H -1.059375266625E-01 3.261041457727E-02 -3.401319169127E-01  
166 F 1 H 1.059375266625E-01 -4.673895854227E-01 -1.598680830870E-01  
167 F 1 H 1.059375266625E-01 -3.261041457727E-02 3.401319169127E-01  
168 F 1 H -1.059375266625E-01 4.673895854227E-01 1.598680830870E-01  
169 T 8 O -4.728248148405E-01 -1.261698272710E-03 -4.531872213338E-01  
170 F 8 O 4.728248148406E-01 4.987383017273E-01 -4.681277866603E-02  
171 F 8 O 4.728248148405E-01 1.261698272710E-03 4.531872213338E-01  
172 F 8 O -4.728248148406E-01 -4.987383017273E-01 4.681277866603E-02  
173 T 1 H -4.531206559541E-01 1.114397815480E-01 -4.436542842741E-01  
174 F 1 H 4.531206559542E-01 -3.885602184520E-01 -5.634571572571E-02  
175 F 1 H 4.531206559541E-01 -1.114397815480E-01 4.436542842741E-01  
176 F 1 H -4.531206559542E-01 3.885602184520E-01 5.634571572571E-02

T = ATOM BELONGING TO THE ASYMMETRIC UNIT

\*\*\*\*\*

\* GEOMETRY EDITING - INPUT COORDINATES ARE GIVEN IN ANGSTROM

\*\*\*\*\*

GEOMETRY NOW FULLY CONSISTENT WITH THE GROUP



11 F 7 N 3.378773524441E-01 -4.925731493334E-01 3.622146215383E-01  
12 F 7 N -3.378773524445E-01 7.426850666620E-03 1.377853784617E-01  
13 T 7 N -1.525380285049E-01 4.560691955626E-01 -4.053211139744E-01  
14 F 7 N 1.525380285045E-01 -4.393080443744E-02 -9.467888602565E-02  
15 F 7 N 1.525380285049E-01 -4.560691955626E-01 4.053211139744E-01  
16 F 7 N -1.525380285052E-01 4.393080443744E-02 9.467888602565E-02  
17 T 8 O -4.197008865774E-01 2.837696910653E-01 -4.336406548671E-01  
18 F 8 O 4.197008865770E-01 -2.162303089347E-01 -6.635934513285E-02  
19 F 8 O 4.197008865774E-01 -2.837696910653E-01 4.336406548671E-01  
20 F 8 O -4.197008865777E-01 2.162303089347E-01 6.635934513285E-02  
21 T 8 O -1.298045302597E-01 2.251930454255E-01 -3.329262432268E-01  
22 F 8 O 1.298045302593E-01 -2.748069545745E-01 -1.670737567732E-01  
23 F 8 O 1.298045302597E-01 -2.251930454255E-01 3.329262432268E-01  
24 F 8 O -1.298045302601E-01 2.748069545745E-01 1.670737567732E-01  
25 T 6 C -3.477194383662E-01 2.534930193944E-01 -2.763523824618E-01  
26 F 6 C 3.477194383659E-01 -2.465069806056E-01 -2.236476175382E-01  
27 F 6 C 3.477194383662E-01 -2.534930193944E-01 2.763523824618E-01  
28 F 6 C -3.477194383666E-01 2.465069806056E-01 2.236476175382E-01  
29 T 1 H -2.694196311263E-01 2.635093871681E-01 -2.371315019576E-01  
30 F 1 H 2.694196311259E-01 -2.364906128319E-01 -2.628684980424E-01  
31 F 1 H 2.694196311263E-01 -2.635093871681E-01 2.371315019576E-01  
32 F 1 H -2.694196311266E-01 2.364906128319E-01 2.628684980424E-01  
33 T 1 H -3.650495896871E-01 1.320767164100E-01 -2.922590933177E-01  
34 F 1 H 3.650495896868E-01 -3.679232835900E-01 -2.077409066823E-01  
35 F 1 H 3.650495896871E-01 -1.320767164100E-01 2.922590933177E-01  
36 F 1 H -3.650495896875E-01 3.679232835900E-01 2.077409066823E-01  
37 T 6 C -3.706997284099E-01 3.461088601499E-01 -3.624116404378E-01  
38 F 6 C 3.706997284095E-01 -1.538911398501E-01 -1.375883595622E-01  
39 F 6 C 3.706997284099E-01 -3.461088601499E-01 3.624116404378E-01  
40 F 6 C -3.706997284103E-01 1.538911398501E-01 1.375883595622E-01  
41 T 6 C -2.784946537169E-01 -4.243721021355E-01 -2.833914410601E-01  
42 F 6 C 2.784946537165E-01 7.562789786449E-02 -2.166085589399E-01

43 F 6 C 2.784946537169E-01 4.243721021355E-01 2.833914410601E-01  
44 F 6 C -2.784946537173E-01 -7.562789786449E-02 2.166085589399E-01  
45 T 1 H -2.530641222280E-01 4.954197920916E-01 -2.276134927365E-01  
46 F 1 H 2.530641222277E-01 -4.580207908392E-03 -2.723865072635E-01  
47 F 1 H 2.530641222280E-01 -4.954197920916E-01 2.276134927365E-01  
48 F 1 H -2.530641222284E-01 4.580207908392E-03 2.723865072635E-01  
49 T 1 H -3.273353024700E-01 -3.376413083017E-01 -2.639282022108E-01  
50 F 1 H 3.273353024696E-01 1.623586916983E-01 -2.360717977892E-01  
51 F 1 H 3.273353024700E-01 3.376413083017E-01 2.639282022108E-01  
52 F 1 H -3.273353024703E-01 -1.623586916983E-01 2.360717977892E-01  
53 T 6 C -1.847459159559E-01 -3.414340080978E-01 -2.999269938487E-01  
54 F 6 C 1.847459159555E-01 1.585659919022E-01 -2.000730061513E-01  
55 F 6 C 1.847459159559E-01 3.414340080978E-01 2.999269938487E-01  
56 F 6 C -1.847459159563E-01 -1.585659919022E-01 2.000730061513E-01  
57 T 6 C -1.334954399106E-01 -2.598474340933E-01 -2.112023170517E-01  
58 F 6 C 1.334954399102E-01 2.401525659067E-01 -2.887976829483E-01  
59 F 6 C 1.334954399106E-01 2.598474340933E-01 2.112023170517E-01  
60 F 6 C -1.334954399109E-01 -2.401525659067E-01 2.887976829483E-01  
61 T 1 H -1.774469227900E-01 -1.587906966784E-01 -2.010145972415E-01  
62 F 1 H 1.774469227896E-01 3.412093033216E-01 -2.989854027585E-01  
63 F 1 H 1.774469227900E-01 1.587906966784E-01 2.010145972415E-01  
64 F 1 H -1.774469227904E-01 -3.412093033216E-01 2.989854027585E-01  
65 T 1 H -5.746608765762E-02 -2.219525697131E-01 -2.104427367442E-01  
66 F 1 H 5.746608765725E-02 2.780474302869E-01 -2.895572632558E-01  
67 F 1 H 5.746608765762E-02 2.219525697131E-01 2.104427367442E-01  
68 F 1 H -5.746608765798E-02 -2.780474302869E-01 2.895572632558E-01  
69 T 1 H -1.276237598795E-01 -3.407549162026E-01 -1.552961851105E-01  
70 F 1 H 1.276237598791E-01 1.592450837974E-01 -3.447038148895E-01  
71 F 1 H 1.276237598795E-01 3.407549162026E-01 1.552961851105E-01  
72 F 1 H -1.276237598798E-01 -1.592450837974E-01 3.447038148895E-01  
73 T 6 C -2.233486322238E-01 -2.304741498421E-01 -3.810869992304E-01  
74 F 6 C 2.233486322234E-01 2.695258501579E-01 -1.189130007696E-01

75 F 6 C 2.233486322238E-01 2.304741498421E-01 3.810869992304E-01  
76 F 6 C -2.233486322241E-01 -2.695258501579E-01 1.189130007696E-01  
77 T 6 C -3.649043110188E-01 -4.171773173148E-01 -4.454908956218E-01  
78 F 6 C 3.649043110185E-01 8.282268268518E-02 -5.450910437821E-02  
79 F 6 C 3.649043110188E-01 4.171773173148E-01 4.454908956218E-01  
80 F 6 C -3.649043110192E-01 -8.282268268518E-02 5.450910437821E-02  
81 T 1 H -4.239522238198E-01 -3.339267252554E-01 -4.413709111550E-01  
82 F 1 H 4.239522238194E-01 1.660732747446E-01 -5.862908884498E-02  
83 F 1 H 4.239522238198E-01 3.339267252554E-01 4.413709111550E-01  
84 F 1 H -4.239522238201E-01 -1.660732747446E-01 5.862908884498E-02  
85 T 1 H -3.975702415404E-01 -4.963215793704E-01 4.995685265866E-01  
86 F 1 H 3.975702415401E-01 3.678420629573E-03 4.314734134181E-04  
87 F 1 H 3.975702415404E-01 4.963215793704E-01 -4.995685265866E-01  
88 F 1 H -3.975702415408E-01 -3.678420629573E-03 -4.314734134183E-04  
89 T 6 C -2.742846633426E-01 -3.310426511047E-01 -4.647446001359E-01  
90 F 6 C 2.742846633423E-01 1.689573488953E-01 -3.525539986407E-02  
91 F 6 C 2.742846633426E-01 3.310426511047E-01 4.647446001359E-01  
92 F 6 C -2.742846633430E-01 -1.689573488953E-01 3.525539986407E-02  
93 T 6 C -3.130190077853E-01 -2.328396034455E-01 4.503149220126E-01  
94 F 6 C 3.130190077849E-01 2.671603965545E-01 4.968507798742E-02  
95 F 6 C 3.130190077853E-01 2.328396034455E-01 -4.503149220126E-01  
96 F 6 C -3.130190077857E-01 -2.671603965545E-01 -4.968507798742E-02  
97 T 1 H -2.506254113198E-01 -1.728102403006E-01 4.325873541998E-01  
98 F 1 H 2.506254113194E-01 3.271897596994E-01 6.741264580023E-02  
99 F 1 H 2.506254113198E-01 1.728102403006E-01 -4.325873541998E-01  
100 F 1 H -2.506254113202E-01 -3.271897596994E-01 -6.741264580023E-02  
101 T 1 H -3.688812357762E-01 -1.465377035014E-01 4.574882278050E-01  
102 F 1 H 3.688812357758E-01 3.534622964986E-01 4.251177219502E-02  
103 F 1 H 3.688812357762E-01 1.465377035014E-01 -4.574882278050E-01  
104 F 1 H -3.688812357765E-01 -3.534622964986E-01 -4.251177219502E-02  
105 T 1 H -3.505390150637E-01 -3.072433650899E-01 3.938683771253E-01  
106 F 1 H 3.505390150634E-01 1.927566349101E-01 1.061316228747E-01



107 F 1 H 3.505390150637E-01 3.072433650899E-01 -3.938683771253E-01  
108 F 1 H -3.505390150641E-01 -1.927566349101E-01 -1.061316228747E-01  
109 T 6 C -1.093941219256E-01 -4.577736680111E-01 -3.223084640577E-01  
110 F 6 C 1.093941219253E-01 4.222633198894E-02 -1.776915359423E-01  
111 F 6 C 1.093941219256E-01 4.577736680111E-01 3.223084640577E-01  
112 F 6 C -1.093941219260E-01 -4.222633198894E-02 1.776915359423E-01  
113 T 1 H -4.268556130444E-02 -3.944012664696E-01 -3.300468304794E-01  
114 F 1 H 4.268556130407E-02 1.055987335304E-01 -1.699531695206E-01  
115 F 1 H 4.268556130444E-02 3.944012664696E-01 3.300468304794E-01  
116 F 1 H -4.268556130481E-02 -1.055987335304E-01 1.699531695206E-01  
117 T 1 H -8.456955407889E-02 4.590277714746E-01 -2.679162214189E-01  
118 F 1 H 8.456955407853E-02 -4.097222852542E-02 -2.320837785811E-01  
119 F 1 H 8.456955407889E-02 -4.590277714746E-01 2.679162214189E-01  
120 F 1 H -8.456955407926E-02 4.097222852542E-02 2.320837785811E-01  
121 T 6 C -1.948244029958E-01 -4.456073597143E-01 -4.829378859761E-01  
122 F 6 C 1.948244029955E-01 5.439264028569E-02 -1.706211402390E-02  
123 F 6 C 1.948244029958E-01 4.456073597143E-01 4.829378859761E-01  
124 F 6 C -1.948244029962E-01 -5.439264028569E-02 1.706211402390E-02  
125 T 1 H -2.296507591646E-01 4.838416867015E-01 4.586042535027E-01  
126 F 1 H 2.296507591643E-01 -1.615831329849E-02 4.139574649730E-02  
127 F 1 H 2.296507591646E-01 -4.838416867015E-01 -4.586042535027E-01  
128 F 1 H -2.296507591650E-01 1.615831329849E-02 -4.139574649730E-02  
129 T 1 H -1.331797890852E-01 -3.798813182332E-01 -4.988243423677E-01  
130 F 1 H 1.331797890849E-01 1.201186817668E-01 -1.175657632331E-03  
131 F 1 H 1.331797890852E-01 3.798813182332E-01 4.988243423677E-01  
132 F 1 H -1.331797890856E-01 -1.201186817668E-01 1.175657632331E-03  
133 T 6 C -1.587480036249E-01 3.003327975584E-01 -4.039273500124E-01  
134 F 6 C 1.587480036245E-01 -1.996672024416E-01 -9.607264998764E-02  
135 F 6 C 1.587480036249E-01 -3.003327975584E-01 4.039273500124E-01  
136 F 6 C -1.587480036252E-01 1.996672024416E-01 9.607264998764E-02  
137 T 6 C -2.029466544462E-01 2.126578327317E-01 -4.899403023205E-01  
138 F 6 C 2.029466544458E-01 -2.873421672683E-01 -1.005969767947E-02

139 F 6 C 2.029466544462E-01 -2.126578327317E-01 4.899403023205E-01  
140 F 6 C -2.029466544466E-01 2.873421672683E-01 1.005969767947E-02  
141 T 1 H -2.704447007410E-01 2.642597045572E-01 4.666099349774E-01  
142 F 1 H 2.704447007406E-01 -2.357402954428E-01 3.339006502259E-02  
143 F 1 H 2.704447007410E-01 -2.642597045572E-01 -4.666099349774E-01  
144 F 1 H -2.704447007413E-01 2.357402954428E-01 -3.339006502259E-02  
145 T 1 H -2.201046699701E-01 9.573940610468E-02 -4.720611698904E-01  
146 F 1 H 2.201046699697E-01 -4.042605938953E-01 -2.793883010962E-02  
147 F 1 H 2.201046699701E-01 -9.573940610468E-02 4.720611698904E-01  
148 F 1 H -2.201046699705E-01 4.042605938953E-01 2.793883010962E-02  
149 T 8 O -2.888270569047E-01 -1.240225303801E-01 -3.576947984940E-01  
150 F 8 O 2.888270569043E-01 3.759774696199E-01 -1.423052015061E-01  
151 F 8 O 2.888270569047E-01 1.240225303801E-01 3.576947984939E-01  
152 F 8 O -2.888270569051E-01 -3.759774696199E-01 1.423052015060E-01  
153 T 1 H -3.422358653914E-01 -9.043536328305E-02 -4.093409661869E-01  
154 F 1 H 3.422358653910E-01 4.095646367170E-01 -9.065903381308E-02  
155 F 1 H 3.422358653914E-01 9.043536328305E-02 4.093409661869E-01  
156 F 1 H -3.422358653918E-01 -4.095646367170E-01 9.065903381308E-02  
157 T 8 O -1.460841297718E-01 -1.529495562414E-01 -4.103471815574E-01  
158 F 8 O 1.460841297715E-01 3.470504437586E-01 -8.965281844264E-02  
159 F 8 O 1.460841297718E-01 1.529495562414E-01 4.103471815574E-01  
160 F 8 O -1.460841297722E-01 -3.470504437586E-01 8.965281844264E-02  
161 T 8 O -7.680866522071E-02 -7.339515786995E-02 -3.389446189199E-01  
162 F 8 O 7.680866522034E-02 4.266048421300E-01 -1.610553810801E-01  
163 F 8 O 7.680866522071E-02 7.339515786995E-02 3.389446189199E-01  
164 F 8 O -7.680866522107E-02 -4.266048421300E-01 1.610553810801E-01  
165 T 1 H -1.059375266625E-01 3.261041457727E-02 -3.401319169127E-01  
166 F 1 H 1.059375266621E-01 -4.673895854227E-01 -1.598680830873E-01  
167 F 1 H 1.059375266625E-01 -3.261041457727E-02 3.401319169127E-01  
168 F 1 H -1.059375266628E-01 4.673895854227E-01 1.598680830873E-01  
169 T 8 O -4.728248148405E-01 -1.261698272710E-03 -4.531872213338E-01  
170 F 8 O 4.728248148402E-01 4.987383017273E-01 -4.681277866623E-02

171 F 8 O 4.728248148405E-01 1.261698272710E-03 4.531872213338E-01  
 172 F 8 O -4.728248148409E-01 -4.987383017273E-01 4.681277866623E-02  
 173 T 1 H -4.531206559541E-01 1.114397815480E-01 -4.436542842741E-01  
 174 F 1 H 4.531206559537E-01 -3.885602184520E-01 -5.634571572591E-02  
 175 F 1 H 4.531206559541E-01 -1.114397815480E-01 4.436542842741E-01  
 176 F 1 H -4.531206559545E-01 3.885602184520E-01 5.634571572591E-02

T = ATOM BELONGING TO THE ASYMMETRIC UNIT

\*\*\*\* 4 SYMMOPS - TRANSLATORS IN FRACTIONAL UNITS

\*\*\*\* MATRICES AND TRANSLATORS IN THE CRYSTALLOGRAPHIC REFERENCE FRAME

| V INV | ROTATION MATRICES |      |       |       |       |       | TRANSLATORS |      |      |       |       |      |      |
|-------|-------------------|------|-------|-------|-------|-------|-------------|------|------|-------|-------|------|------|
| 1 1   | 1.00              | 0.00 | 0.00  | 0.00  | 1.00  | 0.00  | 0.00        | 0.00 | 0.00 | 1.00  | 0.00  | 0.00 | 0.00 |
| 2 2   | -1.00             | 0.00 | 0.00  | -0.00 | 1.00  | -0.00 | 0.00        | 0.00 | 0.00 | -1.00 | -0.00 | 0.50 | 0.50 |
| 3 3   | -1.00             | 0.00 | 0.00  | -0.00 | -1.00 | 0.00  | 0.00        | 0.00 | 0.00 | -1.00 | 0.00  | 0.00 | 0.00 |
| 4 4   | 1.00              | 0.00 | -0.00 | 0.00  | -1.00 | 0.00  | 0.00        | 0.00 | 0.00 | 1.00  | -0.00 | 0.50 | 0.50 |

DIRECT LATTICE VECTORS CARTESIAN COMPONENTS (ANGSTROM)

|   | X                   | Y                  | Z                  |
|---|---------------------|--------------------|--------------------|
| 1 | 0.136546000000E+02  | 0.836103109182E-15 | 0.000000000000E+00 |
| 2 | 0.000000000000E+00  | 0.861060000000E+01 | 0.000000000000E+00 |
| 3 | -0.397357153323E+01 | 0.942414697816E-15 | 0.148690098497E+02 |

CARTESIAN COORDINATES - PRIMITIVE CELL

\*\*\*\*\*

| * ATOM | X(ANGSTROM) | Y(ANGSTROM) | Z(ANGSTROM) |
|--------|-------------|-------------|-------------|
|--------|-------------|-------------|-------------|

\*\*\*\*\*

|   |       |                     |                     |                     |
|---|-------|---------------------|---------------------|---------------------|
| 1 | 253 I | -5.264491633083E+00 | 2.817360011251E+00  | -2.834921206098E+00 |
| 2 | 253 I | -6.403322600307E+00 | -1.487939988749E+00 | -4.599583718752E+00 |
| 3 | 253 I | 5.264491633083E+00  | -2.817360011251E+00 | 2.834921206098E+00  |
| 4 | 253 I | 6.403322600297E+00  | 1.487939988749E+00  | 4.599583718752E+00  |

5 253 I -2.998697447700E+00 1.584865947449E+00 6.440202136160E+00  
6 253 I 1.011911681080E+00 -2.720434052551E+00 9.943027886900E-01  
7 253 I 2.998697447700E+00 -1.584865947449E+00 -6.440202136160E+00  
8 253 I -1.011911681090E+00 2.720434052551E+00 -9.943027886900E-01  
9 7 N -3.174294387619E+00 4.241350359650E+00 -5.385772775359E+00  
10 7 N 5.161080154229E+00 -6.394964035000E-02 -2.048732149491E+00  
11 7 N 3.174294387619E+00 -4.241350359650E+00 5.385772775359E+00  
12 7 N -5.161080154239E+00 6.394964035000E-02 2.048732149491E+00  
13 7 N -4.722733237170E-01 3.927029415311E+00 -6.026723635976E+00  
14 7 N 2.459059090327E+00 -3.782705846890E-01 -1.407781288874E+00  
15 7 N 4.722733237170E-01 -3.927029415311E+00 6.026723635976E+00  
16 7 N -2.459059090337E+00 3.782705846890E-01 1.407781288874E+00  
17 8 O -4.007745564028E+00 2.443427301887E+00 -6.447807168450E+00  
18 8 O 5.994531330638E+00 -1.861872698113E+00 -9.866977564000E-01  
19 8 O 4.007745564028E+00 -2.443427301887E+00 6.447807168450E+00  
20 8 O -5.994531330648E+00 1.861872698113E+00 9.866977564000E-01  
21 8 O -4.495226961330E-01 1.939047236941E+00 -4.950283589763E+00  
22 8 O 2.436308462743E+00 -2.366252763059E+00 -2.484221335087E+00  
23 8 O 4.495226961330E-01 -1.939047236941E+00 4.950283589763E+00  
24 8 O -2.436308462753E+00 2.366252763059E+00 2.484221335087E+00  
25 6 C -3.649863883025E+00 2.182726992797E+00 -4.109086296812E+00  
26 6 C 5.636649649635E+00 -2.122573007203E+00 -3.325418628038E+00  
27 6 C 3.649863883025E+00 -2.182726992797E+00 4.109086296812E+00  
28 6 C -5.636649649645E+00 2.122573007203E+00 3.325418628038E+00  
29 1 H -2.736558309366E+00 2.268973929150E+00 -3.525910638282E+00  
30 1 H 4.723344075976E+00 -2.036326070850E+00 -3.908594286568E+00  
31 1 H 2.736558309366E+00 -2.268973929150E+00 3.525910638282E+00  
32 1 H -4.723344075986E+00 2.036326070850E+00 3.908594286568E+00  
33 1 H -3.823293713807E+00 1.137259774320E+00 -4.345603337205E+00  
34 1 H 5.810079480417E+00 -3.168040225680E+00 -3.088901587645E+00  
35 1 H 3.823293713807E+00 -1.137259774320E+00 4.345603337205E+00  
36 1 H -5.810079480427E+00 3.168040225680E+00 3.088901587645E+00

37 6 C -3.621687933791E+00 2.980204951207E+00 -5.388702251316E+00  
38 6 C 5.608473700401E+00 -1.325095048793E+00 -2.045802673534E+00  
39 6 C 3.621687933791E+00 -2.980204951207E+00 5.388702251316E+00  
40 6 C -5.608473700411E+00 1.325095048793E+00 2.045802673534E+00  
41 6 C -2.676656935685E+00 -3.654098422648E+00 -4.213750128444E+00  
42 6 C 4.663442702295E+00 6.512015773520E-01 -3.220754796406E+00  
43 6 C 2.676656935685E+00 3.654098422648E+00 4.213750128444E+00  
44 6 C -4.663442702305E+00 -6.512015773520E-01 3.220754796406E+00  
45 1 H -2.551050868058E+00 4.265861661784E+00 -3.384387265424E+00  
46 1 H 4.537836634668E+00 -3.943833821600E-02 -4.050117659426E+00  
47 1 H 2.551050868058E+00 -4.265861661784E+00 3.384387265424E+00  
48 1 H -4.537836634678E+00 3.943833821600E-02 4.050117659426E+00  
49 1 H -3.420895029985E+00 -2.907294249263E+00 -3.924351038286E+00  
50 1 H 5.407680796595E+00 1.398005750737E+00 -3.510153886564E+00  
51 1 H 3.420895029985E+00 2.907294249263E+00 3.924351038286E+00  
52 1 H -5.407680796605E+00 -1.398005750737E+00 3.510153886564E+00  
53 6 C -1.330850219207E+00 -2.939951670127E+00 -4.459617425727E+00  
54 6 C 3.317635985817E+00 1.365348329873E+00 -2.974887499123E+00  
55 6 C 1.330850219207E+00 2.939951670127E+00 4.459617425727E+00  
56 6 C -3.317635985827E+00 -1.365348329873E+00 2.974887499123E+00  
57 6 C -9.835993190140E-01 -2.237442316004E+00 -3.140369332521E+00  
58 6 C 2.970385085624E+00 2.067857683996E+00 -4.294135592329E+00  
59 6 C 9.835993190140E-01 2.237442316004E+00 3.140369332521E+00  
60 6 C -2.970385085634E+00 -2.067857683996E+00 4.294135592329E+00  
61 1 H -1.624220870566E+00 -1.367283172819E+00 -2.988888026317E+00  
62 1 H 3.611006637176E+00 2.938016827181E+00 -4.445616898533E+00  
63 1 H 1.624220870566E+00 1.367283172819E+00 2.988888026317E+00  
64 1 H -3.611006637186E+00 -2.938016827181E+00 4.445616898533E+00  
65 1 H 5.153282757200E-02 -1.911144796772E+00 -3.129075125447E+00  
66 1 H 1.935252939038E+00 2.394155203228E+00 -4.305429799403E+00  
67 1 H -5.153282757200E-02 1.911144796772E+00 3.129075125447E+00  
68 1 H -1.935252939048E+00 -2.394155203228E+00 4.305429799403E+00

69 1 H -1.125570891276E+00 -2.934104281454E+00 -2.309100506029E+00  
70 1 H 3.112356657886E+00 1.371195718546E+00 -5.125404418821E+00  
71 1 H 1.125570891276E+00 2.934104281454E+00 2.309100506029E+00  
72 1 H -3.112356657896E+00 -1.371195718546E+00 5.125404418821E+00  
73 6 C -1.535459781737E+00 -1.984520714630E+00 -5.666386345149E+00  
74 6 C 3.522245548347E+00 2.320779285370E+00 -1.768118579701E+00  
75 6 C 1.535459781737E+00 1.984520714630E+00 5.666386345149E+00  
76 6 C -3.522245548357E+00 -2.320779285370E+00 1.768118579701E+00  
77 6 C -3.212432464082E+00 -3.592147008471E+00 -6.624008514952E+00  
78 6 C 5.199218230692E+00 7.131529915290E-01 -8.104964098980E-01  
79 6 C 3.212432464082E+00 3.592147008471E+00 6.624008514952E+00  
80 6 C -5.199218230702E+00 -7.131529915290E-01 8.104964098980E-01  
81 1 H -4.035079147208E+00 -2.875309460484E+00 -6.562748425335E+00  
82 1 H 6.021864913818E+00 1.429990539516E+00 -8.717564995150E-01  
83 1 H 4.035079147208E+00 2.875309460484E+00 6.562748425335E+00  
84 1 H -6.021864913828E+00 -1.429990539516E+00 8.717564995150E-01  
85 1 H -3.440162363050E+00 -4.273626591327E+00 -7.440920507284E+00  
86 1 H 5.426948129660E+00 3.167340867300E-02 6.415582433997E-03  
87 1 H 3.440162363050E+00 4.273626591327E+00 7.440920507284E+00  
88 1 H -5.426948129670E+00 -3.167340867300E-02 -6.415582434000E-03  
89 6 C -1.898551450756E+00 -2.850475851602E+00 -6.910292037016E+00  
90 6 C 3.885337217366E+00 1.454824148398E+00 -5.242128878340E-01  
91 6 C 1.898551450756E+00 2.850475851602E+00 6.910292037016E+00  
92 6 C -3.885337217376E+00 -1.454824148398E+00 5.242128878340E-01  
93 6 C -2.089936365573E+00 -2.004888689428E+00 -8.173272838828E+00  
94 6 C 4.076722132183E+00 2.300411310572E+00 7.387679139780E-01  
95 6 C 2.089936365573E+00 2.004888689428E+00 8.173272838828E+00  
96 6 C -4.076722132193E+00 -2.300411310572E+00 -7.387679139780E-01  
97 1 H -5.141106537691E+00 -1.487999855132E+00 6.432145630452E+00  
98 1 H 3.154320771071E+00 2.817300144868E+00 1.002359294398E+00  
99 1 H 5.141106537691E+00 1.487999855132E+00 -6.432145630452E+00  
100 1 H -3.154320771081E+00 -2.817300144868E+00 -1.002359294398E+00

101 1 H -2.881216387593E+00 -1.261777549769E+00 -8.066612884346E+00  
102 1 H 4.868002154203E+00 3.043522450231E+00 6.321079594960E-01  
103 1 H 2.881216387593E+00 1.261777549769E+00 8.066612884346E+00  
104 1 H -4.868002154213E+00 -3.043522450231E+00 -6.321079594960E-01  
105 1 H -6.351534206274E+00 -2.645549719443E+00 5.856432778962E+00  
106 1 H 4.364748439654E+00 1.659750280557E+00 1.578072145888E+00  
107 1 H 6.351534206274E+00 2.645549719443E+00 -5.856432778962E+00  
108 1 H -4.364748439664E+00 -1.659750280557E+00 -1.578072145888E+00  
109 6 C -2.130172395470E-01 -3.941705945776E+00 -4.792407726715E+00  
110 6 C 2.199803006157E+00 3.635940542240E-01 -2.642097198135E+00  
111 6 C 2.130172395470E-01 3.941705945776E+00 4.792407726715E+00  
112 6 C -2.199803006167E+00 -3.635940542240E-01 2.642097198135E+00  
113 1 H 7.286104248380E-01 -3.396031545063E+00 -4.907469573260E+00  
114 1 H 1.258175341772E+00 9.092684549370E-01 -2.527035351590E+00  
115 1 H -7.286104248380E-01 3.396031545063E+00 4.907469573260E+00  
116 1 H -1.258175341782E+00 -9.092684549370E-01 2.527035351590E+00  
117 1 H -9.017916240500E-02 3.952504529059E+00 -3.983648935172E+00  
118 1 H 2.076964929015E+00 -3.527954709410E-01 -3.450855989678E+00  
119 1 H 9.017916240500E-02 -3.952504529059E+00 3.983648935172E+00  
120 1 H -2.076964929025E+00 3.527954709410E-01 3.450855989678E+00  
121 6 C -7.412610571140E-01 -3.836946731556E+00 -7.180808183372E+00  
122 6 C 2.728046823724E+00 4.683532684440E-01 -2.536967414780E-01  
123 6 C 7.412610571140E-01 3.836946731556E+00 7.180808183372E+00  
124 6 C -2.728046823734E+00 -4.683532684440E-01 2.536967414780E-01  
125 1 H -9.845145295960E-01 4.166167227512E+00 -8.050018687254E+00  
126 1 H 2.971300296206E+00 -1.391327724880E-01 6.155137624040E-01  
127 1 H 9.845145295960E-01 -4.166167227512E+00 8.050018687254E+00  
128 1 H -2.971300296216E+00 1.391327724880E-01 -6.155137624040E-01  
129 1 H 1.635974588710E-01 -3.271006078779E+00 -7.417024059935E+00  
130 1 H 1.823188307739E+00 1.034293921221E+00 -1.748086491500E-02  
131 1 H -1.635974588710E-01 3.271006078779E+00 7.417024059935E+00  
132 1 H -1.823188307749E+00 -1.034293921221E+00 1.748086491500E-02

133 6 C -5.626062707940E-01 2.586045586656E+00 -6.005999745897E+00  
134 6 C 2.549392037404E+00 -1.719254413344E+00 -1.428505178953E+00  
135 6 C 5.626062707940E-01 -2.586045586656E+00 6.005999745897E+00  
136 6 C -2.549392037414E+00 1.719254413344E+00 1.428505178953E+00  
137 6 C -8.243425495180E-01 1.831111534520E+00 -7.284927180969E+00  
138 6 C 2.811128316128E+00 -2.474188465480E+00 -1.495777438810E-01  
139 6 C 8.243425495180E-01 -1.831111534520E+00 7.284927180969E+00  
140 6 C -2.811128316138E+00 2.474188465480E+00 1.495777438810E-01  
141 1 H -1.573350632256E+00 2.275434612060E+00 -7.930982130553E+00  
142 1 H 3.560136398866E+00 -2.029865387940E+00 4.964772057030E-01  
143 1 H 1.573350632256E+00 -2.275434612060E+00 7.930982130553E+00  
144 1 H -3.560136398876E+00 2.029865387940E+00 -4.964772057030E-01  
145 1 H -1.129672399954E+00 8.243737302050E-01 -7.019082184761E+00  
146 1 H 3.116458166564E+00 -3.480926269795E+00 -4.154227400890E-01  
147 1 H 1.129672399954E+00 -8.243737302050E-01 7.019082184761E+00  
148 1 H -3.116458166574E+00 3.480926269795E+00 4.154227400890E-01  
149 8 O -2.522492062331E+00 -1.067908400091E+00 -5.318567481993E+00  
150 8 O 4.509277828941E+00 3.237391599909E+00 -2.115937442857E+00  
151 8 O 2.522492062331E+00 1.067908400091E+00 5.318567481993E+00  
152 8 O -4.509277828951E+00 -3.237391599909E+00 2.115937442857E+00  
153 1 H -3.046548236948E+00 -7.787027390850E-01 -6.086494858119E+00  
154 1 H 5.033334003558E+00 3.526597260915E+00 -1.348010066731E+00  
155 1 H 3.046548236948E+00 7.787027390850E-01 6.086494858119E+00  
156 1 H -5.033334003568E+00 -3.526597260915E+00 1.348010066731E+00  
157 8 O -3.641764790050E-01 -1.316987448972E+00 -6.101456284373E+00  
158 8 O 2.350962245615E+00 2.988312551028E+00 -1.333048640477E+00  
159 8 O 3.641764790050E-01 1.316987448972E+00 6.101456284373E+00  
160 8 O -2.350962245625E+00 -2.988312551028E+00 1.333048640477E+00  
161 8 O 2.980290889590E-01 -6.319763463550E-01 -5.039770877223E+00  
162 8 O 1.688756677651E+00 3.673323653645E+00 -2.394734047627E+00  
163 8 O -2.980290889590E-01 6.319763463550E-01 5.039770877223E+00  
164 8 O -1.688756677661E+00 -3.673323653645E+00 2.394734047627E+00



165 1 H -9.499604897800E-02 2.807952357590E-01 -5.057424822773E+00  
 166 1 H 2.081781815588E+00 -4.024504764241E+00 -2.377080102077E+00  
 167 1 H 9.499604897800E-02 -2.807952357590E-01 5.057424822773E+00  
 168 1 H -2.081781815598E+00 4.024504764241E+00 2.377080102077E+00  
 169 8 O -4.655461874806E+00 -1.086397914700E-02 -6.738445257770E+00  
 170 8 O 6.642247641416E+00 -4.316163979147E+00 -6.960596670800E-01  
 171 8 O 4.655461874806E+00 1.086397914700E-02 6.738445257770E+00  
 172 8 O -6.642247641426E+00 4.316163979147E+00 6.960596670800E-01  
 173 1 H -4.424289274204E+00 9.595633829970E-01 -6.596699922733E+00  
 174 1 H 6.411075040814E+00 -3.345736617003E+00 -8.378050021170E-01  
 175 1 H 4.424289274204E+00 -9.595633829970E-01 6.596699922733E+00  
 176 1 H -6.411075040824E+00 3.345736617003E+00 8.378050021170E-01

\*\*\*\*\*

\*\*\* PSEUDOPOTENTIAL INFORMATION \*\*\*

\*\*\*\*\*

ATOMIC NUMBER 53, NUCLEAR CHARGE 25.000, GIVEN IN INPUT PSEUDOPOTENTIAL

| TYPE   | EXPONENT   | COEFF.      | N | EXPONENT   | COEFF.      | N |
|--------|------------|-------------|---|------------|-------------|---|
| P0 TMS | 40.0333760 | 49.9896490  | 0 | 17.3005760 | 281.0065560 | 0 |
|        | 8.8517200  | 61.4167390  | 0 |            |             |   |
| P1 TMS | 15.7201410 | 67.4162390  | 0 | 15.2082220 | 134.8076960 | 0 |
|        | 8.2941860  | 14.5665480  | 0 | 7.7539490  | 28.9684220  | 0 |
| P2 TMS | 13.8177510 | 35.5387560  | 0 | 13.5878050 | 53.3397590  | 0 |
|        | 6.9476300  | 9.7164660   | 0 | 6.9600990  | 14.9775000  | 0 |
| P3 TMS | 18.5229500 | -20.1766180 | 0 | 18.2510350 | -26.0880770 | 0 |
|        | 7.5579010  | -0.2204340  | 0 | 7.5974040  | -0.2216460  | 0 |

\*\*\*\*\*

LOCAL ATOMIC FUNCTIONS BASIS SET

\*\*\*\*\*

| ATOM | X(AU) | Y(AU) | Z(AU) | N. | TYPE | EXPONENT | S COEF | P COEF | D/F/G COEF |
|------|-------|-------|-------|----|------|----------|--------|--------|------------|
|------|-------|-------|-------|----|------|----------|--------|--------|------------|

\*\*\*\*\*

1 I -9.948 5.324 -5.357

1 S

5.900E+03 2.419E-04 0.000E+00 0.000E+00

8.985E+02 1.547E-03 0.000E+00 0.000E+00

2.004E+02 4.284E-03 0.000E+00 0.000E+00

3.142E+01-3.942E-02 0.000E+00 0.000E+00

1.565E+01 9.609E-01 0.000E+00 0.000E+00

2 S

1.182E+01 7.596E-01 0.000E+00 0.000E+00

6.461E+00 4.250E-01 0.000E+00 0.000E+00

3 S

1.793E+00 1.000E+00 0.000E+00 0.000E+00

4 S

2.229E-01 1.000E+00 0.000E+00 0.000E+00

5- 7 P

1.973E+02 0.000E+00 7.395E-04 0.000E+00

2.006E+01 0.000E+00 6.617E-02 0.000E+00

9.763E+00 0.000E+00-2.855E-01 0.000E+00

8- 10 P

1.298E+01 0.000E+00-4.910E-02 0.000E+00

3.620E+00 0.000E+00 3.891E-01 0.000E+00

2.023E+00 0.000E+00 6.561E-01 0.000E+00

1.037E+00 0.000E+00 3.180E-01 0.000E+00

11- 13 P

4.758E-01 0.000E+00 1.000E+00 0.000E+00

14- 16 P

1.500E-01 0.000E+00 1.000E+00 0.000E+00

17- 21 D

1.191E+02 0.000E+00 0.000E+00 8.260E-04

3.340E+01 0.000E+00 0.000E+00 6.838E-03

1.781E+01 0.000E+00 0.000E+00-1.031E-02

4.899E+00 0.000E+00 0.000E+00 2.267E-01

2.452E+00 0.000E+00 0.000E+00 4.418E-01

1.182E+00 0.000E+00 0.000E+00 3.678E-01

22- 26 D

2.537E+00 0.000E+00 0.000E+00 1.000E+00

27- 31 D

6.887E-01 0.000E+00 0.000E+00 1.000E+00

32- 36 D

2.068E-01 0.000E+00 0.000E+00 1.000E+00

2 I -12.101 -2.812 -8.692

3 I 9.948 -5.324 5.357

4 I 12.101 2.812 8.692

5 I -5.667 2.995 12.170

6 I 1.912 -5.141 1.879

7 I 5.667 -2.995 -12.170

8 I -1.912 5.141 -1.879

9 N -5.999 8.015 -10.178

289 S

4.174E+03 1.835E-03 0.000E+00 0.000E+00

6.275E+02 1.400E-02 0.000E+00 0.000E+00

1.429E+02 6.859E-02 0.000E+00 0.000E+00

4.023E+01 2.322E-01 0.000E+00 0.000E+00

1.282E+01 4.691E-01 0.000E+00 0.000E+00

4.390E+00 3.605E-01 0.000E+00 0.000E+00

290- 293 SP

1.163E+01 -1.150E-01 6.758E-02 0.000E+00

2.716E+00 -1.691E-01 3.239E-01 0.000E+00

7.722E-01 1.146E+00 7.409E-01 0.000E+00

294- 297 SP

2.120E-01 1.000E+00 1.000E+00 0.000E+00

298- 302 D

8.000E-01 0.000E+00 0.000E+00 1.000E+00

10 N 9.753 -0.121 -3.872  
11 N 5.999 -8.015 10.178  
12 N -9.753 0.121 3.872  
13 N -0.892 7.421 -11.389  
14 N 4.647 -0.715 -2.660  
15 N 0.892 -7.421 11.389  
16 N -4.647 0.715 2.660  
17 O -7.574 4.617 -12.185

401 S

5.485E+03 1.831E-03 0.000E+00 0.000E+00  
8.252E+02 1.395E-02 0.000E+00 0.000E+00  
1.880E+02 6.845E-02 0.000E+00 0.000E+00  
5.296E+01 2.327E-01 0.000E+00 0.000E+00  
1.690E+01 4.702E-01 0.000E+00 0.000E+00  
5.800E+00 3.585E-01 0.000E+00 0.000E+00

402- 405 SP

1.554E+01-1.108E-01 7.087E-02 0.000E+00  
3.600E+00-1.480E-01 3.398E-01 0.000E+00  
1.014E+00 1.131E+00 7.272E-01 0.000E+00

406- 409 SP

2.700E-01 1.000E+00 1.000E+00 0.000E+00

410- 414 D

8.000E-01 0.000E+00 0.000E+00 1.000E+00

18 O 11.328 -3.518 -1.865  
19 O 7.574 -4.617 12.185  
20 O -11.328 3.518 1.865  
21 O -0.849 3.664 -9.355  
22 O 4.604 -4.472 -4.694  
23 O 0.849 -3.664 9.355  
24 O -4.604 4.472 4.694  
25 C -6.897 4.125 -7.765

513 S

3.048E+03 1.835E-03 0.000E+00 0.000E+00  
4.574E+02 1.404E-02 0.000E+00 0.000E+00  
1.039E+02 6.884E-02 0.000E+00 0.000E+00  
2.921E+01 2.322E-01 0.000E+00 0.000E+00  
9.287E+00 4.679E-01 0.000E+00 0.000E+00  
3.164E+00 3.623E-01 0.000E+00 0.000E+00

514- 517 SP

7.868E+00-1.193E-01 6.900E-02 0.000E+00  
1.881E+00-1.609E-01 3.164E-01 0.000E+00  
5.442E-01 1.143E+00 7.443E-01 0.000E+00

518- 521 SP

1.687E-01 1.000E+00 1.000E+00 0.000E+00

522- 526 D

8.000E-01 0.000E+00 0.000E+00 1.000E+00

26 C 10.652 -4.011 -6.284

27 C 6.897 -4.125 7.765

28 C -10.652 4.011 6.284

29 H -5.171 4.288 -6.663

569 S

1.873E+01 3.349E-02 0.000E+00 0.000E+00  
2.825E+00 2.347E-01 0.000E+00 0.000E+00  
6.401E-01 8.138E-01 0.000E+00 0.000E+00

570 S

1.613E-01 1.000E+00 0.000E+00 0.000E+00

571- 573 P

1.100E+00 0.000E+00 1.000E+00 0.000E+00

30 H 8.926 -3.848 -7.386

31 H 5.171 -4.288 6.663

32 H -8.926 3.848 7.386

33 H -7.225 2.149 -8.212

34 H 10.979 -5.987 -5.837

35 H 7.225 -2.149 8.212

36 H -10.979 5.987 5.837  
37 C -6.844 5.632 -10.183  
38 C 10.598 -2.504 -3.866  
39 C 6.844 -5.632 10.183  
40 C -10.598 2.504 3.866  
41 C -5.058 -6.905 -7.963  
42 C 8.813 1.231 -6.086  
43 C 5.058 6.905 7.963  
44 C -8.813 -1.231 6.086  
45 H -4.821 8.061 -6.396  
46 H 8.575 -0.075 -7.654  
47 H 4.821 -8.061 6.396  
48 H -8.575 0.075 7.654  
49 H -6.465 -5.494 -7.416  
50 H 10.219 2.642 -6.633  
51 H 6.465 5.494 7.416  
52 H -10.219 -2.642 6.633  
53 C -2.515 -5.556 -8.427  
54 C 6.269 2.580 -5.622  
55 C 2.515 5.556 8.427  
56 C -6.269 -2.580 5.622  
57 C -1.859 -4.228 -5.934  
58 C 5.613 3.908 -8.115  
59 C 1.859 4.228 5.934  
60 C -5.613 -3.908 8.115  
61 H -3.069 -2.584 -5.648  
62 H 6.824 5.552 -8.401  
63 H 3.069 2.584 5.648  
64 H -6.824 -5.552 8.401  
65 H 0.097 -3.612 -5.913  
66 H 3.657 4.524 -8.136  
67 H -0.097 3.612 5.913

68 H -3.657 -4.524 8.136  
69 H -2.127 -5.545 -4.364  
70 H 5.882 2.591 -9.686  
71 H 2.127 5.545 4.364  
72 H -5.882 -2.591 9.686  
73 C -2.902 -3.750 -10.708  
74 C 6.656 4.386 -3.341  
75 C 2.902 3.750 10.708  
76 C -6.656 -4.386 3.341  
77 C -6.071 -6.788 -12.518  
78 C 9.825 1.348 -1.532  
79 C 6.071 6.788 12.518  
80 C -9.825 -1.348 1.532  
81 H -7.625 -5.434 -12.402  
82 H 11.380 2.702 -1.647  
83 H 7.625 5.434 12.402  
84 H -11.380 -2.702 1.647  
85 H -6.501 -8.076 -14.061  
86 H 10.255 0.060 0.012  
87 H 6.501 8.076 14.061  
88 H -10.255 -0.060 -0.012  
89 C -3.588 -5.387 -13.059  
90 C 7.342 2.749 -0.991  
91 C 3.588 5.387 13.059  
92 C -7.342 -2.749 0.991  
93 C -3.949 -3.789 -15.445  
94 C 7.704 4.347 1.396  
95 C 3.949 3.789 15.445  
96 C -7.704 -4.347 -1.396  
97 H -9.715 -2.812 12.155  
98 H 5.961 5.324 1.894  
99 H 9.715 2.812 -12.155

100 H -5.961 -5.324 -1.894  
101 H -5.445 -2.384 -15.244  
102 H 9.199 5.751 1.195  
103 H 5.445 2.384 15.244  
104 H -9.199 -5.751 -1.195  
105 H -12.003 -4.999 11.067  
106 H 8.248 3.136 2.982  
107 H 12.003 4.999 -11.067  
108 H -8.248 -3.136 -2.982  
109 C -0.403 -7.449 -9.056  
110 C 4.157 0.687 -4.993  
111 C 0.403 7.449 9.056  
112 C -4.157 -0.687 4.993  
113 H 1.377 -6.418 -9.274  
114 H 2.378 1.718 -4.775  
115 H -1.377 6.418 9.274  
116 H -2.378 -1.718 4.775  
117 H -0.170 7.469 -7.528  
118 H 3.925 -0.667 -6.521  
119 H 0.170 -7.469 7.528  
120 H -3.925 0.667 6.521  
121 C -1.401 -7.251 -13.570  
122 C 5.155 0.885 -0.479  
123 C 1.401 7.251 13.570  
124 C -5.155 -0.885 0.479  
125 H -1.860 7.873 -15.212  
126 H 5.615 -0.263 1.163  
127 H 1.860 -7.873 15.212  
128 H -5.615 0.263 -1.163  
129 H 0.309 -6.181 -14.016  
130 H 3.445 1.955 -0.033  
131 H -0.309 6.181 14.016



132 H -3.445 -1.955 0.033  
133 C -1.063 4.887 -11.350  
134 C 4.818 -3.249 -2.699  
135 C 1.063 -4.887 11.350  
136 C -4.818 3.249 2.699  
137 C -1.558 3.460 -13.767  
138 C 5.312 -4.676 -0.283  
139 C 1.558 -3.460 13.767  
140 C -5.312 4.676 0.283  
141 H -2.973 4.300 -14.987  
142 H 6.728 -3.836 0.938  
143 H 2.973 -4.300 14.987  
144 H -6.728 3.836 -0.938  
145 H -2.135 1.558 -13.264  
146 H 5.889 -6.578 -0.785  
147 H 2.135 -1.558 13.264  
148 H -5.889 6.578 0.785  
149 O -4.767 -2.018 -10.051  
150 O 8.521 6.118 -3.999  
151 O 4.767 2.018 10.051  
152 O -8.521 -6.118 3.999  
153 H -5.757 -1.472 -11.502  
154 H 9.512 6.664 -2.547  
155 H 5.757 1.472 11.502  
156 H -9.512 -6.664 2.547  
157 O -0.688 -2.489 -11.530  
158 O 4.443 5.647 -2.519  
159 O 0.688 2.489 11.530  
160 O -4.443 -5.647 2.519  
161 O 0.563 -1.194 -9.524  
162 O 3.191 6.942 -4.525  
163 O -0.563 1.194 9.524

164 O -3.191 -6.942 4.525  
165 H -0.180 0.531 -9.557  
166 H 3.934 -7.605 -4.492  
167 H 0.180 -0.531 9.557  
168 H -3.934 7.605 4.492  
169 O -8.798 -0.021 -12.734  
170 O 12.552 -8.156 -1.315  
171 O 8.798 0.021 12.734  
172 O -12.552 8.156 1.315  
173 H -8.361 1.813 -12.466  
174 H 12.115 -6.323 -1.583  
175 H 8.361 -1.813 12.466  
176 H -12.115 6.323 1.583

INFORMATION \*\*\*\* SET\_MPP \*\*\*\* PCRYSTAL CALCULATION

INFORMATION \*\*\*\* READM2 \*\*\*\* NEW DEFAULT: FOCK/KS MATRIX MIXING SET TO 30 %

INFORMATION \*\*\*\* READM2 \*\*\*\* NEW DEFAULT: FULL DIRECT SCF MODE

INFORMATION \*\*\*\* READM2 \*\*\*\* NEW DEFAULT: COULOMB BIPOLAR BUFFER SET TO 32 Mb

INFORMATION \*\*\*\* READM2 \*\*\*\* NEW DEFAULT: EXCHANGE BIPOLAR BUFFER SET TO 32 Mb

\*\*\*\*\*

NEW DEFAULT: DFT INTEGRATION GRID INCREASED TO XLGRID

NEW DEFAULT: DIIS ACCELERATOR ACTIVE

USE KEYWORD NODIIS TO TURN IT OFF

\*\*\*\*\*

WARNING \*\*\*\* RDDFTP \*\*\*\* CAM-B3LYP ACTIVE

RANGE SEPARATION - OMEGA: 0.3300000000000000

Alpha(Beta) FOCK EXCHANGE IN CAM-B3LYP: 0.19000( 0.46000)

INFORMATION \*\*\*\* BIPOSIZE \*\*\*\* COULOMB BIPOLAR BUFFER SET TO 20000000

INFORMATION \*\*\*\* EXCHSIZE \*\*\*\* EXCHANGE BIPOLAR BUFFER SIZE SET TO 20000000

INFORMATION \*\*\*\* LEVSHIFT \*\*\*\* LEVEL SHIFTER ACTIVE

INFORMATION \*\*\*\* TOLDEE \*\*\*\* SCF TOL ON TOTAL ENERGY SET TO 11

INFORMATION \*\*\*\* READM2 \*\*\*\* FULL DIRECT SCF (MONO AND BIEL INT) SELECTED  
 INFORMATION \*\*\*\* MAXCYCLE \*\*\*\* MAX NUMBER OF SCF CYCLES SET TO 200  
 INFORMATION \*\*\*\* READM2 \*\*\*\* LEVSHIFT DISABLED BECAUSE NOT COMPATIBLE WITH DIIS  
 INFORMATION \*\*\*\* READM2 \*\*\*\* TO MAKE LEVSHIFT EFFECTIVE YOU MUST SET NODIIS  
 \*\*\*\*\*  
 N. OF ATOMS PER CELL 176 COULOMB OVERLAP TOL (T1) 10\*\* -6  
 NUMBER OF SHELLS 684 COULOMB PENETRATION TOL (T2) 10\*\* -6  
 NUMBER OF AO 1884 EXCHANGE OVERLAP TOL (T3) 10\*\* -6  
 N. OF ELECTRONS PER CELL 844 EXCHANGE PSEUDO OVP (F(G)) (T4) 10\*\* -6  
 CORE ELECTRONS PER CELL 168 EXCHANGE PSEUDO OVP (P(G)) (T5) 10\*\* -12  
 N. OF SYMMETRY OPERATORS 4 POLE ORDER IN MONO ZONE 4  
 \*\*\*\*\*  
 TYPE OF CALCULATION : RESTRICTED CLOSED SHELL  
 KOHN-SHAM HAMILTONIAN  
  
 (EXCHANGE)[CORRELATION] FUNCTIONAL:(CAM-B3LYP)[LEE-YANG-PARR]  
  
 NON-LOCAL WEIGHTING FACTOR (EXCHANGE) = 0.9000  
 NON-LOCAL WEIGHTING FACTOR [CORRELATION] = 0.8100  
  
 HYBRID EXCHANGE - PERCENTAGE OF FOCK EXCHANGE 100.0000  
 CORE PSEUDO POTENTIAL TOL. ON PSEUDO (TP) 10\*\* -6  
  
 CAPP:IS1 3;IS2 3;IS3 3; K PTS MONK NET 10; SYMMOPS:K SPACE 4;G SPACE 4  
  
 \*\*\*\*\*  
 MAX NUMBER OF SCF CYCLES 200 CONVERGENCE ON DELTAP 10\*\*-21  
 WEIGHT OF F(I) IN F(I+1) 25% CONVERGENCE ON ENERGY 10\*\*-11  
 SHRINK. FACT.(MONKH.) 3 3 3 NUMBER OF K POINTS IN THE IBZ 10  
 SHRINKING FACTOR(GILAT NET) 3 NUMBER OF K POINTS(GILAT NET) 10  
 \*\*\*\*\*  
 \*\*\* K POINTS COORDINATES (OBLIQUE COORDINATES IN UNITS OF IS = 3)

1-R( 0 0 0) 2-C( 1 0 0) 3-C( 0 1 0) 4-C( 1 1 0)  
 5-C( 0 0 1) 6-C( 1 0 1) 7-C( 2 0 1) 8-C( 0 1 1)  
 9-C( 1 1 1) 10-C( 2 1 1)

DIRECT LATTICE VECTORS COMPON. (A.U.)    RECIP. LATTICE VECTORS COMPON. (A.U.)

| X          | Y          | Z          | X          | Y         | Z          |
|------------|------------|------------|------------|-----------|------------|
| 25.8034545 | 0.0000000  | 0.0000000  | 0.2435017  | 0.0000000 | 0.0650730  |
| 0.0000000  | 16.2716758 | 0.0000000  | -0.0000000 | 0.3861425 | -0.0000000 |
| -7.5089620 | 0.0000000  | 28.0983565 | 0.0000000  | 0.0000000 | 0.2236140  |

DISK SPACE FOR EIGENVECTORS (FTN 10)    67439664 REALS

SYMMETRY ADAPTION OF THE BLOCH FUNCTIONS ENABLED

TTTTTTTTTTTTTTTTTTTTTTTTTTTTTTTTTTTTTTT gordsh1    TELAPSE    1.14 TCPU    0.08

MATRIX SIZE: P(G) 1958284, F(G) 343576, P(G) IRR 247194, F(G) IRR 86773

MAX G-VECTOR INDEX FOR 1- AND 2-ELECTRON INTEGRALS 39

TTTTTTTTTTTTTTTTTTTTTTTTTTTTTTTTTTTTTTT INPUT    TELAPSE    1.32 TCPU    0.26

NEIGHBORS OF THE NON-EQUIVALENT ATOMS

N = NUMBER OF NEIGHBORS AT DISTANCE R

| ATOM | N | R/ANG  | R/AU   | NEIGHBORS (ATOM LABELS AND CELL INDICES) |
|------|---|--------|--------|------------------------------------------|
| 1    | 1 | 2.1525 | 4.0676 | 25 C 0 0 0                               |
| 1    | 1 | 2.6774 | 5.0596 | 29 H 0 0 0                               |
| 1    | 1 | 2.6799 | 5.0643 | 33 H 0 0 0                               |
| 1    | 1 | 2.9989 | 5.6671 | 144 H 0 0 0                              |
| 1    | 1 | 3.0409 | 5.7465 | 37 C 0 0 0                               |
| 1    | 1 | 3.1246 | 5.9045 | 45 H 0 0 0                               |
| 5    | 1 | 2.1462 | 4.0558 | 137 C 0 0 1                              |

5 I 1 2.6448 4.9979 145 H 0 0 1  
5 I 1 2.6867 5.0771 141 H 0 0 1  
5 I 1 3.0391 5.7431 133 C 0 0 1  
5 I 1 3.0963 5.8512 32 H 0 0 0  
5 I 1 3.1879 6.0243 163 O 0 0 0  
  
9 N 1 1.3382 2.5287 37 C 0 0 0  
9 N 1 1.4604 2.7597 41 C 0 1 0  
9 N 1 1.4624 2.7635 77 C 0 1 0  
9 N 1 2.0745 3.9202 85 H 0 1 0  
9 N 1 2.0818 3.9340 49 H 0 1 0  
9 N 1 2.0876 3.9450 81 H 0 1 0  
  
13 N 1 1.3442 2.5401 133 C 0 0 0  
13 N 1 1.4564 2.7522 121 C 0 1 0  
13 N 1 1.4633 2.7651 109 C 0 1 0  
13 N 1 2.0787 3.9281 117 H 0 0 0  
13 N 1 2.0815 3.9334 129 H 0 1 0  
13 N 1 2.0863 3.9425 113 H 0 1 0  
  
17 O 1 1.2485 2.3594 37 C 0 0 0  
17 O 1 1.5484 2.9260 173 H 0 0 0  
17 O 1 2.2122 4.1805 85 H 0 1 0  
17 O 1 2.2484 4.2488 9 N 0 0 0  
17 O 1 2.3803 4.4980 25 C 0 0 0  
17 O 1 2.4818 4.6899 33 H 0 0 0  
  
21 O 1 1.2434 2.3496 133 C 0 0 0  
21 O 1 1.6991 3.2108 165 H 0 0 0  
21 O 1 2.2608 4.2723 13 N 0 0 0  
21 O 1 2.2622 4.2749 117 H 0 0 0  
21 O 1 2.3670 4.4730 137 C 0 0 0

|      |   |        |        |       |       |
|------|---|--------|--------|-------|-------|
| 21 O | 1 | 2.4464 | 4.6231 | 145 H | 0 0 0 |
| 25 C | 1 | 1.0858 | 2.0519 | 33 H  | 0 0 0 |
| 25 C | 1 | 1.0870 | 2.0542 | 29 H  | 0 0 0 |
| 25 C | 1 | 1.5080 | 2.8498 | 37 C  | 0 0 0 |
| 25 C | 1 | 2.1525 | 4.0676 | 1 I   | 0 0 0 |
| 25 C | 1 | 2.3803 | 4.4980 | 17 O  | 0 0 0 |
| 25 C | 1 | 2.4641 | 4.6566 | 45 H  | 0 0 0 |
| 29 H | 1 | 1.0870 | 2.0542 | 25 C  | 0 0 0 |
| 29 H | 1 | 1.7702 | 3.3452 | 33 H  | 0 0 0 |
| 29 H | 1 | 2.0105 | 3.7992 | 45 H  | 0 0 0 |
| 29 H | 1 | 2.1816 | 4.1226 | 37 C  | 0 0 0 |
| 29 H | 1 | 2.6774 | 5.0596 | 1 I   | 0 0 0 |
| 29 H | 1 | 2.7144 | 5.1296 | 21 O  | 0 0 0 |
| 33 H | 1 | 1.0858 | 2.0519 | 25 C  | 0 0 0 |
| 33 H | 1 | 1.7702 | 3.3452 | 29 H  | 0 0 0 |
| 33 H | 1 | 2.1272 | 4.0199 | 37 C  | 0 0 0 |
| 33 H | 1 | 2.3367 | 4.4157 | 173 H | 0 0 0 |
| 33 H | 1 | 2.4818 | 4.6899 | 17 O  | 0 0 0 |
| 33 H | 1 | 2.6799 | 5.0643 | 1 I   | 0 0 0 |
| 37 C | 1 | 1.2485 | 2.3594 | 17 O  | 0 0 0 |
| 37 C | 1 | 1.3382 | 2.5287 | 9 N   | 0 0 0 |
| 37 C | 1 | 1.5080 | 2.8498 | 25 C  | 0 0 0 |
| 37 C | 1 | 2.1272 | 4.0199 | 33 H  | 0 0 0 |
| 37 C | 1 | 2.1816 | 4.1226 | 29 H  | 0 0 0 |
| 37 C | 1 | 2.4182 | 4.5698 | 77 C  | 0 1 0 |
| 41 C | 1 | 1.0866 | 2.0533 | 45 H  | 0-1 0 |
| 41 C | 1 | 1.0933 | 2.0661 | 49 H  | 0 0 0 |

|      |   |        |        |       |       |
|------|---|--------|--------|-------|-------|
| 41 C | 1 | 1.4604 | 2.7597 | 9 N   | 0-1 0 |
| 41 C | 1 | 1.5433 | 2.9163 | 53 C  | 0 0 0 |
| 41 C | 1 | 2.4547 | 4.6387 | 57 C  | 0 0 0 |
| 41 C | 1 | 2.4699 | 4.6674 | 77 C  | 0 0 0 |
|      |   |        |        |       |       |
| 45 H | 1 | 1.0866 | 2.0533 | 41 C  | 0 1 0 |
| 45 H | 1 | 1.7648 | 3.3349 | 49 H  | 0 1 0 |
| 45 H | 1 | 2.0105 | 3.7992 | 29 H  | 0 0 0 |
| 45 H | 1 | 2.0963 | 3.9615 | 9 N   | 0 0 0 |
| 45 H | 1 | 2.1491 | 4.0611 | 53 C  | 0 1 0 |
| 45 H | 1 | 2.2755 | 4.3002 | 69 H  | 0 1 0 |
|      |   |        |        |       |       |
| 49 H | 1 | 1.0933 | 2.0661 | 41 C  | 0 0 0 |
| 49 H | 1 | 1.7648 | 3.3349 | 45 H  | 0-1 0 |
| 49 H | 1 | 2.0818 | 3.9340 | 9 N   | 0-1 0 |
| 49 H | 1 | 2.1577 | 4.0775 | 53 C  | 0 0 0 |
| 49 H | 1 | 2.4768 | 4.6804 | 149 O | 0 0 0 |
| 49 H | 1 | 2.5446 | 4.8085 | 61 H  | 0 0 0 |
|      |   |        |        |       |       |
| 53 C | 1 | 1.5344 | 2.8997 | 57 C  | 0 0 0 |
| 53 C | 1 | 1.5375 | 2.9054 | 109 C | 0 0 0 |
| 53 C | 1 | 1.5433 | 2.9163 | 41 C  | 0 0 0 |
| 53 C | 1 | 1.5527 | 2.9343 | 73 C  | 0 0 0 |
| 53 C | 1 | 2.1491 | 4.0611 | 45 H  | 0-1 0 |
| 53 C | 1 | 2.1564 | 4.0750 | 113 H | 0 0 0 |
|      |   |        |        |       |       |
| 57 C | 1 | 1.0854 | 2.0511 | 65 H  | 0 0 0 |
| 57 C | 1 | 1.0911 | 2.0619 | 61 H  | 0 0 0 |
| 57 C | 1 | 1.0938 | 2.0671 | 69 H  | 0 0 0 |
| 57 C | 1 | 1.5344 | 2.8997 | 53 C  | 0 0 0 |
| 57 C | 1 | 2.4547 | 4.6387 | 41 C  | 0 0 0 |
| 57 C | 1 | 2.4955 | 4.7158 | 109 C | 0 0 0 |

|      |   |        |        |       |       |
|------|---|--------|--------|-------|-------|
| 61 H | 1 | 1.0911 | 2.0619 | 57 C  | 0 0 0 |
| 61 H | 1 | 1.7674 | 3.3398 | 65 H  | 0 0 0 |
| 61 H | 1 | 1.7792 | 3.3623 | 69 H  | 0 0 0 |
| 61 H | 1 | 2.1731 | 4.1066 | 53 C  | 0 0 0 |
| 61 H | 1 | 2.5147 | 4.7522 | 149 O | 0 0 0 |
| 61 H | 1 | 2.5446 | 4.8085 | 49 H  | 0 0 0 |
|      |   |        |        |       |       |
| 65 H | 1 | 1.0854 | 2.0511 | 57 C  | 0 0 0 |
| 65 H | 1 | 1.7619 | 3.3296 | 69 H  | 0 0 0 |
| 65 H | 1 | 1.7674 | 3.3398 | 61 H  | 0 0 0 |
| 65 H | 1 | 2.1771 | 4.1141 | 53 C  | 0 0 0 |
| 65 H | 1 | 2.3125 | 4.3700 | 161 O | 0 0 0 |
| 65 H | 1 | 2.4137 | 4.5613 | 113 H | 0 0 0 |
|      |   |        |        |       |       |
| 69 H | 1 | 1.0938 | 2.0671 | 57 C  | 0 0 0 |
| 69 H | 1 | 1.7619 | 3.3296 | 65 H  | 0 0 0 |
| 69 H | 1 | 1.7792 | 3.3623 | 61 H  | 0 0 0 |
| 69 H | 1 | 2.1603 | 4.0824 | 53 C  | 0 0 0 |
| 69 H | 1 | 2.2755 | 4.3002 | 45 H  | 0-1 0 |
| 69 H | 1 | 2.4160 | 4.5656 | 100 H | 0 0 0 |
|      |   |        |        |       |       |
| 73 C | 1 | 1.3912 | 2.6290 | 149 O | 0 0 0 |
| 73 C | 1 | 1.4166 | 2.6770 | 157 O | 0 0 0 |
| 73 C | 1 | 1.5527 | 2.9343 | 53 C  | 0 0 0 |
| 73 C | 1 | 1.5585 | 2.9452 | 89 C  | 0 0 0 |
| 73 C | 1 | 1.9784 | 3.7385 | 153 H | 0 0 0 |
| 73 C | 1 | 2.3630 | 4.4654 | 161 O | 0 0 0 |
|      |   |        |        |       |       |
| 77 C | 1 | 1.0879 | 2.0559 | 85 H  | 0 0 0 |
| 77 C | 1 | 1.0929 | 2.0652 | 81 H  | 0 0 0 |
| 77 C | 1 | 1.4624 | 2.7635 | 9 N   | 0-1 0 |



|      |   |        |        |       |       |
|------|---|--------|--------|-------|-------|
| 77 C | 1 | 1.5357 | 2.9020 | 89 C  | 0 0 0 |
| 77 C | 1 | 2.4182 | 4.5698 | 37 C  | 0-1 0 |
| 77 C | 1 | 2.4699 | 4.6674 | 41 C  | 0 0 0 |
|      |   |        |        |       |       |
| 81 H | 1 | 1.0929 | 2.0652 | 77 C  | 0 0 0 |
| 81 H | 1 | 1.7551 | 3.3167 | 85 H  | 0 0 0 |
| 81 H | 1 | 2.0876 | 3.9450 | 9 N   | 0-1 0 |
| 81 H | 1 | 2.1648 | 4.0908 | 89 C  | 0 0 0 |
| 81 H | 1 | 2.3664 | 4.4718 | 153 H | 0 0 0 |
| 81 H | 1 | 2.4893 | 4.7040 | 101 H | 0 0 0 |
|      |   |        |        |       |       |
| 85 H | 1 | 1.0879 | 2.0559 | 77 C  | 0 0 0 |
| 85 H | 1 | 1.7551 | 3.3167 | 81 H  | 0 0 0 |
| 85 H | 1 | 2.0745 | 3.9202 | 9 N   | 0-1 0 |
| 85 H | 1 | 2.1641 | 4.0896 | 89 C  | 0 0 0 |
| 85 H | 1 | 2.2122 | 4.1805 | 17 O  | 0-1 0 |
| 85 H | 1 | 2.4669 | 4.6617 | 37 C  | 0-1 0 |
|      |   |        |        |       |       |
| 89 C | 1 | 1.5319 | 2.8949 | 93 C  | 0 0 0 |
| 89 C | 1 | 1.5357 | 2.9020 | 77 C  | 0 0 0 |
| 89 C | 1 | 1.5445 | 2.9188 | 121 C | 0 0 0 |
| 89 C | 1 | 1.5585 | 2.9452 | 73 C  | 0 0 0 |
| 89 C | 1 | 2.1622 | 4.0860 | 125 H | 0-1 0 |
| 89 C | 1 | 2.1641 | 4.0896 | 85 H  | 0 0 0 |
|      |   |        |        |       |       |
| 93 C | 1 | 1.0897 | 2.0593 | 97 H  | 0 0-1 |
| 93 C | 1 | 1.0907 | 2.0612 | 101 H | 0 0 0 |
| 93 C | 1 | 1.0945 | 2.0682 | 105 H | 0 0-1 |
| 93 C | 1 | 1.5319 | 2.8949 | 89 C  | 0 0 0 |
| 93 C | 1 | 2.4820 | 4.6903 | 121 C | 0 0 0 |
| 93 C | 1 | 2.4859 | 4.6976 | 77 C  | 0 0 0 |

97 H 1 1.0897 2.0593 93 C 0 0 1  
97 H 1 1.7678 3.3406 101 H 0 0 1  
97 H 1 1.7710 3.3467 105 H 0 0 0  
97 H 1 2.1728 4.1060 89 C 0 0 1  
97 H 1 2.4160 4.5656 72 H 0 0 0  
97 H 1 2.4477 4.6254 129 H 0 0 1  
  
101 H 1 1.0907 2.0612 93 C 0 0 0  
101 H 1 1.7501 3.3073 105 H 0 0-1  
101 H 1 1.7678 3.3406 97 H 0 0-1  
101 H 1 2.0449 3.8643 153 H 0 0 0  
101 H 1 2.1970 4.1517 89 C 0 0 0  
101 H 1 2.4035 4.5419 175 H -1 0-1  
  
105 H 1 1.0945 2.0682 93 C 0 0 1  
105 H 1 1.7501 3.3073 101 H 0 0 1  
105 H 1 1.7710 3.3467 97 H 0 0 0  
105 H 1 2.1660 4.0931 89 C 0 0 1  
105 H 1 2.4707 4.6689 125 H 0-1 1  
105 H 1 2.4998 4.7239 85 H 0 0 1  
  
109 C 1 1.0874 2.0548 117 H 0-1 0  
109 C 1 1.0944 2.0681 113 H 0 0 0  
109 C 1 1.4633 2.7651 13 N 0-1 0  
109 C 1 1.5375 2.9054 53 C 0 0 0  
109 C 1 2.4358 4.6031 133 C 0-1 0  
109 C 1 2.4484 4.6267 121 C 0 0 0  
  
113 H 1 1.0944 2.0681 109 C 0 0 0  
113 H 1 1.7654 3.3361 117 H 0-1 0  
113 H 1 2.0863 3.9425 13 N 0-1 0  
113 H 1 2.1564 4.0750 53 C 0 0 0

|       |   |        |        |       |       |
|-------|---|--------|--------|-------|-------|
| 113 H | 1 | 2.4137 | 4.5613 | 65 H  | 0 0 0 |
| 113 H | 1 | 2.5754 | 4.8668 | 129 H | 0 0 0 |
| 117 H | 1 | 1.0874 | 2.0548 | 109 C | 0 1 0 |
| 117 H | 1 | 1.7654 | 3.3361 | 113 H | 0 1 0 |
| 117 H | 1 | 2.0787 | 3.9281 | 13 N  | 0 0 0 |
| 117 H | 1 | 2.1721 | 4.1046 | 53 C  | 0 1 0 |
| 117 H | 1 | 2.2622 | 4.2749 | 21 O  | 0 0 0 |
| 117 H | 1 | 2.4015 | 4.5382 | 162 O | 0 0 0 |
| 121 C | 1 | 1.0880 | 2.0560 | 125 H | 0-1 0 |
| 121 C | 1 | 1.0931 | 2.0656 | 129 H | 0 0 0 |
| 121 C | 1 | 1.4564 | 2.7522 | 13 N  | 0-1 0 |
| 121 C | 1 | 1.5445 | 2.9188 | 89 C  | 0 0 0 |
| 121 C | 1 | 2.4484 | 4.6267 | 109 C | 0 0 0 |
| 121 C | 1 | 2.4820 | 4.6903 | 93 C  | 0 0 0 |
| 125 H | 1 | 1.0880 | 2.0560 | 121 C | 0 1 0 |
| 125 H | 1 | 1.7595 | 3.3249 | 129 H | 0 1 0 |
| 125 H | 1 | 1.9839 | 3.7490 | 141 H | 0 0 0 |
| 125 H | 1 | 2.1008 | 3.9699 | 13 N  | 0 0 0 |
| 125 H | 1 | 2.1622 | 4.0860 | 89 C  | 0 1 0 |
| 125 H | 1 | 2.4624 | 4.6533 | 137 C | 0 0 0 |
| 129 H | 1 | 1.0931 | 2.0656 | 121 C | 0 0 0 |
| 129 H | 1 | 1.7595 | 3.3249 | 125 H | 0-1 0 |
| 129 H | 1 | 2.0815 | 3.9334 | 13 N  | 0-1 0 |
| 129 H | 1 | 2.1647 | 4.0908 | 89 C  | 0 0 0 |
| 129 H | 1 | 2.4140 | 4.5618 | 157 O | 0 0 0 |
| 129 H | 1 | 2.4477 | 4.6254 | 97 H  | 0 0-1 |
| 133 C | 1 | 1.2434 | 2.3496 | 21 O  | 0 0 0 |

133 C 1 1.3442 2.5401 13 N 0 0 0  
133 C 1 1.5080 2.8497 137 C 0 0 0  
133 C 1 2.1098 3.9870 145 H 0 0 0  
133 C 1 2.1963 4.1504 141 H 0 0 0  
133 C 1 2.4358 4.6031 109 C 0 1 0  
  
137 C 1 1.0844 2.0491 141 H 0 0 0  
137 C 1 1.0851 2.0505 145 H 0 0 0  
137 C 1 1.5080 2.8497 133 C 0 0 0  
137 C 1 2.1462 4.0558 5 I 0 0-1  
137 C 1 2.3670 4.4730 21 O 0 0 0  
137 C 1 2.4624 4.6533 125 H 0 0 0  
  
141 H 1 1.0844 2.0491 137 C 0 0 0  
141 H 1 1.7703 3.3454 145 H 0 0 0  
141 H 1 1.9839 3.7490 125 H 0 0 0  
141 H 1 2.1963 4.1504 133 C 0 0 0  
141 H 1 2.6867 5.0771 5 I 0 0-1  
141 H 1 2.7379 5.1739 121 C 0 1 0  
  
145 H 1 1.0851 2.0505 137 C 0 0 0  
145 H 1 1.7703 3.3454 141 H 0 0 0  
145 H 1 2.1098 3.9870 133 C 0 0 0  
145 H 1 2.2834 4.3151 165 H 0 0 0  
145 H 1 2.4464 4.6231 21 O 0 0 0  
145 H 1 2.4522 4.6340 157 O 0 0 0  
  
149 O 1 0.9736 1.8399 153 H 0 0 0  
149 O 1 1.3912 2.6290 73 C 0 0 0  
149 O 1 2.3094 4.3641 157 O 0 0 0  
149 O 1 2.3796 4.4967 53 C 0 0 0  
149 O 1 2.4699 4.6674 89 C 0 0 0

149 O 1 2.4768 4.6804 49 H 0 0 0  
  
153 H 1 0.9736 1.8399 149 O 0 0 0  
153 H 1 1.8982 3.5871 169 O 0 0 0  
153 H 1 1.9784 3.7385 73 C 0 0 0  
153 H 1 2.0449 3.8643 101 H 0 0 0  
153 H 1 2.2760 4.3010 173 H 0 0 0  
153 H 1 2.3664 4.4718 81 H 0 0 0  
  
157 O 1 1.4166 2.6770 73 C 0 0 0  
157 O 1 1.4265 2.6957 161 O 0 0 0  
157 O 1 1.9275 3.6425 165 H 0 0 0  
157 O 1 2.3094 4.3641 149 O 0 0 0  
157 O 1 2.3152 4.3751 89 C 0 0 0  
157 O 1 2.4140 4.5618 129 H 0 0 0  
  
161 O 1 0.9939 1.8783 165 H 0 0 0  
161 O 1 1.4265 2.6957 157 O 0 0 0  
161 O 1 2.3125 4.3700 65 H 0 0 0  
161 O 1 2.3630 4.4654 73 C 0 0 0  
161 O 1 2.4015 4.5382 118 H 0 0 0  
161 O 1 2.6790 5.0626 21 O 0 0 0  
  
165 H 1 0.9939 1.8783 161 O 0 0 0  
165 H 1 1.6991 3.2108 21 O 0 0 0  
165 H 1 1.9275 3.6425 157 O 0 0 0  
165 H 1 2.2834 4.3151 145 H 0 0 0  
165 H 1 2.5363 4.7928 133 C 0 0 0  
165 H 1 2.7527 5.2019 73 C 0 0 0  
  
169 O 1 1.0076 1.9041 173 H 0 0 0  
169 O 1 1.4406 2.7224 171 O -1 0 -1

169 O 1 1.8982 3.5871 153 H 0 0 0  
169 O 1 1.9011 3.5926 175 H -1 0 -1  
169 O 1 2.4944 4.7137 103 H -1 0 -1  
169 O 1 2.5449 4.8093 101 H 0 0 0

173 H 1 1.0076 1.9041 169 O 0 0 0  
173 H 1 1.5484 2.9260 17 O 0 0 0  
173 H 1 1.9011 3.5926 171 O -1 0 -1  
173 H 1 2.2760 4.3010 153 H 0 0 0  
173 H 1 2.3367 4.4157 33 H 0 0 0  
173 H 1 2.4035 4.5419 103 H -1 0 -1

SYMMETRY ALLOWED INTERNAL DEGREE(S) OF FREEDOM: 132

TTTTTTTTTTTTTTTTTTTTTTTTTTTTTTTTTTTT SYMM TELAPSE 1.34 TCPU 0.28

TTTTTTTTTTTTTTTTTTTTTTTTTTTTTTTTTTTT INT\_SCREEN TELAPSE 1.39 TCPU 0.33

\*\*\*\*\*

\* \*  
\* \*  
\* FFFF RRRR EEEE QQQ U U EEEE N N CCC Y Y \*  
\* F R R E Q Q U U E NN N C YY \*  
\* FFF RRRR EEEE Q Q U U EEEE N N N C Y \*  
\* F R R E Q Q Q U U E N N N C Y \*  
\* F R R EEEE QQQ UUU EEEE N N CCC Y \*

\* \*  
\* \*  
\* CALCULATION OF PHONON FREQUENCIES AT THE GAMMA POINT. \*

\* \*  
\* SYMMETRY IS EXPLOITED TO BUILD THE TOTAL HESSIAN MATRIX. \*  
\* (F. PASCALE PHD THESIS TURIN-PARIS 2002) \*

\* \*

\*\*\*\*\*

\* INTENSITIES COMPUTED VIA THE BERRY PHASE APPROACH \*

\* \*

\* REFERENCES TO BE QUOTED WHEN USING THIS MODULE: \*

\* \*

\* F. Pascale, C.M. Zicovich-Wilson, F. Lopez, B. Civalleri \*

\* R. Orlando, R. Dovesi \*

\* The calculation of the vibration frequencies of crystalline \*

\* compounds and its implementation in the CRYSTAL code \*

\* J. Comput. Chem. 25 (2004) 888-897 \*

\* \*

\* C.M. Zicovich-Wilson, F. Pascale, C. Roetti, V.R. Saunders, \*

\* R. Orlando, R. Dovesi \*

\* The calculation of the vibration frequencies of alpha-quartz: \*

\* the effect of hamiltonian and basis set \*

\* J. Comput. Chem. 25 (2004) 1873-1881 \*

\*\*\*\*\*

#### ATOMS ISOTOPIC MASS (AMU) FOR FREQUENCY CALCULATION

|      |          |      |          |      |          |      |          |
|------|----------|------|----------|------|----------|------|----------|
| 1 I  | 126.9044 | 2 I  | 126.9044 | 3 I  | 126.9044 | 4 I  | 126.9044 |
| 5 I  | 126.9044 | 6 I  | 126.9044 | 7 I  | 126.9044 | 8 I  | 126.9044 |
| 9 N  | 14.0031  | 10 N | 14.0031  | 11 N | 14.0031  | 12 N | 14.0031  |
| 13 N | 14.0031  | 14 N | 14.0031  | 15 N | 14.0031  | 16 N | 14.0031  |
| 17 O | 15.9949  | 18 O | 15.9949  | 19 O | 15.9949  | 20 O | 15.9949  |
| 21 O | 15.9949  | 22 O | 15.9949  | 23 O | 15.9949  | 24 O | 15.9949  |
| 25 C | 12.0000  | 26 C | 12.0000  | 27 C | 12.0000  | 28 C | 12.0000  |
| 29 H | 1.0078   | 30 H | 1.0078   | 31 H | 1.0078   | 32 H | 1.0078   |

|       |         |       |         |       |         |       |         |
|-------|---------|-------|---------|-------|---------|-------|---------|
| 33 H  | 1.0078  | 34 H  | 1.0078  | 35 H  | 1.0078  | 36 H  | 1.0078  |
| 37 C  | 12.0000 | 38 C  | 12.0000 | 39 C  | 12.0000 | 40 C  | 12.0000 |
| 41 C  | 12.0000 | 42 C  | 12.0000 | 43 C  | 12.0000 | 44 C  | 12.0000 |
| 45 H  | 1.0078  | 46 H  | 1.0078  | 47 H  | 1.0078  | 48 H  | 1.0078  |
| 49 H  | 1.0078  | 50 H  | 1.0078  | 51 H  | 1.0078  | 52 H  | 1.0078  |
| 53 C  | 12.0000 | 54 C  | 12.0000 | 55 C  | 12.0000 | 56 C  | 12.0000 |
| 57 C  | 12.0000 | 58 C  | 12.0000 | 59 C  | 12.0000 | 60 C  | 12.0000 |
| 61 H  | 1.0078  | 62 H  | 1.0078  | 63 H  | 1.0078  | 64 H  | 1.0078  |
| 65 H  | 1.0078  | 66 H  | 1.0078  | 67 H  | 1.0078  | 68 H  | 1.0078  |
| 69 H  | 1.0078  | 70 H  | 1.0078  | 71 H  | 1.0078  | 72 H  | 1.0078  |
| 73 C  | 12.0000 | 74 C  | 12.0000 | 75 C  | 12.0000 | 76 C  | 12.0000 |
| 77 C  | 12.0000 | 78 C  | 12.0000 | 79 C  | 12.0000 | 80 C  | 12.0000 |
| 81 H  | 1.0078  | 82 H  | 1.0078  | 83 H  | 1.0078  | 84 H  | 1.0078  |
| 85 H  | 1.0078  | 86 H  | 1.0078  | 87 H  | 1.0078  | 88 H  | 1.0078  |
| 89 C  | 12.0000 | 90 C  | 12.0000 | 91 C  | 12.0000 | 92 C  | 12.0000 |
| 93 C  | 12.0000 | 94 C  | 12.0000 | 95 C  | 12.0000 | 96 C  | 12.0000 |
| 97 H  | 1.0078  | 98 H  | 1.0078  | 99 H  | 1.0078  | 100 H | 1.0078  |
| 101 H | 1.0078  | 102 H | 1.0078  | 103 H | 1.0078  | 104 H | 1.0078  |
| 105 H | 1.0078  | 106 H | 1.0078  | 107 H | 1.0078  | 108 H | 1.0078  |
| 109 C | 12.0000 | 110 C | 12.0000 | 111 C | 12.0000 | 112 C | 12.0000 |
| 113 H | 1.0078  | 114 H | 1.0078  | 115 H | 1.0078  | 116 H | 1.0078  |
| 117 H | 1.0078  | 118 H | 1.0078  | 119 H | 1.0078  | 120 H | 1.0078  |
| 121 C | 12.0000 | 122 C | 12.0000 | 123 C | 12.0000 | 124 C | 12.0000 |
| 125 H | 1.0078  | 126 H | 1.0078  | 127 H | 1.0078  | 128 H | 1.0078  |
| 129 H | 1.0078  | 130 H | 1.0078  | 131 H | 1.0078  | 132 H | 1.0078  |
| 133 C | 12.0000 | 134 C | 12.0000 | 135 C | 12.0000 | 136 C | 12.0000 |
| 137 C | 12.0000 | 138 C | 12.0000 | 139 C | 12.0000 | 140 C | 12.0000 |
| 141 H | 1.0078  | 142 H | 1.0078  | 143 H | 1.0078  | 144 H | 1.0078  |
| 145 H | 1.0078  | 146 H | 1.0078  | 147 H | 1.0078  | 148 H | 1.0078  |
| 149 O | 15.9949 | 150 O | 15.9949 | 151 O | 15.9949 | 152 O | 15.9949 |
| 153 H | 1.0078  | 154 H | 1.0078  | 155 H | 1.0078  | 156 H | 1.0078  |
| 157 O | 15.9949 | 158 O | 15.9949 | 159 O | 15.9949 | 160 O | 15.9949 |



|       |         |       |         |       |         |       |         |
|-------|---------|-------|---------|-------|---------|-------|---------|
| 161 O | 15.9949 | 162 O | 15.9949 | 163 O | 15.9949 | 164 O | 15.9949 |
| 165 H | 1.0078  | 166 H | 1.0078  | 167 H | 1.0078  | 168 H | 1.0078  |
| 169 O | 15.9949 | 170 O | 15.9949 | 171 O | 15.9949 | 172 O | 15.9949 |
| 173 H | 1.0078  | 174 H | 1.0078  | 175 H | 1.0078  | 176 H | 1.0078  |

INFORMATION CONCERNING THE SCF+GRADIENT CALCULATIONS REQUIRED FOR GENERATING FREQUENCIES. IN PRINCIPLE 3N+1 SCF + GRADIENT CALCULATIONS ARE REQUIRED; FOR EACH OF THEM THE REMAINING POINT SYMMETRY IS INDICATED. POINT SYMMETRY PERMITS TO GENERATE GRADIENTS FOR DISPLACEMENT B STARTING FROM THE GRADIENT GENERATED BY DISPLACEMENT A.

N LABEL SYMBOL DISPLACEMENT SYM.

|    |                      |    |   |
|----|----------------------|----|---|
| 1  | EQUILIBRIUM GEOMETRY |    | 4 |
| 2  | 1 I                  | DX | 1 |
| 3  | 1 I                  | DY | 1 |
| 4  | 1 I                  | DZ | 1 |
| 5  | 5 I                  | DX | 1 |
| 6  | 5 I                  | DY | 1 |
| 7  | 5 I                  | DZ | 1 |
| 8  | 9 N                  | DX | 1 |
| 9  | 9 N                  | DY | 1 |
| 10 | 9 N                  | DZ | 1 |
| 11 | 13 N                 | DX | 1 |
| 12 | 13 N                 | DY | 1 |
| 13 | 13 N                 | DZ | 1 |
| 14 | 17 O                 | DX | 1 |
| 15 | 17 O                 | DY | 1 |
| 16 | 17 O                 | DZ | 1 |
| 17 | 21 O                 | DX | 1 |

|    |    |   |    |   |
|----|----|---|----|---|
| 18 | 21 | O | DY | 1 |
| 19 | 21 | O | DZ | 1 |
| 20 | 25 | C | DX | 1 |
| 21 | 25 | C | DY | 1 |
| 22 | 25 | C | DZ | 1 |
| 23 | 29 | H | DX | 1 |
| 24 | 29 | H | DY | 1 |
| 25 | 29 | H | DZ | 1 |
| 26 | 33 | H | DX | 1 |
| 27 | 33 | H | DY | 1 |
| 28 | 33 | H | DZ | 1 |
| 29 | 37 | C | DX | 1 |
| 30 | 37 | C | DY | 1 |
| 31 | 37 | C | DZ | 1 |
| 32 | 41 | C | DX | 1 |
| 33 | 41 | C | DY | 1 |
| 34 | 41 | C | DZ | 1 |
| 35 | 45 | H | DX | 1 |
| 36 | 45 | H | DY | 1 |
| 37 | 45 | H | DZ | 1 |
| 38 | 49 | H | DX | 1 |
| 39 | 49 | H | DY | 1 |
| 40 | 49 | H | DZ | 1 |
| 41 | 53 | C | DX | 1 |
| 42 | 53 | C | DY | 1 |
| 43 | 53 | C | DZ | 1 |
| 44 | 57 | C | DX | 1 |
| 45 | 57 | C | DY | 1 |
| 46 | 57 | C | DZ | 1 |
| 47 | 61 | H | DX | 1 |
| 48 | 61 | H | DY | 1 |
| 49 | 61 | H | DZ | 1 |

|    |     |   |    |   |
|----|-----|---|----|---|
| 50 | 65  | H | DX | 1 |
| 51 | 65  | H | DY | 1 |
| 52 | 65  | H | DZ | 1 |
| 53 | 69  | H | DX | 1 |
| 54 | 69  | H | DY | 1 |
| 55 | 69  | H | DZ | 1 |
| 56 | 73  | C | DX | 1 |
| 57 | 73  | C | DY | 1 |
| 58 | 73  | C | DZ | 1 |
| 59 | 77  | C | DX | 1 |
| 60 | 77  | C | DY | 1 |
| 61 | 77  | C | DZ | 1 |
| 62 | 81  | H | DX | 1 |
| 63 | 81  | H | DY | 1 |
| 64 | 81  | H | DZ | 1 |
| 65 | 85  | H | DX | 1 |
| 66 | 85  | H | DY | 1 |
| 67 | 85  | H | DZ | 1 |
| 68 | 89  | C | DX | 1 |
| 69 | 89  | C | DY | 1 |
| 70 | 89  | C | DZ | 1 |
| 71 | 93  | C | DX | 1 |
| 72 | 93  | C | DY | 1 |
| 73 | 93  | C | DZ | 1 |
| 74 | 97  | H | DX | 1 |
| 75 | 97  | H | DY | 1 |
| 76 | 97  | H | DZ | 1 |
| 77 | 101 | H | DX | 1 |
| 78 | 101 | H | DY | 1 |
| 79 | 101 | H | DZ | 1 |
| 80 | 105 | H | DX | 1 |
| 81 | 105 | H | DY | 1 |

|     |     |   |    |   |
|-----|-----|---|----|---|
| 82  | 105 | H | DZ | 1 |
| 83  | 109 | C | DX | 1 |
| 84  | 109 | C | DY | 1 |
| 85  | 109 | C | DZ | 1 |
| 86  | 113 | H | DX | 1 |
| 87  | 113 | H | DY | 1 |
| 88  | 113 | H | DZ | 1 |
| 89  | 117 | H | DX | 1 |
| 90  | 117 | H | DY | 1 |
| 91  | 117 | H | DZ | 1 |
| 92  | 121 | C | DX | 1 |
| 93  | 121 | C | DY | 1 |
| 94  | 121 | C | DZ | 1 |
| 95  | 125 | H | DX | 1 |
| 96  | 125 | H | DY | 1 |
| 97  | 125 | H | DZ | 1 |
| 98  | 129 | H | DX | 1 |
| 99  | 129 | H | DY | 1 |
| 100 | 129 | H | DZ | 1 |
| 101 | 133 | C | DX | 1 |
| 102 | 133 | C | DY | 1 |
| 103 | 133 | C | DZ | 1 |
| 104 | 137 | C | DX | 1 |
| 105 | 137 | C | DY | 1 |
| 106 | 137 | C | DZ | 1 |
| 107 | 141 | H | DX | 1 |
| 108 | 141 | H | DY | 1 |
| 109 | 141 | H | DZ | 1 |
| 110 | 145 | H | DX | 1 |
| 111 | 145 | H | DY | 1 |
| 112 | 145 | H | DZ | 1 |
| 113 | 149 | O | DX | 1 |

|     |     |   |    |   |
|-----|-----|---|----|---|
| 114 | 149 | O | DY | 1 |
| 115 | 149 | O | DZ | 1 |
| 116 | 153 | H | DX | 1 |
| 117 | 153 | H | DY | 1 |
| 118 | 153 | H | DZ | 1 |
| 119 | 157 | O | DX | 1 |
| 120 | 157 | O | DY | 1 |
| 121 | 157 | O | DZ | 1 |
| 122 | 161 | O | DX | 1 |
| 123 | 161 | O | DY | 1 |
| 124 | 161 | O | DZ | 1 |
| 125 | 165 | H | DX | 1 |
| 126 | 165 | H | DY | 1 |
| 127 | 165 | H | DZ | 1 |
| 128 | 169 | O | DX | 1 |
| 129 | 169 | O | DY | 1 |
| 130 | 169 | O | DZ | 1 |
| 131 | 173 | H | DX | 1 |
| 132 | 173 | H | DY | 1 |
| 133 | 173 | H | DZ | 1 |

#### USE OF RESIDUAL SYMMETRY AFTER DISPLACEMENT

NUMERICAL GRADIENT COMPUTED WITH A SINGLE DISPLACEMENT (+DX) FOR EACH

CARTESIAN COORDINATE WITH RESPECT TO THE EQUILIBRIUM CONFIGURATION

DX= 0.003 ANGSTROM

NUMBER OF IRREDUCIBLE ATOMS            44

NUMBER OF SCF+GRADIENT CALCULATIONS    133

#### ATOM SYMOP ORDER

1   1   1

5   1   1

9   1   1

|     |   |   |
|-----|---|---|
| 13  | 1 | 1 |
| 17  | 1 | 1 |
| 21  | 1 | 1 |
| 25  | 1 | 1 |
| 29  | 1 | 1 |
| 33  | 1 | 1 |
| 37  | 1 | 1 |
| 41  | 1 | 1 |
| 45  | 1 | 1 |
| 49  | 1 | 1 |
| 53  | 1 | 1 |
| 57  | 1 | 1 |
| 61  | 1 | 1 |
| 65  | 1 | 1 |
| 69  | 1 | 1 |
| 73  | 1 | 1 |
| 77  | 1 | 1 |
| 81  | 1 | 1 |
| 85  | 1 | 1 |
| 89  | 1 | 1 |
| 93  | 1 | 1 |
| 97  | 1 | 1 |
| 101 | 1 | 1 |
| 105 | 1 | 1 |
| 109 | 1 | 1 |
| 113 | 1 | 1 |
| 117 | 1 | 1 |
| 121 | 1 | 1 |
| 125 | 1 | 1 |
| 129 | 1 | 1 |
| 133 | 1 | 1 |
| 137 | 1 | 1 |







AAAAAAAAAAAAAAAAAAAAAAAAAAAAAAAAAAAAAAAAAAAAAAAAAAAAAAAAAAAAAAAAAAAAAAAA  
AAAAAA

ATOMIC WAVEFUNCTION(S)

NUCLEAR CHARGE 25.0 SYMMETRY SPECIES S P D  
N. ELECTRONS 25.0 NUMBER OF PRIMITIVE GTOS 9 9 9  
NUMBER OF CONTRACTED GTOS 4 4 4  
NUMBER OF CLOSED SHELLS 2 1 1  
OPEN SHELL OCCUPATION 0 5 0

ZNUC SCFIT TOTAL HF ENERGY KINETIC ENERGY VIRIAL THEOREM ACCURACY  
25.0 10 -2.945808324E+02 1.112323824E+02 -3.648336986E+00 1.4E-06

NUCLEAR CHARGE 7.0 SYMMETRY SPECIES S P  
N. ELECTRONS 7.0 NUMBER OF PRIMITIVE GTOS 10 4  
NUMBER OF CONTRACTED GTOS 3 2  
NUMBER OF CLOSED SHELLS 2 0  
OPEN SHELL OCCUPATION 0 3

ZNUC SCFIT TOTAL HF ENERGY KINETIC ENERGY VIRIAL THEOREM ACCURACY  
7.0 9 -5.438205114E+01 5.431262244E+01 -2.001278316E+00 1.7E-06

NUCLEAR CHARGE 8.0 SYMMETRY SPECIES S P  
N. ELECTRONS 8.0 NUMBER OF PRIMITIVE GTOS 10 4  
NUMBER OF CONTRACTED GTOS 3 2  
NUMBER OF CLOSED SHELLS 2 0  
OPEN SHELL OCCUPATION 0 4

ZNUC SCFIT TOTAL HF ENERGY KINETIC ENERGY VIRIAL THEOREM ACCURACY  
8.0 12 -7.477688628E+01 7.468135682E+01 -2.001279161E+00 3.5E-06

NUCLEAR CHARGE 6.0 SYMMETRY SPECIES S P

N. ELECTRONS 6.0 NUMBER OF PRIMITIVE GTOS 10 4

NUMBER OF CONTRACTED GTOS 3 2

NUMBER OF CLOSED SHELLS 2 0

OPEN SHELL OCCUPATION 0 2

ZNUC SCFIT TOTAL HF ENERGY KINETIC ENERGY VIRIAL THEOREM ACCURACY

6.0 9 -3.767686565E+01 3.769049035E+01 -1.999638511E+00 3.3E-06

NUCLEAR CHARGE 1.0 SYMMETRY SPECIES S

N. ELECTRONS 1.0 NUMBER OF PRIMITIVE GTOS 4

NUMBER OF CONTRACTED GTOS 2

NUMBER OF CLOSED SHELLS 0

OPEN SHELL OCCUPATION 1

ZNUC SCFIT TOTAL HF ENERGY KINETIC ENERGY VIRIAL THEOREM ACCURACY

1.0 1 -4.982329107E-01 5.098666918E-01 -1.977182700E+00 4.7E-17

AAAAAAAAAAAAAAAAAAAAAAAAAAAAAAAAAAAAAAAAAAAAAAAAAAAAAAAAAAAAAAAAAAAA  
AAAAAA

TTTTTTTTTTTTTTTTTTTTTTTTTTTTTTTTTTTT MOQGAD TELAPSE 33.61 TCPU 32.43

TTTTTTTTTTTTTTTTTTTTTTTTTTTTTTTTTTTT SHELLXN TELAPSE 119.86 TCPU 118.53

TTTTTTTTTTTTTTTTTTTTTTTTTTTTTTTTTTTT MONMO3 TELAPSE 128.44 TCPU 127.11

NUMERICALLY INTEGRATED DENSITY 843.9996927058

TTTTTTTTTTTTTTTTTTTTTTTTTTTTTTTTTTTT NUMDFT TELAPSE 134.83 TCPU 133.45

CYC 0 ETOT(AU) -6.661330962282E+03 DETOT -6.66E+03 tst 0.00E+00 PX 1.00E+00

TTTTTTTTTTTTTTTTTTTTTTTTTTTTTTTTTTTT DIIS TELAPSE 135.11 TCPU 133.73

TTTTTTTTTTTTTTTTTTTTTTTTTTTTTTTTTTTT FDIK TELAPSE 591.94 TCPU 588.45

INSULATING STATE

TOP OF VALENCE BANDS - BAND 422; K 1; EIG -2.7158168E-01 AU

BOTTOM OF VIRTUAL BANDS - BAND 423; K 4; EIG -9.7821513E-02 AU

INDIRECT ENERGY BAND GAP: 4.7283 eV

BOTTOM OF VIRTUAL BANDS - BAND 423; K 1; EIG -9.7385585E-02 AU

TTTTTTTTTTTTTTTTTTTTTTTTTTTTTTTTTTTT PDIG TELAPSE 597.72 TCPU 594.18

TTTTTTTTTTTTTTTTTTTTTTTTTTTTTTTTTTTT MOQGAD TELAPSE 597.78 TCPU 594.24

TTTTTTTTTTTTTTTTTTTTTTTTTTTTTTTTTTTT SHELLXN TELAPSE 688.09 TCPU 684.41

TTTTTTTTTTTTTTTTTTTTTTTTTTTTTTTTTTTT MONMO3 TELAPSE 696.36 TCPU 692.67

NUMERICALLY INTEGRATED DENSITY 843.9997876375

TTTTTTTTTTTTTTTTTTTTTTTTTTTTTTTTTTTT NUMDFT TELAPSE 710.10 TCPU 706.34

CYC 1 ETOT(AU) -6.637416684579E+03 DETOT 2.39E+01 tst 0.00E+00 PX 1.00E+00

TTTTTTTTTTTTTTTTTTTTTTTTTTTTTTTTTTTT DIIS TELAPSE 750.79 TCPU 746.90

DIIS TEST: 0.44982E+01 AT SCF CYCLE 1 - MIX 25 %

TTTTTTTTTTTTTTTTTTTTTTTTTTTTTTTTTTTT FDIK TELAPSE 898.24 TCPU 893.89

INSULATING STATE

TOP OF VALENCE BANDS - BAND 422; K 2; EIG -2.4675567E-01 AU

TOP OF VALENCE BANDS - BAND 422; K 1; EIG -2.4677955E-01 AU

BOTTOM OF VIRTUAL BANDS - BAND 423; K 1; EIG -3.6063684E-02 AU

INDIRECT ENERGY BAND GAP: 5.7332 eV

TTTTTTTTTTTTTTTTTTTTTTTTTTTTTTTTTTTT PDIG TELAPSE 904.10 TCPU 899.70

TTTTTTTTTTTTTTTTTTTTTTTTTTTTTTTTTTTT MOQGAD TELAPSE 904.16 TCPU 899.76

TTTTTTTTTTTTTTTTTTTTTTTTTTTTTTTTTTTT SHELLXN TELAPSE 994.50 TCPU 989.95

TTTTTTTTTTTTTTTTTTTTTTTTTTTTTTTTTTTT MONMO3 TELAPSE 1002.88 TCPU 998.31

NUMERICALLY INTEGRATED DENSITY 843.9997738134

TTTTTTTTTTTTTTTTTTTTTTTTTTTTTTTTTTTT NUMDFT TELAPSE 1016.68 TCPU 1012.04

CYC 2 ETOT(AU) -6.637898112407E+03 DETOT -4.81E-01 tst 2.60E-03 PX 2.82E-01

TTTTTTTTTTTTTTTTTTTTTTTTTTTTTTTTTTTT DIIS TELAPSE 1058.00 TCPU 1053.23

DIIS TEST: 0.31501E+01 AT SCF CYCLE 2 - DIIS ACTIVE - HISTORY: 2 CYCLES

TTTTTTTTTTTTTTTTTTTTTTTTTTTTTTTTTTTT FDIK TELAPSE 1176.70 TCPU 1171.54

INSULATING STATE

TOP OF VALENCE BANDS - BAND 422; K 6; EIG -2.6978398E-01 AU

TOP OF VALENCE BANDS - BAND 422; K 1; EIG -2.7002964E-01 AU

BOTTOM OF VIRTUAL BANDS - BAND 423; K 2; EIG -3.1004993E-03 AU

INDIRECT ENERGY BAND GAP: 7.2568 eV

BOTTOM OF VIRTUAL BANDS - BAND 423; K 1; EIG -3.0071780E-03 AU  
TTTTTTTTTTTTTTTTTTTTTTTTTTTTTTTTTTTTTTTT PDIG TELAPSE 1182.46 TCPU 1177.25  
TTTTTTTTTTTTTTTTTTTTTTTTTTTTTTTTTTTTTTTT MOQGAD TELAPSE 1182.52 TCPU 1177.31  
TTTTTTTTTTTTTTTTTTTTTTTTTTTTTTTTTTTTTTTT SHELLXN TELAPSE 1272.93 TCPU 1267.56  
TTTTTTTTTTTTTTTTTTTTTTTTTTTTTTTTTTTTTTTT MONMO3 TELAPSE 1281.19 TCPU 1275.80  
NUMERICALLY INTEGRATED DENSITY 843.9997669395  
TTTTTTTTTTTTTTTTTTTTTTTTTTTTTTTTTTTTTTTT NUMDFT TELAPSE 1294.98 TCPU 1289.51  
CYC 3 ETOT(AU) -6.638537312951E+03 DETOT -6.39E-01 tst 1.38E-03 PX 1.57E-01  
TTTTTTTTTTTTTTTTTTTTTTTTTTTTTTTTTTTTTTTT DIIS TELAPSE 1336.08 TCPU 1330.47  
DIIS TEST: 0.23716E+00 AT SCF CYCLE 3 - DIIS ACTIVE - HISTORY: 3 CYCLES  
TTTTTTTTTTTTTTTTTTTTTTTTTTTTTTTTTTTTTTTT FDIK TELAPSE 1450.05 TCPU 1444.08  
INSULATING STATE  
TOP OF VALENCE BANDS - BAND 422; K 5; EIG -2.7956310E-01 AU  
TOP OF VALENCE BANDS - BAND 422; K 1; EIG -2.7956363E-01 AU  
BOTTOM OF VIRTUAL BANDS - BAND 423; K 2; EIG 9.8660707E-04 AU  
INDIRECT ENERGY BAND GAP: 7.6341 eV  
BOTTOM OF VIRTUAL BANDS - BAND 423; K 1; EIG 1.1040350E-03 AU  
TTTTTTTTTTTTTTTTTTTTTTTTTTTTTTTTTTTTTTTT PDIG TELAPSE 1455.79 TCPU 1449.78  
TTTTTTTTTTTTTTTTTTTTTTTTTTTTTTTTTTTTTTTT MOQGAD TELAPSE 1455.86 TCPU 1449.84  
TTTTTTTTTTTTTTTTTTTTTTTTTTTTTTTTTTTTTTTT SHELLXN TELAPSE 1546.49 TCPU 1540.31  
TTTTTTTTTTTTTTTTTTTTTTTTTTTTTTTTTTTTTTTT MONMO3 TELAPSE 1554.75 TCPU 1548.55  
NUMERICALLY INTEGRATED DENSITY 843.9997716623  
TTTTTTTTTTTTTTTTTTTTTTTTTTTTTTTTTTTTTTTT NUMDFT TELAPSE 1568.45 TCPU 1562.17  
CYC 4 ETOT(AU) -6.638585539560E+03 DETOT -4.82E-02 tst 1.77E-04 PX 4.22E-02  
TTTTTTTTTTTTTTTTTTTTTTTTTTTTTTTTTTTTTTTT DIIS TELAPSE 1609.58 TCPU 1603.10  
DIIS TEST: 0.38747E-01 AT SCF CYCLE 4 - DIIS ACTIVE - HISTORY: 4 CYCLES  
TTTTTTTTTTTTTTTTTTTTTTTTTTTTTTTTTTTTTTTT FDIK TELAPSE 1723.13 TCPU 1716.18  
INSULATING STATE  
TOP OF VALENCE BANDS - BAND 422; K 1; EIG -2.7635037E-01 AU  
BOTTOM OF VIRTUAL BANDS - BAND 423; K 2; EIG 7.0277739E-04 AU  
INDIRECT ENERGY BAND GAP: 7.5390 eV  
BOTTOM OF VIRTUAL BANDS - BAND 423; K 1; EIG 7.9427335E-04 AU













INSULATING STATE

TOP OF VALENCE BANDS - BAND 422; K 1; EIG -2.7701842E-01 AU

BOTTOM OF VIRTUAL BANDS - BAND 423; K 2; EIG 1.7191140E-03 AU

INDIRECT ENERGY BAND GAP: 7.5848 eV

BOTTOM OF VIRTUAL BANDS - BAND 423; K 1; EIG 1.8100274E-03 AU

TTTTTTTTTTTTTTTTTTTTTTTTTTTTTTTTTTTT PDIG TELAPSE 4749.77 TCPU 4734.22

TTTTTTTTTTTTTTTTTTTTTTTTTTTTTTTTTTTT MOQGAD TELAPSE 4749.83 TCPU 4734.28

TTTTTTTTTTTTTTTTTTTTTTTTTTTTTTTTTTTT SHELLXN TELAPSE 4841.12 TCPU 4825.40

TTTTTTTTTTTTTTTTTTTTTTTTTTTTTTTTTTTT MONMO3 TELAPSE 4849.35 TCPU 4833.60

NUMERICALLY INTEGRATED DENSITY 843.9997696845

TTTTTTTTTTTTTTTTTTTTTTTTTTTTTTTTTTTT NUMDFT TELAPSE 4863.05 TCPU 4847.23

CYC 16 ETOT(AU) -6.638595367372E+03 DETOT 2.17E-04 tst 4.14E-07 PX 3.38E-02

TTTTTTTTTTTTTTTTTTTTTTTTTTTTTTTTTTTT DIIS TELAPSE 4906.23 TCPU 4890.23

DIIS TEST: 0.51553E-05 AT SCF CYCLE 16 - DIIS ACTIVE - HISTORY: 16 CYCLES

TTTTTTTTTTTTTTTTTTTTTTTTTTTTTTTTTTTT FDIK TELAPSE 5028.27 TCPU 5011.92

INSULATING STATE

TOP OF VALENCE BANDS - BAND 422; K 1; EIG -2.7701805E-01 AU

BOTTOM OF VIRTUAL BANDS - BAND 423; K 2; EIG 1.7192063E-03 AU

INDIRECT ENERGY BAND GAP: 7.5848 eV

BOTTOM OF VIRTUAL BANDS - BAND 423; K 1; EIG 1.8100578E-03 AU

TTTTTTTTTTTTTTTTTTTTTTTTTTTTTTTTTTTT PDIG TELAPSE 5034.17 TCPU 5017.77

TTTTTTTTTTTTTTTTTTTTTTTTTTTTTTTTTTTT MOQGAD TELAPSE 5034.24 TCPU 5017.83

TTTTTTTTTTTTTTTTTTTTTTTTTTTTTTTTTTTT SHELLXN TELAPSE 5125.69 TCPU 5109.13

TTTTTTTTTTTTTTTTTTTTTTTTTTTTTTTTTTTT MONMO3 TELAPSE 5134.01 TCPU 5117.44

NUMERICALLY INTEGRATED DENSITY 843.9997696863

TTTTTTTTTTTTTTTTTTTTTTTTTTTTTTTTTTTT NUMDFT TELAPSE 5147.72 TCPU 5131.08

CYC 17 ETOT(AU) -6.638595357966E+03 DETOT 9.41E-06 tst 2.10E-09 PX 2.37E-03

TTTTTTTTTTTTTTTTTTTTTTTTTTTTTTTTTTTT DIIS TELAPSE 5190.96 TCPU 5174.17

DIIS TEST: 0.46125E-05 AT SCF CYCLE 17 - DIIS ACTIVE - HISTORY: 17 CYCLES

TTTTTTTTTTTTTTTTTTTTTTTTTTTTTTTTTTTT FDIK TELAPSE 5305.55 TCPU 5288.43

INSULATING STATE

TOP OF VALENCE BANDS - BAND 422; K 1; EIG -2.7702869E-01 AU

BOTTOM OF VIRTUAL BANDS - BAND 423; K 2; EIG 1.7470349E-03 AU  
INDIRECT ENERGY BAND GAP: 7.5859 eV  
BOTTOM OF VIRTUAL BANDS - BAND 423; K 1; EIG 1.8389474E-03 AU  
TTTTTTTTTTTTTTTTTTTTTTTTTTTTTTTTTTTT PDIG TELAPSE 5311.43 TCPU 5294.29  
TTTTTTTTTTTTTTTTTTTTTTTTTTTTTTTTTTTT MOQGAD TELAPSE 5311.49 TCPU 5294.36  
TTTTTTTTTTTTTTTTTTTTTTTTTTTTTTTTTTTT SHELLXN TELAPSE 5402.83 TCPU 5385.53  
TTTTTTTTTTTTTTTTTTTTTTTTTTTTTTTTTTTT MONMO3 TELAPSE 5411.12 TCPU 5393.81  
NUMERICALLY INTEGRATED DENSITY 843.9997696729  
TTTTTTTTTTTTTTTTTTTTTTTTTTTTTTTTTTTT NUMDFT TELAPSE 5424.81 TCPU 5407.42  
CYC 18 ETOT(AU) -6.638594906607E+03 DETOT 4.51E-04 tst 3.31E-06 PX 9.01E-02  
TTTTTTTTTTTTTTTTTTTTTTTTTTTTTTTTTTTT DIIS TELAPSE 5467.86 TCPU 5450.30  
DIIS TEST: 0.62881E-05 AT SCF CYCLE 18 - DIIS ACTIVE - HISTORY: 18 CYCLES  
TTTTTTTTTTTTTTTTTTTTTTTTTTTTTTTTTTTT FDIK TELAPSE 5590.14 TCPU 5572.24  
INSULATING STATE  
TOP OF VALENCE BANDS - BAND 422; K 1; EIG -2.7702818E-01 AU  
BOTTOM OF VIRTUAL BANDS - BAND 423; K 2; EIG 1.7459907E-03 AU  
INDIRECT ENERGY BAND GAP: 7.5858 eV  
BOTTOM OF VIRTUAL BANDS - BAND 423; K 1; EIG 1.8378229E-03 AU  
TTTTTTTTTTTTTTTTTTTTTTTTTTTTTTTTTTTT PDIG TELAPSE 5596.01 TCPU 5578.06  
TTTTTTTTTTTTTTTTTTTTTTTTTTTTTTTTTTTT MOQGAD TELAPSE 5596.08 TCPU 5578.12  
TTTTTTTTTTTTTTTTTTTTTTTTTTTTTTTTTTTT SHELLXN TELAPSE 5687.15 TCPU 5669.04  
TTTTTTTTTTTTTTTTTTTTTTTTTTTTTTTTTTTT MONMO3 TELAPSE 5695.57 TCPU 5677.42  
NUMERICALLY INTEGRATED DENSITY 843.9997696765  
TTTTTTTTTTTTTTTTTTTTTTTTTTTTTTTTTTTT NUMDFT TELAPSE 5709.31 TCPU 5691.09  
CYC 19 ETOT(AU) -6.638594904513E+03 DETOT 2.09E-06 tst 1.41E-09 PX 1.62E-03  
TTTTTTTTTTTTTTTTTTTTTTTTTTTTTTTTTTTT DIIS TELAPSE 5752.42 TCPU 5734.05  
DIIS TEST: 0.27338E-05 AT SCF CYCLE 19 - DIIS ACTIVE - HISTORY: 19 CYCLES  
TTTTTTTTTTTTTTTTTTTTTTTTTTTTTTTTTTTT FDIK TELAPSE 5865.95 TCPU 5847.21  
INSULATING STATE  
TOP OF VALENCE BANDS - BAND 422; K 1; EIG -2.7703741E-01 AU  
BOTTOM OF VIRTUAL BANDS - BAND 423; K 2; EIG 1.7703012E-03 AU  
INDIRECT ENERGY BAND GAP: 7.5867 eV





TTTTTTTTTTTTTTTTTTTTTTTTTTTTTTTTTTTTTT MONMO3    TELAPSE    7076.45 TCPU    7054.21  
 NUMERICALLY INTEGRATED DENSITY    843.9997697792  
 TTTTTTTTTTTTTTTTTTTTTTTTTTTTTTTTTTTTTT NUMDFT    TELAPSE    7090.20 TCPU    7067.89  
 CYC 24 ETOT(AU) -6.638594564167E+03 DETOT -1.38E-05 tst 1.68E-08 PX 7.92E-03  
 TTTTTTTTTTTTTTTTTTTTTTTTTTTTTTTTTTTTTT DIIS    TELAPSE    7133.34 TCPU    7110.87  
 DIIS TEST: 0.10026E-05 AT SCF    CYCLE 24 - DIIS ACTIVE - HISTORY: 24 CYCLES  
 TTTTTTTTTTTTTTTTTTTTTTTTTTTTTTTTTTTTTT FDIK    TELAPSE    7240.56 TCPU    7217.75  
 INSULATING STATE  
 TOP OF VALENCE BANDS - BAND 422; K 1; EIG -2.7702545E-01 AU  
 BOTTOM OF VIRTUAL BANDS - BAND 423; K 2; EIG 1.7646807E-03 AU  
 INDIRECT ENERGY BAND GAP: 7.5863 eV  
 BOTTOM OF VIRTUAL BANDS - BAND 423; K 1; EIG 1.8561826E-03 AU  
 TTTTTTTTTTTTTTTTTTTTTTTTTTTTTTTTTTTTTT PDIG    TELAPSE    7246.46 TCPU    7223.60  
 TTTTTTTTTTTTTTTTTTTTTTTTTTTTTTTTTTTTTT MOQGAD    TELAPSE    7246.52 TCPU    7223.66  
 TTTTTTTTTTTTTTTTTTTTTTTTTTTTTTTTTTTTTT SHELLXN    TELAPSE    7337.71 TCPU    7314.70  
 TTTTTTTTTTTTTTTTTTTTTTTTTTTTTTTTTTTTTT MONMO3    TELAPSE    7346.31 TCPU    7323.29  
 NUMERICALLY INTEGRATED DENSITY    843.9997697824  
 TTTTTTTTTTTTTTTTTTTTTTTTTTTTTTTTTTTTTT NUMDFT    TELAPSE    7360.06 TCPU    7336.96  
 CYC 25 ETOT(AU) -6.638594555034E+03 DETOT 9.13E-06 tst 3.88E-09 PX 2.99E-03  
 TTTTTTTTTTTTTTTTTTTTTTTTTTTTTTTTTTTTTT DIIS    TELAPSE    7403.23 TCPU    7379.98  
 DIIS TEST: 0.97364E-06 AT SCF    CYCLE 25 - DIIS ACTIVE - HISTORY: 25 CYCLES  
 TTTTTTTTTTTTTTTTTTTTTTTTTTTTTTTTTTTTTT FDIK    TELAPSE    7516.14 TCPU    7492.53  
 INSULATING STATE  
 TOP OF VALENCE BANDS - BAND 422; K 1; EIG -2.7702434E-01 AU  
 BOTTOM OF VIRTUAL BANDS - BAND 423; K 2; EIG 1.7638218E-03 AU  
 INDIRECT ENERGY BAND GAP: 7.5862 eV  
 BOTTOM OF VIRTUAL BANDS - BAND 423; K 1; EIG 1.8552861E-03 AU  
 TTTTTTTTTTTTTTTTTTTTTTTTTTTTTTTTTTTTTT PDIG    TELAPSE    7522.03 TCPU    7498.37  
 TTTTTTTTTTTTTTTTTTTTTTTTTTTTTTTTTTTTTT MOQGAD    TELAPSE    7522.09 TCPU    7498.43  
 TTTTTTTTTTTTTTTTTTTTTTTTTTTTTTTTTTTTTT SHELLXN    TELAPSE    7613.16 TCPU    7589.35  
 TTTTTTTTTTTTTTTTTTTTTTTTTTTTTTTTTTTTTT MONMO3    TELAPSE    7621.78 TCPU    7597.95  
 NUMERICALLY INTEGRATED DENSITY    843.9997697848

TTTTTTTTTTTTTTTTTTTTTTTTTTTTTTTTTTTTTTTT NUMDFT TELAPSE 7635.52 TCPU 7611.61  
CYC 26 ETOT(AU) -6.63859453268E+03 DETOT 1.77E-06 tst 9.22E-10 PX 1.25E-03  
TTTTTTTTTTTTTTTTTTTTTTTTTTTTTTTTTTTTTTTT DIIS TELAPSE 7678.71 TCPU 7654.62  
DIIS TEST: 0.94762E-06 AT SCF CYCLE 26 - DIIS ACTIVE - HISTORY: 26 CYCLES  
TTTTTTTTTTTTTTTTTTTTTTTTTTTTTTTTTTTTTTTT FDIK TELAPSE 7786.07 TCPU 7761.63  
INSULATING STATE  
TOP OF VALENCE BANDS - BAND 422; K 1; EIG -2.7702429E-01 AU  
BOTTOM OF VIRTUAL BANDS - BAND 423; K 2; EIG 1.7652814E-03 AU  
INDIRECT ENERGY BAND GAP: 7.5863 eV  
BOTTOM OF VIRTUAL BANDS - BAND 423; K 1; EIG 1.8568015E-03 AU  
TTTTTTTTTTTTTTTTTTTTTTTTTTTTTTTTTTTTTTTT PDIG TELAPSE 7791.96 TCPU 7767.47  
TTTTTTTTTTTTTTTTTTTTTTTTTTTTTTTTTTTTTTTT MOQGAD TELAPSE 7792.03 TCPU 7767.53  
TTTTTTTTTTTTTTTTTTTTTTTTTTTTTTTTTTTTTTTT SHELLXN TELAPSE 7883.35 TCPU 7858.69  
TTTTTTTTTTTTTTTTTTTTTTTTTTTTTTTTTTTTTTTT MONMO3 TELAPSE 7891.48 TCPU 7866.81  
NUMERICALLY INTEGRATED DENSITY 843.9997697873  
TTTTTTTTTTTTTTTTTTTTTTTTTTTTTTTTTTTTTTTT NUMDFT TELAPSE 7905.17 TCPU 7880.43  
CYC 27 ETOT(AU) -6.638594549789E+03 DETOT 3.48E-06 tst 2.13E-09 PX 1.89E-03  
TTTTTTTTTTTTTTTTTTTTTTTTTTTTTTTTTTTTTTTT DIIS TELAPSE 7948.31 TCPU 7923.39  
DIIS TEST: 0.93776E-06 AT SCF CYCLE 27 - DIIS ACTIVE - HISTORY: 27 CYCLES  
TTTTTTTTTTTTTTTTTTTTTTTTTTTTTTTTTTTTTTTT FDIK TELAPSE 8056.64 TCPU 8031.37  
INSULATING STATE  
TOP OF VALENCE BANDS - BAND 422; K 1; EIG -2.7702235E-01 AU  
BOTTOM OF VIRTUAL BANDS - BAND 423; K 2; EIG 1.7634960E-03 AU  
INDIRECT ENERGY BAND GAP: 7.5862 eV  
BOTTOM OF VIRTUAL BANDS - BAND 423; K 1; EIG 1.8549527E-03 AU  
TTTTTTTTTTTTTTTTTTTTTTTTTTTTTTTTTTTTTTTT PDIG TELAPSE 8062.54 TCPU 8037.24  
TTTTTTTTTTTTTTTTTTTTTTTTTTTTTTTTTTTTTTTT MOQGAD TELAPSE 8062.60 TCPU 8037.30  
TTTTTTTTTTTTTTTTTTTTTTTTTTTTTTTTTTTTTTTT SHELLXN TELAPSE 8153.59 TCPU 8128.13  
TTTTTTTTTTTTTTTTTTTTTTTTTTTTTTTTTTTTTTTT MONMO3 TELAPSE 8162.33 TCPU 8136.85  
NUMERICALLY INTEGRATED DENSITY 843.9997697921  
TTTTTTTTTTTTTTTTTTTTTTTTTTTTTTTTTTTTTTTT NUMDFT TELAPSE 8176.06 TCPU 8150.50  
CYC 28 ETOT(AU) -6.638594542748E+03 DETOT 7.04E-06 tst 3.77E-09 PX 2.55E-03

TTTTTTTTTTTTTTTTTTTTTTTTTTTTTTTTTTTTTTTT DIIS TELAPSE 8219.31 TCPU 8193.59  
DIIS TEST: 0.90635E-06 AT SCF CYCLE 28 - DIIS ACTIVE - HISTORY: 28 CYCLES  
TTTTTTTTTTTTTTTTTTTTTTTTTTTTTTTTTTTTTTTT FDIK TELAPSE 8321.49 TCPU 8295.43  
INSULATING STATE  
TOP OF VALENCE BANDS - BAND 422; K 1; EIG -2.7702502E-01 AU  
BOTTOM OF VIRTUAL BANDS - BAND 423; K 2; EIG 1.7692611E-03 AU  
INDIRECT ENERGY BAND GAP: 7.5864 eV  
BOTTOM OF VIRTUAL BANDS - BAND 423; K 1; EIG 1.8611469E-03 AU  
TTTTTTTTTTTTTTTTTTTTTTTTTTTTTTTTTTTTTTTT PDIG TELAPSE 8327.38 TCPU 8301.27  
TTTTTTTTTTTTTTTTTTTTTTTTTTTTTTTTTTTTTTTT MOQGAD TELAPSE 8327.45 TCPU 8301.34  
TTTTTTTTTTTTTTTTTTTTTTTTTTTTTTTTTTTTTTTT SHELLXN TELAPSE 8418.25 TCPU 8391.98  
TTTTTTTTTTTTTTTTTTTTTTTTTTTTTTTTTTTTTTTT MONMO3 TELAPSE 8426.30 TCPU 8400.02  
NUMERICALLY INTEGRATED DENSITY 843.9997698135  
TTTTTTTTTTTTTTTTTTTTTTTTTTTTTTTTTTTTTTTT NUMDFT TELAPSE 8439.98 TCPU 8413.63  
CYC 29 ETOT(AU) -6.638594498325E+03 DETOT 4.44E-05 tst 1.49E-07 PX 1.58E-02  
TTTTTTTTTTTTTTTTTTTTTTTTTTTTTTTTTTTTTTTT DIIS TELAPSE 8480.98 TCPU 8454.47  
DIIS TEST: 0.99591E-06 AT SCF CYCLE 29 - DIIS ACTIVE - HISTORY: 29 CYCLES  
TTTTTTTTTTTTTTTTTTTTTTTTTTTTTTTTTTTTTTTT FDIK TELAPSE 8600.79 TCPU 8573.91  
INSULATING STATE  
TOP OF VALENCE BANDS - BAND 422; K 1; EIG -2.7702416E-01 AU  
BOTTOM OF VIRTUAL BANDS - BAND 423; K 2; EIG 1.7681130E-03 AU  
INDIRECT ENERGY BAND GAP: 7.5863 eV  
BOTTOM OF VIRTUAL BANDS - BAND 423; K 1; EIG 1.8599395E-03 AU  
TTTTTTTTTTTTTTTTTTTTTTTTTTTTTTTTTTTTTTTT PDIG TELAPSE 8606.54 TCPU 8579.61  
TTTTTTTTTTTTTTTTTTTTTTTTTTTTTTTTTTTTTTTT MOQGAD TELAPSE 8606.61 TCPU 8579.69  
TTTTTTTTTTTTTTTTTTTTTTTTTTTTTTTTTTTTTTTT SHELLXN TELAPSE 8696.85 TCPU 8669.77  
TTTTTTTTTTTTTTTTTTTTTTTTTTTTTTTTTTTTTTTT MONMO3 TELAPSE 8705.74 TCPU 8678.65  
NUMERICALLY INTEGRATED DENSITY 843.9997698168  
TTTTTTTTTTTTTTTTTTTTTTTTTTTTTTTTTTTTTTTT NUMDFT TELAPSE 8719.39 TCPU 8692.23  
CYC 30 ETOT(AU) -6.638594495958E+03 DETOT 2.37E-06 tst 9.37E-10 PX 1.31E-03  
TTTTTTTTTTTTTTTTTTTTTTTTTTTTTTTTTTTTTTTT DIIS TELAPSE 8762.52 TCPU 8735.19  
DIIS TEST: 0.79085E-06 AT SCF CYCLE 30 - DIIS ACTIVE - HISTORY: 30 CYCLES



TTTTTTTTTTTTTTTTTTTTTTTTTTTTTTTTTTTTTTTT FDIK TELAPSE 8870.47 TCPU 8842.67

INSULATING STATE

TOP OF VALENCE BANDS - BAND 422; K 1; EIG -2.7700808E-01 AU

BOTTOM OF VIRTUAL BANDS - BAND 423; K 2; EIG 1.7567384E-03 AU

INDIRECT ENERGY BAND GAP: 7.5856 eV

BOTTOM OF VIRTUAL BANDS - BAND 423; K 1; EIG 1.8485941E-03 AU

TTTTTTTTTTTTTTTTTTTTTTTTTTTTTTTTTTTTTTTT PDIG TELAPSE 8876.22 TCPU 8848.36

TTTTTTTTTTTTTTTTTTTTTTTTTTTTTTTTTTTTTTTT MOQGAD TELAPSE 8876.28 TCPU 8848.43

TTTTTTTTTTTTTTTTTTTTTTTTTTTTTTTTTTTTTTTT SHELLXN TELAPSE 8967.21 TCPU 8939.13

TTTTTTTTTTTTTTTTTTTTTTTTTTTTTTTTTTTTTTTT MONMO3 TELAPSE 8975.64 TCPU 8947.53

NUMERICALLY INTEGRATED DENSITY 843.9997699397

TTTTTTTTTTTTTTTTTTTTTTTTTTTTTTTTTTTTTTTT NUMDFT TELAPSE 8989.34 TCPU 8961.14

CYC 31 ETOT(AU) -6.638594378742E+03 DETOT 1.17E-04 tst 2.13E-06 PX 6.01E-02

TTTTTTTTTTTTTTTTTTTTTTTTTTTTTTTTTTTTTTTT DIIS TELAPSE 9030.30 TCPU 9001.94

DIIS TEST: 0.34328E-05 AT SCF CYCLE 31 - DIIS ACTIVE - HISTORY: 31 CYCLES

TTTTTTTTTTTTTTTTTTTTTTTTTTTTTTTTTTTTTTTT FDIK TELAPSE 9155.79 TCPU 9127.05

INSULATING STATE

TOP OF VALENCE BANDS - BAND 422; K 1; EIG -2.7700813E-01 AU

BOTTOM OF VIRTUAL BANDS - BAND 423; K 2; EIG 1.7571564E-03 AU

INDIRECT ENERGY BAND GAP: 7.5856 eV

BOTTOM OF VIRTUAL BANDS - BAND 423; K 1; EIG 1.8490114E-03 AU

TTTTTTTTTTTTTTTTTTTTTTTTTTTTTTTTTTTTTTTT PDIG TELAPSE 9161.58 TCPU 9132.79

TTTTTTTTTTTTTTTTTTTTTTTTTTTTTTTTTTTTTTTT MOQGAD TELAPSE 9161.64 TCPU 9132.86

TTTTTTTTTTTTTTTTTTTTTTTTTTTTTTTTTTTTTTTT SHELLXN TELAPSE 9251.68 TCPU 9222.74

TTTTTTTTTTTTTTTTTTTTTTTTTTTTTTTTTTTTTTTT MONMO3 TELAPSE 9260.57 TCPU 9231.61

NUMERICALLY INTEGRATED DENSITY 843.9997699478

TTTTTTTTTTTTTTTTTTTTTTTTTTTTTTTTTTTTTTTT NUMDFT TELAPSE 9274.26 TCPU 9245.24

CYC 32 ETOT(AU) -6.638594377336E+03 DETOT 1.41E-06 tst 1.78E-09 PX 1.91E-03

TTTTTTTTTTTTTTTTTTTTTTTTTTTTTTTTTTTTTTTT DIIS TELAPSE 9315.14 TCPU 9285.93

DIIS TEST: 0.32129E-06 AT SCF CYCLE 32 - DIIS ACTIVE - HISTORY: 32 CYCLES

TTTTTTTTTTTTTTTTTTTTTTTTTTTTTTTTTTTTTTTT FDIK TELAPSE 9427.05 TCPU 9397.52

INSULATING STATE

TOP OF VALENCE BANDS - BAND 422; K 1; EIG -2.7699948E-01 AU  
BOTTOM OF VIRTUAL BANDS - BAND 423; K 2; EIG 1.7545933E-03 AU  
INDIRECT ENERGY BAND GAP: 7.5853 eV  
BOTTOM OF VIRTUAL BANDS - BAND 423; K 1; EIG 1.8465012E-03 AU  
TTTTTTTTTTTTTTTTTTTTTTTTTTTTTTTTTTTT PDIG TELAPSE 9432.82 TCPU 9403.26  
TTTTTTTTTTTTTTTTTTTTTTTTTTTTTTTTTTTT MOQGAD TELAPSE 9432.88 TCPU 9403.33  
TTTTTTTTTTTTTTTTTTTTTTTTTTTTTTTTTTTT SHELLXN TELAPSE 9522.95 TCPU 9493.24  
TTTTTTTTTTTTTTTTTTTTTTTTTTTTTTTTTTTT MONMO3 TELAPSE 9531.85 TCPU 9502.11  
NUMERICALLY INTEGRATED DENSITY 843.9997701162  
TTTTTTTTTTTTTTTTTTTTTTTTTTTTTTTTTTTT NUMDFT TELAPSE 9545.55 TCPU 9515.74  
CYC 33 ETOT(AU) -6.638594330450E+03 DETOT 4.69E-05 tst 2.25E-06 PX 6.21E-02  
TTTTTTTTTTTTTTTTTTTTTTTTTTTTTTTTTTTT DIIS TELAPSE 9586.53 TCPU 9556.54  
DIIS TEST: 0.32110E-05 AT SCF CYCLE 33 - DIIS ACTIVE - HISTORY: 33 CYCLES  
TTTTTTTTTTTTTTTTTTTTTTTTTTTTTTTTTTTT FDIK TELAPSE 9716.86 TCPU 9686.48  
INSULATING STATE  
TOP OF VALENCE BANDS - BAND 422; K 1; EIG -2.7699942E-01 AU  
BOTTOM OF VIRTUAL BANDS - BAND 423; K 2; EIG 1.7545869E-03 AU  
INDIRECT ENERGY BAND GAP: 7.5853 eV  
BOTTOM OF VIRTUAL BANDS - BAND 423; K 1; EIG 1.8464864E-03 AU  
TTTTTTTTTTTTTTTTTTTTTTTTTTTTTTTTTTTT PDIG TELAPSE 9722.62 TCPU 9692.22  
TTTTTTTTTTTTTTTTTTTTTTTTTTTTTTTTTTTT MOQGAD TELAPSE 9722.68 TCPU 9692.29  
TTTTTTTTTTTTTTTTTTTTTTTTTTTTTTTTTTTT SHELLXN TELAPSE 9812.78 TCPU 9782.23  
TTTTTTTTTTTTTTTTTTTTTTTTTTTTTTTTTTTT MONMO3 TELAPSE 9821.70 TCPU 9791.13  
NUMERICALLY INTEGRATED DENSITY 843.9997701201  
TTTTTTTTTTTTTTTTTTTTTTTTTTTTTTTTTTTT NUMDFT TELAPSE 9835.38 TCPU 9804.74  
CYC 34 ETOT(AU) -6.638594331504E+03 DETOT -1.05E-06 tst 4.23E-10 PX 7.48E-04  
TTTTTTTTTTTTTTTTTTTTTTTTTTTTTTTTTTTT DIIS TELAPSE 9876.16 TCPU 9845.08  
DIIS TEST: 0.99396E-07 AT SCF CYCLE 34 - DIIS ACTIVE - HISTORY: 34 CYCLES  
TTTTTTTTTTTTTTTTTTTTTTTTTTTTTTTTTTTT FDIK TELAPSE 9983.43 TCPU 9951.47  
INSULATING STATE  
TOP OF VALENCE BANDS - BAND 422; K 1; EIG -2.7699330E-01 AU  
BOTTOM OF VIRTUAL BANDS - BAND 423; K 2; EIG 1.7516845E-03 AU

INDIRECT ENERGY BAND GAP: 7.5850 eV

BOTTOM OF VIRTUAL BANDS - BAND 423; K 1; EIG 1.8432218E-03 AU

TTTTTTTTTTTTTTTTTTTTTTTTTTTTTTTTTTTTTTTT PDIG TELAPSE 9989.16 TCPU 9957.17

TTTTTTTTTTTTTTTTTTTTTTTTTTTTTTTTTTTTTTTT MOQGAD TELAPSE 9989.22 TCPU 9957.23

TTTTTTTTTTTTTTTTTTTTTTTTTTTTTTTTTTTTTTTT SHELLXN TELAPSE 10079.16 TCPU 10047.03

TTTTTTTTTTTTTTTTTTTTTTTTTTTTTTTTTTTTTTTT MONMO3 TELAPSE 10087.94 TCPU 10055.79

NUMERICALLY INTEGRATED DENSITY 843.9997701631

TTTTTTTTTTTTTTTTTTTTTTTTTTTTTTTTTTTTTTTT NUMDFT TELAPSE 10101.64 TCPU 10069.42

CYC 35 ETOT(AU) -6.638594331684E+03 DETOT -1.80E-07 tst 1.01E-07 PX 1.35E-02

TTTTTTTTTTTTTTTTTTTTTTTTTTTTTTTTTTTTTTTT DIIS TELAPSE 10143.36 TCPU 10110.99

DIIS TEST: 0.16544E-06 AT SCF CYCLE 35 - DIIS ACTIVE - HISTORY: 35 CYCLES

TTTTTTTTTTTTTTTTTTTTTTTTTTTTTTTTTTTTTTTT FDIK TELAPSE 10263.57 TCPU 10230.76

INSULATING STATE

TOP OF VALENCE BANDS - BAND 422; K 1; EIG -2.7699322E-01 AU

BOTTOM OF VIRTUAL BANDS - BAND 423; K 2; EIG 1.7516116E-03 AU

INDIRECT ENERGY BAND GAP: 7.5850 eV

BOTTOM OF VIRTUAL BANDS - BAND 423; K 1; EIG 1.8430742E-03 AU

TTTTTTTTTTTTTTTTTTTTTTTTTTTTTTTTTTTTTTTT PDIG TELAPSE 10269.44 TCPU 10236.58

TTTTTTTTTTTTTTTTTTTTTTTTTTTTTTTTTTTTTTTT MOQGAD TELAPSE 10269.50 TCPU 10236.64

TTTTTTTTTTTTTTTTTTTTTTTTTTTTTTTTTTTTTTTT SHELLXN TELAPSE 10359.51 TCPU 10326.50

TTTTTTTTTTTTTTTTTTTTTTTTTTTTTTTTTTTTTTTT MONMO3 TELAPSE 10368.00 TCPU 10334.95

NUMERICALLY INTEGRATED DENSITY 843.9997701635

TTTTTTTTTTTTTTTTTTTTTTTTTTTTTTTTTTTTTTTT NUMDFT TELAPSE 10381.71 TCPU 10348.58

CYC 36 ETOT(AU) -6.638594331787E+03 DETOT -1.03E-07 tst 3.51E-10 PX 8.79E-04

TTTTTTTTTTTTTTTTTTTTTTTTTTTTTTTTTTTTTTTT DIIS TELAPSE 10424.60 TCPU 10391.28

DIIS TEST: 0.46907E-07 AT SCF CYCLE 36 - DIIS ACTIVE - HISTORY: 36 CYCLES

TTTTTTTTTTTTTTTTTTTTTTTTTTTTTTTTTTTTTTTT FDIK TELAPSE 10533.40 TCPU 10499.72

INSULATING STATE

TOP OF VALENCE BANDS - BAND 422; K 1; EIG -2.7699356E-01 AU

BOTTOM OF VIRTUAL BANDS - BAND 423; K 2; EIG 1.7525992E-03 AU

INDIRECT ENERGY BAND GAP: 7.5851 eV

BOTTOM OF VIRTUAL BANDS - BAND 423; K 1; EIG 1.8437095E-03 AU













INSULATING STATE

TOP OF VALENCE BANDS - BAND 422; K 1; EIG -2.7699763E-01 AU

BOTTOM OF VIRTUAL BANDS - BAND 423; K 2; EIG 1.7662153E-03 AU

INDIRECT ENERGY BAND GAP: 7.5856 eV

BOTTOM OF VIRTUAL BANDS - BAND 423; K 1; EIG 1.8562344E-03 AU

TTTTTTTTTTTTTTTTTTTTTTTTTTTTTTTTTTTT PDIG TELAPSE 13501.01 TCPU 13448.81

TTTTTTTTTTTTTTTTTTTTTTTTTTTTTTTTTTTT MOQGAD TELAPSE 13501.08 TCPU 13448.88

TTTTTTTTTTTTTTTTTTTTTTTTTTTTTTTTTTTT SHELLXN TELAPSE 13592.06 TCPU 13539.10

TTTTTTTTTTTTTTTTTTTTTTTTTTTTTTTTTTTT MONMO3 TELAPSE 13599.65 TCPU 13546.62

NUMERICALLY INTEGRATED DENSITY 843.9997701511

TTTTTTTTTTTTTTTTTTTTTTTTTTTTTTTTTTTT NUMDFT TELAPSE 13613.36 TCPU 13560.17

CYC 48 ETOT(AU) -6.638594331703E+03 DETOT 3.70E-06 tst 9.81E-09 PX 3.96E-03

TTTTTTTTTTTTTTTTTTTTTTTTTTTTTTTTTTTT DIIS TELAPSE 13655.40 TCPU 13601.68

DIIS TEST: 0.17686E-07 AT SCF CYCLE 48 - DIIS ACTIVE - HISTORY: 48 CYCLES

TTTTTTTTTTTTTTTTTTTTTTTTTTTTTTTTTTTT FDIK TELAPSE 13773.00 TCPU 13718.11

INSULATING STATE

TOP OF VALENCE BANDS - BAND 422; K 1; EIG -2.7699764E-01 AU

BOTTOM OF VIRTUAL BANDS - BAND 423; K 2; EIG 1.7666807E-03 AU

INDIRECT ENERGY BAND GAP: 7.5856 eV

BOTTOM OF VIRTUAL BANDS - BAND 423; K 1; EIG 1.8566916E-03 AU

TTTTTTTTTTTTTTTTTTTTTTTTTTTTTTTTTTTT PDIG TELAPSE 13778.73 TCPU 13723.74

TTTTTTTTTTTTTTTTTTTTTTTTTTTTTTTTTTTT MOQGAD TELAPSE 13778.80 TCPU 13723.81

TTTTTTTTTTTTTTTTTTTTTTTTTTTTTTTTTTTT SHELLXN TELAPSE 13869.83 TCPU 13814.09

TTTTTTTTTTTTTTTTTTTTTTTTTTTTTTTTTTTT MONMO3 TELAPSE 13877.42 TCPU 13821.62

NUMERICALLY INTEGRATED DENSITY 843.9997701517

TTTTTTTTTTTTTTTTTTTTTTTTTTTTTTTTTTTT NUMDFT TELAPSE 13891.10 TCPU 13835.14

CYC 49 ETOT(AU) -6.638594331138E+03 DETOT 5.65E-07 tst 2.56E-10 PX 8.92E-04

TTTTTTTTTTTTTTTTTTTTTTTTTTTTTTTTTTTT DIIS TELAPSE 13933.18 TCPU 13876.69

DIIS TEST: 0.12772E-07 AT SCF CYCLE 49 - DIIS ACTIVE - HISTORY: 49 CYCLES

TTTTTTTTTTTTTTTTTTTTTTTTTTTTTTTTTTTT FDIK TELAPSE 14041.36 TCPU 13983.78

INSULATING STATE

TOP OF VALENCE BANDS - BAND 422; K 1; EIG -2.7699764E-01 AU

BOTTOM OF VIRTUAL BANDS - BAND 423; K 2; EIG 1.7694936E-03 AU  
INDIRECT ENERGY BAND GAP: 7.5856 eV  
BOTTOM OF VIRTUAL BANDS - BAND 423; K 1; EIG 1.8593235E-03 AU  
TTTTTTTTTTTTTTTTTTTTTTTTTTTTTTTTTTTT PDIG TELAPSE 14047.08 TCPU 13989.44  
TTTTTTTTTTTTTTTTTTTTTTTTTTTTTTTTTTTT MOQGAD TELAPSE 14047.14 TCPU 13989.50  
TTTTTTTTTTTTTTTTTTTTTTTTTTTTTTTTTTTT SHELLXN TELAPSE 14137.57 TCPU 14079.77  
TTTTTTTTTTTTTTTTTTTTTTTTTTTTTTTTTTTT MONMO3 TELAPSE 14145.85 TCPU 14088.01  
NUMERICALLY INTEGRATED DENSITY 843.9997701571  
TTTTTTTTTTTTTTTTTTTTTTTTTTTTTTTTTTTT NUMDFT TELAPSE 14159.53 TCPU 14101.62  
CYC 50 ETOT(AU) -6.638594322566E+03 DETOT 8.57E-06 tst 6.73E-08 PX 1.17E-02  
TTTTTTTTTTTTTTTTTTTTTTTTTTTTTTTTTTTT DIIS TELAPSE 14200.32 TCPU 14142.22  
DIIS TEST: 0.32457E-07 AT SCF CYCLE 50 - DIIS ACTIVE - HISTORY: 50 CYCLES  
TTTTTTTTTTTTTTTTTTTTTTTTTTTTTTTTTTTT FDIK TELAPSE 14322.39 TCPU 14263.92  
INSULATING STATE  
TOP OF VALENCE BANDS - BAND 422; K 1; EIG -2.7699762E-01 AU  
BOTTOM OF VIRTUAL BANDS - BAND 423; K 2; EIG 1.7694755E-03 AU  
INDIRECT ENERGY BAND GAP: 7.5856 eV  
BOTTOM OF VIRTUAL BANDS - BAND 423; K 1; EIG 1.8593048E-03 AU  
TTTTTTTTTTTTTTTTTTTTTTTTTTTTTTTTTTTT PDIG TELAPSE 14328.12 TCPU 14269.60  
TTTTTTTTTTTTTTTTTTTTTTTTTTTTTTTTTTTT MOQGAD TELAPSE 14328.18 TCPU 14269.66  
TTTTTTTTTTTTTTTTTTTTTTTTTTTTTTTTTTTT SHELLXN TELAPSE 14418.66 TCPU 14359.98  
TTTTTTTTTTTTTTTTTTTTTTTTTTTTTTTTTTTT MONMO3 TELAPSE 14426.92 TCPU 14368.23  
NUMERICALLY INTEGRATED DENSITY 843.9997701574  
TTTTTTTTTTTTTTTTTTTTTTTTTTTTTTTTTTTT NUMDFT TELAPSE 14440.66 TCPU 14381.89  
CYC 51 ETOT(AU) -6.638594322512E+03 DETOT 5.42E-08 tst 3.17E-11 PX 2.19E-04  
TTTTTTTTTTTTTTTTTTTTTTTTTTTTTTTTTTTT DIIS TELAPSE 14481.49 TCPU 14422.53  
DIIS TEST: 0.45687E-08 AT SCF CYCLE 51 - DIIS ACTIVE - HISTORY: 51 CYCLES  
TTTTTTTTTTTTTTTTTTTTTTTTTTTTTTTTTTTT FDIK TELAPSE 14591.70 TCPU 14532.42  
INSULATING STATE  
TOP OF VALENCE BANDS - BAND 422; K 1; EIG -2.7699717E-01 AU  
BOTTOM OF VIRTUAL BANDS - BAND 423; K 2; EIG 1.7698818E-03 AU  
INDIRECT ENERGY BAND GAP: 7.5856 eV





TTTTTTTTTTTTTTTTTTTTTTTTTTTTTTTTTTTTTTTT MONMO3 TELAPSE 15796.55 TCPU 15733.77  
 NUMERICALLY INTEGRATED DENSITY 843.9997701673  
 TTTTTTTTTTTTTTTTTTTTTTTTTTTTTTTTTTTTTTTT NUMDFT TELAPSE 15810.28 TCPU 15747.43  
 CYC 56 ETOT(AU) -6.638594319656E+03 DETOT -2.70E-07 tst 1.71E-09 PX 1.56E-03  
 TTTTTTTTTTTTTTTTTTTTTTTTTTTTTTTTTTTTTTTT DIIS TELAPSE 15851.05 TCPU 15788.00  
 DIIS TEST: 0.22226E-08 AT SCF CYCLE 56 - DIIS ACTIVE - HISTORY: 56 CYCLES  
 TTTTTTTTTTTTTTTTTTTTTTTTTTTTTTTTTTTTTTTT FDIK TELAPSE 15961.42 TCPU 15898.06  
 INSULATING STATE  
 TOP OF VALENCE BANDS - BAND 422; K 1; EIG -2.7699638E-01 AU  
 BOTTOM OF VIRTUAL BANDS - BAND 423; K 2; EIG 1.7705067E-03 AU  
 INDIRECT ENERGY BAND GAP: 7.5856 eV  
 BOTTOM OF VIRTUAL BANDS - BAND 423; K 1; EIG 1.8605076E-03 AU  
 TTTTTTTTTTTTTTTTTTTTTTTTTTTTTTTTTTTTTTTT PDIG TELAPSE 15967.15 TCPU 15903.75  
 TTTTTTTTTTTTTTTTTTTTTTTTTTTTTTTTTTTTTTTT MOQGAD TELAPSE 15967.21 TCPU 15903.81  
 TTTTTTTTTTTTTTTTTTTTTTTTTTTTTTTTTTTTTTTT SHELLXN TELAPSE 16057.61 TCPU 15994.06  
 TTTTTTTTTTTTTTTTTTTTTTTTTTTTTTTTTTTTTTTT MONMO3 TELAPSE 16065.90 TCPU 16002.32  
 NUMERICALLY INTEGRATED DENSITY 843.9997701674  
 TTTTTTTTTTTTTTTTTTTTTTTTTTTTTTTTTTTTTTTT NUMDFT TELAPSE 16079.66 TCPU 16016.01  
 CYC 57 ETOT(AU) -6.638594319658E+03 DETOT -2.38E-09 tst 3.09E-12 PX 7.33E-05  
 TTTTTTTTTTTTTTTTTTTTTTTTTTTTTTTTTTTTTTTT DIIS TELAPSE 16120.56 TCPU 16056.71  
 DIIS TEST: 0.73874E-09 AT SCF CYCLE 57 - DIIS ACTIVE - HISTORY: 57 CYCLES  
 TTTTTTTTTTTTTTTTTTTTTTTTTTTTTTTTTTTTTTTT FDIK TELAPSE 16234.21 TCPU 16170.00  
 INSULATING STATE  
 TOP OF VALENCE BANDS - BAND 422; K 1; EIG -2.7699612E-01 AU  
 BOTTOM OF VIRTUAL BANDS - BAND 423; K 2; EIG 1.7703920E-03 AU  
 INDIRECT ENERGY BAND GAP: 7.5856 eV  
 BOTTOM OF VIRTUAL BANDS - BAND 423; K 1; EIG 1.8604578E-03 AU  
 TTTTTTTTTTTTTTTTTTTTTTTTTTTTTTTTTTTTTTTT PDIG TELAPSE 16239.93 TCPU 16175.69  
 TTTTTTTTTTTTTTTTTTTTTTTTTTTTTTTTTTTTTTTT MOQGAD TELAPSE 16239.99 TCPU 16175.75  
 TTTTTTTTTTTTTTTTTTTTTTTTTTTTTTTTTTTTTTTT SHELLXN TELAPSE 16330.50 TCPU 16266.11  
 TTTTTTTTTTTTTTTTTTTTTTTTTTTTTTTTTTTTTTTT MONMO3 TELAPSE 16338.44 TCPU 16274.04  
 NUMERICALLY INTEGRATED DENSITY 843.9997701690

TTTTTTTTTTTTTTTTTTTTTTTTTTTTTTTTTTTTTTTT NUMDFT TELAPSE 16352.19 TCPU 16287.71  
CYC 58 ETOT(AU) -6.638594319780E+03 DETOT -1.22E-07 tst 3.66E-10 PX 8.08E-04  
TTTTTTTTTTTTTTTTTTTTTTTTTTTTTTTTTTTTTTTT DIIS TELAPSE 16394.37 TCPU 16329.72  
DIIS TEST: 0.77657E-09 AT SCF CYCLE 58 - DIIS ACTIVE - HISTORY: 58 CYCLES  
TTTTTTTTTTTTTTTTTTTTTTTTTTTTTTTTTTTTTTTT FDIK TELAPSE 16492.14 TCPU 16427.20  
INSULATING STATE  
TOP OF VALENCE BANDS - BAND 422; K 1; EIG -2.7699611E-01 AU  
BOTTOM OF VIRTUAL BANDS - BAND 423; K 2; EIG 1.7704098E-03 AU  
INDIRECT ENERGY BAND GAP: 7.5856 eV  
BOTTOM OF VIRTUAL BANDS - BAND 423; K 1; EIG 1.8604854E-03 AU  
TTTTTTTTTTTTTTTTTTTTTTTTTTTTTTTTTTTTTTTT PDIG TELAPSE 16497.87 TCPU 16432.88  
TTTTTTTTTTTTTTTTTTTTTTTTTTTTTTTTTTTTTTTT MOQGAD TELAPSE 16497.93 TCPU 16432.94  
TTTTTTTTTTTTTTTTTTTTTTTTTTTTTTTTTTTTTTTT SHELLXN TELAPSE 16588.52 TCPU 16523.38  
TTTTTTTTTTTTTTTTTTTTTTTTTTTTTTTTTTTTTTTT MONMO3 TELAPSE 16596.41 TCPU 16531.26  
NUMERICALLY INTEGRATED DENSITY 843.9997701691  
TTTTTTTTTTTTTTTTTTTTTTTTTTTTTTTTTTTTTTTT NUMDFT TELAPSE 16610.11 TCPU 16544.89  
CYC 59 ETOT(AU) -6.638594319796E+03 DETOT -1.61E-08 tst 1.95E-12 PX 6.49E-05  
TTTTTTTTTTTTTTTTTTTTTTTTTTTTTTTTTTTTTTTT DIIS TELAPSE 16652.96 TCPU 16587.58  
DIIS TEST: 0.44266E-09 AT SCF CYCLE 59 - DIIS ACTIVE - HISTORY: 59 CYCLES  
TTTTTTTTTTTTTTTTTTTTTTTTTTTTTTTTTTTTTTTT FDIK TELAPSE 16769.00 TCPU 16703.25  
INSULATING STATE  
TOP OF VALENCE BANDS - BAND 422; K 1; EIG -2.7699604E-01 AU  
BOTTOM OF VIRTUAL BANDS - BAND 423; K 2; EIG 1.7704261E-03 AU  
INDIRECT ENERGY BAND GAP: 7.5856 eV  
BOTTOM OF VIRTUAL BANDS - BAND 423; K 1; EIG 1.8605312E-03 AU  
TTTTTTTTTTTTTTTTTTTTTTTTTTTTTTTTTTTTTTTT PDIG TELAPSE 16774.89 TCPU 16709.10  
TTTTTTTTTTTTTTTTTTTTTTTTTTTTTTTTTTTTTTTT MOQGAD TELAPSE 16774.96 TCPU 16709.16  
TTTTTTTTTTTTTTTTTTTTTTTTTTTTTTTTTTTTTTTT SHELLXN TELAPSE 16865.37 TCPU 16799.42  
TTTTTTTTTTTTTTTTTTTTTTTTTTTTTTTTTTTTTTTT MONMO3 TELAPSE 16873.46 TCPU 16807.50  
NUMERICALLY INTEGRATED DENSITY 843.9997701697  
TTTTTTTTTTTTTTTTTTTTTTTTTTTTTTTTTTTTTTTT NUMDFT TELAPSE 16887.12 TCPU 16821.09  
CYC 60 ETOT(AU) -6.638594319801E+03 DETOT -4.59E-09 tst 5.51E-11 PX 3.53E-04

TTTTTTTTTTTTTTTTTTTTTTTTTTTTTTTTTTTTTTTT DIIS TELAPSE 16929.95 TCPU 16863.71  
DIIS TEST: 0.43897E-09 AT SCF CYCLE 60 - DIIS ACTIVE - HISTORY: 60 CYCLES  
TTTTTTTTTTTTTTTTTTTTTTTTTTTTTTTTTTTTTTTT FDIK TELAPSE 17020.68 TCPU 16954.18  
INSULATING STATE  
TOP OF VALENCE BANDS - BAND 422; K 1; EIG -2.7699602E-01 AU  
BOTTOM OF VIRTUAL BANDS - BAND 423; K 2; EIG 1.7703983E-03 AU  
INDIRECT ENERGY BAND GAP: 7.5856 eV  
BOTTOM OF VIRTUAL BANDS - BAND 423; K 1; EIG 1.8605075E-03 AU  
TTTTTTTTTTTTTTTTTTTTTTTTTTTTTTTTTTTTTTTT PDIG TELAPSE 17026.44 TCPU 16959.89  
TTTTTTTTTTTTTTTTTTTTTTTTTTTTTTTTTTTTTTTT MOQGAD TELAPSE 17026.51 TCPU 16959.95  
TTTTTTTTTTTTTTTTTTTTTTTTTTTTTTTTTTTTTTTT SHELLXN TELAPSE 17116.84 TCPU 17050.14  
TTTTTTTTTTTTTTTTTTTTTTTTTTTTTTTTTTTTTTTT MONMO3 TELAPSE 17125.62 TCPU 17058.90  
NUMERICALLY INTEGRATED DENSITY 843.9997701698  
TTTTTTTTTTTTTTTTTTTTTTTTTTTTTTTTTTTTTTTT NUMDFT TELAPSE 17139.37 TCPU 17072.59  
CYC 61 ETOT(AU) -6.638594319812E+03 DETOT -1.09E-08 tst 1.29E-12 PX 4.47E-05  
TTTTTTTTTTTTTTTTTTTTTTTTTTTTTTTTTTTTTTTT DIIS TELAPSE 17180.92 TCPU 17113.95  
DIIS TEST: 0.30423E-09 AT SCF CYCLE 61 - DIIS ACTIVE - HISTORY: 61 CYCLES  
TTTTTTTTTTTTTTTTTTTTTTTTTTTTTTTTTTTTTTTT FDIK TELAPSE 17280.36 TCPU 17213.10  
INSULATING STATE  
TOP OF VALENCE BANDS - BAND 422; K 1; EIG -2.7699601E-01 AU  
BOTTOM OF VIRTUAL BANDS - BAND 423; K 2; EIG 1.7704175E-03 AU  
INDIRECT ENERGY BAND GAP: 7.5856 eV  
BOTTOM OF VIRTUAL BANDS - BAND 423; K 1; EIG 1.8605401E-03 AU  
TTTTTTTTTTTTTTTTTTTTTTTTTTTTTTTTTTTTTTTT PDIG TELAPSE 17286.11 TCPU 17218.81  
TTTTTTTTTTTTTTTTTTTTTTTTTTTTTTTTTTTTTTTT MOQGAD TELAPSE 17286.17 TCPU 17218.87  
TTTTTTTTTTTTTTTTTTTTTTTTTTTTTTTTTTTTTTTT SHELLXN TELAPSE 17376.30 TCPU 17308.85  
TTTTTTTTTTTTTTTTTTTTTTTTTTTTTTTTTTTTTTTT MONMO3 TELAPSE 17385.16 TCPU 17317.68  
NUMERICALLY INTEGRATED DENSITY 843.9997701701  
TTTTTTTTTTTTTTTTTTTTTTTTTTTTTTTTTTTTTTTT NUMDFT TELAPSE 17398.89 TCPU 17331.34  
CYC 62 ETOT(AU) -6.638594319816E+03 DETOT -4.49E-09 tst 8.60E-12 PX 1.36E-04  
TTTTTTTTTTTTTTTTTTTTTTTTTTTTTTTTTTTTTTTT DIIS TELAPSE 17440.92 TCPU 17373.20  
DIIS TEST: 0.31080E-09 AT SCF CYCLE 62 - DIIS ACTIVE - HISTORY: 62 CYCLES

TTTTTTTTTTTTTTTTTTTTTTTTTTTTTTTTTTTTTTTT FDIK TELAPSE 17534.64 TCPU 17466.63  
INSULATING STATE  
TOP OF VALENCE BANDS - BAND 422; K 1; EIG -2.7699600E-01 AU  
BOTTOM OF VIRTUAL BANDS - BAND 423; K 2; EIG 1.7704057E-03 AU  
INDIRECT ENERGY BAND GAP: 7.5856 eV  
BOTTOM OF VIRTUAL BANDS - BAND 423; K 1; EIG 1.8605295E-03 AU  
TTTTTTTTTTTTTTTTTTTTTTTTTTTTTTTTTTTTTTTT PDIG TELAPSE 17540.53 TCPU 17472.49  
TTTTTTTTTTTTTTTTTTTTTTTTTTTTTTTTTTTTTTTT MOQGAD TELAPSE 17540.59 TCPU 17472.55  
TTTTTTTTTTTTTTTTTTTTTTTTTTTTTTTTTTTTTTTT SHELLXN TELAPSE 17630.86 TCPU 17562.68  
TTTTTTTTTTTTTTTTTTTTTTTTTTTTTTTTTTTTTTTT MONMO3 TELAPSE 17639.56 TCPU 17571.35  
NUMERICALLY INTEGRATED DENSITY 843.9997701701  
TTTTTTTTTTTTTTTTTTTTTTTTTTTTTTTTTTTTTTTT NUMDFT TELAPSE 17653.34 TCPU 17585.06  
CYC 63 ETOT(AU) -6.638594319823E+03 DETOT -6.19E-09 tst 3.99E-14 PX 9.24E-06  
TTTTTTTTTTTTTTTTTTTTTTTTTTTTTTTTTTTTTTTT DIIS TELAPSE 17696.17 TCPU 17627.64  
DIIS TEST: 0.27451E-09 AT SCF CYCLE 63 - DIIS ACTIVE - HISTORY: 63 CYCLES  
TTTTTTTTTTTTTTTTTTTTTTTTTTTTTTTTTTTTTTTT FDIK TELAPSE 17789.38 TCPU 17720.58  
INSULATING STATE  
TOP OF VALENCE BANDS - BAND 422; K 1; EIG -2.7699599E-01 AU  
BOTTOM OF VIRTUAL BANDS - BAND 423; K 2; EIG 1.7703962E-03 AU  
INDIRECT ENERGY BAND GAP: 7.5856 eV  
BOTTOM OF VIRTUAL BANDS - BAND 423; K 1; EIG 1.8605244E-03 AU  
TTTTTTTTTTTTTTTTTTTTTTTTTTTTTTTTTTTTTTTT PDIG TELAPSE 17795.26 TCPU 17726.42  
TTTTTTTTTTTTTTTTTTTTTTTTTTTTTTTTTTTTTTTT MOQGAD TELAPSE 17795.32 TCPU 17726.48  
TTTTTTTTTTTTTTTTTTTTTTTTTTTTTTTTTTTTTTTT SHELLXN TELAPSE 17885.67 TCPU 17816.68  
TTTTTTTTTTTTTTTTTTTTTTTTTTTTTTTTTTTTTTTT MONMO3 TELAPSE 17894.30 TCPU 17825.30  
NUMERICALLY INTEGRATED DENSITY 843.9997701702  
TTTTTTTTTTTTTTTTTTTTTTTTTTTTTTTTTTTTTTTT NUMDFT TELAPSE 17908.05 TCPU 17838.98  
CYC 64 ETOT(AU) -6.638594319824E+03 DETOT -1.47E-09 tst 5.63E-13 PX 3.85E-05  
TTTTTTTTTTTTTTTTTTTTTTTTTTTTTTTTTTTTTTTT DIIS TELAPSE 17948.79 TCPU 17879.47  
DIIS TEST: 0.22263E-09 AT SCF CYCLE 64 - DIIS ACTIVE - HISTORY: 63 CYCLES  
TTTTTTTTTTTTTTTTTTTTTTTTTTTTTTTTTTTTTTTT FDIK TELAPSE 18046.08 TCPU 17976.49  
INSULATING STATE



TOP OF VALENCE BANDS - BAND 422; K 1; EIG -2.7699598E-01 AU  
BOTTOM OF VIRTUAL BANDS - BAND 423; K 2; EIG 1.7704120E-03 AU  
INDIRECT ENERGY BAND GAP: 7.5856 eV  
BOTTOM OF VIRTUAL BANDS - BAND 423; K 1; EIG 1.8605464E-03 AU  
TTTTTTTTTTTTTTTTTTTTTTTTTTTTTTTTTTTT PDIG TELAPSE 18051.87 TCPU 17982.23  
TTTTTTTTTTTTTTTTTTTTTTTTTTTTTTTTTTTT MOQGAD TELAPSE 18051.93 TCPU 17982.29  
TTTTTTTTTTTTTTTTTTTTTTTTTTTTTTTTTTTT SHELLXN TELAPSE 18141.87 TCPU 18072.07  
TTTTTTTTTTTTTTTTTTTTTTTTTTTTTTTTTTTT MONMO3 TELAPSE 18150.26 TCPU 18080.43  
NUMERICALLY INTEGRATED DENSITY 843.9997701703  
TTTTTTTTTTTTTTTTTTTTTTTTTTTTTTTTTTTT NUMDFT TELAPSE 18164.03 TCPU 18094.12  
CYC 65 ETOT(AU) -6.638594319814E+03 DETOT 9.68E-09 tst 2.40E-12 PX 7.19E-05  
TTTTTTTTTTTTTTTTTTTTTTTTTTTTTTTTTTTT DIIS TELAPSE 18207.16 TCPU 18137.09  
DIIS TEST: 0.22880E-09 AT SCF CYCLE 65 - DIIS ACTIVE - HISTORY: 64 CYCLES  
TTTTTTTTTTTTTTTTTTTTTTTTTTTTTTTTTTTT FDIK TELAPSE 18273.59 TCPU 18203.32  
INSULATING STATE  
TOP OF VALENCE BANDS - BAND 422; K 1; EIG -2.7699598E-01 AU  
BOTTOM OF VIRTUAL BANDS - BAND 423; K 2; EIG 1.7704083E-03 AU  
INDIRECT ENERGY BAND GAP: 7.5856 eV  
BOTTOM OF VIRTUAL BANDS - BAND 423; K 1; EIG 1.8605433E-03 AU  
TTTTTTTTTTTTTTTTTTTTTTTTTTTTTTTTTTTT PDIG TELAPSE 18279.35 TCPU 18209.05  
TTTTTTTTTTTTTTTTTTTTTTTTTTTTTTTTTTTT MOQGAD TELAPSE 18279.42 TCPU 18209.12  
TTTTTTTTTTTTTTTTTTTTTTTTTTTTTTTTTTTT SHELLXN TELAPSE 18369.60 TCPU 18299.16  
TTTTTTTTTTTTTTTTTTTTTTTTTTTTTTTTTTTT MONMO3 TELAPSE 18378.14 TCPU 18307.69  
NUMERICALLY INTEGRATED DENSITY 843.9997701703  
TTTTTTTTTTTTTTTTTTTTTTTTTTTTTTTTTTTT NUMDFT TELAPSE 18391.91 TCPU 18321.38  
CYC 66 ETOT(AU) -6.638594319816E+03 DETOT -1.54E-09 tst 2.17E-14 PX 4.87E-06  
TTTTTTTTTTTTTTTTTTTTTTTTTTTTTTTTTTTT DIIS TELAPSE 18433.72 TCPU 18363.01  
DIIS TEST: 0.21647E-09 AT SCF CYCLE 66 - DIIS ACTIVE - HISTORY: 65 CYCLES  
TTTTTTTTTTTTTTTTTTTTTTTTTTTTTTTTTTTT FDIK TELAPSE 18506.74 TCPU 18435.83  
INSULATING STATE  
TOP OF VALENCE BANDS - BAND 422; K 1; EIG -2.7699598E-01 AU  
BOTTOM OF VIRTUAL BANDS - BAND 423; K 2; EIG 1.7704045E-03 AU

INDIRECT ENERGY BAND GAP: 7.5856 eV

BOTTOM OF VIRTUAL BANDS - BAND 423; K 1; EIG 1.8605399E-03 AU

TTTTTTTTTTTTTTTTTTTTTTTTTTTTTTTTTTTT PDIG TELAPSE 18512.48 TCPU 18441.55

TTTTTTTTTTTTTTTTTTTTTTTTTTTTTTTTTTTT MOQGAD TELAPSE 18512.54 TCPU 18441.61

TTTTTTTTTTTTTTTTTTTTTTTTTTTTTTTTTTTT SHELLXN TELAPSE 18602.99 TCPU 18531.91

TTTTTTTTTTTTTTTTTTTTTTTTTTTTTTTTTTTT MONMO3 TELAPSE 18610.99 TCPU 18539.90

NUMERICALLY INTEGRATED DENSITY 843.9997701704

TTTTTTTTTTTTTTTTTTTTTTTTTTTTTTTTTTTT NUMDFT TELAPSE 18624.69 TCPU 18553.52

CYC 67 ETOT(AU) -6.638594319816E+03 DETOT -4.81E-10 tst 1.03E-13 PX 1.13E-05

TTTTTTTTTTTTTTTTTTTTTTTTTTTTTTTTTTTT DIIS TELAPSE 18666.97 TCPU 18595.62

DIIS TEST: 0.21963E-09 AT SCF CYCLE 67 - DIIS ACTIVE - HISTORY: 66 CYCLES

TTTTTTTTTTTTTTTTTTTTTTTTTTTTTTTTTTTT FDIK TELAPSE 18713.64 TCPU 18642.14

INSULATING STATE

TOP OF VALENCE BANDS - BAND 422; K 1; EIG -2.7699598E-01 AU

BOTTOM OF VIRTUAL BANDS - BAND 423; K 2; EIG 1.7704045E-03 AU

INDIRECT ENERGY BAND GAP: 7.5856 eV

BOTTOM OF VIRTUAL BANDS - BAND 423; K 1; EIG 1.8605401E-03 AU

TTTTTTTTTTTTTTTTTTTTTTTTTTTTTTTTTTTT PDIG TELAPSE 18719.39 TCPU 18647.85

TTTTTTTTTTTTTTTTTTTTTTTTTTTTTTTTTTTT MOQGAD TELAPSE 18719.45 TCPU 18647.91

TTTTTTTTTTTTTTTTTTTTTTTTTTTTTTTTTTTT SHELLXN TELAPSE 18810.26 TCPU 18738.57

TTTTTTTTTTTTTTTTTTTTTTTTTTTTTTTTTTTT MONMO3 TELAPSE 18818.24 TCPU 18746.53

NUMERICALLY INTEGRATED DENSITY 843.9997701704

TTTTTTTTTTTTTTTTTTTTTTTTTTTTTTTTTTTT NUMDFT TELAPSE 18831.98 TCPU 18760.19

CYC 68 ETOT(AU) -6.638594319817E+03 DETOT -7.78E-10 tst 2.60E-15 PX 9.21E-07

TTTTTTTTTTTTTTTTTTTTTTTTTTTTTTTTTTTT DIIS TELAPSE 18874.29 TCPU 18802.32

DIIS TEST: 0.21752E-09 AT SCF CYCLE 68 - DIIS ACTIVE - HISTORY: 67 CYCLES

TTTTTTTTTTTTTTTTTTTTTTTTTTTTTTTTTTTT FDIK TELAPSE 18932.51 TCPU 18860.37

INSULATING STATE

TOP OF VALENCE BANDS - BAND 422; K 1; EIG -2.7699598E-01 AU

BOTTOM OF VIRTUAL BANDS - BAND 423; K 2; EIG 1.7704038E-03 AU

INDIRECT ENERGY BAND GAP: 7.5856 eV

BOTTOM OF VIRTUAL BANDS - BAND 423; K 1; EIG 1.8605396E-03 AU











INSULATING STATE

TOP OF VALENCE BANDS - BAND 422; K 1; EIG -2.7699596E-01 AU

BOTTOM OF VIRTUAL BANDS - BAND 423; K 2; EIG 1.7703927E-03 AU

INDIRECT ENERGY BAND GAP: 7.5856 eV

BOTTOM OF VIRTUAL BANDS - BAND 423; K 1; EIG 1.8605354E-03 AU

TTTTTTTTTTTTTTTTTTTTTTTTTTTTTTTTTTTT PDIG TELAPSE 21336.48 TCPU 21256.99

TTTTTTTTTTTTTTTTTTTTTTTTTTTTTTTTTTTT MOQGAD TELAPSE 21336.54 TCPU 21257.05

TTTTTTTTTTTTTTTTTTTTTTTTTTTTTTTTTTTT SHELLXN TELAPSE 21427.63 TCPU 21347.98

TTTTTTTTTTTTTTTTTTTTTTTTTTTTTTTTTTTT MONMO3 TELAPSE 21435.76 TCPU 21356.10

NUMERICALLY INTEGRATED DENSITY 843.9997701705

TTTTTTTTTTTTTTTTTTTTTTTTTTTTTTTTTTTT NUMDFT TELAPSE 21449.61 TCPU 21369.88

CYC 80 ETOT(AU) -6.638594319815E+03 DETOT -5.90E-10 tst 2.49E-15 PX 1.40E-06

TTTTTTTTTTTTTTTTTTTTTTTTTTTTTTTTTTTT DIIS TELAPSE 21491.75 TCPU 21411.82

DIIS TEST: 0.13946E-09 AT SCF CYCLE 80 - DIIS ACTIVE - HISTORY: 78 CYCLES

TTTTTTTTTTTTTTTTTTTTTTTTTTTTTTTTTTTT FDIK TELAPSE 21524.56 TCPU 21444.54

INSULATING STATE

TOP OF VALENCE BANDS - BAND 422; K 1; EIG -2.7699596E-01 AU

BOTTOM OF VIRTUAL BANDS - BAND 423; K 2; EIG 1.7703927E-03 AU

INDIRECT ENERGY BAND GAP: 7.5856 eV

BOTTOM OF VIRTUAL BANDS - BAND 423; K 1; EIG 1.8605355E-03 AU

TTTTTTTTTTTTTTTTTTTTTTTTTTTTTTTTTTTT PDIG TELAPSE 21530.28 TCPU 21450.23

TTTTTTTTTTTTTTTTTTTTTTTTTTTTTTTTTTTT MOQGAD TELAPSE 21530.35 TCPU 21450.29

TTTTTTTTTTTTTTTTTTTTTTTTTTTTTTTTTTTT SHELLXN TELAPSE 21621.19 TCPU 21540.99

TTTTTTTTTTTTTTTTTTTTTTTTTTTTTTTTTTTT MONMO3 TELAPSE 21629.47 TCPU 21549.26

NUMERICALLY INTEGRATED DENSITY 843.9997701705

TTTTTTTTTTTTTTTTTTTTTTTTTTTTTTTTTTTT NUMDFT TELAPSE 21643.13 TCPU 21562.85

CYC 81 ETOT(AU) -6.638594319815E+03 DETOT 0.00E+00 tst 1.76E-15 PX 0.00E+00

TTTTTTTTTTTTTTTTTTTTTTTTTTTTTTTTTTTT DIIS TELAPSE 21685.29 TCPU 21604.80

DIIS TEST: 0.13946E-09 AT SCF CYCLE 81 - DIIS ACTIVE - HISTORY: 79 CYCLES

TTTTTTTTTTTTTTTTTTTTTTTTTTTTTTTTTTTT FDIK TELAPSE 21721.60 TCPU 21641.02

INSULATING STATE

TOP OF VALENCE BANDS - BAND 422; K 1; EIG -2.7699596E-01 AU



BOTTOM OF VIRTUAL BANDS - BAND 423; K 2; EIG 1.7703928E-03 AU  
INDIRECT ENERGY BAND GAP: 7.5856 eV  
BOTTOM OF VIRTUAL BANDS - BAND 423; K 1; EIG 1.8605357E-03 AU  
TTTTTTTTTTTTTTTTTTTTTTTTTTTTTTTTTTTT PDIG TELAPSE 21727.34 TCPU 21646.73  
TTTTTTTTTTTTTTTTTTTTTTTTTTTTTTTTTTTT MOQGAD TELAPSE 21727.40 TCPU 21646.79  
TTTTTTTTTTTTTTTTTTTTTTTTTTTTTTTTTTTT SHELLXN TELAPSE 21818.35 TCPU 21737.60  
::: PSEUDO TOTAL ENERGY -6.0906605428363E+03  
::: VIRIAL COEFFICIENT 9.1476348179774E-01  
TTTTTTTTTTTTTTTTTTTTTTTTTTTTTTTTTTTT MONMO3 TELAPSE 21826.62 TCPU 21745.84  
NUMERICALLY INTEGRATED DENSITY 843.9997701705  
TTTTTTTTTTTTTTTTTTTTTTTTTTTTTTTTTTTT NUMDFT TELAPSE 21840.29 TCPU 21759.44  
CYC 82 ETOT(AU) -6.638594319816E+03 DETOT -4.71E-10 tst 1.76E-15 PX 0.00E+00  
  
== SCF ENDED - CONVERGENCE ON ENERGY E(AU) -6.6385943198156E+03 CYCLES 82  
  
ENERGY EXPRESSION=HARTREE+FOCK EXCH\*0.00000+(CAM-B3LYP EXCH)\*1.00000+LYP CORR  
  
TOTAL ENERGY(DFT)(AU)( 82) -6.6385943198156E+03 DE-4.7E-10 tester 1.8E-15  
TTTTTTTTTTTTTTTTTTTTTTTTTTTTTTTTTTTT EDFT TELAPSE 21840.29 TCPU 21759.44  
  
\*\*\*\*\*  
\* FORCE CALCULATION \*  
\*\*\*\*\*  
TTTTTTTTTTTTTTTTTTTTTTTTTTTTTTTTTTTT NUMDFG TELAPSE 21924.86 TCPU 21843.85  
INFORMATION \*\*\*\* GENPOG \*\*\*\* BIPO BUFFER LENGTH (WORDS) = 4831200  
TTTTTTTTTTTTTTTTTTTTTTTTTTTTTTTTTTTT SHELXG TELAPSE 22430.93 TCPU 22349.11  
  
CARTESIAN FORCES IN HARTREE/BOHR (ANALYTICAL)  
ATOM X Y Z

1 253 -1.950306823595E-05 -2.625524393618E-05 2.154910836438E-07  
2 253 1.950306826881E-05 -2.625524394440E-05 -2.154911000751E-07  
3 253 1.950296920672E-05 2.625524527788E-05 -2.154958944622E-07  
4 253 -1.950296924136E-05 2.625524533972E-05 2.154958682610E-07  
5 253 1.381947026147E-06 2.025646010928E-06 -1.649841983919E-06  
6 253 -1.381946963974E-06 2.025646014925E-06 1.649841941287E-06  
7 253 -1.381940693435E-06 -2.025649536552E-06 1.649779822976E-06  
8 253 1.381940699652E-06 -2.025649521009E-06 -1.649779837187E-06  
9 7 7.398144956650E-06 -9.194354319120E-06 3.542353250285E-06  
10 7 -7.398144981963E-06 -9.194354320563E-06 -3.542353252950E-06  
11 7 -7.398160732475E-06 9.194362376230E-06 -3.542350019314E-06  
12 7 7.398160745797E-06 9.194362348919E-06 3.542350016428E-06  
13 7 1.024052889598E-06 -6.462358883561E-06 -5.157099656206E-06  
14 7 -1.024052902920E-06 -6.462358926790E-06 5.157099676190E-06  
15 7 -1.024060527932E-06 6.462360489734E-06 5.157087834995E-06  
16 7 1.024060519939E-06 6.462360498311E-06 -5.157087850094E-06  
17 8 3.890326230049E-06 -2.238157392753E-08 -7.275942218499E-06  
18 8 -3.890326230938E-06 -2.238158192114E-08 7.275942232710E-06  
19 8 -3.890331949918E-06 2.238060936577E-08 7.275956726005E-06  
20 8 3.890331951695E-06 2.238063423476E-08 -7.275956740216E-06  
21 8 1.109331078419E-05 -5.169180990805E-06 -4.097947682524E-06  
22 8 -1.109331079285E-05 -5.169180996134E-06 4.097947689630E-06  
23 8 -1.109333441307E-05 5.169180981035E-06 4.097929103608E-06  
24 8 1.109333441174E-05 5.169180989029E-06 -4.097929107161E-06  
25 6 -5.979539239309E-07 1.074689031988E-05 -7.405854721476E-06  
26 6 5.979539217105E-07 1.074689031277E-05 7.405854716591E-06  
27 6 5.979356265673E-07 -1.074689531411E-05 7.405850083853E-06  
28 6 -5.979356256791E-07 -1.074689530167E-05 -7.405850079856E-06  
29 1 4.670986643696E-06 9.736587182618E-06 5.315468960987E-06  
30 1 -4.670986639033E-06 9.736587178177E-06 -5.315468960321E-06  
31 1 -4.670989981470E-06 -9.736588040155E-06 -5.315471734546E-06  
32 1 4.670989981470E-06 -9.736588036158E-06 5.315471734990E-06

33 1 -1.654962729802E-05 -7.005311839503E-07 -8.925779456576E-06  
34 1 1.654962729808E-05 -7.005311895014E-07 8.925779455521E-06  
35 1 1.654962387793E-05 7.005288291673E-07 8.925779348329E-06  
36 1 -1.654962388026E-05 7.005288296114E-07 -8.925779348357E-06  
37 6 1.880781815400E-06 -2.572910162346E-05 4.858804778074E-06  
38 6 -1.880781807406E-06 -2.572910164300E-05 -4.858804768304E-06  
39 6 -1.880792579012E-06 2.572910277721E-05 -4.858801589069E-06  
40 6 1.880792547260E-06 2.572910280429E-05 4.858801587737E-06  
41 6 -2.916067797454E-06 -8.800705165513E-06 1.103103793021E-05  
42 6 2.916067809444E-06 -8.800705168843E-06 -1.103103792843E-05  
43 6 2.916047151746E-06 8.800715152635E-06 -1.103104041089E-05  
44 6 -2.916047142421E-06 8.800715146418E-06 1.103104040201E-05  
45 1 5.817888383162E-07 1.478433777624E-06 -9.986136839668E-07  
46 1 -5.817888372867E-07 1.478433780400E-06 9.986136866313E-07  
47 1 -5.817921205336E-07 -1.478431482682E-06 9.986120097505E-07  
48 1 5.817921216377E-07 -1.478431485236E-06 -9.986120115268E-07  
49 1 7.835398716516E-06 5.569980775721E-06 -3.151752824726E-06  
50 1 -7.835398717182E-06 5.569980776166E-06 3.151752823172E-06  
51 1 -7.835403684542E-06 -5.569978213105E-06 3.151752387964E-06  
52 1 7.835403687650E-06 -5.569978214881E-06 -3.151752388630E-06  
53 6 4.616639194821E-06 2.393765603537E-05 -1.920162732105E-05  
54 6 -4.616639204813E-06 2.393765604258E-05 1.920162733615E-05  
55 6 -4.616658146772E-06 -2.393765283182E-05 1.920162203550E-05  
56 6 4.616658150769E-06 -2.393765284159E-05 -1.920162204438E-05  
57 6 2.214053066094E-05 -1.879536679983E-05 -1.079277811744E-05  
58 6 -2.214053066929E-05 -1.879536678651E-05 1.079277811122E-05  
59 6 -2.214056087388E-05 1.879536789229E-05 1.079277661553E-05  
60 6 2.214056087563E-05 1.879536788252E-05 -1.079277660487E-05  
61 1 -5.068530560814E-07 1.215723107739E-06 1.457063217414E-06  
62 1 5.068530539720E-07 1.215723113734E-06 -1.457063218080E-06  
63 1 5.068481889747E-07 -1.215723448800E-06 -1.457062463794E-06  
64 1 -5.068481845338E-07 -1.215723448356E-06 1.457062462684E-06

65 1 6.780504759885E-07 3.374312866899E-06 5.939687084955E-06  
66 1 -6.780504735460E-07 3.374312867677E-06 -5.939687084622E-06  
67 1 -6.780570143139E-07 -3.374313416682E-06 -5.939689498247E-06  
68 1 6.780570123155E-07 -3.374313418458E-06 5.939689496692E-06  
69 1 -3.698896359161E-05 1.601021550263E-05 7.337199400936E-06  
70 1 3.698896359181E-05 1.601021549991E-05 -7.337199407154E-06  
71 1 3.698895857257E-05 -1.601021447906E-05 -7.337198337787E-06  
72 1 -3.698895857090E-05 -1.601021447717E-05 7.337198342228E-06  
73 6 -7.944286878958E-05 -4.136102519214E-05 1.258683837746E-05  
74 6 7.944286877726E-05 -4.136102518104E-05 -1.258683837296E-05  
75 6 7.944285455963E-05 4.136102596008E-05 -1.258683995020E-05  
76 6 -7.944285455308E-05 4.136102595909E-05 1.258683995897E-05  
77 6 4.551926117813E-06 1.766637272360E-05 -3.712443469261E-05  
78 6 -4.551926114260E-06 1.766637274292E-05 3.712443470505E-05  
79 6 -4.551935250952E-06 -1.766636775691E-05 3.712444418902E-05  
80 6 4.551935259833E-06 -1.766636777023E-05 -3.712444419524E-05  
81 1 -1.251571783767E-06 -7.348108335248E-06 2.547597035857E-06  
82 1 1.251571783767E-06 -7.348108332139E-06 -2.547597034969E-06  
83 1 1.251569610838E-06 7.348109901106E-06 -2.547593625196E-06  
84 1 -1.251569616834E-06 7.348109892780E-06 2.547593623670E-06  
85 1 -7.797671683907E-07 -9.939086995647E-07 -2.882501700441E-06  
86 1 7.797671656151E-07 -9.939086966781E-07 2.882501699331E-06  
87 1 7.797668299947E-07 9.939091839550E-07 2.882503401969E-06  
88 1 -7.797668276632E-07 9.939091853983E-07 -2.882503405743E-06  
89 6 1.833300245468E-05 2.385081498646E-05 4.089753294334E-05  
90 6 -1.833300244602E-05 2.385081499318E-05 -4.089753292646E-05  
91 6 -1.833300912413E-05 -2.385081397699E-05 -4.089752895542E-05  
92 6 1.833300911891E-05 -2.385081397349E-05 4.089752894743E-05  
93 6 -4.135213809764E-06 3.983404494923E-06 -2.430039854939E-05  
94 6 4.135213806489E-06 3.983404495811E-06 2.430039854939E-05  
95 6 4.135212055834E-06 -3.983402671048E-06 2.430040939672E-05  
96 6 -4.135212051892E-06 -3.983402680596E-06 -2.430040940649E-05

97 1 2.124307793494E-05 8.223459662560E-06 6.740611061762E-06  
98 1 -2.124307793361E-05 8.223459663448E-06 -6.740611059763E-06  
99 1 -2.124307782325E-05 -8.223458541567E-06 -6.740609409750E-06  
100 1 2.124307781903E-05 -8.223458539458E-06 6.740609410860E-06  
101 1 -4.976540919355E-06 -4.983529418578E-06 -4.848117899359E-07  
102 1 4.976540918578E-06 -4.983529419911E-06 4.848117898248E-07  
103 1 4.976540860069E-06 4.983529674929E-06 4.848139328884E-07  
104 1 -4.976540859847E-06 4.983529672931E-06 -4.848139315561E-07  
105 1 4.022707672524E-07 -5.201158862378E-06 1.461238650080E-07  
106 1 -4.022707683071E-07 -5.201158859047E-06 -1.461238665623E-07  
107 1 -4.022709975682E-07 5.201158451040E-06 -1.461213456899E-07  
108 1 4.022709985119E-07 5.201158452595E-06 1.461213432474E-07  
109 6 -1.386738759379E-07 1.575512430296E-06 -5.435081540384E-07  
110 6 1.386738661679E-07 1.575512431407E-06 5.435081602556E-07  
111 6 1.386618757593E-07 -1.575509266161E-06 5.434947416560E-07  
112 6 -1.386618606602E-07 -1.575509269491E-06 -5.434947363270E-07  
113 1 -2.228064897469E-06 1.588283280840E-06 -6.506105219434E-07  
114 1 2.228064895249E-06 1.588283282505E-06 6.506105211107E-07  
115 1 2.228064331256E-06 -1.588283170983E-06 6.506075506674E-07  
116 1 -2.228064329479E-06 -1.588283172149E-06 -6.506075521384E-07  
117 1 -5.155702045401E-06 -3.012159403681E-06 -6.185208751841E-07  
118 1 5.155702044290E-06 -3.012159399574E-06 6.185208820675E-07  
119 1 5.155698387438E-06 3.012160180171E-06 6.185180903007E-07  
120 1 -5.155698385662E-06 3.012160181171E-06 -6.185180889684E-07  
121 6 -2.344860789094E-06 -6.144669861818E-08 7.460549173999E-07  
122 6 2.344860791759E-06 -6.144669173480E-08 -7.460549049654E-07  
123 6 2.344859414194E-06 6.144502610883E-08 -7.460580775387E-07  
124 6 -2.344859404424E-06 6.144503909844E-08 7.460580846441E-07  
125 1 5.978345952173E-07 -9.321031767540E-07 1.955840655654E-06  
126 1 -5.978345941626E-07 -9.321031825271E-07 -1.955840648105E-06  
127 1 -5.978343416424E-07 9.321020303377E-07 -1.955840991386E-06  
128 1 5.978343433910E-07 9.321020344455E-07 1.955840987833E-06

129 1 -6.583017522210E-07 1.478891818119E-06 8.321648814480E-08  
130 1 6.583017495565E-07 1.478891820117E-06 -8.321648881093E-08  
131 1 6.583022822415E-07 -1.478892013851E-06 -8.321734412675E-08  
132 1 -6.583022791329E-07 -1.478892015183E-06 8.321734457084E-08  
133 6 3.575611506546E-06 9.357876289418E-06 -7.909827093755E-06  
134 6 -3.575611501994E-06 9.357876305405E-06 7.909827099084E-06  
135 6 -3.575620257434E-06 -9.357875862426E-06 7.909814444318E-06  
136 6 3.575620264984E-06 -9.357875867311E-06 -7.909814447871E-06  
137 6 -7.185990543501E-06 1.391399872830E-05 7.091441597940E-06  
138 6 7.185990525738E-06 1.391399871653E-05 -7.091441593055E-06  
139 6 7.185986770519E-06 -1.391399969664E-05 -7.091454628405E-06  
140 6 -7.185986769187E-06 -1.391399969597E-05 7.091454629737E-06  
141 1 1.975490048212E-06 2.029146505267E-06 3.783849678030E-08  
142 1 -1.975490053319E-06 2.029146501936E-06 -3.783849789052E-08  
143 1 -1.975490120154E-06 -2.029147570082E-06 -3.784129165574E-08  
144 1 1.975490121264E-06 -2.029147569305E-06 3.784129143369E-08  
145 1 -2.020869835029E-06 -1.449792173713E-05 5.830710752691E-06  
146 1 2.020869833363E-06 -1.449792173736E-05 -5.830710749742E-06  
147 1 2.020869082631E-06 1.449792194208E-05 -5.830712345986E-06  
148 1 -2.020869083630E-06 1.449792194230E-05 5.830712345757E-06  
149 8 -6.619609609615E-05 7.207540713594E-06 2.315764500693E-05  
150 8 6.619609610681E-05 7.207540749121E-06 -2.315764500338E-05  
151 8 6.619606522573E-05 -7.207544095778E-06 -2.315763975425E-05  
152 8 -6.619606522218E-05 -7.207544113541E-06 2.315763974625E-05  
153 1 4.674933865578E-06 -9.340547217240E-06 5.154969039189E-06  
154 1 -4.674933867577E-06 -9.340547219239E-06 -5.154969043408E-06  
155 1 -4.674937003291E-06 9.340546528458E-06 -5.154967081422E-06  
156 1 4.674936996185E-06 9.340546530012E-06 5.154967082532E-06  
157 8 1.185455400083E-04 3.082395466469E-05 -4.649288569780E-05  
158 8 -1.185455400234E-04 3.082395467402E-05 4.649288568892E-05  
159 8 -1.185455495412E-04 -3.082395543741E-05 4.649287429004E-05  
160 8 1.185455495420E-04 -3.082395542942E-05 -4.649287429004E-05

161 8 1.632044089384E-05 1.162799303822E-05 -3.808316112242E-06  
162 8 -1.632044087430E-05 1.162799304266E-05 3.808316117571E-06  
163 8 -1.632045774169E-05 -1.162799912180E-05 3.808290090390E-06  
164 8 1.632045773725E-05 -1.162799914134E-05 -3.808290092167E-06  
165 1 -2.541801623235E-05 -1.452070477903E-05 2.070230650741E-05  
166 1 2.541801622680E-05 -1.452070478836E-05 -2.070230649875E-05  
167 1 2.541801349254E-05 1.452070420060E-05 -2.070230936257E-05  
168 1 -2.541801348799E-05 1.452070421326E-05 2.070230936568E-05  
169 8 7.837869702931E-06 -4.203429987859E-06 1.020658745166E-05  
170 8 -7.837869711924E-06 -4.203429974314E-06 -1.020658743656E-05  
171 8 -7.837878688632E-06 4.203412967030E-06 -1.020654914363E-05  
172 8 7.837878676975E-06 4.203412957704E-06 1.020654914630E-05  
173 1 -2.364465998383E-06 1.268743997485E-05 9.567572295088E-06  
174 1 2.364465997939E-06 1.268743996663E-05 -9.567572290647E-06  
175 1 2.364465129745E-06 -1.268744144167E-05 -9.567569000113E-06  
176 1 -2.364465128746E-06 -1.268744143945E-05 9.567568997004E-06

RESULTANT FORCE 1.534536386849E-14 -4.010680676458E-15 -1.001976279724E-14

SYMMETRY ALLOWED FORCES (ANALYTICAL) (DIRECTION, FORCE)

1 -3.9006037E-05 2 -5.2510489E-05 3 4.3098697E-07 4 2.7638877E-06  
5 4.0512955E-06 6 -3.2996218E-06 7 1.4796306E-05 8 -1.8388717E-05  
9 7.0847033E-06 10 2.0481134E-06 11 -1.2924719E-05 12 -1.0314188E-05  
13 7.7806582E-06 14 -4.4762200E-08 15 -1.4551899E-05 16 2.2186645E-05  
17 -1.0338362E-05 18 -8.1958768E-06 19 -1.1958895E-06 20 2.1493786E-05  
21 -1.4811705E-05 22 9.3419766E-06 23 1.9473175E-05 24 1.0630941E-05  
25 -3.3099251E-05 26 -1.4010600E-06 27 -1.7851559E-05 28 3.7615744E-06  
29 -5.1458204E-05 30 9.7176064E-06 31 -5.8321150E-06 32 -1.7601420E-05  
33 2.2062078E-05 34 1.1635810E-06 35 2.9568653E-06 36 -1.9972257E-06  
37 1.5670802E-05 38 1.1139959E-05 39 -6.3035052E-06 40 9.2332973E-06  
41 4.7875309E-05 42 -3.8403249E-05 43 4.4281092E-05 44 -3.7590735E-05





(DE IS EXPECTED TO BE POSITIVE FOR ALL DISPLACEMENTS)

| ATOM          | MAX ABS(DGRAD) | TOTAL ENERGY (AU)   | N.CYC | DE          | SYM |
|---------------|----------------|---------------------|-------|-------------|-----|
| CENTRAL POINT |                | -6.638594319816E+03 | 82    | 0.0000E+00  | 4   |
| 1 I DX        | 5.8434E-04     | -6.638594318427E+03 | 14    | 1.3884E-06  | 1   |
| 1 I DY        | 1.8241E-04     | -6.638594318803E+03 | 16    | 1.0129E-06  | 1   |
| 1 I DZ        | 4.0546E-04     | -6.638594317784E+03 | 12    | 2.0314E-06  | 1   |
| 5 I DX        | 6.9092E-04     | -6.638594316977E+03 | 17    | 2.8382E-06  | 1   |
| 5 I DY        | 1.3513E-04     | -6.638594320237E+03 | 17    | -4.2175E-07 | 1   |
| 5 I DZ        | 3.6175E-04     | -6.638594319360E+03 | 16    | 4.5601E-07  | 1   |
| 9 N DX        | 1.3374E-03     | -6.638594317343E+03 | 14    | 2.4727E-06  | 1   |
| 9 N DY        | 4.1508E-03     | -6.638594309540E+03 | 15    | 1.0276E-05  | 1   |
| 9 N DZ        | 3.4036E-03     | -6.638594310931E+03 | 15    | 8.8846E-06  | 1   |
| 13 N DX       | 9.3642E-04     | -6.638594317587E+03 | 13    | 2.2286E-06  | 1   |
| 13 N DY       | 4.4785E-03     | -6.638594308483E+03 | 20    | 1.1332E-05  | 1   |
| 13 N DZ       | 3.3750E-03     | -6.638594309121E+03 | 18    | 1.0695E-05  | 1   |
| 17 O DX       | 9.5225E-04     | -6.638594317283E+03 | 16    | 2.5325E-06  | 1   |
| 17 O DY       | 1.5042E-03     | -6.638594315985E+03 | 19    | 3.8310E-06  | 1   |
| 17 O DZ       | 3.0303E-03     | -6.638594311785E+03 | 37    | 8.0307E-06  | 1   |
| 21 O DX       | 4.5040E-04     | -6.638594319984E+03 | 11    | -1.6813E-07 | 1   |
| 21 O DY       | 1.7370E-03     | -6.638594315641E+03 | 13    | 4.1747E-06  | 1   |
| 21 O DZ       | 3.1011E-03     | -6.638594309562E+03 | 19    | 1.0253E-05  | 1   |
| 25 C DX       | 2.3950E-03     | -6.638594312473E+03 | 16    | 7.3429E-06  | 1   |
| 25 C DY       | 3.1187E-03     | -6.638594310897E+03 | 14    | 8.9182E-06  | 1   |
| 25 C DZ       | 2.5136E-03     | -6.638594312337E+03 | 30    | 7.4782E-06  | 1   |
| 29 H DX       | 1.4787E-03     | -6.638594314899E+03 | 17    | 4.9163E-06  | 1   |
| 29 H DY       | 3.1512E-04     | -6.638594318778E+03 | 12    | 1.0379E-06  | 1   |
| 29 H DZ       | 8.0888E-04     | -6.638594318201E+03 | 13    | 1.6147E-06  | 1   |
| 33 H DX       | 3.1172E-04     | -6.638594318767E+03 | 12    | 1.0490E-06  | 1   |
| 33 H DY       | 1.9446E-03     | -6.638594314292E+03 | 15    | 5.5234E-06  | 1   |
| 33 H DZ       | 3.9855E-04     | -6.638594318872E+03 | 15    | 9.4336E-07  | 1   |
| 37 C DX       | 1.7810E-03     | -6.638594315189E+03 | 13    | 4.6270E-06  | 1   |

|         |            |                     |    |             |   |
|---------|------------|---------------------|----|-------------|---|
| 37 C DY | 4.0557E-03 | -6.638594306343E+03 | 34 | 1.3473E-05  | 1 |
| 37 C DZ | 4.4914E-03 | -6.638594306124E+03 | 15 | 1.3691E-05  | 1 |
| 41 C DX | 2.8437E-03 | -6.638594312183E+03 | 19 | 7.6331E-06  | 1 |
| 41 C DY | 3.4116E-03 | -6.638594310375E+03 | 14 | 9.4409E-06  | 1 |
| 41 C DZ | 3.2962E-03 | -6.638594311570E+03 | 13 | 8.2455E-06  | 1 |
| 45 H DX | 3.1950E-04 | -6.638594317915E+03 | 14 | 1.9003E-06  | 1 |
| 45 H DY | 1.0749E-03 | -6.638594317011E+03 | 12 | 2.8050E-06  | 1 |
| 45 H DZ | 1.3078E-03 | -6.638594315812E+03 | 13 | 4.0037E-06  | 1 |
| 49 H DX | 1.0968E-03 | -6.638594317189E+03 | 13 | 2.6265E-06  | 1 |
| 49 H DY | 1.0849E-03 | -6.638594316835E+03 | 12 | 2.9809E-06  | 1 |
| 49 H DZ | 4.2988E-04 | -6.638594319298E+03 | 10 | 5.1802E-07  | 1 |
| 53 C DX | 2.9127E-03 | -6.638594310673E+03 | 14 | 9.1423E-06  | 1 |
| 53 C DY | 2.7730E-03 | -6.638594313951E+03 | 18 | 5.8649E-06  | 1 |
| 53 C DZ | 2.9820E-03 | -6.638594309102E+03 | 13 | 1.0714E-05  | 1 |
| 57 C DX | 3.5081E-03 | -6.638594310349E+03 | 17 | 9.4668E-06  | 1 |
| 57 C DY | 3.3108E-03 | -6.638594309417E+03 | 16 | 1.0399E-05  | 1 |
| 57 C DZ | 2.8079E-03 | -6.638594312328E+03 | 16 | 7.4873E-06  | 1 |
| 61 H DX | 8.6891E-04 | -6.638594317321E+03 | 11 | 2.4943E-06  | 1 |
| 61 H DY | 1.3615E-03 | -6.638594316317E+03 | 12 | 3.4987E-06  | 1 |
| 61 H DZ | 3.2089E-04 | -6.638594318748E+03 | 17 | 1.0680E-06  | 1 |
| 65 H DX | 1.9014E-03 | -6.638594314195E+03 | 19 | 5.6206E-06  | 1 |
| 65 H DY | 5.2804E-04 | -6.638594318668E+03 | 22 | 1.1480E-06  | 1 |
| 65 H DZ | 3.0381E-04 | -6.638594318680E+03 | 16 | 1.1357E-06  | 1 |
| 69 H DX | 3.1298E-04 | -6.638594318910E+03 | 15 | 9.0578E-07  | 1 |
| 69 H DY | 9.8808E-04 | -6.638594317456E+03 | 11 | 2.3601E-06  | 1 |
| 69 H DZ | 1.2418E-03 | -6.638594316459E+03 | 12 | 3.3570E-06  | 1 |
| 73 C DX | 2.8537E-03 | -6.638594320358E+03 | 41 | -5.4229E-07 | 1 |
| 73 C DY | 3.0087E-03 | -6.638594311399E+03 | 49 | 8.4167E-06  | 1 |
| 73 C DZ | 3.0228E-03 | -6.638594310336E+03 | 37 | 9.4792E-06  | 1 |
| 77 C DX | 3.0445E-03 | -6.638594310577E+03 | 13 | 9.2385E-06  | 1 |
| 77 C DY | 3.3876E-03 | -6.638594310114E+03 | 14 | 9.7019E-06  | 1 |
| 77 C DZ | 3.1495E-03 | -6.638594310121E+03 | 14 | 9.6943E-06  | 1 |

|          |            |                     |    |            |   |
|----------|------------|---------------------|----|------------|---|
| 81 H DX  | 1.2451E-03 | -6.638594316775E+03 | 12 | 3.0405E-06 | 1 |
| 81 H DY  | 1.0428E-03 | -6.638594317030E+03 | 13 | 2.7859E-06 | 1 |
| 81 H DZ  | 3.2880E-04 | -6.638594318968E+03 | 12 | 8.4792E-07 | 1 |
| 85 H DX  | 3.7735E-04 | -6.638594318546E+03 | 16 | 1.2698E-06 | 1 |
| 85 H DY  | 1.0034E-03 | -6.638594317052E+03 | 15 | 2.7637E-06 | 1 |
| 85 H DZ  | 1.3153E-03 | -6.638594316190E+03 | 15 | 3.6261E-06 | 1 |
| 89 C DX  | 2.9553E-03 | -6.638594312938E+03 | 16 | 6.8775E-06 | 1 |
| 89 C DY  | 2.8251E-03 | -6.638594313610E+03 | 18 | 6.2057E-06 | 1 |
| 89 C DZ  | 2.9081E-03 | -6.638594313094E+03 | 18 | 6.7219E-06 | 1 |
| 93 C DX  | 3.4578E-03 | -6.638594308898E+03 | 14 | 1.0918E-05 | 1 |
| 93 C DY  | 3.2247E-03 | -6.638594310896E+03 | 12 | 8.9192E-06 | 1 |
| 93 C DZ  | 2.8856E-03 | -6.638594311330E+03 | 16 | 8.4856E-06 | 1 |
| 97 H DX  | 1.5317E-03 | -6.638594315745E+03 | 12 | 4.0705E-06 | 1 |
| 97 H DY  | 6.8948E-04 | -6.638594318288E+03 | 14 | 1.5279E-06 | 1 |
| 97 H DZ  | 3.8716E-04 | -6.638594319039E+03 | 12 | 7.7676E-07 | 1 |
| 101 H DX | 1.1961E-03 | -6.638594316942E+03 | 11 | 2.8734E-06 | 1 |
| 101 H DY | 1.0701E-03 | -6.638594316697E+03 | 11 | 3.1190E-06 | 1 |
| 101 H DZ | 3.3053E-04 | -6.638594318748E+03 | 16 | 1.0680E-06 | 1 |
| 105 H DX | 3.8006E-04 | -6.638594318928E+03 | 10 | 8.8787E-07 | 1 |
| 105 H DY | 8.8144E-04 | -6.638594317281E+03 | 14 | 2.5341E-06 | 1 |
| 105 H DZ | 1.2638E-03 | -6.638594316063E+03 | 14 | 3.7523E-06 | 1 |
| 109 C DX | 3.1058E-03 | -6.638594311215E+03 | 13 | 8.6005E-06 | 1 |
| 109 C DY | 3.2887E-03 | -6.638594310642E+03 | 21 | 9.1740E-06 | 1 |
| 109 C DZ | 3.1646E-03 | -6.638594311223E+03 | 18 | 8.5922E-06 | 1 |
| 113 H DX | 1.4991E-03 | -6.638594315453E+03 | 14 | 4.3623E-06 | 1 |
| 113 H DY | 7.2955E-04 | -6.638594317650E+03 | 11 | 2.1661E-06 | 1 |
| 113 H DZ | 3.4976E-04 | -6.638594318855E+03 | 10 | 9.6100E-07 | 1 |
| 117 H DX | 3.1717E-04 | -6.638594318996E+03 | 10 | 8.1945E-07 | 1 |
| 117 H DY | 1.0861E-03 | -6.638594317022E+03 | 16 | 2.7936E-06 | 1 |
| 117 H DZ | 1.2968E-03 | -6.638594316096E+03 | 18 | 3.7193E-06 | 1 |
| 121 C DX | 3.0617E-03 | -6.638594311234E+03 | 16 | 8.5818E-06 | 1 |
| 121 C DY | 3.1656E-03 | -6.638594310342E+03 | 16 | 9.4739E-06 | 1 |

|          |            |                     |    |            |   |
|----------|------------|---------------------|----|------------|---|
| 121 C DZ | 3.3577E-03 | -6.638594311725E+03 | 15 | 8.0910E-06 | 1 |
| 125 H DX | 3.7418E-04 | -6.638594319224E+03 | 11 | 5.9169E-07 | 1 |
| 125 H DY | 9.0879E-04 | -6.638594316692E+03 | 15 | 3.1240E-06 | 1 |
| 125 H DZ | 1.3987E-03 | -6.638594315707E+03 | 15 | 4.1083E-06 | 1 |
| 129 H DX | 1.4444E-03 | -6.638594315295E+03 | 11 | 4.5201E-06 | 1 |
| 129 H DY | 7.7868E-04 | -6.638594318077E+03 | 11 | 1.7382E-06 | 1 |
| 129 H DZ | 3.9308E-04 | -6.638594318371E+03 | 16 | 1.4448E-06 | 1 |
| 133 C DX | 1.3629E-03 | -6.638594314312E+03 | 11 | 5.5039E-06 | 1 |
| 133 C DY | 4.3842E-03 | -6.638594307053E+03 | 13 | 1.2763E-05 | 1 |
| 133 C DZ | 4.5613E-03 | -6.638594308759E+03 | 18 | 1.1057E-05 | 1 |
| 137 C DX | 2.1595E-03 | -6.638594314817E+03 | 19 | 4.9982E-06 | 1 |
| 137 C DY | 3.2752E-03 | -6.638594310192E+03 | 18 | 9.6241E-06 | 1 |
| 137 C DZ | 2.6624E-03 | -6.638594312523E+03 | 16 | 7.2921E-06 | 1 |
| 141 H DX | 1.0797E-03 | -6.638594316901E+03 | 13 | 2.9148E-06 | 1 |
| 141 H DY | 6.2051E-04 | -6.638594317813E+03 | 11 | 2.0030E-06 | 1 |
| 141 H DZ | 9.3603E-04 | -6.638594316569E+03 | 14 | 3.2469E-06 | 1 |
| 145 H DX | 4.7628E-04 | -6.638594319328E+03 | 21 | 4.8742E-07 | 1 |
| 145 H DY | 1.8590E-03 | -6.638594314165E+03 | 12 | 5.6504E-06 | 1 |
| 145 H DZ | 4.4667E-04 | -6.638594318395E+03 | 13 | 1.4208E-06 | 1 |
| 149 O DX | 2.0798E-03 | -6.638594311463E+03 | 16 | 8.3523E-06 | 1 |
| 149 O DY | 1.3679E-03 | -6.638594317070E+03 | 12 | 2.7456E-06 | 1 |
| 149 O DZ | 2.5782E-03 | -6.638594313839E+03 | 17 | 5.9767E-06 | 1 |
| 153 H DX | 1.0639E-03 | -6.638594318923E+03 | 15 | 8.9268E-07 | 1 |
| 153 H DY | 5.3707E-04 | -6.638594317751E+03 | 14 | 2.0648E-06 | 1 |
| 153 H DZ | 1.9170E-03 | -6.638594315291E+03 | 12 | 4.5243E-06 | 1 |
| 157 O DX | 2.6411E-03 | -6.638594314096E+03 | 23 | 5.7196E-06 | 1 |
| 157 O DY | 1.2711E-03 | -6.638594313836E+03 | 45 | 5.9795E-06 | 1 |
| 157 O DZ | 2.0209E-03 | -6.638594313734E+03 | 25 | 6.0818E-06 | 1 |
| 161 O DX | 1.1464E-03 | -6.638594315612E+03 | 14 | 4.2034E-06 | 1 |
| 161 O DY | 2.7413E-03 | -6.638594312414E+03 | 21 | 7.4012E-06 | 1 |
| 161 O DZ | 1.1826E-03 | -6.638594315706E+03 | 26 | 4.1095E-06 | 1 |
| 165 H DX | 9.6756E-04 | -6.638594317806E+03 | 13 | 2.0098E-06 | 1 |

|       |    |            |                     |    |            |   |
|-------|----|------------|---------------------|----|------------|---|
| 165 H | DY | 1.8729E-03 | -6.638594313483E+03 | 24 | 6.3329E-06 | 1 |
| 165 H | DZ | 3.4794E-04 | -6.638594318555E+03 | 11 | 1.2603E-06 | 1 |
| 169 O | DX | 5.6109E-04 | -6.638594318275E+03 | 12 | 1.5402E-06 | 1 |
| 169 O | DY | 2.5619E-03 | -6.638594312651E+03 | 13 | 7.1649E-06 | 1 |
| 169 O | DZ | 1.9286E-03 | -6.638594315065E+03 | 21 | 4.7508E-06 | 1 |
| 173 H | DX | 3.3140E-04 | -6.638594318904E+03 | 17 | 9.1152E-07 | 1 |
| 173 H | DY | 1.8393E-03 | -6.638594315148E+03 | 16 | 4.6672E-06 | 1 |
| 173 H | DZ | 5.3536E-04 | -6.638594318359E+03 | 15 | 1.4570E-06 | 1 |

GCALCO - MAX INDICES DIRECT LATTICE VECTOR 13 20 12

NO.OF VECTORS CREATED 6999 STARS 1838 RMAX 269.69560 BOHR

CAPPA:IS1 3;IS2 3;IS3 3; K PTS MONK NET 10; SYMMOPS:K SPACE 4;G SPACE 4

TTTTTTTTTTTTTTTTTTTTTTTTTTTTTTTTTTTTTTT gordsh1 TELAPSE 2002189.67 TCPU 1994394.53

MATRIX SIZE: P(G) 1958284, F(G) 343576, P(G) IRR 247194, F(G) IRR 86773

MAX G-VECTOR INDEX FOR 1- AND 2-ELECTRON INTEGRALS 39

TTTTTTTTTTTTTTTTTTTTTTTTTTTTTTTTTTTTTTT INPUT TELAPSE 2002189.85 TCPU 1994394.71

SYMMETRY ALLOWED INTERNAL DEGREE(S) OF FREEDOM: 132

TTTTTTTTTTTTTTTTTTTTTTTTTTTTTTTTTTTTTTT SYMM TELAPSE 2002189.86 TCPU 1994394.72

TTTTTTTTTTTTTTTTTTTTTTTTTTTTTTTTTTTTTTT INT\_SCREEN TELAPSE 2002189.91 TCPU 1994394.77

+++ SYMMETRY ADAPTION OF VIBRATIONAL MODES +++

SYMMETRY INFORMATION:

K-LITTLE GROUP: CLASS TABLE, CHARACTER TABLE.

IRREP-(DIMENSION, NO. IRREDUCIBLE SETS)

[WARNINGS: (1) ONLY ACTIVE IRREPS ARE GENERATED AND LISTED.

(2) ONLY RELEVANT CLASSES ARE CONSIDERED IN THE CHARACTER TABLE





|     |    |            |          |        |      |   |   |       |   |
|-----|----|------------|----------|--------|------|---|---|-------|---|
| 26- | 26 | 0.5399E-07 | 50.9945  | 1.5288 | (Bg) | I | ( | 0.00) | A |
| 27- | 27 | 0.5686E-07 | 52.3342  | 1.5689 | (Au) | A | ( | 0.00) | I |
| 28- | 28 | 0.5734E-07 | 52.5540  | 1.5755 | (Bu) | A | ( | 0.00) | I |
| 29- | 29 | 0.6315E-07 | 55.1517  | 1.6534 | (Ag) | I | ( | 0.00) | A |
| 30- | 30 | 0.7193E-07 | 58.8606  | 1.7646 | (Au) | A | ( | 0.00) | I |
| 31- | 31 | 0.7623E-07 | 60.5978  | 1.8167 | (Bg) | I | ( | 0.00) | A |
| 32- | 32 | 0.8706E-07 | 64.7572  | 1.9414 | (Bu) | A | ( | 0.00) | I |
| 33- | 33 | 0.9540E-07 | 67.7904  | 2.0323 | (Au) | A | ( | 0.00) | I |
| 34- | 34 | 0.1089E-06 | 72.4169  | 2.1710 | (Ag) | I | ( | 0.00) | A |
| 35- | 35 | 0.1114E-06 | 73.2428  | 2.1958 | (Bg) | I | ( | 0.00) | A |
| 36- | 36 | 0.1194E-06 | 75.8250  | 2.2732 | (Ag) | I | ( | 0.00) | A |
| 37- | 37 | 0.1287E-06 | 78.7296  | 2.3603 | (Au) | A | ( | 0.00) | I |
| 38- | 38 | 0.1399E-06 | 82.0975  | 2.4612 | (Ag) | I | ( | 0.00) | A |
| 39- | 39 | 0.1487E-06 | 84.6276  | 2.5371 | (Bu) | A | ( | 0.00) | I |
| 40- | 40 | 0.1510E-06 | 85.2851  | 2.5568 | (Au) | A | ( | 0.00) | I |
| 41- | 41 | 0.1526E-06 | 85.7455  | 2.5706 | (Bg) | I | ( | 0.00) | A |
| 42- | 42 | 0.1535E-06 | 85.9930  | 2.5780 | (Bu) | A | ( | 0.00) | I |
| 43- | 43 | 0.1632E-06 | 88.6623  | 2.6580 | (Ag) | I | ( | 0.00) | A |
| 44- | 44 | 0.1720E-06 | 91.0158  | 2.7286 | (Au) | A | ( | 0.00) | I |
| 45- | 45 | 0.1725E-06 | 91.1449  | 2.7325 | (Bg) | I | ( | 0.00) | A |
| 46- | 46 | 0.2027E-06 | 98.8091  | 2.9622 | (Bu) | A | ( | 0.00) | I |
| 47- | 47 | 0.2087E-06 | 100.2602 | 3.0057 | (Bg) | I | ( | 0.00) | A |
| 48- | 48 | 0.2108E-06 | 100.7784 | 3.0213 | (Bu) | A | ( | 0.00) | I |
| 49- | 49 | 0.2173E-06 | 102.3187 | 3.0674 | (Ag) | I | ( | 0.00) | A |
| 50- | 50 | 0.2288E-06 | 104.9871 | 3.1474 | (Bg) | I | ( | 0.00) | A |
| 51- | 51 | 0.2342E-06 | 106.2067 | 3.1840 | (Au) | A | ( | 0.00) | I |
| 52- | 52 | 0.2391E-06 | 107.3220 | 3.2174 | (Ag) | I | ( | 0.00) | A |
| 53- | 53 | 0.3586E-06 | 131.4346 | 3.9403 | (Au) | A | ( | 0.00) | I |
| 54- | 54 | 0.3698E-06 | 133.4641 | 4.0012 | (Bu) | A | ( | 0.00) | I |
| 55- | 55 | 0.3856E-06 | 136.2869 | 4.0858 | (Au) | A | ( | 0.00) | I |
| 56- | 56 | 0.3990E-06 | 138.6346 | 4.1562 | (Bu) | A | ( | 0.00) | I |
| 57- | 57 | 0.4013E-06 | 139.0315 | 4.1681 | (Bg) | I | ( | 0.00) | A |



|     |    |            |          |        |      |   |   |       |   |
|-----|----|------------|----------|--------|------|---|---|-------|---|
| 58- | 58 | 0.4177E-06 | 141.8466 | 4.2525 | (Ag) | I | ( | 0.00) | A |
| 59- | 59 | 0.5055E-06 | 156.0415 | 4.6780 | (Bu) | A | ( | 0.00) | I |
| 60- | 60 | 0.5146E-06 | 157.4490 | 4.7202 | (Au) | A | ( | 0.00) | I |
| 61- | 61 | 0.5249E-06 | 159.0035 | 4.7668 | (Bg) | I | ( | 0.00) | A |
| 62- | 62 | 0.5251E-06 | 159.0438 | 4.7680 | (Ag) | I | ( | 0.00) | A |
| 63- | 63 | 0.5356E-06 | 160.6253 | 4.8154 | (Bu) | A | ( | 0.00) | I |
| 64- | 64 | 0.5601E-06 | 164.2591 | 4.9244 | (Au) | A | ( | 0.00) | I |
| 65- | 65 | 0.6172E-06 | 172.4172 | 5.1689 | (Bu) | A | ( | 0.00) | I |
| 66- | 66 | 0.6193E-06 | 172.7117 | 5.1778 | (Bg) | I | ( | 0.00) | A |
| 67- | 67 | 0.6305E-06 | 174.2716 | 5.2245 | (Ag) | I | ( | 0.00) | A |
| 68- | 68 | 0.6359E-06 | 175.0149 | 5.2468 | (Au) | A | ( | 0.00) | I |
| 69- | 69 | 0.6959E-06 | 183.0843 | 5.4887 | (Ag) | I | ( | 0.00) | A |
| 70- | 70 | 0.7038E-06 | 184.1243 | 5.5199 | (Bg) | I | ( | 0.00) | A |
| 71- | 71 | 0.7304E-06 | 187.5700 | 5.6232 | (Bu) | A | ( | 0.00) | I |
| 72- | 72 | 0.7502E-06 | 190.0910 | 5.6988 | (Au) | A | ( | 0.00) | I |
| 73- | 73 | 0.7629E-06 | 191.6970 | 5.7469 | (Ag) | I | ( | 0.00) | A |
| 74- | 74 | 0.7864E-06 | 194.6309 | 5.8349 | (Bg) | I | ( | 0.00) | A |
| 75- | 75 | 0.9243E-06 | 211.0045 | 6.3258 | (Bu) | A | ( | 0.00) | I |
| 76- | 76 | 0.9397E-06 | 212.7583 | 6.3783 | (Au) | A | ( | 0.00) | I |
| 77- | 77 | 0.1028E-05 | 222.5181 | 6.6709 | (Ag) | I | ( | 0.00) | A |
| 78- | 78 | 0.1058E-05 | 225.7762 | 6.7686 | (Bg) | I | ( | 0.00) | A |
| 79- | 79 | 0.1136E-05 | 233.8880 | 7.0118 | (Bu) | A | ( | 0.00) | I |
| 80- | 80 | 0.1141E-05 | 234.4592 | 7.0289 | (Au) | A | ( | 0.00) | I |
| 81- | 81 | 0.1148E-05 | 235.1330 | 7.0491 | (Ag) | I | ( | 0.00) | A |
| 82- | 82 | 0.1156E-05 | 236.0150 | 7.0756 | (Bg) | I | ( | 0.00) | A |
| 83- | 83 | 0.1195E-05 | 239.8835 | 7.1915 | (Bu) | A | ( | 0.00) | I |
| 84- | 84 | 0.1204E-05 | 240.7822 | 7.2185 | (Au) | A | ( | 0.00) | I |
| 85- | 85 | 0.1304E-05 | 250.6133 | 7.5132 | (Bg) | I | ( | 0.00) | A |
| 86- | 86 | 0.1317E-05 | 251.8716 | 7.5509 | (Au) | A | ( | 0.00) | I |
| 87- | 87 | 0.1335E-05 | 253.5489 | 7.6012 | (Ag) | I | ( | 0.00) | A |
| 88- | 88 | 0.1348E-05 | 254.8087 | 7.6390 | (Bu) | A | ( | 0.00) | I |
| 89- | 89 | 0.1472E-05 | 266.2742 | 7.9827 | (Bg) | I | ( | 0.00) | A |

|      |     |            |          |         |      |   |   |       |   |
|------|-----|------------|----------|---------|------|---|---|-------|---|
| 90-  | 90  | 0.1482E-05 | 267.1611 | 8.0093  | (Ag) | I | ( | 0.00) | A |
| 91-  | 91  | 0.1492E-05 | 268.1163 | 8.0379  | (Bg) | I | ( | 0.00) | A |
| 92-  | 92  | 0.1499E-05 | 268.6866 | 8.0550  | (Bu) | A | ( | 0.00) | I |
| 93-  | 93  | 0.1511E-05 | 269.7508 | 8.0869  | (Au) | A | ( | 0.00) | I |
| 94-  | 94  | 0.1543E-05 | 272.6224 | 8.1730  | (Au) | A | ( | 0.00) | I |
| 95-  | 95  | 0.1544E-05 | 272.6820 | 8.1748  | (Bu) | A | ( | 0.00) | I |
| 96-  | 96  | 0.1549E-05 | 273.1300 | 8.1882  | (Ag) | I | ( | 0.00) | A |
| 97-  | 97  | 0.1718E-05 | 287.6644 | 8.6240  | (Ag) | I | ( | 0.00) | A |
| 98-  | 98  | 0.1728E-05 | 288.5339 | 8.6500  | (Bg) | I | ( | 0.00) | A |
| 99-  | 99  | 0.1735E-05 | 289.0830 | 8.6665  | (Au) | A | ( | 0.00) | I |
| 100- | 100 | 0.1772E-05 | 292.1190 | 8.7575  | (Bu) | A | ( | 0.00) | I |
| 101- | 101 | 0.1801E-05 | 294.5750 | 8.8311  | (Ag) | I | ( | 0.00) | A |
| 102- | 102 | 0.1828E-05 | 296.7266 | 8.8956  | (Bg) | I | ( | 0.00) | A |
| 103- | 103 | 0.2063E-05 | 315.2278 | 9.4503  | (Au) | A | ( | 0.00) | I |
| 104- | 104 | 0.2066E-05 | 315.4941 | 9.4583  | (Ag) | I | ( | 0.00) | A |
| 105- | 105 | 0.2072E-05 | 315.9302 | 9.4714  | (Bu) | A | ( | 0.00) | I |
| 106- | 106 | 0.2100E-05 | 318.0842 | 9.5359  | (Bu) | A | ( | 0.00) | I |
| 107- | 107 | 0.2108E-05 | 318.6494 | 9.5529  | (Bg) | I | ( | 0.00) | A |
| 108- | 108 | 0.2118E-05 | 319.3936 | 9.5752  | (Au) | A | ( | 0.00) | I |
| 109- | 109 | 0.2302E-05 | 333.0053 | 9.9832  | (Ag) | I | ( | 0.00) | A |
| 110- | 110 | 0.2311E-05 | 333.6331 | 10.0021 | (Bg) | I | ( | 0.00) | A |
| 111- | 111 | 0.2428E-05 | 341.9891 | 10.2526 | (Au) | A | ( | 0.00) | I |
| 112- | 112 | 0.2468E-05 | 344.7798 | 10.3362 | (Bu) | A | ( | 0.00) | I |
| 113- | 113 | 0.2504E-05 | 347.2864 | 10.4114 | (Bg) | I | ( | 0.00) | A |
| 114- | 114 | 0.2523E-05 | 348.6050 | 10.4509 | (Ag) | I | ( | 0.00) | A |
| 115- | 115 | 0.2535E-05 | 349.4689 | 10.4768 | (Bg) | I | ( | 0.00) | A |
| 116- | 116 | 0.2537E-05 | 349.6061 | 10.4809 | (Ag) | I | ( | 0.00) | A |
| 117- | 117 | 0.2551E-05 | 350.5603 | 10.5095 | (Bu) | A | ( | 0.00) | I |
| 118- | 118 | 0.2553E-05 | 350.6552 | 10.5124 | (Au) | A | ( | 0.00) | I |
| 119- | 119 | 0.2793E-05 | 366.7676 | 10.9954 | (Ag) | I | ( | 0.00) | A |
| 120- | 120 | 0.2799E-05 | 367.1661 | 11.0074 | (Bu) | A | ( | 0.00) | I |
| 121- | 121 | 0.2832E-05 | 369.3247 | 11.0721 | (Au) | A | ( | 0.00) | I |

|          |            |          |         |       |     |       |   |
|----------|------------|----------|---------|-------|-----|-------|---|
| 122- 122 | 0.2854E-05 | 370.7952 | 11.1162 | (Bg ) | I ( | 0.00) | A |
| 123- 123 | 0.2933E-05 | 375.8647 | 11.2681 | (Ag ) | I ( | 0.00) | A |
| 124- 124 | 0.2940E-05 | 376.2933 | 11.2810 | (Bg ) | I ( | 0.00) | A |
| 125- 125 | 0.2940E-05 | 376.3300 | 11.2821 | (Au ) | A ( | 0.00) | I |
| 126- 126 | 0.2947E-05 | 376.7394 | 11.2944 | (Bu ) | A ( | 0.00) | I |
| 127- 127 | 0.2997E-05 | 379.9347 | 11.3902 | (Au ) | A ( | 0.00) | I |
| 128- 128 | 0.3036E-05 | 382.4325 | 11.4650 | (Bu ) | A ( | 0.00) | I |
| 129- 129 | 0.3052E-05 | 383.4183 | 11.4946 | (Bg ) | I ( | 0.00) | A |
| 130- 130 | 0.3058E-05 | 383.8184 | 11.5066 | (Ag ) | I ( | 0.00) | A |
| 131- 131 | 0.3087E-05 | 385.6371 | 11.5611 | (Bu ) | A ( | 0.00) | I |
| 132- 132 | 0.3092E-05 | 385.9157 | 11.5695 | (Au ) | A ( | 0.00) | I |
| 133- 133 | 0.3280E-05 | 397.4821 | 11.9162 | (Ag ) | I ( | 0.00) | A |
| 134- 134 | 0.3300E-05 | 398.7081 | 11.9530 | (Bg ) | I ( | 0.00) | A |
| 135- 135 | 0.3506E-05 | 410.9541 | 12.3201 | (Bu ) | A ( | 0.00) | I |
| 136- 136 | 0.3509E-05 | 411.1393 | 12.3256 | (Au ) | A ( | 0.00) | I |
| 137- 137 | 0.3548E-05 | 413.4234 | 12.3941 | (Ag ) | I ( | 0.00) | A |
| 138- 138 | 0.3557E-05 | 413.9157 | 12.4089 | (Bg ) | I ( | 0.00) | A |
| 139- 139 | 0.3911E-05 | 434.0280 | 13.0118 | (Bu ) | A ( | 0.00) | I |
| 140- 140 | 0.3916E-05 | 434.3409 | 13.0212 | (Au ) | A ( | 0.00) | I |
| 141- 141 | 0.3936E-05 | 435.4034 | 13.0531 | (Bg ) | I ( | 0.00) | A |
| 142- 142 | 0.3938E-05 | 435.5338 | 13.0570 | (Ag ) | I ( | 0.00) | A |
| 143- 143 | 0.4556E-05 | 468.4575 | 14.0440 | (Ag ) | I ( | 0.00) | A |
| 144- 144 | 0.4559E-05 | 468.6376 | 14.0494 | (Bu ) | A ( | 0.00) | I |
| 145- 145 | 0.4561E-05 | 468.7094 | 14.0516 | (Au ) | A ( | 0.00) | I |
| 146- 146 | 0.4563E-05 | 468.8218 | 14.0549 | (Bg ) | I ( | 0.00) | A |
| 147- 147 | 0.4691E-05 | 475.3569 | 14.2508 | (Au ) | A ( | 0.00) | I |
| 148- 148 | 0.4695E-05 | 475.5813 | 14.2576 | (Bu ) | A ( | 0.00) | I |
| 149- 149 | 0.4738E-05 | 477.7072 | 14.3213 | (Ag ) | I ( | 0.00) | A |
| 150- 150 | 0.4752E-05 | 478.4586 | 14.3438 | (Bg ) | I ( | 0.00) | A |
| 151- 151 | 0.4955E-05 | 488.5375 | 14.6460 | (Au ) | A ( | 0.00) | I |
| 152- 152 | 0.4958E-05 | 488.6841 | 14.6504 | (Bu ) | A ( | 0.00) | I |
| 153- 153 | 0.5089E-05 | 495.1249 | 14.8435 | (Bg ) | I ( | 0.00) | A |

|          |            |          |         |       |           |   |
|----------|------------|----------|---------|-------|-----------|---|
| 154- 154 | 0.5107E-05 | 495.9708 | 14.8688 | (Ag ) | I ( 0.00) | A |
| 155- 155 | 0.5323E-05 | 506.3801 | 15.1809 | (Bu ) | A ( 0.00) | I |
| 156- 156 | 0.5333E-05 | 506.8419 | 15.1947 | (Au ) | A ( 0.00) | I |
| 157- 157 | 0.5364E-05 | 508.2959 | 15.2383 | (Bg ) | I ( 0.00) | A |
| 158- 158 | 0.5402E-05 | 510.1107 | 15.2927 | (Ag ) | I ( 0.00) | A |
| 159- 159 | 0.5675E-05 | 522.8162 | 15.6736 | (Ag ) | I ( 0.00) | A |
| 160- 160 | 0.5675E-05 | 522.8474 | 15.6746 | (Bu ) | A ( 0.00) | I |
| 161- 161 | 0.5682E-05 | 523.1611 | 15.6840 | (Bg ) | I ( 0.00) | A |
| 162- 162 | 0.5692E-05 | 523.6405 | 15.6983 | (Au ) | A ( 0.00) | I |
| 163- 163 | 0.6275E-05 | 549.7792 | 16.4820 | (Bg ) | I ( 0.00) | A |
| 164- 164 | 0.6276E-05 | 549.8326 | 16.4836 | (Bu ) | A ( 0.00) | I |
| 165- 165 | 0.6284E-05 | 550.1973 | 16.4945 | (Au ) | A ( 0.00) | I |
| 166- 166 | 0.6301E-05 | 550.9155 | 16.5160 | (Ag ) | I ( 0.00) | A |
| 167- 167 | 0.6359E-05 | 553.4420 | 16.5918 | (Bu ) | A ( 0.00) | I |
| 168- 168 | 0.6362E-05 | 553.5992 | 16.5965 | (Bg ) | I ( 0.00) | A |
| 169- 169 | 0.6370E-05 | 553.9100 | 16.6058 | (Au ) | A ( 0.00) | I |
| 170- 170 | 0.6377E-05 | 554.2237 | 16.6152 | (Ag ) | I ( 0.00) | A |
| 171- 171 | 0.6909E-05 | 576.8990 | 17.2950 | (Ag ) | I ( 0.00) | A |
| 172- 172 | 0.6919E-05 | 577.3239 | 17.3077 | (Bg ) | I ( 0.00) | A |
| 173- 173 | 0.6923E-05 | 577.4535 | 17.3116 | (Au ) | A ( 0.00) | I |
| 174- 174 | 0.6955E-05 | 578.7968 | 17.3519 | (Bu ) | A ( 0.00) | I |
| 175- 175 | 0.7317E-05 | 593.6974 | 17.7986 | (Au ) | A ( 0.00) | I |
| 176- 176 | 0.7319E-05 | 593.7654 | 17.8006 | (Bu ) | A ( 0.00) | I |
| 177- 177 | 0.7323E-05 | 593.9294 | 17.8056 | (Bg ) | I ( 0.00) | A |
| 178- 178 | 0.7341E-05 | 594.6400 | 17.8269 | (Ag ) | I ( 0.00) | A |
| 179- 179 | 0.7556E-05 | 603.3116 | 18.0868 | (Bu ) | A ( 0.00) | I |
| 180- 180 | 0.7564E-05 | 603.6029 | 18.0956 | (Au ) | A ( 0.00) | I |
| 181- 181 | 0.7620E-05 | 605.8384 | 18.1626 | (Bg ) | I ( 0.00) | A |
| 182- 182 | 0.7662E-05 | 607.4946 | 18.2122 | (Ag ) | I ( 0.00) | A |
| 183- 183 | 0.8444E-05 | 637.7673 | 19.1198 | (Bg ) | I ( 0.00) | A |
| 184- 184 | 0.8457E-05 | 638.2367 | 19.1339 | (Ag ) | I ( 0.00) | A |
| 185- 185 | 0.8469E-05 | 638.6884 | 19.1474 | (Bu ) | A ( 0.00) | I |

|          |            |          |         |       |     |       |   |
|----------|------------|----------|---------|-------|-----|-------|---|
| 186- 186 | 0.8479E-05 | 639.0652 | 19.1587 | (Au ) | A ( | 0.00) | I |
| 187- 187 | 0.9330E-05 | 670.3897 | 20.0978 | (Ag ) | I ( | 0.00) | A |
| 188- 188 | 0.9351E-05 | 671.1580 | 20.1208 | (Bu ) | A ( | 0.00) | I |
| 189- 189 | 0.9359E-05 | 671.4147 | 20.1285 | (Au ) | A ( | 0.00) | I |
| 190- 190 | 0.9359E-05 | 671.4381 | 20.1292 | (Bg ) | I ( | 0.00) | A |
| 191- 191 | 0.9499E-05 | 676.4261 | 20.2787 | (Au ) | A ( | 0.00) | I |
| 192- 192 | 0.9501E-05 | 676.4905 | 20.2807 | (Bu ) | A ( | 0.00) | I |
| 193- 193 | 0.9538E-05 | 677.8256 | 20.3207 | (Bg ) | I ( | 0.00) | A |
| 194- 194 | 0.9546E-05 | 678.0973 | 20.3288 | (Ag ) | I ( | 0.00) | A |
| 195- 195 | 0.1186E-04 | 755.7485 | 22.6568 | (Ag ) | I ( | 0.00) | A |
| 196- 196 | 0.1192E-04 | 757.7326 | 22.7163 | (Au ) | A ( | 0.00) | I |
| 197- 197 | 0.1193E-04 | 758.1351 | 22.7283 | (Bu ) | A ( | 0.00) | I |
| 198- 198 | 0.1201E-04 | 760.6147 | 22.8027 | (Bg ) | I ( | 0.00) | A |
| 199- 199 | 0.1215E-04 | 764.9940 | 22.9339 | (Au ) | A ( | 0.00) | I |
| 200- 200 | 0.1216E-04 | 765.3463 | 22.9445 | (Ag ) | I ( | 0.00) | A |
| 201- 201 | 0.1217E-04 | 765.5973 | 22.9520 | (Bu ) | A ( | 0.00) | I |
| 202- 202 | 0.1220E-04 | 766.6576 | 22.9838 | (Bg ) | I ( | 0.00) | A |
| 203- 203 | 0.1250E-04 | 776.0222 | 23.2646 | (Au ) | A ( | 0.00) | I |
| 204- 204 | 0.1251E-04 | 776.1482 | 23.2683 | (Bg ) | I ( | 0.00) | A |
| 205- 205 | 0.1251E-04 | 776.2674 | 23.2719 | (Ag ) | I ( | 0.00) | A |
| 206- 206 | 0.1252E-04 | 776.5600 | 23.2807 | (Bu ) | A ( | 0.00) | I |
| 207- 207 | 0.1372E-04 | 812.8941 | 24.3700 | (Bg ) | I ( | 0.00) | A |
| 208- 208 | 0.1372E-04 | 813.0502 | 24.3746 | (Bu ) | A ( | 0.00) | I |
| 209- 209 | 0.1374E-04 | 813.5861 | 24.3907 | (Au ) | A ( | 0.00) | I |
| 210- 210 | 0.1375E-04 | 813.7005 | 24.3941 | (Ag ) | I ( | 0.00) | A |
| 211- 211 | 0.1388E-04 | 817.6220 | 24.5117 | (Ag ) | I ( | 0.00) | A |
| 212- 212 | 0.1388E-04 | 817.6639 | 24.5129 | (Bu ) | A ( | 0.00) | I |
| 213- 213 | 0.1389E-04 | 817.8832 | 24.5195 | (Au ) | A ( | 0.00) | I |
| 214- 214 | 0.1393E-04 | 819.1524 | 24.5576 | (Bg ) | I ( | 0.00) | A |
| 215- 215 | 0.1482E-04 | 845.0443 | 25.3338 | (Bu ) | A ( | 0.00) | I |
| 216- 216 | 0.1488E-04 | 846.7349 | 25.3845 | (Ag ) | I ( | 0.00) | A |
| 217- 217 | 0.1490E-04 | 847.2465 | 25.3998 | (Au ) | A ( | 0.00) | I |

|          |            |          |         |       |     |       |   |
|----------|------------|----------|---------|-------|-----|-------|---|
| 218- 218 | 0.1490E-04 | 847.3103 | 25.4017 | (Bg ) | I ( | 0.00) | A |
| 219- 219 | 0.1545E-04 | 862.6451 | 25.8614 | (Au ) | A ( | 0.00) | I |
| 220- 220 | 0.1545E-04 | 862.6735 | 25.8623 | (Bg ) | I ( | 0.00) | A |
| 221- 221 | 0.1546E-04 | 862.9806 | 25.8715 | (Bu ) | A ( | 0.00) | I |
| 222- 222 | 0.1551E-04 | 864.4132 | 25.9145 | (Ag ) | I ( | 0.00) | A |
| 223- 223 | 0.1600E-04 | 878.0247 | 26.3225 | (Bu ) | A ( | 0.00) | I |
| 224- 224 | 0.1602E-04 | 878.3978 | 26.3337 | (Ag ) | I ( | 0.00) | A |
| 225- 225 | 0.1604E-04 | 878.9109 | 26.3491 | (Au ) | A ( | 0.00) | I |
| 226- 226 | 0.1608E-04 | 880.0856 | 26.3843 | (Bg ) | I ( | 0.00) | A |
| 227- 227 | 0.1623E-04 | 884.1199 | 26.5052 | (Au ) | A ( | 0.00) | I |
| 228- 228 | 0.1626E-04 | 884.9620 | 26.5305 | (Bg ) | I ( | 0.00) | A |
| 229- 229 | 0.1626E-04 | 885.1344 | 26.5357 | (Ag ) | I ( | 0.00) | A |
| 230- 230 | 0.1627E-04 | 885.2912 | 26.5404 | (Bu ) | A ( | 0.00) | I |
| 231- 231 | 0.1663E-04 | 895.0568 | 26.8331 | (Au ) | A ( | 0.00) | I |
| 232- 232 | 0.1671E-04 | 897.0330 | 26.8924 | (Bu ) | A ( | 0.00) | I |
| 233- 233 | 0.1699E-04 | 904.7076 | 27.1225 | (Ag ) | I ( | 0.00) | A |
| 234- 234 | 0.1704E-04 | 905.8796 | 27.1576 | (Bg ) | I ( | 0.00) | A |
| 235- 235 | 0.1713E-04 | 908.3372 | 27.2313 | (Bu ) | A ( | 0.00) | I |
| 236- 236 | 0.1715E-04 | 908.9680 | 27.2502 | (Au ) | A ( | 0.00) | I |
| 237- 237 | 0.1801E-04 | 931.4277 | 27.9235 | (Bg ) | I ( | 0.00) | A |
| 238- 238 | 0.1803E-04 | 931.9039 | 27.9378 | (Ag ) | I ( | 0.00) | A |
| 239- 239 | 0.1810E-04 | 933.7684 | 27.9937 | (Au ) | A ( | 0.00) | I |
| 240- 240 | 0.1811E-04 | 933.9193 | 27.9982 | (Bu ) | A ( | 0.00) | I |
| 241- 241 | 0.1825E-04 | 937.5140 | 28.1060 | (Bg ) | I ( | 0.00) | A |
| 242- 242 | 0.1828E-04 | 938.3702 | 28.1316 | (Ag ) | I ( | 0.00) | A |
| 243- 243 | 0.1839E-04 | 941.2886 | 28.2191 | (Bg ) | I ( | 0.00) | A |
| 244- 244 | 0.1843E-04 | 942.2153 | 28.2469 | (Au ) | A ( | 0.00) | I |
| 245- 245 | 0.1845E-04 | 942.6759 | 28.2607 | (Bu ) | A ( | 0.00) | I |
| 246- 246 | 0.1852E-04 | 944.3810 | 28.3118 | (Ag ) | I ( | 0.00) | A |
| 247- 247 | 0.1923E-04 | 962.3772 | 28.8513 | (Au ) | A ( | 0.00) | I |
| 248- 248 | 0.1924E-04 | 962.7621 | 28.8629 | (Bu ) | A ( | 0.00) | I |
| 249- 249 | 0.1929E-04 | 963.8583 | 28.8957 | (Bg ) | I ( | 0.00) | A |

|          |            |           |         |       |     |       |   |
|----------|------------|-----------|---------|-------|-----|-------|---|
| 250- 250 | 0.1930E-04 | 964.0866  | 28.9026 | (Ag ) | I ( | 0.00) | A |
| 251- 251 | 0.1998E-04 | 981.0164  | 29.4101 | (Ag ) | I ( | 0.00) | A |
| 252- 252 | 0.1998E-04 | 981.0615  | 29.4115 | (Au ) | A ( | 0.00) | I |
| 253- 253 | 0.1998E-04 | 981.1220  | 29.4133 | (Bu ) | A ( | 0.00) | I |
| 254- 254 | 0.1999E-04 | 981.3366  | 29.4197 | (Bg ) | I ( | 0.00) | A |
| 255- 255 | 0.2082E-04 | 1001.4310 | 30.0221 | (Bg ) | I ( | 0.00) | A |
| 256- 256 | 0.2085E-04 | 1002.0897 | 30.0419 | (Au ) | A ( | 0.00) | I |
| 257- 257 | 0.2086E-04 | 1002.4193 | 30.0518 | (Bu ) | A ( | 0.00) | I |
| 258- 258 | 0.2086E-04 | 1002.4504 | 30.0527 | (Ag ) | I ( | 0.00) | A |
| 259- 259 | 0.2120E-04 | 1010.5789 | 30.2964 | (Au ) | A ( | 0.00) | I |
| 260- 260 | 0.2121E-04 | 1010.7818 | 30.3025 | (Ag ) | I ( | 0.00) | A |
| 261- 261 | 0.2132E-04 | 1013.4321 | 30.3819 | (Bg ) | I ( | 0.00) | A |
| 262- 262 | 0.2133E-04 | 1013.6342 | 30.3880 | (Bu ) | A ( | 0.00) | I |
| 263- 263 | 0.2147E-04 | 1017.0314 | 30.4898 | (Bg ) | I ( | 0.00) | A |
| 264- 264 | 0.2147E-04 | 1017.0601 | 30.4907 | (Ag ) | I ( | 0.00) | A |
| 265- 265 | 0.2173E-04 | 1023.1940 | 30.6746 | (Bu ) | A ( | 0.00) | I |
| 266- 266 | 0.2175E-04 | 1023.4967 | 30.6837 | (Ag ) | I ( | 0.00) | A |
| 267- 267 | 0.2178E-04 | 1024.2819 | 30.7072 | (Au ) | A ( | 0.00) | I |
| 268- 268 | 0.2180E-04 | 1024.7941 | 30.7226 | (Bg ) | I ( | 0.00) | A |
| 269- 269 | 0.2291E-04 | 1050.4142 | 31.4906 | (Ag ) | I ( | 0.00) | A |
| 270- 270 | 0.2291E-04 | 1050.4367 | 31.4913 | (Bu ) | A ( | 0.00) | I |
| 271- 271 | 0.2295E-04 | 1051.4035 | 31.5203 | (Au ) | A ( | 0.00) | I |
| 272- 272 | 0.2297E-04 | 1051.9816 | 31.5376 | (Bg ) | I ( | 0.00) | A |
| 273- 273 | 0.2360E-04 | 1066.2019 | 31.9639 | (Bu ) | A ( | 0.00) | I |
| 274- 274 | 0.2360E-04 | 1066.2722 | 31.9660 | (Ag ) | I ( | 0.00) | A |
| 275- 275 | 0.2362E-04 | 1066.5703 | 31.9750 | (Bg ) | I ( | 0.00) | A |
| 276- 276 | 0.2363E-04 | 1066.9063 | 31.9850 | (Au ) | A ( | 0.00) | I |
| 277- 277 | 0.2393E-04 | 1073.7358 | 32.1898 | (Bg ) | I ( | 0.00) | A |
| 278- 278 | 0.2396E-04 | 1074.2874 | 32.2063 | (Au ) | A ( | 0.00) | I |
| 279- 279 | 0.2397E-04 | 1074.4402 | 32.2109 | (Ag ) | I ( | 0.00) | A |
| 280- 280 | 0.2398E-04 | 1074.8395 | 32.2229 | (Bu ) | A ( | 0.00) | I |
| 281- 281 | 0.2716E-04 | 1143.7551 | 34.2889 | (Au ) | A ( | 0.00) | I |

|          |            |           |         |       |     |       |   |
|----------|------------|-----------|---------|-------|-----|-------|---|
| 282- 282 | 0.2716E-04 | 1143.8841 | 34.2928 | (Bu ) | A ( | 0.00) | I |
| 283- 283 | 0.2720E-04 | 1144.6709 | 34.3164 | (Bg ) | I ( | 0.00) | A |
| 284- 284 | 0.2721E-04 | 1144.7970 | 34.3201 | (Ag ) | I ( | 0.00) | A |
| 285- 285 | 0.2784E-04 | 1157.9506 | 34.7145 | (Bu ) | A ( | 0.00) | I |
| 286- 286 | 0.2786E-04 | 1158.5328 | 34.7319 | (Au ) | A ( | 0.00) | I |
| 287- 287 | 0.2788E-04 | 1158.7960 | 34.7398 | (Ag ) | I ( | 0.00) | A |
| 288- 288 | 0.2790E-04 | 1159.2409 | 34.7532 | (Bg ) | I ( | 0.00) | A |
| 289- 289 | 0.2804E-04 | 1162.1514 | 34.8404 | (Bu ) | A ( | 0.00) | I |
| 290- 290 | 0.2807E-04 | 1162.7325 | 34.8578 | (Au ) | A ( | 0.00) | I |
| 291- 291 | 0.2821E-04 | 1165.6262 | 34.9446 | (Bg ) | I ( | 0.00) | A |
| 292- 292 | 0.2828E-04 | 1167.1886 | 34.9914 | (Ag ) | I ( | 0.00) | A |
| 293- 293 | 0.2865E-04 | 1174.8004 | 35.2196 | (Bu ) | A ( | 0.00) | I |
| 294- 294 | 0.2866E-04 | 1174.8897 | 35.2223 | (Au ) | A ( | 0.00) | I |
| 295- 295 | 0.2870E-04 | 1175.7589 | 35.2484 | (Ag ) | I ( | 0.00) | A |
| 296- 296 | 0.2870E-04 | 1175.7824 | 35.2491 | (Bg ) | I ( | 0.00) | A |
| 297- 297 | 0.2902E-04 | 1182.3823 | 35.4469 | (Bg ) | I ( | 0.00) | A |
| 298- 298 | 0.2906E-04 | 1183.0693 | 35.4675 | (Bu ) | A ( | 0.00) | I |
| 299- 299 | 0.2906E-04 | 1183.0710 | 35.4676 | (Au ) | A ( | 0.00) | I |
| 300- 300 | 0.2909E-04 | 1183.6651 | 35.4854 | (Ag ) | I ( | 0.00) | A |
| 301- 301 | 0.3052E-04 | 1212.3970 | 36.3467 | (Au ) | A ( | 0.00) | I |
| 302- 302 | 0.3052E-04 | 1212.4971 | 36.3497 | (Bu ) | A ( | 0.00) | I |
| 303- 303 | 0.3053E-04 | 1212.6472 | 36.3542 | (Bg ) | I ( | 0.00) | A |
| 304- 304 | 0.3056E-04 | 1213.1832 | 36.3703 | (Ag ) | I ( | 0.00) | A |
| 305- 305 | 0.3073E-04 | 1216.5726 | 36.4719 | (Au ) | A ( | 0.00) | I |
| 306- 306 | 0.3074E-04 | 1216.7861 | 36.4783 | (Ag ) | I ( | 0.00) | A |
| 307- 307 | 0.3080E-04 | 1218.0019 | 36.5148 | (Bu ) | A ( | 0.00) | I |
| 308- 308 | 0.3090E-04 | 1219.9516 | 36.5732 | (Bg ) | I ( | 0.00) | A |
| 309- 309 | 0.3103E-04 | 1222.6329 | 36.6536 | (Bu ) | A ( | 0.00) | I |
| 310- 310 | 0.3105E-04 | 1222.9298 | 36.6625 | (Au ) | A ( | 0.00) | I |
| 311- 311 | 0.3127E-04 | 1227.3031 | 36.7936 | (Ag ) | I ( | 0.00) | A |
| 312- 312 | 0.3128E-04 | 1227.5684 | 36.8016 | (Bg ) | I ( | 0.00) | A |
| 313- 313 | 0.3134E-04 | 1228.5950 | 36.8324 | (Au ) | A ( | 0.00) | I |



|          |            |           |               |           |   |
|----------|------------|-----------|---------------|-----------|---|
| 314- 314 | 0.3140E-04 | 1229.8550 | 36.8701 (Ag ) | I ( 0.00) | A |
| 315- 315 | 0.3149E-04 | 1231.5109 | 36.9198 (Bg ) | I ( 0.00) | A |
| 316- 316 | 0.3159E-04 | 1233.6112 | 36.9827 (Bu ) | A ( 0.00) | I |
| 317- 317 | 0.3169E-04 | 1235.4462 | 37.0377 (Ag ) | I ( 0.00) | A |
| 318- 318 | 0.3174E-04 | 1236.5352 | 37.0704 (Bu ) | A ( 0.00) | I |
| 319- 319 | 0.3176E-04 | 1236.8579 | 37.0801 (Bg ) | I ( 0.00) | A |
| 320- 320 | 0.3181E-04 | 1237.8565 | 37.1100 (Au ) | A ( 0.00) | I |
| 321- 321 | 0.3350E-04 | 1270.2582 | 38.0814 (Au ) | A ( 0.00) | I |
| 322- 322 | 0.3355E-04 | 1271.2710 | 38.1117 (Bu ) | A ( 0.00) | I |
| 323- 323 | 0.3362E-04 | 1272.5005 | 38.1486 (Bg ) | I ( 0.00) | A |
| 324- 324 | 0.3364E-04 | 1272.9955 | 38.1634 (Ag ) | I ( 0.00) | A |
| 325- 325 | 0.3411E-04 | 1281.7442 | 38.4257 (Bu ) | A ( 0.00) | I |
| 326- 326 | 0.3416E-04 | 1282.7040 | 38.4545 (Ag ) | I ( 0.00) | A |
| 327- 327 | 0.3416E-04 | 1282.7552 | 38.4560 (Au ) | A ( 0.00) | I |
| 328- 328 | 0.3419E-04 | 1283.3287 | 38.4732 (Bg ) | I ( 0.00) | A |
| 329- 329 | 0.3431E-04 | 1285.5862 | 38.5409 (Bu ) | A ( 0.00) | I |
| 330- 330 | 0.3434E-04 | 1286.0710 | 38.5554 (Au ) | A ( 0.00) | I |
| 331- 331 | 0.3438E-04 | 1286.9080 | 38.5805 (Bg ) | I ( 0.00) | A |
| 332- 332 | 0.3440E-04 | 1287.1812 | 38.5887 (Ag ) | I ( 0.00) | A |
| 333- 333 | 0.3532E-04 | 1304.2743 | 39.1012 (Au ) | A ( 0.00) | I |
| 334- 334 | 0.3533E-04 | 1304.4760 | 39.1072 (Bu ) | A ( 0.00) | I |
| 335- 335 | 0.3537E-04 | 1305.3280 | 39.1327 (Ag ) | I ( 0.00) | A |
| 336- 336 | 0.3544E-04 | 1306.6446 | 39.1722 (Bg ) | I ( 0.00) | A |
| 337- 337 | 0.3634E-04 | 1323.0811 | 39.6650 (Bu ) | A ( 0.00) | I |
| 338- 338 | 0.3634E-04 | 1323.1218 | 39.6662 (Au ) | A ( 0.00) | I |
| 339- 339 | 0.3636E-04 | 1323.3350 | 39.6726 (Ag ) | I ( 0.00) | A |
| 340- 340 | 0.3637E-04 | 1323.5778 | 39.6799 (Bg ) | I ( 0.00) | A |
| 341- 341 | 0.3691E-04 | 1333.3464 | 39.9727 (Bu ) | A ( 0.00) | I |
| 342- 342 | 0.3694E-04 | 1334.0112 | 39.9926 (Au ) | A ( 0.00) | I |
| 343- 343 | 0.3699E-04 | 1334.8198 | 40.0169 (Ag ) | I ( 0.00) | A |
| 344- 344 | 0.3703E-04 | 1335.6195 | 40.0409 (Bg ) | I ( 0.00) | A |
| 345- 345 | 0.3751E-04 | 1344.2300 | 40.2990 (Bu ) | A ( 0.00) | I |

|          |            |           |         |       |     |       |   |
|----------|------------|-----------|---------|-------|-----|-------|---|
| 346- 346 | 0.3752E-04 | 1344.3385 | 40.3023 | (Au ) | A ( | 0.00) | I |
| 347- 347 | 0.3760E-04 | 1345.8594 | 40.3478 | (Ag ) | I ( | 0.00) | A |
| 348- 348 | 0.3762E-04 | 1346.0855 | 40.3546 | (Bg ) | I ( | 0.00) | A |
| 349- 349 | 0.3910E-04 | 1372.2952 | 41.1404 | (Ag ) | I ( | 0.00) | A |
| 350- 350 | 0.3914E-04 | 1373.1577 | 41.1662 | (Au ) | A ( | 0.00) | I |
| 351- 351 | 0.3920E-04 | 1374.1845 | 41.1970 | (Bg ) | I ( | 0.00) | A |
| 352- 352 | 0.3927E-04 | 1375.2860 | 41.2300 | (Bu ) | A ( | 0.00) | I |
| 353- 353 | 0.3930E-04 | 1375.9277 | 41.2493 | (Au ) | A ( | 0.00) | I |
| 354- 354 | 0.3933E-04 | 1376.3907 | 41.2632 | (Ag ) | I ( | 0.00) | A |
| 355- 355 | 0.3933E-04 | 1376.4461 | 41.2648 | (Bu ) | A ( | 0.00) | I |
| 356- 356 | 0.3936E-04 | 1376.9993 | 41.2814 | (Bg ) | I ( | 0.00) | A |
| 357- 357 | 0.4006E-04 | 1389.1106 | 41.6445 | (Au ) | A ( | 0.00) | I |
| 358- 358 | 0.4009E-04 | 1389.6669 | 41.6612 | (Bu ) | A ( | 0.00) | I |
| 359- 359 | 0.4027E-04 | 1392.7373 | 41.7532 | (Bg ) | I ( | 0.00) | A |
| 360- 360 | 0.4030E-04 | 1393.2990 | 41.7701 | (Ag ) | I ( | 0.00) | A |
| 361- 361 | 0.4115E-04 | 1407.9313 | 42.2087 | (Bu ) | A ( | 0.00) | I |
| 362- 362 | 0.4119E-04 | 1408.4913 | 42.2255 | (Au ) | A ( | 0.00) | I |
| 363- 363 | 0.4124E-04 | 1409.5063 | 42.2559 | (Ag ) | I ( | 0.00) | A |
| 364- 364 | 0.4126E-04 | 1409.7168 | 42.2622 | (Bg ) | I ( | 0.00) | A |
| 365- 365 | 0.4226E-04 | 1426.7666 | 42.7734 | (Bu ) | A ( | 0.00) | I |
| 366- 366 | 0.4238E-04 | 1428.7217 | 42.8320 | (Au ) | A ( | 0.00) | I |
| 367- 367 | 0.4239E-04 | 1428.9437 | 42.8387 | (Ag ) | I ( | 0.00) | A |
| 368- 368 | 0.4241E-04 | 1429.3670 | 42.8513 | (Bg ) | I ( | 0.00) | A |
| 369- 369 | 0.4284E-04 | 1436.4805 | 43.0646 | (Bu ) | A ( | 0.00) | I |
| 370- 370 | 0.4293E-04 | 1438.0497 | 43.1116 | (Au ) | A ( | 0.00) | I |
| 371- 371 | 0.4298E-04 | 1438.7866 | 43.1337 | (Ag ) | I ( | 0.00) | A |
| 372- 372 | 0.4306E-04 | 1440.2141 | 43.1765 | (Bg ) | I ( | 0.00) | A |
| 373- 373 | 0.4333E-04 | 1444.7845 | 43.3135 | (Au ) | A ( | 0.00) | I |
| 374- 374 | 0.4335E-04 | 1445.1091 | 43.3233 | (Bg ) | I ( | 0.00) | A |
| 375- 375 | 0.4342E-04 | 1446.1376 | 43.3541 | (Bu ) | A ( | 0.00) | I |
| 376- 376 | 0.4342E-04 | 1446.2342 | 43.3570 | (Ag ) | I ( | 0.00) | A |
| 377- 377 | 0.4391E-04 | 1454.3741 | 43.6010 | (Bu ) | A ( | 0.00) | I |

|          |            |           |         |       |     |       |   |
|----------|------------|-----------|---------|-------|-----|-------|---|
| 378- 378 | 0.4396E-04 | 1455.1361 | 43.6239 | (Au ) | A ( | 0.00) | I |
| 379- 379 | 0.4398E-04 | 1455.4548 | 43.6334 | (Bg ) | I ( | 0.00) | A |
| 380- 380 | 0.4401E-04 | 1455.9763 | 43.6491 | (Ag ) | I ( | 0.00) | A |
| 381- 381 | 0.4563E-04 | 1482.5656 | 44.4462 | (Bu ) | A ( | 0.00) | I |
| 382- 382 | 0.4565E-04 | 1482.9295 | 44.4571 | (Au ) | A ( | 0.00) | I |
| 383- 383 | 0.4569E-04 | 1483.5060 | 44.4744 | (Ag ) | I ( | 0.00) | A |
| 384- 384 | 0.4577E-04 | 1484.8116 | 44.5135 | (Bg ) | I ( | 0.00) | A |
| 385- 385 | 0.4578E-04 | 1484.9545 | 44.5178 | (Au ) | A ( | 0.00) | I |
| 386- 386 | 0.4582E-04 | 1485.6426 | 44.5384 | (Bu ) | A ( | 0.00) | I |
| 387- 387 | 0.4589E-04 | 1486.7568 | 44.5718 | (Bg ) | I ( | 0.00) | A |
| 388- 388 | 0.4591E-04 | 1487.0140 | 44.5796 | (Ag ) | I ( | 0.00) | A |
| 389- 389 | 0.4672E-04 | 1500.1114 | 44.9722 | (Bu ) | A ( | 0.00) | I |
| 390- 390 | 0.4677E-04 | 1500.8900 | 44.9956 | (Au ) | A ( | 0.00) | I |
| 391- 391 | 0.4686E-04 | 1502.3951 | 45.0407 | (Bg ) | I ( | 0.00) | A |
| 392- 392 | 0.4689E-04 | 1502.8748 | 45.0551 | (Bu ) | A ( | 0.00) | I |
| 393- 393 | 0.4701E-04 | 1504.8467 | 45.1142 | (Ag ) | I ( | 0.00) | A |
| 394- 394 | 0.4707E-04 | 1505.8413 | 45.1440 | (Au ) | A ( | 0.00) | I |
| 395- 395 | 0.4723E-04 | 1508.2734 | 45.2169 | (Ag ) | I ( | 0.00) | A |
| 396- 396 | 0.4729E-04 | 1509.2774 | 45.2470 | (Bg ) | I ( | 0.00) | A |
| 397- 397 | 0.4744E-04 | 1511.6378 | 45.3178 | (Au ) | A ( | 0.00) | I |
| 398- 398 | 0.4752E-04 | 1512.9330 | 45.3566 | (Bg ) | I ( | 0.00) | A |
| 399- 399 | 0.4756E-04 | 1513.5456 | 45.3750 | (Ag ) | I ( | 0.00) | A |
| 400- 400 | 0.4761E-04 | 1514.3283 | 45.3984 | (Bu ) | A ( | 0.00) | I |
| 401- 401 | 0.4779E-04 | 1517.3095 | 45.4878 | (Au ) | A ( | 0.00) | I |
| 402- 402 | 0.4786E-04 | 1518.2725 | 45.5167 | (Bu ) | A ( | 0.00) | I |
| 403- 403 | 0.4788E-04 | 1518.7165 | 45.5300 | (Bg ) | I ( | 0.00) | A |
| 404- 404 | 0.4803E-04 | 1520.9775 | 45.5978 | (Ag ) | I ( | 0.00) | A |
| 405- 405 | 0.4810E-04 | 1522.1611 | 45.6332 | (Ag ) | I ( | 0.00) | A |
| 406- 406 | 0.4814E-04 | 1522.7098 | 45.6497 | (Au ) | A ( | 0.00) | I |
| 407- 407 | 0.4819E-04 | 1523.5892 | 45.6761 | (Bu ) | A ( | 0.00) | I |
| 408- 408 | 0.4829E-04 | 1525.1463 | 45.7227 | (Bg ) | I ( | 0.00) | A |
| 409- 409 | 0.4831E-04 | 1525.4072 | 45.7306 | (Ag ) | I ( | 0.00) | A |

|          |            |           |               |           |   |
|----------|------------|-----------|---------------|-----------|---|
| 410- 410 | 0.4835E-04 | 1526.0774 | 45.7506 (Au ) | A ( 0.00) | I |
| 411- 411 | 0.4840E-04 | 1526.8853 | 45.7749 (Bu ) | A ( 0.00) | I |
| 412- 412 | 0.4845E-04 | 1527.7373 | 45.8004 (Ag ) | I ( 0.00) | A |
| 413- 413 | 0.4848E-04 | 1528.1234 | 45.8120 (Au ) | A ( 0.00) | I |
| 414- 414 | 0.4849E-04 | 1528.3485 | 45.8187 (Bu ) | A ( 0.00) | I |
| 415- 415 | 0.4857E-04 | 1529.6372 | 45.8574 (Bg ) | I ( 0.00) | A |
| 416- 416 | 0.4861E-04 | 1530.1273 | 45.8721 (Bg ) | I ( 0.00) | A |
| 417- 417 | 0.4872E-04 | 1531.9977 | 45.9281 (Au ) | A ( 0.00) | I |
| 418- 418 | 0.4875E-04 | 1532.3878 | 45.9398 (Bu ) | A ( 0.00) | I |
| 419- 419 | 0.4875E-04 | 1532.4454 | 45.9416 (Ag ) | I ( 0.00) | A |
| 420- 420 | 0.4875E-04 | 1532.4687 | 45.9423 (Bg ) | I ( 0.00) | A |
| 421- 421 | 0.4940E-04 | 1542.5095 | 46.2433 (Bu ) | A ( 0.00) | I |
| 422- 422 | 0.4947E-04 | 1543.6619 | 46.2778 (Au ) | A ( 0.00) | I |
| 423- 423 | 0.4999E-04 | 1551.6949 | 46.5186 (Ag ) | I ( 0.00) | A |
| 424- 424 | 0.5009E-04 | 1553.2506 | 46.5653 (Bg ) | I ( 0.00) | A |
| 425- 425 | 0.5015E-04 | 1554.2742 | 46.5960 (Bu ) | A ( 0.00) | I |
| 426- 426 | 0.5016E-04 | 1554.3683 | 46.5988 (Au ) | A ( 0.00) | I |
| 427- 427 | 0.5054E-04 | 1560.3326 | 46.7776 (Ag ) | I ( 0.00) | A |
| 428- 428 | 0.5062E-04 | 1561.5585 | 46.8143 (Bg ) | I ( 0.00) | A |
| 429- 429 | 0.5062E-04 | 1561.5792 | 46.8150 (Bu ) | A ( 0.00) | I |
| 430- 430 | 0.5064E-04 | 1561.7988 | 46.8216 (Au ) | A ( 0.00) | I |
| 431- 431 | 0.5072E-04 | 1563.1184 | 46.8611 (Bu ) | A ( 0.00) | I |
| 432- 432 | 0.5074E-04 | 1563.4125 | 46.8699 (Bg ) | I ( 0.00) | A |
| 433- 433 | 0.5088E-04 | 1565.4747 | 46.9318 (Au ) | A ( 0.00) | I |
| 434- 434 | 0.5101E-04 | 1567.4596 | 46.9913 (Ag ) | I ( 0.00) | A |
| 435- 435 | 0.5853E-04 | 1679.0521 | 50.3367 (Ag ) | I ( 0.00) | A |
| 436- 436 | 0.5885E-04 | 1683.6412 | 50.4743 (Bg ) | I ( 0.00) | A |
| 437- 437 | 0.5975E-04 | 1696.4693 | 50.8589 (Bu ) | A ( 0.00) | I |
| 438- 438 | 0.5991E-04 | 1698.7091 | 50.9260 (Au ) | A ( 0.00) | I |
| 439- 439 | 0.6055E-04 | 1707.8390 | 51.1997 (Ag ) | I ( 0.00) | A |
| 440- 440 | 0.6074E-04 | 1710.4889 | 51.2792 (Au ) | A ( 0.00) | I |
| 441- 441 | 0.6111E-04 | 1715.7622 | 51.4373 (Bg ) | I ( 0.00) | A |

|          |            |           |         |       |     |       |   |
|----------|------------|-----------|---------|-------|-----|-------|---|
| 442- 442 | 0.6127E-04 | 1717.9247 | 51.5021 | (Bu ) | A ( | 0.00) | I |
| 443- 443 | 0.6257E-04 | 1736.1236 | 52.0477 | (Ag ) | I ( | 0.00) | A |
| 444- 444 | 0.6258E-04 | 1736.1993 | 52.0499 | (Bg ) | I ( | 0.00) | A |
| 445- 445 | 0.1833E-03 | 2971.4378 | 89.0815 | (Au ) | A ( | 0.00) | I |
| 446- 446 | 0.1838E-03 | 2975.5898 | 89.2059 | (Bu ) | A ( | 0.00) | I |
| 447- 447 | 0.1946E-03 | 3061.6035 | 91.7846 | (Ag ) | I ( | 0.00) | A |
| 448- 448 | 0.1951E-03 | 3065.5812 | 91.9038 | (Bg ) | I ( | 0.00) | A |
| 449- 449 | 0.1978E-03 | 3086.7377 | 92.5381 | (Bu ) | A ( | 0.00) | I |
| 450- 450 | 0.1978E-03 | 3086.7378 | 92.5381 | (Ag ) | I ( | 0.00) | A |
| 451- 451 | 0.1978E-03 | 3087.0133 | 92.5463 | (Au ) | A ( | 0.00) | I |
| 452- 452 | 0.1979E-03 | 3087.1516 | 92.5505 | (Bg ) | I ( | 0.00) | A |
| 453- 453 | 0.1984E-03 | 3091.7141 | 92.6873 | (Au ) | A ( | 0.00) | I |
| 454- 454 | 0.1985E-03 | 3091.8038 | 92.6899 | (Bu ) | A ( | 0.00) | I |
| 455- 455 | 0.1985E-03 | 3092.4550 | 92.7095 | (Bg ) | I ( | 0.00) | A |
| 456- 456 | 0.1985E-03 | 3092.5400 | 92.7120 | (Ag ) | I ( | 0.00) | A |
| 457- 457 | 0.1990E-03 | 3095.8269 | 92.8106 | (Ag ) | I ( | 0.00) | A |
| 458- 458 | 0.1990E-03 | 3095.8667 | 92.8117 | (Bg ) | I ( | 0.00) | A |
| 459- 459 | 0.1990E-03 | 3095.8972 | 92.8127 | (Bu ) | A ( | 0.00) | I |
| 460- 460 | 0.1990E-03 | 3095.9958 | 92.8156 | (Au ) | A ( | 0.00) | I |
| 461- 461 | 0.2006E-03 | 3108.7059 | 93.1967 | (Ag ) | I ( | 0.00) | A |
| 462- 462 | 0.2006E-03 | 3108.7074 | 93.1967 | (Bu ) | A ( | 0.00) | I |
| 463- 463 | 0.2006E-03 | 3108.7644 | 93.1984 | (Bg ) | I ( | 0.00) | A |
| 464- 464 | 0.2006E-03 | 3108.8611 | 93.2013 | (Au ) | A ( | 0.00) | I |
| 465- 465 | 0.2011E-03 | 3112.6014 | 93.3134 | (Bu ) | A ( | 0.00) | I |
| 466- 466 | 0.2011E-03 | 3112.6234 | 93.3141 | (Au ) | A ( | 0.00) | I |
| 467- 467 | 0.2011E-03 | 3112.6623 | 93.3153 | (Ag ) | I ( | 0.00) | A |
| 468- 468 | 0.2012E-03 | 3112.7915 | 93.3191 | (Bg ) | I ( | 0.00) | A |
| 469- 469 | 0.2024E-03 | 3122.7685 | 93.6182 | (Au ) | A ( | 0.00) | I |
| 470- 470 | 0.2025E-03 | 3122.8299 | 93.6201 | (Bu ) | A ( | 0.00) | I |
| 471- 471 | 0.2025E-03 | 3123.0135 | 93.6256 | (Ag ) | I ( | 0.00) | A |
| 472- 472 | 0.2025E-03 | 3123.0681 | 93.6272 | (Bg ) | I ( | 0.00) | A |
| 473- 473 | 0.2077E-03 | 3162.8501 | 94.8199 | (Au ) | A ( | 0.00) | I |

|          |            |           |               |           |   |
|----------|------------|-----------|---------------|-----------|---|
| 474- 474 | 0.2077E-03 | 3162.9412 | 94.8226 (Ag ) | I ( 0.00) | A |
| 475- 475 | 0.2077E-03 | 3162.9563 | 94.8230 (Bg ) | I ( 0.00) | A |
| 476- 476 | 0.2077E-03 | 3163.0194 | 94.8249 (Bu ) | A ( 0.00) | I |
| 477- 477 | 0.2081E-03 | 3165.8490 | 94.9098 (Bu ) | A ( 0.00) | I |
| 478- 478 | 0.2081E-03 | 3165.9543 | 94.9129 (Au ) | A ( 0.00) | I |
| 479- 479 | 0.2081E-03 | 3166.0709 | 94.9164 (Bg ) | I ( 0.00) | A |
| 480- 480 | 0.2081E-03 | 3166.1260 | 94.9181 (Ag ) | I ( 0.00) | A |
| 481- 481 | 0.2084E-03 | 3168.2610 | 94.9821 (Au ) | A ( 0.00) | I |
| 482- 482 | 0.2084E-03 | 3168.3223 | 94.9839 (Ag ) | I ( 0.00) | A |
| 483- 483 | 0.2084E-03 | 3168.3957 | 94.9861 (Bu ) | A ( 0.00) | I |
| 484- 484 | 0.2084E-03 | 3168.6790 | 94.9946 (Bg ) | I ( 0.00) | A |
| 485- 485 | 0.2114E-03 | 3191.1422 | 95.6680 (Bg ) | I ( 0.00) | A |
| 486- 486 | 0.2114E-03 | 3191.1693 | 95.6688 (Ag ) | I ( 0.00) | A |
| 487- 487 | 0.2114E-03 | 3191.1932 | 95.6696 (Bu ) | A ( 0.00) | I |
| 488- 488 | 0.2114E-03 | 3191.2514 | 95.6713 (Au ) | A ( 0.00) | I |
| 489- 489 | 0.2117E-03 | 3193.0846 | 95.7263 (Bu ) | A ( 0.00) | I |
| 490- 490 | 0.2117E-03 | 3193.0950 | 95.7266 (Au ) | A ( 0.00) | I |
| 491- 491 | 0.2117E-03 | 3193.2772 | 95.7320 (Ag ) | I ( 0.00) | A |
| 492- 492 | 0.2117E-03 | 3193.3467 | 95.7341 (Bg ) | I ( 0.00) | A |
| 493- 493 | 0.2128E-03 | 3201.5572 | 95.9803 (Bu ) | A ( 0.00) | I |
| 494- 494 | 0.2128E-03 | 3201.5589 | 95.9803 (Au ) | A ( 0.00) | I |
| 495- 495 | 0.2128E-03 | 3201.5962 | 95.9814 (Ag ) | I ( 0.00) | A |
| 496- 496 | 0.2128E-03 | 3201.6290 | 95.9824 (Bg ) | I ( 0.00) | A |
| 497- 497 | 0.2131E-03 | 3204.0613 | 96.0553 (Au ) | A ( 0.00) | I |
| 498- 498 | 0.2131E-03 | 3204.0820 | 96.0560 (Ag ) | I ( 0.00) | A |
| 499- 499 | 0.2131E-03 | 3204.1421 | 96.0578 (Bu ) | A ( 0.00) | I |
| 500- 500 | 0.2131E-03 | 3204.2125 | 96.0599 (Bg ) | I ( 0.00) | A |
| 501- 501 | 0.2132E-03 | 3204.3260 | 96.0633 (Ag ) | I ( 0.00) | A |
| 502- 502 | 0.2132E-03 | 3204.3940 | 96.0653 (Bg ) | I ( 0.00) | A |
| 503- 503 | 0.2132E-03 | 3204.5009 | 96.0685 (Bu ) | A ( 0.00) | I |
| 504- 504 | 0.2132E-03 | 3204.5092 | 96.0688 (Au ) | A ( 0.00) | I |
| 505- 505 | 0.2136E-03 | 3207.6965 | 96.1643 (Ag ) | I ( 0.00) | A |

|          |            |           |          |       |           |   |
|----------|------------|-----------|----------|-------|-----------|---|
| 506- 506 | 0.2136E-03 | 3207.7306 | 96.1653  | (Bu ) | A ( 0.00) | I |
| 507- 507 | 0.2136E-03 | 3207.7983 | 96.1674  | (Bg ) | I ( 0.00) | A |
| 508- 508 | 0.2136E-03 | 3207.8321 | 96.1684  | (Au ) | A ( 0.00) | I |
| 509- 509 | 0.2162E-03 | 3227.0932 | 96.7458  | (Au ) | A ( 0.00) | I |
| 510- 510 | 0.2162E-03 | 3227.1186 | 96.7466  | (Ag ) | I ( 0.00) | A |
| 511- 511 | 0.2162E-03 | 3227.1476 | 96.7475  | (Bu ) | A ( 0.00) | I |
| 512- 512 | 0.2162E-03 | 3227.1848 | 96.7486  | (Bg ) | I ( 0.00) | A |
| 513- 513 | 0.2190E-03 | 3247.7624 | 97.3655  | (Bg ) | I ( 0.00) | A |
| 514- 514 | 0.2190E-03 | 3247.7961 | 97.3665  | (Bu ) | A ( 0.00) | I |
| 515- 515 | 0.2190E-03 | 3247.9413 | 97.3708  | (Au ) | A ( 0.00) | I |
| 516- 516 | 0.2190E-03 | 3247.9898 | 97.3723  | (Ag ) | I ( 0.00) | A |
| 517- 517 | 0.2215E-03 | 3266.5735 | 97.9294  | (Ag ) | I ( 0.00) | A |
| 518- 518 | 0.2215E-03 | 3266.6615 | 97.9320  | (Bu ) | A ( 0.00) | I |
| 519- 519 | 0.2215E-03 | 3266.7528 | 97.9348  | (Au ) | A ( 0.00) | I |
| 520- 520 | 0.2216E-03 | 3266.8115 | 97.9365  | (Bg ) | I ( 0.00) | A |
| 521- 521 | 0.2274E-03 | 3309.5556 | 99.2180  | (Ag ) | I ( 0.00) | A |
| 522- 522 | 0.2276E-03 | 3311.3363 | 99.2714  | (Au ) | A ( 0.00) | I |
| 523- 523 | 0.2276E-03 | 3311.4006 | 99.2733  | (Bg ) | I ( 0.00) | A |
| 524- 524 | 0.2281E-03 | 3314.7818 | 99.3747  | (Bu ) | A ( 0.00) | I |
| 525- 525 | 0.2840E-03 | 3698.5421 | 110.8795 | (Bu ) | A ( 0.00) | I |
| 526- 526 | 0.2841E-03 | 3698.9985 | 110.8932 | (Au ) | A ( 0.00) | I |
| 527- 527 | 0.2864E-03 | 3714.3437 | 111.3532 | (Bg ) | I ( 0.00) | A |
| 528- 528 | 0.2865E-03 | 3714.7391 | 111.3651 | (Ag ) | I ( 0.00) | A |

NORMAL MODES NORMALIZED TO CLASSICAL AMPLITUDES (IN BOHR)

FREQ(CM\*\*-1) -64.13 -55.22 -51.24 -50.81 0.00 0.00

AT. 1 | X -0.0024 0.0062 -0.0115 0.0127 -0.0000 -0.0195

Y 0.0090 -0.0084 0.0025 -0.0019 0.0212 0.0000

Z -0.0010 0.0060 0.0025 -0.0028 -0.0000 0.0085

AT. 2 | X 0.0024 -0.0062 -0.0115 0.0127 0.0000 -0.0195

Y 0.0090 -0.0084 -0.0025 0.0019 0.0212 -0.0000  
Z 0.0010 -0.0060 0.0025 -0.0028 0.0000 0.0085  
AT. 3 I X -0.0024 -0.0062 -0.0115 -0.0127 -0.0000 -0.0195  
Y 0.0090 0.0084 0.0025 0.0019 0.0212 0.0000  
Z -0.0010 -0.0060 0.0025 0.0028 -0.0000 0.0085  
AT. 4 I X 0.0024 0.0062 -0.0115 -0.0127 0.0000 -0.0195  
Y 0.0090 0.0084 -0.0025 -0.0019 0.0212 -0.0000  
Z 0.0010 0.0060 0.0025 0.0028 0.0000 0.0085  
AT. 5 I X 0.0059 0.0044 -0.0139 -0.0028 0.0000 -0.0195  
Y 0.0004 0.0098 -0.0097 -0.0069 0.0212 -0.0000  
Z -0.0066 0.0041 -0.0015 -0.0041 0.0000 0.0085  
AT. 6 I X -0.0059 -0.0044 -0.0139 -0.0028 -0.0000 -0.0195  
Y 0.0004 0.0098 0.0097 0.0069 0.0212 0.0000  
Z 0.0066 -0.0041 -0.0015 -0.0041 -0.0000 0.0085  
AT. 7 I X 0.0059 -0.0044 -0.0139 0.0028 0.0000 -0.0195  
Y 0.0004 -0.0098 -0.0097 0.0069 0.0212 -0.0000  
Z -0.0066 -0.0041 -0.0015 0.0041 0.0000 0.0085  
AT. 8 I X -0.0059 0.0044 -0.0139 0.0028 -0.0000 -0.0195  
Y 0.0004 -0.0098 0.0097 -0.0069 0.0212 0.0000  
Z 0.0066 0.0041 -0.0015 0.0041 -0.0000 0.0085  
AT. 9 N X 0.0006 0.0059 -0.0164 -0.0021 0.0000 -0.0195  
Y 0.0214 -0.0179 0.0216 0.0199 0.0212 0.0000  
Z 0.0041 0.0023 0.0086 -0.0018 -0.0000 0.0085  
AT. 10 N X -0.0006 -0.0059 -0.0164 -0.0021 -0.0000 -0.0195  
Y 0.0214 -0.0179 -0.0216 -0.0199 0.0212 -0.0000  
Z -0.0041 -0.0023 0.0086 -0.0018 0.0000 0.0085  
AT. 11 N X 0.0006 -0.0059 -0.0164 0.0021 0.0000 -0.0195  
Y 0.0214 0.0179 0.0216 -0.0199 0.0212 0.0000  
Z 0.0041 -0.0023 0.0086 0.0018 -0.0000 0.0085  
AT. 12 N X -0.0006 0.0059 -0.0164 0.0021 -0.0000 -0.0195  
Y 0.0214 0.0179 -0.0216 0.0199 0.0212 -0.0000  
Z -0.0041 0.0023 0.0086 0.0018 0.0000 0.0085



AT. 13 N X -0.0058 0.0136 -0.0247 -0.0089 0.0000 -0.0195  
Y -0.0212 0.0295 -0.0339 -0.0268 0.0212 -0.0000  
Z -0.0003 0.0079 0.0064 -0.0030 0.0000 0.0085

AT. 14 N X 0.0058 -0.0136 -0.0247 -0.0089 -0.0000 -0.0195  
Y -0.0212 0.0295 0.0339 0.0268 0.0212 0.0000  
Z 0.0003 -0.0079 0.0064 -0.0030 -0.0000 0.0085

AT. 15 N X -0.0058 -0.0136 -0.0247 0.0089 0.0000 -0.0195  
Y -0.0212 -0.0295 -0.0339 0.0268 0.0212 -0.0000  
Z -0.0003 -0.0079 0.0064 0.0030 0.0000 0.0085

AT. 16 N X 0.0058 0.0136 -0.0247 0.0089 -0.0000 -0.0195  
Y -0.0212 -0.0295 0.0339 -0.0268 0.0212 0.0000  
Z 0.0003 0.0079 0.0064 0.0030 -0.0000 0.0085

AT. 17 O X 0.0268 -0.0191 0.0152 0.0247 0.0000 -0.0195  
Y 0.0113 -0.0082 0.0106 0.0118 0.0212 0.0000  
Z 0.0026 0.0034 0.0040 -0.0069 -0.0000 0.0085

AT. 18 O X -0.0268 0.0191 0.0152 0.0247 -0.0000 -0.0195  
Y 0.0113 -0.0082 -0.0106 -0.0118 0.0212 -0.0000  
Z -0.0026 -0.0034 0.0040 -0.0069 0.0000 0.0085

AT. 19 O X 0.0268 0.0191 0.0152 -0.0247 0.0000 -0.0195  
Y 0.0113 0.0082 0.0106 -0.0118 0.0212 0.0000  
Z 0.0026 -0.0034 0.0040 0.0069 -0.0000 0.0085

AT. 20 O X -0.0268 -0.0191 0.0152 -0.0247 -0.0000 -0.0195  
Y 0.0113 0.0082 -0.0106 0.0118 0.0212 -0.0000  
Z -0.0026 0.0034 0.0040 0.0069 0.0000 0.0085

AT. 21 O X -0.0001 0.0066 0.0006 0.0139 0.0000 -0.0195  
Y -0.0240 0.0316 -0.0359 -0.0292 0.0212 -0.0000  
Z -0.0040 0.0099 0.0041 -0.0057 0.0000 0.0085

AT. 22 O X 0.0001 -0.0066 0.0006 0.0139 -0.0000 -0.0195  
Y -0.0240 0.0316 0.0359 0.0292 0.0212 0.0000  
Z 0.0040 -0.0099 0.0041 -0.0057 -0.0000 0.0085

AT. 23 O X -0.0001 -0.0066 0.0006 -0.0139 0.0000 -0.0195  
Y -0.0240 -0.0316 -0.0359 0.0292 0.0212 -0.0000

Z -0.0040 -0.0099 0.0041 0.0057 0.0000 0.0085  
AT. 24 O X 0.0001 0.0066 0.0006 -0.0139 -0.0000 -0.0195  
Y -0.0240 -0.0316 0.0359 -0.0292 0.0212 0.0000  
Z 0.0040 0.0099 0.0041 0.0057 -0.0000 0.0085  
AT. 25 C X 0.0065 -0.0004 -0.0049 0.0136 0.0000 -0.0195  
Y 0.0185 -0.0147 0.0149 0.0114 0.0212 0.0000  
Z 0.0047 0.0020 0.0052 -0.0074 -0.0000 0.0085  
AT. 26 C X -0.0065 0.0004 -0.0049 0.0136 -0.0000 -0.0195  
Y 0.0185 -0.0147 -0.0149 -0.0114 0.0212 -0.0000  
Z -0.0047 -0.0020 0.0052 -0.0074 0.0000 0.0085  
AT. 27 C X 0.0065 0.0004 -0.0049 -0.0136 0.0000 -0.0195  
Y 0.0185 0.0147 0.0149 -0.0114 0.0212 0.0000  
Z 0.0047 -0.0020 0.0052 0.0074 -0.0000 0.0085  
AT. 28 C X -0.0065 -0.0004 -0.0049 -0.0136 -0.0000 -0.0195  
Y 0.0185 0.0147 -0.0149 0.0114 0.0212 -0.0000  
Z -0.0047 0.0020 0.0052 0.0074 0.0000 0.0085  
AT. 29 H X 0.0030 0.0023 -0.0075 0.0136 0.0000 -0.0195  
Y 0.0215 -0.0158 0.0175 0.0127 0.0212 0.0000  
Z 0.0098 -0.0020 0.0087 -0.0074 0.0000 0.0085  
AT. 30 H X -0.0030 -0.0023 -0.0075 0.0136 -0.0000 -0.0195  
Y 0.0215 -0.0158 -0.0175 -0.0127 0.0212 -0.0000  
Z -0.0098 0.0020 0.0087 -0.0074 -0.0000 0.0085  
AT. 31 H X 0.0030 -0.0023 -0.0075 -0.0136 0.0000 -0.0195  
Y 0.0215 0.0158 0.0175 -0.0127 0.0212 0.0000  
Z 0.0098 0.0020 0.0087 0.0074 0.0000 0.0085  
AT. 32 H X -0.0030 0.0023 -0.0075 -0.0136 -0.0000 -0.0195  
Y 0.0215 0.0158 -0.0175 0.0127 0.0212 -0.0000  
Z -0.0098 -0.0020 0.0087 0.0074 -0.0000 0.0085  
AT. 33 H X 0.0121 -0.0033 0.0020 0.0188 0.0000 -0.0195  
Y 0.0178 -0.0145 0.0144 0.0114 0.0212 0.0000  
Z 0.0028 0.0042 0.0013 -0.0121 -0.0000 0.0085  
AT. 34 H X -0.0121 0.0033 0.0020 0.0188 -0.0000 -0.0195

Y 0.0178 -0.0145 -0.0144 -0.0114 0.0212 -0.0000  
Z -0.0028 -0.0042 0.0013 -0.0121 0.0000 0.0085  
AT. 35 H X 0.0121 0.0033 0.0020 -0.0188 0.0000 -0.0195  
Y 0.0178 0.0145 0.0144 -0.0114 0.0212 0.0000  
Z 0.0028 -0.0042 0.0013 0.0121 -0.0000 0.0085  
AT. 36 H X -0.0121 -0.0033 0.0020 -0.0188 -0.0000 -0.0195  
Y 0.0178 0.0145 -0.0144 0.0114 0.0212 -0.0000  
Z -0.0028 0.0042 0.0013 0.0121 0.0000 0.0085  
AT. 37 C X 0.0115 -0.0048 -0.0019 0.0117 0.0000 -0.0195  
Y 0.0179 -0.0143 0.0167 0.0151 0.0212 0.0000  
Z 0.0044 0.0019 0.0068 -0.0045 -0.0000 0.0085  
AT. 38 C X -0.0115 0.0048 -0.0019 0.0117 -0.0000 -0.0195  
Y 0.0179 -0.0143 -0.0167 -0.0151 0.0212 -0.0000  
Z -0.0044 -0.0019 0.0068 -0.0045 0.0000 0.0085  
AT. 39 C X 0.0115 0.0048 -0.0019 -0.0117 0.0000 -0.0195  
Y 0.0179 0.0143 0.0167 -0.0151 0.0212 0.0000  
Z 0.0044 -0.0019 0.0068 0.0045 -0.0000 0.0085  
AT. 40 C X -0.0115 -0.0048 -0.0019 -0.0117 -0.0000 -0.0195  
Y 0.0179 0.0143 -0.0167 0.0151 0.0212 -0.0000  
Z -0.0044 0.0019 0.0068 0.0045 0.0000 0.0085  
AT. 41 C X 0.0069 -0.0030 -0.0072 0.0061 0.0000 -0.0195  
Y 0.0240 -0.0201 0.0234 0.0210 0.0212 0.0000  
Z -0.0014 0.0084 0.0026 -0.0070 -0.0000 0.0085  
AT. 42 C X -0.0069 0.0030 -0.0072 0.0061 -0.0000 -0.0195  
Y 0.0240 -0.0201 -0.0234 -0.0210 0.0212 -0.0000  
Z 0.0014 -0.0084 0.0026 -0.0070 0.0000 0.0085  
AT. 43 C X 0.0069 0.0030 -0.0072 -0.0061 0.0000 -0.0195  
Y 0.0240 0.0201 0.0234 -0.0210 0.0212 0.0000  
Z -0.0014 -0.0084 0.0026 0.0070 -0.0000 0.0085  
AT. 44 C X -0.0069 -0.0030 -0.0072 -0.0061 -0.0000 -0.0195  
Y 0.0240 0.0201 -0.0234 0.0210 0.0212 -0.0000  
Z 0.0014 0.0084 0.0026 0.0070 0.0000 0.0085

AT. 45 H X -0.0121 0.0161 -0.0303 -0.0142 0.0000 -0.0195  
Y 0.0321 -0.0280 0.0322 0.0287 0.0212 0.0000  
Z 0.0085 -0.0013 0.0136 0.0026 -0.0000 0.0085

AT. 46 H X 0.0121 -0.0161 -0.0303 -0.0142 -0.0000 -0.0195  
Y 0.0321 -0.0280 -0.0322 -0.0287 0.0212 -0.0000  
Z -0.0085 0.0013 0.0136 0.0026 0.0000 0.0085

AT. 47 H X -0.0121 -0.0161 -0.0303 0.0142 0.0000 -0.0195  
Y 0.0321 0.0280 0.0322 -0.0287 0.0212 0.0000  
Z 0.0085 0.0013 0.0136 -0.0026 -0.0000 0.0085

AT. 48 H X 0.0121 0.0161 -0.0303 0.0142 -0.0000 -0.0195  
Y 0.0321 0.0280 -0.0322 0.0287 0.0212 -0.0000  
Z -0.0085 -0.0013 0.0136 -0.0026 0.0000 0.0085

AT. 49 H X 0.0176 -0.0150 0.0066 0.0176 0.0000 -0.0195  
Y 0.0410 -0.0381 0.0441 0.0386 0.0212 0.0000  
Z -0.0156 0.0219 -0.0133 -0.0206 -0.0000 0.0085

AT. 50 H X -0.0176 0.0150 0.0066 0.0176 -0.0000 -0.0195  
Y 0.0410 -0.0381 -0.0441 -0.0386 0.0212 -0.0000  
Z 0.0156 -0.0219 -0.0133 -0.0206 0.0000 0.0085

AT. 51 H X 0.0176 0.0150 0.0066 -0.0176 0.0000 -0.0195  
Y 0.0410 0.0381 0.0441 -0.0386 0.0212 0.0000  
Z -0.0156 -0.0219 -0.0133 0.0206 -0.0000 0.0085

AT. 52 H X -0.0176 -0.0150 0.0066 -0.0176 -0.0000 -0.0195  
Y 0.0410 0.0381 -0.0441 0.0386 0.0212 -0.0000  
Z 0.0156 0.0219 -0.0133 0.0206 0.0000 0.0085

AT. 53 C X 0.0191 -0.0159 0.0083 0.0188 0.0000 -0.0195  
Y -0.0024 0.0083 -0.0090 -0.0062 0.0212 0.0000  
Z -0.0060 0.0147 -0.0026 -0.0111 -0.0000 0.0085

AT. 54 C X -0.0191 0.0159 0.0083 0.0188 -0.0000 -0.0195  
Y -0.0024 0.0083 0.0090 0.0062 0.0212 -0.0000  
Z 0.0060 -0.0147 -0.0026 -0.0111 0.0000 0.0085

AT. 55 C X 0.0191 0.0159 0.0083 -0.0188 0.0000 -0.0195  
Y -0.0024 -0.0083 -0.0090 0.0062 0.0212 0.0000

Z -0.0060 -0.0147 -0.0026 0.0111 -0.0000 0.0085  
AT. 56 C X -0.0191 -0.0159 0.0083 -0.0188 -0.0000 -0.0195  
Y -0.0024 -0.0083 0.0090 -0.0062 0.0212 -0.0000  
Z 0.0060 0.0147 -0.0026 0.0111 0.0000 0.0085  
AT. 57 C X 0.0289 -0.0299 0.0226 0.0287 0.0000 -0.0195  
Y -0.0010 0.0068 -0.0065 -0.0050 0.0212 0.0000  
Z -0.0100 0.0199 -0.0084 -0.0150 -0.0000 0.0085  
AT. 58 C X -0.0289 0.0299 0.0226 0.0287 -0.0000 -0.0195  
Y -0.0010 0.0068 0.0065 0.0050 0.0212 -0.0000  
Z 0.0100 -0.0199 -0.0084 -0.0150 0.0000 0.0085  
AT. 59 C X 0.0289 0.0299 0.0226 -0.0287 0.0000 -0.0195  
Y -0.0010 -0.0068 -0.0065 0.0050 0.0212 0.0000  
Z -0.0100 -0.0199 -0.0084 0.0150 -0.0000 0.0085  
AT. 60 C X -0.0289 -0.0299 0.0226 -0.0287 -0.0000 -0.0195  
Y -0.0010 -0.0068 0.0065 -0.0050 0.0212 -0.0000  
Z 0.0100 0.0199 -0.0084 0.0150 0.0000 0.0085  
AT. 61 H X 0.0401 -0.0437 0.0348 0.0413 0.0000 -0.0195  
Y 0.0083 -0.0041 0.0031 0.0053 0.0212 0.0000  
Z -0.0143 0.0230 -0.0113 -0.0195 -0.0000 0.0085  
AT. 62 H X -0.0401 0.0437 0.0348 0.0413 -0.0000 -0.0195  
Y 0.0083 -0.0041 -0.0031 -0.0053 0.0212 -0.0000  
Z 0.0143 -0.0230 -0.0113 -0.0195 0.0000 0.0085  
AT. 63 H X 0.0401 0.0437 0.0348 -0.0413 0.0000 -0.0195  
Y 0.0083 0.0041 0.0031 -0.0053 0.0212 0.0000  
Z -0.0143 -0.0230 -0.0113 0.0195 -0.0000 0.0085  
AT. 64 H X -0.0401 -0.0437 0.0348 -0.0413 -0.0000 -0.0195  
Y 0.0083 0.0041 -0.0031 0.0053 0.0212 -0.0000  
Z 0.0143 0.0230 -0.0113 0.0195 0.0000 0.0085  
AT. 65 H X 0.0331 -0.0350 0.0270 0.0334 0.0000 -0.0195  
Y -0.0141 0.0224 -0.0196 -0.0189 0.0212 -0.0000  
Z -0.0115 0.0237 -0.0136 -0.0156 -0.0000 0.0085  
AT. 66 H X -0.0331 0.0350 0.0270 0.0334 -0.0000 -0.0195

Y -0.0141 0.0224 0.0196 0.0189 0.0212 0.0000  
Z 0.0115 -0.0237 -0.0136 -0.0156 0.0000 0.0085  
AT. 67 H X 0.0331 0.0350 0.0270 -0.0334 0.0000 -0.0195  
Y -0.0141 -0.0224 -0.0196 0.0189 0.0212 -0.0000  
Z -0.0115 -0.0237 -0.0136 0.0156 -0.0000 0.0085  
AT. 68 H X -0.0331 -0.0350 0.0270 -0.0334 -0.0000 -0.0195  
Y -0.0141 -0.0224 0.0196 -0.0189 0.0212 0.0000  
Z 0.0115 0.0237 -0.0136 0.0156 0.0000 0.0085  
AT. 69 H X 0.0199 -0.0219 0.0167 0.0182 0.0000 -0.0195  
Y 0.0051 -0.0000 0.0005 0.0014 0.0212 0.0000  
Z -0.0062 0.0157 -0.0037 -0.0113 -0.0000 0.0085  
AT. 70 H X -0.0199 0.0219 0.0167 0.0182 -0.0000 -0.0195  
Y 0.0051 -0.0000 -0.0005 -0.0014 0.0212 -0.0000  
Z 0.0062 -0.0157 -0.0037 -0.0113 0.0000 0.0085  
AT. 71 H X 0.0199 0.0219 0.0167 -0.0182 0.0000 -0.0195  
Y 0.0051 0.0000 0.0005 -0.0014 0.0212 0.0000  
Z -0.0062 -0.0157 -0.0037 0.0113 -0.0000 0.0085  
AT. 72 H X -0.0199 -0.0219 0.0167 -0.0182 -0.0000 -0.0195  
Y 0.0051 0.0000 -0.0005 0.0014 0.0212 -0.0000  
Z 0.0062 0.0157 -0.0037 0.0113 0.0000 0.0085  
AT. 73 C X 0.0447 -0.0420 0.0383 0.0477 0.0000 -0.0195  
Y -0.0087 0.0154 -0.0161 -0.0135 0.0212 -0.0000  
Z -0.0116 0.0211 -0.0099 -0.0177 -0.0000 0.0085  
AT. 74 C X -0.0447 0.0420 0.0383 0.0477 -0.0000 -0.0195  
Y -0.0087 0.0154 0.0161 0.0135 0.0212 0.0000  
Z 0.0116 -0.0211 -0.0099 -0.0177 0.0000 0.0085  
AT. 75 C X 0.0447 0.0420 0.0383 -0.0477 0.0000 -0.0195  
Y -0.0087 -0.0154 -0.0161 0.0135 0.0212 -0.0000  
Z -0.0116 -0.0211 -0.0099 0.0177 -0.0000 0.0085  
AT. 76 C X -0.0447 -0.0420 0.0383 -0.0477 -0.0000 -0.0195  
Y -0.0087 -0.0154 0.0161 -0.0135 0.0212 0.0000  
Z 0.0116 0.0211 -0.0099 0.0177 0.0000 0.0085

AT. 77 C X 0.0099 -0.0037 -0.0062 0.0067 0.0000 -0.0195  
Y 0.0181 -0.0140 0.0193 0.0187 0.0212 0.0000  
Z 0.0023 0.0045 0.0076 -0.0017 -0.0000 0.0085

AT. 78 C X -0.0099 0.0037 -0.0062 0.0067 -0.0000 -0.0195  
Y 0.0181 -0.0140 -0.0193 -0.0187 0.0212 -0.0000  
Z -0.0023 -0.0045 0.0076 -0.0017 0.0000 0.0085

AT. 79 C X 0.0099 0.0037 -0.0062 -0.0067 0.0000 -0.0195  
Y 0.0181 0.0140 0.0193 -0.0187 0.0212 0.0000  
Z 0.0023 -0.0045 0.0076 0.0017 -0.0000 0.0085

AT. 80 C X -0.0099 -0.0037 -0.0062 -0.0067 -0.0000 -0.0195  
Y 0.0181 0.0140 -0.0193 0.0187 0.0212 -0.0000  
Z -0.0023 0.0045 0.0076 0.0017 0.0000 0.0085

AT. 81 H X 0.0222 -0.0178 0.0106 0.0220 0.0000 -0.0195  
Y 0.0322 -0.0303 0.0382 0.0362 0.0212 0.0000  
Z 0.0067 -0.0008 0.0148 0.0065 -0.0000 0.0085

AT. 82 H X -0.0222 0.0178 0.0106 0.0220 -0.0000 -0.0195  
Y 0.0322 -0.0303 -0.0382 -0.0362 0.0212 -0.0000  
Z -0.0067 0.0008 0.0148 0.0065 0.0000 0.0085

AT. 83 H X 0.0222 0.0178 0.0106 -0.0220 0.0000 -0.0195  
Y 0.0322 0.0303 0.0382 -0.0362 0.0212 0.0000  
Z 0.0067 0.0008 0.0148 -0.0065 -0.0000 0.0085

AT. 84 H X -0.0222 -0.0178 0.0106 -0.0220 -0.0000 -0.0195  
Y 0.0322 0.0303 -0.0382 0.0362 0.0212 -0.0000  
Z -0.0067 -0.0008 0.0148 -0.0065 0.0000 0.0085

AT. 85 H X -0.0078 0.0165 -0.0303 -0.0155 0.0000 -0.0195  
Y 0.0206 -0.0161 0.0237 0.0233 0.0212 0.0000  
Z 0.0054 0.0003 0.0110 0.0008 -0.0000 0.0085

AT. 86 H X 0.0078 -0.0165 -0.0303 -0.0155 -0.0000 -0.0195  
Y 0.0206 -0.0161 -0.0237 -0.0233 0.0212 -0.0000  
Z -0.0054 -0.0003 0.0110 0.0008 0.0000 0.0085

AT. 87 H X -0.0078 -0.0165 -0.0303 0.0155 0.0000 -0.0195  
Y 0.0206 0.0161 0.0237 -0.0233 0.0212 0.0000

Z 0.0054 -0.0003 0.0110 -0.0008 -0.0000 0.0085  
AT. 88 H X 0.0078 0.0165 -0.0303 0.0155 -0.0000 -0.0195  
Y 0.0206 0.0161 -0.0237 0.0233 0.0212 -0.0000  
Z -0.0054 0.0003 0.0110 -0.0008 0.0000 0.0085  
AT. 89 C X 0.0209 -0.0160 0.0090 0.0200 0.0000 -0.0195  
Y -0.0044 0.0113 -0.0119 -0.0084 0.0212 -0.0000  
Z -0.0036 0.0124 -0.0005 -0.0085 -0.0000 0.0085  
AT. 90 C X -0.0209 0.0160 0.0090 0.0200 -0.0000 -0.0195  
Y -0.0044 0.0113 0.0119 0.0084 0.0212 0.0000  
Z 0.0036 -0.0124 -0.0005 -0.0085 0.0000 0.0085  
AT. 91 C X 0.0209 0.0160 0.0090 -0.0200 0.0000 -0.0195  
Y -0.0044 -0.0113 -0.0119 0.0084 0.0212 -0.0000  
Z -0.0036 -0.0124 -0.0005 0.0085 -0.0000 0.0085  
AT. 92 C X -0.0209 -0.0160 0.0090 -0.0200 -0.0000 -0.0195  
Y -0.0044 -0.0113 0.0119 -0.0084 0.0212 0.0000  
Z 0.0036 0.0124 -0.0005 0.0085 0.0000 0.0085  
AT. 93 C X 0.0283 -0.0230 0.0220 0.0271 0.0000 -0.0195  
Y -0.0037 0.0115 -0.0125 -0.0073 0.0212 -0.0000  
Z -0.0035 0.0130 -0.0023 -0.0082 -0.0000 0.0085  
AT. 94 C X -0.0283 0.0230 0.0220 0.0271 -0.0000 -0.0195  
Y -0.0037 0.0115 0.0125 0.0073 0.0212 0.0000  
Z 0.0035 -0.0130 -0.0023 -0.0082 0.0000 0.0085  
AT. 95 C X 0.0283 0.0230 0.0220 -0.0271 0.0000 -0.0195  
Y -0.0037 -0.0115 -0.0125 0.0073 0.0212 -0.0000  
Z -0.0035 -0.0130 -0.0023 0.0082 -0.0000 0.0085  
AT. 96 C X -0.0283 -0.0230 0.0220 -0.0271 -0.0000 -0.0195  
Y -0.0037 -0.0115 0.0125 -0.0073 0.0212 0.0000  
Z 0.0035 0.0130 -0.0023 0.0082 0.0000 0.0085  
AT. 97 H X 0.0300 -0.0244 0.0285 0.0255 0.0000 -0.0195  
Y -0.0051 0.0124 -0.0239 -0.0002 0.0212 -0.0000  
Z 0.0002 0.0103 -0.0022 0.0005 0.0000 0.0085  
AT. 98 H X -0.0300 0.0244 0.0285 0.0255 -0.0000 -0.0195



Y -0.0051 0.0124 0.0239 0.0002 0.0212 0.0000  
Z -0.0002 -0.0103 -0.0022 0.0005 -0.0000 0.0085  
AT. 99 H X 0.0300 0.0244 0.0285 -0.0255 0.0000 -0.0195  
Y -0.0051 -0.0124 -0.0239 0.0002 0.0212 -0.0000  
Z 0.0002 -0.0103 -0.0022 -0.0005 0.0000 0.0085  
AT. 100 H X -0.0300 -0.0244 0.0285 -0.0255 -0.0000 -0.0195  
Y -0.0051 -0.0124 0.0239 -0.0002 0.0212 0.0000  
Z -0.0002 0.0103 -0.0022 -0.0005 -0.0000 0.0085  
AT. 101 H X 0.0283 -0.0219 0.0297 0.0194 0.0000 -0.0195  
Y -0.0031 0.0114 -0.0036 -0.0141 0.0212 0.0000  
Z -0.0062 0.0161 -0.0053 -0.0131 -0.0000 0.0085  
AT. 102 H X -0.0283 0.0219 0.0297 0.0194 -0.0000 -0.0195  
Y -0.0031 0.0114 0.0036 0.0141 0.0212 -0.0000  
Z 0.0062 -0.0161 -0.0053 -0.0131 0.0000 0.0085  
AT. 103 H X 0.0283 0.0219 0.0297 -0.0194 0.0000 -0.0195  
Y -0.0031 -0.0114 -0.0036 0.0141 0.0212 0.0000  
Z -0.0062 -0.0161 -0.0053 0.0131 -0.0000 0.0085  
AT. 104 H X -0.0283 -0.0219 0.0297 -0.0194 -0.0000 -0.0195  
Y -0.0031 -0.0114 0.0036 -0.0141 0.0212 -0.0000  
Z 0.0062 0.0161 -0.0053 0.0131 0.0000 0.0085  
AT. 105 H X 0.0303 -0.0249 0.0153 0.0385 0.0000 -0.0195  
Y -0.0031 0.0119 -0.0115 -0.0079 0.0212 -0.0000  
Z -0.0045 0.0131 -0.0005 -0.0114 -0.0000 0.0085  
AT. 106 H X -0.0303 0.0249 0.0153 0.0385 -0.0000 -0.0195  
Y -0.0031 0.0119 0.0115 0.0079 0.0212 0.0000  
Z 0.0045 -0.0131 -0.0005 -0.0114 0.0000 0.0085  
AT. 107 H X 0.0303 0.0249 0.0153 -0.0385 0.0000 -0.0195  
Y -0.0031 -0.0119 -0.0115 0.0079 0.0212 -0.0000  
Z -0.0045 -0.0131 -0.0005 0.0114 -0.0000 0.0085  
AT. 108 H X -0.0303 -0.0249 0.0153 -0.0385 -0.0000 -0.0195  
Y -0.0031 -0.0119 0.0115 -0.0079 0.0212 0.0000  
Z 0.0045 0.0131 -0.0005 0.0114 0.0000 0.0085

AT.109 C X 0.0023 0.0024 -0.0121 0.0019 0.0000 -0.0195  
Y -0.0221 0.0298 -0.0328 -0.0263 0.0212 -0.0000  
Z -0.0008 0.0099 0.0036 -0.0054 0.0000 0.0085

AT.110 C X -0.0023 -0.0024 -0.0121 0.0019 -0.0000 -0.0195  
Y -0.0221 0.0298 0.0328 0.0263 0.0212 0.0000  
Z 0.0008 -0.0099 0.0036 -0.0054 -0.0000 0.0085

AT.111 C X 0.0023 -0.0024 -0.0121 -0.0019 0.0000 -0.0195  
Y -0.0221 -0.0298 -0.0328 0.0263 0.0212 -0.0000  
Z -0.0008 -0.0099 0.0036 0.0054 0.0000 0.0085

AT.112 C X -0.0023 0.0024 -0.0121 -0.0019 -0.0000 -0.0195  
Y -0.0221 -0.0298 0.0328 -0.0263 0.0212 0.0000  
Z 0.0008 0.0099 0.0036 0.0054 -0.0000 0.0085

AT.113 H X 0.0115 -0.0072 -0.0018 0.0107 0.0000 -0.0195  
Y -0.0377 0.0466 -0.0511 -0.0418 0.0212 -0.0000  
Z 0.0012 0.0098 0.0021 -0.0057 0.0000 0.0085

AT.114 H X -0.0115 0.0072 -0.0018 0.0107 -0.0000 -0.0195  
Y -0.0377 0.0466 0.0511 0.0418 0.0212 0.0000  
Z -0.0012 -0.0098 0.0021 -0.0057 -0.0000 0.0085

AT.115 H X 0.0115 0.0072 -0.0018 -0.0107 0.0000 -0.0195  
Y -0.0377 -0.0466 -0.0511 0.0418 0.0212 -0.0000  
Z 0.0012 -0.0098 0.0021 0.0057 0.0000 0.0085

AT.116 H X -0.0115 -0.0072 -0.0018 -0.0107 -0.0000 -0.0195  
Y -0.0377 -0.0466 0.0511 -0.0418 0.0212 0.0000  
Z -0.0012 0.0098 0.0021 0.0057 -0.0000 0.0085

AT.117 H X -0.0114 0.0158 -0.0256 -0.0103 0.0000 -0.0195  
Y -0.0222 0.0292 -0.0315 -0.0253 0.0212 -0.0000  
Z 0.0010 0.0076 0.0067 -0.0027 0.0000 0.0085

AT.118 H X 0.0114 -0.0158 -0.0256 -0.0103 -0.0000 -0.0195  
Y -0.0222 0.0292 0.0315 0.0253 0.0212 0.0000  
Z -0.0010 -0.0076 0.0067 -0.0027 -0.0000 0.0085

AT.119 H X -0.0114 -0.0158 -0.0256 0.0103 0.0000 -0.0195  
Y -0.0222 -0.0292 -0.0315 0.0253 0.0212 -0.0000

Z 0.0010 -0.0076 0.0067 0.0027 0.0000 0.0085  
AT. 120 H X 0.0114 0.0158 -0.0256 0.0103 -0.0000 -0.0195  
Y -0.0222 -0.0292 0.0315 -0.0253 0.0212 0.0000  
Z -0.0010 0.0076 0.0067 0.0027 -0.0000 0.0085  
AT. 121 C X 0.0035 0.0035 -0.0148 -0.0006 0.0000 -0.0195  
Y -0.0237 0.0330 -0.0389 -0.0315 0.0212 -0.0000  
Z -0.0046 0.0129 -0.0000 -0.0089 -0.0000 0.0085  
AT. 122 C X -0.0035 -0.0035 -0.0148 -0.0006 -0.0000 -0.0195  
Y -0.0237 0.0330 0.0389 0.0315 0.0212 0.0000  
Z 0.0046 -0.0129 -0.0000 -0.0089 0.0000 0.0085  
AT. 123 C X 0.0035 -0.0035 -0.0148 0.0006 0.0000 -0.0195  
Y -0.0237 -0.0330 -0.0389 0.0315 0.0212 -0.0000  
Z -0.0046 -0.0129 -0.0000 0.0089 -0.0000 0.0085  
AT. 124 C X -0.0035 0.0035 -0.0148 0.0006 -0.0000 -0.0195  
Y -0.0237 -0.0330 0.0389 -0.0315 0.0212 0.0000  
Z 0.0046 0.0129 -0.0000 0.0089 0.0000 0.0085  
AT. 125 H X -0.0139 0.0217 -0.0380 -0.0211 0.0000 -0.0195  
Y -0.0247 0.0345 -0.0418 -0.0342 0.0212 -0.0000  
Z 0.0012 0.0064 0.0088 -0.0009 0.0000 0.0085  
AT. 126 H X 0.0139 -0.0217 -0.0380 -0.0211 -0.0000 -0.0195  
Y -0.0247 0.0345 0.0418 0.0342 0.0212 0.0000  
Z -0.0012 -0.0064 0.0088 -0.0009 -0.0000 0.0085  
AT. 127 H X -0.0139 -0.0217 -0.0380 0.0211 0.0000 -0.0195  
Y -0.0247 -0.0345 -0.0418 0.0342 0.0212 -0.0000  
Z 0.0012 -0.0064 0.0088 0.0009 0.0000 0.0085  
AT. 128 H X 0.0139 0.0217 -0.0380 0.0211 -0.0000 -0.0195  
Y -0.0247 -0.0345 0.0418 -0.0342 0.0212 0.0000  
Z -0.0012 0.0064 0.0088 0.0009 -0.0000 0.0085  
AT. 129 H X 0.0114 -0.0052 -0.0045 0.0081 0.0000 -0.0195  
Y -0.0407 0.0516 -0.0618 -0.0514 0.0212 -0.0000  
Z -0.0147 0.0241 -0.0149 -0.0228 -0.0000 0.0085  
AT. 130 H X -0.0114 0.0052 -0.0045 0.0081 -0.0000 -0.0195

Y -0.0407 0.0516 0.0618 0.0514 0.0212 0.0000  
Z 0.0147 -0.0241 -0.0149 -0.0228 0.0000 0.0085  
AT. 131 H X 0.0114 0.0052 -0.0045 -0.0081 0.0000 -0.0195  
Y -0.0407 -0.0516 -0.0618 0.0514 0.0212 -0.0000  
Z -0.0147 -0.0241 -0.0149 0.0228 -0.0000 0.0085  
AT. 132 H X -0.0114 -0.0052 -0.0045 -0.0081 -0.0000 -0.0195  
Y -0.0407 -0.0516 0.0618 -0.0514 0.0212 0.0000  
Z 0.0147 0.0241 -0.0149 0.0228 0.0000 0.0085  
AT. 133 C X -0.0007 0.0107 -0.0119 0.0002 0.0000 -0.0195  
Y -0.0214 0.0298 -0.0345 -0.0275 0.0212 -0.0000  
Z -0.0019 0.0079 0.0067 -0.0028 0.0000 0.0085  
AT. 134 C X 0.0007 -0.0107 -0.0119 0.0002 -0.0000 -0.0195  
Y -0.0214 0.0298 0.0345 0.0275 0.0212 0.0000  
Z 0.0019 -0.0079 0.0067 -0.0028 -0.0000 0.0085  
AT. 135 C X -0.0007 -0.0107 -0.0119 -0.0002 0.0000 -0.0195  
Y -0.0214 -0.0298 -0.0345 0.0275 0.0212 -0.0000  
Z -0.0019 -0.0079 0.0067 0.0028 0.0000 0.0085  
AT. 136 C X 0.0007 0.0107 -0.0119 -0.0002 -0.0000 -0.0195  
Y -0.0214 -0.0298 0.0345 -0.0275 0.0212 0.0000  
Z 0.0019 0.0079 0.0067 0.0028 -0.0000 0.0085  
AT. 137 C X 0.0049 0.0089 -0.0117 -0.0030 0.0000 -0.0195  
Y -0.0198 0.0276 -0.0345 -0.0256 0.0212 -0.0000  
Z -0.0040 0.0088 0.0066 -0.0025 -0.0000 0.0085  
AT. 138 C X -0.0049 -0.0089 -0.0117 -0.0030 -0.0000 -0.0195  
Y -0.0198 0.0276 0.0345 0.0256 0.0212 0.0000  
Z 0.0040 -0.0088 0.0066 -0.0025 0.0000 0.0085  
AT. 139 C X 0.0049 -0.0089 -0.0117 0.0030 0.0000 -0.0195  
Y -0.0198 -0.0276 -0.0345 0.0256 0.0212 -0.0000  
Z -0.0040 -0.0088 0.0066 0.0025 -0.0000 0.0085  
AT. 140 C X -0.0049 0.0089 -0.0117 0.0030 -0.0000 -0.0195  
Y -0.0198 -0.0276 0.0345 -0.0256 0.0212 0.0000  
Z 0.0040 0.0088 0.0066 0.0025 0.0000 0.0085

AT. 141 H X 0.0006 0.0124 -0.0196 -0.0093 0.0000 -0.0195  
Y -0.0243 0.0298 -0.0407 -0.0284 0.0212 -0.0000  
Z -0.0020 0.0061 0.0115 0.0030 -0.0000 0.0085

AT. 142 H X -0.0006 -0.0124 -0.0196 -0.0093 -0.0000 -0.0195  
Y -0.0243 0.0298 0.0407 0.0284 0.0212 0.0000  
Z 0.0020 -0.0061 0.0115 0.0030 0.0000 0.0085

AT. 143 H X 0.0006 -0.0124 -0.0196 0.0093 0.0000 -0.0195  
Y -0.0243 -0.0298 -0.0407 0.0284 0.0212 -0.0000  
Z -0.0020 -0.0061 0.0115 -0.0030 -0.0000 0.0085

AT. 144 H X -0.0006 0.0124 -0.0196 0.0093 -0.0000 -0.0195  
Y -0.0243 -0.0298 0.0407 -0.0284 0.0212 0.0000  
Z 0.0020 0.0061 0.0115 -0.0030 0.0000 0.0085

AT. 145 H X 0.0138 0.0035 0.0006 0.0038 0.0000 -0.0195  
Y -0.0231 0.0295 -0.0382 -0.0277 0.0212 -0.0000  
Z -0.0071 0.0113 0.0051 -0.0036 -0.0000 0.0085

AT. 146 H X -0.0138 -0.0035 0.0006 0.0038 -0.0000 -0.0195  
Y -0.0231 0.0295 0.0382 0.0277 0.0212 0.0000  
Z 0.0071 -0.0113 0.0051 -0.0036 0.0000 0.0085

AT. 147 H X 0.0138 -0.0035 0.0006 -0.0038 0.0000 -0.0195  
Y -0.0231 -0.0295 -0.0382 0.0277 0.0212 -0.0000  
Z -0.0071 -0.0113 0.0051 0.0036 -0.0000 0.0085

AT. 148 H X -0.0138 0.0035 0.0006 -0.0038 -0.0000 -0.0195  
Y -0.0231 -0.0295 0.0382 -0.0277 0.0212 0.0000  
Z 0.0071 0.0113 0.0051 0.0036 0.0000 0.0085

AT. 149 O X 0.0803 -0.0790 0.0802 0.0882 0.0000 -0.0195  
Y 0.0331 -0.0288 0.0326 0.0352 0.0212 0.0000  
Z -0.0260 0.0368 -0.0254 -0.0357 -0.0000 0.0085

AT. 150 O X -0.0803 0.0790 0.0802 0.0882 -0.0000 -0.0195  
Y 0.0331 -0.0288 -0.0326 -0.0352 0.0212 -0.0000  
Z 0.0260 -0.0368 -0.0254 -0.0357 0.0000 0.0085

AT. 151 O X 0.0803 0.0790 0.0802 -0.0882 0.0000 -0.0195  
Y 0.0331 0.0288 0.0326 -0.0352 0.0212 0.0000

Z -0.0260 -0.0368 -0.0254 0.0357 -0.0000 0.0085  
AT. 152 O X -0.0803 -0.0790 0.0802 -0.0882 -0.0000 -0.0195  
Y 0.0331 0.0288 -0.0326 0.0352 0.0212 -0.0000  
Z 0.0260 0.0368 -0.0254 0.0357 0.0000 0.0085  
AT. 153 H X 0.0600 -0.0602 0.0548 0.0678 0.0000 -0.0195  
Y 0.0098 -0.0043 0.0052 0.0073 0.0212 0.0000  
Z -0.0202 0.0322 -0.0178 -0.0312 -0.0000 0.0085  
AT. 154 H X -0.0600 0.0602 0.0548 0.0678 -0.0000 -0.0195  
Y 0.0098 -0.0043 -0.0052 -0.0073 0.0212 -0.0000  
Z 0.0202 -0.0322 -0.0178 -0.0312 0.0000 0.0085  
AT. 155 H X 0.0600 0.0602 0.0548 -0.0678 0.0000 -0.0195  
Y 0.0098 0.0043 0.0052 -0.0073 0.0212 0.0000  
Z -0.0202 -0.0322 -0.0178 0.0312 -0.0000 0.0085  
AT. 156 H X -0.0600 -0.0602 0.0548 -0.0678 -0.0000 -0.0195  
Y 0.0098 0.0043 -0.0052 0.0073 0.0212 -0.0000  
Z 0.0202 0.0322 -0.0178 0.0312 0.0000 0.0085  
AT. 157 O X 0.0563 -0.0548 0.0535 0.0625 0.0000 -0.0195  
Y -0.0547 0.0637 -0.0690 -0.0666 0.0212 -0.0000  
Z -0.0056 0.0150 -0.0049 -0.0099 -0.0000 0.0085  
AT. 158 O X -0.0563 0.0548 0.0535 0.0625 -0.0000 -0.0195  
Y -0.0547 0.0637 0.0690 0.0666 0.0212 0.0000  
Z 0.0056 -0.0150 -0.0049 -0.0099 0.0000 0.0085  
AT. 159 O X 0.0563 0.0548 0.0535 -0.0625 0.0000 -0.0195  
Y -0.0547 -0.0637 -0.0690 0.0666 0.0212 -0.0000  
Z -0.0056 -0.0150 -0.0049 0.0099 -0.0000 0.0085  
AT. 160 O X -0.0563 -0.0548 0.0535 -0.0625 -0.0000 -0.0195  
Y -0.0547 -0.0637 0.0690 -0.0666 0.0212 0.0000  
Z 0.0056 0.0150 -0.0049 0.0099 0.0000 0.0085  
AT. 161 O X 0.0366 -0.0335 0.0336 0.0392 0.0000 -0.0195  
Y -0.0200 0.0273 -0.0319 -0.0290 0.0212 -0.0000  
Z -0.0163 0.0257 -0.0170 -0.0203 -0.0000 0.0085  
AT. 162 O X -0.0366 0.0335 0.0336 0.0392 -0.0000 -0.0195

Y -0.0200 0.0273 0.0319 0.0290 0.0212 0.0000  
Z 0.0163 -0.0257 -0.0170 -0.0203 0.0000 0.0085  
AT. 163 O X 0.0366 0.0335 0.0336 -0.0392 0.0000 -0.0195  
Y -0.0200 -0.0273 -0.0319 0.0290 0.0212 -0.0000  
Z -0.0163 -0.0257 -0.0170 0.0203 -0.0000 0.0085  
AT. 164 O X -0.0366 -0.0335 0.0336 -0.0392 -0.0000 -0.0195  
Y -0.0200 -0.0273 0.0319 -0.0290 0.0212 0.0000  
Z 0.0163 0.0257 -0.0170 0.0203 0.0000 0.0085  
AT. 165 H X 0.0126 -0.0089 0.0087 0.0182 0.0000 -0.0195  
Y -0.0309 0.0385 -0.0433 -0.0387 0.0212 -0.0000  
Z -0.0234 0.0336 -0.0231 -0.0316 -0.0000 0.0085  
AT. 166 H X -0.0126 0.0089 0.0087 0.0182 -0.0000 -0.0195  
Y -0.0309 0.0385 0.0433 0.0387 0.0212 0.0000  
Z 0.0234 -0.0336 -0.0231 -0.0316 0.0000 0.0085  
AT. 167 H X 0.0126 0.0089 0.0087 -0.0182 0.0000 -0.0195  
Y -0.0309 -0.0385 -0.0433 0.0387 0.0212 -0.0000  
Z -0.0234 -0.0336 -0.0231 0.0316 -0.0000 0.0085  
AT. 168 H X -0.0126 -0.0089 0.0087 -0.0182 -0.0000 -0.0195  
Y -0.0309 -0.0385 0.0433 -0.0387 0.0212 0.0000  
Z 0.0234 0.0336 -0.0231 0.0316 0.0000 0.0085  
AT. 169 O X 0.0330 -0.0200 0.0255 0.0234 -0.0000 -0.0195  
Y 0.0035 0.0009 -0.0004 0.0019 0.0212 0.0000  
Z 0.0010 0.0050 0.0075 -0.0059 -0.0000 0.0085  
AT. 170 O X -0.0330 0.0200 0.0255 0.0234 0.0000 -0.0195  
Y 0.0035 0.0009 0.0004 -0.0019 0.0212 -0.0000  
Z -0.0010 -0.0050 0.0075 -0.0059 0.0000 0.0085  
AT. 171 O X 0.0330 0.0200 0.0255 -0.0234 -0.0000 -0.0195  
Y 0.0035 -0.0009 -0.0004 -0.0019 0.0212 0.0000  
Z 0.0010 -0.0050 0.0075 0.0059 -0.0000 0.0085  
AT. 172 O X -0.0330 -0.0200 0.0255 -0.0234 0.0000 -0.0195  
Y 0.0035 -0.0009 0.0004 0.0019 0.0212 -0.0000  
Z -0.0010 0.0050 0.0075 0.0059 0.0000 0.0085

AT. 173 H X 0.0303 -0.0179 0.0219 0.0221 0.0000 -0.0195

Y 0.0033 0.0014 -0.0004 0.0018 0.0212 0.0000

Z -0.0000 0.0094 0.0053 -0.0141 -0.0000 0.0085

AT. 174 H X -0.0303 0.0179 0.0219 0.0221 -0.0000 -0.0195

Y 0.0033 0.0014 0.0004 -0.0018 0.0212 -0.0000

Z 0.0000 -0.0094 0.0053 -0.0141 0.0000 0.0085

AT. 175 H X 0.0303 0.0179 0.0219 -0.0221 0.0000 -0.0195

Y 0.0033 -0.0014 -0.0004 -0.0018 0.0212 0.0000

Z -0.0000 -0.0094 0.0053 0.0141 -0.0000 0.0085

AT. 176 H X -0.0303 -0.0179 0.0219 -0.0221 -0.0000 -0.0195

Y 0.0033 -0.0014 0.0004 0.0018 0.0212 -0.0000

Z 0.0000 0.0094 0.0053 0.0141 0.0000 0.0085

FREQ(CM\*\*-1) 0.00 25.05 25.27 27.48 28.49 29.68

AT. 1 I X 0.0085 -0.0033 0.0305 -0.0117 -0.0016 0.0053

Y 0.0000 -0.0665 -0.0328 0.0782 -0.0846 -0.0258

Z 0.0195 -0.0174 0.0122 0.0294 -0.0216 0.0480

AT. 2 I X 0.0085 -0.0033 -0.0305 0.0117 -0.0016 -0.0053

Y -0.0000 0.0665 -0.0328 0.0782 0.0846 -0.0258

Z 0.0195 -0.0174 -0.0122 -0.0294 -0.0216 -0.0480

AT. 3 I X 0.0085 -0.0033 0.0305 0.0117 0.0016 -0.0053

Y 0.0000 -0.0665 -0.0328 -0.0782 0.0846 0.0258

Z 0.0195 -0.0174 0.0122 -0.0294 0.0216 -0.0480

AT. 4 I X 0.0085 -0.0033 -0.0305 -0.0117 0.0016 0.0053

Y -0.0000 0.0665 -0.0328 -0.0782 -0.0846 0.0258

Z 0.0195 -0.0174 -0.0122 0.0294 0.0216 0.0480

AT. 5 I X 0.0085 0.0179 -0.0248 -0.0111 0.0058 0.0021

Y -0.0000 -0.0429 0.0462 0.0146 0.0091 0.0092

Z 0.0195 0.0254 -0.0578 0.0073 -0.0072 0.0260

AT. 6 I X 0.0085 0.0179 0.0248 0.0111 0.0058 -0.0021

Y 0.0000 0.0429 0.0462 0.0146 -0.0091 0.0092



Z 0.0195 0.0254 0.0578 -0.0073 -0.0072 -0.0260  
AT. 7 I X 0.0085 0.0179 -0.0248 0.0111 -0.0058 -0.0021  
Y -0.0000 -0.0429 0.0462 -0.0146 -0.0091 -0.0092  
Z 0.0195 0.0254 -0.0578 -0.0073 0.0072 -0.0260  
AT. 8 I X 0.0085 0.0179 0.0248 -0.0111 -0.0058 0.0021  
Y 0.0000 0.0429 0.0462 -0.0146 0.0091 -0.0092  
Z 0.0195 0.0254 0.0578 0.0073 0.0072 0.0260  
AT. 9 N X 0.0085 -0.0050 0.0095 -0.0002 -0.0009 -0.0222  
Y 0.0000 -0.0292 -0.0097 0.0094 -0.0103 -0.0126  
Z 0.0195 -0.0040 0.0087 0.0097 0.0033 0.0333  
AT. 10 N X 0.0085 -0.0050 -0.0095 0.0002 -0.0009 0.0222  
Y -0.0000 0.0292 -0.0097 0.0094 0.0103 -0.0126  
Z 0.0195 -0.0040 -0.0087 -0.0097 0.0033 -0.0333  
AT. 11 N X 0.0085 -0.0050 0.0095 0.0002 0.0009 0.0222  
Y 0.0000 -0.0292 -0.0097 -0.0094 0.0103 0.0126  
Z 0.0195 -0.0040 0.0087 -0.0097 -0.0033 -0.0333  
AT. 12 N X 0.0085 -0.0050 -0.0095 -0.0002 0.0009 -0.0222  
Y -0.0000 0.0292 -0.0097 -0.0094 -0.0103 0.0126  
Z 0.0195 -0.0040 -0.0087 0.0097 -0.0033 0.0333  
AT. 13 N X 0.0085 -0.0059 0.0015 0.0028 -0.0011 -0.0244  
Y 0.0000 -0.0218 -0.0019 0.0073 -0.0056 -0.0371  
Z 0.0195 -0.0001 -0.0180 0.0164 0.0058 0.0337  
AT. 14 N X 0.0085 -0.0059 -0.0015 -0.0028 -0.0011 0.0244  
Y -0.0000 0.0218 -0.0019 0.0073 0.0056 -0.0371  
Z 0.0195 -0.0001 0.0180 -0.0164 0.0058 -0.0337  
AT. 15 N X 0.0085 -0.0059 0.0015 -0.0028 0.0011 0.0244  
Y 0.0000 -0.0218 -0.0019 -0.0073 0.0056 0.0371  
Z 0.0195 -0.0001 -0.0180 -0.0164 -0.0058 -0.0337  
AT. 16 N X 0.0085 -0.0059 -0.0015 0.0028 0.0011 -0.0244  
Y -0.0000 0.0218 -0.0019 -0.0073 -0.0056 0.0371  
Z 0.0195 -0.0001 0.0180 0.0164 -0.0058 0.0337  
AT. 17 O X 0.0085 0.0113 0.0110 -0.0270 0.0125 -0.0215

Y 0.0000 -0.0349 -0.0137 0.0175 -0.0104 -0.0136  
Z 0.0195 -0.0051 0.0144 0.0155 -0.0047 0.0363  
AT. 18 O X 0.0085 0.0113 -0.0110 0.0270 0.0125 0.0215  
Y -0.0000 0.0349 -0.0137 0.0175 0.0104 -0.0136  
Z 0.0195 -0.0051 -0.0144 -0.0155 -0.0047 -0.0363  
AT. 19 O X 0.0085 0.0113 0.0110 0.0270 -0.0125 0.0215  
Y 0.0000 -0.0349 -0.0137 -0.0175 0.0104 0.0136  
Z 0.0195 -0.0051 0.0144 -0.0155 0.0047 -0.0363  
AT. 20 O X 0.0085 0.0113 -0.0110 -0.0270 -0.0125 -0.0215  
Y -0.0000 0.0349 -0.0137 -0.0175 -0.0104 0.0136  
Z 0.0195 -0.0051 -0.0144 0.0155 0.0047 0.0363  
AT. 21 O X 0.0085 -0.0075 0.0030 -0.0078 0.0037 -0.0060  
Y 0.0000 -0.0205 -0.0048 0.0079 -0.0075 -0.0373  
Z 0.0195 0.0020 -0.0239 0.0183 0.0013 0.0355  
AT. 22 O X 0.0085 -0.0075 -0.0030 0.0078 0.0037 0.0060  
Y -0.0000 0.0205 -0.0048 0.0079 0.0075 -0.0373  
Z 0.0195 0.0020 0.0239 -0.0183 0.0013 -0.0355  
AT. 23 O X 0.0085 -0.0075 0.0030 0.0078 -0.0037 0.0060  
Y 0.0000 -0.0205 -0.0048 -0.0079 0.0075 0.0373  
Z 0.0195 0.0020 -0.0239 -0.0183 -0.0013 -0.0355  
AT. 24 O X 0.0085 -0.0075 -0.0030 -0.0078 -0.0037 -0.0060  
Y -0.0000 0.0205 -0.0048 -0.0079 -0.0075 0.0373  
Z 0.0195 0.0020 0.0239 0.0183 -0.0013 0.0355  
AT. 25 C X 0.0085 0.0185 0.0363 -0.0401 0.0311 -0.0036  
Y 0.0000 -0.0354 -0.0145 0.0253 -0.0256 -0.0184  
Z 0.0195 -0.0054 0.0107 0.0194 -0.0089 0.0328  
AT. 26 C X 0.0085 0.0185 -0.0363 0.0401 0.0311 0.0036  
Y -0.0000 0.0354 -0.0145 0.0253 0.0256 -0.0184  
Z 0.0195 -0.0054 -0.0107 -0.0194 -0.0089 -0.0328  
AT. 27 C X 0.0085 0.0185 0.0363 0.0401 -0.0311 0.0036  
Y 0.0000 -0.0354 -0.0145 -0.0253 0.0256 0.0184  
Z 0.0195 -0.0054 0.0107 -0.0194 0.0089 -0.0328

AT. 28 C X 0.0085 0.0185 -0.0363 -0.0401 -0.0311 -0.0036  
Y -0.0000 0.0354 -0.0145 -0.0253 -0.0256 0.0184  
Z 0.0195 -0.0054 -0.0107 0.0194 0.0089 0.0328

AT. 29 H X 0.0085 0.0129 0.0369 -0.0326 0.0220 0.0012  
Y 0.0000 -0.0160 -0.0010 0.0002 0.0007 -0.0175  
Z 0.0195 0.0004 0.0082 0.0115 0.0011 0.0253

AT. 30 H X 0.0085 0.0129 -0.0369 0.0326 0.0220 -0.0012  
Y -0.0000 0.0160 -0.0010 0.0002 -0.0007 -0.0175  
Z 0.0195 0.0004 -0.0082 -0.0115 0.0011 -0.0253

AT. 31 H X 0.0085 0.0129 0.0369 0.0326 -0.0220 -0.0012  
Y 0.0000 -0.0160 -0.0010 -0.0002 -0.0007 0.0175  
Z 0.0195 0.0004 0.0082 -0.0115 -0.0011 -0.0253

AT. 32 H X 0.0085 0.0129 -0.0369 -0.0326 -0.0220 0.0012  
Y -0.0000 0.0160 -0.0010 -0.0002 0.0007 0.0175  
Z 0.0195 0.0004 -0.0082 0.0115 -0.0011 0.0253

AT. 33 H X 0.0085 0.0428 0.0521 -0.0766 0.0696 -0.0027  
Y 0.0000 -0.0388 -0.0170 0.0297 -0.0300 -0.0178  
Z 0.0195 -0.0066 0.0109 0.0256 -0.0164 0.0302

AT. 34 H X 0.0085 0.0428 -0.0521 0.0766 0.0696 0.0027  
Y -0.0000 0.0388 -0.0170 0.0297 0.0300 -0.0178  
Z 0.0195 -0.0066 -0.0109 -0.0256 -0.0164 -0.0302

AT. 35 H X 0.0085 0.0428 0.0521 0.0766 -0.0696 0.0027  
Y 0.0000 -0.0388 -0.0170 -0.0297 0.0300 0.0178  
Z 0.0195 -0.0066 0.0109 -0.0256 0.0164 -0.0302

AT. 36 H X 0.0085 0.0428 -0.0521 -0.0766 -0.0696 -0.0027  
Y -0.0000 0.0388 -0.0170 -0.0297 -0.0300 0.0178  
Z 0.0195 -0.0066 -0.0109 0.0256 0.0164 0.0302

AT. 37 C X 0.0085 0.0078 0.0183 -0.0217 0.0133 -0.0165  
Y 0.0000 -0.0332 -0.0128 0.0168 -0.0148 -0.0144  
Z 0.0195 -0.0046 0.0112 0.0143 -0.0024 0.0350

AT. 38 C X 0.0085 0.0078 -0.0183 0.0217 0.0133 0.0165  
Y -0.0000 0.0332 -0.0128 0.0168 0.0148 -0.0144

Z 0.0195 -0.0046 -0.0112 -0.0143 -0.0024 -0.0350  
AT. 39 C X 0.0085 0.0078 0.0183 0.0217 -0.0133 0.0165  
Y 0.0000 -0.0332 -0.0128 -0.0168 0.0148 0.0144  
Z 0.0195 -0.0046 0.0112 -0.0143 0.0024 -0.0350  
AT. 40 C X 0.0085 0.0078 -0.0183 -0.0217 -0.0133 -0.0165  
Y -0.0000 0.0332 -0.0128 -0.0168 -0.0148 0.0144  
Z 0.0195 -0.0046 -0.0112 0.0143 0.0024 0.0350  
AT. 41 C X 0.0085 -0.0132 0.0160 0.0011 -0.0075 -0.0165  
Y 0.0000 -0.0233 -0.0070 0.0083 -0.0080 -0.0107  
Z 0.0195 -0.0044 0.0040 0.0105 0.0045 0.0296  
AT. 42 C X 0.0085 -0.0132 -0.0160 -0.0011 -0.0075 0.0165  
Y -0.0000 0.0233 -0.0070 0.0083 0.0080 -0.0107  
Z 0.0195 -0.0044 -0.0040 -0.0105 0.0045 -0.0296  
AT. 43 C X 0.0085 -0.0132 0.0160 -0.0011 0.0075 0.0165  
Y 0.0000 -0.0233 -0.0070 -0.0083 0.0080 0.0107  
Z 0.0195 -0.0044 0.0040 -0.0105 -0.0045 -0.0296  
AT. 44 C X 0.0085 -0.0132 -0.0160 0.0011 0.0075 -0.0165  
Y -0.0000 0.0233 -0.0070 -0.0083 -0.0080 0.0107  
Z 0.0195 -0.0044 -0.0040 0.0105 -0.0045 0.0296  
AT. 45 H X 0.0085 -0.0161 0.0227 0.0030 -0.0130 -0.0219  
Y 0.0000 -0.0190 -0.0046 0.0065 -0.0054 -0.0075  
Z 0.0195 -0.0005 0.0051 0.0089 0.0075 0.0334  
AT. 46 H X 0.0085 -0.0161 -0.0227 -0.0030 -0.0130 0.0219  
Y -0.0000 0.0190 -0.0046 0.0065 0.0054 -0.0075  
Z 0.0195 -0.0005 -0.0051 -0.0089 0.0075 -0.0334  
AT. 47 H X 0.0085 -0.0161 0.0227 -0.0030 0.0130 0.0219  
Y 0.0000 -0.0190 -0.0046 -0.0065 0.0054 0.0075  
Z 0.0195 -0.0005 0.0051 -0.0089 -0.0075 -0.0334  
AT. 48 H X 0.0085 -0.0161 -0.0227 0.0030 0.0130 -0.0219  
Y -0.0000 0.0190 -0.0046 -0.0065 -0.0054 0.0075  
Z 0.0195 -0.0005 -0.0051 0.0089 -0.0075 0.0334  
AT. 49 H X 0.0085 -0.0162 0.0165 0.0013 -0.0094 -0.0111

Y 0.0000 -0.0236 -0.0077 0.0079 -0.0070 -0.0038  
Z 0.0195 -0.0119 0.0074 0.0124 -0.0028 0.0257  
AT. 50 H X 0.0085 -0.0162 -0.0165 -0.0013 -0.0094 0.0111  
Y -0.0000 0.0236 -0.0077 0.0079 0.0070 -0.0038  
Z 0.0195 -0.0119 -0.0074 -0.0124 -0.0028 -0.0257  
AT. 51 H X 0.0085 -0.0162 0.0165 -0.0013 0.0094 0.0111  
Y 0.0000 -0.0236 -0.0077 -0.0079 0.0070 0.0038  
Z 0.0195 -0.0119 0.0074 -0.0124 0.0028 -0.0257  
AT. 52 H X 0.0085 -0.0162 -0.0165 0.0013 0.0094 -0.0111  
Y -0.0000 0.0236 -0.0077 -0.0079 -0.0070 0.0038  
Z 0.0195 -0.0119 -0.0074 0.0124 0.0028 0.0257  
AT. 53 C X 0.0085 -0.0134 0.0129 0.0012 -0.0063 -0.0114  
Y 0.0000 -0.0219 -0.0050 0.0088 -0.0082 -0.0225  
Z 0.0195 -0.0020 -0.0078 0.0123 0.0080 0.0251  
AT. 54 C X 0.0085 -0.0134 -0.0129 -0.0012 -0.0063 0.0114  
Y -0.0000 0.0219 -0.0050 0.0088 0.0082 -0.0225  
Z 0.0195 -0.0020 0.0078 -0.0123 0.0080 -0.0251  
AT. 55 C X 0.0085 -0.0134 0.0129 -0.0012 0.0063 0.0114  
Y 0.0000 -0.0219 -0.0050 -0.0088 0.0082 0.0225  
Z 0.0195 -0.0020 -0.0078 -0.0123 -0.0080 -0.0251  
AT. 56 C X 0.0085 -0.0134 -0.0129 0.0012 0.0063 -0.0114  
Y -0.0000 0.0219 -0.0050 -0.0088 -0.0082 0.0225  
Z 0.0195 -0.0020 0.0078 0.0123 -0.0080 0.0251  
AT. 57 C X 0.0085 -0.0168 0.0230 -0.0013 -0.0072 -0.0052  
Y 0.0000 -0.0182 -0.0040 0.0089 -0.0087 -0.0168  
Z 0.0195 -0.0029 -0.0113 0.0129 0.0086 0.0206  
AT. 58 C X 0.0085 -0.0168 -0.0230 0.0013 -0.0072 0.0052  
Y -0.0000 0.0182 -0.0040 0.0089 0.0087 -0.0168  
Z 0.0195 -0.0029 0.0113 -0.0129 0.0086 -0.0206  
AT. 59 C X 0.0085 -0.0168 0.0230 0.0013 0.0072 0.0052  
Y 0.0000 -0.0182 -0.0040 -0.0089 0.0087 0.0168  
Z 0.0195 -0.0029 -0.0113 -0.0129 -0.0086 -0.0206

AT. 60 C X 0.0085 -0.0168 -0.0230 -0.0013 0.0072 -0.0052  
Y -0.0000 0.0182 -0.0040 -0.0089 -0.0087 0.0168  
Z 0.0195 -0.0029 0.0113 0.0129 -0.0086 0.0206

AT. 61 H X 0.0085 -0.0176 0.0221 -0.0043 -0.0078 -0.0006  
Y 0.0000 -0.0183 -0.0054 0.0066 -0.0093 -0.0130  
Z 0.0195 -0.0074 -0.0062 0.0138 0.0090 0.0173

AT. 62 H X 0.0085 -0.0176 -0.0221 0.0043 -0.0078 0.0006  
Y -0.0000 0.0183 -0.0054 0.0066 0.0093 -0.0130  
Z 0.0195 -0.0074 0.0062 -0.0138 0.0090 -0.0173

AT. 63 H X 0.0085 -0.0176 0.0221 0.0043 0.0078 0.0006  
Y 0.0000 -0.0183 -0.0054 -0.0066 0.0093 0.0130  
Z 0.0195 -0.0074 -0.0062 -0.0138 -0.0090 -0.0173

AT. 64 H X 0.0085 -0.0176 -0.0221 -0.0043 0.0078 -0.0006  
Y -0.0000 0.0183 -0.0054 -0.0066 -0.0093 0.0130  
Z 0.0195 -0.0074 0.0062 0.0138 -0.0090 0.0173

AT. 65 H X 0.0085 -0.0170 0.0225 -0.0025 -0.0075 -0.0036  
Y 0.0000 -0.0177 -0.0016 0.0124 -0.0078 -0.0219  
Z 0.0195 -0.0010 -0.0202 0.0125 0.0090 0.0160

AT. 66 H X 0.0085 -0.0170 -0.0225 0.0025 -0.0075 0.0036  
Y -0.0000 0.0177 -0.0016 0.0124 0.0078 -0.0219  
Z 0.0195 -0.0010 0.0202 -0.0125 0.0090 -0.0160

AT. 67 H X 0.0085 -0.0170 0.0225 0.0025 0.0075 0.0036  
Y 0.0000 -0.0177 -0.0016 -0.0124 0.0078 0.0219  
Z 0.0195 -0.0010 -0.0202 -0.0125 -0.0090 -0.0160

AT. 68 H X 0.0085 -0.0170 -0.0225 -0.0025 0.0075 -0.0036  
Y -0.0000 0.0177 -0.0016 -0.0124 -0.0078 0.0219  
Z 0.0195 -0.0010 0.0202 0.0125 -0.0090 0.0160

AT. 69 H X 0.0085 -0.0192 0.0315 0.0014 -0.0068 -0.0065  
Y 0.0000 -0.0157 -0.0034 0.0073 -0.0093 -0.0118  
Z 0.0195 -0.0016 -0.0095 0.0123 0.0080 0.0247

AT. 70 H X 0.0085 -0.0192 -0.0315 -0.0014 -0.0068 0.0065  
Y -0.0000 0.0157 -0.0034 0.0073 0.0093 -0.0118

Z 0.0195 -0.0016 0.0095 -0.0123 0.0080 -0.0247  
AT. 71 H X 0.0085 -0.0192 0.0315 -0.0014 0.0068 0.0065  
Y 0.0000 -0.0157 -0.0034 -0.0073 0.0093 0.0118  
Z 0.0195 -0.0016 -0.0095 -0.0123 -0.0080 -0.0247  
AT. 72 H X 0.0085 -0.0192 -0.0315 0.0014 0.0068 -0.0065  
Y -0.0000 0.0157 -0.0034 -0.0073 -0.0093 0.0118  
Z 0.0195 -0.0016 0.0095 0.0123 -0.0080 0.0247  
AT. 73 C X 0.0085 -0.0133 0.0008 0.0036 -0.0048 -0.0025  
Y 0.0000 -0.0231 -0.0049 0.0082 -0.0070 -0.0283  
Z 0.0195 -0.0043 -0.0057 0.0121 0.0079 0.0185  
AT. 74 C X 0.0085 -0.0133 -0.0008 -0.0036 -0.0048 0.0025  
Y -0.0000 0.0231 -0.0049 0.0082 0.0070 -0.0283  
Z 0.0195 -0.0043 0.0057 -0.0121 0.0079 -0.0185  
AT. 75 C X 0.0085 -0.0133 0.0008 -0.0036 0.0048 0.0025  
Y 0.0000 -0.0231 -0.0049 -0.0082 0.0070 0.0283  
Z 0.0195 -0.0043 -0.0057 -0.0121 -0.0079 -0.0185  
AT. 76 C X 0.0085 -0.0133 -0.0008 0.0036 0.0048 -0.0025  
Y -0.0000 0.0231 -0.0049 -0.0082 -0.0070 0.0283  
Z 0.0195 -0.0043 0.0057 0.0121 -0.0079 0.0185  
AT. 77 C X 0.0085 -0.0074 -0.0053 0.0055 -0.0036 -0.0196  
Y 0.0000 -0.0300 -0.0078 0.0078 -0.0067 -0.0169  
Z 0.0195 -0.0046 0.0103 0.0085 0.0055 0.0307  
AT. 78 C X 0.0085 -0.0074 0.0053 -0.0055 -0.0036 0.0196  
Y -0.0000 0.0300 -0.0078 0.0078 0.0067 -0.0169  
Z 0.0195 -0.0046 -0.0103 -0.0085 0.0055 -0.0307  
AT. 79 C X 0.0085 -0.0074 -0.0053 -0.0055 0.0036 0.0196  
Y 0.0000 -0.0300 -0.0078 -0.0078 0.0067 0.0169  
Z 0.0195 -0.0046 0.0103 -0.0085 -0.0055 -0.0307  
AT. 80 C X 0.0085 -0.0074 0.0053 0.0055 0.0036 -0.0196  
Y -0.0000 0.0300 -0.0078 -0.0078 -0.0067 0.0169  
Z 0.0195 -0.0046 -0.0103 0.0085 -0.0055 0.0307  
AT. 81 H X 0.0085 -0.0093 -0.0057 0.0052 -0.0031 -0.0115

Y 0.0000 -0.0326 -0.0094 0.0077 -0.0065 -0.0078  
Z 0.0195 -0.0049 0.0207 0.0046 0.0099 0.0309  
AT. 82 H X 0.0085 -0.0093 0.0057 -0.0052 -0.0031 0.0115  
Y -0.0000 0.0326 -0.0094 0.0077 0.0065 -0.0078  
Z 0.0195 -0.0049 -0.0207 -0.0046 0.0099 -0.0309  
AT. 83 H X 0.0085 -0.0093 -0.0057 -0.0052 0.0031 0.0115  
Y 0.0000 -0.0326 -0.0094 -0.0077 0.0065 0.0078  
Z 0.0195 -0.0049 0.0207 -0.0046 -0.0099 -0.0309  
AT. 84 H X 0.0085 -0.0093 0.0057 0.0052 0.0031 -0.0115  
Y -0.0000 0.0326 -0.0094 -0.0077 -0.0065 0.0078  
Z 0.0195 -0.0049 -0.0207 0.0046 -0.0099 0.0309  
AT. 85 H X 0.0085 -0.0044 -0.0137 0.0080 -0.0046 -0.0293  
Y 0.0000 -0.0315 -0.0067 0.0070 -0.0045 -0.0186  
Z 0.0195 -0.0040 0.0117 0.0084 0.0040 0.0348  
AT. 86 H X 0.0085 -0.0044 0.0137 -0.0080 -0.0046 0.0293  
Y -0.0000 0.0315 -0.0067 0.0070 0.0045 -0.0186  
Z 0.0195 -0.0040 -0.0117 -0.0084 0.0040 -0.0348  
AT. 87 H X 0.0085 -0.0044 -0.0137 -0.0080 0.0046 0.0293  
Y 0.0000 -0.0315 -0.0067 -0.0070 0.0045 0.0186  
Z 0.0195 -0.0040 0.0117 -0.0084 -0.0040 -0.0348  
AT. 88 H X 0.0085 -0.0044 0.0137 0.0080 0.0046 -0.0293  
Y -0.0000 0.0315 -0.0067 -0.0070 -0.0045 0.0186  
Z 0.0195 -0.0040 -0.0117 0.0084 -0.0040 0.0348  
AT. 89 C X 0.0085 -0.0090 -0.0098 0.0064 -0.0031 -0.0130  
Y 0.0000 -0.0264 -0.0045 0.0073 -0.0065 -0.0319  
Z 0.0195 -0.0048 -0.0026 0.0123 0.0064 0.0237  
AT. 90 C X 0.0085 -0.0090 0.0098 -0.0064 -0.0031 0.0130  
Y -0.0000 0.0264 -0.0045 0.0073 0.0065 -0.0319  
Z 0.0195 -0.0048 0.0026 -0.0123 0.0064 -0.0237  
AT. 91 C X 0.0085 -0.0090 -0.0098 -0.0064 0.0031 0.0130  
Y 0.0000 -0.0264 -0.0045 -0.0073 0.0065 0.0319  
Z 0.0195 -0.0048 -0.0026 -0.0123 -0.0064 -0.0237



AT. 92 C X 0.0085 -0.0090 0.0098 0.0064 0.0031 -0.0130  
Y -0.0000 0.0264 -0.0045 -0.0073 -0.0065 0.0319  
Z 0.0195 -0.0048 0.0026 0.0123 -0.0064 0.0237

AT. 93 C X 0.0085 -0.0091 -0.0237 0.0095 -0.0024 -0.0067  
Y 0.0000 -0.0287 -0.0041 0.0060 -0.0057 -0.0367  
Z 0.0195 -0.0067 -0.0000 0.0113 0.0071 0.0193

AT. 94 C X 0.0085 -0.0091 0.0237 -0.0095 -0.0024 0.0067  
Y -0.0000 0.0287 -0.0041 0.0060 0.0057 -0.0367  
Z 0.0195 -0.0067 0.0000 -0.0113 0.0071 -0.0193

AT. 95 C X 0.0085 -0.0091 -0.0237 -0.0095 0.0024 0.0067  
Y 0.0000 -0.0287 -0.0041 -0.0060 0.0057 0.0367  
Z 0.0195 -0.0067 -0.0000 -0.0113 -0.0071 -0.0193

AT. 96 C X 0.0085 -0.0091 0.0237 0.0095 0.0024 -0.0067  
Y -0.0000 0.0287 -0.0041 -0.0060 -0.0057 0.0367  
Z 0.0195 -0.0067 0.0000 0.0113 -0.0071 0.0193

AT. 97 H X 0.0085 -0.0091 -0.0268 0.0098 -0.0026 -0.0023  
Y 0.0000 -0.0285 -0.0040 0.0064 -0.0049 -0.0469  
Z 0.0195 -0.0061 -0.0096 0.0132 0.0077 0.0153

AT. 98 H X 0.0085 -0.0091 0.0268 -0.0098 -0.0026 0.0023  
Y -0.0000 0.0285 -0.0040 0.0064 0.0049 -0.0469  
Z 0.0195 -0.0061 0.0096 -0.0132 0.0077 -0.0153

AT. 99 H X 0.0085 -0.0091 -0.0268 -0.0098 0.0026 0.0023  
Y 0.0000 -0.0285 -0.0040 -0.0064 0.0049 0.0469  
Z 0.0195 -0.0061 -0.0096 -0.0132 -0.0077 -0.0153

AT. 100 H X 0.0085 -0.0091 0.0268 0.0098 0.0026 -0.0023  
Y -0.0000 0.0285 -0.0040 -0.0064 -0.0049 0.0469  
Z 0.0195 -0.0061 0.0096 0.0132 -0.0077 0.0153

AT. 101 H X 0.0085 -0.0098 -0.0226 0.0091 -0.0026 0.0002  
Y 0.0000 -0.0291 -0.0046 0.0055 -0.0062 -0.0290  
Z 0.0195 -0.0096 0.0085 0.0100 0.0076 0.0163

AT. 102 H X 0.0085 -0.0098 0.0226 -0.0091 -0.0026 -0.0002  
Y -0.0000 0.0291 -0.0046 0.0055 0.0062 -0.0290

Z 0.0195 -0.0096 -0.0085 -0.0100 0.0076 -0.0163  
AT. 103 H X 0.0085 -0.0098 -0.0226 -0.0091 0.0026 -0.0002  
Y 0.0000 -0.0291 -0.0046 -0.0055 0.0062 0.0290  
Z 0.0195 -0.0096 0.0085 -0.0100 -0.0076 -0.0163  
AT. 104 H X 0.0085 -0.0098 0.0226 0.0091 0.0026 0.0002  
Y -0.0000 0.0291 -0.0046 -0.0055 -0.0062 0.0290  
Z 0.0195 -0.0096 -0.0085 0.0100 -0.0076 0.0163  
AT. 105 H X 0.0085 -0.0068 -0.0319 0.0114 -0.0019 -0.0137  
Y 0.0000 -0.0309 -0.0037 0.0056 -0.0046 -0.0391  
Z 0.0195 -0.0057 0.0026 0.0109 0.0062 0.0235  
AT. 106 H X 0.0085 -0.0068 0.0319 -0.0114 -0.0019 0.0137  
Y -0.0000 0.0309 -0.0037 0.0056 0.0046 -0.0391  
Z 0.0195 -0.0057 -0.0026 -0.0109 0.0062 -0.0235  
AT. 107 H X 0.0085 -0.0068 -0.0319 -0.0114 0.0019 0.0137  
Y 0.0000 -0.0309 -0.0037 -0.0056 0.0046 0.0391  
Z 0.0195 -0.0057 0.0026 -0.0109 -0.0062 -0.0235  
AT. 108 H X 0.0085 -0.0068 0.0319 0.0114 0.0019 -0.0137  
Y -0.0000 0.0309 -0.0037 -0.0056 -0.0046 0.0391  
Z 0.0195 -0.0057 -0.0026 0.0109 -0.0062 0.0235  
AT. 109 C X 0.0085 -0.0117 0.0109 0.0014 -0.0054 -0.0193  
Y 0.0000 -0.0209 -0.0042 0.0082 -0.0075 -0.0325  
Z 0.0195 0.0008 -0.0184 0.0159 0.0083 0.0301  
AT. 110 C X 0.0085 -0.0117 -0.0109 -0.0014 -0.0054 0.0193  
Y -0.0000 0.0209 -0.0042 0.0082 0.0075 -0.0325  
Z 0.0195 0.0008 0.0184 -0.0159 0.0083 -0.0301  
AT. 111 C X 0.0085 -0.0117 0.0109 -0.0014 0.0054 0.0193  
Y 0.0000 -0.0209 -0.0042 -0.0082 0.0075 0.0325  
Z 0.0195 0.0008 -0.0184 -0.0159 -0.0083 -0.0301  
AT. 112 C X 0.0085 -0.0117 -0.0109 0.0014 0.0054 -0.0193  
Y -0.0000 0.0209 -0.0042 -0.0082 -0.0075 0.0325  
Z 0.0195 0.0008 0.0184 0.0159 -0.0083 0.0301  
AT. 113 H X 0.0085 -0.0122 0.0099 0.0021 -0.0055 -0.0154

Y 0.0000 -0.0196 -0.0036 0.0073 -0.0068 -0.0397  
Z 0.0195 0.0035 -0.0253 0.0174 0.0121 0.0281  
AT. 114 H X 0.0085 -0.0122 -0.0099 -0.0021 -0.0055 0.0154  
Y -0.0000 0.0196 -0.0036 0.0073 0.0068 -0.0397  
Z 0.0195 0.0035 0.0253 -0.0174 0.0121 -0.0281  
AT. 115 H X 0.0085 -0.0122 0.0099 -0.0021 0.0055 0.0154  
Y 0.0000 -0.0196 -0.0036 -0.0073 0.0068 0.0397  
Z 0.0195 0.0035 -0.0253 -0.0174 -0.0121 -0.0281  
AT. 116 H X 0.0085 -0.0122 -0.0099 0.0021 0.0055 -0.0154  
Y -0.0000 0.0196 -0.0036 -0.0073 -0.0068 0.0397  
Z 0.0195 0.0035 0.0253 0.0174 -0.0121 0.0281  
AT. 117 H X 0.0085 -0.0127 0.0168 -0.0009 -0.0068 -0.0241  
Y 0.0000 -0.0204 -0.0057 0.0090 -0.0091 -0.0302  
Z 0.0195 0.0011 -0.0204 0.0170 0.0072 0.0330  
AT. 118 H X 0.0085 -0.0127 -0.0168 0.0009 -0.0068 0.0241  
Y -0.0000 0.0204 -0.0057 0.0090 0.0091 -0.0302  
Z 0.0195 0.0011 0.0204 -0.0170 0.0072 -0.0330  
AT. 119 H X 0.0085 -0.0127 0.0168 0.0009 0.0068 0.0241  
Y 0.0000 -0.0204 -0.0057 -0.0090 0.0091 0.0302  
Z 0.0195 0.0011 -0.0204 -0.0170 -0.0072 -0.0330  
AT. 120 H X 0.0085 -0.0127 -0.0168 -0.0009 0.0068 -0.0241  
Y -0.0000 0.0204 -0.0057 -0.0090 -0.0091 0.0302  
Z 0.0195 0.0011 0.0204 0.0170 -0.0072 0.0330  
AT. 121 C X 0.0085 -0.0050 -0.0098 0.0066 -0.0017 -0.0224  
Y 0.0000 -0.0229 -0.0008 0.0070 -0.0047 -0.0436  
Z 0.0195 -0.0011 -0.0142 0.0155 0.0066 0.0281  
AT. 122 C X 0.0085 -0.0050 0.0098 -0.0066 -0.0017 0.0224  
Y -0.0000 0.0229 -0.0008 0.0070 0.0047 -0.0436  
Z 0.0195 -0.0011 0.0142 -0.0155 0.0066 -0.0281  
AT. 123 C X 0.0085 -0.0050 -0.0098 -0.0066 0.0017 0.0224  
Y 0.0000 -0.0229 -0.0008 -0.0070 0.0047 0.0436  
Z 0.0195 -0.0011 -0.0142 -0.0155 -0.0066 -0.0281

AT. 124 C X 0.0085 -0.0050 0.0098 0.0066 0.0017 -0.0224  
Y -0.0000 0.0229 -0.0008 -0.0070 -0.0047 0.0436  
Z 0.0195 -0.0011 0.0142 0.0155 -0.0066 0.0281

AT. 125 H X 0.0085 -0.0002 -0.0154 0.0091 0.0003 -0.0320  
Y 0.0000 -0.0239 0.0001 0.0071 -0.0045 -0.0487  
Z 0.0195 -0.0017 -0.0130 0.0147 0.0059 0.0344

AT. 126 H X 0.0085 -0.0002 0.0154 -0.0091 0.0003 0.0320  
Y -0.0000 0.0239 0.0001 0.0071 0.0045 -0.0487  
Z 0.0195 -0.0017 0.0130 -0.0147 0.0059 -0.0344

AT. 127 H X 0.0085 -0.0002 -0.0154 -0.0091 -0.0003 0.0320  
Y 0.0000 -0.0239 0.0001 -0.0071 0.0045 0.0487  
Z 0.0195 -0.0017 -0.0130 -0.0147 -0.0059 -0.0344

AT. 128 H X 0.0085 -0.0002 0.0154 0.0091 -0.0003 -0.0320  
Y -0.0000 0.0239 0.0001 -0.0071 -0.0045 0.0487  
Z 0.0195 -0.0017 0.0130 0.0147 -0.0059 0.0344

AT. 129 H X 0.0085 -0.0063 -0.0132 0.0077 -0.0025 -0.0189  
Y 0.0000 -0.0196 0.0014 0.0064 -0.0029 -0.0530  
Z 0.0195 0.0020 -0.0212 0.0179 0.0077 0.0189

AT. 130 H X 0.0085 -0.0063 0.0132 -0.0077 -0.0025 0.0189  
Y -0.0000 0.0196 0.0014 0.0064 0.0029 -0.0530  
Z 0.0195 0.0020 0.0212 -0.0179 0.0077 -0.0189

AT. 131 H X 0.0085 -0.0063 -0.0132 -0.0077 0.0025 0.0189  
Y 0.0000 -0.0196 0.0014 -0.0064 0.0029 0.0530  
Z 0.0195 0.0020 -0.0212 -0.0179 -0.0077 -0.0189

AT. 132 H X 0.0085 -0.0063 0.0132 0.0077 0.0025 -0.0189  
Y -0.0000 0.0196 0.0014 -0.0064 -0.0029 0.0530  
Z 0.0195 0.0020 0.0212 0.0179 -0.0077 0.0189

AT. 133 C X 0.0085 -0.0038 -0.0004 -0.0033 0.0045 -0.0108  
Y 0.0000 -0.0219 -0.0016 0.0079 -0.0059 -0.0377  
Z 0.0195 0.0006 -0.0213 0.0178 0.0021 0.0355

AT. 134 C X 0.0085 -0.0038 0.0004 0.0033 0.0045 0.0108  
Y -0.0000 0.0219 -0.0016 0.0079 0.0059 -0.0377

Z 0.0195 0.0006 0.0213 -0.0178 0.0021 -0.0355  
AT. 135 C X 0.0085 -0.0038 -0.0004 0.0033 -0.0045 0.0108  
Y 0.0000 -0.0219 -0.0016 -0.0079 0.0059 0.0377  
Z 0.0195 0.0006 -0.0213 -0.0178 -0.0021 -0.0355  
AT. 136 C X 0.0085 -0.0038 0.0004 -0.0033 -0.0045 -0.0108  
Y -0.0000 0.0219 -0.0016 -0.0079 -0.0059 0.0377  
Z 0.0195 0.0006 0.0213 0.0178 -0.0021 0.0355  
AT. 137 C X 0.0085 0.0047 -0.0082 -0.0053 0.0086 0.0009  
Y 0.0000 -0.0248 0.0034 0.0086 -0.0042 -0.0393  
Z 0.0195 0.0008 -0.0229 0.0173 0.0002 0.0345  
AT. 138 C X 0.0085 0.0047 0.0082 0.0053 0.0086 -0.0009  
Y -0.0000 0.0248 0.0034 0.0086 0.0042 -0.0393  
Z 0.0195 0.0008 0.0229 -0.0173 0.0002 -0.0345  
AT. 139 C X 0.0085 0.0047 -0.0082 0.0053 -0.0086 -0.0009  
Y 0.0000 -0.0248 0.0034 -0.0086 0.0042 0.0393  
Z 0.0195 0.0008 -0.0229 -0.0173 -0.0002 -0.0345  
AT. 140 C X 0.0085 0.0047 0.0082 -0.0053 -0.0086 0.0009  
Y -0.0000 0.0248 0.0034 -0.0086 -0.0042 0.0393  
Z 0.0195 0.0008 0.0229 0.0173 -0.0002 0.0345  
AT. 141 H X 0.0085 0.0166 -0.0283 -0.0095 0.0037 -0.0116  
Y 0.0000 -0.0221 -0.0041 0.0081 -0.0072 -0.0520  
Z 0.0195 -0.0109 -0.0049 0.0216 0.0036 0.0400  
AT. 142 H X 0.0085 0.0166 0.0283 0.0095 0.0037 0.0116  
Y -0.0000 0.0221 -0.0041 0.0081 0.0072 -0.0520  
Z 0.0195 -0.0109 0.0049 -0.0216 0.0036 -0.0400  
AT. 143 H X 0.0085 0.0166 -0.0283 0.0095 -0.0037 0.0116  
Y 0.0000 -0.0221 -0.0041 -0.0081 0.0072 0.0520  
Z 0.0195 -0.0109 -0.0049 -0.0216 -0.0036 -0.0400  
AT. 144 H X 0.0085 0.0166 0.0283 -0.0095 -0.0037 -0.0116  
Y -0.0000 0.0221 -0.0041 -0.0081 -0.0072 0.0520  
Z 0.0195 -0.0109 0.0049 0.0216 -0.0036 0.0400  
AT. 145 H X 0.0085 -0.0061 0.0143 -0.0015 0.0154 0.0245

Y 0.0000 -0.0212 -0.0043 0.0073 -0.0068 -0.0472  
Z 0.0195 0.0013 -0.0260 0.0168 -0.0020 0.0298  
AT. 146 H X 0.0085 -0.0061 -0.0143 0.0015 0.0154 -0.0245  
Y -0.0000 0.0212 -0.0043 0.0073 0.0068 -0.0472  
Z 0.0195 0.0013 0.0260 -0.0168 -0.0020 -0.0298  
AT. 147 H X 0.0085 -0.0061 0.0143 0.0015 -0.0154 -0.0245  
Y 0.0000 -0.0212 -0.0043 -0.0073 0.0068 0.0472  
Z 0.0195 0.0013 -0.0260 -0.0168 0.0020 -0.0298  
AT. 148 H X 0.0085 -0.0061 -0.0143 -0.0015 -0.0154 0.0245  
Y -0.0000 0.0212 -0.0043 -0.0073 -0.0068 0.0472  
Z 0.0195 0.0013 0.0260 0.0168 0.0020 0.0298  
AT. 149 O X 0.0085 -0.0182 0.0037 0.0034 -0.0069 0.0085  
Y 0.0000 -0.0274 -0.0055 0.0084 -0.0085 -0.0140  
Z 0.0195 -0.0066 0.0034 0.0109 0.0065 0.0114  
AT. 150 O X 0.0085 -0.0182 -0.0037 -0.0034 -0.0069 -0.0085  
Y -0.0000 0.0274 -0.0055 0.0084 0.0085 -0.0140  
Z 0.0195 -0.0066 -0.0034 -0.0109 0.0065 -0.0114  
AT. 151 O X 0.0085 -0.0182 0.0037 -0.0034 0.0069 -0.0085  
Y 0.0000 -0.0274 -0.0055 -0.0084 0.0085 0.0140  
Z 0.0195 -0.0066 0.0034 -0.0109 -0.0065 -0.0114  
AT. 152 O X 0.0085 -0.0182 -0.0037 0.0034 0.0069 0.0085  
Y -0.0000 0.0274 -0.0055 -0.0084 -0.0085 0.0140  
Z 0.0195 -0.0066 -0.0034 0.0109 -0.0065 0.0114  
AT. 153 H X 0.0085 -0.0155 -0.0045 0.0095 -0.0025 0.0130  
Y 0.0000 -0.0281 -0.0064 0.0116 -0.0073 -0.0140  
Z 0.0195 -0.0088 0.0086 0.0083 0.0040 0.0085  
AT. 154 H X 0.0085 -0.0155 0.0045 -0.0095 -0.0025 -0.0130  
Y -0.0000 0.0281 -0.0064 0.0116 0.0073 -0.0140  
Z 0.0195 -0.0088 -0.0086 -0.0083 0.0040 -0.0085  
AT. 155 H X 0.0085 -0.0155 -0.0045 -0.0095 0.0025 -0.0130  
Y 0.0000 -0.0281 -0.0064 -0.0116 0.0073 0.0140  
Z 0.0195 -0.0088 0.0086 -0.0083 -0.0040 -0.0085

AT.156 H X 0.0085 -0.0155 0.0045 0.0095 0.0025 0.0130  
Y -0.0000 0.0281 -0.0064 -0.0116 -0.0073 0.0140  
Z 0.0195 -0.0088 -0.0086 0.0083 -0.0040 0.0085

AT.157 O X 0.0085 -0.0136 -0.0041 0.0046 -0.0039 0.0032  
Y 0.0000 -0.0178 -0.0038 0.0082 -0.0051 -0.0433  
Z 0.0195 -0.0038 -0.0168 0.0132 0.0092 0.0146

AT.158 O X 0.0085 -0.0136 0.0041 -0.0046 -0.0039 -0.0032  
Y -0.0000 0.0178 -0.0038 0.0082 0.0051 -0.0433  
Z 0.0195 -0.0038 0.0168 -0.0132 0.0092 -0.0146

AT.159 O X 0.0085 -0.0136 -0.0041 -0.0046 0.0039 -0.0032  
Y 0.0000 -0.0178 -0.0038 -0.0082 0.0051 0.0433  
Z 0.0195 -0.0038 -0.0168 -0.0132 -0.0092 -0.0146

AT.160 O X 0.0085 -0.0136 0.0041 0.0046 0.0039 0.0032  
Y -0.0000 0.0178 -0.0038 -0.0082 -0.0051 0.0433  
Z 0.0195 -0.0038 0.0168 0.0132 -0.0092 0.0146

AT.161 O X 0.0085 -0.0117 0.0062 0.0021 -0.0044 0.0059  
Y 0.0000 -0.0234 -0.0015 0.0106 -0.0078 -0.0381  
Z 0.0195 -0.0013 -0.0246 0.0129 0.0113 0.0094

AT.162 O X 0.0085 -0.0117 -0.0062 -0.0021 -0.0044 -0.0059  
Y -0.0000 0.0234 -0.0015 0.0106 0.0078 -0.0381  
Z 0.0195 -0.0013 0.0246 -0.0129 0.0113 -0.0094

AT.163 O X 0.0085 -0.0117 0.0062 -0.0021 0.0044 -0.0059  
Y 0.0000 -0.0234 -0.0015 -0.0106 0.0078 0.0381  
Z 0.0195 -0.0013 -0.0246 -0.0129 -0.0113 -0.0094

AT.164 O X 0.0085 -0.0117 -0.0062 0.0021 0.0044 0.0059  
Y -0.0000 0.0234 -0.0015 -0.0106 -0.0078 0.0381  
Z 0.0195 -0.0013 0.0246 0.0129 -0.0113 0.0094

AT.165 H X 0.0085 -0.0082 0.0044 -0.0036 0.0010 -0.0018  
Y 0.0000 -0.0224 -0.0019 0.0081 -0.0056 -0.0417  
Z 0.0195 0.0005 -0.0219 0.0156 0.0076 0.0173

AT.166 H X 0.0085 -0.0082 -0.0044 0.0036 0.0010 0.0018  
Y -0.0000 0.0224 -0.0019 0.0081 0.0056 -0.0417

Z 0.0195 0.0005 0.0219 -0.0156 0.0076 -0.0173  
AT. 167 H X 0.0085 -0.0082 0.0044 0.0036 -0.0010 0.0018  
Y 0.0000 -0.0224 -0.0019 -0.0081 0.0056 0.0417  
Z 0.0195 0.0005 -0.0219 -0.0156 -0.0076 -0.0173  
AT. 168 H X 0.0085 -0.0082 -0.0044 -0.0036 -0.0010 -0.0018  
Y -0.0000 0.0224 -0.0019 -0.0081 -0.0056 0.0417  
Z 0.0195 0.0005 0.0219 0.0156 -0.0076 0.0173  
AT. 169 O X 0.0085 -0.0059 -0.0126 0.0114 0.0044 0.0010  
Y 0.0000 -0.0254 -0.0092 0.0070 -0.0004 -0.0142  
Z 0.0195 -0.0109 0.0192 -0.0034 -0.0014 -0.0003  
AT. 170 O X 0.0085 -0.0059 0.0126 -0.0114 0.0044 -0.0010  
Y -0.0000 0.0254 -0.0092 0.0070 0.0004 -0.0142  
Z 0.0195 -0.0109 -0.0192 0.0034 -0.0014 0.0003  
AT. 171 O X 0.0085 -0.0059 -0.0126 -0.0114 -0.0044 -0.0010  
Y 0.0000 -0.0254 -0.0092 -0.0070 0.0004 0.0142  
Z 0.0195 -0.0109 0.0192 0.0034 0.0014 0.0003  
AT. 172 O X 0.0085 -0.0059 0.0126 0.0114 -0.0044 0.0010  
Y -0.0000 0.0254 -0.0092 -0.0070 -0.0004 0.0142  
Z 0.0195 -0.0109 -0.0192 -0.0034 0.0014 -0.0003  
AT. 173 H X 0.0085 0.0015 -0.0054 -0.0057 0.0087 -0.0087  
Y 0.0000 -0.0270 -0.0109 0.0119 0.0001 -0.0154  
Z 0.0195 -0.0108 0.0176 -0.0049 -0.0024 0.0201  
AT. 174 H X 0.0085 0.0015 0.0054 0.0057 0.0087 0.0087  
Y -0.0000 0.0270 -0.0109 0.0119 -0.0001 -0.0154  
Z 0.0195 -0.0108 -0.0176 0.0049 -0.0024 -0.0201  
AT. 175 H X 0.0085 0.0015 -0.0054 0.0057 -0.0087 0.0087  
Y 0.0000 -0.0270 -0.0109 -0.0119 -0.0001 0.0154  
Z 0.0195 -0.0108 0.0176 0.0049 0.0024 -0.0201  
AT. 176 H X 0.0085 0.0015 0.0054 -0.0057 -0.0087 -0.0087  
Y -0.0000 0.0270 -0.0109 -0.0119 0.0001 0.0154  
Z 0.0195 -0.0108 -0.0176 -0.0049 0.0024 0.0201



FREQ(CM\*\*-1) 30.23 32.25 33.97 37.00 39.23 39.43

AT. 1 I X -0.0034 0.0036 0.0181 -0.0532 -0.0258 0.0026

Y -0.0399 -0.0563 -0.0132 0.0022 -0.0053 -0.0034

Z -0.0475 -0.0072 0.0414 -0.0035 -0.0160 0.0239

AT. 2 I X 0.0034 0.0036 0.0181 -0.0532 0.0258 0.0026

Y -0.0399 0.0563 0.0132 -0.0022 -0.0053 0.0034

Z 0.0475 -0.0072 0.0414 -0.0035 0.0160 0.0239

AT. 3 I X -0.0034 0.0036 -0.0181 0.0532 0.0258 0.0026

Y -0.0399 -0.0563 0.0132 -0.0022 0.0053 -0.0034

Z -0.0475 -0.0072 -0.0414 0.0035 0.0160 0.0239

AT. 4 I X 0.0034 0.0036 -0.0181 0.0532 -0.0258 0.0026

Y -0.0399 0.0563 -0.0132 0.0022 0.0053 0.0034

Z 0.0475 -0.0072 -0.0414 0.0035 -0.0160 0.0239

AT. 5 I X 0.0412 -0.0157 -0.0347 -0.0045 0.0170 0.0020

Y 0.0192 0.0450 -0.0311 -0.0128 0.0594 0.0293

Z 0.0065 -0.0171 -0.0198 0.0196 -0.0244 -0.0293

AT. 6 I X -0.0412 -0.0157 -0.0347 -0.0045 -0.0170 0.0020

Y 0.0192 -0.0450 0.0311 0.0128 0.0594 -0.0293

Z -0.0065 -0.0171 -0.0198 0.0196 0.0244 -0.0293

AT. 7 I X 0.0412 -0.0157 0.0347 0.0045 -0.0170 0.0020

Y 0.0192 0.0450 0.0311 0.0128 -0.0594 0.0293

Z 0.0065 -0.0171 0.0198 -0.0196 0.0244 -0.0293

AT. 8 I X -0.0412 -0.0157 0.0347 0.0045 0.0170 0.0020

Y 0.0192 -0.0450 -0.0311 -0.0128 -0.0594 -0.0293

Z -0.0065 -0.0171 0.0198 -0.0196 -0.0244 -0.0293

AT. 9 N X 0.0216 -0.0041 -0.0056 -0.0289 -0.0112 0.0048

Y -0.0011 0.0254 -0.0181 -0.0083 0.0013 -0.0443

Z -0.0179 0.0136 0.0188 0.0125 0.0033 0.0086

AT. 10 N X -0.0216 -0.0041 -0.0056 -0.0289 0.0112 0.0048

Y -0.0011 -0.0254 0.0181 0.0083 0.0013 0.0443

Z 0.0179 0.0136 0.0188 0.0125 -0.0033 0.0086

AT. 11 N X 0.0216 -0.0041 0.0056 0.0289 0.0112 0.0048  
Y -0.0011 0.0254 0.0181 0.0083 -0.0013 -0.0443  
Z -0.0179 0.0136 -0.0188 -0.0125 -0.0033 0.0086

AT. 12 N X -0.0216 -0.0041 0.0056 0.0289 -0.0112 0.0048  
Y -0.0011 -0.0254 -0.0181 -0.0083 -0.0013 0.0443  
Z 0.0179 0.0136 -0.0188 -0.0125 0.0033 0.0086

AT. 13 N X 0.0282 -0.0086 -0.0136 -0.0302 -0.0122 0.0059  
Y 0.0183 0.0139 -0.0164 -0.0354 -0.0107 -0.0312  
Z 0.0011 0.0102 -0.0159 0.0207 0.0042 -0.0012

AT. 14 N X -0.0282 -0.0086 -0.0136 -0.0302 0.0122 0.0059  
Y 0.0183 -0.0139 0.0164 0.0354 -0.0107 0.0312  
Z -0.0011 0.0102 -0.0159 0.0207 -0.0042 -0.0012

AT. 15 N X 0.0282 -0.0086 0.0136 0.0302 0.0122 0.0059  
Y 0.0183 0.0139 0.0164 0.0354 0.0107 -0.0312  
Z 0.0011 0.0102 0.0159 -0.0207 -0.0042 -0.0012

AT. 16 N X -0.0282 -0.0086 0.0136 0.0302 -0.0122 0.0059  
Y 0.0183 -0.0139 -0.0164 -0.0354 0.0107 0.0312  
Z -0.0011 0.0102 0.0159 -0.0207 0.0042 -0.0012

AT. 17 O X 0.0409 0.0167 -0.0292 -0.0144 0.0057 -0.0155  
Y -0.0067 0.0225 -0.0117 -0.0123 0.0015 -0.0397  
Z -0.0241 0.0022 0.0287 0.0099 -0.0093 0.0179

AT. 18 O X -0.0409 0.0167 -0.0292 -0.0144 -0.0057 -0.0155  
Y -0.0067 -0.0225 0.0117 0.0123 0.0015 0.0397  
Z 0.0241 0.0022 0.0287 0.0099 0.0093 0.0179

AT. 19 O X 0.0409 0.0167 0.0292 0.0144 -0.0057 -0.0155  
Y -0.0067 0.0225 0.0117 0.0123 -0.0015 -0.0397  
Z -0.0241 0.0022 -0.0287 -0.0099 0.0093 0.0179

AT. 20 O X -0.0409 0.0167 0.0292 0.0144 0.0057 -0.0155  
Y -0.0067 -0.0225 -0.0117 -0.0123 -0.0015 0.0397  
Z 0.0241 0.0022 -0.0287 -0.0099 -0.0093 0.0179

AT. 21 O X 0.0188 0.0076 0.0035 -0.0176 -0.0086 0.0091  
Y 0.0182 0.0104 -0.0157 -0.0350 -0.0157 -0.0307

Z 0.0020 0.0037 -0.0161 0.0225 -0.0066 0.0010  
AT. 22 O X -0.0188 0.0076 0.0035 -0.0176 0.0086 0.0091  
Y 0.0182 -0.0104 0.0157 0.0350 -0.0157 0.0307  
Z -0.0020 0.0037 -0.0161 0.0225 0.0066 0.0010  
AT. 23 O X 0.0188 0.0076 -0.0035 0.0176 0.0086 0.0091  
Y 0.0182 0.0104 0.0157 0.0350 0.0157 -0.0307  
Z 0.0020 0.0037 0.0161 -0.0225 0.0066 0.0010  
AT. 24 O X -0.0188 0.0076 -0.0035 0.0176 -0.0086 0.0091  
Y 0.0182 -0.0104 -0.0157 -0.0350 0.0157 0.0307  
Z -0.0020 0.0037 0.0161 -0.0225 -0.0066 0.0010  
AT. 25 C X 0.0289 0.0308 0.0034 -0.0421 -0.0176 -0.0130  
Y -0.0062 0.0064 -0.0177 -0.0054 -0.0036 -0.0346  
Z -0.0231 -0.0026 0.0240 0.0140 -0.0066 0.0184  
AT. 26 C X -0.0289 0.0308 0.0034 -0.0421 0.0176 -0.0130  
Y -0.0062 -0.0064 0.0177 0.0054 -0.0036 0.0346  
Z 0.0231 -0.0026 0.0240 0.0140 0.0066 0.0184  
AT. 27 C X 0.0289 0.0308 -0.0034 0.0421 0.0176 -0.0130  
Y -0.0062 0.0064 0.0177 0.0054 0.0036 -0.0346  
Z -0.0231 -0.0026 -0.0240 -0.0140 0.0066 0.0184  
AT. 28 C X -0.0289 0.0308 -0.0034 0.0421 -0.0176 -0.0130  
Y -0.0062 -0.0064 -0.0177 -0.0054 0.0036 0.0346  
Z 0.0231 -0.0026 -0.0240 -0.0140 -0.0066 0.0184  
AT. 29 H X 0.0170 0.0231 0.0106 -0.0471 -0.0216 -0.0086  
Y 0.0125 0.0287 -0.0208 -0.0068 -0.0072 -0.0461  
Z -0.0076 0.0057 0.0134 0.0217 -0.0001 0.0133  
AT. 30 H X -0.0170 0.0231 0.0106 -0.0471 0.0216 -0.0086  
Y 0.0125 -0.0287 0.0208 0.0068 -0.0072 0.0461  
Z 0.0076 0.0057 0.0134 0.0217 0.0001 0.0133  
AT. 31 H X 0.0170 0.0231 -0.0106 0.0471 0.0216 -0.0086  
Y 0.0125 0.0287 0.0208 0.0068 0.0072 -0.0461  
Z -0.0076 0.0057 -0.0134 -0.0217 0.0001 0.0133  
AT. 32 H X -0.0170 0.0231 -0.0106 0.0471 -0.0216 -0.0086

Y 0.0125 -0.0287 -0.0208 -0.0068 0.0072 0.0461  
Z 0.0076 0.0057 -0.0134 -0.0217 -0.0001 0.0133  
AT. 33 H X 0.0557 0.0672 -0.0026 -0.0428 -0.0180 -0.0325  
Y -0.0099 0.0027 -0.0167 -0.0054 -0.0027 -0.0322  
Z -0.0261 -0.0126 0.0247 0.0140 -0.0102 0.0233  
AT. 34 H X -0.0557 0.0672 -0.0026 -0.0428 0.0180 -0.0325  
Y -0.0099 -0.0027 0.0167 0.0054 -0.0027 0.0322  
Z 0.0261 -0.0126 0.0247 0.0140 0.0102 0.0233  
AT. 35 H X 0.0557 0.0672 0.0026 0.0428 0.0180 -0.0325  
Y -0.0099 0.0027 0.0167 0.0054 0.0027 -0.0322  
Z -0.0261 -0.0126 -0.0247 -0.0140 0.0102 0.0233  
AT. 36 H X -0.0557 0.0672 0.0026 0.0428 -0.0180 -0.0325  
Y -0.0099 -0.0027 -0.0167 -0.0054 0.0027 0.0322  
Z 0.0261 -0.0126 -0.0247 -0.0140 -0.0102 0.0233  
AT. 37 C X 0.0305 0.0131 -0.0108 -0.0268 -0.0066 -0.0070  
Y -0.0045 0.0195 -0.0159 -0.0087 -0.0001 -0.0399  
Z -0.0218 0.0052 0.0244 0.0125 -0.0041 0.0152  
AT. 38 C X -0.0305 0.0131 -0.0108 -0.0268 0.0066 -0.0070  
Y -0.0045 -0.0195 0.0159 0.0087 -0.0001 0.0399  
Z 0.0218 0.0052 0.0244 0.0125 0.0041 0.0152  
AT. 39 C X 0.0305 0.0131 0.0108 0.0268 0.0066 -0.0070  
Y -0.0045 0.0195 0.0159 0.0087 0.0001 -0.0399  
Z -0.0218 0.0052 -0.0244 -0.0125 0.0041 0.0152  
AT. 40 C X -0.0305 0.0131 0.0108 0.0268 -0.0066 -0.0070  
Y -0.0045 -0.0195 -0.0159 -0.0087 0.0001 0.0399  
Z 0.0218 0.0052 -0.0244 -0.0125 -0.0041 0.0152  
AT. 41 C X 0.0071 -0.0027 0.0110 -0.0289 -0.0116 0.0098  
Y 0.0041 0.0245 -0.0215 -0.0064 -0.0040 -0.0435  
Z -0.0152 0.0134 0.0137 0.0108 0.0064 0.0064  
AT. 42 C X -0.0071 -0.0027 0.0110 -0.0289 0.0116 0.0098  
Y 0.0041 -0.0245 0.0215 0.0064 -0.0040 0.0435  
Z 0.0152 0.0134 0.0137 0.0108 -0.0064 0.0064

AT. 43 C X 0.0071 -0.0027 -0.0110 0.0289 0.0116 0.0098  
Y 0.0041 0.0245 0.0215 0.0064 0.0040 -0.0435  
Z -0.0152 0.0134 -0.0137 -0.0108 -0.0064 0.0064

AT. 44 C X -0.0071 -0.0027 -0.0110 0.0289 -0.0116 0.0098  
Y 0.0041 -0.0245 -0.0215 -0.0064 0.0040 0.0435  
Z 0.0152 0.0134 -0.0137 -0.0108 0.0064 0.0064

AT. 45 H X 0.0031 -0.0111 0.0274 -0.0402 -0.0174 0.0223  
Y 0.0071 0.0265 -0.0252 -0.0027 -0.0067 -0.0455  
Z -0.0122 0.0166 0.0083 0.0156 0.0052 0.0027

AT. 46 H X -0.0031 -0.0111 0.0274 -0.0402 0.0174 0.0223  
Y 0.0071 -0.0265 0.0252 0.0027 -0.0067 0.0455  
Z 0.0122 0.0166 0.0083 0.0156 -0.0052 0.0027

AT. 47 H X 0.0031 -0.0111 -0.0274 0.0402 0.0174 0.0223  
Y 0.0071 0.0265 0.0252 0.0027 0.0067 -0.0455  
Z -0.0122 0.0166 -0.0083 -0.0156 -0.0052 0.0027

AT. 48 H X -0.0031 -0.0111 -0.0274 0.0402 -0.0174 0.0223  
Y 0.0071 -0.0265 -0.0252 -0.0027 0.0067 0.0455  
Z 0.0122 0.0166 -0.0083 -0.0156 0.0052 0.0027

AT. 49 H X -0.0004 0.0004 0.0141 -0.0231 -0.0083 0.0081  
Y 0.0001 0.0302 -0.0248 0.0027 -0.0008 -0.0489  
Z -0.0234 0.0075 0.0297 0.0021 0.0060 0.0154

AT. 50 H X 0.0004 0.0004 0.0141 -0.0231 0.0083 0.0081  
Y 0.0001 -0.0302 0.0248 -0.0027 -0.0008 0.0489  
Z 0.0234 0.0075 0.0297 0.0021 -0.0060 0.0154

AT. 51 H X -0.0004 0.0004 -0.0141 0.0231 0.0083 0.0081  
Y 0.0001 0.0302 0.0248 -0.0027 0.0008 -0.0489  
Z -0.0234 0.0075 -0.0297 -0.0021 -0.0060 0.0154

AT. 52 H X 0.0004 0.0004 -0.0141 0.0231 -0.0083 0.0081  
Y 0.0001 -0.0302 -0.0248 0.0027 0.0008 0.0489  
Z 0.0234 0.0075 -0.0297 -0.0021 0.0060 0.0154

AT. 53 C X 0.0047 0.0019 0.0056 -0.0209 -0.0071 0.0043  
Y 0.0127 0.0167 -0.0175 -0.0213 -0.0118 -0.0345

Z -0.0053 0.0130 -0.0041 0.0117 0.0101 -0.0005  
AT. 54 C X -0.0047 0.0019 0.0056 -0.0209 0.0071 0.0043  
Y 0.0127 -0.0167 0.0175 0.0213 -0.0118 0.0345  
Z 0.0053 0.0130 -0.0041 0.0117 -0.0101 -0.0005  
AT. 55 C X 0.0047 0.0019 -0.0056 0.0209 0.0071 0.0043  
Y 0.0127 0.0167 0.0175 0.0213 0.0118 -0.0345  
Z -0.0053 0.0130 0.0041 -0.0117 -0.0101 -0.0005  
AT. 56 C X -0.0047 0.0019 -0.0056 0.0209 -0.0071 0.0043  
Y 0.0127 -0.0167 -0.0175 -0.0213 0.0118 0.0345  
Z 0.0053 0.0130 0.0041 -0.0117 0.0101 -0.0005  
AT. 57 C X -0.0111 0.0081 0.0215 -0.0166 -0.0026 0.0052  
Y 0.0160 0.0132 -0.0183 -0.0173 -0.0193 -0.0301  
Z -0.0029 0.0132 -0.0080 0.0084 0.0130 -0.0028  
AT. 58 C X 0.0111 0.0081 0.0215 -0.0166 0.0026 0.0052  
Y 0.0160 -0.0132 0.0183 0.0173 -0.0193 0.0301  
Z 0.0029 0.0132 -0.0080 0.0084 -0.0130 -0.0028  
AT. 59 C X -0.0111 0.0081 -0.0215 0.0166 0.0026 0.0052  
Y 0.0160 0.0132 0.0183 0.0173 0.0193 -0.0301  
Z -0.0029 0.0132 0.0080 -0.0084 -0.0130 -0.0028  
AT. 60 C X 0.0111 0.0081 -0.0215 0.0166 -0.0026 0.0052  
Y 0.0160 -0.0132 -0.0183 -0.0173 0.0193 0.0301  
Z 0.0029 0.0132 0.0080 -0.0084 0.0130 -0.0028  
AT. 61 H X -0.0193 0.0099 0.0193 -0.0118 0.0019 0.0021  
Y 0.0111 0.0137 -0.0218 -0.0132 -0.0170 -0.0325  
Z -0.0086 0.0187 0.0031 0.0042 0.0181 -0.0033  
AT. 62 H X 0.0193 0.0099 0.0193 -0.0118 -0.0019 0.0021  
Y 0.0111 -0.0137 0.0218 0.0132 -0.0170 0.0325  
Z 0.0086 0.0187 0.0031 0.0042 -0.0181 -0.0033  
AT. 63 H X -0.0193 0.0099 -0.0193 0.0118 -0.0019 0.0021  
Y 0.0111 0.0137 0.0218 0.0132 0.0170 -0.0325  
Z -0.0086 0.0187 -0.0031 -0.0042 -0.0181 -0.0033  
AT. 64 H X 0.0193 0.0099 -0.0193 0.0118 0.0019 0.0021

Y 0.0111 -0.0137 -0.0218 -0.0132 0.0170 0.0325  
Z 0.0086 0.0187 -0.0031 -0.0042 0.0181 -0.0033  
AT. 65 H X -0.0139 0.0085 0.0201 -0.0149 -0.0013 0.0041  
Y 0.0239 0.0120 -0.0130 -0.0227 -0.0235 -0.0258  
Z 0.0050 0.0094 -0.0231 0.0066 0.0133 -0.0066  
AT. 66 H X 0.0139 0.0085 0.0201 -0.0149 0.0013 0.0041  
Y 0.0239 -0.0120 0.0130 0.0227 -0.0235 0.0258  
Z -0.0050 0.0094 -0.0231 0.0066 -0.0133 -0.0066  
AT. 67 H X -0.0139 0.0085 -0.0201 0.0149 0.0013 0.0041  
Y 0.0239 0.0120 0.0130 0.0227 0.0235 -0.0258  
Z 0.0050 0.0094 0.0231 -0.0066 -0.0133 -0.0066  
AT. 68 H X 0.0139 0.0085 -0.0201 0.0149 -0.0013 0.0041  
Y 0.0239 -0.0120 -0.0130 -0.0227 0.0235 0.0258  
Z -0.0050 0.0094 0.0231 -0.0066 0.0133 -0.0066  
AT. 69 H X -0.0128 0.0116 0.0375 -0.0203 -0.0040 0.0104  
Y 0.0157 0.0109 -0.0205 -0.0129 -0.0232 -0.0285  
Z -0.0034 0.0122 -0.0073 0.0112 0.0096 -0.0008  
AT. 70 H X 0.0128 0.0116 0.0375 -0.0203 0.0040 0.0104  
Y 0.0157 -0.0109 0.0205 0.0129 -0.0232 0.0285  
Z 0.0034 0.0122 -0.0073 0.0112 -0.0096 -0.0008  
AT. 71 H X -0.0128 0.0116 -0.0375 0.0203 0.0040 0.0104  
Y 0.0157 0.0109 0.0205 0.0129 0.0232 -0.0285  
Z -0.0034 0.0122 0.0073 -0.0112 -0.0096 -0.0008  
AT. 72 H X 0.0128 0.0116 -0.0375 0.0203 -0.0040 0.0104  
Y 0.0157 -0.0109 -0.0205 -0.0129 0.0232 0.0285  
Z 0.0034 0.0122 0.0073 -0.0112 0.0096 -0.0008  
AT. 73 C X 0.0095 0.0082 -0.0148 -0.0070 0.0017 -0.0085  
Y 0.0107 0.0182 -0.0162 -0.0247 -0.0075 -0.0362  
Z -0.0070 0.0132 -0.0009 0.0060 0.0119 -0.0004  
AT. 74 C X -0.0095 0.0082 -0.0148 -0.0070 -0.0017 -0.0085  
Y 0.0107 -0.0182 0.0162 0.0247 -0.0075 0.0362  
Z 0.0070 0.0132 -0.0009 0.0060 -0.0119 -0.0004

AT. 75 C X 0.0095 0.0082 0.0148 0.0070 -0.0017 -0.0085  
Y 0.0107 0.0182 0.0162 0.0247 0.0075 -0.0362  
Z -0.0070 0.0132 0.0009 -0.0060 -0.0119 -0.0004

AT. 76 C X -0.0095 0.0082 0.0148 0.0070 0.0017 -0.0085  
Y 0.0107 -0.0182 -0.0162 -0.0247 0.0075 0.0362  
Z 0.0070 0.0132 0.0009 -0.0060 0.0119 -0.0004

AT. 77 C X 0.0250 -0.0070 -0.0215 -0.0200 -0.0055 -0.0021  
Y -0.0007 0.0318 -0.0182 -0.0122 0.0053 -0.0470  
Z -0.0174 0.0178 0.0186 0.0099 0.0057 0.0068

AT. 78 C X -0.0250 -0.0070 -0.0215 -0.0200 0.0055 -0.0021  
Y -0.0007 -0.0318 0.0182 0.0122 0.0053 0.0470  
Z 0.0174 0.0178 0.0186 0.0099 -0.0057 0.0068

AT. 79 C X 0.0250 -0.0070 0.0215 0.0200 0.0055 -0.0021  
Y -0.0007 0.0318 0.0182 0.0122 -0.0053 -0.0470  
Z -0.0174 0.0178 -0.0186 -0.0099 -0.0057 0.0068

AT. 80 C X -0.0250 -0.0070 0.0215 0.0200 -0.0055 -0.0021  
Y -0.0007 -0.0318 -0.0182 -0.0122 -0.0053 0.0470  
Z 0.0174 0.0178 -0.0186 -0.0099 0.0057 0.0068

AT. 81 H X 0.0202 -0.0010 -0.0210 -0.0125 -0.0012 -0.0054  
Y -0.0054 0.0378 -0.0187 -0.0035 0.0099 -0.0509  
Z -0.0224 0.0286 0.0272 0.0073 0.0083 0.0066

AT. 82 H X -0.0202 -0.0010 -0.0210 -0.0125 0.0012 -0.0054  
Y -0.0054 -0.0378 0.0187 0.0035 0.0099 0.0509  
Z 0.0224 0.0286 0.0272 0.0073 -0.0083 0.0066

AT. 83 H X 0.0202 -0.0010 0.0210 0.0125 0.0012 -0.0054  
Y -0.0054 0.0378 0.0187 0.0035 -0.0099 -0.0509  
Z -0.0224 0.0286 -0.0272 -0.0073 -0.0083 0.0066

AT. 84 H X -0.0202 -0.0010 0.0210 0.0125 -0.0012 -0.0054  
Y -0.0054 -0.0378 -0.0187 -0.0035 -0.0099 0.0509  
Z 0.0224 0.0286 -0.0272 -0.0073 0.0083 0.0066

AT. 85 H X 0.0342 -0.0182 -0.0303 -0.0257 -0.0092 -0.0001  
Y -0.0009 0.0388 -0.0195 -0.0133 0.0092 -0.0512



Z -0.0197 0.0151 0.0222 0.0125 0.0036 0.0097  
AT. 86 H X -0.0342 -0.0182 -0.0303 -0.0257 0.0092 -0.0001  
Y -0.0009 -0.0388 0.0195 0.0133 0.0092 0.0512  
Z 0.0197 0.0151 0.0222 0.0125 -0.0036 0.0097  
AT. 87 H X 0.0342 -0.0182 0.0303 0.0257 0.0092 -0.0001  
Y -0.0009 0.0388 0.0195 0.0133 -0.0092 -0.0512  
Z -0.0197 0.0151 -0.0222 -0.0125 -0.0036 0.0097  
AT. 88 H X -0.0342 -0.0182 0.0303 0.0257 -0.0092 -0.0001  
Y -0.0009 -0.0388 -0.0195 -0.0133 -0.0092 0.0512  
Z 0.0197 0.0151 -0.0222 -0.0125 0.0036 0.0097  
AT. 89 C X 0.0220 -0.0022 -0.0258 -0.0126 -0.0014 -0.0073  
Y 0.0085 0.0223 -0.0175 -0.0268 -0.0013 -0.0409  
Z -0.0082 0.0146 0.0017 0.0085 0.0088 0.0008  
AT. 90 C X -0.0220 -0.0022 -0.0258 -0.0126 0.0014 -0.0073  
Y 0.0085 -0.0223 0.0175 0.0268 -0.0013 0.0409  
Z 0.0082 0.0146 0.0017 0.0085 -0.0088 0.0008  
AT. 91 C X 0.0220 -0.0022 0.0258 0.0126 0.0014 -0.0073  
Y 0.0085 0.0223 0.0175 0.0268 0.0013 -0.0409  
Z -0.0082 0.0146 -0.0017 -0.0085 -0.0088 0.0008  
AT. 92 C X -0.0220 -0.0022 0.0258 0.0126 -0.0014 -0.0073  
Y 0.0085 -0.0223 -0.0175 -0.0268 0.0013 0.0409  
Z 0.0082 0.0146 -0.0017 -0.0085 0.0088 0.0008  
AT. 93 C X 0.0228 0.0014 -0.0390 -0.0016 0.0039 -0.0159  
Y 0.0075 0.0241 -0.0184 -0.0296 0.0038 -0.0451  
Z -0.0087 0.0150 0.0028 0.0049 0.0113 -0.0009  
AT. 94 C X -0.0228 0.0014 -0.0390 -0.0016 -0.0039 -0.0159  
Y 0.0075 -0.0241 0.0184 0.0296 0.0038 0.0451  
Z 0.0087 0.0150 0.0028 0.0049 -0.0113 -0.0009  
AT. 95 C X 0.0228 0.0014 0.0390 0.0016 -0.0039 -0.0159  
Y 0.0075 0.0241 0.0184 0.0296 -0.0038 -0.0451  
Z -0.0087 0.0150 -0.0028 -0.0049 -0.0113 -0.0009  
AT. 96 C X -0.0228 0.0014 0.0390 0.0016 0.0039 -0.0159

Y 0.0075 -0.0241 -0.0184 -0.0296 -0.0038 0.0451  
Z 0.0087 0.0150 -0.0028 -0.0049 0.0113 -0.0009  
AT. 97 H X 0.0192 0.0045 -0.0385 0.0035 0.0069 -0.0168  
Y 0.0177 0.0182 -0.0274 -0.0382 -0.0003 -0.0486  
Z -0.0016 0.0140 -0.0120 0.0056 0.0135 -0.0108  
AT. 98 H X -0.0192 0.0045 -0.0385 0.0035 -0.0069 -0.0168  
Y 0.0177 -0.0182 0.0274 0.0382 -0.0003 0.0486  
Z 0.0016 0.0140 -0.0120 0.0056 -0.0135 -0.0108  
AT. 99 H X 0.0192 0.0045 0.0385 -0.0035 -0.0069 -0.0168  
Y 0.0177 0.0182 0.0274 0.0382 0.0003 -0.0486  
Z -0.0016 0.0140 0.0120 -0.0056 -0.0135 -0.0108  
AT. 100 H X -0.0192 0.0045 0.0385 -0.0035 0.0069 -0.0168  
Y 0.0177 -0.0182 -0.0274 -0.0382 0.0003 0.0486  
Z 0.0016 0.0140 0.0120 -0.0056 0.0135 -0.0108  
AT. 101 H X 0.0141 0.0058 -0.0300 0.0045 0.0070 -0.0128  
Y -0.0010 0.0289 -0.0111 -0.0224 0.0071 -0.0427  
Z -0.0129 0.0152 0.0130 0.0006 0.0122 0.0026  
AT. 102 H X -0.0141 0.0058 -0.0300 0.0045 -0.0070 -0.0128  
Y -0.0010 -0.0289 0.0111 0.0224 0.0071 0.0427  
Z 0.0129 0.0152 0.0130 0.0006 -0.0122 0.0026  
AT. 103 H X 0.0141 0.0058 0.0300 -0.0045 -0.0070 -0.0128  
Y -0.0010 0.0289 0.0111 0.0224 -0.0071 -0.0427  
Z -0.0129 0.0152 -0.0130 -0.0006 -0.0122 0.0026  
AT. 104 H X -0.0141 0.0058 0.0300 -0.0045 0.0070 -0.0128  
Y -0.0010 -0.0289 -0.0111 -0.0224 -0.0071 0.0427  
Z 0.0129 0.0152 -0.0130 -0.0006 0.0122 0.0026  
AT. 105 H X 0.0351 -0.0034 -0.0571 -0.0049 0.0021 -0.0237  
Y 0.0055 0.0253 -0.0177 -0.0300 0.0076 -0.0477  
Z -0.0113 0.0155 0.0085 0.0065 0.0090 0.0038  
AT. 106 H X -0.0351 -0.0034 -0.0571 -0.0049 -0.0021 -0.0237  
Y 0.0055 -0.0253 0.0177 0.0300 0.0076 0.0477  
Z 0.0113 0.0155 0.0085 0.0065 -0.0090 0.0038

AT.107 H X 0.0351 -0.0034 0.0571 0.0049 -0.0021 -0.0237  
Y 0.0055 0.0253 0.0177 0.0300 -0.0076 -0.0477  
Z -0.0113 0.0155 -0.0085 -0.0065 -0.0090 0.0038

AT.108 H X -0.0351 -0.0034 0.0571 0.0049 0.0021 -0.0237  
Y 0.0055 -0.0253 -0.0177 -0.0300 -0.0076 0.0477  
Z 0.0113 0.0155 -0.0085 -0.0065 0.0090 0.0038

AT.109 C X 0.0138 -0.0031 0.0032 -0.0290 -0.0133 0.0089  
Y 0.0196 0.0117 -0.0152 -0.0321 -0.0176 -0.0271  
Z 0.0035 0.0106 -0.0204 0.0185 0.0085 -0.0049

AT.110 C X -0.0138 -0.0031 0.0032 -0.0290 0.0133 0.0089  
Y 0.0196 -0.0117 0.0152 0.0321 -0.0176 0.0271  
Z -0.0035 0.0106 -0.0204 0.0185 -0.0085 -0.0049

AT.111 C X 0.0138 -0.0031 -0.0032 0.0290 0.0133 0.0089  
Y 0.0196 0.0117 0.0152 0.0321 0.0176 -0.0271  
Z 0.0035 0.0106 0.0204 -0.0185 -0.0085 -0.0049

AT.112 C X -0.0138 -0.0031 -0.0032 0.0290 -0.0133 0.0089  
Y 0.0196 -0.0117 -0.0152 -0.0321 0.0176 0.0271  
Z -0.0035 0.0106 0.0204 -0.0185 0.0085 -0.0049

AT.113 H X 0.0114 -0.0009 -0.0001 -0.0248 -0.0095 0.0042  
Y 0.0255 0.0079 -0.0124 -0.0392 -0.0231 -0.0204  
Z 0.0118 0.0098 -0.0363 0.0191 0.0145 -0.0132

AT.114 H X -0.0114 -0.0009 -0.0001 -0.0248 0.0095 0.0042  
Y 0.0255 -0.0079 0.0124 0.0392 -0.0231 0.0204  
Z -0.0118 0.0098 -0.0363 0.0191 -0.0145 -0.0132

AT.115 H X 0.0114 -0.0009 0.0001 0.0248 0.0095 0.0042  
Y 0.0255 0.0079 0.0124 0.0392 0.0231 -0.0204  
Z 0.0118 0.0098 0.0363 -0.0191 -0.0145 -0.0132

AT.116 H X -0.0114 -0.0009 0.0001 0.0248 -0.0095 0.0042  
Y 0.0255 -0.0079 -0.0124 -0.0392 0.0231 0.0204  
Z -0.0118 0.0098 0.0363 -0.0191 0.0145 -0.0132

AT.117 H X 0.0112 -0.0044 0.0179 -0.0362 -0.0198 0.0194  
Y 0.0200 0.0103 -0.0138 -0.0300 -0.0217 -0.0237

Z 0.0043 0.0098 -0.0218 0.0212 0.0056 -0.0040  
AT. 118 H X -0.0112 -0.0044 0.0179 -0.0362 0.0198 0.0194  
Y 0.0200 -0.0103 0.0138 0.0300 -0.0217 0.0237  
Z -0.0043 0.0098 -0.0218 0.0212 -0.0056 -0.0040  
AT. 119 H X 0.0112 -0.0044 -0.0179 0.0362 0.0198 0.0194  
Y 0.0200 0.0103 0.0138 0.0300 0.0217 -0.0237  
Z 0.0043 0.0098 0.0218 -0.0212 -0.0056 -0.0040  
AT. 120 H X -0.0112 -0.0044 -0.0179 0.0362 -0.0198 0.0194  
Y 0.0200 -0.0103 -0.0138 -0.0300 0.0217 0.0237  
Z -0.0043 0.0098 0.0218 -0.0212 0.0056 -0.0040  
AT. 121 C X 0.0312 -0.0102 -0.0272 -0.0219 -0.0073 -0.0026  
Y 0.0169 0.0142 -0.0154 -0.0393 -0.0068 -0.0345  
Z -0.0008 0.0104 -0.0114 0.0156 0.0060 -0.0014  
AT. 122 C X -0.0312 -0.0102 -0.0272 -0.0219 0.0073 -0.0026  
Y 0.0169 -0.0142 0.0154 0.0393 -0.0068 0.0345  
Z 0.0008 0.0104 -0.0114 0.0156 -0.0060 -0.0014  
AT. 123 C X 0.0312 -0.0102 0.0272 0.0219 0.0073 -0.0026  
Y 0.0169 0.0142 0.0154 0.0393 0.0068 -0.0345  
Z -0.0008 0.0104 0.0114 -0.0156 -0.0060 -0.0014  
AT. 124 C X -0.0312 -0.0102 0.0272 0.0219 -0.0073 -0.0026  
Y 0.0169 -0.0142 -0.0154 -0.0393 0.0068 0.0345  
Z 0.0008 0.0104 0.0114 -0.0156 0.0060 -0.0014  
AT. 125 H X 0.0423 -0.0203 -0.0334 -0.0284 -0.0130 -0.0014  
Y 0.0159 0.0142 -0.0140 -0.0424 -0.0042 -0.0368  
Z -0.0030 0.0132 -0.0106 0.0196 0.0057 0.0000  
AT. 126 H X -0.0423 -0.0203 -0.0334 -0.0284 0.0130 -0.0014  
Y 0.0159 -0.0142 0.0140 0.0424 -0.0042 0.0368  
Z 0.0030 0.0132 -0.0106 0.0196 -0.0057 0.0000  
AT. 127 H X 0.0423 -0.0203 0.0334 0.0284 0.0130 -0.0014  
Y 0.0159 0.0142 0.0140 0.0424 0.0042 -0.0368  
Z -0.0030 0.0132 0.0106 -0.0196 -0.0057 0.0000  
AT. 128 H X -0.0423 -0.0203 0.0334 0.0284 -0.0130 -0.0014

Y 0.0159 -0.0142 -0.0140 -0.0424 0.0042 0.0368  
Z 0.0030 0.0132 0.0106 -0.0196 0.0057 0.0000  
AT. 129 H X 0.0290 -0.0079 -0.0310 -0.0167 -0.0042 -0.0067  
Y 0.0236 0.0075 -0.0122 -0.0492 -0.0124 -0.0293  
Z 0.0063 0.0035 -0.0179 0.0119 0.0049 -0.0045  
AT. 130 H X -0.0290 -0.0079 -0.0310 -0.0167 0.0042 -0.0067  
Y 0.0236 -0.0075 0.0122 0.0492 -0.0124 0.0293  
Z -0.0063 0.0035 -0.0179 0.0119 -0.0049 -0.0045  
AT. 131 H X 0.0290 -0.0079 0.0310 0.0167 0.0042 -0.0067  
Y 0.0236 0.0075 0.0122 0.0492 0.0124 -0.0293  
Z 0.0063 0.0035 0.0179 -0.0119 -0.0049 -0.0045  
AT. 132 H X -0.0290 -0.0079 0.0310 0.0167 -0.0042 -0.0067  
Y 0.0236 -0.0075 -0.0122 -0.0492 0.0124 0.0293  
Z -0.0063 0.0035 0.0179 -0.0119 0.0049 -0.0045  
AT. 133 C X 0.0278 -0.0008 -0.0122 -0.0189 -0.0029 0.0087  
Y 0.0181 0.0134 -0.0163 -0.0362 -0.0111 -0.0308  
Z 0.0009 0.0064 -0.0147 0.0218 -0.0043 0.0009  
AT. 134 C X -0.0278 -0.0008 -0.0122 -0.0189 0.0029 0.0087  
Y 0.0181 -0.0134 0.0163 0.0362 -0.0111 0.0308  
Z -0.0009 0.0064 -0.0147 0.0218 0.0043 0.0009  
AT. 135 C X 0.0278 -0.0008 0.0122 0.0189 0.0029 0.0087  
Y 0.0181 0.0134 0.0163 0.0362 0.0111 -0.0308  
Z 0.0009 0.0064 0.0147 -0.0218 0.0043 0.0009  
AT. 136 C X -0.0278 -0.0008 0.0122 0.0189 -0.0029 0.0087  
Y 0.0181 -0.0134 -0.0163 -0.0362 0.0111 0.0308  
Z -0.0009 0.0064 0.0147 -0.0218 -0.0043 0.0009  
AT. 137 C X 0.0366 -0.0050 -0.0279 -0.0074 0.0153 0.0122  
Y 0.0184 0.0167 -0.0173 -0.0378 -0.0049 -0.0294  
Z -0.0008 0.0051 -0.0111 0.0207 -0.0119 -0.0005  
AT. 138 C X -0.0366 -0.0050 -0.0279 -0.0074 -0.0153 0.0122  
Y 0.0184 -0.0167 0.0173 0.0378 -0.0049 0.0294  
Z 0.0008 0.0051 -0.0111 0.0207 0.0119 -0.0005

AT. 139 C X 0.0366 -0.0050 0.0279 0.0074 -0.0153 0.0122  
Y 0.0184 0.0167 0.0173 0.0378 0.0049 -0.0294  
Z -0.0008 0.0051 0.0111 -0.0207 0.0119 -0.0005

AT. 140 C X -0.0366 -0.0050 0.0279 0.0074 0.0153 0.0122  
Y 0.0184 -0.0167 -0.0173 -0.0378 0.0049 0.0294  
Z 0.0008 0.0051 0.0111 -0.0207 -0.0119 -0.0005

AT. 141 H X 0.0389 -0.0181 -0.0287 -0.0119 -0.0011 -0.0088  
Y 0.0183 0.0111 -0.0143 -0.0449 -0.0180 -0.0424  
Z -0.0036 0.0163 -0.0081 0.0211 -0.0026 0.0146

AT. 142 H X -0.0389 -0.0181 -0.0287 -0.0119 0.0011 -0.0088  
Y 0.0183 -0.0111 0.0143 0.0449 -0.0180 0.0424  
Z 0.0036 0.0163 -0.0081 0.0211 0.0026 0.0146

AT. 143 H X 0.0389 -0.0181 0.0287 0.0119 0.0011 -0.0088  
Y 0.0183 0.0111 0.0143 0.0449 0.0180 -0.0424  
Z -0.0036 0.0163 0.0081 -0.0211 0.0026 0.0146

AT. 144 H X -0.0389 -0.0181 0.0287 0.0119 -0.0011 -0.0088  
Y 0.0183 -0.0111 -0.0143 -0.0449 0.0180 0.0424  
Z 0.0036 0.0163 0.0081 -0.0211 -0.0026 0.0146

AT. 145 H X 0.0347 0.0105 -0.0317 0.0042 0.0458 0.0429  
Y 0.0180 0.0114 -0.0148 -0.0417 -0.0167 -0.0400  
Z -0.0034 0.0035 -0.0065 0.0177 -0.0219 -0.0064

AT. 146 H X -0.0347 0.0105 -0.0317 0.0042 -0.0458 0.0429  
Y 0.0180 -0.0114 0.0148 0.0417 -0.0167 0.0400  
Z 0.0034 0.0035 -0.0065 0.0177 0.0219 -0.0064

AT. 147 H X 0.0347 0.0105 0.0317 -0.0042 -0.0458 0.0429  
Y 0.0180 0.0114 0.0148 0.0417 0.0167 -0.0400  
Z -0.0034 0.0035 0.0065 -0.0177 0.0219 -0.0064

AT. 148 H X -0.0347 0.0105 0.0317 -0.0042 0.0458 0.0429  
Y 0.0180 -0.0114 -0.0148 -0.0417 0.0167 0.0400  
Z 0.0034 0.0035 0.0065 -0.0177 -0.0219 -0.0064

AT. 149 O X 0.0036 0.0194 -0.0203 0.0039 0.0076 -0.0155  
Y 0.0080 0.0305 -0.0268 -0.0107 -0.0010 -0.0471

Z -0.0153 0.0123 0.0138 -0.0014 0.0101 0.0061  
AT. 150 O X -0.0036 0.0194 -0.0203 0.0039 -0.0076 -0.0155  
Y 0.0080 -0.0305 0.0268 0.0107 -0.0010 0.0471  
Z 0.0153 0.0123 0.0138 -0.0014 -0.0101 0.0061  
AT. 151 O X 0.0036 0.0194 0.0203 -0.0039 -0.0076 -0.0155  
Y 0.0080 0.0305 0.0268 0.0107 0.0010 -0.0471  
Z -0.0153 0.0123 -0.0138 0.0014 -0.0101 0.0061  
AT. 152 O X -0.0036 0.0194 0.0203 -0.0039 0.0076 -0.0155  
Y 0.0080 -0.0305 -0.0268 -0.0107 0.0010 0.0471  
Z 0.0153 0.0123 -0.0138 0.0014 0.0101 0.0061  
AT. 153 H X 0.0044 0.0120 -0.0163 0.0010 0.0140 -0.0087  
Y 0.0015 0.0233 -0.0144 -0.0147 0.0041 -0.0360  
Z -0.0180 0.0145 0.0153 -0.0008 0.0077 0.0055  
AT. 154 H X -0.0044 0.0120 -0.0163 0.0010 -0.0140 -0.0087  
Y 0.0015 -0.0233 0.0144 0.0147 0.0041 0.0360  
Z 0.0180 0.0145 0.0153 -0.0008 -0.0077 0.0055  
AT. 155 H X 0.0044 0.0120 0.0163 -0.0010 -0.0140 -0.0087  
Y 0.0015 0.0233 0.0144 0.0147 -0.0041 -0.0360  
Z -0.0180 0.0145 -0.0153 0.0008 -0.0077 0.0055  
AT. 156 H X -0.0044 0.0120 0.0163 -0.0010 0.0140 -0.0087  
Y 0.0015 -0.0233 -0.0144 -0.0147 -0.0041 0.0360  
Z 0.0180 0.0145 -0.0153 0.0008 0.0077 0.0055  
AT. 157 O X 0.0091 0.0132 -0.0236 0.0008 0.0078 -0.0157  
Y 0.0133 0.0048 -0.0051 -0.0398 -0.0155 -0.0242  
Z 0.0002 0.0122 -0.0179 0.0075 0.0186 -0.0102  
AT. 158 O X -0.0091 0.0132 -0.0236 0.0008 -0.0078 -0.0157  
Y 0.0133 -0.0048 0.0051 0.0398 -0.0155 0.0242  
Z -0.0002 0.0122 -0.0179 0.0075 -0.0186 -0.0102  
AT. 159 O X 0.0091 0.0132 0.0236 -0.0008 -0.0078 -0.0157  
Y 0.0133 0.0048 0.0051 0.0398 0.0155 -0.0242  
Z 0.0002 0.0122 0.0179 -0.0075 -0.0186 -0.0102  
AT. 160 O X -0.0091 0.0132 0.0236 -0.0008 0.0078 -0.0157

Y 0.0133 -0.0048 -0.0051 -0.0398 0.0155 0.0242  
Z -0.0002 0.0122 0.0179 -0.0075 0.0186 -0.0102  
AT. 161 O X 0.0061 0.0118 -0.0025 -0.0013 -0.0040 0.0012  
Y 0.0119 0.0123 -0.0154 -0.0330 -0.0106 -0.0339  
Z 0.0028 0.0082 -0.0244 0.0043 0.0228 -0.0140  
AT. 162 O X -0.0061 0.0118 -0.0025 -0.0013 0.0040 0.0012  
Y 0.0119 -0.0123 0.0154 0.0330 -0.0106 0.0339  
Z -0.0028 0.0082 -0.0244 0.0043 -0.0228 -0.0140  
AT. 163 O X 0.0061 0.0118 0.0025 0.0013 0.0040 0.0012  
Y 0.0119 0.0123 0.0154 0.0330 0.0106 -0.0339  
Z 0.0028 0.0082 0.0244 -0.0043 -0.0228 -0.0140  
AT. 164 O X -0.0061 0.0118 0.0025 0.0013 -0.0040 0.0012  
Y 0.0119 -0.0123 -0.0154 -0.0330 0.0106 0.0339  
Z -0.0028 0.0082 0.0244 -0.0043 0.0228 -0.0140  
AT. 165 H X 0.0089 0.0094 0.0039 -0.0108 -0.0022 0.0035  
Y 0.0131 0.0115 -0.0125 -0.0374 -0.0101 -0.0330  
Z 0.0011 0.0043 -0.0166 0.0094 0.0106 -0.0023  
AT. 166 H X -0.0089 0.0094 0.0039 -0.0108 0.0022 0.0035  
Y 0.0131 -0.0115 0.0125 0.0374 -0.0101 0.0330  
Z -0.0011 0.0043 -0.0166 0.0094 -0.0106 -0.0023  
AT. 167 H X 0.0089 0.0094 -0.0039 0.0108 0.0022 0.0035  
Y 0.0131 0.0115 0.0125 0.0374 0.0101 -0.0330  
Z 0.0011 0.0043 0.0166 -0.0094 -0.0106 -0.0023  
AT. 168 H X -0.0089 0.0094 -0.0039 0.0108 -0.0022 0.0035  
Y 0.0131 -0.0115 -0.0125 -0.0374 0.0101 0.0330  
Z -0.0011 0.0043 0.0166 -0.0094 0.0106 -0.0023  
AT. 169 O X -0.0055 0.0080 -0.0061 -0.0087 0.0065 -0.0026  
Y 0.0002 0.0245 -0.0083 -0.0102 0.0016 -0.0398  
Z -0.0085 0.0171 0.0015 0.0026 -0.0016 0.0044  
AT. 170 O X 0.0055 0.0080 -0.0061 -0.0087 -0.0065 -0.0026  
Y 0.0002 -0.0245 0.0083 0.0102 0.0016 0.0398  
Z 0.0085 0.0171 0.0015 0.0026 0.0016 0.0044



AT.171 O X -0.0055 0.0080 0.0061 0.0087 -0.0065 -0.0026

Y 0.0002 0.0245 0.0083 0.0102 -0.0016 -0.0398

Z -0.0085 0.0171 -0.0015 -0.0026 0.0016 0.0044

AT.172 O X 0.0055 0.0080 0.0061 0.0087 0.0065 -0.0026

Y 0.0002 -0.0245 -0.0083 -0.0102 -0.0016 0.0398

Z 0.0085 0.0171 -0.0015 -0.0026 -0.0016 0.0044

AT.173 H X 0.0128 0.0131 -0.0128 -0.0091 0.0060 -0.0096

Y -0.0037 0.0246 -0.0088 -0.0121 0.0023 -0.0393

Z -0.0147 0.0130 0.0156 0.0137 -0.0063 0.0084

AT.174 H X -0.0128 0.0131 -0.0128 -0.0091 -0.0060 -0.0096

Y -0.0037 -0.0246 0.0088 0.0121 0.0023 0.0393

Z 0.0147 0.0130 0.0156 0.0137 0.0063 0.0084

AT.175 H X 0.0128 0.0131 0.0128 0.0091 -0.0060 -0.0096

Y -0.0037 0.0246 0.0088 0.0121 -0.0023 -0.0393

Z -0.0147 0.0130 -0.0156 -0.0137 0.0063 0.0084

AT.176 H X -0.0128 0.0131 0.0128 0.0091 0.0060 -0.0096

Y -0.0037 -0.0246 -0.0088 -0.0121 -0.0023 0.0393

Z 0.0147 0.0130 -0.0156 -0.0137 -0.0063 0.0084

FREQ(CM\*\*-1) 41.89 43.07 43.35 47.50 47.65 47.66

AT. 1 I X 0.0032 -0.0483 0.0473 -0.0250 0.0080 -0.0388

Y -0.0057 -0.0210 0.0096 0.0337 0.0022 0.0088

Z -0.0196 -0.0145 0.0171 -0.0120 -0.0014 -0.0263

AT. 2 I X 0.0032 0.0483 -0.0473 0.0250 0.0080 -0.0388

Y 0.0057 -0.0210 0.0096 0.0337 -0.0022 -0.0088

Z -0.0196 0.0145 -0.0171 0.0120 -0.0014 -0.0263

AT. 3 I X -0.0032 -0.0483 -0.0473 -0.0250 -0.0080 -0.0388

Y 0.0057 -0.0210 -0.0096 0.0337 -0.0022 0.0088

Z 0.0196 -0.0145 -0.0171 -0.0120 0.0014 -0.0263

AT. 4 I X -0.0032 0.0483 0.0473 0.0250 -0.0080 -0.0388

Y -0.0057 -0.0210 -0.0096 0.0337 0.0022 -0.0088

Z 0.0196 0.0145 0.0171 0.0120 0.0014 -0.0263  
AT. 5 I X -0.0127 -0.0330 0.0410 0.0144 0.0490 0.0356  
Y -0.0550 0.0181 0.0166 0.0173 -0.0215 0.0284  
Z 0.0305 -0.0007 -0.0040 -0.0234 0.0066 0.0139  
AT. 6 I X -0.0127 0.0330 -0.0410 -0.0144 0.0490 0.0356  
Y 0.0550 0.0181 0.0166 0.0173 0.0215 -0.0284  
Z 0.0305 0.0007 0.0040 0.0234 0.0066 0.0139  
AT. 7 I X 0.0127 -0.0330 -0.0410 0.0144 -0.0490 0.0356  
Y 0.0550 0.0181 -0.0166 0.0173 0.0215 0.0284  
Z -0.0305 -0.0007 0.0040 -0.0234 -0.0066 0.0139  
AT. 8 I X 0.0127 0.0330 0.0410 -0.0144 -0.0490 0.0356  
Y -0.0550 0.0181 -0.0166 0.0173 -0.0215 -0.0284  
Z -0.0305 0.0007 -0.0040 0.0234 -0.0066 0.0139  
AT. 9 N X 0.0219 -0.0135 0.0113 0.0080 -0.0027 -0.0013  
Y -0.0011 0.0098 0.0041 -0.0331 -0.0181 -0.0030  
Z -0.0074 0.0124 -0.0078 -0.0147 -0.0122 0.0027  
AT. 10 N X 0.0219 0.0135 -0.0113 -0.0080 -0.0027 -0.0013  
Y 0.0011 0.0098 0.0041 -0.0331 0.0181 0.0030  
Z -0.0074 -0.0124 0.0078 0.0147 -0.0122 0.0027  
AT. 11 N X -0.0219 -0.0135 -0.0113 0.0080 0.0027 -0.0013  
Y 0.0011 0.0098 -0.0041 -0.0331 0.0181 -0.0030  
Z 0.0074 0.0124 0.0078 -0.0147 0.0122 0.0027  
AT. 12 N X -0.0219 0.0135 0.0113 -0.0080 0.0027 -0.0013  
Y -0.0011 0.0098 -0.0041 -0.0331 -0.0181 0.0030  
Z 0.0074 -0.0124 -0.0078 0.0147 0.0122 0.0027  
AT. 13 N X 0.0272 -0.0119 0.0117 0.0149 -0.0053 -0.0019  
Y 0.0161 -0.0061 0.0053 -0.0141 -0.0127 -0.0058  
Z 0.0048 0.0233 -0.0071 -0.0079 -0.0274 0.0077  
AT. 14 N X 0.0272 0.0119 -0.0117 -0.0149 -0.0053 -0.0019  
Y -0.0161 -0.0061 0.0053 -0.0141 0.0127 0.0058  
Z 0.0048 -0.0233 0.0071 0.0079 -0.0274 0.0077  
AT. 15 N X -0.0272 -0.0119 -0.0117 0.0149 0.0053 -0.0019

Y -0.0161 -0.0061 -0.0053 -0.0141 0.0127 -0.0058  
Z -0.0048 0.0233 0.0071 -0.0079 0.0274 0.0077  
AT. 16 N X -0.0272 0.0119 0.0117 -0.0149 0.0053 -0.0019  
Y 0.0161 -0.0061 -0.0053 -0.0141 -0.0127 0.0058  
Z -0.0048 -0.0233 -0.0071 0.0079 0.0274 0.0077  
AT. 17 O X -0.0010 -0.0169 0.0249 -0.0125 0.0095 0.0224  
Y 0.0107 0.0145 -0.0053 -0.0281 -0.0239 -0.0103  
Z -0.0110 0.0079 -0.0030 -0.0061 -0.0080 -0.0041  
AT. 18 O X -0.0010 0.0169 -0.0249 0.0125 0.0095 0.0224  
Y -0.0107 0.0145 -0.0053 -0.0281 0.0239 0.0103  
Z -0.0110 -0.0079 0.0030 0.0061 -0.0080 -0.0041  
AT. 19 O X 0.0010 -0.0169 -0.0249 -0.0125 -0.0095 0.0224  
Y -0.0107 0.0145 0.0053 -0.0281 0.0239 -0.0103  
Z 0.0110 0.0079 0.0030 -0.0061 0.0080 -0.0041  
AT. 20 O X 0.0010 0.0169 0.0249 0.0125 -0.0095 0.0224  
Y 0.0107 0.0145 0.0053 -0.0281 -0.0239 0.0103  
Z 0.0110 -0.0079 -0.0030 0.0061 0.0080 -0.0041  
AT. 21 O X 0.0108 -0.0116 0.0211 0.0061 -0.0070 -0.0142  
Y 0.0202 -0.0062 0.0033 -0.0129 -0.0121 -0.0091  
Z 0.0135 0.0241 -0.0108 -0.0049 -0.0276 0.0015  
AT. 22 O X 0.0108 0.0116 -0.0211 -0.0061 -0.0070 -0.0142  
Y -0.0202 -0.0062 0.0033 -0.0129 0.0121 0.0091  
Z 0.0135 -0.0241 0.0108 0.0049 -0.0276 0.0015  
AT. 23 O X -0.0108 -0.0116 -0.0211 0.0061 0.0070 -0.0142  
Y -0.0202 -0.0062 -0.0033 -0.0129 0.0121 -0.0091  
Z -0.0135 0.0241 0.0108 -0.0049 0.0276 0.0015  
AT. 24 O X -0.0108 0.0116 0.0211 -0.0061 0.0070 -0.0142  
Y 0.0202 -0.0062 -0.0033 -0.0129 -0.0121 0.0091  
Z -0.0135 -0.0241 -0.0108 0.0049 0.0276 0.0015  
AT. 25 C X 0.0084 -0.0205 0.0300 -0.0333 -0.0010 -0.0182  
Y -0.0016 0.0064 0.0038 -0.0136 -0.0142 0.0010  
Z -0.0142 0.0068 -0.0022 -0.0006 -0.0050 0.0029

AT. 26 C X 0.0084 0.0205 -0.0300 0.0333 -0.0010 -0.0182  
Y 0.0016 0.0064 0.0038 -0.0136 0.0142 -0.0010  
Z -0.0142 -0.0068 0.0022 0.0006 -0.0050 0.0029

AT. 27 C X -0.0084 -0.0205 -0.0300 -0.0333 0.0010 -0.0182  
Y 0.0016 0.0064 -0.0038 -0.0136 0.0142 0.0010  
Z 0.0142 0.0068 0.0022 -0.0006 0.0050 0.0029

AT. 28 C X -0.0084 0.0205 0.0300 0.0333 0.0010 -0.0182  
Y -0.0016 0.0064 -0.0038 -0.0136 -0.0142 -0.0010  
Z 0.0142 -0.0068 -0.0022 0.0006 0.0050 0.0029

AT. 29 H X 0.0058 -0.0297 0.0375 -0.0332 0.0009 -0.0271  
Y -0.0026 0.0165 0.0023 -0.0281 -0.0185 0.0024  
Z -0.0101 0.0194 -0.0132 0.0014 -0.0074 0.0166

AT. 30 H X 0.0058 0.0297 -0.0375 0.0332 0.0009 -0.0271  
Y 0.0026 0.0165 0.0023 -0.0281 0.0185 -0.0024  
Z -0.0101 -0.0194 0.0132 -0.0014 -0.0074 0.0166

AT. 31 H X -0.0058 -0.0297 -0.0375 -0.0332 -0.0009 -0.0271  
Y 0.0026 0.0165 -0.0023 -0.0281 0.0185 0.0024  
Z 0.0101 0.0194 0.0132 0.0014 0.0074 0.0166

AT. 32 H X -0.0058 0.0297 0.0375 0.0332 -0.0009 -0.0271  
Y -0.0026 0.0165 -0.0023 -0.0281 -0.0185 -0.0024  
Z 0.0101 -0.0194 -0.0132 -0.0014 0.0074 0.0166

AT. 33 H X 0.0095 -0.0033 0.0251 -0.0576 -0.0096 -0.0155  
Y -0.0011 0.0048 0.0038 -0.0116 -0.0138 0.0001  
Z -0.0169 0.0008 0.0013 0.0084 -0.0003 0.0047

AT. 34 H X 0.0095 0.0033 -0.0251 0.0576 -0.0096 -0.0155  
Y 0.0011 0.0048 0.0038 -0.0116 0.0138 -0.0001  
Z -0.0169 -0.0008 -0.0013 -0.0084 -0.0003 0.0047

AT. 35 H X -0.0095 -0.0033 -0.0251 -0.0576 0.0096 -0.0155  
Y 0.0011 0.0048 -0.0038 -0.0116 0.0138 0.0001  
Z 0.0169 0.0008 -0.0013 0.0084 0.0003 0.0047

AT. 36 H X -0.0095 0.0033 0.0251 0.0576 0.0096 -0.0155  
Y -0.0011 0.0048 -0.0038 -0.0116 -0.0138 -0.0001

Z 0.0169 -0.0008 0.0013 -0.0084 0.0003 0.0047  
AT. 37 C X 0.0096 -0.0165 0.0206 -0.0103 0.0028 0.0033  
Y 0.0029 0.0108 0.0007 -0.0263 -0.0192 -0.0047  
Z -0.0109 0.0096 -0.0048 -0.0077 -0.0079 -0.0001  
AT. 38 C X 0.0096 0.0165 -0.0206 0.0103 0.0028 0.0033  
Y -0.0029 0.0108 0.0007 -0.0263 0.0192 0.0047  
Z -0.0109 -0.0096 0.0048 0.0077 -0.0079 -0.0001  
AT. 39 C X -0.0096 -0.0165 -0.0206 -0.0103 -0.0028 0.0033  
Y -0.0029 0.0108 -0.0007 -0.0263 0.0192 -0.0047  
Z 0.0109 0.0096 0.0048 -0.0077 0.0079 -0.0001  
AT. 40 C X -0.0096 0.0165 0.0206 0.0103 -0.0028 0.0033  
Y 0.0029 0.0108 -0.0007 -0.0263 -0.0192 0.0047  
Z 0.0109 -0.0096 -0.0048 0.0077 0.0079 -0.0001  
AT. 41 C X 0.0194 -0.0126 0.0078 0.0042 -0.0014 -0.0075  
Y -0.0052 0.0080 0.0089 -0.0313 -0.0159 -0.0014  
Z -0.0030 0.0134 -0.0098 -0.0139 -0.0150 0.0042  
AT. 42 C X 0.0194 0.0126 -0.0078 -0.0042 -0.0014 -0.0075  
Y 0.0052 0.0080 0.0089 -0.0313 0.0159 0.0014  
Z -0.0030 -0.0134 0.0098 0.0139 -0.0150 0.0042  
AT. 43 C X -0.0194 -0.0126 -0.0078 0.0042 0.0014 -0.0075  
Y 0.0052 0.0080 -0.0089 -0.0313 0.0159 -0.0014  
Z 0.0030 0.0134 0.0098 -0.0139 0.0150 0.0042  
AT. 44 C X -0.0194 0.0126 0.0078 -0.0042 0.0014 -0.0075  
Y -0.0052 0.0080 -0.0089 -0.0313 -0.0159 0.0014  
Z 0.0030 -0.0134 -0.0098 0.0139 0.0150 0.0042  
AT. 45 H X 0.0256 -0.0186 0.0044 0.0126 0.0037 -0.0140  
Y -0.0104 0.0077 0.0132 -0.0330 -0.0150 0.0004  
Z -0.0082 0.0143 -0.0059 -0.0168 -0.0152 0.0068  
AT. 46 H X 0.0256 0.0186 -0.0044 -0.0126 0.0037 -0.0140  
Y 0.0104 0.0077 0.0132 -0.0330 0.0150 -0.0004  
Z -0.0082 -0.0143 0.0059 0.0168 -0.0152 0.0068  
AT. 47 H X -0.0256 -0.0186 -0.0044 0.0126 -0.0037 -0.0140

Y 0.0104 0.0077 -0.0132 -0.0330 0.0150 0.0004  
Z 0.0082 0.0143 0.0059 -0.0168 0.0152 0.0068  
AT. 48 H X -0.0256 0.0186 0.0044 -0.0126 -0.0037 -0.0140  
Y -0.0104 0.0077 -0.0132 -0.0330 -0.0150 -0.0004  
Z 0.0082 -0.0143 -0.0059 0.0168 0.0152 0.0068  
AT. 49 H X 0.0141 -0.0097 0.0068 -0.0006 -0.0013 -0.0072  
Y -0.0126 0.0117 0.0108 -0.0380 -0.0171 0.0016  
Z 0.0030 0.0108 -0.0162 -0.0096 -0.0122 -0.0025  
AT. 50 H X 0.0141 0.0097 -0.0068 0.0006 -0.0013 -0.0072  
Y 0.0126 0.0117 0.0108 -0.0380 0.0171 -0.0016  
Z 0.0030 -0.0108 0.0162 0.0096 -0.0122 -0.0025  
AT. 51 H X -0.0141 -0.0097 -0.0068 -0.0006 0.0013 -0.0072  
Y 0.0126 0.0117 -0.0108 -0.0380 0.0171 0.0016  
Z -0.0030 0.0108 0.0162 -0.0096 0.0122 -0.0025  
AT. 52 H X -0.0141 0.0097 0.0068 0.0006 0.0013 -0.0072  
Y -0.0126 0.0117 -0.0108 -0.0380 -0.0171 -0.0016  
Z -0.0030 -0.0108 -0.0162 0.0096 0.0122 -0.0025  
AT. 53 C X 0.0143 -0.0082 0.0082 -0.0012 -0.0038 -0.0039  
Y 0.0079 0.0013 0.0066 -0.0201 -0.0147 -0.0063  
Z 0.0031 0.0159 -0.0093 -0.0119 -0.0218 0.0087  
AT. 54 C X 0.0143 0.0082 -0.0082 0.0012 -0.0038 -0.0039  
Y -0.0079 0.0013 0.0066 -0.0201 0.0147 0.0063  
Z 0.0031 -0.0159 0.0093 0.0119 -0.0218 0.0087  
AT. 55 C X -0.0143 -0.0082 -0.0082 -0.0012 0.0038 -0.0039  
Y -0.0079 0.0013 -0.0066 -0.0201 0.0147 -0.0063  
Z -0.0031 0.0159 0.0093 -0.0119 0.0218 0.0087  
AT. 56 C X -0.0143 0.0082 0.0082 0.0012 0.0038 -0.0039  
Y 0.0079 0.0013 -0.0066 -0.0201 -0.0147 0.0063  
Z -0.0031 -0.0159 -0.0093 0.0119 0.0218 0.0087  
AT. 57 C X 0.0043 -0.0083 0.0063 -0.0110 0.0019 -0.0043  
Y 0.0056 0.0036 0.0071 -0.0155 -0.0143 -0.0083  
Z 0.0071 0.0148 -0.0093 -0.0118 -0.0236 0.0097

AT. 58 C X 0.0043 0.0083 -0.0063 0.0110 0.0019 -0.0043  
Y -0.0056 0.0036 0.0071 -0.0155 0.0143 0.0083  
Z 0.0071 -0.0148 0.0093 0.0118 -0.0236 0.0097

AT. 59 C X -0.0043 -0.0083 -0.0063 -0.0110 -0.0019 -0.0043  
Y -0.0056 0.0036 -0.0071 -0.0155 0.0143 -0.0083  
Z -0.0071 0.0148 0.0093 -0.0118 0.0236 0.0097

AT. 60 C X -0.0043 0.0083 0.0063 0.0110 -0.0019 -0.0043  
Y 0.0056 0.0036 -0.0071 -0.0155 -0.0143 0.0083  
Z -0.0071 -0.0148 -0.0093 0.0118 0.0236 0.0097

AT. 61 H X -0.0028 -0.0054 0.0049 -0.0174 -0.0005 -0.0076  
Y 0.0001 0.0063 0.0061 -0.0196 -0.0169 -0.0114  
Z 0.0091 0.0112 -0.0097 -0.0163 -0.0190 0.0132

AT. 62 H X -0.0028 0.0054 -0.0049 0.0174 -0.0005 -0.0076  
Y -0.0001 0.0063 0.0061 -0.0196 0.0169 0.0114  
Z 0.0091 -0.0112 0.0097 0.0163 -0.0190 0.0132

AT. 63 H X 0.0028 -0.0054 -0.0049 -0.0174 0.0005 -0.0076  
Y -0.0001 0.0063 -0.0061 -0.0196 0.0169 -0.0114  
Z -0.0091 0.0112 0.0097 -0.0163 0.0190 0.0132

AT. 64 H X 0.0028 0.0054 0.0049 0.0174 0.0005 -0.0076  
Y 0.0001 0.0063 -0.0061 -0.0196 -0.0169 0.0114  
Z -0.0091 -0.0112 -0.0097 0.0163 0.0190 0.0132

AT. 65 H X 0.0018 -0.0072 0.0057 -0.0131 0.0007 -0.0057  
Y 0.0135 0.0001 0.0083 -0.0091 -0.0106 -0.0040  
Z 0.0112 0.0152 -0.0080 -0.0082 -0.0294 0.0083

AT. 66 H X 0.0018 0.0072 -0.0057 0.0131 0.0007 -0.0057  
Y -0.0135 0.0001 0.0083 -0.0091 0.0106 0.0040  
Z 0.0112 -0.0152 0.0080 0.0082 -0.0294 0.0083

AT. 67 H X -0.0018 -0.0072 -0.0057 -0.0131 -0.0007 -0.0057  
Y -0.0135 0.0001 -0.0083 -0.0091 0.0106 -0.0040  
Z -0.0112 0.0152 0.0080 -0.0082 0.0294 0.0083

AT. 68 H X -0.0018 0.0072 0.0057 0.0131 -0.0007 -0.0057  
Y 0.0135 0.0001 -0.0083 -0.0091 -0.0106 0.0040

Z -0.0112 -0.0152 -0.0080 0.0082 0.0294 0.0083  
AT. 69 H X 0.0080 -0.0121 0.0068 -0.0104 0.0090 0.0005  
Y 0.0008 0.0062 0.0066 -0.0146 -0.0155 -0.0115  
Z 0.0041 0.0163 -0.0095 -0.0111 -0.0235 0.0080  
AT. 70 H X 0.0080 0.0121 -0.0068 0.0104 0.0090 0.0005  
Y -0.0008 0.0062 0.0066 -0.0146 0.0155 0.0115  
Z 0.0041 -0.0163 0.0095 0.0111 -0.0235 0.0080  
AT. 71 H X -0.0080 -0.0121 -0.0068 -0.0104 -0.0090 0.0005  
Y -0.0008 0.0062 -0.0066 -0.0146 0.0155 -0.0115  
Z -0.0041 0.0163 0.0095 -0.0111 0.0235 0.0080  
AT. 72 H X -0.0080 0.0121 0.0068 0.0104 -0.0090 0.0005  
Y 0.0008 0.0062 -0.0066 -0.0146 -0.0155 0.0115  
Z -0.0041 -0.0163 -0.0095 0.0111 0.0235 0.0080  
AT. 73 C X 0.0094 0.0006 0.0116 -0.0091 -0.0132 0.0042  
Y 0.0100 -0.0007 0.0041 -0.0214 -0.0151 -0.0046  
Z 0.0059 0.0128 -0.0107 -0.0124 -0.0212 0.0084  
AT. 74 C X 0.0094 -0.0006 -0.0116 0.0091 -0.0132 0.0042  
Y -0.0100 -0.0007 0.0041 -0.0214 0.0151 0.0046  
Z 0.0059 -0.0128 0.0107 0.0124 -0.0212 0.0084  
AT. 75 C X -0.0094 0.0006 -0.0116 -0.0091 0.0132 0.0042  
Y -0.0100 -0.0007 -0.0041 -0.0214 0.0151 -0.0046  
Z -0.0059 0.0128 0.0107 -0.0124 0.0212 0.0084  
AT. 76 C X -0.0094 -0.0006 0.0116 0.0091 0.0132 0.0042  
Y 0.0100 -0.0007 -0.0041 -0.0214 -0.0151 0.0046  
Z -0.0059 -0.0128 -0.0107 0.0124 0.0212 0.0084  
AT. 77 C X 0.0217 -0.0049 0.0107 0.0086 -0.0077 0.0044  
Y 0.0033 0.0082 0.0018 -0.0375 -0.0231 -0.0026  
Z -0.0047 0.0108 -0.0089 -0.0175 -0.0152 0.0028  
AT. 78 C X 0.0217 0.0049 -0.0107 -0.0086 -0.0077 0.0044  
Y -0.0033 0.0082 0.0018 -0.0375 0.0231 0.0026  
Z -0.0047 -0.0108 0.0089 0.0175 -0.0152 0.0028  
AT. 79 C X -0.0217 -0.0049 -0.0107 0.0086 0.0077 0.0044



Y -0.0033 0.0082 -0.0018 -0.0375 0.0231 -0.0026  
Z 0.0047 0.0108 0.0089 -0.0175 0.0152 0.0028  
AT. 80 C X -0.0217 0.0049 0.0107 -0.0086 0.0077 0.0044  
Y 0.0033 0.0082 -0.0018 -0.0375 -0.0231 0.0026  
Z 0.0047 -0.0108 -0.0089 0.0175 0.0152 0.0028  
AT. 81 H X 0.0175 -0.0009 0.0099 0.0016 -0.0108 0.0051  
Y -0.0014 0.0132 0.0014 -0.0447 -0.0267 -0.0018  
Z -0.0052 0.0065 -0.0098 -0.0254 -0.0175 0.0015  
AT. 82 H X 0.0175 0.0009 -0.0099 -0.0016 -0.0108 0.0051  
Y 0.0014 0.0132 0.0014 -0.0447 0.0267 0.0018  
Z -0.0052 -0.0065 0.0098 0.0254 -0.0175 0.0015  
AT. 83 H X -0.0175 -0.0009 -0.0099 0.0016 0.0108 0.0051  
Y 0.0014 0.0132 -0.0014 -0.0447 0.0267 -0.0018  
Z 0.0052 0.0065 0.0098 -0.0254 0.0175 0.0015  
AT. 84 H X -0.0175 0.0009 0.0099 -0.0016 0.0108 0.0051  
Y -0.0014 0.0132 -0.0014 -0.0447 -0.0267 0.0018  
Z 0.0052 -0.0065 -0.0098 0.0254 0.0175 0.0015  
AT. 85 H X 0.0273 -0.0067 0.0120 0.0206 -0.0039 0.0057  
Y 0.0055 0.0080 0.0001 -0.0432 -0.0282 -0.0019  
Z -0.0081 0.0114 -0.0080 -0.0162 -0.0118 0.0019  
AT. 86 H X 0.0273 0.0067 -0.0120 -0.0206 -0.0039 0.0057  
Y -0.0055 0.0080 0.0001 -0.0432 0.0282 0.0019  
Z -0.0081 -0.0114 0.0080 0.0162 -0.0118 0.0019  
AT. 87 H X -0.0273 -0.0067 -0.0120 0.0206 0.0039 0.0057  
Y -0.0055 0.0080 -0.0001 -0.0432 0.0282 -0.0019  
Z 0.0081 0.0114 0.0080 -0.0162 0.0118 0.0019  
AT. 88 H X -0.0273 0.0067 0.0120 -0.0206 0.0039 0.0057  
Y 0.0055 0.0080 -0.0001 -0.0432 -0.0282 0.0019  
Z 0.0081 -0.0114 -0.0080 0.0162 0.0118 0.0019  
AT. 89 C X 0.0192 0.0006 0.0104 0.0026 -0.0126 0.0053  
Y 0.0105 -0.0010 0.0032 -0.0263 -0.0171 -0.0027  
Z 0.0028 0.0136 -0.0087 -0.0137 -0.0208 0.0067

AT. 90 C X 0.0192 -0.0006 -0.0104 -0.0026 -0.0126 0.0053  
Y -0.0105 -0.0010 0.0032 -0.0263 0.0171 0.0027  
Z 0.0028 -0.0136 0.0087 0.0137 -0.0208 0.0067

AT. 91 C X -0.0192 0.0006 -0.0104 0.0026 0.0126 0.0053  
Y -0.0105 -0.0010 -0.0032 -0.0263 0.0171 -0.0027  
Z -0.0028 0.0136 0.0087 -0.0137 0.0208 0.0067

AT. 92 C X -0.0192 -0.0006 0.0104 -0.0026 0.0126 0.0053  
Y 0.0105 -0.0010 -0.0032 -0.0263 -0.0171 0.0027  
Z -0.0028 -0.0136 -0.0087 0.0137 0.0208 0.0067

AT. 93 C X 0.0190 0.0105 0.0086 -0.0025 -0.0225 0.0079  
Y 0.0123 -0.0039 0.0018 -0.0300 -0.0184 -0.0005  
Z 0.0042 0.0100 -0.0090 -0.0154 -0.0200 0.0076

AT. 94 C X 0.0190 -0.0105 -0.0086 0.0025 -0.0225 0.0079  
Y -0.0123 -0.0039 0.0018 -0.0300 0.0184 0.0005  
Z 0.0042 -0.0100 0.0090 0.0154 -0.0200 0.0076

AT. 95 C X -0.0190 0.0105 -0.0086 -0.0025 0.0225 0.0079  
Y -0.0123 -0.0039 -0.0018 -0.0300 0.0184 -0.0005  
Z -0.0042 0.0100 0.0090 -0.0154 0.0200 0.0076

AT. 96 C X -0.0190 -0.0105 0.0086 0.0025 0.0225 0.0079  
Y 0.0123 -0.0039 -0.0018 -0.0300 -0.0184 0.0005  
Z -0.0042 -0.0100 -0.0090 0.0154 0.0200 0.0076

AT. 97 H X 0.0156 0.0140 0.0064 -0.0049 -0.0248 0.0098  
Y 0.0221 -0.0088 0.0063 -0.0273 -0.0184 -0.0035  
Z 0.0112 0.0121 -0.0082 -0.0181 -0.0270 0.0083

AT. 98 H X 0.0156 -0.0140 -0.0064 0.0049 -0.0248 0.0098  
Y -0.0221 -0.0088 0.0063 -0.0273 0.0184 0.0035  
Z 0.0112 -0.0121 0.0082 0.0181 -0.0270 0.0083

AT. 99 H X -0.0156 0.0140 -0.0064 -0.0049 0.0248 0.0098  
Y -0.0221 -0.0088 -0.0063 -0.0273 0.0184 -0.0035  
Z -0.0112 0.0121 0.0082 -0.0181 0.0270 0.0083

AT. 100 H X -0.0156 -0.0140 0.0064 0.0049 0.0248 0.0098  
Y 0.0221 -0.0088 -0.0063 -0.0273 -0.0184 0.0035

Z -0.0112 -0.0121 -0.0082 0.0181 0.0270 0.0083  
AT.101 H X 0.0112 0.0133 0.0046 -0.0049 -0.0218 0.0102  
Y 0.0046 -0.0001 -0.0021 -0.0324 -0.0187 0.0020  
Z 0.0021 0.0041 -0.0099 -0.0162 -0.0150 0.0083  
AT.102 H X 0.0112 -0.0133 -0.0046 0.0049 -0.0218 0.0102  
Y -0.0046 -0.0001 -0.0021 -0.0324 0.0187 -0.0020  
Z 0.0021 -0.0041 0.0099 0.0162 -0.0150 0.0083  
AT.103 H X -0.0112 0.0133 -0.0046 -0.0049 0.0218 0.0102  
Y -0.0046 -0.0001 0.0021 -0.0324 0.0187 0.0020  
Z -0.0021 0.0041 0.0099 -0.0162 0.0150 0.0083  
AT.104 H X -0.0112 -0.0133 0.0046 0.0049 0.0218 0.0102  
Y 0.0046 -0.0001 0.0021 -0.0324 -0.0187 -0.0020  
Z -0.0021 -0.0041 -0.0099 0.0162 0.0150 0.0083  
AT.105 H X 0.0294 0.0115 0.0128 -0.0009 -0.0276 0.0058  
Y 0.0122 -0.0057 0.0001 -0.0334 -0.0194 0.0013  
Z 0.0007 0.0109 -0.0091 -0.0132 -0.0174 0.0069  
AT.106 H X 0.0294 -0.0115 -0.0128 0.0009 -0.0276 0.0058  
Y -0.0122 -0.0057 0.0001 -0.0334 0.0194 -0.0013  
Z 0.0007 -0.0109 0.0091 0.0132 -0.0174 0.0069  
AT.107 H X -0.0294 0.0115 -0.0128 -0.0009 0.0276 0.0058  
Y -0.0122 -0.0057 -0.0001 -0.0334 0.0194 0.0013  
Z -0.0007 0.0109 0.0091 -0.0132 0.0174 0.0069  
AT.108 H X -0.0294 -0.0115 0.0128 0.0009 0.0276 0.0058  
Y 0.0122 -0.0057 -0.0001 -0.0334 -0.0194 -0.0013  
Z -0.0007 -0.0109 -0.0091 0.0132 0.0174 0.0069  
AT.109 C X 0.0246 -0.0117 0.0071 0.0077 -0.0046 -0.0065  
Y 0.0190 -0.0043 0.0044 -0.0114 -0.0135 -0.0098  
Z 0.0034 0.0221 -0.0055 -0.0085 -0.0272 0.0113  
AT.110 C X 0.0246 0.0117 -0.0071 -0.0077 -0.0046 -0.0065  
Y -0.0190 -0.0043 0.0044 -0.0114 0.0135 0.0098  
Z 0.0034 -0.0221 0.0055 0.0085 -0.0272 0.0113  
AT.111 C X -0.0246 -0.0117 -0.0071 0.0077 0.0046 -0.0065

Y -0.0190 -0.0043 -0.0044 -0.0114 0.0135 -0.0098  
Z -0.0034 0.0221 0.0055 -0.0085 0.0272 0.0113  
AT. 112 C X -0.0246 0.0117 0.0071 -0.0077 0.0046 -0.0065  
Y 0.0190 -0.0043 -0.0044 -0.0114 -0.0135 0.0098  
Z -0.0034 -0.0221 -0.0055 0.0085 0.0272 0.0113  
AT. 113 H X 0.0192 -0.0089 0.0092 0.0036 -0.0055 -0.0043  
Y 0.0280 -0.0088 0.0017 -0.0038 -0.0124 -0.0122  
Z 0.0008 0.0238 0.0001 -0.0077 -0.0299 0.0172  
AT. 114 H X 0.0192 0.0089 -0.0092 -0.0036 -0.0055 -0.0043  
Y -0.0280 -0.0088 0.0017 -0.0038 0.0124 0.0122  
Z 0.0008 -0.0238 -0.0001 0.0077 -0.0299 0.0172  
AT. 115 H X -0.0192 -0.0089 -0.0092 0.0036 0.0055 -0.0043  
Y -0.0280 -0.0088 -0.0017 -0.0038 0.0124 -0.0122  
Z -0.0008 0.0238 -0.0001 -0.0077 0.0299 0.0172  
AT. 116 H X -0.0192 0.0089 0.0092 -0.0036 0.0055 -0.0043  
Y 0.0280 -0.0088 -0.0017 -0.0038 -0.0124 0.0122  
Z -0.0008 -0.0238 0.0001 0.0077 0.0299 0.0172  
AT. 117 H X 0.0318 -0.0174 0.0010 0.0112 -0.0008 -0.0134  
Y 0.0212 -0.0033 0.0038 -0.0100 -0.0138 -0.0123  
Z 0.0043 0.0238 -0.0051 -0.0076 -0.0284 0.0101  
AT. 118 H X 0.0318 0.0174 -0.0010 -0.0112 -0.0008 -0.0134  
Y -0.0212 -0.0033 0.0038 -0.0100 0.0138 0.0123  
Z 0.0043 -0.0238 0.0051 0.0076 -0.0284 0.0101  
AT. 119 H X -0.0318 -0.0174 -0.0010 0.0112 0.0008 -0.0134  
Y -0.0212 -0.0033 -0.0038 -0.0100 0.0138 -0.0123  
Z -0.0043 0.0238 0.0051 -0.0076 0.0284 0.0101  
AT. 120 H X -0.0318 0.0174 0.0010 -0.0112 0.0008 -0.0134  
Y 0.0212 -0.0033 -0.0038 -0.0100 -0.0138 0.0123  
Z -0.0043 -0.0238 -0.0051 0.0076 0.0284 0.0101  
AT. 121 C X 0.0257 -0.0049 0.0114 0.0125 -0.0086 0.0055  
Y 0.0164 -0.0085 0.0042 -0.0162 -0.0113 -0.0027  
Z 0.0051 0.0199 -0.0080 -0.0089 -0.0252 0.0084

AT. 122 C X 0.0257 0.0049 -0.0114 -0.0125 -0.0086 0.0055  
Y -0.0164 -0.0085 0.0042 -0.0162 0.0113 0.0027  
Z 0.0051 -0.0199 0.0080 0.0089 -0.0252 0.0084

AT. 123 C X -0.0257 -0.0049 -0.0114 0.0125 0.0086 0.0055  
Y -0.0164 -0.0085 -0.0042 -0.0162 0.0113 -0.0027  
Z -0.0051 0.0199 0.0080 -0.0089 0.0252 0.0084

AT. 124 C X -0.0257 0.0049 0.0114 -0.0125 0.0086 0.0055  
Y 0.0164 -0.0085 -0.0042 -0.0162 -0.0113 0.0027  
Z -0.0051 -0.0199 -0.0080 0.0089 0.0252 0.0084

AT. 125 H X 0.0336 -0.0067 0.0108 0.0225 -0.0073 0.0080  
Y 0.0168 -0.0101 0.0034 -0.0180 -0.0099 -0.0002  
Z 0.0025 0.0214 -0.0070 -0.0103 -0.0264 0.0060

AT. 126 H X 0.0336 0.0067 -0.0108 -0.0225 -0.0073 0.0080  
Y -0.0168 -0.0101 0.0034 -0.0180 0.0099 0.0002  
Z 0.0025 -0.0214 0.0070 0.0103 -0.0264 0.0060

AT. 127 H X -0.0336 -0.0067 -0.0108 0.0225 0.0073 0.0080  
Y -0.0168 -0.0101 -0.0034 -0.0180 0.0099 -0.0002  
Z -0.0025 0.0214 0.0070 -0.0103 0.0264 0.0060

AT. 128 H X -0.0336 0.0067 0.0108 -0.0225 0.0073 0.0080  
Y 0.0168 -0.0101 -0.0034 -0.0180 -0.0099 0.0002  
Z -0.0025 -0.0214 -0.0070 0.0103 0.0264 0.0060

AT. 129 H X 0.0236 -0.0011 0.0109 0.0086 -0.0112 0.0072  
Y 0.0222 -0.0147 0.0044 -0.0080 -0.0070 -0.0031  
Z 0.0106 0.0195 -0.0095 -0.0042 -0.0245 0.0136

AT. 130 H X 0.0236 0.0011 -0.0109 -0.0086 -0.0112 0.0072  
Y -0.0222 -0.0147 0.0044 -0.0080 0.0070 0.0031  
Z 0.0106 -0.0195 0.0095 0.0042 -0.0245 0.0136

AT. 131 H X -0.0236 -0.0011 -0.0109 0.0086 0.0112 0.0072  
Y -0.0222 -0.0147 -0.0044 -0.0080 0.0070 -0.0031  
Z -0.0106 0.0195 0.0095 -0.0042 0.0245 0.0136

AT. 132 H X -0.0236 0.0011 0.0109 -0.0086 0.0112 0.0072  
Y 0.0222 -0.0147 -0.0044 -0.0080 -0.0070 0.0031

Z -0.0106 -0.0195 -0.0095 0.0042 0.0245 0.0136  
AT. 133 C X 0.0104 -0.0127 0.0217 0.0135 0.0010 -0.0018  
Y 0.0172 -0.0057 0.0045 -0.0140 -0.0130 -0.0058  
Z 0.0115 0.0244 -0.0102 -0.0062 -0.0293 0.0022  
AT. 134 C X 0.0104 0.0127 -0.0217 -0.0135 0.0010 -0.0018  
Y -0.0172 -0.0057 0.0045 -0.0140 0.0130 0.0058  
Z 0.0115 -0.0244 0.0102 0.0062 -0.0293 0.0022  
AT. 135 C X -0.0104 -0.0127 -0.0217 0.0135 -0.0010 -0.0018  
Y -0.0172 -0.0057 -0.0045 -0.0140 0.0130 -0.0058  
Z -0.0115 0.0244 0.0102 -0.0062 0.0293 0.0022  
AT. 136 C X -0.0104 0.0127 0.0217 -0.0135 -0.0010 -0.0018  
Y 0.0172 -0.0057 -0.0045 -0.0140 -0.0130 0.0058  
Z -0.0115 -0.0244 -0.0102 0.0062 0.0293 0.0022  
AT. 137 C X -0.0103 -0.0188 0.0339 0.0198 0.0238 0.0188  
Y 0.0129 -0.0041 0.0059 -0.0132 -0.0143 -0.0015  
Z 0.0181 0.0246 -0.0127 -0.0076 -0.0322 -0.0049  
AT. 138 C X -0.0103 0.0188 -0.0339 -0.0198 0.0238 0.0188  
Y -0.0129 -0.0041 0.0059 -0.0132 0.0143 0.0015  
Z 0.0181 -0.0246 0.0127 0.0076 -0.0322 -0.0049  
AT. 139 C X 0.0103 -0.0188 -0.0339 0.0198 -0.0238 0.0188  
Y -0.0129 -0.0041 -0.0059 -0.0132 0.0143 -0.0015  
Z -0.0181 0.0246 0.0127 -0.0076 0.0322 -0.0049  
AT. 140 C X 0.0103 0.0188 0.0339 -0.0198 -0.0238 0.0188  
Y 0.0129 -0.0041 -0.0059 -0.0132 -0.0143 0.0015  
Z -0.0181 -0.0246 -0.0127 0.0076 0.0322 -0.0049  
AT. 141 H X 0.0066 -0.0312 0.0352 0.0097 0.0389 0.0189  
Y 0.0284 -0.0084 0.0035 -0.0200 -0.0137 -0.0067  
Z 0.0096 0.0360 -0.0156 -0.0007 -0.0489 -0.0092  
AT. 142 H X 0.0066 0.0312 -0.0352 -0.0097 0.0389 0.0189  
Y -0.0284 -0.0084 0.0035 -0.0200 0.0137 0.0067  
Z 0.0096 -0.0360 0.0156 0.0007 -0.0489 -0.0092  
AT. 143 H X -0.0066 -0.0312 -0.0352 0.0097 -0.0389 0.0189

Y -0.0284 -0.0084 -0.0035 -0.0200 0.0137 -0.0067  
Z -0.0096 0.0360 0.0156 -0.0007 0.0489 -0.0092  
AT. 144 H X -0.0066 0.0312 0.0352 -0.0097 -0.0389 0.0189  
Y 0.0284 -0.0084 -0.0035 -0.0200 -0.0137 0.0067  
Z -0.0096 -0.0360 -0.0156 0.0007 0.0489 -0.0092  
AT. 145 H X -0.0426 -0.0058 0.0367 0.0356 0.0151 0.0290  
Y 0.0254 -0.0082 0.0037 -0.0191 -0.0130 -0.0069  
Z 0.0284 0.0237 -0.0172 -0.0119 -0.0374 -0.0136  
AT. 146 H X -0.0426 0.0058 -0.0367 -0.0356 0.0151 0.0290  
Y -0.0254 -0.0082 0.0037 -0.0191 0.0130 0.0069  
Z 0.0284 -0.0237 0.0172 0.0119 -0.0374 -0.0136  
AT. 147 H X 0.0426 -0.0058 -0.0367 0.0356 -0.0151 0.0290  
Y -0.0254 -0.0082 -0.0037 -0.0191 0.0130 -0.0069  
Z -0.0284 0.0237 0.0172 -0.0119 0.0374 -0.0136  
AT. 148 H X 0.0426 0.0058 0.0367 -0.0356 -0.0151 0.0290  
Y 0.0254 -0.0082 -0.0037 -0.0191 -0.0130 0.0069  
Z -0.0284 -0.0237 -0.0172 0.0119 0.0374 -0.0136  
AT. 149 O X 0.0001 0.0043 0.0176 -0.0215 -0.0177 0.0081  
Y 0.0007 0.0055 0.0112 -0.0361 -0.0233 0.0003  
Z 0.0065 0.0064 -0.0145 -0.0103 -0.0153 0.0054  
AT. 150 O X 0.0001 -0.0043 -0.0176 0.0215 -0.0177 0.0081  
Y -0.0007 0.0055 0.0112 -0.0361 0.0233 -0.0003  
Z 0.0065 -0.0064 0.0145 0.0103 -0.0153 0.0054  
AT. 151 O X -0.0001 0.0043 -0.0176 -0.0215 0.0177 0.0081  
Y -0.0007 0.0055 -0.0112 -0.0361 0.0233 0.0003  
Z -0.0065 0.0064 0.0145 -0.0103 0.0153 0.0054  
AT. 152 O X -0.0001 -0.0043 0.0176 0.0215 0.0177 0.0081  
Y 0.0007 0.0055 -0.0112 -0.0361 -0.0233 -0.0003  
Z -0.0065 -0.0064 -0.0145 0.0103 0.0153 0.0054  
AT. 153 H X 0.0009 0.0116 0.0093 -0.0118 -0.0151 0.0066  
Y -0.0005 0.0087 0.0019 -0.0258 -0.0148 -0.0030  
Z 0.0054 0.0022 -0.0120 -0.0131 -0.0141 0.0055

AT. 154 H X 0.0009 -0.0116 -0.0093 0.0118 -0.0151 0.0066  
Y 0.0005 0.0087 0.0019 -0.0258 0.0148 0.0030  
Z 0.0054 -0.0022 0.0120 0.0131 -0.0141 0.0055

AT. 155 H X -0.0009 0.0116 -0.0093 -0.0118 0.0151 0.0066  
Y 0.0005 0.0087 -0.0019 -0.0258 0.0148 -0.0030  
Z -0.0054 0.0022 0.0120 -0.0131 0.0141 0.0055

AT. 156 H X -0.0009 -0.0116 0.0093 0.0118 0.0151 0.0066  
Y -0.0005 0.0087 -0.0019 -0.0258 -0.0148 0.0030  
Z -0.0054 -0.0022 -0.0120 0.0131 0.0141 0.0055

AT. 157 O X 0.0047 0.0051 0.0132 -0.0157 -0.0183 0.0077  
Y 0.0205 -0.0070 -0.0036 -0.0054 -0.0060 -0.0108  
Z 0.0083 0.0158 -0.0079 -0.0145 -0.0269 0.0122

AT. 158 O X 0.0047 -0.0051 -0.0132 0.0157 -0.0183 0.0077  
Y -0.0205 -0.0070 -0.0036 -0.0054 0.0060 0.0108  
Z 0.0083 -0.0158 0.0079 0.0145 -0.0269 0.0122

AT. 159 O X -0.0047 0.0051 -0.0132 -0.0157 0.0183 0.0077  
Y -0.0205 -0.0070 0.0036 -0.0054 0.0060 -0.0108  
Z -0.0083 0.0158 0.0079 -0.0145 0.0269 0.0122

AT. 160 O X -0.0047 -0.0051 0.0132 0.0157 0.0183 0.0077  
Y 0.0205 -0.0070 0.0036 -0.0054 -0.0060 0.0108  
Z -0.0083 -0.0158 -0.0079 0.0145 0.0269 0.0122

AT. 161 O X 0.0076 -0.0006 0.0074 -0.0059 -0.0152 0.0030  
Y 0.0160 -0.0015 0.0016 -0.0169 -0.0079 -0.0040  
Z 0.0098 0.0157 -0.0078 -0.0130 -0.0277 0.0107

AT. 162 O X 0.0076 0.0006 -0.0074 0.0059 -0.0152 0.0030  
Y -0.0160 -0.0015 0.0016 -0.0169 0.0079 0.0040  
Z 0.0098 -0.0157 0.0078 0.0130 -0.0277 0.0107

AT. 163 O X -0.0076 -0.0006 -0.0074 -0.0059 0.0152 0.0030  
Y -0.0160 -0.0015 -0.0016 -0.0169 0.0079 -0.0040  
Z -0.0098 0.0157 0.0078 -0.0130 0.0277 0.0107

AT. 164 O X -0.0076 0.0006 0.0074 0.0059 0.0152 0.0030  
Y 0.0160 -0.0015 -0.0016 -0.0169 -0.0079 0.0040



Z -0.0098 -0.0157 -0.0078 0.0130 0.0277 0.0107  
AT. 165 H X 0.0080 -0.0071 0.0102 -0.0014 -0.0130 -0.0041  
Y 0.0163 -0.0041 0.0030 -0.0149 -0.0064 -0.0071  
Z 0.0132 0.0172 -0.0139 -0.0045 -0.0265 0.0082  
AT. 166 H X 0.0080 0.0071 -0.0102 0.0014 -0.0130 -0.0041  
Y -0.0163 -0.0041 0.0030 -0.0149 0.0064 0.0071  
Z 0.0132 -0.0172 0.0139 0.0045 -0.0265 0.0082  
AT. 167 H X -0.0080 -0.0071 -0.0102 -0.0014 0.0130 -0.0041  
Y -0.0163 -0.0041 -0.0030 -0.0149 0.0064 -0.0071  
Z -0.0132 0.0172 0.0139 -0.0045 0.0265 0.0082  
AT. 168 H X -0.0080 0.0071 0.0102 0.0014 0.0130 -0.0041  
Y 0.0163 -0.0041 -0.0030 -0.0149 -0.0064 0.0071  
Z -0.0132 -0.0172 -0.0139 0.0045 0.0265 0.0082  
AT. 169 O X 0.0046 0.0259 -0.0034 -0.0050 -0.0013 -0.0052  
Y 0.0058 0.0061 -0.0018 -0.0259 -0.0085 -0.0068  
Z -0.0012 -0.0109 0.0011 -0.0122 0.0000 0.0052  
AT. 170 O X 0.0046 -0.0259 0.0034 0.0050 -0.0013 -0.0052  
Y -0.0058 0.0061 -0.0018 -0.0259 0.0085 0.0068  
Z -0.0012 0.0109 -0.0011 0.0122 0.0000 0.0052  
AT. 171 O X -0.0046 0.0259 0.0034 -0.0050 0.0013 -0.0052  
Y -0.0058 0.0061 0.0018 -0.0259 0.0085 -0.0068  
Z 0.0012 -0.0109 -0.0011 -0.0122 -0.0000 0.0052  
AT. 172 O X -0.0046 -0.0259 -0.0034 0.0050 0.0013 -0.0052  
Y 0.0058 0.0061 0.0018 -0.0259 -0.0085 0.0068  
Z 0.0012 0.0109 0.0011 0.0122 -0.0000 0.0052  
AT. 173 H X 0.0012 0.0064 0.0075 -0.0077 0.0075 0.0067  
Y 0.0079 0.0094 -0.0046 -0.0256 -0.0105 -0.0092  
Z -0.0083 -0.0044 0.0006 -0.0102 0.0059 0.0009  
AT. 174 H X 0.0012 -0.0064 -0.0075 0.0077 0.0075 0.0067  
Y -0.0079 0.0094 -0.0046 -0.0256 0.0105 0.0092  
Z -0.0083 0.0044 -0.0006 0.0102 0.0059 0.0009  
AT. 175 H X -0.0012 0.0064 -0.0075 -0.0077 -0.0075 0.0067

Y -0.0079 0.0094 0.0046 -0.0256 0.0105 -0.0092  
Z 0.0083 -0.0044 -0.0006 -0.0102 -0.0059 0.0009  
AT. 176 H X -0.0012 -0.0064 0.0075 0.0077 -0.0075 0.0067  
Y 0.0079 0.0094 0.0046 -0.0256 -0.0105 0.0092  
Z 0.0083 0.0044 0.0006 0.0102 -0.0059 0.0009

FREQ(CM\*\*-1) 48.66 50.99 52.33 52.55 55.15 58.86

AT. 1 I X 0.0249 0.0170 -0.0035 0.0027 0.0061 0.0025  
Y -0.0086 -0.0124 -0.0146 0.0068 -0.0132 0.0059  
Z 0.0158 0.0322 0.0298 -0.0254 -0.0110 0.0139

AT. 2 I X -0.0249 0.0170 0.0035 0.0027 -0.0061 -0.0025  
Y -0.0086 0.0124 -0.0146 -0.0068 -0.0132 0.0059  
Z -0.0158 0.0322 -0.0298 -0.0254 0.0110 -0.0139

AT. 3 I X -0.0249 -0.0170 -0.0035 0.0027 -0.0061 0.0025  
Y 0.0086 0.0124 -0.0146 0.0068 0.0132 0.0059  
Z -0.0158 -0.0322 0.0298 -0.0254 0.0110 0.0139

AT. 4 I X 0.0249 -0.0170 0.0035 0.0027 0.0061 -0.0025  
Y 0.0086 -0.0124 -0.0146 -0.0068 0.0132 0.0059  
Z 0.0158 -0.0322 -0.0298 -0.0254 -0.0110 -0.0139

AT. 5 I X -0.0455 0.0115 0.0306 -0.0329 -0.0108 0.0080  
Y 0.0148 0.0079 0.0279 0.0012 0.0174 0.0148  
Z -0.0378 0.0436 0.0185 0.0002 0.0318 0.0098

AT. 6 I X 0.0455 0.0115 -0.0306 -0.0329 0.0108 -0.0080  
Y 0.0148 -0.0079 0.0279 -0.0012 0.0174 0.0148  
Z 0.0378 0.0436 -0.0185 0.0002 -0.0318 -0.0098

AT. 7 I X 0.0455 -0.0115 0.0306 -0.0329 0.0108 0.0080  
Y -0.0148 -0.0079 0.0279 0.0012 -0.0174 0.0148  
Z 0.0378 -0.0436 0.0185 0.0002 -0.0318 0.0098

AT. 8 I X -0.0455 -0.0115 -0.0306 -0.0329 -0.0108 -0.0080  
Y -0.0148 0.0079 0.0279 -0.0012 -0.0174 0.0148  
Z -0.0378 -0.0436 -0.0185 0.0002 0.0318 -0.0098

AT. 9 N X 0.0024 -0.0201 -0.0287 0.0224 0.0010 0.0293  
Y 0.0033 0.0219 0.0058 -0.0223 0.0308 -0.0201  
Z -0.0006 0.0112 0.0051 -0.0079 0.0016 0.0262

AT. 10 N X -0.0024 -0.0201 0.0287 0.0224 -0.0010 -0.0293  
Y 0.0033 -0.0219 0.0058 0.0223 0.0308 -0.0201  
Z 0.0006 0.0112 -0.0051 -0.0079 -0.0016 -0.0262

AT. 11 N X -0.0024 0.0201 -0.0287 0.0224 -0.0010 0.0293  
Y -0.0033 -0.0219 0.0058 -0.0223 -0.0308 -0.0201  
Z 0.0006 -0.0112 0.0051 -0.0079 -0.0016 0.0262

AT. 12 N X 0.0024 0.0201 0.0287 0.0224 0.0010 -0.0293  
Y -0.0033 0.0219 0.0058 0.0223 -0.0308 -0.0201  
Z -0.0006 -0.0112 -0.0051 -0.0079 0.0016 -0.0262

AT. 13 N X 0.0039 -0.0240 -0.0295 0.0302 0.0007 0.0298  
Y 0.0042 0.0046 -0.0138 -0.0048 0.0198 -0.0019  
Z 0.0019 0.0129 0.0051 0.0218 0.0231 0.0227

AT. 14 N X -0.0039 -0.0240 0.0295 0.0302 -0.0007 -0.0298  
Y 0.0042 -0.0046 -0.0138 0.0048 0.0198 -0.0019  
Z -0.0019 0.0129 -0.0051 0.0218 -0.0231 -0.0227

AT. 15 N X -0.0039 0.0240 -0.0295 0.0302 -0.0007 0.0298  
Y -0.0042 -0.0046 -0.0138 -0.0048 -0.0198 -0.0019  
Z -0.0019 -0.0129 0.0051 0.0218 -0.0231 0.0227

AT. 16 N X 0.0039 0.0240 0.0295 0.0302 0.0007 -0.0298  
Y -0.0042 0.0046 -0.0138 0.0048 -0.0198 -0.0019  
Z 0.0019 -0.0129 -0.0051 0.0218 0.0231 -0.0227

AT. 17 O X -0.0074 -0.0043 -0.0386 0.0345 0.0180 0.0340  
Y 0.0059 0.0149 0.0088 -0.0215 0.0256 -0.0211  
Z 0.0013 0.0094 0.0086 -0.0187 -0.0063 0.0250

AT. 18 O X 0.0074 -0.0043 0.0386 0.0345 -0.0180 -0.0340  
Y 0.0059 -0.0149 0.0088 0.0215 0.0256 -0.0211  
Z -0.0013 0.0094 -0.0086 -0.0187 0.0063 -0.0250

AT. 19 O X 0.0074 0.0043 -0.0386 0.0345 -0.0180 0.0340  
Y -0.0059 -0.0149 0.0088 -0.0215 -0.0256 -0.0211

Z -0.0013 -0.0094 0.0086 -0.0187 0.0063 0.0250  
AT. 20 O X -0.0074 0.0043 0.0386 0.0345 0.0180 -0.0340  
Y -0.0059 0.0149 0.0088 0.0215 -0.0256 -0.0211  
Z 0.0013 -0.0094 -0.0086 -0.0187 -0.0063 -0.0250  
AT. 21 O X 0.0192 -0.0210 -0.0060 -0.0125 -0.0043 -0.0158  
Y 0.0040 0.0046 -0.0160 -0.0026 0.0204 -0.0023  
Z 0.0024 0.0143 0.0021 0.0264 0.0265 0.0216  
AT. 22 O X -0.0192 -0.0210 0.0060 -0.0125 0.0043 0.0158  
Y 0.0040 -0.0046 -0.0160 0.0026 0.0204 -0.0023  
Z -0.0024 0.0143 -0.0021 0.0264 -0.0265 -0.0216  
AT. 23 O X -0.0192 0.0210 -0.0060 -0.0125 0.0043 -0.0158  
Y -0.0040 -0.0046 -0.0160 -0.0026 -0.0204 -0.0023  
Z -0.0024 -0.0143 0.0021 0.0264 -0.0265 0.0216  
AT. 24 O X 0.0192 0.0210 0.0060 -0.0125 -0.0043 0.0158  
Y -0.0040 0.0046 -0.0160 0.0026 -0.0204 -0.0023  
Z 0.0024 -0.0143 -0.0021 0.0264 0.0265 -0.0216  
AT. 25 C X 0.0125 0.0066 -0.0172 0.0004 0.0197 0.0087  
Y -0.0008 0.0121 0.0009 -0.0198 0.0202 -0.0132  
Z -0.0030 0.0074 0.0044 -0.0133 -0.0076 0.0301  
AT. 26 C X -0.0125 0.0066 0.0172 0.0004 -0.0197 -0.0087  
Y -0.0008 -0.0121 0.0009 0.0198 0.0202 -0.0132  
Z 0.0030 0.0074 -0.0044 -0.0133 0.0076 -0.0301  
AT. 27 C X -0.0125 -0.0066 -0.0172 0.0004 -0.0197 0.0087  
Y 0.0008 -0.0121 0.0009 -0.0198 -0.0202 -0.0132  
Z 0.0030 -0.0074 0.0044 -0.0133 0.0076 0.0301  
AT. 28 C X 0.0125 -0.0066 0.0172 0.0004 0.0197 -0.0087  
Y 0.0008 0.0121 0.0009 0.0198 -0.0202 -0.0132  
Z -0.0030 -0.0074 -0.0044 -0.0133 -0.0076 -0.0301  
AT. 29 H X 0.0170 0.0121 -0.0110 -0.0023 0.0157 0.0050  
Y -0.0018 0.0160 -0.0001 -0.0306 0.0319 -0.0168  
Z -0.0100 -0.0018 -0.0052 -0.0075 -0.0033 0.0366  
AT. 30 H X -0.0170 0.0121 0.0110 -0.0023 -0.0157 -0.0050

Y -0.0018 -0.0160 -0.0001 0.0306 0.0319 -0.0168  
Z 0.0100 -0.0018 0.0052 -0.0075 0.0033 -0.0366  
AT. 31 H X -0.0170 -0.0121 -0.0110 -0.0023 -0.0157 0.0050  
Y 0.0018 -0.0160 -0.0001 -0.0306 -0.0319 -0.0168  
Z 0.0100 0.0018 -0.0052 -0.0075 0.0033 0.0366  
AT. 32 H X 0.0170 -0.0121 0.0110 -0.0023 0.0157 -0.0050  
Y 0.0018 0.0160 -0.0001 0.0306 -0.0319 -0.0168  
Z -0.0100 0.0018 0.0052 -0.0075 -0.0033 -0.0366  
AT. 33 H X 0.0117 0.0142 -0.0177 -0.0130 0.0387 0.0030  
Y -0.0001 0.0118 0.0019 -0.0175 0.0182 -0.0127  
Z -0.0051 0.0027 0.0002 -0.0125 -0.0133 0.0332  
AT. 34 H X -0.0117 0.0142 0.0177 -0.0130 -0.0387 -0.0030  
Y -0.0001 -0.0118 0.0019 0.0175 0.0182 -0.0127  
Z 0.0051 0.0027 -0.0002 -0.0125 0.0133 -0.0332  
AT. 35 H X -0.0117 -0.0142 -0.0177 -0.0130 -0.0387 0.0030  
Y 0.0001 -0.0118 0.0019 -0.0175 -0.0182 -0.0127  
Z 0.0051 -0.0027 0.0002 -0.0125 0.0133 0.0332  
AT. 36 H X 0.0117 -0.0142 0.0177 -0.0130 0.0387 -0.0030  
Y 0.0001 0.0118 0.0019 0.0175 -0.0182 -0.0127  
Z -0.0051 -0.0027 -0.0002 -0.0125 -0.0133 -0.0332  
AT. 37 C X 0.0007 -0.0085 -0.0303 0.0204 0.0111 0.0259  
Y 0.0036 0.0171 0.0061 -0.0216 0.0262 -0.0187  
Z -0.0005 0.0098 0.0069 -0.0134 -0.0045 0.0274  
AT. 38 C X -0.0007 -0.0085 0.0303 0.0204 -0.0111 -0.0259  
Y 0.0036 -0.0171 0.0061 0.0216 0.0262 -0.0187  
Z 0.0005 0.0098 -0.0069 -0.0134 0.0045 -0.0274  
AT. 39 C X -0.0007 0.0085 -0.0303 0.0204 -0.0111 0.0259  
Y -0.0036 -0.0171 0.0061 -0.0216 -0.0262 -0.0187  
Z 0.0005 -0.0098 0.0069 -0.0134 0.0045 0.0274  
AT. 40 C X 0.0007 0.0085 0.0303 0.0204 0.0111 -0.0259  
Y -0.0036 0.0171 0.0061 0.0216 -0.0262 -0.0187  
Z -0.0005 -0.0098 -0.0069 -0.0134 -0.0045 -0.0274

AT. 41 C X 0.0037 -0.0177 -0.0231 0.0083 -0.0045 0.0238  
Y 0.0034 0.0244 0.0070 -0.0246 0.0335 -0.0194  
Z -0.0011 0.0087 0.0020 0.0000 0.0029 0.0283

AT. 42 C X -0.0037 -0.0177 0.0231 0.0083 0.0045 -0.0238  
Y 0.0034 -0.0244 0.0070 0.0246 0.0335 -0.0194  
Z 0.0011 0.0087 -0.0020 0.0000 -0.0029 -0.0283

AT. 43 C X -0.0037 0.0177 -0.0231 0.0083 0.0045 0.0238  
Y -0.0034 -0.0244 0.0070 -0.0246 -0.0335 -0.0194  
Z 0.0011 -0.0087 0.0020 0.0000 -0.0029 0.0283

AT. 44 C X 0.0037 0.0177 0.0231 0.0083 -0.0045 -0.0238  
Y -0.0034 0.0244 0.0070 0.0246 -0.0335 -0.0194  
Z -0.0011 -0.0087 -0.0020 0.0000 0.0029 -0.0283

AT. 45 H X 0.0031 -0.0247 -0.0282 0.0062 -0.0164 0.0277  
Y 0.0039 0.0281 0.0095 -0.0283 0.0372 -0.0209  
Z -0.0007 0.0129 0.0050 -0.0030 0.0081 0.0263

AT. 46 H X -0.0031 -0.0247 0.0282 0.0062 0.0164 -0.0277  
Y 0.0039 -0.0281 0.0095 0.0283 0.0372 -0.0209  
Z 0.0007 0.0129 -0.0050 -0.0030 -0.0081 -0.0263

AT. 47 H X -0.0031 0.0247 -0.0282 0.0062 0.0164 0.0277  
Y -0.0039 -0.0281 0.0095 -0.0283 -0.0372 -0.0209  
Z 0.0007 -0.0129 0.0050 -0.0030 -0.0081 0.0263

AT. 48 H X 0.0031 0.0247 0.0282 0.0062 -0.0164 -0.0277  
Y -0.0039 0.0281 0.0095 0.0283 -0.0372 -0.0209  
Z -0.0007 -0.0129 -0.0050 -0.0030 0.0081 -0.0263

AT. 49 H X 0.0035 -0.0140 -0.0181 0.0011 -0.0049 0.0199  
Y 0.0037 0.0303 0.0131 -0.0311 0.0377 -0.0236  
Z -0.0017 0.0029 -0.0010 -0.0022 -0.0081 0.0289

AT. 50 H X -0.0035 -0.0140 0.0181 0.0011 0.0049 -0.0199  
Y 0.0037 -0.0303 0.0131 0.0311 0.0377 -0.0236  
Z 0.0017 0.0029 0.0010 -0.0022 0.0081 -0.0289

AT. 51 H X -0.0035 0.0140 -0.0181 0.0011 0.0049 0.0199  
Y -0.0037 -0.0303 0.0131 -0.0311 -0.0377 -0.0236

Z 0.0017 -0.0029 -0.0010 -0.0022 0.0081 0.0289  
AT. 52 H X 0.0035 0.0140 0.0181 0.0011 -0.0049 -0.0199  
Y -0.0037 0.0303 0.0131 0.0311 -0.0377 -0.0236  
Z -0.0017 -0.0029 0.0010 -0.0022 -0.0081 -0.0289  
AT. 53 C X 0.0033 -0.0127 -0.0182 0.0057 0.0004 0.0201  
Y 0.0047 0.0150 -0.0027 -0.0141 0.0277 -0.0121  
Z -0.0006 0.0071 -0.0012 0.0159 0.0110 0.0297  
AT. 54 C X -0.0033 -0.0127 0.0182 0.0057 -0.0004 -0.0201  
Y 0.0047 -0.0150 -0.0027 0.0141 0.0277 -0.0121  
Z 0.0006 0.0071 0.0012 0.0159 -0.0110 -0.0297  
AT. 55 C X -0.0033 0.0127 -0.0182 0.0057 -0.0004 0.0201  
Y -0.0047 -0.0150 -0.0027 -0.0141 -0.0277 -0.0121  
Z 0.0006 -0.0071 -0.0012 0.0159 -0.0110 0.0297  
AT. 56 C X 0.0033 0.0127 0.0182 0.0057 0.0004 -0.0201  
Y -0.0047 0.0150 -0.0027 0.0141 -0.0277 -0.0121  
Z -0.0006 -0.0071 0.0012 0.0159 0.0110 -0.0297  
AT. 57 C X 0.0005 -0.0086 -0.0122 -0.0122 -0.0054 0.0174  
Y 0.0059 0.0192 0.0025 -0.0156 0.0282 -0.0131  
Z -0.0004 0.0037 -0.0056 0.0214 0.0118 0.0311  
AT. 58 C X -0.0005 -0.0086 0.0122 -0.0122 0.0054 -0.0174  
Y 0.0059 -0.0192 0.0025 0.0156 0.0282 -0.0131  
Z 0.0004 0.0037 0.0056 0.0214 -0.0118 -0.0311  
AT. 59 C X -0.0005 0.0086 -0.0122 -0.0122 0.0054 0.0174  
Y -0.0059 -0.0192 0.0025 -0.0156 -0.0282 -0.0131  
Z 0.0004 -0.0037 -0.0056 0.0214 -0.0118 0.0311  
AT. 60 C X 0.0005 0.0086 0.0122 -0.0122 -0.0054 -0.0174  
Y -0.0059 0.0192 0.0025 0.0156 -0.0282 -0.0131  
Z -0.0004 -0.0037 0.0056 0.0214 0.0118 -0.0311  
AT. 61 H X -0.0007 -0.0049 -0.0057 -0.0206 -0.0121 0.0128  
Y 0.0054 0.0225 0.0082 -0.0215 0.0232 -0.0170  
Z -0.0022 0.0005 -0.0106 0.0184 0.0136 0.0332  
AT. 62 H X 0.0007 -0.0049 0.0057 -0.0206 0.0121 -0.0128

Y 0.0054 -0.0225 0.0082 0.0215 0.0232 -0.0170  
Z 0.0022 0.0005 0.0106 0.0184 -0.0136 -0.0332  
AT. 63 H X 0.0007 0.0049 -0.0057 -0.0206 0.0121 0.0128  
Y -0.0054 -0.0225 0.0082 -0.0215 -0.0232 -0.0170  
Z 0.0022 -0.0005 -0.0106 0.0184 -0.0136 0.0332  
AT. 64 H X -0.0007 0.0049 0.0057 -0.0206 -0.0121 -0.0128  
Y -0.0054 0.0225 0.0082 0.0215 -0.0232 -0.0170  
Z -0.0022 -0.0005 0.0106 0.0184 0.0136 -0.0332  
AT. 65 H X 0.0001 -0.0073 -0.0097 -0.0150 -0.0080 0.0154  
Y 0.0066 0.0146 -0.0051 -0.0074 0.0361 -0.0068  
Z 0.0010 0.0011 -0.0084 0.0322 0.0113 0.0295  
AT. 66 H X -0.0001 -0.0073 0.0097 -0.0150 0.0080 -0.0154  
Y 0.0066 -0.0146 -0.0051 0.0074 0.0361 -0.0068  
Z -0.0010 0.0011 0.0084 0.0322 -0.0113 -0.0295  
AT. 67 H X -0.0001 0.0073 -0.0097 -0.0150 0.0080 0.0154  
Y -0.0066 -0.0146 -0.0051 -0.0074 -0.0361 -0.0068  
Z -0.0010 -0.0011 -0.0084 0.0322 -0.0113 0.0295  
AT. 68 H X 0.0001 0.0073 0.0097 -0.0150 -0.0080 -0.0154  
Y -0.0066 0.0146 -0.0051 0.0074 -0.0361 -0.0068  
Z 0.0010 -0.0011 0.0084 0.0322 0.0113 -0.0295  
AT. 69 H X -0.0004 -0.0108 -0.0172 -0.0143 0.0004 0.0229  
Y 0.0064 0.0234 0.0090 -0.0199 0.0251 -0.0153  
Z -0.0000 0.0069 -0.0013 0.0172 0.0104 0.0301  
AT. 70 H X 0.0004 -0.0108 0.0172 -0.0143 -0.0004 -0.0229  
Y 0.0064 -0.0234 0.0090 0.0199 0.0251 -0.0153  
Z 0.0000 0.0069 0.0013 0.0172 -0.0104 -0.0301  
AT. 71 H X 0.0004 0.0108 -0.0172 -0.0143 -0.0004 0.0229  
Y -0.0064 -0.0234 0.0090 -0.0199 -0.0251 -0.0153  
Z 0.0000 -0.0069 -0.0013 0.0172 -0.0104 0.0301  
AT. 72 H X -0.0004 0.0108 0.0172 -0.0143 0.0004 -0.0229  
Y -0.0064 0.0234 0.0090 0.0199 -0.0251 -0.0153  
Z -0.0000 -0.0069 0.0013 0.0172 0.0104 -0.0301



AT. 73 C X 0.0043 -0.0033 -0.0118 0.0104 0.0179 0.0136  
Y 0.0039 0.0118 -0.0057 -0.0124 0.0246 -0.0096  
Z -0.0010 0.0031 -0.0054 0.0170 0.0075 0.0333

AT. 74 C X -0.0043 -0.0033 0.0118 0.0104 -0.0179 -0.0136  
Y 0.0039 -0.0118 -0.0057 0.0124 0.0246 -0.0096  
Z 0.0010 0.0031 0.0054 0.0170 -0.0075 -0.0333

AT. 75 C X -0.0043 0.0033 -0.0118 0.0104 -0.0179 0.0136  
Y -0.0039 -0.0118 -0.0057 -0.0124 -0.0246 -0.0096  
Z 0.0010 -0.0031 -0.0054 0.0170 -0.0075 0.0333

AT. 76 C X 0.0043 0.0033 0.0118 0.0104 0.0179 -0.0136  
Y -0.0039 0.0118 -0.0057 0.0124 -0.0246 -0.0096  
Z -0.0010 -0.0031 0.0054 0.0170 0.0075 -0.0333

AT. 77 C X 0.0005 -0.0175 -0.0249 0.0323 0.0090 0.0289  
Y 0.0054 0.0212 0.0020 -0.0199 0.0334 -0.0201  
Z 0.0010 0.0108 0.0027 -0.0068 0.0033 0.0256

AT. 78 C X -0.0005 -0.0175 0.0249 0.0323 -0.0090 -0.0289  
Y 0.0054 -0.0212 0.0020 0.0199 0.0334 -0.0201  
Z -0.0010 0.0108 -0.0027 -0.0068 -0.0033 -0.0256

AT. 79 C X -0.0005 0.0175 -0.0249 0.0323 -0.0090 0.0289  
Y -0.0054 -0.0212 0.0020 -0.0199 -0.0334 -0.0201  
Z -0.0010 -0.0108 0.0027 -0.0068 -0.0033 0.0256

AT. 80 C X 0.0005 0.0175 0.0249 0.0323 0.0090 -0.0289  
Y -0.0054 0.0212 0.0020 0.0199 -0.0334 -0.0201  
Z 0.0010 -0.0108 -0.0027 -0.0068 0.0033 -0.0256

AT. 81 H X 0.0018 -0.0118 -0.0196 0.0274 0.0127 0.0228  
Y 0.0066 0.0274 0.0079 -0.0247 0.0381 -0.0268  
Z 0.0042 0.0128 0.0004 -0.0148 0.0032 0.0230

AT. 82 H X -0.0018 -0.0118 0.0196 0.0274 -0.0127 -0.0228  
Y 0.0066 -0.0274 0.0079 0.0247 0.0381 -0.0268  
Z -0.0042 0.0128 -0.0004 -0.0148 -0.0032 -0.0230

AT. 83 H X -0.0018 0.0118 -0.0196 0.0274 -0.0127 0.0228  
Y -0.0066 -0.0274 0.0079 -0.0247 -0.0381 -0.0268

Z -0.0042 -0.0128 0.0004 -0.0148 -0.0032 0.0230  
AT. 84 H X 0.0018 0.0118 0.0196 0.0274 0.0127 -0.0228  
Y -0.0066 0.0274 0.0079 0.0247 -0.0381 -0.0268  
Z 0.0042 -0.0128 -0.0004 -0.0148 0.0032 -0.0230  
AT. 85 H X -0.0027 -0.0252 -0.0299 0.0454 0.0061 0.0371  
Y 0.0078 0.0227 0.0003 -0.0193 0.0375 -0.0221  
Z -0.0001 0.0118 0.0055 -0.0109 0.0007 0.0249  
AT. 86 H X 0.0027 -0.0252 0.0299 0.0454 -0.0061 -0.0371  
Y 0.0078 -0.0227 0.0003 0.0193 0.0375 -0.0221  
Z 0.0001 0.0118 -0.0055 -0.0109 -0.0007 -0.0249  
AT. 87 H X 0.0027 0.0252 -0.0299 0.0454 -0.0061 0.0371  
Y -0.0078 -0.0227 0.0003 -0.0193 -0.0375 -0.0221  
Z 0.0001 -0.0118 0.0055 -0.0109 -0.0007 0.0249  
AT. 88 H X -0.0027 0.0252 0.0299 0.0454 0.0061 -0.0371  
Y -0.0078 0.0227 0.0003 0.0193 -0.0375 -0.0221  
Z -0.0001 -0.0118 -0.0055 -0.0109 0.0007 -0.0249  
AT. 89 C X 0.0016 -0.0119 -0.0197 0.0308 0.0153 0.0228  
Y 0.0035 0.0107 -0.0087 -0.0108 0.0253 -0.0077  
Z 0.0005 0.0068 -0.0016 0.0100 0.0102 0.0294  
AT. 90 C X -0.0016 -0.0119 0.0197 0.0308 -0.0153 -0.0228  
Y 0.0035 -0.0107 -0.0087 0.0108 0.0253 -0.0077  
Z -0.0005 0.0068 0.0016 0.0100 -0.0102 -0.0294  
AT. 91 C X -0.0016 0.0119 -0.0197 0.0308 -0.0153 0.0228  
Y -0.0035 -0.0107 -0.0087 -0.0108 -0.0253 -0.0077  
Z -0.0005 -0.0068 -0.0016 0.0100 -0.0102 0.0294  
AT. 92 C X 0.0016 0.0119 0.0197 0.0308 0.0153 -0.0228  
Y -0.0035 0.0107 -0.0087 0.0108 -0.0253 -0.0077  
Z 0.0005 -0.0068 0.0016 0.0100 0.0102 -0.0294  
AT. 93 C X 0.0027 -0.0052 -0.0150 0.0393 0.0265 0.0181  
Y 0.0030 0.0078 -0.0137 -0.0082 0.0234 -0.0045  
Z 0.0000 0.0036 -0.0058 0.0106 0.0076 0.0321  
AT. 94 C X -0.0027 -0.0052 0.0150 0.0393 -0.0265 -0.0181

Y 0.0030 -0.0078 -0.0137 0.0082 0.0234 -0.0045  
Z -0.0000 0.0036 0.0058 0.0106 -0.0076 -0.0321  
AT. 95 C X -0.0027 0.0052 -0.0150 0.0393 -0.0265 0.0181  
Y -0.0030 -0.0078 -0.0137 -0.0082 -0.0234 -0.0045  
Z -0.0000 -0.0036 -0.0058 0.0106 -0.0076 0.0321  
AT. 96 C X 0.0027 0.0052 0.0150 0.0393 0.0265 -0.0181  
Y -0.0030 0.0078 -0.0137 0.0082 -0.0234 -0.0045  
Z 0.0000 -0.0036 0.0058 0.0106 0.0076 -0.0321  
AT. 97 H X 0.0025 -0.0011 -0.0106 0.0379 0.0271 0.0168  
Y 0.0039 -0.0002 -0.0245 0.0015 0.0274 -0.0016  
Z 0.0012 0.0021 -0.0116 0.0241 0.0179 0.0322  
AT. 98 H X -0.0025 -0.0011 0.0106 0.0379 -0.0271 -0.0168  
Y 0.0039 0.0002 -0.0245 -0.0015 0.0274 -0.0016  
Z -0.0012 0.0021 0.0116 0.0241 -0.0179 -0.0322  
AT. 99 H X -0.0025 0.0011 -0.0106 0.0379 -0.0271 0.0168  
Y -0.0039 0.0002 -0.0245 0.0015 -0.0274 -0.0016  
Z -0.0012 -0.0021 -0.0116 0.0241 -0.0179 0.0322  
AT. 100 H X 0.0025 0.0011 0.0106 0.0379 0.0271 -0.0168  
Y -0.0039 -0.0002 -0.0245 -0.0015 -0.0274 -0.0016  
Z 0.0012 -0.0021 0.0116 0.0241 0.0179 -0.0322  
AT. 101 H X 0.0020 0.0004 -0.0073 0.0309 0.0211 0.0169  
Y 0.0023 0.0141 -0.0053 -0.0158 0.0195 -0.0062  
Z -0.0009 0.0004 -0.0079 0.0031 -0.0021 0.0350  
AT. 102 H X -0.0020 0.0004 0.0073 0.0309 -0.0211 -0.0169  
Y 0.0023 -0.0141 -0.0053 0.0158 0.0195 -0.0062  
Z 0.0009 0.0004 0.0079 0.0031 0.0021 -0.0350  
AT. 103 H X -0.0020 -0.0004 -0.0073 0.0309 -0.0211 0.0169  
Y -0.0023 -0.0141 -0.0053 -0.0158 -0.0195 -0.0062  
Z 0.0009 -0.0004 -0.0079 0.0031 0.0021 0.0350  
AT. 104 H X 0.0020 -0.0004 0.0073 0.0309 0.0211 -0.0169  
Y -0.0023 0.0141 -0.0053 0.0158 -0.0195 -0.0062  
Z -0.0009 -0.0004 0.0079 0.0031 -0.0021 -0.0350

AT.105 H X 0.0042 -0.0097 -0.0234 0.0561 0.0388 0.0185  
Y 0.0026 0.0069 -0.0157 -0.0080 0.0209 -0.0031  
Z -0.0002 0.0057 -0.0013 0.0047 0.0052 0.0308

AT.106 H X -0.0042 -0.0097 0.0234 0.0561 -0.0388 -0.0185  
Y 0.0026 -0.0069 -0.0157 0.0080 0.0209 -0.0031  
Z 0.0002 0.0057 0.0013 0.0047 -0.0052 -0.0308

AT.107 H X -0.0042 0.0097 -0.0234 0.0561 -0.0388 0.0185  
Y -0.0026 -0.0069 -0.0157 -0.0080 -0.0209 -0.0031  
Z 0.0002 -0.0057 -0.0013 0.0047 -0.0052 0.0308

AT.108 H X 0.0042 0.0097 0.0234 0.0561 0.0388 -0.0185  
Y -0.0026 0.0069 -0.0157 0.0080 -0.0209 -0.0031  
Z -0.0002 -0.0057 0.0013 0.0047 0.0052 -0.0308

AT.109 C X 0.0053 -0.0194 -0.0251 0.0166 -0.0021 0.0247  
Y 0.0065 0.0066 -0.0112 -0.0051 0.0219 -0.0057  
Z 0.0002 0.0109 0.0025 0.0247 0.0225 0.0260

AT.110 C X -0.0053 -0.0194 0.0251 0.0166 0.0021 -0.0247  
Y 0.0065 -0.0066 -0.0112 0.0051 0.0219 -0.0057  
Z -0.0002 0.0109 -0.0025 0.0247 -0.0225 -0.0260

AT.111 C X -0.0053 0.0194 -0.0251 0.0166 0.0021 0.0247  
Y -0.0065 -0.0066 -0.0112 -0.0051 -0.0219 -0.0057  
Z -0.0002 -0.0109 0.0025 0.0247 -0.0225 0.0260

AT.112 C X 0.0053 0.0194 0.0251 0.0166 -0.0021 -0.0247  
Y -0.0065 0.0066 -0.0112 0.0051 -0.0219 -0.0057  
Z 0.0002 -0.0109 -0.0025 0.0247 0.0225 -0.0260

AT.113 H X 0.0041 -0.0157 -0.0218 0.0138 0.0018 0.0222  
Y 0.0080 -0.0000 -0.0173 0.0012 0.0162 -0.0007  
Z -0.0013 0.0095 0.0004 0.0334 0.0284 0.0281

AT.114 H X -0.0041 -0.0157 0.0218 0.0138 -0.0018 -0.0222  
Y 0.0080 0.0000 -0.0173 -0.0012 0.0162 -0.0007  
Z 0.0013 0.0095 -0.0004 0.0334 -0.0284 -0.0281

AT.115 H X -0.0041 0.0157 -0.0218 0.0138 -0.0018 0.0222  
Y -0.0080 0.0000 -0.0173 0.0012 -0.0162 -0.0007

Z 0.0013 -0.0095 0.0004 0.0334 -0.0284 0.0281  
AT. 116 H X 0.0041 0.0157 0.0218 0.0138 0.0018 -0.0222  
Y -0.0080 -0.0000 -0.0173 -0.0012 -0.0162 -0.0007  
Z -0.0013 -0.0095 -0.0004 0.0334 0.0284 -0.0281  
AT. 117 H X 0.0077 -0.0237 -0.0291 0.0138 -0.0120 0.0278  
Y 0.0078 0.0078 -0.0099 -0.0053 0.0234 -0.0081  
Z 0.0009 0.0126 0.0044 0.0249 0.0256 0.0229  
AT. 118 H X -0.0077 -0.0237 0.0291 0.0138 0.0120 -0.0278  
Y 0.0078 -0.0078 -0.0099 0.0053 0.0234 -0.0081  
Z -0.0009 0.0126 -0.0044 0.0249 -0.0256 -0.0229  
AT. 119 H X -0.0077 0.0237 -0.0291 0.0138 0.0120 0.0278  
Y -0.0078 -0.0078 -0.0099 -0.0053 -0.0234 -0.0081  
Z -0.0009 -0.0126 0.0044 0.0249 -0.0256 0.0229  
AT. 120 H X 0.0077 0.0237 0.0291 0.0138 -0.0120 -0.0278  
Y -0.0078 0.0078 -0.0099 0.0053 -0.0234 -0.0081  
Z 0.0009 -0.0126 -0.0044 0.0249 0.0256 -0.0229  
AT. 121 C X 0.0001 -0.0196 -0.0264 0.0398 0.0095 0.0316  
Y 0.0018 0.0015 -0.0170 -0.0032 0.0164 0.0033  
Z 0.0007 0.0096 0.0019 0.0208 0.0182 0.0267  
AT. 122 C X -0.0001 -0.0196 0.0264 0.0398 -0.0095 -0.0316  
Y 0.0018 -0.0015 -0.0170 0.0032 0.0164 0.0033  
Z -0.0007 0.0096 -0.0019 0.0208 -0.0182 -0.0267  
AT. 123 C X -0.0001 0.0196 -0.0264 0.0398 -0.0095 0.0316  
Y -0.0018 -0.0015 -0.0170 -0.0032 -0.0164 0.0033  
Z -0.0007 -0.0096 0.0019 0.0208 -0.0182 0.0267  
AT. 124 C X 0.0001 0.0196 0.0264 0.0398 0.0095 -0.0316  
Y -0.0018 0.0015 -0.0170 0.0032 -0.0164 0.0033  
Z 0.0007 -0.0096 -0.0019 0.0208 0.0182 -0.0267  
AT. 125 H X -0.0018 -0.0266 -0.0327 0.0564 0.0066 0.0416  
Y -0.0003 -0.0005 -0.0193 -0.0022 0.0141 0.0076  
Z 0.0027 0.0130 0.0054 0.0153 0.0206 0.0208  
AT. 126 H X 0.0018 -0.0266 0.0327 0.0564 -0.0066 -0.0416

Y -0.0003 0.0005 -0.0193 0.0022 0.0141 0.0076  
Z -0.0027 0.0130 -0.0054 0.0153 -0.0206 -0.0208  
AT. 127 H X 0.0018 0.0266 -0.0327 0.0564 -0.0066 0.0416  
Y 0.0003 0.0005 -0.0193 -0.0022 -0.0141 0.0076  
Z -0.0027 -0.0130 0.0054 0.0153 -0.0206 0.0208  
AT. 128 H X -0.0018 0.0266 0.0327 0.0564 0.0066 -0.0416  
Y 0.0003 -0.0005 -0.0193 0.0022 -0.0141 0.0076  
Z 0.0027 -0.0130 -0.0054 0.0153 0.0206 -0.0208  
AT. 129 H X -0.0003 -0.0159 -0.0238 0.0402 0.0142 0.0291  
Y 0.0010 -0.0066 -0.0232 0.0023 0.0083 0.0113  
Z -0.0027 0.0045 -0.0026 0.0349 0.0169 0.0362  
AT. 130 H X 0.0003 -0.0159 0.0238 0.0402 -0.0142 -0.0291  
Y 0.0010 0.0066 -0.0232 -0.0023 0.0083 0.0113  
Z 0.0027 0.0045 0.0026 0.0349 -0.0169 -0.0362  
AT. 131 H X 0.0003 0.0159 -0.0238 0.0402 -0.0142 0.0291  
Y -0.0010 0.0066 -0.0232 0.0023 -0.0083 0.0113  
Z 0.0027 -0.0045 -0.0026 0.0349 -0.0169 0.0362  
AT. 132 H X -0.0003 0.0159 0.0238 0.0402 0.0142 -0.0291  
Y -0.0010 -0.0066 -0.0232 -0.0023 -0.0083 0.0113  
Z -0.0027 -0.0045 0.0026 0.0349 0.0169 -0.0362  
AT. 133 C X 0.0055 -0.0206 -0.0111 0.0026 -0.0047 0.0074  
Y 0.0042 0.0044 -0.0150 -0.0024 0.0202 0.0000  
Z 0.0039 0.0141 0.0034 0.0245 0.0264 0.0202  
AT. 134 C X -0.0055 -0.0206 0.0111 0.0026 0.0047 -0.0074  
Y 0.0042 -0.0044 -0.0150 0.0024 0.0202 0.0000  
Z -0.0039 0.0141 -0.0034 0.0245 -0.0264 -0.0202  
AT. 135 C X -0.0055 0.0206 -0.0111 0.0026 0.0047 0.0074  
Y -0.0042 -0.0044 -0.0150 -0.0024 -0.0202 0.0000  
Z -0.0039 -0.0141 0.0034 0.0245 -0.0264 0.0202  
AT. 136 C X 0.0055 0.0206 0.0111 0.0026 -0.0047 -0.0074  
Y -0.0042 0.0044 -0.0150 0.0024 -0.0202 0.0000  
Z 0.0039 -0.0141 -0.0034 0.0245 0.0264 -0.0202

AT. 137 C X -0.0168 -0.0085 0.0115 -0.0148 -0.0104 0.0103  
Y 0.0045 0.0028 -0.0150 0.0007 0.0200 0.0050  
Z 0.0081 0.0124 -0.0011 0.0255 0.0275 0.0159

AT. 138 C X 0.0168 -0.0085 -0.0115 -0.0148 0.0104 -0.0103  
Y 0.0045 -0.0028 -0.0150 -0.0007 0.0200 0.0050  
Z -0.0081 0.0124 0.0011 0.0255 -0.0275 -0.0159

AT. 139 C X 0.0168 0.0085 0.0115 -0.0148 0.0104 0.0103  
Y -0.0045 -0.0028 -0.0150 0.0007 -0.0200 0.0050  
Z -0.0081 -0.0124 -0.0011 0.0255 -0.0275 0.0159

AT. 140 C X -0.0168 0.0085 -0.0115 -0.0148 -0.0104 -0.0103  
Y -0.0045 0.0028 -0.0150 -0.0007 -0.0200 0.0050  
Z 0.0081 -0.0124 0.0011 0.0255 0.0275 -0.0159

AT. 141 H X -0.0341 -0.0006 0.0091 -0.0239 -0.0091 0.0073  
Y 0.0024 0.0007 -0.0264 0.0044 0.0220 0.0064  
Z 0.0269 0.0016 -0.0067 0.0382 0.0273 0.0199

AT. 142 H X 0.0341 -0.0006 -0.0091 -0.0239 0.0091 -0.0073  
Y 0.0024 -0.0007 -0.0264 -0.0044 0.0220 0.0064  
Z -0.0269 0.0016 0.0067 0.0382 -0.0273 -0.0199

AT. 143 H X 0.0341 0.0006 0.0091 -0.0239 0.0091 0.0073  
Y -0.0024 -0.0007 -0.0264 0.0044 -0.0220 0.0064  
Z -0.0269 -0.0016 -0.0067 0.0382 -0.0273 0.0199

AT. 144 H X -0.0341 0.0006 -0.0091 -0.0239 -0.0091 -0.0073  
Y -0.0024 0.0007 -0.0264 -0.0044 -0.0220 0.0064  
Z 0.0269 -0.0016 0.0067 0.0382 0.0273 -0.0199

AT. 145 H X -0.0057 -0.0100 0.0298 -0.0136 -0.0138 0.0131  
Y 0.0025 0.0027 -0.0226 0.0010 0.0213 0.0030  
Z 0.0132 0.0098 -0.0093 0.0280 0.0288 0.0117

AT. 146 H X 0.0057 -0.0100 -0.0298 -0.0136 0.0138 -0.0131  
Y 0.0025 -0.0027 -0.0226 -0.0010 0.0213 0.0030  
Z -0.0132 0.0098 0.0093 0.0280 -0.0288 -0.0117

AT. 147 H X 0.0057 0.0100 0.0298 -0.0136 0.0138 0.0131  
Y -0.0025 -0.0027 -0.0226 0.0010 -0.0213 0.0030

Z -0.0132 -0.0098 -0.0093 0.0280 -0.0288 0.0117  
AT. 148 H X -0.0057 0.0100 -0.0298 -0.0136 -0.0138 -0.0131  
Y -0.0025 0.0027 -0.0226 -0.0010 -0.0213 0.0030  
Z 0.0132 -0.0098 0.0093 0.0280 0.0288 -0.0117  
AT. 149 O X 0.0072 0.0073 -0.0044 -0.0016 0.0306 0.0057  
Y 0.0075 0.0250 0.0027 -0.0224 0.0433 -0.0202  
Z -0.0016 -0.0019 -0.0082 0.0092 -0.0049 0.0375  
AT. 150 O X -0.0072 0.0073 0.0044 -0.0016 -0.0306 -0.0057  
Y 0.0075 -0.0250 0.0027 0.0224 0.0433 -0.0202  
Z 0.0016 -0.0019 0.0082 0.0092 0.0049 -0.0375  
AT. 151 O X -0.0072 -0.0073 -0.0044 -0.0016 -0.0306 0.0057  
Y -0.0075 -0.0250 0.0027 -0.0224 -0.0433 -0.0202  
Z 0.0016 0.0019 -0.0082 0.0092 0.0049 0.0375  
AT. 152 O X 0.0072 -0.0073 0.0044 -0.0016 0.0306 -0.0057  
Y -0.0075 0.0250 0.0027 0.0224 -0.0433 -0.0202  
Z -0.0016 0.0019 0.0082 0.0092 -0.0049 -0.0375  
AT. 153 H X 0.0023 0.0027 0.0000 0.0087 0.0207 0.0094  
Y 0.0025 0.0177 0.0064 -0.0215 0.0248 -0.0144  
Z -0.0000 -0.0015 -0.0098 0.0025 -0.0048 0.0368  
AT. 154 H X -0.0023 0.0027 -0.0000 0.0087 -0.0207 -0.0094  
Y 0.0025 -0.0177 0.0064 0.0215 0.0248 -0.0144  
Z 0.0000 -0.0015 0.0098 0.0025 0.0048 -0.0368  
AT. 155 H X -0.0023 -0.0027 0.0000 0.0087 -0.0207 0.0094  
Y -0.0025 -0.0177 0.0064 -0.0215 -0.0248 -0.0144  
Z 0.0000 0.0015 -0.0098 0.0025 0.0048 0.0368  
AT. 156 H X 0.0023 -0.0027 -0.0000 0.0087 0.0207 -0.0094  
Y -0.0025 0.0177 0.0064 0.0215 -0.0248 -0.0144  
Z -0.0000 0.0015 0.0098 0.0025 -0.0048 -0.0368  
AT. 157 O X 0.0050 0.0033 -0.0073 0.0097 0.0272 0.0087  
Y -0.0002 -0.0021 -0.0154 -0.0006 0.0044 0.0017  
Z -0.0017 0.0015 -0.0104 0.0321 0.0148 0.0352  
AT. 158 O X -0.0050 0.0033 0.0073 0.0097 -0.0272 -0.0087



Y -0.0002 0.0021 -0.0154 0.0006 0.0044 0.0017  
Z 0.0017 0.0015 0.0104 0.0321 -0.0148 -0.0352  
AT. 159 O X -0.0050 -0.0033 -0.0073 0.0097 -0.0272 0.0087  
Y 0.0002 0.0021 -0.0154 -0.0006 -0.0044 0.0017  
Z 0.0017 -0.0015 -0.0104 0.0321 -0.0148 0.0352  
AT. 160 O X 0.0050 -0.0033 0.0073 0.0097 0.0272 -0.0087  
Y 0.0002 -0.0021 -0.0154 0.0006 -0.0044 0.0017  
Z -0.0017 -0.0015 0.0104 0.0321 0.0148 -0.0352  
AT. 161 O X 0.0087 0.0019 0.0035 -0.0080 0.0152 -0.0004  
Y -0.0031 0.0070 -0.0181 0.0017 0.0207 0.0084  
Z -0.0023 -0.0035 -0.0151 0.0421 0.0112 0.0360  
AT. 162 O X -0.0087 0.0019 -0.0035 -0.0080 -0.0152 0.0004  
Y -0.0031 -0.0070 -0.0181 -0.0017 0.0207 0.0084  
Z 0.0023 -0.0035 0.0151 0.0421 -0.0112 -0.0360  
AT. 163 O X -0.0087 -0.0019 0.0035 -0.0080 -0.0152 -0.0004  
Y 0.0031 -0.0070 -0.0181 0.0017 -0.0207 0.0084  
Z 0.0023 0.0035 -0.0151 0.0421 -0.0112 0.0360  
AT. 164 O X 0.0087 -0.0019 -0.0035 -0.0080 0.0152 0.0004  
Y 0.0031 0.0070 -0.0181 -0.0017 -0.0207 0.0084  
Z -0.0023 0.0035 0.0151 0.0421 0.0112 -0.0360  
AT. 165 H X 0.0130 -0.0096 0.0016 -0.0116 0.0009 -0.0087  
Y -0.0017 0.0020 -0.0189 -0.0002 0.0143 0.0050  
Z -0.0020 0.0014 -0.0065 0.0358 0.0103 0.0327  
AT. 166 H X -0.0130 -0.0096 -0.0016 -0.0116 -0.0009 0.0087  
Y -0.0017 -0.0020 -0.0189 0.0002 0.0143 0.0050  
Z 0.0020 0.0014 0.0065 0.0358 -0.0103 -0.0327  
AT. 167 H X -0.0130 0.0096 0.0016 -0.0116 -0.0009 -0.0087  
Y 0.0017 -0.0020 -0.0189 -0.0002 -0.0143 0.0050  
Z 0.0020 -0.0014 -0.0065 0.0358 -0.0103 0.0327  
AT. 168 H X 0.0130 0.0096 -0.0016 -0.0116 0.0009 0.0087  
Y 0.0017 0.0020 -0.0189 0.0002 -0.0143 0.0050  
Z -0.0020 -0.0014 0.0065 0.0358 0.0103 -0.0327

AT.169 O X -0.0039 0.0016 0.0025 0.0213 0.0054 0.0185

Y 0.0008 0.0076 0.0006 -0.0190 0.0126 -0.0136

Z 0.0012 -0.0004 -0.0170 -0.0213 -0.0013 0.0312

AT.170 O X 0.0039 0.0016 -0.0025 0.0213 -0.0054 -0.0185

Y 0.0008 -0.0076 0.0006 0.0190 0.0126 -0.0136

Z -0.0012 -0.0004 0.0170 -0.0213 0.0013 -0.0312

AT.171 O X 0.0039 -0.0016 0.0025 0.0213 -0.0054 0.0185

Y -0.0008 -0.0076 0.0006 -0.0190 -0.0126 -0.0136

Z -0.0012 0.0004 -0.0170 -0.0213 0.0013 0.0312

AT.172 O X -0.0039 -0.0016 -0.0025 0.0213 0.0054 -0.0185

Y -0.0008 0.0076 0.0006 0.0190 -0.0126 -0.0136

Z 0.0012 0.0004 0.0170 -0.0213 -0.0013 -0.0312

AT.173 H X -0.0060 -0.0019 -0.0153 0.0267 0.0060 0.0251

Y 0.0010 0.0089 0.0035 -0.0205 0.0132 -0.0144

Z 0.0015 -0.0056 -0.0091 -0.0224 -0.0156 0.0293

AT.174 H X 0.0060 -0.0019 0.0153 0.0267 -0.0060 -0.0251

Y 0.0010 -0.0089 0.0035 0.0205 0.0132 -0.0144

Z -0.0015 -0.0056 0.0091 -0.0224 0.0156 -0.0293

AT.175 H X 0.0060 0.0019 -0.0153 0.0267 -0.0060 0.0251

Y -0.0010 -0.0089 0.0035 -0.0205 -0.0132 -0.0144

Z -0.0015 0.0056 -0.0091 -0.0224 0.0156 0.0293

AT.176 H X -0.0060 0.0019 0.0153 0.0267 0.0060 -0.0251

Y -0.0010 0.0089 0.0035 0.0205 -0.0132 -0.0144

Z 0.0015 0.0056 0.0091 -0.0224 -0.0156 -0.0293

FREQ(CM\*\*-1) 60.60 64.76 67.79 72.42 73.24 75.83

AT. 1 I X 0.0091 0.0259 -0.0234 -0.0152 0.0224 -0.0130

Y 0.0034 0.0022 -0.0085 -0.0138 0.0053 -0.0093

Z 0.0152 0.0041 0.0069 0.0140 -0.0073 0.0188

AT. 2 I X 0.0091 0.0259 0.0234 0.0152 0.0224 0.0130

Y -0.0034 -0.0022 -0.0085 -0.0138 -0.0053 -0.0093

Z 0.0152 0.0041 -0.0069 -0.0140 -0.0073 -0.0188  
AT. 3 I X -0.0091 0.0259 -0.0234 0.0152 -0.0224 0.0130  
Y -0.0034 0.0022 -0.0085 0.0138 -0.0053 0.0093  
Z -0.0152 0.0041 0.0069 -0.0140 0.0073 -0.0188  
AT. 4 I X -0.0091 0.0259 0.0234 -0.0152 -0.0224 -0.0130  
Y 0.0034 -0.0022 -0.0085 0.0138 0.0053 0.0093  
Z -0.0152 0.0041 -0.0069 0.0140 0.0073 0.0188  
AT. 5 I X 0.0191 0.0040 0.0187 0.0070 -0.0154 0.0089  
Y -0.0001 0.0220 -0.0160 -0.0013 0.0114 -0.0025  
Z -0.0027 0.0225 -0.0157 -0.0050 0.0120 -0.0068  
AT. 6 I X 0.0191 0.0040 -0.0187 -0.0070 -0.0154 -0.0089  
Y 0.0001 -0.0220 -0.0160 -0.0013 -0.0114 -0.0025  
Z -0.0027 0.0225 0.0157 0.0050 0.0120 0.0068  
AT. 7 I X -0.0191 0.0040 0.0187 -0.0070 0.0154 -0.0089  
Y 0.0001 0.0220 -0.0160 0.0013 -0.0114 0.0025  
Z 0.0027 0.0225 -0.0157 0.0050 -0.0120 0.0068  
AT. 8 I X -0.0191 0.0040 -0.0187 0.0070 0.0154 0.0089  
Y -0.0001 -0.0220 -0.0160 0.0013 0.0114 0.0025  
Z 0.0027 0.0225 0.0157 -0.0050 -0.0120 -0.0068  
AT. 9 N X 0.0189 -0.0233 0.0102 0.0356 0.0042 -0.0225  
Y -0.0186 0.0062 0.0054 -0.0099 -0.0241 0.0293  
Z 0.0130 -0.0205 0.0179 -0.0050 -0.0183 0.0111  
AT. 10 N X 0.0189 -0.0233 -0.0102 -0.0356 0.0042 0.0225  
Y 0.0186 -0.0062 0.0054 -0.0099 0.0241 0.0293  
Z 0.0130 -0.0205 -0.0179 0.0050 -0.0183 -0.0111  
AT. 11 N X -0.0189 -0.0233 0.0102 -0.0356 -0.0042 0.0225  
Y 0.0186 0.0062 0.0054 0.0099 0.0241 -0.0293  
Z -0.0130 -0.0205 0.0179 0.0050 0.0183 -0.0111  
AT. 12 N X -0.0189 -0.0233 -0.0102 0.0356 -0.0042 -0.0225  
Y -0.0186 -0.0062 0.0054 0.0099 -0.0241 -0.0293  
Z -0.0130 -0.0205 -0.0179 -0.0050 0.0183 0.0111  
AT. 13 N X 0.0269 -0.0204 0.0057 0.0452 0.0091 -0.0296

Y -0.0122 -0.0109 0.0115 0.0087 -0.0162 0.0153  
Z 0.0228 0.0094 -0.0238 -0.0022 0.0109 -0.0152  
AT. 14 N X 0.0269 -0.0204 -0.0057 -0.0452 0.0091 0.0296  
Y 0.0122 0.0109 0.0115 0.0087 0.0162 0.0153  
Z 0.0228 0.0094 0.0238 0.0022 0.0109 0.0152  
AT. 15 N X -0.0269 -0.0204 0.0057 -0.0452 -0.0091 0.0296  
Y 0.0122 -0.0109 0.0115 -0.0087 0.0162 -0.0153  
Z -0.0228 0.0094 -0.0238 0.0022 -0.0109 0.0152  
AT. 16 N X -0.0269 -0.0204 -0.0057 0.0452 -0.0091 -0.0296  
Y -0.0122 0.0109 0.0115 -0.0087 -0.0162 -0.0153  
Z -0.0228 0.0094 0.0238 -0.0022 -0.0109 -0.0152  
AT. 17 O X -0.0204 -0.0147 -0.0300 -0.0605 0.0127 -0.0193  
Y 0.0035 0.0063 0.0215 0.0221 -0.0268 0.0219  
Z 0.0069 -0.0259 0.0233 0.0162 -0.0162 0.0178  
AT. 18 O X -0.0204 -0.0147 0.0300 0.0605 0.0127 0.0193  
Y -0.0035 -0.0063 0.0215 0.0221 0.0268 0.0219  
Z 0.0069 -0.0259 -0.0233 -0.0162 -0.0162 -0.0178  
AT. 19 O X 0.0204 -0.0147 -0.0300 0.0605 -0.0127 0.0193  
Y -0.0035 0.0063 0.0215 -0.0221 0.0268 -0.0219  
Z -0.0069 -0.0259 0.0233 -0.0162 0.0162 -0.0178  
AT. 20 O X 0.0204 -0.0147 0.0300 -0.0605 -0.0127 -0.0193  
Y 0.0035 -0.0063 0.0215 -0.0221 -0.0268 -0.0219  
Z -0.0069 -0.0259 -0.0233 0.0162 0.0162 0.0178  
AT. 21 O X 0.0331 -0.0373 -0.0049 0.0017 -0.0418 0.0095  
Y -0.0144 -0.0094 0.0104 0.0111 -0.0111 0.0112  
Z 0.0168 0.0151 -0.0289 0.0033 0.0240 -0.0248  
AT. 22 O X 0.0331 -0.0373 0.0049 -0.0017 -0.0418 -0.0095  
Y 0.0144 0.0094 0.0104 0.0111 0.0111 0.0112  
Z 0.0168 0.0151 0.0289 -0.0033 0.0240 0.0248  
AT. 23 O X -0.0331 -0.0373 -0.0049 -0.0017 0.0418 -0.0095  
Y 0.0144 -0.0094 0.0104 -0.0111 0.0111 -0.0112  
Z -0.0168 0.0151 -0.0289 -0.0033 -0.0240 0.0248

AT. 24 O X -0.0331 -0.0373 0.0049 0.0017 0.0418 0.0095  
Y -0.0144 0.0094 0.0104 -0.0111 -0.0111 -0.0112  
Z -0.0168 0.0151 0.0289 0.0033 -0.0240 -0.0248

AT. 25 C X -0.0087 -0.0033 -0.0069 -0.0121 0.0054 -0.0016  
Y -0.0180 -0.0025 0.0074 0.0041 -0.0201 0.0245  
Z 0.0032 -0.0279 0.0179 0.0062 -0.0135 0.0145

AT. 26 C X -0.0087 -0.0033 0.0069 0.0121 0.0054 0.0016  
Y 0.0180 0.0025 0.0074 0.0041 0.0201 0.0245  
Z 0.0032 -0.0279 -0.0179 -0.0062 -0.0135 -0.0145

AT. 27 C X 0.0087 -0.0033 -0.0069 0.0121 -0.0054 0.0016  
Y 0.0180 -0.0025 0.0074 -0.0041 0.0201 -0.0245  
Z -0.0032 -0.0279 0.0179 -0.0062 0.0135 -0.0145

AT. 28 C X 0.0087 -0.0033 0.0069 -0.0121 -0.0054 -0.0016  
Y -0.0180 0.0025 0.0074 -0.0041 -0.0201 -0.0245  
Z -0.0032 -0.0279 -0.0179 0.0062 0.0135 0.0145

AT. 29 H X -0.0036 0.0085 -0.0127 -0.0127 0.0111 -0.0033  
Y -0.0366 -0.0122 0.0121 0.0032 -0.0276 0.0382  
Z -0.0018 -0.0446 0.0256 0.0067 -0.0210 0.0151

AT. 30 H X -0.0036 0.0085 0.0127 0.0127 0.0111 0.0033  
Y 0.0366 0.0122 0.0121 0.0032 0.0276 0.0382  
Z -0.0018 -0.0446 -0.0256 -0.0067 -0.0210 -0.0151

AT. 31 H X 0.0036 0.0085 -0.0127 0.0127 -0.0111 0.0033  
Y 0.0366 -0.0122 0.0121 -0.0032 0.0276 -0.0382  
Z 0.0018 -0.0446 0.0256 -0.0067 0.0210 -0.0151

AT. 32 H X 0.0036 0.0085 0.0127 -0.0127 -0.0111 -0.0033  
Y -0.0366 0.0122 0.0121 -0.0032 -0.0276 -0.0382  
Z 0.0018 -0.0446 -0.0256 0.0067 0.0210 0.0151

AT. 33 H X -0.0307 -0.0143 0.0022 -0.0110 -0.0085 0.0171  
Y -0.0133 0.0001 0.0067 0.0048 -0.0188 0.0218  
Z -0.0006 -0.0311 0.0140 0.0015 -0.0081 0.0114

AT. 34 H X -0.0307 -0.0143 -0.0022 0.0110 -0.0085 -0.0171  
Y 0.0133 -0.0001 0.0067 0.0048 0.0188 0.0218

Z -0.0006 -0.0311 -0.0140 -0.0015 -0.0081 -0.0114  
AT. 35 H X 0.0307 -0.0143 0.0022 0.0110 0.0085 -0.0171  
Y 0.0133 0.0001 0.0067 -0.0048 0.0188 -0.0218  
Z 0.0006 -0.0311 0.0140 -0.0015 0.0081 -0.0114  
AT. 36 H X 0.0307 -0.0143 -0.0022 -0.0110 0.0085 0.0171  
Y -0.0133 -0.0001 0.0067 -0.0048 -0.0188 -0.0218  
Z 0.0006 -0.0311 -0.0140 0.0015 0.0081 0.0114  
AT. 37 C X -0.0035 -0.0161 -0.0078 -0.0149 0.0071 -0.0155  
Y -0.0107 0.0038 0.0117 0.0070 -0.0240 0.0261  
Z 0.0077 -0.0243 0.0205 0.0071 -0.0154 0.0144  
AT. 38 C X -0.0035 -0.0161 0.0078 0.0149 0.0071 0.0155  
Y 0.0107 -0.0038 0.0117 0.0070 0.0240 0.0261  
Z 0.0077 -0.0243 -0.0205 -0.0071 -0.0154 -0.0144  
AT. 39 C X 0.0035 -0.0161 -0.0078 0.0149 -0.0071 0.0155  
Y 0.0107 0.0038 0.0117 -0.0070 0.0240 -0.0261  
Z -0.0077 -0.0243 0.0205 -0.0071 0.0154 -0.0144  
AT. 40 C X 0.0035 -0.0161 0.0078 -0.0149 -0.0071 -0.0155  
Y -0.0107 -0.0038 0.0117 -0.0070 -0.0240 -0.0261  
Z -0.0077 -0.0243 -0.0205 0.0071 0.0154 0.0144  
AT. 41 C X 0.0192 -0.0284 0.0257 0.0365 -0.0079 -0.0124  
Y -0.0296 0.0054 -0.0012 -0.0106 -0.0207 0.0331  
Z 0.0202 -0.0179 0.0154 -0.0045 -0.0156 0.0044  
AT. 42 C X 0.0192 -0.0284 -0.0257 -0.0365 -0.0079 0.0124  
Y 0.0296 -0.0054 -0.0012 -0.0106 0.0207 0.0331  
Z 0.0202 -0.0179 -0.0154 0.0045 -0.0156 -0.0044  
AT. 43 C X -0.0192 -0.0284 0.0257 -0.0365 0.0079 0.0124  
Y 0.0296 0.0054 -0.0012 0.0106 0.0207 -0.0331  
Z -0.0202 -0.0179 0.0154 0.0045 0.0156 -0.0044  
AT. 44 C X -0.0192 -0.0284 -0.0257 0.0365 0.0079 -0.0124  
Y -0.0296 -0.0054 -0.0012 0.0106 -0.0207 -0.0331  
Z -0.0202 -0.0179 -0.0154 -0.0045 0.0156 0.0044  
AT. 45 H X 0.0236 -0.0371 0.0376 0.0429 -0.0088 -0.0141

Y -0.0390 0.0057 -0.0066 -0.0132 -0.0201 0.0379  
Z 0.0116 -0.0162 0.0094 -0.0076 -0.0154 0.0091  
AT. 46 H X 0.0236 -0.0371 -0.0376 -0.0429 -0.0088 0.0141  
Y 0.0390 -0.0057 -0.0066 -0.0132 0.0201 0.0379  
Z 0.0116 -0.0162 -0.0094 0.0076 -0.0154 -0.0091  
AT. 47 H X -0.0236 -0.0371 0.0376 -0.0429 0.0088 0.0141  
Y 0.0390 0.0057 -0.0066 0.0132 0.0201 -0.0379  
Z -0.0116 -0.0162 0.0094 0.0076 0.0154 -0.0091  
AT. 48 H X -0.0236 -0.0371 -0.0376 0.0429 0.0088 -0.0141  
Y -0.0390 -0.0057 -0.0066 0.0132 -0.0201 -0.0379  
Z -0.0116 -0.0162 -0.0094 -0.0076 0.0154 0.0091  
AT. 49 H X 0.0173 -0.0285 0.0299 0.0326 -0.0141 -0.0059  
Y -0.0354 0.0071 -0.0027 -0.0158 -0.0256 0.0404  
Z 0.0301 -0.0233 0.0301 0.0004 -0.0200 0.0025  
AT. 50 H X 0.0173 -0.0285 -0.0299 -0.0326 -0.0141 0.0059  
Y 0.0354 -0.0071 -0.0027 -0.0158 0.0256 0.0404  
Z 0.0301 -0.0233 -0.0301 -0.0004 -0.0200 -0.0025  
AT. 51 H X -0.0173 -0.0285 0.0299 -0.0326 0.0141 0.0059  
Y 0.0354 0.0071 -0.0027 0.0158 0.0256 -0.0404  
Z -0.0301 -0.0233 0.0301 -0.0004 0.0200 -0.0025  
AT. 52 H X -0.0173 -0.0285 -0.0299 0.0326 0.0141 -0.0059  
Y -0.0354 -0.0071 -0.0027 0.0158 -0.0256 -0.0404  
Z -0.0301 -0.0233 -0.0301 0.0004 0.0200 0.0025  
AT. 53 C X 0.0162 -0.0244 0.0220 0.0307 -0.0106 -0.0082  
Y -0.0220 -0.0001 0.0009 0.0007 -0.0139 0.0222  
Z 0.0279 -0.0077 0.0003 -0.0035 -0.0052 -0.0076  
AT. 54 C X 0.0162 -0.0244 -0.0220 -0.0307 -0.0106 0.0082  
Y 0.0220 0.0001 0.0009 0.0007 0.0139 0.0222  
Z 0.0279 -0.0077 -0.0003 0.0035 -0.0052 0.0076  
AT. 55 C X -0.0162 -0.0244 0.0220 -0.0307 0.0106 0.0082  
Y 0.0220 -0.0001 0.0009 -0.0007 0.0139 -0.0222  
Z -0.0279 -0.0077 0.0003 0.0035 0.0052 0.0076

AT. 56 C X -0.0162 -0.0244 -0.0220 0.0307 0.0106 -0.0082  
Y -0.0220 0.0001 0.0009 -0.0007 -0.0139 -0.0222  
Z -0.0279 -0.0077 -0.0003 -0.0035 0.0052 -0.0076

AT. 57 C X 0.0107 -0.0338 0.0416 0.0226 -0.0300 0.0081  
Y -0.0288 0.0028 -0.0082 0.0013 -0.0066 0.0226  
Z 0.0336 -0.0071 -0.0002 -0.0020 -0.0040 -0.0122

AT. 58 C X 0.0107 -0.0338 -0.0416 -0.0226 -0.0300 -0.0081  
Y 0.0288 -0.0028 -0.0082 0.0013 0.0066 0.0226  
Z 0.0336 -0.0071 0.0002 0.0020 -0.0040 0.0122

AT. 59 C X -0.0107 -0.0338 0.0416 -0.0226 0.0300 -0.0081  
Y 0.0288 0.0028 -0.0082 -0.0013 0.0066 -0.0226  
Z -0.0336 -0.0071 -0.0002 0.0020 0.0040 0.0122

AT. 60 C X -0.0107 -0.0338 -0.0416 0.0226 0.0300 0.0081  
Y -0.0288 -0.0028 -0.0082 -0.0013 -0.0066 -0.0226  
Z -0.0336 -0.0071 0.0002 -0.0020 0.0040 -0.0122

AT. 61 H X 0.0138 -0.0374 0.0437 0.0152 -0.0377 0.0155  
Y -0.0266 0.0008 -0.0094 -0.0042 -0.0104 0.0277  
Z 0.0329 -0.0115 0.0160 -0.0018 -0.0154 -0.0089

AT. 62 H X 0.0138 -0.0374 -0.0437 -0.0152 -0.0377 -0.0155  
Y 0.0266 -0.0008 -0.0094 -0.0042 0.0104 0.0277  
Z 0.0329 -0.0115 -0.0160 0.0018 -0.0154 0.0089

AT. 63 H X -0.0138 -0.0374 0.0437 -0.0152 0.0377 -0.0155  
Y 0.0266 0.0008 -0.0094 0.0042 0.0104 -0.0277  
Z -0.0329 -0.0115 0.0160 0.0018 0.0154 0.0089

AT. 64 H X -0.0138 -0.0374 -0.0437 0.0152 0.0377 0.0155  
Y -0.0266 -0.0008 -0.0094 0.0042 -0.0104 -0.0277  
Z -0.0329 -0.0115 -0.0160 -0.0018 0.0154 -0.0089

AT. 65 H X 0.0121 -0.0349 0.0416 0.0198 -0.0322 0.0106  
Y -0.0326 0.0052 -0.0072 0.0096 -0.0007 0.0156  
Z 0.0414 -0.0014 -0.0137 -0.0001 0.0079 -0.0214

AT. 66 H X 0.0121 -0.0349 -0.0416 -0.0198 -0.0322 -0.0106  
Y 0.0326 -0.0052 -0.0072 0.0096 0.0007 0.0156



Z 0.0414 -0.0014 0.0137 0.0001 0.0079 0.0214  
AT. 67 H X -0.0121 -0.0349 0.0416 -0.0198 0.0322 -0.0106  
Y 0.0326 0.0052 -0.0072 -0.0096 0.0007 -0.0156  
Z -0.0414 -0.0014 -0.0137 0.0001 -0.0079 0.0214  
AT. 68 H X -0.0121 -0.0349 -0.0416 0.0198 0.0322 0.0106  
Y -0.0326 -0.0052 -0.0072 -0.0096 -0.0007 -0.0156  
Z -0.0414 -0.0014 0.0137 -0.0001 -0.0079 -0.0214  
AT. 69 H X 0.0028 -0.0362 0.0554 0.0270 -0.0365 0.0103  
Y -0.0316 0.0027 -0.0140 -0.0011 -0.0043 0.0260  
Z 0.0297 -0.0075 -0.0026 -0.0034 -0.0033 -0.0088  
AT. 70 H X 0.0028 -0.0362 -0.0554 -0.0270 -0.0365 -0.0103  
Y 0.0316 -0.0027 -0.0140 -0.0011 0.0043 0.0260  
Z 0.0297 -0.0075 0.0026 0.0034 -0.0033 0.0088  
AT. 71 H X -0.0028 -0.0362 0.0554 -0.0270 0.0365 -0.0103  
Y 0.0316 0.0027 -0.0140 0.0011 0.0043 -0.0260  
Z -0.0297 -0.0075 -0.0026 0.0034 0.0033 0.0088  
AT. 72 H X -0.0028 -0.0362 -0.0554 0.0270 0.0365 0.0103  
Y -0.0316 -0.0027 -0.0140 0.0011 -0.0043 -0.0260  
Z -0.0297 -0.0075 0.0026 -0.0034 0.0033 -0.0088  
AT. 73 C X 0.0150 -0.0075 0.0044 0.0257 -0.0062 -0.0087  
Y -0.0163 -0.0044 0.0083 -0.0004 -0.0194 0.0220  
Z 0.0330 -0.0138 0.0092 -0.0016 -0.0104 -0.0077  
AT. 74 C X 0.0150 -0.0075 -0.0044 -0.0257 -0.0062 0.0087  
Y 0.0163 0.0044 0.0083 -0.0004 0.0194 0.0220  
Z 0.0330 -0.0138 -0.0092 0.0016 -0.0104 0.0077  
AT. 75 C X -0.0150 -0.0075 0.0044 -0.0257 0.0062 0.0087  
Y 0.0163 -0.0044 0.0083 0.0004 0.0194 -0.0220  
Z -0.0330 -0.0138 0.0092 0.0016 0.0104 0.0077  
AT. 76 C X -0.0150 -0.0075 -0.0044 0.0257 0.0062 -0.0087  
Y -0.0163 0.0044 0.0083 0.0004 -0.0194 -0.0220  
Z -0.0330 -0.0138 -0.0092 -0.0016 0.0104 -0.0077  
AT. 77 C X 0.0231 -0.0107 -0.0013 0.0413 0.0129 -0.0283

Y -0.0125 0.0042 0.0086 -0.0143 -0.0311 0.0288  
Z 0.0166 -0.0216 0.0195 -0.0091 -0.0228 0.0107  
AT. 78 C X 0.0231 -0.0107 0.0013 -0.0413 0.0129 0.0283  
Y 0.0125 -0.0042 0.0086 -0.0143 0.0311 0.0288  
Z 0.0166 -0.0216 -0.0195 0.0091 -0.0228 -0.0107  
AT. 79 C X -0.0231 -0.0107 -0.0013 -0.0413 -0.0129 0.0283  
Y 0.0125 0.0042 0.0086 0.0143 0.0311 -0.0288  
Z -0.0166 -0.0216 0.0195 0.0091 0.0228 -0.0107  
AT. 80 C X -0.0231 -0.0107 0.0013 0.0413 -0.0129 -0.0283  
Y -0.0125 -0.0042 0.0086 0.0143 -0.0311 -0.0288  
Z -0.0166 -0.0216 -0.0195 -0.0091 0.0228 0.0107  
AT. 81 H X 0.0223 -0.0058 -0.0033 0.0334 0.0084 -0.0242  
Y -0.0130 0.0104 0.0059 -0.0220 -0.0351 0.0324  
Z 0.0153 -0.0291 0.0275 -0.0222 -0.0372 0.0176  
AT. 82 H X 0.0223 -0.0058 0.0033 -0.0334 0.0084 0.0242  
Y 0.0130 -0.0104 0.0059 -0.0220 0.0351 0.0324  
Z 0.0153 -0.0291 -0.0275 0.0222 -0.0372 -0.0176  
AT. 83 H X -0.0223 -0.0058 -0.0033 -0.0334 -0.0084 0.0242  
Y 0.0130 0.0104 0.0059 0.0220 0.0351 -0.0324  
Z -0.0153 -0.0291 0.0275 0.0222 0.0372 -0.0176  
AT. 84 H X -0.0223 -0.0058 0.0033 0.0334 -0.0084 -0.0242  
Y -0.0130 -0.0104 0.0059 0.0220 -0.0351 -0.0324  
Z -0.0153 -0.0291 -0.0275 -0.0222 0.0372 0.0176  
AT. 85 H X 0.0265 -0.0098 -0.0059 0.0535 0.0268 -0.0391  
Y -0.0094 0.0042 0.0092 -0.0194 -0.0376 0.0299  
Z 0.0128 -0.0217 0.0200 -0.0084 -0.0212 0.0127  
AT. 86 H X 0.0265 -0.0098 0.0059 -0.0535 0.0268 0.0391  
Y 0.0094 -0.0042 0.0092 -0.0194 0.0376 0.0299  
Z 0.0128 -0.0217 -0.0200 0.0084 -0.0212 -0.0127  
AT. 87 H X -0.0265 -0.0098 -0.0059 -0.0535 -0.0268 0.0391  
Y 0.0094 0.0042 0.0092 0.0194 0.0376 -0.0299  
Z -0.0128 -0.0217 0.0200 0.0084 0.0212 -0.0127

AT. 88 H X -0.0265 -0.0098 0.0059 0.0535 -0.0268 -0.0391  
Y -0.0094 -0.0042 0.0092 0.0194 -0.0376 -0.0299  
Z -0.0128 -0.0217 -0.0200 -0.0084 0.0212 0.0127

AT. 89 C X 0.0240 -0.0026 -0.0070 0.0362 0.0119 -0.0269  
Y -0.0107 -0.0070 0.0146 -0.0013 -0.0256 0.0224  
Z 0.0266 -0.0132 0.0082 -0.0019 -0.0121 -0.0025

AT. 90 C X 0.0240 -0.0026 0.0070 -0.0362 0.0119 0.0269  
Y 0.0107 0.0070 0.0146 -0.0013 0.0256 0.0224  
Z 0.0266 -0.0132 -0.0082 0.0019 -0.0121 0.0025

AT. 91 C X -0.0240 -0.0026 -0.0070 -0.0362 -0.0119 0.0269  
Y 0.0107 -0.0070 0.0146 0.0013 0.0256 -0.0224  
Z -0.0266 -0.0132 0.0082 0.0019 0.0121 0.0025

AT. 92 C X -0.0240 -0.0026 0.0070 0.0362 -0.0119 -0.0269  
Y -0.0107 0.0070 0.0146 0.0013 -0.0256 -0.0224  
Z -0.0266 -0.0132 -0.0082 -0.0019 0.0121 -0.0025

AT. 93 C X 0.0287 0.0133 -0.0253 0.0323 0.0182 -0.0312  
Y -0.0041 -0.0116 0.0214 -0.0010 -0.0317 0.0209  
Z 0.0299 -0.0184 0.0155 -0.0010 -0.0170 -0.0029

AT. 94 C X 0.0287 0.0133 0.0253 -0.0323 0.0182 0.0312  
Y 0.0041 0.0116 0.0214 -0.0010 0.0317 0.0209  
Z 0.0299 -0.0184 -0.0155 0.0010 -0.0170 0.0029

AT. 95 C X -0.0287 0.0133 -0.0253 -0.0323 -0.0182 0.0312  
Y 0.0041 -0.0116 0.0214 0.0010 0.0317 -0.0209  
Z -0.0299 -0.0184 0.0155 0.0010 0.0170 0.0029

AT. 96 C X -0.0287 0.0133 0.0253 0.0323 -0.0182 -0.0312  
Y -0.0041 0.0116 0.0214 0.0010 -0.0317 -0.0209  
Z -0.0299 -0.0184 -0.0155 -0.0010 0.0170 -0.0029

AT. 97 H X 0.0293 0.0163 -0.0290 0.0292 0.0166 -0.0268  
Y -0.0010 -0.0125 0.0226 0.0063 -0.0248 0.0067  
Z 0.0368 -0.0093 0.0055 0.0015 -0.0097 -0.0151

AT. 98 H X 0.0293 0.0163 0.0290 -0.0292 0.0166 0.0268  
Y 0.0010 0.0125 0.0226 0.0063 0.0248 0.0067

Z 0.0368 -0.0093 -0.0055 -0.0015 -0.0097 0.0151  
AT. 99 H X -0.0293 0.0163 -0.0290 -0.0292 -0.0166 0.0268  
Y 0.0010 -0.0125 0.0226 -0.0063 0.0248 -0.0067  
Z -0.0368 -0.0093 0.0055 -0.0015 0.0097 0.0151  
AT. 100 H X -0.0293 0.0163 0.0290 0.0292 -0.0166 -0.0268  
Y -0.0010 0.0125 0.0226 -0.0063 -0.0248 -0.0067  
Z -0.0368 -0.0093 -0.0055 0.0015 0.0097 -0.0151  
AT. 101 H X 0.0261 0.0119 -0.0235 0.0265 0.0107 -0.0186  
Y -0.0062 -0.0114 0.0206 -0.0067 -0.0376 0.0326  
Z 0.0297 -0.0302 0.0304 -0.0011 -0.0273 0.0034  
AT. 102 H X 0.0261 0.0119 0.0235 -0.0265 0.0107 0.0186  
Y 0.0062 0.0114 0.0206 -0.0067 0.0376 0.0326  
Z 0.0297 -0.0302 -0.0304 0.0011 -0.0273 -0.0034  
AT. 103 H X -0.0261 0.0119 -0.0235 -0.0265 -0.0107 0.0186  
Y 0.0062 -0.0114 0.0206 0.0067 0.0376 -0.0326  
Z -0.0297 -0.0302 0.0304 0.0011 0.0273 -0.0034  
AT. 104 H X -0.0261 0.0119 0.0235 0.0265 -0.0107 -0.0186  
Y -0.0062 0.0114 0.0206 0.0067 -0.0376 -0.0326  
Z -0.0297 -0.0302 -0.0304 -0.0011 0.0273 0.0034  
AT. 105 H X 0.0338 0.0232 -0.0364 0.0379 0.0323 -0.0503  
Y -0.0006 -0.0146 0.0259 -0.0015 -0.0374 0.0222  
Z 0.0253 -0.0192 0.0156 -0.0023 -0.0174 0.0026  
AT. 106 H X 0.0338 0.0232 0.0364 -0.0379 0.0323 0.0503  
Y 0.0006 0.0146 0.0259 -0.0015 0.0374 0.0222  
Z 0.0253 -0.0192 -0.0156 0.0023 -0.0174 -0.0026  
AT. 107 H X -0.0338 0.0232 -0.0364 -0.0379 -0.0323 0.0503  
Y 0.0006 -0.0146 0.0259 0.0015 0.0374 -0.0222  
Z -0.0253 -0.0192 0.0156 0.0023 0.0174 -0.0026  
AT. 108 H X -0.0338 0.0232 0.0364 0.0379 -0.0323 -0.0503  
Y -0.0006 0.0146 0.0259 0.0015 -0.0374 -0.0222  
Z -0.0253 -0.0192 -0.0156 -0.0023 0.0174 0.0026  
AT. 109 C X 0.0217 -0.0265 0.0180 0.0388 -0.0028 -0.0188

Y -0.0153 -0.0066 0.0039 0.0093 -0.0098 0.0125  
Z 0.0260 0.0078 -0.0219 -0.0018 0.0094 -0.0152  
AT. 110 C X 0.0217 -0.0265 -0.0180 -0.0388 -0.0028 0.0188  
Y 0.0153 0.0066 0.0039 0.0093 0.0098 0.0125  
Z 0.0260 0.0078 0.0219 0.0018 0.0094 0.0152  
AT. 111 C X -0.0217 -0.0265 0.0180 -0.0388 0.0028 0.0188  
Y 0.0153 -0.0066 0.0039 -0.0093 0.0098 -0.0125  
Z -0.0260 0.0078 -0.0219 0.0018 -0.0094 0.0152  
AT. 112 C X -0.0217 -0.0265 -0.0180 0.0388 0.0028 -0.0188  
Y -0.0153 0.0066 0.0039 -0.0093 -0.0098 -0.0125  
Z -0.0260 0.0078 0.0219 -0.0018 -0.0094 -0.0152  
AT. 113 H X 0.0195 -0.0227 0.0158 0.0357 -0.0043 -0.0149  
Y -0.0106 -0.0122 0.0061 0.0151 -0.0064 0.0048  
Z 0.0298 0.0130 -0.0312 -0.0001 0.0140 -0.0190  
AT. 114 H X 0.0195 -0.0227 -0.0158 -0.0357 -0.0043 0.0149  
Y 0.0106 0.0122 0.0061 0.0151 0.0064 0.0048  
Z 0.0298 0.0130 0.0312 0.0001 0.0140 0.0190  
AT. 115 H X -0.0195 -0.0227 0.0158 -0.0357 0.0043 0.0149  
Y 0.0106 -0.0122 0.0061 -0.0151 0.0064 -0.0048  
Z -0.0298 0.0130 -0.0312 0.0001 -0.0140 0.0190  
AT. 116 H X -0.0195 -0.0227 -0.0158 0.0357 0.0043 -0.0149  
Y -0.0106 0.0122 0.0061 -0.0151 -0.0064 -0.0048  
Z -0.0298 0.0130 0.0312 -0.0001 -0.0140 -0.0190  
AT. 117 H X 0.0228 -0.0376 0.0296 0.0408 -0.0068 -0.0205  
Y -0.0171 -0.0031 -0.0003 0.0104 -0.0055 0.0104  
Z 0.0241 0.0128 -0.0276 -0.0014 0.0136 -0.0165  
AT. 118 H X 0.0228 -0.0376 -0.0296 -0.0408 -0.0068 0.0205  
Y 0.0171 0.0031 -0.0003 0.0104 0.0055 0.0104  
Z 0.0241 0.0128 0.0276 0.0014 0.0136 0.0165  
AT. 119 H X -0.0228 -0.0376 0.0296 -0.0408 0.0068 0.0205  
Y 0.0171 -0.0031 -0.0003 -0.0104 0.0055 -0.0104  
Z -0.0241 0.0128 -0.0276 0.0014 -0.0136 0.0165

AT. 120 H X -0.0228 -0.0376 -0.0296 0.0408 0.0068 -0.0205  
Y -0.0171 0.0031 -0.0003 -0.0104 -0.0055 -0.0104  
Z -0.0241 0.0128 0.0276 -0.0014 -0.0136 -0.0165

AT. 121 C X 0.0264 -0.0065 -0.0072 0.0467 0.0203 -0.0355  
Y -0.0082 -0.0157 0.0200 0.0103 -0.0207 0.0161  
Z 0.0257 0.0023 -0.0139 -0.0008 0.0048 -0.0128

AT. 122 C X 0.0264 -0.0065 0.0072 -0.0467 0.0203 0.0355  
Y 0.0082 0.0157 0.0200 0.0103 0.0207 0.0161  
Z 0.0257 0.0023 0.0139 0.0008 0.0048 0.0128

AT. 123 C X -0.0264 -0.0065 -0.0072 -0.0467 -0.0203 0.0355  
Y 0.0082 -0.0157 0.0200 -0.0103 0.0207 -0.0161  
Z -0.0257 0.0023 -0.0139 0.0008 -0.0048 0.0128

AT. 124 C X -0.0264 -0.0065 0.0072 0.0467 -0.0203 -0.0355  
Y -0.0082 0.0157 0.0200 -0.0103 -0.0207 -0.0161  
Z -0.0257 0.0023 0.0139 -0.0008 -0.0048 -0.0128

AT. 125 H X 0.0294 -0.0035 -0.0157 0.0582 0.0364 -0.0494  
Y -0.0057 -0.0191 0.0266 0.0125 -0.0241 0.0170  
Z 0.0230 0.0039 -0.0163 -0.0055 0.0028 -0.0096

AT. 126 H X 0.0294 -0.0035 0.0157 -0.0582 0.0364 0.0494  
Y 0.0057 0.0191 0.0266 0.0125 0.0241 0.0170  
Z 0.0230 0.0039 0.0163 0.0055 0.0028 0.0096

AT. 127 H X -0.0294 -0.0035 -0.0157 -0.0582 -0.0364 0.0494  
Y 0.0057 -0.0191 0.0266 -0.0125 0.0241 -0.0170  
Z -0.0230 0.0039 -0.0163 0.0055 -0.0028 0.0096

AT. 128 H X -0.0294 -0.0035 0.0157 0.0582 -0.0364 -0.0494  
Y -0.0057 0.0191 0.0266 -0.0125 -0.0241 -0.0170  
Z -0.0230 0.0039 0.0163 -0.0055 -0.0028 -0.0096

AT. 129 H X 0.0258 -0.0014 -0.0113 0.0439 0.0211 -0.0350  
Y -0.0054 -0.0224 0.0244 0.0186 -0.0171 0.0107  
Z 0.0294 0.0061 -0.0189 0.0081 0.0162 -0.0232

AT. 130 H X 0.0258 -0.0014 0.0113 -0.0439 0.0211 0.0350  
Y 0.0054 0.0224 0.0244 0.0186 0.0171 0.0107

Z 0.0294 0.0061 0.0189 -0.0081 0.0162 0.0232  
AT. 131 H X -0.0258 -0.0014 -0.0113 -0.0439 -0.0211 0.0350  
Y 0.0054 -0.0224 0.0244 -0.0186 0.0171 -0.0107  
Z -0.0294 0.0061 -0.0189 -0.0081 -0.0162 0.0232  
AT. 132 H X -0.0258 -0.0014 0.0113 0.0439 -0.0211 -0.0350  
Y -0.0054 0.0224 0.0244 -0.0186 -0.0171 -0.0107  
Z -0.0294 0.0061 0.0189 0.0081 -0.0162 -0.0232  
AT. 133 C X 0.0302 -0.0234 0.0026 0.0196 -0.0157 -0.0071  
Y -0.0123 -0.0104 0.0114 0.0108 -0.0142 0.0133  
Z 0.0183 0.0128 -0.0289 0.0013 0.0192 -0.0214  
AT. 134 C X 0.0302 -0.0234 -0.0026 -0.0196 -0.0157 0.0071  
Y 0.0123 0.0104 0.0114 0.0108 0.0142 0.0133  
Z 0.0183 0.0128 0.0289 -0.0013 0.0192 0.0214  
AT. 135 C X -0.0302 -0.0234 0.0026 -0.0196 0.0157 0.0071  
Y 0.0123 -0.0104 0.0114 -0.0108 0.0142 -0.0133  
Z -0.0183 0.0128 -0.0289 -0.0013 -0.0192 0.0214  
AT. 136 C X -0.0302 -0.0234 -0.0026 0.0196 0.0157 -0.0071  
Y -0.0123 0.0104 0.0114 -0.0108 -0.0142 -0.0133  
Z -0.0183 0.0128 0.0289 0.0013 -0.0192 -0.0214  
AT. 137 C X 0.0279 -0.0065 0.0102 0.0128 -0.0125 -0.0007  
Y -0.0103 -0.0107 0.0126 0.0124 -0.0159 0.0141  
Z 0.0163 0.0104 -0.0310 0.0012 0.0192 -0.0228  
AT. 138 C X 0.0279 -0.0065 -0.0102 -0.0128 -0.0125 0.0007  
Y 0.0103 0.0107 0.0126 0.0124 0.0159 0.0141  
Z 0.0163 0.0104 0.0310 -0.0012 0.0192 0.0228  
AT. 139 C X -0.0279 -0.0065 0.0102 -0.0128 0.0125 0.0007  
Y 0.0103 -0.0107 0.0126 -0.0124 0.0159 -0.0141  
Z -0.0163 0.0104 -0.0310 -0.0012 -0.0192 0.0228  
AT. 140 C X -0.0279 -0.0065 -0.0102 0.0128 0.0125 -0.0007  
Y -0.0103 0.0107 0.0126 -0.0124 -0.0159 -0.0141  
Z -0.0163 0.0104 0.0310 0.0012 -0.0192 -0.0228  
AT. 141 H X 0.0195 -0.0082 0.0229 0.0145 -0.0203 0.0079

Y -0.0128 -0.0180 0.0190 0.0182 -0.0213 0.0164  
Z 0.0232 0.0074 -0.0411 0.0027 0.0242 -0.0305  
AT. 142 H X 0.0195 -0.0082 -0.0229 -0.0145 -0.0203 -0.0079  
Y 0.0128 0.0180 0.0190 0.0182 0.0213 0.0164  
Z 0.0232 0.0074 0.0411 -0.0027 0.0242 0.0305  
AT. 143 H X -0.0195 -0.0082 0.0229 -0.0145 0.0203 -0.0079  
Y 0.0128 -0.0180 0.0190 -0.0182 0.0213 -0.0164  
Z -0.0232 0.0074 -0.0411 -0.0027 -0.0242 0.0305  
AT. 144 H X -0.0195 -0.0082 -0.0229 0.0145 0.0203 0.0079  
Y -0.0128 0.0180 0.0190 -0.0182 -0.0213 -0.0164  
Z -0.0232 0.0074 0.0411 0.0027 -0.0242 -0.0305  
AT. 145 H X 0.0367 0.0056 -0.0044 0.0057 -0.0008 -0.0088  
Y -0.0129 -0.0159 0.0167 0.0145 -0.0197 0.0162  
Z 0.0165 0.0040 -0.0315 0.0014 0.0173 -0.0234  
AT. 146 H X 0.0367 0.0056 0.0044 -0.0057 -0.0008 0.0088  
Y 0.0129 0.0159 0.0167 0.0145 0.0197 0.0162  
Z 0.0165 0.0040 0.0315 -0.0014 0.0173 0.0234  
AT. 147 H X -0.0367 0.0056 -0.0044 -0.0057 0.0008 0.0088  
Y 0.0129 -0.0159 0.0167 -0.0145 0.0197 -0.0162  
Z -0.0165 0.0040 -0.0315 -0.0014 -0.0173 0.0234  
AT. 148 H X -0.0367 0.0056 0.0044 0.0057 0.0008 -0.0088  
Y -0.0129 0.0159 0.0167 -0.0145 -0.0197 -0.0162  
Z -0.0165 0.0040 0.0315 0.0014 -0.0173 -0.0234  
AT. 149 O X 0.0064 -0.0041 0.0034 0.0196 -0.0176 0.0037  
Y -0.0246 0.0044 0.0006 -0.0063 -0.0287 0.0332  
Z 0.0332 -0.0280 0.0271 -0.0039 -0.0202 -0.0026  
AT. 150 O X 0.0064 -0.0041 -0.0034 -0.0196 -0.0176 -0.0037  
Y 0.0246 -0.0044 0.0006 -0.0063 0.0287 0.0332  
Z 0.0332 -0.0280 -0.0271 0.0039 -0.0202 0.0026  
AT. 151 O X -0.0064 -0.0041 0.0034 -0.0196 0.0176 -0.0037  
Y 0.0246 0.0044 0.0006 0.0063 0.0287 -0.0332  
Z -0.0332 -0.0280 0.0271 0.0039 0.0202 0.0026



AT. 152 O X -0.0064 -0.0041 -0.0034 0.0196 0.0176 0.0037  
Y -0.0246 -0.0044 0.0006 0.0063 -0.0287 -0.0332  
Z -0.0332 -0.0280 -0.0271 -0.0039 0.0202 -0.0026

AT. 153 H X 0.0204 0.0053 0.0060 0.0230 -0.0096 -0.0021  
Y -0.0136 0.0034 0.0159 -0.0044 -0.0256 0.0303  
Z 0.0278 -0.0347 0.0307 -0.0054 -0.0247 0.0005

AT. 154 H X 0.0204 0.0053 -0.0060 -0.0230 -0.0096 0.0021  
Y 0.0136 -0.0034 0.0159 -0.0044 0.0256 0.0303  
Z 0.0278 -0.0347 -0.0307 0.0054 -0.0247 -0.0005

AT. 155 H X -0.0204 0.0053 0.0060 -0.0230 0.0096 0.0021  
Y 0.0136 0.0034 0.0159 0.0044 0.0256 -0.0303  
Z -0.0278 -0.0347 0.0307 0.0054 0.0247 -0.0005

AT. 156 H X -0.0204 0.0053 -0.0060 0.0230 0.0096 -0.0021  
Y -0.0136 -0.0034 0.0159 0.0044 -0.0256 -0.0303  
Z -0.0278 -0.0347 -0.0307 -0.0054 0.0247 0.0005

AT. 157 O X 0.0136 -0.0000 -0.0024 0.0202 -0.0074 -0.0056  
Y -0.0082 -0.0132 0.0153 0.0070 -0.0086 0.0098  
Z 0.0420 -0.0055 -0.0012 0.0036 -0.0019 -0.0187

AT. 158 O X 0.0136 -0.0000 0.0024 -0.0202 -0.0074 0.0056  
Y 0.0082 0.0132 0.0153 0.0070 0.0086 0.0098  
Z 0.0420 -0.0055 0.0012 -0.0036 -0.0019 0.0187

AT. 159 O X -0.0136 -0.0000 -0.0024 -0.0202 0.0074 0.0056  
Y 0.0082 -0.0132 0.0153 -0.0070 0.0086 -0.0098  
Z -0.0420 -0.0055 -0.0012 -0.0036 0.0019 0.0187

AT. 160 O X -0.0136 -0.0000 0.0024 0.0202 0.0074 -0.0056  
Y -0.0082 0.0132 0.0153 -0.0070 -0.0086 -0.0098  
Z -0.0420 -0.0055 0.0012 0.0036 0.0019 -0.0187

AT. 161 O X 0.0093 -0.0104 0.0031 0.0087 -0.0164 0.0065  
Y -0.0160 -0.0062 0.0179 0.0162 -0.0099 0.0112  
Z 0.0503 -0.0037 -0.0064 0.0043 0.0046 -0.0270

AT. 162 O X 0.0093 -0.0104 -0.0031 -0.0087 -0.0164 -0.0065  
Y 0.0160 0.0062 0.0179 0.0162 0.0099 0.0112

Z 0.0503 -0.0037 0.0064 -0.0043 0.0046 0.0270  
AT.163 O X -0.0093 -0.0104 0.0031 -0.0087 0.0164 -0.0065  
Y 0.0160 -0.0062 0.0179 -0.0162 0.0099 -0.0112  
Z -0.0503 -0.0037 -0.0064 -0.0043 -0.0046 0.0270  
AT.164 O X -0.0093 -0.0104 -0.0031 0.0087 0.0164 0.0065  
Y -0.0160 0.0062 0.0179 -0.0162 -0.0099 -0.0112  
Z -0.0503 -0.0037 0.0064 0.0043 -0.0046 -0.0270  
AT.165 H X 0.0230 -0.0242 0.0033 -0.0002 -0.0300 0.0107  
Y -0.0102 -0.0123 0.0182 0.0126 -0.0164 0.0134  
Z 0.0390 0.0023 -0.0113 0.0024 0.0159 -0.0276  
AT.166 H X 0.0230 -0.0242 -0.0033 0.0002 -0.0300 -0.0107  
Y 0.0102 0.0123 0.0182 0.0126 0.0164 0.0134  
Z 0.0390 0.0023 0.0113 -0.0024 0.0159 0.0276  
AT.167 H X -0.0230 -0.0242 0.0033 0.0002 0.0300 -0.0107  
Y 0.0102 -0.0123 0.0182 -0.0126 0.0164 -0.0134  
Z -0.0390 0.0023 -0.0113 -0.0024 -0.0159 0.0276  
AT.168 H X -0.0230 -0.0242 -0.0033 -0.0002 0.0300 0.0107  
Y -0.0102 0.0123 0.0182 -0.0126 -0.0164 -0.0134  
Z -0.0390 0.0023 0.0113 0.0024 -0.0159 -0.0276  
AT.169 O X 0.0075 0.0146 0.0119 0.0110 0.0065 -0.0005  
Y -0.0034 0.0011 0.0168 -0.0002 -0.0115 0.0088  
Z -0.0017 -0.0473 0.0212 -0.0029 -0.0022 -0.0001  
AT.170 O X 0.0075 0.0146 -0.0119 -0.0110 0.0065 0.0005  
Y 0.0034 -0.0011 0.0168 -0.0002 0.0115 0.0088  
Z -0.0017 -0.0473 -0.0212 0.0029 -0.0022 0.0001  
AT.171 O X -0.0075 0.0146 0.0119 -0.0110 -0.0065 0.0005  
Y 0.0034 0.0011 0.0168 0.0002 0.0115 -0.0088  
Z 0.0017 -0.0473 0.0212 0.0029 0.0022 0.0001  
AT.172 O X -0.0075 0.0146 -0.0119 0.0110 -0.0065 -0.0005  
Y -0.0034 -0.0011 0.0168 0.0002 -0.0115 -0.0088  
Z 0.0017 -0.0473 -0.0212 -0.0029 0.0022 -0.0001  
AT.173 H X -0.0043 0.0032 -0.0067 -0.0193 0.0136 -0.0119

Y -0.0019 0.0027 0.0217 0.0053 -0.0134 0.0116  
Z 0.0013 -0.0419 0.0255 0.0030 0.0043 -0.0016  
AT. 174 H X -0.0043 0.0032 0.0067 0.0193 0.0136 0.0119  
Y 0.0019 -0.0027 0.0217 0.0053 0.0134 0.0116  
Z 0.0013 -0.0419 -0.0255 -0.0030 0.0043 0.0016  
AT. 175 H X 0.0043 0.0032 -0.0067 0.0193 -0.0136 0.0119  
Y 0.0019 0.0027 0.0217 -0.0053 0.0134 -0.0116  
Z -0.0013 -0.0419 0.0255 -0.0030 -0.0043 0.0016  
AT. 176 H X 0.0043 0.0032 0.0067 -0.0193 -0.0136 -0.0119  
Y -0.0019 -0.0027 0.0217 -0.0053 -0.0134 -0.0116  
Z -0.0013 -0.0419 -0.0255 0.0030 -0.0043 -0.0016

FREQ(CM\*\*-1) 78.73 82.10 84.63 85.29 85.75 85.99

AT. 1 I X -0.0018 -0.0040 0.0025 0.0032 -0.0129 0.0159  
Y -0.0079 -0.0001 -0.0006 -0.0009 -0.0062 0.0105  
Z 0.0191 -0.0005 0.0014 0.0082 0.0061 -0.0097  
AT. 2 I X 0.0018 0.0040 0.0025 -0.0032 -0.0129 0.0159  
Y -0.0079 -0.0001 0.0006 -0.0009 0.0062 -0.0105  
Z -0.0191 0.0005 0.0014 -0.0082 0.0061 -0.0097  
AT. 3 I X -0.0018 0.0040 0.0025 0.0032 0.0129 0.0159  
Y -0.0079 0.0001 -0.0006 -0.0009 0.0062 0.0105  
Z 0.0191 0.0005 0.0014 0.0082 -0.0061 -0.0097  
AT. 4 I X 0.0018 -0.0040 0.0025 -0.0032 0.0129 0.0159  
Y -0.0079 0.0001 0.0006 -0.0009 -0.0062 -0.0105  
Z -0.0191 -0.0005 0.0014 -0.0082 -0.0061 -0.0097  
AT. 5 I X -0.0063 0.0083 0.0106 0.0078 -0.0001 0.0006  
Y -0.0032 -0.0192 -0.0090 -0.0070 0.0125 -0.0012  
Z 0.0004 -0.0154 -0.0166 -0.0232 0.0107 -0.0031  
AT. 6 I X 0.0063 -0.0083 0.0106 -0.0078 -0.0001 0.0006  
Y -0.0032 -0.0192 0.0090 -0.0070 -0.0125 0.0012  
Z -0.0004 0.0154 -0.0166 0.0232 0.0107 -0.0031

AT. 7 I X -0.0063 -0.0083 0.0106 0.0078 0.0001 0.0006  
Y -0.0032 0.0192 -0.0090 -0.0070 -0.0125 -0.0012  
Z 0.0004 0.0154 -0.0166 -0.0232 -0.0107 -0.0031

AT. 8 I X 0.0063 0.0083 0.0106 -0.0078 0.0001 0.0006  
Y -0.0032 0.0192 0.0090 -0.0070 0.0125 0.0012  
Z -0.0004 -0.0154 -0.0166 0.0232 -0.0107 -0.0031

AT. 9 N X 0.0254 -0.0107 -0.0202 -0.0149 0.0309 -0.0175  
Y -0.0071 0.0089 0.0073 0.0092 -0.0156 0.0037  
Z -0.0168 0.0010 -0.0053 -0.0073 -0.0012 0.0158

AT. 10 N X -0.0254 0.0107 -0.0202 0.0149 0.0309 -0.0175  
Y -0.0071 0.0089 -0.0073 0.0092 0.0156 -0.0037  
Z 0.0168 -0.0010 -0.0053 0.0073 -0.0012 0.0158

AT. 11 N X 0.0254 0.0107 -0.0202 -0.0149 -0.0309 -0.0175  
Y -0.0071 -0.0089 0.0073 0.0092 0.0156 0.0037  
Z -0.0168 -0.0010 -0.0053 -0.0073 0.0012 0.0158

AT. 12 N X -0.0254 -0.0107 -0.0202 0.0149 -0.0309 -0.0175  
Y -0.0071 -0.0089 -0.0073 0.0092 -0.0156 -0.0037  
Z 0.0168 0.0010 -0.0053 0.0073 0.0012 0.0158

AT. 13 N X 0.0395 -0.0017 -0.0125 -0.0029 0.0329 -0.0303  
Y 0.0113 0.0027 -0.0057 0.0027 0.0040 -0.0051  
Z 0.0014 0.0249 0.0069 0.0195 -0.0087 -0.0009

AT. 14 N X -0.0395 0.0017 -0.0125 0.0029 0.0329 -0.0303  
Y 0.0113 0.0027 0.0057 0.0027 -0.0040 0.0051  
Z -0.0014 -0.0249 0.0069 -0.0195 -0.0087 -0.0009

AT. 15 N X 0.0395 0.0017 -0.0125 -0.0029 -0.0329 -0.0303  
Y 0.0113 -0.0027 -0.0057 0.0027 -0.0040 -0.0051  
Z 0.0014 -0.0249 0.0069 0.0195 0.0087 -0.0009

AT. 16 N X -0.0395 -0.0017 -0.0125 0.0029 -0.0329 -0.0303  
Y 0.0113 -0.0027 0.0057 0.0027 0.0040 0.0051  
Z -0.0014 0.0249 0.0069 -0.0195 0.0087 -0.0009

AT. 17 O X -0.0493 0.0102 -0.0361 -0.0108 -0.0516 0.0821  
Y 0.0120 0.0061 0.0259 0.0120 0.0068 -0.0280

Z 0.0107 -0.0110 -0.0246 -0.0162 0.0255 -0.0089  
AT. 18 O X 0.0493 -0.0102 -0.0361 0.0108 -0.0516 0.0821  
Y 0.0120 0.0061 -0.0259 0.0120 -0.0068 0.0280  
Z -0.0107 0.0110 -0.0246 0.0162 0.0255 -0.0089  
AT. 19 O X -0.0493 -0.0102 -0.0361 -0.0108 0.0516 0.0821  
Y 0.0120 -0.0061 0.0259 0.0120 -0.0068 -0.0280  
Z 0.0107 0.0110 -0.0246 -0.0162 -0.0255 -0.0089  
AT. 20 O X 0.0493 0.0102 -0.0361 0.0108 0.0516 0.0821  
Y 0.0120 -0.0061 -0.0259 0.0120 0.0068 0.0280  
Z -0.0107 -0.0110 -0.0246 0.0162 -0.0255 -0.0089  
AT. 21 O X 0.0026 0.0686 0.0226 0.0495 0.0070 0.0081  
Y 0.0157 -0.0062 -0.0126 -0.0067 0.0107 -0.0094  
Z 0.0122 0.0054 -0.0104 -0.0017 0.0085 -0.0112  
AT. 22 O X -0.0026 -0.0686 0.0226 -0.0495 0.0070 0.0081  
Y 0.0157 -0.0062 0.0126 -0.0067 -0.0107 0.0094  
Z -0.0122 -0.0054 -0.0104 0.0017 0.0085 -0.0112  
AT. 23 O X 0.0026 -0.0686 0.0226 0.0495 -0.0070 0.0081  
Y 0.0157 0.0062 -0.0126 -0.0067 -0.0107 -0.0094  
Z 0.0122 -0.0054 -0.0104 -0.0017 -0.0085 -0.0112  
AT. 24 O X -0.0026 0.0686 0.0226 -0.0495 -0.0070 0.0081  
Y 0.0157 0.0062 0.0126 -0.0067 0.0107 0.0094  
Z -0.0122 0.0054 -0.0104 0.0017 -0.0085 -0.0112  
AT. 25 C X -0.0053 -0.0085 -0.0250 -0.0134 -0.0014 0.0185  
Y 0.0084 0.0034 -0.0060 0.0033 0.0003 -0.0080  
Z 0.0031 -0.0078 -0.0294 -0.0161 0.0158 0.0044  
AT. 26 C X 0.0053 0.0085 -0.0250 0.0134 -0.0014 0.0185  
Y 0.0084 0.0034 0.0060 0.0033 -0.0003 0.0080  
Z -0.0031 0.0078 -0.0294 0.0161 0.0158 0.0044  
AT. 27 C X -0.0053 0.0085 -0.0250 -0.0134 0.0014 0.0185  
Y 0.0084 -0.0034 -0.0060 0.0033 -0.0003 -0.0080  
Z 0.0031 0.0078 -0.0294 -0.0161 -0.0158 0.0044  
AT. 28 C X 0.0053 -0.0085 -0.0250 0.0134 0.0014 0.0185

Y 0.0084 -0.0034 0.0060 0.0033 0.0003 0.0080  
Z -0.0031 -0.0078 -0.0294 0.0161 -0.0158 0.0044  
AT. 29 H X -0.0028 -0.0075 -0.0152 -0.0070 -0.0051 0.0164  
Y 0.0098 -0.0008 -0.0271 -0.0068 0.0075 -0.0085  
Z -0.0015 -0.0082 -0.0414 -0.0241 0.0199 0.0085  
AT. 30 H X 0.0028 0.0075 -0.0152 0.0070 -0.0051 0.0164  
Y 0.0098 -0.0008 0.0271 -0.0068 -0.0075 0.0085  
Z 0.0015 0.0082 -0.0414 0.0241 0.0199 0.0085  
AT. 31 H X -0.0028 0.0075 -0.0152 -0.0070 0.0051 0.0164  
Y 0.0098 0.0008 -0.0271 -0.0068 -0.0075 -0.0085  
Z -0.0015 0.0082 -0.0414 -0.0241 -0.0199 0.0085  
AT. 32 H X 0.0028 -0.0075 -0.0152 0.0070 0.0051 0.0164  
Y 0.0098 0.0008 0.0271 -0.0068 0.0075 0.0085  
Z 0.0015 -0.0082 -0.0414 0.0241 -0.0199 0.0085  
AT. 33 H X -0.0049 -0.0112 -0.0442 -0.0228 0.0047 0.0160  
Y 0.0083 0.0044 -0.0005 0.0058 -0.0012 -0.0085  
Z 0.0018 -0.0104 -0.0391 -0.0203 0.0168 0.0095  
AT. 34 H X 0.0049 0.0112 -0.0442 0.0228 0.0047 0.0160  
Y 0.0083 0.0044 0.0005 0.0058 0.0012 0.0085  
Z -0.0018 0.0104 -0.0391 0.0203 0.0168 0.0095  
AT. 35 H X -0.0049 0.0112 -0.0442 -0.0228 -0.0047 0.0160  
Y 0.0083 -0.0044 -0.0005 0.0058 0.0012 -0.0085  
Z 0.0018 0.0104 -0.0391 -0.0203 -0.0168 0.0095  
AT. 36 H X 0.0049 -0.0112 -0.0442 0.0228 -0.0047 0.0160  
Y 0.0083 -0.0044 0.0005 0.0058 -0.0012 0.0085  
Z -0.0018 -0.0104 -0.0391 0.0203 -0.0168 0.0095  
AT. 37 C X -0.0132 -0.0039 -0.0281 -0.0151 -0.0078 0.0306  
Y 0.0056 0.0066 0.0104 0.0094 -0.0025 -0.0124  
Z 0.0003 -0.0064 -0.0195 -0.0136 0.0143 0.0023  
AT. 38 C X 0.0132 0.0039 -0.0281 0.0151 -0.0078 0.0306  
Y 0.0056 0.0066 -0.0104 0.0094 0.0025 0.0124  
Z -0.0003 0.0064 -0.0195 0.0136 0.0143 0.0023

AT. 39 C X -0.0132 0.0039 -0.0281 -0.0151 0.0078 0.0306  
Y 0.0056 -0.0066 0.0104 0.0094 0.0025 -0.0124  
Z 0.0003 0.0064 -0.0195 -0.0136 -0.0143 0.0023

AT. 40 C X 0.0132 -0.0039 -0.0281 0.0151 0.0078 0.0306  
Y 0.0056 -0.0066 -0.0104 0.0094 -0.0025 0.0124  
Z -0.0003 -0.0064 -0.0195 0.0136 -0.0143 0.0023

AT. 41 C X 0.0193 -0.0227 -0.0179 -0.0261 0.0380 -0.0172  
Y 0.0003 0.0089 -0.0102 0.0046 -0.0105 0.0034  
Z -0.0186 0.0056 0.0048 -0.0002 -0.0068 0.0153

AT. 42 C X -0.0193 0.0227 -0.0179 0.0261 0.0380 -0.0172  
Y 0.0003 0.0089 0.0102 0.0046 0.0105 -0.0034  
Z 0.0186 -0.0056 0.0048 0.0002 -0.0068 0.0153

AT. 43 C X 0.0193 0.0227 -0.0179 -0.0261 -0.0380 -0.0172  
Y 0.0003 -0.0089 -0.0102 0.0046 0.0105 0.0034  
Z -0.0186 -0.0056 0.0048 -0.0002 0.0068 0.0153

AT. 44 C X -0.0193 -0.0227 -0.0179 0.0261 -0.0380 -0.0172  
Y 0.0003 -0.0089 0.0102 0.0046 -0.0105 -0.0034  
Z 0.0186 0.0056 0.0048 0.0002 0.0068 0.0153

AT. 45 H X 0.0214 -0.0364 -0.0234 -0.0391 0.0521 -0.0178  
Y 0.0030 0.0105 -0.0215 0.0026 -0.0094 0.0048  
Z -0.0167 0.0090 -0.0040 0.0001 -0.0080 0.0165

AT. 46 H X -0.0214 0.0364 -0.0234 0.0391 0.0521 -0.0178  
Y 0.0030 0.0105 0.0215 0.0026 0.0094 -0.0048  
Z 0.0167 -0.0090 -0.0040 -0.0001 -0.0080 0.0165

AT. 47 H X 0.0214 0.0364 -0.0234 -0.0391 -0.0521 -0.0178  
Y 0.0030 -0.0105 -0.0215 0.0026 0.0094 0.0048  
Z -0.0167 -0.0090 -0.0040 0.0001 0.0080 0.0165

AT. 48 H X -0.0214 -0.0364 -0.0234 0.0391 -0.0521 -0.0178  
Y 0.0030 -0.0105 0.0215 0.0026 -0.0094 -0.0048  
Z 0.0167 0.0090 -0.0040 -0.0001 0.0080 0.0165

AT. 49 H X 0.0133 -0.0238 -0.0144 -0.0267 0.0341 -0.0144  
Y -0.0038 0.0121 -0.0102 0.0067 -0.0164 0.0060

Z -0.0223 -0.0056 0.0133 -0.0074 -0.0001 0.0147  
AT. 50 H X -0.0133 0.0238 -0.0144 0.0267 0.0341 -0.0144  
Y -0.0038 0.0121 0.0102 0.0067 0.0164 -0.0060  
Z 0.0223 0.0056 0.0133 0.0074 -0.0001 0.0147  
AT. 51 H X 0.0133 0.0238 -0.0144 -0.0267 -0.0341 -0.0144  
Y -0.0038 -0.0121 -0.0102 0.0067 0.0164 0.0060  
Z -0.0223 0.0056 0.0133 -0.0074 0.0001 0.0147  
AT. 52 H X -0.0133 -0.0238 -0.0144 0.0267 -0.0341 -0.0144  
Y -0.0038 -0.0121 0.0102 0.0067 -0.0164 -0.0060  
Z 0.0223 -0.0056 0.0133 0.0074 0.0001 0.0147  
AT. 53 C X 0.0144 -0.0172 -0.0137 -0.0206 0.0293 -0.0144  
Y 0.0106 0.0029 -0.0146 -0.0011 0.0038 -0.0032  
Z -0.0139 0.0206 0.0177 0.0181 -0.0170 0.0097  
AT. 54 C X -0.0144 0.0172 -0.0137 0.0206 0.0293 -0.0144  
Y 0.0106 0.0029 0.0146 -0.0011 -0.0038 0.0032  
Z 0.0139 -0.0206 0.0177 -0.0181 -0.0170 0.0097  
AT. 55 C X 0.0144 0.0172 -0.0137 -0.0206 -0.0293 -0.0144  
Y 0.0106 -0.0029 -0.0146 -0.0011 -0.0038 -0.0032  
Z -0.0139 -0.0206 0.0177 0.0181 0.0170 0.0097  
AT. 56 C X -0.0144 -0.0172 -0.0137 0.0206 -0.0293 -0.0144  
Y 0.0106 -0.0029 0.0146 -0.0011 0.0038 0.0032  
Z 0.0139 0.0206 0.0177 -0.0181 0.0170 0.0097  
AT. 57 C X -0.0042 -0.0319 -0.0148 -0.0356 0.0251 -0.0025  
Y 0.0193 0.0028 -0.0280 -0.0065 0.0140 -0.0065  
Z -0.0135 0.0248 0.0255 0.0254 -0.0215 0.0085  
AT. 58 C X 0.0042 0.0319 -0.0148 0.0356 0.0251 -0.0025  
Y 0.0193 0.0028 0.0280 -0.0065 -0.0140 0.0065  
Z 0.0135 -0.0248 0.0255 -0.0254 -0.0215 0.0085  
AT. 59 C X -0.0042 0.0319 -0.0148 -0.0356 -0.0251 -0.0025  
Y 0.0193 -0.0028 -0.0280 -0.0065 -0.0140 -0.0065  
Z -0.0135 -0.0248 0.0255 0.0254 0.0215 0.0085  
AT. 60 C X 0.0042 -0.0319 -0.0148 0.0356 -0.0251 -0.0025



Y 0.0193 -0.0028 0.0280 -0.0065 0.0140 0.0065  
Z 0.0135 0.0248 0.0255 -0.0254 0.0215 0.0085  
AT. 61 H X -0.0120 -0.0372 -0.0089 -0.0399 0.0203 0.0027  
Y 0.0156 0.0000 -0.0247 -0.0093 0.0117 -0.0036  
Z -0.0244 0.0180 0.0296 0.0220 -0.0272 0.0135  
AT. 62 H X 0.0120 0.0372 -0.0089 0.0399 0.0203 0.0027  
Y 0.0156 0.0000 0.0247 -0.0093 -0.0117 0.0036  
Z 0.0244 -0.0180 0.0296 -0.0220 -0.0272 0.0135  
AT. 63 H X -0.0120 0.0372 -0.0089 -0.0399 -0.0203 0.0027  
Y 0.0156 -0.0000 -0.0247 -0.0093 -0.0117 -0.0036  
Z -0.0244 -0.0180 0.0296 0.0220 0.0272 0.0135  
AT. 64 H X 0.0120 -0.0372 -0.0089 0.0399 -0.0203 0.0027  
Y 0.0156 -0.0000 0.0247 -0.0093 0.0117 0.0036  
Z 0.0244 0.0180 0.0296 -0.0220 0.0272 0.0135  
AT. 65 H X -0.0066 -0.0337 -0.0126 -0.0370 0.0235 -0.0009  
Y 0.0259 0.0061 -0.0348 -0.0038 0.0193 -0.0110  
Z -0.0037 0.0348 0.0322 0.0373 -0.0229 0.0018  
AT. 66 H X 0.0066 0.0337 -0.0126 0.0370 0.0235 -0.0009  
Y 0.0259 0.0061 0.0348 -0.0038 -0.0193 0.0110  
Z 0.0037 -0.0348 0.0322 -0.0373 -0.0229 0.0018  
AT. 67 H X -0.0066 0.0337 -0.0126 -0.0370 -0.0235 -0.0009  
Y 0.0259 -0.0061 -0.0348 -0.0038 -0.0193 -0.0110  
Z -0.0037 -0.0348 0.0322 0.0373 0.0229 0.0018  
AT. 68 H X 0.0066 -0.0337 -0.0126 0.0370 -0.0235 -0.0009  
Y 0.0259 -0.0061 0.0348 -0.0038 0.0193 0.0110  
Z 0.0037 0.0348 0.0322 -0.0373 0.0229 0.0018  
AT. 69 H X -0.0087 -0.0384 -0.0232 -0.0428 0.0281 -0.0004  
Y 0.0222 0.0017 -0.0342 -0.0113 0.0192 -0.0066  
Z -0.0116 0.0225 0.0185 0.0203 -0.0166 0.0088  
AT. 70 H X 0.0087 0.0384 -0.0232 0.0428 0.0281 -0.0004  
Y 0.0222 0.0017 0.0342 -0.0113 -0.0192 0.0066  
Z 0.0116 -0.0225 0.0185 -0.0203 -0.0166 0.0088

AT. 71 H X -0.0087 0.0384 -0.0232 -0.0428 -0.0281 -0.0004  
Y 0.0222 -0.0017 -0.0342 -0.0113 -0.0192 -0.0066  
Z -0.0116 -0.0225 0.0185 0.0203 0.0166 0.0088

AT. 72 H X 0.0087 -0.0384 -0.0232 0.0428 -0.0281 -0.0004  
Y 0.0222 -0.0017 0.0342 -0.0113 0.0192 0.0066  
Z 0.0116 0.0225 0.0185 -0.0203 0.0166 0.0088

AT. 73 C X 0.0140 0.0014 -0.0033 -0.0024 0.0142 -0.0152  
Y 0.0026 0.0051 -0.0029 0.0042 -0.0042 0.0000  
Z -0.0194 0.0201 0.0254 0.0193 -0.0201 0.0115

AT. 74 C X -0.0140 -0.0014 -0.0033 0.0024 0.0142 -0.0152  
Y 0.0026 0.0051 0.0029 0.0042 0.0042 -0.0000  
Z 0.0194 -0.0201 0.0254 -0.0193 -0.0201 0.0115

AT. 75 C X 0.0140 -0.0014 -0.0033 -0.0024 -0.0142 -0.0152  
Y 0.0026 -0.0051 -0.0029 0.0042 0.0042 0.0000  
Z -0.0194 -0.0201 0.0254 0.0193 0.0201 0.0115

AT. 76 C X -0.0140 0.0014 -0.0033 0.0024 -0.0142 -0.0152  
Y 0.0026 -0.0051 0.0029 0.0042 -0.0042 -0.0000  
Z 0.0194 0.0201 0.0254 -0.0193 0.0201 0.0115

AT. 77 C X 0.0366 0.0013 -0.0102 0.0015 0.0228 -0.0289  
Y -0.0206 0.0123 0.0195 0.0125 -0.0226 0.0118  
Z -0.0266 0.0033 0.0021 -0.0060 -0.0057 0.0222

AT. 78 C X -0.0366 -0.0013 -0.0102 -0.0015 0.0228 -0.0289  
Y -0.0206 0.0123 -0.0195 0.0125 0.0226 -0.0118  
Z 0.0266 -0.0033 0.0021 0.0060 -0.0057 0.0222

AT. 79 C X 0.0366 -0.0013 -0.0102 0.0015 -0.0228 -0.0289  
Y -0.0206 -0.0123 0.0195 0.0125 0.0226 0.0118  
Z -0.0266 -0.0033 0.0021 -0.0060 0.0057 0.0222

AT. 80 C X -0.0366 0.0013 -0.0102 -0.0015 -0.0228 -0.0289  
Y -0.0206 -0.0123 -0.0195 0.0125 -0.0226 -0.0118  
Z 0.0266 0.0033 0.0021 0.0060 0.0057 0.0222

AT. 81 H X 0.0265 0.0030 -0.0046 0.0026 0.0169 -0.0222  
Y -0.0292 0.0146 0.0260 0.0147 -0.0286 0.0166

Z -0.0503 -0.0008 0.0050 -0.0146 -0.0098 0.0411  
AT. 82 H X -0.0265 -0.0030 -0.0046 -0.0026 0.0169 -0.0222  
Y -0.0292 0.0146 -0.0260 0.0147 0.0286 -0.0166  
Z 0.0503 0.0008 0.0050 0.0146 -0.0098 0.0411  
AT. 83 H X 0.0265 -0.0030 -0.0046 0.0026 -0.0169 -0.0222  
Y -0.0292 -0.0146 0.0260 0.0147 0.0286 0.0166  
Z -0.0503 0.0008 0.0050 -0.0146 0.0098 0.0411  
AT. 84 H X -0.0265 0.0030 -0.0046 -0.0026 -0.0169 -0.0222  
Y -0.0292 -0.0146 -0.0260 0.0147 -0.0286 -0.0166  
Z 0.0503 -0.0008 0.0050 0.0146 0.0098 0.0411  
AT. 85 H X 0.0575 0.0060 -0.0116 0.0101 0.0254 -0.0453  
Y -0.0336 0.0157 0.0286 0.0150 -0.0288 0.0206  
Z -0.0220 -0.0010 -0.0053 -0.0106 -0.0012 0.0199  
AT. 86 H X -0.0575 -0.0060 -0.0116 -0.0101 0.0254 -0.0453  
Y -0.0336 0.0157 -0.0286 0.0150 0.0288 -0.0206  
Z 0.0220 0.0010 -0.0053 0.0106 -0.0012 0.0199  
AT. 87 H X 0.0575 -0.0060 -0.0116 0.0101 -0.0254 -0.0453  
Y -0.0336 -0.0157 0.0286 0.0150 0.0288 0.0206  
Z -0.0220 0.0010 -0.0053 -0.0106 0.0012 0.0199  
AT. 88 H X -0.0575 0.0060 -0.0116 -0.0101 -0.0254 -0.0453  
Y -0.0336 -0.0157 -0.0286 0.0150 -0.0288 -0.0206  
Z 0.0220 -0.0010 -0.0053 0.0106 0.0012 0.0199  
AT. 89 C X 0.0316 0.0064 -0.0020 0.0078 0.0156 -0.0278  
Y -0.0065 0.0082 0.0099 0.0096 -0.0131 0.0040  
Z -0.0171 0.0169 0.0157 0.0122 -0.0132 0.0116  
AT. 90 C X -0.0316 -0.0064 -0.0020 -0.0078 0.0156 -0.0278  
Y -0.0065 0.0082 -0.0099 0.0096 0.0131 -0.0040  
Z 0.0171 -0.0169 0.0157 -0.0122 -0.0132 0.0116  
AT. 91 C X 0.0316 -0.0064 -0.0020 0.0078 -0.0156 -0.0278  
Y -0.0065 -0.0082 0.0099 0.0096 0.0131 0.0040  
Z -0.0171 -0.0169 0.0157 0.0122 0.0132 0.0116  
AT. 92 C X -0.0316 0.0064 -0.0020 -0.0078 -0.0156 -0.0278

Y -0.0065 -0.0082 -0.0099 0.0096 -0.0131 -0.0040  
Z 0.0171 0.0169 0.0157 -0.0122 0.0132 0.0116  
AT. 93 C X 0.0305 0.0193 0.0127 0.0264 0.0022 -0.0297  
Y -0.0153 0.0118 0.0225 0.0158 -0.0214 0.0078  
Z -0.0225 0.0175 0.0217 0.0131 -0.0164 0.0144  
AT. 94 C X -0.0305 -0.0193 0.0127 -0.0264 0.0022 -0.0297  
Y -0.0153 0.0118 -0.0225 0.0158 0.0214 -0.0078  
Z 0.0225 -0.0175 0.0217 -0.0131 -0.0164 0.0144  
AT. 95 C X 0.0305 -0.0193 0.0127 0.0264 -0.0022 -0.0297  
Y -0.0153 -0.0118 0.0225 0.0158 0.0214 0.0078  
Z -0.0225 -0.0175 0.0217 0.0131 0.0164 0.0144  
AT. 96 C X -0.0305 0.0193 0.0127 -0.0264 -0.0022 -0.0297  
Y -0.0153 -0.0118 -0.0225 0.0158 -0.0214 -0.0078  
Z 0.0225 0.0175 0.0217 -0.0131 0.0164 0.0144  
AT. 97 H X 0.0236 0.0199 0.0188 0.0325 -0.0038 -0.0249  
Y 0.0017 0.0179 0.0167 0.0121 -0.0150 -0.0058  
Z -0.0135 0.0320 0.0316 0.0256 -0.0235 0.0050  
AT. 98 H X -0.0236 -0.0199 0.0188 -0.0325 -0.0038 -0.0249  
Y 0.0017 0.0179 -0.0167 0.0121 0.0150 0.0058  
Z 0.0135 -0.0320 0.0316 -0.0256 -0.0235 0.0050  
AT. 99 H X 0.0236 -0.0199 0.0188 0.0325 0.0038 -0.0249  
Y 0.0017 -0.0179 0.0167 0.0121 0.0150 -0.0058  
Z -0.0135 -0.0320 0.0316 0.0256 0.0235 0.0050  
AT. 100 H X -0.0236 0.0199 0.0188 -0.0325 0.0038 -0.0249  
Y 0.0017 -0.0179 -0.0167 0.0121 -0.0150 0.0058  
Z 0.0135 0.0320 0.0316 -0.0256 0.0235 0.0050  
AT. 101 H X 0.0145 0.0129 0.0181 0.0288 -0.0032 -0.0171  
Y -0.0301 0.0065 0.0280 0.0197 -0.0273 0.0192  
Z -0.0350 0.0098 0.0234 0.0066 -0.0154 0.0236  
AT. 102 H X -0.0145 -0.0129 0.0181 -0.0288 -0.0032 -0.0171  
Y -0.0301 0.0065 -0.0280 0.0197 0.0273 -0.0192  
Z 0.0350 -0.0098 0.0234 -0.0066 -0.0154 0.0236

AT.103 H X 0.0145 -0.0129 0.0181 0.0288 0.0032 -0.0171  
Y -0.0301 -0.0065 0.0280 0.0197 0.0273 0.0192  
Z -0.0350 -0.0098 0.0234 0.0066 0.0154 0.0236

AT.104 H X -0.0145 0.0129 0.0181 -0.0288 0.0032 -0.0171  
Y -0.0301 -0.0065 -0.0280 0.0197 -0.0273 -0.0192  
Z 0.0350 0.0098 0.0234 -0.0066 0.0154 0.0236

AT.105 H X 0.0540 0.0345 0.0124 0.0324 0.0025 -0.0492  
Y -0.0247 0.0132 0.0321 0.0208 -0.0278 0.0130  
Z -0.0233 0.0111 0.0143 0.0071 -0.0113 0.0172

AT.106 H X -0.0540 -0.0345 0.0124 -0.0324 0.0025 -0.0492  
Y -0.0247 0.0132 -0.0321 0.0208 0.0278 -0.0130  
Z 0.0233 -0.0111 0.0143 -0.0071 -0.0113 0.0172

AT.107 H X 0.0540 -0.0345 0.0124 0.0324 -0.0025 -0.0492  
Y -0.0247 -0.0132 0.0321 0.0208 0.0278 0.0130  
Z -0.0233 -0.0111 0.0143 0.0071 0.0113 0.0172

AT.108 H X -0.0540 0.0345 0.0124 -0.0324 -0.0025 -0.0492  
Y -0.0247 -0.0132 -0.0321 0.0208 -0.0278 -0.0130  
Z 0.0233 0.0111 0.0143 -0.0071 0.0113 0.0172

AT.109 C X 0.0258 -0.0168 -0.0158 -0.0198 0.0378 -0.0221  
Y 0.0181 -0.0013 -0.0153 -0.0044 0.0136 -0.0090  
Z 0.0001 0.0323 0.0138 0.0288 -0.0169 0.0005

AT.110 C X -0.0258 0.0168 -0.0158 0.0198 0.0378 -0.0221  
Y 0.0181 -0.0013 0.0153 -0.0044 -0.0136 0.0090  
Z -0.0001 -0.0323 0.0138 -0.0288 -0.0169 0.0005

AT.111 C X 0.0258 0.0168 -0.0158 -0.0198 -0.0378 -0.0221  
Y 0.0181 0.0013 -0.0153 -0.0044 -0.0136 -0.0090  
Z 0.0001 -0.0323 0.0138 0.0288 0.0169 0.0005

AT.112 C X -0.0258 -0.0168 -0.0158 0.0198 -0.0378 -0.0221  
Y 0.0181 0.0013 0.0153 -0.0044 0.0136 0.0090  
Z -0.0001 0.0323 0.0138 -0.0288 0.0169 0.0005

AT.113 H X 0.0229 -0.0125 -0.0140 -0.0158 0.0320 -0.0200  
Y 0.0241 -0.0051 -0.0165 -0.0072 0.0213 -0.0132

Z 0.0053 0.0506 0.0226 0.0488 -0.0287 -0.0023  
AT. 114 H X -0.0229 0.0125 -0.0140 0.0158 0.0320 -0.0200  
Y 0.0241 -0.0051 0.0165 -0.0072 -0.0213 0.0132  
Z -0.0053 -0.0506 0.0226 -0.0488 -0.0287 -0.0023  
AT. 115 H X 0.0229 0.0125 -0.0140 -0.0158 -0.0320 -0.0200  
Y 0.0241 0.0051 -0.0165 -0.0072 -0.0213 -0.0132  
Z 0.0053 -0.0506 0.0226 0.0488 0.0287 -0.0023  
AT. 116 H X -0.0229 -0.0125 -0.0140 0.0158 -0.0320 -0.0200  
Y 0.0241 0.0051 0.0165 -0.0072 0.0213 0.0132  
Z -0.0053 0.0506 0.0226 -0.0488 0.0287 -0.0023  
AT. 117 H X 0.0236 -0.0322 -0.0213 -0.0354 0.0508 -0.0211  
Y 0.0229 -0.0062 -0.0218 -0.0105 0.0204 -0.0120  
Z 0.0048 0.0303 0.0088 0.0258 -0.0130 -0.0024  
AT. 118 H X -0.0236 0.0322 -0.0213 0.0354 0.0508 -0.0211  
Y 0.0229 -0.0062 0.0218 -0.0105 -0.0204 0.0120  
Z -0.0048 -0.0303 0.0088 -0.0258 -0.0130 -0.0024  
AT. 119 H X 0.0236 0.0322 -0.0213 -0.0354 -0.0508 -0.0211  
Y 0.0229 0.0062 -0.0218 -0.0105 -0.0204 -0.0120  
Z 0.0048 -0.0303 0.0088 0.0258 0.0130 -0.0024  
AT. 120 H X -0.0236 -0.0322 -0.0213 0.0354 -0.0508 -0.0211  
Y 0.0229 0.0062 0.0218 -0.0105 0.0204 0.0120  
Z -0.0048 0.0303 0.0088 -0.0258 0.0130 -0.0024  
AT. 121 C X 0.0459 0.0047 -0.0090 0.0071 0.0237 -0.0366  
Y 0.0065 0.0044 0.0025 0.0070 -0.0040 -0.0029  
Z -0.0031 0.0242 0.0119 0.0204 -0.0123 0.0019  
AT. 122 C X -0.0459 -0.0047 -0.0090 -0.0071 0.0237 -0.0366  
Y 0.0065 0.0044 -0.0025 0.0070 0.0040 0.0029  
Z 0.0031 -0.0242 0.0119 -0.0204 -0.0123 0.0019  
AT. 123 C X 0.0459 -0.0047 -0.0090 0.0071 -0.0237 -0.0366  
Y 0.0065 -0.0044 0.0025 0.0070 0.0040 -0.0029  
Z -0.0031 -0.0242 0.0119 0.0204 0.0123 0.0019  
AT. 124 C X -0.0459 0.0047 -0.0090 -0.0071 -0.0237 -0.0366

Y 0.0065 -0.0044 -0.0025 0.0070 -0.0040 0.0029  
Z 0.0031 0.0242 0.0119 -0.0204 0.0123 0.0019  
AT. 125 H X 0.0661 0.0065 -0.0142 0.0124 0.0285 -0.0501  
Y 0.0035 0.0044 0.0079 0.0095 -0.0090 -0.0019  
Z -0.0065 0.0235 0.0093 0.0169 -0.0098 0.0049  
AT. 126 H X -0.0661 -0.0065 -0.0142 -0.0124 0.0285 -0.0501  
Y 0.0035 0.0044 -0.0079 0.0095 0.0090 0.0019  
Z 0.0065 -0.0235 0.0093 -0.0169 -0.0098 0.0049  
AT. 127 H X 0.0661 -0.0065 -0.0142 0.0124 -0.0285 -0.0501  
Y 0.0035 -0.0044 0.0079 0.0095 0.0090 -0.0019  
Z -0.0065 -0.0235 0.0093 0.0169 0.0098 0.0049  
AT. 128 H X -0.0661 0.0065 -0.0142 -0.0124 -0.0285 -0.0501  
Y 0.0035 -0.0044 -0.0079 0.0095 -0.0090 0.0019  
Z 0.0065 0.0235 0.0093 -0.0169 0.0098 0.0049  
AT. 129 H X 0.0432 0.0071 -0.0057 0.0102 0.0188 -0.0357  
Y 0.0160 0.0021 -0.0019 0.0057 0.0025 -0.0085  
Z 0.0091 0.0277 0.0134 0.0284 -0.0156 -0.0076  
AT. 130 H X -0.0432 -0.0071 -0.0057 -0.0102 0.0188 -0.0357  
Y 0.0160 0.0021 0.0019 0.0057 -0.0025 0.0085  
Z -0.0091 -0.0277 0.0134 -0.0284 -0.0156 -0.0076  
AT. 131 H X 0.0432 -0.0071 -0.0057 0.0102 -0.0188 -0.0357  
Y 0.0160 -0.0021 -0.0019 0.0057 -0.0025 -0.0085  
Z 0.0091 -0.0277 0.0134 0.0284 0.0156 -0.0076  
AT. 132 H X -0.0432 0.0071 -0.0057 -0.0102 -0.0188 -0.0357  
Y 0.0160 -0.0021 0.0019 0.0057 0.0025 0.0085  
Z -0.0091 0.0277 0.0134 -0.0284 0.0156 -0.0076  
AT. 133 C X 0.0158 0.0359 0.0097 0.0275 0.0111 -0.0083  
Y 0.0131 -0.0003 -0.0074 0.0002 0.0058 -0.0067  
Z 0.0093 0.0124 -0.0059 0.0049 0.0051 -0.0079  
AT. 134 C X -0.0158 -0.0359 0.0097 -0.0275 0.0111 -0.0083  
Y 0.0131 -0.0003 0.0074 0.0002 -0.0058 0.0067  
Z -0.0093 -0.0124 -0.0059 -0.0049 0.0051 -0.0079

AT. 135 C X 0.0158 -0.0359 0.0097 0.0275 -0.0111 -0.0083  
Y 0.0131 0.0003 -0.0074 0.0002 -0.0058 -0.0067  
Z 0.0093 -0.0124 -0.0059 0.0049 -0.0051 -0.0079

AT. 136 C X -0.0158 0.0359 0.0097 -0.0275 -0.0111 -0.0083  
Y 0.0131 0.0003 0.0074 0.0002 0.0058 0.0067  
Z -0.0093 0.0124 -0.0059 -0.0049 -0.0051 -0.0079

AT. 137 C X 0.0033 0.0258 0.0133 0.0223 0.0001 -0.0039  
Y 0.0114 0.0018 -0.0025 0.0051 0.0024 -0.0054  
Z 0.0119 0.0116 -0.0099 0.0014 0.0101 -0.0093

AT. 138 C X -0.0033 -0.0258 0.0133 -0.0223 0.0001 -0.0039  
Y 0.0114 0.0018 0.0025 0.0051 -0.0024 0.0054  
Z -0.0119 -0.0116 -0.0099 -0.0014 0.0101 -0.0093

AT. 139 C X 0.0033 -0.0258 0.0133 0.0223 -0.0001 -0.0039  
Y 0.0114 -0.0018 -0.0025 0.0051 -0.0024 -0.0054  
Z 0.0119 -0.0116 -0.0099 0.0014 -0.0101 -0.0093

AT. 140 C X -0.0033 0.0258 0.0133 -0.0223 -0.0001 -0.0039  
Y 0.0114 -0.0018 0.0025 0.0051 0.0024 0.0054  
Z -0.0119 0.0116 -0.0099 -0.0014 -0.0101 -0.0093

AT. 141 H X 0.0024 0.0210 0.0128 0.0162 -0.0031 -0.0033  
Y 0.0157 0.0043 -0.0014 0.0065 0.0009 -0.0073  
Z 0.0152 0.0185 -0.0088 0.0090 0.0125 -0.0106

AT. 142 H X -0.0024 -0.0210 0.0128 -0.0162 -0.0031 -0.0033  
Y 0.0157 0.0043 0.0014 0.0065 -0.0009 0.0073  
Z -0.0152 -0.0185 -0.0088 -0.0090 0.0125 -0.0106

AT. 143 H X 0.0024 -0.0210 0.0128 0.0162 0.0031 -0.0033  
Y 0.0157 -0.0043 -0.0014 0.0065 -0.0009 -0.0073  
Z 0.0152 -0.0185 -0.0088 0.0090 -0.0125 -0.0106

AT. 144 H X -0.0024 0.0210 0.0128 -0.0162 0.0031 -0.0033  
Y 0.0157 -0.0043 0.0014 0.0065 0.0009 0.0073  
Z -0.0152 0.0185 -0.0088 -0.0090 -0.0125 -0.0106

AT. 145 H X -0.0034 0.0228 0.0144 0.0238 0.0035 -0.0014  
Y 0.0143 0.0039 -0.0032 0.0051 0.0016 -0.0064



Z 0.0154 0.0170 -0.0107 0.0036 0.0112 -0.0105  
AT. 146 H X 0.0034 -0.0228 0.0144 -0.0238 0.0035 -0.0014  
Y 0.0143 0.0039 0.0032 0.0051 -0.0016 0.0064  
Z -0.0154 -0.0170 -0.0107 -0.0036 0.0112 -0.0105  
AT. 147 H X -0.0034 -0.0228 0.0144 0.0238 -0.0035 -0.0014  
Y 0.0143 -0.0039 -0.0032 0.0051 -0.0016 -0.0064  
Z 0.0154 -0.0170 -0.0107 0.0036 -0.0112 -0.0105  
AT. 148 H X 0.0034 0.0228 0.0144 -0.0238 -0.0035 -0.0014  
Y 0.0143 -0.0039 0.0032 0.0051 0.0016 0.0064  
Z -0.0154 0.0170 -0.0107 -0.0036 -0.0112 -0.0105  
AT. 149 O X 0.0048 0.0066 -0.0032 -0.0035 0.0095 -0.0096  
Y -0.0039 0.0148 -0.0030 0.0073 -0.0103 0.0045  
Z -0.0313 0.0101 0.0276 0.0101 -0.0189 0.0181  
AT. 150 O X -0.0048 -0.0066 -0.0032 0.0035 0.0095 -0.0096  
Y -0.0039 0.0148 0.0030 0.0073 0.0103 -0.0045  
Z 0.0313 -0.0101 0.0276 -0.0101 -0.0189 0.0181  
AT. 151 O X 0.0048 -0.0066 -0.0032 -0.0035 -0.0095 -0.0096  
Y -0.0039 -0.0148 -0.0030 0.0073 0.0103 0.0045  
Z -0.0313 -0.0101 0.0276 0.0101 0.0189 0.0181  
AT. 152 O X -0.0048 0.0066 -0.0032 0.0035 -0.0095 -0.0096  
Y -0.0039 -0.0148 0.0030 0.0073 -0.0103 -0.0045  
Z 0.0313 0.0101 0.0276 -0.0101 0.0189 0.0181  
AT. 153 H X 0.0100 0.0093 0.0123 0.0071 0.0051 -0.0123  
Y -0.0061 0.0098 0.0109 0.0085 -0.0121 0.0033  
Z -0.0358 0.0066 0.0220 0.0035 -0.0165 0.0197  
AT. 154 H X -0.0100 -0.0093 0.0123 -0.0071 0.0051 -0.0123  
Y -0.0061 0.0098 -0.0109 0.0085 0.0121 -0.0033  
Z 0.0358 -0.0066 0.0220 -0.0035 -0.0165 0.0197  
AT. 155 H X 0.0100 -0.0093 0.0123 0.0071 -0.0051 -0.0123  
Y -0.0061 -0.0098 0.0109 0.0085 0.0121 0.0033  
Z -0.0358 -0.0066 0.0220 0.0035 0.0165 0.0197  
AT. 156 H X -0.0100 0.0093 0.0123 -0.0071 -0.0051 -0.0123

Y -0.0061 -0.0098 -0.0109 0.0085 -0.0121 -0.0033  
Z 0.0358 0.0066 0.0220 -0.0035 0.0165 0.0197  
AT. 157 O X 0.0092 0.0116 0.0039 0.0067 0.0039 -0.0118  
Y 0.0110 -0.0071 -0.0054 -0.0013 0.0039 -0.0059  
Z -0.0126 0.0305 0.0368 0.0337 -0.0288 0.0038  
AT. 158 O X -0.0092 -0.0116 0.0039 -0.0067 0.0039 -0.0118  
Y 0.0110 -0.0071 0.0054 -0.0013 -0.0039 0.0059  
Z 0.0126 -0.0305 0.0368 -0.0337 -0.0288 0.0038  
AT. 159 O X 0.0092 -0.0116 0.0039 0.0067 -0.0039 -0.0118  
Y 0.0110 0.0071 -0.0054 -0.0013 -0.0039 -0.0059  
Z -0.0126 -0.0305 0.0368 0.0337 0.0288 0.0038  
AT. 160 O X -0.0092 0.0116 0.0039 -0.0067 -0.0039 -0.0118  
Y 0.0110 0.0071 0.0054 -0.0013 0.0039 0.0059  
Z 0.0126 0.0305 0.0368 -0.0337 0.0288 0.0038  
AT. 161 O X 0.0001 0.0137 -0.0025 0.0044 0.0132 -0.0020  
Y 0.0136 -0.0178 -0.0129 -0.0141 0.0036 -0.0098  
Z -0.0089 0.0360 0.0459 0.0435 -0.0344 0.0001  
AT. 162 O X -0.0001 -0.0137 -0.0025 -0.0044 0.0132 -0.0020  
Y 0.0136 -0.0178 0.0129 -0.0141 -0.0036 0.0098  
Z 0.0089 -0.0360 0.0459 -0.0435 -0.0344 0.0001  
AT. 163 O X 0.0001 -0.0137 -0.0025 0.0044 -0.0132 -0.0020  
Y 0.0136 0.0178 -0.0129 -0.0141 -0.0036 -0.0098  
Z -0.0089 -0.0360 0.0459 0.0435 0.0344 0.0001  
AT. 164 O X -0.0001 0.0137 -0.0025 -0.0044 -0.0132 -0.0020  
Y 0.0136 0.0178 0.0129 -0.0141 0.0036 0.0098  
Z 0.0089 0.0360 0.0459 -0.0435 0.0344 0.0001  
AT. 165 H X -0.0071 0.0405 0.0162 0.0298 0.0045 0.0071  
Y 0.0105 -0.0062 -0.0052 -0.0034 -0.0001 -0.0058  
Z -0.0032 0.0196 0.0254 0.0248 -0.0178 -0.0038  
AT. 166 H X 0.0071 -0.0405 0.0162 -0.0298 0.0045 0.0071  
Y 0.0105 -0.0062 0.0052 -0.0034 0.0001 0.0058  
Z 0.0032 -0.0196 0.0254 -0.0248 -0.0178 -0.0038

AT.167 H X -0.0071 -0.0405 0.0162 0.0298 -0.0045 0.0071  
Y 0.0105 0.0062 -0.0052 -0.0034 0.0001 -0.0058  
Z -0.0032 -0.0196 0.0254 0.0248 0.0178 -0.0038  
AT.168 H X 0.0071 0.0405 0.0162 -0.0298 -0.0045 0.0071  
Y 0.0105 0.0062 0.0052 -0.0034 -0.0001 0.0058  
Z 0.0032 0.0196 0.0254 -0.0248 0.0178 -0.0038  
AT.169 O X 0.0239 0.0031 0.0245 0.0066 -0.0021 -0.0207  
Y -0.0075 0.0050 0.0122 0.0053 -0.0062 0.0013  
Z -0.0354 -0.0008 -0.0205 -0.0193 0.0006 0.0120  
AT.170 O X -0.0239 -0.0031 0.0245 -0.0066 -0.0021 -0.0207  
Y -0.0075 0.0050 -0.0122 0.0053 0.0062 -0.0013  
Z 0.0354 0.0008 -0.0205 0.0193 0.0006 0.0120  
AT.171 O X 0.0239 -0.0031 0.0245 0.0066 0.0021 -0.0207  
Y -0.0075 -0.0050 0.0122 0.0053 0.0062 0.0013  
Z -0.0354 0.0008 -0.0205 -0.0193 -0.0006 0.0120  
AT.172 O X -0.0239 0.0031 0.0245 -0.0066 0.0021 -0.0207  
Y -0.0075 -0.0050 -0.0122 0.0053 -0.0062 -0.0013  
Z 0.0354 -0.0008 -0.0205 0.0193 -0.0006 0.0120  
AT.173 H X -0.0102 0.0054 0.0035 0.0023 -0.0210 0.0220  
Y -0.0029 0.0054 0.0175 0.0061 -0.0041 -0.0065  
Z -0.0207 -0.0085 -0.0197 -0.0194 0.0136 0.0013  
AT.174 H X 0.0102 -0.0054 0.0035 -0.0023 -0.0210 0.0220  
Y -0.0029 0.0054 -0.0175 0.0061 0.0041 0.0065  
Z 0.0207 0.0085 -0.0197 0.0194 0.0136 0.0013  
AT.175 H X -0.0102 -0.0054 0.0035 0.0023 0.0210 0.0220  
Y -0.0029 -0.0054 0.0175 0.0061 0.0041 -0.0065  
Z -0.0207 0.0085 -0.0197 -0.0194 -0.0136 0.0013  
AT.176 H X 0.0102 0.0054 0.0035 -0.0023 0.0210 0.0220  
Y -0.0029 -0.0054 -0.0175 0.0061 -0.0041 0.0065  
Z 0.0207 -0.0085 -0.0197 0.0194 -0.0136 0.0013

FREQ(CM\*\*-1) 88.66 91.02 91.14 98.81 100.26 100.78

AT. 1 I X 0.0113 -0.0073 -0.0029 -0.0040 -0.0077 -0.0050  
Y -0.0008 0.0006 -0.0066 -0.0032 -0.0033 0.0012  
Z 0.0007 0.0047 0.0099 0.0165 0.0164 -0.0013

AT. 2 I X -0.0113 0.0073 -0.0029 -0.0040 -0.0077 -0.0050  
Y -0.0008 0.0006 0.0066 0.0032 0.0033 -0.0012  
Z -0.0007 -0.0047 0.0099 0.0165 0.0164 -0.0013

AT. 3 I X -0.0113 -0.0073 0.0029 -0.0040 0.0077 -0.0050  
Y 0.0008 0.0006 0.0066 -0.0032 0.0033 0.0012  
Z -0.0007 0.0047 -0.0099 0.0165 -0.0164 -0.0013

AT. 4 I X 0.0113 0.0073 0.0029 -0.0040 0.0077 -0.0050  
Y 0.0008 0.0006 -0.0066 0.0032 -0.0033 -0.0012  
Z 0.0007 -0.0047 -0.0099 0.0165 -0.0164 -0.0013

AT. 5 I X 0.0018 -0.0008 0.0019 0.0067 0.0033 -0.0005  
Y -0.0085 -0.0059 -0.0058 -0.0057 -0.0093 -0.0009  
Z -0.0019 -0.0006 -0.0096 -0.0159 -0.0107 -0.0032

AT. 6 I X -0.0018 0.0008 0.0019 0.0067 0.0033 -0.0005  
Y -0.0085 -0.0059 0.0058 0.0057 0.0093 0.0009  
Z 0.0019 0.0006 -0.0096 -0.0159 -0.0107 -0.0032

AT. 7 I X -0.0018 -0.0008 -0.0019 0.0067 -0.0033 -0.0005  
Y 0.0085 -0.0059 0.0058 -0.0057 0.0093 -0.0009  
Z 0.0019 -0.0006 0.0096 -0.0159 0.0107 -0.0032

AT. 8 I X 0.0018 0.0008 -0.0019 0.0067 -0.0033 -0.0005  
Y 0.0085 -0.0059 -0.0058 0.0057 -0.0093 0.0009  
Z -0.0019 0.0006 0.0096 -0.0159 0.0107 -0.0032

AT. 9 N X -0.0014 0.0030 -0.0069 -0.0025 0.0045 -0.0067  
Y 0.0069 -0.0010 0.0058 0.0022 0.0016 0.0035  
Z 0.0079 0.0185 -0.0270 -0.0091 -0.0018 -0.0009

AT. 10 N X 0.0014 -0.0030 -0.0069 -0.0025 0.0045 -0.0067  
Y 0.0069 -0.0010 -0.0058 -0.0022 -0.0016 -0.0035  
Z -0.0079 -0.0185 -0.0270 -0.0091 -0.0018 -0.0009

AT. 11 N X 0.0014 0.0030 0.0069 -0.0025 -0.0045 -0.0067

Y -0.0069 -0.0010 -0.0058 0.0022 -0.0016 0.0035  
Z -0.0079 0.0185 0.0270 -0.0091 0.0018 -0.0009  
AT. 12 N X -0.0014 -0.0030 0.0069 -0.0025 -0.0045 -0.0067  
Y -0.0069 -0.0010 0.0058 -0.0022 0.0016 -0.0035  
Z 0.0079 -0.0185 0.0270 -0.0091 0.0018 -0.0009  
AT. 13 N X -0.0096 0.0022 0.0025 0.0053 0.0143 0.0014  
Y -0.0041 0.0080 0.0002 0.0060 0.0078 0.0055  
Z -0.0128 0.0150 -0.0057 0.0083 0.0163 0.0242  
AT. 14 N X 0.0096 -0.0022 0.0025 0.0053 0.0143 0.0014  
Y -0.0041 0.0080 -0.0002 -0.0060 -0.0078 -0.0055  
Z 0.0128 -0.0150 -0.0057 0.0083 0.0163 0.0242  
AT. 15 N X 0.0096 0.0022 -0.0025 0.0053 -0.0143 0.0014  
Y 0.0041 0.0080 -0.0002 0.0060 -0.0078 0.0055  
Z 0.0128 0.0150 0.0057 0.0083 -0.0163 0.0242  
AT. 16 N X -0.0096 -0.0022 -0.0025 0.0053 -0.0143 0.0014  
Y 0.0041 0.0080 0.0002 -0.0060 0.0078 -0.0055  
Z -0.0128 -0.0150 0.0057 0.0083 -0.0163 0.0242  
AT. 17 O X -0.0118 0.0306 -0.0673 0.0432 0.0459 0.0078  
Y 0.0212 -0.0171 0.0304 -0.0227 -0.0275 -0.0041  
Z -0.0105 0.0252 -0.0202 -0.0015 0.0165 0.0005  
AT. 18 O X 0.0118 -0.0306 -0.0673 0.0432 0.0459 0.0078  
Y 0.0212 -0.0171 -0.0304 0.0227 0.0275 0.0041  
Z 0.0105 -0.0252 -0.0202 -0.0015 0.0165 0.0005  
AT. 19 O X 0.0118 0.0306 0.0673 0.0432 -0.0459 0.0078  
Y -0.0212 -0.0171 -0.0304 -0.0227 0.0275 -0.0041  
Z 0.0105 0.0252 0.0202 -0.0015 -0.0165 0.0005  
AT. 20 O X -0.0118 -0.0306 0.0673 0.0432 -0.0459 0.0078  
Y -0.0212 -0.0171 0.0304 0.0227 -0.0275 0.0041  
Z -0.0105 -0.0252 0.0202 -0.0015 -0.0165 0.0005  
AT. 21 O X -0.0503 0.0772 -0.0427 -0.0401 -0.0001 0.0829  
Y -0.0063 0.0067 -0.0017 0.0013 0.0043 0.0041  
Z -0.0204 0.0140 -0.0101 -0.0019 0.0096 0.0231

AT. 22 O X 0.0503 -0.0772 -0.0427 -0.0401 -0.0001 0.0829  
Y -0.0063 0.0067 0.0017 -0.0013 -0.0043 -0.0041  
Z 0.0204 -0.0140 -0.0101 -0.0019 0.0096 0.0231

AT. 23 O X 0.0503 0.0772 0.0427 -0.0401 0.0001 0.0829  
Y 0.0063 0.0067 0.0017 0.0013 -0.0043 0.0041  
Z 0.0204 0.0140 0.0101 -0.0019 -0.0096 0.0231

AT. 24 O X -0.0503 -0.0772 0.0427 -0.0401 0.0001 0.0829  
Y 0.0063 0.0067 -0.0017 -0.0013 0.0043 -0.0041  
Z -0.0204 -0.0140 0.0101 -0.0019 -0.0096 0.0231

AT. 25 C X -0.0039 0.0150 -0.0277 -0.0005 0.0111 -0.0002  
Y -0.0052 0.0035 0.0076 0.0107 0.0145 0.0041  
Z -0.0144 0.0298 -0.0287 0.0100 0.0270 0.0028

AT. 26 C X 0.0039 -0.0150 -0.0277 -0.0005 0.0111 -0.0002  
Y -0.0052 0.0035 -0.0076 -0.0107 -0.0145 -0.0041  
Z 0.0144 -0.0298 -0.0287 0.0100 0.0270 0.0028

AT. 27 C X 0.0039 0.0150 0.0277 -0.0005 -0.0111 -0.0002  
Y 0.0052 0.0035 -0.0076 0.0107 -0.0145 0.0041  
Z 0.0144 0.0298 0.0287 0.0100 -0.0270 0.0028

AT. 28 C X -0.0039 -0.0150 0.0277 -0.0005 -0.0111 -0.0002  
Y 0.0052 0.0035 0.0076 -0.0107 0.0145 -0.0041  
Z -0.0144 -0.0298 0.0287 0.0100 -0.0270 0.0028

AT. 29 H X 0.0017 0.0070 -0.0180 -0.0017 0.0049 -0.0022  
Y -0.0204 0.0199 -0.0038 0.0189 0.0336 0.0098  
Z -0.0212 0.0404 -0.0426 0.0108 0.0341 0.0056

AT. 30 H X -0.0017 -0.0070 -0.0180 -0.0017 0.0049 -0.0022  
Y -0.0204 0.0199 0.0038 -0.0189 -0.0336 -0.0098  
Z 0.0212 -0.0404 -0.0426 0.0108 0.0341 0.0056

AT. 31 H X -0.0017 0.0070 0.0180 -0.0017 -0.0049 -0.0022  
Y 0.0204 0.0199 0.0038 0.0189 -0.0336 0.0098  
Z 0.0212 0.0404 0.0426 0.0108 -0.0341 0.0056

AT. 32 H X 0.0017 -0.0070 0.0180 -0.0017 -0.0049 -0.0022  
Y 0.0204 0.0199 -0.0038 -0.0189 0.0336 -0.0098

Z -0.0212 -0.0404 0.0426 0.0108 -0.0341 0.0056  
AT. 33 H X -0.0173 0.0311 -0.0369 0.0086 0.0312 0.0051  
Y -0.0011 -0.0006 0.0107 0.0080 0.0091 0.0029  
Z -0.0219 0.0354 -0.0360 0.0147 0.0350 0.0037  
AT. 34 H X 0.0173 -0.0311 -0.0369 0.0086 0.0312 0.0051  
Y -0.0011 -0.0006 -0.0107 -0.0080 -0.0091 -0.0029  
Z 0.0219 -0.0354 -0.0360 0.0147 0.0350 0.0037  
AT. 35 H X 0.0173 0.0311 0.0369 0.0086 -0.0312 0.0051  
Y 0.0011 -0.0006 -0.0107 0.0080 -0.0091 0.0029  
Z 0.0219 0.0354 0.0360 0.0147 -0.0350 0.0037  
AT. 36 H X -0.0173 -0.0311 0.0369 0.0086 -0.0312 0.0051  
Y 0.0011 -0.0006 0.0107 -0.0080 0.0091 -0.0029  
Z -0.0219 -0.0354 0.0360 0.0147 -0.0350 0.0037  
AT. 37 C X -0.0058 0.0179 -0.0383 0.0108 0.0189 0.0000  
Y 0.0083 -0.0062 0.0171 -0.0028 -0.0040 0.0006  
Z -0.0061 0.0243 -0.0240 0.0000 0.0142 0.0006  
AT. 38 C X 0.0058 -0.0179 -0.0383 0.0108 0.0189 0.0000  
Y 0.0083 -0.0062 -0.0171 0.0028 0.0040 -0.0006  
Z 0.0061 -0.0243 -0.0240 0.0000 0.0142 0.0006  
AT. 39 C X 0.0058 0.0179 0.0383 0.0108 -0.0189 0.0000  
Y -0.0083 -0.0062 -0.0171 -0.0028 0.0040 0.0006  
Z 0.0061 0.0243 0.0240 0.0000 -0.0142 0.0006  
AT. 40 C X -0.0058 -0.0179 0.0383 0.0108 -0.0189 0.0000  
Y -0.0083 -0.0062 0.0171 0.0028 -0.0040 -0.0006  
Z -0.0061 -0.0243 0.0240 0.0000 -0.0142 0.0006  
AT. 41 C X 0.0099 -0.0004 -0.0141 -0.0278 -0.0180 -0.0161  
Y -0.0118 0.0139 0.0007 0.0203 0.0248 0.0137  
Z 0.0149 0.0103 -0.0215 -0.0110 -0.0074 -0.0030  
AT. 42 C X -0.0099 0.0004 -0.0141 -0.0278 -0.0180 -0.0161  
Y -0.0118 0.0139 -0.0007 -0.0203 -0.0248 -0.0137  
Z -0.0149 -0.0103 -0.0215 -0.0110 -0.0074 -0.0030  
AT. 43 C X -0.0099 -0.0004 0.0141 -0.0278 0.0180 -0.0161

Y 0.0118 0.0139 -0.0007 0.0203 -0.0248 0.0137  
Z -0.0149 0.0103 0.0215 -0.0110 0.0074 -0.0030  
AT. 44 C X 0.0099 0.0004 0.0141 -0.0278 0.0180 -0.0161  
Y 0.0118 0.0139 0.0007 -0.0203 0.0248 -0.0137  
Z 0.0149 -0.0103 0.0215 -0.0110 0.0074 -0.0030  
AT. 45 H X 0.0120 0.0040 -0.0243 -0.0504 -0.0360 -0.0197  
Y -0.0237 0.0237 -0.0019 0.0345 0.0414 0.0200  
Z 0.0045 0.0181 -0.0221 0.0043 0.0092 0.0030  
AT. 46 H X -0.0120 -0.0040 -0.0243 -0.0504 -0.0360 -0.0197  
Y -0.0237 0.0237 0.0019 -0.0345 -0.0414 -0.0200  
Z -0.0045 -0.0181 -0.0221 0.0043 0.0092 0.0030  
AT. 47 H X -0.0120 0.0040 0.0243 -0.0504 0.0360 -0.0197  
Y 0.0237 0.0237 0.0019 0.0345 -0.0414 0.0200  
Z -0.0045 0.0181 0.0221 0.0043 -0.0092 0.0030  
AT. 48 H X 0.0120 -0.0040 0.0243 -0.0504 0.0360 -0.0197  
Y 0.0237 0.0237 -0.0019 -0.0345 0.0414 -0.0200  
Z 0.0045 -0.0181 0.0221 0.0043 -0.0092 0.0030  
AT. 49 H X 0.0160 -0.0042 -0.0143 -0.0310 -0.0222 -0.0206  
Y -0.0115 0.0132 0.0023 0.0287 0.0321 0.0132  
Z 0.0298 0.0025 -0.0256 -0.0410 -0.0368 -0.0132  
AT. 50 H X -0.0160 0.0042 -0.0143 -0.0310 -0.0222 -0.0206  
Y -0.0115 0.0132 -0.0023 -0.0287 -0.0321 -0.0132  
Z -0.0298 -0.0025 -0.0256 -0.0410 -0.0368 -0.0132  
AT. 51 H X -0.0160 -0.0042 0.0143 -0.0310 0.0222 -0.0206  
Y 0.0115 0.0132 -0.0023 0.0287 -0.0321 0.0132  
Z -0.0298 0.0025 0.0256 -0.0410 0.0368 -0.0132  
AT. 52 H X 0.0160 0.0042 0.0143 -0.0310 0.0222 -0.0206  
Y 0.0115 0.0132 0.0023 -0.0287 0.0321 -0.0132  
Z 0.0298 -0.0025 0.0256 -0.0410 0.0368 -0.0132  
AT. 53 C X 0.0119 -0.0036 -0.0107 -0.0202 -0.0126 -0.0157  
Y -0.0166 0.0185 -0.0034 0.0082 0.0161 0.0169  
Z 0.0145 0.0012 -0.0068 0.0024 0.0008 0.0016



AT. 54 C X -0.0119 0.0036 -0.0107 -0.0202 -0.0126 -0.0157  
Y -0.0166 0.0185 0.0034 -0.0082 -0.0161 -0.0169  
Z -0.0145 -0.0012 -0.0068 0.0024 0.0008 0.0016

AT. 55 C X -0.0119 -0.0036 0.0107 -0.0202 0.0126 -0.0157  
Y 0.0166 0.0185 0.0034 0.0082 -0.0161 0.0169  
Z -0.0145 0.0012 0.0068 0.0024 -0.0008 0.0016

AT. 56 C X 0.0119 0.0036 0.0107 -0.0202 0.0126 -0.0157  
Y 0.0166 0.0185 -0.0034 -0.0082 0.0161 -0.0169  
Z 0.0145 -0.0012 0.0068 0.0024 -0.0008 0.0016

AT. 57 C X 0.0301 -0.0098 -0.0229 -0.0324 -0.0263 -0.0283  
Y -0.0369 0.0353 -0.0085 0.0127 0.0269 0.0288  
Z 0.0204 -0.0061 -0.0012 0.0030 -0.0010 -0.0004

AT. 58 C X -0.0301 0.0098 -0.0229 -0.0324 -0.0263 -0.0283  
Y -0.0369 0.0353 0.0085 -0.0127 -0.0269 -0.0288  
Z -0.0204 0.0061 -0.0012 0.0030 -0.0010 -0.0004

AT. 59 C X -0.0301 -0.0098 0.0229 -0.0324 0.0263 -0.0283  
Y 0.0369 0.0353 0.0085 0.0127 -0.0269 0.0288  
Z -0.0204 -0.0061 0.0012 0.0030 0.0010 -0.0004

AT. 60 C X 0.0301 0.0098 0.0229 -0.0324 0.0263 -0.0283  
Y 0.0369 0.0353 -0.0085 -0.0127 0.0269 -0.0288  
Z 0.0204 0.0061 0.0012 0.0030 0.0010 -0.0004

AT. 61 H X 0.0406 -0.0212 -0.0271 -0.0381 -0.0286 -0.0216  
Y -0.0323 0.0288 -0.0113 0.0097 0.0277 0.0371  
Z 0.0377 -0.0148 -0.0031 -0.0042 -0.0147 -0.0189

AT. 62 H X -0.0406 0.0212 -0.0271 -0.0381 -0.0286 -0.0216  
Y -0.0323 0.0288 0.0113 -0.0097 -0.0277 -0.0371  
Z -0.0377 0.0148 -0.0031 -0.0042 -0.0147 -0.0189

AT. 63 H X -0.0406 -0.0212 0.0271 -0.0381 0.0286 -0.0216  
Y 0.0323 0.0288 0.0113 0.0097 -0.0277 0.0371  
Z -0.0377 -0.0148 0.0031 -0.0042 0.0147 -0.0189

AT. 64 H X 0.0406 0.0212 0.0271 -0.0381 0.0286 -0.0216  
Y 0.0323 0.0288 -0.0113 -0.0097 0.0277 -0.0371

Z 0.0377 0.0148 0.0031 -0.0042 0.0147 -0.0189  
AT. 65 H X 0.0334 -0.0139 -0.0242 -0.0345 -0.0268 -0.0249  
Y -0.0456 0.0464 -0.0055 0.0178 0.0271 0.0183  
Z 0.0145 -0.0101 0.0089 0.0102 0.0086 0.0119  
AT. 66 H X -0.0334 0.0139 -0.0242 -0.0345 -0.0268 -0.0249  
Y -0.0456 0.0464 0.0055 -0.0178 -0.0271 -0.0183  
Z -0.0145 0.0101 0.0089 0.0102 0.0086 0.0119  
AT. 67 H X -0.0334 -0.0139 0.0242 -0.0345 0.0268 -0.0249  
Y 0.0456 0.0464 0.0055 0.0178 -0.0271 0.0183  
Z -0.0145 -0.0101 -0.0089 0.0102 -0.0086 0.0119  
AT. 68 H X 0.0334 0.0139 0.0242 -0.0345 0.0268 -0.0249  
Y 0.0456 0.0464 -0.0055 -0.0178 0.0271 -0.0183  
Z 0.0145 0.0101 -0.0089 0.0102 -0.0086 0.0119  
AT. 69 H X 0.0318 -0.0016 -0.0280 -0.0357 -0.0354 -0.0470  
Y -0.0462 0.0420 -0.0127 0.0138 0.0330 0.0394  
Z 0.0125 0.0012 -0.0055 0.0034 0.0030 0.0053  
AT. 70 H X -0.0318 0.0016 -0.0280 -0.0357 -0.0354 -0.0470  
Y -0.0462 0.0420 0.0127 -0.0138 -0.0330 -0.0394  
Z -0.0125 -0.0012 -0.0055 0.0034 0.0030 0.0053  
AT. 71 H X -0.0318 -0.0016 0.0280 -0.0357 0.0354 -0.0470  
Y 0.0462 0.0420 0.0127 0.0138 -0.0330 0.0394  
Z -0.0125 0.0012 0.0055 0.0034 -0.0030 0.0053  
AT. 72 H X 0.0318 0.0016 0.0280 -0.0357 0.0354 -0.0470  
Y 0.0462 0.0420 -0.0127 -0.0138 0.0330 -0.0394  
Z 0.0125 -0.0012 0.0055 0.0034 -0.0030 0.0053  
AT. 73 C X 0.0102 -0.0085 0.0049 0.0022 0.0009 -0.0107  
Y -0.0011 0.0070 0.0008 0.0044 0.0064 0.0071  
Z 0.0279 -0.0077 -0.0055 -0.0041 -0.0097 -0.0080  
AT. 74 C X -0.0102 0.0085 0.0049 0.0022 0.0009 -0.0107  
Y -0.0011 0.0070 -0.0008 -0.0044 -0.0064 -0.0071  
Z -0.0279 0.0077 -0.0055 -0.0041 -0.0097 -0.0080  
AT. 75 C X -0.0102 -0.0085 -0.0049 0.0022 -0.0009 -0.0107

Y 0.0011 0.0070 -0.0008 0.0044 -0.0064 0.0071  
Z -0.0279 -0.0077 0.0055 -0.0041 0.0097 -0.0080  
AT. 76 C X 0.0102 0.0085 -0.0049 0.0022 -0.0009 -0.0107  
Y 0.0011 0.0070 0.0008 -0.0044 0.0064 -0.0071  
Z 0.0279 0.0077 0.0055 -0.0041 0.0097 -0.0080  
AT. 77 C X -0.0033 -0.0085 0.0126 0.0178 0.0206 -0.0048  
Y 0.0228 -0.0073 0.0051 -0.0109 -0.0189 -0.0023  
Z 0.0177 0.0155 -0.0288 -0.0188 -0.0162 -0.0038  
AT. 78 C X 0.0033 0.0085 0.0126 0.0178 0.0206 -0.0048  
Y 0.0228 -0.0073 -0.0051 0.0109 0.0189 0.0023  
Z -0.0177 -0.0155 -0.0288 -0.0188 -0.0162 -0.0038  
AT. 79 C X 0.0033 -0.0085 -0.0126 0.0178 -0.0206 -0.0048  
Y -0.0228 -0.0073 -0.0051 -0.0109 0.0189 -0.0023  
Z -0.0177 0.0155 0.0288 -0.0188 0.0162 -0.0038  
AT. 80 C X -0.0033 0.0085 -0.0126 0.0178 -0.0206 -0.0048  
Y -0.0228 -0.0073 0.0051 0.0109 -0.0189 0.0023  
Z 0.0177 -0.0155 0.0288 -0.0188 0.0162 -0.0038  
AT. 81 H X 0.0022 -0.0096 0.0112 0.0107 0.0107 -0.0049  
Y 0.0276 -0.0094 0.0041 -0.0172 -0.0269 -0.0021  
Z 0.0325 0.0192 -0.0439 -0.0417 -0.0441 -0.0095  
AT. 82 H X -0.0022 0.0096 0.0112 0.0107 0.0107 -0.0049  
Y 0.0276 -0.0094 -0.0041 0.0172 0.0269 0.0021  
Z -0.0325 -0.0192 -0.0439 -0.0417 -0.0441 -0.0095  
AT. 83 H X -0.0022 -0.0096 -0.0112 0.0107 -0.0107 -0.0049  
Y -0.0276 -0.0094 -0.0041 -0.0172 0.0269 -0.0021  
Z -0.0325 0.0192 0.0439 -0.0417 0.0441 -0.0095  
AT. 84 H X 0.0022 0.0096 -0.0112 0.0107 -0.0107 -0.0049  
Y -0.0276 -0.0094 0.0041 0.0172 -0.0269 0.0021  
Z 0.0325 -0.0192 0.0439 -0.0417 0.0441 -0.0095  
AT. 85 H X -0.0145 -0.0131 0.0233 0.0382 0.0447 -0.0019  
Y 0.0349 -0.0111 0.0047 -0.0207 -0.0356 -0.0056  
Z 0.0106 0.0201 -0.0314 -0.0162 -0.0092 -0.0018

AT. 86 H X 0.0145 0.0131 0.0233 0.0382 0.0447 -0.0019  
Y 0.0349 -0.0111 -0.0047 0.0207 0.0356 0.0056  
Z -0.0106 -0.0201 -0.0314 -0.0162 -0.0092 -0.0018

AT. 87 H X 0.0145 -0.0131 -0.0233 0.0382 -0.0447 -0.0019  
Y -0.0349 -0.0111 -0.0047 -0.0207 0.0356 -0.0056  
Z -0.0106 0.0201 0.0314 -0.0162 0.0092 -0.0018

AT. 88 H X -0.0145 0.0131 -0.0233 0.0382 -0.0447 -0.0019  
Y -0.0349 -0.0111 0.0047 0.0207 -0.0356 0.0056  
Z 0.0106 -0.0201 0.0314 -0.0162 0.0092 -0.0018

AT. 89 C X 0.0006 -0.0130 0.0168 0.0160 0.0170 -0.0036  
Y 0.0167 -0.0061 0.0059 0.0012 -0.0052 -0.0052  
Z 0.0189 0.0026 -0.0117 -0.0053 -0.0067 -0.0020

AT. 90 C X -0.0006 0.0130 0.0168 0.0160 0.0170 -0.0036  
Y 0.0167 -0.0061 -0.0059 -0.0012 0.0052 0.0052  
Z -0.0189 -0.0026 -0.0117 -0.0053 -0.0067 -0.0020

AT. 91 C X -0.0006 -0.0130 -0.0168 0.0160 -0.0170 -0.0036  
Y -0.0167 -0.0061 -0.0059 0.0012 0.0052 -0.0052  
Z -0.0189 0.0026 0.0117 -0.0053 0.0067 -0.0020

AT. 92 C X 0.0006 0.0130 -0.0168 0.0160 -0.0170 -0.0036  
Y -0.0167 -0.0061 0.0059 -0.0012 -0.0052 0.0052  
Z 0.0189 -0.0026 0.0117 -0.0053 0.0067 -0.0020

AT. 93 C X 0.0023 -0.0216 0.0308 0.0203 0.0192 0.0025  
Y 0.0345 -0.0203 0.0124 0.0009 -0.0157 -0.0178  
Z 0.0304 -0.0057 -0.0095 -0.0058 -0.0140 -0.0114

AT. 94 C X -0.0023 0.0216 0.0308 0.0203 0.0192 0.0025  
Y 0.0345 -0.0203 -0.0124 -0.0009 0.0157 0.0178  
Z -0.0304 0.0057 -0.0095 -0.0058 -0.0140 -0.0114

AT. 95 C X -0.0023 -0.0216 -0.0308 0.0203 -0.0192 0.0025  
Y -0.0345 -0.0203 -0.0124 0.0009 0.0157 -0.0178  
Z -0.0304 -0.0057 0.0095 -0.0058 0.0140 -0.0114

AT. 96 C X 0.0023 0.0216 -0.0308 0.0203 -0.0192 0.0025  
Y -0.0345 -0.0203 0.0124 -0.0009 -0.0157 0.0178

Z 0.0304 0.0057 0.0095 -0.0058 0.0140 -0.0114  
AT. 97 H X 0.0073 -0.0247 0.0337 0.0166 0.0147 -0.0000  
Y 0.0258 -0.0204 0.0148 0.0143 -0.0040 -0.0110  
Z 0.0305 -0.0164 0.0047 0.0075 -0.0071 -0.0061  
AT. 98 H X -0.0073 0.0247 0.0337 0.0166 0.0147 -0.0000  
Y 0.0258 -0.0204 -0.0148 -0.0143 0.0040 0.0110  
Z -0.0305 0.0164 0.0047 0.0075 -0.0071 -0.0061  
AT. 99 H X -0.0073 -0.0247 -0.0337 0.0166 -0.0147 -0.0000  
Y -0.0258 -0.0204 -0.0148 0.0143 0.0040 -0.0110  
Z -0.0305 -0.0164 -0.0047 0.0075 0.0071 -0.0061  
AT. 100 H X 0.0073 0.0247 -0.0337 0.0166 -0.0147 -0.0000  
Y -0.0258 -0.0204 0.0148 -0.0143 -0.0040 0.0110  
Z 0.0305 0.0164 -0.0047 0.0075 0.0071 -0.0061  
AT. 101 H X 0.0117 -0.0228 0.0284 0.0083 0.0071 -0.0058  
Y 0.0424 -0.0214 0.0111 -0.0102 -0.0260 -0.0244  
Z 0.0436 -0.0095 -0.0146 -0.0141 -0.0274 -0.0256  
AT. 102 H X -0.0117 0.0228 0.0284 0.0083 0.0071 -0.0058  
Y 0.0424 -0.0214 -0.0111 0.0102 0.0260 0.0244  
Z -0.0436 0.0095 -0.0146 -0.0141 -0.0274 -0.0256  
AT. 103 H X -0.0117 -0.0228 -0.0284 0.0083 -0.0071 -0.0058  
Y -0.0424 -0.0214 -0.0111 -0.0102 0.0260 -0.0244  
Z -0.0436 -0.0095 0.0146 -0.0141 0.0274 -0.0256  
AT. 104 H X 0.0117 0.0228 -0.0284 0.0083 -0.0071 -0.0058  
Y -0.0424 -0.0214 0.0111 0.0102 -0.0260 0.0244  
Z 0.0436 0.0095 0.0146 -0.0141 0.0274 -0.0256  
AT. 105 H X -0.0111 -0.0242 0.0410 0.0392 0.0380 0.0173  
Y 0.0478 -0.0304 0.0172 -0.0007 -0.0252 -0.0278  
Z 0.0244 0.0031 -0.0166 -0.0108 -0.0132 -0.0086  
AT. 106 H X 0.0111 0.0242 0.0410 0.0392 0.0380 0.0173  
Y 0.0478 -0.0304 -0.0172 0.0007 0.0252 0.0278  
Z -0.0244 -0.0031 -0.0166 -0.0108 -0.0132 -0.0086  
AT. 107 H X 0.0111 -0.0242 -0.0410 0.0392 -0.0380 0.0173

Y -0.0478 -0.0304 -0.0172 -0.0007 0.0252 -0.0278  
Z -0.0244 0.0031 0.0166 -0.0108 0.0132 -0.0086  
AT. 108 H X -0.0111 0.0242 -0.0410 0.0392 -0.0380 0.0173  
Y -0.0478 -0.0304 0.0172 0.0007 -0.0252 0.0278  
Z 0.0244 -0.0031 0.0166 -0.0108 0.0132 -0.0086  
AT. 109 C X 0.0033 -0.0000 -0.0108 -0.0218 -0.0111 -0.0093  
Y -0.0181 0.0183 -0.0064 -0.0012 0.0084 0.0173  
Z -0.0076 0.0105 0.0017 0.0202 0.0230 0.0199  
AT. 110 C X -0.0033 0.0000 -0.0108 -0.0218 -0.0111 -0.0093  
Y -0.0181 0.0183 0.0064 0.0012 -0.0084 -0.0173  
Z 0.0076 -0.0105 0.0017 0.0202 0.0230 0.0199  
AT. 111 C X -0.0033 -0.0000 0.0108 -0.0218 0.0111 -0.0093  
Y 0.0181 0.0183 0.0064 -0.0012 -0.0084 0.0173  
Z 0.0076 0.0105 -0.0017 0.0202 -0.0230 0.0199  
AT. 112 C X 0.0033 0.0000 0.0108 -0.0218 0.0111 -0.0093  
Y 0.0181 0.0183 -0.0064 0.0012 0.0084 -0.0173  
Z -0.0076 -0.0105 -0.0017 0.0202 -0.0230 0.0199  
AT. 113 H X 0.0040 -0.0001 -0.0073 -0.0150 -0.0060 -0.0094  
Y -0.0204 0.0185 -0.0097 -0.0077 0.0039 0.0186  
Z -0.0132 0.0108 0.0162 0.0468 0.0441 0.0248  
AT. 114 H X -0.0040 0.0001 -0.0073 -0.0150 -0.0060 -0.0094  
Y -0.0204 0.0185 0.0097 0.0077 -0.0039 -0.0186  
Z 0.0132 -0.0108 0.0162 0.0468 0.0441 0.0248  
AT. 115 H X -0.0040 -0.0001 0.0073 -0.0150 0.0060 -0.0094  
Y 0.0204 0.0185 0.0097 -0.0077 -0.0039 0.0186  
Z 0.0132 0.0108 -0.0162 0.0468 -0.0441 0.0248  
AT. 116 H X 0.0040 0.0001 0.0073 -0.0150 0.0060 -0.0094  
Y 0.0204 0.0185 -0.0097 0.0077 0.0039 -0.0186  
Z -0.0132 -0.0108 -0.0162 0.0468 -0.0441 0.0248  
AT. 117 H X 0.0096 -0.0020 -0.0250 -0.0473 -0.0320 -0.0131  
Y -0.0258 0.0230 -0.0108 -0.0074 0.0080 0.0248  
Z -0.0162 0.0154 0.0000 0.0188 0.0262 0.0274

AT. 118 H X -0.0096 0.0020 -0.0250 -0.0473 -0.0320 -0.0131  
Y -0.0258 0.0230 0.0108 0.0074 -0.0080 -0.0248  
Z 0.0162 -0.0154 0.0000 0.0188 0.0262 0.0274

AT. 119 H X -0.0096 -0.0020 0.0250 -0.0473 0.0320 -0.0131  
Y 0.0258 0.0230 0.0108 -0.0074 -0.0080 0.0248  
Z 0.0162 0.0154 -0.0000 0.0188 -0.0262 0.0274

AT. 120 H X 0.0096 0.0020 0.0250 -0.0473 0.0320 -0.0131  
Y 0.0258 0.0230 -0.0108 0.0074 0.0080 -0.0248  
Z -0.0162 -0.0154 -0.0000 0.0188 -0.0262 0.0274

AT. 121 C X -0.0091 -0.0105 0.0196 0.0271 0.0310 -0.0013  
Y 0.0105 -0.0040 0.0070 0.0112 0.0067 -0.0068  
Z -0.0016 0.0084 -0.0044 0.0076 0.0120 0.0150

AT. 122 C X 0.0091 0.0105 0.0196 0.0271 0.0310 -0.0013  
Y 0.0105 -0.0040 -0.0070 -0.0112 -0.0067 0.0068  
Z 0.0016 -0.0084 -0.0044 0.0076 0.0120 0.0150

AT. 123 C X 0.0091 -0.0105 -0.0196 0.0271 -0.0310 -0.0013  
Y -0.0105 -0.0040 -0.0070 0.0112 -0.0067 -0.0068  
Z 0.0016 0.0084 0.0044 0.0076 -0.0120 0.0150

AT. 124 C X -0.0091 0.0105 -0.0196 0.0271 -0.0310 -0.0013  
Y -0.0105 -0.0040 0.0070 -0.0112 0.0067 0.0068  
Z -0.0016 -0.0084 0.0044 0.0076 -0.0120 0.0150

AT. 125 H X -0.0219 -0.0125 0.0303 0.0475 0.0544 0.0022  
Y 0.0223 -0.0141 0.0124 0.0147 0.0055 -0.0174  
Z -0.0066 0.0162 -0.0112 -0.0006 0.0064 0.0215

AT. 126 H X 0.0219 0.0125 0.0303 0.0475 0.0544 0.0022  
Y 0.0223 -0.0141 -0.0124 -0.0147 -0.0055 0.0174  
Z 0.0066 -0.0162 -0.0112 -0.0006 0.0064 0.0215

AT. 127 H X 0.0219 -0.0125 -0.0303 0.0475 -0.0544 0.0022  
Y -0.0223 -0.0141 -0.0124 0.0147 -0.0055 -0.0174  
Z 0.0066 0.0162 0.0112 -0.0006 -0.0064 0.0215

AT. 128 H X -0.0219 0.0125 -0.0303 0.0475 -0.0544 0.0022  
Y -0.0223 -0.0141 0.0124 -0.0147 0.0055 0.0174

Z -0.0066 -0.0162 0.0112 -0.0006 -0.0064 0.0215  
AT. 129 H X -0.0060 -0.0148 0.0235 0.0289 0.0306 -0.0022  
Y 0.0055 -0.0021 0.0072 0.0168 0.0152 -0.0074  
Z -0.0019 -0.0030 0.0107 0.0284 0.0307 0.0100  
AT. 130 H X 0.0060 0.0148 0.0235 0.0289 0.0306 -0.0022  
Y 0.0055 -0.0021 -0.0072 -0.0168 -0.0152 0.0074  
Z 0.0019 0.0030 0.0107 0.0284 0.0307 0.0100  
AT. 131 H X 0.0060 -0.0148 -0.0235 0.0289 -0.0306 -0.0022  
Y -0.0055 -0.0021 -0.0072 0.0168 -0.0152 -0.0074  
Z 0.0019 -0.0030 -0.0107 0.0284 -0.0307 0.0100  
AT. 132 H X -0.0060 0.0148 -0.0235 0.0289 -0.0306 -0.0022  
Y -0.0055 -0.0021 0.0072 -0.0168 0.0152 0.0074  
Z -0.0019 0.0030 -0.0107 0.0284 -0.0307 0.0100  
AT. 133 C X -0.0263 0.0348 -0.0144 -0.0060 0.0131 0.0394  
Y -0.0027 0.0054 0.0013 0.0063 0.0075 0.0026  
Z -0.0207 0.0177 -0.0110 -0.0024 0.0101 0.0266  
AT. 134 C X 0.0263 -0.0348 -0.0144 -0.0060 0.0131 0.0394  
Y -0.0027 0.0054 -0.0013 -0.0063 -0.0075 -0.0026  
Z 0.0207 -0.0177 -0.0110 -0.0024 0.0101 0.0266  
AT. 135 C X 0.0263 0.0348 0.0144 -0.0060 -0.0131 0.0394  
Y 0.0027 0.0054 -0.0013 0.0063 -0.0075 0.0026  
Z 0.0207 0.0177 0.0110 -0.0024 -0.0101 0.0266  
AT. 136 C X -0.0263 -0.0348 0.0144 -0.0060 -0.0131 0.0394  
Y 0.0027 0.0054 0.0013 -0.0063 0.0075 -0.0026  
Z -0.0207 -0.0177 0.0110 -0.0024 -0.0101 0.0266  
AT. 137 C X -0.0126 0.0156 -0.0028 0.0100 0.0149 0.0212  
Y 0.0032 -0.0009 0.0053 0.0132 0.0103 -0.0040  
Z -0.0262 0.0243 -0.0166 -0.0112 0.0059 0.0329  
AT. 138 C X 0.0126 -0.0156 -0.0028 0.0100 0.0149 0.0212  
Y 0.0032 -0.0009 -0.0053 -0.0132 -0.0103 0.0040  
Z 0.0262 -0.0243 -0.0166 -0.0112 0.0059 0.0329  
AT. 139 C X 0.0126 0.0156 0.0028 0.0100 -0.0149 0.0212



Y -0.0032 -0.0009 -0.0053 0.0132 -0.0103 -0.0040  
Z 0.0262 0.0243 0.0166 -0.0112 -0.0059 0.0329  
AT. 140 C X -0.0126 -0.0156 0.0028 0.0100 -0.0149 0.0212  
Y -0.0032 -0.0009 0.0053 -0.0132 0.0103 0.0040  
Z -0.0262 -0.0243 0.0166 -0.0112 -0.0059 0.0329  
AT. 141 H X 0.0006 0.0063 0.0041 0.0151 0.0149 0.0056  
Y 0.0099 -0.0053 0.0102 0.0195 0.0147 -0.0114  
Z -0.0364 0.0320 -0.0217 -0.0127 0.0087 0.0453  
AT. 142 H X -0.0006 -0.0063 0.0041 0.0151 0.0149 0.0056  
Y 0.0099 -0.0053 -0.0102 -0.0195 -0.0147 0.0114  
Z 0.0364 -0.0320 -0.0217 -0.0127 0.0087 0.0453  
AT. 143 H X -0.0006 0.0063 -0.0041 0.0151 -0.0149 0.0056  
Y -0.0099 -0.0053 -0.0102 0.0195 -0.0147 -0.0114  
Z 0.0364 0.0320 0.0217 -0.0127 -0.0087 0.0453  
AT. 144 H X 0.0006 -0.0063 -0.0041 0.0151 -0.0149 0.0056  
Y -0.0099 -0.0053 0.0102 -0.0195 0.0147 0.0114  
Z -0.0364 -0.0320 0.0217 -0.0127 -0.0087 0.0453  
AT. 145 H X -0.0231 0.0202 -0.0101 -0.0007 0.0071 0.0325  
Y 0.0049 -0.0001 0.0065 0.0151 0.0127 -0.0050  
Z -0.0315 0.0325 -0.0201 -0.0158 0.0063 0.0420  
AT. 146 H X 0.0231 -0.0202 -0.0101 -0.0007 0.0071 0.0325  
Y 0.0049 -0.0001 -0.0065 -0.0151 -0.0127 0.0050  
Z 0.0315 -0.0325 -0.0201 -0.0158 0.0063 0.0420  
AT. 147 H X 0.0231 0.0202 0.0101 -0.0007 -0.0071 0.0325  
Y -0.0049 -0.0001 -0.0065 0.0151 -0.0127 -0.0050  
Z 0.0315 0.0325 0.0201 -0.0158 -0.0063 0.0420  
AT. 148 H X -0.0231 -0.0202 0.0101 -0.0007 -0.0071 0.0325  
Y -0.0049 -0.0001 0.0065 -0.0151 0.0127 0.0050  
Z -0.0315 -0.0325 0.0201 -0.0158 -0.0063 0.0420  
AT. 149 O X 0.0145 -0.0064 0.0053 0.0056 -0.0014 -0.0139  
Y -0.0003 0.0105 0.0035 0.0148 0.0102 0.0090  
Z 0.0409 -0.0111 -0.0137 -0.0230 -0.0284 -0.0208

AT.150 O X -0.0145 0.0064 0.0053 0.0056 -0.0014 -0.0139  
Y -0.0003 0.0105 -0.0035 -0.0148 -0.0102 -0.0090  
Z -0.0409 0.0111 -0.0137 -0.0230 -0.0284 -0.0208

AT.151 O X -0.0145 -0.0064 -0.0053 0.0056 0.0014 -0.0139  
Y 0.0003 0.0105 -0.0035 0.0148 -0.0102 0.0090  
Z -0.0409 -0.0111 0.0137 -0.0230 0.0284 -0.0208

AT.152 O X 0.0145 0.0064 -0.0053 0.0056 0.0014 -0.0139  
Y 0.0003 0.0105 0.0035 -0.0148 0.0102 -0.0090  
Z 0.0409 0.0111 0.0137 -0.0230 0.0284 -0.0208

AT.153 H X 0.0170 -0.0133 0.0077 -0.0009 -0.0075 -0.0116  
Y 0.0083 0.0022 0.0041 -0.0029 -0.0066 0.0012  
Z 0.0425 -0.0096 -0.0149 -0.0246 -0.0303 -0.0253

AT.154 H X -0.0170 0.0133 0.0077 -0.0009 -0.0075 -0.0116  
Y 0.0083 0.0022 -0.0041 0.0029 0.0066 -0.0012  
Z -0.0425 0.0096 -0.0149 -0.0246 -0.0303 -0.0253

AT.155 H X -0.0170 -0.0133 -0.0077 -0.0009 0.0075 -0.0116  
Y -0.0083 0.0022 -0.0041 -0.0029 0.0066 0.0012  
Z -0.0425 -0.0096 0.0149 -0.0246 0.0303 -0.0253

AT.156 H X 0.0170 0.0133 -0.0077 -0.0009 0.0075 -0.0116  
Y -0.0083 0.0022 0.0041 0.0029 -0.0066 -0.0012  
Z 0.0425 0.0096 0.0149 -0.0246 0.0303 -0.0253

AT.157 O X 0.0126 -0.0107 0.0109 0.0122 0.0049 -0.0087  
Y -0.0023 0.0032 -0.0016 -0.0057 0.0031 0.0049  
Z 0.0341 -0.0235 0.0115 0.0131 -0.0010 -0.0108

AT.158 O X -0.0126 0.0107 0.0109 0.0122 0.0049 -0.0087  
Y -0.0023 0.0032 0.0016 0.0057 -0.0031 -0.0049  
Z -0.0341 0.0235 0.0115 0.0131 -0.0010 -0.0108

AT.159 O X -0.0126 -0.0107 -0.0109 0.0122 -0.0049 -0.0087  
Y 0.0023 0.0032 0.0016 -0.0057 -0.0031 0.0049  
Z -0.0341 -0.0235 -0.0115 0.0131 0.0010 -0.0108

AT.160 O X 0.0126 0.0107 -0.0109 0.0122 -0.0049 -0.0087  
Y 0.0023 0.0032 -0.0016 0.0057 0.0031 -0.0049

Z 0.0341 0.0235 -0.0115 0.0131 0.0010 -0.0108  
AT.161 O X -0.0083 0.0216 -0.0142 -0.0156 -0.0033 0.0170  
Y 0.0144 -0.0144 0.0111 0.0143 0.0063 -0.0226  
Z 0.0365 -0.0325 0.0187 0.0172 0.0018 -0.0087  
AT.162 O X 0.0083 -0.0216 -0.0142 -0.0156 -0.0033 0.0170  
Y 0.0144 -0.0144 -0.0111 -0.0143 -0.0063 0.0226  
Z -0.0365 0.0325 0.0187 0.0172 0.0018 -0.0087  
AT.163 O X 0.0083 0.0216 0.0142 -0.0156 0.0033 0.0170  
Y -0.0144 -0.0144 -0.0111 0.0143 -0.0063 -0.0226  
Z -0.0365 -0.0325 -0.0187 0.0172 -0.0018 -0.0087  
AT.164 O X -0.0083 -0.0216 0.0142 -0.0156 0.0033 0.0170  
Y -0.0144 -0.0144 0.0111 -0.0143 0.0063 0.0226  
Z 0.0365 0.0325 -0.0187 0.0172 -0.0018 -0.0087  
AT.165 H X -0.0195 0.0408 -0.0272 -0.0311 -0.0060 0.0455  
Y 0.0095 -0.0057 0.0053 0.0075 0.0054 -0.0101  
Z 0.0173 -0.0173 0.0084 0.0050 0.0013 0.0019  
AT.166 H X 0.0195 -0.0408 -0.0272 -0.0311 -0.0060 0.0455  
Y 0.0095 -0.0057 -0.0053 -0.0075 -0.0054 0.0101  
Z -0.0173 0.0173 0.0084 0.0050 0.0013 0.0019  
AT.167 H X 0.0195 0.0408 0.0272 -0.0311 0.0060 0.0455  
Y -0.0095 -0.0057 -0.0053 0.0075 -0.0054 -0.0101  
Z -0.0173 -0.0173 -0.0084 0.0050 -0.0013 0.0019  
AT.168 H X -0.0195 -0.0408 0.0272 -0.0311 0.0060 0.0455  
Y -0.0095 -0.0057 0.0053 -0.0075 0.0054 0.0101  
Z 0.0173 0.0173 -0.0084 0.0050 -0.0013 0.0019  
AT.169 O X 0.0015 -0.0136 0.0091 -0.0216 -0.0089 -0.0111  
Y 0.0100 -0.0018 0.0093 -0.0090 -0.0118 -0.0002  
Z 0.0002 0.0145 -0.0023 0.0051 0.0021 -0.0251  
AT.170 O X -0.0015 0.0136 0.0091 -0.0216 -0.0089 -0.0111  
Y 0.0100 -0.0018 -0.0093 0.0090 0.0118 0.0002  
Z -0.0002 -0.0145 -0.0023 0.0051 0.0021 -0.0251  
AT.171 O X -0.0015 -0.0136 -0.0091 -0.0216 0.0089 -0.0111

Y -0.0100 -0.0018 -0.0093 -0.0090 0.0118 -0.0002  
Z -0.0002 0.0145 0.0023 0.0051 -0.0021 -0.0251  
AT. 172 O X 0.0015 0.0136 -0.0091 -0.0216 0.0089 -0.0111  
Y -0.0100 -0.0018 0.0093 0.0090 -0.0118 0.0002  
Z 0.0002 -0.0145 0.0023 0.0051 -0.0021 -0.0251  
AT. 173 H X -0.0063 0.0012 -0.0174 0.0049 0.0124 -0.0059  
Y 0.0131 -0.0055 0.0172 -0.0149 -0.0191 -0.0030  
Z -0.0112 0.0156 -0.0117 0.0002 0.0142 -0.0209  
AT. 174 H X 0.0063 -0.0012 -0.0174 0.0049 0.0124 -0.0059  
Y 0.0131 -0.0055 -0.0172 0.0149 0.0191 0.0030  
Z 0.0112 -0.0156 -0.0117 0.0002 0.0142 -0.0209  
AT. 175 H X 0.0063 0.0012 0.0174 0.0049 -0.0124 -0.0059  
Y -0.0131 -0.0055 -0.0172 -0.0149 0.0191 -0.0030  
Z 0.0112 0.0156 0.0117 0.0002 -0.0142 -0.0209  
AT. 176 H X -0.0063 -0.0012 0.0174 0.0049 -0.0124 -0.0059  
Y -0.0131 -0.0055 0.0172 0.0149 -0.0191 0.0030  
Z -0.0112 -0.0156 0.0117 0.0002 -0.0142 -0.0209  
  
FREQ(CM\*\*-1) 102.32 104.99 106.21 107.32 131.43 133.46

AT. 1 I X -0.0075 0.0063 -0.0102 -0.0057 -0.0026 0.0098  
Y 0.0008 0.0003 -0.0027 -0.0038 -0.0006 0.0026  
Z 0.0000 -0.0025 0.0133 0.0140 -0.0001 -0.0106  
AT. 2 I X 0.0075 0.0063 0.0102 0.0057 0.0026 0.0098  
Y 0.0008 -0.0003 -0.0027 -0.0038 -0.0006 -0.0026  
Z -0.0000 -0.0025 -0.0133 -0.0140 0.0001 -0.0106  
AT. 3 I X 0.0075 -0.0063 -0.0102 0.0057 -0.0026 0.0098  
Y -0.0008 -0.0003 -0.0027 0.0038 -0.0006 0.0026  
Z -0.0000 0.0025 0.0133 -0.0140 -0.0001 -0.0106  
AT. 4 I X -0.0075 -0.0063 0.0102 -0.0057 0.0026 0.0098  
Y -0.0008 0.0003 -0.0027 0.0038 -0.0006 -0.0026  
Z 0.0000 0.0025 -0.0133 0.0140 0.0001 -0.0106

AT. 5 I X -0.0008 -0.0003 0.0028 0.0004 0.0015 -0.0001  
Y -0.0017 -0.0014 -0.0054 -0.0044 -0.0014 0.0014  
Z -0.0046 -0.0023 -0.0073 -0.0072 -0.0027 0.0004

AT. 6 I X 0.0008 -0.0003 -0.0028 -0.0004 -0.0015 -0.0001  
Y -0.0017 0.0014 -0.0054 -0.0044 -0.0014 -0.0014  
Z 0.0046 -0.0023 0.0073 0.0072 0.0027 0.0004

AT. 7 I X 0.0008 0.0003 0.0028 -0.0004 0.0015 -0.0001  
Y 0.0017 0.0014 -0.0054 0.0044 -0.0014 0.0014  
Z 0.0046 0.0023 -0.0073 0.0072 -0.0027 0.0004

AT. 8 I X -0.0008 0.0003 -0.0028 0.0004 -0.0015 -0.0001  
Y 0.0017 -0.0014 -0.0054 0.0044 -0.0014 -0.0014  
Z -0.0046 0.0023 0.0073 -0.0072 0.0027 0.0004

AT. 9 N X 0.0193 -0.0146 -0.0057 -0.0066 -0.0013 -0.0011  
Y -0.0046 0.0054 0.0044 0.0045 -0.0017 -0.0039  
Z 0.0311 -0.0114 0.0004 -0.0117 -0.0086 -0.0127

AT. 10 N X -0.0193 -0.0146 0.0057 0.0066 0.0013 -0.0011  
Y -0.0046 -0.0054 0.0044 0.0045 -0.0017 0.0039  
Z -0.0311 -0.0114 -0.0004 0.0117 0.0086 -0.0127

AT. 11 N X -0.0193 0.0146 -0.0057 0.0066 -0.0013 -0.0011  
Y 0.0046 -0.0054 0.0044 -0.0045 -0.0017 -0.0039  
Z -0.0311 0.0114 0.0004 0.0117 -0.0086 -0.0127

AT. 12 N X 0.0193 0.0146 0.0057 -0.0066 0.0013 -0.0011  
Y 0.0046 0.0054 0.0044 -0.0045 -0.0017 0.0039  
Z 0.0311 0.0114 -0.0004 -0.0117 0.0086 -0.0127

AT. 13 N X 0.0129 -0.0083 -0.0061 0.0000 0.0013 -0.0001  
Y 0.0067 0.0003 0.0047 0.0019 0.0016 -0.0016  
Z 0.0015 0.0144 -0.0017 0.0036 0.0055 0.0036

AT. 14 N X -0.0129 -0.0083 0.0061 -0.0000 -0.0013 -0.0001  
Y 0.0067 -0.0003 0.0047 0.0019 0.0016 0.0016  
Z -0.0015 0.0144 0.0017 -0.0036 -0.0055 0.0036

AT. 15 N X -0.0129 0.0083 -0.0061 -0.0000 0.0013 -0.0001  
Y -0.0067 -0.0003 0.0047 -0.0019 0.0016 -0.0016

Z -0.0015 -0.0144 -0.0017 -0.0036 0.0055 0.0036  
AT. 16 N X 0.0129 0.0083 0.0061 0.0000 -0.0013 -0.0001  
Y -0.0067 0.0003 0.0047 -0.0019 0.0016 0.0016  
Z 0.0015 -0.0144 0.0017 0.0036 -0.0055 0.0036  
AT. 17 O X 0.0718 -0.0360 0.0749 0.0468 -0.0269 -0.0409  
Y -0.0251 0.0129 -0.0285 -0.0221 -0.0045 -0.0015  
Z 0.0260 -0.0083 -0.0040 -0.0063 0.0135 0.0087  
AT. 18 O X -0.0718 -0.0360 -0.0749 -0.0468 0.0269 -0.0409  
Y -0.0251 -0.0129 -0.0285 -0.0221 -0.0045 0.0015  
Z -0.0260 -0.0083 0.0040 0.0063 -0.0135 0.0087  
AT. 19 O X -0.0718 0.0360 0.0749 -0.0468 -0.0269 -0.0409  
Y 0.0251 -0.0129 -0.0285 0.0221 -0.0045 -0.0015  
Z -0.0260 0.0083 -0.0040 0.0063 0.0135 0.0087  
AT. 20 O X 0.0718 0.0360 -0.0749 0.0468 0.0269 -0.0409  
Y 0.0251 0.0129 -0.0285 0.0221 -0.0045 0.0015  
Z 0.0260 0.0083 0.0040 -0.0063 -0.0135 0.0087  
AT. 21 O X 0.0074 0.0822 -0.0472 -0.0623 -0.0217 0.0093  
Y 0.0055 -0.0007 0.0023 0.0005 -0.0013 -0.0037  
Z -0.0016 0.0134 -0.0080 -0.0004 0.0013 0.0009  
AT. 22 O X -0.0074 0.0822 0.0472 0.0623 0.0217 0.0093  
Y 0.0055 0.0007 0.0023 0.0005 -0.0013 0.0037  
Z 0.0016 0.0134 0.0080 0.0004 -0.0013 0.0009  
AT. 23 O X -0.0074 -0.0822 -0.0472 0.0623 -0.0217 0.0093  
Y -0.0055 0.0007 0.0023 -0.0005 -0.0013 -0.0037  
Z 0.0016 -0.0134 -0.0080 0.0004 0.0013 0.0009  
AT. 24 O X 0.0074 -0.0822 0.0472 -0.0623 0.0217 0.0093  
Y -0.0055 -0.0007 0.0023 -0.0005 -0.0013 0.0037  
Z -0.0016 -0.0134 0.0080 -0.0004 -0.0013 0.0009  
AT. 25 C X 0.0210 -0.0037 -0.0021 -0.0037 0.0060 0.0155  
Y -0.0032 0.0027 0.0073 0.0106 0.0082 0.0057  
Z 0.0366 -0.0147 0.0134 0.0058 0.0088 -0.0002  
AT. 26 C X -0.0210 -0.0037 0.0021 0.0037 -0.0060 0.0155

Y -0.0032 -0.0027 0.0073 0.0106 0.0082 -0.0057  
Z -0.0366 -0.0147 -0.0134 -0.0058 -0.0088 -0.0002  
AT. 27 C X -0.0210 0.0037 -0.0021 0.0037 0.0060 0.0155  
Y 0.0032 -0.0027 0.0073 -0.0106 0.0082 0.0057  
Z -0.0366 0.0147 0.0134 -0.0058 0.0088 -0.0002  
AT. 28 C X 0.0210 0.0037 0.0021 -0.0037 -0.0060 0.0155  
Y 0.0032 0.0027 0.0073 -0.0106 0.0082 -0.0057  
Z 0.0366 0.0147 -0.0134 0.0058 -0.0088 -0.0002  
AT. 29 H X 0.0088 0.0014 -0.0065 -0.0046 0.0045 0.0164  
Y 0.0068 0.0027 0.0118 0.0165 0.0265 0.0214  
Z 0.0543 -0.0223 0.0198 0.0064 0.0080 -0.0044  
AT. 30 H X -0.0088 0.0014 0.0065 0.0046 -0.0045 0.0164  
Y 0.0068 -0.0027 0.0118 0.0165 0.0265 -0.0214  
Z -0.0543 -0.0223 -0.0198 -0.0064 -0.0080 -0.0044  
AT. 31 H X -0.0088 -0.0014 -0.0065 0.0046 0.0045 0.0164  
Y -0.0068 -0.0027 0.0118 -0.0165 0.0265 0.0214  
Z -0.0543 0.0223 0.0198 -0.0064 0.0080 -0.0044  
AT. 32 H X 0.0088 -0.0014 0.0065 -0.0046 -0.0045 0.0164  
Y -0.0068 0.0027 0.0118 -0.0165 0.0265 -0.0214  
Z 0.0543 0.0223 -0.0198 0.0064 -0.0080 -0.0044  
AT. 33 H X 0.0322 -0.0052 0.0046 0.0042 0.0246 0.0259  
Y -0.0059 0.0031 0.0056 0.0084 0.0033 0.0015  
Z 0.0402 -0.0154 0.0156 0.0091 0.0161 0.0107  
AT. 34 H X -0.0322 -0.0052 -0.0046 -0.0042 -0.0246 0.0259  
Y -0.0059 -0.0031 0.0056 0.0084 0.0033 -0.0015  
Z -0.0402 -0.0154 -0.0156 -0.0091 -0.0161 0.0107  
AT. 35 H X -0.0322 0.0052 0.0046 -0.0042 0.0246 0.0259  
Y 0.0059 -0.0031 0.0056 -0.0084 0.0033 0.0015  
Z -0.0402 0.0154 0.0156 -0.0091 0.0161 0.0107  
AT. 36 H X 0.0322 0.0052 -0.0046 0.0042 -0.0246 0.0259  
Y 0.0059 0.0031 0.0056 -0.0084 0.0033 -0.0015  
Z 0.0402 0.0154 -0.0156 0.0091 -0.0161 0.0107

AT. 37 C X 0.0409 -0.0192 0.0216 0.0098 -0.0088 -0.0101  
Y -0.0130 0.0075 -0.0056 -0.0016 0.0005 -0.0004  
Z 0.0309 -0.0116 0.0038 -0.0032 0.0044 -0.0035

AT. 38 C X -0.0409 -0.0192 -0.0216 -0.0098 0.0088 -0.0101  
Y -0.0130 -0.0075 -0.0056 -0.0016 0.0005 0.0004  
Z -0.0309 -0.0116 -0.0038 0.0032 -0.0044 -0.0035

AT. 39 C X -0.0409 0.0192 0.0216 -0.0098 -0.0088 -0.0101  
Y 0.0130 -0.0075 -0.0056 0.0016 0.0005 -0.0004  
Z -0.0309 0.0116 0.0038 0.0032 0.0044 -0.0035

AT. 40 C X 0.0409 0.0192 -0.0216 0.0098 0.0088 -0.0101  
Y 0.0130 0.0075 -0.0056 0.0016 0.0005 0.0004  
Z 0.0309 0.0116 -0.0038 -0.0032 -0.0044 -0.0035

AT. 41 C X 0.0233 -0.0165 -0.0213 -0.0267 -0.0164 -0.0099  
Y 0.0012 0.0061 0.0190 0.0187 0.0121 0.0016  
Z 0.0258 -0.0107 -0.0030 -0.0126 -0.0111 -0.0125

AT. 42 C X -0.0233 -0.0165 0.0213 0.0267 0.0164 -0.0099  
Y 0.0012 -0.0061 0.0190 0.0187 0.0121 -0.0016  
Z -0.0258 -0.0107 0.0030 0.0126 0.0111 -0.0125

AT. 43 C X -0.0233 0.0165 -0.0213 0.0267 -0.0164 -0.0099  
Y -0.0012 -0.0061 0.0190 -0.0187 0.0121 0.0016  
Z -0.0258 0.0107 -0.0030 0.0126 -0.0111 -0.0125

AT. 44 C X 0.0233 0.0165 0.0213 -0.0267 0.0164 -0.0099  
Y -0.0012 0.0061 0.0190 -0.0187 0.0121 -0.0016  
Z 0.0258 0.0107 0.0030 -0.0126 0.0111 -0.0125

AT. 45 H X 0.0316 -0.0165 -0.0343 -0.0483 -0.0333 -0.0213  
Y 0.0041 0.0061 0.0296 0.0296 0.0237 0.0076  
Z 0.0272 -0.0106 0.0081 -0.0003 0.0008 -0.0063

AT. 46 H X -0.0316 -0.0165 0.0343 0.0483 0.0333 -0.0213  
Y 0.0041 -0.0061 0.0296 0.0296 0.0237 -0.0076  
Z -0.0272 -0.0106 -0.0081 0.0003 -0.0008 -0.0063

AT. 47 H X -0.0316 0.0165 -0.0343 0.0483 -0.0333 -0.0213  
Y -0.0041 -0.0061 0.0296 -0.0296 0.0237 0.0076



Z -0.0272 0.0106 0.0081 0.0003 0.0008 -0.0063  
AT. 48 H X 0.0316 0.0165 0.0343 -0.0483 0.0333 -0.0213  
Y -0.0041 0.0061 0.0296 -0.0296 0.0237 -0.0076  
Z 0.0272 0.0106 -0.0081 -0.0003 -0.0008 -0.0063  
AT. 49 H X 0.0233 -0.0189 -0.0217 -0.0272 -0.0190 -0.0121  
Y 0.0004 0.0038 0.0259 0.0278 0.0183 0.0046  
Z 0.0283 -0.0114 -0.0226 -0.0380 -0.0333 -0.0255  
AT. 50 H X -0.0233 -0.0189 0.0217 0.0272 0.0190 -0.0121  
Y 0.0004 -0.0038 0.0259 0.0278 0.0183 -0.0046  
Z -0.0283 -0.0114 0.0226 0.0380 0.0333 -0.0255  
AT. 51 H X -0.0233 0.0189 -0.0217 0.0272 -0.0190 -0.0121  
Y -0.0004 -0.0038 0.0259 -0.0278 0.0183 0.0046  
Z -0.0283 0.0114 -0.0226 0.0380 -0.0333 -0.0255  
AT. 52 H X 0.0233 0.0189 0.0217 -0.0272 0.0190 -0.0121  
Y -0.0004 0.0038 0.0259 -0.0278 0.0183 -0.0046  
Z 0.0283 0.0114 0.0226 -0.0380 0.0333 -0.0255  
AT. 53 C X 0.0201 -0.0168 -0.0154 -0.0179 -0.0116 -0.0074  
Y 0.0041 0.0097 0.0084 0.0047 0.0038 -0.0025  
Z 0.0118 -0.0052 -0.0015 -0.0011 -0.0009 -0.0010  
AT. 54 C X -0.0201 -0.0168 0.0154 0.0179 0.0116 -0.0074  
Y 0.0041 -0.0097 0.0084 0.0047 0.0038 0.0025  
Z -0.0118 -0.0052 0.0015 0.0011 0.0009 -0.0010  
AT. 55 C X -0.0201 0.0168 -0.0154 0.0179 -0.0116 -0.0074  
Y -0.0041 -0.0097 0.0084 -0.0047 0.0038 -0.0025  
Z -0.0118 0.0052 -0.0015 0.0011 -0.0009 -0.0010  
AT. 56 C X 0.0201 0.0168 0.0154 -0.0179 0.0116 -0.0074  
Y -0.0041 0.0097 0.0084 -0.0047 0.0038 0.0025  
Z 0.0118 0.0052 0.0015 -0.0011 0.0009 -0.0010  
AT. 57 C X 0.0309 -0.0288 -0.0118 -0.0211 -0.0200 -0.0173  
Y 0.0067 0.0166 0.0106 0.0047 0.0064 -0.0047  
Z 0.0076 -0.0049 -0.0034 -0.0001 -0.0001 0.0028  
AT. 58 C X -0.0309 -0.0288 0.0118 0.0211 0.0200 -0.0173

Y 0.0067 -0.0166 0.0106 0.0047 0.0064 0.0047  
Z -0.0076 -0.0049 0.0034 0.0001 0.0001 0.0028  
AT. 59 C X -0.0309 0.0288 -0.0118 0.0211 -0.0200 -0.0173  
Y -0.0067 -0.0166 0.0106 -0.0047 0.0064 -0.0047  
Z -0.0076 0.0049 -0.0034 0.0001 -0.0001 0.0028  
AT. 60 C X 0.0309 0.0288 0.0118 -0.0211 0.0200 -0.0173  
Y -0.0067 0.0166 0.0106 -0.0047 0.0064 0.0047  
Z 0.0076 0.0049 0.0034 -0.0001 0.0001 0.0028  
AT. 61 H X 0.0302 -0.0201 -0.0088 -0.0174 -0.0228 -0.0165  
Y 0.0056 0.0259 0.0131 0.0078 0.0051 -0.0035  
Z 0.0119 -0.0214 -0.0044 -0.0033 -0.0048 -0.0019  
AT. 62 H X -0.0302 -0.0201 0.0088 0.0174 0.0228 -0.0165  
Y 0.0056 -0.0259 0.0131 0.0078 0.0051 0.0035  
Z -0.0119 -0.0214 0.0044 0.0033 0.0048 -0.0019  
AT. 63 H X -0.0302 0.0201 -0.0088 0.0174 -0.0228 -0.0165  
Y -0.0056 -0.0259 0.0131 -0.0078 0.0051 -0.0035  
Z -0.0119 0.0214 -0.0044 0.0033 -0.0048 -0.0019  
AT. 64 H X 0.0302 0.0201 0.0088 -0.0174 0.0228 -0.0165  
Y -0.0056 0.0259 0.0131 -0.0078 0.0051 0.0035  
Z 0.0119 0.0214 0.0044 -0.0033 0.0048 -0.0019  
AT. 65 H X 0.0302 -0.0246 -0.0109 -0.0198 -0.0209 -0.0166  
Y 0.0090 0.0038 0.0086 0.0012 0.0092 -0.0073  
Z -0.0026 0.0090 -0.0051 0.0044 0.0049 0.0128  
AT. 66 H X -0.0302 -0.0246 0.0109 0.0198 0.0209 -0.0166  
Y 0.0090 -0.0038 0.0086 0.0012 0.0092 0.0073  
Z 0.0026 0.0090 0.0051 -0.0044 -0.0049 0.0128  
AT. 67 H X -0.0302 0.0246 -0.0109 0.0198 -0.0209 -0.0166  
Y -0.0090 -0.0038 0.0086 -0.0012 0.0092 -0.0073  
Z 0.0026 -0.0090 -0.0051 -0.0044 0.0049 0.0128  
AT. 68 H X 0.0302 0.0246 0.0109 -0.0198 0.0209 -0.0166  
Y -0.0090 0.0038 0.0086 -0.0012 0.0092 0.0073  
Z -0.0026 -0.0090 0.0051 0.0044 -0.0049 0.0128

AT. 69 H X 0.0397 -0.0498 -0.0126 -0.0276 -0.0228 -0.0262  
Y 0.0081 0.0249 0.0127 0.0055 0.0070 -0.0055  
Z 0.0104 -0.0016 -0.0017 -0.0006 -0.0001 0.0005

AT. 70 H X -0.0397 -0.0498 0.0126 0.0276 0.0228 -0.0262  
Y 0.0081 -0.0249 0.0127 0.0055 0.0070 0.0055  
Z -0.0104 -0.0016 0.0017 0.0006 0.0001 0.0005

AT. 71 H X -0.0397 0.0498 -0.0126 0.0276 -0.0228 -0.0262  
Y -0.0081 -0.0249 0.0127 -0.0055 0.0070 -0.0055  
Z -0.0104 0.0016 -0.0017 0.0006 -0.0001 0.0005

AT. 72 H X 0.0397 0.0498 0.0126 -0.0276 0.0228 -0.0262  
Y -0.0081 0.0249 0.0127 -0.0055 0.0070 0.0055  
Z 0.0104 0.0016 0.0017 -0.0006 0.0001 0.0005

AT. 73 C X 0.0077 -0.0145 -0.0058 -0.0014 0.0026 0.0016  
Y 0.0022 0.0043 0.0056 0.0029 0.0013 -0.0021  
Z 0.0127 -0.0107 -0.0064 -0.0057 -0.0050 -0.0012

AT. 74 C X -0.0077 -0.0145 0.0058 0.0014 -0.0026 0.0016  
Y 0.0022 -0.0043 0.0056 0.0029 0.0013 0.0021  
Z -0.0127 -0.0107 0.0064 0.0057 0.0050 -0.0012

AT. 75 C X -0.0077 0.0145 -0.0058 0.0014 0.0026 0.0016  
Y -0.0022 -0.0043 0.0056 -0.0029 0.0013 -0.0021  
Z -0.0127 0.0107 -0.0064 0.0057 -0.0050 -0.0012

AT. 76 C X 0.0077 0.0145 0.0058 -0.0014 -0.0026 0.0016  
Y -0.0022 0.0043 0.0056 -0.0029 0.0013 0.0021  
Z 0.0127 0.0107 0.0064 -0.0057 0.0050 -0.0012

AT. 77 C X 0.0058 -0.0136 0.0058 0.0159 0.0084 0.0018  
Y -0.0063 0.0048 -0.0067 -0.0112 -0.0111 -0.0062  
Z 0.0303 -0.0110 -0.0081 -0.0235 -0.0144 -0.0131

AT. 78 C X -0.0058 -0.0136 -0.0058 -0.0159 -0.0084 0.0018  
Y -0.0063 -0.0048 -0.0067 -0.0112 -0.0111 0.0062  
Z -0.0303 -0.0110 0.0081 0.0235 0.0144 -0.0131

AT. 79 C X -0.0058 0.0136 0.0058 -0.0159 0.0084 0.0018  
Y 0.0063 -0.0048 -0.0067 0.0112 -0.0111 -0.0062

Z -0.0303 0.0110 -0.0081 0.0235 -0.0144 -0.0131  
AT. 80 C X 0.0058 0.0136 -0.0058 0.0159 -0.0084 0.0018  
Y 0.0063 0.0048 -0.0067 0.0112 -0.0111 0.0062  
Z 0.0303 0.0110 0.0081 -0.0235 0.0144 -0.0131  
AT. 81 H X 0.0032 -0.0111 0.0016 0.0080 0.0011 -0.0032  
Y -0.0088 0.0070 -0.0111 -0.0175 -0.0175 -0.0108  
Z 0.0383 -0.0127 -0.0216 -0.0509 -0.0313 -0.0212  
AT. 82 H X -0.0032 -0.0111 -0.0016 -0.0080 -0.0011 -0.0032  
Y -0.0088 -0.0070 -0.0111 -0.0175 -0.0175 0.0108  
Z -0.0383 -0.0127 0.0216 0.0509 0.0313 -0.0212  
AT. 83 H X -0.0032 0.0111 0.0016 -0.0080 0.0011 -0.0032  
Y 0.0088 -0.0070 -0.0111 0.0175 -0.0175 -0.0108  
Z -0.0383 0.0127 -0.0216 0.0509 -0.0313 -0.0212  
AT. 84 H X 0.0032 0.0111 -0.0016 0.0080 -0.0011 -0.0032  
Y 0.0088 0.0070 -0.0111 0.0175 -0.0175 0.0108  
Z 0.0383 0.0127 0.0216 -0.0509 0.0313 -0.0212  
AT. 85 H X 0.0021 -0.0146 0.0165 0.0401 0.0241 0.0116  
Y -0.0088 0.0054 -0.0145 -0.0242 -0.0189 -0.0087  
Z 0.0333 -0.0111 -0.0042 -0.0196 -0.0127 -0.0143  
AT. 86 H X -0.0021 -0.0146 -0.0165 -0.0401 -0.0241 0.0116  
Y -0.0088 -0.0054 -0.0145 -0.0242 -0.0189 0.0087  
Z -0.0333 -0.0111 0.0042 0.0196 0.0127 -0.0143  
AT. 87 H X -0.0021 0.0146 0.0165 -0.0401 0.0241 0.0116  
Y 0.0088 -0.0054 -0.0145 0.0242 -0.0189 -0.0087  
Z -0.0333 0.0111 -0.0042 0.0196 -0.0127 -0.0143  
AT. 88 H X 0.0021 0.0146 -0.0165 0.0401 -0.0241 0.0116  
Y 0.0088 0.0054 -0.0145 0.0242 -0.0189 0.0087  
Z 0.0333 0.0111 0.0042 -0.0196 0.0127 -0.0143  
AT. 89 C X -0.0010 -0.0095 0.0027 0.0148 0.0066 0.0019  
Y 0.0008 -0.0034 0.0018 0.0001 -0.0012 -0.0009  
Z 0.0169 -0.0077 -0.0062 -0.0090 -0.0046 -0.0029  
AT. 90 C X 0.0010 -0.0095 -0.0027 -0.0148 -0.0066 0.0019

Y 0.0008 0.0034 0.0018 0.0001 -0.0012 0.0009  
Z -0.0169 -0.0077 0.0062 0.0090 0.0046 -0.0029  
AT. 91 C X 0.0010 0.0095 0.0027 -0.0148 0.0066 0.0019  
Y -0.0008 0.0034 0.0018 -0.0001 -0.0012 -0.0009  
Z -0.0169 0.0077 -0.0062 0.0090 -0.0046 -0.0029  
AT. 92 C X -0.0010 0.0095 -0.0027 0.0148 -0.0066 0.0019  
Y -0.0008 -0.0034 0.0018 -0.0001 -0.0012 0.0009  
Z 0.0169 0.0077 0.0062 -0.0090 0.0046 -0.0029  
AT. 93 C X -0.0190 0.0034 0.0025 0.0201 0.0062 0.0031  
Y -0.0026 -0.0126 -0.0011 -0.0004 -0.0005 0.0038  
Z 0.0175 -0.0160 -0.0081 -0.0100 -0.0040 0.0001  
AT. 94 C X 0.0190 0.0034 -0.0025 -0.0201 -0.0062 0.0031  
Y -0.0026 0.0126 -0.0011 -0.0004 -0.0005 -0.0038  
Z -0.0175 -0.0160 0.0081 0.0100 0.0040 0.0001  
AT. 95 C X 0.0190 -0.0034 0.0025 -0.0201 0.0062 0.0031  
Y 0.0026 0.0126 -0.0011 0.0004 -0.0005 0.0038  
Z -0.0175 0.0160 -0.0081 0.0100 -0.0040 0.0001  
AT. 96 C X -0.0190 -0.0034 -0.0025 0.0201 -0.0062 0.0031  
Y 0.0026 -0.0126 -0.0011 0.0004 -0.0005 -0.0038  
Z 0.0175 0.0160 0.0081 -0.0100 0.0040 0.0001  
AT. 97 H X -0.0233 0.0087 0.0029 0.0161 0.0000 -0.0026  
Y -0.0018 -0.0224 -0.0019 0.0145 0.0161 0.0207  
Z 0.0040 -0.0166 -0.0084 0.0049 0.0069 0.0134  
AT. 98 H X 0.0233 0.0087 -0.0029 -0.0161 -0.0000 -0.0026  
Y -0.0018 0.0224 -0.0019 0.0145 0.0161 -0.0207  
Z -0.0040 -0.0166 0.0084 -0.0049 -0.0069 0.0134  
AT. 99 H X 0.0233 -0.0087 0.0029 -0.0161 0.0000 -0.0026  
Y 0.0018 0.0224 -0.0019 -0.0145 0.0161 0.0207  
Z -0.0040 0.0166 -0.0084 -0.0049 0.0069 0.0134  
AT. 100 H X -0.0233 -0.0087 -0.0029 0.0161 -0.0000 -0.0026  
Y 0.0018 -0.0224 -0.0019 -0.0145 0.0161 -0.0207  
Z 0.0040 0.0166 0.0084 0.0049 -0.0069 0.0134

AT.101 H X -0.0191 0.0094 0.0029 0.0066 -0.0084 -0.0112  
Y -0.0041 -0.0047 -0.0007 -0.0128 -0.0141 -0.0100  
Z 0.0247 -0.0254 -0.0106 -0.0202 -0.0087 -0.0028

AT.102 H X 0.0191 0.0094 -0.0029 -0.0066 0.0084 -0.0112  
Y -0.0041 0.0047 -0.0007 -0.0128 -0.0141 0.0100  
Z -0.0247 -0.0254 0.0106 0.0202 0.0087 -0.0028

AT.103 H X 0.0191 -0.0094 0.0029 -0.0066 -0.0084 -0.0112  
Y 0.0041 0.0047 -0.0007 0.0128 -0.0141 -0.0100  
Z -0.0247 0.0254 -0.0106 0.0202 -0.0087 -0.0028

AT.104 H X -0.0191 -0.0094 -0.0029 0.0066 0.0084 -0.0112  
Y 0.0041 -0.0047 -0.0007 0.0128 -0.0141 0.0100  
Z 0.0247 0.0254 0.0106 -0.0202 0.0087 -0.0028

AT.105 H X -0.0280 0.0016 0.0025 0.0433 0.0248 0.0223  
Y -0.0062 -0.0174 -0.0028 -0.0032 -0.0020 0.0054  
Z 0.0231 -0.0115 -0.0066 -0.0159 -0.0092 -0.0076

AT.106 H X 0.0280 0.0016 -0.0025 -0.0433 -0.0248 0.0223  
Y -0.0062 0.0174 -0.0028 -0.0032 -0.0020 -0.0054  
Z -0.0231 -0.0115 0.0066 0.0159 0.0092 -0.0076

AT.107 H X 0.0280 -0.0016 0.0025 -0.0433 0.0248 0.0223  
Y 0.0062 0.0174 -0.0028 0.0032 -0.0020 0.0054  
Z -0.0231 0.0115 -0.0066 0.0159 -0.0092 -0.0076

AT.108 H X -0.0280 -0.0016 -0.0025 0.0433 -0.0248 0.0223  
Y 0.0062 -0.0174 -0.0028 0.0032 -0.0020 -0.0054  
Z 0.0231 0.0115 0.0066 -0.0159 0.0092 -0.0076

AT.109 C X 0.0190 -0.0120 -0.0200 -0.0211 -0.0130 -0.0064  
Y 0.0054 0.0111 -0.0006 -0.0045 -0.0022 -0.0033  
Z 0.0015 0.0085 0.0053 0.0126 0.0116 0.0062

AT.110 C X -0.0190 -0.0120 0.0200 0.0211 0.0130 -0.0064  
Y 0.0054 -0.0111 -0.0006 -0.0045 -0.0022 0.0033  
Z -0.0015 0.0085 -0.0053 -0.0126 -0.0116 0.0062

AT.111 C X -0.0190 0.0120 -0.0200 0.0211 -0.0130 -0.0064  
Y -0.0054 -0.0111 -0.0006 0.0045 -0.0022 -0.0033

Z -0.0015 -0.0085 0.0053 -0.0126 0.0116 0.0062  
AT. 112 C X 0.0190 0.0120 0.0200 -0.0211 0.0130 -0.0064  
Y -0.0054 0.0111 -0.0006 0.0045 -0.0022 0.0033  
Z 0.0015 -0.0085 -0.0053 0.0126 -0.0116 0.0062  
AT. 113 H X 0.0178 -0.0126 -0.0153 -0.0157 -0.0085 -0.0049  
Y 0.0065 0.0124 -0.0058 -0.0099 -0.0069 -0.0045  
Z -0.0039 0.0087 0.0183 0.0313 0.0266 0.0139  
AT. 114 H X -0.0178 -0.0126 0.0153 0.0157 0.0085 -0.0049  
Y 0.0065 -0.0124 -0.0058 -0.0099 -0.0069 0.0045  
Z 0.0039 0.0087 -0.0183 -0.0313 -0.0266 0.0139  
AT. 115 H X -0.0178 0.0126 -0.0153 0.0157 -0.0085 -0.0049  
Y -0.0065 -0.0124 -0.0058 0.0099 -0.0069 -0.0045  
Z 0.0039 -0.0087 0.0183 -0.0313 0.0266 0.0139  
AT. 116 H X 0.0178 0.0126 0.0153 -0.0157 0.0085 -0.0049  
Y -0.0065 0.0124 -0.0058 0.0099 -0.0069 0.0045  
Z -0.0039 -0.0087 -0.0183 0.0313 -0.0266 0.0139  
AT. 117 H X 0.0249 -0.0122 -0.0326 -0.0389 -0.0278 -0.0129  
Y 0.0043 0.0185 -0.0038 -0.0080 -0.0049 -0.0043  
Z -0.0006 0.0154 0.0045 0.0121 0.0115 0.0063  
AT. 118 H X -0.0249 -0.0122 0.0326 0.0389 0.0278 -0.0129  
Y 0.0043 -0.0185 -0.0038 -0.0080 -0.0049 0.0043  
Z 0.0006 0.0154 -0.0045 -0.0121 -0.0115 0.0063  
AT. 119 H X -0.0249 0.0122 -0.0326 0.0389 -0.0278 -0.0129  
Y -0.0043 -0.0185 -0.0038 0.0080 -0.0049 -0.0043  
Z 0.0006 -0.0154 0.0045 -0.0121 0.0115 0.0063  
AT. 120 H X 0.0249 0.0122 0.0326 -0.0389 0.0278 -0.0129  
Y -0.0043 0.0185 -0.0038 0.0080 -0.0049 0.0043  
Z -0.0006 -0.0154 -0.0045 0.0121 -0.0115 0.0063  
AT. 121 C X 0.0018 -0.0122 0.0096 0.0248 0.0134 0.0039  
Y 0.0078 -0.0105 0.0097 0.0087 0.0037 -0.0011  
Z 0.0054 0.0064 -0.0006 0.0036 0.0039 0.0019  
AT. 122 C X -0.0018 -0.0122 -0.0096 -0.0248 -0.0134 0.0039

Y 0.0078 0.0105 0.0097 0.0087 0.0037 0.0011  
Z -0.0054 0.0064 0.0006 -0.0036 -0.0039 0.0019  
AT. 123 C X -0.0018 0.0122 0.0096 -0.0248 0.0134 0.0039  
Y -0.0078 0.0105 0.0097 -0.0087 0.0037 -0.0011  
Z -0.0054 -0.0064 -0.0006 -0.0036 0.0039 0.0019  
AT. 124 C X 0.0018 0.0122 -0.0096 0.0248 -0.0134 0.0039  
Y -0.0078 -0.0105 0.0097 -0.0087 0.0037 0.0011  
Z 0.0054 -0.0064 0.0006 0.0036 -0.0039 0.0019  
AT. 125 H X -0.0016 -0.0140 0.0229 0.0460 0.0250 0.0073  
Y 0.0088 -0.0195 0.0139 0.0141 0.0048 -0.0017  
Z 0.0057 0.0133 -0.0073 -0.0062 -0.0001 0.0013  
AT. 126 H X 0.0016 -0.0140 -0.0229 -0.0460 -0.0250 0.0073  
Y 0.0088 0.0195 0.0139 0.0141 0.0048 0.0017  
Z -0.0057 0.0133 0.0073 0.0062 0.0001 0.0013  
AT. 127 H X 0.0016 0.0140 0.0229 -0.0460 0.0250 0.0073  
Y -0.0088 0.0195 0.0139 -0.0141 0.0048 -0.0017  
Z -0.0057 -0.0133 -0.0073 0.0062 -0.0001 0.0013  
AT. 128 H X -0.0016 0.0140 -0.0229 0.0460 -0.0250 0.0073  
Y -0.0088 -0.0195 0.0139 -0.0141 0.0048 0.0017  
Z 0.0057 -0.0133 0.0073 -0.0062 0.0001 0.0013  
AT. 129 H X -0.0029 -0.0117 0.0109 0.0279 0.0146 0.0050  
Y 0.0128 -0.0142 0.0139 0.0138 0.0064 -0.0016  
Z 0.0003 -0.0010 0.0146 0.0276 0.0153 0.0051  
AT. 130 H X 0.0029 -0.0117 -0.0109 -0.0279 -0.0146 0.0050  
Y 0.0128 0.0142 0.0139 0.0138 0.0064 0.0016  
Z -0.0003 -0.0010 -0.0146 -0.0276 -0.0153 0.0051  
AT. 131 H X 0.0029 0.0117 0.0109 -0.0279 0.0146 0.0050  
Y -0.0128 0.0142 0.0139 -0.0138 0.0064 -0.0016  
Z -0.0003 0.0010 0.0146 -0.0276 0.0153 0.0051  
AT. 132 H X -0.0029 0.0117 -0.0109 0.0279 -0.0146 0.0050  
Y -0.0128 -0.0142 0.0139 -0.0138 0.0064 0.0016  
Z 0.0003 0.0010 -0.0146 0.0276 -0.0153 0.0051



AT. 133 C X 0.0079 0.0328 -0.0179 -0.0202 -0.0055 0.0041  
Y 0.0071 -0.0027 0.0053 0.0032 0.0017 -0.0021  
Z -0.0006 0.0173 -0.0093 -0.0033 0.0017 0.0025

AT. 134 C X -0.0079 0.0328 0.0179 0.0202 0.0055 0.0041  
Y 0.0071 0.0027 0.0053 0.0032 0.0017 0.0021  
Z 0.0006 0.0173 0.0093 0.0033 -0.0017 0.0025

AT. 135 C X -0.0079 -0.0328 -0.0179 0.0202 -0.0055 0.0041  
Y -0.0071 0.0027 0.0053 -0.0032 0.0017 -0.0021  
Z 0.0006 -0.0173 -0.0093 0.0033 0.0017 0.0025

AT. 136 C X 0.0079 -0.0328 0.0179 -0.0202 0.0055 0.0041  
Y -0.0071 -0.0027 0.0053 -0.0032 0.0017 0.0021  
Z -0.0006 -0.0173 0.0093 -0.0033 -0.0017 0.0025

AT. 137 C X 0.0028 0.0153 -0.0021 -0.0016 0.0015 0.0013  
Y 0.0091 -0.0091 0.0107 0.0085 0.0049 -0.0015  
Z -0.0012 0.0245 -0.0166 -0.0114 -0.0024 0.0029

AT. 138 C X -0.0028 0.0153 0.0021 0.0016 -0.0015 0.0013  
Y 0.0091 0.0091 0.0107 0.0085 0.0049 0.0015  
Z 0.0012 0.0245 0.0166 0.0114 0.0024 0.0029

AT. 139 C X -0.0028 -0.0153 -0.0021 0.0016 0.0015 0.0013  
Y -0.0091 0.0091 0.0107 -0.0085 0.0049 -0.0015  
Z 0.0012 -0.0245 -0.0166 0.0114 -0.0024 0.0029

AT. 140 C X 0.0028 -0.0153 0.0021 -0.0016 -0.0015 0.0013  
Y -0.0091 -0.0091 0.0107 -0.0085 0.0049 0.0015  
Z -0.0012 -0.0245 0.0166 -0.0114 0.0024 0.0029

AT. 141 H X 0.0035 0.0016 0.0068 0.0061 0.0042 -0.0005  
Y 0.0124 -0.0168 0.0171 0.0145 0.0076 -0.0021  
Z 0.0005 0.0346 -0.0220 -0.0161 -0.0039 0.0043

AT. 142 H X -0.0035 0.0016 -0.0068 -0.0061 -0.0042 -0.0005  
Y 0.0124 0.0168 0.0171 0.0145 0.0076 0.0021  
Z -0.0005 0.0346 0.0220 0.0161 0.0039 0.0043

AT. 143 H X -0.0035 -0.0016 0.0068 -0.0061 0.0042 -0.0005  
Y -0.0124 0.0168 0.0171 -0.0145 0.0076 -0.0021

Z -0.0005 -0.0346 -0.0220 0.0161 -0.0039 0.0043  
AT. 144 H X 0.0035 -0.0016 -0.0068 0.0061 -0.0042 -0.0005  
Y -0.0124 -0.0168 0.0171 -0.0145 0.0076 0.0021  
Z 0.0005 -0.0346 0.0220 -0.0161 0.0039 0.0043  
AT. 145 H X -0.0026 0.0280 -0.0137 -0.0118 -0.0031 0.0029  
Y 0.0107 -0.0108 0.0128 0.0101 0.0056 -0.0018  
Z -0.0011 0.0326 -0.0217 -0.0169 -0.0047 0.0038  
AT. 146 H X 0.0026 0.0280 0.0137 0.0118 0.0031 0.0029  
Y 0.0107 0.0108 0.0128 0.0101 0.0056 0.0018  
Z 0.0011 0.0326 0.0217 0.0169 0.0047 0.0038  
AT. 147 H X 0.0026 -0.0280 -0.0137 0.0118 -0.0031 0.0029  
Y -0.0107 0.0108 0.0128 -0.0101 0.0056 -0.0018  
Z 0.0011 -0.0326 -0.0217 0.0169 -0.0047 0.0038  
AT. 148 H X -0.0026 -0.0280 0.0137 -0.0118 0.0031 0.0029  
Y -0.0107 -0.0108 0.0128 -0.0101 0.0056 0.0018  
Z -0.0011 -0.0326 0.0217 -0.0169 0.0047 0.0038  
AT. 149 O X 0.0086 -0.0182 -0.0085 -0.0043 0.0118 0.0099  
Y 0.0013 0.0020 0.0073 0.0044 0.0133 0.0069  
Z 0.0185 -0.0152 -0.0175 -0.0203 -0.0131 -0.0032  
AT. 150 O X -0.0086 -0.0182 0.0085 0.0043 -0.0118 0.0099  
Y 0.0013 -0.0020 0.0073 0.0044 0.0133 -0.0069  
Z -0.0185 -0.0152 0.0175 0.0203 0.0131 -0.0032  
AT. 151 O X -0.0086 0.0182 -0.0085 0.0043 0.0118 0.0099  
Y -0.0013 -0.0020 0.0073 -0.0044 0.0133 0.0069  
Z -0.0185 0.0152 -0.0175 0.0203 -0.0131 -0.0032  
AT. 152 O X 0.0086 0.0182 0.0085 -0.0043 -0.0118 0.0099  
Y -0.0013 0.0020 0.0073 -0.0044 0.0133 -0.0069  
Z 0.0185 0.0152 0.0175 -0.0203 0.0131 -0.0032  
AT. 153 H X 0.0079 -0.0160 -0.0052 -0.0041 -0.0100 -0.0108  
Y -0.0005 0.0032 -0.0003 -0.0040 -0.0039 -0.0066  
Z 0.0182 -0.0165 -0.0221 -0.0233 -0.0043 0.0059  
AT. 154 H X -0.0079 -0.0160 0.0052 0.0041 0.0100 -0.0108

Y -0.0005 -0.0032 -0.0003 -0.0040 -0.0039 0.0066  
Z -0.0182 -0.0165 0.0221 0.0233 0.0043 0.0059  
AT. 155 H X -0.0079 0.0160 -0.0052 0.0041 -0.0100 -0.0108  
Y 0.0005 -0.0032 -0.0003 0.0040 -0.0039 -0.0066  
Z -0.0182 0.0165 -0.0221 0.0233 -0.0043 0.0059  
AT. 156 H X 0.0079 0.0160 0.0052 -0.0041 0.0100 -0.0108  
Y 0.0005 0.0032 -0.0003 0.0040 -0.0039 0.0066  
Z 0.0182 0.0165 0.0221 -0.0233 0.0043 0.0059  
AT. 157 O X 0.0031 -0.0142 -0.0018 0.0049 0.0099 0.0075  
Y 0.0030 0.0057 0.0045 0.0022 -0.0101 -0.0111  
Z 0.0013 -0.0142 0.0010 0.0113 0.0039 0.0057  
AT. 158 O X -0.0031 -0.0142 0.0018 -0.0049 -0.0099 0.0075  
Y 0.0030 -0.0057 0.0045 0.0022 -0.0101 0.0111  
Z -0.0013 -0.0142 -0.0010 -0.0113 -0.0039 0.0057  
AT. 159 O X -0.0031 0.0142 -0.0018 -0.0049 0.0099 0.0075  
Y -0.0030 -0.0057 0.0045 -0.0022 -0.0101 -0.0111  
Z -0.0013 0.0142 0.0010 -0.0113 0.0039 0.0057  
AT. 160 O X 0.0031 0.0142 0.0018 0.0049 -0.0099 0.0075  
Y -0.0030 0.0057 0.0045 -0.0022 -0.0101 0.0111  
Z 0.0013 0.0142 -0.0010 0.0113 -0.0039 0.0057  
AT. 161 O X 0.0095 0.0134 -0.0177 -0.0240 -0.0054 0.0006  
Y 0.0096 -0.0279 0.0175 0.0187 0.0012 -0.0126  
Z -0.0076 -0.0095 0.0025 0.0187 0.0060 0.0109  
AT. 162 O X -0.0095 0.0134 0.0177 0.0240 0.0054 0.0006  
Y 0.0096 0.0279 0.0175 0.0187 0.0012 0.0126  
Z 0.0076 -0.0095 -0.0025 -0.0187 -0.0060 0.0109  
AT. 163 O X -0.0095 -0.0134 -0.0177 0.0240 -0.0054 0.0006  
Y -0.0096 0.0279 0.0175 -0.0187 0.0012 -0.0126  
Z 0.0076 0.0095 0.0025 -0.0187 0.0060 0.0109  
AT. 164 O X 0.0095 -0.0134 0.0177 -0.0240 0.0054 0.0006  
Y -0.0096 -0.0279 0.0175 -0.0187 0.0012 0.0126  
Z -0.0076 0.0095 -0.0025 0.0187 -0.0060 0.0109

AT.165 H X 0.0059 0.0470 -0.0305 -0.0419 -0.0151 0.0053  
Y 0.0084 -0.0132 0.0121 0.0109 -0.0033 -0.0111  
Z -0.0064 -0.0002 -0.0032 0.0098 0.0008 0.0049

AT.166 H X -0.0059 0.0470 0.0305 0.0419 0.0151 0.0053  
Y 0.0084 0.0132 0.0121 0.0109 -0.0033 0.0111  
Z 0.0064 -0.0002 0.0032 -0.0098 -0.0008 0.0049

AT.167 H X -0.0059 -0.0470 -0.0305 0.0419 -0.0151 0.0053  
Y -0.0084 0.0132 0.0121 -0.0109 -0.0033 -0.0111  
Z 0.0064 0.0002 -0.0032 -0.0098 0.0008 0.0049

AT.168 H X 0.0059 -0.0470 0.0305 -0.0419 0.0151 0.0053  
Y -0.0084 -0.0132 0.0121 -0.0109 -0.0033 0.0111  
Z -0.0064 0.0002 0.0032 0.0098 -0.0008 0.0049

AT.169 O X 0.0039 -0.0005 -0.0075 0.0025 -0.0496 -0.0438  
Y -0.0064 0.0049 -0.0031 -0.0073 -0.0069 -0.0131  
Z -0.0012 -0.0002 -0.0293 -0.0010 0.0789 0.0753

AT.170 O X -0.0039 -0.0005 0.0075 -0.0025 0.0496 -0.0438  
Y -0.0064 -0.0049 -0.0031 -0.0073 -0.0069 0.0131  
Z 0.0012 -0.0002 0.0293 0.0010 -0.0789 0.0753

AT.171 O X -0.0039 0.0005 -0.0075 -0.0025 -0.0496 -0.0438  
Y 0.0064 -0.0049 -0.0031 0.0073 -0.0069 -0.0131  
Z 0.0012 0.0002 -0.0293 0.0010 0.0789 0.0753

AT.172 O X 0.0039 0.0005 0.0075 0.0025 0.0496 -0.0438  
Y 0.0064 0.0049 -0.0031 0.0073 -0.0069 0.0131  
Z -0.0012 0.0002 0.0293 -0.0010 -0.0789 0.0753

AT.173 H X 0.0258 -0.0118 0.0238 0.0201 -0.0381 -0.0415  
Y -0.0132 0.0085 -0.0110 -0.0118 -0.0066 -0.0117  
Z 0.0045 -0.0035 -0.0287 0.0028 0.0667 0.0635

AT.174 H X -0.0258 -0.0118 -0.0238 -0.0201 0.0381 -0.0415  
Y -0.0132 -0.0085 -0.0110 -0.0118 -0.0066 0.0117  
Z -0.0045 -0.0035 0.0287 -0.0028 -0.0667 0.0635

AT.175 H X -0.0258 0.0118 0.0238 -0.0201 -0.0381 -0.0415  
Y 0.0132 -0.0085 -0.0110 0.0118 -0.0066 -0.0117

Z -0.0045 0.0035 -0.0287 -0.0028 0.0667 0.0635  
 AT. 176 H X 0.0258 0.0118 -0.0238 0.0201 0.0381 -0.0415  
 Y 0.0132 0.0085 -0.0110 0.0118 -0.0066 0.0117  
 Z 0.0045 0.0035 0.0287 0.0028 -0.0667 0.0635  
  
 FREQ(CM\*\*-1) 136.29 138.63 139.03 141.85 156.04 157.45  
  
 AT. 1 I X 0.0085 0.0041 0.0088 0.0061 -0.0022 0.0007  
 Y 0.0025 0.0033 0.0036 0.0028 -0.0017 0.0010  
 Z -0.0101 -0.0118 -0.0135 -0.0133 0.0035 -0.0024  
 AT. 2 I X -0.0085 0.0041 0.0088 -0.0061 -0.0022 -0.0007  
 Y 0.0025 -0.0033 -0.0036 0.0028 0.0017 0.0010  
 Z 0.0101 -0.0118 -0.0135 0.0133 0.0035 0.0024  
 AT. 3 I X 0.0085 0.0041 -0.0088 -0.0061 -0.0022 0.0007  
 Y 0.0025 0.0033 -0.0036 -0.0028 -0.0017 0.0010  
 Z -0.0101 -0.0118 0.0135 0.0133 0.0035 -0.0024  
 AT. 4 I X -0.0085 0.0041 -0.0088 0.0061 -0.0022 -0.0007  
 Y 0.0025 -0.0033 0.0036 -0.0028 0.0017 0.0010  
 Z 0.0101 -0.0118 0.0135 -0.0133 0.0035 0.0024  
 AT. 5 I X 0.0065 0.0052 0.0055 0.0052 0.0010 -0.0021  
 Y -0.0057 -0.0052 -0.0049 -0.0048 -0.0013 0.0020  
 Z -0.0101 -0.0117 -0.0070 -0.0112 -0.0025 0.0053  
 AT. 6 I X -0.0065 0.0052 0.0055 -0.0052 0.0010 0.0021  
 Y -0.0057 0.0052 0.0049 -0.0048 0.0013 0.0020  
 Z 0.0101 -0.0117 -0.0070 0.0112 -0.0025 -0.0053  
 AT. 7 I X 0.0065 0.0052 -0.0055 -0.0052 0.0010 -0.0021  
 Y -0.0057 -0.0052 0.0049 0.0048 -0.0013 0.0020  
 Z -0.0101 -0.0117 0.0070 0.0112 -0.0025 0.0053  
 AT. 8 I X -0.0065 0.0052 -0.0055 0.0052 0.0010 0.0021  
 Y -0.0057 0.0052 -0.0049 0.0048 0.0013 0.0020  
 Z 0.0101 -0.0117 0.0070 -0.0112 -0.0025 -0.0053  
 AT. 9 N X -0.0043 -0.0018 0.0008 0.0008 -0.0058 -0.0032

Y 0.0096 0.0063 0.0049 0.0071 0.0152 -0.0039  
Z 0.0129 0.0176 0.0144 0.0144 -0.0057 -0.0071  
AT. 10 N X 0.0043 -0.0018 0.0008 -0.0008 -0.0058 0.0032  
Y 0.0096 -0.0063 -0.0049 0.0071 -0.0152 -0.0039  
Z -0.0129 0.0176 0.0144 -0.0144 -0.0057 0.0071  
AT. 11 N X -0.0043 -0.0018 -0.0008 -0.0008 -0.0058 -0.0032  
Y 0.0096 0.0063 -0.0049 -0.0071 0.0152 -0.0039  
Z 0.0129 0.0176 -0.0144 -0.0144 -0.0057 -0.0071  
AT. 12 N X 0.0043 -0.0018 -0.0008 0.0008 -0.0058 0.0032  
Y 0.0096 -0.0063 0.0049 -0.0071 -0.0152 -0.0039  
Z -0.0129 0.0176 -0.0144 0.0144 -0.0057 0.0071  
AT. 13 N X -0.0078 -0.0059 -0.0068 -0.0047 -0.0034 -0.0055  
Y -0.0089 -0.0066 -0.0054 -0.0068 -0.0145 0.0062  
Z 0.0173 0.0176 0.0139 0.0176 0.0041 -0.0078  
AT. 14 N X 0.0078 -0.0059 -0.0068 0.0047 -0.0034 0.0055  
Y -0.0089 0.0066 0.0054 -0.0068 0.0145 0.0062  
Z -0.0173 0.0176 0.0139 -0.0176 0.0041 0.0078  
AT. 15 N X -0.0078 -0.0059 0.0068 0.0047 -0.0034 -0.0055  
Y -0.0089 -0.0066 0.0054 0.0068 -0.0145 0.0062  
Z 0.0173 0.0176 -0.0139 -0.0176 0.0041 -0.0078  
AT. 16 N X 0.0078 -0.0059 0.0068 -0.0047 -0.0034 0.0055  
Y -0.0089 0.0066 -0.0054 0.0068 0.0145 0.0062  
Z -0.0173 0.0176 -0.0139 0.0176 0.0041 0.0078  
AT. 17 O X -0.0221 -0.0259 -0.0475 -0.0375 0.0237 -0.0057  
Y 0.0129 0.0124 0.0100 0.0123 0.0148 -0.0158  
Z 0.0231 0.0275 0.0383 0.0326 -0.0245 0.0128  
AT. 18 O X 0.0221 -0.0259 -0.0475 0.0375 0.0237 0.0057  
Y 0.0129 -0.0124 -0.0100 0.0123 -0.0148 -0.0158  
Z -0.0231 0.0275 0.0383 -0.0326 -0.0245 -0.0128  
AT. 19 O X -0.0221 -0.0259 0.0475 0.0375 0.0237 -0.0057  
Y 0.0129 0.0124 -0.0100 -0.0123 0.0148 -0.0158  
Z 0.0231 0.0275 -0.0383 -0.0326 -0.0245 0.0128

AT. 20 O X 0.0221 -0.0259 0.0475 -0.0375 0.0237 0.0057  
Y 0.0129 -0.0124 0.0100 -0.0123 -0.0148 -0.0158  
Z -0.0231 0.0275 -0.0383 0.0326 -0.0245 -0.0128

AT. 21 O X -0.0394 -0.0419 -0.0359 -0.0387 -0.0117 0.0184  
Y -0.0060 -0.0045 -0.0054 -0.0050 -0.0032 -0.0042  
Z 0.0224 0.0220 0.0147 0.0213 0.0247 -0.0289

AT. 22 O X 0.0394 -0.0419 -0.0359 0.0387 -0.0117 -0.0184  
Y -0.0060 0.0045 0.0054 -0.0050 0.0032 -0.0042  
Z -0.0224 0.0220 0.0147 -0.0213 0.0247 0.0289

AT. 23 O X -0.0394 -0.0419 0.0359 0.0387 -0.0117 0.0184  
Y -0.0060 -0.0045 0.0054 0.0050 -0.0032 -0.0042  
Z 0.0224 0.0220 -0.0147 -0.0213 0.0247 -0.0289

AT. 24 O X 0.0394 -0.0419 0.0359 -0.0387 -0.0117 -0.0184  
Y -0.0060 0.0045 -0.0054 0.0050 0.0032 -0.0042  
Z -0.0224 0.0220 -0.0147 0.0213 0.0247 0.0289

AT. 25 C X 0.0262 0.0236 0.0346 0.0294 -0.0144 0.0149  
Y 0.0092 0.0058 0.0104 0.0102 0.0073 0.0067  
Z 0.0154 0.0185 0.0241 0.0207 -0.0184 0.0126

AT. 26 C X -0.0262 0.0236 0.0346 -0.0294 -0.0144 -0.0149  
Y 0.0092 -0.0058 -0.0104 0.0102 -0.0073 0.0067  
Z -0.0154 0.0185 0.0241 -0.0207 -0.0184 -0.0126

AT. 27 C X 0.0262 0.0236 -0.0346 -0.0294 -0.0144 0.0149  
Y 0.0092 0.0058 -0.0104 -0.0102 0.0073 0.0067  
Z 0.0154 0.0185 -0.0241 -0.0207 -0.0184 0.0126

AT. 28 C X -0.0262 0.0236 -0.0346 0.0294 -0.0144 -0.0149  
Y 0.0092 -0.0058 0.0104 -0.0102 -0.0073 0.0067  
Z -0.0154 0.0185 -0.0241 0.0207 -0.0184 -0.0126

AT. 29 H X 0.0229 0.0184 0.0293 0.0238 -0.0117 0.0117  
Y 0.0297 0.0266 0.0413 0.0372 -0.0077 0.0253  
Z 0.0170 0.0230 0.0270 0.0245 -0.0202 0.0146

AT. 30 H X -0.0229 0.0184 0.0293 -0.0238 -0.0117 -0.0117  
Y 0.0297 -0.0266 -0.0413 0.0372 0.0077 0.0253

Z -0.0170 0.0230 0.0270 -0.0245 -0.0202 -0.0146  
AT. 31 H X 0.0229 0.0184 -0.0293 -0.0238 -0.0117 0.0117  
Y 0.0297 0.0266 -0.0413 -0.0372 -0.0077 0.0253  
Z 0.0170 0.0230 -0.0270 -0.0245 -0.0202 0.0146  
AT. 32 H X -0.0229 0.0184 -0.0293 0.0238 -0.0117 -0.0117  
Y 0.0297 -0.0266 0.0413 -0.0372 0.0077 0.0253  
Z -0.0170 0.0230 -0.0270 0.0245 -0.0202 -0.0146  
AT. 33 H X 0.0449 0.0424 0.0617 0.0542 -0.0239 0.0303  
Y 0.0049 0.0017 0.0037 0.0045 0.0104 0.0015  
Z 0.0197 0.0226 0.0330 0.0267 -0.0254 0.0236  
AT. 34 H X -0.0449 0.0424 0.0617 -0.0542 -0.0239 -0.0303  
Y 0.0049 -0.0017 -0.0037 0.0045 -0.0104 0.0015  
Z -0.0197 0.0226 0.0330 -0.0267 -0.0254 -0.0236  
AT. 35 H X 0.0449 0.0424 -0.0617 -0.0542 -0.0239 0.0303  
Y 0.0049 0.0017 -0.0037 -0.0045 0.0104 0.0015  
Z 0.0197 0.0226 -0.0330 -0.0267 -0.0254 0.0236  
AT. 36 H X -0.0449 0.0424 -0.0617 0.0542 -0.0239 -0.0303  
Y 0.0049 -0.0017 0.0037 -0.0045 -0.0104 0.0015  
Z -0.0197 0.0226 -0.0330 0.0267 -0.0254 -0.0236  
AT. 37 C X 0.0010 0.0005 -0.0030 -0.0016 0.0003 0.0018  
Y 0.0086 0.0061 0.0061 0.0077 0.0141 -0.0053  
Z 0.0169 0.0212 0.0238 0.0214 -0.0149 0.0049  
AT. 38 C X -0.0010 0.0005 -0.0030 0.0016 0.0003 -0.0018  
Y 0.0086 -0.0061 -0.0061 0.0077 -0.0141 -0.0053  
Z -0.0169 0.0212 0.0238 -0.0214 -0.0149 -0.0049  
AT. 39 C X 0.0010 0.0005 0.0030 0.0016 0.0003 0.0018  
Y 0.0086 0.0061 -0.0061 -0.0077 0.0141 -0.0053  
Z 0.0169 0.0212 -0.0238 -0.0214 -0.0149 0.0049  
AT. 40 C X -0.0010 0.0005 0.0030 -0.0016 0.0003 -0.0018  
Y 0.0086 -0.0061 0.0061 -0.0077 -0.0141 -0.0053  
Z -0.0169 0.0212 -0.0238 0.0214 -0.0149 -0.0049  
AT. 41 C X -0.0065 -0.0036 -0.0032 -0.0039 0.0073 -0.0148



Y 0.0156 0.0133 0.0150 0.0168 0.0006 0.0067  
Z 0.0102 0.0142 0.0100 0.0107 -0.0014 -0.0096  
AT. 42 C X 0.0065 -0.0036 -0.0032 0.0039 0.0073 0.0148  
Y 0.0156 -0.0133 -0.0150 0.0168 -0.0006 0.0067  
Z -0.0102 0.0142 0.0100 -0.0107 -0.0014 0.0096  
AT. 43 C X -0.0065 -0.0036 0.0032 0.0039 0.0073 -0.0148  
Y 0.0156 0.0133 -0.0150 -0.0168 0.0006 0.0067  
Z 0.0102 0.0142 -0.0100 -0.0107 -0.0014 -0.0096  
AT. 44 C X 0.0065 -0.0036 0.0032 -0.0039 0.0073 0.0148  
Y 0.0156 -0.0133 0.0150 -0.0168 -0.0006 0.0067  
Z -0.0102 0.0142 -0.0100 0.0107 -0.0014 0.0096  
AT. 45 H X -0.0097 -0.0047 -0.0090 -0.0096 0.0133 -0.0285  
Y 0.0206 0.0188 0.0243 0.0252 -0.0109 0.0164  
Z 0.0149 0.0190 0.0184 0.0185 -0.0117 0.0000  
AT. 46 H X 0.0097 -0.0047 -0.0090 0.0096 0.0133 0.0285  
Y 0.0206 -0.0188 -0.0243 0.0252 0.0109 0.0164  
Z -0.0149 0.0190 0.0184 -0.0185 -0.0117 -0.0000  
AT. 47 H X -0.0097 -0.0047 0.0090 0.0096 0.0133 -0.0285  
Y 0.0206 0.0188 -0.0243 -0.0252 -0.0109 0.0164  
Z 0.0149 0.0190 -0.0184 -0.0185 -0.0117 0.0000  
AT. 48 H X 0.0097 -0.0047 0.0090 -0.0096 0.0133 0.0285  
Y 0.0206 -0.0188 0.0243 -0.0252 0.0109 0.0164  
Z -0.0149 0.0190 -0.0184 0.0185 -0.0117 -0.0000  
AT. 49 H X -0.0059 -0.0041 -0.0042 -0.0047 0.0138 -0.0153  
Y 0.0183 0.0150 0.0188 0.0204 0.0000 0.0129  
Z 0.0035 0.0078 -0.0023 -0.0007 0.0150 -0.0273  
AT. 50 H X 0.0059 -0.0041 -0.0042 0.0047 0.0138 0.0153  
Y 0.0183 -0.0150 -0.0188 0.0204 -0.0000 0.0129  
Z -0.0035 0.0078 -0.0023 0.0007 0.0150 0.0273  
AT. 51 H X -0.0059 -0.0041 0.0042 0.0047 0.0138 -0.0153  
Y 0.0183 0.0150 -0.0188 -0.0204 0.0000 0.0129  
Z 0.0035 0.0078 0.0023 0.0007 0.0150 -0.0273

AT. 52 H X 0.0059 -0.0041 0.0042 -0.0047 0.0138 0.0153  
Y 0.0183 -0.0150 0.0188 -0.0204 -0.0000 0.0129  
Z -0.0035 0.0078 0.0023 -0.0007 0.0150 0.0273

AT. 53 C X -0.0047 -0.0033 -0.0019 -0.0020 0.0091 -0.0104  
Y 0.0086 0.0089 0.0083 0.0100 -0.0019 -0.0014  
Z 0.0060 0.0088 0.0077 0.0077 -0.0050 -0.0023

AT. 54 C X 0.0047 -0.0033 -0.0019 0.0020 0.0091 0.0104  
Y 0.0086 -0.0089 -0.0083 0.0100 0.0019 -0.0014  
Z -0.0060 0.0088 0.0077 -0.0077 -0.0050 0.0023

AT. 55 C X -0.0047 -0.0033 0.0019 0.0020 0.0091 -0.0104  
Y 0.0086 0.0089 -0.0083 -0.0100 -0.0019 -0.0014  
Z 0.0060 0.0088 -0.0077 -0.0077 -0.0050 -0.0023

AT. 56 C X 0.0047 -0.0033 0.0019 -0.0020 0.0091 0.0104  
Y 0.0086 -0.0089 0.0083 -0.0100 0.0019 -0.0014  
Z -0.0060 0.0088 -0.0077 0.0077 -0.0050 0.0023

AT. 57 C X 0.0006 -0.0008 0.0014 0.0034 0.0181 -0.0151  
Y 0.0180 0.0211 0.0156 0.0192 -0.0046 -0.0038  
Z 0.0000 0.0019 0.0030 0.0018 -0.0060 0.0001

AT. 58 C X -0.0006 -0.0008 0.0014 -0.0034 0.0181 0.0151  
Y 0.0180 -0.0211 -0.0156 0.0192 0.0046 -0.0038  
Z -0.0000 0.0019 0.0030 -0.0018 -0.0060 -0.0001

AT. 59 C X 0.0006 -0.0008 -0.0014 -0.0034 0.0181 -0.0151  
Y 0.0180 0.0211 -0.0156 -0.0192 -0.0046 -0.0038  
Z 0.0000 0.0019 -0.0030 -0.0018 -0.0060 0.0001

AT. 60 C X -0.0006 -0.0008 -0.0014 0.0034 0.0181 0.0151  
Y 0.0180 -0.0211 0.0156 -0.0192 0.0046 -0.0038  
Z -0.0000 0.0019 -0.0030 0.0018 -0.0060 -0.0001

AT. 61 H X 0.0034 -0.0023 0.0010 0.0064 0.0282 -0.0162  
Y 0.0211 0.0215 0.0161 0.0223 0.0024 -0.0045  
Z -0.0051 -0.0053 -0.0005 -0.0031 -0.0038 -0.0014

AT. 62 H X -0.0034 -0.0023 0.0010 -0.0064 0.0282 0.0162  
Y 0.0211 -0.0215 -0.0161 0.0223 -0.0024 -0.0045

Z 0.0051 -0.0053 -0.0005 0.0031 -0.0038 0.0014  
AT. 63 H X 0.0034 -0.0023 -0.0010 -0.0064 0.0282 -0.0162  
Y 0.0211 0.0215 -0.0161 -0.0223 0.0024 -0.0045  
Z -0.0051 -0.0053 0.0005 0.0031 -0.0038 -0.0014  
AT. 64 H X -0.0034 -0.0023 -0.0010 0.0064 0.0282 0.0162  
Y 0.0211 -0.0215 0.0161 -0.0223 -0.0024 -0.0045  
Z 0.0051 -0.0053 0.0005 -0.0031 -0.0038 0.0014  
AT. 65 H X 0.0015 -0.0013 0.0013 0.0043 0.0222 -0.0154  
Y 0.0156 0.0220 0.0156 0.0167 -0.0168 -0.0033  
Z -0.0058 -0.0027 -0.0008 -0.0043 -0.0073 0.0053  
AT. 66 H X -0.0015 -0.0013 0.0013 -0.0043 0.0222 0.0154  
Y 0.0156 -0.0220 -0.0156 0.0167 0.0168 -0.0033  
Z 0.0058 -0.0027 -0.0008 0.0043 -0.0073 -0.0053  
AT. 67 H X 0.0015 -0.0013 -0.0013 -0.0043 0.0222 -0.0154  
Y 0.0156 0.0220 -0.0156 -0.0167 -0.0168 -0.0033  
Z -0.0058 -0.0027 0.0008 0.0043 -0.0073 0.0053  
AT. 68 H X -0.0015 -0.0013 -0.0013 0.0043 0.0222 0.0154  
Y 0.0156 -0.0220 0.0156 -0.0167 0.0168 -0.0033  
Z 0.0058 -0.0027 0.0008 -0.0043 -0.0073 -0.0053  
AT. 69 H X 0.0007 0.0011 0.0032 0.0038 0.0125 -0.0180  
Y 0.0250 0.0288 0.0203 0.0261 -0.0036 -0.0055  
Z 0.0061 0.0089 0.0075 0.0078 -0.0062 -0.0018  
AT. 70 H X -0.0007 0.0011 0.0032 -0.0038 0.0125 0.0180  
Y 0.0250 -0.0288 -0.0203 0.0261 0.0036 -0.0055  
Z -0.0061 0.0089 0.0075 -0.0078 -0.0062 0.0018  
AT. 71 H X 0.0007 0.0011 -0.0032 -0.0038 0.0125 -0.0180  
Y 0.0250 0.0288 -0.0203 -0.0261 -0.0036 -0.0055  
Z 0.0061 0.0089 -0.0075 -0.0078 -0.0062 -0.0018  
AT. 72 H X -0.0007 0.0011 -0.0032 0.0038 0.0125 0.0180  
Y 0.0250 -0.0288 0.0203 -0.0261 0.0036 -0.0055  
Z -0.0061 0.0089 -0.0075 0.0078 -0.0062 0.0018  
AT. 73 C X -0.0085 -0.0068 -0.0010 -0.0022 -0.0007 -0.0062

Y 0.0015 0.0017 0.0026 0.0028 -0.0015 0.0013  
Z -0.0006 0.0025 0.0026 0.0013 -0.0035 -0.0005  
AT. 74 C X 0.0085 -0.0068 -0.0010 0.0022 -0.0007 0.0062  
Y 0.0015 -0.0017 -0.0026 0.0028 0.0015 0.0013  
Z 0.0006 0.0025 0.0026 -0.0013 -0.0035 0.0005  
AT. 75 C X -0.0085 -0.0068 0.0010 0.0022 -0.0007 -0.0062  
Y 0.0015 0.0017 -0.0026 -0.0028 -0.0015 0.0013  
Z -0.0006 0.0025 -0.0026 -0.0013 -0.0035 -0.0005  
AT. 76 C X 0.0085 -0.0068 0.0010 -0.0022 -0.0007 0.0062  
Y 0.0015 -0.0017 0.0026 -0.0028 0.0015 0.0013  
Z 0.0006 0.0025 -0.0026 0.0013 -0.0035 0.0005  
AT. 77 C X -0.0044 -0.0046 -0.0040 -0.0014 0.0019 -0.0004  
Y -0.0007 -0.0020 -0.0014 -0.0013 0.0136 -0.0098  
Z 0.0073 0.0135 0.0118 0.0103 -0.0075 -0.0115  
AT. 78 C X 0.0044 -0.0046 -0.0040 0.0014 0.0019 0.0004  
Y -0.0007 0.0020 0.0014 -0.0013 -0.0136 -0.0098  
Z -0.0073 0.0135 0.0118 -0.0103 -0.0075 0.0115  
AT. 79 C X -0.0044 -0.0046 0.0040 0.0014 0.0019 -0.0004  
Y -0.0007 -0.0020 0.0014 0.0013 0.0136 -0.0098  
Z 0.0073 0.0135 -0.0118 -0.0103 -0.0075 -0.0115  
AT. 80 C X 0.0044 -0.0046 0.0040 -0.0014 0.0019 0.0004  
Y -0.0007 0.0020 -0.0014 0.0013 -0.0136 -0.0098  
Z -0.0073 0.0135 -0.0118 0.0103 -0.0075 0.0115  
AT. 81 H X -0.0024 -0.0029 -0.0039 -0.0007 0.0093 -0.0086  
Y 0.0021 0.0002 -0.0011 -0.0001 0.0218 -0.0185  
Z -0.0007 0.0087 0.0073 0.0032 -0.0091 -0.0221  
AT. 82 H X 0.0024 -0.0029 -0.0039 0.0007 0.0093 0.0086  
Y 0.0021 -0.0002 0.0011 -0.0001 -0.0218 -0.0185  
Z 0.0007 0.0087 0.0073 -0.0032 -0.0091 0.0221  
AT. 83 H X -0.0024 -0.0029 0.0039 0.0007 0.0093 -0.0086  
Y 0.0021 0.0002 0.0011 0.0001 0.0218 -0.0185  
Z -0.0007 0.0087 -0.0073 -0.0032 -0.0091 -0.0221

AT. 84 H X 0.0024 -0.0029 0.0039 -0.0007 0.0093 0.0086  
Y 0.0021 -0.0002 -0.0011 0.0001 -0.0218 -0.0185  
Z 0.0007 0.0087 -0.0073 0.0032 -0.0091 0.0221

AT. 85 H X -0.0046 -0.0063 -0.0056 -0.0021 -0.0039 0.0139  
Y -0.0081 -0.0080 -0.0054 -0.0068 0.0142 -0.0164  
Z 0.0135 0.0189 0.0153 0.0150 -0.0060 -0.0104

AT. 86 H X 0.0046 -0.0063 -0.0056 0.0021 -0.0039 -0.0139  
Y -0.0081 0.0080 0.0054 -0.0068 -0.0142 -0.0164  
Z -0.0135 0.0189 0.0153 -0.0150 -0.0060 0.0104

AT. 87 H X -0.0046 -0.0063 0.0056 0.0021 -0.0039 0.0139  
Y -0.0081 -0.0080 0.0054 0.0068 0.0142 -0.0164  
Z 0.0135 0.0189 -0.0153 -0.0150 -0.0060 -0.0104

AT. 88 H X 0.0046 -0.0063 0.0056 -0.0021 -0.0039 -0.0139  
Y -0.0081 0.0080 -0.0054 0.0068 -0.0142 -0.0164  
Z -0.0135 0.0189 -0.0153 0.0150 -0.0060 0.0104

AT. 89 C X -0.0017 -0.0034 -0.0028 0.0005 0.0097 -0.0048  
Y -0.0083 -0.0077 -0.0042 -0.0061 -0.0030 0.0037  
Z 0.0035 0.0076 0.0077 0.0069 -0.0056 -0.0044

AT. 90 C X 0.0017 -0.0034 -0.0028 -0.0005 0.0097 0.0048  
Y -0.0083 0.0077 0.0042 -0.0061 0.0030 0.0037  
Z -0.0035 0.0076 0.0077 -0.0069 -0.0056 0.0044

AT. 91 C X -0.0017 -0.0034 0.0028 -0.0005 0.0097 -0.0048  
Y -0.0083 -0.0077 0.0042 0.0061 -0.0030 0.0037  
Z 0.0035 0.0076 -0.0077 -0.0069 -0.0056 -0.0044

AT. 92 C X 0.0017 -0.0034 0.0028 0.0005 0.0097 0.0048  
Y -0.0083 0.0077 -0.0042 0.0061 0.0030 0.0037  
Z -0.0035 0.0076 -0.0077 0.0069 -0.0056 0.0044

AT. 93 C X 0.0045 -0.0020 -0.0014 0.0044 0.0253 -0.0038  
Y -0.0228 -0.0214 -0.0121 -0.0175 -0.0041 0.0053  
Z -0.0070 -0.0015 0.0024 -0.0010 -0.0090 -0.0035

AT. 94 C X -0.0045 -0.0020 -0.0014 -0.0044 0.0253 0.0038  
Y -0.0228 0.0214 0.0121 -0.0175 0.0041 0.0053

Z 0.0070 -0.0015 0.0024 0.0010 -0.0090 0.0035  
AT. 95 C X 0.0045 -0.0020 0.0014 -0.0044 0.0253 -0.0038  
Y -0.0228 -0.0214 0.0121 0.0175 -0.0041 0.0053  
Z -0.0070 -0.0015 -0.0024 0.0010 -0.0090 -0.0035  
AT. 96 C X -0.0045 -0.0020 0.0014 0.0044 0.0253 0.0038  
Y -0.0228 0.0214 -0.0121 0.0175 0.0041 0.0053  
Z 0.0070 -0.0015 -0.0024 -0.0010 -0.0090 0.0035  
AT. 97 H X 0.0082 -0.0004 0.0032 0.0084 0.0340 -0.0016  
Y -0.0336 -0.0287 -0.0261 -0.0294 -0.0206 0.0021  
Z -0.0149 -0.0097 -0.0089 -0.0099 -0.0110 -0.0026  
AT. 98 H X -0.0082 -0.0004 0.0032 -0.0084 0.0340 0.0016  
Y -0.0336 0.0287 0.0261 -0.0294 0.0206 0.0021  
Z 0.0149 -0.0097 -0.0089 0.0099 -0.0110 0.0026  
AT. 99 H X 0.0082 -0.0004 -0.0032 -0.0084 0.0340 -0.0016  
Y -0.0336 -0.0287 0.0261 0.0294 -0.0206 0.0021  
Z -0.0149 -0.0097 0.0089 0.0099 -0.0110 -0.0026  
AT. 100 H X -0.0082 -0.0004 -0.0032 0.0084 0.0340 0.0016  
Y -0.0336 0.0287 -0.0261 0.0294 0.0206 0.0021  
Z 0.0149 -0.0097 0.0089 -0.0099 -0.0110 0.0026  
AT. 101 H X 0.0111 0.0021 0.0097 0.0126 0.0383 -0.0002  
Y -0.0147 -0.0162 -0.0004 -0.0080 0.0112 0.0081  
Z -0.0161 -0.0089 0.0025 -0.0060 -0.0098 -0.0037  
AT. 102 H X -0.0111 0.0021 0.0097 -0.0126 0.0383 0.0002  
Y -0.0147 0.0162 0.0004 -0.0080 -0.0112 0.0081  
Z 0.0161 -0.0089 0.0025 0.0060 -0.0098 0.0037  
AT. 103 H X 0.0111 0.0021 -0.0097 -0.0126 0.0383 -0.0002  
Y -0.0147 -0.0162 0.0004 0.0080 0.0112 0.0081  
Z -0.0161 -0.0089 -0.0025 0.0060 -0.0098 -0.0037  
AT. 104 H X -0.0111 0.0021 -0.0097 0.0126 0.0383 0.0002  
Y -0.0147 0.0162 -0.0004 0.0080 -0.0112 0.0081  
Z 0.0161 -0.0089 -0.0025 -0.0060 -0.0098 0.0037  
AT. 105 H X -0.0003 -0.0054 -0.0175 -0.0061 0.0120 -0.0045

Y -0.0323 -0.0309 -0.0148 -0.0235 -0.0008 0.0062  
Z 0.0018 0.0068 0.0102 0.0073 -0.0069 -0.0041  
AT. 106 H X 0.0003 -0.0054 -0.0175 0.0061 0.0120 0.0045  
Y -0.0323 0.0309 0.0148 -0.0235 0.0008 0.0062  
Z -0.0018 0.0068 0.0102 -0.0073 -0.0069 0.0041  
AT. 107 H X -0.0003 -0.0054 0.0175 0.0061 0.0120 -0.0045  
Y -0.0323 -0.0309 0.0148 0.0235 -0.0008 0.0062  
Z 0.0018 0.0068 -0.0102 -0.0073 -0.0069 -0.0041  
AT. 108 H X 0.0003 -0.0054 0.0175 -0.0061 0.0120 0.0045  
Y -0.0323 0.0309 -0.0148 0.0235 0.0008 0.0062  
Z -0.0018 0.0068 -0.0102 0.0073 -0.0069 0.0041  
AT. 109 C X -0.0113 -0.0090 -0.0090 -0.0090 0.0066 -0.0125  
Y -0.0027 -0.0008 -0.0027 -0.0017 -0.0034 -0.0045  
Z 0.0152 0.0163 0.0140 0.0166 -0.0060 0.0002  
AT. 110 C X 0.0113 -0.0090 -0.0090 0.0090 0.0066 0.0125  
Y -0.0027 0.0008 0.0027 -0.0017 0.0034 -0.0045  
Z -0.0152 0.0163 0.0140 -0.0166 -0.0060 -0.0002  
AT. 111 C X -0.0113 -0.0090 0.0090 0.0090 0.0066 -0.0125  
Y -0.0027 -0.0008 0.0027 0.0017 -0.0034 -0.0045  
Z 0.0152 0.0163 -0.0140 -0.0166 -0.0060 0.0002  
AT. 112 C X 0.0113 -0.0090 0.0090 -0.0090 0.0066 0.0125  
Y -0.0027 0.0008 -0.0027 0.0017 0.0034 -0.0045  
Z -0.0152 0.0163 -0.0140 0.0166 -0.0060 -0.0002  
AT. 113 H X -0.0067 -0.0049 -0.0038 -0.0037 0.0050 -0.0091  
Y -0.0102 -0.0077 -0.0110 -0.0102 -0.0033 -0.0076  
Z 0.0157 0.0163 0.0162 0.0186 -0.0211 0.0137  
AT. 114 H X 0.0067 -0.0049 -0.0038 0.0037 0.0050 0.0091  
Y -0.0102 0.0077 0.0110 -0.0102 0.0033 -0.0076  
Z -0.0157 0.0163 0.0162 -0.0186 -0.0211 -0.0137  
AT. 115 H X -0.0067 -0.0049 0.0038 0.0037 0.0050 -0.0091  
Y -0.0102 -0.0077 0.0110 0.0102 -0.0033 -0.0076  
Z 0.0157 0.0163 -0.0162 -0.0186 -0.0211 0.0137

AT.116 H X 0.0067 -0.0049 0.0038 -0.0037 0.0050 0.0091  
Y -0.0102 0.0077 -0.0110 0.0102 0.0033 -0.0076  
Z -0.0157 0.0163 -0.0162 0.0186 -0.0211 -0.0137

AT.117 H X -0.0200 -0.0162 -0.0184 -0.0190 0.0156 -0.0218  
Y 0.0018 0.0025 -0.0011 0.0019 0.0055 -0.0120  
Z 0.0209 0.0205 0.0171 0.0214 0.0004 -0.0049

AT.118 H X 0.0200 -0.0162 -0.0184 0.0190 0.0156 0.0218  
Y 0.0018 -0.0025 0.0011 0.0019 -0.0055 -0.0120  
Z -0.0209 0.0205 0.0171 -0.0214 0.0004 0.0049

AT.119 H X -0.0200 -0.0162 0.0184 0.0190 0.0156 -0.0218  
Y 0.0018 0.0025 0.0011 -0.0019 0.0055 -0.0120  
Z 0.0209 0.0205 -0.0171 -0.0214 0.0004 -0.0049

AT.120 H X 0.0200 -0.0162 0.0184 -0.0190 0.0156 0.0218  
Y 0.0018 -0.0025 -0.0011 -0.0019 -0.0055 -0.0120  
Z -0.0209 0.0205 -0.0171 0.0214 0.0004 0.0049

AT.121 C X -0.0007 -0.0019 -0.0025 0.0015 0.0007 0.0016  
Y -0.0111 -0.0090 -0.0060 -0.0083 -0.0179 0.0133  
Z 0.0145 0.0154 0.0126 0.0154 0.0005 -0.0035

AT.122 C X 0.0007 -0.0019 -0.0025 -0.0015 0.0007 -0.0016  
Y -0.0111 0.0090 0.0060 -0.0083 0.0179 0.0133  
Z -0.0145 0.0154 0.0126 -0.0154 0.0005 0.0035

AT.123 C X -0.0007 -0.0019 0.0025 -0.0015 0.0007 0.0016  
Y -0.0111 -0.0090 0.0060 0.0083 -0.0179 0.0133  
Z 0.0145 0.0154 -0.0126 -0.0154 0.0005 -0.0035

AT.124 C X 0.0007 -0.0019 0.0025 0.0015 0.0007 -0.0016  
Y -0.0111 0.0090 -0.0060 0.0083 0.0179 0.0133  
Z -0.0145 0.0154 -0.0126 0.0154 0.0005 0.0035

AT.125 H X 0.0044 0.0017 -0.0009 0.0051 -0.0070 0.0136  
Y -0.0133 -0.0114 -0.0067 -0.0099 -0.0203 0.0194  
Z 0.0145 0.0160 0.0126 0.0154 0.0041 -0.0110

AT.126 H X -0.0044 0.0017 -0.0009 -0.0051 -0.0070 -0.0136  
Y -0.0133 0.0114 0.0067 -0.0099 0.0203 0.0194



Z -0.0145 0.0160 0.0126 -0.0154 0.0041 0.0110  
AT.127 H X 0.0044 0.0017 0.0009 -0.0051 -0.0070 0.0136  
Y -0.0133 -0.0114 0.0067 0.0099 -0.0203 0.0194  
Z 0.0145 0.0160 -0.0126 -0.0154 0.0041 -0.0110  
AT.128 H X -0.0044 0.0017 0.0009 0.0051 -0.0070 -0.0136  
Y -0.0133 0.0114 -0.0067 0.0099 0.0203 0.0194  
Z -0.0145 0.0160 -0.0126 0.0154 0.0041 0.0110  
AT.129 H X 0.0005 -0.0018 -0.0018 0.0026 0.0057 0.0011  
Y -0.0113 -0.0084 -0.0064 -0.0087 -0.0269 0.0195  
Z 0.0183 0.0171 0.0144 0.0186 -0.0037 0.0101  
AT.130 H X -0.0005 -0.0018 -0.0018 -0.0026 0.0057 -0.0011  
Y -0.0113 0.0084 0.0064 -0.0087 0.0269 0.0195  
Z -0.0183 0.0171 0.0144 -0.0186 -0.0037 -0.0101  
AT.131 H X 0.0005 -0.0018 0.0018 -0.0026 0.0057 0.0011  
Y -0.0113 -0.0084 0.0064 0.0087 -0.0269 0.0195  
Z 0.0183 0.0171 -0.0144 -0.0186 -0.0037 0.0101  
AT.132 H X -0.0005 -0.0018 0.0018 0.0026 0.0057 -0.0011  
Y -0.0113 0.0084 -0.0064 0.0087 0.0269 0.0195  
Z -0.0183 0.0171 -0.0144 0.0186 -0.0037 -0.0101  
AT.133 C X -0.0090 -0.0095 -0.0097 -0.0081 -0.0013 -0.0010  
Y -0.0089 -0.0066 -0.0054 -0.0067 -0.0146 0.0062  
Z 0.0166 0.0167 0.0115 0.0164 0.0157 -0.0197  
AT.134 C X 0.0090 -0.0095 -0.0097 0.0081 -0.0013 0.0010  
Y -0.0089 0.0066 0.0054 -0.0067 0.0146 0.0062  
Z -0.0166 0.0167 0.0115 -0.0164 0.0157 0.0197  
AT.135 C X -0.0090 -0.0095 0.0097 0.0081 -0.0013 -0.0010  
Y -0.0089 -0.0066 0.0054 0.0067 -0.0146 0.0062  
Z 0.0166 0.0167 -0.0115 -0.0164 0.0157 -0.0197  
AT.136 C X 0.0090 -0.0095 0.0097 -0.0081 -0.0013 0.0010  
Y -0.0089 0.0066 -0.0054 0.0067 0.0146 0.0062  
Z -0.0166 0.0167 -0.0115 0.0164 0.0157 0.0197  
AT.137 C X 0.0144 0.0135 0.0096 0.0133 0.0102 -0.0144

Y -0.0131 -0.0108 -0.0070 -0.0101 -0.0268 0.0192  
Z 0.0115 0.0112 0.0063 0.0109 0.0199 -0.0230  
AT. 138 C X -0.0144 0.0135 0.0096 -0.0133 0.0102 0.0144  
Y -0.0131 0.0108 0.0070 -0.0101 0.0268 0.0192  
Z -0.0115 0.0112 0.0063 -0.0109 0.0199 0.0230  
AT. 139 C X 0.0144 0.0135 -0.0096 -0.0133 0.0102 -0.0144  
Y -0.0131 -0.0108 0.0070 0.0101 -0.0268 0.0192  
Z 0.0115 0.0112 -0.0063 -0.0109 0.0199 -0.0230  
AT. 140 C X -0.0144 0.0135 -0.0096 0.0133 0.0102 0.0144  
Y -0.0131 0.0108 -0.0070 0.0101 0.0268 0.0192  
Z -0.0115 0.0112 -0.0063 0.0109 0.0199 0.0230  
AT. 141 H X 0.0078 0.0064 0.0067 0.0065 -0.0037 0.0004  
Y -0.0213 -0.0194 -0.0120 -0.0179 -0.0411 0.0348  
Z 0.0128 0.0126 0.0055 0.0125 0.0254 -0.0285  
AT. 142 H X -0.0078 0.0064 0.0067 -0.0065 -0.0037 -0.0004  
Y -0.0213 0.0194 0.0120 -0.0179 0.0411 0.0348  
Z -0.0128 0.0126 0.0055 -0.0125 0.0254 0.0285  
AT. 143 H X 0.0078 0.0064 -0.0067 -0.0065 -0.0037 0.0004  
Y -0.0213 -0.0194 0.0120 0.0179 -0.0411 0.0348  
Z 0.0128 0.0126 -0.0055 -0.0125 0.0254 -0.0285  
AT. 144 H X -0.0078 0.0064 -0.0067 0.0065 -0.0037 -0.0004  
Y -0.0213 0.0194 -0.0120 0.0179 0.0411 0.0348  
Z -0.0128 0.0126 -0.0055 0.0125 0.0254 0.0285  
AT. 145 H X 0.0246 0.0236 0.0151 0.0228 0.0312 -0.0331  
Y -0.0165 -0.0140 -0.0092 -0.0133 -0.0316 0.0230  
Z 0.0095 0.0099 0.0039 0.0092 0.0241 -0.0286  
AT. 146 H X -0.0246 0.0236 0.0151 -0.0228 0.0312 0.0331  
Y -0.0165 0.0140 0.0092 -0.0133 0.0316 0.0230  
Z -0.0095 0.0099 0.0039 -0.0092 0.0241 0.0286  
AT. 147 H X 0.0246 0.0236 -0.0151 -0.0228 0.0312 -0.0331  
Y -0.0165 -0.0140 0.0092 0.0133 -0.0316 0.0230  
Z 0.0095 0.0099 -0.0039 -0.0092 0.0241 -0.0286

AT. 148 H X -0.0246 0.0236 -0.0151 0.0228 0.0312 0.0331  
Y -0.0165 0.0140 -0.0092 0.0133 0.0316 0.0230  
Z -0.0095 0.0099 -0.0039 0.0092 0.0241 0.0286

AT. 149 O X -0.0188 -0.0129 0.0001 -0.0055 -0.0209 -0.0015  
Y -0.0095 -0.0051 0.0057 0.0016 -0.0240 0.0014  
Z -0.0017 0.0016 -0.0005 -0.0033 0.0045 0.0032

AT. 150 O X 0.0188 -0.0129 0.0001 0.0055 -0.0209 0.0015  
Y -0.0095 0.0051 -0.0057 0.0016 0.0240 0.0014  
Z 0.0017 0.0016 -0.0005 0.0033 0.0045 -0.0032

AT. 151 O X -0.0188 -0.0129 -0.0001 0.0055 -0.0209 -0.0015  
Y -0.0095 -0.0051 -0.0057 -0.0016 -0.0240 0.0014  
Z -0.0017 0.0016 0.0005 0.0033 0.0045 0.0032

AT. 152 O X 0.0188 -0.0129 -0.0001 -0.0055 -0.0209 0.0015  
Y -0.0095 0.0051 0.0057 -0.0016 0.0240 0.0014  
Z 0.0017 0.0016 0.0005 -0.0033 0.0045 -0.0032

AT. 153 H X -0.0071 -0.0034 -0.0009 -0.0043 -0.0111 -0.0074  
Y 0.0036 0.0060 0.0032 0.0008 -0.0060 0.0016  
Z -0.0057 -0.0015 -0.0007 -0.0047 0.0049 0.0060

AT. 154 H X 0.0071 -0.0034 -0.0009 0.0043 -0.0111 0.0074  
Y 0.0036 -0.0060 -0.0032 0.0008 0.0060 0.0016  
Z 0.0057 -0.0015 -0.0007 0.0047 0.0049 -0.0060

AT. 155 H X -0.0071 -0.0034 0.0009 0.0043 -0.0111 -0.0074  
Y 0.0036 0.0060 -0.0032 -0.0008 -0.0060 0.0016  
Z -0.0057 -0.0015 0.0007 0.0047 0.0049 0.0060

AT. 156 H X 0.0071 -0.0034 0.0009 -0.0043 -0.0111 0.0074  
Y 0.0036 -0.0060 0.0032 -0.0008 0.0060 0.0016  
Z 0.0057 -0.0015 0.0007 -0.0047 0.0049 -0.0060

AT. 157 O X -0.0143 -0.0113 -0.0018 -0.0043 -0.0125 -0.0031  
Y 0.0129 0.0091 0.0009 0.0057 0.0224 -0.0012  
Z -0.0067 -0.0056 -0.0017 -0.0022 -0.0058 0.0006

AT. 158 O X 0.0143 -0.0113 -0.0018 0.0043 -0.0125 0.0031  
Y 0.0129 -0.0091 -0.0009 0.0057 -0.0224 -0.0012

Z 0.0067 -0.0056 -0.0017 0.0022 -0.0058 -0.0006  
AT. 159 O X -0.0143 -0.0113 0.0018 0.0043 -0.0125 -0.0031  
Y 0.0129 0.0091 -0.0009 -0.0057 0.0224 -0.0012  
Z -0.0067 -0.0056 0.0017 0.0022 -0.0058 0.0006  
AT. 160 O X 0.0143 -0.0113 0.0018 -0.0043 -0.0125 0.0031  
Y 0.0129 -0.0091 0.0009 -0.0057 -0.0224 -0.0012  
Z 0.0067 -0.0056 0.0017 -0.0022 -0.0058 -0.0006  
AT. 161 O X -0.0078 -0.0034 -0.0015 -0.0050 0.0007 -0.0013  
Y 0.0109 0.0110 0.0078 0.0115 0.0048 -0.0083  
Z -0.0096 -0.0119 -0.0064 -0.0058 -0.0021 0.0039  
AT. 162 O X 0.0078 -0.0034 -0.0015 0.0050 0.0007 0.0013  
Y 0.0109 -0.0110 -0.0078 0.0115 -0.0048 -0.0083  
Z 0.0096 -0.0119 -0.0064 0.0058 -0.0021 -0.0039  
AT. 163 O X -0.0078 -0.0034 0.0015 0.0050 0.0007 -0.0013  
Y 0.0109 0.0110 -0.0078 -0.0115 0.0048 -0.0083  
Z -0.0096 -0.0119 0.0064 0.0058 -0.0021 0.0039  
AT. 164 O X 0.0078 -0.0034 0.0015 -0.0050 0.0007 0.0013  
Y 0.0109 -0.0110 0.0078 -0.0115 -0.0048 -0.0083  
Z 0.0096 -0.0119 0.0064 -0.0058 -0.0021 -0.0039  
AT. 165 H X -0.0225 -0.0218 -0.0172 -0.0221 -0.0015 0.0146  
Y 0.0054 0.0037 0.0015 0.0049 0.0048 -0.0019  
Z 0.0093 0.0079 0.0041 0.0076 0.0190 -0.0101  
AT. 166 H X 0.0225 -0.0218 -0.0172 0.0221 -0.0015 -0.0146  
Y 0.0054 -0.0037 -0.0015 0.0049 -0.0048 -0.0019  
Z -0.0093 0.0079 0.0041 -0.0076 0.0190 0.0101  
AT. 167 H X -0.0225 -0.0218 0.0172 0.0221 -0.0015 0.0146  
Y 0.0054 0.0037 -0.0015 -0.0049 0.0048 -0.0019  
Z 0.0093 0.0079 -0.0041 -0.0076 0.0190 -0.0101  
AT. 168 H X 0.0225 -0.0218 0.0172 -0.0221 -0.0015 -0.0146  
Y 0.0054 -0.0037 0.0015 -0.0049 -0.0048 -0.0019  
Z -0.0093 0.0079 -0.0041 0.0076 0.0190 0.0101  
AT. 169 O X 0.0372 0.0320 -0.0123 -0.0046 -0.0278 0.0687

|                                                        |   |         |         |         |         |         |         |
|--------------------------------------------------------|---|---------|---------|---------|---------|---------|---------|
|                                                        | Y | 0.0082  | 0.0071  | -0.0044 | -0.0008 | 0.0329  | -0.0304 |
|                                                        | Z | -0.0054 | -0.0008 | 0.0033  | 0.0012  | 0.0300  | 0.0193  |
| AT. 170 O X                                            |   | -0.0372 | 0.0320  | -0.0123 | 0.0046  | -0.0278 | -0.0687 |
|                                                        | Y | 0.0082  | -0.0071 | 0.0044  | -0.0008 | -0.0329 | -0.0304 |
|                                                        | Z | 0.0054  | -0.0008 | 0.0033  | -0.0012 | 0.0300  | -0.0193 |
| AT. 171 O X                                            |   | 0.0372  | 0.0320  | 0.0123  | 0.0046  | -0.0278 | 0.0687  |
|                                                        | Y | 0.0082  | 0.0071  | 0.0044  | 0.0008  | 0.0329  | -0.0304 |
|                                                        | Z | -0.0054 | -0.0008 | -0.0033 | -0.0012 | 0.0300  | 0.0193  |
| AT. 172 O X                                            |   | -0.0372 | 0.0320  | 0.0123  | -0.0046 | -0.0278 | -0.0687 |
|                                                        | Y | 0.0082  | -0.0071 | -0.0044 | 0.0008  | -0.0329 | -0.0304 |
|                                                        | Z | 0.0054  | -0.0008 | -0.0033 | 0.0012  | 0.0300  | -0.0193 |
| AT. 173 H X                                            |   | 0.0125  | 0.0076  | -0.0289 | -0.0185 | 0.0028  | 0.0338  |
|                                                        | Y | 0.0132  | 0.0123  | -0.0033 | 0.0003  | 0.0301  | -0.0223 |
|                                                        | Z | 0.0056  | 0.0102  | 0.0197  | 0.0105  | 0.0143  | 0.0261  |
| AT. 174 H X                                            |   | -0.0125 | 0.0076  | -0.0289 | 0.0185  | 0.0028  | -0.0338 |
|                                                        | Y | 0.0132  | -0.0123 | 0.0033  | 0.0003  | -0.0301 | -0.0223 |
|                                                        | Z | -0.0056 | 0.0102  | 0.0197  | -0.0105 | 0.0143  | -0.0261 |
| AT. 175 H X                                            |   | 0.0125  | 0.0076  | 0.0289  | 0.0185  | 0.0028  | 0.0338  |
|                                                        | Y | 0.0132  | 0.0123  | 0.0033  | -0.0003 | 0.0301  | -0.0223 |
|                                                        | Z | 0.0056  | 0.0102  | -0.0197 | -0.0105 | 0.0143  | 0.0261  |
| AT. 176 H X                                            |   | -0.0125 | 0.0076  | 0.0289  | -0.0185 | 0.0028  | -0.0338 |
|                                                        | Y | 0.0132  | -0.0123 | -0.0033 | -0.0003 | -0.0301 | -0.0223 |
|                                                        | Z | -0.0056 | 0.0102  | -0.0197 | 0.0105  | 0.0143  | -0.0261 |
| FREQ(CM**-1) 159.00 159.04 160.63 164.26 172.42 172.71 |   |         |         |         |         |         |         |
| AT. 1 I X                                              |   | -0.0019 | -0.0019 | -0.0028 | -0.0027 | 0.0005  | -0.0009 |
|                                                        | Y | -0.0015 | -0.0021 | 0.0000  | -0.0027 | 0.0003  | -0.0009 |
|                                                        | Z | 0.0036  | 0.0047  | 0.0026  | 0.0066  | -0.0012 | 0.0005  |
| AT. 2 I X                                              |   | -0.0019 | 0.0019  | -0.0028 | 0.0027  | 0.0005  | -0.0009 |
|                                                        | Y | 0.0015  | -0.0021 | -0.0000 | -0.0027 | -0.0003 | 0.0009  |
|                                                        | Z | 0.0036  | -0.0047 | 0.0026  | -0.0066 | -0.0012 | 0.0005  |

AT. 3 I X 0.0019 0.0019 -0.0028 -0.0027 0.0005 0.0009  
Y 0.0015 0.0021 0.0000 -0.0027 0.0003 0.0009  
Z -0.0036 -0.0047 0.0026 0.0066 -0.0012 -0.0005

AT. 4 I X 0.0019 -0.0019 -0.0028 0.0027 0.0005 0.0009  
Y -0.0015 0.0021 -0.0000 -0.0027 -0.0003 -0.0009  
Z -0.0036 0.0047 0.0026 -0.0066 -0.0012 -0.0005

AT. 5 I X 0.0037 0.0036 -0.0022 -0.0004 -0.0027 -0.0016  
Y -0.0030 -0.0027 0.0015 0.0003 0.0024 0.0016  
Z -0.0081 -0.0056 0.0033 -0.0004 0.0035 0.0033

AT. 6 I X 0.0037 -0.0036 -0.0022 0.0004 -0.0027 -0.0016  
Y 0.0030 -0.0027 -0.0015 0.0003 -0.0024 -0.0016  
Z -0.0081 0.0056 0.0033 0.0004 0.0035 0.0033

AT. 7 I X -0.0037 -0.0036 -0.0022 -0.0004 -0.0027 0.0016  
Y 0.0030 0.0027 0.0015 0.0003 0.0024 -0.0016  
Z 0.0081 0.0056 0.0033 -0.0004 0.0035 -0.0033

AT. 8 I X -0.0037 0.0036 -0.0022 0.0004 -0.0027 0.0016  
Y -0.0030 0.0027 -0.0015 0.0003 -0.0024 0.0016  
Z 0.0081 -0.0056 0.0033 0.0004 0.0035 -0.0033

AT. 9 N X -0.0032 -0.0060 -0.0082 -0.0073 -0.0015 -0.0059  
Y 0.0131 0.0135 0.0057 0.0148 0.0122 0.0202  
Z 0.0069 0.0018 -0.0096 -0.0107 0.0039 -0.0074

AT. 10 N X -0.0032 0.0060 -0.0082 0.0073 -0.0015 -0.0059  
Y -0.0131 0.0135 -0.0057 0.0148 -0.0122 -0.0202  
Z 0.0069 -0.0018 -0.0096 0.0107 0.0039 -0.0074

AT. 11 N X 0.0032 0.0060 -0.0082 -0.0073 -0.0015 0.0059  
Y -0.0131 -0.0135 0.0057 0.0148 0.0122 -0.0202  
Z -0.0069 -0.0018 -0.0096 -0.0107 0.0039 0.0074

AT. 12 N X 0.0032 -0.0060 -0.0082 0.0073 -0.0015 0.0059  
Y 0.0131 -0.0135 -0.0057 0.0148 -0.0122 0.0202  
Z -0.0069 0.0018 -0.0096 0.0107 0.0039 0.0074

AT. 13 N X 0.0001 -0.0017 -0.0069 -0.0036 -0.0105 -0.0119  
Y -0.0066 -0.0069 -0.0011 -0.0098 -0.0130 -0.0158

Z 0.0087 0.0044 -0.0024 -0.0015 0.0004 -0.0073  
AT. 14 N X 0.0001 0.0017 -0.0069 0.0036 -0.0105 -0.0119  
Y 0.0066 -0.0069 0.0011 -0.0098 0.0130 0.0158  
Z 0.0087 -0.0044 -0.0024 0.0015 0.0004 -0.0073  
AT. 15 N X -0.0001 0.0017 -0.0069 -0.0036 -0.0105 0.0119  
Y 0.0066 0.0069 -0.0011 -0.0098 -0.0130 0.0158  
Z -0.0087 -0.0044 -0.0024 -0.0015 0.0004 0.0073  
AT. 16 N X -0.0001 -0.0017 -0.0069 0.0036 -0.0105 0.0119  
Y -0.0066 0.0069 0.0011 -0.0098 0.0130 -0.0158  
Z -0.0087 0.0044 -0.0024 0.0015 0.0004 0.0073  
AT. 17 O X 0.0237 0.0280 0.0133 0.0285 -0.0060 0.0078  
Y 0.0189 0.0165 -0.0072 0.0083 0.0049 0.0024  
Z -0.0214 -0.0284 -0.0039 -0.0237 0.0208 0.0078  
AT. 18 O X 0.0237 -0.0280 0.0133 -0.0285 -0.0060 0.0078  
Y -0.0189 0.0165 0.0072 0.0083 -0.0049 -0.0024  
Z -0.0214 0.0284 -0.0039 0.0237 0.0208 0.0078  
AT. 19 O X -0.0237 -0.0280 0.0133 0.0285 -0.0060 -0.0078  
Y -0.0189 -0.0165 -0.0072 0.0083 0.0049 -0.0024  
Z 0.0214 0.0284 -0.0039 -0.0237 0.0208 -0.0078  
AT. 20 O X -0.0237 0.0280 0.0133 -0.0285 -0.0060 -0.0078  
Y 0.0189 -0.0165 0.0072 0.0083 -0.0049 0.0024  
Z 0.0214 -0.0284 -0.0039 0.0237 0.0208 -0.0078  
AT. 21 O X -0.0283 -0.0133 0.0190 0.0083 0.0168 0.0123  
Y 0.0068 0.0099 -0.0048 -0.0034 -0.0253 -0.0114  
Z 0.0346 0.0348 -0.0120 0.0086 -0.0258 -0.0036  
AT. 22 O X -0.0283 0.0133 0.0190 -0.0083 0.0168 0.0123  
Y -0.0068 0.0099 0.0048 -0.0034 0.0253 0.0114  
Z 0.0346 -0.0348 -0.0120 -0.0086 -0.0258 -0.0036  
AT. 23 O X 0.0283 0.0133 0.0190 0.0083 0.0168 -0.0123  
Y -0.0068 -0.0099 -0.0048 -0.0034 -0.0253 0.0114  
Z -0.0346 -0.0348 -0.0120 0.0086 -0.0258 0.0036  
AT. 24 O X 0.0283 -0.0133 0.0190 -0.0083 0.0168 -0.0123

Y 0.0068 -0.0099 0.0048 -0.0034 0.0253 -0.0114  
Z -0.0346 0.0348 -0.0120 -0.0086 -0.0258 0.0036  
AT. 25 C X -0.0167 -0.0208 0.0006 -0.0126 0.0215 0.0173  
Y -0.0013 -0.0014 0.0100 0.0093 0.0176 0.0263  
Z -0.0168 -0.0219 0.0005 -0.0157 0.0181 0.0088  
AT. 26 C X -0.0167 0.0208 0.0006 0.0126 0.0215 0.0173  
Y 0.0013 -0.0014 -0.0100 0.0093 -0.0176 -0.0263  
Z -0.0168 0.0219 0.0005 0.0157 0.0181 0.0088  
AT. 27 C X 0.0167 0.0208 0.0006 -0.0126 0.0215 -0.0173  
Y 0.0013 0.0014 0.0100 0.0093 0.0176 -0.0263  
Z 0.0168 0.0219 0.0005 -0.0157 0.0181 -0.0088  
AT. 28 C X 0.0167 -0.0208 0.0006 0.0126 0.0215 -0.0173  
Y -0.0013 0.0014 -0.0100 0.0093 -0.0176 0.0263  
Z 0.0168 -0.0219 0.0005 0.0157 0.0181 -0.0088  
AT. 29 H X -0.0135 -0.0165 -0.0009 -0.0098 0.0163 0.0124  
Y -0.0219 -0.0262 0.0175 -0.0017 0.0404 0.0472  
Z -0.0185 -0.0246 0.0018 -0.0183 0.0226 0.0130  
AT. 30 H X -0.0135 0.0165 -0.0009 0.0098 0.0163 0.0124  
Y 0.0219 -0.0262 -0.0175 -0.0017 -0.0404 -0.0472  
Z -0.0185 0.0246 0.0018 0.0183 0.0226 0.0130  
AT. 31 H X 0.0135 0.0165 -0.0009 -0.0098 0.0163 -0.0124  
Y 0.0219 0.0262 0.0175 -0.0017 0.0404 -0.0472  
Z 0.0185 0.0246 0.0018 -0.0183 0.0226 -0.0130  
AT. 32 H X 0.0135 -0.0165 -0.0009 0.0098 0.0163 -0.0124  
Y -0.0219 0.0262 -0.0175 -0.0017 -0.0404 0.0472  
Z 0.0185 -0.0246 0.0018 0.0183 0.0226 -0.0130  
AT. 33 H X -0.0325 -0.0407 0.0090 -0.0179 0.0447 0.0418  
Y 0.0042 0.0048 0.0073 0.0112 0.0125 0.0207  
Z -0.0290 -0.0341 0.0059 -0.0204 0.0224 0.0143  
AT. 34 H X -0.0325 0.0407 0.0090 0.0179 0.0447 0.0418  
Y -0.0042 0.0048 -0.0073 0.0112 -0.0125 -0.0207  
Z -0.0290 0.0341 0.0059 0.0204 0.0224 0.0143



AT. 35 H X 0.0325 0.0407 0.0090 -0.0179 0.0447 -0.0418  
Y -0.0042 -0.0048 0.0073 0.0112 0.0125 -0.0207  
Z 0.0290 0.0341 0.0059 -0.0204 0.0224 -0.0143

AT. 36 H X 0.0325 -0.0407 0.0090 0.0179 0.0447 -0.0418  
Y 0.0042 -0.0048 -0.0073 0.0112 -0.0125 0.0207  
Z 0.0290 -0.0341 0.0059 0.0204 0.0224 -0.0143

AT. 37 C X 0.0016 0.0003 0.0013 0.0016 0.0039 0.0048  
Y 0.0114 0.0111 0.0035 0.0128 0.0104 0.0163  
Z -0.0091 -0.0150 -0.0042 -0.0152 0.0139 0.0017

AT. 38 C X 0.0016 -0.0003 0.0013 -0.0016 0.0039 0.0048  
Y -0.0114 0.0111 -0.0035 0.0128 -0.0104 -0.0163  
Z -0.0091 0.0150 -0.0042 0.0152 0.0139 0.0017

AT. 39 C X -0.0016 -0.0003 0.0013 0.0016 0.0039 -0.0048  
Y -0.0114 -0.0111 0.0035 0.0128 0.0104 -0.0163  
Z 0.0091 0.0150 -0.0042 -0.0152 0.0139 -0.0017

AT. 40 C X -0.0016 0.0003 0.0013 -0.0016 0.0039 -0.0048  
Y 0.0114 -0.0111 -0.0035 0.0128 -0.0104 0.0163  
Z 0.0091 -0.0150 -0.0042 0.0152 0.0139 -0.0017

AT. 41 C X 0.0139 0.0128 -0.0124 0.0028 -0.0064 0.0002  
Y -0.0009 -0.0036 0.0086 0.0031 0.0194 0.0179  
Z 0.0096 0.0056 -0.0096 -0.0075 0.0015 -0.0080

AT. 42 C X 0.0139 -0.0128 -0.0124 -0.0028 -0.0064 0.0002  
Y 0.0009 -0.0036 -0.0086 0.0031 -0.0194 -0.0179  
Z 0.0096 -0.0056 -0.0096 0.0075 0.0015 -0.0080

AT. 43 C X -0.0139 -0.0128 -0.0124 0.0028 -0.0064 -0.0002  
Y 0.0009 0.0036 0.0086 0.0031 0.0194 -0.0179  
Z -0.0096 -0.0056 -0.0096 -0.0075 0.0015 0.0080

AT. 44 C X -0.0139 0.0128 -0.0124 -0.0028 -0.0064 -0.0002  
Y -0.0009 0.0036 -0.0086 0.0031 -0.0194 0.0179  
Z -0.0096 0.0056 -0.0096 0.0075 0.0015 0.0080

AT. 45 H X 0.0310 0.0290 -0.0225 0.0043 -0.0229 -0.0128  
Y -0.0136 -0.0180 0.0118 -0.0058 0.0270 0.0189

Z -0.0030 -0.0084 -0.0057 -0.0152 0.0100 -0.0058  
AT. 46 H X 0.0310 -0.0290 -0.0225 -0.0043 -0.0229 -0.0128  
Y 0.0136 -0.0180 -0.0118 -0.0058 -0.0270 -0.0189  
Z -0.0030 0.0084 -0.0057 0.0152 0.0100 -0.0058  
AT. 47 H X -0.0310 -0.0290 -0.0225 0.0043 -0.0229 0.0128  
Y 0.0136 0.0180 0.0118 -0.0058 0.0270 -0.0189  
Z 0.0030 0.0084 -0.0057 -0.0152 0.0100 0.0058  
AT. 48 H X -0.0310 0.0290 -0.0225 -0.0043 -0.0229 0.0128  
Y -0.0136 0.0180 -0.0118 -0.0058 -0.0270 0.0189  
Z 0.0030 -0.0084 -0.0057 0.0152 0.0100 0.0058  
AT. 49 H X 0.0174 0.0175 -0.0092 0.0099 -0.0001 0.0112  
Y -0.0069 -0.0089 0.0145 0.0050 0.0310 0.0297  
Z 0.0329 0.0305 -0.0181 0.0040 -0.0139 -0.0120  
AT. 50 H X 0.0174 -0.0175 -0.0092 -0.0099 -0.0001 0.0112  
Y 0.0069 -0.0089 -0.0145 0.0050 -0.0310 -0.0297  
Z 0.0329 -0.0305 -0.0181 -0.0040 -0.0139 -0.0120  
AT. 51 H X -0.0174 -0.0175 -0.0092 0.0099 -0.0001 -0.0112  
Y 0.0069 0.0089 0.0145 0.0050 0.0310 -0.0297  
Z -0.0329 -0.0305 -0.0181 0.0040 -0.0139 0.0120  
AT. 52 H X -0.0174 0.0175 -0.0092 -0.0099 -0.0001 -0.0112  
Y -0.0069 0.0089 -0.0145 0.0050 -0.0310 0.0297  
Z -0.0329 0.0305 -0.0181 -0.0040 -0.0139 0.0120  
AT. 53 C X 0.0105 0.0099 -0.0068 0.0062 0.0029 0.0098  
Y 0.0064 0.0034 -0.0006 -0.0019 -0.0020 -0.0027  
Z -0.0013 -0.0038 -0.0050 -0.0084 0.0013 -0.0080  
AT. 54 C X 0.0105 -0.0099 -0.0068 -0.0062 0.0029 0.0098  
Y -0.0064 0.0034 0.0006 -0.0019 0.0020 0.0027  
Z -0.0013 0.0038 -0.0050 0.0084 0.0013 -0.0080  
AT. 55 C X -0.0105 -0.0099 -0.0068 0.0062 0.0029 -0.0098  
Y -0.0064 -0.0034 -0.0006 -0.0019 -0.0020 0.0027  
Z 0.0013 0.0038 -0.0050 -0.0084 0.0013 0.0080  
AT. 56 C X -0.0105 0.0099 -0.0068 -0.0062 0.0029 -0.0098

Y 0.0064 -0.0034 0.0006 -0.0019 0.0020 -0.0027  
Z 0.0013 -0.0038 -0.0050 0.0084 0.0013 0.0080  
AT. 57 C X 0.0156 0.0171 -0.0067 0.0092 0.0234 0.0319  
Y 0.0140 0.0054 -0.0021 -0.0036 -0.0096 -0.0178  
Z -0.0066 -0.0068 -0.0044 -0.0084 0.0003 -0.0054  
AT. 58 C X 0.0156 -0.0171 -0.0067 -0.0092 0.0234 0.0319  
Y -0.0140 0.0054 0.0021 -0.0036 0.0096 0.0178  
Z -0.0066 0.0068 -0.0044 0.0084 0.0003 -0.0054  
AT. 59 C X -0.0156 -0.0171 -0.0067 0.0092 0.0234 -0.0319  
Y -0.0140 -0.0054 -0.0021 -0.0036 -0.0096 0.0178  
Z 0.0066 0.0068 -0.0044 -0.0084 0.0003 0.0054  
AT. 60 C X -0.0156 0.0171 -0.0067 -0.0092 0.0234 -0.0319  
Y 0.0140 -0.0054 0.0021 -0.0036 0.0096 -0.0178  
Z 0.0066 -0.0068 -0.0044 0.0084 0.0003 0.0054  
AT. 61 H X 0.0197 0.0206 -0.0057 0.0207 0.0482 0.0717  
Y 0.0181 0.0078 -0.0016 0.0055 0.0082 0.0116  
Z -0.0117 -0.0052 -0.0038 -0.0130 0.0027 -0.0063  
AT. 62 H X 0.0197 -0.0206 -0.0057 -0.0207 0.0482 0.0717  
Y -0.0181 0.0078 0.0016 0.0055 -0.0082 -0.0116  
Z -0.0117 0.0052 -0.0038 0.0130 0.0027 -0.0063  
AT. 63 H X -0.0197 -0.0206 -0.0057 0.0207 0.0482 -0.0717  
Y -0.0181 -0.0078 -0.0016 0.0055 0.0082 -0.0116  
Z 0.0117 0.0052 -0.0038 -0.0130 0.0027 0.0063  
AT. 64 H X -0.0197 0.0206 -0.0057 -0.0207 0.0482 -0.0717  
Y 0.0181 -0.0078 0.0016 0.0055 -0.0082 0.0116  
Z 0.0117 -0.0052 -0.0038 0.0130 0.0027 0.0063  
AT. 65 H X 0.0175 0.0183 -0.0063 0.0140 0.0325 0.0472  
Y 0.0084 0.0020 -0.0031 -0.0183 -0.0377 -0.0652  
Z -0.0099 -0.0131 -0.0043 -0.0042 -0.0016 0.0023  
AT. 66 H X 0.0175 -0.0183 -0.0063 -0.0140 0.0325 0.0472  
Y -0.0084 0.0020 0.0031 -0.0183 0.0377 0.0652  
Z -0.0099 0.0131 -0.0043 0.0042 -0.0016 0.0023

AT. 67 H X -0.0175 -0.0183 -0.0063 0.0140 0.0325 -0.0472  
Y -0.0084 -0.0020 -0.0031 -0.0183 -0.0377 0.0652  
Z 0.0099 0.0131 -0.0043 -0.0042 -0.0016 -0.0023

AT. 68 H X -0.0175 0.0183 -0.0063 -0.0140 0.0325 -0.0472  
Y 0.0084 -0.0020 0.0031 -0.0183 0.0377 -0.0652  
Z 0.0099 -0.0131 -0.0043 0.0042 -0.0016 -0.0023

AT. 69 H X 0.0133 0.0195 -0.0074 -0.0046 0.0067 -0.0046  
Y 0.0208 0.0074 -0.0030 0.0002 -0.0061 -0.0127  
Z -0.0011 -0.0047 -0.0054 -0.0075 0.0004 -0.0073

AT. 70 H X 0.0133 -0.0195 -0.0074 0.0046 0.0067 -0.0046  
Y -0.0208 0.0074 0.0030 0.0002 0.0061 0.0127  
Z -0.0011 0.0047 -0.0054 0.0075 0.0004 -0.0073

AT. 71 H X -0.0133 -0.0195 -0.0074 -0.0046 0.0067 0.0046  
Y -0.0208 -0.0074 -0.0030 0.0002 -0.0061 0.0127  
Z 0.0011 0.0047 -0.0054 -0.0075 0.0004 0.0073

AT. 72 H X -0.0133 0.0195 -0.0074 0.0046 0.0067 0.0046  
Y 0.0208 -0.0074 0.0030 0.0002 0.0061 -0.0127  
Z 0.0011 -0.0047 -0.0054 0.0075 0.0004 0.0073

AT. 73 C X -0.0003 -0.0005 -0.0086 -0.0028 -0.0001 0.0015  
Y 0.0028 0.0025 0.0014 -0.0002 -0.0012 0.0011  
Z -0.0029 -0.0030 -0.0033 -0.0057 0.0007 -0.0037

AT. 74 C X -0.0003 0.0005 -0.0086 0.0028 -0.0001 0.0015  
Y -0.0028 0.0025 -0.0014 -0.0002 0.0012 -0.0011  
Z -0.0029 0.0030 -0.0033 0.0057 0.0007 -0.0037

AT. 75 C X 0.0003 0.0005 -0.0086 -0.0028 -0.0001 -0.0015  
Y -0.0028 -0.0025 0.0014 -0.0002 -0.0012 -0.0011  
Z 0.0029 0.0030 -0.0033 -0.0057 0.0007 0.0037

AT. 76 C X 0.0003 -0.0005 -0.0086 0.0028 -0.0001 -0.0015  
Y 0.0028 -0.0025 -0.0014 -0.0002 0.0012 0.0011  
Z 0.0029 -0.0030 -0.0033 0.0057 0.0007 0.0037

AT. 77 C X -0.0052 -0.0074 0.0002 0.0028 0.0111 0.0064  
Y 0.0182 0.0214 -0.0020 0.0105 -0.0056 0.0077

Z 0.0106 0.0068 -0.0158 -0.0150 -0.0085 -0.0171  
AT. 78 C X -0.0052 0.0074 0.0002 -0.0028 0.0111 0.0064  
Y -0.0182 0.0214 0.0020 0.0105 0.0056 -0.0077  
Z 0.0106 -0.0068 -0.0158 0.0150 -0.0085 -0.0171  
AT. 79 C X 0.0052 0.0074 0.0002 0.0028 0.0111 -0.0064  
Y -0.0182 -0.0214 -0.0020 0.0105 -0.0056 -0.0077  
Z -0.0106 -0.0068 -0.0158 -0.0150 -0.0085 0.0171  
AT. 80 C X 0.0052 -0.0074 0.0002 -0.0028 0.0111 -0.0064  
Y 0.0182 -0.0214 0.0020 0.0105 0.0056 0.0077  
Z -0.0106 0.0068 -0.0158 0.0150 -0.0085 0.0171  
AT. 81 H X 0.0074 0.0058 -0.0033 0.0069 0.0055 0.0053  
Y 0.0311 0.0347 -0.0055 0.0151 -0.0101 0.0075  
Z 0.0246 0.0230 -0.0279 -0.0213 -0.0337 -0.0357  
AT. 82 H X 0.0074 -0.0058 -0.0033 -0.0069 0.0055 0.0053  
Y -0.0311 0.0347 0.0055 0.0151 0.0101 -0.0075  
Z 0.0246 -0.0230 -0.0279 0.0213 -0.0337 -0.0357  
AT. 83 H X -0.0074 -0.0058 -0.0033 0.0069 0.0055 -0.0053  
Y -0.0311 -0.0347 -0.0055 0.0151 -0.0101 -0.0075  
Z -0.0246 -0.0230 -0.0279 -0.0213 -0.0337 0.0357  
AT. 84 H X -0.0074 0.0058 -0.0033 -0.0069 0.0055 -0.0053  
Y 0.0311 -0.0347 0.0055 0.0151 0.0101 0.0075  
Z -0.0246 0.0230 -0.0279 0.0213 -0.0337 0.0357  
AT. 85 H X -0.0252 -0.0279 0.0112 0.0031 0.0277 0.0166  
Y 0.0249 0.0300 -0.0086 0.0083 -0.0207 -0.0026  
Z 0.0111 0.0058 -0.0134 -0.0129 -0.0007 -0.0118  
AT. 86 H X -0.0252 0.0279 0.0112 -0.0031 0.0277 0.0166  
Y -0.0249 0.0300 0.0086 0.0083 0.0207 0.0026  
Z 0.0111 -0.0058 -0.0134 0.0129 -0.0007 -0.0118  
AT. 87 H X 0.0252 0.0279 0.0112 0.0031 0.0277 -0.0166  
Y -0.0249 -0.0300 -0.0086 0.0083 -0.0207 0.0026  
Z -0.0111 -0.0058 -0.0134 -0.0129 -0.0007 0.0118  
AT. 88 H X 0.0252 -0.0279 0.0112 -0.0031 0.0277 -0.0166

Y 0.0249 -0.0300 0.0086 0.0083 0.0207 -0.0026  
Z -0.0111 0.0058 -0.0134 0.0129 -0.0007 0.0118  
AT. 89 C X 0.0017 0.0007 0.0002 0.0085 0.0114 0.0123  
Y -0.0024 -0.0003 0.0013 -0.0002 -0.0025 0.0021  
Z 0.0007 -0.0012 -0.0078 -0.0098 -0.0019 -0.0091  
AT. 90 C X 0.0017 -0.0007 0.0002 -0.0085 0.0114 0.0123  
Y 0.0024 -0.0003 -0.0013 -0.0002 0.0025 -0.0021  
Z 0.0007 0.0012 -0.0078 0.0098 -0.0019 -0.0091  
AT. 91 C X -0.0017 -0.0007 0.0002 0.0085 0.0114 -0.0123  
Y 0.0024 0.0003 0.0013 -0.0002 -0.0025 -0.0021  
Z -0.0007 0.0012 -0.0078 -0.0098 -0.0019 0.0091  
AT. 92 C X -0.0017 0.0007 0.0002 -0.0085 0.0114 -0.0123  
Y -0.0024 0.0003 -0.0013 -0.0002 0.0025 0.0021  
Z -0.0007 -0.0012 -0.0078 0.0098 -0.0019 0.0091  
AT. 93 C X 0.0079 0.0106 0.0115 0.0255 0.0202 0.0318  
Y -0.0127 -0.0067 -0.0008 -0.0006 -0.0034 0.0070  
Z -0.0073 -0.0073 -0.0110 -0.0129 -0.0039 -0.0090  
AT. 94 C X 0.0079 -0.0106 0.0115 -0.0255 0.0202 0.0318  
Y 0.0127 -0.0067 0.0008 -0.0006 0.0034 -0.0070  
Z -0.0073 0.0073 -0.0110 0.0129 -0.0039 -0.0090  
AT. 95 C X -0.0079 -0.0106 0.0115 0.0255 0.0202 -0.0318  
Y 0.0127 0.0067 -0.0008 -0.0006 -0.0034 -0.0070  
Z 0.0073 0.0073 -0.0110 -0.0129 -0.0039 0.0090  
AT. 96 C X -0.0079 0.0106 0.0115 -0.0255 0.0202 -0.0318  
Y -0.0127 0.0067 0.0008 -0.0006 0.0034 0.0070  
Z 0.0073 -0.0073 -0.0110 0.0129 -0.0039 0.0090  
AT. 97 H X 0.0102 0.0149 0.0200 0.0371 0.0240 0.0425  
Y -0.0191 -0.0152 -0.0171 -0.0230 -0.0083 -0.0097  
Z -0.0114 -0.0091 -0.0132 -0.0163 -0.0006 -0.0043  
AT. 98 H X 0.0102 -0.0149 0.0200 -0.0371 0.0240 0.0425  
Y 0.0191 -0.0152 0.0171 -0.0230 0.0083 0.0097  
Z -0.0114 0.0091 -0.0132 0.0163 -0.0006 -0.0043

AT. 99 H X -0.0102 -0.0149 0.0200 0.0371 0.0240 -0.0425  
Y 0.0191 0.0152 -0.0171 -0.0230 -0.0083 0.0097  
Z 0.0114 0.0091 -0.0132 -0.0163 -0.0006 0.0043

AT. 100 H X -0.0102 0.0149 0.0200 -0.0371 0.0240 -0.0425  
Y -0.0191 0.0152 0.0171 -0.0230 0.0083 -0.0097  
Z 0.0114 -0.0091 -0.0132 0.0163 -0.0006 0.0043

AT. 101 H X 0.0110 0.0161 0.0253 0.0442 0.0230 0.0455  
Y -0.0080 0.0005 0.0136 0.0200 0.0010 0.0227  
Z -0.0146 -0.0134 -0.0132 -0.0127 -0.0084 -0.0105

AT. 102 H X 0.0110 -0.0161 0.0253 -0.0442 0.0230 0.0455  
Y 0.0080 0.0005 -0.0136 0.0200 -0.0010 -0.0227  
Z -0.0146 0.0134 -0.0132 0.0127 -0.0084 -0.0105

AT. 103 H X -0.0110 -0.0161 0.0253 0.0442 0.0230 -0.0455  
Y 0.0080 -0.0005 0.0136 0.0200 0.0010 -0.0227  
Z 0.0146 0.0134 -0.0132 -0.0127 -0.0084 0.0105

AT. 104 H X -0.0110 0.0161 0.0253 -0.0442 0.0230 -0.0455  
Y -0.0080 -0.0005 -0.0136 0.0200 -0.0010 0.0227  
Z 0.0146 -0.0134 -0.0132 0.0127 -0.0084 0.0105

AT. 105 H X 0.0063 0.0077 0.0013 0.0076 0.0209 0.0225  
Y -0.0197 -0.0104 0.0004 0.0040 -0.0031 0.0145  
Z -0.0014 -0.0035 -0.0084 -0.0101 -0.0043 -0.0116

AT. 106 H X 0.0063 -0.0077 0.0013 -0.0076 0.0209 0.0225  
Y 0.0197 -0.0104 -0.0004 0.0040 0.0031 -0.0145  
Z -0.0014 0.0035 -0.0084 0.0101 -0.0043 -0.0116

AT. 107 H X -0.0063 -0.0077 0.0013 0.0076 0.0209 -0.0225  
Y 0.0197 0.0104 0.0004 0.0040 -0.0031 -0.0145  
Z 0.0014 0.0035 -0.0084 -0.0101 -0.0043 0.0116

AT. 108 H X -0.0063 0.0077 0.0013 -0.0076 0.0209 -0.0225  
Y -0.0197 0.0104 -0.0004 0.0040 0.0031 0.0145  
Z 0.0014 -0.0035 -0.0084 0.0101 -0.0043 0.0116

AT. 109 C X 0.0108 0.0118 -0.0100 0.0039 -0.0115 -0.0017  
Y 0.0078 0.0087 -0.0047 -0.0034 -0.0212 -0.0140

Z -0.0024 -0.0087 -0.0002 -0.0081 0.0046 -0.0127  
AT. 110 C X 0.0108 -0.0118 -0.0100 -0.0039 -0.0115 -0.0017  
Y -0.0078 0.0087 0.0047 -0.0034 0.0212 0.0140  
Z -0.0024 0.0087 -0.0002 0.0081 0.0046 -0.0127  
AT. 111 C X -0.0108 -0.0118 -0.0100 0.0039 -0.0115 0.0017  
Y -0.0078 -0.0087 -0.0047 -0.0034 -0.0212 0.0140  
Z 0.0024 0.0087 -0.0002 -0.0081 0.0046 0.0127  
AT. 112 C X -0.0108 0.0118 -0.0100 -0.0039 -0.0115 0.0017  
Y 0.0078 -0.0087 0.0047 -0.0034 0.0212 -0.0140  
Z 0.0024 -0.0087 -0.0002 0.0081 0.0046 0.0127  
AT. 113 H X 0.0073 0.0059 -0.0071 0.0033 -0.0011 0.0019  
Y 0.0101 0.0143 -0.0080 -0.0037 -0.0361 -0.0209  
Z -0.0215 -0.0315 0.0061 -0.0177 0.0156 -0.0198  
AT. 114 H X 0.0073 -0.0059 -0.0071 -0.0033 -0.0011 0.0019  
Y -0.0101 0.0143 0.0080 -0.0037 0.0361 0.0209  
Z -0.0215 0.0315 0.0061 0.0177 0.0156 -0.0198  
AT. 115 H X -0.0073 -0.0059 -0.0071 0.0033 -0.0011 -0.0019  
Y -0.0101 -0.0143 -0.0080 -0.0037 -0.0361 0.0209  
Z 0.0215 0.0315 0.0061 -0.0177 0.0156 0.0198  
AT. 116 H X -0.0073 0.0059 -0.0071 -0.0033 -0.0011 -0.0019  
Y 0.0101 -0.0143 0.0080 -0.0037 0.0361 -0.0209  
Z 0.0215 -0.0315 0.0061 0.0177 0.0156 0.0198  
AT. 117 H X 0.0231 0.0296 -0.0165 0.0088 -0.0296 -0.0016  
Y 0.0179 0.0199 -0.0064 0.0020 -0.0247 -0.0105  
Z 0.0047 -0.0016 -0.0007 -0.0041 0.0044 -0.0097  
AT. 118 H X 0.0231 -0.0296 -0.0165 -0.0088 -0.0296 -0.0016  
Y -0.0179 0.0199 0.0064 0.0020 0.0247 0.0105  
Z 0.0047 0.0016 -0.0007 0.0041 0.0044 -0.0097  
AT. 119 H X -0.0231 -0.0296 -0.0165 0.0088 -0.0296 0.0016  
Y -0.0179 -0.0199 -0.0064 0.0020 -0.0247 0.0105  
Z -0.0047 0.0016 -0.0007 -0.0041 0.0044 0.0097  
AT. 120 H X -0.0231 0.0296 -0.0165 -0.0088 -0.0296 0.0016



Y 0.0179 -0.0199 0.0064 0.0020 0.0247 -0.0105  
Z -0.0047 -0.0016 -0.0007 0.0041 0.0044 0.0097  
AT. 121 C X -0.0067 -0.0113 0.0025 0.0025 0.0136 0.0031  
Y -0.0155 -0.0169 0.0030 -0.0104 -0.0000 -0.0101  
Z 0.0037 -0.0009 -0.0009 -0.0032 0.0057 -0.0056  
AT. 122 C X -0.0067 0.0113 0.0025 -0.0025 0.0136 0.0031  
Y 0.0155 -0.0169 -0.0030 -0.0104 0.0000 0.0101  
Z 0.0037 0.0009 -0.0009 0.0032 0.0057 -0.0056  
AT. 123 C X 0.0067 0.0113 0.0025 0.0025 0.0136 -0.0031  
Y 0.0155 0.0169 0.0030 -0.0104 -0.0000 0.0101  
Z -0.0037 0.0009 -0.0009 -0.0032 0.0057 0.0056  
AT. 124 C X 0.0067 -0.0113 0.0025 -0.0025 0.0136 -0.0031  
Y -0.0155 0.0169 -0.0030 -0.0104 0.0000 -0.0101  
Z -0.0037 -0.0009 -0.0009 0.0032 0.0057 0.0056  
AT. 125 H X -0.0194 -0.0297 0.0120 0.0003 0.0303 0.0009  
Y -0.0229 -0.0252 0.0068 -0.0106 0.0120 -0.0041  
Z 0.0122 0.0097 -0.0062 -0.0028 -0.0072 -0.0094  
AT. 126 H X -0.0194 0.0297 0.0120 -0.0003 0.0303 0.0009  
Y 0.0229 -0.0252 -0.0068 -0.0106 -0.0120 0.0041  
Z 0.0122 -0.0097 -0.0062 0.0028 -0.0072 -0.0094  
AT. 127 H X 0.0194 0.0297 0.0120 0.0003 0.0303 -0.0009  
Y 0.0229 0.0252 0.0068 -0.0106 0.0120 0.0041  
Z -0.0122 -0.0097 -0.0062 -0.0028 -0.0072 0.0094  
AT. 128 H X 0.0194 -0.0297 0.0120 -0.0003 0.0303 -0.0009  
Y -0.0229 0.0252 -0.0068 -0.0106 -0.0120 -0.0041  
Z -0.0122 0.0097 -0.0062 0.0028 -0.0072 0.0094  
AT. 129 H X -0.0058 -0.0095 0.0046 0.0071 0.0198 0.0115  
Y -0.0224 -0.0269 0.0048 -0.0165 0.0013 -0.0190  
Z -0.0106 -0.0200 0.0108 -0.0017 0.0316 0.0022  
AT. 130 H X -0.0058 0.0095 0.0046 -0.0071 0.0198 0.0115  
Y 0.0224 -0.0269 -0.0048 -0.0165 -0.0013 0.0190  
Z -0.0106 0.0200 0.0108 0.0017 0.0316 0.0022

AT.131 H X 0.0058 0.0095 0.0046 0.0071 0.0198 -0.0115  
Y 0.0224 0.0269 0.0048 -0.0165 0.0013 0.0190  
Z 0.0106 0.0200 0.0108 -0.0017 0.0316 -0.0022

AT.132 H X 0.0058 -0.0095 0.0046 -0.0071 0.0198 -0.0115  
Y -0.0224 0.0269 -0.0048 -0.0165 -0.0013 -0.0190  
Z 0.0106 -0.0200 0.0108 0.0017 0.0316 -0.0022

AT.133 C X -0.0024 0.0019 0.0017 0.0026 -0.0035 -0.0026  
Y -0.0065 -0.0070 -0.0011 -0.0100 -0.0128 -0.0160  
Z 0.0228 0.0218 -0.0079 0.0047 -0.0156 -0.0049

AT.134 C X -0.0024 -0.0019 0.0017 -0.0026 -0.0035 -0.0026  
Y 0.0065 -0.0070 0.0011 -0.0100 0.0128 0.0160  
Z 0.0228 -0.0218 -0.0079 -0.0047 -0.0156 -0.0049

AT.135 C X 0.0024 -0.0019 0.0017 0.0026 -0.0035 0.0026  
Y 0.0065 0.0070 -0.0011 -0.0100 -0.0128 0.0160  
Z -0.0228 -0.0218 -0.0079 0.0047 -0.0156 0.0049

AT.136 C X 0.0024 0.0019 0.0017 -0.0026 -0.0035 0.0026  
Y -0.0065 0.0070 0.0011 -0.0100 0.0128 -0.0160  
Z -0.0228 0.0218 -0.0079 -0.0047 -0.0156 0.0049

AT.137 C X 0.0178 0.0186 -0.0070 0.0032 -0.0155 -0.0054  
Y -0.0228 -0.0270 0.0046 -0.0164 0.0049 -0.0182  
Z 0.0256 0.0286 -0.0082 0.0086 -0.0218 -0.0013

AT.138 C X 0.0178 -0.0186 -0.0070 -0.0032 -0.0155 -0.0054  
Y 0.0228 -0.0270 -0.0046 -0.0164 -0.0049 0.0182  
Z 0.0256 -0.0286 -0.0082 -0.0086 -0.0218 -0.0013

AT.139 C X -0.0178 -0.0186 -0.0070 0.0032 -0.0155 0.0054  
Y 0.0228 0.0270 0.0046 -0.0164 0.0049 0.0182  
Z -0.0256 -0.0286 -0.0082 0.0086 -0.0218 0.0013

AT.140 C X -0.0178 0.0186 -0.0070 -0.0032 -0.0155 0.0054  
Y -0.0228 0.0270 -0.0046 -0.0164 -0.0049 -0.0182  
Z -0.0256 0.0286 -0.0082 -0.0086 -0.0218 0.0013

AT.141 H X 0.0006 -0.0003 -0.0018 -0.0048 -0.0041 -0.0083  
Y -0.0422 -0.0489 0.0119 -0.0234 0.0216 -0.0209

Z 0.0312 0.0343 -0.0089 0.0128 -0.0227 0.0002  
AT. 142 H X 0.0006 0.0003 -0.0018 0.0048 -0.0041 -0.0083  
Y 0.0422 -0.0489 -0.0119 -0.0234 -0.0216 0.0209  
Z 0.0312 -0.0343 -0.0089 -0.0128 -0.0227 0.0002  
AT. 143 H X -0.0006 0.0003 -0.0018 -0.0048 -0.0041 0.0083  
Y 0.0422 0.0489 0.0119 -0.0234 0.0216 0.0209  
Z -0.0312 -0.0343 -0.0089 0.0128 -0.0227 -0.0002  
AT. 144 H X -0.0006 -0.0003 -0.0018 0.0048 -0.0041 0.0083  
Y -0.0422 0.0489 -0.0119 -0.0234 -0.0216 -0.0209  
Z -0.0312 0.0343 -0.0089 -0.0128 -0.0227 -0.0002  
AT. 145 H X 0.0415 0.0449 -0.0131 0.0156 -0.0277 0.0041  
Y -0.0281 -0.0323 0.0055 -0.0192 0.0058 -0.0208  
Z 0.0314 0.0369 -0.0113 0.0112 -0.0319 -0.0013  
AT. 146 H X 0.0415 -0.0449 -0.0131 -0.0156 -0.0277 0.0041  
Y 0.0281 -0.0323 -0.0055 -0.0192 -0.0058 0.0208  
Z 0.0314 -0.0369 -0.0113 -0.0112 -0.0319 -0.0013  
AT. 147 H X -0.0415 -0.0449 -0.0131 0.0156 -0.0277 -0.0041  
Y 0.0281 0.0323 0.0055 -0.0192 0.0058 0.0208  
Z -0.0314 -0.0369 -0.0113 0.0112 -0.0319 0.0013  
AT. 148 H X -0.0415 0.0449 -0.0131 -0.0156 -0.0277 -0.0041  
Y -0.0281 0.0323 -0.0055 -0.0192 -0.0058 -0.0208  
Z -0.0314 0.0369 -0.0113 -0.0112 -0.0319 0.0013  
AT. 149 O X -0.0118 -0.0105 -0.0150 -0.0203 -0.0200 -0.0209  
Y -0.0110 -0.0105 -0.0128 -0.0246 -0.0187 -0.0232  
Z 0.0024 0.0040 0.0064 0.0072 -0.0004 0.0044  
AT. 150 O X -0.0118 0.0105 -0.0150 0.0203 -0.0200 -0.0209  
Y 0.0110 -0.0105 0.0128 -0.0246 0.0187 0.0232  
Z 0.0024 -0.0040 0.0064 -0.0072 -0.0004 0.0044  
AT. 151 O X 0.0118 0.0105 -0.0150 -0.0203 -0.0200 0.0209  
Y 0.0110 0.0105 -0.0128 -0.0246 -0.0187 0.0232  
Z -0.0024 -0.0040 0.0064 0.0072 -0.0004 -0.0044  
AT. 152 O X 0.0118 -0.0105 -0.0150 0.0203 -0.0200 0.0209

Y -0.0110 0.0105 0.0128 -0.0246 0.0187 -0.0232  
Z -0.0024 0.0040 0.0064 -0.0072 -0.0004 -0.0044  
AT. 153 H X 0.0015 -0.0004 -0.0168 -0.0147 -0.0066 -0.0163  
Y 0.0052 0.0044 -0.0008 -0.0033 -0.0106 -0.0115  
Z -0.0009 0.0025 0.0105 0.0107 -0.0059 0.0058  
AT. 154 H X 0.0015 0.0004 -0.0168 0.0147 -0.0066 -0.0163  
Y -0.0052 0.0044 0.0008 -0.0033 0.0106 0.0115  
Z -0.0009 -0.0025 0.0105 -0.0107 -0.0059 0.0058  
AT. 155 H X -0.0015 0.0004 -0.0168 -0.0147 -0.0066 0.0163  
Y -0.0052 -0.0044 -0.0008 -0.0033 -0.0106 0.0115  
Z 0.0009 -0.0025 0.0105 0.0107 -0.0059 -0.0058  
AT. 156 H X -0.0015 -0.0004 -0.0168 0.0147 -0.0066 0.0163  
Y 0.0052 -0.0044 0.0008 -0.0033 0.0106 -0.0115  
Z 0.0009 0.0025 0.0105 -0.0107 -0.0059 -0.0058  
AT. 157 O X -0.0103 -0.0088 -0.0131 -0.0145 -0.0077 -0.0090  
Y 0.0186 0.0174 0.0138 0.0239 0.0151 0.0268  
Z -0.0116 -0.0082 -0.0064 -0.0094 0.0035 0.0028  
AT. 158 O X -0.0103 0.0088 -0.0131 0.0145 -0.0077 -0.0090  
Y -0.0186 0.0174 -0.0138 0.0239 -0.0151 -0.0268  
Z -0.0116 0.0082 -0.0064 0.0094 0.0035 0.0028  
AT. 159 O X 0.0103 0.0088 -0.0131 -0.0145 -0.0077 0.0090  
Y -0.0186 -0.0174 0.0138 0.0239 0.0151 -0.0268  
Z 0.0116 0.0082 -0.0064 -0.0094 0.0035 -0.0028  
AT. 160 O X 0.0103 -0.0088 -0.0131 0.0145 -0.0077 0.0090  
Y 0.0186 -0.0174 -0.0138 0.0239 -0.0151 0.0268  
Z 0.0116 -0.0082 -0.0064 0.0094 0.0035 -0.0028  
AT. 161 O X 0.0009 -0.0044 -0.0015 0.0025 0.0017 -0.0074  
Y 0.0149 0.0149 -0.0023 0.0009 -0.0073 0.0004  
Z -0.0158 -0.0090 -0.0036 -0.0049 0.0119 0.0197  
AT. 162 O X 0.0009 0.0044 -0.0015 -0.0025 0.0017 -0.0074  
Y -0.0149 0.0149 0.0023 0.0009 0.0073 -0.0004  
Z -0.0158 0.0090 -0.0036 0.0049 0.0119 0.0197

AT.163 O X -0.0009 0.0044 -0.0015 0.0025 0.0017 0.0074  
Y -0.0149 -0.0149 -0.0023 0.0009 -0.0073 -0.0004  
Z 0.0158 0.0090 -0.0036 -0.0049 0.0119 -0.0197

AT.164 O X -0.0009 -0.0044 -0.0015 -0.0025 0.0017 0.0074  
Y 0.0149 -0.0149 0.0023 0.0009 0.0073 0.0004  
Z 0.0158 -0.0090 -0.0036 0.0049 0.0119 -0.0197

AT.165 H X -0.0157 -0.0168 0.0119 0.0100 0.0243 0.0103  
Y 0.0085 0.0104 0.0039 0.0049 0.0033 0.0090  
Z 0.0117 0.0130 -0.0025 0.0107 0.0026 0.0194

AT.166 H X -0.0157 0.0168 0.0119 -0.0100 0.0243 0.0103  
Y -0.0085 0.0104 -0.0039 0.0049 -0.0033 -0.0090  
Z 0.0117 -0.0130 -0.0025 -0.0107 0.0026 0.0194

AT.167 H X 0.0157 0.0168 0.0119 0.0100 0.0243 -0.0103  
Y -0.0085 -0.0104 0.0039 0.0049 0.0033 -0.0090  
Z -0.0117 -0.0130 -0.0025 0.0107 0.0026 -0.0194

AT.168 H X 0.0157 -0.0168 0.0119 -0.0100 0.0243 -0.0103  
Y 0.0085 -0.0104 -0.0039 0.0049 -0.0033 0.0090  
Z -0.0117 0.0130 -0.0025 -0.0107 0.0026 -0.0194

AT.169 O X 0.0201 0.0120 0.0735 0.0248 -0.0238 -0.0258  
Y 0.0161 0.0155 -0.0133 0.0188 0.0117 0.0025  
Z -0.0054 -0.0032 0.0461 0.0510 -0.0255 0.0072

AT.170 O X 0.0201 -0.0120 0.0735 -0.0248 -0.0238 -0.0258  
Y -0.0161 0.0155 0.0133 0.0188 -0.0117 -0.0025  
Z -0.0054 0.0032 0.0461 -0.0510 -0.0255 0.0072

AT.171 O X -0.0201 -0.0120 0.0735 0.0248 -0.0238 0.0258  
Y -0.0161 -0.0155 -0.0133 0.0188 0.0117 -0.0025  
Z 0.0054 0.0032 0.0461 0.0510 -0.0255 -0.0072

AT.172 O X -0.0201 0.0120 0.0735 -0.0248 -0.0238 0.0258  
Y 0.0161 -0.0155 0.0133 0.0188 -0.0117 0.0025  
Z 0.0054 -0.0032 0.0461 -0.0510 -0.0255 -0.0072

AT.173 H X 0.0200 0.0163 0.0504 0.0343 -0.0159 -0.0158  
Y 0.0195 0.0180 -0.0046 0.0223 0.0077 -0.0008

Z -0.0272 -0.0249 0.0426 0.0363 -0.0171 0.0093  
 AT. 174 H X 0.0200 -0.0163 0.0504 -0.0343 -0.0159 -0.0158  
 Y -0.0195 0.0180 0.0046 0.0223 -0.0077 0.0008  
 Z -0.0272 0.0249 0.0426 -0.0363 -0.0171 0.0093  
 AT. 175 H X -0.0200 -0.0163 0.0504 0.0343 -0.0159 0.0158  
 Y -0.0195 -0.0180 -0.0046 0.0223 0.0077 0.0008  
 Z 0.0272 0.0249 0.0426 0.0363 -0.0171 -0.0093  
 AT. 176 H X -0.0200 0.0163 0.0504 -0.0343 -0.0159 0.0158  
 Y 0.0195 -0.0180 0.0046 0.0223 -0.0077 -0.0008  
 Z 0.0272 -0.0249 0.0426 -0.0363 -0.0171 -0.0093

FREQ(CM\*\*-1) 174.27 175.01 183.08 184.12 187.57 190.09

AT. 1 I X -0.0007 0.0001 0.0019 -0.0002 -0.0009 0.0012  
 Y -0.0003 -0.0007 -0.0007 0.0003 0.0004 -0.0002  
 Z 0.0009 0.0026 0.0003 -0.0012 -0.0001 -0.0002  
 AT. 2 I X 0.0007 -0.0001 -0.0019 -0.0002 -0.0009 -0.0012  
 Y -0.0003 -0.0007 -0.0007 -0.0003 -0.0004 -0.0002  
 Z -0.0009 -0.0026 -0.0003 -0.0012 -0.0001 0.0002  
 AT. 3 I X 0.0007 0.0001 -0.0019 0.0002 -0.0009 0.0012  
 Y 0.0003 -0.0007 0.0007 -0.0003 0.0004 -0.0002  
 Z -0.0009 0.0026 -0.0003 0.0012 -0.0001 -0.0002  
 AT. 4 I X -0.0007 -0.0001 0.0019 0.0002 -0.0009 -0.0012  
 Y 0.0003 -0.0007 0.0007 0.0003 -0.0004 -0.0002  
 Z 0.0009 -0.0026 0.0003 0.0012 -0.0001 0.0002  
 AT. 5 I X -0.0022 0.0020 0.0008 -0.0003 0.0012 -0.0008  
 Y 0.0020 -0.0021 0.0001 0.0012 0.0009 -0.0010  
 Z 0.0034 -0.0046 -0.0005 0.0017 -0.0010 0.0001  
 AT. 6 I X 0.0022 -0.0020 -0.0008 -0.0003 0.0012 0.0008  
 Y 0.0020 -0.0021 0.0001 -0.0012 -0.0009 -0.0010  
 Z -0.0034 0.0046 0.0005 0.0017 -0.0010 -0.0001  
 AT. 7 I X 0.0022 0.0020 -0.0008 0.0003 0.0012 -0.0008

Y -0.0020 -0.0021 -0.0001 -0.0012 0.0009 -0.0010  
Z -0.0034 -0.0046 0.0005 -0.0017 -0.0010 0.0001  
AT. 8 I X -0.0022 -0.0020 0.0008 0.0003 0.0012 0.0008  
Y -0.0020 -0.0021 -0.0001 0.0012 -0.0009 -0.0010  
Z 0.0034 0.0046 -0.0005 -0.0017 -0.0010 -0.0001  
AT. 9 N X -0.0057 -0.0027 0.0014 -0.0006 -0.0044 0.0034  
Y 0.0203 -0.0103 -0.0025 0.0057 0.0056 -0.0067  
Z -0.0027 -0.0047 0.0062 0.0064 -0.0043 0.0040  
AT. 10 N X 0.0057 0.0027 -0.0014 -0.0006 -0.0044 -0.0034  
Y 0.0203 -0.0103 -0.0025 -0.0057 -0.0056 -0.0067  
Z 0.0027 0.0047 -0.0062 0.0064 -0.0043 -0.0040  
AT. 11 N X 0.0057 -0.0027 -0.0014 0.0006 -0.0044 0.0034  
Y -0.0203 -0.0103 0.0025 -0.0057 0.0056 -0.0067  
Z 0.0027 -0.0047 -0.0062 -0.0064 -0.0043 0.0040  
AT. 12 N X -0.0057 0.0027 0.0014 0.0006 -0.0044 -0.0034  
Y -0.0203 -0.0103 0.0025 0.0057 -0.0056 -0.0067  
Z -0.0027 0.0047 0.0062 -0.0064 -0.0043 -0.0040  
AT. 13 N X -0.0118 0.0061 0.0028 -0.0034 -0.0061 0.0069  
Y -0.0155 0.0122 -0.0006 -0.0062 -0.0014 0.0036  
Z 0.0007 -0.0015 0.0162 0.0142 -0.0143 0.0141  
AT. 14 N X 0.0118 -0.0061 -0.0028 -0.0034 -0.0061 -0.0069  
Y -0.0155 0.0122 -0.0006 0.0062 0.0014 0.0036  
Z -0.0007 0.0015 -0.0162 0.0142 -0.0143 -0.0141  
AT. 15 N X 0.0118 0.0061 -0.0028 0.0034 -0.0061 0.0069  
Y 0.0155 0.0122 0.0006 0.0062 -0.0014 0.0036  
Z -0.0007 -0.0015 -0.0162 -0.0142 -0.0143 0.0141  
AT. 16 N X -0.0118 -0.0061 0.0028 0.0034 -0.0061 -0.0069  
Y 0.0155 0.0122 0.0006 -0.0062 0.0014 0.0036  
Z 0.0007 0.0015 0.0162 -0.0142 -0.0143 -0.0141  
AT. 17 O X 0.0092 0.0031 0.0040 0.0041 -0.0008 0.0014  
Y 0.0057 -0.0086 0.0116 0.0109 -0.0102 0.0094  
Z 0.0076 -0.0157 -0.0166 -0.0046 0.0141 -0.0175

AT. 18 O X -0.0092 -0.0031 -0.0040 0.0041 -0.0008 -0.0014  
Y 0.0057 -0.0086 0.0116 -0.0109 0.0102 0.0094  
Z -0.0076 0.0157 0.0166 -0.0046 0.0141 0.0175

AT. 19 O X -0.0092 0.0031 -0.0040 -0.0041 -0.0008 0.0014  
Y -0.0057 -0.0086 -0.0116 -0.0109 -0.0102 0.0094  
Z -0.0076 -0.0157 0.0166 0.0046 0.0141 -0.0175

AT. 20 O X 0.0092 -0.0031 0.0040 -0.0041 -0.0008 -0.0014  
Y -0.0057 -0.0086 -0.0116 0.0109 0.0102 0.0094  
Z 0.0076 0.0157 -0.0166 0.0046 0.0141 0.0175

AT. 21 O X 0.0236 -0.0180 -0.0153 -0.0013 0.0100 -0.0171  
Y -0.0210 0.0264 -0.0194 -0.0275 0.0181 -0.0133  
Z -0.0134 0.0260 -0.0146 -0.0234 0.0162 -0.0120

AT. 22 O X -0.0236 0.0180 0.0153 -0.0013 0.0100 0.0171  
Y -0.0210 0.0264 -0.0194 0.0275 -0.0181 -0.0133  
Z 0.0134 -0.0260 0.0146 -0.0234 0.0162 0.0120

AT. 23 O X -0.0236 -0.0180 0.0153 0.0013 0.0100 -0.0171  
Y 0.0210 0.0264 0.0194 0.0275 0.0181 -0.0133  
Z 0.0134 0.0260 0.0146 0.0234 0.0162 -0.0120

AT. 24 O X 0.0236 0.0180 -0.0153 0.0013 0.0100 0.0171  
Y 0.0210 0.0264 0.0194 -0.0275 -0.0181 -0.0133  
Z -0.0134 -0.0260 -0.0146 0.0234 0.0162 0.0120

AT. 25 C X 0.0145 -0.0163 -0.0167 -0.0049 0.0164 -0.0199  
Y 0.0234 -0.0140 -0.0133 -0.0007 0.0137 -0.0168  
Z 0.0086 -0.0137 -0.0157 -0.0049 0.0139 -0.0173

AT. 26 C X -0.0145 0.0163 0.0167 -0.0049 0.0164 0.0199  
Y 0.0234 -0.0140 -0.0133 0.0007 -0.0137 -0.0168  
Z -0.0086 0.0137 0.0157 -0.0049 0.0139 0.0173

AT. 27 C X -0.0145 -0.0163 0.0167 0.0049 0.0164 -0.0199  
Y -0.0234 -0.0140 0.0133 0.0007 0.0137 -0.0168  
Z -0.0086 -0.0137 0.0157 0.0049 0.0139 -0.0173

AT. 28 C X 0.0145 0.0163 -0.0167 0.0049 0.0164 0.0199  
Y -0.0234 -0.0140 0.0133 -0.0007 -0.0137 -0.0168



Z 0.0086 0.0137 -0.0157 0.0049 0.0139 0.0173  
AT. 29 H X 0.0105 -0.0112 -0.0114 -0.0044 0.0116 -0.0145  
Y 0.0402 -0.0303 -0.0347 -0.0074 0.0339 -0.0412  
Z 0.0121 -0.0190 -0.0204 -0.0045 0.0179 -0.0217  
AT. 30 H X -0.0105 0.0112 0.0114 -0.0044 0.0116 0.0145  
Y 0.0402 -0.0303 -0.0347 0.0074 -0.0339 -0.0412  
Z -0.0121 0.0190 0.0204 -0.0045 0.0179 0.0217  
AT. 31 H X -0.0105 -0.0112 0.0114 0.0044 0.0116 -0.0145  
Y -0.0402 -0.0303 0.0347 0.0074 0.0339 -0.0412  
Z -0.0121 -0.0190 0.0204 0.0045 0.0179 -0.0217  
AT. 32 H X 0.0105 0.0112 -0.0114 0.0044 0.0116 0.0145  
Y -0.0402 -0.0303 0.0347 -0.0074 -0.0339 -0.0412  
Z 0.0121 0.0190 -0.0204 0.0045 0.0179 0.0217  
AT. 33 H X 0.0349 -0.0341 -0.0376 -0.0099 0.0358 -0.0436  
Y 0.0191 -0.0104 -0.0076 0.0014 0.0085 -0.0106  
Z 0.0115 -0.0156 -0.0247 -0.0100 0.0216 -0.0262  
AT. 34 H X -0.0349 0.0341 0.0376 -0.0099 0.0358 0.0436  
Y 0.0191 -0.0104 -0.0076 -0.0014 -0.0085 -0.0106  
Z -0.0115 0.0156 0.0247 -0.0100 0.0216 0.0262  
AT. 35 H X -0.0349 -0.0341 0.0376 0.0099 0.0358 -0.0436  
Y -0.0191 -0.0104 0.0076 -0.0014 0.0085 -0.0106  
Z -0.0115 -0.0156 0.0247 0.0100 0.0216 -0.0262  
AT. 36 H X 0.0349 0.0341 -0.0376 0.0099 0.0358 0.0436  
Y -0.0191 -0.0104 0.0076 0.0014 -0.0085 -0.0106  
Z 0.0115 0.0156 -0.0247 0.0100 0.0216 0.0262  
AT. 37 C X 0.0046 -0.0049 -0.0039 -0.0005 0.0035 -0.0046  
Y 0.0164 -0.0099 -0.0006 0.0057 0.0021 -0.0035  
Z 0.0037 -0.0120 -0.0071 -0.0001 0.0058 -0.0083  
AT. 38 C X -0.0046 0.0049 0.0039 -0.0005 0.0035 0.0046  
Y 0.0164 -0.0099 -0.0006 -0.0057 -0.0021 -0.0035  
Z -0.0037 0.0120 0.0071 -0.0001 0.0058 0.0083  
AT. 39 C X -0.0046 -0.0049 0.0039 0.0005 0.0035 -0.0046

Y -0.0164 -0.0099 0.0006 -0.0057 0.0021 -0.0035  
Z -0.0037 -0.0120 0.0071 0.0001 0.0058 -0.0083  
AT. 40 C X 0.0046 0.0049 -0.0039 0.0005 0.0035 0.0046  
Y -0.0164 -0.0099 0.0006 0.0057 -0.0021 -0.0035  
Z 0.0037 0.0120 -0.0071 0.0001 0.0058 0.0083  
AT. 41 C X -0.0019 0.0012 -0.0009 -0.0024 -0.0007 0.0002  
Y 0.0190 -0.0151 -0.0049 0.0054 0.0076 -0.0093  
Z -0.0026 -0.0031 0.0103 0.0088 -0.0079 0.0082  
AT. 42 C X 0.0019 -0.0012 0.0009 -0.0024 -0.0007 -0.0002  
Y 0.0190 -0.0151 -0.0049 -0.0054 -0.0076 -0.0093  
Z 0.0026 0.0031 -0.0103 0.0088 -0.0079 -0.0082  
AT. 43 C X 0.0019 0.0012 0.0009 0.0024 -0.0007 0.0002  
Y -0.0190 -0.0151 0.0049 -0.0054 0.0076 -0.0093  
Z 0.0026 -0.0031 -0.0103 -0.0088 -0.0079 0.0082  
AT. 44 C X -0.0019 -0.0012 -0.0009 0.0024 -0.0007 -0.0002  
Y -0.0190 -0.0151 0.0049 0.0054 -0.0076 -0.0093  
Z -0.0026 0.0031 0.0103 -0.0088 -0.0079 -0.0082  
AT. 45 H X -0.0146 0.0130 0.0056 -0.0043 -0.0071 0.0081  
Y 0.0201 -0.0199 -0.0093 0.0040 0.0118 -0.0142  
Z -0.0001 -0.0088 0.0064 0.0084 -0.0041 0.0037  
AT. 46 H X 0.0146 -0.0130 -0.0056 -0.0043 -0.0071 -0.0081  
Y 0.0201 -0.0199 -0.0093 -0.0040 -0.0118 -0.0142  
Z 0.0001 0.0088 -0.0064 0.0084 -0.0041 -0.0037  
AT. 47 H X 0.0146 0.0130 -0.0056 0.0043 -0.0071 0.0081  
Y -0.0201 -0.0199 0.0093 -0.0040 0.0118 -0.0142  
Z 0.0001 -0.0088 -0.0064 -0.0084 -0.0041 0.0037  
AT. 48 H X -0.0146 -0.0130 0.0056 0.0043 -0.0071 -0.0081  
Y -0.0201 -0.0199 0.0093 0.0040 -0.0118 -0.0142  
Z -0.0001 0.0088 0.0064 -0.0084 -0.0041 -0.0037  
AT. 49 H X 0.0079 -0.0037 -0.0046 -0.0015 0.0044 -0.0055  
Y 0.0298 -0.0234 -0.0107 0.0061 0.0145 -0.0171  
Z -0.0076 0.0070 0.0148 0.0074 -0.0121 0.0132

AT. 50 H X -0.0079 0.0037 0.0046 -0.0015 0.0044 0.0055  
Y 0.0298 -0.0234 -0.0107 -0.0061 -0.0145 -0.0171  
Z 0.0076 -0.0070 -0.0148 0.0074 -0.0121 -0.0132

AT. 51 H X -0.0079 -0.0037 0.0046 0.0015 0.0044 -0.0055  
Y -0.0298 -0.0234 0.0107 -0.0061 0.0145 -0.0171  
Z 0.0076 0.0070 -0.0148 -0.0074 -0.0121 0.0132

AT. 52 H X 0.0079 0.0037 -0.0046 0.0015 0.0044 0.0055  
Y -0.0298 -0.0234 0.0107 0.0061 -0.0145 -0.0171  
Z -0.0076 -0.0070 0.0148 -0.0074 -0.0121 -0.0132

AT. 53 C X 0.0083 -0.0058 -0.0016 0.0018 0.0015 -0.0025  
Y -0.0012 0.0017 0.0014 0.0006 -0.0005 0.0010  
Z -0.0026 -0.0018 0.0102 0.0090 -0.0098 0.0098

AT. 54 C X -0.0083 0.0058 0.0016 0.0018 0.0015 0.0025  
Y -0.0012 0.0017 0.0014 -0.0006 0.0005 0.0010  
Z 0.0026 0.0018 -0.0102 0.0090 -0.0098 -0.0098

AT. 55 C X -0.0083 -0.0058 0.0016 -0.0018 0.0015 -0.0025  
Y 0.0012 0.0017 -0.0014 -0.0006 -0.0005 0.0010  
Z 0.0026 -0.0018 -0.0102 -0.0090 -0.0098 0.0098

AT. 56 C X 0.0083 0.0058 -0.0016 -0.0018 0.0015 0.0025  
Y 0.0012 0.0017 -0.0014 0.0006 0.0005 0.0010  
Z -0.0026 0.0018 0.0102 -0.0090 -0.0098 -0.0098

AT. 57 C X 0.0296 -0.0214 -0.0068 0.0046 0.0144 -0.0143  
Y -0.0110 0.0050 0.0191 0.0133 -0.0179 0.0184  
Z -0.0031 0.0001 0.0019 0.0014 -0.0036 0.0033

AT. 58 C X -0.0296 0.0214 0.0068 0.0046 0.0144 0.0143  
Y -0.0110 0.0050 0.0191 -0.0133 0.0179 0.0184  
Z 0.0031 -0.0001 -0.0019 0.0014 -0.0036 -0.0033

AT. 59 C X -0.0296 -0.0214 0.0068 -0.0046 0.0144 -0.0143  
Y 0.0110 0.0050 -0.0191 -0.0133 -0.0179 0.0184  
Z 0.0031 0.0001 -0.0019 -0.0014 -0.0036 0.0033

AT. 60 C X 0.0296 0.0214 -0.0068 -0.0046 0.0144 0.0143  
Y 0.0110 0.0050 -0.0191 0.0133 0.0179 0.0184

Z -0.0031 -0.0001 0.0019 -0.0014 -0.0036 -0.0033  
AT. 61 H X 0.0509 -0.0467 -0.0320 -0.0061 0.0467 -0.0496  
Y 0.0034 -0.0146 0.0007 0.0057 0.0056 -0.0079  
Z 0.0038 0.0050 0.0018 0.0001 -0.0028 0.0056  
AT. 62 H X -0.0509 0.0467 0.0320 -0.0061 0.0467 0.0496  
Y 0.0034 -0.0146 0.0007 -0.0057 -0.0056 -0.0079  
Z -0.0038 -0.0050 -0.0018 0.0001 -0.0028 -0.0056  
AT. 63 H X -0.0509 -0.0467 0.0320 0.0061 0.0467 -0.0496  
Y -0.0034 -0.0146 -0.0007 -0.0057 0.0056 -0.0079  
Z -0.0038 0.0050 -0.0018 -0.0001 -0.0028 0.0056  
AT. 64 H X 0.0509 0.0467 -0.0320 0.0061 0.0467 0.0496  
Y -0.0034 -0.0146 -0.0007 0.0057 -0.0056 -0.0079  
Z 0.0038 -0.0050 0.0018 -0.0001 -0.0028 -0.0056  
AT. 65 H X 0.0373 -0.0311 -0.0167 0.0003 0.0268 -0.0281  
Y -0.0353 0.0353 0.0512 0.0276 -0.0566 0.0624  
Z -0.0073 -0.0027 -0.0152 -0.0131 0.0095 -0.0137  
AT. 66 H X -0.0373 0.0311 0.0167 0.0003 0.0268 0.0281  
Y -0.0353 0.0353 0.0512 -0.0276 0.0566 0.0624  
Z 0.0073 0.0027 0.0152 -0.0131 0.0095 0.0137  
AT. 67 H X -0.0373 -0.0311 0.0167 -0.0003 0.0268 -0.0281  
Y 0.0353 0.0353 -0.0512 -0.0276 -0.0566 0.0624  
Z 0.0073 -0.0027 0.0152 0.0131 0.0095 -0.0137  
AT. 68 H X 0.0373 0.0311 -0.0167 -0.0003 0.0268 0.0281  
Y 0.0353 0.0353 -0.0512 0.0276 0.0566 0.0624  
Z -0.0073 0.0027 -0.0152 0.0131 0.0095 0.0137  
AT. 69 H X 0.0184 0.0018 0.0241 0.0221 -0.0187 0.0251  
Y -0.0105 -0.0029 0.0219 0.0181 -0.0180 0.0171  
Z -0.0047 -0.0026 0.0098 0.0086 -0.0094 0.0090  
AT. 70 H X -0.0184 -0.0018 -0.0241 0.0221 -0.0187 -0.0251  
Y -0.0105 -0.0029 0.0219 -0.0181 0.0180 0.0171  
Z 0.0047 0.0026 -0.0098 0.0086 -0.0094 -0.0090  
AT. 71 H X -0.0184 0.0018 -0.0241 -0.0221 -0.0187 0.0251

Y 0.0105 -0.0029 -0.0219 -0.0181 -0.0180 0.0171  
Z 0.0047 -0.0026 -0.0098 -0.0086 -0.0094 0.0090  
AT. 72 H X 0.0184 -0.0018 0.0241 -0.0221 -0.0187 -0.0251  
Y 0.0105 -0.0029 -0.0219 0.0181 0.0180 0.0171  
Z -0.0047 0.0026 0.0098 -0.0086 -0.0094 -0.0090  
AT. 73 C X -0.0008 -0.0010 -0.0022 -0.0015 0.0005 -0.0008  
Y 0.0019 0.0022 -0.0005 -0.0002 0.0015 -0.0006  
Z 0.0005 -0.0005 0.0062 0.0065 -0.0062 0.0064  
AT. 74 C X 0.0008 0.0010 0.0022 -0.0015 0.0005 0.0008  
Y 0.0019 0.0022 -0.0005 0.0002 -0.0015 -0.0006  
Z -0.0005 0.0005 -0.0062 0.0065 -0.0062 -0.0064  
AT. 75 C X 0.0008 -0.0010 0.0022 0.0015 0.0005 -0.0008  
Y -0.0019 0.0022 0.0005 0.0002 0.0015 -0.0006  
Z -0.0005 -0.0005 -0.0062 -0.0065 -0.0062 0.0064  
AT. 76 C X -0.0008 0.0010 -0.0022 0.0015 0.0005 0.0008  
Y -0.0019 0.0022 0.0005 -0.0002 -0.0015 -0.0006  
Z 0.0005 0.0005 0.0062 -0.0065 -0.0062 -0.0064  
AT. 77 C X 0.0086 -0.0136 0.0047 0.0087 -0.0070 0.0048  
Y 0.0058 0.0064 -0.0015 -0.0016 0.0053 -0.0035  
Z -0.0137 0.0067 0.0074 0.0015 -0.0050 0.0065  
AT. 78 C X -0.0086 0.0136 -0.0047 0.0087 -0.0070 -0.0048  
Y 0.0058 0.0064 -0.0015 0.0016 -0.0053 -0.0035  
Z 0.0137 -0.0067 -0.0074 0.0015 -0.0050 -0.0065  
AT. 79 C X -0.0086 -0.0136 -0.0047 -0.0087 -0.0070 0.0048  
Y -0.0058 0.0064 0.0015 0.0016 0.0053 -0.0035  
Z 0.0137 0.0067 -0.0074 -0.0015 -0.0050 0.0065  
AT. 80 C X 0.0086 0.0136 0.0047 -0.0087 -0.0070 -0.0048  
Y -0.0058 0.0064 0.0015 -0.0016 -0.0053 -0.0035  
Z -0.0137 -0.0067 0.0074 -0.0015 -0.0050 -0.0065  
AT. 81 H X 0.0066 -0.0082 0.0064 0.0078 -0.0055 0.0044  
Y 0.0051 0.0107 0.0004 -0.0017 0.0064 -0.0037  
Z -0.0360 0.0299 0.0076 -0.0104 -0.0024 0.0075

AT. 82 H X -0.0066 0.0082 -0.0064 0.0078 -0.0055 -0.0044  
Y 0.0051 0.0107 0.0004 0.0017 -0.0064 -0.0037  
Z 0.0360 -0.0299 -0.0076 -0.0104 -0.0024 -0.0075

AT. 83 H X -0.0066 -0.0082 -0.0064 -0.0078 -0.0055 0.0044  
Y -0.0051 0.0107 -0.0004 0.0017 0.0064 -0.0037  
Z 0.0360 0.0299 -0.0076 0.0104 -0.0024 0.0075

AT. 84 H X 0.0066 0.0082 0.0064 -0.0078 -0.0055 -0.0044  
Y -0.0051 0.0107 -0.0004 -0.0017 -0.0064 -0.0037  
Z -0.0360 -0.0299 0.0076 0.0104 -0.0024 -0.0075

AT. 85 H X 0.0213 -0.0286 0.0034 0.0152 -0.0101 0.0054  
Y -0.0062 0.0206 -0.0000 -0.0073 0.0051 -0.0010  
Z -0.0074 -0.0008 0.0070 0.0046 -0.0043 0.0045

AT. 86 H X -0.0213 0.0286 -0.0034 0.0152 -0.0101 -0.0054  
Y -0.0062 0.0206 -0.0000 0.0073 -0.0051 -0.0010  
Z 0.0074 0.0008 -0.0070 0.0046 -0.0043 -0.0045

AT. 87 H X -0.0213 -0.0286 -0.0034 -0.0152 -0.0101 0.0054  
Y 0.0062 0.0206 0.0000 0.0073 0.0051 -0.0010  
Z 0.0074 -0.0008 -0.0070 -0.0046 -0.0043 0.0045

AT. 88 H X 0.0213 0.0286 0.0034 -0.0152 -0.0101 -0.0054  
Y 0.0062 0.0206 0.0000 -0.0073 -0.0051 -0.0010  
Z -0.0074 0.0008 0.0070 -0.0046 -0.0043 -0.0045

AT. 89 C X 0.0133 -0.0128 0.0030 0.0081 -0.0036 0.0015  
Y 0.0015 0.0035 -0.0030 -0.0022 0.0026 -0.0015  
Z -0.0043 0.0012 0.0089 0.0067 -0.0083 0.0089

AT. 90 C X -0.0133 0.0128 -0.0030 0.0081 -0.0036 -0.0015  
Y 0.0015 0.0035 -0.0030 0.0022 -0.0026 -0.0015  
Z 0.0043 -0.0012 -0.0089 0.0067 -0.0083 -0.0089

AT. 91 C X -0.0133 -0.0128 -0.0030 -0.0081 -0.0036 0.0015  
Y -0.0015 0.0035 0.0030 0.0022 0.0026 -0.0015  
Z 0.0043 0.0012 -0.0089 -0.0067 -0.0083 0.0089

AT. 92 C X 0.0133 0.0128 0.0030 -0.0081 -0.0036 -0.0015  
Y -0.0015 0.0035 0.0030 -0.0022 -0.0026 -0.0015

Z -0.0043 -0.0012 0.0089 -0.0067 -0.0083 -0.0089  
AT. 93 C X 0.0343 -0.0179 0.0019 0.0135 0.0013 -0.0035  
Y 0.0013 0.0043 -0.0111 -0.0090 0.0067 -0.0065  
Z -0.0078 0.0025 0.0037 0.0014 -0.0066 0.0065  
AT. 94 C X -0.0343 0.0179 -0.0019 0.0135 0.0013 0.0035  
Y 0.0013 0.0043 -0.0111 0.0090 -0.0067 -0.0065  
Z 0.0078 -0.0025 -0.0037 0.0014 -0.0066 -0.0065  
AT. 95 C X -0.0343 -0.0179 -0.0019 -0.0135 0.0013 -0.0035  
Y -0.0013 0.0043 0.0111 0.0090 0.0067 -0.0065  
Z 0.0078 0.0025 -0.0037 -0.0014 -0.0066 0.0065  
AT. 96 C X 0.0343 0.0179 0.0019 -0.0135 0.0013 0.0035  
Y -0.0013 0.0043 0.0111 -0.0090 -0.0067 -0.0065  
Z -0.0078 -0.0025 0.0037 -0.0014 -0.0066 -0.0065  
AT. 97 H X 0.0474 -0.0192 0.0014 0.0173 0.0014 -0.0018  
Y -0.0221 0.0057 -0.0141 -0.0193 0.0123 -0.0174  
Z -0.0083 0.0008 -0.0031 -0.0048 0.0041 -0.0080  
AT. 98 H X -0.0474 0.0192 -0.0014 0.0173 0.0014 0.0018  
Y -0.0221 0.0057 -0.0141 0.0193 -0.0123 -0.0174  
Z 0.0083 -0.0008 0.0031 -0.0048 0.0041 0.0080  
AT. 99 H X -0.0474 -0.0192 -0.0014 -0.0173 0.0014 -0.0018  
Y 0.0221 0.0057 0.0141 0.0193 0.0123 -0.0174  
Z 0.0083 0.0008 0.0031 0.0048 0.0041 -0.0080  
AT. 100 H X 0.0474 0.0192 0.0014 -0.0173 0.0014 0.0018  
Y 0.0221 0.0057 0.0141 -0.0193 -0.0123 -0.0174  
Z -0.0083 -0.0008 -0.0031 0.0048 0.0041 0.0080  
AT. 101 H X 0.0528 -0.0180 0.0030 0.0204 -0.0034 0.0056  
Y 0.0224 0.0028 -0.0093 -0.0008 0.0021 0.0025  
Z -0.0111 0.0048 0.0010 -0.0017 -0.0109 0.0118  
AT. 102 H X -0.0528 0.0180 -0.0030 0.0204 -0.0034 -0.0056  
Y 0.0224 0.0028 -0.0093 0.0008 -0.0021 0.0025  
Z 0.0111 -0.0048 -0.0010 -0.0017 -0.0109 -0.0118  
AT. 103 H X -0.0528 -0.0180 -0.0030 -0.0204 -0.0034 0.0056

Y -0.0224 0.0028 0.0093 0.0008 0.0021 0.0025  
Z 0.0111 0.0048 -0.0010 0.0017 -0.0109 0.0118  
AT. 104 H X 0.0528 0.0180 0.0030 -0.0204 -0.0034 -0.0056  
Y -0.0224 0.0028 0.0093 -0.0008 -0.0021 0.0025  
Z -0.0111 -0.0048 0.0010 0.0017 -0.0109 -0.0118  
AT. 105 H X 0.0194 -0.0188 -0.0015 0.0056 0.0131 -0.0209  
Y 0.0058 0.0044 -0.0176 -0.0132 0.0087 -0.0086  
Z -0.0060 0.0028 0.0098 0.0072 -0.0122 0.0140  
AT. 106 H X -0.0194 0.0188 0.0015 0.0056 0.0131 0.0209  
Y 0.0058 0.0044 -0.0176 0.0132 -0.0087 -0.0086  
Z 0.0060 -0.0028 -0.0098 0.0072 -0.0122 -0.0140  
AT. 107 H X -0.0194 -0.0188 0.0015 -0.0056 0.0131 -0.0209  
Y -0.0058 0.0044 0.0176 0.0132 0.0087 -0.0086  
Z 0.0060 0.0028 -0.0098 -0.0072 -0.0122 0.0140  
AT. 108 H X 0.0194 0.0188 -0.0015 -0.0056 0.0131 0.0209  
Y -0.0058 0.0044 0.0176 -0.0132 -0.0087 -0.0086  
Z -0.0060 -0.0028 0.0098 -0.0072 -0.0122 -0.0140  
AT. 109 C X -0.0058 0.0072 -0.0057 -0.0079 0.0023 -0.0030  
Y -0.0180 0.0199 -0.0089 -0.0157 0.0062 -0.0047  
Z -0.0009 -0.0058 0.0241 0.0213 -0.0225 0.0227  
AT. 110 C X 0.0058 -0.0072 0.0057 -0.0079 0.0023 0.0030  
Y -0.0180 0.0199 -0.0089 0.0157 -0.0062 -0.0047  
Z 0.0009 0.0058 -0.0241 0.0213 -0.0225 -0.0227  
AT. 111 C X 0.0058 0.0072 0.0057 0.0079 0.0023 -0.0030  
Y 0.0180 0.0199 0.0089 0.0157 0.0062 -0.0047  
Z 0.0009 -0.0058 -0.0241 -0.0213 -0.0225 0.0227  
AT. 112 C X -0.0058 -0.0072 -0.0057 0.0079 0.0023 0.0030  
Y 0.0180 0.0199 0.0089 -0.0157 -0.0062 -0.0047  
Z -0.0009 0.0058 0.0241 -0.0213 -0.0225 -0.0227  
AT. 113 H X 0.0026 -0.0032 0.0039 0.0035 -0.0047 0.0043  
Y -0.0312 0.0350 -0.0212 -0.0314 0.0149 -0.0134  
Z 0.0011 -0.0171 0.0420 0.0372 -0.0382 0.0405



AT. 114 H X -0.0026 0.0032 -0.0039 0.0035 -0.0047 -0.0043  
Y -0.0312 0.0350 -0.0212 0.0314 -0.0149 -0.0134  
Z -0.0011 0.0171 -0.0420 0.0372 -0.0382 -0.0405

AT. 115 H X -0.0026 -0.0032 -0.0039 -0.0035 -0.0047 0.0043  
Y 0.0312 0.0350 0.0212 0.0314 0.0149 -0.0134  
Z -0.0011 -0.0171 -0.0420 -0.0372 -0.0382 0.0405

AT. 116 H X 0.0026 0.0032 0.0039 -0.0035 -0.0047 -0.0043  
Y 0.0312 0.0350 0.0212 -0.0314 -0.0149 -0.0134  
Z 0.0011 0.0171 0.0420 -0.0372 -0.0382 -0.0405

AT. 117 H X -0.0177 0.0264 -0.0295 -0.0306 0.0196 -0.0237  
Y -0.0174 0.0238 -0.0147 -0.0202 0.0108 -0.0110  
Z 0.0016 -0.0055 0.0231 0.0210 -0.0213 0.0206

AT. 118 H X 0.0177 -0.0264 0.0295 -0.0306 0.0196 0.0237  
Y -0.0174 0.0238 -0.0147 0.0202 -0.0108 -0.0110  
Z -0.0016 0.0055 -0.0231 0.0210 -0.0213 -0.0206

AT. 119 H X 0.0177 0.0264 0.0295 0.0306 0.0196 -0.0237  
Y 0.0174 0.0238 0.0147 0.0202 0.0108 -0.0110  
Z -0.0016 -0.0055 -0.0231 -0.0210 -0.0213 0.0206

AT. 120 H X -0.0177 -0.0264 -0.0295 0.0306 0.0196 0.0237  
Y 0.0174 0.0238 0.0147 -0.0202 -0.0108 -0.0110  
Z 0.0016 0.0055 0.0231 -0.0210 -0.0213 -0.0206

AT. 121 C X 0.0089 -0.0166 0.0144 0.0174 -0.0159 0.0140  
Y -0.0055 -0.0005 0.0082 0.0068 -0.0098 0.0110  
Z 0.0045 -0.0066 0.0202 0.0198 -0.0178 0.0174

AT. 122 C X -0.0089 0.0166 -0.0144 0.0174 -0.0159 -0.0140  
Y -0.0055 -0.0005 0.0082 -0.0068 0.0098 0.0110  
Z -0.0045 0.0066 -0.0202 0.0198 -0.0178 -0.0174

AT. 123 C X -0.0089 -0.0166 -0.0144 -0.0174 -0.0159 0.0140  
Y 0.0055 -0.0005 -0.0082 -0.0068 -0.0098 0.0110  
Z -0.0045 -0.0066 -0.0202 -0.0198 -0.0178 0.0174

AT. 124 C X 0.0089 0.0166 0.0144 -0.0174 -0.0159 -0.0140  
Y 0.0055 -0.0005 -0.0082 0.0068 0.0098 0.0110

Z 0.0045 0.0066 0.0202 -0.0198 -0.0178 -0.0174  
AT. 125 H X 0.0171 -0.0348 0.0373 0.0431 -0.0381 0.0348  
Y 0.0040 -0.0120 0.0151 0.0180 -0.0161 0.0163  
Z -0.0045 0.0064 0.0095 0.0052 -0.0075 0.0083  
AT. 126 H X -0.0171 0.0348 -0.0373 0.0431 -0.0381 -0.0348  
Y 0.0040 -0.0120 0.0151 -0.0180 0.0161 0.0163  
Z 0.0045 -0.0064 -0.0095 0.0052 -0.0075 -0.0083  
AT. 127 H X -0.0171 -0.0348 -0.0373 -0.0431 -0.0381 0.0348  
Y -0.0040 -0.0120 -0.0151 -0.0180 -0.0161 0.0163  
Z 0.0045 0.0064 -0.0095 -0.0052 -0.0075 0.0083  
AT. 128 H X 0.0171 0.0348 0.0373 -0.0431 -0.0381 -0.0348  
Y -0.0040 -0.0120 -0.0151 0.0180 0.0161 0.0163  
Z -0.0045 -0.0064 0.0095 -0.0052 -0.0075 -0.0083  
AT. 129 H X 0.0170 -0.0219 0.0132 0.0197 -0.0141 0.0112  
Y -0.0098 -0.0033 0.0189 0.0153 -0.0207 0.0224  
Z 0.0231 -0.0326 0.0424 0.0496 -0.0389 0.0359  
AT. 130 H X -0.0170 0.0219 -0.0132 0.0197 -0.0141 -0.0112  
Y -0.0098 -0.0033 0.0189 -0.0153 0.0207 0.0224  
Z -0.0231 0.0326 -0.0424 0.0496 -0.0389 -0.0359  
AT. 131 H X -0.0170 -0.0219 -0.0132 -0.0197 -0.0141 0.0112  
Y 0.0098 -0.0033 -0.0189 -0.0153 -0.0207 0.0224  
Z -0.0231 -0.0326 -0.0424 -0.0496 -0.0389 0.0359  
AT. 132 H X 0.0170 0.0219 0.0132 -0.0197 -0.0141 -0.0112  
Y 0.0098 -0.0033 -0.0189 0.0153 0.0207 0.0224  
Z 0.0231 0.0326 0.0424 -0.0496 -0.0389 -0.0359  
AT. 133 C X 0.0003 0.0016 -0.0062 -0.0059 0.0037 -0.0051  
Y -0.0155 0.0122 -0.0003 -0.0059 -0.0016 0.0038  
Z -0.0078 0.0150 -0.0037 -0.0096 0.0044 -0.0025  
AT. 134 C X -0.0003 -0.0016 0.0062 -0.0059 0.0037 0.0051  
Y -0.0155 0.0122 -0.0003 0.0059 0.0016 0.0038  
Z 0.0078 -0.0150 0.0037 -0.0096 0.0044 0.0025  
AT. 135 C X -0.0003 0.0016 0.0062 0.0059 0.0037 -0.0051

Y 0.0155 0.0122 0.0003 0.0059 -0.0016 0.0038  
Z 0.0078 0.0150 0.0037 0.0096 0.0044 -0.0025  
AT. 136 C X 0.0003 -0.0016 -0.0062 0.0059 0.0037 0.0051  
Y 0.0155 0.0122 0.0003 -0.0059 0.0016 0.0038  
Z -0.0078 -0.0150 -0.0037 0.0096 0.0044 0.0025  
AT. 137 C X -0.0092 0.0145 -0.0075 -0.0129 0.0090 -0.0071  
Y -0.0062 -0.0066 0.0236 0.0219 -0.0231 0.0235  
Z -0.0094 0.0214 -0.0180 -0.0239 0.0169 -0.0147  
AT. 138 C X 0.0092 -0.0145 0.0075 -0.0129 0.0090 0.0071  
Y -0.0062 -0.0066 0.0236 -0.0219 0.0231 0.0235  
Z 0.0094 -0.0214 0.0180 -0.0239 0.0169 0.0147  
AT. 139 C X 0.0092 0.0145 0.0075 0.0129 0.0090 -0.0071  
Y 0.0062 -0.0066 -0.0236 -0.0219 -0.0231 0.0235  
Z 0.0094 0.0214 0.0180 0.0239 0.0169 -0.0147  
AT. 140 C X -0.0092 -0.0145 -0.0075 0.0129 0.0090 0.0071  
Y 0.0062 -0.0066 -0.0236 0.0219 0.0231 0.0235  
Z -0.0094 -0.0214 -0.0180 0.0239 0.0169 0.0147  
AT. 141 H X -0.0055 0.0018 0.0078 0.0049 -0.0071 0.0079  
Y 0.0018 -0.0246 0.0449 0.0472 -0.0435 0.0424  
Z -0.0078 0.0228 -0.0204 -0.0260 0.0207 -0.0185  
AT. 142 H X 0.0055 -0.0018 -0.0078 0.0049 -0.0071 -0.0079  
Y 0.0018 -0.0246 0.0449 -0.0472 0.0435 0.0424  
Z 0.0078 -0.0228 0.0204 -0.0260 0.0207 0.0185  
AT. 143 H X 0.0055 0.0018 -0.0078 -0.0049 -0.0071 0.0079  
Y -0.0018 -0.0246 -0.0449 -0.0472 -0.0435 0.0424  
Z 0.0078 0.0228 0.0204 0.0260 0.0207 -0.0185  
AT. 144 H X -0.0055 -0.0018 0.0078 -0.0049 -0.0071 -0.0079  
Y -0.0018 -0.0246 -0.0449 0.0472 0.0435 0.0424  
Z -0.0078 -0.0228 -0.0204 0.0260 0.0207 0.0185  
AT. 145 H X -0.0102 0.0287 -0.0301 -0.0372 0.0318 -0.0296  
Y -0.0074 -0.0081 0.0262 0.0245 -0.0265 0.0268  
Z -0.0152 0.0314 -0.0327 -0.0406 0.0289 -0.0265

AT. 146 H X 0.0102 -0.0287 0.0301 -0.0372 0.0318 0.0296  
Y -0.0074 -0.0081 0.0262 -0.0245 0.0265 0.0268  
Z 0.0152 -0.0314 0.0327 -0.0406 0.0289 0.0265

AT. 147 H X 0.0102 0.0287 0.0301 0.0372 0.0318 -0.0296  
Y 0.0074 -0.0081 -0.0262 -0.0245 -0.0265 0.0268  
Z 0.0152 0.0314 0.0327 0.0406 0.0289 -0.0265

AT. 148 H X -0.0102 -0.0287 -0.0301 0.0372 0.0318 0.0296  
Y 0.0074 -0.0081 -0.0262 0.0245 0.0265 0.0268  
Z -0.0152 -0.0314 -0.0327 0.0406 0.0289 0.0265

AT. 149 O X -0.0275 0.0200 -0.0064 -0.0157 0.0015 0.0020  
Y -0.0278 0.0211 -0.0072 -0.0172 0.0037 0.0001  
Z 0.0105 -0.0006 0.0114 0.0136 -0.0102 0.0112

AT. 150 O X 0.0275 -0.0200 0.0064 -0.0157 0.0015 -0.0020  
Y -0.0278 0.0211 -0.0072 0.0172 -0.0037 0.0001  
Z -0.0105 0.0006 -0.0114 0.0136 -0.0102 -0.0112

AT. 151 O X 0.0275 0.0200 0.0064 0.0157 0.0015 0.0020  
Y 0.0278 0.0211 0.0072 0.0172 0.0037 0.0001  
Z -0.0105 -0.0006 -0.0114 -0.0136 -0.0102 0.0112

AT. 152 O X -0.0275 -0.0200 -0.0064 0.0157 0.0015 -0.0020  
Y 0.0278 0.0211 0.0072 -0.0172 -0.0037 0.0001  
Z 0.0105 0.0006 0.0114 -0.0136 -0.0102 -0.0112

AT. 153 H X -0.0145 0.0048 0.0032 0.0005 -0.0030 0.0040  
Y -0.0093 0.0093 0.0040 -0.0002 -0.0041 0.0055  
Z 0.0084 0.0046 0.0088 0.0087 -0.0102 0.0118

AT. 154 H X 0.0145 -0.0048 -0.0032 0.0005 -0.0030 -0.0040  
Y -0.0093 0.0093 0.0040 0.0002 0.0041 0.0055  
Z -0.0084 -0.0046 -0.0088 0.0087 -0.0102 -0.0118

AT. 155 H X 0.0145 0.0048 -0.0032 -0.0005 -0.0030 0.0040  
Y 0.0093 0.0093 -0.0040 0.0002 -0.0041 0.0055  
Z -0.0084 0.0046 -0.0088 -0.0087 -0.0102 0.0118

AT. 156 H X -0.0145 -0.0048 0.0032 -0.0005 -0.0030 -0.0040  
Y 0.0093 0.0093 -0.0040 -0.0002 0.0041 0.0055

Z 0.0084 -0.0046 0.0088 -0.0087 -0.0102 -0.0118  
AT. 157 O X -0.0150 0.0082 -0.0104 -0.0138 0.0063 -0.0056  
Y 0.0306 -0.0145 0.0020 0.0122 0.0038 -0.0052  
Z -0.0021 0.0002 -0.0161 -0.0133 0.0141 -0.0146  
AT. 158 O X 0.0150 -0.0082 0.0104 -0.0138 0.0063 0.0056  
Y 0.0306 -0.0145 0.0020 -0.0122 -0.0038 -0.0052  
Z 0.0021 -0.0002 0.0161 -0.0133 0.0141 0.0146  
AT. 159 O X 0.0150 0.0082 0.0104 0.0138 0.0063 -0.0056  
Y -0.0306 -0.0145 -0.0020 -0.0122 0.0038 -0.0052  
Z 0.0021 0.0002 0.0161 0.0133 0.0141 -0.0146  
AT. 160 O X -0.0150 -0.0082 -0.0104 0.0138 0.0063 0.0056  
Y -0.0306 -0.0145 -0.0020 0.0122 -0.0038 -0.0052  
Z -0.0021 -0.0002 -0.0161 0.0133 0.0141 0.0146  
AT. 161 O X 0.0098 -0.0118 0.0344 0.0348 -0.0389 0.0341  
Y -0.0044 0.0140 -0.0036 -0.0065 0.0119 -0.0046  
Z 0.0051 -0.0054 -0.0423 -0.0329 0.0388 -0.0418  
AT. 162 O X -0.0098 0.0118 -0.0344 0.0348 -0.0389 -0.0341  
Y -0.0044 0.0140 -0.0036 0.0065 -0.0119 -0.0046  
Z -0.0051 0.0054 0.0423 -0.0329 0.0388 0.0418  
AT. 163 O X -0.0098 -0.0118 -0.0344 -0.0348 -0.0389 0.0341  
Y 0.0044 0.0140 0.0036 0.0065 0.0119 -0.0046  
Z -0.0051 -0.0054 0.0423 0.0329 0.0388 -0.0418  
AT. 164 O X 0.0098 0.0118 0.0344 -0.0348 -0.0389 -0.0341  
Y 0.0044 0.0140 0.0036 -0.0065 -0.0119 -0.0046  
Z 0.0051 0.0054 -0.0423 0.0329 0.0388 0.0418  
AT. 165 H X 0.0332 -0.0362 0.0281 0.0409 -0.0357 0.0245  
Y 0.0071 0.0027 -0.0054 -0.0027 0.0131 -0.0085  
Z 0.0103 -0.0009 -0.0230 -0.0176 0.0210 -0.0242  
AT. 166 H X -0.0332 0.0362 -0.0281 0.0409 -0.0357 -0.0245  
Y 0.0071 0.0027 -0.0054 0.0027 -0.0131 -0.0085  
Z -0.0103 0.0009 0.0230 -0.0176 0.0210 0.0242  
AT. 167 H X -0.0332 -0.0362 -0.0281 -0.0409 -0.0357 0.0245

|              |   |         |         |         |         |         |         |
|--------------|---|---------|---------|---------|---------|---------|---------|
|              | Y | -0.0071 | 0.0027  | 0.0054  | 0.0027  | 0.0131  | -0.0085 |
|              | Z | -0.0103 | -0.0009 | 0.0230  | 0.0176  | 0.0210  | -0.0242 |
| AT. 168 H X  |   | 0.0332  | 0.0362  | 0.0281  | -0.0409 | -0.0357 | -0.0245 |
|              | Y | -0.0071 | 0.0027  | 0.0054  | -0.0027 | -0.0131 | -0.0085 |
|              | Z | 0.0103  | 0.0009  | -0.0230 | 0.0176  | 0.0210  | 0.0242  |
| AT. 169 O X  |   | -0.0068 | 0.0322  | 0.0171  | 0.0212  | 0.0074  | 0.0051  |
|              | Y | 0.0030  | -0.0231 | 0.0096  | 0.0061  | -0.0216 | 0.0145  |
|              | Z | 0.0018  | 0.0186  | -0.0046 | -0.0058 | -0.0100 | 0.0066  |
| AT. 170 O X  |   | 0.0068  | -0.0322 | -0.0171 | 0.0212  | 0.0074  | -0.0051 |
|              | Y | 0.0030  | -0.0231 | 0.0096  | -0.0061 | 0.0216  | 0.0145  |
|              | Z | -0.0018 | -0.0186 | 0.0046  | -0.0058 | -0.0100 | -0.0066 |
| AT. 171 O X  |   | 0.0068  | 0.0322  | -0.0171 | -0.0212 | 0.0074  | 0.0051  |
|              | Y | -0.0030 | -0.0231 | -0.0096 | -0.0061 | -0.0216 | 0.0145  |
|              | Z | -0.0018 | 0.0186  | 0.0046  | 0.0058  | -0.0100 | 0.0066  |
| AT. 172 O X  |   | -0.0068 | -0.0322 | 0.0171  | -0.0212 | 0.0074  | -0.0051 |
|              | Y | -0.0030 | -0.0231 | -0.0096 | 0.0061  | 0.0216  | 0.0145  |
|              | Z | 0.0018  | -0.0186 | -0.0046 | 0.0058  | -0.0100 | -0.0066 |
| AT. 173 H X  |   | -0.0053 | 0.0180  | 0.0119  | 0.0123  | -0.0013 | 0.0090  |
|              | Y | 0.0018  | -0.0189 | 0.0133  | 0.0092  | -0.0222 | 0.0160  |
|              | Z | 0.0024  | 0.0135  | -0.0185 | -0.0137 | -0.0029 | -0.0004 |
| AT. 174 H X  |   | 0.0053  | -0.0180 | -0.0119 | 0.0123  | -0.0013 | -0.0090 |
|              | Y | 0.0018  | -0.0189 | 0.0133  | -0.0092 | 0.0222  | 0.0160  |
|              | Z | -0.0024 | -0.0135 | 0.0185  | -0.0137 | -0.0029 | 0.0004  |
| AT. 175 H X  |   | 0.0053  | 0.0180  | -0.0119 | -0.0123 | -0.0013 | 0.0090  |
|              | Y | -0.0018 | -0.0189 | -0.0133 | -0.0092 | -0.0222 | 0.0160  |
|              | Z | -0.0024 | 0.0135  | 0.0185  | 0.0137  | -0.0029 | -0.0004 |
| AT. 176 H X  |   | -0.0053 | -0.0180 | 0.0119  | -0.0123 | -0.0013 | -0.0090 |
|              | Y | -0.0018 | -0.0189 | -0.0133 | 0.0092  | 0.0222  | 0.0160  |
|              | Z | 0.0024  | -0.0135 | -0.0185 | 0.0137  | -0.0029 | 0.0004  |
| FREQ(CM**-1) |   | 191.70  | 194.63  | 211.00  | 212.76  | 222.52  | 225.78  |

AT. 1 I X 0.0027 -0.0015 -0.0006 0.0010 0.0006 0.0011  
Y -0.0005 0.0010 -0.0005 -0.0001 -0.0002 0.0001  
Z -0.0015 -0.0012 0.0009 -0.0006 -0.0001 -0.0014

AT. 2 I X -0.0027 -0.0015 -0.0006 -0.0010 -0.0006 0.0011  
Y -0.0005 -0.0010 0.0005 -0.0001 -0.0002 -0.0001  
Z 0.0015 -0.0012 0.0009 0.0006 0.0001 -0.0014

AT. 3 I X -0.0027 0.0015 -0.0006 0.0010 -0.0006 -0.0011  
Y 0.0005 -0.0010 -0.0005 -0.0001 0.0002 -0.0001  
Z 0.0015 0.0012 0.0009 -0.0006 0.0001 0.0014

AT. 4 I X 0.0027 0.0015 -0.0006 -0.0010 0.0006 -0.0011  
Y 0.0005 0.0010 0.0005 -0.0001 0.0002 0.0001  
Z -0.0015 0.0012 0.0009 0.0006 -0.0001 0.0014

AT. 5 I X -0.0008 -0.0010 -0.0001 -0.0003 -0.0004 -0.0009  
Y 0.0003 0.0002 -0.0011 0.0005 0.0003 0.0000  
Z 0.0010 0.0014 -0.0011 0.0006 0.0011 0.0011

AT. 6 I X 0.0008 -0.0010 -0.0001 0.0003 0.0004 -0.0009  
Y 0.0003 -0.0002 0.0011 0.0005 0.0003 -0.0000  
Z -0.0010 0.0014 -0.0011 -0.0006 -0.0011 0.0011

AT. 7 I X 0.0008 0.0010 -0.0001 -0.0003 0.0004 0.0009  
Y -0.0003 -0.0002 -0.0011 0.0005 -0.0003 -0.0000  
Z -0.0010 -0.0014 -0.0011 0.0006 -0.0011 -0.0011

AT. 8 I X -0.0008 0.0010 -0.0001 0.0003 -0.0004 0.0009  
Y -0.0003 0.0002 0.0011 0.0005 -0.0003 0.0000  
Z 0.0010 -0.0014 -0.0011 -0.0006 0.0011 -0.0011

AT. 9 N X -0.0024 -0.0028 -0.0052 0.0037 0.0021 0.0017  
Y 0.0027 0.0043 0.0034 -0.0042 0.0036 0.0018  
Z 0.0029 0.0051 -0.0104 0.0103 0.0133 0.0156

AT. 10 N X 0.0024 -0.0028 -0.0052 -0.0037 -0.0021 0.0017  
Y 0.0027 -0.0043 -0.0034 -0.0042 0.0036 -0.0018  
Z -0.0029 0.0051 -0.0104 -0.0103 -0.0133 0.0156

AT. 11 N X 0.0024 0.0028 -0.0052 0.0037 -0.0021 -0.0017  
Y -0.0027 -0.0043 0.0034 -0.0042 -0.0036 -0.0018

Z -0.0029 -0.0051 -0.0104 0.0103 -0.0133 -0.0156  
AT. 12 N X -0.0024 0.0028 -0.0052 -0.0037 0.0021 -0.0017  
Y -0.0027 0.0043 -0.0034 -0.0042 -0.0036 0.0018  
Z 0.0029 -0.0051 -0.0104 -0.0103 0.0133 -0.0156  
AT. 13 N X -0.0017 -0.0030 -0.0087 0.0085 0.0025 0.0028  
Y 0.0015 0.0006 -0.0024 0.0039 0.0002 -0.0006  
Z -0.0031 -0.0047 0.0030 -0.0024 0.0036 0.0040  
AT. 14 N X 0.0017 -0.0030 -0.0087 -0.0085 -0.0025 0.0028  
Y 0.0015 -0.0006 0.0024 0.0039 0.0002 0.0006  
Z 0.0031 -0.0047 0.0030 0.0024 -0.0036 0.0040  
AT. 15 N X 0.0017 0.0030 -0.0087 0.0085 -0.0025 -0.0028  
Y -0.0015 -0.0006 -0.0024 0.0039 -0.0002 0.0006  
Z 0.0031 0.0047 0.0030 -0.0024 -0.0036 -0.0040  
AT. 16 N X -0.0017 0.0030 -0.0087 -0.0085 0.0025 -0.0028  
Y -0.0015 0.0006 0.0024 0.0039 -0.0002 -0.0006  
Z -0.0031 0.0047 0.0030 0.0024 0.0036 -0.0040  
AT. 17 O X -0.0049 -0.0056 -0.0061 0.0054 0.0036 0.0031  
Y 0.0040 0.0014 -0.0141 0.0136 0.0164 0.0168  
Z 0.0057 0.0136 0.0021 -0.0034 -0.0051 -0.0061  
AT. 18 O X 0.0049 -0.0056 -0.0061 -0.0054 -0.0036 0.0031  
Y 0.0040 -0.0014 0.0141 0.0136 0.0164 -0.0168  
Z -0.0057 0.0136 0.0021 0.0034 0.0051 -0.0061  
AT. 19 O X 0.0049 0.0056 -0.0061 0.0054 -0.0036 -0.0031  
Y -0.0040 -0.0014 -0.0141 0.0136 -0.0164 -0.0168  
Z -0.0057 -0.0136 0.0021 -0.0034 0.0051 0.0061  
AT. 20 O X -0.0049 0.0056 -0.0061 -0.0054 0.0036 -0.0031  
Y -0.0040 0.0014 0.0141 0.0136 -0.0164 0.0168  
Z 0.0057 -0.0136 0.0021 0.0034 -0.0051 0.0061  
AT. 21 O X 0.0081 0.0114 -0.0080 0.0060 0.0043 0.0093  
Y 0.0014 0.0030 0.0009 0.0001 -0.0084 -0.0086  
Z -0.0050 -0.0044 0.0093 -0.0094 -0.0123 -0.0142  
AT. 22 O X -0.0081 0.0114 -0.0080 -0.0060 -0.0043 0.0093



Y 0.0014 -0.0030 -0.0009 0.0001 -0.0084 0.0086  
Z 0.0050 -0.0044 0.0093 0.0094 0.0123 -0.0142  
AT. 23 O X -0.0081 -0.0114 -0.0080 0.0060 -0.0043 -0.0093  
Y -0.0014 -0.0030 0.0009 0.0001 0.0084 0.0086  
Z 0.0050 0.0044 0.0093 -0.0094 0.0123 0.0142  
AT. 24 O X 0.0081 -0.0114 -0.0080 -0.0060 0.0043 -0.0093  
Y -0.0014 0.0030 -0.0009 0.0001 0.0084 -0.0086  
Z -0.0050 0.0044 0.0093 0.0094 -0.0123 0.0142  
AT. 25 C X 0.0079 0.0086 0.0049 -0.0059 -0.0085 -0.0103  
Y 0.0019 0.0058 0.0100 -0.0122 -0.0077 -0.0113  
Z 0.0043 0.0111 0.0015 -0.0026 -0.0062 -0.0075  
AT. 26 C X -0.0079 0.0086 0.0049 0.0059 0.0085 -0.0103  
Y 0.0019 -0.0058 -0.0100 -0.0122 -0.0077 0.0113  
Z -0.0043 0.0111 0.0015 0.0026 0.0062 -0.0075  
AT. 27 C X -0.0079 -0.0086 0.0049 -0.0059 0.0085 0.0103  
Y -0.0019 -0.0058 0.0100 -0.0122 0.0077 0.0113  
Z -0.0043 -0.0111 0.0015 -0.0026 0.0062 0.0075  
AT. 28 C X 0.0079 -0.0086 0.0049 0.0059 -0.0085 0.0103  
Y -0.0019 0.0058 -0.0100 -0.0122 0.0077 -0.0113  
Z 0.0043 -0.0111 0.0015 0.0026 -0.0062 0.0075  
AT. 29 H X 0.0078 0.0050 0.0042 -0.0045 -0.0066 -0.0082  
Y 0.0051 0.0164 0.0206 -0.0249 -0.0216 -0.0281  
Z 0.0039 0.0151 0.0006 -0.0025 -0.0067 -0.0079  
AT. 30 H X -0.0078 0.0050 0.0042 0.0045 0.0066 -0.0082  
Y 0.0051 -0.0164 -0.0206 -0.0249 -0.0216 0.0281  
Z -0.0039 0.0151 0.0006 0.0025 0.0067 -0.0079  
AT. 31 H X -0.0078 -0.0050 0.0042 -0.0045 0.0066 0.0082  
Y -0.0051 -0.0164 0.0206 -0.0249 0.0216 0.0281  
Z -0.0039 -0.0151 0.0006 -0.0025 0.0067 0.0079  
AT. 32 H X 0.0078 -0.0050 0.0042 0.0045 -0.0066 0.0082  
Y -0.0051 0.0164 -0.0206 -0.0249 0.0216 -0.0281  
Z 0.0039 -0.0151 0.0006 0.0025 -0.0067 0.0079

AT. 33 H X 0.0086 0.0182 0.0147 -0.0179 -0.0202 -0.0253  
Y 0.0017 0.0037 0.0070 -0.0086 -0.0035 -0.0064  
Z 0.0045 0.0126 0.0076 -0.0093 -0.0157 -0.0178

AT. 34 H X -0.0086 0.0182 0.0147 0.0179 0.0202 -0.0253  
Y 0.0017 -0.0037 -0.0070 -0.0086 -0.0035 0.0064  
Z -0.0045 0.0126 0.0076 0.0093 0.0157 -0.0178

AT. 35 H X -0.0086 -0.0182 0.0147 -0.0179 0.0202 0.0253  
Y -0.0017 -0.0037 0.0070 -0.0086 0.0035 0.0064  
Z -0.0045 -0.0126 0.0076 -0.0093 0.0157 0.0178

AT. 36 H X 0.0086 -0.0182 0.0147 0.0179 -0.0202 0.0253  
Y -0.0017 0.0037 -0.0070 -0.0086 0.0035 -0.0064  
Z 0.0045 -0.0126 0.0076 0.0093 -0.0157 0.0178

AT. 37 C X 0.0004 0.0008 -0.0040 0.0029 -0.0002 -0.0006  
Y 0.0025 0.0033 0.0000 -0.0010 0.0047 0.0029  
Z 0.0045 0.0104 -0.0064 0.0054 0.0025 0.0027

AT. 38 C X -0.0004 0.0008 -0.0040 -0.0029 0.0002 -0.0006  
Y 0.0025 -0.0033 -0.0000 -0.0010 0.0047 -0.0029  
Z -0.0045 0.0104 -0.0064 -0.0054 -0.0025 0.0027

AT. 39 C X -0.0004 -0.0008 -0.0040 0.0029 0.0002 0.0006  
Y -0.0025 -0.0033 0.0000 -0.0010 -0.0047 -0.0029  
Z -0.0045 -0.0104 -0.0064 0.0054 -0.0025 -0.0027

AT. 40 C X 0.0004 -0.0008 -0.0040 -0.0029 -0.0002 0.0006  
Y -0.0025 0.0033 -0.0000 -0.0010 -0.0047 0.0029  
Z 0.0045 -0.0104 -0.0064 -0.0054 0.0025 -0.0027

AT. 41 C X -0.0015 -0.0033 -0.0041 0.0036 0.0088 0.0066  
Y 0.0022 0.0083 0.0036 -0.0061 -0.0002 -0.0007  
Z 0.0020 0.0023 -0.0084 0.0088 0.0135 0.0156

AT. 42 C X 0.0015 -0.0033 -0.0041 -0.0036 -0.0088 0.0066  
Y 0.0022 -0.0083 -0.0036 -0.0061 -0.0002 0.0007  
Z -0.0020 0.0023 -0.0084 -0.0088 -0.0135 0.0156

AT. 43 C X 0.0015 0.0033 -0.0041 0.0036 -0.0088 -0.0066  
Y -0.0022 -0.0083 0.0036 -0.0061 0.0002 0.0007

Z -0.0020 -0.0023 -0.0084 0.0088 -0.0135 -0.0156  
AT. 44 C X -0.0015 0.0033 -0.0041 -0.0036 0.0088 -0.0066  
Y -0.0022 0.0083 -0.0036 -0.0061 0.0002 -0.0007  
Z 0.0020 -0.0023 -0.0084 -0.0088 0.0135 -0.0156  
AT. 45 H X -0.0017 -0.0084 -0.0112 0.0123 0.0229 0.0194  
Y 0.0024 0.0123 0.0053 -0.0089 -0.0063 -0.0053  
Z 0.0020 0.0063 -0.0063 0.0055 0.0068 0.0105  
AT. 46 H X 0.0017 -0.0084 -0.0112 -0.0123 -0.0229 0.0194  
Y 0.0024 -0.0123 -0.0053 -0.0089 -0.0063 0.0053  
Z -0.0020 0.0063 -0.0063 -0.0055 -0.0068 0.0105  
AT. 47 H X 0.0017 0.0084 -0.0112 0.0123 -0.0229 -0.0194  
Y -0.0024 -0.0123 0.0053 -0.0089 0.0063 0.0053  
Z -0.0020 -0.0063 -0.0063 0.0055 -0.0068 -0.0105  
AT. 48 H X -0.0017 0.0084 -0.0112 -0.0123 0.0229 -0.0194  
Y -0.0024 0.0123 -0.0053 -0.0089 0.0063 -0.0053  
Z 0.0020 -0.0063 -0.0063 -0.0055 0.0068 -0.0105  
AT. 49 H X -0.0001 -0.0005 -0.0020 0.0012 0.0077 0.0052  
Y 0.0034 0.0132 0.0070 -0.0107 -0.0062 -0.0060  
Z 0.0023 -0.0034 -0.0128 0.0153 0.0268 0.0263  
AT. 50 H X 0.0001 -0.0005 -0.0020 -0.0012 -0.0077 0.0052  
Y 0.0034 -0.0132 -0.0070 -0.0107 -0.0062 0.0060  
Z -0.0023 -0.0034 -0.0128 -0.0153 -0.0268 0.0263  
AT. 51 H X 0.0001 0.0005 -0.0020 0.0012 -0.0077 -0.0052  
Y -0.0034 -0.0132 0.0070 -0.0107 0.0062 0.0060  
Z -0.0023 0.0034 -0.0128 0.0153 -0.0268 -0.0263  
AT. 52 H X -0.0001 0.0005 -0.0020 -0.0012 0.0077 -0.0052  
Y -0.0034 0.0132 -0.0070 -0.0107 0.0062 -0.0060  
Z 0.0023 0.0034 -0.0128 -0.0153 0.0268 -0.0263  
AT. 53 C X -0.0016 -0.0013 0.0018 -0.0033 0.0031 0.0014  
Y -0.0002 0.0009 0.0006 -0.0009 0.0057 0.0042  
Z -0.0003 -0.0013 0.0011 -0.0002 0.0006 0.0017  
AT. 54 C X 0.0016 -0.0013 0.0018 0.0033 -0.0031 0.0014

Y -0.0002 -0.0009 -0.0006 -0.0009 0.0057 -0.0042  
Z 0.0003 -0.0013 0.0011 0.0002 -0.0006 0.0017  
AT. 55 C X 0.0016 0.0013 0.0018 -0.0033 -0.0031 -0.0014  
Y 0.0002 -0.0009 0.0006 -0.0009 -0.0057 -0.0042  
Z 0.0003 0.0013 0.0011 -0.0002 -0.0006 -0.0017  
AT. 56 C X -0.0016 0.0013 0.0018 0.0033 0.0031 -0.0014  
Y 0.0002 0.0009 -0.0006 -0.0009 -0.0057 0.0042  
Z -0.0003 0.0013 0.0011 0.0002 0.0006 -0.0017  
AT. 57 C X -0.0009 0.0073 0.0056 -0.0108 0.0082 0.0096  
Y -0.0008 -0.0030 -0.0072 0.0079 0.0227 0.0188  
Z 0.0002 -0.0009 0.0031 -0.0019 -0.0077 -0.0068  
AT. 58 C X 0.0009 0.0073 0.0056 0.0108 -0.0082 0.0096  
Y -0.0008 0.0030 0.0072 0.0079 0.0227 -0.0188  
Z -0.0002 -0.0009 0.0031 0.0019 0.0077 -0.0068  
AT. 59 C X 0.0009 -0.0073 0.0056 -0.0108 -0.0082 -0.0096  
Y 0.0008 0.0030 -0.0072 0.0079 -0.0227 -0.0188  
Z -0.0002 0.0009 0.0031 -0.0019 0.0077 0.0068  
AT. 60 C X -0.0009 -0.0073 0.0056 0.0108 0.0082 -0.0096  
Y 0.0008 -0.0030 0.0072 0.0079 -0.0227 0.0188  
Z 0.0002 0.0009 0.0031 0.0019 -0.0077 0.0068  
AT. 61 H X 0.0110 0.0273 -0.0266 0.0150 0.0844 0.0597  
Y 0.0092 0.0125 -0.0361 0.0319 0.0893 0.0625  
Z -0.0072 -0.0056 0.0337 -0.0311 -0.0685 -0.0461  
AT. 62 H X -0.0110 0.0273 -0.0266 -0.0150 -0.0844 0.0597  
Y 0.0092 -0.0125 0.0361 0.0319 0.0893 -0.0625  
Z 0.0072 -0.0056 0.0337 0.0311 0.0685 -0.0461  
AT. 63 H X -0.0110 -0.0273 -0.0266 0.0150 -0.0844 -0.0597  
Y -0.0092 -0.0125 -0.0361 0.0319 -0.0893 -0.0625  
Z 0.0072 0.0056 0.0337 -0.0311 0.0685 0.0461  
AT. 64 H X 0.0110 -0.0273 -0.0266 -0.0150 0.0844 -0.0597  
Y -0.0092 0.0125 0.0361 0.0319 -0.0893 0.0625  
Z -0.0072 0.0056 0.0337 0.0311 -0.0685 0.0461

AT. 65 H X 0.0039 0.0148 -0.0076 0.0001 0.0392 0.0294  
Y -0.0164 -0.0269 0.0352 -0.0277 -0.0750 -0.0436  
Z 0.0082 0.0050 -0.0202 0.0215 0.0292 0.0118

AT. 66 H X -0.0039 0.0148 -0.0076 -0.0001 -0.0392 0.0294  
Y -0.0164 0.0269 -0.0352 -0.0277 -0.0750 0.0436  
Z -0.0082 0.0050 -0.0202 -0.0215 -0.0292 0.0118

AT. 67 H X -0.0039 -0.0148 -0.0076 0.0001 -0.0392 -0.0294  
Y 0.0164 0.0269 0.0352 -0.0277 0.0750 0.0436  
Z -0.0082 -0.0050 -0.0202 0.0215 -0.0292 -0.0118

AT. 68 H X 0.0039 -0.0148 -0.0076 -0.0001 0.0392 -0.0294  
Y 0.0164 -0.0269 -0.0352 -0.0277 0.0750 -0.0436  
Z 0.0082 -0.0050 -0.0202 -0.0215 0.0292 -0.0118

AT. 69 H X -0.0180 -0.0134 0.0559 -0.0554 -0.0939 -0.0531  
Y 0.0037 0.0017 -0.0265 0.0252 0.0679 0.0503  
Z 0.0012 -0.0005 -0.0047 0.0050 0.0129 0.0091

AT. 70 H X 0.0180 -0.0134 0.0559 0.0554 0.0939 -0.0531  
Y 0.0037 -0.0017 0.0265 0.0252 0.0679 -0.0503  
Z -0.0012 -0.0005 -0.0047 -0.0050 -0.0129 0.0091

AT. 71 H X 0.0180 0.0134 0.0559 -0.0554 0.0939 0.0531  
Y -0.0037 -0.0017 -0.0265 0.0252 -0.0679 -0.0503  
Z -0.0012 0.0005 -0.0047 0.0050 -0.0129 -0.0091

AT. 72 H X -0.0180 0.0134 0.0559 0.0554 -0.0939 0.0531  
Y -0.0037 0.0017 0.0265 0.0252 -0.0679 0.0503  
Z 0.0012 0.0005 -0.0047 -0.0050 0.0129 -0.0091

AT. 73 C X -0.0030 -0.0022 0.0012 -0.0021 -0.0005 0.0006  
Y -0.0019 -0.0010 0.0081 -0.0084 -0.0015 -0.0023  
Z -0.0012 -0.0026 0.0088 -0.0080 -0.0068 -0.0066

AT. 74 C X 0.0030 -0.0022 0.0012 0.0021 0.0005 0.0006  
Y -0.0019 0.0010 -0.0081 -0.0084 -0.0015 0.0023  
Z 0.0012 -0.0026 0.0088 0.0080 0.0068 -0.0066

AT. 75 C X 0.0030 0.0022 0.0012 -0.0021 0.0005 -0.0006  
Y 0.0019 0.0010 0.0081 -0.0084 0.0015 0.0023

Z 0.0012 0.0026 0.0088 -0.0080 0.0068 0.0066  
AT. 76 C X -0.0030 0.0022 0.0012 0.0021 -0.0005 -0.0006  
Y 0.0019 -0.0010 -0.0081 -0.0084 0.0015 -0.0023  
Z -0.0012 0.0026 0.0088 0.0080 -0.0068 0.0066  
AT. 77 C X -0.0027 -0.0013 -0.0025 0.0002 0.0001 0.0003  
Y -0.0003 -0.0026 0.0104 -0.0091 0.0022 0.0010  
Z 0.0011 0.0006 -0.0070 0.0081 0.0135 0.0163  
AT. 78 C X 0.0027 -0.0013 -0.0025 -0.0002 -0.0001 0.0003  
Y -0.0003 0.0026 -0.0104 -0.0091 0.0022 -0.0010  
Z -0.0011 0.0006 -0.0070 -0.0081 -0.0135 0.0163  
AT. 79 C X 0.0027 0.0013 -0.0025 0.0002 -0.0001 -0.0003  
Y 0.0003 0.0026 0.0104 -0.0091 -0.0022 -0.0010  
Z -0.0011 -0.0006 -0.0070 0.0081 -0.0135 -0.0163  
AT. 80 C X -0.0027 0.0013 -0.0025 -0.0002 0.0001 -0.0003  
Y 0.0003 -0.0026 -0.0104 -0.0091 -0.0022 0.0010  
Z 0.0011 -0.0006 -0.0070 -0.0081 0.0135 -0.0163  
AT. 81 H X -0.0012 -0.0015 -0.0036 0.0020 0.0074 0.0084  
Y 0.0012 -0.0026 0.0091 -0.0070 0.0098 0.0095  
Z 0.0002 -0.0052 -0.0068 0.0102 0.0213 0.0245  
AT. 82 H X 0.0012 -0.0015 -0.0036 -0.0020 -0.0074 0.0084  
Y 0.0012 0.0026 -0.0091 -0.0070 0.0098 -0.0095  
Z -0.0002 -0.0052 -0.0068 -0.0102 -0.0213 0.0245  
AT. 83 H X 0.0012 0.0015 -0.0036 0.0020 -0.0074 -0.0084  
Y -0.0012 0.0026 0.0091 -0.0070 -0.0098 -0.0095  
Z -0.0002 0.0052 -0.0068 0.0102 -0.0213 -0.0245  
AT. 84 H X -0.0012 0.0015 -0.0036 -0.0020 0.0074 -0.0084  
Y -0.0012 -0.0026 -0.0091 -0.0070 -0.0098 0.0095  
Z 0.0002 0.0052 -0.0068 -0.0102 0.0213 -0.0245  
AT. 85 H X -0.0044 0.0004 0.0026 -0.0067 -0.0148 -0.0159  
Y -0.0022 -0.0077 0.0141 -0.0113 0.0039 0.0030  
Z 0.0032 0.0044 -0.0122 0.0125 0.0169 0.0197  
AT. 86 H X 0.0044 0.0004 0.0026 0.0067 0.0148 -0.0159

Y -0.0022 0.0077 -0.0141 -0.0113 0.0039 -0.0030  
Z -0.0032 0.0044 -0.0122 -0.0125 -0.0169 0.0197  
AT. 87 H X 0.0044 -0.0004 0.0026 -0.0067 0.0148 0.0159  
Y 0.0022 0.0077 0.0141 -0.0113 -0.0039 -0.0030  
Z -0.0032 -0.0044 -0.0122 0.0125 -0.0169 -0.0197  
AT. 88 H X -0.0044 -0.0004 0.0026 0.0067 -0.0148 0.0159  
Y 0.0022 -0.0077 -0.0141 -0.0113 -0.0039 0.0030  
Z 0.0032 -0.0044 -0.0122 -0.0125 0.0169 -0.0197  
AT. 89 C X -0.0024 -0.0015 0.0013 -0.0032 0.0004 0.0007  
Y -0.0016 -0.0020 0.0115 -0.0110 -0.0065 -0.0084  
Z -0.0021 -0.0030 0.0045 -0.0039 -0.0005 0.0007  
AT. 90 C X 0.0024 -0.0015 0.0013 0.0032 -0.0004 0.0007  
Y -0.0016 0.0020 -0.0115 -0.0110 -0.0065 0.0084  
Z 0.0021 -0.0030 0.0045 0.0039 0.0005 0.0007  
AT. 91 C X 0.0024 0.0015 0.0013 -0.0032 -0.0004 -0.0007  
Y 0.0016 0.0020 0.0115 -0.0110 0.0065 0.0084  
Z 0.0021 0.0030 0.0045 -0.0039 0.0005 -0.0007  
AT. 92 C X -0.0024 0.0015 0.0013 0.0032 0.0004 -0.0007  
Y 0.0016 -0.0020 -0.0115 -0.0110 0.0065 -0.0084  
Z -0.0021 0.0030 0.0045 0.0039 -0.0005 -0.0007  
AT. 93 C X -0.0061 -0.0057 0.0213 -0.0208 -0.0095 -0.0101  
Y -0.0053 -0.0066 0.0246 -0.0243 -0.0255 -0.0321  
Z -0.0046 -0.0059 0.0096 -0.0097 -0.0110 -0.0127  
AT. 94 C X 0.0061 -0.0057 0.0213 0.0208 0.0095 -0.0101  
Y -0.0053 0.0066 -0.0246 -0.0243 -0.0255 0.0321  
Z 0.0046 -0.0059 0.0096 0.0097 0.0110 -0.0127  
AT. 95 C X 0.0061 0.0057 0.0213 -0.0208 0.0095 0.0101  
Y 0.0053 0.0066 0.0246 -0.0243 0.0255 0.0321  
Z 0.0046 0.0059 0.0096 -0.0097 0.0110 0.0127  
AT. 96 C X -0.0061 0.0057 0.0213 0.0208 -0.0095 0.0101  
Y 0.0053 -0.0066 -0.0246 -0.0243 0.0255 -0.0321  
Z -0.0046 0.0059 0.0096 0.0097 -0.0110 0.0127

AT. 97 H X -0.0116 -0.0102 0.0336 -0.0268 -0.0260 -0.0171  
Y 0.0072 0.0030 0.0060 -0.0215 0.0100 -0.0247  
Z 0.0006 -0.0035 0.0163 -0.0262 0.0012 -0.0234

AT. 98 H X 0.0116 -0.0102 0.0336 0.0268 0.0260 -0.0171  
Y 0.0072 -0.0030 -0.0060 -0.0215 0.0100 0.0247  
Z -0.0006 -0.0035 0.0163 0.0262 -0.0012 -0.0234

AT. 99 H X 0.0116 0.0102 0.0336 -0.0268 0.0260 0.0171  
Y -0.0072 -0.0030 0.0060 -0.0215 -0.0100 0.0247  
Z -0.0006 0.0035 0.0163 -0.0262 -0.0012 0.0234

AT. 100 H X -0.0116 0.0102 0.0336 0.0268 -0.0260 0.0171  
Y -0.0072 0.0030 -0.0060 -0.0215 -0.0100 -0.0247  
Z 0.0006 0.0035 0.0163 0.0262 0.0012 0.0234

AT. 101 H X -0.0177 -0.0147 0.0374 -0.0237 -0.0430 -0.0205  
Y -0.0173 -0.0159 0.0416 -0.0277 -0.0580 -0.0409  
Z -0.0101 -0.0107 0.0137 -0.0098 -0.0347 -0.0283

AT. 102 H X 0.0177 -0.0147 0.0374 0.0237 0.0430 -0.0205  
Y -0.0173 0.0159 -0.0416 -0.0277 -0.0580 0.0409  
Z 0.0101 -0.0107 0.0137 0.0098 0.0347 -0.0283

AT. 103 H X 0.0177 0.0147 0.0374 -0.0237 0.0430 0.0205  
Y 0.0173 0.0159 0.0416 -0.0277 0.0580 0.0409  
Z 0.0101 0.0107 0.0137 -0.0098 0.0347 0.0283

AT. 104 H X -0.0177 0.0147 0.0374 0.0237 -0.0430 0.0205  
Y 0.0173 -0.0159 -0.0416 -0.0277 0.0580 -0.0409  
Z -0.0101 0.0107 0.0137 0.0098 -0.0347 0.0283

AT. 105 H X 0.0093 0.0056 0.0089 -0.0265 0.0349 -0.0008  
Y -0.0114 -0.0125 0.0380 -0.0355 -0.0474 -0.0530  
Z -0.0051 -0.0052 0.0034 0.0009 -0.0094 0.0002

AT. 106 H X -0.0093 0.0056 0.0089 0.0265 -0.0349 -0.0008  
Y -0.0114 0.0125 -0.0380 -0.0355 -0.0474 0.0530  
Z 0.0051 -0.0052 0.0034 -0.0009 0.0094 0.0002

AT. 107 H X -0.0093 -0.0056 0.0089 -0.0265 -0.0349 0.0008  
Y 0.0114 0.0125 0.0380 -0.0355 0.0474 0.0530



Z 0.0051 0.0052 0.0034 0.0009 0.0094 -0.0002  
AT. 108 H X 0.0093 -0.0056 0.0089 0.0265 0.0349 0.0008  
Y 0.0114 -0.0125 -0.0380 -0.0355 0.0474 -0.0530  
Z -0.0051 0.0052 0.0034 -0.0009 -0.0094 -0.0002  
AT. 109 C X -0.0015 -0.0038 -0.0015 0.0023 0.0020 -0.0016  
Y 0.0005 -0.0010 -0.0009 0.0034 0.0008 -0.0031  
Z -0.0024 -0.0040 -0.0004 0.0007 0.0044 0.0072  
AT. 110 C X 0.0015 -0.0038 -0.0015 -0.0023 -0.0020 -0.0016  
Y 0.0005 0.0010 0.0009 0.0034 0.0008 0.0031  
Z 0.0024 -0.0040 -0.0004 -0.0007 -0.0044 0.0072  
AT. 111 C X 0.0015 0.0038 -0.0015 0.0023 -0.0020 0.0016  
Y -0.0005 0.0010 -0.0009 0.0034 -0.0008 0.0031  
Z 0.0024 0.0040 -0.0004 0.0007 -0.0044 -0.0072  
AT. 112 C X -0.0015 0.0038 -0.0015 -0.0023 0.0020 0.0016  
Y -0.0005 -0.0010 0.0009 0.0034 -0.0008 -0.0031  
Z -0.0024 0.0040 -0.0004 -0.0007 0.0044 -0.0072  
AT. 113 H X -0.0025 -0.0035 -0.0007 -0.0005 0.0038 0.0028  
Y 0.0020 -0.0012 -0.0030 0.0082 -0.0024 -0.0094  
Z -0.0032 -0.0031 -0.0060 0.0035 0.0049 0.0146  
AT. 114 H X 0.0025 -0.0035 -0.0007 0.0005 -0.0038 0.0028  
Y 0.0020 0.0012 0.0030 0.0082 -0.0024 0.0094  
Z 0.0032 -0.0031 -0.0060 -0.0035 -0.0049 0.0146  
AT. 115 H X 0.0025 0.0035 -0.0007 -0.0005 -0.0038 -0.0028  
Y -0.0020 0.0012 -0.0030 0.0082 0.0024 0.0094  
Z 0.0032 0.0031 -0.0060 0.0035 -0.0049 -0.0146  
AT. 116 H X -0.0025 0.0035 -0.0007 0.0005 0.0038 -0.0028  
Y -0.0020 -0.0012 0.0030 0.0082 0.0024 -0.0094  
Z -0.0032 0.0031 -0.0060 -0.0035 0.0049 -0.0146  
AT. 117 H X 0.0012 -0.0044 0.0015 0.0052 -0.0013 -0.0136  
Y -0.0001 -0.0024 0.0013 0.0022 0.0020 -0.0052  
Z -0.0033 -0.0052 0.0011 -0.0007 0.0062 0.0074  
AT. 118 H X -0.0012 -0.0044 0.0015 -0.0052 0.0013 -0.0136

Y -0.0001 0.0024 -0.0013 0.0022 0.0020 0.0052  
Z 0.0033 -0.0052 0.0011 0.0007 -0.0062 0.0074  
AT. 119 H X -0.0012 0.0044 0.0015 0.0052 0.0013 0.0136  
Y 0.0001 0.0024 0.0013 0.0022 -0.0020 0.0052  
Z 0.0033 0.0052 0.0011 -0.0007 -0.0062 -0.0074  
AT. 120 H X 0.0012 0.0044 0.0015 -0.0052 -0.0013 0.0136  
Y 0.0001 -0.0024 -0.0013 0.0022 -0.0020 -0.0052  
Z -0.0033 0.0052 0.0011 0.0007 0.0062 -0.0074  
AT. 121 C X -0.0023 -0.0019 -0.0058 0.0036 0.0046 0.0058  
Y 0.0006 -0.0000 0.0011 -0.0006 -0.0002 -0.0005  
Z -0.0032 -0.0047 0.0042 -0.0039 0.0041 0.0056  
AT. 122 C X 0.0023 -0.0019 -0.0058 -0.0036 -0.0046 0.0058  
Y 0.0006 0.0000 -0.0011 -0.0006 -0.0002 0.0005  
Z 0.0032 -0.0047 0.0042 0.0039 -0.0041 0.0056  
AT. 123 C X 0.0023 0.0019 -0.0058 0.0036 -0.0046 -0.0058  
Y -0.0006 0.0000 0.0011 -0.0006 0.0002 0.0005  
Z 0.0032 0.0047 0.0042 -0.0039 -0.0041 -0.0056  
AT. 124 C X -0.0023 0.0019 -0.0058 -0.0036 0.0046 -0.0058  
Y -0.0006 -0.0000 -0.0011 -0.0006 0.0002 -0.0005  
Z -0.0032 0.0047 0.0042 0.0039 0.0041 -0.0056  
AT. 125 H X -0.0010 -0.0009 -0.0139 0.0108 0.0138 0.0172  
Y 0.0001 -0.0000 0.0033 -0.0035 0.0005 0.0009  
Z -0.0032 -0.0049 0.0046 -0.0035 0.0016 0.0019  
AT. 126 H X 0.0010 -0.0009 -0.0139 -0.0108 -0.0138 0.0172  
Y 0.0001 0.0000 -0.0033 -0.0035 0.0005 -0.0009  
Z 0.0032 -0.0049 0.0046 0.0035 -0.0016 0.0019  
AT. 127 H X 0.0010 0.0009 -0.0139 0.0108 -0.0138 -0.0172  
Y -0.0001 0.0000 0.0033 -0.0035 -0.0005 -0.0009  
Z 0.0032 0.0049 0.0046 -0.0035 -0.0016 -0.0019  
AT. 128 H X -0.0010 0.0009 -0.0139 -0.0108 0.0138 -0.0172  
Y -0.0001 -0.0000 -0.0033 -0.0035 -0.0005 0.0009  
Z -0.0032 0.0049 0.0046 0.0035 0.0016 -0.0019

AT. 129 H X -0.0029 -0.0018 -0.0015 -0.0013 0.0028 0.0034  
Y 0.0018 0.0005 -0.0063 0.0071 0.0052 0.0065  
Z -0.0031 -0.0040 0.0027 -0.0038 0.0097 0.0132

AT. 130 H X 0.0029 -0.0018 -0.0015 0.0013 -0.0028 0.0034  
Y 0.0018 -0.0005 0.0063 0.0071 0.0052 -0.0065  
Z 0.0031 -0.0040 0.0027 0.0038 -0.0097 0.0132

AT. 131 H X 0.0029 0.0018 -0.0015 -0.0013 -0.0028 -0.0034  
Y -0.0018 -0.0005 -0.0063 0.0071 -0.0052 -0.0065  
Z 0.0031 0.0040 0.0027 -0.0038 -0.0097 -0.0132

AT. 132 H X -0.0029 0.0018 -0.0015 0.0013 0.0028 -0.0034  
Y -0.0018 0.0005 0.0063 0.0071 -0.0052 0.0065  
Z -0.0031 0.0040 0.0027 0.0038 0.0097 -0.0132

AT. 133 C X 0.0012 0.0020 -0.0045 0.0037 -0.0001 0.0019  
Y 0.0017 0.0009 -0.0027 0.0045 0.0009 0.0002  
Z -0.0040 -0.0044 0.0060 -0.0059 -0.0058 -0.0072

AT. 134 C X -0.0012 0.0020 -0.0045 -0.0037 0.0001 0.0019  
Y 0.0017 -0.0009 0.0027 0.0045 0.0009 -0.0002  
Z 0.0040 -0.0044 0.0060 0.0059 0.0058 -0.0072

AT. 135 C X -0.0012 -0.0020 -0.0045 0.0037 0.0001 -0.0019  
Y -0.0017 -0.0009 -0.0027 0.0045 -0.0009 -0.0002  
Z 0.0040 0.0044 0.0060 -0.0059 0.0058 0.0072

AT. 136 C X 0.0012 -0.0020 -0.0045 -0.0037 -0.0001 -0.0019  
Y -0.0017 0.0009 0.0027 0.0045 -0.0009 0.0002  
Z -0.0040 0.0044 0.0060 0.0059 -0.0058 0.0072

AT. 137 C X -0.0025 -0.0023 0.0026 -0.0030 -0.0064 -0.0070  
Y 0.0022 -0.0005 -0.0083 0.0102 0.0116 0.0126  
Z -0.0032 -0.0022 0.0074 -0.0078 -0.0111 -0.0129

AT. 138 C X 0.0025 -0.0023 0.0026 0.0030 0.0064 -0.0070  
Y 0.0022 0.0005 0.0083 0.0102 0.0116 -0.0126  
Z 0.0032 -0.0022 0.0074 0.0078 0.0111 -0.0129

AT. 139 C X 0.0025 0.0023 0.0026 -0.0030 0.0064 0.0070  
Y -0.0022 0.0005 -0.0083 0.0102 -0.0116 -0.0126

Z 0.0032 0.0022 0.0074 -0.0078 0.0111 0.0129  
AT. 140 C X -0.0025 0.0023 0.0026 0.0030 -0.0064 0.0070  
Y -0.0022 -0.0005 0.0083 0.0102 -0.0116 0.0126  
Z -0.0032 0.0022 0.0074 0.0078 -0.0111 0.0129  
AT. 141 H X -0.0008 -0.0012 -0.0012 0.0016 0.0017 0.0024  
Y 0.0037 0.0000 -0.0140 0.0159 0.0218 0.0254  
Z -0.0040 -0.0029 0.0076 -0.0089 -0.0130 -0.0143  
AT. 142 H X 0.0008 -0.0012 -0.0012 -0.0016 -0.0017 0.0024  
Y 0.0037 -0.0000 0.0140 0.0159 0.0218 -0.0254  
Z 0.0040 -0.0029 0.0076 0.0089 0.0130 -0.0143  
AT. 143 H X 0.0008 0.0012 -0.0012 0.0016 -0.0017 -0.0024  
Y -0.0037 -0.0000 -0.0140 0.0159 -0.0218 -0.0254  
Z 0.0040 0.0029 0.0076 -0.0089 0.0130 0.0143  
AT. 144 H X -0.0008 0.0012 -0.0012 -0.0016 0.0017 -0.0024  
Y -0.0037 0.0000 0.0140 0.0159 -0.0218 0.0254  
Z -0.0040 0.0029 0.0076 0.0089 -0.0130 0.0143  
AT. 145 H X -0.0043 -0.0026 0.0100 -0.0112 -0.0179 -0.0213  
Y 0.0027 -0.0002 -0.0098 0.0119 0.0136 0.0147  
Z -0.0029 -0.0012 0.0096 -0.0101 -0.0161 -0.0202  
AT. 146 H X 0.0043 -0.0026 0.0100 0.0112 0.0179 -0.0213  
Y 0.0027 0.0002 0.0098 0.0119 0.0136 -0.0147  
Z 0.0029 -0.0012 0.0096 0.0101 0.0161 -0.0202  
AT. 147 H X 0.0043 0.0026 0.0100 -0.0112 0.0179 0.0213  
Y -0.0027 0.0002 -0.0098 0.0119 -0.0136 -0.0147  
Z 0.0029 0.0012 0.0096 -0.0101 0.0161 0.0202  
AT. 148 H X -0.0043 0.0026 0.0100 0.0112 -0.0179 0.0213  
Y -0.0027 -0.0002 0.0098 0.0119 -0.0136 0.0147  
Z -0.0029 0.0012 0.0096 0.0101 -0.0161 0.0202  
AT. 149 O X -0.0078 -0.0069 -0.0017 0.0025 -0.0034 0.0006  
Y -0.0074 -0.0057 0.0024 -0.0008 -0.0013 0.0013  
Z -0.0062 -0.0092 0.0201 -0.0197 -0.0153 -0.0163  
AT. 150 O X 0.0078 -0.0069 -0.0017 -0.0025 0.0034 0.0006

Y -0.0074 0.0057 -0.0024 -0.0008 -0.0013 -0.0013  
Z 0.0062 -0.0092 0.0201 0.0197 0.0153 -0.0163  
AT. 151 O X 0.0078 0.0069 -0.0017 0.0025 0.0034 -0.0006  
Y 0.0074 0.0057 0.0024 -0.0008 0.0013 -0.0013  
Z 0.0062 0.0092 0.0201 -0.0197 0.0153 0.0163  
AT. 152 O X -0.0078 0.0069 -0.0017 -0.0025 -0.0034 -0.0006  
Y 0.0074 -0.0057 -0.0024 -0.0008 0.0013 0.0013  
Z -0.0062 0.0092 0.0201 0.0197 -0.0153 0.0163  
AT. 153 H X 0.0139 0.0114 -0.0058 0.0071 -0.0049 -0.0035  
Y 0.0006 -0.0014 -0.0029 0.0039 -0.0038 -0.0036  
Z -0.0184 -0.0204 0.0209 -0.0210 -0.0150 -0.0150  
AT. 154 H X -0.0139 0.0114 -0.0058 -0.0071 0.0049 -0.0035  
Y 0.0006 0.0014 0.0029 0.0039 -0.0038 0.0036  
Z 0.0184 -0.0204 0.0209 0.0210 0.0150 -0.0150  
AT. 155 H X -0.0139 -0.0114 -0.0058 0.0071 0.0049 0.0035  
Y -0.0006 0.0014 -0.0029 0.0039 0.0038 0.0036  
Z 0.0184 0.0204 0.0209 -0.0210 0.0150 0.0150  
AT. 156 H X 0.0139 -0.0114 -0.0058 -0.0071 -0.0049 0.0035  
Y -0.0006 -0.0014 0.0029 0.0039 0.0038 -0.0036  
Z -0.0184 0.0204 0.0209 0.0210 -0.0150 0.0150  
AT. 157 O X -0.0026 -0.0010 -0.0064 0.0065 0.0031 0.0050  
Y 0.0029 0.0043 0.0163 -0.0188 -0.0024 -0.0059  
Z 0.0043 0.0067 -0.0063 0.0069 0.0057 0.0062  
AT. 158 O X 0.0026 -0.0010 -0.0064 -0.0065 -0.0031 0.0050  
Y 0.0029 -0.0043 -0.0163 -0.0188 -0.0024 0.0059  
Z -0.0043 0.0067 -0.0063 -0.0069 -0.0057 0.0062  
AT. 159 O X 0.0026 0.0010 -0.0064 0.0065 -0.0031 -0.0050  
Y -0.0029 -0.0043 0.0163 -0.0188 0.0024 0.0059  
Z -0.0043 -0.0067 -0.0063 0.0069 -0.0057 -0.0062  
AT. 160 O X -0.0026 0.0010 -0.0064 -0.0065 0.0031 -0.0050  
Y -0.0029 0.0043 -0.0163 -0.0188 0.0024 -0.0059  
Z 0.0043 -0.0067 -0.0063 -0.0069 0.0057 -0.0062

AT.161 O X -0.0138 -0.0233 0.0311 -0.0312 -0.0202 -0.0319  
Y 0.0004 0.0066 0.0079 -0.0091 -0.0093 0.0079  
Z 0.0134 0.0198 -0.0243 0.0242 0.0250 0.0204

AT.162 O X 0.0138 -0.0233 0.0311 0.0312 0.0202 -0.0319  
Y 0.0004 -0.0066 -0.0079 -0.0091 -0.0093 -0.0079  
Z -0.0134 0.0198 -0.0243 -0.0242 -0.0250 0.0204

AT.163 O X 0.0138 0.0233 0.0311 -0.0312 0.0202 0.0319  
Y -0.0004 -0.0066 0.0079 -0.0091 0.0093 -0.0079  
Z -0.0134 -0.0198 -0.0243 0.0242 -0.0250 -0.0204

AT.164 O X -0.0138 0.0233 0.0311 0.0312 -0.0202 0.0319  
Y -0.0004 0.0066 -0.0079 -0.0091 0.0093 0.0079  
Z 0.0134 -0.0198 -0.0243 -0.0242 0.0250 -0.0204

AT.165 H X -0.0059 -0.0156 0.0219 -0.0224 -0.0044 -0.0251  
Y 0.0036 0.0099 0.0049 -0.0066 -0.0031 0.0109  
Z 0.0039 0.0049 0.0015 -0.0025 0.0038 -0.0073

AT.166 H X 0.0059 -0.0156 0.0219 0.0224 0.0044 -0.0251  
Y 0.0036 -0.0099 -0.0049 -0.0066 -0.0031 -0.0109  
Z -0.0039 0.0049 0.0015 0.0025 -0.0038 -0.0073

AT.167 H X 0.0059 0.0156 0.0219 -0.0224 0.0044 0.0251  
Y -0.0036 -0.0099 0.0049 -0.0066 0.0031 -0.0109  
Z -0.0039 -0.0049 0.0015 -0.0025 -0.0038 0.0073

AT.168 H X -0.0059 0.0156 0.0219 0.0224 -0.0044 0.0251  
Y -0.0036 0.0099 -0.0049 -0.0066 0.0031 0.0109  
Z 0.0039 -0.0049 0.0015 0.0025 0.0038 0.0073

AT.169 O X 0.0875 0.0790 -0.0101 0.0130 -0.0159 -0.0209  
Y -0.0101 -0.0128 -0.0506 0.0496 0.0178 0.0189  
Z -0.0245 -0.0222 -0.0139 0.0106 0.0045 0.0059

AT.170 O X -0.0875 0.0790 -0.0101 -0.0130 0.0159 -0.0209  
Y -0.0101 0.0128 0.0506 0.0496 0.0178 -0.0189  
Z 0.0245 -0.0222 -0.0139 -0.0106 -0.0045 0.0059

AT.171 O X -0.0875 -0.0790 -0.0101 0.0130 0.0159 0.0209  
Y 0.0101 0.0128 -0.0506 0.0496 -0.0178 -0.0189

Z 0.0245 0.0222 -0.0139 0.0106 -0.0045 -0.0059  
 AT.172 O X 0.0875 -0.0790 -0.0101 -0.0130 -0.0159 0.0209  
 Y 0.0101 -0.0128 0.0506 0.0496 -0.0178 0.0189  
 Z -0.0245 0.0222 -0.0139 -0.0106 0.0045 -0.0059  
 AT.173 H X 0.0510 0.0448 -0.0161 0.0193 -0.0032 -0.0081  
 Y -0.0022 -0.0062 -0.0542 0.0531 0.0178 0.0189  
 Z -0.0192 -0.0117 -0.0108 0.0073 -0.0138 -0.0131  
 AT.174 H X -0.0510 0.0448 -0.0161 -0.0193 0.0032 -0.0081  
 Y -0.0022 0.0062 0.0542 0.0531 0.0178 -0.0189  
 Z 0.0192 -0.0117 -0.0108 -0.0073 0.0138 -0.0131  
 AT.175 H X -0.0510 -0.0448 -0.0161 0.0193 0.0032 0.0081  
 Y 0.0022 0.0062 -0.0542 0.0531 -0.0178 -0.0189  
 Z 0.0192 0.0117 -0.0108 0.0073 0.0138 0.0131  
 AT.176 H X 0.0510 -0.0448 -0.0161 -0.0193 -0.0032 0.0081  
 Y 0.0022 -0.0062 0.0542 0.0531 -0.0178 0.0189  
 Z -0.0192 0.0117 -0.0108 -0.0073 -0.0138 0.0131

FREQ(CM\*\*-1) 233.89 234.46 235.13 236.02 239.88 240.78

AT. 1 I X -0.0011 0.0004 0.0007 -0.0009 -0.0012 0.0004  
 Y -0.0002 0.0001 0.0001 -0.0001 0.0006 -0.0001  
 Z 0.0010 -0.0002 -0.0006 0.0005 0.0005 -0.0005  
 AT. 2 I X -0.0011 -0.0004 -0.0007 -0.0009 -0.0012 -0.0004  
 Y 0.0002 0.0001 0.0001 0.0001 -0.0006 -0.0001  
 Z 0.0010 0.0002 0.0006 0.0005 0.0005 0.0005  
 AT. 3 I X -0.0011 0.0004 -0.0007 0.0009 -0.0012 0.0004  
 Y -0.0002 0.0001 -0.0001 0.0001 0.0006 -0.0001  
 Z 0.0010 -0.0002 0.0006 -0.0005 0.0005 -0.0005  
 AT. 4 I X -0.0011 -0.0004 0.0007 0.0009 -0.0012 -0.0004  
 Y 0.0002 0.0001 -0.0001 -0.0001 -0.0006 -0.0001  
 Z 0.0010 0.0002 -0.0006 -0.0005 0.0005 0.0005  
 AT. 5 I X 0.0003 -0.0005 -0.0013 0.0010 -0.0007 0.0006

Y -0.0000 0.0010 0.0003 -0.0009 -0.0000 -0.0000  
Z -0.0006 0.0014 0.0012 -0.0009 -0.0001 0.0001  
AT. 6 I X 0.0003 0.0005 0.0013 0.0010 -0.0007 -0.0006  
Y 0.0000 0.0010 0.0003 0.0009 0.0000 -0.0000  
Z -0.0006 -0.0014 -0.0012 -0.0009 -0.0001 -0.0001  
AT. 7 I X 0.0003 -0.0005 0.0013 -0.0010 -0.0007 0.0006  
Y -0.0000 0.0010 -0.0003 0.0009 -0.0000 -0.0000  
Z -0.0006 0.0014 -0.0012 0.0009 -0.0001 0.0001  
AT. 8 I X 0.0003 0.0005 -0.0013 -0.0010 -0.0007 -0.0006  
Y 0.0000 0.0010 -0.0003 -0.0009 0.0000 -0.0000  
Z -0.0006 -0.0014 0.0012 0.0009 -0.0001 -0.0001  
AT. 9 N X 0.0045 -0.0037 -0.0054 0.0049 0.0048 -0.0068  
Y 0.0002 0.0005 0.0014 -0.0014 -0.0028 0.0045  
Z -0.0037 0.0005 0.0076 -0.0022 -0.0078 0.0086  
AT. 10 N X 0.0045 0.0037 0.0054 0.0049 0.0048 0.0068  
Y -0.0002 0.0005 0.0014 0.0014 0.0028 0.0045  
Z -0.0037 -0.0005 -0.0076 -0.0022 -0.0078 -0.0086  
AT. 11 N X 0.0045 -0.0037 0.0054 -0.0049 0.0048 -0.0068  
Y 0.0002 0.0005 -0.0014 0.0014 -0.0028 0.0045  
Z -0.0037 0.0005 -0.0076 0.0022 -0.0078 0.0086  
AT. 12 N X 0.0045 0.0037 -0.0054 -0.0049 0.0048 0.0068  
Y -0.0002 0.0005 -0.0014 -0.0014 0.0028 0.0045  
Z -0.0037 -0.0005 0.0076 0.0022 -0.0078 -0.0086  
AT. 13 N X -0.0013 -0.0004 -0.0006 0.0010 0.0057 -0.0056  
Y 0.0024 -0.0044 -0.0038 0.0044 0.0034 -0.0045  
Z -0.0029 -0.0009 0.0031 -0.0032 -0.0092 0.0096  
AT. 14 N X -0.0013 0.0004 0.0006 0.0010 0.0057 0.0056  
Y -0.0024 -0.0044 -0.0038 -0.0044 -0.0034 -0.0045  
Z -0.0029 0.0009 -0.0031 -0.0032 -0.0092 -0.0096  
AT. 15 N X -0.0013 -0.0004 0.0006 -0.0010 0.0057 -0.0056  
Y 0.0024 -0.0044 0.0038 -0.0044 0.0034 -0.0045  
Z -0.0029 -0.0009 -0.0031 0.0032 -0.0092 0.0096



AT. 16 N X -0.0013 0.0004 -0.0006 -0.0010 0.0057 0.0056  
Y -0.0024 -0.0044 0.0038 0.0044 -0.0034 -0.0045  
Z -0.0029 0.0009 0.0031 0.0032 -0.0092 -0.0096

AT. 17 O X 0.0024 0.0012 0.0003 0.0015 0.0010 -0.0013  
Y -0.0029 0.0025 0.0056 -0.0028 -0.0022 0.0027  
Z 0.0015 0.0002 -0.0029 0.0021 0.0096 -0.0074

AT. 18 O X 0.0024 -0.0012 -0.0003 0.0015 0.0010 0.0013  
Y 0.0029 0.0025 0.0056 0.0028 0.0022 0.0027  
Z 0.0015 -0.0002 0.0029 0.0021 0.0096 0.0074

AT. 19 O X 0.0024 0.0012 -0.0003 -0.0015 0.0010 -0.0013  
Y -0.0029 0.0025 -0.0056 0.0028 -0.0022 0.0027  
Z 0.0015 0.0002 0.0029 -0.0021 0.0096 -0.0074

AT. 20 O X 0.0024 -0.0012 0.0003 -0.0015 0.0010 0.0013  
Y 0.0029 0.0025 -0.0056 -0.0028 0.0022 0.0027  
Z 0.0015 -0.0002 -0.0029 -0.0021 0.0096 0.0074

AT. 21 O X -0.0229 0.0183 0.0241 -0.0213 -0.0075 0.0159  
Y -0.0007 -0.0008 -0.0050 0.0006 0.0101 -0.0118  
Z 0.0010 -0.0015 -0.0090 -0.0010 0.0082 -0.0112

AT. 22 O X -0.0229 -0.0183 -0.0241 -0.0213 -0.0075 -0.0159  
Y 0.0007 -0.0008 -0.0050 -0.0006 -0.0101 -0.0118  
Z 0.0010 0.0015 0.0090 -0.0010 0.0082 0.0112

AT. 23 O X -0.0229 0.0183 -0.0241 0.0213 -0.0075 0.0159  
Y -0.0007 -0.0008 0.0050 -0.0006 0.0101 -0.0118  
Z 0.0010 -0.0015 0.0090 0.0010 0.0082 -0.0112

AT. 24 O X -0.0229 -0.0183 0.0241 0.0213 -0.0075 -0.0159  
Y 0.0007 -0.0008 0.0050 0.0006 -0.0101 -0.0118  
Z 0.0010 0.0015 -0.0090 0.0010 0.0082 0.0112

AT. 25 C X 0.0036 0.0019 -0.0054 0.0025 0.0147 -0.0132  
Y 0.0040 0.0011 -0.0055 0.0010 0.0099 -0.0075  
Z 0.0024 0.0016 -0.0037 0.0023 0.0131 -0.0111

AT. 26 C X 0.0036 -0.0019 0.0054 0.0025 0.0147 0.0132  
Y -0.0040 0.0011 -0.0055 -0.0010 -0.0099 -0.0075

Z 0.0024 -0.0016 0.0037 0.0023 0.0131 0.0111  
AT. 27 C X 0.0036 0.0019 0.0054 -0.0025 0.0147 -0.0132  
Y 0.0040 0.0011 0.0055 -0.0010 0.0099 -0.0075  
Z 0.0024 0.0016 0.0037 -0.0023 0.0131 -0.0111  
AT. 28 C X 0.0036 -0.0019 -0.0054 -0.0025 0.0147 0.0132  
Y -0.0040 0.0011 0.0055 0.0010 -0.0099 -0.0075  
Z 0.0024 -0.0016 -0.0037 -0.0023 0.0131 0.0111  
AT. 29 H X 0.0021 0.0017 -0.0039 0.0014 0.0107 -0.0101  
Y 0.0073 0.0049 -0.0116 0.0018 0.0282 -0.0226  
Z 0.0040 0.0016 -0.0048 0.0037 0.0165 -0.0133  
AT. 30 H X 0.0021 -0.0017 0.0039 0.0014 0.0107 0.0101  
Y -0.0073 0.0049 -0.0116 -0.0018 -0.0282 -0.0226  
Z 0.0040 -0.0016 0.0048 0.0037 0.0165 0.0133  
AT. 31 H X 0.0021 0.0017 0.0039 -0.0014 0.0107 -0.0101  
Y 0.0073 0.0049 0.0116 -0.0018 0.0282 -0.0226  
Z 0.0040 0.0016 0.0048 -0.0037 0.0165 -0.0133  
AT. 32 H X 0.0021 -0.0017 -0.0039 -0.0014 0.0107 0.0101  
Y -0.0073 0.0049 0.0116 0.0018 -0.0282 -0.0226  
Z 0.0040 -0.0016 -0.0048 -0.0037 0.0165 0.0133  
AT. 33 H X 0.0075 0.0052 -0.0110 0.0035 0.0313 -0.0265  
Y 0.0029 0.0002 -0.0037 0.0007 0.0050 -0.0034  
Z 0.0042 0.0029 -0.0076 0.0031 0.0214 -0.0185  
AT. 34 H X 0.0075 -0.0052 0.0110 0.0035 0.0313 0.0265  
Y -0.0029 0.0002 -0.0037 -0.0007 -0.0050 -0.0034  
Z 0.0042 -0.0029 0.0076 0.0031 0.0214 0.0185  
AT. 35 H X 0.0075 0.0052 0.0110 -0.0035 0.0313 -0.0265  
Y 0.0029 0.0002 0.0037 -0.0007 0.0050 -0.0034  
Z 0.0042 0.0029 0.0076 -0.0031 0.0214 -0.0185  
AT. 36 H X 0.0075 -0.0052 -0.0110 -0.0035 0.0313 0.0265  
Y -0.0029 0.0002 0.0037 0.0007 -0.0050 -0.0034  
Z 0.0042 -0.0029 -0.0076 -0.0031 0.0214 0.0185  
AT. 37 C X 0.0037 -0.0005 -0.0032 0.0037 0.0066 -0.0067

Y 0.0003 0.0008 0.0008 -0.0011 -0.0006 0.0019  
Z -0.0006 0.0018 0.0010 0.0004 0.0067 -0.0049  
AT. 38 C X 0.0037 0.0005 0.0032 0.0037 0.0066 0.0067  
Y -0.0003 0.0008 0.0008 0.0011 0.0006 0.0019  
Z -0.0006 -0.0018 -0.0010 0.0004 0.0067 0.0049  
AT. 39 C X 0.0037 -0.0005 0.0032 -0.0037 0.0066 -0.0067  
Y 0.0003 0.0008 -0.0008 0.0011 -0.0006 0.0019  
Z -0.0006 0.0018 -0.0010 -0.0004 0.0067 -0.0049  
AT. 40 C X 0.0037 0.0005 -0.0032 -0.0037 0.0066 0.0067  
Y -0.0003 0.0008 -0.0008 -0.0011 0.0006 0.0019  
Z -0.0006 -0.0018 0.0010 -0.0004 0.0067 0.0049  
AT. 41 C X 0.0078 -0.0092 -0.0044 0.0086 -0.0068 0.0057  
Y -0.0035 0.0050 0.0023 -0.0058 0.0032 -0.0011  
Z -0.0029 -0.0013 0.0068 -0.0015 -0.0111 0.0110  
AT. 42 C X 0.0078 0.0092 0.0044 0.0086 -0.0068 -0.0057  
Y 0.0035 0.0050 0.0023 0.0058 -0.0032 -0.0011  
Z -0.0029 0.0013 -0.0068 -0.0015 -0.0111 -0.0110  
AT. 43 C X 0.0078 -0.0092 0.0044 -0.0086 -0.0068 0.0057  
Y -0.0035 0.0050 -0.0023 0.0058 0.0032 -0.0011  
Z -0.0029 -0.0013 -0.0068 0.0015 -0.0111 0.0110  
AT. 44 C X 0.0078 0.0092 -0.0044 -0.0086 -0.0068 -0.0057  
Y 0.0035 0.0050 -0.0023 -0.0058 -0.0032 -0.0011  
Z -0.0029 0.0013 0.0068 0.0015 -0.0111 -0.0110  
AT. 45 H X 0.0176 -0.0238 -0.0084 0.0207 -0.0224 0.0178  
Y -0.0086 0.0120 0.0048 -0.0116 0.0113 -0.0078  
Z -0.0089 0.0068 0.0099 -0.0085 -0.0026 0.0042  
AT. 46 H X 0.0176 0.0238 0.0084 0.0207 -0.0224 -0.0178  
Y 0.0086 0.0120 0.0048 0.0116 -0.0113 -0.0078  
Z -0.0089 -0.0068 -0.0099 -0.0085 -0.0026 -0.0042  
AT. 47 H X 0.0176 -0.0238 0.0084 -0.0207 -0.0224 0.0178  
Y -0.0086 0.0120 -0.0048 0.0116 0.0113 -0.0078  
Z -0.0089 0.0068 -0.0099 0.0085 -0.0026 0.0042

AT. 48 H X 0.0176 0.0238 -0.0084 -0.0207 -0.0224 -0.0178  
Y 0.0086 0.0120 -0.0048 -0.0116 -0.0113 -0.0078  
Z -0.0089 -0.0068 0.0099 0.0085 -0.0026 -0.0042

AT. 49 H X 0.0061 -0.0062 -0.0023 0.0061 -0.0059 0.0066  
Y -0.0094 0.0135 0.0062 -0.0131 0.0104 -0.0054  
Z 0.0078 -0.0161 0.0024 0.0111 -0.0274 0.0245

AT. 50 H X 0.0061 0.0062 0.0023 0.0061 -0.0059 -0.0066  
Y 0.0094 0.0135 0.0062 0.0131 -0.0104 -0.0054  
Z 0.0078 0.0161 -0.0024 0.0111 -0.0274 -0.0245

AT. 51 H X 0.0061 -0.0062 0.0023 -0.0061 -0.0059 0.0066  
Y -0.0094 0.0135 -0.0062 0.0131 0.0104 -0.0054  
Z 0.0078 -0.0161 -0.0024 -0.0111 -0.0274 0.0245

AT. 52 H X 0.0061 0.0062 -0.0023 -0.0061 -0.0059 -0.0066  
Y 0.0094 0.0135 -0.0062 -0.0131 -0.0104 -0.0054  
Z 0.0078 0.0161 0.0024 -0.0111 -0.0274 -0.0245

AT. 53 C X 0.0032 -0.0034 -0.0020 0.0025 -0.0041 0.0045  
Y 0.0043 -0.0067 -0.0032 0.0041 -0.0053 0.0039  
Z -0.0030 0.0014 0.0025 -0.0026 -0.0018 0.0020

AT. 54 C X 0.0032 0.0034 0.0020 0.0025 -0.0041 -0.0045  
Y -0.0043 -0.0067 -0.0032 -0.0041 0.0053 0.0039  
Z -0.0030 -0.0014 -0.0025 -0.0026 -0.0018 -0.0020

AT. 55 C X 0.0032 -0.0034 0.0020 -0.0025 -0.0041 0.0045  
Y 0.0043 -0.0067 0.0032 -0.0041 -0.0053 0.0039  
Z -0.0030 0.0014 -0.0025 0.0026 -0.0018 0.0020

AT. 56 C X 0.0032 0.0034 -0.0020 -0.0025 -0.0041 -0.0045  
Y -0.0043 -0.0067 0.0032 0.0041 0.0053 0.0039  
Z -0.0030 -0.0014 0.0025 0.0026 -0.0018 -0.0020

AT. 57 C X -0.0072 0.0036 0.0072 -0.0118 -0.0180 0.0174  
Y 0.0159 -0.0250 -0.0097 0.0187 -0.0230 0.0178  
Z -0.0048 0.0070 0.0022 -0.0048 0.0105 -0.0083

AT. 58 C X -0.0072 -0.0036 -0.0072 -0.0118 -0.0180 -0.0174  
Y -0.0159 -0.0250 -0.0097 -0.0187 0.0230 0.0178

Z -0.0048 -0.0070 -0.0022 -0.0048 0.0105 0.0083  
AT. 59 C X -0.0072 0.0036 -0.0072 0.0118 -0.0180 0.0174  
Y 0.0159 -0.0250 0.0097 -0.0187 -0.0230 0.0178  
Z -0.0048 0.0070 -0.0022 0.0048 0.0105 -0.0083  
AT. 60 C X -0.0072 -0.0036 0.0072 0.0118 -0.0180 -0.0174  
Y -0.0159 -0.0250 0.0097 0.0187 0.0230 0.0178  
Z -0.0048 -0.0070 0.0022 0.0048 0.0105 0.0083  
AT. 61 H X 0.0638 -0.0842 -0.0475 0.0611 -0.0684 0.0480  
Y 0.0792 -0.1029 -0.0581 0.0844 -0.0666 0.0442  
Z -0.0689 0.0846 0.0499 -0.0753 0.0482 -0.0308  
AT. 62 H X 0.0638 0.0842 0.0475 0.0611 -0.0684 -0.0480  
Y -0.0792 -0.1029 -0.0581 -0.0844 0.0666 0.0442  
Z -0.0689 -0.0846 -0.0499 -0.0753 0.0482 0.0308  
AT. 63 H X 0.0638 -0.0842 0.0475 -0.0611 -0.0684 0.0480  
Y 0.0792 -0.1029 0.0581 -0.0844 -0.0666 0.0442  
Z -0.0689 0.0846 -0.0499 0.0753 0.0482 -0.0308  
AT. 64 H X 0.0638 0.0842 -0.0475 -0.0611 -0.0684 -0.0480  
Y -0.0792 -0.1029 0.0581 0.0844 0.0666 0.0442  
Z -0.0689 -0.0846 0.0499 0.0753 0.0482 0.0308  
AT. 65 H X 0.0230 -0.0331 -0.0162 0.0194 -0.0376 0.0290  
Y -0.0796 0.0897 0.0631 -0.0799 0.0374 -0.0182  
Z 0.0448 -0.0460 -0.0369 0.0490 0.0026 -0.0090  
AT. 66 H X 0.0230 0.0331 0.0162 0.0194 -0.0376 -0.0290  
Y 0.0796 0.0897 0.0631 0.0799 -0.0374 -0.0182  
Z 0.0448 0.0460 0.0369 0.0490 0.0026 0.0090  
AT. 67 H X 0.0230 -0.0331 0.0162 -0.0194 -0.0376 0.0290  
Y -0.0796 0.0897 -0.0631 0.0799 0.0374 -0.0182  
Z 0.0448 -0.0460 0.0369 -0.0490 0.0026 -0.0090  
AT. 68 H X 0.0230 0.0331 -0.0162 -0.0194 -0.0376 -0.0290  
Y 0.0796 0.0897 -0.0631 -0.0799 -0.0374 -0.0182  
Z 0.0448 0.0460 -0.0369 -0.0490 0.0026 0.0090  
AT. 69 H X -0.1159 0.1315 0.0918 -0.1267 0.0369 -0.0110

Y 0.0573 -0.0784 -0.0403 0.0633 -0.0578 0.0403  
Z 0.0112 -0.0159 -0.0088 0.0129 -0.0095 0.0060  
AT. 70 H X -0.1159 -0.1315 -0.0918 -0.1267 0.0369 0.0110  
Y -0.0573 -0.0784 -0.0403 -0.0633 0.0578 0.0403  
Z 0.0112 0.0159 0.0088 0.0129 -0.0095 -0.0060  
AT. 71 H X -0.1159 0.1315 -0.0918 0.1267 0.0369 -0.0110  
Y 0.0573 -0.0784 0.0403 -0.0633 -0.0578 0.0403  
Z 0.0112 -0.0159 0.0088 -0.0129 -0.0095 0.0060  
AT. 72 H X -0.1159 -0.1315 0.0918 0.1267 0.0369 0.0110  
Y -0.0573 -0.0784 0.0403 0.0633 0.0578 0.0403  
Z 0.0112 0.0159 -0.0088 -0.0129 -0.0095 -0.0060  
AT. 73 C X -0.0027 0.0019 0.0029 -0.0021 -0.0027 0.0037  
Y 0.0024 -0.0035 -0.0026 0.0011 -0.0039 0.0029  
Z -0.0008 0.0010 -0.0016 -0.0015 0.0008 -0.0013  
AT. 74 C X -0.0027 -0.0019 -0.0029 -0.0021 -0.0027 -0.0037  
Y -0.0024 -0.0035 -0.0026 -0.0011 0.0039 0.0029  
Z -0.0008 -0.0010 0.0016 -0.0015 0.0008 0.0013  
AT. 75 C X -0.0027 0.0019 -0.0029 0.0021 -0.0027 0.0037  
Y 0.0024 -0.0035 0.0026 -0.0011 -0.0039 0.0029  
Z -0.0008 0.0010 0.0016 0.0015 0.0008 -0.0013  
AT. 76 C X -0.0027 -0.0019 0.0029 0.0021 -0.0027 -0.0037  
Y -0.0024 -0.0035 0.0026 0.0011 0.0039 0.0029  
Z -0.0008 -0.0010 -0.0016 0.0015 0.0008 0.0013  
AT. 77 C X -0.0010 0.0023 -0.0010 -0.0011 0.0054 -0.0057  
Y 0.0033 -0.0053 0.0005 0.0016 -0.0132 0.0133  
Z -0.0021 -0.0028 0.0076 -0.0007 -0.0144 0.0144  
AT. 78 C X -0.0010 -0.0023 0.0010 -0.0011 0.0054 0.0057  
Y -0.0033 -0.0053 0.0005 -0.0016 0.0132 0.0133  
Z -0.0021 0.0028 -0.0076 -0.0007 -0.0144 -0.0144  
AT. 79 C X -0.0010 0.0023 0.0010 0.0011 0.0054 -0.0057  
Y 0.0033 -0.0053 -0.0005 -0.0016 -0.0132 0.0133  
Z -0.0021 -0.0028 -0.0076 0.0007 -0.0144 0.0144

AT. 80 C X -0.0010 -0.0023 -0.0010 0.0011 0.0054 0.0057  
Y -0.0033 -0.0053 -0.0005 0.0016 0.0132 0.0133  
Z -0.0021 0.0028 0.0076 0.0007 -0.0144 -0.0144

AT. 81 H X -0.0016 0.0013 0.0046 -0.0026 -0.0067 0.0070  
Y 0.0019 -0.0057 0.0069 -0.0004 -0.0255 0.0266  
Z 0.0032 -0.0102 0.0091 0.0034 -0.0305 0.0288

AT. 82 H X -0.0016 -0.0013 -0.0046 -0.0026 -0.0067 -0.0070  
Y -0.0019 -0.0057 0.0069 0.0004 0.0255 0.0266  
Z 0.0032 0.0102 -0.0091 0.0034 -0.0305 -0.0288

AT. 83 H X -0.0016 0.0013 -0.0046 0.0026 -0.0067 0.0070  
Y 0.0019 -0.0057 -0.0069 0.0004 -0.0255 0.0266  
Z 0.0032 -0.0102 -0.0091 -0.0034 -0.0305 0.0288

AT. 84 H X -0.0016 -0.0013 0.0046 0.0026 -0.0067 -0.0070  
Y -0.0019 -0.0057 -0.0069 -0.0004 0.0255 0.0266  
Z 0.0032 0.0102 0.0091 -0.0034 -0.0305 -0.0288

AT. 85 H X -0.0024 0.0068 -0.0088 -0.0016 0.0254 -0.0259  
Y 0.0052 -0.0086 0.0015 0.0025 -0.0234 0.0224  
Z -0.0035 -0.0012 0.0092 -0.0013 -0.0115 0.0124

AT. 86 H X -0.0024 -0.0068 0.0088 -0.0016 0.0254 0.0259  
Y -0.0052 -0.0086 0.0015 -0.0025 0.0234 0.0224  
Z -0.0035 0.0012 -0.0092 -0.0013 -0.0115 -0.0124

AT. 87 H X -0.0024 0.0068 0.0088 0.0016 0.0254 -0.0259  
Y 0.0052 -0.0086 -0.0015 -0.0025 -0.0234 0.0224  
Z -0.0035 -0.0012 -0.0092 0.0013 -0.0115 0.0124

AT. 88 H X -0.0024 -0.0068 -0.0088 0.0016 0.0254 0.0259  
Y -0.0052 -0.0086 -0.0015 0.0025 0.0234 0.0224  
Z -0.0035 0.0012 0.0092 0.0013 -0.0115 -0.0124

AT. 89 C X -0.0019 0.0023 0.0017 -0.0026 -0.0008 0.0013  
Y 0.0052 -0.0050 -0.0070 0.0043 0.0004 -0.0020  
Z -0.0024 0.0003 0.0019 -0.0026 -0.0052 0.0050

AT. 90 C X -0.0019 -0.0023 -0.0017 -0.0026 -0.0008 -0.0013  
Y -0.0052 -0.0050 -0.0070 -0.0043 -0.0004 -0.0020

Z -0.0024 -0.0003 -0.0019 -0.0026 -0.0052 -0.0050  
AT. 91 C X -0.0019 0.0023 -0.0017 0.0026 -0.0008 0.0013  
Y 0.0052 -0.0050 0.0070 -0.0043 0.0004 -0.0020  
Z -0.0024 0.0003 -0.0019 0.0026 -0.0052 0.0050  
AT. 92 C X -0.0019 -0.0023 0.0017 0.0026 -0.0008 -0.0013  
Y -0.0052 -0.0050 0.0070 0.0043 -0.0004 -0.0020  
Z -0.0024 -0.0003 0.0019 0.0026 -0.0052 -0.0050  
AT. 93 C X -0.0017 -0.0006 0.0020 -0.0038 -0.0096 0.0117  
Y 0.0150 -0.0075 -0.0238 0.0115 0.0176 -0.0219  
Z 0.0037 -0.0004 -0.0088 0.0018 0.0073 -0.0094  
AT. 94 C X -0.0017 0.0006 -0.0020 -0.0038 -0.0096 -0.0117  
Y -0.0150 -0.0075 -0.0238 -0.0115 -0.0176 -0.0219  
Z 0.0037 0.0004 0.0088 0.0018 0.0073 0.0094  
AT. 95 C X -0.0017 -0.0006 -0.0020 0.0038 -0.0096 0.0117  
Y 0.0150 -0.0075 0.0238 -0.0115 0.0176 -0.0219  
Z 0.0037 -0.0004 0.0088 -0.0018 0.0073 -0.0094  
AT. 96 C X -0.0017 0.0006 0.0020 0.0038 -0.0096 -0.0117  
Y -0.0150 -0.0075 0.0238 0.0115 -0.0176 -0.0219  
Z 0.0037 0.0004 -0.0088 -0.0018 0.0073 0.0094  
AT. 97 H X -0.0150 -0.0121 0.0106 0.0085 0.0006 0.0102  
Y 0.0552 0.0210 -0.0515 -0.0210 -0.0134 -0.0149  
Z 0.0363 0.0169 -0.0336 -0.0204 -0.0180 -0.0009  
AT. 98 H X -0.0150 0.0121 -0.0106 0.0085 0.0006 -0.0102  
Y -0.0552 0.0210 -0.0515 0.0210 0.0134 -0.0149  
Z 0.0363 -0.0169 0.0336 -0.0204 -0.0180 0.0009  
AT. 99 H X -0.0150 -0.0121 -0.0106 -0.0085 0.0006 0.0102  
Y 0.0552 0.0210 0.0515 0.0210 -0.0134 -0.0149  
Z 0.0363 0.0169 0.0336 0.0204 -0.0180 -0.0009  
AT. 100 H X -0.0150 0.0121 0.0106 -0.0085 0.0006 -0.0102  
Y -0.0552 0.0210 0.0515 -0.0210 0.0134 -0.0149  
Z 0.0363 -0.0169 -0.0336 0.0204 -0.0180 0.0009  
AT. 101 H X -0.0343 -0.0251 0.0222 0.0258 0.0219 0.0003



Y -0.0188 -0.0320 -0.0016 0.0402 0.0463 -0.0301  
Z -0.0058 -0.0114 -0.0112 0.0210 0.0402 -0.0355  
AT. 102 H X -0.0343 0.0251 -0.0222 0.0258 0.0219 -0.0003  
Y 0.0188 -0.0320 -0.0016 -0.0402 -0.0463 -0.0301  
Z -0.0058 0.0114 0.0112 0.0210 0.0402 0.0355  
AT. 103 H X -0.0343 -0.0251 -0.0222 -0.0258 0.0219 0.0003  
Y -0.0188 -0.0320 0.0016 -0.0402 0.0463 -0.0301  
Z -0.0058 -0.0114 0.0112 -0.0210 0.0402 -0.0355  
AT. 104 H X -0.0343 0.0251 0.0222 -0.0258 0.0219 -0.0003  
Y 0.0188 -0.0320 0.0016 0.0402 -0.0463 -0.0301  
Z -0.0058 0.0114 -0.0112 -0.0210 0.0402 0.0355  
AT. 105 H X 0.0475 0.0335 -0.0274 -0.0481 -0.0624 0.0357  
Y 0.0160 -0.0142 -0.0332 0.0230 0.0378 -0.0399  
Z -0.0139 -0.0069 0.0085 0.0080 0.0099 -0.0038  
AT. 106 H X 0.0475 -0.0335 0.0274 -0.0481 -0.0624 -0.0357  
Y -0.0160 -0.0142 -0.0332 -0.0230 -0.0378 -0.0399  
Z -0.0139 0.0069 -0.0085 0.0080 0.0099 0.0038  
AT. 107 H X 0.0475 0.0335 0.0274 0.0481 -0.0624 0.0357  
Y 0.0160 -0.0142 0.0332 -0.0230 0.0378 -0.0399  
Z -0.0139 -0.0069 -0.0085 -0.0080 0.0099 -0.0038  
AT. 108 H X 0.0475 -0.0335 -0.0274 0.0481 -0.0624 -0.0357  
Y -0.0160 -0.0142 0.0332 0.0230 -0.0378 -0.0399  
Z -0.0139 0.0069 0.0085 -0.0080 0.0099 0.0038  
AT. 109 C X 0.0065 -0.0059 -0.0048 0.0075 0.0023 -0.0011  
Y 0.0084 -0.0091 -0.0080 0.0099 0.0046 -0.0052  
Z -0.0072 0.0022 0.0064 -0.0065 -0.0088 0.0090  
AT. 110 C X 0.0065 0.0059 0.0048 0.0075 0.0023 0.0011  
Y -0.0084 -0.0091 -0.0080 -0.0099 -0.0046 -0.0052  
Z -0.0072 -0.0022 -0.0064 -0.0065 -0.0088 -0.0090  
AT. 111 C X 0.0065 -0.0059 0.0048 -0.0075 0.0023 -0.0011  
Y 0.0084 -0.0091 0.0080 -0.0099 0.0046 -0.0052  
Z -0.0072 0.0022 -0.0064 0.0065 -0.0088 0.0090

AT. 112 C X 0.0065 0.0059 -0.0048 -0.0075 0.0023 0.0011  
Y -0.0084 -0.0091 0.0080 0.0099 -0.0046 -0.0052  
Z -0.0072 -0.0022 0.0064 0.0065 -0.0088 -0.0090

AT. 113 H X 0.0023 -0.0036 -0.0015 0.0026 -0.0039 0.0041  
Y 0.0130 -0.0113 -0.0123 0.0157 0.0145 -0.0140  
Z -0.0189 0.0106 0.0141 -0.0174 -0.0109 0.0093

AT. 114 H X 0.0023 0.0036 0.0015 0.0026 -0.0039 -0.0041  
Y -0.0130 -0.0113 -0.0123 -0.0157 -0.0145 -0.0140  
Z -0.0189 -0.0106 -0.0141 -0.0174 -0.0109 -0.0093

AT. 115 H X 0.0023 -0.0036 0.0015 -0.0026 -0.0039 0.0041  
Y 0.0130 -0.0113 0.0123 -0.0157 0.0145 -0.0140  
Z -0.0189 0.0106 -0.0141 0.0174 -0.0109 0.0093

AT. 116 H X 0.0023 0.0036 -0.0015 -0.0026 -0.0039 -0.0041  
Y -0.0130 -0.0113 0.0123 0.0157 -0.0145 -0.0140  
Z -0.0189 -0.0106 0.0141 0.0174 -0.0109 -0.0093

AT. 117 H X 0.0187 -0.0113 -0.0112 0.0200 0.0142 -0.0078  
Y 0.0138 -0.0116 -0.0092 0.0146 0.0044 -0.0028  
Z -0.0041 0.0005 0.0061 -0.0041 -0.0111 0.0123

AT. 118 H X 0.0187 0.0113 0.0112 0.0200 0.0142 0.0078  
Y -0.0138 -0.0116 -0.0092 -0.0146 -0.0044 -0.0028  
Z -0.0041 -0.0005 -0.0061 -0.0041 -0.0111 -0.0123

AT. 119 H X 0.0187 -0.0113 0.0112 -0.0200 0.0142 -0.0078  
Y 0.0138 -0.0116 0.0092 -0.0146 0.0044 -0.0028  
Z -0.0041 0.0005 -0.0061 0.0041 -0.0111 0.0123

AT. 120 H X 0.0187 0.0113 -0.0112 -0.0200 0.0142 0.0078  
Y -0.0138 -0.0116 0.0092 0.0146 -0.0044 -0.0028  
Z -0.0041 -0.0005 0.0061 0.0041 -0.0111 -0.0123

AT. 121 C X -0.0040 0.0026 0.0029 -0.0028 0.0010 -0.0005  
Y 0.0021 -0.0038 -0.0038 0.0036 0.0017 -0.0031  
Z -0.0043 -0.0001 0.0050 -0.0045 -0.0117 0.0124

AT. 122 C X -0.0040 -0.0026 -0.0029 -0.0028 0.0010 0.0005  
Y -0.0021 -0.0038 -0.0038 -0.0036 -0.0017 -0.0031

Z -0.0043 0.0001 -0.0050 -0.0045 -0.0117 -0.0124  
AT. 123 C X -0.0040 0.0026 -0.0029 0.0028 0.0010 -0.0005  
Y 0.0021 -0.0038 0.0038 -0.0036 0.0017 -0.0031  
Z -0.0043 -0.0001 -0.0050 0.0045 -0.0117 0.0124  
AT. 124 C X -0.0040 -0.0026 0.0029 0.0028 0.0010 0.0005  
Y -0.0021 -0.0038 0.0038 0.0036 -0.0017 -0.0031  
Z -0.0043 0.0001 0.0050 0.0045 -0.0117 -0.0124  
AT. 125 H X -0.0092 0.0040 0.0093 -0.0053 -0.0037 0.0052  
Y 0.0012 -0.0029 -0.0020 0.0029 -0.0009 -0.0003  
Z -0.0022 -0.0011 0.0022 -0.0034 -0.0092 0.0093  
AT. 126 H X -0.0092 -0.0040 -0.0093 -0.0053 -0.0037 -0.0052  
Y -0.0012 -0.0029 -0.0020 -0.0029 0.0009 -0.0003  
Z -0.0022 0.0011 -0.0022 -0.0034 -0.0092 -0.0093  
AT. 127 H X -0.0092 0.0040 -0.0093 0.0053 -0.0037 0.0052  
Y 0.0012 -0.0029 0.0020 -0.0029 -0.0009 -0.0003  
Z -0.0022 -0.0011 -0.0022 0.0034 -0.0092 0.0093  
AT. 128 H X -0.0092 -0.0040 0.0093 0.0053 -0.0037 -0.0052  
Y -0.0012 -0.0029 0.0020 0.0029 0.0009 -0.0003  
Z -0.0022 0.0011 0.0022 0.0034 -0.0092 -0.0093  
AT. 129 H X -0.0036 0.0033 0.0024 -0.0037 -0.0000 0.0005  
Y -0.0004 -0.0038 -0.0008 0.0037 0.0010 -0.0019  
Z -0.0091 0.0019 0.0102 -0.0073 -0.0165 0.0184  
AT. 130 H X -0.0036 -0.0033 -0.0024 -0.0037 -0.0000 -0.0005  
Y 0.0004 -0.0038 -0.0008 -0.0037 -0.0010 -0.0019  
Z -0.0091 -0.0019 -0.0102 -0.0073 -0.0165 -0.0184  
AT. 131 H X -0.0036 0.0033 -0.0024 0.0037 -0.0000 0.0005  
Y -0.0004 -0.0038 0.0008 -0.0037 0.0010 -0.0019  
Z -0.0091 0.0019 -0.0102 0.0073 -0.0165 0.0184  
AT. 132 H X -0.0036 -0.0033 0.0024 0.0037 -0.0000 -0.0005  
Y 0.0004 -0.0038 0.0008 0.0037 -0.0010 -0.0019  
Z -0.0091 -0.0019 0.0102 0.0073 -0.0165 -0.0184  
AT. 133 C X -0.0091 0.0065 0.0073 -0.0077 0.0008 0.0018

Y 0.0009 -0.0036 -0.0022 0.0030 0.0027 -0.0030  
Z 0.0008 -0.0019 -0.0051 -0.0005 0.0025 -0.0042  
AT. 134 C X -0.0091 -0.0065 -0.0073 -0.0077 0.0008 -0.0018  
Y -0.0009 -0.0036 -0.0022 -0.0030 -0.0027 -0.0030  
Z 0.0008 0.0019 0.0051 -0.0005 0.0025 0.0042  
AT. 135 C X -0.0091 0.0065 -0.0073 0.0077 0.0008 0.0018  
Y 0.0009 -0.0036 0.0022 -0.0030 0.0027 -0.0030  
Z 0.0008 -0.0019 0.0051 0.0005 0.0025 -0.0042  
AT. 136 C X -0.0091 -0.0065 0.0073 0.0077 0.0008 -0.0018  
Y -0.0009 -0.0036 0.0022 0.0030 -0.0027 -0.0030  
Z 0.0008 0.0019 -0.0051 0.0005 0.0025 0.0042  
AT. 137 C X -0.0018 0.0005 -0.0036 -0.0014 0.0046 -0.0052  
Y 0.0000 -0.0040 0.0044 0.0033 -0.0093 0.0102  
Z -0.0011 0.0006 -0.0065 -0.0029 0.0090 -0.0107  
AT. 138 C X -0.0018 -0.0005 0.0036 -0.0014 0.0046 0.0052  
Y -0.0000 -0.0040 0.0044 -0.0033 0.0093 0.0102  
Z -0.0011 -0.0006 0.0065 -0.0029 0.0090 0.0107  
AT. 139 C X -0.0018 0.0005 0.0036 0.0014 0.0046 -0.0052  
Y 0.0000 -0.0040 -0.0044 -0.0033 -0.0093 0.0102  
Z -0.0011 0.0006 0.0065 0.0029 0.0090 -0.0107  
AT. 140 C X -0.0018 -0.0005 -0.0036 0.0014 0.0046 0.0052  
Y -0.0000 -0.0040 -0.0044 0.0033 0.0093 0.0102  
Z -0.0011 -0.0006 -0.0065 0.0029 0.0090 0.0107  
AT. 141 H X -0.0018 -0.0004 0.0008 0.0006 -0.0027 0.0027  
Y -0.0036 -0.0026 0.0134 0.0017 -0.0203 0.0231  
Z -0.0037 0.0027 -0.0049 -0.0062 0.0094 -0.0104  
AT. 142 H X -0.0018 0.0004 -0.0008 0.0006 -0.0027 -0.0027  
Y 0.0036 -0.0026 0.0134 -0.0017 0.0203 0.0231  
Z -0.0037 -0.0027 0.0049 -0.0062 0.0094 0.0104  
AT. 143 H X -0.0018 -0.0004 -0.0008 -0.0006 -0.0027 0.0027  
Y -0.0036 -0.0026 -0.0134 -0.0017 -0.0203 0.0231  
Z -0.0037 0.0027 0.0049 0.0062 0.0094 -0.0104

AT.144 H X -0.0018 0.0004 0.0008 -0.0006 -0.0027 -0.0027  
Y 0.0036 -0.0026 -0.0134 0.0017 0.0203 0.0231  
Z -0.0037 -0.0027 -0.0049 0.0062 0.0094 0.0104

AT.145 H X 0.0018 -0.0004 -0.0125 -0.0007 0.0157 -0.0180  
Y -0.0002 -0.0042 0.0052 0.0037 -0.0102 0.0113  
Z 0.0021 -0.0014 -0.0131 -0.0007 0.0175 -0.0204

AT.146 H X 0.0018 0.0004 0.0125 -0.0007 0.0157 0.0180  
Y 0.0002 -0.0042 0.0052 -0.0037 0.0102 0.0113  
Z 0.0021 0.0014 0.0131 -0.0007 0.0175 0.0204

AT.147 H X 0.0018 -0.0004 0.0125 0.0007 0.0157 -0.0180  
Y -0.0002 -0.0042 -0.0052 -0.0037 -0.0102 0.0113  
Z 0.0021 -0.0014 0.0131 0.0007 0.0175 -0.0204

AT.148 H X 0.0018 0.0004 -0.0125 0.0007 0.0157 0.0180  
Y 0.0002 -0.0042 -0.0052 0.0037 0.0102 0.0113  
Z 0.0021 0.0014 -0.0131 0.0007 0.0175 0.0204

AT.149 O X -0.0077 0.0035 0.0067 -0.0040 -0.0016 0.0034  
Y -0.0042 -0.0003 0.0038 -0.0023 -0.0037 0.0038  
Z 0.0022 -0.0027 -0.0079 0.0011 0.0020 -0.0034

AT.150 O X -0.0077 -0.0035 -0.0067 -0.0040 -0.0016 -0.0034  
Y 0.0042 -0.0003 0.0038 0.0023 0.0037 0.0038  
Z 0.0022 0.0027 0.0079 0.0011 0.0020 0.0034

AT.151 O X -0.0077 0.0035 -0.0067 0.0040 -0.0016 0.0034  
Y -0.0042 -0.0003 -0.0038 0.0023 -0.0037 0.0038  
Z 0.0022 -0.0027 0.0079 -0.0011 0.0020 -0.0034

AT.152 O X -0.0077 -0.0035 0.0067 0.0040 -0.0016 -0.0034  
Y 0.0042 -0.0003 -0.0038 -0.0023 0.0037 0.0038  
Z 0.0022 0.0027 -0.0079 -0.0011 0.0020 0.0034

AT.153 H X -0.0023 0.0063 0.0028 -0.0009 0.0025 -0.0029  
Y 0.0030 0.0013 -0.0031 0.0026 0.0061 -0.0085  
Z 0.0011 -0.0040 -0.0078 0.0009 0.0029 -0.0036

AT.154 H X -0.0023 -0.0063 -0.0028 -0.0009 0.0025 0.0029  
Y -0.0030 0.0013 -0.0031 -0.0026 -0.0061 -0.0085

Z 0.0011 0.0040 0.0078 0.0009 0.0029 0.0036  
AT. 155 H X -0.0023 0.0063 -0.0028 0.0009 0.0025 -0.0029  
Y 0.0030 0.0013 0.0031 -0.0026 0.0061 -0.0085  
Z 0.0011 -0.0040 0.0078 -0.0009 0.0029 -0.0036  
AT. 156 H X -0.0023 -0.0063 0.0028 0.0009 0.0025 0.0029  
Y -0.0030 0.0013 0.0031 0.0026 -0.0061 -0.0085  
Z 0.0011 0.0040 -0.0078 -0.0009 0.0029 0.0036  
AT. 157 O X -0.0023 0.0014 0.0039 -0.0005 -0.0010 0.0017  
Y 0.0065 -0.0054 -0.0063 0.0018 -0.0075 0.0059  
Z 0.0013 -0.0005 0.0018 0.0018 -0.0011 0.0010  
AT. 158 O X -0.0023 -0.0014 -0.0039 -0.0005 -0.0010 -0.0017  
Y -0.0065 -0.0054 -0.0063 -0.0018 0.0075 0.0059  
Z 0.0013 0.0005 -0.0018 0.0018 -0.0011 -0.0010  
AT. 159 O X -0.0023 0.0014 -0.0039 0.0005 -0.0010 0.0017  
Y 0.0065 -0.0054 0.0063 -0.0018 -0.0075 0.0059  
Z 0.0013 -0.0005 -0.0018 -0.0018 -0.0011 0.0010  
AT. 160 O X -0.0023 -0.0014 0.0039 0.0005 -0.0010 -0.0017  
Y -0.0065 -0.0054 0.0063 0.0018 0.0075 0.0059  
Z 0.0013 0.0005 0.0018 -0.0018 -0.0011 -0.0010  
AT. 161 O X 0.0290 -0.0212 -0.0386 0.0232 0.0154 -0.0255  
Y -0.0426 0.0359 0.0438 -0.0434 -0.0238 0.0317  
Z 0.0147 -0.0141 -0.0047 0.0175 -0.0008 0.0009  
AT. 162 O X 0.0290 0.0212 0.0386 0.0232 0.0154 0.0255  
Y 0.0426 0.0359 0.0438 0.0434 0.0238 0.0317  
Z 0.0147 0.0141 0.0047 0.0175 -0.0008 -0.0009  
AT. 163 O X 0.0290 -0.0212 0.0386 -0.0232 0.0154 -0.0255  
Y -0.0426 0.0359 -0.0438 0.0434 -0.0238 0.0317  
Z 0.0147 -0.0141 0.0047 -0.0175 -0.0008 0.0009  
AT. 164 O X 0.0290 0.0212 -0.0386 -0.0232 0.0154 0.0255  
Y 0.0426 0.0359 -0.0438 -0.0434 0.0238 0.0317  
Z 0.0147 0.0141 -0.0047 -0.0175 -0.0008 -0.0009  
AT. 165 H X 0.0488 -0.0393 -0.0537 0.0435 0.0175 -0.0288

Y -0.0355 0.0296 0.0390 -0.0364 -0.0242 0.0317  
Z 0.0307 -0.0246 -0.0306 0.0282 0.0130 -0.0201  
AT.166 H X 0.0488 0.0393 0.0537 0.0435 0.0175 0.0288  
Y 0.0355 0.0296 0.0390 0.0364 0.0242 0.0317  
Z 0.0307 0.0246 0.0306 0.0282 0.0130 0.0201  
AT.167 H X 0.0488 -0.0393 0.0537 -0.0435 0.0175 -0.0288  
Y -0.0355 0.0296 -0.0390 0.0364 -0.0242 0.0317  
Z 0.0307 -0.0246 0.0306 -0.0282 0.0130 -0.0201  
AT.168 H X 0.0488 0.0393 -0.0537 -0.0435 0.0175 0.0288  
Y 0.0355 0.0296 -0.0390 -0.0364 0.0242 0.0317  
Z 0.0307 0.0246 -0.0306 -0.0282 0.0130 0.0201  
AT.169 O X 0.0053 0.0020 -0.0052 0.0060 0.0060 -0.0055  
Y -0.0053 0.0183 0.0046 -0.0031 0.0374 -0.0359  
Z -0.0021 0.0001 0.0015 -0.0017 -0.0062 0.0053  
AT.170 O X 0.0053 -0.0020 0.0052 0.0060 0.0060 0.0055  
Y 0.0053 0.0183 0.0046 0.0031 -0.0374 -0.0359  
Z -0.0021 -0.0001 -0.0015 -0.0017 -0.0062 -0.0053  
AT.171 O X 0.0053 0.0020 0.0052 -0.0060 0.0060 -0.0055  
Y -0.0053 0.0183 -0.0046 0.0031 0.0374 -0.0359  
Z -0.0021 0.0001 -0.0015 0.0017 -0.0062 0.0053  
AT.172 O X 0.0053 -0.0020 -0.0052 -0.0060 0.0060 0.0055  
Y 0.0053 0.0183 -0.0046 -0.0031 -0.0374 -0.0359  
Z -0.0021 -0.0001 0.0015 0.0017 -0.0062 -0.0053  
AT.173 H X 0.0002 0.0039 -0.0037 0.0010 0.0123 -0.0099  
Y -0.0046 0.0194 0.0048 -0.0024 0.0391 -0.0380  
Z 0.0001 0.0005 -0.0034 0.0020 -0.0021 0.0015  
AT.174 H X 0.0002 -0.0039 0.0037 0.0010 0.0123 0.0099  
Y 0.0046 0.0194 0.0048 0.0024 -0.0391 -0.0380  
Z 0.0001 -0.0005 0.0034 0.0020 -0.0021 -0.0015  
AT.175 H X 0.0002 0.0039 0.0037 -0.0010 0.0123 -0.0099  
Y -0.0046 0.0194 -0.0048 0.0024 0.0391 -0.0380  
Z 0.0001 0.0005 0.0034 -0.0020 -0.0021 0.0015

AT. 176 H X 0.0002 -0.0039 -0.0037 -0.0010 0.0123 0.0099  
Y 0.0046 0.0194 -0.0048 -0.0024 -0.0391 -0.0380  
Z 0.0001 -0.0005 -0.0034 -0.0020 -0.0021 -0.0015

FREQ(CM\*\*-1) 250.61 251.87 253.55 254.81 266.27 267.16

AT. 1 I X 0.0001 -0.0003 -0.0002 0.0007 -0.0005 -0.0000  
Y -0.0002 0.0001 0.0001 -0.0002 0.0002 0.0001  
Z 0.0003 0.0006 -0.0002 -0.0004 0.0001 -0.0001

AT. 2 I X 0.0001 0.0003 0.0002 0.0007 -0.0005 0.0000  
Y 0.0002 0.0001 0.0001 0.0002 -0.0002 0.0001  
Z 0.0003 -0.0006 0.0002 -0.0004 0.0001 0.0001

AT. 3 I X -0.0001 -0.0003 0.0002 0.0007 0.0005 0.0000  
Y 0.0002 0.0001 -0.0001 -0.0002 -0.0002 -0.0001  
Z -0.0003 0.0006 0.0002 -0.0004 -0.0001 0.0001

AT. 4 I X -0.0001 0.0003 -0.0002 0.0007 0.0005 -0.0000  
Y -0.0002 0.0001 -0.0001 0.0002 0.0002 -0.0001  
Z -0.0003 -0.0006 -0.0002 -0.0004 -0.0001 -0.0001

AT. 5 I X -0.0007 0.0004 0.0002 -0.0001 0.0001 -0.0001  
Y 0.0000 -0.0000 0.0002 -0.0000 0.0001 0.0004  
Z 0.0004 -0.0004 -0.0002 -0.0000 0.0002 0.0002

AT. 6 I X -0.0007 -0.0004 -0.0002 -0.0001 0.0001 0.0001  
Y -0.0000 -0.0000 0.0002 0.0000 -0.0001 0.0004  
Z 0.0004 0.0004 0.0002 -0.0000 0.0002 -0.0002

AT. 7 I X 0.0007 0.0004 -0.0002 -0.0001 -0.0001 0.0001  
Y -0.0000 -0.0000 -0.0002 -0.0000 -0.0001 -0.0004  
Z -0.0004 -0.0004 0.0002 -0.0000 -0.0002 -0.0002

AT. 8 I X 0.0007 -0.0004 0.0002 -0.0001 -0.0001 -0.0001  
Y 0.0000 -0.0000 -0.0002 0.0000 0.0001 -0.0004  
Z -0.0004 0.0004 -0.0002 -0.0000 -0.0002 0.0002

AT. 9 N X -0.0004 0.0015 0.0004 -0.0018 -0.0054 0.0050  
Y -0.0015 0.0002 -0.0015 0.0005 0.0115 -0.0083



Z -0.0016 0.0012 0.0003 -0.0003 0.0029 -0.0025  
AT. 10 N X -0.0004 -0.0015 -0.0004 -0.0018 -0.0054 -0.0050  
Y 0.0015 0.0002 -0.0015 -0.0005 -0.0115 -0.0083  
Z -0.0016 -0.0012 -0.0003 -0.0003 0.0029 0.0025  
AT. 11 N X 0.0004 0.0015 -0.0004 -0.0018 0.0054 -0.0050  
Y 0.0015 0.0002 0.0015 0.0005 -0.0115 0.0083  
Z 0.0016 0.0012 -0.0003 -0.0003 -0.0029 0.0025  
AT. 12 N X 0.0004 -0.0015 0.0004 -0.0018 0.0054 0.0050  
Y -0.0015 0.0002 0.0015 -0.0005 0.0115 0.0083  
Z 0.0016 -0.0012 0.0003 -0.0003 -0.0029 -0.0025  
AT. 13 N X 0.0004 -0.0002 -0.0041 0.0008 0.0138 -0.0139  
Y -0.0013 0.0011 -0.0026 0.0015 0.0054 -0.0065  
Z 0.0007 -0.0001 -0.0003 0.0019 -0.0033 0.0037  
AT. 14 N X 0.0004 0.0002 0.0041 0.0008 0.0138 0.0139  
Y 0.0013 0.0011 -0.0026 -0.0015 -0.0054 -0.0065  
Z 0.0007 0.0001 0.0003 0.0019 -0.0033 -0.0037  
AT. 15 N X -0.0004 -0.0002 0.0041 0.0008 -0.0138 0.0139  
Y 0.0013 0.0011 0.0026 0.0015 -0.0054 0.0065  
Z -0.0007 -0.0001 0.0003 0.0019 0.0033 -0.0037  
AT. 16 N X -0.0004 0.0002 -0.0041 0.0008 -0.0138 -0.0139  
Y -0.0013 0.0011 0.0026 -0.0015 0.0054 0.0065  
Z -0.0007 0.0001 -0.0003 0.0019 0.0033 0.0037  
AT. 17 O X 0.0019 0.0039 -0.0034 -0.0029 0.0055 -0.0033  
Y -0.0025 0.0012 -0.0023 -0.0004 0.0125 -0.0112  
Z -0.0031 -0.0012 0.0040 -0.0026 -0.0008 0.0022  
AT. 18 O X 0.0019 -0.0039 0.0034 -0.0029 0.0055 0.0033  
Y 0.0025 0.0012 -0.0023 0.0004 -0.0125 -0.0112  
Z -0.0031 0.0012 -0.0040 -0.0026 -0.0008 -0.0022  
AT. 19 O X -0.0019 0.0039 0.0034 -0.0029 -0.0055 0.0033  
Y 0.0025 0.0012 0.0023 -0.0004 -0.0125 0.0112  
Z 0.0031 -0.0012 -0.0040 -0.0026 0.0008 -0.0022  
AT. 20 O X -0.0019 -0.0039 -0.0034 -0.0029 -0.0055 -0.0033

Y -0.0025 0.0012 0.0023 0.0004 0.0125 0.0112  
Z 0.0031 0.0012 0.0040 -0.0026 0.0008 0.0022  
AT. 21 O X 0.0080 -0.0074 0.0033 -0.0025 -0.0099 0.0099  
Y 0.0014 -0.0015 -0.0027 0.0014 0.0042 -0.0082  
Z 0.0014 -0.0014 -0.0020 0.0022 -0.0001 -0.0039  
AT. 22 O X 0.0080 0.0074 -0.0033 -0.0025 -0.0099 -0.0099  
Y -0.0014 -0.0015 -0.0027 -0.0014 -0.0042 -0.0082  
Z 0.0014 0.0014 0.0020 0.0022 -0.0001 0.0039  
AT. 23 O X -0.0080 -0.0074 -0.0033 -0.0025 0.0099 -0.0099  
Y -0.0014 -0.0015 0.0027 0.0014 -0.0042 0.0082  
Z -0.0014 -0.0014 0.0020 0.0022 0.0001 0.0039  
AT. 24 O X -0.0080 0.0074 0.0033 -0.0025 0.0099 0.0099  
Y 0.0014 -0.0015 0.0027 -0.0014 0.0042 0.0082  
Z -0.0014 0.0014 -0.0020 0.0022 0.0001 -0.0039  
AT. 25 C X -0.0036 0.0001 0.0028 -0.0043 0.0064 -0.0030  
Y -0.0024 -0.0008 0.0001 -0.0017 0.0122 -0.0079  
Z -0.0030 -0.0003 0.0034 -0.0040 0.0017 0.0001  
AT. 26 C X -0.0036 -0.0001 -0.0028 -0.0043 0.0064 0.0030  
Y 0.0024 -0.0008 0.0001 0.0017 -0.0122 -0.0079  
Z -0.0030 0.0003 -0.0034 -0.0040 0.0017 -0.0001  
AT. 27 C X 0.0036 0.0001 -0.0028 -0.0043 -0.0064 0.0030  
Y 0.0024 -0.0008 -0.0001 -0.0017 -0.0122 0.0079  
Z 0.0030 -0.0003 -0.0034 -0.0040 -0.0017 -0.0001  
AT. 28 C X 0.0036 -0.0001 0.0028 -0.0043 -0.0064 -0.0030  
Y -0.0024 -0.0008 -0.0001 0.0017 0.0122 0.0079  
Z 0.0030 0.0003 0.0034 -0.0040 -0.0017 0.0001  
AT. 29 H X -0.0027 -0.0002 0.0020 -0.0027 0.0049 -0.0028  
Y -0.0057 -0.0026 0.0031 -0.0058 0.0210 -0.0139  
Z -0.0039 0.0003 0.0041 -0.0058 0.0025 0.0008  
AT. 30 H X -0.0027 0.0002 -0.0020 -0.0027 0.0049 0.0028  
Y 0.0057 -0.0026 0.0031 0.0058 -0.0210 -0.0139  
Z -0.0039 -0.0003 -0.0041 -0.0058 0.0025 -0.0008

AT. 31 H X 0.0027 -0.0002 -0.0020 -0.0027 -0.0049 0.0028  
Y 0.0057 -0.0026 -0.0031 -0.0058 -0.0210 0.0139  
Z 0.0039 0.0003 -0.0041 -0.0058 -0.0025 -0.0008

AT. 32 H X 0.0027 0.0002 0.0020 -0.0027 -0.0049 -0.0028  
Y -0.0057 -0.0026 -0.0031 0.0058 0.0210 0.0139  
Z 0.0039 -0.0003 0.0041 -0.0058 -0.0025 0.0008

AT. 33 H X -0.0071 -0.0008 0.0053 -0.0088 0.0170 -0.0100  
Y -0.0016 -0.0005 -0.0006 -0.0005 0.0101 -0.0067  
Z -0.0038 -0.0008 0.0047 -0.0056 0.0027 0.0002

AT. 34 H X -0.0071 0.0008 -0.0053 -0.0088 0.0170 0.0100  
Y 0.0016 -0.0005 -0.0006 0.0005 -0.0101 -0.0067  
Z -0.0038 0.0008 -0.0047 -0.0056 0.0027 -0.0002

AT. 35 H X 0.0071 -0.0008 -0.0053 -0.0088 -0.0170 0.0100  
Y 0.0016 -0.0005 0.0006 -0.0005 -0.0101 0.0067  
Z 0.0038 -0.0008 -0.0047 -0.0056 -0.0027 -0.0002

AT. 36 H X 0.0071 0.0008 0.0053 -0.0088 -0.0170 -0.0100  
Y -0.0016 -0.0005 0.0006 0.0005 0.0101 0.0067  
Z 0.0038 0.0008 0.0047 -0.0056 -0.0027 0.0002

AT. 37 C X -0.0007 0.0024 -0.0000 -0.0035 0.0014 0.0007  
Y -0.0017 0.0001 -0.0013 0.0001 0.0107 -0.0081  
Z -0.0027 -0.0003 0.0023 -0.0024 0.0015 -0.0008

AT. 38 C X -0.0007 -0.0024 0.0000 -0.0035 0.0014 -0.0007  
Y 0.0017 0.0001 -0.0013 -0.0001 -0.0107 -0.0081  
Z -0.0027 0.0003 -0.0023 -0.0024 0.0015 0.0008

AT. 39 C X 0.0007 0.0024 0.0000 -0.0035 -0.0014 -0.0007  
Y 0.0017 0.0001 0.0013 0.0001 -0.0107 0.0081  
Z 0.0027 -0.0003 -0.0023 -0.0024 -0.0015 0.0008

AT. 40 C X 0.0007 -0.0024 -0.0000 -0.0035 -0.0014 0.0007  
Y -0.0017 0.0001 0.0013 -0.0001 0.0107 0.0081  
Z 0.0027 0.0003 0.0023 -0.0024 -0.0015 -0.0008

AT. 41 C X -0.0023 0.0035 0.0006 -0.0005 -0.0008 0.0057  
Y 0.0003 -0.0034 -0.0020 0.0023 0.0079 -0.0108

Z -0.0016 0.0024 0.0009 -0.0006 -0.0005 0.0013  
AT. 42 C X -0.0023 -0.0035 -0.0006 -0.0005 -0.0008 -0.0057  
Y -0.0003 -0.0034 -0.0020 -0.0023 -0.0079 -0.0108  
Z -0.0016 -0.0024 -0.0009 -0.0006 -0.0005 -0.0013  
AT. 43 C X 0.0023 0.0035 -0.0006 -0.0005 0.0008 -0.0057  
Y -0.0003 -0.0034 0.0020 0.0023 -0.0079 0.0108  
Z 0.0016 0.0024 -0.0009 -0.0006 0.0005 -0.0013  
AT. 44 C X 0.0023 -0.0035 0.0006 -0.0005 0.0008 0.0057  
Y 0.0003 -0.0034 0.0020 -0.0023 0.0079 0.0108  
Z 0.0016 -0.0024 0.0009 -0.0006 0.0005 0.0013  
AT. 45 H X -0.0059 0.0109 0.0012 -0.0001 -0.0081 0.0176  
Y 0.0019 -0.0071 -0.0019 0.0022 0.0094 -0.0157  
Z 0.0003 -0.0018 0.0007 -0.0005 0.0014 -0.0044  
AT. 46 H X -0.0059 -0.0109 -0.0012 -0.0001 -0.0081 -0.0176  
Y -0.0019 -0.0071 -0.0019 -0.0022 -0.0094 -0.0157  
Z 0.0003 0.0018 -0.0007 -0.0005 0.0014 0.0044  
AT. 47 H X 0.0059 0.0109 -0.0012 -0.0001 0.0081 -0.0176  
Y -0.0019 -0.0071 0.0019 0.0022 -0.0094 0.0157  
Z -0.0003 -0.0018 -0.0007 -0.0005 -0.0014 0.0044  
AT. 48 H X 0.0059 -0.0109 0.0012 -0.0001 0.0081 0.0176  
Y 0.0019 -0.0071 0.0019 -0.0022 0.0094 0.0157  
Z -0.0003 0.0018 0.0007 -0.0005 -0.0014 -0.0044  
AT. 49 H X -0.0022 0.0021 -0.0001 -0.0001 0.0057 0.0004  
Y 0.0018 -0.0076 -0.0028 0.0026 0.0153 -0.0198  
Z -0.0057 0.0099 0.0012 -0.0004 -0.0025 0.0108  
AT. 50 H X -0.0022 -0.0021 0.0001 -0.0001 0.0057 -0.0004  
Y -0.0018 -0.0076 -0.0028 -0.0026 -0.0153 -0.0198  
Z -0.0057 -0.0099 -0.0012 -0.0004 -0.0025 -0.0108  
AT. 51 H X 0.0022 0.0021 0.0001 -0.0001 -0.0057 -0.0004  
Y -0.0018 -0.0076 0.0028 0.0026 -0.0153 0.0198  
Z 0.0057 0.0099 -0.0012 -0.0004 0.0025 -0.0108  
AT. 52 H X 0.0022 -0.0021 -0.0001 -0.0001 -0.0057 0.0004

Y 0.0018 -0.0076 0.0028 -0.0026 0.0153 0.0198  
Z 0.0057 -0.0099 0.0012 -0.0004 0.0025 0.0108  
AT. 53 C X -0.0002 -0.0003 0.0001 0.0007 0.0019 0.0005  
Y -0.0019 0.0020 -0.0013 0.0024 -0.0006 -0.0001  
Z 0.0004 -0.0004 0.0008 -0.0008 -0.0006 0.0003  
AT. 54 C X -0.0002 0.0003 -0.0001 0.0007 0.0019 -0.0005  
Y 0.0019 0.0020 -0.0013 -0.0024 0.0006 -0.0001  
Z 0.0004 0.0004 -0.0008 -0.0008 -0.0006 -0.0003  
AT. 55 C X 0.0002 -0.0003 -0.0001 0.0007 -0.0019 -0.0005  
Y 0.0019 0.0020 0.0013 0.0024 0.0006 0.0001  
Z -0.0004 -0.0004 -0.0008 -0.0008 0.0006 -0.0003  
AT. 56 C X 0.0002 0.0003 0.0001 0.0007 -0.0019 0.0005  
Y -0.0019 0.0020 0.0013 -0.0024 -0.0006 0.0001  
Z -0.0004 0.0004 0.0008 -0.0008 0.0006 0.0003  
AT. 57 C X -0.0007 -0.0012 0.0023 0.0044 -0.0051 -0.0072  
Y 0.0011 0.0015 -0.0033 0.0092 -0.0288 0.0344  
Z -0.0012 0.0003 0.0007 -0.0047 0.0166 -0.0163  
AT. 58 C X -0.0007 0.0012 -0.0023 0.0044 -0.0051 0.0072  
Y -0.0011 0.0015 -0.0033 -0.0092 0.0288 0.0344  
Z -0.0012 -0.0003 -0.0007 -0.0047 0.0166 0.0163  
AT. 59 C X 0.0007 -0.0012 -0.0023 0.0044 0.0051 0.0072  
Y -0.0011 0.0015 0.0033 0.0092 0.0288 -0.0344  
Z 0.0012 0.0003 -0.0007 -0.0047 -0.0166 0.0163  
AT. 60 C X 0.0007 0.0012 0.0023 0.0044 0.0051 -0.0072  
Y 0.0011 0.0015 0.0033 -0.0092 -0.0288 -0.0344  
Z 0.0012 -0.0003 0.0007 -0.0047 -0.0166 -0.0163  
AT. 61 H X 0.0007 -0.0037 -0.0208 0.0481 -0.0508 0.0229  
Y 0.0027 -0.0005 -0.0233 0.0467 -0.0707 0.0658  
Z -0.0053 0.0018 0.0185 -0.0357 0.0649 -0.0704  
AT. 62 H X 0.0007 0.0037 0.0208 0.0481 -0.0508 -0.0229  
Y -0.0027 -0.0005 -0.0233 -0.0467 0.0707 0.0658  
Z -0.0053 -0.0018 -0.0185 -0.0357 0.0649 0.0704

AT. 63 H X -0.0007 -0.0037 0.0208 0.0481 0.0508 -0.0229  
Y -0.0027 -0.0005 0.0233 0.0467 0.0707 -0.0658  
Z 0.0053 0.0018 -0.0185 -0.0357 -0.0649 0.0704

AT. 64 H X -0.0007 0.0037 -0.0208 0.0481 0.0508 0.0229  
Y 0.0027 -0.0005 0.0233 -0.0467 -0.0707 -0.0658  
Z 0.0053 -0.0018 0.0185 -0.0357 -0.0649 -0.0704

AT. 65 H X -0.0003 -0.0021 -0.0073 0.0221 -0.0232 0.0053  
Y 0.0004 0.0039 0.0272 -0.0462 0.0261 -0.0046  
Z -0.0024 0.0013 -0.0151 0.0145 0.0096 -0.0038

AT. 66 H X -0.0003 0.0021 0.0073 0.0221 -0.0232 -0.0053  
Y -0.0004 0.0039 0.0272 0.0462 -0.0261 -0.0046  
Z -0.0024 -0.0013 0.0151 0.0145 0.0096 0.0038

AT. 67 H X 0.0003 -0.0021 0.0073 0.0221 0.0232 -0.0053  
Y -0.0004 0.0039 -0.0272 -0.0462 -0.0261 0.0046  
Z 0.0024 0.0013 0.0151 0.0145 -0.0096 0.0038

AT. 68 H X 0.0003 0.0021 -0.0073 0.0221 0.0232 0.0053  
Y 0.0004 0.0039 -0.0272 0.0462 0.0261 0.0046  
Z 0.0024 -0.0013 -0.0151 0.0145 -0.0096 -0.0038

AT. 69 H X -0.0035 0.0015 0.0351 -0.0500 0.0478 -0.0544  
Y 0.0052 -0.0007 -0.0139 0.0323 -0.0707 0.0752  
Z 0.0016 -0.0009 -0.0027 0.0055 -0.0098 0.0100

AT. 70 H X -0.0035 -0.0015 -0.0351 -0.0500 0.0478 0.0544  
Y -0.0052 -0.0007 -0.0139 -0.0323 0.0707 0.0752  
Z 0.0016 0.0009 0.0027 0.0055 -0.0098 -0.0100

AT. 71 H X 0.0035 0.0015 -0.0351 -0.0500 -0.0478 0.0544  
Y -0.0052 -0.0007 0.0139 0.0323 0.0707 -0.0752  
Z -0.0016 -0.0009 0.0027 0.0055 0.0098 -0.0100

AT. 72 H X 0.0035 -0.0015 0.0351 -0.0500 -0.0478 -0.0544  
Y 0.0052 -0.0007 0.0139 -0.0323 -0.0707 -0.0752  
Z -0.0016 0.0009 -0.0027 0.0055 0.0098 0.0100

AT. 73 C X 0.0038 -0.0040 -0.0011 0.0021 -0.0006 0.0021  
Y -0.0015 0.0017 -0.0001 0.0015 0.0022 -0.0049

Z 0.0004 -0.0003 0.0022 -0.0013 -0.0029 0.0017  
AT. 74 C X 0.0038 0.0040 0.0011 0.0021 -0.0006 -0.0021  
Y 0.0015 0.0017 -0.0001 -0.0015 -0.0022 -0.0049  
Z 0.0004 0.0003 -0.0022 -0.0013 -0.0029 -0.0017  
AT. 75 C X -0.0038 -0.0040 0.0011 0.0021 0.0006 -0.0021  
Y 0.0015 0.0017 0.0001 0.0015 -0.0022 0.0049  
Z -0.0004 -0.0003 -0.0022 -0.0013 0.0029 -0.0017  
AT. 76 C X -0.0038 0.0040 -0.0011 0.0021 0.0006 0.0021  
Y -0.0015 0.0017 0.0001 -0.0015 0.0022 0.0049  
Z -0.0004 0.0003 0.0022 -0.0013 0.0029 0.0017  
AT. 77 C X 0.0041 -0.0048 -0.0040 0.0038 -0.0013 -0.0001  
Y -0.0036 0.0059 0.0033 -0.0034 0.0047 -0.0003  
Z -0.0028 0.0044 0.0023 -0.0021 0.0018 -0.0006  
AT. 78 C X 0.0041 0.0048 0.0040 0.0038 -0.0013 0.0001  
Y 0.0036 0.0059 0.0033 0.0034 -0.0047 -0.0003  
Z -0.0028 -0.0044 -0.0023 -0.0021 0.0018 0.0006  
AT. 79 C X -0.0041 -0.0048 0.0040 0.0038 0.0013 0.0001  
Y 0.0036 0.0059 -0.0033 -0.0034 -0.0047 0.0003  
Z 0.0028 0.0044 -0.0023 -0.0021 -0.0018 0.0006  
AT. 80 C X -0.0041 0.0048 -0.0040 0.0038 0.0013 -0.0001  
Y -0.0036 0.0059 -0.0033 0.0034 0.0047 0.0003  
Z 0.0028 -0.0044 0.0023 -0.0021 -0.0018 -0.0006  
AT. 81 H X 0.0004 0.0012 -0.0005 -0.0008 0.0037 -0.0017  
Y -0.0068 0.0112 0.0061 -0.0072 0.0108 -0.0027  
Z -0.0114 0.0184 0.0121 -0.0132 -0.0011 0.0056  
AT. 82 H X 0.0004 -0.0012 0.0005 -0.0008 0.0037 0.0017  
Y 0.0068 0.0112 0.0061 0.0072 -0.0108 -0.0027  
Z -0.0114 -0.0184 -0.0121 -0.0132 -0.0011 -0.0056  
AT. 83 H X -0.0004 0.0012 0.0005 -0.0008 -0.0037 0.0017  
Y 0.0068 0.0112 -0.0061 -0.0072 -0.0108 0.0027  
Z 0.0114 0.0184 -0.0121 -0.0132 0.0011 -0.0056  
AT. 84 H X -0.0004 -0.0012 -0.0005 -0.0008 -0.0037 -0.0017

Y -0.0068 0.0112 -0.0061 0.0072 0.0108 0.0027  
Z 0.0114 -0.0184 0.0121 -0.0132 0.0011 0.0056  
AT. 85 H X 0.0127 -0.0178 -0.0121 0.0139 -0.0067 -0.0003  
Y -0.0073 0.0126 0.0084 -0.0084 0.0026 0.0029  
Z -0.0021 0.0025 0.0000 -0.0006 0.0055 -0.0035  
AT. 86 H X 0.0127 0.0178 0.0121 0.0139 -0.0067 0.0003  
Y 0.0073 0.0126 0.0084 0.0084 -0.0026 0.0029  
Z -0.0021 -0.0025 -0.0000 -0.0006 0.0055 0.0035  
AT. 87 H X -0.0127 -0.0178 0.0121 0.0139 0.0067 0.0003  
Y 0.0073 0.0126 -0.0084 -0.0084 -0.0026 -0.0029  
Z 0.0021 0.0025 -0.0000 -0.0006 -0.0055 0.0035  
AT. 88 H X -0.0127 0.0178 -0.0121 0.0139 0.0067 -0.0003  
Y -0.0073 0.0126 -0.0084 0.0084 0.0026 -0.0029  
Z 0.0021 -0.0025 0.0000 -0.0006 -0.0055 -0.0035  
AT. 89 C X 0.0029 -0.0028 -0.0016 0.0016 -0.0002 0.0013  
Y -0.0005 0.0007 0.0003 0.0011 -0.0030 0.0019  
Z 0.0004 -0.0001 0.0018 -0.0002 -0.0037 0.0025  
AT. 90 C X 0.0029 0.0028 0.0016 0.0016 -0.0002 -0.0013  
Y 0.0005 0.0007 0.0003 -0.0011 0.0030 0.0019  
Z 0.0004 0.0001 -0.0018 -0.0002 -0.0037 -0.0025  
AT. 91 C X -0.0029 -0.0028 0.0016 0.0016 0.0002 -0.0013  
Y 0.0005 0.0007 -0.0003 0.0011 0.0030 -0.0019  
Z -0.0004 -0.0001 -0.0018 -0.0002 0.0037 -0.0025  
AT. 92 C X -0.0029 0.0028 -0.0016 0.0016 0.0002 0.0013  
Y -0.0005 0.0007 -0.0003 -0.0011 -0.0030 -0.0019  
Z -0.0004 0.0001 0.0018 -0.0002 0.0037 0.0025  
AT. 93 C X -0.0018 0.0044 0.0120 -0.0097 -0.0182 0.0230  
Y -0.0004 -0.0004 0.0065 -0.0032 -0.0308 0.0303  
Z 0.0015 -0.0023 0.0036 -0.0010 -0.0196 0.0184  
AT. 94 C X -0.0018 -0.0044 -0.0120 -0.0097 -0.0182 -0.0230  
Y 0.0004 -0.0004 0.0065 0.0032 0.0308 0.0303  
Z 0.0015 0.0023 -0.0036 -0.0010 -0.0196 -0.0184



AT. 95 C X 0.0018 0.0044 -0.0120 -0.0097 0.0182 -0.0230  
Y 0.0004 -0.0004 -0.0065 -0.0032 0.0308 -0.0303  
Z -0.0015 -0.0023 -0.0036 -0.0010 0.0196 -0.0184

AT. 96 C X 0.0018 -0.0044 0.0120 -0.0097 0.0182 0.0230  
Y -0.0004 -0.0004 -0.0065 0.0032 -0.0308 -0.0303  
Z -0.0015 0.0023 0.0036 -0.0010 0.0196 0.0184

AT. 97 H X 0.0465 -0.0429 -0.0320 0.0332 -0.0172 0.0396  
Y -0.1403 0.1385 0.1424 -0.1335 -0.0550 0.0068  
Z -0.1035 0.1041 0.1158 -0.1062 -0.0633 0.0312

AT. 98 H X 0.0465 0.0429 0.0320 0.0332 -0.0172 -0.0396  
Y 0.1403 0.1385 0.1424 0.1335 0.0550 0.0068  
Z -0.1035 -0.1041 -0.1158 -0.1062 -0.0633 -0.0312

AT. 99 H X -0.0465 -0.0429 0.0320 0.0332 0.0172 -0.0396  
Y 0.1403 0.1385 -0.1424 -0.1335 0.0550 -0.0068  
Z 0.1035 0.1041 -0.1158 -0.1062 0.0633 -0.0312

AT. 100 H X -0.0465 0.0429 -0.0320 0.0332 0.0172 0.0396  
Y -0.1403 0.1385 -0.1424 0.1335 -0.0550 -0.0068  
Z 0.1035 -0.1041 0.1158 -0.1062 0.0633 0.0312

AT. 101 H X 0.1207 -0.1176 -0.1067 0.1045 -0.0012 0.0477  
Y 0.1217 -0.1217 -0.1115 0.1102 -0.0128 0.0544  
Z 0.0644 -0.0672 -0.0588 0.0587 -0.0189 0.0360

AT. 102 H X 0.1207 0.1176 0.1067 0.1045 -0.0012 -0.0477  
Y -0.1217 -0.1217 -0.1115 -0.1102 0.0128 0.0544  
Z 0.0644 0.0672 0.0588 0.0587 -0.0189 -0.0360

AT. 103 H X -0.1207 -0.1176 0.1067 0.1045 0.0012 -0.0477  
Y -0.1217 -0.1217 0.1115 0.1102 0.0128 -0.0544  
Z -0.0644 -0.0672 0.0588 0.0587 0.0189 -0.0360

AT. 104 H X -0.1207 0.1176 -0.1067 0.1045 0.0012 0.0477  
Y 0.1217 -0.1217 0.1115 -0.1102 -0.0128 -0.0544  
Z -0.0644 0.0672 -0.0588 0.0587 0.0189 0.0360

AT. 105 H X -0.1847 0.1889 0.1949 -0.1842 -0.0545 0.0010  
Y 0.0257 -0.0272 -0.0135 0.0177 -0.0511 0.0600

Z 0.0442 -0.0449 -0.0437 0.0428 0.0084 0.0032  
AT. 106 H X -0.1847 -0.1889 -0.1949 -0.1842 -0.0545 -0.0010  
Y -0.0257 -0.0272 -0.0135 -0.0177 0.0511 0.0600  
Z 0.0442 0.0449 0.0437 0.0428 0.0084 -0.0032  
AT. 107 H X 0.1847 0.1889 -0.1949 -0.1842 0.0545 -0.0010  
Y -0.0257 -0.0272 0.0135 0.0177 0.0511 -0.0600  
Z -0.0442 -0.0449 0.0437 0.0428 -0.0084 -0.0032  
AT. 108 H X 0.1847 -0.1889 0.1949 -0.1842 0.0545 0.0010  
Y 0.0257 -0.0272 0.0135 -0.0177 -0.0511 -0.0600  
Z -0.0442 0.0449 -0.0437 0.0428 -0.0084 0.0032  
AT. 109 C X -0.0022 0.0015 -0.0008 -0.0008 0.0083 -0.0024  
Y -0.0044 0.0038 -0.0019 0.0002 0.0070 -0.0046  
Z 0.0034 -0.0023 -0.0016 0.0028 -0.0040 0.0027  
AT. 110 C X -0.0022 -0.0015 0.0008 -0.0008 0.0083 0.0024  
Y 0.0044 0.0038 -0.0019 -0.0002 -0.0070 -0.0046  
Z 0.0034 0.0023 0.0016 0.0028 -0.0040 -0.0027  
AT. 111 C X 0.0022 0.0015 0.0008 -0.0008 -0.0083 0.0024  
Y 0.0044 0.0038 0.0019 0.0002 -0.0070 0.0046  
Z -0.0034 -0.0023 0.0016 0.0028 0.0040 -0.0027  
AT. 112 C X 0.0022 -0.0015 -0.0008 -0.0008 -0.0083 -0.0024  
Y -0.0044 0.0038 0.0019 -0.0002 0.0070 0.0046  
Z -0.0034 0.0023 -0.0016 0.0028 0.0040 0.0027  
AT. 113 H X 0.0001 0.0002 -0.0008 0.0008 0.0032 -0.0001  
Y -0.0073 0.0055 -0.0025 -0.0019 0.0157 -0.0103  
Z 0.0087 -0.0058 -0.0044 0.0059 -0.0044 -0.0049  
AT. 114 H X 0.0001 -0.0002 0.0008 0.0008 0.0032 0.0001  
Y 0.0073 0.0055 -0.0025 0.0019 -0.0157 -0.0103  
Z 0.0087 0.0058 0.0044 0.0059 -0.0044 0.0049  
AT. 115 H X -0.0001 0.0002 0.0008 0.0008 -0.0032 0.0001  
Y 0.0073 0.0055 0.0025 -0.0019 -0.0157 0.0103  
Z -0.0087 -0.0058 0.0044 0.0059 0.0044 0.0049  
AT. 116 H X -0.0001 -0.0002 -0.0008 0.0008 -0.0032 -0.0001

Y -0.0073 0.0055 0.0025 0.0019 0.0157 0.0103  
Z -0.0087 0.0058 -0.0044 0.0059 0.0044 -0.0049  
AT. 117 H X -0.0089 0.0040 0.0010 -0.0052 0.0170 -0.0009  
Y -0.0069 0.0050 -0.0012 0.0001 0.0079 -0.0022  
Z 0.0021 -0.0016 -0.0013 0.0034 -0.0047 0.0046  
AT. 118 H X -0.0089 -0.0040 -0.0010 -0.0052 0.0170 0.0009  
Y 0.0069 0.0050 -0.0012 -0.0001 -0.0079 -0.0022  
Z 0.0021 0.0016 0.0013 0.0034 -0.0047 -0.0046  
AT. 119 H X 0.0089 0.0040 -0.0010 -0.0052 -0.0170 0.0009  
Y 0.0069 0.0050 0.0012 0.0001 -0.0079 0.0022  
Z -0.0021 -0.0016 0.0013 0.0034 0.0047 -0.0046  
AT. 120 H X 0.0089 -0.0040 0.0010 -0.0052 -0.0170 -0.0009  
Y -0.0069 0.0050 0.0012 -0.0001 0.0079 0.0022  
Z -0.0021 0.0016 -0.0013 0.0034 0.0047 0.0046  
AT. 121 C X 0.0045 -0.0050 -0.0068 0.0058 0.0067 -0.0077  
Y 0.0006 -0.0011 -0.0043 0.0044 0.0039 -0.0069  
Z 0.0011 -0.0004 -0.0001 0.0022 -0.0022 0.0014  
AT. 122 C X 0.0045 0.0050 0.0068 0.0058 0.0067 0.0077  
Y -0.0006 -0.0011 -0.0043 -0.0044 -0.0039 -0.0069  
Z 0.0011 0.0004 0.0001 0.0022 -0.0022 -0.0014  
AT. 123 C X -0.0045 -0.0050 0.0068 0.0058 -0.0067 0.0077  
Y -0.0006 -0.0011 0.0043 0.0044 -0.0039 0.0069  
Z -0.0011 -0.0004 0.0001 0.0022 0.0022 -0.0014  
AT. 124 C X -0.0045 0.0050 -0.0068 0.0058 -0.0067 -0.0077  
Y 0.0006 -0.0011 0.0043 -0.0044 0.0039 0.0069  
Z -0.0011 0.0004 -0.0001 0.0022 0.0022 0.0014  
AT. 125 H X 0.0100 -0.0113 -0.0166 0.0154 0.0141 -0.0160  
Y 0.0033 -0.0042 -0.0065 0.0078 0.0032 -0.0065  
Z -0.0027 0.0039 0.0045 -0.0030 -0.0037 0.0034  
AT. 126 H X 0.0100 0.0113 0.0166 0.0154 0.0141 0.0160  
Y -0.0033 -0.0042 -0.0065 -0.0078 -0.0032 -0.0065  
Z -0.0027 -0.0039 -0.0045 -0.0030 -0.0037 -0.0034

AT.127 H X -0.0100 -0.0113 0.0166 0.0154 -0.0141 0.0160  
Y -0.0033 -0.0042 0.0065 0.0078 -0.0032 0.0065  
Z 0.0027 0.0039 -0.0045 -0.0030 0.0037 -0.0034

AT.128 H X -0.0100 0.0113 -0.0166 0.0154 -0.0141 -0.0160  
Y 0.0033 -0.0042 0.0065 -0.0078 0.0032 0.0065  
Z 0.0027 -0.0039 0.0045 -0.0030 0.0037 0.0034

AT.129 H X 0.0052 -0.0058 -0.0058 0.0059 0.0017 -0.0024  
Y 0.0023 -0.0031 -0.0094 0.0084 0.0125 -0.0167  
Z 0.0084 -0.0088 -0.0095 0.0127 -0.0004 -0.0018

AT.130 H X 0.0052 0.0058 0.0058 0.0059 0.0017 0.0024  
Y -0.0023 -0.0031 -0.0094 -0.0084 -0.0125 -0.0167  
Z 0.0084 0.0088 0.0095 0.0127 -0.0004 0.0018

AT.131 H X -0.0052 -0.0058 0.0058 0.0059 -0.0017 0.0024  
Y -0.0023 -0.0031 0.0094 0.0084 -0.0125 0.0167  
Z -0.0084 -0.0088 0.0095 0.0127 0.0004 0.0018

AT.132 H X -0.0052 0.0058 -0.0058 0.0059 -0.0017 -0.0024  
Y 0.0023 -0.0031 0.0094 -0.0084 0.0125 0.0167  
Z -0.0084 0.0088 -0.0095 0.0127 0.0004 -0.0018

AT.133 C X 0.0036 -0.0033 -0.0010 0.0002 0.0009 -0.0022  
Y -0.0009 0.0008 -0.0025 0.0012 0.0055 -0.0063  
Z 0.0004 -0.0004 -0.0014 0.0019 -0.0003 -0.0017

AT.134 C X 0.0036 0.0033 0.0010 0.0002 0.0009 0.0022  
Y 0.0009 0.0008 -0.0025 -0.0012 -0.0055 -0.0063  
Z 0.0004 0.0004 0.0014 0.0019 -0.0003 0.0017

AT.135 C X -0.0036 -0.0033 0.0010 0.0002 -0.0009 0.0022  
Y 0.0009 0.0008 0.0025 0.0012 -0.0055 0.0063  
Z -0.0004 -0.0004 0.0014 0.0019 0.0003 0.0017

AT.136 C X -0.0036 0.0033 -0.0010 0.0002 -0.0009 -0.0022  
Y -0.0009 0.0008 0.0025 -0.0012 0.0055 0.0063  
Z -0.0004 0.0004 -0.0014 0.0019 0.0003 -0.0017

AT.137 C X 0.0013 -0.0016 -0.0014 0.0011 0.0001 -0.0028  
Y -0.0022 0.0022 -0.0027 0.0026 0.0077 -0.0057

Z 0.0019 -0.0020 -0.0013 0.0010 -0.0014 -0.0024  
AT. 138 C X 0.0013 0.0016 0.0014 0.0011 0.0001 0.0028  
Y 0.0022 0.0022 -0.0027 -0.0026 -0.0077 -0.0057  
Z 0.0019 0.0020 0.0013 0.0010 -0.0014 0.0024  
AT. 139 C X -0.0013 -0.0016 0.0014 0.0011 -0.0001 0.0028  
Y 0.0022 0.0022 0.0027 0.0026 -0.0077 0.0057  
Z -0.0019 -0.0020 0.0013 0.0010 0.0014 0.0024  
AT. 140 C X -0.0013 0.0016 -0.0014 0.0011 -0.0001 -0.0028  
Y -0.0022 0.0022 0.0027 -0.0026 0.0077 0.0057  
Z -0.0019 0.0020 -0.0013 0.0010 0.0014 -0.0024  
AT. 141 H X -0.0000 -0.0006 -0.0020 0.0020 0.0025 -0.0034  
Y -0.0018 0.0015 -0.0041 0.0046 0.0103 -0.0063  
Z 0.0036 -0.0034 -0.0015 0.0013 -0.0023 -0.0020  
AT. 142 H X -0.0000 0.0006 0.0020 0.0020 0.0025 0.0034  
Y 0.0018 0.0015 -0.0041 -0.0046 -0.0103 -0.0063  
Z 0.0036 0.0034 0.0015 0.0013 -0.0023 0.0020  
AT. 143 H X 0.0000 -0.0006 0.0020 0.0020 -0.0025 0.0034  
Y 0.0018 0.0015 0.0041 0.0046 -0.0103 0.0063  
Z -0.0036 -0.0034 0.0015 0.0013 0.0023 0.0020  
AT. 144 H X 0.0000 0.0006 -0.0020 0.0020 -0.0025 -0.0034  
Y -0.0018 0.0015 0.0041 -0.0046 0.0103 0.0063  
Z -0.0036 0.0034 -0.0015 0.0013 0.0023 -0.0020  
AT. 145 H X 0.0025 -0.0027 -0.0009 0.0005 -0.0033 -0.0012  
Y -0.0030 0.0029 -0.0026 0.0022 0.0088 -0.0068  
Z 0.0005 -0.0007 -0.0009 -0.0006 -0.0007 -0.0051  
AT. 146 H X 0.0025 0.0027 0.0009 0.0005 -0.0033 0.0012  
Y 0.0030 0.0029 -0.0026 -0.0022 -0.0088 -0.0068  
Z 0.0005 0.0007 0.0009 -0.0006 -0.0007 0.0051  
AT. 147 H X -0.0025 -0.0027 0.0009 0.0005 0.0033 0.0012  
Y 0.0030 0.0029 0.0026 0.0022 -0.0088 0.0068  
Z -0.0005 -0.0007 0.0009 -0.0006 0.0007 0.0051  
AT. 148 H X -0.0025 0.0027 -0.0009 0.0005 0.0033 -0.0012

Y -0.0030 0.0029 0.0026 -0.0022 0.0088 0.0068  
Z -0.0005 0.0007 -0.0009 -0.0006 0.0007 -0.0051  
AT. 149 O X 0.0088 -0.0087 -0.0039 0.0052 -0.0021 0.0022  
Y 0.0021 -0.0022 -0.0014 0.0034 0.0002 -0.0048  
Z 0.0045 -0.0037 -0.0001 0.0019 -0.0029 0.0019  
AT. 150 O X 0.0088 0.0087 0.0039 0.0052 -0.0021 -0.0022  
Y -0.0021 -0.0022 -0.0014 -0.0034 -0.0002 -0.0048  
Z 0.0045 0.0037 0.0001 0.0019 -0.0029 -0.0019  
AT. 151 O X -0.0088 -0.0087 0.0039 0.0052 0.0021 -0.0022  
Y -0.0021 -0.0022 0.0014 0.0034 -0.0002 0.0048  
Z -0.0045 -0.0037 0.0001 0.0019 0.0029 -0.0019  
AT. 152 O X -0.0088 0.0087 -0.0039 0.0052 0.0021 0.0022  
Y 0.0021 -0.0022 0.0014 -0.0034 0.0002 0.0048  
Z -0.0045 0.0037 -0.0001 0.0019 0.0029 0.0019  
AT. 153 H X 0.0041 0.0003 -0.0016 -0.0032 0.0009 0.0008  
Y 0.0008 0.0054 -0.0028 -0.0043 0.0062 -0.0082  
Z 0.0074 -0.0076 -0.0024 0.0053 -0.0029 0.0019  
AT. 154 H X 0.0041 -0.0003 0.0016 -0.0032 0.0009 -0.0008  
Y -0.0008 0.0054 -0.0028 0.0043 -0.0062 -0.0082  
Z 0.0074 0.0076 0.0024 0.0053 -0.0029 -0.0019  
AT. 155 H X -0.0041 0.0003 0.0016 -0.0032 -0.0009 -0.0008  
Y -0.0008 0.0054 0.0028 -0.0043 -0.0062 0.0082  
Z -0.0074 -0.0076 0.0024 0.0053 0.0029 -0.0019  
AT. 156 H X -0.0041 -0.0003 -0.0016 -0.0032 -0.0009 0.0008  
Y 0.0008 0.0054 0.0028 0.0043 0.0062 0.0082  
Z -0.0074 0.0076 -0.0024 0.0053 0.0029 0.0019  
AT. 157 O X 0.0025 -0.0026 -0.0019 0.0021 -0.0007 0.0017  
Y -0.0028 0.0029 0.0011 0.0016 0.0026 -0.0050  
Z -0.0016 0.0012 -0.0004 0.0005 -0.0001 0.0009  
AT. 158 O X 0.0025 0.0026 0.0019 0.0021 -0.0007 -0.0017  
Y 0.0028 0.0029 0.0011 -0.0016 -0.0026 -0.0050  
Z -0.0016 -0.0012 0.0004 0.0005 -0.0001 -0.0009

AT.159 O X -0.0025 -0.0026 0.0019 0.0021 0.0007 -0.0017  
Y 0.0028 0.0029 -0.0011 0.0016 -0.0026 0.0050  
Z 0.0016 0.0012 0.0004 0.0005 0.0001 -0.0009

AT.160 O X -0.0025 0.0026 -0.0019 0.0021 0.0007 0.0017  
Y -0.0028 0.0029 -0.0011 -0.0016 0.0026 0.0050  
Z 0.0016 -0.0012 -0.0004 0.0005 0.0001 0.0009

AT.161 O X -0.0125 0.0122 0.0014 -0.0016 0.0087 -0.0141  
Y 0.0173 -0.0144 0.0122 -0.0054 -0.0281 0.0260  
Z -0.0054 0.0032 -0.0105 0.0083 0.0151 -0.0106

AT.162 O X -0.0125 -0.0122 -0.0014 -0.0016 0.0087 0.0141  
Y -0.0173 -0.0144 0.0122 0.0054 0.0281 0.0260  
Z -0.0054 -0.0032 0.0105 0.0083 0.0151 0.0106

AT.163 O X 0.0125 0.0122 -0.0014 -0.0016 -0.0087 0.0141  
Y -0.0173 -0.0144 -0.0122 -0.0054 0.0281 -0.0260  
Z 0.0054 0.0032 0.0105 0.0083 -0.0151 0.0106

AT.164 O X 0.0125 -0.0122 0.0014 -0.0016 -0.0087 -0.0141  
Y 0.0173 -0.0144 -0.0122 0.0054 -0.0281 -0.0260  
Z 0.0054 -0.0032 -0.0105 0.0083 -0.0151 -0.0106

AT.165 H X -0.0215 0.0193 -0.0050 0.0032 0.0213 -0.0242  
Y 0.0139 -0.0118 0.0103 -0.0036 -0.0240 0.0228  
Z -0.0114 0.0095 -0.0095 0.0066 0.0217 -0.0230

AT.166 H X -0.0215 -0.0193 0.0050 0.0032 0.0213 0.0242  
Y -0.0139 -0.0118 0.0103 0.0036 0.0240 0.0228  
Z -0.0114 -0.0095 0.0095 0.0066 0.0217 0.0230

AT.167 H X 0.0215 0.0193 0.0050 0.0032 -0.0213 0.0242  
Y -0.0139 -0.0118 -0.0103 -0.0036 0.0240 -0.0228  
Z 0.0114 0.0095 0.0095 0.0066 -0.0217 0.0230

AT.168 H X 0.0215 -0.0193 -0.0050 0.0032 -0.0213 -0.0242  
Y 0.0139 -0.0118 -0.0103 0.0036 -0.0240 -0.0228  
Z 0.0114 -0.0095 -0.0095 0.0066 -0.0217 -0.0230

AT.169 O X 0.0032 0.0057 -0.0036 -0.0048 -0.0009 0.0023  
Y -0.0051 0.0023 -0.0002 -0.0114 0.0145 -0.0145

Z -0.0009 0.0026 0.0010 -0.0005 0.0004 -0.0008  
 AT.170 O X 0.0032 -0.0057 0.0036 -0.0048 -0.0009 -0.0023  
 Y 0.0051 0.0023 -0.0002 0.0114 -0.0145 -0.0145  
 Z -0.0009 -0.0026 -0.0010 -0.0005 0.0004 0.0008  
 AT.171 O X -0.0032 0.0057 0.0036 -0.0048 0.0009 -0.0023  
 Y 0.0051 0.0023 0.0002 -0.0114 -0.0145 0.0145  
 Z 0.0009 0.0026 -0.0010 -0.0005 -0.0004 0.0008  
 AT.172 O X -0.0032 -0.0057 -0.0036 -0.0048 0.0009 0.0023  
 Y -0.0051 0.0023 0.0002 0.0114 0.0145 0.0145  
 Z 0.0009 -0.0026 0.0010 -0.0005 -0.0004 -0.0008  
 AT.173 H X -0.0085 -0.0045 0.0067 0.0031 0.0011 -0.0037  
 Y -0.0039 0.0046 -0.0022 -0.0137 0.0162 -0.0156  
 Z 0.0052 0.0047 0.0001 -0.0038 -0.0130 0.0136  
 AT.174 H X -0.0085 0.0045 -0.0067 0.0031 0.0011 0.0037  
 Y 0.0039 0.0046 -0.0022 0.0137 -0.0162 -0.0156  
 Z 0.0052 -0.0047 -0.0001 -0.0038 -0.0130 -0.0136  
 AT.175 H X 0.0085 -0.0045 -0.0067 0.0031 -0.0011 0.0037  
 Y 0.0039 0.0046 0.0022 -0.0137 -0.0162 0.0156  
 Z -0.0052 0.0047 -0.0001 -0.0038 0.0130 -0.0136  
 AT.176 H X 0.0085 0.0045 0.0067 0.0031 -0.0011 -0.0037  
 Y -0.0039 0.0046 0.0022 0.0137 0.0162 0.0156  
 Z -0.0052 -0.0047 0.0001 -0.0038 0.0130 0.0136

FREQ(CM\*\*-1) 268.12 268.69 269.75 272.62 272.68 273.13

AT. 1 I X -0.0012 -0.0006 -0.0011 0.0009 -0.0006 -0.0011  
 Y 0.0001 0.0000 0.0002 -0.0000 0.0001 0.0001  
 Z 0.0004 0.0005 0.0004 -0.0006 0.0002 0.0011  
 AT. 2 I X -0.0012 -0.0006 0.0011 -0.0009 -0.0006 0.0011  
 Y -0.0001 -0.0000 0.0002 -0.0000 -0.0001 0.0001  
 Z 0.0004 0.0005 -0.0004 0.0006 0.0002 -0.0011  
 AT. 3 I X 0.0012 -0.0006 -0.0011 0.0009 -0.0006 0.0011



Y -0.0001 0.0000 0.0002 -0.0000 0.0001 -0.0001  
Z -0.0004 0.0005 0.0004 -0.0006 0.0002 -0.0011  
AT. 4 I X 0.0012 -0.0006 0.0011 -0.0009 -0.0006 -0.0011  
Y 0.0001 -0.0000 0.0002 -0.0000 -0.0001 -0.0001  
Z -0.0004 0.0005 -0.0004 0.0006 0.0002 0.0011  
AT. 5 I X 0.0004 0.0004 0.0005 -0.0003 0.0003 0.0004  
Y -0.0000 -0.0004 -0.0000 0.0001 0.0004 -0.0002  
Z 0.0003 -0.0003 0.0003 -0.0000 0.0003 -0.0001  
AT. 6 I X 0.0004 0.0004 -0.0005 0.0003 0.0003 -0.0004  
Y 0.0000 0.0004 -0.0000 0.0001 -0.0004 -0.0002  
Z 0.0003 -0.0003 -0.0003 0.0000 0.0003 0.0001  
AT. 7 I X -0.0004 0.0004 0.0005 -0.0003 0.0003 -0.0004  
Y 0.0000 -0.0004 -0.0000 0.0001 0.0004 0.0002  
Z -0.0003 -0.0003 0.0003 -0.0000 0.0003 0.0001  
AT. 8 I X -0.0004 0.0004 -0.0005 0.0003 0.0003 0.0004  
Y -0.0000 0.0004 -0.0000 0.0001 -0.0004 0.0002  
Z -0.0003 -0.0003 -0.0003 0.0000 0.0003 -0.0001  
AT. 9 N X 0.0015 -0.0049 0.0062 0.0053 0.0078 0.0020  
Y 0.0036 0.0096 -0.0015 -0.0095 -0.0027 0.0063  
Z 0.0024 0.0032 0.0004 -0.0018 0.0009 0.0025  
AT. 10 N X 0.0015 -0.0049 -0.0062 -0.0053 0.0078 -0.0020  
Y -0.0036 -0.0096 -0.0015 -0.0095 0.0027 0.0063  
Z 0.0024 0.0032 -0.0004 0.0018 0.0009 -0.0025  
AT. 11 N X -0.0015 -0.0049 0.0062 0.0053 0.0078 -0.0020  
Y -0.0036 0.0096 -0.0015 -0.0095 -0.0027 -0.0063  
Z -0.0024 0.0032 0.0004 -0.0018 0.0009 -0.0025  
AT. 12 N X -0.0015 -0.0049 -0.0062 -0.0053 0.0078 0.0020  
Y 0.0036 -0.0096 -0.0015 -0.0095 0.0027 -0.0063  
Z -0.0024 0.0032 -0.0004 0.0018 0.0009 0.0025  
AT. 13 N X -0.0008 0.0080 -0.0055 -0.0104 -0.0073 0.0042  
Y -0.0019 0.0030 -0.0039 -0.0036 -0.0047 0.0005  
Z -0.0008 0.0005 -0.0018 0.0007 -0.0009 -0.0018

AT. 14 N X -0.0008 0.0080 0.0055 0.0104 -0.0073 -0.0042  
Y 0.0019 -0.0030 -0.0039 -0.0036 0.0047 0.0005  
Z -0.0008 0.0005 0.0018 -0.0007 -0.0009 0.0018

AT. 15 N X 0.0008 0.0080 -0.0055 -0.0104 -0.0073 -0.0042  
Y 0.0019 0.0030 -0.0039 -0.0036 -0.0047 -0.0005  
Z 0.0008 0.0005 -0.0018 0.0007 -0.0009 0.0018

AT. 16 N X 0.0008 0.0080 0.0055 0.0104 -0.0073 0.0042  
Y -0.0019 -0.0030 -0.0039 -0.0036 0.0047 -0.0005  
Z 0.0008 0.0005 0.0018 -0.0007 -0.0009 -0.0018

AT. 17 O X 0.0026 0.0025 -0.0016 -0.0026 -0.0021 0.0044  
Y -0.0016 0.0032 -0.0022 -0.0028 -0.0011 0.0031  
Z 0.0072 0.0022 0.0098 -0.0016 0.0081 0.0064

AT. 18 O X 0.0026 0.0025 0.0016 0.0026 -0.0021 -0.0044  
Y 0.0016 -0.0032 -0.0022 -0.0028 0.0011 0.0031  
Z 0.0072 0.0022 -0.0098 0.0016 0.0081 -0.0064

AT. 19 O X -0.0026 0.0025 -0.0016 -0.0026 -0.0021 -0.0044  
Y 0.0016 0.0032 -0.0022 -0.0028 -0.0011 -0.0031  
Z -0.0072 0.0022 0.0098 -0.0016 0.0081 -0.0064

AT. 20 O X -0.0026 0.0025 0.0016 0.0026 -0.0021 0.0044  
Y -0.0016 -0.0032 -0.0022 -0.0028 0.0011 -0.0031  
Z -0.0072 0.0022 -0.0098 0.0016 0.0081 0.0064

AT. 21 O X 0.0039 -0.0071 0.0017 0.0097 0.0087 -0.0075  
Y -0.0086 -0.0042 -0.0085 0.0012 -0.0083 -0.0070  
Z -0.0126 -0.0083 -0.0099 0.0052 -0.0084 -0.0107

AT. 22 O X 0.0039 -0.0071 -0.0017 -0.0097 0.0087 0.0075  
Y 0.0086 0.0042 -0.0085 0.0012 0.0083 -0.0070  
Z -0.0126 -0.0083 0.0099 -0.0052 -0.0084 0.0107

AT. 23 O X -0.0039 -0.0071 0.0017 0.0097 0.0087 0.0075  
Y 0.0086 -0.0042 -0.0085 0.0012 -0.0083 0.0070  
Z 0.0126 -0.0083 -0.0099 0.0052 -0.0084 0.0107

AT. 24 O X -0.0039 -0.0071 -0.0017 -0.0097 0.0087 -0.0075  
Y -0.0086 0.0042 -0.0085 0.0012 0.0083 0.0070

Z 0.0126 -0.0083 0.0099 -0.0052 -0.0084 -0.0107  
AT. 25 C X 0.0093 0.0068 0.0102 -0.0067 0.0068 0.0113  
Y 0.0054 0.0096 0.0028 -0.0107 -0.0002 0.0089  
Z 0.0072 0.0025 0.0095 -0.0025 0.0070 0.0075  
AT. 26 C X 0.0093 0.0068 -0.0102 0.0067 0.0068 -0.0113  
Y -0.0054 -0.0096 0.0028 -0.0107 0.0002 0.0089  
Z 0.0072 0.0025 -0.0095 0.0025 0.0070 -0.0075  
AT. 27 C X -0.0093 0.0068 0.0102 -0.0067 0.0068 -0.0113  
Y -0.0054 0.0096 0.0028 -0.0107 -0.0002 -0.0089  
Z -0.0072 0.0025 0.0095 -0.0025 0.0070 -0.0075  
AT. 28 C X -0.0093 0.0068 -0.0102 0.0067 0.0068 0.0113  
Y 0.0054 -0.0096 0.0028 -0.0107 0.0002 -0.0089  
Z -0.0072 0.0025 -0.0095 0.0025 0.0070 0.0075  
AT. 29 H X 0.0059 0.0051 0.0068 -0.0050 0.0043 0.0080  
Y 0.0101 0.0153 0.0081 -0.0183 0.0008 0.0155  
Z 0.0116 0.0040 0.0137 -0.0036 0.0104 0.0112  
AT. 30 H X 0.0059 0.0051 -0.0068 0.0050 0.0043 -0.0080  
Y -0.0101 -0.0153 0.0081 -0.0183 -0.0008 0.0155  
Z 0.0116 0.0040 -0.0137 0.0036 0.0104 -0.0112  
AT. 31 H X -0.0059 0.0051 0.0068 -0.0050 0.0043 -0.0080  
Y -0.0101 0.0153 0.0081 -0.0183 0.0008 -0.0155  
Z -0.0116 0.0040 0.0137 -0.0036 0.0104 -0.0112  
AT. 32 H X -0.0059 0.0051 -0.0068 0.0050 0.0043 0.0080  
Y 0.0101 -0.0153 0.0081 -0.0183 -0.0008 -0.0155  
Z -0.0116 0.0040 -0.0137 0.0036 0.0104 0.0112  
AT. 33 H X 0.0160 0.0149 0.0160 -0.0166 0.0079 0.0203  
Y 0.0038 0.0079 0.0013 -0.0085 -0.0005 0.0068  
Z 0.0090 0.0038 0.0115 -0.0047 0.0072 0.0092  
AT. 34 H X 0.0160 0.0149 -0.0160 0.0166 0.0079 -0.0203  
Y -0.0038 -0.0079 0.0013 -0.0085 0.0005 0.0068  
Z 0.0090 0.0038 -0.0115 0.0047 0.0072 -0.0092  
AT. 35 H X -0.0160 0.0149 0.0160 -0.0166 0.0079 -0.0203

Y -0.0038 0.0079 0.0013 -0.0085 -0.0005 -0.0068  
Z -0.0090 0.0038 0.0115 -0.0047 0.0072 -0.0092  
AT. 36 H X -0.0160 0.0149 -0.0160 0.0166 0.0079 0.0203  
Y 0.0038 -0.0079 0.0013 -0.0085 0.0005 -0.0068  
Z -0.0090 0.0038 -0.0115 0.0047 0.0072 0.0092  
AT. 37 C X 0.0058 0.0015 0.0062 -0.0010 0.0054 0.0068  
Y 0.0020 0.0071 -0.0009 -0.0070 -0.0014 0.0050  
Z 0.0035 0.0002 0.0059 0.0003 0.0052 0.0038  
AT. 38 C X 0.0058 0.0015 -0.0062 0.0010 0.0054 -0.0068  
Y -0.0020 -0.0071 -0.0009 -0.0070 0.0014 0.0050  
Z 0.0035 0.0002 -0.0059 -0.0003 0.0052 -0.0038  
AT. 39 C X -0.0058 0.0015 0.0062 -0.0010 0.0054 -0.0068  
Y -0.0020 0.0071 -0.0009 -0.0070 -0.0014 -0.0050  
Z -0.0035 0.0002 0.0059 0.0003 0.0052 -0.0038  
AT. 40 C X -0.0058 0.0015 -0.0062 0.0010 0.0054 0.0068  
Y 0.0020 -0.0071 -0.0009 -0.0070 0.0014 -0.0050  
Z -0.0035 0.0002 -0.0059 -0.0003 0.0052 0.0038  
AT. 41 C X 0.0166 0.0117 0.0137 -0.0086 0.0124 0.0164  
Y -0.0154 -0.0059 -0.0157 0.0028 -0.0135 -0.0131  
Z 0.0049 0.0030 0.0034 -0.0005 0.0042 0.0042  
AT. 42 C X 0.0166 0.0117 -0.0137 0.0086 0.0124 -0.0164  
Y 0.0154 0.0059 -0.0157 0.0028 0.0135 -0.0131  
Z 0.0049 0.0030 -0.0034 0.0005 0.0042 -0.0042  
AT. 43 C X -0.0166 0.0117 0.0137 -0.0086 0.0124 -0.0164  
Y 0.0154 -0.0059 -0.0157 0.0028 -0.0135 0.0131  
Z -0.0049 0.0030 0.0034 -0.0005 0.0042 -0.0042  
AT. 44 C X -0.0166 0.0117 -0.0137 0.0086 0.0124 0.0164  
Y -0.0154 0.0059 -0.0157 0.0028 0.0135 0.0131  
Z -0.0049 0.0030 -0.0034 0.0005 0.0042 0.0042  
AT. 45 H X 0.0395 0.0268 0.0328 -0.0177 0.0298 0.0381  
Y -0.0287 -0.0154 -0.0262 0.0093 -0.0223 -0.0260  
Z -0.0101 -0.0076 -0.0086 0.0068 -0.0060 -0.0104

AT. 46 H X 0.0395 0.0268 -0.0328 0.0177 0.0298 -0.0381  
Y 0.0287 0.0154 -0.0262 0.0093 0.0223 -0.0260  
Z -0.0101 -0.0076 0.0086 -0.0068 -0.0060 0.0104

AT. 47 H X -0.0395 0.0268 0.0328 -0.0177 0.0298 -0.0381  
Y 0.0287 -0.0154 -0.0262 0.0093 -0.0223 0.0260  
Z 0.0101 -0.0076 -0.0086 0.0068 -0.0060 0.0104

AT. 48 H X -0.0395 0.0268 -0.0328 0.0177 0.0298 0.0381  
Y -0.0287 0.0154 -0.0262 0.0093 0.0223 0.0260  
Z 0.0101 -0.0076 0.0086 -0.0068 -0.0060 -0.0104

AT. 49 H X 0.0162 0.0149 0.0108 -0.0128 0.0085 0.0165  
Y -0.0271 -0.0112 -0.0273 0.0047 -0.0246 -0.0239  
Z 0.0341 0.0251 0.0259 -0.0166 0.0227 0.0329

AT. 50 H X 0.0162 0.0149 -0.0108 0.0128 0.0085 -0.0165  
Y 0.0271 0.0112 -0.0273 0.0047 0.0246 -0.0239  
Z 0.0341 0.0251 -0.0259 0.0166 0.0227 -0.0329

AT. 51 H X -0.0162 0.0149 0.0108 -0.0128 0.0085 -0.0165  
Y 0.0271 -0.0112 -0.0273 0.0047 -0.0246 0.0239  
Z -0.0341 0.0251 0.0259 -0.0166 0.0227 -0.0329

AT. 52 H X -0.0162 0.0149 -0.0108 0.0128 0.0085 0.0165  
Y -0.0271 0.0112 -0.0273 0.0047 0.0246 0.0239  
Z -0.0341 0.0251 -0.0259 0.0166 0.0227 0.0329

AT. 53 C X 0.0051 0.0052 0.0028 -0.0051 0.0022 0.0048  
Y -0.0005 0.0024 -0.0023 -0.0015 -0.0011 0.0005  
Z -0.0007 -0.0018 0.0000 0.0017 -0.0001 -0.0013

AT. 54 C X 0.0051 0.0052 -0.0028 0.0051 0.0022 -0.0048  
Y 0.0005 -0.0024 -0.0023 -0.0015 0.0011 0.0005  
Z -0.0007 -0.0018 -0.0000 -0.0017 -0.0001 0.0013

AT. 55 C X -0.0051 0.0052 0.0028 -0.0051 0.0022 -0.0048  
Y 0.0005 0.0024 -0.0023 -0.0015 -0.0011 -0.0005  
Z 0.0007 -0.0018 0.0000 0.0017 -0.0001 0.0013

AT. 56 C X -0.0051 0.0052 -0.0028 0.0051 0.0022 0.0048  
Y -0.0005 -0.0024 -0.0023 -0.0015 0.0011 -0.0005

Z 0.0007 -0.0018 -0.0000 -0.0017 -0.0001 -0.0013  
AT. 57 C X -0.0337 -0.0191 -0.0346 0.0144 -0.0286 -0.0363  
Y 0.0145 -0.0076 0.0243 0.0185 0.0322 0.0100  
Z 0.0016 0.0103 -0.0046 -0.0145 -0.0100 0.0046  
AT. 58 C X -0.0337 -0.0191 0.0346 -0.0144 -0.0286 0.0363  
Y -0.0145 0.0076 0.0243 0.0185 -0.0322 0.0100  
Z 0.0016 0.0103 0.0046 0.0145 -0.0100 -0.0046  
AT. 59 C X 0.0337 -0.0191 -0.0346 0.0144 -0.0286 0.0363  
Y -0.0145 -0.0076 0.0243 0.0185 0.0322 -0.0100  
Z -0.0016 0.0103 -0.0046 -0.0145 -0.0100 -0.0046  
AT. 60 C X 0.0337 -0.0191 0.0346 -0.0144 -0.0286 -0.0363  
Y 0.0145 0.0076 0.0243 0.0185 -0.0322 -0.0100  
Z -0.0016 0.0103 0.0046 0.0145 -0.0100 0.0046  
AT. 61 H X -0.0907 -0.0714 -0.0737 0.0635 -0.0549 -0.0968  
Y -0.0267 -0.0505 -0.0003 0.0605 0.0186 -0.0349  
Z -0.0028 0.0354 -0.0291 -0.0489 -0.0435 0.0062  
AT. 62 H X -0.0907 -0.0714 0.0737 -0.0635 -0.0549 0.0968  
Y 0.0267 0.0505 -0.0003 0.0605 -0.0186 -0.0349  
Z -0.0028 0.0354 0.0291 0.0489 -0.0435 -0.0062  
AT. 63 H X 0.0907 -0.0714 -0.0737 0.0635 -0.0549 0.0968  
Y 0.0267 -0.0505 -0.0003 0.0605 0.0186 0.0349  
Z 0.0028 0.0354 -0.0291 -0.0489 -0.0435 -0.0062  
AT. 64 H X 0.0907 -0.0714 0.0737 -0.0635 -0.0549 -0.0968  
Y -0.0267 0.0505 -0.0003 0.0605 -0.0186 0.0349  
Z 0.0028 0.0354 0.0291 0.0489 -0.0435 0.0062  
AT. 65 H X -0.0551 -0.0392 -0.0487 0.0332 -0.0380 -0.0588  
Y 0.0793 0.0527 0.0666 -0.0390 0.0598 0.0776  
Z 0.0066 0.0115 0.0053 -0.0155 -0.0019 0.0135  
AT. 66 H X -0.0551 -0.0392 0.0487 -0.0332 -0.0380 0.0588  
Y -0.0793 -0.0527 0.0666 -0.0390 -0.0598 0.0776  
Z 0.0066 0.0115 -0.0053 0.0155 -0.0019 -0.0135  
AT. 67 H X 0.0551 -0.0392 -0.0487 0.0332 -0.0380 0.0588

Y -0.0793 0.0527 0.0666 -0.0390 0.0598 -0.0776  
Z -0.0066 0.0115 0.0053 -0.0155 -0.0019 -0.0135  
AT. 68 H X 0.0551 -0.0392 0.0487 -0.0332 -0.0380 -0.0588  
Y 0.0793 -0.0527 0.0666 -0.0390 -0.0598 -0.0776  
Z -0.0066 0.0115 -0.0053 0.0155 -0.0019 0.0135  
AT. 69 H X 0.0026 0.0266 -0.0204 -0.0306 -0.0253 0.0026  
Y 0.0047 -0.0373 0.0311 0.0536 0.0487 -0.0066  
Z -0.0002 -0.0068 0.0038 0.0074 0.0046 -0.0026  
AT. 70 H X 0.0026 0.0266 0.0204 0.0306 -0.0253 -0.0026  
Y -0.0047 0.0373 0.0311 0.0536 -0.0487 -0.0066  
Z -0.0002 -0.0068 -0.0038 -0.0074 0.0046 0.0026  
AT. 71 H X -0.0026 0.0266 -0.0204 -0.0306 -0.0253 -0.0026  
Y -0.0047 -0.0373 0.0311 0.0536 0.0487 0.0066  
Z 0.0002 -0.0068 0.0038 0.0074 0.0046 0.0026  
AT. 72 H X -0.0026 0.0266 0.0204 0.0306 -0.0253 0.0026  
Y 0.0047 0.0373 0.0311 0.0536 -0.0487 0.0066  
Z 0.0002 -0.0068 -0.0038 -0.0074 0.0046 -0.0026  
AT. 73 C X 0.0018 0.0008 0.0011 -0.0014 0.0013 0.0005  
Y -0.0040 0.0041 -0.0088 -0.0059 -0.0097 -0.0033  
Z -0.0019 -0.0036 -0.0007 0.0027 -0.0013 -0.0033  
AT. 74 C X 0.0018 0.0008 -0.0011 0.0014 0.0013 -0.0005  
Y 0.0040 -0.0041 -0.0088 -0.0059 0.0097 -0.0033  
Z -0.0019 -0.0036 0.0007 -0.0027 -0.0013 0.0033  
AT. 75 C X -0.0018 0.0008 0.0011 -0.0014 0.0013 -0.0005  
Y 0.0040 0.0041 -0.0088 -0.0059 -0.0097 0.0033  
Z 0.0019 -0.0036 -0.0007 0.0027 -0.0013 0.0033  
AT. 76 C X -0.0018 0.0008 -0.0011 0.0014 0.0013 0.0005  
Y -0.0040 -0.0041 -0.0088 -0.0059 0.0097 0.0033  
Z 0.0019 -0.0036 0.0007 -0.0027 -0.0013 -0.0033  
AT. 77 C X -0.0112 -0.0117 -0.0061 0.0100 -0.0023 -0.0101  
Y 0.0207 0.0223 0.0104 -0.0201 0.0059 0.0204  
Z 0.0112 0.0123 0.0048 -0.0103 0.0031 0.0105

AT. 78 C X -0.0112 -0.0117 0.0061 -0.0100 -0.0023 0.0101  
Y -0.0207 -0.0223 0.0104 -0.0201 -0.0059 0.0204  
Z 0.0112 0.0123 -0.0048 0.0103 0.0031 -0.0105

AT. 79 C X 0.0112 -0.0117 -0.0061 0.0100 -0.0023 0.0101  
Y -0.0207 0.0223 0.0104 -0.0201 0.0059 -0.0204  
Z -0.0112 0.0123 0.0048 -0.0103 0.0031 -0.0105

AT. 80 C X 0.0112 -0.0117 0.0061 -0.0100 -0.0023 -0.0101  
Y 0.0207 -0.0223 0.0104 -0.0201 -0.0059 -0.0204  
Z -0.0112 0.0123 -0.0048 0.0103 0.0031 0.0105

AT. 81 H X 0.0058 0.0068 0.0019 -0.0064 0.0021 0.0068  
Y 0.0373 0.0411 0.0174 -0.0371 0.0094 0.0371  
Z 0.0420 0.0379 0.0256 -0.0316 0.0177 0.0391

AT. 82 H X 0.0058 0.0068 -0.0019 0.0064 0.0021 -0.0068  
Y -0.0373 -0.0411 0.0174 -0.0371 -0.0094 0.0371  
Z 0.0420 0.0379 -0.0256 0.0316 0.0177 -0.0391

AT. 83 H X -0.0058 0.0068 0.0019 -0.0064 0.0021 -0.0068  
Y -0.0373 0.0411 0.0174 -0.0371 0.0094 -0.0371  
Z -0.0420 0.0379 0.0256 -0.0316 0.0177 -0.0391

AT. 84 H X -0.0058 0.0068 -0.0019 0.0064 0.0021 0.0068  
Y 0.0373 -0.0411 0.0174 -0.0371 -0.0094 -0.0371  
Z -0.0420 0.0379 -0.0256 0.0316 0.0177 0.0391

AT. 85 H X -0.0446 -0.0440 -0.0257 0.0377 -0.0154 -0.0429  
Y 0.0353 0.0360 0.0189 -0.0323 0.0109 0.0334  
Z 0.0082 0.0100 0.0031 -0.0080 0.0025 0.0088

AT. 86 H X -0.0446 -0.0440 0.0257 -0.0377 -0.0154 0.0429  
Y -0.0353 -0.0360 0.0189 -0.0323 -0.0109 0.0334  
Z 0.0082 0.0100 -0.0031 0.0080 0.0025 -0.0088

AT. 87 H X 0.0446 -0.0440 -0.0257 0.0377 -0.0154 0.0429  
Y -0.0353 0.0360 0.0189 -0.0323 0.0109 -0.0334  
Z -0.0082 0.0100 0.0031 -0.0080 0.0025 -0.0088

AT. 88 H X 0.0446 -0.0440 0.0257 -0.0377 -0.0154 -0.0429  
Y 0.0353 -0.0360 0.0189 -0.0323 -0.0109 -0.0334



Z -0.0082 0.0100 -0.0031 0.0080 0.0025 0.0088  
AT. 89 C X 0.0002 -0.0010 0.0006 0.0007 0.0020 0.0003  
Y -0.0009 -0.0008 -0.0009 0.0001 -0.0012 -0.0012  
Z -0.0013 -0.0018 -0.0013 0.0016 -0.0014 -0.0030  
AT. 90 C X 0.0002 -0.0010 -0.0006 -0.0007 0.0020 -0.0003  
Y 0.0009 0.0008 -0.0009 0.0001 0.0012 -0.0012  
Z -0.0013 -0.0018 0.0013 -0.0016 -0.0014 0.0030  
AT. 91 C X -0.0002 -0.0010 0.0006 0.0007 0.0020 -0.0003  
Y 0.0009 -0.0008 -0.0009 0.0001 -0.0012 0.0012  
Z 0.0013 -0.0018 -0.0013 0.0016 -0.0014 0.0030  
AT. 92 C X -0.0002 -0.0010 -0.0006 -0.0007 0.0020 0.0003  
Y -0.0009 0.0008 -0.0009 0.0001 0.0012 0.0012  
Z 0.0013 -0.0018 0.0013 -0.0016 -0.0014 -0.0030  
AT. 93 C X 0.0341 0.0123 0.0328 -0.0064 0.0286 0.0248  
Y -0.0006 -0.0298 0.0220 0.0333 0.0274 -0.0052  
Z -0.0065 -0.0235 0.0088 0.0252 0.0136 -0.0097  
AT. 94 C X 0.0341 0.0123 -0.0328 0.0064 0.0286 -0.0248  
Y 0.0006 0.0298 0.0220 0.0333 -0.0274 -0.0052  
Z -0.0065 -0.0235 -0.0088 -0.0252 0.0136 0.0097  
AT. 95 C X -0.0341 0.0123 0.0328 -0.0064 0.0286 -0.0248  
Y 0.0006 -0.0298 0.0220 0.0333 0.0274 0.0052  
Z 0.0065 -0.0235 0.0088 0.0252 0.0136 0.0097  
AT. 96 C X -0.0341 0.0123 -0.0328 0.0064 0.0286 0.0248  
Y -0.0006 0.0298 0.0220 0.0333 -0.0274 0.0052  
Z 0.0065 -0.0235 -0.0088 -0.0252 0.0136 -0.0097  
AT. 97 H X 0.0529 0.0243 0.0506 -0.0176 0.0490 0.0401  
Y -0.0278 -0.0616 0.0020 0.0686 -0.0030 -0.0316  
Z 0.0052 -0.0444 0.0316 0.0555 0.0258 -0.0080  
AT. 98 H X 0.0529 0.0243 -0.0506 0.0176 0.0490 -0.0401  
Y 0.0278 0.0616 0.0020 0.0686 0.0030 -0.0316  
Z 0.0052 -0.0444 -0.0316 -0.0555 0.0258 0.0080  
AT. 99 H X -0.0529 0.0243 0.0506 -0.0176 0.0490 -0.0401

Y 0.0278 -0.0616 0.0020 0.0686 -0.0030 0.0316  
Z -0.0052 -0.0444 0.0316 0.0555 0.0258 0.0080  
AT.100 H X -0.0529 0.0243 -0.0506 0.0176 0.0490 0.0401  
Y -0.0278 0.0616 0.0020 0.0686 0.0030 0.0316  
Z -0.0052 -0.0444 -0.0316 -0.0555 0.0258 -0.0080  
AT.101 H X 0.0540 0.0318 0.0512 -0.0288 0.0583 0.0438  
Y 0.0235 -0.0054 0.0421 0.0063 0.0575 0.0175  
Z -0.0209 -0.0444 0.0106 0.0429 0.0291 -0.0214  
AT.102 H X 0.0540 0.0318 -0.0512 0.0288 0.0583 -0.0438  
Y -0.0235 0.0054 0.0421 0.0063 -0.0575 0.0175  
Z -0.0209 -0.0444 -0.0106 -0.0429 0.0291 0.0214  
AT.103 H X -0.0540 0.0318 0.0512 -0.0288 0.0583 -0.0438  
Y -0.0235 -0.0054 0.0421 0.0063 0.0575 -0.0175  
Z 0.0209 -0.0444 0.0106 0.0429 0.0291 0.0214  
AT.104 H X -0.0540 0.0318 -0.0512 0.0288 0.0583 0.0438  
Y 0.0235 0.0054 0.0421 0.0063 -0.0575 -0.0175  
Z 0.0209 -0.0444 -0.0106 -0.0429 0.0291 -0.0214  
AT.105 H X 0.0285 -0.0066 0.0271 0.0204 0.0021 0.0134  
Y 0.0039 -0.0503 0.0447 0.0567 0.0578 -0.0049  
Z -0.0079 -0.0012 -0.0067 -0.0020 -0.0006 -0.0060  
AT.106 H X 0.0285 -0.0066 -0.0271 -0.0204 0.0021 -0.0134  
Y -0.0039 0.0503 0.0447 0.0567 -0.0578 -0.0049  
Z -0.0079 -0.0012 0.0067 0.0020 -0.0006 0.0060  
AT.107 H X -0.0285 -0.0066 0.0271 0.0204 0.0021 -0.0134  
Y -0.0039 -0.0503 0.0447 0.0567 0.0578 0.0049  
Z 0.0079 -0.0012 -0.0067 -0.0020 -0.0006 0.0060  
AT.108 H X -0.0285 -0.0066 -0.0271 -0.0204 0.0021 0.0134  
Y 0.0039 0.0503 0.0447 0.0567 -0.0578 0.0049  
Z 0.0079 -0.0012 0.0067 0.0020 -0.0006 -0.0060  
AT.109 C X 0.0137 0.0148 0.0089 -0.0129 0.0054 0.0150  
Y 0.0073 0.0116 0.0031 -0.0095 0.0008 0.0099  
Z -0.0056 -0.0051 -0.0045 0.0051 -0.0023 -0.0063

AT.110 C X 0.0137 0.0148 -0.0089 0.0129 0.0054 -0.0150  
Y -0.0073 -0.0116 0.0031 -0.0095 -0.0008 0.0099  
Z -0.0056 -0.0051 0.0045 -0.0051 -0.0023 0.0063

AT.111 C X -0.0137 0.0148 0.0089 -0.0129 0.0054 -0.0150  
Y -0.0073 0.0116 0.0031 -0.0095 0.0008 -0.0099  
Z 0.0056 -0.0051 -0.0045 0.0051 -0.0023 0.0063

AT.112 C X -0.0137 0.0148 -0.0089 0.0129 0.0054 0.0150  
Y 0.0073 -0.0116 0.0031 -0.0095 -0.0008 -0.0099  
Z 0.0056 -0.0051 0.0045 -0.0051 -0.0023 -0.0063

AT.113 H X 0.0080 0.0081 0.0048 -0.0077 0.0039 0.0085  
Y 0.0132 0.0202 0.0067 -0.0172 0.0006 0.0178  
Z -0.0235 -0.0181 -0.0203 0.0127 -0.0143 -0.0220

AT.114 H X 0.0080 0.0081 -0.0048 0.0077 0.0039 -0.0085  
Y -0.0132 -0.0202 0.0067 -0.0172 -0.0006 0.0178  
Z -0.0235 -0.0181 0.0203 -0.0127 -0.0143 0.0220

AT.115 H X -0.0080 0.0081 0.0048 -0.0077 0.0039 -0.0085  
Y -0.0132 0.0202 0.0067 -0.0172 0.0006 -0.0178  
Z 0.0235 -0.0181 -0.0203 0.0127 -0.0143 0.0220

AT.116 H X -0.0080 0.0081 -0.0048 0.0077 0.0039 0.0085  
Y 0.0132 -0.0202 0.0067 -0.0172 -0.0006 -0.0178  
Z 0.0235 -0.0181 0.0203 -0.0127 -0.0143 -0.0220

AT.117 H X 0.0303 0.0306 0.0232 -0.0228 0.0129 0.0310  
Y 0.0113 0.0168 0.0058 -0.0121 0.0020 0.0132  
Z -0.0044 -0.0027 -0.0042 0.0041 -0.0022 -0.0055

AT.118 H X 0.0303 0.0306 -0.0232 0.0228 0.0129 -0.0310  
Y -0.0113 -0.0168 0.0058 -0.0121 -0.0020 0.0132  
Z -0.0044 -0.0027 0.0042 -0.0041 -0.0022 0.0055

AT.119 H X -0.0303 0.0306 0.0232 -0.0228 0.0129 -0.0310  
Y -0.0113 0.0168 0.0058 -0.0121 0.0020 -0.0132  
Z 0.0044 -0.0027 -0.0042 0.0041 -0.0022 0.0055

AT.120 H X -0.0303 0.0306 -0.0232 0.0228 0.0129 0.0310  
Y 0.0113 -0.0168 0.0058 -0.0121 -0.0020 -0.0132

Z 0.0044 -0.0027 0.0042 -0.0041 -0.0022 -0.0055  
AT. 121 C X -0.0124 -0.0046 -0.0121 0.0018 -0.0097 -0.0089  
Y -0.0115 -0.0037 -0.0117 0.0011 -0.0113 -0.0089  
Z -0.0027 0.0014 -0.0054 -0.0013 -0.0052 -0.0038  
AT. 122 C X -0.0124 -0.0046 0.0121 -0.0018 -0.0097 0.0089  
Y 0.0115 0.0037 -0.0117 0.0011 0.0113 -0.0089  
Z -0.0027 0.0014 0.0054 0.0013 -0.0052 0.0038  
AT. 123 C X 0.0124 -0.0046 -0.0121 0.0018 -0.0097 0.0089  
Y 0.0115 -0.0037 -0.0117 0.0011 -0.0113 0.0089  
Z 0.0027 0.0014 -0.0054 -0.0013 -0.0052 0.0038  
AT. 124 C X 0.0124 -0.0046 0.0121 -0.0018 -0.0097 -0.0089  
Y -0.0115 0.0037 -0.0117 0.0011 0.0113 0.0089  
Z 0.0027 0.0014 0.0054 0.0013 -0.0052 -0.0038  
AT. 125 H X -0.0284 -0.0084 -0.0292 0.0029 -0.0244 -0.0215  
Y -0.0165 -0.0067 -0.0162 0.0028 -0.0152 -0.0141  
Z 0.0058 0.0051 0.0029 -0.0034 0.0018 0.0040  
AT. 126 H X -0.0284 -0.0084 0.0292 -0.0029 -0.0244 0.0215  
Y 0.0165 0.0067 -0.0162 0.0028 0.0152 -0.0141  
Z 0.0058 0.0051 -0.0029 0.0034 0.0018 -0.0040  
AT. 127 H X 0.0284 -0.0084 -0.0292 0.0029 -0.0244 0.0215  
Y 0.0165 -0.0067 -0.0162 0.0028 -0.0152 0.0141  
Z -0.0058 0.0051 0.0029 -0.0034 0.0018 -0.0040  
AT. 128 H X 0.0284 -0.0084 0.0292 -0.0029 -0.0244 -0.0215  
Y -0.0165 0.0067 -0.0162 0.0028 0.0152 0.0141  
Z -0.0058 0.0051 -0.0029 0.0034 0.0018 0.0040  
AT. 129 H X -0.0126 -0.0085 -0.0103 0.0062 -0.0066 -0.0108  
Y -0.0188 -0.0014 -0.0217 -0.0032 -0.0218 -0.0129  
Z -0.0216 -0.0084 -0.0224 0.0058 -0.0186 -0.0211  
AT. 130 H X -0.0126 -0.0085 0.0103 -0.0062 -0.0066 0.0108  
Y 0.0188 0.0014 -0.0217 -0.0032 0.0218 -0.0129  
Z -0.0216 -0.0084 0.0224 -0.0058 -0.0186 0.0211  
AT. 131 H X 0.0126 -0.0085 -0.0103 0.0062 -0.0066 0.0108

Y 0.0188 -0.0014 -0.0217 -0.0032 -0.0218 0.0129  
Z 0.0216 -0.0084 -0.0224 0.0058 -0.0186 0.0211  
AT. 132 H X 0.0126 -0.0085 0.0103 -0.0062 -0.0066 -0.0108  
Y -0.0188 0.0014 -0.0217 -0.0032 0.0218 0.0129  
Z 0.0216 -0.0084 0.0224 -0.0058 -0.0186 -0.0211  
AT. 133 C X -0.0027 -0.0025 -0.0042 0.0020 -0.0017 -0.0047  
Y -0.0016 0.0034 -0.0041 -0.0038 -0.0049 0.0001  
Z -0.0071 -0.0036 -0.0060 0.0023 -0.0050 -0.0056  
AT. 134 C X -0.0027 -0.0025 0.0042 -0.0020 -0.0017 0.0047  
Y 0.0016 -0.0034 -0.0041 -0.0038 0.0049 0.0001  
Z -0.0071 -0.0036 0.0060 -0.0023 -0.0050 0.0056  
AT. 135 C X 0.0027 -0.0025 -0.0042 0.0020 -0.0017 0.0047  
Y 0.0016 0.0034 -0.0041 -0.0038 -0.0049 -0.0001  
Z 0.0071 -0.0036 -0.0060 0.0023 -0.0050 0.0056  
AT. 136 C X 0.0027 -0.0025 0.0042 -0.0020 -0.0017 -0.0047  
Y -0.0016 -0.0034 -0.0041 -0.0038 0.0049 -0.0001  
Z 0.0071 -0.0036 0.0060 -0.0023 -0.0050 -0.0056  
AT. 137 C X -0.0070 -0.0053 -0.0056 0.0038 -0.0041 -0.0068  
Y 0.0044 0.0122 -0.0015 -0.0114 -0.0047 0.0068  
Z -0.0109 -0.0095 -0.0084 0.0072 -0.0053 -0.0107  
AT. 138 C X -0.0070 -0.0053 0.0056 -0.0038 -0.0041 0.0068  
Y -0.0044 -0.0122 -0.0015 -0.0114 0.0047 0.0068  
Z -0.0109 -0.0095 0.0084 -0.0072 -0.0053 0.0107  
AT. 139 C X 0.0070 -0.0053 -0.0056 0.0038 -0.0041 0.0068  
Y -0.0044 0.0122 -0.0015 -0.0114 -0.0047 -0.0068  
Z 0.0109 -0.0095 -0.0084 0.0072 -0.0053 0.0107  
AT. 140 C X 0.0070 -0.0053 0.0056 -0.0038 -0.0041 -0.0068  
Y 0.0044 -0.0122 -0.0015 -0.0114 0.0047 -0.0068  
Z 0.0109 -0.0095 0.0084 -0.0072 -0.0053 -0.0107  
AT. 141 H X -0.0030 0.0006 -0.0036 -0.0013 -0.0048 -0.0022  
Y 0.0071 0.0185 -0.0016 -0.0175 -0.0071 0.0098  
Z -0.0131 -0.0115 -0.0105 0.0085 -0.0059 -0.0135

AT.142 H X -0.0030 0.0006 0.0036 0.0013 -0.0048 0.0022  
Y -0.0071 -0.0185 -0.0016 -0.0175 0.0071 0.0098  
Z -0.0131 -0.0115 0.0105 -0.0085 -0.0059 0.0135

AT.143 H X 0.0030 0.0006 -0.0036 -0.0013 -0.0048 0.0022  
Y -0.0071 0.0185 -0.0016 -0.0175 -0.0071 -0.0098  
Z 0.0131 -0.0115 -0.0105 0.0085 -0.0059 0.0135

AT.144 H X 0.0030 0.0006 0.0036 0.0013 -0.0048 -0.0022  
Y 0.0071 -0.0185 -0.0016 -0.0175 0.0071 -0.0098  
Z 0.0131 -0.0115 0.0105 -0.0085 -0.0059 -0.0135

AT.145 H X -0.0114 -0.0129 -0.0068 0.0107 -0.0021 -0.0117  
Y 0.0049 0.0135 -0.0017 -0.0126 -0.0055 0.0075  
Z -0.0137 -0.0127 -0.0105 0.0099 -0.0058 -0.0132

AT.146 H X -0.0114 -0.0129 0.0068 -0.0107 -0.0021 0.0117  
Y -0.0049 -0.0135 -0.0017 -0.0126 0.0055 0.0075  
Z -0.0137 -0.0127 0.0105 -0.0099 -0.0058 0.0132

AT.147 H X 0.0114 -0.0129 -0.0068 0.0107 -0.0021 0.0117  
Y -0.0049 0.0135 -0.0017 -0.0126 -0.0055 -0.0075  
Z 0.0137 -0.0127 -0.0105 0.0099 -0.0058 0.0132

AT.148 H X 0.0114 -0.0129 0.0068 -0.0107 -0.0021 -0.0117  
Y 0.0049 -0.0135 -0.0017 -0.0126 0.0055 -0.0075  
Z 0.0137 -0.0127 0.0105 -0.0099 -0.0058 -0.0132

AT.149 O X -0.0038 -0.0035 -0.0039 0.0009 -0.0042 -0.0065  
Y -0.0093 0.0004 -0.0133 -0.0032 -0.0146 -0.0101  
Z -0.0052 -0.0062 -0.0039 0.0017 -0.0058 -0.0074

AT.150 O X -0.0038 -0.0035 0.0039 -0.0009 -0.0042 0.0065  
Y 0.0093 -0.0004 -0.0133 -0.0032 0.0146 -0.0101  
Z -0.0052 -0.0062 0.0039 -0.0017 -0.0058 0.0074

AT.151 O X 0.0038 -0.0035 -0.0039 0.0009 -0.0042 0.0065  
Y 0.0093 0.0004 -0.0133 -0.0032 -0.0146 0.0101  
Z 0.0052 -0.0062 -0.0039 0.0017 -0.0058 0.0074

AT.152 O X 0.0038 -0.0035 0.0039 -0.0009 -0.0042 -0.0065  
Y -0.0093 -0.0004 -0.0133 -0.0032 0.0146 0.0101

Z 0.0052 -0.0062 0.0039 -0.0017 -0.0058 -0.0074  
AT. 153 H X 0.0018 -0.0005 0.0008 -0.0006 -0.0019 0.0006  
Y -0.0059 -0.0003 -0.0090 -0.0033 -0.0128 -0.0035  
Z -0.0076 -0.0084 -0.0050 0.0028 -0.0062 -0.0097  
AT. 154 H X 0.0018 -0.0005 -0.0008 0.0006 -0.0019 -0.0006  
Y 0.0059 0.0003 -0.0090 -0.0033 0.0128 -0.0035  
Z -0.0076 -0.0084 0.0050 -0.0028 -0.0062 0.0097  
AT. 155 H X -0.0018 -0.0005 0.0008 -0.0006 -0.0019 -0.0006  
Y 0.0059 -0.0003 -0.0090 -0.0033 -0.0128 0.0035  
Z 0.0076 -0.0084 -0.0050 0.0028 -0.0062 0.0097  
AT. 156 H X -0.0018 -0.0005 -0.0008 0.0006 -0.0019 0.0006  
Y -0.0059 0.0003 -0.0090 -0.0033 0.0128 0.0035  
Z 0.0076 -0.0084 0.0050 -0.0028 -0.0062 -0.0097  
AT. 157 O X 0.0018 0.0009 0.0014 -0.0001 0.0022 0.0015  
Y -0.0029 0.0066 -0.0102 -0.0092 -0.0109 -0.0025  
Z 0.0027 0.0026 0.0012 -0.0001 0.0026 0.0029  
AT. 158 O X 0.0018 0.0009 -0.0014 0.0001 0.0022 -0.0015  
Y 0.0029 -0.0066 -0.0102 -0.0092 0.0109 -0.0025  
Z 0.0027 0.0026 -0.0012 0.0001 0.0026 -0.0029  
AT. 159 O X -0.0018 0.0009 0.0014 -0.0001 0.0022 -0.0015  
Y 0.0029 0.0066 -0.0102 -0.0092 -0.0109 0.0025  
Z -0.0027 0.0026 0.0012 -0.0001 0.0026 -0.0029  
AT. 160 O X -0.0018 0.0009 -0.0014 0.0001 0.0022 0.0015  
Y -0.0029 -0.0066 -0.0102 -0.0092 0.0109 0.0025  
Z -0.0027 0.0026 -0.0012 0.0001 0.0026 0.0029  
AT. 161 O X -0.0091 0.0040 -0.0111 -0.0087 -0.0144 -0.0006  
Y 0.0032 -0.0194 0.0086 0.0189 0.0104 -0.0138  
Z 0.0055 0.0190 -0.0045 -0.0145 -0.0021 0.0119  
AT. 162 O X -0.0091 0.0040 0.0111 0.0087 -0.0144 0.0006  
Y -0.0032 0.0194 0.0086 0.0189 -0.0104 -0.0138  
Z 0.0055 0.0190 0.0045 0.0145 -0.0021 -0.0119  
AT. 163 O X 0.0091 0.0040 -0.0111 -0.0087 -0.0144 0.0006

Y -0.0032 -0.0194 0.0086 0.0189 0.0104 0.0138  
Z -0.0055 0.0190 -0.0045 -0.0145 -0.0021 -0.0119  
AT.164 O X 0.0091 0.0040 0.0111 0.0087 -0.0144 -0.0006  
Y 0.0032 0.0194 0.0086 0.0189 -0.0104 0.0138  
Z -0.0055 0.0190 0.0045 0.0145 -0.0021 0.0119  
AT.165 H X -0.0070 0.0184 -0.0157 -0.0206 -0.0183 0.0075  
Y 0.0042 -0.0139 0.0071 0.0143 0.0090 -0.0107  
Z -0.0060 0.0171 -0.0156 -0.0189 -0.0160 0.0069  
AT.166 H X -0.0070 0.0184 0.0157 0.0206 -0.0183 -0.0075  
Y -0.0042 0.0139 0.0071 0.0143 -0.0090 -0.0107  
Z -0.0060 0.0171 0.0156 0.0189 -0.0160 -0.0069  
AT.167 H X 0.0070 0.0184 -0.0157 -0.0206 -0.0183 -0.0075  
Y -0.0042 -0.0139 0.0071 0.0143 0.0090 0.0107  
Z 0.0060 0.0171 -0.0156 -0.0189 -0.0160 -0.0069  
AT.168 H X 0.0070 0.0184 0.0157 0.0206 -0.0183 0.0075  
Y 0.0042 0.0139 0.0071 0.0143 -0.0090 0.0107  
Z 0.0060 0.0171 0.0156 0.0189 -0.0160 0.0069  
AT.169 O X 0.0002 -0.0049 -0.0033 0.0068 -0.0011 -0.0027  
Y -0.0056 -0.0123 0.0069 0.0111 0.0058 0.0015  
Z -0.0002 0.0012 -0.0010 -0.0012 -0.0003 0.0006  
AT.170 O X 0.0002 -0.0049 0.0033 -0.0068 -0.0011 0.0027  
Y 0.0056 0.0123 0.0069 0.0111 -0.0058 0.0015  
Z -0.0002 0.0012 0.0010 0.0012 -0.0003 -0.0006  
AT.171 O X -0.0002 -0.0049 -0.0033 0.0068 -0.0011 0.0027  
Y 0.0056 -0.0123 0.0069 0.0111 0.0058 -0.0015  
Z 0.0002 0.0012 -0.0010 -0.0012 -0.0003 -0.0006  
AT.172 O X -0.0002 -0.0049 0.0033 -0.0068 -0.0011 -0.0027  
Y -0.0056 0.0123 0.0069 0.0111 -0.0058 -0.0015  
Z 0.0002 0.0012 0.0010 0.0012 -0.0003 0.0006  
AT.173 H X -0.0036 -0.0040 0.0011 0.0058 0.0034 -0.0041  
Y -0.0064 -0.0141 0.0061 0.0129 0.0051 0.0012  
Z 0.0073 0.0011 0.0010 -0.0013 0.0006 0.0015



AT.174 H X -0.0036 -0.0040 -0.0011 -0.0058 0.0034 0.0041

Y 0.0064 0.0141 0.0061 0.0129 -0.0051 0.0012

Z 0.0073 0.0011 -0.0010 0.0013 0.0006 -0.0015

AT.175 H X 0.0036 -0.0040 0.0011 0.0058 0.0034 0.0041

Y 0.0064 -0.0141 0.0061 0.0129 0.0051 -0.0012

Z -0.0073 0.0011 0.0010 -0.0013 0.0006 -0.0015

AT.176 H X 0.0036 -0.0040 -0.0011 -0.0058 0.0034 -0.0041

Y -0.0064 0.0141 0.0061 0.0129 -0.0051 -0.0012

Z -0.0073 0.0011 -0.0010 0.0013 0.0006 0.0015

FREQ(CM\*\*-1) 287.66 288.53 289.08 292.12 294.57 296.73

AT. 1 I X -0.0004 -0.0002 -0.0003 0.0007 -0.0000 0.0006

Y 0.0001 -0.0002 0.0000 -0.0001 0.0001 -0.0002

Z 0.0004 0.0005 0.0003 -0.0008 -0.0005 -0.0003

AT. 2 I X 0.0004 -0.0002 0.0003 0.0007 0.0000 0.0006

Y 0.0001 0.0002 0.0000 0.0001 0.0001 0.0002

Z -0.0004 0.0005 -0.0003 -0.0008 0.0005 -0.0003

AT. 3 I X 0.0004 0.0002 -0.0003 0.0007 0.0000 -0.0006

Y -0.0001 0.0002 0.0000 -0.0001 -0.0001 0.0002

Z -0.0004 -0.0005 0.0003 -0.0008 0.0005 0.0003

AT. 4 I X -0.0004 0.0002 0.0003 0.0007 -0.0000 -0.0006

Y -0.0001 -0.0002 0.0000 0.0001 -0.0001 -0.0002

Z 0.0004 -0.0005 -0.0003 -0.0008 -0.0005 0.0003

AT. 5 I X 0.0004 0.0005 0.0000 0.0002 0.0005 0.0002

Y -0.0001 -0.0000 0.0002 -0.0001 -0.0004 -0.0002

Z -0.0002 -0.0003 0.0001 -0.0001 -0.0006 -0.0005

AT. 6 I X -0.0004 0.0005 -0.0000 0.0002 -0.0005 0.0002

Y -0.0001 0.0000 0.0002 0.0001 -0.0004 0.0002

Z 0.0002 -0.0003 -0.0001 -0.0001 0.0006 -0.0005

AT. 7 I X -0.0004 -0.0005 0.0000 0.0002 -0.0005 -0.0002

Y 0.0001 0.0000 0.0002 -0.0001 0.0004 0.0002

Z 0.0002 0.0003 0.0001 -0.0001 0.0006 0.0005  
AT. 8 I X 0.0004 -0.0005 -0.0000 0.0002 0.0005 -0.0002  
Y 0.0001 -0.0000 0.0002 0.0001 0.0004 -0.0002  
Z -0.0002 0.0003 -0.0001 -0.0001 -0.0006 0.0005  
AT. 9 N X 0.0153 0.0095 0.0248 -0.0248 -0.0212 -0.0250  
Y -0.0165 -0.0140 -0.0173 0.0177 0.0044 0.0076  
Z -0.0045 -0.0063 -0.0019 0.0035 -0.0049 -0.0029  
AT. 10 N X -0.0153 0.0095 -0.0248 -0.0248 0.0212 -0.0250  
Y -0.0165 0.0140 -0.0173 -0.0177 0.0044 -0.0076  
Z 0.0045 -0.0063 0.0019 0.0035 0.0049 -0.0029  
AT. 11 N X -0.0153 -0.0095 0.0248 -0.0248 0.0212 0.0250  
Y 0.0165 0.0140 -0.0173 0.0177 -0.0044 -0.0076  
Z 0.0045 0.0063 -0.0019 0.0035 0.0049 0.0029  
AT. 12 N X 0.0153 -0.0095 -0.0248 -0.0248 -0.0212 0.0250  
Y 0.0165 -0.0140 -0.0173 -0.0177 -0.0044 0.0076  
Z -0.0045 0.0063 0.0019 0.0035 -0.0049 0.0029  
AT. 13 N X -0.0205 -0.0167 -0.0254 0.0263 0.0140 0.0191  
Y -0.0072 -0.0061 -0.0109 0.0113 0.0082 0.0097  
Z 0.0029 0.0043 -0.0018 0.0002 0.0071 0.0044  
AT. 14 N X 0.0205 -0.0167 0.0254 0.0263 -0.0140 0.0191  
Y -0.0072 0.0061 -0.0109 -0.0113 0.0082 -0.0097  
Z -0.0029 0.0043 0.0018 0.0002 -0.0071 0.0044  
AT. 15 N X 0.0205 0.0167 -0.0254 0.0263 -0.0140 -0.0191  
Y 0.0072 0.0061 -0.0109 0.0113 -0.0082 -0.0097  
Z -0.0029 -0.0043 -0.0018 0.0002 -0.0071 -0.0044  
AT. 16 N X -0.0205 0.0167 0.0254 0.0263 0.0140 -0.0191  
Y 0.0072 -0.0061 -0.0109 -0.0113 -0.0082 0.0097  
Z 0.0029 -0.0043 0.0018 0.0002 0.0071 -0.0044  
AT. 17 O X -0.0060 -0.0058 -0.0045 0.0048 -0.0028 -0.0015  
Y -0.0138 -0.0158 -0.0027 0.0038 -0.0167 -0.0127  
Z -0.0011 -0.0021 -0.0005 0.0003 0.0007 0.0002  
AT. 18 O X 0.0060 -0.0058 0.0045 0.0048 0.0028 -0.0015

Y -0.0138 0.0158 -0.0027 -0.0038 -0.0167 0.0127  
Z 0.0011 -0.0021 0.0005 0.0003 -0.0007 0.0002  
AT. 19 O X 0.0060 0.0058 -0.0045 0.0048 0.0028 0.0015  
Y 0.0138 0.0158 -0.0027 0.0038 0.0167 0.0127  
Z 0.0011 0.0021 -0.0005 0.0003 -0.0007 -0.0002  
AT. 20 O X -0.0060 0.0058 0.0045 0.0048 -0.0028 0.0015  
Y 0.0138 -0.0158 -0.0027 -0.0038 0.0167 -0.0127  
Z -0.0011 0.0021 0.0005 0.0003 0.0007 -0.0002  
AT. 21 O X 0.0006 -0.0000 0.0028 -0.0040 -0.0026 -0.0044  
Y -0.0093 -0.0085 -0.0108 0.0120 0.0056 0.0093  
Z -0.0031 -0.0024 -0.0041 0.0039 0.0025 0.0036  
AT. 22 O X -0.0006 -0.0000 -0.0028 -0.0040 0.0026 -0.0044  
Y -0.0093 0.0085 -0.0108 -0.0120 0.0056 -0.0093  
Z 0.0031 -0.0024 0.0041 0.0039 -0.0025 0.0036  
AT. 23 O X -0.0006 0.0000 0.0028 -0.0040 0.0026 0.0044  
Y 0.0093 0.0085 -0.0108 0.0120 -0.0056 -0.0093  
Z 0.0031 0.0024 -0.0041 0.0039 -0.0025 -0.0036  
AT. 24 O X 0.0006 0.0000 -0.0028 -0.0040 -0.0026 0.0044  
Y 0.0093 -0.0085 -0.0108 -0.0120 -0.0056 0.0093  
Z -0.0031 0.0024 0.0041 0.0039 0.0025 -0.0036  
AT. 25 C X -0.0058 -0.0055 -0.0046 0.0041 -0.0010 -0.0005  
Y -0.0132 -0.0107 -0.0135 0.0125 0.0033 0.0037  
Z -0.0024 -0.0029 -0.0009 0.0003 -0.0011 -0.0012  
AT. 26 C X 0.0058 -0.0055 0.0046 0.0041 0.0010 -0.0005  
Y -0.0132 0.0107 -0.0135 -0.0125 0.0033 -0.0037  
Z 0.0024 -0.0029 0.0009 0.0003 0.0011 -0.0012  
AT. 27 C X 0.0058 0.0055 -0.0046 0.0041 0.0010 0.0005  
Y 0.0132 0.0107 -0.0135 0.0125 -0.0033 -0.0037  
Z 0.0024 0.0029 -0.0009 0.0003 0.0011 0.0012  
AT. 28 C X -0.0058 0.0055 0.0046 0.0041 -0.0010 0.0005  
Y 0.0132 -0.0107 -0.0135 -0.0125 -0.0033 0.0037  
Z -0.0024 0.0029 0.0009 0.0003 -0.0011 0.0012

AT. 29 H X -0.0054 -0.0044 -0.0048 0.0045 0.0002 0.0014  
Y -0.0208 -0.0162 -0.0227 0.0203 0.0078 0.0075  
Z -0.0019 -0.0038 0.0010 -0.0016 -0.0037 -0.0049

AT. 30 H X 0.0054 -0.0044 0.0048 0.0045 -0.0002 0.0014  
Y -0.0208 0.0162 -0.0227 -0.0203 0.0078 -0.0075  
Z 0.0019 -0.0038 -0.0010 -0.0016 0.0037 -0.0049

AT. 31 H X 0.0054 0.0044 -0.0048 0.0045 -0.0002 -0.0014  
Y 0.0208 0.0162 -0.0227 0.0203 -0.0078 -0.0075  
Z 0.0019 0.0038 0.0010 -0.0016 0.0037 0.0049

AT. 32 H X -0.0054 0.0044 0.0048 0.0045 0.0002 -0.0014  
Y 0.0208 -0.0162 -0.0227 -0.0203 -0.0078 0.0075  
Z -0.0019 0.0038 -0.0010 -0.0016 -0.0037 0.0049

AT. 33 H X -0.0158 -0.0131 -0.0158 0.0141 0.0034 0.0038  
Y -0.0117 -0.0099 -0.0112 0.0107 0.0015 0.0023  
Z -0.0010 -0.0003 -0.0025 0.0008 0.0039 0.0022

AT. 34 H X 0.0158 -0.0131 0.0158 0.0141 -0.0034 0.0038  
Y -0.0117 0.0099 -0.0112 -0.0107 0.0015 -0.0023  
Z 0.0010 -0.0003 0.0025 0.0008 -0.0039 0.0022

AT. 35 H X 0.0158 0.0131 -0.0158 0.0141 -0.0034 -0.0038  
Y 0.0117 0.0099 -0.0112 0.0107 -0.0015 -0.0023  
Z 0.0010 0.0003 -0.0025 0.0008 -0.0039 -0.0022

AT. 36 H X -0.0158 0.0131 0.0158 0.0141 0.0034 -0.0038  
Y 0.0117 -0.0099 -0.0112 -0.0107 -0.0015 0.0023  
Z -0.0010 0.0003 0.0025 0.0008 0.0039 -0.0022

AT. 37 C X 0.0022 -0.0002 0.0062 -0.0062 -0.0082 -0.0092  
Y -0.0136 -0.0126 -0.0106 0.0110 -0.0024 0.0002  
Z -0.0040 -0.0057 -0.0000 0.0002 -0.0050 -0.0039

AT. 38 C X -0.0022 -0.0002 -0.0062 -0.0062 0.0082 -0.0092  
Y -0.0136 0.0126 -0.0106 -0.0110 -0.0024 -0.0002  
Z 0.0040 -0.0057 0.0000 0.0002 0.0050 -0.0039

AT. 39 C X -0.0022 0.0002 0.0062 -0.0062 0.0082 0.0092  
Y 0.0136 0.0126 -0.0106 0.0110 0.0024 -0.0002

Z 0.0040 0.0057 -0.0000 0.0002 0.0050 0.0039  
AT. 40 C X 0.0022 0.0002 -0.0062 -0.0062 -0.0082 0.0092  
Y 0.0136 -0.0126 -0.0106 -0.0110 0.0024 0.0002  
Z -0.0040 0.0057 0.0000 0.0002 -0.0050 0.0039  
AT. 41 C X 0.0067 0.0048 0.0079 -0.0070 -0.0041 -0.0063  
Y -0.0065 -0.0056 -0.0040 0.0034 -0.0054 -0.0038  
Z -0.0064 -0.0085 -0.0045 0.0065 -0.0028 -0.0007  
AT. 42 C X -0.0067 0.0048 -0.0079 -0.0070 0.0041 -0.0063  
Y -0.0065 0.0056 -0.0040 -0.0034 -0.0054 0.0038  
Z 0.0064 -0.0085 0.0045 0.0065 0.0028 -0.0007  
AT. 43 C X -0.0067 -0.0048 0.0079 -0.0070 0.0041 0.0063  
Y 0.0065 0.0056 -0.0040 0.0034 0.0054 0.0038  
Z 0.0064 0.0085 -0.0045 0.0065 0.0028 0.0007  
AT. 44 C X 0.0067 -0.0048 -0.0079 -0.0070 -0.0041 0.0063  
Y 0.0065 -0.0056 -0.0040 -0.0034 0.0054 -0.0038  
Z -0.0064 0.0085 0.0045 0.0065 -0.0028 0.0007  
AT. 45 H X 0.0191 0.0135 0.0177 -0.0147 -0.0028 -0.0069  
Y -0.0032 -0.0026 0.0020 -0.0035 -0.0118 -0.0110  
Z -0.0051 -0.0071 -0.0003 0.0014 -0.0090 -0.0071  
AT. 46 H X -0.0191 0.0135 -0.0177 -0.0147 0.0028 -0.0069  
Y -0.0032 0.0026 0.0020 0.0035 -0.0118 0.0110  
Z 0.0051 -0.0071 0.0003 0.0014 0.0090 -0.0071  
AT. 47 H X -0.0191 -0.0135 0.0177 -0.0147 0.0028 0.0069  
Y 0.0032 0.0026 0.0020 -0.0035 0.0118 0.0110  
Z 0.0051 0.0071 -0.0003 0.0014 0.0090 0.0071  
AT. 48 H X 0.0191 -0.0135 -0.0177 -0.0147 -0.0028 0.0069  
Y 0.0032 -0.0026 0.0020 0.0035 0.0118 -0.0110  
Z -0.0051 0.0071 0.0003 0.0014 -0.0090 0.0071  
AT. 49 H X -0.0049 -0.0037 -0.0057 0.0064 0.0022 0.0024  
Y -0.0171 -0.0132 -0.0144 0.0128 -0.0037 0.0001  
Z -0.0076 -0.0096 -0.0114 0.0154 0.0089 0.0114  
AT. 50 H X 0.0049 -0.0037 0.0057 0.0064 -0.0022 0.0024

Y -0.0171 0.0132 -0.0144 -0.0128 -0.0037 -0.0001  
Z 0.0076 -0.0096 0.0114 0.0154 -0.0089 0.0114  
AT. 51 H X 0.0049 0.0037 -0.0057 0.0064 -0.0022 -0.0024  
Y 0.0171 0.0132 -0.0144 0.0128 0.0037 -0.0001  
Z 0.0076 0.0096 -0.0114 0.0154 -0.0089 -0.0114  
AT. 52 H X -0.0049 0.0037 0.0057 0.0064 0.0022 -0.0024  
Y 0.0171 -0.0132 -0.0144 -0.0128 0.0037 0.0001  
Z -0.0076 0.0096 0.0114 0.0154 0.0089 -0.0114  
AT. 53 C X 0.0004 0.0012 0.0001 -0.0000 -0.0004 -0.0012  
Y 0.0102 0.0082 0.0101 -0.0100 -0.0044 -0.0070  
Z -0.0058 -0.0055 -0.0058 0.0057 0.0015 0.0023  
AT. 54 C X -0.0004 0.0012 -0.0001 -0.0000 0.0004 -0.0012  
Y 0.0102 -0.0082 0.0101 0.0100 -0.0044 0.0070  
Z 0.0058 -0.0055 0.0058 0.0057 -0.0015 0.0023  
AT. 55 C X -0.0004 -0.0012 0.0001 -0.0000 0.0004 0.0012  
Y -0.0102 -0.0082 0.0101 -0.0100 0.0044 0.0070  
Z 0.0058 0.0055 -0.0058 0.0057 -0.0015 -0.0023  
AT. 56 C X 0.0004 -0.0012 -0.0001 -0.0000 -0.0004 0.0012  
Y -0.0102 0.0082 0.0101 0.0100 0.0044 -0.0070  
Z -0.0058 0.0055 0.0058 0.0057 0.0015 -0.0023  
AT. 57 C X 0.0015 0.0046 -0.0088 0.0089 0.0130 0.0146  
Y 0.0003 -0.0077 0.0102 -0.0068 -0.0158 -0.0181  
Z -0.0012 0.0016 -0.0042 0.0023 0.0044 0.0044  
AT. 58 C X -0.0015 0.0046 0.0088 0.0089 -0.0130 0.0146  
Y 0.0003 0.0077 0.0102 0.0068 -0.0158 0.0181  
Z 0.0012 0.0016 0.0042 0.0023 -0.0044 0.0044  
AT. 59 C X -0.0015 -0.0046 -0.0088 0.0089 -0.0130 -0.0146  
Y -0.0003 0.0077 0.0102 -0.0068 0.0158 0.0181  
Z 0.0012 -0.0016 -0.0042 0.0023 -0.0044 -0.0044  
AT. 60 C X 0.0015 -0.0046 0.0088 0.0089 0.0130 -0.0146  
Y -0.0003 -0.0077 0.0102 0.0068 0.0158 -0.0181  
Z -0.0012 -0.0016 0.0042 0.0023 0.0044 -0.0044

AT. 61 H X 0.0010 0.0128 -0.0312 0.0295 0.0586 0.0609  
Y -0.0013 -0.0031 -0.0070 0.0094 0.0186 0.0168  
Z 0.0065 0.0105 0.0006 -0.0044 -0.0027 -0.0022

AT. 62 H X -0.0010 0.0128 0.0312 0.0295 -0.0586 0.0609  
Y -0.0013 0.0031 -0.0070 -0.0094 0.0186 -0.0168  
Z -0.0065 0.0105 -0.0006 -0.0044 0.0027 -0.0022

AT. 63 H X -0.0010 -0.0128 -0.0312 0.0295 -0.0586 -0.0609  
Y 0.0013 0.0031 -0.0070 0.0094 -0.0186 -0.0168  
Z -0.0065 -0.0105 0.0006 -0.0044 0.0027 0.0022

AT. 64 H X 0.0010 -0.0128 0.0312 0.0295 0.0586 -0.0609  
Y 0.0013 -0.0031 -0.0070 -0.0094 -0.0186 0.0168  
Z 0.0065 -0.0105 -0.0006 -0.0044 -0.0027 0.0022

AT. 65 H X 0.0010 0.0078 -0.0178 0.0170 0.0312 0.0329  
Y 0.0019 -0.0171 0.0371 -0.0311 -0.0704 -0.0727  
Z -0.0015 0.0048 -0.0074 0.0039 0.0155 0.0139

AT. 66 H X -0.0010 0.0078 0.0178 0.0170 -0.0312 0.0329  
Y 0.0019 0.0171 0.0371 0.0311 -0.0704 0.0727  
Z 0.0015 0.0048 0.0074 0.0039 -0.0155 0.0139

AT. 67 H X -0.0010 -0.0078 -0.0178 0.0170 -0.0312 -0.0329  
Y -0.0019 0.0171 0.0371 -0.0311 0.0704 0.0727  
Z 0.0015 -0.0048 -0.0074 0.0039 -0.0155 -0.0139

AT. 68 H X 0.0010 -0.0078 0.0178 0.0170 0.0312 -0.0329  
Y -0.0019 -0.0171 0.0371 0.0311 0.0704 -0.0727  
Z -0.0015 -0.0048 0.0074 0.0039 0.0155 -0.0139

AT. 69 H X 0.0047 -0.0016 0.0111 -0.0095 -0.0303 -0.0281  
Y -0.0055 -0.0142 0.0038 0.0016 -0.0069 -0.0086  
Z -0.0056 -0.0051 -0.0062 0.0062 0.0042 0.0051

AT. 70 H X -0.0047 -0.0016 -0.0111 -0.0095 0.0303 -0.0281  
Y -0.0055 0.0142 0.0038 -0.0016 -0.0069 0.0086  
Z 0.0056 -0.0051 0.0062 0.0062 -0.0042 0.0051

AT. 71 H X -0.0047 0.0016 0.0111 -0.0095 0.0303 0.0281  
Y 0.0055 0.0142 0.0038 0.0016 0.0069 0.0086

Z 0.0056 0.0051 -0.0062 0.0062 -0.0042 -0.0051  
AT. 72 H X 0.0047 0.0016 -0.0111 -0.0095 -0.0303 0.0281  
Y 0.0055 -0.0142 0.0038 -0.0016 0.0069 -0.0086  
Z -0.0056 0.0051 0.0062 0.0062 0.0042 -0.0051  
AT. 73 C X 0.0033 0.0035 0.0046 -0.0040 -0.0035 -0.0037  
Y 0.0227 0.0226 0.0191 -0.0198 -0.0010 -0.0057  
Z -0.0004 0.0004 -0.0014 0.0013 0.0030 0.0028  
AT. 74 C X -0.0033 0.0035 -0.0046 -0.0040 0.0035 -0.0037  
Y 0.0227 -0.0226 0.0191 0.0198 -0.0010 0.0057  
Z 0.0004 0.0004 0.0014 0.0013 -0.0030 0.0028  
AT. 75 C X -0.0033 -0.0035 0.0046 -0.0040 0.0035 0.0037  
Y -0.0227 -0.0226 0.0191 -0.0198 0.0010 0.0057  
Z 0.0004 -0.0004 -0.0014 0.0013 -0.0030 -0.0028  
AT. 76 C X 0.0033 -0.0035 -0.0046 -0.0040 -0.0035 0.0037  
Y -0.0227 0.0226 0.0191 0.0198 0.0010 -0.0057  
Z -0.0004 -0.0004 0.0014 0.0013 0.0030 -0.0028  
AT. 77 C X 0.0028 -0.0006 0.0134 -0.0126 -0.0196 -0.0193  
Y 0.0029 0.0052 -0.0060 0.0066 0.0136 0.0122  
Z 0.0080 0.0064 0.0057 -0.0042 -0.0001 -0.0011  
AT. 78 C X -0.0028 -0.0006 -0.0134 -0.0126 0.0196 -0.0193  
Y 0.0029 -0.0052 -0.0060 -0.0066 0.0136 -0.0122  
Z -0.0080 0.0064 -0.0057 -0.0042 0.0001 -0.0011  
AT. 79 C X -0.0028 0.0006 0.0134 -0.0126 0.0196 0.0193  
Y -0.0029 -0.0052 -0.0060 0.0066 -0.0136 -0.0122  
Z -0.0080 -0.0064 0.0057 -0.0042 0.0001 0.0011  
AT. 80 C X 0.0028 0.0006 -0.0134 -0.0126 -0.0196 0.0193  
Y -0.0029 0.0052 -0.0060 -0.0066 -0.0136 0.0122  
Z 0.0080 -0.0064 -0.0057 -0.0042 -0.0001 0.0011  
AT. 81 H X 0.0020 0.0001 0.0055 -0.0036 -0.0081 -0.0074  
Y 0.0007 0.0050 -0.0155 0.0173 0.0258 0.0253  
Z 0.0286 0.0257 0.0165 -0.0144 0.0099 0.0043  
AT. 82 H X -0.0020 0.0001 -0.0055 -0.0036 0.0081 -0.0074



Y 0.0007 -0.0050 -0.0155 -0.0173 0.0258 -0.0253  
Z -0.0286 0.0257 -0.0165 -0.0144 -0.0099 0.0043  
AT. 83 H X -0.0020 -0.0001 0.0055 -0.0036 0.0081 0.0074  
Y -0.0007 -0.0050 -0.0155 0.0173 -0.0258 -0.0253  
Z -0.0286 -0.0257 0.0165 -0.0144 -0.0099 -0.0043  
AT. 84 H X 0.0020 -0.0001 -0.0055 -0.0036 -0.0081 0.0074  
Y -0.0007 0.0050 -0.0155 -0.0173 -0.0258 0.0253  
Z 0.0286 -0.0257 -0.0165 -0.0144 0.0099 -0.0043  
AT. 85 H X -0.0029 -0.0067 0.0186 -0.0194 -0.0339 -0.0327  
Y 0.0167 0.0196 0.0004 0.0003 0.0224 0.0179  
Z -0.0023 -0.0043 -0.0012 0.0030 -0.0039 -0.0025  
AT. 86 H X 0.0029 -0.0067 -0.0186 -0.0194 0.0339 -0.0327  
Y 0.0167 -0.0196 0.0004 -0.0003 0.0224 -0.0179  
Z 0.0023 -0.0043 0.0012 0.0030 0.0039 -0.0025  
AT. 87 H X 0.0029 0.0067 0.0186 -0.0194 0.0339 0.0327  
Y -0.0167 -0.0196 0.0004 0.0003 -0.0224 -0.0179  
Z 0.0023 0.0043 -0.0012 0.0030 0.0039 0.0025  
AT. 88 H X -0.0029 0.0067 -0.0186 -0.0194 -0.0339 0.0327  
Y -0.0167 0.0196 0.0004 -0.0003 -0.0224 0.0179  
Z -0.0023 0.0043 0.0012 0.0030 -0.0039 0.0025  
AT. 89 C X 0.0012 -0.0004 0.0057 -0.0044 -0.0085 -0.0081  
Y 0.0101 0.0097 0.0093 -0.0097 -0.0013 -0.0039  
Z 0.0034 0.0042 0.0011 -0.0014 0.0036 0.0024  
AT. 90 C X -0.0012 -0.0004 -0.0057 -0.0044 0.0085 -0.0081  
Y 0.0101 -0.0097 0.0093 0.0097 -0.0013 0.0039  
Z -0.0034 0.0042 -0.0011 -0.0014 -0.0036 0.0024  
AT. 91 C X -0.0012 0.0004 0.0057 -0.0044 0.0085 0.0081  
Y -0.0101 -0.0097 0.0093 -0.0097 0.0013 0.0039  
Z -0.0034 -0.0042 0.0011 -0.0014 -0.0036 -0.0024  
AT. 92 C X 0.0012 0.0004 -0.0057 -0.0044 -0.0085 0.0081  
Y -0.0101 0.0097 0.0093 0.0097 0.0013 -0.0039  
Z 0.0034 -0.0042 -0.0011 -0.0014 0.0036 -0.0024

AT. 93 C X 0.0035 0.0050 -0.0080 0.0084 0.0249 0.0220  
Y -0.0191 -0.0234 -0.0066 0.0065 -0.0139 -0.0113  
Z -0.0163 -0.0185 -0.0069 0.0072 -0.0101 -0.0075

AT. 94 C X -0.0035 0.0050 0.0080 0.0084 -0.0249 0.0220  
Y -0.0191 0.0234 -0.0066 -0.0065 -0.0139 0.0113  
Z 0.0163 -0.0185 0.0069 0.0072 0.0101 -0.0075

AT. 95 C X -0.0035 -0.0050 -0.0080 0.0084 -0.0249 -0.0220  
Y 0.0191 0.0234 -0.0066 0.0065 0.0139 0.0113  
Z 0.0163 0.0185 -0.0069 0.0072 0.0101 0.0075

AT. 96 C X 0.0035 -0.0050 0.0080 0.0084 0.0249 -0.0220  
Y 0.0191 -0.0234 -0.0066 -0.0065 0.0139 -0.0113  
Z -0.0163 0.0185 0.0069 0.0072 -0.0101 0.0075

AT. 97 H X 0.0055 0.0069 -0.0107 0.0120 0.0377 0.0318  
Y -0.0280 -0.0314 -0.0099 0.0072 -0.0305 -0.0208  
Z -0.0278 -0.0283 -0.0238 0.0220 0.0028 0.0088

AT. 98 H X -0.0055 0.0069 0.0107 0.0120 -0.0377 0.0318  
Y -0.0280 0.0314 -0.0099 -0.0072 -0.0305 0.0208  
Z 0.0278 -0.0283 0.0238 0.0220 -0.0028 0.0088

AT. 99 H X -0.0055 -0.0069 -0.0107 0.0120 -0.0377 -0.0318  
Y 0.0280 0.0314 -0.0099 0.0072 0.0305 0.0208  
Z 0.0278 0.0283 -0.0238 0.0220 -0.0028 -0.0088

AT. 100 H X 0.0055 -0.0069 0.0107 0.0120 0.0377 -0.0318  
Y 0.0280 -0.0314 -0.0099 -0.0072 0.0305 -0.0208  
Z -0.0278 0.0283 0.0238 0.0220 0.0028 -0.0088

AT. 101 H X 0.0053 0.0048 -0.0067 0.0096 0.0334 0.0253  
Y -0.0140 -0.0197 -0.0051 0.0075 -0.0004 -0.0038  
Z -0.0364 -0.0440 -0.0081 0.0096 -0.0365 -0.0310

AT. 102 H X -0.0053 0.0048 0.0067 0.0096 -0.0334 0.0253  
Y -0.0140 0.0197 -0.0051 -0.0075 -0.0004 0.0038  
Z 0.0364 -0.0440 0.0081 0.0096 0.0365 -0.0310

AT. 103 H X -0.0053 -0.0048 -0.0067 0.0096 -0.0334 -0.0253  
Y 0.0140 0.0197 -0.0051 0.0075 0.0004 0.0038

Z 0.0364 0.0440 -0.0081 0.0096 0.0365 0.0310  
AT.104 H X 0.0053 -0.0048 0.0067 0.0096 0.0334 -0.0253  
Y 0.0140 -0.0197 -0.0051 -0.0075 0.0004 -0.0038  
Z -0.0364 0.0440 0.0081 0.0096 -0.0365 0.0310  
AT.105 H X 0.0051 0.0115 -0.0166 0.0134 0.0355 0.0371  
Y -0.0408 -0.0491 -0.0174 0.0180 -0.0230 -0.0178  
Z -0.0001 -0.0010 0.0043 -0.0033 -0.0067 -0.0077  
AT.106 H X -0.0051 0.0115 0.0166 0.0134 -0.0355 0.0371  
Y -0.0408 0.0491 -0.0174 -0.0180 -0.0230 0.0178  
Z 0.0001 -0.0010 -0.0043 -0.0033 0.0067 -0.0077  
AT.107 H X -0.0051 -0.0115 -0.0166 0.0134 -0.0355 -0.0371  
Y 0.0408 0.0491 -0.0174 0.0180 0.0230 0.0178  
Z 0.0001 0.0010 0.0043 -0.0033 0.0067 0.0077  
AT.108 H X 0.0051 -0.0115 0.0166 0.0134 0.0355 -0.0371  
Y 0.0408 -0.0491 -0.0174 -0.0180 0.0230 -0.0178  
Z -0.0001 0.0010 -0.0043 -0.0033 -0.0067 0.0077  
AT.109 C X -0.0072 -0.0041 -0.0107 0.0099 0.0092 0.0083  
Y 0.0003 0.0010 -0.0039 0.0035 0.0080 0.0060  
Z -0.0053 -0.0043 -0.0075 0.0067 0.0044 0.0048  
AT.110 C X 0.0072 -0.0041 0.0107 0.0099 -0.0092 0.0083  
Y 0.0003 -0.0010 -0.0039 -0.0035 0.0080 -0.0060  
Z 0.0053 -0.0043 0.0075 0.0067 -0.0044 0.0048  
AT.111 C X 0.0072 0.0041 -0.0107 0.0099 -0.0092 -0.0083  
Y -0.0003 -0.0010 -0.0039 0.0035 -0.0080 -0.0060  
Z 0.0053 0.0043 -0.0075 0.0067 -0.0044 -0.0048  
AT.112 C X -0.0072 0.0041 0.0107 0.0099 0.0092 -0.0083  
Y -0.0003 0.0010 -0.0039 -0.0035 -0.0080 0.0060  
Z -0.0053 0.0043 0.0075 0.0067 0.0044 -0.0048  
AT.113 H X -0.0022 -0.0010 -0.0035 0.0034 0.0020 0.0015  
Y -0.0101 -0.0062 -0.0181 0.0168 0.0200 0.0187  
Z -0.0155 -0.0149 -0.0169 0.0181 0.0028 0.0096  
AT.114 H X 0.0022 -0.0010 0.0035 0.0034 -0.0020 0.0015

Y -0.0101 0.0062 -0.0181 -0.0168 0.0200 -0.0187  
Z 0.0155 -0.0149 0.0169 0.0181 -0.0028 0.0096  
AT. 115 H X 0.0022 0.0010 -0.0035 0.0034 -0.0020 -0.0015  
Y 0.0101 0.0062 -0.0181 0.0168 -0.0200 -0.0187  
Z 0.0155 0.0149 -0.0169 0.0181 -0.0028 -0.0096  
AT. 116 H X -0.0022 0.0010 0.0035 0.0034 0.0020 -0.0015  
Y 0.0101 -0.0062 -0.0181 -0.0168 -0.0200 0.0187  
Z -0.0155 0.0149 0.0169 0.0181 0.0028 -0.0096  
AT. 117 H X -0.0107 -0.0043 -0.0170 0.0134 0.0191 0.0137  
Y 0.0069 0.0084 0.0006 -0.0025 0.0105 0.0053  
Z 0.0013 0.0026 -0.0025 0.0006 0.0053 0.0034  
AT. 118 H X 0.0107 -0.0043 0.0170 0.0134 -0.0191 0.0137  
Y 0.0069 -0.0084 0.0006 0.0025 0.0105 -0.0053  
Z -0.0013 0.0026 0.0025 0.0006 -0.0053 0.0034  
AT. 119 H X 0.0107 0.0043 -0.0170 0.0134 -0.0191 -0.0137  
Y -0.0069 -0.0084 0.0006 -0.0025 -0.0105 -0.0053  
Z -0.0013 -0.0026 -0.0025 0.0006 -0.0053 -0.0034  
AT. 120 H X -0.0107 0.0043 0.0170 0.0134 0.0191 -0.0137  
Y -0.0069 0.0084 0.0006 0.0025 -0.0105 0.0053  
Z 0.0013 -0.0026 0.0025 0.0006 0.0053 -0.0034  
AT. 121 C X -0.0075 -0.0071 -0.0053 0.0062 -0.0031 -0.0001  
Y -0.0008 0.0003 -0.0032 0.0031 0.0035 0.0044  
Z 0.0069 0.0094 -0.0003 -0.0013 0.0106 0.0076  
AT. 122 C X 0.0075 -0.0071 0.0053 0.0062 0.0031 -0.0001  
Y -0.0008 -0.0003 -0.0032 -0.0031 0.0035 -0.0044  
Z -0.0069 0.0094 0.0003 -0.0013 -0.0106 0.0076  
AT. 123 C X 0.0075 0.0071 -0.0053 0.0062 0.0031 0.0001  
Y 0.0008 -0.0003 -0.0032 0.0031 -0.0035 -0.0044  
Z -0.0069 -0.0094 -0.0003 -0.0013 -0.0106 -0.0076  
AT. 124 C X -0.0075 0.0071 0.0053 0.0062 -0.0031 0.0001  
Y 0.0008 0.0003 -0.0032 -0.0031 -0.0035 0.0044  
Z 0.0069 -0.0094 0.0003 -0.0013 0.0106 -0.0076

AT.125 H X -0.0133 -0.0106 -0.0148 0.0152 0.0028 0.0078  
Y 0.0057 0.0068 0.0035 -0.0036 0.0013 0.0013  
Z 0.0038 0.0057 -0.0030 0.0014 0.0111 0.0082

AT.126 H X 0.0133 -0.0106 0.0148 0.0152 -0.0028 0.0078  
Y 0.0057 -0.0068 0.0035 0.0036 0.0013 -0.0013  
Z -0.0038 0.0057 0.0030 0.0014 -0.0111 0.0082

AT.127 H X 0.0133 0.0106 -0.0148 0.0152 -0.0028 -0.0078  
Y -0.0057 -0.0068 0.0035 -0.0036 -0.0013 -0.0013  
Z -0.0038 -0.0057 -0.0030 0.0014 -0.0111 -0.0082

AT.128 H X -0.0133 0.0106 0.0148 0.0152 0.0028 -0.0078  
Y -0.0057 0.0068 0.0035 0.0036 -0.0013 0.0013  
Z 0.0038 -0.0057 0.0030 0.0014 0.0111 -0.0082

AT.129 H X -0.0002 -0.0015 0.0054 -0.0047 -0.0109 -0.0097  
Y -0.0096 -0.0059 -0.0171 0.0171 0.0137 0.0173  
Z 0.0118 0.0145 0.0051 -0.0072 0.0066 0.0035

AT.130 H X 0.0002 -0.0015 -0.0054 -0.0047 0.0109 -0.0097  
Y -0.0096 0.0059 -0.0171 -0.0171 0.0137 -0.0173  
Z -0.0118 0.0145 -0.0051 -0.0072 -0.0066 0.0035

AT.131 H X 0.0002 0.0015 0.0054 -0.0047 0.0109 0.0097  
Y 0.0096 0.0059 -0.0171 0.0171 -0.0137 -0.0173  
Z -0.0118 -0.0145 0.0051 -0.0072 -0.0066 -0.0035

AT.132 H X -0.0002 0.0015 -0.0054 -0.0047 -0.0109 0.0097  
Y 0.0096 -0.0059 -0.0171 -0.0171 -0.0137 0.0173  
Z 0.0118 -0.0145 -0.0051 -0.0072 0.0066 -0.0035

AT.133 C X -0.0082 -0.0071 -0.0093 0.0094 0.0046 0.0063  
Y -0.0082 -0.0066 -0.0127 0.0130 0.0103 0.0118  
Z -0.0017 -0.0008 -0.0043 0.0037 0.0047 0.0045

AT.134 C X 0.0082 -0.0071 0.0093 0.0094 -0.0046 0.0063  
Y -0.0082 0.0066 -0.0127 -0.0130 0.0103 -0.0118  
Z 0.0017 -0.0008 0.0043 0.0037 -0.0047 0.0045

AT.135 C X 0.0082 0.0071 -0.0093 0.0094 -0.0046 -0.0063  
Y 0.0082 0.0066 -0.0127 0.0130 -0.0103 -0.0118

Z 0.0017 0.0008 -0.0043 0.0037 -0.0047 -0.0045  
AT. 136 C X -0.0082 0.0071 0.0093 0.0094 0.0046 -0.0063  
Y 0.0082 -0.0066 -0.0127 -0.0130 -0.0103 0.0118  
Z -0.0017 0.0008 0.0043 0.0037 0.0047 -0.0045  
AT. 137 C X -0.0041 -0.0039 -0.0041 0.0044 0.0010 0.0021  
Y -0.0077 -0.0033 -0.0194 0.0193 0.0222 0.0226  
Z -0.0033 -0.0037 -0.0019 0.0016 -0.0017 -0.0009  
AT. 138 C X 0.0041 -0.0039 0.0041 0.0044 -0.0010 0.0021  
Y -0.0077 0.0033 -0.0194 -0.0193 0.0222 -0.0226  
Z 0.0033 -0.0037 0.0019 0.0016 0.0017 -0.0009  
AT. 139 C X 0.0041 0.0039 -0.0041 0.0044 -0.0010 -0.0021  
Y 0.0077 0.0033 -0.0194 0.0193 -0.0222 -0.0226  
Z 0.0033 0.0037 -0.0019 0.0016 0.0017 0.0009  
AT. 140 C X -0.0041 0.0039 0.0041 0.0044 0.0010 -0.0021  
Y 0.0077 -0.0033 -0.0194 -0.0193 -0.0222 0.0226  
Z -0.0033 0.0037 0.0019 0.0016 -0.0017 0.0009  
AT. 141 H X -0.0042 -0.0023 -0.0086 0.0089 0.0089 0.0095  
Y -0.0094 -0.0018 -0.0281 0.0277 0.0347 0.0351  
Z -0.0043 -0.0044 -0.0029 0.0024 -0.0018 -0.0005  
AT. 142 H X 0.0042 -0.0023 0.0086 0.0089 -0.0089 0.0095  
Y -0.0094 0.0018 -0.0281 -0.0277 0.0347 -0.0351  
Z 0.0043 -0.0044 0.0029 0.0024 0.0018 -0.0005  
AT. 143 H X 0.0042 0.0023 -0.0086 0.0089 -0.0089 -0.0095  
Y 0.0094 0.0018 -0.0281 0.0277 -0.0347 -0.0351  
Z 0.0043 0.0044 -0.0029 0.0024 0.0018 0.0005  
AT. 144 H X -0.0042 0.0023 0.0086 0.0089 0.0089 -0.0095  
Y 0.0094 -0.0018 -0.0281 -0.0277 -0.0347 0.0351  
Z -0.0043 0.0044 0.0029 0.0024 -0.0018 0.0005  
AT. 145 H X 0.0021 -0.0015 0.0106 -0.0100 -0.0157 -0.0152  
Y -0.0095 -0.0047 -0.0226 0.0225 0.0250 0.0257  
Z -0.0038 -0.0064 0.0020 -0.0019 -0.0094 -0.0080  
AT. 146 H X -0.0021 -0.0015 -0.0106 -0.0100 0.0157 -0.0152

Y -0.0095 0.0047 -0.0226 -0.0225 0.0250 -0.0257  
Z 0.0038 -0.0064 -0.0020 -0.0019 0.0094 -0.0080  
AT. 147 H X -0.0021 0.0015 0.0106 -0.0100 0.0157 0.0152  
Y 0.0095 0.0047 -0.0226 0.0225 -0.0250 -0.0257  
Z 0.0038 0.0064 0.0020 -0.0019 0.0094 0.0080  
AT. 148 H X 0.0021 0.0015 -0.0106 -0.0100 -0.0157 0.0152  
Y 0.0095 -0.0047 -0.0226 -0.0225 -0.0250 0.0257  
Z -0.0038 0.0064 -0.0020 -0.0019 -0.0094 0.0080  
AT. 149 O X 0.0055 0.0087 0.0021 -0.0033 0.0070 0.0058  
Y 0.0275 0.0293 0.0194 -0.0220 0.0073 0.0012  
Z -0.0001 0.0046 -0.0049 0.0031 0.0121 0.0110  
AT. 150 O X -0.0055 0.0087 -0.0021 -0.0033 -0.0070 0.0058  
Y 0.0275 -0.0293 0.0194 0.0220 0.0073 -0.0012  
Z 0.0001 0.0046 0.0049 0.0031 -0.0121 0.0110  
AT. 151 O X -0.0055 -0.0087 0.0021 -0.0033 -0.0070 -0.0058  
Y -0.0275 -0.0293 0.0194 -0.0220 -0.0073 -0.0012  
Z 0.0001 -0.0046 -0.0049 0.0031 -0.0121 -0.0110  
AT. 152 O X 0.0055 -0.0087 -0.0021 -0.0033 0.0070 -0.0058  
Y -0.0275 0.0293 0.0194 0.0220 -0.0073 0.0012  
Z -0.0001 -0.0046 0.0049 0.0031 0.0121 -0.0110  
AT. 153 H X 0.0003 0.0020 0.0002 0.0003 0.0021 0.0032  
Y 0.0149 0.0165 0.0139 -0.0158 0.0014 -0.0009  
Z -0.0015 0.0040 -0.0059 0.0032 0.0129 0.0118  
AT. 154 H X -0.0003 0.0020 -0.0002 0.0003 -0.0021 0.0032  
Y 0.0149 -0.0165 0.0139 0.0158 0.0014 0.0009  
Z 0.0015 0.0040 0.0059 0.0032 -0.0129 0.0118  
AT. 155 H X -0.0003 -0.0020 0.0002 0.0003 -0.0021 -0.0032  
Y -0.0149 -0.0165 0.0139 -0.0158 -0.0014 0.0009  
Z 0.0015 -0.0040 -0.0059 0.0032 -0.0129 -0.0118  
AT. 156 H X 0.0003 -0.0020 -0.0002 0.0003 0.0021 -0.0032  
Y -0.0149 0.0165 0.0139 0.0158 -0.0014 -0.0009  
Z -0.0015 -0.0040 0.0059 0.0032 0.0129 -0.0118

AT.157 O X 0.0034 0.0021 0.0061 -0.0048 -0.0053 -0.0055  
Y 0.0318 0.0309 0.0288 -0.0292 -0.0066 -0.0128  
Z 0.0055 0.0026 0.0094 -0.0076 -0.0075 -0.0084

AT.158 O X -0.0034 0.0021 -0.0061 -0.0048 0.0053 -0.0055  
Y 0.0318 -0.0309 0.0288 0.0292 -0.0066 0.0128  
Z -0.0055 0.0026 -0.0094 -0.0076 0.0075 -0.0084

AT.159 O X -0.0034 -0.0021 0.0061 -0.0048 0.0053 0.0055  
Y -0.0318 -0.0309 0.0288 -0.0292 0.0066 0.0128  
Z -0.0055 -0.0026 0.0094 -0.0076 0.0075 0.0084

AT.160 O X 0.0034 -0.0021 -0.0061 -0.0048 -0.0053 0.0055  
Y -0.0318 0.0309 0.0288 0.0292 0.0066 -0.0128  
Z 0.0055 -0.0026 -0.0094 -0.0076 -0.0075 0.0084

AT.161 O X 0.0184 0.0157 0.0172 -0.0149 -0.0067 -0.0090  
Y 0.0083 0.0100 0.0112 -0.0110 -0.0023 -0.0017  
Z 0.0157 0.0112 0.0185 -0.0171 -0.0117 -0.0159

AT.162 O X -0.0184 0.0157 -0.0172 -0.0149 0.0067 -0.0090  
Y 0.0083 -0.0100 0.0112 0.0110 -0.0023 0.0017  
Z -0.0157 0.0112 -0.0185 -0.0171 0.0117 -0.0159

AT.163 O X -0.0184 -0.0157 0.0172 -0.0149 0.0067 0.0090  
Y -0.0083 -0.0100 0.0112 -0.0110 0.0023 0.0017  
Z -0.0157 -0.0112 0.0185 -0.0171 0.0117 0.0159

AT.164 O X 0.0184 -0.0157 -0.0172 -0.0149 -0.0067 0.0090  
Y -0.0083 0.0100 0.0112 0.0110 0.0023 -0.0017  
Z 0.0157 -0.0112 -0.0185 -0.0171 -0.0117 0.0159

AT.165 H X 0.0279 0.0231 0.0251 -0.0227 -0.0105 -0.0159  
Y 0.0139 0.0146 0.0163 -0.0160 -0.0045 -0.0054  
Z 0.0211 0.0173 0.0211 -0.0202 -0.0102 -0.0149

AT.166 H X -0.0279 0.0231 -0.0251 -0.0227 0.0105 -0.0159  
Y 0.0139 -0.0146 0.0163 0.0160 -0.0045 0.0054  
Z -0.0211 0.0173 -0.0211 -0.0202 0.0102 -0.0149

AT.167 H X -0.0279 -0.0231 0.0251 -0.0227 0.0105 0.0159  
Y -0.0139 -0.0146 0.0163 -0.0160 0.0045 0.0054



Z -0.0211 -0.0173 0.0211 -0.0202 0.0102 0.0149  
AT.168 H X 0.0279 -0.0231 -0.0251 -0.0227 -0.0105 0.0159  
Y -0.0139 0.0146 0.0163 0.0160 0.0045 -0.0054  
Z 0.0211 -0.0173 -0.0211 -0.0202 -0.0102 0.0149  
AT.169 O X 0.0021 0.0010 0.0040 -0.0029 -0.0007 -0.0014  
Y -0.0171 -0.0206 0.0067 -0.0082 -0.0274 -0.0216  
Z -0.0009 -0.0006 0.0016 -0.0020 0.0000 0.0003  
AT.170 O X -0.0021 0.0010 -0.0040 -0.0029 0.0007 -0.0014  
Y -0.0171 0.0206 0.0067 0.0082 -0.0274 0.0216  
Z 0.0009 -0.0006 -0.0016 -0.0020 -0.0000 0.0003  
AT.171 O X -0.0021 -0.0010 0.0040 -0.0029 0.0007 0.0014  
Y 0.0171 0.0206 0.0067 -0.0082 0.0274 0.0216  
Z 0.0009 0.0006 0.0016 -0.0020 -0.0000 -0.0003  
AT.172 O X 0.0021 -0.0010 -0.0040 -0.0029 -0.0007 0.0014  
Y 0.0171 -0.0206 0.0067 0.0082 0.0274 -0.0216  
Z -0.0009 0.0006 -0.0016 -0.0020 0.0000 -0.0003  
AT.173 H X -0.0022 -0.0028 0.0004 0.0008 -0.0037 -0.0026  
Y -0.0183 -0.0227 0.0087 -0.0104 -0.0314 -0.0252  
Z 0.0151 0.0184 0.0025 -0.0033 0.0256 0.0202  
AT.174 H X 0.0022 -0.0028 -0.0004 0.0008 0.0037 -0.0026  
Y -0.0183 0.0227 0.0087 0.0104 -0.0314 0.0252  
Z -0.0151 0.0184 -0.0025 -0.0033 -0.0256 0.0202  
AT.175 H X 0.0022 0.0028 0.0004 0.0008 0.0037 0.0026  
Y 0.0183 0.0227 0.0087 -0.0104 0.0314 0.0252  
Z -0.0151 -0.0184 0.0025 -0.0033 -0.0256 -0.0202  
AT.176 H X -0.0022 0.0028 -0.0004 0.0008 -0.0037 0.0026  
Y 0.0183 -0.0227 0.0087 0.0104 0.0314 -0.0252  
Z 0.0151 -0.0184 -0.0025 -0.0033 0.0256 -0.0202  
  
FREQ(CM\*\*-1) 315.23 315.49 315.93 318.08 318.65 319.39  
  
AT. 11 X 0.0009 -0.0013 0.0005 -0.0017 0.0013 0.0012

Y -0.0002 -0.0001 0.0003 0.0004 -0.0001 0.0001  
Z -0.0007 0.0013 -0.0006 0.0016 -0.0014 -0.0014  
AT. 2 I X -0.0009 0.0013 0.0005 -0.0017 0.0013 -0.0012  
Y -0.0002 -0.0001 -0.0003 -0.0004 0.0001 0.0001  
Z 0.0007 -0.0013 -0.0006 0.0016 -0.0014 0.0014  
AT. 3 I X 0.0009 0.0013 0.0005 -0.0017 -0.0013 0.0012  
Y -0.0002 0.0001 0.0003 0.0004 0.0001 0.0001  
Z -0.0007 -0.0013 -0.0006 0.0016 0.0014 -0.0014  
AT. 4 I X -0.0009 -0.0013 0.0005 -0.0017 -0.0013 -0.0012  
Y -0.0002 0.0001 -0.0003 -0.0004 -0.0001 0.0001  
Z 0.0007 0.0013 -0.0006 0.0016 0.0014 0.0014  
AT. 5 I X -0.0004 -0.0003 0.0005 0.0000 0.0004 0.0002  
Y 0.0002 0.0002 -0.0004 -0.0000 -0.0000 -0.0000  
Z 0.0005 0.0003 -0.0006 -0.0000 -0.0005 -0.0003  
AT. 6 I X 0.0004 0.0003 0.0005 0.0000 0.0004 -0.0002  
Y 0.0002 0.0002 0.0004 0.0000 0.0000 -0.0000  
Z -0.0005 -0.0003 -0.0006 -0.0000 -0.0005 0.0003  
AT. 7 I X -0.0004 0.0003 0.0005 0.0000 -0.0004 0.0002  
Y 0.0002 -0.0002 -0.0004 -0.0000 0.0000 -0.0000  
Z 0.0005 -0.0003 -0.0006 -0.0000 0.0005 -0.0003  
AT. 8 I X 0.0004 -0.0003 0.0005 0.0000 -0.0004 -0.0002  
Y 0.0002 -0.0002 0.0004 0.0000 -0.0000 -0.0000  
Z -0.0005 0.0003 -0.0006 -0.0000 0.0005 0.0003  
AT. 9 N X -0.0075 0.0016 0.0034 0.0080 -0.0036 -0.0036  
Y 0.0144 0.0038 -0.0126 -0.0085 -0.0019 -0.0037  
Z 0.0107 -0.0137 0.0030 -0.0167 0.0140 0.0132  
AT. 10 N X 0.0075 -0.0016 0.0034 0.0080 -0.0036 0.0036  
Y 0.0144 0.0038 0.0126 0.0085 0.0019 -0.0037  
Z -0.0107 0.0137 0.0030 -0.0167 0.0140 -0.0132  
AT. 11 N X -0.0075 -0.0016 0.0034 0.0080 0.0036 -0.0036  
Y 0.0144 -0.0038 -0.0126 -0.0085 0.0019 -0.0037  
Z 0.0107 0.0137 0.0030 -0.0167 -0.0140 0.0132

AT. 12 N X 0.0075 0.0016 0.0034 0.0080 0.0036 0.0036  
Y 0.0144 -0.0038 0.0126 0.0085 -0.0019 -0.0037  
Z -0.0107 -0.0137 0.0030 -0.0167 -0.0140 -0.0132

AT. 13 N X 0.0026 0.0079 -0.0081 0.0087 -0.0118 -0.0093  
Y -0.0001 -0.0079 0.0065 -0.0039 0.0062 0.0074  
Z -0.0067 0.0043 0.0020 0.0067 -0.0029 -0.0040

AT. 14 N X -0.0026 -0.0079 -0.0081 0.0087 -0.0118 0.0093  
Y -0.0001 -0.0079 -0.0065 0.0039 -0.0062 0.0074  
Z 0.0067 -0.0043 0.0020 0.0067 -0.0029 0.0040

AT. 15 N X 0.0026 -0.0079 -0.0081 0.0087 0.0118 -0.0093  
Y -0.0001 0.0079 0.0065 -0.0039 -0.0062 0.0074  
Z -0.0067 -0.0043 0.0020 0.0067 0.0029 -0.0040

AT. 16 N X -0.0026 0.0079 -0.0081 0.0087 0.0118 0.0093  
Y -0.0001 0.0079 -0.0065 0.0039 0.0062 0.0074  
Z 0.0067 0.0043 0.0020 0.0067 0.0029 0.0040

AT. 17 O X 0.0048 0.0005 -0.0050 -0.0028 0.0000 -0.0024  
Y 0.0135 -0.0004 -0.0092 -0.0101 0.0002 -0.0008  
Z -0.0031 -0.0056 0.0069 -0.0013 0.0057 0.0066

AT. 18 O X -0.0048 -0.0005 -0.0050 -0.0028 0.0000 0.0024  
Y 0.0135 -0.0004 0.0092 0.0101 -0.0002 -0.0008  
Z 0.0031 0.0056 0.0069 -0.0013 0.0057 -0.0066

AT. 19 O X 0.0048 -0.0005 -0.0050 -0.0028 -0.0000 -0.0024  
Y 0.0135 0.0004 -0.0092 -0.0101 -0.0002 -0.0008  
Z -0.0031 0.0056 0.0069 -0.0013 -0.0057 0.0066

AT. 20 O X -0.0048 0.0005 -0.0050 -0.0028 -0.0000 0.0024  
Y 0.0135 0.0004 0.0092 0.0101 0.0002 -0.0008  
Z 0.0031 -0.0056 0.0069 -0.0013 -0.0057 -0.0066

AT. 21 O X -0.0011 0.0012 -0.0024 0.0008 -0.0020 -0.0004  
Y 0.0022 -0.0124 0.0074 -0.0087 0.0099 0.0122  
Z -0.0014 -0.0010 0.0018 -0.0001 0.0014 0.0009

AT. 22 O X 0.0011 -0.0012 -0.0024 0.0008 -0.0020 0.0004  
Y 0.0022 -0.0124 -0.0074 0.0087 -0.0099 0.0122

Z 0.0014 0.0010 0.0018 -0.0001 0.0014 -0.0009  
AT. 23 O X -0.0011 -0.0012 -0.0024 0.0008 0.0020 -0.0004  
Y 0.0022 0.0124 0.0074 -0.0087 -0.0099 0.0122  
Z -0.0014 0.0010 0.0018 -0.0001 -0.0014 0.0009  
AT. 24 O X 0.0011 0.0012 -0.0024 0.0008 0.0020 0.0004  
Y 0.0022 0.0124 -0.0074 0.0087 0.0099 0.0122  
Z 0.0014 -0.0010 0.0018 -0.0001 -0.0014 -0.0009  
AT. 25 C X -0.0061 0.0117 -0.0052 0.0136 -0.0125 -0.0119  
Y 0.0056 0.0207 -0.0197 0.0104 -0.0200 -0.0210  
Z -0.0058 0.0003 0.0036 0.0052 -0.0009 0.0000  
AT. 26 C X 0.0061 -0.0117 -0.0052 0.0136 -0.0125 0.0119  
Y 0.0056 0.0207 0.0197 -0.0104 0.0200 -0.0210  
Z 0.0058 -0.0003 0.0036 0.0052 -0.0009 -0.0000  
AT. 27 C X -0.0061 -0.0117 -0.0052 0.0136 0.0125 -0.0119  
Y 0.0056 -0.0207 -0.0197 0.0104 0.0200 -0.0210  
Z -0.0058 -0.0003 0.0036 0.0052 0.0009 0.0000  
AT. 28 C X 0.0061 0.0117 -0.0052 0.0136 0.0125 0.0119  
Y 0.0056 -0.0207 0.0197 -0.0104 -0.0200 -0.0210  
Z 0.0058 0.0003 0.0036 0.0052 0.0009 -0.0000  
AT. 29 H X -0.0042 0.0089 -0.0040 0.0102 -0.0096 -0.0089  
Y -0.0013 0.0419 -0.0321 0.0304 -0.0416 -0.0423  
Z -0.0076 0.0011 0.0039 0.0070 -0.0016 -0.0009  
AT. 30 H X 0.0042 -0.0089 -0.0040 0.0102 -0.0096 0.0089  
Y -0.0013 0.0419 0.0321 -0.0304 0.0416 -0.0423  
Z 0.0076 -0.0011 0.0039 0.0070 -0.0016 0.0009  
AT. 31 H X -0.0042 -0.0089 -0.0040 0.0102 0.0096 -0.0089  
Y -0.0013 -0.0419 -0.0321 0.0304 0.0416 -0.0423  
Z -0.0076 -0.0011 0.0039 0.0070 0.0016 -0.0009  
AT. 32 H X 0.0042 0.0089 -0.0040 0.0102 0.0096 0.0089  
Y -0.0013 -0.0419 0.0321 -0.0304 -0.0416 -0.0423  
Z 0.0076 0.0011 0.0039 0.0070 0.0016 0.0009  
AT. 33 H X -0.0090 0.0318 -0.0196 0.0300 -0.0322 -0.0320

Y 0.0078 0.0143 -0.0162 0.0042 -0.0135 -0.0146  
Z -0.0137 0.0129 -0.0008 0.0200 -0.0142 -0.0125  
AT. 34 H X 0.0090 -0.0318 -0.0196 0.0300 -0.0322 0.0320  
Y 0.0078 0.0143 0.0162 -0.0042 0.0135 -0.0146  
Z 0.0137 -0.0129 -0.0008 0.0200 -0.0142 0.0125  
AT. 35 H X -0.0090 -0.0318 -0.0196 0.0300 0.0322 -0.0320  
Y 0.0078 -0.0143 -0.0162 0.0042 0.0135 -0.0146  
Z -0.0137 -0.0129 -0.0008 0.0200 0.0142 -0.0125  
AT. 36 H X 0.0090 0.0318 -0.0196 0.0300 0.0322 0.0320  
Y 0.0078 -0.0143 0.0162 -0.0042 -0.0135 -0.0146  
Z 0.0137 0.0129 -0.0008 0.0200 0.0142 0.0125  
AT. 37 C X -0.0041 0.0017 0.0009 0.0053 -0.0026 -0.0029  
Y 0.0127 0.0056 -0.0129 -0.0059 -0.0043 -0.0059  
Z 0.0007 -0.0090 0.0065 -0.0064 0.0089 0.0093  
AT. 38 C X 0.0041 -0.0017 0.0009 0.0053 -0.0026 0.0029  
Y 0.0127 0.0056 0.0129 0.0059 0.0043 -0.0059  
Z -0.0007 0.0090 0.0065 -0.0064 0.0089 -0.0093  
AT. 39 C X -0.0041 -0.0017 0.0009 0.0053 0.0026 -0.0029  
Y 0.0127 -0.0056 -0.0129 -0.0059 0.0043 -0.0059  
Z 0.0007 0.0090 0.0065 -0.0064 -0.0089 0.0093  
AT. 40 C X 0.0041 0.0017 0.0009 0.0053 0.0026 0.0029  
Y 0.0127 -0.0056 0.0129 0.0059 -0.0043 -0.0059  
Z -0.0007 -0.0090 0.0065 -0.0064 -0.0089 -0.0093  
AT. 41 C X 0.0008 0.0060 -0.0042 0.0036 -0.0046 -0.0058  
Y 0.0081 0.0002 -0.0065 -0.0071 0.0003 -0.0011  
Z 0.0118 -0.0161 0.0044 -0.0181 0.0158 0.0151  
AT. 42 C X -0.0008 -0.0060 -0.0042 0.0036 -0.0046 0.0058  
Y 0.0081 0.0002 0.0065 0.0071 -0.0003 -0.0011  
Z -0.0118 0.0161 0.0044 -0.0181 0.0158 -0.0151  
AT. 43 C X 0.0008 -0.0060 -0.0042 0.0036 0.0046 -0.0058  
Y 0.0081 -0.0002 -0.0065 -0.0071 -0.0003 -0.0011  
Z 0.0118 0.0161 0.0044 -0.0181 -0.0158 0.0151

AT. 44 C X -0.0008 0.0060 -0.0042 0.0036 0.0046 0.0058  
Y 0.0081 -0.0002 0.0065 0.0071 0.0003 -0.0011  
Z -0.0118 -0.0161 0.0044 -0.0181 -0.0158 -0.0151

AT. 45 H X 0.0024 -0.0038 0.0040 -0.0030 0.0067 0.0052  
Y 0.0049 0.0024 -0.0070 -0.0035 -0.0033 -0.0043  
Z 0.0093 -0.0138 0.0032 -0.0151 0.0121 0.0117

AT. 46 H X -0.0024 0.0038 0.0040 -0.0030 0.0067 -0.0052  
Y 0.0049 0.0024 0.0070 0.0035 0.0033 -0.0043  
Z -0.0093 0.0138 0.0032 -0.0151 0.0121 -0.0117

AT. 47 H X 0.0024 0.0038 0.0040 -0.0030 -0.0067 0.0052  
Y 0.0049 -0.0024 -0.0070 -0.0035 0.0033 -0.0043  
Z 0.0093 0.0138 0.0032 -0.0151 -0.0121 0.0117

AT. 48 H X -0.0024 -0.0038 0.0040 -0.0030 -0.0067 -0.0052  
Y 0.0049 -0.0024 0.0070 0.0035 -0.0033 -0.0043  
Z -0.0093 -0.0138 0.0032 -0.0151 -0.0121 -0.0117

AT. 49 H X 0.0069 0.0117 -0.0130 0.0021 -0.0093 -0.0109  
Y 0.0114 0.0070 -0.0151 -0.0060 -0.0067 -0.0082  
Z 0.0176 -0.0199 0.0054 -0.0244 0.0228 0.0211

AT. 50 H X -0.0069 -0.0117 -0.0130 0.0021 -0.0093 0.0109  
Y 0.0114 0.0070 0.0151 0.0060 0.0067 -0.0082  
Z -0.0176 0.0199 0.0054 -0.0244 0.0228 -0.0211

AT. 51 H X 0.0069 -0.0117 -0.0130 0.0021 0.0093 -0.0109  
Y 0.0114 -0.0070 -0.0151 -0.0060 0.0067 -0.0082  
Z 0.0176 0.0199 0.0054 -0.0244 -0.0228 0.0211

AT. 52 H X -0.0069 0.0117 -0.0130 0.0021 0.0093 0.0109  
Y 0.0114 -0.0070 0.0151 0.0060 -0.0067 -0.0082  
Z -0.0176 -0.0199 0.0054 -0.0244 -0.0228 -0.0211

AT. 53 C X 0.0024 0.0116 -0.0103 0.0051 -0.0100 -0.0112  
Y 0.0002 -0.0066 0.0054 -0.0052 0.0075 0.0064  
Z 0.0012 -0.0044 0.0019 -0.0039 0.0044 0.0042

AT. 54 C X -0.0024 -0.0116 -0.0103 0.0051 -0.0100 0.0112  
Y 0.0002 -0.0066 -0.0054 0.0052 -0.0075 0.0064

Z -0.0012 0.0044 0.0019 -0.0039 0.0044 -0.0042  
AT. 55 C X 0.0024 -0.0116 -0.0103 0.0051 0.0100 -0.0112  
Y 0.0002 0.0066 0.0054 -0.0052 -0.0075 0.0064  
Z 0.0012 0.0044 0.0019 -0.0039 -0.0044 0.0042  
AT. 56 C X -0.0024 0.0116 -0.0103 0.0051 0.0100 0.0112  
Y 0.0002 0.0066 -0.0054 0.0052 0.0075 0.0064  
Z -0.0012 -0.0044 0.0019 -0.0039 -0.0044 -0.0042  
AT. 57 C X -0.0025 -0.0236 0.0194 -0.0131 0.0225 0.0220  
Y 0.0198 0.0021 -0.0131 -0.0103 -0.0052 -0.0068  
Z -0.0078 -0.0002 0.0040 0.0030 0.0032 0.0031  
AT. 58 C X 0.0025 0.0236 0.0194 -0.0131 0.0225 -0.0220  
Y 0.0198 0.0021 0.0131 0.0103 0.0052 -0.0068  
Z 0.0078 0.0002 0.0040 0.0030 0.0032 -0.0031  
AT. 59 C X -0.0025 0.0236 0.0194 -0.0131 -0.0225 0.0220  
Y 0.0198 -0.0021 -0.0131 -0.0103 0.0052 -0.0068  
Z -0.0078 0.0002 0.0040 0.0030 -0.0032 0.0031  
AT. 60 C X 0.0025 -0.0236 0.0194 -0.0131 -0.0225 -0.0220  
Y 0.0198 -0.0021 0.0131 0.0103 -0.0052 -0.0068  
Z 0.0078 -0.0002 0.0040 0.0030 -0.0032 -0.0031  
AT. 61 H X -0.0457 -0.0216 0.0473 0.0179 0.0178 0.0227  
Y -0.0129 0.0090 0.0040 0.0167 -0.0144 -0.0117  
Z -0.0006 -0.0346 0.0244 -0.0252 0.0404 0.0375  
AT. 62 H X 0.0457 0.0216 0.0473 0.0179 0.0178 -0.0227  
Y -0.0129 0.0090 -0.0040 -0.0167 0.0144 -0.0117  
Z 0.0006 0.0346 0.0244 -0.0252 0.0404 -0.0375  
AT. 63 H X -0.0457 0.0216 0.0473 0.0179 -0.0178 0.0227  
Y -0.0129 -0.0090 0.0040 0.0167 0.0144 -0.0117  
Z -0.0006 0.0346 0.0244 -0.0252 -0.0404 0.0375  
AT. 64 H X 0.0457 -0.0216 0.0473 0.0179 -0.0178 -0.0227  
Y -0.0129 -0.0090 -0.0040 -0.0167 -0.0144 -0.0117  
Z 0.0006 -0.0346 0.0244 -0.0252 -0.0404 -0.0375  
AT. 65 H X -0.0202 -0.0208 0.0292 0.0008 0.0187 0.0205

Y 0.0728 -0.0067 -0.0425 -0.0519 0.0065 -0.0015  
Z -0.0282 0.0324 -0.0071 0.0364 -0.0275 -0.0252  
AT. 66 H X 0.0202 0.0208 0.0292 0.0008 0.0187 -0.0205  
Y 0.0728 -0.0067 0.0425 0.0519 -0.0065 -0.0015  
Z 0.0282 -0.0324 -0.0071 0.0364 -0.0275 0.0252  
AT. 67 H X -0.0202 0.0208 0.0292 0.0008 -0.0187 0.0205  
Y 0.0728 0.0067 -0.0425 -0.0519 -0.0065 -0.0015  
Z -0.0282 -0.0324 -0.0071 0.0364 0.0275 -0.0252  
AT. 68 H X 0.0202 -0.0208 0.0292 0.0008 -0.0187 -0.0205  
Y 0.0728 0.0067 0.0425 0.0519 0.0065 -0.0015  
Z 0.0282 0.0324 -0.0071 0.0364 0.0275 0.0252  
AT. 69 H X 0.0465 -0.0595 0.0139 -0.0690 0.0594 0.0522  
Y 0.0154 0.0138 -0.0183 0.0018 -0.0201 -0.0195  
Z -0.0030 0.0034 -0.0015 0.0033 -0.0029 -0.0023  
AT. 70 H X -0.0465 0.0595 0.0139 -0.0690 0.0594 -0.0522  
Y 0.0154 0.0138 0.0183 -0.0018 0.0201 -0.0195  
Z 0.0030 -0.0034 -0.0015 0.0033 -0.0029 0.0023  
AT. 71 H X 0.0465 0.0595 0.0139 -0.0690 -0.0594 0.0522  
Y 0.0154 -0.0138 -0.0183 0.0018 0.0201 -0.0195  
Z -0.0030 -0.0034 -0.0015 0.0033 0.0029 -0.0023  
AT. 72 H X -0.0465 -0.0595 0.0139 -0.0690 -0.0594 -0.0522  
Y 0.0154 -0.0138 0.0183 -0.0018 -0.0201 -0.0195  
Z 0.0030 0.0034 -0.0015 0.0033 0.0029 0.0023  
AT. 73 C X 0.0054 0.0096 -0.0114 0.0016 -0.0082 -0.0091  
Y -0.0084 -0.0009 0.0065 0.0029 0.0029 0.0025  
Z -0.0024 0.0005 0.0007 0.0014 -0.0009 -0.0002  
AT. 74 C X -0.0054 -0.0096 -0.0114 0.0016 -0.0082 0.0091  
Y -0.0084 -0.0009 -0.0065 -0.0029 -0.0029 0.0025  
Z 0.0024 -0.0005 0.0007 0.0014 -0.0009 0.0002  
AT. 75 C X 0.0054 -0.0096 -0.0114 0.0016 0.0082 -0.0091  
Y -0.0084 0.0009 0.0065 0.0029 -0.0029 0.0025  
Z -0.0024 -0.0005 0.0007 0.0014 0.0009 -0.0002



AT. 76 C X -0.0054 0.0096 -0.0114 0.0016 0.0082 0.0091  
Y -0.0084 0.0009 -0.0065 -0.0029 0.0029 0.0025  
Z 0.0024 0.0005 0.0007 0.0014 0.0009 0.0002

AT. 77 C X 0.0092 -0.0019 -0.0056 -0.0106 0.0037 0.0013  
Y 0.0020 0.0075 -0.0063 0.0068 -0.0077 -0.0070  
Z 0.0042 -0.0058 0.0016 -0.0044 0.0050 0.0053

AT. 78 C X -0.0092 0.0019 -0.0056 -0.0106 0.0037 -0.0013  
Y 0.0020 0.0075 0.0063 -0.0068 0.0077 -0.0070  
Z -0.0042 0.0058 0.0016 -0.0044 0.0050 -0.0053

AT. 79 C X 0.0092 0.0019 -0.0056 -0.0106 -0.0037 0.0013  
Y 0.0020 -0.0075 -0.0063 0.0068 0.0077 -0.0070  
Z 0.0042 0.0058 0.0016 -0.0044 -0.0050 0.0053

AT. 80 C X -0.0092 -0.0019 -0.0056 -0.0106 -0.0037 -0.0013  
Y 0.0020 -0.0075 0.0063 -0.0068 -0.0077 -0.0070  
Z -0.0042 -0.0058 0.0016 -0.0044 -0.0050 -0.0053

AT. 81 H X 0.0127 0.0021 -0.0108 -0.0062 -0.0013 -0.0028  
Y 0.0068 0.0119 -0.0126 0.0104 -0.0128 -0.0115  
Z -0.0106 0.0008 0.0073 0.0194 -0.0067 -0.0024

AT. 82 H X -0.0127 -0.0021 -0.0108 -0.0062 -0.0013 0.0028  
Y 0.0068 0.0119 0.0126 -0.0104 0.0128 -0.0115  
Z 0.0106 -0.0008 0.0073 0.0194 -0.0067 0.0024

AT. 83 H X 0.0127 -0.0021 -0.0108 -0.0062 0.0013 -0.0028  
Y 0.0068 -0.0119 -0.0126 0.0104 0.0128 -0.0115  
Z -0.0106 -0.0008 0.0073 0.0194 0.0067 -0.0024

AT. 84 H X -0.0127 0.0021 -0.0108 -0.0062 0.0013 0.0028  
Y 0.0068 -0.0119 0.0126 -0.0104 -0.0128 -0.0115  
Z 0.0106 0.0008 0.0073 0.0194 0.0067 0.0024

AT. 85 H X 0.0103 -0.0063 -0.0039 -0.0232 0.0116 0.0069  
Y -0.0069 0.0147 -0.0054 0.0221 -0.0168 -0.0143  
Z 0.0115 -0.0108 0.0004 -0.0137 0.0104 0.0099

AT. 86 H X -0.0103 0.0063 -0.0039 -0.0232 0.0116 -0.0069  
Y -0.0069 0.0147 0.0054 -0.0221 0.0168 -0.0143

Z -0.0115 0.0108 0.0004 -0.0137 0.0104 -0.0099  
AT. 87 H X 0.0103 0.0063 -0.0039 -0.0232 -0.0116 0.0069  
Y -0.0069 -0.0147 -0.0054 0.0221 0.0168 -0.0143  
Z 0.0115 0.0108 0.0004 -0.0137 -0.0104 0.0099  
AT. 88 H X -0.0103 -0.0063 -0.0039 -0.0232 -0.0116 -0.0069  
Y -0.0069 -0.0147 0.0054 -0.0221 -0.0168 -0.0143  
Z -0.0115 -0.0108 0.0004 -0.0137 -0.0104 -0.0099  
AT. 89 C X 0.0097 -0.0006 -0.0066 -0.0079 0.0022 0.0007  
Y -0.0034 0.0012 0.0016 0.0020 -0.0008 -0.0010  
Z -0.0037 0.0001 0.0022 0.0021 0.0003 0.0004  
AT. 90 C X -0.0097 0.0006 -0.0066 -0.0079 0.0022 -0.0007  
Y -0.0034 0.0012 -0.0016 -0.0020 0.0008 -0.0010  
Z 0.0037 -0.0001 0.0022 0.0021 0.0003 -0.0004  
AT. 91 C X 0.0097 0.0006 -0.0066 -0.0079 -0.0022 0.0007  
Y -0.0034 -0.0012 0.0016 0.0020 0.0008 -0.0010  
Z -0.0037 -0.0001 0.0022 0.0021 -0.0003 0.0004  
AT. 92 C X -0.0097 -0.0006 -0.0066 -0.0079 -0.0022 -0.0007  
Y -0.0034 -0.0012 -0.0016 -0.0020 -0.0008 -0.0010  
Z 0.0037 0.0001 0.0022 0.0021 -0.0003 -0.0004  
AT. 93 C X -0.0270 -0.0259 0.0409 0.0065 0.0240 0.0298  
Y 0.0074 -0.0092 0.0018 -0.0090 0.0077 0.0055  
Z 0.0091 -0.0026 -0.0052 -0.0072 0.0024 -0.0000  
AT. 94 C X 0.0270 0.0259 0.0409 0.0065 0.0240 -0.0298  
Y 0.0074 -0.0092 -0.0018 0.0090 -0.0077 0.0055  
Z -0.0091 0.0026 -0.0052 -0.0072 0.0024 0.0000  
AT. 95 C X -0.0270 0.0259 0.0409 0.0065 -0.0240 0.0298  
Y 0.0074 0.0092 0.0018 -0.0090 -0.0077 0.0055  
Z 0.0091 0.0026 -0.0052 -0.0072 -0.0024 -0.0000  
AT. 96 C X 0.0270 -0.0259 0.0409 0.0065 -0.0240 -0.0298  
Y 0.0074 0.0092 -0.0018 0.0090 0.0077 0.0055  
Z -0.0091 -0.0026 -0.0052 -0.0072 -0.0024 0.0000  
AT. 97 H X -0.0407 -0.0433 0.0664 0.0098 0.0418 0.0502

Y 0.0214 0.0144 -0.0317 -0.0134 -0.0207 -0.0254  
Z -0.0109 -0.0165 0.0179 -0.0032 0.0091 0.0113  
AT. 98 H X 0.0407 0.0433 0.0664 0.0098 0.0418 -0.0502  
Y 0.0214 0.0144 0.0317 0.0134 0.0207 -0.0254  
Z 0.0109 0.0165 0.0179 -0.0032 0.0091 -0.0113  
AT. 99 H X -0.0407 0.0433 0.0664 0.0098 -0.0418 0.0502  
Y 0.0214 -0.0144 -0.0317 -0.0134 0.0207 -0.0254  
Z -0.0109 0.0165 0.0179 -0.0032 -0.0091 0.0113  
AT. 100 H X 0.0407 -0.0433 0.0664 0.0098 -0.0418 -0.0502  
Y 0.0214 -0.0144 0.0317 0.0134 -0.0207 -0.0254  
Z 0.0109 -0.0165 0.0179 -0.0032 -0.0091 -0.0113  
AT. 101 H X -0.0334 -0.0448 0.0647 0.0075 0.0475 0.0541  
Y -0.0042 -0.0309 0.0317 -0.0059 0.0337 0.0335  
Z 0.0365 0.0046 -0.0294 -0.0186 -0.0014 -0.0100  
AT. 102 H X 0.0334 0.0448 0.0647 0.0075 0.0475 -0.0541  
Y -0.0042 -0.0309 -0.0317 0.0059 -0.0337 0.0335  
Z -0.0365 -0.0046 -0.0294 -0.0186 -0.0014 0.0100  
AT. 103 H X -0.0334 0.0448 0.0647 0.0075 -0.0475 0.0541  
Y -0.0042 0.0309 0.0317 -0.0059 -0.0337 0.0335  
Z 0.0365 -0.0046 -0.0294 -0.0186 0.0014 -0.0100  
AT. 104 H X 0.0334 -0.0448 0.0647 0.0075 -0.0475 -0.0541  
Y -0.0042 0.0309 -0.0317 0.0059 0.0337 0.0335  
Z -0.0365 0.0046 -0.0294 -0.0186 0.0014 0.0100  
AT. 105 H X -0.0433 -0.0184 0.0418 0.0137 0.0080 0.0180  
Y 0.0138 -0.0213 0.0078 -0.0166 0.0198 0.0160  
Z 0.0097 0.0040 -0.0100 -0.0037 -0.0013 -0.0040  
AT. 106 H X 0.0433 0.0184 0.0418 0.0137 0.0080 -0.0180  
Y 0.0138 -0.0213 -0.0078 0.0166 -0.0198 0.0160  
Z -0.0097 -0.0040 -0.0100 -0.0037 -0.0013 0.0040  
AT. 107 H X -0.0433 0.0184 0.0418 0.0137 -0.0080 0.0180  
Y 0.0138 0.0213 0.0078 -0.0166 -0.0198 0.0160  
Z 0.0097 -0.0040 -0.0100 -0.0037 0.0013 -0.0040

AT.108 H X 0.0433 -0.0184 0.0418 0.0137 -0.0080 -0.0180  
Y 0.0138 0.0213 -0.0078 0.0166 0.0198 0.0160  
Z -0.0097 0.0040 -0.0100 -0.0037 0.0013 0.0040

AT.109 C X -0.0013 0.0115 -0.0074 0.0075 -0.0096 -0.0106  
Y -0.0045 -0.0107 0.0124 -0.0047 0.0119 0.0115  
Z -0.0003 0.0071 -0.0054 0.0064 -0.0086 -0.0083

AT.110 C X 0.0013 -0.0115 -0.0074 0.0075 -0.0096 0.0106  
Y -0.0045 -0.0107 -0.0124 0.0047 -0.0119 0.0115  
Z 0.0003 -0.0071 -0.0054 0.0064 -0.0086 0.0083

AT.111 C X -0.0013 -0.0115 -0.0074 0.0075 0.0096 -0.0106  
Y -0.0045 0.0107 0.0124 -0.0047 -0.0119 0.0115  
Z -0.0003 -0.0071 -0.0054 0.0064 0.0086 -0.0083

AT.112 C X 0.0013 0.0115 -0.0074 0.0075 0.0096 0.0106  
Y -0.0045 0.0107 -0.0124 0.0047 0.0119 0.0115  
Z 0.0003 0.0071 -0.0054 0.0064 0.0086 0.0083

AT.113 H X 0.0027 0.0157 -0.0137 0.0093 -0.0155 -0.0160  
Y -0.0097 -0.0166 0.0209 -0.0064 0.0191 0.0188  
Z 0.0077 0.0112 -0.0154 0.0113 -0.0204 -0.0159

AT.114 H X -0.0027 -0.0157 -0.0137 0.0093 -0.0155 0.0160  
Y -0.0097 -0.0166 -0.0209 0.0064 -0.0191 0.0188  
Z -0.0077 -0.0112 -0.0154 0.0113 -0.0204 0.0159

AT.115 H X 0.0027 -0.0157 -0.0137 0.0093 0.0155 -0.0160  
Y -0.0097 0.0166 0.0209 -0.0064 -0.0191 0.0188  
Z 0.0077 -0.0112 -0.0154 0.0113 0.0204 -0.0159

AT.116 H X -0.0027 0.0157 -0.0137 0.0093 0.0155 0.0160  
Y -0.0097 0.0166 -0.0209 0.0064 0.0191 0.0188  
Z -0.0077 0.0112 -0.0154 0.0113 0.0204 0.0159

AT.117 H X -0.0099 0.0036 0.0058 -0.0001 0.0057 0.0008  
Y -0.0105 -0.0112 0.0176 -0.0035 0.0154 0.0134  
Z -0.0046 0.0080 -0.0027 0.0088 -0.0078 -0.0085

AT.118 H X 0.0099 -0.0036 0.0058 -0.0001 0.0057 -0.0008  
Y -0.0105 -0.0112 -0.0176 0.0035 -0.0154 0.0134

Z 0.0046 -0.0080 -0.0027 0.0088 -0.0078 0.0085  
AT. 119 H X -0.0099 -0.0036 0.0058 -0.0001 -0.0057 0.0008  
Y -0.0105 0.0112 0.0176 -0.0035 -0.0154 0.0134  
Z -0.0046 -0.0080 -0.0027 0.0088 0.0078 -0.0085  
AT. 120 H X 0.0099 0.0036 0.0058 -0.0001 -0.0057 -0.0008  
Y -0.0105 0.0112 -0.0176 0.0035 0.0154 0.0134  
Z 0.0046 0.0080 -0.0027 0.0088 0.0078 0.0085  
AT. 121 C X 0.0094 0.0025 -0.0085 -0.0051 -0.0014 -0.0031  
Y -0.0003 -0.0024 0.0022 -0.0018 0.0019 0.0019  
Z -0.0110 0.0057 0.0040 0.0107 -0.0044 -0.0048  
AT. 122 C X -0.0094 -0.0025 -0.0085 -0.0051 -0.0014 0.0031  
Y -0.0003 -0.0024 -0.0022 0.0018 -0.0019 0.0019  
Z 0.0110 -0.0057 0.0040 0.0107 -0.0044 0.0048  
AT. 123 C X 0.0094 -0.0025 -0.0085 -0.0051 0.0014 -0.0031  
Y -0.0003 0.0024 0.0022 -0.0018 -0.0019 0.0019  
Z -0.0110 -0.0057 0.0040 0.0107 0.0044 -0.0048  
AT. 124 C X -0.0094 0.0025 -0.0085 -0.0051 0.0014 0.0031  
Y -0.0003 0.0024 -0.0022 0.0018 0.0019 0.0019  
Z 0.0110 0.0057 0.0040 0.0107 0.0044 0.0048  
AT. 125 H X 0.0109 0.0058 -0.0113 -0.0045 -0.0028 -0.0065  
Y -0.0017 -0.0021 0.0032 -0.0022 0.0036 0.0025  
Z -0.0108 0.0045 0.0043 0.0110 -0.0052 -0.0041  
AT. 126 H X -0.0109 -0.0058 -0.0113 -0.0045 -0.0028 0.0065  
Y -0.0017 -0.0021 -0.0032 0.0022 -0.0036 0.0025  
Z 0.0108 -0.0045 0.0043 0.0110 -0.0052 0.0041  
AT. 127 H X 0.0109 -0.0058 -0.0113 -0.0045 0.0028 -0.0065  
Y -0.0017 0.0021 0.0032 -0.0022 -0.0036 0.0025  
Z -0.0108 -0.0045 0.0043 0.0110 0.0052 -0.0041  
AT. 128 H X -0.0109 0.0058 -0.0113 -0.0045 0.0028 0.0065  
Y -0.0017 0.0021 -0.0032 0.0022 0.0036 0.0025  
Z 0.0108 0.0045 0.0043 0.0110 0.0052 0.0041  
AT. 129 H X 0.0108 0.0018 -0.0091 -0.0086 0.0010 -0.0020

Y -0.0011 -0.0005 0.0018 0.0019 -0.0010 -0.0004  
Z -0.0086 0.0078 0.0013 0.0071 -0.0025 -0.0063  
AT. 130 H X -0.0108 -0.0018 -0.0091 -0.0086 0.0010 0.0020  
Y -0.0011 -0.0005 -0.0018 -0.0019 0.0010 -0.0004  
Z 0.0086 -0.0078 0.0013 0.0071 -0.0025 0.0063  
AT. 131 H X 0.0108 -0.0018 -0.0091 -0.0086 -0.0010 -0.0020  
Y -0.0011 0.0005 0.0018 0.0019 0.0010 -0.0004  
Z -0.0086 -0.0078 0.0013 0.0071 0.0025 -0.0063  
AT. 132 H X -0.0108 0.0018 -0.0091 -0.0086 -0.0010 0.0020  
Y -0.0011 0.0005 -0.0018 -0.0019 -0.0010 -0.0004  
Z 0.0086 0.0078 0.0013 0.0071 0.0025 0.0063  
AT. 133 C X 0.0002 0.0024 -0.0027 0.0035 -0.0044 -0.0028  
Y -0.0009 -0.0085 0.0074 -0.0038 0.0068 0.0083  
Z -0.0033 0.0009 0.0022 0.0028 -0.0002 -0.0009  
AT. 134 C X -0.0002 -0.0024 -0.0027 0.0035 -0.0044 0.0028  
Y -0.0009 -0.0085 -0.0074 0.0038 -0.0068 0.0083  
Z 0.0033 -0.0009 0.0022 0.0028 -0.0002 0.0009  
AT. 135 C X 0.0002 -0.0024 -0.0027 0.0035 0.0044 -0.0028  
Y -0.0009 0.0085 0.0074 -0.0038 -0.0068 0.0083  
Z -0.0033 -0.0009 0.0022 0.0028 0.0002 -0.0009  
AT. 136 C X -0.0002 0.0024 -0.0027 0.0035 0.0044 0.0028  
Y -0.0009 0.0085 -0.0074 0.0038 0.0068 0.0083  
Z 0.0033 0.0009 0.0022 0.0028 0.0002 0.0009  
AT. 137 C X 0.0006 -0.0005 -0.0004 0.0000 -0.0005 -0.0002  
Y -0.0083 -0.0061 0.0123 0.0041 0.0057 0.0064  
Z 0.0012 -0.0001 -0.0015 -0.0012 -0.0004 -0.0004  
AT. 138 C X -0.0006 0.0005 -0.0004 0.0000 -0.0005 0.0002  
Y -0.0083 -0.0061 -0.0123 -0.0041 -0.0057 0.0064  
Z -0.0012 0.0001 -0.0015 -0.0012 -0.0004 0.0004  
AT. 139 C X 0.0006 0.0005 -0.0004 0.0000 0.0005 -0.0002  
Y -0.0083 0.0061 0.0123 0.0041 -0.0057 0.0064  
Z 0.0012 0.0001 -0.0015 -0.0012 0.0004 -0.0004

AT. 140 C X -0.0006 -0.0005 -0.0004 0.0000 0.0005 0.0002  
Y -0.0083 0.0061 -0.0123 -0.0041 0.0057 0.0064  
Z -0.0012 -0.0001 -0.0015 -0.0012 0.0004 0.0004

AT. 141 H X -0.0045 -0.0017 0.0051 0.0030 0.0015 0.0017  
Y -0.0155 -0.0048 0.0178 0.0114 0.0058 0.0060  
Z 0.0019 0.0021 -0.0037 0.0005 -0.0027 -0.0027

AT. 142 H X 0.0045 0.0017 0.0051 0.0030 0.0015 -0.0017  
Y -0.0155 -0.0048 -0.0178 -0.0114 -0.0058 0.0060  
Z -0.0019 -0.0021 -0.0037 0.0005 -0.0027 0.0027

AT. 143 H X -0.0045 0.0017 0.0051 0.0030 -0.0015 0.0017  
Y -0.0155 0.0048 0.0178 0.0114 -0.0058 0.0060  
Z 0.0019 -0.0021 -0.0037 0.0005 0.0027 -0.0027

AT. 144 H X 0.0045 -0.0017 0.0051 0.0030 -0.0015 -0.0017  
Y -0.0155 0.0048 -0.0178 -0.0114 0.0058 0.0060  
Z -0.0019 0.0021 -0.0037 0.0005 0.0027 0.0027

AT. 145 H X 0.0089 0.0018 -0.0095 -0.0061 -0.0031 -0.0029  
Y -0.0091 -0.0074 0.0139 0.0042 0.0067 0.0077  
Z 0.0077 -0.0031 -0.0049 -0.0079 0.0008 0.0016

AT. 146 H X -0.0089 -0.0018 -0.0095 -0.0061 -0.0031 0.0029  
Y -0.0091 -0.0074 -0.0139 -0.0042 -0.0067 0.0077  
Z -0.0077 0.0031 -0.0049 -0.0079 0.0008 -0.0016

AT. 147 H X 0.0089 -0.0018 -0.0095 -0.0061 0.0031 -0.0029  
Y -0.0091 0.0074 0.0139 0.0042 -0.0067 0.0077  
Z 0.0077 0.0031 -0.0049 -0.0079 -0.0008 0.0016

AT. 148 H X -0.0089 0.0018 -0.0095 -0.0061 0.0031 0.0029  
Y -0.0091 0.0074 -0.0139 -0.0042 0.0067 0.0077  
Z -0.0077 -0.0031 -0.0049 -0.0079 -0.0008 -0.0016

AT. 149 O X -0.0124 0.0174 -0.0040 0.0183 -0.0166 -0.0151  
Y -0.0252 -0.0024 0.0197 0.0128 0.0044 0.0054  
Z -0.0175 0.0325 -0.0123 0.0322 -0.0347 -0.0308

AT. 150 O X 0.0124 -0.0174 -0.0040 0.0183 -0.0166 0.0151  
Y -0.0252 -0.0024 -0.0197 -0.0128 -0.0044 0.0054

Z 0.0175 -0.0325 -0.0123 0.0322 -0.0347 0.0308  
AT. 151 O X -0.0124 -0.0174 -0.0040 0.0183 0.0166 -0.0151  
Y -0.0252 0.0024 0.0197 0.0128 -0.0044 0.0054  
Z -0.0175 -0.0325 -0.0123 0.0322 0.0347 -0.0308  
AT. 152 O X 0.0124 0.0174 -0.0040 0.0183 0.0166 0.0151  
Y -0.0252 0.0024 -0.0197 -0.0128 0.0044 0.0054  
Z 0.0175 0.0325 -0.0123 0.0322 0.0347 0.0308  
AT. 153 H X -0.0015 0.0134 -0.0110 0.0094 -0.0119 -0.0147  
Y -0.0226 0.0126 0.0052 0.0223 -0.0118 -0.0128  
Z -0.0231 0.0406 -0.0135 0.0412 -0.0437 -0.0377  
AT. 154 H X 0.0015 -0.0134 -0.0110 0.0094 -0.0119 0.0147  
Y -0.0226 0.0126 -0.0052 -0.0223 0.0118 -0.0128  
Z 0.0231 -0.0406 -0.0135 0.0412 -0.0437 0.0377  
AT. 155 H X -0.0015 -0.0134 -0.0110 0.0094 0.0119 -0.0147  
Y -0.0226 -0.0126 0.0052 0.0223 0.0118 -0.0128  
Z -0.0231 -0.0406 -0.0135 0.0412 0.0437 -0.0377  
AT. 156 H X 0.0015 0.0134 -0.0110 0.0094 0.0119 0.0147  
Y -0.0226 -0.0126 -0.0052 -0.0223 -0.0118 -0.0128  
Z 0.0231 0.0406 -0.0135 0.0412 0.0437 0.0377  
AT. 157 O X 0.0080 -0.0011 -0.0047 -0.0067 0.0015 0.0007  
Y -0.0029 0.0098 -0.0058 0.0048 -0.0063 -0.0074  
Z 0.0118 -0.0077 -0.0024 -0.0130 0.0068 0.0059  
AT. 158 O X -0.0080 0.0011 -0.0047 -0.0067 0.0015 -0.0007  
Y -0.0029 0.0098 0.0058 -0.0048 0.0063 -0.0074  
Z -0.0118 0.0077 -0.0024 -0.0130 0.0068 -0.0059  
AT. 159 O X 0.0080 0.0011 -0.0047 -0.0067 -0.0015 0.0007  
Y -0.0029 -0.0098 -0.0058 0.0048 0.0063 -0.0074  
Z 0.0118 0.0077 -0.0024 -0.0130 -0.0068 0.0059  
AT. 160 O X -0.0080 -0.0011 -0.0047 -0.0067 -0.0015 -0.0007  
Y -0.0029 -0.0098 0.0058 -0.0048 -0.0063 -0.0074  
Z -0.0118 -0.0077 -0.0024 -0.0130 -0.0068 -0.0059  
AT. 161 O X 0.0091 -0.0106 0.0003 -0.0155 0.0113 0.0106



Y -0.0034 0.0109 -0.0084 0.0070 -0.0089 -0.0073  
Z 0.0139 -0.0028 -0.0056 -0.0111 0.0029 -0.0000  
AT.162 O X -0.0091 0.0106 0.0003 -0.0155 0.0113 -0.0106  
Y -0.0034 0.0109 0.0084 -0.0070 0.0089 -0.0073  
Z -0.0139 0.0028 -0.0056 -0.0111 0.0029 0.0000  
AT.163 O X 0.0091 0.0106 0.0003 -0.0155 -0.0113 0.0106  
Y -0.0034 -0.0109 -0.0084 0.0070 0.0089 -0.0073  
Z 0.0139 0.0028 -0.0056 -0.0111 -0.0029 -0.0000  
AT.164 O X -0.0091 -0.0106 0.0003 -0.0155 -0.0113 -0.0106  
Y -0.0034 -0.0109 0.0084 -0.0070 -0.0089 -0.0073  
Z -0.0139 -0.0028 -0.0056 -0.0111 -0.0029 0.0000  
AT.165 H X 0.0122 -0.0151 0.0040 -0.0206 0.0166 0.0136  
Y -0.0022 0.0098 -0.0074 0.0052 -0.0071 -0.0067  
Z 0.0098 -0.0018 -0.0047 -0.0082 0.0017 0.0000  
AT.166 H X -0.0122 0.0151 0.0040 -0.0206 0.0166 -0.0136  
Y -0.0022 0.0098 0.0074 -0.0052 0.0071 -0.0067  
Z -0.0098 0.0018 -0.0047 -0.0082 0.0017 -0.0000  
AT.167 H X 0.0122 0.0151 0.0040 -0.0206 -0.0166 0.0136  
Y -0.0022 -0.0098 -0.0074 0.0052 0.0071 -0.0067  
Z 0.0098 0.0018 -0.0047 -0.0082 -0.0017 0.0000  
AT.168 H X -0.0122 -0.0151 0.0040 -0.0206 -0.0166 -0.0136  
Y -0.0022 -0.0098 0.0074 -0.0052 -0.0071 -0.0067  
Z -0.0098 -0.0018 -0.0047 -0.0082 -0.0017 -0.0000  
AT.169 O X 0.0001 0.0001 0.0013 -0.0016 -0.0017 0.0026  
Y -0.0216 -0.0009 0.0129 0.0161 -0.0021 -0.0008  
Z 0.0029 0.0004 0.0041 -0.0063 -0.0001 0.0058  
AT.170 O X -0.0001 -0.0001 0.0013 -0.0016 -0.0017 -0.0026  
Y -0.0216 -0.0009 -0.0129 -0.0161 0.0021 -0.0008  
Z -0.0029 -0.0004 0.0041 -0.0063 -0.0001 -0.0058  
AT.171 O X 0.0001 -0.0001 0.0013 -0.0016 0.0017 0.0026  
Y -0.0216 0.0009 0.0129 0.0161 0.0021 -0.0008  
Z 0.0029 -0.0004 0.0041 -0.0063 0.0001 0.0058

AT.172 O X -0.0001 0.0001 0.0013 -0.0016 0.0017 -0.0026

Y -0.0216 0.0009 -0.0129 -0.0161 -0.0021 -0.0008

Z -0.0029 0.0004 0.0041 -0.0063 0.0001 -0.0058

AT.173 H X -0.0036 0.0000 0.0064 -0.0002 -0.0020 0.0068

Y -0.0234 -0.0011 0.0140 0.0173 -0.0025 -0.0011

Z 0.0006 0.0005 0.0047 -0.0038 0.0032 0.0047

AT.174 H X 0.0036 -0.0000 0.0064 -0.0002 -0.0020 -0.0068

Y -0.0234 -0.0011 -0.0140 -0.0173 0.0025 -0.0011

Z -0.0006 -0.0005 0.0047 -0.0038 0.0032 -0.0047

AT.175 H X -0.0036 -0.0000 0.0064 -0.0002 0.0020 0.0068

Y -0.0234 0.0011 0.0140 0.0173 0.0025 -0.0011

Z 0.0006 -0.0005 0.0047 -0.0038 -0.0032 0.0047

AT.176 H X 0.0036 0.0000 0.0064 -0.0002 0.0020 -0.0068

Y -0.0234 0.0011 -0.0140 -0.0173 -0.0025 -0.0011

Z -0.0006 0.0005 0.0047 -0.0038 -0.0032 -0.0047

FREQ(CM\*\*-1) 333.01 333.63 341.99 344.78 347.29 348.61

AT. 1 I X -0.0013 0.0015 0.0009 0.0008 -0.0002 0.0008

Y 0.0001 -0.0006 0.0000 0.0000 -0.0003 -0.0000

Z 0.0014 -0.0013 -0.0011 -0.0010 0.0006 -0.0009

AT. 2 I X 0.0013 0.0015 -0.0009 0.0008 -0.0002 -0.0008

Y 0.0001 0.0006 0.0000 -0.0000 0.0003 -0.0000

Z -0.0014 -0.0013 0.0011 -0.0010 0.0006 0.0009

AT. 3 I X 0.0013 -0.0015 0.0009 0.0008 0.0002 -0.0008

Y -0.0001 0.0006 0.0000 0.0000 0.0003 0.0000

Z -0.0014 0.0013 -0.0011 -0.0010 -0.0006 0.0009

AT. 4 I X -0.0013 -0.0015 -0.0009 0.0008 0.0002 0.0008

Y -0.0001 -0.0006 0.0000 -0.0000 -0.0003 0.0000

Z 0.0014 0.0013 0.0011 -0.0010 -0.0006 -0.0009

AT. 5 I X 0.0003 -0.0002 -0.0009 -0.0009 0.0006 -0.0000

Y -0.0003 0.0001 0.0001 0.0003 -0.0003 0.0003

Z -0.0005 0.0002 0.0008 0.0010 -0.0006 0.0002  
AT. 6 I X -0.0003 -0.0002 0.0009 -0.0009 0.0006 0.0000  
Y -0.0003 -0.0001 0.0001 -0.0003 0.0003 0.0003  
Z 0.0005 0.0002 -0.0008 0.0010 -0.0006 -0.0002  
AT. 7 I X -0.0003 0.0002 -0.0009 -0.0009 -0.0006 0.0000  
Y 0.0003 -0.0001 0.0001 0.0003 0.0003 -0.0003  
Z 0.0005 -0.0002 0.0008 0.0010 0.0006 -0.0002  
AT. 8 I X 0.0003 0.0002 0.0009 -0.0009 -0.0006 -0.0000  
Y 0.0003 0.0001 0.0001 -0.0003 -0.0003 -0.0003  
Z -0.0005 -0.0002 -0.0008 0.0010 0.0006 0.0002  
AT. 9 N X 0.0274 -0.0288 -0.0196 -0.0208 0.0012 -0.0113  
Y -0.0129 0.0133 0.0027 0.0023 0.0037 0.0012  
Z -0.0075 0.0063 0.0064 0.0060 -0.0061 0.0061  
AT. 10 N X -0.0274 -0.0288 0.0196 -0.0208 0.0012 0.0113  
Y -0.0129 -0.0133 0.0027 -0.0023 -0.0037 0.0012  
Z 0.0075 0.0063 -0.0064 0.0060 -0.0061 -0.0061  
AT. 11 N X -0.0274 0.0288 -0.0196 -0.0208 -0.0012 0.0113  
Y 0.0129 -0.0133 0.0027 0.0023 -0.0037 -0.0012  
Z 0.0075 -0.0063 0.0064 0.0060 0.0061 -0.0061  
AT. 12 N X 0.0274 0.0288 0.0196 -0.0208 -0.0012 -0.0113  
Y 0.0129 0.0133 0.0027 -0.0023 0.0037 -0.0012  
Z -0.0075 -0.0063 -0.0064 0.0060 0.0061 0.0061  
AT. 13 N X -0.0077 0.0063 0.0082 0.0071 -0.0030 -0.0070  
Y -0.0020 0.0010 0.0042 0.0040 -0.0048 0.0028  
Z 0.0088 -0.0071 -0.0164 -0.0158 0.0168 -0.0111  
AT. 14 N X 0.0077 0.0063 -0.0082 0.0071 -0.0030 0.0070  
Y -0.0020 -0.0010 0.0042 -0.0040 0.0048 0.0028  
Z -0.0088 -0.0071 0.0164 -0.0158 0.0168 0.0111  
AT. 15 N X 0.0077 -0.0063 0.0082 0.0071 0.0030 0.0070  
Y 0.0020 -0.0010 0.0042 0.0040 0.0048 -0.0028  
Z -0.0088 0.0071 -0.0164 -0.0158 -0.0168 0.0111  
AT. 16 N X -0.0077 -0.0063 -0.0082 0.0071 0.0030 -0.0070

Y 0.0020 0.0010 0.0042 -0.0040 -0.0048 -0.0028  
Z 0.0088 0.0071 0.0164 -0.0158 -0.0168 -0.0111  
AT. 17 O X 0.0002 -0.0002 -0.0003 -0.0006 -0.0009 0.0024  
Y 0.0064 -0.0068 -0.0057 -0.0071 -0.0030 0.0019  
Z -0.0012 -0.0000 0.0055 0.0065 -0.0058 0.0064  
AT. 18 O X -0.0002 -0.0002 0.0003 -0.0006 -0.0009 -0.0024  
Y 0.0064 0.0068 -0.0057 0.0071 0.0030 0.0019  
Z 0.0012 -0.0000 -0.0055 0.0065 -0.0058 -0.0064  
AT. 19 O X -0.0002 0.0002 -0.0003 -0.0006 0.0009 -0.0024  
Y -0.0064 0.0068 -0.0057 -0.0071 0.0030 -0.0019  
Z 0.0012 0.0000 0.0055 0.0065 0.0058 -0.0064  
AT. 20 O X 0.0002 0.0002 0.0003 -0.0006 0.0009 0.0024  
Y -0.0064 -0.0068 -0.0057 0.0071 -0.0030 -0.0019  
Z -0.0012 0.0000 -0.0055 0.0065 0.0058 0.0064  
AT. 21 O X 0.0003 0.0004 0.0012 0.0017 -0.0016 0.0025  
Y -0.0089 0.0065 0.0175 0.0165 -0.0179 0.0127  
Z 0.0012 -0.0014 -0.0039 -0.0044 0.0044 -0.0029  
AT. 22 O X -0.0003 0.0004 -0.0012 0.0017 -0.0016 -0.0025  
Y -0.0089 -0.0065 0.0175 -0.0165 0.0179 0.0127  
Z -0.0012 -0.0014 0.0039 -0.0044 0.0044 0.0029  
AT. 23 O X -0.0003 -0.0004 0.0012 0.0017 0.0016 -0.0025  
Y 0.0089 -0.0065 0.0175 0.0165 0.0179 -0.0127  
Z -0.0012 0.0014 -0.0039 -0.0044 -0.0044 0.0029  
AT. 24 O X 0.0003 -0.0004 -0.0012 0.0017 0.0016 0.0025  
Y 0.0089 0.0065 0.0175 -0.0165 -0.0179 -0.0127  
Z 0.0012 0.0014 0.0039 -0.0044 -0.0044 -0.0029  
AT. 25 C X 0.0088 -0.0088 -0.0020 -0.0023 -0.0010 -0.0003  
Y -0.0025 0.0024 -0.0044 -0.0057 0.0076 -0.0069  
Z 0.0039 -0.0047 0.0045 0.0050 -0.0065 0.0060  
AT. 26 C X -0.0088 -0.0088 0.0020 -0.0023 -0.0010 0.0003  
Y -0.0025 -0.0024 -0.0044 0.0057 -0.0076 -0.0069  
Z -0.0039 -0.0047 -0.0045 0.0050 -0.0065 -0.0060

AT. 27 C X -0.0088 0.0088 -0.0020 -0.0023 0.0010 0.0003  
Y 0.0025 -0.0024 -0.0044 -0.0057 -0.0076 0.0069  
Z -0.0039 0.0047 0.0045 0.0050 0.0065 -0.0060

AT. 28 C X 0.0088 0.0088 0.0020 -0.0023 0.0010 -0.0003  
Y 0.0025 0.0024 -0.0044 0.0057 0.0076 0.0069  
Z 0.0039 0.0047 -0.0045 0.0050 0.0065 0.0060

AT. 29 H X 0.0053 -0.0049 -0.0004 -0.0004 -0.0008 0.0007  
Y 0.0024 -0.0020 -0.0049 -0.0072 0.0096 -0.0115  
Z 0.0085 -0.0099 0.0022 0.0025 -0.0074 0.0054

AT. 30 H X -0.0053 -0.0049 0.0004 -0.0004 -0.0008 -0.0007  
Y 0.0024 0.0020 -0.0049 0.0072 -0.0096 -0.0115  
Z -0.0085 -0.0099 -0.0022 0.0025 -0.0074 -0.0054

AT. 31 H X -0.0053 0.0049 -0.0004 -0.0004 0.0008 -0.0007  
Y -0.0024 0.0020 -0.0049 -0.0072 -0.0096 0.0115  
Z -0.0085 0.0099 0.0022 0.0025 0.0074 -0.0054

AT. 32 H X 0.0053 0.0049 0.0004 -0.0004 0.0008 0.0007  
Y -0.0024 -0.0020 -0.0049 0.0072 0.0096 0.0115  
Z 0.0085 0.0099 -0.0022 0.0025 0.0074 0.0054

AT. 33 H X 0.0109 -0.0102 -0.0034 -0.0051 0.0034 -0.0056  
Y -0.0038 0.0036 -0.0038 -0.0048 0.0063 -0.0048  
Z 0.0077 -0.0084 0.0032 0.0034 -0.0041 0.0012

AT. 34 H X -0.0109 -0.0102 0.0034 -0.0051 0.0034 0.0056  
Y -0.0038 -0.0036 -0.0038 0.0048 -0.0063 -0.0048  
Z -0.0077 -0.0084 -0.0032 0.0034 -0.0041 -0.0012

AT. 35 H X -0.0109 0.0102 -0.0034 -0.0051 -0.0034 0.0056  
Y 0.0038 -0.0036 -0.0038 -0.0048 -0.0063 0.0048  
Z -0.0077 0.0084 0.0032 0.0034 0.0041 -0.0012

AT. 36 H X 0.0109 0.0102 0.0034 -0.0051 -0.0034 -0.0056  
Y 0.0038 0.0036 -0.0038 0.0048 0.0063 0.0048  
Z 0.0077 0.0084 -0.0032 0.0034 0.0041 0.0012

AT. 37 C X 0.0128 -0.0138 -0.0068 -0.0072 -0.0015 -0.0020  
Y -0.0057 0.0059 -0.0022 -0.0030 0.0038 -0.0012

Z 0.0003 -0.0015 0.0058 0.0064 -0.0086 0.0092  
AT. 38 C X -0.0128 -0.0138 0.0068 -0.0072 -0.0015 0.0020  
Y -0.0057 -0.0059 -0.0022 0.0030 -0.0038 -0.0012  
Z -0.0003 -0.0015 -0.0058 0.0064 -0.0086 -0.0092  
AT. 39 C X -0.0128 0.0138 -0.0068 -0.0072 0.0015 0.0020  
Y 0.0057 -0.0059 -0.0022 -0.0030 -0.0038 0.0012  
Z -0.0003 0.0015 0.0058 0.0064 0.0086 -0.0092  
AT. 40 C X 0.0128 0.0138 0.0068 -0.0072 0.0015 -0.0020  
Y 0.0057 0.0059 -0.0022 0.0030 0.0038 0.0012  
Z 0.0003 0.0015 -0.0058 0.0064 0.0086 0.0092  
AT. 41 C X 0.0056 -0.0052 -0.0142 -0.0141 0.0135 -0.0080  
Y -0.0013 0.0018 -0.0006 -0.0011 -0.0019 -0.0014  
Z -0.0078 0.0063 0.0049 0.0042 -0.0045 0.0044  
AT. 42 C X -0.0056 -0.0052 0.0142 -0.0141 0.0135 0.0080  
Y -0.0013 -0.0018 -0.0006 0.0011 0.0019 -0.0014  
Z 0.0078 0.0063 -0.0049 0.0042 -0.0045 -0.0044  
AT. 43 C X -0.0056 0.0052 -0.0142 -0.0141 -0.0135 0.0080  
Y 0.0013 -0.0018 -0.0006 -0.0011 0.0019 0.0014  
Z 0.0078 -0.0063 0.0049 0.0042 0.0045 -0.0044  
AT. 44 C X 0.0056 0.0052 0.0142 -0.0141 -0.0135 -0.0080  
Y 0.0013 0.0018 -0.0006 0.0011 -0.0019 0.0014  
Z -0.0078 -0.0063 -0.0049 0.0042 0.0045 0.0044  
AT. 45 H X 0.0009 -0.0014 -0.0198 -0.0184 0.0248 -0.0099  
Y 0.0051 -0.0044 0.0005 -0.0006 -0.0085 -0.0030  
Z -0.0019 0.0007 0.0066 0.0053 -0.0118 0.0035  
AT. 46 H X -0.0009 -0.0014 0.0198 -0.0184 0.0248 0.0099  
Y 0.0051 0.0044 0.0005 0.0006 0.0085 -0.0030  
Z 0.0019 0.0007 -0.0066 0.0053 -0.0118 -0.0035  
AT. 47 H X -0.0009 0.0014 -0.0198 -0.0184 -0.0248 0.0099  
Y -0.0051 0.0044 0.0005 -0.0006 0.0085 0.0030  
Z 0.0019 -0.0007 0.0066 0.0053 0.0118 -0.0035  
AT. 48 H X 0.0009 0.0014 0.0198 -0.0184 -0.0248 -0.0099

Y -0.0051 -0.0044 0.0005 0.0006 -0.0085 0.0030  
Z -0.0019 -0.0007 -0.0066 0.0053 0.0118 0.0035  
AT. 49 H X -0.0052 0.0063 -0.0069 -0.0069 0.0124 -0.0036  
Y -0.0060 0.0071 0.0068 0.0057 -0.0083 0.0017  
Z -0.0221 0.0205 0.0039 0.0046 0.0093 0.0071  
AT. 50 H X 0.0052 0.0063 0.0069 -0.0069 0.0124 0.0036  
Y -0.0060 -0.0071 0.0068 -0.0057 0.0083 0.0017  
Z 0.0221 0.0205 -0.0039 0.0046 0.0093 -0.0071  
AT. 51 H X 0.0052 -0.0063 -0.0069 -0.0069 -0.0124 0.0036  
Y 0.0060 -0.0071 0.0068 0.0057 0.0083 -0.0017  
Z 0.0221 -0.0205 0.0039 0.0046 -0.0093 -0.0071  
AT. 52 H X -0.0052 -0.0063 0.0069 -0.0069 -0.0124 -0.0036  
Y 0.0060 0.0071 0.0068 -0.0057 -0.0083 -0.0017  
Z -0.0221 -0.0205 -0.0039 0.0046 -0.0093 0.0071  
AT. 53 C X 0.0003 0.0007 -0.0081 -0.0085 0.0100 -0.0065  
Y 0.0061 -0.0056 -0.0109 -0.0102 0.0074 -0.0060  
Z 0.0006 -0.0012 0.0019 0.0009 -0.0041 0.0028  
AT. 54 C X -0.0003 0.0007 0.0081 -0.0085 0.0100 0.0065  
Y 0.0061 0.0056 -0.0109 0.0102 -0.0074 -0.0060  
Z -0.0006 -0.0012 -0.0019 0.0009 -0.0041 -0.0028  
AT. 55 C X -0.0003 -0.0007 -0.0081 -0.0085 -0.0100 0.0065  
Y -0.0061 0.0056 -0.0109 -0.0102 -0.0074 0.0060  
Z -0.0006 0.0012 0.0019 0.0009 0.0041 -0.0028  
AT. 56 C X 0.0003 -0.0007 0.0081 -0.0085 -0.0100 -0.0065  
Y -0.0061 -0.0056 -0.0109 0.0102 0.0074 0.0060  
Z 0.0006 0.0012 -0.0019 0.0009 0.0041 0.0028  
AT. 57 C X 0.0022 -0.0023 -0.0129 -0.0131 0.0131 -0.0146  
Y -0.0132 0.0146 0.0028 0.0042 0.0014 0.0022  
Z 0.0110 -0.0120 -0.0052 -0.0069 -0.0015 0.0004  
AT. 58 C X -0.0022 -0.0023 0.0129 -0.0131 0.0131 0.0146  
Y -0.0132 -0.0146 0.0028 -0.0042 -0.0014 0.0022  
Z -0.0110 -0.0120 0.0052 -0.0069 -0.0015 -0.0004

AT. 59 C X -0.0022 0.0023 -0.0129 -0.0131 -0.0131 0.0146  
Y 0.0132 -0.0146 0.0028 0.0042 -0.0014 -0.0022  
Z -0.0110 0.0120 -0.0052 -0.0069 0.0015 -0.0004

AT. 60 C X 0.0022 0.0023 0.0129 -0.0131 -0.0131 -0.0146  
Y 0.0132 0.0146 0.0028 -0.0042 0.0014 -0.0022  
Z 0.0110 0.0120 0.0052 -0.0069 0.0015 0.0004

AT. 61 H X 0.0142 -0.0171 0.0062 0.0028 -0.0071 -0.0011  
Y -0.0064 0.0055 0.0220 0.0207 -0.0176 0.0161  
Z 0.0222 -0.0220 -0.0357 -0.0355 0.0226 -0.0237

AT. 62 H X -0.0142 -0.0171 -0.0062 0.0028 -0.0071 0.0011  
Y -0.0064 -0.0055 0.0220 -0.0207 0.0176 0.0161  
Z -0.0222 -0.0220 0.0357 -0.0355 0.0226 0.0237

AT. 63 H X -0.0142 0.0171 0.0062 0.0028 0.0071 0.0011  
Y 0.0064 -0.0055 0.0220 0.0207 0.0176 -0.0161  
Z -0.0222 0.0220 -0.0357 -0.0355 -0.0226 0.0237

AT. 64 H X 0.0142 0.0171 -0.0062 0.0028 0.0071 -0.0011  
Y 0.0064 0.0055 0.0220 -0.0207 -0.0176 -0.0161  
Z 0.0222 0.0220 0.0357 -0.0355 -0.0226 -0.0237

AT. 65 H X 0.0074 -0.0085 -0.0049 -0.0063 0.0045 -0.0085  
Y -0.0289 0.0332 -0.0207 -0.0157 0.0270 -0.0160  
Z 0.0212 -0.0232 0.0052 0.0009 -0.0142 0.0140

AT. 66 H X -0.0074 -0.0085 0.0049 -0.0063 0.0045 0.0085  
Y -0.0289 -0.0332 -0.0207 0.0157 -0.0270 -0.0160  
Z -0.0212 -0.0232 -0.0052 0.0009 -0.0142 -0.0140

AT. 67 H X -0.0074 0.0085 -0.0049 -0.0063 -0.0045 0.0085  
Y 0.0289 -0.0332 -0.0207 -0.0157 -0.0270 0.0160  
Z -0.0212 0.0232 0.0052 0.0009 0.0142 -0.0140

AT. 68 H X 0.0074 0.0085 0.0049 -0.0063 -0.0045 -0.0085  
Y 0.0289 0.0332 -0.0207 0.0157 0.0270 0.0160  
Z 0.0212 0.0232 -0.0052 0.0009 0.0142 0.0140

AT. 69 H X -0.0110 0.0142 -0.0437 -0.0386 0.0451 -0.0412  
Y -0.0240 0.0246 0.0252 0.0253 -0.0153 0.0168



Z -0.0004 -0.0008 0.0081 0.0062 -0.0098 0.0079  
AT. 70 H X 0.0110 0.0142 0.0437 -0.0386 0.0451 0.0412  
Y -0.0240 -0.0246 0.0252 -0.0253 0.0153 0.0168  
Z 0.0004 -0.0008 -0.0081 0.0062 -0.0098 -0.0079  
AT. 71 H X 0.0110 -0.0142 -0.0437 -0.0386 -0.0451 0.0412  
Y 0.0240 -0.0246 0.0252 0.0253 0.0153 -0.0168  
Z 0.0004 0.0008 0.0081 0.0062 0.0098 -0.0079  
AT. 72 H X -0.0110 -0.0142 0.0437 -0.0386 -0.0451 -0.0412  
Y 0.0240 0.0246 0.0252 -0.0253 -0.0153 -0.0168  
Z -0.0004 0.0008 -0.0081 0.0062 0.0098 0.0079  
AT. 73 C X -0.0093 0.0095 0.0043 0.0034 0.0011 -0.0019  
Y 0.0052 -0.0046 -0.0036 -0.0026 0.0017 -0.0010  
Z -0.0032 0.0026 0.0100 0.0097 -0.0098 0.0095  
AT. 74 C X 0.0093 0.0095 -0.0043 0.0034 0.0011 0.0019  
Y 0.0052 0.0046 -0.0036 0.0026 -0.0017 -0.0010  
Z 0.0032 0.0026 -0.0100 0.0097 -0.0098 -0.0095  
AT. 75 C X 0.0093 -0.0095 0.0043 0.0034 -0.0011 0.0019  
Y -0.0052 0.0046 -0.0036 -0.0026 -0.0017 0.0010  
Z 0.0032 -0.0026 0.0100 0.0097 0.0098 -0.0095  
AT. 76 C X -0.0093 -0.0095 -0.0043 0.0034 -0.0011 -0.0019  
Y -0.0052 -0.0046 -0.0036 0.0026 0.0017 0.0010  
Z -0.0032 -0.0026 -0.0100 0.0097 0.0098 0.0095  
AT. 77 C X 0.0001 -0.0004 0.0005 -0.0004 -0.0049 0.0061  
Y -0.0080 0.0077 -0.0016 -0.0022 0.0092 -0.0166  
Z -0.0042 0.0025 0.0015 0.0005 -0.0003 -0.0085  
AT. 78 C X -0.0001 -0.0004 -0.0005 -0.0004 -0.0049 -0.0061  
Y -0.0080 -0.0077 -0.0016 0.0022 -0.0092 -0.0166  
Z 0.0042 0.0025 -0.0015 0.0005 -0.0003 0.0085  
AT. 79 C X -0.0001 0.0004 0.0005 -0.0004 0.0049 -0.0061  
Y 0.0080 -0.0077 -0.0016 -0.0022 -0.0092 0.0166  
Z 0.0042 -0.0025 0.0015 0.0005 0.0003 0.0085  
AT. 80 C X 0.0001 0.0004 -0.0005 -0.0004 0.0049 0.0061

Y 0.0080 0.0077 -0.0016 0.0022 0.0092 0.0166  
Z -0.0042 -0.0025 -0.0015 0.0005 0.0003 -0.0085  
AT. 81 H X -0.0095 0.0082 0.0021 0.0001 0.0015 -0.0099  
Y -0.0197 0.0183 0.0013 -0.0006 0.0154 -0.0318  
Z 0.0096 -0.0136 -0.0125 -0.0152 0.0107 -0.0441  
AT. 82 H X 0.0095 0.0082 -0.0021 0.0001 0.0015 0.0099  
Y -0.0197 -0.0183 0.0013 0.0006 -0.0154 -0.0318  
Z -0.0096 -0.0136 0.0125 -0.0152 0.0107 0.0441  
AT. 83 H X 0.0095 -0.0082 0.0021 0.0001 -0.0015 0.0099  
Y 0.0197 -0.0183 0.0013 -0.0006 -0.0154 0.0318  
Z -0.0096 0.0136 -0.0125 -0.0152 -0.0107 0.0441  
AT. 84 H X -0.0095 -0.0082 -0.0021 0.0001 -0.0015 -0.0099  
Y 0.0197 0.0183 0.0013 0.0006 0.0154 0.0318  
Z 0.0096 0.0136 0.0125 -0.0152 -0.0107 -0.0441  
AT. 85 H X 0.0027 -0.0003 0.0066 0.0077 -0.0162 0.0392  
Y -0.0055 0.0045 -0.0057 -0.0072 0.0160 -0.0364  
Z -0.0066 0.0047 0.0031 0.0021 -0.0030 -0.0012  
AT. 86 H X -0.0027 -0.0003 -0.0066 0.0077 -0.0162 -0.0392  
Y -0.0055 -0.0045 -0.0057 0.0072 -0.0160 -0.0364  
Z 0.0066 0.0047 -0.0031 0.0021 -0.0030 0.0012  
AT. 87 H X -0.0027 0.0003 0.0066 0.0077 0.0162 -0.0392  
Y 0.0055 -0.0045 -0.0057 -0.0072 -0.0160 0.0364  
Z 0.0066 -0.0047 0.0031 0.0021 0.0030 0.0012  
AT. 88 H X 0.0027 0.0003 -0.0066 0.0077 0.0162 0.0392  
Y 0.0055 0.0045 -0.0057 0.0072 0.0160 0.0364  
Z -0.0066 -0.0047 -0.0031 0.0021 0.0030 -0.0012  
AT. 89 C X -0.0090 0.0085 0.0050 0.0042 -0.0019 0.0005  
Y 0.0023 -0.0019 -0.0015 -0.0012 0.0002 -0.0003  
Z -0.0001 -0.0000 0.0018 0.0018 -0.0008 0.0012  
AT. 90 C X 0.0090 0.0085 -0.0050 0.0042 -0.0019 -0.0005  
Y 0.0023 0.0019 -0.0015 0.0012 -0.0002 -0.0003  
Z 0.0001 -0.0000 -0.0018 0.0018 -0.0008 -0.0012

AT. 91 C X 0.0090 -0.0085 0.0050 0.0042 0.0019 -0.0005  
Y -0.0023 0.0019 -0.0015 -0.0012 -0.0002 0.0003  
Z 0.0001 0.0000 0.0018 0.0018 0.0008 -0.0012

AT. 92 C X -0.0090 -0.0085 -0.0050 0.0042 0.0019 0.0005  
Y -0.0023 -0.0019 -0.0015 0.0012 0.0002 0.0003  
Z -0.0001 0.0000 -0.0018 0.0018 0.0008 0.0012

AT. 93 C X 0.0152 -0.0176 0.0083 0.0113 -0.0175 0.0176  
Y 0.0087 -0.0076 -0.0199 -0.0197 0.0176 -0.0183  
Z 0.0001 0.0006 -0.0102 -0.0107 0.0127 -0.0125

AT. 94 C X -0.0152 -0.0176 -0.0083 0.0113 -0.0175 -0.0176  
Y 0.0087 0.0076 -0.0199 0.0197 -0.0176 -0.0183  
Z -0.0001 0.0006 0.0102 -0.0107 0.0127 0.0125

AT. 95 C X -0.0152 0.0176 0.0083 0.0113 0.0175 -0.0176  
Y -0.0087 0.0076 -0.0199 -0.0197 -0.0176 0.0183  
Z -0.0001 -0.0006 -0.0102 -0.0107 -0.0127 0.0125

AT. 96 C X 0.0152 0.0176 -0.0083 0.0113 0.0175 0.0176  
Y -0.0087 -0.0076 -0.0199 0.0197 0.0176 0.0183  
Z 0.0001 -0.0006 0.0102 -0.0107 -0.0127 -0.0125

AT. 97 H X 0.0267 -0.0296 0.0089 0.0153 -0.0248 0.0261  
Y -0.0043 0.0052 -0.0215 -0.0281 0.0279 -0.0315  
Z 0.0154 -0.0164 -0.0124 -0.0134 0.0083 -0.0089

AT. 98 H X -0.0267 -0.0296 -0.0089 0.0153 -0.0248 -0.0261  
Y -0.0043 -0.0052 -0.0215 0.0281 -0.0279 -0.0315  
Z -0.0154 -0.0164 0.0124 -0.0134 0.0083 0.0089

AT. 99 H X -0.0267 0.0296 0.0089 0.0153 0.0248 -0.0261  
Y 0.0043 -0.0052 -0.0215 -0.0281 -0.0279 0.0315  
Z -0.0154 0.0164 -0.0124 -0.0134 -0.0083 0.0089

AT. 100 H X 0.0267 0.0296 -0.0089 0.0153 0.0248 0.0261  
Y 0.0043 0.0052 -0.0215 0.0281 0.0279 0.0315  
Z 0.0154 0.0164 0.0124 -0.0134 -0.0083 -0.0089

AT. 101 H X 0.0256 -0.0273 0.0039 0.0126 -0.0192 0.0220  
Y 0.0210 -0.0196 -0.0213 -0.0151 0.0115 -0.0095

Z -0.0055 0.0089 -0.0303 -0.0305 0.0387 -0.0371  
AT.102 H X -0.0256 -0.0273 -0.0039 0.0126 -0.0192 -0.0220  
Y 0.0210 0.0196 -0.0213 0.0151 -0.0115 -0.0095  
Z 0.0055 0.0089 0.0303 -0.0305 0.0387 0.0371  
AT.103 H X -0.0256 0.0273 0.0039 0.0126 0.0192 -0.0220  
Y -0.0210 0.0196 -0.0213 -0.0151 -0.0115 0.0095  
Z 0.0055 -0.0089 -0.0303 -0.0305 -0.0387 0.0371  
AT.104 H X 0.0256 0.0273 -0.0039 0.0126 0.0192 0.0220  
Y -0.0210 -0.0196 -0.0213 0.0151 0.0115 0.0095  
Z -0.0055 -0.0089 0.0303 -0.0305 -0.0387 -0.0371  
AT.105 H X 0.0165 -0.0212 0.0195 0.0174 -0.0296 0.0270  
Y 0.0175 -0.0151 -0.0377 -0.0359 0.0336 -0.0336  
Z -0.0071 0.0076 -0.0005 -0.0003 0.0047 -0.0041  
AT.106 H X -0.0165 -0.0212 -0.0195 0.0174 -0.0296 -0.0270  
Y 0.0175 0.0151 -0.0377 0.0359 -0.0336 -0.0336  
Z 0.0071 0.0076 0.0005 -0.0003 0.0047 0.0041  
AT.107 H X -0.0165 0.0212 0.0195 0.0174 0.0296 -0.0270  
Y -0.0175 0.0151 -0.0377 -0.0359 -0.0336 0.0336  
Z 0.0071 -0.0076 -0.0005 -0.0003 -0.0047 0.0041  
AT.108 H X 0.0165 0.0212 -0.0195 0.0174 0.0296 0.0270  
Y -0.0175 -0.0151 -0.0377 0.0359 0.0336 0.0336  
Z -0.0071 -0.0076 0.0005 -0.0003 -0.0047 -0.0041  
AT.109 C X -0.0008 0.0029 -0.0028 -0.0019 0.0067 -0.0002  
Y 0.0044 -0.0035 -0.0022 -0.0003 0.0001 0.0059  
Z 0.0025 -0.0023 -0.0090 -0.0101 0.0102 -0.0138  
AT.110 C X 0.0008 0.0029 0.0028 -0.0019 0.0067 0.0002  
Y 0.0044 0.0035 -0.0022 0.0003 -0.0001 0.0059  
Z -0.0025 -0.0023 0.0090 -0.0101 0.0102 0.0138  
AT.111 C X 0.0008 -0.0029 -0.0028 -0.0019 -0.0067 0.0002  
Y -0.0044 0.0035 -0.0022 -0.0003 -0.0001 -0.0059  
Z -0.0025 0.0023 -0.0090 -0.0101 -0.0102 0.0138  
AT.112 C X -0.0008 -0.0029 0.0028 -0.0019 -0.0067 -0.0002

Y -0.0044 -0.0035 -0.0022 0.0003 0.0001 -0.0059  
Z 0.0025 0.0023 0.0090 -0.0101 -0.0102 -0.0138  
AT. 113 H X -0.0006 0.0017 -0.0097 -0.0100 0.0134 -0.0121  
Y 0.0028 -0.0008 0.0098 0.0131 -0.0113 0.0223  
Z -0.0049 0.0010 -0.0057 -0.0097 0.0082 -0.0326  
AT. 114 H X 0.0006 0.0017 0.0097 -0.0100 0.0134 0.0121  
Y 0.0028 0.0008 0.0098 -0.0131 0.0113 0.0223  
Z 0.0049 0.0010 0.0057 -0.0097 0.0082 0.0326  
AT. 115 H X 0.0006 -0.0017 -0.0097 -0.0100 -0.0134 0.0121  
Y -0.0028 0.0008 0.0098 0.0131 0.0113 -0.0223  
Z 0.0049 -0.0010 -0.0057 -0.0097 -0.0082 0.0326  
AT. 116 H X -0.0006 -0.0017 0.0097 -0.0100 -0.0134 -0.0121  
Y -0.0028 -0.0008 0.0098 -0.0131 -0.0113 -0.0223  
Z -0.0049 -0.0010 0.0057 -0.0097 -0.0082 -0.0326  
AT. 117 H X 0.0019 0.0043 0.0077 0.0108 -0.0039 0.0282  
Y 0.0101 -0.0070 -0.0085 -0.0047 0.0061 0.0078  
Z 0.0077 -0.0059 -0.0169 -0.0163 0.0176 -0.0170  
AT. 118 H X -0.0019 0.0043 -0.0077 0.0108 -0.0039 -0.0282  
Y 0.0101 0.0070 -0.0085 0.0047 -0.0061 0.0078  
Z -0.0077 -0.0059 0.0169 -0.0163 0.0176 0.0170  
AT. 119 H X -0.0019 -0.0043 0.0077 0.0108 0.0039 -0.0282  
Y -0.0101 0.0070 -0.0085 -0.0047 -0.0061 -0.0078  
Z -0.0077 0.0059 -0.0169 -0.0163 -0.0176 0.0170  
AT. 120 H X 0.0019 -0.0043 -0.0077 0.0108 0.0039 0.0282  
Y -0.0101 -0.0070 -0.0085 0.0047 0.0061 -0.0078  
Z 0.0077 0.0059 0.0169 -0.0163 -0.0176 -0.0170  
AT. 121 C X -0.0083 0.0079 0.0013 -0.0000 0.0044 -0.0038  
Y -0.0015 0.0012 0.0012 0.0007 0.0003 0.0003  
Z 0.0090 -0.0075 -0.0127 -0.0121 0.0137 -0.0081  
AT. 122 C X 0.0083 0.0079 -0.0013 -0.0000 0.0044 0.0038  
Y -0.0015 -0.0012 0.0012 -0.0007 -0.0003 0.0003  
Z -0.0090 -0.0075 0.0127 -0.0121 0.0137 0.0081

AT.123 C X 0.0083 -0.0079 0.0013 -0.0000 -0.0044 0.0038  
Y 0.0015 -0.0012 0.0012 0.0007 -0.0003 -0.0003  
Z -0.0090 0.0075 -0.0127 -0.0121 -0.0137 0.0081

AT.124 C X -0.0083 -0.0079 -0.0013 -0.0000 -0.0044 -0.0038  
Y 0.0015 0.0012 0.0012 -0.0007 0.0003 -0.0003  
Z 0.0090 0.0075 0.0127 -0.0121 -0.0137 -0.0081

AT.125 H X -0.0080 0.0086 -0.0112 -0.0132 0.0237 -0.0154  
Y -0.0009 0.0010 -0.0003 -0.0007 0.0033 0.0016  
Z 0.0087 -0.0078 -0.0086 -0.0079 0.0067 -0.0062

AT.126 H X 0.0080 0.0086 0.0112 -0.0132 0.0237 0.0154  
Y -0.0009 -0.0010 -0.0003 0.0007 -0.0033 0.0016  
Z -0.0087 -0.0078 0.0086 -0.0079 0.0067 0.0062

AT.127 H X 0.0080 -0.0086 -0.0112 -0.0132 -0.0237 0.0154  
Y 0.0009 -0.0010 -0.0003 -0.0007 -0.0033 -0.0016  
Z -0.0087 0.0078 -0.0086 -0.0079 -0.0067 0.0062

AT.128 H X -0.0080 -0.0086 0.0112 -0.0132 -0.0237 -0.0154  
Y 0.0009 0.0010 -0.0003 0.0007 0.0033 -0.0016  
Z 0.0087 0.0078 0.0086 -0.0079 -0.0067 -0.0062

AT.129 H X -0.0072 0.0074 -0.0013 -0.0023 0.0059 -0.0023  
Y -0.0035 0.0028 0.0007 -0.0006 0.0052 -0.0048  
Z 0.0098 -0.0068 -0.0248 -0.0248 0.0320 -0.0151

AT.130 H X 0.0072 0.0074 0.0013 -0.0023 0.0059 0.0023  
Y -0.0035 -0.0028 0.0007 0.0006 -0.0052 -0.0048  
Z -0.0098 -0.0068 0.0248 -0.0248 0.0320 0.0151

AT.131 H X 0.0072 -0.0074 -0.0013 -0.0023 -0.0059 0.0023  
Y 0.0035 -0.0028 0.0007 -0.0006 -0.0052 0.0048  
Z -0.0098 0.0068 -0.0248 -0.0248 -0.0320 0.0151

AT.132 H X -0.0072 -0.0074 0.0013 -0.0023 -0.0059 -0.0023  
Y 0.0035 0.0028 0.0007 0.0006 0.0052 0.0048  
Z 0.0098 0.0068 0.0248 -0.0248 -0.0320 -0.0151

AT.133 C X -0.0017 0.0011 0.0016 0.0009 -0.0001 -0.0038  
Y -0.0026 0.0016 0.0058 0.0054 -0.0058 0.0036

Z 0.0052 -0.0046 -0.0107 -0.0105 0.0111 -0.0074  
AT. 134 C X 0.0017 0.0011 -0.0016 0.0009 -0.0001 0.0038  
Y -0.0026 -0.0016 0.0058 -0.0054 0.0058 0.0036  
Z -0.0052 -0.0046 0.0107 -0.0105 0.0111 0.0074  
AT. 135 C X 0.0017 -0.0011 0.0016 0.0009 0.0001 0.0038  
Y 0.0026 -0.0016 0.0058 0.0054 0.0058 -0.0036  
Z -0.0052 0.0046 -0.0107 -0.0105 -0.0111 0.0074  
AT. 136 C X -0.0017 -0.0011 -0.0016 0.0009 0.0001 -0.0038  
Y 0.0026 0.0016 0.0058 -0.0054 -0.0058 -0.0036  
Z 0.0052 0.0046 0.0107 -0.0105 -0.0111 -0.0074  
AT. 137 C X -0.0010 0.0006 0.0007 -0.0001 -0.0009 -0.0016  
Y 0.0052 -0.0053 -0.0103 -0.0098 0.0119 -0.0078  
Z -0.0003 0.0002 -0.0006 -0.0009 0.0005 -0.0013  
AT. 138 C X 0.0010 0.0006 -0.0007 -0.0001 -0.0009 0.0016  
Y 0.0052 0.0053 -0.0103 0.0098 -0.0119 -0.0078  
Z 0.0003 0.0002 0.0006 -0.0009 0.0005 0.0013  
AT. 139 C X 0.0010 -0.0006 0.0007 -0.0001 0.0009 0.0016  
Y -0.0052 0.0053 -0.0103 -0.0098 -0.0119 0.0078  
Z 0.0003 -0.0002 -0.0006 -0.0009 -0.0005 0.0013  
AT. 140 C X -0.0010 -0.0006 -0.0007 -0.0001 0.0009 -0.0016  
Y -0.0052 -0.0053 -0.0103 0.0098 0.0119 0.0078  
Z -0.0003 -0.0002 0.0006 -0.0009 -0.0005 -0.0013  
AT. 141 H X 0.0040 -0.0039 -0.0063 -0.0070 0.0075 -0.0057  
Y 0.0124 -0.0119 -0.0244 -0.0233 0.0285 -0.0182  
Z -0.0008 0.0006 -0.0024 -0.0025 0.0026 -0.0038  
AT. 142 H X -0.0040 -0.0039 0.0063 -0.0070 0.0075 0.0057  
Y 0.0124 0.0119 -0.0244 0.0233 -0.0285 -0.0182  
Z 0.0008 0.0006 0.0024 -0.0025 0.0026 0.0038  
AT. 143 H X -0.0040 0.0039 -0.0063 -0.0070 -0.0075 0.0057  
Y -0.0124 0.0119 -0.0244 -0.0233 -0.0285 0.0182  
Z 0.0008 -0.0006 -0.0024 -0.0025 -0.0026 0.0038  
AT. 144 H X 0.0040 0.0039 0.0063 -0.0070 -0.0075 -0.0057

Y -0.0124 -0.0119 -0.0244 0.0233 0.0285 0.0182  
Z -0.0008 -0.0006 0.0024 -0.0025 -0.0026 -0.0038  
AT. 145 H X -0.0082 0.0077 0.0127 0.0115 -0.0148 0.0071  
Y 0.0055 -0.0058 -0.0106 -0.0100 0.0125 -0.0085  
Z -0.0074 0.0066 0.0119 0.0112 -0.0130 0.0061  
AT. 146 H X 0.0082 0.0077 -0.0127 0.0115 -0.0148 -0.0071  
Y 0.0055 0.0058 -0.0106 0.0100 -0.0125 -0.0085  
Z 0.0074 0.0066 -0.0119 0.0112 -0.0130 -0.0061  
AT. 147 H X 0.0082 -0.0077 0.0127 0.0115 0.0148 -0.0071  
Y -0.0055 0.0058 -0.0106 -0.0100 -0.0125 0.0085  
Z 0.0074 -0.0066 0.0119 0.0112 0.0130 -0.0061  
AT. 148 H X -0.0082 -0.0077 -0.0127 0.0115 0.0148 0.0071  
Y -0.0055 -0.0058 -0.0106 0.0100 0.0125 0.0085  
Z -0.0074 -0.0066 -0.0119 0.0112 0.0130 0.0061  
AT. 149 O X 0.0049 -0.0043 0.0021 0.0020 -0.0022 0.0070  
Y 0.0198 -0.0188 -0.0087 -0.0070 0.0018 0.0032  
Z 0.0039 -0.0043 0.0170 0.0171 -0.0208 0.0260  
AT. 150 O X -0.0049 -0.0043 -0.0021 0.0020 -0.0022 -0.0070  
Y 0.0198 0.0188 -0.0087 0.0070 -0.0018 0.0032  
Z -0.0039 -0.0043 -0.0170 0.0171 -0.0208 -0.0260  
AT. 151 O X -0.0049 0.0043 0.0021 0.0020 0.0022 -0.0070  
Y -0.0198 0.0188 -0.0087 -0.0070 -0.0018 -0.0032  
Z -0.0039 0.0043 0.0170 0.0171 0.0208 -0.0260  
AT. 152 O X 0.0049 0.0043 -0.0021 0.0020 0.0022 0.0070  
Y -0.0198 -0.0188 -0.0087 0.0070 0.0018 -0.0032  
Z 0.0039 0.0043 -0.0170 0.0171 0.0208 0.0260  
AT. 153 H X -0.0095 0.0096 0.0120 0.0098 -0.0050 0.0026  
Y 0.0157 -0.0154 0.0060 0.0064 -0.0138 0.0146  
Z 0.0111 -0.0115 0.0156 0.0165 -0.0237 0.0322  
AT. 154 H X 0.0095 0.0096 -0.0120 0.0098 -0.0050 -0.0026  
Y 0.0157 0.0154 0.0060 -0.0064 0.0138 0.0146  
Z -0.0111 -0.0115 -0.0156 0.0165 -0.0237 -0.0322



AT.155 H X 0.0095 -0.0096 0.0120 0.0098 0.0050 -0.0026  
Y -0.0157 0.0154 0.0060 0.0064 0.0138 -0.0146  
Z -0.0111 0.0115 0.0156 0.0165 0.0237 -0.0322

AT.156 H X -0.0095 -0.0096 -0.0120 0.0098 0.0050 0.0026  
Y -0.0157 -0.0154 0.0060 -0.0064 -0.0138 -0.0146  
Z 0.0111 0.0115 -0.0156 0.0165 0.0237 0.0322

AT.157 O X -0.0119 0.0120 0.0085 0.0085 -0.0033 0.0025  
Y -0.0032 0.0044 -0.0021 -0.0014 0.0056 -0.0065  
Z -0.0173 0.0170 0.0171 0.0179 -0.0114 0.0094

AT.158 O X 0.0119 0.0120 -0.0085 0.0085 -0.0033 -0.0025  
Y -0.0032 -0.0044 -0.0021 0.0014 -0.0056 -0.0065  
Z 0.0173 0.0170 -0.0171 0.0179 -0.0114 -0.0094

AT.159 O X 0.0119 -0.0120 0.0085 0.0085 0.0033 -0.0025  
Y 0.0032 -0.0044 -0.0021 -0.0014 -0.0056 0.0065  
Z 0.0173 -0.0170 0.0171 0.0179 0.0114 -0.0094

AT.160 O X -0.0119 -0.0120 -0.0085 0.0085 0.0033 0.0025  
Y 0.0032 0.0044 -0.0021 0.0014 0.0056 0.0065  
Z -0.0173 -0.0170 -0.0171 0.0179 0.0114 0.0094

AT.161 O X -0.0244 0.0233 0.0260 0.0261 -0.0179 0.0118  
Y -0.0149 0.0138 0.0239 0.0220 -0.0154 0.0123  
Z -0.0072 0.0091 -0.0059 -0.0035 0.0089 -0.0068

AT.162 O X 0.0244 0.0233 -0.0260 0.0261 -0.0179 -0.0118  
Y -0.0149 -0.0138 0.0239 -0.0220 0.0154 0.0123  
Z 0.0072 0.0091 0.0059 -0.0035 0.0089 0.0068

AT.163 O X 0.0244 -0.0233 0.0260 0.0261 0.0179 -0.0118  
Y 0.0149 -0.0138 0.0239 0.0220 0.0154 -0.0123  
Z 0.0072 -0.0091 -0.0059 -0.0035 -0.0089 0.0068

AT.164 O X -0.0244 -0.0233 -0.0260 0.0261 0.0179 0.0118  
Y 0.0149 0.0138 0.0239 -0.0220 -0.0154 -0.0123  
Z -0.0072 -0.0091 0.0059 -0.0035 -0.0089 -0.0068

AT.165 H X -0.0187 0.0185 0.0112 0.0135 -0.0066 0.0023  
Y -0.0130 0.0124 0.0181 0.0172 -0.0108 0.0085

Z -0.0054 0.0073 -0.0051 -0.0037 0.0075 -0.0070  
AT.166 H X 0.0187 0.0185 -0.0112 0.0135 -0.0066 -0.0023  
Y -0.0130 -0.0124 0.0181 -0.0172 0.0108 0.0085  
Z 0.0054 0.0073 0.0051 -0.0037 0.0075 0.0070  
AT.167 H X 0.0187 -0.0185 0.0112 0.0135 0.0066 -0.0023  
Y 0.0130 -0.0124 0.0181 0.0172 0.0108 -0.0085  
Z 0.0054 -0.0073 -0.0051 -0.0037 -0.0075 0.0070  
AT.168 H X -0.0187 -0.0185 -0.0112 0.0135 0.0066 0.0023  
Y 0.0130 0.0124 0.0181 -0.0172 -0.0108 -0.0085  
Z -0.0054 -0.0073 0.0051 -0.0037 -0.0075 -0.0070  
AT.169 O X 0.0058 -0.0063 -0.0028 -0.0032 -0.0022 0.0027  
Y 0.0294 -0.0294 0.0070 0.0087 -0.0229 0.0232  
Z -0.0016 0.0017 -0.0020 -0.0013 0.0004 -0.0004  
AT.170 O X -0.0058 -0.0063 0.0028 -0.0032 -0.0022 -0.0027  
Y 0.0294 0.0294 0.0070 -0.0087 0.0229 0.0232  
Z 0.0016 0.0017 0.0020 -0.0013 0.0004 0.0004  
AT.171 O X -0.0058 0.0063 -0.0028 -0.0032 0.0022 -0.0027  
Y -0.0294 0.0294 0.0070 0.0087 0.0229 -0.0232  
Z 0.0016 -0.0017 -0.0020 -0.0013 -0.0004 0.0004  
AT.172 O X 0.0058 0.0063 0.0028 -0.0032 0.0022 0.0027  
Y -0.0294 -0.0294 0.0070 -0.0087 -0.0229 -0.0232  
Z -0.0016 -0.0017 0.0020 -0.0013 -0.0004 -0.0004  
AT.173 H X 0.0018 -0.0019 -0.0005 -0.0004 -0.0002 0.0019  
Y 0.0356 -0.0357 0.0069 0.0087 -0.0271 0.0271  
Z -0.0273 0.0274 -0.0009 -0.0000 0.0203 -0.0210  
AT.174 H X -0.0018 -0.0019 0.0005 -0.0004 -0.0002 -0.0019  
Y 0.0356 0.0357 0.0069 -0.0087 0.0271 0.0271  
Z 0.0273 0.0274 0.0009 -0.0000 0.0203 0.0210  
AT.175 H X -0.0018 0.0019 -0.0005 -0.0004 0.0002 -0.0019  
Y -0.0356 0.0357 0.0069 0.0087 0.0271 -0.0271  
Z 0.0273 -0.0274 -0.0009 -0.0000 -0.0203 0.0210  
AT.176 H X 0.0018 0.0019 0.0005 -0.0004 0.0002 0.0019

Y -0.0356 -0.0357 0.0069 -0.0087 -0.0271 -0.0271  
Z -0.0273 -0.0274 0.0009 -0.0000 -0.0203 -0.0210

FREQ(CM\*\*-1) 349.47 349.61 350.56 350.66 366.77 367.17

AT. 1 I X -0.0012 -0.0013 -0.0011 -0.0014 0.0002 0.0005

Y 0.0006 0.0004 0.0005 0.0004 0.0001 -0.0001

Z 0.0015 0.0014 0.0012 0.0015 -0.0002 -0.0008

AT. 2 I X -0.0012 0.0013 -0.0011 0.0014 -0.0002 0.0005

Y -0.0006 0.0004 -0.0005 0.0004 0.0001 0.0001

Z 0.0015 -0.0014 0.0012 -0.0015 0.0002 -0.0008

AT. 3 I X 0.0012 0.0013 -0.0011 -0.0014 -0.0002 0.0005

Y -0.0006 -0.0004 0.0005 0.0004 -0.0001 -0.0001

Z -0.0015 -0.0014 0.0012 0.0015 0.0002 -0.0008

AT. 4 I X 0.0012 -0.0013 -0.0011 0.0014 0.0002 0.0005

Y 0.0006 -0.0004 -0.0005 0.0004 -0.0001 0.0001

Z -0.0015 0.0014 0.0012 -0.0015 -0.0002 -0.0008

AT. 5 I X -0.0010 -0.0012 -0.0012 -0.0011 0.0001 -0.0001

Y 0.0002 0.0004 0.0004 0.0004 0.0001 -0.0001

Z 0.0010 0.0012 0.0011 0.0011 -0.0001 0.0001

AT. 6 I X -0.0010 0.0012 -0.0012 0.0011 -0.0001 -0.0001

Y -0.0002 0.0004 -0.0004 0.0004 0.0001 0.0001

Z 0.0010 -0.0012 0.0011 -0.0011 0.0001 0.0001

AT. 7 I X 0.0010 0.0012 -0.0012 -0.0011 -0.0001 -0.0001

Y -0.0002 -0.0004 0.0004 0.0004 -0.0001 -0.0001

Z -0.0010 -0.0012 0.0011 0.0011 0.0001 0.0001

AT. 8 I X 0.0010 -0.0012 -0.0012 0.0011 0.0001 -0.0001

Y 0.0002 -0.0004 -0.0004 0.0004 -0.0001 0.0001

Z -0.0010 0.0012 0.0011 -0.0011 -0.0001 0.0001

AT. 9 N X 0.0242 0.0227 0.0237 0.0246 -0.0063 -0.0184

Y -0.0130 -0.0144 -0.0133 -0.0142 0.0020 0.0059

Z -0.0049 -0.0044 -0.0045 -0.0065 0.0050 0.0072

AT. 10 N X 0.0242 -0.0227 0.0237 -0.0246 0.0063 -0.0184  
Y 0.0130 -0.0144 0.0133 -0.0142 0.0020 -0.0059  
Z -0.0049 0.0044 -0.0045 0.0065 -0.0050 0.0072

AT. 11 N X -0.0242 -0.0227 0.0237 0.0246 0.0063 -0.0184  
Y 0.0130 0.0144 -0.0133 -0.0142 -0.0020 0.0059  
Z 0.0049 0.0044 -0.0045 -0.0065 -0.0050 0.0072

AT. 12 N X -0.0242 0.0227 0.0237 -0.0246 -0.0063 -0.0184  
Y -0.0130 0.0144 0.0133 -0.0142 -0.0020 -0.0059  
Z 0.0049 -0.0044 -0.0045 0.0065 0.0050 0.0072

AT. 13 N X 0.0215 0.0224 0.0221 0.0233 0.0010 0.0044  
Y 0.0027 0.0045 0.0028 0.0028 -0.0047 -0.0063  
Z -0.0070 -0.0122 -0.0077 -0.0067 0.0003 0.0007

AT. 14 N X 0.0215 -0.0224 0.0221 -0.0233 -0.0010 0.0044  
Y -0.0027 0.0045 -0.0028 0.0028 -0.0047 0.0063  
Z -0.0070 0.0122 -0.0077 0.0067 -0.0003 0.0007

AT. 15 N X -0.0215 -0.0224 0.0221 0.0233 -0.0010 0.0044  
Y -0.0027 -0.0045 0.0028 0.0028 0.0047 -0.0063  
Z 0.0070 0.0122 -0.0077 -0.0067 -0.0003 0.0007

AT. 16 N X -0.0215 0.0224 0.0221 -0.0233 0.0010 0.0044  
Y 0.0027 -0.0045 -0.0028 0.0028 0.0047 0.0063  
Z 0.0070 -0.0122 -0.0077 0.0067 0.0003 0.0007

AT. 17 O X -0.0046 -0.0042 -0.0064 -0.0065 0.0012 0.0017  
Y 0.0003 0.0008 0.0004 -0.0008 0.0022 -0.0030  
Z -0.0052 -0.0033 -0.0037 -0.0043 0.0019 0.0058

AT. 18 O X -0.0046 0.0042 -0.0064 0.0065 -0.0012 0.0017  
Y -0.0003 0.0008 -0.0004 -0.0008 0.0022 0.0030  
Z -0.0052 0.0033 -0.0037 0.0043 -0.0019 0.0058

AT. 19 O X 0.0046 0.0042 -0.0064 -0.0065 -0.0012 0.0017  
Y -0.0003 -0.0008 0.0004 -0.0008 -0.0022 -0.0030  
Z 0.0052 0.0033 -0.0037 -0.0043 -0.0019 0.0058

AT. 20 O X 0.0046 -0.0042 -0.0064 0.0065 0.0012 0.0017  
Y 0.0003 -0.0008 -0.0004 -0.0008 -0.0022 0.0030

Z 0.0052 -0.0033 -0.0037 0.0043 0.0019 0.0058  
AT. 21 O X -0.0037 -0.0025 -0.0037 -0.0032 0.0017 0.0017  
Y 0.0055 0.0121 0.0061 0.0056 -0.0060 -0.0088  
Z -0.0021 -0.0034 -0.0026 -0.0021 -0.0016 -0.0013  
AT. 22 O X -0.0037 0.0025 -0.0037 0.0032 -0.0017 0.0017  
Y -0.0055 0.0121 -0.0061 0.0056 -0.0060 0.0088  
Z -0.0021 0.0034 -0.0026 0.0021 0.0016 -0.0013  
AT. 23 O X 0.0037 0.0025 -0.0037 -0.0032 -0.0017 0.0017  
Y -0.0055 -0.0121 0.0061 0.0056 0.0060 -0.0088  
Z 0.0021 0.0034 -0.0026 -0.0021 0.0016 -0.0013  
AT. 24 O X 0.0037 -0.0025 -0.0037 0.0032 0.0017 0.0017  
Y 0.0055 -0.0121 -0.0061 0.0056 0.0060 0.0088  
Z 0.0021 -0.0034 -0.0026 0.0021 -0.0016 -0.0013  
AT. 25 C X 0.0069 0.0082 0.0054 0.0065 0.0012 -0.0022  
Y -0.0001 -0.0025 -0.0014 -0.0011 -0.0011 -0.0035  
Z -0.0005 0.0022 -0.0003 -0.0004 0.0026 0.0036  
AT. 26 C X 0.0069 -0.0082 0.0054 -0.0065 -0.0012 -0.0022  
Y 0.0001 -0.0025 0.0014 -0.0011 -0.0011 0.0035  
Z -0.0005 -0.0022 -0.0003 0.0004 -0.0026 0.0036  
AT. 27 C X -0.0069 -0.0082 0.0054 0.0065 -0.0012 -0.0022  
Y 0.0001 0.0025 -0.0014 -0.0011 0.0011 -0.0035  
Z 0.0005 -0.0022 -0.0003 -0.0004 -0.0026 0.0036  
AT. 28 C X -0.0069 0.0082 0.0054 -0.0065 0.0012 -0.0022  
Y -0.0001 0.0025 0.0014 -0.0011 0.0011 0.0035  
Z 0.0005 0.0022 -0.0003 0.0004 0.0026 0.0036  
AT. 29 H X 0.0043 0.0053 0.0033 0.0038 0.0011 -0.0014  
Y 0.0106 0.0087 0.0072 0.0092 0.0005 -0.0071  
Z 0.0016 0.0050 0.0015 0.0021 0.0026 0.0029  
AT. 30 H X 0.0043 -0.0053 0.0033 -0.0038 -0.0011 -0.0014  
Y -0.0106 0.0087 -0.0072 0.0092 0.0005 0.0071  
Z 0.0016 -0.0050 0.0015 -0.0021 -0.0026 0.0029  
AT. 31 H X -0.0043 -0.0053 0.0033 0.0038 -0.0011 -0.0014

Y -0.0106 -0.0087 0.0072 0.0092 -0.0005 -0.0071  
Z -0.0016 -0.0050 0.0015 0.0021 -0.0026 0.0029  
AT. 32 H X -0.0043 0.0053 0.0033 -0.0038 0.0011 -0.0014  
Y 0.0106 -0.0087 -0.0072 0.0092 -0.0005 0.0071  
Z -0.0016 0.0050 0.0015 -0.0021 0.0026 0.0029  
AT. 33 H X 0.0134 0.0142 0.0100 0.0124 0.0036 -0.0037  
Y -0.0034 -0.0056 -0.0040 -0.0042 -0.0014 -0.0023  
Z 0.0082 0.0107 0.0070 0.0081 0.0016 -0.0006  
AT. 34 H X 0.0134 -0.0142 0.0100 -0.0124 -0.0036 -0.0037  
Y 0.0034 -0.0056 0.0040 -0.0042 -0.0014 0.0023  
Z 0.0082 -0.0107 0.0070 -0.0081 -0.0016 -0.0006  
AT. 35 H X -0.0134 -0.0142 0.0100 0.0124 -0.0036 -0.0037  
Y 0.0034 0.0056 -0.0040 -0.0042 0.0014 -0.0023  
Z -0.0082 -0.0107 0.0070 0.0081 -0.0016 -0.0006  
AT. 36 H X -0.0134 0.0142 0.0100 -0.0124 0.0036 -0.0037  
Y -0.0034 0.0056 0.0040 -0.0042 0.0014 0.0023  
Z -0.0082 0.0107 0.0070 -0.0081 0.0016 -0.0006  
AT. 37 C X 0.0083 0.0088 0.0072 0.0077 -0.0014 -0.0053  
Y -0.0071 -0.0087 -0.0069 -0.0076 0.0005 0.0008  
Z -0.0063 -0.0034 -0.0049 -0.0059 0.0032 0.0058  
AT. 38 C X 0.0083 -0.0088 0.0072 -0.0077 0.0014 -0.0053  
Y 0.0071 -0.0087 0.0069 -0.0076 0.0005 -0.0008  
Z -0.0063 0.0034 -0.0049 0.0059 -0.0032 0.0058  
AT. 39 C X -0.0083 -0.0088 0.0072 0.0077 0.0014 -0.0053  
Y 0.0071 0.0087 -0.0069 -0.0076 -0.0005 0.0008  
Z 0.0063 0.0034 -0.0049 -0.0059 -0.0032 0.0058  
AT. 40 C X -0.0083 0.0088 0.0072 -0.0077 -0.0014 -0.0053  
Y -0.0071 0.0087 0.0069 -0.0076 -0.0005 -0.0008  
Z 0.0063 -0.0034 -0.0049 0.0059 0.0032 0.0058  
AT. 41 C X -0.0103 -0.0149 -0.0108 -0.0102 -0.0015 0.0024  
Y 0.0047 0.0054 0.0046 0.0043 -0.0024 -0.0055  
Z -0.0040 -0.0041 -0.0037 -0.0054 0.0015 0.0019

AT. 42 C X -0.0103 0.0149 -0.0108 0.0102 0.0015 0.0024  
Y -0.0047 0.0054 -0.0046 0.0043 -0.0024 0.0055  
Z -0.0040 0.0041 -0.0037 0.0054 -0.0015 0.0019

AT. 43 C X 0.0103 0.0149 -0.0108 -0.0102 0.0015 0.0024  
Y -0.0047 -0.0054 0.0046 0.0043 0.0024 -0.0055  
Z 0.0040 0.0041 -0.0037 -0.0054 -0.0015 0.0019

AT. 44 C X 0.0103 -0.0149 -0.0108 0.0102 -0.0015 0.0024  
Y 0.0047 -0.0054 -0.0046 0.0043 0.0024 0.0055  
Z 0.0040 -0.0041 -0.0037 0.0054 0.0015 0.0019

AT. 45 H X -0.0292 -0.0392 -0.0295 -0.0298 0.0024 0.0182  
Y 0.0226 0.0259 0.0225 0.0228 -0.0050 -0.0149  
Z 0.0136 0.0165 0.0139 0.0128 -0.0015 -0.0084

AT. 46 H X -0.0292 0.0392 -0.0295 0.0298 -0.0024 0.0182  
Y -0.0226 0.0259 -0.0225 0.0228 -0.0050 0.0149  
Z 0.0136 -0.0165 0.0139 -0.0128 0.0015 -0.0084

AT. 47 H X 0.0292 0.0392 -0.0295 -0.0298 -0.0024 0.0182  
Y -0.0226 -0.0259 0.0225 0.0228 0.0050 -0.0149  
Z -0.0136 -0.0165 0.0139 0.0128 0.0015 -0.0084

AT. 48 H X 0.0292 -0.0392 -0.0295 0.0298 0.0024 0.0182  
Y 0.0226 -0.0259 -0.0225 0.0228 0.0050 0.0149  
Z -0.0136 0.0165 0.0139 -0.0128 -0.0015 -0.0084

AT. 49 H X -0.0195 -0.0231 -0.0201 -0.0197 0.0009 0.0083  
Y 0.0096 0.0135 0.0094 0.0094 -0.0025 -0.0086  
Z -0.0395 -0.0452 -0.0394 -0.0423 0.0088 0.0258

AT. 50 H X -0.0195 0.0231 -0.0201 0.0197 -0.0009 0.0083  
Y -0.0096 0.0135 -0.0094 0.0094 -0.0025 0.0086  
Z -0.0395 0.0452 -0.0394 0.0423 -0.0088 0.0258

AT. 51 H X 0.0195 0.0231 -0.0201 -0.0197 -0.0009 0.0083  
Y -0.0096 -0.0135 0.0094 0.0094 0.0025 -0.0086  
Z 0.0395 0.0452 -0.0394 -0.0423 -0.0088 0.0258

AT. 52 H X 0.0195 -0.0231 -0.0201 0.0197 0.0009 0.0083  
Y 0.0096 -0.0135 -0.0094 0.0094 0.0025 0.0086

Z 0.0395 -0.0452 -0.0394 0.0423 0.0088 0.0258  
AT. 53 C X -0.0070 -0.0096 -0.0074 -0.0066 -0.0018 0.0004  
Y -0.0027 -0.0061 -0.0029 -0.0031 -0.0008 -0.0005  
Z 0.0007 0.0013 0.0006 -0.0003 0.0032 -0.0022  
AT. 54 C X -0.0070 0.0096 -0.0074 0.0066 0.0018 0.0004  
Y 0.0027 -0.0061 0.0029 -0.0031 -0.0008 0.0005  
Z 0.0007 -0.0013 0.0006 0.0003 -0.0032 -0.0022  
AT. 55 C X 0.0070 0.0096 -0.0074 -0.0066 0.0018 0.0004  
Y 0.0027 0.0061 -0.0029 -0.0031 0.0008 -0.0005  
Z -0.0007 -0.0013 0.0006 -0.0003 -0.0032 -0.0022  
AT. 56 C X 0.0070 -0.0096 -0.0074 0.0066 -0.0018 0.0004  
Y -0.0027 0.0061 0.0029 -0.0031 0.0008 0.0005  
Z -0.0007 0.0013 0.0006 0.0003 0.0032 -0.0022  
AT. 57 C X 0.0036 -0.0006 0.0032 0.0054 -0.0197 -0.0193  
Y -0.0074 -0.0026 -0.0062 -0.0046 -0.0278 -0.0269  
Z -0.0002 -0.0038 -0.0012 -0.0034 0.0229 0.0167  
AT. 58 C X 0.0036 0.0006 0.0032 -0.0054 0.0197 -0.0193  
Y 0.0074 -0.0026 0.0062 -0.0046 -0.0278 0.0269  
Z -0.0002 0.0038 -0.0012 0.0034 -0.0229 0.0167  
AT. 59 C X -0.0036 0.0006 0.0032 0.0054 0.0197 -0.0193  
Y 0.0074 0.0026 -0.0062 -0.0046 0.0278 -0.0269  
Z 0.0002 0.0038 -0.0012 -0.0034 -0.0229 0.0167  
AT. 60 C X -0.0036 -0.0006 0.0032 -0.0054 -0.0197 -0.0193  
Y -0.0074 0.0026 0.0062 -0.0046 0.0278 0.0269  
Z 0.0002 -0.0038 -0.0012 0.0034 0.0229 0.0167  
AT. 61 H X 0.0173 0.0198 0.0172 0.0192 0.0166 0.0077  
Y 0.0024 0.0142 0.0040 0.0054 0.0018 -0.0048  
Z 0.0022 -0.0144 -0.0001 -0.0024 0.0057 0.0032  
AT. 62 H X 0.0173 -0.0198 0.0172 -0.0192 -0.0166 0.0077  
Y -0.0024 0.0142 -0.0040 0.0054 0.0018 0.0048  
Z 0.0022 0.0144 -0.0001 0.0024 -0.0057 0.0032  
AT. 63 H X -0.0173 -0.0198 0.0172 0.0192 -0.0166 0.0077



Y -0.0024 -0.0142 0.0040 0.0054 -0.0018 -0.0048  
Z -0.0022 0.0144 -0.0001 -0.0024 -0.0057 0.0032  
AT. 64 H X -0.0173 0.0198 0.0172 -0.0192 0.0166 0.0077  
Y 0.0024 -0.0142 -0.0040 0.0054 -0.0018 0.0048  
Z -0.0022 -0.0144 -0.0001 0.0024 0.0057 0.0032  
AT. 65 H X 0.0087 0.0070 0.0084 0.0101 -0.0029 -0.0063  
Y -0.0227 -0.0255 -0.0220 -0.0187 -0.0769 -0.0647  
Z -0.0022 -0.0035 -0.0033 -0.0087 0.0691 0.0599  
AT. 66 H X 0.0087 -0.0070 0.0084 -0.0101 0.0029 -0.0063  
Y 0.0227 -0.0255 0.0220 -0.0187 -0.0769 0.0647  
Z -0.0022 0.0035 -0.0033 0.0087 -0.0691 0.0599  
AT. 67 H X -0.0087 -0.0070 0.0084 0.0101 0.0029 -0.0063  
Y 0.0227 0.0255 -0.0220 -0.0187 0.0769 -0.0647  
Z 0.0022 0.0035 -0.0033 -0.0087 -0.0691 0.0599  
AT. 68 H X -0.0087 0.0070 0.0084 -0.0101 -0.0029 -0.0063  
Y -0.0227 0.0255 0.0220 -0.0187 0.0769 0.0647  
Z 0.0022 -0.0035 -0.0033 0.0087 0.0691 0.0599  
AT. 69 H X -0.0044 -0.0189 -0.0050 -0.0009 -0.0865 -0.0762  
Y -0.0052 0.0092 -0.0029 -0.0000 -0.0282 -0.0302  
Z 0.0002 0.0028 0.0001 -0.0007 0.0106 0.0038  
AT. 70 H X -0.0044 0.0189 -0.0050 0.0009 0.0865 -0.0762  
Y 0.0052 0.0092 0.0029 -0.0000 -0.0282 0.0302  
Z 0.0002 -0.0028 0.0001 0.0007 -0.0106 0.0038  
AT. 71 H X 0.0044 0.0189 -0.0050 -0.0009 0.0865 -0.0762  
Y 0.0052 -0.0092 -0.0029 -0.0000 0.0282 -0.0302  
Z -0.0002 -0.0028 0.0001 -0.0007 -0.0106 0.0038  
AT. 72 H X 0.0044 -0.0189 -0.0050 0.0009 -0.0865 -0.0762  
Y -0.0052 -0.0092 0.0029 -0.0000 0.0282 0.0302  
Z -0.0002 0.0028 0.0001 0.0007 0.0106 0.0038  
AT. 73 C X 0.0015 0.0005 0.0013 0.0012 0.0052 0.0055  
Y -0.0014 -0.0030 -0.0015 -0.0018 0.0045 0.0059  
Z -0.0021 0.0020 -0.0019 -0.0024 -0.0003 -0.0038

AT. 74 C X 0.0015 -0.0005 0.0013 -0.0012 -0.0052 0.0055  
Y 0.0014 -0.0030 0.0015 -0.0018 0.0045 -0.0059  
Z -0.0021 -0.0020 -0.0019 0.0024 0.0003 -0.0038

AT. 75 C X -0.0015 -0.0005 0.0013 0.0012 -0.0052 0.0055  
Y 0.0014 0.0030 -0.0015 -0.0018 -0.0045 0.0059  
Z 0.0021 -0.0020 -0.0019 -0.0024 0.0003 -0.0038

AT. 76 C X -0.0015 0.0005 0.0013 -0.0012 0.0052 0.0055  
Y -0.0014 0.0030 0.0015 -0.0018 -0.0045 -0.0059  
Z 0.0021 0.0020 -0.0019 0.0024 -0.0003 -0.0038

AT. 77 C X -0.0063 -0.0057 -0.0064 -0.0079 0.0042 0.0005  
Y 0.0213 0.0155 0.0205 0.0208 0.0033 0.0045  
Z 0.0196 0.0162 0.0194 0.0181 0.0073 0.0063

AT. 78 C X -0.0063 0.0057 -0.0064 0.0079 -0.0042 0.0005  
Y -0.0213 0.0155 -0.0205 0.0208 0.0033 -0.0045  
Z 0.0196 -0.0162 0.0194 -0.0181 -0.0073 0.0063

AT. 79 C X 0.0063 0.0057 -0.0064 -0.0079 -0.0042 0.0005  
Y -0.0213 -0.0155 0.0205 0.0208 -0.0033 0.0045  
Z -0.0196 -0.0162 0.0194 0.0181 -0.0073 0.0063

AT. 80 C X 0.0063 -0.0057 -0.0064 0.0079 0.0042 0.0005  
Y 0.0213 -0.0155 -0.0205 0.0208 -0.0033 -0.0045  
Z -0.0196 0.0162 0.0194 -0.0181 0.0073 0.0063

AT. 81 H X 0.0203 0.0154 0.0192 0.0178 0.0110 0.0088  
Y 0.0463 0.0350 0.0446 0.0448 0.0107 0.0140  
Z 0.0864 0.0743 0.0848 0.0857 0.0081 0.0006

AT. 82 H X 0.0203 -0.0154 0.0192 -0.0178 -0.0110 0.0088  
Y -0.0463 0.0350 -0.0446 0.0448 0.0107 -0.0140  
Z 0.0864 -0.0743 0.0848 -0.0857 -0.0081 0.0006

AT. 83 H X -0.0203 -0.0154 0.0192 0.0178 -0.0110 0.0088  
Y -0.0463 -0.0350 0.0446 0.0448 -0.0107 0.0140  
Z -0.0864 -0.0743 0.0848 0.0857 -0.0081 0.0006

AT. 84 H X -0.0203 0.0154 0.0192 -0.0178 0.0110 0.0088  
Y 0.0463 -0.0350 -0.0446 0.0448 -0.0107 -0.0140

Z -0.0864 0.0743 0.0848 -0.0857 0.0081 0.0006  
AT. 85 H X -0.0644 -0.0541 -0.0628 -0.0654 -0.0017 -0.0037  
Y 0.0573 0.0461 0.0561 0.0576 0.0072 0.0061  
Z 0.0063 0.0046 0.0059 0.0040 0.0057 0.0061  
AT. 86 H X -0.0644 0.0541 -0.0628 0.0654 0.0017 -0.0037  
Y -0.0573 0.0461 -0.0561 0.0576 0.0072 -0.0061  
Z 0.0063 -0.0046 0.0059 -0.0040 -0.0057 0.0061  
AT. 87 H X 0.0644 0.0541 -0.0628 -0.0654 0.0017 -0.0037  
Y -0.0573 -0.0461 0.0561 0.0576 -0.0072 0.0061  
Z -0.0063 -0.0046 0.0059 0.0040 -0.0057 0.0061  
AT. 88 H X 0.0644 -0.0541 -0.0628 0.0654 -0.0017 -0.0037  
Y 0.0573 -0.0461 -0.0561 0.0576 -0.0072 -0.0061  
Z -0.0063 0.0046 0.0059 -0.0040 0.0057 0.0061  
AT. 89 C X 0.0022 0.0006 0.0021 0.0006 0.0088 0.0078  
Y -0.0004 -0.0004 -0.0004 -0.0002 -0.0034 -0.0034  
Z -0.0014 -0.0014 -0.0014 -0.0017 0.0058 0.0053  
AT. 90 C X 0.0022 -0.0006 0.0021 -0.0006 -0.0088 0.0078  
Y 0.0004 -0.0004 0.0004 -0.0002 -0.0034 0.0034  
Z -0.0014 0.0014 -0.0014 0.0017 -0.0058 0.0053  
AT. 91 C X -0.0022 -0.0006 0.0021 0.0006 -0.0088 0.0078  
Y 0.0004 0.0004 -0.0004 -0.0002 0.0034 -0.0034  
Z 0.0014 0.0014 -0.0014 -0.0017 -0.0058 0.0053  
AT. 92 C X -0.0022 0.0006 0.0021 -0.0006 0.0088 0.0078  
Y -0.0004 0.0004 0.0004 -0.0002 0.0034 0.0034  
Z 0.0014 -0.0014 -0.0014 0.0017 0.0058 0.0053  
AT. 93 C X -0.0008 0.0080 -0.0001 0.0015 -0.0034 -0.0042  
Y 0.0038 -0.0042 0.0037 0.0038 0.0024 0.0067  
Z 0.0014 -0.0053 0.0011 0.0004 0.0133 0.0152  
AT. 94 C X -0.0008 -0.0080 -0.0001 -0.0015 0.0034 -0.0042  
Y -0.0038 -0.0042 -0.0037 0.0038 0.0024 -0.0067  
Z 0.0014 0.0053 0.0011 -0.0004 -0.0133 0.0152  
AT. 95 C X 0.0008 -0.0080 -0.0001 0.0015 0.0034 -0.0042

Y -0.0038 0.0042 0.0037 0.0038 -0.0024 0.0067  
Z -0.0014 0.0053 0.0011 0.0004 -0.0133 0.0152  
AT. 96 C X 0.0008 0.0080 -0.0001 -0.0015 -0.0034 -0.0042  
Y 0.0038 0.0042 -0.0037 0.0038 -0.0024 -0.0067  
Z -0.0014 -0.0053 0.0011 -0.0004 0.0133 0.0152  
AT. 97 H X 0.0003 0.0143 0.0026 0.0048 -0.0069 -0.0083  
Y -0.0008 -0.0161 -0.0042 -0.0040 0.0037 0.0116  
Z -0.0035 -0.0067 -0.0047 -0.0032 0.0053 0.0116  
AT. 98 H X 0.0003 -0.0143 0.0026 -0.0048 0.0069 -0.0083  
Y 0.0008 -0.0161 0.0042 -0.0040 0.0037 -0.0116  
Z -0.0035 0.0067 -0.0047 0.0032 -0.0053 0.0116  
AT. 99 H X -0.0003 -0.0143 0.0026 0.0048 0.0069 -0.0083  
Y 0.0008 0.0161 -0.0042 -0.0040 -0.0037 0.0116  
Z 0.0035 0.0067 -0.0047 -0.0032 -0.0053 0.0116  
AT. 100 H X -0.0003 0.0143 0.0026 -0.0048 -0.0069 -0.0083  
Y -0.0008 0.0161 0.0042 -0.0040 -0.0037 -0.0116  
Z 0.0035 -0.0067 -0.0047 0.0032 0.0053 0.0116  
AT. 101 H X 0.0043 0.0161 0.0076 0.0090 -0.0017 -0.0040  
Y 0.0085 0.0056 0.0111 0.0114 0.0022 0.0043  
Z 0.0069 -0.0116 0.0070 0.0047 0.0260 0.0310  
AT. 102 H X 0.0043 -0.0161 0.0076 -0.0090 0.0017 -0.0040  
Y -0.0085 0.0056 -0.0111 0.0114 0.0022 -0.0043  
Z 0.0069 0.0116 0.0070 -0.0047 -0.0260 0.0310  
AT. 103 H X -0.0043 -0.0161 0.0076 0.0090 0.0017 -0.0040  
Y -0.0085 -0.0056 0.0111 0.0114 -0.0022 0.0043  
Z -0.0069 0.0116 0.0070 0.0047 -0.0260 0.0310  
AT. 104 H X -0.0043 0.0161 0.0076 -0.0090 -0.0017 -0.0040  
Y 0.0085 -0.0056 -0.0111 0.0114 -0.0022 -0.0043  
Z -0.0069 -0.0116 0.0070 -0.0047 0.0260 0.0310  
AT. 105 H X -0.0109 0.0029 -0.0128 -0.0092 -0.0158 -0.0139  
Y 0.0079 -0.0064 0.0084 0.0085 0.0090 0.0174  
Z 0.0018 -0.0018 0.0019 0.0005 0.0125 0.0104

AT.106 H X -0.0109 -0.0029 -0.0128 0.0092 0.0158 -0.0139  
Y -0.0079 -0.0064 -0.0084 0.0085 0.0090 -0.0174  
Z 0.0018 0.0018 0.0019 -0.0005 -0.0125 0.0104

AT.107 H X 0.0109 -0.0029 -0.0128 -0.0092 0.0158 -0.0139  
Y -0.0079 0.0064 0.0084 0.0085 -0.0090 0.0174  
Z -0.0018 0.0018 0.0019 0.0005 -0.0125 0.0104

AT.108 H X 0.0109 0.0029 -0.0128 0.0092 -0.0158 -0.0139  
Y 0.0079 0.0064 -0.0084 0.0085 -0.0090 -0.0174  
Z -0.0018 -0.0018 0.0019 -0.0005 0.0125 0.0104

AT.109 C X -0.0128 -0.0141 -0.0133 -0.0130 0.0048 0.0063  
Y -0.0131 -0.0134 -0.0135 -0.0146 0.0048 0.0030  
Z 0.0108 0.0078 0.0109 0.0124 -0.0052 -0.0050

AT.110 C X -0.0128 0.0141 -0.0133 0.0130 -0.0048 0.0063  
Y 0.0131 -0.0134 0.0135 -0.0146 0.0048 -0.0030  
Z 0.0108 -0.0078 0.0109 -0.0124 0.0052 -0.0050

AT.111 C X 0.0128 0.0141 -0.0133 -0.0130 -0.0048 0.0063  
Y 0.0131 0.0134 -0.0135 -0.0146 -0.0048 0.0030  
Z -0.0108 -0.0078 0.0109 0.0124 0.0052 -0.0050

AT.112 C X 0.0128 -0.0141 -0.0133 0.0130 0.0048 0.0063  
Y -0.0131 0.0134 0.0135 -0.0146 -0.0048 -0.0030  
Z -0.0108 0.0078 0.0109 -0.0124 -0.0052 -0.0050

AT.113 H X -0.0010 -0.0048 -0.0012 0.0003 -0.0041 0.0008  
Y -0.0245 -0.0209 -0.0252 -0.0279 0.0168 0.0105  
Z 0.0543 0.0510 0.0557 0.0595 -0.0216 -0.0159

AT.114 H X -0.0010 0.0048 -0.0012 -0.0003 0.0041 0.0008  
Y 0.0245 -0.0209 0.0252 -0.0279 0.0168 -0.0105  
Z 0.0543 -0.0510 0.0557 -0.0595 0.0216 -0.0159

AT.115 H X 0.0010 0.0048 -0.0012 0.0003 0.0041 0.0008  
Y 0.0245 0.0209 -0.0252 -0.0279 -0.0168 0.0105  
Z -0.0543 -0.0510 0.0557 0.0595 0.0216 -0.0159

AT.116 H X 0.0010 -0.0048 -0.0012 -0.0003 -0.0041 0.0008  
Y -0.0245 0.0209 0.0252 -0.0279 -0.0168 -0.0105

Z -0.0543 0.0510 0.0557 -0.0595 -0.0216 -0.0159  
AT. 117 H X -0.0498 -0.0468 -0.0513 -0.0543 0.0263 0.0168  
Y -0.0276 -0.0300 -0.0285 -0.0302 0.0113 0.0100  
Z 0.0036 -0.0023 0.0033 0.0048 -0.0026 -0.0002  
AT. 118 H X -0.0498 0.0468 -0.0513 0.0543 -0.0263 0.0168  
Y 0.0276 -0.0300 0.0285 -0.0302 0.0113 -0.0100  
Z 0.0036 0.0023 0.0033 -0.0048 0.0026 -0.0002  
AT. 119 H X 0.0498 0.0468 -0.0513 -0.0543 -0.0263 0.0168  
Y 0.0276 0.0300 -0.0285 -0.0302 -0.0113 0.0100  
Z -0.0036 0.0023 0.0033 0.0048 0.0026 -0.0002  
AT. 120 H X 0.0498 -0.0468 -0.0513 0.0543 0.0263 0.0168  
Y -0.0276 0.0300 0.0285 -0.0302 -0.0113 -0.0100  
Z -0.0036 -0.0023 0.0033 -0.0048 -0.0026 -0.0002  
AT. 121 C X -0.0000 -0.0028 -0.0002 -0.0008 0.0047 0.0095  
Y -0.0019 -0.0018 -0.0019 -0.0016 -0.0052 -0.0019  
Z -0.0071 -0.0106 -0.0076 -0.0062 -0.0004 0.0023  
AT. 122 C X -0.0000 0.0028 -0.0002 0.0008 -0.0047 0.0095  
Y 0.0019 -0.0018 0.0019 -0.0016 -0.0052 0.0019  
Z -0.0071 0.0106 -0.0076 0.0062 0.0004 0.0023  
AT. 123 C X 0.0000 0.0028 -0.0002 -0.0008 -0.0047 0.0095  
Y 0.0019 0.0018 -0.0019 -0.0016 0.0052 -0.0019  
Z 0.0071 0.0106 -0.0076 -0.0062 0.0004 0.0023  
AT. 124 C X 0.0000 -0.0028 -0.0002 0.0008 0.0047 0.0095  
Y -0.0019 0.0018 0.0019 -0.0016 0.0052 0.0019  
Z 0.0071 -0.0106 -0.0076 0.0062 -0.0004 0.0023  
AT. 125 H X -0.0093 -0.0184 -0.0103 -0.0096 0.0011 0.0163  
Y -0.0097 -0.0106 -0.0098 -0.0098 -0.0032 0.0036  
Z 0.0009 -0.0003 0.0006 0.0019 -0.0008 -0.0035  
AT. 126 H X -0.0093 0.0184 -0.0103 0.0096 -0.0011 0.0163  
Y 0.0097 -0.0106 0.0098 -0.0098 -0.0032 -0.0036  
Z 0.0009 0.0003 0.0006 -0.0019 0.0008 -0.0035  
AT. 127 H X 0.0093 0.0184 -0.0103 -0.0096 -0.0011 0.0163

Y 0.0097 0.0106 -0.0098 -0.0098 0.0032 0.0036  
Z -0.0009 0.0003 0.0006 0.0019 0.0008 -0.0035  
AT. 128 H X 0.0093 -0.0184 -0.0103 0.0096 0.0011 0.0163  
Y -0.0097 0.0106 0.0098 -0.0098 0.0032 -0.0036  
Z -0.0009 -0.0003 0.0006 -0.0019 -0.0008 -0.0035  
AT. 129 H X -0.0066 -0.0103 -0.0070 -0.0083 0.0068 0.0105  
Y 0.0010 -0.0000 0.0012 0.0024 -0.0082 0.0011  
Z -0.0251 -0.0351 -0.0264 -0.0249 -0.0005 0.0124  
AT. 130 H X -0.0066 0.0103 -0.0070 0.0083 -0.0068 0.0105  
Y -0.0010 -0.0000 -0.0012 0.0024 -0.0082 -0.0011  
Z -0.0251 0.0351 -0.0264 0.0249 0.0005 0.0124  
AT. 131 H X 0.0066 0.0103 -0.0070 -0.0083 -0.0068 0.0105  
Y -0.0010 0.0000 0.0012 0.0024 0.0082 0.0011  
Z 0.0251 0.0351 -0.0264 -0.0249 0.0005 0.0124  
AT. 132 H X 0.0066 -0.0103 -0.0070 0.0083 0.0068 0.0105  
Y 0.0010 0.0000 -0.0012 0.0024 0.0082 -0.0011  
Z 0.0251 -0.0351 -0.0264 0.0249 -0.0005 0.0124  
AT. 133 C X 0.0080 0.0083 0.0082 0.0092 -0.0005 0.0016  
Y 0.0031 0.0056 0.0034 0.0035 -0.0045 -0.0068  
Z -0.0048 -0.0083 -0.0053 -0.0047 -0.0007 0.0001  
AT. 134 C X 0.0080 -0.0083 0.0082 -0.0092 0.0005 0.0016  
Y -0.0031 0.0056 -0.0034 0.0035 -0.0045 0.0068  
Z -0.0048 0.0083 -0.0053 0.0047 0.0007 0.0001  
AT. 135 C X -0.0080 -0.0083 0.0082 0.0092 0.0005 0.0016  
Y -0.0031 -0.0056 0.0034 0.0035 0.0045 -0.0068  
Z 0.0048 0.0083 -0.0053 -0.0047 0.0007 0.0001  
AT. 136 C X -0.0080 0.0083 0.0082 -0.0092 -0.0005 0.0016  
Y 0.0031 -0.0056 -0.0034 0.0035 0.0045 0.0068  
Z 0.0048 -0.0083 -0.0053 0.0047 -0.0007 0.0001  
AT. 137 C X 0.0046 0.0049 0.0046 0.0052 -0.0022 -0.0015  
Y -0.0031 -0.0067 -0.0041 -0.0029 -0.0024 -0.0029  
Z 0.0011 0.0012 0.0013 0.0015 -0.0022 -0.0020

AT. 138 C X 0.0046 -0.0049 0.0046 -0.0052 0.0022 -0.0015  
Y 0.0031 -0.0067 0.0041 -0.0029 -0.0024 0.0029  
Z 0.0011 -0.0012 0.0013 -0.0015 0.0022 -0.0020

AT. 139 C X -0.0046 -0.0049 0.0046 0.0052 0.0022 -0.0015  
Y 0.0031 0.0067 -0.0041 -0.0029 0.0024 -0.0029  
Z -0.0011 -0.0012 0.0013 0.0015 0.0022 -0.0020

AT. 140 C X -0.0046 0.0049 0.0046 -0.0052 -0.0022 -0.0015  
Y -0.0031 0.0067 0.0041 -0.0029 0.0024 0.0029  
Z -0.0011 0.0012 0.0013 -0.0015 -0.0022 -0.0020

AT. 141 H X -0.0017 -0.0041 -0.0023 -0.0012 -0.0017 0.0005  
Y -0.0097 -0.0188 -0.0123 -0.0100 -0.0003 0.0028  
Z 0.0034 0.0028 0.0032 0.0036 -0.0012 -0.0004

AT. 142 H X -0.0017 0.0041 -0.0023 0.0012 0.0017 0.0005  
Y 0.0097 -0.0188 0.0123 -0.0100 -0.0003 -0.0028  
Z 0.0034 -0.0028 0.0032 -0.0036 0.0012 -0.0004

AT. 143 H X 0.0017 0.0041 -0.0023 -0.0012 0.0017 0.0005  
Y 0.0097 0.0188 -0.0123 -0.0100 0.0003 0.0028  
Z -0.0034 -0.0028 0.0032 0.0036 0.0012 -0.0004

AT. 144 H X 0.0017 -0.0041 -0.0023 0.0012 -0.0017 0.0005  
Y -0.0097 0.0188 0.0123 -0.0100 0.0003 -0.0028  
Z -0.0034 0.0028 0.0032 -0.0036 -0.0012 -0.0004

AT. 145 H X 0.0100 0.0149 0.0118 0.0111 -0.0027 -0.0045  
Y -0.0026 -0.0063 -0.0039 -0.0025 -0.0028 -0.0029  
Z 0.0091 0.0135 0.0102 0.0095 -0.0046 -0.0059

AT. 146 H X 0.0100 -0.0149 0.0118 -0.0111 0.0027 -0.0045  
Y 0.0026 -0.0063 0.0039 -0.0025 -0.0028 0.0029  
Z 0.0091 -0.0135 0.0102 -0.0095 0.0046 -0.0059

AT. 147 H X -0.0100 -0.0149 0.0118 0.0111 0.0027 -0.0045  
Y 0.0026 0.0063 -0.0039 -0.0025 0.0028 -0.0029  
Z -0.0091 -0.0135 0.0102 0.0095 0.0046 -0.0059

AT. 148 H X -0.0100 0.0149 0.0118 -0.0111 -0.0027 -0.0045  
Y -0.0026 0.0063 0.0039 -0.0025 0.0028 0.0029



Z -0.0091 0.0135 0.0102 -0.0095 -0.0046 -0.0059  
AT. 149 O X -0.0112 -0.0059 -0.0110 -0.0085 -0.0057 -0.0018  
Y -0.0101 -0.0090 -0.0101 -0.0088 0.0014 0.0053  
Z -0.0163 0.0012 -0.0159 -0.0117 -0.0272 -0.0270  
AT. 150 O X -0.0112 0.0059 -0.0110 0.0085 0.0057 -0.0018  
Y 0.0101 -0.0090 0.0101 -0.0088 0.0014 -0.0053  
Z -0.0163 -0.0012 -0.0159 0.0117 0.0272 -0.0270  
AT. 151 O X 0.0112 0.0059 -0.0110 -0.0085 0.0057 -0.0018  
Y 0.0101 0.0090 -0.0101 -0.0088 -0.0014 0.0053  
Z 0.0163 -0.0012 -0.0159 -0.0117 0.0272 -0.0270  
AT. 152 O X 0.0112 -0.0059 -0.0110 0.0085 -0.0057 -0.0018  
Y -0.0101 0.0090 0.0101 -0.0088 -0.0014 -0.0053  
Z 0.0163 0.0012 -0.0159 0.0117 -0.0272 -0.0270  
AT. 153 H X 0.0052 0.0081 0.0050 0.0068 0.0013 0.0022  
Y -0.0018 0.0080 -0.0013 0.0019 -0.0080 -0.0057  
Z -0.0239 -0.0021 -0.0232 -0.0179 -0.0349 -0.0332  
AT. 154 H X 0.0052 -0.0081 0.0050 -0.0068 -0.0013 0.0022  
Y 0.0018 0.0080 0.0013 0.0019 -0.0080 0.0057  
Z -0.0239 0.0021 -0.0232 0.0179 0.0349 -0.0332  
AT. 155 H X -0.0052 -0.0081 0.0050 0.0068 -0.0013 0.0022  
Y 0.0018 -0.0080 -0.0013 0.0019 0.0080 -0.0057  
Z 0.0239 0.0021 -0.0232 -0.0179 0.0349 -0.0332  
AT. 156 H X -0.0052 0.0081 0.0050 -0.0068 0.0013 0.0022  
Y -0.0018 -0.0080 0.0013 0.0019 0.0080 0.0057  
Z 0.0239 -0.0021 -0.0232 0.0179 -0.0349 -0.0332  
AT. 157 O X 0.0005 0.0007 0.0009 -0.0001 0.0015 0.0003  
Y 0.0025 -0.0015 0.0025 0.0018 0.0102 0.0148  
Z 0.0019 0.0055 0.0029 0.0014 -0.0050 -0.0087  
AT. 158 O X 0.0005 -0.0007 0.0009 0.0001 -0.0015 0.0003  
Y -0.0025 -0.0015 -0.0025 0.0018 0.0102 -0.0148  
Z 0.0019 -0.0055 0.0029 -0.0014 0.0050 -0.0087  
AT. 159 O X -0.0005 -0.0007 0.0009 -0.0001 -0.0015 0.0003

Y -0.0025 0.0015 0.0025 0.0018 -0.0102 0.0148  
Z -0.0019 -0.0055 0.0029 0.0014 0.0050 -0.0087  
AT.160 O X -0.0005 0.0007 0.0009 0.0001 0.0015 0.0003  
Y 0.0025 0.0015 -0.0025 0.0018 -0.0102 -0.0148  
Z -0.0019 0.0055 0.0029 -0.0014 -0.0050 -0.0087  
AT.161 O X 0.0094 0.0095 0.0098 0.0047 0.0105 0.0056  
Y 0.0031 0.0081 0.0039 0.0034 0.0201 0.0165  
Z -0.0029 -0.0045 -0.0023 -0.0017 -0.0159 -0.0123  
AT.162 O X 0.0094 -0.0095 0.0098 -0.0047 -0.0105 0.0056  
Y -0.0031 0.0081 -0.0039 0.0034 0.0201 -0.0165  
Z -0.0029 0.0045 -0.0023 0.0017 0.0159 -0.0123  
AT.163 O X -0.0094 -0.0095 0.0098 0.0047 -0.0105 0.0056  
Y -0.0031 -0.0081 0.0039 0.0034 -0.0201 0.0165  
Z 0.0029 0.0045 -0.0023 -0.0017 0.0159 -0.0123  
AT.164 O X -0.0094 0.0095 0.0098 -0.0047 0.0105 0.0056  
Y 0.0031 -0.0081 -0.0039 0.0034 -0.0201 -0.0165  
Z 0.0029 -0.0045 -0.0023 0.0017 -0.0159 -0.0123  
AT.165 H X 0.0075 0.0038 0.0073 0.0030 0.0000 -0.0006  
Y 0.0024 0.0055 0.0030 0.0026 0.0169 0.0150  
Z 0.0006 -0.0030 0.0013 -0.0001 -0.0103 -0.0059  
AT.166 H X 0.0075 -0.0038 0.0073 -0.0030 -0.0000 -0.0006  
Y -0.0024 0.0055 -0.0030 0.0026 0.0169 -0.0150  
Z 0.0006 0.0030 0.0013 0.0001 0.0103 -0.0059  
AT.167 H X -0.0075 -0.0038 0.0073 0.0030 -0.0000 -0.0006  
Y -0.0024 -0.0055 0.0030 0.0026 -0.0169 0.0150  
Z -0.0006 0.0030 0.0013 -0.0001 0.0103 -0.0059  
AT.168 H X -0.0075 0.0038 0.0073 -0.0030 0.0000 -0.0006  
Y 0.0024 -0.0055 -0.0030 0.0026 -0.0169 -0.0150  
Z -0.0006 -0.0030 0.0013 0.0001 -0.0103 -0.0059  
AT.169 O X -0.0010 0.0006 0.0011 0.0014 -0.0011 0.0023  
Y -0.0022 0.0095 0.0006 0.0022 0.0041 0.0005  
Z 0.0001 -0.0001 0.0025 0.0018 0.0001 0.0025

AT.170 O X -0.0010 -0.0006 0.0011 -0.0014 0.0011 0.0023

Y 0.0022 0.0095 -0.0006 0.0022 0.0041 -0.0005

Z 0.0001 0.0001 0.0025 -0.0018 -0.0001 0.0025

AT.171 O X 0.0010 -0.0006 0.0011 0.0014 0.0011 0.0023

Y 0.0022 -0.0095 0.0006 0.0022 -0.0041 0.0005

Z -0.0001 0.0001 0.0025 0.0018 -0.0001 0.0025

AT.172 O X 0.0010 0.0006 0.0011 -0.0014 -0.0011 0.0023

Y -0.0022 -0.0095 -0.0006 0.0022 -0.0041 -0.0005

Z -0.0001 -0.0001 0.0025 -0.0018 0.0001 0.0025

AT.173 H X -0.0040 -0.0041 -0.0028 -0.0022 0.0013 0.0032

Y -0.0017 0.0123 0.0018 0.0035 0.0042 0.0004

Z 0.0023 -0.0081 0.0029 0.0022 -0.0030 0.0037

AT.174 H X -0.0040 0.0041 -0.0028 0.0022 -0.0013 0.0032

Y 0.0017 0.0123 -0.0018 0.0035 0.0042 -0.0004

Z 0.0023 0.0081 0.0029 -0.0022 0.0030 0.0037

AT.175 H X 0.0040 0.0041 -0.0028 -0.0022 -0.0013 0.0032

Y 0.0017 -0.0123 0.0018 0.0035 -0.0042 0.0004

Z -0.0023 0.0081 0.0029 0.0022 0.0030 0.0037

AT.176 H X 0.0040 -0.0041 -0.0028 0.0022 0.0013 0.0032

Y -0.0017 -0.0123 -0.0018 0.0035 -0.0042 -0.0004

Z -0.0023 -0.0081 0.0029 -0.0022 -0.0030 0.0037

FREQ(CM\*\*-1) 369.32 370.80 375.86 376.29 376.33 376.74

AT. 1 I X -0.0004 -0.0004 0.0015 0.0014 -0.0013 -0.0013

Y -0.0001 -0.0000 -0.0003 -0.0002 0.0002 0.0002

Z 0.0004 0.0007 -0.0015 -0.0013 0.0015 0.0013

AT. 2 I X 0.0004 -0.0004 -0.0015 0.0014 0.0013 -0.0013

Y -0.0001 0.0000 -0.0003 0.0002 0.0002 -0.0002

Z -0.0004 0.0007 0.0015 -0.0013 -0.0015 0.0013

AT. 3 I X -0.0004 0.0004 -0.0015 -0.0014 -0.0013 -0.0013

Y -0.0001 0.0000 0.0003 0.0002 0.0002 0.0002

Z 0.0004 -0.0007 0.0015 0.0013 0.0015 0.0013  
AT. 4 I X 0.0004 0.0004 0.0015 -0.0014 0.0013 -0.0013  
Y -0.0001 -0.0000 0.0003 -0.0002 0.0002 -0.0002  
Z -0.0004 -0.0007 -0.0015 0.0013 -0.0015 0.0013  
AT. 5 I X -0.0001 0.0000 -0.0008 -0.0009 0.0008 0.0006  
Y -0.0000 -0.0003 0.0004 0.0003 -0.0003 -0.0004  
Z -0.0001 -0.0002 0.0011 0.0009 -0.0007 -0.0008  
AT. 6 I X 0.0001 0.0000 0.0008 -0.0009 -0.0008 0.0006  
Y -0.0000 0.0003 0.0004 -0.0003 -0.0003 0.0004  
Z 0.0001 -0.0002 -0.0011 0.0009 0.0007 -0.0008  
AT. 7 I X -0.0001 -0.0000 0.0008 0.0009 0.0008 0.0006  
Y -0.0000 0.0003 -0.0004 -0.0003 -0.0003 -0.0004  
Z -0.0001 0.0002 -0.0011 -0.0009 -0.0007 -0.0008  
AT. 8 I X 0.0001 -0.0000 -0.0008 0.0009 -0.0008 0.0006  
Y -0.0000 -0.0003 -0.0004 0.0003 -0.0003 0.0004  
Z 0.0001 0.0002 0.0011 -0.0009 0.0007 -0.0008  
AT. 9 N X 0.0127 0.0132 -0.0170 -0.0130 0.0220 0.0164  
Y -0.0041 -0.0056 0.0023 0.0004 -0.0017 -0.0004  
Z -0.0053 -0.0078 0.0116 0.0100 -0.0089 -0.0082  
AT. 10 N X -0.0127 0.0132 0.0170 -0.0130 -0.0220 0.0164  
Y -0.0041 0.0056 0.0023 -0.0004 -0.0017 0.0004  
Z 0.0053 -0.0078 -0.0116 0.0100 0.0089 -0.0082  
AT. 11 N X 0.0127 -0.0132 0.0170 0.0130 0.0220 0.0164  
Y -0.0041 0.0056 -0.0023 -0.0004 -0.0017 -0.0004  
Z -0.0053 0.0078 -0.0116 -0.0100 -0.0089 -0.0082  
AT. 12 N X -0.0127 -0.0132 -0.0170 0.0130 -0.0220 0.0164  
Y -0.0041 -0.0056 -0.0023 0.0004 -0.0017 0.0004  
Z 0.0053 0.0078 0.0116 -0.0100 0.0089 -0.0082  
AT. 13 N X -0.0024 -0.0024 0.0304 0.0311 -0.0302 -0.0305  
Y 0.0059 0.0059 -0.0059 -0.0054 0.0064 0.0057  
Z -0.0022 0.0004 -0.0085 -0.0078 0.0061 0.0059  
AT. 14 N X 0.0024 -0.0024 -0.0304 0.0311 0.0302 -0.0305

Y 0.0059 -0.0059 -0.0059 0.0054 0.0064 -0.0057  
Z 0.0022 0.0004 0.0085 -0.0078 -0.0061 0.0059  
AT. 15 N X -0.0024 0.0024 -0.0304 -0.0311 -0.0302 -0.0305  
Y 0.0059 -0.0059 0.0059 0.0054 0.0064 0.0057  
Z -0.0022 -0.0004 0.0085 0.0078 0.0061 0.0059  
AT. 16 N X 0.0024 0.0024 0.0304 -0.0311 0.0302 -0.0305  
Y 0.0059 0.0059 0.0059 -0.0054 0.0064 -0.0057  
Z 0.0022 -0.0004 -0.0085 0.0078 -0.0061 0.0059  
AT. 17 O X -0.0012 -0.0025 0.0014 0.0009 -0.0002 -0.0002  
Y 0.0014 -0.0017 -0.0029 -0.0026 0.0085 0.0058  
Z -0.0030 -0.0053 0.0081 0.0061 -0.0080 -0.0056  
AT. 18 O X 0.0012 -0.0025 -0.0014 0.0009 0.0002 -0.0002  
Y 0.0014 0.0017 -0.0029 0.0026 0.0085 -0.0058  
Z 0.0030 -0.0053 -0.0081 0.0061 0.0080 -0.0056  
AT. 19 O X -0.0012 0.0025 -0.0014 -0.0009 -0.0002 -0.0002  
Y 0.0014 0.0017 0.0029 0.0026 0.0085 0.0058  
Z -0.0030 0.0053 -0.0081 -0.0061 -0.0080 -0.0056  
AT. 20 O X 0.0012 0.0025 0.0014 -0.0009 0.0002 -0.0002  
Y 0.0014 -0.0017 0.0029 -0.0026 0.0085 -0.0058  
Z 0.0030 0.0053 0.0081 -0.0061 0.0080 -0.0056  
AT. 21 O X -0.0013 -0.0021 -0.0040 -0.0042 0.0043 0.0044  
Y 0.0089 0.0074 -0.0090 -0.0098 0.0104 0.0106  
Z 0.0005 0.0013 -0.0061 -0.0066 0.0038 0.0047  
AT. 22 O X 0.0013 -0.0021 0.0040 -0.0042 -0.0043 0.0044  
Y 0.0089 -0.0074 -0.0090 0.0098 0.0104 -0.0106  
Z -0.0005 0.0013 0.0061 -0.0066 -0.0038 0.0047  
AT. 23 O X -0.0013 0.0021 0.0040 0.0042 0.0043 0.0044  
Y 0.0089 -0.0074 0.0090 0.0098 0.0104 0.0106  
Z 0.0005 -0.0013 0.0061 0.0066 0.0038 0.0047  
AT. 24 O X 0.0013 0.0021 -0.0040 0.0042 -0.0043 0.0044  
Y 0.0089 0.0074 0.0090 -0.0098 0.0104 -0.0106  
Z -0.0005 -0.0013 -0.0061 0.0066 -0.0038 0.0047

AT. 25 C X 0.0003 0.0009 -0.0141 -0.0141 0.0127 0.0133  
Y 0.0010 0.0026 -0.0186 -0.0179 0.0172 0.0170  
Z -0.0024 -0.0038 0.0015 0.0004 -0.0021 -0.0004

AT. 26 C X -0.0003 0.0009 0.0141 -0.0141 -0.0127 0.0133  
Y 0.0010 -0.0026 -0.0186 0.0179 0.0172 -0.0170  
Z 0.0024 -0.0038 -0.0015 0.0004 0.0021 -0.0004

AT. 27 C X 0.0003 -0.0009 0.0141 0.0141 0.0127 0.0133  
Y 0.0010 -0.0026 0.0186 0.0179 0.0172 0.0170  
Z -0.0024 0.0038 -0.0015 -0.0004 -0.0021 -0.0004

AT. 28 C X -0.0003 -0.0009 -0.0141 0.0141 -0.0127 0.0133  
Y 0.0010 0.0026 0.0186 -0.0179 0.0172 -0.0170  
Z 0.0024 0.0038 0.0015 -0.0004 0.0021 -0.0004

AT. 29 H X -0.0001 0.0007 -0.0103 -0.0100 0.0090 0.0093  
Y 0.0009 0.0062 -0.0390 -0.0369 0.0335 0.0334  
Z -0.0018 -0.0040 -0.0004 -0.0021 0.0004 0.0026

AT. 30 H X 0.0001 0.0007 0.0103 -0.0100 -0.0090 0.0093  
Y 0.0009 -0.0062 -0.0390 0.0369 0.0335 -0.0334  
Z 0.0018 -0.0040 0.0004 -0.0021 -0.0004 0.0026

AT. 31 H X -0.0001 -0.0007 0.0103 0.0100 0.0090 0.0093  
Y 0.0009 -0.0062 0.0390 0.0369 0.0335 0.0334  
Z -0.0018 0.0040 0.0004 0.0021 0.0004 0.0026

AT. 32 H X 0.0001 -0.0007 -0.0103 0.0100 -0.0090 0.0093  
Y 0.0009 0.0062 0.0390 -0.0369 0.0335 -0.0334  
Z 0.0018 0.0040 -0.0004 0.0021 -0.0004 0.0026

AT. 33 H X -0.0013 0.0025 -0.0344 -0.0338 0.0295 0.0308  
Y 0.0010 0.0013 -0.0119 -0.0116 0.0118 0.0115  
Z -0.0007 0.0009 -0.0119 -0.0117 0.0082 0.0097

AT. 34 H X 0.0013 0.0025 0.0344 -0.0338 -0.0295 0.0308  
Y 0.0010 -0.0013 -0.0119 0.0116 0.0118 -0.0115  
Z 0.0007 0.0009 0.0119 -0.0117 -0.0082 0.0097

AT. 35 H X -0.0013 -0.0025 0.0344 0.0338 0.0295 0.0308  
Y 0.0010 -0.0013 0.0119 0.0116 0.0118 0.0115

Z -0.0007 -0.0009 0.0119 0.0117 0.0082 0.0097  
AT. 36 H X 0.0013 -0.0025 -0.0344 0.0338 -0.0295 0.0308  
Y 0.0010 0.0013 0.0119 -0.0116 0.0118 -0.0115  
Z 0.0007 -0.0009 -0.0119 0.0117 -0.0082 0.0097  
AT. 37 C X 0.0037 0.0029 -0.0065 -0.0058 0.0083 0.0071  
Y -0.0008 -0.0021 -0.0035 -0.0042 0.0054 0.0051  
Z -0.0034 -0.0064 0.0108 0.0092 -0.0092 -0.0078  
AT. 38 C X -0.0037 0.0029 0.0065 -0.0058 -0.0083 0.0071  
Y -0.0008 0.0021 -0.0035 0.0042 0.0054 -0.0051  
Z 0.0034 -0.0064 -0.0108 0.0092 0.0092 -0.0078  
AT. 39 C X 0.0037 -0.0029 0.0065 0.0058 0.0083 0.0071  
Y -0.0008 0.0021 0.0035 0.0042 0.0054 0.0051  
Z -0.0034 0.0064 -0.0108 -0.0092 -0.0092 -0.0078  
AT. 40 C X -0.0037 -0.0029 -0.0065 0.0058 -0.0083 0.0071  
Y -0.0008 -0.0021 0.0035 -0.0042 0.0054 -0.0051  
Z 0.0034 0.0064 0.0108 -0.0092 0.0092 -0.0078  
AT. 41 C X -0.0010 -0.0028 -0.0079 -0.0103 0.0075 0.0095  
Y 0.0045 0.0050 0.0169 0.0202 -0.0137 -0.0185  
Z -0.0011 -0.0029 -0.0020 -0.0034 0.0042 0.0049  
AT. 42 C X 0.0010 -0.0028 0.0079 -0.0103 -0.0075 0.0095  
Y 0.0045 -0.0050 0.0169 -0.0202 -0.0137 0.0185  
Z 0.0011 -0.0029 0.0020 -0.0034 -0.0042 0.0049  
AT. 43 C X -0.0010 0.0028 0.0079 0.0103 0.0075 0.0095  
Y 0.0045 -0.0050 -0.0169 -0.0202 -0.0137 -0.0185  
Z -0.0011 0.0029 0.0020 0.0034 0.0042 0.0049  
AT. 44 C X 0.0010 0.0028 -0.0079 0.0103 -0.0075 0.0095  
Y 0.0045 0.0050 -0.0169 0.0202 -0.0137 0.0185  
Z 0.0011 0.0029 -0.0020 0.0034 -0.0042 0.0049  
AT. 45 H X -0.0113 -0.0167 -0.0241 -0.0346 0.0202 0.0314  
Y 0.0107 0.0136 0.0310 0.0392 -0.0259 -0.0363  
Z 0.0059 0.0066 0.0132 0.0171 -0.0087 -0.0141  
AT. 46 H X 0.0113 -0.0167 0.0241 -0.0346 -0.0202 0.0314

Y 0.0107 -0.0136 0.0310 -0.0392 -0.0259 0.0363  
Z -0.0059 0.0066 -0.0132 0.0171 0.0087 -0.0141  
AT. 47 H X -0.0113 0.0167 0.0241 0.0346 0.0202 0.0314  
Y 0.0107 -0.0136 -0.0310 -0.0392 -0.0259 -0.0363  
Z 0.0059 -0.0066 -0.0132 -0.0171 -0.0087 -0.0141  
AT. 48 H X 0.0113 0.0167 -0.0241 0.0346 -0.0202 0.0314  
Y 0.0107 0.0136 -0.0310 0.0392 -0.0259 0.0363  
Z -0.0059 -0.0066 0.0132 -0.0171 0.0087 -0.0141  
AT. 49 H X -0.0052 -0.0076 0.0033 0.0001 -0.0042 -0.0016  
Y 0.0063 0.0081 0.0357 0.0424 -0.0311 -0.0399  
Z -0.0172 -0.0240 -0.0216 -0.0336 0.0190 0.0318  
AT. 50 H X 0.0052 -0.0076 -0.0033 0.0001 0.0042 -0.0016  
Y 0.0063 -0.0081 0.0357 -0.0424 -0.0311 0.0399  
Z 0.0172 -0.0240 0.0216 -0.0336 -0.0190 0.0318  
AT. 51 H X -0.0052 0.0076 -0.0033 -0.0001 -0.0042 -0.0016  
Y 0.0063 -0.0081 -0.0357 -0.0424 -0.0311 -0.0399  
Z -0.0172 0.0240 0.0216 0.0336 0.0190 0.0318  
AT. 52 H X 0.0052 0.0076 0.0033 -0.0001 0.0042 -0.0016  
Y 0.0063 0.0081 -0.0357 0.0424 -0.0311 0.0399  
Z 0.0172 0.0240 -0.0216 0.0336 -0.0190 0.0318  
AT. 53 C X 0.0000 -0.0003 0.0037 0.0036 -0.0035 -0.0042  
Y 0.0009 0.0008 0.0012 0.0018 -0.0002 -0.0012  
Z 0.0000 0.0003 -0.0093 -0.0079 0.0119 0.0101  
AT. 54 C X -0.0000 -0.0003 -0.0037 0.0036 0.0035 -0.0042  
Y 0.0009 -0.0008 0.0012 -0.0018 -0.0002 0.0012  
Z -0.0000 0.0003 0.0093 -0.0079 -0.0119 0.0101  
AT. 55 C X 0.0000 0.0003 -0.0037 -0.0036 -0.0035 -0.0042  
Y 0.0009 -0.0008 -0.0012 -0.0018 -0.0002 -0.0012  
Z 0.0000 -0.0003 0.0093 0.0079 0.0119 0.0101  
AT. 56 C X -0.0000 0.0003 0.0037 -0.0036 0.0035 -0.0042  
Y 0.0009 0.0008 -0.0012 0.0018 -0.0002 0.0012  
Z -0.0000 -0.0003 -0.0093 0.0079 -0.0119 0.0101



AT. 57 C X 0.0189 0.0230 -0.0068 -0.0029 0.0018 -0.0008  
Y 0.0262 0.0273 0.0026 0.0066 -0.0059 -0.0091  
Z -0.0183 -0.0200 -0.0083 -0.0095 0.0156 0.0149

AT. 58 C X -0.0189 0.0230 0.0068 -0.0029 -0.0018 -0.0008  
Y 0.0262 -0.0273 0.0026 -0.0066 -0.0059 0.0091  
Z 0.0183 -0.0200 0.0083 -0.0095 -0.0156 0.0149

AT. 59 C X 0.0189 -0.0230 0.0068 0.0029 0.0018 -0.0008  
Y 0.0262 -0.0273 -0.0026 -0.0066 -0.0059 -0.0091  
Z -0.0183 0.0200 0.0083 0.0095 0.0156 0.0149

AT. 60 C X -0.0189 -0.0230 -0.0068 0.0029 -0.0018 -0.0008  
Y 0.0262 0.0273 -0.0026 0.0066 -0.0059 0.0091  
Z 0.0183 0.0200 -0.0083 0.0095 -0.0156 0.0149

AT. 61 H X -0.0121 -0.0069 -0.0209 -0.0201 0.0204 0.0203  
Y 0.0008 0.0023 -0.0073 -0.0061 0.0080 0.0069  
Z -0.0030 -0.0017 -0.0112 -0.0094 0.0142 0.0117

AT. 62 H X 0.0121 -0.0069 0.0209 -0.0201 -0.0204 0.0203  
Y 0.0008 -0.0023 -0.0073 0.0061 0.0080 -0.0069  
Z 0.0030 -0.0017 0.0112 -0.0094 -0.0142 0.0117

AT. 63 H X -0.0121 0.0069 0.0209 0.0201 0.0204 0.0203  
Y 0.0008 -0.0023 0.0073 0.0061 0.0080 0.0069  
Z -0.0030 0.0017 0.0112 0.0094 0.0142 0.0117

AT. 64 H X 0.0121 0.0069 -0.0209 0.0201 -0.0204 0.0203  
Y 0.0008 0.0023 0.0073 -0.0061 0.0080 -0.0069  
Z 0.0030 0.0017 -0.0112 0.0094 -0.0142 0.0117

AT. 65 H X 0.0044 0.0085 -0.0123 -0.0099 0.0097 0.0082  
Y 0.0689 0.0698 0.0180 0.0265 -0.0286 -0.0348  
Z -0.0619 -0.0691 -0.0034 -0.0114 0.0212 0.0239

AT. 66 H X -0.0044 0.0085 0.0123 -0.0099 -0.0097 0.0082  
Y 0.0689 -0.0698 0.0180 -0.0265 -0.0286 0.0348  
Z 0.0619 -0.0691 0.0034 -0.0114 -0.0212 0.0239

AT. 67 H X 0.0044 -0.0085 0.0123 0.0099 0.0097 0.0082  
Y 0.0689 -0.0698 -0.0180 -0.0265 -0.0286 -0.0348

Z -0.0619 0.0691 0.0034 0.0114 0.0212 0.0239  
AT. 68 H X -0.0044 -0.0085 -0.0123 0.0099 -0.0097 0.0082  
Y 0.0689 0.0698 -0.0180 0.0265 -0.0286 0.0348  
Z 0.0619 0.0691 -0.0034 0.0114 -0.0212 0.0239  
AT. 69 H X 0.0790 0.0879 -0.0008 0.0117 -0.0172 -0.0244  
Y 0.0278 0.0293 0.0001 0.0044 -0.0042 -0.0069  
Z -0.0062 -0.0067 -0.0095 -0.0088 0.0137 0.0126  
AT. 70 H X -0.0790 0.0879 0.0008 0.0117 0.0172 -0.0244  
Y 0.0278 -0.0293 0.0001 -0.0044 -0.0042 0.0069  
Z 0.0062 -0.0067 0.0095 -0.0088 -0.0137 0.0126  
AT. 71 H X 0.0790 -0.0879 0.0008 -0.0117 -0.0172 -0.0244  
Y 0.0278 -0.0293 -0.0001 -0.0044 -0.0042 -0.0069  
Z -0.0062 0.0067 0.0095 0.0088 0.0137 0.0126  
AT. 72 H X -0.0790 -0.0879 -0.0008 -0.0117 0.0172 -0.0244  
Y 0.0278 0.0293 -0.0001 0.0044 -0.0042 0.0069  
Z 0.0062 0.0067 -0.0095 0.0088 -0.0137 0.0126  
AT. 73 C X -0.0060 -0.0056 0.0009 0.0001 -0.0007 -0.0004  
Y -0.0049 -0.0051 0.0060 0.0051 -0.0056 -0.0047  
Z 0.0029 0.0027 -0.0052 -0.0040 0.0057 0.0049  
AT. 74 C X 0.0060 -0.0056 -0.0009 0.0001 0.0007 -0.0004  
Y -0.0049 0.0051 0.0060 -0.0051 -0.0056 0.0047  
Z -0.0029 0.0027 0.0052 -0.0040 -0.0057 0.0049  
AT. 75 C X -0.0060 0.0056 -0.0009 -0.0001 -0.0007 -0.0004  
Y -0.0049 0.0051 -0.0060 -0.0051 -0.0056 -0.0047  
Z 0.0029 -0.0027 0.0052 0.0040 0.0057 0.0049  
AT. 76 C X 0.0060 0.0056 0.0009 -0.0001 0.0007 -0.0004  
Y -0.0049 -0.0051 -0.0060 0.0051 -0.0056 0.0047  
Z -0.0029 -0.0027 -0.0052 0.0040 -0.0057 0.0049  
AT. 77 C X -0.0018 -0.0035 -0.0064 -0.0065 0.0101 0.0088  
Y -0.0057 -0.0019 -0.0019 -0.0026 0.0003 0.0017  
Z -0.0075 -0.0058 0.0069 0.0067 -0.0053 -0.0054  
AT. 78 C X 0.0018 -0.0035 0.0064 -0.0065 -0.0101 0.0088

Y -0.0057 0.0019 -0.0019 0.0026 0.0003 -0.0017  
Z 0.0075 -0.0058 -0.0069 0.0067 0.0053 -0.0054  
AT. 79 C X -0.0018 0.0035 0.0064 0.0065 0.0101 0.0088  
Y -0.0057 0.0019 0.0019 0.0026 0.0003 0.0017  
Z -0.0075 0.0058 -0.0069 -0.0067 -0.0053 -0.0054  
AT. 80 C X 0.0018 0.0035 -0.0064 0.0065 -0.0101 0.0088  
Y -0.0057 -0.0019 0.0019 -0.0026 0.0003 -0.0017  
Z 0.0075 0.0058 0.0069 -0.0067 0.0053 -0.0054  
AT. 81 H X -0.0113 -0.0086 -0.0023 -0.0030 0.0044 0.0044  
Y -0.0161 -0.0081 0.0033 0.0018 -0.0064 -0.0036  
Z -0.0081 0.0020 0.0020 0.0044 -0.0015 -0.0034  
AT. 82 H X 0.0113 -0.0086 0.0023 -0.0030 -0.0044 0.0044  
Y -0.0161 0.0081 0.0033 -0.0018 -0.0064 0.0036  
Z 0.0081 0.0020 -0.0020 0.0044 0.0015 -0.0034  
AT. 83 H X -0.0113 0.0086 0.0023 0.0030 0.0044 0.0044  
Y -0.0161 0.0081 -0.0033 -0.0018 -0.0064 -0.0036  
Z -0.0081 -0.0020 -0.0020 -0.0044 -0.0015 -0.0034  
AT. 84 H X 0.0113 0.0086 -0.0023 0.0030 -0.0044 0.0044  
Y -0.0161 -0.0081 -0.0033 0.0018 -0.0064 0.0036  
Z 0.0081 -0.0020 0.0020 -0.0044 0.0015 -0.0034  
AT. 85 H X 0.0064 -0.0029 -0.0072 -0.0078 0.0125 0.0109  
Y -0.0106 -0.0009 -0.0026 -0.0020 -0.0012 -0.0001  
Z -0.0056 -0.0068 0.0078 0.0067 -0.0047 -0.0046  
AT. 86 H X -0.0064 -0.0029 0.0072 -0.0078 -0.0125 0.0109  
Y -0.0106 0.0009 -0.0026 0.0020 -0.0012 0.0001  
Z 0.0056 -0.0068 -0.0078 0.0067 0.0047 -0.0046  
AT. 87 H X 0.0064 0.0029 0.0072 0.0078 0.0125 0.0109  
Y -0.0106 0.0009 0.0026 0.0020 -0.0012 -0.0001  
Z -0.0056 0.0068 -0.0078 -0.0067 -0.0047 -0.0046  
AT. 88 H X -0.0064 0.0029 -0.0072 0.0078 -0.0125 0.0109  
Y -0.0106 -0.0009 0.0026 -0.0020 -0.0012 0.0001  
Z 0.0056 0.0068 0.0078 -0.0067 0.0047 -0.0046

AT. 89 C X -0.0083 -0.0079 -0.0010 -0.0019 0.0024 0.0030  
Y 0.0029 0.0028 -0.0044 -0.0049 0.0044 0.0047  
Z -0.0050 -0.0047 0.0056 0.0062 -0.0052 -0.0054

AT. 90 C X 0.0083 -0.0079 0.0010 -0.0019 -0.0024 0.0030  
Y 0.0029 -0.0028 -0.0044 0.0049 0.0044 -0.0047  
Z 0.0050 -0.0047 -0.0056 0.0062 0.0052 -0.0054

AT. 91 C X -0.0083 0.0079 0.0010 0.0019 0.0024 0.0030  
Y 0.0029 -0.0028 0.0044 0.0049 0.0044 0.0047  
Z -0.0050 0.0047 -0.0056 -0.0062 -0.0052 -0.0054

AT. 92 C X 0.0083 0.0079 -0.0010 0.0019 -0.0024 0.0030  
Y 0.0029 0.0028 0.0044 -0.0049 0.0044 -0.0047  
Z 0.0050 0.0047 0.0056 -0.0062 0.0052 -0.0054

AT. 93 C X 0.0104 0.0069 0.0087 0.0095 -0.0072 -0.0064  
Y -0.0070 -0.0061 0.0060 0.0044 -0.0061 -0.0053  
Z -0.0155 -0.0138 0.0123 0.0121 -0.0120 -0.0119

AT. 94 C X -0.0104 0.0069 -0.0087 0.0095 0.0072 -0.0064  
Y -0.0070 0.0061 0.0060 -0.0044 -0.0061 0.0053  
Z 0.0155 -0.0138 -0.0123 0.0121 0.0120 -0.0119

AT. 95 C X 0.0104 -0.0069 -0.0087 -0.0095 -0.0072 -0.0064  
Y -0.0070 0.0061 -0.0060 -0.0044 -0.0061 -0.0053  
Z -0.0155 0.0138 -0.0123 -0.0121 -0.0120 -0.0119

AT. 96 C X -0.0104 -0.0069 0.0087 -0.0095 0.0072 -0.0064  
Y -0.0070 -0.0061 -0.0060 0.0044 -0.0061 0.0053  
Z 0.0155 0.0138 0.0123 -0.0121 0.0120 -0.0119

AT. 97 H X 0.0190 0.0139 0.0131 0.0149 -0.0116 -0.0100  
Y -0.0197 -0.0175 0.0053 0.0016 -0.0053 -0.0065  
Z -0.0098 -0.0111 0.0267 0.0259 -0.0260 -0.0265

AT. 98 H X -0.0190 0.0139 -0.0131 0.0149 0.0116 -0.0100  
Y -0.0197 0.0175 0.0053 -0.0016 -0.0053 0.0065  
Z 0.0098 -0.0111 -0.0267 0.0259 0.0260 -0.0265

AT. 99 H X 0.0190 -0.0139 -0.0131 -0.0149 -0.0116 -0.0100  
Y -0.0197 0.0175 -0.0053 -0.0016 -0.0053 -0.0065

Z -0.0098 0.0111 -0.0267 -0.0259 -0.0260 -0.0265  
AT.100 H X -0.0190 -0.0139 0.0131 -0.0149 0.0116 -0.0100  
Y -0.0197 -0.0175 -0.0053 0.0016 -0.0053 0.0065  
Z 0.0098 0.0111 0.0267 -0.0259 0.0260 -0.0265  
AT.101 H X 0.0167 0.0130 0.0121 0.0145 -0.0115 -0.0083  
Y 0.0027 0.0028 0.0090 0.0093 -0.0098 -0.0067  
Z -0.0326 -0.0274 0.0171 0.0158 -0.0181 -0.0167  
AT.102 H X -0.0167 0.0130 -0.0121 0.0145 0.0115 -0.0083  
Y 0.0027 -0.0028 0.0090 -0.0093 -0.0098 0.0067  
Z 0.0326 -0.0274 -0.0171 0.0158 0.0181 -0.0167  
AT.103 H X 0.0167 -0.0130 -0.0121 -0.0145 -0.0115 -0.0083  
Y 0.0027 -0.0028 -0.0090 -0.0093 -0.0098 -0.0067  
Z -0.0326 0.0274 -0.0171 -0.0158 -0.0181 -0.0167  
AT.104 H X -0.0167 -0.0130 0.0121 -0.0145 0.0115 -0.0083  
Y 0.0027 0.0028 -0.0090 0.0093 -0.0098 0.0067  
Z 0.0326 0.0274 0.0171 -0.0158 0.0181 -0.0167  
AT.105 H X 0.0163 0.0098 0.0120 0.0116 -0.0090 -0.0109  
Y -0.0155 -0.0136 0.0193 0.0171 -0.0204 -0.0183  
Z -0.0111 -0.0091 0.0010 0.0017 -0.0006 -0.0006  
AT.106 H X -0.0163 0.0098 -0.0120 0.0116 0.0090 -0.0109  
Y -0.0155 0.0136 0.0193 -0.0171 -0.0204 0.0183  
Z 0.0111 -0.0091 -0.0010 0.0017 0.0006 -0.0006  
AT.107 H X 0.0163 -0.0098 -0.0120 -0.0116 -0.0090 -0.0109  
Y -0.0155 0.0136 -0.0193 -0.0171 -0.0204 -0.0183  
Z -0.0111 0.0091 -0.0010 -0.0017 -0.0006 -0.0006  
AT.108 H X -0.0163 -0.0098 0.0120 -0.0116 0.0090 -0.0109  
Y -0.0155 -0.0136 -0.0193 0.0171 -0.0204 0.0183  
Z 0.0111 0.0091 0.0010 -0.0017 0.0006 -0.0006  
AT.109 C X -0.0059 -0.0049 0.0090 0.0099 -0.0099 -0.0105  
Y -0.0027 -0.0020 -0.0020 -0.0001 0.0016 0.0008  
Z 0.0031 0.0049 -0.0044 -0.0042 0.0040 0.0033  
AT.110 C X 0.0059 -0.0049 -0.0090 0.0099 0.0099 -0.0105

Y -0.0027 0.0020 -0.0020 0.0001 0.0016 -0.0008  
Z -0.0031 0.0049 0.0044 -0.0042 -0.0040 0.0033  
AT. 111 C X -0.0059 0.0049 -0.0090 -0.0099 -0.0099 -0.0105  
Y -0.0027 0.0020 0.0020 0.0001 0.0016 0.0008  
Z 0.0031 -0.0049 0.0044 0.0042 0.0040 0.0033  
AT. 112 C X 0.0059 0.0049 0.0090 -0.0099 0.0099 -0.0105  
Y -0.0027 -0.0020 0.0020 -0.0001 0.0016 -0.0008  
Z -0.0031 -0.0049 -0.0044 0.0042 -0.0040 0.0033  
AT. 113 H X 0.0004 0.0001 0.0086 0.0079 -0.0093 -0.0092  
Y -0.0110 -0.0086 0.0018 0.0058 -0.0023 -0.0039  
Z 0.0161 0.0150 0.0085 0.0065 -0.0079 -0.0076  
AT. 114 H X -0.0004 0.0001 -0.0086 0.0079 0.0093 -0.0092  
Y -0.0110 0.0086 0.0018 -0.0058 -0.0023 0.0039  
Z -0.0161 0.0150 -0.0085 0.0065 0.0079 -0.0076  
AT. 115 H X 0.0004 -0.0001 -0.0086 -0.0079 -0.0093 -0.0092  
Y -0.0110 0.0086 -0.0018 -0.0058 -0.0023 -0.0039  
Z 0.0161 -0.0150 -0.0085 -0.0065 -0.0079 -0.0076  
AT. 116 H X -0.0004 -0.0001 0.0086 -0.0079 0.0093 -0.0092  
Y -0.0110 -0.0086 -0.0018 0.0058 -0.0023 0.0039  
Z -0.0161 -0.0150 0.0085 -0.0065 0.0079 -0.0076  
AT. 117 H X -0.0210 -0.0148 0.0013 0.0070 -0.0021 -0.0058  
Y -0.0095 -0.0074 -0.0014 0.0014 -0.0008 -0.0016  
Z -0.0008 0.0015 -0.0025 -0.0023 0.0005 0.0003  
AT. 118 H X 0.0210 -0.0148 -0.0013 0.0070 0.0021 -0.0058  
Y -0.0095 0.0074 -0.0014 -0.0014 -0.0008 0.0016  
Z 0.0008 0.0015 0.0025 -0.0023 -0.0005 0.0003  
AT. 119 H X -0.0210 0.0148 -0.0013 -0.0070 -0.0021 -0.0058  
Y -0.0095 0.0074 0.0014 -0.0014 -0.0008 -0.0016  
Z -0.0008 -0.0015 0.0025 0.0023 0.0005 0.0003  
AT. 120 H X 0.0210 0.0148 0.0013 -0.0070 0.0021 -0.0058  
Y -0.0095 -0.0074 0.0014 0.0014 -0.0008 0.0016  
Z 0.0008 -0.0015 -0.0025 0.0023 -0.0005 0.0003

AT. 121 C X -0.0089 -0.0082 0.0068 0.0041 -0.0069 -0.0043  
Y 0.0022 0.0022 -0.0012 -0.0031 0.0008 0.0025  
Z -0.0022 -0.0002 -0.0012 -0.0012 -0.0014 -0.0005

AT. 122 C X 0.0089 -0.0082 -0.0068 0.0041 0.0069 -0.0043  
Y 0.0022 -0.0022 -0.0012 0.0031 0.0008 -0.0025  
Z 0.0022 -0.0002 0.0012 -0.0012 0.0014 -0.0005

AT. 123 C X -0.0089 0.0082 -0.0068 -0.0041 -0.0069 -0.0043  
Y 0.0022 -0.0022 0.0012 0.0031 0.0008 0.0025  
Z -0.0022 0.0002 0.0012 0.0012 -0.0014 -0.0005

AT. 124 C X 0.0089 0.0082 0.0068 -0.0041 0.0069 -0.0043  
Y 0.0022 0.0022 0.0012 -0.0031 0.0008 -0.0025  
Z 0.0022 0.0002 -0.0012 0.0012 0.0014 -0.0005

AT. 125 H X -0.0146 -0.0113 0.0053 -0.0019 -0.0096 -0.0021  
Y -0.0022 -0.0021 0.0002 -0.0034 -0.0015 0.0023  
Z 0.0025 0.0037 -0.0020 0.0005 0.0012 -0.0009

AT. 126 H X 0.0146 -0.0113 -0.0053 -0.0019 0.0096 -0.0021  
Y -0.0022 0.0021 0.0002 0.0034 -0.0015 -0.0023  
Z -0.0025 0.0037 0.0020 0.0005 -0.0012 -0.0009

AT. 127 H X -0.0146 0.0113 -0.0053 0.0019 -0.0096 -0.0021  
Y -0.0022 0.0021 -0.0002 0.0034 -0.0015 0.0023  
Z 0.0025 -0.0037 0.0020 -0.0005 0.0012 -0.0009

AT. 128 H X 0.0146 0.0113 0.0053 0.0019 0.0096 -0.0021  
Y -0.0022 -0.0021 -0.0002 -0.0034 -0.0015 -0.0023  
Z -0.0025 -0.0037 -0.0020 -0.0005 -0.0012 -0.0009

AT. 129 H X -0.0106 -0.0099 -0.0012 -0.0043 0.0014 0.0042  
Y 0.0008 0.0017 0.0090 0.0054 -0.0114 -0.0075  
Z -0.0112 -0.0072 -0.0074 -0.0127 0.0010 0.0078

AT. 130 H X 0.0106 -0.0099 0.0012 -0.0043 -0.0014 0.0042  
Y 0.0008 -0.0017 0.0090 -0.0054 -0.0114 0.0075  
Z 0.0112 -0.0072 0.0074 -0.0127 -0.0010 0.0078

AT. 131 H X -0.0106 0.0099 0.0012 0.0043 0.0014 0.0042  
Y 0.0008 -0.0017 -0.0090 -0.0054 -0.0114 -0.0075

Z -0.0112 0.0072 0.0074 0.0127 0.0010 0.0078  
AT. 132 H X 0.0106 0.0099 -0.0012 0.0043 -0.0014 0.0042  
Y 0.0008 0.0017 -0.0090 0.0054 -0.0114 0.0075  
Z 0.0112 0.0072 -0.0074 0.0127 -0.0010 0.0078  
AT. 133 C X -0.0004 -0.0010 0.0079 0.0080 -0.0084 -0.0080  
Y 0.0061 0.0066 -0.0073 -0.0065 0.0077 0.0068  
Z -0.0008 0.0006 -0.0057 -0.0054 0.0032 0.0035  
AT. 134 C X 0.0004 -0.0010 -0.0079 0.0080 0.0084 -0.0080  
Y 0.0061 -0.0066 -0.0073 0.0065 0.0077 -0.0068  
Z 0.0008 0.0006 0.0057 -0.0054 -0.0032 0.0035  
AT. 135 C X -0.0004 0.0010 -0.0079 -0.0080 -0.0084 -0.0080  
Y 0.0061 -0.0066 0.0073 0.0065 0.0077 0.0068  
Z -0.0008 -0.0006 0.0057 0.0054 0.0032 0.0035  
AT. 136 C X 0.0004 0.0010 0.0079 -0.0080 0.0084 -0.0080  
Y 0.0061 0.0066 0.0073 -0.0065 0.0077 -0.0068  
Z 0.0008 -0.0006 -0.0057 0.0054 -0.0032 0.0035  
AT. 137 C X 0.0016 0.0010 0.0018 0.0014 -0.0020 -0.0019  
Y 0.0022 0.0046 -0.0119 -0.0103 0.0078 0.0076  
Z 0.0014 0.0016 -0.0016 -0.0019 0.0014 0.0014  
AT. 138 C X -0.0016 0.0010 -0.0018 0.0014 0.0020 -0.0019  
Y 0.0022 -0.0046 -0.0119 0.0103 0.0078 -0.0076  
Z -0.0014 0.0016 0.0016 -0.0019 -0.0014 0.0014  
AT. 139 C X 0.0016 -0.0010 -0.0018 -0.0014 -0.0020 -0.0019  
Y 0.0022 -0.0046 0.0119 0.0103 0.0078 0.0076  
Z 0.0014 -0.0016 0.0016 0.0019 0.0014 0.0014  
AT. 140 C X -0.0016 -0.0010 0.0018 -0.0014 0.0020 -0.0019  
Y 0.0022 0.0046 0.0119 -0.0103 0.0078 -0.0076  
Z -0.0014 -0.0016 -0.0016 0.0019 -0.0014 0.0014  
AT. 141 H X -0.0006 0.0008 -0.0033 -0.0031 0.0009 0.0018  
Y -0.0030 0.0016 -0.0165 -0.0150 0.0078 0.0094  
Z 0.0002 -0.0001 0.0009 -0.0001 -0.0017 -0.0014  
AT. 142 H X 0.0006 0.0008 0.0033 -0.0031 -0.0009 0.0018



Y -0.0030 -0.0016 -0.0165 0.0150 0.0078 -0.0094  
Z -0.0002 -0.0001 -0.0009 -0.0001 0.0017 -0.0014  
AT. 143 H X -0.0006 -0.0008 0.0033 0.0031 0.0009 0.0018  
Y -0.0030 -0.0016 0.0165 0.0150 0.0078 0.0094  
Z 0.0002 0.0001 -0.0009 0.0001 -0.0017 -0.0014  
AT. 144 H X 0.0006 -0.0008 -0.0033 0.0031 -0.0009 0.0018  
Y -0.0030 0.0016 0.0165 -0.0150 0.0078 -0.0094  
Z -0.0002 0.0001 0.0009 0.0001 0.0017 -0.0014  
AT. 145 H X 0.0044 0.0012 0.0095 0.0084 -0.0053 -0.0065  
Y 0.0024 0.0052 -0.0123 -0.0106 0.0079 0.0078  
Z 0.0055 0.0043 0.0047 0.0042 -0.0013 -0.0022  
AT. 146 H X -0.0044 0.0012 -0.0095 0.0084 0.0053 -0.0065  
Y 0.0024 -0.0052 -0.0123 0.0106 0.0079 -0.0078  
Z -0.0055 0.0043 -0.0047 0.0042 0.0013 -0.0022  
AT. 147 H X 0.0044 -0.0012 -0.0095 -0.0084 -0.0053 -0.0065  
Y 0.0024 -0.0052 0.0123 0.0106 0.0079 0.0078  
Z 0.0055 -0.0043 -0.0047 -0.0042 -0.0013 -0.0022  
AT. 148 H X -0.0044 -0.0012 0.0095 -0.0084 0.0053 -0.0065  
Y 0.0024 0.0052 0.0123 -0.0106 0.0079 -0.0078  
Z -0.0055 -0.0043 0.0047 -0.0042 0.0013 -0.0022  
AT. 149 O X 0.0042 0.0012 0.0085 0.0075 -0.0083 -0.0078  
Y -0.0019 -0.0043 0.0136 0.0123 -0.0128 -0.0113  
Z 0.0289 0.0231 0.0039 0.0061 -0.0038 -0.0063  
AT. 150 O X -0.0042 0.0012 -0.0085 0.0075 0.0083 -0.0078  
Y -0.0019 0.0043 0.0136 -0.0123 -0.0128 0.0113  
Z -0.0289 0.0231 -0.0039 0.0061 0.0038 -0.0063  
AT. 151 O X 0.0042 -0.0012 -0.0085 -0.0075 -0.0083 -0.0078  
Y -0.0019 0.0043 -0.0136 -0.0123 -0.0128 -0.0113  
Z 0.0289 -0.0231 -0.0039 -0.0061 -0.0038 -0.0063  
AT. 152 O X -0.0042 -0.0012 0.0085 -0.0075 0.0083 -0.0078  
Y -0.0019 -0.0043 -0.0136 0.0123 -0.0128 0.0113  
Z -0.0289 -0.0231 0.0039 -0.0061 0.0038 -0.0063

AT. 153 H X -0.0030 -0.0028 0.0005 0.0008 -0.0001 -0.0011  
Y 0.0075 0.0043 0.0108 0.0117 -0.0098 -0.0106  
Z 0.0366 0.0285 0.0082 0.0103 -0.0082 -0.0106

AT. 154 H X 0.0030 -0.0028 -0.0005 0.0008 0.0001 -0.0011  
Y 0.0075 -0.0043 0.0108 -0.0117 -0.0098 0.0106  
Z -0.0366 0.0285 -0.0082 0.0103 0.0082 -0.0106

AT. 155 H X -0.0030 0.0028 -0.0005 -0.0008 -0.0001 -0.0011  
Y 0.0075 -0.0043 -0.0108 -0.0117 -0.0098 -0.0106  
Z 0.0366 -0.0285 -0.0082 -0.0103 -0.0082 -0.0106

AT. 156 H X 0.0030 0.0028 0.0005 -0.0008 0.0001 -0.0011  
Y 0.0075 0.0043 -0.0108 0.0117 -0.0098 0.0106  
Z -0.0366 -0.0285 0.0082 -0.0103 0.0082 -0.0106

AT. 157 O X -0.0012 -0.0001 -0.0079 -0.0081 0.0060 0.0068  
Y -0.0131 -0.0127 0.0198 0.0178 -0.0193 -0.0178  
Z 0.0069 0.0090 -0.0122 -0.0105 0.0086 0.0087

AT. 158 O X 0.0012 -0.0001 0.0079 -0.0081 -0.0060 0.0068  
Y -0.0131 0.0127 0.0198 -0.0178 -0.0193 0.0178  
Z -0.0069 0.0090 0.0122 -0.0105 -0.0086 0.0087

AT. 159 O X -0.0012 0.0001 0.0079 0.0081 0.0060 0.0068  
Y -0.0131 0.0127 -0.0198 -0.0178 -0.0193 -0.0178  
Z 0.0069 -0.0090 0.0122 0.0105 0.0086 0.0087

AT. 160 O X 0.0012 0.0001 -0.0079 0.0081 -0.0060 0.0068  
Y -0.0131 -0.0127 -0.0198 0.0178 -0.0193 0.0178  
Z -0.0069 -0.0090 -0.0122 0.0105 -0.0086 0.0087

AT. 161 O X -0.0082 -0.0054 -0.0088 -0.0093 0.0070 0.0088  
Y -0.0172 -0.0169 -0.0098 -0.0115 0.0097 0.0120  
Z 0.0129 0.0145 0.0064 0.0080 -0.0106 -0.0114

AT. 162 O X 0.0082 -0.0054 0.0088 -0.0093 -0.0070 0.0088  
Y -0.0172 0.0169 -0.0098 0.0115 0.0097 -0.0120  
Z -0.0129 0.0145 -0.0064 0.0080 0.0106 -0.0114

AT. 163 O X -0.0082 0.0054 0.0088 0.0093 0.0070 0.0088  
Y -0.0172 0.0169 0.0098 0.0115 0.0097 0.0120

Z 0.0129 -0.0145 -0.0064 -0.0080 -0.0106 -0.0114  
AT.164 O X 0.0082 0.0054 -0.0088 0.0093 -0.0070 0.0088  
Y -0.0172 -0.0169 0.0098 -0.0115 0.0097 -0.0120  
Z -0.0129 -0.0145 0.0064 -0.0080 0.0106 -0.0114  
AT.165 H X -0.0001 0.0017 0.0009 0.0005 -0.0032 -0.0016  
Y -0.0149 -0.0151 -0.0056 -0.0073 0.0050 0.0074  
Z 0.0065 0.0084 0.0151 0.0157 -0.0175 -0.0181  
AT.166 H X 0.0001 0.0017 -0.0009 0.0005 0.0032 -0.0016  
Y -0.0149 0.0151 -0.0056 0.0073 0.0050 -0.0074  
Z -0.0065 0.0084 -0.0151 0.0157 0.0175 -0.0181  
AT.167 H X -0.0001 -0.0017 -0.0009 -0.0005 -0.0032 -0.0016  
Y -0.0149 0.0151 0.0056 0.0073 0.0050 0.0074  
Z 0.0065 -0.0084 -0.0151 -0.0157 -0.0175 -0.0181  
AT.168 H X 0.0001 -0.0017 0.0009 -0.0005 0.0032 -0.0016  
Y -0.0149 -0.0151 0.0056 -0.0073 0.0050 -0.0074  
Z -0.0065 -0.0084 0.0151 -0.0157 0.0175 -0.0181  
AT.169 O X -0.0027 0.0007 0.0016 0.0008 -0.0011 -0.0001  
Y 0.0008 -0.0047 0.0031 0.0022 -0.0043 -0.0024  
Z -0.0026 -0.0000 -0.0005 -0.0003 0.0010 0.0002  
AT.170 O X 0.0027 0.0007 -0.0016 0.0008 0.0011 -0.0001  
Y 0.0008 0.0047 0.0031 -0.0022 -0.0043 0.0024  
Z 0.0026 -0.0000 0.0005 -0.0003 -0.0010 0.0002  
AT.171 O X -0.0027 -0.0007 -0.0016 -0.0008 -0.0011 -0.0001  
Y 0.0008 0.0047 -0.0031 -0.0022 -0.0043 -0.0024  
Z -0.0026 0.0000 0.0005 0.0003 0.0010 0.0002  
AT.172 O X 0.0027 -0.0007 0.0016 -0.0008 0.0011 -0.0001  
Y 0.0008 -0.0047 -0.0031 0.0022 -0.0043 0.0024  
Z 0.0026 0.0000 -0.0005 0.0003 -0.0010 0.0002  
AT.173 H X -0.0021 -0.0023 0.0009 -0.0009 -0.0045 -0.0026  
Y 0.0006 -0.0046 0.0038 0.0030 -0.0042 -0.0024  
Z -0.0035 0.0034 -0.0026 -0.0014 0.0004 0.0000  
AT.174 H X 0.0021 -0.0023 -0.0009 -0.0009 0.0045 -0.0026

|         |     |         |         |         |         |         |         |
|---------|-----|---------|---------|---------|---------|---------|---------|
|         | Y   | 0.0006  | 0.0046  | 0.0038  | -0.0030 | -0.0042 | 0.0024  |
|         | Z   | 0.0035  | 0.0034  | 0.0026  | -0.0014 | -0.0004 | 0.0000  |
| AT. 175 | H X | -0.0021 | 0.0023  | -0.0009 | 0.0009  | -0.0045 | -0.0026 |
|         | Y   | 0.0006  | 0.0046  | -0.0038 | -0.0030 | -0.0042 | -0.0024 |
|         | Z   | -0.0035 | -0.0034 | 0.0026  | 0.0014  | 0.0004  | 0.0000  |
| AT. 176 | H X | 0.0021  | 0.0023  | 0.0009  | 0.0009  | 0.0045  | -0.0026 |
|         | Y   | 0.0006  | -0.0046 | -0.0038 | 0.0030  | -0.0042 | 0.0024  |
|         | Z   | 0.0035  | -0.0034 | -0.0026 | 0.0014  | -0.0004 | 0.0000  |

FREQ(CM\*\*-1) 379.93 382.43 383.42 383.82 385.64 385.92

|         |   |         |         |         |         |         |         |
|---------|---|---------|---------|---------|---------|---------|---------|
| AT. 1 I | X | 0.0003  | -0.0003 | 0.0003  | -0.0002 | 0.0008  | -0.0006 |
|         | Y | -0.0001 | 0.0001  | -0.0002 | 0.0001  | -0.0004 | 0.0003  |
|         | Z | -0.0002 | -0.0002 | -0.0007 | 0.0004  | -0.0007 | 0.0008  |
| AT. 2 I | X | -0.0003 | -0.0003 | 0.0003  | 0.0002  | 0.0008  | 0.0006  |
|         | Y | -0.0001 | -0.0001 | 0.0002  | 0.0001  | 0.0004  | 0.0003  |
|         | Z | 0.0002  | -0.0002 | -0.0007 | -0.0004 | -0.0007 | -0.0008 |
| AT. 3 I | X | 0.0003  | -0.0003 | -0.0003 | 0.0002  | 0.0008  | -0.0006 |
|         | Y | -0.0001 | 0.0001  | 0.0002  | -0.0001 | -0.0004 | 0.0003  |
|         | Z | -0.0002 | -0.0002 | 0.0007  | -0.0004 | -0.0007 | 0.0008  |
| AT. 4 I | X | -0.0003 | -0.0003 | -0.0003 | -0.0002 | 0.0008  | 0.0006  |
|         | Y | -0.0001 | -0.0001 | -0.0002 | -0.0001 | 0.0004  | 0.0003  |
|         | Z | 0.0002  | -0.0002 | 0.0007  | 0.0004  | -0.0007 | -0.0008 |
| AT. 5 I | X | -0.0001 | -0.0001 | -0.0005 | 0.0005  | -0.0006 | 0.0005  |
|         | Y | 0.0001  | -0.0000 | 0.0002  | -0.0001 | 0.0003  | -0.0003 |
|         | Z | 0.0003  | -0.0003 | 0.0006  | -0.0002 | 0.0005  | -0.0005 |
| AT. 6 I | X | 0.0001  | -0.0001 | -0.0005 | -0.0005 | -0.0006 | -0.0005 |
|         | Y | 0.0001  | 0.0000  | -0.0002 | -0.0001 | -0.0003 | -0.0003 |
|         | Z | -0.0003 | -0.0003 | 0.0006  | 0.0002  | 0.0005  | 0.0005  |
| AT. 7 I | X | -0.0001 | -0.0001 | 0.0005  | -0.0005 | -0.0006 | 0.0005  |
|         | Y | 0.0001  | -0.0000 | -0.0002 | 0.0001  | 0.0003  | -0.0003 |
|         | Z | 0.0003  | -0.0003 | -0.0006 | 0.0002  | 0.0005  | -0.0005 |

AT. 8 I X 0.0001 -0.0001 0.0005 0.0005 -0.0006 -0.0005  
Y 0.0001 0.0000 0.0002 0.0001 -0.0003 -0.0003  
Z -0.0003 -0.0003 -0.0006 -0.0002 0.0005 0.0005

AT. 9 N X 0.0217 -0.0214 -0.0079 0.0106 0.0076 -0.0045  
Y -0.0012 0.0017 0.0059 -0.0057 0.0071 -0.0071  
Z 0.0058 -0.0034 0.0062 -0.0047 0.0108 -0.0102

AT. 10 N X -0.0217 -0.0214 -0.0079 -0.0106 0.0076 0.0045  
Y -0.0012 -0.0017 -0.0059 -0.0057 -0.0071 -0.0071  
Z -0.0058 -0.0034 0.0062 0.0047 0.0108 0.0102

AT. 11 N X 0.0217 -0.0214 0.0079 -0.0106 0.0076 -0.0045  
Y -0.0012 0.0017 -0.0059 0.0057 0.0071 -0.0071  
Z 0.0058 -0.0034 -0.0062 0.0047 0.0108 -0.0102

AT. 12 N X -0.0217 -0.0214 0.0079 0.0106 0.0076 0.0045  
Y -0.0012 -0.0017 0.0059 0.0057 -0.0071 -0.0071  
Z -0.0058 -0.0034 -0.0062 -0.0047 0.0108 0.0102

AT. 13 N X 0.0059 -0.0030 -0.0038 0.0059 -0.0034 0.0059  
Y 0.0010 -0.0010 0.0023 -0.0013 0.0041 -0.0036  
Z -0.0050 0.0028 -0.0072 0.0051 -0.0114 0.0101

AT. 14 N X -0.0059 -0.0030 -0.0038 -0.0059 -0.0034 -0.0059  
Y 0.0010 0.0010 -0.0023 -0.0013 -0.0041 -0.0036  
Z 0.0050 0.0028 -0.0072 -0.0051 -0.0114 -0.0101

AT. 15 N X 0.0059 -0.0030 0.0038 -0.0059 -0.0034 0.0059  
Y 0.0010 -0.0010 -0.0023 0.0013 0.0041 -0.0036  
Z -0.0050 0.0028 0.0072 -0.0051 -0.0114 0.0101

AT. 16 N X -0.0059 -0.0030 0.0038 0.0059 -0.0034 -0.0059  
Y 0.0010 0.0010 0.0023 0.0013 -0.0041 -0.0036  
Z 0.0050 0.0028 0.0072 0.0051 -0.0114 -0.0101

AT. 17 O X 0.0021 -0.0017 0.0019 -0.0019 0.0043 -0.0039  
Y 0.0181 -0.0171 -0.0012 0.0022 0.0131 -0.0102  
Z -0.0045 0.0065 0.0103 -0.0097 0.0077 -0.0086

AT. 18 O X -0.0021 -0.0017 0.0019 0.0019 0.0043 0.0039  
Y 0.0181 0.0171 0.0012 0.0022 -0.0131 -0.0102

Z 0.0045 0.0065 0.0103 0.0097 0.0077 0.0086  
AT. 19 O X 0.0021 -0.0017 -0.0019 0.0019 0.0043 -0.0039  
Y 0.0181 -0.0171 0.0012 -0.0022 0.0131 -0.0102  
Z -0.0045 0.0065 -0.0103 0.0097 0.0077 -0.0086  
AT. 20 O X -0.0021 -0.0017 -0.0019 -0.0019 0.0043 0.0039  
Y 0.0181 0.0171 -0.0012 -0.0022 -0.0131 -0.0102  
Z 0.0045 0.0065 -0.0103 -0.0097 0.0077 0.0086  
AT. 21 O X -0.0010 0.0008 0.0013 -0.0021 0.0013 -0.0019  
Y -0.0024 0.0036 0.0136 -0.0123 0.0153 -0.0157  
Z -0.0089 0.0083 0.0036 -0.0048 -0.0018 0.0002  
AT. 22 O X 0.0010 0.0008 0.0013 0.0021 0.0013 0.0019  
Y -0.0024 -0.0036 -0.0136 -0.0123 -0.0153 -0.0157  
Z 0.0089 0.0083 0.0036 0.0048 -0.0018 -0.0002  
AT. 23 O X -0.0010 0.0008 -0.0013 0.0021 0.0013 -0.0019  
Y -0.0024 0.0036 -0.0136 0.0123 0.0153 -0.0157  
Z -0.0089 0.0083 -0.0036 0.0048 -0.0018 0.0002  
AT. 24 O X 0.0010 0.0008 -0.0013 -0.0021 0.0013 0.0019  
Y -0.0024 -0.0036 0.0136 0.0123 -0.0153 -0.0157  
Z 0.0089 0.0083 -0.0036 -0.0048 -0.0018 -0.0002  
AT. 25 C X -0.0087 0.0055 -0.0013 -0.0025 -0.0067 0.0060  
Y -0.0040 0.0009 -0.0053 0.0027 -0.0066 0.0061  
Z -0.0066 0.0067 0.0050 -0.0066 0.0004 -0.0014  
AT. 26 C X 0.0087 0.0055 -0.0013 0.0025 -0.0067 -0.0060  
Y -0.0040 -0.0009 0.0053 0.0027 0.0066 0.0061  
Z 0.0066 0.0067 0.0050 0.0066 0.0004 0.0014  
AT. 27 C X -0.0087 0.0055 0.0013 0.0025 -0.0067 0.0060  
Y -0.0040 0.0009 0.0053 -0.0027 -0.0066 0.0061  
Z -0.0066 0.0067 -0.0050 0.0066 0.0004 -0.0014  
AT. 28 C X 0.0087 0.0055 0.0013 -0.0025 -0.0067 -0.0060  
Y -0.0040 -0.0009 -0.0053 -0.0027 0.0066 0.0061  
Z 0.0066 0.0067 -0.0050 -0.0066 0.0004 0.0014  
AT. 29 H X -0.0077 0.0047 -0.0011 -0.0021 -0.0059 0.0052

Y -0.0158 0.0075 -0.0200 0.0116 -0.0319 0.0297  
Z -0.0057 0.0065 0.0069 -0.0084 0.0031 -0.0039  
AT. 30 H X 0.0077 0.0047 -0.0011 0.0021 -0.0059 -0.0052  
Y -0.0158 -0.0075 0.0200 0.0116 0.0319 0.0297  
Z 0.0057 0.0065 0.0069 0.0084 0.0031 0.0039  
AT. 31 H X -0.0077 0.0047 0.0011 0.0021 -0.0059 0.0052  
Y -0.0158 0.0075 0.0200 -0.0116 -0.0319 0.0297  
Z -0.0057 0.0065 -0.0069 0.0084 0.0031 -0.0039  
AT. 32 H X 0.0077 0.0047 0.0011 -0.0021 -0.0059 -0.0052  
Y -0.0158 -0.0075 -0.0200 -0.0116 0.0319 0.0297  
Z 0.0057 0.0065 -0.0069 -0.0084 0.0031 0.0039  
AT. 33 H X -0.0202 0.0123 -0.0121 0.0028 -0.0267 0.0242  
Y 0.0000 -0.0015 -0.0012 0.0004 0.0007 -0.0007  
Z -0.0151 0.0118 -0.0045 -0.0005 -0.0165 0.0144  
AT. 34 H X 0.0202 0.0123 -0.0121 -0.0028 -0.0267 -0.0242  
Y 0.0000 0.0015 0.0012 0.0004 -0.0007 -0.0007  
Z 0.0151 0.0118 -0.0045 0.0005 -0.0165 -0.0144  
AT. 35 H X -0.0202 0.0123 0.0121 -0.0028 -0.0267 0.0242  
Y 0.0000 -0.0015 0.0012 -0.0004 0.0007 -0.0007  
Z -0.0151 0.0118 0.0045 0.0005 -0.0165 0.0144  
AT. 36 H X 0.0202 0.0123 0.0121 0.0028 -0.0267 -0.0242  
Y 0.0000 0.0015 -0.0012 -0.0004 -0.0007 -0.0007  
Z 0.0151 0.0118 0.0045 -0.0005 -0.0165 -0.0144  
AT. 37 C X 0.0048 -0.0047 0.0009 -0.0007 0.0049 -0.0041  
Y 0.0053 -0.0051 0.0021 -0.0014 0.0079 -0.0070  
Z 0.0013 0.0009 0.0080 -0.0072 0.0093 -0.0093  
AT. 38 C X -0.0048 -0.0047 0.0009 0.0007 0.0049 0.0041  
Y 0.0053 0.0051 -0.0021 -0.0014 -0.0079 -0.0070  
Z -0.0013 0.0009 0.0080 0.0072 0.0093 0.0093  
AT. 39 C X 0.0048 -0.0047 -0.0009 0.0007 0.0049 -0.0041  
Y 0.0053 -0.0051 -0.0021 0.0014 0.0079 -0.0070  
Z 0.0013 0.0009 -0.0080 0.0072 0.0093 -0.0093

AT. 40 C X -0.0048 -0.0047 -0.0009 -0.0007 0.0049 0.0041  
Y 0.0053 0.0051 0.0021 0.0014 -0.0079 -0.0070  
Z -0.0013 0.0009 -0.0080 -0.0072 0.0093 0.0093

AT. 41 C X -0.0090 0.0084 0.0115 -0.0124 0.0082 -0.0097  
Y 0.0249 -0.0220 -0.0158 0.0211 -0.0020 0.0055  
Z 0.0015 -0.0005 0.0089 -0.0082 0.0122 -0.0120

AT. 42 C X 0.0090 0.0084 0.0115 0.0124 0.0082 0.0097  
Y 0.0249 0.0220 0.0158 0.0211 0.0020 0.0055  
Z -0.0015 -0.0005 0.0089 0.0082 0.0122 0.0120

AT. 43 C X -0.0090 0.0084 -0.0115 0.0124 0.0082 -0.0097  
Y 0.0249 -0.0220 0.0158 -0.0211 -0.0020 0.0055  
Z 0.0015 -0.0005 -0.0089 0.0082 0.0122 -0.0120

AT. 44 C X 0.0090 0.0084 -0.0115 -0.0124 0.0082 0.0097  
Y 0.0249 0.0220 -0.0158 -0.0211 0.0020 0.0055  
Z -0.0015 -0.0005 -0.0089 -0.0082 0.0122 0.0120

AT. 45 H X -0.0511 0.0485 0.0528 -0.0594 0.0282 -0.0347  
Y 0.0485 -0.0437 -0.0386 0.0480 -0.0140 0.0205  
Z 0.0282 -0.0251 -0.0161 0.0214 -0.0002 0.0038

AT. 46 H X 0.0511 0.0485 0.0528 0.0594 0.0282 0.0347  
Y 0.0485 0.0437 0.0386 0.0480 0.0140 0.0205  
Z -0.0282 -0.0251 -0.0161 -0.0214 -0.0002 -0.0038

AT. 47 H X -0.0511 0.0485 -0.0528 0.0594 0.0282 -0.0347  
Y 0.0485 -0.0437 0.0386 -0.0480 -0.0140 0.0205  
Z 0.0282 -0.0251 0.0161 -0.0214 -0.0002 0.0038

AT. 48 H X 0.0511 0.0485 -0.0528 -0.0594 0.0282 0.0347  
Y 0.0485 0.0437 -0.0386 -0.0480 0.0140 0.0205  
Z -0.0282 -0.0251 0.0161 0.0214 -0.0002 -0.0038

AT. 49 H X -0.0083 0.0086 0.0095 -0.0100 0.0057 -0.0075  
Y 0.0461 -0.0411 -0.0365 0.0454 -0.0128 0.0186  
Z -0.0511 0.0485 0.0569 -0.0645 0.0339 -0.0406

AT. 50 H X 0.0083 0.0086 0.0095 0.0100 0.0057 0.0075  
Y 0.0461 0.0411 0.0365 0.0454 0.0128 0.0186



Z 0.0511 0.0485 0.0569 0.0645 0.0339 0.0406  
AT. 51 H X -0.0083 0.0086 -0.0095 0.0100 0.0057 -0.0075  
Y 0.0461 -0.0411 0.0365 -0.0454 -0.0128 0.0186  
Z -0.0511 0.0485 -0.0569 0.0645 0.0339 -0.0406  
AT. 52 H X 0.0083 0.0086 -0.0095 -0.0100 0.0057 0.0075  
Y 0.0461 0.0411 -0.0365 -0.0454 0.0128 0.0186  
Z 0.0511 0.0485 -0.0569 -0.0645 0.0339 0.0406  
AT. 53 C X 0.0033 -0.0027 -0.0014 0.0029 0.0007 -0.0010  
Y 0.0061 -0.0059 -0.0032 0.0046 0.0008 0.0005  
Z 0.0126 -0.0135 -0.0087 0.0086 0.0006 0.0005  
AT. 54 C X -0.0033 -0.0027 -0.0014 -0.0029 0.0007 0.0010  
Y 0.0061 0.0059 0.0032 0.0046 -0.0008 0.0005  
Z -0.0126 -0.0135 -0.0087 -0.0086 0.0006 -0.0005  
AT. 55 C X 0.0033 -0.0027 0.0014 -0.0029 0.0007 -0.0010  
Y 0.0061 -0.0059 0.0032 -0.0046 0.0008 0.0005  
Z 0.0126 -0.0135 0.0087 -0.0086 0.0006 0.0005  
AT. 56 C X -0.0033 -0.0027 0.0014 0.0029 0.0007 0.0010  
Y 0.0061 0.0059 -0.0032 -0.0046 -0.0008 0.0005  
Z -0.0126 -0.0135 0.0087 0.0086 0.0006 -0.0005  
AT. 57 C X -0.0083 0.0075 -0.0050 0.0073 -0.0136 0.0128  
Y 0.0014 0.0003 -0.0046 0.0108 -0.0061 0.0081  
Z 0.0231 -0.0245 -0.0095 0.0072 0.0090 -0.0077  
AT. 58 C X 0.0083 0.0075 -0.0050 -0.0073 -0.0136 -0.0128  
Y 0.0014 -0.0003 0.0046 0.0108 0.0061 0.0081  
Z -0.0231 -0.0245 -0.0095 -0.0072 0.0090 0.0077  
AT. 59 C X -0.0083 0.0075 0.0050 -0.0073 -0.0136 0.0128  
Y 0.0014 0.0003 0.0046 -0.0108 -0.0061 0.0081  
Z 0.0231 -0.0245 0.0095 -0.0072 0.0090 -0.0077  
AT. 60 C X 0.0083 0.0075 0.0050 0.0073 -0.0136 -0.0128  
Y 0.0014 -0.0003 -0.0046 -0.0108 0.0061 0.0081  
Z -0.0231 -0.0245 0.0095 0.0072 0.0090 0.0077  
AT. 61 H X -0.0051 -0.0026 -0.0143 0.0054 -0.0164 0.0151

Y 0.0054 -0.0089 -0.0121 0.0092 -0.0073 0.0089  
Z 0.0149 -0.0146 -0.0070 0.0095 0.0025 -0.0016  
AT. 62 H X 0.0051 -0.0026 -0.0143 -0.0054 -0.0164 -0.0151  
Y 0.0054 0.0089 0.0121 0.0092 0.0073 0.0089  
Z -0.0149 -0.0146 -0.0070 -0.0095 0.0025 0.0016  
AT. 63 H X -0.0051 -0.0026 0.0143 -0.0054 -0.0164 0.0151  
Y 0.0054 -0.0089 0.0121 -0.0092 -0.0073 0.0089  
Z 0.0149 -0.0146 0.0070 -0.0095 0.0025 -0.0016  
AT. 64 H X 0.0051 -0.0026 0.0143 0.0054 -0.0164 -0.0151  
Y 0.0054 0.0089 -0.0121 -0.0092 0.0073 0.0089  
Z -0.0149 -0.0146 0.0070 0.0095 0.0025 0.0016  
AT. 65 H X -0.0058 0.0024 -0.0083 0.0058 -0.0130 0.0120  
Y -0.0059 0.0153 0.0042 0.0155 -0.0084 0.0108  
Z 0.0428 -0.0452 -0.0075 -0.0018 0.0306 -0.0291  
AT. 66 H X 0.0058 0.0024 -0.0083 -0.0058 -0.0130 -0.0120  
Y -0.0059 -0.0153 -0.0042 0.0155 0.0084 0.0108  
Z -0.0428 -0.0452 -0.0075 0.0018 0.0306 0.0291  
AT. 67 H X -0.0058 0.0024 0.0083 -0.0058 -0.0130 0.0120  
Y -0.0059 0.0153 -0.0042 -0.0155 -0.0084 0.0108  
Z 0.0428 -0.0452 0.0075 0.0018 0.0306 -0.0291  
AT. 68 H X 0.0058 0.0024 0.0083 0.0058 -0.0130 -0.0120  
Y -0.0059 -0.0153 0.0042 -0.0155 0.0084 0.0108  
Z -0.0428 -0.0452 0.0075 -0.0018 0.0306 0.0291  
AT. 69 H X -0.0282 0.0342 0.0008 0.0168 -0.0302 0.0301  
Y -0.0007 0.0007 -0.0083 0.0122 -0.0108 0.0128  
Z 0.0179 -0.0195 -0.0115 0.0102 0.0021 -0.0008  
AT. 70 H X 0.0282 0.0342 0.0008 -0.0168 -0.0302 -0.0301  
Y -0.0007 -0.0007 0.0083 0.0122 0.0108 0.0128  
Z -0.0179 -0.0195 -0.0115 -0.0102 0.0021 0.0008  
AT. 71 H X -0.0282 0.0342 -0.0008 -0.0168 -0.0302 0.0301  
Y -0.0007 0.0007 0.0083 -0.0122 -0.0108 0.0128  
Z 0.0179 -0.0195 0.0115 -0.0102 0.0021 -0.0008

AT. 72 H X 0.0282 0.0342 -0.0008 0.0168 -0.0302 -0.0301  
Y -0.0007 -0.0007 -0.0083 -0.0122 0.0108 0.0128  
Z -0.0179 -0.0195 0.0115 0.0102 0.0021 0.0008

AT. 73 C X 0.0002 -0.0006 -0.0014 0.0011 -0.0012 0.0003  
Y -0.0002 0.0006 0.0012 -0.0014 0.0005 -0.0002  
Z 0.0054 -0.0068 -0.0077 0.0075 -0.0043 0.0058

AT. 74 C X -0.0002 -0.0006 -0.0014 -0.0011 -0.0012 -0.0003  
Y -0.0002 -0.0006 -0.0012 -0.0014 -0.0005 -0.0002  
Z -0.0054 -0.0068 -0.0077 -0.0075 -0.0043 -0.0058

AT. 75 C X 0.0002 -0.0006 0.0014 -0.0011 -0.0012 0.0003  
Y -0.0002 0.0006 -0.0012 0.0014 0.0005 -0.0002  
Z 0.0054 -0.0068 0.0077 -0.0075 -0.0043 0.0058

AT. 76 C X -0.0002 -0.0006 0.0014 0.0011 -0.0012 -0.0003  
Y -0.0002 -0.0006 0.0012 0.0014 -0.0005 -0.0002  
Z -0.0054 -0.0068 0.0077 0.0075 -0.0043 -0.0058

AT. 77 C X 0.0115 -0.0117 -0.0019 0.0026 0.0079 -0.0063  
Y -0.0105 0.0109 0.0071 -0.0079 0.0004 -0.0016  
Z 0.0028 -0.0012 0.0020 -0.0015 0.0032 -0.0032

AT. 78 C X -0.0115 -0.0117 -0.0019 -0.0026 0.0079 0.0063  
Y -0.0105 -0.0109 -0.0071 -0.0079 -0.0004 -0.0016  
Z -0.0028 -0.0012 0.0020 0.0015 0.0032 0.0032

AT. 79 C X 0.0115 -0.0117 0.0019 -0.0026 0.0079 -0.0063  
Y -0.0105 0.0109 -0.0071 0.0079 0.0004 -0.0016  
Z 0.0028 -0.0012 -0.0020 0.0015 0.0032 -0.0032

AT. 80 C X -0.0115 -0.0117 0.0019 0.0026 0.0079 0.0063  
Y -0.0105 -0.0109 0.0071 0.0079 -0.0004 -0.0016  
Z -0.0028 -0.0012 -0.0020 -0.0015 0.0032 0.0032

AT. 81 H X 0.0005 0.0000 0.0038 -0.0042 0.0052 -0.0054  
Y -0.0219 0.0231 0.0133 -0.0152 -0.0022 -0.0009  
Z -0.0043 0.0076 0.0042 -0.0037 -0.0024 0.0009

AT. 82 H X -0.0005 0.0000 0.0038 0.0042 0.0052 0.0054  
Y -0.0219 -0.0231 -0.0133 -0.0152 0.0022 -0.0009

Z 0.0043 0.0076 0.0042 0.0037 -0.0024 -0.0009  
AT. 83 H X 0.0005 0.0000 -0.0038 0.0042 0.0052 -0.0054  
Y -0.0219 0.0231 -0.0133 0.0152 -0.0022 -0.0009  
Z -0.0043 0.0076 -0.0042 0.0037 -0.0024 0.0009  
AT. 84 H X -0.0005 0.0000 -0.0038 -0.0042 0.0052 0.0054  
Y -0.0219 -0.0231 0.0133 0.0152 0.0022 -0.0009  
Z 0.0043 0.0076 -0.0042 -0.0037 -0.0024 -0.0009  
AT. 85 H X 0.0245 -0.0270 -0.0120 0.0129 0.0083 -0.0043  
Y -0.0184 0.0189 0.0056 -0.0075 -0.0088 0.0063  
Z 0.0062 -0.0040 0.0059 -0.0045 0.0110 -0.0105  
AT. 86 H X -0.0245 -0.0270 -0.0120 -0.0129 0.0083 0.0043  
Y -0.0184 -0.0189 -0.0056 -0.0075 0.0088 0.0063  
Z -0.0062 -0.0040 0.0059 0.0045 0.0110 0.0105  
AT. 87 H X 0.0245 -0.0270 0.0120 -0.0129 0.0083 -0.0043  
Y -0.0184 0.0189 -0.0056 0.0075 -0.0088 0.0063  
Z 0.0062 -0.0040 -0.0059 0.0045 0.0110 -0.0105  
AT. 88 H X -0.0245 -0.0270 0.0120 0.0129 0.0083 0.0043  
Y -0.0184 -0.0189 0.0056 0.0075 0.0088 0.0063  
Z -0.0062 -0.0040 -0.0059 -0.0045 0.0110 0.0105  
AT. 89 C X 0.0019 -0.0023 -0.0002 -0.0004 0.0019 -0.0016  
Y -0.0034 0.0040 0.0065 -0.0060 0.0052 -0.0054  
Z 0.0058 -0.0067 -0.0100 0.0090 -0.0076 0.0087  
AT. 90 C X -0.0019 -0.0023 -0.0002 0.0004 0.0019 0.0016  
Y -0.0034 -0.0040 -0.0065 -0.0060 -0.0052 -0.0054  
Z -0.0058 -0.0067 -0.0100 -0.0090 -0.0076 -0.0087  
AT. 91 C X 0.0019 -0.0023 0.0002 0.0004 0.0019 -0.0016  
Y -0.0034 0.0040 -0.0065 0.0060 0.0052 -0.0054  
Z 0.0058 -0.0067 0.0100 -0.0090 -0.0076 0.0087  
AT. 92 C X -0.0019 -0.0023 0.0002 -0.0004 0.0019 0.0016  
Y -0.0034 -0.0040 0.0065 0.0060 -0.0052 -0.0054  
Z -0.0058 -0.0067 0.0100 0.0090 -0.0076 -0.0087  
AT. 93 C X 0.0053 -0.0052 0.0039 -0.0024 0.0089 -0.0060

Y -0.0060 0.0084 0.0087 -0.0089 0.0042 -0.0064  
Z 0.0053 -0.0059 -0.0131 0.0108 -0.0123 0.0121  
AT. 94 C X -0.0053 -0.0052 0.0039 0.0024 0.0089 0.0060  
Y -0.0060 -0.0084 -0.0087 -0.0089 -0.0042 -0.0064  
Z -0.0053 -0.0059 -0.0131 -0.0108 -0.0123 -0.0121  
AT. 95 C X 0.0053 -0.0052 -0.0039 0.0024 0.0089 -0.0060  
Y -0.0060 0.0084 -0.0087 0.0089 0.0042 -0.0064  
Z 0.0053 -0.0059 0.0131 -0.0108 -0.0123 0.0121  
AT. 96 C X -0.0053 -0.0052 -0.0039 -0.0024 0.0089 0.0060  
Y -0.0060 -0.0084 0.0087 0.0089 -0.0042 -0.0064  
Z -0.0053 -0.0059 0.0131 0.0108 -0.0123 -0.0121  
AT. 97 H X 0.0059 -0.0070 0.0056 -0.0031 0.0116 -0.0072  
Y -0.0060 0.0128 0.0094 -0.0103 0.0028 -0.0086  
Z 0.0075 -0.0045 -0.0061 0.0059 -0.0051 0.0044  
AT. 98 H X -0.0059 -0.0070 0.0056 0.0031 0.0116 0.0072  
Y -0.0060 -0.0128 -0.0094 -0.0103 -0.0028 -0.0086  
Z -0.0075 -0.0045 -0.0061 -0.0059 -0.0051 -0.0044  
AT. 99 H X 0.0059 -0.0070 -0.0056 0.0031 0.0116 -0.0072  
Y -0.0060 0.0128 -0.0094 0.0103 0.0028 -0.0086  
Z 0.0075 -0.0045 0.0061 -0.0059 -0.0051 0.0044  
AT. 100 H X -0.0059 -0.0070 -0.0056 -0.0031 0.0116 0.0072  
Y -0.0060 -0.0128 0.0094 0.0103 -0.0028 -0.0086  
Z -0.0075 -0.0045 0.0061 0.0059 -0.0051 -0.0044  
AT. 101 H X 0.0035 -0.0069 0.0033 -0.0017 0.0083 -0.0032  
Y -0.0070 0.0059 0.0087 -0.0085 0.0050 -0.0045  
Z -0.0010 -0.0005 -0.0165 0.0122 -0.0213 0.0188  
AT. 102 H X -0.0035 -0.0069 0.0033 0.0017 0.0083 0.0032  
Y -0.0070 -0.0059 -0.0087 -0.0085 -0.0050 -0.0045  
Z 0.0010 -0.0005 -0.0165 -0.0122 -0.0213 -0.0188  
AT. 103 H X 0.0035 -0.0069 -0.0033 0.0017 0.0083 -0.0032  
Y -0.0070 0.0059 -0.0087 0.0085 0.0050 -0.0045  
Z -0.0010 -0.0005 0.0165 -0.0122 -0.0213 0.0188

AT.104 H X -0.0035 -0.0069 -0.0033 -0.0017 0.0083 0.0032  
Y -0.0070 -0.0059 0.0087 0.0085 -0.0050 -0.0045  
Z 0.0010 -0.0005 0.0165 0.0122 -0.0213 -0.0188

AT.105 H X 0.0103 -0.0049 0.0108 -0.0069 0.0182 -0.0165  
Y -0.0095 0.0122 0.0094 -0.0101 0.0008 -0.0044  
Z 0.0061 -0.0088 -0.0158 0.0132 -0.0129 0.0142

AT.106 H X -0.0103 -0.0049 0.0108 0.0069 0.0182 0.0165  
Y -0.0095 -0.0122 -0.0094 -0.0101 -0.0008 -0.0044  
Z -0.0061 -0.0088 -0.0158 -0.0132 -0.0129 -0.0142

AT.107 H X 0.0103 -0.0049 -0.0108 0.0069 0.0182 -0.0165  
Y -0.0095 0.0122 -0.0094 0.0101 0.0008 -0.0044  
Z 0.0061 -0.0088 0.0158 -0.0132 -0.0129 0.0142

AT.108 H X -0.0103 -0.0049 -0.0108 -0.0069 0.0182 0.0165  
Y -0.0095 -0.0122 0.0094 0.0101 -0.0008 -0.0044  
Z -0.0061 -0.0088 0.0158 0.0132 -0.0129 -0.0142

AT.109 C X 0.0071 -0.0081 -0.0165 0.0160 -0.0146 0.0153  
Y 0.0092 -0.0122 -0.0198 0.0187 -0.0155 0.0178  
Z -0.0049 0.0061 0.0074 -0.0071 0.0048 -0.0063

AT.110 C X -0.0071 -0.0081 -0.0165 -0.0160 -0.0146 -0.0153  
Y 0.0092 0.0122 0.0198 0.0187 0.0155 0.0178  
Z 0.0049 0.0061 0.0074 0.0071 0.0048 0.0063

AT.111 C X 0.0071 -0.0081 0.0165 -0.0160 -0.0146 0.0153  
Y 0.0092 -0.0122 0.0198 -0.0187 -0.0155 0.0178  
Z -0.0049 0.0061 -0.0074 0.0071 0.0048 -0.0063

AT.112 C X -0.0071 -0.0081 0.0165 0.0160 -0.0146 -0.0153  
Y 0.0092 0.0122 -0.0198 -0.0187 0.0155 0.0178  
Z 0.0049 0.0061 -0.0074 -0.0071 0.0048 0.0063

AT.113 H X -0.0026 0.0043 0.0052 -0.0033 0.0033 -0.0039  
Y 0.0226 -0.0290 -0.0486 0.0445 -0.0391 0.0435  
Z -0.0196 0.0276 0.0475 -0.0419 0.0384 -0.0408

AT.114 H X 0.0026 0.0043 0.0052 0.0033 0.0033 0.0039  
Y 0.0226 0.0290 0.0486 0.0445 0.0391 0.0435

Z 0.0196 0.0276 0.0475 0.0419 0.0384 0.0408  
AT. 115 H X -0.0026 0.0043 -0.0052 0.0033 0.0033 -0.0039  
Y 0.0226 -0.0290 0.0486 -0.0445 -0.0391 0.0435  
Z -0.0196 0.0276 -0.0475 0.0419 0.0384 -0.0408  
AT. 116 H X 0.0026 0.0043 -0.0052 -0.0033 0.0033 0.0039  
Y 0.0226 0.0290 -0.0486 -0.0445 0.0391 0.0435  
Z 0.0196 0.0276 -0.0475 -0.0419 0.0384 0.0408  
AT. 117 H X 0.0306 -0.0377 -0.0656 0.0601 -0.0533 0.0567  
Y 0.0100 -0.0156 -0.0342 0.0311 -0.0316 0.0348  
Z -0.0076 0.0076 0.0015 -0.0025 -0.0043 0.0028  
AT. 118 H X -0.0306 -0.0377 -0.0656 -0.0601 -0.0533 -0.0567  
Y 0.0100 0.0156 0.0342 0.0311 0.0316 0.0348  
Z 0.0076 0.0076 0.0015 0.0025 -0.0043 -0.0028  
AT. 119 H X 0.0306 -0.0377 0.0656 -0.0601 -0.0533 0.0567  
Y 0.0100 -0.0156 0.0342 -0.0311 -0.0316 0.0348  
Z -0.0076 0.0076 -0.0015 0.0025 -0.0043 0.0028  
AT. 120 H X -0.0306 -0.0377 0.0656 0.0601 -0.0533 -0.0567  
Y 0.0100 0.0156 -0.0342 -0.0311 0.0316 0.0348  
Z 0.0076 0.0076 -0.0015 -0.0025 -0.0043 -0.0028  
AT. 121 C X -0.0116 0.0138 0.0158 -0.0164 0.0089 -0.0106  
Y -0.0119 0.0141 0.0180 -0.0177 0.0115 -0.0132  
Z -0.0084 0.0075 -0.0011 -0.0009 -0.0078 0.0064  
AT. 122 C X 0.0116 0.0138 0.0158 0.0164 0.0089 0.0106  
Y -0.0119 -0.0141 -0.0180 -0.0177 -0.0115 -0.0132  
Z 0.0084 0.0075 -0.0011 0.0009 -0.0078 -0.0064  
AT. 123 C X -0.0116 0.0138 -0.0158 0.0164 0.0089 -0.0106  
Y -0.0119 0.0141 -0.0180 0.0177 0.0115 -0.0132  
Z -0.0084 0.0075 0.0011 0.0009 -0.0078 0.0064  
AT. 124 C X 0.0116 0.0138 -0.0158 -0.0164 0.0089 0.0106  
Y -0.0119 -0.0141 0.0180 0.0177 -0.0115 -0.0132  
Z 0.0084 0.0075 0.0011 -0.0009 -0.0078 -0.0064  
AT. 125 H X -0.0473 0.0523 0.0489 -0.0520 0.0191 -0.0274

Y -0.0221 0.0249 0.0274 -0.0283 0.0144 -0.0176  
Z 0.0089 -0.0113 -0.0181 0.0175 -0.0138 0.0153  
AT. 126 H X 0.0473 0.0523 0.0489 0.0520 0.0191 0.0274  
Y -0.0221 -0.0249 -0.0274 -0.0283 -0.0144 -0.0176  
Z -0.0089 -0.0113 -0.0181 -0.0175 -0.0138 -0.0153  
AT. 127 H X -0.0473 0.0523 -0.0489 0.0520 0.0191 -0.0274  
Y -0.0221 0.0249 -0.0274 0.0283 0.0144 -0.0176  
Z 0.0089 -0.0113 0.0181 -0.0175 -0.0138 0.0153  
AT. 128 H X 0.0473 0.0523 -0.0489 -0.0520 0.0191 0.0274  
Y -0.0221 -0.0249 0.0274 0.0283 -0.0144 -0.0176  
Z -0.0089 -0.0113 0.0181 0.0175 -0.0138 -0.0153  
AT. 129 H X -0.0122 0.0135 0.0159 -0.0171 0.0096 -0.0118  
Y -0.0264 0.0312 0.0330 -0.0330 0.0160 -0.0198  
Z -0.0458 0.0473 0.0353 -0.0406 0.0058 -0.0141  
AT. 130 H X 0.0122 0.0135 0.0159 0.0171 0.0096 0.0118  
Y -0.0264 -0.0312 -0.0330 -0.0330 -0.0160 -0.0198  
Z 0.0458 0.0473 0.0353 0.0406 0.0058 0.0141  
AT. 131 H X -0.0122 0.0135 -0.0159 0.0171 0.0096 -0.0118  
Y -0.0264 0.0312 -0.0330 0.0330 0.0160 -0.0198  
Z -0.0458 0.0473 -0.0353 0.0406 0.0058 -0.0141  
AT. 132 H X 0.0122 0.0135 -0.0159 -0.0171 0.0096 0.0118  
Y -0.0264 -0.0312 0.0330 0.0330 -0.0160 -0.0198  
Z 0.0458 0.0473 -0.0353 -0.0406 0.0058 0.0141  
AT. 133 C X -0.0013 0.0016 0.0009 -0.0007 -0.0005 0.0011  
Y 0.0004 -0.0008 0.0019 -0.0012 0.0033 -0.0030  
Z -0.0062 0.0046 -0.0040 0.0023 -0.0087 0.0076  
AT. 134 C X 0.0013 0.0016 0.0009 0.0007 -0.0005 -0.0011  
Y 0.0004 0.0008 -0.0019 -0.0012 -0.0033 -0.0030  
Z 0.0062 0.0046 -0.0040 -0.0023 -0.0087 -0.0076  
AT. 135 C X -0.0013 0.0016 -0.0009 0.0007 -0.0005 0.0011  
Y 0.0004 -0.0008 -0.0019 0.0012 0.0033 -0.0030  
Z -0.0062 0.0046 0.0040 -0.0023 -0.0087 0.0076



AT.136 C X 0.0013 0.0016 -0.0009 -0.0007 -0.0005 -0.0011  
Y 0.0004 0.0008 0.0019 0.0012 -0.0033 -0.0030  
Z 0.0062 0.0046 0.0040 0.0023 -0.0087 -0.0076

AT.137 C X -0.0027 0.0029 0.0051 -0.0042 0.0036 -0.0036  
Y -0.0066 0.0019 -0.0129 0.0106 -0.0185 0.0174  
Z -0.0039 0.0048 0.0062 -0.0059 0.0044 -0.0049

AT.138 C X 0.0027 0.0029 0.0051 0.0042 0.0036 0.0036  
Y -0.0066 -0.0019 0.0129 0.0106 0.0185 0.0174  
Z 0.0039 0.0048 0.0062 0.0059 0.0044 0.0049

AT.139 C X -0.0027 0.0029 -0.0051 0.0042 0.0036 -0.0036  
Y -0.0066 0.0019 0.0129 -0.0106 -0.0185 0.0174  
Z -0.0039 0.0048 -0.0062 0.0059 0.0044 -0.0049

AT.140 C X 0.0027 0.0029 -0.0051 -0.0042 0.0036 0.0036  
Y -0.0066 -0.0019 -0.0129 -0.0106 0.0185 0.0174  
Z 0.0039 0.0048 -0.0062 -0.0059 0.0044 0.0049

AT.141 H X -0.0075 0.0048 -0.0021 0.0014 -0.0088 0.0072  
Y -0.0188 0.0097 -0.0227 0.0167 -0.0388 0.0351  
Z -0.0064 0.0076 0.0069 -0.0073 0.0038 -0.0044

AT.142 H X 0.0075 0.0048 -0.0021 -0.0014 -0.0088 -0.0072  
Y -0.0188 -0.0097 0.0227 0.0167 0.0388 0.0351  
Z 0.0064 0.0076 0.0069 0.0073 0.0038 0.0044

AT.143 H X -0.0075 0.0048 0.0021 -0.0014 -0.0088 0.0072  
Y -0.0188 0.0097 0.0227 -0.0167 -0.0388 0.0351  
Z -0.0064 0.0076 -0.0069 0.0073 0.0038 -0.0044

AT.144 H X 0.0075 0.0048 0.0021 0.0014 -0.0088 -0.0072  
Y -0.0188 -0.0097 -0.0227 -0.0167 0.0388 0.0351  
Z 0.0064 0.0076 -0.0069 -0.0073 0.0038 0.0044

AT.145 H X 0.0065 -0.0011 0.0174 -0.0134 0.0247 -0.0226  
Y -0.0073 0.0020 -0.0138 0.0115 -0.0202 0.0190  
Z 0.0038 0.0007 0.0164 -0.0127 0.0211 -0.0197

AT.146 H X -0.0065 -0.0011 0.0174 0.0134 0.0247 0.0226  
Y -0.0073 -0.0020 0.0138 0.0115 0.0202 0.0190

Z -0.0038 0.0007 0.0164 0.0127 0.0211 0.0197  
AT. 147 H X 0.0065 -0.0011 -0.0174 0.0134 0.0247 -0.0226  
Y -0.0073 0.0020 0.0138 -0.0115 -0.0202 0.0190  
Z 0.0038 0.0007 -0.0164 0.0127 0.0211 -0.0197  
AT. 148 H X -0.0065 -0.0011 -0.0174 -0.0134 0.0247 0.0226  
Y -0.0073 -0.0020 -0.0138 -0.0115 0.0202 0.0190  
Z -0.0038 0.0007 -0.0164 -0.0127 0.0211 0.0197  
AT. 149 O X -0.0011 0.0025 0.0075 -0.0062 0.0078 -0.0085  
Y -0.0002 0.0017 0.0060 -0.0062 0.0057 -0.0052  
Z 0.0057 -0.0037 0.0053 0.0005 0.0106 -0.0075  
AT. 150 O X 0.0011 0.0025 0.0075 0.0062 0.0078 0.0085  
Y -0.0002 -0.0017 -0.0060 -0.0062 -0.0057 -0.0052  
Z -0.0057 -0.0037 0.0053 -0.0005 0.0106 0.0075  
AT. 151 O X -0.0011 0.0025 -0.0075 0.0062 0.0078 -0.0085  
Y -0.0002 0.0017 -0.0060 0.0062 0.0057 -0.0052  
Z 0.0057 -0.0037 -0.0053 -0.0005 0.0106 -0.0075  
AT. 152 O X 0.0011 0.0025 -0.0075 -0.0062 0.0078 0.0085  
Y -0.0002 -0.0017 0.0060 0.0062 -0.0057 -0.0052  
Z -0.0057 -0.0037 -0.0053 0.0005 0.0106 0.0075  
AT. 153 H X -0.0051 0.0041 0.0028 -0.0019 -0.0005 -0.0006  
Y -0.0063 0.0075 0.0106 -0.0086 0.0059 -0.0049  
Z 0.0061 -0.0027 0.0099 -0.0031 0.0160 -0.0126  
AT. 154 H X 0.0051 0.0041 0.0028 0.0019 -0.0005 0.0006  
Y -0.0063 -0.0075 -0.0106 -0.0086 -0.0059 -0.0049  
Z -0.0061 -0.0027 0.0099 0.0031 0.0160 0.0126  
AT. 155 H X -0.0051 0.0041 -0.0028 0.0019 -0.0005 -0.0006  
Y -0.0063 0.0075 -0.0106 0.0086 0.0059 -0.0049  
Z 0.0061 -0.0027 -0.0099 0.0031 0.0160 -0.0126  
AT. 156 H X 0.0051 0.0041 -0.0028 -0.0019 -0.0005 0.0006  
Y -0.0063 -0.0075 0.0106 0.0086 -0.0059 -0.0049  
Z -0.0061 -0.0027 -0.0099 -0.0031 0.0160 0.0126  
AT. 157 O X -0.0065 0.0046 -0.0030 0.0014 -0.0079 0.0070

Y -0.0009 0.0030 0.0046 -0.0035 0.0026 -0.0032  
Z -0.0071 0.0044 -0.0084 0.0073 -0.0150 0.0154  
AT. 158 O X 0.0065 0.0046 -0.0030 -0.0014 -0.0079 -0.0070  
Y -0.0009 -0.0030 -0.0046 -0.0035 -0.0026 -0.0032  
Z 0.0071 0.0044 -0.0084 -0.0073 -0.0150 -0.0154  
AT. 159 O X -0.0065 0.0046 0.0030 -0.0014 -0.0079 0.0070  
Y -0.0009 0.0030 -0.0046 0.0035 0.0026 -0.0032  
Z -0.0071 0.0044 0.0084 -0.0073 -0.0150 0.0154  
AT. 160 O X 0.0065 0.0046 0.0030 0.0014 -0.0079 -0.0070  
Y -0.0009 -0.0030 0.0046 0.0035 -0.0026 -0.0032  
Z 0.0071 0.0044 0.0084 0.0073 -0.0150 -0.0154  
AT. 161 O X -0.0081 0.0058 -0.0048 0.0034 -0.0123 0.0134  
Y -0.0035 -0.0011 -0.0108 0.0031 -0.0137 0.0105  
Z -0.0069 0.0081 0.0006 0.0030 -0.0059 0.0062  
AT. 162 O X 0.0081 0.0058 -0.0048 -0.0034 -0.0123 -0.0134  
Y -0.0035 0.0011 0.0108 0.0031 0.0137 0.0105  
Z 0.0069 0.0081 0.0006 -0.0030 -0.0059 -0.0062  
AT. 163 O X -0.0081 0.0058 0.0048 -0.0034 -0.0123 0.0134  
Y -0.0035 -0.0011 0.0108 -0.0031 -0.0137 0.0105  
Z -0.0069 0.0081 -0.0006 -0.0030 -0.0059 0.0062  
AT. 164 O X 0.0081 0.0058 0.0048 0.0034 -0.0123 -0.0134  
Y -0.0035 0.0011 -0.0108 -0.0031 0.0137 0.0105  
Z 0.0069 0.0081 -0.0006 0.0030 -0.0059 -0.0062  
AT. 165 H X -0.0062 0.0054 -0.0013 0.0037 -0.0075 0.0096  
Y -0.0028 -0.0012 -0.0099 0.0038 -0.0125 0.0099  
Z -0.0064 0.0108 0.0097 -0.0038 0.0035 -0.0020  
AT. 166 H X 0.0062 0.0054 -0.0013 -0.0037 -0.0075 -0.0096  
Y -0.0028 0.0012 0.0099 0.0038 0.0125 0.0099  
Z 0.0064 0.0108 0.0097 0.0038 0.0035 0.0020  
AT. 167 H X -0.0062 0.0054 0.0013 -0.0037 -0.0075 0.0096  
Y -0.0028 -0.0012 0.0099 -0.0038 -0.0125 0.0099  
Z -0.0064 0.0108 -0.0097 0.0038 0.0035 -0.0020

AT.168 H X 0.0062 0.0054 0.0013 0.0037 -0.0075 -0.0096  
Y -0.0028 0.0012 -0.0099 -0.0038 0.0125 0.0099  
Z 0.0064 0.0108 -0.0097 -0.0038 0.0035 0.0020

AT.169 O X -0.0020 0.0022 0.0007 -0.0007 -0.0028 0.0022  
Y -0.0106 0.0100 0.0022 -0.0070 -0.0084 0.0071  
Z 0.0002 -0.0005 -0.0002 0.0002 -0.0013 0.0012

AT.170 O X 0.0020 0.0022 0.0007 0.0007 -0.0028 -0.0022  
Y -0.0106 -0.0100 -0.0022 -0.0070 0.0084 0.0071  
Z -0.0002 -0.0005 -0.0002 -0.0002 -0.0013 -0.0012

AT.171 O X -0.0020 0.0022 -0.0007 0.0007 -0.0028 0.0022  
Y -0.0106 0.0100 -0.0022 0.0070 -0.0084 0.0071  
Z 0.0002 -0.0005 0.0002 -0.0002 -0.0013 0.0012

AT.172 O X 0.0020 0.0022 -0.0007 -0.0007 -0.0028 -0.0022  
Y -0.0106 -0.0100 0.0022 0.0070 0.0084 0.0071  
Z -0.0002 -0.0005 0.0002 0.0002 -0.0013 -0.0012

AT.173 H X -0.0022 0.0021 -0.0004 -0.0009 -0.0035 0.0027  
Y -0.0122 0.0114 0.0026 -0.0078 -0.0102 0.0087  
Z -0.0034 0.0032 -0.0004 0.0048 -0.0019 0.0012

AT.174 H X 0.0022 0.0021 -0.0004 0.0009 -0.0035 -0.0027  
Y -0.0122 -0.0114 -0.0026 -0.0078 0.0102 0.0087  
Z 0.0034 0.0032 -0.0004 -0.0048 -0.0019 -0.0012

AT.175 H X -0.0022 0.0021 0.0004 0.0009 -0.0035 0.0027  
Y -0.0122 0.0114 -0.0026 0.0078 -0.0102 0.0087  
Z -0.0034 0.0032 0.0004 -0.0048 -0.0019 0.0012

AT.176 H X 0.0022 0.0021 0.0004 -0.0009 -0.0035 -0.0027  
Y -0.0122 -0.0114 0.0026 0.0078 0.0102 0.0087  
Z 0.0034 0.0032 0.0004 0.0048 -0.0019 -0.0012

FREQ(CM\*\*-1) 397.48 398.71 410.95 411.14 413.42 413.92

AT. 1 I X 0.0009 0.0011 -0.0008 0.0010 -0.0006 -0.0005  
Y -0.0004 -0.0007 0.0003 -0.0003 0.0002 -0.0000

Z -0.0008 -0.0007 0.0010 -0.0010 0.0008 0.0006  
AT. 2 I X -0.0009 0.0011 -0.0008 -0.0010 0.0006 -0.0005  
Y -0.0004 0.0007 -0.0003 -0.0003 0.0002 0.0000  
Z 0.0008 -0.0007 0.0010 0.0010 -0.0008 0.0006  
AT. 3 I X -0.0009 -0.0011 -0.0008 0.0010 0.0006 0.0005  
Y 0.0004 0.0007 0.0003 -0.0003 -0.0002 0.0000  
Z 0.0008 0.0007 0.0010 -0.0010 -0.0008 -0.0006  
AT. 4 I X 0.0009 -0.0011 -0.0008 -0.0010 -0.0006 0.0005  
Y 0.0004 -0.0007 -0.0003 -0.0003 -0.0002 -0.0000  
Z -0.0008 0.0007 0.0010 0.0010 0.0008 -0.0006  
AT. 5 I X 0.0001 0.0001 -0.0011 0.0012 -0.0013 -0.0012  
Y -0.0001 -0.0001 0.0004 -0.0004 0.0004 0.0004  
Z 0.0001 -0.0001 0.0011 -0.0012 0.0013 0.0013  
AT. 6 I X -0.0001 0.0001 -0.0011 -0.0012 0.0013 -0.0012  
Y -0.0001 0.0001 -0.0004 -0.0004 0.0004 -0.0004  
Z -0.0001 -0.0001 0.0011 0.0012 -0.0013 0.0013  
AT. 7 I X -0.0001 -0.0001 -0.0011 0.0012 0.0013 0.0012  
Y 0.0001 0.0001 0.0004 -0.0004 -0.0004 -0.0004  
Z -0.0001 0.0001 0.0011 -0.0012 -0.0013 -0.0013  
AT. 8 I X 0.0001 -0.0001 -0.0011 -0.0012 -0.0013 0.0012  
Y 0.0001 -0.0001 -0.0004 -0.0004 -0.0004 0.0004  
Z 0.0001 0.0001 0.0011 0.0012 0.0013 -0.0013  
AT. 9 N X 0.0173 0.0174 0.0022 -0.0024 0.0050 0.0060  
Y 0.0056 0.0053 0.0012 -0.0015 0.0032 0.0034  
Z 0.0069 0.0059 -0.0007 0.0006 -0.0002 0.0003  
AT. 10 N X -0.0173 0.0174 0.0022 0.0024 -0.0050 0.0060  
Y 0.0056 -0.0053 -0.0012 -0.0015 0.0032 -0.0034  
Z -0.0069 0.0059 -0.0007 -0.0006 0.0002 0.0003  
AT. 11 N X -0.0173 -0.0174 0.0022 -0.0024 -0.0050 -0.0060  
Y -0.0056 -0.0053 0.0012 -0.0015 -0.0032 -0.0034  
Z -0.0069 -0.0059 -0.0007 0.0006 0.0002 -0.0003  
AT. 12 N X 0.0173 -0.0174 0.0022 0.0024 0.0050 -0.0060

Y -0.0056 0.0053 -0.0012 -0.0015 -0.0032 0.0034  
Z 0.0069 -0.0059 -0.0007 -0.0006 -0.0002 -0.0003  
AT. 13 N X -0.0107 -0.0112 0.0222 -0.0216 0.0202 0.0187  
Y 0.0071 0.0069 -0.0051 0.0050 -0.0026 -0.0026  
Z -0.0047 -0.0029 -0.0072 0.0073 -0.0077 -0.0078  
AT. 14 N X 0.0107 -0.0112 0.0222 0.0216 -0.0202 0.0187  
Y 0.0071 -0.0069 0.0051 0.0050 -0.0026 0.0026  
Z 0.0047 -0.0029 -0.0072 -0.0073 0.0077 -0.0078  
AT. 15 N X 0.0107 0.0112 0.0222 -0.0216 -0.0202 -0.0187  
Y -0.0071 -0.0069 -0.0051 0.0050 0.0026 0.0026  
Z 0.0047 0.0029 -0.0072 0.0073 0.0077 0.0078  
AT. 16 N X -0.0107 0.0112 0.0222 0.0216 0.0202 -0.0187  
Y -0.0071 0.0069 0.0051 0.0050 0.0026 -0.0026  
Z -0.0047 0.0029 -0.0072 -0.0073 -0.0077 0.0078  
AT. 17 O X 0.0028 0.0025 0.0010 -0.0011 0.0012 0.0012  
Y 0.0112 0.0111 0.0074 -0.0077 0.0074 0.0082  
Z 0.0031 0.0016 -0.0106 0.0102 -0.0101 -0.0104  
AT. 18 O X -0.0028 0.0025 0.0010 0.0011 -0.0012 0.0012  
Y 0.0112 -0.0111 -0.0074 -0.0077 0.0074 -0.0082  
Z -0.0031 0.0016 -0.0106 -0.0102 0.0101 -0.0104  
AT. 19 O X -0.0028 -0.0025 0.0010 -0.0011 -0.0012 -0.0012  
Y -0.0112 -0.0111 0.0074 -0.0077 -0.0074 -0.0082  
Z -0.0031 -0.0016 -0.0106 0.0102 0.0101 0.0104  
AT. 20 O X 0.0028 -0.0025 0.0010 0.0011 0.0012 -0.0012  
Y -0.0112 0.0111 -0.0074 -0.0077 -0.0074 0.0082  
Z 0.0031 -0.0016 -0.0106 -0.0102 -0.0101 0.0104  
AT. 21 O X 0.0015 0.0009 -0.0028 0.0029 -0.0029 -0.0029  
Y 0.0131 0.0108 -0.0121 0.0119 -0.0094 -0.0091  
Z -0.0042 -0.0035 -0.0108 0.0112 -0.0135 -0.0133  
AT. 22 O X -0.0015 0.0009 -0.0028 -0.0029 0.0029 -0.0029  
Y 0.0131 -0.0108 0.0121 0.0119 -0.0094 0.0091  
Z 0.0042 -0.0035 -0.0108 -0.0112 0.0135 -0.0133

AT. 23 O X -0.0015 -0.0009 -0.0028 0.0029 0.0029 0.0029  
Y -0.0131 -0.0108 -0.0121 0.0119 0.0094 0.0091  
Z 0.0042 0.0035 -0.0108 0.0112 0.0135 0.0133

AT. 24 O X 0.0015 -0.0009 -0.0028 -0.0029 -0.0029 0.0029  
Y -0.0131 0.0108 0.0121 0.0119 0.0094 -0.0091  
Z -0.0042 0.0035 -0.0108 -0.0112 -0.0135 0.0133

AT. 25 C X -0.0142 -0.0144 0.0118 -0.0114 0.0072 0.0065  
Y -0.0033 -0.0037 0.0153 -0.0154 0.0169 0.0166  
Z -0.0066 -0.0076 -0.0019 0.0017 -0.0042 -0.0049

AT. 26 C X 0.0142 -0.0144 0.0118 0.0114 -0.0072 0.0065  
Y -0.0033 0.0037 -0.0153 -0.0154 0.0169 -0.0166  
Z 0.0066 -0.0076 -0.0019 -0.0017 0.0042 -0.0049

AT. 27 C X 0.0142 0.0144 0.0118 -0.0114 -0.0072 -0.0065  
Y 0.0033 0.0037 0.0153 -0.0154 -0.0169 -0.0166  
Z 0.0066 0.0076 -0.0019 0.0017 0.0042 0.0049

AT. 28 C X -0.0142 0.0144 0.0118 0.0114 0.0072 -0.0065  
Y 0.0033 -0.0037 -0.0153 -0.0154 -0.0169 0.0166  
Z -0.0066 0.0076 -0.0019 -0.0017 -0.0042 0.0049

AT. 29 H X -0.0121 -0.0116 0.0093 -0.0092 0.0058 0.0054  
Y -0.0307 -0.0299 0.0389 -0.0382 0.0347 0.0337  
Z -0.0053 -0.0076 -0.0022 0.0023 -0.0052 -0.0063

AT. 30 H X 0.0121 -0.0116 0.0093 0.0092 -0.0058 0.0054  
Y -0.0307 0.0299 -0.0389 -0.0382 0.0347 -0.0337  
Z 0.0053 -0.0076 -0.0022 -0.0023 0.0052 -0.0063

AT. 31 H X 0.0121 0.0116 0.0093 -0.0092 -0.0058 -0.0054  
Y 0.0307 0.0299 0.0389 -0.0382 -0.0347 -0.0337  
Z 0.0053 0.0076 -0.0022 0.0023 0.0052 0.0063

AT. 32 H X -0.0121 0.0116 0.0093 0.0092 0.0058 -0.0054  
Y 0.0307 -0.0299 -0.0389 -0.0382 -0.0347 0.0337  
Z -0.0053 0.0076 -0.0022 -0.0023 -0.0052 0.0063

AT. 33 H X -0.0362 -0.0350 0.0346 -0.0338 0.0260 0.0252  
Y 0.0044 0.0037 0.0081 -0.0084 0.0111 0.0110

Z -0.0232 -0.0241 0.0127 -0.0122 0.0074 0.0056  
AT. 34 H X 0.0362 -0.0350 0.0346 0.0338 -0.0260 0.0252  
Y 0.0044 -0.0037 -0.0081 -0.0084 0.0111 -0.0110  
Z 0.0232 -0.0241 0.0127 0.0122 -0.0074 0.0056  
AT. 35 H X 0.0362 0.0350 0.0346 -0.0338 -0.0260 -0.0252  
Y -0.0044 -0.0037 0.0081 -0.0084 -0.0111 -0.0110  
Z 0.0232 0.0241 0.0127 -0.0122 -0.0074 -0.0056  
AT. 36 H X -0.0362 0.0350 0.0346 0.0338 0.0260 -0.0252  
Y -0.0044 0.0037 -0.0081 -0.0084 -0.0111 0.0110  
Z -0.0232 0.0241 0.0127 0.0122 0.0074 -0.0056  
AT. 37 C X 0.0034 0.0027 0.0009 -0.0010 0.0001 0.0000  
Y 0.0099 0.0097 0.0033 -0.0036 0.0063 0.0069  
Z 0.0037 0.0025 -0.0082 0.0078 -0.0085 -0.0086  
AT. 38 C X -0.0034 0.0027 0.0009 0.0010 -0.0001 0.0000  
Y 0.0099 -0.0097 -0.0033 -0.0036 0.0063 -0.0069  
Z -0.0037 0.0025 -0.0082 -0.0078 0.0085 -0.0086  
AT. 39 C X -0.0034 -0.0027 0.0009 -0.0010 -0.0001 -0.0000  
Y -0.0099 -0.0097 0.0033 -0.0036 -0.0063 -0.0069  
Z -0.0037 -0.0025 -0.0082 0.0078 0.0085 0.0086  
AT. 40 C X 0.0034 -0.0027 0.0009 0.0010 0.0001 -0.0000  
Y -0.0099 0.0097 -0.0033 -0.0036 -0.0063 0.0069  
Z 0.0037 -0.0025 -0.0082 -0.0078 -0.0085 0.0086  
AT. 41 C X 0.0041 0.0032 0.0000 -0.0002 0.0014 0.0014  
Y 0.0129 0.0155 -0.0122 0.0125 -0.0097 -0.0086  
Z 0.0078 0.0060 0.0093 -0.0095 0.0111 0.0116  
AT. 42 C X -0.0041 0.0032 0.0000 0.0002 -0.0014 0.0014  
Y 0.0129 -0.0155 0.0122 0.0125 -0.0097 0.0086  
Z -0.0078 0.0060 0.0093 0.0095 -0.0111 0.0116  
AT. 43 C X -0.0041 -0.0032 0.0000 -0.0002 -0.0014 -0.0014  
Y -0.0129 -0.0155 -0.0122 0.0125 0.0097 0.0086  
Z -0.0078 -0.0060 0.0093 -0.0095 -0.0111 -0.0116  
AT. 44 C X 0.0041 -0.0032 0.0000 0.0002 0.0014 -0.0014



Y -0.0129 0.0155 0.0122 0.0125 0.0097 -0.0086  
Z 0.0078 -0.0060 0.0093 0.0095 0.0111 -0.0116  
AT. 45 H X -0.0075 -0.0139 0.0212 -0.0217 0.0209 0.0188  
Y 0.0160 0.0217 -0.0242 0.0252 -0.0225 -0.0204  
Z 0.0130 0.0145 -0.0046 0.0050 -0.0031 -0.0014  
AT. 46 H X 0.0075 -0.0139 0.0212 0.0217 -0.0209 0.0188  
Y 0.0160 -0.0217 0.0242 0.0252 -0.0225 0.0204  
Z -0.0130 0.0145 -0.0046 -0.0050 0.0031 -0.0014  
AT. 47 H X 0.0075 0.0139 0.0212 -0.0217 -0.0209 -0.0188  
Y -0.0160 -0.0217 -0.0242 0.0252 0.0225 0.0204  
Z -0.0130 -0.0145 -0.0046 0.0050 0.0031 0.0014  
AT. 48 H X -0.0075 0.0139 0.0212 0.0217 0.0209 -0.0188  
Y -0.0160 0.0217 0.0242 0.0252 0.0225 -0.0204  
Z 0.0130 -0.0145 -0.0046 -0.0050 -0.0031 0.0014  
AT. 49 H X 0.0030 0.0031 -0.0078 0.0079 -0.0069 -0.0067  
Y 0.0173 0.0231 -0.0286 0.0295 -0.0263 -0.0240  
Z -0.0063 -0.0139 0.0327 -0.0338 0.0334 0.0315  
AT. 50 H X -0.0030 0.0031 -0.0078 -0.0079 0.0069 -0.0067  
Y 0.0173 -0.0231 0.0286 0.0295 -0.0263 0.0240  
Z 0.0063 -0.0139 0.0327 0.0338 -0.0334 0.0315  
AT. 51 H X -0.0030 -0.0031 -0.0078 0.0079 0.0069 0.0067  
Y -0.0173 -0.0231 -0.0286 0.0295 0.0263 0.0240  
Z 0.0063 0.0139 0.0327 -0.0338 -0.0334 -0.0315  
AT. 52 H X 0.0030 -0.0031 -0.0078 -0.0079 -0.0069 0.0067  
Y -0.0173 0.0231 0.0286 0.0295 0.0263 -0.0240  
Z -0.0063 0.0139 0.0327 0.0338 0.0334 -0.0315  
AT. 53 C X 0.0079 0.0092 -0.0117 0.0119 -0.0093 -0.0087  
Y 0.0056 0.0062 0.0013 -0.0013 0.0034 0.0036  
Z 0.0114 0.0117 0.0031 -0.0034 0.0072 0.0080  
AT. 54 C X -0.0079 0.0092 -0.0117 -0.0119 0.0093 -0.0087  
Y 0.0056 -0.0062 -0.0013 -0.0013 0.0034 -0.0036  
Z -0.0114 0.0117 0.0031 0.0034 -0.0072 0.0080

AT. 55 C X -0.0079 -0.0092 -0.0117 0.0119 0.0093 0.0087  
Y -0.0056 -0.0062 0.0013 -0.0013 -0.0034 -0.0036  
Z -0.0114 -0.0117 0.0031 -0.0034 -0.0072 -0.0080

AT. 56 C X 0.0079 -0.0092 -0.0117 -0.0119 -0.0093 0.0087  
Y -0.0056 0.0062 -0.0013 -0.0013 -0.0034 0.0036  
Z 0.0114 -0.0117 0.0031 0.0034 0.0072 -0.0080

AT. 57 C X -0.0085 -0.0072 0.0048 -0.0039 0.0039 0.0037  
Y 0.0001 0.0006 0.0046 -0.0040 0.0060 0.0060  
Z 0.0242 0.0247 -0.0027 0.0017 0.0049 0.0063

AT. 58 C X 0.0085 -0.0072 0.0048 0.0039 -0.0039 0.0037  
Y 0.0001 -0.0006 -0.0046 -0.0040 0.0060 -0.0060  
Z -0.0242 0.0247 -0.0027 -0.0017 -0.0049 0.0063

AT. 59 C X 0.0085 0.0072 0.0048 -0.0039 -0.0039 -0.0037  
Y -0.0001 -0.0006 0.0046 -0.0040 -0.0060 -0.0060  
Z -0.0242 -0.0247 -0.0027 0.0017 -0.0049 -0.0063

AT. 60 C X -0.0085 0.0072 0.0048 0.0039 0.0039 -0.0037  
Y -0.0001 0.0006 -0.0046 -0.0040 -0.0060 0.0060  
Z 0.0242 -0.0247 -0.0027 -0.0017 0.0049 -0.0063

AT. 61 H X -0.0112 -0.0095 0.0101 -0.0093 0.0087 0.0082  
Y -0.0008 -0.0000 0.0082 -0.0077 0.0094 0.0093  
Z 0.0176 0.0186 0.0006 -0.0014 0.0070 0.0079

AT. 62 H X 0.0112 -0.0095 0.0101 0.0093 -0.0087 0.0082  
Y -0.0008 0.0000 -0.0082 -0.0077 0.0094 -0.0093  
Z -0.0176 0.0186 0.0006 0.0014 -0.0070 0.0079

AT. 63 H X 0.0112 0.0095 0.0101 -0.0093 -0.0087 -0.0082  
Y 0.0008 0.0000 0.0082 -0.0077 -0.0094 -0.0093  
Z -0.0176 -0.0186 0.0006 -0.0014 -0.0070 -0.0079

AT. 64 H X -0.0112 0.0095 0.0101 0.0093 0.0087 -0.0082  
Y 0.0008 -0.0000 -0.0082 -0.0077 -0.0094 0.0093  
Z 0.0176 -0.0186 0.0006 0.0014 0.0070 -0.0079

AT. 65 H X -0.0076 -0.0064 0.0058 -0.0049 0.0050 0.0049  
Y -0.0023 -0.0019 0.0015 -0.0010 0.0030 0.0027

Z 0.0478 0.0476 -0.0185 0.0163 -0.0065 -0.0042  
AT. 66 H X 0.0076 -0.0064 0.0058 0.0049 -0.0050 0.0049  
Y -0.0023 0.0019 -0.0015 -0.0010 0.0030 -0.0027  
Z -0.0478 0.0476 -0.0185 -0.0163 0.0065 -0.0042  
AT. 67 H X 0.0076 0.0064 0.0058 -0.0049 -0.0050 -0.0049  
Y 0.0023 0.0019 0.0015 -0.0010 -0.0030 -0.0027  
Z -0.0478 -0.0476 -0.0185 0.0163 0.0065 0.0042  
AT. 68 H X -0.0076 0.0064 0.0058 0.0049 0.0050 -0.0049  
Y 0.0023 -0.0019 -0.0015 -0.0010 -0.0030 0.0027  
Z 0.0478 -0.0476 -0.0185 -0.0163 -0.0065 0.0042  
AT. 69 H X -0.0270 -0.0256 0.0135 -0.0115 0.0092 0.0080  
Y -0.0060 -0.0056 0.0102 -0.0094 0.0103 0.0102  
Z 0.0160 0.0165 0.0036 -0.0043 0.0095 0.0108  
AT. 70 H X 0.0270 -0.0256 0.0135 0.0115 -0.0092 0.0080  
Y -0.0060 0.0056 -0.0102 -0.0094 0.0103 -0.0102  
Z -0.0160 0.0165 0.0036 0.0043 -0.0095 0.0108  
AT. 71 H X 0.0270 0.0256 0.0135 -0.0115 -0.0092 -0.0080  
Y 0.0060 0.0056 0.0102 -0.0094 -0.0103 -0.0102  
Z -0.0160 -0.0165 0.0036 -0.0043 -0.0095 -0.0108  
AT. 72 H X -0.0270 0.0256 0.0135 0.0115 0.0092 -0.0080  
Y 0.0060 -0.0056 -0.0102 -0.0094 -0.0103 0.0102  
Z 0.0160 -0.0165 0.0036 0.0043 0.0095 -0.0108  
AT. 73 C X 0.0057 0.0071 -0.0176 0.0178 -0.0157 -0.0153  
Y -0.0028 -0.0034 0.0067 -0.0068 0.0064 0.0061  
Z -0.0007 -0.0006 0.0089 -0.0088 0.0096 0.0096  
AT. 74 C X -0.0057 0.0071 -0.0176 -0.0178 0.0157 -0.0153  
Y -0.0028 0.0034 -0.0067 -0.0068 0.0064 -0.0061  
Z 0.0007 -0.0006 0.0089 0.0088 -0.0096 0.0096  
AT. 75 C X -0.0057 -0.0071 -0.0176 0.0178 0.0157 0.0153  
Y 0.0028 0.0034 0.0067 -0.0068 -0.0064 -0.0061  
Z 0.0007 0.0006 0.0089 -0.0088 -0.0096 -0.0096  
AT. 76 C X 0.0057 -0.0071 -0.0176 -0.0178 -0.0157 0.0153

Y 0.0028 -0.0034 -0.0067 -0.0068 -0.0064 0.0061  
Z -0.0007 0.0006 0.0089 0.0088 0.0096 -0.0096  
AT. 77 C X 0.0117 0.0116 0.0024 -0.0025 0.0052 0.0060  
Y -0.0024 -0.0026 -0.0031 0.0028 -0.0033 -0.0029  
Z 0.0015 0.0011 -0.0009 0.0008 -0.0016 -0.0009  
AT. 78 C X -0.0117 0.0116 0.0024 0.0025 -0.0052 0.0060  
Y -0.0024 0.0026 0.0031 0.0028 -0.0033 0.0029  
Z -0.0015 0.0011 -0.0009 -0.0008 0.0016 -0.0009  
AT. 79 C X -0.0117 -0.0116 0.0024 -0.0025 -0.0052 -0.0060  
Y 0.0024 0.0026 -0.0031 0.0028 0.0033 0.0029  
Z -0.0015 -0.0011 -0.0009 0.0008 0.0016 0.0009  
AT. 80 C X 0.0117 -0.0116 0.0024 0.0025 0.0052 -0.0060  
Y 0.0024 -0.0026 0.0031 0.0028 0.0033 -0.0029  
Z 0.0015 -0.0011 -0.0009 -0.0008 -0.0016 0.0009  
AT. 81 H X 0.0050 0.0048 -0.0051 0.0047 -0.0046 -0.0034  
Y -0.0094 -0.0098 -0.0105 0.0098 -0.0131 -0.0123  
Z -0.0049 -0.0054 -0.0122 0.0118 -0.0166 -0.0150  
AT. 82 H X -0.0050 0.0048 -0.0051 -0.0047 0.0046 -0.0034  
Y -0.0094 0.0098 0.0105 0.0098 -0.0131 0.0123  
Z 0.0049 -0.0054 -0.0122 -0.0118 0.0166 -0.0150  
AT. 83 H X -0.0050 -0.0048 -0.0051 0.0047 0.0046 0.0034  
Y 0.0094 0.0098 -0.0105 0.0098 0.0131 0.0123  
Z 0.0049 0.0054 -0.0122 0.0118 0.0166 0.0150  
AT. 84 H X 0.0050 -0.0048 -0.0051 -0.0047 -0.0046 0.0034  
Y 0.0094 -0.0098 0.0105 0.0098 0.0131 -0.0123  
Z -0.0049 0.0054 -0.0122 -0.0118 -0.0166 0.0150  
AT. 85 H X 0.0167 0.0174 0.0151 -0.0146 0.0211 0.0210  
Y -0.0114 -0.0111 -0.0092 0.0089 -0.0118 -0.0112  
Z 0.0078 0.0067 0.0007 -0.0009 0.0011 0.0020  
AT. 86 H X -0.0167 0.0174 0.0151 0.0146 -0.0211 0.0210  
Y -0.0114 0.0111 0.0092 0.0089 -0.0118 0.0112  
Z -0.0078 0.0067 0.0007 0.0009 -0.0011 0.0020

AT. 87 H X -0.0167 -0.0174 0.0151 -0.0146 -0.0211 -0.0210  
Y 0.0114 0.0111 -0.0092 0.0089 0.0118 0.0112  
Z -0.0078 -0.0067 0.0007 -0.0009 -0.0011 -0.0020

AT. 88 H X 0.0167 -0.0174 0.0151 0.0146 0.0211 -0.0210  
Y 0.0114 -0.0111 0.0092 0.0089 0.0118 -0.0112  
Z 0.0078 -0.0067 0.0007 0.0009 0.0011 -0.0020

AT. 89 C X 0.0038 0.0040 -0.0030 0.0030 -0.0020 -0.0014  
Y 0.0021 0.0015 0.0010 -0.0012 0.0017 0.0017  
Z -0.0040 -0.0034 0.0083 -0.0079 0.0083 0.0082

AT. 90 C X -0.0038 0.0040 -0.0030 -0.0030 0.0020 -0.0014  
Y 0.0021 -0.0015 -0.0010 -0.0012 0.0017 -0.0017  
Z 0.0040 -0.0034 0.0083 0.0079 -0.0083 0.0082

AT. 91 C X -0.0038 -0.0040 -0.0030 0.0030 0.0020 0.0014  
Y -0.0021 -0.0015 0.0010 -0.0012 -0.0017 -0.0017  
Z 0.0040 0.0034 0.0083 -0.0079 -0.0083 -0.0082

AT. 92 C X 0.0038 -0.0040 -0.0030 -0.0030 -0.0020 0.0014  
Y -0.0021 0.0015 -0.0010 -0.0012 -0.0017 0.0017  
Z -0.0040 0.0034 0.0083 0.0079 0.0083 -0.0082

AT. 93 C X 0.0046 0.0015 0.0013 -0.0015 0.0014 0.0013  
Y -0.0010 -0.0009 -0.0042 0.0041 -0.0053 -0.0055  
Z -0.0077 -0.0061 0.0060 -0.0053 0.0046 0.0045

AT. 94 C X -0.0046 0.0015 0.0013 0.0015 -0.0014 0.0013  
Y -0.0010 0.0009 0.0042 0.0041 -0.0053 0.0055  
Z 0.0077 -0.0061 0.0060 0.0053 -0.0046 0.0045

AT. 95 C X -0.0046 -0.0015 0.0013 -0.0015 -0.0014 -0.0013  
Y 0.0010 0.0009 -0.0042 0.0041 0.0053 0.0055  
Z 0.0077 0.0061 0.0060 -0.0053 -0.0046 -0.0045

AT. 96 C X 0.0046 -0.0015 0.0013 0.0015 0.0014 -0.0013  
Y 0.0010 -0.0009 0.0042 0.0041 0.0053 -0.0055  
Z -0.0077 0.0061 0.0060 0.0053 0.0046 -0.0045

AT. 97 H X 0.0036 -0.0017 0.0032 -0.0035 0.0022 0.0014  
Y 0.0009 0.0051 -0.0083 0.0086 -0.0079 -0.0071

Z -0.0067 -0.0058 0.0051 -0.0041 0.0027 0.0024  
AT. 98 H X -0.0036 -0.0017 0.0032 0.0035 -0.0022 0.0014  
Y 0.0009 -0.0051 0.0083 0.0086 -0.0079 0.0071  
Z 0.0067 -0.0058 0.0051 0.0041 -0.0027 0.0024  
AT. 99 H X -0.0036 0.0017 0.0032 -0.0035 -0.0022 -0.0014  
Y -0.0009 -0.0051 -0.0083 0.0086 0.0079 0.0071  
Z 0.0067 0.0058 0.0051 -0.0041 -0.0027 -0.0024  
AT. 100 H X 0.0036 0.0017 0.0032 0.0035 0.0022 -0.0014  
Y -0.0009 0.0051 0.0083 0.0086 0.0079 -0.0071  
Z -0.0067 0.0058 0.0051 0.0041 0.0027 -0.0024  
AT. 101 H X 0.0011 -0.0051 0.0034 -0.0037 0.0017 0.0005  
Y -0.0037 -0.0073 -0.0013 0.0010 -0.0041 -0.0054  
Z -0.0150 -0.0116 0.0004 0.0005 -0.0030 -0.0033  
AT. 102 H X -0.0011 -0.0051 0.0034 0.0037 -0.0017 0.0005  
Y -0.0037 0.0073 0.0013 0.0010 -0.0041 0.0054  
Z 0.0150 -0.0116 0.0004 -0.0005 0.0030 -0.0033  
AT. 103 H X -0.0011 0.0051 0.0034 -0.0037 -0.0017 -0.0005  
Y 0.0037 0.0073 -0.0013 0.0010 0.0041 0.0054  
Z 0.0150 0.0116 0.0004 0.0005 0.0030 0.0033  
AT. 104 H X 0.0011 0.0051 0.0034 0.0037 0.0017 -0.0005  
Y 0.0037 -0.0073 0.0013 0.0010 0.0041 -0.0054  
Z -0.0150 0.0116 0.0004 -0.0005 -0.0030 0.0033  
AT. 105 H X 0.0114 0.0098 0.0012 -0.0013 0.0031 0.0039  
Y -0.0074 -0.0075 -0.0079 0.0078 -0.0117 -0.0123  
Z -0.0052 -0.0039 0.0088 -0.0081 0.0089 0.0087  
AT. 106 H X -0.0114 0.0098 0.0012 0.0013 -0.0031 0.0039  
Y -0.0074 0.0075 0.0079 0.0078 -0.0117 0.0123  
Z 0.0052 -0.0039 0.0088 0.0081 -0.0089 0.0087  
AT. 107 H X -0.0114 -0.0098 0.0012 -0.0013 -0.0031 -0.0039  
Y 0.0074 0.0075 -0.0079 0.0078 0.0117 0.0123  
Z 0.0052 0.0039 0.0088 -0.0081 -0.0089 -0.0087  
AT. 108 H X 0.0114 -0.0098 0.0012 0.0013 0.0031 -0.0039

Y 0.0074 -0.0075 0.0079 0.0078 0.0117 -0.0123  
Z -0.0052 0.0039 0.0088 0.0081 0.0089 -0.0087  
AT. 109 C X -0.0051 -0.0029 -0.0004 0.0009 -0.0011 -0.0009  
Y -0.0058 -0.0037 0.0054 -0.0051 0.0043 0.0046  
Z 0.0061 0.0054 -0.0055 0.0053 -0.0026 -0.0033  
AT. 110 C X 0.0051 -0.0029 -0.0004 -0.0009 0.0011 -0.0009  
Y -0.0058 0.0037 -0.0054 -0.0051 0.0043 -0.0046  
Z -0.0061 0.0054 -0.0055 -0.0053 0.0026 -0.0033  
AT. 111 C X 0.0051 0.0029 -0.0004 0.0009 0.0011 0.0009  
Y 0.0058 0.0037 0.0054 -0.0051 -0.0043 -0.0046  
Z -0.0061 -0.0054 -0.0055 0.0053 0.0026 0.0033  
AT. 112 C X -0.0051 0.0029 -0.0004 -0.0009 -0.0011 0.0009  
Y 0.0058 -0.0037 -0.0054 -0.0051 -0.0043 0.0046  
Z 0.0061 -0.0054 -0.0055 -0.0053 -0.0026 0.0033  
AT. 113 H X 0.0051 0.0057 -0.0086 0.0087 -0.0061 -0.0064  
Y -0.0206 -0.0166 0.0191 -0.0181 0.0132 0.0141  
Z 0.0177 0.0128 -0.0046 0.0036 0.0028 -0.0000  
AT. 114 H X -0.0051 0.0057 -0.0086 -0.0087 0.0061 -0.0064  
Y -0.0206 0.0166 -0.0191 -0.0181 0.0132 -0.0141  
Z -0.0177 0.0128 -0.0046 -0.0036 -0.0028 -0.0000  
AT. 115 H X -0.0051 -0.0057 -0.0086 0.0087 0.0061 0.0064  
Y 0.0206 0.0166 0.0191 -0.0181 -0.0132 -0.0141  
Z -0.0177 -0.0128 -0.0046 0.0036 -0.0028 0.0000  
AT. 116 H X 0.0051 -0.0057 -0.0086 -0.0087 -0.0061 0.0064  
Y 0.0206 -0.0166 -0.0191 -0.0181 -0.0132 0.0141  
Z 0.0177 -0.0128 -0.0046 -0.0036 0.0028 0.0000  
AT. 117 H X -0.0207 -0.0143 0.0084 -0.0074 0.0023 0.0046  
Y -0.0191 -0.0150 0.0107 -0.0100 0.0057 0.0060  
Z -0.0035 -0.0033 -0.0018 0.0019 -0.0015 -0.0026  
AT. 118 H X 0.0207 -0.0143 0.0084 0.0074 -0.0023 0.0046  
Y -0.0191 0.0150 -0.0107 -0.0100 0.0057 -0.0060  
Z 0.0035 -0.0033 -0.0018 -0.0019 0.0015 -0.0026

AT. 119 H X 0.0207 0.0143 0.0084 -0.0074 -0.0023 -0.0046  
Y 0.0191 0.0150 0.0107 -0.0100 -0.0057 -0.0060  
Z 0.0035 0.0033 -0.0018 0.0019 0.0015 0.0026

AT. 120 H X -0.0207 0.0143 0.0084 0.0074 0.0023 -0.0046  
Y 0.0191 -0.0150 -0.0107 -0.0100 -0.0057 0.0060  
Z -0.0035 0.0033 -0.0018 -0.0019 -0.0015 0.0026

AT. 121 C X -0.0048 -0.0069 0.0077 -0.0078 0.0048 0.0056  
Y -0.0008 -0.0032 0.0062 -0.0066 0.0052 0.0056  
Z -0.0095 -0.0095 0.0039 -0.0037 0.0015 0.0014

AT. 122 C X 0.0048 -0.0069 0.0077 0.0078 -0.0048 0.0056  
Y -0.0008 0.0032 -0.0062 -0.0066 0.0052 -0.0056  
Z 0.0095 -0.0095 0.0039 0.0037 -0.0015 0.0014

AT. 123 C X 0.0048 0.0069 0.0077 -0.0078 -0.0048 -0.0056  
Y 0.0008 0.0032 0.0062 -0.0066 -0.0052 -0.0056  
Z 0.0095 0.0095 0.0039 -0.0037 -0.0015 -0.0014

AT. 124 C X -0.0048 0.0069 0.0077 0.0078 0.0048 -0.0056  
Y 0.0008 -0.0032 -0.0062 -0.0066 -0.0052 0.0056  
Z -0.0095 0.0095 0.0039 0.0037 0.0015 -0.0014

AT. 125 H X -0.0207 -0.0265 0.0106 -0.0111 -0.0002 0.0016  
Y -0.0087 -0.0123 0.0119 -0.0122 0.0071 0.0081  
Z 0.0001 0.0022 -0.0020 0.0022 0.0005 -0.0003

AT. 126 H X 0.0207 -0.0265 0.0106 0.0111 0.0002 0.0016  
Y -0.0087 0.0123 -0.0119 -0.0122 0.0071 -0.0081  
Z -0.0001 0.0022 -0.0020 -0.0022 -0.0005 -0.0003

AT. 127 H X 0.0207 0.0265 0.0106 -0.0111 0.0002 -0.0016  
Y 0.0087 0.0123 0.0119 -0.0122 -0.0071 -0.0081  
Z -0.0001 -0.0022 -0.0020 0.0022 -0.0005 0.0003

AT. 128 H X -0.0207 0.0265 0.0106 0.0111 -0.0002 -0.0016  
Y 0.0087 -0.0123 -0.0119 -0.0122 -0.0071 0.0081  
Z 0.0001 -0.0022 -0.0020 -0.0022 0.0005 0.0003

AT. 129 H X -0.0015 -0.0032 0.0015 -0.0017 -0.0006 0.0006  
Y -0.0122 -0.0170 0.0172 -0.0176 0.0115 0.0119



Z -0.0246 -0.0287 0.0078 -0.0081 -0.0032 -0.0016  
AT. 130 H X 0.0015 -0.0032 0.0015 0.0017 0.0006 0.0006  
Y -0.0122 0.0170 -0.0172 -0.0176 0.0115 -0.0119  
Z 0.0246 -0.0287 0.0078 0.0081 0.0032 -0.0016  
AT. 131 H X 0.0015 0.0032 0.0015 -0.0017 0.0006 -0.0006  
Y 0.0122 0.0170 0.0172 -0.0176 -0.0115 -0.0119  
Z 0.0246 0.0287 0.0078 -0.0081 0.0032 0.0016  
AT. 132 H X -0.0015 0.0032 0.0015 0.0017 -0.0006 -0.0006  
Y 0.0122 -0.0170 -0.0172 -0.0176 -0.0115 0.0119  
Z -0.0246 0.0287 0.0078 0.0081 -0.0032 0.0016  
AT. 133 C X -0.0053 -0.0050 0.0067 -0.0065 0.0054 0.0049  
Y 0.0072 0.0069 -0.0081 0.0080 -0.0057 -0.0057  
Z -0.0064 -0.0045 -0.0087 0.0092 -0.0111 -0.0110  
AT. 134 C X 0.0053 -0.0050 0.0067 0.0065 -0.0054 0.0049  
Y 0.0072 -0.0069 0.0081 0.0080 -0.0057 0.0057  
Z 0.0064 -0.0045 -0.0087 -0.0092 0.0111 -0.0110  
AT. 135 C X 0.0053 0.0050 0.0067 -0.0065 -0.0054 -0.0049  
Y -0.0072 -0.0069 -0.0081 0.0080 0.0057 0.0057  
Z 0.0064 0.0045 -0.0087 0.0092 0.0111 0.0110  
AT. 136 C X -0.0053 0.0050 0.0067 0.0065 0.0054 -0.0049  
Y -0.0072 0.0069 0.0081 0.0080 0.0057 -0.0057  
Z -0.0064 0.0045 -0.0087 -0.0092 -0.0111 0.0110  
AT. 137 C X -0.0012 -0.0015 0.0045 -0.0047 0.0044 0.0043  
Y -0.0077 -0.0037 -0.0235 0.0240 -0.0257 -0.0257  
Z 0.0006 0.0000 -0.0001 0.0002 -0.0003 -0.0003  
AT. 138 C X 0.0012 -0.0015 0.0045 0.0047 -0.0044 0.0043  
Y -0.0077 0.0037 0.0235 0.0240 -0.0257 0.0257  
Z -0.0006 0.0000 -0.0001 -0.0002 0.0003 -0.0003  
AT. 139 C X 0.0012 0.0015 0.0045 -0.0047 -0.0044 -0.0043  
Y 0.0077 0.0037 -0.0235 0.0240 0.0257 0.0257  
Z -0.0006 -0.0000 -0.0001 0.0002 0.0003 0.0003  
AT. 140 C X -0.0012 0.0015 0.0045 0.0047 0.0044 -0.0043

Y 0.0077 -0.0037 0.0235 0.0240 0.0257 -0.0257  
Z 0.0006 -0.0000 -0.0001 -0.0002 -0.0003 0.0003  
AT. 141 H X -0.0089 -0.0069 -0.0075 0.0078 -0.0105 -0.0107  
Y -0.0257 -0.0177 -0.0403 0.0415 -0.0494 -0.0494  
Z -0.0031 -0.0033 0.0014 -0.0014 -0.0002 -0.0000  
AT. 142 H X 0.0089 -0.0069 -0.0075 -0.0078 0.0105 -0.0107  
Y -0.0257 0.0177 0.0403 0.0415 -0.0494 0.0494  
Z 0.0031 -0.0033 0.0014 0.0014 0.0002 -0.0000  
AT. 143 H X 0.0089 0.0069 -0.0075 0.0078 0.0105 0.0107  
Y 0.0257 0.0177 -0.0403 0.0415 0.0494 0.0494  
Z 0.0031 0.0033 0.0014 -0.0014 0.0002 0.0000  
AT. 144 H X -0.0089 0.0069 -0.0075 -0.0078 -0.0105 0.0107  
Y 0.0257 -0.0177 0.0403 0.0415 0.0494 -0.0494  
Z -0.0031 0.0033 0.0014 0.0014 -0.0002 0.0000  
AT. 145 H X 0.0136 0.0093 0.0225 -0.0233 0.0280 0.0278  
Y -0.0087 -0.0044 -0.0248 0.0253 -0.0274 -0.0274  
Z 0.0134 0.0095 0.0150 -0.0155 0.0197 0.0196  
AT. 146 H X -0.0136 0.0093 0.0225 0.0233 -0.0280 0.0278  
Y -0.0087 0.0044 0.0248 0.0253 -0.0274 0.0274  
Z -0.0134 0.0095 0.0150 0.0155 -0.0197 0.0196  
AT. 147 H X -0.0136 -0.0093 0.0225 -0.0233 -0.0280 -0.0278  
Y 0.0087 0.0044 -0.0248 0.0253 0.0274 0.0274  
Z -0.0134 -0.0095 0.0150 -0.0155 -0.0197 -0.0196  
AT. 148 H X 0.0136 -0.0093 0.0225 0.0233 0.0280 -0.0278  
Y 0.0087 -0.0044 0.0248 0.0253 0.0274 -0.0274  
Z 0.0134 -0.0095 0.0150 0.0155 0.0197 -0.0196  
AT. 149 O X 0.0051 0.0046 -0.0097 0.0098 -0.0092 -0.0091  
Y -0.0065 -0.0092 0.0244 -0.0245 0.0226 0.0220  
Z 0.0066 0.0064 -0.0034 0.0035 -0.0027 -0.0024  
AT. 150 O X -0.0051 0.0046 -0.0097 -0.0098 0.0092 -0.0091  
Y -0.0065 0.0092 -0.0244 -0.0245 0.0226 -0.0220  
Z -0.0066 0.0064 -0.0034 -0.0035 0.0027 -0.0024

AT. 151 O X -0.0051 -0.0046 -0.0097 0.0098 0.0092 0.0091  
Y 0.0065 0.0092 0.0244 -0.0245 -0.0226 -0.0220  
Z -0.0066 -0.0064 -0.0034 0.0035 0.0027 0.0024

AT. 152 O X 0.0051 -0.0046 -0.0097 -0.0098 -0.0092 0.0091  
Y 0.0065 -0.0092 -0.0244 -0.0245 -0.0226 0.0220  
Z 0.0066 -0.0064 -0.0034 -0.0035 -0.0027 0.0024

AT. 153 H X 0.0061 0.0087 -0.0246 0.0236 -0.0199 -0.0197  
Y -0.0083 -0.0086 -0.0005 -0.0008 -0.0024 -0.0038  
Z 0.0059 0.0047 -0.0034 0.0037 -0.0051 -0.0050

AT. 154 H X -0.0061 0.0087 -0.0246 -0.0236 0.0199 -0.0197  
Y -0.0083 0.0086 0.0005 -0.0008 -0.0024 0.0038  
Z -0.0059 0.0047 -0.0034 -0.0037 0.0051 -0.0050

AT. 155 H X -0.0061 -0.0087 -0.0246 0.0236 0.0199 0.0197  
Y 0.0083 0.0086 -0.0005 -0.0008 0.0024 0.0038  
Z -0.0059 -0.0047 -0.0034 0.0037 0.0051 0.0050

AT. 156 H X 0.0061 -0.0087 -0.0246 -0.0236 -0.0199 0.0197  
Y 0.0083 -0.0086 0.0005 -0.0008 0.0024 -0.0038  
Z 0.0059 -0.0047 -0.0034 -0.0037 -0.0051 0.0050

AT. 157 O X -0.0050 -0.0041 -0.0070 0.0073 -0.0084 -0.0087  
Y 0.0016 0.0018 -0.0114 0.0115 -0.0105 -0.0107  
Z -0.0140 -0.0136 0.0085 -0.0081 0.0055 0.0046

AT. 158 O X 0.0050 -0.0041 -0.0070 -0.0073 0.0084 -0.0087  
Y 0.0016 -0.0018 0.0114 0.0115 -0.0105 0.0107  
Z 0.0140 -0.0136 0.0085 0.0081 -0.0055 0.0046

AT. 159 O X 0.0050 0.0041 -0.0070 0.0073 0.0084 0.0087  
Y -0.0016 -0.0018 -0.0114 0.0115 0.0105 0.0107  
Z 0.0140 0.0136 0.0085 -0.0081 -0.0055 -0.0046

AT. 160 O X -0.0050 0.0041 -0.0070 -0.0073 -0.0084 0.0087  
Y -0.0016 0.0018 0.0114 0.0115 0.0105 -0.0107  
Z -0.0140 0.0136 0.0085 0.0081 0.0055 -0.0046

AT. 161 O X -0.0119 -0.0110 -0.0012 0.0016 -0.0030 -0.0038  
Y -0.0092 -0.0092 -0.0002 0.0001 -0.0019 -0.0029

Z -0.0061 -0.0053 -0.0046 0.0051 -0.0064 -0.0069  
AT.162 O X 0.0119 -0.0110 -0.0012 -0.0016 0.0030 -0.0038  
Y -0.0092 0.0092 0.0002 0.0001 -0.0019 0.0029  
Z 0.0061 -0.0053 -0.0046 -0.0051 0.0064 -0.0069  
AT.163 O X 0.0119 0.0110 -0.0012 0.0016 0.0030 0.0038  
Y 0.0092 0.0092 -0.0002 0.0001 0.0019 0.0029  
Z 0.0061 0.0053 -0.0046 0.0051 0.0064 0.0069  
AT.164 O X -0.0119 0.0110 -0.0012 -0.0016 -0.0030 0.0038  
Y 0.0092 -0.0092 0.0002 0.0001 0.0019 -0.0029  
Z -0.0061 0.0053 -0.0046 -0.0051 -0.0064 0.0069  
AT.165 H X -0.0063 -0.0049 -0.0043 0.0048 -0.0044 -0.0038  
Y -0.0077 -0.0072 -0.0013 0.0013 -0.0026 -0.0030  
Z -0.0029 -0.0027 -0.0074 0.0075 -0.0084 -0.0096  
AT.166 H X 0.0063 -0.0049 -0.0043 -0.0048 0.0044 -0.0038  
Y -0.0077 0.0072 0.0013 0.0013 -0.0026 0.0030  
Z 0.0029 -0.0027 -0.0074 -0.0075 0.0084 -0.0096  
AT.167 H X 0.0063 0.0049 -0.0043 0.0048 0.0044 0.0038  
Y 0.0077 0.0072 -0.0013 0.0013 0.0026 0.0030  
Z 0.0029 0.0027 -0.0074 0.0075 0.0084 0.0096  
AT.168 H X -0.0063 0.0049 -0.0043 -0.0048 -0.0044 0.0038  
Y 0.0077 -0.0072 0.0013 0.0013 0.0026 -0.0030  
Z -0.0029 0.0027 -0.0074 -0.0075 -0.0084 0.0096  
AT.169 O X -0.0038 -0.0048 0.0014 -0.0008 0.0001 -0.0001  
Y -0.0265 -0.0280 -0.0035 0.0036 -0.0128 -0.0154  
Z 0.0012 0.0015 0.0006 -0.0011 -0.0003 -0.0002  
AT.170 O X 0.0038 -0.0048 0.0014 0.0008 -0.0001 -0.0001  
Y -0.0265 0.0280 0.0035 0.0036 -0.0128 0.0154  
Z -0.0012 0.0015 0.0006 0.0011 0.0003 -0.0002  
AT.171 O X 0.0038 0.0048 0.0014 -0.0008 -0.0001 0.0001  
Y 0.0265 0.0280 -0.0035 0.0036 0.0128 0.0154  
Z -0.0012 -0.0015 0.0006 -0.0011 0.0003 0.0002  
AT.172 O X -0.0038 0.0048 0.0014 0.0008 0.0001 0.0001

|             |         |         |         |         |         |         |
|-------------|---------|---------|---------|---------|---------|---------|
| Y           | 0.0265  | -0.0280 | 0.0035  | 0.0036  | 0.0128  | -0.0154 |
| Z           | 0.0012  | -0.0015 | 0.0006  | 0.0011  | -0.0003 | 0.0002  |
| AT. 173 H X | -0.0042 | -0.0046 | 0.0015  | -0.0005 | 0.0004  | 0.0007  |
| Y           | -0.0316 | -0.0333 | -0.0036 | 0.0037  | -0.0148 | -0.0179 |
| Z           | 0.0237  | 0.0250  | -0.0013 | 0.0006  | 0.0100  | 0.0119  |
| AT. 174 H X | 0.0042  | -0.0046 | 0.0015  | 0.0005  | -0.0004 | 0.0007  |
| Y           | -0.0316 | 0.0333  | 0.0036  | 0.0037  | -0.0148 | 0.0179  |
| Z           | -0.0237 | 0.0250  | -0.0013 | -0.0006 | -0.0100 | 0.0119  |
| AT. 175 H X | 0.0042  | 0.0046  | 0.0015  | -0.0005 | -0.0004 | -0.0007 |
| Y           | 0.0316  | 0.0333  | -0.0036 | 0.0037  | 0.0148  | 0.0179  |
| Z           | -0.0237 | -0.0250 | -0.0013 | 0.0006  | -0.0100 | -0.0119 |
| AT. 176 H X | -0.0042 | 0.0046  | 0.0015  | 0.0005  | 0.0004  | -0.0007 |
| Y           | 0.0316  | -0.0333 | 0.0036  | 0.0037  | 0.0148  | -0.0179 |
| Z           | 0.0237  | -0.0250 | -0.0013 | -0.0006 | 0.0100  | -0.0119 |

FREQ(CM\*\*-1) 434.03 434.34 435.40 435.53 468.46 468.64

|           |         |         |         |         |         |         |
|-----------|---------|---------|---------|---------|---------|---------|
| AT. 1 I X | -0.0001 | 0.0002  | 0.0000  | -0.0001 | -0.0012 | -0.0013 |
| Y         | -0.0002 | -0.0002 | 0.0001  | 0.0001  | 0.0007  | 0.0008  |
| Z         | -0.0002 | -0.0001 | 0.0001  | 0.0001  | 0.0012  | 0.0012  |
| AT. 2 I X | -0.0001 | -0.0002 | 0.0000  | 0.0001  | 0.0012  | -0.0013 |
| Y         | 0.0002  | -0.0002 | -0.0001 | 0.0001  | 0.0007  | -0.0008 |
| Z         | -0.0002 | 0.0001  | 0.0001  | -0.0001 | -0.0012 | 0.0012  |
| AT. 3 I X | -0.0001 | 0.0002  | -0.0000 | 0.0001  | 0.0012  | -0.0013 |
| Y         | -0.0002 | -0.0002 | -0.0001 | -0.0001 | -0.0007 | 0.0008  |
| Z         | -0.0002 | -0.0001 | -0.0001 | -0.0001 | -0.0012 | 0.0012  |
| AT. 4 I X | -0.0001 | -0.0002 | -0.0000 | -0.0001 | -0.0012 | -0.0013 |
| Y         | 0.0002  | -0.0002 | 0.0001  | -0.0001 | -0.0007 | -0.0008 |
| Z         | -0.0002 | 0.0001  | -0.0001 | 0.0001  | 0.0012  | 0.0012  |
| AT. 5 I X | -0.0007 | -0.0005 | 0.0007  | 0.0006  | 0.0012  | 0.0011  |
| Y         | -0.0000 | 0.0001  | 0.0001  | 0.0002  | -0.0001 | -0.0000 |
| Z         | 0.0005  | 0.0006  | -0.0005 | -0.0003 | -0.0008 | -0.0007 |

AT. 6 I X -0.0007 0.0005 0.0007 -0.0006 -0.0012 0.0011  
Y 0.0000 0.0001 -0.0001 0.0002 -0.0001 0.0000  
Z 0.0005 -0.0006 -0.0005 0.0003 0.0008 -0.0007

AT. 7 I X -0.0007 -0.0005 -0.0007 -0.0006 -0.0012 0.0011  
Y -0.0000 0.0001 -0.0001 -0.0002 0.0001 -0.0000  
Z 0.0005 0.0006 0.0005 0.0003 0.0008 -0.0007

AT. 8 I X -0.0007 0.0005 -0.0007 0.0006 0.0012 0.0011  
Y 0.0000 0.0001 0.0001 -0.0002 0.0001 0.0000  
Z 0.0005 -0.0006 0.0005 -0.0003 -0.0008 -0.0007

AT. 9 N X -0.0079 -0.0077 0.0074 0.0083 -0.0106 -0.0103  
Y 0.0052 0.0051 -0.0044 -0.0042 -0.0073 -0.0075  
Z -0.0033 -0.0030 0.0035 0.0038 0.0064 0.0055

AT. 10 N X -0.0079 0.0077 0.0074 -0.0083 0.0106 -0.0103  
Y -0.0052 0.0051 0.0044 -0.0042 -0.0073 0.0075  
Z -0.0033 0.0030 0.0035 -0.0038 -0.0064 0.0055

AT. 11 N X -0.0079 -0.0077 -0.0074 -0.0083 0.0106 -0.0103  
Y 0.0052 0.0051 0.0044 0.0042 0.0073 -0.0075  
Z -0.0033 -0.0030 -0.0035 -0.0038 -0.0064 0.0055

AT. 12 N X -0.0079 0.0077 -0.0074 0.0083 -0.0106 -0.0103  
Y -0.0052 0.0051 -0.0044 0.0042 0.0073 0.0075  
Z -0.0033 0.0030 -0.0035 0.0038 0.0064 0.0055

AT. 13 N X 0.0155 0.0155 -0.0164 -0.0154 -0.0085 -0.0092  
Y 0.0066 0.0064 -0.0059 -0.0061 0.0019 0.0029  
Z 0.0034 0.0031 -0.0034 -0.0040 -0.0053 -0.0048

AT. 14 N X 0.0155 -0.0155 -0.0164 0.0154 0.0085 -0.0092  
Y -0.0066 0.0064 0.0059 -0.0061 0.0019 -0.0029  
Z 0.0034 -0.0031 -0.0034 0.0040 0.0053 -0.0048

AT. 15 N X 0.0155 0.0155 0.0164 0.0154 0.0085 -0.0092  
Y 0.0066 0.0064 0.0059 0.0061 -0.0019 0.0029  
Z 0.0034 0.0031 0.0034 0.0040 0.0053 -0.0048

AT. 16 N X 0.0155 -0.0155 0.0164 -0.0154 -0.0085 -0.0092  
Y -0.0066 0.0064 -0.0059 0.0061 -0.0019 -0.0029

Z 0.0034 -0.0031 0.0034 -0.0040 -0.0053 -0.0048  
AT. 17 O X 0.0016 0.0020 -0.0014 -0.0012 -0.0021 -0.0029  
Y -0.0035 -0.0028 0.0026 0.0029 0.0028 0.0025  
Z 0.0019 0.0012 -0.0025 -0.0021 -0.0199 -0.0194  
AT. 18 O X 0.0016 -0.0020 -0.0014 0.0012 0.0021 -0.0029  
Y 0.0035 -0.0028 -0.0026 0.0029 0.0028 -0.0025  
Z 0.0019 -0.0012 -0.0025 0.0021 0.0199 -0.0194  
AT. 19 O X 0.0016 0.0020 0.0014 0.0012 0.0021 -0.0029  
Y -0.0035 -0.0028 -0.0026 -0.0029 -0.0028 0.0025  
Z 0.0019 0.0012 0.0025 0.0021 0.0199 -0.0194  
AT. 20 O X 0.0016 -0.0020 0.0014 -0.0012 -0.0021 -0.0029  
Y 0.0035 -0.0028 0.0026 -0.0029 -0.0028 -0.0025  
Z 0.0019 -0.0012 0.0025 -0.0021 -0.0199 -0.0194  
AT. 21 O X -0.0049 -0.0046 0.0050 0.0045 0.0039 0.0039  
Y -0.0006 -0.0006 0.0010 0.0006 0.0224 0.0226  
Z -0.0071 -0.0069 0.0058 0.0052 0.0042 0.0024  
AT. 22 O X -0.0049 0.0046 0.0050 -0.0045 -0.0039 0.0039  
Y 0.0006 -0.0006 -0.0010 0.0006 0.0224 -0.0226  
Z -0.0071 0.0069 0.0058 -0.0052 -0.0042 0.0024  
AT. 23 O X -0.0049 -0.0046 -0.0050 -0.0045 -0.0039 0.0039  
Y -0.0006 -0.0006 -0.0010 -0.0006 -0.0224 0.0226  
Z -0.0071 -0.0069 -0.0058 -0.0052 -0.0042 0.0024  
AT. 24 O X -0.0049 0.0046 -0.0050 0.0045 0.0039 0.0039  
Y 0.0006 -0.0006 0.0010 -0.0006 -0.0224 -0.0226  
Z -0.0071 0.0069 -0.0058 0.0052 0.0042 0.0024  
AT. 25 C X -0.0011 -0.0011 0.0005 -0.0001 0.0146 0.0148  
Y 0.0029 0.0036 -0.0018 -0.0008 0.0056 0.0038  
Z -0.0001 0.0000 -0.0005 -0.0004 -0.0025 -0.0030  
AT. 26 C X -0.0011 0.0011 0.0005 0.0001 -0.0146 0.0148  
Y -0.0029 0.0036 0.0018 -0.0008 0.0056 -0.0038  
Z -0.0001 -0.0000 -0.0005 0.0004 0.0025 -0.0030  
AT. 27 C X -0.0011 -0.0011 -0.0005 0.0001 -0.0146 0.0148

Y 0.0029 0.0036 0.0018 0.0008 -0.0056 0.0038  
Z -0.0001 0.0000 0.0005 0.0004 0.0025 -0.0030  
AT. 28 C X -0.0011 0.0011 -0.0005 -0.0001 0.0146 0.0148  
Y -0.0029 0.0036 -0.0018 0.0008 -0.0056 -0.0038  
Z -0.0001 -0.0000 0.0005 -0.0004 -0.0025 -0.0030  
AT. 29 H X -0.0010 -0.0007 0.0004 -0.0004 0.0121 0.0123  
Y 0.0001 0.0019 0.0011 0.0023 0.0510 0.0467  
Z -0.0002 -0.0007 -0.0006 -0.0002 -0.0060 -0.0060  
AT. 30 H X -0.0010 0.0007 0.0004 0.0004 -0.0121 0.0123  
Y -0.0001 0.0019 -0.0011 0.0023 0.0510 -0.0467  
Z -0.0002 0.0007 -0.0006 0.0002 0.0060 -0.0060  
AT. 31 H X -0.0010 -0.0007 -0.0004 0.0004 -0.0121 0.0123  
Y 0.0001 0.0019 -0.0011 -0.0023 -0.0510 0.0467  
Z -0.0002 -0.0007 0.0006 0.0002 0.0060 -0.0060  
AT. 32 H X -0.0010 0.0007 -0.0004 -0.0004 0.0121 0.0123  
Y -0.0001 0.0019 0.0011 -0.0023 -0.0510 -0.0467  
Z -0.0002 0.0007 0.0006 -0.0002 -0.0060 -0.0060  
AT. 33 H X -0.0011 -0.0000 0.0008 0.0007 0.0504 0.0477  
Y 0.0033 0.0038 -0.0025 -0.0016 -0.0071 -0.0081  
Z -0.0021 -0.0015 0.0021 0.0022 0.0257 0.0242  
AT. 34 H X -0.0011 0.0000 0.0008 -0.0007 -0.0504 0.0477  
Y -0.0033 0.0038 0.0025 -0.0016 -0.0071 0.0081  
Z -0.0021 0.0015 0.0021 -0.0022 -0.0257 0.0242  
AT. 35 H X -0.0011 -0.0000 -0.0008 -0.0007 -0.0504 0.0477  
Y 0.0033 0.0038 0.0025 0.0016 0.0071 -0.0081  
Z -0.0021 -0.0015 -0.0021 -0.0022 -0.0257 0.0242  
AT. 36 H X -0.0011 0.0000 -0.0008 0.0007 0.0504 0.0477  
Y -0.0033 0.0038 -0.0025 0.0016 0.0071 0.0081  
Z -0.0021 0.0015 -0.0021 0.0022 0.0257 0.0242  
AT. 37 C X -0.0020 -0.0023 0.0013 0.0015 -0.0058 -0.0048  
Y 0.0023 0.0024 -0.0019 -0.0013 -0.0089 -0.0094  
Z 0.0000 -0.0001 -0.0009 -0.0007 -0.0105 -0.0105



AT. 38 C X -0.0020 0.0023 0.0013 -0.0015 0.0058 -0.0048  
Y -0.0023 0.0024 0.0019 -0.0013 -0.0089 0.0094  
Z 0.0000 0.0001 -0.0009 0.0007 0.0105 -0.0105

AT. 39 C X -0.0020 -0.0023 -0.0013 -0.0015 0.0058 -0.0048  
Y 0.0023 0.0024 0.0019 0.0013 0.0089 -0.0094  
Z 0.0000 -0.0001 0.0009 0.0007 0.0105 -0.0105

AT. 40 C X -0.0020 0.0023 -0.0013 0.0015 -0.0058 -0.0048  
Y -0.0023 0.0024 -0.0019 0.0013 0.0089 0.0094  
Z 0.0000 0.0001 0.0009 -0.0007 -0.0105 -0.0105

AT. 41 C X 0.0117 0.0116 -0.0113 -0.0109 0.0016 0.0020  
Y -0.0067 -0.0069 0.0069 0.0071 -0.0011 -0.0004  
Z -0.0012 -0.0009 0.0022 0.0026 0.0011 0.0001

AT. 42 C X 0.0117 -0.0116 -0.0113 0.0109 -0.0016 0.0020  
Y 0.0067 -0.0069 -0.0069 0.0071 -0.0011 0.0004  
Z -0.0012 0.0009 0.0022 -0.0026 -0.0011 0.0001

AT. 43 C X 0.0117 0.0116 0.0113 0.0109 -0.0016 0.0020  
Y -0.0067 -0.0069 -0.0069 -0.0071 0.0011 -0.0004  
Z -0.0012 -0.0009 -0.0022 -0.0026 -0.0011 0.0001

AT. 44 C X 0.0117 -0.0116 0.0113 -0.0109 0.0016 0.0020  
Y 0.0067 -0.0069 0.0069 -0.0071 0.0011 0.0004  
Z -0.0012 0.0009 -0.0022 0.0026 0.0011 0.0001

AT. 45 H X 0.0341 0.0344 -0.0334 -0.0323 -0.0026 -0.0054  
Y -0.0237 -0.0240 0.0233 0.0231 0.0092 0.0106  
Z -0.0189 -0.0188 0.0193 0.0194 0.0098 0.0099

AT. 46 H X 0.0341 -0.0344 -0.0334 0.0323 0.0026 -0.0054  
Y 0.0237 -0.0240 -0.0233 0.0231 0.0092 -0.0106  
Z -0.0189 0.0188 0.0193 -0.0194 -0.0098 0.0099

AT. 47 H X 0.0341 0.0344 0.0334 0.0323 0.0026 -0.0054  
Y -0.0237 -0.0240 -0.0233 -0.0231 -0.0092 0.0106  
Z -0.0189 -0.0188 -0.0193 -0.0194 -0.0098 0.0099

AT. 48 H X 0.0341 -0.0344 0.0334 -0.0323 -0.0026 -0.0054  
Y 0.0237 -0.0240 0.0233 -0.0231 -0.0092 -0.0106

Z -0.0189 0.0188 -0.0193 0.0194 0.0098 0.0099  
AT. 49 H X 0.0110 0.0107 -0.0104 -0.0104 0.0059 0.0068  
Y -0.0199 -0.0203 0.0198 0.0195 0.0062 0.0085  
Z 0.0300 0.0306 -0.0281 -0.0273 -0.0068 -0.0108  
AT. 50 H X 0.0110 -0.0107 -0.0104 0.0104 -0.0059 0.0068  
Y 0.0199 -0.0203 -0.0198 0.0195 0.0062 -0.0085  
Z 0.0300 -0.0306 -0.0281 0.0273 0.0068 -0.0108  
AT. 51 H X 0.0110 0.0107 0.0104 0.0104 -0.0059 0.0068  
Y -0.0199 -0.0203 -0.0198 -0.0195 -0.0062 0.0085  
Z 0.0300 0.0306 0.0281 0.0273 0.0068 -0.0108  
AT. 52 H X 0.0110 -0.0107 0.0104 -0.0104 0.0059 0.0068  
Y 0.0199 -0.0203 0.0198 -0.0195 -0.0062 -0.0085  
Z 0.0300 -0.0306 0.0281 -0.0273 -0.0068 -0.0108  
AT. 53 C X 0.0068 0.0066 -0.0061 -0.0062 0.0081 0.0097  
Y 0.0046 0.0045 -0.0039 -0.0037 -0.0026 -0.0027  
Z 0.0009 0.0009 0.0008 0.0005 0.0001 0.0014  
AT. 54 C X 0.0068 -0.0066 -0.0061 0.0062 -0.0081 0.0097  
Y -0.0046 0.0045 0.0039 -0.0037 -0.0026 0.0027  
Z 0.0009 -0.0009 0.0008 -0.0005 -0.0001 0.0014  
AT. 55 C X 0.0068 0.0066 0.0061 0.0062 -0.0081 0.0097  
Y 0.0046 0.0045 0.0039 0.0037 0.0026 -0.0027  
Z 0.0009 0.0009 -0.0008 -0.0005 -0.0001 0.0014  
AT. 56 C X 0.0068 -0.0066 0.0061 -0.0062 0.0081 0.0097  
Y -0.0046 0.0045 -0.0039 0.0037 0.0026 0.0027  
Z 0.0009 -0.0009 -0.0008 0.0005 0.0001 0.0014  
AT. 57 C X 0.0047 0.0038 -0.0045 -0.0035 -0.0003 -0.0001  
Y 0.0007 -0.0003 0.0006 0.0009 0.0040 0.0044  
Z 0.0057 0.0063 -0.0032 -0.0042 -0.0015 0.0007  
AT. 58 C X 0.0047 -0.0038 -0.0045 0.0035 0.0003 -0.0001  
Y -0.0007 -0.0003 -0.0006 0.0009 0.0040 -0.0044  
Z 0.0057 -0.0063 -0.0032 0.0042 0.0015 0.0007  
AT. 59 C X 0.0047 0.0038 0.0045 0.0035 0.0003 -0.0001

Y 0.0007 -0.0003 -0.0006 -0.0009 -0.0040 0.0044  
Z 0.0057 0.0063 0.0032 0.0042 0.0015 0.0007  
AT. 60 C X 0.0047 -0.0038 0.0045 -0.0035 -0.0003 -0.0001  
Y -0.0007 -0.0003 0.0006 -0.0009 -0.0040 -0.0044  
Z 0.0057 -0.0063 0.0032 -0.0042 -0.0015 0.0007  
AT. 61 H X 0.0037 0.0047 -0.0037 -0.0051 -0.0097 -0.0087  
Y -0.0007 0.0001 0.0019 0.0002 -0.0014 0.0000  
Z 0.0096 0.0085 -0.0074 -0.0067 -0.0101 -0.0092  
AT. 62 H X 0.0037 -0.0047 -0.0037 0.0051 0.0097 -0.0087  
Y 0.0007 0.0001 -0.0019 0.0002 -0.0014 -0.0000  
Z 0.0096 -0.0085 -0.0074 0.0067 0.0101 -0.0092  
AT. 63 H X 0.0037 0.0047 0.0037 0.0051 0.0097 -0.0087  
Y -0.0007 0.0001 -0.0019 -0.0002 0.0014 0.0000  
Z 0.0096 0.0085 0.0074 0.0067 0.0101 -0.0092  
AT. 64 H X 0.0037 -0.0047 0.0037 -0.0051 -0.0097 -0.0087  
Y 0.0007 0.0001 0.0019 -0.0002 0.0014 -0.0000  
Z 0.0096 -0.0085 0.0074 -0.0067 -0.0101 -0.0092  
AT. 65 H X 0.0047 0.0044 -0.0044 -0.0044 -0.0037 -0.0032  
Y 0.0006 -0.0021 0.0007 0.0032 0.0139 0.0134  
Z 0.0079 0.0101 -0.0048 -0.0073 0.0005 0.0032  
AT. 66 H X 0.0047 -0.0044 -0.0044 0.0044 0.0037 -0.0032  
Y -0.0006 -0.0021 -0.0007 0.0032 0.0139 -0.0134  
Z 0.0079 -0.0101 -0.0048 0.0073 -0.0005 0.0032  
AT. 67 H X 0.0047 0.0044 0.0044 0.0044 0.0037 -0.0032  
Y 0.0006 -0.0021 -0.0007 -0.0032 -0.0139 0.0134  
Z 0.0079 0.0101 0.0048 0.0073 -0.0005 0.0032  
AT. 68 H X 0.0047 -0.0044 0.0044 -0.0044 -0.0037 -0.0032  
Y -0.0006 -0.0021 0.0007 -0.0032 -0.0139 -0.0134  
Z 0.0079 -0.0101 0.0048 -0.0073 0.0005 0.0032  
AT. 69 H X 0.0046 0.0002 -0.0046 -0.0004 0.0025 0.0012  
Y -0.0034 -0.0037 0.0047 0.0041 0.0082 0.0091  
Z 0.0024 0.0029 0.0000 -0.0011 0.0025 0.0048

AT. 70 H X 0.0046 -0.0002 -0.0046 0.0004 -0.0025 0.0012  
Y 0.0034 -0.0037 -0.0047 0.0041 0.0082 -0.0091  
Z 0.0024 -0.0029 0.0000 0.0011 -0.0025 0.0048

AT. 71 H X 0.0046 0.0002 0.0046 0.0004 -0.0025 0.0012  
Y -0.0034 -0.0037 -0.0047 -0.0041 -0.0082 0.0091  
Z 0.0024 0.0029 -0.0000 0.0011 -0.0025 0.0048

AT. 72 H X 0.0046 -0.0002 0.0046 -0.0004 0.0025 0.0012  
Y 0.0034 -0.0037 0.0047 -0.0041 -0.0082 -0.0091  
Z 0.0024 -0.0029 -0.0000 -0.0011 0.0025 0.0048

AT. 73 C X 0.0027 0.0032 -0.0024 -0.0035 0.0063 0.0067  
Y 0.0037 0.0038 -0.0040 -0.0034 -0.0028 -0.0030  
Z -0.0008 -0.0008 0.0012 0.0015 -0.0000 0.0004

AT. 74 C X 0.0027 -0.0032 -0.0024 0.0035 -0.0063 0.0067  
Y -0.0037 0.0038 0.0040 -0.0034 -0.0028 0.0030  
Z -0.0008 0.0008 0.0012 -0.0015 0.0000 0.0004

AT. 75 C X 0.0027 0.0032 0.0024 0.0035 -0.0063 0.0067  
Y 0.0037 0.0038 0.0040 0.0034 0.0028 -0.0030  
Z -0.0008 -0.0008 -0.0012 -0.0015 0.0000 0.0004

AT. 76 C X 0.0027 -0.0032 0.0024 -0.0035 0.0063 0.0067  
Y -0.0037 0.0038 -0.0040 0.0034 0.0028 0.0030  
Z -0.0008 0.0008 -0.0012 0.0015 -0.0000 0.0004

AT. 77 C X -0.0033 -0.0024 0.0040 0.0038 -0.0003 -0.0022  
Y -0.0101 -0.0104 0.0101 0.0103 -0.0101 -0.0096  
Z -0.0135 -0.0130 0.0132 0.0136 0.0093 0.0086

AT. 78 C X -0.0033 0.0024 0.0040 -0.0038 0.0003 -0.0022  
Y 0.0101 -0.0104 -0.0101 0.0103 -0.0101 0.0096  
Z -0.0135 0.0130 0.0132 -0.0136 -0.0093 0.0086

AT. 79 C X -0.0033 -0.0024 -0.0040 -0.0038 0.0003 -0.0022  
Y -0.0101 -0.0104 -0.0101 -0.0103 0.0101 -0.0096  
Z -0.0135 -0.0130 -0.0132 -0.0136 -0.0093 0.0086

AT. 80 C X -0.0033 0.0024 -0.0040 0.0038 -0.0003 -0.0022  
Y 0.0101 -0.0104 0.0101 -0.0103 0.0101 0.0096

Z -0.0135 0.0130 -0.0132 0.0136 0.0093 0.0086  
AT. 81 H X -0.0246 -0.0235 0.0251 0.0243 -0.0027 -0.0050  
Y -0.0318 -0.0319 0.0318 0.0313 -0.0121 -0.0116  
Z -0.0492 -0.0493 0.0475 0.0480 -0.0019 -0.0011  
AT. 82 H X -0.0246 0.0235 0.0251 -0.0243 0.0027 -0.0050  
Y 0.0318 -0.0319 -0.0318 0.0313 -0.0121 0.0116  
Z -0.0492 0.0493 0.0475 -0.0480 0.0019 -0.0011  
AT. 83 H X -0.0246 -0.0235 -0.0251 -0.0243 0.0027 -0.0050  
Y -0.0318 -0.0319 -0.0318 -0.0313 0.0121 -0.0116  
Z -0.0492 -0.0493 -0.0475 -0.0480 0.0019 -0.0011  
AT. 84 H X -0.0246 0.0235 -0.0251 0.0243 -0.0027 -0.0050  
Y 0.0318 -0.0319 0.0318 -0.0313 0.0121 0.0116  
Z -0.0492 0.0493 -0.0475 0.0480 -0.0019 -0.0011  
AT. 85 H X 0.0364 0.0375 -0.0356 -0.0355 0.0100 0.0078  
Y -0.0300 -0.0305 0.0291 0.0290 -0.0105 -0.0094  
Z -0.0085 -0.0080 0.0089 0.0094 0.0069 0.0058  
AT. 86 H X 0.0364 -0.0375 -0.0356 0.0355 -0.0100 0.0078  
Y 0.0300 -0.0305 -0.0291 0.0290 -0.0105 0.0094  
Z -0.0085 0.0080 0.0089 -0.0094 -0.0069 0.0058  
AT. 87 H X 0.0364 0.0375 0.0356 0.0355 -0.0100 0.0078  
Y -0.0300 -0.0305 -0.0291 -0.0290 0.0105 -0.0094  
Z -0.0085 -0.0080 -0.0089 -0.0094 -0.0069 0.0058  
AT. 88 H X 0.0364 -0.0375 0.0356 -0.0355 0.0100 0.0078  
Y 0.0300 -0.0305 0.0291 -0.0290 0.0105 0.0094  
Z -0.0085 0.0080 -0.0089 0.0094 0.0069 0.0058  
AT. 89 C X -0.0067 -0.0060 0.0072 0.0065 -0.0005 -0.0018  
Y 0.0016 0.0011 -0.0015 -0.0010 -0.0090 -0.0085  
Z 0.0027 0.0032 -0.0026 -0.0023 0.0150 0.0148  
AT. 90 C X -0.0067 0.0060 0.0072 -0.0065 0.0005 -0.0018  
Y -0.0016 0.0011 0.0015 -0.0010 -0.0090 0.0085  
Z 0.0027 -0.0032 -0.0026 0.0023 -0.0150 0.0148  
AT. 91 C X -0.0067 -0.0060 -0.0072 -0.0065 0.0005 -0.0018

Y 0.0016 0.0011 0.0015 0.0010 0.0090 -0.0085  
Z 0.0027 0.0032 0.0026 0.0023 -0.0150 0.0148  
AT. 92 C X -0.0067 0.0060 -0.0072 0.0065 -0.0005 -0.0018  
Y -0.0016 0.0011 -0.0015 0.0010 0.0090 0.0085  
Z 0.0027 -0.0032 0.0026 -0.0023 0.0150 0.0148  
AT. 93 C X -0.0009 -0.0010 0.0008 0.0009 0.0085 0.0084  
Y -0.0003 -0.0008 0.0001 0.0002 -0.0119 -0.0119  
Z 0.0003 0.0013 -0.0004 -0.0004 0.0212 0.0201  
AT. 94 C X -0.0009 0.0010 0.0008 -0.0009 -0.0085 0.0084  
Y 0.0003 -0.0008 -0.0001 0.0002 -0.0119 0.0119  
Z 0.0003 -0.0013 -0.0004 0.0004 -0.0212 0.0201  
AT. 95 C X -0.0009 -0.0010 -0.0008 -0.0009 -0.0085 0.0084  
Y -0.0003 -0.0008 -0.0001 -0.0002 0.0119 -0.0119  
Z 0.0003 0.0013 0.0004 0.0004 -0.0212 0.0201  
AT. 96 C X -0.0009 0.0010 -0.0008 0.0009 0.0085 0.0084  
Y 0.0003 -0.0008 0.0001 -0.0002 0.0119 0.0119  
Z 0.0003 -0.0013 0.0004 -0.0004 0.0212 0.0201  
AT. 97 H X 0.0017 0.0016 -0.0031 -0.0023 0.0136 0.0137  
Y -0.0044 -0.0049 0.0064 0.0055 -0.0171 -0.0173  
Z 0.0017 0.0024 -0.0017 -0.0012 0.0288 0.0283  
AT. 98 H X 0.0017 -0.0016 -0.0031 0.0023 -0.0136 0.0137  
Y 0.0044 -0.0049 -0.0064 0.0055 -0.0171 0.0173  
Z 0.0017 -0.0024 -0.0017 0.0012 -0.0288 0.0283  
AT. 99 H X 0.0017 0.0016 0.0031 0.0023 -0.0136 0.0137  
Y -0.0044 -0.0049 -0.0064 -0.0055 0.0171 -0.0173  
Z 0.0017 0.0024 0.0017 0.0012 -0.0288 0.0283  
AT. 100 H X 0.0017 -0.0016 0.0031 -0.0023 0.0136 0.0137  
Y 0.0044 -0.0049 0.0064 -0.0055 0.0171 0.0173  
Z 0.0017 -0.0024 0.0017 -0.0012 0.0288 0.0283  
AT. 101 H X 0.0015 0.0014 -0.0034 -0.0028 0.0117 0.0116  
Y 0.0028 0.0020 -0.0047 -0.0040 -0.0075 -0.0071  
Z -0.0035 -0.0018 0.0029 0.0020 0.0132 0.0104

AT.102 H X 0.0015 -0.0014 -0.0034 0.0028 -0.0117 0.0116  
Y -0.0028 0.0020 0.0047 -0.0040 -0.0075 0.0071  
Z -0.0035 0.0018 0.0029 -0.0020 -0.0132 0.0104

AT.103 H X 0.0015 0.0014 0.0034 0.0028 -0.0117 0.0116  
Y 0.0028 0.0020 0.0047 0.0040 0.0075 -0.0071  
Z -0.0035 -0.0018 -0.0029 -0.0020 -0.0132 0.0104

AT.104 H X 0.0015 -0.0014 0.0034 -0.0028 0.0117 0.0116  
Y -0.0028 0.0020 -0.0047 0.0040 0.0075 0.0071  
Z -0.0035 0.0018 -0.0029 0.0020 0.0132 0.0104

AT.105 H X -0.0014 -0.0017 0.0029 0.0034 0.0130 0.0138  
Y -0.0008 -0.0012 -0.0002 -0.0004 -0.0108 -0.0116  
Z 0.0008 0.0018 -0.0008 -0.0007 0.0188 0.0182

AT.106 H X -0.0014 0.0017 0.0029 -0.0034 -0.0130 0.0138  
Y 0.0008 -0.0012 0.0002 -0.0004 -0.0108 0.0116  
Z 0.0008 -0.0018 -0.0008 0.0007 -0.0188 0.0182

AT.107 H X -0.0014 -0.0017 -0.0029 -0.0034 -0.0130 0.0138  
Y -0.0008 -0.0012 0.0002 0.0004 0.0108 -0.0116  
Z 0.0008 0.0018 0.0008 0.0007 -0.0188 0.0182

AT.108 H X -0.0014 0.0017 -0.0029 0.0034 0.0130 0.0138  
Y 0.0008 -0.0012 -0.0002 0.0004 0.0108 0.0116  
Z 0.0008 -0.0018 0.0008 -0.0007 0.0188 0.0182

AT.109 C X -0.0013 -0.0016 0.0016 0.0014 0.0012 0.0031  
Y -0.0095 -0.0093 0.0097 0.0092 -0.0095 -0.0099  
Z 0.0196 0.0190 -0.0189 -0.0191 -0.0016 -0.0002

AT.110 C X -0.0013 0.0016 0.0016 -0.0014 -0.0012 0.0031  
Y 0.0095 -0.0093 -0.0097 0.0092 -0.0095 0.0099  
Z 0.0196 -0.0190 -0.0189 0.0191 0.0016 -0.0002

AT.111 C X -0.0013 -0.0016 -0.0016 -0.0014 -0.0012 0.0031  
Y -0.0095 -0.0093 -0.0097 -0.0092 0.0095 -0.0099  
Z 0.0196 0.0190 0.0189 0.0191 0.0016 -0.0002

AT.112 C X -0.0013 0.0016 -0.0016 0.0014 0.0012 0.0031  
Y 0.0095 -0.0093 0.0097 -0.0092 0.0095 0.0099

Z 0.0196 -0.0190 0.0189 -0.0191 -0.0016 -0.0002  
AT. 113 H X 0.0198 0.0192 -0.0193 -0.0189 0.0086 0.0109  
Y -0.0365 -0.0358 0.0362 0.0350 -0.0207 -0.0219  
Z 0.0649 0.0634 -0.0646 -0.0630 0.0034 0.0042  
AT. 114 H X 0.0198 -0.0192 -0.0193 0.0189 -0.0086 0.0109  
Y 0.0365 -0.0358 -0.0362 0.0350 -0.0207 0.0219  
Z 0.0649 -0.0634 -0.0646 0.0630 -0.0034 0.0042  
AT. 115 H X 0.0198 0.0192 0.0193 0.0189 -0.0086 0.0109  
Y -0.0365 -0.0358 -0.0362 -0.0350 0.0207 -0.0219  
Z 0.0649 0.0634 0.0646 0.0630 -0.0034 0.0042  
AT. 116 H X 0.0198 -0.0192 0.0193 -0.0189 0.0086 0.0109  
Y 0.0365 -0.0358 0.0362 -0.0350 0.0207 0.0219  
Z 0.0649 -0.0634 0.0646 -0.0630 0.0034 0.0042  
AT. 117 H X -0.0535 -0.0531 0.0542 0.0523 -0.0099 -0.0068  
Y -0.0258 -0.0255 0.0255 0.0246 -0.0165 -0.0172  
Z 0.0135 0.0128 -0.0133 -0.0135 -0.0067 -0.0059  
AT. 118 H X -0.0535 0.0531 0.0542 -0.0523 0.0099 -0.0068  
Y 0.0258 -0.0255 -0.0255 0.0246 -0.0165 0.0172  
Z 0.0135 -0.0128 -0.0133 0.0135 0.0067 -0.0059  
AT. 119 H X -0.0535 -0.0531 -0.0542 -0.0523 0.0099 -0.0068  
Y -0.0258 -0.0255 -0.0255 -0.0246 0.0165 -0.0172  
Z 0.0135 0.0128 0.0133 0.0135 0.0067 -0.0059  
AT. 120 H X -0.0535 0.0531 -0.0542 0.0523 -0.0099 -0.0068  
Y 0.0258 -0.0255 0.0255 -0.0246 0.0165 0.0172  
Z 0.0135 -0.0128 0.0133 -0.0135 -0.0067 -0.0059  
AT. 121 C X -0.0242 -0.0240 0.0244 0.0246 -0.0020 -0.0019  
Y -0.0124 -0.0131 0.0129 0.0139 0.0029 0.0050  
Z -0.0032 -0.0038 0.0031 0.0034 0.0029 0.0043  
AT. 122 C X -0.0242 0.0240 0.0244 -0.0246 0.0020 -0.0019  
Y 0.0124 -0.0131 -0.0129 0.0139 0.0029 -0.0050  
Z -0.0032 0.0038 0.0031 -0.0034 -0.0029 0.0043  
AT. 123 C X -0.0242 -0.0240 -0.0244 -0.0246 0.0020 -0.0019



Y -0.0124 -0.0131 -0.0129 -0.0139 -0.0029 0.0050  
Z -0.0032 -0.0038 -0.0031 -0.0034 -0.0029 0.0043  
AT. 124 C X -0.0242 0.0240 -0.0244 0.0246 -0.0020 -0.0019  
Y 0.0124 -0.0131 0.0129 -0.0139 -0.0029 -0.0050  
Z -0.0032 0.0038 -0.0031 0.0034 0.0029 0.0043  
AT. 125 H X -0.0728 -0.0739 0.0726 0.0734 0.0013 0.0055  
Y -0.0358 -0.0365 0.0359 0.0374 0.0092 0.0115  
Z 0.0275 0.0274 -0.0274 -0.0277 -0.0027 -0.0028  
AT. 126 H X -0.0728 0.0739 0.0726 -0.0734 -0.0013 0.0055  
Y 0.0358 -0.0365 -0.0359 0.0374 0.0092 -0.0115  
Z 0.0275 -0.0274 -0.0274 0.0277 0.0027 -0.0028  
AT. 127 H X -0.0728 -0.0739 -0.0726 -0.0734 -0.0013 0.0055  
Y -0.0358 -0.0365 -0.0359 -0.0374 -0.0092 0.0115  
Z 0.0275 0.0274 0.0274 0.0277 0.0027 -0.0028  
AT. 128 H X -0.0728 0.0739 -0.0726 0.0734 0.0013 0.0055  
Y 0.0358 -0.0365 0.0359 -0.0374 -0.0092 -0.0115  
Z 0.0275 -0.0274 0.0274 -0.0277 -0.0027 -0.0028  
AT. 129 H X -0.0290 -0.0286 0.0294 0.0291 -0.0036 -0.0041  
Y -0.0306 -0.0320 0.0308 0.0326 0.0084 0.0128  
Z -0.0645 -0.0660 0.0644 0.0652 0.0093 0.0143  
AT. 130 H X -0.0290 0.0286 0.0294 -0.0291 0.0036 -0.0041  
Y 0.0306 -0.0320 -0.0308 0.0326 0.0084 -0.0128  
Z -0.0645 0.0660 0.0644 -0.0652 -0.0093 0.0143  
AT. 131 H X -0.0290 -0.0286 -0.0294 -0.0291 0.0036 -0.0041  
Y -0.0306 -0.0320 -0.0308 -0.0326 -0.0084 0.0128  
Z -0.0645 -0.0660 -0.0644 -0.0652 -0.0093 0.0143  
AT. 132 H X -0.0290 0.0286 -0.0294 0.0291 -0.0036 -0.0041  
Y 0.0306 -0.0320 0.0308 -0.0326 -0.0084 -0.0128  
Z -0.0645 0.0660 -0.0644 0.0652 0.0093 0.0143  
AT. 133 C X 0.0056 0.0055 -0.0064 -0.0059 -0.0099 -0.0105  
Y 0.0067 0.0067 -0.0060 -0.0065 0.0049 0.0057  
Z -0.0028 -0.0028 0.0021 0.0015 -0.0043 -0.0056

AT. 134 C X 0.0056 -0.0055 -0.0064 0.0059 0.0099 -0.0105  
Y -0.0067 0.0067 0.0060 -0.0065 0.0049 -0.0057  
Z -0.0028 0.0028 0.0021 -0.0015 0.0043 -0.0056

AT. 135 C X 0.0056 0.0055 0.0064 0.0059 0.0099 -0.0105  
Y 0.0067 0.0067 0.0060 0.0065 -0.0049 0.0057  
Z -0.0028 -0.0028 -0.0021 -0.0015 0.0043 -0.0056

AT. 136 C X 0.0056 -0.0055 0.0064 -0.0059 -0.0099 -0.0105  
Y -0.0067 0.0067 -0.0060 0.0065 -0.0049 -0.0057  
Z -0.0028 0.0028 -0.0021 0.0015 -0.0043 -0.0056

AT. 137 C X 0.0044 0.0047 -0.0050 -0.0039 -0.0117 -0.0113  
Y 0.0053 0.0059 -0.0072 -0.0080 -0.0014 -0.0044  
Z -0.0015 -0.0016 0.0017 0.0016 -0.0020 -0.0014

AT. 138 C X 0.0044 -0.0047 -0.0050 0.0039 0.0117 -0.0113  
Y -0.0053 0.0059 0.0072 -0.0080 -0.0014 0.0044  
Z -0.0015 0.0016 0.0017 -0.0016 0.0020 -0.0014

AT. 139 C X 0.0044 0.0047 0.0050 0.0039 0.0117 -0.0113  
Y 0.0053 0.0059 0.0072 0.0080 0.0014 -0.0044  
Z -0.0015 -0.0016 -0.0017 -0.0016 0.0020 -0.0014

AT. 140 C X 0.0044 -0.0047 0.0050 -0.0039 -0.0117 -0.0113  
Y -0.0053 0.0059 -0.0072 0.0080 0.0014 0.0044  
Z -0.0015 0.0016 -0.0017 0.0016 -0.0020 -0.0014

AT. 141 H X -0.0001 0.0007 -0.0020 -0.0013 -0.0081 -0.0107  
Y -0.0053 -0.0038 -0.0004 -0.0016 -0.0028 -0.0107  
Z -0.0031 -0.0031 0.0023 0.0024 -0.0070 -0.0067

AT. 142 H X -0.0001 -0.0007 -0.0020 0.0013 0.0081 -0.0107  
Y 0.0053 -0.0038 0.0004 -0.0016 -0.0028 0.0107  
Z -0.0031 0.0031 0.0023 -0.0024 0.0070 -0.0067

AT. 143 H X -0.0001 0.0007 0.0020 0.0013 0.0081 -0.0107  
Y -0.0053 -0.0038 0.0004 0.0016 0.0028 -0.0107  
Z -0.0031 -0.0031 -0.0023 -0.0024 0.0070 -0.0067

AT. 144 H X -0.0001 -0.0007 0.0020 -0.0013 -0.0081 -0.0107  
Y 0.0053 -0.0038 -0.0004 0.0016 0.0028 0.0107

Z -0.0031 0.0031 -0.0023 0.0024 -0.0070 -0.0067  
AT. 145 H X 0.0086 0.0075 -0.0048 -0.0037 -0.0098 -0.0046  
Y 0.0063 0.0071 -0.0089 -0.0096 -0.0017 -0.0051  
Z 0.0070 0.0063 -0.0047 -0.0042 -0.0005 0.0040  
AT. 146 H X 0.0086 -0.0075 -0.0048 0.0037 0.0098 -0.0046  
Y -0.0063 0.0071 0.0089 -0.0096 -0.0017 0.0051  
Z 0.0070 -0.0063 -0.0047 0.0042 0.0005 0.0040  
AT. 147 H X 0.0086 0.0075 0.0048 0.0037 0.0098 -0.0046  
Y 0.0063 0.0071 0.0089 0.0096 0.0017 -0.0051  
Z 0.0070 0.0063 0.0047 0.0042 0.0005 0.0040  
AT. 148 H X 0.0086 -0.0075 0.0048 -0.0037 -0.0098 -0.0046  
Y -0.0063 0.0071 -0.0089 0.0096 0.0017 0.0051  
Z 0.0070 -0.0063 0.0047 -0.0042 -0.0005 0.0040  
AT. 149 O X -0.0005 -0.0000 0.0009 -0.0002 0.0077 0.0072  
Y 0.0031 0.0031 -0.0033 -0.0021 0.0003 -0.0003  
Z -0.0079 -0.0081 0.0077 0.0075 -0.0082 -0.0097  
AT. 150 O X -0.0005 0.0000 0.0009 0.0002 -0.0077 0.0072  
Y -0.0031 0.0031 0.0033 -0.0021 0.0003 0.0003  
Z -0.0079 0.0081 0.0077 -0.0075 0.0082 -0.0097  
AT. 151 O X -0.0005 -0.0000 -0.0009 0.0002 -0.0077 0.0072  
Y 0.0031 0.0031 0.0033 0.0021 -0.0003 -0.0003  
Z -0.0079 -0.0081 -0.0077 -0.0075 0.0082 -0.0097  
AT. 152 O X -0.0005 0.0000 -0.0009 -0.0002 0.0077 0.0072  
Y -0.0031 0.0031 -0.0033 0.0021 -0.0003 0.0003  
Z -0.0079 0.0081 -0.0077 0.0075 -0.0082 -0.0097  
AT. 153 H X -0.0081 -0.0073 0.0080 0.0059 -0.0028 -0.0030  
Y -0.0116 -0.0113 0.0092 0.0086 -0.0172 -0.0196  
Z -0.0082 -0.0084 0.0076 0.0074 -0.0075 -0.0098  
AT. 154 H X -0.0081 0.0073 0.0080 -0.0059 0.0028 -0.0030  
Y 0.0116 -0.0113 -0.0092 0.0086 -0.0172 0.0196  
Z -0.0082 0.0084 0.0076 -0.0074 0.0075 -0.0098  
AT. 155 H X -0.0081 -0.0073 -0.0080 -0.0059 0.0028 -0.0030

Y -0.0116 -0.0113 -0.0092 -0.0086 0.0172 -0.0196  
Z -0.0082 -0.0084 -0.0076 -0.0074 0.0075 -0.0098  
AT. 156 H X -0.0081 0.0073 -0.0080 0.0059 -0.0028 -0.0030  
Y 0.0116 -0.0113 0.0092 -0.0086 0.0172 0.0196  
Z -0.0082 0.0084 -0.0076 0.0074 -0.0075 -0.0098  
AT. 157 O X 0.0027 0.0027 -0.0032 -0.0035 -0.0024 -0.0022  
Y 0.0086 0.0092 -0.0083 -0.0090 0.0114 0.0110  
Z 0.0002 -0.0002 -0.0010 -0.0005 -0.0090 -0.0086  
AT. 158 O X 0.0027 -0.0027 -0.0032 0.0035 0.0024 -0.0022  
Y -0.0086 0.0092 0.0083 -0.0090 0.0114 -0.0110  
Z 0.0002 0.0002 -0.0010 0.0005 0.0090 -0.0086  
AT. 159 O X 0.0027 0.0027 0.0032 0.0035 0.0024 -0.0022  
Y 0.0086 0.0092 0.0083 0.0090 -0.0114 0.0110  
Z 0.0002 -0.0002 0.0010 0.0005 0.0090 -0.0086  
AT. 160 O X 0.0027 -0.0027 0.0032 -0.0035 -0.0024 -0.0022  
Y -0.0086 0.0092 -0.0083 0.0090 -0.0114 -0.0110  
Z 0.0002 0.0002 0.0010 -0.0005 -0.0090 -0.0086  
AT. 161 O X 0.0057 0.0051 -0.0066 -0.0058 -0.0029 -0.0023  
Y 0.0042 0.0052 -0.0045 -0.0060 -0.0070 -0.0067  
Z 0.0046 0.0042 -0.0049 -0.0049 0.0028 0.0025  
AT. 162 O X 0.0057 -0.0051 -0.0066 0.0058 0.0029 -0.0023  
Y -0.0042 0.0052 0.0045 -0.0060 -0.0070 0.0067  
Z 0.0046 -0.0042 -0.0049 0.0049 -0.0028 0.0025  
AT. 163 O X 0.0057 0.0051 0.0066 0.0058 0.0029 -0.0023  
Y 0.0042 0.0052 0.0045 0.0060 0.0070 -0.0067  
Z 0.0046 0.0042 0.0049 0.0049 -0.0028 0.0025  
AT. 164 O X 0.0057 -0.0051 0.0066 -0.0058 -0.0029 -0.0023  
Y -0.0042 0.0052 -0.0045 0.0060 0.0070 0.0067  
Z 0.0046 -0.0042 0.0049 -0.0049 0.0028 0.0025  
AT. 165 H X 0.0069 0.0068 -0.0080 -0.0068 0.0039 0.0045  
Y 0.0049 0.0061 -0.0054 -0.0066 -0.0047 -0.0043  
Z 0.0041 0.0021 -0.0035 -0.0028 0.0105 0.0098

AT.166 H X 0.0069 -0.0068 -0.0080 0.0068 -0.0039 0.0045  
Y -0.0049 0.0061 0.0054 -0.0066 -0.0047 0.0043  
Z 0.0041 -0.0021 -0.0035 0.0028 -0.0105 0.0098

AT.167 H X 0.0069 0.0068 0.0080 0.0068 -0.0039 0.0045  
Y 0.0049 0.0061 0.0054 0.0066 0.0047 -0.0043  
Z 0.0041 0.0021 0.0035 0.0028 -0.0105 0.0098

AT.168 H X 0.0069 -0.0068 0.0080 -0.0068 0.0039 0.0045  
Y -0.0049 0.0061 -0.0054 0.0066 0.0047 0.0043  
Z 0.0041 -0.0021 0.0035 -0.0028 0.0105 0.0098

AT.169 O X 0.0006 0.0006 -0.0007 -0.0006 -0.0001 -0.0002  
Y 0.0018 0.0013 -0.0063 -0.0070 0.0001 0.0015  
Z 0.0004 0.0005 0.0003 0.0003 0.0002 0.0007

AT.170 O X 0.0006 -0.0006 -0.0007 0.0006 0.0001 -0.0002  
Y -0.0018 0.0013 0.0063 -0.0070 0.0001 -0.0015  
Z 0.0004 -0.0005 0.0003 -0.0003 -0.0002 0.0007

AT.171 O X 0.0006 0.0006 0.0007 0.0006 0.0001 -0.0002  
Y 0.0018 0.0013 0.0063 0.0070 -0.0001 0.0015  
Z 0.0004 0.0005 -0.0003 -0.0003 -0.0002 0.0007

AT.172 O X 0.0006 -0.0006 0.0007 -0.0006 -0.0001 -0.0002  
Y -0.0018 0.0013 -0.0063 0.0070 -0.0001 -0.0015  
Z 0.0004 -0.0005 -0.0003 0.0003 0.0002 0.0007

AT.173 H X 0.0038 0.0036 -0.0042 -0.0039 0.0015 0.0053  
Y 0.0012 0.0009 -0.0064 -0.0073 0.0003 0.0014  
Z 0.0006 0.0007 0.0056 0.0062 -0.0033 -0.0038

AT.174 H X 0.0038 -0.0036 -0.0042 0.0039 -0.0015 0.0053  
Y -0.0012 0.0009 0.0064 -0.0073 0.0003 -0.0014  
Z 0.0006 -0.0007 0.0056 -0.0062 0.0033 -0.0038

AT.175 H X 0.0038 0.0036 0.0042 0.0039 -0.0015 0.0053  
Y 0.0012 0.0009 0.0064 0.0073 -0.0003 0.0014  
Z 0.0006 0.0007 -0.0056 -0.0062 0.0033 -0.0038

AT.176 H X 0.0038 -0.0036 0.0042 -0.0039 0.0015 0.0053  
Y -0.0012 0.0009 -0.0064 0.0073 -0.0003 -0.0014

Z 0.0006 -0.0007 -0.0056 0.0062 -0.0033 -0.0038

FREQ(CM\*\*-1) 468.71 468.82 475.36 475.58 477.71 478.46

AT. 1 I X -0.0013 -0.0012 -0.0005 0.0004 0.0002 -0.0001

Y 0.0008 0.0008 0.0003 -0.0002 -0.0000 0.0000

Z 0.0012 0.0011 0.0005 -0.0003 -0.0002 -0.0001

AT. 2 I X 0.0013 -0.0012 0.0005 0.0004 -0.0002 -0.0001

Y 0.0008 -0.0008 0.0003 0.0002 -0.0000 -0.0000

Z -0.0012 0.0011 -0.0005 -0.0003 0.0002 -0.0001

AT. 3 I X -0.0013 0.0012 -0.0005 0.0004 -0.0002 0.0001

Y 0.0008 -0.0008 0.0003 -0.0002 0.0000 -0.0000

Z 0.0012 -0.0011 0.0005 -0.0003 0.0002 0.0001

AT. 4 I X 0.0013 0.0012 0.0005 0.0004 0.0002 0.0001

Y 0.0008 0.0008 0.0003 0.0002 0.0000 0.0000

Z -0.0012 -0.0011 -0.0005 -0.0003 -0.0002 0.0001

AT. 5 I X 0.0012 0.0012 -0.0002 0.0001 -0.0005 0.0003

Y -0.0001 -0.0001 0.0000 -0.0001 0.0000 -0.0000

Z -0.0007 -0.0007 -0.0000 0.0001 0.0001 -0.0000

AT. 6 I X -0.0012 0.0012 0.0002 0.0001 0.0005 0.0003

Y -0.0001 0.0001 0.0000 0.0001 0.0000 0.0000

Z 0.0007 -0.0007 0.0000 0.0001 -0.0001 -0.0000

AT. 7 I X 0.0012 -0.0012 -0.0002 0.0001 0.0005 -0.0003

Y -0.0001 0.0001 0.0000 -0.0001 -0.0000 0.0000

Z -0.0007 0.0007 -0.0000 0.0001 -0.0001 0.0000

AT. 8 I X -0.0012 -0.0012 0.0002 0.0001 -0.0005 -0.0003

Y -0.0001 -0.0001 0.0000 0.0001 -0.0000 -0.0000

Z 0.0007 0.0007 0.0000 0.0001 0.0001 0.0000

AT. 9 N X -0.0106 -0.0111 0.0031 -0.0031 0.0046 -0.0028

Y -0.0073 -0.0072 -0.0012 0.0010 -0.0002 0.0008

Z 0.0052 0.0060 0.0099 -0.0094 0.0083 -0.0086

AT. 10 N X 0.0106 -0.0111 -0.0031 -0.0031 -0.0046 -0.0028

Y -0.0073 0.0072 -0.0012 -0.0010 -0.0002 -0.0008  
Z -0.0052 0.0060 -0.0099 -0.0094 -0.0083 -0.0086  
AT. 11 N X -0.0106 0.0111 0.0031 -0.0031 -0.0046 0.0028  
Y -0.0073 0.0072 -0.0012 0.0010 0.0002 -0.0008  
Z 0.0052 -0.0060 0.0099 -0.0094 -0.0083 0.0086  
AT. 12 N X 0.0106 0.0111 -0.0031 -0.0031 0.0046 0.0028  
Y -0.0073 -0.0072 -0.0012 -0.0010 0.0002 0.0008  
Z -0.0052 -0.0060 -0.0099 -0.0094 0.0083 0.0086  
AT. 13 N X -0.0089 -0.0089 0.0036 -0.0044 0.0033 -0.0031  
Y 0.0027 0.0027 -0.0074 0.0074 -0.0064 0.0060  
Z -0.0047 -0.0048 -0.0061 0.0059 -0.0057 0.0058  
AT. 14 N X 0.0089 -0.0089 -0.0036 -0.0044 -0.0033 -0.0031  
Y 0.0027 -0.0027 -0.0074 -0.0074 -0.0064 -0.0060  
Z 0.0047 -0.0048 0.0061 0.0059 0.0057 0.0058  
AT. 15 N X -0.0089 0.0089 0.0036 -0.0044 -0.0033 0.0031  
Y 0.0027 -0.0027 -0.0074 0.0074 0.0064 -0.0060  
Z -0.0047 0.0048 -0.0061 0.0059 0.0057 -0.0058  
AT. 16 N X 0.0089 0.0089 -0.0036 -0.0044 0.0033 0.0031  
Y 0.0027 0.0027 -0.0074 -0.0074 0.0064 0.0060  
Z 0.0047 0.0048 0.0061 0.0059 -0.0057 -0.0058  
AT. 17 O X -0.0029 -0.0023 0.0023 -0.0025 0.0025 -0.0021  
Y 0.0022 0.0022 0.0168 -0.0157 0.0097 -0.0095  
Z -0.0193 -0.0191 -0.0076 0.0067 -0.0041 0.0061  
AT. 18 O X 0.0029 -0.0023 -0.0023 -0.0025 -0.0025 -0.0021  
Y 0.0022 -0.0022 0.0168 0.0157 0.0097 0.0095  
Z 0.0193 -0.0191 0.0076 0.0067 0.0041 0.0061  
AT. 19 O X -0.0029 0.0023 0.0023 -0.0025 -0.0025 0.0021  
Y 0.0022 -0.0022 0.0168 -0.0157 -0.0097 0.0095  
Z -0.0193 0.0191 -0.0076 0.0067 0.0041 -0.0061  
AT. 20 O X 0.0029 0.0023 -0.0023 -0.0025 0.0025 0.0021  
Y 0.0022 0.0022 0.0168 0.0157 -0.0097 -0.0095  
Z 0.0193 0.0191 0.0076 0.0067 -0.0041 -0.0061

AT. 21 O X 0.0039 0.0039 0.0000 -0.0003 -0.0004 -0.0000  
Y 0.0224 0.0227 0.0005 -0.0002 -0.0020 0.0004  
Z 0.0023 0.0030 0.0142 -0.0145 0.0115 -0.0115

AT. 22 O X -0.0039 0.0039 -0.0000 -0.0003 0.0004 -0.0000  
Y 0.0224 -0.0227 0.0005 0.0002 -0.0020 -0.0004  
Z -0.0023 0.0030 -0.0142 -0.0145 -0.0115 -0.0115

AT. 23 O X 0.0039 -0.0039 0.0000 -0.0003 0.0004 0.0000  
Y 0.0224 -0.0227 0.0005 -0.0002 0.0020 -0.0004  
Z 0.0023 -0.0030 0.0142 -0.0145 -0.0115 0.0115

AT. 24 O X -0.0039 -0.0039 -0.0000 -0.0003 -0.0004 0.0000  
Y 0.0224 0.0227 0.0005 0.0002 0.0020 0.0004  
Z -0.0023 -0.0030 -0.0142 -0.0145 0.0115 0.0115

AT. 25 C X 0.0148 0.0144 0.0085 -0.0072 0.0009 -0.0032  
Y 0.0037 0.0046 0.0020 -0.0028 0.0075 -0.0070  
Z -0.0030 -0.0025 0.0009 -0.0013 0.0012 -0.0009

AT. 26 C X -0.0148 0.0144 -0.0085 -0.0072 -0.0009 -0.0032  
Y 0.0037 -0.0046 0.0020 0.0028 0.0075 0.0070  
Z 0.0030 -0.0025 -0.0009 -0.0013 -0.0012 -0.0009

AT. 27 C X 0.0148 -0.0144 0.0085 -0.0072 -0.0009 0.0032  
Y 0.0037 -0.0046 0.0020 -0.0028 -0.0075 0.0070  
Z -0.0030 0.0025 0.0009 -0.0013 -0.0012 0.0009

AT. 28 C X -0.0148 -0.0144 -0.0085 -0.0072 0.0009 0.0032  
Y 0.0037 0.0046 0.0020 0.0028 -0.0075 -0.0070  
Z 0.0030 0.0025 -0.0009 -0.0013 0.0012 0.0009

AT. 29 H X 0.0122 0.0120 0.0065 -0.0056 0.0008 -0.0025  
Y 0.0467 0.0481 0.0149 -0.0152 0.0162 -0.0200  
Z -0.0059 -0.0058 0.0019 -0.0017 -0.0001 0.0004

AT. 30 H X -0.0122 0.0120 -0.0065 -0.0056 -0.0008 -0.0025  
Y 0.0467 -0.0481 0.0149 0.0152 0.0162 0.0200  
Z 0.0059 -0.0058 -0.0019 -0.0017 0.0001 0.0004

AT. 31 H X 0.0122 -0.0120 0.0065 -0.0056 -0.0008 0.0025  
Y 0.0467 -0.0481 0.0149 -0.0152 -0.0162 0.0200



Z -0.0059 0.0058 0.0019 -0.0017 0.0001 -0.0004  
AT. 32 H X -0.0122 -0.0120 -0.0065 -0.0056 0.0008 0.0025  
Y 0.0467 0.0481 0.0149 0.0152 -0.0162 -0.0200  
Z 0.0059 0.0058 -0.0019 -0.0017 -0.0001 -0.0004  
AT. 33 H X 0.0482 0.0480 0.0193 -0.0179 0.0103 -0.0155  
Y -0.0083 -0.0075 -0.0015 0.0005 0.0047 -0.0030  
Z 0.0239 0.0249 0.0083 -0.0080 0.0067 -0.0091  
AT. 34 H X -0.0482 0.0480 -0.0193 -0.0179 -0.0103 -0.0155  
Y -0.0083 0.0075 -0.0015 -0.0005 0.0047 0.0030  
Z -0.0239 0.0249 -0.0083 -0.0080 -0.0067 -0.0091  
AT. 35 H X 0.0482 -0.0480 0.0193 -0.0179 -0.0103 0.0155  
Y -0.0083 0.0075 -0.0015 0.0005 -0.0047 0.0030  
Z 0.0239 -0.0249 0.0083 -0.0080 -0.0067 0.0091  
AT. 36 H X -0.0482 -0.0480 -0.0193 -0.0179 0.0103 0.0155  
Y -0.0083 -0.0075 -0.0015 -0.0005 -0.0047 -0.0030  
Z -0.0239 -0.0249 -0.0083 -0.0080 0.0067 0.0091  
AT. 37 C X -0.0049 -0.0056 0.0025 -0.0019 -0.0012 0.0018  
Y -0.0093 -0.0091 0.0012 -0.0015 0.0035 -0.0024  
Z -0.0105 -0.0102 0.0002 -0.0006 0.0003 0.0010  
AT. 38 C X 0.0049 -0.0056 -0.0025 -0.0019 0.0012 0.0018  
Y -0.0093 0.0091 0.0012 0.0015 0.0035 0.0024  
Z 0.0105 -0.0102 -0.0002 -0.0006 -0.0003 0.0010  
AT. 39 C X -0.0049 0.0056 0.0025 -0.0019 0.0012 -0.0018  
Y -0.0093 0.0091 0.0012 -0.0015 -0.0035 0.0024  
Z -0.0105 0.0102 0.0002 -0.0006 -0.0003 -0.0010  
AT. 40 C X 0.0049 0.0056 -0.0025 -0.0019 -0.0012 -0.0018  
Y -0.0093 -0.0091 0.0012 0.0015 -0.0035 -0.0024  
Z 0.0105 0.0102 -0.0002 -0.0006 0.0003 -0.0010  
AT. 41 C X 0.0022 0.0020 -0.0056 0.0051 -0.0069 0.0071  
Y -0.0002 -0.0008 -0.0051 0.0056 -0.0064 0.0065  
Z -0.0004 0.0002 0.0092 -0.0089 0.0120 -0.0120  
AT. 42 C X -0.0022 0.0020 0.0056 0.0051 0.0069 0.0071

Y -0.0002 0.0008 -0.0051 -0.0056 -0.0064 -0.0065  
Z 0.0004 0.0002 -0.0092 -0.0089 -0.0120 -0.0120  
AT. 43 C X 0.0022 -0.0020 -0.0056 0.0051 0.0069 -0.0071  
Y -0.0002 0.0008 -0.0051 0.0056 0.0064 -0.0065  
Z -0.0004 -0.0002 0.0092 -0.0089 -0.0120 0.0120  
AT. 44 C X -0.0022 -0.0020 0.0056 0.0051 -0.0069 -0.0071  
Y -0.0002 -0.0008 -0.0051 -0.0056 0.0064 0.0065  
Z 0.0004 -0.0002 -0.0092 -0.0089 0.0120 0.0120  
AT. 45 H X -0.0059 -0.0040 0.0147 -0.0163 0.0183 -0.0185  
Y 0.0109 0.0097 -0.0071 0.0082 -0.0123 0.0118  
Z 0.0095 0.0093 0.0045 -0.0034 0.0033 -0.0037  
AT. 46 H X 0.0059 -0.0040 -0.0147 -0.0163 -0.0183 -0.0185  
Y 0.0109 -0.0097 -0.0071 -0.0082 -0.0123 -0.0118  
Z -0.0095 0.0093 -0.0045 -0.0034 -0.0033 -0.0037  
AT. 47 H X -0.0059 0.0040 0.0147 -0.0163 -0.0183 0.0185  
Y 0.0109 -0.0097 -0.0071 0.0082 0.0123 -0.0118  
Z 0.0095 -0.0093 0.0045 -0.0034 -0.0033 0.0037  
AT. 48 H X 0.0059 0.0040 -0.0147 -0.0163 0.0183 0.0185  
Y 0.0109 0.0097 -0.0071 -0.0082 0.0123 0.0118  
Z -0.0095 -0.0093 -0.0045 -0.0034 0.0033 0.0037  
AT. 49 H X 0.0072 0.0070 -0.0099 0.0097 -0.0144 0.0144  
Y 0.0090 0.0077 -0.0143 0.0155 -0.0207 0.0206  
Z -0.0116 -0.0093 0.0221 -0.0233 0.0299 -0.0297  
AT. 50 H X -0.0072 0.0070 0.0099 0.0097 0.0144 0.0144  
Y 0.0090 -0.0077 -0.0143 -0.0155 -0.0207 -0.0206  
Z 0.0116 -0.0093 -0.0221 -0.0233 -0.0299 -0.0297  
AT. 51 H X 0.0072 -0.0070 -0.0099 0.0097 0.0144 -0.0144  
Y 0.0090 -0.0077 -0.0143 0.0155 0.0207 -0.0206  
Z -0.0116 0.0093 0.0221 -0.0233 -0.0299 0.0297  
AT. 52 H X -0.0072 -0.0070 0.0099 0.0097 -0.0144 -0.0144  
Y 0.0090 0.0077 -0.0143 -0.0155 0.0207 0.0206  
Z 0.0116 0.0093 -0.0221 -0.0233 0.0299 0.0297

AT. 53 C X 0.0100 0.0093 -0.0140 0.0139 -0.0163 0.0159  
Y -0.0023 -0.0029 -0.0047 0.0044 -0.0018 0.0015  
Z 0.0017 0.0008 -0.0110 0.0115 -0.0071 0.0072

AT. 54 C X -0.0100 0.0093 0.0140 0.0139 0.0163 0.0159  
Y -0.0023 0.0029 -0.0047 -0.0044 -0.0018 -0.0015  
Z -0.0017 0.0008 0.0110 0.0115 0.0071 0.0072

AT. 55 C X 0.0100 -0.0093 -0.0140 0.0139 0.0163 -0.0159  
Y -0.0023 0.0029 -0.0047 0.0044 0.0018 -0.0015  
Z 0.0017 -0.0008 -0.0110 0.0115 0.0071 -0.0072

AT. 56 C X -0.0100 -0.0093 0.0140 0.0139 -0.0163 -0.0159  
Y -0.0023 -0.0029 -0.0047 -0.0044 0.0018 0.0015  
Z -0.0017 -0.0008 0.0110 0.0115 -0.0071 -0.0072

AT. 57 C X 0.0001 -0.0007 -0.0079 0.0075 -0.0054 0.0049  
Y 0.0050 0.0038 -0.0095 0.0091 -0.0067 0.0053  
Z 0.0012 -0.0000 -0.0187 0.0197 -0.0137 0.0143

AT. 58 C X -0.0001 -0.0007 0.0079 0.0075 0.0054 0.0049  
Y 0.0050 -0.0038 -0.0095 -0.0091 -0.0067 -0.0053  
Z -0.0012 -0.0000 0.0187 0.0197 0.0137 0.0143

AT. 59 C X 0.0001 0.0007 -0.0079 0.0075 0.0054 -0.0049  
Y 0.0050 -0.0038 -0.0095 0.0091 0.0067 -0.0053  
Z 0.0012 0.0000 -0.0187 0.0197 0.0137 -0.0143

AT. 60 C X -0.0001 0.0007 0.0079 0.0075 -0.0054 -0.0049  
Y 0.0050 0.0038 -0.0095 -0.0091 0.0067 0.0053  
Z -0.0012 0.0000 0.0187 0.0197 -0.0137 -0.0143

AT. 61 H X -0.0092 -0.0087 -0.0037 0.0061 -0.0004 0.0019  
Y 0.0001 -0.0001 -0.0068 0.0087 -0.0041 0.0043  
Z -0.0085 -0.0102 -0.0179 0.0173 -0.0089 0.0084

AT. 62 H X 0.0092 -0.0087 0.0037 0.0061 0.0004 0.0019  
Y 0.0001 0.0001 -0.0068 -0.0087 -0.0041 -0.0043  
Z 0.0085 -0.0102 0.0179 0.0173 0.0089 0.0084

AT. 63 H X -0.0092 0.0087 -0.0037 0.0061 0.0004 -0.0019  
Y 0.0001 0.0001 -0.0068 0.0087 0.0041 -0.0043

Z -0.0085 0.0102 -0.0179 0.0173 0.0089 -0.0084  
AT. 64 H X 0.0092 0.0087 0.0037 0.0061 -0.0004 -0.0019  
Y 0.0001 -0.0001 -0.0068 -0.0087 0.0041 0.0043  
Z 0.0085 0.0102 0.0179 0.0173 -0.0089 -0.0084  
AT. 65 H X -0.0032 -0.0036 -0.0068 0.0074 -0.0041 0.0044  
Y 0.0146 0.0122 -0.0138 0.0103 -0.0111 0.0075  
Z 0.0044 0.0029 -0.0210 0.0228 -0.0205 0.0218  
AT. 66 H X 0.0032 -0.0036 0.0068 0.0074 0.0041 0.0044  
Y 0.0146 -0.0122 -0.0138 -0.0103 -0.0111 -0.0075  
Z -0.0044 0.0029 0.0210 0.0228 0.0205 0.0218  
AT. 67 H X -0.0032 0.0036 -0.0068 0.0074 0.0041 -0.0044  
Y 0.0146 -0.0122 -0.0138 0.0103 0.0111 -0.0075  
Z 0.0044 -0.0029 -0.0210 0.0228 0.0205 -0.0218  
AT. 68 H X 0.0032 0.0036 0.0068 0.0074 -0.0041 -0.0044  
Y 0.0146 0.0122 -0.0138 -0.0103 0.0111 0.0075  
Z -0.0044 -0.0029 0.0210 0.0228 -0.0205 -0.0218  
AT. 69 H X 0.0019 0.0001 -0.0088 0.0051 -0.0025 -0.0011  
Y 0.0097 0.0088 -0.0078 0.0082 -0.0061 0.0050  
Z 0.0055 0.0043 -0.0177 0.0188 -0.0129 0.0132  
AT. 70 H X -0.0019 0.0001 0.0088 0.0051 0.0025 -0.0011  
Y 0.0097 -0.0088 -0.0078 -0.0082 -0.0061 -0.0050  
Z -0.0055 0.0043 0.0177 0.0188 0.0129 0.0132  
AT. 71 H X 0.0019 -0.0001 -0.0088 0.0051 0.0025 0.0011  
Y 0.0097 -0.0088 -0.0078 0.0082 0.0061 -0.0050  
Z 0.0055 -0.0043 -0.0177 0.0188 0.0129 -0.0132  
AT. 72 H X -0.0019 -0.0001 0.0088 0.0051 -0.0025 0.0011  
Y 0.0097 0.0088 -0.0078 -0.0082 0.0061 0.0050  
Z -0.0055 -0.0043 0.0177 0.0188 -0.0129 -0.0132  
AT. 73 C X 0.0066 0.0066 -0.0019 0.0020 -0.0018 0.0011  
Y -0.0030 -0.0028 0.0013 -0.0017 0.0016 -0.0014  
Z 0.0006 0.0002 -0.0027 0.0028 -0.0023 0.0023  
AT. 74 C X -0.0066 0.0066 0.0019 0.0020 0.0018 0.0011

Y -0.0030 0.0028 0.0013 0.0017 0.0016 0.0014  
Z -0.0006 0.0002 0.0027 0.0028 0.0023 0.0023  
AT. 75 C X 0.0066 -0.0066 -0.0019 0.0020 0.0018 -0.0011  
Y -0.0030 0.0028 0.0013 -0.0017 -0.0016 0.0014  
Z 0.0006 -0.0002 -0.0027 0.0028 0.0023 -0.0023  
AT. 76 C X -0.0066 -0.0066 0.0019 0.0020 -0.0018 -0.0011  
Y -0.0030 -0.0028 0.0013 0.0017 -0.0016 -0.0014  
Z -0.0006 -0.0002 0.0027 0.0028 -0.0023 -0.0023  
AT. 77 C X -0.0025 -0.0013 0.0121 -0.0121 0.0162 -0.0164  
Y -0.0093 -0.0100 -0.0061 0.0058 -0.0031 0.0034  
Z 0.0085 0.0089 0.0081 -0.0077 0.0073 -0.0078  
AT. 78 C X 0.0025 -0.0013 -0.0121 -0.0121 -0.0162 -0.0164  
Y -0.0093 0.0100 -0.0061 -0.0058 -0.0031 -0.0034  
Z -0.0085 0.0089 -0.0081 -0.0077 -0.0073 -0.0078  
AT. 79 C X -0.0025 0.0013 0.0121 -0.0121 -0.0162 0.0164  
Y -0.0093 0.0100 -0.0061 0.0058 0.0031 -0.0034  
Z 0.0085 -0.0089 0.0081 -0.0077 -0.0073 0.0078  
AT. 80 C X 0.0025 0.0013 -0.0121 -0.0121 0.0162 0.0164  
Y -0.0093 -0.0100 -0.0061 -0.0058 0.0031 0.0034  
Z -0.0085 -0.0089 -0.0081 -0.0077 0.0073 0.0078  
AT. 81 H X -0.0050 -0.0042 0.0108 -0.0105 0.0195 -0.0200  
Y -0.0110 -0.0124 -0.0067 0.0067 0.0009 -0.0011  
Z -0.0011 -0.0023 -0.0000 0.0006 0.0036 -0.0033  
AT. 82 H X 0.0050 -0.0042 -0.0108 -0.0105 -0.0195 -0.0200  
Y -0.0110 0.0124 -0.0067 -0.0067 0.0009 0.0011  
Z 0.0011 -0.0023 0.0000 0.0006 -0.0036 -0.0033  
AT. 83 H X -0.0050 0.0042 0.0108 -0.0105 -0.0195 0.0200  
Y -0.0110 0.0124 -0.0067 0.0067 -0.0009 0.0011  
Z -0.0011 0.0023 -0.0000 0.0006 -0.0036 0.0033  
AT. 84 H X 0.0050 0.0042 -0.0108 -0.0105 0.0195 0.0200  
Y -0.0110 -0.0124 -0.0067 -0.0067 -0.0009 -0.0011  
Z 0.0011 0.0023 0.0000 0.0006 0.0036 0.0033

AT. 85 H X 0.0072 0.0096 0.0151 -0.0154 0.0118 -0.0125  
Y -0.0088 -0.0103 -0.0111 0.0108 -0.0056 0.0055  
Z 0.0054 0.0062 0.0119 -0.0114 0.0109 -0.0109

AT. 86 H X -0.0072 0.0096 -0.0151 -0.0154 -0.0118 -0.0125  
Y -0.0088 0.0103 -0.0111 -0.0108 -0.0056 -0.0055  
Z -0.0054 0.0062 -0.0119 -0.0114 -0.0109 -0.0109

AT. 87 H X 0.0072 -0.0096 0.0151 -0.0154 -0.0118 0.0125  
Y -0.0088 0.0103 -0.0111 0.0108 0.0056 -0.0055  
Z 0.0054 -0.0062 0.0119 -0.0114 -0.0109 0.0109

AT. 88 H X -0.0072 -0.0096 -0.0151 -0.0154 0.0118 0.0125  
Y -0.0088 -0.0103 -0.0111 -0.0108 0.0056 0.0055  
Z -0.0054 -0.0062 -0.0119 -0.0114 0.0109 0.0109

AT. 89 C X -0.0019 -0.0013 0.0075 -0.0076 0.0121 -0.0128  
Y -0.0085 -0.0086 -0.0041 0.0037 -0.0041 0.0047  
Z 0.0151 0.0151 0.0008 -0.0007 -0.0016 0.0006

AT. 90 C X 0.0019 -0.0013 -0.0075 -0.0076 -0.0121 -0.0128  
Y -0.0085 0.0086 -0.0041 -0.0037 -0.0041 -0.0047  
Z -0.0151 0.0151 -0.0008 -0.0007 0.0016 0.0006

AT. 91 C X -0.0019 0.0013 0.0075 -0.0076 -0.0121 0.0128  
Y -0.0085 0.0086 -0.0041 0.0037 0.0041 -0.0047  
Z 0.0151 -0.0151 0.0008 -0.0007 0.0016 -0.0006

AT. 92 C X 0.0019 0.0013 -0.0075 -0.0076 0.0121 0.0128  
Y -0.0085 -0.0086 -0.0041 -0.0037 0.0041 0.0047  
Z -0.0151 -0.0151 -0.0008 -0.0007 -0.0016 -0.0006

AT. 93 C X 0.0082 0.0085 0.0026 -0.0020 0.0009 -0.0015  
Y -0.0120 -0.0118 -0.0012 0.0010 -0.0005 0.0014  
Z 0.0204 0.0206 0.0066 -0.0064 0.0049 -0.0062

AT. 94 C X -0.0082 0.0085 -0.0026 -0.0020 -0.0009 -0.0015  
Y -0.0120 0.0118 -0.0012 -0.0010 -0.0005 -0.0014  
Z -0.0204 0.0206 -0.0066 -0.0064 -0.0049 -0.0062

AT. 95 C X 0.0082 -0.0085 0.0026 -0.0020 -0.0009 0.0015  
Y -0.0120 0.0118 -0.0012 0.0010 0.0005 -0.0014

Z 0.0204 -0.0206 0.0066 -0.0064 -0.0049 0.0062  
AT. 96 C X -0.0082 -0.0085 -0.0026 -0.0020 0.0009 0.0015  
Y -0.0120 -0.0118 -0.0012 -0.0010 0.0005 0.0014  
Z -0.0204 -0.0206 -0.0066 -0.0064 0.0049 0.0062  
AT. 97 H X 0.0134 0.0140 0.0011 -0.0003 -0.0043 0.0038  
Y -0.0174 -0.0179 0.0025 -0.0031 0.0081 -0.0070  
Z 0.0282 0.0280 0.0086 -0.0081 0.0035 -0.0043  
AT. 98 H X -0.0134 0.0140 -0.0011 -0.0003 0.0043 0.0038  
Y -0.0174 0.0179 0.0025 0.0031 0.0081 0.0070  
Z -0.0282 0.0280 -0.0086 -0.0081 -0.0035 -0.0043  
AT. 99 H X 0.0134 -0.0140 0.0011 -0.0003 0.0043 -0.0038  
Y -0.0174 0.0179 0.0025 -0.0031 -0.0081 0.0070  
Z 0.0282 -0.0280 0.0086 -0.0081 -0.0035 0.0043  
AT. 100 H X -0.0134 -0.0140 -0.0011 -0.0003 -0.0043 -0.0038  
Y -0.0174 -0.0179 0.0025 0.0031 -0.0081 -0.0070  
Z -0.0282 -0.0280 -0.0086 -0.0081 0.0035 0.0043  
AT. 101 H X 0.0113 0.0121 0.0022 -0.0011 -0.0029 0.0019  
Y -0.0073 -0.0067 -0.0031 0.0035 -0.0067 0.0073  
Z 0.0106 0.0115 0.0160 -0.0160 0.0187 -0.0202  
AT. 102 H X -0.0113 0.0121 -0.0022 -0.0011 0.0029 0.0019  
Y -0.0073 0.0067 -0.0031 -0.0035 -0.0067 -0.0073  
Z -0.0106 0.0115 -0.0160 -0.0160 -0.0187 -0.0202  
AT. 103 H X 0.0113 -0.0121 0.0022 -0.0011 0.0029 -0.0019  
Y -0.0073 0.0067 -0.0031 0.0035 0.0067 -0.0073  
Z 0.0106 -0.0115 0.0160 -0.0160 -0.0187 0.0202  
AT. 104 H X -0.0113 -0.0121 -0.0022 -0.0011 -0.0029 -0.0019  
Y -0.0073 -0.0067 -0.0031 -0.0035 0.0067 0.0073  
Z -0.0106 -0.0115 -0.0160 -0.0160 0.0187 0.0202  
AT. 105 H X 0.0136 0.0131 0.0003 0.0002 -0.0021 0.0019  
Y -0.0120 -0.0114 0.0060 -0.0057 0.0059 -0.0054  
Z 0.0187 0.0189 0.0019 -0.0020 0.0010 -0.0022  
AT. 106 H X -0.0136 0.0131 -0.0003 0.0002 0.0021 0.0019

Y -0.0120 0.0114 0.0060 0.0057 0.0059 0.0054  
Z -0.0187 0.0189 -0.0019 -0.0020 -0.0010 -0.0022  
AT. 107 H X 0.0136 -0.0131 0.0003 0.0002 0.0021 -0.0019  
Y -0.0120 0.0114 0.0060 -0.0057 -0.0059 0.0054  
Z 0.0187 -0.0189 0.0019 -0.0020 -0.0010 0.0022  
AT. 108 H X -0.0136 -0.0131 -0.0003 0.0002 -0.0021 -0.0019  
Y -0.0120 -0.0114 0.0060 0.0057 -0.0059 -0.0054  
Z -0.0187 -0.0189 -0.0019 -0.0020 0.0010 0.0022  
AT. 109 C X 0.0035 0.0025 -0.0156 0.0158 -0.0180 0.0180  
Y -0.0094 -0.0101 -0.0022 0.0024 0.0013 -0.0013  
Z -0.0005 -0.0003 -0.0102 0.0096 -0.0094 0.0091  
AT. 110 C X -0.0035 0.0025 0.0156 0.0158 0.0180 0.0180  
Y -0.0094 0.0101 -0.0022 -0.0024 0.0013 0.0013  
Z 0.0005 -0.0003 0.0102 0.0096 0.0094 0.0091  
AT. 111 C X 0.0035 -0.0025 -0.0156 0.0158 0.0180 -0.0180  
Y -0.0094 0.0101 -0.0022 0.0024 -0.0013 0.0013  
Z -0.0005 0.0003 -0.0102 0.0096 0.0094 -0.0091  
AT. 112 C X -0.0035 -0.0025 0.0156 0.0158 -0.0180 -0.0180  
Y -0.0094 -0.0101 -0.0022 -0.0024 -0.0013 -0.0013  
Z 0.0005 0.0003 0.0102 0.0096 -0.0094 -0.0091  
AT. 113 H X 0.0108 0.0106 -0.0181 0.0174 -0.0220 0.0215  
Y -0.0208 -0.0224 0.0033 -0.0019 0.0090 -0.0082  
Z 0.0028 0.0052 -0.0027 0.0002 -0.0035 0.0029  
AT. 114 H X -0.0108 0.0106 0.0181 0.0174 0.0220 0.0215  
Y -0.0208 0.0224 0.0033 0.0019 0.0090 0.0082  
Z -0.0028 0.0052 0.0027 0.0002 0.0035 0.0029  
AT. 115 H X 0.0108 -0.0106 -0.0181 0.0174 0.0220 -0.0215  
Y -0.0208 0.0224 0.0033 -0.0019 -0.0090 0.0082  
Z 0.0028 -0.0052 -0.0027 0.0002 0.0035 -0.0029  
AT. 116 H X -0.0108 -0.0106 0.0181 0.0174 -0.0220 -0.0215  
Y -0.0208 -0.0224 0.0033 0.0019 -0.0090 -0.0082  
Z -0.0028 -0.0052 0.0027 0.0002 -0.0035 -0.0029



AT.117 H X -0.0066 -0.0082 -0.0165 0.0190 -0.0155 0.0162  
Y -0.0166 -0.0175 0.0006 -0.0002 0.0041 -0.0040  
Z -0.0060 -0.0060 -0.0078 0.0070 -0.0073 0.0070

AT.118 H X 0.0066 -0.0082 0.0165 0.0190 0.0155 0.0162  
Y -0.0166 0.0175 0.0006 0.0002 0.0041 0.0040  
Z 0.0060 -0.0060 0.0078 0.0070 0.0073 0.0070

AT.119 H X -0.0066 0.0082 -0.0165 0.0190 0.0155 -0.0162  
Y -0.0166 0.0175 0.0006 -0.0002 -0.0041 0.0040  
Z -0.0060 0.0060 -0.0078 0.0070 0.0073 -0.0070

AT.120 H X 0.0066 0.0082 0.0165 0.0190 -0.0155 -0.0162  
Y -0.0166 -0.0175 0.0006 0.0002 -0.0041 -0.0040  
Z 0.0060 0.0060 0.0078 0.0070 -0.0073 -0.0070

AT.121 C X -0.0016 -0.0024 -0.0005 0.0010 0.0021 -0.0023  
Y 0.0054 0.0042 -0.0136 0.0140 -0.0162 0.0164  
Z 0.0047 0.0038 -0.0105 0.0108 -0.0140 0.0139

AT.122 C X 0.0016 -0.0024 0.0005 0.0010 -0.0021 -0.0023  
Y 0.0054 -0.0042 -0.0136 -0.0140 -0.0162 -0.0164  
Z -0.0047 0.0038 0.0105 0.0108 0.0140 0.0139

AT.123 C X -0.0016 0.0024 -0.0005 0.0010 -0.0021 0.0023  
Y 0.0054 -0.0042 -0.0136 0.0140 0.0162 -0.0164  
Z 0.0047 -0.0038 -0.0105 0.0108 0.0140 -0.0139

AT.124 C X 0.0016 0.0024 0.0005 0.0010 0.0021 0.0023  
Y 0.0054 0.0042 -0.0136 -0.0140 0.0162 0.0164  
Z -0.0047 -0.0038 0.0105 0.0108 -0.0140 -0.0139

AT.125 H X 0.0067 0.0024 -0.0246 0.0267 -0.0279 0.0286  
Y 0.0122 0.0103 -0.0118 0.0129 -0.0177 0.0180  
Z -0.0028 -0.0021 -0.0038 0.0030 -0.0033 0.0028

AT.126 H X -0.0067 0.0024 0.0246 0.0267 0.0279 0.0286  
Y 0.0122 -0.0103 -0.0118 -0.0129 -0.0177 -0.0180  
Z 0.0028 -0.0021 0.0038 0.0030 0.0033 0.0028

AT.127 H X 0.0067 -0.0024 -0.0246 0.0267 0.0279 -0.0286  
Y 0.0122 -0.0103 -0.0118 0.0129 0.0177 -0.0180

Z -0.0028 0.0021 -0.0038 0.0030 0.0033 -0.0028  
AT. 128 H X -0.0067 -0.0024 0.0246 0.0267 -0.0279 -0.0286  
Y 0.0122 0.0103 -0.0118 -0.0129 0.0177 0.0180  
Z 0.0028 0.0021 0.0038 0.0030 -0.0033 -0.0028  
AT. 129 H X -0.0039 -0.0043 0.0027 -0.0023 0.0071 -0.0073  
Y 0.0138 0.0106 -0.0262 0.0276 -0.0339 0.0344  
Z 0.0155 0.0113 -0.0294 0.0318 -0.0386 0.0392  
AT. 130 H X 0.0039 -0.0043 -0.0027 -0.0023 -0.0071 -0.0073  
Y 0.0138 -0.0106 -0.0262 -0.0276 -0.0339 -0.0344  
Z -0.0155 0.0113 0.0294 0.0318 0.0386 0.0392  
AT. 131 H X -0.0039 0.0043 0.0027 -0.0023 -0.0071 0.0073  
Y 0.0138 -0.0106 -0.0262 0.0276 0.0339 -0.0344  
Z 0.0155 -0.0113 -0.0294 0.0318 0.0386 -0.0392  
AT. 132 H X 0.0039 0.0043 -0.0027 -0.0023 0.0071 0.0073  
Y 0.0138 0.0106 -0.0262 -0.0276 0.0339 0.0344  
Z -0.0155 -0.0113 0.0294 0.0318 -0.0386 -0.0392  
AT. 133 C X -0.0109 -0.0103 0.0081 -0.0077 0.0086 -0.0075  
Y 0.0054 0.0057 -0.0057 0.0057 -0.0053 0.0046  
Z -0.0057 -0.0052 0.0084 -0.0088 0.0075 -0.0071  
AT. 134 C X 0.0109 -0.0103 -0.0081 -0.0077 -0.0086 -0.0075  
Y 0.0054 -0.0057 -0.0057 -0.0057 -0.0053 -0.0046  
Z 0.0057 -0.0052 -0.0084 -0.0088 -0.0075 -0.0071  
AT. 135 C X -0.0109 0.0103 0.0081 -0.0077 -0.0086 0.0075  
Y 0.0054 -0.0057 -0.0057 0.0057 0.0053 -0.0046  
Z -0.0057 0.0052 0.0084 -0.0088 -0.0075 0.0071  
AT. 136 C X 0.0109 0.0103 -0.0081 -0.0077 0.0086 0.0075  
Y 0.0054 0.0057 -0.0057 -0.0057 0.0053 0.0046  
Z 0.0057 0.0052 -0.0084 -0.0088 0.0075 0.0071  
AT. 137 C X -0.0119 -0.0115 0.0028 -0.0020 0.0043 -0.0031  
Y -0.0049 -0.0031 0.0218 -0.0222 0.0204 -0.0200  
Z -0.0015 -0.0016 -0.0035 0.0032 -0.0036 0.0036  
AT. 138 C X 0.0119 -0.0115 -0.0028 -0.0020 -0.0043 -0.0031

Y -0.0049 0.0031 0.0218 0.0222 0.0204 0.0200  
Z 0.0015 -0.0016 0.0035 0.0032 0.0036 0.0036  
AT. 139 C X -0.0119 0.0115 0.0028 -0.0020 -0.0043 0.0031  
Y -0.0049 0.0031 0.0218 -0.0222 -0.0204 0.0200  
Z -0.0015 0.0016 -0.0035 0.0032 0.0036 -0.0036  
AT. 140 C X 0.0119 0.0115 -0.0028 -0.0020 0.0043 0.0031  
Y -0.0049 -0.0031 0.0218 0.0222 -0.0204 -0.0200  
Z 0.0015 0.0016 0.0035 0.0032 -0.0036 -0.0036  
AT. 141 H X -0.0113 -0.0096 0.0215 -0.0211 0.0200 -0.0185  
Y -0.0114 -0.0076 0.0599 -0.0608 0.0541 -0.0521  
Z -0.0068 -0.0069 0.0023 -0.0025 0.0025 -0.0017  
AT. 142 H X 0.0113 -0.0096 -0.0215 -0.0211 -0.0200 -0.0185  
Y -0.0114 0.0076 0.0599 0.0608 0.0541 0.0521  
Z 0.0068 -0.0069 -0.0023 -0.0025 -0.0025 -0.0017  
AT. 143 H X -0.0113 0.0096 0.0215 -0.0211 -0.0200 0.0185  
Y -0.0114 0.0076 0.0599 -0.0608 -0.0541 0.0521  
Z -0.0068 0.0069 0.0023 -0.0025 -0.0025 0.0017  
AT. 144 H X 0.0113 0.0096 -0.0215 -0.0211 0.0200 0.0185  
Y -0.0114 -0.0076 0.0599 0.0608 -0.0541 -0.0521  
Z 0.0068 0.0069 -0.0023 -0.0025 0.0025 0.0017  
AT. 145 H X -0.0049 -0.0069 -0.0332 0.0345 -0.0281 0.0279  
Y -0.0056 -0.0035 0.0251 -0.0255 0.0235 -0.0229  
Z 0.0039 0.0024 -0.0317 0.0317 -0.0286 0.0277  
AT. 146 H X 0.0049 -0.0069 0.0332 0.0345 0.0281 0.0279  
Y -0.0056 0.0035 0.0251 0.0255 0.0235 0.0229  
Z -0.0039 0.0024 0.0317 0.0317 0.0286 0.0277  
AT. 147 H X -0.0049 0.0069 -0.0332 0.0345 0.0281 -0.0279  
Y -0.0056 0.0035 0.0251 -0.0255 -0.0235 0.0229  
Z 0.0039 -0.0024 -0.0317 0.0317 0.0286 -0.0277  
AT. 148 H X 0.0049 0.0069 0.0332 0.0345 -0.0281 -0.0279  
Y -0.0056 -0.0035 0.0251 0.0255 -0.0235 -0.0229  
Z -0.0039 -0.0024 0.0317 0.0317 -0.0286 -0.0277

AT. 149 O X 0.0069 0.0073 0.0044 -0.0039 0.0049 -0.0055  
Y -0.0005 -0.0001 0.0065 -0.0064 0.0066 -0.0061  
Z -0.0097 -0.0094 0.0082 -0.0082 0.0102 -0.0101

AT. 150 O X -0.0069 0.0073 -0.0044 -0.0039 -0.0049 -0.0055  
Y -0.0005 0.0001 0.0065 0.0064 0.0066 0.0061  
Z 0.0097 -0.0094 -0.0082 -0.0082 -0.0102 -0.0101

AT. 151 O X 0.0069 -0.0073 0.0044 -0.0039 -0.0049 0.0055  
Y -0.0005 0.0001 0.0065 -0.0064 -0.0066 0.0061  
Z -0.0097 0.0094 0.0082 -0.0082 -0.0102 0.0101

AT. 152 O X -0.0069 -0.0073 -0.0044 -0.0039 0.0049 0.0055  
Y -0.0005 -0.0001 0.0065 0.0064 -0.0066 -0.0061  
Z 0.0097 0.0094 -0.0082 -0.0082 0.0102 0.0101

AT. 153 H X -0.0017 -0.0044 0.0022 0.0002 0.0133 -0.0133  
Y -0.0185 -0.0197 0.0124 -0.0109 0.0237 -0.0226  
Z -0.0104 -0.0087 0.0119 -0.0125 0.0111 -0.0112

AT. 154 H X 0.0017 -0.0044 -0.0022 0.0002 -0.0133 -0.0133  
Y -0.0185 0.0197 0.0124 0.0109 0.0237 0.0226  
Z 0.0104 -0.0087 -0.0119 -0.0125 -0.0111 -0.0112

AT. 155 H X -0.0017 0.0044 0.0022 0.0002 -0.0133 0.0133  
Y -0.0185 0.0197 0.0124 -0.0109 -0.0237 0.0226  
Z -0.0104 0.0087 0.0119 -0.0125 -0.0111 0.0112

AT. 156 H X 0.0017 0.0044 -0.0022 0.0002 0.0133 0.0133  
Y -0.0185 -0.0197 0.0124 0.0109 -0.0237 -0.0226  
Z 0.0104 0.0087 -0.0119 -0.0125 0.0111 0.0112

AT. 157 O X -0.0021 -0.0021 -0.0035 0.0030 -0.0051 0.0048  
Y 0.0104 0.0113 0.0066 -0.0068 0.0067 -0.0078  
Z -0.0084 -0.0089 -0.0022 0.0013 -0.0038 0.0039

AT. 158 O X 0.0021 -0.0021 0.0035 0.0030 0.0051 0.0048  
Y 0.0104 -0.0113 0.0066 0.0068 0.0067 0.0078  
Z 0.0084 -0.0089 0.0022 0.0013 0.0038 0.0039

AT. 159 O X -0.0021 0.0021 -0.0035 0.0030 0.0051 -0.0048  
Y 0.0104 -0.0113 0.0066 -0.0068 -0.0067 0.0078

Z -0.0084 0.0089 -0.0022 0.0013 0.0038 -0.0039  
AT.160 O X 0.0021 0.0021 0.0035 0.0030 -0.0051 -0.0048  
Y 0.0104 0.0113 0.0066 0.0068 -0.0067 -0.0078  
Z 0.0084 0.0089 0.0022 0.0013 -0.0038 -0.0039  
AT.161 O X -0.0026 -0.0023 0.0000 -0.0012 -0.0028 0.0024  
Y -0.0066 -0.0068 -0.0011 0.0012 -0.0031 0.0041  
Z 0.0024 0.0025 0.0007 -0.0014 0.0002 -0.0011  
AT.162 O X 0.0026 -0.0023 -0.0000 -0.0012 0.0028 0.0024  
Y -0.0066 0.0068 -0.0011 -0.0012 -0.0031 -0.0041  
Z -0.0024 0.0025 -0.0007 -0.0014 -0.0002 -0.0011  
AT.163 O X -0.0026 0.0023 0.0000 -0.0012 0.0028 -0.0024  
Y -0.0066 0.0068 -0.0011 0.0012 0.0031 -0.0041  
Z 0.0024 -0.0025 0.0007 -0.0014 -0.0002 0.0011  
AT.164 O X 0.0026 0.0023 -0.0000 -0.0012 -0.0028 -0.0024  
Y -0.0066 -0.0068 -0.0011 -0.0012 0.0031 0.0041  
Z -0.0024 -0.0025 -0.0007 -0.0014 0.0002 0.0011  
AT.165 H X 0.0044 0.0046 -0.0025 0.0015 -0.0036 0.0026  
Y -0.0041 -0.0044 -0.0023 0.0025 -0.0036 0.0043  
Z 0.0089 0.0100 0.0096 -0.0102 0.0089 -0.0104  
AT.166 H X -0.0044 0.0046 0.0025 0.0015 0.0036 0.0026  
Y -0.0041 0.0044 -0.0023 -0.0025 -0.0036 -0.0043  
Z -0.0089 0.0100 -0.0096 -0.0102 -0.0089 -0.0104  
AT.167 H X 0.0044 -0.0046 -0.0025 0.0015 0.0036 -0.0026  
Y -0.0041 0.0044 -0.0023 0.0025 0.0036 -0.0043  
Z 0.0089 -0.0100 0.0096 -0.0102 -0.0089 0.0104  
AT.168 H X -0.0044 -0.0046 0.0025 0.0015 -0.0036 -0.0026  
Y -0.0041 -0.0044 -0.0023 -0.0025 0.0036 0.0043  
Z -0.0089 -0.0100 -0.0096 -0.0102 0.0089 0.0104  
AT.169 O X -0.0001 -0.0000 -0.0012 0.0011 -0.0007 0.0006  
Y 0.0017 0.0010 -0.0057 0.0052 -0.0091 0.0089  
Z 0.0006 0.0001 -0.0002 0.0003 0.0004 -0.0004  
AT.170 O X 0.0001 -0.0000 0.0012 0.0011 0.0007 0.0006

Y 0.0017 -0.0010 -0.0057 -0.0052 -0.0091 -0.0089  
Z -0.0006 0.0001 0.0002 0.0003 -0.0004 -0.0004  
AT. 171 O X -0.0001 0.0000 -0.0012 0.0011 0.0007 -0.0006  
Y 0.0017 -0.0010 -0.0057 0.0052 0.0091 -0.0089  
Z 0.0006 -0.0001 -0.0002 0.0003 -0.0004 0.0004  
AT. 172 O X 0.0001 0.0000 0.0012 0.0011 -0.0007 -0.0006  
Y 0.0017 0.0010 -0.0057 -0.0052 0.0091 0.0089  
Z -0.0006 -0.0001 0.0002 0.0003 0.0004 0.0004  
AT. 173 H X 0.0052 0.0025 -0.0030 0.0031 -0.0061 0.0059  
Y 0.0017 0.0011 -0.0062 0.0057 -0.0096 0.0093  
Z -0.0039 -0.0043 -0.0034 0.0031 0.0078 -0.0072  
AT. 174 H X -0.0052 0.0025 0.0030 0.0031 0.0061 0.0059  
Y 0.0017 -0.0011 -0.0062 -0.0057 -0.0096 -0.0093  
Z 0.0039 -0.0043 0.0034 0.0031 -0.0078 -0.0072  
AT. 175 H X 0.0052 -0.0025 -0.0030 0.0031 0.0061 -0.0059  
Y 0.0017 -0.0011 -0.0062 0.0057 0.0096 -0.0093  
Z -0.0039 0.0043 -0.0034 0.0031 -0.0078 0.0072  
AT. 176 H X -0.0052 -0.0025 0.0030 0.0031 -0.0061 -0.0059  
Y 0.0017 0.0011 -0.0062 -0.0057 0.0096 0.0093  
Z 0.0039 0.0043 0.0034 0.0031 0.0078 0.0072  
  
FREQ(CM\*\*-1) 488.54 488.68 495.12 495.97 506.38 506.84

AT. 1 I X -0.0011 -0.0009 -0.0004 -0.0005 -0.0032 0.0029  
Y 0.0004 0.0005 0.0001 0.0002 0.0016 -0.0015  
Z 0.0007 0.0007 0.0003 0.0004 0.0022 -0.0022  
AT. 2 I X 0.0011 -0.0009 -0.0004 0.0005 -0.0032 -0.0029  
Y 0.0004 -0.0005 -0.0001 0.0002 -0.0016 -0.0015  
Z -0.0007 0.0007 0.0003 -0.0004 0.0022 0.0022  
AT. 3 I X -0.0011 -0.0009 0.0004 0.0005 -0.0032 0.0029  
Y 0.0004 0.0005 -0.0001 -0.0002 0.0016 -0.0015  
Z 0.0007 0.0007 -0.0003 -0.0004 0.0022 -0.0022

AT. 4 I X 0.0011 -0.0009 0.0004 -0.0005 -0.0032 -0.0029  
Y 0.0004 -0.0005 0.0001 -0.0002 -0.0016 -0.0015  
Z -0.0007 0.0007 -0.0003 0.0004 0.0022 0.0022

AT. 5 I X 0.0008 0.0009 0.0011 0.0009 -0.0030 0.0030  
Y 0.0000 -0.0000 0.0000 0.0001 0.0001 -0.0001  
Z -0.0005 -0.0006 -0.0007 -0.0007 0.0017 -0.0018

AT. 6 I X -0.0008 0.0009 0.0011 -0.0009 -0.0030 -0.0030  
Y 0.0000 0.0000 -0.0000 0.0001 -0.0001 -0.0001  
Z 0.0005 -0.0006 -0.0007 0.0007 0.0017 0.0018

AT. 7 I X 0.0008 0.0009 -0.0011 -0.0009 -0.0030 0.0030  
Y 0.0000 -0.0000 -0.0000 -0.0001 0.0001 -0.0001  
Z -0.0005 -0.0006 0.0007 0.0007 0.0017 -0.0018

AT. 8 I X -0.0008 0.0009 -0.0011 0.0009 -0.0030 -0.0030  
Y 0.0000 0.0000 0.0000 -0.0001 -0.0001 -0.0001  
Z 0.0005 -0.0006 0.0007 -0.0007 0.0017 0.0018

AT. 9 N X 0.0066 0.0065 0.0103 0.0107 -0.0113 0.0113  
Y 0.0033 0.0033 0.0038 0.0035 0.0010 -0.0007  
Z 0.0021 0.0021 0.0041 0.0037 0.0049 -0.0049

AT. 10 N X -0.0066 0.0065 0.0103 -0.0107 -0.0113 -0.0113  
Y 0.0033 -0.0033 -0.0038 0.0035 -0.0010 -0.0007  
Z -0.0021 0.0021 0.0041 -0.0037 0.0049 0.0049

AT. 11 N X 0.0066 0.0065 -0.0103 -0.0107 -0.0113 0.0113  
Y 0.0033 0.0033 -0.0038 -0.0035 0.0010 -0.0007  
Z 0.0021 0.0021 -0.0041 -0.0037 0.0049 -0.0049

AT. 12 N X -0.0066 0.0065 -0.0103 0.0107 -0.0113 -0.0113  
Y 0.0033 -0.0033 0.0038 -0.0035 -0.0010 -0.0007  
Z -0.0021 0.0021 -0.0041 0.0037 0.0049 0.0049

AT. 13 N X 0.0060 0.0063 0.0080 0.0076 -0.0089 0.0092  
Y -0.0047 -0.0050 -0.0077 -0.0075 0.0042 -0.0046  
Z -0.0012 -0.0011 -0.0049 -0.0048 0.0043 -0.0044

AT. 14 N X -0.0060 0.0063 0.0080 -0.0076 -0.0089 -0.0092  
Y -0.0047 0.0050 0.0077 -0.0075 -0.0042 -0.0046

Z 0.0012 -0.0011 -0.0049 0.0048 0.0043 0.0044  
AT. 15 N X 0.0060 0.0063 -0.0080 -0.0076 -0.0089 0.0092  
Y -0.0047 -0.0050 0.0077 0.0075 0.0042 -0.0046  
Z -0.0012 -0.0011 0.0049 0.0048 0.0043 -0.0044  
AT. 16 N X -0.0060 0.0063 -0.0080 0.0076 -0.0089 -0.0092  
Y -0.0047 0.0050 -0.0077 0.0075 -0.0042 -0.0046  
Z 0.0012 -0.0011 0.0049 -0.0048 0.0043 0.0044  
AT. 17 O X 0.0030 0.0031 0.0040 0.0040 -0.0046 0.0047  
Y 0.0194 0.0196 0.0207 0.0198 0.0106 -0.0098  
Z 0.0003 0.0002 -0.0006 -0.0002 -0.0094 0.0095  
AT. 18 O X -0.0030 0.0031 0.0040 -0.0040 -0.0046 -0.0047  
Y 0.0194 -0.0196 -0.0207 0.0198 -0.0106 -0.0098  
Z -0.0003 0.0002 -0.0006 0.0002 -0.0094 -0.0095  
AT. 19 O X 0.0030 0.0031 -0.0040 -0.0040 -0.0046 0.0047  
Y 0.0194 0.0196 -0.0207 -0.0198 0.0106 -0.0098  
Z 0.0003 0.0002 0.0006 0.0002 -0.0094 0.0095  
AT. 20 O X -0.0030 0.0031 -0.0040 0.0040 -0.0046 -0.0047  
Y 0.0194 -0.0196 0.0207 -0.0198 -0.0106 -0.0098  
Z -0.0003 0.0002 0.0006 -0.0002 -0.0094 -0.0095  
AT. 21 O X 0.0010 0.0015 0.0022 0.0018 -0.0068 0.0071  
Y 0.0001 0.0002 0.0019 0.0020 -0.0093 0.0096  
Z 0.0083 0.0087 0.0134 0.0130 -0.0098 0.0106  
AT. 22 O X -0.0010 0.0015 0.0022 -0.0018 -0.0068 -0.0071  
Y 0.0001 -0.0002 -0.0019 0.0020 0.0093 0.0096  
Z -0.0083 0.0087 0.0134 -0.0130 -0.0098 -0.0106  
AT. 23 O X 0.0010 0.0015 -0.0022 -0.0018 -0.0068 0.0071  
Y 0.0001 0.0002 -0.0019 -0.0020 -0.0093 0.0096  
Z 0.0083 0.0087 -0.0134 -0.0130 -0.0098 0.0106  
AT. 24 O X -0.0010 0.0015 -0.0022 0.0018 -0.0068 -0.0071  
Y 0.0001 -0.0002 0.0019 -0.0020 0.0093 0.0096  
Z -0.0083 0.0087 -0.0134 0.0130 -0.0098 -0.0106  
AT. 25 C X 0.0068 0.0067 0.0025 0.0012 0.0286 -0.0274



Y -0.0117 -0.0119 -0.0055 -0.0044 -0.0240 0.0234  
Z -0.0018 -0.0018 -0.0026 -0.0026 -0.0057 0.0056  
AT. 26 C X -0.0068 0.0067 0.0025 -0.0012 0.0286 0.0274  
Y -0.0117 0.0119 0.0055 -0.0044 0.0240 0.0234  
Z 0.0018 -0.0018 -0.0026 0.0026 -0.0057 -0.0056  
AT. 27 C X 0.0068 0.0067 -0.0025 -0.0012 0.0286 -0.0274  
Y -0.0117 -0.0119 0.0055 0.0044 -0.0240 0.0234  
Z -0.0018 -0.0018 0.0026 0.0026 -0.0057 0.0056  
AT. 28 C X -0.0068 0.0067 -0.0025 0.0012 0.0286 0.0274  
Y -0.0117 0.0119 -0.0055 0.0044 0.0240 0.0234  
Z 0.0018 -0.0018 0.0026 -0.0026 -0.0057 -0.0056  
AT. 29 H X 0.0041 0.0043 0.0011 -0.0005 0.0235 -0.0226  
Y -0.0264 -0.0274 -0.0199 -0.0190 -0.0163 0.0152  
Z 0.0051 0.0048 0.0019 0.0026 0.0014 -0.0012  
AT. 30 H X -0.0041 0.0043 0.0011 0.0005 0.0235 0.0226  
Y -0.0264 0.0274 0.0199 -0.0190 0.0163 0.0152  
Z -0.0051 0.0048 0.0019 -0.0026 0.0014 0.0012  
AT. 31 H X 0.0041 0.0043 -0.0011 0.0005 0.0235 -0.0226  
Y -0.0264 -0.0274 0.0199 0.0190 -0.0163 0.0152  
Z 0.0051 0.0048 -0.0019 -0.0026 0.0014 -0.0012  
AT. 32 H X -0.0041 0.0043 -0.0011 -0.0005 0.0235 0.0226  
Y -0.0264 0.0274 -0.0199 0.0190 0.0163 0.0152  
Z -0.0051 0.0048 -0.0019 0.0026 0.0014 0.0012  
AT. 33 H X -0.0074 -0.0082 -0.0087 -0.0106 0.0256 -0.0254  
Y -0.0067 -0.0067 -0.0010 0.0001 -0.0247 0.0243  
Z -0.0129 -0.0132 -0.0135 -0.0129 -0.0006 0.0002  
AT. 34 H X 0.0074 -0.0082 -0.0087 0.0106 0.0256 0.0254  
Y -0.0067 0.0067 0.0010 0.0001 0.0247 0.0243  
Z 0.0129 -0.0132 -0.0135 0.0129 -0.0006 -0.0002  
AT. 35 H X -0.0074 -0.0082 0.0087 0.0106 0.0256 -0.0254  
Y -0.0067 -0.0067 0.0010 -0.0001 -0.0247 0.0243  
Z -0.0129 -0.0132 0.0135 0.0129 -0.0006 0.0002

AT. 36 H X 0.0074 -0.0082 0.0087 -0.0106 0.0256 0.0254  
Y -0.0067 0.0067 -0.0010 -0.0001 0.0247 0.0243  
Z 0.0129 -0.0132 0.0135 -0.0129 -0.0006 -0.0002

AT. 37 C X 0.0122 0.0122 0.0098 0.0095 0.0132 -0.0123  
Y 0.0027 0.0025 0.0063 0.0066 -0.0100 0.0101  
Z 0.0047 0.0047 0.0044 0.0043 -0.0045 0.0044

AT. 38 C X -0.0122 0.0122 0.0098 -0.0095 0.0132 0.0123  
Y 0.0027 -0.0025 -0.0063 0.0066 0.0100 0.0101  
Z -0.0047 0.0047 0.0044 -0.0043 -0.0045 -0.0044

AT. 39 C X 0.0122 0.0122 -0.0098 -0.0095 0.0132 -0.0123  
Y 0.0027 0.0025 -0.0063 -0.0066 -0.0100 0.0101  
Z 0.0047 0.0047 -0.0044 -0.0043 -0.0045 0.0044

AT. 40 C X -0.0122 0.0122 -0.0098 0.0095 0.0132 0.0123  
Y 0.0027 -0.0025 0.0063 -0.0066 0.0100 0.0101  
Z -0.0047 0.0047 -0.0044 0.0043 -0.0045 -0.0044

AT. 41 C X 0.0080 0.0079 0.0067 0.0072 -0.0030 0.0028  
Y 0.0078 0.0078 0.0070 0.0069 0.0009 -0.0012  
Z -0.0083 -0.0083 -0.0041 -0.0044 0.0024 -0.0025

AT. 42 C X -0.0080 0.0079 0.0067 -0.0072 -0.0030 -0.0028  
Y 0.0078 -0.0078 -0.0070 0.0069 -0.0009 -0.0012  
Z 0.0083 -0.0083 -0.0041 0.0044 0.0024 0.0025

AT. 43 C X 0.0080 0.0079 -0.0067 -0.0072 -0.0030 0.0028  
Y 0.0078 0.0078 -0.0070 -0.0069 0.0009 -0.0012  
Z -0.0083 -0.0083 0.0041 0.0044 0.0024 -0.0025

AT. 44 C X -0.0080 0.0079 -0.0067 0.0072 -0.0030 -0.0028  
Y 0.0078 -0.0078 0.0070 -0.0069 -0.0009 -0.0012  
Z 0.0083 -0.0083 0.0041 -0.0044 0.0024 0.0025

AT. 45 H X -0.0101 -0.0104 -0.0065 -0.0068 -0.0025 0.0032  
Y 0.0157 0.0158 0.0139 0.0142 0.0006 -0.0014  
Z 0.0013 0.0014 0.0039 0.0040 0.0023 -0.0029

AT. 46 H X 0.0101 -0.0104 -0.0065 0.0068 -0.0025 -0.0032  
Y 0.0157 -0.0158 -0.0139 0.0142 -0.0006 -0.0014

Z -0.0013 0.0014 0.0039 -0.0040 0.0023 0.0029  
AT. 47 H X -0.0101 -0.0104 0.0065 0.0068 -0.0025 0.0032  
Y 0.0157 0.0158 -0.0139 -0.0142 0.0006 -0.0014  
Z 0.0013 0.0014 -0.0039 -0.0040 0.0023 -0.0029  
AT. 48 H X 0.0101 -0.0104 0.0065 -0.0068 -0.0025 -0.0032  
Y 0.0157 -0.0158 0.0139 -0.0142 -0.0006 -0.0014  
Z -0.0013 0.0014 -0.0039 0.0040 0.0023 0.0029  
AT. 49 H X 0.0173 0.0173 0.0138 0.0145 -0.0009 0.0007  
Y 0.0231 0.0232 0.0191 0.0195 0.0018 -0.0026  
Z -0.0229 -0.0230 -0.0160 -0.0174 0.0048 -0.0038  
AT. 50 H X -0.0173 0.0173 0.0138 -0.0145 -0.0009 -0.0007  
Y 0.0231 -0.0232 -0.0191 0.0195 -0.0018 -0.0026  
Z 0.0229 -0.0230 -0.0160 0.0174 0.0048 0.0038  
AT. 51 H X 0.0173 0.0173 -0.0138 -0.0145 -0.0009 0.0007  
Y 0.0231 0.0232 -0.0191 -0.0195 0.0018 -0.0026  
Z -0.0229 -0.0230 0.0160 0.0174 0.0048 -0.0038  
AT. 52 H X -0.0173 0.0173 -0.0138 0.0145 -0.0009 -0.0007  
Y 0.0231 -0.0232 0.0191 -0.0195 -0.0018 -0.0026  
Z 0.0229 -0.0230 0.0160 -0.0174 0.0048 0.0038  
AT. 53 C X 0.0086 0.0084 0.0049 0.0056 -0.0006 -0.0001  
Y -0.0075 -0.0072 -0.0081 -0.0085 0.0014 -0.0016  
Z -0.0102 -0.0103 -0.0113 -0.0109 0.0012 -0.0017  
AT. 54 C X -0.0086 0.0084 0.0049 -0.0056 -0.0006 0.0001  
Y -0.0075 0.0072 0.0081 -0.0085 -0.0014 -0.0016  
Z 0.0102 -0.0103 -0.0113 0.0109 0.0012 0.0017  
AT. 55 C X 0.0086 0.0084 -0.0049 -0.0056 -0.0006 -0.0001  
Y -0.0075 -0.0072 0.0081 0.0085 0.0014 -0.0016  
Z -0.0102 -0.0103 0.0113 0.0109 0.0012 -0.0017  
AT. 56 C X -0.0086 0.0084 -0.0049 0.0056 -0.0006 0.0001  
Y -0.0075 0.0072 -0.0081 0.0085 -0.0014 -0.0016  
Z 0.0102 -0.0103 0.0113 -0.0109 0.0012 0.0017  
AT. 57 C X -0.0079 -0.0081 -0.0098 -0.0097 0.0011 -0.0014

Y -0.0095 -0.0094 -0.0100 -0.0099 0.0001 -0.0006  
Z -0.0117 -0.0115 -0.0148 -0.0145 0.0028 -0.0039  
AT. 58 C X 0.0079 -0.0081 -0.0098 0.0097 0.0011 0.0014  
Y -0.0095 0.0094 0.0100 -0.0099 -0.0001 -0.0006  
Z 0.0117 -0.0115 -0.0148 0.0145 0.0028 0.0039  
AT. 59 C X -0.0079 -0.0081 0.0098 0.0097 0.0011 -0.0014  
Y -0.0095 -0.0094 0.0100 0.0099 0.0001 -0.0006  
Z -0.0117 -0.0115 0.0148 0.0145 0.0028 -0.0039  
AT. 60 C X 0.0079 -0.0081 0.0098 -0.0097 0.0011 0.0014  
Y -0.0095 0.0094 -0.0100 0.0099 -0.0001 -0.0006  
Z 0.0117 -0.0115 0.0148 -0.0145 0.0028 0.0039  
AT. 61 H X -0.0122 -0.0124 -0.0148 -0.0140 0.0024 -0.0026  
Y -0.0105 -0.0106 -0.0116 -0.0108 0.0001 -0.0006  
Z -0.0239 -0.0232 -0.0273 -0.0280 0.0072 -0.0083  
AT. 62 H X 0.0122 -0.0124 -0.0148 0.0140 0.0024 0.0026  
Y -0.0105 0.0106 0.0116 -0.0108 -0.0001 -0.0006  
Z 0.0239 -0.0232 -0.0273 0.0280 0.0072 0.0083  
AT. 63 H X -0.0122 -0.0124 0.0148 0.0140 0.0024 -0.0026  
Y -0.0105 -0.0106 0.0116 0.0108 0.0001 -0.0006  
Z -0.0239 -0.0232 0.0273 0.0280 0.0072 -0.0083  
AT. 64 H X 0.0122 -0.0124 0.0148 -0.0140 0.0024 0.0026  
Y -0.0105 0.0106 -0.0116 0.0108 -0.0001 -0.0006  
Z 0.0239 -0.0232 0.0273 -0.0280 0.0072 0.0083  
AT. 65 H X -0.0087 -0.0088 -0.0109 -0.0106 0.0017 -0.0018  
Y -0.0077 -0.0075 -0.0071 -0.0078 -0.0015 0.0006  
Z 0.0059 0.0065 0.0016 0.0023 0.0029 -0.0032  
AT. 66 H X 0.0087 -0.0088 -0.0109 0.0106 0.0017 0.0018  
Y -0.0077 0.0075 0.0071 -0.0078 0.0015 0.0006  
Z -0.0059 0.0065 0.0016 -0.0023 0.0029 0.0032  
AT. 67 H X -0.0087 -0.0088 0.0109 0.0106 0.0017 -0.0018  
Y -0.0077 -0.0075 0.0071 0.0078 -0.0015 0.0006  
Z 0.0059 0.0065 -0.0016 -0.0023 0.0029 -0.0032

AT. 68 H X 0.0087 -0.0088 0.0109 -0.0106 0.0017 0.0018  
Y -0.0077 0.0075 -0.0071 0.0078 0.0015 0.0006  
Z -0.0059 0.0065 -0.0016 0.0023 0.0029 0.0032

AT. 69 H X -0.0221 -0.0225 -0.0227 -0.0235 0.0018 -0.0023  
Y -0.0079 -0.0082 -0.0073 -0.0066 -0.0030 0.0025  
Z -0.0130 -0.0132 -0.0151 -0.0144 0.0004 -0.0014

AT. 70 H X 0.0221 -0.0225 -0.0227 0.0235 0.0018 0.0023  
Y -0.0079 0.0082 0.0073 -0.0066 0.0030 0.0025  
Z 0.0130 -0.0132 -0.0151 0.0144 0.0004 0.0014

AT. 71 H X -0.0221 -0.0225 0.0227 0.0235 0.0018 -0.0023  
Y -0.0079 -0.0082 0.0073 0.0066 -0.0030 0.0025  
Z -0.0130 -0.0132 0.0151 0.0144 0.0004 -0.0014

AT. 72 H X 0.0221 -0.0225 0.0227 -0.0235 0.0018 0.0023  
Y -0.0079 0.0082 -0.0073 0.0066 0.0030 0.0025  
Z 0.0130 -0.0132 0.0151 -0.0144 0.0004 0.0014

AT. 73 C X -0.0057 -0.0058 -0.0072 -0.0071 0.0051 -0.0054  
Y 0.0006 0.0006 0.0013 0.0013 -0.0025 0.0027  
Z 0.0006 0.0005 0.0018 0.0020 -0.0042 0.0041

AT. 74 C X 0.0057 -0.0058 -0.0072 0.0071 0.0051 0.0054  
Y 0.0006 -0.0006 -0.0013 0.0013 0.0025 0.0027  
Z -0.0006 0.0005 0.0018 -0.0020 -0.0042 -0.0041

AT. 75 C X -0.0057 -0.0058 0.0072 0.0071 0.0051 -0.0054  
Y 0.0006 0.0006 -0.0013 -0.0013 -0.0025 0.0027  
Z 0.0006 0.0005 -0.0018 -0.0020 -0.0042 0.0041

AT. 76 C X 0.0057 -0.0058 0.0072 -0.0071 0.0051 0.0054  
Y 0.0006 -0.0006 0.0013 -0.0013 0.0025 0.0027  
Z -0.0006 0.0005 -0.0018 0.0020 -0.0042 -0.0041

AT. 77 C X -0.0141 -0.0142 -0.0082 -0.0087 -0.0044 0.0047  
Y -0.0059 -0.0059 -0.0057 -0.0061 -0.0027 0.0030  
Z -0.0026 -0.0026 0.0003 0.0000 -0.0014 0.0014

AT. 78 C X 0.0141 -0.0142 -0.0082 0.0087 -0.0044 -0.0047  
Y -0.0059 0.0059 0.0057 -0.0061 0.0027 0.0030

Z 0.0026 -0.0026 0.0003 -0.0000 -0.0014 -0.0014  
AT. 79 C X -0.0141 -0.0142 0.0082 0.0087 -0.0044 0.0047  
Y -0.0059 -0.0059 0.0057 0.0061 -0.0027 0.0030  
Z -0.0026 -0.0026 -0.0003 -0.0000 -0.0014 0.0014  
AT. 80 C X 0.0141 -0.0142 0.0082 -0.0087 -0.0044 -0.0047  
Y -0.0059 0.0059 -0.0057 0.0061 0.0027 0.0030  
Z 0.0026 -0.0026 -0.0003 0.0000 -0.0014 -0.0014  
AT. 81 H X -0.0330 -0.0326 -0.0270 -0.0280 -0.0054 0.0062  
Y -0.0264 -0.0258 -0.0260 -0.0270 -0.0033 0.0041  
Z -0.0142 -0.0138 -0.0122 -0.0122 -0.0112 0.0112  
AT. 82 H X 0.0330 -0.0326 -0.0270 0.0280 -0.0054 -0.0062  
Y -0.0264 0.0258 0.0260 -0.0270 0.0033 0.0041  
Z 0.0142 -0.0138 -0.0122 0.0122 -0.0112 -0.0112  
AT. 83 H X -0.0330 -0.0326 0.0270 0.0280 -0.0054 0.0062  
Y -0.0264 -0.0258 0.0260 0.0270 -0.0033 0.0041  
Z -0.0142 -0.0138 0.0122 0.0122 -0.0112 0.0112  
AT. 84 H X 0.0330 -0.0326 0.0270 -0.0280 -0.0054 -0.0062  
Y -0.0264 0.0258 -0.0260 0.0270 0.0033 0.0041  
Z 0.0142 -0.0138 0.0122 -0.0122 -0.0112 -0.0112  
AT. 85 H X 0.0073 0.0065 0.0128 0.0129 0.0007 -0.0010  
Y -0.0184 -0.0181 -0.0178 -0.0184 -0.0088 0.0091  
Z 0.0019 0.0020 0.0050 0.0047 0.0024 -0.0023  
AT. 86 H X -0.0073 0.0065 0.0128 -0.0129 0.0007 0.0010  
Y -0.0184 0.0181 0.0178 -0.0184 0.0088 0.0091  
Z -0.0019 0.0020 0.0050 -0.0047 0.0024 0.0023  
AT. 87 H X 0.0073 0.0065 -0.0128 -0.0129 0.0007 -0.0010  
Y -0.0184 -0.0181 0.0178 0.0184 -0.0088 0.0091  
Z 0.0019 0.0020 -0.0050 -0.0047 0.0024 -0.0023  
AT. 88 H X -0.0073 0.0065 -0.0128 0.0129 0.0007 0.0010  
Y -0.0184 0.0181 -0.0178 0.0184 0.0088 0.0091  
Z -0.0019 0.0020 -0.0050 0.0047 0.0024 0.0023  
AT. 89 C X -0.0186 -0.0185 -0.0149 -0.0156 -0.0014 0.0017

Y 0.0053 0.0051 0.0047 0.0047 -0.0001 0.0000  
Z 0.0023 0.0020 0.0041 0.0043 -0.0062 0.0062  
AT. 90 C X 0.0186 -0.0185 -0.0149 0.0156 -0.0014 -0.0017  
Y 0.0053 -0.0051 -0.0047 0.0047 0.0001 0.0000  
Z -0.0023 0.0020 0.0041 -0.0043 -0.0062 -0.0062  
AT. 91 C X -0.0186 -0.0185 0.0149 0.0156 -0.0014 0.0017  
Y 0.0053 0.0051 -0.0047 -0.0047 -0.0001 0.0000  
Z 0.0023 0.0020 -0.0041 -0.0043 -0.0062 0.0062  
AT. 92 C X 0.0186 -0.0185 0.0149 -0.0156 -0.0014 -0.0017  
Y 0.0053 -0.0051 0.0047 -0.0047 0.0001 0.0000  
Z -0.0023 0.0020 -0.0041 0.0043 -0.0062 -0.0062  
AT. 93 C X 0.0003 0.0003 0.0011 0.0012 -0.0001 0.0000  
Y 0.0022 0.0023 0.0006 0.0001 0.0049 -0.0050  
Z -0.0048 -0.0049 -0.0018 -0.0017 -0.0070 0.0073  
AT. 94 C X -0.0003 0.0003 0.0011 -0.0012 -0.0001 -0.0000  
Y 0.0022 -0.0023 -0.0006 0.0001 -0.0049 -0.0050  
Z 0.0048 -0.0049 -0.0018 0.0017 -0.0070 -0.0073  
AT. 95 C X 0.0003 0.0003 -0.0011 -0.0012 -0.0001 0.0000  
Y 0.0022 0.0023 -0.0006 -0.0001 0.0049 -0.0050  
Z -0.0048 -0.0049 0.0018 0.0017 -0.0070 0.0073  
AT. 96 C X -0.0003 0.0003 -0.0011 0.0012 -0.0001 -0.0000  
Y 0.0022 -0.0023 0.0006 -0.0001 -0.0049 -0.0050  
Z 0.0048 -0.0049 0.0018 -0.0017 -0.0070 -0.0073  
AT. 97 H X 0.0096 0.0095 0.0087 0.0094 0.0011 -0.0015  
Y -0.0080 -0.0079 -0.0077 -0.0092 0.0050 -0.0044  
Z 0.0071 0.0070 0.0082 0.0086 -0.0032 0.0034  
AT. 98 H X -0.0096 0.0095 0.0087 -0.0094 0.0011 0.0015  
Y -0.0080 0.0079 0.0077 -0.0092 -0.0050 -0.0044  
Z -0.0071 0.0070 0.0082 -0.0086 -0.0032 -0.0034  
AT. 99 H X 0.0096 0.0095 -0.0087 -0.0094 0.0011 -0.0015  
Y -0.0080 -0.0079 0.0077 0.0092 0.0050 -0.0044  
Z 0.0071 0.0070 -0.0082 -0.0086 -0.0032 0.0034

AT.100 H X -0.0096 0.0095 -0.0087 0.0094 0.0011 0.0015  
Y -0.0080 0.0079 -0.0077 0.0092 -0.0050 -0.0044  
Z -0.0071 0.0070 -0.0082 0.0086 -0.0032 -0.0034

AT.101 H X 0.0068 0.0070 0.0061 0.0068 0.0005 -0.0008  
Y 0.0115 0.0117 0.0079 0.0083 0.0055 -0.0060  
Z -0.0209 -0.0204 -0.0159 -0.0167 -0.0055 0.0065

AT.102 H X -0.0068 0.0070 0.0061 -0.0068 0.0005 0.0008  
Y 0.0115 -0.0117 -0.0079 0.0083 -0.0055 -0.0060  
Z 0.0209 -0.0204 -0.0159 0.0167 -0.0055 -0.0065

AT.103 H X 0.0068 0.0070 -0.0061 -0.0068 0.0005 -0.0008  
Y 0.0115 0.0117 -0.0079 -0.0083 0.0055 -0.0060  
Z -0.0209 -0.0204 0.0159 0.0167 -0.0055 0.0065

AT.104 H X -0.0068 0.0070 -0.0061 0.0068 0.0005 0.0008  
Y 0.0115 -0.0117 0.0079 -0.0083 -0.0055 -0.0060  
Z 0.0209 -0.0204 0.0159 -0.0167 -0.0055 -0.0065

AT.105 H X 0.0081 0.0080 0.0077 0.0079 0.0013 -0.0015  
Y -0.0002 0.0005 -0.0019 -0.0024 0.0084 -0.0082  
Z -0.0056 -0.0061 -0.0021 -0.0020 -0.0101 0.0103

AT.106 H X -0.0081 0.0080 0.0077 -0.0079 0.0013 0.0015  
Y -0.0002 -0.0005 0.0019 -0.0024 -0.0084 -0.0082  
Z 0.0056 -0.0061 -0.0021 0.0020 -0.0101 -0.0103

AT.107 H X 0.0081 0.0080 -0.0077 -0.0079 0.0013 -0.0015  
Y -0.0002 0.0005 0.0019 0.0024 0.0084 -0.0082  
Z -0.0056 -0.0061 0.0021 0.0020 -0.0101 0.0103

AT.108 H X -0.0081 0.0080 -0.0077 0.0079 0.0013 0.0015  
Y -0.0002 -0.0005 -0.0019 0.0024 -0.0084 -0.0082  
Z 0.0056 -0.0061 0.0021 -0.0020 -0.0101 -0.0103

AT.109 C X 0.0097 0.0099 0.0053 0.0058 -0.0011 0.0003  
Y -0.0111 -0.0106 -0.0122 -0.0131 0.0062 -0.0064  
Z -0.0017 -0.0019 -0.0058 -0.0054 0.0011 -0.0012

AT.110 C X -0.0097 0.0099 0.0053 -0.0058 -0.0011 -0.0003  
Y -0.0111 0.0106 0.0122 -0.0131 -0.0062 -0.0064



Z 0.0017 -0.0019 -0.0058 0.0054 0.0011 0.0012  
AT.111 C X 0.0097 0.0099 -0.0053 -0.0058 -0.0011 0.0003  
Y -0.0111 -0.0106 0.0122 0.0131 0.0062 -0.0064  
Z -0.0017 -0.0019 0.0058 0.0054 0.0011 -0.0012  
AT.112 C X -0.0097 0.0099 -0.0053 0.0058 -0.0011 -0.0003  
Y -0.0111 0.0106 -0.0122 0.0131 -0.0062 -0.0064  
Z 0.0017 -0.0019 0.0058 -0.0054 0.0011 0.0012  
AT.113 H X 0.0152 0.0149 0.0101 0.0111 -0.0051 0.0042  
Y -0.0187 -0.0176 -0.0182 -0.0200 0.0110 -0.0110  
Z 0.0060 0.0052 0.0042 0.0052 -0.0104 0.0110  
AT.114 H X -0.0152 0.0149 0.0101 -0.0111 -0.0051 -0.0042  
Y -0.0187 0.0176 0.0182 -0.0200 -0.0110 -0.0110  
Z -0.0060 0.0052 0.0042 -0.0052 -0.0104 -0.0110  
AT.115 H X 0.0152 0.0149 -0.0101 -0.0111 -0.0051 0.0042  
Y -0.0187 -0.0176 0.0182 0.0200 0.0110 -0.0110  
Z 0.0060 0.0052 -0.0042 -0.0052 -0.0104 0.0110  
AT.116 H X -0.0152 0.0149 -0.0101 0.0111 -0.0051 -0.0042  
Y -0.0187 0.0176 -0.0182 0.0200 -0.0110 -0.0110  
Z -0.0060 0.0052 -0.0042 0.0052 -0.0104 -0.0110  
AT.117 H X -0.0030 -0.0034 -0.0083 -0.0079 0.0108 -0.0116  
Y -0.0114 -0.0103 -0.0120 -0.0137 0.0086 -0.0086  
Z -0.0002 0.0003 -0.0037 -0.0040 0.0017 -0.0016  
AT.118 H X 0.0030 -0.0034 -0.0083 0.0079 0.0108 0.0116  
Y -0.0114 0.0103 0.0120 -0.0137 -0.0086 -0.0086  
Z 0.0002 0.0003 -0.0037 0.0040 0.0017 0.0016  
AT.119 H X -0.0030 -0.0034 0.0083 0.0079 0.0108 -0.0116  
Y -0.0114 -0.0103 0.0120 0.0137 0.0086 -0.0086  
Z -0.0002 0.0003 0.0037 0.0040 0.0017 -0.0016  
AT.120 H X 0.0030 -0.0034 0.0083 -0.0079 0.0108 0.0116  
Y -0.0114 0.0103 -0.0120 0.0137 -0.0086 -0.0086  
Z 0.0002 0.0003 0.0037 -0.0040 0.0017 0.0016  
AT.121 C X -0.0091 -0.0088 -0.0084 -0.0091 0.0009 -0.0008

Y 0.0113 0.0111 0.0078 0.0081 0.0016 -0.0022  
Z 0.0111 0.0110 0.0074 0.0077 -0.0016 0.0016  
AT. 122 C X 0.0091 -0.0088 -0.0084 0.0091 0.0009 0.0008  
Y 0.0113 -0.0111 -0.0078 0.0081 -0.0016 -0.0022  
Z -0.0111 0.0110 0.0074 -0.0077 -0.0016 -0.0016  
AT. 123 C X -0.0091 -0.0088 0.0084 0.0091 0.0009 -0.0008  
Y 0.0113 0.0111 -0.0078 -0.0081 0.0016 -0.0022  
Z 0.0111 0.0110 -0.0074 -0.0077 -0.0016 0.0016  
AT. 124 C X 0.0091 -0.0088 0.0084 -0.0091 0.0009 0.0008  
Y 0.0113 -0.0111 0.0078 -0.0081 -0.0016 -0.0022  
Z -0.0111 0.0110 -0.0074 0.0077 -0.0016 -0.0016  
AT. 125 H X 0.0138 0.0147 0.0056 0.0053 0.0088 -0.0094  
Y 0.0217 0.0215 0.0199 0.0202 -0.0012 0.0007  
Z -0.0027 -0.0029 -0.0049 -0.0047 -0.0019 0.0021  
AT. 126 H X -0.0138 0.0147 0.0056 -0.0053 0.0088 0.0094  
Y 0.0217 -0.0215 -0.0199 0.0202 0.0012 0.0007  
Z 0.0027 -0.0029 -0.0049 0.0047 -0.0019 -0.0021  
AT. 127 H X 0.0138 0.0147 -0.0056 -0.0053 0.0088 -0.0094  
Y 0.0217 0.0215 -0.0199 -0.0202 -0.0012 0.0007  
Z -0.0027 -0.0029 0.0049 0.0047 -0.0019 0.0021  
AT. 128 H X -0.0138 0.0147 -0.0056 0.0053 0.0088 0.0094  
Y 0.0217 -0.0215 0.0199 -0.0202 0.0012 0.0007  
Z 0.0027 -0.0029 0.0049 -0.0047 -0.0019 -0.0021  
AT. 129 H X -0.0156 -0.0153 -0.0136 -0.0146 0.0022 -0.0020  
Y 0.0294 0.0293 0.0213 0.0222 0.0025 -0.0034  
Z 0.0319 0.0321 0.0220 0.0224 0.0052 -0.0057  
AT. 130 H X 0.0156 -0.0153 -0.0136 0.0146 0.0022 0.0020  
Y 0.0294 -0.0293 -0.0213 0.0222 -0.0025 -0.0034  
Z -0.0319 0.0321 0.0220 -0.0224 0.0052 0.0057  
AT. 131 H X -0.0156 -0.0153 0.0136 0.0146 0.0022 -0.0020  
Y 0.0294 0.0293 -0.0213 -0.0222 0.0025 -0.0034  
Z 0.0319 0.0321 -0.0220 -0.0224 0.0052 -0.0057

AT. 132 H X 0.0156 -0.0153 0.0136 -0.0146 0.0022 0.0020  
Y 0.0294 -0.0293 0.0213 -0.0222 -0.0025 -0.0034  
Z -0.0319 0.0321 -0.0220 0.0224 0.0052 0.0057

AT. 133 C X -0.0010 -0.0018 -0.0009 -0.0003 0.0134 -0.0132  
Y -0.0048 -0.0051 -0.0076 -0.0073 0.0035 -0.0038  
Z 0.0044 0.0046 0.0064 0.0060 -0.0038 0.0043

AT. 134 C X 0.0010 -0.0018 -0.0009 0.0003 0.0134 0.0132  
Y -0.0048 0.0051 0.0076 -0.0073 -0.0035 -0.0038  
Z -0.0044 0.0046 0.0064 -0.0060 -0.0038 -0.0043

AT. 135 C X -0.0010 -0.0018 0.0009 0.0003 0.0134 -0.0132  
Y -0.0048 -0.0051 0.0076 0.0073 0.0035 -0.0038  
Z 0.0044 0.0046 -0.0064 -0.0060 -0.0038 0.0043

AT. 136 C X 0.0010 -0.0018 0.0009 -0.0003 0.0134 0.0132  
Y -0.0048 0.0051 -0.0076 0.0073 -0.0035 -0.0038  
Z -0.0044 0.0046 -0.0064 0.0060 -0.0038 -0.0043

AT. 137 C X -0.0056 -0.0071 -0.0088 -0.0075 0.0292 -0.0299  
Y 0.0009 0.0007 0.0049 0.0049 0.0014 -0.0006  
Z 0.0025 0.0024 0.0014 0.0013 -0.0010 0.0007

AT. 138 C X 0.0056 -0.0071 -0.0088 0.0075 0.0292 0.0299  
Y 0.0009 -0.0007 -0.0049 0.0049 -0.0014 -0.0006  
Z -0.0025 0.0024 0.0014 -0.0013 -0.0010 -0.0007

AT. 139 C X -0.0056 -0.0071 0.0088 0.0075 0.0292 -0.0299  
Y 0.0009 0.0007 -0.0049 -0.0049 0.0014 -0.0006  
Z 0.0025 0.0024 -0.0014 -0.0013 -0.0010 0.0007

AT. 140 C X 0.0056 -0.0071 0.0088 -0.0075 0.0292 0.0299  
Y 0.0009 -0.0007 0.0049 -0.0049 -0.0014 -0.0006  
Z -0.0025 0.0024 -0.0014 0.0013 -0.0010 -0.0007

AT. 141 H X 0.0033 0.0023 0.0061 0.0070 0.0179 -0.0179  
Y 0.0167 0.0166 0.0322 0.0317 -0.0111 0.0128  
Z 0.0032 0.0027 0.0035 0.0034 0.0029 -0.0035

AT. 142 H X -0.0033 0.0023 0.0061 -0.0070 0.0179 0.0179  
Y 0.0167 -0.0166 -0.0322 0.0317 0.0111 0.0128

Z -0.0032 0.0027 0.0035 -0.0034 0.0029 0.0035  
AT. 143 H X 0.0033 0.0023 -0.0061 -0.0070 0.0179 -0.0179  
Y 0.0167 0.0166 -0.0322 -0.0317 -0.0111 0.0128  
Z 0.0032 0.0027 -0.0035 -0.0034 0.0029 -0.0035  
AT. 144 H X -0.0033 0.0023 -0.0061 0.0070 0.0179 0.0179  
Y 0.0167 -0.0166 0.0322 -0.0317 0.0111 0.0128  
Z -0.0032 0.0027 -0.0035 0.0034 0.0029 0.0035  
AT. 145 H X -0.0180 -0.0193 -0.0308 -0.0295 0.0354 -0.0370  
Y 0.0016 0.0013 0.0062 0.0063 0.0025 -0.0018  
Z -0.0081 -0.0086 -0.0180 -0.0175 0.0097 -0.0112  
AT. 146 H X 0.0180 -0.0193 -0.0308 0.0295 0.0354 0.0370  
Y 0.0016 -0.0013 -0.0062 0.0063 -0.0025 -0.0018  
Z 0.0081 -0.0086 -0.0180 0.0175 0.0097 0.0112  
AT. 147 H X -0.0180 -0.0193 0.0308 0.0295 0.0354 -0.0370  
Y 0.0016 0.0013 -0.0062 -0.0063 0.0025 -0.0018  
Z -0.0081 -0.0086 0.0180 0.0175 0.0097 -0.0112  
AT. 148 H X 0.0180 -0.0193 0.0308 -0.0295 0.0354 0.0370  
Y 0.0016 -0.0013 0.0062 -0.0063 -0.0025 -0.0018  
Z 0.0081 -0.0086 0.0180 -0.0175 0.0097 0.0112  
AT. 149 O X -0.0082 -0.0082 -0.0083 -0.0085 0.0063 -0.0064  
Y 0.0020 0.0020 0.0056 0.0060 -0.0076 0.0081  
Z -0.0051 -0.0048 -0.0026 -0.0032 0.0015 -0.0012  
AT. 150 O X 0.0082 -0.0082 -0.0083 0.0085 0.0063 0.0064  
Y 0.0020 -0.0020 -0.0056 0.0060 0.0076 0.0081  
Z 0.0051 -0.0048 -0.0026 0.0032 0.0015 0.0012  
AT. 151 O X -0.0082 -0.0082 0.0083 0.0085 0.0063 -0.0064  
Y 0.0020 0.0020 -0.0056 -0.0060 -0.0076 0.0081  
Z -0.0051 -0.0048 0.0026 0.0032 0.0015 -0.0012  
AT. 152 O X 0.0082 -0.0082 0.0083 -0.0085 0.0063 0.0064  
Y 0.0020 -0.0020 0.0056 -0.0060 0.0076 0.0081  
Z 0.0051 -0.0048 0.0026 -0.0032 0.0015 0.0012  
AT. 153 H X -0.0443 -0.0435 -0.0412 -0.0402 0.0193 -0.0192

Y -0.0430 -0.0419 -0.0400 -0.0397 0.0103 -0.0092  
Z 0.0020 0.0022 0.0026 0.0012 -0.0002 0.0005  
AT. 154 H X 0.0443 -0.0435 -0.0412 0.0402 0.0193 0.0192  
Y -0.0430 0.0419 0.0400 -0.0397 -0.0103 -0.0092  
Z -0.0020 0.0022 0.0026 -0.0012 -0.0002 -0.0005  
AT. 155 H X -0.0443 -0.0435 0.0412 0.0402 0.0193 -0.0192  
Y -0.0430 -0.0419 0.0400 0.0397 0.0103 -0.0092  
Z 0.0020 0.0022 -0.0026 -0.0012 -0.0002 0.0005  
AT. 156 H X 0.0443 -0.0435 0.0412 -0.0402 0.0193 0.0192  
Y -0.0430 0.0419 -0.0400 0.0397 -0.0103 -0.0092  
Z -0.0020 0.0022 -0.0026 0.0012 -0.0002 -0.0005  
AT. 157 O X 0.0044 0.0043 0.0014 0.0012 0.0031 -0.0033  
Y -0.0081 -0.0081 -0.0075 -0.0077 0.0046 -0.0049  
Z 0.0105 0.0104 0.0096 0.0099 -0.0029 0.0032  
AT. 158 O X -0.0044 0.0043 0.0014 -0.0012 0.0031 0.0033  
Y -0.0081 0.0081 0.0075 -0.0077 -0.0046 -0.0049  
Z -0.0105 0.0104 0.0096 -0.0099 -0.0029 -0.0032  
AT. 159 O X 0.0044 0.0043 -0.0014 -0.0012 0.0031 -0.0033  
Y -0.0081 -0.0081 0.0075 0.0077 0.0046 -0.0049  
Z 0.0105 0.0104 -0.0096 -0.0099 -0.0029 0.0032  
AT. 160 O X -0.0044 0.0043 -0.0014 0.0012 0.0031 0.0033  
Y -0.0081 0.0081 -0.0075 0.0077 -0.0046 -0.0049  
Z -0.0105 0.0104 -0.0096 0.0099 -0.0029 -0.0032  
AT. 161 O X 0.0084 0.0085 0.0067 0.0066 0.0004 -0.0006  
Y 0.0085 0.0084 0.0060 0.0065 0.0021 -0.0017  
Z 0.0003 0.0002 -0.0006 -0.0006 0.0021 -0.0021  
AT. 162 O X -0.0084 0.0085 0.0067 -0.0066 0.0004 0.0006  
Y 0.0085 -0.0084 -0.0060 0.0065 -0.0021 -0.0017  
Z -0.0003 0.0002 -0.0006 0.0006 0.0021 0.0021  
AT. 163 O X 0.0084 0.0085 -0.0067 -0.0066 0.0004 -0.0006  
Y 0.0085 0.0084 -0.0060 -0.0065 0.0021 -0.0017  
Z 0.0003 0.0002 0.0006 0.0006 0.0021 -0.0021

AT.164 O X -0.0084 0.0085 -0.0067 0.0066 0.0004 0.0006  
Y 0.0085 -0.0084 0.0060 -0.0065 -0.0021 -0.0017  
Z -0.0003 0.0002 0.0006 -0.0006 0.0021 0.0021

AT.165 H X -0.0007 -0.0019 -0.0034 -0.0021 0.0028 -0.0032  
Y 0.0049 0.0042 0.0019 0.0029 0.0035 -0.0033  
Z -0.0026 -0.0015 0.0007 -0.0009 -0.0011 0.0009

AT.166 H X 0.0007 -0.0019 -0.0034 0.0021 0.0028 0.0032  
Y 0.0049 -0.0042 -0.0019 0.0029 -0.0035 -0.0033  
Z 0.0026 -0.0015 0.0007 0.0009 -0.0011 -0.0009

AT.167 H X -0.0007 -0.0019 0.0034 0.0021 0.0028 -0.0032  
Y 0.0049 0.0042 -0.0019 -0.0029 0.0035 -0.0033  
Z -0.0026 -0.0015 -0.0007 0.0009 -0.0011 0.0009

AT.168 H X 0.0007 -0.0019 0.0034 -0.0021 0.0028 0.0032  
Y 0.0049 -0.0042 0.0019 -0.0029 -0.0035 -0.0033  
Z 0.0026 -0.0015 -0.0007 -0.0009 -0.0011 -0.0009

AT.169 O X -0.0008 -0.0008 -0.0014 -0.0012 -0.0010 0.0010  
Y -0.0050 -0.0051 -0.0125 -0.0118 -0.0025 0.0024  
Z 0.0001 0.0003 0.0003 0.0003 0.0008 -0.0002

AT.170 O X 0.0008 -0.0008 -0.0014 0.0012 -0.0010 -0.0010  
Y -0.0050 0.0051 0.0125 -0.0118 0.0025 0.0024  
Z -0.0001 0.0003 0.0003 -0.0003 0.0008 0.0002

AT.171 O X -0.0008 -0.0008 0.0014 0.0012 -0.0010 0.0010  
Y -0.0050 -0.0051 0.0125 0.0118 -0.0025 0.0024  
Z 0.0001 0.0003 -0.0003 -0.0003 0.0008 -0.0002

AT.172 O X 0.0008 -0.0008 0.0014 -0.0012 -0.0010 -0.0010  
Y -0.0050 0.0051 -0.0125 0.0118 0.0025 0.0024  
Z -0.0001 0.0003 -0.0003 0.0003 0.0008 0.0002

AT.173 H X 0.0071 0.0073 0.0070 0.0070 -0.0030 0.0028  
Y -0.0074 -0.0074 -0.0161 -0.0153 -0.0019 0.0018  
Z -0.0045 -0.0045 0.0085 0.0080 -0.0028 0.0031

AT.174 H X -0.0071 0.0073 0.0070 -0.0070 -0.0030 -0.0028  
Y -0.0074 0.0074 0.0161 -0.0153 0.0019 0.0018

Z 0.0045 -0.0045 0.0085 -0.0080 -0.0028 -0.0031  
AT. 175 H X 0.0071 0.0073 -0.0070 -0.0070 -0.0030 0.0028  
Y -0.0074 -0.0074 0.0161 0.0153 -0.0019 0.0018  
Z -0.0045 -0.0045 -0.0085 -0.0080 -0.0028 0.0031  
AT. 176 H X -0.0071 0.0073 -0.0070 0.0070 -0.0030 -0.0028  
Y -0.0074 0.0074 -0.0161 0.0153 0.0019 0.0018  
Z 0.0045 -0.0045 -0.0085 0.0080 -0.0028 -0.0031

FREQ(CM\*\*-1) 508.30 510.11 522.82 522.85 523.16 523.64

AT. 1 I X -0.0031 0.0030 0.0025 0.0020 0.0023 0.0022  
Y 0.0015 -0.0015 -0.0013 -0.0010 -0.0011 -0.0011  
Z 0.0023 -0.0020 -0.0019 -0.0015 -0.0015 -0.0014  
AT. 2 I X -0.0031 -0.0030 -0.0025 0.0020 0.0023 -0.0022  
Y -0.0015 -0.0015 -0.0013 0.0010 0.0011 -0.0011  
Z 0.0023 0.0020 0.0019 -0.0015 -0.0015 0.0014  
AT. 3 I X 0.0031 -0.0030 -0.0025 0.0020 -0.0023 0.0022  
Y -0.0015 0.0015 0.0013 -0.0010 0.0011 -0.0011  
Z -0.0023 0.0020 0.0019 -0.0015 0.0015 -0.0014  
AT. 4 I X 0.0031 0.0030 0.0025 0.0020 -0.0023 -0.0022  
Y 0.0015 0.0015 0.0013 0.0010 -0.0011 -0.0011  
Z -0.0023 -0.0020 -0.0019 -0.0015 0.0015 0.0014  
AT. 5 I X -0.0029 0.0032 -0.0034 -0.0037 -0.0036 -0.0037  
Y 0.0002 -0.0002 0.0002 0.0003 0.0002 0.0003  
Z 0.0017 -0.0018 0.0019 0.0020 0.0020 0.0020  
AT. 6 I X -0.0029 -0.0032 0.0034 -0.0037 -0.0036 0.0037  
Y -0.0002 -0.0002 0.0002 -0.0003 -0.0002 0.0003  
Z 0.0017 0.0018 -0.0019 0.0020 0.0020 -0.0020  
AT. 7 I X 0.0029 -0.0032 0.0034 -0.0037 0.0036 -0.0037  
Y -0.0002 0.0002 -0.0002 0.0003 -0.0002 0.0003  
Z -0.0017 0.0018 -0.0019 0.0020 -0.0020 0.0020  
AT. 8 I X 0.0029 0.0032 -0.0034 -0.0037 0.0036 0.0037

Y 0.0002 0.0002 -0.0002 -0.0003 0.0002 0.0003  
Z -0.0017 -0.0018 0.0019 0.0020 -0.0020 -0.0020  
AT. 9 N X -0.0095 0.0085 0.0082 0.0075 0.0079 0.0078  
Y 0.0017 -0.0015 -0.0051 -0.0042 -0.0046 -0.0041  
Z 0.0060 -0.0064 -0.0001 0.0010 0.0006 0.0006  
AT. 10 N X -0.0095 -0.0085 -0.0082 0.0075 0.0079 -0.0078  
Y -0.0017 -0.0015 -0.0051 0.0042 0.0046 -0.0041  
Z 0.0060 0.0064 0.0001 0.0010 0.0006 -0.0006  
AT. 11 N X 0.0095 -0.0085 -0.0082 0.0075 -0.0079 0.0078  
Y -0.0017 0.0015 0.0051 -0.0042 0.0046 -0.0041  
Z -0.0060 0.0064 0.0001 0.0010 -0.0006 0.0006  
AT. 12 N X 0.0095 0.0085 0.0082 0.0075 -0.0079 -0.0078  
Y 0.0017 0.0015 0.0051 0.0042 -0.0046 -0.0041  
Z -0.0060 -0.0064 -0.0001 0.0010 -0.0006 -0.0006  
AT. 13 N X -0.0083 0.0095 -0.0127 -0.0134 -0.0133 -0.0137  
Y 0.0027 -0.0030 0.0005 -0.0002 0.0003 0.0003  
Z 0.0026 -0.0029 -0.0017 -0.0025 -0.0018 -0.0019  
AT. 14 N X -0.0083 -0.0095 0.0127 -0.0134 -0.0133 0.0137  
Y -0.0027 -0.0030 0.0005 0.0002 -0.0003 0.0003  
Z 0.0026 0.0029 0.0017 -0.0025 -0.0018 0.0019  
AT. 15 N X 0.0083 -0.0095 0.0127 -0.0134 0.0133 -0.0137  
Y -0.0027 0.0030 -0.0005 -0.0002 -0.0003 0.0003  
Z -0.0026 0.0029 0.0017 -0.0025 0.0018 -0.0019  
AT. 16 N X 0.0083 0.0095 -0.0127 -0.0134 0.0133 0.0137  
Y 0.0027 0.0030 -0.0005 0.0002 0.0003 0.0003  
Z -0.0026 -0.0029 -0.0017 -0.0025 0.0018 0.0019  
AT. 17 O X -0.0043 0.0038 0.0042 0.0035 0.0040 0.0036  
Y 0.0138 -0.0138 -0.0060 -0.0030 -0.0040 -0.0031  
Z -0.0103 0.0100 0.0020 0.0007 0.0013 0.0010  
AT. 18 O X -0.0043 -0.0038 -0.0042 0.0035 0.0040 -0.0036  
Y -0.0138 -0.0138 -0.0060 0.0030 0.0040 -0.0031  
Z -0.0103 -0.0100 -0.0020 0.0007 0.0013 -0.0010



AT. 19 O X 0.0043 -0.0038 -0.0042 0.0035 -0.0040 0.0036  
Y -0.0138 0.0138 0.0060 -0.0030 0.0040 -0.0031  
Z 0.0103 -0.0100 -0.0020 0.0007 -0.0013 0.0010

AT. 20 O X 0.0043 0.0038 0.0042 0.0035 -0.0040 -0.0036  
Y 0.0138 0.0138 0.0060 0.0030 -0.0040 -0.0031  
Z 0.0103 0.0100 0.0020 0.0007 -0.0013 -0.0010

AT. 21 O X -0.0068 0.0073 -0.0063 -0.0069 -0.0066 -0.0069  
Y -0.0089 0.0086 0.0003 -0.0005 -0.0002 0.0002  
Z -0.0077 0.0079 -0.0040 -0.0032 -0.0036 -0.0035

AT. 22 O X -0.0068 -0.0073 0.0063 -0.0069 -0.0066 0.0069  
Y 0.0089 0.0086 0.0003 0.0005 0.0002 0.0002  
Z -0.0077 -0.0079 0.0040 -0.0032 -0.0036 0.0035

AT. 23 O X 0.0068 -0.0073 0.0063 -0.0069 0.0066 -0.0069  
Y 0.0089 -0.0086 -0.0003 -0.0005 0.0002 0.0002  
Z 0.0077 -0.0079 0.0040 -0.0032 0.0036 -0.0035

AT. 24 O X 0.0068 0.0073 -0.0063 -0.0069 0.0066 0.0069  
Y -0.0089 -0.0086 -0.0003 0.0005 -0.0002 0.0002  
Z 0.0077 0.0079 -0.0040 -0.0032 0.0036 0.0035

AT. 25 C X 0.0286 -0.0265 -0.0240 -0.0199 -0.0215 -0.0204  
Y -0.0239 0.0216 0.0220 0.0187 0.0198 0.0190  
Z -0.0071 0.0067 0.0063 0.0045 0.0054 0.0046

AT. 26 C X 0.0286 0.0265 0.0240 -0.0199 -0.0215 0.0204  
Y 0.0239 0.0216 0.0220 -0.0187 -0.0198 0.0190  
Z -0.0071 -0.0067 -0.0063 0.0045 0.0054 -0.0046

AT. 27 C X -0.0286 0.0265 0.0240 -0.0199 0.0215 -0.0204  
Y 0.0239 -0.0216 -0.0220 0.0187 -0.0198 0.0190  
Z 0.0071 -0.0067 -0.0063 0.0045 -0.0054 0.0046

AT. 28 C X -0.0286 -0.0265 -0.0240 -0.0199 0.0215 0.0204  
Y -0.0239 -0.0216 -0.0220 -0.0187 0.0198 0.0190  
Z 0.0071 0.0067 0.0063 0.0045 -0.0054 -0.0046

AT. 29 H X 0.0233 -0.0217 -0.0200 -0.0167 -0.0183 -0.0172  
Y -0.0173 0.0148 0.0306 0.0264 0.0272 0.0259

Z 0.0006 -0.0001 -0.0018 -0.0021 -0.0012 -0.0018  
AT. 30 H X 0.0233 0.0217 0.0200 -0.0167 -0.0183 0.0172  
Y 0.0173 0.0148 0.0306 -0.0264 -0.0272 0.0259  
Z 0.0006 0.0001 0.0018 -0.0021 -0.0012 0.0018  
AT. 31 H X -0.0233 0.0217 0.0200 -0.0167 0.0183 -0.0172  
Y 0.0173 -0.0148 -0.0306 0.0264 -0.0272 0.0259  
Z -0.0006 0.0001 0.0018 -0.0021 0.0012 -0.0018  
AT. 32 H X -0.0233 -0.0217 -0.0200 -0.0167 0.0183 0.0172  
Y -0.0173 -0.0148 -0.0306 -0.0264 0.0272 0.0259  
Z -0.0006 -0.0001 -0.0018 -0.0021 0.0012 0.0018  
AT. 33 H X 0.0250 -0.0241 -0.0096 -0.0072 -0.0090 -0.0088  
Y -0.0242 0.0222 0.0183 0.0154 0.0165 0.0161  
Z -0.0029 0.0022 0.0114 0.0091 0.0100 0.0088  
AT. 34 H X 0.0250 0.0241 0.0096 -0.0072 -0.0090 0.0088  
Y 0.0242 0.0222 0.0183 -0.0154 -0.0165 0.0161  
Z -0.0029 -0.0022 -0.0114 0.0091 0.0100 -0.0088  
AT. 35 H X -0.0250 0.0241 0.0096 -0.0072 0.0090 -0.0088  
Y 0.0242 -0.0222 -0.0183 0.0154 -0.0165 0.0161  
Z 0.0029 -0.0022 -0.0114 0.0091 -0.0100 0.0088  
AT. 36 H X -0.0250 -0.0241 -0.0096 -0.0072 0.0090 0.0088  
Y -0.0242 -0.0222 -0.0183 -0.0154 0.0165 0.0161  
Z 0.0029 0.0022 0.0114 0.0091 -0.0100 -0.0088  
AT. 37 C X 0.0139 -0.0131 -0.0134 -0.0107 -0.0117 -0.0110  
Y -0.0084 0.0077 0.0046 0.0044 0.0045 0.0047  
Z -0.0046 0.0042 0.0027 0.0021 0.0024 0.0021  
AT. 38 C X 0.0139 0.0131 0.0134 -0.0107 -0.0117 0.0110  
Y 0.0084 0.0077 0.0046 -0.0044 -0.0045 0.0047  
Z -0.0046 -0.0042 -0.0027 0.0021 0.0024 -0.0021  
AT. 39 C X -0.0139 0.0131 0.0134 -0.0107 0.0117 -0.0110  
Y 0.0084 -0.0077 -0.0046 0.0044 -0.0045 0.0047  
Z 0.0046 -0.0042 -0.0027 0.0021 -0.0024 0.0021  
AT. 40 C X -0.0139 -0.0131 -0.0134 -0.0107 0.0117 0.0110

Y -0.0084 -0.0077 -0.0046 -0.0044 0.0045 0.0047  
Z 0.0046 0.0042 0.0027 0.0021 -0.0024 -0.0021  
AT. 41 C X -0.0017 0.0013 0.0063 0.0066 0.0062 0.0064  
Y 0.0023 -0.0023 0.0016 0.0025 0.0022 0.0024  
Z 0.0025 -0.0025 -0.0049 -0.0043 -0.0048 -0.0048  
AT. 42 C X -0.0017 -0.0013 -0.0063 0.0066 0.0062 -0.0064  
Y -0.0023 -0.0023 0.0016 -0.0025 -0.0022 0.0024  
Z 0.0025 0.0025 0.0049 -0.0043 -0.0048 0.0048  
AT. 43 C X 0.0017 -0.0013 -0.0063 0.0066 -0.0062 0.0064  
Y -0.0023 0.0023 -0.0016 0.0025 -0.0022 0.0024  
Z -0.0025 0.0025 0.0049 -0.0043 0.0048 -0.0048  
AT. 44 C X 0.0017 0.0013 0.0063 0.0066 -0.0062 -0.0064  
Y 0.0023 0.0023 -0.0016 -0.0025 0.0022 0.0024  
Z -0.0025 -0.0025 -0.0049 -0.0043 0.0048 0.0048  
AT. 45 H X -0.0034 0.0028 0.0036 0.0023 0.0034 0.0026  
Y 0.0035 -0.0039 0.0095 0.0108 0.0103 0.0106  
Z 0.0040 -0.0043 0.0019 0.0031 0.0021 0.0023  
AT. 46 H X -0.0034 -0.0028 -0.0036 0.0023 0.0034 -0.0026  
Y -0.0035 -0.0039 0.0095 -0.0108 -0.0103 0.0106  
Z 0.0040 0.0043 -0.0019 0.0031 0.0021 -0.0023  
AT. 47 H X 0.0034 -0.0028 -0.0036 0.0023 -0.0034 0.0026  
Y -0.0035 0.0039 -0.0095 0.0108 -0.0103 0.0106  
Z -0.0040 0.0043 -0.0019 0.0031 -0.0021 0.0023  
AT. 48 H X 0.0034 0.0028 0.0036 0.0023 -0.0034 -0.0026  
Y 0.0035 0.0039 -0.0095 -0.0108 0.0103 0.0106  
Z -0.0040 -0.0043 0.0019 0.0031 -0.0021 -0.0023  
AT. 49 H X 0.0015 -0.0019 0.0074 0.0086 0.0075 0.0083  
Y 0.0055 -0.0055 0.0061 0.0083 0.0071 0.0081  
Z 0.0025 -0.0023 -0.0136 -0.0139 -0.0140 -0.0144  
AT. 50 H X 0.0015 0.0019 -0.0074 0.0086 0.0075 -0.0083  
Y -0.0055 -0.0055 0.0061 -0.0083 -0.0071 0.0081  
Z 0.0025 0.0023 0.0136 -0.0139 -0.0140 0.0144

AT. 51 H X -0.0015 0.0019 -0.0074 0.0086 -0.0075 0.0083  
Y -0.0055 0.0055 -0.0061 0.0083 -0.0071 0.0081  
Z -0.0025 0.0023 0.0136 -0.0139 0.0140 -0.0144

AT. 52 H X -0.0015 -0.0019 0.0074 0.0086 -0.0075 -0.0083  
Y 0.0055 0.0055 -0.0061 -0.0083 0.0071 0.0081  
Z -0.0025 -0.0023 -0.0136 -0.0139 0.0140 0.0144

AT. 53 C X 0.0006 -0.0007 0.0053 0.0060 0.0050 0.0055  
Y 0.0002 0.0000 -0.0004 -0.0010 -0.0005 -0.0009  
Z -0.0003 0.0009 -0.0054 -0.0056 -0.0062 -0.0058

AT. 54 C X 0.0006 0.0007 -0.0053 0.0060 0.0050 -0.0055  
Y -0.0002 0.0000 -0.0004 0.0010 0.0005 -0.0009  
Z -0.0003 -0.0009 0.0054 -0.0056 -0.0062 0.0058

AT. 55 C X -0.0006 0.0007 -0.0053 0.0060 -0.0050 0.0055  
Y -0.0002 -0.0000 0.0004 -0.0010 0.0005 -0.0009  
Z 0.0003 -0.0009 0.0054 -0.0056 0.0062 -0.0058

AT. 56 C X -0.0006 -0.0007 0.0053 0.0060 -0.0050 -0.0055  
Y 0.0002 -0.0000 0.0004 0.0010 -0.0005 -0.0009  
Z 0.0003 0.0009 -0.0054 -0.0056 0.0062 0.0058

AT. 57 C X -0.0003 0.0011 -0.0034 -0.0037 -0.0037 -0.0040  
Y -0.0010 0.0018 -0.0032 -0.0031 -0.0036 -0.0037  
Z 0.0009 -0.0001 -0.0052 -0.0058 -0.0065 -0.0062

AT. 58 C X -0.0003 -0.0011 0.0034 -0.0037 -0.0037 0.0040  
Y 0.0010 0.0018 -0.0032 0.0031 0.0036 -0.0037  
Z 0.0009 0.0001 0.0052 -0.0058 -0.0065 0.0062

AT. 59 C X 0.0003 -0.0011 0.0034 -0.0037 0.0037 -0.0040  
Y 0.0010 -0.0018 0.0032 -0.0031 0.0036 -0.0037  
Z -0.0009 0.0001 0.0052 -0.0058 0.0065 -0.0062

AT. 60 C X 0.0003 0.0011 -0.0034 -0.0037 0.0037 0.0040  
Y -0.0010 -0.0018 0.0032 0.0031 -0.0036 -0.0037  
Z -0.0009 -0.0001 -0.0052 -0.0058 0.0065 0.0062

AT. 61 H X -0.0006 0.0010 -0.0068 -0.0086 -0.0075 -0.0076  
Y -0.0016 0.0021 -0.0050 -0.0057 -0.0057 -0.0054

Z 0.0027 -0.0013 -0.0096 -0.0117 -0.0111 -0.0117  
AT. 62 H X -0.0006 -0.0010 0.0068 -0.0086 -0.0075 0.0076  
Y 0.0016 0.0021 -0.0050 0.0057 0.0057 -0.0054  
Z 0.0027 0.0013 0.0096 -0.0117 -0.0111 0.0117  
AT. 63 H X 0.0006 -0.0010 0.0068 -0.0086 0.0075 -0.0076  
Y 0.0016 -0.0021 0.0050 -0.0057 0.0057 -0.0054  
Z -0.0027 0.0013 0.0096 -0.0117 0.0111 -0.0117  
AT. 64 H X 0.0006 0.0010 -0.0068 -0.0086 0.0075 0.0076  
Y -0.0016 -0.0021 0.0050 0.0057 -0.0057 -0.0054  
Z -0.0027 -0.0013 -0.0096 -0.0117 0.0111 0.0117  
AT. 65 H X -0.0002 0.0009 -0.0043 -0.0050 -0.0046 -0.0049  
Y -0.0013 0.0025 -0.0007 0.0004 -0.0010 -0.0012  
Z 0.0037 -0.0029 0.0029 0.0045 0.0029 0.0025  
AT. 66 H X -0.0002 -0.0009 0.0043 -0.0050 -0.0046 0.0049  
Y 0.0013 0.0025 -0.0007 -0.0004 0.0010 -0.0012  
Z 0.0037 0.0029 -0.0029 0.0045 0.0029 -0.0025  
AT. 67 H X 0.0002 -0.0009 0.0043 -0.0050 0.0046 -0.0049  
Y 0.0013 -0.0025 0.0007 0.0004 0.0010 -0.0012  
Z -0.0037 0.0029 -0.0029 0.0045 -0.0029 0.0025  
AT. 68 H X 0.0002 0.0009 -0.0043 -0.0050 0.0046 0.0049  
Y -0.0013 -0.0025 0.0007 -0.0004 -0.0010 -0.0012  
Z -0.0037 -0.0029 0.0029 0.0045 -0.0029 -0.0025  
AT. 69 H X -0.0015 0.0031 -0.0085 -0.0095 -0.0089 -0.0097  
Y -0.0034 0.0041 -0.0038 -0.0035 -0.0045 -0.0041  
Z -0.0014 0.0023 -0.0068 -0.0072 -0.0084 -0.0077  
AT. 70 H X -0.0015 -0.0031 0.0085 -0.0095 -0.0089 0.0097  
Y 0.0034 0.0041 -0.0038 0.0035 0.0045 -0.0041  
Z -0.0014 -0.0023 0.0068 -0.0072 -0.0084 0.0077  
AT. 71 H X 0.0015 -0.0031 0.0085 -0.0095 0.0089 -0.0097  
Y 0.0034 -0.0041 0.0038 -0.0035 0.0045 -0.0041  
Z 0.0014 -0.0023 0.0068 -0.0072 0.0084 -0.0077  
AT. 72 H X 0.0015 0.0031 -0.0085 -0.0095 0.0089 0.0097

Y -0.0034 -0.0041 0.0038 0.0035 -0.0045 -0.0041  
Z 0.0014 0.0023 -0.0068 -0.0072 0.0084 0.0077  
AT. 73 C X 0.0042 -0.0043 0.0009 0.0008 0.0011 0.0007  
Y -0.0024 0.0024 0.0004 0.0002 0.0003 0.0003  
Z -0.0036 0.0037 0.0002 0.0006 0.0003 0.0006  
AT. 74 C X 0.0042 0.0043 -0.0009 0.0008 0.0011 -0.0007  
Y 0.0024 0.0024 0.0004 -0.0002 -0.0003 0.0003  
Z -0.0036 -0.0037 -0.0002 0.0006 0.0003 -0.0006  
AT. 75 C X -0.0042 0.0043 -0.0009 0.0008 -0.0011 0.0007  
Y 0.0024 -0.0024 -0.0004 0.0002 -0.0003 0.0003  
Z 0.0036 -0.0037 -0.0002 0.0006 -0.0003 0.0006  
AT. 76 C X -0.0042 -0.0043 0.0009 0.0008 -0.0011 -0.0007  
Y -0.0024 -0.0024 -0.0004 -0.0002 0.0003 0.0003  
Z 0.0036 0.0037 0.0002 0.0006 -0.0003 -0.0006  
AT. 77 C X -0.0048 0.0046 -0.0008 -0.0015 -0.0009 -0.0008  
Y -0.0042 0.0045 -0.0038 -0.0044 -0.0038 -0.0039  
Z -0.0011 0.0001 0.0063 0.0061 0.0065 0.0062  
AT. 78 C X -0.0048 -0.0046 0.0008 -0.0015 -0.0009 0.0008  
Y 0.0042 0.0045 -0.0038 0.0044 0.0038 -0.0039  
Z -0.0011 -0.0001 -0.0063 0.0061 0.0065 -0.0062  
AT. 79 C X 0.0048 -0.0046 0.0008 -0.0015 0.0009 -0.0008  
Y 0.0042 -0.0045 0.0038 -0.0044 0.0038 -0.0039  
Z 0.0011 -0.0001 -0.0063 0.0061 -0.0065 0.0062  
AT. 80 C X 0.0048 0.0046 -0.0008 -0.0015 0.0009 0.0008  
Y -0.0042 -0.0045 0.0038 0.0044 -0.0038 -0.0039  
Z 0.0011 0.0001 0.0063 0.0061 -0.0065 -0.0062  
AT. 81 H X -0.0094 0.0099 -0.0042 -0.0068 -0.0050 -0.0051  
Y -0.0089 0.0099 -0.0078 -0.0104 -0.0085 -0.0089  
Z -0.0143 0.0132 0.0111 0.0084 0.0104 0.0093  
AT. 82 H X -0.0094 -0.0099 0.0042 -0.0068 -0.0050 0.0051  
Y 0.0089 0.0099 -0.0078 0.0104 0.0085 -0.0089  
Z -0.0143 -0.0132 -0.0111 0.0084 0.0104 -0.0093

AT. 83 H X 0.0094 -0.0099 0.0042 -0.0068 0.0050 -0.0051  
Y 0.0089 -0.0099 0.0078 -0.0104 0.0085 -0.0089  
Z 0.0143 -0.0132 -0.0111 0.0084 -0.0104 0.0093

AT. 84 H X 0.0094 0.0099 -0.0042 -0.0068 0.0050 0.0051  
Y -0.0089 -0.0099 0.0078 0.0104 -0.0085 -0.0089  
Z 0.0143 0.0132 0.0111 0.0084 -0.0104 -0.0093

AT. 85 H X 0.0042 -0.0052 0.0030 0.0044 0.0038 0.0042  
Y -0.0122 0.0127 -0.0015 -0.0038 -0.0022 -0.0023  
Z 0.0034 -0.0043 0.0033 0.0039 0.0038 0.0035

AT. 86 H X 0.0042 0.0052 -0.0030 0.0044 0.0038 -0.0042  
Y 0.0122 0.0127 -0.0015 0.0038 0.0022 -0.0023  
Z 0.0034 0.0043 -0.0033 0.0039 0.0038 -0.0035

AT. 87 H X -0.0042 0.0052 -0.0030 0.0044 -0.0038 0.0042  
Y 0.0122 -0.0127 0.0015 -0.0038 0.0022 -0.0023  
Z -0.0034 0.0043 -0.0033 0.0039 -0.0038 0.0035

AT. 88 H X -0.0042 -0.0052 0.0030 0.0044 -0.0038 -0.0042  
Y -0.0122 -0.0127 0.0015 0.0038 -0.0022 -0.0023  
Z -0.0034 -0.0043 0.0033 0.0039 -0.0038 -0.0035

AT. 89 C X -0.0036 0.0039 -0.0052 -0.0062 -0.0052 -0.0054  
Y 0.0004 -0.0005 -0.0005 0.0001 -0.0002 -0.0001  
Z -0.0048 0.0038 0.0091 0.0091 0.0094 0.0098

AT. 90 C X -0.0036 -0.0039 0.0052 -0.0062 -0.0052 0.0054  
Y -0.0004 -0.0005 -0.0005 -0.0001 0.0002 -0.0001  
Z -0.0048 -0.0038 -0.0091 0.0091 0.0094 -0.0098

AT. 91 C X 0.0036 -0.0039 0.0052 -0.0062 0.0052 -0.0054  
Y -0.0004 0.0005 0.0005 0.0001 0.0002 -0.0001  
Z 0.0048 -0.0038 -0.0091 0.0091 -0.0094 0.0098

AT. 92 C X 0.0036 0.0039 -0.0052 -0.0062 0.0052 0.0054  
Y 0.0004 0.0005 0.0005 -0.0001 -0.0002 -0.0001  
Z 0.0048 0.0038 0.0091 0.0091 -0.0094 -0.0098

AT. 93 C X 0.0004 -0.0009 0.0036 0.0038 0.0039 0.0039  
Y 0.0043 -0.0037 -0.0072 -0.0066 -0.0070 -0.0072

Z -0.0065 0.0054 0.0096 0.0089 0.0099 0.0102  
AT. 94 C X 0.0004 0.0009 -0.0036 0.0038 0.0039 -0.0039  
Y -0.0043 -0.0037 -0.0072 0.0066 0.0070 -0.0072  
Z -0.0065 -0.0054 -0.0096 0.0089 0.0099 -0.0102  
AT. 95 C X -0.0004 0.0009 -0.0036 0.0038 -0.0039 0.0039  
Y -0.0043 0.0037 0.0072 -0.0066 0.0070 -0.0072  
Z 0.0065 -0.0054 -0.0096 0.0089 -0.0099 0.0102  
AT. 96 C X -0.0004 -0.0009 0.0036 0.0038 -0.0039 -0.0039  
Y 0.0043 0.0037 0.0072 0.0066 -0.0070 -0.0072  
Z 0.0065 0.0054 0.0096 0.0089 -0.0099 -0.0102  
AT. 97 H X 0.0027 -0.0034 0.0084 0.0089 0.0086 0.0084  
Y 0.0036 -0.0028 -0.0137 -0.0129 -0.0134 -0.0129  
Z -0.0004 -0.0011 0.0139 0.0144 0.0141 0.0149  
AT. 98 H X 0.0027 0.0034 -0.0084 0.0089 0.0086 -0.0084  
Y -0.0036 -0.0028 -0.0137 0.0129 0.0134 -0.0129  
Z -0.0004 0.0011 -0.0139 0.0144 0.0141 -0.0149  
AT. 99 H X -0.0027 0.0034 -0.0084 0.0089 -0.0086 0.0084  
Y -0.0036 0.0028 0.0137 -0.0129 0.0134 -0.0129  
Z 0.0004 0.0011 -0.0139 0.0144 -0.0141 0.0149  
AT. 100 H X -0.0027 -0.0034 0.0084 0.0089 -0.0086 -0.0084  
Y 0.0036 0.0028 0.0137 0.0129 -0.0134 -0.0129  
Z 0.0004 -0.0011 0.0139 0.0144 -0.0141 -0.0149  
AT. 101 H X 0.0013 -0.0018 0.0066 0.0065 0.0067 0.0061  
Y 0.0056 -0.0051 -0.0024 -0.0020 -0.0024 -0.0032  
Z -0.0082 0.0080 -0.0010 -0.0034 -0.0011 -0.0016  
AT. 102 H X 0.0013 0.0018 -0.0066 0.0065 0.0067 -0.0061  
Y -0.0056 -0.0051 -0.0024 0.0020 0.0024 -0.0032  
Z -0.0082 -0.0080 0.0010 -0.0034 -0.0011 0.0016  
AT. 103 H X -0.0013 0.0018 -0.0066 0.0065 -0.0067 0.0061  
Y -0.0056 0.0051 0.0024 -0.0020 0.0024 -0.0032  
Z 0.0082 -0.0080 0.0010 -0.0034 0.0011 -0.0016  
AT. 104 H X -0.0013 -0.0018 0.0066 0.0065 -0.0067 -0.0061



Y 0.0056 0.0051 0.0024 0.0020 -0.0024 -0.0032  
Z 0.0082 0.0080 -0.0010 -0.0034 0.0011 0.0016  
AT. 105 H X 0.0036 -0.0047 0.0080 0.0095 0.0084 0.0092  
Y 0.0071 -0.0061 -0.0110 -0.0108 -0.0111 -0.0118  
Z -0.0097 0.0084 0.0111 0.0102 0.0115 0.0119  
AT. 106 H X 0.0036 0.0047 -0.0080 0.0095 0.0084 -0.0092  
Y -0.0071 -0.0061 -0.0110 0.0108 0.0111 -0.0118  
Z -0.0097 -0.0084 -0.0111 0.0102 0.0115 -0.0119  
AT. 107 H X -0.0036 0.0047 -0.0080 0.0095 -0.0084 0.0092  
Y -0.0071 0.0061 0.0110 -0.0108 0.0111 -0.0118  
Z 0.0097 -0.0084 -0.0111 0.0102 -0.0115 0.0119  
AT. 108 H X -0.0036 -0.0047 0.0080 0.0095 -0.0084 -0.0092  
Y 0.0071 0.0061 0.0110 0.0108 -0.0111 -0.0118  
Z 0.0097 0.0084 0.0111 0.0102 -0.0115 -0.0119  
AT. 109 C X -0.0006 0.0008 -0.0011 -0.0009 -0.0016 -0.0010  
Y 0.0038 -0.0037 -0.0036 -0.0045 -0.0033 -0.0038  
Z -0.0007 0.0010 -0.0059 -0.0073 -0.0069 -0.0070  
AT. 110 C X -0.0006 -0.0008 0.0011 -0.0009 -0.0016 0.0010  
Y -0.0038 -0.0037 -0.0036 0.0045 0.0033 -0.0038  
Z -0.0007 -0.0010 0.0059 -0.0073 -0.0069 0.0070  
AT. 111 C X 0.0006 -0.0008 0.0011 -0.0009 0.0016 -0.0010  
Y -0.0038 0.0037 0.0036 -0.0045 0.0033 -0.0038  
Z 0.0007 -0.0010 0.0059 -0.0073 0.0069 -0.0070  
AT. 112 C X 0.0006 0.0008 -0.0011 -0.0009 0.0016 0.0010  
Y 0.0038 0.0037 0.0036 0.0045 -0.0033 -0.0038  
Z 0.0007 0.0010 -0.0059 -0.0073 0.0069 0.0070  
AT. 113 H X -0.0037 0.0037 0.0031 0.0031 0.0020 0.0027  
Y 0.0073 -0.0069 -0.0112 -0.0121 -0.0102 -0.0109  
Z -0.0109 0.0120 -0.0100 -0.0122 -0.0122 -0.0126  
AT. 114 H X -0.0037 -0.0037 -0.0031 0.0031 0.0020 -0.0027  
Y -0.0073 -0.0069 -0.0112 0.0121 0.0102 -0.0109  
Z -0.0109 -0.0120 0.0100 -0.0122 -0.0122 0.0126

AT. 115 H X 0.0037 -0.0037 -0.0031 0.0031 -0.0020 0.0027  
Y -0.0073 0.0069 0.0112 -0.0121 0.0102 -0.0109  
Z 0.0109 -0.0120 0.0100 -0.0122 0.0122 -0.0126

AT. 116 H X 0.0037 0.0037 0.0031 0.0031 -0.0020 -0.0027  
Y 0.0073 0.0069 0.0112 0.0121 -0.0102 -0.0109  
Z 0.0109 0.0120 -0.0100 -0.0122 0.0122 0.0126

AT. 117 H X 0.0089 -0.0092 -0.0048 -0.0039 -0.0044 -0.0035  
Y 0.0059 -0.0058 -0.0037 -0.0045 -0.0025 -0.0034  
Z -0.0001 0.0005 -0.0055 -0.0069 -0.0059 -0.0064

AT. 118 H X 0.0089 0.0092 0.0048 -0.0039 -0.0044 0.0035  
Y -0.0059 -0.0058 -0.0037 0.0045 0.0025 -0.0034  
Z -0.0001 -0.0005 0.0055 -0.0069 -0.0059 0.0064

AT. 119 H X -0.0089 0.0092 0.0048 -0.0039 0.0044 -0.0035  
Y -0.0059 0.0058 0.0037 -0.0045 0.0025 -0.0034  
Z 0.0001 -0.0005 0.0055 -0.0069 0.0059 -0.0064

AT. 120 H X -0.0089 -0.0092 -0.0048 -0.0039 0.0044 0.0035  
Y 0.0059 0.0058 0.0037 0.0045 -0.0025 -0.0034  
Z 0.0001 0.0005 -0.0055 -0.0069 0.0059 0.0064

AT. 121 C X -0.0008 0.0011 -0.0060 -0.0060 -0.0056 -0.0057  
Y 0.0029 -0.0037 0.0068 0.0081 0.0074 0.0078  
Z -0.0011 0.0003 0.0046 0.0045 0.0049 0.0052

AT. 122 C X -0.0008 -0.0011 0.0060 -0.0060 -0.0056 0.0057  
Y -0.0029 -0.0037 0.0068 -0.0081 -0.0074 0.0078  
Z -0.0011 -0.0003 -0.0046 0.0045 0.0049 -0.0052

AT. 123 C X 0.0008 -0.0011 0.0060 -0.0060 0.0056 -0.0057  
Y -0.0029 0.0037 -0.0068 0.0081 -0.0074 0.0078  
Z 0.0011 -0.0003 -0.0046 0.0045 -0.0049 0.0052

AT. 124 C X 0.0008 0.0011 -0.0060 -0.0060 0.0056 0.0057  
Y 0.0029 0.0037 -0.0068 -0.0081 0.0074 0.0078  
Z 0.0011 0.0003 0.0046 0.0045 -0.0049 -0.0052

AT. 125 H X 0.0083 -0.0083 0.0005 0.0029 0.0018 0.0017  
Y 0.0029 -0.0043 0.0160 0.0192 0.0176 0.0184

Z -0.0037 0.0034 -0.0037 -0.0058 -0.0045 -0.0044  
AT. 126 H X 0.0083 0.0083 -0.0005 0.0029 0.0018 -0.0017  
Y -0.0029 -0.0043 0.0160 -0.0192 -0.0176 0.0184  
Z -0.0037 -0.0034 0.0037 -0.0058 -0.0045 0.0044  
AT. 127 H X -0.0083 0.0083 -0.0005 0.0029 -0.0018 0.0017  
Y -0.0029 0.0043 -0.0160 0.0192 -0.0176 0.0184  
Z 0.0037 -0.0034 0.0037 -0.0058 0.0045 -0.0044  
AT. 128 H X -0.0083 -0.0083 0.0005 0.0029 -0.0018 -0.0017  
Y 0.0029 0.0043 -0.0160 -0.0192 0.0176 0.0184  
Z 0.0037 0.0034 -0.0037 -0.0058 0.0045 0.0044  
AT. 129 H X -0.0002 0.0005 -0.0066 -0.0066 -0.0061 -0.0061  
Y 0.0058 -0.0069 0.0129 0.0154 0.0140 0.0143  
Z 0.0081 -0.0099 0.0170 0.0198 0.0190 0.0193  
AT. 130 H X -0.0002 -0.0005 0.0066 -0.0066 -0.0061 0.0061  
Y -0.0058 -0.0069 0.0129 -0.0154 -0.0140 0.0143  
Z 0.0081 0.0099 -0.0170 0.0198 0.0190 -0.0193  
AT. 131 H X 0.0002 -0.0005 0.0066 -0.0066 0.0061 -0.0061  
Y -0.0058 0.0069 -0.0129 0.0154 -0.0140 0.0143  
Z -0.0081 0.0099 -0.0170 0.0198 -0.0190 0.0193  
AT. 132 H X 0.0002 0.0005 -0.0066 -0.0066 0.0061 0.0061  
Y 0.0058 0.0069 -0.0129 -0.0154 0.0140 0.0143  
Z -0.0081 -0.0099 0.0170 0.0198 -0.0190 -0.0193  
AT. 133 C X 0.0143 -0.0154 0.0148 0.0173 0.0163 0.0166  
Y 0.0021 -0.0025 0.0012 0.0004 0.0010 0.0010  
Z -0.0032 0.0035 -0.0053 -0.0051 -0.0050 -0.0052  
AT. 134 C X 0.0143 0.0154 -0.0148 0.0173 0.0163 -0.0166  
Y -0.0021 -0.0025 0.0012 -0.0004 -0.0010 0.0010  
Z -0.0032 -0.0035 0.0053 -0.0051 -0.0050 0.0052  
AT. 135 C X -0.0143 0.0154 -0.0148 0.0173 -0.0163 0.0166  
Y -0.0021 0.0025 -0.0012 0.0004 -0.0010 0.0010  
Z 0.0032 -0.0035 0.0053 -0.0051 0.0050 -0.0052  
AT. 136 C X -0.0143 -0.0154 0.0148 0.0173 -0.0163 -0.0166

Y 0.0021 0.0025 -0.0012 -0.0004 0.0010 0.0010  
Z 0.0032 0.0035 -0.0053 -0.0051 0.0050 0.0052  
AT. 137 C X 0.0300 -0.0328 0.0348 0.0387 0.0372 0.0379  
Y 0.0027 -0.0032 0.0042 0.0053 0.0053 0.0051  
Z -0.0011 0.0015 -0.0042 -0.0044 -0.0044 -0.0045  
AT. 138 C X 0.0300 0.0328 -0.0348 0.0387 0.0372 -0.0379  
Y -0.0027 -0.0032 0.0042 -0.0053 -0.0053 0.0051  
Z -0.0011 -0.0015 0.0042 -0.0044 -0.0044 0.0045  
AT. 139 C X -0.0300 0.0328 -0.0348 0.0387 -0.0372 0.0379  
Y -0.0027 0.0032 -0.0042 0.0053 -0.0053 0.0051  
Z 0.0011 -0.0015 0.0042 -0.0044 0.0044 -0.0045  
AT. 140 C X -0.0300 -0.0328 0.0348 0.0387 -0.0372 -0.0379  
Y 0.0027 0.0032 -0.0042 -0.0053 0.0053 0.0051  
Z 0.0011 0.0015 -0.0042 -0.0044 0.0044 0.0045  
AT. 141 H X 0.0216 -0.0235 0.0306 0.0350 0.0330 0.0335  
Y -0.0037 0.0044 0.0055 0.0098 0.0075 0.0073  
Z 0.0039 -0.0035 0.0013 0.0026 0.0017 0.0018  
AT. 142 H X 0.0216 0.0235 -0.0306 0.0350 0.0330 -0.0335  
Y 0.0037 0.0044 0.0055 -0.0098 -0.0075 0.0073  
Z 0.0039 0.0035 -0.0013 0.0026 0.0017 -0.0018  
AT. 143 H X -0.0216 0.0235 -0.0306 0.0350 -0.0330 0.0335  
Y 0.0037 -0.0044 -0.0055 0.0098 -0.0075 0.0073  
Z -0.0039 0.0035 -0.0013 0.0026 -0.0017 0.0018  
AT. 144 H X -0.0216 -0.0235 0.0306 0.0350 -0.0330 -0.0335  
Y -0.0037 -0.0044 -0.0055 -0.0098 0.0075 0.0073  
Z -0.0039 -0.0035 0.0013 0.0026 -0.0017 -0.0018  
AT. 145 H X 0.0310 -0.0340 0.0269 0.0273 0.0279 0.0283  
Y 0.0043 -0.0049 0.0071 0.0087 0.0083 0.0082  
Z 0.0057 -0.0058 -0.0026 -0.0047 -0.0038 -0.0037  
AT. 146 H X 0.0310 0.0340 -0.0269 0.0273 0.0279 -0.0283  
Y -0.0043 -0.0049 0.0071 -0.0087 -0.0083 0.0082  
Z 0.0057 0.0058 0.0026 -0.0047 -0.0038 0.0037

AT. 147 H X -0.0310 0.0340 -0.0269 0.0273 -0.0279 0.0283  
Y -0.0043 0.0049 -0.0071 0.0087 -0.0083 0.0082  
Z -0.0057 0.0058 0.0026 -0.0047 0.0038 -0.0037

AT. 148 H X -0.0310 -0.0340 0.0269 0.0273 -0.0279 -0.0283  
Y 0.0043 0.0049 -0.0071 -0.0087 0.0083 0.0082  
Z -0.0057 -0.0058 -0.0026 -0.0047 0.0038 0.0037

AT. 149 O X 0.0051 -0.0051 -0.0021 -0.0021 -0.0021 -0.0022  
Y -0.0064 0.0069 -0.0037 -0.0033 -0.0040 -0.0034  
Z 0.0012 -0.0008 -0.0032 -0.0031 -0.0026 -0.0030

AT. 150 O X 0.0051 0.0051 0.0021 -0.0021 -0.0021 0.0022  
Y 0.0064 0.0069 -0.0037 0.0033 0.0040 -0.0034  
Z 0.0012 0.0008 0.0032 -0.0031 -0.0026 0.0030

AT. 151 O X -0.0051 0.0051 0.0021 -0.0021 0.0021 -0.0022  
Y 0.0064 -0.0069 0.0037 -0.0033 0.0040 -0.0034  
Z -0.0012 0.0008 0.0032 -0.0031 0.0026 -0.0030

AT. 152 O X -0.0051 -0.0051 -0.0021 -0.0021 0.0021 0.0022  
Y -0.0064 -0.0069 0.0037 0.0033 -0.0040 -0.0034  
Z -0.0012 -0.0008 -0.0032 -0.0031 0.0026 0.0030

AT. 153 H X 0.0117 -0.0113 0.0019 -0.0002 0.0021 0.0011  
Y 0.0015 -0.0000 -0.0001 -0.0048 -0.0011 -0.0030  
Z 0.0002 0.0002 -0.0047 -0.0048 -0.0044 -0.0050

AT. 154 H X 0.0117 0.0113 -0.0019 -0.0002 0.0021 -0.0011  
Y -0.0015 -0.0000 -0.0001 0.0048 0.0011 -0.0030  
Z 0.0002 -0.0002 0.0047 -0.0048 -0.0044 0.0050

AT. 155 H X -0.0117 0.0113 -0.0019 -0.0002 -0.0021 0.0011  
Y -0.0015 0.0000 0.0001 -0.0048 0.0011 -0.0030  
Z -0.0002 -0.0002 0.0047 -0.0048 0.0044 -0.0050

AT. 156 H X -0.0117 -0.0113 0.0019 -0.0002 -0.0021 -0.0011  
Y 0.0015 0.0000 0.0001 0.0048 -0.0011 -0.0030  
Z -0.0002 0.0002 -0.0047 -0.0048 0.0044 0.0050

AT. 157 O X 0.0031 -0.0032 0.0024 0.0024 0.0027 0.0022  
Y 0.0037 -0.0039 -0.0023 -0.0022 -0.0023 -0.0024

Z -0.0018 0.0023 -0.0004 0.0003 -0.0000 -0.0002  
AT. 158 O X 0.0031 0.0032 -0.0024 0.0024 0.0027 -0.0022  
Y -0.0037 -0.0039 -0.0023 0.0022 0.0023 -0.0024  
Z -0.0018 -0.0023 0.0004 0.0003 -0.0000 0.0002  
AT. 159 O X -0.0031 0.0032 -0.0024 0.0024 -0.0027 0.0022  
Y -0.0037 0.0039 0.0023 -0.0022 0.0023 -0.0024  
Z 0.0018 -0.0023 0.0004 0.0003 0.0000 -0.0002  
AT. 160 O X -0.0031 -0.0032 0.0024 0.0024 -0.0027 -0.0022  
Y 0.0037 0.0039 0.0023 0.0022 -0.0023 -0.0024  
Z 0.0018 0.0023 -0.0004 0.0003 0.0000 0.0002  
AT. 161 O X 0.0011 -0.0011 -0.0002 0.0004 0.0000 -0.0002  
Y 0.0024 -0.0019 -0.0004 -0.0000 -0.0004 -0.0005  
Z 0.0019 -0.0017 -0.0001 0.0001 0.0001 -0.0001  
AT. 162 O X 0.0011 0.0011 0.0002 0.0004 0.0000 0.0002  
Y -0.0024 -0.0019 -0.0004 0.0000 0.0004 -0.0005  
Z 0.0019 0.0017 0.0001 0.0001 0.0001 0.0001  
AT. 163 O X -0.0011 0.0011 0.0002 0.0004 -0.0000 -0.0002  
Y -0.0024 0.0019 0.0004 -0.0000 0.0004 -0.0005  
Z -0.0019 0.0017 0.0001 0.0001 -0.0001 -0.0001  
AT. 164 O X -0.0011 -0.0011 -0.0002 0.0004 -0.0000 0.0002  
Y 0.0024 0.0019 0.0004 0.0000 -0.0004 -0.0005  
Z -0.0019 -0.0017 -0.0001 0.0001 -0.0001 0.0001  
AT. 165 H X 0.0009 -0.0014 -0.0013 -0.0014 -0.0028 -0.0009  
Y 0.0026 -0.0024 -0.0008 -0.0005 -0.0014 -0.0005  
Z 0.0001 -0.0001 -0.0014 -0.0008 -0.0000 -0.0017  
AT. 166 H X 0.0009 0.0014 0.0013 -0.0014 -0.0028 0.0009  
Y -0.0026 -0.0024 -0.0008 0.0005 0.0014 -0.0005  
Z 0.0001 0.0001 0.0014 -0.0008 -0.0000 0.0017  
AT. 167 H X -0.0009 0.0014 0.0013 -0.0014 0.0028 -0.0009  
Y -0.0026 0.0024 0.0008 -0.0005 0.0014 -0.0005  
Z -0.0001 0.0001 0.0014 -0.0008 0.0000 -0.0017  
AT. 168 H X -0.0009 -0.0014 -0.0013 -0.0014 0.0028 0.0009

|                                                        |     |         |         |         |         |         |         |
|--------------------------------------------------------|-----|---------|---------|---------|---------|---------|---------|
|                                                        | Y   | 0.0026  | 0.0024  | 0.0008  | 0.0005  | -0.0014 | -0.0005 |
|                                                        | Z   | -0.0001 | -0.0001 | -0.0014 | -0.0008 | 0.0000  | 0.0017  |
| AT. 169                                                | O X | -0.0014 | 0.0017  | 0.0005  | -0.0001 | 0.0001  | -0.0001 |
|                                                        | Y   | -0.0070 | 0.0079  | 0.0034  | 0.0005  | 0.0017  | 0.0006  |
|                                                        | Z   | 0.0007  | -0.0008 | -0.0002 | -0.0003 | -0.0000 | 0.0001  |
| AT. 170                                                | O X | -0.0014 | -0.0017 | -0.0005 | -0.0001 | 0.0001  | 0.0001  |
|                                                        | Y   | 0.0070  | 0.0079  | 0.0034  | -0.0005 | -0.0017 | 0.0006  |
|                                                        | Z   | 0.0007  | 0.0008  | 0.0002  | -0.0003 | -0.0000 | -0.0001 |
| AT. 171                                                | O X | 0.0014  | -0.0017 | -0.0005 | -0.0001 | -0.0001 | -0.0001 |
|                                                        | Y   | 0.0070  | -0.0079 | -0.0034 | 0.0005  | -0.0017 | 0.0006  |
|                                                        | Z   | -0.0007 | 0.0008  | 0.0002  | -0.0003 | 0.0000  | 0.0001  |
| AT. 172                                                | O X | 0.0014  | 0.0017  | 0.0005  | -0.0001 | -0.0001 | 0.0001  |
|                                                        | Y   | -0.0070 | -0.0079 | -0.0034 | -0.0005 | 0.0017  | 0.0006  |
|                                                        | Z   | -0.0007 | -0.0008 | -0.0002 | -0.0003 | 0.0000  | -0.0001 |
| AT. 173                                                | H X | -0.0021 | 0.0017  | -0.0000 | 0.0026  | 0.0003  | 0.0021  |
|                                                        | Y   | -0.0078 | 0.0088  | 0.0038  | 0.0001  | 0.0018  | 0.0002  |
|                                                        | Z   | 0.0033  | -0.0041 | -0.0018 | 0.0002  | -0.0008 | 0.0007  |
| AT. 174                                                | H X | -0.0021 | -0.0017 | 0.0000  | 0.0026  | 0.0003  | -0.0021 |
|                                                        | Y   | 0.0078  | 0.0088  | 0.0038  | -0.0001 | -0.0018 | 0.0002  |
|                                                        | Z   | 0.0033  | 0.0041  | 0.0018  | 0.0002  | -0.0008 | -0.0007 |
| AT. 175                                                | H X | 0.0021  | -0.0017 | 0.0000  | 0.0026  | -0.0003 | 0.0021  |
|                                                        | Y   | 0.0078  | -0.0088 | -0.0038 | 0.0001  | -0.0018 | 0.0002  |
|                                                        | Z   | -0.0033 | 0.0041  | 0.0018  | 0.0002  | 0.0008  | 0.0007  |
| AT. 176                                                | H X | 0.0021  | 0.0017  | -0.0000 | 0.0026  | -0.0003 | -0.0021 |
|                                                        | Y   | -0.0078 | -0.0088 | -0.0038 | -0.0001 | 0.0018  | 0.0002  |
|                                                        | Z   | -0.0033 | -0.0041 | -0.0018 | 0.0002  | 0.0008  | -0.0007 |
| FREQ(CM**-1) 549.78 549.83 550.20 550.92 553.44 553.60 |     |         |         |         |         |         |         |
| AT. 11                                                 | I X | 0.0004  | 0.0001  | 0.0004  | 0.0002  | -0.0014 | -0.0013 |
|                                                        | Y   | -0.0000 | 0.0001  | -0.0001 | -0.0000 | 0.0005  | 0.0004  |
|                                                        | Z   | -0.0001 | -0.0000 | -0.0001 | -0.0001 | 0.0009  | 0.0009  |

AT. 2 I X 0.0004 0.0001 -0.0004 -0.0002 -0.0014 -0.0013  
Y 0.0000 -0.0001 -0.0001 -0.0000 -0.0005 -0.0004  
Z -0.0001 -0.0000 0.0001 0.0001 0.0009 0.0009

AT. 3 I X -0.0004 0.0001 0.0004 -0.0002 -0.0014 0.0013  
Y 0.0000 0.0001 -0.0001 0.0000 0.0005 -0.0004  
Z 0.0001 -0.0000 -0.0001 0.0001 0.0009 -0.0009

AT. 4 I X -0.0004 0.0001 -0.0004 0.0002 -0.0014 0.0013  
Y -0.0000 -0.0001 -0.0001 0.0000 -0.0005 0.0004  
Z 0.0001 -0.0000 0.0001 -0.0001 0.0009 -0.0009

AT. 5 I X -0.0007 -0.0006 -0.0006 -0.0007 -0.0009 -0.0010  
Y 0.0002 0.0002 0.0002 0.0002 0.0002 0.0002  
Z 0.0003 0.0003 0.0002 0.0003 0.0005 0.0005

AT. 6 I X -0.0007 -0.0006 0.0006 0.0007 -0.0009 -0.0010  
Y -0.0002 -0.0002 0.0002 0.0002 -0.0002 -0.0002  
Z 0.0003 0.0003 -0.0002 -0.0003 0.0005 0.0005

AT. 7 I X 0.0007 -0.0006 -0.0006 0.0007 -0.0009 0.0010  
Y -0.0002 0.0002 0.0002 -0.0002 0.0002 -0.0002  
Z -0.0003 0.0003 0.0002 -0.0003 0.0005 -0.0005

AT. 8 I X 0.0007 -0.0006 0.0006 -0.0007 -0.0009 0.0010  
Y 0.0002 -0.0002 0.0002 -0.0002 -0.0002 0.0002  
Z -0.0003 0.0003 -0.0002 0.0003 0.0005 -0.0005

AT. 9 N X -0.0024 -0.0019 -0.0012 -0.0026 -0.0033 -0.0033  
Y -0.0035 -0.0026 -0.0036 -0.0032 0.0105 0.0101  
Z 0.0031 0.0030 0.0038 0.0031 -0.0131 -0.0137

AT. 10 N X -0.0024 -0.0019 0.0012 0.0026 -0.0033 -0.0033  
Y 0.0035 0.0026 -0.0036 -0.0032 -0.0105 -0.0101  
Z 0.0031 0.0030 -0.0038 -0.0031 -0.0131 -0.0137

AT. 11 N X 0.0024 -0.0019 -0.0012 0.0026 -0.0033 0.0033  
Y 0.0035 -0.0026 -0.0036 0.0032 0.0105 -0.0101  
Z -0.0031 0.0030 0.0038 -0.0031 -0.0131 0.0137

AT. 12 N X 0.0024 -0.0019 0.0012 -0.0026 -0.0033 0.0033  
Y -0.0035 0.0026 -0.0036 0.0032 -0.0105 0.0101



Z -0.0031 0.0030 -0.0038 0.0031 -0.0131 0.0137  
AT. 13 N X 0.0017 0.0022 0.0021 0.0016 -0.0033 -0.0039  
Y -0.0085 -0.0089 -0.0085 -0.0082 -0.0065 -0.0064  
Z -0.0106 -0.0110 -0.0103 -0.0102 -0.0093 -0.0095  
AT. 14 N X 0.0017 0.0022 -0.0021 -0.0016 -0.0033 -0.0039  
Y 0.0085 0.0089 -0.0085 -0.0082 0.0065 0.0064  
Z -0.0106 -0.0110 0.0103 0.0102 -0.0093 -0.0095  
AT. 15 N X -0.0017 0.0022 0.0021 -0.0016 -0.0033 0.0039  
Y 0.0085 -0.0089 -0.0085 0.0082 -0.0065 0.0064  
Z 0.0106 -0.0110 -0.0103 0.0102 -0.0093 0.0095  
AT. 16 N X -0.0017 0.0022 -0.0021 0.0016 -0.0033 0.0039  
Y -0.0085 0.0089 -0.0085 0.0082 0.0065 -0.0064  
Z 0.0106 -0.0110 0.0103 -0.0102 -0.0093 0.0095  
AT. 17 O X -0.0021 -0.0021 -0.0017 -0.0021 -0.0040 -0.0041  
Y -0.0081 -0.0064 -0.0066 -0.0079 -0.0069 -0.0070  
Z -0.0044 -0.0042 -0.0052 -0.0042 0.0110 0.0112  
AT. 18 O X -0.0021 -0.0021 0.0017 0.0021 -0.0040 -0.0041  
Y 0.0081 0.0064 -0.0066 -0.0079 0.0069 0.0070  
Z -0.0044 -0.0042 0.0052 0.0042 0.0110 0.0112  
AT. 19 O X 0.0021 -0.0021 -0.0017 0.0021 -0.0040 0.0041  
Y 0.0081 -0.0064 -0.0066 0.0079 -0.0069 0.0070  
Z 0.0044 -0.0042 -0.0052 0.0042 0.0110 -0.0112  
AT. 20 O X 0.0021 -0.0021 0.0017 -0.0021 -0.0040 0.0041  
Y -0.0081 0.0064 -0.0066 0.0079 0.0069 -0.0070  
Z 0.0044 -0.0042 0.0052 -0.0042 0.0110 -0.0112  
AT. 21 O X -0.0006 -0.0004 -0.0003 -0.0004 -0.0004 -0.0004  
Y -0.0024 -0.0021 -0.0027 -0.0022 0.0089 0.0089  
Z 0.0116 0.0120 0.0116 0.0110 0.0076 0.0073  
AT. 22 O X -0.0006 -0.0004 0.0003 0.0004 -0.0004 -0.0004  
Y 0.0024 0.0021 -0.0027 -0.0022 -0.0089 -0.0089  
Z 0.0116 0.0120 -0.0116 -0.0110 0.0076 0.0073  
AT. 23 O X 0.0006 -0.0004 -0.0003 0.0004 -0.0004 0.0004

Y 0.0024 -0.0021 -0.0027 0.0022 0.0089 -0.0089  
Z -0.0116 0.0120 0.0116 -0.0110 0.0076 -0.0073  
AT. 24 O X 0.0006 -0.0004 0.0003 -0.0004 -0.0004 0.0004  
Y -0.0024 0.0021 -0.0027 0.0022 -0.0089 0.0089  
Z -0.0116 0.0120 -0.0116 0.0110 0.0076 -0.0073  
AT. 25 C X -0.0028 -0.0013 -0.0030 -0.0021 0.0114 0.0101  
Y 0.0048 0.0034 0.0053 0.0042 -0.0129 -0.0119  
Z 0.0001 -0.0008 -0.0001 0.0001 -0.0084 -0.0074  
AT. 26 C X -0.0028 -0.0013 0.0030 0.0021 0.0114 0.0101  
Y -0.0048 -0.0034 0.0053 0.0042 0.0129 0.0119  
Z 0.0001 -0.0008 0.0001 -0.0001 -0.0084 -0.0074  
AT. 27 C X 0.0028 -0.0013 -0.0030 0.0021 0.0114 -0.0101  
Y -0.0048 0.0034 0.0053 -0.0042 -0.0129 0.0119  
Z -0.0001 -0.0008 -0.0001 -0.0001 -0.0084 0.0074  
AT. 28 C X 0.0028 -0.0013 0.0030 -0.0021 0.0114 -0.0101  
Y 0.0048 -0.0034 0.0053 -0.0042 0.0129 -0.0119  
Z -0.0001 -0.0008 0.0001 0.0001 -0.0084 0.0074  
AT. 29 H X -0.0022 -0.0008 -0.0028 -0.0018 0.0104 0.0091  
Y 0.0222 0.0183 0.0243 0.0224 -0.0488 -0.0478  
Z -0.0040 -0.0042 -0.0038 -0.0035 -0.0010 0.0001  
AT. 30 H X -0.0022 -0.0008 0.0028 0.0018 0.0104 0.0091  
Y -0.0222 -0.0183 0.0243 0.0224 0.0488 0.0478  
Z -0.0040 -0.0042 0.0038 0.0035 -0.0010 0.0001  
AT. 31 H X 0.0022 -0.0008 -0.0028 0.0018 0.0104 -0.0091  
Y -0.0222 0.0183 0.0243 -0.0224 -0.0488 0.0478  
Z 0.0040 -0.0042 -0.0038 0.0035 -0.0010 -0.0001  
AT. 32 H X 0.0022 -0.0008 0.0028 -0.0018 0.0104 -0.0091  
Y 0.0222 -0.0183 0.0243 -0.0224 0.0488 -0.0478  
Z 0.0040 -0.0042 0.0038 -0.0035 -0.0010 -0.0001  
AT. 33 H X 0.0123 0.0116 0.0140 0.0139 -0.0225 -0.0236  
Y -0.0004 -0.0010 -0.0003 -0.0011 -0.0019 -0.0009  
Z 0.0115 0.0089 0.0120 0.0112 -0.0306 -0.0293

AT. 34 H X 0.0123 0.0116 -0.0140 -0.0139 -0.0225 -0.0236  
Y 0.0004 0.0010 -0.0003 -0.0011 0.0019 0.0009  
Z 0.0115 0.0089 -0.0120 -0.0112 -0.0306 -0.0293

AT. 35 H X -0.0123 0.0116 0.0140 -0.0139 -0.0225 0.0236  
Y 0.0004 -0.0010 -0.0003 0.0011 -0.0019 0.0009  
Z -0.0115 0.0089 0.0120 -0.0112 -0.0306 0.0293

AT. 36 H X -0.0123 0.0116 -0.0140 0.0139 -0.0225 0.0236  
Y -0.0004 0.0010 -0.0003 0.0011 0.0019 -0.0009  
Z -0.0115 0.0089 -0.0120 0.0112 -0.0306 0.0293

AT. 37 C X -0.0073 -0.0055 -0.0073 -0.0069 0.0142 0.0135  
Y -0.0038 -0.0033 -0.0033 -0.0038 0.0031 0.0032  
Z -0.0035 -0.0035 -0.0036 -0.0035 -0.0019 -0.0015

AT. 38 C X -0.0073 -0.0055 0.0073 0.0069 0.0142 0.0135  
Y 0.0038 0.0033 -0.0033 -0.0038 -0.0031 -0.0032  
Z -0.0035 -0.0035 0.0036 0.0035 -0.0019 -0.0015

AT. 39 C X 0.0073 -0.0055 -0.0073 0.0069 0.0142 -0.0135  
Y 0.0038 -0.0033 -0.0033 0.0038 0.0031 -0.0032  
Z 0.0035 -0.0035 -0.0036 0.0035 -0.0019 0.0015

AT. 40 C X 0.0073 -0.0055 0.0073 -0.0069 0.0142 -0.0135  
Y -0.0038 0.0033 -0.0033 0.0038 -0.0031 0.0032  
Z 0.0035 -0.0035 0.0036 -0.0035 -0.0019 0.0015

AT. 41 C X -0.0020 -0.0023 -0.0020 -0.0021 0.0042 0.0039  
Y -0.0018 -0.0019 -0.0017 -0.0020 0.0023 0.0017  
Z 0.0111 0.0115 0.0120 0.0113 -0.0107 -0.0109

AT. 42 C X -0.0020 -0.0023 0.0020 0.0021 0.0042 0.0039  
Y 0.0018 0.0019 -0.0017 -0.0020 -0.0023 -0.0017  
Z 0.0111 0.0115 -0.0120 -0.0113 -0.0107 -0.0109

AT. 43 C X 0.0020 -0.0023 -0.0020 0.0021 0.0042 -0.0039  
Y 0.0018 -0.0019 -0.0017 0.0020 0.0023 -0.0017  
Z -0.0111 0.0115 0.0120 -0.0113 -0.0107 0.0109

AT. 44 C X 0.0020 -0.0023 0.0020 -0.0021 0.0042 -0.0039  
Y -0.0018 0.0019 -0.0017 0.0020 -0.0023 0.0017

Z -0.0111 0.0115 -0.0120 0.0113 -0.0107 0.0109  
AT. 45 H X -0.0209 -0.0210 -0.0208 -0.0212 0.0038 0.0039  
Y 0.0029 0.0017 0.0035 0.0025 -0.0100 -0.0109  
Z 0.0178 0.0173 0.0190 0.0178 -0.0208 -0.0214  
AT. 46 H X -0.0209 -0.0210 0.0208 0.0212 0.0038 0.0039  
Y -0.0029 -0.0017 0.0035 0.0025 0.0100 0.0109  
Z 0.0178 0.0173 -0.0190 -0.0178 -0.0208 -0.0214  
AT. 47 H X 0.0209 -0.0210 -0.0208 0.0212 0.0038 -0.0039  
Y -0.0029 0.0017 0.0035 -0.0025 -0.0100 0.0109  
Z -0.0178 0.0173 0.0190 -0.0178 -0.0208 0.0214  
AT. 48 H X 0.0209 -0.0210 0.0208 -0.0212 0.0038 -0.0039  
Y 0.0029 -0.0017 0.0035 -0.0025 0.0100 -0.0109  
Z -0.0178 0.0173 -0.0190 0.0178 -0.0208 0.0214  
AT. 49 H X 0.0016 0.0011 0.0015 0.0016 0.0045 0.0036  
Y 0.0076 0.0069 0.0078 0.0074 -0.0018 -0.0032  
Z -0.0035 -0.0023 -0.0031 -0.0034 0.0003 0.0002  
AT. 50 H X 0.0016 0.0011 -0.0015 -0.0016 0.0045 0.0036  
Y -0.0076 -0.0069 0.0078 0.0074 0.0018 0.0032  
Z -0.0035 -0.0023 0.0031 0.0034 0.0003 0.0002  
AT. 51 H X -0.0016 0.0011 0.0015 -0.0016 0.0045 -0.0036  
Y -0.0076 0.0069 0.0078 -0.0074 -0.0018 0.0032  
Z 0.0035 -0.0023 -0.0031 0.0034 0.0003 -0.0002  
AT. 52 H X -0.0016 0.0011 -0.0015 0.0016 0.0045 -0.0036  
Y 0.0076 -0.0069 0.0078 -0.0074 0.0018 -0.0032  
Z 0.0035 -0.0023 0.0031 -0.0034 0.0003 -0.0002  
AT. 53 C X 0.0077 0.0071 0.0074 0.0077 0.0046 0.0042  
Y -0.0069 -0.0071 -0.0073 -0.0070 0.0044 0.0046  
Z 0.0169 0.0176 0.0169 0.0175 0.0028 0.0036  
AT. 54 C X 0.0077 0.0071 -0.0074 -0.0077 0.0046 0.0042  
Y 0.0069 0.0071 -0.0073 -0.0070 -0.0044 -0.0046  
Z 0.0169 0.0176 -0.0169 -0.0175 0.0028 0.0036  
AT. 55 C X -0.0077 0.0071 0.0074 -0.0077 0.0046 -0.0042

Y 0.0069 -0.0071 -0.0073 0.0070 0.0044 -0.0046  
Z -0.0169 0.0176 0.0169 -0.0175 0.0028 -0.0036  
AT. 56 C X -0.0077 0.0071 -0.0074 0.0077 0.0046 -0.0042  
Y -0.0069 0.0071 -0.0073 0.0070 -0.0044 0.0046  
Z -0.0169 0.0176 -0.0169 0.0175 0.0028 -0.0036  
AT. 57 C X 0.0039 0.0035 0.0039 0.0042 0.0020 0.0020  
Y 0.0126 0.0127 0.0121 0.0127 0.0076 0.0083  
Z 0.0217 0.0223 0.0212 0.0221 0.0063 0.0074  
AT. 58 C X 0.0039 0.0035 -0.0039 -0.0042 0.0020 0.0020  
Y -0.0126 -0.0127 0.0121 0.0127 -0.0076 -0.0083  
Z 0.0217 0.0223 -0.0212 -0.0221 0.0063 0.0074  
AT. 59 C X -0.0039 0.0035 0.0039 -0.0042 0.0020 -0.0020  
Y -0.0126 0.0127 0.0121 -0.0127 0.0076 -0.0083  
Z -0.0217 0.0223 0.0212 -0.0221 0.0063 -0.0074  
AT. 60 C X -0.0039 0.0035 -0.0039 0.0042 0.0020 -0.0020  
Y 0.0126 -0.0127 0.0121 -0.0127 -0.0076 0.0083  
Z -0.0217 0.0223 -0.0212 0.0221 0.0063 -0.0074  
AT. 61 H X -0.0049 -0.0050 -0.0039 -0.0036 -0.0043 -0.0035  
Y 0.0099 0.0103 0.0101 0.0108 0.0043 0.0055  
Z 0.0033 0.0034 0.0029 0.0031 0.0005 0.0017  
AT. 62 H X -0.0049 -0.0050 0.0039 0.0036 -0.0043 -0.0035  
Y -0.0099 -0.0103 0.0101 0.0108 -0.0043 -0.0055  
Z 0.0033 0.0034 -0.0029 -0.0031 0.0005 0.0017  
AT. 63 H X 0.0049 -0.0050 -0.0039 0.0036 -0.0043 0.0035  
Y -0.0099 0.0103 0.0101 -0.0108 0.0043 -0.0055  
Z -0.0033 0.0034 0.0029 -0.0031 0.0005 -0.0017  
AT. 64 H X 0.0049 -0.0050 0.0039 -0.0036 -0.0043 0.0035  
Y 0.0099 -0.0103 0.0101 -0.0108 -0.0043 0.0055  
Z -0.0033 0.0034 -0.0029 0.0031 0.0005 -0.0017  
AT. 65 H X 0.0009 0.0006 0.0010 0.0013 -0.0001 0.0002  
Y 0.0226 0.0225 0.0210 0.0216 0.0142 0.0141  
Z 0.0204 0.0210 0.0194 0.0200 0.0066 0.0072

AT. 66 H X 0.0009 0.0006 -0.0010 -0.0013 -0.0001 0.0002  
Y -0.0226 -0.0225 0.0210 0.0216 -0.0142 -0.0141  
Z 0.0204 0.0210 -0.0194 -0.0200 0.0066 0.0072

AT. 67 H X -0.0009 0.0006 0.0010 -0.0013 -0.0001 -0.0002  
Y -0.0226 0.0225 0.0210 -0.0216 0.0142 -0.0141  
Z -0.0204 0.0210 0.0194 -0.0200 0.0066 -0.0072

AT. 68 H X -0.0009 0.0006 -0.0010 0.0013 -0.0001 -0.0002  
Y 0.0226 -0.0225 0.0210 -0.0216 -0.0142 0.0141  
Z -0.0204 0.0210 -0.0194 0.0200 0.0066 -0.0072

AT. 69 H X 0.0042 0.0037 0.0041 0.0045 0.0034 0.0037  
Y 0.0250 0.0255 0.0246 0.0255 0.0102 0.0111  
Z 0.0325 0.0334 0.0321 0.0332 0.0089 0.0101

AT. 70 H X 0.0042 0.0037 -0.0041 -0.0045 0.0034 0.0037  
Y -0.0250 -0.0255 0.0246 0.0255 -0.0102 -0.0111  
Z 0.0325 0.0334 -0.0321 -0.0332 0.0089 0.0101

AT. 71 H X -0.0042 0.0037 0.0041 -0.0045 0.0034 -0.0037  
Y -0.0250 0.0255 0.0246 -0.0255 0.0102 -0.0111  
Z -0.0325 0.0334 0.0321 -0.0332 0.0089 -0.0101

AT. 72 H X -0.0042 0.0037 -0.0041 0.0045 0.0034 -0.0037  
Y 0.0250 -0.0255 0.0246 -0.0255 -0.0102 0.0111  
Z -0.0325 0.0334 -0.0321 0.0332 0.0089 -0.0101

AT. 73 C X -0.0016 -0.0020 -0.0016 -0.0015 -0.0022 -0.0021  
Y -0.0024 -0.0028 -0.0029 -0.0025 0.0037 0.0032  
Z 0.0037 0.0039 0.0034 0.0037 0.0090 0.0091

AT. 74 C X -0.0016 -0.0020 0.0016 0.0015 -0.0022 -0.0021  
Y 0.0024 0.0028 -0.0029 -0.0025 -0.0037 -0.0032  
Z 0.0037 0.0039 -0.0034 -0.0037 0.0090 0.0091

AT. 75 C X 0.0016 -0.0020 -0.0016 0.0015 -0.0022 0.0021  
Y 0.0024 -0.0028 -0.0029 0.0025 0.0037 -0.0032  
Z -0.0037 0.0039 0.0034 -0.0037 0.0090 -0.0091

AT. 76 C X 0.0016 -0.0020 0.0016 -0.0015 -0.0022 0.0021  
Y -0.0024 0.0028 -0.0029 0.0025 -0.0037 0.0032

Z -0.0037 0.0039 -0.0034 0.0037 0.0090 -0.0091  
AT. 77 C X -0.0047 -0.0057 -0.0056 -0.0046 0.0034 0.0028  
Y -0.0026 -0.0030 -0.0038 -0.0023 0.0125 0.0126  
Z -0.0006 -0.0014 -0.0005 -0.0007 -0.0097 -0.0099  
AT. 78 C X -0.0047 -0.0057 0.0056 0.0046 0.0034 0.0028  
Y 0.0026 0.0030 -0.0038 -0.0023 -0.0125 -0.0126  
Z -0.0006 -0.0014 0.0005 0.0007 -0.0097 -0.0099  
AT. 79 C X 0.0047 -0.0057 -0.0056 0.0046 0.0034 -0.0028  
Y 0.0026 -0.0030 -0.0038 0.0023 0.0125 -0.0126  
Z 0.0006 -0.0014 -0.0005 0.0007 -0.0097 0.0099  
AT. 80 C X 0.0047 -0.0057 0.0056 -0.0046 0.0034 -0.0028  
Y -0.0026 0.0030 -0.0038 0.0023 -0.0125 0.0126  
Z 0.0006 -0.0014 0.0005 -0.0007 -0.0097 0.0099  
AT. 81 H X -0.0058 -0.0071 -0.0079 -0.0055 0.0111 0.0117  
Y -0.0041 -0.0046 -0.0066 -0.0035 0.0214 0.0229  
Z 0.0016 0.0001 0.0013 0.0014 -0.0115 -0.0100  
AT. 82 H X -0.0058 -0.0071 0.0079 0.0055 0.0111 0.0117  
Y 0.0041 0.0046 -0.0066 -0.0035 -0.0214 -0.0229  
Z 0.0016 0.0001 -0.0013 -0.0014 -0.0115 -0.0100  
AT. 83 H X 0.0058 -0.0071 -0.0079 0.0055 0.0111 -0.0117  
Y 0.0041 -0.0046 -0.0066 0.0035 0.0214 -0.0229  
Z -0.0016 0.0001 0.0013 -0.0014 -0.0115 0.0100  
AT. 84 H X 0.0058 -0.0071 0.0079 -0.0055 0.0111 -0.0117  
Y -0.0041 0.0046 -0.0066 0.0035 -0.0214 0.0229  
Z -0.0016 0.0001 -0.0013 0.0014 -0.0115 0.0100  
AT. 85 H X -0.0097 -0.0110 -0.0101 -0.0100 0.0027 -0.0001  
Y -0.0055 -0.0068 -0.0079 -0.0051 0.0200 0.0213  
Z 0.0031 0.0031 0.0041 0.0030 -0.0161 -0.0169  
AT. 86 H X -0.0097 -0.0110 0.0101 0.0100 0.0027 -0.0001  
Y 0.0055 0.0068 -0.0079 -0.0051 -0.0200 -0.0213  
Z 0.0031 0.0031 -0.0041 -0.0030 -0.0161 -0.0169  
AT. 87 H X 0.0097 -0.0110 -0.0101 0.0100 0.0027 0.0001

Y 0.0055 -0.0068 -0.0079 0.0051 0.0200 -0.0213  
Z -0.0031 0.0031 0.0041 -0.0030 -0.0161 0.0169  
AT. 88 H X 0.0097 -0.0110 0.0101 -0.0100 0.0027 0.0001  
Y -0.0055 0.0068 -0.0079 0.0051 -0.0200 0.0213  
Z -0.0031 0.0031 -0.0041 0.0030 -0.0161 0.0169  
AT. 89 C X -0.0044 -0.0051 -0.0057 -0.0040 0.0092 0.0093  
Y 0.0012 0.0003 0.0008 0.0012 -0.0008 -0.0019  
Z -0.0110 -0.0116 -0.0117 -0.0113 0.0125 0.0122  
AT. 90 C X -0.0044 -0.0051 0.0057 0.0040 0.0092 0.0093  
Y -0.0012 -0.0003 0.0008 0.0012 0.0008 0.0019  
Z -0.0110 -0.0116 0.0117 0.0113 0.0125 0.0122  
AT. 91 C X 0.0044 -0.0051 -0.0057 0.0040 0.0092 -0.0093  
Y -0.0012 0.0003 0.0008 -0.0012 -0.0008 0.0019  
Z 0.0110 -0.0116 -0.0117 0.0113 0.0125 -0.0122  
AT. 92 C X 0.0044 -0.0051 0.0057 -0.0040 0.0092 -0.0093  
Y 0.0012 -0.0003 0.0008 -0.0012 0.0008 -0.0019  
Z 0.0110 -0.0116 0.0117 -0.0113 0.0125 -0.0122  
AT. 93 C X -0.0020 -0.0019 -0.0020 -0.0017 -0.0001 -0.0001  
Y 0.0100 0.0097 0.0104 0.0102 -0.0132 -0.0136  
Z -0.0176 -0.0178 -0.0184 -0.0180 0.0171 0.0178  
AT. 94 C X -0.0020 -0.0019 0.0020 0.0017 -0.0001 -0.0001  
Y -0.0100 -0.0097 0.0104 0.0102 0.0132 0.0136  
Z -0.0176 -0.0178 0.0184 0.0180 0.0171 0.0178  
AT. 95 C X 0.0020 -0.0019 -0.0020 0.0017 -0.0001 0.0001  
Y -0.0100 0.0097 0.0104 -0.0102 -0.0132 0.0136  
Z 0.0176 -0.0178 -0.0184 0.0180 0.0171 -0.0178  
AT. 96 C X 0.0020 -0.0019 0.0020 -0.0017 -0.0001 0.0001  
Y 0.0100 -0.0097 0.0104 -0.0102 0.0132 -0.0136  
Z 0.0176 -0.0178 0.0184 -0.0180 0.0171 -0.0178  
AT. 97 H X 0.0011 0.0012 0.0013 0.0015 -0.0083 -0.0082  
Y 0.0078 0.0080 0.0091 0.0074 -0.0080 -0.0081  
Z -0.0119 -0.0106 -0.0104 -0.0124 -0.0003 0.0014



AT. 98 H X 0.0011 0.0012 -0.0013 -0.0015 -0.0083 -0.0082  
Y -0.0078 -0.0080 0.0091 0.0074 0.0080 0.0081  
Z -0.0119 -0.0106 0.0104 0.0124 -0.0003 0.0014

AT. 99 H X -0.0011 0.0012 0.0013 -0.0015 -0.0083 0.0082  
Y -0.0078 0.0080 0.0091 -0.0074 -0.0080 0.0081  
Z 0.0119 -0.0106 -0.0104 0.0124 -0.0003 -0.0014

AT. 100 H X -0.0011 0.0012 -0.0013 0.0015 -0.0083 0.0082  
Y 0.0078 -0.0080 0.0091 -0.0074 0.0080 -0.0081  
Z 0.0119 -0.0106 0.0104 -0.0124 -0.0003 -0.0014

AT. 101 H X 0.0002 0.0006 -0.0001 0.0010 -0.0065 -0.0069  
Y 0.0129 0.0128 0.0131 0.0136 -0.0202 -0.0212  
Z -0.0203 -0.0198 -0.0212 -0.0203 0.0168 0.0181

AT. 102 H X 0.0002 0.0006 0.0001 -0.0010 -0.0065 -0.0069  
Y -0.0129 -0.0128 0.0131 0.0136 0.0202 0.0212  
Z -0.0203 -0.0198 0.0212 0.0203 0.0168 0.0181

AT. 103 H X -0.0002 0.0006 -0.0001 -0.0010 -0.0065 0.0069  
Y -0.0129 0.0128 0.0131 -0.0136 -0.0202 0.0212  
Z 0.0203 -0.0198 -0.0212 0.0203 0.0168 -0.0181

AT. 104 H X -0.0002 0.0006 0.0001 0.0010 -0.0065 0.0069  
Y 0.0129 -0.0128 0.0131 -0.0136 0.0202 -0.0212  
Z 0.0203 -0.0198 0.0212 -0.0203 0.0168 -0.0181

AT. 105 H X 0.0007 0.0011 0.0022 0.0003 -0.0046 -0.0046  
Y 0.0124 0.0133 0.0139 0.0129 -0.0251 -0.0246  
Z -0.0205 -0.0216 -0.0226 -0.0209 0.0277 0.0277

AT. 106 H X 0.0007 0.0011 -0.0022 -0.0003 -0.0046 -0.0046  
Y -0.0124 -0.0133 0.0139 0.0129 0.0251 0.0246  
Z -0.0205 -0.0216 0.0226 0.0209 0.0277 0.0277

AT. 107 H X -0.0007 0.0011 0.0022 -0.0003 -0.0046 0.0046  
Y -0.0124 0.0133 0.0139 -0.0129 -0.0251 0.0246  
Z 0.0205 -0.0216 -0.0226 0.0209 0.0277 -0.0277

AT. 108 H X -0.0007 0.0011 -0.0022 0.0003 -0.0046 0.0046  
Y 0.0124 -0.0133 0.0139 -0.0129 0.0251 -0.0246

Z 0.0205 -0.0216 0.0226 -0.0209 0.0277 -0.0277  
AT.109 C X 0.0065 0.0061 0.0066 0.0067 -0.0036 -0.0042  
Y -0.0143 -0.0144 -0.0140 -0.0139 -0.0071 -0.0066  
Z -0.0047 -0.0048 -0.0044 -0.0042 -0.0088 -0.0090  
AT.110 C X 0.0065 0.0061 -0.0066 -0.0067 -0.0036 -0.0042  
Y 0.0143 0.0144 -0.0140 -0.0139 0.0071 0.0066  
Z -0.0047 -0.0048 0.0044 0.0042 -0.0088 -0.0090  
AT.111 C X -0.0065 0.0061 0.0066 -0.0067 -0.0036 0.0042  
Y 0.0143 -0.0144 -0.0140 0.0139 -0.0071 0.0066  
Z 0.0047 -0.0048 -0.0044 0.0042 -0.0088 0.0090  
AT.112 C X -0.0065 0.0061 -0.0066 0.0067 -0.0036 0.0042  
Y -0.0143 0.0144 -0.0140 0.0139 0.0071 -0.0066  
Z 0.0047 -0.0048 0.0044 -0.0042 -0.0088 0.0090  
AT.113 H X 0.0068 0.0061 0.0062 0.0066 0.0041 0.0031  
Y -0.0152 -0.0148 -0.0139 -0.0143 -0.0195 -0.0186  
Z -0.0072 -0.0071 -0.0073 -0.0073 -0.0047 -0.0055  
AT.114 H X 0.0068 0.0061 -0.0062 -0.0066 0.0041 0.0031  
Y 0.0152 0.0148 -0.0139 -0.0143 0.0195 0.0186  
Z -0.0072 -0.0071 0.0073 0.0073 -0.0047 -0.0055  
AT.115 H X -0.0068 0.0061 0.0062 -0.0066 0.0041 -0.0031  
Y 0.0152 -0.0148 -0.0139 0.0143 -0.0195 0.0186  
Z 0.0072 -0.0071 -0.0073 0.0073 -0.0047 0.0055  
AT.116 H X -0.0068 0.0061 -0.0062 0.0066 0.0041 -0.0031  
Y -0.0152 0.0148 -0.0139 0.0143 0.0195 -0.0186  
Z 0.0072 -0.0071 0.0073 -0.0073 -0.0047 0.0055  
AT.117 H X 0.0132 0.0135 0.0142 0.0142 -0.0145 -0.0141  
Y -0.0234 -0.0236 -0.0227 -0.0229 -0.0104 -0.0100  
Z -0.0140 -0.0144 -0.0135 -0.0136 -0.0106 -0.0109  
AT.118 H X 0.0132 0.0135 -0.0142 -0.0142 -0.0145 -0.0141  
Y 0.0234 0.0236 -0.0227 -0.0229 0.0104 0.0100  
Z -0.0140 -0.0144 0.0135 0.0136 -0.0106 -0.0109  
AT.119 H X -0.0132 0.0135 0.0142 -0.0142 -0.0145 0.0141

Y 0.0234 -0.0236 -0.0227 0.0229 -0.0104 0.0100  
Z 0.0140 -0.0144 -0.0135 0.0136 -0.0106 0.0109  
AT. 120 H X -0.0132 0.0135 -0.0142 0.0142 -0.0145 0.0141  
Y -0.0234 0.0236 -0.0227 0.0229 0.0104 -0.0100  
Z 0.0140 -0.0144 0.0135 -0.0136 -0.0106 0.0109  
AT. 121 C X 0.0012 0.0013 0.0007 0.0014 0.0028 0.0033  
Y -0.0001 -0.0006 0.0001 -0.0004 -0.0021 -0.0025  
Z -0.0129 -0.0133 -0.0126 -0.0128 -0.0030 -0.0037  
AT. 122 C X 0.0012 0.0013 -0.0007 -0.0014 0.0028 0.0033  
Y 0.0001 0.0006 0.0001 -0.0004 0.0021 0.0025  
Z -0.0129 -0.0133 0.0126 0.0128 -0.0030 -0.0037  
AT. 123 C X -0.0012 0.0013 0.0007 -0.0014 0.0028 -0.0033  
Y 0.0001 -0.0006 0.0001 0.0004 -0.0021 0.0025  
Z 0.0129 -0.0133 -0.0126 0.0128 -0.0030 0.0037  
AT. 124 C X -0.0012 0.0013 -0.0007 0.0014 0.0028 -0.0033  
Y -0.0001 0.0006 0.0001 0.0004 0.0021 -0.0025  
Z 0.0129 -0.0133 0.0126 -0.0128 -0.0030 0.0037  
AT. 125 H X 0.0126 0.0145 0.0143 0.0128 -0.0101 -0.0082  
Y 0.0079 0.0076 0.0081 0.0072 0.0091 0.0090  
Z -0.0215 -0.0225 -0.0217 -0.0210 -0.0072 -0.0085  
AT. 126 H X 0.0126 0.0145 -0.0143 -0.0128 -0.0101 -0.0082  
Y -0.0079 -0.0076 0.0081 0.0072 -0.0091 -0.0090  
Z -0.0215 -0.0225 0.0217 0.0210 -0.0072 -0.0085  
AT. 127 H X -0.0126 0.0145 0.0143 -0.0128 -0.0101 0.0082  
Y -0.0079 0.0076 0.0081 -0.0072 0.0091 -0.0090  
Z 0.0215 -0.0225 -0.0217 0.0210 -0.0072 0.0085  
AT. 128 H X -0.0126 0.0145 -0.0143 0.0128 -0.0101 0.0082  
Y 0.0079 -0.0076 0.0081 -0.0072 -0.0091 0.0090  
Z 0.0215 -0.0225 0.0217 -0.0210 -0.0072 0.0085  
AT. 129 H X 0.0009 0.0007 -0.0001 0.0013 0.0055 0.0059  
Y 0.0060 0.0065 0.0075 0.0053 -0.0068 -0.0064  
Z 0.0007 0.0016 0.0023 0.0005 -0.0047 -0.0043

AT. 130 H X 0.0009 0.0007 0.0001 -0.0013 0.0055 0.0059  
Y -0.0060 -0.0065 0.0075 0.0053 0.0068 0.0064  
Z 0.0007 0.0016 -0.0023 -0.0005 -0.0047 -0.0043

AT. 131 H X -0.0009 0.0007 -0.0001 -0.0013 0.0055 -0.0059  
Y -0.0060 0.0065 0.0075 -0.0053 -0.0068 0.0064  
Z -0.0007 0.0016 0.0023 -0.0005 -0.0047 0.0043

AT. 132 H X -0.0009 0.0007 0.0001 0.0013 0.0055 -0.0059  
Y 0.0060 -0.0065 0.0075 -0.0053 0.0068 -0.0064  
Z -0.0007 0.0016 -0.0023 0.0005 -0.0047 0.0043

AT. 133 C X 0.0085 0.0080 0.0082 0.0082 0.0062 0.0062  
Y -0.0108 -0.0111 -0.0108 -0.0105 -0.0057 -0.0057  
Z 0.0036 0.0037 0.0039 0.0033 -0.0024 -0.0025

AT. 134 C X 0.0085 0.0080 -0.0082 -0.0082 0.0062 0.0062  
Y 0.0108 0.0111 -0.0108 -0.0105 0.0057 0.0057  
Z 0.0036 0.0037 -0.0039 -0.0033 -0.0024 -0.0025

AT. 135 C X -0.0085 0.0080 0.0082 -0.0082 0.0062 -0.0062  
Y 0.0108 -0.0111 -0.0108 0.0105 -0.0057 0.0057  
Z -0.0036 0.0037 0.0039 -0.0033 -0.0024 0.0025

AT. 136 C X -0.0085 0.0080 -0.0082 0.0082 0.0062 -0.0062  
Y -0.0108 0.0111 -0.0108 0.0105 0.0057 -0.0057  
Z -0.0036 0.0037 -0.0039 0.0033 -0.0024 0.0025

AT. 137 C X 0.0070 0.0057 0.0065 0.0073 0.0084 0.0085  
Y 0.0056 0.0056 0.0057 0.0054 0.0030 0.0029  
Z -0.0029 -0.0029 -0.0027 -0.0028 -0.0068 -0.0067

AT. 138 C X 0.0070 0.0057 -0.0065 -0.0073 0.0084 0.0085  
Y -0.0056 -0.0056 0.0057 0.0054 -0.0030 -0.0029  
Z -0.0029 -0.0029 0.0027 0.0028 -0.0068 -0.0067

AT. 139 C X -0.0070 0.0057 0.0065 -0.0073 0.0084 -0.0085  
Y -0.0056 0.0056 0.0057 -0.0054 0.0030 -0.0029  
Z 0.0029 -0.0029 -0.0027 0.0028 -0.0068 0.0067

AT. 140 C X -0.0070 0.0057 -0.0065 0.0073 0.0084 -0.0085  
Y 0.0056 -0.0056 0.0057 -0.0054 -0.0030 0.0029

Z 0.0029 -0.0029 0.0027 -0.0028 -0.0068 0.0067  
AT. 141 H X 0.0227 0.0221 0.0225 0.0227 0.0178 0.0184  
Y 0.0403 0.0409 0.0401 0.0389 0.0237 0.0243  
Z 0.0033 0.0029 0.0031 0.0029 -0.0032 -0.0032  
AT. 142 H X 0.0227 0.0221 -0.0225 -0.0227 0.0178 0.0184  
Y -0.0403 -0.0409 0.0401 0.0389 -0.0237 -0.0243  
Z 0.0033 0.0029 -0.0031 -0.0029 -0.0032 -0.0032  
AT. 143 H X -0.0227 0.0221 0.0225 -0.0227 0.0178 -0.0184  
Y -0.0403 0.0409 0.0401 -0.0389 0.0237 -0.0243  
Z -0.0033 0.0029 0.0031 -0.0029 -0.0032 0.0032  
AT. 144 H X -0.0227 0.0221 -0.0225 0.0227 0.0178 -0.0184  
Y 0.0403 -0.0409 0.0401 -0.0389 -0.0237 0.0243  
Z -0.0033 0.0029 -0.0031 0.0029 -0.0032 0.0032  
AT. 145 H X -0.0239 -0.0255 -0.0238 -0.0228 -0.0125 -0.0128  
Y 0.0087 0.0086 0.0086 0.0084 0.0053 0.0054  
Z -0.0262 -0.0268 -0.0261 -0.0253 -0.0211 -0.0211  
AT. 146 H X -0.0239 -0.0255 0.0238 0.0228 -0.0125 -0.0128  
Y -0.0087 -0.0086 0.0086 0.0084 -0.0053 -0.0054  
Z -0.0262 -0.0268 0.0261 0.0253 -0.0211 -0.0211  
AT. 147 H X 0.0239 -0.0255 -0.0238 0.0228 -0.0125 0.0128  
Y -0.0087 0.0086 0.0086 -0.0084 0.0053 -0.0054  
Z 0.0262 -0.0268 -0.0261 0.0253 -0.0211 0.0211  
AT. 148 H X 0.0239 -0.0255 0.0238 -0.0228 -0.0125 0.0128  
Y 0.0087 -0.0086 0.0086 -0.0084 -0.0053 0.0054  
Z 0.0262 -0.0268 0.0261 -0.0253 -0.0211 0.0211  
AT. 149 O X 0.0031 0.0034 0.0038 0.0034 -0.0082 -0.0074  
Y 0.0091 0.0095 0.0087 0.0091 0.0062 0.0061  
Z -0.0054 -0.0055 -0.0056 -0.0054 -0.0006 -0.0006  
AT. 150 O X 0.0031 0.0034 -0.0038 -0.0034 -0.0082 -0.0074  
Y -0.0091 -0.0095 0.0087 0.0091 -0.0062 -0.0061  
Z -0.0054 -0.0055 0.0056 0.0054 -0.0006 -0.0006  
AT. 151 O X -0.0031 0.0034 0.0038 -0.0034 -0.0082 0.0074

Y -0.0091 0.0095 0.0087 -0.0091 0.0062 -0.0061  
Z 0.0054 -0.0055 -0.0056 0.0054 -0.0006 0.0006  
AT. 152 O X -0.0031 0.0034 -0.0038 0.0034 -0.0082 0.0074  
Y 0.0091 -0.0095 0.0087 -0.0091 -0.0062 0.0061  
Z 0.0054 -0.0055 0.0056 -0.0054 -0.0006 0.0006  
AT. 153 H X -0.0250 -0.0193 -0.0195 -0.0264 -0.0083 -0.0078  
Y -0.0276 -0.0227 -0.0239 -0.0293 -0.0023 -0.0019  
Z -0.0005 -0.0024 -0.0022 -0.0000 -0.0040 -0.0036  
AT. 154 H X -0.0250 -0.0193 0.0195 0.0264 -0.0083 -0.0078  
Y 0.0276 0.0227 -0.0239 -0.0293 0.0023 0.0019  
Z -0.0005 -0.0024 0.0022 0.0000 -0.0040 -0.0036  
AT. 155 H X 0.0250 -0.0193 -0.0195 0.0264 -0.0083 0.0078  
Y 0.0276 -0.0227 -0.0239 0.0293 -0.0023 0.0019  
Z 0.0005 -0.0024 -0.0022 0.0000 -0.0040 0.0036  
AT. 156 H X 0.0250 -0.0193 0.0195 -0.0264 -0.0083 0.0078  
Y -0.0276 0.0227 -0.0239 0.0293 0.0023 -0.0019  
Z 0.0005 -0.0024 0.0022 -0.0000 -0.0040 0.0036  
AT. 157 O X -0.0056 -0.0061 -0.0055 -0.0056 -0.0034 -0.0037  
Y 0.0051 0.0056 0.0056 0.0053 -0.0063 -0.0056  
Z 0.0020 0.0023 0.0023 0.0020 0.0016 0.0015  
AT. 158 O X -0.0056 -0.0061 0.0055 0.0056 -0.0034 -0.0037  
Y -0.0051 -0.0056 0.0056 0.0053 0.0063 0.0056  
Z 0.0020 0.0023 -0.0023 -0.0020 0.0016 0.0015  
AT. 159 O X 0.0056 -0.0061 -0.0055 0.0056 -0.0034 0.0037  
Y -0.0051 0.0056 0.0056 -0.0053 -0.0063 0.0056  
Z -0.0020 0.0023 0.0023 -0.0020 0.0016 -0.0015  
AT. 160 O X 0.0056 -0.0061 0.0055 -0.0056 -0.0034 0.0037  
Y 0.0051 -0.0056 0.0056 -0.0053 0.0063 -0.0056  
Z -0.0020 0.0023 -0.0023 0.0020 0.0016 -0.0015  
AT. 161 O X 0.0024 0.0027 0.0028 0.0023 -0.0037 -0.0038  
Y 0.0017 0.0020 0.0022 0.0016 -0.0051 -0.0049  
Z 0.0000 0.0002 0.0004 0.0001 -0.0035 -0.0032

AT.162 O X 0.0024 0.0027 -0.0028 -0.0023 -0.0037 -0.0038  
Y -0.0017 -0.0020 0.0022 0.0016 0.0051 0.0049  
Z 0.0000 0.0002 -0.0004 -0.0001 -0.0035 -0.0032

AT.163 O X -0.0024 0.0027 0.0028 -0.0023 -0.0037 0.0038  
Y -0.0017 0.0020 0.0022 -0.0016 -0.0051 0.0049  
Z -0.0000 0.0002 0.0004 -0.0001 -0.0035 0.0032

AT.164 O X -0.0024 0.0027 -0.0028 0.0023 -0.0037 0.0038  
Y 0.0017 -0.0020 0.0022 -0.0016 0.0051 -0.0049  
Z -0.0000 0.0002 -0.0004 0.0001 -0.0035 0.0032

AT.165 H X -0.0069 -0.0063 -0.0065 -0.0062 -0.0060 -0.0073  
Y -0.0021 -0.0016 -0.0015 -0.0018 -0.0066 -0.0069  
Z 0.0120 0.0125 0.0130 0.0120 0.0004 0.0022

AT.166 H X -0.0069 -0.0063 0.0065 0.0062 -0.0060 -0.0073  
Y 0.0021 0.0016 -0.0015 -0.0018 0.0066 0.0069  
Z 0.0120 0.0125 -0.0130 -0.0120 0.0004 0.0022

AT.167 H X 0.0069 -0.0063 -0.0065 0.0062 -0.0060 0.0073  
Y 0.0021 -0.0016 -0.0015 0.0018 -0.0066 0.0069  
Z -0.0120 0.0125 0.0130 -0.0120 0.0004 -0.0022

AT.168 H X 0.0069 -0.0063 0.0065 -0.0062 -0.0060 0.0073  
Y -0.0021 0.0016 -0.0015 0.0018 0.0066 -0.0069  
Z -0.0120 0.0125 -0.0130 0.0120 0.0004 -0.0022

AT.169 O X 0.0006 0.0005 0.0007 0.0007 0.0007 0.0005  
Y 0.0044 0.0024 0.0025 0.0045 0.0012 0.0030  
Z -0.0004 0.0000 0.0000 -0.0004 0.0002 -0.0004

AT.170 O X 0.0006 0.0005 -0.0007 -0.0007 0.0007 0.0005  
Y -0.0044 -0.0024 0.0025 0.0045 -0.0012 -0.0030  
Z -0.0004 0.0000 -0.0000 0.0004 0.0002 -0.0004

AT.171 O X -0.0006 0.0005 0.0007 -0.0007 0.0007 -0.0005  
Y -0.0044 0.0024 0.0025 -0.0045 0.0012 -0.0030  
Z 0.0004 0.0000 0.0000 0.0004 0.0002 0.0004

AT.172 O X -0.0006 0.0005 -0.0007 0.0007 0.0007 -0.0005  
Y 0.0044 -0.0024 0.0025 -0.0045 -0.0012 0.0030

Z 0.0004 0.0000 -0.0000 -0.0004 0.0002 0.0004  
AT. 173 H X 0.0090 0.0060 0.0066 0.0092 0.0005 0.0021  
Y 0.0039 0.0021 0.0021 0.0039 0.0013 0.0031  
Z -0.0053 -0.0006 -0.0008 -0.0054 0.0027 -0.0007  
AT. 174 H X 0.0090 0.0060 -0.0066 -0.0092 0.0005 0.0021  
Y -0.0039 -0.0021 0.0021 0.0039 -0.0013 -0.0031  
Z -0.0053 -0.0006 0.0008 0.0054 0.0027 -0.0007  
AT. 175 H X -0.0090 0.0060 0.0066 -0.0092 0.0005 -0.0021  
Y -0.0039 0.0021 0.0021 -0.0039 0.0013 -0.0031  
Z 0.0053 -0.0006 -0.0008 0.0054 0.0027 0.0007  
AT. 176 H X -0.0090 0.0060 -0.0066 0.0092 0.0005 -0.0021  
Y 0.0039 -0.0021 0.0021 -0.0039 -0.0013 0.0031  
Z 0.0053 -0.0006 0.0008 -0.0054 0.0027 0.0007

FREQ(CM\*\*-1) 553.91 554.22 576.90 577.32 577.45 578.80

AT. 1 I X -0.0015 -0.0014 0.0003 0.0001 -0.0003 0.0001  
Y 0.0005 0.0004 -0.0002 -0.0003 0.0003 -0.0003  
Z 0.0010 0.0008 -0.0002 -0.0001 0.0002 -0.0001  
AT. 2 I X 0.0015 0.0014 -0.0003 0.0001 0.0003 0.0001  
Y 0.0005 0.0004 -0.0002 0.0003 0.0003 0.0003  
Z -0.0010 -0.0008 0.0002 -0.0001 -0.0002 -0.0001  
AT. 3 I X -0.0015 0.0014 -0.0003 -0.0001 -0.0003 0.0001  
Y 0.0005 -0.0004 0.0002 0.0003 0.0003 -0.0003  
Z 0.0010 -0.0008 0.0002 0.0001 0.0002 -0.0001  
AT. 4 I X 0.0015 -0.0014 0.0003 -0.0001 0.0003 0.0001  
Y 0.0005 -0.0004 0.0002 -0.0003 0.0003 0.0003  
Z -0.0010 0.0008 -0.0002 0.0001 -0.0002 -0.0001  
AT. 5 I X -0.0010 -0.0011 0.0001 0.0001 -0.0001 0.0000  
Y 0.0002 0.0002 -0.0000 0.0000 0.0001 -0.0000  
Z 0.0005 0.0006 0.0000 0.0000 0.0000 0.0000  
AT. 6 I X 0.0010 0.0011 -0.0001 0.0001 0.0001 0.0000



Y 0.0002 0.0002 -0.0000 -0.0000 0.0001 0.0000  
Z -0.0005 -0.0006 -0.0000 0.0000 -0.0000 0.0000  
AT. 7 I X -0.0010 0.0011 -0.0001 -0.0001 -0.0001 0.0000  
Y 0.0002 -0.0002 0.0000 -0.0000 0.0001 -0.0000  
Z 0.0005 -0.0006 -0.0000 -0.0000 0.0000 0.0000  
AT. 8 I X 0.0010 -0.0011 0.0001 -0.0001 0.0001 0.0000  
Y 0.0002 -0.0002 0.0000 0.0000 0.0001 0.0000  
Z -0.0005 0.0006 0.0000 -0.0000 -0.0000 0.0000  
AT. 9 N X -0.0035 -0.0028 0.0083 0.0088 -0.0089 0.0093  
Y 0.0106 0.0100 0.0015 0.0018 -0.0019 0.0024  
Z -0.0132 -0.0138 -0.0065 -0.0069 0.0067 -0.0072  
AT. 10 N X 0.0035 0.0028 -0.0083 0.0088 0.0089 0.0093  
Y 0.0106 0.0100 0.0015 -0.0018 -0.0019 -0.0024  
Z 0.0132 0.0138 0.0065 -0.0069 -0.0067 -0.0072  
AT. 11 N X -0.0035 0.0028 -0.0083 -0.0088 -0.0089 0.0093  
Y 0.0106 -0.0100 -0.0015 -0.0018 -0.0019 0.0024  
Z -0.0132 0.0138 0.0065 0.0069 0.0067 -0.0072  
AT. 12 N X 0.0035 -0.0028 0.0083 -0.0088 0.0089 0.0093  
Y 0.0106 -0.0100 -0.0015 0.0018 -0.0019 -0.0024  
Z 0.0132 -0.0138 -0.0065 0.0069 -0.0067 -0.0072  
AT. 13 N X -0.0035 -0.0041 0.0039 0.0035 -0.0041 0.0037  
Y -0.0070 -0.0065 -0.0033 -0.0032 0.0031 -0.0030  
Z -0.0100 -0.0092 -0.0038 -0.0036 0.0036 -0.0034  
AT. 14 N X 0.0035 0.0041 -0.0039 0.0035 0.0041 0.0037  
Y -0.0070 -0.0065 -0.0033 0.0032 0.0031 0.0030  
Z 0.0100 0.0092 0.0038 -0.0036 -0.0036 -0.0034  
AT. 15 N X -0.0035 0.0041 -0.0039 -0.0035 -0.0041 0.0037  
Y -0.0070 0.0065 0.0033 0.0032 0.0031 -0.0030  
Z -0.0100 0.0092 0.0038 0.0036 0.0036 -0.0034  
AT. 16 N X 0.0035 -0.0041 0.0039 -0.0035 0.0041 0.0037  
Y -0.0070 0.0065 0.0033 -0.0032 0.0031 0.0030  
Z 0.0100 -0.0092 -0.0038 0.0036 -0.0036 -0.0034

AT. 17 O X -0.0041 -0.0040 0.0037 0.0039 -0.0040 0.0040  
Y -0.0068 -0.0071 0.0083 0.0088 -0.0088 0.0087  
Z 0.0107 0.0114 0.0028 0.0032 -0.0035 0.0042

AT. 18 O X 0.0041 0.0040 -0.0037 0.0039 0.0040 0.0040  
Y -0.0068 -0.0071 0.0083 -0.0088 -0.0088 -0.0087  
Z -0.0107 -0.0114 -0.0028 0.0032 0.0035 0.0042

AT. 19 O X -0.0041 0.0040 -0.0037 -0.0039 -0.0040 0.0040  
Y -0.0068 0.0071 -0.0083 -0.0088 -0.0088 0.0087  
Z 0.0107 -0.0114 -0.0028 -0.0032 -0.0035 0.0042

AT. 20 O X 0.0041 -0.0040 0.0037 -0.0039 0.0040 0.0040  
Y -0.0068 0.0071 -0.0083 0.0088 -0.0088 -0.0087  
Z -0.0107 0.0114 0.0028 -0.0032 0.0035 0.0042

AT. 21 O X -0.0005 -0.0006 0.0013 0.0012 -0.0012 0.0012  
Y 0.0084 0.0092 0.0024 0.0031 -0.0023 0.0032  
Z 0.0079 0.0072 0.0026 0.0026 -0.0023 0.0021

AT. 22 O X 0.0005 0.0006 -0.0013 0.0012 0.0012 0.0012  
Y 0.0084 0.0092 0.0024 -0.0031 -0.0023 -0.0032  
Z -0.0079 -0.0072 -0.0026 0.0026 0.0023 0.0021

AT. 23 O X -0.0005 0.0006 -0.0013 -0.0012 -0.0012 0.0012  
Y 0.0084 -0.0092 -0.0024 -0.0031 -0.0023 0.0032  
Z 0.0079 -0.0072 -0.0026 -0.0026 -0.0023 0.0021

AT. 24 O X 0.0005 -0.0006 0.0013 -0.0012 0.0012 0.0012  
Y 0.0084 -0.0092 -0.0024 0.0031 -0.0023 -0.0032  
Z -0.0079 0.0072 0.0026 -0.0026 0.0023 0.0021

AT. 25 C X 0.0114 0.0100 -0.0024 -0.0023 0.0026 -0.0022  
Y -0.0127 -0.0115 0.0055 0.0056 -0.0055 0.0053  
Z -0.0083 -0.0076 0.0000 0.0001 -0.0004 0.0001

AT. 26 C X -0.0114 -0.0100 0.0024 -0.0023 -0.0026 -0.0022  
Y -0.0127 -0.0115 0.0055 -0.0056 -0.0055 -0.0053  
Z 0.0083 0.0076 -0.0000 0.0001 0.0004 0.0001

AT. 27 C X 0.0114 -0.0100 0.0024 0.0023 0.0026 -0.0022  
Y -0.0127 0.0115 -0.0055 -0.0056 -0.0055 0.0053

Z -0.0083 0.0076 -0.0000 -0.0001 -0.0004 0.0001  
AT. 28 C X -0.0114 0.0100 -0.0024 0.0023 -0.0026 -0.0022  
Y -0.0127 0.0115 -0.0055 0.0056 -0.0055 -0.0053  
Z 0.0083 -0.0076 0.0000 -0.0001 0.0004 0.0001  
AT. 29 H X 0.0103 0.0096 -0.0019 -0.0029 0.0022 -0.0027  
Y -0.0488 -0.0475 -0.0110 -0.0106 0.0139 -0.0138  
Z -0.0007 -0.0010 0.0017 0.0035 -0.0026 0.0038  
AT. 30 H X -0.0103 -0.0096 0.0019 -0.0029 -0.0022 -0.0027  
Y -0.0488 -0.0475 -0.0110 0.0106 0.0139 0.0138  
Z 0.0007 0.0010 -0.0017 0.0035 0.0026 0.0038  
AT. 31 H X 0.0103 -0.0096 0.0019 0.0029 0.0022 -0.0027  
Y -0.0488 0.0475 0.0110 0.0106 0.0139 -0.0138  
Z -0.0007 0.0010 -0.0017 -0.0035 -0.0026 0.0038  
AT. 32 H X -0.0103 0.0096 -0.0019 0.0029 -0.0022 -0.0027  
Y -0.0488 0.0475 0.0110 -0.0106 0.0139 0.0138  
Z 0.0007 -0.0010 0.0017 -0.0035 0.0026 0.0038  
AT. 33 H X -0.0228 -0.0238 -0.0148 -0.0144 0.0173 -0.0167  
Y -0.0017 -0.0005 0.0095 0.0097 -0.0102 0.0102  
Z -0.0301 -0.0298 -0.0085 -0.0087 0.0098 -0.0105  
AT. 34 H X 0.0228 0.0238 0.0148 -0.0144 -0.0173 -0.0167  
Y -0.0017 -0.0005 0.0095 -0.0097 -0.0102 -0.0102  
Z 0.0301 0.0298 0.0085 -0.0087 -0.0098 -0.0105  
AT. 35 H X -0.0228 0.0238 0.0148 0.0144 0.0173 -0.0167  
Y -0.0017 0.0005 -0.0095 -0.0097 -0.0102 0.0102  
Z -0.0301 0.0298 0.0085 0.0087 0.0098 -0.0105  
AT. 36 H X 0.0228 -0.0238 -0.0148 0.0144 -0.0173 -0.0167  
Y -0.0017 0.0005 -0.0095 0.0097 -0.0102 -0.0102  
Z 0.0301 -0.0298 -0.0085 0.0087 -0.0098 -0.0105  
AT. 37 C X 0.0140 0.0134 0.0065 0.0068 -0.0073 0.0077  
Y 0.0032 0.0034 0.0057 0.0064 -0.0064 0.0072  
Z -0.0020 -0.0016 0.0020 0.0020 -0.0026 0.0026  
AT. 38 C X -0.0140 -0.0134 -0.0065 0.0068 0.0073 0.0077

Y 0.0032 0.0034 0.0057 -0.0064 -0.0064 -0.0072  
Z 0.0020 0.0016 -0.0020 0.0020 0.0026 0.0026  
AT. 39 C X 0.0140 -0.0134 -0.0065 -0.0068 -0.0073 0.0077  
Y 0.0032 -0.0034 -0.0057 -0.0064 -0.0064 0.0072  
Z -0.0020 0.0016 -0.0020 -0.0020 -0.0026 0.0026  
AT. 40 C X -0.0140 0.0134 0.0065 -0.0068 0.0073 0.0077  
Y 0.0032 -0.0034 -0.0057 0.0064 -0.0064 -0.0072  
Z 0.0020 -0.0016 0.0020 -0.0020 0.0026 0.0026  
AT. 41 C X 0.0039 0.0037 -0.0014 -0.0020 0.0015 -0.0021  
Y 0.0019 0.0014 -0.0033 -0.0040 0.0032 -0.0039  
Z -0.0099 -0.0107 -0.0016 -0.0016 0.0020 -0.0018  
AT. 42 C X -0.0039 -0.0037 0.0014 -0.0020 -0.0015 -0.0021  
Y 0.0019 0.0014 -0.0033 0.0040 0.0032 0.0039  
Z 0.0099 0.0107 0.0016 -0.0016 -0.0020 -0.0018  
AT. 43 C X 0.0039 -0.0037 0.0014 0.0020 0.0015 -0.0021  
Y 0.0019 -0.0014 0.0033 0.0040 0.0032 -0.0039  
Z -0.0099 0.0107 0.0016 0.0016 0.0020 -0.0018  
AT. 44 C X -0.0039 0.0037 -0.0014 0.0020 -0.0015 -0.0021  
Y 0.0019 -0.0014 0.0033 -0.0040 0.0032 0.0039  
Z 0.0099 -0.0107 -0.0016 0.0016 -0.0020 -0.0018  
AT. 45 H X 0.0027 0.0034 0.0042 0.0031 -0.0057 0.0045  
Y -0.0109 -0.0114 -0.0134 -0.0143 0.0140 -0.0149  
Z -0.0203 -0.0214 -0.0108 -0.0110 0.0121 -0.0121  
AT. 46 H X -0.0027 -0.0034 -0.0042 0.0031 0.0057 0.0045  
Y -0.0109 -0.0114 -0.0134 0.0143 0.0140 0.0149  
Z 0.0203 0.0214 0.0108 -0.0110 -0.0121 -0.0121  
AT. 47 H X 0.0027 -0.0034 -0.0042 -0.0031 -0.0057 0.0045  
Y -0.0109 0.0114 0.0134 0.0143 0.0140 -0.0149  
Z -0.0203 0.0214 0.0108 0.0110 0.0121 -0.0121  
AT. 48 H X -0.0027 0.0034 0.0042 -0.0031 0.0057 0.0045  
Y -0.0109 0.0114 0.0134 -0.0143 0.0140 0.0149  
Z 0.0203 -0.0214 -0.0108 0.0110 -0.0121 -0.0121

AT. 49 H X 0.0041 0.0032 -0.0085 -0.0090 0.0091 -0.0097  
Y -0.0023 -0.0036 -0.0139 -0.0144 0.0147 -0.0154  
Z 0.0008 0.0008 0.0075 0.0073 -0.0082 0.0085

AT. 50 H X -0.0041 -0.0032 0.0085 -0.0090 -0.0091 -0.0097  
Y -0.0023 -0.0036 -0.0139 0.0144 0.0147 0.0154  
Z -0.0008 -0.0008 -0.0075 0.0073 0.0082 0.0085

AT. 51 H X 0.0041 -0.0032 0.0085 0.0090 0.0091 -0.0097  
Y -0.0023 0.0036 0.0139 0.0144 0.0147 -0.0154  
Z 0.0008 -0.0008 -0.0075 -0.0073 -0.0082 0.0085

AT. 52 H X -0.0041 0.0032 -0.0085 0.0090 -0.0091 -0.0097  
Y -0.0023 0.0036 0.0139 -0.0144 0.0147 0.0154  
Z -0.0008 0.0008 0.0075 -0.0073 0.0082 0.0085

AT. 53 C X 0.0047 0.0041 -0.0044 -0.0048 0.0052 -0.0057  
Y 0.0041 0.0041 0.0010 -0.0003 -0.0013 -0.0001  
Z 0.0045 0.0038 0.0062 0.0064 -0.0052 0.0054

AT. 54 C X -0.0047 -0.0041 0.0044 -0.0048 -0.0052 -0.0057  
Y 0.0041 0.0041 0.0010 0.0003 -0.0013 0.0001  
Z -0.0045 -0.0038 -0.0062 0.0064 0.0052 0.0054

AT. 55 C X 0.0047 -0.0041 0.0044 0.0048 0.0052 -0.0057  
Y 0.0041 -0.0041 -0.0010 0.0003 -0.0013 -0.0001  
Z 0.0045 -0.0038 -0.0062 -0.0064 -0.0052 0.0054

AT. 56 C X -0.0047 0.0041 -0.0044 0.0048 -0.0052 -0.0057  
Y 0.0041 -0.0041 -0.0010 -0.0003 -0.0013 0.0001  
Z -0.0045 0.0038 0.0062 -0.0064 0.0052 0.0054

AT. 57 C X 0.0021 0.0023 0.0025 0.0019 -0.0018 0.0017  
Y 0.0085 0.0079 0.0048 0.0044 -0.0039 0.0037  
Z 0.0087 0.0073 0.0078 0.0068 -0.0064 0.0051

AT. 58 C X -0.0021 -0.0023 -0.0025 0.0019 0.0018 0.0017  
Y 0.0085 0.0079 0.0048 -0.0044 -0.0039 -0.0037  
Z -0.0087 -0.0073 -0.0078 0.0068 0.0064 0.0051

AT. 59 C X 0.0021 -0.0023 -0.0025 -0.0019 -0.0018 0.0017  
Y 0.0085 -0.0079 -0.0048 -0.0044 -0.0039 0.0037

Z 0.0087 -0.0073 -0.0078 -0.0068 -0.0064 0.0051  
AT. 60 C X -0.0021 0.0023 0.0025 -0.0019 0.0018 0.0017  
Y 0.0085 -0.0079 -0.0048 0.0044 -0.0039 -0.0037  
Z -0.0087 0.0073 0.0078 -0.0068 0.0064 0.0051  
AT. 61 H X -0.0032 -0.0031 0.0043 0.0039 -0.0045 0.0038  
Y 0.0061 0.0053 0.0059 0.0057 -0.0055 0.0048  
Z 0.0015 0.0010 0.0097 0.0079 -0.0091 0.0073  
AT. 62 H X 0.0032 0.0031 -0.0043 0.0039 0.0045 0.0038  
Y 0.0061 0.0053 0.0059 -0.0057 -0.0055 -0.0048  
Z -0.0015 -0.0010 -0.0097 0.0079 0.0091 0.0073  
AT. 63 H X -0.0032 0.0031 -0.0043 -0.0039 -0.0045 0.0038  
Y 0.0061 -0.0053 -0.0059 -0.0057 -0.0055 0.0048  
Z 0.0015 -0.0010 -0.0097 -0.0079 -0.0091 0.0073  
AT. 64 H X 0.0032 -0.0031 0.0043 -0.0039 0.0045 0.0038  
Y 0.0061 -0.0053 -0.0059 0.0057 -0.0055 -0.0048  
Z -0.0015 0.0010 0.0097 -0.0079 0.0091 0.0073  
AT. 65 H X 0.0003 0.0004 0.0028 0.0023 -0.0024 0.0021  
Y 0.0141 0.0137 0.0041 0.0036 -0.0025 0.0029  
Z 0.0086 0.0062 0.0008 -0.0014 0.0004 -0.0035  
AT. 66 H X -0.0003 -0.0004 -0.0028 0.0023 0.0024 0.0021  
Y 0.0141 0.0137 0.0041 -0.0036 -0.0025 -0.0029  
Z -0.0086 -0.0062 -0.0008 -0.0014 -0.0004 -0.0035  
AT. 67 H X 0.0003 -0.0004 -0.0028 -0.0023 -0.0024 0.0021  
Y 0.0141 -0.0137 -0.0041 -0.0036 -0.0025 0.0029  
Z 0.0086 -0.0062 -0.0008 0.0014 0.0004 -0.0035  
AT. 68 H X -0.0003 0.0004 0.0028 -0.0023 0.0024 0.0021  
Y 0.0141 -0.0137 -0.0041 0.0036 -0.0025 -0.0029  
Z -0.0086 0.0062 0.0008 0.0014 -0.0004 -0.0035  
AT. 69 H X 0.0023 0.0035 0.0064 0.0067 -0.0058 0.0070  
Y 0.0121 0.0113 0.0059 0.0066 -0.0046 0.0055  
Z 0.0118 0.0106 0.0096 0.0097 -0.0078 0.0076  
AT. 70 H X -0.0023 -0.0035 -0.0064 0.0067 0.0058 0.0070

Y 0.0121 0.0113 0.0059 -0.0066 -0.0046 -0.0055  
Z -0.0118 -0.0106 -0.0096 0.0097 0.0078 0.0076  
AT. 71 H X 0.0023 -0.0035 -0.0064 -0.0067 -0.0058 0.0070  
Y 0.0121 -0.0113 -0.0059 -0.0066 -0.0046 0.0055  
Z 0.0118 -0.0106 -0.0096 -0.0097 -0.0078 0.0076  
AT. 72 H X -0.0023 0.0035 0.0064 -0.0067 0.0058 0.0070  
Y 0.0121 -0.0113 -0.0059 0.0066 -0.0046 -0.0055  
Z -0.0118 0.0106 0.0096 -0.0097 0.0078 0.0076  
AT. 73 C X -0.0022 -0.0020 -0.0017 -0.0018 0.0014 -0.0015  
Y 0.0031 0.0029 -0.0074 -0.0076 0.0073 -0.0076  
Z 0.0091 0.0089 0.0005 0.0007 -0.0005 0.0009  
AT. 74 C X 0.0022 0.0020 0.0017 -0.0018 -0.0014 -0.0015  
Y 0.0031 0.0029 -0.0074 0.0076 0.0073 0.0076  
Z -0.0091 -0.0089 -0.0005 0.0007 0.0005 0.0009  
AT. 75 C X -0.0022 0.0020 0.0017 0.0018 0.0014 -0.0015  
Y 0.0031 -0.0029 0.0074 0.0076 0.0073 -0.0076  
Z 0.0091 -0.0089 -0.0005 -0.0007 -0.0005 0.0009  
AT. 76 C X 0.0022 -0.0020 -0.0017 0.0018 -0.0014 -0.0015  
Y 0.0031 -0.0029 0.0074 -0.0076 0.0073 0.0076  
Z -0.0091 0.0089 0.0005 -0.0007 0.0005 0.0009  
AT. 77 C X 0.0024 0.0027 -0.0183 -0.0179 0.0179 -0.0172  
Y 0.0121 0.0124 -0.0086 -0.0083 0.0083 -0.0075  
Z -0.0102 -0.0100 -0.0099 -0.0102 0.0099 -0.0104  
AT. 78 C X -0.0024 -0.0027 0.0183 -0.0179 -0.0179 -0.0172  
Y 0.0121 0.0124 -0.0086 0.0083 0.0083 0.0075  
Z 0.0102 0.0100 0.0099 -0.0102 -0.0099 -0.0104  
AT. 79 C X 0.0024 -0.0027 0.0183 0.0179 0.0179 -0.0172  
Y 0.0121 -0.0124 0.0086 0.0083 0.0083 -0.0075  
Z -0.0102 0.0100 0.0099 0.0102 0.0099 -0.0104  
AT. 80 C X -0.0024 0.0027 -0.0183 0.0179 -0.0179 -0.0172  
Y 0.0121 -0.0124 0.0086 -0.0083 0.0083 0.0075  
Z 0.0102 -0.0100 -0.0099 0.0102 -0.0099 -0.0104

AT. 81 H X 0.0101 0.0112 -0.0160 -0.0159 0.0164 -0.0158  
Y 0.0210 0.0223 -0.0067 -0.0067 0.0073 -0.0067  
Z -0.0117 -0.0101 -0.0038 -0.0040 0.0046 -0.0052

AT. 82 H X -0.0101 -0.0112 0.0160 -0.0159 -0.0164 -0.0158  
Y 0.0210 0.0223 -0.0067 0.0067 0.0073 0.0067  
Z 0.0117 0.0101 0.0038 -0.0040 -0.0046 -0.0052

AT. 83 H X 0.0101 -0.0112 0.0160 0.0159 0.0164 -0.0158  
Y 0.0210 -0.0223 0.0067 0.0067 0.0073 -0.0067  
Z -0.0117 0.0101 0.0038 0.0040 0.0046 -0.0052

AT. 84 H X -0.0101 0.0112 -0.0160 0.0159 -0.0164 -0.0158  
Y 0.0210 -0.0223 0.0067 -0.0067 0.0073 0.0067  
Z 0.0117 -0.0101 -0.0038 0.0040 -0.0046 -0.0052

AT. 85 H X 0.0010 0.0003 -0.0214 -0.0204 0.0199 -0.0187  
Y 0.0190 0.0209 -0.0146 -0.0145 0.0147 -0.0138  
Z -0.0161 -0.0169 -0.0038 -0.0041 0.0038 -0.0045

AT. 86 H X -0.0010 -0.0003 0.0214 -0.0204 -0.0199 -0.0187  
Y 0.0190 0.0209 -0.0146 0.0145 0.0147 0.0138  
Z 0.0161 0.0169 0.0038 -0.0041 -0.0038 -0.0045

AT. 87 H X 0.0010 -0.0003 0.0214 0.0204 0.0199 -0.0187  
Y 0.0190 -0.0209 0.0146 0.0145 0.0147 -0.0138  
Z -0.0161 0.0169 0.0038 0.0041 0.0038 -0.0045

AT. 88 H X -0.0010 0.0003 -0.0214 0.0204 -0.0199 -0.0187  
Y 0.0190 -0.0209 0.0146 -0.0145 0.0147 0.0138  
Z 0.0161 -0.0169 -0.0038 0.0041 -0.0038 -0.0045

AT. 89 C X 0.0085 0.0091 -0.0141 -0.0139 0.0139 -0.0132  
Y -0.0014 -0.0020 -0.0156 -0.0154 0.0152 -0.0148  
Z 0.0112 0.0123 -0.0041 -0.0039 0.0031 -0.0026

AT. 90 C X -0.0085 -0.0091 0.0141 -0.0139 -0.0139 -0.0132  
Y -0.0014 -0.0020 -0.0156 0.0154 0.0152 0.0148  
Z -0.0112 -0.0123 0.0041 -0.0039 -0.0031 -0.0026

AT. 91 C X 0.0085 -0.0091 0.0141 0.0139 0.0139 -0.0132  
Y -0.0014 0.0020 0.0156 0.0154 0.0152 -0.0148



Z 0.0112 -0.0123 0.0041 0.0039 0.0031 -0.0026  
AT. 92 C X -0.0085 0.0091 -0.0141 0.0139 -0.0139 -0.0132  
Y -0.0014 0.0020 0.0156 -0.0154 0.0152 0.0148  
Z -0.0112 0.0123 -0.0041 0.0039 -0.0031 -0.0026  
AT. 93 C X -0.0005 0.0000 0.0009 0.0007 -0.0014 0.0014  
Y -0.0125 -0.0137 -0.0043 -0.0045 0.0046 -0.0050  
Z 0.0160 0.0179 0.0064 0.0067 -0.0076 0.0081  
AT. 94 C X 0.0005 -0.0000 -0.0009 0.0007 0.0014 0.0014  
Y -0.0125 -0.0137 -0.0043 0.0045 0.0046 0.0050  
Z -0.0160 -0.0179 -0.0064 0.0067 0.0076 0.0081  
AT. 95 C X -0.0005 -0.0000 -0.0009 -0.0007 -0.0014 0.0014  
Y -0.0125 0.0137 0.0043 0.0045 0.0046 -0.0050  
Z 0.0160 -0.0179 -0.0064 -0.0067 -0.0076 0.0081  
AT. 96 C X 0.0005 0.0000 0.0009 -0.0007 0.0014 0.0014  
Y -0.0125 0.0137 0.0043 -0.0045 0.0046 0.0050  
Z -0.0160 0.0179 0.0064 -0.0067 0.0076 0.0081  
AT. 97 H X -0.0082 -0.0082 0.0073 0.0069 -0.0089 0.0084  
Y -0.0076 -0.0081 -0.0073 -0.0075 0.0109 -0.0109  
Z 0.0001 0.0012 0.0223 0.0221 -0.0213 0.0206  
AT. 98 H X 0.0082 0.0082 -0.0073 0.0069 0.0089 0.0084  
Y -0.0076 -0.0081 -0.0073 0.0075 0.0109 0.0109  
Z -0.0001 -0.0012 -0.0223 0.0221 0.0213 0.0206  
AT. 99 H X -0.0082 0.0082 -0.0073 -0.0069 -0.0089 0.0084  
Y -0.0076 0.0081 0.0073 0.0075 0.0109 -0.0109  
Z 0.0001 -0.0012 -0.0223 -0.0221 -0.0213 0.0206  
AT. 100 H X 0.0082 -0.0082 0.0073 -0.0069 0.0089 0.0084  
Y -0.0076 0.0081 0.0073 -0.0075 0.0109 0.0109  
Z -0.0001 0.0012 0.0223 -0.0221 0.0213 0.0206  
AT. 101 H X -0.0068 -0.0065 0.0051 0.0046 -0.0064 0.0060  
Y -0.0196 -0.0210 -0.0002 -0.0007 -0.0005 -0.0002  
Z 0.0161 0.0182 0.0103 0.0104 -0.0107 0.0112  
AT. 102 H X 0.0068 0.0065 -0.0051 0.0046 0.0064 0.0060

Y -0.0196 -0.0210 -0.0002 0.0007 -0.0005 0.0002  
Z -0.0161 -0.0182 -0.0103 0.0104 0.0107 0.0112  
AT. 103 H X -0.0068 0.0065 -0.0051 -0.0046 -0.0064 0.0060  
Y -0.0196 0.0210 0.0002 0.0007 -0.0005 -0.0002  
Z 0.0161 -0.0182 -0.0103 -0.0104 -0.0107 0.0112  
AT. 104 H X 0.0068 -0.0065 0.0051 -0.0046 0.0064 0.0060  
Y -0.0196 0.0210 0.0002 -0.0007 -0.0005 0.0002  
Z -0.0161 0.0182 0.0103 -0.0104 0.0107 0.0112  
AT. 105 H X -0.0045 -0.0048 0.0030 0.0029 -0.0008 0.0001  
Y -0.0236 -0.0246 0.0116 0.0109 -0.0105 0.0094  
Z 0.0257 0.0278 -0.0065 -0.0058 0.0037 -0.0025  
AT. 106 H X 0.0045 0.0048 -0.0030 0.0029 0.0008 0.0001  
Y -0.0236 -0.0246 0.0116 -0.0109 -0.0105 -0.0094  
Z -0.0257 -0.0278 0.0065 -0.0058 -0.0037 -0.0025  
AT. 107 H X -0.0045 0.0048 -0.0030 -0.0029 -0.0008 0.0001  
Y -0.0236 0.0246 -0.0116 -0.0109 -0.0105 0.0094  
Z 0.0257 -0.0278 0.0065 0.0058 0.0037 -0.0025  
AT. 108 H X 0.0045 -0.0048 0.0030 -0.0029 0.0008 0.0001  
Y -0.0236 0.0246 -0.0116 0.0109 -0.0105 -0.0094  
Z -0.0257 0.0278 -0.0065 0.0058 -0.0037 -0.0025  
AT. 109 C X -0.0036 -0.0041 -0.0042 -0.0038 0.0051 -0.0047  
Y -0.0076 -0.0068 0.0007 -0.0000 -0.0014 0.0008  
Z -0.0090 -0.0089 -0.0023 -0.0018 0.0023 -0.0020  
AT. 110 C X 0.0036 0.0041 0.0042 -0.0038 -0.0051 -0.0047  
Y -0.0076 -0.0068 0.0007 0.0000 -0.0014 -0.0008  
Z 0.0090 0.0089 0.0023 -0.0018 -0.0023 -0.0020  
AT. 111 C X -0.0036 0.0041 0.0042 0.0038 0.0051 -0.0047  
Y -0.0076 0.0068 -0.0007 0.0000 -0.0014 0.0008  
Z -0.0090 0.0089 0.0023 0.0018 0.0023 -0.0020  
AT. 112 C X 0.0036 -0.0041 -0.0042 0.0038 -0.0051 -0.0047  
Y -0.0076 0.0068 -0.0007 -0.0000 -0.0014 -0.0008  
Z 0.0090 -0.0089 -0.0023 0.0018 -0.0023 -0.0020

AT. 113 H X 0.0036 0.0026 -0.0080 -0.0083 0.0092 -0.0095  
Y -0.0194 -0.0179 0.0064 0.0067 -0.0076 0.0080  
Z -0.0056 -0.0062 -0.0050 -0.0052 0.0049 -0.0053

AT. 114 H X -0.0036 -0.0026 0.0080 -0.0083 -0.0092 -0.0095  
Y -0.0194 -0.0179 0.0064 -0.0067 -0.0076 -0.0080  
Z 0.0056 0.0062 0.0050 -0.0052 -0.0049 -0.0053

AT. 115 H X 0.0036 -0.0026 0.0080 0.0083 0.0092 -0.0095  
Y -0.0194 0.0179 -0.0064 -0.0067 -0.0076 0.0080  
Z -0.0056 0.0062 0.0050 0.0052 0.0049 -0.0053

AT. 116 H X -0.0036 0.0026 -0.0080 0.0083 -0.0092 -0.0095  
Y -0.0194 0.0179 -0.0064 0.0067 -0.0076 -0.0080  
Z 0.0056 -0.0062 -0.0050 0.0052 -0.0049 -0.0053

AT. 117 H X -0.0136 -0.0131 0.0028 0.0052 -0.0020 0.0044  
Y -0.0115 -0.0100 0.0013 0.0007 -0.0026 0.0021  
Z -0.0113 -0.0108 -0.0030 -0.0027 0.0025 -0.0023

AT. 118 H X 0.0136 0.0131 -0.0028 0.0052 0.0020 0.0044  
Y -0.0115 -0.0100 0.0013 -0.0007 -0.0026 -0.0021  
Z 0.0113 0.0108 0.0030 -0.0027 -0.0025 -0.0023

AT. 119 H X -0.0136 0.0131 -0.0028 -0.0052 -0.0020 0.0044  
Y -0.0115 0.0100 -0.0013 -0.0007 -0.0026 0.0021  
Z -0.0113 0.0108 0.0030 0.0027 0.0025 -0.0023

AT. 120 H X 0.0136 -0.0131 0.0028 -0.0052 0.0020 0.0044  
Y -0.0115 0.0100 -0.0013 0.0007 -0.0026 -0.0021  
Z 0.0113 -0.0108 -0.0030 0.0027 -0.0025 -0.0023

AT. 121 C X 0.0030 0.0030 -0.0012 -0.0015 0.0017 -0.0020  
Y -0.0024 -0.0025 -0.0017 -0.0019 0.0016 -0.0017  
Z -0.0043 -0.0032 -0.0008 -0.0006 0.0003 0.0002

AT. 122 C X -0.0030 -0.0030 0.0012 -0.0015 -0.0017 -0.0020  
Y -0.0024 -0.0025 -0.0017 0.0019 0.0016 0.0017  
Z 0.0043 0.0032 0.0008 -0.0006 -0.0003 0.0002

AT. 123 C X 0.0030 -0.0030 0.0012 0.0015 0.0017 -0.0020  
Y -0.0024 0.0025 0.0017 0.0019 0.0016 -0.0017

Z -0.0043 0.0032 0.0008 0.0006 0.0003 0.0002  
AT. 124 C X -0.0030 0.0030 -0.0012 0.0015 -0.0017 -0.0020  
Y -0.0024 0.0025 0.0017 -0.0019 0.0016 0.0017  
Z 0.0043 -0.0032 -0.0008 0.0006 -0.0003 0.0002  
AT. 125 H X -0.0080 -0.0083 0.0345 0.0332 -0.0328 0.0307  
Y 0.0092 0.0089 0.0040 0.0035 -0.0041 0.0037  
Z -0.0093 -0.0079 -0.0150 -0.0141 0.0140 -0.0128  
AT. 126 H X 0.0080 0.0083 -0.0345 0.0332 0.0328 0.0307  
Y 0.0092 0.0089 0.0040 -0.0035 -0.0041 -0.0037  
Z 0.0093 0.0079 0.0150 -0.0141 -0.0140 -0.0128  
AT. 127 H X -0.0080 0.0083 -0.0345 -0.0332 -0.0328 0.0307  
Y 0.0092 -0.0089 -0.0040 -0.0035 -0.0041 0.0037  
Z -0.0093 0.0079 0.0150 0.0141 0.0140 -0.0128  
AT. 128 H X 0.0080 -0.0083 0.0345 -0.0332 0.0328 0.0307  
Y 0.0092 -0.0089 -0.0040 0.0035 -0.0041 -0.0037  
Z 0.0093 -0.0079 -0.0150 0.0141 -0.0140 -0.0128  
AT. 129 H X 0.0054 0.0055 -0.0101 -0.0103 0.0106 -0.0106  
Y -0.0060 -0.0062 0.0236 0.0227 -0.0233 0.0221  
Z -0.0045 -0.0034 0.0260 0.0252 -0.0254 0.0246  
AT. 130 H X -0.0054 -0.0055 0.0101 -0.0103 -0.0106 -0.0106  
Y -0.0060 -0.0062 0.0236 -0.0227 -0.0233 -0.0221  
Z 0.0045 0.0034 -0.0260 0.0252 0.0254 0.0246  
AT. 131 H X 0.0054 -0.0055 0.0101 0.0103 0.0106 -0.0106  
Y -0.0060 0.0062 -0.0236 -0.0227 -0.0233 0.0221  
Z -0.0045 0.0034 -0.0260 -0.0252 -0.0254 0.0246  
AT. 132 H X -0.0054 0.0055 -0.0101 0.0103 -0.0106 -0.0106  
Y -0.0060 0.0062 -0.0236 0.0227 -0.0233 -0.0221  
Z 0.0045 -0.0034 0.0260 -0.0252 0.0254 0.0246  
AT. 133 C X 0.0068 0.0066 -0.0000 0.0000 0.0002 -0.0001  
Y -0.0065 -0.0057 -0.0028 -0.0025 0.0025 -0.0021  
Z -0.0022 -0.0029 -0.0007 -0.0010 0.0008 -0.0012  
AT. 134 C X -0.0068 -0.0066 0.0000 0.0000 -0.0002 -0.0001

Y -0.0065 -0.0057 -0.0028 0.0025 0.0025 0.0021  
Z 0.0022 0.0029 0.0007 -0.0010 -0.0008 -0.0012  
AT. 135 C X 0.0068 -0.0066 0.0000 -0.0000 0.0002 -0.0001  
Y -0.0065 0.0057 0.0028 0.0025 0.0025 -0.0021  
Z -0.0022 0.0029 0.0007 0.0010 0.0008 -0.0012  
AT. 136 C X -0.0068 0.0066 -0.0000 -0.0000 -0.0002 -0.0001  
Y -0.0065 0.0057 0.0028 -0.0025 0.0025 0.0021  
Z 0.0022 -0.0029 -0.0007 0.0010 -0.0008 -0.0012  
AT. 137 C X 0.0091 0.0097 -0.0032 -0.0030 0.0035 -0.0032  
Y 0.0032 0.0031 0.0000 0.0001 0.0002 -0.0001  
Z -0.0069 -0.0074 -0.0029 -0.0032 0.0028 -0.0031  
AT. 138 C X -0.0091 -0.0097 0.0032 -0.0030 -0.0035 -0.0032  
Y 0.0032 0.0031 0.0000 -0.0001 0.0002 0.0001  
Z 0.0069 0.0074 0.0029 -0.0032 -0.0028 -0.0031  
AT. 139 C X 0.0091 -0.0097 0.0032 0.0030 0.0035 -0.0032  
Y 0.0032 -0.0031 -0.0000 -0.0001 0.0002 -0.0001  
Z -0.0069 0.0074 0.0029 0.0032 0.0028 -0.0031  
AT. 140 C X -0.0091 0.0097 -0.0032 0.0030 -0.0035 -0.0032  
Y 0.0032 -0.0031 -0.0000 0.0001 0.0002 0.0001  
Z 0.0069 -0.0074 -0.0029 0.0032 -0.0028 -0.0031  
AT. 141 H X 0.0194 0.0192 -0.0025 -0.0025 0.0029 -0.0029  
Y 0.0267 0.0239 0.0042 0.0038 -0.0036 0.0031  
Z -0.0024 -0.0039 -0.0009 -0.0012 0.0009 -0.0013  
AT. 142 H X -0.0194 -0.0192 0.0025 -0.0025 -0.0029 -0.0029  
Y 0.0267 0.0239 0.0042 -0.0038 -0.0036 -0.0031  
Z 0.0024 0.0039 0.0009 -0.0012 -0.0009 -0.0013  
AT. 143 H X 0.0194 -0.0192 0.0025 0.0025 0.0029 -0.0029  
Y 0.0267 -0.0239 -0.0042 -0.0038 -0.0036 0.0031  
Z -0.0024 0.0039 0.0009 0.0012 0.0009 -0.0013  
AT. 144 H X -0.0194 0.0192 -0.0025 0.0025 -0.0029 -0.0029  
Y 0.0267 -0.0239 -0.0042 0.0038 -0.0036 -0.0031  
Z 0.0024 -0.0039 -0.0009 0.0012 -0.0009 -0.0013

AT. 145 H X -0.0138 -0.0116 -0.0008 -0.0005 0.0007 -0.0001  
Y 0.0058 0.0056 -0.0017 -0.0016 0.0019 -0.0018  
Z -0.0225 -0.0217 -0.0079 -0.0076 0.0071 -0.0071

AT. 146 H X 0.0138 0.0116 0.0008 -0.0005 -0.0007 -0.0001  
Y 0.0058 0.0056 -0.0017 0.0016 0.0019 0.0018  
Z 0.0225 0.0217 0.0079 -0.0076 -0.0071 -0.0071

AT. 147 H X -0.0138 0.0116 0.0008 0.0005 0.0007 -0.0001  
Y 0.0058 -0.0056 0.0017 0.0016 0.0019 -0.0018  
Z -0.0225 0.0217 0.0079 0.0076 0.0071 -0.0071

AT. 148 H X 0.0138 -0.0116 -0.0008 0.0005 -0.0007 -0.0001  
Y 0.0058 -0.0056 0.0017 -0.0016 0.0019 0.0018  
Z 0.0225 -0.0217 -0.0079 0.0076 -0.0071 -0.0071

AT. 149 O X -0.0074 -0.0070 0.0083 0.0085 -0.0083 0.0085  
Y 0.0066 0.0060 -0.0030 -0.0025 0.0037 -0.0032  
Z -0.0009 -0.0010 -0.0038 -0.0042 0.0034 -0.0038

AT. 150 O X 0.0074 0.0070 -0.0083 0.0085 0.0083 0.0085  
Y 0.0066 0.0060 -0.0030 0.0025 0.0037 0.0032  
Z 0.0009 0.0010 0.0038 -0.0042 -0.0034 -0.0038

AT. 151 O X -0.0074 0.0070 -0.0083 -0.0085 -0.0083 0.0085  
Y 0.0066 -0.0060 0.0030 0.0025 0.0037 -0.0032  
Z -0.0009 0.0010 0.0038 0.0042 0.0034 -0.0038

AT. 152 O X 0.0074 -0.0070 0.0083 -0.0085 0.0083 0.0085  
Y 0.0066 -0.0060 0.0030 -0.0025 0.0037 0.0032  
Z 0.0009 -0.0010 -0.0038 0.0042 -0.0034 -0.0038

AT. 153 H X -0.0099 -0.0082 0.1009 0.1008 -0.1018 0.1030  
Y -0.0045 -0.0029 0.0911 0.0902 -0.0900 0.0904  
Z -0.0037 -0.0038 -0.0298 -0.0305 0.0301 -0.0312

AT. 154 H X 0.0099 0.0082 -0.1009 0.1008 0.1018 0.1030  
Y -0.0045 -0.0029 0.0911 -0.0902 -0.0900 -0.0904  
Z 0.0037 0.0038 0.0298 -0.0305 -0.0301 -0.0312

AT. 155 H X -0.0099 0.0082 -0.1009 -0.1008 -0.1018 0.1030  
Y -0.0045 0.0029 -0.0911 -0.0902 -0.0900 0.0904

Z -0.0037 0.0038 0.0298 0.0305 0.0301 -0.0312  
AT. 156 H X 0.0099 -0.0082 0.1009 -0.1008 0.1018 0.1030  
Y -0.0045 0.0029 -0.0911 0.0902 -0.0900 -0.0904  
Z 0.0037 -0.0038 -0.0298 0.0305 -0.0301 -0.0312  
AT. 157 O X -0.0039 -0.0039 -0.0031 -0.0038 0.0029 -0.0036  
Y -0.0057 -0.0054 0.0085 0.0090 -0.0083 0.0088  
Z 0.0016 0.0010 0.0018 0.0018 -0.0015 0.0015  
AT. 158 O X 0.0039 0.0039 0.0031 -0.0038 -0.0029 -0.0036  
Y -0.0057 -0.0054 0.0085 -0.0090 -0.0083 -0.0088  
Z -0.0016 -0.0010 -0.0018 0.0018 0.0015 0.0015  
AT. 159 O X -0.0039 0.0039 0.0031 0.0038 0.0029 -0.0036  
Y -0.0057 0.0054 -0.0085 -0.0090 -0.0083 0.0088  
Z 0.0016 -0.0010 -0.0018 -0.0018 -0.0015 0.0015  
AT. 160 O X 0.0039 -0.0039 -0.0031 0.0038 -0.0029 -0.0036  
Y -0.0057 0.0054 -0.0085 0.0090 -0.0083 -0.0088  
Z -0.0016 0.0010 0.0018 -0.0018 0.0015 0.0015  
AT. 161 O X -0.0037 -0.0041 0.0059 0.0058 -0.0057 0.0054  
Y -0.0043 -0.0047 0.0050 0.0049 -0.0049 0.0045  
Z -0.0035 -0.0033 0.0041 0.0041 -0.0039 0.0038  
AT. 162 O X 0.0037 0.0041 -0.0059 0.0058 0.0057 0.0054  
Y -0.0043 -0.0047 0.0050 -0.0049 -0.0049 -0.0045  
Z 0.0035 0.0033 -0.0041 0.0041 0.0039 0.0038  
AT. 163 O X -0.0037 0.0041 -0.0059 -0.0058 -0.0057 0.0054  
Y -0.0043 0.0047 -0.0050 -0.0049 -0.0049 0.0045  
Z -0.0035 0.0033 -0.0041 -0.0041 -0.0039 0.0038  
AT. 164 O X 0.0037 -0.0041 0.0059 -0.0058 0.0057 0.0054  
Y -0.0043 0.0047 -0.0050 0.0049 -0.0049 -0.0045  
Z 0.0035 -0.0033 0.0041 -0.0041 0.0039 0.0038  
AT. 165 H X -0.0074 -0.0070 0.0001 0.0016 -0.0003 0.0013  
Y -0.0065 -0.0065 0.0031 0.0036 -0.0030 0.0032  
Z 0.0017 0.0015 0.0138 0.0129 -0.0131 0.0127  
AT. 166 H X 0.0074 0.0070 -0.0001 0.0016 0.0003 0.0013

Y -0.0065 -0.0065 0.0031 -0.0036 -0.0030 -0.0032  
Z -0.0017 -0.0015 -0.0138 0.0129 0.0131 0.0127  
AT. 167 H X -0.0074 0.0070 -0.0001 -0.0016 -0.0003 0.0013  
Y -0.0065 0.0065 -0.0031 -0.0036 -0.0030 0.0032  
Z 0.0017 -0.0015 -0.0138 -0.0129 -0.0131 0.0127  
AT. 168 H X 0.0074 -0.0070 0.0001 -0.0016 0.0003 0.0013  
Y -0.0065 0.0065 -0.0031 0.0036 -0.0030 -0.0032  
Z -0.0017 0.0015 0.0138 -0.0129 0.0131 0.0127  
AT. 169 O X 0.0004 0.0003 -0.0015 -0.0015 0.0008 -0.0008  
Y 0.0011 0.0031 -0.0033 -0.0035 0.0044 -0.0042  
Z 0.0002 -0.0004 0.0008 0.0009 -0.0011 0.0010  
AT. 170 O X -0.0004 -0.0003 0.0015 -0.0015 -0.0008 -0.0008  
Y 0.0011 0.0031 -0.0033 0.0035 0.0044 0.0042  
Z -0.0002 0.0004 -0.0008 0.0009 0.0011 0.0010  
AT. 171 O X 0.0004 -0.0003 0.0015 0.0015 0.0008 -0.0008  
Y 0.0011 -0.0031 0.0033 0.0035 0.0044 -0.0042  
Z 0.0002 0.0004 -0.0008 -0.0009 -0.0011 0.0010  
AT. 172 O X -0.0004 0.0003 -0.0015 0.0015 -0.0008 -0.0008  
Y 0.0011 -0.0031 0.0033 -0.0035 0.0044 0.0042  
Z -0.0002 -0.0004 0.0008 -0.0009 0.0011 0.0010  
AT. 173 H X 0.0001 0.0022 -0.0280 -0.0275 0.0252 -0.0254  
Y 0.0013 0.0030 0.0002 -0.0002 0.0008 -0.0008  
Z 0.0030 -0.0008 0.0079 0.0079 -0.0065 0.0065  
AT. 174 H X -0.0001 -0.0022 0.0280 -0.0275 -0.0252 -0.0254  
Y 0.0013 0.0030 0.0002 0.0002 0.0008 0.0008  
Z -0.0030 0.0008 -0.0079 0.0079 0.0065 0.0065  
AT. 175 H X 0.0001 -0.0022 0.0280 0.0275 0.0252 -0.0254  
Y 0.0013 -0.0030 -0.0002 0.0002 0.0008 -0.0008  
Z 0.0030 0.0008 -0.0079 -0.0079 -0.0065 0.0065  
AT. 176 H X -0.0001 0.0022 -0.0280 0.0275 -0.0252 -0.0254  
Y 0.0013 -0.0030 -0.0002 -0.0002 0.0008 0.0008  
Z -0.0030 -0.0008 0.0079 -0.0079 0.0065 0.0065



FREQ(CM\*\*-1) 593.70 593.77 593.93 594.64 603.31 603.60

AT. 1 I X 0.0001 -0.0001 -0.0001 -0.0000 0.0002 -0.0001

Y -0.0000 0.0000 -0.0000 0.0000 -0.0002 0.0003

Z -0.0000 -0.0000 -0.0000 0.0001 -0.0002 0.0002

AT. 2 I X -0.0001 -0.0001 -0.0001 0.0000 0.0002 0.0001

Y -0.0000 -0.0000 0.0000 0.0000 0.0002 0.0003

Z 0.0000 -0.0000 -0.0000 -0.0001 -0.0002 -0.0002

AT. 3 I X 0.0001 -0.0001 0.0001 0.0000 0.0002 -0.0001

Y -0.0000 0.0000 0.0000 -0.0000 -0.0002 0.0003

Z -0.0000 -0.0000 0.0000 -0.0001 -0.0002 0.0002

AT. 4 I X -0.0001 -0.0001 0.0001 -0.0000 0.0002 0.0001

Y -0.0000 -0.0000 -0.0000 -0.0000 0.0002 0.0003

Z 0.0000 -0.0000 0.0000 0.0001 -0.0002 -0.0002

AT. 5 I X 0.0002 -0.0002 -0.0004 0.0003 -0.0005 0.0004

Y 0.0001 -0.0001 -0.0000 0.0000 0.0000 -0.0000

Z -0.0001 0.0001 0.0002 -0.0001 0.0003 -0.0003

AT. 6 I X -0.0002 -0.0002 -0.0004 -0.0003 -0.0005 -0.0004

Y 0.0001 0.0001 0.0000 0.0000 -0.0000 -0.0000

Z 0.0001 0.0001 0.0002 0.0001 0.0003 0.0003

AT. 7 I X 0.0002 -0.0002 0.0004 -0.0003 -0.0005 0.0004

Y 0.0001 -0.0001 0.0000 -0.0000 0.0000 -0.0000

Z -0.0001 0.0001 -0.0002 0.0001 0.0003 -0.0003

AT. 8 I X -0.0002 -0.0002 0.0004 0.0003 -0.0005 -0.0004

Y 0.0001 0.0001 -0.0000 -0.0000 -0.0000 -0.0000

Z 0.0001 0.0001 -0.0002 -0.0001 0.0003 0.0003

AT. 9 N X -0.0027 0.0031 0.0045 -0.0044 0.0061 -0.0066

Y -0.0026 0.0026 0.0030 -0.0026 0.0026 -0.0025

Z 0.0022 -0.0023 -0.0039 0.0038 -0.0070 0.0071

AT. 10 N X 0.0027 0.0031 0.0045 0.0044 0.0061 0.0066

Y -0.0026 -0.0026 -0.0030 -0.0026 -0.0026 -0.0025

Z -0.0022 -0.0023 -0.0039 -0.0038 -0.0070 -0.0071  
AT. 11 N X -0.0027 0.0031 -0.0045 0.0044 0.0061 -0.0066  
Y -0.0026 0.0026 -0.0030 0.0026 0.0026 -0.0025  
Z 0.0022 -0.0023 0.0039 -0.0038 -0.0070 0.0071  
AT. 12 N X 0.0027 0.0031 -0.0045 -0.0044 0.0061 0.0066  
Y -0.0026 -0.0026 0.0030 0.0026 -0.0026 -0.0025  
Z -0.0022 -0.0023 0.0039 0.0038 -0.0070 -0.0071  
AT. 13 N X 0.0006 -0.0011 -0.0022 0.0018 -0.0049 0.0048  
Y -0.0008 0.0011 0.0015 -0.0016 0.0024 -0.0025  
Z -0.0040 0.0048 0.0058 -0.0054 0.0059 -0.0064  
AT. 14 N X -0.0006 -0.0011 -0.0022 -0.0018 -0.0049 -0.0048  
Y -0.0008 -0.0011 -0.0015 -0.0016 -0.0024 -0.0025  
Z 0.0040 0.0048 0.0058 0.0054 0.0059 0.0064  
AT. 15 N X 0.0006 -0.0011 0.0022 -0.0018 -0.0049 0.0048  
Y -0.0008 0.0011 -0.0015 0.0016 0.0024 -0.0025  
Z -0.0040 0.0048 -0.0058 0.0054 0.0059 -0.0064  
AT. 16 N X -0.0006 -0.0011 0.0022 0.0018 -0.0049 -0.0048  
Y -0.0008 -0.0011 0.0015 0.0016 -0.0024 -0.0025  
Z 0.0040 0.0048 -0.0058 -0.0054 0.0059 0.0064  
AT. 17 O X -0.0005 0.0006 0.0007 -0.0009 0.0012 -0.0015  
Y -0.0005 0.0011 0.0023 -0.0021 0.0067 -0.0070  
Z -0.0052 0.0055 0.0071 -0.0066 0.0065 -0.0068  
AT. 18 O X 0.0005 0.0006 0.0007 0.0009 0.0012 0.0015  
Y -0.0005 -0.0011 -0.0023 -0.0021 -0.0067 -0.0070  
Z 0.0052 0.0055 0.0071 0.0066 0.0065 0.0068  
AT. 19 O X -0.0005 0.0006 -0.0007 0.0009 0.0012 -0.0015  
Y -0.0005 0.0011 -0.0023 0.0021 0.0067 -0.0070  
Z -0.0052 0.0055 -0.0071 0.0066 0.0065 -0.0068  
AT. 20 O X 0.0005 0.0006 -0.0007 -0.0009 0.0012 0.0015  
Y -0.0005 -0.0011 0.0023 0.0021 -0.0067 -0.0070  
Z 0.0052 0.0055 -0.0071 -0.0066 0.0065 0.0068  
AT. 21 O X 0.0003 -0.0002 -0.0004 0.0004 -0.0011 0.0009

Y -0.0027 0.0028 0.0045 -0.0040 0.0071 -0.0075  
Z 0.0006 -0.0013 -0.0024 0.0023 -0.0060 0.0061  
AT. 22 O X -0.0003 -0.0002 -0.0004 -0.0004 -0.0011 -0.0009  
Y -0.0027 -0.0028 -0.0045 -0.0040 -0.0071 -0.0075  
Z -0.0006 -0.0013 -0.0024 -0.0023 -0.0060 -0.0061  
AT. 23 O X 0.0003 -0.0002 0.0004 -0.0004 -0.0011 0.0009  
Y -0.0027 0.0028 -0.0045 0.0040 0.0071 -0.0075  
Z 0.0006 -0.0013 0.0024 -0.0023 -0.0060 0.0061  
AT. 24 O X -0.0003 -0.0002 0.0004 0.0004 -0.0011 -0.0009  
Y -0.0027 -0.0028 0.0045 0.0040 -0.0071 -0.0075  
Z -0.0006 -0.0013 0.0024 0.0023 -0.0060 -0.0061  
AT. 25 C X -0.0022 0.0020 0.0014 -0.0011 -0.0019 0.0017  
Y 0.0001 0.0004 0.0013 -0.0018 0.0046 -0.0047  
Z 0.0000 0.0003 0.0007 -0.0010 0.0012 -0.0015  
AT. 26 C X 0.0022 0.0020 0.0014 0.0011 -0.0019 -0.0017  
Y 0.0001 -0.0004 -0.0013 -0.0018 -0.0046 -0.0047  
Z -0.0000 0.0003 0.0007 0.0010 0.0012 0.0015  
AT. 27 C X -0.0022 0.0020 -0.0014 0.0011 -0.0019 0.0017  
Y 0.0001 0.0004 -0.0013 0.0018 0.0046 -0.0047  
Z 0.0000 0.0003 -0.0007 0.0010 0.0012 -0.0015  
AT. 28 C X 0.0022 0.0020 -0.0014 -0.0011 -0.0019 -0.0017  
Y 0.0001 -0.0004 0.0013 0.0018 -0.0046 -0.0047  
Z -0.0000 0.0003 -0.0007 -0.0010 0.0012 0.0015  
AT. 29 H X -0.0030 0.0024 0.0022 -0.0020 -0.0003 0.0015  
Y 0.0148 -0.0147 -0.0183 0.0168 -0.0184 0.0166  
Z -0.0011 0.0021 0.0027 -0.0025 0.0023 -0.0044  
AT. 30 H X 0.0030 0.0024 0.0022 0.0020 -0.0003 -0.0015  
Y 0.0148 0.0147 0.0183 0.0168 0.0184 0.0166  
Z 0.0011 0.0021 0.0027 0.0025 0.0023 0.0044  
AT. 31 H X -0.0030 0.0024 -0.0022 0.0020 -0.0003 0.0015  
Y 0.0148 -0.0147 0.0183 -0.0168 -0.0184 0.0166  
Z -0.0011 0.0021 -0.0027 0.0025 0.0023 -0.0044

AT. 32 H X 0.0030 0.0024 -0.0022 -0.0020 -0.0003 -0.0015  
Y 0.0148 0.0147 -0.0183 -0.0168 0.0184 0.0166  
Z 0.0011 0.0021 -0.0027 -0.0025 0.0023 0.0044

AT. 33 H X 0.0096 -0.0100 -0.0139 0.0133 -0.0188 0.0172  
Y -0.0039 0.0045 0.0067 -0.0068 0.0107 -0.0105  
Z 0.0091 -0.0090 -0.0115 0.0105 -0.0123 0.0115

AT. 34 H X -0.0096 -0.0100 -0.0139 -0.0133 -0.0188 -0.0172  
Y -0.0039 -0.0045 -0.0067 -0.0068 -0.0107 -0.0105  
Z -0.0091 -0.0090 -0.0115 -0.0105 -0.0123 -0.0115

AT. 35 H X 0.0096 -0.0100 0.0139 -0.0133 -0.0188 0.0172  
Y -0.0039 0.0045 -0.0067 0.0068 0.0107 -0.0105  
Z 0.0091 -0.0090 0.0115 -0.0105 -0.0123 0.0115

AT. 36 H X -0.0096 -0.0100 0.0139 0.0133 -0.0188 -0.0172  
Y -0.0039 -0.0045 0.0067 0.0068 -0.0107 -0.0105  
Z -0.0091 -0.0090 0.0115 0.0105 -0.0123 -0.0115

AT. 37 C X -0.0044 0.0044 0.0057 -0.0051 0.0062 -0.0063  
Y -0.0034 0.0039 0.0051 -0.0048 0.0059 -0.0063  
Z -0.0011 0.0013 0.0022 -0.0021 0.0032 -0.0031

AT. 38 C X 0.0044 0.0044 0.0057 0.0051 0.0062 0.0063  
Y -0.0034 -0.0039 -0.0051 -0.0048 -0.0059 -0.0063  
Z 0.0011 0.0013 0.0022 0.0021 0.0032 0.0031

AT. 39 C X -0.0044 0.0044 -0.0057 0.0051 0.0062 -0.0063  
Y -0.0034 0.0039 -0.0051 0.0048 0.0059 -0.0063  
Z -0.0011 0.0013 -0.0022 0.0021 0.0032 -0.0031

AT. 40 C X 0.0044 0.0044 -0.0057 -0.0051 0.0062 0.0063  
Y -0.0034 -0.0039 0.0051 0.0048 -0.0059 -0.0063  
Z 0.0011 0.0013 -0.0022 -0.0021 0.0032 0.0031

AT. 41 C X 0.0117 -0.0121 -0.0133 0.0133 -0.0061 0.0074  
Y 0.0103 -0.0108 -0.0122 0.0121 -0.0068 0.0080  
Z -0.0063 0.0062 0.0059 -0.0059 -0.0015 0.0008

AT. 42 C X -0.0117 -0.0121 -0.0133 -0.0133 -0.0061 -0.0074  
Y 0.0103 0.0108 0.0122 0.0121 0.0068 0.0080

Z 0.0063 0.0062 0.0059 0.0059 -0.0015 -0.0008  
AT. 43 C X 0.0117 -0.0121 0.0133 -0.0133 -0.0061 0.0074  
Y 0.0103 -0.0108 0.0122 -0.0121 -0.0068 0.0080  
Z -0.0063 0.0062 -0.0059 0.0059 -0.0015 0.0008  
AT. 44 C X -0.0117 -0.0121 0.0133 0.0133 -0.0061 -0.0074  
Y 0.0103 0.0108 -0.0122 -0.0121 0.0068 0.0080  
Z 0.0063 0.0062 -0.0059 -0.0059 -0.0015 -0.0008  
AT. 45 H X 0.0363 -0.0372 -0.0380 0.0380 -0.0087 0.0119  
Y 0.0090 -0.0097 -0.0131 0.0127 -0.0150 0.0161  
Z -0.0110 0.0108 0.0088 -0.0090 -0.0081 0.0069  
AT. 46 H X -0.0363 -0.0372 -0.0380 -0.0380 -0.0087 -0.0119  
Y 0.0090 0.0097 0.0131 0.0127 0.0150 0.0161  
Z 0.0110 0.0108 0.0088 0.0090 -0.0081 -0.0069  
AT. 47 H X 0.0363 -0.0372 0.0380 -0.0380 -0.0087 0.0119  
Y 0.0090 -0.0097 0.0131 -0.0127 -0.0150 0.0161  
Z -0.0110 0.0108 -0.0088 0.0090 -0.0081 0.0069  
AT. 48 H X -0.0363 -0.0372 0.0380 0.0380 -0.0087 -0.0119  
Y 0.0090 0.0097 -0.0131 -0.0127 0.0150 0.0161  
Z 0.0110 0.0108 -0.0088 -0.0090 -0.0081 -0.0069  
AT. 49 H X 0.0041 -0.0043 -0.0065 0.0067 -0.0082 0.0091  
Y -0.0030 0.0028 -0.0003 0.0002 -0.0105 0.0108  
Z 0.0073 -0.0078 -0.0063 0.0067 0.0036 -0.0030  
AT. 50 H X -0.0041 -0.0043 -0.0065 -0.0067 -0.0082 -0.0091  
Y -0.0030 -0.0028 0.0003 0.0002 0.0105 0.0108  
Z -0.0073 -0.0078 -0.0063 -0.0067 0.0036 0.0030  
AT. 51 H X 0.0041 -0.0043 0.0065 -0.0067 -0.0082 0.0091  
Y -0.0030 0.0028 0.0003 -0.0002 -0.0105 0.0108  
Z 0.0073 -0.0078 0.0063 -0.0067 0.0036 -0.0030  
AT. 52 H X -0.0041 -0.0043 0.0065 0.0067 -0.0082 -0.0091  
Y -0.0030 -0.0028 -0.0003 -0.0002 0.0105 0.0108  
Z -0.0073 -0.0078 0.0063 0.0067 0.0036 0.0030  
AT. 53 C X 0.0028 -0.0032 -0.0047 0.0045 -0.0063 0.0067

Y 0.0246 -0.0258 -0.0266 0.0262 -0.0075 0.0100  
Z -0.0085 0.0086 0.0099 -0.0099 0.0055 -0.0065  
AT. 54 C X -0.0028 -0.0032 -0.0047 -0.0045 -0.0063 -0.0067  
Y 0.0246 0.0258 0.0266 0.0262 0.0075 0.0100  
Z 0.0085 0.0086 0.0099 0.0099 0.0055 0.0065  
AT. 55 C X 0.0028 -0.0032 0.0047 -0.0045 -0.0063 0.0067  
Y 0.0246 -0.0258 0.0266 -0.0262 -0.0075 0.0100  
Z -0.0085 0.0086 -0.0099 0.0099 0.0055 -0.0065  
AT. 56 C X -0.0028 -0.0032 0.0047 0.0045 -0.0063 -0.0067  
Y 0.0246 0.0258 -0.0266 -0.0262 0.0075 0.0100  
Z 0.0085 0.0086 -0.0099 -0.0099 0.0055 0.0065  
AT. 57 C X 0.0008 -0.0014 -0.0008 0.0006 0.0015 -0.0012  
Y 0.0041 -0.0051 -0.0049 0.0042 -0.0010 0.0011  
Z 0.0121 -0.0126 -0.0124 0.0124 -0.0024 0.0034  
AT. 58 C X -0.0008 -0.0014 -0.0008 -0.0006 0.0015 0.0012  
Y 0.0041 0.0051 0.0049 0.0042 0.0010 0.0011  
Z -0.0121 -0.0126 -0.0124 -0.0124 -0.0024 -0.0034  
AT. 59 C X 0.0008 -0.0014 0.0008 -0.0006 0.0015 -0.0012  
Y 0.0041 -0.0051 0.0049 -0.0042 -0.0010 0.0011  
Z 0.0121 -0.0126 0.0124 -0.0124 -0.0024 0.0034  
AT. 60 C X -0.0008 -0.0014 0.0008 0.0006 0.0015 0.0012  
Y 0.0041 0.0051 -0.0049 -0.0042 0.0010 0.0011  
Z -0.0121 -0.0126 0.0124 0.0124 -0.0024 -0.0034  
AT. 61 H X 0.0041 -0.0028 -0.0018 0.0024 0.0049 -0.0041  
Y 0.0029 -0.0022 -0.0019 0.0019 0.0016 -0.0014  
Z 0.0324 -0.0343 -0.0337 0.0326 -0.0030 0.0058  
AT. 62 H X -0.0041 -0.0028 -0.0018 -0.0024 0.0049 0.0041  
Y 0.0029 0.0022 0.0019 0.0019 -0.0016 -0.0014  
Z -0.0324 -0.0343 -0.0337 -0.0326 -0.0030 -0.0058  
AT. 63 H X 0.0041 -0.0028 0.0018 -0.0024 0.0049 -0.0041  
Y 0.0029 -0.0022 0.0019 -0.0019 0.0016 -0.0014  
Z 0.0324 -0.0343 0.0337 -0.0326 -0.0030 0.0058

AT. 64 H X -0.0041 -0.0028 0.0018 0.0024 0.0049 0.0041  
Y 0.0029 0.0022 -0.0019 -0.0019 -0.0016 -0.0014  
Z -0.0324 -0.0343 0.0337 0.0326 -0.0030 -0.0058

AT. 65 H X 0.0037 -0.0036 -0.0030 0.0031 0.0019 -0.0014  
Y -0.0041 0.0016 0.0017 -0.0031 -0.0023 0.0017  
Z 0.0295 -0.0300 -0.0329 0.0332 -0.0165 0.0185

AT. 66 H X -0.0037 -0.0036 -0.0030 -0.0031 0.0019 0.0014  
Y -0.0041 -0.0016 -0.0017 -0.0031 0.0023 0.0017  
Z -0.0295 -0.0300 -0.0329 -0.0332 -0.0165 -0.0185

AT. 67 H X 0.0037 -0.0036 0.0030 -0.0031 0.0019 -0.0014  
Y -0.0041 0.0016 -0.0017 0.0031 -0.0023 0.0017  
Z 0.0295 -0.0300 0.0329 -0.0332 -0.0165 0.0185

AT. 68 H X -0.0037 -0.0036 0.0030 0.0031 0.0019 0.0014  
Y -0.0041 -0.0016 0.0017 0.0031 0.0023 0.0017  
Z -0.0295 -0.0300 0.0329 0.0332 -0.0165 -0.0185

AT. 69 H X -0.0093 0.0069 0.0091 -0.0117 0.0091 -0.0106  
Y -0.0183 0.0186 0.0194 -0.0197 0.0054 -0.0071  
Z -0.0084 0.0086 0.0097 -0.0097 0.0043 -0.0052

AT. 70 H X 0.0093 0.0069 0.0091 0.0117 0.0091 0.0106  
Y -0.0183 -0.0186 -0.0194 -0.0197 -0.0054 -0.0071  
Z 0.0084 0.0086 0.0097 0.0097 0.0043 0.0052

AT. 71 H X -0.0093 0.0069 -0.0091 0.0117 0.0091 -0.0106  
Y -0.0183 0.0186 -0.0194 0.0197 0.0054 -0.0071  
Z -0.0084 0.0086 -0.0097 0.0097 0.0043 -0.0052

AT. 72 H X 0.0093 0.0069 -0.0091 -0.0117 0.0091 0.0106  
Y -0.0183 -0.0186 0.0194 0.0197 -0.0054 -0.0071  
Z 0.0084 0.0086 -0.0097 -0.0097 0.0043 0.0052

AT. 73 C X -0.0004 0.0005 0.0004 -0.0005 -0.0010 0.0009  
Y 0.0046 -0.0051 -0.0069 0.0068 -0.0086 0.0094  
Z -0.0057 0.0054 0.0050 -0.0052 -0.0013 0.0009

AT. 74 C X 0.0004 0.0005 0.0004 0.0005 -0.0010 -0.0009  
Y 0.0046 0.0051 0.0069 0.0068 0.0086 0.0094

Z 0.0057 0.0054 0.0050 0.0052 -0.0013 -0.0009  
AT. 75 C X -0.0004 0.0005 -0.0004 0.0005 -0.0010 0.0009  
Y 0.0046 -0.0051 0.0069 -0.0068 -0.0086 0.0094  
Z -0.0057 0.0054 -0.0050 0.0052 -0.0013 0.0009  
AT. 76 C X 0.0004 0.0005 -0.0004 -0.0005 -0.0010 -0.0009  
Y 0.0046 0.0051 -0.0069 -0.0068 0.0086 0.0094  
Z 0.0057 0.0054 -0.0050 -0.0052 -0.0013 -0.0009  
AT. 77 C X -0.0114 0.0117 0.0097 -0.0095 -0.0074 0.0068  
Y -0.0082 0.0084 0.0083 -0.0079 -0.0005 0.0000  
Z 0.0013 -0.0012 -0.0026 0.0024 -0.0055 0.0057  
AT. 78 C X 0.0114 0.0117 0.0097 0.0095 -0.0074 -0.0068  
Y -0.0082 -0.0084 -0.0083 -0.0079 0.0005 0.0000  
Z -0.0013 -0.0012 -0.0026 -0.0024 -0.0055 -0.0057  
AT. 79 C X -0.0114 0.0117 -0.0097 0.0095 -0.0074 0.0068  
Y -0.0082 0.0084 -0.0083 0.0079 -0.0005 0.0000  
Z 0.0013 -0.0012 0.0026 -0.0024 -0.0055 0.0057  
AT. 80 C X 0.0114 0.0117 -0.0097 -0.0095 -0.0074 -0.0068  
Y -0.0082 -0.0084 0.0083 0.0079 0.0005 0.0000  
Z -0.0013 -0.0012 0.0026 0.0024 -0.0055 -0.0057  
AT. 81 H X -0.0004 0.0012 0.0012 -0.0005 0.0008 -0.0003  
Y 0.0036 -0.0029 -0.0008 0.0019 0.0084 -0.0076  
Z 0.0140 -0.0126 -0.0107 0.0111 0.0082 -0.0071  
AT. 82 H X 0.0004 0.0012 0.0012 0.0005 0.0008 0.0003  
Y 0.0036 0.0029 0.0008 0.0019 -0.0084 -0.0076  
Z -0.0140 -0.0126 -0.0107 -0.0111 0.0082 0.0071  
AT. 83 H X -0.0004 0.0012 -0.0012 0.0005 0.0008 -0.0003  
Y 0.0036 -0.0029 0.0008 -0.0019 0.0084 -0.0076  
Z 0.0140 -0.0126 0.0107 -0.0111 0.0082 -0.0071  
AT. 84 H X 0.0004 0.0012 -0.0012 -0.0005 0.0008 0.0003  
Y 0.0036 0.0029 -0.0008 -0.0019 -0.0084 -0.0076  
Z -0.0140 -0.0126 0.0107 0.0111 0.0082 0.0071  
AT. 85 H X -0.0343 0.0327 0.0248 -0.0260 -0.0298 0.0274



Y -0.0035 0.0044 0.0057 -0.0049 0.0041 -0.0041  
Z 0.0041 -0.0040 -0.0049 0.0048 -0.0029 0.0032  
AT. 86 H X 0.0343 0.0327 0.0248 0.0260 -0.0298 -0.0274  
Y -0.0035 -0.0044 -0.0057 -0.0049 -0.0041 -0.0041  
Z -0.0041 -0.0040 -0.0049 -0.0048 -0.0029 -0.0032  
AT. 87 H X -0.0343 0.0327 -0.0248 0.0260 -0.0298 0.0274  
Y -0.0035 0.0044 -0.0057 0.0049 0.0041 -0.0041  
Z 0.0041 -0.0040 0.0049 -0.0048 -0.0029 0.0032  
AT. 88 H X 0.0343 0.0327 -0.0248 -0.0260 -0.0298 -0.0274  
Y -0.0035 -0.0044 0.0057 0.0049 -0.0041 -0.0041  
Z -0.0041 -0.0040 0.0049 0.0048 -0.0029 -0.0032  
AT. 89 C X -0.0037 0.0041 0.0041 -0.0036 -0.0006 0.0005  
Y -0.0168 0.0162 0.0125 -0.0129 -0.0148 0.0137  
Z -0.0078 0.0073 0.0057 -0.0062 -0.0070 0.0066  
AT. 90 C X 0.0037 0.0041 0.0041 0.0036 -0.0006 -0.0005  
Y -0.0168 -0.0162 -0.0125 -0.0129 0.0148 0.0137  
Z 0.0078 0.0073 0.0057 0.0062 -0.0070 -0.0066  
AT. 91 C X -0.0037 0.0041 -0.0041 0.0036 -0.0006 0.0005  
Y -0.0168 0.0162 -0.0125 0.0129 -0.0148 0.0137  
Z -0.0078 0.0073 -0.0057 0.0062 -0.0070 0.0066  
AT. 92 C X 0.0037 0.0041 -0.0041 -0.0036 -0.0006 -0.0005  
Y -0.0168 -0.0162 0.0125 0.0129 0.0148 0.0137  
Z 0.0078 0.0073 -0.0057 -0.0062 -0.0070 -0.0066  
AT. 93 C X 0.0013 -0.0016 -0.0017 0.0016 -0.0017 0.0017  
Y -0.0039 0.0039 0.0027 -0.0027 -0.0045 0.0041  
Z 0.0050 -0.0049 -0.0033 0.0032 0.0058 -0.0050  
AT. 94 C X -0.0013 -0.0016 -0.0017 -0.0016 -0.0017 -0.0017  
Y -0.0039 -0.0039 -0.0027 -0.0027 0.0045 0.0041  
Z -0.0050 -0.0049 -0.0033 -0.0032 0.0058 0.0050  
AT. 95 C X 0.0013 -0.0016 0.0017 -0.0016 -0.0017 0.0017  
Y -0.0039 0.0039 -0.0027 0.0027 -0.0045 0.0041  
Z 0.0050 -0.0049 0.0033 -0.0032 0.0058 -0.0050

AT. 96 C X -0.0013 -0.0016 0.0017 0.0016 -0.0017 -0.0017  
Y -0.0039 -0.0039 0.0027 0.0027 0.0045 0.0041  
Z -0.0050 -0.0049 0.0033 0.0032 0.0058 0.0050

AT. 97 H X 0.0051 -0.0057 -0.0064 0.0058 -0.0040 0.0040  
Y -0.0013 0.0023 0.0029 -0.0022 0.0039 -0.0039  
Z 0.0228 -0.0219 -0.0185 0.0182 0.0148 -0.0132

AT. 98 H X -0.0051 -0.0057 -0.0064 -0.0058 -0.0040 -0.0040  
Y -0.0013 -0.0023 -0.0029 -0.0022 -0.0039 -0.0039  
Z -0.0228 -0.0219 -0.0185 -0.0182 0.0148 0.0132

AT. 99 H X 0.0051 -0.0057 0.0064 -0.0058 -0.0040 0.0040  
Y -0.0013 0.0023 -0.0029 0.0022 0.0039 -0.0039  
Z 0.0228 -0.0219 0.0185 -0.0182 0.0148 -0.0132

AT. 100 H X -0.0051 -0.0057 0.0064 0.0058 -0.0040 -0.0040  
Y -0.0013 -0.0023 0.0029 0.0022 -0.0039 -0.0039  
Z -0.0228 -0.0219 0.0185 0.0182 0.0148 0.0132

AT. 101 H X 0.0067 -0.0071 -0.0067 0.0068 0.0002 0.0001  
Y -0.0005 0.0002 -0.0013 0.0011 -0.0055 0.0051  
Z 0.0197 -0.0185 -0.0128 0.0141 0.0225 -0.0206

AT. 102 H X -0.0067 -0.0071 -0.0067 -0.0068 0.0002 -0.0001  
Y -0.0005 -0.0002 0.0013 0.0011 0.0055 0.0051  
Z -0.0197 -0.0185 -0.0128 -0.0141 0.0225 0.0206

AT. 103 H X 0.0067 -0.0071 0.0067 -0.0068 0.0002 0.0001  
Y -0.0005 0.0002 0.0013 -0.0011 -0.0055 0.0051  
Z 0.0197 -0.0185 0.0128 -0.0141 0.0225 -0.0206

AT. 104 H X -0.0067 -0.0071 0.0067 0.0068 0.0002 -0.0001  
Y -0.0005 -0.0002 -0.0013 -0.0011 0.0055 0.0051  
Z -0.0197 -0.0185 0.0128 0.0141 0.0225 0.0206

AT. 105 H X 0.0024 -0.0023 -0.0034 0.0026 -0.0024 0.0028  
Y 0.0171 -0.0163 -0.0138 0.0145 0.0104 -0.0097  
Z -0.0113 0.0106 0.0097 -0.0101 -0.0053 0.0051

AT. 106 H X -0.0024 -0.0023 -0.0034 -0.0026 -0.0024 -0.0028  
Y 0.0171 0.0163 0.0138 0.0145 -0.0104 -0.0097

Z 0.0113 0.0106 0.0097 0.0101 -0.0053 -0.0051  
AT. 107 H X 0.0024 -0.0023 0.0034 -0.0026 -0.0024 0.0028  
Y 0.0171 -0.0163 0.0138 -0.0145 0.0104 -0.0097  
Z -0.0113 0.0106 -0.0097 0.0101 -0.0053 0.0051  
AT. 108 H X -0.0024 -0.0023 0.0034 0.0026 -0.0024 -0.0028  
Y 0.0171 0.0163 -0.0138 -0.0145 -0.0104 -0.0097  
Z 0.0113 0.0106 -0.0097 -0.0101 -0.0053 -0.0051  
AT. 109 C X -0.0123 0.0124 0.0113 -0.0116 -0.0017 0.0006  
Y 0.0106 -0.0106 -0.0096 0.0097 0.0027 -0.0018  
Z -0.0040 0.0047 0.0055 -0.0052 0.0050 -0.0055  
AT. 110 C X 0.0123 0.0124 0.0113 0.0116 -0.0017 -0.0006  
Y 0.0106 0.0106 0.0096 0.0097 -0.0027 -0.0018  
Z 0.0040 0.0047 0.0055 0.0052 0.0050 0.0055  
AT. 111 C X -0.0123 0.0124 -0.0113 0.0116 -0.0017 0.0006  
Y 0.0106 -0.0106 0.0096 -0.0097 0.0027 -0.0018  
Z -0.0040 0.0047 -0.0055 0.0052 0.0050 -0.0055  
AT. 112 C X 0.0123 0.0124 -0.0113 -0.0116 -0.0017 -0.0006  
Y 0.0106 0.0106 -0.0096 -0.0097 -0.0027 -0.0018  
Z 0.0040 0.0047 -0.0055 -0.0052 0.0050 0.0055  
AT. 113 H X 0.0026 -0.0035 -0.0066 0.0060 -0.0129 0.0134  
Y -0.0120 0.0136 0.0174 -0.0169 0.0189 -0.0206  
Z 0.0132 -0.0135 -0.0157 0.0155 -0.0099 0.0113  
AT. 114 H X -0.0026 -0.0035 -0.0066 -0.0060 -0.0129 -0.0134  
Y -0.0120 -0.0136 -0.0174 -0.0169 -0.0189 -0.0206  
Z -0.0132 -0.0135 -0.0157 -0.0155 -0.0099 -0.0113  
AT. 115 H X 0.0026 -0.0035 0.0066 -0.0060 -0.0129 0.0134  
Y -0.0120 0.0136 -0.0174 0.0169 0.0189 -0.0206  
Z 0.0132 -0.0135 0.0157 -0.0155 -0.0099 0.0113  
AT. 116 H X -0.0026 -0.0035 0.0066 0.0060 -0.0129 -0.0134  
Y -0.0120 -0.0136 0.0174 0.0169 -0.0189 -0.0206  
Z -0.0132 -0.0135 0.0157 0.0155 -0.0099 -0.0113  
AT. 117 H X -0.0429 0.0456 0.0489 -0.0478 0.0215 -0.0259

Y 0.0108 -0.0106 -0.0091 0.0095 0.0052 -0.0042  
Z 0.0010 -0.0007 -0.0000 0.0004 0.0035 -0.0034  
AT. 118 H X 0.0429 0.0456 0.0489 0.0478 0.0215 0.0259  
Y 0.0108 0.0106 0.0091 0.0095 -0.0052 -0.0042  
Z -0.0010 -0.0007 -0.0000 -0.0004 0.0035 0.0034  
AT. 119 H X -0.0429 0.0456 -0.0489 0.0478 0.0215 -0.0259  
Y 0.0108 -0.0106 0.0091 -0.0095 0.0052 -0.0042  
Z 0.0010 -0.0007 0.0000 -0.0004 0.0035 -0.0034  
AT. 120 H X 0.0429 0.0456 -0.0489 -0.0478 0.0215 0.0259  
Y 0.0108 0.0106 -0.0091 -0.0095 -0.0052 -0.0042  
Z -0.0010 -0.0007 0.0000 0.0004 0.0035 0.0034  
AT. 121 C X 0.0095 -0.0090 -0.0076 0.0081 0.0048 -0.0039  
Y -0.0076 0.0069 0.0042 -0.0052 -0.0106 0.0101  
Z -0.0104 0.0105 0.0103 -0.0103 0.0012 -0.0023  
AT. 122 C X -0.0095 -0.0090 -0.0076 -0.0081 0.0048 0.0039  
Y -0.0076 -0.0069 -0.0042 -0.0052 0.0106 0.0101  
Z 0.0104 0.0105 0.0103 0.0103 0.0012 0.0023  
AT. 123 C X 0.0095 -0.0090 0.0076 -0.0081 0.0048 -0.0039  
Y -0.0076 0.0069 -0.0042 0.0052 -0.0106 0.0101  
Z -0.0104 0.0105 -0.0103 0.0103 0.0012 -0.0023  
AT. 124 C X -0.0095 -0.0090 0.0076 0.0081 0.0048 0.0039  
Y -0.0076 -0.0069 0.0042 0.0052 0.0106 0.0101  
Z 0.0104 0.0105 -0.0103 -0.0103 0.0012 0.0023  
AT. 125 H X 0.0327 -0.0322 -0.0273 0.0272 0.0198 -0.0175  
Y -0.0057 0.0043 0.0001 -0.0017 -0.0178 0.0177  
Z -0.0182 0.0188 0.0188 -0.0182 0.0023 -0.0040  
AT. 126 H X -0.0327 -0.0322 -0.0273 -0.0272 0.0198 0.0175  
Y -0.0057 -0.0043 -0.0001 -0.0017 0.0178 0.0177  
Z 0.0182 0.0188 0.0188 0.0182 0.0023 0.0040  
AT. 127 H X 0.0327 -0.0322 0.0273 -0.0272 0.0198 -0.0175  
Y -0.0057 0.0043 -0.0001 0.0017 -0.0178 0.0177  
Z -0.0182 0.0188 -0.0188 0.0182 0.0023 -0.0040

AT.128 H X -0.0327 -0.0322 0.0273 0.0272 0.0198 0.0175  
Y -0.0057 -0.0043 0.0001 0.0017 0.0178 0.0177  
Z 0.0182 0.0188 -0.0188 -0.0182 0.0023 0.0040

AT.129 H X 0.0055 -0.0049 -0.0041 0.0048 0.0020 -0.0013  
Y 0.0064 -0.0076 -0.0083 0.0068 -0.0032 0.0035  
Z 0.0075 -0.0078 -0.0060 0.0057 0.0071 -0.0070

AT.130 H X -0.0055 -0.0049 -0.0041 -0.0048 0.0020 0.0013  
Y 0.0064 0.0076 0.0083 0.0068 0.0032 0.0035  
Z -0.0075 -0.0078 -0.0060 -0.0057 0.0071 0.0070

AT.131 H X 0.0055 -0.0049 0.0041 -0.0048 0.0020 -0.0013  
Y 0.0064 -0.0076 0.0083 -0.0068 -0.0032 0.0035  
Z 0.0075 -0.0078 0.0060 -0.0057 0.0071 -0.0070

AT.132 H X -0.0055 -0.0049 0.0041 0.0048 0.0020 0.0013  
Y 0.0064 0.0076 -0.0083 -0.0068 0.0032 0.0035  
Z -0.0075 -0.0078 0.0060 0.0057 0.0071 0.0070

AT.133 C X 0.0012 -0.0012 -0.0009 0.0013 0.0002 -0.0003  
Y -0.0017 0.0022 0.0032 -0.0031 0.0050 -0.0051  
Z 0.0009 -0.0012 -0.0024 0.0021 -0.0055 0.0056

AT.134 C X -0.0012 -0.0012 -0.0009 -0.0013 0.0002 0.0003  
Y -0.0017 -0.0022 -0.0032 -0.0031 -0.0050 -0.0051  
Z -0.0009 -0.0012 -0.0024 -0.0021 -0.0055 -0.0056

AT.135 C X 0.0012 -0.0012 0.0009 -0.0013 0.0002 -0.0003  
Y -0.0017 0.0022 -0.0032 0.0031 0.0050 -0.0051  
Z 0.0009 -0.0012 0.0024 -0.0021 -0.0055 0.0056

AT.136 C X -0.0012 -0.0012 0.0009 0.0013 0.0002 0.0003  
Y -0.0017 -0.0022 0.0032 0.0031 -0.0050 -0.0051  
Z -0.0009 -0.0012 0.0024 0.0021 -0.0055 -0.0056

AT.137 C X -0.0025 0.0035 0.0046 -0.0033 0.0048 -0.0045  
Y -0.0008 0.0009 0.0009 -0.0008 -0.0004 0.0004  
Z 0.0004 -0.0004 -0.0016 0.0010 -0.0042 0.0043

AT.138 C X 0.0025 0.0035 0.0046 0.0033 0.0048 0.0045  
Y -0.0008 -0.0009 -0.0009 -0.0008 0.0004 0.0004

Z -0.0004 -0.0004 -0.0016 -0.0010 -0.0042 -0.0043  
AT. 139 C X -0.0025 0.0035 -0.0046 0.0033 0.0048 -0.0045  
Y -0.0008 0.0009 -0.0009 0.0008 -0.0004 0.0004  
Z 0.0004 -0.0004 0.0016 -0.0010 -0.0042 0.0043  
AT. 140 C X 0.0025 0.0035 -0.0046 -0.0033 0.0048 0.0045  
Y -0.0008 -0.0009 0.0009 0.0008 0.0004 0.0004  
Z -0.0004 -0.0004 0.0016 0.0010 -0.0042 -0.0043  
AT. 141 H X 0.0001 0.0007 0.0009 0.0006 0.0008 0.0000  
Y 0.0046 -0.0056 -0.0076 0.0080 -0.0110 0.0118  
Z 0.0012 -0.0016 -0.0032 0.0025 -0.0070 0.0071  
AT. 142 H X -0.0001 0.0007 0.0009 -0.0006 0.0008 -0.0000  
Y 0.0046 0.0056 0.0076 0.0080 0.0110 0.0118  
Z -0.0012 -0.0016 -0.0032 -0.0025 -0.0070 -0.0071  
AT. 143 H X 0.0001 0.0007 -0.0009 -0.0006 0.0008 0.0000  
Y 0.0046 -0.0056 0.0076 -0.0080 -0.0110 0.0118  
Z 0.0012 -0.0016 0.0032 -0.0025 -0.0070 0.0071  
AT. 144 H X -0.0001 0.0007 -0.0009 0.0006 0.0008 -0.0000  
Y 0.0046 0.0056 -0.0076 -0.0080 0.0110 0.0118  
Z -0.0012 -0.0016 0.0032 0.0025 -0.0070 -0.0071  
AT. 145 H X -0.0075 0.0089 0.0107 -0.0105 0.0083 -0.0087  
Y -0.0001 0.0004 0.0006 -0.0002 0.0012 -0.0010  
Z -0.0022 0.0032 0.0041 -0.0047 0.0070 -0.0075  
AT. 146 H X 0.0075 0.0089 0.0107 0.0105 0.0083 0.0087  
Y -0.0001 -0.0004 -0.0006 -0.0002 -0.0012 -0.0010  
Z 0.0022 0.0032 0.0041 0.0047 0.0070 0.0075  
AT. 147 H X -0.0075 0.0089 -0.0107 0.0105 0.0083 -0.0087  
Y -0.0001 0.0004 -0.0006 0.0002 0.0012 -0.0010  
Z -0.0022 0.0032 -0.0041 0.0047 0.0070 -0.0075  
AT. 148 H X 0.0075 0.0089 -0.0107 -0.0105 0.0083 0.0087  
Y -0.0001 -0.0004 0.0006 0.0002 -0.0012 -0.0010  
Z 0.0022 0.0032 -0.0041 -0.0047 0.0070 0.0075  
AT. 149 O X -0.0037 0.0046 0.0075 -0.0073 0.0131 -0.0138

Y -0.0016 0.0024 0.0033 -0.0025 0.0054 -0.0054  
Z 0.0120 -0.0120 -0.0120 0.0123 -0.0012 0.0023  
AT. 150 O X 0.0037 0.0046 0.0075 0.0073 0.0131 0.0138  
Y -0.0016 -0.0024 -0.0033 -0.0025 -0.0054 -0.0054  
Z -0.0120 -0.0120 -0.0120 -0.0123 -0.0012 -0.0023  
AT. 151 O X -0.0037 0.0046 -0.0075 0.0073 0.0131 -0.0138  
Y -0.0016 0.0024 -0.0033 0.0025 0.0054 -0.0054  
Z 0.0120 -0.0120 0.0120 -0.0123 -0.0012 0.0023  
AT. 152 O X 0.0037 0.0046 -0.0075 -0.0073 0.0131 0.0138  
Y -0.0016 -0.0024 0.0033 0.0025 -0.0054 -0.0054  
Z -0.0120 -0.0120 0.0120 0.0123 -0.0012 -0.0023  
AT. 153 H X -0.0483 0.0352 0.0188 -0.0291 -0.0890 0.0835  
Y -0.0291 0.0157 -0.0018 -0.0082 -0.0960 0.0925  
Z 0.0311 -0.0270 -0.0209 0.0242 0.0295 -0.0265  
AT. 154 H X 0.0483 0.0352 0.0188 0.0291 -0.0890 -0.0835  
Y -0.0291 -0.0157 0.0018 -0.0082 0.0960 0.0925  
Z -0.0311 -0.0270 -0.0209 -0.0242 0.0295 0.0265  
AT. 155 H X -0.0483 0.0352 -0.0188 0.0291 -0.0890 0.0835  
Y -0.0291 0.0157 0.0018 0.0082 -0.0960 0.0925  
Z 0.0311 -0.0270 0.0209 -0.0242 0.0295 -0.0265  
AT. 156 H X 0.0483 0.0352 -0.0188 -0.0291 -0.0890 -0.0835  
Y -0.0291 -0.0157 -0.0018 0.0082 0.0960 0.0925  
Z -0.0311 -0.0270 0.0209 0.0242 0.0295 0.0265  
AT. 157 O X 0.0082 -0.0086 -0.0096 0.0093 -0.0055 0.0062  
Y -0.0075 0.0078 0.0101 -0.0104 0.0105 -0.0116  
Z 0.0032 -0.0035 -0.0036 0.0034 -0.0001 0.0002  
AT. 158 O X -0.0082 -0.0086 -0.0096 -0.0093 -0.0055 -0.0062  
Y -0.0075 -0.0078 -0.0101 -0.0104 -0.0105 -0.0116  
Z -0.0032 -0.0035 -0.0036 -0.0034 -0.0001 -0.0002  
AT. 159 O X 0.0082 -0.0086 0.0096 -0.0093 -0.0055 0.0062  
Y -0.0075 0.0078 -0.0101 0.0104 0.0105 -0.0116  
Z 0.0032 -0.0035 0.0036 -0.0034 -0.0001 0.0002

AT.160 O X -0.0082 -0.0086 0.0096 0.0093 -0.0055 -0.0062  
Y -0.0075 -0.0078 0.0101 0.0104 -0.0105 -0.0116  
Z -0.0032 -0.0035 0.0036 0.0034 -0.0001 -0.0002

AT.161 O X 0.0042 -0.0044 -0.0033 0.0029 0.0048 -0.0049  
Y 0.0054 -0.0047 -0.0042 0.0047 0.0022 -0.0017  
Z 0.0022 -0.0023 -0.0014 0.0012 0.0036 -0.0035

AT.162 O X -0.0042 -0.0044 -0.0033 -0.0029 0.0048 0.0049  
Y 0.0054 0.0047 0.0042 0.0047 -0.0022 -0.0017  
Z -0.0022 -0.0023 -0.0014 -0.0012 0.0036 0.0035

AT.163 O X 0.0042 -0.0044 0.0033 -0.0029 0.0048 -0.0049  
Y 0.0054 -0.0047 0.0042 -0.0047 0.0022 -0.0017  
Z 0.0022 -0.0023 0.0014 -0.0012 0.0036 -0.0035

AT.164 O X -0.0042 -0.0044 0.0033 0.0029 0.0048 0.0049  
Y 0.0054 0.0047 -0.0042 -0.0047 -0.0022 -0.0017  
Z -0.0022 -0.0023 0.0014 0.0012 0.0036 0.0035

AT.165 H X 0.0005 -0.0021 -0.0015 -0.0004 0.0036 -0.0043  
Y 0.0039 -0.0041 -0.0037 0.0034 0.0021 -0.0019  
Z -0.0068 0.0070 0.0094 -0.0096 0.0099 -0.0112

AT.166 H X -0.0005 -0.0021 -0.0015 0.0004 0.0036 0.0043  
Y 0.0039 0.0041 0.0037 0.0034 -0.0021 -0.0019  
Z 0.0068 0.0070 0.0094 0.0096 0.0099 0.0112

AT.167 H X 0.0005 -0.0021 0.0015 0.0004 0.0036 -0.0043  
Y 0.0039 -0.0041 0.0037 -0.0034 0.0021 -0.0019  
Z -0.0068 0.0070 -0.0094 0.0096 0.0099 -0.0112

AT.168 H X -0.0005 -0.0021 0.0015 -0.0004 0.0036 0.0043  
Y 0.0039 0.0041 -0.0037 -0.0034 -0.0021 -0.0019  
Z 0.0068 0.0070 -0.0094 -0.0096 0.0099 0.0112

AT.169 O X 0.0002 -0.0000 -0.0009 0.0011 -0.0005 0.0007  
Y 0.0008 -0.0005 0.0007 -0.0007 0.0005 -0.0005  
Z -0.0008 0.0006 0.0003 -0.0004 -0.0013 0.0010

AT.170 O X -0.0002 -0.0000 -0.0009 -0.0011 -0.0005 -0.0007  
Y 0.0008 0.0005 -0.0007 -0.0007 -0.0005 -0.0005



Z 0.0008 0.0006 0.0003 0.0004 -0.0013 -0.0010  
 AT. 171 O X 0.0002 -0.0000 0.0009 -0.0011 -0.0005 0.0007  
 Y 0.0008 -0.0005 -0.0007 0.0007 0.0005 -0.0005  
 Z -0.0008 0.0006 -0.0003 0.0004 -0.0013 0.0010  
 AT. 172 O X -0.0002 -0.0000 0.0009 0.0011 -0.0005 -0.0007  
 Y 0.0008 0.0005 0.0007 0.0007 -0.0005 -0.0005  
 Z 0.0008 0.0006 -0.0003 -0.0004 -0.0013 -0.0010  
 AT. 173 H X 0.0115 -0.0069 0.0019 0.0012 0.0321 -0.0298  
 Y -0.0009 0.0003 -0.0002 -0.0002 -0.0057 0.0055  
 Z -0.0050 0.0036 0.0001 -0.0006 -0.0089 0.0083  
 AT. 174 H X -0.0115 -0.0069 0.0019 -0.0012 0.0321 0.0298  
 Y -0.0009 -0.0003 0.0002 -0.0002 0.0057 0.0055  
 Z 0.0050 0.0036 0.0001 0.0006 -0.0089 -0.0083  
 AT. 175 H X 0.0115 -0.0069 -0.0019 -0.0012 0.0321 -0.0298  
 Y -0.0009 0.0003 0.0002 0.0002 -0.0057 0.0055  
 Z -0.0050 0.0036 -0.0001 0.0006 -0.0089 0.0083  
 AT. 176 H X -0.0115 -0.0069 -0.0019 0.0012 0.0321 0.0298  
 Y -0.0009 -0.0003 -0.0002 0.0002 0.0057 0.0055  
 Z 0.0050 0.0036 -0.0001 -0.0006 -0.0089 -0.0083  
  
 FREQ(CM\*\*-1) 605.84 607.49 637.77 638.24 638.69 639.07  
  
 AT. 1 I X 0.0003 -0.0001 0.0002 -0.0001 -0.0003 -0.0002  
 Y -0.0002 0.0003 0.0000 -0.0000 0.0000 -0.0000  
 Z -0.0002 0.0001 -0.0001 0.0001 0.0002 0.0002  
 AT. 2 I X 0.0003 0.0001 0.0002 0.0001 -0.0003 0.0002  
 Y 0.0002 0.0003 -0.0000 -0.0000 -0.0000 -0.0000  
 Z -0.0002 -0.0001 -0.0001 -0.0001 0.0002 -0.0002  
 AT. 3 I X -0.0003 0.0001 -0.0002 0.0001 -0.0003 -0.0002  
 Y 0.0002 -0.0003 -0.0000 0.0000 0.0000 -0.0000  
 Z 0.0002 -0.0001 0.0001 -0.0001 0.0002 0.0002  
 AT. 4 I X -0.0003 -0.0001 -0.0002 -0.0001 -0.0003 0.0002

Y -0.0002 -0.0003 0.0000 0.0000 -0.0000 -0.0000  
Z 0.0002 0.0001 0.0001 0.0001 0.0002 -0.0002  
AT. 5 I X -0.0004 0.0003 -0.0006 0.0006 0.0005 0.0005  
Y 0.0001 -0.0001 -0.0001 0.0001 0.0001 0.0001  
Z 0.0003 -0.0002 0.0003 -0.0003 -0.0003 -0.0003  
AT. 6 I X -0.0004 -0.0003 -0.0006 -0.0006 0.0005 -0.0005  
Y -0.0001 -0.0001 0.0001 0.0001 -0.0001 0.0001  
Z 0.0003 0.0002 0.0003 0.0003 -0.0003 0.0003  
AT. 7 I X 0.0004 -0.0003 0.0006 -0.0006 0.0005 0.0005  
Y -0.0001 0.0001 0.0001 -0.0001 0.0001 0.0001  
Z -0.0003 0.0002 -0.0003 0.0003 -0.0003 -0.0003  
AT. 8 I X 0.0004 0.0003 0.0006 0.0006 0.0005 -0.0005  
Y 0.0001 0.0001 -0.0001 -0.0001 -0.0001 0.0001  
Z -0.0003 -0.0002 -0.0003 -0.0003 -0.0003 0.0003  
AT. 9 N X 0.0055 -0.0061 -0.0052 0.0054 0.0049 0.0053  
Y 0.0018 -0.0019 -0.0007 0.0006 0.0010 0.0010  
Z -0.0055 0.0059 0.0030 -0.0030 -0.0028 -0.0026  
AT. 10 N X 0.0055 0.0061 -0.0052 -0.0054 0.0049 -0.0053  
Y -0.0018 -0.0019 0.0007 0.0006 -0.0010 0.0010  
Z -0.0055 -0.0059 0.0030 0.0030 -0.0028 0.0026  
AT. 11 N X -0.0055 0.0061 0.0052 -0.0054 0.0049 0.0053  
Y -0.0018 0.0019 0.0007 -0.0006 0.0010 0.0010  
Z 0.0055 -0.0059 -0.0030 0.0030 -0.0028 -0.0026  
AT. 12 N X -0.0055 -0.0061 0.0052 0.0054 0.0049 -0.0053  
Y 0.0018 0.0019 -0.0007 -0.0006 -0.0010 0.0010  
Z 0.0055 0.0059 -0.0030 -0.0030 -0.0028 0.0026  
AT. 13 N X -0.0042 0.0043 -0.0091 0.0092 0.0088 0.0088  
Y 0.0021 -0.0024 0.0009 -0.0011 -0.0008 -0.0008  
Z 0.0049 -0.0056 0.0090 -0.0089 -0.0092 -0.0089  
AT. 14 N X -0.0042 -0.0043 -0.0091 -0.0092 0.0088 -0.0088  
Y -0.0021 -0.0024 -0.0009 -0.0011 0.0008 -0.0008  
Z 0.0049 0.0056 0.0090 0.0089 -0.0092 0.0089

AT. 15 N X 0.0042 -0.0043 0.0091 -0.0092 0.0088 0.0088  
Y -0.0021 0.0024 -0.0009 0.0011 -0.0008 -0.0008  
Z -0.0049 0.0056 -0.0090 0.0089 -0.0092 -0.0089

AT. 16 N X 0.0042 0.0043 0.0091 0.0092 0.0088 -0.0088  
Y 0.0021 0.0024 0.0009 0.0011 0.0008 -0.0008  
Z -0.0049 -0.0056 -0.0090 -0.0089 -0.0092 0.0089

AT. 17 O X 0.0014 -0.0016 0.0020 -0.0020 -0.0024 -0.0022  
Y 0.0070 -0.0070 0.0050 -0.0048 -0.0051 -0.0054  
Z 0.0045 -0.0050 -0.0037 0.0034 0.0035 0.0037

AT. 18 O X 0.0014 0.0016 0.0020 0.0020 -0.0024 0.0022  
Y -0.0070 -0.0070 -0.0050 -0.0048 0.0051 -0.0054  
Z 0.0045 0.0050 -0.0037 -0.0034 0.0035 -0.0037

AT. 19 O X -0.0014 0.0016 -0.0020 0.0020 -0.0024 -0.0022  
Y -0.0070 0.0070 -0.0050 0.0048 -0.0051 -0.0054  
Z -0.0045 0.0050 0.0037 -0.0034 0.0035 0.0037

AT. 20 O X -0.0014 -0.0016 -0.0020 -0.0020 -0.0024 0.0022  
Y 0.0070 0.0070 0.0050 0.0048 0.0051 -0.0054  
Z -0.0045 -0.0050 0.0037 0.0034 0.0035 -0.0037

AT. 21 O X -0.0009 0.0007 0.0008 -0.0005 -0.0008 -0.0006  
Y 0.0064 -0.0067 0.0109 -0.0106 -0.0113 -0.0111  
Z -0.0056 0.0060 -0.0035 0.0036 0.0036 0.0034

AT. 22 O X -0.0009 -0.0007 0.0008 0.0005 -0.0008 0.0006  
Y -0.0064 -0.0067 -0.0109 -0.0106 0.0113 -0.0111  
Z -0.0056 -0.0060 -0.0035 -0.0036 0.0036 -0.0034

AT. 23 O X 0.0009 -0.0007 -0.0008 0.0005 -0.0008 -0.0006  
Y -0.0064 0.0067 -0.0109 0.0106 -0.0113 -0.0111  
Z 0.0056 -0.0060 0.0035 -0.0036 0.0036 0.0034

AT. 24 O X 0.0009 0.0007 -0.0008 -0.0005 -0.0008 0.0006  
Y 0.0064 0.0067 0.0109 0.0106 0.0113 -0.0111  
Z 0.0056 0.0060 0.0035 0.0036 0.0036 -0.0034

AT. 25 C X -0.0026 0.0026 -0.0011 0.0008 0.0013 0.0013  
Y 0.0046 -0.0049 -0.0037 0.0036 0.0034 0.0037

Z 0.0013 -0.0012 0.0044 -0.0041 -0.0047 -0.0051  
AT. 26 C X -0.0026 -0.0026 -0.0011 -0.0008 0.0013 -0.0013  
Y -0.0046 -0.0049 0.0037 0.0036 -0.0034 0.0037  
Z 0.0013 0.0012 0.0044 0.0041 -0.0047 0.0051  
AT. 27 C X 0.0026 -0.0026 0.0011 -0.0008 0.0013 0.0013  
Y -0.0046 0.0049 0.0037 -0.0036 0.0034 0.0037  
Z -0.0013 0.0012 -0.0044 0.0041 -0.0047 -0.0051  
AT. 28 C X 0.0026 0.0026 0.0011 0.0008 0.0013 -0.0013  
Y 0.0046 0.0049 -0.0037 -0.0036 -0.0034 0.0037  
Z -0.0013 -0.0012 -0.0044 -0.0041 -0.0047 0.0051  
AT. 29 H X -0.0011 0.0026 -0.0019 0.0008 0.0018 0.0016  
Y -0.0141 0.0127 0.0068 -0.0059 -0.0072 -0.0058  
Z 0.0017 -0.0039 0.0042 -0.0028 -0.0040 -0.0043  
AT. 30 H X -0.0011 -0.0026 -0.0019 -0.0008 0.0018 -0.0016  
Y 0.0141 0.0127 -0.0068 -0.0059 0.0072 -0.0058  
Z 0.0017 0.0039 0.0042 0.0028 -0.0040 0.0043  
AT. 31 H X 0.0011 -0.0026 0.0019 -0.0008 0.0018 0.0016  
Y 0.0141 -0.0127 -0.0068 0.0059 -0.0072 -0.0058  
Z -0.0017 0.0039 -0.0042 0.0028 -0.0040 -0.0043  
AT. 32 H X 0.0011 0.0026 0.0019 0.0008 0.0018 -0.0016  
Y -0.0141 -0.0127 0.0068 0.0059 0.0072 -0.0058  
Z -0.0017 -0.0039 -0.0042 -0.0028 -0.0040 0.0043  
AT. 33 H X -0.0155 0.0150 0.0075 -0.0072 -0.0076 -0.0068  
Y 0.0094 -0.0095 -0.0065 0.0063 0.0063 0.0063  
Z -0.0094 0.0093 0.0101 -0.0095 -0.0104 -0.0104  
AT. 34 H X -0.0155 -0.0150 0.0075 0.0072 -0.0076 0.0068  
Y -0.0094 -0.0095 0.0065 0.0063 -0.0063 0.0063  
Z -0.0094 -0.0093 0.0101 0.0095 -0.0104 0.0104  
AT. 35 H X 0.0155 -0.0150 -0.0075 0.0072 -0.0076 -0.0068  
Y -0.0094 0.0095 0.0065 -0.0063 0.0063 0.0063  
Z 0.0094 -0.0093 -0.0101 0.0095 -0.0104 -0.0104  
AT. 36 H X 0.0155 0.0150 -0.0075 -0.0072 -0.0076 0.0068

Y 0.0094 0.0095 -0.0065 -0.0063 -0.0063 0.0063  
Z 0.0094 0.0093 -0.0101 -0.0095 -0.0104 0.0104  
AT. 37 C X 0.0055 -0.0056 -0.0034 0.0032 0.0035 0.0031  
Y 0.0049 -0.0058 -0.0019 0.0020 0.0016 0.0020  
Z 0.0031 -0.0030 0.0022 -0.0023 -0.0027 -0.0028  
AT. 38 C X 0.0055 0.0056 -0.0034 -0.0032 0.0035 -0.0031  
Y -0.0049 -0.0058 0.0019 0.0020 -0.0016 0.0020  
Z 0.0031 0.0030 0.0022 0.0023 -0.0027 0.0028  
AT. 39 C X -0.0055 0.0056 0.0034 -0.0032 0.0035 0.0031  
Y -0.0049 0.0058 0.0019 -0.0020 0.0016 0.0020  
Z -0.0031 0.0030 -0.0022 0.0023 -0.0027 -0.0028  
AT. 40 C X -0.0055 -0.0056 0.0034 0.0032 0.0035 -0.0031  
Y 0.0049 0.0058 -0.0019 -0.0020 -0.0016 0.0020  
Z -0.0031 -0.0030 -0.0022 -0.0023 -0.0027 0.0028  
AT. 41 C X -0.0034 0.0039 0.0088 -0.0088 -0.0088 -0.0086  
Y -0.0041 0.0048 0.0016 -0.0014 -0.0013 -0.0012  
Z -0.0023 0.0019 -0.0047 0.0046 0.0048 0.0050  
AT. 42 C X -0.0034 -0.0039 0.0088 0.0088 -0.0088 0.0086  
Y 0.0041 0.0048 -0.0016 -0.0014 0.0013 -0.0012  
Z -0.0023 -0.0019 -0.0047 -0.0046 0.0048 -0.0050  
AT. 43 C X 0.0034 -0.0039 -0.0088 0.0088 -0.0088 -0.0086  
Y 0.0041 -0.0048 -0.0016 0.0014 -0.0013 -0.0012  
Z 0.0023 -0.0019 0.0047 -0.0046 0.0048 0.0050  
AT. 44 C X 0.0034 0.0039 -0.0088 -0.0088 -0.0088 0.0086  
Y -0.0041 -0.0048 0.0016 0.0014 0.0013 -0.0012  
Z 0.0023 0.0019 0.0047 0.0046 0.0048 -0.0050  
AT. 45 H X -0.0008 0.0028 -0.0113 0.0117 0.0110 0.0113  
Y -0.0121 0.0122 0.0120 -0.0117 -0.0115 -0.0111  
Z -0.0094 0.0085 0.0069 -0.0069 -0.0065 -0.0062  
AT. 46 H X -0.0008 -0.0028 -0.0113 -0.0117 0.0110 -0.0113  
Y 0.0121 0.0122 -0.0120 -0.0117 0.0115 -0.0111  
Z -0.0094 -0.0085 0.0069 0.0069 -0.0065 0.0062

AT. 47 H X 0.0008 -0.0028 0.0113 -0.0117 0.0110 0.0113  
Y 0.0121 -0.0122 -0.0120 0.0117 -0.0115 -0.0111  
Z 0.0094 -0.0085 -0.0069 0.0069 -0.0065 -0.0062

AT. 48 H X 0.0008 0.0028 0.0113 0.0117 0.0110 -0.0113  
Y -0.0121 -0.0122 0.0120 0.0117 0.0115 -0.0111  
Z 0.0094 0.0085 -0.0069 -0.0069 -0.0065 0.0062

AT. 49 H X -0.0071 0.0073 0.0215 -0.0217 -0.0210 -0.0208  
Y -0.0105 0.0103 0.0203 -0.0202 -0.0195 -0.0193  
Z 0.0050 -0.0042 -0.0199 0.0197 0.0197 0.0198

AT. 50 H X -0.0071 -0.0073 0.0215 0.0217 -0.0210 0.0208  
Y 0.0105 0.0103 -0.0203 -0.0202 0.0195 -0.0193  
Z 0.0050 0.0042 -0.0199 -0.0197 0.0197 -0.0198

AT. 51 H X 0.0071 -0.0073 -0.0215 0.0217 -0.0210 -0.0208  
Y 0.0105 -0.0103 -0.0203 0.0202 -0.0195 -0.0193  
Z -0.0050 0.0042 0.0199 -0.0197 0.0197 0.0198

AT. 52 H X 0.0071 0.0073 -0.0215 -0.0217 -0.0210 0.0208  
Y -0.0105 -0.0103 0.0203 0.0202 0.0195 -0.0193  
Z -0.0050 -0.0042 0.0199 0.0197 0.0197 -0.0198

AT. 53 C X -0.0055 0.0058 0.0095 -0.0095 -0.0092 -0.0092  
Y -0.0022 0.0040 -0.0055 0.0057 0.0054 0.0053  
Z 0.0033 -0.0036 -0.0024 0.0022 0.0023 0.0021

AT. 54 C X -0.0055 -0.0058 0.0095 0.0095 -0.0092 0.0092  
Y 0.0022 0.0040 0.0055 0.0057 -0.0054 0.0053  
Z 0.0033 0.0036 -0.0024 -0.0022 0.0023 -0.0021

AT. 55 C X 0.0055 -0.0058 -0.0095 0.0095 -0.0092 -0.0092  
Y 0.0022 -0.0040 0.0055 -0.0057 0.0054 0.0053  
Z -0.0033 0.0036 0.0024 -0.0022 0.0023 0.0021

AT. 56 C X 0.0055 0.0058 -0.0095 -0.0095 -0.0092 0.0092  
Y -0.0022 -0.0040 -0.0055 -0.0057 -0.0054 0.0053  
Z -0.0033 -0.0036 0.0024 0.0022 0.0023 -0.0021

AT. 57 C X 0.0012 -0.0012 -0.0008 0.0006 0.0006 0.0005  
Y -0.0004 0.0008 -0.0036 0.0034 0.0036 0.0031

Z -0.0001 0.0017 -0.0049 0.0050 0.0048 0.0046  
AT. 58 C X 0.0012 0.0012 -0.0008 -0.0006 0.0006 -0.0005  
Y 0.0004 0.0008 0.0036 0.0034 -0.0036 0.0031  
Z -0.0001 -0.0017 -0.0049 -0.0050 0.0048 -0.0046  
AT. 59 C X -0.0012 0.0012 0.0008 -0.0006 0.0006 0.0005  
Y 0.0004 -0.0008 0.0036 -0.0034 0.0036 0.0031  
Z 0.0001 -0.0017 0.0049 -0.0050 0.0048 0.0046  
AT. 60 C X -0.0012 -0.0012 0.0008 0.0006 0.0006 -0.0005  
Y -0.0004 -0.0008 -0.0036 -0.0034 -0.0036 0.0031  
Z 0.0001 0.0017 0.0049 0.0050 0.0048 -0.0046  
AT. 61 H X 0.0054 -0.0044 -0.0040 0.0050 0.0038 0.0044  
Y 0.0021 -0.0010 -0.0046 0.0053 0.0046 0.0047  
Z 0.0035 -0.0011 -0.0134 0.0133 0.0129 0.0124  
AT. 62 H X 0.0054 0.0044 -0.0040 -0.0050 0.0038 -0.0044  
Y -0.0021 -0.0010 0.0046 0.0053 -0.0046 0.0047  
Z 0.0035 0.0011 -0.0134 -0.0133 0.0129 -0.0124  
AT. 63 H X -0.0054 0.0044 0.0040 -0.0050 0.0038 0.0044  
Y -0.0021 0.0010 0.0046 -0.0053 0.0046 0.0047  
Z -0.0035 0.0011 0.0134 -0.0133 0.0129 0.0124  
AT. 64 H X -0.0054 -0.0044 0.0040 0.0050 0.0038 -0.0044  
Y 0.0021 0.0010 -0.0046 -0.0053 -0.0046 0.0047  
Z -0.0035 -0.0011 0.0134 0.0133 0.0129 -0.0124  
AT. 65 H X 0.0023 -0.0019 -0.0019 0.0019 0.0016 0.0017  
Y -0.0037 0.0029 -0.0005 -0.0005 0.0005 -0.0005  
Z -0.0094 0.0123 0.0029 -0.0022 -0.0022 -0.0024  
AT. 66 H X 0.0023 0.0019 -0.0019 -0.0019 0.0016 -0.0017  
Y 0.0037 0.0029 0.0005 -0.0005 -0.0005 -0.0005  
Z -0.0094 -0.0123 0.0029 0.0022 -0.0022 0.0024  
AT. 67 H X -0.0023 0.0019 0.0019 -0.0019 0.0016 0.0017  
Y 0.0037 -0.0029 0.0005 0.0005 0.0005 -0.0005  
Z 0.0094 -0.0123 -0.0029 0.0022 -0.0022 -0.0024  
AT. 68 H X -0.0023 -0.0019 0.0019 0.0019 0.0016 -0.0017

Y -0.0037 -0.0029 -0.0005 0.0005 -0.0005 -0.0005  
Z 0.0094 0.0123 -0.0029 -0.0022 -0.0022 0.0024  
AT. 69 H X 0.0064 -0.0078 -0.0068 0.0056 0.0063 0.0050  
Y 0.0008 -0.0018 -0.0010 0.0005 0.0007 0.0006  
Z 0.0019 -0.0017 -0.0038 0.0035 0.0035 0.0034  
AT. 70 H X 0.0064 0.0078 -0.0068 -0.0056 0.0063 -0.0050  
Y -0.0008 -0.0018 0.0010 0.0005 -0.0007 0.0006  
Z 0.0019 0.0017 -0.0038 -0.0035 0.0035 -0.0034  
AT. 71 H X -0.0064 0.0078 0.0068 -0.0056 0.0063 0.0050  
Y -0.0008 0.0018 0.0010 -0.0005 0.0007 0.0006  
Z -0.0019 0.0017 0.0038 -0.0035 0.0035 0.0034  
AT. 72 H X -0.0064 -0.0078 0.0068 0.0056 0.0063 -0.0050  
Y 0.0008 0.0018 -0.0010 -0.0005 -0.0007 0.0006  
Z -0.0019 -0.0017 0.0038 0.0035 0.0035 -0.0034  
AT. 73 C X -0.0010 0.0012 -0.0124 0.0125 0.0123 0.0124  
Y -0.0074 0.0081 0.0011 -0.0012 -0.0011 -0.0011  
Z -0.0025 0.0021 0.0036 -0.0037 -0.0034 -0.0036  
AT. 74 C X -0.0010 -0.0012 -0.0124 -0.0125 0.0123 -0.0124  
Y 0.0074 0.0081 -0.0011 -0.0012 0.0011 -0.0011  
Z -0.0025 -0.0021 0.0036 0.0037 -0.0034 0.0036  
AT. 75 C X 0.0010 -0.0012 0.0124 -0.0125 0.0123 0.0124  
Y 0.0074 -0.0081 -0.0011 0.0012 -0.0011 -0.0011  
Z 0.0025 -0.0021 -0.0036 0.0037 -0.0034 -0.0036  
AT. 76 C X 0.0010 0.0012 0.0124 0.0125 0.0123 -0.0124  
Y -0.0074 -0.0081 0.0011 0.0012 0.0011 -0.0011  
Z 0.0025 0.0021 -0.0036 -0.0037 -0.0034 0.0036  
AT. 77 C X -0.0097 0.0094 0.0019 -0.0020 -0.0015 -0.0011  
Y -0.0026 0.0023 -0.0034 0.0033 0.0034 0.0034  
Z -0.0047 0.0051 -0.0016 0.0015 0.0017 0.0019  
AT. 78 C X -0.0097 -0.0094 0.0019 0.0020 -0.0015 0.0011  
Y 0.0026 0.0023 0.0034 0.0033 -0.0034 0.0034  
Z -0.0047 -0.0051 -0.0016 -0.0015 0.0017 -0.0019



AT. 79 C X 0.0097 -0.0094 -0.0019 0.0020 -0.0015 -0.0011  
Y 0.0026 -0.0023 0.0034 -0.0033 0.0034 0.0034  
Z 0.0047 -0.0051 0.0016 -0.0015 0.0017 0.0019

AT. 80 C X 0.0097 0.0094 -0.0019 -0.0020 -0.0015 0.0011  
Y -0.0026 -0.0023 -0.0034 -0.0033 -0.0034 0.0034  
Z 0.0047 0.0051 0.0016 0.0015 0.0017 -0.0019

AT. 81 H X -0.0001 0.0002 0.0202 -0.0203 -0.0195 -0.0192  
Y 0.0079 -0.0077 0.0163 -0.0164 -0.0160 -0.0161  
Z 0.0102 -0.0099 0.0120 -0.0117 -0.0121 -0.0118

AT. 82 H X -0.0001 -0.0002 0.0202 0.0203 -0.0195 0.0192  
Y -0.0079 -0.0077 -0.0163 -0.0164 0.0160 -0.0161  
Z 0.0102 0.0099 0.0120 0.0117 -0.0121 0.0118

AT. 83 H X 0.0001 -0.0002 -0.0202 0.0203 -0.0195 -0.0192  
Y -0.0079 0.0077 -0.0163 0.0164 -0.0160 -0.0161  
Z -0.0102 0.0099 -0.0120 0.0117 -0.0121 -0.0118

AT. 84 H X 0.0001 0.0002 -0.0202 -0.0203 -0.0195 0.0192  
Y 0.0079 0.0077 0.0163 0.0164 0.0160 -0.0161  
Z -0.0102 -0.0099 -0.0120 -0.0117 -0.0121 0.0118

AT. 85 H X -0.0344 0.0336 -0.0246 0.0242 0.0245 0.0249  
Y 0.0022 -0.0024 0.0022 -0.0021 -0.0024 -0.0024  
Z -0.0014 0.0019 0.0016 -0.0017 -0.0014 -0.0011

AT. 86 H X -0.0344 -0.0336 -0.0246 -0.0242 0.0245 -0.0249  
Y -0.0022 -0.0024 -0.0022 -0.0021 0.0024 -0.0024  
Z -0.0014 -0.0019 0.0016 0.0017 -0.0014 0.0011

AT. 87 H X 0.0344 -0.0336 0.0246 -0.0242 0.0245 0.0249  
Y -0.0022 0.0024 -0.0022 0.0021 -0.0024 -0.0024  
Z 0.0014 -0.0019 -0.0016 0.0017 -0.0014 -0.0011

AT. 88 H X 0.0344 0.0336 0.0246 0.0242 0.0245 -0.0249  
Y 0.0022 0.0024 0.0022 0.0021 0.0024 -0.0024  
Z 0.0014 0.0019 -0.0016 -0.0017 -0.0014 0.0011

AT. 89 C X -0.0018 0.0019 0.0063 -0.0064 -0.0061 -0.0061  
Y -0.0177 0.0173 -0.0101 0.0101 0.0105 0.0106

Z -0.0086 0.0083 -0.0108 0.0106 0.0108 0.0109  
AT. 90 C X -0.0018 -0.0019 0.0063 0.0064 -0.0061 0.0061  
Y 0.0177 0.0173 0.0101 0.0101 -0.0105 0.0106  
Z -0.0086 -0.0083 -0.0108 -0.0106 0.0108 -0.0109  
AT. 91 C X 0.0018 -0.0019 -0.0063 0.0064 -0.0061 -0.0061  
Y 0.0177 -0.0173 0.0101 -0.0101 0.0105 0.0106  
Z 0.0086 -0.0083 0.0108 -0.0106 0.0108 0.0109  
AT. 92 C X 0.0018 0.0019 -0.0063 -0.0064 -0.0061 0.0061  
Y -0.0177 -0.0173 -0.0101 -0.0101 -0.0105 0.0106  
Z 0.0086 0.0083 0.0108 0.0106 0.0108 -0.0109  
AT. 93 C X -0.0006 0.0007 -0.0012 0.0011 0.0009 0.0009  
Y -0.0045 0.0044 0.0026 -0.0023 -0.0025 -0.0026  
Z 0.0061 -0.0062 -0.0040 0.0037 0.0036 0.0035  
AT. 94 C X -0.0006 -0.0007 -0.0012 -0.0011 0.0009 -0.0009  
Y 0.0045 0.0044 -0.0026 -0.0023 0.0025 -0.0026  
Z 0.0061 0.0062 -0.0040 -0.0037 0.0036 -0.0035  
AT. 95 C X 0.0006 -0.0007 0.0012 -0.0011 0.0009 0.0009  
Y 0.0045 -0.0044 -0.0026 0.0023 -0.0025 -0.0026  
Z -0.0061 0.0062 0.0040 -0.0037 0.0036 0.0035  
AT. 96 C X 0.0006 0.0007 0.0012 0.0011 0.0009 -0.0009  
Y -0.0045 -0.0044 0.0026 0.0023 0.0025 -0.0026  
Z -0.0061 -0.0062 0.0040 0.0037 0.0036 -0.0035  
AT. 97 H X 0.0000 0.0002 -0.0052 0.0051 0.0039 0.0039  
Y 0.0003 -0.0003 0.0113 -0.0109 -0.0093 -0.0094  
Z 0.0180 -0.0173 -0.0013 0.0011 0.0011 0.0014  
AT. 98 H X 0.0000 -0.0002 -0.0052 -0.0051 0.0039 -0.0039  
Y -0.0003 -0.0003 -0.0113 -0.0109 0.0093 -0.0094  
Z 0.0180 0.0173 -0.0013 -0.0011 0.0011 -0.0014  
AT. 99 H X -0.0000 -0.0002 0.0052 -0.0051 0.0039 0.0039  
Y -0.0003 0.0003 -0.0113 0.0109 -0.0093 -0.0094  
Z -0.0180 0.0173 0.0013 -0.0011 0.0011 0.0014  
AT. 100 H X -0.0000 0.0002 0.0052 0.0051 0.0039 -0.0039

Y 0.0003 0.0003 0.0113 0.0109 0.0093 -0.0094  
Z -0.0180 -0.0173 0.0013 0.0011 0.0011 -0.0014  
AT. 101 H X 0.0037 -0.0033 -0.0017 0.0016 0.0007 0.0009  
Y -0.0029 0.0030 -0.0012 0.0014 0.0004 0.0005  
Z 0.0246 -0.0244 0.0186 -0.0189 -0.0191 -0.0189  
AT. 102 H X 0.0037 0.0033 -0.0017 -0.0016 0.0007 -0.0009  
Y 0.0029 0.0030 0.0012 0.0014 -0.0004 0.0005  
Z 0.0246 0.0244 0.0186 0.0189 -0.0191 0.0189  
AT. 103 H X -0.0037 0.0033 0.0017 -0.0016 0.0007 0.0009  
Y 0.0029 -0.0030 0.0012 -0.0014 0.0004 0.0005  
Z -0.0246 0.0244 -0.0186 0.0189 -0.0191 -0.0189  
AT. 104 H X -0.0037 -0.0033 0.0017 0.0016 0.0007 -0.0009  
Y -0.0029 -0.0030 -0.0012 -0.0014 -0.0004 0.0005  
Z -0.0246 -0.0244 -0.0186 -0.0189 -0.0191 0.0189  
AT. 105 H X -0.0043 0.0045 -0.0089 0.0088 0.0101 0.0101  
Y 0.0151 -0.0145 0.0196 -0.0198 -0.0208 -0.0201  
Z -0.0075 0.0068 -0.0144 0.0144 0.0144 0.0138  
AT. 106 H X -0.0043 -0.0045 -0.0089 -0.0088 0.0101 -0.0101  
Y -0.0151 -0.0145 -0.0196 -0.0198 0.0208 -0.0201  
Z -0.0075 -0.0068 -0.0144 -0.0144 0.0144 -0.0138  
AT. 107 H X 0.0043 -0.0045 0.0089 -0.0088 0.0101 0.0101  
Y -0.0151 0.0145 -0.0196 0.0198 -0.0208 -0.0201  
Z 0.0075 -0.0068 0.0144 -0.0144 0.0144 0.0138  
AT. 108 H X 0.0043 0.0045 0.0089 0.0088 0.0101 -0.0101  
Y 0.0151 0.0145 0.0196 0.0198 0.0208 -0.0201  
Z 0.0075 0.0068 0.0144 0.0144 0.0144 -0.0138  
AT. 109 C X -0.0041 0.0033 0.0137 -0.0137 -0.0135 -0.0136  
Y 0.0048 -0.0044 -0.0067 0.0069 0.0065 0.0067  
Z 0.0042 -0.0046 0.0061 -0.0060 -0.0062 -0.0062  
AT. 110 C X -0.0041 -0.0033 0.0137 0.0137 -0.0135 0.0136  
Y -0.0048 -0.0044 0.0067 0.0069 -0.0065 0.0067  
Z 0.0042 0.0046 0.0061 0.0060 -0.0062 0.0062

AT.111 C X 0.0041 -0.0033 -0.0137 0.0137 -0.0135 -0.0136  
Y -0.0048 0.0044 0.0067 -0.0069 0.0065 0.0067  
Z -0.0042 0.0046 -0.0061 0.0060 -0.0062 -0.0062

AT.112 C X 0.0041 0.0033 -0.0137 -0.0137 -0.0135 0.0136  
Y 0.0048 0.0044 -0.0067 -0.0069 -0.0065 0.0067  
Z -0.0042 -0.0046 -0.0061 -0.0060 -0.0062 0.0062

AT.113 H X -0.0118 0.0122 0.0215 -0.0218 -0.0210 -0.0214  
Y 0.0158 -0.0173 -0.0199 0.0206 0.0193 0.0200  
Z -0.0064 0.0073 0.0049 -0.0050 -0.0048 -0.0049

AT.114 H X -0.0118 -0.0122 0.0215 0.0218 -0.0210 0.0214  
Y -0.0158 -0.0173 0.0199 0.0206 -0.0193 0.0200  
Z -0.0064 -0.0073 0.0049 0.0050 -0.0048 0.0049

AT.115 H X 0.0118 -0.0122 -0.0215 0.0218 -0.0210 -0.0214  
Y -0.0158 0.0173 0.0199 -0.0206 0.0193 0.0200  
Z 0.0064 -0.0073 -0.0049 0.0050 -0.0048 -0.0049

AT.116 H X 0.0118 0.0122 -0.0215 -0.0218 -0.0210 0.0214  
Y 0.0158 0.0173 -0.0199 -0.0206 -0.0193 0.0200  
Z 0.0064 0.0073 -0.0049 -0.0050 -0.0048 0.0049

AT.117 H X 0.0117 -0.0145 0.0012 -0.0011 -0.0014 -0.0012  
Y 0.0072 -0.0070 -0.0082 0.0092 0.0078 0.0085  
Z 0.0038 -0.0041 0.0067 -0.0059 -0.0069 -0.0064

AT.118 H X 0.0117 0.0145 0.0012 0.0011 -0.0014 0.0012  
Y -0.0072 -0.0070 0.0082 0.0092 -0.0078 0.0085  
Z 0.0038 0.0041 0.0067 0.0059 -0.0069 0.0064

AT.119 H X -0.0117 0.0145 -0.0012 0.0011 -0.0014 -0.0012  
Y -0.0072 0.0070 0.0082 -0.0092 0.0078 0.0085  
Z -0.0038 0.0041 -0.0067 0.0059 -0.0069 -0.0064

AT.120 H X -0.0117 -0.0145 -0.0012 -0.0011 -0.0014 0.0012  
Y 0.0072 0.0070 -0.0082 -0.0092 -0.0078 0.0085  
Z -0.0038 -0.0041 -0.0067 -0.0059 -0.0069 0.0064

AT.121 C X 0.0061 -0.0057 0.0099 -0.0100 -0.0101 -0.0101  
Y -0.0119 0.0118 -0.0156 0.0154 0.0159 0.0159

Z -0.0008 -0.0002 0.0009 -0.0005 -0.0010 -0.0006  
AT. 122 C X 0.0061 0.0057 0.0099 0.0100 -0.0101 0.0101  
Y 0.0119 0.0118 0.0156 0.0154 -0.0159 0.0159  
Z -0.0008 0.0002 0.0009 0.0005 -0.0010 0.0006  
AT. 123 C X -0.0061 0.0057 -0.0099 0.0100 -0.0101 -0.0101  
Y 0.0119 -0.0118 0.0156 -0.0154 0.0159 0.0159  
Z 0.0008 0.0002 -0.0009 0.0005 -0.0010 -0.0006  
AT. 124 C X -0.0061 -0.0057 -0.0099 -0.0100 -0.0101 0.0101  
Y -0.0119 -0.0118 -0.0156 -0.0154 -0.0159 0.0159  
Z 0.0008 -0.0002 -0.0009 -0.0005 -0.0010 0.0006  
AT. 125 H X 0.0259 -0.0251 0.0049 -0.0048 -0.0058 -0.0061  
Y -0.0187 0.0190 -0.0296 0.0293 0.0300 0.0299  
Z -0.0013 -0.0000 0.0123 -0.0120 -0.0123 -0.0118  
AT. 126 H X 0.0259 0.0251 0.0049 0.0048 -0.0058 0.0061  
Y 0.0187 0.0190 0.0296 0.0293 -0.0300 0.0299  
Z -0.0013 0.0000 0.0123 0.0120 -0.0123 0.0118  
AT. 127 H X -0.0259 0.0251 -0.0049 0.0048 -0.0058 -0.0061  
Y 0.0187 -0.0190 0.0296 -0.0293 0.0300 0.0299  
Z 0.0013 0.0000 -0.0123 0.0120 -0.0123 -0.0118  
AT. 128 H X -0.0259 -0.0251 -0.0049 -0.0048 -0.0058 0.0061  
Y -0.0187 -0.0190 -0.0296 -0.0293 -0.0300 0.0299  
Z 0.0013 -0.0000 -0.0123 -0.0120 -0.0123 0.0118  
AT. 129 H X 0.0024 -0.0018 0.0153 -0.0154 -0.0153 -0.0154  
Y -0.0014 0.0015 -0.0276 0.0274 0.0276 0.0274  
Z 0.0087 -0.0089 -0.0088 0.0091 0.0085 0.0086  
AT. 130 H X 0.0024 0.0018 0.0153 0.0154 -0.0153 0.0154  
Y 0.0014 0.0015 0.0276 0.0274 -0.0276 0.0274  
Z 0.0087 0.0089 -0.0088 -0.0091 0.0085 -0.0086  
AT. 131 H X -0.0024 0.0018 -0.0153 0.0154 -0.0153 -0.0154  
Y 0.0014 -0.0015 0.0276 -0.0274 0.0276 0.0274  
Z -0.0087 0.0089 0.0088 -0.0091 0.0085 0.0086  
AT. 132 H X -0.0024 -0.0018 -0.0153 -0.0154 -0.0153 0.0154

Y -0.0014 -0.0015 -0.0276 -0.0274 -0.0276 0.0274  
Z -0.0087 -0.0089 0.0088 0.0091 0.0085 -0.0086  
AT. 133 C X 0.0005 -0.0004 -0.0036 0.0036 0.0035 0.0037  
Y 0.0044 -0.0048 0.0054 -0.0058 -0.0054 -0.0055  
Z -0.0052 0.0053 -0.0043 0.0041 0.0045 0.0044  
AT. 134 C X 0.0005 0.0004 -0.0036 -0.0036 0.0035 -0.0037  
Y -0.0044 -0.0048 -0.0054 -0.0058 0.0054 -0.0055  
Z -0.0052 -0.0053 -0.0043 -0.0041 0.0045 -0.0044  
AT. 135 C X -0.0005 0.0004 0.0036 -0.0036 0.0035 0.0037  
Y -0.0044 0.0048 -0.0054 0.0058 -0.0054 -0.0055  
Z 0.0052 -0.0053 0.0043 -0.0041 0.0045 0.0044  
AT. 136 C X -0.0005 -0.0004 0.0036 0.0036 0.0035 -0.0037  
Y 0.0044 0.0048 0.0054 0.0058 0.0054 -0.0055  
Z 0.0052 0.0053 0.0043 0.0041 0.0045 -0.0044  
AT. 137 C X 0.0037 -0.0033 0.0061 -0.0060 -0.0058 -0.0057  
Y -0.0008 0.0007 0.0032 -0.0035 -0.0030 -0.0030  
Z -0.0040 0.0038 -0.0070 0.0063 0.0073 0.0069  
AT. 138 C X 0.0037 0.0033 0.0061 0.0060 -0.0058 0.0057  
Y 0.0008 0.0007 -0.0032 -0.0035 0.0030 -0.0030  
Z -0.0040 -0.0038 -0.0070 -0.0063 0.0073 -0.0069  
AT. 139 C X -0.0037 0.0033 -0.0061 0.0060 -0.0058 -0.0057  
Y 0.0008 -0.0007 -0.0032 0.0035 -0.0030 -0.0030  
Z 0.0040 -0.0038 0.0070 -0.0063 0.0073 0.0069  
AT. 140 C X -0.0037 -0.0033 -0.0061 -0.0060 -0.0058 0.0057  
Y -0.0008 -0.0007 0.0032 0.0035 0.0030 -0.0030  
Z 0.0040 0.0038 0.0070 0.0063 0.0073 -0.0069  
AT. 141 H X -0.0001 0.0011 -0.0024 0.0033 0.0025 0.0024  
Y -0.0098 0.0108 -0.0141 0.0145 0.0139 0.0137  
Z -0.0060 0.0059 -0.0093 0.0082 0.0094 0.0092  
AT. 142 H X -0.0001 -0.0011 -0.0024 -0.0033 0.0025 -0.0024  
Y 0.0098 0.0108 0.0141 0.0145 -0.0139 0.0137  
Z -0.0060 -0.0059 -0.0093 -0.0082 0.0094 -0.0092

AT. 143 H X 0.0001 -0.0011 0.0024 -0.0033 0.0025 0.0024  
Y 0.0098 -0.0108 0.0141 -0.0145 0.0139 0.0137  
Z 0.0060 -0.0059 0.0093 -0.0082 0.0094 0.0092

AT. 144 H X 0.0001 0.0011 0.0024 0.0033 0.0025 -0.0024  
Y -0.0098 -0.0108 -0.0141 -0.0145 -0.0139 0.0137  
Z 0.0060 0.0059 0.0093 0.0082 0.0094 -0.0092

AT. 145 H X 0.0062 -0.0070 0.0179 -0.0187 -0.0174 -0.0171  
Y 0.0008 -0.0008 0.0018 -0.0020 -0.0017 -0.0018  
Z 0.0066 -0.0076 0.0013 -0.0025 -0.0011 -0.0014

AT. 146 H X 0.0062 0.0070 0.0179 0.0187 -0.0174 0.0171  
Y -0.0008 -0.0008 -0.0018 -0.0020 0.0017 -0.0018  
Z 0.0066 0.0076 0.0013 0.0025 -0.0011 0.0014

AT. 147 H X -0.0062 0.0070 -0.0179 0.0187 -0.0174 -0.0171  
Y -0.0008 0.0008 -0.0018 0.0020 -0.0017 -0.0018  
Z -0.0066 0.0076 -0.0013 0.0025 -0.0011 -0.0014

AT. 148 H X -0.0062 -0.0070 -0.0179 -0.0187 -0.0174 0.0171  
Y 0.0008 0.0008 0.0018 0.0020 0.0017 -0.0018  
Z -0.0066 -0.0076 -0.0013 -0.0025 -0.0011 0.0014

AT. 149 O X 0.0120 -0.0125 -0.0112 0.0111 0.0110 0.0110  
Y 0.0049 -0.0052 0.0179 -0.0179 -0.0178 -0.0177  
Z 0.0015 -0.0009 0.0024 -0.0022 -0.0024 -0.0023

AT. 150 O X 0.0120 0.0125 -0.0112 -0.0111 0.0110 -0.0110  
Y -0.0049 -0.0052 -0.0179 -0.0179 0.0178 -0.0177  
Z 0.0015 0.0009 0.0024 0.0022 -0.0024 0.0023

AT. 151 O X -0.0120 0.0125 0.0112 -0.0111 0.0110 0.0110  
Y -0.0049 0.0052 -0.0179 0.0179 -0.0178 -0.0177  
Z -0.0015 0.0009 -0.0024 0.0022 -0.0024 -0.0023

AT. 152 O X -0.0120 -0.0125 0.0112 0.0111 0.0110 -0.0110  
Y 0.0049 0.0052 0.0179 0.0179 0.0178 -0.0177  
Z -0.0015 -0.0009 -0.0024 -0.0022 -0.0024 0.0023

AT. 153 H X -0.0950 0.0912 0.0219 -0.0244 -0.0243 -0.0250  
Y -0.0999 0.0975 0.0470 -0.0494 -0.0493 -0.0501

Z 0.0341 -0.0322 -0.0094 0.0103 0.0100 0.0102  
AT. 154 H X -0.0950 -0.0912 0.0219 0.0244 -0.0243 0.0250  
Y 0.0999 0.0975 -0.0470 -0.0494 0.0493 -0.0501  
Z 0.0341 0.0322 -0.0094 -0.0103 0.0100 -0.0102  
AT. 155 H X 0.0950 -0.0912 -0.0219 0.0244 -0.0243 -0.0250  
Y 0.0999 -0.0975 -0.0470 0.0494 -0.0493 -0.0501  
Z -0.0341 0.0322 0.0094 -0.0103 0.0100 0.0102  
AT. 156 H X 0.0950 0.0912 -0.0219 -0.0244 -0.0243 0.0250  
Y -0.0999 -0.0975 0.0470 0.0494 0.0493 -0.0501  
Z -0.0341 -0.0322 0.0094 0.0103 0.0100 -0.0102  
AT. 157 O X -0.0037 0.0044 -0.0097 0.0098 0.0095 0.0095  
Y 0.0086 -0.0092 -0.0063 0.0059 0.0061 0.0058  
Z 0.0007 -0.0009 0.0101 -0.0102 -0.0099 -0.0101  
AT. 158 O X -0.0037 -0.0044 -0.0097 -0.0098 0.0095 -0.0095  
Y -0.0086 -0.0092 0.0063 0.0059 -0.0061 0.0058  
Z 0.0007 0.0009 0.0101 0.0102 -0.0099 0.0101  
AT. 159 O X 0.0037 -0.0044 0.0097 -0.0098 0.0095 0.0095  
Y -0.0086 0.0092 0.0063 -0.0059 0.0061 0.0058  
Z -0.0007 0.0009 -0.0101 0.0102 -0.0099 -0.0101  
AT. 160 O X 0.0037 0.0044 0.0097 0.0098 0.0095 -0.0095  
Y 0.0086 0.0092 -0.0063 -0.0059 -0.0061 0.0058  
Z -0.0007 -0.0009 -0.0101 -0.0102 -0.0099 0.0101  
AT. 161 O X 0.0059 -0.0060 0.0026 -0.0027 -0.0028 -0.0029  
Y 0.0032 -0.0030 0.0010 -0.0008 -0.0011 -0.0009  
Z 0.0038 -0.0039 -0.0015 0.0013 0.0015 0.0013  
AT. 162 O X 0.0059 0.0060 0.0026 0.0027 -0.0028 0.0029  
Y -0.0032 -0.0030 -0.0010 -0.0008 0.0011 -0.0009  
Z 0.0038 0.0039 -0.0015 -0.0013 0.0015 -0.0013  
AT. 163 O X -0.0059 0.0060 -0.0026 0.0027 -0.0028 -0.0029  
Y -0.0032 0.0030 -0.0010 0.0008 -0.0011 -0.0009  
Z -0.0038 0.0039 0.0015 -0.0013 0.0015 0.0013  
AT. 164 O X -0.0059 -0.0060 -0.0026 -0.0027 -0.0028 0.0029



Y 0.0032 0.0030 0.0010 0.0008 0.0011 -0.0009  
Z -0.0038 -0.0039 0.0015 0.0013 0.0015 -0.0013  
AT. 165 H X 0.0048 -0.0044 -0.0003 -0.0024 -0.0009 -0.0031  
Y 0.0032 -0.0028 -0.0004 -0.0005 -0.0001 -0.0008  
Z 0.0074 -0.0090 0.0008 0.0014 0.0001 0.0018  
AT. 166 H X 0.0048 0.0044 -0.0003 0.0024 -0.0009 0.0031  
Y -0.0032 -0.0028 0.0004 -0.0005 0.0001 -0.0008  
Z 0.0074 0.0090 0.0008 -0.0014 0.0001 -0.0018  
AT. 167 H X -0.0048 0.0044 0.0003 0.0024 -0.0009 -0.0031  
Y -0.0032 0.0028 0.0004 0.0005 -0.0001 -0.0008  
Z -0.0074 0.0090 -0.0008 -0.0014 0.0001 0.0018  
AT. 168 H X -0.0048 -0.0044 0.0003 -0.0024 -0.0009 0.0031  
Y 0.0032 0.0028 -0.0004 0.0005 0.0001 -0.0008  
Z -0.0074 -0.0090 -0.0008 0.0014 0.0001 -0.0018  
AT. 169 O X 0.0004 -0.0003 0.0001 -0.0001 -0.0005 -0.0005  
Y -0.0007 0.0004 -0.0027 0.0028 0.0022 0.0024  
Z -0.0002 0.0002 -0.0002 0.0002 -0.0006 -0.0005  
AT. 170 O X 0.0004 0.0003 0.0001 0.0001 -0.0005 0.0005  
Y 0.0007 0.0004 0.0027 0.0028 -0.0022 0.0024  
Z -0.0002 -0.0002 -0.0002 -0.0002 -0.0006 0.0005  
AT. 171 O X -0.0004 0.0003 -0.0001 0.0001 -0.0005 -0.0005  
Y 0.0007 -0.0004 0.0027 -0.0028 0.0022 0.0024  
Z 0.0002 -0.0002 0.0002 -0.0002 -0.0006 -0.0005  
AT. 172 O X -0.0004 -0.0003 -0.0001 -0.0001 -0.0005 0.0005  
Y -0.0007 -0.0004 -0.0027 -0.0028 -0.0022 0.0024  
Z 0.0002 0.0002 0.0002 0.0002 -0.0006 0.0005  
AT. 173 H X 0.0296 -0.0291 -0.0137 0.0143 0.0133 0.0139  
Y -0.0060 0.0058 -0.0001 0.0000 -0.0005 -0.0005  
Z -0.0042 0.0045 0.0044 -0.0045 -0.0030 -0.0031  
AT. 174 H X 0.0296 0.0291 -0.0137 -0.0143 0.0133 -0.0139  
Y 0.0060 0.0058 0.0001 0.0000 0.0005 -0.0005  
Z -0.0042 -0.0045 0.0044 0.0045 -0.0030 0.0031

AT.175 H X -0.0296 0.0291 0.0137 -0.0143 0.0133 0.0139

Y 0.0060 -0.0058 0.0001 -0.0000 -0.0005 -0.0005

Z 0.0042 -0.0045 -0.0044 0.0045 -0.0030 -0.0031

AT.176 H X -0.0296 -0.0291 0.0137 0.0143 0.0133 -0.0139

Y -0.0060 -0.0058 -0.0001 -0.0000 0.0005 -0.0005

Z 0.0042 0.0045 -0.0044 -0.0045 -0.0030 0.0031

FREQ(CM\*\*-1) 670.39 671.16 671.41 671.44 676.43 676.49

AT. 1 I X 0.0003 0.0005 0.0003 0.0003 0.0012 0.0012

Y -0.0001 -0.0001 -0.0001 -0.0001 -0.0003 -0.0003

Z -0.0003 -0.0004 -0.0002 -0.0002 -0.0009 -0.0009

AT. 2 I X -0.0003 0.0005 -0.0003 0.0003 -0.0012 0.0012

Y -0.0001 0.0001 -0.0001 0.0001 -0.0003 0.0003

Z 0.0003 -0.0004 0.0002 -0.0002 0.0009 -0.0009

AT. 3 I X -0.0003 0.0005 0.0003 -0.0003 0.0012 0.0012

Y 0.0001 -0.0001 -0.0001 0.0001 -0.0003 -0.0003

Z 0.0003 -0.0004 -0.0002 0.0002 -0.0009 -0.0009

AT. 4 I X 0.0003 0.0005 -0.0003 -0.0003 -0.0012 0.0012

Y 0.0001 0.0001 -0.0001 -0.0001 -0.0003 0.0003

Z -0.0003 -0.0004 0.0002 0.0002 0.0009 -0.0009

AT. 5 I X 0.0012 0.0013 0.0013 0.0012 -0.0003 -0.0006

Y -0.0003 -0.0003 -0.0003 -0.0003 0.0001 0.0002

Z -0.0008 -0.0008 -0.0008 -0.0008 0.0002 0.0003

AT. 6 I X -0.0012 0.0013 -0.0013 0.0012 0.0003 -0.0006

Y -0.0003 0.0003 -0.0003 0.0003 0.0001 -0.0002

Z 0.0008 -0.0008 0.0008 -0.0008 -0.0002 0.0003

AT. 7 I X -0.0012 0.0013 0.0013 -0.0012 -0.0003 -0.0006

Y 0.0003 -0.0003 -0.0003 0.0003 0.0001 0.0002

Z 0.0008 -0.0008 -0.0008 0.0008 0.0002 0.0003

AT. 8 I X 0.0012 0.0013 -0.0013 -0.0012 0.0003 -0.0006

Y 0.0003 0.0003 -0.0003 -0.0003 0.0001 -0.0002

Z -0.0008 -0.0008 0.0008 0.0008 -0.0002 0.0003  
AT. 9 N X -0.0032 -0.0040 -0.0027 -0.0030 -0.0070 -0.0064  
Y -0.0005 -0.0013 -0.0005 -0.0006 -0.0057 -0.0056  
Z -0.0038 -0.0047 -0.0034 -0.0035 -0.0074 -0.0068  
AT. 10 N X 0.0032 -0.0040 0.0027 -0.0030 0.0070 -0.0064  
Y -0.0005 0.0013 -0.0005 0.0006 -0.0057 0.0056  
Z 0.0038 -0.0047 0.0034 -0.0035 0.0074 -0.0068  
AT. 11 N X 0.0032 -0.0040 -0.0027 0.0030 -0.0070 -0.0064  
Y 0.0005 -0.0013 -0.0005 0.0006 -0.0057 -0.0056  
Z 0.0038 -0.0047 -0.0034 0.0035 -0.0074 -0.0068  
AT. 12 N X -0.0032 -0.0040 0.0027 0.0030 0.0070 -0.0064  
Y 0.0005 0.0013 -0.0005 -0.0006 -0.0057 0.0056  
Z -0.0038 -0.0047 0.0034 0.0035 0.0074 -0.0068  
AT. 13 N X -0.0076 -0.0073 -0.0078 -0.0077 0.0026 0.0037  
Y 0.0095 0.0091 0.0097 0.0097 -0.0030 -0.0046  
Z -0.0070 -0.0066 -0.0067 -0.0066 -0.0010 0.0000  
AT. 14 N X 0.0076 -0.0073 0.0078 -0.0077 -0.0026 0.0037  
Y 0.0095 -0.0091 0.0097 -0.0097 -0.0030 0.0046  
Z 0.0070 -0.0066 0.0067 -0.0066 0.0010 0.0000  
AT. 15 N X 0.0076 -0.0073 -0.0078 0.0077 0.0026 0.0037  
Y -0.0095 0.0091 0.0097 -0.0097 -0.0030 -0.0046  
Z 0.0070 -0.0066 -0.0067 0.0066 -0.0010 0.0000  
AT. 16 N X -0.0076 -0.0073 0.0078 0.0077 -0.0026 0.0037  
Y -0.0095 -0.0091 0.0097 0.0097 -0.0030 0.0046  
Z -0.0070 -0.0066 0.0067 0.0066 0.0010 0.0000  
AT. 17 O X 0.0024 0.0032 0.0024 0.0026 0.0060 0.0057  
Y 0.0077 0.0102 0.0068 0.0073 0.0211 0.0198  
Z -0.0012 -0.0021 -0.0006 -0.0009 -0.0077 -0.0075  
AT. 18 O X -0.0024 0.0032 -0.0024 0.0026 -0.0060 0.0057  
Y 0.0077 -0.0102 0.0068 -0.0073 0.0211 -0.0198  
Z 0.0012 -0.0021 0.0006 -0.0009 0.0077 -0.0075  
AT. 19 O X -0.0024 0.0032 0.0024 -0.0026 0.0060 0.0057

Y -0.0077 0.0102 0.0068 -0.0073 0.0211 0.0198  
Z 0.0012 -0.0021 -0.0006 0.0009 -0.0077 -0.0075  
AT. 20 O X 0.0024 0.0032 -0.0024 -0.0026 -0.0060 0.0057  
Y -0.0077 -0.0102 0.0068 0.0073 0.0211 -0.0198  
Z -0.0012 -0.0021 0.0006 0.0009 0.0077 -0.0075  
AT. 21 O X -0.0021 -0.0019 -0.0021 -0.0020 0.0008 0.0009  
Y -0.0202 -0.0193 -0.0202 -0.0202 0.0034 0.0068  
Z -0.0072 -0.0070 -0.0073 -0.0075 0.0037 0.0046  
AT. 22 O X 0.0021 -0.0019 0.0021 -0.0020 -0.0008 0.0009  
Y -0.0202 0.0193 -0.0202 0.0202 0.0034 -0.0068  
Z 0.0072 -0.0070 0.0073 -0.0075 -0.0037 0.0046  
AT. 23 O X 0.0021 -0.0019 -0.0021 0.0020 0.0008 0.0009  
Y 0.0202 -0.0193 -0.0202 0.0202 0.0034 0.0068  
Z 0.0072 -0.0070 -0.0073 0.0075 0.0037 0.0046  
AT. 24 O X -0.0021 -0.0019 0.0021 0.0020 -0.0008 0.0009  
Y 0.0202 0.0193 -0.0202 -0.0202 0.0034 -0.0068  
Z -0.0072 -0.0070 0.0073 0.0075 -0.0037 0.0046  
AT. 25 C X -0.0024 -0.0033 -0.0018 -0.0020 -0.0104 -0.0099  
Y -0.0019 -0.0033 -0.0015 -0.0016 -0.0102 -0.0097  
Z 0.0085 0.0120 0.0073 0.0079 0.0302 0.0287  
AT. 26 C X 0.0024 -0.0033 0.0018 -0.0020 0.0104 -0.0099  
Y -0.0019 0.0033 -0.0015 0.0016 -0.0102 0.0097  
Z -0.0085 0.0120 -0.0073 0.0079 -0.0302 0.0287  
AT. 27 C X 0.0024 -0.0033 -0.0018 0.0020 -0.0104 -0.0099  
Y 0.0019 -0.0033 -0.0015 0.0016 -0.0102 -0.0097  
Z -0.0085 0.0120 0.0073 -0.0079 0.0302 0.0287  
AT. 28 C X -0.0024 -0.0033 0.0018 0.0020 0.0104 -0.0099  
Y 0.0019 0.0033 -0.0015 -0.0016 -0.0102 0.0097  
Z 0.0085 0.0120 -0.0073 -0.0079 -0.0302 0.0287  
AT. 29 H X -0.0036 -0.0048 -0.0016 -0.0020 -0.0138 -0.0129  
Y -0.0024 -0.0015 -0.0027 -0.0025 0.0086 0.0092  
Z 0.0106 0.0143 0.0075 0.0082 0.0332 0.0310

AT. 30 H X 0.0036 -0.0048 0.0016 -0.0020 0.0138 -0.0129  
Y -0.0024 0.0015 -0.0027 0.0025 0.0086 -0.0092  
Z -0.0106 0.0143 -0.0075 0.0082 -0.0332 0.0310

AT. 31 H X 0.0036 -0.0048 -0.0016 0.0020 -0.0138 -0.0129  
Y 0.0024 -0.0015 -0.0027 0.0025 0.0086 0.0092  
Z -0.0106 0.0143 0.0075 -0.0082 0.0332 0.0310

AT. 32 H X -0.0036 -0.0048 0.0016 0.0020 0.0138 -0.0129  
Y 0.0024 0.0015 -0.0027 -0.0025 0.0086 -0.0092  
Z 0.0106 0.0143 -0.0075 -0.0082 -0.0332 0.0310

AT. 33 H X -0.0007 0.0003 -0.0010 -0.0011 0.0098 0.0098  
Y -0.0024 -0.0045 -0.0017 -0.0020 -0.0173 -0.0167  
Z 0.0087 0.0137 0.0069 0.0081 0.0430 0.0417

AT. 34 H X 0.0007 0.0003 0.0010 -0.0011 -0.0098 0.0098  
Y -0.0024 0.0045 -0.0017 0.0020 -0.0173 0.0167  
Z -0.0087 0.0137 -0.0069 0.0081 -0.0430 0.0417

AT. 35 H X 0.0007 0.0003 -0.0010 0.0011 0.0098 0.0098  
Y 0.0024 -0.0045 -0.0017 0.0020 -0.0173 -0.0167  
Z -0.0087 0.0137 0.0069 -0.0081 0.0430 0.0417

AT. 36 H X -0.0007 0.0003 0.0010 0.0011 -0.0098 0.0098  
Y 0.0024 0.0045 -0.0017 -0.0020 -0.0173 0.0167  
Z 0.0087 0.0137 -0.0069 -0.0081 -0.0430 0.0417

AT. 37 C X -0.0000 -0.0009 -0.0007 -0.0006 -0.0050 -0.0050  
Y -0.0010 -0.0019 -0.0004 -0.0006 -0.0083 -0.0081  
Z 0.0033 0.0047 0.0033 0.0035 0.0099 0.0093

AT. 38 C X 0.0000 -0.0009 0.0007 -0.0006 0.0050 -0.0050  
Y -0.0010 0.0019 -0.0004 0.0006 -0.0083 0.0081  
Z -0.0033 0.0047 -0.0033 0.0035 -0.0099 0.0093

AT. 39 C X 0.0000 -0.0009 -0.0007 0.0006 -0.0050 -0.0050  
Y 0.0010 -0.0019 -0.0004 0.0006 -0.0083 -0.0081  
Z -0.0033 0.0047 0.0033 -0.0035 0.0099 0.0093

AT. 40 C X -0.0000 -0.0009 0.0007 0.0006 0.0050 -0.0050  
Y 0.0010 0.0019 -0.0004 -0.0006 -0.0083 0.0081

Z 0.0033 0.0047 -0.0033 -0.0035 -0.0099 0.0093  
AT. 41 C X 0.0013 0.0010 0.0013 0.0015 -0.0044 -0.0047  
Y -0.0043 -0.0053 -0.0043 -0.0042 -0.0076 -0.0068  
Z -0.0072 -0.0091 -0.0067 -0.0070 -0.0154 -0.0142  
AT. 42 C X -0.0013 0.0010 -0.0013 0.0015 0.0044 -0.0047  
Y -0.0043 0.0053 -0.0043 0.0042 -0.0076 0.0068  
Z 0.0072 -0.0091 0.0067 -0.0070 0.0154 -0.0142  
AT. 43 C X -0.0013 0.0010 0.0013 -0.0015 -0.0044 -0.0047  
Y 0.0043 -0.0053 -0.0043 0.0042 -0.0076 -0.0068  
Z 0.0072 -0.0091 -0.0067 0.0070 -0.0154 -0.0142  
AT. 44 C X 0.0013 0.0010 -0.0013 -0.0015 0.0044 -0.0047  
Y 0.0043 0.0053 -0.0043 -0.0042 -0.0076 0.0068  
Z -0.0072 -0.0091 0.0067 0.0070 0.0154 -0.0142  
AT. 45 H X -0.0095 -0.0096 -0.0103 -0.0098 0.0032 0.0049  
Y -0.0038 -0.0050 -0.0032 -0.0033 -0.0120 -0.0115  
Z -0.0053 -0.0075 -0.0043 -0.0047 -0.0205 -0.0199  
AT. 46 H X 0.0095 -0.0096 0.0103 -0.0098 -0.0032 0.0049  
Y -0.0038 0.0050 -0.0032 0.0033 -0.0120 0.0115  
Z 0.0053 -0.0075 0.0043 -0.0047 0.0205 -0.0199  
AT. 47 H X 0.0095 -0.0096 -0.0103 0.0098 0.0032 0.0049  
Y 0.0038 -0.0050 -0.0032 0.0033 -0.0120 -0.0115  
Z 0.0053 -0.0075 -0.0043 0.0047 -0.0205 -0.0199  
AT. 48 H X -0.0095 -0.0096 0.0103 0.0098 -0.0032 0.0049  
Y 0.0038 0.0050 -0.0032 -0.0033 -0.0120 0.0115  
Z -0.0053 -0.0075 0.0043 0.0047 0.0205 -0.0199  
AT. 49 H X 0.0064 0.0061 0.0069 0.0071 -0.0079 -0.0091  
Y 0.0022 0.0009 0.0031 0.0031 -0.0153 -0.0156  
Z -0.0106 -0.0118 -0.0112 -0.0112 -0.0044 -0.0026  
AT. 50 H X -0.0064 0.0061 -0.0069 0.0071 0.0079 -0.0091  
Y 0.0022 -0.0009 0.0031 -0.0031 -0.0153 0.0156  
Z 0.0106 -0.0118 0.0112 -0.0112 0.0044 -0.0026  
AT. 51 H X -0.0064 0.0061 0.0069 -0.0071 -0.0079 -0.0091

Y -0.0022 0.0009 0.0031 -0.0031 -0.0153 -0.0156  
Z 0.0106 -0.0118 -0.0112 0.0112 -0.0044 -0.0026  
AT. 52 H X 0.0064 0.0061 -0.0069 -0.0071 0.0079 -0.0091  
Y -0.0022 -0.0009 0.0031 0.0031 -0.0153 0.0156  
Z -0.0106 -0.0118 0.0112 0.0112 0.0044 -0.0026  
AT. 53 C X 0.0040 0.0039 0.0040 0.0041 -0.0023 -0.0029  
Y -0.0057 -0.0057 -0.0064 -0.0064 0.0029 0.0038  
Z 0.0034 0.0036 0.0034 0.0032 0.0024 0.0020  
AT. 54 C X -0.0040 0.0039 -0.0040 0.0041 0.0023 -0.0029  
Y -0.0057 0.0057 -0.0064 0.0064 0.0029 -0.0038  
Z -0.0034 0.0036 -0.0034 0.0032 -0.0024 0.0020  
AT. 55 C X -0.0040 0.0039 0.0040 -0.0041 -0.0023 -0.0029  
Y 0.0057 -0.0057 -0.0064 0.0064 0.0029 0.0038  
Z -0.0034 0.0036 0.0034 -0.0032 0.0024 0.0020  
AT. 56 C X 0.0040 0.0039 -0.0040 -0.0041 0.0023 -0.0029  
Y 0.0057 0.0057 -0.0064 -0.0064 0.0029 -0.0038  
Z 0.0034 0.0036 -0.0034 -0.0032 -0.0024 0.0020  
AT. 57 C X 0.0009 0.0015 0.0006 0.0008 0.0036 0.0033  
Y 0.0009 0.0015 0.0006 0.0006 0.0059 0.0059  
Z 0.0008 0.0012 0.0002 0.0000 0.0073 0.0073  
AT. 58 C X -0.0009 0.0015 -0.0006 0.0008 -0.0036 0.0033  
Y 0.0009 -0.0015 0.0006 -0.0006 0.0059 -0.0059  
Z -0.0008 0.0012 -0.0002 0.0000 -0.0073 0.0073  
AT. 59 C X -0.0009 0.0015 0.0006 -0.0008 0.0036 0.0033  
Y -0.0009 0.0015 0.0006 -0.0006 0.0059 0.0059  
Z -0.0008 0.0012 0.0002 -0.0000 0.0073 0.0073  
AT. 60 C X 0.0009 0.0015 -0.0006 -0.0008 -0.0036 0.0033  
Y -0.0009 -0.0015 0.0006 0.0006 0.0059 -0.0059  
Z 0.0008 0.0012 -0.0002 -0.0000 -0.0073 0.0073  
AT. 61 H X -0.0021 -0.0014 -0.0021 -0.0023 0.0073 0.0078  
Y 0.0009 0.0015 0.0007 0.0005 0.0080 0.0082  
Z -0.0111 -0.0105 -0.0117 -0.0121 0.0119 0.0140

AT. 62 H X 0.0021 -0.0014 0.0021 -0.0023 -0.0073 0.0078  
Y 0.0009 -0.0015 0.0007 -0.0005 0.0080 -0.0082  
Z 0.0111 -0.0105 0.0117 -0.0121 -0.0119 0.0140

AT. 63 H X 0.0021 -0.0014 -0.0021 0.0023 0.0073 0.0078  
Y -0.0009 0.0015 0.0007 -0.0005 0.0080 0.0082  
Z 0.0111 -0.0105 -0.0117 0.0121 0.0119 0.0140

AT. 64 H X -0.0021 -0.0014 0.0021 0.0023 -0.0073 0.0078  
Y -0.0009 -0.0015 0.0007 0.0005 0.0080 -0.0082  
Z -0.0111 -0.0105 0.0117 0.0121 -0.0119 0.0140

AT. 65 H X -0.0007 -0.0001 -0.0010 -0.0008 0.0044 0.0045  
Y 0.0062 0.0067 0.0055 0.0055 0.0041 0.0030  
Z -0.0032 -0.0029 -0.0037 -0.0027 -0.0031 -0.0028

AT. 66 H X 0.0007 -0.0001 0.0010 -0.0008 -0.0044 0.0045  
Y 0.0062 -0.0067 0.0055 -0.0055 0.0041 -0.0030  
Z 0.0032 -0.0029 0.0037 -0.0027 0.0031 -0.0028

AT. 67 H X 0.0007 -0.0001 -0.0010 0.0008 0.0044 0.0045  
Y -0.0062 0.0067 0.0055 -0.0055 0.0041 0.0030  
Z 0.0032 -0.0029 -0.0037 0.0027 -0.0031 -0.0028

AT. 68 H X -0.0007 -0.0001 0.0010 0.0008 -0.0044 0.0045  
Y -0.0062 -0.0067 0.0055 0.0055 0.0041 -0.0030  
Z -0.0032 -0.0029 0.0037 0.0027 0.0031 -0.0028

AT. 69 H X 0.0020 0.0028 0.0017 0.0012 0.0102 0.0102  
Y 0.0096 0.0103 0.0100 0.0097 0.0069 0.0056  
Z 0.0083 0.0089 0.0083 0.0077 0.0094 0.0084

AT. 70 H X -0.0020 0.0028 -0.0017 0.0012 -0.0102 0.0102  
Y 0.0096 -0.0103 0.0100 -0.0097 0.0069 -0.0056  
Z -0.0083 0.0089 -0.0083 0.0077 -0.0094 0.0084

AT. 71 H X -0.0020 0.0028 0.0017 -0.0012 0.0102 0.0102  
Y -0.0096 0.0103 0.0100 -0.0097 0.0069 0.0056  
Z -0.0083 0.0089 0.0083 -0.0077 0.0094 0.0084

AT. 72 H X 0.0020 0.0028 -0.0017 -0.0012 -0.0102 0.0102  
Y -0.0096 -0.0103 0.0100 0.0097 0.0069 -0.0056



Z 0.0083 0.0089 -0.0083 -0.0077 -0.0094 0.0084  
AT. 73 C X -0.0011 -0.0009 -0.0015 -0.0014 0.0044 0.0044  
Y -0.0025 -0.0022 -0.0027 -0.0028 0.0021 0.0025  
Z 0.0063 0.0066 0.0063 0.0064 0.0018 0.0008  
AT. 74 C X 0.0011 -0.0009 0.0015 -0.0014 -0.0044 0.0044  
Y -0.0025 0.0022 -0.0027 0.0028 0.0021 -0.0025  
Z -0.0063 0.0066 -0.0063 0.0064 -0.0018 0.0008  
AT. 75 C X 0.0011 -0.0009 -0.0015 0.0014 0.0044 0.0044  
Y 0.0025 -0.0022 -0.0027 0.0028 0.0021 0.0025  
Z -0.0063 0.0066 0.0063 -0.0064 0.0018 0.0008  
AT. 76 C X -0.0011 -0.0009 0.0015 0.0014 -0.0044 0.0044  
Y 0.0025 0.0022 -0.0027 -0.0028 0.0021 -0.0025  
Z 0.0063 0.0066 -0.0063 -0.0064 -0.0018 0.0008  
AT. 77 C X -0.0003 -0.0004 -0.0001 -0.0001 -0.0009 -0.0010  
Y 0.0006 0.0012 0.0003 0.0003 0.0057 0.0054  
Z -0.0034 -0.0043 -0.0029 -0.0031 -0.0073 -0.0068  
AT. 78 C X 0.0003 -0.0004 0.0001 -0.0001 0.0009 -0.0010  
Y 0.0006 -0.0012 0.0003 -0.0003 0.0057 -0.0054  
Z 0.0034 -0.0043 0.0029 -0.0031 0.0073 -0.0068  
AT. 79 C X 0.0003 -0.0004 -0.0001 0.0001 -0.0009 -0.0010  
Y -0.0006 0.0012 0.0003 -0.0003 0.0057 0.0054  
Z 0.0034 -0.0043 -0.0029 0.0031 -0.0073 -0.0068  
AT. 80 C X -0.0003 -0.0004 0.0001 0.0001 0.0009 -0.0010  
Y -0.0006 -0.0012 0.0003 0.0003 0.0057 -0.0054  
Z -0.0034 -0.0043 0.0029 0.0031 0.0073 -0.0068  
AT. 81 H X 0.0083 0.0086 0.0084 0.0086 0.0013 0.0002  
Y 0.0098 0.0109 0.0095 0.0098 0.0077 0.0062  
Z 0.0040 0.0042 0.0047 0.0046 -0.0000 -0.0006  
AT. 82 H X -0.0083 0.0086 -0.0084 0.0086 -0.0013 0.0002  
Y 0.0098 -0.0109 0.0095 -0.0098 0.0077 -0.0062  
Z -0.0040 0.0042 -0.0047 0.0046 0.0000 -0.0006  
AT. 83 H X -0.0083 0.0086 0.0084 -0.0086 0.0013 0.0002

Y -0.0098 0.0109 0.0095 -0.0098 0.0077 0.0062  
Z -0.0040 0.0042 0.0047 -0.0046 -0.0000 -0.0006  
AT. 84 H X 0.0083 0.0086 -0.0084 -0.0086 -0.0013 0.0002  
Y -0.0098 -0.0109 0.0095 0.0098 0.0077 -0.0062  
Z 0.0040 0.0042 -0.0047 -0.0046 0.0000 -0.0006  
AT. 85 H X -0.0105 -0.0106 -0.0108 -0.0108 0.0016 0.0026  
Y 0.0081 0.0104 0.0075 0.0076 0.0182 0.0167  
Z -0.0065 -0.0086 -0.0056 -0.0059 -0.0178 -0.0166  
AT. 86 H X 0.0105 -0.0106 0.0108 -0.0108 -0.0016 0.0026  
Y 0.0081 -0.0104 0.0075 -0.0076 0.0182 -0.0167  
Z 0.0065 -0.0086 0.0056 -0.0059 0.0178 -0.0166  
AT. 87 H X 0.0105 -0.0106 -0.0108 0.0108 0.0016 0.0026  
Y -0.0081 0.0104 0.0075 -0.0076 0.0182 0.0167  
Z 0.0065 -0.0086 -0.0056 0.0059 -0.0178 -0.0166  
AT. 88 H X -0.0105 -0.0106 0.0108 0.0108 -0.0016 0.0026  
Y -0.0081 -0.0104 0.0075 0.0076 0.0182 -0.0167  
Z -0.0065 -0.0086 0.0056 0.0059 0.0178 -0.0166  
AT. 89 C X 0.0022 0.0028 0.0021 0.0022 0.0040 0.0037  
Y -0.0029 -0.0022 -0.0032 -0.0031 0.0072 0.0072  
Z 0.0016 0.0018 0.0012 0.0012 0.0042 0.0040  
AT. 90 C X -0.0022 0.0028 -0.0021 0.0022 -0.0040 0.0037  
Y -0.0029 0.0022 -0.0032 0.0031 0.0072 -0.0072  
Z -0.0016 0.0018 -0.0012 0.0012 -0.0042 0.0040  
AT. 91 C X -0.0022 0.0028 0.0021 -0.0022 0.0040 0.0037  
Y 0.0029 -0.0022 -0.0032 0.0031 0.0072 0.0072  
Z -0.0016 0.0018 0.0012 -0.0012 0.0042 0.0040  
AT. 92 C X 0.0022 0.0028 -0.0021 -0.0022 -0.0040 0.0037  
Y 0.0029 0.0022 -0.0032 -0.0031 0.0072 -0.0072  
Z 0.0016 0.0018 -0.0012 -0.0012 -0.0042 0.0040  
AT. 93 C X 0.0023 0.0021 0.0022 0.0022 -0.0008 -0.0010  
Y -0.0067 -0.0063 -0.0066 -0.0064 0.0017 0.0026  
Z 0.0073 0.0069 0.0071 0.0070 -0.0016 -0.0025

AT. 94 C X -0.0023 0.0021 -0.0022 0.0022 0.0008 -0.0010  
Y -0.0067 0.0063 -0.0066 0.0064 0.0017 -0.0026  
Z -0.0073 0.0069 -0.0071 0.0070 0.0016 -0.0025

AT. 95 C X -0.0023 0.0021 0.0022 -0.0022 -0.0008 -0.0010  
Y 0.0067 -0.0063 -0.0066 0.0064 0.0017 0.0026  
Z -0.0073 0.0069 0.0071 -0.0070 -0.0016 -0.0025

AT. 96 C X 0.0023 0.0021 -0.0022 -0.0022 0.0008 -0.0010  
Y 0.0067 0.0063 -0.0066 -0.0064 0.0017 -0.0026  
Z 0.0073 0.0069 -0.0071 -0.0070 0.0016 -0.0025

AT. 97 H X 0.0029 0.0020 0.0029 0.0030 -0.0049 -0.0056  
Y -0.0090 -0.0080 -0.0086 -0.0088 0.0029 0.0046  
Z 0.0055 0.0036 0.0061 0.0056 -0.0130 -0.0144

AT. 98 H X -0.0029 0.0020 -0.0029 0.0030 0.0049 -0.0056  
Y -0.0090 0.0080 -0.0086 0.0088 0.0029 -0.0046  
Z -0.0055 0.0036 -0.0061 0.0056 0.0130 -0.0144

AT. 99 H X -0.0029 0.0020 0.0029 -0.0030 -0.0049 -0.0056  
Y 0.0090 -0.0080 -0.0086 0.0088 0.0029 0.0046  
Z -0.0055 0.0036 0.0061 -0.0056 -0.0130 -0.0144

AT. 100 H X 0.0029 0.0020 -0.0029 -0.0030 0.0049 -0.0056  
Y 0.0090 0.0080 -0.0086 -0.0088 0.0029 -0.0046  
Z 0.0055 0.0036 -0.0061 -0.0056 0.0130 -0.0144

AT. 101 H X 0.0030 0.0022 0.0029 0.0030 -0.0047 -0.0053  
Y -0.0054 -0.0057 -0.0053 -0.0050 -0.0017 -0.0014  
Z 0.0021 0.0018 0.0021 0.0020 -0.0069 -0.0063

AT. 102 H X -0.0030 0.0022 -0.0029 0.0030 0.0047 -0.0053  
Y -0.0054 0.0057 -0.0053 0.0050 -0.0017 0.0014  
Z -0.0021 0.0018 -0.0021 0.0020 0.0069 -0.0063

AT. 103 H X -0.0030 0.0022 0.0029 -0.0030 -0.0047 -0.0053  
Y 0.0054 -0.0057 -0.0053 0.0050 -0.0017 -0.0014  
Z -0.0021 0.0018 0.0021 -0.0020 -0.0069 -0.0063

AT. 104 H X 0.0030 0.0022 -0.0029 -0.0030 0.0047 -0.0053  
Y 0.0054 0.0057 -0.0053 -0.0050 -0.0017 0.0014

Z 0.0021 0.0018 -0.0021 -0.0020 0.0069 -0.0063  
AT. 105 H X 0.0027 0.0023 0.0029 0.0025 -0.0020 -0.0024  
Y -0.0109 -0.0115 -0.0104 -0.0104 -0.0098 -0.0076  
Z 0.0104 0.0107 0.0098 0.0099 0.0074 0.0057  
AT. 106 H X -0.0027 0.0023 -0.0029 0.0025 0.0020 -0.0024  
Y -0.0109 0.0115 -0.0104 0.0104 -0.0098 0.0076  
Z -0.0104 0.0107 -0.0098 0.0099 -0.0074 0.0057  
AT. 107 H X -0.0027 0.0023 0.0029 -0.0025 -0.0020 -0.0024  
Y 0.0109 -0.0115 -0.0104 0.0104 -0.0098 -0.0076  
Z -0.0104 0.0107 0.0098 -0.0099 0.0074 0.0057  
AT. 108 H X 0.0027 0.0023 -0.0029 -0.0025 0.0020 -0.0024  
Y 0.0109 0.0115 -0.0104 -0.0104 -0.0098 0.0076  
Z 0.0104 0.0107 -0.0098 -0.0099 -0.0074 0.0057  
AT. 109 C X -0.0005 -0.0003 -0.0001 -0.0003 -0.0013 -0.0011  
Y -0.0040 -0.0040 -0.0043 -0.0043 0.0017 0.0022  
Z -0.0067 -0.0064 -0.0067 -0.0064 0.0010 0.0019  
AT. 110 C X 0.0005 -0.0003 0.0001 -0.0003 0.0013 -0.0011  
Y -0.0040 0.0040 -0.0043 0.0043 0.0017 -0.0022  
Z 0.0067 -0.0064 0.0067 -0.0064 -0.0010 0.0019  
AT. 111 C X 0.0005 -0.0003 -0.0001 0.0003 -0.0013 -0.0011  
Y 0.0040 -0.0040 -0.0043 0.0043 0.0017 0.0022  
Z 0.0067 -0.0064 -0.0067 0.0064 0.0010 0.0019  
AT. 112 C X -0.0005 -0.0003 0.0001 0.0003 0.0013 -0.0011  
Y 0.0040 0.0040 -0.0043 -0.0043 0.0017 -0.0022  
Z -0.0067 -0.0064 0.0067 0.0064 -0.0010 0.0019  
AT. 113 H X 0.0079 0.0078 0.0081 0.0078 -0.0027 -0.0037  
Y -0.0154 -0.0150 -0.0152 -0.0151 0.0034 0.0054  
Z 0.0082 0.0077 0.0080 0.0080 -0.0016 -0.0032  
AT. 114 H X -0.0079 0.0078 -0.0081 0.0078 0.0027 -0.0037  
Y -0.0154 0.0150 -0.0152 0.0151 0.0034 -0.0054  
Z -0.0082 0.0077 -0.0080 0.0080 0.0016 -0.0032  
AT. 115 H X -0.0079 0.0078 0.0081 -0.0078 -0.0027 -0.0037

Y 0.0154 -0.0150 -0.0152 0.0151 0.0034 0.0054  
Z -0.0082 0.0077 0.0080 -0.0080 -0.0016 -0.0032  
AT. 116 H X 0.0079 0.0078 -0.0081 -0.0078 0.0027 -0.0037  
Y 0.0154 0.0150 -0.0152 -0.0151 0.0034 -0.0054  
Z 0.0082 0.0077 -0.0080 -0.0080 0.0016 -0.0032  
AT. 117 H X -0.0141 -0.0134 -0.0129 -0.0138 0.0014 0.0039  
Y -0.0196 -0.0190 -0.0198 -0.0198 0.0043 0.0069  
Z -0.0180 -0.0172 -0.0179 -0.0176 0.0027 0.0052  
AT. 118 H X 0.0141 -0.0134 0.0129 -0.0138 -0.0014 0.0039  
Y -0.0196 0.0190 -0.0198 0.0198 0.0043 -0.0069  
Z 0.0180 -0.0172 0.0179 -0.0176 -0.0027 0.0052  
AT. 119 H X 0.0141 -0.0134 -0.0129 0.0138 0.0014 0.0039  
Y 0.0196 -0.0190 -0.0198 0.0198 0.0043 0.0069  
Z 0.0180 -0.0172 -0.0179 0.0176 0.0027 0.0052  
AT. 120 H X -0.0141 -0.0134 0.0129 0.0138 -0.0014 0.0039  
Y 0.0196 0.0190 -0.0198 -0.0198 0.0043 -0.0069  
Z -0.0180 -0.0172 0.0179 0.0176 -0.0027 0.0052  
AT. 121 C X 0.0021 0.0024 0.0023 0.0022 -0.0002 -0.0005  
Y 0.0073 0.0071 0.0071 0.0070 0.0021 0.0007  
Z -0.0179 -0.0171 -0.0179 -0.0178 0.0026 0.0056  
AT. 122 C X -0.0021 0.0024 -0.0023 0.0022 0.0002 -0.0005  
Y 0.0073 -0.0071 0.0071 -0.0070 0.0021 -0.0007  
Z 0.0179 -0.0171 0.0179 -0.0178 -0.0026 0.0056  
AT. 123 C X -0.0021 0.0024 0.0023 -0.0022 -0.0002 -0.0005  
Y -0.0073 0.0071 0.0071 -0.0070 0.0021 0.0007  
Z 0.0179 -0.0171 -0.0179 0.0178 0.0026 0.0056  
AT. 124 C X 0.0021 0.0024 -0.0023 -0.0022 0.0002 -0.0005  
Y -0.0073 -0.0071 0.0071 0.0070 0.0021 -0.0007  
Z -0.0179 -0.0171 0.0179 0.0178 -0.0026 0.0056  
AT. 125 H X 0.0026 0.0016 0.0033 0.0027 -0.0106 -0.0111  
Y 0.0084 0.0081 0.0078 0.0074 0.0053 0.0037  
Z -0.0190 -0.0178 -0.0189 -0.0185 0.0032 0.0065

AT.126 H X -0.0026 0.0016 -0.0033 0.0027 0.0106 -0.0111  
Y 0.0084 -0.0081 0.0078 -0.0074 0.0053 -0.0037  
Z 0.0190 -0.0178 0.0189 -0.0185 -0.0032 0.0065

AT.127 H X -0.0026 0.0016 0.0033 -0.0027 -0.0106 -0.0111  
Y -0.0084 0.0081 0.0078 -0.0074 0.0053 0.0037  
Z 0.0190 -0.0178 -0.0189 0.0185 0.0032 0.0065

AT.128 H X 0.0026 0.0016 -0.0033 -0.0027 0.0106 -0.0111  
Y -0.0084 -0.0081 0.0078 0.0074 0.0053 -0.0037  
Z -0.0190 -0.0178 0.0189 0.0185 -0.0032 0.0065

AT.129 H X 0.0029 0.0036 0.0033 0.0031 0.0018 0.0012  
Y 0.0084 0.0069 0.0080 0.0079 -0.0034 -0.0049  
Z -0.0122 -0.0129 -0.0123 -0.0125 -0.0032 -0.0012

AT.130 H X -0.0029 0.0036 -0.0033 0.0031 -0.0018 0.0012  
Y 0.0084 -0.0069 0.0080 -0.0079 -0.0034 0.0049  
Z 0.0122 -0.0129 0.0123 -0.0125 0.0032 -0.0012

AT.131 H X -0.0029 0.0036 0.0033 -0.0031 0.0018 0.0012  
Y -0.0084 0.0069 0.0080 -0.0079 -0.0034 -0.0049  
Z 0.0122 -0.0129 -0.0123 0.0125 -0.0032 -0.0012

AT.132 H X 0.0029 0.0036 -0.0033 -0.0031 -0.0018 0.0012  
Y -0.0084 -0.0069 0.0080 0.0079 -0.0034 0.0049  
Z -0.0122 -0.0129 0.0123 0.0125 0.0032 -0.0012

AT.133 C X -0.0010 -0.0008 -0.0010 -0.0011 0.0010 0.0013  
Y 0.0107 0.0101 0.0109 0.0110 -0.0051 -0.0067  
Z 0.0096 0.0091 0.0097 0.0096 -0.0016 -0.0034

AT.134 C X 0.0010 -0.0008 0.0010 -0.0011 -0.0010 0.0013  
Y 0.0107 -0.0101 0.0109 -0.0110 -0.0051 0.0067  
Z -0.0096 0.0091 -0.0097 0.0096 0.0016 -0.0034

AT.135 C X 0.0010 -0.0008 -0.0010 0.0011 0.0010 0.0013  
Y -0.0107 0.0101 0.0109 -0.0110 -0.0051 -0.0067  
Z -0.0096 0.0091 0.0097 -0.0096 -0.0016 -0.0034

AT.136 C X -0.0010 -0.0008 0.0010 0.0011 -0.0010 0.0013  
Y -0.0107 -0.0101 0.0109 0.0110 -0.0051 0.0067

Z 0.0096 0.0091 -0.0097 -0.0096 0.0016 -0.0034  
AT. 137 C X -0.0051 -0.0049 -0.0054 -0.0052 0.0014 0.0023  
Y 0.0128 0.0122 0.0130 0.0132 -0.0049 -0.0069  
Z 0.0279 0.0266 0.0282 0.0281 -0.0072 -0.0117  
AT. 138 C X 0.0051 -0.0049 0.0054 -0.0052 -0.0014 0.0023  
Y 0.0128 -0.0122 0.0130 -0.0132 -0.0049 0.0069  
Z -0.0279 0.0266 -0.0282 0.0281 0.0072 -0.0117  
AT. 139 C X 0.0051 -0.0049 -0.0054 0.0052 0.0014 0.0023  
Y -0.0128 0.0122 0.0130 -0.0132 -0.0049 -0.0069  
Z -0.0279 0.0266 0.0282 -0.0281 -0.0072 -0.0117  
AT. 140 C X -0.0051 -0.0049 0.0054 0.0052 -0.0014 0.0023  
Y -0.0128 -0.0122 0.0130 0.0132 -0.0049 0.0069  
Z 0.0279 0.0266 -0.0282 -0.0281 0.0072 -0.0117  
AT. 141 H X -0.0164 -0.0159 -0.0167 -0.0167 0.0081 0.0099  
Y -0.0012 -0.0011 -0.0019 -0.0022 0.0055 0.0063  
Z 0.0313 0.0301 0.0311 0.0309 -0.0077 -0.0113  
AT. 142 H X 0.0164 -0.0159 0.0167 -0.0167 -0.0081 0.0099  
Y -0.0012 0.0011 -0.0019 0.0022 0.0055 -0.0063  
Z -0.0313 0.0301 -0.0311 0.0309 0.0077 -0.0113  
AT. 143 H X 0.0164 -0.0159 -0.0167 0.0167 0.0081 0.0099  
Y 0.0012 -0.0011 -0.0019 0.0022 0.0055 0.0063  
Z -0.0313 0.0301 0.0311 -0.0309 -0.0077 -0.0113  
AT. 144 H X -0.0164 -0.0159 0.0167 0.0167 -0.0081 0.0099  
Y 0.0012 0.0011 -0.0019 -0.0022 0.0055 -0.0063  
Z 0.0313 0.0301 -0.0311 -0.0309 0.0077 -0.0113  
AT. 145 H X 0.0108 0.0105 0.0112 0.0119 -0.0083 -0.0102  
Y 0.0119 0.0114 0.0121 0.0122 -0.0043 -0.0060  
Z 0.0412 0.0393 0.0420 0.0421 -0.0151 -0.0218  
AT. 146 H X -0.0108 0.0105 -0.0112 0.0119 0.0083 -0.0102  
Y 0.0119 -0.0114 0.0121 -0.0122 -0.0043 0.0060  
Z -0.0412 0.0393 -0.0420 0.0421 0.0151 -0.0218  
AT. 147 H X -0.0108 0.0105 0.0112 -0.0119 -0.0083 -0.0102

Y -0.0119 0.0114 0.0121 -0.0122 -0.0043 -0.0060  
Z -0.0412 0.0393 0.0420 -0.0421 -0.0151 -0.0218  
AT. 148 H X 0.0108 0.0105 -0.0112 -0.0119 0.0083 -0.0102  
Y -0.0119 -0.0114 0.0121 0.0122 -0.0043 0.0060  
Z 0.0412 0.0393 -0.0420 -0.0421 0.0151 -0.0218  
AT. 149 O X 0.0009 0.0004 0.0008 0.0009 -0.0007 -0.0008  
Y 0.0049 0.0049 0.0054 0.0053 -0.0035 -0.0042  
Z -0.0021 -0.0021 -0.0021 -0.0021 -0.0003 -0.0001  
AT. 150 O X -0.0009 0.0004 -0.0008 0.0009 0.0007 -0.0008  
Y 0.0049 -0.0049 0.0054 -0.0053 -0.0035 0.0042  
Z 0.0021 -0.0021 0.0021 -0.0021 0.0003 -0.0001  
AT. 151 O X -0.0009 0.0004 0.0008 -0.0009 -0.0007 -0.0008  
Y -0.0049 0.0049 0.0054 -0.0053 -0.0035 -0.0042  
Z 0.0021 -0.0021 -0.0021 0.0021 -0.0003 -0.0001  
AT. 152 O X 0.0009 0.0004 -0.0008 -0.0009 0.0007 -0.0008  
Y -0.0049 -0.0049 0.0054 0.0053 -0.0035 0.0042  
Z -0.0021 -0.0021 0.0021 0.0021 0.0003 -0.0001  
AT. 153 H X -0.0004 0.0006 0.0006 0.0001 -0.0027 -0.0031  
Y -0.0062 -0.0049 -0.0044 -0.0054 -0.0093 -0.0083  
Z -0.0052 -0.0058 -0.0056 -0.0055 -0.0009 0.0002  
AT. 154 H X 0.0004 0.0006 -0.0006 0.0001 0.0027 -0.0031  
Y -0.0062 0.0049 -0.0044 0.0054 -0.0093 0.0083  
Z 0.0052 -0.0058 0.0056 -0.0055 0.0009 0.0002  
AT. 155 H X 0.0004 0.0006 0.0006 -0.0001 -0.0027 -0.0031  
Y 0.0062 -0.0049 -0.0044 0.0054 -0.0093 -0.0083  
Z 0.0052 -0.0058 -0.0056 0.0055 -0.0009 0.0002  
AT. 156 H X -0.0004 0.0006 -0.0006 -0.0001 0.0027 -0.0031  
Y 0.0062 0.0049 -0.0044 -0.0054 -0.0093 0.0083  
Z -0.0052 -0.0058 0.0056 0.0055 0.0009 0.0002  
AT. 157 O X -0.0060 -0.0057 -0.0064 -0.0063 0.0029 0.0037  
Y 0.0020 0.0019 0.0021 0.0021 -0.0006 -0.0008  
Z 0.0025 0.0026 0.0027 0.0031 -0.0027 -0.0031



AT.158 O X 0.0060 -0.0057 0.0064 -0.0063 -0.0029 0.0037  
Y 0.0020 -0.0019 0.0021 -0.0021 -0.0006 0.0008  
Z -0.0025 0.0026 -0.0027 0.0031 0.0027 -0.0031

AT.159 O X 0.0060 -0.0057 -0.0064 0.0063 0.0029 0.0037  
Y -0.0020 0.0019 0.0021 -0.0021 -0.0006 -0.0008  
Z -0.0025 0.0026 0.0027 -0.0031 -0.0027 -0.0031

AT.160 O X -0.0060 -0.0057 0.0064 0.0063 -0.0029 0.0037  
Y -0.0020 -0.0019 0.0021 0.0021 -0.0006 0.0008  
Z 0.0025 0.0026 -0.0027 -0.0031 0.0027 -0.0031

AT.161 O X -0.0017 -0.0015 -0.0016 -0.0013 -0.0023 -0.0020  
Y 0.0006 0.0002 0.0006 0.0006 -0.0023 -0.0024  
Z -0.0006 -0.0008 -0.0006 -0.0006 -0.0010 -0.0008

AT.162 O X 0.0017 -0.0015 0.0016 -0.0013 0.0023 -0.0020  
Y 0.0006 -0.0002 0.0006 -0.0006 -0.0023 0.0024  
Z 0.0006 -0.0008 0.0006 -0.0006 0.0010 -0.0008

AT.163 O X 0.0017 -0.0015 -0.0016 0.0013 -0.0023 -0.0020  
Y -0.0006 0.0002 0.0006 -0.0006 -0.0023 -0.0024  
Z 0.0006 -0.0008 -0.0006 0.0006 -0.0010 -0.0008

AT.164 O X -0.0017 -0.0015 0.0016 0.0013 0.0023 -0.0020  
Y -0.0006 -0.0002 0.0006 0.0006 -0.0023 0.0024  
Z -0.0006 -0.0008 0.0006 0.0006 0.0010 -0.0008

AT.165 H X 0.0144 0.0115 0.0153 0.0118 -0.0049 -0.0065  
Y 0.0074 0.0057 0.0077 0.0062 -0.0035 -0.0044  
Z -0.0158 -0.0125 -0.0163 -0.0126 0.0028 0.0045

AT.166 H X -0.0144 0.0115 -0.0153 0.0118 0.0049 -0.0065  
Y 0.0074 -0.0057 0.0077 -0.0062 -0.0035 0.0044  
Z 0.0158 -0.0125 0.0163 -0.0126 -0.0028 0.0045

AT.167 H X -0.0144 0.0115 0.0153 -0.0118 -0.0049 -0.0065  
Y -0.0074 0.0057 0.0077 -0.0062 -0.0035 -0.0044  
Z 0.0158 -0.0125 -0.0163 0.0126 0.0028 0.0045

AT.168 H X 0.0144 0.0115 -0.0153 -0.0118 0.0049 -0.0065  
Y -0.0074 -0.0057 0.0077 0.0062 -0.0035 0.0044

Z -0.0158 -0.0125 0.0163 0.0126 -0.0028 0.0045  
 AT. 169 O X -0.0005 -0.0003 -0.0003 -0.0004 -0.0007 -0.0007  
 Y -0.0015 -0.0015 -0.0009 -0.0013 -0.0032 -0.0029  
 Z 0.0002 0.0003 0.0002 0.0002 0.0002 0.0003  
 AT. 170 O X 0.0005 -0.0003 0.0003 -0.0004 0.0007 -0.0007  
 Y -0.0015 0.0015 -0.0009 0.0013 -0.0032 0.0029  
 Z -0.0002 0.0003 -0.0002 0.0002 -0.0002 0.0003  
 AT. 171 O X 0.0005 -0.0003 -0.0003 0.0004 -0.0007 -0.0007  
 Y 0.0015 -0.0015 -0.0009 0.0013 -0.0032 -0.0029  
 Z -0.0002 0.0003 0.0002 -0.0002 0.0002 0.0003  
 AT. 172 O X -0.0005 -0.0003 0.0003 0.0004 0.0007 -0.0007  
 Y 0.0015 0.0015 -0.0009 -0.0013 -0.0032 0.0029  
 Z 0.0002 0.0003 -0.0002 -0.0002 -0.0002 0.0003  
 AT. 173 H X 0.0026 0.0038 0.0040 0.0024 0.0039 0.0019  
 Y -0.0023 -0.0023 -0.0019 -0.0021 -0.0038 -0.0031  
 Z -0.0001 -0.0025 -0.0020 -0.0001 -0.0058 -0.0047  
 AT. 174 H X -0.0026 0.0038 -0.0040 0.0024 -0.0039 0.0019  
 Y -0.0023 0.0023 -0.0019 0.0021 -0.0038 0.0031  
 Z 0.0001 -0.0025 0.0020 -0.0001 0.0058 -0.0047  
 AT. 175 H X -0.0026 0.0038 0.0040 -0.0024 0.0039 0.0019  
 Y 0.0023 -0.0023 -0.0019 0.0021 -0.0038 -0.0031  
 Z 0.0001 -0.0025 -0.0020 0.0001 -0.0058 -0.0047  
 AT. 176 H X 0.0026 0.0038 -0.0040 -0.0024 -0.0039 0.0019  
 Y 0.0023 0.0023 -0.0019 -0.0021 -0.0038 0.0031  
 Z -0.0001 -0.0025 0.0020 0.0001 0.0058 -0.0047  
  
 FREQ(CM\*\*-1) 677.83 678.10 755.75 757.73 758.14 760.61  
  
 AT. 1 I X 0.0012 0.0012 -0.0002 -0.0002 -0.0002 -0.0002  
 Y -0.0003 -0.0003 0.0001 0.0001 0.0002 0.0002  
 Z -0.0009 -0.0009 0.0000 0.0001 0.0001 0.0001  
 AT. 2 I X 0.0012 -0.0012 0.0002 0.0002 -0.0002 -0.0002

Y 0.0003 -0.0003 0.0001 0.0001 -0.0002 -0.0002  
Z -0.0009 0.0009 -0.0000 -0.0001 0.0001 0.0001  
AT. 3 I X -0.0012 -0.0012 0.0002 -0.0002 -0.0002 0.0002  
Y 0.0003 0.0003 -0.0001 0.0001 0.0002 -0.0002  
Z 0.0009 0.0009 -0.0000 0.0001 0.0001 -0.0001  
AT. 4 I X -0.0012 0.0012 -0.0002 0.0002 -0.0002 0.0002  
Y -0.0003 0.0003 -0.0001 0.0001 -0.0002 0.0002  
Z 0.0009 -0.0009 0.0000 -0.0001 0.0001 -0.0001  
AT. 5 I X -0.0003 -0.0004 -0.0005 -0.0004 -0.0005 -0.0006  
Y 0.0001 0.0001 0.0000 0.0000 0.0000 -0.0000  
Z 0.0002 0.0002 0.0001 0.0000 0.0000 0.0001  
AT. 6 I X -0.0003 0.0004 0.0005 0.0004 -0.0005 -0.0006  
Y -0.0001 0.0001 0.0000 0.0000 -0.0000 0.0000  
Z 0.0002 -0.0002 -0.0001 -0.0000 0.0000 0.0001  
AT. 7 I X 0.0003 0.0004 0.0005 -0.0004 -0.0005 0.0006  
Y -0.0001 -0.0001 -0.0000 0.0000 0.0000 0.0000  
Z -0.0002 -0.0002 -0.0001 0.0000 0.0000 -0.0001  
AT. 8 I X 0.0003 -0.0004 -0.0005 0.0004 -0.0005 0.0006  
Y 0.0001 -0.0001 -0.0000 0.0000 -0.0000 -0.0000  
Z -0.0002 0.0002 0.0001 -0.0000 0.0000 -0.0001  
AT. 9 N X -0.0068 -0.0068 0.0026 0.0027 0.0030 0.0038  
Y -0.0055 -0.0056 -0.0008 -0.0008 -0.0009 -0.0009  
Z -0.0070 -0.0068 -0.0012 -0.0013 -0.0014 -0.0017  
AT. 10 N X -0.0068 0.0068 -0.0026 -0.0027 0.0030 0.0038  
Y 0.0055 -0.0056 -0.0008 -0.0008 0.0009 0.0009  
Z -0.0070 0.0068 0.0012 0.0013 -0.0014 -0.0017  
AT. 11 N X 0.0068 0.0068 -0.0026 0.0027 0.0030 -0.0038  
Y 0.0055 0.0056 0.0008 -0.0008 -0.0009 0.0009  
Z 0.0070 0.0068 0.0012 -0.0013 -0.0014 0.0017  
AT. 12 N X 0.0068 -0.0068 0.0026 -0.0027 0.0030 -0.0038  
Y -0.0055 0.0056 0.0008 -0.0008 0.0009 -0.0009  
Z 0.0070 -0.0068 -0.0012 0.0013 -0.0014 0.0017

AT. 13 N X 0.0027 0.0027 0.0046 0.0050 0.0055 0.0058  
Y -0.0031 -0.0035 -0.0025 -0.0028 -0.0025 -0.0023  
Z -0.0007 -0.0005 -0.0015 -0.0019 -0.0019 -0.0023

AT. 14 N X 0.0027 -0.0027 -0.0046 -0.0050 0.0055 0.0058  
Y 0.0031 -0.0035 -0.0025 -0.0028 0.0025 0.0023  
Z -0.0007 0.0005 0.0015 0.0019 -0.0019 -0.0023

AT. 15 N X -0.0027 -0.0027 -0.0046 0.0050 0.0055 -0.0058  
Y 0.0031 0.0035 0.0025 -0.0028 -0.0025 0.0023  
Z 0.0007 0.0005 0.0015 -0.0019 -0.0019 0.0023

AT. 16 N X -0.0027 0.0027 0.0046 -0.0050 0.0055 -0.0058  
Y -0.0031 0.0035 0.0025 -0.0028 0.0025 -0.0023  
Z 0.0007 -0.0005 -0.0015 0.0019 -0.0019 0.0023

AT. 17 O X 0.0059 0.0058 0.0023 0.0023 0.0031 0.0038  
Y 0.0217 0.0218 0.0008 0.0007 0.0008 0.0003  
Z -0.0082 -0.0082 0.0014 0.0012 0.0016 0.0018

AT. 18 O X 0.0059 -0.0058 -0.0023 -0.0023 0.0031 0.0038  
Y -0.0217 0.0218 0.0008 0.0007 -0.0008 -0.0003  
Z -0.0082 0.0082 -0.0014 -0.0012 0.0016 0.0018

AT. 19 O X -0.0059 -0.0058 -0.0023 0.0023 0.0031 -0.0038  
Y -0.0217 -0.0218 -0.0008 0.0007 0.0008 -0.0003  
Z 0.0082 0.0082 -0.0014 0.0012 0.0016 -0.0018

AT. 20 O X -0.0059 0.0058 0.0023 -0.0023 0.0031 -0.0038  
Y 0.0217 -0.0218 -0.0008 0.0007 -0.0008 0.0003  
Z 0.0082 -0.0082 0.0014 -0.0012 0.0016 -0.0018

AT. 21 O X 0.0007 0.0008 0.0004 0.0007 0.0012 0.0019  
Y 0.0039 0.0047 0.0020 0.0020 0.0012 0.0008  
Z 0.0038 0.0036 0.0034 0.0038 0.0037 0.0034

AT. 22 O X 0.0007 -0.0008 -0.0004 -0.0007 0.0012 0.0019  
Y -0.0039 0.0047 0.0020 0.0020 -0.0012 -0.0008  
Z 0.0038 -0.0036 -0.0034 -0.0038 0.0037 0.0034

AT. 23 O X -0.0007 -0.0008 -0.0004 0.0007 0.0012 -0.0019  
Y -0.0039 -0.0047 -0.0020 0.0020 0.0012 -0.0008

Z -0.0038 -0.0036 -0.0034 0.0038 0.0037 -0.0034  
AT. 24 O X -0.0007 0.0008 0.0004 -0.0007 0.0012 -0.0019  
Y 0.0039 -0.0047 -0.0020 0.0020 -0.0012 0.0008  
Z -0.0038 0.0036 0.0034 -0.0038 0.0037 -0.0034  
AT. 25 C X -0.0102 -0.0103 0.0029 0.0032 0.0038 0.0049  
Y -0.0104 -0.0104 -0.0012 -0.0011 -0.0024 -0.0035  
Z 0.0298 0.0295 -0.0015 -0.0015 -0.0021 -0.0030  
AT. 26 C X -0.0102 0.0103 -0.0029 -0.0032 0.0038 0.0049  
Y 0.0104 -0.0104 -0.0012 -0.0011 0.0024 0.0035  
Z 0.0298 -0.0295 0.0015 0.0015 -0.0021 -0.0030  
AT. 27 C X 0.0102 0.0103 -0.0029 0.0032 0.0038 -0.0049  
Y 0.0104 0.0104 0.0012 -0.0011 -0.0024 0.0035  
Z -0.0298 -0.0295 0.0015 -0.0015 -0.0021 0.0030  
AT. 28 C X 0.0102 -0.0103 0.0029 -0.0032 0.0038 -0.0049  
Y -0.0104 0.0104 0.0012 -0.0011 0.0024 -0.0035  
Z -0.0298 0.0295 -0.0015 0.0015 -0.0021 0.0030  
AT. 29 H X -0.0137 -0.0135 0.0060 0.0062 0.0070 0.0083  
Y 0.0092 0.0084 -0.0022 -0.0031 -0.0009 -0.0008  
Z 0.0327 0.0323 -0.0061 -0.0056 -0.0073 -0.0084  
AT. 30 H X -0.0137 0.0135 -0.0060 -0.0062 0.0070 0.0083  
Y -0.0092 0.0084 -0.0022 -0.0031 0.0009 0.0008  
Z 0.0327 -0.0323 0.0061 0.0056 -0.0073 -0.0084  
AT. 31 H X 0.0137 0.0135 -0.0060 0.0062 0.0070 -0.0083  
Y -0.0092 -0.0084 0.0022 -0.0031 -0.0009 0.0008  
Z -0.0327 -0.0323 0.0061 -0.0056 -0.0073 0.0084  
AT. 32 H X 0.0137 -0.0135 0.0060 -0.0062 0.0070 -0.0083  
Y 0.0092 -0.0084 0.0022 -0.0031 0.0009 -0.0008  
Z -0.0327 0.0323 -0.0061 0.0056 -0.0073 0.0084  
AT. 33 H X 0.0107 0.0100 0.0034 0.0023 0.0062 0.0080  
Y -0.0177 -0.0176 -0.0004 -0.0000 -0.0019 -0.0028  
Z 0.0432 0.0428 -0.0049 -0.0054 -0.0059 -0.0078  
AT. 34 H X 0.0107 -0.0100 -0.0034 -0.0023 0.0062 0.0080

Y 0.0177 -0.0176 -0.0004 -0.0000 0.0019 0.0028  
Z 0.0432 -0.0428 0.0049 0.0054 -0.0059 -0.0078  
AT. 35 H X -0.0107 -0.0100 -0.0034 0.0023 0.0062 -0.0080  
Y 0.0177 0.0176 0.0004 -0.0000 -0.0019 0.0028  
Z -0.0432 -0.0428 0.0049 -0.0054 -0.0059 0.0078  
AT. 36 H X -0.0107 0.0100 0.0034 -0.0023 0.0062 -0.0080  
Y -0.0177 0.0176 0.0004 -0.0000 0.0019 -0.0028  
Z -0.0432 0.0428 -0.0049 0.0054 -0.0059 0.0078  
AT. 37 C X -0.0050 -0.0048 -0.0057 -0.0061 -0.0084 -0.0109  
Y -0.0080 -0.0080 0.0031 0.0033 0.0041 0.0050  
Z 0.0098 0.0097 0.0024 0.0024 0.0033 0.0039  
AT. 38 C X -0.0050 0.0048 0.0057 0.0061 -0.0084 -0.0109  
Y 0.0080 -0.0080 0.0031 0.0033 -0.0041 -0.0050  
Z 0.0098 -0.0097 -0.0024 -0.0024 0.0033 0.0039  
AT. 39 C X 0.0050 0.0048 0.0057 -0.0061 -0.0084 0.0109  
Y 0.0080 0.0080 -0.0031 0.0033 0.0041 -0.0050  
Z -0.0098 -0.0097 -0.0024 0.0024 0.0033 -0.0039  
AT. 40 C X 0.0050 -0.0048 -0.0057 0.0061 -0.0084 0.0109  
Y -0.0080 0.0080 -0.0031 0.0033 -0.0041 0.0050  
Z -0.0098 0.0097 0.0024 -0.0024 0.0033 -0.0039  
AT. 41 C X -0.0043 -0.0042 -0.0042 -0.0045 -0.0030 -0.0027  
Y -0.0073 -0.0070 -0.0027 -0.0025 -0.0024 -0.0022  
Z -0.0149 -0.0150 0.0012 0.0015 0.0005 0.0004  
AT. 42 C X -0.0043 0.0042 0.0042 0.0045 -0.0030 -0.0027  
Y 0.0073 -0.0070 -0.0027 -0.0025 0.0024 0.0022  
Z -0.0149 0.0150 -0.0012 -0.0015 0.0005 0.0004  
AT. 43 C X 0.0043 0.0042 0.0042 -0.0045 -0.0030 0.0027  
Y 0.0073 0.0070 0.0027 -0.0025 -0.0024 0.0022  
Z 0.0149 0.0150 -0.0012 0.0015 0.0005 -0.0004  
AT. 44 C X 0.0043 -0.0042 -0.0042 0.0045 -0.0030 0.0027  
Y -0.0073 0.0070 0.0027 -0.0025 0.0024 -0.0022  
Z 0.0149 -0.0150 0.0012 -0.0015 0.0005 -0.0004

AT. 45 H X 0.0036 0.0040 -0.0044 -0.0040 -0.0034 -0.0031  
Y -0.0117 -0.0112 -0.0053 -0.0053 -0.0044 -0.0040  
Z -0.0201 -0.0201 -0.0008 -0.0008 -0.0011 -0.0010

AT. 46 H X 0.0036 -0.0040 0.0044 0.0040 -0.0034 -0.0031  
Y 0.0117 -0.0112 -0.0053 -0.0053 0.0044 0.0040  
Z -0.0201 0.0201 0.0008 0.0008 -0.0011 -0.0010

AT. 47 H X -0.0036 -0.0040 0.0044 -0.0040 -0.0034 0.0031  
Y 0.0117 0.0112 0.0053 -0.0053 -0.0044 0.0040  
Z 0.0201 0.0201 0.0008 -0.0008 -0.0011 0.0010

AT. 48 H X -0.0036 0.0040 -0.0044 0.0040 -0.0034 0.0031  
Y -0.0117 0.0112 0.0053 -0.0053 0.0044 -0.0040  
Z 0.0201 -0.0201 -0.0008 0.0008 -0.0011 0.0010

AT. 49 H X -0.0078 -0.0076 -0.0062 -0.0068 -0.0044 -0.0040  
Y -0.0151 -0.0146 -0.0052 -0.0053 -0.0042 -0.0037  
Z -0.0038 -0.0040 0.0025 0.0027 0.0014 0.0009

AT. 50 H X -0.0078 0.0076 0.0062 0.0068 -0.0044 -0.0040  
Y 0.0151 -0.0146 -0.0052 -0.0053 0.0042 0.0037  
Z -0.0038 0.0040 -0.0025 -0.0027 0.0014 0.0009

AT. 51 H X 0.0078 0.0076 0.0062 -0.0068 -0.0044 0.0040  
Y 0.0151 0.0146 0.0052 -0.0053 -0.0042 0.0037  
Z 0.0038 0.0040 -0.0025 0.0027 0.0014 -0.0009

AT. 52 H X 0.0078 -0.0076 -0.0062 0.0068 -0.0044 0.0040  
Y -0.0151 0.0146 0.0052 -0.0053 0.0042 -0.0037  
Z 0.0038 -0.0040 0.0025 -0.0027 0.0014 -0.0009

AT. 53 C X -0.0023 -0.0024 -0.0013 -0.0013 -0.0009 -0.0008  
Y 0.0030 0.0030 -0.0017 -0.0015 -0.0019 -0.0020  
Z 0.0022 0.0020 0.0017 0.0016 0.0017 0.0016

AT. 54 C X -0.0023 0.0024 0.0013 0.0013 -0.0009 -0.0008  
Y -0.0030 0.0030 -0.0017 -0.0015 0.0019 0.0020  
Z 0.0022 -0.0020 -0.0017 -0.0016 0.0017 0.0016

AT. 55 C X 0.0023 0.0024 0.0013 -0.0013 -0.0009 0.0008  
Y -0.0030 -0.0030 0.0017 -0.0015 -0.0019 0.0020

Z -0.0022 -0.0020 -0.0017 0.0016 0.0017 -0.0016  
AT. 56 C X 0.0023 -0.0024 -0.0013 0.0013 -0.0009 0.0008  
Y 0.0030 -0.0030 0.0017 -0.0015 0.0019 -0.0020  
Z -0.0022 0.0020 0.0017 -0.0016 0.0017 -0.0016  
AT. 57 C X 0.0034 0.0032 0.0001 -0.0000 -0.0003 -0.0004  
Y 0.0058 0.0056 -0.0001 0.0000 0.0000 0.0001  
Z 0.0070 0.0068 0.0020 0.0022 0.0017 0.0015  
AT. 58 C X 0.0034 -0.0032 -0.0001 0.0000 -0.0003 -0.0004  
Y -0.0058 0.0056 -0.0001 0.0000 -0.0000 -0.0001  
Z 0.0070 -0.0068 -0.0020 -0.0022 0.0017 0.0015  
AT. 59 C X -0.0034 -0.0032 -0.0001 -0.0000 -0.0003 0.0004  
Y -0.0058 -0.0056 0.0001 0.0000 0.0000 -0.0001  
Z -0.0070 -0.0068 -0.0020 0.0022 0.0017 -0.0015  
AT. 60 C X -0.0034 0.0032 0.0001 0.0000 -0.0003 0.0004  
Y 0.0058 -0.0056 0.0001 0.0000 -0.0000 0.0001  
Z -0.0070 0.0068 0.0020 -0.0022 0.0017 -0.0015  
AT. 61 H X 0.0072 0.0073 0.0014 0.0015 0.0002 0.0003  
Y 0.0078 0.0078 0.0012 0.0016 0.0011 0.0013  
Z 0.0121 0.0120 -0.0014 -0.0013 -0.0036 -0.0037  
AT. 62 H X 0.0072 -0.0073 -0.0014 -0.0015 0.0002 0.0003  
Y -0.0078 0.0078 0.0012 0.0016 -0.0011 -0.0013  
Z 0.0121 -0.0120 0.0014 0.0013 -0.0036 -0.0037  
AT. 63 H X -0.0072 -0.0073 -0.0014 0.0015 0.0002 -0.0003  
Y -0.0078 -0.0078 -0.0012 0.0016 0.0011 -0.0013  
Z -0.0121 -0.0120 0.0014 -0.0013 -0.0036 0.0037  
AT. 64 H X -0.0072 0.0073 0.0014 -0.0015 0.0002 -0.0003  
Y 0.0078 -0.0078 -0.0012 0.0016 -0.0011 0.0013  
Z -0.0121 0.0120 -0.0014 0.0013 -0.0036 0.0037  
AT. 65 H X 0.0043 0.0042 -0.0012 -0.0012 -0.0013 -0.0013  
Y 0.0038 0.0033 0.0044 0.0044 0.0028 0.0027  
Z -0.0035 -0.0029 -0.0025 -0.0023 -0.0017 -0.0015  
AT. 66 H X 0.0043 -0.0042 0.0012 0.0012 -0.0013 -0.0013



Y -0.0038 0.0033 0.0044 0.0044 -0.0028 -0.0027  
Z -0.0035 0.0029 0.0025 0.0023 -0.0017 -0.0015  
AT. 67 H X -0.0043 -0.0042 0.0012 -0.0012 -0.0013 0.0013  
Y -0.0038 -0.0033 -0.0044 0.0044 0.0028 -0.0027  
Z 0.0035 0.0029 0.0025 -0.0023 -0.0017 0.0015  
AT. 68 H X -0.0043 0.0042 -0.0012 0.0012 -0.0013 0.0013  
Y 0.0038 -0.0033 -0.0044 0.0044 -0.0028 0.0027  
Z 0.0035 -0.0029 -0.0025 0.0023 -0.0017 0.0015  
AT. 69 H X 0.0101 0.0096 0.0026 0.0025 0.0040 0.0040  
Y 0.0064 0.0061 0.0026 0.0024 0.0031 0.0029  
Z 0.0089 0.0085 0.0049 0.0048 0.0050 0.0046  
AT. 70 H X 0.0101 -0.0096 -0.0026 -0.0025 0.0040 0.0040  
Y -0.0064 0.0061 0.0026 0.0024 -0.0031 -0.0029  
Z 0.0089 -0.0085 -0.0049 -0.0048 0.0050 0.0046  
AT. 71 H X -0.0101 -0.0096 -0.0026 0.0025 0.0040 -0.0040  
Y -0.0064 -0.0061 -0.0026 0.0024 0.0031 -0.0029  
Z -0.0089 -0.0085 -0.0049 0.0048 0.0050 -0.0046  
AT. 72 H X -0.0101 0.0096 0.0026 -0.0025 0.0040 -0.0040  
Y 0.0064 -0.0061 -0.0026 0.0024 -0.0031 0.0029  
Z -0.0089 0.0085 0.0049 -0.0048 0.0050 -0.0046  
AT. 73 C X 0.0042 0.0041 0.0008 0.0009 0.0007 0.0004  
Y 0.0022 0.0020 0.0052 0.0053 0.0047 0.0042  
Z 0.0017 0.0017 -0.0020 -0.0020 -0.0014 -0.0011  
AT. 74 C X 0.0042 -0.0041 -0.0008 -0.0009 0.0007 0.0004  
Y -0.0022 0.0020 0.0052 0.0053 -0.0047 -0.0042  
Z 0.0017 -0.0017 0.0020 0.0020 -0.0014 -0.0011  
AT. 75 C X -0.0042 -0.0041 -0.0008 0.0009 0.0007 -0.0004  
Y -0.0022 -0.0020 -0.0052 0.0053 0.0047 -0.0042  
Z -0.0017 -0.0017 0.0020 -0.0020 -0.0014 0.0011  
AT. 76 C X -0.0042 0.0041 0.0008 -0.0009 0.0007 -0.0004  
Y 0.0022 -0.0020 -0.0052 0.0053 -0.0047 0.0042  
Z -0.0017 0.0017 -0.0020 0.0020 -0.0014 0.0011

AT. 77 C X -0.0010 -0.0010 -0.0014 -0.0013 -0.0013 -0.0009  
Y 0.0053 0.0050 -0.0006 -0.0007 -0.0007 -0.0004  
Z -0.0075 -0.0074 -0.0010 -0.0010 -0.0012 -0.0013

AT. 78 C X -0.0010 0.0010 0.0014 0.0013 -0.0013 -0.0009  
Y -0.0053 0.0050 -0.0006 -0.0007 0.0007 0.0004  
Z -0.0075 0.0074 0.0010 0.0010 -0.0012 -0.0013

AT. 79 C X 0.0010 0.0010 0.0014 -0.0013 -0.0013 0.0009  
Y -0.0053 -0.0050 0.0006 -0.0007 -0.0007 0.0004  
Z 0.0075 0.0074 0.0010 -0.0010 -0.0012 0.0013

AT. 80 C X 0.0010 -0.0010 -0.0014 0.0013 -0.0013 0.0009  
Y 0.0053 -0.0050 0.0006 -0.0007 0.0007 -0.0004  
Z 0.0075 -0.0074 -0.0010 0.0010 -0.0012 0.0013

AT. 81 H X 0.0011 0.0010 -0.0013 -0.0014 -0.0009 0.0002  
Y 0.0069 0.0067 -0.0007 -0.0010 -0.0005 0.0005  
Z -0.0005 -0.0002 0.0013 0.0013 0.0020 0.0024

AT. 82 H X 0.0011 -0.0010 0.0013 0.0014 -0.0009 0.0002  
Y -0.0069 0.0067 -0.0007 -0.0010 0.0005 -0.0005  
Z -0.0005 0.0002 -0.0013 -0.0013 0.0020 0.0024

AT. 83 H X -0.0011 -0.0010 0.0013 -0.0014 -0.0009 -0.0002  
Y -0.0069 -0.0067 0.0007 -0.0010 -0.0005 -0.0005  
Z 0.0005 0.0002 -0.0013 0.0013 0.0020 -0.0024

AT. 84 H X -0.0011 0.0010 -0.0013 0.0014 -0.0009 -0.0002  
Y 0.0069 -0.0067 0.0007 -0.0010 0.0005 0.0005  
Z 0.0005 -0.0002 0.0013 -0.0013 0.0020 -0.0024

AT. 85 H X 0.0010 0.0006 -0.0022 -0.0021 -0.0027 -0.0031  
Y 0.0177 0.0173 -0.0006 -0.0007 -0.0001 0.0004  
Z -0.0176 -0.0173 -0.0007 -0.0008 -0.0013 -0.0014

AT. 86 H X 0.0010 -0.0006 0.0022 0.0021 -0.0027 -0.0031  
Y -0.0177 0.0173 -0.0006 -0.0007 0.0001 -0.0004  
Z -0.0176 0.0173 0.0007 0.0008 -0.0013 -0.0014

AT. 87 H X -0.0010 -0.0006 0.0022 -0.0021 -0.0027 0.0031  
Y -0.0177 -0.0173 0.0006 -0.0007 -0.0001 -0.0004

Z 0.0176 0.0173 0.0007 -0.0008 -0.0013 0.0014  
AT. 88 H X -0.0010 0.0006 -0.0022 0.0021 -0.0027 0.0031  
Y 0.0177 -0.0173 0.0006 -0.0007 0.0001 0.0004  
Z 0.0176 -0.0173 -0.0007 0.0008 -0.0013 0.0014  
AT. 89 C X 0.0039 0.0039 -0.0008 -0.0009 -0.0009 -0.0008  
Y 0.0070 0.0067 -0.0013 -0.0011 -0.0010 -0.0012  
Z 0.0040 0.0038 -0.0007 -0.0006 -0.0005 -0.0006  
AT. 90 C X 0.0039 -0.0039 0.0008 0.0009 -0.0009 -0.0008  
Y -0.0070 0.0067 -0.0013 -0.0011 0.0010 0.0012  
Z 0.0040 -0.0038 0.0007 0.0006 -0.0005 -0.0006  
AT. 91 C X -0.0039 -0.0039 0.0008 -0.0009 -0.0009 0.0008  
Y -0.0070 -0.0067 0.0013 -0.0011 -0.0010 0.0012  
Z -0.0040 -0.0038 0.0007 -0.0006 -0.0005 0.0006  
AT. 92 C X -0.0039 0.0039 -0.0008 0.0009 -0.0009 0.0008  
Y 0.0070 -0.0067 0.0013 -0.0011 0.0010 -0.0012  
Z -0.0040 0.0038 -0.0007 0.0006 -0.0005 0.0006  
AT. 93 C X -0.0008 -0.0007 -0.0000 -0.0000 -0.0001 0.0001  
Y 0.0019 0.0020 -0.0005 -0.0005 -0.0005 -0.0008  
Z -0.0018 -0.0020 0.0004 0.0002 0.0004 0.0005  
AT. 94 C X -0.0008 0.0007 0.0000 0.0000 -0.0001 0.0001  
Y -0.0019 0.0020 -0.0005 -0.0005 0.0005 0.0008  
Z -0.0018 0.0020 -0.0004 -0.0002 0.0004 0.0005  
AT. 95 C X 0.0008 0.0007 0.0000 -0.0000 -0.0001 -0.0001  
Y -0.0019 -0.0020 0.0005 -0.0005 -0.0005 0.0008  
Z 0.0018 0.0020 -0.0004 0.0002 0.0004 -0.0005  
AT. 96 C X 0.0008 -0.0007 -0.0000 0.0000 -0.0001 -0.0001  
Y 0.0019 -0.0020 0.0005 -0.0005 0.0005 -0.0008  
Z 0.0018 -0.0020 0.0004 -0.0002 0.0004 -0.0005  
AT. 97 H X -0.0047 -0.0051 0.0001 0.0001 0.0001 0.0002  
Y 0.0030 0.0036 0.0007 0.0009 0.0005 0.0004  
Z -0.0133 -0.0141 0.0031 0.0033 0.0030 0.0032  
AT. 98 H X -0.0047 0.0051 -0.0001 -0.0001 0.0001 0.0002

Y -0.0030 0.0036 0.0007 0.0009 -0.0005 -0.0004  
Z -0.0133 0.0141 -0.0031 -0.0033 0.0030 0.0032  
AT. 99 H X 0.0047 0.0051 -0.0001 0.0001 0.0001 -0.0002  
Y -0.0030 -0.0036 -0.0007 0.0009 0.0005 -0.0004  
Z 0.0133 0.0141 -0.0031 0.0033 0.0030 -0.0032  
AT. 100 H X 0.0047 -0.0051 0.0001 -0.0001 0.0001 -0.0002  
Y 0.0030 -0.0036 -0.0007 0.0009 -0.0005 0.0004  
Z 0.0133 -0.0141 0.0031 -0.0033 0.0030 -0.0032  
AT. 101 H X -0.0046 -0.0048 0.0007 0.0006 0.0004 0.0008  
Y -0.0014 -0.0018 -0.0004 -0.0004 -0.0005 -0.0004  
Z -0.0066 -0.0059 0.0046 0.0042 0.0038 0.0040  
AT. 102 H X -0.0046 0.0048 -0.0007 -0.0006 0.0004 0.0008  
Y 0.0014 -0.0018 -0.0004 -0.0004 0.0005 0.0004  
Z -0.0066 0.0059 -0.0046 -0.0042 0.0038 0.0040  
AT. 103 H X 0.0046 0.0048 -0.0007 0.0006 0.0004 -0.0008  
Y 0.0014 0.0018 0.0004 -0.0004 -0.0005 0.0004  
Z 0.0066 0.0059 -0.0046 0.0042 0.0038 -0.0040  
AT. 104 H X 0.0046 -0.0048 0.0007 -0.0006 0.0004 -0.0008  
Y -0.0014 0.0018 0.0004 -0.0004 0.0005 -0.0004  
Z 0.0066 -0.0059 0.0046 -0.0042 0.0038 -0.0040  
AT. 105 H X -0.0024 -0.0026 -0.0001 -0.0003 0.0002 -0.0004  
Y -0.0092 -0.0084 0.0043 0.0042 0.0035 0.0036  
Z 0.0071 0.0065 -0.0032 -0.0032 -0.0027 -0.0027  
AT. 106 H X -0.0024 0.0026 0.0001 0.0003 0.0002 -0.0004  
Y 0.0092 -0.0084 0.0043 0.0042 -0.0035 -0.0036  
Z 0.0071 -0.0065 0.0032 0.0032 -0.0027 -0.0027  
AT. 107 H X 0.0024 0.0026 0.0001 -0.0003 0.0002 0.0004  
Y 0.0092 0.0084 -0.0043 0.0042 0.0035 -0.0036  
Z -0.0071 -0.0065 0.0032 -0.0032 -0.0027 0.0027  
AT. 108 H X 0.0024 -0.0026 -0.0001 0.0003 0.0002 0.0004  
Y -0.0092 0.0084 -0.0043 0.0042 -0.0035 0.0036  
Z -0.0071 0.0065 -0.0032 0.0032 -0.0027 0.0027

AT. 109 C X -0.0011 -0.0012 0.0020 0.0021 0.0010 0.0010  
Y 0.0018 0.0018 -0.0032 -0.0035 -0.0039 -0.0037  
Z 0.0012 0.0013 -0.0003 -0.0007 -0.0000 -0.0003

AT. 110 C X -0.0011 0.0012 -0.0020 -0.0021 0.0010 0.0010  
Y -0.0018 0.0018 -0.0032 -0.0035 0.0039 0.0037  
Z 0.0012 -0.0013 0.0003 0.0007 -0.0000 -0.0003

AT. 111 C X 0.0011 0.0012 -0.0020 0.0021 0.0010 -0.0010  
Y -0.0018 -0.0018 0.0032 -0.0035 -0.0039 0.0037  
Z -0.0012 -0.0013 0.0003 -0.0007 -0.0000 0.0003

AT. 112 C X 0.0011 -0.0012 0.0020 -0.0021 0.0010 -0.0010  
Y 0.0018 -0.0018 0.0032 -0.0035 0.0039 -0.0037  
Z -0.0012 0.0013 -0.0003 0.0007 -0.0000 0.0003

AT. 113 H X -0.0024 -0.0028 0.0007 0.0008 -0.0016 -0.0015  
Y 0.0034 0.0038 -0.0014 -0.0018 -0.0001 -0.0001  
Z -0.0016 -0.0020 -0.0021 -0.0027 -0.0024 -0.0022

AT. 114 H X -0.0024 0.0028 -0.0007 -0.0008 -0.0016 -0.0015  
Y -0.0034 0.0038 -0.0014 -0.0018 0.0001 0.0001  
Z -0.0016 0.0020 0.0021 0.0027 -0.0024 -0.0022

AT. 115 H X 0.0024 0.0028 -0.0007 0.0008 -0.0016 0.0015  
Y -0.0034 -0.0038 0.0014 -0.0018 -0.0001 0.0001  
Z 0.0016 0.0020 0.0021 -0.0027 -0.0024 0.0022

AT. 116 H X 0.0024 -0.0028 0.0007 -0.0008 -0.0016 0.0015  
Y 0.0034 -0.0038 0.0014 -0.0018 0.0001 -0.0001  
Z 0.0016 -0.0020 -0.0021 0.0027 -0.0024 0.0022

AT. 117 H X 0.0018 0.0020 0.0074 0.0069 0.0058 0.0053  
Y 0.0044 0.0052 -0.0044 -0.0046 -0.0041 -0.0040  
Z 0.0029 0.0037 -0.0022 -0.0025 -0.0012 -0.0014

AT. 118 H X 0.0018 -0.0020 -0.0074 -0.0069 0.0058 0.0053  
Y -0.0044 0.0052 -0.0044 -0.0046 0.0041 0.0040  
Z 0.0029 -0.0037 0.0022 0.0025 -0.0012 -0.0014

AT. 119 H X -0.0018 -0.0020 -0.0074 0.0069 0.0058 -0.0053  
Y -0.0044 -0.0052 0.0044 -0.0046 -0.0041 0.0040

Z -0.0029 -0.0037 0.0022 -0.0025 -0.0012 0.0014  
AT. 120 H X -0.0018 0.0020 0.0074 -0.0069 0.0058 -0.0053  
Y 0.0044 -0.0052 0.0044 -0.0046 0.0041 -0.0040  
Z -0.0029 0.0037 -0.0022 0.0025 -0.0012 0.0014  
AT. 121 C X -0.0001 -0.0001 0.0003 0.0002 0.0001 0.0001  
Y 0.0018 0.0012 -0.0021 -0.0021 -0.0015 -0.0014  
Z 0.0031 0.0036 0.0005 0.0006 -0.0001 -0.0003  
AT. 122 C X -0.0001 0.0001 -0.0003 -0.0002 0.0001 0.0001  
Y -0.0018 0.0012 -0.0021 -0.0021 0.0015 0.0014  
Z 0.0031 -0.0036 -0.0005 -0.0006 -0.0001 -0.0003  
AT. 123 C X 0.0001 0.0001 -0.0003 0.0002 0.0001 -0.0001  
Y -0.0018 -0.0012 0.0021 -0.0021 -0.0015 0.0014  
Z -0.0031 -0.0036 -0.0005 0.0006 -0.0001 0.0003  
AT. 124 C X 0.0001 -0.0001 0.0003 -0.0002 0.0001 -0.0001  
Y 0.0018 -0.0012 0.0021 -0.0021 0.0015 -0.0014  
Z -0.0031 0.0036 0.0005 -0.0006 -0.0001 0.0003  
AT. 125 H X -0.0106 -0.0107 0.0047 0.0044 0.0043 0.0041  
Y 0.0046 0.0040 -0.0009 -0.0006 -0.0004 -0.0000  
Z 0.0040 0.0047 -0.0015 -0.0016 -0.0020 -0.0023  
AT. 126 H X -0.0106 0.0107 -0.0047 -0.0044 0.0043 0.0041  
Y -0.0046 0.0040 -0.0009 -0.0006 0.0004 0.0000  
Z 0.0040 -0.0047 0.0015 0.0016 -0.0020 -0.0023  
AT. 127 H X 0.0106 0.0107 -0.0047 0.0044 0.0043 -0.0041  
Y -0.0046 -0.0040 0.0009 -0.0006 -0.0004 0.0000  
Z -0.0040 -0.0047 0.0015 -0.0016 -0.0020 0.0023  
AT. 128 H X 0.0106 -0.0107 0.0047 -0.0044 0.0043 -0.0041  
Y 0.0046 -0.0040 0.0009 -0.0006 0.0004 -0.0000  
Z -0.0040 0.0047 -0.0015 0.0016 -0.0020 0.0023  
AT. 129 H X 0.0019 0.0018 -0.0002 -0.0002 -0.0004 -0.0006  
Y -0.0040 -0.0046 -0.0002 0.0001 0.0005 0.0012  
Z -0.0032 -0.0030 0.0043 0.0051 0.0033 0.0038  
AT. 130 H X 0.0019 -0.0018 0.0002 0.0002 -0.0004 -0.0006

Y 0.0040 -0.0046 -0.0002 0.0001 -0.0005 -0.0012  
Z -0.0032 0.0030 -0.0043 -0.0051 0.0033 0.0038  
AT. 131 H X -0.0019 -0.0018 0.0002 -0.0002 -0.0004 0.0006  
Y 0.0040 0.0046 0.0002 0.0001 0.0005 -0.0012  
Z 0.0032 0.0030 -0.0043 0.0051 0.0033 -0.0038  
AT. 132 H X -0.0019 0.0018 -0.0002 0.0002 -0.0004 0.0006  
Y -0.0040 0.0046 0.0002 0.0001 -0.0005 0.0012  
Z 0.0032 -0.0030 0.0043 -0.0051 0.0033 -0.0038  
AT. 133 C X 0.0009 0.0012 -0.0139 -0.0147 -0.0168 -0.0192  
Y -0.0052 -0.0055 0.0015 0.0013 0.0017 0.0019  
Z -0.0019 -0.0024 0.0033 0.0039 0.0043 0.0050  
AT. 134 C X 0.0009 -0.0012 0.0139 0.0147 -0.0168 -0.0192  
Y 0.0052 -0.0055 0.0015 0.0013 -0.0017 -0.0019  
Z -0.0019 0.0024 -0.0033 -0.0039 0.0043 0.0050  
AT. 135 C X -0.0009 -0.0012 0.0139 -0.0147 -0.0168 0.0192  
Y 0.0052 0.0055 -0.0015 0.0013 0.0017 -0.0019  
Z 0.0019 0.0024 -0.0033 0.0039 0.0043 -0.0050  
AT. 136 C X -0.0009 0.0012 -0.0139 0.0147 -0.0168 0.0192  
Y -0.0052 0.0055 -0.0015 0.0013 -0.0017 0.0019  
Z 0.0019 -0.0024 0.0033 -0.0039 0.0043 -0.0050  
AT. 137 C X 0.0015 0.0016 0.0092 0.0094 0.0103 0.0120  
Y -0.0052 -0.0054 -0.0014 -0.0007 -0.0003 0.0000  
Z -0.0077 -0.0086 -0.0006 -0.0012 -0.0010 -0.0009  
AT. 138 C X 0.0015 -0.0016 -0.0092 -0.0094 0.0103 0.0120  
Y 0.0052 -0.0054 -0.0014 -0.0007 0.0003 -0.0000  
Z -0.0077 0.0086 0.0006 0.0012 -0.0010 -0.0009  
AT. 139 C X -0.0015 -0.0016 -0.0092 0.0094 0.0103 -0.0120  
Y 0.0052 0.0054 0.0014 -0.0007 -0.0003 -0.0000  
Z 0.0077 0.0086 0.0006 -0.0012 -0.0010 0.0009  
AT. 140 C X -0.0015 0.0016 0.0092 -0.0094 0.0103 -0.0120  
Y -0.0052 0.0054 0.0014 -0.0007 0.0003 0.0000  
Z 0.0077 -0.0086 -0.0006 0.0012 -0.0010 0.0009

AT.141 H X 0.0084 0.0079 0.0196 0.0169 0.0183 0.0221  
Y 0.0054 0.0062 0.0003 -0.0015 -0.0024 -0.0021  
Z -0.0084 -0.0078 -0.0113 -0.0104 -0.0115 -0.0138

AT.142 H X 0.0084 -0.0079 -0.0196 -0.0169 0.0183 0.0221  
Y -0.0054 0.0062 0.0003 -0.0015 0.0024 0.0021  
Z -0.0084 0.0078 0.0113 0.0104 -0.0115 -0.0138

AT.143 H X -0.0084 -0.0079 -0.0196 0.0169 0.0183 -0.0221  
Y -0.0054 -0.0062 -0.0003 -0.0015 -0.0024 0.0021  
Z 0.0084 0.0078 0.0113 -0.0104 -0.0115 0.0138

AT.144 H X -0.0084 0.0079 0.0196 -0.0169 0.0183 -0.0221  
Y 0.0054 -0.0062 -0.0003 -0.0015 0.0024 -0.0021  
Z 0.0084 -0.0078 -0.0113 0.0104 -0.0115 0.0138

AT.145 H X -0.0086 -0.0091 -0.0061 -0.0012 -0.0000 -0.0000  
Y -0.0044 -0.0046 0.0013 0.0005 0.0008 0.0013  
Z -0.0156 -0.0168 -0.0065 -0.0077 -0.0074 -0.0084

AT.146 H X -0.0086 0.0091 0.0061 0.0012 -0.0000 -0.0000  
Y 0.0044 -0.0046 0.0013 0.0005 -0.0008 -0.0013  
Z -0.0156 0.0168 0.0065 0.0077 -0.0074 -0.0084

AT.147 H X 0.0086 0.0091 0.0061 -0.0012 -0.0000 0.0000  
Y 0.0044 0.0046 -0.0013 0.0005 0.0008 -0.0013  
Z 0.0156 0.0168 0.0065 -0.0077 -0.0074 0.0084

AT.148 H X 0.0086 -0.0091 -0.0061 0.0012 -0.0000 0.0000  
Y -0.0044 0.0046 -0.0013 0.0005 -0.0008 0.0013  
Z 0.0156 -0.0168 -0.0065 0.0077 -0.0074 0.0084

AT.149 O X -0.0009 -0.0010 -0.0020 -0.0021 -0.0018 -0.0015  
Y -0.0033 -0.0031 0.0008 0.0006 0.0009 0.0009  
Z -0.0001 0.0001 0.0015 0.0015 0.0014 0.0013

AT.150 O X -0.0009 0.0010 0.0020 0.0021 -0.0018 -0.0015  
Y 0.0033 -0.0031 0.0008 0.0006 -0.0009 -0.0009  
Z -0.0001 -0.0001 -0.0015 -0.0015 0.0014 0.0013

AT.151 O X 0.0009 0.0010 0.0020 -0.0021 -0.0018 0.0015  
Y 0.0033 0.0031 -0.0008 0.0006 0.0009 -0.0009



Z 0.0001 -0.0001 -0.0015 0.0015 0.0014 -0.0013  
AT. 152 O X 0.0009 -0.0010 -0.0020 0.0021 -0.0018 0.0015  
Y -0.0033 0.0031 -0.0008 0.0006 -0.0009 0.0009  
Z 0.0001 0.0001 0.0015 -0.0015 0.0014 -0.0013  
AT. 153 H X -0.0024 -0.0023 -0.0020 -0.0020 -0.0012 -0.0021  
Y -0.0100 -0.0104 0.0033 0.0032 0.0023 0.0019  
Z -0.0012 -0.0013 0.0025 0.0026 0.0017 0.0021  
AT. 154 H X -0.0024 0.0023 0.0020 0.0020 -0.0012 -0.0021  
Y 0.0100 -0.0104 0.0033 0.0032 -0.0023 -0.0019  
Z -0.0012 0.0013 -0.0025 -0.0026 0.0017 0.0021  
AT. 155 H X 0.0024 0.0023 0.0020 -0.0020 -0.0012 0.0021  
Y 0.0100 0.0104 -0.0033 0.0032 0.0023 -0.0019  
Z 0.0012 0.0013 -0.0025 0.0026 0.0017 -0.0021  
AT. 156 H X 0.0024 -0.0023 -0.0020 0.0020 -0.0012 0.0021  
Y -0.0100 0.0104 -0.0033 0.0032 -0.0023 0.0019  
Z 0.0012 -0.0013 0.0025 -0.0026 0.0017 -0.0021  
AT. 157 O X 0.0029 0.0028 0.0045 0.0047 0.0038 0.0034  
Y -0.0006 -0.0008 -0.0007 -0.0008 -0.0006 -0.0006  
Z -0.0027 -0.0025 -0.0055 -0.0055 -0.0050 -0.0046  
AT. 158 O X 0.0029 -0.0028 -0.0045 -0.0047 0.0038 0.0034  
Y 0.0006 -0.0008 -0.0007 -0.0008 0.0006 0.0006  
Z -0.0027 0.0025 0.0055 0.0055 -0.0050 -0.0046  
AT. 159 O X -0.0029 -0.0028 -0.0045 0.0047 0.0038 -0.0034  
Y 0.0006 0.0008 0.0007 -0.0008 -0.0006 0.0006  
Z 0.0027 0.0025 0.0055 -0.0055 -0.0050 0.0046  
AT. 160 O X -0.0029 0.0028 0.0045 -0.0047 0.0038 -0.0034  
Y -0.0006 0.0008 0.0007 -0.0008 0.0006 -0.0006  
Z 0.0027 -0.0025 -0.0055 0.0055 -0.0050 0.0046  
AT. 161 O X -0.0022 -0.0020 -0.0054 -0.0053 -0.0052 -0.0051  
Y -0.0024 -0.0022 -0.0004 -0.0003 -0.0003 -0.0002  
Z -0.0009 -0.0010 0.0051 0.0050 0.0049 0.0047  
AT. 162 O X -0.0022 0.0020 0.0054 0.0053 -0.0052 -0.0051

Y 0.0024 -0.0022 -0.0004 -0.0003 0.0003 0.0002  
Z -0.0009 0.0010 -0.0051 -0.0050 0.0049 0.0047  
AT. 163 O X 0.0022 0.0020 0.0054 -0.0053 -0.0052 0.0051  
Y 0.0024 0.0022 0.0004 -0.0003 -0.0003 0.0002  
Z 0.0009 0.0010 -0.0051 0.0050 0.0049 -0.0047  
AT. 164 O X 0.0022 -0.0020 -0.0054 0.0053 -0.0052 0.0051  
Y -0.0024 0.0022 0.0004 -0.0003 0.0003 -0.0002  
Z 0.0009 -0.0010 0.0051 -0.0050 0.0049 -0.0047  
AT. 165 H X -0.0029 -0.0052 0.1226 0.1214 0.1184 0.1123  
Y -0.0027 -0.0037 0.0539 0.0533 0.0519 0.0494  
Z 0.0009 0.0033 -0.1113 -0.1101 -0.1079 -0.1021  
AT. 166 H X -0.0029 0.0052 -0.1226 -0.1214 0.1184 0.1123  
Y 0.0027 -0.0037 0.0539 0.0533 -0.0519 -0.0494  
Z 0.0009 -0.0033 0.1113 0.1101 -0.1079 -0.1021  
AT. 167 H X 0.0029 0.0052 -0.1226 0.1214 0.1184 -0.1123  
Y 0.0027 0.0037 -0.0539 0.0533 0.0519 -0.0494  
Z -0.0009 -0.0033 0.1113 -0.1101 -0.1079 0.1021  
AT. 168 H X 0.0029 -0.0052 0.1226 -0.1214 0.1184 -0.1123  
Y -0.0027 0.0037 -0.0539 0.0533 -0.0519 0.0494  
Z -0.0009 0.0033 -0.1113 0.1101 -0.1079 0.1021  
AT. 169 O X -0.0009 -0.0010 0.0001 0.0000 -0.0000 0.0001  
Y -0.0049 -0.0053 -0.0004 -0.0004 -0.0004 -0.0002  
Z 0.0008 0.0009 -0.0001 0.0000 0.0001 -0.0001  
AT. 170 O X -0.0009 0.0010 -0.0001 -0.0000 -0.0000 0.0001  
Y 0.0049 -0.0053 -0.0004 -0.0004 0.0004 0.0002  
Z 0.0008 -0.0009 0.0001 -0.0000 0.0001 -0.0001  
AT. 171 O X 0.0009 0.0010 -0.0001 0.0000 -0.0000 -0.0001  
Y 0.0049 0.0053 0.0004 -0.0004 -0.0004 0.0002  
Z -0.0008 -0.0009 0.0001 0.0000 0.0001 0.0001  
AT. 172 O X 0.0009 -0.0010 0.0001 -0.0000 -0.0000 -0.0001  
Y -0.0049 0.0053 0.0004 -0.0004 0.0004 -0.0002  
Z -0.0008 0.0009 -0.0001 -0.0000 0.0001 0.0001

AT. 173 H X 0.0038 0.0051 -0.0004 0.0014 0.0032 0.0003

Y -0.0058 -0.0065 -0.0004 -0.0007 -0.0011 -0.0003

Z 0.0004 0.0002 0.0005 0.0000 -0.0006 0.0005

AT. 174 H X 0.0038 -0.0051 0.0004 -0.0014 0.0032 0.0003

Y 0.0058 -0.0065 -0.0004 -0.0007 0.0011 0.0003

Z 0.0004 -0.0002 -0.0005 -0.0000 -0.0006 0.0005

AT. 175 H X -0.0038 -0.0051 0.0004 0.0014 0.0032 -0.0003

Y 0.0058 0.0065 0.0004 -0.0007 -0.0011 0.0003

Z -0.0004 -0.0002 -0.0005 0.0000 -0.0006 -0.0005

AT. 176 H X -0.0038 0.0051 -0.0004 -0.0014 0.0032 -0.0003

Y -0.0058 0.0065 0.0004 -0.0007 0.0011 -0.0003

Z -0.0004 0.0002 0.0005 -0.0000 -0.0006 -0.0005

FREQ(CM\*\*-1) 764.99 765.35 765.60 766.66 776.02 776.15

AT. 1 I X 0.0008 0.0007 0.0007 0.0007 -0.0002 -0.0002

Y -0.0007 -0.0007 -0.0007 -0.0007 0.0002 0.0002

Z -0.0002 -0.0002 -0.0002 -0.0002 0.0001 0.0001

AT. 2 I X -0.0008 -0.0007 0.0007 0.0007 0.0002 -0.0002

Y -0.0007 -0.0007 0.0007 0.0007 0.0002 -0.0002

Z 0.0002 0.0002 -0.0002 -0.0002 -0.0001 0.0001

AT. 3 I X 0.0008 -0.0007 0.0007 -0.0007 -0.0002 0.0002

Y -0.0007 0.0007 -0.0007 0.0007 0.0002 -0.0002

Z -0.0002 0.0002 -0.0002 0.0002 0.0001 -0.0001

AT. 4 I X -0.0008 0.0007 0.0007 -0.0007 0.0002 0.0002

Y -0.0007 0.0007 0.0007 -0.0007 0.0002 0.0002

Z 0.0002 -0.0002 -0.0002 0.0002 -0.0001 -0.0001

AT. 5 I X 0.0003 0.0003 0.0002 0.0002 0.0010 0.0010

Y 0.0001 0.0001 0.0001 0.0000 0.0002 0.0002

Z -0.0001 -0.0001 -0.0001 -0.0001 -0.0002 -0.0001

AT. 6 I X -0.0003 -0.0003 0.0002 0.0002 -0.0010 0.0010

Y 0.0001 0.0001 -0.0001 -0.0000 0.0002 -0.0002

Z 0.0001 0.0001 -0.0001 -0.0001 0.0002 -0.0001  
AT. 7 I X 0.0003 -0.0003 0.0002 -0.0002 0.0010 -0.0010  
Y 0.0001 -0.0001 0.0001 -0.0000 0.0002 -0.0002  
Z -0.0001 0.0001 -0.0001 0.0001 -0.0002 0.0001  
AT. 8 I X -0.0003 0.0003 0.0002 -0.0002 -0.0010 -0.0010  
Y 0.0001 -0.0001 -0.0001 0.0000 0.0002 0.0002  
Z 0.0001 -0.0001 -0.0001 0.0001 0.0002 0.0001  
AT. 9 N X -0.0093 -0.0094 -0.0090 -0.0090 0.0028 0.0031  
Y 0.0025 0.0025 0.0025 0.0025 -0.0010 -0.0009  
Z 0.0034 0.0035 0.0034 0.0033 -0.0009 -0.0011  
AT. 10 N X 0.0093 0.0094 -0.0090 -0.0090 -0.0028 0.0031  
Y 0.0025 0.0025 -0.0025 -0.0025 -0.0010 0.0009  
Z -0.0034 -0.0035 0.0034 0.0033 0.0009 -0.0011  
AT. 11 N X -0.0093 0.0094 -0.0090 0.0090 0.0028 -0.0031  
Y 0.0025 -0.0025 0.0025 -0.0025 -0.0010 0.0009  
Z 0.0034 -0.0035 0.0034 -0.0033 -0.0009 0.0011  
AT. 12 N X 0.0093 -0.0094 -0.0090 0.0090 -0.0028 -0.0031  
Y 0.0025 -0.0025 -0.0025 0.0025 -0.0010 -0.0009  
Z -0.0034 0.0035 0.0034 -0.0033 0.0009 0.0011  
AT. 13 N X -0.0024 -0.0028 -0.0020 -0.0014 -0.0078 -0.0073  
Y -0.0009 -0.0011 -0.0013 -0.0013 -0.0025 -0.0026  
Z 0.0009 0.0012 0.0009 0.0005 0.0029 0.0027  
AT. 14 N X 0.0024 0.0028 -0.0020 -0.0014 0.0078 -0.0073  
Y -0.0009 -0.0011 0.0013 0.0013 -0.0025 0.0026  
Z -0.0009 -0.0012 0.0009 0.0005 -0.0029 0.0027  
AT. 15 N X -0.0024 0.0028 -0.0020 0.0014 -0.0078 0.0073  
Y -0.0009 0.0011 -0.0013 0.0013 -0.0025 0.0026  
Z 0.0009 -0.0012 0.0009 -0.0005 0.0029 -0.0027  
AT. 16 N X 0.0024 -0.0028 -0.0020 0.0014 0.0078 0.0073  
Y -0.0009 0.0011 0.0013 -0.0013 -0.0025 -0.0026  
Z -0.0009 0.0012 0.0009 -0.0005 -0.0029 -0.0027  
AT. 17 O X -0.0118 -0.0117 -0.0116 -0.0115 0.0041 0.0041

Y 0.0001 0.0000 0.0001 0.0002 0.0003 0.0002  
Z -0.0048 -0.0045 -0.0045 -0.0045 0.0015 0.0015  
AT. 18 O X 0.0118 0.0117 -0.0116 -0.0115 -0.0041 0.0041  
Y 0.0001 0.0000 -0.0001 -0.0002 0.0003 -0.0002  
Z 0.0048 0.0045 -0.0045 -0.0045 -0.0015 0.0015  
AT. 19 O X -0.0118 0.0117 -0.0116 0.0115 0.0041 -0.0041  
Y 0.0001 -0.0000 0.0001 -0.0002 0.0003 -0.0002  
Z -0.0048 0.0045 -0.0045 0.0045 0.0015 -0.0015  
AT. 20 O X 0.0118 -0.0117 -0.0116 0.0115 -0.0041 -0.0041  
Y 0.0001 -0.0000 -0.0001 0.0002 0.0003 0.0002  
Z 0.0048 -0.0045 -0.0045 0.0045 -0.0015 -0.0015  
AT. 21 O X -0.0035 -0.0041 -0.0037 -0.0032 -0.0116 -0.0116  
Y 0.0022 0.0028 0.0026 0.0023 0.0067 0.0068  
Z -0.0003 -0.0007 -0.0003 0.0001 -0.0027 -0.0028  
AT. 22 O X 0.0035 0.0041 -0.0037 -0.0032 0.0116 -0.0116  
Y 0.0022 0.0028 -0.0026 -0.0023 0.0067 -0.0068  
Z 0.0003 0.0007 -0.0003 0.0001 0.0027 -0.0028  
AT. 23 O X -0.0035 0.0041 -0.0037 0.0032 -0.0116 0.0116  
Y 0.0022 -0.0028 0.0026 -0.0023 0.0067 -0.0068  
Z -0.0003 0.0007 -0.0003 -0.0001 -0.0027 0.0028  
AT. 24 O X 0.0035 -0.0041 -0.0037 0.0032 0.0116 0.0116  
Y 0.0022 -0.0028 -0.0026 0.0023 0.0067 0.0068  
Z 0.0003 -0.0007 -0.0003 -0.0001 0.0027 0.0028  
AT. 25 C X -0.0134 -0.0131 -0.0135 -0.0130 0.0034 0.0035  
Y 0.0149 0.0146 0.0143 0.0142 -0.0046 -0.0049  
Z 0.0093 0.0090 0.0091 0.0088 -0.0029 -0.0028  
AT. 26 C X 0.0134 0.0131 -0.0135 -0.0130 -0.0034 0.0035  
Y 0.0149 0.0146 -0.0143 -0.0142 -0.0046 0.0049  
Z -0.0093 -0.0090 0.0091 0.0088 0.0029 -0.0028  
AT. 27 C X -0.0134 0.0131 -0.0135 0.0130 0.0034 -0.0035  
Y 0.0149 -0.0146 0.0143 -0.0142 -0.0046 0.0049  
Z 0.0093 -0.0090 0.0091 -0.0088 -0.0029 0.0028

AT. 28 C X 0.0134 -0.0131 -0.0135 0.0130 -0.0034 -0.0035  
Y 0.0149 -0.0146 -0.0143 0.0142 -0.0046 -0.0049  
Z -0.0093 0.0090 0.0091 -0.0088 0.0029 0.0028

AT. 29 H X -0.0227 -0.0223 -0.0230 -0.0225 0.0069 0.0067  
Y -0.0115 -0.0111 -0.0108 -0.0113 0.0052 0.0054  
Z 0.0274 0.0266 0.0273 0.0272 -0.0097 -0.0092

AT. 30 H X 0.0227 0.0223 -0.0230 -0.0225 -0.0069 0.0067  
Y -0.0115 -0.0111 0.0108 0.0113 0.0052 -0.0054  
Z -0.0274 -0.0266 0.0273 0.0272 0.0097 -0.0092

AT. 31 H X -0.0227 0.0223 -0.0230 0.0225 0.0069 -0.0067  
Y -0.0115 0.0111 -0.0108 0.0113 0.0052 -0.0054  
Z 0.0274 -0.0266 0.0273 -0.0272 -0.0097 0.0092

AT. 32 H X 0.0227 -0.0223 -0.0230 0.0225 -0.0069 -0.0067  
Y -0.0115 0.0111 0.0108 -0.0113 0.0052 0.0054  
Z -0.0274 0.0266 0.0273 -0.0272 0.0097 0.0092

AT. 33 H X -0.0361 -0.0351 -0.0337 -0.0339 0.0128 0.0132  
Y 0.0163 0.0160 0.0155 0.0156 -0.0056 -0.0060  
Z 0.0196 0.0190 0.0187 0.0182 -0.0057 -0.0054

AT. 34 H X 0.0361 0.0351 -0.0337 -0.0339 -0.0128 0.0132  
Y 0.0163 0.0160 -0.0155 -0.0156 -0.0056 0.0060  
Z -0.0196 -0.0190 0.0187 0.0182 0.0057 -0.0054

AT. 35 H X -0.0361 0.0351 -0.0337 0.0339 0.0128 -0.0132  
Y 0.0163 -0.0160 0.0155 -0.0156 -0.0056 0.0060  
Z 0.0196 -0.0190 0.0187 -0.0182 -0.0057 0.0054

AT. 36 H X 0.0361 -0.0351 -0.0337 0.0339 -0.0128 -0.0132  
Y 0.0163 -0.0160 -0.0155 0.0156 -0.0056 -0.0060  
Z -0.0196 0.0190 0.0187 -0.0182 0.0057 0.0054

AT. 37 C X 0.0365 0.0359 0.0358 0.0353 -0.0117 -0.0121  
Y -0.0138 -0.0136 -0.0134 -0.0131 0.0045 0.0045  
Z -0.0128 -0.0126 -0.0124 -0.0124 0.0046 0.0046

AT. 38 C X -0.0365 -0.0359 0.0358 0.0353 0.0117 -0.0121  
Y -0.0138 -0.0136 0.0134 0.0131 0.0045 -0.0045

Z 0.0128 0.0126 -0.0124 -0.0124 -0.0046 0.0046  
AT. 39 C X 0.0365 -0.0359 0.0358 -0.0353 -0.0117 0.0121  
Y -0.0138 0.0136 -0.0134 0.0131 0.0045 -0.0045  
Z -0.0128 0.0126 -0.0124 0.0124 0.0046 -0.0046  
AT. 40 C X -0.0365 0.0359 0.0358 -0.0353 0.0117 0.0121  
Y -0.0138 0.0136 0.0134 -0.0131 0.0045 0.0045  
Z 0.0128 -0.0126 -0.0124 0.0124 -0.0046 -0.0046  
AT. 41 C X -0.0017 -0.0017 -0.0017 -0.0019 0.0001 0.0003  
Y 0.0013 0.0013 0.0013 0.0011 -0.0010 -0.0010  
Z 0.0056 0.0056 0.0056 0.0058 -0.0016 -0.0014  
AT. 42 C X 0.0017 0.0017 -0.0017 -0.0019 -0.0001 0.0003  
Y 0.0013 0.0013 -0.0013 -0.0011 -0.0010 0.0010  
Z -0.0056 -0.0056 0.0056 0.0058 0.0016 -0.0014  
AT. 43 C X -0.0017 0.0017 -0.0017 0.0019 0.0001 -0.0003  
Y 0.0013 -0.0013 0.0013 -0.0011 -0.0010 0.0010  
Z 0.0056 -0.0056 0.0056 -0.0058 -0.0016 0.0014  
AT. 44 C X 0.0017 -0.0017 -0.0017 0.0019 -0.0001 -0.0003  
Y 0.0013 -0.0013 -0.0013 0.0011 -0.0010 -0.0010  
Z -0.0056 0.0056 0.0056 -0.0058 0.0016 0.0014  
AT. 45 H X -0.0035 -0.0034 -0.0034 -0.0038 -0.0000 -0.0003  
Y 0.0017 0.0017 0.0016 0.0015 -0.0013 -0.0011  
Z 0.0062 0.0061 0.0062 0.0065 -0.0019 -0.0014  
AT. 46 H X 0.0035 0.0034 -0.0034 -0.0038 0.0000 -0.0003  
Y 0.0017 0.0017 -0.0016 -0.0015 -0.0013 0.0011  
Z -0.0062 -0.0061 0.0062 0.0065 0.0019 -0.0014  
AT. 47 H X -0.0035 0.0034 -0.0034 0.0038 -0.0000 0.0003  
Y 0.0017 -0.0017 0.0016 -0.0015 -0.0013 0.0011  
Z 0.0062 -0.0061 0.0062 -0.0065 -0.0019 0.0014  
AT. 48 H X 0.0035 -0.0034 -0.0034 0.0038 0.0000 0.0003  
Y 0.0017 -0.0017 -0.0016 0.0015 -0.0013 -0.0011  
Z -0.0062 0.0061 0.0062 -0.0065 0.0019 0.0014  
AT. 49 H X -0.0001 0.0001 -0.0000 0.0000 -0.0003 0.0002

Y 0.0034 0.0035 0.0034 0.0035 -0.0015 -0.0010  
Z 0.0038 0.0041 0.0039 0.0039 -0.0013 -0.0013  
AT. 50 H X 0.0001 -0.0001 -0.0000 0.0000 0.0003 0.0002  
Y 0.0034 0.0035 -0.0034 -0.0035 -0.0015 0.0010  
Z -0.0038 -0.0041 0.0039 0.0039 0.0013 -0.0013  
AT. 51 H X -0.0001 -0.0001 -0.0000 -0.0000 -0.0003 -0.0002  
Y 0.0034 -0.0035 0.0034 -0.0035 -0.0015 0.0010  
Z 0.0038 -0.0041 0.0039 -0.0039 -0.0013 0.0013  
AT. 52 H X 0.0001 0.0001 -0.0000 -0.0000 0.0003 -0.0002  
Y 0.0034 -0.0035 -0.0034 0.0035 -0.0015 -0.0010  
Z -0.0038 0.0041 0.0039 -0.0039 0.0013 0.0013  
AT. 53 C X 0.0009 0.0009 0.0009 0.0010 -0.0000 0.0001  
Y -0.0002 -0.0002 -0.0005 -0.0007 -0.0008 -0.0014  
Z -0.0002 -0.0002 -0.0001 0.0000 0.0007 0.0008  
AT. 54 C X -0.0009 -0.0009 0.0009 0.0010 0.0000 0.0001  
Y -0.0002 -0.0002 0.0005 0.0007 -0.0008 0.0014  
Z 0.0002 0.0002 -0.0001 0.0000 -0.0007 0.0008  
AT. 55 C X 0.0009 -0.0009 0.0009 -0.0010 -0.0000 -0.0001  
Y -0.0002 0.0002 -0.0005 0.0007 -0.0008 0.0014  
Z -0.0002 0.0002 -0.0001 -0.0000 0.0007 -0.0008  
AT. 56 C X -0.0009 0.0009 0.0009 -0.0010 0.0000 -0.0001  
Y -0.0002 0.0002 0.0005 -0.0007 -0.0008 -0.0014  
Z 0.0002 -0.0002 -0.0001 -0.0000 -0.0007 -0.0008  
AT. 57 C X -0.0003 -0.0002 -0.0003 -0.0003 0.0000 0.0002  
Y -0.0006 -0.0007 -0.0007 -0.0007 0.0003 0.0002  
Z -0.0001 0.0000 -0.0003 -0.0002 0.0014 0.0009  
AT. 58 C X 0.0003 0.0002 -0.0003 -0.0003 -0.0000 0.0002  
Y -0.0006 -0.0007 0.0007 0.0007 0.0003 -0.0002  
Z 0.0001 -0.0000 -0.0003 -0.0002 -0.0014 0.0009  
AT. 59 C X -0.0003 0.0002 -0.0003 0.0003 0.0000 -0.0002  
Y -0.0006 0.0007 -0.0007 0.0007 0.0003 -0.0002  
Z -0.0001 -0.0000 -0.0003 0.0002 0.0014 -0.0009



AT. 60 C X 0.0003 -0.0002 -0.0003 0.0003 -0.0000 -0.0002  
Y -0.0006 0.0007 0.0007 -0.0007 0.0003 0.0002  
Z 0.0001 0.0000 -0.0003 0.0002 -0.0014 -0.0009

AT. 61 H X -0.0014 -0.0015 -0.0022 -0.0022 0.0004 -0.0011  
Y -0.0012 -0.0013 -0.0016 -0.0015 0.0008 -0.0002  
Z -0.0020 -0.0020 -0.0033 -0.0039 -0.0004 -0.0026

AT. 62 H X 0.0014 0.0015 -0.0022 -0.0022 -0.0004 -0.0011  
Y -0.0012 -0.0013 0.0016 0.0015 0.0008 0.0002  
Z 0.0020 0.0020 -0.0033 -0.0039 0.0004 -0.0026

AT. 63 H X -0.0014 0.0015 -0.0022 0.0022 0.0004 0.0011  
Y -0.0012 0.0013 -0.0016 0.0015 0.0008 0.0002  
Z -0.0020 0.0020 -0.0033 0.0039 -0.0004 0.0026

AT. 64 H X 0.0014 -0.0015 -0.0022 0.0022 -0.0004 0.0011  
Y -0.0012 0.0013 0.0016 -0.0015 0.0008 -0.0002  
Z 0.0020 -0.0020 -0.0033 0.0039 0.0004 0.0026

AT. 65 H X -0.0009 -0.0009 -0.0011 -0.0012 -0.0005 -0.0006  
Y 0.0013 0.0014 0.0015 0.0019 0.0018 0.0026  
Z 0.0019 0.0020 0.0028 0.0029 -0.0014 0.0011

AT. 66 H X 0.0009 0.0009 -0.0011 -0.0012 0.0005 -0.0006  
Y 0.0013 0.0014 -0.0015 -0.0019 0.0018 -0.0026  
Z -0.0019 -0.0020 0.0028 0.0029 0.0014 0.0011

AT. 67 H X -0.0009 0.0009 -0.0011 0.0012 -0.0005 0.0006  
Y 0.0013 -0.0014 0.0015 -0.0019 0.0018 -0.0026  
Z 0.0019 -0.0020 0.0028 -0.0029 -0.0014 -0.0011

AT. 68 H X 0.0009 -0.0009 -0.0011 0.0012 0.0005 0.0006  
Y 0.0013 -0.0014 -0.0015 0.0019 0.0018 0.0026  
Z -0.0019 0.0020 0.0028 -0.0029 0.0014 -0.0011

AT. 69 H X -0.0014 -0.0014 -0.0008 -0.0005 0.0011 0.0016  
Y -0.0007 -0.0007 -0.0005 -0.0003 0.0016 0.0018  
Z -0.0003 -0.0001 -0.0002 0.0001 0.0028 0.0024

AT. 70 H X 0.0014 0.0014 -0.0008 -0.0005 -0.0011 0.0016  
Y -0.0007 -0.0007 0.0005 0.0003 0.0016 -0.0018

Z 0.0003 0.0001 -0.0002 0.0001 -0.0028 0.0024  
AT. 71 H X -0.0014 0.0014 -0.0008 0.0005 0.0011 -0.0016  
Y -0.0007 0.0007 -0.0005 0.0003 0.0016 -0.0018  
Z -0.0003 0.0001 -0.0002 -0.0001 0.0028 -0.0024  
AT. 72 H X 0.0014 -0.0014 -0.0008 0.0005 -0.0011 -0.0016  
Y -0.0007 0.0007 0.0005 -0.0003 0.0016 0.0018  
Z 0.0003 -0.0001 -0.0002 -0.0001 -0.0028 -0.0024  
AT. 73 C X 0.0004 0.0001 0.0005 0.0003 0.0005 0.0002  
Y 0.0031 0.0032 0.0034 0.0037 0.0019 0.0019  
Z -0.0021 -0.0023 -0.0020 -0.0021 -0.0008 -0.0007  
AT. 74 C X -0.0004 -0.0001 0.0005 0.0003 -0.0005 0.0002  
Y 0.0031 0.0032 -0.0034 -0.0037 0.0019 -0.0019  
Z 0.0021 0.0023 -0.0020 -0.0021 0.0008 -0.0007  
AT. 75 C X 0.0004 -0.0001 0.0005 -0.0003 0.0005 -0.0002  
Y 0.0031 -0.0032 0.0034 -0.0037 0.0019 -0.0019  
Z -0.0021 0.0023 -0.0020 0.0021 -0.0008 0.0007  
AT. 76 C X -0.0004 0.0001 0.0005 -0.0003 -0.0005 -0.0002  
Y 0.0031 -0.0032 -0.0034 0.0037 0.0019 0.0019  
Z 0.0021 -0.0023 -0.0020 0.0021 0.0008 0.0007  
AT. 77 C X -0.0015 -0.0011 -0.0017 -0.0014 -0.0002 -0.0000  
Y -0.0001 -0.0005 -0.0001 -0.0005 -0.0003 0.0000  
Z 0.0021 0.0017 0.0018 0.0014 -0.0008 -0.0010  
AT. 78 C X 0.0015 0.0011 -0.0017 -0.0014 0.0002 -0.0000  
Y -0.0001 -0.0005 0.0001 0.0005 -0.0003 -0.0000  
Z -0.0021 -0.0017 0.0018 0.0014 0.0008 -0.0010  
AT. 79 C X -0.0015 0.0011 -0.0017 0.0014 -0.0002 0.0000  
Y -0.0001 0.0005 -0.0001 0.0005 -0.0003 -0.0000  
Z 0.0021 -0.0017 0.0018 -0.0014 -0.0008 0.0010  
AT. 80 C X 0.0015 -0.0011 -0.0017 0.0014 0.0002 0.0000  
Y -0.0001 0.0005 0.0001 -0.0005 -0.0003 0.0000  
Z -0.0021 0.0017 0.0018 -0.0014 0.0008 0.0010  
AT. 81 H X -0.0044 -0.0035 -0.0049 -0.0039 -0.0002 0.0003

Y -0.0027 -0.0028 -0.0030 -0.0030 -0.0005 0.0003  
Z -0.0089 -0.0086 -0.0088 -0.0084 0.0017 0.0014  
AT. 82 H X 0.0044 0.0035 -0.0049 -0.0039 0.0002 0.0003  
Y -0.0027 -0.0028 0.0030 0.0030 -0.0005 -0.0003  
Z 0.0089 0.0086 -0.0088 -0.0084 -0.0017 0.0014  
AT. 83 H X -0.0044 0.0035 -0.0049 0.0039 -0.0002 -0.0003  
Y -0.0027 0.0028 -0.0030 0.0030 -0.0005 -0.0003  
Z -0.0089 0.0086 -0.0088 0.0084 0.0017 -0.0014  
AT. 84 H X 0.0044 -0.0035 -0.0049 0.0039 0.0002 -0.0003  
Y -0.0027 0.0028 0.0030 -0.0030 -0.0005 0.0003  
Z 0.0089 -0.0086 -0.0088 0.0084 -0.0017 -0.0014  
AT. 85 H X 0.0044 0.0039 0.0045 0.0036 -0.0005 -0.0008  
Y -0.0056 -0.0052 -0.0058 -0.0053 0.0007 0.0012  
Z 0.0049 0.0042 0.0046 0.0039 -0.0015 -0.0017  
AT. 86 H X -0.0044 -0.0039 0.0045 0.0036 0.0005 -0.0008  
Y -0.0056 -0.0052 0.0058 0.0053 0.0007 -0.0012  
Z -0.0049 -0.0042 0.0046 0.0039 0.0015 -0.0017  
AT. 87 H X 0.0044 -0.0039 0.0045 -0.0036 -0.0005 0.0008  
Y -0.0056 0.0052 -0.0058 0.0053 0.0007 -0.0012  
Z 0.0049 -0.0042 0.0046 -0.0039 -0.0015 0.0017  
AT. 88 H X -0.0044 0.0039 0.0045 -0.0036 0.0005 0.0008  
Y -0.0056 0.0052 0.0058 -0.0053 0.0007 0.0012  
Z -0.0049 0.0042 0.0046 -0.0039 0.0015 0.0017  
AT. 89 C X 0.0006 0.0005 0.0005 0.0005 -0.0002 -0.0000  
Y 0.0000 -0.0001 -0.0000 -0.0002 -0.0002 -0.0003  
Z -0.0001 -0.0003 -0.0002 -0.0002 -0.0003 -0.0003  
AT. 90 C X -0.0006 -0.0005 0.0005 0.0005 0.0002 -0.0000  
Y 0.0000 -0.0001 0.0000 0.0002 -0.0002 0.0003  
Z 0.0001 0.0003 -0.0002 -0.0002 0.0003 -0.0003  
AT. 91 C X 0.0006 -0.0005 0.0005 -0.0005 -0.0002 0.0000  
Y 0.0000 0.0001 -0.0000 0.0002 -0.0002 0.0003  
Z -0.0001 0.0003 -0.0002 0.0002 -0.0003 0.0003

AT. 92 C X -0.0006 0.0005 0.0005 -0.0005 0.0002 0.0000  
Y 0.0000 0.0001 0.0000 -0.0002 -0.0002 -0.0003  
Z 0.0001 -0.0003 -0.0002 0.0002 0.0003 0.0003

AT. 93 C X 0.0001 -0.0000 -0.0000 0.0002 -0.0003 -0.0004  
Y 0.0004 0.0004 0.0005 0.0002 0.0011 0.0009  
Z -0.0005 -0.0007 -0.0005 -0.0005 -0.0016 -0.0015

AT. 94 C X -0.0001 0.0000 -0.0000 0.0002 0.0003 -0.0004  
Y 0.0004 0.0004 -0.0005 -0.0002 0.0011 -0.0009  
Z 0.0005 0.0007 -0.0005 -0.0005 0.0016 -0.0015

AT. 95 C X 0.0001 0.0000 -0.0000 -0.0002 -0.0003 0.0004  
Y 0.0004 -0.0004 0.0005 -0.0002 0.0011 -0.0009  
Z -0.0005 0.0007 -0.0005 0.0005 -0.0016 0.0015

AT. 96 C X -0.0001 -0.0000 -0.0000 -0.0002 0.0003 0.0004  
Y 0.0004 -0.0004 -0.0005 0.0002 0.0011 0.0009  
Z 0.0005 -0.0007 -0.0005 0.0005 0.0016 0.0015

AT. 97 H X -0.0003 -0.0006 -0.0004 -0.0006 -0.0014 -0.0019  
Y 0.0014 0.0023 0.0015 0.0024 0.0029 0.0036  
Z -0.0001 0.0008 0.0001 0.0008 -0.0016 -0.0016

AT. 98 H X 0.0003 0.0006 -0.0004 -0.0006 0.0014 -0.0019  
Y 0.0014 0.0023 -0.0015 -0.0024 0.0029 -0.0036  
Z 0.0001 -0.0008 0.0001 0.0008 0.0016 -0.0016

AT. 99 H X -0.0003 0.0006 -0.0004 0.0006 -0.0014 0.0019  
Y 0.0014 -0.0023 0.0015 -0.0024 0.0029 -0.0036  
Z -0.0001 -0.0008 0.0001 -0.0008 -0.0016 0.0016

AT. 100 H X 0.0003 -0.0006 -0.0004 0.0006 0.0014 0.0019  
Y 0.0014 -0.0023 -0.0015 0.0024 0.0029 0.0036  
Z 0.0001 0.0008 0.0001 -0.0008 0.0016 0.0016

AT. 101 H X 0.0002 -0.0002 -0.0000 -0.0000 -0.0009 -0.0008  
Y 0.0001 -0.0003 0.0001 -0.0006 -0.0000 -0.0003  
Z 0.0026 0.0026 0.0026 0.0033 0.0024 0.0035

AT. 102 H X -0.0002 0.0002 -0.0000 -0.0000 0.0009 -0.0008  
Y 0.0001 -0.0003 -0.0001 0.0006 -0.0000 0.0003

Z -0.0026 -0.0026 0.0026 0.0033 -0.0024 0.0035  
AT. 103 H X 0.0002 0.0002 -0.0000 0.0000 -0.0009 0.0008  
Y 0.0001 0.0003 0.0001 0.0006 -0.0000 0.0003  
Z 0.0026 -0.0026 0.0026 -0.0033 0.0024 -0.0035  
AT. 104 H X -0.0002 -0.0002 -0.0000 0.0000 0.0009 0.0008  
Y 0.0001 0.0003 -0.0001 -0.0006 -0.0000 -0.0003  
Z -0.0026 0.0026 0.0026 -0.0033 -0.0024 -0.0035  
AT. 105 H X -0.0006 -0.0004 -0.0006 -0.0007 -0.0023 -0.0024  
Y 0.0027 0.0033 0.0031 0.0035 0.0036 0.0040  
Z -0.0021 -0.0027 -0.0024 -0.0027 -0.0029 -0.0033  
AT. 106 H X 0.0006 0.0004 -0.0006 -0.0007 0.0023 -0.0024  
Y 0.0027 0.0033 -0.0031 -0.0035 0.0036 -0.0040  
Z 0.0021 0.0027 -0.0024 -0.0027 0.0029 -0.0033  
AT. 107 H X -0.0006 0.0004 -0.0006 0.0007 -0.0023 0.0024  
Y 0.0027 -0.0033 0.0031 -0.0035 0.0036 -0.0040  
Z -0.0021 0.0027 -0.0024 0.0027 -0.0029 0.0033  
AT. 108 H X 0.0006 -0.0004 -0.0006 0.0007 0.0023 0.0024  
Y 0.0027 -0.0033 -0.0031 0.0035 0.0036 0.0040  
Z 0.0021 -0.0027 -0.0024 0.0027 0.0029 0.0033  
AT. 109 C X 0.0016 0.0017 0.0013 0.0015 -0.0009 -0.0015  
Y -0.0017 -0.0019 -0.0022 -0.0026 -0.0022 -0.0028  
Z -0.0002 -0.0000 0.0001 -0.0002 -0.0002 -0.0004  
AT. 110 C X -0.0016 -0.0017 0.0013 0.0015 0.0009 -0.0015  
Y -0.0017 -0.0019 0.0022 0.0026 -0.0022 0.0028  
Z 0.0002 0.0000 0.0001 -0.0002 0.0002 -0.0004  
AT. 111 C X 0.0016 -0.0017 0.0013 -0.0015 -0.0009 0.0015  
Y -0.0017 0.0019 -0.0022 0.0026 -0.0022 0.0028  
Z -0.0002 0.0000 0.0001 0.0002 -0.0002 0.0004  
AT. 112 C X -0.0016 0.0017 0.0013 -0.0015 0.0009 0.0015  
Y -0.0017 0.0019 0.0022 -0.0026 -0.0022 -0.0028  
Z 0.0002 -0.0000 0.0001 0.0002 0.0002 0.0004  
AT. 113 H X 0.0015 0.0013 0.0002 0.0004 -0.0042 -0.0058

Y -0.0022 -0.0019 -0.0013 -0.0016 0.0013 0.0023  
Z -0.0038 -0.0045 -0.0048 -0.0046 -0.0126 -0.0133  
AT. 114 H X -0.0015 -0.0013 0.0002 0.0004 0.0042 -0.0058  
Y -0.0022 -0.0019 0.0013 0.0016 0.0013 -0.0023  
Z 0.0038 0.0045 -0.0048 -0.0046 0.0126 -0.0133  
AT. 115 H X 0.0015 -0.0013 0.0002 -0.0004 -0.0042 0.0058  
Y -0.0022 0.0019 -0.0013 0.0016 0.0013 -0.0023  
Z -0.0038 0.0045 -0.0048 0.0046 -0.0126 0.0133  
AT. 116 H X -0.0015 0.0013 0.0002 -0.0004 0.0042 0.0058  
Y -0.0022 0.0019 0.0013 -0.0016 0.0013 0.0023  
Z 0.0038 -0.0045 -0.0048 0.0046 0.0126 0.0133  
AT. 117 H X 0.0037 0.0046 0.0044 0.0046 0.0084 0.0094  
Y -0.0015 -0.0011 -0.0012 -0.0018 0.0020 0.0020  
Z -0.0003 0.0001 0.0005 -0.0001 0.0018 0.0019  
AT. 118 H X -0.0037 -0.0046 0.0044 0.0046 -0.0084 0.0094  
Y -0.0015 -0.0011 0.0012 0.0018 0.0020 -0.0020  
Z 0.0003 -0.0001 0.0005 -0.0001 -0.0018 0.0019  
AT. 119 H X 0.0037 -0.0046 0.0044 -0.0046 0.0084 -0.0094  
Y -0.0015 0.0011 -0.0012 0.0018 0.0020 -0.0020  
Z -0.0003 -0.0001 0.0005 0.0001 0.0018 -0.0019  
AT. 120 H X -0.0037 0.0046 0.0044 -0.0046 -0.0084 -0.0094  
Y -0.0015 0.0011 0.0012 -0.0018 0.0020 0.0020  
Z 0.0003 0.0001 0.0005 0.0001 -0.0018 -0.0019  
AT. 121 C X 0.0015 0.0012 0.0017 0.0014 -0.0010 -0.0010  
Y -0.0023 -0.0024 -0.0028 -0.0023 -0.0040 -0.0042  
Z 0.0010 0.0018 0.0013 0.0012 0.0067 0.0070  
AT. 122 C X -0.0015 -0.0012 0.0017 0.0014 0.0010 -0.0010  
Y -0.0023 -0.0024 0.0028 0.0023 -0.0040 0.0042  
Z -0.0010 -0.0018 0.0013 0.0012 -0.0067 0.0070  
AT. 123 C X 0.0015 -0.0012 0.0017 -0.0014 -0.0010 0.0010  
Y -0.0023 0.0024 -0.0028 0.0023 -0.0040 0.0042  
Z 0.0010 -0.0018 0.0013 -0.0012 0.0067 -0.0070

AT.124 C X -0.0015 0.0012 0.0017 -0.0014 0.0010 0.0010  
Y -0.0023 0.0024 0.0028 -0.0023 -0.0040 -0.0042  
Z -0.0010 0.0018 0.0013 -0.0012 -0.0067 -0.0070

AT.125 H X 0.0013 0.0008 0.0016 0.0013 -0.0001 0.0006  
Y -0.0029 -0.0028 -0.0034 -0.0026 -0.0034 -0.0034  
Z 0.0015 0.0023 0.0018 0.0015 0.0062 0.0061

AT.126 H X -0.0013 -0.0008 0.0016 0.0013 0.0001 0.0006  
Y -0.0029 -0.0028 0.0034 0.0026 -0.0034 0.0034  
Z -0.0015 -0.0023 0.0018 0.0015 -0.0062 0.0061

AT.127 H X 0.0013 -0.0008 0.0016 -0.0013 -0.0001 -0.0006  
Y -0.0029 0.0028 -0.0034 0.0026 -0.0034 0.0034  
Z 0.0015 -0.0023 0.0018 -0.0015 0.0062 -0.0061

AT.128 H X -0.0013 0.0008 0.0016 -0.0013 0.0001 -0.0006  
Y -0.0029 0.0028 0.0034 -0.0026 -0.0034 -0.0034  
Z -0.0015 0.0023 0.0018 -0.0015 -0.0062 -0.0061

AT.129 H X 0.0028 0.0025 0.0029 0.0026 0.0002 0.0000  
Y -0.0041 -0.0045 -0.0048 -0.0040 -0.0052 -0.0050  
Z 0.0011 0.0014 0.0012 0.0016 0.0076 0.0083

AT.130 H X -0.0028 -0.0025 0.0029 0.0026 -0.0002 0.0000  
Y -0.0041 -0.0045 0.0048 0.0040 -0.0052 0.0050  
Z -0.0011 -0.0014 0.0012 0.0016 -0.0076 0.0083

AT.131 H X 0.0028 -0.0025 0.0029 -0.0026 0.0002 -0.0000  
Y -0.0041 0.0045 -0.0048 0.0040 -0.0052 0.0050  
Z 0.0011 -0.0014 0.0012 -0.0016 0.0076 -0.0083

AT.132 H X -0.0028 0.0025 0.0029 -0.0026 -0.0002 -0.0000  
Y -0.0041 0.0045 0.0048 -0.0040 -0.0052 -0.0050  
Z -0.0011 0.0014 0.0012 -0.0016 -0.0076 -0.0083

AT.133 C X 0.0096 0.0117 0.0088 0.0064 0.0383 0.0369  
Y 0.0001 -0.0001 0.0003 0.0005 -0.0019 -0.0016  
Z -0.0027 -0.0037 -0.0028 -0.0019 -0.0119 -0.0116

AT.134 C X -0.0096 -0.0117 0.0088 0.0064 -0.0383 0.0369  
Y 0.0001 -0.0001 -0.0003 -0.0005 -0.0019 0.0016

Z 0.0027 0.0037 -0.0028 -0.0019 0.0119 -0.0116  
AT. 135 C X 0.0096 -0.0117 0.0088 -0.0064 0.0383 -0.0369  
Y 0.0001 0.0001 0.0003 -0.0005 -0.0019 0.0016  
Z -0.0027 0.0037 -0.0028 0.0019 -0.0119 0.0116  
AT. 136 C X -0.0096 0.0117 0.0088 -0.0064 -0.0383 -0.0369  
Y 0.0001 0.0001 -0.0003 0.0005 -0.0019 -0.0016  
Z 0.0027 -0.0037 -0.0028 0.0019 0.0119 0.0116  
AT. 137 C X -0.0052 -0.0060 -0.0047 -0.0031 -0.0185 -0.0175  
Y -0.0007 -0.0013 -0.0009 -0.0006 -0.0038 -0.0035  
Z 0.0025 0.0027 0.0025 0.0026 0.0070 0.0076  
AT. 138 C X 0.0052 0.0060 -0.0047 -0.0031 0.0185 -0.0175  
Y -0.0007 -0.0013 0.0009 0.0006 -0.0038 0.0035  
Z -0.0025 -0.0027 0.0025 0.0026 -0.0070 0.0076  
AT. 139 C X -0.0052 0.0060 -0.0047 0.0031 -0.0185 0.0175  
Y -0.0007 0.0013 -0.0009 0.0006 -0.0038 0.0035  
Z 0.0025 -0.0027 0.0025 -0.0026 0.0070 -0.0076  
AT. 140 C X 0.0052 -0.0060 -0.0047 0.0031 0.0185 0.0175  
Y -0.0007 0.0013 0.0009 -0.0006 -0.0038 -0.0035  
Z -0.0025 0.0027 0.0025 -0.0026 -0.0070 -0.0076  
AT. 141 H X -0.0063 -0.0066 -0.0050 -0.0022 -0.0242 -0.0221  
Y 0.0039 0.0058 0.0044 0.0037 0.0185 0.0186  
Z 0.0069 0.0083 0.0065 0.0045 0.0288 0.0280  
AT. 142 H X 0.0063 0.0066 -0.0050 -0.0022 0.0242 -0.0221  
Y 0.0039 0.0058 -0.0044 -0.0037 0.0185 -0.0186  
Z -0.0069 -0.0083 0.0065 0.0045 -0.0288 0.0280  
AT. 143 H X -0.0063 0.0066 -0.0050 0.0022 -0.0242 0.0221  
Y 0.0039 -0.0058 0.0044 -0.0037 0.0185 -0.0186  
Z 0.0069 -0.0083 0.0065 -0.0045 0.0288 -0.0280  
AT. 144 H X 0.0063 -0.0066 -0.0050 0.0022 0.0242 0.0221  
Y 0.0039 -0.0058 -0.0044 0.0037 0.0185 0.0186  
Z -0.0069 0.0083 0.0065 -0.0045 -0.0288 -0.0280  
AT. 145 H X -0.0087 -0.0116 -0.0097 -0.0090 -0.0302 -0.0308



Y 0.0013 0.0015 0.0015 0.0018 0.0030 0.0038  
Z 0.0063 0.0068 0.0060 0.0052 0.0194 0.0199  
AT. 146 H X 0.0087 0.0116 -0.0097 -0.0090 0.0302 -0.0308  
Y 0.0013 0.0015 -0.0015 -0.0018 0.0030 -0.0038  
Z -0.0063 -0.0068 0.0060 0.0052 -0.0194 0.0199  
AT. 147 H X -0.0087 0.0116 -0.0097 0.0090 -0.0302 0.0308  
Y 0.0013 -0.0015 0.0015 -0.0018 0.0030 -0.0038  
Z 0.0063 -0.0068 0.0060 -0.0052 0.0194 -0.0199  
AT. 148 H X 0.0087 -0.0116 -0.0097 0.0090 0.0302 0.0308  
Y 0.0013 -0.0015 -0.0015 0.0018 0.0030 0.0038  
Z -0.0063 0.0068 0.0060 -0.0052 -0.0194 -0.0199  
AT. 149 O X -0.0024 -0.0026 -0.0026 -0.0028 -0.0014 -0.0014  
Y 0.0007 0.0007 0.0009 0.0010 0.0002 0.0004  
Z 0.0008 0.0008 0.0010 0.0011 0.0006 0.0006  
AT. 150 O X 0.0024 0.0026 -0.0026 -0.0028 0.0014 -0.0014  
Y 0.0007 0.0007 -0.0009 -0.0010 0.0002 -0.0004  
Z -0.0008 -0.0008 0.0010 0.0011 -0.0006 0.0006  
AT. 151 O X -0.0024 0.0026 -0.0026 0.0028 -0.0014 0.0014  
Y 0.0007 -0.0007 0.0009 -0.0010 0.0002 -0.0004  
Z 0.0008 -0.0008 0.0010 -0.0011 0.0006 -0.0006  
AT. 152 O X 0.0024 -0.0026 -0.0026 0.0028 0.0014 0.0014  
Y 0.0007 -0.0007 -0.0009 0.0010 0.0002 0.0004  
Z -0.0008 0.0008 0.0010 -0.0011 -0.0006 -0.0006  
AT. 153 H X -0.0022 -0.0014 -0.0007 -0.0004 0.0026 0.0022  
Y 0.0050 0.0069 0.0060 0.0069 0.0051 0.0051  
Z 0.0022 0.0021 0.0015 0.0016 -0.0003 -0.0000  
AT. 154 H X 0.0022 0.0014 -0.0007 -0.0004 -0.0026 0.0022  
Y 0.0050 0.0069 -0.0060 -0.0069 0.0051 -0.0051  
Z -0.0022 -0.0021 0.0015 0.0016 0.0003 -0.0000  
AT. 155 H X -0.0022 0.0014 -0.0007 0.0004 0.0026 -0.0022  
Y 0.0050 -0.0069 0.0060 -0.0069 0.0051 -0.0051  
Z 0.0022 -0.0021 0.0015 -0.0016 -0.0003 0.0000

AT.156 H X 0.0022 -0.0014 -0.0007 0.0004 -0.0026 -0.0022  
Y 0.0050 -0.0069 -0.0060 0.0069 0.0051 0.0051  
Z -0.0022 0.0021 0.0015 -0.0016 0.0003 0.0000

AT.157 O X 0.0031 0.0032 0.0032 0.0035 0.0017 0.0016  
Y -0.0010 -0.0011 -0.0011 -0.0012 -0.0008 -0.0008  
Z -0.0023 -0.0024 -0.0026 -0.0030 -0.0020 -0.0022

AT.158 O X -0.0031 -0.0032 0.0032 0.0035 -0.0017 0.0016  
Y -0.0010 -0.0011 0.0011 0.0012 -0.0008 0.0008  
Z 0.0023 0.0024 -0.0026 -0.0030 0.0020 -0.0022

AT.159 O X 0.0031 -0.0032 0.0032 -0.0035 0.0017 -0.0016  
Y -0.0010 0.0011 -0.0011 0.0012 -0.0008 0.0008  
Z -0.0023 0.0024 -0.0026 0.0030 -0.0020 0.0022

AT.160 O X -0.0031 0.0032 0.0032 -0.0035 -0.0017 -0.0016  
Y -0.0010 0.0011 0.0011 -0.0012 -0.0008 -0.0008  
Z 0.0023 -0.0024 -0.0026 0.0030 0.0020 0.0022

AT.161 O X -0.0013 -0.0013 -0.0018 -0.0023 -0.0013 -0.0017  
Y -0.0002 -0.0002 -0.0002 -0.0002 -0.0005 -0.0004  
Z 0.0014 0.0014 0.0018 0.0021 0.0015 0.0019

AT.162 O X 0.0013 0.0013 -0.0018 -0.0023 0.0013 -0.0017  
Y -0.0002 -0.0002 0.0002 0.0002 -0.0005 0.0004  
Z -0.0014 -0.0014 0.0018 0.0021 -0.0015 0.0019

AT.163 O X -0.0013 0.0013 -0.0018 0.0023 -0.0013 0.0017  
Y -0.0002 0.0002 -0.0002 0.0002 -0.0005 0.0004  
Z 0.0014 -0.0014 0.0018 -0.0021 0.0015 -0.0019

AT.164 O X 0.0013 -0.0013 -0.0018 0.0023 0.0013 0.0017  
Y -0.0002 0.0002 0.0002 -0.0002 -0.0005 -0.0004  
Z -0.0014 0.0014 0.0018 -0.0021 -0.0015 -0.0019

AT.165 H X 0.0292 0.0290 0.0391 0.0477 0.0327 0.0423  
Y 0.0127 0.0126 0.0170 0.0208 0.0141 0.0183  
Z -0.0273 -0.0269 -0.0365 -0.0442 -0.0284 -0.0373

AT.166 H X -0.0292 -0.0290 0.0391 0.0477 -0.0327 0.0423  
Y 0.0127 0.0126 -0.0170 -0.0208 0.0141 -0.0183

Z 0.0273 0.0269 -0.0365 -0.0442 0.0284 -0.0373  
AT. 167 H X 0.0292 -0.0290 0.0391 -0.0477 0.0327 -0.0423  
Y 0.0127 -0.0126 0.0170 -0.0208 0.0141 -0.0183  
Z -0.0273 0.0269 -0.0365 0.0442 -0.0284 0.0373  
AT. 168 H X -0.0292 0.0290 0.0391 -0.0477 -0.0327 -0.0423  
Y 0.0127 -0.0126 -0.0170 0.0208 0.0141 0.0183  
Z 0.0273 -0.0269 -0.0365 0.0442 0.0284 0.0373  
AT. 169 O X 0.0003 0.0004 0.0002 0.0002 0.0001 0.0001  
Y 0.0004 0.0006 0.0002 0.0001 -0.0004 -0.0002  
Z 0.0001 -0.0002 -0.0001 -0.0000 -0.0001 -0.0000  
AT. 170 O X -0.0003 -0.0004 0.0002 0.0002 -0.0001 0.0001  
Y 0.0004 0.0006 -0.0002 -0.0001 -0.0004 0.0002  
Z -0.0001 0.0002 -0.0001 -0.0000 0.0001 -0.0000  
AT. 171 O X 0.0003 -0.0004 0.0002 -0.0002 0.0001 -0.0001  
Y 0.0004 -0.0006 0.0002 -0.0001 -0.0004 0.0002  
Z 0.0001 0.0002 -0.0001 0.0000 -0.0001 0.0000  
AT. 172 O X -0.0003 0.0004 0.0002 -0.0002 -0.0001 -0.0001  
Y 0.0004 -0.0006 -0.0002 0.0001 -0.0004 -0.0002  
Z -0.0001 -0.0002 -0.0001 0.0000 0.0001 0.0000  
AT. 173 H X -0.0059 -0.0060 -0.0040 -0.0036 -0.0047 -0.0042  
Y 0.0019 0.0020 0.0013 0.0011 0.0005 0.0006  
Z 0.0016 0.0008 0.0006 0.0002 0.0016 0.0017  
AT. 174 H X 0.0059 0.0060 -0.0040 -0.0036 0.0047 -0.0042  
Y 0.0019 0.0020 -0.0013 -0.0011 0.0005 -0.0006  
Z -0.0016 -0.0008 0.0006 0.0002 -0.0016 0.0017  
AT. 175 H X -0.0059 0.0060 -0.0040 0.0036 -0.0047 0.0042  
Y 0.0019 -0.0020 0.0013 -0.0011 0.0005 -0.0006  
Z 0.0016 -0.0008 0.0006 -0.0002 0.0016 -0.0017  
AT. 176 H X 0.0059 -0.0060 -0.0040 0.0036 0.0047 0.0042  
Y 0.0019 -0.0020 -0.0013 0.0011 0.0005 0.0006  
Z -0.0016 0.0008 0.0006 -0.0002 -0.0016 -0.0017

FREQ(CM\*\*-1) 776.27 776.56 812.89 813.05 813.59 813.70

AT. 1 I X -0.0002 -0.0002 -0.0002 -0.0003 -0.0003 -0.0002

Y 0.0003 0.0002 -0.0001 -0.0001 -0.0001 -0.0001

Z 0.0001 0.0001 -0.0001 -0.0000 -0.0001 -0.0001

AT. 2 I X 0.0002 -0.0002 -0.0002 -0.0003 0.0003 0.0002

Y 0.0003 -0.0002 0.0001 0.0001 -0.0001 -0.0001

Z -0.0001 0.0001 -0.0001 -0.0000 0.0001 0.0001

AT. 3 I X 0.0002 -0.0002 0.0002 -0.0003 -0.0003 0.0002

Y -0.0003 0.0002 0.0001 -0.0001 -0.0001 0.0001

Z -0.0001 0.0001 0.0001 -0.0000 -0.0001 0.0001

AT. 4 I X -0.0002 -0.0002 0.0002 -0.0003 0.0003 -0.0002

Y -0.0003 -0.0002 -0.0001 0.0001 -0.0001 0.0001

Z 0.0001 0.0001 0.0001 -0.0000 0.0001 -0.0001

AT. 5 I X 0.0010 0.0010 0.0002 -0.0000 0.0001 0.0002

Y 0.0002 0.0002 -0.0002 -0.0002 -0.0002 -0.0002

Z -0.0002 -0.0002 -0.0000 0.0000 0.0000 -0.0000

AT. 6 I X -0.0010 0.0010 0.0002 -0.0000 -0.0001 -0.0002

Y 0.0002 -0.0002 0.0002 0.0002 -0.0002 -0.0002

Z 0.0002 -0.0002 -0.0000 0.0000 -0.0000 0.0000

AT. 7 I X -0.0010 0.0010 -0.0002 -0.0000 0.0001 -0.0002

Y -0.0002 0.0002 0.0002 -0.0002 -0.0002 0.0002

Z 0.0002 -0.0002 0.0000 0.0000 0.0000 0.0000

AT. 8 I X 0.0010 0.0010 -0.0002 -0.0000 -0.0001 0.0002

Y -0.0002 -0.0002 -0.0002 0.0002 -0.0002 0.0002

Z -0.0002 -0.0002 0.0000 0.0000 -0.0000 -0.0000

AT. 9 N X 0.0034 0.0032 -0.0002 -0.0001 -0.0015 -0.0009

Y -0.0010 -0.0009 -0.0031 -0.0031 -0.0039 -0.0036

Z -0.0010 -0.0010 -0.0014 -0.0014 -0.0011 -0.0013

AT. 10 N X -0.0034 0.0032 -0.0002 -0.0001 0.0015 0.0009

Y -0.0010 0.0009 0.0031 0.0031 -0.0039 -0.0036

Z 0.0010 -0.0010 -0.0014 -0.0014 0.0011 0.0013

AT. 11 N X -0.0034 0.0032 0.0002 -0.0001 -0.0015 0.0009  
Y 0.0010 -0.0009 0.0031 -0.0031 -0.0039 0.0036  
Z 0.0010 -0.0010 0.0014 -0.0014 -0.0011 0.0013

AT. 12 N X 0.0034 0.0032 0.0002 -0.0001 0.0015 -0.0009  
Y 0.0010 0.0009 -0.0031 0.0031 -0.0039 0.0036  
Z -0.0010 -0.0010 0.0014 -0.0014 0.0011 -0.0013

AT. 13 N X -0.0079 -0.0074 0.0007 0.0009 0.0004 0.0005  
Y -0.0021 -0.0025 -0.0030 -0.0035 -0.0026 -0.0028  
Z 0.0028 0.0028 -0.0014 -0.0013 -0.0012 -0.0013

AT. 14 N X 0.0079 -0.0074 0.0007 0.0009 -0.0004 -0.0005  
Y -0.0021 0.0025 0.0030 0.0035 -0.0026 -0.0028  
Z -0.0028 0.0028 -0.0014 -0.0013 0.0012 0.0013

AT. 15 N X 0.0079 -0.0074 -0.0007 0.0009 0.0004 -0.0005  
Y 0.0021 -0.0025 0.0030 -0.0035 -0.0026 0.0028  
Z -0.0028 0.0028 0.0014 -0.0013 -0.0012 0.0013

AT. 16 N X -0.0079 -0.0074 -0.0007 0.0009 -0.0004 0.0005  
Y 0.0021 0.0025 -0.0030 0.0035 -0.0026 0.0028  
Z 0.0028 0.0028 0.0014 -0.0013 0.0012 -0.0013

AT. 17 O X 0.0046 0.0042 0.0023 0.0019 0.0023 0.0026  
Y 0.0001 0.0001 0.0034 0.0029 0.0036 0.0036  
Z 0.0017 0.0016 0.0012 0.0011 0.0012 0.0010

AT. 18 O X -0.0046 0.0042 0.0023 0.0019 -0.0023 -0.0026  
Y 0.0001 -0.0001 -0.0034 -0.0029 0.0036 0.0036  
Z -0.0017 0.0016 0.0012 0.0011 -0.0012 -0.0010

AT. 19 O X -0.0046 0.0042 -0.0023 0.0019 0.0023 -0.0026  
Y -0.0001 0.0001 -0.0034 0.0029 0.0036 -0.0036  
Z -0.0017 0.0016 -0.0012 0.0011 0.0012 -0.0010

AT. 20 O X 0.0046 0.0042 -0.0023 0.0019 -0.0023 0.0026  
Y -0.0001 -0.0001 0.0034 -0.0029 0.0036 -0.0036  
Z 0.0017 0.0016 -0.0012 0.0011 -0.0012 0.0010

AT. 21 O X -0.0115 -0.0116 0.0010 0.0007 0.0012 0.0011  
Y 0.0063 0.0066 0.0015 0.0018 0.0012 0.0013

Z -0.0028 -0.0027 -0.0030 -0.0032 -0.0028 -0.0029  
AT. 22 O X 0.0115 -0.0116 0.0010 0.0007 -0.0012 -0.0011  
Y 0.0063 -0.0066 -0.0015 -0.0018 0.0012 0.0013  
Z 0.0028 -0.0027 -0.0030 -0.0032 0.0028 0.0029  
AT. 23 O X 0.0115 -0.0116 -0.0010 0.0007 0.0012 -0.0011  
Y -0.0063 0.0066 -0.0015 0.0018 0.0012 -0.0013  
Z 0.0028 -0.0027 0.0030 -0.0032 -0.0028 0.0029  
AT. 24 O X -0.0115 -0.0116 -0.0010 0.0007 -0.0012 0.0011  
Y -0.0063 -0.0066 0.0015 -0.0018 0.0012 -0.0013  
Z -0.0028 -0.0027 0.0030 -0.0032 0.0028 -0.0029  
AT. 25 C X 0.0041 0.0036 0.0058 0.0056 0.0073 0.0070  
Y -0.0054 -0.0052 0.0055 0.0053 0.0074 0.0067  
Z -0.0035 -0.0032 0.0007 0.0008 0.0009 0.0009  
AT. 26 C X -0.0041 0.0036 0.0058 0.0056 -0.0073 -0.0070  
Y -0.0054 0.0052 -0.0055 -0.0053 0.0074 0.0067  
Z 0.0035 -0.0032 0.0007 0.0008 -0.0009 -0.0009  
AT. 27 C X -0.0041 0.0036 -0.0058 0.0056 0.0073 -0.0070  
Y 0.0054 -0.0052 -0.0055 0.0053 0.0074 -0.0067  
Z 0.0035 -0.0032 -0.0007 0.0008 0.0009 -0.0009  
AT. 28 C X 0.0041 0.0036 -0.0058 0.0056 -0.0073 0.0070  
Y 0.0054 0.0052 0.0055 -0.0053 0.0074 -0.0067  
Z -0.0035 -0.0032 -0.0007 0.0008 -0.0009 0.0009  
AT. 29 H X 0.0077 0.0066 0.0155 0.0148 0.0199 0.0188  
Y 0.0060 0.0059 -0.0211 -0.0204 -0.0266 -0.0255  
Z -0.0109 -0.0095 -0.0098 -0.0091 -0.0129 -0.0118  
AT. 30 H X -0.0077 0.0066 0.0155 0.0148 -0.0199 -0.0188  
Y 0.0060 -0.0059 0.0211 0.0204 -0.0266 -0.0255  
Z 0.0109 -0.0095 -0.0098 -0.0091 0.0129 0.0118  
AT. 31 H X -0.0077 0.0066 -0.0155 0.0148 0.0199 -0.0188  
Y -0.0060 0.0059 0.0211 -0.0204 -0.0266 0.0255  
Z 0.0109 -0.0095 0.0098 -0.0091 -0.0129 0.0118  
AT. 32 H X 0.0077 0.0066 -0.0155 0.0148 -0.0199 0.0188

Y -0.0060 -0.0059 -0.0211 0.0204 -0.0266 0.0255  
Z -0.0109 -0.0095 0.0098 -0.0091 0.0129 -0.0118  
AT. 33 H X 0.0149 0.0142 -0.0229 -0.0227 -0.0310 -0.0288  
Y -0.0065 -0.0063 0.0127 0.0124 0.0167 0.0154  
Z -0.0067 -0.0060 -0.0086 -0.0079 -0.0100 -0.0096  
AT. 34 H X -0.0149 0.0142 -0.0229 -0.0227 0.0310 0.0288  
Y -0.0065 0.0063 -0.0127 -0.0124 0.0167 0.0154  
Z 0.0067 -0.0060 -0.0086 -0.0079 0.0100 0.0096  
AT. 35 H X -0.0149 0.0142 0.0229 -0.0227 -0.0310 0.0288  
Y 0.0065 -0.0063 -0.0127 0.0124 0.0167 -0.0154  
Z 0.0067 -0.0060 0.0086 -0.0079 -0.0100 0.0096  
AT. 36 H X 0.0149 0.0142 0.0229 -0.0227 0.0310 -0.0288  
Y 0.0065 0.0063 0.0127 -0.0124 0.0167 -0.0154  
Z -0.0067 -0.0060 0.0086 -0.0079 0.0100 -0.0096  
AT. 37 C X -0.0135 -0.0125 -0.0022 -0.0026 -0.0027 -0.0030  
Y 0.0051 0.0048 0.0028 0.0028 0.0028 0.0031  
Z 0.0050 0.0047 0.0022 0.0020 0.0023 0.0024  
AT. 38 C X 0.0135 -0.0125 -0.0022 -0.0026 0.0027 0.0030  
Y 0.0051 -0.0048 -0.0028 -0.0028 0.0028 0.0031  
Z -0.0050 0.0047 0.0022 0.0020 -0.0023 -0.0024  
AT. 39 C X 0.0135 -0.0125 0.0022 -0.0026 -0.0027 0.0030  
Y -0.0051 0.0048 -0.0028 0.0028 0.0028 -0.0031  
Z -0.0050 0.0047 -0.0022 0.0020 0.0023 -0.0024  
AT. 40 C X -0.0135 -0.0125 0.0022 -0.0026 0.0027 -0.0030  
Y -0.0051 -0.0048 0.0028 -0.0028 0.0028 -0.0031  
Z 0.0050 0.0047 -0.0022 0.0020 -0.0023 0.0024  
AT. 41 C X 0.0005 0.0005 -0.0140 -0.0137 -0.0135 -0.0135  
Y -0.0009 -0.0008 -0.0083 -0.0079 -0.0093 -0.0090  
Z -0.0018 -0.0016 0.0007 0.0014 -0.0010 -0.0006  
AT. 42 C X -0.0005 0.0005 -0.0140 -0.0137 0.0135 0.0135  
Y -0.0009 0.0008 0.0083 0.0079 -0.0093 -0.0090  
Z 0.0018 -0.0016 0.0007 0.0014 0.0010 0.0006

AT. 43 C X -0.0005 0.0005 0.0140 -0.0137 -0.0135 0.0135  
Y 0.0009 -0.0008 0.0083 -0.0079 -0.0093 0.0090  
Z 0.0018 -0.0016 -0.0007 0.0014 -0.0010 0.0006

AT. 44 C X 0.0005 0.0005 0.0140 -0.0137 0.0135 -0.0135  
Y 0.0009 0.0008 -0.0083 0.0079 -0.0093 0.0090  
Z -0.0018 -0.0016 -0.0007 0.0014 0.0010 -0.0006

AT. 45 H X -0.0000 0.0002 -0.0130 -0.0127 -0.0146 -0.0143  
Y -0.0010 -0.0009 -0.0134 -0.0127 -0.0127 -0.0129  
Z -0.0018 -0.0017 -0.0037 -0.0027 -0.0037 -0.0037

AT. 46 H X 0.0000 0.0002 -0.0130 -0.0127 0.0146 0.0143  
Y -0.0010 0.0009 0.0134 0.0127 -0.0127 -0.0129  
Z 0.0018 -0.0017 -0.0037 -0.0027 0.0037 0.0037

AT. 47 H X 0.0000 0.0002 0.0130 -0.0127 -0.0146 0.0143  
Y 0.0010 -0.0009 0.0134 -0.0127 -0.0127 0.0129  
Z 0.0018 -0.0017 0.0037 -0.0027 -0.0037 0.0037

AT. 48 H X -0.0000 0.0002 0.0130 -0.0127 0.0146 -0.0143  
Y 0.0010 0.0009 -0.0134 0.0127 -0.0127 0.0129  
Z -0.0018 -0.0017 0.0037 -0.0027 0.0037 -0.0037

AT. 49 H X 0.0003 0.0005 -0.0204 -0.0200 -0.0189 -0.0192  
Y -0.0010 -0.0009 -0.0154 -0.0149 -0.0145 -0.0148  
Z -0.0019 -0.0014 0.0026 0.0032 -0.0011 -0.0001

AT. 50 H X -0.0003 0.0005 -0.0204 -0.0200 0.0189 0.0192  
Y -0.0010 0.0009 0.0154 0.0149 -0.0145 -0.0148  
Z 0.0019 -0.0014 0.0026 0.0032 0.0011 0.0001

AT. 51 H X -0.0003 0.0005 0.0204 -0.0200 -0.0189 0.0192  
Y 0.0010 -0.0009 0.0154 -0.0149 -0.0145 0.0148  
Z 0.0019 -0.0014 -0.0026 0.0032 -0.0011 0.0001

AT. 52 H X 0.0003 0.0005 0.0204 -0.0200 0.0189 -0.0192  
Y 0.0010 0.0009 -0.0154 0.0149 -0.0145 0.0148  
Z -0.0019 -0.0014 -0.0026 0.0032 0.0011 -0.0001

AT. 53 C X 0.0001 0.0000 -0.0009 -0.0009 -0.0006 -0.0007  
Y -0.0008 -0.0012 -0.0022 -0.0020 -0.0021 -0.0022



Z 0.0008 0.0007 0.0009 0.0007 0.0007 0.0008  
AT. 54 C X -0.0001 0.0000 -0.0009 -0.0009 0.0006 0.0007  
Y -0.0008 0.0012 0.0022 0.0020 -0.0021 -0.0022  
Z -0.0008 0.0007 0.0009 0.0007 -0.0007 -0.0008  
AT. 55 C X -0.0001 0.0000 0.0009 -0.0009 -0.0006 0.0007  
Y 0.0008 -0.0012 0.0022 -0.0020 -0.0021 0.0022  
Z -0.0008 0.0007 -0.0009 0.0007 0.0007 -0.0008  
AT. 56 C X 0.0001 0.0000 0.0009 -0.0009 0.0006 -0.0007  
Y 0.0008 0.0012 -0.0022 0.0020 -0.0021 0.0022  
Z 0.0008 0.0007 -0.0009 0.0007 -0.0007 0.0008  
AT. 57 C X 0.0000 0.0002 0.0017 0.0017 0.0018 0.0018  
Y 0.0002 0.0002 0.0029 0.0030 0.0034 0.0032  
Z 0.0012 0.0007 0.0057 0.0060 0.0059 0.0056  
AT. 58 C X -0.0000 0.0002 0.0017 0.0017 -0.0018 -0.0018  
Y 0.0002 -0.0002 -0.0029 -0.0030 0.0034 0.0032  
Z -0.0012 0.0007 0.0057 0.0060 -0.0059 -0.0056  
AT. 59 C X -0.0000 0.0002 -0.0017 0.0017 0.0018 -0.0018  
Y -0.0002 0.0002 -0.0029 0.0030 0.0034 -0.0032  
Z -0.0012 0.0007 -0.0057 0.0060 0.0059 -0.0056  
AT. 60 C X 0.0000 0.0002 -0.0017 0.0017 -0.0018 0.0018  
Y -0.0002 -0.0002 0.0029 -0.0030 0.0034 -0.0032  
Z 0.0012 0.0007 -0.0057 0.0060 -0.0059 0.0056  
AT. 61 H X 0.0003 -0.0008 0.0011 0.0005 0.0013 0.0009  
Y 0.0007 -0.0001 0.0036 0.0033 0.0040 0.0036  
Z -0.0006 -0.0020 0.0012 0.0015 0.0021 0.0017  
AT. 62 H X -0.0003 -0.0008 0.0011 0.0005 -0.0013 -0.0009  
Y 0.0007 0.0001 -0.0036 -0.0033 0.0040 0.0036  
Z 0.0006 -0.0020 0.0012 0.0015 -0.0021 -0.0017  
AT. 63 H X -0.0003 -0.0008 -0.0011 0.0005 0.0013 -0.0009  
Y -0.0007 -0.0001 -0.0036 0.0033 0.0040 -0.0036  
Z 0.0006 -0.0020 -0.0012 0.0015 0.0021 -0.0017  
AT. 64 H X 0.0003 -0.0008 -0.0011 0.0005 -0.0013 0.0009

Y -0.0007 0.0001 0.0036 -0.0033 0.0040 -0.0036  
Z -0.0006 -0.0020 -0.0012 0.0015 -0.0021 0.0017  
AT. 65 H X -0.0004 -0.0004 0.0011 0.0009 0.0015 0.0013  
Y 0.0015 0.0021 0.0053 0.0060 0.0048 0.0051  
Z -0.0016 0.0007 0.0012 0.0022 0.0012 0.0007  
AT. 66 H X 0.0004 -0.0004 0.0011 0.0009 -0.0015 -0.0013  
Y 0.0015 -0.0021 -0.0053 -0.0060 0.0048 0.0051  
Z 0.0016 0.0007 0.0012 0.0022 -0.0012 -0.0007  
AT. 67 H X 0.0004 -0.0004 -0.0011 0.0009 0.0015 -0.0013  
Y -0.0015 0.0021 -0.0053 0.0060 0.0048 -0.0051  
Z 0.0016 0.0007 -0.0012 0.0022 0.0012 -0.0007  
AT. 68 H X -0.0004 -0.0004 -0.0011 0.0009 -0.0015 0.0013  
Y -0.0015 -0.0021 0.0053 -0.0060 0.0048 -0.0051  
Z -0.0016 0.0007 -0.0012 0.0022 -0.0012 0.0007  
AT. 69 H X 0.0009 0.0015 0.0040 0.0032 0.0060 0.0058  
Y 0.0016 0.0016 0.0094 0.0094 0.0095 0.0097  
Z 0.0025 0.0021 0.0119 0.0120 0.0119 0.0119  
AT. 70 H X -0.0009 0.0015 0.0040 0.0032 -0.0060 -0.0058  
Y 0.0016 -0.0016 -0.0094 -0.0094 0.0095 0.0097  
Z -0.0025 0.0021 0.0119 0.0120 -0.0119 -0.0119  
AT. 71 H X -0.0009 0.0015 -0.0040 0.0032 0.0060 -0.0058  
Y -0.0016 0.0016 -0.0094 0.0094 0.0095 -0.0097  
Z -0.0025 0.0021 -0.0119 0.0120 0.0119 -0.0119  
AT. 72 H X 0.0009 0.0015 -0.0040 0.0032 -0.0060 0.0058  
Y -0.0016 -0.0016 0.0094 -0.0094 0.0095 -0.0097  
Z 0.0025 0.0021 -0.0119 0.0120 -0.0119 0.0119  
AT. 73 C X 0.0002 0.0003 0.0057 0.0049 0.0053 0.0058  
Y 0.0014 0.0014 0.0143 0.0141 0.0138 0.0139  
Z -0.0004 -0.0005 -0.0117 -0.0118 -0.0115 -0.0113  
AT. 74 C X -0.0002 0.0003 0.0057 0.0049 -0.0053 -0.0058  
Y 0.0014 -0.0014 -0.0143 -0.0141 0.0138 0.0139  
Z 0.0004 -0.0005 -0.0117 -0.0118 0.0115 0.0113

AT. 75 C X -0.0002 0.0003 -0.0057 0.0049 0.0053 -0.0058  
Y -0.0014 0.0014 -0.0143 0.0141 0.0138 -0.0139  
Z 0.0004 -0.0005 0.0117 -0.0118 -0.0115 0.0113

AT. 76 C X 0.0002 0.0003 -0.0057 0.0049 -0.0053 0.0058  
Y -0.0014 -0.0014 0.0143 -0.0141 0.0138 -0.0139  
Z -0.0004 -0.0005 0.0117 -0.0118 0.0115 -0.0113

AT. 77 C X -0.0000 0.0000 -0.0016 -0.0016 -0.0008 -0.0014  
Y -0.0000 -0.0001 -0.0036 -0.0033 -0.0048 -0.0045  
Z -0.0008 -0.0010 0.0031 0.0026 0.0046 0.0041

AT. 78 C X 0.0000 0.0000 -0.0016 -0.0016 0.0008 0.0014  
Y -0.0000 0.0001 0.0036 0.0033 -0.0048 -0.0045  
Z 0.0008 -0.0010 0.0031 0.0026 -0.0046 -0.0041

AT. 79 C X 0.0000 0.0000 0.0016 -0.0016 -0.0008 0.0014  
Y 0.0000 -0.0001 0.0036 -0.0033 -0.0048 0.0045  
Z 0.0008 -0.0010 -0.0031 0.0026 0.0046 -0.0041

AT. 80 C X -0.0000 0.0000 0.0016 -0.0016 0.0008 -0.0014  
Y 0.0000 0.0001 -0.0036 0.0033 -0.0048 0.0045  
Z -0.0008 -0.0010 -0.0031 0.0026 -0.0046 0.0041

AT. 81 H X 0.0001 0.0002 -0.0033 -0.0031 -0.0014 -0.0028  
Y -0.0000 -0.0001 -0.0058 -0.0054 -0.0058 -0.0063  
Z 0.0020 0.0017 0.0050 0.0045 0.0075 0.0066

AT. 82 H X -0.0001 0.0002 -0.0033 -0.0031 0.0014 0.0028  
Y -0.0000 0.0001 0.0058 0.0054 -0.0058 -0.0063  
Z -0.0020 0.0017 0.0050 0.0045 -0.0075 -0.0066

AT. 83 H X -0.0001 0.0002 0.0033 -0.0031 -0.0014 0.0028  
Y 0.0000 -0.0001 0.0058 -0.0054 -0.0058 0.0063  
Z -0.0020 0.0017 -0.0050 0.0045 0.0075 -0.0066

AT. 84 H X 0.0001 0.0002 0.0033 -0.0031 0.0014 -0.0028  
Y 0.0000 0.0001 -0.0058 0.0054 -0.0058 0.0063  
Z 0.0020 0.0017 -0.0050 0.0045 -0.0075 0.0066

AT. 85 H X -0.0007 -0.0005 -0.0004 -0.0002 -0.0014 -0.0012  
Y 0.0010 0.0012 -0.0030 -0.0027 -0.0031 -0.0033

Z -0.0014 -0.0019 0.0023 0.0017 0.0035 0.0033  
AT. 86 H X 0.0007 -0.0005 -0.0004 -0.0002 0.0014 0.0012  
Y 0.0010 -0.0012 0.0030 0.0027 -0.0031 -0.0033  
Z 0.0014 -0.0019 0.0023 0.0017 -0.0035 -0.0033  
AT. 87 H X 0.0007 -0.0005 0.0004 -0.0002 -0.0014 0.0012  
Y -0.0010 0.0012 0.0030 -0.0027 -0.0031 0.0033  
Z 0.0014 -0.0019 -0.0023 0.0017 0.0035 -0.0033  
AT. 88 H X -0.0007 -0.0005 0.0004 -0.0002 0.0014 -0.0012  
Y -0.0010 -0.0012 -0.0030 0.0027 -0.0031 0.0033  
Z -0.0014 -0.0019 -0.0023 0.0017 -0.0035 0.0033  
AT. 89 C X -0.0001 -0.0002 -0.0014 -0.0015 -0.0013 -0.0014  
Y -0.0002 -0.0002 -0.0010 -0.0010 -0.0009 -0.0009  
Z -0.0002 -0.0002 -0.0011 -0.0010 -0.0009 -0.0009  
AT. 90 C X 0.0001 -0.0002 -0.0014 -0.0015 0.0013 0.0014  
Y -0.0002 0.0002 0.0010 0.0010 -0.0009 -0.0009  
Z 0.0002 -0.0002 -0.0011 -0.0010 0.0009 0.0009  
AT. 91 C X 0.0001 -0.0002 0.0014 -0.0015 -0.0013 0.0014  
Y 0.0002 -0.0002 0.0010 -0.0010 -0.0009 0.0009  
Z 0.0002 -0.0002 0.0011 -0.0010 -0.0009 0.0009  
AT. 92 C X -0.0001 -0.0002 0.0014 -0.0015 0.0013 -0.0014  
Y 0.0002 0.0002 -0.0010 0.0010 -0.0009 0.0009  
Z -0.0002 -0.0002 0.0011 -0.0010 0.0009 -0.0009  
AT. 93 C X -0.0003 -0.0004 0.0001 0.0000 0.0001 0.0000  
Y 0.0009 0.0011 -0.0020 -0.0017 -0.0016 -0.0016  
Z -0.0015 -0.0016 0.0008 0.0009 0.0005 0.0006  
AT. 94 C X 0.0003 -0.0004 0.0001 0.0000 -0.0001 -0.0000  
Y 0.0009 -0.0011 0.0020 0.0017 -0.0016 -0.0016  
Z 0.0015 -0.0016 0.0008 0.0009 -0.0005 -0.0006  
AT. 95 C X 0.0003 -0.0004 -0.0001 0.0000 0.0001 -0.0000  
Y -0.0009 0.0011 0.0020 -0.0017 -0.0016 0.0016  
Z 0.0015 -0.0016 -0.0008 0.0009 0.0005 -0.0006  
AT. 96 C X -0.0003 -0.0004 -0.0001 0.0000 -0.0001 0.0000

Y -0.0009 -0.0011 -0.0020 0.0017 -0.0016 0.0016  
Z -0.0015 -0.0016 -0.0008 0.0009 -0.0005 0.0006  
AT. 97 H X -0.0017 -0.0016 0.0011 0.0009 0.0022 0.0016  
Y 0.0031 0.0030 0.0015 0.0015 0.0004 0.0009  
Z -0.0020 -0.0020 0.0109 0.0100 0.0111 0.0106  
AT. 98 H X 0.0017 -0.0016 0.0011 0.0009 -0.0022 -0.0016  
Y 0.0031 -0.0030 -0.0015 -0.0015 0.0004 0.0009  
Z 0.0020 -0.0020 0.0109 0.0100 -0.0111 -0.0106  
AT. 99 H X 0.0017 -0.0016 -0.0011 0.0009 0.0022 -0.0016  
Y -0.0031 0.0030 -0.0015 0.0015 0.0004 -0.0009  
Z 0.0020 -0.0020 -0.0109 0.0100 0.0111 -0.0106  
AT. 100 H X -0.0017 -0.0016 -0.0011 0.0009 -0.0022 0.0016  
Y -0.0031 -0.0030 0.0015 -0.0015 0.0004 -0.0009  
Z -0.0020 -0.0020 -0.0109 0.0100 -0.0111 0.0106  
AT. 101 H X -0.0008 -0.0010 0.0036 0.0031 0.0040 0.0038  
Y -0.0002 -0.0001 -0.0002 -0.0003 0.0011 0.0007  
Z 0.0026 0.0026 0.0126 0.0128 0.0105 0.0110  
AT. 102 H X 0.0008 -0.0010 0.0036 0.0031 -0.0040 -0.0038  
Y -0.0002 0.0001 0.0002 0.0003 0.0011 0.0007  
Z -0.0026 0.0026 0.0126 0.0128 -0.0105 -0.0110  
AT. 103 H X 0.0008 -0.0010 -0.0036 0.0031 0.0040 -0.0038  
Y 0.0002 -0.0001 0.0002 -0.0003 0.0011 -0.0007  
Z -0.0026 0.0026 -0.0126 0.0128 0.0105 -0.0110  
AT. 104 H X -0.0008 -0.0010 -0.0036 0.0031 -0.0040 0.0038  
Y 0.0002 0.0001 -0.0002 0.0003 0.0011 -0.0007  
Z 0.0026 0.0026 -0.0126 0.0128 -0.0105 0.0110  
AT. 105 H X -0.0021 -0.0022 -0.0003 -0.0008 0.0001 0.0005  
Y 0.0033 0.0035 0.0114 0.0113 0.0113 0.0110  
Z -0.0026 -0.0028 -0.0090 -0.0086 -0.0091 -0.0090  
AT. 106 H X 0.0021 -0.0022 -0.0003 -0.0008 -0.0001 -0.0005  
Y 0.0033 -0.0035 -0.0114 -0.0113 0.0113 0.0110  
Z 0.0026 -0.0028 -0.0090 -0.0086 0.0091 0.0090

AT.107 H X 0.0021 -0.0022 0.0003 -0.0008 0.0001 -0.0005  
Y -0.0033 0.0035 -0.0114 0.0113 0.0113 -0.0110  
Z 0.0026 -0.0028 0.0090 -0.0086 -0.0091 0.0090

AT.108 H X -0.0021 -0.0022 0.0003 -0.0008 -0.0001 0.0005  
Y -0.0033 -0.0035 0.0114 -0.0113 0.0113 -0.0110  
Z -0.0026 -0.0028 0.0090 -0.0086 0.0091 -0.0090

AT.109 C X -0.0010 -0.0016 0.0071 0.0063 0.0070 0.0068  
Y -0.0019 -0.0024 -0.0118 -0.0122 -0.0111 -0.0113  
Z -0.0004 -0.0002 -0.0048 -0.0058 -0.0041 -0.0043

AT.110 C X 0.0010 -0.0016 0.0071 0.0063 -0.0070 -0.0068  
Y -0.0019 0.0024 0.0118 0.0122 -0.0111 -0.0113  
Z 0.0004 -0.0002 -0.0048 -0.0058 0.0041 0.0043

AT.111 C X 0.0010 -0.0016 -0.0071 0.0063 0.0070 -0.0068  
Y 0.0019 -0.0024 0.0118 -0.0122 -0.0111 0.0113  
Z 0.0004 -0.0002 0.0048 -0.0058 -0.0041 0.0043

AT.112 C X -0.0010 -0.0016 -0.0071 0.0063 -0.0070 0.0068  
Y 0.0019 0.0024 -0.0118 0.0122 -0.0111 0.0113  
Z -0.0004 -0.0002 0.0048 -0.0058 0.0041 -0.0043

AT.113 H X -0.0043 -0.0060 0.0054 0.0044 0.0056 0.0050  
Y 0.0017 0.0027 -0.0100 -0.0101 -0.0095 -0.0094  
Z -0.0121 -0.0133 -0.0122 -0.0135 -0.0109 -0.0117

AT.114 H X 0.0043 -0.0060 0.0054 0.0044 -0.0056 -0.0050  
Y 0.0017 -0.0027 0.0100 0.0101 -0.0095 -0.0094  
Z 0.0121 -0.0133 -0.0122 -0.0135 0.0109 0.0117

AT.115 H X 0.0043 -0.0060 -0.0054 0.0044 0.0056 -0.0050  
Y -0.0017 0.0027 0.0100 -0.0101 -0.0095 0.0094  
Z 0.0121 -0.0133 0.0122 -0.0135 -0.0109 0.0117

AT.116 H X -0.0043 -0.0060 -0.0054 0.0044 -0.0056 0.0050  
Y -0.0017 -0.0027 -0.0100 0.0101 -0.0095 0.0094  
Z -0.0121 -0.0133 0.0122 -0.0135 0.0109 -0.0117

AT.117 H X 0.0080 0.0084 0.0172 0.0171 0.0156 0.0159  
Y 0.0024 0.0027 -0.0154 -0.0154 -0.0142 -0.0143

Z 0.0019 0.0025 -0.0097 -0.0104 -0.0084 -0.0086  
AT. 118 H X -0.0080 0.0084 0.0172 0.0171 -0.0156 -0.0159  
Y 0.0024 -0.0027 0.0154 0.0154 -0.0142 -0.0143  
Z -0.0019 0.0025 -0.0097 -0.0104 0.0084 0.0086  
AT. 119 H X -0.0080 0.0084 -0.0172 0.0171 0.0156 -0.0159  
Y -0.0024 0.0027 0.0154 -0.0154 -0.0142 0.0143  
Z -0.0019 0.0025 0.0097 -0.0104 -0.0084 0.0086  
AT. 120 H X 0.0080 0.0084 -0.0172 0.0171 -0.0156 0.0159  
Y -0.0024 -0.0027 -0.0154 0.0154 -0.0142 0.0143  
Z 0.0019 0.0025 0.0097 -0.0104 0.0084 -0.0086  
AT. 121 C X -0.0010 -0.0012 0.0008 0.0005 0.0009 0.0011  
Y -0.0037 -0.0039 -0.0042 -0.0046 -0.0032 -0.0038  
Z 0.0065 0.0069 0.0041 0.0055 0.0035 0.0036  
AT. 122 C X 0.0010 -0.0012 0.0008 0.0005 -0.0009 -0.0011  
Y -0.0037 0.0039 0.0042 0.0046 -0.0032 -0.0038  
Z -0.0065 0.0069 0.0041 0.0055 -0.0035 -0.0036  
AT. 123 C X 0.0010 -0.0012 -0.0008 0.0005 0.0009 -0.0011  
Y 0.0037 -0.0039 0.0042 -0.0046 -0.0032 0.0038  
Z -0.0065 0.0069 -0.0041 0.0055 0.0035 -0.0036  
AT. 124 C X -0.0010 -0.0012 -0.0008 0.0005 -0.0009 0.0011  
Y 0.0037 0.0039 -0.0042 0.0046 -0.0032 0.0038  
Z 0.0065 0.0069 -0.0041 0.0055 -0.0035 0.0036  
AT. 125 H X 0.0004 0.0002 0.0060 0.0062 0.0044 0.0054  
Y -0.0029 -0.0033 -0.0032 -0.0033 -0.0026 -0.0030  
Z 0.0057 0.0061 0.0020 0.0030 0.0021 0.0020  
AT. 126 H X -0.0004 0.0002 0.0060 0.0062 -0.0044 -0.0054  
Y -0.0029 0.0033 0.0032 0.0033 -0.0026 -0.0030  
Z -0.0057 0.0061 0.0020 0.0030 -0.0021 -0.0020  
AT. 127 H X -0.0004 0.0002 -0.0060 0.0062 0.0044 -0.0054  
Y 0.0029 -0.0033 0.0032 -0.0033 -0.0026 0.0030  
Z -0.0057 0.0061 -0.0020 0.0030 0.0021 -0.0020  
AT. 128 H X 0.0004 0.0002 -0.0060 0.0062 -0.0044 0.0054

Y 0.0029 0.0033 -0.0032 0.0033 -0.0026 0.0030  
Z 0.0057 0.0061 -0.0020 0.0030 -0.0021 0.0020  
AT. 129 H X -0.0000 -0.0004 0.0016 0.0011 0.0019 0.0019  
Y -0.0046 -0.0047 -0.0036 -0.0038 -0.0036 -0.0037  
Z 0.0075 0.0079 0.0086 0.0102 0.0065 0.0072  
AT. 130 H X 0.0000 -0.0004 0.0016 0.0011 -0.0019 -0.0019  
Y -0.0046 0.0047 0.0036 0.0038 -0.0036 -0.0037  
Z -0.0075 0.0079 0.0086 0.0102 -0.0065 -0.0072  
AT. 131 H X 0.0000 -0.0004 -0.0016 0.0011 0.0019 -0.0019  
Y 0.0046 -0.0047 0.0036 -0.0038 -0.0036 0.0037  
Z -0.0075 0.0079 -0.0086 0.0102 0.0065 -0.0072  
AT. 132 H X -0.0000 -0.0004 -0.0016 0.0011 -0.0019 0.0019  
Y 0.0046 0.0047 -0.0036 0.0038 -0.0036 0.0037  
Z 0.0075 0.0079 -0.0086 0.0102 -0.0065 0.0072  
AT. 133 C X 0.0380 0.0375 -0.0028 -0.0026 -0.0027 -0.0025  
Y -0.0019 -0.0017 0.0030 0.0030 0.0025 0.0027  
Z -0.0117 -0.0117 -0.0009 -0.0012 -0.0009 -0.0008  
AT. 134 C X -0.0380 0.0375 -0.0028 -0.0026 0.0027 0.0025  
Y -0.0019 0.0017 -0.0030 -0.0030 0.0025 0.0027  
Z 0.0117 -0.0117 -0.0009 -0.0012 0.0009 0.0008  
AT. 135 C X -0.0380 0.0375 0.0028 -0.0026 -0.0027 0.0025  
Y 0.0019 -0.0017 -0.0030 0.0030 0.0025 -0.0027  
Z 0.0117 -0.0117 0.0009 -0.0012 -0.0009 0.0008  
AT. 136 C X 0.0380 0.0375 0.0028 -0.0026 0.0027 -0.0025  
Y 0.0019 0.0017 0.0030 -0.0030 0.0025 -0.0027  
Z -0.0117 -0.0117 0.0009 -0.0012 0.0009 -0.0008  
AT. 137 C X -0.0184 -0.0182 0.0008 0.0005 0.0008 0.0006  
Y -0.0038 -0.0037 0.0100 0.0109 0.0093 0.0097  
Z 0.0072 0.0073 0.0046 0.0049 0.0041 0.0043  
AT. 138 C X 0.0184 -0.0182 0.0008 0.0005 -0.0008 -0.0006  
Y -0.0038 0.0037 -0.0100 -0.0109 0.0093 0.0097  
Z -0.0072 0.0073 0.0046 0.0049 -0.0041 -0.0043



AT. 139 C X 0.0184 -0.0182 -0.0008 0.0005 0.0008 -0.0006  
Y 0.0038 -0.0037 -0.0100 0.0109 0.0093 -0.0097  
Z -0.0072 0.0073 -0.0046 0.0049 0.0041 -0.0043

AT. 140 C X -0.0184 -0.0182 -0.0008 0.0005 -0.0008 0.0006  
Y 0.0038 0.0037 0.0100 -0.0109 0.0093 -0.0097  
Z 0.0072 0.0073 -0.0046 0.0049 -0.0041 0.0043

AT. 141 H X -0.0233 -0.0235 -0.0180 -0.0211 -0.0169 -0.0181  
Y 0.0184 0.0181 -0.0117 -0.0129 -0.0109 -0.0115  
Z 0.0281 0.0282 0.0111 0.0130 0.0104 0.0109

AT. 142 H X 0.0233 -0.0235 -0.0180 -0.0211 0.0169 0.0181  
Y 0.0184 -0.0181 0.0117 0.0129 -0.0109 -0.0115  
Z -0.0281 0.0282 0.0111 0.0130 -0.0104 -0.0109

AT. 143 H X 0.0233 -0.0235 0.0180 -0.0211 -0.0169 0.0181  
Y -0.0184 0.0181 0.0117 -0.0129 -0.0109 0.0115  
Z -0.0281 0.0282 -0.0111 0.0130 0.0104 -0.0109

AT. 144 H X -0.0233 -0.0235 0.0180 -0.0211 0.0169 -0.0181  
Y -0.0184 -0.0181 -0.0117 0.0129 -0.0109 0.0115  
Z 0.0281 0.0282 -0.0111 0.0130 -0.0104 0.0109

AT. 145 H X -0.0306 -0.0300 0.0269 0.0297 0.0255 0.0264  
Y 0.0033 0.0033 0.0051 0.0053 0.0045 0.0046  
Z 0.0197 0.0198 0.0140 0.0153 0.0126 0.0132

AT. 146 H X 0.0306 -0.0300 0.0269 0.0297 -0.0255 -0.0264  
Y 0.0033 -0.0033 -0.0051 -0.0053 0.0045 0.0046  
Z -0.0197 0.0198 0.0140 0.0153 -0.0126 -0.0132

AT. 147 H X 0.0306 -0.0300 -0.0269 0.0297 0.0255 -0.0264  
Y -0.0033 0.0033 -0.0051 0.0053 0.0045 -0.0046  
Z -0.0197 0.0198 -0.0140 0.0153 0.0126 -0.0132

AT. 148 H X -0.0306 -0.0300 -0.0269 0.0297 -0.0255 0.0264  
Y -0.0033 -0.0033 0.0051 -0.0053 0.0045 -0.0046  
Z 0.0197 0.0198 -0.0140 0.0153 -0.0126 0.0132

AT. 149 O X -0.0010 -0.0009 -0.0153 -0.0149 -0.0146 -0.0150  
Y 0.0001 0.0003 0.0037 0.0033 0.0034 0.0038

Z 0.0004 0.0005 0.0057 0.0056 0.0055 0.0056  
AT.150 O X 0.0010 -0.0009 -0.0153 -0.0149 0.0146 0.0150  
Y 0.0001 -0.0003 -0.0037 -0.0033 0.0034 0.0038  
Z -0.0004 0.0005 0.0057 0.0056 -0.0055 -0.0056  
AT.151 O X 0.0010 -0.0009 0.0153 -0.0149 -0.0146 0.0150  
Y -0.0001 0.0003 -0.0037 0.0033 0.0034 -0.0038  
Z -0.0004 0.0005 -0.0057 0.0056 0.0055 -0.0056  
AT.152 O X -0.0010 -0.0009 0.0153 -0.0149 0.0146 -0.0150  
Y -0.0001 -0.0003 0.0037 -0.0033 0.0034 -0.0038  
Z 0.0004 0.0005 -0.0057 0.0056 -0.0055 0.0056  
AT.153 H X 0.0032 0.0025 -0.0169 -0.0151 -0.0152 -0.0172  
Y 0.0048 0.0035 0.0168 0.0190 0.0181 0.0152  
Z -0.0006 -0.0006 0.0108 0.0106 0.0103 0.0105  
AT.154 H X -0.0032 0.0025 -0.0169 -0.0151 0.0152 0.0172  
Y 0.0048 -0.0035 -0.0168 -0.0190 0.0181 0.0152  
Z 0.0006 -0.0006 0.0108 0.0106 -0.0103 -0.0105  
AT.155 H X -0.0032 0.0025 0.0169 -0.0151 -0.0152 0.0172  
Y -0.0048 0.0035 -0.0168 0.0190 0.0181 -0.0152  
Z 0.0006 -0.0006 -0.0108 0.0106 0.0103 -0.0105  
AT.156 H X 0.0032 0.0025 0.0169 -0.0151 0.0152 -0.0172  
Y -0.0048 -0.0035 0.0168 -0.0190 0.0181 -0.0152  
Z -0.0006 -0.0006 -0.0108 0.0106 -0.0103 0.0105  
AT.157 O X 0.0011 0.0011 0.0192 0.0190 0.0187 0.0188  
Y -0.0006 -0.0007 -0.0022 -0.0022 -0.0020 -0.0021  
Z -0.0016 -0.0018 -0.0124 -0.0124 -0.0119 -0.0121  
AT.158 O X -0.0011 0.0011 0.0192 0.0190 -0.0187 -0.0188  
Y -0.0006 0.0007 0.0022 0.0022 -0.0020 -0.0021  
Z 0.0016 -0.0018 -0.0124 -0.0124 0.0119 0.0121  
AT.159 O X -0.0011 0.0011 -0.0192 0.0190 0.0187 -0.0188  
Y 0.0006 -0.0007 0.0022 -0.0022 -0.0020 0.0021  
Z 0.0016 -0.0018 0.0124 -0.0124 -0.0119 0.0121  
AT.160 O X 0.0011 0.0011 -0.0192 0.0190 -0.0187 0.0188

Y 0.0006 0.0007 -0.0022 0.0022 -0.0020 0.0021  
Z -0.0016 -0.0018 0.0124 -0.0124 0.0119 -0.0121  
AT.161 O X -0.0010 -0.0015 0.0009 0.0010 0.0011 0.0009  
Y -0.0005 -0.0005 0.0006 0.0007 0.0006 0.0005  
Z 0.0012 0.0016 0.0028 0.0029 0.0025 0.0027  
AT.162 O X 0.0010 -0.0015 0.0009 0.0010 -0.0011 -0.0009  
Y -0.0005 0.0005 -0.0006 -0.0007 0.0006 0.0005  
Z -0.0012 0.0016 0.0028 0.0029 -0.0025 -0.0027  
AT.163 O X 0.0010 -0.0015 -0.0009 0.0010 0.0011 -0.0009  
Y 0.0005 -0.0005 -0.0006 0.0007 0.0006 -0.0005  
Z -0.0012 0.0016 -0.0028 0.0029 0.0025 -0.0027  
AT.164 O X -0.0010 -0.0015 -0.0009 0.0010 -0.0011 0.0009  
Y 0.0005 0.0005 0.0006 -0.0007 0.0006 -0.0005  
Z 0.0012 0.0016 -0.0028 0.0029 -0.0025 0.0027  
AT.165 H X 0.0292 0.0364 -0.0341 -0.0333 -0.0367 -0.0347  
Y 0.0125 0.0157 -0.0140 -0.0136 -0.0152 -0.0143  
Z -0.0249 -0.0322 0.0249 0.0244 0.0281 0.0262  
AT.166 H X -0.0292 0.0364 -0.0341 -0.0333 0.0367 0.0347  
Y 0.0125 -0.0157 0.0140 0.0136 -0.0152 -0.0143  
Z 0.0249 -0.0322 0.0249 0.0244 -0.0281 -0.0262  
AT.167 H X -0.0292 0.0364 0.0341 -0.0333 -0.0367 0.0347  
Y -0.0125 0.0157 0.0140 -0.0136 -0.0152 0.0143  
Z 0.0249 -0.0322 -0.0249 0.0244 0.0281 -0.0262  
AT.168 H X 0.0292 0.0364 0.0341 -0.0333 0.0367 -0.0347  
Y -0.0125 -0.0157 -0.0140 0.0136 -0.0152 0.0143  
Z -0.0249 -0.0322 -0.0249 0.0244 -0.0281 0.0262  
AT.169 O X 0.0001 0.0001 0.0005 0.0001 0.0000 0.0002  
Y -0.0004 -0.0004 -0.0014 -0.0008 -0.0008 -0.0014  
Z 0.0000 -0.0000 -0.0005 0.0001 0.0002 -0.0005  
AT.170 O X -0.0001 0.0001 0.0005 0.0001 -0.0000 -0.0002  
Y -0.0004 0.0004 0.0014 0.0008 -0.0008 -0.0014  
Z -0.0000 -0.0000 -0.0005 0.0001 -0.0002 0.0005

AT.171 O X -0.0001 0.0001 -0.0005 0.0001 0.0000 -0.0002  
Y 0.0004 -0.0004 0.0014 -0.0008 -0.0008 0.0014  
Z -0.0000 -0.0000 0.0005 0.0001 0.0002 0.0005

AT.172 O X 0.0001 0.0001 -0.0005 0.0001 -0.0000 0.0002  
Y 0.0004 0.0004 -0.0014 0.0008 -0.0008 0.0014  
Z 0.0000 -0.0000 0.0005 0.0001 -0.0002 -0.0005

AT.173 H X -0.0037 -0.0025 -0.0066 0.0010 0.0003 -0.0051  
Y 0.0003 0.0002 0.0002 -0.0009 -0.0009 -0.0004  
Z 0.0015 0.0012 0.0024 -0.0013 -0.0013 0.0019

AT.174 H X 0.0037 -0.0025 -0.0066 0.0010 -0.0003 0.0051  
Y 0.0003 -0.0002 -0.0002 0.0009 -0.0009 -0.0004  
Z -0.0015 0.0012 0.0024 -0.0013 0.0013 -0.0019

AT.175 H X 0.0037 -0.0025 0.0066 0.0010 0.0003 0.0051  
Y -0.0003 0.0002 -0.0002 -0.0009 -0.0009 0.0004  
Z -0.0015 0.0012 -0.0024 -0.0013 -0.0013 -0.0019

AT.176 H X -0.0037 -0.0025 0.0066 0.0010 -0.0003 -0.0051  
Y -0.0003 -0.0002 0.0002 0.0009 -0.0009 0.0004  
Z 0.0015 0.0012 -0.0024 -0.0013 0.0013 0.0019

FREQ(CM\*\*-1) 817.62 817.66 817.88 819.15 845.04 846.73

AT. 1 I X 0.0004 -0.0004 -0.0004 0.0004 -0.0002 -0.0003  
Y 0.0002 -0.0002 -0.0002 0.0002 -0.0003 -0.0003  
Z 0.0001 -0.0001 -0.0001 0.0001 -0.0002 -0.0002

AT. 2 I X -0.0004 -0.0004 0.0004 0.0004 -0.0002 0.0003  
Y 0.0002 0.0002 -0.0002 -0.0002 0.0003 -0.0003  
Z -0.0001 -0.0001 0.0001 0.0001 -0.0002 0.0002

AT. 3 I X -0.0004 -0.0004 -0.0004 -0.0004 -0.0002 0.0003  
Y -0.0002 -0.0002 -0.0002 -0.0002 -0.0003 0.0003  
Z -0.0001 -0.0001 -0.0001 -0.0001 -0.0002 0.0002

AT. 4 I X 0.0004 -0.0004 0.0004 -0.0004 -0.0002 -0.0003  
Y -0.0002 0.0002 -0.0002 0.0002 0.0003 0.0003

Z 0.0001 -0.0001 0.0001 -0.0001 -0.0002 -0.0002  
AT. 5 I X 0.0002 -0.0001 -0.0002 0.0001 0.0002 0.0001  
Y -0.0003 0.0002 0.0003 -0.0003 -0.0003 -0.0003  
Z 0.0000 -0.0000 -0.0000 0.0000 0.0001 0.0001  
AT. 6 I X -0.0002 -0.0001 0.0002 0.0001 0.0002 -0.0001  
Y -0.0003 -0.0002 0.0003 0.0003 0.0003 -0.0003  
Z -0.0000 -0.0000 0.0000 0.0000 0.0001 -0.0001  
AT. 7 I X -0.0002 -0.0001 -0.0002 -0.0001 0.0002 -0.0001  
Y 0.0003 0.0002 0.0003 0.0003 -0.0003 0.0003  
Z -0.0000 -0.0000 -0.0000 -0.0000 0.0001 -0.0001  
AT. 8 I X 0.0002 -0.0001 0.0002 -0.0001 0.0002 0.0001  
Y 0.0003 -0.0002 0.0003 -0.0003 0.0003 0.0003  
Z 0.0000 -0.0000 0.0000 -0.0000 0.0001 0.0001  
AT. 9 N X 0.0087 -0.0090 -0.0086 0.0087 -0.0042 -0.0048  
Y 0.0040 -0.0046 -0.0040 0.0041 -0.0034 -0.0036  
Z -0.0019 0.0017 0.0019 -0.0017 0.0016 0.0018  
AT. 10 N X -0.0087 -0.0090 0.0086 0.0087 -0.0042 0.0048  
Y 0.0040 0.0046 -0.0040 -0.0041 0.0034 -0.0036  
Z 0.0019 0.0017 -0.0019 -0.0017 0.0016 -0.0018  
AT. 11 N X -0.0087 -0.0090 -0.0086 -0.0087 -0.0042 0.0048  
Y -0.0040 -0.0046 -0.0040 -0.0041 -0.0034 0.0036  
Z 0.0019 0.0017 0.0019 0.0017 0.0016 -0.0018  
AT. 12 N X 0.0087 -0.0090 0.0086 -0.0087 -0.0042 -0.0048  
Y -0.0040 0.0046 -0.0040 0.0041 0.0034 0.0036  
Z -0.0019 0.0017 -0.0019 0.0017 0.0016 0.0018  
AT. 13 N X 0.0068 -0.0067 -0.0067 0.0069 0.0062 0.0063  
Y -0.0060 0.0055 0.0060 -0.0057 -0.0058 -0.0060  
Z -0.0015 0.0013 0.0016 -0.0015 -0.0007 -0.0006  
AT. 14 N X -0.0068 -0.0067 0.0067 0.0069 0.0062 -0.0063  
Y -0.0060 -0.0055 0.0060 0.0057 0.0058 -0.0060  
Z 0.0015 0.0013 -0.0016 -0.0015 -0.0007 0.0006  
AT. 15 N X -0.0068 -0.0067 -0.0067 -0.0069 0.0062 -0.0063

Y 0.0060 0.0055 0.0060 0.0057 -0.0058 0.0060  
Z 0.0015 0.0013 0.0016 0.0015 -0.0007 0.0006  
AT. 16 N X 0.0068 -0.0067 0.0067 -0.0069 0.0062 0.0063  
Y 0.0060 -0.0055 0.0060 -0.0057 0.0058 0.0060  
Z -0.0015 0.0013 -0.0016 0.0015 -0.0007 -0.0006  
AT. 17 O X -0.0022 0.0020 0.0019 -0.0023 -0.0008 -0.0002  
Y -0.0039 0.0043 0.0038 -0.0042 -0.0002 -0.0000  
Z -0.0019 0.0019 0.0018 -0.0019 -0.0043 -0.0040  
AT. 18 O X 0.0022 0.0020 -0.0019 -0.0023 -0.0008 0.0002  
Y -0.0039 -0.0043 0.0038 0.0042 0.0002 -0.0000  
Z 0.0019 0.0019 -0.0018 -0.0019 -0.0043 0.0040  
AT. 19 O X 0.0022 0.0020 0.0019 0.0023 -0.0008 0.0002  
Y 0.0039 0.0043 0.0038 0.0042 -0.0002 0.0000  
Z 0.0019 0.0019 0.0018 0.0019 -0.0043 0.0040  
AT. 20 O X -0.0022 0.0020 -0.0019 0.0023 -0.0008 -0.0002  
Y 0.0039 -0.0043 0.0038 -0.0042 0.0002 0.0000  
Z -0.0019 0.0019 -0.0018 0.0019 -0.0043 -0.0040  
AT. 21 O X 0.0006 -0.0007 -0.0006 0.0007 0.0002 -0.0000  
Y 0.0036 -0.0032 -0.0034 0.0033 0.0025 0.0026  
Z -0.0045 0.0041 0.0046 -0.0042 -0.0000 -0.0004  
AT. 22 O X -0.0006 -0.0007 0.0006 0.0007 0.0002 0.0000  
Y 0.0036 0.0032 -0.0034 -0.0033 -0.0025 0.0026  
Z 0.0045 0.0041 -0.0046 -0.0042 -0.0000 0.0004  
AT. 23 O X -0.0006 -0.0007 -0.0006 -0.0007 0.0002 0.0000  
Y -0.0036 -0.0032 -0.0034 -0.0033 0.0025 -0.0026  
Z 0.0045 0.0041 0.0046 0.0042 -0.0000 0.0004  
AT. 24 O X 0.0006 -0.0007 0.0006 -0.0007 0.0002 -0.0000  
Y -0.0036 0.0032 -0.0034 0.0033 -0.0025 -0.0026  
Z -0.0045 0.0041 -0.0046 0.0042 -0.0000 -0.0004  
AT. 25 C X -0.0094 0.0100 0.0091 -0.0096 0.0098 0.0096  
Y -0.0128 0.0137 0.0127 -0.0132 0.0094 0.0098  
Z 0.0015 -0.0014 -0.0018 0.0016 0.0071 0.0066

AT. 26 C X 0.0094 0.0100 -0.0091 -0.0096 0.0098 -0.0096  
Y -0.0128 -0.0137 0.0127 0.0132 -0.0094 0.0098  
Z -0.0015 -0.0014 0.0018 0.0016 0.0071 -0.0066

AT. 27 C X 0.0094 0.0100 0.0091 0.0096 0.0098 -0.0096  
Y 0.0128 0.0137 0.0127 0.0132 0.0094 -0.0098  
Z -0.0015 -0.0014 -0.0018 -0.0016 0.0071 -0.0066

AT. 28 C X -0.0094 0.0100 -0.0091 0.0096 0.0098 0.0096  
Y 0.0128 -0.0137 0.0127 -0.0132 -0.0094 -0.0098  
Z 0.0015 -0.0014 0.0018 -0.0016 0.0071 0.0066

AT. 29 H X -0.0267 0.0283 0.0255 -0.0268 0.0316 0.0315  
Y 0.0367 -0.0391 -0.0354 0.0379 -0.0414 -0.0413  
Z 0.0200 -0.0209 -0.0192 0.0198 -0.0177 -0.0182

AT. 30 H X 0.0267 0.0283 -0.0255 -0.0268 0.0316 -0.0315  
Y 0.0367 0.0391 -0.0354 -0.0379 0.0414 -0.0413  
Z -0.0200 -0.0209 0.0192 0.0198 -0.0177 0.0182

AT. 31 H X 0.0267 0.0283 0.0255 0.0268 0.0316 -0.0315  
Y -0.0367 -0.0391 -0.0354 -0.0379 -0.0414 0.0413  
Z -0.0200 -0.0209 -0.0192 -0.0198 -0.0177 0.0182

AT. 32 H X -0.0267 0.0283 -0.0255 0.0268 0.0316 0.0315  
Y -0.0367 0.0391 -0.0354 0.0379 0.0414 0.0413  
Z 0.0200 -0.0209 0.0192 -0.0198 -0.0177 -0.0182

AT. 33 H X 0.0465 -0.0496 -0.0451 0.0471 -0.0564 -0.0557  
Y -0.0263 0.0280 0.0257 -0.0269 0.0224 0.0229  
Z 0.0169 -0.0177 -0.0167 0.0177 0.0007 -0.0010

AT. 34 H X -0.0465 -0.0496 0.0451 0.0471 -0.0564 0.0557  
Y -0.0263 -0.0280 0.0257 0.0269 -0.0224 0.0229  
Z -0.0169 -0.0177 0.0167 0.0177 0.0007 0.0010

AT. 35 H X -0.0465 -0.0496 -0.0451 -0.0471 -0.0564 0.0557  
Y 0.0263 0.0280 0.0257 0.0269 0.0224 -0.0229  
Z -0.0169 -0.0177 -0.0167 -0.0177 0.0007 0.0010

AT. 36 H X 0.0465 -0.0496 0.0451 -0.0471 -0.0564 -0.0557  
Y 0.0263 -0.0280 0.0257 -0.0269 -0.0224 -0.0229

Z 0.0169 -0.0177 0.0167 -0.0177 0.0007 -0.0010  
AT. 37 C X 0.0007 -0.0008 -0.0005 0.0007 -0.0051 -0.0048  
Y -0.0022 0.0026 0.0022 -0.0026 -0.0011 -0.0012  
Z -0.0024 0.0027 0.0024 -0.0026 -0.0003 -0.0002  
AT. 38 C X -0.0007 -0.0008 0.0005 0.0007 -0.0051 0.0048  
Y -0.0022 -0.0026 0.0022 0.0026 0.0011 -0.0012  
Z 0.0024 0.0027 -0.0024 -0.0026 -0.0003 0.0002  
AT. 39 C X -0.0007 -0.0008 -0.0005 -0.0007 -0.0051 0.0048  
Y 0.0022 0.0026 0.0022 0.0026 -0.0011 0.0012  
Z 0.0024 0.0027 0.0024 0.0026 -0.0003 0.0002  
AT. 40 C X 0.0007 -0.0008 0.0005 -0.0007 -0.0051 -0.0048  
Y 0.0022 -0.0026 0.0022 -0.0026 0.0011 0.0012  
Z -0.0024 0.0027 -0.0024 0.0026 -0.0003 -0.0002  
AT. 41 C X 0.0009 -0.0026 -0.0007 0.0020 0.0061 0.0064  
Y 0.0099 -0.0108 -0.0096 0.0105 0.0011 0.0005  
Z 0.0136 -0.0133 -0.0133 0.0132 -0.0074 -0.0089  
AT. 42 C X -0.0009 -0.0026 0.0007 0.0020 0.0061 -0.0064  
Y 0.0099 0.0108 -0.0096 -0.0105 -0.0011 0.0005  
Z -0.0136 -0.0133 0.0133 0.0132 -0.0074 0.0089  
AT. 43 C X -0.0009 -0.0026 -0.0007 -0.0020 0.0061 -0.0064  
Y -0.0099 -0.0108 -0.0096 -0.0105 0.0011 -0.0005  
Z -0.0136 -0.0133 -0.0133 -0.0132 -0.0074 0.0089  
AT. 44 C X 0.0009 -0.0026 0.0007 -0.0020 0.0061 0.0064  
Y -0.0099 0.0108 -0.0096 0.0105 -0.0011 -0.0005  
Z 0.0136 -0.0133 0.0133 -0.0132 -0.0074 -0.0089  
AT. 45 H X 0.0155 -0.0165 -0.0151 0.0165 0.0079 0.0070  
Y 0.0026 -0.0042 -0.0022 0.0038 0.0056 0.0058  
Z 0.0058 -0.0061 -0.0054 0.0059 -0.0040 -0.0046  
AT. 46 H X -0.0155 -0.0165 0.0151 0.0165 0.0079 -0.0070  
Y 0.0026 0.0042 -0.0022 -0.0038 -0.0056 0.0058  
Z -0.0058 -0.0061 0.0054 0.0059 -0.0040 0.0046  
AT. 47 H X -0.0155 -0.0165 -0.0151 -0.0165 0.0079 -0.0070



Y -0.0026 -0.0042 -0.0022 -0.0038 0.0056 -0.0058  
Z -0.0058 -0.0061 -0.0054 -0.0059 -0.0040 0.0046  
AT. 48 H X 0.0155 -0.0165 0.0151 -0.0165 0.0079 0.0070  
Y -0.0026 0.0042 -0.0022 0.0038 -0.0056 -0.0058  
Z 0.0058 -0.0061 0.0054 -0.0059 -0.0040 -0.0046  
AT. 49 H X -0.0043 0.0015 0.0045 -0.0029 0.0073 0.0081  
Y 0.0000 -0.0021 0.0002 0.0011 0.0035 0.0037  
Z 0.0247 -0.0246 -0.0245 0.0245 -0.0110 -0.0126  
AT. 50 H X 0.0043 0.0015 -0.0045 -0.0029 0.0073 -0.0081  
Y 0.0000 0.0021 0.0002 -0.0011 -0.0035 0.0037  
Z -0.0247 -0.0246 0.0245 0.0245 -0.0110 0.0126  
AT. 51 H X 0.0043 0.0015 0.0045 0.0029 0.0073 -0.0081  
Y -0.0000 -0.0021 0.0002 -0.0011 0.0035 -0.0037  
Z -0.0247 -0.0246 -0.0245 -0.0245 -0.0110 0.0126  
AT. 52 H X -0.0043 0.0015 -0.0045 0.0029 0.0073 0.0081  
Y -0.0000 0.0021 0.0002 0.0011 -0.0035 -0.0037  
Z 0.0247 -0.0246 0.0245 -0.0245 -0.0110 -0.0126  
AT. 53 C X 0.0001 -0.0001 -0.0001 0.0002 0.0008 0.0006  
Y -0.0000 -0.0000 0.0002 0.0003 0.0028 0.0026  
Z -0.0002 0.0001 0.0000 -0.0002 -0.0034 -0.0034  
AT. 54 C X -0.0001 -0.0001 0.0001 0.0002 0.0008 -0.0006  
Y -0.0000 0.0000 0.0002 -0.0003 -0.0028 0.0026  
Z 0.0002 0.0001 -0.0000 -0.0002 -0.0034 0.0034  
AT. 55 C X -0.0001 -0.0001 -0.0001 -0.0002 0.0008 -0.0006  
Y 0.0000 -0.0000 0.0002 -0.0003 0.0028 -0.0026  
Z 0.0002 0.0001 0.0000 0.0002 -0.0034 0.0034  
AT. 56 C X 0.0001 -0.0001 0.0001 -0.0002 0.0008 0.0006  
Y 0.0000 0.0000 0.0002 0.0003 -0.0028 -0.0026  
Z -0.0002 0.0001 -0.0000 0.0002 -0.0034 -0.0034  
AT. 57 C X -0.0003 0.0005 0.0002 -0.0004 0.0012 0.0013  
Y -0.0003 0.0008 0.0002 -0.0005 0.0031 0.0031  
Z 0.0004 0.0002 -0.0007 0.0003 0.0042 0.0050

AT. 58 C X 0.0003 0.0005 -0.0002 -0.0004 0.0012 -0.0013  
Y -0.0003 -0.0008 0.0002 0.0005 -0.0031 0.0031  
Z -0.0004 0.0002 0.0007 0.0003 0.0042 -0.0050

AT. 59 C X 0.0003 0.0005 0.0002 0.0004 0.0012 -0.0013  
Y 0.0003 0.0008 0.0002 0.0005 0.0031 -0.0031  
Z -0.0004 0.0002 -0.0007 -0.0003 0.0042 -0.0050

AT. 60 C X -0.0003 0.0005 -0.0002 0.0004 0.0012 0.0013  
Y 0.0003 -0.0008 0.0002 -0.0005 -0.0031 -0.0031  
Z 0.0004 0.0002 0.0007 -0.0003 0.0042 0.0050

AT. 61 H X -0.0091 0.0090 0.0092 -0.0090 -0.0016 -0.0010  
Y -0.0053 0.0056 0.0051 -0.0052 0.0013 0.0019  
Z -0.0075 0.0083 0.0084 -0.0081 0.0025 0.0025

AT. 62 H X 0.0091 0.0090 -0.0092 -0.0090 -0.0016 0.0010  
Y -0.0053 -0.0056 0.0051 0.0052 -0.0013 0.0019  
Z 0.0075 0.0083 -0.0084 -0.0081 0.0025 -0.0025

AT. 63 H X 0.0091 0.0090 0.0092 0.0090 -0.0016 0.0010  
Y 0.0053 0.0056 0.0051 0.0052 0.0013 -0.0019  
Z 0.0075 0.0083 0.0084 0.0081 0.0025 -0.0025

AT. 64 H X -0.0091 0.0090 -0.0092 0.0090 -0.0016 -0.0010  
Y 0.0053 -0.0056 0.0051 -0.0052 -0.0013 -0.0019  
Z -0.0075 0.0083 -0.0084 0.0081 0.0025 0.0025

AT. 65 H X -0.0026 0.0028 0.0026 -0.0026 0.0006 0.0006  
Y 0.0065 -0.0056 -0.0067 0.0058 0.0049 0.0055  
Z 0.0118 -0.0111 -0.0121 0.0117 0.0075 0.0068

AT. 66 H X 0.0026 0.0028 -0.0026 -0.0026 0.0006 -0.0006  
Y 0.0065 0.0056 -0.0067 -0.0058 -0.0049 0.0055  
Z -0.0118 -0.0111 0.0121 0.0117 0.0075 -0.0068

AT. 67 H X 0.0026 0.0028 0.0026 0.0026 0.0006 -0.0006  
Y -0.0065 -0.0056 -0.0067 -0.0058 0.0049 -0.0055  
Z -0.0118 -0.0111 -0.0121 -0.0117 0.0075 -0.0068

AT. 68 H X -0.0026 0.0028 -0.0026 0.0026 0.0006 0.0006  
Y -0.0065 0.0056 -0.0067 0.0058 -0.0049 -0.0055

Z 0.0118 -0.0111 0.0121 -0.0117 0.0075 0.0068  
AT. 69 H X -0.0070 0.0078 0.0069 -0.0078 -0.0007 -0.0010  
Y 0.0005 0.0001 -0.0008 -0.0002 0.0016 0.0024  
Z -0.0001 0.0009 -0.0004 -0.0008 0.0026 0.0039  
AT. 70 H X 0.0070 0.0078 -0.0069 -0.0078 -0.0007 0.0010  
Y 0.0005 -0.0001 -0.0008 0.0002 -0.0016 0.0024  
Z 0.0001 0.0009 0.0004 -0.0008 0.0026 -0.0039  
AT. 71 H X 0.0070 0.0078 0.0069 0.0078 -0.0007 0.0010  
Y -0.0005 0.0001 -0.0008 0.0002 0.0016 -0.0024  
Z 0.0001 0.0009 -0.0004 0.0008 0.0026 -0.0039  
AT. 72 H X -0.0070 0.0078 -0.0069 0.0078 -0.0007 -0.0010  
Y -0.0005 -0.0001 -0.0008 -0.0002 -0.0016 -0.0024  
Z -0.0001 0.0009 0.0004 0.0008 0.0026 0.0039  
AT. 73 C X 0.0000 0.0005 -0.0001 -0.0002 -0.0014 -0.0017  
Y 0.0003 0.0015 -0.0006 -0.0010 -0.0038 -0.0041  
Z -0.0007 -0.0006 0.0010 0.0003 0.0074 0.0073  
AT. 74 C X -0.0000 0.0005 0.0001 -0.0002 -0.0014 0.0017  
Y 0.0003 -0.0015 -0.0006 0.0010 0.0038 -0.0041  
Z 0.0007 -0.0006 -0.0010 0.0003 0.0074 -0.0073  
AT. 75 C X -0.0000 0.0005 -0.0001 0.0002 -0.0014 0.0017  
Y -0.0003 0.0015 -0.0006 0.0010 -0.0038 0.0041  
Z 0.0007 -0.0006 0.0010 -0.0003 0.0074 -0.0073  
AT. 76 C X 0.0000 0.0005 0.0001 0.0002 -0.0014 -0.0017  
Y -0.0003 -0.0015 -0.0006 -0.0010 0.0038 0.0041  
Z -0.0007 -0.0006 -0.0010 -0.0003 0.0074 0.0073  
AT. 77 C X -0.0041 0.0041 0.0041 -0.0041 0.0012 0.0011  
Y 0.0104 -0.0108 -0.0101 0.0107 -0.0024 -0.0030  
Z -0.0119 0.0122 0.0118 -0.0120 0.0074 0.0085  
AT. 78 C X 0.0041 0.0041 -0.0041 -0.0041 0.0012 -0.0011  
Y 0.0104 0.0108 -0.0101 -0.0107 0.0024 -0.0030  
Z 0.0119 0.0122 -0.0118 -0.0120 0.0074 -0.0085  
AT. 79 C X 0.0041 0.0041 0.0041 0.0041 0.0012 -0.0011

Y -0.0104 -0.0108 -0.0101 -0.0107 -0.0024 0.0030  
Z 0.0119 0.0122 0.0118 0.0120 0.0074 -0.0085  
AT. 80 C X -0.0041 0.0041 -0.0041 0.0041 0.0012 0.0011  
Y -0.0104 0.0108 -0.0101 0.0107 0.0024 0.0030  
Z -0.0119 0.0122 -0.0118 0.0120 0.0074 0.0085  
AT. 81 H X -0.0127 0.0123 0.0121 -0.0126 -0.0039 -0.0040  
Y 0.0010 -0.0020 -0.0014 0.0015 -0.0079 -0.0083  
Z -0.0204 0.0215 0.0202 -0.0211 0.0043 0.0046  
AT. 82 H X 0.0127 0.0123 -0.0121 -0.0126 -0.0039 0.0040  
Y 0.0010 0.0020 -0.0014 -0.0015 0.0079 -0.0083  
Z 0.0204 0.0215 -0.0202 -0.0211 0.0043 -0.0046  
AT. 83 H X 0.0127 0.0123 0.0121 0.0126 -0.0039 0.0040  
Y -0.0010 -0.0020 -0.0014 -0.0015 -0.0079 0.0083  
Z 0.0204 0.0215 0.0202 0.0211 0.0043 -0.0046  
AT. 84 H X -0.0127 0.0123 -0.0121 0.0126 -0.0039 -0.0040  
Y -0.0010 0.0020 -0.0014 0.0015 0.0079 0.0083  
Z -0.0204 0.0215 -0.0202 0.0211 0.0043 0.0046  
AT. 85 H X 0.0107 -0.0097 -0.0099 0.0107 0.0091 0.0084  
Y 0.0043 -0.0043 -0.0041 0.0049 -0.0017 -0.0023  
Z -0.0115 0.0113 0.0112 -0.0117 0.0048 0.0061  
AT. 86 H X -0.0107 -0.0097 0.0099 0.0107 0.0091 -0.0084  
Y 0.0043 0.0043 -0.0041 -0.0049 0.0017 -0.0023  
Z 0.0115 0.0113 -0.0112 -0.0117 0.0048 -0.0061  
AT. 87 H X -0.0107 -0.0097 -0.0099 -0.0107 0.0091 -0.0084  
Y -0.0043 -0.0043 -0.0041 -0.0049 -0.0017 0.0023  
Z 0.0115 0.0113 0.0112 0.0117 0.0048 -0.0061  
AT. 88 H X 0.0107 -0.0097 0.0099 -0.0107 0.0091 0.0084  
Y -0.0043 0.0043 -0.0041 0.0049 0.0017 0.0023  
Z -0.0115 0.0113 -0.0112 0.0117 0.0048 0.0061  
AT. 89 C X 0.0003 -0.0005 -0.0004 0.0004 0.0012 0.0012  
Y 0.0004 -0.0005 -0.0003 0.0004 0.0028 0.0028  
Z -0.0002 0.0001 0.0001 0.0001 0.0050 0.0054

AT. 90 C X -0.0003 -0.0005 0.0004 0.0004 0.0012 -0.0012  
Y 0.0004 0.0005 -0.0003 -0.0004 -0.0028 0.0028  
Z 0.0002 0.0001 -0.0001 0.0001 0.0050 -0.0054

AT. 91 C X -0.0003 -0.0005 -0.0004 -0.0004 0.0012 -0.0012  
Y -0.0004 -0.0005 -0.0003 -0.0004 0.0028 -0.0028  
Z 0.0002 0.0001 0.0001 -0.0001 0.0050 -0.0054

AT. 92 C X 0.0003 -0.0005 0.0004 -0.0004 0.0012 0.0012  
Y -0.0004 0.0005 -0.0003 0.0004 -0.0028 -0.0028  
Z -0.0002 0.0001 -0.0001 -0.0001 0.0050 0.0054

AT. 93 C X 0.0001 -0.0003 -0.0002 0.0000 -0.0016 -0.0013  
Y -0.0003 0.0001 0.0004 -0.0002 0.0069 0.0079  
Z 0.0004 -0.0005 -0.0007 0.0005 -0.0081 -0.0080

AT. 94 C X -0.0001 -0.0003 0.0002 0.0000 -0.0016 0.0013  
Y -0.0003 -0.0001 0.0004 0.0002 -0.0069 0.0079  
Z -0.0004 -0.0005 0.0007 0.0005 -0.0081 0.0080

AT. 95 C X -0.0001 -0.0003 -0.0002 -0.0000 -0.0016 0.0013  
Y 0.0003 0.0001 0.0004 0.0002 0.0069 -0.0079  
Z -0.0004 -0.0005 -0.0007 -0.0005 -0.0081 0.0080

AT. 96 C X 0.0001 -0.0003 0.0002 -0.0000 -0.0016 -0.0013  
Y 0.0003 -0.0001 0.0004 -0.0002 -0.0069 -0.0079  
Z 0.0004 -0.0005 0.0007 -0.0005 -0.0081 -0.0080

AT. 97 H X -0.0075 0.0074 0.0075 -0.0078 -0.0039 -0.0021  
Y 0.0086 -0.0079 -0.0084 0.0084 0.0083 0.0055  
Z -0.0083 0.0098 0.0085 -0.0095 -0.0136 -0.0156

AT. 98 H X 0.0075 0.0074 -0.0075 -0.0078 -0.0039 0.0021  
Y 0.0086 0.0079 -0.0084 -0.0084 -0.0083 0.0055  
Z 0.0083 0.0098 -0.0085 -0.0095 -0.0136 0.0156

AT. 99 H X 0.0075 0.0074 0.0075 0.0078 -0.0039 0.0021  
Y -0.0086 -0.0079 -0.0084 -0.0084 0.0083 -0.0055  
Z 0.0083 0.0098 0.0085 0.0095 -0.0136 0.0156

AT. 100 H X -0.0075 0.0074 -0.0075 0.0078 -0.0039 -0.0021  
Y -0.0086 0.0079 -0.0084 0.0084 -0.0083 -0.0055

Z -0.0083 0.0098 -0.0085 0.0095 -0.0136 -0.0156  
AT. 101 H X -0.0050 0.0054 0.0049 -0.0053 -0.0036 -0.0036  
Y -0.0074 0.0074 0.0074 -0.0073 0.0058 0.0073  
Z 0.0117 -0.0100 -0.0121 0.0105 -0.0139 -0.0169  
AT. 102 H X 0.0050 0.0054 -0.0049 -0.0053 -0.0036 0.0036  
Y -0.0074 -0.0074 0.0074 0.0073 -0.0058 0.0073  
Z -0.0117 -0.0100 0.0121 0.0105 -0.0139 0.0169  
AT. 103 H X 0.0050 0.0054 0.0049 0.0053 -0.0036 0.0036  
Y 0.0074 0.0074 0.0074 0.0073 0.0058 -0.0073  
Z -0.0117 -0.0100 -0.0121 -0.0105 -0.0139 0.0169  
AT. 104 H X -0.0050 0.0054 -0.0049 0.0053 -0.0036 -0.0036  
Y 0.0074 -0.0074 0.0074 -0.0073 -0.0058 -0.0073  
Z 0.0117 -0.0100 0.0121 -0.0105 -0.0139 -0.0169  
AT. 105 H X -0.0069 0.0072 0.0069 -0.0064 -0.0004 -0.0015  
Y -0.0000 0.0018 -0.0004 -0.0008 -0.0000 -0.0011  
Z 0.0026 -0.0043 -0.0025 0.0032 -0.0033 -0.0012  
AT. 106 H X 0.0069 0.0072 -0.0069 -0.0064 -0.0004 0.0015  
Y -0.0000 -0.0018 -0.0004 0.0008 0.0000 -0.0011  
Z -0.0026 -0.0043 0.0025 0.0032 -0.0033 0.0012  
AT. 107 H X 0.0069 0.0072 0.0069 0.0064 -0.0004 0.0015  
Y 0.0000 0.0018 -0.0004 0.0008 -0.0000 0.0011  
Z -0.0026 -0.0043 -0.0025 -0.0032 -0.0033 0.0012  
AT. 108 H X -0.0069 0.0072 -0.0069 0.0064 -0.0004 -0.0015  
Y 0.0000 -0.0018 -0.0004 -0.0008 0.0000 0.0011  
Z 0.0026 -0.0043 0.0025 -0.0032 -0.0033 -0.0012  
AT. 109 C X -0.0070 0.0080 0.0071 -0.0077 -0.0108 -0.0116  
Y -0.0094 0.0079 0.0098 -0.0084 -0.0005 -0.0003  
Z -0.0123 0.0116 0.0126 -0.0121 -0.0118 -0.0121  
AT. 110 C X 0.0070 0.0080 -0.0071 -0.0077 -0.0108 0.0116  
Y -0.0094 -0.0079 0.0098 0.0084 0.0005 -0.0003  
Z 0.0123 0.0116 -0.0126 -0.0121 -0.0118 0.0121  
AT. 111 C X 0.0070 0.0080 0.0071 0.0077 -0.0108 0.0116

Y 0.0094 0.0079 0.0098 0.0084 -0.0005 0.0003  
Z 0.0123 0.0116 0.0126 0.0121 -0.0118 0.0121  
AT. 112 C X -0.0070 0.0080 -0.0071 0.0077 -0.0108 -0.0116  
Y 0.0094 -0.0079 0.0098 -0.0084 0.0005 0.0003  
Z -0.0123 0.0116 -0.0126 0.0121 -0.0118 -0.0121  
AT. 113 H X -0.0135 0.0145 0.0138 -0.0139 -0.0089 -0.0100  
Y -0.0001 -0.0016 0.0001 0.0004 -0.0037 -0.0032  
Z -0.0212 0.0195 0.0217 -0.0202 -0.0103 -0.0109  
AT. 114 H X 0.0135 0.0145 -0.0138 -0.0139 -0.0089 0.0100  
Y -0.0001 0.0016 0.0001 -0.0004 0.0037 -0.0032  
Z 0.0212 0.0195 -0.0217 -0.0202 -0.0103 0.0109  
AT. 115 H X 0.0135 0.0145 0.0138 0.0139 -0.0089 0.0100  
Y 0.0001 -0.0016 0.0001 -0.0004 -0.0037 0.0032  
Z 0.0212 0.0195 0.0217 0.0202 -0.0103 0.0109  
AT. 116 H X -0.0135 0.0145 -0.0138 0.0139 -0.0089 -0.0100  
Y 0.0001 0.0016 0.0001 0.0004 0.0037 0.0032  
Z -0.0212 0.0195 -0.0217 0.0202 -0.0103 -0.0109  
AT. 117 H X 0.0088 -0.0073 -0.0095 0.0070 -0.0146 -0.0151  
Y -0.0059 0.0038 0.0061 -0.0045 0.0057 0.0059  
Z -0.0121 0.0109 0.0124 -0.0115 -0.0063 -0.0065  
AT. 118 H X -0.0088 -0.0073 0.0095 0.0070 -0.0146 0.0151  
Y -0.0059 -0.0038 0.0061 0.0045 -0.0057 0.0059  
Z 0.0121 0.0109 -0.0124 -0.0115 -0.0063 0.0065  
AT. 119 H X -0.0088 -0.0073 -0.0095 -0.0070 -0.0146 0.0151  
Y 0.0059 0.0038 0.0061 0.0045 0.0057 -0.0059  
Z 0.0121 0.0109 0.0124 0.0115 -0.0063 0.0065  
AT. 120 H X 0.0088 -0.0073 0.0095 -0.0070 -0.0146 -0.0151  
Y 0.0059 -0.0038 0.0061 -0.0045 -0.0057 -0.0059  
Z -0.0121 0.0109 -0.0124 0.0115 -0.0063 -0.0065  
AT. 121 C X -0.0017 0.0017 0.0017 -0.0017 0.0012 0.0017  
Y -0.0097 0.0091 0.0096 -0.0094 -0.0071 -0.0077  
Z 0.0132 -0.0124 -0.0132 0.0127 0.0105 0.0107

AT.122 C X 0.0017 0.0017 -0.0017 -0.0017 0.0012 -0.0017  
Y -0.0097 -0.0091 0.0096 0.0094 0.0071 -0.0077  
Z -0.0132 -0.0124 0.0132 0.0127 0.0105 -0.0107

AT.123 C X 0.0017 0.0017 0.0017 0.0017 0.0012 -0.0017  
Y 0.0097 0.0091 0.0096 0.0094 -0.0071 0.0077  
Z -0.0132 -0.0124 -0.0132 -0.0127 0.0105 -0.0107

AT.124 C X -0.0017 0.0017 -0.0017 0.0017 0.0012 0.0017  
Y 0.0097 -0.0091 0.0096 -0.0094 0.0071 0.0077  
Z 0.0132 -0.0124 0.0132 -0.0127 0.0105 0.0107

AT.125 H X 0.0124 -0.0119 -0.0124 0.0123 0.0024 0.0026  
Y -0.0067 0.0063 0.0065 -0.0063 -0.0054 -0.0060  
Z 0.0074 -0.0070 -0.0074 0.0069 0.0091 0.0096

AT.126 H X -0.0124 -0.0119 0.0124 0.0123 0.0024 -0.0026  
Y -0.0067 -0.0063 0.0065 0.0063 0.0054 -0.0060  
Z -0.0074 -0.0070 0.0074 0.0069 0.0091 -0.0096

AT.127 H X -0.0124 -0.0119 -0.0124 -0.0123 0.0024 -0.0026  
Y 0.0067 0.0063 0.0065 0.0063 -0.0054 0.0060  
Z -0.0074 -0.0070 -0.0074 -0.0069 0.0091 -0.0096

AT.128 H X 0.0124 -0.0119 0.0124 -0.0123 0.0024 0.0026  
Y 0.0067 -0.0063 0.0065 -0.0063 0.0054 0.0060  
Z 0.0074 -0.0070 0.0074 -0.0069 0.0091 0.0096

AT.129 H X -0.0037 0.0037 0.0036 -0.0038 0.0023 0.0031  
Y -0.0023 0.0017 0.0021 -0.0017 -0.0074 -0.0085  
Z 0.0238 -0.0223 -0.0238 0.0234 0.0135 0.0136

AT.130 H X 0.0037 0.0037 -0.0036 -0.0038 0.0023 -0.0031  
Y -0.0023 -0.0017 0.0021 0.0017 0.0074 -0.0085  
Z -0.0238 -0.0223 0.0238 0.0234 0.0135 -0.0136

AT.131 H X 0.0037 0.0037 0.0036 0.0038 0.0023 -0.0031  
Y 0.0023 0.0017 0.0021 0.0017 -0.0074 0.0085  
Z -0.0238 -0.0223 -0.0238 -0.0234 0.0135 -0.0136

AT.132 H X -0.0037 0.0037 -0.0036 0.0038 0.0023 0.0031  
Y 0.0023 -0.0017 0.0021 -0.0017 0.0074 0.0085



Z 0.0238 -0.0223 0.0238 -0.0234 0.0135 0.0136  
AT. 133 C X -0.0047 0.0049 0.0045 -0.0048 -0.0007 -0.0009  
Y 0.0039 -0.0037 -0.0040 0.0039 0.0003 0.0005  
Z -0.0013 0.0011 0.0013 -0.0011 -0.0006 -0.0008  
AT. 134 C X 0.0047 0.0049 -0.0045 -0.0048 -0.0007 0.0009  
Y 0.0039 0.0037 -0.0040 -0.0039 -0.0003 0.0005  
Z 0.0013 0.0011 -0.0013 -0.0011 -0.0006 0.0008  
AT. 135 C X 0.0047 0.0049 0.0045 0.0048 -0.0007 0.0009  
Y -0.0039 -0.0037 -0.0040 -0.0039 0.0003 -0.0005  
Z 0.0013 0.0011 0.0013 0.0011 -0.0006 0.0008  
AT. 136 C X -0.0047 0.0049 -0.0045 0.0048 -0.0007 -0.0009  
Y -0.0039 0.0037 -0.0040 0.0039 -0.0003 -0.0005  
Z -0.0013 0.0011 -0.0013 0.0011 -0.0006 -0.0008  
AT. 137 C X 0.0012 -0.0014 -0.0011 0.0012 -0.0012 -0.0009  
Y 0.0143 -0.0132 -0.0149 0.0140 0.0119 0.0118  
Z 0.0053 -0.0045 -0.0054 0.0046 -0.0024 -0.0017  
AT. 138 C X -0.0012 -0.0014 0.0011 0.0012 -0.0012 0.0009  
Y 0.0143 0.0132 -0.0149 -0.0140 -0.0119 0.0118  
Z -0.0053 -0.0045 0.0054 0.0046 -0.0024 0.0017  
AT. 139 C X -0.0012 -0.0014 -0.0011 -0.0012 -0.0012 0.0009  
Y -0.0143 -0.0132 -0.0149 -0.0140 0.0119 -0.0118  
Z -0.0053 -0.0045 -0.0054 -0.0046 -0.0024 0.0017  
AT. 140 C X 0.0012 -0.0014 0.0011 -0.0012 -0.0012 -0.0009  
Y -0.0143 0.0132 -0.0149 0.0140 -0.0119 -0.0118  
Z 0.0053 -0.0045 0.0054 -0.0046 -0.0024 -0.0017  
AT. 141 H X -0.0272 0.0251 0.0289 -0.0273 -0.0361 -0.0345  
Y -0.0186 0.0179 0.0198 -0.0195 -0.0222 -0.0212  
Z 0.0151 -0.0132 -0.0156 0.0139 0.0135 0.0136  
AT. 142 H X 0.0272 0.0251 -0.0289 -0.0273 -0.0361 0.0345  
Y -0.0186 -0.0179 0.0198 0.0195 0.0222 -0.0212  
Z -0.0151 -0.0132 0.0156 0.0139 0.0135 -0.0136  
AT. 143 H X 0.0272 0.0251 0.0289 0.0273 -0.0361 0.0345

Y 0.0186 0.0179 0.0198 0.0195 -0.0222 0.0212  
Z -0.0151 -0.0132 -0.0156 -0.0139 0.0135 -0.0136  
AT. 144 H X -0.0272 0.0251 -0.0289 0.0273 -0.0361 -0.0345  
Y 0.0186 -0.0179 0.0198 -0.0195 0.0222 0.0212  
Z 0.0151 -0.0132 0.0156 -0.0139 0.0135 0.0136  
AT. 145 H X 0.0386 -0.0362 -0.0409 0.0392 0.0437 0.0414  
Y 0.0076 -0.0069 -0.0075 0.0070 0.0020 0.0026  
Z 0.0214 -0.0193 -0.0218 0.0203 0.0112 0.0119  
AT. 146 H X -0.0386 -0.0362 0.0409 0.0392 0.0437 -0.0414  
Y 0.0076 0.0069 -0.0075 -0.0070 -0.0020 0.0026  
Z -0.0214 -0.0193 0.0218 0.0203 0.0112 -0.0119  
AT. 147 H X -0.0386 -0.0362 -0.0409 -0.0392 0.0437 -0.0414  
Y -0.0076 -0.0069 -0.0075 -0.0070 0.0020 -0.0026  
Z -0.0214 -0.0193 -0.0218 -0.0203 0.0112 -0.0119  
AT. 148 H X 0.0386 -0.0362 0.0409 -0.0392 0.0437 0.0414  
Y -0.0076 0.0069 -0.0075 0.0070 -0.0020 -0.0026  
Z 0.0214 -0.0193 0.0218 -0.0203 0.0112 0.0119  
AT. 149 O X 0.0002 -0.0020 0.0003 0.0014 0.0070 0.0075  
Y -0.0004 0.0007 0.0003 -0.0006 -0.0035 -0.0037  
Z 0.0001 0.0006 -0.0002 -0.0003 -0.0030 -0.0030  
AT. 150 O X -0.0002 -0.0020 -0.0003 0.0014 0.0070 -0.0075  
Y -0.0004 -0.0007 0.0003 0.0006 0.0035 -0.0037  
Z -0.0001 0.0006 0.0002 -0.0003 -0.0030 0.0030  
AT. 151 O X -0.0002 -0.0020 0.0003 -0.0014 0.0070 -0.0075  
Y 0.0004 0.0007 0.0003 0.0006 -0.0035 0.0037  
Z -0.0001 0.0006 -0.0002 0.0003 -0.0030 0.0030  
AT. 152 O X 0.0002 -0.0020 -0.0003 -0.0014 0.0070 0.0075  
Y 0.0004 -0.0007 0.0003 -0.0006 0.0035 0.0037  
Z 0.0001 0.0006 0.0002 0.0003 -0.0030 -0.0030  
AT. 153 H X -0.0034 0.0053 0.0045 -0.0035 0.0141 0.0099  
Y -0.0021 0.0070 0.0024 -0.0049 -0.0101 -0.0131  
Z 0.0018 -0.0018 -0.0022 0.0012 -0.0093 -0.0075

AT.154 H X 0.0034 0.0053 -0.0045 -0.0035 0.0141 -0.0099  
Y -0.0021 -0.0070 0.0024 0.0049 0.0101 -0.0131  
Z -0.0018 -0.0018 0.0022 0.0012 -0.0093 0.0075

AT.155 H X 0.0034 0.0053 0.0045 0.0035 0.0141 -0.0099  
Y 0.0021 0.0070 0.0024 0.0049 -0.0101 0.0131  
Z -0.0018 -0.0018 -0.0022 -0.0012 -0.0093 0.0075

AT.156 H X -0.0034 0.0053 -0.0045 0.0035 0.0141 0.0099  
Y 0.0021 -0.0070 0.0024 -0.0049 0.0101 0.0131  
Z 0.0018 -0.0018 0.0022 -0.0012 -0.0093 -0.0075

AT.157 O X 0.0011 0.0009 -0.0016 -0.0003 -0.0082 -0.0084  
Y -0.0005 -0.0001 0.0004 -0.0001 0.0002 0.0001  
Z -0.0010 -0.0005 0.0013 0.0001 0.0066 0.0060

AT.158 O X -0.0011 0.0009 0.0016 -0.0003 -0.0082 0.0084  
Y -0.0005 0.0001 0.0004 0.0001 -0.0002 0.0001  
Z 0.0010 -0.0005 -0.0013 0.0001 0.0066 -0.0060

AT.159 O X -0.0011 0.0009 -0.0016 0.0003 -0.0082 0.0084  
Y 0.0005 -0.0001 0.0004 0.0001 0.0002 -0.0001  
Z 0.0010 -0.0005 0.0013 -0.0001 0.0066 -0.0060

AT.160 O X 0.0011 0.0009 0.0016 0.0003 -0.0082 -0.0084  
Y 0.0005 0.0001 0.0004 -0.0001 -0.0002 -0.0001  
Z -0.0010 -0.0005 -0.0013 -0.0001 0.0066 0.0060

AT.161 O X 0.0000 -0.0004 -0.0003 0.0003 -0.0013 -0.0017  
Y 0.0002 -0.0001 -0.0003 0.0001 -0.0012 -0.0011  
Z 0.0002 0.0004 0.0000 -0.0002 -0.0029 -0.0024

AT.162 O X -0.0000 -0.0004 0.0003 0.0003 -0.0013 0.0017  
Y 0.0002 0.0001 -0.0003 -0.0001 0.0012 -0.0011  
Z -0.0002 0.0004 -0.0000 -0.0002 -0.0029 0.0024

AT.163 O X -0.0000 -0.0004 -0.0003 -0.0003 -0.0013 0.0017  
Y -0.0002 -0.0001 -0.0003 -0.0001 -0.0012 0.0011  
Z -0.0002 0.0004 0.0000 0.0002 -0.0029 0.0024

AT.164 O X 0.0000 -0.0004 0.0003 -0.0003 -0.0013 -0.0017  
Y -0.0002 0.0001 -0.0003 0.0001 0.0012 0.0011

Z 0.0002 0.0004 -0.0000 0.0002 -0.0029 -0.0024  
AT.165 H X -0.0024 0.0019 0.0049 -0.0040 0.0120 0.0150  
Y -0.0007 0.0009 0.0020 -0.0016 0.0040 0.0056  
Z 0.0025 -0.0022 -0.0046 0.0037 -0.0088 -0.0117  
AT.166 H X 0.0024 0.0019 -0.0049 -0.0040 0.0120 -0.0150  
Y -0.0007 -0.0009 0.0020 0.0016 -0.0040 0.0056  
Z -0.0025 -0.0022 0.0046 0.0037 -0.0088 0.0117  
AT.167 H X 0.0024 0.0019 0.0049 0.0040 0.0120 -0.0150  
Y 0.0007 0.0009 0.0020 0.0016 0.0040 -0.0056  
Z -0.0025 -0.0022 -0.0046 -0.0037 -0.0088 0.0117  
AT.168 H X -0.0024 0.0019 -0.0049 0.0040 0.0120 0.0150  
Y 0.0007 -0.0009 0.0020 -0.0016 -0.0040 -0.0056  
Z 0.0025 -0.0022 0.0046 -0.0037 -0.0088 -0.0117  
AT.169 O X 0.0005 -0.0004 -0.0005 0.0002 -0.0013 -0.0014  
Y 0.0009 -0.0007 -0.0005 0.0011 0.0004 0.0003  
Z -0.0001 0.0003 0.0003 -0.0002 0.0007 0.0007  
AT.170 O X -0.0005 -0.0004 0.0005 0.0002 -0.0013 0.0014  
Y 0.0009 0.0007 -0.0005 -0.0011 -0.0004 0.0003  
Z 0.0001 0.0003 -0.0003 -0.0002 0.0007 -0.0007  
AT.171 O X -0.0005 -0.0004 -0.0005 -0.0002 -0.0013 0.0014  
Y -0.0009 -0.0007 -0.0005 -0.0011 0.0004 -0.0003  
Z 0.0001 0.0003 0.0003 0.0002 0.0007 -0.0007  
AT.172 O X 0.0005 -0.0004 0.0005 -0.0002 -0.0013 -0.0014  
Y -0.0009 0.0007 -0.0005 0.0011 -0.0004 -0.0003  
Z -0.0001 0.0003 -0.0003 0.0002 0.0007 0.0007  
AT.173 H X -0.0016 0.0115 0.0043 -0.0014 0.0425 0.0244  
Y 0.0014 -0.0029 -0.0015 0.0012 -0.0075 -0.0048  
Z 0.0005 -0.0043 -0.0017 0.0002 -0.0140 -0.0083  
AT.174 H X 0.0016 0.0115 -0.0043 -0.0014 0.0425 -0.0244  
Y 0.0014 0.0029 -0.0015 -0.0012 0.0075 -0.0048  
Z -0.0005 -0.0043 0.0017 0.0002 -0.0140 0.0083  
AT.175 H X 0.0016 0.0115 0.0043 0.0014 0.0425 -0.0244

|              |   |         |         |         |         |         |         |
|--------------|---|---------|---------|---------|---------|---------|---------|
|              | Y | -0.0014 | -0.0029 | -0.0015 | -0.0012 | -0.0075 | 0.0048  |
|              | Z | -0.0005 | -0.0043 | -0.0017 | -0.0002 | -0.0140 | 0.0083  |
| AT. 176 H X  |   | -0.0016 | 0.0115  | -0.0043 | 0.0014  | 0.0425  | 0.0244  |
|              | Y | -0.0014 | 0.0029  | -0.0015 | 0.0012  | 0.0075  | 0.0048  |
|              | Z | 0.0005  | -0.0043 | 0.0017  | -0.0002 | -0.0140 | -0.0083 |
|              |   |         |         |         |         |         |         |
| FREQ(CM**-1) |   | 847.25  | 847.31  | 862.65  | 862.67  | 862.98  | 864.41  |
|              |   |         |         |         |         |         |         |
| AT. 1 I X    |   | -0.0003 | -0.0003 | 0.0001  | 0.0001  | 0.0001  | 0.0001  |
|              | Y | -0.0003 | -0.0003 | 0.0003  | 0.0003  | 0.0003  | 0.0003  |
|              | Z | -0.0002 | -0.0002 | 0.0003  | 0.0003  | 0.0003  | 0.0004  |
| AT. 2 I X    |   | 0.0003  | -0.0003 | -0.0001 | 0.0001  | 0.0001  | -0.0001 |
|              | Y | -0.0003 | 0.0003  | 0.0003  | -0.0003 | -0.0003 | 0.0003  |
|              | Z | 0.0002  | -0.0002 | -0.0003 | 0.0003  | 0.0003  | -0.0004 |
| AT. 3 I X    |   | -0.0003 | 0.0003  | 0.0001  | -0.0001 | 0.0001  | -0.0001 |
|              | Y | -0.0003 | 0.0003  | 0.0003  | -0.0003 | 0.0003  | -0.0003 |
|              | Z | -0.0002 | 0.0002  | 0.0003  | -0.0003 | 0.0003  | -0.0004 |
| AT. 4 I X    |   | 0.0003  | 0.0003  | -0.0001 | -0.0001 | 0.0001  | 0.0001  |
|              | Y | -0.0003 | -0.0003 | 0.0003  | 0.0003  | -0.0003 | -0.0003 |
|              | Z | 0.0002  | 0.0002  | -0.0003 | -0.0003 | 0.0003  | 0.0004  |
| AT. 5 I X    |   | 0.0001  | 0.0001  | -0.0000 | -0.0000 | 0.0000  | 0.0000  |
|              | Y | -0.0003 | -0.0003 | -0.0002 | -0.0002 | -0.0002 | -0.0002 |
|              | Z | 0.0001  | 0.0001  | 0.0002  | 0.0001  | 0.0001  | 0.0002  |
| AT. 6 I X    |   | -0.0001 | 0.0001  | 0.0000  | -0.0000 | 0.0000  | -0.0000 |
|              | Y | -0.0003 | 0.0003  | -0.0002 | 0.0002  | 0.0002  | -0.0002 |
|              | Z | -0.0001 | 0.0001  | -0.0002 | 0.0001  | 0.0001  | -0.0002 |
| AT. 7 I X    |   | 0.0001  | -0.0001 | -0.0000 | 0.0000  | 0.0000  | -0.0000 |
|              | Y | -0.0003 | 0.0003  | -0.0002 | 0.0002  | -0.0002 | 0.0002  |
|              | Z | 0.0001  | -0.0001 | 0.0002  | -0.0001 | 0.0001  | -0.0002 |
| AT. 8 I X    |   | -0.0001 | -0.0001 | 0.0000  | 0.0000  | 0.0000  | 0.0000  |
|              | Y | -0.0003 | -0.0003 | -0.0002 | -0.0002 | 0.0002  | 0.0002  |
|              | Z | -0.0001 | -0.0001 | -0.0002 | -0.0001 | 0.0001  | 0.0002  |

AT. 9 N X -0.0047 -0.0051 -0.0047 -0.0041 -0.0052 -0.0043  
Y -0.0036 -0.0039 -0.0004 -0.0005 -0.0009 -0.0006  
Z 0.0017 0.0017 0.0021 0.0021 0.0024 0.0022

AT. 10 N X 0.0047 -0.0051 0.0047 -0.0041 -0.0052 0.0043  
Y -0.0036 0.0039 -0.0004 0.0005 0.0009 -0.0006  
Z -0.0017 0.0017 -0.0021 0.0021 0.0024 -0.0022

AT. 11 N X -0.0047 0.0051 -0.0047 0.0041 -0.0052 0.0043  
Y -0.0036 0.0039 -0.0004 0.0005 -0.0009 0.0006  
Z 0.0017 -0.0017 0.0021 -0.0021 0.0024 -0.0022

AT. 12 N X 0.0047 0.0051 0.0047 0.0041 -0.0052 -0.0043  
Y -0.0036 -0.0039 -0.0004 -0.0005 0.0009 0.0006  
Z -0.0017 -0.0017 -0.0021 -0.0021 0.0024 0.0022

AT. 13 N X 0.0060 0.0062 -0.0003 -0.0007 0.0003 -0.0003  
Y -0.0058 -0.0061 -0.0014 -0.0013 -0.0017 -0.0013  
Z -0.0005 -0.0006 0.0011 0.0012 0.0010 0.0011

AT. 14 N X -0.0060 0.0062 0.0003 -0.0007 0.0003 0.0003  
Y -0.0058 0.0061 -0.0014 0.0013 0.0017 -0.0013  
Z 0.0005 -0.0006 -0.0011 0.0012 0.0010 -0.0011

AT. 15 N X 0.0060 -0.0062 -0.0003 0.0007 0.0003 0.0003  
Y -0.0058 0.0061 -0.0014 0.0013 -0.0017 0.0013  
Z -0.0005 0.0006 0.0011 -0.0012 0.0010 -0.0011

AT. 16 N X -0.0060 -0.0062 0.0003 0.0007 0.0003 -0.0003  
Y -0.0058 -0.0061 -0.0014 -0.0013 0.0017 0.0013  
Z 0.0005 0.0006 -0.0011 -0.0012 0.0010 0.0011

AT. 17 O X -0.0006 -0.0000 0.0022 0.0017 0.0024 0.0017  
Y 0.0000 0.0004 0.0039 0.0038 0.0041 0.0039  
Z -0.0038 -0.0038 0.0101 0.0101 0.0100 0.0100

AT. 18 O X 0.0006 -0.0000 -0.0022 0.0017 0.0024 -0.0017  
Y 0.0000 -0.0004 0.0039 -0.0038 -0.0041 0.0039  
Z 0.0038 -0.0038 -0.0101 0.0101 0.0100 -0.0100

AT. 19 O X -0.0006 0.0000 0.0022 -0.0017 0.0024 -0.0017  
Y 0.0000 -0.0004 0.0039 -0.0038 0.0041 -0.0039

Z -0.0038 0.0038 0.0101 -0.0101 0.0100 -0.0100  
AT. 20 O X 0.0006 0.0000 -0.0022 -0.0017 0.0024 0.0017  
Y 0.0000 0.0004 0.0039 0.0038 -0.0041 -0.0039  
Z 0.0038 0.0038 -0.0101 -0.0101 0.0100 0.0100  
AT. 21 O X -0.0000 0.0001 0.0005 0.0004 0.0005 0.0005  
Y 0.0025 0.0028 -0.0001 0.0000 0.0004 0.0002  
Z -0.0002 -0.0004 0.0031 0.0030 0.0021 0.0025  
AT. 22 O X 0.0000 0.0001 -0.0005 0.0004 0.0005 -0.0005  
Y 0.0025 -0.0028 -0.0001 -0.0000 -0.0004 0.0002  
Z 0.0002 -0.0004 -0.0031 0.0030 0.0021 -0.0025  
AT. 23 O X -0.0000 -0.0001 0.0005 -0.0004 0.0005 -0.0005  
Y 0.0025 -0.0028 -0.0001 -0.0000 0.0004 -0.0002  
Z -0.0002 0.0004 0.0031 -0.0030 0.0021 -0.0025  
AT. 24 O X 0.0000 -0.0001 -0.0005 -0.0004 0.0005 0.0005  
Y 0.0025 0.0028 -0.0001 0.0000 -0.0004 -0.0002  
Z 0.0002 0.0004 -0.0031 -0.0030 0.0021 0.0025  
AT. 25 C X 0.0096 0.0100 -0.0088 -0.0087 -0.0080 -0.0089  
Y 0.0096 0.0102 0.0001 -0.0002 0.0008 0.0002  
Z 0.0063 0.0064 -0.0184 -0.0183 -0.0183 -0.0183  
AT. 26 C X -0.0096 0.0100 0.0088 -0.0087 -0.0080 0.0089  
Y 0.0096 -0.0102 0.0001 0.0002 -0.0008 0.0002  
Z -0.0063 0.0064 0.0184 -0.0183 -0.0183 0.0183  
AT. 27 C X 0.0096 -0.0100 -0.0088 0.0087 -0.0080 0.0089  
Y 0.0096 -0.0102 0.0001 0.0002 0.0008 -0.0002  
Z 0.0063 -0.0064 -0.0184 0.0183 -0.0183 0.0183  
AT. 28 C X -0.0096 -0.0100 0.0088 0.0087 -0.0080 -0.0089  
Y 0.0096 0.0102 0.0001 -0.0002 -0.0008 -0.0002  
Z -0.0063 -0.0064 0.0184 0.0183 -0.0183 -0.0183  
AT. 29 H X 0.0311 0.0325 -0.0297 -0.0303 -0.0278 -0.0300  
Y -0.0402 -0.0427 0.0413 0.0422 0.0387 0.0419  
Z -0.0181 -0.0191 0.0058 0.0068 0.0046 0.0060  
AT. 30 H X -0.0311 0.0325 0.0297 -0.0303 -0.0278 0.0300

Y -0.0402 0.0427 0.0413 -0.0422 -0.0387 0.0419  
Z 0.0181 -0.0191 -0.0058 0.0068 0.0046 -0.0060  
AT. 31 H X 0.0311 -0.0325 -0.0297 0.0303 -0.0278 0.0300  
Y -0.0402 0.0427 0.0413 -0.0422 0.0387 -0.0419  
Z -0.0181 0.0191 0.0058 -0.0068 0.0046 -0.0060  
AT. 32 H X -0.0311 -0.0325 0.0297 0.0303 -0.0278 -0.0300  
Y -0.0402 -0.0427 0.0413 0.0422 -0.0387 -0.0419  
Z 0.0181 0.0191 -0.0058 -0.0068 0.0046 0.0060  
AT. 33 H X -0.0546 -0.0569 0.0501 0.0504 0.0463 0.0499  
Y 0.0225 0.0238 -0.0093 -0.0097 -0.0076 -0.0093  
Z -0.0014 -0.0021 -0.0206 -0.0201 -0.0211 -0.0200  
AT. 34 H X 0.0546 -0.0569 -0.0501 0.0504 0.0463 -0.0499  
Y 0.0225 -0.0238 -0.0093 0.0097 0.0076 -0.0093  
Z 0.0014 -0.0021 0.0206 -0.0201 -0.0211 0.0200  
AT. 35 H X -0.0546 0.0569 0.0501 -0.0504 0.0463 -0.0499  
Y 0.0225 -0.0238 -0.0093 0.0097 -0.0076 0.0093  
Z -0.0014 0.0021 -0.0206 0.0201 -0.0211 0.0200  
AT. 36 H X 0.0546 0.0569 -0.0501 -0.0504 0.0463 0.0499  
Y 0.0225 0.0238 -0.0093 -0.0097 0.0076 0.0093  
Z 0.0014 0.0021 0.0206 0.0201 -0.0211 -0.0200  
AT. 37 C X -0.0048 -0.0047 0.0096 0.0092 0.0092 0.0097  
Y -0.0013 -0.0010 0.0005 0.0004 0.0005 0.0004  
Z 0.0001 0.0003 0.0039 0.0039 0.0040 0.0038  
AT. 38 C X 0.0048 -0.0047 -0.0096 0.0092 0.0092 -0.0097  
Y -0.0013 0.0010 0.0005 -0.0004 -0.0005 0.0004  
Z -0.0001 0.0003 -0.0039 0.0039 0.0040 -0.0038  
AT. 39 C X -0.0048 0.0047 0.0096 -0.0092 0.0092 -0.0097  
Y -0.0013 0.0010 0.0005 -0.0004 0.0005 -0.0004  
Z 0.0001 -0.0003 0.0039 -0.0039 0.0040 -0.0038  
AT. 40 C X 0.0048 0.0047 -0.0096 -0.0092 0.0092 0.0097  
Y -0.0013 -0.0010 0.0005 0.0004 -0.0005 -0.0004  
Z -0.0001 -0.0003 -0.0039 -0.0039 0.0040 0.0038



AT. 41 C X 0.0067 0.0057 0.0032 0.0035 0.0037 0.0035  
Y 0.0007 -0.0002 -0.0070 -0.0066 -0.0069 -0.0065  
Z -0.0088 -0.0091 -0.0157 -0.0153 -0.0172 -0.0157

AT. 42 C X -0.0067 0.0057 -0.0032 0.0035 0.0037 -0.0035  
Y 0.0007 0.0002 -0.0070 0.0066 0.0069 -0.0065  
Z 0.0088 -0.0091 0.0157 -0.0153 -0.0172 0.0157

AT. 43 C X 0.0067 -0.0057 0.0032 -0.0035 0.0037 -0.0035  
Y 0.0007 0.0002 -0.0070 0.0066 -0.0069 0.0065  
Z -0.0088 0.0091 -0.0157 0.0153 -0.0172 0.0157

AT. 44 C X -0.0067 -0.0057 -0.0032 -0.0035 0.0037 0.0035  
Y 0.0007 -0.0002 -0.0070 -0.0066 0.0069 0.0065  
Z 0.0088 0.0091 0.0157 0.0153 -0.0172 -0.0157

AT. 45 H X 0.0072 0.0064 -0.0026 -0.0023 -0.0015 -0.0017  
Y 0.0061 0.0050 -0.0022 -0.0014 -0.0015 -0.0018  
Z -0.0045 -0.0050 -0.0115 -0.0108 -0.0126 -0.0116

AT. 46 H X -0.0072 0.0064 0.0026 -0.0023 -0.0015 0.0017  
Y 0.0061 -0.0050 -0.0022 0.0014 0.0015 -0.0018  
Z 0.0045 -0.0050 0.0115 -0.0108 -0.0126 0.0116

AT. 47 H X 0.0072 -0.0064 -0.0026 0.0023 -0.0015 0.0017  
Y 0.0061 -0.0050 -0.0022 0.0014 -0.0015 0.0018  
Z -0.0045 0.0050 -0.0115 0.0108 -0.0126 0.0116

AT. 48 H X -0.0072 -0.0064 0.0026 0.0023 -0.0015 -0.0017  
Y 0.0061 0.0050 -0.0022 -0.0014 0.0015 0.0018  
Z 0.0045 0.0050 0.0115 0.0108 -0.0126 -0.0116

AT. 49 H X 0.0084 0.0070 0.0064 0.0066 0.0069 0.0063  
Y 0.0037 0.0026 -0.0030 -0.0026 -0.0030 -0.0030  
Z -0.0124 -0.0132 -0.0179 -0.0174 -0.0190 -0.0175

AT. 50 H X -0.0084 0.0070 -0.0064 0.0066 0.0069 -0.0063  
Y 0.0037 -0.0026 -0.0030 0.0026 0.0030 -0.0030  
Z 0.0124 -0.0132 0.0179 -0.0174 -0.0190 0.0175

AT. 51 H X 0.0084 -0.0070 0.0064 -0.0066 0.0069 -0.0063  
Y 0.0037 -0.0026 -0.0030 0.0026 -0.0030 0.0030

Z -0.0124 0.0132 -0.0179 0.0174 -0.0190 0.0175  
AT. 52 H X -0.0084 -0.0070 -0.0064 -0.0066 0.0069 0.0063  
Y 0.0037 0.0026 -0.0030 -0.0026 0.0030 0.0030  
Z 0.0124 0.0132 0.0179 0.0174 -0.0190 -0.0175  
AT. 53 C X 0.0007 0.0006 -0.0018 -0.0017 -0.0018 -0.0017  
Y 0.0026 0.0027 -0.0044 -0.0045 -0.0042 -0.0044  
Z -0.0032 -0.0034 0.0026 0.0029 0.0024 0.0028  
AT. 54 C X -0.0007 0.0006 0.0018 -0.0017 -0.0018 0.0017  
Y 0.0026 -0.0027 -0.0044 0.0045 0.0042 -0.0044  
Z 0.0032 -0.0034 -0.0026 0.0029 0.0024 -0.0028  
AT. 55 C X 0.0007 -0.0006 -0.0018 0.0017 -0.0018 0.0017  
Y 0.0026 -0.0027 -0.0044 0.0045 -0.0042 0.0044  
Z -0.0032 0.0034 0.0026 -0.0029 0.0024 -0.0028  
AT. 56 C X -0.0007 -0.0006 0.0018 0.0017 -0.0018 -0.0017  
Y 0.0026 0.0027 -0.0044 -0.0045 0.0042 0.0044  
Z 0.0032 0.0034 -0.0026 -0.0029 0.0024 0.0028  
AT. 57 C X 0.0013 0.0015 -0.0001 -0.0003 -0.0000 -0.0002  
Y 0.0029 0.0035 -0.0003 -0.0006 0.0001 -0.0005  
Z 0.0046 0.0051 0.0026 0.0020 0.0031 0.0023  
AT. 58 C X -0.0013 0.0015 0.0001 -0.0003 -0.0000 0.0002  
Y 0.0029 -0.0035 -0.0003 0.0006 -0.0001 -0.0005  
Z -0.0046 0.0051 -0.0026 0.0020 0.0031 -0.0023  
AT. 59 C X 0.0013 -0.0015 -0.0001 0.0003 -0.0000 0.0002  
Y 0.0029 -0.0035 -0.0003 0.0006 0.0001 0.0005  
Z 0.0046 -0.0051 0.0026 -0.0020 0.0031 -0.0023  
AT. 60 C X -0.0013 -0.0015 0.0001 0.0003 -0.0000 -0.0002  
Y 0.0029 0.0035 -0.0003 -0.0006 -0.0001 0.0005  
Z -0.0046 -0.0051 -0.0026 -0.0020 0.0031 0.0023  
AT. 61 H X -0.0012 -0.0013 0.0044 0.0041 0.0045 0.0041  
Y 0.0017 0.0020 0.0047 0.0043 0.0051 0.0045  
Z 0.0016 0.0027 -0.0065 -0.0075 -0.0063 -0.0077  
AT. 62 H X 0.0012 -0.0013 -0.0044 0.0041 0.0045 -0.0041

Y 0.0017 -0.0020 0.0047 -0.0043 -0.0051 0.0045  
Z -0.0016 0.0027 0.0065 -0.0075 -0.0063 0.0077  
AT. 63 H X -0.0012 0.0013 0.0044 -0.0041 0.0045 -0.0041  
Y 0.0017 -0.0020 0.0047 -0.0043 0.0051 -0.0045  
Z 0.0016 -0.0027 -0.0065 0.0075 -0.0063 0.0077  
AT. 64 H X 0.0012 0.0013 -0.0044 -0.0041 0.0045 0.0041  
Y 0.0017 0.0020 0.0047 0.0043 -0.0051 -0.0045  
Z -0.0016 -0.0027 0.0065 0.0075 -0.0063 -0.0077  
AT. 65 H X 0.0006 0.0008 -0.0004 -0.0006 -0.0003 -0.0005  
Y 0.0055 0.0054 0.0014 0.0012 0.0016 0.0012  
Z 0.0064 0.0069 -0.0164 -0.0170 -0.0165 -0.0170  
AT. 66 H X -0.0006 0.0008 0.0004 -0.0006 -0.0003 0.0005  
Y 0.0055 -0.0054 0.0014 -0.0012 -0.0016 0.0012  
Z -0.0064 0.0069 0.0164 -0.0170 -0.0165 0.0170  
AT. 67 H X 0.0006 -0.0008 -0.0004 0.0006 -0.0003 0.0005  
Y 0.0055 -0.0054 0.0014 -0.0012 0.0016 -0.0012  
Z 0.0064 -0.0069 -0.0164 0.0170 -0.0165 0.0170  
AT. 68 H X -0.0006 -0.0008 0.0004 0.0006 -0.0003 -0.0005  
Y 0.0055 0.0054 0.0014 0.0012 -0.0016 -0.0012  
Z -0.0064 -0.0069 0.0164 0.0170 -0.0165 -0.0170  
AT. 69 H X -0.0011 0.0003 0.0094 0.0095 0.0098 0.0092  
Y 0.0022 0.0024 0.0131 0.0132 0.0136 0.0133  
Z 0.0035 0.0040 0.0153 0.0150 0.0161 0.0154  
AT. 70 H X 0.0011 0.0003 -0.0094 0.0095 0.0098 -0.0092  
Y 0.0022 -0.0024 0.0131 -0.0132 -0.0136 0.0133  
Z -0.0035 0.0040 -0.0153 0.0150 0.0161 -0.0154  
AT. 71 H X -0.0011 -0.0003 0.0094 -0.0095 0.0098 -0.0092  
Y 0.0022 -0.0024 0.0131 -0.0132 0.0136 -0.0133  
Z 0.0035 -0.0040 0.0153 -0.0150 0.0161 -0.0154  
AT. 72 H X 0.0011 -0.0003 -0.0094 -0.0095 0.0098 0.0092  
Y 0.0022 0.0024 0.0131 0.0132 -0.0136 -0.0133  
Z -0.0035 -0.0040 -0.0153 -0.0150 0.0161 0.0154

AT. 73 C X -0.0011 -0.0016 0.0053 0.0059 0.0056 0.0058  
Y -0.0041 -0.0034 0.0033 0.0034 0.0030 0.0035  
Z 0.0079 0.0070 0.0055 0.0061 0.0062 0.0064

AT. 74 C X 0.0011 -0.0016 -0.0053 0.0059 0.0056 -0.0058  
Y -0.0041 0.0034 0.0033 -0.0034 -0.0030 0.0035  
Z -0.0079 0.0070 -0.0055 0.0061 0.0062 -0.0064

AT. 75 C X -0.0011 0.0016 0.0053 -0.0059 0.0056 -0.0058  
Y -0.0041 0.0034 0.0033 -0.0034 0.0030 -0.0035  
Z 0.0079 -0.0070 0.0055 -0.0061 0.0062 -0.0064

AT. 76 C X 0.0011 0.0016 -0.0053 -0.0059 0.0056 0.0058  
Y -0.0041 -0.0034 0.0033 0.0034 -0.0030 -0.0035  
Z -0.0079 -0.0070 -0.0055 -0.0061 0.0062 0.0064

AT. 77 C X 0.0007 0.0007 -0.0096 -0.0108 -0.0097 -0.0109  
Y -0.0028 -0.0033 -0.0062 -0.0057 -0.0067 -0.0059  
Z 0.0084 0.0087 0.0101 0.0099 0.0112 0.0103

AT. 78 C X -0.0007 0.0007 0.0096 -0.0108 -0.0097 0.0109  
Y -0.0028 0.0033 -0.0062 0.0057 0.0067 -0.0059  
Z -0.0084 0.0087 -0.0101 0.0099 0.0112 -0.0103

AT. 79 C X 0.0007 -0.0007 -0.0096 0.0108 -0.0097 0.0109  
Y -0.0028 0.0033 -0.0062 0.0057 -0.0067 0.0059  
Z 0.0084 -0.0087 0.0101 -0.0099 0.0112 -0.0103

AT. 80 C X -0.0007 -0.0007 0.0096 0.0108 -0.0097 -0.0109  
Y -0.0028 -0.0033 -0.0062 -0.0057 0.0067 0.0059  
Z -0.0084 -0.0087 -0.0101 -0.0099 0.0112 0.0103

AT. 81 H X -0.0049 -0.0047 -0.0188 -0.0216 -0.0196 -0.0220  
Y -0.0087 -0.0091 -0.0160 -0.0170 -0.0171 -0.0177  
Z 0.0046 0.0053 0.0038 0.0025 0.0046 0.0030

AT. 82 H X 0.0049 -0.0047 0.0188 -0.0216 -0.0196 0.0220  
Y -0.0087 0.0091 -0.0160 0.0170 0.0171 -0.0177  
Z -0.0046 0.0053 -0.0038 0.0025 0.0046 -0.0030

AT. 83 H X -0.0049 0.0047 -0.0188 0.0216 -0.0196 0.0220  
Y -0.0087 0.0091 -0.0160 0.0170 -0.0171 0.0177

Z 0.0046 -0.0053 0.0038 -0.0025 0.0046 -0.0030  
AT. 84 H X 0.0049 0.0047 0.0188 0.0216 -0.0196 -0.0220  
Y -0.0087 -0.0091 -0.0160 -0.0170 0.0171 0.0177  
Z -0.0046 -0.0053 -0.0038 -0.0025 0.0046 0.0030  
AT. 85 H X 0.0088 0.0085 0.0008 0.0017 0.0013 0.0022  
Y -0.0023 -0.0027 -0.0122 -0.0125 -0.0126 -0.0128  
Z 0.0058 0.0062 0.0123 0.0122 0.0132 0.0125  
AT. 86 H X -0.0088 0.0085 -0.0008 0.0017 0.0013 -0.0022  
Y -0.0023 0.0027 -0.0122 0.0125 0.0126 -0.0128  
Z -0.0058 0.0062 -0.0123 0.0122 0.0132 -0.0125  
AT. 87 H X 0.0088 -0.0085 0.0008 -0.0017 0.0013 -0.0022  
Y -0.0023 0.0027 -0.0122 0.0125 -0.0126 0.0128  
Z 0.0058 -0.0062 0.0123 -0.0122 0.0132 -0.0125  
AT. 88 H X -0.0088 -0.0085 -0.0008 -0.0017 0.0013 0.0022  
Y -0.0023 -0.0027 -0.0122 -0.0125 0.0126 0.0128  
Z -0.0058 -0.0062 -0.0123 -0.0122 0.0132 0.0125  
AT. 89 C X 0.0012 0.0012 -0.0000 0.0001 0.0003 0.0003  
Y 0.0031 0.0031 0.0055 0.0058 0.0055 0.0058  
Z 0.0054 0.0054 0.0058 0.0060 0.0063 0.0063  
AT. 90 C X -0.0012 0.0012 0.0000 0.0001 0.0003 -0.0003  
Y 0.0031 -0.0031 0.0055 -0.0058 -0.0055 0.0058  
Z -0.0054 0.0054 -0.0058 0.0060 0.0063 -0.0063  
AT. 91 C X 0.0012 -0.0012 -0.0000 -0.0001 0.0003 -0.0003  
Y 0.0031 -0.0031 0.0055 -0.0058 0.0055 -0.0058  
Z 0.0054 -0.0054 0.0058 -0.0060 0.0063 -0.0063  
AT. 92 C X -0.0012 -0.0012 0.0000 -0.0001 0.0003 0.0003  
Y 0.0031 0.0031 0.0055 0.0058 -0.0055 -0.0058  
Z -0.0054 -0.0054 -0.0058 -0.0060 0.0063 0.0063  
AT. 93 C X -0.0017 -0.0013 -0.0012 -0.0012 -0.0010 -0.0010  
Y 0.0076 0.0080 0.0056 0.0055 0.0062 0.0056  
Z -0.0085 -0.0081 -0.0021 -0.0020 -0.0031 -0.0024  
AT. 94 C X 0.0017 -0.0013 0.0012 -0.0012 -0.0010 0.0010

Y 0.0076 -0.0080 0.0056 -0.0055 -0.0062 0.0056  
Z 0.0085 -0.0081 0.0021 -0.0020 -0.0031 0.0024  
AT. 95 C X -0.0017 0.0013 -0.0012 0.0012 -0.0010 0.0010  
Y 0.0076 -0.0080 0.0056 -0.0055 0.0062 -0.0056  
Z -0.0085 0.0081 -0.0021 0.0020 -0.0031 0.0024  
AT. 96 C X 0.0017 0.0013 0.0012 0.0012 -0.0010 -0.0010  
Y 0.0076 0.0080 0.0056 0.0055 -0.0062 -0.0056  
Z 0.0085 0.0081 0.0021 0.0020 -0.0031 -0.0024  
AT. 97 H X -0.0036 -0.0020 0.0026 0.0018 0.0018 0.0011  
Y 0.0080 0.0057 -0.0040 -0.0030 -0.0026 -0.0019  
Z -0.0148 -0.0156 -0.0085 -0.0090 -0.0110 -0.0105  
AT. 98 H X 0.0036 -0.0020 -0.0026 0.0018 0.0018 -0.0011  
Y 0.0080 -0.0057 -0.0040 0.0030 0.0026 -0.0019  
Z 0.0148 -0.0156 0.0085 -0.0090 -0.0110 0.0105  
AT. 99 H X -0.0036 0.0020 0.0026 -0.0018 0.0018 -0.0011  
Y 0.0080 -0.0057 -0.0040 0.0030 -0.0026 0.0019  
Z -0.0148 0.0156 -0.0085 0.0090 -0.0110 0.0105  
AT. 100 H X 0.0036 0.0020 -0.0026 -0.0018 0.0018 0.0011  
Y 0.0080 0.0057 -0.0040 -0.0030 0.0026 0.0019  
Z 0.0148 0.0156 0.0085 0.0090 -0.0110 -0.0105  
AT. 101 H X -0.0041 -0.0039 -0.0013 -0.0016 -0.0016 -0.0017  
Y 0.0063 0.0069 0.0092 0.0087 0.0092 0.0083  
Z -0.0155 -0.0164 -0.0253 -0.0254 -0.0249 -0.0242  
AT. 102 H X 0.0041 -0.0039 0.0013 -0.0016 -0.0016 0.0017  
Y 0.0063 -0.0069 0.0092 -0.0087 -0.0092 0.0083  
Z 0.0155 -0.0164 0.0253 -0.0254 -0.0249 0.0242  
AT. 103 H X -0.0041 0.0039 -0.0013 0.0016 -0.0016 0.0017  
Y 0.0063 -0.0069 0.0092 -0.0087 0.0092 -0.0083  
Z -0.0155 0.0164 -0.0253 0.0254 -0.0249 0.0242  
AT. 104 H X 0.0041 0.0039 0.0013 0.0016 -0.0016 -0.0017  
Y 0.0063 0.0069 0.0092 0.0087 -0.0092 -0.0083  
Z 0.0155 0.0164 0.0253 0.0254 -0.0249 -0.0242

AT.105 H X -0.0002 -0.0015 0.0053 0.0058 0.0047 0.0056  
Y -0.0012 -0.0012 -0.0114 -0.0120 -0.0103 -0.0112  
Z -0.0024 -0.0012 0.0084 0.0087 0.0073 0.0080

AT.106 H X 0.0002 -0.0015 -0.0053 0.0058 0.0047 -0.0056  
Y -0.0012 0.0012 -0.0114 0.0120 0.0103 -0.0112  
Z 0.0024 -0.0012 -0.0084 0.0087 0.0073 -0.0080

AT.107 H X -0.0002 0.0015 0.0053 -0.0058 0.0047 -0.0056  
Y -0.0012 0.0012 -0.0114 0.0120 -0.0103 0.0112  
Z -0.0024 0.0012 0.0084 -0.0087 0.0073 -0.0080

AT.108 H X 0.0002 0.0015 -0.0053 -0.0058 0.0047 0.0056  
Y -0.0012 -0.0012 -0.0114 -0.0120 0.0103 0.0112  
Z 0.0024 0.0012 -0.0084 -0.0087 0.0073 0.0080

AT.109 C X -0.0116 -0.0110 -0.0062 -0.0062 -0.0073 -0.0064  
Y -0.0000 -0.0006 0.0013 0.0014 0.0011 0.0014  
Z -0.0116 -0.0120 0.0007 0.0014 -0.0002 0.0007

AT.110 C X 0.0116 -0.0110 0.0062 -0.0062 -0.0073 0.0064  
Y -0.0000 0.0006 0.0013 -0.0014 -0.0011 0.0014  
Z 0.0116 -0.0120 -0.0007 0.0014 -0.0002 -0.0007

AT.111 C X -0.0116 0.0110 -0.0062 0.0062 -0.0073 0.0064  
Y -0.0000 0.0006 0.0013 -0.0014 0.0011 -0.0014  
Z -0.0116 0.0120 0.0007 -0.0014 -0.0002 -0.0007

AT.112 C X 0.0116 0.0110 0.0062 0.0062 -0.0073 -0.0064  
Y -0.0000 -0.0006 0.0013 0.0014 -0.0011 -0.0014  
Z 0.0116 0.0120 -0.0007 -0.0014 -0.0002 0.0007

AT.113 H X -0.0101 -0.0090 -0.0104 -0.0108 -0.0119 -0.0108  
Y -0.0027 -0.0042 0.0073 0.0079 0.0077 0.0077  
Z -0.0105 -0.0110 -0.0033 -0.0034 -0.0048 -0.0037

AT.114 H X 0.0101 -0.0090 0.0104 -0.0108 -0.0119 0.0108  
Y -0.0027 0.0042 0.0073 -0.0079 -0.0077 0.0077  
Z 0.0105 -0.0110 0.0033 -0.0034 -0.0048 0.0037

AT.115 H X -0.0101 0.0090 -0.0104 0.0108 -0.0119 0.0108  
Y -0.0027 0.0042 0.0073 -0.0079 0.0077 -0.0077

Z -0.0105 0.0110 -0.0033 0.0034 -0.0048 0.0037  
AT. 116 H X 0.0101 0.0090 0.0104 0.0108 -0.0119 -0.0108  
Y -0.0027 -0.0042 0.0073 0.0079 -0.0077 -0.0077  
Z 0.0105 0.0110 0.0033 0.0034 -0.0048 -0.0037  
AT. 117 H X -0.0150 -0.0151 0.0022 0.0030 0.0020 0.0021  
Y 0.0067 0.0058 0.0038 0.0040 0.0040 0.0039  
Z -0.0056 -0.0063 0.0017 0.0023 0.0010 0.0017  
AT. 118 H X 0.0150 -0.0151 -0.0022 0.0030 0.0020 -0.0021  
Y 0.0067 -0.0058 0.0038 -0.0040 -0.0040 0.0039  
Z 0.0056 -0.0063 -0.0017 0.0023 0.0010 -0.0017  
AT. 119 H X -0.0150 0.0151 0.0022 -0.0030 0.0020 -0.0021  
Y 0.0067 -0.0058 0.0038 -0.0040 0.0040 -0.0039  
Z -0.0056 0.0063 0.0017 -0.0023 0.0010 -0.0017  
AT. 120 H X 0.0150 0.0151 -0.0022 -0.0030 0.0020 0.0021  
Y 0.0067 0.0058 0.0038 0.0040 -0.0040 -0.0039  
Z 0.0056 0.0063 -0.0017 -0.0023 0.0010 0.0017  
AT. 121 C X 0.0018 0.0020 0.0119 0.0128 0.0119 0.0127  
Y -0.0074 -0.0078 -0.0038 -0.0042 -0.0046 -0.0045  
Z 0.0102 0.0107 -0.0059 -0.0067 -0.0045 -0.0059  
AT. 122 C X -0.0018 0.0020 -0.0119 0.0128 0.0119 -0.0127  
Y -0.0074 0.0078 -0.0038 0.0042 0.0046 -0.0045  
Z -0.0102 0.0107 0.0059 -0.0067 -0.0045 0.0059  
AT. 123 C X 0.0018 -0.0020 0.0119 -0.0128 0.0119 -0.0127  
Y -0.0074 0.0078 -0.0038 0.0042 -0.0046 0.0045  
Z 0.0102 -0.0107 -0.0059 0.0067 -0.0045 0.0059  
AT. 124 C X -0.0018 -0.0020 -0.0119 -0.0128 0.0119 0.0127  
Y -0.0074 -0.0078 -0.0038 -0.0042 0.0046 0.0045  
Z -0.0102 -0.0107 0.0059 0.0067 -0.0045 -0.0059  
AT. 125 H X 0.0023 0.0023 0.0010 0.0019 0.0012 0.0019  
Y -0.0059 -0.0062 -0.0086 -0.0092 -0.0091 -0.0094  
Z 0.0093 0.0097 0.0005 -0.0002 0.0017 0.0005  
AT. 126 H X -0.0023 0.0023 -0.0010 0.0019 0.0012 -0.0019



Y -0.0059 0.0062 -0.0086 0.0092 0.0091 -0.0094  
Z -0.0093 0.0097 -0.0005 -0.0002 0.0017 -0.0005  
AT. 127 H X 0.0023 -0.0023 0.0010 -0.0019 0.0012 -0.0019  
Y -0.0059 0.0062 -0.0086 0.0092 -0.0091 0.0094  
Z 0.0093 -0.0097 0.0005 0.0002 0.0017 -0.0005  
AT. 128 H X -0.0023 -0.0023 -0.0010 -0.0019 0.0012 0.0019  
Y -0.0059 -0.0062 -0.0086 -0.0092 0.0091 0.0094  
Z -0.0093 -0.0097 -0.0005 0.0002 0.0017 0.0005  
AT. 129 H X 0.0032 0.0037 0.0169 0.0180 0.0169 0.0179  
Y -0.0084 -0.0093 -0.0138 -0.0146 -0.0148 -0.0151  
Z 0.0124 0.0130 -0.0126 -0.0134 -0.0113 -0.0127  
AT. 130 H X -0.0032 0.0037 -0.0169 0.0180 0.0169 -0.0179  
Y -0.0084 0.0093 -0.0138 0.0146 0.0148 -0.0151  
Z -0.0124 0.0130 0.0126 -0.0134 -0.0113 0.0127  
AT. 131 H X 0.0032 -0.0037 0.0169 -0.0180 0.0169 -0.0179  
Y -0.0084 0.0093 -0.0138 0.0146 -0.0148 0.0151  
Z 0.0124 -0.0130 -0.0126 0.0134 -0.0113 0.0127  
AT. 132 H X -0.0032 -0.0037 -0.0169 -0.0180 0.0169 0.0179  
Y -0.0084 -0.0093 -0.0138 -0.0146 0.0148 0.0151  
Z -0.0124 -0.0130 0.0126 0.0134 -0.0113 -0.0127  
AT. 133 C X -0.0006 -0.0011 0.0007 0.0011 0.0002 0.0005  
Y 0.0002 0.0005 -0.0009 -0.0008 -0.0006 -0.0006  
Z -0.0008 -0.0009 0.0014 0.0012 0.0008 0.0011  
AT. 134 C X 0.0006 -0.0011 -0.0007 0.0011 0.0002 -0.0005  
Y 0.0002 -0.0005 -0.0009 0.0008 0.0006 -0.0006  
Z 0.0008 -0.0009 -0.0014 0.0012 0.0008 -0.0011  
AT. 135 C X -0.0006 0.0011 0.0007 -0.0011 0.0002 -0.0005  
Y 0.0002 -0.0005 -0.0009 0.0008 -0.0006 0.0006  
Z -0.0008 0.0009 0.0014 -0.0012 0.0008 -0.0011  
AT. 136 C X 0.0006 0.0011 -0.0007 -0.0011 0.0002 0.0005  
Y 0.0002 0.0005 -0.0009 -0.0008 0.0006 0.0006  
Z 0.0008 0.0009 -0.0014 -0.0012 0.0008 0.0011

AT. 137 C X -0.0012 -0.0010 -0.0016 -0.0018 -0.0014 -0.0016  
Y 0.0115 0.0119 0.0058 0.0053 0.0057 0.0052  
Z -0.0023 -0.0020 -0.0071 -0.0067 -0.0054 -0.0059

AT. 138 C X 0.0012 -0.0010 0.0016 -0.0018 -0.0014 0.0016  
Y 0.0115 -0.0119 0.0058 -0.0053 -0.0057 0.0052  
Z 0.0023 -0.0020 0.0071 -0.0067 -0.0054 0.0059

AT. 139 C X -0.0012 0.0010 -0.0016 0.0018 -0.0014 0.0016  
Y 0.0115 -0.0119 0.0058 -0.0053 0.0057 -0.0052  
Z -0.0023 0.0020 -0.0071 0.0067 -0.0054 0.0059

AT. 140 C X 0.0012 0.0010 0.0016 0.0018 -0.0014 -0.0016  
Y 0.0115 0.0119 0.0058 0.0053 -0.0057 -0.0052  
Z 0.0023 0.0020 0.0071 0.0067 -0.0054 -0.0059

AT. 141 H X -0.0352 -0.0352 -0.0281 -0.0262 -0.0248 -0.0239  
Y -0.0212 -0.0218 -0.0186 -0.0174 -0.0165 -0.0165  
Z 0.0135 0.0134 0.0059 0.0050 0.0056 0.0041

AT. 142 H X 0.0352 -0.0352 0.0281 -0.0262 -0.0248 0.0239  
Y -0.0212 0.0218 -0.0186 0.0174 0.0165 -0.0165  
Z -0.0135 0.0134 -0.0059 0.0050 0.0056 -0.0041

AT. 143 H X -0.0352 0.0352 -0.0281 0.0262 -0.0248 0.0239  
Y -0.0212 0.0218 -0.0186 0.0174 -0.0165 0.0165  
Z 0.0135 -0.0134 0.0059 -0.0050 0.0056 -0.0041

AT. 144 H X 0.0352 0.0352 0.0281 0.0262 -0.0248 -0.0239  
Y -0.0212 -0.0218 -0.0186 -0.0174 0.0165 0.0165  
Z -0.0135 -0.0134 -0.0059 -0.0050 0.0056 0.0041

AT. 145 H X 0.0419 0.0426 0.0311 0.0287 0.0278 0.0269  
Y 0.0021 0.0025 -0.0026 -0.0025 -0.0014 -0.0020  
Z 0.0112 0.0119 -0.0013 -0.0012 0.0010 -0.0002

AT. 146 H X -0.0419 0.0426 -0.0311 0.0287 0.0278 -0.0269  
Y 0.0021 -0.0025 -0.0026 0.0025 0.0014 -0.0020  
Z -0.0112 0.0119 0.0013 -0.0012 0.0010 0.0002

AT. 147 H X 0.0419 -0.0426 0.0311 -0.0287 0.0278 -0.0269  
Y 0.0021 -0.0025 -0.0026 0.0025 -0.0014 0.0020

Z 0.0112 -0.0119 -0.0013 0.0012 0.0010 0.0002  
AT. 148 H X -0.0419 -0.0426 -0.0311 -0.0287 0.0278 0.0269  
Y 0.0021 0.0025 -0.0026 -0.0025 0.0014 0.0020  
Z -0.0112 -0.0119 0.0013 0.0012 0.0010 -0.0002  
AT. 149 O X 0.0072 0.0068 -0.0025 -0.0031 -0.0021 -0.0029  
Y -0.0035 -0.0037 0.0003 0.0006 0.0002 0.0004  
Z -0.0031 -0.0029 0.0001 0.0003 -0.0000 0.0001  
AT. 150 O X -0.0072 0.0068 0.0025 -0.0031 -0.0021 0.0029  
Y -0.0035 0.0037 0.0003 -0.0006 -0.0002 0.0004  
Z 0.0031 -0.0029 -0.0001 0.0003 -0.0000 -0.0001  
AT. 151 O X 0.0072 -0.0068 -0.0025 0.0031 -0.0021 0.0029  
Y -0.0035 0.0037 0.0003 -0.0006 0.0002 -0.0004  
Z -0.0031 0.0029 0.0001 -0.0003 -0.0000 -0.0001  
AT. 152 O X -0.0072 -0.0068 0.0025 0.0031 -0.0021 -0.0029  
Y -0.0035 -0.0037 0.0003 0.0006 -0.0002 -0.0004  
Z 0.0031 0.0029 -0.0001 -0.0003 -0.0000 0.0001  
AT. 153 H X 0.0120 0.0106 0.0000 0.0035 0.0002 0.0036  
Y -0.0129 -0.0114 -0.0096 -0.0081 -0.0115 -0.0085  
Z -0.0089 -0.0075 -0.0055 -0.0075 -0.0061 -0.0075  
AT. 154 H X -0.0120 0.0106 -0.0000 0.0035 0.0002 -0.0036  
Y -0.0129 0.0114 -0.0096 0.0081 0.0115 -0.0085  
Z 0.0089 -0.0075 0.0055 -0.0075 -0.0061 0.0075  
AT. 155 H X 0.0120 -0.0106 0.0000 -0.0035 0.0002 -0.0036  
Y -0.0129 0.0114 -0.0096 0.0081 -0.0115 0.0085  
Z -0.0089 0.0075 -0.0055 0.0075 -0.0061 0.0075  
AT. 156 H X -0.0120 -0.0106 -0.0000 -0.0035 0.0002 0.0036  
Y -0.0129 -0.0114 -0.0096 -0.0081 0.0115 0.0085  
Z 0.0089 0.0075 0.0055 0.0075 -0.0061 -0.0075  
AT. 157 O X -0.0086 -0.0075 0.0027 0.0030 0.0021 0.0027  
Y 0.0001 0.0002 0.0008 0.0008 0.0009 0.0008  
Z 0.0065 0.0059 -0.0023 -0.0025 -0.0018 -0.0023  
AT. 158 O X 0.0086 -0.0075 -0.0027 0.0030 0.0021 -0.0027

Y 0.0001 -0.0002 0.0008 -0.0008 -0.0009 0.0008  
Z -0.0065 0.0059 0.0023 -0.0025 -0.0018 0.0023  
AT. 159 O X -0.0086 0.0075 0.0027 -0.0030 0.0021 -0.0027  
Y 0.0001 -0.0002 0.0008 -0.0008 0.0009 -0.0008  
Z 0.0065 -0.0059 -0.0023 0.0025 -0.0018 0.0023  
AT. 160 O X 0.0086 0.0075 -0.0027 -0.0030 0.0021 0.0027  
Y 0.0001 0.0002 0.0008 0.0008 -0.0009 -0.0008  
Z -0.0065 -0.0059 0.0023 0.0025 -0.0018 -0.0023  
AT. 161 O X -0.0016 -0.0015 -0.0022 -0.0025 -0.0022 -0.0025  
Y -0.0012 -0.0013 -0.0017 -0.0019 -0.0018 -0.0019  
Z -0.0029 -0.0024 -0.0009 -0.0009 -0.0013 -0.0010  
AT. 162 O X 0.0016 -0.0015 0.0022 -0.0025 -0.0022 0.0025  
Y -0.0012 0.0013 -0.0017 0.0019 0.0018 -0.0019  
Z 0.0029 -0.0024 0.0009 -0.0009 -0.0013 0.0010  
AT. 163 O X -0.0016 0.0015 -0.0022 0.0025 -0.0022 0.0025  
Y -0.0012 0.0013 -0.0017 0.0019 -0.0018 0.0019  
Z -0.0029 0.0024 -0.0009 0.0009 -0.0013 0.0010  
AT. 164 O X 0.0016 0.0015 0.0022 0.0025 -0.0022 -0.0025  
Y -0.0012 -0.0013 -0.0017 -0.0019 0.0018 0.0019  
Z 0.0029 0.0024 0.0009 0.0009 -0.0013 -0.0010  
AT. 165 H X 0.0129 0.0117 0.0032 0.0034 0.0011 0.0031  
Y 0.0045 0.0040 0.0006 0.0006 -0.0004 0.0005  
Z -0.0099 -0.0088 -0.0030 -0.0035 -0.0014 -0.0031  
AT. 166 H X -0.0129 0.0117 -0.0032 0.0034 0.0011 -0.0031  
Y 0.0045 -0.0040 0.0006 -0.0006 0.0004 0.0005  
Z 0.0099 -0.0088 0.0030 -0.0035 -0.0014 0.0031  
AT. 167 H X 0.0129 -0.0117 0.0032 -0.0034 0.0011 -0.0031  
Y 0.0045 -0.0040 0.0006 -0.0006 -0.0004 -0.0005  
Z -0.0099 0.0088 -0.0030 0.0035 -0.0014 0.0031  
AT. 168 H X -0.0129 -0.0117 -0.0032 -0.0034 0.0011 0.0031  
Y 0.0045 0.0040 0.0006 0.0006 0.0004 -0.0005  
Z 0.0099 0.0088 0.0030 0.0035 -0.0014 -0.0031

AT.169 O X -0.0014 -0.0010 0.0009 -0.0001 0.0007 0.0005

Y 0.0003 0.0002 -0.0002 -0.0000 -0.0003 0.0002

Z 0.0008 0.0009 -0.0005 -0.0003 -0.0003 -0.0003

AT.170 O X 0.0014 -0.0010 -0.0009 -0.0001 0.0007 -0.0005

Y 0.0003 -0.0002 -0.0002 0.0000 0.0003 0.0002

Z -0.0008 0.0009 0.0005 -0.0003 -0.0003 0.0003

AT.171 O X -0.0014 0.0010 0.0009 0.0001 0.0007 -0.0005

Y 0.0003 -0.0002 -0.0002 0.0000 -0.0003 -0.0002

Z 0.0008 -0.0009 -0.0005 0.0003 -0.0003 0.0003

AT.172 O X 0.0014 0.0010 -0.0009 0.0001 0.0007 0.0005

Y 0.0003 0.0002 -0.0002 -0.0000 0.0003 -0.0002

Z -0.0008 -0.0009 0.0005 0.0003 -0.0003 -0.0003

AT.173 H X 0.0349 0.0234 -0.0218 -0.0040 -0.0236 -0.0089

Y -0.0064 -0.0043 0.0032 -0.0002 0.0031 0.0014

Z -0.0113 -0.0076 0.0087 0.0022 0.0093 0.0040

AT.174 H X -0.0349 0.0234 0.0218 -0.0040 -0.0236 0.0089

Y -0.0064 0.0043 0.0032 0.0002 -0.0031 0.0014

Z 0.0113 -0.0076 -0.0087 0.0022 0.0093 -0.0040

AT.175 H X 0.0349 -0.0234 -0.0218 0.0040 -0.0236 0.0089

Y -0.0064 0.0043 0.0032 0.0002 0.0031 -0.0014

Z -0.0113 0.0076 0.0087 -0.0022 0.0093 -0.0040

AT.176 H X -0.0349 -0.0234 0.0218 0.0040 -0.0236 -0.0089

Y -0.0064 -0.0043 0.0032 -0.0002 -0.0031 -0.0014

Z 0.0113 0.0076 -0.0087 -0.0022 0.0093 0.0040

FREQ(CM\*\*-1) 878.02 878.40 878.91 880.09 884.12 884.96

AT. 1 I X -0.0000 0.0000 -0.0001 -0.0001 0.0000 0.0000

Y -0.0001 0.0002 -0.0001 -0.0001 0.0001 0.0001

Z -0.0001 0.0002 -0.0002 -0.0002 0.0000 -0.0000

AT. 2 I X -0.0000 -0.0000 0.0001 -0.0001 -0.0000 0.0000

Y 0.0001 0.0002 -0.0001 0.0001 0.0001 -0.0001

Z -0.0001 -0.0002 0.0002 -0.0002 -0.0000 -0.0000  
AT. 3 I X -0.0000 -0.0000 -0.0001 0.0001 0.0000 -0.0000  
Y -0.0001 -0.0002 -0.0001 0.0001 0.0001 -0.0001  
Z -0.0001 -0.0002 -0.0002 0.0002 0.0000 0.0000  
AT. 4 I X -0.0000 0.0000 0.0001 0.0001 -0.0000 -0.0000  
Y 0.0001 -0.0002 -0.0001 -0.0001 0.0001 0.0001  
Z -0.0001 0.0002 0.0002 0.0002 -0.0000 0.0000  
AT. 5 I X -0.0001 0.0001 -0.0001 -0.0000 -0.0000 -0.0001  
Y -0.0002 0.0001 -0.0001 -0.0001 -0.0004 -0.0004  
Z 0.0003 -0.0002 0.0003 0.0002 0.0004 0.0005  
AT. 6 I X -0.0001 -0.0001 0.0001 -0.0000 0.0000 -0.0001  
Y 0.0002 0.0001 -0.0001 0.0001 -0.0004 0.0004  
Z 0.0003 0.0002 -0.0003 0.0002 -0.0004 0.0005  
AT. 7 I X -0.0001 -0.0001 -0.0001 0.0000 -0.0000 0.0001  
Y -0.0002 -0.0001 -0.0001 0.0001 -0.0004 0.0004  
Z 0.0003 0.0002 0.0003 -0.0002 0.0004 -0.0005  
AT. 8 I X -0.0001 0.0001 0.0001 0.0000 0.0000 0.0001  
Y 0.0002 -0.0001 -0.0001 -0.0001 -0.0004 -0.0004  
Z 0.0003 -0.0002 -0.0003 -0.0002 -0.0004 -0.0005  
AT. 9 N X 0.0080 -0.0083 0.0083 0.0083 -0.0023 -0.0014  
Y -0.0008 0.0013 -0.0009 -0.0014 0.0017 0.0015  
Z -0.0011 0.0011 -0.0011 -0.0009 -0.0010 -0.0010  
AT. 10 N X 0.0080 0.0083 -0.0083 0.0083 0.0023 -0.0014  
Y 0.0008 0.0013 -0.0009 0.0014 0.0017 -0.0015  
Z -0.0011 -0.0011 0.0011 -0.0009 0.0010 -0.0010  
AT. 11 N X 0.0080 0.0083 0.0083 -0.0083 -0.0023 0.0014  
Y -0.0008 -0.0013 -0.0009 0.0014 0.0017 -0.0015  
Z -0.0011 -0.0011 -0.0011 0.0009 -0.0010 0.0010  
AT. 12 N X 0.0080 -0.0083 -0.0083 -0.0083 0.0023 0.0014  
Y 0.0008 -0.0013 -0.0009 -0.0014 0.0017 0.0015  
Z -0.0011 0.0011 0.0011 0.0009 0.0010 0.0010  
AT. 13 N X -0.0055 0.0051 -0.0053 -0.0047 -0.0024 -0.0028

Y 0.0019 -0.0017 0.0020 0.0019 -0.0004 -0.0003  
Z 0.0024 -0.0023 0.0023 0.0023 -0.0009 -0.0006  
AT. 14 N X -0.0055 -0.0051 0.0053 -0.0047 0.0024 -0.0028  
Y -0.0019 -0.0017 0.0020 -0.0019 -0.0004 0.0003  
Z 0.0024 0.0023 -0.0023 0.0023 0.0009 -0.0006  
AT. 15 N X -0.0055 -0.0051 -0.0053 0.0047 -0.0024 0.0028  
Y 0.0019 0.0017 0.0020 -0.0019 -0.0004 0.0003  
Z 0.0024 0.0023 0.0023 -0.0023 -0.0009 0.0006  
AT. 16 N X -0.0055 0.0051 0.0053 0.0047 0.0024 0.0028  
Y -0.0019 0.0017 0.0020 0.0019 -0.0004 -0.0003  
Z 0.0024 -0.0023 -0.0023 -0.0023 0.0009 0.0006  
AT. 17 O X -0.0013 0.0010 -0.0013 -0.0009 -0.0010 -0.0003  
Y -0.0026 0.0031 -0.0028 -0.0032 0.0007 0.0002  
Z -0.0047 0.0064 -0.0054 -0.0069 0.0022 0.0010  
AT. 18 O X -0.0013 -0.0010 0.0013 -0.0009 0.0010 -0.0003  
Y 0.0026 0.0031 -0.0028 0.0032 0.0007 -0.0002  
Z -0.0047 -0.0064 0.0054 -0.0069 -0.0022 0.0010  
AT. 19 O X -0.0013 -0.0010 -0.0013 0.0009 -0.0010 0.0003  
Y -0.0026 -0.0031 -0.0028 0.0032 0.0007 -0.0002  
Z -0.0047 -0.0064 -0.0054 0.0069 0.0022 -0.0010  
AT. 20 O X -0.0013 0.0010 0.0013 0.0009 0.0010 0.0003  
Y 0.0026 -0.0031 -0.0028 -0.0032 0.0007 0.0002  
Z -0.0047 0.0064 0.0054 0.0069 -0.0022 -0.0010  
AT. 21 O X -0.0002 0.0002 -0.0002 -0.0001 -0.0008 -0.0009  
Y -0.0024 0.0020 -0.0023 -0.0017 -0.0033 -0.0037  
Z 0.0071 -0.0061 0.0066 0.0050 0.0105 0.0118  
AT. 22 O X -0.0002 -0.0002 0.0002 -0.0001 0.0008 -0.0009  
Y 0.0024 0.0020 -0.0023 0.0017 -0.0033 0.0037  
Z 0.0071 0.0061 -0.0066 0.0050 -0.0105 0.0118  
AT. 23 O X -0.0002 -0.0002 -0.0002 0.0001 -0.0008 0.0009  
Y -0.0024 -0.0020 -0.0023 0.0017 -0.0033 0.0037  
Z 0.0071 0.0061 0.0066 -0.0050 0.0105 -0.0118

AT. 24 O X -0.0002 0.0002 0.0002 0.0001 0.0008 0.0009  
Y 0.0024 -0.0020 -0.0023 -0.0017 -0.0033 -0.0037  
Z 0.0071 -0.0061 -0.0066 -0.0050 -0.0105 -0.0118

AT. 25 C X 0.0029 -0.0043 0.0039 0.0051 -0.0021 -0.0012  
Y -0.0010 -0.0000 -0.0004 0.0003 -0.0024 -0.0021  
Z 0.0074 -0.0101 0.0086 0.0106 -0.0019 -0.0001

AT. 26 C X 0.0029 0.0043 -0.0039 0.0051 0.0021 -0.0012  
Y 0.0010 -0.0000 -0.0004 -0.0003 -0.0024 0.0021  
Z 0.0074 0.0101 -0.0086 0.0106 0.0019 -0.0001

AT. 27 C X 0.0029 0.0043 0.0039 -0.0051 -0.0021 0.0012  
Y -0.0010 0.0000 -0.0004 -0.0003 -0.0024 0.0021  
Z 0.0074 0.0101 0.0086 -0.0106 -0.0019 0.0001

AT. 28 C X 0.0029 -0.0043 -0.0039 -0.0051 0.0021 0.0012  
Y 0.0010 0.0000 -0.0004 0.0003 -0.0024 -0.0021  
Z 0.0074 -0.0101 -0.0086 -0.0106 0.0019 0.0001

AT. 29 H X 0.0113 -0.0177 0.0147 0.0196 -0.0094 -0.0052  
Y -0.0124 0.0208 -0.0170 -0.0237 0.0104 0.0049  
Z -0.0033 0.0063 -0.0047 -0.0069 0.0069 0.0049

AT. 30 H X 0.0113 0.0177 -0.0147 0.0196 0.0094 -0.0052  
Y 0.0124 0.0208 -0.0170 0.0237 0.0104 -0.0049  
Z -0.0033 -0.0063 0.0047 -0.0069 -0.0069 0.0049

AT. 31 H X 0.0113 0.0177 0.0147 -0.0196 -0.0094 0.0052  
Y -0.0124 -0.0208 -0.0170 0.0237 0.0104 -0.0049  
Z -0.0033 -0.0063 -0.0047 0.0069 0.0069 -0.0049

AT. 32 H X 0.0113 -0.0177 -0.0147 -0.0196 0.0094 0.0052  
Y 0.0124 -0.0208 -0.0170 -0.0237 0.0104 0.0049  
Z -0.0033 0.0063 0.0047 0.0069 -0.0069 -0.0049

AT. 33 H X -0.0178 0.0274 -0.0226 -0.0303 0.0151 0.0093  
Y 0.0016 -0.0047 0.0034 0.0056 -0.0054 -0.0039  
Z 0.0114 -0.0130 0.0116 0.0133 -0.0018 -0.0004

AT. 34 H X -0.0178 -0.0274 0.0226 -0.0303 -0.0151 0.0093  
Y -0.0016 -0.0047 0.0034 -0.0056 -0.0054 0.0039



Z 0.0114 0.0130 -0.0116 0.0133 0.0018 -0.0004  
AT. 35 H X -0.0178 -0.0274 -0.0226 0.0303 0.0151 -0.0093  
Y 0.0016 0.0047 0.0034 -0.0056 -0.0054 0.0039  
Z 0.0114 0.0130 0.0116 -0.0133 -0.0018 0.0004  
AT. 36 H X -0.0178 0.0274 0.0226 0.0303 -0.0151 -0.0093  
Y -0.0016 0.0047 0.0034 0.0056 -0.0054 -0.0039  
Z 0.0114 -0.0130 -0.0116 -0.0133 0.0018 0.0004  
AT. 37 C X -0.0062 0.0072 -0.0068 -0.0079 0.0026 0.0011  
Y 0.0006 -0.0004 0.0006 0.0006 0.0004 0.0005  
Z -0.0014 0.0019 -0.0016 -0.0018 0.0003 -0.0000  
AT. 38 C X -0.0062 -0.0072 0.0068 -0.0079 -0.0026 0.0011  
Y -0.0006 -0.0004 0.0006 -0.0006 0.0004 -0.0005  
Z -0.0014 -0.0019 0.0016 -0.0018 -0.0003 -0.0000  
AT. 39 C X -0.0062 -0.0072 -0.0068 0.0079 0.0026 -0.0011  
Y 0.0006 0.0004 0.0006 -0.0006 0.0004 -0.0005  
Z -0.0014 -0.0019 -0.0016 0.0018 0.0003 0.0000  
AT. 40 C X -0.0062 0.0072 0.0068 0.0079 -0.0026 -0.0011  
Y -0.0006 0.0004 0.0006 0.0006 0.0004 0.0005  
Z -0.0014 0.0019 0.0016 0.0018 -0.0003 0.0000  
AT. 41 C X 0.0022 -0.0029 0.0026 0.0044 -0.0073 -0.0059  
Y 0.0036 -0.0036 0.0035 0.0032 -0.0014 -0.0012  
Z 0.0124 -0.0134 0.0132 0.0139 -0.0001 0.0016  
AT. 42 C X 0.0022 0.0029 -0.0026 0.0044 0.0073 -0.0059  
Y -0.0036 -0.0036 0.0035 -0.0032 -0.0014 0.0012  
Z 0.0124 0.0134 -0.0132 0.0139 0.0001 0.0016  
AT. 43 C X 0.0022 0.0029 0.0026 -0.0044 -0.0073 0.0059  
Y 0.0036 0.0036 0.0035 -0.0032 -0.0014 0.0012  
Z 0.0124 0.0134 0.0132 -0.0139 -0.0001 -0.0016  
AT. 44 C X 0.0022 -0.0029 -0.0026 -0.0044 0.0073 0.0059  
Y -0.0036 0.0036 0.0035 0.0032 -0.0014 -0.0012  
Z 0.0124 -0.0134 -0.0132 -0.0139 0.0001 -0.0016  
AT. 45 H X -0.0030 0.0045 -0.0045 -0.0061 -0.0024 -0.0045

Y 0.0044 -0.0058 0.0051 0.0068 -0.0063 -0.0048  
Z 0.0144 -0.0169 0.0162 0.0191 -0.0052 -0.0016  
AT. 46 H X -0.0030 -0.0045 0.0045 -0.0061 0.0024 -0.0045  
Y -0.0044 -0.0058 0.0051 -0.0068 -0.0063 0.0048  
Z 0.0144 0.0169 -0.0162 0.0191 0.0052 -0.0016  
AT. 47 H X -0.0030 -0.0045 -0.0045 0.0061 -0.0024 0.0045  
Y 0.0044 0.0058 0.0051 -0.0068 -0.0063 0.0048  
Z 0.0144 0.0169 0.0162 -0.0191 -0.0052 0.0016  
AT. 48 H X -0.0030 0.0045 0.0045 0.0061 0.0024 0.0045  
Y -0.0044 0.0058 0.0051 0.0068 -0.0063 -0.0048  
Z 0.0144 -0.0169 -0.0162 -0.0191 0.0052 0.0016  
AT. 49 H X 0.0025 -0.0037 0.0033 0.0064 -0.0096 -0.0069  
Y 0.0066 -0.0080 0.0073 0.0099 -0.0063 -0.0036  
Z 0.0051 -0.0036 0.0045 0.0009 0.0071 0.0055  
AT. 50 H X 0.0025 0.0037 -0.0033 0.0064 0.0096 -0.0069  
Y -0.0066 -0.0080 0.0073 -0.0099 -0.0063 0.0036  
Z 0.0051 0.0036 -0.0045 0.0009 -0.0071 0.0055  
AT. 51 H X 0.0025 0.0037 0.0033 -0.0064 -0.0096 0.0069  
Y 0.0066 0.0080 0.0073 -0.0099 -0.0063 0.0036  
Z 0.0051 0.0036 0.0045 -0.0009 0.0071 -0.0055  
AT. 52 H X 0.0025 -0.0037 -0.0033 -0.0064 0.0096 0.0069  
Y -0.0066 0.0080 0.0073 0.0099 -0.0063 -0.0036  
Z 0.0051 -0.0036 -0.0045 -0.0009 -0.0071 -0.0055  
AT. 53 C X 0.0024 -0.0027 0.0026 0.0027 -0.0006 -0.0001  
Y -0.0018 0.0016 -0.0017 -0.0024 0.0038 0.0027  
Z 0.0044 -0.0040 0.0042 0.0043 -0.0025 -0.0017  
AT. 54 C X 0.0024 0.0027 -0.0026 0.0027 0.0006 -0.0001  
Y 0.0018 0.0016 -0.0017 0.0024 0.0038 -0.0027  
Z 0.0044 0.0040 -0.0042 0.0043 0.0025 -0.0017  
AT. 55 C X 0.0024 0.0027 0.0026 -0.0027 -0.0006 0.0001  
Y -0.0018 -0.0016 -0.0017 0.0024 0.0038 -0.0027  
Z 0.0044 0.0040 0.0042 -0.0043 -0.0025 0.0017

AT. 56 C X 0.0024 -0.0027 -0.0026 -0.0027 0.0006 0.0001  
Y 0.0018 -0.0016 -0.0017 -0.0024 0.0038 0.0027  
Z 0.0044 -0.0040 -0.0042 -0.0043 0.0025 0.0017

AT. 57 C X -0.0012 0.0010 -0.0012 -0.0010 -0.0003 -0.0003  
Y -0.0057 0.0056 -0.0057 -0.0059 0.0024 0.0015  
Z -0.0075 0.0074 -0.0076 -0.0072 0.0001 -0.0007

AT. 58 C X -0.0012 -0.0010 0.0012 -0.0010 0.0003 -0.0003  
Y 0.0057 0.0056 -0.0057 0.0059 0.0024 -0.0015  
Z -0.0075 -0.0074 0.0076 -0.0072 -0.0001 -0.0007

AT. 59 C X -0.0012 -0.0010 -0.0012 0.0010 -0.0003 0.0003  
Y -0.0057 -0.0056 -0.0057 0.0059 0.0024 -0.0015  
Z -0.0075 -0.0074 -0.0076 0.0072 0.0001 0.0007

AT. 60 C X -0.0012 0.0010 0.0012 0.0010 0.0003 0.0003  
Y 0.0057 -0.0056 -0.0057 -0.0059 0.0024 0.0015  
Z -0.0075 0.0074 0.0076 0.0072 -0.0001 0.0007

AT. 61 H X -0.0055 0.0063 -0.0057 -0.0064 0.0050 0.0032  
Y -0.0072 0.0079 -0.0075 -0.0079 0.0033 0.0017  
Z -0.0174 0.0172 -0.0167 -0.0189 0.0166 0.0124

AT. 62 H X -0.0055 -0.0063 0.0057 -0.0064 -0.0050 0.0032  
Y 0.0072 0.0079 -0.0075 0.0079 0.0033 -0.0017  
Z -0.0174 -0.0172 0.0167 -0.0189 -0.0166 0.0124

AT. 63 H X -0.0055 -0.0063 -0.0057 0.0064 0.0050 -0.0032  
Y -0.0072 -0.0079 -0.0075 0.0079 0.0033 -0.0017  
Z -0.0174 -0.0172 -0.0167 0.0189 0.0166 -0.0124

AT. 64 H X -0.0055 0.0063 0.0057 0.0064 -0.0050 -0.0032  
Y 0.0072 -0.0079 -0.0075 -0.0079 0.0033 0.0017  
Z -0.0174 0.0172 0.0167 0.0189 -0.0166 -0.0124

AT. 65 H X -0.0029 0.0028 -0.0029 -0.0031 0.0022 0.0016  
Y -0.0011 0.0008 -0.0013 -0.0001 -0.0054 -0.0043  
Z -0.0038 0.0020 -0.0034 -0.0027 0.0037 0.0041

AT. 66 H X -0.0029 -0.0028 0.0029 -0.0031 -0.0022 0.0016  
Y 0.0011 0.0008 -0.0013 0.0001 -0.0054 0.0043

Z -0.0038 -0.0020 0.0034 -0.0027 -0.0037 0.0041  
AT. 67 H X -0.0029 -0.0028 -0.0029 0.0031 0.0022 -0.0016  
Y -0.0011 -0.0008 -0.0013 0.0001 -0.0054 0.0043  
Z -0.0038 -0.0020 -0.0034 0.0027 0.0037 -0.0041  
AT. 68 H X -0.0029 0.0028 0.0029 0.0031 -0.0022 -0.0016  
Y 0.0011 -0.0008 -0.0013 -0.0001 -0.0054 -0.0043  
Z -0.0038 0.0020 0.0034 0.0027 -0.0037 -0.0041  
AT. 69 H X -0.0043 0.0051 -0.0047 -0.0048 -0.0006 -0.0006  
Y -0.0007 0.0013 -0.0008 0.0004 -0.0096 -0.0086  
Z -0.0040 0.0048 -0.0044 -0.0029 -0.0098 -0.0091  
AT. 70 H X -0.0043 -0.0051 0.0047 -0.0048 0.0006 -0.0006  
Y 0.0007 0.0013 -0.0008 -0.0004 -0.0096 0.0086  
Z -0.0040 -0.0048 0.0044 -0.0029 0.0098 -0.0091  
AT. 71 H X -0.0043 -0.0051 -0.0047 0.0048 -0.0006 0.0006  
Y -0.0007 -0.0013 -0.0008 -0.0004 -0.0096 0.0086  
Z -0.0040 -0.0048 -0.0044 0.0029 -0.0098 0.0091  
AT. 72 H X -0.0043 0.0051 0.0047 0.0048 0.0006 0.0006  
Y 0.0007 -0.0013 -0.0008 0.0004 -0.0096 -0.0086  
Z -0.0040 0.0048 0.0044 0.0029 0.0098 0.0091  
AT. 73 C X 0.0041 -0.0034 0.0039 0.0035 -0.0048 -0.0048  
Y 0.0037 -0.0030 0.0036 0.0034 -0.0025 -0.0022  
Z 0.0035 -0.0033 0.0033 0.0029 -0.0037 -0.0037  
AT. 74 C X 0.0041 0.0034 -0.0039 0.0035 0.0048 -0.0048  
Y -0.0037 -0.0030 0.0036 -0.0034 -0.0025 0.0022  
Z 0.0035 0.0033 -0.0033 0.0029 0.0037 -0.0037  
AT. 75 C X 0.0041 0.0034 0.0039 -0.0035 -0.0048 0.0048  
Y 0.0037 0.0030 0.0036 -0.0034 -0.0025 0.0022  
Z 0.0035 0.0033 0.0033 -0.0029 -0.0037 0.0037  
AT. 76 C X 0.0041 -0.0034 -0.0039 -0.0035 0.0048 0.0048  
Y -0.0037 0.0030 0.0036 0.0034 -0.0025 -0.0022  
Z 0.0035 -0.0033 -0.0033 -0.0029 0.0037 0.0037  
AT. 77 C X -0.0169 0.0176 -0.0172 -0.0184 0.0153 0.0128

Y 0.0045 -0.0058 0.0049 0.0061 -0.0000 0.0005  
Z -0.0078 0.0077 -0.0081 -0.0081 -0.0001 -0.0013  
AT. 78 C X -0.0169 -0.0176 0.0172 -0.0184 -0.0153 0.0128  
Y -0.0045 -0.0058 0.0049 -0.0061 -0.0000 -0.0005  
Z -0.0078 -0.0077 0.0081 -0.0081 0.0001 -0.0013  
AT. 79 C X -0.0169 -0.0176 -0.0172 0.0184 0.0153 -0.0128  
Y 0.0045 0.0058 0.0049 -0.0061 -0.0000 -0.0005  
Z -0.0078 -0.0077 -0.0081 0.0081 -0.0001 0.0013  
AT. 80 C X -0.0169 0.0176 0.0172 0.0184 -0.0153 -0.0128  
Y -0.0045 0.0058 0.0049 0.0061 -0.0000 0.0005  
Z -0.0078 0.0077 0.0081 0.0081 0.0001 0.0013  
AT. 81 H X -0.0317 0.0344 -0.0326 -0.0358 0.0284 0.0241  
Y -0.0116 0.0126 -0.0118 -0.0130 0.0141 0.0128  
Z -0.0150 0.0181 -0.0161 -0.0191 0.0083 0.0060  
AT. 82 H X -0.0317 -0.0344 0.0326 -0.0358 -0.0284 0.0241  
Y 0.0116 0.0126 -0.0118 0.0130 0.0141 -0.0128  
Z -0.0150 -0.0181 0.0161 -0.0191 -0.0083 0.0060  
AT. 83 H X -0.0317 -0.0344 -0.0326 0.0358 0.0284 -0.0241  
Y -0.0116 -0.0126 -0.0118 0.0130 0.0141 -0.0128  
Z -0.0150 -0.0181 -0.0161 0.0191 0.0083 -0.0060  
AT. 84 H X -0.0317 0.0344 0.0326 0.0358 -0.0284 -0.0241  
Y 0.0116 -0.0126 -0.0118 -0.0130 0.0141 0.0128  
Z -0.0150 0.0181 0.0161 0.0191 -0.0083 -0.0060  
AT. 85 H X 0.0020 -0.0060 0.0026 0.0063 -0.0019 -0.0028  
Y -0.0051 0.0044 -0.0053 -0.0049 0.0095 0.0089  
Z -0.0056 0.0063 -0.0058 -0.0064 -0.0028 -0.0037  
AT. 86 H X 0.0020 0.0060 -0.0026 0.0063 0.0019 -0.0028  
Y 0.0051 0.0044 -0.0053 0.0049 0.0095 -0.0089  
Z -0.0056 -0.0063 0.0058 -0.0064 0.0028 -0.0037  
AT. 87 H X 0.0020 0.0060 0.0026 -0.0063 -0.0019 0.0028  
Y -0.0051 -0.0044 -0.0053 0.0049 0.0095 -0.0089  
Z -0.0056 -0.0063 -0.0058 0.0064 -0.0028 0.0037

AT. 88 H X 0.0020 -0.0060 -0.0026 -0.0063 0.0019 0.0028  
Y 0.0051 -0.0044 -0.0053 -0.0049 0.0095 0.0089  
Z -0.0056 0.0063 0.0058 0.0064 0.0028 0.0037

AT. 89 C X -0.0013 0.0015 -0.0011 -0.0011 -0.0022 -0.0024  
Y 0.0069 -0.0069 0.0069 0.0069 -0.0044 -0.0031  
Z 0.0022 -0.0023 0.0021 0.0022 -0.0040 -0.0034

AT. 90 C X -0.0013 -0.0015 0.0011 -0.0011 0.0022 -0.0024  
Y -0.0069 -0.0069 0.0069 -0.0069 -0.0044 0.0031  
Z 0.0022 0.0023 -0.0021 0.0022 0.0040 -0.0034

AT. 91 C X -0.0013 -0.0015 -0.0011 0.0011 -0.0022 0.0024  
Y 0.0069 0.0069 0.0069 -0.0069 -0.0044 0.0031  
Z 0.0022 0.0023 0.0021 -0.0022 -0.0040 0.0034

AT. 92 C X -0.0013 0.0015 0.0011 0.0011 0.0022 0.0024  
Y -0.0069 0.0069 0.0069 0.0069 -0.0044 -0.0031  
Z 0.0022 -0.0023 -0.0021 -0.0022 0.0040 0.0034

AT. 93 C X 0.0005 -0.0008 0.0009 0.0012 -0.0009 -0.0006  
Y -0.0008 0.0001 -0.0008 -0.0002 -0.0042 -0.0040  
Z 0.0072 -0.0076 0.0073 0.0076 0.0008 0.0022

AT. 94 C X 0.0005 0.0008 -0.0009 0.0012 0.0009 -0.0006  
Y 0.0008 0.0001 -0.0008 0.0002 -0.0042 0.0040  
Z 0.0072 0.0076 -0.0073 0.0076 -0.0008 0.0022

AT. 95 C X 0.0005 0.0008 0.0009 -0.0012 -0.0009 0.0006  
Y -0.0008 -0.0001 -0.0008 0.0002 -0.0042 0.0040  
Z 0.0072 0.0076 0.0073 -0.0076 0.0008 -0.0022

AT. 96 C X 0.0005 -0.0008 -0.0009 -0.0012 0.0009 0.0006  
Y 0.0008 -0.0001 -0.0008 -0.0002 -0.0042 -0.0040  
Z 0.0072 -0.0076 -0.0073 -0.0076 -0.0008 -0.0022

AT. 97 H X -0.0006 -0.0007 -0.0013 -0.0003 0.0045 0.0051  
Y -0.0061 0.0085 -0.0051 -0.0068 -0.0050 -0.0070  
Z -0.0069 0.0086 -0.0086 -0.0103 0.0184 0.0167

AT. 98 H X -0.0006 0.0007 0.0013 -0.0003 -0.0045 0.0051  
Y 0.0061 0.0085 -0.0051 0.0068 -0.0050 0.0070

Z -0.0069 -0.0086 0.0086 -0.0103 -0.0184 0.0167  
AT. 99 H X -0.0006 0.0007 -0.0013 0.0003 0.0045 -0.0051  
Y -0.0061 -0.0085 -0.0051 0.0068 -0.0050 0.0070  
Z -0.0069 -0.0086 -0.0086 0.0103 0.0184 -0.0167  
AT. 100 H X -0.0006 -0.0007 0.0013 0.0003 -0.0045 -0.0051  
Y 0.0061 -0.0085 -0.0051 -0.0068 -0.0050 -0.0070  
Z -0.0069 0.0086 0.0086 0.0103 -0.0184 -0.0167  
AT. 101 H X -0.0033 0.0038 -0.0036 -0.0042 0.0057 0.0051  
Y -0.0018 0.0014 -0.0029 -0.0028 0.0011 0.0012  
Z -0.0144 0.0164 -0.0126 -0.0139 0.0091 0.0054  
AT. 102 H X -0.0033 -0.0038 0.0036 -0.0042 -0.0057 0.0051  
Y 0.0018 0.0014 -0.0029 0.0028 0.0011 -0.0012  
Z -0.0144 -0.0164 0.0126 -0.0139 -0.0091 0.0054  
AT. 103 H X -0.0033 -0.0038 -0.0036 0.0042 0.0057 -0.0051  
Y -0.0018 -0.0014 -0.0029 0.0028 0.0011 -0.0012  
Z -0.0144 -0.0164 -0.0126 0.0139 0.0091 -0.0054  
AT. 104 H X -0.0033 0.0038 0.0036 0.0042 -0.0057 -0.0051  
Y 0.0018 -0.0014 -0.0029 -0.0028 0.0011 0.0012  
Z -0.0144 0.0164 0.0126 0.0139 -0.0091 -0.0054  
AT. 105 H X 0.0057 -0.0046 0.0050 0.0036 0.0029 0.0034  
Y -0.0230 0.0242 -0.0229 -0.0235 0.0104 0.0058  
Z 0.0223 -0.0244 0.0226 0.0243 -0.0113 -0.0064  
AT. 106 H X 0.0057 0.0046 -0.0050 0.0036 -0.0029 0.0034  
Y 0.0230 0.0242 -0.0229 0.0235 0.0104 -0.0058  
Z 0.0223 0.0244 -0.0226 0.0243 0.0113 -0.0064  
AT. 107 H X 0.0057 0.0046 0.0050 -0.0036 0.0029 -0.0034  
Y -0.0230 -0.0242 -0.0229 0.0235 0.0104 -0.0058  
Z 0.0223 0.0244 0.0226 -0.0243 -0.0113 0.0064  
AT. 108 H X 0.0057 -0.0046 -0.0050 -0.0036 -0.0029 -0.0034  
Y 0.0230 -0.0242 -0.0229 -0.0235 0.0104 0.0058  
Z 0.0223 -0.0244 -0.0226 -0.0243 0.0113 0.0064  
AT. 109 C X 0.0009 -0.0002 0.0007 -0.0013 0.0106 0.0092

Y 0.0041 -0.0044 0.0043 0.0047 0.0005 0.0013  
Z 0.0086 -0.0078 0.0081 0.0075 0.0027 0.0038  
AT. 110 C X 0.0009 0.0002 -0.0007 -0.0013 -0.0106 0.0092  
Y -0.0041 -0.0044 0.0043 -0.0047 0.0005 -0.0013  
Z 0.0086 0.0078 -0.0081 0.0075 -0.0027 0.0038  
AT. 111 C X 0.0009 0.0002 0.0007 0.0013 0.0106 -0.0092  
Y 0.0041 0.0044 0.0043 -0.0047 0.0005 -0.0013  
Z 0.0086 0.0078 0.0081 -0.0075 0.0027 -0.0038  
AT. 112 C X 0.0009 -0.0002 -0.0007 0.0013 -0.0106 -0.0092  
Y -0.0041 0.0044 0.0043 0.0047 0.0005 0.0013  
Z 0.0086 -0.0078 -0.0081 -0.0075 -0.0027 -0.0038  
AT. 113 H X -0.0012 0.0014 -0.0008 -0.0037 0.0188 0.0160  
Y 0.0073 -0.0067 0.0067 0.0083 -0.0115 -0.0088  
Z 0.0064 -0.0063 0.0068 0.0057 0.0111 0.0108  
AT. 114 H X -0.0012 -0.0014 0.0008 -0.0037 -0.0188 0.0160  
Y -0.0073 -0.0067 0.0067 -0.0083 -0.0115 0.0088  
Z 0.0064 0.0063 -0.0068 0.0057 -0.0111 0.0108  
AT. 115 H X -0.0012 -0.0014 -0.0008 0.0037 0.0188 -0.0160  
Y 0.0073 0.0067 0.0067 -0.0083 -0.0115 0.0088  
Z 0.0064 0.0063 0.0068 -0.0057 0.0111 -0.0108  
AT. 116 H X -0.0012 0.0014 0.0008 0.0037 -0.0188 -0.0160  
Y -0.0073 0.0067 0.0067 0.0083 -0.0115 -0.0088  
Z 0.0064 -0.0063 -0.0068 -0.0057 -0.0111 -0.0108  
AT. 117 H X 0.0051 -0.0029 0.0039 0.0030 -0.0058 -0.0057  
Y 0.0039 -0.0045 0.0041 0.0050 -0.0034 -0.0018  
Z 0.0081 -0.0077 0.0077 0.0073 0.0020 0.0036  
AT. 118 H X 0.0051 0.0029 -0.0039 0.0030 0.0058 -0.0057  
Y -0.0039 -0.0045 0.0041 -0.0050 -0.0034 0.0018  
Z 0.0081 0.0077 -0.0077 0.0073 -0.0020 0.0036  
AT. 119 H X 0.0051 0.0029 0.0039 -0.0030 -0.0058 0.0057  
Y 0.0039 0.0045 0.0041 -0.0050 -0.0034 0.0018  
Z 0.0081 0.0077 0.0077 -0.0073 0.0020 -0.0036



AT.120 H X 0.0051 -0.0029 -0.0039 -0.0030 0.0058 0.0057  
Y -0.0039 0.0045 0.0041 0.0050 -0.0034 -0.0018  
Z 0.0081 -0.0077 -0.0077 -0.0073 -0.0020 -0.0036

AT.121 C X 0.0127 -0.0131 0.0126 0.0133 -0.0122 -0.0100  
Y -0.0005 0.0024 -0.0008 -0.0028 0.0094 0.0094  
Z -0.0163 0.0157 -0.0157 -0.0149 -0.0043 -0.0065

AT.122 C X 0.0127 0.0131 -0.0126 0.0133 0.0122 -0.0100  
Y 0.0005 0.0024 -0.0008 0.0028 0.0094 -0.0094  
Z -0.0163 -0.0157 0.0157 -0.0149 0.0043 -0.0065

AT.123 C X 0.0127 0.0131 0.0126 -0.0133 -0.0122 0.0100  
Y -0.0005 -0.0024 -0.0008 0.0028 0.0094 -0.0094  
Z -0.0163 -0.0157 -0.0157 0.0149 -0.0043 0.0065

AT.124 C X 0.0127 -0.0131 -0.0126 -0.0133 0.0122 0.0100  
Y 0.0005 -0.0024 -0.0008 -0.0028 0.0094 0.0094  
Z -0.0163 0.0157 0.0157 0.0149 0.0043 0.0065

AT.125 H X 0.0070 -0.0100 0.0074 0.0099 -0.0005 -0.0007  
Y -0.0067 0.0083 -0.0069 -0.0090 0.0150 0.0143  
Z -0.0107 0.0110 -0.0104 -0.0099 -0.0122 -0.0131

AT.126 H X 0.0070 0.0100 -0.0074 0.0099 0.0005 -0.0007  
Y 0.0067 0.0083 -0.0069 0.0090 0.0150 -0.0143  
Z -0.0107 -0.0110 0.0104 -0.0099 0.0122 -0.0131

AT.127 H X 0.0070 0.0100 0.0074 -0.0099 -0.0005 0.0007  
Y -0.0067 -0.0083 -0.0069 0.0090 0.0150 -0.0143  
Z -0.0107 -0.0110 -0.0104 0.0099 -0.0122 0.0131

AT.128 H X 0.0070 -0.0100 -0.0074 -0.0099 0.0005 0.0007  
Y 0.0067 -0.0083 -0.0069 -0.0090 0.0150 0.0143  
Z -0.0107 0.0110 0.0104 0.0099 0.0122 0.0131

AT.129 H X 0.0168 -0.0170 0.0165 0.0171 -0.0166 -0.0134  
Y -0.0075 0.0082 -0.0074 -0.0088 0.0209 0.0191  
Z -0.0192 0.0168 -0.0182 -0.0167 0.0089 0.0058

AT.130 H X 0.0168 0.0170 -0.0165 0.0171 0.0166 -0.0134  
Y 0.0075 0.0082 -0.0074 0.0088 0.0209 -0.0191

Z -0.0192 -0.0168 0.0182 -0.0167 -0.0089 0.0058  
AT. 131 H X 0.0168 0.0170 0.0165 -0.0171 -0.0166 0.0134  
Y -0.0075 -0.0082 -0.0074 0.0088 0.0209 -0.0191  
Z -0.0192 -0.0168 -0.0182 0.0167 0.0089 -0.0058  
AT. 132 H X 0.0168 -0.0170 -0.0165 -0.0171 0.0166 0.0134  
Y 0.0075 -0.0082 -0.0074 -0.0088 0.0209 0.0191  
Z -0.0192 0.0168 0.0182 0.0167 -0.0089 -0.0058  
AT. 133 C X 0.0059 -0.0053 0.0055 0.0044 0.0077 0.0085  
Y -0.0021 0.0014 -0.0018 -0.0010 -0.0044 -0.0047  
Z 0.0027 -0.0024 0.0025 0.0020 0.0032 0.0037  
AT. 134 C X 0.0059 0.0053 -0.0055 0.0044 -0.0077 0.0085  
Y 0.0021 0.0014 -0.0018 0.0010 -0.0044 0.0047  
Z 0.0027 0.0024 -0.0025 0.0020 -0.0032 0.0037  
AT. 135 C X 0.0059 0.0053 0.0055 -0.0044 0.0077 -0.0085  
Y -0.0021 -0.0014 -0.0018 0.0010 -0.0044 0.0047  
Z 0.0027 0.0024 0.0025 -0.0020 0.0032 -0.0037  
AT. 136 C X 0.0059 -0.0053 -0.0055 -0.0044 -0.0077 -0.0085  
Y 0.0021 -0.0014 -0.0018 -0.0010 -0.0044 -0.0047  
Z 0.0027 -0.0024 -0.0025 -0.0020 -0.0032 -0.0037  
AT. 137 C X -0.0042 0.0036 -0.0039 -0.0031 -0.0051 -0.0056  
Y 0.0019 -0.0015 0.0015 0.0004 0.0085 0.0092  
Z -0.0135 0.0119 -0.0127 -0.0101 -0.0175 -0.0198  
AT. 138 C X -0.0042 -0.0036 0.0039 -0.0031 0.0051 -0.0056  
Y -0.0019 -0.0015 0.0015 -0.0004 0.0085 -0.0092  
Z -0.0135 -0.0119 0.0127 -0.0101 0.0175 -0.0198  
AT. 139 C X -0.0042 -0.0036 -0.0039 0.0031 -0.0051 0.0056  
Y 0.0019 0.0015 0.0015 -0.0004 0.0085 -0.0092  
Z -0.0135 -0.0119 -0.0127 0.0101 -0.0175 0.0198  
AT. 140 C X -0.0042 0.0036 0.0039 0.0031 0.0051 0.0056  
Y -0.0019 0.0015 0.0015 0.0004 0.0085 0.0092  
Z -0.0135 0.0119 0.0127 0.0101 0.0175 0.0198  
AT. 141 H X -0.0324 0.0276 -0.0297 -0.0210 -0.0609 -0.0675

Y -0.0198 0.0177 -0.0182 -0.0134 -0.0337 -0.0382  
Z 0.0030 -0.0014 0.0023 0.0002 0.0157 0.0165  
AT. 142 H X -0.0324 -0.0276 0.0297 -0.0210 0.0609 -0.0675  
Y 0.0198 0.0177 -0.0182 0.0134 -0.0337 0.0382  
Z 0.0030 0.0014 -0.0023 0.0002 -0.0157 0.0165  
AT. 143 H X -0.0324 -0.0276 -0.0297 0.0210 -0.0609 0.0675  
Y -0.0198 -0.0177 -0.0182 0.0134 -0.0337 0.0382  
Z 0.0030 0.0014 0.0023 -0.0002 0.0157 -0.0165  
AT. 144 H X -0.0324 0.0276 0.0297 0.0210 0.0609 0.0675  
Y 0.0198 -0.0177 -0.0182 -0.0134 -0.0337 -0.0382  
Z 0.0030 -0.0014 -0.0023 -0.0002 -0.0157 -0.0165  
AT. 145 H X 0.0312 -0.0263 0.0283 0.0192 0.0644 0.0709  
Y -0.0083 0.0071 -0.0078 -0.0062 -0.0109 -0.0121  
Z -0.0111 0.0096 -0.0105 -0.0089 -0.0106 -0.0121  
AT. 146 H X 0.0312 0.0263 -0.0283 0.0192 -0.0644 0.0709  
Y 0.0083 0.0071 -0.0078 0.0062 -0.0109 0.0121  
Z -0.0111 -0.0096 0.0105 -0.0089 0.0106 -0.0121  
AT. 147 H X 0.0312 0.0263 0.0283 -0.0192 0.0644 -0.0709  
Y -0.0083 -0.0071 -0.0078 0.0062 -0.0109 0.0121  
Z -0.0111 -0.0096 -0.0105 0.0089 -0.0106 0.0121  
AT. 148 H X 0.0312 -0.0263 -0.0283 -0.0192 -0.0644 -0.0709  
Y 0.0083 -0.0071 -0.0078 -0.0062 -0.0109 -0.0121  
Z -0.0111 0.0096 0.0105 0.0089 0.0106 0.0121  
AT. 149 O X -0.0046 0.0038 -0.0045 -0.0042 0.0027 0.0024  
Y 0.0017 -0.0015 0.0017 0.0016 -0.0004 -0.0002  
Z 0.0007 -0.0004 0.0006 0.0005 -0.0000 -0.0000  
AT. 150 O X -0.0046 -0.0038 0.0045 -0.0042 -0.0027 0.0024  
Y -0.0017 -0.0015 0.0017 -0.0016 -0.0004 0.0002  
Z 0.0007 0.0004 -0.0006 0.0005 0.0000 -0.0000  
AT. 151 O X -0.0046 -0.0038 -0.0045 0.0042 0.0027 -0.0024  
Y 0.0017 0.0015 0.0017 -0.0016 -0.0004 0.0002  
Z 0.0007 0.0004 0.0006 -0.0005 -0.0000 0.0000

AT.152 O X -0.0046 0.0038 0.0045 0.0042 -0.0027 -0.0024  
Y -0.0017 0.0015 0.0017 0.0016 -0.0004 -0.0002  
Z 0.0007 -0.0004 -0.0006 -0.0005 0.0000 0.0000

AT.153 H X 0.0075 -0.0040 0.0067 0.0036 -0.0033 -0.0084  
Y 0.0011 0.0001 0.0011 0.0007 0.0017 -0.0018  
Z -0.0075 0.0056 -0.0069 -0.0052 0.0050 0.0066

AT.154 H X 0.0075 0.0040 -0.0067 0.0036 0.0033 -0.0084  
Y -0.0011 0.0001 0.0011 -0.0007 0.0017 0.0018  
Z -0.0075 -0.0056 0.0069 -0.0052 -0.0050 0.0066

AT.155 H X 0.0075 0.0040 0.0067 -0.0036 -0.0033 0.0084  
Y 0.0011 -0.0001 0.0011 -0.0007 0.0017 0.0018  
Z -0.0075 -0.0056 -0.0069 0.0052 0.0050 -0.0066

AT.156 H X 0.0075 -0.0040 -0.0067 -0.0036 0.0033 0.0084  
Y -0.0011 -0.0001 0.0011 0.0007 0.0017 -0.0018  
Z -0.0075 0.0056 0.0069 0.0052 -0.0050 -0.0066

AT.157 O X 0.0047 -0.0041 0.0047 0.0046 -0.0026 -0.0018  
Y 0.0003 -0.0004 0.0005 0.0004 -0.0010 -0.0010  
Z -0.0039 0.0035 -0.0038 -0.0040 0.0019 0.0006

AT.158 O X 0.0047 0.0041 -0.0047 0.0046 0.0026 -0.0018  
Y -0.0003 -0.0004 0.0005 -0.0004 -0.0010 0.0010  
Z -0.0039 -0.0035 0.0038 -0.0040 -0.0019 0.0006

AT.159 O X 0.0047 0.0041 0.0047 -0.0046 -0.0026 0.0018  
Y 0.0003 0.0004 0.0005 -0.0004 -0.0010 0.0010  
Z -0.0039 -0.0035 -0.0038 0.0040 0.0019 -0.0006

AT.160 O X 0.0047 -0.0041 -0.0047 -0.0046 0.0026 0.0018  
Y -0.0003 0.0004 0.0005 0.0004 -0.0010 -0.0010  
Z -0.0039 0.0035 0.0038 0.0040 -0.0019 -0.0006

AT.161 O X -0.0016 0.0014 -0.0014 -0.0013 0.0009 0.0005  
Y -0.0008 0.0008 -0.0008 -0.0008 0.0015 0.0014  
Z -0.0000 -0.0002 0.0000 0.0002 0.0007 0.0014

AT.162 O X -0.0016 -0.0014 0.0014 -0.0013 -0.0009 0.0005  
Y 0.0008 0.0008 -0.0008 0.0008 0.0015 -0.0014

Z -0.0000 0.0002 -0.0000 0.0002 -0.0007 0.0014  
AT.163 O X -0.0016 -0.0014 -0.0014 0.0013 0.0009 -0.0005  
Y -0.0008 -0.0008 -0.0008 0.0008 0.0015 -0.0014  
Z -0.0000 0.0002 0.0000 -0.0002 0.0007 -0.0014  
AT.164 O X -0.0016 0.0014 0.0014 0.0013 -0.0009 -0.0005  
Y 0.0008 -0.0008 -0.0008 -0.0008 0.0015 0.0014  
Z -0.0000 -0.0002 -0.0000 -0.0002 -0.0007 -0.0014  
AT.165 H X 0.0021 -0.0037 0.0018 0.0019 0.0127 0.0177  
Y 0.0011 -0.0016 0.0008 0.0008 0.0068 0.0091  
Z -0.0021 0.0036 -0.0020 -0.0023 -0.0089 -0.0129  
AT.166 H X 0.0021 0.0037 -0.0018 0.0019 -0.0127 0.0177  
Y -0.0011 -0.0016 0.0008 -0.0008 0.0068 -0.0091  
Z -0.0021 -0.0036 0.0020 -0.0023 0.0089 -0.0129  
AT.167 H X 0.0021 0.0037 0.0018 -0.0019 0.0127 -0.0177  
Y 0.0011 0.0016 0.0008 -0.0008 0.0068 -0.0091  
Z -0.0021 -0.0036 -0.0020 0.0023 -0.0089 0.0129  
AT.168 H X 0.0021 -0.0037 -0.0018 -0.0019 -0.0127 -0.0177  
Y -0.0011 0.0016 0.0008 0.0008 0.0068 0.0091  
Z -0.0021 0.0036 0.0020 0.0023 0.0089 0.0129  
AT.169 O X -0.0013 0.0009 -0.0013 -0.0005 -0.0009 0.0001  
Y 0.0001 -0.0003 0.0001 0.0005 -0.0001 -0.0001  
Z 0.0008 -0.0003 0.0008 0.0003 0.0001 0.0001  
AT.170 O X -0.0013 -0.0009 0.0013 -0.0005 0.0009 0.0001  
Y -0.0001 -0.0003 0.0001 -0.0005 -0.0001 0.0001  
Z 0.0008 0.0003 -0.0008 0.0003 -0.0001 0.0001  
AT.171 O X -0.0013 -0.0009 -0.0013 0.0005 -0.0009 -0.0001  
Y 0.0001 0.0003 0.0001 -0.0005 -0.0001 0.0001  
Z 0.0008 0.0003 0.0008 -0.0003 0.0001 -0.0001  
AT.172 O X -0.0013 0.0009 0.0013 0.0005 0.0009 -0.0001  
Y -0.0001 0.0003 0.0001 0.0005 -0.0001 -0.0001  
Z 0.0008 -0.0003 -0.0008 -0.0003 -0.0001 -0.0001  
AT.173 H X 0.0416 -0.0201 0.0384 0.0169 0.0247 0.0037

Y -0.0071 0.0035 -0.0065 -0.0024 -0.0048 -0.0006  
Z -0.0131 0.0065 -0.0120 -0.0053 -0.0072 -0.0004  
AT. 174 H X 0.0416 0.0201 -0.0384 0.0169 -0.0247 0.0037  
Y 0.0071 0.0035 -0.0065 0.0024 -0.0048 0.0006  
Z -0.0131 -0.0065 0.0120 -0.0053 0.0072 -0.0004  
AT. 175 H X 0.0416 0.0201 0.0384 -0.0169 0.0247 -0.0037  
Y -0.0071 -0.0035 -0.0065 0.0024 -0.0048 0.0006  
Z -0.0131 -0.0065 -0.0120 0.0053 -0.0072 0.0004  
AT. 176 H X 0.0416 -0.0201 -0.0384 -0.0169 -0.0247 -0.0037  
Y 0.0071 -0.0035 -0.0065 -0.0024 -0.0048 -0.0006  
Z -0.0131 0.0065 0.0120 0.0053 0.0072 0.0004

FREQ(CM\*\*-1) 885.13 885.29 895.06 897.03 904.71 905.88

AT. 1 I X 0.0001 0.0001 0.0001 0.0001 -0.0000 0.0000  
Y 0.0001 0.0001 0.0001 0.0001 0.0000 0.0000  
Z 0.0001 0.0001 0.0002 0.0001 0.0001 0.0000  
AT. 2 I X -0.0001 0.0001 -0.0001 0.0001 0.0000 0.0000  
Y 0.0001 -0.0001 0.0001 -0.0001 0.0000 -0.0000  
Z -0.0001 0.0001 -0.0002 0.0001 -0.0001 0.0000  
AT. 3 I X -0.0001 0.0001 0.0001 0.0001 0.0000 -0.0000  
Y -0.0001 0.0001 0.0001 0.0001 -0.0000 -0.0000  
Z -0.0001 0.0001 0.0002 0.0001 -0.0001 -0.0000  
AT. 4 I X 0.0001 0.0001 -0.0001 0.0001 -0.0000 -0.0000  
Y -0.0001 -0.0001 0.0001 -0.0001 -0.0000 0.0000  
Z 0.0001 0.0001 -0.0002 0.0001 0.0001 -0.0000  
AT. 5 I X -0.0000 -0.0000 0.0000 0.0001 0.0000 0.0000  
Y -0.0004 -0.0004 0.0001 0.0001 0.0000 0.0000  
Z 0.0004 0.0004 -0.0001 -0.0001 -0.0001 -0.0001  
AT. 6 I X 0.0000 -0.0000 -0.0000 0.0001 -0.0000 0.0000  
Y -0.0004 0.0004 0.0001 -0.0001 0.0000 -0.0000  
Z -0.0004 0.0004 0.0001 -0.0001 0.0001 -0.0001

AT. 7 I X 0.0000 -0.0000 0.0000 0.0001 -0.0000 -0.0000  
Y 0.0004 -0.0004 0.0001 0.0001 -0.0000 -0.0000  
Z -0.0004 0.0004 -0.0001 -0.0001 0.0001 0.0001

AT. 8 I X -0.0000 -0.0000 -0.0000 0.0001 0.0000 -0.0000  
Y 0.0004 0.0004 0.0001 -0.0001 -0.0000 0.0000  
Z 0.0004 0.0004 0.0001 -0.0001 -0.0001 0.0001

AT. 9 N X -0.0020 -0.0029 0.0010 0.0010 0.0032 0.0036  
Y 0.0016 0.0020 -0.0006 -0.0004 -0.0028 -0.0029  
Z -0.0009 -0.0008 -0.0006 -0.0004 -0.0012 -0.0013

AT. 10 N X 0.0020 -0.0029 -0.0010 0.0010 -0.0032 0.0036  
Y 0.0016 -0.0020 -0.0006 0.0004 -0.0028 0.0029  
Z 0.0009 -0.0008 0.0006 -0.0004 0.0012 -0.0013

AT. 11 N X 0.0020 -0.0029 0.0010 0.0010 -0.0032 -0.0036  
Y -0.0016 0.0020 -0.0006 -0.0004 0.0028 0.0029  
Z 0.0009 -0.0008 -0.0006 -0.0004 0.0012 0.0013

AT. 12 N X -0.0020 -0.0029 -0.0010 0.0010 0.0032 -0.0036  
Y -0.0016 -0.0020 -0.0006 0.0004 0.0028 -0.0029  
Z -0.0009 -0.0008 0.0006 -0.0004 -0.0012 0.0013

AT. 13 N X -0.0025 -0.0020 -0.0016 -0.0016 -0.0045 -0.0050  
Y -0.0006 -0.0004 -0.0006 -0.0006 -0.0019 -0.0016  
Z -0.0009 -0.0009 -0.0001 -0.0004 0.0001 0.0003

AT. 14 N X 0.0025 -0.0020 0.0016 -0.0016 0.0045 -0.0050  
Y -0.0006 0.0004 -0.0006 0.0006 -0.0019 0.0016  
Z 0.0009 -0.0009 0.0001 -0.0004 -0.0001 0.0003

AT. 15 N X 0.0025 -0.0020 -0.0016 -0.0016 0.0045 0.0050  
Y 0.0006 -0.0004 -0.0006 -0.0006 0.0019 0.0016  
Z 0.0009 -0.0009 -0.0001 -0.0004 -0.0001 -0.0003

AT. 16 N X -0.0025 -0.0020 0.0016 -0.0016 -0.0045 0.0050  
Y 0.0006 0.0004 -0.0006 0.0006 0.0019 -0.0016  
Z -0.0009 -0.0009 0.0001 -0.0004 0.0001 -0.0003

AT. 17 O X -0.0002 -0.0006 -0.0032 -0.0032 -0.0002 -0.0002  
Y 0.0006 0.0008 0.0016 0.0017 0.0016 0.0016

Z 0.0019 0.0027 0.0045 0.0050 0.0022 0.0023  
AT. 18 O X 0.0002 -0.0006 0.0032 -0.0032 0.0002 -0.0002  
Y 0.0006 -0.0008 0.0016 -0.0017 0.0016 -0.0016  
Z -0.0019 0.0027 -0.0045 0.0050 -0.0022 0.0023  
AT. 19 O X 0.0002 -0.0006 -0.0032 -0.0032 0.0002 0.0002  
Y -0.0006 0.0008 0.0016 0.0017 -0.0016 -0.0016  
Z -0.0019 0.0027 0.0045 0.0050 -0.0022 -0.0023  
AT. 20 O X -0.0002 -0.0006 0.0032 -0.0032 -0.0002 0.0002  
Y -0.0006 -0.0008 0.0016 -0.0017 -0.0016 0.0016  
Z 0.0019 0.0027 -0.0045 0.0050 0.0022 -0.0023  
AT. 21 O X -0.0008 -0.0008 -0.0001 0.0000 -0.0004 -0.0005  
Y -0.0034 -0.0034 0.0016 0.0013 0.0019 0.0017  
Z 0.0113 0.0107 -0.0034 -0.0027 -0.0027 -0.0021  
AT. 22 O X 0.0008 -0.0008 0.0001 0.0000 0.0004 -0.0005  
Y -0.0034 0.0034 0.0016 -0.0013 0.0019 -0.0017  
Z -0.0113 0.0107 0.0034 -0.0027 0.0027 -0.0021  
AT. 23 O X 0.0008 -0.0008 -0.0001 0.0000 0.0004 0.0005  
Y 0.0034 -0.0034 0.0016 0.0013 -0.0019 -0.0017  
Z -0.0113 0.0107 -0.0034 -0.0027 0.0027 0.0021  
AT. 24 O X -0.0008 -0.0008 0.0001 0.0000 -0.0004 0.0005  
Y 0.0034 0.0034 0.0016 -0.0013 -0.0019 0.0017  
Z 0.0113 0.0107 0.0034 -0.0027 -0.0027 0.0021  
AT. 25 C X -0.0021 -0.0031 -0.0033 -0.0040 -0.0007 -0.0007  
Y -0.0022 -0.0026 -0.0002 -0.0015 0.0015 0.0012  
Z -0.0016 -0.0028 -0.0070 -0.0078 -0.0037 -0.0035  
AT. 26 C X 0.0021 -0.0031 0.0033 -0.0040 0.0007 -0.0007  
Y -0.0022 0.0026 -0.0002 0.0015 0.0015 -0.0012  
Z 0.0016 -0.0028 0.0070 -0.0078 0.0037 -0.0035  
AT. 27 C X 0.0021 -0.0031 -0.0033 -0.0040 0.0007 0.0007  
Y 0.0022 -0.0026 -0.0002 -0.0015 -0.0015 -0.0012  
Z 0.0016 -0.0028 -0.0070 -0.0078 0.0037 0.0035  
AT. 28 C X -0.0021 -0.0031 0.0033 -0.0040 -0.0007 0.0007



Y 0.0022 0.0026 -0.0002 0.0015 -0.0015 0.0012  
Z -0.0016 -0.0028 0.0070 -0.0078 -0.0037 0.0035  
AT. 29 H X -0.0084 -0.0119 -0.0139 -0.0175 -0.0033 -0.0036  
Y 0.0088 0.0134 0.0205 0.0255 0.0061 0.0065  
Z 0.0060 0.0078 0.0053 0.0078 -0.0009 -0.0002  
AT. 30 H X 0.0084 -0.0119 0.0139 -0.0175 0.0033 -0.0036  
Y 0.0088 -0.0134 0.0205 -0.0255 0.0061 -0.0065  
Z -0.0060 0.0078 -0.0053 0.0078 0.0009 -0.0002  
AT. 31 H X 0.0084 -0.0119 -0.0139 -0.0175 0.0033 0.0036  
Y -0.0088 0.0134 0.0205 0.0255 -0.0061 -0.0065  
Z -0.0060 0.0078 0.0053 0.0078 0.0009 0.0002  
AT. 32 H X -0.0084 -0.0119 0.0139 -0.0175 -0.0033 0.0036  
Y -0.0088 -0.0134 0.0205 -0.0255 -0.0061 0.0065  
Z 0.0060 0.0078 -0.0053 0.0078 -0.0009 0.0002  
AT. 33 H X 0.0138 0.0190 0.0194 0.0240 0.0055 0.0063  
Y -0.0049 -0.0065 -0.0043 -0.0071 0.0008 0.0003  
Z -0.0019 -0.0025 -0.0058 -0.0039 -0.0048 -0.0044  
AT. 34 H X -0.0138 0.0190 -0.0194 0.0240 -0.0055 0.0063  
Y -0.0049 0.0065 -0.0043 0.0071 0.0008 -0.0003  
Z 0.0019 -0.0025 0.0058 -0.0039 0.0048 -0.0044  
AT. 35 H X -0.0138 0.0190 0.0194 0.0240 -0.0055 -0.0063  
Y 0.0049 -0.0065 -0.0043 -0.0071 -0.0008 -0.0003  
Z 0.0019 -0.0025 -0.0058 -0.0039 0.0048 0.0044  
AT. 36 H X 0.0138 0.0190 -0.0194 0.0240 0.0055 -0.0063  
Y 0.0049 0.0065 -0.0043 0.0071 -0.0008 0.0003  
Z -0.0019 -0.0025 0.0058 -0.0039 -0.0048 0.0044  
AT. 37 C X 0.0022 0.0033 0.0035 0.0036 0.0013 0.0010  
Y 0.0006 0.0005 -0.0004 -0.0005 -0.0004 -0.0003  
Z 0.0001 0.0001 0.0017 0.0015 0.0013 0.0014  
AT. 38 C X -0.0022 0.0033 -0.0035 0.0036 -0.0013 0.0010  
Y 0.0006 -0.0005 -0.0004 0.0005 -0.0004 0.0003  
Z -0.0001 0.0001 -0.0017 0.0015 -0.0013 0.0014

AT. 39 C X -0.0022 0.0033 0.0035 0.0036 -0.0013 -0.0010  
Y -0.0006 0.0005 -0.0004 -0.0005 0.0004 0.0003  
Z -0.0001 0.0001 0.0017 0.0015 -0.0013 -0.0014

AT. 40 C X 0.0022 0.0033 -0.0035 0.0036 0.0013 -0.0010  
Y -0.0006 -0.0005 -0.0004 0.0005 0.0004 -0.0003  
Z 0.0001 0.0001 -0.0017 0.0015 0.0013 -0.0014

AT. 41 C X -0.0070 -0.0061 -0.0097 -0.0104 -0.0206 -0.0211  
Y -0.0014 -0.0021 0.0023 0.0025 0.0036 0.0024  
Z 0.0000 -0.0012 -0.0018 -0.0018 0.0014 0.0027

AT. 42 C X 0.0070 -0.0061 0.0097 -0.0104 0.0206 -0.0211  
Y -0.0014 0.0021 0.0023 -0.0025 0.0036 -0.0024  
Z -0.0000 -0.0012 0.0018 -0.0018 -0.0014 0.0027

AT. 43 C X 0.0070 -0.0061 -0.0097 -0.0104 0.0206 0.0211  
Y 0.0014 -0.0021 0.0023 0.0025 -0.0036 -0.0024  
Z -0.0000 -0.0012 -0.0018 -0.0018 -0.0014 -0.0027

AT. 44 C X -0.0070 -0.0061 0.0097 -0.0104 -0.0206 0.0211  
Y 0.0014 0.0021 0.0023 -0.0025 -0.0036 0.0024  
Z 0.0000 -0.0012 0.0018 -0.0018 0.0014 -0.0027

AT. 45 H X -0.0024 -0.0036 0.0129 0.0147 0.0181 0.0140  
Y -0.0058 -0.0055 -0.0071 -0.0075 -0.0128 -0.0127  
Z -0.0045 -0.0047 -0.0132 -0.0141 -0.0181 -0.0151

AT. 46 H X 0.0024 -0.0036 -0.0129 0.0147 -0.0181 0.0140  
Y -0.0058 0.0055 -0.0071 0.0075 -0.0128 0.0127  
Z 0.0045 -0.0047 0.0132 -0.0141 0.0181 -0.0151

AT. 47 H X 0.0024 -0.0036 0.0129 0.0147 -0.0181 -0.0140  
Y 0.0058 -0.0055 -0.0071 -0.0075 0.0128 0.0127  
Z 0.0045 -0.0047 -0.0132 -0.0141 0.0181 0.0151

AT. 48 H X -0.0024 -0.0036 -0.0129 0.0147 0.0181 -0.0140  
Y 0.0058 0.0055 -0.0071 0.0075 0.0128 -0.0127  
Z -0.0045 -0.0047 0.0132 -0.0141 -0.0181 0.0151

AT. 49 H X -0.0092 -0.0071 -0.0200 -0.0212 -0.0404 -0.0400  
Y -0.0059 -0.0049 -0.0154 -0.0162 -0.0274 -0.0264

Z 0.0062 0.0039 0.0174 0.0186 0.0310 0.0289  
AT. 50 H X 0.0092 -0.0071 0.0200 -0.0212 0.0404 -0.0400  
Y -0.0059 0.0049 -0.0154 0.0162 -0.0274 0.0264  
Z -0.0062 0.0039 -0.0174 0.0186 -0.0310 0.0289  
AT. 51 H X 0.0092 -0.0071 -0.0200 -0.0212 0.0404 0.0400  
Y 0.0059 -0.0049 -0.0154 -0.0162 0.0274 0.0264  
Z -0.0062 0.0039 0.0174 0.0186 -0.0310 -0.0289  
AT. 52 H X -0.0092 -0.0071 0.0200 -0.0212 -0.0404 0.0400  
Y 0.0059 0.0049 -0.0154 0.0162 0.0274 -0.0264  
Z 0.0062 0.0039 -0.0174 0.0186 0.0310 -0.0289  
AT. 53 C X -0.0007 -0.0007 -0.0003 -0.0006 0.0002 0.0006  
Y 0.0035 0.0027 0.0059 0.0062 0.0144 0.0143  
Z -0.0021 -0.0021 -0.0020 -0.0022 -0.0058 -0.0056  
AT. 54 C X 0.0007 -0.0007 0.0003 -0.0006 -0.0002 0.0006  
Y 0.0035 -0.0027 0.0059 -0.0062 0.0144 -0.0143  
Z 0.0021 -0.0021 0.0020 -0.0022 0.0058 -0.0056  
AT. 55 C X 0.0007 -0.0007 -0.0003 -0.0006 -0.0002 -0.0006  
Y -0.0035 0.0027 0.0059 0.0062 -0.0144 -0.0143  
Z 0.0021 -0.0021 -0.0020 -0.0022 0.0058 0.0056  
AT. 56 C X -0.0007 -0.0007 0.0003 -0.0006 0.0002 -0.0006  
Y -0.0035 -0.0027 0.0059 -0.0062 -0.0144 0.0143  
Z -0.0021 -0.0021 0.0020 -0.0022 -0.0058 0.0056  
AT. 57 C X -0.0004 -0.0001 -0.0008 -0.0010 -0.0011 -0.0010  
Y 0.0022 0.0024 0.0017 0.0019 0.0048 0.0045  
Z 0.0000 0.0005 -0.0026 -0.0026 -0.0052 -0.0057  
AT. 58 C X 0.0004 -0.0001 0.0008 -0.0010 0.0011 -0.0010  
Y 0.0022 -0.0024 0.0017 -0.0019 0.0048 -0.0045  
Z -0.0000 0.0005 0.0026 -0.0026 0.0052 -0.0057  
AT. 59 C X 0.0004 -0.0001 -0.0008 -0.0010 0.0011 0.0010  
Y -0.0022 0.0024 0.0017 0.0019 -0.0048 -0.0045  
Z -0.0000 0.0005 -0.0026 -0.0026 0.0052 0.0057  
AT. 60 C X -0.0004 -0.0001 0.0008 -0.0010 -0.0011 0.0010

Y -0.0022 -0.0024 0.0017 -0.0019 -0.0048 0.0045  
Z 0.0000 0.0005 0.0026 -0.0026 -0.0052 0.0057  
AT. 61 H X 0.0051 0.0047 0.0021 0.0029 0.0041 0.0041  
Y 0.0034 0.0033 0.0013 0.0020 0.0022 0.0018  
Z 0.0161 0.0151 0.0117 0.0132 0.0314 0.0303  
AT. 62 H X -0.0051 0.0047 -0.0021 0.0029 -0.0041 0.0041  
Y 0.0034 -0.0033 0.0013 -0.0020 0.0022 -0.0018  
Z -0.0161 0.0151 -0.0117 0.0132 -0.0314 0.0303  
AT. 63 H X -0.0051 0.0047 0.0021 0.0029 -0.0041 -0.0041  
Y -0.0034 0.0033 0.0013 0.0020 -0.0022 -0.0018  
Z -0.0161 0.0151 0.0117 0.0132 -0.0314 -0.0303  
AT. 64 H X 0.0051 0.0047 -0.0021 0.0029 0.0041 -0.0041  
Y -0.0034 -0.0033 0.0013 -0.0020 -0.0022 0.0018  
Z 0.0161 0.0151 -0.0117 0.0132 0.0314 -0.0303  
AT. 65 H X 0.0019 0.0020 0.0011 0.0012 0.0036 0.0034  
Y -0.0051 -0.0040 -0.0042 -0.0049 -0.0101 -0.0093  
Z 0.0024 0.0033 0.0024 0.0029 0.0145 0.0157  
AT. 66 H X -0.0019 0.0020 -0.0011 0.0012 -0.0036 0.0034  
Y -0.0051 0.0040 -0.0042 0.0049 -0.0101 0.0093  
Z -0.0024 0.0033 -0.0024 0.0029 -0.0145 0.0157  
AT. 67 H X -0.0019 0.0020 0.0011 0.0012 -0.0036 -0.0034  
Y 0.0051 -0.0040 -0.0042 -0.0049 0.0101 0.0093  
Z -0.0024 0.0033 0.0024 0.0029 -0.0145 -0.0157  
AT. 68 H X 0.0019 0.0020 -0.0011 0.0012 0.0036 -0.0034  
Y 0.0051 0.0040 -0.0042 0.0049 0.0101 -0.0093  
Z 0.0024 0.0033 -0.0024 0.0029 0.0145 -0.0157  
AT. 69 H X -0.0002 0.0007 -0.0021 -0.0018 -0.0074 -0.0083  
Y -0.0093 -0.0081 -0.0089 -0.0099 -0.0261 -0.0267  
Z -0.0093 -0.0079 -0.0117 -0.0125 -0.0320 -0.0329  
AT. 70 H X 0.0002 0.0007 0.0021 -0.0018 0.0074 -0.0083  
Y -0.0093 0.0081 -0.0089 0.0099 -0.0261 0.0267  
Z 0.0093 -0.0079 0.0117 -0.0125 0.0320 -0.0329

AT. 71 H X 0.0002 0.0007 -0.0021 -0.0018 0.0074 0.0083  
Y 0.0093 -0.0081 -0.0089 -0.0099 0.0261 0.0267  
Z 0.0093 -0.0079 -0.0117 -0.0125 0.0320 0.0329

AT. 72 H X -0.0002 0.0007 0.0021 -0.0018 -0.0074 0.0083  
Y 0.0093 0.0081 -0.0089 0.0099 0.0261 -0.0267  
Z -0.0093 -0.0079 0.0117 -0.0125 -0.0320 0.0329

AT. 73 C X -0.0046 -0.0047 0.0033 0.0033 0.0001 -0.0000  
Y -0.0024 -0.0026 0.0009 0.0004 -0.0025 -0.0024  
Z -0.0035 -0.0041 0.0049 0.0044 0.0053 0.0055

AT. 74 C X 0.0046 -0.0047 -0.0033 0.0033 -0.0001 -0.0000  
Y -0.0024 0.0026 0.0009 -0.0004 -0.0025 0.0024  
Z 0.0035 -0.0041 -0.0049 0.0044 -0.0053 0.0055

AT. 75 C X 0.0046 -0.0047 0.0033 0.0033 -0.0001 0.0000  
Y 0.0024 -0.0026 0.0009 0.0004 0.0025 0.0024  
Z 0.0035 -0.0041 0.0049 0.0044 -0.0053 -0.0055

AT. 76 C X -0.0046 -0.0047 -0.0033 0.0033 0.0001 0.0000  
Y 0.0024 0.0026 0.0009 -0.0004 0.0025 -0.0024  
Z -0.0035 -0.0041 -0.0049 0.0044 0.0053 -0.0055

AT. 77 C X 0.0138 0.0158 -0.0037 -0.0019 -0.0075 -0.0078  
Y -0.0003 -0.0001 -0.0035 -0.0032 -0.0029 -0.0018  
Z -0.0002 0.0004 0.0019 0.0015 0.0027 0.0021

AT. 78 C X -0.0138 0.0158 0.0037 -0.0019 0.0075 -0.0078  
Y -0.0003 0.0001 -0.0035 0.0032 -0.0029 0.0018  
Z 0.0002 0.0004 -0.0019 0.0015 -0.0027 0.0021

AT. 79 C X -0.0138 0.0158 -0.0037 -0.0019 0.0075 0.0078  
Y 0.0003 -0.0001 -0.0035 -0.0032 0.0029 0.0018  
Z 0.0002 0.0004 0.0019 0.0015 -0.0027 -0.0021

AT. 80 C X 0.0138 0.0158 0.0037 -0.0019 -0.0075 0.0078  
Y 0.0003 0.0001 -0.0035 0.0032 0.0029 -0.0018  
Z -0.0002 0.0004 -0.0019 0.0015 0.0027 -0.0021

AT. 81 H X 0.0259 0.0291 -0.0042 -0.0013 -0.0139 -0.0155  
Y 0.0128 0.0144 -0.0045 -0.0028 -0.0102 -0.0105

Z 0.0080 0.0083 0.0062 0.0065 0.0046 0.0025  
AT. 82 H X -0.0259 0.0291 0.0042 -0.0013 0.0139 -0.0155  
Y 0.0128 -0.0144 -0.0045 0.0028 -0.0102 0.0105  
Z -0.0080 0.0083 -0.0062 0.0065 -0.0046 0.0025  
AT. 83 H X -0.0259 0.0291 -0.0042 -0.0013 0.0139 0.0155  
Y -0.0128 0.0144 -0.0045 -0.0028 0.0102 0.0105  
Z -0.0080 0.0083 0.0062 0.0065 -0.0046 -0.0025  
AT. 84 H X 0.0259 0.0291 0.0042 -0.0013 -0.0139 0.0155  
Y -0.0128 -0.0144 -0.0045 0.0028 0.0102 -0.0105  
Z 0.0080 0.0083 -0.0062 0.0065 0.0046 -0.0025  
AT. 85 H X -0.0031 -0.0018 -0.0054 -0.0057 -0.0021 -0.0002  
Y 0.0086 0.0096 -0.0041 -0.0028 -0.0040 -0.0037  
Z -0.0026 -0.0023 0.0028 0.0023 0.0022 0.0016  
AT. 86 H X 0.0031 -0.0018 0.0054 -0.0057 0.0021 -0.0002  
Y 0.0086 -0.0096 -0.0041 0.0028 -0.0040 0.0037  
Z 0.0026 -0.0023 -0.0028 0.0023 -0.0022 0.0016  
AT. 87 H X 0.0031 -0.0018 -0.0054 -0.0057 0.0021 0.0002  
Y -0.0086 0.0096 -0.0041 -0.0028 0.0040 0.0037  
Z 0.0026 -0.0023 0.0028 0.0023 -0.0022 -0.0016  
AT. 88 H X -0.0031 -0.0018 0.0054 -0.0057 -0.0021 0.0002  
Y -0.0086 -0.0096 -0.0041 0.0028 0.0040 -0.0037  
Z -0.0026 -0.0023 -0.0028 0.0023 0.0022 -0.0016  
AT. 89 C X -0.0023 -0.0023 0.0011 0.0011 0.0010 0.0010  
Y -0.0035 -0.0046 0.0009 0.0002 0.0042 0.0045  
Z -0.0033 -0.0041 0.0020 0.0013 0.0041 0.0041  
AT. 90 C X 0.0023 -0.0023 -0.0011 0.0011 -0.0010 0.0010  
Y -0.0035 0.0046 0.0009 -0.0002 0.0042 -0.0045  
Z 0.0033 -0.0041 -0.0020 0.0013 -0.0041 0.0041  
AT. 91 C X 0.0023 -0.0023 0.0011 0.0011 -0.0010 -0.0010  
Y 0.0035 -0.0046 0.0009 0.0002 -0.0042 -0.0045  
Z 0.0033 -0.0041 0.0020 0.0013 -0.0041 -0.0041  
AT. 92 C X -0.0023 -0.0023 -0.0011 0.0011 0.0010 -0.0010

Y 0.0035 0.0046 0.0009 -0.0002 -0.0042 0.0045  
Z -0.0033 -0.0041 -0.0020 0.0013 0.0041 -0.0041  
AT. 93 C X -0.0008 -0.0009 -0.0003 -0.0001 0.0001 0.0001  
Y -0.0035 -0.0042 0.0014 0.0009 0.0050 0.0045  
Z 0.0014 0.0008 -0.0027 -0.0028 0.0001 0.0006  
AT. 94 C X 0.0008 -0.0009 0.0003 -0.0001 -0.0001 0.0001  
Y -0.0035 0.0042 0.0014 -0.0009 0.0050 -0.0045  
Z -0.0014 0.0008 0.0027 -0.0028 -0.0001 0.0006  
AT. 95 C X 0.0008 -0.0009 -0.0003 -0.0001 -0.0001 -0.0001  
Y 0.0035 -0.0042 0.0014 0.0009 -0.0050 -0.0045  
Z -0.0014 0.0008 -0.0027 -0.0028 -0.0001 -0.0006  
AT. 96 C X -0.0008 -0.0009 0.0003 -0.0001 0.0001 -0.0001  
Y 0.0035 0.0042 0.0014 -0.0009 -0.0050 0.0045  
Z 0.0014 0.0008 0.0027 -0.0028 0.0001 -0.0006  
AT. 97 H X 0.0052 0.0051 -0.0045 -0.0042 -0.0003 -0.0004  
Y -0.0065 -0.0056 0.0072 0.0075 -0.0018 -0.0025  
Z 0.0166 0.0192 -0.0064 -0.0045 -0.0150 -0.0146  
AT. 98 H X -0.0052 0.0051 0.0045 -0.0042 0.0003 -0.0004  
Y -0.0065 0.0056 0.0072 -0.0075 -0.0018 0.0025  
Z -0.0166 0.0192 0.0064 -0.0045 0.0150 -0.0146  
AT. 99 H X -0.0052 0.0051 -0.0045 -0.0042 0.0003 0.0004  
Y 0.0065 -0.0056 0.0072 0.0075 0.0018 0.0025  
Z -0.0166 0.0192 -0.0064 -0.0045 0.0150 0.0146  
AT. 100 H X 0.0052 0.0051 0.0045 -0.0042 -0.0003 0.0004  
Y 0.0065 0.0056 0.0072 -0.0075 0.0018 -0.0025  
Z 0.0166 0.0192 0.0064 -0.0045 -0.0150 0.0146  
AT. 101 H X 0.0050 0.0058 -0.0017 -0.0014 -0.0048 -0.0043  
Y 0.0017 0.0014 -0.0005 -0.0013 0.0030 0.0030  
Z 0.0054 0.0090 -0.0014 0.0008 -0.0195 -0.0193  
AT. 102 H X -0.0050 0.0058 0.0017 -0.0014 0.0048 -0.0043  
Y 0.0017 -0.0014 -0.0005 0.0013 0.0030 -0.0030  
Z -0.0054 0.0090 0.0014 0.0008 0.0195 -0.0193

AT.103 H X -0.0050 0.0058 -0.0017 -0.0014 0.0048 0.0043  
Y -0.0017 0.0014 -0.0005 -0.0013 -0.0030 -0.0030  
Z -0.0054 0.0090 -0.0014 0.0008 0.0195 0.0193

AT.104 H X 0.0050 0.0058 0.0017 -0.0014 -0.0048 0.0043  
Y -0.0017 -0.0014 -0.0005 0.0013 -0.0030 0.0030  
Z 0.0054 0.0090 0.0014 0.0008 -0.0195 0.0193

AT.105 H X 0.0033 0.0029 0.0004 -0.0002 0.0011 0.0015  
Y 0.0070 0.0108 0.0001 0.0014 -0.0156 -0.0152  
Z -0.0078 -0.0116 -0.0019 -0.0031 0.0151 0.0148

AT.106 H X -0.0033 0.0029 -0.0004 -0.0002 -0.0011 0.0015  
Y 0.0070 -0.0108 0.0001 -0.0014 -0.0156 0.0152  
Z 0.0078 -0.0116 0.0019 -0.0031 -0.0151 0.0148

AT.107 H X -0.0033 0.0029 0.0004 -0.0002 -0.0011 -0.0015  
Y -0.0070 0.0108 0.0001 0.0014 0.0156 0.0152  
Z 0.0078 -0.0116 -0.0019 -0.0031 -0.0151 -0.0148

AT.108 H X 0.0033 0.0029 -0.0004 -0.0002 0.0011 -0.0015  
Y -0.0070 -0.0108 0.0001 -0.0014 0.0156 -0.0152  
Z -0.0078 -0.0116 0.0019 -0.0031 0.0151 -0.0148

AT.109 C X 0.0100 0.0090 0.0088 0.0096 0.0196 0.0203  
Y 0.0007 0.0006 -0.0037 -0.0040 -0.0057 -0.0043  
Z 0.0029 0.0029 -0.0016 -0.0013 -0.0030 -0.0032

AT.110 C X -0.0100 0.0090 -0.0088 0.0096 -0.0196 0.0203  
Y 0.0007 -0.0006 -0.0037 0.0040 -0.0057 0.0043  
Z -0.0029 0.0029 0.0016 -0.0013 0.0030 -0.0032

AT.111 C X -0.0100 0.0090 0.0088 0.0096 -0.0196 -0.0203  
Y -0.0007 0.0006 -0.0037 -0.0040 0.0057 0.0043  
Z -0.0029 0.0029 -0.0016 -0.0013 0.0030 0.0032

AT.112 C X 0.0100 0.0090 -0.0088 0.0096 0.0196 -0.0203  
Y -0.0007 -0.0006 -0.0037 0.0040 0.0057 -0.0043  
Z 0.0029 0.0029 0.0016 -0.0013 -0.0030 0.0032

AT.113 H X 0.0175 0.0153 0.0142 0.0150 0.0350 0.0374  
Y -0.0105 -0.0085 -0.0123 -0.0126 -0.0298 -0.0308



Z 0.0103 0.0098 -0.0012 -0.0001 0.0029 0.0053  
AT. 114 H X -0.0175 0.0153 -0.0142 0.0150 -0.0350 0.0374  
Y -0.0105 0.0085 -0.0123 0.0126 -0.0298 0.0308  
Z -0.0103 0.0098 0.0012 -0.0001 -0.0029 0.0053  
AT. 115 H X -0.0175 0.0153 0.0142 0.0150 -0.0350 -0.0374  
Y 0.0105 -0.0085 -0.0123 -0.0126 0.0298 0.0308  
Z -0.0103 0.0098 -0.0012 -0.0001 -0.0029 -0.0053  
AT. 116 H X 0.0175 0.0153 -0.0142 0.0150 0.0350 -0.0374  
Y 0.0105 0.0085 -0.0123 0.0126 0.0298 -0.0308  
Z 0.0103 0.0098 0.0012 -0.0001 0.0029 -0.0053  
AT. 117 H X -0.0056 -0.0048 0.0006 0.0018 -0.0049 -0.0094  
Y -0.0031 -0.0025 -0.0058 -0.0065 -0.0113 -0.0106  
Z 0.0022 0.0026 -0.0021 -0.0023 -0.0041 -0.0042  
AT. 118 H X 0.0056 -0.0048 -0.0006 0.0018 0.0049 -0.0094  
Y -0.0031 0.0025 -0.0058 0.0065 -0.0113 0.0106  
Z -0.0022 0.0026 0.0021 -0.0023 0.0041 -0.0042  
AT. 119 H X 0.0056 -0.0048 0.0006 0.0018 0.0049 0.0094  
Y 0.0031 -0.0025 -0.0058 -0.0065 0.0113 0.0106  
Z -0.0022 0.0026 -0.0021 -0.0023 0.0041 0.0042  
AT. 120 H X -0.0056 -0.0048 -0.0006 0.0018 -0.0049 0.0094  
Y 0.0031 0.0025 -0.0058 0.0065 0.0113 -0.0106  
Z 0.0022 0.0026 0.0021 -0.0023 -0.0041 0.0042  
AT. 121 C X -0.0107 -0.0124 0.0029 0.0011 0.0076 0.0077  
Y 0.0090 0.0095 -0.0018 -0.0010 -0.0049 -0.0052  
Z -0.0052 -0.0043 0.0017 0.0016 -0.0012 -0.0018  
AT. 122 C X 0.0107 -0.0124 -0.0029 0.0011 -0.0076 0.0077  
Y 0.0090 -0.0095 -0.0018 0.0010 -0.0049 0.0052  
Z 0.0052 -0.0043 -0.0017 0.0016 0.0012 -0.0018  
AT. 123 C X 0.0107 -0.0124 0.0029 0.0011 -0.0076 -0.0077  
Y -0.0090 0.0095 -0.0018 -0.0010 0.0049 0.0052  
Z 0.0052 -0.0043 0.0017 0.0016 0.0012 0.0018  
AT. 124 C X -0.0107 -0.0124 -0.0029 0.0011 0.0076 -0.0077

Y -0.0090 -0.0095 -0.0018 0.0010 0.0049 -0.0052  
Z -0.0052 -0.0043 -0.0017 0.0016 -0.0012 0.0018  
AT. 125 H X -0.0006 -0.0005 -0.0031 -0.0030 0.0002 0.0020  
Y 0.0144 0.0151 -0.0023 -0.0006 -0.0061 -0.0060  
Z -0.0125 -0.0122 0.0038 0.0025 0.0018 0.0004  
AT. 126 H X 0.0006 -0.0005 0.0031 -0.0030 -0.0002 0.0020  
Y 0.0144 -0.0151 -0.0023 0.0006 -0.0061 0.0060  
Z 0.0125 -0.0122 -0.0038 0.0025 -0.0018 0.0004  
AT. 127 H X 0.0006 -0.0005 -0.0031 -0.0030 -0.0002 -0.0020  
Y -0.0144 0.0151 -0.0023 -0.0006 0.0061 0.0060  
Z 0.0125 -0.0122 0.0038 0.0025 -0.0018 -0.0004  
AT. 128 H X -0.0006 -0.0005 0.0031 -0.0030 0.0002 -0.0020  
Y -0.0144 -0.0151 -0.0023 0.0006 0.0061 -0.0060  
Z -0.0125 -0.0122 -0.0038 0.0025 0.0018 -0.0004  
AT. 129 H X -0.0144 -0.0171 0.0057 0.0031 0.0131 0.0133  
Y 0.0193 0.0217 -0.0080 -0.0050 -0.0141 -0.0140  
Z 0.0076 0.0089 -0.0030 -0.0011 -0.0039 -0.0031  
AT. 130 H X 0.0144 -0.0171 -0.0057 0.0031 -0.0131 0.0133  
Y 0.0193 -0.0217 -0.0080 0.0050 -0.0141 0.0140  
Z -0.0076 0.0089 0.0030 -0.0011 0.0039 -0.0031  
AT. 131 H X 0.0144 -0.0171 0.0057 0.0031 -0.0131 -0.0133  
Y -0.0193 0.0217 -0.0080 -0.0050 0.0141 0.0140  
Z -0.0076 0.0089 -0.0030 -0.0011 0.0039 0.0031  
AT. 132 H X -0.0144 -0.0171 -0.0057 0.0031 0.0131 -0.0133  
Y -0.0193 -0.0217 -0.0080 0.0050 0.0141 -0.0140  
Z 0.0076 0.0089 0.0030 -0.0011 -0.0039 0.0031  
AT. 133 C X 0.0079 0.0075 -0.0016 -0.0013 -0.0008 -0.0001  
Y -0.0046 -0.0046 0.0008 0.0005 0.0005 0.0002  
Z 0.0035 0.0035 -0.0017 -0.0013 -0.0020 -0.0015  
AT. 134 C X -0.0079 0.0075 0.0016 -0.0013 0.0008 -0.0001  
Y -0.0046 0.0046 0.0008 -0.0005 0.0005 -0.0002  
Z -0.0035 0.0035 0.0017 -0.0013 0.0020 -0.0015

AT. 135 C X -0.0079 0.0075 -0.0016 -0.0013 0.0008 0.0001  
Y 0.0046 -0.0046 0.0008 0.0005 -0.0005 -0.0002  
Z -0.0035 0.0035 -0.0017 -0.0013 0.0020 0.0015

AT. 136 C X 0.0079 0.0075 0.0016 -0.0013 -0.0008 0.0001  
Y 0.0046 0.0046 0.0008 -0.0005 -0.0005 0.0002  
Z 0.0035 0.0035 0.0017 -0.0013 -0.0020 0.0015

AT. 137 C X -0.0053 -0.0051 0.0012 0.0010 0.0014 0.0010  
Y 0.0094 0.0088 -0.0024 -0.0017 0.0007 0.0007  
Z -0.0188 -0.0177 0.0066 0.0056 0.0052 0.0037

AT. 138 C X 0.0053 -0.0051 -0.0012 0.0010 -0.0014 0.0010  
Y 0.0094 -0.0088 -0.0024 0.0017 0.0007 -0.0007  
Z 0.0188 -0.0177 -0.0066 0.0056 -0.0052 0.0037

AT. 139 C X 0.0053 -0.0051 0.0012 0.0010 -0.0014 -0.0010  
Y -0.0094 0.0088 -0.0024 -0.0017 -0.0007 -0.0007  
Z 0.0188 -0.0177 0.0066 0.0056 -0.0052 -0.0037

AT. 140 C X -0.0053 -0.0051 -0.0012 0.0010 0.0014 -0.0010  
Y -0.0094 -0.0088 -0.0024 0.0017 -0.0007 0.0007  
Z -0.0188 -0.0177 -0.0066 0.0056 0.0052 -0.0037

AT. 141 H X -0.0659 -0.0617 0.0194 0.0158 0.0090 0.0059  
Y -0.0370 -0.0345 0.0138 0.0113 0.0075 0.0055  
Z 0.0168 0.0158 -0.0026 -0.0021 0.0016 0.0016

AT. 142 H X 0.0659 -0.0617 -0.0194 0.0158 -0.0090 0.0059  
Y -0.0370 0.0345 0.0138 -0.0113 0.0075 -0.0055  
Z -0.0168 0.0158 0.0026 -0.0021 -0.0016 0.0016

AT. 143 H X 0.0659 -0.0617 0.0194 0.0158 -0.0090 -0.0059  
Y 0.0370 -0.0345 0.0138 0.0113 -0.0075 -0.0055  
Z -0.0168 0.0158 -0.0026 -0.0021 -0.0016 -0.0016

AT. 144 H X -0.0659 -0.0617 -0.0194 0.0158 0.0090 -0.0059  
Y 0.0370 0.0345 0.0138 -0.0113 -0.0075 0.0055  
Z 0.0168 0.0158 0.0026 -0.0021 0.0016 -0.0016

AT. 145 H X 0.0695 0.0655 -0.0197 -0.0151 -0.0085 -0.0056  
Y -0.0114 -0.0109 0.0033 0.0026 0.0036 0.0027

Z -0.0110 -0.0106 0.0038 0.0031 0.0047 0.0034  
AT. 146 H X -0.0695 0.0655 0.0197 -0.0151 0.0085 -0.0056  
Y -0.0114 0.0109 0.0033 -0.0026 0.0036 -0.0027  
Z 0.0110 -0.0106 -0.0038 0.0031 -0.0047 0.0034  
AT. 147 H X -0.0695 0.0655 -0.0197 -0.0151 0.0085 0.0056  
Y 0.0114 -0.0109 0.0033 0.0026 -0.0036 -0.0027  
Z 0.0110 -0.0106 0.0038 0.0031 -0.0047 -0.0034  
AT. 148 H X 0.0695 0.0655 0.0197 -0.0151 -0.0085 0.0056  
Y 0.0114 0.0109 0.0033 -0.0026 -0.0036 0.0027  
Z -0.0110 -0.0106 -0.0038 0.0031 0.0047 -0.0034  
AT. 149 O X 0.0028 0.0027 -0.0014 -0.0011 0.0044 0.0043  
Y -0.0005 -0.0002 0.0000 0.0001 -0.0024 -0.0023  
Z -0.0001 0.0000 0.0009 0.0010 -0.0007 -0.0007  
AT. 150 O X -0.0028 0.0027 0.0014 -0.0011 -0.0044 0.0043  
Y -0.0005 0.0002 0.0000 -0.0001 -0.0024 0.0023  
Z 0.0001 0.0000 -0.0009 0.0010 0.0007 -0.0007  
AT. 151 O X -0.0028 0.0027 -0.0014 -0.0011 -0.0044 -0.0043  
Y 0.0005 -0.0002 0.0000 0.0001 0.0024 0.0023  
Z 0.0001 0.0000 0.0009 0.0010 0.0007 0.0007  
AT. 152 O X 0.0028 0.0027 0.0014 -0.0011 0.0044 -0.0043  
Y 0.0005 0.0002 0.0000 -0.0001 0.0024 -0.0023  
Z -0.0001 0.0000 -0.0009 0.0010 -0.0007 0.0007  
AT. 153 H X -0.0078 -0.0067 0.0318 0.0306 0.0134 0.0132  
Y -0.0025 0.0001 0.0088 0.0083 -0.0080 -0.0083  
Z 0.0064 0.0065 -0.0166 -0.0159 -0.0083 -0.0083  
AT. 154 H X 0.0078 -0.0067 -0.0318 0.0306 -0.0134 0.0132  
Y -0.0025 -0.0001 0.0088 -0.0083 -0.0080 0.0083  
Z -0.0064 0.0065 0.0166 -0.0159 0.0083 -0.0083  
AT. 155 H X 0.0078 -0.0067 0.0318 0.0306 -0.0134 -0.0132  
Y 0.0025 0.0001 0.0088 0.0083 0.0080 0.0083  
Z -0.0064 0.0065 -0.0166 -0.0159 0.0083 0.0083  
AT. 156 H X -0.0078 -0.0067 -0.0318 0.0306 0.0134 -0.0132

Y 0.0025 -0.0001 0.0088 -0.0083 0.0080 -0.0083  
Z 0.0064 0.0065 0.0166 -0.0159 -0.0083 0.0083  
AT. 157 O X -0.0022 -0.0023 -0.0013 -0.0017 -0.0056 -0.0053  
Y -0.0009 -0.0010 0.0000 -0.0001 0.0002 0.0001  
Z 0.0013 0.0014 0.0023 0.0027 0.0061 0.0057  
AT. 158 O X 0.0022 -0.0023 0.0013 -0.0017 0.0056 -0.0053  
Y -0.0009 0.0010 0.0000 0.0001 0.0002 -0.0001  
Z -0.0013 0.0014 -0.0023 0.0027 -0.0061 0.0057  
AT. 159 O X 0.0022 -0.0023 -0.0013 -0.0017 0.0056 0.0053  
Y 0.0009 -0.0010 0.0000 -0.0001 -0.0002 -0.0001  
Z -0.0013 0.0014 0.0023 0.0027 -0.0061 -0.0057  
AT. 160 O X -0.0022 -0.0023 0.0013 -0.0017 -0.0056 0.0053  
Y 0.0009 0.0010 0.0000 0.0001 -0.0002 0.0001  
Z 0.0013 0.0014 -0.0023 0.0027 0.0061 -0.0057  
AT. 161 O X 0.0005 0.0008 -0.0012 -0.0011 -0.0011 -0.0013  
Y 0.0014 0.0016 -0.0014 -0.0011 -0.0013 -0.0012  
Z 0.0011 0.0009 -0.0018 -0.0019 -0.0027 -0.0025  
AT. 162 O X -0.0005 0.0008 0.0012 -0.0011 0.0011 -0.0013  
Y 0.0014 -0.0016 -0.0014 0.0011 -0.0013 0.0012  
Z -0.0011 0.0009 0.0018 -0.0019 0.0027 -0.0025  
AT. 163 O X -0.0005 0.0008 -0.0012 -0.0011 0.0011 0.0013  
Y -0.0014 0.0016 -0.0014 -0.0011 0.0013 0.0012  
Z -0.0011 0.0009 -0.0018 -0.0019 0.0027 0.0025  
AT. 164 O X 0.0005 0.0008 0.0012 -0.0011 -0.0011 0.0013  
Y -0.0014 -0.0016 -0.0014 0.0011 0.0013 -0.0012  
Z 0.0011 0.0009 0.0018 -0.0019 -0.0027 0.0025  
AT. 165 H X 0.0160 0.0150 -0.0034 -0.0025 0.0007 0.0053  
Y 0.0083 0.0080 -0.0025 -0.0019 -0.0010 0.0012  
Z -0.0116 -0.0103 0.0022 0.0020 -0.0014 -0.0045  
AT. 166 H X -0.0160 0.0150 0.0034 -0.0025 -0.0007 0.0053  
Y 0.0083 -0.0080 -0.0025 0.0019 -0.0010 -0.0012  
Z 0.0116 -0.0103 -0.0022 0.0020 0.0014 -0.0045

AT.167 H X -0.0160 0.0150 -0.0034 -0.0025 -0.0007 -0.0053  
Y -0.0083 0.0080 -0.0025 -0.0019 0.0010 -0.0012  
Z 0.0116 -0.0103 0.0022 0.0020 0.0014 0.0045  
AT.168 H X 0.0160 0.0150 0.0034 -0.0025 0.0007 -0.0053  
Y -0.0083 -0.0080 -0.0025 0.0019 0.0010 0.0012  
Z -0.0116 -0.0103 -0.0022 0.0020 -0.0014 0.0045  
AT.169 O X 0.0001 -0.0004 -0.0047 -0.0048 -0.0012 -0.0012  
Y -0.0001 -0.0000 -0.0004 -0.0003 0.0001 0.0001  
Z 0.0001 -0.0000 0.0021 0.0022 0.0009 0.0009  
AT.170 O X -0.0001 -0.0004 0.0047 -0.0048 0.0012 -0.0012  
Y -0.0001 0.0000 -0.0004 0.0003 0.0001 -0.0001  
Z -0.0001 -0.0000 -0.0021 0.0022 -0.0009 0.0009  
AT.171 O X -0.0001 -0.0004 -0.0047 -0.0048 0.0012 0.0012  
Y 0.0001 -0.0000 -0.0004 -0.0003 -0.0001 -0.0001  
Z -0.0001 -0.0000 0.0021 0.0022 -0.0009 -0.0009  
AT.172 O X 0.0001 -0.0004 0.0047 -0.0048 -0.0012 0.0012  
Y 0.0001 0.0000 -0.0004 0.0003 -0.0001 0.0001  
Z 0.0001 -0.0000 -0.0021 0.0022 0.0009 -0.0009  
AT.173 H X 0.0041 0.0101 0.1340 0.1322 0.0286 0.0294  
Y -0.0008 -0.0023 -0.0256 -0.0256 -0.0058 -0.0060  
Z -0.0005 -0.0027 -0.0411 -0.0410 -0.0081 -0.0084  
AT.174 H X -0.0041 0.0101 -0.1340 0.1322 -0.0286 0.0294  
Y -0.0008 0.0023 -0.0256 0.0256 -0.0058 0.0060  
Z 0.0005 -0.0027 0.0411 -0.0410 0.0081 -0.0084  
AT.175 H X -0.0041 0.0101 0.1340 0.1322 -0.0286 -0.0294  
Y 0.0008 -0.0023 -0.0256 -0.0256 0.0058 0.0060  
Z 0.0005 -0.0027 -0.0411 -0.0410 0.0081 0.0084  
AT.176 H X 0.0041 0.0101 -0.1340 0.1322 0.0286 -0.0294  
Y 0.0008 0.0023 -0.0256 0.0256 0.0058 -0.0060  
Z -0.0005 -0.0027 0.0411 -0.0410 -0.0081 0.0084

FREQ(CM\*\*-1) 908.34 908.97 931.43 931.90 933.77 933.92

AT. 1 I X 0.0000 -0.0000 -0.0001 -0.0000 -0.0001 -0.0001  
Y -0.0000 -0.0000 -0.0000 -0.0000 -0.0000 -0.0000  
Z -0.0000 -0.0000 0.0000 0.0000 0.0000 0.0000

AT. 2 I X 0.0000 0.0000 -0.0001 0.0000 0.0001 -0.0001  
Y 0.0000 -0.0000 0.0000 -0.0000 -0.0000 0.0000  
Z -0.0000 0.0000 0.0000 -0.0000 -0.0000 0.0000

AT. 3 I X 0.0000 -0.0000 0.0001 0.0000 -0.0001 -0.0001  
Y -0.0000 -0.0000 0.0000 0.0000 -0.0000 -0.0000  
Z -0.0000 -0.0000 -0.0000 -0.0000 0.0000 0.0000

AT. 4 I X 0.0000 0.0000 0.0001 -0.0000 0.0001 -0.0001  
Y 0.0000 -0.0000 -0.0000 0.0000 -0.0000 0.0000  
Z -0.0000 0.0000 -0.0000 0.0000 -0.0000 0.0000

AT. 5 I X 0.0001 0.0000 0.0000 0.0000 0.0000 0.0000  
Y -0.0000 -0.0000 -0.0000 -0.0000 -0.0001 -0.0001  
Z -0.0000 -0.0000 0.0000 0.0000 0.0000 0.0000

AT. 6 I X 0.0001 -0.0000 0.0000 -0.0000 -0.0000 0.0000  
Y 0.0000 -0.0000 0.0000 -0.0000 -0.0001 0.0001  
Z -0.0000 0.0000 0.0000 -0.0000 -0.0000 0.0000

AT. 7 I X 0.0001 0.0000 -0.0000 -0.0000 0.0000 0.0000  
Y -0.0000 -0.0000 0.0000 0.0000 -0.0001 -0.0001  
Z -0.0000 -0.0000 -0.0000 -0.0000 0.0000 0.0000

AT. 8 I X 0.0001 -0.0000 -0.0000 0.0000 -0.0000 0.0000  
Y 0.0000 -0.0000 -0.0000 0.0000 -0.0001 0.0001  
Z -0.0000 0.0000 -0.0000 0.0000 -0.0000 0.0000

AT. 9 N X 0.0032 0.0034 -0.0011 -0.0014 -0.0015 -0.0015  
Y -0.0029 -0.0027 -0.0015 -0.0015 -0.0022 -0.0021  
Z -0.0013 -0.0011 0.0001 0.0003 0.0002 0.0003

AT. 10 N X 0.0032 -0.0034 -0.0011 0.0014 0.0015 -0.0015  
Y 0.0029 -0.0027 0.0015 -0.0015 -0.0022 0.0021  
Z -0.0013 0.0011 0.0001 -0.0003 -0.0002 0.0003

AT. 11 N X 0.0032 0.0034 0.0011 0.0014 -0.0015 -0.0015

Y -0.0029 -0.0027 0.0015 0.0015 -0.0022 -0.0021  
Z -0.0013 -0.0011 -0.0001 -0.0003 0.0002 0.0003  
AT. 12 N X 0.0032 -0.0034 0.0011 -0.0014 0.0015 -0.0015  
Y 0.0029 -0.0027 -0.0015 0.0015 -0.0022 0.0021  
Z -0.0013 0.0011 -0.0001 0.0003 -0.0002 0.0003  
AT. 13 N X -0.0044 -0.0042 0.0008 0.0009 0.0004 0.0004  
Y -0.0016 -0.0020 0.0002 0.0005 0.0004 0.0004  
Z 0.0005 0.0002 0.0005 0.0007 0.0008 0.0007  
AT. 14 N X -0.0044 0.0042 0.0008 -0.0009 -0.0004 0.0004  
Y 0.0016 -0.0020 -0.0002 0.0005 0.0004 -0.0004  
Z 0.0005 -0.0002 0.0005 -0.0007 -0.0008 0.0007  
AT. 15 N X -0.0044 -0.0042 -0.0008 -0.0009 0.0004 0.0004  
Y -0.0016 -0.0020 -0.0002 -0.0005 0.0004 0.0004  
Z 0.0005 0.0002 -0.0005 -0.0007 0.0008 0.0007  
AT. 16 N X -0.0044 0.0042 -0.0008 0.0009 -0.0004 0.0004  
Y 0.0016 -0.0020 0.0002 -0.0005 0.0004 -0.0004  
Z 0.0005 -0.0002 -0.0005 0.0007 -0.0008 0.0007  
AT. 17 O X 0.0023 0.0023 -0.0019 -0.0015 0.0000 -0.0000  
Y 0.0010 0.0008 0.0007 0.0006 0.0009 0.0007  
Z -0.0001 -0.0002 0.0001 -0.0001 -0.0009 -0.0010  
AT. 18 O X 0.0023 -0.0023 -0.0019 0.0015 -0.0000 -0.0000  
Y -0.0010 0.0008 -0.0007 0.0006 0.0009 -0.0007  
Z -0.0001 0.0002 0.0001 0.0001 0.0009 -0.0010  
AT. 19 O X 0.0023 0.0023 0.0019 0.0015 0.0000 -0.0000  
Y 0.0010 0.0008 -0.0007 -0.0006 0.0009 0.0007  
Z -0.0001 -0.0002 -0.0001 0.0001 -0.0009 -0.0010  
AT. 20 O X 0.0023 -0.0023 0.0019 -0.0015 -0.0000 -0.0000  
Y -0.0010 0.0008 0.0007 -0.0006 0.0009 -0.0007  
Z -0.0001 0.0002 -0.0001 -0.0001 0.0009 -0.0010  
AT. 21 O X -0.0005 -0.0003 0.0004 0.0003 0.0004 0.0004  
Y 0.0011 0.0013 -0.0009 -0.0012 -0.0015 -0.0015  
Z -0.0009 -0.0012 0.0016 0.0020 0.0025 0.0024



AT. 22 O X -0.0005 0.0003 0.0004 -0.0003 -0.0004 0.0004  
Y -0.0011 0.0013 0.0009 -0.0012 -0.0015 0.0015  
Z -0.0009 0.0012 0.0016 -0.0020 -0.0025 0.0024

AT. 23 O X -0.0005 -0.0003 -0.0004 -0.0003 0.0004 0.0004  
Y 0.0011 0.0013 0.0009 0.0012 -0.0015 -0.0015  
Z -0.0009 -0.0012 -0.0016 -0.0020 0.0025 0.0024

AT. 24 O X -0.0005 0.0003 -0.0004 0.0003 -0.0004 0.0004  
Y -0.0011 0.0013 -0.0009 0.0012 -0.0015 0.0015  
Z -0.0009 0.0012 -0.0016 0.0020 -0.0025 0.0024

AT. 25 C X 0.0013 0.0010 0.0004 0.0003 0.0010 0.0010  
Y 0.0022 0.0016 0.0017 0.0022 0.0025 0.0027  
Z -0.0000 0.0001 -0.0029 -0.0032 -0.0020 -0.0020

AT. 26 C X 0.0013 -0.0010 0.0004 -0.0003 -0.0010 0.0010  
Y -0.0022 0.0016 -0.0017 0.0022 0.0025 -0.0027  
Z -0.0000 -0.0001 -0.0029 0.0032 0.0020 -0.0020

AT. 27 C X 0.0013 0.0010 -0.0004 -0.0003 0.0010 0.0010  
Y 0.0022 0.0016 -0.0017 -0.0022 0.0025 0.0027  
Z -0.0000 0.0001 0.0029 0.0032 -0.0020 -0.0020

AT. 28 C X 0.0013 -0.0010 -0.0004 0.0003 -0.0010 0.0010  
Y -0.0022 0.0016 0.0017 -0.0022 0.0025 -0.0027  
Z -0.0000 -0.0001 0.0029 -0.0032 0.0020 -0.0020

AT. 29 H X 0.0054 0.0046 0.0007 0.0010 0.0046 0.0043  
Y -0.0068 -0.0056 0.0038 0.0033 -0.0018 -0.0024  
Z -0.0049 -0.0042 -0.0039 -0.0047 -0.0069 -0.0063

AT. 30 H X 0.0054 -0.0046 0.0007 -0.0010 -0.0046 0.0043  
Y 0.0068 -0.0056 -0.0038 0.0033 -0.0018 0.0024  
Z -0.0049 0.0042 -0.0039 0.0047 0.0069 -0.0063

AT. 31 H X 0.0054 0.0046 -0.0007 -0.0010 0.0046 0.0043  
Y -0.0068 -0.0056 -0.0038 -0.0033 -0.0018 -0.0024  
Z -0.0049 -0.0042 0.0039 0.0047 -0.0069 -0.0063

AT. 32 H X 0.0054 -0.0046 -0.0007 0.0010 -0.0046 0.0043  
Y 0.0068 -0.0056 0.0038 -0.0033 -0.0018 0.0024

Z -0.0049 0.0042 0.0039 -0.0047 0.0069 -0.0063  
AT. 33 H X -0.0045 -0.0044 -0.0036 -0.0034 -0.0071 -0.0069  
Y 0.0040 0.0031 0.0019 0.0024 0.0038 0.0040  
Z -0.0039 -0.0023 -0.0001 -0.0008 -0.0009 -0.0013  
AT. 34 H X -0.0045 0.0044 -0.0036 0.0034 0.0071 -0.0069  
Y -0.0040 0.0031 -0.0019 0.0024 0.0038 -0.0040  
Z -0.0039 0.0023 -0.0001 0.0008 0.0009 -0.0013  
AT. 35 H X -0.0045 -0.0044 0.0036 0.0034 -0.0071 -0.0069  
Y 0.0040 0.0031 -0.0019 -0.0024 0.0038 0.0040  
Z -0.0039 -0.0023 0.0001 0.0008 -0.0009 -0.0013  
AT. 36 H X -0.0045 0.0044 0.0036 -0.0034 0.0071 -0.0069  
Y -0.0040 0.0031 0.0019 -0.0024 0.0038 -0.0040  
Z -0.0039 0.0023 0.0001 -0.0008 0.0009 -0.0013  
AT. 37 C X -0.0005 -0.0008 0.0005 0.0008 0.0008 0.0008  
Y 0.0000 -0.0001 -0.0018 -0.0018 -0.0018 -0.0017  
Z 0.0009 0.0005 0.0012 0.0012 0.0013 0.0012  
AT. 38 C X -0.0005 0.0008 0.0005 -0.0008 -0.0008 0.0008  
Y -0.0000 -0.0001 0.0018 -0.0018 -0.0018 0.0017  
Z 0.0009 -0.0005 0.0012 -0.0012 -0.0013 0.0012  
AT. 39 C X -0.0005 -0.0008 -0.0005 -0.0008 0.0008 0.0008  
Y 0.0000 -0.0001 0.0018 0.0018 -0.0018 -0.0017  
Z 0.0009 0.0005 -0.0012 -0.0012 0.0013 0.0012  
AT. 40 C X -0.0005 0.0008 -0.0005 0.0008 -0.0008 0.0008  
Y -0.0000 -0.0001 -0.0018 0.0018 -0.0018 0.0017  
Z 0.0009 -0.0005 -0.0012 0.0012 -0.0013 0.0012  
AT. 41 C X -0.0188 -0.0183 0.0024 0.0034 0.0021 0.0021  
Y 0.0015 0.0024 0.0137 0.0136 0.0136 0.0138  
Z 0.0032 0.0026 0.0003 0.0004 0.0010 0.0008  
AT. 42 C X -0.0188 0.0183 0.0024 -0.0034 -0.0021 0.0021  
Y -0.0015 0.0024 -0.0137 0.0136 0.0136 -0.0138  
Z 0.0032 -0.0026 0.0003 -0.0004 -0.0010 0.0008  
AT. 43 C X -0.0188 -0.0183 -0.0024 -0.0034 0.0021 0.0021

Y 0.0015 0.0024 -0.0137 -0.0136 0.0136 0.0138  
Z 0.0032 0.0026 -0.0003 -0.0004 0.0010 0.0008  
AT. 44 C X -0.0188 0.0183 -0.0024 0.0034 -0.0021 0.0021  
Y -0.0015 0.0024 0.0137 -0.0136 0.0136 -0.0138  
Z 0.0032 -0.0026 -0.0003 0.0004 -0.0010 0.0008  
AT. 45 H X 0.0088 0.0126 0.0354 0.0345 0.0345 0.0350  
Y -0.0112 -0.0106 0.0003 0.0008 0.0005 0.0002  
Z -0.0114 -0.0129 -0.0155 -0.0147 -0.0144 -0.0152  
AT. 46 H X 0.0088 -0.0126 0.0354 -0.0345 -0.0345 0.0350  
Y 0.0112 -0.0106 -0.0003 0.0008 0.0005 -0.0002  
Z -0.0114 0.0129 -0.0155 0.0147 0.0144 -0.0152  
AT. 47 H X 0.0088 0.0126 -0.0354 -0.0345 0.0345 0.0350  
Y -0.0112 -0.0106 -0.0003 -0.0008 0.0005 0.0002  
Z -0.0114 -0.0129 0.0155 0.0147 -0.0144 -0.0152  
AT. 48 H X 0.0088 -0.0126 -0.0354 0.0345 -0.0345 0.0350  
Y 0.0112 -0.0106 0.0003 -0.0008 0.0005 -0.0002  
Z -0.0114 0.0129 0.0155 -0.0147 0.0144 -0.0152  
AT. 49 H X -0.0348 -0.0352 -0.0057 -0.0039 -0.0067 -0.0067  
Y -0.0222 -0.0227 -0.0059 -0.0046 -0.0062 -0.0061  
Z 0.0238 0.0245 0.0289 0.0277 0.0284 0.0287  
AT. 50 H X -0.0348 0.0352 -0.0057 0.0039 0.0067 -0.0067  
Y 0.0222 -0.0227 0.0059 -0.0046 -0.0062 0.0061  
Z 0.0238 -0.0245 0.0289 -0.0277 -0.0284 0.0287  
AT. 51 H X -0.0348 -0.0352 0.0057 0.0039 -0.0067 -0.0067  
Y -0.0222 -0.0227 0.0059 0.0046 -0.0062 -0.0061  
Z 0.0238 0.0245 -0.0289 -0.0277 0.0284 0.0287  
AT. 52 H X -0.0348 0.0352 0.0057 -0.0039 0.0067 -0.0067  
Y 0.0222 -0.0227 -0.0059 0.0046 -0.0062 0.0061  
Z 0.0238 -0.0245 -0.0289 0.0277 -0.0284 0.0287  
AT. 53 C X 0.0009 0.0002 0.0001 0.0000 -0.0002 -0.0004  
Y 0.0131 0.0133 -0.0006 -0.0013 0.0001 -0.0000  
Z -0.0057 -0.0056 0.0021 0.0021 0.0005 0.0005

AT. 54 C X 0.0009 -0.0002 0.0001 -0.0000 0.0002 -0.0004  
Y -0.0131 0.0133 0.0006 -0.0013 0.0001 0.0000  
Z -0.0057 0.0056 0.0021 -0.0021 -0.0005 0.0005

AT. 55 C X 0.0009 0.0002 -0.0001 -0.0000 -0.0002 -0.0004  
Y 0.0131 0.0133 0.0006 0.0013 0.0001 -0.0000  
Z -0.0057 -0.0056 -0.0021 -0.0021 0.0005 0.0005

AT. 56 C X 0.0009 -0.0002 -0.0001 0.0000 0.0002 -0.0004  
Y -0.0131 0.0133 -0.0006 0.0013 0.0001 0.0000  
Z -0.0057 0.0056 -0.0021 0.0021 -0.0005 0.0005

AT. 57 C X -0.0004 -0.0009 -0.0003 -0.0004 0.0000 -0.0002  
Y 0.0046 0.0048 -0.0022 -0.0018 -0.0004 -0.0004  
Z -0.0045 -0.0046 -0.0014 -0.0009 -0.0003 -0.0000

AT. 58 C X -0.0004 0.0009 -0.0003 0.0004 -0.0000 -0.0002  
Y -0.0046 0.0048 0.0022 -0.0018 -0.0004 0.0004  
Z -0.0045 0.0046 -0.0014 0.0009 0.0003 -0.0000

AT. 59 C X -0.0004 -0.0009 0.0003 0.0004 0.0000 -0.0002  
Y 0.0046 0.0048 0.0022 0.0018 -0.0004 -0.0004  
Z -0.0045 -0.0046 0.0014 0.0009 -0.0003 -0.0000

AT. 60 C X -0.0004 0.0009 0.0003 -0.0004 -0.0000 -0.0002  
Y -0.0046 0.0048 -0.0022 0.0018 -0.0004 0.0004  
Z -0.0045 0.0046 0.0014 -0.0009 0.0003 -0.0000

AT. 61 H X 0.0033 0.0039 -0.0041 -0.0037 -0.0033 -0.0031  
Y 0.0013 0.0021 -0.0034 -0.0028 -0.0024 -0.0020  
Z 0.0287 0.0307 -0.0100 -0.0092 -0.0025 -0.0027

AT. 62 H X 0.0033 -0.0039 -0.0041 0.0037 0.0033 -0.0031  
Y -0.0013 0.0021 0.0034 -0.0028 -0.0024 0.0020  
Z 0.0287 -0.0307 -0.0100 0.0092 0.0025 -0.0027

AT. 63 H X 0.0033 0.0039 0.0041 0.0037 -0.0033 -0.0031  
Y 0.0013 0.0021 0.0034 0.0028 -0.0024 -0.0020  
Z 0.0287 0.0307 0.0100 0.0092 -0.0025 -0.0027

AT. 64 H X 0.0033 -0.0039 0.0041 -0.0037 0.0033 -0.0031  
Y -0.0013 0.0021 -0.0034 0.0028 -0.0024 0.0020

Z 0.0287 -0.0307 0.0100 -0.0092 0.0025 -0.0027  
AT. 65 H X 0.0035 0.0036 -0.0019 -0.0019 -0.0010 -0.0008  
Y -0.0079 -0.0094 0.0026 0.0024 0.0021 0.0016  
Z 0.0173 0.0152 -0.0025 -0.0024 0.0025 0.0021  
AT. 66 H X 0.0035 -0.0036 -0.0019 0.0019 0.0010 -0.0008  
Y 0.0079 -0.0094 -0.0026 0.0024 0.0021 -0.0016  
Z 0.0173 -0.0152 -0.0025 0.0024 -0.0025 0.0021  
AT. 67 H X 0.0035 0.0036 0.0019 0.0019 -0.0010 -0.0008  
Y -0.0079 -0.0094 -0.0026 -0.0024 0.0021 0.0016  
Z 0.0173 0.0152 0.0025 0.0024 0.0025 0.0021  
AT. 68 H X 0.0035 -0.0036 0.0019 -0.0019 0.0010 -0.0008  
Y 0.0079 -0.0094 0.0026 -0.0024 0.0021 -0.0016  
Z 0.0173 -0.0152 0.0025 -0.0024 -0.0025 0.0021  
AT. 69 H X -0.0085 -0.0073 -0.0013 0.0000 -0.0013 -0.0021  
Y -0.0251 -0.0256 0.0033 0.0035 -0.0002 -0.0005  
Z -0.0307 -0.0309 0.0029 0.0036 -0.0004 -0.0004  
AT. 70 H X -0.0085 0.0073 -0.0013 -0.0000 0.0013 -0.0021  
Y 0.0251 -0.0256 -0.0033 0.0035 -0.0002 0.0005  
Z -0.0307 0.0309 0.0029 -0.0036 0.0004 -0.0004  
AT. 71 H X -0.0085 -0.0073 0.0013 -0.0000 -0.0013 -0.0021  
Y -0.0251 -0.0256 -0.0033 -0.0035 -0.0002 -0.0005  
Z -0.0307 -0.0309 -0.0029 -0.0036 -0.0004 -0.0004  
AT. 72 H X -0.0085 0.0073 0.0013 0.0000 0.0013 -0.0021  
Y 0.0251 -0.0256 0.0033 -0.0035 -0.0002 0.0005  
Z -0.0307 0.0309 -0.0029 0.0036 0.0004 -0.0004  
AT. 73 C X -0.0022 -0.0016 0.0020 0.0008 -0.0021 -0.0021  
Y -0.0035 -0.0035 0.0011 0.0009 -0.0007 -0.0007  
Z 0.0034 0.0035 0.0035 0.0027 0.0006 0.0005  
AT. 74 C X -0.0022 0.0016 0.0020 -0.0008 0.0021 -0.0021  
Y 0.0035 -0.0035 -0.0011 0.0009 -0.0007 0.0007  
Z 0.0034 -0.0035 0.0035 -0.0027 -0.0006 0.0005  
AT. 75 C X -0.0022 -0.0016 -0.0020 -0.0008 -0.0021 -0.0021

Y -0.0035 -0.0035 -0.0011 -0.0009 -0.0007 -0.0007  
Z 0.0034 0.0035 -0.0035 -0.0027 0.0006 0.0005  
AT. 76 C X -0.0022 0.0016 -0.0020 0.0008 0.0021 -0.0021  
Y 0.0035 -0.0035 0.0011 -0.0009 -0.0007 0.0007  
Z 0.0034 -0.0035 -0.0035 0.0027 -0.0006 0.0005  
AT. 77 C X -0.0071 -0.0072 -0.0026 -0.0032 -0.0049 -0.0046  
Y -0.0009 -0.0003 -0.0160 -0.0169 -0.0169 -0.0171  
Z 0.0021 0.0026 -0.0090 -0.0094 -0.0093 -0.0090  
AT. 78 C X -0.0071 0.0072 -0.0026 0.0032 0.0049 -0.0046  
Y 0.0009 -0.0003 0.0160 -0.0169 -0.0169 0.0171  
Z 0.0021 -0.0026 -0.0090 0.0094 0.0093 -0.0090  
AT. 79 C X -0.0071 -0.0072 0.0026 0.0032 -0.0049 -0.0046  
Y -0.0009 -0.0003 0.0160 0.0169 -0.0169 -0.0171  
Z 0.0021 0.0026 0.0090 0.0094 -0.0093 -0.0090  
AT. 80 C X -0.0071 0.0072 0.0026 -0.0032 0.0049 -0.0046  
Y 0.0009 -0.0003 -0.0160 0.0169 -0.0169 0.0171  
Z 0.0021 -0.0026 0.0090 -0.0094 0.0093 -0.0090  
AT. 81 H X -0.0159 -0.0172 0.0293 0.0299 0.0257 0.0261  
Y -0.0106 -0.0113 0.0172 0.0176 0.0147 0.0147  
Z 0.0012 -0.0000 0.0310 0.0327 0.0332 0.0336  
AT. 82 H X -0.0159 0.0172 0.0293 -0.0299 -0.0257 0.0261  
Y 0.0106 -0.0113 -0.0172 0.0176 0.0147 -0.0147  
Z 0.0012 0.0000 0.0310 -0.0327 -0.0332 0.0336  
AT. 83 H X -0.0159 -0.0172 -0.0293 -0.0299 0.0257 0.0261  
Y -0.0106 -0.0113 -0.0172 -0.0176 0.0147 0.0147  
Z 0.0012 -0.0000 -0.0310 -0.0327 0.0332 0.0336  
AT. 84 H X -0.0159 0.0172 -0.0293 0.0299 -0.0257 0.0261  
Y 0.0106 -0.0113 0.0172 -0.0176 0.0147 -0.0147  
Z 0.0012 0.0000 -0.0310 0.0327 -0.0332 0.0336  
AT. 85 H X 0.0022 0.0041 -0.0556 -0.0589 -0.0601 -0.0600  
Y -0.0027 -0.0026 0.0032 0.0028 0.0040 0.0037  
Z 0.0010 0.0013 -0.0097 -0.0099 -0.0107 -0.0102

AT. 86 H X 0.0022 -0.0041 -0.0556 0.0589 0.0601 -0.0600  
Y 0.0027 -0.0026 -0.0032 0.0028 0.0040 -0.0037  
Z 0.0010 -0.0013 -0.0097 0.0099 0.0107 -0.0102

AT. 87 H X 0.0022 0.0041 0.0556 0.0589 -0.0601 -0.0600  
Y -0.0027 -0.0026 -0.0032 -0.0028 0.0040 0.0037  
Z 0.0010 0.0013 0.0097 0.0099 -0.0107 -0.0102

AT. 88 H X 0.0022 -0.0041 0.0556 -0.0589 0.0601 -0.0600  
Y 0.0027 -0.0026 0.0032 -0.0028 0.0040 -0.0037  
Z 0.0010 -0.0013 0.0097 -0.0099 0.0107 -0.0102

AT. 89 C X 0.0006 0.0004 0.0025 0.0028 0.0038 0.0037  
Y 0.0052 0.0052 -0.0021 -0.0017 0.0002 0.0001  
Z 0.0040 0.0042 -0.0001 -0.0002 0.0002 0.0002

AT. 90 C X 0.0006 -0.0004 0.0025 -0.0028 -0.0038 0.0037  
Y -0.0052 0.0052 0.0021 -0.0017 0.0002 -0.0001  
Z 0.0040 -0.0042 -0.0001 0.0002 -0.0002 0.0002

AT. 91 C X 0.0006 0.0004 -0.0025 -0.0028 0.0038 0.0037  
Y 0.0052 0.0052 0.0021 0.0017 0.0002 0.0001  
Z 0.0040 0.0042 0.0001 0.0002 0.0002 0.0002

AT. 92 C X 0.0006 -0.0004 -0.0025 0.0028 -0.0038 0.0037  
Y -0.0052 0.0052 -0.0021 0.0017 0.0002 -0.0001  
Z 0.0040 -0.0042 0.0001 -0.0002 -0.0002 0.0002

AT. 93 C X -0.0002 -0.0003 0.0021 0.0024 0.0023 0.0024  
Y 0.0048 0.0045 0.0012 0.0011 0.0005 0.0007  
Z 0.0016 0.0016 -0.0008 -0.0007 -0.0002 -0.0003

AT. 94 C X -0.0002 0.0003 0.0021 -0.0024 -0.0023 0.0024  
Y -0.0048 0.0045 -0.0012 0.0011 0.0005 -0.0007  
Z 0.0016 -0.0016 -0.0008 0.0007 0.0002 -0.0003

AT. 95 C X -0.0002 -0.0003 -0.0021 -0.0024 0.0023 0.0024  
Y 0.0048 0.0045 -0.0012 -0.0011 0.0005 0.0007  
Z 0.0016 0.0016 0.0008 0.0007 -0.0002 -0.0003

AT. 96 C X -0.0002 0.0003 -0.0021 0.0024 -0.0023 0.0024  
Y -0.0048 0.0045 0.0012 -0.0011 0.0005 -0.0007

Z 0.0016 -0.0016 0.0008 -0.0007 0.0002 -0.0003  
AT. 97 H X 0.0009 0.0012 -0.0001 -0.0012 -0.0030 -0.0031  
Y -0.0047 -0.0054 0.0006 0.0024 0.0043 0.0047  
Z -0.0136 -0.0124 -0.0096 -0.0105 -0.0112 -0.0116  
AT. 98 H X 0.0009 -0.0012 -0.0001 0.0012 0.0030 -0.0031  
Y 0.0047 -0.0054 -0.0006 0.0024 0.0043 -0.0047  
Z -0.0136 0.0124 -0.0096 0.0105 0.0112 -0.0116  
AT. 99 H X 0.0009 0.0012 0.0001 0.0012 -0.0030 -0.0031  
Y -0.0047 -0.0054 -0.0006 -0.0024 0.0043 0.0047  
Z -0.0136 -0.0124 0.0096 0.0105 -0.0112 -0.0116  
AT. 100 H X 0.0009 -0.0012 0.0001 -0.0012 0.0030 -0.0031  
Y 0.0047 -0.0054 0.0006 -0.0024 0.0043 -0.0047  
Z -0.0136 0.0124 0.0096 -0.0105 0.0112 -0.0116  
AT. 101 H X -0.0044 -0.0036 -0.0018 -0.0017 -0.0014 -0.0015  
Y 0.0042 0.0049 -0.0028 -0.0035 -0.0042 -0.0041  
Z -0.0221 -0.0227 0.0017 0.0029 0.0046 0.0041  
AT. 102 H X -0.0044 0.0036 -0.0018 0.0017 0.0014 -0.0015  
Y -0.0042 0.0049 0.0028 -0.0035 -0.0042 0.0041  
Z -0.0221 0.0227 0.0017 -0.0029 -0.0046 0.0041  
AT. 103 H X -0.0044 -0.0036 0.0018 0.0017 -0.0014 -0.0015  
Y 0.0042 0.0049 0.0028 0.0035 -0.0042 -0.0041  
Z -0.0221 -0.0227 -0.0017 -0.0029 0.0046 0.0041  
AT. 104 H X -0.0044 0.0036 0.0018 -0.0017 0.0014 -0.0015  
Y -0.0042 0.0049 -0.0028 0.0035 -0.0042 0.0041  
Z -0.0221 0.0227 -0.0017 0.0029 -0.0046 0.0041  
AT. 105 H X 0.0030 0.0032 -0.0057 -0.0058 -0.0041 -0.0044  
Y -0.0192 -0.0181 0.0010 -0.0003 -0.0025 -0.0034  
Z 0.0184 0.0173 0.0018 0.0030 0.0042 0.0050  
AT. 106 H X 0.0030 -0.0032 -0.0057 0.0058 0.0041 -0.0044  
Y 0.0192 -0.0181 -0.0010 -0.0003 -0.0025 0.0034  
Z 0.0184 -0.0173 0.0018 -0.0030 -0.0042 0.0050  
AT. 107 H X 0.0030 0.0032 0.0057 0.0058 -0.0041 -0.0044



Y -0.0192 -0.0181 -0.0010 0.0003 -0.0025 -0.0034  
Z 0.0184 0.0173 -0.0018 -0.0030 0.0042 0.0050  
AT. 108 H X 0.0030 -0.0032 0.0057 -0.0058 0.0041 -0.0044  
Y 0.0192 -0.0181 0.0010 0.0003 -0.0025 0.0034  
Z 0.0184 -0.0173 -0.0018 0.0030 -0.0042 0.0050  
AT. 109 C X 0.0180 0.0175 -0.0041 -0.0048 -0.0036 -0.0035  
Y -0.0033 -0.0042 -0.0101 -0.0106 -0.0119 -0.0122  
Z -0.0038 -0.0027 0.0031 0.0026 0.0015 0.0015  
AT. 110 C X 0.0180 -0.0175 -0.0041 0.0048 0.0036 -0.0035  
Y 0.0033 -0.0042 0.0101 -0.0106 -0.0119 0.0122  
Z -0.0038 0.0027 0.0031 -0.0026 -0.0015 0.0015  
AT. 111 C X 0.0180 0.0175 0.0041 0.0048 -0.0036 -0.0035  
Y -0.0033 -0.0042 0.0101 0.0106 -0.0119 -0.0122  
Z -0.0038 -0.0027 -0.0031 -0.0026 0.0015 0.0015  
AT. 112 C X 0.0180 -0.0175 0.0041 -0.0048 0.0036 -0.0035  
Y 0.0033 -0.0042 -0.0101 0.0106 -0.0119 0.0122  
Z -0.0038 0.0027 -0.0031 0.0026 -0.0015 0.0015  
AT. 113 H X 0.0347 0.0324 -0.0223 -0.0240 -0.0217 -0.0220  
Y -0.0291 -0.0275 0.0163 0.0171 0.0139 0.0142  
Z 0.0053 0.0041 -0.0213 -0.0228 -0.0244 -0.0247  
AT. 114 H X 0.0347 -0.0324 -0.0223 0.0240 0.0217 -0.0220  
Y 0.0291 -0.0275 -0.0163 0.0171 0.0139 -0.0142  
Z 0.0053 -0.0041 -0.0213 0.0228 0.0244 -0.0247  
AT. 115 H X 0.0347 0.0324 0.0223 0.0240 -0.0217 -0.0220  
Y -0.0291 -0.0275 -0.0163 -0.0171 0.0139 0.0142  
Z 0.0053 0.0041 0.0213 0.0228 -0.0244 -0.0247  
AT. 116 H X 0.0347 -0.0324 0.0223 -0.0240 0.0217 -0.0220  
Y 0.0291 -0.0275 0.0163 -0.0171 0.0139 -0.0142  
Z 0.0053 -0.0041 0.0213 -0.0228 0.0244 -0.0247  
AT. 117 H X -0.0119 -0.0067 0.0357 0.0366 0.0369 0.0373  
Y -0.0091 -0.0096 -0.0027 -0.0030 -0.0043 -0.0046  
Z -0.0044 -0.0037 0.0036 0.0029 0.0020 0.0019

AT. 118 H X -0.0119 0.0067 0.0357 -0.0366 -0.0369 0.0373  
Y 0.0091 -0.0096 0.0027 -0.0030 -0.0043 0.0046  
Z -0.0044 0.0037 0.0036 -0.0029 -0.0020 0.0019

AT. 119 H X -0.0119 -0.0067 -0.0357 -0.0366 0.0369 0.0373  
Y -0.0091 -0.0096 0.0027 0.0030 -0.0043 -0.0046  
Z -0.0044 -0.0037 -0.0036 -0.0029 0.0020 0.0019

AT. 120 H X -0.0119 0.0067 -0.0357 0.0366 -0.0369 0.0373  
Y 0.0091 -0.0096 -0.0027 0.0030 -0.0043 0.0046  
Z -0.0044 0.0037 -0.0036 0.0029 -0.0020 0.0019

AT. 121 C X 0.0081 0.0080 0.0018 0.0025 0.0055 0.0052  
Y -0.0050 -0.0052 0.0145 0.0159 0.0182 0.0180  
Z -0.0019 -0.0026 0.0036 0.0044 0.0053 0.0053

AT. 122 C X 0.0081 -0.0080 0.0018 -0.0025 -0.0055 0.0052  
Y 0.0050 -0.0052 -0.0145 0.0159 0.0182 -0.0180  
Z -0.0019 0.0026 0.0036 -0.0044 -0.0053 0.0053

AT. 123 C X 0.0081 0.0080 -0.0018 -0.0025 0.0055 0.0052  
Y -0.0050 -0.0052 -0.0145 -0.0159 0.0182 0.0180  
Z -0.0019 -0.0026 -0.0036 -0.0044 0.0053 0.0053

AT. 124 C X 0.0081 -0.0080 -0.0018 0.0025 -0.0055 0.0052  
Y 0.0050 -0.0052 0.0145 -0.0159 0.0182 -0.0180  
Z -0.0019 0.0026 -0.0036 0.0044 -0.0053 0.0053

AT. 125 H X 0.0021 0.0031 -0.0409 -0.0457 -0.0556 -0.0549  
Y -0.0067 -0.0062 0.0083 0.0086 0.0088 0.0087  
Z 0.0010 -0.0005 0.0199 0.0229 0.0288 0.0286

AT. 126 H X 0.0021 -0.0031 -0.0409 0.0457 0.0556 -0.0549  
Y 0.0067 -0.0062 -0.0083 0.0086 0.0088 -0.0087  
Z 0.0010 0.0005 0.0199 -0.0229 -0.0288 0.0286

AT. 127 H X 0.0021 0.0031 0.0409 0.0457 -0.0556 -0.0549  
Y -0.0067 -0.0062 -0.0083 -0.0086 0.0088 0.0087  
Z 0.0010 -0.0005 -0.0199 -0.0229 0.0288 0.0286

AT. 128 H X 0.0021 -0.0031 0.0409 -0.0457 0.0556 -0.0549  
Y 0.0067 -0.0062 0.0083 -0.0086 0.0088 -0.0087

Z 0.0010 0.0005 -0.0199 0.0229 -0.0288 0.0286  
AT. 129 H X 0.0133 0.0131 0.0068 0.0083 0.0134 0.0130  
Y -0.0134 -0.0131 -0.0077 -0.0093 -0.0143 -0.0140  
Z -0.0035 -0.0030 -0.0303 -0.0340 -0.0423 -0.0417  
AT. 130 H X 0.0133 -0.0131 0.0068 -0.0083 -0.0134 0.0130  
Y 0.0134 -0.0131 0.0077 -0.0093 -0.0143 0.0140  
Z -0.0035 0.0030 -0.0303 0.0340 0.0423 -0.0417  
AT. 131 H X 0.0133 0.0131 -0.0068 -0.0083 0.0134 0.0130  
Y -0.0134 -0.0131 0.0077 0.0093 -0.0143 -0.0140  
Z -0.0035 -0.0030 0.0303 0.0340 -0.0423 -0.0417  
AT. 132 H X 0.0133 -0.0131 -0.0068 0.0083 -0.0134 0.0130  
Y 0.0134 -0.0131 -0.0077 0.0093 -0.0143 0.0140  
Z -0.0035 0.0030 0.0303 -0.0340 0.0423 -0.0417  
AT. 133 C X 0.0004 -0.0002 -0.0001 0.0001 -0.0000 -0.0001  
Y 0.0000 0.0001 -0.0010 -0.0012 -0.0017 -0.0015  
Z -0.0010 -0.0013 0.0001 0.0004 0.0005 0.0005  
AT. 134 C X 0.0004 0.0002 -0.0001 -0.0001 0.0000 -0.0001  
Y -0.0000 0.0001 0.0010 -0.0012 -0.0017 0.0015  
Z -0.0010 0.0013 0.0001 -0.0004 -0.0005 0.0005  
AT. 135 C X 0.0004 -0.0002 0.0001 -0.0001 -0.0000 -0.0001  
Y 0.0000 0.0001 0.0010 0.0012 -0.0017 -0.0015  
Z -0.0010 -0.0013 -0.0001 -0.0004 0.0005 0.0005  
AT. 136 C X 0.0004 0.0002 0.0001 0.0001 0.0000 -0.0001  
Y -0.0000 0.0001 -0.0010 0.0012 -0.0017 0.0015  
Z -0.0010 0.0013 -0.0001 0.0004 -0.0005 0.0005  
AT. 137 C X 0.0008 0.0010 -0.0006 -0.0007 -0.0006 -0.0006  
Y 0.0023 0.0025 0.0004 0.0005 0.0012 0.0013  
Z 0.0012 0.0020 -0.0001 -0.0004 -0.0011 -0.0008  
AT. 138 C X 0.0008 -0.0010 -0.0006 0.0007 0.0006 -0.0006  
Y -0.0023 0.0025 -0.0004 0.0005 0.0012 -0.0013  
Z 0.0012 -0.0020 -0.0001 0.0004 0.0011 -0.0008  
AT. 139 C X 0.0008 0.0010 0.0006 0.0007 -0.0006 -0.0006

Y 0.0023 0.0025 -0.0004 -0.0005 0.0012 0.0013  
Z 0.0012 0.0020 0.0001 0.0004 -0.0011 -0.0008  
AT. 140 C X 0.0008 -0.0010 0.0006 -0.0007 0.0006 -0.0006  
Y -0.0023 0.0025 0.0004 -0.0005 0.0012 -0.0013  
Z 0.0012 -0.0020 0.0001 -0.0004 0.0011 -0.0008  
AT. 141 H X -0.0029 -0.0016 -0.0033 -0.0042 -0.0076 -0.0071  
Y -0.0009 -0.0003 0.0003 -0.0008 -0.0024 -0.0024  
Z 0.0033 0.0032 0.0027 0.0024 0.0042 0.0038  
AT. 142 H X -0.0029 0.0016 -0.0033 0.0042 0.0076 -0.0071  
Y 0.0009 -0.0003 -0.0003 -0.0008 -0.0024 0.0024  
Z 0.0033 -0.0032 0.0027 -0.0024 -0.0042 0.0038  
AT. 143 H X -0.0029 -0.0016 0.0033 0.0042 -0.0076 -0.0071  
Y -0.0009 -0.0003 -0.0003 0.0008 -0.0024 -0.0024  
Z 0.0033 0.0032 -0.0027 -0.0024 0.0042 0.0038  
AT. 144 H X -0.0029 0.0016 0.0033 -0.0042 0.0076 -0.0071  
Y 0.0009 -0.0003 0.0003 0.0008 -0.0024 0.0024  
Z 0.0033 -0.0032 -0.0027 0.0024 -0.0042 0.0038  
AT. 145 H X 0.0031 0.0021 0.0051 0.0057 0.0085 0.0084  
Y 0.0021 0.0027 -0.0019 -0.0019 -0.0020 -0.0018  
Z 0.0032 0.0040 -0.0025 -0.0025 -0.0027 -0.0024  
AT. 146 H X 0.0031 -0.0021 0.0051 -0.0057 -0.0085 0.0084  
Y -0.0021 0.0027 0.0019 -0.0019 -0.0020 0.0018  
Z 0.0032 -0.0040 -0.0025 0.0025 0.0027 -0.0024  
AT. 147 H X 0.0031 0.0021 -0.0051 -0.0057 0.0085 0.0084  
Y 0.0021 0.0027 0.0019 0.0019 -0.0020 -0.0018  
Z 0.0032 0.0040 0.0025 0.0025 -0.0027 -0.0024  
AT. 148 H X 0.0031 -0.0021 -0.0051 0.0057 -0.0085 0.0084  
Y -0.0021 0.0027 -0.0019 0.0019 -0.0020 0.0018  
Z 0.0032 -0.0040 0.0025 -0.0025 0.0027 -0.0024  
AT. 149 O X 0.0064 0.0063 -0.0027 -0.0021 0.0009 0.0009  
Y -0.0030 -0.0030 0.0012 0.0009 -0.0006 -0.0006  
Z -0.0018 -0.0018 0.0009 0.0006 -0.0007 -0.0007

AT.150 O X 0.0064 -0.0063 -0.0027 0.0021 -0.0009 0.0009  
Y 0.0030 -0.0030 -0.0012 0.0009 -0.0006 0.0006  
Z -0.0018 0.0018 0.0009 -0.0006 0.0007 -0.0007

AT.151 O X 0.0064 0.0063 0.0027 0.0021 0.0009 0.0009  
Y -0.0030 -0.0030 -0.0012 -0.0009 -0.0006 -0.0006  
Z -0.0018 -0.0018 -0.0009 -0.0006 -0.0007 -0.0007

AT.152 O X 0.0064 -0.0063 0.0027 -0.0021 -0.0009 0.0009  
Y 0.0030 -0.0030 0.0012 -0.0009 -0.0006 0.0006  
Z -0.0018 0.0018 -0.0009 0.0006 0.0007 -0.0007

AT.153 H X -0.0071 -0.0072 0.0150 0.0108 -0.0024 -0.0025  
Y -0.0174 -0.0180 0.0020 0.0017 -0.0036 -0.0035  
Z 0.0020 0.0017 -0.0105 -0.0077 0.0003 0.0004

AT.154 H X -0.0071 0.0072 0.0150 -0.0108 0.0024 -0.0025  
Y 0.0174 -0.0180 -0.0020 0.0017 -0.0036 0.0035  
Z 0.0020 -0.0017 -0.0105 0.0077 -0.0003 0.0004

AT.155 H X -0.0071 -0.0072 -0.0150 -0.0108 -0.0024 -0.0025  
Y -0.0174 -0.0180 -0.0020 -0.0017 -0.0036 -0.0035  
Z 0.0020 0.0017 0.0105 0.0077 0.0003 0.0004

AT.156 H X -0.0071 0.0072 -0.0150 0.0108 0.0024 -0.0025  
Y 0.0174 -0.0180 0.0020 -0.0017 -0.0036 0.0035  
Z 0.0020 -0.0017 0.0105 -0.0077 -0.0003 0.0004

AT.157 O X -0.0059 -0.0060 0.0019 0.0021 0.0003 -0.0000  
Y 0.0002 0.0003 -0.0003 -0.0001 -0.0002 -0.0004  
Z 0.0056 0.0062 -0.0025 -0.0026 -0.0010 -0.0012

AT.158 O X -0.0059 0.0060 0.0019 -0.0021 -0.0003 -0.0000  
Y -0.0002 0.0003 0.0003 -0.0001 -0.0002 0.0004  
Z 0.0056 -0.0062 -0.0025 0.0026 0.0010 -0.0012

AT.159 O X -0.0059 -0.0060 -0.0019 -0.0021 0.0003 -0.0000  
Y 0.0002 0.0003 0.0003 0.0001 -0.0002 -0.0004  
Z 0.0056 0.0062 0.0025 0.0026 -0.0010 -0.0012

AT.160 O X -0.0059 0.0060 -0.0019 0.0021 -0.0003 -0.0000  
Y -0.0002 0.0003 -0.0003 0.0001 -0.0002 0.0004

Z 0.0056 -0.0062 0.0025 -0.0026 0.0010 -0.0012  
AT.161 O X -0.0007 -0.0007 -0.0000 0.0002 0.0006 0.0008  
Y -0.0007 -0.0009 0.0003 0.0003 0.0007 0.0010  
Z -0.0020 -0.0024 0.0009 0.0011 0.0010 0.0012  
AT.162 O X -0.0007 0.0007 -0.0000 -0.0002 -0.0006 0.0008  
Y 0.0007 -0.0009 -0.0003 0.0003 0.0007 -0.0010  
Z -0.0020 0.0024 0.0009 -0.0011 -0.0010 0.0012  
AT.163 O X -0.0007 -0.0007 0.0000 -0.0002 0.0006 0.0008  
Y -0.0007 -0.0009 -0.0003 -0.0003 0.0007 0.0010  
Z -0.0020 -0.0024 -0.0009 -0.0011 0.0010 0.0012  
AT.164 O X -0.0007 0.0007 0.0000 0.0002 -0.0006 0.0008  
Y 0.0007 -0.0009 0.0003 -0.0003 0.0007 -0.0010  
Z -0.0020 0.0024 -0.0009 0.0011 -0.0010 0.0012  
AT.165 H X 0.0072 0.0028 -0.0020 0.0010 0.0027 0.0007  
Y 0.0023 0.0002 -0.0005 0.0009 0.0017 0.0009  
Z -0.0061 -0.0029 0.0013 0.0002 -0.0008 -0.0006  
AT.166 H X 0.0072 -0.0028 -0.0020 -0.0010 -0.0027 0.0007  
Y -0.0023 0.0002 0.0005 0.0009 0.0017 -0.0009  
Z -0.0061 0.0029 0.0013 -0.0002 0.0008 -0.0006  
AT.167 H X 0.0072 0.0028 0.0020 -0.0010 0.0027 0.0007  
Y 0.0023 0.0002 0.0005 -0.0009 0.0017 0.0009  
Z -0.0061 -0.0029 -0.0013 -0.0002 -0.0008 -0.0006  
AT.168 H X 0.0072 -0.0028 0.0020 0.0010 -0.0027 0.0007  
Y -0.0023 0.0002 -0.0005 -0.0009 0.0017 -0.0009  
Z -0.0061 0.0029 -0.0013 0.0002 0.0008 -0.0006  
AT.169 O X 0.0024 0.0024 -0.0028 -0.0021 0.0003 0.0004  
Y 0.0002 0.0003 -0.0005 -0.0004 -0.0000 -0.0000  
Z -0.0011 -0.0010 0.0020 0.0015 -0.0002 -0.0002  
AT.170 O X 0.0024 -0.0024 -0.0028 0.0021 -0.0003 0.0004  
Y -0.0002 0.0003 0.0005 -0.0004 -0.0000 0.0000  
Z -0.0011 0.0010 0.0020 -0.0015 0.0002 -0.0002  
AT.171 O X 0.0024 0.0024 0.0028 0.0021 0.0003 0.0004

Y 0.0002 0.0003 0.0005 0.0004 -0.0000 -0.0000  
 Z -0.0011 -0.0010 -0.0020 -0.0015 -0.0002 -0.0002  
 AT. 172 O X 0.0024 -0.0024 0.0028 -0.0021 -0.0003 0.0004  
 Y -0.0002 0.0003 -0.0005 0.0004 -0.0000 0.0000  
 Z -0.0011 0.0010 -0.0020 0.0015 0.0002 -0.0002  
 AT. 173 H X -0.0649 -0.0671 0.0721 0.0545 -0.0106 -0.0114  
 Y 0.0123 0.0126 -0.0142 -0.0107 0.0021 0.0023  
 Z 0.0210 0.0212 -0.0208 -0.0157 0.0033 0.0036  
 AT. 174 H X -0.0649 0.0671 0.0721 -0.0545 0.0106 -0.0114  
 Y -0.0123 0.0126 0.0142 -0.0107 0.0021 -0.0023  
 Z 0.0210 -0.0212 -0.0208 0.0157 -0.0033 0.0036  
 AT. 175 H X -0.0649 -0.0671 -0.0721 -0.0545 -0.0106 -0.0114  
 Y 0.0123 0.0126 0.0142 0.0107 0.0021 0.0023  
 Z 0.0210 0.0212 0.0208 0.0157 0.0033 0.0036  
 AT. 176 H X -0.0649 0.0671 -0.0721 0.0545 0.0106 -0.0114  
 Y -0.0123 0.0126 -0.0142 0.0107 0.0021 -0.0023  
 Z 0.0210 -0.0212 0.0208 -0.0157 -0.0033 0.0036  
  
 FREQ(CM\*\*-1) 937.51 938.37 941.29 942.22 942.68 944.38

AT. 1 I X 0.0001 0.0001 0.0000 0.0000 -0.0000 0.0000  
 Y 0.0000 0.0000 -0.0001 -0.0001 -0.0001 -0.0000  
 Z -0.0000 0.0001 -0.0001 -0.0001 -0.0001 -0.0001  
 AT. 2 I X 0.0001 -0.0001 0.0000 -0.0000 -0.0000 -0.0000  
 Y -0.0000 0.0000 0.0001 -0.0001 0.0001 -0.0000  
 Z -0.0000 -0.0001 -0.0001 0.0001 -0.0001 0.0001  
 AT. 3 I X -0.0001 -0.0001 -0.0000 0.0000 -0.0000 -0.0000  
 Y -0.0000 -0.0000 0.0001 -0.0001 -0.0001 0.0000  
 Z 0.0000 -0.0001 0.0001 -0.0001 -0.0001 0.0001  
 AT. 4 I X -0.0001 0.0001 -0.0000 -0.0000 -0.0000 0.0000  
 Y 0.0000 -0.0000 -0.0001 -0.0001 0.0001 0.0000  
 Z 0.0000 0.0001 0.0001 0.0001 -0.0001 -0.0001

AT. 5 I X 0.0000 0.0000 0.0001 0.0000 0.0000 0.0001  
Y 0.0000 0.0001 -0.0000 -0.0000 -0.0000 -0.0000  
Z -0.0000 -0.0000 -0.0000 -0.0000 -0.0000 -0.0000

AT. 6 I X 0.0000 -0.0000 0.0001 -0.0000 0.0000 -0.0001  
Y -0.0000 0.0001 0.0000 -0.0000 0.0000 -0.0000  
Z -0.0000 0.0000 -0.0000 0.0000 -0.0000 0.0000

AT. 7 I X -0.0000 -0.0000 -0.0001 0.0000 0.0000 -0.0001  
Y -0.0000 -0.0001 0.0000 -0.0000 -0.0000 0.0000  
Z 0.0000 0.0000 0.0000 -0.0000 -0.0000 0.0000

AT. 8 I X -0.0000 0.0000 -0.0001 -0.0000 0.0000 0.0001  
Y 0.0000 -0.0001 -0.0000 -0.0000 0.0000 0.0000  
Z 0.0000 -0.0000 0.0000 0.0000 -0.0000 -0.0000

AT. 9 N X 0.0001 -0.0004 0.0022 0.0019 0.0019 0.0019  
Y 0.0017 0.0009 0.0051 0.0050 0.0047 0.0054  
Z 0.0003 0.0004 -0.0015 -0.0014 -0.0015 -0.0014

AT. 10 N X 0.0001 0.0004 0.0022 -0.0019 0.0019 -0.0019  
Y -0.0017 0.0009 -0.0051 0.0050 -0.0047 0.0054  
Z 0.0003 -0.0004 -0.0015 0.0014 -0.0015 0.0014

AT. 11 N X -0.0001 0.0004 -0.0022 0.0019 0.0019 -0.0019  
Y -0.0017 -0.0009 -0.0051 0.0050 0.0047 -0.0054  
Z -0.0003 -0.0004 0.0015 -0.0014 -0.0015 0.0014

AT. 12 N X -0.0001 -0.0004 -0.0022 -0.0019 0.0019 0.0019  
Y 0.0017 -0.0009 0.0051 0.0050 -0.0047 -0.0054  
Z -0.0003 0.0004 0.0015 0.0014 -0.0015 -0.0014

AT. 13 N X 0.0009 0.0008 0.0002 0.0007 0.0005 0.0007  
Y -0.0004 0.0004 -0.0045 -0.0042 -0.0043 -0.0043  
Z -0.0008 -0.0005 -0.0005 -0.0005 -0.0006 -0.0006

AT. 14 N X 0.0009 -0.0008 0.0002 -0.0007 0.0005 -0.0007  
Y 0.0004 0.0004 0.0045 -0.0042 0.0043 -0.0043  
Z -0.0008 0.0005 -0.0005 0.0005 -0.0006 0.0006

AT. 15 N X -0.0009 -0.0008 -0.0002 0.0007 0.0005 -0.0007  
Y 0.0004 -0.0004 0.0045 -0.0042 -0.0043 0.0043



Z 0.0008 0.0005 0.0005 -0.0005 -0.0006 0.0006  
AT. 16 N X -0.0009 0.0008 -0.0002 -0.0007 0.0005 0.0007  
Y -0.0004 -0.0004 -0.0045 -0.0042 0.0043 0.0043  
Z 0.0008 -0.0005 0.0005 0.0005 -0.0006 -0.0006  
AT. 17 O X -0.0030 -0.0032 -0.0013 -0.0017 -0.0014 -0.0017  
Y -0.0003 0.0004 -0.0041 -0.0039 -0.0038 -0.0040  
Z 0.0015 0.0024 -0.0045 -0.0042 -0.0043 -0.0041  
AT. 18 O X -0.0030 0.0032 -0.0013 0.0017 -0.0014 0.0017  
Y 0.0003 0.0004 0.0041 -0.0039 0.0038 -0.0040  
Z 0.0015 -0.0024 -0.0045 0.0042 -0.0043 0.0041  
AT. 19 O X 0.0030 0.0032 0.0013 -0.0017 -0.0014 0.0017  
Y 0.0003 -0.0004 0.0041 -0.0039 -0.0038 0.0040  
Z -0.0015 -0.0024 0.0045 -0.0042 -0.0043 0.0041  
AT. 20 O X 0.0030 -0.0032 0.0013 0.0017 -0.0014 -0.0017  
Y -0.0003 -0.0004 -0.0041 -0.0039 0.0038 0.0040  
Z -0.0015 0.0024 0.0045 0.0042 -0.0043 -0.0041  
AT. 21 O X -0.0003 -0.0003 0.0000 0.0000 0.0000 -0.0001  
Y 0.0012 0.0007 0.0025 0.0025 0.0025 0.0026  
Z -0.0018 -0.0013 -0.0020 -0.0020 -0.0023 -0.0022  
AT. 22 O X -0.0003 0.0003 0.0000 -0.0000 0.0000 0.0001  
Y -0.0012 0.0007 -0.0025 0.0025 -0.0025 0.0026  
Z -0.0018 0.0013 -0.0020 0.0020 -0.0023 0.0022  
AT. 23 O X 0.0003 0.0003 -0.0000 0.0000 0.0000 0.0001  
Y -0.0012 -0.0007 -0.0025 0.0025 0.0025 -0.0026  
Z 0.0018 0.0013 0.0020 -0.0020 -0.0023 0.0022  
AT. 24 O X 0.0003 -0.0003 -0.0000 -0.0000 0.0000 -0.0001  
Y 0.0012 -0.0007 0.0025 0.0025 -0.0025 -0.0026  
Z 0.0018 -0.0013 0.0020 0.0020 -0.0023 -0.0022  
AT. 25 C X -0.0010 -0.0018 0.0010 0.0008 0.0011 0.0008  
Y -0.0021 -0.0012 -0.0031 -0.0031 -0.0029 -0.0035  
Z -0.0004 -0.0022 0.0067 0.0059 0.0060 0.0062  
AT. 26 C X -0.0010 0.0018 0.0010 -0.0008 0.0011 -0.0008

Y 0.0021 -0.0012 0.0031 -0.0031 0.0029 -0.0035  
Z -0.0004 0.0022 0.0067 -0.0059 0.0060 -0.0062  
AT. 27 C X 0.0010 0.0018 -0.0010 0.0008 0.0011 -0.0008  
Y 0.0021 0.0012 0.0031 -0.0031 -0.0029 0.0035  
Z 0.0004 0.0022 -0.0067 0.0059 0.0060 -0.0062  
AT. 28 C X 0.0010 -0.0018 -0.0010 -0.0008 0.0011 0.0008  
Y -0.0021 0.0012 -0.0031 -0.0031 0.0029 0.0035  
Z 0.0004 -0.0022 -0.0067 -0.0059 0.0060 0.0062  
AT. 29 H X -0.0082 -0.0084 0.0036 0.0029 0.0036 0.0026  
Y 0.0086 0.0117 -0.0101 -0.0079 -0.0090 -0.0077  
Z 0.0087 0.0056 0.0045 0.0039 0.0037 0.0046  
AT. 30 H X -0.0082 0.0084 0.0036 -0.0029 0.0036 -0.0026  
Y -0.0086 0.0117 0.0101 -0.0079 0.0090 -0.0077  
Z 0.0087 -0.0056 0.0045 -0.0039 0.0037 -0.0046  
AT. 31 H X 0.0082 0.0084 -0.0036 0.0029 0.0036 -0.0026  
Y -0.0086 -0.0117 0.0101 -0.0079 -0.0090 0.0077  
Z -0.0087 -0.0056 -0.0045 0.0039 0.0037 -0.0046  
AT. 32 H X 0.0082 -0.0084 -0.0036 -0.0029 0.0036 0.0026  
Y 0.0086 -0.0117 -0.0101 -0.0079 0.0090 0.0077  
Z -0.0087 0.0056 -0.0045 -0.0039 0.0037 0.0046  
AT. 33 H X 0.0069 0.0096 -0.0085 -0.0071 -0.0084 -0.0067  
Y -0.0041 -0.0036 -0.0021 -0.0025 -0.0019 -0.0029  
Z 0.0022 -0.0002 0.0083 0.0083 0.0077 0.0083  
AT. 34 H X 0.0069 -0.0096 -0.0085 0.0071 -0.0084 0.0067  
Y 0.0041 -0.0036 0.0021 -0.0025 0.0019 -0.0029  
Z 0.0022 0.0002 0.0083 -0.0083 0.0077 -0.0083  
AT. 35 H X -0.0069 -0.0096 0.0085 -0.0071 -0.0084 0.0067  
Y 0.0041 0.0036 0.0021 -0.0025 -0.0019 0.0029  
Z -0.0022 0.0002 -0.0083 0.0083 0.0077 -0.0083  
AT. 36 H X -0.0069 0.0096 0.0085 0.0071 -0.0084 -0.0067  
Y -0.0041 0.0036 -0.0021 -0.0025 0.0019 0.0029  
Z -0.0022 -0.0002 -0.0083 -0.0083 0.0077 0.0083

AT. 37 C X 0.0000 0.0013 -0.0023 -0.0022 -0.0023 -0.0022  
Y 0.0008 0.0005 0.0006 0.0004 0.0004 0.0004  
Z -0.0005 0.0000 -0.0040 -0.0035 -0.0035 -0.0038

AT. 38 C X 0.0000 -0.0013 -0.0023 0.0022 -0.0023 0.0022  
Y -0.0008 0.0005 -0.0006 0.0004 -0.0004 0.0004  
Z -0.0005 -0.0000 -0.0040 0.0035 -0.0035 0.0038

AT. 39 C X -0.0000 -0.0013 0.0023 -0.0022 -0.0023 0.0022  
Y -0.0008 -0.0005 -0.0006 0.0004 0.0004 -0.0004  
Z 0.0005 -0.0000 0.0040 -0.0035 -0.0035 0.0038

AT. 40 C X -0.0000 0.0013 0.0023 0.0022 -0.0023 -0.0022  
Y 0.0008 -0.0005 0.0006 0.0004 -0.0004 -0.0004  
Z 0.0005 0.0000 0.0040 0.0035 -0.0035 -0.0038

AT. 41 C X 0.0008 0.0001 0.0020 0.0032 0.0018 0.0030  
Y -0.0047 -0.0050 0.0149 0.0151 0.0152 0.0143  
Z -0.0021 -0.0007 -0.0112 -0.0113 -0.0112 -0.0118

AT. 42 C X 0.0008 -0.0001 0.0020 -0.0032 0.0018 -0.0030  
Y 0.0047 -0.0050 -0.0149 0.0151 -0.0152 0.0143  
Z -0.0021 0.0007 -0.0112 0.0113 -0.0112 0.0118

AT. 43 C X -0.0008 -0.0001 -0.0020 0.0032 0.0018 -0.0030  
Y 0.0047 0.0050 -0.0149 0.0151 0.0152 -0.0143  
Z 0.0021 0.0007 0.0112 -0.0113 -0.0112 0.0118

AT. 44 C X -0.0008 0.0001 -0.0020 -0.0032 0.0018 0.0030  
Y -0.0047 0.0050 0.0149 0.0151 -0.0152 -0.0143  
Z 0.0021 -0.0007 0.0112 0.0113 -0.0112 -0.0118

AT. 45 H X -0.0099 -0.0119 0.0442 0.0447 0.0454 0.0429  
Y 0.0007 0.0002 -0.0028 -0.0020 -0.0027 -0.0021  
Z 0.0038 0.0053 -0.0325 -0.0319 -0.0328 -0.0316

AT. 46 H X -0.0099 0.0119 0.0442 -0.0447 0.0454 -0.0429  
Y -0.0007 0.0002 0.0028 -0.0020 0.0027 -0.0021  
Z 0.0038 -0.0053 -0.0325 0.0319 -0.0328 0.0316

AT. 47 H X 0.0099 0.0119 -0.0442 0.0447 0.0454 -0.0429  
Y -0.0007 -0.0002 0.0028 -0.0020 -0.0027 0.0021

Z -0.0038 -0.0053 0.0325 -0.0319 -0.0328 0.0316  
AT. 48 H X 0.0099 -0.0119 -0.0442 -0.0447 0.0454 0.0429  
Y 0.0007 -0.0002 -0.0028 -0.0020 0.0027 0.0021  
Z -0.0038 0.0053 0.0325 0.0319 -0.0328 -0.0316  
AT. 49 H X 0.0055 0.0047 -0.0081 -0.0062 -0.0089 -0.0060  
Y 0.0035 0.0031 -0.0101 -0.0090 -0.0110 -0.0092  
Z -0.0110 -0.0098 0.0266 0.0260 0.0279 0.0247  
AT. 50 H X 0.0055 -0.0047 -0.0081 0.0062 -0.0089 0.0060  
Y -0.0035 0.0031 0.0101 -0.0090 0.0110 -0.0092  
Z -0.0110 0.0098 0.0266 -0.0260 0.0279 -0.0247  
AT. 51 H X -0.0055 -0.0047 0.0081 -0.0062 -0.0089 0.0060  
Y -0.0035 -0.0031 0.0101 -0.0090 -0.0110 0.0092  
Z 0.0110 0.0098 -0.0266 0.0260 0.0279 -0.0247  
AT. 52 H X -0.0055 0.0047 0.0081 0.0062 -0.0089 -0.0060  
Y 0.0035 -0.0031 -0.0101 -0.0090 0.0110 0.0092  
Z 0.0110 -0.0098 -0.0266 -0.0260 0.0279 0.0247  
AT. 53 C X 0.0001 0.0012 -0.0048 -0.0047 -0.0044 -0.0048  
Y -0.0013 -0.0014 0.0010 -0.0001 0.0010 0.0001  
Z 0.0019 0.0018 0.0030 0.0039 0.0036 0.0036  
AT. 54 C X 0.0001 -0.0012 -0.0048 0.0047 -0.0044 0.0048  
Y 0.0013 -0.0014 -0.0010 -0.0001 -0.0010 0.0001  
Z 0.0019 -0.0018 0.0030 -0.0039 0.0036 -0.0036  
AT. 55 C X -0.0001 -0.0012 0.0048 -0.0047 -0.0044 0.0048  
Y 0.0013 0.0014 -0.0010 -0.0001 0.0010 -0.0001  
Z -0.0019 -0.0018 -0.0030 0.0039 0.0036 -0.0036  
AT. 56 C X -0.0001 0.0012 0.0048 0.0047 -0.0044 -0.0048  
Y -0.0013 0.0014 0.0010 -0.0001 -0.0010 -0.0001  
Z -0.0019 0.0018 -0.0030 -0.0039 0.0036 0.0036  
AT. 57 C X -0.0007 0.0002 -0.0044 -0.0043 -0.0042 -0.0040  
Y -0.0019 -0.0023 -0.0010 -0.0015 -0.0017 -0.0011  
Z -0.0009 -0.0010 -0.0018 -0.0022 -0.0023 -0.0019  
AT. 58 C X -0.0007 -0.0002 -0.0044 0.0043 -0.0042 0.0040

Y 0.0019 -0.0023 0.0010 -0.0015 0.0017 -0.0011  
Z -0.0009 0.0010 -0.0018 0.0022 -0.0023 0.0019  
AT. 59 C X 0.0007 -0.0002 0.0044 -0.0043 -0.0042 0.0040  
Y 0.0019 0.0023 0.0010 -0.0015 -0.0017 0.0011  
Z 0.0009 0.0010 0.0018 -0.0022 -0.0023 0.0019  
AT. 60 C X 0.0007 0.0002 0.0044 0.0043 -0.0042 -0.0040  
Y -0.0019 0.0023 -0.0010 -0.0015 0.0017 0.0011  
Z 0.0009 -0.0010 0.0018 0.0022 -0.0023 -0.0019  
AT. 61 H X 0.0016 -0.0014 0.0100 0.0088 0.0089 0.0088  
Y 0.0008 -0.0017 0.0073 0.0063 0.0061 0.0063  
Z -0.0069 -0.0115 0.0103 0.0071 0.0067 0.0083  
AT. 62 H X 0.0016 0.0014 0.0100 -0.0088 0.0089 -0.0088  
Y -0.0008 -0.0017 -0.0073 0.0063 -0.0061 0.0063  
Z -0.0069 0.0115 0.0103 -0.0071 0.0067 -0.0083  
AT. 63 H X -0.0016 0.0014 -0.0100 0.0088 0.0089 -0.0088  
Y -0.0008 0.0017 -0.0073 0.0063 0.0061 -0.0063  
Z 0.0069 0.0115 -0.0103 0.0071 0.0067 -0.0083  
AT. 64 H X -0.0016 -0.0014 -0.0100 -0.0088 0.0089 0.0088  
Y 0.0008 0.0017 0.0073 0.0063 -0.0061 -0.0063  
Z 0.0069 -0.0115 -0.0103 -0.0071 0.0067 0.0083  
AT. 65 H X -0.0010 -0.0012 -0.0007 -0.0013 -0.0012 -0.0010  
Y -0.0008 0.0022 -0.0115 -0.0106 -0.0103 -0.0102  
Z -0.0094 -0.0053 -0.0235 -0.0249 -0.0244 -0.0242  
AT. 66 H X -0.0010 0.0012 -0.0007 0.0013 -0.0012 0.0010  
Y 0.0008 0.0022 0.0115 -0.0106 0.0103 -0.0102  
Z -0.0094 0.0053 -0.0235 0.0249 -0.0244 0.0242  
AT. 67 H X 0.0010 0.0012 0.0007 -0.0013 -0.0012 0.0010  
Y 0.0008 -0.0022 0.0115 -0.0106 -0.0103 0.0102  
Z 0.0094 0.0053 0.0235 -0.0249 -0.0244 0.0242  
AT. 68 H X 0.0010 -0.0012 0.0007 0.0013 -0.0012 -0.0010  
Y -0.0008 -0.0022 -0.0115 -0.0106 0.0103 0.0102  
Z 0.0094 -0.0053 0.0235 0.0249 -0.0244 -0.0242

AT. 69 H X 0.0035 0.0008 0.0087 0.0110 0.0082 0.0106  
Y 0.0054 0.0066 -0.0009 0.0015 0.0003 0.0009  
Z 0.0058 0.0064 0.0005 0.0028 0.0014 0.0022

AT. 70 H X 0.0035 -0.0008 0.0087 -0.0110 0.0082 -0.0106  
Y -0.0054 0.0066 0.0009 0.0015 -0.0003 0.0009  
Z 0.0058 -0.0064 0.0005 -0.0028 0.0014 -0.0022

AT. 71 H X -0.0035 -0.0008 -0.0087 0.0110 0.0082 -0.0106  
Y -0.0054 -0.0066 0.0009 0.0015 0.0003 -0.0009  
Z -0.0058 -0.0064 -0.0005 0.0028 0.0014 -0.0022

AT. 72 H X -0.0035 0.0008 -0.0087 -0.0110 0.0082 0.0106  
Y 0.0054 -0.0066 -0.0009 0.0015 -0.0003 -0.0009  
Z -0.0058 0.0064 -0.0005 -0.0028 0.0014 0.0022

AT. 73 C X 0.0056 0.0052 0.0054 0.0066 0.0073 0.0060  
Y 0.0024 0.0026 0.0008 0.0016 0.0015 0.0012  
Z 0.0031 0.0037 0.0028 0.0037 0.0041 0.0032

AT. 74 C X 0.0056 -0.0052 0.0054 -0.0066 0.0073 -0.0060  
Y -0.0024 0.0026 -0.0008 0.0016 -0.0015 0.0012  
Z 0.0031 -0.0037 0.0028 -0.0037 0.0041 -0.0032

AT. 75 C X -0.0056 -0.0052 -0.0054 0.0066 0.0073 -0.0060  
Y -0.0024 -0.0026 -0.0008 0.0016 0.0015 -0.0012  
Z -0.0031 -0.0037 -0.0028 0.0037 0.0041 -0.0032

AT. 76 C X -0.0056 0.0052 -0.0054 -0.0066 0.0073 0.0060  
Y 0.0024 -0.0026 0.0008 0.0016 -0.0015 -0.0012  
Z -0.0031 0.0037 -0.0028 -0.0037 0.0041 0.0032

AT. 77 C X 0.0073 0.0056 0.0069 0.0076 0.0076 0.0080  
Y 0.0066 0.0036 0.0025 0.0018 0.0015 0.0028  
Z 0.0039 0.0015 0.0111 0.0103 0.0104 0.0113

AT. 78 C X 0.0073 -0.0056 0.0069 -0.0076 0.0076 -0.0080  
Y -0.0066 0.0036 -0.0025 0.0018 -0.0015 0.0028  
Z 0.0039 -0.0015 0.0111 -0.0103 0.0104 -0.0113

AT. 79 C X -0.0073 -0.0056 -0.0069 0.0076 0.0076 -0.0080  
Y -0.0066 -0.0036 -0.0025 0.0018 0.0015 -0.0028

Z -0.0039 -0.0015 -0.0111 0.0103 0.0104 -0.0113  
AT. 80 C X -0.0073 0.0056 -0.0069 -0.0076 0.0076 0.0080  
Y 0.0066 -0.0036 0.0025 0.0018 -0.0015 -0.0028  
Z -0.0039 0.0015 -0.0111 -0.0103 0.0104 0.0113  
AT. 81 H X 0.0002 0.0040 -0.0025 0.0012 0.0013 -0.0009  
Y -0.0006 0.0022 -0.0069 -0.0042 -0.0045 -0.0058  
Z -0.0129 -0.0076 -0.0039 -0.0027 -0.0019 -0.0048  
AT. 82 H X 0.0002 -0.0040 -0.0025 -0.0012 0.0013 0.0009  
Y 0.0006 0.0022 0.0069 -0.0042 0.0045 -0.0058  
Z -0.0129 0.0076 -0.0039 0.0027 -0.0019 0.0048  
AT. 83 H X -0.0002 -0.0040 0.0025 0.0012 0.0013 0.0009  
Y 0.0006 -0.0022 0.0069 -0.0042 -0.0045 0.0058  
Z 0.0129 0.0076 0.0039 -0.0027 -0.0019 0.0048  
AT. 84 H X -0.0002 0.0040 0.0025 -0.0012 0.0013 -0.0009  
Y -0.0006 -0.0022 -0.0069 -0.0042 0.0045 0.0058  
Z 0.0129 -0.0076 0.0039 0.0027 -0.0019 -0.0048  
AT. 85 H X 0.0238 0.0126 0.0235 0.0212 0.0207 0.0246  
Y -0.0001 -0.0001 -0.0010 -0.0003 -0.0003 -0.0012  
Z 0.0047 0.0026 0.0094 0.0082 0.0082 0.0099  
AT. 86 H X 0.0238 -0.0126 0.0235 -0.0212 0.0207 -0.0246  
Y 0.0001 -0.0001 0.0010 -0.0003 0.0003 -0.0012  
Z 0.0047 -0.0026 0.0094 -0.0082 0.0082 -0.0099  
AT. 87 H X -0.0238 -0.0126 -0.0235 0.0212 0.0207 -0.0246  
Y 0.0001 0.0001 0.0010 -0.0003 -0.0003 0.0012  
Z -0.0047 -0.0026 -0.0094 0.0082 0.0082 -0.0099  
AT. 88 H X -0.0238 0.0126 -0.0235 -0.0212 0.0207 0.0246  
Y -0.0001 0.0001 -0.0010 -0.0003 0.0003 0.0012  
Z -0.0047 0.0026 -0.0094 -0.0082 0.0082 0.0099  
AT. 89 C X -0.0025 -0.0014 -0.0058 -0.0059 -0.0057 -0.0058  
Y -0.0047 -0.0047 -0.0011 -0.0024 -0.0025 -0.0024  
Z -0.0014 -0.0012 0.0011 0.0006 0.0009 0.0005  
AT. 90 C X -0.0025 0.0014 -0.0058 0.0059 -0.0057 0.0058

Y 0.0047 -0.0047 0.0011 -0.0024 0.0025 -0.0024  
Z -0.0014 0.0012 0.0011 -0.0006 0.0009 -0.0005  
AT. 91 C X 0.0025 0.0014 0.0058 -0.0059 -0.0057 0.0058  
Y 0.0047 0.0047 0.0011 -0.0024 -0.0025 0.0024  
Z 0.0014 0.0012 -0.0011 0.0006 0.0009 -0.0005  
AT. 92 C X 0.0025 -0.0014 0.0058 0.0059 -0.0057 -0.0058  
Y -0.0047 0.0047 -0.0011 -0.0024 0.0025 0.0024  
Z 0.0014 -0.0012 -0.0011 -0.0006 0.0009 0.0005  
AT. 93 C X -0.0005 0.0003 -0.0058 -0.0055 -0.0051 -0.0051  
Y 0.0005 0.0008 0.0001 0.0000 0.0007 -0.0000  
Z -0.0010 -0.0014 -0.0005 -0.0007 -0.0008 -0.0007  
AT. 94 C X -0.0005 -0.0003 -0.0058 0.0055 -0.0051 0.0051  
Y -0.0005 0.0008 -0.0001 0.0000 -0.0007 -0.0000  
Z -0.0010 0.0014 -0.0005 0.0007 -0.0008 0.0007  
AT. 95 C X 0.0005 -0.0003 0.0058 -0.0055 -0.0051 0.0051  
Y -0.0005 -0.0008 -0.0001 0.0000 0.0007 0.0000  
Z 0.0010 0.0014 0.0005 -0.0007 -0.0008 0.0007  
AT. 96 C X 0.0005 0.0003 0.0058 0.0055 -0.0051 -0.0051  
Y 0.0005 -0.0008 0.0001 0.0000 -0.0007 0.0000  
Z 0.0010 -0.0014 0.0005 0.0007 -0.0008 -0.0007  
AT. 97 H X 0.0058 0.0044 0.0107 0.0115 0.0107 0.0103  
Y -0.0068 -0.0046 -0.0163 -0.0170 -0.0157 -0.0150  
Z 0.0066 0.0020 0.0241 0.0244 0.0212 0.0229  
AT. 98 H X 0.0058 -0.0044 0.0107 -0.0115 0.0107 -0.0103  
Y 0.0068 -0.0046 0.0163 -0.0170 0.0157 -0.0150  
Z 0.0066 -0.0020 0.0241 -0.0244 0.0212 -0.0229  
AT. 99 H X -0.0058 -0.0044 -0.0107 0.0115 0.0107 -0.0103  
Y 0.0068 0.0046 0.0163 -0.0170 -0.0157 0.0150  
Z -0.0066 -0.0020 -0.0241 0.0244 0.0212 -0.0229  
AT. 100 H X -0.0058 0.0044 -0.0107 -0.0115 0.0107 0.0103  
Y -0.0068 0.0046 -0.0163 -0.0170 0.0157 0.0150  
Z -0.0066 0.0020 -0.0241 -0.0244 0.0212 0.0229



AT.101 H X 0.0002 -0.0008 0.0071 0.0070 0.0062 0.0067  
Y 0.0021 0.0001 0.0167 0.0162 0.0159 0.0153  
Z -0.0020 0.0002 -0.0216 -0.0203 -0.0216 -0.0192

AT.102 H X 0.0002 0.0008 0.0071 -0.0070 0.0062 -0.0067  
Y -0.0021 0.0001 -0.0167 0.0162 -0.0159 0.0153  
Z -0.0020 -0.0002 -0.0216 0.0203 -0.0216 0.0192

AT.103 H X -0.0002 0.0008 -0.0071 0.0070 0.0062 -0.0067  
Y -0.0021 -0.0001 -0.0167 0.0162 0.0159 -0.0153  
Z 0.0020 -0.0002 0.0216 -0.0203 -0.0216 0.0192

AT.104 H X -0.0002 -0.0008 -0.0071 -0.0070 0.0062 0.0067  
Y 0.0021 -0.0001 0.0167 0.0162 -0.0159 -0.0153  
Z 0.0020 0.0002 0.0216 0.0203 -0.0216 -0.0192

AT.105 H X -0.0028 -0.0050 0.0127 0.0112 0.0106 0.0109  
Y 0.0093 0.0092 0.0027 0.0051 0.0032 0.0045  
Z -0.0071 -0.0061 -0.0087 -0.0103 -0.0081 -0.0096

AT.106 H X -0.0028 0.0050 0.0127 -0.0112 0.0106 -0.0109  
Y -0.0093 0.0092 -0.0027 0.0051 -0.0032 0.0045  
Z -0.0071 0.0061 -0.0087 0.0103 -0.0081 0.0096

AT.107 H X 0.0028 0.0050 -0.0127 0.0112 0.0106 -0.0109  
Y -0.0093 -0.0092 -0.0027 0.0051 0.0032 -0.0045  
Z 0.0071 0.0061 0.0087 -0.0103 -0.0081 0.0096

AT.108 H X 0.0028 -0.0050 -0.0127 -0.0112 0.0106 0.0109  
Y 0.0093 -0.0092 0.0027 0.0051 -0.0032 -0.0045  
Z 0.0071 -0.0061 0.0087 0.0103 -0.0081 -0.0096

AT.109 C X 0.0002 -0.0005 0.0028 0.0013 0.0024 0.0017  
Y 0.0061 0.0066 -0.0108 -0.0105 -0.0103 -0.0102  
Z 0.0020 -0.0002 0.0149 0.0155 0.0152 0.0154

AT.110 C X 0.0002 0.0005 0.0028 -0.0013 0.0024 -0.0017  
Y -0.0061 0.0066 0.0108 -0.0105 0.0103 -0.0102  
Z 0.0020 0.0002 0.0149 -0.0155 0.0152 -0.0154

AT.111 C X -0.0002 0.0005 -0.0028 0.0013 0.0024 -0.0017  
Y -0.0061 -0.0066 0.0108 -0.0105 -0.0103 0.0102

Z -0.0020 0.0002 -0.0149 0.0155 0.0152 -0.0154  
AT. 112 C X -0.0002 -0.0005 -0.0028 -0.0013 0.0024 0.0017  
Y 0.0061 -0.0066 -0.0108 -0.0105 0.0103 0.0102  
Z -0.0020 -0.0002 -0.0149 -0.0155 0.0152 0.0154  
AT. 113 H X 0.0051 0.0059 -0.0198 -0.0231 -0.0204 -0.0218  
Y -0.0004 -0.0021 0.0210 0.0241 0.0220 0.0230  
Z 0.0118 0.0119 -0.0185 -0.0191 -0.0177 -0.0183  
AT. 114 H X 0.0051 -0.0059 -0.0198 0.0231 -0.0204 0.0218  
Y 0.0004 -0.0021 -0.0210 0.0241 -0.0220 0.0230  
Z 0.0118 -0.0119 -0.0185 0.0191 -0.0177 0.0183  
AT. 115 H X -0.0051 -0.0059 0.0198 -0.0231 -0.0204 0.0218  
Y 0.0004 0.0021 -0.0210 0.0241 0.0220 -0.0230  
Z -0.0118 -0.0119 0.0185 -0.0191 -0.0177 0.0183  
AT. 116 H X -0.0051 0.0059 0.0198 0.0231 -0.0204 -0.0218  
Y -0.0004 0.0021 0.0210 0.0241 -0.0220 -0.0230  
Z -0.0118 0.0119 0.0185 0.0191 -0.0177 -0.0183  
AT. 117 H X -0.0120 -0.0165 0.0514 0.0531 0.0514 0.0517  
Y 0.0034 0.0040 -0.0049 -0.0042 -0.0047 -0.0044  
Z 0.0016 -0.0000 0.0129 0.0133 0.0130 0.0132  
AT. 118 H X -0.0120 0.0165 0.0514 -0.0531 0.0514 -0.0517  
Y -0.0034 0.0040 0.0049 -0.0042 0.0047 -0.0044  
Z 0.0016 0.0000 0.0129 -0.0133 0.0130 -0.0132  
AT. 119 H X 0.0120 0.0165 -0.0514 0.0531 0.0514 -0.0517  
Y -0.0034 -0.0040 0.0049 -0.0042 -0.0047 0.0044  
Z -0.0016 0.0000 -0.0129 0.0133 0.0130 -0.0132  
AT. 120 H X 0.0120 -0.0165 -0.0514 -0.0531 0.0514 0.0517  
Y 0.0034 -0.0040 -0.0049 -0.0042 0.0047 0.0044  
Z -0.0016 -0.0000 -0.0129 -0.0133 0.0130 0.0132  
AT. 121 C X -0.0089 -0.0078 -0.0016 -0.0031 -0.0036 -0.0036  
Y -0.0097 -0.0072 -0.0047 -0.0046 -0.0053 -0.0054  
Z -0.0035 -0.0012 -0.0118 -0.0118 -0.0119 -0.0120  
AT. 122 C X -0.0089 0.0078 -0.0016 0.0031 -0.0036 0.0036

Y 0.0097 -0.0072 0.0047 -0.0046 0.0053 -0.0054  
Z -0.0035 0.0012 -0.0118 0.0118 -0.0119 0.0120  
AT. 123 C X 0.0089 0.0078 0.0016 -0.0031 -0.0036 0.0036  
Y 0.0097 0.0072 0.0047 -0.0046 -0.0053 0.0054  
Z 0.0035 0.0012 0.0118 -0.0118 -0.0119 0.0120  
AT. 124 C X 0.0089 -0.0078 0.0016 0.0031 -0.0036 -0.0036  
Y -0.0097 0.0072 -0.0047 -0.0046 0.0053 0.0054  
Z 0.0035 -0.0012 0.0118 0.0118 -0.0119 -0.0120  
AT. 125 H X 0.0372 0.0280 0.0238 0.0257 0.0277 0.0280  
Y -0.0015 -0.0006 -0.0026 -0.0021 -0.0021 -0.0021  
Z -0.0222 -0.0159 -0.0206 -0.0219 -0.0233 -0.0234  
AT. 126 H X 0.0372 -0.0280 0.0238 -0.0257 0.0277 -0.0280  
Y 0.0015 -0.0006 0.0026 -0.0021 0.0021 -0.0021  
Z -0.0222 0.0159 -0.0206 0.0219 -0.0233 0.0234  
AT. 127 H X -0.0372 -0.0280 -0.0238 0.0257 0.0277 -0.0280  
Y 0.0015 0.0006 0.0026 -0.0021 -0.0021 0.0021  
Z 0.0222 0.0159 0.0206 -0.0219 -0.0233 0.0234  
AT. 128 H X -0.0372 0.0280 -0.0238 -0.0257 0.0277 0.0280  
Y -0.0015 0.0006 -0.0026 -0.0021 0.0021 0.0021  
Z 0.0222 -0.0159 0.0206 0.0219 -0.0233 -0.0234  
AT. 129 H X -0.0163 -0.0136 -0.0050 -0.0076 -0.0084 -0.0084  
Y 0.0165 0.0130 0.0087 0.0112 0.0120 0.0121  
Z 0.0316 0.0259 0.0077 0.0097 0.0121 0.0123  
AT. 130 H X -0.0163 0.0136 -0.0050 0.0076 -0.0084 0.0084  
Y -0.0165 0.0130 -0.0087 0.0112 -0.0120 0.0121  
Z 0.0316 -0.0259 0.0077 -0.0097 0.0121 -0.0123  
AT. 131 H X 0.0163 0.0136 0.0050 -0.0076 -0.0084 0.0084  
Y -0.0165 -0.0130 -0.0087 0.0112 0.0120 -0.0121  
Z -0.0316 -0.0259 -0.0077 0.0097 0.0121 -0.0123  
AT. 132 H X 0.0163 -0.0136 0.0050 0.0076 -0.0084 -0.0084  
Y 0.0165 -0.0130 0.0087 0.0112 -0.0120 -0.0121  
Z -0.0316 0.0259 -0.0077 -0.0097 0.0121 0.0123

AT. 133 C X 0.0001 0.0004 -0.0017 -0.0020 -0.0019 -0.0019  
Y 0.0012 0.0013 -0.0002 0.0000 0.0001 0.0003  
Z -0.0005 -0.0001 -0.0026 -0.0026 -0.0026 -0.0026

AT. 134 C X 0.0001 -0.0004 -0.0017 0.0020 -0.0019 0.0019  
Y -0.0012 0.0013 0.0002 0.0000 -0.0001 0.0003  
Z -0.0005 0.0001 -0.0026 0.0026 -0.0026 0.0026

AT. 135 C X -0.0001 -0.0004 0.0017 -0.0020 -0.0019 0.0019  
Y -0.0012 -0.0013 0.0002 0.0000 0.0001 -0.0003  
Z 0.0005 0.0001 0.0026 -0.0026 -0.0026 0.0026

AT. 136 C X -0.0001 0.0004 0.0017 0.0020 -0.0019 -0.0019  
Y 0.0012 -0.0013 -0.0002 0.0000 -0.0001 -0.0003  
Z 0.0005 -0.0001 0.0026 0.0026 -0.0026 -0.0026

AT. 137 C X -0.0002 -0.0004 0.0012 0.0013 0.0014 0.0012  
Y -0.0015 -0.0021 0.0031 0.0027 0.0029 0.0027  
Z 0.0016 0.0010 0.0038 0.0038 0.0042 0.0042

AT. 138 C X -0.0002 0.0004 0.0012 -0.0013 0.0014 -0.0012  
Y 0.0015 -0.0021 -0.0031 0.0027 -0.0029 0.0027  
Z 0.0016 -0.0010 0.0038 -0.0038 0.0042 -0.0042

AT. 139 C X 0.0002 0.0004 -0.0012 0.0013 0.0014 -0.0012  
Y 0.0015 0.0021 -0.0031 0.0027 0.0029 -0.0027  
Z -0.0016 -0.0010 -0.0038 0.0038 0.0042 -0.0042

AT. 140 C X 0.0002 -0.0004 -0.0012 -0.0013 0.0014 0.0012  
Y -0.0015 0.0021 0.0031 0.0027 -0.0029 -0.0027  
Z -0.0016 0.0010 -0.0038 -0.0038 0.0042 0.0042

AT. 141 H X 0.0079 0.0085 -0.0017 -0.0009 -0.0004 0.0006  
Y 0.0042 0.0036 0.0022 0.0024 0.0028 0.0025  
Z -0.0035 -0.0053 0.0067 0.0063 0.0065 0.0049

AT. 142 H X 0.0079 -0.0085 -0.0017 0.0009 -0.0004 -0.0006  
Y -0.0042 0.0036 -0.0022 0.0024 -0.0028 0.0025  
Z -0.0035 0.0053 0.0067 -0.0063 0.0065 -0.0049

AT. 143 H X -0.0079 -0.0085 0.0017 -0.0009 -0.0004 -0.0006  
Y -0.0042 -0.0036 -0.0022 0.0024 0.0028 -0.0025

Z 0.0035 0.0053 -0.0067 0.0063 0.0065 -0.0049  
AT. 144 H X -0.0079 0.0085 0.0017 0.0009 -0.0004 0.0006  
Y 0.0042 -0.0036 0.0022 0.0024 -0.0028 -0.0025  
Z 0.0035 -0.0053 -0.0067 -0.0063 0.0065 0.0049  
AT. 145 H X -0.0065 -0.0067 0.0019 0.0006 0.0002 -0.0001  
Y 0.0002 -0.0005 0.0036 0.0037 0.0039 0.0037  
Z 0.0005 -0.0005 0.0058 0.0060 0.0060 0.0057  
AT. 146 H X -0.0065 0.0067 0.0019 -0.0006 0.0002 0.0001  
Y -0.0002 -0.0005 -0.0036 0.0037 -0.0039 0.0037  
Z 0.0005 0.0005 0.0058 -0.0060 0.0060 -0.0057  
AT. 147 H X 0.0065 0.0067 -0.0019 0.0006 0.0002 0.0001  
Y -0.0002 0.0005 -0.0036 0.0037 0.0039 -0.0037  
Z -0.0005 0.0005 -0.0058 0.0060 0.0060 -0.0057  
AT. 148 H X 0.0065 -0.0067 -0.0019 -0.0006 0.0002 -0.0001  
Y 0.0002 0.0005 0.0036 0.0037 -0.0039 -0.0037  
Z -0.0005 -0.0005 -0.0058 -0.0060 0.0060 0.0057  
AT. 149 O X -0.0053 -0.0054 -0.0017 -0.0032 -0.0030 -0.0028  
Y 0.0029 0.0027 0.0016 0.0023 0.0024 0.0022  
Z 0.0028 0.0028 -0.0000 0.0006 0.0006 0.0005  
AT. 150 O X -0.0053 0.0054 -0.0017 0.0032 -0.0030 0.0028  
Y -0.0029 0.0027 -0.0016 0.0023 -0.0024 0.0022  
Z 0.0028 -0.0028 -0.0000 -0.0006 0.0006 -0.0005  
AT. 151 O X 0.0053 0.0054 0.0017 -0.0032 -0.0030 0.0028  
Y -0.0029 -0.0027 -0.0016 0.0023 0.0024 -0.0022  
Z -0.0028 -0.0028 0.0000 0.0006 0.0006 -0.0005  
AT. 152 O X 0.0053 -0.0054 0.0017 0.0032 -0.0030 -0.0028  
Y 0.0029 -0.0027 0.0016 0.0023 -0.0024 -0.0022  
Z -0.0028 0.0028 0.0000 -0.0006 0.0006 0.0005  
AT. 153 H X 0.0263 0.0286 -0.0008 0.0037 0.0028 0.0030  
Y 0.0106 0.0113 -0.0052 -0.0037 -0.0059 -0.0022  
Z -0.0152 -0.0165 -0.0032 -0.0063 -0.0064 -0.0052  
AT. 154 H X 0.0263 -0.0286 -0.0008 -0.0037 0.0028 -0.0030

Y -0.0106 0.0113 0.0052 -0.0037 0.0059 -0.0022  
Z -0.0152 0.0165 -0.0032 0.0063 -0.0064 0.0052  
AT. 155 H X -0.0263 -0.0286 0.0008 0.0037 0.0028 -0.0030  
Y -0.0106 -0.0113 0.0052 -0.0037 -0.0059 0.0022  
Z 0.0152 0.0165 0.0032 -0.0063 -0.0064 0.0052  
AT. 156 H X -0.0263 0.0286 0.0008 -0.0037 0.0028 0.0030  
Y 0.0106 -0.0113 -0.0052 -0.0037 0.0059 0.0022  
Z 0.0152 -0.0165 0.0032 0.0063 -0.0064 -0.0052  
AT. 157 O X 0.0024 0.0029 -0.0022 -0.0007 -0.0014 -0.0010  
Y 0.0001 0.0001 -0.0001 0.0004 -0.0000 0.0005  
Z -0.0015 -0.0023 0.0031 0.0026 0.0026 0.0029  
AT. 158 O X 0.0024 -0.0029 -0.0022 0.0007 -0.0014 0.0010  
Y -0.0001 0.0001 0.0001 0.0004 0.0000 0.0005  
Z -0.0015 0.0023 0.0031 -0.0026 0.0026 -0.0029  
AT. 159 O X -0.0024 -0.0029 0.0022 -0.0007 -0.0014 0.0010  
Y -0.0001 -0.0001 0.0001 0.0004 -0.0000 -0.0005  
Z 0.0015 0.0023 -0.0031 0.0026 0.0026 -0.0029  
AT. 160 O X -0.0024 0.0029 0.0022 0.0007 -0.0014 -0.0010  
Y 0.0001 -0.0001 -0.0001 0.0004 0.0000 -0.0005  
Z 0.0015 -0.0023 -0.0031 -0.0026 0.0026 0.0029  
AT. 161 O X -0.0010 -0.0009 -0.0013 -0.0014 -0.0015 -0.0014  
Y -0.0009 -0.0007 -0.0015 -0.0021 -0.0017 -0.0021  
Z -0.0005 -0.0001 -0.0019 -0.0021 -0.0020 -0.0022  
AT. 162 O X -0.0010 0.0009 -0.0013 0.0014 -0.0015 0.0014  
Y 0.0009 -0.0007 0.0015 -0.0021 0.0017 -0.0021  
Z -0.0005 0.0001 -0.0019 0.0021 -0.0020 0.0022  
AT. 163 O X 0.0010 0.0009 0.0013 -0.0014 -0.0015 0.0014  
Y 0.0009 0.0007 0.0015 -0.0021 -0.0017 0.0021  
Z 0.0005 0.0001 0.0019 -0.0021 -0.0020 0.0022  
AT. 164 O X 0.0010 -0.0009 0.0013 0.0014 -0.0015 -0.0014  
Y -0.0009 0.0007 -0.0015 -0.0021 0.0017 0.0021  
Z 0.0005 -0.0001 0.0019 0.0021 -0.0020 -0.0022

AT.165 H X -0.0034 -0.0041 -0.0010 -0.0001 -0.0026 0.0000  
Y -0.0017 -0.0020 -0.0010 -0.0009 -0.0018 -0.0008  
Z 0.0027 0.0024 0.0002 0.0006 0.0011 0.0004

AT.166 H X -0.0034 0.0041 -0.0010 0.0001 -0.0026 -0.0000  
Y 0.0017 -0.0020 0.0010 -0.0009 0.0018 -0.0008  
Z 0.0027 -0.0024 0.0002 -0.0006 0.0011 -0.0004

AT.167 H X 0.0034 0.0041 0.0010 -0.0001 -0.0026 -0.0000  
Y 0.0017 0.0020 0.0010 -0.0009 -0.0018 0.0008  
Z -0.0027 -0.0024 -0.0002 0.0006 0.0011 -0.0004

AT.168 H X 0.0034 -0.0041 0.0010 0.0001 -0.0026 0.0000  
Y -0.0017 0.0020 -0.0010 -0.0009 0.0018 0.0008  
Z -0.0027 0.0024 -0.0002 -0.0006 0.0011 0.0004

AT.169 O X -0.0048 -0.0051 0.0009 0.0003 0.0006 0.0000  
Y -0.0005 -0.0006 0.0009 0.0006 0.0006 0.0007  
Z 0.0033 0.0037 -0.0016 0.0001 -0.0001 -0.0012

AT.170 O X -0.0048 0.0051 0.0009 -0.0003 0.0006 -0.0000  
Y 0.0005 -0.0006 -0.0009 0.0006 -0.0006 0.0007  
Z 0.0033 -0.0037 -0.0016 -0.0001 -0.0001 0.0012

AT.171 O X 0.0048 0.0051 -0.0009 0.0003 0.0006 -0.0000  
Y 0.0005 0.0006 -0.0009 0.0006 0.0006 -0.0007  
Z -0.0033 -0.0037 0.0016 0.0001 -0.0001 0.0012

AT.172 O X 0.0048 -0.0051 -0.0009 -0.0003 0.0006 0.0000  
Y -0.0005 0.0006 0.0009 0.0006 -0.0006 -0.0007  
Z -0.0033 0.0037 0.0016 -0.0001 -0.0001 -0.0012

AT.173 H X 0.1261 0.1357 -0.0272 -0.0046 -0.0113 -0.0078  
Y -0.0251 -0.0269 0.0056 0.0009 0.0023 0.0014  
Z -0.0361 -0.0386 0.0067 0.0023 0.0045 0.0008

AT.174 H X 0.1261 -0.1357 -0.0272 0.0046 -0.0113 0.0078  
Y 0.0251 -0.0269 -0.0056 0.0009 -0.0023 0.0014  
Z -0.0361 0.0386 0.0067 -0.0023 0.0045 -0.0008

AT.175 H X -0.1261 -0.1357 0.0272 -0.0046 -0.0113 0.0078  
Y 0.0251 0.0269 -0.0056 0.0009 0.0023 -0.0014

|              |   |         |         |         |         |         |         |
|--------------|---|---------|---------|---------|---------|---------|---------|
|              | Z | 0.0361  | 0.0386  | -0.0067 | 0.0023  | 0.0045  | -0.0008 |
| AT. 176 H X  |   | -0.1261 | 0.1357  | 0.0272  | 0.0046  | -0.0113 | -0.0078 |
|              | Y | -0.0251 | 0.0269  | 0.0056  | 0.0009  | -0.0023 | -0.0014 |
|              | Z | 0.0361  | -0.0386 | -0.0067 | -0.0023 | 0.0045  | 0.0008  |
|              |   |         |         |         |         |         |         |
| FREQ(CM**-1) |   | 962.38  | 962.76  | 963.86  | 964.09  | 981.02  | 981.06  |
|              |   |         |         |         |         |         |         |
| AT. 1 I X    |   | -0.0000 | -0.0000 | -0.0000 | -0.0000 | -0.0001 | 0.0001  |
|              | Y | 0.0000  | -0.0000 | -0.0000 | -0.0000 | -0.0001 | 0.0000  |
|              | Z | 0.0000  | 0.0000  | 0.0000  | -0.0000 | -0.0000 | -0.0000 |
| AT. 2 I X    |   | 0.0000  | -0.0000 | -0.0000 | 0.0000  | 0.0001  | -0.0001 |
|              | Y | 0.0000  | 0.0000  | 0.0000  | -0.0000 | -0.0001 | 0.0000  |
|              | Z | -0.0000 | 0.0000  | 0.0000  | 0.0000  | 0.0000  | 0.0000  |
| AT. 3 I X    |   | -0.0000 | -0.0000 | 0.0000  | 0.0000  | 0.0001  | 0.0001  |
|              | Y | 0.0000  | -0.0000 | 0.0000  | 0.0000  | 0.0001  | 0.0000  |
|              | Z | 0.0000  | 0.0000  | -0.0000 | 0.0000  | 0.0000  | -0.0000 |
| AT. 4 I X    |   | 0.0000  | -0.0000 | 0.0000  | -0.0000 | -0.0001 | -0.0001 |
|              | Y | 0.0000  | 0.0000  | -0.0000 | 0.0000  | 0.0001  | 0.0000  |
|              | Z | -0.0000 | 0.0000  | -0.0000 | -0.0000 | -0.0000 | 0.0000  |
| AT. 5 I X    |   | -0.0000 | -0.0001 | -0.0000 | -0.0000 | 0.0000  | -0.0000 |
|              | Y | 0.0000  | 0.0000  | 0.0000  | 0.0000  | -0.0000 | 0.0000  |
|              | Z | 0.0000  | 0.0000  | 0.0000  | 0.0000  | 0.0000  | -0.0000 |
| AT. 6 I X    |   | 0.0000  | -0.0001 | -0.0000 | 0.0000  | -0.0000 | 0.0000  |
|              | Y | 0.0000  | -0.0000 | -0.0000 | 0.0000  | -0.0000 | 0.0000  |
|              | Z | -0.0000 | 0.0000  | 0.0000  | -0.0000 | -0.0000 | 0.0000  |
| AT. 7 I X    |   | -0.0000 | -0.0001 | 0.0000  | 0.0000  | -0.0000 | -0.0000 |
|              | Y | 0.0000  | 0.0000  | -0.0000 | -0.0000 | 0.0000  | 0.0000  |
|              | Z | 0.0000  | 0.0000  | -0.0000 | -0.0000 | -0.0000 | -0.0000 |
| AT. 8 I X    |   | 0.0000  | -0.0001 | 0.0000  | -0.0000 | 0.0000  | 0.0000  |
|              | Y | 0.0000  | -0.0000 | 0.0000  | -0.0000 | 0.0000  | 0.0000  |
|              | Z | -0.0000 | 0.0000  | -0.0000 | 0.0000  | 0.0000  | 0.0000  |
| AT. 9 N X    |   | -0.0009 | -0.0011 | -0.0004 | -0.0005 | 0.0005  | -0.0001 |



Y -0.0014 -0.0016 -0.0008 -0.0010 -0.0030 0.0031  
Z -0.0014 -0.0012 -0.0017 -0.0016 0.0046 -0.0046  
AT. 10 N X 0.0009 -0.0011 -0.0004 0.0005 -0.0005 0.0001  
Y -0.0014 0.0016 0.0008 -0.0010 -0.0030 0.0031  
Z 0.0014 -0.0012 -0.0017 0.0016 -0.0046 0.0046  
AT. 11 N X -0.0009 -0.0011 0.0004 0.0005 -0.0005 -0.0001  
Y -0.0014 -0.0016 0.0008 0.0010 0.0030 0.0031  
Z -0.0014 -0.0012 0.0017 0.0016 -0.0046 -0.0046  
AT. 12 N X 0.0009 -0.0011 0.0004 -0.0005 0.0005 0.0001  
Y -0.0014 0.0016 -0.0008 0.0010 0.0030 0.0031  
Z 0.0014 -0.0012 0.0017 -0.0016 0.0046 0.0046  
AT. 13 N X 0.0008 0.0010 0.0008 0.0007 -0.0004 0.0002  
Y 0.0028 0.0031 0.0031 0.0028 -0.0014 0.0022  
Z 0.0004 0.0004 0.0006 0.0005 -0.0039 0.0041  
AT. 14 N X -0.0008 0.0010 0.0008 -0.0007 0.0004 -0.0002  
Y 0.0028 -0.0031 -0.0031 0.0028 -0.0014 0.0022  
Z -0.0004 0.0004 0.0006 -0.0005 0.0039 -0.0041  
AT. 15 N X 0.0008 0.0010 -0.0008 -0.0007 0.0004 0.0002  
Y 0.0028 0.0031 -0.0031 -0.0028 0.0014 0.0022  
Z 0.0004 0.0004 -0.0006 -0.0005 0.0039 0.0041  
AT. 16 N X -0.0008 0.0010 -0.0008 0.0007 -0.0004 -0.0002  
Y 0.0028 -0.0031 0.0031 -0.0028 0.0014 0.0022  
Z -0.0004 0.0004 -0.0006 0.0005 -0.0039 -0.0041  
AT. 17 O X 0.0006 0.0006 0.0009 0.0010 0.0003 -0.0006  
Y 0.0010 0.0011 0.0005 0.0006 0.0004 -0.0008  
Z 0.0001 0.0002 -0.0002 -0.0002 0.0001 -0.0004  
AT. 18 O X -0.0006 0.0006 0.0009 -0.0010 -0.0003 0.0006  
Y 0.0010 -0.0011 -0.0005 0.0006 0.0004 -0.0008  
Z -0.0001 0.0002 -0.0002 0.0002 -0.0001 0.0004  
AT. 19 O X 0.0006 0.0006 -0.0009 -0.0010 -0.0003 -0.0006  
Y 0.0010 0.0011 -0.0005 -0.0006 -0.0004 -0.0008  
Z 0.0001 0.0002 0.0002 0.0002 -0.0001 -0.0004

AT. 20 O X -0.0006 0.0006 -0.0009 0.0010 0.0003 0.0006  
Y 0.0010 -0.0011 0.0005 -0.0006 -0.0004 -0.0008  
Z -0.0001 0.0002 0.0002 -0.0002 0.0001 0.0004

AT. 21 O X -0.0003 -0.0003 -0.0003 -0.0003 -0.0001 0.0001  
Y -0.0009 -0.0010 -0.0011 -0.0009 0.0000 -0.0004  
Z 0.0008 0.0010 0.0011 0.0009 0.0005 -0.0001

AT. 22 O X 0.0003 -0.0003 -0.0003 0.0003 0.0001 -0.0001  
Y -0.0009 0.0010 0.0011 -0.0009 0.0000 -0.0004  
Z -0.0008 0.0010 0.0011 -0.0009 -0.0005 0.0001

AT. 23 O X -0.0003 -0.0003 0.0003 0.0003 0.0001 0.0001  
Y -0.0009 -0.0010 0.0011 0.0009 -0.0000 -0.0004  
Z 0.0008 0.0010 -0.0011 -0.0009 -0.0005 -0.0001

AT. 24 O X 0.0003 -0.0003 0.0003 -0.0003 -0.0001 -0.0001  
Y -0.0009 0.0010 -0.0011 0.0009 -0.0000 -0.0004  
Z -0.0008 0.0010 -0.0011 0.0009 0.0005 0.0001

AT. 25 C X 0.0003 0.0004 0.0005 0.0005 0.0004 -0.0002  
Y 0.0015 0.0018 0.0013 0.0015 0.0027 -0.0026  
Z -0.0008 -0.0009 -0.0001 -0.0000 -0.0023 0.0028

AT. 26 C X -0.0003 0.0004 0.0005 -0.0005 -0.0004 0.0002  
Y 0.0015 -0.0018 -0.0013 0.0015 0.0027 -0.0026  
Z 0.0008 -0.0009 -0.0001 0.0000 0.0023 -0.0028

AT. 27 C X 0.0003 0.0004 -0.0005 -0.0005 -0.0004 -0.0002  
Y 0.0015 0.0018 -0.0013 -0.0015 -0.0027 -0.0026  
Z -0.0008 -0.0009 0.0001 0.0000 0.0023 0.0028

AT. 28 C X -0.0003 0.0004 -0.0005 0.0005 0.0004 0.0002  
Y 0.0015 -0.0018 0.0013 -0.0015 -0.0027 -0.0026  
Z 0.0008 -0.0009 0.0001 -0.0000 -0.0023 -0.0028

AT. 29 H X 0.0019 0.0022 0.0024 0.0035 0.0055 -0.0048  
Y -0.0021 -0.0022 -0.0035 -0.0038 0.0006 -0.0013  
Z -0.0026 -0.0031 -0.0021 -0.0036 -0.0100 0.0098

AT. 30 H X -0.0019 0.0022 0.0024 -0.0035 -0.0055 0.0048  
Y -0.0021 0.0022 0.0035 -0.0038 0.0006 -0.0013

Z 0.0026 -0.0031 -0.0021 0.0036 0.0100 -0.0098  
AT. 31 H X 0.0019 0.0022 -0.0024 -0.0035 -0.0055 -0.0048  
Y -0.0021 -0.0022 0.0035 0.0038 -0.0006 -0.0013  
Z -0.0026 -0.0031 0.0021 0.0036 0.0100 0.0098  
AT. 32 H X -0.0019 0.0022 -0.0024 0.0035 0.0055 0.0048  
Y -0.0021 0.0022 -0.0035 0.0038 -0.0006 -0.0013  
Z 0.0026 -0.0031 0.0021 -0.0036 -0.0100 -0.0098  
AT. 33 H X -0.0008 -0.0014 -0.0015 -0.0021 -0.0065 0.0058  
Y 0.0022 0.0026 0.0021 0.0024 0.0034 -0.0031  
Z -0.0029 -0.0031 -0.0025 -0.0024 0.0005 -0.0003  
AT. 34 H X 0.0008 -0.0014 -0.0015 0.0021 0.0065 -0.0058  
Y 0.0022 -0.0026 -0.0021 0.0024 0.0034 -0.0031  
Z 0.0029 -0.0031 -0.0025 0.0024 -0.0005 0.0003  
AT. 35 H X -0.0008 -0.0014 0.0015 0.0021 0.0065 0.0058  
Y 0.0022 0.0026 -0.0021 -0.0024 -0.0034 -0.0031  
Z -0.0029 -0.0031 0.0025 0.0024 -0.0005 -0.0003  
AT. 36 H X 0.0008 -0.0014 0.0015 -0.0021 -0.0065 -0.0058  
Y 0.0022 -0.0026 0.0021 -0.0024 -0.0034 -0.0031  
Z 0.0029 -0.0031 0.0025 -0.0024 0.0005 0.0003  
AT. 37 C X 0.0007 0.0007 0.0002 0.0002 -0.0000 -0.0001  
Y -0.0009 -0.0009 -0.0008 -0.0012 -0.0023 0.0023  
Z 0.0007 0.0009 0.0000 0.0003 0.0017 -0.0018  
AT. 38 C X -0.0007 0.0007 0.0002 -0.0002 0.0000 0.0001  
Y -0.0009 0.0009 0.0008 -0.0012 -0.0023 0.0023  
Z -0.0007 0.0009 0.0000 -0.0003 -0.0017 0.0018  
AT. 39 C X 0.0007 0.0007 -0.0002 -0.0002 0.0000 -0.0001  
Y -0.0009 -0.0009 0.0008 0.0012 0.0023 0.0023  
Z 0.0007 0.0009 -0.0000 -0.0003 -0.0017 -0.0018  
AT. 40 C X -0.0007 0.0007 -0.0002 0.0002 -0.0000 0.0001  
Y -0.0009 0.0009 -0.0008 0.0012 0.0023 0.0023  
Z -0.0007 0.0009 -0.0000 0.0003 0.0017 0.0018  
AT. 41 C X -0.0089 -0.0086 -0.0091 -0.0092 0.0057 -0.0061

Y 0.0044 0.0038 0.0045 0.0049 0.0003 0.0003  
Z 0.0023 0.0028 0.0018 0.0022 -0.0015 0.0017  
AT. 42 C X 0.0089 -0.0086 -0.0091 0.0092 -0.0057 0.0061  
Y 0.0044 -0.0038 -0.0045 0.0049 0.0003 0.0003  
Z -0.0023 0.0028 0.0018 -0.0022 0.0015 -0.0017  
AT. 43 C X -0.0089 -0.0086 0.0091 0.0092 -0.0057 -0.0061  
Y 0.0044 0.0038 -0.0045 -0.0049 -0.0003 0.0003  
Z 0.0023 0.0028 -0.0018 -0.0022 0.0015 0.0017  
AT. 44 C X 0.0089 -0.0086 0.0091 -0.0092 0.0057 0.0061  
Y 0.0044 -0.0038 0.0045 -0.0049 -0.0003 0.0003  
Z -0.0023 0.0028 -0.0018 0.0022 -0.0015 -0.0017  
AT. 45 H X 0.0101 0.0083 0.0100 0.0109 0.0075 -0.0066  
Y -0.0094 -0.0089 -0.0100 -0.0099 0.0103 -0.0112  
Z -0.0118 -0.0101 -0.0131 -0.0130 0.0068 -0.0081  
AT. 46 H X -0.0101 0.0083 0.0100 -0.0109 -0.0075 0.0066  
Y -0.0094 0.0089 0.0100 -0.0099 0.0103 -0.0112  
Z 0.0118 -0.0101 -0.0131 0.0130 -0.0068 0.0081  
AT. 47 H X 0.0101 0.0083 -0.0100 -0.0109 -0.0075 -0.0066  
Y -0.0094 -0.0089 0.0100 0.0099 -0.0103 -0.0112  
Z -0.0118 -0.0101 0.0131 0.0130 -0.0068 -0.0081  
AT. 48 H X -0.0101 0.0083 -0.0100 0.0109 0.0075 0.0066  
Y -0.0094 0.0089 -0.0100 0.0099 -0.0103 -0.0112  
Z 0.0118 -0.0101 0.0131 -0.0130 0.0068 0.0081  
AT. 49 H X -0.0156 -0.0147 -0.0159 -0.0161 0.0064 -0.0070  
Y -0.0104 -0.0095 -0.0106 -0.0105 0.0037 -0.0036  
Z 0.0223 0.0206 0.0226 0.0234 -0.0085 0.0094  
AT. 50 H X 0.0156 -0.0147 -0.0159 0.0161 -0.0064 0.0070  
Y -0.0104 0.0095 0.0106 -0.0105 0.0037 -0.0036  
Z -0.0223 0.0206 0.0226 -0.0234 0.0085 -0.0094  
AT. 51 H X -0.0156 -0.0147 0.0159 0.0161 -0.0064 -0.0070  
Y -0.0104 -0.0095 0.0106 0.0105 -0.0037 -0.0036  
Z 0.0223 0.0206 -0.0226 -0.0234 0.0085 0.0094

AT. 52 H X 0.0156 -0.0147 0.0159 -0.0161 0.0064 0.0070  
Y -0.0104 0.0095 -0.0106 0.0105 -0.0037 -0.0036  
Z -0.0223 0.0206 -0.0226 0.0234 -0.0085 -0.0094

AT. 53 C X 0.0088 0.0089 0.0089 0.0088 -0.0075 0.0077  
Y 0.0019 0.0017 0.0018 0.0020 0.0016 -0.0019  
Z 0.0066 0.0065 0.0065 0.0065 0.0015 -0.0014

AT. 54 C X -0.0088 0.0089 0.0089 -0.0088 0.0075 -0.0077  
Y 0.0019 -0.0017 -0.0018 0.0020 0.0016 -0.0019  
Z -0.0066 0.0065 0.0065 -0.0065 -0.0015 0.0014

AT. 55 C X 0.0088 0.0089 -0.0089 -0.0088 0.0075 0.0077  
Y 0.0019 0.0017 -0.0018 -0.0020 -0.0016 -0.0019  
Z 0.0066 0.0065 -0.0065 -0.0065 -0.0015 -0.0014

AT. 56 C X -0.0088 0.0089 -0.0089 0.0088 -0.0075 -0.0077  
Y 0.0019 -0.0017 0.0018 -0.0020 -0.0016 -0.0019  
Z -0.0066 0.0065 -0.0065 0.0065 0.0015 0.0014

AT. 57 C X 0.0041 0.0041 0.0044 0.0042 -0.0085 0.0085  
Y -0.0086 -0.0083 -0.0083 -0.0084 0.0008 -0.0013  
Z -0.0074 -0.0074 -0.0073 -0.0073 -0.0004 0.0005

AT. 58 C X -0.0041 0.0041 0.0044 -0.0042 0.0085 -0.0085  
Y -0.0086 0.0083 0.0083 -0.0084 0.0008 -0.0013  
Z 0.0074 -0.0074 -0.0073 0.0073 0.0004 -0.0005

AT. 59 C X 0.0041 0.0041 -0.0044 -0.0042 0.0085 0.0085  
Y -0.0086 -0.0083 0.0083 0.0084 -0.0008 -0.0013  
Z -0.0074 -0.0074 0.0073 0.0073 0.0004 0.0005

AT. 60 C X -0.0041 0.0041 -0.0044 0.0042 -0.0085 -0.0085  
Y -0.0086 0.0083 -0.0083 0.0084 -0.0008 -0.0013  
Z 0.0074 -0.0074 0.0073 -0.0073 -0.0004 -0.0005

AT. 61 H X -0.0196 -0.0195 -0.0200 -0.0197 0.0213 -0.0216  
Y -0.0183 -0.0182 -0.0185 -0.0185 0.0174 -0.0177  
Z -0.0508 -0.0500 -0.0505 -0.0500 0.0283 -0.0309

AT. 62 H X 0.0196 -0.0195 -0.0200 0.0197 -0.0213 0.0216  
Y -0.0183 0.0182 0.0185 -0.0185 0.0174 -0.0177

Z 0.0508 -0.0500 -0.0505 0.0500 -0.0283 0.0309  
AT. 63 H X -0.0196 -0.0195 0.0200 0.0197 -0.0213 -0.0216  
Y -0.0183 -0.0182 0.0185 0.0185 -0.0174 -0.0177  
Z -0.0508 -0.0500 0.0505 0.0500 -0.0283 -0.0309  
AT. 64 H X 0.0196 -0.0195 0.0200 -0.0197 0.0213 0.0216  
Y -0.0183 0.0182 -0.0185 0.0185 -0.0174 -0.0177  
Z 0.0508 -0.0500 0.0505 -0.0500 0.0283 0.0309  
AT. 65 H X -0.0042 -0.0043 -0.0041 -0.0041 -0.0007 0.0003  
Y 0.0166 0.0166 0.0171 0.0167 -0.0225 0.0229  
Z 0.0077 0.0085 0.0091 0.0090 -0.0365 0.0367  
AT. 66 H X 0.0042 -0.0043 -0.0041 0.0041 0.0007 -0.0003  
Y 0.0166 -0.0166 -0.0171 0.0167 -0.0225 0.0229  
Z -0.0077 0.0085 0.0091 -0.0090 0.0365 -0.0367  
AT. 67 H X -0.0042 -0.0043 0.0041 0.0041 0.0007 0.0003  
Y 0.0166 0.0166 -0.0171 -0.0167 0.0225 0.0229  
Z 0.0077 0.0085 -0.0091 -0.0090 0.0365 0.0367  
AT. 68 H X 0.0042 -0.0043 0.0041 -0.0041 -0.0007 -0.0003  
Y 0.0166 -0.0166 0.0171 -0.0167 0.0225 0.0229  
Z -0.0077 0.0085 -0.0091 0.0090 -0.0365 -0.0367  
AT. 69 H X -0.0113 -0.0107 -0.0110 -0.0118 0.0172 -0.0169  
Y 0.0114 0.0116 0.0111 0.0110 -0.0017 0.0035  
Z 0.0061 0.0061 0.0058 0.0056 0.0019 0.0002  
AT. 70 H X 0.0113 -0.0107 -0.0110 0.0118 -0.0172 0.0169  
Y 0.0114 -0.0116 -0.0111 0.0110 -0.0017 0.0035  
Z -0.0061 0.0061 0.0058 -0.0056 -0.0019 -0.0002  
AT. 71 H X -0.0113 -0.0107 0.0110 0.0118 -0.0172 -0.0169  
Y 0.0114 0.0116 -0.0111 -0.0110 0.0017 0.0035  
Z 0.0061 0.0061 -0.0058 -0.0056 -0.0019 0.0002  
AT. 72 H X 0.0113 -0.0107 0.0110 -0.0118 0.0172 0.0169  
Y 0.0114 -0.0116 0.0111 -0.0110 0.0017 0.0035  
Z -0.0061 0.0061 -0.0058 0.0056 0.0019 -0.0002  
AT. 73 C X 0.0159 0.0155 0.0151 0.0148 0.0050 -0.0052

Y 0.0061 0.0061 0.0058 0.0056 0.0028 -0.0027  
Z 0.0185 0.0183 0.0183 0.0182 0.0014 -0.0013  
AT. 74 C X -0.0159 0.0155 0.0151 -0.0148 -0.0050 0.0052  
Y 0.0061 -0.0061 -0.0058 0.0056 0.0028 -0.0027  
Z -0.0185 0.0183 0.0183 -0.0182 -0.0014 0.0013  
AT. 75 C X 0.0159 0.0155 -0.0151 -0.0148 -0.0050 -0.0052  
Y 0.0061 0.0061 -0.0058 -0.0056 -0.0028 -0.0027  
Z 0.0185 0.0183 -0.0183 -0.0182 -0.0014 -0.0013  
AT. 76 C X -0.0159 0.0155 -0.0151 0.0148 0.0050 0.0052  
Y 0.0061 -0.0061 0.0058 -0.0056 -0.0028 -0.0027  
Z -0.0185 0.0183 -0.0183 0.0182 0.0014 0.0013  
AT. 77 C X 0.0024 0.0022 0.0019 0.0018 -0.0105 0.0099  
Y -0.0085 -0.0087 -0.0076 -0.0079 0.0004 -0.0001  
Z -0.0046 -0.0052 -0.0033 -0.0039 -0.0001 0.0006  
AT. 78 C X -0.0024 0.0022 0.0019 -0.0018 0.0105 -0.0099  
Y -0.0085 0.0087 0.0076 -0.0079 0.0004 -0.0001  
Z 0.0046 -0.0052 -0.0033 0.0039 0.0001 -0.0006  
AT. 79 C X 0.0024 0.0022 -0.0019 -0.0018 0.0105 0.0099  
Y -0.0085 -0.0087 0.0076 0.0079 -0.0004 -0.0001  
Z -0.0046 -0.0052 0.0033 0.0039 0.0001 0.0006  
AT. 80 C X -0.0024 0.0022 -0.0019 0.0018 -0.0105 -0.0099  
Y -0.0085 0.0087 -0.0076 0.0079 -0.0004 -0.0001  
Z 0.0046 -0.0052 0.0033 -0.0039 -0.0001 -0.0006  
AT. 81 H X 0.0179 0.0184 0.0145 0.0152 -0.0198 0.0180  
Y 0.0073 0.0078 0.0053 0.0059 -0.0100 0.0090  
Z 0.0174 0.0179 0.0154 0.0163 -0.0075 0.0066  
AT. 82 H X -0.0179 0.0184 0.0145 -0.0152 0.0198 -0.0180  
Y 0.0073 -0.0078 -0.0053 0.0059 -0.0100 0.0090  
Z -0.0174 0.0179 0.0154 -0.0163 0.0075 -0.0066  
AT. 83 H X 0.0179 0.0184 -0.0145 -0.0152 0.0198 0.0180  
Y 0.0073 0.0078 -0.0053 -0.0059 0.0100 0.0090  
Z 0.0174 0.0179 -0.0154 -0.0163 0.0075 0.0066

AT. 84 H X -0.0179 0.0184 -0.0145 0.0152 -0.0198 -0.0180  
Y 0.0073 -0.0078 0.0053 -0.0059 0.0100 0.0090  
Z -0.0174 0.0179 -0.0154 0.0163 -0.0075 -0.0066

AT. 85 H X -0.0245 -0.0257 -0.0201 -0.0219 0.0003 0.0013  
Y 0.0041 0.0043 0.0028 0.0032 -0.0115 0.0110  
Z -0.0073 -0.0078 -0.0057 -0.0063 0.0066 -0.0060

AT. 86 H X 0.0245 -0.0257 -0.0201 0.0219 -0.0003 -0.0013  
Y 0.0041 -0.0043 -0.0028 0.0032 -0.0115 0.0110  
Z 0.0073 -0.0078 -0.0057 0.0063 -0.0066 0.0060

AT. 87 H X -0.0245 -0.0257 0.0201 0.0219 -0.0003 0.0013  
Y 0.0041 0.0043 -0.0028 -0.0032 0.0115 0.0110  
Z -0.0073 -0.0078 0.0057 0.0063 -0.0066 -0.0060

AT. 88 H X 0.0245 -0.0257 0.0201 -0.0219 0.0003 -0.0013  
Y 0.0041 -0.0043 0.0028 -0.0032 0.0115 0.0110  
Z 0.0073 -0.0078 0.0057 -0.0063 0.0066 0.0060

AT. 89 C X 0.0025 0.0029 0.0021 0.0025 0.0125 -0.0124  
Y -0.0079 -0.0079 -0.0070 -0.0068 -0.0009 0.0008  
Z 0.0030 0.0028 0.0034 0.0034 -0.0035 0.0034

AT. 90 C X -0.0025 0.0029 0.0021 -0.0025 -0.0125 0.0124  
Y -0.0079 0.0079 0.0070 -0.0068 -0.0009 0.0008  
Z -0.0030 0.0028 0.0034 -0.0034 0.0035 -0.0034

AT. 91 C X 0.0025 0.0029 -0.0021 -0.0025 -0.0125 -0.0124  
Y -0.0079 -0.0079 0.0070 0.0068 0.0009 0.0008  
Z 0.0030 0.0028 -0.0034 -0.0034 0.0035 0.0034

AT. 92 C X -0.0025 0.0029 -0.0021 0.0025 0.0125 0.0124  
Y -0.0079 0.0079 -0.0070 0.0068 0.0009 0.0008  
Z -0.0030 0.0028 -0.0034 0.0034 -0.0035 -0.0034

AT. 93 C X 0.0003 0.0007 -0.0005 -0.0001 0.0144 -0.0142  
Y 0.0032 0.0033 0.0027 0.0030 -0.0025 0.0020  
Z -0.0074 -0.0075 -0.0076 -0.0075 -0.0027 0.0024

AT. 94 C X -0.0003 0.0007 -0.0005 0.0001 -0.0144 0.0142  
Y 0.0032 -0.0033 -0.0027 0.0030 -0.0025 0.0020



Z 0.0074 -0.0075 -0.0076 0.0075 0.0027 -0.0024  
AT. 95 C X 0.0003 0.0007 0.0005 0.0001 -0.0144 -0.0142  
Y 0.0032 0.0033 -0.0027 -0.0030 0.0025 0.0020  
Z -0.0074 -0.0075 0.0076 0.0075 0.0027 0.0024  
AT. 96 C X -0.0003 0.0007 0.0005 -0.0001 0.0144 0.0142  
Y 0.0032 -0.0033 0.0027 -0.0030 0.0025 0.0020  
Z 0.0074 -0.0075 0.0076 -0.0075 -0.0027 -0.0024  
AT. 97 H X -0.0042 -0.0048 -0.0048 -0.0054 -0.0253 0.0245  
Y 0.0093 0.0104 0.0100 0.0111 0.0438 -0.0424  
Z -0.0123 -0.0132 -0.0093 -0.0110 -0.0494 0.0494  
AT. 98 H X 0.0042 -0.0048 -0.0048 0.0054 0.0253 -0.0245  
Y 0.0093 -0.0104 -0.0100 0.0111 0.0438 -0.0424  
Z 0.0123 -0.0132 -0.0093 0.0110 0.0494 -0.0494  
AT. 99 H X -0.0042 -0.0048 0.0048 0.0054 0.0253 0.0245  
Y 0.0093 0.0104 -0.0100 -0.0111 -0.0438 -0.0424  
Z -0.0123 -0.0132 0.0093 0.0110 0.0494 0.0494  
AT. 100 H X 0.0042 -0.0048 0.0048 -0.0054 -0.0253 -0.0245  
Y 0.0093 -0.0104 0.0100 -0.0111 -0.0438 -0.0424  
Z 0.0123 -0.0132 0.0093 -0.0110 -0.0494 -0.0494  
AT. 101 H X -0.0025 -0.0025 -0.0013 -0.0016 -0.0129 0.0130  
Y -0.0003 -0.0009 0.0012 0.0008 -0.0403 0.0392  
Z -0.0002 0.0011 -0.0007 -0.0007 0.0570 -0.0541  
AT. 102 H X 0.0025 -0.0025 -0.0013 0.0016 0.0129 -0.0130  
Y -0.0003 0.0009 -0.0012 0.0008 -0.0403 0.0392  
Z 0.0002 0.0011 -0.0007 0.0007 -0.0570 0.0541  
AT. 103 H X -0.0025 -0.0025 0.0013 0.0016 0.0129 0.0130  
Y -0.0003 -0.0009 -0.0012 -0.0008 0.0403 0.0392  
Z -0.0002 0.0011 0.0007 0.0007 -0.0570 -0.0541  
AT. 104 H X 0.0025 -0.0025 0.0013 -0.0016 -0.0129 -0.0130  
Y -0.0003 0.0009 0.0012 -0.0008 0.0403 0.0392  
Z 0.0002 0.0011 0.0007 -0.0007 0.0570 0.0541  
AT. 105 H X -0.0056 -0.0064 -0.0031 -0.0036 -0.0276 0.0271

Y 0.0098 0.0092 0.0095 0.0077 0.0044 -0.0025  
Z -0.0107 -0.0098 -0.0120 -0.0101 0.0063 -0.0081  
AT. 106 H X 0.0056 -0.0064 -0.0031 0.0036 0.0276 -0.0271  
Y 0.0098 -0.0092 -0.0095 0.0077 0.0044 -0.0025  
Z 0.0107 -0.0098 -0.0120 0.0101 -0.0063 0.0081  
AT. 107 H X -0.0056 -0.0064 0.0031 0.0036 0.0276 0.0271  
Y 0.0098 0.0092 -0.0095 -0.0077 -0.0044 -0.0025  
Z -0.0107 -0.0098 0.0120 0.0101 -0.0063 -0.0081  
AT. 108 H X 0.0056 -0.0064 0.0031 -0.0036 -0.0276 -0.0271  
Y 0.0098 -0.0092 0.0095 -0.0077 -0.0044 -0.0025  
Z 0.0107 -0.0098 0.0120 -0.0101 0.0063 0.0081  
AT. 109 C X -0.0018 -0.0022 -0.0020 -0.0016 0.0055 -0.0055  
Y 0.0090 0.0093 0.0089 0.0087 -0.0014 0.0016  
Z -0.0032 -0.0036 -0.0035 -0.0033 0.0047 -0.0056  
AT. 110 C X 0.0018 -0.0022 -0.0020 0.0016 -0.0055 0.0055  
Y 0.0090 -0.0093 -0.0089 0.0087 -0.0014 0.0016  
Z 0.0032 -0.0036 -0.0035 0.0033 -0.0047 0.0056  
AT. 111 C X -0.0018 -0.0022 0.0020 0.0016 -0.0055 -0.0055  
Y 0.0090 0.0093 -0.0089 -0.0087 0.0014 0.0016  
Z -0.0032 -0.0036 0.0035 0.0033 -0.0047 -0.0056  
AT. 112 C X 0.0018 -0.0022 0.0020 -0.0016 0.0055 0.0055  
Y 0.0090 -0.0093 0.0089 -0.0087 0.0014 0.0016  
Z 0.0032 -0.0036 0.0035 -0.0033 0.0047 0.0056  
AT. 113 H X 0.0067 0.0069 0.0069 0.0070 0.0048 -0.0040  
Y -0.0017 -0.0022 -0.0022 -0.0021 -0.0006 -0.0002  
Z 0.0150 0.0156 0.0151 0.0146 0.0029 -0.0021  
AT. 114 H X -0.0067 0.0069 0.0069 -0.0070 -0.0048 0.0040  
Y -0.0017 0.0022 0.0022 -0.0021 -0.0006 -0.0002  
Z -0.0150 0.0156 0.0151 -0.0146 -0.0029 0.0021  
AT. 115 H X 0.0067 0.0069 -0.0069 -0.0070 -0.0048 -0.0040  
Y -0.0017 -0.0022 0.0022 0.0021 0.0006 -0.0002  
Z 0.0150 0.0156 -0.0151 -0.0146 -0.0029 -0.0021

AT.116 H X -0.0067 0.0069 -0.0069 0.0070 0.0048 0.0040  
Y -0.0017 0.0022 -0.0022 0.0021 0.0006 -0.0002  
Z -0.0150 0.0156 -0.0151 0.0146 0.0029 0.0021

AT.117 H X -0.0222 -0.0228 -0.0216 -0.0219 0.0081 -0.0099  
Y 0.0055 0.0053 0.0047 0.0050 -0.0062 0.0054  
Z -0.0032 -0.0040 -0.0043 -0.0035 0.0002 -0.0018

AT.118 H X 0.0222 -0.0228 -0.0216 0.0219 -0.0081 0.0099  
Y 0.0055 -0.0053 -0.0047 0.0050 -0.0062 0.0054  
Z 0.0032 -0.0040 -0.0043 0.0035 -0.0002 0.0018

AT.119 H X -0.0222 -0.0228 0.0216 0.0219 -0.0081 -0.0099  
Y 0.0055 0.0053 -0.0047 -0.0050 0.0062 0.0054  
Z -0.0032 -0.0040 0.0043 0.0035 -0.0002 -0.0018

AT.120 H X 0.0222 -0.0228 0.0216 -0.0219 0.0081 0.0099  
Y 0.0055 -0.0053 0.0047 -0.0050 0.0062 0.0054  
Z 0.0032 -0.0040 0.0043 -0.0035 0.0002 0.0018

AT.121 C X -0.0100 -0.0104 -0.0088 -0.0091 -0.0107 0.0112  
Y -0.0043 -0.0041 -0.0047 -0.0045 0.0023 -0.0020  
Z 0.0004 0.0010 0.0001 0.0003 -0.0018 0.0021

AT.122 C X 0.0100 -0.0104 -0.0088 0.0091 0.0107 -0.0112  
Y -0.0043 0.0041 0.0047 -0.0045 0.0023 -0.0020  
Z -0.0004 0.0010 0.0001 -0.0003 0.0018 -0.0021

AT.123 C X -0.0100 -0.0104 0.0088 0.0091 0.0107 0.0112  
Y -0.0043 -0.0041 0.0047 0.0045 -0.0023 -0.0020  
Z 0.0004 0.0010 -0.0001 -0.0003 0.0018 0.0021

AT.124 C X 0.0100 -0.0104 0.0088 -0.0091 -0.0107 -0.0112  
Y -0.0043 0.0041 -0.0047 0.0045 -0.0023 -0.0020  
Z -0.0004 0.0010 -0.0001 0.0003 -0.0018 -0.0021

AT.125 H X 0.0224 0.0221 0.0227 0.0220 0.0047 -0.0058  
Y 0.0009 0.0014 -0.0006 0.0004 0.0164 -0.0171  
Z -0.0123 -0.0120 -0.0116 -0.0118 -0.0163 0.0177

AT.126 H X -0.0224 0.0221 0.0227 -0.0220 -0.0047 0.0058  
Y 0.0009 -0.0014 0.0006 0.0004 0.0164 -0.0171

Z 0.0123 -0.0120 -0.0116 0.0118 0.0163 -0.0177  
AT. 127 H X 0.0224 0.0221 -0.0227 -0.0220 -0.0047 -0.0058  
Y 0.0009 0.0014 0.0006 -0.0004 -0.0164 -0.0171  
Z -0.0123 -0.0120 0.0116 0.0118 0.0163 0.0177  
AT. 128 H X -0.0224 0.0221 -0.0227 0.0220 0.0047 0.0058  
Y 0.0009 -0.0014 -0.0006 -0.0004 -0.0164 -0.0171  
Z 0.0123 -0.0120 0.0116 -0.0118 -0.0163 -0.0177  
AT. 129 H X -0.0162 -0.0166 -0.0147 -0.0147 -0.0141 0.0146  
Y 0.0154 0.0154 0.0142 0.0137 0.0148 -0.0150  
Z 0.0243 0.0245 0.0232 0.0230 0.0158 -0.0167  
AT. 130 H X 0.0162 -0.0166 -0.0147 0.0147 0.0141 -0.0146  
Y 0.0154 -0.0154 -0.0142 0.0137 0.0148 -0.0150  
Z -0.0243 0.0245 0.0232 -0.0230 -0.0158 0.0167  
AT. 131 H X -0.0162 -0.0166 0.0147 0.0147 0.0141 0.0146  
Y 0.0154 0.0154 -0.0142 -0.0137 -0.0148 -0.0150  
Z 0.0243 0.0245 -0.0232 -0.0230 -0.0158 -0.0167  
AT. 132 H X 0.0162 -0.0166 0.0147 -0.0147 -0.0141 -0.0146  
Y 0.0154 -0.0154 0.0142 -0.0137 -0.0148 -0.0150  
Z -0.0243 0.0245 -0.0232 0.0230 0.0158 0.0167  
AT. 133 C X 0.0016 0.0016 0.0018 0.0017 -0.0003 0.0008  
Y 0.0016 0.0017 0.0020 0.0017 -0.0006 0.0010  
Z 0.0015 0.0018 0.0021 0.0017 -0.0007 0.0013  
AT. 134 C X -0.0016 0.0016 0.0018 -0.0017 0.0003 -0.0008  
Y 0.0016 -0.0017 -0.0020 0.0017 -0.0006 0.0010  
Z -0.0015 0.0018 0.0021 -0.0017 0.0007 -0.0013  
AT. 135 C X 0.0016 0.0016 -0.0018 -0.0017 0.0003 0.0008  
Y 0.0016 0.0017 -0.0020 -0.0017 0.0006 0.0010  
Z 0.0015 0.0018 -0.0021 -0.0017 0.0007 0.0013  
AT. 136 C X -0.0016 0.0016 -0.0018 0.0017 -0.0003 -0.0008  
Y 0.0016 -0.0017 0.0020 -0.0017 0.0006 0.0010  
Z -0.0015 0.0018 -0.0021 0.0017 -0.0007 -0.0013  
AT. 137 C X -0.0005 -0.0006 -0.0007 -0.0005 0.0003 -0.0007

Y -0.0024 -0.0026 -0.0025 -0.0022 0.0015 -0.0018  
Z -0.0034 -0.0037 -0.0041 -0.0037 0.0004 -0.0010  
AT. 138 C X 0.0005 -0.0006 -0.0007 0.0005 -0.0003 0.0007  
Y -0.0024 0.0026 0.0025 -0.0022 0.0015 -0.0018  
Z 0.0034 -0.0037 -0.0041 0.0037 -0.0004 0.0010  
AT. 139 C X -0.0005 -0.0006 0.0007 0.0005 -0.0003 -0.0007  
Y -0.0024 -0.0026 0.0025 0.0022 -0.0015 -0.0018  
Z -0.0034 -0.0037 0.0041 0.0037 -0.0004 -0.0010  
AT. 140 C X 0.0005 -0.0006 0.0007 -0.0005 0.0003 0.0007  
Y -0.0024 0.0026 -0.0025 0.0022 -0.0015 -0.0018  
Z 0.0034 -0.0037 0.0041 -0.0037 0.0004 0.0010  
AT. 141 H X -0.0002 0.0001 0.0001 -0.0004 -0.0055 0.0063  
Y -0.0046 -0.0049 -0.0061 -0.0054 -0.0008 -0.0005  
Z -0.0054 -0.0063 -0.0078 -0.0062 0.0054 -0.0080  
AT. 142 H X 0.0002 0.0001 0.0001 0.0004 0.0055 -0.0063  
Y -0.0046 0.0049 0.0061 -0.0054 -0.0008 -0.0005  
Z 0.0054 -0.0063 -0.0078 0.0062 -0.0054 0.0080  
AT. 143 H X -0.0002 0.0001 -0.0001 0.0004 0.0055 0.0063  
Y -0.0046 -0.0049 0.0061 0.0054 0.0008 -0.0005  
Z -0.0054 -0.0063 0.0078 0.0062 -0.0054 -0.0080  
AT. 144 H X 0.0002 0.0001 -0.0001 -0.0004 -0.0055 -0.0063  
Y -0.0046 0.0049 -0.0061 0.0054 0.0008 -0.0005  
Z 0.0054 -0.0063 0.0078 -0.0062 0.0054 0.0080  
AT. 145 H X -0.0024 -0.0025 -0.0022 -0.0019 0.0069 -0.0068  
Y -0.0013 -0.0015 -0.0015 -0.0012 -0.0006 0.0001  
Z -0.0012 -0.0015 -0.0015 -0.0011 -0.0004 -0.0002  
AT. 146 H X 0.0024 -0.0025 -0.0022 0.0019 -0.0069 0.0068  
Y -0.0013 0.0015 0.0015 -0.0012 -0.0006 0.0001  
Z 0.0012 -0.0015 -0.0015 0.0011 0.0004 0.0002  
AT. 147 H X -0.0024 -0.0025 0.0022 0.0019 -0.0069 -0.0068  
Y -0.0013 -0.0015 0.0015 0.0012 0.0006 0.0001  
Z -0.0012 -0.0015 0.0015 0.0011 0.0004 -0.0002

AT. 148 H X 0.0024 -0.0025 0.0022 -0.0019 0.0069 0.0068  
Y -0.0013 0.0015 -0.0015 0.0012 0.0006 0.0001  
Z 0.0012 -0.0015 0.0015 -0.0011 -0.0004 0.0002

AT. 149 O X -0.0054 -0.0054 -0.0044 -0.0042 -0.0007 0.0008  
Y 0.0028 0.0028 0.0022 0.0022 0.0005 -0.0006  
Z 0.0006 0.0006 -0.0002 -0.0002 0.0003 -0.0004

AT. 150 O X 0.0054 -0.0054 -0.0044 0.0042 0.0007 -0.0008  
Y 0.0028 -0.0028 -0.0022 0.0022 0.0005 -0.0006  
Z -0.0006 0.0006 -0.0002 0.0002 -0.0003 0.0004

AT. 151 O X -0.0054 -0.0054 0.0044 0.0042 0.0007 0.0008  
Y 0.0028 0.0028 -0.0022 -0.0022 -0.0005 -0.0006  
Z 0.0006 0.0006 0.0002 0.0002 -0.0003 -0.0004

AT. 152 O X 0.0054 -0.0054 0.0044 -0.0042 -0.0007 -0.0008  
Y 0.0028 -0.0028 0.0022 -0.0022 -0.0005 -0.0006  
Z -0.0006 0.0006 0.0002 -0.0002 0.0003 0.0004

AT. 153 H X 0.0070 0.0067 0.0027 0.0018 -0.0034 0.0040  
Y -0.0221 -0.0215 -0.0220 -0.0221 -0.0009 0.0018  
Z -0.0171 -0.0166 -0.0141 -0.0135 0.0018 -0.0019

AT. 154 H X -0.0070 0.0067 0.0027 -0.0018 0.0034 -0.0040  
Y -0.0221 0.0215 0.0220 -0.0221 -0.0009 0.0018  
Z 0.0171 -0.0166 -0.0141 0.0135 -0.0018 0.0019

AT. 155 H X 0.0070 0.0067 -0.0027 -0.0018 0.0034 0.0040  
Y -0.0221 -0.0215 0.0220 0.0221 0.0009 0.0018  
Z -0.0171 -0.0166 0.0141 0.0135 -0.0018 -0.0019

AT. 156 H X -0.0070 0.0067 -0.0027 0.0018 -0.0034 -0.0040  
Y -0.0221 0.0215 -0.0220 0.0221 0.0009 0.0018  
Z 0.0171 -0.0166 0.0141 -0.0135 0.0018 0.0019

AT. 157 O X 0.0040 0.0045 0.0039 0.0035 0.0013 -0.0013  
Y 0.0029 0.0030 0.0033 0.0030 0.0029 -0.0029  
Z 0.0015 0.0015 0.0026 0.0023 0.0061 -0.0060

AT. 158 O X -0.0040 0.0045 0.0039 -0.0035 -0.0013 0.0013  
Y 0.0029 -0.0030 -0.0033 0.0030 0.0029 -0.0029

Z -0.0015 0.0015 0.0026 -0.0023 -0.0061 0.0060  
AT. 159 O X 0.0040 0.0045 -0.0039 -0.0035 -0.0013 -0.0013  
Y 0.0029 0.0030 -0.0033 -0.0030 -0.0029 -0.0029  
Z 0.0015 0.0015 -0.0026 -0.0023 -0.0061 -0.0060  
AT. 160 O X -0.0040 0.0045 -0.0039 0.0035 0.0013 0.0013  
Y 0.0029 -0.0030 0.0033 -0.0030 -0.0029 -0.0029  
Z -0.0015 0.0015 -0.0026 0.0023 0.0061 0.0060  
AT. 161 O X -0.0049 -0.0049 -0.0051 -0.0049 -0.0037 0.0036  
Y -0.0045 -0.0046 -0.0049 -0.0046 -0.0039 0.0039  
Z -0.0048 -0.0048 -0.0054 -0.0051 -0.0055 0.0055  
AT. 162 O X 0.0049 -0.0049 -0.0051 0.0049 0.0037 -0.0036  
Y -0.0045 0.0046 0.0049 -0.0046 -0.0039 0.0039  
Z 0.0048 -0.0048 -0.0054 0.0051 0.0055 -0.0055  
AT. 163 O X -0.0049 -0.0049 0.0051 0.0049 0.0037 0.0036  
Y -0.0045 -0.0046 0.0049 0.0046 0.0039 0.0039  
Z -0.0048 -0.0048 0.0054 0.0051 0.0055 0.0055  
AT. 164 O X 0.0049 -0.0049 0.0051 -0.0049 -0.0037 -0.0036  
Y -0.0045 0.0046 -0.0049 0.0046 0.0039 0.0039  
Z 0.0048 -0.0048 0.0054 -0.0051 -0.0055 -0.0055  
AT. 165 H X -0.0039 -0.0030 -0.0021 -0.0028 0.0011 -0.0008  
Y -0.0043 -0.0039 -0.0038 -0.0040 -0.0020 0.0021  
Z -0.0004 -0.0002 -0.0009 -0.0011 -0.0016 0.0013  
AT. 166 H X 0.0039 -0.0030 -0.0021 0.0028 -0.0011 0.0008  
Y -0.0043 0.0039 0.0038 -0.0040 -0.0020 0.0021  
Z 0.0004 -0.0002 -0.0009 0.0011 0.0016 -0.0013  
AT. 167 H X -0.0039 -0.0030 0.0021 0.0028 -0.0011 -0.0008  
Y -0.0043 -0.0039 0.0038 0.0040 0.0020 0.0021  
Z -0.0004 -0.0002 0.0009 0.0011 0.0016 0.0013  
AT. 168 H X 0.0039 -0.0030 0.0021 -0.0028 0.0011 0.0008  
Y -0.0043 0.0039 -0.0038 0.0040 0.0020 0.0021  
Z 0.0004 -0.0002 0.0009 -0.0011 -0.0016 -0.0013  
AT. 169 O X 0.0008 0.0008 0.0010 0.0011 0.0001 -0.0004

Y 0.0002 0.0001 0.0008 0.0008 0.0002 0.0002  
Z -0.0001 -0.0001 -0.0021 -0.0022 -0.0001 0.0001  
AT. 170 O X -0.0008 0.0008 0.0010 -0.0011 -0.0001 0.0004  
Y 0.0002 -0.0001 -0.0008 0.0008 0.0002 0.0002  
Z 0.0001 -0.0001 -0.0021 0.0022 0.0001 -0.0001  
AT. 171 O X 0.0008 0.0008 -0.0010 -0.0011 -0.0001 -0.0004  
Y 0.0002 0.0001 -0.0008 -0.0008 -0.0002 0.0002  
Z -0.0001 -0.0001 0.0021 0.0022 0.0001 0.0001  
AT. 172 O X -0.0008 0.0008 -0.0010 0.0011 0.0001 0.0004  
Y 0.0002 -0.0001 0.0008 -0.0008 -0.0002 0.0002  
Z 0.0001 -0.0001 0.0021 -0.0022 -0.0001 -0.0001  
AT. 173 H X -0.0204 -0.0194 -0.0417 -0.0450 -0.0029 0.0076  
Y 0.0037 0.0035 0.0080 0.0087 0.0005 -0.0016  
Z 0.0083 0.0079 0.0113 0.0122 0.0009 -0.0022  
AT. 174 H X 0.0204 -0.0194 -0.0417 0.0450 0.0029 -0.0076  
Y 0.0037 -0.0035 -0.0080 0.0087 0.0005 -0.0016  
Z -0.0083 0.0079 0.0113 -0.0122 -0.0009 0.0022  
AT. 175 H X -0.0204 -0.0194 0.0417 0.0450 0.0029 0.0076  
Y 0.0037 0.0035 -0.0080 -0.0087 -0.0005 -0.0016  
Z 0.0083 0.0079 -0.0113 -0.0122 -0.0009 -0.0022  
AT. 176 H X 0.0204 -0.0194 0.0417 -0.0450 -0.0029 -0.0076  
Y 0.0037 -0.0035 0.0080 -0.0087 -0.0005 -0.0016  
Z -0.0083 0.0079 -0.0113 0.0122 0.0009 0.0022  
  
FREQ(CM\*\*-1) 981.12 981.34 1001.43 1002.09 1002.42 1002.45  
  
AT. 1 I X 0.0001 0.0001 0.0001 -0.0000 0.0001 0.0001  
Y 0.0000 0.0000 0.0000 -0.0000 -0.0000 -0.0000  
Z 0.0000 -0.0000 -0.0000 0.0000 -0.0000 -0.0000  
AT. 2 I X 0.0001 0.0001 0.0001 0.0000 0.0001 -0.0001  
Y -0.0000 -0.0000 -0.0000 -0.0000 0.0000 -0.0000  
Z 0.0000 -0.0000 -0.0000 -0.0000 -0.0000 0.0000



AT. 3 I X 0.0001 -0.0001 -0.0001 -0.0000 0.0001 -0.0001  
Y 0.0000 -0.0000 -0.0000 -0.0000 -0.0000 0.0000  
Z 0.0000 0.0000 0.0000 0.0000 -0.0000 0.0000

AT. 4 I X 0.0001 -0.0001 -0.0001 0.0000 0.0001 0.0001  
Y -0.0000 0.0000 0.0000 -0.0000 0.0000 0.0000  
Z 0.0000 0.0000 0.0000 -0.0000 -0.0000 -0.0000

AT. 5 I X -0.0000 -0.0000 -0.0001 0.0001 -0.0000 -0.0001  
Y 0.0001 0.0000 0.0000 -0.0000 0.0000 0.0000  
Z -0.0000 -0.0000 0.0000 -0.0000 0.0000 0.0000

AT. 6 I X -0.0000 -0.0000 -0.0001 -0.0001 -0.0000 0.0001  
Y -0.0001 -0.0000 -0.0000 -0.0000 -0.0000 0.0000  
Z -0.0000 -0.0000 0.0000 0.0000 0.0000 -0.0000

AT. 7 I X -0.0000 0.0000 0.0001 0.0001 -0.0000 0.0001  
Y 0.0001 -0.0000 -0.0000 -0.0000 0.0000 -0.0000  
Z -0.0000 0.0000 -0.0000 -0.0000 0.0000 -0.0000

AT. 8 I X -0.0000 0.0000 0.0001 -0.0001 -0.0000 -0.0001  
Y -0.0001 0.0000 0.0000 -0.0000 -0.0000 -0.0000  
Z -0.0000 0.0000 -0.0000 0.0000 0.0000 0.0000

AT. 9 N X -0.0005 0.0000 0.0049 -0.0052 0.0049 0.0049  
Y 0.0029 0.0033 0.0039 -0.0043 0.0039 0.0042  
Z -0.0047 -0.0045 -0.0018 0.0019 -0.0020 -0.0022

AT. 10 N X -0.0005 0.0000 0.0049 0.0052 0.0049 -0.0049  
Y -0.0029 -0.0033 -0.0039 -0.0043 -0.0039 0.0042  
Z -0.0047 -0.0045 -0.0018 -0.0019 -0.0020 0.0022

AT. 11 N X -0.0005 -0.0000 -0.0049 -0.0052 0.0049 -0.0049  
Y 0.0029 -0.0033 -0.0039 -0.0043 0.0039 -0.0042  
Z -0.0047 0.0045 0.0018 0.0019 -0.0020 0.0022

AT. 12 N X -0.0005 -0.0000 -0.0049 0.0052 0.0049 0.0049  
Y -0.0029 0.0033 0.0039 -0.0043 -0.0039 -0.0042  
Z -0.0047 0.0045 0.0018 -0.0019 -0.0020 -0.0022

AT. 13 N X 0.0006 0.0003 -0.0016 0.0017 -0.0013 -0.0016  
Y 0.0020 0.0024 0.0071 -0.0074 0.0067 0.0071

Z 0.0040 0.0041 0.0025 -0.0026 0.0026 0.0027  
AT. 14 N X 0.0006 0.0003 -0.0016 -0.0017 -0.0013 0.0016  
Y -0.0020 -0.0024 -0.0071 -0.0074 -0.0067 0.0071  
Z 0.0040 0.0041 0.0025 0.0026 0.0026 -0.0027  
AT. 15 N X 0.0006 -0.0003 0.0016 0.0017 -0.0013 0.0016  
Y 0.0020 -0.0024 -0.0071 -0.0074 0.0067 -0.0071  
Z 0.0040 -0.0041 -0.0025 -0.0026 0.0026 -0.0027  
AT. 16 N X 0.0006 -0.0003 0.0016 -0.0017 -0.0013 -0.0016  
Y -0.0020 0.0024 0.0071 -0.0074 -0.0067 -0.0071  
Z 0.0040 -0.0041 -0.0025 0.0026 0.0026 0.0027  
AT. 17 O X -0.0006 -0.0005 -0.0011 0.0006 -0.0004 -0.0011  
Y -0.0005 -0.0007 -0.0023 0.0025 -0.0022 -0.0024  
Z -0.0000 -0.0003 -0.0018 0.0021 -0.0018 -0.0018  
AT. 18 O X -0.0006 -0.0005 -0.0011 -0.0006 -0.0004 0.0011  
Y 0.0005 0.0007 0.0023 0.0025 0.0022 -0.0024  
Z -0.0000 -0.0003 -0.0018 -0.0021 -0.0018 0.0018  
AT. 19 O X -0.0006 0.0005 0.0011 0.0006 -0.0004 0.0011  
Y -0.0005 0.0007 0.0023 0.0025 -0.0022 0.0024  
Z -0.0000 0.0003 0.0018 0.0021 -0.0018 0.0018  
AT. 20 O X -0.0006 0.0005 0.0011 -0.0006 -0.0004 -0.0011  
Y 0.0005 -0.0007 -0.0023 0.0025 0.0022 0.0024  
Z -0.0000 0.0003 0.0018 -0.0021 -0.0018 -0.0018  
AT. 21 O X 0.0002 0.0002 -0.0000 0.0000 0.0000 -0.0000  
Y -0.0002 -0.0004 -0.0037 0.0038 -0.0035 -0.0037  
Z -0.0003 -0.0002 0.0039 -0.0039 0.0037 0.0038  
AT. 22 O X 0.0002 0.0002 -0.0000 -0.0000 0.0000 0.0000  
Y 0.0002 0.0004 0.0037 0.0038 0.0035 -0.0037  
Z -0.0003 -0.0002 0.0039 0.0039 0.0037 -0.0038  
AT. 23 O X 0.0002 -0.0002 0.0000 0.0000 0.0000 0.0000  
Y -0.0002 0.0004 0.0037 0.0038 -0.0035 0.0037  
Z -0.0003 0.0002 -0.0039 -0.0039 0.0037 -0.0038  
AT. 24 O X 0.0002 -0.0002 0.0000 -0.0000 0.0000 -0.0000

Y 0.0002 -0.0004 -0.0037 0.0038 0.0035 0.0037  
Z -0.0003 0.0002 -0.0039 0.0039 0.0037 0.0038  
AT. 25 C X -0.0005 -0.0003 0.0000 -0.0000 0.0000 -0.0001  
Y -0.0027 -0.0027 -0.0030 0.0030 -0.0026 -0.0030  
Z 0.0022 0.0028 0.0036 -0.0040 0.0037 0.0039  
AT. 26 C X -0.0005 -0.0003 0.0000 0.0000 0.0000 0.0001  
Y 0.0027 0.0027 0.0030 0.0030 0.0026 -0.0030  
Z 0.0022 0.0028 0.0036 0.0040 0.0037 -0.0039  
AT. 27 C X -0.0005 0.0003 -0.0000 -0.0000 0.0000 0.0001  
Y -0.0027 0.0027 0.0030 0.0030 -0.0026 0.0030  
Z 0.0022 -0.0028 -0.0036 -0.0040 0.0037 -0.0039  
AT. 28 C X -0.0005 0.0003 -0.0000 0.0000 0.0000 -0.0001  
Y 0.0027 -0.0027 -0.0030 0.0030 0.0026 0.0030  
Z 0.0022 -0.0028 -0.0036 0.0040 0.0037 0.0039  
AT. 29 H X -0.0057 -0.0050 -0.0044 0.0033 -0.0026 -0.0046  
Y 0.0004 -0.0013 -0.0020 0.0034 -0.0035 -0.0025  
Z 0.0099 0.0100 0.0104 -0.0095 0.0081 0.0109  
AT. 30 H X -0.0057 -0.0050 -0.0044 -0.0033 -0.0026 0.0046  
Y -0.0004 0.0013 0.0020 0.0034 0.0035 -0.0025  
Z 0.0099 0.0100 0.0104 0.0095 0.0081 -0.0109  
AT. 31 H X -0.0057 0.0050 0.0044 0.0033 -0.0026 0.0046  
Y 0.0004 0.0013 0.0020 0.0034 -0.0035 0.0025  
Z 0.0099 -0.0100 -0.0104 -0.0095 0.0081 -0.0109  
AT. 32 H X -0.0057 0.0050 0.0044 -0.0033 -0.0026 -0.0046  
Y -0.0004 -0.0013 -0.0020 0.0034 0.0035 0.0025  
Z 0.0099 -0.0100 -0.0104 0.0095 0.0081 0.0109  
AT. 33 H X 0.0065 0.0062 0.0022 -0.0020 0.0021 0.0028  
Y -0.0036 -0.0032 -0.0035 0.0034 -0.0029 -0.0035  
Z -0.0001 -0.0005 0.0034 -0.0032 0.0026 0.0030  
AT. 34 H X 0.0065 0.0062 0.0022 0.0020 0.0021 -0.0028  
Y 0.0036 0.0032 0.0035 0.0034 0.0029 -0.0035  
Z -0.0001 -0.0005 0.0034 0.0032 0.0026 -0.0030

AT. 35 H X 0.0065 -0.0062 -0.0022 -0.0020 0.0021 -0.0028  
Y -0.0036 0.0032 0.0035 0.0034 -0.0029 0.0035  
Z -0.0001 0.0005 -0.0034 -0.0032 0.0026 -0.0030

AT. 36 H X 0.0065 -0.0062 -0.0022 0.0020 0.0021 0.0028  
Y 0.0036 -0.0032 -0.0035 0.0034 0.0029 0.0035  
Z -0.0001 0.0005 -0.0034 0.0032 0.0026 0.0030

AT. 37 C X 0.0000 -0.0001 -0.0017 0.0019 -0.0018 -0.0015  
Y 0.0023 0.0024 0.0027 -0.0027 0.0024 0.0030  
Z -0.0016 -0.0019 -0.0029 0.0033 -0.0029 -0.0032

AT. 38 C X 0.0000 -0.0001 -0.0017 -0.0019 -0.0018 0.0015  
Y -0.0023 -0.0024 -0.0027 -0.0027 -0.0024 0.0030  
Z -0.0016 -0.0019 -0.0029 -0.0033 -0.0029 0.0032

AT. 39 C X 0.0000 0.0001 0.0017 0.0019 -0.0018 0.0015  
Y 0.0023 -0.0024 -0.0027 -0.0027 0.0024 -0.0030  
Z -0.0016 0.0019 0.0029 0.0033 -0.0029 0.0032

AT. 40 C X 0.0000 0.0001 0.0017 -0.0019 -0.0018 -0.0015  
Y -0.0023 0.0024 0.0027 -0.0027 -0.0024 -0.0030  
Z -0.0016 0.0019 0.0029 -0.0033 -0.0029 -0.0032

AT. 41 C X -0.0058 -0.0059 -0.0065 0.0068 -0.0074 -0.0072  
Y -0.0001 -0.0004 0.0014 -0.0018 0.0011 0.0014  
Z 0.0013 0.0016 -0.0069 0.0067 -0.0069 -0.0065

AT. 42 C X -0.0058 -0.0059 -0.0065 -0.0068 -0.0074 0.0072  
Y 0.0001 0.0004 -0.0014 -0.0018 -0.0011 0.0014  
Z 0.0013 0.0016 -0.0069 -0.0067 -0.0069 0.0065

AT. 43 C X -0.0058 0.0059 0.0065 0.0068 -0.0074 0.0072  
Y -0.0001 0.0004 -0.0014 -0.0018 0.0011 -0.0014  
Z 0.0013 -0.0016 0.0069 0.0067 -0.0069 0.0065

AT. 44 C X -0.0058 0.0059 0.0065 -0.0068 -0.0074 -0.0072  
Y 0.0001 -0.0004 0.0014 -0.0018 -0.0011 -0.0014  
Z 0.0013 -0.0016 0.0069 -0.0067 -0.0069 -0.0065

AT. 45 H X -0.0066 -0.0083 0.0060 -0.0065 0.0055 0.0055  
Y -0.0104 -0.0110 -0.0104 0.0108 -0.0114 -0.0115

Z -0.0075 -0.0072 -0.0190 0.0195 -0.0197 -0.0196  
AT. 46 H X -0.0066 -0.0083 0.0060 0.0065 0.0055 -0.0055  
Y 0.0104 0.0110 0.0104 0.0108 0.0114 -0.0115  
Z -0.0075 -0.0072 -0.0190 -0.0195 -0.0197 0.0196  
AT. 47 H X -0.0066 0.0083 -0.0060 -0.0065 0.0055 -0.0055  
Y -0.0104 0.0110 0.0104 0.0108 -0.0114 0.0115  
Z -0.0075 0.0072 0.0190 0.0195 -0.0197 0.0196  
AT. 48 H X -0.0066 0.0083 -0.0060 0.0065 0.0055 0.0055  
Y 0.0104 -0.0110 -0.0104 0.0108 0.0114 0.0115  
Z -0.0075 0.0072 0.0190 -0.0195 -0.0197 -0.0196  
AT. 49 H X -0.0070 -0.0061 -0.0125 0.0127 -0.0138 -0.0135  
Y -0.0043 -0.0030 -0.0105 0.0104 -0.0116 -0.0112  
Z 0.0089 0.0078 0.0089 -0.0100 0.0094 0.0097  
AT. 50 H X -0.0070 -0.0061 -0.0125 -0.0127 -0.0138 0.0135  
Y 0.0043 0.0030 0.0105 0.0104 0.0116 -0.0112  
Z 0.0089 0.0078 0.0089 0.0100 0.0094 -0.0097  
AT. 51 H X -0.0070 0.0061 0.0125 0.0127 -0.0138 0.0135  
Y -0.0043 0.0030 0.0105 0.0104 -0.0116 0.0112  
Z 0.0089 -0.0078 -0.0089 -0.0100 0.0094 -0.0097  
AT. 52 H X -0.0070 0.0061 0.0125 -0.0127 -0.0138 -0.0135  
Y 0.0043 -0.0030 -0.0105 0.0104 0.0116 0.0112  
Z 0.0089 -0.0078 -0.0089 0.0100 0.0094 0.0097  
AT. 53 C X 0.0077 0.0075 0.0032 -0.0030 0.0041 0.0039  
Y -0.0018 -0.0021 -0.0034 0.0034 -0.0032 -0.0033  
Z -0.0014 -0.0016 -0.0025 0.0020 -0.0025 -0.0024  
AT. 54 C X 0.0077 0.0075 0.0032 0.0030 0.0041 -0.0039  
Y 0.0018 0.0021 0.0034 0.0034 0.0032 -0.0033  
Z -0.0014 -0.0016 -0.0025 -0.0020 -0.0025 0.0024  
AT. 55 C X 0.0077 -0.0075 -0.0032 -0.0030 0.0041 -0.0039  
Y -0.0018 0.0021 0.0034 0.0034 -0.0032 0.0033  
Z -0.0014 0.0016 0.0025 0.0020 -0.0025 0.0024  
AT. 56 C X 0.0077 -0.0075 -0.0032 0.0030 0.0041 0.0039

Y 0.0018 -0.0021 -0.0034 0.0034 0.0032 0.0033  
Z -0.0014 0.0016 0.0025 -0.0020 -0.0025 -0.0024  
AT. 57 C X 0.0089 0.0086 0.0064 -0.0058 0.0076 0.0071  
Y -0.0009 -0.0008 -0.0004 0.0011 -0.0003 -0.0007  
Z 0.0003 0.0007 0.0031 -0.0033 0.0026 0.0030  
AT. 58 C X 0.0089 0.0086 0.0064 0.0058 0.0076 -0.0071  
Y 0.0009 0.0008 0.0004 0.0011 0.0003 -0.0007  
Z 0.0003 0.0007 0.0031 0.0033 0.0026 -0.0030  
AT. 59 C X 0.0089 -0.0086 -0.0064 -0.0058 0.0076 -0.0071  
Y -0.0009 0.0008 0.0004 0.0011 -0.0003 0.0007  
Z 0.0003 -0.0007 -0.0031 -0.0033 0.0026 -0.0030  
AT. 60 C X 0.0089 -0.0086 -0.0064 0.0058 0.0076 0.0071  
Y 0.0009 -0.0008 -0.0004 0.0011 0.0003 0.0007  
Z 0.0003 -0.0007 -0.0031 0.0033 0.0026 0.0030  
AT. 61 H X -0.0227 -0.0216 -0.0134 0.0122 -0.0163 -0.0152  
Y -0.0185 -0.0175 -0.0104 0.0095 -0.0129 -0.0119  
Z -0.0304 -0.0293 -0.0213 0.0230 -0.0237 -0.0244  
AT. 62 H X -0.0227 -0.0216 -0.0134 -0.0122 -0.0163 0.0152  
Y 0.0185 0.0175 0.0104 0.0095 0.0129 -0.0119  
Z -0.0304 -0.0293 -0.0213 -0.0230 -0.0237 0.0244  
AT. 63 H X -0.0227 0.0216 0.0134 0.0122 -0.0163 0.0152  
Y -0.0185 0.0175 0.0104 0.0095 -0.0129 0.0119  
Z -0.0304 0.0293 0.0213 0.0230 -0.0237 0.0244  
AT. 64 H X -0.0227 0.0216 0.0134 -0.0122 -0.0163 -0.0152  
Y 0.0185 -0.0175 -0.0104 0.0095 0.0129 0.0119  
Z -0.0304 0.0293 0.0213 -0.0230 -0.0237 -0.0244  
AT. 65 H X 0.0006 0.0006 0.0006 0.0001 0.0010 0.0005  
Y 0.0237 0.0228 0.0175 -0.0170 0.0199 0.0195  
Z 0.0379 0.0377 0.0229 -0.0184 0.0280 0.0245  
AT. 66 H X 0.0006 0.0006 0.0006 -0.0001 0.0010 -0.0005  
Y -0.0237 -0.0228 -0.0175 -0.0170 -0.0199 0.0195  
Z 0.0379 0.0377 0.0229 0.0184 0.0280 -0.0245

AT. 67 H X 0.0006 -0.0006 -0.0006 0.0001 0.0010 -0.0005  
Y 0.0237 -0.0228 -0.0175 -0.0170 0.0199 -0.0195  
Z 0.0379 -0.0377 -0.0229 -0.0184 0.0280 -0.0245

AT. 68 H X 0.0006 -0.0006 -0.0006 -0.0001 0.0010 0.0005  
Y -0.0237 0.0228 0.0175 -0.0170 -0.0199 -0.0195  
Z 0.0379 -0.0377 -0.0229 0.0184 0.0280 0.0245

AT. 69 H X -0.0175 -0.0165 -0.0082 0.0067 -0.0111 -0.0099  
Y 0.0024 0.0031 0.0075 -0.0096 0.0060 0.0078  
Z -0.0014 -0.0003 0.0073 -0.0104 0.0049 0.0073

AT. 70 H X -0.0175 -0.0165 -0.0082 -0.0067 -0.0111 0.0099  
Y -0.0024 -0.0031 -0.0075 -0.0096 -0.0060 0.0078  
Z -0.0014 -0.0003 0.0073 0.0104 0.0049 -0.0073

AT. 71 H X -0.0175 0.0165 0.0082 0.0067 -0.0111 0.0099  
Y 0.0024 -0.0031 -0.0075 -0.0096 0.0060 -0.0078  
Z -0.0014 0.0003 -0.0073 -0.0104 0.0049 -0.0073

AT. 72 H X -0.0175 0.0165 0.0082 -0.0067 -0.0111 -0.0099  
Y -0.0024 0.0031 0.0075 -0.0096 -0.0060 -0.0078  
Z -0.0014 0.0003 -0.0073 0.0104 0.0049 0.0073

AT. 73 C X -0.0046 -0.0053 0.0019 -0.0024 0.0024 0.0020  
Y -0.0025 -0.0027 0.0027 -0.0032 0.0028 0.0028  
Z -0.0009 -0.0019 -0.0051 0.0047 -0.0052 -0.0048

AT. 74 C X -0.0046 -0.0053 0.0019 0.0024 0.0024 -0.0020  
Y 0.0025 0.0027 -0.0027 -0.0032 -0.0028 0.0028  
Z -0.0009 -0.0019 -0.0051 -0.0047 -0.0052 0.0048

AT. 75 C X -0.0046 0.0053 -0.0019 -0.0024 0.0024 -0.0020  
Y -0.0025 0.0027 -0.0027 -0.0032 0.0028 -0.0028  
Z -0.0009 0.0019 0.0051 0.0047 -0.0052 0.0048

AT. 76 C X -0.0046 0.0053 -0.0019 0.0024 0.0024 0.0020  
Y 0.0025 -0.0027 0.0027 -0.0032 -0.0028 -0.0028  
Z -0.0009 0.0019 0.0051 -0.0047 -0.0052 -0.0048

AT. 77 C X 0.0101 0.0099 -0.0068 0.0069 -0.0068 -0.0063  
Y -0.0003 0.0003 0.0057 -0.0055 0.0056 0.0052

Z 0.0004 0.0008 0.0139 -0.0138 0.0140 0.0137  
AT. 78 C X 0.0101 0.0099 -0.0068 -0.0069 -0.0068 0.0063  
Y 0.0003 -0.0003 -0.0057 -0.0055 -0.0056 0.0052  
Z 0.0004 0.0008 0.0139 0.0138 0.0140 -0.0137  
AT. 79 C X 0.0101 -0.0099 0.0068 0.0069 -0.0068 0.0063  
Y -0.0003 -0.0003 -0.0057 -0.0055 0.0056 -0.0052  
Z 0.0004 -0.0008 -0.0139 -0.0138 0.0140 -0.0137  
AT. 80 C X 0.0101 -0.0099 0.0068 -0.0069 -0.0068 -0.0063  
Y 0.0003 0.0003 0.0057 -0.0055 -0.0056 -0.0052  
Z 0.0004 -0.0008 -0.0139 0.0138 0.0140 0.0137  
AT. 81 H X 0.0188 0.0174 -0.0298 0.0296 -0.0296 -0.0281  
Y 0.0094 0.0088 -0.0176 0.0172 -0.0174 -0.0168  
Z 0.0070 0.0054 -0.0201 0.0202 -0.0201 -0.0189  
AT. 82 H X 0.0188 0.0174 -0.0298 -0.0296 -0.0296 0.0281  
Y -0.0094 -0.0088 0.0176 0.0172 0.0174 -0.0168  
Z 0.0070 0.0054 -0.0201 -0.0202 -0.0201 0.0189  
AT. 83 H X 0.0188 -0.0174 0.0298 0.0296 -0.0296 0.0281  
Y 0.0094 -0.0088 0.0176 0.0172 -0.0174 0.0168  
Z 0.0070 -0.0054 0.0201 0.0202 -0.0201 0.0189  
AT. 84 H X 0.0188 -0.0174 0.0298 -0.0296 -0.0296 -0.0281  
Y -0.0094 0.0088 -0.0176 0.0172 0.0174 0.0168  
Z 0.0070 -0.0054 0.0201 -0.0202 -0.0201 -0.0189  
AT. 85 H X 0.0009 0.0019 0.0286 -0.0282 0.0289 0.0273  
Y 0.0116 0.0103 -0.0174 0.0178 -0.0176 -0.0170  
Z -0.0066 -0.0051 0.0227 -0.0228 0.0228 0.0224  
AT. 86 H X 0.0009 0.0019 0.0286 0.0282 0.0289 -0.0273  
Y -0.0116 -0.0103 0.0174 0.0178 0.0176 -0.0170  
Z -0.0066 -0.0051 0.0227 0.0228 0.0228 -0.0224  
AT. 87 H X 0.0009 -0.0019 -0.0286 -0.0282 0.0289 -0.0273  
Y 0.0116 -0.0103 0.0174 0.0178 -0.0176 0.0170  
Z -0.0066 0.0051 -0.0227 -0.0228 0.0228 -0.0224  
AT. 88 H X 0.0009 -0.0019 -0.0286 0.0282 0.0289 0.0273



Y -0.0116 0.0103 -0.0174 0.0178 0.0176 0.0170  
Z -0.0066 0.0051 -0.0227 0.0228 0.0228 0.0224  
AT. 89 C X -0.0123 -0.0124 0.0023 -0.0019 0.0021 0.0016  
Y 0.0006 0.0009 -0.0011 0.0010 -0.0009 -0.0014  
Z 0.0034 0.0031 -0.0056 0.0052 -0.0055 -0.0053  
AT. 90 C X -0.0123 -0.0124 0.0023 0.0019 0.0021 -0.0016  
Y -0.0006 -0.0009 0.0011 0.0010 0.0009 -0.0014  
Z 0.0034 0.0031 -0.0056 -0.0052 -0.0055 0.0053  
AT. 91 C X -0.0123 0.0124 -0.0023 -0.0019 0.0021 -0.0016  
Y 0.0006 -0.0009 0.0011 0.0010 -0.0009 0.0014  
Z 0.0034 -0.0031 0.0056 0.0052 -0.0055 0.0053  
AT. 92 C X -0.0123 0.0124 -0.0023 0.0019 0.0021 0.0016  
Y -0.0006 0.0009 -0.0011 0.0010 0.0009 0.0014  
Z 0.0034 -0.0031 0.0056 -0.0052 -0.0055 -0.0053  
AT. 93 C X -0.0143 -0.0140 0.0031 -0.0024 0.0031 0.0023  
Y 0.0020 0.0020 -0.0100 0.0100 -0.0097 -0.0098  
Z 0.0022 0.0028 -0.0034 0.0036 -0.0033 -0.0035  
AT. 94 C X -0.0143 -0.0140 0.0031 0.0024 0.0031 -0.0023  
Y -0.0020 -0.0020 0.0100 0.0100 0.0097 -0.0098  
Z 0.0022 0.0028 -0.0034 -0.0036 -0.0033 0.0035  
AT. 95 C X -0.0143 0.0140 -0.0031 -0.0024 0.0031 -0.0023  
Y 0.0020 -0.0020 0.0100 0.0100 -0.0097 0.0098  
Z 0.0022 -0.0028 0.0034 0.0036 -0.0033 0.0035  
AT. 96 C X -0.0143 0.0140 -0.0031 0.0024 0.0031 0.0023  
Y -0.0020 0.0020 -0.0100 0.0100 0.0097 0.0098  
Z 0.0022 -0.0028 0.0034 -0.0036 -0.0033 -0.0035  
AT. 97 H X 0.0248 0.0248 -0.0035 0.0029 -0.0037 -0.0022  
Y -0.0426 -0.0430 0.0128 -0.0119 0.0129 0.0107  
Z 0.0504 0.0495 0.0177 -0.0201 0.0171 0.0203  
AT. 98 H X 0.0248 0.0248 -0.0035 -0.0029 -0.0037 0.0022  
Y 0.0426 0.0430 -0.0128 -0.0119 -0.0129 0.0107  
Z 0.0504 0.0495 0.0177 0.0201 0.0171 -0.0203

AT. 99 H X 0.0248 -0.0248 0.0035 0.0029 -0.0037 0.0022  
Y -0.0426 0.0430 -0.0128 -0.0119 0.0129 -0.0107  
Z 0.0504 -0.0495 -0.0177 -0.0201 0.0171 -0.0203

AT. 100 H X 0.0248 -0.0248 0.0035 -0.0029 -0.0037 -0.0022  
Y 0.0426 -0.0430 0.0128 -0.0119 -0.0129 -0.0107  
Z 0.0504 -0.0495 -0.0177 0.0201 0.0171 0.0203

AT. 101 H X 0.0133 0.0128 0.0070 -0.0077 0.0071 0.0080  
Y 0.0398 0.0390 -0.0134 0.0117 -0.0128 -0.0109  
Z -0.0545 -0.0542 0.0480 -0.0462 0.0467 0.0451

AT. 102 H X 0.0133 0.0128 0.0070 0.0077 0.0071 -0.0080  
Y -0.0398 -0.0390 0.0134 0.0117 0.0128 -0.0109  
Z -0.0545 -0.0542 0.0480 0.0462 0.0467 -0.0451

AT. 103 H X 0.0133 -0.0128 -0.0070 -0.0077 0.0071 -0.0080  
Y 0.0398 -0.0390 0.0134 0.0117 -0.0128 0.0109  
Z -0.0545 0.0542 -0.0480 -0.0462 0.0467 -0.0451

AT. 104 H X 0.0133 -0.0128 -0.0070 0.0077 0.0071 0.0080  
Y -0.0398 0.0390 -0.0134 0.0117 0.0128 0.0109  
Z -0.0545 0.0542 -0.0480 0.0462 0.0467 0.0451

AT. 105 H X 0.0270 0.0268 -0.0132 0.0120 -0.0123 -0.0117  
Y -0.0021 -0.0028 0.0350 -0.0352 0.0332 0.0352  
Z -0.0087 -0.0074 -0.0316 0.0326 -0.0302 -0.0325

AT. 106 H X 0.0270 0.0268 -0.0132 -0.0120 -0.0123 0.0117  
Y 0.0021 0.0028 -0.0350 -0.0352 -0.0332 0.0352  
Z -0.0087 -0.0074 -0.0316 -0.0326 -0.0302 0.0325

AT. 107 H X 0.0270 -0.0268 0.0132 0.0120 -0.0123 0.0117  
Y -0.0021 0.0028 -0.0350 -0.0352 0.0332 -0.0352  
Z -0.0087 0.0074 0.0316 0.0326 -0.0302 0.0325

AT. 108 H X 0.0270 -0.0268 0.0132 -0.0120 -0.0123 -0.0117  
Y 0.0021 -0.0028 0.0350 -0.0352 -0.0332 -0.0352  
Z -0.0087 0.0074 0.0316 -0.0326 -0.0302 -0.0325

AT. 109 C X -0.0063 -0.0059 -0.0029 0.0023 -0.0034 -0.0032  
Y 0.0013 0.0015 -0.0035 0.0028 -0.0035 -0.0030

Z -0.0052 -0.0059 -0.0044 0.0056 -0.0035 -0.0049  
AT. 110 C X -0.0063 -0.0059 -0.0029 -0.0023 -0.0034 0.0032  
Y -0.0013 -0.0015 0.0035 0.0028 0.0035 -0.0030  
Z -0.0052 -0.0059 -0.0044 -0.0056 -0.0035 0.0049  
AT. 111 C X -0.0063 0.0059 0.0029 0.0023 -0.0034 0.0032  
Y 0.0013 -0.0015 0.0035 0.0028 -0.0035 0.0030  
Z -0.0052 0.0059 0.0044 0.0056 -0.0035 0.0049  
AT. 112 C X -0.0063 0.0059 0.0029 -0.0023 -0.0034 -0.0032  
Y -0.0013 0.0015 -0.0035 0.0028 0.0035 0.0030  
Z -0.0052 0.0059 0.0044 -0.0056 -0.0035 -0.0049  
AT. 113 H X -0.0058 -0.0044 -0.0064 0.0038 -0.0082 -0.0061  
Y 0.0009 -0.0001 0.0029 -0.0009 0.0046 0.0026  
Z -0.0031 -0.0020 -0.0048 0.0027 -0.0059 -0.0044  
AT. 114 H X -0.0058 -0.0044 -0.0064 -0.0038 -0.0082 0.0061  
Y -0.0009 0.0001 -0.0029 -0.0009 -0.0046 0.0026  
Z -0.0031 -0.0020 -0.0048 -0.0027 -0.0059 0.0044  
AT. 115 H X -0.0058 0.0044 0.0064 0.0038 -0.0082 0.0061  
Y 0.0009 0.0001 -0.0029 -0.0009 0.0046 -0.0026  
Z -0.0031 0.0020 0.0048 0.0027 -0.0059 0.0044  
AT. 116 H X -0.0058 0.0044 0.0064 -0.0038 -0.0082 -0.0061  
Y -0.0009 -0.0001 0.0029 -0.0009 -0.0046 -0.0026  
Z -0.0031 0.0020 0.0048 -0.0027 -0.0059 -0.0044  
AT. 117 H X -0.0079 -0.0096 0.0059 -0.0023 0.0075 0.0041  
Y 0.0058 0.0051 -0.0060 0.0067 -0.0046 -0.0052  
Z -0.0012 -0.0023 -0.0080 0.0098 -0.0062 -0.0079  
AT. 118 H X -0.0079 -0.0096 0.0059 0.0023 0.0075 -0.0041  
Y -0.0058 -0.0051 0.0060 0.0067 0.0046 -0.0052  
Z -0.0012 -0.0023 -0.0080 -0.0098 -0.0062 0.0079  
AT. 119 H X -0.0079 0.0096 -0.0059 -0.0023 0.0075 -0.0041  
Y 0.0058 -0.0051 0.0060 0.0067 -0.0046 0.0052  
Z -0.0012 0.0023 0.0080 0.0098 -0.0062 0.0079  
AT. 120 H X -0.0079 0.0096 -0.0059 0.0023 0.0075 0.0041

Y -0.0058 0.0051 -0.0060 0.0067 0.0046 0.0052  
Z -0.0012 0.0023 0.0080 -0.0098 -0.0062 -0.0079  
AT. 121 C X 0.0108 0.0112 0.0052 -0.0057 0.0048 0.0057  
Y -0.0021 -0.0021 0.0085 -0.0080 0.0080 0.0086  
Z 0.0020 0.0022 0.0026 -0.0031 0.0019 0.0030  
AT. 122 C X 0.0108 0.0112 0.0052 0.0057 0.0048 -0.0057  
Y 0.0021 0.0021 -0.0085 -0.0080 -0.0080 0.0086  
Z 0.0020 0.0022 0.0026 0.0031 0.0019 -0.0030  
AT. 123 C X 0.0108 -0.0112 -0.0052 -0.0057 0.0048 -0.0057  
Y -0.0021 0.0021 -0.0085 -0.0080 0.0080 -0.0086  
Z 0.0020 -0.0022 -0.0026 -0.0031 0.0019 -0.0030  
AT. 124 C X 0.0108 -0.0112 -0.0052 0.0057 0.0048 0.0057  
Y 0.0021 -0.0021 0.0085 -0.0080 -0.0080 -0.0086  
Z 0.0020 -0.0022 -0.0026 0.0031 0.0019 0.0030  
AT. 125 H X -0.0050 -0.0053 -0.0189 0.0186 -0.0165 -0.0196  
Y -0.0169 -0.0175 -0.0058 0.0069 -0.0057 -0.0064  
Z 0.0172 0.0180 0.0196 -0.0206 0.0178 0.0208  
AT. 126 H X -0.0050 -0.0053 -0.0189 -0.0186 -0.0165 0.0196  
Y 0.0169 0.0175 0.0058 0.0069 0.0057 -0.0064  
Z 0.0172 0.0180 0.0196 0.0206 0.0178 -0.0208  
AT. 127 H X -0.0050 0.0053 0.0189 0.0186 -0.0165 0.0196  
Y -0.0169 0.0175 0.0058 0.0069 -0.0057 0.0064  
Z 0.0172 -0.0180 -0.0196 -0.0206 0.0178 -0.0208  
AT. 128 H X -0.0050 0.0053 0.0189 -0.0186 -0.0165 -0.0196  
Y 0.0169 -0.0175 -0.0058 0.0069 0.0057 0.0064  
Z 0.0172 -0.0180 -0.0196 0.0206 0.0178 0.0208  
AT. 129 H X 0.0139 0.0145 0.0051 -0.0058 0.0042 0.0056  
Y -0.0146 -0.0149 -0.0017 0.0027 -0.0009 -0.0027  
Z -0.0164 -0.0165 -0.0242 0.0240 -0.0233 -0.0258  
AT. 130 H X 0.0139 0.0145 0.0051 0.0058 0.0042 -0.0056  
Y 0.0146 0.0149 0.0017 0.0027 0.0009 -0.0027  
Z -0.0164 -0.0165 -0.0242 -0.0240 -0.0233 0.0258

AT. 131 H X 0.0139 -0.0145 -0.0051 -0.0058 0.0042 -0.0056  
Y -0.0146 0.0149 0.0017 0.0027 -0.0009 0.0027  
Z -0.0164 0.0165 0.0242 0.0240 -0.0233 0.0258

AT. 132 H X 0.0139 -0.0145 -0.0051 0.0058 0.0042 0.0056  
Y 0.0146 -0.0149 -0.0017 0.0027 0.0009 0.0027  
Z -0.0164 0.0165 0.0242 -0.0240 -0.0233 -0.0258

AT. 133 C X 0.0003 0.0004 0.0031 -0.0032 0.0028 0.0031  
Y 0.0012 0.0013 0.0033 -0.0032 0.0032 0.0029  
Z 0.0012 0.0014 0.0044 -0.0045 0.0041 0.0043

AT. 134 C X 0.0003 0.0004 0.0031 0.0032 0.0028 -0.0031  
Y -0.0012 -0.0013 -0.0033 -0.0032 -0.0032 0.0029  
Z 0.0012 0.0014 0.0044 0.0045 0.0041 -0.0043

AT. 135 C X 0.0003 -0.0004 -0.0031 -0.0032 0.0028 -0.0031  
Y 0.0012 -0.0013 -0.0033 -0.0032 0.0032 -0.0029  
Z 0.0012 -0.0014 -0.0044 -0.0045 0.0041 -0.0043

AT. 136 C X 0.0003 -0.0004 -0.0031 0.0032 0.0028 0.0031  
Y -0.0012 0.0013 0.0033 -0.0032 -0.0032 -0.0029  
Z 0.0012 -0.0014 -0.0044 0.0045 0.0041 0.0043

AT. 137 C X -0.0006 -0.0006 -0.0021 0.0020 -0.0018 -0.0021  
Y -0.0019 -0.0020 -0.0034 0.0036 -0.0034 -0.0035  
Z -0.0010 -0.0011 -0.0058 0.0059 -0.0055 -0.0058

AT. 138 C X -0.0006 -0.0006 -0.0021 -0.0020 -0.0018 0.0021  
Y 0.0019 0.0020 0.0034 0.0036 0.0034 -0.0035  
Z -0.0010 -0.0011 -0.0058 -0.0059 -0.0055 0.0058

AT. 139 C X -0.0006 0.0006 0.0021 0.0020 -0.0018 0.0021  
Y -0.0019 0.0020 0.0034 0.0036 -0.0034 0.0035  
Z -0.0010 0.0011 0.0058 0.0059 -0.0055 0.0058

AT. 140 C X -0.0006 0.0006 0.0021 -0.0020 -0.0018 -0.0021  
Y 0.0019 -0.0020 -0.0034 0.0036 0.0034 0.0035  
Z -0.0010 0.0011 0.0058 -0.0059 -0.0055 -0.0058

AT. 141 H X 0.0067 0.0068 0.0029 -0.0025 0.0023 0.0020  
Y -0.0005 -0.0007 -0.0095 0.0094 -0.0090 -0.0086

Z -0.0081 -0.0086 -0.0161 0.0154 -0.0145 -0.0142  
AT. 142 H X 0.0067 0.0068 0.0029 0.0025 0.0023 -0.0020  
Y 0.0005 0.0007 0.0095 0.0094 0.0090 -0.0086  
Z -0.0081 -0.0086 -0.0161 -0.0154 -0.0145 0.0142  
AT. 143 H X 0.0067 -0.0068 -0.0029 -0.0025 0.0023 -0.0020  
Y -0.0005 0.0007 0.0095 0.0094 -0.0090 0.0086  
Z -0.0081 0.0086 0.0161 0.0154 -0.0145 0.0142  
AT. 144 H X 0.0067 -0.0068 -0.0029 0.0025 0.0023 0.0020  
Y 0.0005 -0.0007 -0.0095 0.0094 0.0090 0.0086  
Z -0.0081 0.0086 0.0161 -0.0154 -0.0145 -0.0142  
AT. 145 H X -0.0072 -0.0074 -0.0027 0.0033 -0.0033 -0.0028  
Y 0.0002 0.0002 -0.0029 0.0028 -0.0025 -0.0029  
Z -0.0001 -0.0001 -0.0034 0.0034 -0.0031 -0.0037  
AT. 146 H X -0.0072 -0.0074 -0.0027 -0.0033 -0.0033 0.0028  
Y -0.0002 -0.0002 0.0029 0.0028 0.0025 -0.0029  
Z -0.0001 -0.0001 -0.0034 -0.0034 -0.0031 0.0037  
AT. 147 H X -0.0072 0.0074 0.0027 0.0033 -0.0033 0.0028  
Y 0.0002 -0.0002 0.0029 0.0028 -0.0025 0.0029  
Z -0.0001 0.0001 0.0034 0.0034 -0.0031 0.0037  
AT. 148 H X -0.0072 0.0074 0.0027 -0.0033 -0.0033 -0.0028  
Y -0.0002 0.0002 -0.0029 0.0028 0.0025 0.0029  
Z -0.0001 0.0001 0.0034 -0.0034 -0.0031 -0.0037  
AT. 149 O X 0.0006 0.0008 0.0011 -0.0014 0.0011 0.0011  
Y -0.0006 -0.0006 -0.0006 0.0009 -0.0004 -0.0006  
Z -0.0004 -0.0003 -0.0006 0.0009 -0.0008 -0.0006  
AT. 150 O X 0.0006 0.0008 0.0011 0.0014 0.0011 -0.0011  
Y 0.0006 0.0006 0.0006 0.0009 0.0004 -0.0006  
Z -0.0004 -0.0003 -0.0006 -0.0009 -0.0008 0.0006  
AT. 151 O X 0.0006 -0.0008 -0.0011 -0.0014 0.0011 -0.0011  
Y -0.0006 0.0006 0.0006 0.0009 -0.0004 0.0006  
Z -0.0004 0.0003 0.0006 0.0009 -0.0008 0.0006  
AT. 152 O X 0.0006 -0.0008 -0.0011 0.0014 0.0011 0.0011

Y 0.0006 -0.0006 -0.0006 0.0009 0.0004 0.0006  
Z -0.0004 0.0003 0.0006 -0.0009 -0.0008 -0.0006  
AT. 153 H X 0.0045 0.0036 0.0020 0.0015 -0.0020 0.0021  
Y 0.0015 0.0020 0.0076 -0.0054 0.0056 0.0067  
Z -0.0024 -0.0015 0.0023 -0.0038 0.0039 0.0019  
AT. 154 H X 0.0045 0.0036 0.0020 -0.0015 -0.0020 -0.0021  
Y -0.0015 -0.0020 -0.0076 -0.0054 -0.0056 0.0067  
Z -0.0024 -0.0015 0.0023 0.0038 0.0039 -0.0019  
AT. 155 H X 0.0045 -0.0036 -0.0020 0.0015 -0.0020 -0.0021  
Y 0.0015 -0.0020 -0.0076 -0.0054 0.0056 -0.0067  
Z -0.0024 0.0015 -0.0023 -0.0038 0.0039 -0.0019  
AT. 156 H X 0.0045 -0.0036 -0.0020 -0.0015 -0.0020 0.0021  
Y -0.0015 0.0020 0.0076 -0.0054 -0.0056 -0.0067  
Z -0.0024 0.0015 -0.0023 0.0038 0.0039 0.0019  
AT. 157 O X -0.0010 -0.0012 -0.0013 0.0011 -0.0013 -0.0013  
Y -0.0025 -0.0027 0.0024 -0.0027 0.0026 0.0023  
Z -0.0055 -0.0058 0.0108 -0.0113 0.0116 0.0106  
AT. 158 O X -0.0010 -0.0012 -0.0013 -0.0011 -0.0013 0.0013  
Y 0.0025 0.0027 -0.0024 -0.0027 -0.0026 0.0023  
Z -0.0055 -0.0058 0.0108 0.0113 0.0116 -0.0106  
AT. 159 O X -0.0010 0.0012 0.0013 0.0011 -0.0013 0.0013  
Y -0.0025 0.0027 -0.0024 -0.0027 0.0026 -0.0023  
Z -0.0055 0.0058 -0.0108 -0.0113 0.0116 -0.0106  
AT. 160 O X -0.0010 0.0012 0.0013 -0.0011 -0.0013 -0.0013  
Y 0.0025 -0.0027 0.0024 -0.0027 -0.0026 -0.0023  
Z -0.0055 0.0058 -0.0108 0.0113 0.0116 0.0106  
AT. 161 O X 0.0033 0.0037 -0.0032 0.0036 -0.0035 -0.0031  
Y 0.0035 0.0038 -0.0034 0.0037 -0.0038 -0.0033  
Z 0.0051 0.0055 -0.0066 0.0071 -0.0071 -0.0065  
AT. 162 O X 0.0033 0.0037 -0.0032 -0.0036 -0.0035 0.0031  
Y -0.0035 -0.0038 0.0034 0.0037 0.0038 -0.0033  
Z 0.0051 0.0055 -0.0066 -0.0071 -0.0071 0.0065

AT.163 O X 0.0033 -0.0037 0.0032 0.0036 -0.0035 0.0031  
Y 0.0035 -0.0038 0.0034 0.0037 -0.0038 0.0033  
Z 0.0051 -0.0055 0.0066 0.0071 -0.0071 0.0065

AT.164 O X 0.0033 -0.0037 0.0032 -0.0036 -0.0035 -0.0031  
Y -0.0035 0.0038 -0.0034 0.0037 0.0038 0.0033  
Z 0.0051 -0.0055 0.0066 -0.0071 -0.0071 -0.0065

AT.165 H X -0.0014 -0.0013 0.0029 -0.0026 0.0026 0.0028  
Y 0.0015 0.0018 -0.0015 0.0018 -0.0018 -0.0015  
Z 0.0016 0.0016 -0.0047 0.0040 -0.0048 -0.0040

AT.166 H X -0.0014 -0.0013 0.0029 0.0026 0.0026 -0.0028  
Y -0.0015 -0.0018 0.0015 0.0018 0.0018 -0.0015  
Z 0.0016 0.0016 -0.0047 -0.0040 -0.0048 0.0040

AT.167 H X -0.0014 0.0013 -0.0029 -0.0026 0.0026 -0.0028  
Y 0.0015 -0.0018 0.0015 0.0018 -0.0018 0.0015  
Z 0.0016 -0.0016 0.0047 0.0040 -0.0048 0.0040

AT.168 H X -0.0014 0.0013 -0.0029 0.0026 0.0026 0.0028  
Y -0.0015 0.0018 -0.0015 0.0018 0.0018 0.0015  
Z 0.0016 -0.0016 0.0047 -0.0040 -0.0048 -0.0040

AT.169 O X -0.0005 -0.0002 -0.0007 -0.0003 0.0003 -0.0007  
Y 0.0002 -0.0001 0.0003 -0.0002 0.0002 0.0003  
Z 0.0001 0.0002 -0.0002 0.0001 -0.0001 -0.0003

AT.170 O X -0.0005 -0.0002 -0.0007 0.0003 0.0003 0.0007  
Y -0.0002 0.0001 -0.0003 -0.0002 -0.0002 0.0003  
Z 0.0001 0.0002 -0.0002 -0.0001 -0.0001 0.0003

AT.171 O X -0.0005 0.0002 0.0007 -0.0003 0.0003 0.0007  
Y 0.0002 0.0001 -0.0003 -0.0002 0.0002 -0.0003  
Z 0.0001 -0.0002 0.0002 0.0001 -0.0001 0.0003

AT.172 O X -0.0005 0.0002 0.0007 0.0003 0.0003 -0.0007  
Y -0.0002 -0.0001 0.0003 -0.0002 -0.0002 -0.0003  
Z 0.0001 -0.0002 0.0002 -0.0001 -0.0001 -0.0003

AT.173 H X 0.0091 0.0071 0.0182 0.0049 -0.0054 0.0165  
Y -0.0020 -0.0013 -0.0039 -0.0007 0.0009 -0.0036



Z -0.0026 -0.0021 -0.0059 -0.0013 0.0016 -0.0055  
 AT.174 H X 0.0091 0.0071 0.0182 -0.0049 -0.0054 -0.0165  
 Y 0.0020 0.0013 0.0039 -0.0007 -0.0009 -0.0036  
 Z -0.0026 -0.0021 -0.0059 0.0013 0.0016 0.0055  
 AT.175 H X 0.0091 -0.0071 -0.0182 0.0049 -0.0054 -0.0165  
 Y -0.0020 0.0013 0.0039 -0.0007 0.0009 0.0036  
 Z -0.0026 0.0021 0.0059 -0.0013 0.0016 0.0055  
 AT.176 H X 0.0091 -0.0071 -0.0182 -0.0049 -0.0054 0.0165  
 Y 0.0020 -0.0013 -0.0039 -0.0007 -0.0009 0.0036  
 Z -0.0026 0.0021 0.0059 0.0013 0.0016 -0.0055

FREQ(CM\*\*-1) 1010.58 1010.78 1013.43 1013.63 1017.03 1017.06

AT. 1 I X -0.0000 -0.0000 -0.0000 -0.0000 0.0000 -0.0000  
 Y 0.0000 0.0000 0.0000 0.0000 -0.0000 0.0000  
 Z 0.0000 0.0000 0.0000 0.0000 -0.0000 0.0000  
 AT. 2 I X 0.0000 0.0000 -0.0000 -0.0000 0.0000 0.0000  
 Y 0.0000 0.0000 -0.0000 -0.0000 0.0000 0.0000  
 Z -0.0000 -0.0000 0.0000 0.0000 -0.0000 -0.0000  
 AT. 3 I X -0.0000 0.0000 0.0000 -0.0000 -0.0000 0.0000  
 Y 0.0000 -0.0000 -0.0000 0.0000 0.0000 -0.0000  
 Z 0.0000 -0.0000 -0.0000 0.0000 0.0000 -0.0000  
 AT. 4 I X 0.0000 -0.0000 0.0000 -0.0000 -0.0000 -0.0000  
 Y 0.0000 -0.0000 0.0000 -0.0000 -0.0000 -0.0000  
 Z -0.0000 0.0000 -0.0000 0.0000 0.0000 0.0000  
 AT. 5 I X 0.0001 0.0001 0.0000 0.0001 0.0000 0.0000  
 Y -0.0000 -0.0000 -0.0000 -0.0000 -0.0000 -0.0000  
 Z -0.0000 -0.0000 -0.0000 -0.0000 -0.0000 0.0000  
 AT. 6 I X -0.0001 -0.0001 0.0000 0.0001 0.0000 -0.0000  
 Y -0.0000 -0.0000 0.0000 0.0000 0.0000 -0.0000  
 Z 0.0000 0.0000 -0.0000 -0.0000 -0.0000 -0.0000  
 AT. 7 I X 0.0001 -0.0001 -0.0000 0.0001 -0.0000 -0.0000

Y -0.0000 0.0000 0.0000 -0.0000 0.0000 0.0000  
Z -0.0000 0.0000 0.0000 -0.0000 0.0000 -0.0000  
AT. 8 I X -0.0001 0.0001 -0.0000 0.0001 -0.0000 0.0000  
Y -0.0000 0.0000 -0.0000 0.0000 -0.0000 0.0000  
Z 0.0000 -0.0000 0.0000 -0.0000 0.0000 0.0000  
AT. 9 N X -0.0033 -0.0037 -0.0036 -0.0039 -0.0005 -0.0004  
Y -0.0041 -0.0048 -0.0045 -0.0051 -0.0009 -0.0008  
Z 0.0001 0.0005 0.0004 0.0007 0.0001 -0.0000  
AT. 10 N X 0.0033 0.0037 -0.0036 -0.0039 -0.0005 0.0004  
Y -0.0041 -0.0048 0.0045 0.0051 0.0009 -0.0008  
Z -0.0001 -0.0005 0.0004 0.0007 0.0001 0.0000  
AT. 11 N X -0.0033 0.0037 0.0036 -0.0039 0.0005 0.0004  
Y -0.0041 0.0048 0.0045 -0.0051 0.0009 0.0008  
Z 0.0001 -0.0005 -0.0004 0.0007 -0.0001 0.0000  
AT. 12 N X 0.0033 -0.0037 0.0036 -0.0039 0.0005 -0.0004  
Y -0.0041 0.0048 -0.0045 0.0051 -0.0009 0.0008  
Z -0.0001 0.0005 -0.0004 0.0007 -0.0001 -0.0000  
AT. 13 N X 0.0025 0.0026 0.0028 0.0028 0.0001 0.0000  
Y -0.0066 -0.0071 -0.0063 -0.0069 -0.0003 -0.0000  
Z -0.0009 -0.0011 -0.0009 -0.0011 0.0001 0.0001  
AT. 14 N X -0.0025 -0.0026 0.0028 0.0028 0.0001 -0.0000  
Y -0.0066 -0.0071 0.0063 0.0069 0.0003 -0.0000  
Z 0.0009 0.0011 -0.0009 -0.0011 0.0001 -0.0001  
AT. 15 N X 0.0025 -0.0026 -0.0028 0.0028 -0.0001 -0.0000  
Y -0.0066 0.0071 0.0063 -0.0069 0.0003 0.0000  
Z -0.0009 0.0011 0.0009 -0.0011 -0.0001 -0.0001  
AT. 16 N X -0.0025 0.0026 -0.0028 0.0028 -0.0001 0.0000  
Y -0.0066 0.0071 -0.0063 0.0069 -0.0003 0.0000  
Z 0.0009 -0.0011 0.0009 -0.0011 -0.0001 0.0001  
AT. 17 O X 0.0012 0.0014 0.0013 0.0014 0.0002 0.0002  
Y 0.0029 0.0033 0.0031 0.0033 -0.0000 -0.0002  
Z 0.0029 0.0031 0.0030 0.0032 0.0003 0.0000

AT. 18 O X -0.0012 -0.0014 0.0013 0.0014 0.0002 -0.0002  
Y 0.0029 0.0033 -0.0031 -0.0033 0.0000 -0.0002  
Z -0.0029 -0.0031 0.0030 0.0032 0.0003 -0.0000

AT. 19 O X 0.0012 -0.0014 -0.0013 0.0014 -0.0002 -0.0002  
Y 0.0029 -0.0033 -0.0031 0.0033 0.0000 0.0002  
Z 0.0029 -0.0031 -0.0030 0.0032 -0.0003 -0.0000

AT. 20 O X -0.0012 0.0014 -0.0013 0.0014 -0.0002 0.0002  
Y 0.0029 -0.0033 0.0031 -0.0033 -0.0000 0.0002  
Z -0.0029 0.0031 -0.0030 0.0032 -0.0003 0.0000

AT. 21 O X 0.0001 0.0001 0.0003 0.0004 0.0000 0.0000  
Y 0.0028 0.0030 0.0029 0.0031 0.0002 0.0001  
Z -0.0022 -0.0023 -0.0025 -0.0027 -0.0001 -0.0000

AT. 22 O X -0.0001 -0.0001 0.0003 0.0004 0.0000 -0.0000  
Y 0.0028 0.0030 -0.0029 -0.0031 -0.0002 0.0001  
Z 0.0022 0.0023 -0.0025 -0.0027 -0.0001 0.0000

AT. 23 O X 0.0001 -0.0001 -0.0003 0.0004 -0.0000 -0.0000  
Y 0.0028 -0.0030 -0.0029 0.0031 -0.0002 -0.0001  
Z -0.0022 0.0023 0.0025 -0.0027 0.0001 0.0000

AT. 24 O X -0.0001 0.0001 -0.0003 0.0004 -0.0000 0.0000  
Y 0.0028 -0.0030 0.0029 -0.0031 0.0002 -0.0001  
Z 0.0022 -0.0023 0.0025 -0.0027 0.0001 -0.0000

AT. 25 C X -0.0006 -0.0005 -0.0005 -0.0004 -0.0001 0.0001  
Y 0.0027 0.0031 0.0029 0.0033 0.0003 0.0004  
Z -0.0039 -0.0044 -0.0041 -0.0046 -0.0009 -0.0004

AT. 26 C X 0.0006 0.0005 -0.0005 -0.0004 -0.0001 -0.0001  
Y 0.0027 0.0031 -0.0029 -0.0033 -0.0003 0.0004  
Z 0.0039 0.0044 -0.0041 -0.0046 -0.0009 0.0004

AT. 27 C X -0.0006 0.0005 0.0005 -0.0004 0.0001 -0.0001  
Y 0.0027 -0.0031 -0.0029 0.0033 -0.0003 -0.0004  
Z -0.0039 0.0044 0.0041 -0.0046 0.0009 0.0004

AT. 28 C X 0.0006 -0.0005 0.0005 -0.0004 0.0001 0.0001  
Y 0.0027 -0.0031 0.0029 -0.0033 0.0003 -0.0004

Z 0.0039 -0.0044 0.0041 -0.0046 0.0009 -0.0004  
AT. 29 H X 0.0017 0.0022 0.0026 0.0029 0.0007 0.0013  
Y 0.0044 0.0046 0.0044 0.0048 0.0006 -0.0008  
Z -0.0079 -0.0091 -0.0094 -0.0103 -0.0022 -0.0020  
AT. 30 H X -0.0017 -0.0022 0.0026 0.0029 0.0007 -0.0013  
Y 0.0044 0.0046 -0.0044 -0.0048 -0.0006 -0.0008  
Z 0.0079 0.0091 -0.0094 -0.0103 -0.0022 0.0020  
AT. 31 H X 0.0017 -0.0022 -0.0026 0.0029 -0.0007 -0.0013  
Y 0.0044 -0.0046 -0.0044 0.0048 -0.0006 0.0008  
Z -0.0079 0.0091 0.0094 -0.0103 0.0022 0.0020  
AT. 32 H X -0.0017 0.0022 -0.0026 0.0029 -0.0007 0.0013  
Y 0.0044 -0.0046 0.0044 -0.0048 0.0006 0.0008  
Z 0.0079 -0.0091 0.0094 -0.0103 0.0022 -0.0020  
AT. 33 H X 0.0020 0.0016 0.0011 0.0008 -0.0002 -0.0005  
Y 0.0025 0.0031 0.0028 0.0034 0.0001 0.0006  
Z -0.0043 -0.0051 -0.0039 -0.0048 0.0004 -0.0004  
AT. 34 H X -0.0020 -0.0016 0.0011 0.0008 -0.0002 0.0005  
Y 0.0025 0.0031 -0.0028 -0.0034 -0.0001 0.0006  
Z 0.0043 0.0051 -0.0039 -0.0048 0.0004 0.0004  
AT. 35 H X 0.0020 -0.0016 -0.0011 0.0008 0.0002 0.0005  
Y 0.0025 -0.0031 -0.0028 0.0034 -0.0001 -0.0006  
Z -0.0043 0.0051 0.0039 -0.0048 -0.0004 0.0004  
AT. 36 H X -0.0020 0.0016 -0.0011 0.0008 0.0002 -0.0005  
Y 0.0025 -0.0031 0.0028 -0.0034 0.0001 -0.0006  
Z 0.0043 -0.0051 0.0039 -0.0048 -0.0004 -0.0004  
AT. 37 C X 0.0010 0.0012 0.0011 0.0012 0.0004 0.0003  
Y -0.0028 -0.0031 -0.0032 -0.0035 -0.0001 -0.0000  
Z 0.0031 0.0036 0.0034 0.0038 0.0008 0.0007  
AT. 38 C X -0.0010 -0.0012 0.0011 0.0012 0.0004 -0.0003  
Y -0.0028 -0.0031 0.0032 0.0035 0.0001 -0.0000  
Z -0.0031 -0.0036 0.0034 0.0038 0.0008 -0.0007  
AT. 39 C X 0.0010 -0.0012 -0.0011 0.0012 -0.0004 -0.0003

Y -0.0028 0.0031 0.0032 -0.0035 0.0001 0.0000  
Z 0.0031 -0.0036 -0.0034 0.0038 -0.0008 -0.0007  
AT. 40 C X -0.0010 0.0012 -0.0011 0.0012 -0.0004 0.0003  
Y -0.0028 0.0031 -0.0032 0.0035 -0.0001 0.0000  
Z -0.0031 0.0036 -0.0034 0.0038 -0.0008 0.0007  
AT. 41 C X -0.0036 -0.0029 -0.0036 -0.0027 0.0004 0.0008  
Y -0.0074 -0.0077 -0.0068 -0.0071 -0.0000 0.0002  
Z -0.0001 0.0006 -0.0004 0.0004 0.0010 0.0013  
AT. 42 C X 0.0036 0.0029 -0.0036 -0.0027 0.0004 -0.0008  
Y -0.0074 -0.0077 0.0068 0.0071 0.0000 0.0002  
Z 0.0001 -0.0006 -0.0004 0.0004 0.0010 -0.0013  
AT. 43 C X -0.0036 0.0029 0.0036 -0.0027 -0.0004 -0.0008  
Y -0.0074 0.0077 0.0068 -0.0071 0.0000 -0.0002  
Z -0.0001 -0.0006 0.0004 0.0004 -0.0010 -0.0013  
AT. 44 C X 0.0036 -0.0029 0.0036 -0.0027 -0.0004 0.0008  
Y -0.0074 0.0077 -0.0068 0.0071 -0.0000 -0.0002  
Z 0.0001 0.0006 0.0004 0.0004 -0.0010 0.0013  
AT. 45 H X -0.0148 -0.0154 -0.0124 -0.0136 0.0003 0.0003  
Y -0.0036 -0.0024 -0.0034 -0.0021 0.0012 0.0016  
Z 0.0046 0.0068 0.0036 0.0062 0.0021 0.0027  
AT. 46 H X 0.0148 0.0154 -0.0124 -0.0136 0.0003 -0.0003  
Y -0.0036 -0.0024 0.0034 0.0021 -0.0012 0.0016  
Z -0.0046 -0.0068 0.0036 0.0062 0.0021 -0.0027  
AT. 47 H X -0.0148 0.0154 0.0124 -0.0136 -0.0003 -0.0003  
Y -0.0036 0.0024 0.0034 -0.0021 -0.0012 -0.0016  
Z 0.0046 -0.0068 -0.0036 0.0062 -0.0021 -0.0027  
AT. 48 H X 0.0148 -0.0154 0.0124 -0.0136 -0.0003 0.0003  
Y -0.0036 0.0024 -0.0034 0.0021 0.0012 -0.0016  
Z -0.0046 0.0068 -0.0036 0.0062 -0.0021 0.0027  
AT. 49 H X -0.0055 -0.0045 -0.0064 -0.0047 -0.0001 0.0006  
Y -0.0053 -0.0043 -0.0060 -0.0045 0.0002 0.0006  
Z -0.0108 -0.0123 -0.0096 -0.0114 -0.0006 -0.0005

AT. 50 H X 0.0055 0.0045 -0.0064 -0.0047 -0.0001 -0.0006  
Y -0.0053 -0.0043 0.0060 0.0045 -0.0002 0.0006  
Z 0.0108 0.0123 -0.0096 -0.0114 -0.0006 0.0005

AT. 51 H X -0.0055 0.0045 0.0064 -0.0047 0.0001 -0.0006  
Y -0.0053 0.0043 0.0060 -0.0045 -0.0002 -0.0006  
Z -0.0108 0.0123 0.0096 -0.0114 0.0006 0.0005

AT. 52 H X 0.0055 -0.0045 0.0064 -0.0047 0.0001 0.0006  
Y -0.0053 0.0043 -0.0060 0.0045 0.0002 -0.0006  
Z 0.0108 -0.0123 0.0096 -0.0114 0.0006 -0.0005

AT. 53 C X 0.0088 0.0083 0.0088 0.0083 -0.0002 -0.0007  
Y 0.0013 0.0016 0.0015 0.0018 0.0003 0.0004  
Z -0.0045 -0.0045 -0.0045 -0.0045 0.0000 0.0003

AT. 54 C X -0.0088 -0.0083 0.0088 0.0083 -0.0002 0.0007  
Y 0.0013 0.0016 -0.0015 -0.0018 -0.0003 0.0004  
Z 0.0045 0.0045 -0.0045 -0.0045 0.0000 -0.0003

AT. 55 C X 0.0088 -0.0083 -0.0088 0.0083 0.0002 0.0007  
Y 0.0013 -0.0016 -0.0015 0.0018 -0.0003 -0.0004  
Z -0.0045 0.0045 0.0045 -0.0045 -0.0000 -0.0003

AT. 56 C X -0.0088 0.0083 -0.0088 0.0083 0.0002 -0.0007  
Y 0.0013 -0.0016 0.0015 -0.0018 0.0003 -0.0004  
Z 0.0045 -0.0045 0.0045 -0.0045 -0.0000 0.0003

AT. 57 C X 0.0132 0.0124 0.0131 0.0123 -0.0004 -0.0011  
Y 0.0053 0.0054 0.0051 0.0053 -0.0004 -0.0005  
Z -0.0039 -0.0041 -0.0036 -0.0038 0.0000 0.0001

AT. 58 C X -0.0132 -0.0124 0.0131 0.0123 -0.0004 0.0011  
Y 0.0053 0.0054 -0.0051 -0.0053 0.0004 -0.0005  
Z 0.0039 0.0041 -0.0036 -0.0038 0.0000 -0.0001

AT. 59 C X 0.0132 -0.0124 -0.0131 0.0123 0.0004 0.0011  
Y 0.0053 -0.0054 -0.0051 0.0053 0.0004 0.0005  
Z -0.0039 0.0041 0.0036 -0.0038 -0.0000 -0.0001

AT. 60 C X -0.0132 0.0124 -0.0131 0.0123 0.0004 -0.0011  
Y 0.0053 -0.0054 0.0051 -0.0053 -0.0004 0.0005

Z 0.0039 -0.0041 0.0036 -0.0038 -0.0000 0.0001  
AT. 61 H X -0.0290 -0.0272 -0.0284 -0.0264 0.0007 0.0022  
Y -0.0248 -0.0233 -0.0243 -0.0227 0.0005 0.0018  
Z -0.0087 -0.0063 -0.0092 -0.0062 -0.0008 0.0008  
AT. 62 H X 0.0290 0.0272 -0.0284 -0.0264 0.0007 -0.0022  
Y -0.0248 -0.0233 0.0243 0.0227 -0.0005 0.0018  
Z 0.0087 0.0063 -0.0092 -0.0062 -0.0008 -0.0008  
AT. 63 H X -0.0290 0.0272 0.0284 -0.0264 -0.0007 -0.0022  
Y -0.0248 0.0233 0.0243 -0.0227 -0.0005 -0.0018  
Z -0.0087 0.0063 0.0092 -0.0062 0.0008 -0.0008  
AT. 64 H X 0.0290 -0.0272 0.0284 -0.0264 -0.0007 0.0022  
Y -0.0248 0.0233 -0.0243 0.0227 0.0005 -0.0018  
Z 0.0087 -0.0063 0.0092 -0.0062 0.0008 0.0008  
AT. 65 H X 0.0069 0.0068 0.0068 0.0068 -0.0003 -0.0006  
Y 0.0231 0.0211 0.0227 0.0205 -0.0005 -0.0021  
Z 0.0730 0.0707 0.0711 0.0690 -0.0022 -0.0061  
AT. 66 H X -0.0069 -0.0068 0.0068 0.0068 -0.0003 0.0006  
Y 0.0231 0.0211 -0.0227 -0.0205 0.0005 -0.0021  
Z -0.0730 -0.0707 0.0711 0.0690 -0.0022 0.0061  
AT. 67 H X 0.0069 -0.0068 -0.0068 0.0068 0.0003 0.0006  
Y 0.0231 -0.0211 -0.0227 0.0205 0.0005 0.0021  
Z 0.0730 -0.0707 -0.0711 0.0690 0.0022 0.0061  
AT. 68 H X -0.0069 0.0068 -0.0068 0.0068 0.0003 -0.0006  
Y 0.0231 -0.0211 0.0227 -0.0205 -0.0005 0.0021  
Z -0.0730 0.0707 -0.0711 0.0690 0.0022 -0.0061  
AT. 69 H X -0.0315 -0.0301 -0.0319 -0.0305 0.0010 0.0024  
Y -0.0227 -0.0233 -0.0223 -0.0232 0.0012 0.0017  
Z -0.0347 -0.0350 -0.0339 -0.0346 0.0016 0.0025  
AT. 70 H X 0.0315 0.0301 -0.0319 -0.0305 0.0010 -0.0024  
Y -0.0227 -0.0233 0.0223 0.0232 -0.0012 0.0017  
Z 0.0347 0.0350 -0.0339 -0.0346 0.0016 -0.0025  
AT. 71 H X -0.0315 0.0301 0.0319 -0.0305 -0.0010 -0.0024

Y -0.0227 0.0233 0.0223 -0.0232 -0.0012 -0.0017  
Z -0.0347 0.0350 0.0339 -0.0346 -0.0016 -0.0025  
AT. 72 H X 0.0315 -0.0301 0.0319 -0.0305 -0.0010 0.0024  
Y -0.0227 0.0233 -0.0223 0.0232 0.0012 -0.0017  
Z 0.0347 -0.0350 0.0339 -0.0346 -0.0016 0.0025  
AT. 73 C X -0.0002 0.0001 -0.0003 -0.0004 0.0006 0.0009  
Y -0.0017 -0.0015 -0.0025 -0.0025 0.0026 0.0030  
Z -0.0052 -0.0049 -0.0053 -0.0051 0.0001 0.0005  
AT. 74 C X 0.0002 -0.0001 -0.0003 -0.0004 0.0006 -0.0009  
Y -0.0017 -0.0015 0.0025 0.0025 -0.0026 0.0030  
Z 0.0052 0.0049 -0.0053 -0.0051 0.0001 -0.0005  
AT. 75 C X -0.0002 -0.0001 0.0003 -0.0004 -0.0006 -0.0009  
Y -0.0017 0.0015 0.0025 -0.0025 -0.0026 -0.0030  
Z -0.0052 0.0049 0.0053 -0.0051 -0.0001 -0.0005  
AT. 76 C X 0.0002 0.0001 0.0003 -0.0004 -0.0006 0.0009  
Y -0.0017 0.0015 -0.0025 0.0025 0.0026 -0.0030  
Z 0.0052 -0.0049 0.0053 -0.0051 -0.0001 0.0005  
AT. 77 C X -0.0005 -0.0003 0.0001 0.0000 0.0001 0.0002  
Y 0.0016 0.0013 0.0014 0.0011 0.0003 0.0002  
Z 0.0003 -0.0010 0.0001 -0.0013 -0.0015 -0.0016  
AT. 78 C X 0.0005 0.0003 0.0001 0.0000 0.0001 -0.0002  
Y 0.0016 0.0013 -0.0014 -0.0011 -0.0003 0.0002  
Z -0.0003 0.0010 0.0001 -0.0013 -0.0015 0.0016  
AT. 79 C X -0.0005 0.0003 -0.0001 0.0000 -0.0001 -0.0002  
Y 0.0016 -0.0013 -0.0014 0.0011 -0.0003 -0.0002  
Z 0.0003 0.0010 -0.0001 -0.0013 0.0015 0.0016  
AT. 80 C X 0.0005 -0.0003 -0.0001 0.0000 -0.0001 0.0002  
Y 0.0016 -0.0013 0.0014 -0.0011 0.0003 -0.0002  
Z -0.0003 -0.0010 -0.0001 -0.0013 0.0015 -0.0016  
AT. 81 H X -0.0044 -0.0028 -0.0034 -0.0020 0.0005 0.0011  
Y -0.0029 -0.0019 -0.0029 -0.0017 0.0004 0.0009  
Z -0.0018 -0.0004 -0.0003 0.0009 0.0009 0.0008



AT. 82 H X 0.0044 0.0028 -0.0034 -0.0020 0.0005 -0.0011  
Y -0.0029 -0.0019 0.0029 0.0017 -0.0004 0.0009  
Z 0.0018 0.0004 -0.0003 0.0009 0.0009 -0.0008

AT. 83 H X -0.0044 0.0028 0.0034 -0.0020 -0.0005 -0.0011  
Y -0.0029 0.0019 0.0029 -0.0017 -0.0004 -0.0009  
Z -0.0018 0.0004 0.0003 0.0009 -0.0009 -0.0008

AT. 84 H X 0.0044 -0.0028 0.0034 -0.0020 -0.0005 0.0011  
Y -0.0029 0.0019 -0.0029 0.0017 0.0004 -0.0009  
Z 0.0018 -0.0004 0.0003 0.0009 -0.0009 0.0008

AT. 85 H X 0.0073 0.0050 0.0069 0.0046 -0.0003 -0.0009  
Y 0.0026 0.0042 0.0034 0.0045 0.0027 0.0030  
Z -0.0026 -0.0048 -0.0033 -0.0053 -0.0034 -0.0036

AT. 86 H X -0.0073 -0.0050 0.0069 0.0046 -0.0003 0.0009  
Y 0.0026 0.0042 -0.0034 -0.0045 -0.0027 0.0030  
Z 0.0026 0.0048 -0.0033 -0.0053 -0.0034 0.0036

AT. 87 H X 0.0073 -0.0050 -0.0069 0.0046 0.0003 0.0009  
Y 0.0026 -0.0042 -0.0034 0.0045 -0.0027 -0.0030  
Z -0.0026 0.0048 0.0033 -0.0053 0.0034 0.0036

AT. 88 H X -0.0073 0.0050 -0.0069 0.0046 0.0003 -0.0009  
Y 0.0026 -0.0042 0.0034 -0.0045 0.0027 -0.0030  
Z 0.0026 -0.0048 0.0033 -0.0053 0.0034 -0.0036

AT. 89 C X 0.0022 0.0025 0.0024 0.0027 -0.0005 -0.0007  
Y 0.0025 0.0026 0.0025 0.0029 0.0005 0.0003  
Z -0.0020 -0.0018 -0.0018 -0.0015 -0.0001 0.0000

AT. 90 C X -0.0022 -0.0025 0.0024 0.0027 -0.0005 0.0007  
Y 0.0025 0.0026 -0.0025 -0.0029 -0.0005 0.0003  
Z 0.0020 0.0018 -0.0018 -0.0015 -0.0001 -0.0000

AT. 91 C X 0.0022 -0.0025 -0.0024 0.0027 0.0005 0.0007  
Y 0.0025 -0.0026 -0.0025 0.0029 -0.0005 -0.0003  
Z -0.0020 0.0018 0.0018 -0.0015 0.0001 -0.0000

AT. 92 C X -0.0022 0.0025 -0.0024 0.0027 0.0005 -0.0007  
Y 0.0025 -0.0026 0.0025 -0.0029 0.0005 -0.0003

Z 0.0020 -0.0018 0.0018 -0.0015 0.0001 0.0000  
AT. 93 C X 0.0036 0.0036 0.0043 0.0043 -0.0015 -0.0020  
Y -0.0006 -0.0002 0.0007 0.0012 -0.0010 -0.0012  
Z 0.0024 0.0024 0.0028 0.0030 -0.0000 -0.0003  
AT. 94 C X -0.0036 -0.0036 0.0043 0.0043 -0.0015 0.0020  
Y -0.0006 -0.0002 -0.0007 -0.0012 0.0010 -0.0012  
Z -0.0024 -0.0024 0.0028 0.0030 -0.0000 0.0003  
AT. 95 C X 0.0036 -0.0036 -0.0043 0.0043 0.0015 0.0020  
Y -0.0006 0.0002 -0.0007 0.0012 0.0010 0.0012  
Z 0.0024 -0.0024 -0.0028 0.0030 0.0000 0.0003  
AT. 96 C X -0.0036 0.0036 -0.0043 0.0043 0.0015 -0.0020  
Y -0.0006 0.0002 0.0007 -0.0012 -0.0010 0.0012  
Z -0.0024 0.0024 -0.0028 0.0030 0.0000 -0.0003  
AT. 97 H X -0.0043 -0.0043 -0.0052 -0.0053 0.0023 0.0030  
Y 0.0061 0.0059 0.0071 0.0068 -0.0038 -0.0047  
Z -0.0116 -0.0129 -0.0171 -0.0189 0.0076 0.0098  
AT. 98 H X 0.0043 0.0043 -0.0052 -0.0053 0.0023 -0.0030  
Y 0.0061 0.0059 -0.0071 -0.0068 0.0038 -0.0047  
Z 0.0116 0.0129 -0.0171 -0.0189 0.0076 -0.0098  
AT. 99 H X -0.0043 0.0043 0.0052 -0.0053 -0.0023 -0.0030  
Y 0.0061 -0.0059 -0.0071 0.0068 0.0038 0.0047  
Z -0.0116 0.0129 0.0171 -0.0189 -0.0076 -0.0098  
AT. 100 H X 0.0043 -0.0043 0.0052 -0.0053 -0.0023 0.0030  
Y 0.0061 -0.0059 0.0071 -0.0068 -0.0038 0.0047  
Z 0.0116 -0.0129 0.0171 -0.0189 -0.0076 0.0098  
AT. 101 H X -0.0034 -0.0041 -0.0052 -0.0060 0.0023 0.0030  
Y -0.0092 -0.0094 -0.0101 -0.0102 0.0032 0.0044  
Z 0.0083 0.0073 0.0057 0.0038 -0.0008 -0.0013  
AT. 102 H X 0.0034 0.0041 -0.0052 -0.0060 0.0023 -0.0030  
Y -0.0092 -0.0094 0.0101 0.0102 -0.0032 0.0044  
Z -0.0083 -0.0073 0.0057 0.0038 -0.0008 0.0013  
AT. 103 H X -0.0034 0.0041 0.0052 -0.0060 -0.0023 -0.0030

Y -0.0092 0.0094 0.0101 -0.0102 -0.0032 -0.0044  
Z 0.0083 -0.0073 -0.0057 0.0038 0.0008 0.0013  
AT. 104 H X 0.0034 -0.0041 0.0052 -0.0060 -0.0023 0.0030  
Y -0.0092 0.0094 -0.0101 0.0102 0.0032 -0.0044  
Z -0.0083 0.0073 -0.0057 0.0038 0.0008 -0.0013  
AT. 105 H X -0.0037 -0.0038 -0.0038 -0.0035 0.0023 0.0028  
Y -0.0074 -0.0085 -0.0119 -0.0141 0.0026 0.0041  
Z 0.0101 0.0113 0.0150 0.0172 -0.0041 -0.0058  
AT. 106 H X 0.0037 0.0038 -0.0038 -0.0035 0.0023 -0.0028  
Y -0.0074 -0.0085 0.0119 0.0141 -0.0026 0.0041  
Z -0.0101 -0.0113 0.0150 0.0172 -0.0041 0.0058  
AT. 107 H X -0.0037 0.0038 0.0038 -0.0035 -0.0023 -0.0028  
Y -0.0074 0.0085 0.0119 -0.0141 -0.0026 -0.0041  
Z 0.0101 -0.0113 -0.0150 0.0172 0.0041 0.0058  
AT. 108 H X 0.0037 -0.0038 0.0038 -0.0035 -0.0023 0.0028  
Y -0.0074 0.0085 -0.0119 0.0141 0.0026 -0.0041  
Z -0.0101 0.0113 -0.0150 0.0172 0.0041 -0.0058  
AT. 109 C X -0.0089 -0.0087 -0.0088 -0.0085 0.0001 0.0004  
Y -0.0021 -0.0019 -0.0022 -0.0021 -0.0004 -0.0004  
Z 0.0149 0.0152 0.0151 0.0152 0.0002 -0.0005  
AT. 110 C X 0.0089 0.0087 -0.0088 -0.0085 0.0001 -0.0004  
Y -0.0021 -0.0019 0.0022 0.0021 0.0004 -0.0004  
Z -0.0149 -0.0152 0.0151 0.0152 0.0002 0.0005  
AT. 111 C X -0.0089 0.0087 0.0088 -0.0085 -0.0001 -0.0004  
Y -0.0021 0.0019 0.0022 -0.0021 0.0004 0.0004  
Z 0.0149 -0.0152 -0.0151 0.0152 -0.0002 0.0005  
AT. 112 C X 0.0089 -0.0087 0.0088 -0.0085 -0.0001 0.0004  
Y -0.0021 0.0019 -0.0022 0.0021 -0.0004 0.0004  
Z -0.0149 0.0152 -0.0151 0.0152 -0.0002 -0.0005  
AT. 113 H X -0.0284 -0.0279 -0.0285 -0.0279 -0.0001 0.0010  
Y 0.0240 0.0236 0.0243 0.0237 -0.0002 -0.0014  
Z -0.0179 -0.0177 -0.0177 -0.0175 -0.0007 -0.0004

AT. 114 H X 0.0284 0.0279 -0.0285 -0.0279 -0.0001 -0.0010  
Y 0.0240 0.0236 -0.0243 -0.0237 0.0002 -0.0014  
Z 0.0179 0.0177 -0.0177 -0.0175 -0.0007 0.0004

AT. 115 H X -0.0284 0.0279 0.0285 -0.0279 0.0001 -0.0010  
Y 0.0240 -0.0236 -0.0243 0.0237 0.0002 0.0014  
Z -0.0179 0.0177 0.0177 -0.0175 0.0007 0.0004

AT. 116 H X 0.0284 -0.0279 0.0285 -0.0279 0.0001 0.0010  
Y 0.0240 -0.0236 0.0243 -0.0237 -0.0002 0.0014  
Z 0.0179 -0.0177 0.0177 -0.0175 0.0007 -0.0004

AT. 117 H X 0.0305 0.0302 0.0309 0.0306 0.0012 0.0002  
Y 0.0187 0.0191 0.0180 0.0184 -0.0001 -0.0011  
Z 0.0275 0.0280 0.0270 0.0274 0.0003 -0.0011

AT. 118 H X -0.0305 -0.0302 0.0309 0.0306 0.0012 -0.0002  
Y 0.0187 0.0191 -0.0180 -0.0184 0.0001 -0.0011  
Z -0.0275 -0.0280 0.0270 0.0274 0.0003 0.0011

AT. 119 H X 0.0305 -0.0302 -0.0309 0.0306 -0.0012 -0.0002  
Y 0.0187 -0.0191 -0.0180 0.0184 0.0001 0.0011  
Z 0.0275 -0.0280 -0.0270 0.0274 -0.0003 0.0011

AT. 120 H X -0.0305 0.0302 -0.0309 0.0306 -0.0012 0.0002  
Y 0.0187 -0.0191 0.0180 -0.0184 -0.0001 0.0011  
Z -0.0275 0.0280 -0.0270 0.0274 -0.0003 -0.0011

AT. 121 C X -0.0046 -0.0053 -0.0056 -0.0058 0.0003 0.0007  
Y 0.0013 0.0010 0.0003 -0.0001 -0.0004 -0.0004  
Z -0.0076 -0.0076 -0.0079 -0.0079 -0.0003 0.0001

AT. 122 C X 0.0046 0.0053 -0.0056 -0.0058 0.0003 -0.0007  
Y 0.0013 0.0010 -0.0003 0.0001 0.0004 -0.0004  
Z 0.0076 0.0076 -0.0079 -0.0079 -0.0003 -0.0001

AT. 123 C X -0.0046 0.0053 0.0056 -0.0058 -0.0003 -0.0007  
Y 0.0013 -0.0010 -0.0003 -0.0001 0.0004 0.0004  
Z -0.0076 0.0076 0.0079 -0.0079 0.0003 -0.0001

AT. 124 C X 0.0046 -0.0053 0.0056 -0.0058 -0.0003 0.0007  
Y 0.0013 -0.0010 0.0003 0.0001 -0.0004 0.0004

Z 0.0076 -0.0076 0.0079 -0.0079 0.0003 0.0001  
AT. 125 H X 0.0039 0.0049 0.0078 0.0082 0.0007 0.0002  
Y 0.0105 0.0113 0.0101 0.0109 -0.0009 -0.0015  
Z -0.0168 -0.0181 -0.0189 -0.0199 -0.0000 0.0011  
AT. 126 H X -0.0039 -0.0049 0.0078 0.0082 0.0007 -0.0002  
Y 0.0105 0.0113 -0.0101 -0.0109 0.0009 -0.0015  
Z 0.0168 0.0181 -0.0189 -0.0199 -0.0000 -0.0011  
AT. 127 H X 0.0039 -0.0049 -0.0078 0.0082 -0.0007 -0.0002  
Y 0.0105 -0.0113 -0.0101 0.0109 0.0009 0.0015  
Z -0.0168 0.0181 0.0189 -0.0199 0.0000 -0.0011  
AT. 128 H X -0.0039 0.0049 -0.0078 0.0082 -0.0007 0.0002  
Y 0.0105 -0.0113 0.0101 -0.0109 -0.0009 0.0015  
Z 0.0168 -0.0181 0.0189 -0.0199 0.0000 0.0011  
AT. 129 H X -0.0064 -0.0072 -0.0080 -0.0083 0.0006 0.0011  
Y 0.0084 0.0089 0.0099 0.0099 -0.0007 -0.0013  
Z 0.0036 0.0049 0.0069 0.0078 -0.0002 -0.0008  
AT. 130 H X 0.0064 0.0072 -0.0080 -0.0083 0.0006 -0.0011  
Y 0.0084 0.0089 -0.0099 -0.0099 0.0007 -0.0013  
Z -0.0036 -0.0049 0.0069 0.0078 -0.0002 0.0008  
AT. 131 H X -0.0064 0.0072 0.0080 -0.0083 -0.0006 -0.0011  
Y 0.0084 -0.0089 -0.0099 0.0099 0.0007 0.0013  
Z 0.0036 -0.0049 -0.0069 0.0078 0.0002 0.0008  
AT. 132 H X 0.0064 -0.0072 0.0080 -0.0083 -0.0006 0.0011  
Y 0.0084 -0.0089 0.0099 -0.0099 -0.0007 0.0013  
Z -0.0036 0.0049 -0.0069 0.0078 0.0002 -0.0008  
AT. 133 C X -0.0026 -0.0028 -0.0030 -0.0032 -0.0001 -0.0000  
Y -0.0025 -0.0028 -0.0021 -0.0023 0.0000 0.0001  
Z -0.0037 -0.0041 -0.0034 -0.0037 -0.0001 0.0000  
AT. 134 C X 0.0026 0.0028 -0.0030 -0.0032 -0.0001 0.0000  
Y -0.0025 -0.0028 0.0021 0.0023 -0.0000 0.0001  
Z 0.0037 0.0041 -0.0034 -0.0037 -0.0001 -0.0000  
AT. 135 C X -0.0026 0.0028 0.0030 -0.0032 0.0001 0.0000

Y -0.0025 0.0028 0.0021 -0.0023 -0.0000 -0.0001  
Z -0.0037 0.0041 0.0034 -0.0037 0.0001 -0.0000  
AT. 136 C X 0.0026 -0.0028 0.0030 -0.0032 0.0001 -0.0000  
Y -0.0025 0.0028 -0.0021 0.0023 0.0000 -0.0001  
Z 0.0037 -0.0041 0.0034 -0.0037 0.0001 0.0000  
AT. 137 C X 0.0014 0.0015 0.0013 0.0014 0.0001 0.0000  
Y 0.0029 0.0033 0.0028 0.0031 0.0002 0.0001  
Z 0.0044 0.0047 0.0041 0.0046 0.0002 0.0000  
AT. 138 C X -0.0014 -0.0015 0.0013 0.0014 0.0001 -0.0000  
Y 0.0029 0.0033 -0.0028 -0.0031 -0.0002 0.0001  
Z -0.0044 -0.0047 0.0041 0.0046 0.0002 -0.0000  
AT. 139 C X 0.0014 -0.0015 -0.0013 0.0014 -0.0001 -0.0000  
Y 0.0029 -0.0033 -0.0028 0.0031 -0.0002 -0.0001  
Z 0.0044 -0.0047 -0.0041 0.0046 -0.0002 -0.0000  
AT. 140 C X -0.0014 0.0015 -0.0013 0.0014 -0.0001 0.0000  
Y 0.0029 -0.0033 0.0028 -0.0031 0.0002 -0.0001  
Z -0.0044 0.0047 -0.0041 0.0046 -0.0002 0.0000  
AT. 141 H X -0.0042 -0.0051 -0.0030 -0.0032 -0.0001 -0.0001  
Y 0.0065 0.0068 0.0054 0.0063 -0.0003 -0.0006  
Z 0.0135 0.0148 0.0111 0.0122 0.0001 -0.0003  
AT. 142 H X 0.0042 0.0051 -0.0030 -0.0032 -0.0001 0.0001  
Y 0.0065 0.0068 -0.0054 -0.0063 0.0003 -0.0006  
Z -0.0135 -0.0148 0.0111 0.0122 0.0001 0.0003  
AT. 143 H X -0.0042 0.0051 0.0030 -0.0032 0.0001 0.0001  
Y 0.0065 -0.0068 -0.0054 0.0063 0.0003 0.0006  
Z 0.0135 -0.0148 -0.0111 0.0122 -0.0001 0.0003  
AT. 144 H X 0.0042 -0.0051 0.0030 -0.0032 0.0001 -0.0001  
Y 0.0065 -0.0068 0.0054 -0.0063 -0.0003 0.0006  
Z -0.0135 0.0148 -0.0111 0.0122 -0.0001 -0.0003  
AT. 145 H X 0.0034 0.0046 0.0035 0.0041 -0.0002 -0.0001  
Y 0.0021 0.0022 0.0020 0.0020 0.0003 0.0002  
Z 0.0028 0.0034 0.0028 0.0030 0.0003 0.0001

AT. 146 H X -0.0034 -0.0046 0.0035 0.0041 -0.0002 0.0001  
Y 0.0021 0.0022 -0.0020 -0.0020 -0.0003 0.0002  
Z -0.0028 -0.0034 0.0028 0.0030 0.0003 -0.0001

AT. 147 H X 0.0034 -0.0046 -0.0035 0.0041 0.0002 0.0001  
Y 0.0021 -0.0022 -0.0020 0.0020 -0.0003 -0.0002  
Z 0.0028 -0.0034 -0.0028 0.0030 -0.0003 -0.0001

AT. 148 H X -0.0034 0.0046 -0.0035 0.0041 0.0002 -0.0001  
Y 0.0021 -0.0022 0.0020 -0.0020 0.0003 -0.0002  
Z -0.0028 0.0034 -0.0028 0.0030 -0.0003 0.0001

AT. 149 O X -0.0011 -0.0012 -0.0014 -0.0014 0.0002 0.0003  
Y 0.0021 0.0021 0.0025 0.0024 -0.0007 -0.0008  
Z 0.0002 0.0003 0.0004 0.0004 -0.0007 -0.0007

AT. 150 O X 0.0011 0.0012 -0.0014 -0.0014 0.0002 -0.0003  
Y 0.0021 0.0021 -0.0025 -0.0024 0.0007 -0.0008  
Z -0.0002 -0.0003 0.0004 0.0004 -0.0007 0.0007

AT. 151 O X -0.0011 0.0012 0.0014 -0.0014 -0.0002 -0.0003  
Y 0.0021 -0.0021 -0.0025 0.0024 0.0007 0.0008  
Z 0.0002 -0.0003 -0.0004 0.0004 0.0007 0.0007

AT. 152 O X 0.0011 -0.0012 0.0014 -0.0014 -0.0002 0.0003  
Y 0.0021 -0.0021 0.0025 -0.0024 -0.0007 0.0008  
Z -0.0002 0.0003 -0.0004 0.0004 0.0007 -0.0007

AT. 153 H X -0.0019 -0.0019 -0.0022 -0.0020 -0.0035 -0.0032  
Y 0.0067 0.0055 0.0062 0.0064 -0.0001 -0.0009  
Z 0.0025 0.0021 0.0023 0.0022 0.0020 0.0017

AT. 154 H X 0.0019 0.0019 -0.0022 -0.0020 -0.0035 0.0032  
Y 0.0067 0.0055 -0.0062 -0.0064 0.0001 -0.0009  
Z -0.0025 -0.0021 0.0023 0.0022 0.0020 -0.0017

AT. 155 H X -0.0019 0.0019 0.0022 -0.0020 0.0035 0.0032  
Y 0.0067 -0.0055 -0.0062 0.0064 0.0001 0.0009  
Z 0.0025 -0.0021 -0.0023 0.0022 -0.0020 -0.0017

AT. 156 H X 0.0019 -0.0019 0.0022 -0.0020 0.0035 -0.0032  
Y 0.0067 -0.0055 0.0062 -0.0064 -0.0001 0.0009

Z -0.0025 0.0021 -0.0023 0.0022 -0.0020 0.0017  
AT. 157 O X -0.0014 -0.0012 -0.0024 -0.0022 0.0013 0.0016  
Y 0.0006 0.0007 -0.0005 -0.0005 0.0016 0.0019  
Z 0.0058 0.0058 0.0041 0.0037 0.0032 0.0035  
AT. 158 O X 0.0014 0.0012 -0.0024 -0.0022 0.0013 -0.0016  
Y 0.0006 0.0007 0.0005 0.0005 -0.0016 0.0019  
Z -0.0058 -0.0058 0.0041 0.0037 0.0032 -0.0035  
AT. 159 O X -0.0014 0.0012 0.0024 -0.0022 -0.0013 -0.0016  
Y 0.0006 -0.0007 0.0005 -0.0005 -0.0016 -0.0019  
Z 0.0058 -0.0058 -0.0041 0.0037 -0.0032 -0.0035  
AT. 160 O X 0.0014 -0.0012 0.0024 -0.0022 -0.0013 0.0016  
Y 0.0006 -0.0007 -0.0005 0.0005 0.0016 -0.0019  
Z -0.0058 0.0058 -0.0041 0.0037 -0.0032 0.0035  
AT. 161 O X -0.0008 -0.0009 0.0000 0.0001 -0.0016 -0.0019  
Y -0.0014 -0.0015 -0.0003 -0.0002 -0.0017 -0.0020  
Z -0.0030 -0.0031 -0.0015 -0.0014 -0.0027 -0.0031  
AT. 162 O X 0.0008 0.0009 0.0000 0.0001 -0.0016 0.0019  
Y -0.0014 -0.0015 0.0003 0.0002 0.0017 -0.0020  
Z 0.0030 0.0031 -0.0015 -0.0014 -0.0027 0.0031  
AT. 163 O X -0.0008 0.0009 -0.0000 0.0001 0.0016 0.0019  
Y -0.0014 0.0015 0.0003 -0.0002 0.0017 0.0020  
Z -0.0030 0.0031 0.0015 -0.0014 0.0027 0.0031  
AT. 164 O X 0.0008 -0.0009 -0.0000 0.0001 0.0016 -0.0019  
Y -0.0014 0.0015 -0.0003 0.0002 -0.0017 0.0020  
Z 0.0030 -0.0031 0.0015 -0.0014 0.0027 -0.0031  
AT. 165 H X 0.0035 0.0032 -0.0000 -0.0001 0.0002 0.0003  
Y 0.0008 0.0007 0.0000 0.0000 -0.0011 -0.0013  
Z -0.0031 -0.0027 -0.0011 -0.0008 -0.0005 -0.0006  
AT. 166 H X -0.0035 -0.0032 -0.0000 -0.0001 0.0002 -0.0003  
Y 0.0008 0.0007 -0.0000 -0.0000 0.0011 -0.0013  
Z 0.0031 0.0027 -0.0011 -0.0008 -0.0005 0.0006  
AT. 167 H X 0.0035 -0.0032 0.0000 -0.0001 -0.0002 -0.0003



Y 0.0008 -0.0007 -0.0000 0.0000 0.0011 0.0013  
Z -0.0031 0.0027 0.0011 -0.0008 0.0005 0.0006  
AT.168 H X -0.0035 0.0032 0.0000 -0.0001 -0.0002 0.0003  
Y 0.0008 -0.0007 0.0000 -0.0000 -0.0011 0.0013  
Z 0.0031 -0.0027 0.0011 -0.0008 0.0005 -0.0006  
AT.169 O X -0.0001 0.0005 0.0001 -0.0001 0.0116 0.0116  
Y -0.0003 -0.0005 -0.0005 -0.0004 -0.0003 -0.0003  
Z 0.0001 0.0018 0.0005 0.0001 0.0405 0.0402  
AT.170 O X 0.0001 -0.0005 0.0001 -0.0001 0.0116 -0.0116  
Y -0.0003 -0.0005 0.0005 0.0004 0.0003 -0.0003  
Z -0.0001 -0.0018 0.0005 0.0001 0.0405 -0.0402  
AT.171 O X -0.0001 -0.0005 -0.0001 -0.0001 -0.0116 -0.0116  
Y -0.0003 0.0005 0.0005 -0.0004 0.0003 0.0003  
Z 0.0001 -0.0018 -0.0005 0.0001 -0.0405 -0.0402  
AT.172 O X 0.0001 0.0005 -0.0001 -0.0001 -0.0116 0.0116  
Y -0.0003 0.0005 -0.0005 0.0004 -0.0003 0.0003  
Z -0.0001 0.0018 -0.0005 0.0001 -0.0405 0.0402  
AT.173 H X 0.0028 0.0019 0.0001 0.0029 -0.0032 -0.0034  
Y -0.0006 -0.0001 -0.0002 -0.0007 0.0124 0.0124  
Z -0.0016 0.0004 0.0002 -0.0016 0.0139 0.0139  
AT.174 H X -0.0028 -0.0019 0.0001 0.0029 -0.0032 0.0034  
Y -0.0006 -0.0001 0.0002 0.0007 -0.0124 0.0124  
Z 0.0016 -0.0004 0.0002 -0.0016 0.0139 -0.0139  
AT.175 H X 0.0028 -0.0019 -0.0001 0.0029 0.0032 0.0034  
Y -0.0006 0.0001 0.0002 -0.0007 -0.0124 -0.0124  
Z -0.0016 -0.0004 -0.0002 -0.0016 -0.0139 -0.0139  
AT.176 H X -0.0028 0.0019 -0.0001 0.0029 0.0032 -0.0034  
Y -0.0006 0.0001 -0.0002 0.0007 0.0124 -0.0124  
Z 0.0016 0.0004 -0.0002 -0.0016 -0.0139 0.0139

FREQ(CM\*\*-1) 1023.19 1023.50 1024.28 1024.79 1050.41 1050.44

AT. 1 I X -0.0000 -0.0000 -0.0000 0.0000 0.0001 0.0000  
Y 0.0000 0.0000 0.0000 -0.0000 0.0000 0.0000  
Z 0.0000 0.0000 0.0000 -0.0000 -0.0000 -0.0000

AT. 2 I X -0.0000 0.0000 0.0000 0.0000 -0.0001 0.0000  
Y -0.0000 0.0000 0.0000 0.0000 0.0000 -0.0000  
Z 0.0000 -0.0000 -0.0000 -0.0000 0.0000 -0.0000

AT. 3 I X -0.0000 0.0000 -0.0000 -0.0000 -0.0001 0.0000  
Y 0.0000 -0.0000 0.0000 0.0000 -0.0000 0.0000  
Z 0.0000 -0.0000 0.0000 0.0000 0.0000 -0.0000

AT. 4 I X -0.0000 -0.0000 0.0000 -0.0000 0.0001 0.0000  
Y -0.0000 -0.0000 0.0000 -0.0000 -0.0000 -0.0000  
Z 0.0000 0.0000 -0.0000 0.0000 -0.0000 -0.0000

AT. 5 I X 0.0000 0.0000 0.0000 -0.0000 0.0001 0.0000  
Y -0.0000 -0.0000 -0.0000 0.0000 -0.0001 -0.0001  
Z -0.0000 -0.0000 -0.0000 0.0000 0.0000 0.0000

AT. 6 I X 0.0000 -0.0000 -0.0000 -0.0000 -0.0001 0.0000  
Y 0.0000 -0.0000 -0.0000 -0.0000 -0.0001 0.0001  
Z -0.0000 0.0000 0.0000 0.0000 -0.0000 0.0000

AT. 7 I X 0.0000 -0.0000 0.0000 0.0000 -0.0001 0.0000  
Y -0.0000 0.0000 -0.0000 -0.0000 0.0001 -0.0001  
Z -0.0000 0.0000 -0.0000 -0.0000 -0.0000 0.0000

AT. 8 I X 0.0000 0.0000 -0.0000 0.0000 0.0001 0.0000  
Y 0.0000 0.0000 -0.0000 0.0000 0.0001 0.0001  
Z -0.0000 -0.0000 0.0000 -0.0000 0.0000 0.0000

AT. 9 N X -0.0023 -0.0020 -0.0022 0.0022 0.0013 0.0014  
Y -0.0034 -0.0032 -0.0034 0.0036 0.0033 0.0035  
Z 0.0004 0.0005 0.0006 -0.0007 -0.0025 -0.0025

AT. 10 N X -0.0023 0.0020 0.0022 0.0022 -0.0013 0.0014  
Y 0.0034 -0.0032 -0.0034 -0.0036 0.0033 -0.0035  
Z 0.0004 -0.0005 -0.0006 -0.0007 0.0025 -0.0025

AT. 11 N X -0.0023 0.0020 -0.0022 -0.0022 -0.0013 0.0014  
Y -0.0034 0.0032 -0.0034 -0.0036 -0.0033 0.0035

Z 0.0004 -0.0005 0.0006 0.0007 0.0025 -0.0025  
AT. 12 N X -0.0023 -0.0020 0.0022 -0.0022 0.0013 0.0014  
Y 0.0034 0.0032 -0.0034 0.0036 -0.0033 -0.0035  
Z 0.0004 0.0005 -0.0006 0.0007 -0.0025 -0.0025  
AT. 13 N X 0.0008 0.0006 0.0008 -0.0009 -0.0006 -0.0005  
Y -0.0028 -0.0020 -0.0021 0.0026 -0.0042 -0.0040  
Z -0.0002 -0.0001 -0.0000 -0.0000 -0.0035 -0.0034  
AT. 14 N X 0.0008 -0.0006 -0.0008 -0.0009 0.0006 -0.0005  
Y 0.0028 -0.0020 -0.0021 -0.0026 -0.0042 0.0040  
Z -0.0002 0.0001 0.0000 -0.0000 0.0035 -0.0034  
AT. 15 N X 0.0008 -0.0006 0.0008 0.0009 0.0006 -0.0005  
Y -0.0028 0.0020 -0.0021 -0.0026 0.0042 -0.0040  
Z -0.0002 0.0001 -0.0000 0.0000 0.0035 -0.0034  
AT. 16 N X 0.0008 0.0006 -0.0008 0.0009 -0.0006 -0.0005  
Y 0.0028 0.0020 -0.0021 0.0026 0.0042 0.0040  
Z -0.0002 -0.0001 0.0000 0.0000 -0.0035 -0.0034  
AT. 17 O X 0.0009 0.0007 0.0008 -0.0008 -0.0003 -0.0002  
Y 0.0020 0.0019 0.0019 -0.0022 -0.0017 -0.0016  
Z 0.0016 0.0016 0.0016 -0.0018 -0.0012 -0.0014  
AT. 18 O X 0.0009 -0.0007 -0.0008 -0.0008 0.0003 -0.0002  
Y -0.0020 0.0019 0.0019 0.0022 -0.0017 0.0016  
Z 0.0016 -0.0016 -0.0016 -0.0018 0.0012 -0.0014  
AT. 19 O X 0.0009 -0.0007 0.0008 0.0008 0.0003 -0.0002  
Y 0.0020 -0.0019 0.0019 0.0022 0.0017 -0.0016  
Z 0.0016 -0.0016 0.0016 0.0018 0.0012 -0.0014  
AT. 20 O X 0.0009 0.0007 -0.0008 0.0008 -0.0003 -0.0002  
Y -0.0020 -0.0019 0.0019 -0.0022 0.0017 0.0016  
Z 0.0016 0.0016 -0.0016 0.0018 -0.0012 -0.0014  
AT. 21 O X -0.0000 -0.0001 -0.0000 0.0000 0.0004 0.0005  
Y 0.0016 0.0012 0.0014 -0.0016 0.0015 0.0014  
Z -0.0011 -0.0007 -0.0009 0.0010 -0.0013 -0.0013  
AT. 22 O X -0.0000 0.0001 0.0000 0.0000 -0.0004 0.0005

Y -0.0016 0.0012 0.0014 0.0016 0.0015 -0.0014  
Z -0.0011 0.0007 0.0009 0.0010 0.0013 -0.0013  
AT. 23 O X -0.0000 0.0001 -0.0000 -0.0000 -0.0004 0.0005  
Y 0.0016 -0.0012 0.0014 0.0016 -0.0015 0.0014  
Z -0.0011 0.0007 -0.0009 -0.0010 0.0013 -0.0013  
AT. 24 O X -0.0000 -0.0001 0.0000 -0.0000 0.0004 0.0005  
Y -0.0016 -0.0012 0.0014 -0.0016 -0.0015 -0.0014  
Z -0.0011 -0.0007 0.0009 -0.0010 -0.0013 -0.0013  
AT. 25 C X -0.0002 -0.0001 -0.0002 0.0002 -0.0000 0.0001  
Y 0.0015 0.0014 0.0015 -0.0017 -0.0019 -0.0020  
Z -0.0022 -0.0021 -0.0021 0.0024 0.0035 0.0037  
AT. 26 C X -0.0002 0.0001 0.0002 0.0002 0.0000 0.0001  
Y -0.0015 0.0014 0.0015 0.0017 -0.0019 0.0020  
Z -0.0022 0.0021 0.0021 0.0024 -0.0035 0.0037  
AT. 27 C X -0.0002 0.0001 -0.0002 -0.0002 0.0000 0.0001  
Y 0.0015 -0.0014 0.0015 0.0017 0.0019 -0.0020  
Z -0.0022 0.0021 -0.0021 -0.0024 -0.0035 0.0037  
AT. 28 C X -0.0002 -0.0001 0.0002 -0.0002 -0.0000 0.0001  
Y -0.0015 -0.0014 0.0015 -0.0017 0.0019 0.0020  
Z -0.0022 -0.0021 0.0021 -0.0024 0.0035 0.0037  
AT. 29 H X 0.0008 0.0009 0.0013 -0.0011 -0.0047 -0.0048  
Y 0.0019 0.0023 0.0022 -0.0025 -0.0049 -0.0056  
Z -0.0039 -0.0041 -0.0047 0.0046 0.0115 0.0120  
AT. 30 H X 0.0008 -0.0009 -0.0013 -0.0011 0.0047 -0.0048  
Y -0.0019 0.0023 0.0022 0.0025 -0.0049 0.0056  
Z -0.0039 0.0041 0.0047 0.0046 -0.0115 0.0120  
AT. 31 H X 0.0008 -0.0009 0.0013 0.0011 0.0047 -0.0048  
Y 0.0019 -0.0023 0.0022 0.0025 0.0049 -0.0056  
Z -0.0039 0.0041 -0.0047 -0.0046 -0.0115 0.0120  
AT. 32 H X 0.0008 0.0009 -0.0013 0.0011 -0.0047 -0.0048  
Y -0.0019 -0.0023 0.0022 -0.0025 0.0049 0.0056  
Z -0.0039 -0.0041 0.0047 -0.0046 0.0115 0.0120

AT. 33 H X 0.0003 -0.0003 0.0001 0.0002 0.0043 0.0045  
Y 0.0017 0.0015 0.0016 -0.0019 -0.0013 -0.0014  
Z -0.0031 -0.0022 -0.0025 0.0026 -0.0033 -0.0034

AT. 34 H X 0.0003 0.0003 -0.0001 0.0002 -0.0043 0.0045  
Y -0.0017 0.0015 0.0016 0.0019 -0.0013 0.0014  
Z -0.0031 0.0022 0.0025 0.0026 0.0033 -0.0034

AT. 35 H X 0.0003 0.0003 0.0001 -0.0002 -0.0043 0.0045  
Y 0.0017 -0.0015 0.0016 0.0019 0.0013 -0.0014  
Z -0.0031 0.0022 -0.0025 -0.0026 0.0033 -0.0034

AT. 36 H X 0.0003 -0.0003 -0.0001 -0.0002 0.0043 0.0045  
Y -0.0017 -0.0015 0.0016 -0.0019 0.0013 0.0014  
Z -0.0031 -0.0022 0.0025 -0.0026 -0.0033 -0.0034

AT. 37 C X 0.0010 0.0009 0.0011 -0.0009 -0.0008 -0.0009  
Y -0.0007 -0.0009 -0.0009 0.0011 0.0037 0.0040  
Z 0.0022 0.0019 0.0022 -0.0022 -0.0027 -0.0028

AT. 38 C X 0.0010 -0.0009 -0.0011 -0.0009 0.0008 -0.0009  
Y 0.0007 -0.0009 -0.0009 -0.0011 0.0037 -0.0040  
Z 0.0022 -0.0019 -0.0022 -0.0022 0.0027 -0.0028

AT. 39 C X 0.0010 -0.0009 0.0011 0.0009 0.0008 -0.0009  
Y -0.0007 0.0009 -0.0009 -0.0011 -0.0037 0.0040  
Z 0.0022 -0.0019 0.0022 0.0022 0.0027 -0.0028

AT. 40 C X 0.0010 0.0009 -0.0011 0.0009 -0.0008 -0.0009  
Y 0.0007 0.0009 -0.0009 0.0011 -0.0037 -0.0040  
Z 0.0022 0.0019 -0.0022 0.0022 -0.0027 -0.0028

AT. 41 C X 0.0047 0.0049 0.0049 -0.0044 0.0024 0.0021  
Y -0.0060 -0.0056 -0.0057 0.0060 -0.0068 -0.0073  
Z 0.0079 0.0076 0.0083 -0.0078 0.0017 0.0015

AT. 42 C X 0.0047 -0.0049 -0.0049 -0.0044 -0.0024 0.0021  
Y 0.0060 -0.0056 -0.0057 -0.0060 -0.0068 0.0073  
Z 0.0079 -0.0076 -0.0083 -0.0078 -0.0017 0.0015

AT. 43 C X 0.0047 -0.0049 0.0049 0.0044 -0.0024 0.0021  
Y -0.0060 0.0056 -0.0057 -0.0060 0.0068 -0.0073

Z 0.0079 -0.0076 0.0083 0.0078 -0.0017 0.0015  
AT. 44 C X 0.0047 0.0049 -0.0049 0.0044 0.0024 0.0021  
Y 0.0060 0.0056 -0.0057 0.0060 0.0068 0.0073  
Z 0.0079 0.0076 -0.0083 0.0078 0.0017 0.0015  
AT. 45 H X -0.0157 -0.0143 -0.0157 0.0155 -0.0231 -0.0245  
Y 0.0086 0.0090 0.0085 -0.0081 -0.0025 -0.0031  
Z 0.0237 0.0231 0.0237 -0.0230 0.0087 0.0087  
AT. 46 H X -0.0157 0.0143 0.0157 0.0155 0.0231 -0.0245  
Y -0.0086 0.0090 0.0085 0.0081 -0.0025 0.0031  
Z 0.0237 -0.0231 -0.0237 -0.0230 -0.0087 0.0087  
AT. 47 H X -0.0157 0.0143 -0.0157 -0.0155 0.0231 -0.0245  
Y 0.0086 -0.0090 0.0085 0.0081 0.0025 -0.0031  
Z 0.0237 -0.0231 0.0237 0.0230 -0.0087 0.0087  
AT. 48 H X -0.0157 -0.0143 0.0157 -0.0155 -0.0231 -0.0245  
Y -0.0086 -0.0090 0.0085 -0.0081 0.0025 0.0031  
Z 0.0237 0.0231 -0.0237 0.0230 0.0087 0.0087  
AT. 49 H X 0.0095 0.0101 0.0105 -0.0095 0.0036 0.0035  
Y 0.0077 0.0081 0.0091 -0.0082 0.0019 0.0018  
Z -0.0154 -0.0145 -0.0153 0.0156 -0.0175 -0.0182  
AT. 50 H X 0.0095 -0.0101 -0.0105 -0.0095 -0.0036 0.0035  
Y -0.0077 0.0081 0.0091 0.0082 0.0019 -0.0018  
Z -0.0154 0.0145 0.0153 0.0156 0.0175 -0.0182  
AT. 51 H X 0.0095 -0.0101 0.0105 0.0095 -0.0036 0.0035  
Y 0.0077 -0.0081 0.0091 0.0082 -0.0019 0.0018  
Z -0.0154 0.0145 -0.0153 -0.0156 0.0175 -0.0182  
AT. 52 H X 0.0095 0.0101 -0.0105 0.0095 0.0036 0.0035  
Y -0.0077 -0.0081 0.0091 -0.0082 -0.0019 -0.0018  
Z -0.0154 -0.0145 0.0153 -0.0156 -0.0175 -0.0182  
AT. 53 C X -0.0022 -0.0028 -0.0025 0.0018 0.0028 0.0031  
Y 0.0023 0.0022 0.0018 -0.0018 0.0077 0.0076  
Z -0.0009 -0.0006 -0.0009 0.0014 0.0082 0.0078  
AT. 54 C X -0.0022 0.0028 0.0025 0.0018 -0.0028 0.0031

Y -0.0023 0.0022 0.0018 0.0018 0.0077 -0.0076  
Z -0.0009 0.0006 0.0009 0.0014 -0.0082 0.0078  
AT. 55 C X -0.0022 0.0028 -0.0025 -0.0018 -0.0028 0.0031  
Y 0.0023 -0.0022 0.0018 0.0018 -0.0077 0.0076  
Z -0.0009 0.0006 -0.0009 -0.0014 -0.0082 0.0078  
AT. 56 C X -0.0022 -0.0028 0.0025 -0.0018 0.0028 0.0031  
Y -0.0023 -0.0022 0.0018 -0.0018 -0.0077 -0.0076  
Z -0.0009 -0.0006 0.0009 -0.0014 0.0082 0.0078  
AT. 57 C X -0.0039 -0.0047 -0.0044 0.0034 -0.0035 -0.0030  
Y 0.0029 0.0025 0.0023 -0.0030 0.0034 0.0040  
Z -0.0017 -0.0015 -0.0012 0.0014 -0.0106 -0.0105  
AT. 58 C X -0.0039 0.0047 0.0044 0.0034 0.0035 -0.0030  
Y -0.0029 0.0025 0.0023 0.0030 0.0034 -0.0040  
Z -0.0017 0.0015 0.0012 0.0014 0.0106 -0.0105  
AT. 59 C X -0.0039 0.0047 -0.0044 -0.0034 0.0035 -0.0030  
Y 0.0029 -0.0025 0.0023 0.0030 -0.0034 0.0040  
Z -0.0017 0.0015 -0.0012 -0.0014 0.0106 -0.0105  
AT. 60 C X -0.0039 -0.0047 0.0044 -0.0034 -0.0035 -0.0030  
Y -0.0029 -0.0025 0.0023 -0.0030 -0.0034 -0.0040  
Z -0.0017 -0.0015 0.0012 -0.0014 -0.0106 -0.0105  
AT. 61 H X 0.0087 0.0102 0.0096 -0.0077 0.0031 0.0022  
Y 0.0076 0.0089 0.0085 -0.0069 0.0015 0.0008  
Z 0.0240 0.0242 0.0222 -0.0223 0.0256 0.0265  
AT. 62 H X 0.0087 -0.0102 -0.0096 -0.0077 -0.0031 0.0022  
Y -0.0076 0.0089 0.0085 0.0069 0.0015 -0.0008  
Z 0.0240 -0.0242 -0.0222 -0.0223 -0.0256 0.0265  
AT. 63 H X 0.0087 -0.0102 0.0096 0.0077 -0.0031 0.0022  
Y 0.0076 -0.0089 0.0085 0.0069 -0.0015 0.0008  
Z 0.0240 -0.0242 0.0222 0.0223 -0.0256 0.0265  
AT. 64 H X 0.0087 0.0102 -0.0096 0.0077 0.0031 0.0022  
Y -0.0076 -0.0089 0.0085 -0.0069 -0.0015 -0.0008  
Z 0.0240 0.0242 -0.0222 0.0223 0.0256 0.0265

AT. 65 H X 0.0012 0.0007 0.0007 -0.0014 0.0025 0.0029  
Y -0.0124 -0.0133 -0.0127 0.0114 -0.0163 -0.0156  
Z -0.0063 -0.0109 -0.0088 0.0029 0.0016 0.0048

AT. 66 H X 0.0012 -0.0007 -0.0007 -0.0014 -0.0025 0.0029  
Y 0.0124 -0.0133 -0.0127 -0.0114 -0.0163 0.0156  
Z -0.0063 0.0109 0.0088 0.0029 -0.0016 0.0048

AT. 67 H X 0.0012 -0.0007 0.0007 0.0014 -0.0025 0.0029  
Y -0.0124 0.0133 -0.0127 -0.0114 0.0163 -0.0156  
Z -0.0063 0.0109 -0.0088 -0.0029 -0.0016 0.0048

AT. 68 H X 0.0012 0.0007 -0.0007 0.0014 0.0025 0.0029  
Y 0.0124 0.0133 -0.0127 0.0114 0.0163 0.0156  
Z -0.0063 -0.0109 0.0088 -0.0029 0.0016 0.0048

AT. 69 H X 0.0034 0.0051 0.0052 -0.0030 -0.0057 -0.0071  
Y -0.0100 -0.0080 -0.0073 0.0096 -0.0258 -0.0271  
Z -0.0112 -0.0085 -0.0075 0.0107 -0.0356 -0.0374

AT. 70 H X 0.0034 -0.0051 -0.0052 -0.0030 0.0057 -0.0071  
Y 0.0100 -0.0080 -0.0073 -0.0096 -0.0258 0.0271  
Z -0.0112 0.0085 0.0075 0.0107 0.0356 -0.0374

AT. 71 H X 0.0034 -0.0051 0.0052 0.0030 0.0057 -0.0071  
Y -0.0100 0.0080 -0.0073 -0.0096 0.0258 -0.0271  
Z -0.0112 0.0085 -0.0075 -0.0107 0.0356 -0.0374

AT. 72 H X 0.0034 0.0051 -0.0052 0.0030 -0.0057 -0.0071  
Y 0.0100 0.0080 -0.0073 0.0096 0.0258 0.0271  
Z -0.0112 -0.0085 0.0075 -0.0107 -0.0356 -0.0374

AT. 73 C X 0.0073 0.0070 0.0067 -0.0066 0.0046 0.0052  
Y 0.0084 0.0083 0.0086 -0.0080 -0.0004 -0.0008  
Z -0.0002 0.0006 -0.0003 0.0008 0.0157 0.0150

AT. 74 C X 0.0073 -0.0070 -0.0067 -0.0066 -0.0046 0.0052  
Y -0.0084 0.0083 0.0086 0.0080 -0.0004 0.0008  
Z -0.0002 -0.0006 0.0003 0.0008 -0.0157 0.0150

AT. 75 C X 0.0073 -0.0070 0.0067 0.0066 -0.0046 0.0052  
Y 0.0084 -0.0083 0.0086 0.0080 0.0004 -0.0008



Z -0.0002 -0.0006 -0.0003 -0.0008 -0.0157 0.0150  
AT. 76 C X 0.0073 0.0070 -0.0067 0.0066 0.0046 0.0052  
Y -0.0084 -0.0083 0.0086 -0.0080 0.0004 0.0008  
Z -0.0002 0.0006 0.0003 -0.0008 0.0157 0.0150  
AT. 77 C X 0.0000 0.0003 0.0006 -0.0005 -0.0031 -0.0031  
Y 0.0005 0.0005 0.0004 -0.0007 0.0022 0.0023  
Z -0.0104 -0.0102 -0.0108 0.0102 0.0025 0.0029  
AT. 78 C X 0.0000 -0.0003 -0.0006 -0.0005 0.0031 -0.0031  
Y -0.0005 0.0005 0.0004 0.0007 0.0022 -0.0023  
Z -0.0104 0.0102 0.0108 0.0102 -0.0025 0.0029  
AT. 79 C X 0.0000 -0.0003 0.0006 0.0005 0.0031 -0.0031  
Y 0.0005 -0.0005 0.0004 0.0007 -0.0022 0.0023  
Z -0.0104 0.0102 -0.0108 -0.0102 -0.0025 0.0029  
AT. 80 C X 0.0000 0.0003 -0.0006 0.0005 -0.0031 -0.0031  
Y -0.0005 -0.0005 0.0004 -0.0007 -0.0022 -0.0023  
Z -0.0104 -0.0102 0.0108 -0.0102 0.0025 0.0029  
AT. 81 H X 0.0081 0.0088 0.0094 -0.0086 -0.0052 -0.0058  
Y 0.0085 0.0092 0.0092 -0.0089 0.0014 0.0010  
Z 0.0012 0.0003 0.0018 -0.0007 -0.0133 -0.0140  
AT. 82 H X 0.0081 -0.0088 -0.0094 -0.0086 0.0052 -0.0058  
Y -0.0085 0.0092 0.0092 0.0089 0.0014 -0.0010  
Z 0.0012 -0.0003 -0.0018 -0.0007 0.0133 -0.0140  
AT. 83 H X 0.0081 -0.0088 0.0094 0.0086 0.0052 -0.0058  
Y 0.0085 -0.0092 0.0092 0.0089 -0.0014 0.0010  
Z 0.0012 -0.0003 0.0018 0.0007 0.0133 -0.0140  
AT. 84 H X 0.0081 0.0088 -0.0094 0.0086 -0.0052 -0.0058  
Y -0.0085 -0.0092 0.0092 -0.0089 -0.0014 -0.0010  
Z 0.0012 0.0003 -0.0018 0.0007 -0.0133 -0.0140  
AT. 85 H X -0.0092 -0.0093 -0.0100 0.0088 0.0057 0.0058  
Y 0.0119 0.0119 0.0125 -0.0123 -0.0061 -0.0071  
Z -0.0173 -0.0169 -0.0179 0.0172 0.0067 0.0080  
AT. 86 H X -0.0092 0.0093 0.0100 0.0088 -0.0057 0.0058

Y -0.0119 0.0119 0.0125 0.0123 -0.0061 0.0071  
Z -0.0173 0.0169 0.0179 0.0172 -0.0067 0.0080  
AT. 87 H X -0.0092 0.0093 -0.0100 -0.0088 -0.0057 0.0058  
Y 0.0119 -0.0119 0.0125 0.0123 0.0061 -0.0071  
Z -0.0173 0.0169 -0.0179 -0.0172 -0.0067 0.0080  
AT. 88 H X -0.0092 -0.0093 0.0100 -0.0088 0.0057 0.0058  
Y -0.0119 -0.0119 0.0125 -0.0123 0.0061 0.0071  
Z -0.0173 -0.0169 0.0179 -0.0172 0.0067 0.0080  
AT. 89 C X -0.0032 -0.0035 -0.0037 0.0035 0.0010 0.0011  
Y 0.0016 0.0012 0.0016 -0.0017 -0.0084 -0.0083  
Z -0.0010 -0.0007 -0.0010 0.0013 0.0079 0.0074  
AT. 90 C X -0.0032 0.0035 0.0037 0.0035 -0.0010 0.0011  
Y -0.0016 0.0012 0.0016 0.0017 -0.0084 0.0083  
Z -0.0010 0.0007 0.0010 0.0013 -0.0079 0.0074  
AT. 91 C X -0.0032 0.0035 -0.0037 -0.0035 -0.0010 0.0011  
Y 0.0016 -0.0012 0.0016 0.0017 0.0084 -0.0083  
Z -0.0010 0.0007 -0.0010 -0.0013 -0.0079 0.0074  
AT. 92 C X -0.0032 -0.0035 0.0037 -0.0035 0.0010 0.0011  
Y -0.0016 -0.0012 0.0016 -0.0017 0.0084 0.0083  
Z -0.0010 -0.0007 0.0010 -0.0013 0.0079 0.0074  
AT. 93 C X -0.0091 -0.0094 -0.0095 0.0090 -0.0023 -0.0019  
Y -0.0053 -0.0051 -0.0050 0.0050 -0.0043 -0.0042  
Z 0.0005 0.0002 0.0008 -0.0009 -0.0112 -0.0109  
AT. 94 C X -0.0091 0.0094 0.0095 0.0090 0.0023 -0.0019  
Y 0.0053 -0.0051 -0.0050 -0.0050 -0.0043 0.0042  
Z 0.0005 -0.0002 -0.0008 -0.0009 0.0112 -0.0109  
AT. 95 C X -0.0091 0.0094 -0.0095 -0.0090 0.0023 -0.0019  
Y -0.0053 0.0051 -0.0050 -0.0050 0.0043 -0.0042  
Z 0.0005 -0.0002 0.0008 0.0009 0.0112 -0.0109  
AT. 96 C X -0.0091 -0.0094 0.0095 -0.0090 -0.0023 -0.0019  
Y 0.0053 0.0051 -0.0050 0.0050 0.0043 0.0042  
Z 0.0005 0.0002 -0.0008 0.0009 -0.0112 -0.0109

AT. 97 H X 0.0134 0.0138 0.0141 -0.0137 -0.0012 -0.0013  
Y -0.0228 -0.0232 -0.0242 0.0233 0.0094 0.0096  
Z 0.0433 0.0437 0.0441 -0.0428 0.0183 0.0173

AT. 98 H X 0.0134 -0.0138 -0.0141 -0.0137 0.0012 -0.0013  
Y 0.0228 -0.0232 -0.0242 -0.0233 0.0094 -0.0096  
Z 0.0433 -0.0437 -0.0441 -0.0428 -0.0183 0.0173

AT. 99 H X 0.0134 -0.0138 0.0141 0.0137 0.0012 -0.0013  
Y -0.0228 0.0232 -0.0242 -0.0233 -0.0094 0.0096  
Z 0.0433 -0.0437 0.0441 0.0428 -0.0183 0.0173

AT. 100 H X 0.0134 0.0138 -0.0141 0.0137 -0.0012 -0.0013  
Y 0.0228 0.0232 -0.0242 0.0233 -0.0094 -0.0096  
Z 0.0433 0.0437 -0.0441 0.0428 0.0183 0.0173

AT. 101 H X 0.0125 0.0124 0.0127 -0.0122 0.0085 0.0081  
Y 0.0192 0.0197 0.0207 -0.0193 0.0034 0.0027  
Z -0.0095 -0.0108 -0.0121 0.0109 0.0191 0.0193

AT. 102 H X 0.0125 -0.0124 -0.0127 -0.0122 -0.0085 0.0081  
Y -0.0192 0.0197 0.0207 0.0193 0.0034 -0.0027  
Z -0.0095 0.0108 0.0121 0.0109 -0.0191 0.0193

AT. 103 H X 0.0125 -0.0124 0.0127 0.0122 -0.0085 0.0081  
Y 0.0192 -0.0197 0.0207 0.0193 -0.0034 0.0027  
Z -0.0095 0.0108 -0.0121 -0.0109 -0.0191 0.0193

AT. 104 H X 0.0125 0.0124 -0.0127 0.0122 0.0085 0.0081  
Y -0.0192 -0.0197 0.0207 -0.0193 -0.0034 -0.0027  
Z -0.0095 -0.0108 0.0121 -0.0109 0.0191 0.0193

AT. 105 H X 0.0110 0.0109 0.0121 -0.0110 -0.0071 -0.0076  
Y 0.0163 0.0169 0.0149 -0.0147 0.0390 0.0381  
Z -0.0226 -0.0231 -0.0214 0.0206 -0.0424 -0.0410

AT. 106 H X 0.0110 -0.0109 -0.0121 -0.0110 0.0071 -0.0076  
Y -0.0163 0.0169 0.0149 0.0147 0.0390 -0.0381  
Z -0.0226 0.0231 0.0214 0.0206 0.0424 -0.0410

AT. 107 H X 0.0110 -0.0109 0.0121 0.0110 0.0071 -0.0076  
Y 0.0163 -0.0169 0.0149 0.0147 -0.0390 0.0381

Z -0.0226 0.0231 -0.0214 -0.0206 0.0424 -0.0410  
AT. 108 H X 0.0110 0.0109 -0.0121 0.0110 -0.0071 -0.0076  
Y -0.0163 -0.0169 0.0149 -0.0147 -0.0390 -0.0381  
Z -0.0226 -0.0231 0.0214 -0.0206 -0.0424 -0.0410  
AT. 109 C X -0.0009 -0.0006 -0.0008 0.0012 -0.0021 -0.0027  
Y -0.0024 -0.0021 -0.0016 0.0024 0.0012 0.0008  
Z 0.0009 -0.0009 -0.0007 -0.0007 0.0028 0.0028  
AT. 110 C X -0.0009 0.0006 0.0008 0.0012 0.0021 -0.0027  
Y 0.0024 -0.0021 -0.0016 -0.0024 0.0012 -0.0008  
Z 0.0009 0.0009 0.0007 -0.0007 -0.0028 0.0028  
AT. 111 C X -0.0009 0.0006 -0.0008 -0.0012 0.0021 -0.0027  
Y -0.0024 0.0021 -0.0016 -0.0024 -0.0012 0.0008  
Z 0.0009 0.0009 -0.0007 0.0007 -0.0028 0.0028  
AT. 112 C X -0.0009 -0.0006 0.0008 -0.0012 -0.0021 -0.0027  
Y 0.0024 0.0021 -0.0016 0.0024 -0.0012 -0.0008  
Z 0.0009 -0.0009 0.0007 0.0007 0.0028 0.0028  
AT. 113 H X -0.0021 0.0001 0.0000 0.0028 -0.0010 -0.0024  
Y -0.0021 -0.0045 -0.0040 0.0017 -0.0034 -0.0024  
Z -0.0087 -0.0068 -0.0061 0.0088 -0.0083 -0.0090  
AT. 114 H X -0.0021 -0.0001 -0.0000 0.0028 0.0010 -0.0024  
Y 0.0021 -0.0045 -0.0040 -0.0017 -0.0034 0.0024  
Z -0.0087 0.0068 0.0061 0.0088 0.0083 -0.0090  
AT. 115 H X -0.0021 -0.0001 0.0000 -0.0028 0.0010 -0.0024  
Y -0.0021 0.0045 -0.0040 -0.0017 0.0034 -0.0024  
Z -0.0087 0.0068 -0.0061 -0.0088 0.0083 -0.0090  
AT. 116 H X -0.0021 0.0001 -0.0000 -0.0028 -0.0010 -0.0024  
Y 0.0021 0.0045 -0.0040 0.0017 0.0034 0.0024  
Z -0.0087 -0.0068 0.0061 -0.0088 -0.0083 -0.0090  
AT. 117 H X 0.0063 0.0031 0.0021 -0.0061 0.0019 0.0033  
Y 0.0023 0.0001 0.0010 -0.0026 0.0064 0.0062  
Z 0.0038 0.0005 0.0011 -0.0039 0.0067 0.0066  
AT. 118 H X 0.0063 -0.0031 -0.0021 -0.0061 -0.0019 0.0033

Y -0.0023 0.0001 0.0010 0.0026 0.0064 -0.0062  
Z 0.0038 -0.0005 -0.0011 -0.0039 -0.0067 0.0066  
AT. 119 H X 0.0063 -0.0031 0.0021 0.0061 -0.0019 0.0033  
Y 0.0023 -0.0001 0.0010 0.0026 -0.0064 0.0062  
Z 0.0038 -0.0005 0.0011 0.0039 -0.0067 0.0066  
AT. 120 H X 0.0063 0.0031 -0.0021 0.0061 0.0019 0.0033  
Y -0.0023 -0.0001 0.0010 -0.0026 -0.0064 -0.0062  
Z 0.0038 0.0005 -0.0011 0.0039 0.0067 0.0066  
AT. 121 C X 0.0031 0.0034 0.0032 -0.0029 0.0050 0.0049  
Y 0.0011 0.0007 0.0005 -0.0008 0.0065 0.0066  
Z 0.0010 0.0017 0.0017 -0.0010 0.0010 0.0010  
AT. 122 C X 0.0031 -0.0034 -0.0032 -0.0029 -0.0050 0.0049  
Y -0.0011 0.0007 0.0005 0.0008 0.0065 -0.0066  
Z 0.0010 -0.0017 -0.0017 -0.0010 -0.0010 0.0010  
AT. 123 C X 0.0031 -0.0034 0.0032 0.0029 -0.0050 0.0049  
Y 0.0011 -0.0007 0.0005 0.0008 -0.0065 0.0066  
Z 0.0010 -0.0017 0.0017 0.0010 -0.0010 0.0010  
AT. 124 C X 0.0031 0.0034 -0.0032 0.0029 0.0050 0.0049  
Y -0.0011 -0.0007 0.0005 -0.0008 -0.0065 -0.0066  
Z 0.0010 0.0017 -0.0017 0.0010 0.0010 0.0010  
AT. 125 H X -0.0082 -0.0077 -0.0068 0.0069 -0.0259 -0.0256  
Y -0.0019 -0.0032 -0.0034 0.0023 0.0123 0.0118  
Z 0.0062 0.0075 0.0073 -0.0059 0.0052 0.0056  
AT. 126 H X -0.0082 0.0077 0.0068 0.0069 0.0259 -0.0256  
Y 0.0019 -0.0032 -0.0034 -0.0023 0.0123 -0.0118  
Z 0.0062 -0.0075 -0.0073 -0.0059 -0.0052 0.0056  
AT. 127 H X -0.0082 0.0077 -0.0068 -0.0069 0.0259 -0.0256  
Y -0.0019 0.0032 -0.0034 -0.0023 -0.0123 0.0118  
Z 0.0062 -0.0075 0.0073 0.0059 -0.0052 0.0056  
AT. 128 H X -0.0082 -0.0077 0.0068 -0.0069 -0.0259 -0.0256  
Y 0.0019 0.0032 -0.0034 0.0023 -0.0123 -0.0118  
Z 0.0062 0.0075 -0.0073 0.0059 0.0052 0.0056

AT.129 H X 0.0060 0.0063 0.0061 -0.0057 0.0057 0.0053  
Y -0.0069 -0.0075 -0.0077 0.0069 -0.0027 -0.0021  
Z -0.0086 -0.0080 -0.0080 0.0080 -0.0183 -0.0185

AT.130 H X 0.0060 -0.0063 -0.0061 -0.0057 -0.0057 0.0053  
Y 0.0069 -0.0075 -0.0077 -0.0069 -0.0027 0.0021  
Z -0.0086 0.0080 0.0080 0.0080 0.0183 -0.0185

AT.131 H X 0.0060 -0.0063 0.0061 0.0057 -0.0057 0.0053  
Y -0.0069 0.0075 -0.0077 -0.0069 0.0027 -0.0021  
Z -0.0086 0.0080 -0.0080 -0.0080 0.0183 -0.0185

AT.132 H X 0.0060 0.0063 -0.0061 0.0057 0.0057 0.0053  
Y 0.0069 0.0075 -0.0077 0.0069 0.0027 0.0021  
Z -0.0086 -0.0080 0.0080 -0.0080 -0.0183 -0.0185

AT.133 C X -0.0013 -0.0008 -0.0012 0.0011 -0.0031 -0.0030  
Y -0.0019 -0.0012 -0.0015 0.0015 -0.0047 -0.0046  
Z -0.0020 -0.0012 -0.0015 0.0016 -0.0034 -0.0031

AT.134 C X -0.0013 0.0008 0.0012 0.0011 0.0031 -0.0030  
Y 0.0019 -0.0012 -0.0015 -0.0015 -0.0047 0.0046  
Z -0.0020 0.0012 0.0015 0.0016 0.0034 -0.0031

AT.135 C X -0.0013 0.0008 -0.0012 -0.0011 0.0031 -0.0030  
Y -0.0019 0.0012 -0.0015 -0.0015 0.0047 -0.0046  
Z -0.0020 0.0012 -0.0015 -0.0016 0.0034 -0.0031

AT.136 C X -0.0013 -0.0008 0.0012 -0.0011 -0.0031 -0.0030  
Y 0.0019 0.0012 -0.0015 0.0015 0.0047 0.0046  
Z -0.0020 -0.0012 0.0015 -0.0016 -0.0034 -0.0031

AT.137 C X 0.0010 0.0005 0.0009 -0.0007 0.0015 0.0014  
Y 0.0014 0.0011 0.0010 -0.0014 0.0026 0.0025  
Z 0.0022 0.0015 0.0017 -0.0020 0.0036 0.0035

AT.138 C X 0.0010 -0.0005 -0.0009 -0.0007 -0.0015 0.0014  
Y -0.0014 0.0011 0.0010 0.0014 0.0026 -0.0025  
Z 0.0022 -0.0015 -0.0017 -0.0020 -0.0036 0.0035

AT.139 C X 0.0010 -0.0005 0.0009 0.0007 -0.0015 0.0014  
Y 0.0014 -0.0011 0.0010 0.0014 -0.0026 0.0025

Z 0.0022 -0.0015 0.0017 0.0020 -0.0036 0.0035  
AT. 140 C X 0.0010 0.0005 -0.0009 0.0007 0.0015 0.0014  
Y -0.0014 -0.0011 0.0010 -0.0014 -0.0026 -0.0025  
Z 0.0022 0.0015 -0.0017 0.0020 0.0036 0.0035  
AT. 141 H X -0.0033 -0.0018 -0.0028 0.0025 -0.0085 -0.0083  
Y 0.0033 0.0015 0.0030 -0.0025 0.0092 0.0087  
Z 0.0084 0.0045 0.0074 -0.0065 0.0197 0.0188  
AT. 142 H X -0.0033 0.0018 0.0028 0.0025 0.0085 -0.0083  
Y -0.0033 0.0015 0.0030 0.0025 0.0092 -0.0087  
Z 0.0084 -0.0045 -0.0074 -0.0065 -0.0197 0.0188  
AT. 143 H X -0.0033 0.0018 -0.0028 -0.0025 0.0085 -0.0083  
Y 0.0033 -0.0015 0.0030 0.0025 -0.0092 0.0087  
Z 0.0084 -0.0045 0.0074 0.0065 -0.0197 0.0188  
AT. 144 H X -0.0033 -0.0018 0.0028 -0.0025 -0.0085 -0.0083  
Y -0.0033 -0.0015 0.0030 -0.0025 -0.0092 -0.0087  
Z 0.0084 0.0045 -0.0074 0.0065 0.0197 0.0188  
AT. 145 H X 0.0006 0.0006 -0.0003 -0.0009 0.0071 0.0070  
Y 0.0014 0.0010 0.0011 -0.0011 -0.0007 -0.0007  
Z 0.0010 0.0008 0.0006 -0.0008 -0.0034 -0.0035  
AT. 146 H X 0.0006 -0.0006 0.0003 -0.0009 -0.0071 0.0070  
Y -0.0014 0.0010 0.0011 0.0011 -0.0007 0.0007  
Z 0.0010 -0.0008 -0.0006 -0.0008 0.0034 -0.0035  
AT. 147 H X 0.0006 -0.0006 -0.0003 0.0009 -0.0071 0.0070  
Y 0.0014 -0.0010 0.0011 0.0011 0.0007 -0.0007  
Z 0.0010 -0.0008 0.0006 0.0008 0.0034 -0.0035  
AT. 148 H X 0.0006 0.0006 0.0003 0.0009 0.0071 0.0070  
Y -0.0014 -0.0010 0.0011 -0.0011 0.0007 0.0007  
Z 0.0010 0.0008 -0.0006 0.0008 -0.0034 -0.0035  
AT. 149 O X 0.0009 0.0010 0.0011 -0.0009 -0.0016 -0.0019  
Y -0.0025 -0.0027 -0.0028 0.0024 0.0008 0.0013  
Z -0.0005 -0.0004 -0.0006 0.0004 0.0001 0.0004  
AT. 150 O X 0.0009 -0.0010 -0.0011 -0.0009 0.0016 -0.0019

Y 0.0025 -0.0027 -0.0028 -0.0024 0.0008 -0.0013  
Z -0.0005 0.0004 0.0006 0.0004 -0.0001 0.0004  
AT. 151 O X 0.0009 -0.0010 0.0011 0.0009 0.0016 -0.0019  
Y -0.0025 0.0027 -0.0028 -0.0024 -0.0008 0.0013  
Z -0.0005 0.0004 -0.0006 -0.0004 -0.0001 0.0004  
AT. 152 O X 0.0009 0.0010 -0.0011 0.0009 -0.0016 -0.0019  
Y 0.0025 0.0027 -0.0028 0.0024 -0.0008 -0.0013  
Z -0.0005 -0.0004 0.0006 -0.0004 0.0001 0.0004  
AT. 153 H X 0.0004 0.0024 0.0003 -0.0015 0.0120 0.0117  
Y -0.0039 -0.0038 -0.0031 0.0023 -0.0188 -0.0207  
Z -0.0006 -0.0017 -0.0001 0.0007 -0.0161 -0.0165  
AT. 154 H X 0.0004 -0.0024 -0.0003 -0.0015 -0.0120 0.0117  
Y 0.0039 -0.0038 -0.0031 -0.0023 -0.0188 0.0207  
Z -0.0006 0.0017 0.0001 0.0007 0.0161 -0.0165  
AT. 155 H X 0.0004 -0.0024 0.0003 0.0015 -0.0120 0.0117  
Y -0.0039 0.0038 -0.0031 -0.0023 0.0188 -0.0207  
Z -0.0006 0.0017 -0.0001 -0.0007 0.0161 -0.0165  
AT. 156 H X 0.0004 0.0024 -0.0003 0.0015 0.0120 0.0117  
Y 0.0039 0.0038 -0.0031 0.0023 0.0188 0.0207  
Z -0.0006 -0.0017 0.0001 -0.0007 -0.0161 -0.0165  
AT. 157 O X 0.0081 0.0083 0.0084 -0.0082 -0.0021 -0.0024  
Y 0.0101 0.0100 0.0101 -0.0101 -0.0039 -0.0041  
Z 0.0178 0.0170 0.0175 -0.0179 -0.0112 -0.0111  
AT. 158 O X 0.0081 -0.0083 -0.0084 -0.0082 0.0021 -0.0024  
Y -0.0101 0.0100 0.0101 0.0101 -0.0039 0.0041  
Z 0.0178 -0.0170 -0.0175 -0.0179 0.0112 -0.0111  
AT. 159 O X 0.0081 -0.0083 0.0084 0.0082 0.0021 -0.0024  
Y 0.0101 -0.0100 0.0101 0.0101 0.0039 -0.0041  
Z 0.0178 -0.0170 0.0175 0.0179 0.0112 -0.0111  
AT. 160 O X 0.0081 0.0083 -0.0084 0.0082 -0.0021 -0.0024  
Y -0.0101 -0.0100 0.0101 -0.0101 0.0039 0.0041  
Z 0.0178 0.0170 -0.0175 0.0179 -0.0112 -0.0111



AT.161 O X -0.0089 -0.0088 -0.0088 0.0089 0.0024 0.0026  
Y -0.0095 -0.0093 -0.0094 0.0094 0.0030 0.0031  
Z -0.0152 -0.0147 -0.0150 0.0152 0.0066 0.0066

AT.162 O X -0.0089 0.0088 0.0088 0.0089 -0.0024 0.0026  
Y 0.0095 -0.0093 -0.0094 -0.0094 0.0030 -0.0031  
Z -0.0152 0.0147 0.0150 0.0152 -0.0066 0.0066

AT.163 O X -0.0089 0.0088 -0.0088 -0.0089 -0.0024 0.0026  
Y -0.0095 0.0093 -0.0094 -0.0094 -0.0030 0.0031  
Z -0.0152 0.0147 -0.0150 -0.0152 -0.0066 0.0066

AT.164 O X -0.0089 -0.0088 0.0088 -0.0089 0.0024 0.0026  
Y 0.0095 0.0093 -0.0094 0.0094 -0.0030 -0.0031  
Z -0.0152 -0.0147 0.0150 -0.0152 0.0066 0.0066

AT.165 H X 0.0033 0.0036 0.0034 -0.0036 -0.0020 -0.0028  
Y -0.0052 -0.0049 -0.0051 0.0050 0.0016 0.0014  
Z -0.0038 -0.0037 -0.0037 0.0040 0.0020 0.0027

AT.166 H X 0.0033 -0.0036 -0.0034 -0.0036 0.0020 -0.0028  
Y 0.0052 -0.0049 -0.0051 -0.0050 0.0016 -0.0014  
Z -0.0038 0.0037 0.0037 0.0040 -0.0020 0.0027

AT.167 H X 0.0033 -0.0036 0.0034 0.0036 0.0020 -0.0028  
Y -0.0052 0.0049 -0.0051 -0.0050 -0.0016 0.0014  
Z -0.0038 0.0037 -0.0037 -0.0040 -0.0020 0.0027

AT.168 H X 0.0033 0.0036 -0.0034 0.0036 -0.0020 -0.0028  
Y 0.0052 0.0049 -0.0051 0.0050 -0.0016 -0.0014  
Z -0.0038 -0.0037 0.0037 -0.0040 0.0020 0.0027

AT.169 O X -0.0000 -0.0024 -0.0001 0.0020 0.0003 0.0004  
Y -0.0003 -0.0002 -0.0003 0.0003 0.0009 0.0003  
Z -0.0001 -0.0076 -0.0001 0.0062 0.0011 0.0000

AT.170 O X -0.0000 0.0024 0.0001 0.0020 -0.0003 0.0004  
Y 0.0003 -0.0002 -0.0003 -0.0003 0.0009 -0.0003  
Z -0.0001 0.0076 0.0001 0.0062 -0.0011 0.0000

AT.171 O X -0.0000 0.0024 -0.0001 -0.0020 -0.0003 0.0004  
Y -0.0003 0.0002 -0.0003 -0.0003 -0.0009 0.0003

Z -0.0001 0.0076 -0.0001 -0.0062 -0.0011 0.0000  
 AT. 172 O X -0.0000 -0.0024 0.0001 -0.0020 0.0003 0.0004  
 Y 0.0003 0.0002 -0.0003 0.0003 -0.0009 -0.0003  
 Z -0.0001 -0.0076 0.0001 -0.0062 0.0011 0.0000  
 AT. 173 H X -0.0025 0.0035 -0.0009 -0.0035 -0.0039 -0.0090  
 Y 0.0007 -0.0027 0.0004 0.0023 0.0011 0.0016  
 Z 0.0013 -0.0029 0.0008 0.0024 0.0013 0.0048  
 AT. 174 H X -0.0025 -0.0035 0.0009 -0.0035 0.0039 -0.0090  
 Y -0.0007 -0.0027 0.0004 -0.0023 0.0011 -0.0016  
 Z 0.0013 0.0029 -0.0008 0.0024 -0.0013 0.0048  
 AT. 175 H X -0.0025 -0.0035 -0.0009 0.0035 0.0039 -0.0090  
 Y 0.0007 0.0027 0.0004 -0.0023 -0.0011 0.0016  
 Z 0.0013 0.0029 0.0008 -0.0024 -0.0013 0.0048  
 AT. 176 H X -0.0025 0.0035 0.0009 0.0035 -0.0039 -0.0090  
 Y -0.0007 0.0027 0.0004 0.0023 -0.0011 -0.0016  
 Z 0.0013 -0.0029 -0.0008 -0.0024 0.0013 0.0048

FREQ(CM\*\*-1) 1051.40 1051.98 1066.20 1066.27 1066.57 1066.91

AT. 1 I X 0.0001 0.0001 0.0001 -0.0001 0.0000 -0.0001  
 Y 0.0000 0.0000 0.0000 -0.0000 0.0000 -0.0000  
 Z -0.0000 -0.0000 -0.0000 0.0000 0.0000 0.0000  
 AT. 2 I X -0.0001 0.0001 0.0001 0.0001 0.0000 0.0001  
 Y 0.0000 -0.0000 -0.0000 -0.0000 -0.0000 -0.0000  
 Z 0.0000 -0.0000 -0.0000 -0.0000 0.0000 -0.0000  
 AT. 3 I X 0.0001 -0.0001 0.0001 0.0001 -0.0000 -0.0001  
 Y 0.0000 -0.0000 0.0000 0.0000 -0.0000 -0.0000  
 Z -0.0000 0.0000 -0.0000 -0.0000 -0.0000 0.0000  
 AT. 4 I X -0.0001 -0.0001 0.0001 -0.0001 -0.0000 0.0001  
 Y 0.0000 0.0000 -0.0000 0.0000 0.0000 -0.0000  
 Z 0.0000 0.0000 -0.0000 0.0000 -0.0000 -0.0000  
 AT. 5 I X 0.0001 0.0001 0.0001 -0.0001 0.0001 -0.0001

Y -0.0001 -0.0001 -0.0001 0.0001 -0.0001 0.0001  
Z 0.0000 0.0000 0.0000 -0.0000 0.0000 -0.0000  
AT. 6 I X -0.0001 0.0001 0.0001 0.0001 0.0001 0.0001  
Y -0.0001 0.0001 0.0001 0.0001 0.0001 0.0001  
Z -0.0000 0.0000 0.0000 0.0000 0.0000 0.0000  
AT. 7 I X 0.0001 -0.0001 0.0001 0.0001 -0.0001 -0.0001  
Y -0.0001 0.0001 -0.0001 -0.0001 0.0001 0.0001  
Z 0.0000 -0.0000 0.0000 0.0000 -0.0000 -0.0000  
AT. 8 I X -0.0001 -0.0001 0.0001 -0.0001 -0.0001 0.0001  
Y -0.0001 -0.0001 0.0001 -0.0001 -0.0001 0.0001  
Z -0.0000 -0.0000 0.0000 -0.0000 -0.0000 0.0000  
AT. 9 N X 0.0013 0.0011 0.0026 -0.0026 0.0021 -0.0024  
Y 0.0033 0.0028 0.0048 -0.0049 0.0025 -0.0035  
Z -0.0024 -0.0024 -0.0019 0.0018 -0.0011 0.0013  
AT. 10 N X -0.0013 0.0011 0.0026 0.0026 0.0021 0.0024  
Y 0.0033 -0.0028 -0.0048 -0.0049 -0.0025 -0.0035  
Z 0.0024 -0.0024 -0.0019 -0.0018 -0.0011 -0.0013  
AT. 11 N X 0.0013 -0.0011 0.0026 0.0026 -0.0021 -0.0024  
Y 0.0033 -0.0028 0.0048 0.0049 -0.0025 -0.0035  
Z -0.0024 0.0024 -0.0019 -0.0018 0.0011 0.0013  
AT. 12 N X -0.0013 -0.0011 0.0026 -0.0026 -0.0021 0.0024  
Y 0.0033 0.0028 -0.0048 0.0049 0.0025 -0.0035  
Z 0.0024 0.0024 -0.0019 0.0018 0.0011 -0.0013  
AT. 13 N X -0.0005 -0.0005 -0.0019 0.0019 -0.0022 0.0022  
Y -0.0038 -0.0043 -0.0116 0.0115 -0.0116 0.0117  
Z -0.0033 -0.0034 -0.0038 0.0038 -0.0038 0.0040  
AT. 14 N X 0.0005 -0.0005 -0.0019 -0.0019 -0.0022 -0.0022  
Y -0.0038 0.0043 0.0116 0.0115 0.0116 0.0117  
Z 0.0033 -0.0034 -0.0038 -0.0038 -0.0038 -0.0040  
AT. 15 N X -0.0005 0.0005 -0.0019 -0.0019 0.0022 0.0022  
Y -0.0038 0.0043 -0.0116 -0.0115 0.0116 0.0117  
Z -0.0033 0.0034 -0.0038 -0.0038 0.0038 0.0040

AT. 16 N X 0.0005 0.0005 -0.0019 0.0019 0.0022 -0.0022  
Y -0.0038 -0.0043 0.0116 -0.0115 -0.0116 0.0117  
Z 0.0033 0.0034 -0.0038 0.0038 0.0038 -0.0040

AT. 17 O X -0.0001 -0.0001 -0.0012 0.0013 -0.0008 0.0010  
Y -0.0014 -0.0014 -0.0026 0.0027 -0.0013 0.0020  
Z -0.0011 -0.0008 -0.0025 0.0026 -0.0012 0.0019

AT. 18 O X 0.0001 -0.0001 -0.0012 -0.0013 -0.0008 -0.0010  
Y -0.0014 0.0014 0.0026 0.0027 0.0013 0.0020  
Z 0.0011 -0.0008 -0.0025 -0.0026 -0.0012 -0.0019

AT. 19 O X -0.0001 0.0001 -0.0012 -0.0013 0.0008 0.0010  
Y -0.0014 0.0014 -0.0026 -0.0027 0.0013 0.0020  
Z -0.0011 0.0008 -0.0025 -0.0026 0.0012 0.0019

AT. 20 O X 0.0001 0.0001 -0.0012 0.0013 0.0008 -0.0010  
Y -0.0014 -0.0014 0.0026 -0.0027 -0.0013 0.0020  
Z 0.0011 0.0008 -0.0025 0.0026 0.0012 -0.0019

AT. 21 O X 0.0004 0.0005 0.0002 -0.0002 0.0002 -0.0003  
Y 0.0013 0.0016 0.0060 -0.0060 0.0060 -0.0060  
Z -0.0011 -0.0015 -0.0054 0.0055 -0.0054 0.0056

AT. 22 O X -0.0004 0.0005 0.0002 0.0002 0.0002 0.0003  
Y 0.0013 -0.0016 -0.0060 -0.0060 -0.0060 -0.0060  
Z 0.0011 -0.0015 -0.0054 -0.0055 -0.0054 -0.0056

AT. 23 O X 0.0004 -0.0005 0.0002 0.0002 -0.0002 -0.0003  
Y 0.0013 -0.0016 0.0060 0.0060 -0.0060 -0.0060  
Z -0.0011 0.0015 -0.0054 -0.0055 0.0054 0.0056

AT. 24 O X -0.0004 -0.0005 0.0002 -0.0002 -0.0002 0.0003  
Y 0.0013 0.0016 -0.0060 0.0060 0.0060 -0.0060  
Z 0.0011 0.0015 -0.0054 0.0055 0.0054 -0.0056

AT. 25 C X -0.0002 -0.0001 0.0004 -0.0006 -0.0001 -0.0002  
Y -0.0020 -0.0018 -0.0029 0.0030 -0.0018 0.0024  
Z 0.0034 0.0031 0.0037 -0.0037 0.0019 -0.0030

AT. 26 C X 0.0002 -0.0001 0.0004 0.0006 -0.0001 0.0002  
Y -0.0020 0.0018 0.0029 0.0030 0.0018 0.0024

Z -0.0034 0.0031 0.0037 0.0037 0.0019 0.0030  
AT. 27 C X -0.0002 0.0001 0.0004 0.0006 0.0001 -0.0002  
Y -0.0020 0.0018 -0.0029 -0.0030 0.0018 0.0024  
Z 0.0034 -0.0031 0.0037 0.0037 -0.0019 -0.0030  
AT. 28 C X 0.0002 0.0001 0.0004 -0.0006 0.0001 0.0002  
Y -0.0020 -0.0018 0.0029 -0.0030 -0.0018 0.0024  
Z -0.0034 -0.0031 0.0037 -0.0037 -0.0019 0.0030  
AT. 29 H X -0.0039 -0.0045 -0.0081 0.0087 -0.0035 0.0057  
Y -0.0045 -0.0036 -0.0049 0.0049 -0.0006 0.0029  
Z 0.0098 0.0103 0.0173 -0.0184 0.0071 -0.0124  
AT. 30 H X 0.0039 -0.0045 -0.0081 -0.0087 -0.0035 -0.0057  
Y -0.0045 0.0036 0.0049 0.0049 0.0006 0.0029  
Z -0.0098 0.0103 0.0173 0.0184 0.0071 0.0124  
AT. 31 H X -0.0039 0.0045 -0.0081 -0.0087 0.0035 0.0057  
Y -0.0045 0.0036 -0.0049 -0.0049 0.0006 0.0029  
Z 0.0098 -0.0103 0.0173 0.0184 -0.0071 -0.0124  
AT. 32 H X 0.0039 0.0045 -0.0081 0.0087 0.0035 -0.0057  
Y -0.0045 -0.0036 0.0049 -0.0049 -0.0006 0.0029  
Z -0.0098 -0.0103 0.0173 -0.0184 -0.0071 0.0124  
AT. 33 H X 0.0044 0.0034 0.0055 -0.0048 0.0024 -0.0030  
Y -0.0017 -0.0015 -0.0025 0.0025 -0.0022 0.0023  
Z -0.0024 -0.0018 -0.0029 0.0023 0.0013 0.0001  
AT. 34 H X -0.0044 0.0034 0.0055 0.0048 0.0024 0.0030  
Y -0.0017 0.0015 0.0025 0.0025 0.0022 0.0023  
Z 0.0024 -0.0018 -0.0029 -0.0023 0.0013 -0.0001  
AT. 35 H X 0.0044 -0.0034 0.0055 0.0048 -0.0024 -0.0030  
Y -0.0017 0.0015 -0.0025 -0.0025 0.0022 0.0023  
Z -0.0024 0.0018 -0.0029 -0.0023 -0.0013 0.0001  
AT. 36 H X -0.0044 -0.0034 0.0055 -0.0048 -0.0024 0.0030  
Y -0.0017 -0.0015 0.0025 -0.0025 -0.0022 0.0023  
Z 0.0024 0.0018 -0.0029 0.0023 -0.0013 -0.0001  
AT. 37 C X -0.0007 -0.0008 -0.0007 0.0007 -0.0001 0.0004

Y 0.0037 0.0035 0.0052 -0.0055 0.0027 -0.0041  
Z -0.0026 -0.0024 -0.0035 0.0036 -0.0018 0.0028  
AT. 38 C X 0.0007 -0.0008 -0.0007 -0.0007 -0.0001 -0.0004  
Y 0.0037 -0.0035 -0.0052 -0.0055 -0.0027 -0.0041  
Z 0.0026 -0.0024 -0.0035 -0.0036 -0.0018 -0.0028  
AT. 39 C X -0.0007 0.0008 -0.0007 -0.0007 0.0001 0.0004  
Y 0.0037 -0.0035 0.0052 0.0055 -0.0027 -0.0041  
Z -0.0026 0.0024 -0.0035 -0.0036 0.0018 0.0028  
AT. 40 C X 0.0007 0.0008 -0.0007 0.0007 0.0001 -0.0004  
Y 0.0037 0.0035 -0.0052 0.0055 0.0027 -0.0041  
Z 0.0026 0.0024 -0.0035 0.0036 0.0018 -0.0028  
AT. 41 C X 0.0024 0.0023 -0.0032 0.0027 -0.0036 0.0031  
Y -0.0074 -0.0073 0.0012 -0.0013 0.0022 -0.0019  
Z 0.0016 0.0018 0.0002 -0.0005 0.0003 -0.0003  
AT. 42 C X -0.0024 0.0023 -0.0032 -0.0027 -0.0036 -0.0031  
Y -0.0074 0.0073 -0.0012 -0.0013 -0.0022 -0.0019  
Z -0.0016 0.0018 0.0002 0.0005 0.0003 0.0003  
AT. 43 C X 0.0024 -0.0023 -0.0032 -0.0027 0.0036 0.0031  
Y -0.0074 0.0073 0.0012 0.0013 -0.0022 -0.0019  
Z 0.0016 -0.0018 0.0002 0.0005 -0.0003 -0.0003  
AT. 44 C X -0.0024 -0.0023 -0.0032 0.0027 0.0036 -0.0031  
Y -0.0074 -0.0073 -0.0012 0.0013 0.0022 -0.0019  
Z -0.0016 -0.0018 0.0002 -0.0005 -0.0003 0.0003  
AT. 45 H X -0.0245 -0.0241 -0.0055 0.0050 0.0005 0.0013  
Y -0.0024 -0.0023 -0.0081 0.0073 -0.0050 0.0057  
Z 0.0096 0.0097 -0.0075 0.0067 -0.0065 0.0065  
AT. 46 H X 0.0245 -0.0241 -0.0055 -0.0050 0.0005 -0.0013  
Y -0.0024 0.0023 0.0081 0.0073 0.0050 0.0057  
Z -0.0096 0.0097 -0.0075 -0.0067 -0.0065 -0.0065  
AT. 47 H X -0.0245 0.0241 -0.0055 -0.0050 -0.0005 0.0013  
Y -0.0024 0.0023 -0.0081 -0.0073 0.0050 0.0057  
Z 0.0096 -0.0097 -0.0075 -0.0067 0.0065 0.0065

AT. 48 H X 0.0245 0.0241 -0.0055 0.0050 -0.0005 -0.0013  
Y -0.0024 -0.0023 0.0081 -0.0073 -0.0050 0.0057  
Z -0.0096 -0.0097 -0.0075 0.0067 0.0065 -0.0065

AT. 49 H X 0.0044 0.0037 -0.0017 0.0007 -0.0036 0.0023  
Y 0.0027 0.0023 0.0004 -0.0011 -0.0008 -0.0001  
Z -0.0188 -0.0187 0.0069 -0.0064 0.0084 -0.0072

AT. 50 H X -0.0044 0.0037 -0.0017 -0.0007 -0.0036 -0.0023  
Y 0.0027 -0.0023 -0.0004 -0.0011 0.0008 -0.0001  
Z 0.0188 -0.0187 0.0069 0.0064 0.0084 0.0072

AT. 51 H X 0.0044 -0.0037 -0.0017 -0.0007 0.0036 0.0023  
Y 0.0027 -0.0023 0.0004 0.0011 0.0008 -0.0001  
Z -0.0188 0.0187 0.0069 0.0064 -0.0084 -0.0072

AT. 52 H X -0.0044 -0.0037 -0.0017 0.0007 0.0036 -0.0023  
Y 0.0027 0.0023 -0.0004 0.0011 -0.0008 -0.0001  
Z 0.0188 0.0187 0.0069 -0.0064 -0.0084 0.0072

AT. 53 C X 0.0028 0.0033 0.0006 0.0005 0.0005 0.0004  
Y 0.0073 0.0076 -0.0005 0.0009 -0.0007 0.0006  
Z 0.0078 0.0079 -0.0011 0.0013 -0.0016 0.0012

AT. 54 C X -0.0028 0.0033 0.0006 -0.0005 0.0005 -0.0004  
Y 0.0073 -0.0076 0.0005 0.0009 0.0007 0.0006  
Z -0.0078 0.0079 -0.0011 -0.0013 -0.0016 -0.0012

AT. 55 C X 0.0028 -0.0033 0.0006 -0.0005 -0.0005 0.0004  
Y 0.0073 -0.0076 -0.0005 -0.0009 0.0007 0.0006  
Z 0.0078 -0.0079 -0.0011 -0.0013 0.0016 0.0012

AT. 56 C X -0.0028 -0.0033 0.0006 0.0005 -0.0005 -0.0004  
Y 0.0073 0.0076 0.0005 -0.0009 -0.0007 0.0006  
Z -0.0078 -0.0079 -0.0011 0.0013 0.0016 -0.0012

AT. 57 C X -0.0036 -0.0031 0.0024 -0.0016 0.0025 -0.0017  
Y 0.0039 0.0037 -0.0083 0.0083 -0.0091 0.0088  
Z -0.0104 -0.0105 0.0043 -0.0046 0.0051 -0.0047

AT. 58 C X 0.0036 -0.0031 0.0024 0.0016 0.0025 0.0017  
Y 0.0039 -0.0037 0.0083 0.0083 0.0091 0.0088

Z 0.0104 -0.0105 0.0043 0.0046 0.0051 0.0047  
AT. 59 C X -0.0036 0.0031 0.0024 0.0016 -0.0025 -0.0017  
Y 0.0039 -0.0037 -0.0083 -0.0083 0.0091 0.0088  
Z -0.0104 0.0105 0.0043 0.0046 -0.0051 -0.0047  
AT. 60 C X 0.0036 0.0031 0.0024 -0.0016 -0.0025 0.0017  
Y 0.0039 0.0037 0.0083 -0.0083 -0.0091 0.0088  
Z 0.0104 0.0105 0.0043 -0.0046 -0.0051 0.0047  
AT. 61 H X 0.0036 0.0023 -0.0041 0.0025 -0.0043 0.0027  
Y 0.0022 0.0010 -0.0053 0.0039 -0.0054 0.0040  
Z 0.0272 0.0249 -0.0383 0.0362 -0.0429 0.0391  
AT. 62 H X -0.0036 0.0023 -0.0041 -0.0025 -0.0043 -0.0027  
Y 0.0022 -0.0010 0.0053 0.0039 0.0054 0.0040  
Z -0.0272 0.0249 -0.0383 -0.0362 -0.0429 -0.0391  
AT. 63 H X 0.0036 -0.0023 -0.0041 -0.0025 0.0043 0.0027  
Y 0.0022 -0.0010 -0.0053 -0.0039 0.0054 0.0040  
Z 0.0272 -0.0249 -0.0383 -0.0362 0.0429 0.0391  
AT. 64 H X -0.0036 -0.0023 -0.0041 0.0025 0.0043 -0.0027  
Y 0.0022 0.0010 0.0053 -0.0039 -0.0054 0.0040  
Z -0.0272 -0.0249 -0.0383 0.0362 0.0429 -0.0391  
AT. 65 H X 0.0028 0.0028 -0.0048 0.0048 -0.0054 0.0051  
Y -0.0168 -0.0157 0.0140 -0.0128 0.0153 -0.0134  
Z 0.0032 0.0045 -0.0129 0.0159 -0.0148 0.0165  
AT. 66 H X -0.0028 0.0028 -0.0048 -0.0048 -0.0054 -0.0051  
Y -0.0168 0.0157 -0.0140 -0.0128 -0.0153 -0.0134  
Z -0.0032 0.0045 -0.0129 -0.0159 -0.0148 -0.0165  
AT. 67 H X 0.0028 -0.0028 -0.0048 -0.0048 0.0054 0.0051  
Y -0.0168 0.0157 0.0140 0.0128 -0.0153 -0.0134  
Z 0.0032 -0.0045 -0.0129 -0.0159 0.0148 0.0165  
AT. 68 H X -0.0028 -0.0028 -0.0048 0.0048 0.0054 -0.0051  
Y -0.0168 -0.0157 -0.0140 0.0128 0.0153 -0.0134  
Z -0.0032 -0.0045 -0.0129 0.0159 0.0148 -0.0165  
AT. 69 H X -0.0052 -0.0064 0.0043 -0.0051 0.0055 -0.0055



Y -0.0265 -0.0263 0.0252 -0.0259 0.0285 -0.0269  
Z -0.0363 -0.0362 0.0324 -0.0335 0.0367 -0.0350  
AT. 70 H X 0.0052 -0.0064 0.0043 0.0051 0.0055 0.0055  
Y -0.0265 0.0263 -0.0252 -0.0259 -0.0285 -0.0269  
Z 0.0363 -0.0362 0.0324 0.0335 0.0367 0.0350  
AT. 71 H X -0.0052 0.0064 0.0043 0.0051 -0.0055 -0.0055  
Y -0.0265 0.0263 0.0252 0.0259 -0.0285 -0.0269  
Z -0.0363 0.0362 0.0324 0.0335 -0.0367 -0.0350  
AT. 72 H X 0.0052 0.0064 0.0043 -0.0051 -0.0055 0.0055  
Y -0.0265 -0.0263 -0.0252 0.0259 0.0285 -0.0269  
Z 0.0363 0.0362 0.0324 -0.0335 -0.0367 0.0350  
AT. 73 C X 0.0050 0.0048 -0.0056 0.0052 -0.0056 0.0053  
Y -0.0005 -0.0004 0.0030 -0.0034 0.0032 -0.0031  
Z 0.0152 0.0153 -0.0044 0.0047 -0.0043 0.0041  
AT. 74 C X -0.0050 0.0048 -0.0056 -0.0052 -0.0056 -0.0053  
Y -0.0005 0.0004 -0.0030 -0.0034 -0.0032 -0.0031  
Z -0.0152 0.0153 -0.0044 -0.0047 -0.0043 -0.0041  
AT. 75 C X 0.0050 -0.0048 -0.0056 -0.0052 0.0056 0.0053  
Y -0.0005 0.0004 0.0030 0.0034 -0.0032 -0.0031  
Z 0.0152 -0.0153 -0.0044 -0.0047 0.0043 0.0041  
AT. 76 C X -0.0050 -0.0048 -0.0056 0.0052 0.0056 -0.0053  
Y -0.0005 -0.0004 -0.0030 0.0034 0.0032 -0.0031  
Z -0.0152 -0.0153 -0.0044 0.0047 0.0043 -0.0041  
AT. 77 C X -0.0030 -0.0031 -0.0017 0.0019 -0.0020 0.0020  
Y 0.0027 0.0027 -0.0052 0.0055 -0.0027 0.0038  
Z 0.0024 0.0021 0.0034 -0.0028 0.0019 -0.0024  
AT. 78 C X 0.0030 -0.0031 -0.0017 -0.0019 -0.0020 -0.0020  
Y 0.0027 -0.0027 0.0052 0.0055 0.0027 0.0038  
Z -0.0024 0.0021 0.0034 0.0028 0.0019 0.0024  
AT. 79 C X -0.0030 0.0031 -0.0017 -0.0019 0.0020 0.0020  
Y 0.0027 -0.0027 -0.0052 -0.0055 0.0027 0.0038  
Z 0.0024 -0.0021 0.0034 0.0028 -0.0019 -0.0024

AT. 80 C X 0.0030 0.0031 -0.0017 0.0019 0.0020 -0.0020  
Y 0.0027 0.0027 0.0052 -0.0055 -0.0027 0.0038  
Z -0.0024 -0.0021 0.0034 -0.0028 -0.0019 0.0024

AT. 81 H X -0.0057 -0.0055 0.0003 -0.0007 -0.0022 0.0013  
Y 0.0013 0.0014 -0.0028 0.0025 -0.0028 0.0030  
Z -0.0142 -0.0136 0.0061 -0.0073 0.0035 -0.0048

AT. 82 H X 0.0057 -0.0055 0.0003 0.0007 -0.0022 -0.0013  
Y 0.0013 -0.0014 0.0028 0.0025 0.0028 0.0030  
Z 0.0142 -0.0136 0.0061 0.0073 0.0035 0.0048

AT. 83 H X -0.0057 0.0055 0.0003 0.0007 0.0022 0.0013  
Y 0.0013 -0.0014 -0.0028 -0.0025 0.0028 0.0030  
Z -0.0142 0.0136 0.0061 0.0073 -0.0035 -0.0048

AT. 84 H X 0.0057 0.0055 0.0003 -0.0007 0.0022 -0.0013  
Y 0.0013 0.0014 0.0028 -0.0025 -0.0028 0.0030  
Z 0.0142 0.0136 0.0061 -0.0073 -0.0035 0.0048

AT. 85 H X 0.0066 0.0068 -0.0130 0.0140 -0.0067 0.0100  
Y -0.0061 -0.0051 -0.0098 0.0104 -0.0051 0.0072  
Z 0.0068 0.0056 0.0103 -0.0102 0.0051 -0.0074

AT. 86 H X -0.0066 0.0068 -0.0130 -0.0140 -0.0067 -0.0100  
Y -0.0061 0.0051 0.0098 0.0104 0.0051 0.0072  
Z -0.0068 0.0056 0.0103 0.0102 0.0051 0.0074

AT. 87 H X 0.0066 -0.0068 -0.0130 -0.0140 0.0067 0.0100  
Y -0.0061 0.0051 -0.0098 -0.0104 0.0051 0.0072  
Z 0.0068 -0.0056 0.0103 0.0102 -0.0051 -0.0074

AT. 88 H X -0.0066 -0.0068 -0.0130 0.0140 0.0067 -0.0100  
Y -0.0061 -0.0051 0.0098 -0.0104 -0.0051 0.0072  
Z -0.0068 -0.0056 0.0103 -0.0102 -0.0051 0.0074

AT. 89 C X 0.0007 0.0009 0.0007 -0.0007 0.0006 -0.0008  
Y -0.0083 -0.0083 0.0020 -0.0023 0.0024 -0.0023  
Z 0.0075 0.0078 -0.0004 0.0007 -0.0005 0.0002

AT. 90 C X -0.0007 0.0009 0.0007 0.0007 0.0006 0.0008  
Y -0.0083 0.0083 -0.0020 -0.0023 -0.0024 -0.0023

Z -0.0075 0.0078 -0.0004 -0.0007 -0.0005 -0.0002  
AT. 91 C X 0.0007 -0.0009 0.0007 0.0007 -0.0006 -0.0008  
Y -0.0083 0.0083 0.0020 0.0023 -0.0024 -0.0023  
Z 0.0075 -0.0078 -0.0004 -0.0007 0.0005 0.0002  
AT. 92 C X -0.0007 -0.0009 0.0007 -0.0007 -0.0006 0.0008  
Y -0.0083 -0.0083 -0.0020 0.0023 0.0024 -0.0023  
Z -0.0075 -0.0078 -0.0004 0.0007 0.0005 -0.0002  
AT. 93 C X -0.0024 -0.0025 0.0004 -0.0004 -0.0001 -0.0000  
Y -0.0047 -0.0047 -0.0011 0.0010 -0.0024 0.0018  
Z -0.0110 -0.0112 0.0001 -0.0005 -0.0001 0.0002  
AT. 94 C X 0.0024 -0.0025 0.0004 0.0004 -0.0001 0.0000  
Y -0.0047 0.0047 0.0011 0.0010 0.0024 0.0018  
Z 0.0110 -0.0112 0.0001 0.0005 -0.0001 -0.0002  
AT. 95 C X -0.0024 0.0025 0.0004 0.0004 0.0001 -0.0000  
Y -0.0047 0.0047 -0.0011 -0.0010 0.0024 0.0018  
Z -0.0110 0.0112 0.0001 0.0005 0.0001 0.0002  
AT. 96 C X 0.0024 0.0025 0.0004 -0.0004 0.0001 0.0000  
Y -0.0047 -0.0047 0.0011 -0.0010 -0.0024 0.0018  
Z 0.0110 0.0112 0.0001 -0.0005 0.0001 -0.0002  
AT. 97 H X -0.0006 -0.0009 0.0002 -0.0005 0.0008 -0.0005  
Y 0.0084 0.0087 0.0005 0.0004 -0.0002 -0.0003  
Z 0.0202 0.0200 0.0023 -0.0022 0.0070 -0.0052  
AT. 98 H X 0.0006 -0.0009 0.0002 0.0005 0.0008 0.0005  
Y 0.0084 -0.0087 -0.0005 0.0004 0.0002 -0.0003  
Z -0.0202 0.0200 0.0023 0.0022 0.0070 0.0052  
AT. 99 H X -0.0006 0.0009 0.0002 0.0005 -0.0008 -0.0005  
Y 0.0084 -0.0087 0.0005 -0.0004 0.0002 -0.0003  
Z 0.0202 -0.0200 0.0023 0.0022 -0.0070 -0.0052  
AT. 100 H X 0.0006 0.0009 0.0002 -0.0005 -0.0008 0.0005  
Y 0.0084 0.0087 -0.0005 -0.0004 -0.0002 -0.0003  
Z -0.0202 -0.0200 0.0023 -0.0022 -0.0070 0.0052  
AT. 101 H X 0.0095 0.0097 0.0012 -0.0009 0.0021 -0.0017

Y 0.0042 0.0044 -0.0009 0.0009 -0.0011 0.0009  
Z 0.0193 0.0195 0.0041 -0.0032 0.0073 -0.0056  
AT.102 H X -0.0095 0.0097 0.0012 0.0009 0.0021 0.0017  
Y 0.0042 -0.0044 0.0009 0.0009 0.0011 0.0009  
Z -0.0193 0.0195 0.0041 0.0032 0.0073 0.0056  
AT.103 H X 0.0095 -0.0097 0.0012 0.0009 -0.0021 -0.0017  
Y 0.0042 -0.0044 -0.0009 -0.0009 0.0011 0.0009  
Z 0.0193 -0.0195 0.0041 0.0032 -0.0073 -0.0056  
AT.104 H X -0.0095 -0.0097 0.0012 -0.0009 -0.0021 0.0017  
Y 0.0042 0.0044 0.0009 -0.0009 -0.0011 0.0009  
Z -0.0193 -0.0195 0.0041 -0.0032 -0.0073 0.0056  
AT.105 H X -0.0069 -0.0066 -0.0003 0.0000 -0.0008 0.0006  
Y 0.0398 0.0398 0.0018 -0.0011 0.0062 -0.0045  
Z -0.0431 -0.0435 -0.0018 0.0008 -0.0063 0.0046  
AT.106 H X 0.0069 -0.0066 -0.0003 -0.0000 -0.0008 -0.0006  
Y 0.0398 -0.0398 -0.0018 -0.0011 -0.0062 -0.0045  
Z 0.0431 -0.0435 -0.0018 -0.0008 -0.0063 -0.0046  
AT.107 H X -0.0069 0.0066 -0.0003 -0.0000 0.0008 0.0006  
Y 0.0398 -0.0398 0.0018 0.0011 -0.0062 -0.0045  
Z -0.0431 0.0435 -0.0018 -0.0008 0.0063 0.0046  
AT.108 H X 0.0069 0.0066 -0.0003 0.0000 0.0008 -0.0006  
Y 0.0398 0.0398 -0.0018 0.0011 0.0062 -0.0045  
Z 0.0431 0.0435 -0.0018 0.0008 0.0063 -0.0046  
AT.109 C X -0.0025 -0.0027 0.0057 -0.0062 0.0061 -0.0066  
Y 0.0009 0.0012 0.0127 -0.0125 0.0130 -0.0128  
Z 0.0023 0.0029 0.0072 -0.0069 0.0072 -0.0071  
AT.110 C X 0.0025 -0.0027 0.0057 0.0062 0.0061 0.0066  
Y 0.0009 -0.0012 -0.0127 -0.0125 -0.0130 -0.0128  
Z -0.0023 0.0029 0.0072 0.0069 0.0072 0.0071  
AT.111 C X -0.0025 0.0027 0.0057 0.0062 -0.0061 -0.0066  
Y 0.0009 -0.0012 0.0127 0.0125 -0.0130 -0.0128  
Z 0.0023 -0.0029 0.0072 0.0069 -0.0072 -0.0071

AT.112 C X 0.0025 0.0027 0.0057 -0.0062 -0.0061 0.0066  
Y 0.0009 0.0012 -0.0127 0.0125 0.0130 -0.0128  
Z -0.0023 -0.0029 0.0072 -0.0069 -0.0072 0.0071

AT.113 H X -0.0016 -0.0021 0.0169 -0.0177 0.0179 -0.0184  
Y -0.0032 -0.0026 -0.0051 0.0056 -0.0056 0.0057  
Z -0.0086 -0.0088 0.0165 -0.0169 0.0170 -0.0175

AT.114 H X 0.0016 -0.0021 0.0169 0.0177 0.0179 0.0184  
Y -0.0032 0.0026 0.0051 0.0056 0.0056 0.0057  
Z 0.0086 -0.0088 0.0165 0.0169 0.0170 0.0175

AT.115 H X -0.0016 0.0021 0.0169 0.0177 -0.0179 -0.0184  
Y -0.0032 0.0026 -0.0051 -0.0056 0.0056 0.0057  
Z -0.0086 0.0088 0.0165 0.0169 -0.0170 -0.0175

AT.116 H X 0.0016 0.0021 0.0169 -0.0177 -0.0179 0.0184  
Y -0.0032 -0.0026 0.0051 -0.0056 -0.0056 0.0057  
Z 0.0086 0.0088 0.0165 -0.0169 -0.0170 0.0175

AT.117 H X 0.0021 0.0023 -0.0256 0.0262 -0.0266 0.0268  
Y 0.0062 0.0072 0.0271 -0.0263 0.0280 -0.0271  
Z 0.0062 0.0074 0.0248 -0.0241 0.0257 -0.0249

AT.118 H X -0.0021 0.0023 -0.0256 -0.0262 -0.0266 -0.0268  
Y 0.0062 -0.0072 -0.0271 -0.0263 -0.0280 -0.0271  
Z -0.0062 0.0074 0.0248 0.0241 0.0257 0.0249

AT.119 H X 0.0021 -0.0023 -0.0256 -0.0262 0.0266 0.0268  
Y 0.0062 -0.0072 0.0271 0.0263 -0.0280 -0.0271  
Z 0.0062 -0.0074 0.0248 0.0241 -0.0257 -0.0249

AT.120 H X -0.0021 -0.0023 -0.0256 0.0262 0.0266 -0.0268  
Y 0.0062 0.0072 -0.0271 0.0263 0.0280 -0.0271  
Z -0.0062 -0.0074 0.0248 -0.0241 -0.0257 0.0249

AT.121 C X 0.0051 0.0050 0.0020 -0.0019 0.0025 -0.0025  
Y 0.0067 0.0067 0.0029 -0.0027 0.0029 -0.0028  
Z 0.0013 0.0011 -0.0001 -0.0001 -0.0004 0.0002

AT.122 C X -0.0051 0.0050 0.0020 0.0019 0.0025 0.0025  
Y 0.0067 -0.0067 -0.0029 -0.0027 -0.0029 -0.0028

Z -0.0013 0.0011 -0.0001 0.0001 -0.0004 -0.0002  
AT. 123 C X 0.0051 -0.0050 0.0020 0.0019 -0.0025 -0.0025  
Y 0.0067 -0.0067 0.0029 0.0027 -0.0029 -0.0028  
Z 0.0013 -0.0011 -0.0001 0.0001 0.0004 0.0002  
AT. 124 C X -0.0051 -0.0050 0.0020 -0.0019 -0.0025 0.0025  
Y 0.0067 0.0067 -0.0029 0.0027 0.0029 -0.0028  
Z -0.0013 -0.0011 -0.0001 -0.0001 0.0004 -0.0002  
AT. 125 H X -0.0257 -0.0260 -0.0233 0.0228 -0.0237 0.0242  
Y 0.0117 0.0126 0.0233 -0.0231 0.0230 -0.0234  
Z 0.0062 0.0054 -0.0081 0.0081 -0.0079 0.0080  
AT. 126 H X 0.0257 -0.0260 -0.0233 -0.0228 -0.0237 -0.0242  
Y 0.0117 -0.0126 -0.0233 -0.0231 -0.0230 -0.0234  
Z -0.0062 0.0054 -0.0081 -0.0081 -0.0079 -0.0080  
AT. 127 H X -0.0257 0.0260 -0.0233 -0.0228 0.0237 0.0242  
Y 0.0117 -0.0126 0.0233 0.0231 -0.0230 -0.0234  
Z 0.0062 -0.0054 -0.0081 -0.0081 0.0079 0.0080  
AT. 128 H X 0.0257 0.0260 -0.0233 0.0228 0.0237 -0.0242  
Y 0.0117 0.0126 -0.0233 0.0231 0.0230 -0.0234  
Z -0.0062 -0.0054 -0.0081 0.0081 0.0079 -0.0080  
AT. 129 H X 0.0059 0.0058 0.0100 -0.0102 0.0104 -0.0105  
Y -0.0032 -0.0031 -0.0121 0.0126 -0.0119 0.0120  
Z -0.0194 -0.0193 -0.0052 0.0046 -0.0057 0.0053  
AT. 130 H X -0.0059 0.0058 0.0100 0.0102 0.0104 0.0105  
Y -0.0032 0.0031 0.0121 0.0126 0.0119 0.0120  
Z 0.0194 -0.0193 -0.0052 -0.0046 -0.0057 -0.0053  
AT. 131 H X 0.0059 -0.0058 0.0100 0.0102 -0.0104 -0.0105  
Y -0.0032 0.0031 -0.0121 -0.0126 0.0119 0.0120  
Z -0.0194 0.0193 -0.0052 -0.0046 0.0057 0.0053  
AT. 132 H X -0.0059 -0.0058 0.0100 -0.0102 -0.0104 0.0105  
Y -0.0032 -0.0031 0.0121 -0.0126 -0.0119 0.0120  
Z 0.0194 0.0193 -0.0052 0.0046 0.0057 -0.0053  
AT. 133 C X -0.0029 -0.0032 -0.0068 0.0068 -0.0069 0.0070

Y -0.0045 -0.0049 -0.0109 0.0108 -0.0109 0.0111  
Z -0.0032 -0.0034 -0.0089 0.0088 -0.0090 0.0090  
AT. 134 C X 0.0029 -0.0032 -0.0068 -0.0068 -0.0069 -0.0070  
Y -0.0045 0.0049 0.0109 0.0108 0.0109 0.0111  
Z 0.0032 -0.0034 -0.0089 -0.0088 -0.0090 -0.0090  
AT. 135 C X -0.0029 0.0032 -0.0068 -0.0068 0.0069 0.0070  
Y -0.0045 0.0049 -0.0109 -0.0108 0.0109 0.0111  
Z -0.0032 0.0034 -0.0089 -0.0088 0.0090 0.0090  
AT. 136 C X 0.0029 0.0032 -0.0068 0.0068 0.0069 -0.0070  
Y -0.0045 -0.0049 0.0109 -0.0108 -0.0109 0.0111  
Z 0.0032 0.0034 -0.0089 0.0088 0.0090 -0.0090  
AT. 137 C X 0.0013 0.0014 0.0038 -0.0038 0.0038 -0.0038  
Y 0.0025 0.0027 0.0050 -0.0050 0.0049 -0.0052  
Z 0.0034 0.0038 0.0092 -0.0093 0.0094 -0.0096  
AT. 138 C X -0.0013 0.0014 0.0038 0.0038 0.0038 0.0038  
Y 0.0025 -0.0027 -0.0050 -0.0050 -0.0049 -0.0052  
Z -0.0034 0.0038 0.0092 0.0093 0.0094 0.0096  
AT. 139 C X 0.0013 -0.0014 0.0038 0.0038 -0.0038 -0.0038  
Y 0.0025 -0.0027 0.0050 0.0050 -0.0049 -0.0052  
Z 0.0034 -0.0038 0.0092 0.0093 -0.0094 -0.0096  
AT. 140 C X -0.0013 -0.0014 0.0038 -0.0038 -0.0038 0.0038  
Y 0.0025 0.0027 -0.0050 0.0050 0.0049 -0.0052  
Z -0.0034 -0.0038 0.0092 -0.0093 -0.0094 0.0096  
AT. 141 H X -0.0084 -0.0085 -0.0174 0.0169 -0.0173 0.0172  
Y 0.0085 0.0091 0.0269 -0.0267 0.0274 -0.0271  
Z 0.0188 0.0196 0.0489 -0.0483 0.0495 -0.0490  
AT. 142 H X 0.0084 -0.0085 -0.0174 -0.0169 -0.0173 -0.0172  
Y 0.0085 -0.0091 -0.0269 -0.0267 -0.0274 -0.0271  
Z -0.0188 0.0196 0.0489 0.0483 0.0495 0.0490  
AT. 143 H X -0.0084 0.0085 -0.0174 -0.0169 0.0173 0.0172  
Y 0.0085 -0.0091 0.0269 0.0267 -0.0274 -0.0271  
Z 0.0188 -0.0196 0.0489 0.0483 -0.0495 -0.0490

AT.144 H X 0.0084 0.0085 -0.0174 0.0169 0.0173 -0.0172  
Y 0.0085 0.0091 -0.0269 0.0267 0.0274 -0.0271  
Z -0.0188 -0.0196 0.0489 -0.0483 -0.0495 0.0490

AT.145 H X 0.0069 0.0074 0.0142 -0.0142 0.0140 -0.0150  
Y -0.0006 -0.0007 -0.0031 0.0032 -0.0033 0.0034  
Z -0.0030 -0.0033 -0.0117 0.0120 -0.0121 0.0123

AT.146 H X -0.0069 0.0074 0.0142 0.0142 0.0140 0.0150  
Y -0.0006 0.0007 0.0031 0.0032 0.0033 0.0034  
Z 0.0030 -0.0033 -0.0117 -0.0120 -0.0121 -0.0123

AT.147 H X 0.0069 -0.0074 0.0142 0.0142 -0.0140 -0.0150  
Y -0.0006 0.0007 -0.0031 -0.0032 0.0033 0.0034  
Z -0.0030 0.0033 -0.0117 -0.0120 0.0121 0.0123

AT.148 H X -0.0069 -0.0074 0.0142 -0.0142 -0.0140 0.0150  
Y -0.0006 -0.0007 0.0031 -0.0032 -0.0033 0.0034  
Z 0.0030 0.0033 -0.0117 0.0120 0.0121 -0.0123

AT.149 O X -0.0018 -0.0016 0.0037 -0.0035 0.0038 -0.0038  
Y 0.0010 0.0009 -0.0034 0.0034 -0.0035 0.0035  
Z 0.0003 0.0001 -0.0013 0.0011 -0.0013 0.0013

AT.150 O X 0.0018 -0.0016 0.0037 0.0035 0.0038 0.0038  
Y 0.0010 -0.0009 0.0034 0.0034 0.0035 0.0035  
Z -0.0003 0.0001 -0.0013 -0.0011 -0.0013 -0.0013

AT.151 O X -0.0018 0.0016 0.0037 0.0035 -0.0038 -0.0038  
Y 0.0010 -0.0009 -0.0034 -0.0034 0.0035 0.0035  
Z 0.0003 -0.0001 -0.0013 -0.0011 0.0013 0.0013

AT.152 O X 0.0018 0.0016 0.0037 -0.0035 -0.0038 0.0038  
Y 0.0010 0.0009 0.0034 -0.0034 -0.0035 0.0035  
Z -0.0003 -0.0001 -0.0013 0.0011 0.0013 -0.0013

AT.153 H X 0.0120 0.0119 -0.0057 0.0051 -0.0046 0.0054  
Y -0.0206 -0.0189 0.0077 -0.0075 0.0071 -0.0068  
Z -0.0166 -0.0161 0.0090 -0.0087 0.0084 -0.0087

AT.154 H X -0.0120 0.0119 -0.0057 -0.0051 -0.0046 -0.0054  
Y -0.0206 0.0189 -0.0077 -0.0075 -0.0071 -0.0068



Z 0.0166 -0.0161 0.0090 0.0087 0.0084 0.0087  
AT. 155 H X 0.0120 -0.0119 -0.0057 -0.0051 0.0046 0.0054  
Y -0.0206 0.0189 0.0077 0.0075 -0.0071 -0.0068  
Z -0.0166 0.0161 0.0090 0.0087 -0.0084 -0.0087  
AT. 156 H X -0.0120 -0.0119 -0.0057 0.0051 0.0046 -0.0054  
Y -0.0206 -0.0189 -0.0077 0.0075 0.0071 -0.0068  
Z 0.0166 0.0161 0.0090 -0.0087 -0.0084 0.0087  
AT. 157 O X -0.0020 -0.0021 0.0007 -0.0012 -0.0000 -0.0000  
Y -0.0037 -0.0037 0.0009 -0.0012 0.0003 -0.0004  
Z -0.0108 -0.0106 0.0035 -0.0039 0.0030 -0.0028  
AT. 158 O X 0.0020 -0.0021 0.0007 0.0012 -0.0000 0.0000  
Y -0.0037 0.0037 -0.0009 -0.0012 -0.0003 -0.0004  
Z 0.0108 -0.0106 0.0035 0.0039 0.0030 0.0028  
AT. 159 O X -0.0020 0.0021 0.0007 0.0012 0.0000 -0.0000  
Y -0.0037 0.0037 0.0009 0.0012 -0.0003 -0.0004  
Z -0.0108 0.0106 0.0035 0.0039 -0.0030 -0.0028  
AT. 160 O X 0.0020 0.0021 0.0007 -0.0012 0.0000 0.0000  
Y -0.0037 -0.0037 -0.0009 0.0012 0.0003 -0.0004  
Z 0.0108 0.0106 0.0035 -0.0039 -0.0030 0.0028  
AT. 161 O X 0.0024 0.0023 -0.0007 0.0011 -0.0006 0.0003  
Y 0.0028 0.0028 -0.0012 0.0014 -0.0009 0.0008  
Z 0.0063 0.0062 -0.0022 0.0024 -0.0016 0.0015  
AT. 162 O X -0.0024 0.0023 -0.0007 -0.0011 -0.0006 -0.0003  
Y 0.0028 -0.0028 0.0012 0.0014 0.0009 0.0008  
Z -0.0063 0.0062 -0.0022 -0.0024 -0.0016 -0.0015  
AT. 163 O X 0.0024 -0.0023 -0.0007 -0.0011 0.0006 0.0003  
Y 0.0028 -0.0028 -0.0012 -0.0014 0.0009 0.0008  
Z 0.0063 -0.0062 -0.0022 -0.0024 0.0016 0.0015  
AT. 164 O X -0.0024 -0.0023 -0.0007 0.0011 0.0006 -0.0003  
Y 0.0028 0.0028 0.0012 -0.0014 -0.0009 0.0008  
Z -0.0063 -0.0062 -0.0022 0.0024 0.0016 -0.0015  
AT. 165 H X -0.0023 -0.0030 0.0029 -0.0023 0.0024 -0.0017

Y 0.0014 0.0012 0.0007 -0.0004 0.0009 -0.0004  
Z 0.0021 0.0030 0.0009 -0.0008 0.0015 -0.0011  
AT.166 H X 0.0023 -0.0030 0.0029 0.0023 0.0024 0.0017  
Y 0.0014 -0.0012 -0.0007 -0.0004 -0.0009 -0.0004  
Z -0.0021 0.0030 0.0009 0.0008 0.0015 0.0011  
AT.167 H X -0.0023 0.0030 0.0029 0.0023 -0.0024 -0.0017  
Y 0.0014 -0.0012 0.0007 0.0004 -0.0009 -0.0004  
Z 0.0021 -0.0030 0.0009 0.0008 -0.0015 -0.0011  
AT.168 H X 0.0023 0.0030 0.0029 -0.0023 -0.0024 0.0017  
Y 0.0014 0.0012 -0.0007 0.0004 0.0009 -0.0004  
Z -0.0021 -0.0030 0.0009 -0.0008 -0.0015 0.0011  
AT.169 O X 0.0004 0.0003 -0.0001 0.0002 -0.0003 0.0001  
Y 0.0003 0.0009 0.0002 0.0001 -0.0001 -0.0002  
Z 0.0000 0.0013 -0.0001 0.0004 -0.0006 0.0001  
AT.170 O X -0.0004 0.0003 -0.0001 -0.0002 -0.0003 -0.0001  
Y 0.0003 -0.0009 -0.0002 0.0001 0.0001 -0.0002  
Z -0.0000 0.0013 -0.0001 -0.0004 -0.0006 -0.0001  
AT.171 O X 0.0004 -0.0003 -0.0001 -0.0002 0.0003 0.0001  
Y 0.0003 -0.0009 0.0002 -0.0001 0.0001 -0.0002  
Z 0.0000 -0.0013 -0.0001 -0.0004 0.0006 0.0001  
AT.172 O X -0.0004 -0.0003 -0.0001 0.0002 0.0003 -0.0001  
Y 0.0003 0.0009 -0.0002 -0.0001 -0.0001 -0.0002  
Z -0.0000 -0.0013 -0.0001 0.0004 0.0006 -0.0001  
AT.173 H X -0.0091 -0.0038 0.0023 -0.0053 0.0057 -0.0006  
Y 0.0016 0.0011 -0.0004 0.0011 -0.0013 0.0001  
Z 0.0048 0.0013 -0.0012 0.0019 -0.0020 0.0010  
AT.174 H X 0.0091 -0.0038 0.0023 0.0053 0.0057 0.0006  
Y 0.0016 -0.0011 0.0004 0.0011 0.0013 0.0001  
Z -0.0048 0.0013 -0.0012 -0.0019 -0.0020 -0.0010  
AT.175 H X -0.0091 0.0038 0.0023 0.0053 -0.0057 -0.0006  
Y 0.0016 -0.0011 -0.0004 -0.0011 0.0013 0.0001  
Z 0.0048 -0.0013 -0.0012 -0.0019 0.0020 0.0010

AT. 176 H X 0.0091 0.0038 0.0023 -0.0053 -0.0057 0.0006  
Y 0.0016 0.0011 0.0004 -0.0011 -0.0013 0.0001  
Z -0.0048 -0.0013 -0.0012 0.0019 0.0020 -0.0010

FREQ(CM\*\*-1) 1073.74 1074.29 1074.44 1074.84 1143.76 1143.88

AT. 1 I X -0.0002 0.0002 0.0002 -0.0002 -0.0001 0.0001  
Y -0.0001 0.0001 0.0001 -0.0001 -0.0001 0.0001  
Z 0.0000 -0.0000 -0.0000 0.0000 -0.0000 0.0000

AT. 2 I X -0.0002 -0.0002 -0.0002 -0.0002 0.0001 0.0001  
Y 0.0001 0.0001 0.0001 0.0001 -0.0001 -0.0001  
Z 0.0000 0.0000 0.0000 0.0000 0.0000 0.0000

AT. 3 I X 0.0002 0.0002 -0.0002 -0.0002 -0.0001 0.0001  
Y 0.0001 0.0001 -0.0001 -0.0001 -0.0001 0.0001  
Z -0.0000 -0.0000 0.0000 0.0000 -0.0000 0.0000

AT. 4 I X 0.0002 -0.0002 0.0002 -0.0002 0.0001 0.0001  
Y -0.0001 0.0001 -0.0001 0.0001 -0.0001 -0.0001  
Z -0.0000 0.0000 -0.0000 0.0000 0.0000 0.0000

AT. 5 I X -0.0000 -0.0000 -0.0000 0.0000 0.0001 -0.0001  
Y 0.0000 0.0000 0.0000 -0.0000 -0.0002 0.0002  
Z 0.0000 -0.0000 0.0000 -0.0000 0.0001 -0.0001

AT. 6 I X -0.0000 0.0000 0.0000 0.0000 -0.0001 -0.0001  
Y -0.0000 0.0000 0.0000 0.0000 -0.0002 -0.0002  
Z 0.0000 0.0000 -0.0000 -0.0000 -0.0001 -0.0001

AT. 7 I X 0.0000 -0.0000 0.0000 0.0000 0.0001 -0.0001  
Y -0.0000 0.0000 -0.0000 -0.0000 -0.0002 0.0002  
Z -0.0000 -0.0000 -0.0000 -0.0000 0.0001 -0.0001

AT. 8 I X 0.0000 0.0000 -0.0000 0.0000 -0.0001 -0.0001  
Y 0.0000 0.0000 -0.0000 0.0000 -0.0002 -0.0002  
Z -0.0000 0.0000 0.0000 -0.0000 -0.0001 -0.0001

AT. 9 N X -0.0029 0.0025 0.0023 -0.0023 0.0023 -0.0017  
Y -0.0132 0.0129 0.0124 -0.0123 0.0020 -0.0009

Z 0.0044 -0.0042 -0.0041 0.0038 0.0016 -0.0016  
AT. 10 N X -0.0029 -0.0025 -0.0023 -0.0023 -0.0023 -0.0017  
Y 0.0132 0.0129 0.0124 0.0123 0.0020 0.0009  
Z 0.0044 0.0042 0.0041 0.0038 -0.0016 -0.0016  
AT. 11 N X 0.0029 0.0025 -0.0023 -0.0023 0.0023 -0.0017  
Y 0.0132 0.0129 -0.0124 -0.0123 0.0020 -0.0009  
Z -0.0044 -0.0042 0.0041 0.0038 0.0016 -0.0016  
AT. 12 N X 0.0029 -0.0025 0.0023 -0.0023 -0.0023 -0.0017  
Y -0.0132 0.0129 -0.0124 0.0123 0.0020 0.0009  
Z -0.0044 0.0042 -0.0041 0.0038 -0.0016 -0.0016  
AT. 13 N X -0.0013 0.0015 0.0017 -0.0017 -0.0003 0.0006  
Y 0.0005 0.0007 0.0020 -0.0020 0.0085 -0.0090  
Z 0.0001 0.0002 0.0006 -0.0007 0.0009 -0.0006  
AT. 14 N X -0.0013 -0.0015 -0.0017 -0.0017 0.0003 0.0006  
Y -0.0005 0.0007 0.0020 0.0020 0.0085 0.0090  
Z 0.0001 -0.0002 -0.0006 -0.0007 -0.0009 -0.0006  
AT. 15 N X 0.0013 0.0015 -0.0017 -0.0017 -0.0003 0.0006  
Y -0.0005 0.0007 -0.0020 -0.0020 0.0085 -0.0090  
Z -0.0001 0.0002 -0.0006 -0.0007 0.0009 -0.0006  
AT. 16 N X 0.0013 -0.0015 0.0017 -0.0017 0.0003 0.0006  
Y 0.0005 0.0007 -0.0020 0.0020 0.0085 0.0090  
Z -0.0001 -0.0002 0.0006 -0.0007 -0.0009 -0.0006  
AT. 17 O X 0.0024 -0.0025 -0.0022 0.0024 -0.0002 0.0001  
Y 0.0064 -0.0063 -0.0059 0.0059 0.0001 -0.0003  
Z 0.0058 -0.0058 -0.0054 0.0054 0.0011 -0.0010  
AT. 18 O X 0.0024 0.0025 0.0022 0.0024 0.0002 0.0001  
Y -0.0064 -0.0063 -0.0059 -0.0059 0.0001 0.0003  
Z 0.0058 0.0058 0.0054 0.0054 -0.0011 -0.0010  
AT. 19 O X -0.0024 -0.0025 0.0022 0.0024 -0.0002 0.0001  
Y -0.0064 -0.0063 0.0059 0.0059 0.0001 -0.0003  
Z -0.0058 -0.0058 0.0054 0.0054 0.0011 -0.0010  
AT. 20 O X -0.0024 0.0025 -0.0022 0.0024 0.0002 0.0001

Y 0.0064 -0.0063 0.0059 -0.0059 0.0001 0.0003  
Z -0.0058 0.0058 -0.0054 0.0054 -0.0011 -0.0010  
AT. 21 O X 0.0001 -0.0002 -0.0002 0.0002 0.0002 -0.0002  
Y -0.0005 -0.0001 -0.0008 0.0006 0.0005 -0.0005  
Z 0.0004 0.0002 0.0007 -0.0005 -0.0030 0.0032  
AT. 22 O X 0.0001 0.0002 0.0002 0.0002 -0.0002 -0.0002  
Y 0.0005 -0.0001 -0.0008 -0.0006 0.0005 0.0005  
Z 0.0004 -0.0002 -0.0007 -0.0005 0.0030 0.0032  
AT. 23 O X -0.0001 -0.0002 0.0002 0.0002 0.0002 -0.0002  
Y 0.0005 -0.0001 0.0008 0.0006 0.0005 -0.0005  
Z -0.0004 0.0002 -0.0007 -0.0005 -0.0030 0.0032  
AT. 24 O X -0.0001 0.0002 -0.0002 0.0002 -0.0002 -0.0002  
Y -0.0005 -0.0001 0.0008 -0.0006 0.0005 0.0005  
Z -0.0004 -0.0002 0.0007 -0.0005 0.0030 0.0032  
AT. 25 C X -0.0012 0.0013 0.0011 -0.0012 -0.0020 0.0014  
Y 0.0069 -0.0067 -0.0063 0.0064 -0.0006 -0.0001  
Z -0.0105 0.0104 0.0098 -0.0097 -0.0008 0.0015  
AT. 26 C X -0.0012 -0.0013 -0.0011 -0.0012 0.0020 0.0014  
Y -0.0069 -0.0067 -0.0063 -0.0064 -0.0006 0.0001  
Z -0.0105 -0.0104 -0.0098 -0.0097 0.0008 0.0015  
AT. 27 C X 0.0012 0.0013 -0.0011 -0.0012 -0.0020 0.0014  
Y -0.0069 -0.0067 0.0063 0.0064 -0.0006 -0.0001  
Z 0.0105 0.0104 -0.0098 -0.0097 -0.0008 0.0015  
AT. 28 C X 0.0012 -0.0013 0.0011 -0.0012 0.0020 0.0014  
Y 0.0069 -0.0067 0.0063 -0.0064 -0.0006 0.0001  
Z 0.0105 -0.0104 0.0098 -0.0097 0.0008 0.0015  
AT. 29 H X 0.0221 -0.0223 -0.0208 0.0214 0.0175 -0.0149  
Y 0.0166 -0.0168 -0.0159 0.0154 0.0092 -0.0076  
Z -0.0485 0.0489 0.0456 -0.0464 -0.0319 0.0276  
AT. 30 H X 0.0221 0.0223 0.0208 0.0214 -0.0175 -0.0149  
Y -0.0166 -0.0168 -0.0159 -0.0154 0.0092 0.0076  
Z -0.0485 -0.0489 -0.0456 -0.0464 0.0319 0.0276

AT. 31 H X -0.0221 -0.0223 0.0208 0.0214 0.0175 -0.0149  
Y -0.0166 -0.0168 0.0159 0.0154 0.0092 -0.0076  
Z 0.0485 0.0489 -0.0456 -0.0464 -0.0319 0.0276

AT. 32 H X -0.0221 0.0223 -0.0208 0.0214 -0.0175 -0.0149  
Y 0.0166 -0.0168 0.0159 -0.0154 0.0092 0.0076  
Z 0.0485 -0.0489 0.0456 -0.0464 0.0319 0.0276

AT. 33 H X -0.0150 0.0147 0.0142 -0.0134 -0.0081 0.0080  
Y 0.0046 -0.0043 -0.0042 0.0043 -0.0052 0.0036  
Z 0.0127 -0.0131 -0.0122 0.0113 0.0243 -0.0202

AT. 34 H X -0.0150 -0.0147 -0.0142 -0.0134 0.0081 0.0080  
Y -0.0046 -0.0043 -0.0042 -0.0043 -0.0052 -0.0036  
Z 0.0127 0.0131 0.0122 0.0113 -0.0243 -0.0202

AT. 35 H X 0.0150 0.0147 -0.0142 -0.0134 -0.0081 0.0080  
Y -0.0046 -0.0043 0.0042 0.0043 -0.0052 0.0036  
Z -0.0127 -0.0131 0.0122 0.0113 0.0243 -0.0202

AT. 36 H X 0.0150 -0.0147 0.0142 -0.0134 0.0081 0.0080  
Y 0.0046 -0.0043 0.0042 -0.0043 -0.0052 -0.0036  
Z -0.0127 0.0131 -0.0122 0.0113 -0.0243 -0.0202

AT. 37 C X 0.0022 -0.0021 -0.0020 0.0021 0.0013 -0.0010  
Y -0.0142 0.0142 0.0132 -0.0134 -0.0033 0.0037  
Z 0.0096 -0.0095 -0.0091 0.0091 0.0004 -0.0011

AT. 38 C X 0.0022 0.0021 0.0020 0.0021 -0.0013 -0.0010  
Y 0.0142 0.0142 0.0132 0.0134 -0.0033 -0.0037  
Z 0.0096 0.0095 0.0091 0.0091 -0.0004 -0.0011

AT. 39 C X -0.0022 -0.0021 0.0020 0.0021 0.0013 -0.0010  
Y 0.0142 0.0142 -0.0132 -0.0134 -0.0033 0.0037  
Z -0.0096 -0.0095 0.0091 0.0091 0.0004 -0.0011

AT. 40 C X -0.0022 0.0021 -0.0020 0.0021 -0.0013 -0.0010  
Y -0.0142 0.0142 -0.0132 0.0134 -0.0033 -0.0037  
Z -0.0096 0.0095 -0.0091 0.0091 -0.0004 -0.0011

AT. 41 C X -0.0010 0.0012 0.0017 -0.0015 -0.0014 0.0009  
Y 0.0063 -0.0064 -0.0067 0.0064 0.0015 -0.0023

Z -0.0003 0.0002 0.0003 -0.0000 -0.0034 0.0033  
AT. 42 C X -0.0010 -0.0012 -0.0017 -0.0015 0.0014 0.0009  
Y -0.0063 -0.0064 -0.0067 -0.0064 0.0015 0.0023  
Z -0.0003 -0.0002 -0.0003 -0.0000 0.0034 0.0033  
AT. 43 C X 0.0010 0.0012 -0.0017 -0.0015 -0.0014 0.0009  
Y -0.0063 -0.0064 0.0067 0.0064 0.0015 -0.0023  
Z 0.0003 0.0002 -0.0003 -0.0000 -0.0034 0.0033  
AT. 44 C X 0.0010 -0.0012 0.0017 -0.0015 0.0014 0.0009  
Y 0.0063 -0.0064 0.0067 -0.0064 0.0015 0.0023  
Z 0.0003 -0.0002 0.0003 -0.0000 0.0034 0.0033  
AT. 45 H X 0.0332 -0.0321 -0.0331 0.0317 0.0065 -0.0081  
Y 0.0168 -0.0162 -0.0159 0.0156 -0.0023 0.0018  
Z 0.0042 -0.0040 -0.0030 0.0035 -0.0078 0.0081  
AT. 46 H X 0.0332 0.0321 0.0331 0.0317 -0.0065 -0.0081  
Y -0.0168 -0.0162 -0.0159 -0.0156 -0.0023 -0.0018  
Z 0.0042 0.0040 0.0030 0.0035 0.0078 0.0081  
AT. 47 H X -0.0332 -0.0321 0.0331 0.0317 0.0065 -0.0081  
Y -0.0168 -0.0162 0.0159 0.0156 -0.0023 0.0018  
Z -0.0042 -0.0040 0.0030 0.0035 -0.0078 0.0081  
AT. 48 H X -0.0332 0.0321 -0.0331 0.0317 -0.0065 -0.0081  
Y 0.0168 -0.0162 0.0159 -0.0156 -0.0023 -0.0018  
Z -0.0042 0.0040 -0.0030 0.0035 0.0078 0.0081  
AT. 49 H X -0.0106 0.0104 0.0116 -0.0113 0.0028 -0.0026  
Y -0.0075 0.0072 0.0081 -0.0080 0.0015 -0.0014  
Z 0.0102 -0.0111 -0.0121 0.0114 0.0070 -0.0076  
AT. 50 H X -0.0106 -0.0104 -0.0116 -0.0113 -0.0028 -0.0026  
Y 0.0075 0.0072 0.0081 0.0080 0.0015 0.0014  
Z 0.0102 0.0111 0.0121 0.0114 -0.0070 -0.0076  
AT. 51 H X 0.0106 0.0104 -0.0116 -0.0113 0.0028 -0.0026  
Y 0.0075 0.0072 -0.0081 -0.0080 0.0015 -0.0014  
Z -0.0102 -0.0111 0.0121 0.0114 0.0070 -0.0076  
AT. 52 H X 0.0106 -0.0104 0.0116 -0.0113 -0.0028 -0.0026

Y -0.0075 0.0072 -0.0081 0.0080 0.0015 0.0014  
Z -0.0102 0.0111 -0.0121 0.0114 -0.0070 -0.0076  
AT. 53 C X -0.0002 0.0002 0.0004 -0.0001 -0.0007 0.0009  
Y 0.0010 -0.0009 -0.0010 0.0016 -0.0068 0.0070  
Z -0.0008 0.0007 0.0011 -0.0006 -0.0003 -0.0006  
AT. 54 C X -0.0002 -0.0002 -0.0004 -0.0001 0.0007 0.0009  
Y -0.0010 -0.0009 -0.0010 -0.0016 -0.0068 -0.0070  
Z -0.0008 -0.0007 -0.0011 -0.0006 0.0003 -0.0006  
AT. 55 C X 0.0002 0.0002 -0.0004 -0.0001 -0.0007 0.0009  
Y -0.0010 -0.0009 0.0010 0.0016 -0.0068 0.0070  
Z 0.0008 0.0007 -0.0011 -0.0006 -0.0003 -0.0006  
AT. 56 C X 0.0002 -0.0002 0.0004 -0.0001 0.0007 0.0009  
Y 0.0010 -0.0009 0.0010 -0.0016 -0.0068 -0.0070  
Z 0.0008 -0.0007 0.0011 -0.0006 0.0003 -0.0006  
AT. 57 C X 0.0003 -0.0005 -0.0008 0.0007 0.0004 -0.0004  
Y -0.0043 0.0048 0.0059 -0.0059 0.0043 -0.0043  
Z 0.0021 -0.0022 -0.0030 0.0025 0.0000 0.0004  
AT. 58 C X 0.0003 0.0005 0.0008 0.0007 -0.0004 -0.0004  
Y 0.0043 0.0048 0.0059 0.0059 0.0043 0.0043  
Z 0.0021 0.0022 0.0030 0.0025 -0.0000 0.0004  
AT. 59 C X -0.0003 -0.0005 0.0008 0.0007 0.0004 -0.0004  
Y 0.0043 0.0048 -0.0059 -0.0059 0.0043 -0.0043  
Z -0.0021 -0.0022 0.0030 0.0025 0.0000 0.0004  
AT. 60 C X -0.0003 0.0005 -0.0008 0.0007 -0.0004 -0.0004  
Y -0.0043 0.0048 -0.0059 0.0059 0.0043 0.0043  
Z -0.0021 0.0022 -0.0030 0.0025 -0.0000 0.0004  
AT. 61 H X -0.0013 0.0017 0.0021 -0.0019 0.0010 0.0007  
Y -0.0017 0.0022 0.0029 -0.0028 0.0019 -0.0007  
Z -0.0186 0.0208 0.0255 -0.0248 0.0150 -0.0142  
AT. 62 H X -0.0013 -0.0017 -0.0021 -0.0019 -0.0010 0.0007  
Y 0.0017 0.0022 0.0029 0.0028 0.0019 0.0007  
Z -0.0186 -0.0208 -0.0255 -0.0248 -0.0150 -0.0142



AT. 63 H X 0.0013 0.0017 -0.0021 -0.0019 0.0010 0.0007  
Y 0.0017 0.0022 -0.0029 -0.0028 0.0019 -0.0007  
Z 0.0186 0.0208 -0.0255 -0.0248 0.0150 -0.0142

AT. 64 H X 0.0013 -0.0017 0.0021 -0.0019 -0.0010 0.0007  
Y -0.0017 0.0022 -0.0029 0.0028 0.0019 0.0007  
Z 0.0186 -0.0208 0.0255 -0.0248 -0.0150 -0.0142

AT. 65 H X -0.0029 0.0031 0.0038 -0.0038 0.0027 -0.0031  
Y 0.0058 -0.0064 -0.0087 0.0082 -0.0033 0.0043  
Z -0.0084 0.0091 0.0118 -0.0120 0.0095 -0.0104

AT. 66 H X -0.0029 -0.0031 -0.0038 -0.0038 -0.0027 -0.0031  
Y -0.0058 -0.0064 -0.0087 -0.0082 -0.0033 -0.0043  
Z -0.0084 -0.0091 -0.0118 -0.0120 -0.0095 -0.0104

AT. 67 H X 0.0029 0.0031 -0.0038 -0.0038 0.0027 -0.0031  
Y -0.0058 -0.0064 0.0087 0.0082 -0.0033 0.0043  
Z 0.0084 0.0091 -0.0118 -0.0120 0.0095 -0.0104

AT. 68 H X 0.0029 -0.0031 0.0038 -0.0038 -0.0027 -0.0031  
Y 0.0058 -0.0064 0.0087 -0.0082 -0.0033 -0.0043  
Z 0.0084 -0.0091 0.0118 -0.0120 -0.0095 -0.0104

AT. 69 H X 0.0029 -0.0032 -0.0036 0.0031 -0.0013 0.0010  
Y 0.0129 -0.0142 -0.0179 0.0168 -0.0087 0.0089  
Z 0.0167 -0.0184 -0.0230 0.0215 -0.0109 0.0113

AT. 70 H X 0.0029 0.0032 0.0036 0.0031 0.0013 0.0010  
Y -0.0129 -0.0142 -0.0179 -0.0168 -0.0087 -0.0089  
Z 0.0167 0.0184 0.0230 0.0215 0.0109 0.0113

AT. 71 H X -0.0029 -0.0032 0.0036 0.0031 -0.0013 0.0010  
Y -0.0129 -0.0142 0.0179 0.0168 -0.0087 0.0089  
Z -0.0167 -0.0184 0.0230 0.0215 -0.0109 0.0113

AT. 72 H X -0.0029 0.0032 -0.0036 0.0031 0.0013 0.0010  
Y 0.0129 -0.0142 0.0179 -0.0168 -0.0087 -0.0089  
Z -0.0167 0.0184 -0.0230 0.0215 0.0109 0.0113

AT. 73 C X -0.0010 0.0012 0.0018 -0.0018 0.0076 -0.0064  
Y 0.0011 -0.0010 -0.0014 0.0018 -0.0113 0.0107

Z 0.0029 -0.0024 -0.0020 0.0026 -0.0008 0.0007  
AT. 74 C X -0.0010 -0.0012 -0.0018 -0.0018 -0.0076 -0.0064  
Y -0.0011 -0.0010 -0.0014 -0.0018 -0.0113 -0.0107  
Z 0.0029 0.0024 0.0020 0.0026 0.0008 0.0007  
AT. 75 C X 0.0010 0.0012 -0.0018 -0.0018 0.0076 -0.0064  
Y -0.0011 -0.0010 0.0014 0.0018 -0.0113 0.0107  
Z -0.0029 -0.0024 0.0020 0.0026 -0.0008 0.0007  
AT. 76 C X 0.0010 -0.0012 0.0018 -0.0018 -0.0076 -0.0064  
Y 0.0011 -0.0010 0.0014 -0.0018 -0.0113 -0.0107  
Z -0.0029 0.0024 -0.0020 0.0026 0.0008 0.0007  
AT. 77 C X -0.0002 0.0011 0.0008 -0.0014 0.0005 -0.0005  
Y 0.0134 -0.0133 -0.0125 0.0127 0.0032 -0.0034  
Z -0.0071 0.0071 0.0065 -0.0068 0.0014 -0.0012  
AT. 78 C X -0.0002 -0.0011 -0.0008 -0.0014 -0.0005 -0.0005  
Y -0.0134 -0.0133 -0.0125 -0.0127 0.0032 0.0034  
Z -0.0071 -0.0071 -0.0065 -0.0068 -0.0014 -0.0012  
AT. 79 C X 0.0002 0.0011 -0.0008 -0.0014 0.0005 -0.0005  
Y -0.0134 -0.0133 0.0125 0.0127 0.0032 -0.0034  
Z 0.0071 0.0071 -0.0065 -0.0068 0.0014 -0.0012  
AT. 80 C X 0.0002 -0.0011 0.0008 -0.0014 -0.0005 -0.0005  
Y 0.0134 -0.0133 0.0125 -0.0127 0.0032 0.0034  
Z 0.0071 -0.0071 0.0065 -0.0068 -0.0014 -0.0012  
AT. 81 H X -0.0131 0.0134 0.0135 -0.0133 -0.0007 0.0016  
Y -0.0012 0.0006 0.0017 -0.0008 0.0027 -0.0017  
Z -0.0155 0.0160 0.0150 -0.0151 -0.0115 0.0101  
AT. 82 H X -0.0131 -0.0134 -0.0135 -0.0133 0.0007 0.0016  
Y 0.0012 0.0006 0.0017 0.0008 0.0027 0.0017  
Z -0.0155 -0.0160 -0.0150 -0.0151 0.0115 0.0101  
AT. 83 H X 0.0131 0.0134 -0.0135 -0.0133 -0.0007 0.0016  
Y 0.0012 0.0006 -0.0017 -0.0008 0.0027 -0.0017  
Z 0.0155 0.0160 -0.0150 -0.0151 -0.0115 0.0101  
AT. 84 H X 0.0131 -0.0134 0.0135 -0.0133 0.0007 0.0016

Y -0.0012 0.0006 -0.0017 0.0008 0.0027 0.0017  
Z 0.0155 -0.0160 0.0150 -0.0151 0.0115 0.0101  
AT. 85 H X 0.0334 -0.0333 -0.0310 0.0323 0.0018 -0.0044  
Y 0.0287 -0.0268 -0.0270 0.0258 -0.0089 0.0058  
Z -0.0292 0.0280 0.0272 -0.0271 0.0110 -0.0076  
AT. 86 H X 0.0334 0.0333 0.0310 0.0323 -0.0018 -0.0044  
Y -0.0287 -0.0268 -0.0270 -0.0258 -0.0089 -0.0058  
Z -0.0292 -0.0280 -0.0272 -0.0271 -0.0110 -0.0076  
AT. 87 H X -0.0334 -0.0333 0.0310 0.0323 0.0018 -0.0044  
Y -0.0287 -0.0268 0.0270 0.0258 -0.0089 0.0058  
Z 0.0292 0.0280 -0.0272 -0.0271 0.0110 -0.0076  
AT. 88 H X -0.0334 0.0333 -0.0310 0.0323 -0.0018 -0.0044  
Y 0.0287 -0.0268 0.0270 -0.0258 -0.0089 -0.0058  
Z 0.0292 -0.0280 0.0272 -0.0271 -0.0110 -0.0076  
AT. 89 C X -0.0003 0.0001 0.0001 -0.0000 0.0002 -0.0000  
Y 0.0014 -0.0017 -0.0018 0.0017 -0.0033 0.0031  
Z 0.0018 -0.0016 -0.0016 0.0020 -0.0074 0.0067  
AT. 90 C X -0.0003 -0.0001 -0.0001 -0.0000 -0.0002 -0.0000  
Y -0.0014 -0.0017 -0.0018 -0.0017 -0.0033 -0.0031  
Z 0.0018 0.0016 0.0016 0.0020 0.0074 0.0067  
AT. 91 C X 0.0003 0.0001 -0.0001 -0.0000 0.0002 -0.0000  
Y -0.0014 -0.0017 0.0018 0.0017 -0.0033 0.0031  
Z -0.0018 -0.0016 0.0016 0.0020 -0.0074 0.0067  
AT. 92 C X 0.0003 -0.0001 0.0001 -0.0000 -0.0002 -0.0000  
Y 0.0014 -0.0017 0.0018 -0.0017 -0.0033 -0.0031  
Z -0.0018 0.0016 -0.0016 0.0020 0.0074 0.0067  
AT. 93 C X -0.0029 0.0027 0.0028 -0.0028 -0.0008 0.0008  
Y -0.0068 0.0071 0.0073 -0.0075 0.0024 -0.0020  
Z -0.0034 0.0032 0.0035 -0.0037 0.0037 -0.0032  
AT. 94 C X -0.0029 -0.0027 -0.0028 -0.0028 0.0008 0.0008  
Y 0.0068 0.0071 0.0073 0.0075 0.0024 0.0020  
Z -0.0034 -0.0032 -0.0035 -0.0037 -0.0037 -0.0032

AT. 95 C X 0.0029 0.0027 -0.0028 -0.0028 -0.0008 0.0008  
Y 0.0068 0.0071 -0.0073 -0.0075 0.0024 -0.0020  
Z 0.0034 0.0032 -0.0035 -0.0037 0.0037 -0.0032

AT. 96 C X 0.0029 -0.0027 0.0028 -0.0028 0.0008 0.0008  
Y -0.0068 0.0071 -0.0073 0.0075 0.0024 0.0020  
Z 0.0034 -0.0032 0.0035 -0.0037 -0.0037 -0.0032

AT. 97 H X 0.0023 -0.0020 -0.0022 0.0019 0.0026 -0.0023  
Y -0.0010 0.0007 0.0008 -0.0002 -0.0076 0.0069  
Z 0.0256 -0.0254 -0.0267 0.0266 -0.0040 0.0032

AT. 98 H X 0.0023 0.0020 0.0022 0.0019 -0.0026 -0.0023  
Y 0.0010 0.0007 0.0008 0.0002 -0.0076 -0.0069  
Z 0.0256 0.0254 0.0267 0.0266 0.0040 0.0032

AT. 99 H X -0.0023 -0.0020 0.0022 0.0019 0.0026 -0.0023  
Y 0.0010 0.0007 -0.0008 -0.0002 -0.0076 0.0069  
Z -0.0256 -0.0254 0.0267 0.0266 -0.0040 0.0032

AT. 100 H X -0.0023 0.0020 -0.0022 0.0019 -0.0026 -0.0023  
Y -0.0010 0.0007 -0.0008 0.0002 -0.0076 -0.0069  
Z -0.0256 0.0254 -0.0267 0.0266 0.0040 0.0032

AT. 101 H X 0.0085 -0.0085 -0.0094 0.0096 -0.0034 0.0030  
Y 0.0024 -0.0019 -0.0025 0.0025 0.0014 -0.0012  
Z 0.0172 -0.0183 -0.0190 0.0196 -0.0110 0.0093

AT. 102 H X 0.0085 0.0085 0.0094 0.0096 0.0034 0.0030  
Y -0.0024 -0.0019 -0.0025 -0.0025 0.0014 0.0012  
Z 0.0172 0.0183 0.0190 0.0196 0.0110 0.0093

AT. 103 H X -0.0085 -0.0085 0.0094 0.0096 -0.0034 0.0030  
Y -0.0024 -0.0019 0.0025 0.0025 0.0014 -0.0012  
Z -0.0172 -0.0183 0.0190 0.0196 -0.0110 0.0093

AT. 104 H X -0.0085 0.0085 -0.0094 0.0096 0.0034 0.0030  
Y 0.0024 -0.0019 0.0025 -0.0025 0.0014 0.0012  
Z -0.0172 0.0183 -0.0190 0.0196 0.0110 0.0093

AT. 105 H X -0.0019 0.0021 0.0021 -0.0023 0.0052 -0.0047  
Y 0.0244 -0.0248 -0.0259 0.0268 -0.0113 0.0096

Z -0.0271 0.0273 0.0285 -0.0296 0.0118 -0.0099  
AT. 106 H X -0.0019 -0.0021 -0.0021 -0.0023 -0.0052 -0.0047  
Y -0.0244 -0.0248 -0.0259 -0.0268 -0.0113 -0.0096  
Z -0.0271 -0.0273 -0.0285 -0.0296 -0.0118 -0.0099  
AT. 107 H X 0.0019 0.0021 -0.0021 -0.0023 0.0052 -0.0047  
Y -0.0244 -0.0248 0.0259 0.0268 -0.0113 0.0096  
Z 0.0271 0.0273 -0.0285 -0.0296 0.0118 -0.0099  
AT. 108 H X 0.0019 -0.0021 0.0021 -0.0023 -0.0052 -0.0047  
Y 0.0244 -0.0248 0.0259 -0.0268 -0.0113 -0.0096  
Z 0.0271 -0.0273 0.0285 -0.0296 -0.0118 -0.0099  
AT. 109 C X 0.0022 -0.0027 -0.0035 0.0033 -0.0008 0.0006  
Y -0.0002 -0.0008 -0.0019 0.0019 0.0023 -0.0024  
Z 0.0009 -0.0017 -0.0025 0.0023 -0.0048 0.0046  
AT. 110 C X 0.0022 0.0027 0.0035 0.0033 0.0008 0.0006  
Y 0.0002 -0.0008 -0.0019 -0.0019 0.0023 0.0024  
Z 0.0009 0.0017 0.0025 0.0023 0.0048 0.0046  
AT. 111 C X -0.0022 -0.0027 0.0035 0.0033 -0.0008 0.0006  
Y 0.0002 -0.0008 0.0019 0.0019 0.0023 -0.0024  
Z -0.0009 -0.0017 0.0025 0.0023 -0.0048 0.0046  
AT. 112 C X -0.0022 0.0027 -0.0035 0.0033 0.0008 0.0006  
Y -0.0002 -0.0008 0.0019 -0.0019 0.0023 0.0024  
Z -0.0009 0.0017 -0.0025 0.0023 0.0048 0.0046  
AT. 113 H X 0.0025 -0.0036 -0.0056 0.0057 -0.0021 0.0028  
Y -0.0005 0.0005 0.0012 -0.0019 0.0092 -0.0111  
Z 0.0016 -0.0024 -0.0040 0.0036 0.0150 -0.0172  
AT. 114 H X 0.0025 0.0036 0.0056 0.0057 0.0021 0.0028  
Y 0.0005 0.0005 0.0012 0.0019 0.0092 0.0111  
Z 0.0016 0.0024 0.0040 0.0036 -0.0150 -0.0172  
AT. 115 H X -0.0025 -0.0036 0.0056 0.0057 -0.0021 0.0028  
Y 0.0005 0.0005 -0.0012 -0.0019 0.0092 -0.0111  
Z -0.0016 -0.0024 0.0040 0.0036 0.0150 -0.0172  
AT. 116 H X -0.0025 0.0036 -0.0056 0.0057 0.0021 0.0028

Y -0.0005 0.0005 -0.0012 0.0019 0.0092 0.0111  
Z -0.0016 0.0024 -0.0040 0.0036 -0.0150 -0.0172  
AT. 117 H X 0.0014 0.0005 0.0031 -0.0029 -0.0051 0.0039  
Y -0.0005 -0.0021 -0.0053 0.0049 -0.0113 0.0139  
Z 0.0009 -0.0035 -0.0066 0.0060 -0.0164 0.0186  
AT. 118 H X 0.0014 -0.0005 -0.0031 -0.0029 0.0051 0.0039  
Y 0.0005 -0.0021 -0.0053 -0.0049 -0.0113 -0.0139  
Z 0.0009 0.0035 0.0066 0.0060 0.0164 0.0186  
AT. 119 H X -0.0014 0.0005 -0.0031 -0.0029 -0.0051 0.0039  
Y 0.0005 -0.0021 0.0053 0.0049 -0.0113 0.0139  
Z -0.0009 -0.0035 0.0066 0.0060 -0.0164 0.0186  
AT. 120 H X -0.0014 -0.0005 0.0031 -0.0029 0.0051 0.0039  
Y -0.0005 -0.0021 0.0053 -0.0049 -0.0113 -0.0139  
Z -0.0009 0.0035 -0.0066 0.0060 0.0164 0.0186  
AT. 121 C X 0.0023 -0.0026 -0.0028 0.0030 -0.0001 -0.0001  
Y -0.0001 -0.0003 -0.0010 0.0010 0.0014 -0.0008  
Z -0.0020 0.0020 0.0020 -0.0020 0.0063 -0.0063  
AT. 122 C X 0.0023 0.0026 0.0028 0.0030 0.0001 -0.0001  
Y 0.0001 -0.0003 -0.0010 -0.0010 0.0014 0.0008  
Z -0.0020 -0.0020 -0.0020 -0.0020 -0.0063 -0.0063  
AT. 123 C X -0.0023 -0.0026 0.0028 0.0030 -0.0001 -0.0001  
Y 0.0001 -0.0003 0.0010 0.0010 0.0014 -0.0008  
Z 0.0020 0.0020 -0.0020 -0.0020 0.0063 -0.0063  
AT. 124 C X -0.0023 0.0026 -0.0028 0.0030 0.0001 -0.0001  
Y -0.0001 -0.0003 0.0010 -0.0010 0.0014 0.0008  
Z 0.0020 -0.0020 0.0020 -0.0020 -0.0063 -0.0063  
AT. 125 H X 0.0007 0.0020 0.0051 -0.0052 0.0056 -0.0066  
Y -0.0004 -0.0019 -0.0050 0.0049 -0.0163 0.0169  
Z -0.0014 0.0020 0.0028 -0.0026 0.0176 -0.0173  
AT. 126 H X 0.0007 -0.0020 -0.0051 -0.0052 -0.0056 -0.0066  
Y 0.0004 -0.0019 -0.0050 -0.0049 -0.0163 -0.0169  
Z -0.0014 -0.0020 -0.0028 -0.0026 -0.0176 -0.0173

AT.127 H X -0.0007 0.0020 -0.0051 -0.0052 0.0056 -0.0066  
Y 0.0004 -0.0019 0.0050 0.0049 -0.0163 0.0169  
Z 0.0014 0.0020 -0.0028 -0.0026 0.0176 -0.0173

AT.128 H X -0.0007 -0.0020 0.0051 -0.0052 -0.0056 -0.0066  
Y -0.0004 -0.0019 0.0050 -0.0049 -0.0163 -0.0169  
Z 0.0014 -0.0020 0.0028 -0.0026 -0.0176 -0.0173

AT.129 H X 0.0022 -0.0032 -0.0045 0.0046 -0.0056 0.0058  
Y -0.0001 0.0012 0.0030 -0.0030 0.0038 -0.0040  
Z -0.0027 0.0038 0.0049 -0.0053 -0.0104 0.0102

AT.130 H X 0.0022 0.0032 0.0045 0.0046 0.0056 0.0058  
Y 0.0001 0.0012 0.0030 0.0030 0.0038 0.0040  
Z -0.0027 -0.0038 -0.0049 -0.0053 0.0104 0.0102

AT.131 H X -0.0022 -0.0032 0.0045 0.0046 -0.0056 0.0058  
Y 0.0001 0.0012 -0.0030 -0.0030 0.0038 -0.0040  
Z 0.0027 0.0038 -0.0049 -0.0053 -0.0104 0.0102

AT.132 H X -0.0022 0.0032 -0.0045 0.0046 0.0056 0.0058  
Y -0.0001 0.0012 -0.0030 0.0030 0.0038 0.0040  
Z 0.0027 -0.0038 0.0049 -0.0053 0.0104 0.0102

AT.133 C X 0.0001 0.0007 0.0014 -0.0012 -0.0045 0.0047  
Y 0.0008 0.0004 0.0016 -0.0015 -0.0035 0.0037  
Z 0.0002 0.0007 0.0017 -0.0017 -0.0001 0.0000

AT.134 C X 0.0001 -0.0007 -0.0014 -0.0012 0.0045 0.0047  
Y -0.0008 0.0004 0.0016 0.0015 -0.0035 -0.0037  
Z 0.0002 -0.0007 -0.0017 -0.0017 0.0001 0.0000

AT.135 C X -0.0001 0.0007 -0.0014 -0.0012 -0.0045 0.0047  
Y -0.0008 0.0004 -0.0016 -0.0015 -0.0035 0.0037  
Z -0.0002 0.0007 -0.0017 -0.0017 -0.0001 0.0000

AT.136 C X -0.0001 -0.0007 0.0014 -0.0012 0.0045 0.0047  
Y 0.0008 0.0004 -0.0016 0.0015 -0.0035 -0.0037  
Z -0.0002 -0.0007 0.0017 -0.0017 0.0001 0.0000

AT.137 C X 0.0001 -0.0005 -0.0006 0.0007 0.0038 -0.0037  
Y -0.0007 0.0001 -0.0006 0.0007 -0.0059 0.0061

Z -0.0006 -0.0003 -0.0016 0.0014 -0.0000 -0.0002  
AT. 138 C X 0.0001 0.0005 0.0006 0.0007 -0.0038 -0.0037  
Y 0.0007 0.0001 -0.0006 -0.0007 -0.0059 -0.0061  
Z -0.0006 0.0003 0.0016 0.0014 0.0000 -0.0002  
AT. 139 C X -0.0001 -0.0005 0.0006 0.0007 0.0038 -0.0037  
Y 0.0007 0.0001 0.0006 0.0007 -0.0059 0.0061  
Z 0.0006 -0.0003 0.0016 0.0014 -0.0000 -0.0002  
AT. 140 C X -0.0001 0.0005 -0.0006 0.0007 -0.0038 -0.0037  
Y -0.0007 0.0001 0.0006 -0.0007 -0.0059 -0.0061  
Z 0.0006 0.0003 -0.0016 0.0014 0.0000 -0.0002  
AT. 141 H X 0.0003 0.0018 0.0030 -0.0029 -0.0312 0.0323  
Y 0.0006 -0.0031 -0.0054 0.0046 0.0431 -0.0453  
Z -0.0000 -0.0051 -0.0092 0.0083 0.0729 -0.0760  
AT. 142 H X 0.0003 -0.0018 -0.0030 -0.0029 0.0312 0.0323  
Y -0.0006 -0.0031 -0.0054 -0.0046 0.0431 0.0453  
Z -0.0000 0.0051 0.0092 0.0083 -0.0729 -0.0760  
AT. 143 H X -0.0003 0.0018 -0.0030 -0.0029 -0.0312 0.0323  
Y -0.0006 -0.0031 0.0054 0.0046 0.0431 -0.0453  
Z 0.0000 -0.0051 0.0092 0.0083 0.0729 -0.0760  
AT. 144 H X -0.0003 -0.0018 0.0030 -0.0029 0.0312 0.0323  
Y 0.0006 -0.0031 0.0054 -0.0046 0.0431 0.0453  
Z 0.0000 0.0051 -0.0092 0.0083 -0.0729 -0.0760  
AT. 145 H X -0.0013 -0.0003 -0.0027 0.0023 0.0064 -0.0074  
Y -0.0004 0.0006 0.0009 -0.0005 -0.0202 0.0216  
Z -0.0013 0.0024 0.0025 -0.0018 -0.0521 0.0550  
AT. 146 H X -0.0013 0.0003 0.0027 0.0023 -0.0064 -0.0074  
Y 0.0004 0.0006 0.0009 0.0005 -0.0202 -0.0216  
Z -0.0013 -0.0024 -0.0025 -0.0018 0.0521 0.0550  
AT. 147 H X 0.0013 -0.0003 0.0027 0.0023 0.0064 -0.0074  
Y 0.0004 0.0006 -0.0009 -0.0005 -0.0202 0.0216  
Z 0.0013 0.0024 -0.0025 -0.0018 -0.0521 0.0550  
AT. 148 H X 0.0013 0.0003 -0.0027 0.0023 -0.0064 -0.0074



Y -0.0004 0.0006 -0.0009 0.0005 -0.0202 -0.0216  
Z 0.0013 -0.0024 0.0025 -0.0018 0.0521 0.0550  
AT. 149 O X 0.0016 -0.0018 -0.0023 0.0024 -0.0062 0.0059  
Y -0.0014 0.0015 0.0019 -0.0021 0.0065 -0.0061  
Z -0.0009 0.0010 0.0011 -0.0013 0.0027 -0.0025  
AT. 150 O X 0.0016 0.0018 0.0023 0.0024 0.0062 0.0059  
Y 0.0014 0.0015 0.0019 0.0021 0.0065 0.0061  
Z -0.0009 -0.0010 -0.0011 -0.0013 -0.0027 -0.0025  
AT. 151 O X -0.0016 -0.0018 0.0023 0.0024 -0.0062 0.0059  
Y 0.0014 0.0015 -0.0019 -0.0021 0.0065 -0.0061  
Z 0.0009 0.0010 -0.0011 -0.0013 0.0027 -0.0025  
AT. 152 O X -0.0016 0.0018 -0.0023 0.0024 0.0062 0.0059  
Y -0.0014 0.0015 -0.0019 0.0021 0.0065 0.0061  
Z 0.0009 -0.0010 0.0011 -0.0013 -0.0027 -0.0025  
AT. 153 H X 0.0028 -0.0010 -0.0017 0.0009 0.0055 -0.0046  
Y -0.0015 0.0020 0.0016 -0.0016 -0.0084 0.0067  
Z -0.0014 0.0004 0.0002 0.0003 -0.0104 0.0090  
AT. 154 H X 0.0028 0.0010 0.0017 0.0009 -0.0055 -0.0046  
Y 0.0015 0.0020 0.0016 0.0016 -0.0084 -0.0067  
Z -0.0014 -0.0004 -0.0002 0.0003 0.0104 0.0090  
AT. 155 H X -0.0028 -0.0010 0.0017 0.0009 0.0055 -0.0046  
Y 0.0015 0.0020 -0.0016 -0.0016 -0.0084 0.0067  
Z 0.0014 0.0004 -0.0002 0.0003 -0.0104 0.0090  
AT. 156 H X -0.0028 0.0010 -0.0017 0.0009 -0.0055 -0.0046  
Y -0.0015 0.0020 -0.0016 0.0016 -0.0084 -0.0067  
Z 0.0014 -0.0004 0.0002 0.0003 0.0104 0.0090  
AT. 157 O X -0.0058 0.0058 0.0059 -0.0059 0.0029 -0.0032  
Y -0.0045 0.0045 0.0045 -0.0045 0.0027 -0.0028  
Z -0.0044 0.0042 0.0039 -0.0040 0.0002 -0.0001  
AT. 158 O X -0.0058 -0.0058 -0.0059 -0.0059 -0.0029 -0.0032  
Y 0.0045 0.0045 0.0045 0.0045 0.0027 0.0028  
Z -0.0044 -0.0042 -0.0039 -0.0040 -0.0002 -0.0001

AT. 159 O X 0.0058 0.0058 -0.0059 -0.0059 0.0029 -0.0032  
Y 0.0045 0.0045 -0.0045 -0.0045 0.0027 -0.0028  
Z 0.0044 0.0042 -0.0039 -0.0040 0.0002 -0.0001

AT. 160 O X 0.0058 -0.0058 0.0059 -0.0059 -0.0029 -0.0032  
Y -0.0045 0.0045 -0.0045 0.0045 0.0027 0.0028  
Z 0.0044 -0.0042 0.0039 -0.0040 -0.0002 -0.0001

AT. 161 O X 0.0025 -0.0026 -0.0026 0.0025 -0.0005 0.0005  
Y 0.0027 -0.0026 -0.0025 0.0025 -0.0006 0.0007  
Z 0.0045 -0.0044 -0.0043 0.0043 -0.0008 0.0008

AT. 162 O X 0.0025 0.0026 0.0026 0.0025 0.0005 0.0005  
Y -0.0027 -0.0026 -0.0025 -0.0025 -0.0006 -0.0007  
Z 0.0045 0.0044 0.0043 0.0043 0.0008 0.0008

AT. 163 O X -0.0025 -0.0026 0.0026 0.0025 -0.0005 0.0005  
Y -0.0027 -0.0026 0.0025 0.0025 -0.0006 0.0007  
Z -0.0045 -0.0044 0.0043 0.0043 -0.0008 0.0008

AT. 164 O X -0.0025 0.0026 -0.0026 0.0025 0.0005 0.0005  
Y 0.0027 -0.0026 0.0025 -0.0025 -0.0006 -0.0007  
Z -0.0045 0.0044 -0.0043 0.0043 0.0008 0.0008

AT. 165 H X -0.0016 0.0017 0.0018 -0.0015 0.0018 -0.0020  
Y 0.0013 -0.0013 -0.0013 0.0014 -0.0007 0.0006  
Z 0.0015 -0.0018 -0.0024 0.0021 -0.0067 0.0066

AT. 166 H X -0.0016 -0.0017 -0.0018 -0.0015 -0.0018 -0.0020  
Y -0.0013 -0.0013 -0.0013 -0.0014 -0.0007 -0.0006  
Z 0.0015 0.0018 0.0024 0.0021 0.0067 0.0066

AT. 167 H X 0.0016 0.0017 -0.0018 -0.0015 0.0018 -0.0020  
Y -0.0013 -0.0013 0.0013 0.0014 -0.0007 0.0006  
Z -0.0015 -0.0018 0.0024 0.0021 -0.0067 0.0066

AT. 168 H X 0.0016 -0.0017 0.0018 -0.0015 -0.0018 -0.0020  
Y 0.0013 -0.0013 0.0013 -0.0014 -0.0007 -0.0006  
Z -0.0015 0.0018 -0.0024 0.0021 0.0067 0.0066

AT. 169 O X -0.0006 0.0001 0.0006 0.0000 0.0003 -0.0003  
Y -0.0006 0.0006 0.0005 -0.0006 0.0002 -0.0001

Z -0.0012 -0.0000 0.0010 -0.0000 0.0001 -0.0001  
 AT.170 O X -0.0006 -0.0001 -0.0006 0.0000 -0.0003 -0.0003  
 Y 0.0006 0.0006 0.0005 0.0006 0.0002 0.0001  
 Z -0.0012 0.0000 -0.0010 -0.0000 -0.0001 -0.0001  
 AT.171 O X 0.0006 0.0001 -0.0006 0.0000 0.0003 -0.0003  
 Y 0.0006 0.0006 -0.0005 -0.0006 0.0002 -0.0001  
 Z 0.0012 -0.0000 -0.0010 -0.0000 0.0001 -0.0001  
 AT.172 O X 0.0006 -0.0001 0.0006 0.0000 -0.0003 -0.0003  
 Y -0.0006 0.0006 -0.0005 0.0006 0.0002 0.0001  
 Z 0.0012 0.0000 0.0010 -0.0000 -0.0001 -0.0001  
 AT.173 H X 0.0004 0.0036 -0.0022 -0.0047 -0.0010 0.0011  
 Y -0.0005 -0.0010 0.0007 0.0012 -0.0006 0.0004  
 Z -0.0004 0.0003 0.0006 0.0002 0.0022 -0.0022  
 AT.174 H X 0.0004 -0.0036 0.0022 -0.0047 0.0010 0.0011  
 Y 0.0005 -0.0010 0.0007 -0.0012 -0.0006 -0.0004  
 Z -0.0004 -0.0003 -0.0006 0.0002 -0.0022 -0.0022  
 AT.175 H X -0.0004 0.0036 0.0022 -0.0047 -0.0010 0.0011  
 Y 0.0005 -0.0010 -0.0007 0.0012 -0.0006 0.0004  
 Z 0.0004 0.0003 -0.0006 0.0002 0.0022 -0.0022  
 AT.176 H X -0.0004 -0.0036 -0.0022 -0.0047 0.0010 0.0011  
 Y -0.0005 -0.0010 -0.0007 -0.0012 -0.0006 -0.0004  
 Z 0.0004 -0.0003 0.0006 0.0002 -0.0022 -0.0022

FREQ(CM\*\*-1) 1144.67 1144.80 1157.95 1158.53 1158.80 1159.24

AT. 1 I X -0.0001 0.0001 0.0002 0.0002 0.0002 0.0002  
 Y -0.0001 0.0001 0.0001 0.0001 0.0001 0.0001  
 Z -0.0000 0.0000 0.0001 0.0001 0.0001 0.0001  
 AT. 2 I X -0.0001 -0.0001 0.0002 -0.0002 -0.0002 0.0002  
 Y 0.0001 0.0001 -0.0001 0.0001 0.0001 -0.0001  
 Z -0.0000 -0.0000 0.0001 -0.0001 -0.0001 0.0001  
 AT. 3 I X 0.0001 -0.0001 0.0002 0.0002 -0.0002 -0.0002

Y 0.0001 -0.0001 0.0001 0.0001 -0.0001 -0.0001  
Z 0.0000 -0.0000 0.0001 0.0001 -0.0001 -0.0001  
AT. 4 I X 0.0001 0.0001 0.0002 -0.0002 0.0002 -0.0002  
Y -0.0001 -0.0001 -0.0001 0.0001 -0.0001 0.0001  
Z 0.0000 0.0000 0.0001 -0.0001 0.0001 -0.0001  
AT. 5 I X 0.0001 -0.0001 0.0001 0.0000 0.0000 0.0000  
Y -0.0002 0.0002 -0.0001 -0.0001 -0.0001 -0.0001  
Z 0.0001 -0.0001 0.0001 0.0001 0.0001 0.0001  
AT. 6 I X 0.0001 0.0001 0.0001 -0.0000 -0.0000 0.0000  
Y 0.0002 0.0002 0.0001 -0.0001 -0.0001 0.0001  
Z 0.0001 0.0001 0.0001 -0.0001 -0.0001 0.0001  
AT. 7 I X -0.0001 0.0001 0.0001 0.0000 -0.0000 -0.0000  
Y 0.0002 -0.0002 -0.0001 -0.0001 0.0001 0.0001  
Z -0.0001 0.0001 0.0001 0.0001 -0.0001 -0.0001  
AT. 8 I X -0.0001 -0.0001 0.0001 -0.0000 0.0000 -0.0000  
Y -0.0002 -0.0002 0.0001 -0.0001 0.0001 -0.0001  
Z -0.0001 -0.0001 0.0001 -0.0001 0.0001 -0.0001  
AT. 9 N X 0.0017 -0.0020 -0.0042 -0.0046 -0.0049 -0.0043  
Y 0.0017 -0.0022 -0.0096 -0.0093 -0.0090 -0.0098  
Z 0.0011 -0.0011 0.0006 0.0003 0.0000 0.0008  
AT. 10 N X 0.0017 0.0020 -0.0042 0.0046 0.0049 -0.0043  
Y -0.0017 -0.0022 0.0096 -0.0093 -0.0090 0.0098  
Z 0.0011 0.0011 0.0006 -0.0003 -0.0000 0.0008  
AT. 11 N X -0.0017 0.0020 -0.0042 -0.0046 0.0049 0.0043  
Y -0.0017 0.0022 -0.0096 -0.0093 0.0090 0.0098  
Z -0.0011 0.0011 0.0006 0.0003 -0.0000 -0.0008  
AT. 12 N X -0.0017 -0.0020 -0.0042 0.0046 -0.0049 0.0043  
Y 0.0017 0.0022 0.0096 -0.0093 0.0090 -0.0098  
Z -0.0011 -0.0011 0.0006 -0.0003 0.0000 -0.0008  
AT. 13 N X -0.0006 0.0004 0.0001 0.0001 0.0000 0.0000  
Y 0.0092 -0.0088 0.0056 0.0069 0.0076 0.0060  
Z 0.0001 -0.0003 0.0013 0.0012 0.0004 0.0014

AT. 14 N X -0.0006 -0.0004 0.0001 -0.0001 -0.0000 0.0000  
Y -0.0092 -0.0088 -0.0056 0.0069 0.0076 -0.0060  
Z 0.0001 0.0003 0.0013 -0.0012 -0.0004 0.0014

AT. 15 N X 0.0006 -0.0004 0.0001 0.0001 -0.0000 -0.0000  
Y -0.0092 0.0088 0.0056 0.0069 -0.0076 -0.0060  
Z -0.0001 0.0003 0.0013 0.0012 -0.0004 -0.0014

AT. 16 N X 0.0006 0.0004 0.0001 -0.0001 0.0000 -0.0000  
Y 0.0092 0.0088 -0.0056 0.0069 -0.0076 0.0060  
Z -0.0001 -0.0003 0.0013 -0.0012 0.0004 -0.0014

AT. 17 O X -0.0000 0.0001 -0.0000 0.0001 0.0001 0.0001  
Y 0.0003 -0.0002 -0.0002 -0.0000 0.0001 -0.0002  
Z 0.0013 -0.0013 -0.0039 -0.0035 -0.0033 -0.0037

AT. 18 O X -0.0000 -0.0001 -0.0000 -0.0001 -0.0001 0.0001  
Y -0.0003 -0.0002 0.0002 -0.0000 0.0001 0.0002  
Z 0.0013 0.0013 -0.0039 0.0035 0.0033 -0.0037

AT. 19 O X 0.0000 -0.0001 -0.0000 0.0001 -0.0001 -0.0001  
Y -0.0003 0.0002 -0.0002 -0.0000 -0.0001 0.0002  
Z -0.0013 0.0013 -0.0039 -0.0035 0.0033 0.0037

AT. 20 O X 0.0000 0.0001 -0.0000 -0.0001 0.0001 -0.0001  
Y 0.0003 0.0002 0.0002 -0.0000 -0.0001 -0.0002  
Z -0.0013 -0.0013 -0.0039 0.0035 -0.0033 0.0037

AT. 21 O X 0.0002 -0.0002 -0.0000 -0.0000 -0.0001 -0.0000  
Y 0.0003 -0.0003 -0.0000 -0.0001 -0.0003 0.0000  
Z -0.0031 0.0029 -0.0015 -0.0018 -0.0017 -0.0016

AT. 22 O X 0.0002 0.0002 -0.0000 0.0000 0.0001 -0.0000  
Y -0.0003 -0.0003 0.0000 -0.0001 -0.0003 -0.0000  
Z -0.0031 -0.0029 -0.0015 0.0018 0.0017 -0.0016

AT. 23 O X -0.0002 0.0002 -0.0000 -0.0000 0.0001 0.0000  
Y -0.0003 0.0003 -0.0000 -0.0001 0.0003 -0.0000  
Z 0.0031 -0.0029 -0.0015 -0.0018 0.0017 0.0016

AT. 24 O X -0.0002 -0.0002 -0.0000 0.0000 -0.0001 0.0000  
Y 0.0003 0.0003 0.0000 -0.0001 0.0003 0.0000

Z 0.0031 0.0029 -0.0015 0.0018 -0.0017 0.0016  
AT. 25 C X -0.0016 0.0021 0.0058 0.0054 0.0054 0.0059  
Y -0.0005 0.0006 0.0052 0.0050 0.0049 0.0051  
Z -0.0013 0.0013 0.0006 0.0004 -0.0000 0.0004  
AT. 26 C X -0.0016 -0.0021 0.0058 -0.0054 -0.0054 0.0059  
Y 0.0005 0.0006 -0.0052 0.0050 0.0049 -0.0051  
Z -0.0013 -0.0013 0.0006 -0.0004 0.0000 0.0004  
AT. 27 C X 0.0016 -0.0021 0.0058 0.0054 -0.0054 -0.0059  
Y 0.0005 -0.0006 0.0052 0.0050 -0.0049 -0.0051  
Z 0.0013 -0.0013 0.0006 0.0004 0.0000 -0.0004  
AT. 28 C X 0.0016 0.0021 0.0058 -0.0054 0.0054 -0.0059  
Y -0.0005 -0.0006 -0.0052 0.0050 -0.0049 0.0051  
Z 0.0013 0.0013 0.0006 -0.0004 -0.0000 -0.0004  
AT. 29 H X 0.0161 -0.0194 -0.0423 -0.0404 -0.0392 -0.0432  
Y 0.0097 -0.0102 -0.0276 -0.0255 -0.0242 -0.0266  
Z -0.0298 0.0358 0.0788 0.0747 0.0722 0.0798  
AT. 30 H X 0.0161 0.0194 -0.0423 0.0404 0.0392 -0.0432  
Y -0.0097 -0.0102 0.0276 -0.0255 -0.0242 0.0266  
Z -0.0298 -0.0358 0.0788 -0.0747 -0.0722 0.0798  
AT. 31 H X -0.0161 0.0194 -0.0423 -0.0404 0.0392 0.0432  
Y -0.0097 0.0102 -0.0276 -0.0255 0.0242 0.0266  
Z 0.0298 -0.0358 0.0788 0.0747 -0.0722 -0.0798  
AT. 32 H X -0.0161 -0.0194 -0.0423 0.0404 -0.0392 0.0432  
Y 0.0097 0.0102 0.0276 -0.0255 0.0242 -0.0266  
Z 0.0298 0.0358 0.0788 -0.0747 0.0722 -0.0798  
AT. 33 H X -0.0098 0.0079 0.0177 0.0160 0.0153 0.0159  
Y -0.0050 0.0057 0.0199 0.0188 0.0182 0.0196  
Z 0.0253 -0.0258 -0.0735 -0.0685 -0.0663 -0.0712  
AT. 34 H X -0.0098 -0.0079 0.0177 -0.0160 -0.0153 0.0159  
Y 0.0050 0.0057 -0.0199 0.0188 0.0182 -0.0196  
Z 0.0253 0.0258 -0.0735 0.0685 0.0663 -0.0712  
AT. 35 H X 0.0098 -0.0079 0.0177 0.0160 -0.0153 -0.0159

Y 0.0050 -0.0057 0.0199 0.0188 -0.0182 -0.0196  
Z -0.0253 0.0258 -0.0735 -0.0685 0.0663 0.0712  
AT. 36 H X 0.0098 0.0079 0.0177 -0.0160 0.0153 -0.0159  
Y -0.0050 -0.0057 -0.0199 0.0188 -0.0182 0.0196  
Z -0.0253 -0.0258 -0.0735 0.0685 -0.0663 0.0712  
AT. 37 C X 0.0012 -0.0015 -0.0038 -0.0035 -0.0035 -0.0039  
Y -0.0035 0.0040 0.0021 0.0021 0.0017 0.0023  
Z 0.0007 -0.0009 0.0021 0.0021 0.0023 0.0020  
AT. 38 C X 0.0012 0.0015 -0.0038 0.0035 0.0035 -0.0039  
Y 0.0035 0.0040 -0.0021 0.0021 0.0017 -0.0023  
Z 0.0007 0.0009 0.0021 -0.0021 -0.0023 0.0020  
AT. 39 C X -0.0012 0.0015 -0.0038 -0.0035 0.0035 0.0039  
Y 0.0035 -0.0040 0.0021 0.0021 -0.0017 -0.0023  
Z -0.0007 0.0009 0.0021 0.0021 -0.0023 -0.0020  
AT. 40 C X -0.0012 -0.0015 -0.0038 0.0035 -0.0035 0.0039  
Y -0.0035 -0.0040 -0.0021 0.0021 -0.0017 0.0023  
Z -0.0007 -0.0009 0.0021 -0.0021 0.0023 -0.0020  
AT. 41 C X -0.0005 0.0005 0.0012 0.0017 0.0025 0.0011  
Y 0.0023 -0.0019 0.0025 0.0025 0.0027 0.0024  
Z -0.0037 0.0036 0.0036 0.0031 0.0025 0.0033  
AT. 42 C X -0.0005 -0.0005 0.0012 -0.0017 -0.0025 0.0011  
Y -0.0023 -0.0019 -0.0025 0.0025 0.0027 -0.0024  
Z -0.0037 -0.0036 0.0036 -0.0031 -0.0025 0.0033  
AT. 43 C X 0.0005 -0.0005 0.0012 0.0017 -0.0025 -0.0011  
Y -0.0023 0.0019 0.0025 0.0025 -0.0027 -0.0024  
Z 0.0037 -0.0036 0.0036 0.0031 -0.0025 -0.0033  
AT. 44 C X 0.0005 0.0005 0.0012 -0.0017 0.0025 -0.0011  
Y 0.0023 0.0019 -0.0025 0.0025 -0.0027 0.0024  
Z 0.0037 0.0036 0.0036 -0.0031 0.0025 -0.0033  
AT. 45 H X 0.0072 -0.0043 0.0177 0.0164 0.0146 0.0185  
Y -0.0025 0.0037 0.0118 0.0109 0.0101 0.0124  
Z -0.0089 0.0092 0.0093 0.0083 0.0073 0.0094

AT. 46 H X 0.0072 0.0043 0.0177 -0.0164 -0.0146 0.0185  
Y 0.0025 0.0037 -0.0118 0.0109 0.0101 -0.0124  
Z -0.0089 -0.0092 0.0093 -0.0083 -0.0073 0.0094

AT. 47 H X -0.0072 0.0043 0.0177 0.0164 -0.0146 -0.0185  
Y 0.0025 -0.0037 0.0118 0.0109 -0.0101 -0.0124  
Z 0.0089 -0.0092 0.0093 0.0083 -0.0073 -0.0094

AT. 48 H X -0.0072 -0.0043 0.0177 -0.0164 0.0146 -0.0185  
Y -0.0025 -0.0037 -0.0118 0.0109 -0.0101 0.0124  
Z 0.0089 0.0092 0.0093 -0.0083 0.0073 -0.0094

AT. 49 H X 0.0023 -0.0031 -0.0048 -0.0058 -0.0068 -0.0059  
Y 0.0008 -0.0013 -0.0011 -0.0025 -0.0039 -0.0020  
Z 0.0070 -0.0075 -0.0037 -0.0046 -0.0055 -0.0046

AT. 50 H X 0.0023 0.0031 -0.0048 0.0058 0.0068 -0.0059  
Y -0.0008 -0.0013 0.0011 -0.0025 -0.0039 0.0020  
Z 0.0070 0.0075 -0.0037 0.0046 0.0055 -0.0046

AT. 51 H X -0.0023 0.0031 -0.0048 -0.0058 0.0068 0.0059  
Y -0.0008 0.0013 -0.0011 -0.0025 0.0039 0.0020  
Z -0.0070 0.0075 -0.0037 -0.0046 0.0055 0.0046

AT. 52 H X -0.0023 -0.0031 -0.0048 0.0058 -0.0068 0.0059  
Y 0.0008 0.0013 0.0011 -0.0025 0.0039 -0.0020  
Z -0.0070 -0.0075 -0.0037 0.0046 -0.0055 0.0046

AT. 53 C X -0.0008 0.0005 -0.0006 -0.0001 -0.0000 -0.0004  
Y -0.0066 0.0060 -0.0010 0.0001 0.0019 -0.0007  
Z 0.0021 -0.0023 -0.0039 -0.0013 0.0017 -0.0034

AT. 54 C X -0.0008 -0.0005 -0.0006 0.0001 0.0000 -0.0004  
Y 0.0066 0.0060 0.0010 0.0001 0.0019 0.0007  
Z 0.0021 0.0023 -0.0039 0.0013 -0.0017 -0.0034

AT. 55 C X 0.0008 -0.0005 -0.0006 -0.0001 0.0000 0.0004  
Y 0.0066 -0.0060 -0.0010 0.0001 -0.0019 0.0007  
Z -0.0021 0.0023 -0.0039 -0.0013 -0.0017 0.0034

AT. 56 C X 0.0008 0.0005 -0.0006 0.0001 -0.0000 0.0004  
Y -0.0066 -0.0060 0.0010 0.0001 -0.0019 -0.0007



Z -0.0021 -0.0023 -0.0039 0.0013 0.0017 0.0034  
AT. 57 C X 0.0005 -0.0003 0.0003 0.0003 0.0004 0.0004  
Y 0.0044 -0.0039 0.0003 -0.0001 -0.0009 0.0001  
Z -0.0012 0.0013 0.0014 0.0002 -0.0011 0.0013  
AT. 58 C X 0.0005 0.0003 0.0003 -0.0003 -0.0004 0.0004  
Y -0.0044 -0.0039 -0.0003 -0.0001 -0.0009 -0.0001  
Z -0.0012 -0.0013 0.0014 -0.0002 0.0011 0.0013  
AT. 59 C X -0.0005 0.0003 0.0003 0.0003 -0.0004 -0.0004  
Y -0.0044 0.0039 0.0003 -0.0001 0.0009 -0.0001  
Z 0.0012 -0.0013 0.0014 0.0002 0.0011 -0.0013  
AT. 60 C X -0.0005 -0.0003 0.0003 -0.0003 0.0004 -0.0004  
Y 0.0044 0.0039 -0.0003 -0.0001 0.0009 0.0001  
Z 0.0012 0.0013 0.0014 -0.0002 -0.0011 -0.0013  
AT. 61 H X -0.0015 -0.0001 0.0000 -0.0007 -0.0020 -0.0003  
Y -0.0001 -0.0008 0.0004 -0.0006 -0.0022 0.0000  
Z 0.0142 -0.0138 0.0003 -0.0009 -0.0037 -0.0006  
AT. 62 H X -0.0015 0.0001 0.0000 0.0007 0.0020 -0.0003  
Y 0.0001 -0.0008 -0.0004 -0.0006 -0.0022 -0.0000  
Z 0.0142 0.0138 0.0003 0.0009 0.0037 -0.0006  
AT. 63 H X 0.0015 0.0001 0.0000 -0.0007 0.0020 0.0003  
Y 0.0001 0.0008 0.0004 -0.0006 0.0022 -0.0000  
Z -0.0142 0.0138 0.0003 -0.0009 0.0037 0.0006  
AT. 64 H X 0.0015 -0.0001 0.0000 0.0007 -0.0020 0.0003  
Y -0.0001 0.0008 -0.0004 -0.0006 0.0022 0.0000  
Z -0.0142 -0.0138 0.0003 0.0009 -0.0037 0.0006  
AT. 65 H X 0.0034 -0.0027 0.0001 -0.0000 -0.0003 0.0001  
Y -0.0048 0.0042 0.0012 0.0008 0.0008 0.0013  
Z 0.0112 -0.0094 0.0020 0.0024 0.0015 0.0018  
AT. 66 H X 0.0034 0.0027 0.0001 0.0000 0.0003 0.0001  
Y 0.0048 0.0042 -0.0012 0.0008 0.0008 -0.0013  
Z 0.0112 0.0094 0.0020 -0.0024 -0.0015 0.0018  
AT. 67 H X -0.0034 0.0027 0.0001 -0.0000 0.0003 -0.0001

Y 0.0048 -0.0042 0.0012 0.0008 -0.0008 -0.0013  
Z -0.0112 0.0094 0.0020 0.0024 -0.0015 -0.0018  
AT. 68 H X -0.0034 -0.0027 0.0001 0.0000 -0.0003 -0.0001  
Y -0.0048 -0.0042 -0.0012 0.0008 -0.0008 0.0013  
Z -0.0112 -0.0094 0.0020 -0.0024 0.0015 -0.0018  
AT. 69 H X -0.0019 0.0020 0.0010 0.0000 -0.0014 0.0005  
Y -0.0102 0.0098 0.0024 0.0009 0.0006 0.0021  
Z -0.0135 0.0128 0.0033 0.0009 -0.0003 0.0029  
AT. 70 H X -0.0019 -0.0020 0.0010 -0.0000 0.0014 0.0005  
Y 0.0102 0.0098 -0.0024 0.0009 0.0006 -0.0021  
Z -0.0135 -0.0128 0.0033 -0.0009 0.0003 0.0029  
AT. 71 H X 0.0019 -0.0020 0.0010 0.0000 0.0014 -0.0005  
Y 0.0102 -0.0098 0.0024 0.0009 -0.0006 -0.0021  
Z 0.0135 -0.0128 0.0033 0.0009 0.0003 -0.0029  
AT. 72 H X 0.0019 0.0020 0.0010 -0.0000 -0.0014 -0.0005  
Y -0.0102 -0.0098 -0.0024 0.0009 -0.0006 0.0021  
Z 0.0135 0.0128 0.0033 -0.0009 -0.0003 -0.0029  
AT. 73 C X 0.0046 -0.0053 0.0030 0.0011 -0.0020 0.0022  
Y -0.0109 0.0103 0.0040 0.0049 0.0057 0.0033  
Z -0.0005 0.0006 0.0001 0.0000 -0.0006 0.0002  
AT. 74 C X 0.0046 0.0053 0.0030 -0.0011 0.0020 0.0022  
Y 0.0109 0.0103 -0.0040 0.0049 0.0057 -0.0033  
Z -0.0005 -0.0006 0.0001 -0.0000 0.0006 0.0002  
AT. 75 C X -0.0046 0.0053 0.0030 0.0011 0.0020 -0.0022  
Y 0.0109 -0.0103 0.0040 0.0049 -0.0057 -0.0033  
Z 0.0005 -0.0006 0.0001 0.0000 0.0006 -0.0002  
AT. 76 C X -0.0046 -0.0053 0.0030 -0.0011 -0.0020 -0.0022  
Y -0.0109 -0.0103 -0.0040 0.0049 -0.0057 0.0033  
Z 0.0005 0.0006 0.0001 -0.0000 -0.0006 -0.0002  
AT. 77 C X 0.0005 -0.0006 0.0000 0.0003 0.0008 0.0003  
Y 0.0030 -0.0031 -0.0000 -0.0001 -0.0002 0.0003  
Z 0.0017 -0.0017 -0.0023 -0.0018 -0.0013 -0.0022

AT. 78 C X 0.0005 0.0006 0.0000 -0.0003 -0.0008 0.0003  
Y -0.0030 -0.0031 0.0000 -0.0001 -0.0002 -0.0003  
Z 0.0017 0.0017 -0.0023 0.0018 0.0013 -0.0022

AT. 79 C X -0.0005 0.0006 0.0000 0.0003 -0.0008 -0.0003  
Y -0.0030 0.0031 -0.0000 -0.0001 0.0002 -0.0003  
Z -0.0017 0.0017 -0.0023 -0.0018 0.0013 0.0022

AT. 80 C X -0.0005 -0.0006 0.0000 -0.0003 0.0008 -0.0003  
Y 0.0030 0.0031 0.0000 -0.0001 0.0002 0.0003  
Z -0.0017 -0.0017 -0.0023 0.0018 -0.0013 0.0022

AT. 81 H X -0.0015 0.0010 -0.0085 -0.0085 -0.0075 -0.0081  
Y 0.0014 -0.0023 -0.0115 -0.0120 -0.0113 -0.0111  
Z -0.0093 0.0107 0.0142 0.0150 0.0134 0.0127

AT. 82 H X -0.0015 -0.0010 -0.0085 0.0085 0.0075 -0.0081  
Y -0.0014 -0.0023 0.0115 -0.0120 -0.0113 0.0111  
Z -0.0093 -0.0107 0.0142 -0.0150 -0.0134 0.0127

AT. 83 H X 0.0015 -0.0010 -0.0085 -0.0085 0.0075 0.0081  
Y -0.0014 0.0023 -0.0115 -0.0120 0.0113 0.0111  
Z 0.0093 -0.0107 0.0142 0.0150 -0.0134 -0.0127

AT. 84 H X 0.0015 0.0010 -0.0085 0.0085 -0.0075 0.0081  
Y 0.0014 0.0023 0.0115 -0.0120 0.0113 -0.0111  
Z 0.0093 0.0107 0.0142 -0.0150 0.0134 -0.0127

AT. 85 H X 0.0048 -0.0035 0.0120 0.0134 0.0129 0.0117  
Y -0.0065 0.0078 0.0201 0.0205 0.0220 0.0209  
Z 0.0083 -0.0098 -0.0223 -0.0225 -0.0229 -0.0222

AT. 86 H X 0.0048 0.0035 0.0120 -0.0134 -0.0129 0.0117  
Y 0.0065 0.0078 -0.0201 0.0205 0.0220 -0.0209  
Z 0.0083 0.0098 -0.0223 0.0225 0.0229 -0.0222

AT. 87 H X -0.0048 0.0035 0.0120 0.0134 -0.0129 -0.0117  
Y 0.0065 -0.0078 0.0201 0.0205 -0.0220 -0.0209  
Z -0.0083 0.0098 -0.0223 -0.0225 0.0229 0.0222

AT. 88 H X -0.0048 -0.0035 0.0120 -0.0134 0.0129 -0.0117  
Y -0.0065 -0.0078 -0.0201 0.0205 -0.0220 0.0209

Z -0.0083 -0.0098 -0.0223 0.0225 -0.0229 0.0222  
AT. 89 C X 0.0002 -0.0000 -0.0002 -0.0006 -0.0006 -0.0003  
Y -0.0033 0.0034 0.0050 0.0046 0.0034 0.0038  
Z -0.0055 0.0061 -0.0004 0.0000 0.0017 -0.0001  
AT. 90 C X 0.0002 0.0000 -0.0002 0.0006 0.0006 -0.0003  
Y 0.0033 0.0034 -0.0050 0.0046 0.0034 -0.0038  
Z -0.0055 -0.0061 -0.0004 -0.0000 -0.0017 -0.0001  
AT. 91 C X -0.0002 0.0000 -0.0002 -0.0006 0.0006 0.0003  
Y 0.0033 -0.0034 0.0050 0.0046 -0.0034 -0.0038  
Z 0.0055 -0.0061 -0.0004 0.0000 -0.0017 0.0001  
AT. 92 C X -0.0002 -0.0000 -0.0002 0.0006 -0.0006 0.0003  
Y -0.0033 -0.0034 -0.0050 0.0046 -0.0034 0.0038  
Z 0.0055 0.0061 -0.0004 -0.0000 0.0017 0.0001  
AT. 93 C X -0.0007 0.0008 0.0008 0.0011 0.0012 0.0009  
Y 0.0022 -0.0023 -0.0027 -0.0024 -0.0015 -0.0022  
Z 0.0026 -0.0029 0.0000 -0.0001 -0.0007 -0.0000  
AT. 94 C X -0.0007 -0.0008 0.0008 -0.0011 -0.0012 0.0009  
Y -0.0022 -0.0023 0.0027 -0.0024 -0.0015 0.0022  
Z 0.0026 0.0029 0.0000 0.0001 0.0007 -0.0000  
AT. 95 C X 0.0007 -0.0008 0.0008 0.0011 -0.0012 -0.0009  
Y -0.0022 0.0023 -0.0027 -0.0024 0.0015 0.0022  
Z -0.0026 0.0029 0.0000 -0.0001 0.0007 0.0000  
AT. 96 C X 0.0007 0.0008 0.0008 -0.0011 0.0012 -0.0009  
Y 0.0022 0.0023 0.0027 -0.0024 0.0015 -0.0022  
Z -0.0026 -0.0029 0.0000 0.0001 -0.0007 0.0000  
AT. 97 H X 0.0018 -0.0020 -0.0010 -0.0015 -0.0015 -0.0010  
Y -0.0059 0.0063 0.0025 0.0033 0.0036 0.0024  
Z -0.0043 0.0040 0.0038 0.0021 -0.0000 0.0024  
AT. 98 H X 0.0018 0.0020 -0.0010 0.0015 0.0015 -0.0010  
Y 0.0059 0.0063 -0.0025 0.0033 0.0036 -0.0024  
Z -0.0043 -0.0040 0.0038 -0.0021 0.0000 0.0024  
AT. 99 H X -0.0018 0.0020 -0.0010 -0.0015 0.0015 0.0010

Y 0.0059 -0.0063 0.0025 0.0033 -0.0036 -0.0024  
Z 0.0043 -0.0040 0.0038 0.0021 0.0000 -0.0024  
AT.100 H X -0.0018 -0.0020 -0.0010 0.0015 -0.0015 0.0010  
Y -0.0059 -0.0063 -0.0025 0.0033 -0.0036 0.0024  
Z 0.0043 0.0040 0.0038 -0.0021 -0.0000 -0.0024  
AT.101 H X -0.0027 0.0030 0.0017 0.0011 0.0003 0.0010  
Y 0.0016 -0.0016 -0.0033 -0.0038 -0.0037 -0.0032  
Z -0.0089 0.0099 0.0104 0.0100 0.0084 0.0086  
AT.102 H X -0.0027 -0.0030 0.0017 -0.0011 -0.0003 0.0010  
Y -0.0016 -0.0016 0.0033 -0.0038 -0.0037 0.0032  
Z -0.0089 -0.0099 0.0104 -0.0100 -0.0084 0.0086  
AT.103 H X 0.0027 -0.0030 0.0017 0.0011 -0.0003 -0.0010  
Y -0.0016 0.0016 -0.0033 -0.0038 0.0037 0.0032  
Z 0.0089 -0.0099 0.0104 0.0100 -0.0084 -0.0086  
AT.104 H X 0.0027 0.0030 0.0017 -0.0011 0.0003 -0.0010  
Y 0.0016 0.0016 0.0033 -0.0038 0.0037 -0.0032  
Z 0.0089 0.0099 0.0104 -0.0100 0.0084 -0.0086  
AT.105 H X 0.0048 -0.0049 -0.0022 -0.0026 -0.0030 -0.0024  
Y -0.0092 0.0098 0.0056 0.0055 0.0052 0.0053  
Z 0.0092 -0.0100 -0.0051 -0.0047 -0.0042 -0.0045  
AT.106 H X 0.0048 0.0049 -0.0022 0.0026 0.0030 -0.0024  
Y 0.0092 0.0098 -0.0056 0.0055 0.0052 -0.0053  
Z 0.0092 0.0100 -0.0051 0.0047 0.0042 -0.0045  
AT.107 H X -0.0048 0.0049 -0.0022 -0.0026 0.0030 0.0024  
Y 0.0092 -0.0098 0.0056 0.0055 -0.0052 -0.0053  
Z -0.0092 0.0100 -0.0051 -0.0047 0.0042 0.0045  
AT.108 H X -0.0048 -0.0049 -0.0022 0.0026 -0.0030 0.0024  
Y -0.0092 -0.0098 -0.0056 0.0055 -0.0052 0.0053  
Z -0.0092 -0.0100 -0.0051 0.0047 -0.0042 0.0045  
AT.109 C X -0.0006 0.0008 -0.0001 -0.0003 -0.0003 -0.0001  
Y 0.0023 -0.0025 -0.0022 -0.0026 -0.0029 -0.0022  
Z -0.0045 0.0044 -0.0005 -0.0006 -0.0002 -0.0006

AT. 110 C X -0.0006 -0.0008 -0.0001 0.0003 0.0003 -0.0001  
Y -0.0023 -0.0025 0.0022 -0.0026 -0.0029 0.0022  
Z -0.0045 -0.0044 -0.0005 0.0006 0.0002 -0.0006

AT. 111 C X 0.0006 -0.0008 -0.0001 -0.0003 0.0003 0.0001  
Y -0.0023 0.0025 -0.0022 -0.0026 0.0029 0.0022  
Z 0.0045 -0.0044 -0.0005 -0.0006 0.0002 0.0006

AT. 112 C X 0.0006 0.0008 -0.0001 0.0003 -0.0003 0.0001  
Y 0.0023 0.0025 0.0022 -0.0026 0.0029 -0.0022  
Z 0.0045 0.0044 -0.0005 0.0006 -0.0002 0.0006

AT. 113 H X -0.0028 0.0022 -0.0052 -0.0062 -0.0065 -0.0054  
Y 0.0112 -0.0096 0.0081 0.0093 0.0092 0.0085  
Z 0.0174 -0.0159 0.0047 0.0049 0.0045 0.0049

AT. 114 H X -0.0028 -0.0022 -0.0052 0.0062 0.0065 -0.0054  
Y -0.0112 -0.0096 -0.0081 0.0093 0.0092 -0.0085  
Z 0.0174 0.0159 0.0047 -0.0049 -0.0045 0.0049

AT. 115 H X 0.0028 -0.0022 -0.0052 -0.0062 0.0065 0.0054  
Y -0.0112 0.0096 0.0081 0.0093 -0.0092 -0.0085  
Z -0.0174 0.0159 0.0047 0.0049 -0.0045 -0.0049

AT. 116 H X 0.0028 0.0022 -0.0052 0.0062 -0.0065 0.0054  
Y 0.0112 0.0096 -0.0081 0.0093 -0.0092 0.0085  
Z -0.0174 -0.0159 0.0047 -0.0049 0.0045 -0.0049

AT. 117 H X -0.0028 0.0033 0.0079 0.0103 0.0134 0.0082  
Y -0.0157 0.0147 -0.0104 -0.0147 -0.0195 -0.0109  
Z -0.0202 0.0194 -0.0090 -0.0130 -0.0168 -0.0096

AT. 118 H X -0.0028 -0.0033 0.0079 -0.0103 -0.0134 0.0082  
Y 0.0157 0.0147 0.0104 -0.0147 -0.0195 0.0109  
Z -0.0202 -0.0194 -0.0090 0.0130 0.0168 -0.0096

AT. 119 H X 0.0028 -0.0033 0.0079 0.0103 -0.0134 -0.0082  
Y 0.0157 -0.0147 -0.0104 -0.0147 0.0195 0.0109  
Z 0.0202 -0.0194 -0.0090 -0.0130 0.0168 0.0096

AT. 120 H X 0.0028 0.0033 0.0079 -0.0103 0.0134 -0.0082  
Y -0.0157 -0.0147 0.0104 -0.0147 0.0195 -0.0109

Z 0.0202 0.0194 -0.0090 0.0130 -0.0168 0.0096  
AT. 121 C X 0.0002 -0.0002 -0.0003 -0.0001 0.0001 -0.0002  
Y 0.0002 -0.0007 -0.0031 -0.0035 -0.0046 -0.0026  
Z 0.0064 -0.0063 -0.0006 -0.0002 -0.0000 -0.0003  
AT. 122 C X 0.0002 0.0002 -0.0003 0.0001 -0.0001 -0.0002  
Y -0.0002 -0.0007 0.0031 -0.0035 -0.0046 0.0026  
Z 0.0064 0.0063 -0.0006 0.0002 0.0000 -0.0003  
AT. 123 C X -0.0002 0.0002 -0.0003 -0.0001 -0.0001 0.0002  
Y -0.0002 0.0007 -0.0031 -0.0035 0.0046 0.0026  
Z -0.0064 0.0063 -0.0006 -0.0002 0.0000 0.0003  
AT. 124 C X -0.0002 -0.0002 -0.0003 0.0001 0.0001 0.0002  
Y 0.0002 0.0007 0.0031 -0.0035 0.0046 -0.0026  
Z -0.0064 -0.0063 -0.0006 0.0002 -0.0000 0.0003  
AT. 125 H X 0.0070 -0.0064 0.0154 0.0181 0.0182 0.0156  
Y -0.0159 0.0164 -0.0116 -0.0150 -0.0141 -0.0130  
Z 0.0162 -0.0169 0.0012 0.0030 0.0019 0.0027  
AT. 126 H X 0.0070 0.0064 0.0154 -0.0181 -0.0182 0.0156  
Y 0.0159 0.0164 0.0116 -0.0150 -0.0141 0.0130  
Z 0.0162 0.0169 0.0012 -0.0030 -0.0019 0.0027  
AT. 127 H X -0.0070 0.0064 0.0154 0.0181 -0.0182 -0.0156  
Y 0.0159 -0.0164 -0.0116 -0.0150 0.0141 0.0130  
Z -0.0162 0.0169 0.0012 0.0030 -0.0019 -0.0027  
AT. 128 H X -0.0070 -0.0064 0.0154 -0.0181 0.0182 -0.0156  
Y -0.0159 -0.0164 0.0116 -0.0150 0.0141 -0.0130  
Z -0.0162 -0.0169 0.0012 -0.0030 0.0019 -0.0027  
AT. 129 H X -0.0054 0.0056 -0.0031 -0.0046 -0.0047 -0.0043  
Y 0.0033 -0.0037 0.0025 0.0038 0.0038 0.0038  
Z -0.0091 0.0099 0.0010 -0.0009 0.0008 -0.0012  
AT. 130 H X -0.0054 -0.0056 -0.0031 0.0046 0.0047 -0.0043  
Y -0.0033 -0.0037 -0.0025 0.0038 0.0038 -0.0038  
Z -0.0091 -0.0099 0.0010 0.0009 -0.0008 -0.0012  
AT. 131 H X 0.0054 -0.0056 -0.0031 -0.0046 0.0047 0.0043

Y -0.0033 0.0037 0.0025 0.0038 -0.0038 -0.0038  
Z 0.0091 -0.0099 0.0010 -0.0009 -0.0008 0.0012  
AT. 132 H X 0.0054 0.0056 -0.0031 0.0046 -0.0047 0.0043  
Y 0.0033 0.0037 -0.0025 0.0038 -0.0038 0.0038  
Z 0.0091 0.0099 0.0010 0.0009 0.0008 0.0012  
AT. 133 C X -0.0046 0.0046 -0.0011 -0.0017 -0.0014 -0.0016  
Y -0.0033 0.0035 0.0010 0.0006 0.0014 0.0004  
Z 0.0004 0.0001 0.0017 0.0016 0.0021 0.0014  
AT. 134 C X -0.0046 -0.0046 -0.0011 0.0017 0.0014 -0.0016  
Y 0.0033 0.0035 -0.0010 0.0006 0.0014 -0.0004  
Z 0.0004 -0.0001 0.0017 -0.0016 -0.0021 0.0014  
AT. 135 C X 0.0046 -0.0046 -0.0011 -0.0017 0.0014 0.0016  
Y 0.0033 -0.0035 0.0010 0.0006 -0.0014 -0.0004  
Z -0.0004 -0.0001 0.0017 0.0016 -0.0021 -0.0014  
AT. 136 C X 0.0046 0.0046 -0.0011 0.0017 -0.0014 0.0016  
Y -0.0033 -0.0035 -0.0010 0.0006 -0.0014 0.0004  
Z -0.0004 0.0001 0.0017 -0.0016 0.0021 -0.0014  
AT. 137 C X 0.0038 -0.0038 0.0018 0.0020 0.0018 0.0018  
Y -0.0061 0.0059 -0.0041 -0.0048 -0.0052 -0.0041  
Z -0.0002 -0.0001 -0.0015 -0.0012 -0.0014 -0.0010  
AT. 138 C X 0.0038 0.0038 0.0018 -0.0020 -0.0018 0.0018  
Y 0.0061 0.0059 0.0041 -0.0048 -0.0052 0.0041  
Z -0.0002 0.0001 -0.0015 0.0012 0.0014 -0.0010  
AT. 139 C X -0.0038 0.0038 0.0018 0.0020 -0.0018 -0.0018  
Y 0.0061 -0.0059 -0.0041 -0.0048 0.0052 0.0041  
Z 0.0002 0.0001 -0.0015 -0.0012 0.0014 0.0010  
AT. 140 C X -0.0038 -0.0038 0.0018 -0.0020 0.0018 -0.0018  
Y -0.0061 -0.0059 0.0041 -0.0048 0.0052 -0.0041  
Z 0.0002 -0.0001 -0.0015 0.0012 -0.0014 0.0010  
AT. 141 H X -0.0320 0.0319 -0.0138 -0.0174 -0.0165 -0.0158  
Y 0.0444 -0.0443 0.0182 0.0239 0.0250 0.0209  
Z 0.0747 -0.0747 0.0310 0.0401 0.0398 0.0358



AT. 142 H X -0.0320 -0.0319 -0.0138 0.0174 0.0165 -0.0158  
Y -0.0444 -0.0443 -0.0182 0.0239 0.0250 -0.0209  
Z 0.0747 0.0747 0.0310 -0.0401 -0.0398 0.0358

AT. 143 H X 0.0320 -0.0319 -0.0138 -0.0174 0.0165 0.0158  
Y -0.0444 0.0443 0.0182 0.0239 -0.0250 -0.0209  
Z -0.0747 0.0747 0.0310 0.0401 -0.0398 -0.0358

AT. 144 H X 0.0320 0.0319 -0.0138 0.0174 -0.0165 0.0158  
Y 0.0444 0.0443 -0.0182 0.0239 -0.0250 0.0209  
Z -0.0747 -0.0747 0.0310 -0.0401 0.0398 -0.0358

AT. 145 H X 0.0073 -0.0071 -0.0011 0.0004 0.0019 0.0001  
Y -0.0215 0.0210 -0.0091 -0.0121 -0.0142 -0.0103  
Z -0.0551 0.0537 -0.0244 -0.0312 -0.0360 -0.0270

AT. 146 H X 0.0073 0.0071 -0.0011 -0.0004 -0.0019 0.0001  
Y 0.0215 0.0210 0.0091 -0.0121 -0.0142 0.0103  
Z -0.0551 -0.0537 -0.0244 0.0312 0.0360 -0.0270

AT. 147 H X -0.0073 0.0071 -0.0011 0.0004 -0.0019 -0.0001  
Y 0.0215 -0.0210 -0.0091 -0.0121 0.0142 0.0103  
Z 0.0551 -0.0537 -0.0244 -0.0312 0.0360 0.0270

AT. 148 H X -0.0073 -0.0071 -0.0011 -0.0004 0.0019 -0.0001  
Y -0.0215 -0.0210 0.0091 -0.0121 0.0142 -0.0103  
Z 0.0551 0.0537 -0.0244 0.0312 -0.0360 0.0270

AT. 149 O X -0.0055 0.0054 0.0010 0.0015 0.0023 0.0008  
Y 0.0057 -0.0056 -0.0009 -0.0016 -0.0025 -0.0007  
Z 0.0021 -0.0021 -0.0004 -0.0008 -0.0011 -0.0003

AT. 150 O X -0.0055 -0.0054 0.0010 -0.0015 -0.0023 0.0008  
Y -0.0057 -0.0056 0.0009 -0.0016 -0.0025 0.0007  
Z 0.0021 0.0021 -0.0004 0.0008 0.0011 -0.0003

AT. 151 O X 0.0055 -0.0054 0.0010 0.0015 -0.0023 -0.0008  
Y -0.0057 0.0056 -0.0009 -0.0016 0.0025 0.0007  
Z -0.0021 0.0021 -0.0004 -0.0008 0.0011 0.0003

AT. 152 O X 0.0055 0.0054 0.0010 -0.0015 0.0023 -0.0008  
Y 0.0057 0.0056 0.0009 -0.0016 0.0025 -0.0007

Z -0.0021 -0.0021 -0.0004 0.0008 -0.0011 0.0003  
AT. 153 H X 0.0025 -0.0024 0.0018 0.0002 -0.0019 0.0019  
Y -0.0034 0.0041 -0.0028 0.0003 0.0051 -0.0026  
Z -0.0066 0.0067 -0.0016 0.0008 0.0044 -0.0017  
AT. 154 H X 0.0025 0.0024 0.0018 -0.0002 0.0019 0.0019  
Y 0.0034 0.0041 0.0028 0.0003 0.0051 0.0026  
Z -0.0066 -0.0067 -0.0016 -0.0008 -0.0044 -0.0017  
AT. 155 H X -0.0025 0.0024 0.0018 0.0002 0.0019 -0.0019  
Y 0.0034 -0.0041 -0.0028 0.0003 -0.0051 0.0026  
Z 0.0066 -0.0067 -0.0016 0.0008 -0.0044 0.0017  
AT. 156 H X -0.0025 -0.0024 0.0018 -0.0002 -0.0019 -0.0019  
Y -0.0034 -0.0041 0.0028 0.0003 -0.0051 -0.0026  
Z 0.0066 0.0067 -0.0016 -0.0008 0.0044 0.0017  
AT. 157 O X 0.0044 -0.0038 -0.0053 -0.0045 -0.0029 -0.0043  
Y 0.0034 -0.0032 -0.0030 -0.0027 -0.0019 -0.0024  
Z 0.0003 -0.0004 -0.0006 -0.0005 -0.0001 -0.0004  
AT. 158 O X 0.0044 0.0038 -0.0053 0.0045 0.0029 -0.0043  
Y -0.0034 -0.0032 0.0030 -0.0027 -0.0019 0.0024  
Z 0.0003 0.0004 -0.0006 0.0005 0.0001 -0.0004  
AT. 159 O X -0.0044 0.0038 -0.0053 -0.0045 0.0029 0.0043  
Y -0.0034 0.0032 -0.0030 -0.0027 0.0019 0.0024  
Z -0.0003 0.0004 -0.0006 -0.0005 0.0001 0.0004  
AT. 160 O X -0.0044 -0.0038 -0.0053 0.0045 -0.0029 0.0043  
Y 0.0034 0.0032 0.0030 -0.0027 0.0019 -0.0024  
Z -0.0003 -0.0004 -0.0006 0.0005 -0.0001 0.0004  
AT. 161 O X -0.0010 0.0009 0.0013 0.0011 0.0007 0.0010  
Y -0.0010 0.0009 0.0010 0.0008 0.0005 0.0007  
Z -0.0011 0.0011 0.0018 0.0016 0.0011 0.0015  
AT. 162 O X -0.0010 -0.0009 0.0013 -0.0011 -0.0007 0.0010  
Y 0.0010 0.0009 -0.0010 0.0008 0.0005 -0.0007  
Z -0.0011 -0.0011 0.0018 -0.0016 -0.0011 0.0015  
AT. 163 O X 0.0010 -0.0009 0.0013 0.0011 -0.0007 -0.0010

Y 0.0010 -0.0009 0.0010 0.0008 -0.0005 -0.0007  
Z 0.0011 -0.0011 0.0018 0.0016 -0.0011 -0.0015  
AT.164 O X 0.0010 0.0009 0.0013 -0.0011 0.0007 -0.0010  
Y -0.0010 -0.0009 -0.0010 0.0008 -0.0005 0.0007  
Z 0.0011 0.0011 0.0018 -0.0016 0.0011 -0.0015  
AT.165 H X 0.0028 -0.0020 -0.0020 -0.0022 -0.0015 -0.0022  
Y -0.0004 0.0006 -0.0002 -0.0005 -0.0005 -0.0005  
Z -0.0065 0.0062 -0.0010 -0.0007 -0.0007 -0.0010  
AT.166 H X 0.0028 0.0020 -0.0020 0.0022 0.0015 -0.0022  
Y 0.0004 0.0006 0.0002 -0.0005 -0.0005 0.0005  
Z -0.0065 -0.0062 -0.0010 0.0007 0.0007 -0.0010  
AT.167 H X -0.0028 0.0020 -0.0020 -0.0022 0.0015 0.0022  
Y 0.0004 -0.0006 -0.0002 -0.0005 0.0005 0.0005  
Z 0.0065 -0.0062 -0.0010 -0.0007 0.0007 0.0010  
AT.168 H X -0.0028 -0.0020 -0.0020 0.0022 -0.0015 0.0022  
Y -0.0004 -0.0006 0.0002 -0.0005 0.0005 -0.0005  
Z 0.0065 0.0062 -0.0010 0.0007 -0.0007 0.0010  
AT.169 O X 0.0004 -0.0004 0.0000 0.0001 -0.0003 -0.0002  
Y 0.0004 -0.0004 -0.0002 -0.0002 -0.0006 -0.0004  
Z 0.0006 -0.0006 0.0003 0.0002 -0.0004 -0.0000  
AT.170 O X 0.0004 0.0004 0.0000 -0.0001 0.0003 -0.0002  
Y -0.0004 -0.0004 0.0002 -0.0002 -0.0006 0.0004  
Z 0.0006 0.0006 0.0003 -0.0002 0.0004 -0.0000  
AT.171 O X -0.0004 0.0004 0.0000 0.0001 0.0003 0.0002  
Y -0.0004 0.0004 -0.0002 -0.0002 0.0006 0.0004  
Z -0.0006 0.0006 0.0003 0.0002 0.0004 0.0000  
AT.172 O X -0.0004 -0.0004 0.0000 -0.0001 -0.0003 0.0002  
Y 0.0004 0.0004 0.0002 -0.0002 0.0006 -0.0004  
Z -0.0006 -0.0006 0.0003 -0.0002 -0.0004 0.0000  
AT.173 H X -0.0035 0.0031 -0.0018 -0.0017 0.0023 -0.0012  
Y 0.0003 -0.0003 0.0019 0.0019 0.0002 0.0008  
Z 0.0013 -0.0015 -0.0026 -0.0027 -0.0027 -0.0017

AT.174 H X -0.0035 -0.0031 -0.0018 0.0017 -0.0023 -0.0012  
Y -0.0003 -0.0003 -0.0019 0.0019 0.0002 -0.0008  
Z 0.0013 0.0015 -0.0026 0.0027 0.0027 -0.0017

AT.175 H X 0.0035 -0.0031 -0.0018 -0.0017 -0.0023 0.0012  
Y -0.0003 0.0003 0.0019 0.0019 -0.0002 -0.0008  
Z -0.0013 0.0015 -0.0026 -0.0027 0.0027 0.0017

AT.176 H X 0.0035 0.0031 -0.0018 0.0017 0.0023 0.0012  
Y 0.0003 0.0003 -0.0019 0.0019 -0.0002 0.0008  
Z -0.0013 -0.0015 -0.0026 0.0027 -0.0027 0.0017

FREQ(CM\*\*-1) 1162.15 1162.73 1165.63 1167.19 1174.80 1174.89

AT. 1 I X -0.0000 0.0000 -0.0000 -0.0001 -0.0000 0.0000  
Y -0.0000 0.0000 -0.0000 -0.0000 0.0000 0.0000  
Z 0.0000 0.0000 -0.0000 -0.0000 0.0000 0.0000

AT. 2 I X -0.0000 -0.0000 -0.0000 0.0001 -0.0000 -0.0000  
Y 0.0000 0.0000 0.0000 -0.0000 -0.0000 0.0000  
Z 0.0000 -0.0000 -0.0000 0.0000 0.0000 -0.0000

AT. 3 I X -0.0000 0.0000 0.0000 0.0001 -0.0000 0.0000  
Y -0.0000 0.0000 0.0000 0.0000 0.0000 0.0000  
Z 0.0000 0.0000 0.0000 0.0000 0.0000 0.0000

AT. 4 I X -0.0000 -0.0000 0.0000 -0.0001 -0.0000 -0.0000  
Y 0.0000 0.0000 -0.0000 0.0000 -0.0000 0.0000  
Z 0.0000 -0.0000 0.0000 -0.0000 0.0000 -0.0000

AT. 5 I X -0.0000 0.0000 -0.0000 -0.0000 -0.0001 -0.0000  
Y -0.0001 0.0001 -0.0001 -0.0000 0.0000 0.0000  
Z 0.0001 -0.0000 0.0000 0.0000 -0.0000 -0.0000

AT. 6 I X -0.0000 -0.0000 -0.0000 0.0000 -0.0001 0.0000  
Y 0.0001 0.0001 0.0001 -0.0000 -0.0000 0.0000  
Z 0.0001 0.0000 0.0000 -0.0000 -0.0000 0.0000

AT. 7 I X -0.0000 0.0000 0.0000 0.0000 -0.0001 -0.0000  
Y -0.0001 0.0001 0.0001 0.0000 0.0000 0.0000

Z 0.0001 -0.0000 -0.0000 -0.0000 -0.0000 -0.0000  
AT. 8 I X -0.0000 -0.0000 0.0000 -0.0000 -0.0001 0.0000  
Y 0.0001 0.0001 -0.0001 0.0000 -0.0000 0.0000  
Z 0.0001 0.0000 -0.0000 0.0000 -0.0000 0.0000  
AT. 9 N X -0.0030 0.0022 -0.0031 -0.0020 0.0006 0.0005  
Y 0.0003 -0.0014 0.0011 0.0033 -0.0034 -0.0034  
Z -0.0039 0.0036 -0.0036 -0.0031 -0.0044 -0.0046  
AT. 10 N X -0.0030 -0.0022 -0.0031 0.0020 0.0006 -0.0005  
Y -0.0003 -0.0014 -0.0011 0.0033 0.0034 -0.0034  
Z -0.0039 -0.0036 -0.0036 0.0031 -0.0044 0.0046  
AT. 11 N X -0.0030 0.0022 0.0031 0.0020 0.0006 0.0005  
Y 0.0003 -0.0014 -0.0011 -0.0033 -0.0034 -0.0034  
Z -0.0039 0.0036 0.0036 0.0031 -0.0044 -0.0046  
AT. 12 N X -0.0030 -0.0022 0.0031 -0.0020 0.0006 -0.0005  
Y -0.0003 -0.0014 0.0011 -0.0033 0.0034 -0.0034  
Z -0.0039 -0.0036 0.0036 -0.0031 -0.0044 0.0046  
AT. 13 N X -0.0005 0.0004 0.0002 0.0006 -0.0044 -0.0044  
Y 0.0060 -0.0057 0.0054 0.0038 -0.0015 -0.0008  
Z -0.0043 0.0045 -0.0041 -0.0039 -0.0046 -0.0047  
AT. 14 N X -0.0005 -0.0004 0.0002 -0.0006 -0.0044 0.0044  
Y -0.0060 -0.0057 -0.0054 0.0038 0.0015 -0.0008  
Z -0.0043 -0.0045 -0.0041 0.0039 -0.0046 0.0047  
AT. 15 N X -0.0005 0.0004 -0.0002 -0.0006 -0.0044 -0.0044  
Y 0.0060 -0.0057 -0.0054 -0.0038 -0.0015 -0.0008  
Z -0.0043 0.0045 0.0041 0.0039 -0.0046 -0.0047  
AT. 16 N X -0.0005 -0.0004 -0.0002 0.0006 -0.0044 0.0044  
Y -0.0060 -0.0057 0.0054 -0.0038 0.0015 -0.0008  
Z -0.0043 -0.0045 0.0041 -0.0039 -0.0046 0.0047  
AT. 17 O X 0.0005 -0.0006 0.0004 0.0005 0.0003 0.0003  
Y 0.0010 -0.0011 0.0011 0.0013 0.0006 0.0006  
Z 0.0013 -0.0019 0.0012 0.0024 -0.0002 -0.0003  
AT. 18 O X 0.0005 0.0006 0.0004 -0.0005 0.0003 -0.0003

Y -0.0010 -0.0011 -0.0011 0.0013 -0.0006 0.0006  
Z 0.0013 0.0019 0.0012 -0.0024 -0.0002 0.0003  
AT. 19 O X 0.0005 -0.0006 -0.0004 -0.0005 0.0003 0.0003  
Y 0.0010 -0.0011 -0.0011 -0.0013 0.0006 0.0006  
Z 0.0013 -0.0019 -0.0012 -0.0024 -0.0002 -0.0003  
AT. 20 O X 0.0005 0.0006 -0.0004 0.0005 0.0003 -0.0003  
Y -0.0010 -0.0011 0.0011 -0.0013 -0.0006 0.0006  
Z 0.0013 0.0019 -0.0012 0.0024 -0.0002 0.0003  
AT. 21 O X 0.0000 -0.0001 0.0001 0.0002 -0.0002 -0.0002  
Y -0.0015 0.0014 -0.0015 -0.0014 -0.0006 -0.0008  
Z -0.0003 0.0003 -0.0000 0.0004 0.0009 0.0009  
AT. 22 O X 0.0000 0.0001 0.0001 -0.0002 -0.0002 0.0002  
Y 0.0015 0.0014 0.0015 -0.0014 0.0006 -0.0008  
Z -0.0003 -0.0003 -0.0000 -0.0004 0.0009 -0.0009  
AT. 23 O X 0.0000 -0.0001 -0.0001 -0.0002 -0.0002 -0.0002  
Y -0.0015 0.0014 0.0015 0.0014 -0.0006 -0.0008  
Z -0.0003 0.0003 0.0000 -0.0004 0.0009 0.0009  
AT. 24 O X 0.0000 0.0001 -0.0001 0.0002 -0.0002 0.0002  
Y 0.0015 0.0014 -0.0015 0.0014 0.0006 -0.0008  
Z -0.0003 -0.0003 0.0000 0.0004 0.0009 -0.0009  
AT. 25 C X -0.0006 0.0008 -0.0009 -0.0017 0.0009 0.0009  
Y -0.0005 0.0013 -0.0010 -0.0024 0.0016 0.0017  
Z -0.0010 0.0015 -0.0007 -0.0017 -0.0003 -0.0002  
AT. 26 C X -0.0006 -0.0008 -0.0009 0.0017 0.0009 -0.0009  
Y 0.0005 0.0013 0.0010 -0.0024 -0.0016 0.0017  
Z -0.0010 -0.0015 -0.0007 0.0017 -0.0003 0.0002  
AT. 27 C X -0.0006 0.0008 0.0009 0.0017 0.0009 0.0009  
Y -0.0005 0.0013 0.0010 0.0024 0.0016 0.0017  
Z -0.0010 0.0015 0.0007 0.0017 -0.0003 -0.0002  
AT. 28 C X -0.0006 -0.0008 0.0009 -0.0017 0.0009 -0.0009  
Y 0.0005 0.0013 -0.0010 0.0024 -0.0016 0.0017  
Z -0.0010 -0.0015 0.0007 -0.0017 -0.0003 0.0002

AT. 29 H X 0.0020 -0.0062 0.0036 0.0118 -0.0075 -0.0074  
Y 0.0047 -0.0091 0.0053 0.0136 -0.0059 -0.0064  
Z -0.0058 0.0140 -0.0086 -0.0248 0.0137 0.0135

AT. 30 H X 0.0020 0.0062 0.0036 -0.0118 -0.0075 0.0074  
Y -0.0047 -0.0091 -0.0053 0.0136 0.0059 -0.0064  
Z -0.0058 -0.0140 -0.0086 0.0248 0.0137 -0.0135

AT. 31 H X 0.0020 -0.0062 -0.0036 -0.0118 -0.0075 -0.0074  
Y 0.0047 -0.0091 -0.0053 -0.0136 -0.0059 -0.0064  
Z -0.0058 0.0140 0.0086 0.0248 0.0137 0.0135

AT. 32 H X 0.0020 0.0062 -0.0036 0.0118 -0.0075 0.0074  
Y -0.0047 -0.0091 0.0053 -0.0136 0.0059 -0.0064  
Z -0.0058 -0.0140 0.0086 -0.0248 0.0137 -0.0135

AT. 33 H X -0.0002 0.0061 -0.0000 -0.0092 0.0039 0.0053  
Y -0.0020 0.0048 -0.0031 -0.0086 0.0047 0.0049  
Z 0.0057 -0.0189 0.0084 0.0320 -0.0160 -0.0178

AT. 34 H X -0.0002 -0.0061 -0.0000 0.0092 0.0039 -0.0053  
Y 0.0020 0.0048 0.0031 -0.0086 -0.0047 0.0049  
Z 0.0057 0.0189 0.0084 -0.0320 -0.0160 0.0178

AT. 35 H X -0.0002 0.0061 0.0000 0.0092 0.0039 0.0053  
Y -0.0020 0.0048 0.0031 0.0086 0.0047 0.0049  
Z 0.0057 -0.0189 -0.0084 -0.0320 -0.0160 -0.0178

AT. 36 H X -0.0002 -0.0061 0.0000 -0.0092 0.0039 -0.0053  
Y 0.0020 0.0048 -0.0031 0.0086 -0.0047 0.0049  
Z 0.0057 0.0189 -0.0084 0.0320 -0.0160 0.0178

AT. 37 C X 0.0002 -0.0004 0.0005 0.0012 -0.0010 -0.0009  
Y -0.0007 0.0010 -0.0000 -0.0002 -0.0014 -0.0014  
Z 0.0007 -0.0003 0.0005 -0.0001 0.0012 0.0012

AT. 38 C X 0.0002 0.0004 0.0005 -0.0012 -0.0010 0.0009  
Y 0.0007 0.0010 0.0000 -0.0002 0.0014 -0.0014  
Z 0.0007 0.0003 0.0005 0.0001 0.0012 -0.0012

AT. 39 C X 0.0002 -0.0004 -0.0005 -0.0012 -0.0010 -0.0009  
Y -0.0007 0.0010 0.0000 0.0002 -0.0014 -0.0014

Z 0.0007 -0.0003 -0.0005 0.0001 0.0012 0.0012  
AT. 40 C X 0.0002 0.0004 -0.0005 0.0012 -0.0010 0.0009  
Y 0.0007 0.0010 -0.0000 0.0002 0.0014 -0.0014  
Z 0.0007 0.0003 -0.0005 -0.0001 0.0012 -0.0012  
AT. 41 C X 0.0053 -0.0047 0.0053 0.0043 0.0014 0.0016  
Y 0.0010 -0.0003 -0.0004 -0.0019 0.0074 0.0076  
Z -0.0014 0.0021 -0.0014 -0.0022 0.0021 0.0021  
AT. 42 C X 0.0053 0.0047 0.0053 -0.0043 0.0014 -0.0016  
Y -0.0010 -0.0003 0.0004 -0.0019 -0.0074 0.0076  
Z -0.0014 -0.0021 -0.0014 0.0022 0.0021 -0.0021  
AT. 43 C X 0.0053 -0.0047 -0.0053 -0.0043 0.0014 0.0016  
Y 0.0010 -0.0003 0.0004 0.0019 0.0074 0.0076  
Z -0.0014 0.0021 0.0014 0.0022 0.0021 0.0021  
AT. 44 C X 0.0053 0.0047 -0.0053 0.0043 0.0014 -0.0016  
Y -0.0010 -0.0003 -0.0004 0.0019 -0.0074 0.0076  
Z -0.0014 -0.0021 0.0014 -0.0022 0.0021 -0.0021  
AT. 45 H X -0.0136 0.0147 -0.0172 -0.0220 0.0152 0.0149  
Y -0.0048 0.0054 -0.0050 -0.0071 0.0002 -0.0004  
Z -0.0036 0.0041 -0.0020 -0.0028 -0.0060 -0.0065  
AT. 46 H X -0.0136 -0.0147 -0.0172 0.0220 0.0152 -0.0149  
Y 0.0048 0.0054 0.0050 -0.0071 -0.0002 -0.0004  
Z -0.0036 -0.0041 -0.0020 0.0028 -0.0060 0.0065  
AT. 47 H X -0.0136 0.0147 0.0172 0.0220 0.0152 0.0149  
Y -0.0048 0.0054 0.0050 0.0071 0.0002 -0.0004  
Z -0.0036 0.0041 0.0020 0.0028 -0.0060 -0.0065  
AT. 48 H X -0.0136 -0.0147 0.0172 -0.0220 0.0152 -0.0149  
Y 0.0048 0.0054 -0.0050 0.0071 -0.0002 -0.0004  
Z -0.0036 -0.0041 0.0020 -0.0028 -0.0060 0.0065  
AT. 49 H X -0.0066 0.0073 -0.0082 -0.0083 0.0085 0.0095  
Y -0.0087 0.0095 -0.0104 -0.0110 0.0093 0.0100  
Z -0.0059 0.0063 -0.0086 -0.0094 0.0140 0.0148  
AT. 50 H X -0.0066 -0.0073 -0.0082 0.0083 0.0085 -0.0095



Y 0.0087 0.0095 0.0104 -0.0110 -0.0093 0.0100  
Z -0.0059 -0.0063 -0.0086 0.0094 0.0140 -0.0148  
AT. 51 H X -0.0066 0.0073 0.0082 0.0083 0.0085 0.0095  
Y -0.0087 0.0095 0.0104 0.0110 0.0093 0.0100  
Z -0.0059 0.0063 0.0086 0.0094 0.0140 0.0148  
AT. 52 H X -0.0066 -0.0073 0.0082 -0.0083 0.0085 -0.0095  
Y 0.0087 0.0095 -0.0104 0.0110 -0.0093 0.0100  
Z -0.0059 -0.0063 0.0086 -0.0094 0.0140 -0.0148  
AT. 53 C X 0.0018 -0.0022 0.0022 0.0031 -0.0045 -0.0045  
Y 0.0118 -0.0124 0.0139 0.0150 -0.0111 -0.0115  
Z 0.0196 -0.0198 0.0198 0.0198 -0.0032 -0.0032  
AT. 54 C X 0.0018 0.0022 0.0022 -0.0031 -0.0045 0.0045  
Y -0.0118 -0.0124 -0.0139 0.0150 0.0111 -0.0115  
Z 0.0196 0.0198 0.0198 -0.0198 -0.0032 0.0032  
AT. 55 C X 0.0018 -0.0022 -0.0022 -0.0031 -0.0045 -0.0045  
Y 0.0118 -0.0124 -0.0139 -0.0150 -0.0111 -0.0115  
Z 0.0196 -0.0198 -0.0198 -0.0198 -0.0032 -0.0032  
AT. 56 C X 0.0018 0.0022 -0.0022 0.0031 -0.0045 0.0045  
Y -0.0118 -0.0124 0.0139 -0.0150 0.0111 -0.0115  
Z 0.0196 0.0198 -0.0198 0.0198 -0.0032 0.0032  
AT. 57 C X 0.0001 -0.0001 -0.0001 -0.0004 0.0021 0.0021  
Y -0.0052 0.0055 -0.0063 -0.0067 0.0041 0.0043  
Z -0.0086 0.0085 -0.0084 -0.0085 0.0018 0.0018  
AT. 58 C X 0.0001 0.0001 -0.0001 0.0004 0.0021 -0.0021  
Y 0.0052 0.0055 0.0063 -0.0067 -0.0041 0.0043  
Z -0.0086 -0.0085 -0.0084 0.0085 0.0018 -0.0018  
AT. 59 C X 0.0001 -0.0001 0.0001 0.0004 0.0021 0.0021  
Y -0.0052 0.0055 0.0063 0.0067 0.0041 0.0043  
Z -0.0086 0.0085 0.0084 0.0085 0.0018 0.0018  
AT. 60 C X 0.0001 0.0001 0.0001 -0.0004 0.0021 -0.0021  
Y 0.0052 0.0055 -0.0063 0.0067 -0.0041 0.0043  
Z -0.0086 -0.0085 0.0084 -0.0085 0.0018 -0.0018

AT. 61 H X -0.0083 0.0077 -0.0080 -0.0070 -0.0020 -0.0020  
Y -0.0100 0.0095 -0.0099 -0.0092 -0.0008 -0.0006  
Z -0.0174 0.0191 -0.0211 -0.0225 0.0114 0.0120

AT. 62 H X -0.0083 -0.0077 -0.0080 0.0070 -0.0020 0.0020  
Y 0.0100 0.0095 0.0099 -0.0092 0.0008 -0.0006  
Z -0.0174 -0.0191 -0.0211 0.0225 0.0114 -0.0120

AT. 63 H X -0.0083 0.0077 0.0080 0.0070 -0.0020 -0.0020  
Y -0.0100 0.0095 0.0099 0.0092 -0.0008 -0.0006  
Z -0.0174 0.0191 0.0211 0.0225 0.0114 0.0120

AT. 64 H X -0.0083 -0.0077 0.0080 -0.0070 -0.0020 0.0020  
Y 0.0100 0.0095 -0.0099 0.0092 0.0008 -0.0006  
Z -0.0174 -0.0191 0.0211 -0.0225 0.0114 -0.0120

AT. 65 H X -0.0014 0.0018 -0.0021 -0.0028 0.0031 0.0034  
Y -0.0016 0.0012 -0.0008 -0.0008 0.0005 -0.0001  
Z -0.0044 0.0055 -0.0078 -0.0095 0.0155 0.0158

AT. 66 H X -0.0014 -0.0018 -0.0021 0.0028 0.0031 -0.0034  
Y 0.0016 0.0012 0.0008 -0.0008 -0.0005 -0.0001  
Z -0.0044 -0.0055 -0.0078 0.0095 0.0155 -0.0158

AT. 67 H X -0.0014 0.0018 0.0021 0.0028 0.0031 0.0034  
Y -0.0016 0.0012 0.0008 0.0008 0.0005 -0.0001  
Z -0.0044 0.0055 0.0078 0.0095 0.0155 0.0158

AT. 68 H X -0.0014 -0.0018 0.0021 -0.0028 0.0031 -0.0034  
Y 0.0016 0.0012 -0.0008 0.0008 -0.0005 -0.0001  
Z -0.0044 -0.0055 0.0078 -0.0095 0.0155 -0.0158

AT. 69 H X -0.0090 0.0077 -0.0084 -0.0065 -0.0030 -0.0027  
Y -0.0047 0.0042 -0.0026 -0.0012 -0.0059 -0.0064  
Z -0.0102 0.0091 -0.0073 -0.0054 -0.0069 -0.0075

AT. 70 H X -0.0090 -0.0077 -0.0084 0.0065 -0.0030 0.0027  
Y 0.0047 0.0042 0.0026 -0.0012 0.0059 -0.0064  
Z -0.0102 -0.0091 -0.0073 0.0054 -0.0069 0.0075

AT. 71 H X -0.0090 0.0077 0.0084 0.0065 -0.0030 -0.0027  
Y -0.0047 0.0042 0.0026 0.0012 -0.0059 -0.0064

Z -0.0102 0.0091 0.0073 0.0054 -0.0069 -0.0075  
AT. 72 H X -0.0090 -0.0077 0.0084 -0.0065 -0.0030 0.0027  
Y 0.0047 0.0042 -0.0026 0.0012 0.0059 -0.0064  
Z -0.0102 -0.0091 0.0073 -0.0054 -0.0069 0.0075  
AT. 73 C X -0.0160 0.0154 -0.0151 -0.0139 -0.0049 -0.0049  
Y 0.0077 -0.0064 0.0108 0.0110 -0.0177 -0.0173  
Z -0.0055 0.0059 -0.0060 -0.0059 -0.0063 -0.0063  
AT. 74 C X -0.0160 -0.0154 -0.0151 0.0139 -0.0049 0.0049  
Y -0.0077 -0.0064 -0.0108 0.0110 0.0177 -0.0173  
Z -0.0055 -0.0059 -0.0060 0.0059 -0.0063 0.0063  
AT. 75 C X -0.0160 0.0154 0.0151 0.0139 -0.0049 -0.0049  
Y 0.0077 -0.0064 -0.0108 -0.0110 -0.0177 -0.0173  
Z -0.0055 0.0059 0.0060 0.0059 -0.0063 -0.0063  
AT. 76 C X -0.0160 -0.0154 0.0151 -0.0139 -0.0049 0.0049  
Y -0.0077 -0.0064 0.0108 -0.0110 0.0177 -0.0173  
Z -0.0055 -0.0059 0.0060 -0.0059 -0.0063 0.0063  
AT. 77 C X 0.0007 -0.0006 0.0012 0.0012 -0.0028 -0.0027  
Y -0.0016 0.0011 -0.0021 -0.0017 0.0006 0.0003  
Z 0.0033 -0.0035 0.0031 0.0031 0.0016 0.0016  
AT. 78 C X 0.0007 0.0006 0.0012 -0.0012 -0.0028 0.0027  
Y 0.0016 0.0011 0.0021 -0.0017 -0.0006 0.0003  
Z 0.0033 0.0035 0.0031 -0.0031 0.0016 -0.0016  
AT. 79 C X 0.0007 -0.0006 -0.0012 -0.0012 -0.0028 -0.0027  
Y -0.0016 0.0011 0.0021 0.0017 0.0006 0.0003  
Z 0.0033 -0.0035 -0.0031 -0.0031 0.0016 0.0016  
AT. 80 C X 0.0007 0.0006 -0.0012 0.0012 -0.0028 0.0027  
Y 0.0016 0.0011 -0.0021 0.0017 -0.0006 0.0003  
Z 0.0033 0.0035 -0.0031 0.0031 0.0016 -0.0016  
AT. 81 H X 0.0017 -0.0029 0.0022 0.0039 -0.0018 -0.0020  
Y -0.0002 -0.0022 -0.0007 0.0021 0.0016 0.0008  
Z 0.0021 0.0021 0.0031 -0.0008 -0.0010 0.0004  
AT. 82 H X 0.0017 0.0029 0.0022 -0.0039 -0.0018 0.0020

Y 0.0002 -0.0022 0.0007 0.0021 -0.0016 0.0008  
Z 0.0021 -0.0021 0.0031 0.0008 -0.0010 -0.0004  
AT. 83 H X 0.0017 -0.0029 -0.0022 -0.0039 -0.0018 -0.0020  
Y -0.0002 -0.0022 0.0007 -0.0021 0.0016 0.0008  
Z 0.0021 0.0021 -0.0031 0.0008 -0.0010 0.0004  
AT. 84 H X 0.0017 0.0029 -0.0022 0.0039 -0.0018 0.0020  
Y 0.0002 -0.0022 -0.0007 -0.0021 -0.0016 0.0008  
Z 0.0021 -0.0021 -0.0031 -0.0008 -0.0010 -0.0004  
AT. 85 H X 0.0092 -0.0078 0.0055 0.0012 0.0202 0.0204  
Y 0.0100 -0.0065 0.0079 0.0010 0.0186 0.0195  
Z -0.0085 0.0046 -0.0062 0.0010 -0.0196 -0.0206  
AT. 86 H X 0.0092 0.0078 0.0055 -0.0012 0.0202 -0.0204  
Y -0.0100 -0.0065 -0.0079 0.0010 -0.0186 0.0195  
Z -0.0085 -0.0046 -0.0062 -0.0010 -0.0196 0.0206  
AT. 87 H X 0.0092 -0.0078 -0.0055 -0.0012 0.0202 0.0204  
Y 0.0100 -0.0065 -0.0079 -0.0010 0.0186 0.0195  
Z -0.0085 0.0046 0.0062 -0.0010 -0.0196 -0.0206  
AT. 88 H X 0.0092 0.0078 -0.0055 0.0012 0.0202 -0.0204  
Y -0.0100 -0.0065 0.0079 -0.0010 -0.0186 0.0195  
Z -0.0085 -0.0046 0.0062 0.0010 -0.0196 0.0206  
AT. 89 C X -0.0006 0.0004 -0.0011 -0.0011 0.0026 0.0026  
Y -0.0041 0.0057 -0.0027 -0.0031 -0.0094 -0.0089  
Z 0.0097 -0.0094 0.0075 0.0056 0.0182 0.0184  
AT. 90 C X -0.0006 -0.0004 -0.0011 0.0011 0.0026 -0.0026  
Y 0.0041 0.0057 0.0027 -0.0031 0.0094 -0.0089  
Z 0.0097 0.0094 0.0075 -0.0056 0.0182 -0.0184  
AT. 91 C X -0.0006 0.0004 0.0011 0.0011 0.0026 0.0026  
Y -0.0041 0.0057 0.0027 0.0031 -0.0094 -0.0089  
Z 0.0097 -0.0094 -0.0075 -0.0056 0.0182 0.0184  
AT. 92 C X -0.0006 -0.0004 0.0011 -0.0011 0.0026 -0.0026  
Y 0.0041 0.0057 -0.0027 0.0031 0.0094 -0.0089  
Z 0.0097 0.0094 -0.0075 0.0056 0.0182 -0.0184

AT. 93 C X 0.0011 -0.0009 0.0014 0.0012 -0.0013 -0.0012  
Y 0.0034 -0.0042 0.0029 0.0031 0.0036 0.0035  
Z -0.0040 0.0038 -0.0028 -0.0019 -0.0083 -0.0083

AT. 94 C X 0.0011 0.0009 0.0014 -0.0012 -0.0013 0.0012  
Y -0.0034 -0.0042 -0.0029 0.0031 -0.0036 0.0035  
Z -0.0040 -0.0038 -0.0028 0.0019 -0.0083 0.0083

AT. 95 C X 0.0011 -0.0009 -0.0014 -0.0012 -0.0013 -0.0012  
Y 0.0034 -0.0042 -0.0029 -0.0031 0.0036 0.0035  
Z -0.0040 0.0038 0.0028 0.0019 -0.0083 -0.0083

AT. 96 C X 0.0011 0.0009 -0.0014 0.0012 -0.0013 0.0012  
Y -0.0034 -0.0042 0.0029 -0.0031 -0.0036 0.0035  
Z -0.0040 -0.0038 0.0028 -0.0019 -0.0083 0.0083

AT. 97 H X -0.0032 0.0028 -0.0026 -0.0020 -0.0032 -0.0034  
Y 0.0073 -0.0063 0.0061 0.0043 0.0084 0.0084  
Z -0.0120 0.0132 -0.0105 -0.0108 -0.0064 -0.0071

AT. 98 H X -0.0032 -0.0028 -0.0026 0.0020 -0.0032 0.0034  
Y -0.0073 -0.0063 -0.0061 0.0043 -0.0084 0.0084  
Z -0.0120 -0.0132 -0.0105 0.0108 -0.0064 0.0071

AT. 99 H X -0.0032 0.0028 0.0026 0.0020 -0.0032 -0.0034  
Y 0.0073 -0.0063 -0.0061 -0.0043 0.0084 0.0084  
Z -0.0120 0.0132 0.0105 0.0108 -0.0064 -0.0071

AT. 100 H X -0.0032 -0.0028 0.0026 -0.0020 -0.0032 0.0034  
Y -0.0073 -0.0063 0.0061 -0.0043 -0.0084 0.0084  
Z -0.0120 -0.0132 0.0105 -0.0108 -0.0064 0.0071

AT. 101 H X -0.0024 0.0030 -0.0025 -0.0029 0.0012 0.0014  
Y -0.0007 -0.0002 -0.0016 -0.0011 0.0063 0.0061  
Z -0.0012 0.0044 -0.0006 -0.0028 -0.0058 -0.0052

AT. 102 H X -0.0024 -0.0030 -0.0025 0.0029 0.0012 -0.0014  
Y 0.0007 -0.0002 0.0016 -0.0011 -0.0063 0.0061  
Z -0.0012 -0.0044 -0.0006 0.0028 -0.0058 0.0052

AT. 103 H X -0.0024 0.0030 0.0025 0.0029 0.0012 0.0014  
Y -0.0007 -0.0002 0.0016 0.0011 0.0063 0.0061

Z -0.0012 0.0044 0.0006 0.0028 -0.0058 -0.0052  
AT. 104 H X -0.0024 -0.0030 0.0025 -0.0029 0.0012 -0.0014  
Y 0.0007 -0.0002 -0.0016 0.0011 -0.0063 0.0061  
Z -0.0012 -0.0044 0.0006 -0.0028 -0.0058 0.0052  
AT. 105 H X -0.0022 0.0013 -0.0023 -0.0010 -0.0028 -0.0024  
Y 0.0009 0.0011 -0.0003 -0.0030 0.0101 0.0108  
Z -0.0011 -0.0008 0.0007 0.0034 -0.0130 -0.0136  
AT. 106 H X -0.0022 -0.0013 -0.0023 0.0010 -0.0028 0.0024  
Y -0.0009 0.0011 0.0003 -0.0030 -0.0101 0.0108  
Z -0.0011 0.0008 0.0007 -0.0034 -0.0130 0.0136  
AT. 107 H X -0.0022 0.0013 0.0023 0.0010 -0.0028 -0.0024  
Y 0.0009 0.0011 0.0003 0.0030 0.0101 0.0108  
Z -0.0011 -0.0008 -0.0007 -0.0034 -0.0130 -0.0136  
AT. 108 H X -0.0022 -0.0013 0.0023 -0.0010 -0.0028 0.0024  
Y -0.0009 0.0011 -0.0003 0.0030 -0.0101 0.0108  
Z -0.0011 0.0008 -0.0007 0.0034 -0.0130 0.0136  
AT. 109 C X -0.0006 0.0008 -0.0009 -0.0014 0.0034 0.0033  
Y -0.0025 0.0021 -0.0032 -0.0030 0.0063 0.0065  
Z 0.0019 -0.0017 0.0020 0.0018 0.0026 0.0022  
AT. 110 C X -0.0006 -0.0008 -0.0009 0.0014 0.0034 -0.0033  
Y 0.0025 0.0021 0.0032 -0.0030 -0.0063 0.0065  
Z 0.0019 0.0017 0.0020 -0.0018 0.0026 -0.0022  
AT. 111 C X -0.0006 0.0008 0.0009 0.0014 0.0034 0.0033  
Y -0.0025 0.0021 0.0032 0.0030 0.0063 0.0065  
Z 0.0019 -0.0017 -0.0020 -0.0018 0.0026 0.0022  
AT. 112 C X -0.0006 -0.0008 0.0009 -0.0014 0.0034 -0.0033  
Y 0.0025 0.0021 -0.0032 0.0030 -0.0063 0.0065  
Z 0.0019 0.0017 -0.0020 0.0018 0.0026 -0.0022  
AT. 113 H X -0.0033 0.0021 -0.0028 -0.0013 0.0004 0.0007  
Y 0.0018 0.0002 -0.0011 -0.0051 0.0154 0.0154  
Z -0.0004 0.0010 -0.0045 -0.0083 0.0245 0.0264  
AT. 114 H X -0.0033 -0.0021 -0.0028 0.0013 0.0004 -0.0007

Y -0.0018 0.0002 0.0011 -0.0051 -0.0154 0.0154  
Z -0.0004 -0.0010 -0.0045 0.0083 0.0245 -0.0264  
AT. 115 H X -0.0033 0.0021 0.0028 0.0013 0.0004 0.0007  
Y 0.0018 0.0002 0.0011 0.0051 0.0154 0.0154  
Z -0.0004 0.0010 0.0045 0.0083 0.0245 0.0264  
AT. 116 H X -0.0033 -0.0021 0.0028 -0.0013 0.0004 -0.0007  
Y -0.0018 0.0002 -0.0011 0.0051 -0.0154 0.0154  
Z -0.0004 -0.0010 0.0045 -0.0083 0.0245 -0.0264  
AT. 117 H X 0.0203 -0.0192 0.0219 0.0197 -0.0099 -0.0097  
Y -0.0319 0.0300 -0.0305 -0.0250 -0.0057 -0.0068  
Z -0.0271 0.0258 -0.0254 -0.0205 -0.0061 -0.0075  
AT. 118 H X 0.0203 0.0192 0.0219 -0.0197 -0.0099 0.0097  
Y 0.0319 0.0300 0.0305 -0.0250 0.0057 -0.0068  
Z -0.0271 -0.0258 -0.0254 0.0205 -0.0061 0.0075  
AT. 119 H X 0.0203 -0.0192 -0.0219 -0.0197 -0.0099 -0.0097  
Y -0.0319 0.0300 0.0305 0.0250 -0.0057 -0.0068  
Z -0.0271 0.0258 0.0254 0.0205 -0.0061 -0.0075  
AT. 120 H X 0.0203 0.0192 -0.0219 0.0197 -0.0099 0.0097  
Y 0.0319 0.0300 -0.0305 0.0250 0.0057 -0.0068  
Z -0.0271 -0.0258 0.0254 -0.0205 -0.0061 0.0075  
AT. 121 C X 0.0019 -0.0020 0.0015 0.0012 0.0034 0.0034  
Y -0.0061 0.0054 -0.0058 -0.0044 -0.0022 -0.0026  
Z 0.0015 -0.0019 0.0013 0.0014 0.0004 0.0006  
AT. 122 C X 0.0019 0.0020 0.0015 -0.0012 0.0034 -0.0034  
Y 0.0061 0.0054 0.0058 -0.0044 0.0022 -0.0026  
Z 0.0015 0.0019 0.0013 -0.0014 0.0004 -0.0006  
AT. 123 C X 0.0019 -0.0020 -0.0015 -0.0012 0.0034 0.0034  
Y -0.0061 0.0054 0.0058 0.0044 -0.0022 -0.0026  
Z 0.0015 -0.0019 -0.0013 -0.0014 0.0004 0.0006  
AT. 124 C X 0.0019 0.0020 -0.0015 0.0012 0.0034 -0.0034  
Y 0.0061 0.0054 -0.0058 0.0044 0.0022 -0.0026  
Z 0.0015 0.0019 -0.0013 0.0014 0.0004 -0.0006

AT.125 H X 0.0064 -0.0036 0.0072 0.0048 -0.0214 -0.0199  
Y -0.0044 0.0032 -0.0052 -0.0041 0.0242 0.0231  
Z -0.0009 -0.0001 -0.0007 0.0002 -0.0113 -0.0110

AT.126 H X 0.0064 0.0036 0.0072 -0.0048 -0.0214 0.0199  
Y 0.0044 0.0032 0.0052 -0.0041 -0.0242 0.0231  
Z -0.0009 0.0001 -0.0007 -0.0002 -0.0113 0.0110

AT.127 H X 0.0064 -0.0036 -0.0072 -0.0048 -0.0214 -0.0199  
Y -0.0044 0.0032 0.0052 0.0041 0.0242 0.0231  
Z -0.0009 -0.0001 0.0007 -0.0002 -0.0113 -0.0110

AT.128 H X 0.0064 0.0036 -0.0072 0.0048 -0.0214 0.0199  
Y 0.0044 0.0032 -0.0052 0.0041 -0.0242 0.0231  
Z -0.0009 0.0001 0.0007 0.0002 -0.0113 0.0110

AT.129 H X -0.0036 0.0037 -0.0030 -0.0029 0.0034 0.0035  
Y 0.0031 -0.0036 0.0022 0.0022 -0.0004 -0.0010  
Z 0.0026 -0.0016 0.0031 0.0014 0.0055 0.0059

AT.130 H X -0.0036 -0.0037 -0.0030 0.0029 0.0034 -0.0035  
Y -0.0031 -0.0036 -0.0022 0.0022 0.0004 -0.0010  
Z 0.0026 0.0016 0.0031 -0.0014 0.0055 -0.0059

AT.131 H X -0.0036 0.0037 0.0030 0.0029 0.0034 0.0035  
Y 0.0031 -0.0036 -0.0022 -0.0022 -0.0004 -0.0010  
Z 0.0026 -0.0016 -0.0031 -0.0014 0.0055 0.0059

AT.132 H X -0.0036 -0.0037 0.0030 -0.0029 0.0034 -0.0035  
Y -0.0031 -0.0036 0.0022 -0.0022 0.0004 -0.0010  
Z 0.0026 0.0016 -0.0031 0.0014 0.0055 -0.0059

AT.133 C X 0.0001 0.0001 0.0001 0.0003 0.0009 0.0009  
Y 0.0023 -0.0020 0.0026 0.0021 -0.0003 0.0000  
Z 0.0019 -0.0017 0.0018 0.0013 0.0001 0.0001

AT.134 C X 0.0001 -0.0001 0.0001 -0.0003 0.0009 -0.0009  
Y -0.0023 -0.0020 -0.0026 0.0021 0.0003 0.0000  
Z 0.0019 0.0017 0.0018 -0.0013 0.0001 -0.0001

AT.135 C X 0.0001 0.0001 -0.0001 -0.0003 0.0009 0.0009  
Y 0.0023 -0.0020 -0.0026 -0.0021 -0.0003 0.0000



Z 0.0019 -0.0017 -0.0018 -0.0013 0.0001 0.0001  
AT. 136 C X 0.0001 -0.0001 -0.0001 0.0003 0.0009 -0.0009  
Y -0.0023 -0.0020 0.0026 -0.0021 0.0003 0.0000  
Z 0.0019 0.0017 -0.0018 0.0013 0.0001 -0.0001  
AT. 137 C X -0.0005 0.0005 -0.0003 -0.0007 -0.0013 -0.0011  
Y -0.0030 0.0027 -0.0027 -0.0017 0.0021 0.0016  
Z 0.0002 -0.0005 -0.0001 0.0000 0.0006 0.0004  
AT. 138 C X -0.0005 -0.0005 -0.0003 0.0007 -0.0013 0.0011  
Y 0.0030 0.0027 0.0027 -0.0017 -0.0021 0.0016  
Z 0.0002 0.0005 -0.0001 -0.0000 0.0006 -0.0004  
AT. 139 C X -0.0005 0.0005 0.0003 0.0007 -0.0013 -0.0011  
Y -0.0030 0.0027 0.0027 0.0017 0.0021 0.0016  
Z 0.0002 -0.0005 0.0001 -0.0000 0.0006 0.0004  
AT. 140 C X -0.0005 -0.0005 0.0003 -0.0007 -0.0013 0.0011  
Y 0.0030 0.0027 -0.0027 0.0017 -0.0021 0.0016  
Z 0.0002 0.0005 0.0001 0.0000 0.0006 -0.0004  
AT. 141 H X -0.0036 0.0030 -0.0031 -0.0000 0.0085 0.0067  
Y 0.0150 -0.0147 0.0127 0.0073 -0.0100 -0.0077  
Z 0.0159 -0.0152 0.0136 0.0055 -0.0186 -0.0147  
AT. 142 H X -0.0036 -0.0030 -0.0031 0.0000 0.0085 -0.0067  
Y -0.0150 -0.0147 -0.0127 0.0073 0.0100 -0.0077  
Z 0.0159 0.0152 0.0136 -0.0055 -0.0186 0.0147  
AT. 143 H X -0.0036 0.0030 0.0031 0.0000 0.0085 0.0067  
Y 0.0150 -0.0147 -0.0127 -0.0073 -0.0100 -0.0077  
Z 0.0159 -0.0152 -0.0136 -0.0055 -0.0186 -0.0147  
AT. 144 H X -0.0036 -0.0030 0.0031 -0.0000 0.0085 -0.0067  
Y -0.0150 -0.0147 0.0127 -0.0073 0.0100 -0.0077  
Z 0.0159 0.0152 -0.0136 0.0055 -0.0186 0.0147  
AT. 145 H X 0.0079 -0.0087 0.0059 0.0049 0.0040 0.0039  
Y -0.0131 0.0131 -0.0109 -0.0074 0.0029 0.0018  
Z -0.0292 0.0292 -0.0245 -0.0159 0.0100 0.0074  
AT. 146 H X 0.0079 0.0087 0.0059 -0.0049 0.0040 -0.0039

Y 0.0131 0.0131 0.0109 -0.0074 -0.0029 0.0018  
Z -0.0292 -0.0292 -0.0245 0.0159 0.0100 -0.0074  
AT. 147 H X 0.0079 -0.0087 -0.0059 -0.0049 0.0040 0.0039  
Y -0.0131 0.0131 0.0109 0.0074 0.0029 0.0018  
Z -0.0292 0.0292 0.0245 0.0159 0.0100 0.0074  
AT. 148 H X 0.0079 0.0087 -0.0059 0.0049 0.0040 -0.0039  
Y 0.0131 0.0131 -0.0109 0.0074 -0.0029 0.0018  
Z -0.0292 -0.0292 0.0245 -0.0159 0.0100 -0.0074  
AT. 149 O X 0.0065 -0.0060 0.0073 0.0071 -0.0048 -0.0046  
Y -0.0066 0.0060 -0.0075 -0.0073 0.0057 0.0056  
Z -0.0035 0.0032 -0.0034 -0.0033 0.0018 0.0017  
AT. 150 O X 0.0065 0.0060 0.0073 -0.0071 -0.0048 0.0046  
Y 0.0066 0.0060 0.0075 -0.0073 -0.0057 0.0056  
Z -0.0035 -0.0032 -0.0034 0.0033 0.0018 -0.0017  
AT. 151 O X 0.0065 -0.0060 -0.0073 -0.0071 -0.0048 -0.0046  
Y -0.0066 0.0060 0.0075 0.0073 0.0057 0.0056  
Z -0.0035 0.0032 0.0034 0.0033 0.0018 0.0017  
AT. 152 O X 0.0065 0.0060 -0.0073 0.0071 -0.0048 0.0046  
Y 0.0066 0.0060 -0.0075 0.0073 -0.0057 0.0056  
Z -0.0035 -0.0032 0.0034 -0.0033 0.0018 -0.0017  
AT. 153 H X -0.0208 0.0210 -0.0190 -0.0190 -0.0048 -0.0048  
Y 0.0306 -0.0303 0.0278 0.0259 0.0086 0.0089  
Z 0.0280 -0.0277 0.0269 0.0263 0.0027 0.0028  
AT. 154 H X -0.0208 -0.0210 -0.0190 0.0190 -0.0048 0.0048  
Y -0.0306 -0.0303 -0.0278 0.0259 -0.0086 0.0089  
Z 0.0280 0.0277 0.0269 -0.0263 0.0027 -0.0028  
AT. 155 H X -0.0208 0.0210 0.0190 0.0190 -0.0048 -0.0048  
Y 0.0306 -0.0303 -0.0278 -0.0259 0.0086 0.0089  
Z 0.0280 -0.0277 -0.0269 -0.0263 0.0027 0.0028  
AT. 156 H X -0.0208 -0.0210 0.0190 -0.0190 -0.0048 0.0048  
Y -0.0306 -0.0303 0.0278 -0.0259 -0.0086 0.0089  
Z 0.0280 0.0277 -0.0269 0.0263 0.0027 -0.0028

AT.157 O X 0.0044 -0.0048 0.0024 0.0019 0.0102 0.0102  
Y 0.0018 -0.0021 0.0005 0.0002 0.0065 0.0066  
Z 0.0024 -0.0025 0.0025 0.0024 0.0011 0.0010

AT.158 O X 0.0044 0.0048 0.0024 -0.0019 0.0102 -0.0102  
Y -0.0018 -0.0021 -0.0005 0.0002 -0.0065 0.0066  
Z 0.0024 0.0025 0.0025 -0.0024 0.0011 -0.0010

AT.159 O X 0.0044 -0.0048 -0.0024 -0.0019 0.0102 0.0102  
Y 0.0018 -0.0021 -0.0005 -0.0002 0.0065 0.0066  
Z 0.0024 -0.0025 -0.0025 -0.0024 0.0011 0.0010

AT.160 O X 0.0044 0.0048 -0.0024 0.0019 0.0102 -0.0102  
Y -0.0018 -0.0021 0.0005 -0.0002 -0.0065 0.0066  
Z 0.0024 0.0025 -0.0025 0.0024 0.0011 -0.0010

AT.161 O X -0.0006 0.0007 -0.0002 -0.0002 -0.0017 -0.0016  
Y -0.0008 0.0008 -0.0005 -0.0003 -0.0013 -0.0013  
Z -0.0018 0.0020 -0.0013 -0.0012 -0.0030 -0.0030

AT.162 O X -0.0006 -0.0007 -0.0002 0.0002 -0.0017 0.0016  
Y 0.0008 0.0008 0.0005 -0.0003 0.0013 -0.0013  
Z -0.0018 -0.0020 -0.0013 0.0012 -0.0030 0.0030

AT.163 O X -0.0006 0.0007 0.0002 0.0002 -0.0017 -0.0016  
Y -0.0008 0.0008 0.0005 0.0003 -0.0013 -0.0013  
Z -0.0018 0.0020 0.0013 0.0012 -0.0030 -0.0030

AT.164 O X -0.0006 -0.0007 0.0002 -0.0002 -0.0017 0.0016  
Y 0.0008 0.0008 -0.0005 0.0003 0.0013 -0.0013  
Z -0.0018 -0.0020 0.0013 -0.0012 -0.0030 0.0030

AT.165 H X -0.0003 -0.0002 -0.0013 -0.0009 0.0049 0.0037  
Y -0.0016 0.0014 -0.0017 -0.0011 0.0008 0.0000  
Z 0.0011 -0.0016 0.0019 0.0034 -0.0021 -0.0031

AT.166 H X -0.0003 0.0002 -0.0013 0.0009 0.0049 -0.0037  
Y 0.0016 0.0014 0.0017 -0.0011 -0.0008 0.0000  
Z 0.0011 0.0016 0.0019 -0.0034 -0.0021 0.0031

AT.167 H X -0.0003 -0.0002 0.0013 0.0009 0.0049 0.0037  
Y -0.0016 0.0014 0.0017 0.0011 0.0008 0.0000

Z 0.0011 -0.0016 -0.0019 -0.0034 -0.0021 -0.0031  
 AT.168 H X -0.0003 0.0002 0.0013 -0.0009 0.0049 -0.0037  
 Y 0.0016 0.0014 -0.0017 0.0011 -0.0008 0.0000  
 Z 0.0011 0.0016 -0.0019 0.0034 -0.0021 0.0031  
 AT.169 O X -0.0005 0.0004 -0.0005 -0.0004 0.0001 0.0002  
 Y -0.0003 0.0002 -0.0010 -0.0008 -0.0002 -0.0002  
 Z -0.0002 0.0002 -0.0008 -0.0007 0.0002 0.0002  
 AT.170 O X -0.0005 -0.0004 -0.0005 0.0004 0.0001 -0.0002  
 Y 0.0003 0.0002 0.0010 -0.0008 0.0002 -0.0002  
 Z -0.0002 -0.0002 -0.0008 0.0007 0.0002 -0.0002  
 AT.171 O X -0.0005 0.0004 0.0005 0.0004 0.0001 0.0002  
 Y -0.0003 0.0002 0.0010 0.0008 -0.0002 -0.0002  
 Z -0.0002 0.0002 0.0008 0.0007 0.0002 0.0002  
 AT.172 O X -0.0005 -0.0004 0.0005 -0.0004 0.0001 -0.0002  
 Y 0.0003 0.0002 -0.0010 0.0008 0.0002 -0.0002  
 Z -0.0002 -0.0002 0.0008 -0.0007 0.0002 -0.0002  
 AT.173 H X 0.0059 -0.0055 0.0092 0.0082 -0.0005 -0.0006  
 Y -0.0008 0.0010 -0.0017 -0.0017 0.0003 0.0004  
 Z -0.0059 0.0058 -0.0028 -0.0018 -0.0013 -0.0012  
 AT.174 H X 0.0059 0.0055 0.0092 -0.0082 -0.0005 0.0006  
 Y 0.0008 0.0010 0.0017 -0.0017 -0.0003 0.0004  
 Z -0.0059 -0.0058 -0.0028 0.0018 -0.0013 0.0012  
 AT.175 H X 0.0059 -0.0055 -0.0092 -0.0082 -0.0005 -0.0006  
 Y -0.0008 0.0010 0.0017 0.0017 0.0003 0.0004  
 Z -0.0059 0.0058 0.0028 0.0018 -0.0013 -0.0012  
 AT.176 H X 0.0059 0.0055 -0.0092 0.0082 -0.0005 0.0006  
 Y 0.0008 0.0010 -0.0017 0.0017 -0.0003 0.0004  
 Z -0.0059 -0.0058 0.0028 -0.0018 -0.0013 0.0012  
  
 FREQ(CM\*\*-1) 1175.76 1175.78 1182.38 1183.07 1183.07 1183.67  
  
 AT. 11 X 0.0000 0.0000 0.0000 0.0000 -0.0000 -0.0000

Y 0.0000 0.0000 0.0000 0.0000 -0.0000 -0.0000  
Z 0.0000 0.0000 0.0000 0.0000 -0.0000 -0.0000  
AT. 2 I X -0.0000 0.0000 0.0000 0.0000 0.0000 0.0000  
Y 0.0000 -0.0000 -0.0000 -0.0000 -0.0000 -0.0000  
Z -0.0000 0.0000 0.0000 0.0000 0.0000 0.0000  
AT. 3 I X -0.0000 -0.0000 -0.0000 0.0000 -0.0000 0.0000  
Y -0.0000 -0.0000 -0.0000 0.0000 -0.0000 0.0000  
Z -0.0000 -0.0000 -0.0000 0.0000 -0.0000 0.0000  
AT. 4 I X 0.0000 -0.0000 -0.0000 0.0000 0.0000 -0.0000  
Y -0.0000 0.0000 0.0000 -0.0000 -0.0000 0.0000  
Z 0.0000 -0.0000 -0.0000 0.0000 0.0000 -0.0000  
AT. 5 I X -0.0000 -0.0000 0.0000 0.0000 -0.0000 -0.0000  
Y 0.0000 0.0000 0.0000 0.0000 -0.0000 0.0000  
Z -0.0000 -0.0000 0.0000 -0.0000 0.0000 -0.0000  
AT. 6 I X 0.0000 -0.0000 0.0000 0.0000 0.0000 0.0000  
Y 0.0000 -0.0000 -0.0000 -0.0000 -0.0000 0.0000  
Z 0.0000 -0.0000 0.0000 -0.0000 -0.0000 0.0000  
AT. 7 I X 0.0000 0.0000 -0.0000 0.0000 -0.0000 0.0000  
Y -0.0000 -0.0000 -0.0000 0.0000 -0.0000 -0.0000  
Z 0.0000 0.0000 -0.0000 -0.0000 0.0000 0.0000  
AT. 8 I X -0.0000 0.0000 -0.0000 0.0000 0.0000 -0.0000  
Y -0.0000 0.0000 0.0000 -0.0000 -0.0000 -0.0000  
Z -0.0000 0.0000 -0.0000 -0.0000 -0.0000 -0.0000  
AT. 9 N X 0.0002 0.0003 0.0010 0.0010 -0.0009 -0.0009  
Y -0.0030 -0.0033 -0.0031 -0.0036 0.0038 0.0034  
Z -0.0053 -0.0050 0.0019 0.0020 -0.0018 -0.0027  
AT. 10 N X -0.0002 0.0003 0.0010 0.0010 0.0009 0.0009  
Y -0.0030 0.0033 0.0031 0.0036 0.0038 0.0034  
Z 0.0053 -0.0050 0.0019 0.0020 0.0018 0.0027  
AT. 11 N X -0.0002 -0.0003 -0.0010 0.0010 -0.0009 0.0009  
Y 0.0030 0.0033 0.0031 -0.0036 0.0038 -0.0034  
Z 0.0053 0.0050 -0.0019 0.0020 -0.0018 0.0027

AT. 12 N X 0.0002 -0.0003 -0.0010 0.0010 0.0009 -0.0009  
Y 0.0030 -0.0033 -0.0031 0.0036 0.0038 -0.0034  
Z -0.0053 0.0050 -0.0019 0.0020 0.0018 -0.0027

AT. 13 N X -0.0043 -0.0043 0.0007 0.0007 -0.0005 -0.0011  
Y -0.0002 -0.0010 -0.0001 -0.0001 0.0007 0.0003  
Z -0.0057 -0.0053 0.0040 0.0039 -0.0038 -0.0047

AT. 14 N X 0.0043 -0.0043 0.0007 0.0007 0.0005 0.0011  
Y -0.0002 0.0010 0.0001 0.0001 0.0007 0.0003  
Z 0.0057 -0.0053 0.0040 0.0039 0.0038 0.0047

AT. 15 N X 0.0043 0.0043 -0.0007 0.0007 -0.0005 0.0011  
Y 0.0002 0.0010 0.0001 -0.0001 0.0007 -0.0003  
Z 0.0057 0.0053 -0.0040 0.0039 -0.0038 0.0047

AT. 16 N X -0.0043 0.0043 -0.0007 0.0007 0.0005 -0.0011  
Y 0.0002 -0.0010 -0.0001 0.0001 0.0007 -0.0003  
Z -0.0057 0.0053 -0.0040 0.0039 0.0038 -0.0047

AT. 17 O X 0.0005 0.0004 0.0003 0.0004 -0.0003 -0.0002  
Y 0.0010 0.0008 0.0003 0.0003 -0.0003 -0.0001  
Z 0.0003 -0.0000 -0.0003 -0.0002 0.0005 0.0007

AT. 18 O X -0.0005 0.0004 0.0003 0.0004 0.0003 0.0002  
Y 0.0010 -0.0008 -0.0003 -0.0003 -0.0003 -0.0001  
Z -0.0003 -0.0000 -0.0003 -0.0002 -0.0005 -0.0007

AT. 19 O X -0.0005 -0.0004 -0.0003 0.0004 -0.0003 0.0002  
Y -0.0010 -0.0008 -0.0003 0.0003 -0.0003 0.0001  
Z -0.0003 0.0000 0.0003 -0.0002 0.0005 -0.0007

AT. 20 O X 0.0005 -0.0004 -0.0003 0.0004 0.0003 -0.0002  
Y -0.0010 0.0008 0.0003 -0.0003 -0.0003 0.0001  
Z 0.0003 0.0000 0.0003 -0.0002 -0.0005 0.0007

AT. 21 O X -0.0001 -0.0001 0.0001 0.0001 -0.0002 -0.0002  
Y -0.0012 -0.0009 0.0001 0.0001 -0.0004 -0.0005  
Z 0.0012 0.0011 0.0003 0.0002 -0.0001 0.0002

AT. 22 O X 0.0001 -0.0001 0.0001 0.0001 0.0002 0.0002  
Y -0.0012 0.0009 -0.0001 -0.0001 -0.0004 -0.0005

Z -0.0012 0.0011 0.0003 0.0002 0.0001 -0.0002  
AT. 23 O X 0.0001 0.0001 -0.0001 0.0001 -0.0002 0.0002  
Y 0.0012 0.0009 -0.0001 0.0001 -0.0004 0.0005  
Z -0.0012 -0.0011 -0.0003 0.0002 -0.0001 -0.0002  
AT. 24 O X -0.0001 0.0001 -0.0001 0.0001 0.0002 -0.0002  
Y 0.0012 -0.0009 0.0001 -0.0001 -0.0004 0.0005  
Z 0.0012 -0.0011 -0.0003 0.0002 0.0001 0.0002  
AT. 25 C X 0.0006 0.0008 0.0008 0.0015 -0.0013 -0.0010  
Y 0.0011 0.0015 0.0013 0.0016 -0.0018 -0.0015  
Z -0.0007 -0.0004 -0.0001 -0.0007 0.0001 0.0001  
AT. 26 C X -0.0006 0.0008 0.0008 0.0015 0.0013 0.0010  
Y 0.0011 -0.0015 -0.0013 -0.0016 -0.0018 -0.0015  
Z 0.0007 -0.0004 -0.0001 -0.0007 -0.0001 -0.0001  
AT. 27 C X -0.0006 -0.0008 -0.0008 0.0015 -0.0013 0.0010  
Y -0.0011 -0.0015 -0.0013 0.0016 -0.0018 0.0015  
Z 0.0007 0.0004 0.0001 -0.0007 0.0001 -0.0001  
AT. 28 C X 0.0006 -0.0008 -0.0008 0.0015 0.0013 -0.0010  
Y -0.0011 0.0015 0.0013 -0.0016 -0.0018 0.0015  
Z -0.0007 0.0004 0.0001 -0.0007 -0.0001 0.0001  
AT. 29 H X -0.0056 -0.0068 -0.0057 -0.0100 0.0096 0.0080  
Y -0.0035 -0.0053 -0.0043 -0.0045 0.0062 0.0055  
Z 0.0094 0.0122 0.0107 0.0175 -0.0174 -0.0146  
AT. 30 H X 0.0056 -0.0068 -0.0057 -0.0100 -0.0096 -0.0080  
Y -0.0035 0.0053 0.0043 0.0045 0.0062 0.0055  
Z -0.0094 0.0122 0.0107 0.0175 0.0174 0.0146  
AT. 31 H X 0.0056 0.0068 0.0057 -0.0100 0.0096 -0.0080  
Y 0.0035 0.0053 0.0043 -0.0045 0.0062 -0.0055  
Z -0.0094 -0.0122 -0.0107 0.0175 -0.0174 0.0146  
AT. 32 H X -0.0056 0.0068 0.0057 -0.0100 -0.0096 0.0080  
Y 0.0035 -0.0053 -0.0043 0.0045 0.0062 -0.0055  
Z 0.0094 -0.0122 -0.0107 0.0175 0.0174 -0.0146  
AT. 33 H X 0.0026 0.0043 0.0013 -0.0003 -0.0032 -0.0027

Y 0.0031 0.0042 0.0041 0.0049 -0.0059 -0.0049  
Z -0.0105 -0.0150 -0.0126 -0.0137 0.0194 0.0161  
AT. 34 H X -0.0026 0.0043 0.0013 -0.0003 0.0032 0.0027  
Y 0.0031 -0.0042 -0.0041 -0.0049 -0.0059 -0.0049  
Z 0.0105 -0.0150 -0.0126 -0.0137 -0.0194 -0.0161  
AT. 35 H X -0.0026 -0.0043 -0.0013 -0.0003 -0.0032 0.0027  
Y -0.0031 -0.0042 -0.0041 0.0049 -0.0059 0.0049  
Z 0.0105 0.0150 0.0126 -0.0137 0.0194 -0.0161  
AT. 36 H X 0.0026 -0.0043 -0.0013 -0.0003 0.0032 -0.0027  
Y -0.0031 0.0042 0.0041 -0.0049 -0.0059 0.0049  
Z -0.0105 0.0150 0.0126 -0.0137 -0.0194 0.0161  
AT. 37 C X -0.0007 -0.0009 -0.0007 -0.0013 0.0012 0.0008  
Y -0.0013 -0.0013 -0.0006 -0.0007 0.0007 0.0003  
Z 0.0012 0.0012 0.0012 0.0010 -0.0012 -0.0012  
AT. 38 C X 0.0007 -0.0009 -0.0007 -0.0013 -0.0012 -0.0008  
Y -0.0013 0.0013 0.0006 0.0007 0.0007 0.0003  
Z -0.0012 0.0012 0.0012 0.0010 0.0012 0.0012  
AT. 39 C X 0.0007 0.0009 0.0007 -0.0013 0.0012 -0.0008  
Y 0.0013 0.0013 0.0006 -0.0007 0.0007 -0.0003  
Z -0.0012 -0.0012 -0.0012 0.0010 -0.0012 0.0012  
AT. 40 C X -0.0007 0.0009 0.0007 -0.0013 -0.0012 0.0008  
Y 0.0013 -0.0013 -0.0006 0.0007 0.0007 -0.0003  
Z 0.0012 -0.0012 -0.0012 0.0010 0.0012 -0.0012  
AT. 41 C X 0.0023 0.0023 -0.0021 -0.0020 0.0020 0.0023  
Y 0.0066 0.0071 -0.0049 -0.0047 0.0045 0.0053  
Z 0.0020 0.0021 0.0010 0.0013 -0.0015 -0.0010  
AT. 42 C X -0.0023 0.0023 -0.0021 -0.0020 -0.0020 -0.0023  
Y 0.0066 -0.0071 0.0049 0.0047 0.0045 0.0053  
Z -0.0020 0.0021 0.0010 0.0013 0.0015 0.0010  
AT. 43 C X -0.0023 -0.0023 0.0021 -0.0020 0.0020 -0.0023  
Y -0.0066 -0.0071 0.0049 -0.0047 0.0045 -0.0053  
Z -0.0020 -0.0021 -0.0010 0.0013 -0.0015 0.0010



AT. 44 C X 0.0023 -0.0023 0.0021 -0.0020 -0.0020 0.0023  
Y -0.0066 0.0071 -0.0049 0.0047 0.0045 -0.0053  
Z 0.0020 -0.0021 -0.0010 0.0013 0.0015 -0.0010

AT. 45 H X 0.0104 0.0119 0.0048 0.0055 -0.0071 -0.0055  
Y -0.0008 -0.0008 0.0121 0.0124 -0.0134 -0.0128  
Z -0.0055 -0.0060 0.0145 0.0148 -0.0155 -0.0153

AT. 46 H X -0.0104 0.0119 0.0048 0.0055 0.0071 0.0055  
Y -0.0008 0.0008 -0.0121 -0.0124 -0.0134 -0.0128  
Z 0.0055 -0.0060 0.0145 0.0148 0.0155 0.0153

AT. 47 H X -0.0104 -0.0119 -0.0048 0.0055 -0.0071 0.0055  
Y 0.0008 0.0008 -0.0121 0.0124 -0.0134 0.0128  
Z 0.0055 0.0060 -0.0145 0.0148 -0.0155 0.0153

AT. 48 H X 0.0104 -0.0119 -0.0048 0.0055 0.0071 -0.0055  
Y 0.0008 -0.0008 0.0121 -0.0124 -0.0134 0.0128  
Z -0.0055 0.0060 -0.0145 0.0148 0.0155 -0.0153

AT. 49 H X 0.0057 0.0076 -0.0191 -0.0185 0.0186 0.0196  
Y 0.0062 0.0080 -0.0139 -0.0131 0.0131 0.0140  
Z 0.0105 0.0126 -0.0197 -0.0198 0.0196 0.0211

AT. 50 H X -0.0057 0.0076 -0.0191 -0.0185 -0.0186 -0.0196  
Y 0.0062 -0.0080 0.0139 0.0131 0.0131 0.0140  
Z -0.0105 0.0126 -0.0197 -0.0198 -0.0196 -0.0211

AT. 51 H X -0.0057 -0.0076 0.0191 -0.0185 0.0186 -0.0196  
Y -0.0062 -0.0080 0.0139 -0.0131 0.0131 -0.0140  
Z -0.0105 -0.0126 0.0197 -0.0198 0.0196 -0.0211

AT. 52 H X 0.0057 -0.0076 0.0191 -0.0185 -0.0186 0.0196  
Y -0.0062 0.0080 -0.0139 0.0131 0.0131 -0.0140  
Z 0.0105 -0.0126 0.0197 -0.0198 -0.0196 0.0211

AT. 53 C X -0.0035 -0.0041 0.0042 0.0042 -0.0037 -0.0043  
Y -0.0068 -0.0087 0.0133 0.0130 -0.0124 -0.0133  
Z 0.0011 -0.0004 -0.0019 -0.0021 0.0031 0.0028

AT. 54 C X 0.0035 -0.0041 0.0042 0.0042 0.0037 0.0043  
Y -0.0068 0.0087 -0.0133 -0.0130 -0.0124 -0.0133

Z -0.0011 -0.0004 -0.0019 -0.0021 -0.0031 -0.0028  
AT. 55 C X 0.0035 0.0041 -0.0042 0.0042 -0.0037 0.0043  
Y 0.0068 0.0087 -0.0133 0.0130 -0.0124 0.0133  
Z -0.0011 0.0004 0.0019 -0.0021 0.0031 -0.0028  
AT. 56 C X -0.0035 0.0041 -0.0042 0.0042 0.0037 -0.0043  
Y 0.0068 -0.0087 0.0133 -0.0130 -0.0124 0.0133  
Z 0.0011 0.0004 0.0019 -0.0021 -0.0031 0.0028  
AT. 57 C X 0.0018 0.0020 -0.0024 -0.0025 0.0021 0.0025  
Y 0.0020 0.0029 -0.0070 -0.0069 0.0067 0.0070  
Z 0.0002 0.0008 0.0022 0.0024 -0.0027 -0.0027  
AT. 58 C X -0.0018 0.0020 -0.0024 -0.0025 -0.0021 -0.0025  
Y 0.0020 -0.0029 0.0070 0.0069 0.0067 0.0070  
Z -0.0002 0.0008 0.0022 0.0024 0.0027 0.0027  
AT. 59 C X -0.0018 -0.0020 0.0024 -0.0025 0.0021 -0.0025  
Y -0.0020 -0.0029 0.0070 -0.0069 0.0067 -0.0070  
Z -0.0002 -0.0008 -0.0022 0.0024 -0.0027 0.0027  
AT. 60 C X 0.0018 -0.0020 0.0024 -0.0025 -0.0021 0.0025  
Y -0.0020 0.0029 -0.0070 0.0069 0.0067 -0.0070  
Z 0.0002 -0.0008 -0.0022 0.0024 0.0027 -0.0027  
AT. 61 H X -0.0033 -0.0028 0.0044 0.0045 -0.0043 -0.0048  
Y -0.0027 -0.0020 0.0021 0.0027 -0.0022 -0.0030  
Z 0.0045 0.0073 -0.0216 -0.0227 0.0207 0.0227  
AT. 62 H X 0.0033 -0.0028 0.0044 0.0045 0.0043 0.0048  
Y -0.0027 0.0020 -0.0021 -0.0027 -0.0022 -0.0030  
Z -0.0045 0.0073 -0.0216 -0.0227 -0.0207 -0.0227  
AT. 63 H X 0.0033 0.0028 -0.0044 0.0045 -0.0043 0.0048  
Y 0.0027 0.0020 -0.0021 0.0027 -0.0022 0.0030  
Z -0.0045 -0.0073 0.0216 -0.0227 0.0207 -0.0227  
AT. 64 H X -0.0033 0.0028 -0.0044 0.0045 0.0043 -0.0048  
Y 0.0027 -0.0020 0.0021 -0.0027 -0.0022 0.0030  
Z 0.0045 -0.0073 0.0216 -0.0227 -0.0207 0.0227  
AT. 65 H X 0.0021 0.0027 -0.0055 -0.0054 0.0053 0.0055

Y 0.0004 0.0005 0.0035 0.0032 -0.0041 -0.0035  
Z 0.0114 0.0132 -0.0234 -0.0227 0.0222 0.0235  
AT. 66 H X -0.0021 0.0027 -0.0055 -0.0054 -0.0053 -0.0055  
Y 0.0004 -0.0005 -0.0035 -0.0032 -0.0041 -0.0035  
Z -0.0114 0.0132 -0.0234 -0.0227 -0.0222 -0.0235  
AT. 67 H X -0.0021 -0.0027 0.0055 -0.0054 0.0053 -0.0055  
Y -0.0004 -0.0005 -0.0035 0.0032 -0.0041 0.0035  
Z -0.0114 -0.0132 0.0234 -0.0227 0.0222 -0.0235  
AT. 68 H X 0.0021 -0.0027 0.0055 -0.0054 -0.0053 0.0055  
Y -0.0004 0.0005 0.0035 -0.0032 -0.0041 0.0035  
Z 0.0114 -0.0132 0.0234 -0.0227 -0.0222 0.0235  
AT. 69 H X -0.0036 -0.0036 0.0070 0.0078 -0.0067 -0.0079  
Y -0.0049 -0.0059 0.0144 0.0135 -0.0145 -0.0140  
Z -0.0061 -0.0070 0.0210 0.0207 -0.0213 -0.0215  
AT. 70 H X 0.0036 -0.0036 0.0070 0.0078 0.0067 0.0079  
Y -0.0049 0.0059 -0.0144 -0.0135 -0.0145 -0.0140  
Z 0.0061 -0.0070 0.0210 0.0207 0.0213 0.0215  
AT. 71 H X 0.0036 0.0036 -0.0070 0.0078 -0.0067 0.0079  
Y 0.0049 0.0059 -0.0144 0.0135 -0.0145 0.0140  
Z 0.0061 0.0070 -0.0210 0.0207 -0.0213 0.0215  
AT. 72 H X -0.0036 0.0036 -0.0070 0.0078 0.0067 -0.0079  
Y 0.0049 -0.0059 0.0144 -0.0135 -0.0145 0.0140  
Z -0.0061 0.0070 -0.0210 0.0207 0.0213 -0.0215  
AT. 73 C X -0.0068 -0.0059 0.0036 0.0035 -0.0038 -0.0042  
Y -0.0160 -0.0161 -0.0074 -0.0073 0.0079 0.0063  
Z -0.0093 -0.0086 -0.0047 -0.0051 0.0047 0.0038  
AT. 74 C X 0.0068 -0.0059 0.0036 0.0035 0.0038 0.0042  
Y -0.0160 0.0161 0.0074 0.0073 0.0079 0.0063  
Z 0.0093 -0.0086 -0.0047 -0.0051 -0.0047 -0.0038  
AT. 75 C X 0.0068 0.0059 -0.0036 0.0035 -0.0038 0.0042  
Y 0.0160 0.0161 0.0074 -0.0073 0.0079 -0.0063  
Z 0.0093 0.0086 0.0047 -0.0051 0.0047 -0.0038

AT. 76 C X -0.0068 0.0059 -0.0036 0.0035 0.0038 -0.0042  
Y 0.0160 -0.0161 -0.0074 0.0073 0.0079 -0.0063  
Z -0.0093 0.0086 0.0047 -0.0051 -0.0047 0.0038

AT. 77 C X -0.0026 -0.0027 -0.0007 -0.0011 0.0010 0.0007  
Y 0.0006 0.0002 0.0087 0.0086 -0.0088 -0.0088  
Z 0.0024 0.0020 -0.0000 -0.0003 0.0004 0.0006

AT. 78 C X 0.0026 -0.0027 -0.0007 -0.0011 -0.0010 -0.0007  
Y 0.0006 -0.0002 -0.0087 -0.0086 -0.0088 -0.0088  
Z -0.0024 0.0020 -0.0000 -0.0003 -0.0004 -0.0006

AT. 79 C X 0.0026 0.0027 0.0007 -0.0011 0.0010 -0.0007  
Y -0.0006 -0.0002 -0.0087 0.0086 -0.0088 0.0088  
Z -0.0024 -0.0020 0.0000 -0.0003 0.0004 -0.0006

AT. 80 C X -0.0026 0.0027 0.0007 -0.0011 -0.0010 0.0007  
Y -0.0006 0.0002 0.0087 -0.0086 -0.0088 0.0088  
Z 0.0024 -0.0020 0.0000 -0.0003 -0.0004 0.0006

AT. 81 H X -0.0005 -0.0013 0.0050 0.0052 -0.0049 -0.0046  
Y 0.0032 0.0018 0.0177 0.0183 -0.0181 -0.0172  
Z -0.0041 -0.0015 -0.0357 -0.0358 0.0356 0.0352

AT. 82 H X 0.0005 -0.0013 0.0050 0.0052 0.0049 0.0046  
Y 0.0032 -0.0018 -0.0177 -0.0183 -0.0181 -0.0172  
Z 0.0041 -0.0015 -0.0357 -0.0358 -0.0356 -0.0352

AT. 83 H X 0.0005 0.0013 -0.0050 0.0052 -0.0049 0.0046  
Y -0.0032 -0.0018 -0.0177 0.0183 -0.0181 0.0172  
Z 0.0041 0.0015 0.0357 -0.0358 0.0356 -0.0352

AT. 84 H X -0.0005 0.0013 -0.0050 0.0052 0.0049 -0.0046  
Y -0.0032 0.0018 0.0177 -0.0183 -0.0181 0.0172  
Z -0.0041 0.0015 0.0357 -0.0358 -0.0356 0.0352

AT. 85 H X 0.0220 0.0208 0.0143 0.0147 -0.0153 -0.0126  
Y 0.0197 0.0203 -0.0078 -0.0073 0.0071 0.0090  
Z -0.0201 -0.0211 0.0094 0.0083 -0.0080 -0.0103

AT. 86 H X -0.0220 0.0208 0.0143 0.0147 0.0153 0.0126  
Y 0.0197 -0.0203 0.0078 0.0073 0.0071 0.0090

Z 0.0201 -0.0211 0.0094 0.0083 0.0080 0.0103  
AT. 87 H X -0.0220 -0.0208 -0.0143 0.0147 -0.0153 0.0126  
Y -0.0197 -0.0203 0.0078 -0.0073 0.0071 -0.0090  
Z 0.0201 0.0211 -0.0094 0.0083 -0.0080 0.0103  
AT. 88 H X 0.0220 -0.0208 -0.0143 0.0147 0.0153 -0.0126  
Y -0.0197 0.0203 -0.0078 0.0073 0.0071 -0.0090  
Z -0.0201 0.0211 -0.0094 0.0083 0.0080 -0.0103  
AT. 89 C X 0.0028 0.0029 0.0012 0.0016 -0.0014 -0.0014  
Y -0.0125 -0.0107 -0.0200 -0.0201 0.0200 0.0190  
Z 0.0205 0.0198 0.0018 0.0027 -0.0026 -0.0003  
AT. 90 C X -0.0028 0.0029 0.0012 0.0016 0.0014 0.0014  
Y -0.0125 0.0107 0.0200 0.0201 0.0200 0.0190  
Z -0.0205 0.0198 0.0018 0.0027 0.0026 0.0003  
AT. 91 C X -0.0028 -0.0029 -0.0012 0.0016 -0.0014 0.0014  
Y 0.0125 0.0107 0.0200 -0.0201 0.0200 -0.0190  
Z -0.0205 -0.0198 -0.0018 0.0027 -0.0026 0.0003  
AT. 92 C X 0.0028 -0.0029 -0.0012 0.0016 0.0014 -0.0014  
Y 0.0125 -0.0107 -0.0200 0.0201 0.0200 -0.0190  
Z 0.0205 -0.0198 -0.0018 0.0027 0.0026 -0.0003  
AT. 93 C X -0.0013 -0.0013 -0.0008 -0.0010 0.0010 0.0009  
Y 0.0055 0.0046 0.0089 0.0090 -0.0088 -0.0084  
Z -0.0091 -0.0087 -0.0003 -0.0005 0.0007 -0.0005  
AT. 94 C X 0.0013 -0.0013 -0.0008 -0.0010 -0.0010 -0.0009  
Y 0.0055 -0.0046 -0.0089 -0.0090 -0.0088 -0.0084  
Z 0.0091 -0.0087 -0.0003 -0.0005 -0.0007 0.0005  
AT. 95 C X 0.0013 0.0013 0.0008 -0.0010 0.0010 -0.0009  
Y -0.0055 -0.0046 -0.0089 0.0090 -0.0088 0.0084  
Z 0.0091 0.0087 0.0003 -0.0005 0.0007 0.0005  
AT. 96 C X -0.0013 0.0013 0.0008 -0.0010 -0.0010 0.0009  
Y -0.0055 0.0046 0.0089 -0.0090 -0.0088 0.0084  
Z -0.0091 0.0087 0.0003 -0.0005 -0.0007 -0.0005  
AT. 97 H X -0.0035 -0.0034 0.0006 0.0004 -0.0006 -0.0007

Y 0.0088 0.0085 -0.0039 -0.0044 0.0036 0.0053  
Z -0.0113 -0.0094 -0.0206 -0.0216 0.0198 0.0204  
AT. 98 H X 0.0035 -0.0034 0.0006 0.0004 0.0006 0.0007  
Y 0.0088 -0.0085 0.0039 0.0044 0.0036 0.0053  
Z 0.0113 -0.0094 -0.0206 -0.0216 -0.0198 -0.0204  
AT. 99 H X 0.0035 0.0034 -0.0006 0.0004 -0.0006 0.0007  
Y -0.0088 -0.0085 0.0039 -0.0044 0.0036 -0.0053  
Z 0.0113 0.0094 0.0206 -0.0216 0.0198 -0.0204  
AT. 100 H X -0.0035 0.0034 -0.0006 0.0004 0.0006 -0.0007  
Y -0.0088 0.0085 -0.0039 0.0044 0.0036 -0.0053  
Z -0.0113 0.0094 0.0206 -0.0216 -0.0198 0.0204  
AT. 101 H X -0.0001 0.0007 -0.0074 -0.0069 0.0069 0.0069  
Y 0.0072 0.0069 0.0057 0.0064 -0.0061 -0.0057  
Z -0.0097 -0.0077 -0.0268 -0.0268 0.0263 0.0259  
AT. 102 H X 0.0001 0.0007 -0.0074 -0.0069 -0.0069 -0.0069  
Y 0.0072 -0.0069 -0.0057 -0.0064 -0.0061 -0.0057  
Z 0.0097 -0.0077 -0.0268 -0.0268 -0.0263 -0.0259  
AT. 103 H X 0.0001 -0.0007 0.0074 -0.0069 0.0069 -0.0069  
Y -0.0072 -0.0069 -0.0057 0.0064 -0.0061 0.0057  
Z 0.0097 0.0077 0.0268 -0.0268 0.0263 -0.0259  
AT. 104 H X -0.0001 -0.0007 0.0074 -0.0069 -0.0069 0.0069  
Y -0.0072 0.0069 0.0057 -0.0064 -0.0061 0.0057  
Z -0.0097 0.0077 0.0268 -0.0268 -0.0263 0.0259  
AT. 105 H X -0.0019 -0.0019 0.0060 0.0071 -0.0058 -0.0074  
Y 0.0077 0.0095 -0.0165 -0.0157 0.0153 0.0165  
Z -0.0108 -0.0125 0.0158 0.0147 -0.0144 -0.0159  
AT. 106 H X 0.0019 -0.0019 0.0060 0.0071 0.0058 0.0074  
Y 0.0077 -0.0095 0.0165 0.0157 0.0153 0.0165  
Z 0.0108 -0.0125 0.0158 0.0147 0.0144 0.0159  
AT. 107 H X 0.0019 0.0019 -0.0060 0.0071 -0.0058 0.0074  
Y -0.0077 -0.0095 0.0165 -0.0157 0.0153 -0.0165  
Z 0.0108 0.0125 -0.0158 0.0147 -0.0144 0.0159

AT.108 H X -0.0019 0.0019 -0.0060 0.0071 0.0058 -0.0074  
Y -0.0077 0.0095 -0.0165 0.0157 0.0153 -0.0165  
Z -0.0108 0.0125 -0.0158 0.0147 0.0144 -0.0159

AT.109 C X 0.0029 0.0033 -0.0020 -0.0020 0.0017 0.0022  
Y 0.0054 0.0060 -0.0055 -0.0053 0.0052 0.0058  
Z 0.0027 0.0031 -0.0013 -0.0011 0.0008 0.0014

AT.110 C X -0.0029 0.0033 -0.0020 -0.0020 -0.0017 -0.0022  
Y 0.0054 -0.0060 0.0055 0.0053 0.0052 0.0058  
Z -0.0027 0.0031 -0.0013 -0.0011 -0.0008 -0.0014

AT.111 C X -0.0029 -0.0033 0.0020 -0.0020 0.0017 -0.0022  
Y -0.0054 -0.0060 0.0055 -0.0053 0.0052 -0.0058  
Z -0.0027 -0.0031 0.0013 -0.0011 0.0008 -0.0014

AT.112 C X 0.0029 -0.0033 0.0020 -0.0020 -0.0017 0.0022  
Y -0.0054 0.0060 -0.0055 0.0053 0.0052 -0.0058  
Z 0.0027 -0.0031 0.0013 -0.0011 -0.0008 0.0014

AT.113 H X 0.0009 0.0003 0.0037 0.0035 -0.0034 -0.0032  
Y 0.0123 0.0148 -0.0214 -0.0209 0.0200 0.0215  
Z 0.0216 0.0234 -0.0320 -0.0314 0.0308 0.0332

AT.114 H X -0.0009 0.0003 0.0037 0.0035 0.0034 0.0032  
Y 0.0123 -0.0148 0.0214 0.0209 0.0200 0.0215  
Z -0.0216 0.0234 -0.0320 -0.0314 -0.0308 -0.0332

AT.115 H X -0.0009 -0.0003 -0.0037 0.0035 -0.0034 0.0032  
Y -0.0123 -0.0148 0.0214 -0.0209 0.0200 -0.0215  
Z -0.0216 -0.0234 0.0320 -0.0314 0.0308 -0.0332

AT.116 H X 0.0009 -0.0003 -0.0037 0.0035 0.0034 -0.0032  
Y -0.0123 0.0148 -0.0214 0.0209 0.0200 -0.0215  
Z 0.0216 -0.0234 0.0320 -0.0314 -0.0308 0.0332

AT.117 H X -0.0048 -0.0068 0.0049 0.0050 -0.0046 -0.0051  
Y -0.0109 -0.0101 0.0176 0.0170 -0.0183 -0.0190  
Z -0.0105 -0.0096 0.0180 0.0174 -0.0188 -0.0193

AT.118 H X 0.0048 -0.0068 0.0049 0.0050 0.0046 0.0051  
Y -0.0109 0.0101 -0.0176 -0.0170 -0.0183 -0.0190

Z 0.0105 -0.0096 0.0180 0.0174 0.0188 0.0193  
AT. 119 H X 0.0048 0.0068 -0.0049 0.0050 -0.0046 0.0051  
Y 0.0109 0.0101 -0.0176 0.0170 -0.0183 0.0190  
Z 0.0105 0.0096 -0.0180 0.0174 -0.0188 0.0193  
AT. 120 H X -0.0048 0.0068 -0.0049 0.0050 0.0046 -0.0051  
Y 0.0109 -0.0101 0.0176 -0.0170 -0.0183 0.0190  
Z -0.0105 0.0096 -0.0180 0.0174 0.0188 -0.0193  
AT. 121 C X 0.0038 0.0036 0.0006 0.0005 -0.0007 -0.0001  
Y -0.0027 -0.0027 0.0087 0.0084 -0.0086 -0.0089  
Z 0.0011 0.0007 -0.0005 -0.0005 0.0008 0.0007  
AT. 122 C X -0.0038 0.0036 0.0006 0.0005 0.0007 0.0001  
Y -0.0027 0.0027 -0.0087 -0.0084 -0.0086 -0.0089  
Z -0.0011 0.0007 -0.0005 -0.0005 -0.0008 -0.0007  
AT. 123 C X -0.0038 -0.0036 -0.0006 0.0005 -0.0007 0.0001  
Y 0.0027 0.0027 -0.0087 0.0084 -0.0086 0.0089  
Z -0.0011 -0.0007 0.0005 -0.0005 0.0008 -0.0007  
AT. 124 C X 0.0038 -0.0036 -0.0006 0.0005 0.0007 -0.0001  
Y 0.0027 -0.0027 0.0087 -0.0084 -0.0086 0.0089  
Z 0.0011 -0.0007 0.0005 -0.0005 -0.0008 0.0007  
AT. 125 H X -0.0220 -0.0220 -0.0086 -0.0091 0.0100 0.0070  
Y 0.0229 0.0247 -0.0103 -0.0083 0.0079 0.0104  
Z -0.0096 -0.0115 0.0158 0.0142 -0.0141 -0.0152  
AT. 126 H X 0.0220 -0.0220 -0.0086 -0.0091 -0.0100 -0.0070  
Y 0.0229 -0.0247 0.0103 0.0083 0.0079 0.0104  
Z 0.0096 -0.0115 0.0158 0.0142 0.0141 0.0152  
AT. 127 H X 0.0220 0.0220 0.0086 -0.0091 0.0100 -0.0070  
Y -0.0229 -0.0247 0.0103 -0.0083 0.0079 -0.0104  
Z 0.0096 0.0115 -0.0158 0.0142 -0.0141 0.0152  
AT. 128 H X -0.0220 0.0220 0.0086 -0.0091 -0.0100 0.0070  
Y -0.0229 0.0247 -0.0103 0.0083 0.0079 -0.0104  
Z -0.0096 0.0115 -0.0158 0.0142 0.0141 -0.0152  
AT. 129 H X 0.0014 0.0029 -0.0177 -0.0171 0.0172 0.0176



Y 0.0021 0.0002 0.0265 0.0254 -0.0263 -0.0258  
Z 0.0041 0.0058 -0.0271 -0.0260 0.0263 0.0272  
AT. 130 H X -0.0014 0.0029 -0.0177 -0.0171 -0.0172 -0.0176  
Y 0.0021 -0.0002 -0.0265 -0.0254 -0.0263 -0.0258  
Z -0.0041 0.0058 -0.0271 -0.0260 -0.0263 -0.0272  
AT. 131 H X -0.0014 -0.0029 0.0177 -0.0171 0.0172 -0.0176  
Y -0.0021 -0.0002 -0.0265 0.0254 -0.0263 0.0258  
Z -0.0041 -0.0058 0.0271 -0.0260 0.0263 -0.0272  
AT. 132 H X 0.0014 -0.0029 0.0177 -0.0171 -0.0172 0.0176  
Y -0.0021 0.0002 0.0265 -0.0254 -0.0263 0.0258  
Z 0.0041 -0.0058 0.0271 -0.0260 -0.0263 0.0272  
AT. 133 C X 0.0010 0.0010 -0.0006 -0.0005 0.0005 0.0007  
Y 0.0005 0.0001 -0.0009 -0.0006 0.0011 0.0012  
Z 0.0004 0.0002 -0.0005 -0.0003 0.0002 0.0003  
AT. 134 C X -0.0010 0.0010 -0.0006 -0.0005 -0.0005 -0.0007  
Y 0.0005 -0.0001 0.0009 0.0006 0.0011 0.0012  
Z -0.0004 0.0002 -0.0005 -0.0003 -0.0002 -0.0003  
AT. 135 C X -0.0010 -0.0010 0.0006 -0.0005 0.0005 -0.0007  
Y -0.0005 -0.0001 0.0009 -0.0006 0.0011 -0.0012  
Z -0.0004 -0.0002 0.0005 -0.0003 0.0002 -0.0003  
AT. 136 C X 0.0010 -0.0010 0.0006 -0.0005 -0.0005 0.0007  
Y -0.0005 0.0001 -0.0009 0.0006 0.0011 -0.0012  
Z 0.0004 -0.0002 0.0005 -0.0003 -0.0002 0.0003  
AT. 137 C X -0.0013 -0.0013 0.0006 0.0005 -0.0003 -0.0005  
Y 0.0014 0.0019 0.0001 -0.0000 -0.0005 -0.0001  
Z 0.0004 0.0006 -0.0002 -0.0004 0.0000 0.0000  
AT. 138 C X 0.0013 -0.0013 0.0006 0.0005 0.0003 0.0005  
Y 0.0014 -0.0019 -0.0001 0.0000 -0.0005 -0.0001  
Z -0.0004 0.0006 -0.0002 -0.0004 -0.0000 -0.0000  
AT. 139 C X 0.0013 0.0013 -0.0006 0.0005 -0.0003 0.0005  
Y -0.0014 -0.0019 -0.0001 -0.0000 -0.0005 0.0001  
Z -0.0004 -0.0006 0.0002 -0.0004 0.0000 -0.0000

AT. 140 C X -0.0013 0.0013 -0.0006 0.0005 0.0003 -0.0005  
Y -0.0014 0.0019 0.0001 0.0000 -0.0005 0.0001  
Z 0.0004 -0.0006 0.0002 -0.0004 -0.0000 0.0000

AT. 141 H X 0.0074 0.0087 -0.0033 -0.0027 0.0012 0.0029  
Y -0.0072 -0.0095 0.0004 0.0002 0.0016 -0.0008  
Z -0.0152 -0.0185 0.0042 0.0033 -0.0002 -0.0042

AT. 142 H X -0.0074 0.0087 -0.0033 -0.0027 -0.0012 -0.0029  
Y -0.0072 0.0095 -0.0004 -0.0002 0.0016 -0.0008  
Z 0.0152 -0.0185 0.0042 0.0033 0.0002 0.0042

AT. 143 H X -0.0074 -0.0087 0.0033 -0.0027 0.0012 -0.0029  
Y 0.0072 0.0095 -0.0004 0.0002 0.0016 0.0008  
Z 0.0152 0.0185 -0.0042 0.0033 -0.0002 0.0042

AT. 144 H X 0.0074 -0.0087 0.0033 -0.0027 -0.0012 0.0029  
Y 0.0072 -0.0095 0.0004 -0.0002 0.0016 0.0008  
Z -0.0152 0.0185 -0.0042 0.0033 0.0002 -0.0042

AT. 145 H X 0.0046 0.0040 -0.0036 -0.0034 0.0031 0.0023  
Y 0.0010 0.0025 0.0020 0.0018 -0.0026 -0.0010  
Z 0.0057 0.0093 0.0027 0.0028 -0.0047 -0.0007

AT. 146 H X -0.0046 0.0040 -0.0036 -0.0034 -0.0031 -0.0023  
Y 0.0010 -0.0025 -0.0020 -0.0018 -0.0026 -0.0010  
Z -0.0057 0.0093 0.0027 0.0028 0.0047 0.0007

AT. 147 H X -0.0046 -0.0040 0.0036 -0.0034 0.0031 -0.0023  
Y -0.0010 -0.0025 -0.0020 0.0018 -0.0026 0.0010  
Z -0.0057 -0.0093 -0.0027 0.0028 -0.0047 0.0007

AT. 148 H X 0.0046 -0.0040 0.0036 -0.0034 -0.0031 0.0023  
Y -0.0010 0.0025 0.0020 -0.0018 -0.0026 0.0010  
Z 0.0057 -0.0093 -0.0027 0.0028 0.0047 -0.0007

AT. 149 O X -0.0036 -0.0038 -0.0027 -0.0026 0.0029 0.0025  
Y 0.0045 0.0048 0.0034 0.0033 -0.0036 -0.0031  
Z 0.0013 0.0014 0.0020 0.0019 -0.0021 -0.0019

AT. 150 O X 0.0036 -0.0038 -0.0027 -0.0026 -0.0029 -0.0025  
Y 0.0045 -0.0048 -0.0034 -0.0033 -0.0036 -0.0031

Z -0.0013 0.0014 0.0020 0.0019 0.0021 0.0019  
AT. 151 O X 0.0036 0.0038 0.0027 -0.0026 0.0029 -0.0025  
Y -0.0045 -0.0048 -0.0034 0.0033 -0.0036 0.0031  
Z -0.0013 -0.0014 -0.0020 0.0019 -0.0021 0.0019  
AT. 152 O X -0.0036 0.0038 0.0027 -0.0026 -0.0029 0.0025  
Y -0.0045 0.0048 0.0034 -0.0033 -0.0036 0.0031  
Z 0.0013 -0.0014 -0.0020 0.0019 0.0021 -0.0019  
AT. 153 H X -0.0103 -0.0083 -0.0040 -0.0041 0.0031 0.0027  
Y 0.0164 0.0140 0.0035 0.0047 -0.0033 -0.0018  
Z 0.0099 0.0075 0.0030 0.0034 -0.0021 -0.0016  
AT. 154 H X 0.0103 -0.0083 -0.0040 -0.0041 -0.0031 -0.0027  
Y 0.0164 -0.0140 -0.0035 -0.0047 -0.0033 -0.0018  
Z -0.0099 0.0075 0.0030 0.0034 0.0021 0.0016  
AT. 155 H X 0.0103 0.0083 0.0040 -0.0041 0.0031 -0.0027  
Y -0.0164 -0.0140 -0.0035 0.0047 -0.0033 0.0018  
Z -0.0099 -0.0075 -0.0030 0.0034 -0.0021 0.0016  
AT. 156 H X -0.0103 0.0083 0.0040 -0.0041 -0.0031 0.0027  
Y -0.0164 0.0140 0.0035 -0.0047 -0.0033 0.0018  
Z 0.0099 -0.0075 -0.0030 0.0034 0.0021 -0.0016  
AT. 157 O X 0.0099 0.0095 0.0005 0.0005 -0.0006 0.0002  
Y 0.0065 0.0062 0.0014 0.0013 -0.0014 -0.0008  
Z 0.0021 0.0017 0.0031 0.0032 -0.0030 -0.0029  
AT. 158 O X -0.0099 0.0095 0.0005 0.0005 0.0006 -0.0002  
Y 0.0065 -0.0062 -0.0014 -0.0013 -0.0014 -0.0008  
Z -0.0021 0.0017 0.0031 0.0032 0.0030 0.0029  
AT. 159 O X -0.0099 -0.0095 -0.0005 0.0005 -0.0006 -0.0002  
Y -0.0065 -0.0062 -0.0014 0.0013 -0.0014 0.0008  
Z -0.0021 -0.0017 -0.0031 0.0032 -0.0030 0.0029  
AT. 160 O X 0.0099 -0.0095 -0.0005 0.0005 0.0006 0.0002  
Y -0.0065 0.0062 0.0014 -0.0013 -0.0014 0.0008  
Z 0.0021 -0.0017 -0.0031 0.0032 0.0030 -0.0029  
AT. 161 O X -0.0014 -0.0014 -0.0002 -0.0002 0.0003 0.0001

Y -0.0013 -0.0012 -0.0004 -0.0004 0.0005 0.0004  
Z -0.0033 -0.0031 -0.0011 -0.0011 0.0011 0.0009  
AT.162 O X 0.0014 -0.0014 -0.0002 -0.0002 -0.0003 -0.0001  
Y -0.0013 0.0012 0.0004 0.0004 0.0005 0.0004  
Z 0.0033 -0.0031 -0.0011 -0.0011 -0.0011 -0.0009  
AT.163 O X 0.0014 0.0014 0.0002 -0.0002 0.0003 -0.0001  
Y 0.0013 0.0012 0.0004 -0.0004 0.0005 -0.0004  
Z 0.0033 0.0031 0.0011 -0.0011 0.0011 -0.0009  
AT.164 O X -0.0014 0.0014 0.0002 -0.0002 -0.0003 0.0001  
Y 0.0013 -0.0012 -0.0004 0.0004 0.0005 -0.0004  
Z -0.0033 0.0031 0.0011 -0.0011 -0.0011 0.0009  
AT.165 H X 0.0039 0.0043 0.0015 0.0012 -0.0023 -0.0020  
Y -0.0000 0.0005 0.0003 0.0002 -0.0009 -0.0009  
Z -0.0026 -0.0018 -0.0024 -0.0022 0.0014 0.0014  
AT.166 H X -0.0039 0.0043 0.0015 0.0012 0.0023 0.0020  
Y -0.0000 -0.0005 -0.0003 -0.0002 -0.0009 -0.0009  
Z 0.0026 -0.0018 -0.0024 -0.0022 -0.0014 -0.0014  
AT.167 H X -0.0039 -0.0043 -0.0015 0.0012 -0.0023 0.0020  
Y 0.0000 -0.0005 -0.0003 0.0002 -0.0009 0.0009  
Z 0.0026 0.0018 0.0024 -0.0022 0.0014 -0.0014  
AT.168 H X 0.0039 -0.0043 -0.0015 0.0012 0.0023 -0.0020  
Y 0.0000 0.0005 0.0003 -0.0002 -0.0009 0.0009  
Z -0.0026 0.0018 0.0024 -0.0022 -0.0014 0.0014  
AT.169 O X 0.0001 0.0001 0.0003 0.0001 -0.0001 -0.0003  
Y -0.0005 -0.0004 -0.0001 -0.0001 0.0001 -0.0000  
Z 0.0002 0.0003 0.0001 0.0002 -0.0002 -0.0001  
AT.170 O X -0.0001 0.0001 0.0003 0.0001 0.0001 0.0003  
Y -0.0005 0.0004 0.0001 0.0001 0.0001 -0.0000  
Z -0.0002 0.0003 0.0001 0.0002 0.0002 0.0001  
AT.171 O X -0.0001 -0.0001 -0.0003 0.0001 -0.0001 0.0003  
Y 0.0005 0.0004 0.0001 -0.0001 0.0001 0.0000  
Z -0.0002 -0.0003 -0.0001 0.0002 -0.0002 0.0001

AT.172 O X 0.0001 -0.0001 -0.0003 0.0001 0.0001 -0.0003  
Y 0.0005 -0.0004 -0.0001 0.0001 0.0001 0.0000  
Z 0.0002 -0.0003 -0.0001 0.0002 0.0002 -0.0001

AT.173 H X 0.0027 0.0022 -0.0032 0.0020 -0.0020 0.0032  
Y -0.0004 -0.0004 0.0008 -0.0000 -0.0002 -0.0008  
Z -0.0014 -0.0016 0.0014 -0.0024 0.0020 -0.0014

AT.174 H X -0.0027 0.0022 -0.0032 0.0020 0.0020 -0.0032  
Y -0.0004 0.0004 -0.0008 0.0000 -0.0002 -0.0008  
Z 0.0014 -0.0016 0.0014 -0.0024 -0.0020 0.0014

AT.175 H X -0.0027 -0.0022 0.0032 0.0020 -0.0020 -0.0032  
Y 0.0004 0.0004 -0.0008 -0.0000 -0.0002 0.0008  
Z 0.0014 0.0016 -0.0014 -0.0024 0.0020 0.0014

AT.176 H X 0.0027 -0.0022 0.0032 0.0020 0.0020 0.0032  
Y 0.0004 -0.0004 0.0008 0.0000 -0.0002 0.0008  
Z -0.0014 0.0016 -0.0014 -0.0024 -0.0020 -0.0014

FREQ(CM\*\*-1) 1212.40 1212.50 1212.65 1213.18 1216.57 1216.79

AT. 1 I X 0.0000 0.0001 -0.0000 0.0000 -0.0001 0.0001  
Y 0.0000 -0.0000 0.0000 -0.0000 0.0001 -0.0002  
Z 0.0000 0.0000 -0.0000 0.0000 0.0000 -0.0000

AT. 2 I X -0.0000 0.0001 -0.0000 -0.0000 0.0001 -0.0001  
Y 0.0000 0.0000 -0.0000 -0.0000 0.0001 -0.0002  
Z -0.0000 0.0000 -0.0000 -0.0000 -0.0000 0.0000

AT. 3 I X 0.0000 0.0001 0.0000 -0.0000 -0.0001 -0.0001  
Y 0.0000 -0.0000 -0.0000 0.0000 0.0001 0.0002  
Z 0.0000 0.0000 0.0000 -0.0000 0.0000 0.0000

AT. 4 I X -0.0000 0.0001 0.0000 0.0000 0.0001 0.0001  
Y 0.0000 0.0000 0.0000 0.0000 0.0001 0.0002  
Z -0.0000 0.0000 0.0000 0.0000 -0.0000 -0.0000

AT. 5 I X 0.0000 -0.0000 0.0000 -0.0000 0.0001 -0.0001  
Y 0.0000 0.0000 -0.0000 0.0000 0.0000 -0.0001

Z -0.0000 -0.0000 0.0000 -0.0000 -0.0000 0.0000  
AT. 6 I X -0.0000 -0.0000 0.0000 0.0000 -0.0001 0.0001  
Y 0.0000 -0.0000 0.0000 0.0000 0.0000 -0.0001  
Z 0.0000 -0.0000 0.0000 0.0000 0.0000 -0.0000  
AT. 7 I X 0.0000 -0.0000 -0.0000 0.0000 0.0001 0.0001  
Y 0.0000 0.0000 0.0000 -0.0000 0.0000 0.0001  
Z -0.0000 -0.0000 -0.0000 0.0000 -0.0000 -0.0000  
AT. 8 I X -0.0000 -0.0000 -0.0000 -0.0000 -0.0001 -0.0001  
Y 0.0000 -0.0000 -0.0000 -0.0000 0.0000 0.0001  
Z 0.0000 -0.0000 -0.0000 -0.0000 0.0000 0.0000  
AT. 9 N X -0.0002 0.0007 -0.0005 0.0006 -0.0034 0.0035  
Y -0.0028 -0.0023 0.0026 -0.0025 -0.0006 0.0019  
Z 0.0037 0.0062 -0.0065 0.0065 -0.0100 0.0066  
AT. 10 N X 0.0002 0.0007 -0.0005 -0.0006 0.0034 -0.0035  
Y -0.0028 0.0023 -0.0026 -0.0025 -0.0006 0.0019  
Z -0.0037 0.0062 -0.0065 -0.0065 0.0100 -0.0066  
AT. 11 N X -0.0002 0.0007 0.0005 -0.0006 -0.0034 -0.0035  
Y -0.0028 -0.0023 -0.0026 0.0025 -0.0006 -0.0019  
Z 0.0037 0.0062 0.0065 -0.0065 -0.0100 -0.0066  
AT. 12 N X 0.0002 0.0007 0.0005 0.0006 0.0034 0.0035  
Y -0.0028 0.0023 0.0026 0.0025 -0.0006 -0.0019  
Z -0.0037 0.0062 0.0065 0.0065 0.0100 0.0066  
AT. 13 N X -0.0003 -0.0008 0.0006 -0.0006 0.0020 -0.0020  
Y -0.0019 -0.0013 0.0016 -0.0015 -0.0015 0.0026  
Z -0.0101 -0.0103 0.0101 -0.0098 0.0012 0.0008  
AT. 14 N X 0.0003 -0.0008 0.0006 0.0006 -0.0020 0.0020  
Y -0.0019 0.0013 -0.0016 -0.0015 -0.0015 0.0026  
Z 0.0101 -0.0103 0.0101 0.0098 -0.0012 -0.0008  
AT. 15 N X -0.0003 -0.0008 -0.0006 0.0006 0.0020 0.0020  
Y -0.0019 -0.0013 -0.0016 0.0015 -0.0015 -0.0026  
Z -0.0101 -0.0103 -0.0101 0.0098 0.0012 -0.0008  
AT. 16 N X 0.0003 -0.0008 -0.0006 -0.0006 -0.0020 -0.0020

Y -0.0019 0.0013 0.0016 0.0015 -0.0015 -0.0026  
Z 0.0101 -0.0103 -0.0101 -0.0098 -0.0012 0.0008  
AT. 17 O X -0.0002 0.0000 0.0002 -0.0002 -0.0003 0.0006  
Y -0.0003 -0.0006 0.0006 -0.0006 0.0015 -0.0011  
Z -0.0020 -0.0017 0.0022 -0.0021 0.0003 0.0008  
AT. 18 O X 0.0002 0.0000 0.0002 0.0002 0.0003 -0.0006  
Y -0.0003 0.0006 -0.0006 -0.0006 0.0015 -0.0011  
Z 0.0020 -0.0017 0.0022 0.0021 -0.0003 -0.0008  
AT. 19 O X -0.0002 0.0000 -0.0002 0.0002 -0.0003 -0.0006  
Y -0.0003 -0.0006 -0.0006 0.0006 0.0015 0.0011  
Z -0.0020 -0.0017 -0.0022 0.0021 0.0003 -0.0008  
AT. 20 O X 0.0002 0.0000 -0.0002 -0.0002 0.0003 0.0006  
Y -0.0003 0.0006 0.0006 0.0006 0.0015 0.0011  
Z 0.0020 -0.0017 -0.0022 -0.0021 -0.0003 0.0008  
AT. 21 O X -0.0000 -0.0002 0.0002 -0.0002 0.0005 -0.0005  
Y -0.0015 -0.0013 0.0012 -0.0012 0.0001 0.0000  
Z 0.0029 0.0025 -0.0024 0.0024 0.0005 -0.0013  
AT. 22 O X 0.0000 -0.0002 0.0002 0.0002 -0.0005 0.0005  
Y -0.0015 0.0013 -0.0012 -0.0012 0.0001 0.0000  
Z -0.0029 0.0025 -0.0024 -0.0024 -0.0005 0.0013  
AT. 23 O X -0.0000 -0.0002 -0.0002 0.0002 0.0005 0.0005  
Y -0.0015 -0.0013 -0.0012 0.0012 0.0001 -0.0000  
Z 0.0029 0.0025 0.0024 -0.0024 0.0005 0.0013  
AT. 24 O X 0.0000 -0.0002 -0.0002 -0.0002 -0.0005 -0.0005  
Y -0.0015 0.0013 0.0012 0.0012 0.0001 -0.0000  
Z -0.0029 0.0025 0.0024 0.0024 -0.0005 -0.0013  
AT. 25 C X 0.0009 0.0027 -0.0021 0.0024 -0.0062 0.0055  
Y 0.0028 0.0021 -0.0026 0.0025 0.0009 -0.0023  
Z -0.0003 -0.0027 0.0017 -0.0021 0.0078 -0.0077  
AT. 26 C X -0.0009 0.0027 -0.0021 -0.0024 0.0062 -0.0055  
Y 0.0028 -0.0021 0.0026 0.0025 0.0009 -0.0023  
Z 0.0003 -0.0027 0.0017 0.0021 -0.0078 0.0077

AT. 27 C X 0.0009 0.0027 0.0021 -0.0024 -0.0062 -0.0055  
Y 0.0028 0.0021 0.0026 -0.0025 0.0009 0.0023  
Z -0.0003 -0.0027 -0.0017 0.0021 0.0078 0.0077

AT. 28 C X -0.0009 0.0027 0.0021 0.0024 0.0062 0.0055  
Y 0.0028 -0.0021 -0.0026 -0.0025 0.0009 0.0023  
Z 0.0003 -0.0027 -0.0017 -0.0021 -0.0078 -0.0077

AT. 29 H X -0.0056 -0.0132 0.0103 -0.0125 0.0286 -0.0248  
Y -0.0070 -0.0019 0.0046 -0.0037 -0.0124 0.0161  
Z 0.0110 0.0217 -0.0181 0.0212 -0.0420 0.0345

AT. 30 H X 0.0056 -0.0132 0.0103 0.0125 -0.0286 0.0248  
Y -0.0070 0.0019 -0.0046 -0.0037 -0.0124 0.0161  
Z -0.0110 0.0217 -0.0181 -0.0212 0.0420 -0.0345

AT. 31 H X -0.0056 -0.0132 -0.0103 0.0125 0.0286 0.0248  
Y -0.0070 -0.0019 -0.0046 0.0037 -0.0124 -0.0161  
Z 0.0110 0.0217 0.0181 -0.0212 -0.0420 -0.0345

AT. 32 H X 0.0056 -0.0132 -0.0103 -0.0125 -0.0286 -0.0248  
Y -0.0070 0.0019 0.0046 0.0037 -0.0124 -0.0161  
Z -0.0110 0.0217 0.0181 0.0212 0.0420 0.0345

AT. 33 H X 0.0056 -0.0091 0.0032 -0.0053 0.0430 -0.0455  
Y 0.0071 0.0050 -0.0064 0.0060 0.0029 -0.0069  
Z -0.0226 -0.0049 0.0133 -0.0110 -0.0428 0.0552

AT. 34 H X -0.0056 -0.0091 0.0032 0.0053 -0.0430 0.0455  
Y 0.0071 -0.0050 0.0064 0.0060 0.0029 -0.0069  
Z 0.0226 -0.0049 0.0133 0.0110 0.0428 -0.0552

AT. 35 H X 0.0056 -0.0091 -0.0032 0.0053 0.0430 0.0455  
Y 0.0071 0.0050 0.0064 -0.0060 0.0029 0.0069  
Z -0.0226 -0.0049 -0.0133 0.0110 -0.0428 -0.0552

AT. 36 H X -0.0056 -0.0091 -0.0032 -0.0053 -0.0430 -0.0455  
Y 0.0071 -0.0050 -0.0064 -0.0060 0.0029 0.0069  
Z 0.0226 -0.0049 -0.0133 -0.0110 0.0428 0.0552

AT. 37 C X -0.0014 -0.0021 0.0019 -0.0020 0.0031 -0.0022  
Y -0.0033 -0.0019 0.0026 -0.0023 -0.0031 0.0047



Z 0.0028 0.0022 -0.0026 0.0025 0.0008 -0.0019  
AT. 38 C X 0.0014 -0.0021 0.0019 0.0020 -0.0031 0.0022  
Y -0.0033 0.0019 -0.0026 -0.0023 -0.0031 0.0047  
Z -0.0028 0.0022 -0.0026 -0.0025 -0.0008 0.0019  
AT. 39 C X -0.0014 -0.0021 -0.0019 0.0020 0.0031 0.0022  
Y -0.0033 -0.0019 -0.0026 0.0023 -0.0031 -0.0047  
Z 0.0028 0.0022 0.0026 -0.0025 0.0008 0.0019  
AT. 40 C X 0.0014 -0.0021 -0.0019 -0.0020 -0.0031 -0.0022  
Y -0.0033 0.0019 0.0026 0.0023 -0.0031 -0.0047  
Z -0.0028 0.0022 0.0026 0.0025 -0.0008 -0.0019  
AT. 41 C X 0.0021 0.0021 -0.0019 0.0021 -0.0005 -0.0001  
Y 0.0007 -0.0007 0.0004 -0.0004 0.0038 -0.0041  
Z -0.0040 -0.0057 0.0058 -0.0059 0.0062 -0.0031  
AT. 42 C X -0.0021 0.0021 -0.0019 -0.0021 0.0005 0.0001  
Y 0.0007 0.0007 -0.0004 -0.0004 0.0038 -0.0041  
Z 0.0040 -0.0057 0.0058 0.0059 -0.0062 0.0031  
AT. 43 C X 0.0021 0.0021 0.0019 -0.0021 -0.0005 0.0001  
Y 0.0007 -0.0007 -0.0004 0.0004 0.0038 0.0041  
Z -0.0040 -0.0057 -0.0058 0.0059 0.0062 0.0031  
AT. 44 C X -0.0021 0.0021 0.0019 0.0021 0.0005 -0.0001  
Y 0.0007 0.0007 0.0004 0.0004 0.0038 0.0041  
Z 0.0040 -0.0057 -0.0058 -0.0059 -0.0062 -0.0031  
AT. 45 H X 0.0082 0.0138 -0.0137 0.0147 -0.0235 0.0164  
Y 0.0043 0.0110 -0.0100 0.0111 -0.0229 0.0183  
Z -0.0017 0.0026 -0.0015 0.0022 -0.0129 0.0133  
AT. 46 H X -0.0082 0.0138 -0.0137 -0.0147 0.0235 -0.0164  
Y 0.0043 -0.0110 0.0100 0.0111 -0.0229 0.0183  
Z 0.0017 0.0026 -0.0015 -0.0022 0.0129 -0.0133  
AT. 47 H X 0.0082 0.0138 0.0137 -0.0147 -0.0235 -0.0164  
Y 0.0043 0.0110 0.0100 -0.0111 -0.0229 -0.0183  
Z -0.0017 0.0026 0.0015 -0.0022 -0.0129 -0.0133  
AT. 48 H X -0.0082 0.0138 0.0137 0.0147 0.0235 0.0164

Y 0.0043 -0.0110 -0.0100 -0.0111 -0.0229 -0.0183  
Z 0.0017 0.0026 0.0015 0.0022 0.0129 0.0133  
AT. 49 H X -0.0095 -0.0137 0.0139 -0.0141 0.0140 -0.0085  
Y -0.0095 -0.0134 0.0132 -0.0137 0.0124 -0.0072  
Z -0.0080 -0.0135 0.0134 -0.0134 0.0205 -0.0162  
AT. 50 H X 0.0095 -0.0137 0.0139 0.0141 -0.0140 0.0085  
Y -0.0095 0.0134 -0.0132 -0.0137 0.0124 -0.0072  
Z 0.0080 -0.0135 0.0134 0.0134 -0.0205 0.0162  
AT. 51 H X -0.0095 -0.0137 -0.0139 0.0141 0.0140 0.0085  
Y -0.0095 -0.0134 -0.0132 0.0137 0.0124 0.0072  
Z -0.0080 -0.0135 -0.0134 0.0134 0.0205 0.0162  
AT. 52 H X 0.0095 -0.0137 -0.0139 -0.0141 -0.0140 -0.0085  
Y -0.0095 0.0134 0.0132 0.0137 0.0124 0.0072  
Z 0.0080 -0.0135 -0.0134 -0.0134 -0.0205 -0.0162  
AT. 53 C X -0.0011 -0.0036 0.0029 -0.0034 0.0101 -0.0093  
Y 0.0045 0.0042 -0.0047 0.0042 0.0028 -0.0046  
Z 0.0147 0.0121 -0.0129 0.0123 0.0073 -0.0126  
AT. 54 C X 0.0011 -0.0036 0.0029 0.0034 -0.0101 0.0093  
Y 0.0045 -0.0042 0.0047 0.0042 0.0028 -0.0046  
Z -0.0147 0.0121 -0.0129 -0.0123 -0.0073 0.0126  
AT. 55 C X -0.0011 -0.0036 -0.0029 0.0034 0.0101 0.0093  
Y 0.0045 0.0042 0.0047 -0.0042 0.0028 0.0046  
Z 0.0147 0.0121 0.0129 -0.0123 0.0073 0.0126  
AT. 56 C X 0.0011 -0.0036 -0.0029 -0.0034 -0.0101 -0.0093  
Y 0.0045 -0.0042 -0.0047 -0.0042 0.0028 0.0046  
Z -0.0147 0.0121 0.0129 0.0123 -0.0073 -0.0126  
AT. 57 C X 0.0009 0.0024 -0.0020 0.0024 -0.0057 0.0050  
Y -0.0020 -0.0018 0.0020 -0.0017 -0.0017 0.0024  
Z -0.0050 -0.0042 0.0044 -0.0043 -0.0017 0.0034  
AT. 58 C X -0.0009 0.0024 -0.0020 -0.0024 0.0057 -0.0050  
Y -0.0020 0.0018 -0.0020 -0.0017 -0.0017 0.0024  
Z 0.0050 -0.0042 0.0044 0.0043 0.0017 -0.0034

AT. 59 C X 0.0009 0.0024 0.0020 -0.0024 -0.0057 -0.0050  
Y -0.0020 -0.0018 -0.0020 0.0017 -0.0017 -0.0024  
Z -0.0050 -0.0042 -0.0044 0.0043 -0.0017 -0.0034

AT. 60 C X -0.0009 0.0024 0.0020 0.0024 0.0057 0.0050  
Y -0.0020 0.0018 0.0020 0.0017 -0.0017 -0.0024  
Z 0.0050 -0.0042 -0.0044 -0.0043 0.0017 0.0034

AT. 61 H X -0.0063 -0.0084 0.0082 -0.0080 0.0081 -0.0050  
Y -0.0069 -0.0087 0.0084 -0.0085 0.0071 -0.0040  
Z -0.0097 -0.0109 0.0118 -0.0104 0.0027 0.0015

AT. 62 H X 0.0063 -0.0084 0.0082 0.0080 -0.0081 0.0050  
Y -0.0069 0.0087 -0.0084 -0.0085 0.0071 -0.0040  
Z 0.0097 -0.0109 0.0118 0.0104 -0.0027 -0.0015

AT. 63 H X -0.0063 -0.0084 -0.0082 0.0080 0.0081 0.0050  
Y -0.0069 -0.0087 -0.0084 0.0085 0.0071 0.0040  
Z -0.0097 -0.0109 -0.0118 0.0104 0.0027 -0.0015

AT. 64 H X 0.0063 -0.0084 -0.0082 -0.0080 -0.0081 -0.0050  
Y -0.0069 0.0087 0.0084 0.0085 0.0071 0.0040  
Z 0.0097 -0.0109 -0.0118 -0.0104 -0.0027 0.0015

AT. 65 H X 0.0008 0.0012 -0.0011 0.0011 -0.0024 0.0020  
Y -0.0030 0.0009 0.0003 0.0007 -0.0114 0.0116  
Z 0.0002 0.0049 -0.0034 0.0047 -0.0212 0.0202

AT. 66 H X -0.0008 0.0012 -0.0011 -0.0011 0.0024 -0.0020  
Y -0.0030 -0.0009 -0.0003 0.0007 -0.0114 0.0116  
Z -0.0002 0.0049 -0.0034 -0.0047 0.0212 -0.0202

AT. 67 H X 0.0008 0.0012 0.0011 -0.0011 -0.0024 -0.0020  
Y -0.0030 0.0009 -0.0003 -0.0007 -0.0114 -0.0116  
Z 0.0002 0.0049 0.0034 -0.0047 -0.0212 -0.0202

AT. 68 H X -0.0008 0.0012 0.0011 0.0011 0.0024 0.0020  
Y -0.0030 -0.0009 0.0003 -0.0007 -0.0114 -0.0116  
Z -0.0002 0.0049 0.0034 0.0047 0.0212 0.0202

AT. 69 H X -0.0050 -0.0077 0.0069 -0.0075 0.0091 -0.0061  
Y -0.0062 -0.0043 0.0047 -0.0046 -0.0038 0.0057

Z -0.0096 -0.0082 0.0084 -0.0086 -0.0012 0.0046  
AT. 70 H X 0.0050 -0.0077 0.0069 0.0075 -0.0091 0.0061  
Y -0.0062 0.0043 -0.0047 -0.0046 -0.0038 0.0057  
Z 0.0096 -0.0082 0.0084 0.0086 0.0012 -0.0046  
AT. 71 H X -0.0050 -0.0077 -0.0069 0.0075 0.0091 0.0061  
Y -0.0062 -0.0043 -0.0047 0.0046 -0.0038 -0.0057  
Z -0.0096 -0.0082 -0.0084 0.0086 -0.0012 -0.0046  
AT. 72 H X 0.0050 -0.0077 -0.0069 -0.0075 -0.0091 -0.0061  
Y -0.0062 0.0043 0.0047 0.0046 -0.0038 -0.0057  
Z 0.0096 -0.0082 -0.0084 -0.0086 0.0012 0.0046  
AT. 73 C X 0.0108 0.0084 -0.0081 0.0083 0.0065 -0.0050  
Y -0.0049 -0.0033 0.0043 -0.0041 -0.0058 0.0095  
Z -0.0086 -0.0058 0.0052 -0.0051 -0.0095 0.0080  
AT. 74 C X -0.0108 0.0084 -0.0081 -0.0083 -0.0065 0.0050  
Y -0.0049 0.0033 -0.0043 -0.0041 -0.0058 0.0095  
Z 0.0086 -0.0058 0.0052 0.0051 0.0095 -0.0080  
AT. 75 C X 0.0108 0.0084 0.0081 -0.0083 0.0065 0.0050  
Y -0.0049 -0.0033 -0.0043 0.0041 -0.0058 -0.0095  
Z -0.0086 -0.0058 -0.0052 0.0051 -0.0095 -0.0080  
AT. 76 C X -0.0108 0.0084 0.0081 0.0083 -0.0065 -0.0050  
Y -0.0049 0.0033 0.0043 0.0041 -0.0058 -0.0095  
Z 0.0086 -0.0058 -0.0052 -0.0051 0.0095 0.0080  
AT. 77 C X -0.0044 -0.0046 0.0042 -0.0045 0.0013 -0.0019  
Y 0.0026 0.0035 -0.0041 0.0039 -0.0047 0.0022  
Z -0.0009 -0.0025 0.0024 -0.0025 0.0064 -0.0054  
AT. 78 C X 0.0044 -0.0046 0.0042 0.0045 -0.0013 0.0019  
Y 0.0026 -0.0035 0.0041 0.0039 -0.0047 0.0022  
Z 0.0009 -0.0025 0.0024 0.0025 -0.0064 0.0054  
AT. 79 C X -0.0044 -0.0046 -0.0042 0.0045 0.0013 0.0019  
Y 0.0026 0.0035 0.0041 -0.0039 -0.0047 -0.0022  
Z -0.0009 -0.0025 -0.0024 0.0025 0.0064 0.0054  
AT. 80 C X 0.0044 -0.0046 -0.0042 -0.0045 -0.0013 -0.0019

Y 0.0026 -0.0035 -0.0041 -0.0039 -0.0047 -0.0022  
Z 0.0009 -0.0025 -0.0024 -0.0025 -0.0064 -0.0054  
AT. 81 H X -0.0014 0.0006 -0.0001 0.0002 -0.0082 0.0088  
Y 0.0070 0.0108 -0.0105 0.0106 -0.0170 0.0155  
Z -0.0167 -0.0216 0.0220 -0.0218 0.0229 -0.0167  
AT. 82 H X 0.0014 0.0006 -0.0001 -0.0002 0.0082 -0.0088  
Y 0.0070 -0.0108 0.0105 0.0106 -0.0170 0.0155  
Z 0.0167 -0.0216 0.0220 0.0218 -0.0229 0.0167  
AT. 83 H X -0.0014 0.0006 0.0001 -0.0002 -0.0082 -0.0088  
Y 0.0070 0.0108 0.0105 -0.0106 -0.0170 -0.0155  
Z -0.0167 -0.0216 -0.0220 0.0218 0.0229 0.0167  
AT. 84 H X 0.0014 0.0006 0.0001 0.0002 0.0082 0.0088  
Y 0.0070 -0.0108 -0.0105 -0.0106 -0.0170 -0.0155  
Z 0.0167 -0.0216 -0.0220 -0.0218 -0.0229 -0.0167  
AT. 85 H X -0.0066 -0.0118 0.0107 -0.0110 0.0184 -0.0143  
Y -0.0169 -0.0228 0.0233 -0.0234 0.0235 -0.0172  
Z 0.0156 0.0211 -0.0218 0.0216 -0.0218 0.0141  
AT. 86 H X 0.0066 -0.0118 0.0107 0.0110 -0.0184 0.0143  
Y -0.0169 0.0228 -0.0233 -0.0234 0.0235 -0.0172  
Z -0.0156 0.0211 -0.0218 -0.0216 0.0218 -0.0141  
AT. 87 H X -0.0066 -0.0118 -0.0107 0.0110 0.0184 0.0143  
Y -0.0169 -0.0228 -0.0233 0.0234 0.0235 0.0172  
Z 0.0156 0.0211 0.0218 -0.0216 -0.0218 -0.0141  
AT. 88 H X 0.0066 -0.0118 -0.0107 -0.0110 -0.0184 -0.0143  
Y -0.0169 0.0228 0.0233 0.0234 0.0235 0.0172  
Z -0.0156 0.0211 0.0218 0.0216 0.0218 0.0141  
AT. 89 C X 0.0095 0.0105 -0.0098 0.0102 -0.0046 0.0041  
Y 0.0022 0.0014 -0.0020 0.0019 0.0038 -0.0059  
Z -0.0115 -0.0109 0.0125 -0.0119 -0.0016 0.0075  
AT. 90 C X -0.0095 0.0105 -0.0098 -0.0102 0.0046 -0.0041  
Y 0.0022 -0.0014 0.0020 0.0019 0.0038 -0.0059  
Z 0.0115 -0.0109 0.0125 0.0119 0.0016 -0.0075

AT. 91 C X 0.0095 0.0105 0.0098 -0.0102 -0.0046 -0.0041  
Y 0.0022 0.0014 0.0020 -0.0019 0.0038 0.0059  
Z -0.0115 -0.0109 -0.0125 0.0119 -0.0016 -0.0075

AT. 92 C X -0.0095 0.0105 0.0098 0.0102 0.0046 0.0041  
Y 0.0022 -0.0014 -0.0020 -0.0019 0.0038 0.0059  
Z 0.0115 -0.0109 -0.0125 -0.0119 0.0016 0.0075

AT. 93 C X -0.0060 -0.0065 0.0062 -0.0064 0.0027 -0.0018  
Y 0.0002 0.0003 -0.0000 0.0000 -0.0009 0.0018  
Z 0.0045 0.0044 -0.0048 0.0048 0.0004 -0.0021

AT. 94 C X 0.0060 -0.0065 0.0062 0.0064 -0.0027 0.0018  
Y 0.0002 -0.0003 0.0000 0.0000 -0.0009 0.0018  
Z -0.0045 0.0044 -0.0048 -0.0048 -0.0004 0.0021

AT. 95 C X -0.0060 -0.0065 -0.0062 0.0064 0.0027 0.0018  
Y 0.0002 0.0003 0.0000 -0.0000 -0.0009 -0.0018  
Z 0.0045 0.0044 0.0048 -0.0048 0.0004 0.0021

AT. 96 C X 0.0060 -0.0065 -0.0062 -0.0064 -0.0027 -0.0018  
Y 0.0002 -0.0003 -0.0000 -0.0000 -0.0009 -0.0018  
Z -0.0045 0.0044 0.0048 0.0048 -0.0004 -0.0021

AT. 97 H X 0.0089 0.0089 -0.0091 0.0089 -0.0018 -0.0010  
Y -0.0197 -0.0204 0.0205 -0.0206 0.0047 0.0004  
Z 0.0169 0.0167 -0.0177 0.0172 -0.0036 -0.0032

AT. 98 H X -0.0089 0.0089 -0.0091 -0.0089 0.0018 0.0010  
Y -0.0197 0.0204 -0.0205 -0.0206 0.0047 0.0004  
Z -0.0169 0.0167 -0.0177 -0.0172 0.0036 0.0032

AT. 99 H X 0.0089 0.0089 0.0091 -0.0089 -0.0018 0.0010  
Y -0.0197 -0.0204 -0.0205 0.0206 0.0047 -0.0004  
Z 0.0169 0.0167 0.0177 -0.0172 -0.0036 0.0032

AT. 100 H X -0.0089 0.0089 0.0091 0.0089 0.0018 -0.0010  
Y -0.0197 0.0204 0.0205 0.0206 0.0047 -0.0004  
Z -0.0169 0.0167 0.0177 0.0172 0.0036 -0.0032

AT. 101 H X 0.0034 0.0035 -0.0032 0.0035 -0.0008 0.0005  
Y 0.0116 0.0128 -0.0117 0.0123 -0.0062 0.0058

Z -0.0117 -0.0137 0.0126 -0.0129 0.0093 -0.0099  
AT.102 H X -0.0034 0.0035 -0.0032 -0.0035 0.0008 -0.0005  
Y 0.0116 -0.0128 0.0117 0.0123 -0.0062 0.0058  
Z 0.0117 -0.0137 0.0126 0.0129 -0.0093 0.0099  
AT.103 H X 0.0034 0.0035 0.0032 -0.0035 -0.0008 -0.0005  
Y 0.0116 0.0128 0.0117 -0.0123 -0.0062 -0.0058  
Z -0.0117 -0.0137 -0.0126 0.0129 0.0093 0.0099  
AT.104 H X -0.0034 0.0035 0.0032 0.0035 0.0008 0.0005  
Y 0.0116 -0.0128 -0.0117 -0.0123 -0.0062 -0.0058  
Z 0.0117 -0.0137 -0.0126 -0.0129 -0.0093 -0.0099  
AT.105 H X 0.0153 0.0162 -0.0155 0.0160 -0.0041 0.0025  
Y -0.0099 -0.0091 0.0099 -0.0093 -0.0011 0.0041  
Z 0.0050 0.0040 -0.0051 0.0044 0.0030 -0.0055  
AT.106 H X -0.0153 0.0162 -0.0155 -0.0160 0.0041 -0.0025  
Y -0.0099 0.0091 -0.0099 -0.0093 -0.0011 0.0041  
Z -0.0050 0.0040 -0.0051 -0.0044 -0.0030 0.0055  
AT.107 H X 0.0153 0.0162 0.0155 -0.0160 -0.0041 -0.0025  
Y -0.0099 -0.0091 -0.0099 0.0093 -0.0011 -0.0041  
Z 0.0050 0.0040 0.0051 -0.0044 0.0030 0.0055  
AT.108 H X -0.0153 0.0162 0.0155 0.0160 0.0041 0.0025  
Y -0.0099 0.0091 0.0099 0.0093 -0.0011 -0.0041  
Z -0.0050 0.0040 0.0051 0.0044 -0.0030 -0.0055  
AT.109 C X 0.0012 0.0024 -0.0020 0.0023 -0.0049 0.0042  
Y 0.0067 0.0058 -0.0059 0.0057 0.0023 -0.0039  
Z 0.0028 0.0032 -0.0030 0.0030 -0.0018 0.0016  
AT.110 C X -0.0012 0.0024 -0.0020 -0.0023 0.0049 -0.0042  
Y 0.0067 -0.0058 0.0059 0.0057 0.0023 -0.0039  
Z -0.0028 0.0032 -0.0030 -0.0030 0.0018 -0.0016  
AT.111 C X 0.0012 0.0024 0.0020 -0.0023 -0.0049 -0.0042  
Y 0.0067 0.0058 0.0059 -0.0057 0.0023 0.0039  
Z 0.0028 0.0032 0.0030 -0.0030 -0.0018 -0.0016  
AT.112 C X -0.0012 0.0024 0.0020 0.0023 0.0049 0.0042

Y 0.0067 -0.0058 -0.0059 -0.0057 0.0023 0.0039  
Z -0.0028 0.0032 0.0030 0.0030 0.0018 0.0016  
AT. 113 H X 0.0007 -0.0000 -0.0005 -0.0001 0.0037 -0.0049  
Y 0.0117 0.0148 -0.0130 0.0143 -0.0156 0.0135  
Z 0.0216 0.0253 -0.0235 0.0237 -0.0164 0.0103  
AT. 114 H X -0.0007 -0.0000 -0.0005 0.0001 -0.0037 0.0049  
Y 0.0117 -0.0148 0.0130 0.0143 -0.0156 0.0135  
Z -0.0216 0.0253 -0.0235 -0.0237 0.0164 -0.0103  
AT. 115 H X 0.0007 -0.0000 0.0005 0.0001 0.0037 0.0049  
Y 0.0117 0.0148 0.0130 -0.0143 -0.0156 -0.0135  
Z 0.0216 0.0253 0.0235 -0.0237 -0.0164 -0.0103  
AT. 116 H X -0.0007 -0.0000 0.0005 -0.0001 -0.0037 -0.0049  
Y 0.0117 -0.0148 -0.0130 -0.0143 -0.0156 -0.0135  
Z -0.0216 0.0253 0.0235 0.0237 0.0164 0.0103  
AT. 117 H X 0.0042 0.0065 -0.0055 0.0056 -0.0061 0.0060  
Y -0.0269 -0.0290 0.0271 -0.0281 0.0118 -0.0063  
Z -0.0275 -0.0282 0.0268 -0.0274 0.0066 -0.0006  
AT. 118 H X -0.0042 0.0065 -0.0055 -0.0056 0.0061 -0.0060  
Y -0.0269 0.0290 -0.0271 -0.0281 0.0118 -0.0063  
Z 0.0275 -0.0282 0.0268 0.0274 -0.0066 0.0006  
AT. 119 H X 0.0042 0.0065 0.0055 -0.0056 -0.0061 -0.0060  
Y -0.0269 -0.0290 -0.0271 0.0281 0.0118 0.0063  
Z -0.0275 -0.0282 -0.0268 0.0274 0.0066 0.0006  
AT. 120 H X -0.0042 0.0065 0.0055 0.0056 0.0061 0.0060  
Y -0.0269 0.0290 0.0271 0.0281 0.0118 0.0063  
Z 0.0275 -0.0282 -0.0268 -0.0274 -0.0066 -0.0006  
AT. 121 C X -0.0029 -0.0032 0.0031 -0.0033 0.0016 -0.0012  
Y 0.0002 -0.0004 -0.0001 -0.0001 0.0012 -0.0017  
Z 0.0102 0.0101 -0.0102 0.0100 -0.0005 -0.0019  
AT. 122 C X 0.0029 -0.0032 0.0031 0.0033 -0.0016 0.0012  
Y 0.0002 0.0004 0.0001 -0.0001 0.0012 -0.0017  
Z -0.0102 0.0101 -0.0102 -0.0100 0.0005 0.0019



AT. 123 C X -0.0029 -0.0032 -0.0031 0.0033 0.0016 0.0012  
Y 0.0002 -0.0004 0.0001 0.0001 0.0012 0.0017  
Z 0.0102 0.0101 0.0102 -0.0100 -0.0005 0.0019

AT. 124 C X 0.0029 -0.0032 -0.0031 -0.0033 -0.0016 -0.0012  
Y 0.0002 0.0004 -0.0001 0.0001 0.0012 0.0017  
Z -0.0102 0.0101 0.0102 0.0100 0.0005 -0.0019

AT. 125 H X -0.0202 -0.0203 0.0201 -0.0198 0.0033 0.0010  
Y 0.0243 0.0263 -0.0245 0.0251 -0.0080 0.0042  
Z -0.0022 -0.0041 0.0025 -0.0033 0.0056 -0.0066

AT. 126 H X 0.0202 -0.0203 0.0201 0.0198 -0.0033 -0.0010  
Y 0.0243 -0.0263 0.0245 0.0251 -0.0080 0.0042  
Z 0.0022 -0.0041 0.0025 0.0033 -0.0056 0.0066

AT. 127 H X -0.0202 -0.0203 -0.0201 0.0198 0.0033 -0.0010  
Y 0.0243 0.0263 0.0245 -0.0251 -0.0080 -0.0042  
Z -0.0022 -0.0041 -0.0025 0.0033 0.0056 0.0066

AT. 128 H X 0.0202 -0.0203 -0.0201 -0.0198 -0.0033 0.0010  
Y 0.0243 -0.0263 -0.0245 -0.0251 -0.0080 -0.0042  
Z 0.0022 -0.0041 -0.0025 -0.0033 -0.0056 -0.0066

AT. 129 H X 0.0148 0.0148 -0.0147 0.0149 -0.0018 -0.0025  
Y -0.0239 -0.0244 0.0241 -0.0244 0.0041 0.0026  
Z 0.0193 0.0209 -0.0197 0.0204 -0.0074 0.0039

AT. 130 H X -0.0148 0.0148 -0.0147 -0.0149 0.0018 0.0025  
Y -0.0239 0.0244 -0.0241 -0.0244 0.0041 0.0026  
Z -0.0193 0.0209 -0.0197 -0.0204 0.0074 -0.0039

AT. 131 H X 0.0148 0.0148 0.0147 -0.0149 -0.0018 0.0025  
Y -0.0239 -0.0244 -0.0241 0.0244 0.0041 -0.0026  
Z 0.0193 0.0209 0.0197 -0.0204 -0.0074 -0.0039

AT. 132 H X -0.0148 0.0148 0.0147 0.0149 0.0018 -0.0025  
Y -0.0239 0.0244 0.0241 0.0244 0.0041 -0.0026  
Z -0.0193 0.0209 0.0197 0.0204 0.0074 0.0039

AT. 133 C X 0.0004 0.0012 -0.0011 0.0012 -0.0017 0.0016  
Y -0.0029 -0.0024 0.0029 -0.0025 -0.0010 0.0027

Z -0.0021 -0.0016 0.0018 -0.0018 -0.0007 0.0018  
AT. 134 C X -0.0004 0.0012 -0.0011 -0.0012 0.0017 -0.0016  
Y -0.0029 0.0024 -0.0029 -0.0025 -0.0010 0.0027  
Z 0.0021 -0.0016 0.0018 0.0018 0.0007 -0.0018  
AT. 135 C X 0.0004 0.0012 0.0011 -0.0012 -0.0017 -0.0016  
Y -0.0029 -0.0024 -0.0029 0.0025 -0.0010 -0.0027  
Z -0.0021 -0.0016 -0.0018 0.0018 -0.0007 -0.0018  
AT. 136 C X -0.0004 0.0012 0.0011 0.0012 0.0017 0.0016  
Y -0.0029 0.0024 0.0029 0.0025 -0.0010 -0.0027  
Z 0.0021 -0.0016 -0.0018 -0.0018 0.0007 0.0018  
AT. 137 C X 0.0002 -0.0010 0.0010 -0.0010 0.0024 -0.0023  
Y 0.0031 0.0032 -0.0034 0.0032 -0.0003 -0.0011  
Z -0.0005 0.0009 -0.0013 0.0012 -0.0030 0.0026  
AT. 138 C X -0.0002 -0.0010 0.0010 0.0010 -0.0024 0.0023  
Y 0.0031 -0.0032 0.0034 0.0032 -0.0003 -0.0011  
Z 0.0005 0.0009 -0.0013 -0.0012 0.0030 -0.0026  
AT. 139 C X 0.0002 -0.0010 -0.0010 0.0010 0.0024 0.0023  
Y 0.0031 0.0032 0.0034 -0.0032 -0.0003 0.0011  
Z -0.0005 0.0009 0.0013 -0.0012 -0.0030 -0.0026  
AT. 140 C X -0.0002 -0.0010 -0.0010 -0.0010 -0.0024 -0.0023  
Y 0.0031 -0.0032 -0.0034 -0.0032 -0.0003 0.0011  
Z 0.0005 0.0009 0.0013 0.0012 0.0030 0.0026  
AT. 141 H X 0.0016 0.0066 -0.0074 0.0072 -0.0108 0.0085  
Y -0.0122 -0.0116 0.0114 -0.0111 -0.0014 0.0054  
Z -0.0126 -0.0176 0.0181 -0.0178 0.0108 -0.0048  
AT. 142 H X -0.0016 0.0066 -0.0074 -0.0072 0.0108 -0.0085  
Y -0.0122 0.0116 -0.0114 -0.0111 -0.0014 0.0054  
Z 0.0126 -0.0176 0.0181 0.0178 -0.0108 0.0048  
AT. 143 H X 0.0016 0.0066 0.0074 -0.0072 -0.0108 -0.0085  
Y -0.0122 -0.0116 -0.0114 0.0111 -0.0014 -0.0054  
Z -0.0126 -0.0176 -0.0181 0.0178 0.0108 0.0048  
AT. 144 H X -0.0016 0.0066 0.0074 0.0072 0.0108 0.0085

Y -0.0122 0.0116 0.0114 0.0111 -0.0014 -0.0054  
Z 0.0126 -0.0176 -0.0181 -0.0178 -0.0108 -0.0048  
AT. 145 H X -0.0033 0.0045 -0.0054 0.0052 -0.0174 0.0173  
Y 0.0107 0.0051 -0.0049 0.0045 0.0117 -0.0154  
Z 0.0251 0.0142 -0.0139 0.0129 0.0215 -0.0311  
AT. 146 H X 0.0033 0.0045 -0.0054 -0.0052 0.0174 -0.0173  
Y 0.0107 -0.0051 0.0049 0.0045 0.0117 -0.0154  
Z -0.0251 0.0142 -0.0139 -0.0129 -0.0215 0.0311  
AT. 147 H X -0.0033 0.0045 0.0054 -0.0052 -0.0174 -0.0173  
Y 0.0107 0.0051 0.0049 -0.0045 0.0117 0.0154  
Z 0.0251 0.0142 0.0139 -0.0129 0.0215 0.0311  
AT. 148 H X 0.0033 0.0045 0.0054 0.0052 0.0174 0.0173  
Y 0.0107 -0.0051 -0.0049 -0.0045 0.0117 0.0154  
Z -0.0251 0.0142 0.0139 0.0129 -0.0215 -0.0311  
AT. 149 O X -0.0031 -0.0022 0.0024 -0.0025 -0.0023 0.0030  
Y 0.0031 0.0023 -0.0025 0.0025 0.0024 -0.0033  
Z 0.0011 0.0009 -0.0010 0.0010 0.0007 -0.0012  
AT. 150 O X 0.0031 -0.0022 0.0024 0.0025 0.0023 -0.0030  
Y 0.0031 -0.0023 0.0025 0.0025 0.0024 -0.0033  
Z -0.0011 0.0009 -0.0010 -0.0010 -0.0007 0.0012  
AT. 151 O X -0.0031 -0.0022 -0.0024 0.0025 -0.0023 -0.0030  
Y 0.0031 0.0023 0.0025 -0.0025 0.0024 0.0033  
Z 0.0011 0.0009 0.0010 -0.0010 0.0007 0.0012  
AT. 152 O X 0.0031 -0.0022 -0.0024 -0.0025 0.0023 0.0030  
Y 0.0031 -0.0023 -0.0025 -0.0025 0.0024 0.0033  
Z -0.0011 0.0009 0.0010 0.0010 -0.0007 -0.0012  
AT. 153 H X -0.0049 -0.0040 0.0033 -0.0029 -0.0029 0.0006  
Y 0.0084 0.0051 -0.0041 0.0039 0.0083 -0.0064  
Z 0.0047 0.0035 -0.0026 0.0022 0.0035 -0.0009  
AT. 154 H X 0.0049 -0.0040 0.0033 0.0029 0.0029 -0.0006  
Y 0.0084 -0.0051 0.0041 0.0039 0.0083 -0.0064  
Z -0.0047 0.0035 -0.0026 -0.0022 -0.0035 0.0009

AT.155 H X -0.0049 -0.0040 -0.0033 0.0029 -0.0029 -0.0006  
Y 0.0084 0.0051 0.0041 -0.0039 0.0083 0.0064  
Z 0.0047 0.0035 0.0026 -0.0022 0.0035 0.0009

AT.156 H X 0.0049 -0.0040 -0.0033 -0.0029 0.0029 0.0006  
Y 0.0084 -0.0051 -0.0041 -0.0039 0.0083 0.0064  
Z -0.0047 0.0035 0.0026 0.0022 -0.0035 -0.0009

AT.157 O X -0.0062 -0.0048 0.0043 -0.0044 -0.0039 0.0015  
Y -0.0025 -0.0020 0.0018 -0.0018 -0.0011 -0.0001  
Z 0.0014 0.0007 -0.0006 0.0005 0.0026 -0.0020

AT.158 O X 0.0062 -0.0048 0.0043 0.0044 0.0039 -0.0015  
Y -0.0025 0.0020 -0.0018 -0.0018 -0.0011 -0.0001  
Z -0.0014 0.0007 -0.0006 -0.0005 -0.0026 0.0020

AT.159 O X -0.0062 -0.0048 -0.0043 0.0044 -0.0039 -0.0015  
Y -0.0025 -0.0020 -0.0018 0.0018 -0.0011 0.0001  
Z 0.0014 0.0007 0.0006 -0.0005 0.0026 0.0020

AT.160 O X 0.0062 -0.0048 -0.0043 -0.0044 0.0039 0.0015  
Y -0.0025 0.0020 0.0018 0.0018 -0.0011 0.0001  
Z -0.0014 0.0007 0.0006 0.0005 -0.0026 -0.0020

AT.161 O X 0.0009 0.0007 -0.0006 0.0006 0.0008 -0.0003  
Y 0.0009 0.0007 -0.0007 0.0007 0.0005 -0.0003  
Z 0.0010 0.0008 -0.0007 0.0008 0.0001 0.0003

AT.162 O X -0.0009 0.0007 -0.0006 -0.0006 -0.0008 0.0003  
Y 0.0009 -0.0007 0.0007 0.0007 0.0005 -0.0003  
Z -0.0010 0.0008 -0.0007 -0.0008 -0.0001 -0.0003

AT.163 O X 0.0009 0.0007 0.0006 -0.0006 0.0008 0.0003  
Y 0.0009 0.0007 0.0007 -0.0007 0.0005 0.0003  
Z 0.0010 0.0008 0.0007 -0.0008 0.0001 -0.0003

AT.164 O X -0.0009 0.0007 0.0006 0.0006 -0.0008 -0.0003  
Y 0.0009 -0.0007 -0.0007 -0.0007 0.0005 0.0003  
Z -0.0010 0.0008 0.0007 0.0008 -0.0001 0.0003

AT.165 H X 0.0010 0.0017 -0.0018 0.0011 0.0005 -0.0014  
Y 0.0015 0.0016 -0.0016 0.0012 0.0008 -0.0010

Z -0.0020 -0.0016 0.0014 -0.0019 -0.0012 0.0006  
AT.166 H X -0.0010 0.0017 -0.0018 -0.0011 -0.0005 0.0014  
Y 0.0015 -0.0016 0.0016 0.0012 0.0008 -0.0010  
Z 0.0020 -0.0016 0.0014 0.0019 0.0012 -0.0006  
AT.167 H X 0.0010 0.0017 0.0018 -0.0011 0.0005 0.0014  
Y 0.0015 0.0016 0.0016 -0.0012 0.0008 0.0010  
Z -0.0020 -0.0016 -0.0014 0.0019 -0.0012 -0.0006  
AT.168 H X -0.0010 0.0017 0.0018 0.0011 -0.0005 -0.0014  
Y 0.0015 -0.0016 -0.0016 -0.0012 0.0008 0.0010  
Z 0.0020 -0.0016 -0.0014 -0.0019 0.0012 0.0006  
AT.169 O X 0.0001 0.0002 -0.0002 0.0002 0.0001 0.0000  
Y -0.0001 -0.0000 0.0001 -0.0000 -0.0003 0.0005  
Z 0.0002 0.0001 -0.0002 0.0002 0.0001 -0.0001  
AT.170 O X -0.0001 0.0002 -0.0002 -0.0002 -0.0001 -0.0000  
Y -0.0001 0.0000 -0.0001 -0.0000 -0.0003 0.0005  
Z -0.0002 0.0001 -0.0002 -0.0002 -0.0001 0.0001  
AT.171 O X 0.0001 0.0002 0.0002 -0.0002 0.0001 -0.0000  
Y -0.0001 -0.0000 -0.0001 0.0000 -0.0003 -0.0005  
Z 0.0002 0.0001 0.0002 -0.0002 0.0001 0.0001  
AT.172 O X -0.0001 0.0002 0.0002 0.0002 -0.0001 0.0000  
Y -0.0001 0.0000 0.0001 0.0000 -0.0003 -0.0005  
Z -0.0002 0.0001 0.0002 0.0002 -0.0001 -0.0001  
AT.173 H X 0.0011 -0.0003 0.0015 -0.0012 0.0012 -0.0035  
Y 0.0003 0.0003 -0.0005 0.0004 0.0003 0.0004  
Z -0.0022 -0.0011 0.0000 -0.0001 -0.0023 0.0030  
AT.174 H X -0.0011 -0.0003 0.0015 0.0012 -0.0012 0.0035  
Y 0.0003 -0.0003 0.0005 0.0004 0.0003 0.0004  
Z 0.0022 -0.0011 0.0000 0.0001 0.0023 -0.0030  
AT.175 H X 0.0011 -0.0003 -0.0015 0.0012 0.0012 0.0035  
Y 0.0003 0.0003 0.0005 -0.0004 0.0003 -0.0004  
Z -0.0022 -0.0011 -0.0000 0.0001 -0.0023 -0.0030  
AT.176 H X -0.0011 -0.0003 -0.0015 -0.0012 -0.0012 -0.0035

Y 0.0003 -0.0003 -0.0005 -0.0004 0.0003 -0.0004  
Z 0.0022 -0.0011 -0.0000 -0.0001 0.0023 0.0030

FREQ(CM\*\*-1) 1218.00 1219.95 1222.63 1222.93 1227.30 1227.57

AT. 1 I X -0.0000 0.0000 0.0001 0.0000 -0.0001 -0.0000

Y 0.0001 -0.0001 -0.0000 -0.0001 0.0001 -0.0000

Z -0.0000 -0.0000 -0.0000 -0.0000 -0.0000 -0.0000

AT. 2 I X -0.0000 0.0000 0.0001 -0.0000 0.0001 -0.0000

Y -0.0001 0.0001 0.0000 -0.0001 0.0001 0.0000

Z -0.0000 -0.0000 -0.0000 0.0000 0.0000 -0.0000

AT. 3 I X -0.0000 -0.0000 0.0001 0.0000 0.0001 0.0000

Y 0.0001 0.0001 -0.0000 -0.0001 -0.0001 0.0000

Z -0.0000 0.0000 -0.0000 -0.0000 0.0000 0.0000

AT. 4 I X -0.0000 -0.0000 0.0001 -0.0000 -0.0001 0.0000

Y -0.0001 -0.0001 0.0000 -0.0001 -0.0001 -0.0000

Z -0.0000 0.0000 -0.0000 0.0000 -0.0000 0.0000

AT. 5 I X 0.0001 -0.0001 0.0001 0.0001 -0.0000 0.0001

Y 0.0001 -0.0001 0.0000 0.0000 -0.0000 0.0000

Z -0.0000 0.0000 0.0000 0.0000 0.0000 0.0000

AT. 6 I X 0.0001 -0.0001 0.0001 -0.0001 0.0000 0.0001

Y -0.0001 0.0001 -0.0000 0.0000 -0.0000 -0.0000

Z -0.0000 0.0000 0.0000 -0.0000 -0.0000 0.0000

AT. 7 I X 0.0001 0.0001 0.0001 0.0001 0.0000 -0.0001

Y 0.0001 0.0001 0.0000 0.0000 0.0000 -0.0000

Z -0.0000 -0.0000 0.0000 0.0000 -0.0000 -0.0000

AT. 8 I X 0.0001 0.0001 0.0001 -0.0001 -0.0000 -0.0001

Y -0.0001 -0.0001 -0.0000 0.0000 0.0000 0.0000

Z -0.0000 -0.0000 0.0000 -0.0000 0.0000 -0.0000

AT. 9 N X -0.0034 0.0039 0.0019 0.0016 0.0015 0.0004

Y -0.0015 0.0023 0.0022 0.0019 0.0016 0.0009

Z -0.0087 0.0060 -0.0053 -0.0055 -0.0048 -0.0085

AT. 10 N X -0.0034 0.0039 0.0019 -0.0016 -0.0015 0.0004  
Y 0.0015 -0.0023 -0.0022 0.0019 0.0016 -0.0009  
Z -0.0087 0.0060 -0.0053 0.0055 0.0048 -0.0085

AT. 11 N X -0.0034 -0.0039 0.0019 0.0016 -0.0015 -0.0004  
Y -0.0015 -0.0023 0.0022 0.0019 -0.0016 -0.0009  
Z -0.0087 -0.0060 -0.0053 -0.0055 0.0048 0.0085

AT. 12 N X -0.0034 -0.0039 0.0019 -0.0016 0.0015 -0.0004  
Y 0.0015 0.0023 -0.0022 0.0019 -0.0016 0.0009  
Z -0.0087 -0.0060 -0.0053 0.0055 -0.0048 0.0085

AT. 13 N X 0.0020 -0.0025 -0.0014 -0.0011 -0.0011 -0.0000  
Y -0.0020 0.0032 0.0036 0.0029 0.0031 0.0025  
Z -0.0014 -0.0004 -0.0021 -0.0011 -0.0022 -0.0027

AT. 14 N X 0.0020 -0.0025 -0.0014 0.0011 0.0011 -0.0000  
Y 0.0020 -0.0032 -0.0036 0.0029 0.0031 -0.0025  
Z -0.0014 -0.0004 -0.0021 0.0011 0.0022 -0.0027

AT. 15 N X 0.0020 0.0025 -0.0014 -0.0011 0.0011 0.0000  
Y -0.0020 -0.0032 0.0036 0.0029 -0.0031 -0.0025  
Z -0.0014 0.0004 -0.0021 -0.0011 0.0022 0.0027

AT. 16 N X 0.0020 0.0025 -0.0014 0.0011 -0.0011 0.0000  
Y 0.0020 0.0032 -0.0036 0.0029 -0.0031 0.0025  
Z -0.0014 0.0004 -0.0021 0.0011 -0.0022 0.0027

AT. 17 O X 0.0001 -0.0001 0.0006 0.0006 -0.0006 0.0005  
Y 0.0016 -0.0015 0.0005 0.0006 0.0000 0.0013  
Z 0.0005 -0.0002 0.0019 0.0021 -0.0001 0.0020

AT. 18 O X 0.0001 -0.0001 0.0006 -0.0006 0.0006 0.0005  
Y -0.0016 0.0015 -0.0005 0.0006 0.0000 -0.0013  
Z 0.0005 -0.0002 0.0019 -0.0021 0.0001 0.0020

AT. 19 O X 0.0001 0.0001 0.0006 0.0006 0.0006 -0.0005  
Y 0.0016 0.0015 0.0005 0.0006 -0.0000 -0.0013  
Z 0.0005 0.0002 0.0019 0.0021 0.0001 -0.0020

AT. 20 O X 0.0001 0.0001 0.0006 -0.0006 -0.0006 -0.0005  
Y -0.0016 -0.0015 -0.0005 0.0006 -0.0000 0.0013

Z 0.0005 0.0002 0.0019 -0.0021 -0.0001 -0.0020  
AT. 21 O X 0.0006 -0.0005 0.0002 0.0003 -0.0002 0.0002  
Y -0.0005 -0.0003 -0.0015 -0.0014 -0.0009 -0.0013  
Z 0.0018 -0.0012 0.0006 0.0008 -0.0002 0.0008  
AT. 22 O X 0.0006 -0.0005 0.0002 -0.0003 0.0002 0.0002  
Y 0.0005 0.0003 0.0015 -0.0014 -0.0009 0.0013  
Z 0.0018 -0.0012 0.0006 -0.0008 0.0002 0.0008  
AT. 23 O X 0.0006 0.0005 0.0002 0.0003 0.0002 -0.0002  
Y -0.0005 0.0003 -0.0015 -0.0014 0.0009 0.0013  
Z 0.0018 0.0012 0.0006 0.0008 0.0002 -0.0008  
AT. 24 O X 0.0006 0.0005 0.0002 -0.0003 -0.0002 -0.0002  
Y 0.0005 -0.0003 0.0015 -0.0014 0.0009 -0.0013  
Z 0.0018 0.0012 0.0006 -0.0008 -0.0002 -0.0008  
AT. 25 C X -0.0032 0.0019 -0.0008 0.0000 -0.0061 -0.0017  
Y 0.0013 -0.0021 -0.0028 -0.0028 -0.0013 -0.0016  
Z 0.0037 -0.0025 -0.0003 -0.0015 0.0081 0.0008  
AT. 26 C X -0.0032 0.0019 -0.0008 -0.0000 0.0061 -0.0017  
Y -0.0013 0.0021 0.0028 -0.0028 -0.0013 0.0016  
Z 0.0037 -0.0025 -0.0003 0.0015 -0.0081 0.0008  
AT. 27 C X -0.0032 -0.0019 -0.0008 0.0000 0.0061 0.0017  
Y 0.0013 0.0021 -0.0028 -0.0028 0.0013 0.0016  
Z 0.0037 0.0025 -0.0003 -0.0015 -0.0081 -0.0008  
AT. 28 C X -0.0032 -0.0019 -0.0008 -0.0000 -0.0061 0.0017  
Y -0.0013 -0.0021 0.0028 -0.0028 0.0013 -0.0016  
Z 0.0037 0.0025 -0.0003 0.0015 0.0081 -0.0008  
AT. 29 H X 0.0151 -0.0087 0.0047 0.0001 0.0284 0.0082  
Y -0.0077 0.0078 0.0072 0.0086 -0.0083 0.0029  
Z -0.0222 0.0118 -0.0104 -0.0035 -0.0421 -0.0147  
AT. 30 H X 0.0151 -0.0087 0.0047 -0.0001 -0.0284 0.0082  
Y 0.0077 -0.0078 -0.0072 0.0086 -0.0083 -0.0029  
Z -0.0222 0.0118 -0.0104 0.0035 0.0421 -0.0147  
AT. 31 H X 0.0151 0.0087 0.0047 0.0001 -0.0284 -0.0082



Y -0.0077 -0.0078 0.0072 0.0086 0.0083 -0.0029  
Z -0.0222 -0.0118 -0.0104 -0.0035 0.0421 0.0147  
AT. 32 H X 0.0151 0.0087 0.0047 -0.0001 0.0284 -0.0082  
Y 0.0077 0.0078 -0.0072 0.0086 0.0083 0.0029  
Z -0.0222 -0.0118 -0.0104 0.0035 -0.0421 0.0147  
AT. 33 H X 0.0252 -0.0209 -0.0078 -0.0134 0.0343 0.0022  
Y 0.0028 -0.0051 -0.0077 -0.0078 -0.0013 -0.0049  
Z -0.0271 0.0295 0.0267 0.0319 -0.0262 0.0118  
AT. 34 H X 0.0252 -0.0209 -0.0078 0.0134 -0.0343 0.0022  
Y -0.0028 0.0051 0.0077 -0.0078 -0.0013 0.0049  
Z -0.0271 0.0295 0.0267 -0.0319 0.0262 0.0118  
AT. 35 H X 0.0252 0.0209 -0.0078 -0.0134 -0.0343 -0.0022  
Y 0.0028 0.0051 -0.0077 -0.0078 0.0013 0.0049  
Z -0.0271 -0.0295 0.0267 0.0319 0.0262 -0.0118  
AT. 36 H X 0.0252 0.0209 -0.0078 0.0134 0.0343 -0.0022  
Y -0.0028 -0.0051 0.0077 -0.0078 0.0013 -0.0049  
Z -0.0271 -0.0295 0.0267 -0.0319 -0.0262 -0.0118  
AT. 37 C X 0.0014 -0.0003 0.0016 0.0010 0.0037 0.0015  
Y -0.0032 0.0047 0.0043 0.0043 0.0017 0.0019  
Z 0.0015 -0.0022 -0.0026 -0.0025 -0.0019 -0.0015  
AT. 38 C X 0.0014 -0.0003 0.0016 -0.0010 -0.0037 0.0015  
Y 0.0032 -0.0047 -0.0043 0.0043 0.0017 -0.0019  
Z 0.0015 -0.0022 -0.0026 0.0025 0.0019 -0.0015  
AT. 39 C X 0.0014 0.0003 0.0016 0.0010 -0.0037 -0.0015  
Y -0.0032 -0.0047 0.0043 0.0043 -0.0017 -0.0019  
Z 0.0015 0.0022 -0.0026 -0.0025 0.0019 0.0015  
AT. 40 C X 0.0014 0.0003 0.0016 -0.0010 0.0037 -0.0015  
Y 0.0032 0.0047 -0.0043 0.0043 -0.0017 0.0019  
Z 0.0015 0.0022 -0.0026 0.0025 -0.0019 0.0015  
AT. 41 C X -0.0003 0.0008 0.0001 -0.0002 0.0004 -0.0011  
Y 0.0040 -0.0047 -0.0021 -0.0019 -0.0016 -0.0005  
Z 0.0048 -0.0021 0.0059 0.0060 0.0055 0.0076

AT. 42 C X -0.0003 0.0008 0.0001 0.0002 -0.0004 -0.0011  
Y -0.0040 0.0047 0.0021 -0.0019 -0.0016 0.0005  
Z 0.0048 -0.0021 0.0059 -0.0060 -0.0055 0.0076

AT. 43 C X -0.0003 -0.0008 0.0001 -0.0002 -0.0004 0.0011  
Y 0.0040 0.0047 -0.0021 -0.0019 0.0016 0.0005  
Z 0.0048 0.0021 0.0059 0.0060 -0.0055 -0.0076

AT. 44 C X -0.0003 -0.0008 0.0001 0.0002 0.0004 0.0011  
Y -0.0040 -0.0047 0.0021 -0.0019 0.0016 -0.0005  
Z 0.0048 0.0021 0.0059 -0.0060 0.0055 -0.0076

AT. 45 H X -0.0207 0.0150 -0.0097 -0.0104 -0.0080 -0.0176  
Y -0.0223 0.0197 -0.0035 -0.0047 -0.0022 -0.0136  
Z -0.0144 0.0164 0.0064 0.0053 0.0065 -0.0009

AT. 46 H X -0.0207 0.0150 -0.0097 0.0104 0.0080 -0.0176  
Y 0.0223 -0.0197 0.0035 -0.0047 -0.0022 0.0136  
Z -0.0144 0.0164 0.0064 -0.0053 -0.0065 -0.0009

AT. 47 H X -0.0207 -0.0150 -0.0097 -0.0104 0.0080 0.0176  
Y -0.0223 -0.0197 -0.0035 -0.0047 0.0022 0.0136  
Z -0.0144 -0.0164 0.0064 0.0053 -0.0065 0.0009

AT. 48 H X -0.0207 -0.0150 -0.0097 0.0104 -0.0080 0.0176  
Y 0.0223 0.0197 0.0035 -0.0047 0.0022 -0.0136  
Z -0.0144 -0.0164 0.0064 -0.0053 0.0065 0.0009

AT. 49 H X 0.0108 -0.0084 0.0083 0.0083 0.0067 0.0127  
Y 0.0094 -0.0073 0.0075 0.0076 0.0063 0.0118  
Z 0.0188 -0.0185 0.0017 0.0025 0.0004 0.0105

AT. 50 H X 0.0108 -0.0084 0.0083 -0.0083 -0.0067 0.0127  
Y -0.0094 0.0073 -0.0075 0.0076 0.0063 -0.0118  
Z 0.0188 -0.0185 0.0017 -0.0025 -0.0004 0.0105

AT. 51 H X 0.0108 0.0084 0.0083 0.0083 -0.0067 -0.0127  
Y 0.0094 0.0073 0.0075 0.0076 -0.0063 -0.0118  
Z 0.0188 0.0185 0.0017 0.0025 -0.0004 -0.0105

AT. 52 H X 0.0108 0.0084 0.0083 -0.0083 0.0067 -0.0127  
Y -0.0094 -0.0073 -0.0075 0.0076 -0.0063 0.0118

Z 0.0188 0.0185 0.0017 -0.0025 0.0004 -0.0105  
AT. 53 C X 0.0109 -0.0117 -0.0027 -0.0017 -0.0029 0.0041  
Y 0.0035 -0.0042 -0.0041 -0.0038 -0.0026 -0.0019  
Z 0.0120 -0.0148 -0.0110 -0.0099 -0.0101 -0.0051  
AT. 54 C X 0.0109 -0.0117 -0.0027 0.0017 0.0029 0.0041  
Y -0.0035 0.0042 0.0041 -0.0038 -0.0026 0.0019  
Z 0.0120 -0.0148 -0.0110 0.0099 0.0101 -0.0051  
AT. 55 C X 0.0109 0.0117 -0.0027 -0.0017 0.0029 -0.0041  
Y 0.0035 0.0042 -0.0041 -0.0038 0.0026 0.0019  
Z 0.0120 0.0148 -0.0110 -0.0099 0.0101 0.0051  
AT. 56 C X 0.0109 0.0117 -0.0027 0.0017 -0.0029 -0.0041  
Y -0.0035 -0.0042 0.0041 -0.0038 0.0026 -0.0019  
Z 0.0120 0.0148 -0.0110 0.0099 -0.0101 0.0051  
AT. 57 C X -0.0058 0.0058 0.0006 0.0000 0.0006 -0.0030  
Y -0.0019 0.0020 0.0014 0.0013 0.0009 0.0003  
Z -0.0032 0.0042 0.0033 0.0029 0.0029 0.0016  
AT. 58 C X -0.0058 0.0058 0.0006 -0.0000 -0.0006 -0.0030  
Y 0.0019 -0.0020 -0.0014 0.0013 0.0009 -0.0003  
Z -0.0032 0.0042 0.0033 -0.0029 -0.0029 0.0016  
AT. 59 C X -0.0058 -0.0058 0.0006 0.0000 -0.0006 0.0030  
Y -0.0019 -0.0020 0.0014 0.0013 -0.0009 -0.0003  
Z -0.0032 -0.0042 0.0033 0.0029 -0.0029 -0.0016  
AT. 60 C X -0.0058 -0.0058 0.0006 -0.0000 0.0006 0.0030  
Y 0.0019 0.0020 -0.0014 0.0013 -0.0009 0.0003  
Z -0.0032 -0.0042 0.0033 -0.0029 0.0029 -0.0016  
AT. 61 H X 0.0066 -0.0058 0.0029 0.0032 0.0023 0.0072  
Y 0.0057 -0.0049 0.0031 0.0034 0.0023 0.0070  
Z 0.0010 -0.0004 0.0055 0.0056 0.0034 0.0058  
AT. 62 H X 0.0066 -0.0058 0.0029 -0.0032 -0.0023 0.0072  
Y -0.0057 0.0049 -0.0031 0.0034 0.0023 -0.0070  
Z 0.0010 -0.0004 0.0055 -0.0056 -0.0034 0.0058  
AT. 63 H X 0.0066 0.0058 0.0029 0.0032 -0.0023 -0.0072

Y 0.0057 0.0049 0.0031 0.0034 -0.0023 -0.0070  
Z 0.0010 0.0004 0.0055 0.0056 -0.0034 -0.0058  
AT. 64 H X 0.0066 0.0058 0.0029 -0.0032 0.0023 -0.0072  
Y -0.0057 -0.0049 -0.0031 0.0034 -0.0023 0.0070  
Z 0.0010 0.0004 0.0055 -0.0056 0.0034 -0.0058  
AT. 65 H X -0.0019 0.0019 0.0003 0.0001 -0.0001 -0.0010  
Y -0.0139 0.0143 0.0031 0.0017 0.0035 -0.0046  
Z -0.0215 0.0217 0.0050 0.0038 0.0040 -0.0068  
AT. 66 H X -0.0019 0.0019 0.0003 -0.0001 0.0001 -0.0010  
Y 0.0139 -0.0143 -0.0031 0.0017 0.0035 0.0046  
Z -0.0215 0.0217 0.0050 -0.0038 -0.0040 -0.0068  
AT. 67 H X -0.0019 -0.0019 0.0003 0.0001 0.0001 0.0010  
Y -0.0139 -0.0143 0.0031 0.0017 -0.0035 0.0046  
Z -0.0215 -0.0217 0.0050 0.0038 -0.0040 0.0068  
AT. 68 H X -0.0019 -0.0019 0.0003 -0.0001 -0.0001 0.0010  
Y 0.0139 0.0143 -0.0031 0.0017 -0.0035 -0.0046  
Z -0.0215 -0.0217 0.0050 -0.0038 0.0040 0.0068  
AT. 69 H X 0.0090 -0.0076 0.0035 0.0049 0.0032 0.0097  
Y -0.0064 0.0080 0.0048 0.0042 0.0054 0.0015  
Z -0.0046 0.0072 0.0069 0.0065 0.0074 0.0049  
AT. 70 H X 0.0090 -0.0076 0.0035 -0.0049 -0.0032 0.0097  
Y 0.0064 -0.0080 -0.0048 0.0042 0.0054 -0.0015  
Z -0.0046 0.0072 0.0069 -0.0065 -0.0074 0.0049  
AT. 71 H X 0.0090 0.0076 0.0035 0.0049 -0.0032 -0.0097  
Y -0.0064 -0.0080 0.0048 0.0042 -0.0054 -0.0015  
Z -0.0046 -0.0072 0.0069 0.0065 -0.0074 -0.0049  
AT. 72 H X 0.0090 0.0076 0.0035 -0.0049 0.0032 -0.0097  
Y 0.0064 0.0080 -0.0048 0.0042 -0.0054 0.0015  
Z -0.0046 -0.0072 0.0069 -0.0065 0.0074 -0.0049  
AT. 73 C X 0.0103 -0.0029 0.0137 0.0142 0.0122 0.0181  
Y -0.0084 0.0133 0.0142 0.0132 0.0136 0.0092  
Z -0.0123 0.0061 -0.0100 -0.0106 -0.0079 -0.0140

AT. 74 C X 0.0103 -0.0029 0.0137 -0.0142 -0.0122 0.0181  
Y 0.0084 -0.0133 -0.0142 0.0132 0.0136 -0.0092  
Z -0.0123 0.0061 -0.0100 0.0106 0.0079 -0.0140

AT. 75 C X 0.0103 0.0029 0.0137 0.0142 -0.0122 -0.0181  
Y -0.0084 -0.0133 0.0142 0.0132 -0.0136 -0.0092  
Z -0.0123 -0.0061 -0.0100 -0.0106 0.0079 0.0140

AT. 76 C X 0.0103 0.0029 0.0137 -0.0142 0.0122 -0.0181  
Y 0.0084 0.0133 -0.0142 0.0132 -0.0136 0.0092  
Z -0.0123 -0.0061 -0.0100 0.0106 -0.0079 0.0140

AT. 77 C X 0.0001 -0.0032 -0.0062 -0.0060 -0.0058 -0.0061  
Y -0.0042 0.0018 -0.0055 -0.0056 -0.0039 -0.0066  
Z 0.0060 -0.0054 0.0004 0.0007 0.0008 0.0032

AT. 78 C X 0.0001 -0.0032 -0.0062 0.0060 0.0058 -0.0061  
Y 0.0042 -0.0018 0.0055 -0.0056 -0.0039 0.0066  
Z 0.0060 -0.0054 0.0004 -0.0007 -0.0008 0.0032

AT. 79 C X 0.0001 0.0032 -0.0062 -0.0060 0.0058 0.0061  
Y -0.0042 -0.0018 -0.0055 -0.0056 0.0039 0.0066  
Z 0.0060 0.0054 0.0004 0.0007 -0.0008 -0.0032

AT. 80 C X 0.0001 0.0032 -0.0062 0.0060 -0.0058 0.0061  
Y 0.0042 0.0018 0.0055 -0.0056 0.0039 -0.0066  
Z 0.0060 0.0054 0.0004 -0.0007 0.0008 -0.0032

AT. 81 H X -0.0091 0.0107 0.0032 0.0026 0.0031 -0.0018  
Y -0.0162 0.0192 0.0055 0.0041 0.0070 -0.0020  
Z 0.0205 -0.0221 -0.0035 -0.0018 -0.0087 0.0036

AT. 82 H X -0.0091 0.0107 0.0032 -0.0026 -0.0031 -0.0018  
Y 0.0162 -0.0192 -0.0055 0.0041 0.0070 0.0020  
Z 0.0205 -0.0221 -0.0035 0.0018 0.0087 0.0036

AT. 83 H X -0.0091 -0.0107 0.0032 0.0026 -0.0031 0.0018  
Y -0.0162 -0.0192 0.0055 0.0041 -0.0070 0.0020  
Z 0.0205 0.0221 -0.0035 -0.0018 0.0087 -0.0036

AT. 84 H X -0.0091 -0.0107 0.0032 -0.0026 0.0031 0.0018  
Y 0.0162 0.0192 -0.0055 0.0041 -0.0070 -0.0020

Z 0.0205 0.0221 -0.0035 0.0018 -0.0087 -0.0036  
AT. 85 H X 0.0182 -0.0173 -0.0016 0.0000 -0.0043 0.0048  
Y 0.0208 -0.0206 0.0026 0.0047 -0.0031 0.0096  
Z -0.0198 0.0170 -0.0077 -0.0097 -0.0005 -0.0135  
AT. 86 H X 0.0182 -0.0173 -0.0016 -0.0000 0.0043 0.0048  
Y -0.0208 0.0206 -0.0026 0.0047 -0.0031 -0.0096  
Z -0.0198 0.0170 -0.0077 0.0097 0.0005 -0.0135  
AT. 87 H X 0.0182 0.0173 -0.0016 0.0000 0.0043 -0.0048  
Y 0.0208 0.0206 0.0026 0.0047 0.0031 -0.0096  
Z -0.0198 -0.0170 -0.0077 -0.0097 0.0005 0.0135  
AT. 88 H X 0.0182 0.0173 -0.0016 -0.0000 -0.0043 -0.0048  
Y -0.0208 -0.0206 -0.0026 0.0047 0.0031 0.0096  
Z -0.0198 -0.0170 -0.0077 0.0097 -0.0005 0.0135  
AT. 89 C X -0.0020 0.0063 0.0097 0.0090 0.0098 0.0095  
Y 0.0046 -0.0082 -0.0084 -0.0081 -0.0074 -0.0049  
Z -0.0047 0.0095 0.0135 0.0131 0.0090 0.0078  
AT. 90 C X -0.0020 0.0063 0.0097 -0.0090 -0.0098 0.0095  
Y -0.0046 0.0082 0.0084 -0.0081 -0.0074 0.0049  
Z -0.0047 0.0095 0.0135 -0.0131 -0.0090 0.0078  
AT. 91 C X -0.0020 -0.0063 0.0097 0.0090 -0.0098 -0.0095  
Y 0.0046 0.0082 -0.0084 -0.0081 0.0074 0.0049  
Z -0.0047 -0.0095 0.0135 0.0131 -0.0090 -0.0078  
AT. 92 C X -0.0020 -0.0063 0.0097 -0.0090 0.0098 -0.0095  
Y -0.0046 -0.0082 0.0084 -0.0081 0.0074 -0.0049  
Z -0.0047 -0.0095 0.0135 -0.0131 0.0090 -0.0078  
AT. 93 C X 0.0009 -0.0029 -0.0038 -0.0036 -0.0040 -0.0038  
Y -0.0009 0.0029 0.0041 0.0040 0.0036 0.0030  
Z 0.0013 -0.0024 -0.0034 -0.0033 -0.0017 -0.0015  
AT. 94 C X 0.0009 -0.0029 -0.0038 0.0036 0.0040 -0.0038  
Y 0.0009 -0.0029 -0.0041 0.0040 0.0036 -0.0030  
Z 0.0013 -0.0024 -0.0034 0.0033 0.0017 -0.0015  
AT. 95 C X 0.0009 0.0029 -0.0038 -0.0036 0.0040 0.0038

Y -0.0009 -0.0029 0.0041 0.0040 -0.0036 -0.0030  
Z 0.0013 0.0024 -0.0034 -0.0033 0.0017 0.0015  
AT. 96 C X 0.0009 0.0029 -0.0038 0.0036 -0.0040 0.0038  
Y 0.0009 0.0029 -0.0041 0.0040 -0.0036 0.0030  
Z 0.0013 0.0024 -0.0034 0.0033 -0.0017 0.0015  
AT. 97 H X 0.0011 -0.0001 0.0007 0.0005 0.0022 0.0024  
Y -0.0010 -0.0015 -0.0028 -0.0023 -0.0062 -0.0060  
Z 0.0022 -0.0029 -0.0038 -0.0037 -0.0014 0.0002  
AT. 98 H X 0.0011 -0.0001 0.0007 -0.0005 -0.0022 0.0024  
Y 0.0010 0.0015 0.0028 -0.0023 -0.0062 0.0060  
Z 0.0022 -0.0029 -0.0038 0.0037 0.0014 0.0002  
AT. 99 H X 0.0011 0.0001 0.0007 0.0005 -0.0022 -0.0024  
Y -0.0010 0.0015 -0.0028 -0.0023 0.0062 0.0060  
Z 0.0022 0.0029 -0.0038 -0.0037 0.0014 -0.0002  
AT. 100 H X 0.0011 0.0001 0.0007 -0.0005 0.0022 -0.0024  
Y 0.0010 -0.0015 0.0028 -0.0023 0.0062 -0.0060  
Z 0.0022 0.0029 -0.0038 0.0037 -0.0014 -0.0002  
AT. 101 H X 0.0005 0.0006 0.0026 0.0025 0.0016 0.0029  
Y -0.0027 0.0090 0.0130 0.0125 0.0120 0.0117  
Z 0.0068 -0.0151 -0.0169 -0.0161 -0.0170 -0.0137  
AT. 102 H X 0.0005 0.0006 0.0026 -0.0025 -0.0016 0.0029  
Y 0.0027 -0.0090 -0.0130 0.0125 0.0120 -0.0117  
Z 0.0068 -0.0151 -0.0169 0.0161 0.0170 -0.0137  
AT. 103 H X 0.0005 -0.0006 0.0026 0.0025 -0.0016 -0.0029  
Y -0.0027 -0.0090 0.0130 0.0125 -0.0120 -0.0117  
Z 0.0068 0.0151 -0.0169 -0.0161 0.0170 0.0137  
AT. 104 H X 0.0005 -0.0006 0.0026 -0.0025 0.0016 -0.0029  
Y 0.0027 0.0090 -0.0130 0.0125 -0.0120 0.0117  
Z 0.0068 0.0151 -0.0169 0.0161 -0.0170 0.0137  
AT. 105 H X 0.0002 0.0047 0.0090 0.0082 0.0097 0.0099  
Y -0.0045 0.0040 0.0039 0.0031 0.0026 0.0011  
Z 0.0045 -0.0062 -0.0079 -0.0068 -0.0059 -0.0049

AT.106 H X 0.0002 0.0047 0.0090 -0.0082 -0.0097 0.0099  
Y 0.0045 -0.0040 -0.0039 0.0031 0.0026 -0.0011  
Z 0.0045 -0.0062 -0.0079 0.0068 0.0059 -0.0049

AT.107 H X 0.0002 -0.0047 0.0090 0.0082 -0.0097 -0.0099  
Y -0.0045 -0.0040 0.0039 0.0031 -0.0026 -0.0011  
Z 0.0045 0.0062 -0.0079 -0.0068 0.0059 0.0049

AT.108 H X 0.0002 -0.0047 0.0090 -0.0082 0.0097 -0.0099  
Y 0.0045 0.0040 -0.0039 0.0031 -0.0026 0.0011  
Z 0.0045 0.0062 -0.0079 0.0068 -0.0059 0.0049

AT.109 C X -0.0050 0.0050 0.0006 0.0001 0.0006 -0.0026  
Y 0.0047 -0.0042 -0.0007 -0.0006 -0.0011 0.0014  
Z -0.0015 0.0028 0.0026 0.0024 0.0030 0.0018

AT.110 C X -0.0050 0.0050 0.0006 -0.0001 -0.0006 -0.0026  
Y -0.0047 0.0042 0.0007 -0.0006 -0.0011 -0.0014  
Z -0.0015 0.0028 0.0026 -0.0024 -0.0030 0.0018

AT.111 C X -0.0050 -0.0050 0.0006 0.0001 -0.0006 0.0026  
Y 0.0047 0.0042 -0.0007 -0.0006 0.0011 -0.0014  
Z -0.0015 -0.0028 0.0026 0.0024 -0.0030 -0.0018

AT.112 C X -0.0050 -0.0050 0.0006 -0.0001 0.0006 0.0026  
Y -0.0047 -0.0042 0.0007 -0.0006 0.0011 0.0014  
Z -0.0015 -0.0028 0.0026 -0.0024 0.0030 -0.0018

AT.113 H X 0.0044 -0.0059 -0.0048 -0.0051 -0.0055 -0.0028  
Y -0.0129 0.0167 0.0101 0.0092 0.0100 0.0021  
Z -0.0094 0.0130 0.0079 0.0049 0.0045 0.0010

AT.114 H X 0.0044 -0.0059 -0.0048 0.0051 0.0055 -0.0028  
Y 0.0129 -0.0167 -0.0101 0.0092 0.0100 -0.0021  
Z -0.0094 0.0130 0.0079 -0.0049 -0.0045 0.0010

AT.115 H X 0.0044 0.0059 -0.0048 -0.0051 0.0055 0.0028  
Y -0.0129 -0.0167 0.0101 0.0092 -0.0100 -0.0021  
Z -0.0094 -0.0130 0.0079 0.0049 -0.0045 -0.0010

AT.116 H X 0.0044 0.0059 -0.0048 0.0051 -0.0055 0.0028  
Y 0.0129 0.0167 -0.0101 0.0092 -0.0100 0.0021



Z -0.0094 -0.0130 0.0079 -0.0049 0.0045 -0.0010  
AT. 117 H X -0.0060 0.0097 0.0088 0.0077 0.0092 0.0062  
Y 0.0051 -0.0115 -0.0104 -0.0095 -0.0102 -0.0051  
Z -0.0011 -0.0041 -0.0072 -0.0066 -0.0063 -0.0053  
AT. 118 H X -0.0060 0.0097 0.0088 -0.0077 -0.0092 0.0062  
Y -0.0051 0.0115 0.0104 -0.0095 -0.0102 0.0051  
Z -0.0011 -0.0041 -0.0072 0.0066 0.0063 -0.0053  
AT. 119 H X -0.0060 -0.0097 0.0088 0.0077 -0.0092 -0.0062  
Y 0.0051 0.0115 -0.0104 -0.0095 0.0102 0.0051  
Z -0.0011 0.0041 -0.0072 -0.0066 0.0063 0.0053  
AT. 120 H X -0.0060 -0.0097 0.0088 -0.0077 0.0092 -0.0062  
Y -0.0051 -0.0115 0.0104 -0.0095 0.0102 -0.0051  
Z -0.0011 0.0041 -0.0072 0.0066 -0.0063 0.0053  
AT. 121 C X 0.0009 -0.0016 -0.0018 -0.0018 -0.0025 -0.0022  
Y 0.0015 -0.0022 -0.0020 -0.0014 -0.0015 -0.0010  
Z 0.0023 -0.0011 0.0004 -0.0001 0.0013 0.0021  
AT. 122 C X 0.0009 -0.0016 -0.0018 0.0018 0.0025 -0.0022  
Y -0.0015 0.0022 0.0020 -0.0014 -0.0015 0.0010  
Z 0.0023 -0.0011 0.0004 0.0001 -0.0013 0.0021  
AT. 123 C X 0.0009 0.0016 -0.0018 -0.0018 0.0025 0.0022  
Y 0.0015 0.0022 -0.0020 -0.0014 0.0015 0.0010  
Z 0.0023 0.0011 0.0004 -0.0001 -0.0013 -0.0021  
AT. 124 C X 0.0009 0.0016 -0.0018 0.0018 -0.0025 0.0022  
Y -0.0015 -0.0022 0.0020 -0.0014 0.0015 -0.0010  
Z 0.0023 0.0011 0.0004 0.0001 0.0013 -0.0021  
AT. 125 H X -0.0024 -0.0025 -0.0046 -0.0046 -0.0053 -0.0051  
Y -0.0019 0.0094 0.0139 0.0126 0.0147 0.0132  
Z 0.0056 -0.0091 -0.0100 -0.0093 -0.0094 -0.0071  
AT. 126 H X -0.0024 -0.0025 -0.0046 0.0046 0.0053 -0.0051  
Y 0.0019 -0.0094 -0.0139 0.0126 0.0147 -0.0132  
Z 0.0056 -0.0091 -0.0100 0.0093 0.0094 -0.0071  
AT. 127 H X -0.0024 0.0025 -0.0046 -0.0046 0.0053 0.0051

Y -0.0019 -0.0094 0.0139 0.0126 -0.0147 -0.0132  
Z 0.0056 0.0091 -0.0100 -0.0093 0.0094 0.0071  
AT. 128 H X -0.0024 0.0025 -0.0046 0.0046 -0.0053 0.0051  
Y 0.0019 0.0094 -0.0139 0.0126 -0.0147 0.0132  
Z 0.0056 0.0091 -0.0100 0.0093 -0.0094 0.0071  
AT. 129 H X 0.0022 -0.0012 -0.0009 -0.0015 0.0012 0.0011  
Y -0.0021 0.0005 0.0003 0.0016 -0.0034 -0.0029  
Z -0.0024 0.0075 0.0091 0.0077 0.0105 0.0091  
AT. 130 H X 0.0022 -0.0012 -0.0009 0.0015 -0.0012 0.0011  
Y 0.0021 -0.0005 -0.0003 0.0016 -0.0034 0.0029  
Z -0.0024 0.0075 0.0091 -0.0077 -0.0105 0.0091  
AT. 131 H X 0.0022 0.0012 -0.0009 -0.0015 -0.0012 -0.0011  
Y -0.0021 -0.0005 0.0003 0.0016 0.0034 0.0029  
Z -0.0024 -0.0075 0.0091 0.0077 -0.0105 -0.0091  
AT. 132 H X 0.0022 0.0012 -0.0009 0.0015 0.0012 -0.0011  
Y 0.0021 0.0005 -0.0003 0.0016 0.0034 -0.0029  
Z -0.0024 -0.0075 0.0091 -0.0077 0.0105 -0.0091  
AT. 133 C X -0.0021 0.0020 -0.0005 -0.0012 0.0011 -0.0008  
Y -0.0021 0.0039 0.0047 0.0041 0.0046 0.0036  
Z -0.0015 0.0022 0.0023 0.0021 0.0020 0.0019  
AT. 134 C X -0.0021 0.0020 -0.0005 0.0012 -0.0011 -0.0008  
Y 0.0021 -0.0039 -0.0047 0.0041 0.0046 -0.0036  
Z -0.0015 0.0022 0.0023 -0.0021 -0.0020 0.0019  
AT. 135 C X -0.0021 -0.0020 -0.0005 -0.0012 -0.0011 0.0008  
Y -0.0021 -0.0039 0.0047 0.0041 -0.0046 -0.0036  
Z -0.0015 -0.0022 0.0023 0.0021 -0.0020 -0.0019  
AT. 136 C X -0.0021 -0.0020 -0.0005 0.0012 0.0011 0.0008  
Y 0.0021 0.0039 -0.0047 0.0041 -0.0046 0.0036  
Z -0.0015 -0.0022 0.0023 -0.0021 0.0020 -0.0019  
AT. 137 C X 0.0036 -0.0030 0.0019 0.0029 -0.0012 0.0023  
Y 0.0002 -0.0012 -0.0033 -0.0034 -0.0020 -0.0028  
Z -0.0049 0.0033 -0.0038 -0.0051 0.0007 -0.0043

AT. 138 C X 0.0036 -0.0030 0.0019 -0.0029 0.0012 0.0023  
Y -0.0002 0.0012 0.0033 -0.0034 -0.0020 0.0028  
Z -0.0049 0.0033 -0.0038 0.0051 -0.0007 -0.0043

AT. 139 C X 0.0036 0.0030 0.0019 0.0029 0.0012 -0.0023  
Y 0.0002 0.0012 -0.0033 -0.0034 0.0020 0.0028  
Z -0.0049 -0.0033 -0.0038 -0.0051 -0.0007 0.0043

AT. 140 C X 0.0036 0.0030 0.0019 -0.0029 -0.0012 -0.0023  
Y -0.0002 -0.0012 0.0033 -0.0034 0.0020 -0.0028  
Z -0.0049 -0.0033 -0.0038 0.0051 0.0007 0.0043

AT. 141 H X -0.0159 0.0110 -0.0137 -0.0179 0.0013 -0.0157  
Y -0.0052 0.0061 0.0051 0.0041 0.0050 0.0034  
Z 0.0128 -0.0070 0.0190 0.0227 0.0027 0.0195

AT. 142 H X -0.0159 0.0110 -0.0137 0.0179 -0.0013 -0.0157  
Y 0.0052 -0.0061 -0.0051 0.0041 0.0050 -0.0034  
Z 0.0128 -0.0070 0.0190 -0.0227 -0.0027 0.0195

AT. 143 H X -0.0159 -0.0110 -0.0137 -0.0179 -0.0013 0.0157  
Y -0.0052 -0.0061 0.0051 0.0041 -0.0050 -0.0034  
Z 0.0128 0.0070 0.0190 0.0227 -0.0027 -0.0195

AT. 144 H X -0.0159 -0.0110 -0.0137 0.0179 0.0013 0.0157  
Y 0.0052 0.0061 -0.0051 0.0041 -0.0050 0.0034  
Z 0.0128 0.0070 0.0190 -0.0227 0.0027 -0.0195

AT. 145 H X -0.0264 0.0227 -0.0106 -0.0180 0.0105 -0.0140  
Y 0.0205 -0.0193 0.0010 0.0065 -0.0118 0.0047  
Z 0.0407 -0.0383 -0.0007 0.0101 -0.0245 0.0068

AT. 146 H X -0.0264 0.0227 -0.0106 0.0180 -0.0105 -0.0140  
Y -0.0205 0.0193 -0.0010 0.0065 -0.0118 -0.0047  
Z 0.0407 -0.0383 -0.0007 -0.0101 0.0245 0.0068

AT. 147 H X -0.0264 -0.0227 -0.0106 -0.0180 -0.0105 0.0140  
Y 0.0205 0.0193 0.0010 0.0065 0.0118 -0.0047  
Z 0.0407 0.0383 -0.0007 0.0101 0.0245 -0.0068

AT. 148 H X -0.0264 -0.0227 -0.0106 0.0180 0.0105 0.0140  
Y -0.0205 -0.0193 -0.0010 0.0065 0.0118 0.0047

Z 0.0407 0.0383 -0.0007 -0.0101 -0.0245 -0.0068  
AT. 149 O X -0.0037 0.0038 0.0013 0.0009 0.0013 -0.0008  
Y 0.0038 -0.0040 -0.0018 -0.0014 -0.0017 0.0004  
Z 0.0010 -0.0011 -0.0007 -0.0007 -0.0002 -0.0000  
AT. 150 O X -0.0037 0.0038 0.0013 -0.0009 -0.0013 -0.0008  
Y -0.0038 0.0040 0.0018 -0.0014 -0.0017 -0.0004  
Z 0.0010 -0.0011 -0.0007 0.0007 0.0002 -0.0000  
AT. 151 O X -0.0037 -0.0038 0.0013 0.0009 -0.0013 0.0008  
Y 0.0038 0.0040 -0.0018 -0.0014 0.0017 -0.0004  
Z 0.0010 0.0011 -0.0007 -0.0007 0.0002 0.0000  
AT. 152 O X -0.0037 -0.0038 0.0013 -0.0009 0.0013 0.0008  
Y -0.0038 -0.0040 0.0018 -0.0014 0.0017 0.0004  
Z 0.0010 0.0011 -0.0007 0.0007 -0.0002 0.0000  
AT. 153 H X -0.0047 0.0004 -0.0081 -0.0083 -0.0036 -0.0076  
Y 0.0127 -0.0070 0.0108 0.0121 0.0050 0.0133  
Z 0.0052 -0.0001 0.0104 0.0106 0.0057 0.0096  
AT. 154 H X -0.0047 0.0004 -0.0081 0.0083 0.0036 -0.0076  
Y -0.0127 0.0070 -0.0108 0.0121 0.0050 -0.0133  
Z 0.0052 -0.0001 0.0104 -0.0106 -0.0057 0.0096  
AT. 155 H X -0.0047 -0.0004 -0.0081 -0.0083 0.0036 0.0076  
Y 0.0127 0.0070 0.0108 0.0121 -0.0050 -0.0133  
Z 0.0052 0.0001 0.0104 0.0106 -0.0057 -0.0096  
AT. 156 H X -0.0047 -0.0004 -0.0081 0.0083 -0.0036 0.0076  
Y -0.0127 -0.0070 -0.0108 0.0121 -0.0050 0.0133  
Z 0.0052 0.0001 0.0104 -0.0106 0.0057 -0.0096  
AT. 157 O X -0.0057 -0.0013 -0.0145 -0.0146 -0.0132 -0.0164  
Y -0.0017 -0.0015 -0.0070 -0.0070 -0.0065 -0.0076  
Z 0.0031 -0.0014 0.0030 0.0031 0.0025 0.0041  
AT. 158 O X -0.0057 -0.0013 -0.0145 0.0146 0.0132 -0.0164  
Y 0.0017 0.0015 0.0070 -0.0070 -0.0065 0.0076  
Z 0.0031 -0.0014 0.0030 -0.0031 -0.0025 0.0041  
AT. 159 O X -0.0057 0.0013 -0.0145 -0.0146 0.0132 0.0164

Y -0.0017 0.0015 -0.0070 -0.0070 0.0065 0.0076  
Z 0.0031 0.0014 0.0030 0.0031 -0.0025 -0.0041  
AT.160 O X -0.0057 0.0013 -0.0145 0.0146 -0.0132 0.0164  
Y 0.0017 -0.0015 0.0070 -0.0070 0.0065 -0.0076  
Z 0.0031 0.0014 0.0030 -0.0031 0.0025 -0.0041  
AT.161 O X 0.0011 0.0001 0.0023 0.0023 0.0020 0.0025  
Y 0.0008 0.0000 0.0015 0.0016 0.0013 0.0017  
Z 0.0004 0.0007 0.0024 0.0024 0.0023 0.0025  
AT.162 O X 0.0011 0.0001 0.0023 -0.0023 -0.0020 0.0025  
Y -0.0008 -0.0000 -0.0015 0.0016 0.0013 -0.0017  
Z 0.0004 0.0007 0.0024 -0.0024 -0.0023 0.0025  
AT.163 O X 0.0011 -0.0001 0.0023 0.0023 -0.0020 -0.0025  
Y 0.0008 -0.0000 0.0015 0.0016 -0.0013 -0.0017  
Z 0.0004 -0.0007 0.0024 0.0024 -0.0023 -0.0025  
AT.164 O X 0.0011 -0.0001 0.0023 -0.0023 0.0020 -0.0025  
Y -0.0008 0.0000 -0.0015 0.0016 -0.0013 0.0017  
Z 0.0004 -0.0007 0.0024 -0.0024 0.0023 -0.0025  
AT.165 H X 0.0007 -0.0025 -0.0042 -0.0041 -0.0038 -0.0029  
Y 0.0012 -0.0012 0.0002 0.0003 0.0000 0.0010  
Z -0.0015 0.0003 -0.0014 -0.0008 -0.0014 -0.0025  
AT.166 H X 0.0007 -0.0025 -0.0042 0.0041 0.0038 -0.0029  
Y -0.0012 0.0012 -0.0002 0.0003 0.0000 -0.0010  
Z -0.0015 0.0003 -0.0014 0.0008 0.0014 -0.0025  
AT.167 H X 0.0007 0.0025 -0.0042 -0.0041 0.0038 0.0029  
Y 0.0012 0.0012 0.0002 0.0003 -0.0000 -0.0010  
Z -0.0015 -0.0003 -0.0014 -0.0008 0.0014 0.0025  
AT.168 H X 0.0007 0.0025 -0.0042 0.0041 -0.0038 0.0029  
Y -0.0012 -0.0012 -0.0002 0.0003 -0.0000 0.0010  
Z -0.0015 -0.0003 -0.0014 0.0008 -0.0014 0.0025  
AT.169 O X 0.0001 -0.0000 0.0000 -0.0001 -0.0000 0.0001  
Y -0.0003 0.0003 -0.0001 -0.0002 -0.0002 -0.0003  
Z 0.0002 -0.0003 -0.0003 -0.0003 -0.0002 -0.0000

AT.170 O X 0.0001 -0.0000 0.0000 0.0001 0.0000 0.0001  
Y 0.0003 -0.0003 0.0001 -0.0002 -0.0002 0.0003  
Z 0.0002 -0.0003 -0.0003 0.0003 0.0002 -0.0000

AT.171 O X 0.0001 0.0000 0.0000 -0.0001 0.0000 -0.0001  
Y -0.0003 -0.0003 -0.0001 -0.0002 0.0002 0.0003  
Z 0.0002 0.0003 -0.0003 -0.0003 0.0002 0.0000

AT.172 O X 0.0001 0.0000 0.0000 0.0001 -0.0000 -0.0001  
Y 0.0003 0.0003 0.0001 -0.0002 0.0002 -0.0003  
Z 0.0002 0.0003 -0.0003 0.0003 -0.0002 0.0000

AT.173 H X 0.0021 -0.0022 0.0016 0.0020 0.0029 0.0037  
Y -0.0003 0.0007 -0.0007 -0.0011 -0.0002 -0.0008  
Z -0.0015 0.0030 0.0020 0.0020 -0.0003 -0.0001

AT.174 H X 0.0021 -0.0022 0.0016 -0.0020 -0.0029 0.0037  
Y 0.0003 -0.0007 0.0007 -0.0011 -0.0002 0.0008  
Z -0.0015 0.0030 0.0020 -0.0020 0.0003 -0.0001

AT.175 H X 0.0021 0.0022 0.0016 0.0020 -0.0029 -0.0037  
Y -0.0003 -0.0007 -0.0007 -0.0011 0.0002 0.0008  
Z -0.0015 -0.0030 0.0020 0.0020 0.0003 0.0001

AT.176 H X 0.0021 0.0022 0.0016 -0.0020 0.0029 -0.0037  
Y 0.0003 0.0007 0.0007 -0.0011 0.0002 -0.0008  
Z -0.0015 -0.0030 0.0020 -0.0020 -0.0003 0.0001

FREQ(CM\*\*-1) 1228.59 1229.85 1231.51 1233.61 1235.45 1236.54

AT. 1 I X 0.0002 0.0001 0.0001 0.0002 -0.0001 -0.0001  
Y -0.0002 -0.0001 -0.0002 -0.0002 0.0001 0.0001  
Z -0.0000 -0.0000 -0.0000 0.0000 0.0000 0.0000

AT. 2 I X -0.0002 -0.0001 0.0001 0.0002 0.0001 -0.0001  
Y -0.0002 -0.0001 0.0002 0.0002 0.0001 -0.0001  
Z 0.0000 0.0000 -0.0000 0.0000 -0.0000 0.0000

AT. 3 I X 0.0002 -0.0001 -0.0001 0.0002 0.0001 -0.0001  
Y -0.0002 0.0001 0.0002 -0.0002 -0.0001 0.0001

Z -0.0000 0.0000 0.0000 0.0000 -0.0000 0.0000  
AT. 4 I X -0.0002 0.0001 -0.0001 0.0002 -0.0001 -0.0001  
Y -0.0002 0.0001 -0.0002 0.0002 -0.0001 -0.0001  
Z 0.0000 -0.0000 0.0000 0.0000 0.0000 0.0000  
AT. 5 I X 0.0001 0.0002 0.0002 0.0001 0.0002 0.0002  
Y 0.0001 0.0001 0.0001 0.0001 0.0001 0.0001  
Z -0.0000 -0.0000 -0.0000 -0.0000 -0.0000 -0.0000  
AT. 6 I X -0.0001 -0.0002 0.0002 0.0001 -0.0002 0.0002  
Y 0.0001 0.0001 -0.0001 -0.0001 0.0001 -0.0001  
Z 0.0000 0.0000 -0.0000 -0.0000 0.0000 -0.0000  
AT. 7 I X 0.0001 -0.0002 -0.0002 0.0001 -0.0002 0.0002  
Y 0.0001 -0.0001 -0.0001 0.0001 -0.0001 0.0001  
Z -0.0000 0.0000 0.0000 -0.0000 0.0000 -0.0000  
AT. 8 I X -0.0001 0.0002 -0.0002 0.0001 0.0002 0.0002  
Y 0.0001 -0.0001 0.0001 -0.0001 -0.0001 -0.0001  
Z 0.0000 -0.0000 0.0000 -0.0000 -0.0000 -0.0000  
AT. 9 N X -0.0016 -0.0002 0.0004 -0.0002 0.0010 0.0007  
Y -0.0010 -0.0000 0.0005 -0.0002 0.0013 0.0011  
Z -0.0013 -0.0048 0.0022 0.0009 0.0049 0.0042  
AT. 10 N X 0.0016 0.0002 0.0004 -0.0002 -0.0010 0.0007  
Y -0.0010 -0.0000 -0.0005 0.0002 0.0013 -0.0011  
Z 0.0013 0.0048 0.0022 0.0009 -0.0049 0.0042  
AT. 11 N X -0.0016 0.0002 -0.0004 -0.0002 -0.0010 0.0007  
Y -0.0010 0.0000 -0.0005 -0.0002 -0.0013 0.0011  
Z -0.0013 0.0048 -0.0022 0.0009 -0.0049 0.0042  
AT. 12 N X 0.0016 -0.0002 -0.0004 -0.0002 0.0010 0.0007  
Y -0.0010 0.0000 0.0005 0.0002 -0.0013 -0.0011  
Z 0.0013 -0.0048 -0.0022 0.0009 0.0049 0.0042  
AT. 13 N X 0.0015 0.0007 0.0001 0.0006 -0.0012 -0.0007  
Y -0.0019 0.0002 -0.0005 -0.0009 0.0004 0.0000  
Z 0.0015 0.0004 0.0015 0.0016 0.0010 0.0013  
AT. 14 N X -0.0015 -0.0007 0.0001 0.0006 0.0012 -0.0007

Y -0.0019 0.0002 0.0005 0.0009 0.0004 -0.0000  
Z -0.0015 -0.0004 0.0015 0.0016 -0.0010 0.0013  
AT. 15 N X 0.0015 -0.0007 -0.0001 0.0006 0.0012 -0.0007  
Y -0.0019 -0.0002 0.0005 -0.0009 -0.0004 0.0000  
Z 0.0015 -0.0004 -0.0015 0.0016 -0.0010 0.0013  
AT. 16 N X -0.0015 0.0007 -0.0001 0.0006 -0.0012 -0.0007  
Y -0.0019 -0.0002 -0.0005 0.0009 -0.0004 -0.0000  
Z -0.0015 0.0004 -0.0015 0.0016 0.0010 0.0013  
AT. 17 O X 0.0016 0.0013 0.0010 0.0015 -0.0013 -0.0013  
Y 0.0012 0.0013 0.0001 0.0007 -0.0016 -0.0015  
Z 0.0024 0.0027 0.0016 0.0023 -0.0021 -0.0020  
AT. 18 O X -0.0016 -0.0013 0.0010 0.0015 0.0013 -0.0013  
Y 0.0012 0.0013 -0.0001 -0.0007 -0.0016 0.0015  
Z -0.0024 -0.0027 0.0016 0.0023 0.0021 -0.0020  
AT. 19 O X 0.0016 -0.0013 -0.0010 0.0015 0.0013 -0.0013  
Y 0.0012 -0.0013 -0.0001 0.0007 0.0016 -0.0015  
Z 0.0024 -0.0027 -0.0016 0.0023 0.0021 -0.0020  
AT. 20 O X -0.0016 0.0013 -0.0010 0.0015 -0.0013 -0.0013  
Y 0.0012 -0.0013 0.0001 -0.0007 0.0016 0.0015  
Z -0.0024 0.0027 -0.0016 0.0023 -0.0021 -0.0020  
AT. 21 O X 0.0005 0.0007 0.0008 0.0005 0.0010 0.0011  
Y 0.0002 -0.0009 -0.0007 -0.0001 -0.0014 -0.0013  
Z 0.0009 0.0016 0.0017 0.0008 0.0022 0.0022  
AT. 22 O X -0.0005 -0.0007 0.0008 0.0005 -0.0010 0.0011  
Y 0.0002 -0.0009 0.0007 0.0001 -0.0014 0.0013  
Z -0.0009 -0.0016 0.0017 0.0008 -0.0022 0.0022  
AT. 23 O X 0.0005 -0.0007 -0.0008 0.0005 -0.0010 0.0011  
Y 0.0002 0.0009 0.0007 -0.0001 0.0014 -0.0013  
Z 0.0009 -0.0016 -0.0017 0.0008 -0.0022 0.0022  
AT. 24 O X -0.0005 0.0007 -0.0008 0.0005 0.0010 0.0011  
Y 0.0002 0.0009 -0.0007 0.0001 0.0014 0.0013  
Z -0.0009 0.0016 -0.0017 0.0008 0.0022 0.0022



AT. 25 C X 0.0079 0.0049 0.0071 0.0087 -0.0036 -0.0036  
Y -0.0004 -0.0013 -0.0012 -0.0008 -0.0003 -0.0001  
Z -0.0121 -0.0083 -0.0108 -0.0134 0.0059 0.0059

AT. 26 C X -0.0079 -0.0049 0.0071 0.0087 0.0036 -0.0036  
Y -0.0004 -0.0013 0.0012 0.0008 -0.0003 0.0001  
Z 0.0121 0.0083 -0.0108 -0.0134 -0.0059 0.0059

AT. 27 C X 0.0079 -0.0049 -0.0071 0.0087 0.0036 -0.0036  
Y -0.0004 0.0013 0.0012 -0.0008 0.0003 -0.0001  
Z -0.0121 0.0083 0.0108 -0.0134 -0.0059 0.0059

AT. 28 C X -0.0079 0.0049 -0.0071 0.0087 -0.0036 -0.0036  
Y -0.0004 0.0013 -0.0012 0.0008 0.0003 0.0001  
Z 0.0121 -0.0083 0.0108 -0.0134 0.0059 0.0059

AT. 29 H X -0.0372 -0.0231 -0.0334 -0.0407 0.0171 0.0168  
Y 0.0178 0.0147 0.0173 0.0198 -0.0077 -0.0078  
Z 0.0520 0.0305 0.0464 0.0566 -0.0236 -0.0232

AT. 30 H X 0.0372 0.0231 -0.0334 -0.0407 -0.0171 0.0168  
Y 0.0178 0.0147 -0.0173 -0.0198 -0.0077 0.0078  
Z -0.0520 -0.0305 0.0464 0.0566 0.0236 -0.0232

AT. 31 H X -0.0372 0.0231 0.0334 -0.0407 -0.0171 0.0168  
Y 0.0178 -0.0147 -0.0173 0.0198 0.0077 -0.0078  
Z 0.0520 -0.0305 -0.0464 0.0566 0.0236 -0.0232

AT. 32 H X 0.0372 -0.0231 0.0334 -0.0407 0.0171 0.0168  
Y 0.0178 -0.0147 0.0173 -0.0198 0.0077 0.0078  
Z -0.0520 0.0305 -0.0464 0.0566 -0.0236 -0.0232

AT. 33 H X -0.0547 -0.0391 -0.0530 -0.0631 0.0241 0.0249  
Y -0.0048 -0.0062 -0.0060 -0.0062 0.0019 0.0022  
Z 0.0601 0.0503 0.0611 0.0713 -0.0270 -0.0286

AT. 34 H X 0.0547 0.0391 -0.0530 -0.0631 -0.0241 0.0249  
Y -0.0048 -0.0062 0.0060 0.0062 0.0019 -0.0022  
Z -0.0601 -0.0503 0.0611 0.0713 0.0270 -0.0286

AT. 35 H X -0.0547 0.0391 0.0530 -0.0631 -0.0241 0.0249  
Y -0.0048 0.0062 0.0060 -0.0062 -0.0019 0.0022

Z 0.0601 -0.0503 -0.0611 0.0713 0.0270 -0.0286  
AT. 36 H X 0.0547 -0.0391 0.0530 -0.0631 0.0241 0.0249  
Y -0.0048 0.0062 -0.0060 0.0062 -0.0019 -0.0022  
Z -0.0601 0.0503 -0.0611 0.0713 -0.0270 -0.0286  
AT. 37 C X -0.0040 -0.0021 -0.0033 -0.0043 0.0022 0.0021  
Y 0.0007 0.0021 0.0026 0.0018 0.0011 0.0008  
Z 0.0009 -0.0005 -0.0000 0.0002 -0.0006 -0.0004  
AT. 38 C X 0.0040 0.0021 -0.0033 -0.0043 -0.0022 0.0021  
Y 0.0007 0.0021 -0.0026 -0.0018 0.0011 -0.0008  
Z -0.0009 0.0005 -0.0000 0.0002 0.0006 -0.0004  
AT. 39 C X -0.0040 0.0021 0.0033 -0.0043 -0.0022 0.0021  
Y 0.0007 -0.0021 -0.0026 0.0018 -0.0011 0.0008  
Z 0.0009 0.0005 0.0000 0.0002 0.0006 -0.0004  
AT. 40 C X 0.0040 -0.0021 0.0033 -0.0043 0.0022 0.0021  
Y 0.0007 -0.0021 0.0026 -0.0018 -0.0011 -0.0008  
Z -0.0009 -0.0005 0.0000 0.0002 -0.0006 -0.0004  
AT. 41 C X -0.0012 -0.0008 0.0004 -0.0007 0.0031 0.0028  
Y 0.0015 0.0003 -0.0007 0.0003 -0.0014 -0.0011  
Z -0.0001 0.0040 -0.0020 -0.0013 -0.0037 -0.0032  
AT. 42 C X 0.0012 0.0008 0.0004 -0.0007 -0.0031 0.0028  
Y 0.0015 0.0003 0.0007 -0.0003 -0.0014 0.0011  
Z 0.0001 -0.0040 -0.0020 -0.0013 0.0037 -0.0032  
AT. 43 C X -0.0012 0.0008 -0.0004 -0.0007 -0.0031 0.0028  
Y 0.0015 -0.0003 0.0007 0.0003 0.0014 -0.0011  
Z -0.0001 -0.0040 0.0020 -0.0013 0.0037 -0.0032  
AT. 44 C X 0.0012 -0.0008 -0.0004 -0.0007 0.0031 0.0028  
Y 0.0015 -0.0003 -0.0007 -0.0003 0.0014 0.0011  
Z 0.0001 0.0040 0.0020 -0.0013 -0.0037 -0.0032  
AT. 45 H X -0.0060 -0.0117 0.0028 -0.0024 0.0136 0.0117  
Y -0.0087 -0.0100 0.0039 -0.0024 0.0160 0.0135  
Z -0.0083 -0.0033 0.0013 -0.0036 0.0096 0.0080  
AT. 46 H X 0.0060 0.0117 0.0028 -0.0024 -0.0136 0.0117

Y -0.0087 -0.0100 -0.0039 0.0024 0.0160 -0.0135  
Z 0.0083 0.0033 0.0013 -0.0036 -0.0096 0.0080  
AT. 47 H X -0.0060 0.0117 -0.0028 -0.0024 -0.0136 0.0117  
Y -0.0087 0.0100 -0.0039 -0.0024 -0.0160 0.0135  
Z -0.0083 0.0033 -0.0013 -0.0036 -0.0096 0.0080  
AT. 48 H X 0.0060 -0.0117 -0.0028 -0.0024 0.0136 0.0117  
Y -0.0087 0.0100 0.0039 0.0024 -0.0160 -0.0135  
Z 0.0083 -0.0033 -0.0013 -0.0036 0.0096 0.0080  
AT. 49 H X 0.0020 0.0079 -0.0043 0.0008 -0.0113 -0.0099  
Y 0.0014 0.0066 -0.0045 -0.0003 -0.0104 -0.0092  
Z 0.0081 0.0093 -0.0040 0.0043 -0.0168 -0.0147  
AT. 50 H X -0.0020 -0.0079 -0.0043 0.0008 0.0113 -0.0099  
Y 0.0014 0.0066 0.0045 0.0003 -0.0104 0.0092  
Z -0.0081 -0.0093 -0.0040 0.0043 0.0168 -0.0147  
AT. 51 H X 0.0020 -0.0079 0.0043 0.0008 0.0113 -0.0099  
Y 0.0014 -0.0066 0.0045 -0.0003 0.0104 -0.0092  
Z 0.0081 -0.0093 0.0040 0.0043 0.0168 -0.0147  
AT. 52 H X -0.0020 0.0079 0.0043 0.0008 -0.0113 -0.0099  
Y 0.0014 -0.0066 -0.0045 0.0003 0.0104 0.0092  
Z -0.0081 0.0093 0.0040 0.0043 -0.0168 -0.0147  
AT. 53 C X 0.0069 0.0042 -0.0015 0.0024 -0.0109 -0.0095  
Y 0.0015 -0.0013 0.0002 -0.0002 0.0000 0.0002  
Z 0.0077 -0.0001 0.0016 0.0034 -0.0027 -0.0019  
AT. 54 C X -0.0069 -0.0042 -0.0015 0.0024 0.0109 -0.0095  
Y 0.0015 -0.0013 -0.0002 0.0002 0.0000 -0.0002  
Z -0.0077 0.0001 0.0016 0.0034 0.0027 -0.0019  
AT. 55 C X 0.0069 -0.0042 0.0015 0.0024 0.0109 -0.0095  
Y 0.0015 0.0013 -0.0002 -0.0002 -0.0000 0.0002  
Z 0.0077 0.0001 -0.0016 0.0034 0.0027 -0.0019  
AT. 56 C X -0.0069 0.0042 0.0015 0.0024 -0.0109 -0.0095  
Y 0.0015 0.0013 0.0002 0.0002 -0.0000 -0.0002  
Z -0.0077 -0.0001 -0.0016 0.0034 -0.0027 -0.0019

AT. 57 C X -0.0031 -0.0025 0.0011 -0.0008 0.0052 0.0047  
Y -0.0007 0.0003 0.0000 0.0002 0.0001 0.0001  
Z -0.0020 0.0002 -0.0006 -0.0010 0.0004 0.0002

AT. 58 C X 0.0031 0.0025 0.0011 -0.0008 -0.0052 0.0047  
Y -0.0007 0.0003 -0.0000 -0.0002 0.0001 -0.0001  
Z 0.0020 -0.0002 -0.0006 -0.0010 -0.0004 0.0002

AT. 59 C X -0.0031 0.0025 -0.0011 -0.0008 -0.0052 0.0047  
Y -0.0007 -0.0003 -0.0000 0.0002 -0.0001 0.0001  
Z -0.0020 -0.0002 0.0006 -0.0010 -0.0004 0.0002

AT. 60 C X 0.0031 -0.0025 -0.0011 -0.0008 0.0052 0.0047  
Y -0.0007 -0.0003 0.0000 -0.0002 -0.0001 -0.0001  
Z 0.0020 0.0002 0.0006 -0.0010 0.0004 0.0002

AT. 61 H X 0.0033 0.0047 -0.0022 0.0004 -0.0093 -0.0083  
Y 0.0031 0.0045 -0.0021 0.0004 -0.0088 -0.0080  
Z 0.0011 0.0051 -0.0016 0.0019 -0.0064 -0.0051

AT. 62 H X -0.0033 -0.0047 -0.0022 0.0004 0.0093 -0.0083  
Y 0.0031 0.0045 0.0021 -0.0004 -0.0088 0.0080  
Z -0.0011 -0.0051 -0.0016 0.0019 0.0064 -0.0051

AT. 63 H X 0.0033 -0.0047 0.0022 0.0004 0.0093 -0.0083  
Y 0.0031 -0.0045 0.0021 0.0004 0.0088 -0.0080  
Z 0.0011 -0.0051 0.0016 0.0019 0.0064 -0.0051

AT. 64 H X -0.0033 0.0047 0.0022 0.0004 -0.0093 -0.0083  
Y 0.0031 -0.0045 -0.0021 -0.0004 0.0088 0.0080  
Z -0.0011 0.0051 0.0016 0.0019 -0.0064 -0.0051

AT. 65 H X -0.0007 -0.0004 0.0005 0.0002 0.0016 0.0014  
Y -0.0080 -0.0056 0.0017 -0.0029 0.0105 0.0095  
Z -0.0109 -0.0070 0.0037 -0.0018 0.0161 0.0139

AT. 66 H X 0.0007 0.0004 0.0005 0.0002 -0.0016 0.0014  
Y -0.0080 -0.0056 -0.0017 0.0029 0.0105 -0.0095  
Z 0.0109 0.0070 0.0037 -0.0018 -0.0161 0.0139

AT. 67 H X -0.0007 0.0004 -0.0005 0.0002 -0.0016 0.0014  
Y -0.0080 0.0056 -0.0017 -0.0029 -0.0105 0.0095

Z -0.0109 0.0070 -0.0037 -0.0018 -0.0161 0.0139  
AT. 68 H X 0.0007 -0.0004 -0.0005 0.0002 0.0016 0.0014  
Y -0.0080 0.0056 0.0017 0.0029 -0.0105 -0.0095  
Z 0.0109 -0.0070 -0.0037 -0.0018 0.0161 0.0139  
AT. 69 H X 0.0041 0.0064 -0.0028 0.0003 -0.0107 -0.0110  
Y -0.0053 -0.0012 -0.0008 -0.0028 0.0044 0.0031  
Z -0.0047 0.0005 -0.0019 -0.0034 0.0013 0.0001  
AT. 70 H X -0.0041 -0.0064 -0.0028 0.0003 0.0107 -0.0110  
Y -0.0053 -0.0012 0.0008 0.0028 0.0044 -0.0031  
Z 0.0047 -0.0005 -0.0019 -0.0034 -0.0013 0.0001  
AT. 71 H X 0.0041 -0.0064 0.0028 0.0003 0.0107 -0.0110  
Y -0.0053 0.0012 0.0008 -0.0028 -0.0044 0.0031  
Z -0.0047 -0.0005 0.0019 -0.0034 -0.0013 0.0001  
AT. 72 H X -0.0041 0.0064 0.0028 0.0003 -0.0107 -0.0110  
Y -0.0053 0.0012 -0.0008 0.0028 -0.0044 -0.0031  
Z 0.0047 0.0005 0.0019 -0.0034 0.0013 0.0001  
AT. 73 C X 0.0010 0.0113 -0.0027 -0.0015 -0.0088 -0.0074  
Y -0.0087 0.0026 -0.0010 -0.0030 0.0037 0.0026  
Z -0.0030 -0.0092 0.0004 -0.0004 0.0062 0.0052  
AT. 74 C X -0.0010 -0.0113 -0.0027 -0.0015 0.0088 -0.0074  
Y -0.0087 0.0026 0.0010 0.0030 0.0037 -0.0026  
Z 0.0030 0.0092 0.0004 -0.0004 -0.0062 0.0052  
AT. 75 C X 0.0010 -0.0113 0.0027 -0.0015 0.0088 -0.0074  
Y -0.0087 -0.0026 0.0010 -0.0030 -0.0037 0.0026  
Z -0.0030 0.0092 -0.0004 -0.0004 -0.0062 0.0052  
AT. 76 C X -0.0010 0.0113 0.0027 -0.0015 -0.0088 -0.0074  
Y -0.0087 -0.0026 -0.0010 0.0030 -0.0037 -0.0026  
Z 0.0030 -0.0092 -0.0004 -0.0004 0.0062 0.0052  
AT. 77 C X 0.0020 -0.0030 0.0005 0.0014 0.0007 0.0006  
Y -0.0012 -0.0044 -0.0001 -0.0007 0.0026 0.0022  
Z 0.0016 0.0020 -0.0014 -0.0002 -0.0030 -0.0025  
AT. 78 C X -0.0020 0.0030 0.0005 0.0014 -0.0007 0.0006

Y -0.0012 -0.0044 0.0001 0.0007 0.0026 -0.0022  
Z -0.0016 -0.0020 -0.0014 -0.0002 0.0030 -0.0025  
AT. 79 C X 0.0020 0.0030 -0.0005 0.0014 -0.0007 0.0006  
Y -0.0012 0.0044 0.0001 -0.0007 -0.0026 0.0022  
Z 0.0016 -0.0020 0.0014 -0.0002 0.0030 -0.0025  
AT. 80 C X -0.0020 -0.0030 -0.0005 0.0014 0.0007 0.0006  
Y -0.0012 0.0044 -0.0001 0.0007 -0.0026 -0.0022  
Z -0.0016 0.0020 0.0014 -0.0002 -0.0030 -0.0025  
AT. 81 H X -0.0055 -0.0030 0.0011 -0.0019 0.0063 0.0050  
Y -0.0112 -0.0053 0.0002 -0.0054 0.0101 0.0083  
Z 0.0164 0.0086 0.0025 0.0092 -0.0128 -0.0109  
AT. 82 H X 0.0055 0.0030 0.0011 -0.0019 -0.0063 0.0050  
Y -0.0112 -0.0053 -0.0002 0.0054 0.0101 -0.0083  
Z -0.0164 -0.0086 0.0025 0.0092 0.0128 -0.0109  
AT. 83 H X -0.0055 0.0030 -0.0011 -0.0019 -0.0063 0.0050  
Y -0.0112 0.0053 -0.0002 -0.0054 -0.0101 0.0083  
Z 0.0164 -0.0086 -0.0025 0.0092 0.0128 -0.0109  
AT. 84 H X 0.0055 -0.0030 -0.0011 -0.0019 0.0063 0.0050  
Y -0.0112 0.0053 0.0002 0.0054 -0.0101 -0.0083  
Z -0.0164 0.0086 -0.0025 0.0092 -0.0128 -0.0109  
AT. 85 H X 0.0109 0.0073 -0.0013 0.0043 -0.0114 -0.0103  
Y 0.0151 0.0127 0.0019 0.0099 -0.0143 -0.0126  
Z -0.0143 -0.0151 -0.0024 -0.0096 0.0145 0.0129  
AT. 86 H X -0.0109 -0.0073 -0.0013 0.0043 0.0114 -0.0103  
Y 0.0151 0.0127 -0.0019 -0.0099 -0.0143 0.0126  
Z 0.0143 0.0151 -0.0024 -0.0096 -0.0145 0.0129  
AT. 87 H X 0.0109 -0.0073 0.0013 0.0043 0.0114 -0.0103  
Y 0.0151 -0.0127 -0.0019 0.0099 0.0143 -0.0126  
Z -0.0143 0.0151 0.0024 -0.0096 -0.0145 0.0129  
AT. 88 H X -0.0109 0.0073 0.0013 0.0043 -0.0114 -0.0103  
Y 0.0151 -0.0127 0.0019 -0.0099 0.0143 0.0126  
Z 0.0143 -0.0151 0.0024 -0.0096 0.0145 0.0129

AT. 89 C X -0.0044 0.0043 -0.0010 -0.0030 -0.0006 -0.0002  
Y 0.0046 -0.0014 0.0009 0.0024 -0.0021 -0.0015  
Z -0.0031 0.0043 0.0021 0.0003 0.0030 0.0023

AT. 90 C X 0.0044 -0.0043 -0.0010 -0.0030 0.0006 -0.0002  
Y 0.0046 -0.0014 -0.0009 -0.0024 -0.0021 0.0015  
Z 0.0031 -0.0043 0.0021 0.0003 -0.0030 0.0023

AT. 91 C X -0.0044 -0.0043 0.0010 -0.0030 0.0006 -0.0002  
Y 0.0046 0.0014 -0.0009 0.0024 0.0021 -0.0015  
Z -0.0031 -0.0043 -0.0021 0.0003 -0.0030 0.0023

AT. 92 C X 0.0044 0.0043 0.0010 -0.0030 -0.0006 -0.0002  
Y 0.0046 0.0014 0.0009 -0.0024 0.0021 0.0015  
Z 0.0031 0.0043 -0.0021 0.0003 0.0030 0.0023

AT. 93 C X 0.0020 -0.0015 0.0005 0.0016 0.0003 0.0001  
Y -0.0016 0.0011 -0.0004 -0.0012 0.0003 0.0002  
Z 0.0003 -0.0010 -0.0010 -0.0006 -0.0011 -0.0009

AT. 94 C X -0.0020 0.0015 0.0005 0.0016 -0.0003 0.0001  
Y -0.0016 0.0011 0.0004 0.0012 0.0003 -0.0002  
Z -0.0003 0.0010 -0.0010 -0.0006 0.0011 -0.0009

AT. 95 C X 0.0020 0.0015 -0.0005 0.0016 -0.0003 0.0001  
Y -0.0016 -0.0011 0.0004 -0.0012 -0.0003 0.0002  
Z 0.0003 0.0010 0.0010 -0.0006 0.0011 -0.0009

AT. 96 C X -0.0020 -0.0015 -0.0005 0.0016 0.0003 0.0001  
Y -0.0016 -0.0011 -0.0004 0.0012 -0.0003 -0.0002  
Z -0.0003 -0.0010 0.0010 -0.0006 -0.0011 -0.0009

AT. 97 H X -0.0007 0.0006 -0.0013 -0.0017 -0.0015 -0.0012  
Y 0.0032 -0.0015 0.0032 0.0047 0.0033 0.0026  
Z 0.0012 0.0005 0.0002 -0.0001 -0.0011 -0.0002

AT. 98 H X 0.0007 -0.0006 -0.0013 -0.0017 0.0015 -0.0012  
Y 0.0032 -0.0015 -0.0032 -0.0047 0.0033 -0.0026  
Z -0.0012 -0.0005 0.0002 -0.0001 0.0011 -0.0002

AT. 99 H X -0.0007 -0.0006 0.0013 -0.0017 0.0015 -0.0012  
Y 0.0032 0.0015 -0.0032 0.0047 -0.0033 0.0026

Z 0.0012 -0.0005 -0.0002 -0.0001 0.0011 -0.0002  
AT.100 H X 0.0007 0.0006 0.0013 -0.0017 -0.0015 -0.0012  
Y 0.0032 0.0015 0.0032 -0.0047 -0.0033 -0.0026  
Z -0.0012 0.0005 -0.0002 -0.0001 -0.0011 -0.0002  
AT.101 H X 0.0000 0.0023 0.0012 0.0002 0.0000 0.0005  
Y -0.0055 0.0054 -0.0001 -0.0037 0.0006 0.0011  
Z 0.0101 -0.0046 0.0026 0.0064 -0.0023 -0.0016  
AT.102 H X -0.0000 -0.0023 0.0012 0.0002 -0.0000 0.0005  
Y -0.0055 0.0054 0.0001 0.0037 0.0006 -0.0011  
Z -0.0101 0.0046 0.0026 0.0064 0.0023 -0.0016  
AT.103 H X 0.0000 -0.0023 -0.0012 0.0002 -0.0000 0.0005  
Y -0.0055 -0.0054 0.0001 -0.0037 -0.0006 0.0011  
Z 0.0101 0.0046 -0.0026 0.0064 0.0023 -0.0016  
AT.104 H X -0.0000 0.0023 -0.0012 0.0002 0.0000 0.0005  
Y -0.0055 -0.0054 -0.0001 0.0037 -0.0006 -0.0011  
Z -0.0101 -0.0046 -0.0026 0.0064 -0.0023 -0.0016  
AT.105 H X -0.0044 0.0040 -0.0022 -0.0050 -0.0034 -0.0024  
Y -0.0018 0.0003 0.0001 0.0012 0.0010 0.0002  
Z 0.0029 -0.0023 -0.0003 0.0000 -0.0004 -0.0001  
AT.106 H X 0.0044 -0.0040 -0.0022 -0.0050 0.0034 -0.0024  
Y -0.0018 0.0003 -0.0001 -0.0012 0.0010 -0.0002  
Z -0.0029 0.0023 -0.0003 0.0000 0.0004 -0.0001  
AT.107 H X -0.0044 -0.0040 0.0022 -0.0050 0.0034 -0.0024  
Y -0.0018 -0.0003 -0.0001 0.0012 -0.0010 0.0002  
Z 0.0029 0.0023 0.0003 0.0000 0.0004 -0.0001  
AT.108 H X 0.0044 0.0040 0.0022 -0.0050 -0.0034 -0.0024  
Y -0.0018 -0.0003 0.0001 -0.0012 -0.0010 -0.0002  
Z -0.0029 -0.0023 0.0003 0.0000 -0.0004 -0.0001  
AT.109 C X -0.0029 -0.0022 0.0009 -0.0009 0.0050 0.0043  
Y 0.0024 0.0017 0.0000 0.0009 -0.0023 -0.0020  
Z -0.0021 -0.0002 -0.0008 -0.0011 -0.0001 -0.0000  
AT.110 C X 0.0029 0.0022 0.0009 -0.0009 -0.0050 0.0043



Y 0.0024 0.0017 -0.0000 -0.0009 -0.0023 0.0020  
Z 0.0021 0.0002 -0.0008 -0.0011 0.0001 -0.0000  
AT. 111 C X -0.0029 0.0022 -0.0009 -0.0009 -0.0050 0.0043  
Y 0.0024 -0.0017 -0.0000 0.0009 0.0023 -0.0020  
Z -0.0021 0.0002 0.0008 -0.0011 0.0001 -0.0000  
AT. 112 C X 0.0029 -0.0022 -0.0009 -0.0009 0.0050 0.0043  
Y 0.0024 -0.0017 0.0000 -0.0009 0.0023 0.0020  
Z 0.0021 -0.0002 0.0008 -0.0011 -0.0001 -0.0000  
AT. 113 H X 0.0034 -0.0004 0.0004 0.0012 -0.0002 -0.0004  
Y -0.0095 -0.0011 0.0020 -0.0028 0.0095 0.0082  
Z -0.0069 -0.0007 0.0046 -0.0018 0.0138 0.0101  
AT. 114 H X -0.0034 0.0004 0.0004 0.0012 0.0002 -0.0004  
Y -0.0095 -0.0011 -0.0020 0.0028 0.0095 -0.0082  
Z 0.0069 0.0007 0.0046 -0.0018 -0.0138 0.0101  
AT. 115 H X 0.0034 0.0004 -0.0004 0.0012 0.0002 -0.0004  
Y -0.0095 0.0011 -0.0020 -0.0028 -0.0095 0.0082  
Z -0.0069 0.0007 -0.0046 -0.0018 -0.0138 0.0101  
AT. 116 H X -0.0034 -0.0004 -0.0004 0.0012 -0.0002 -0.0004  
Y -0.0095 0.0011 0.0020 0.0028 -0.0095 -0.0082  
Z 0.0069 -0.0007 -0.0046 -0.0018 0.0138 0.0101  
AT. 117 H X -0.0067 0.0007 -0.0000 -0.0037 0.0041 0.0024  
Y 0.0076 -0.0015 -0.0042 0.0019 -0.0130 -0.0127  
Z 0.0030 -0.0036 -0.0044 0.0001 -0.0093 -0.0092  
AT. 118 H X 0.0067 -0.0007 -0.0000 -0.0037 -0.0041 0.0024  
Y 0.0076 -0.0015 0.0042 -0.0019 -0.0130 0.0127  
Z -0.0030 0.0036 -0.0044 0.0001 0.0093 -0.0092  
AT. 119 H X -0.0067 -0.0007 0.0000 -0.0037 -0.0041 0.0024  
Y 0.0076 0.0015 0.0042 0.0019 0.0130 -0.0127  
Z 0.0030 0.0036 0.0044 0.0001 0.0093 -0.0092  
AT. 120 H X 0.0067 0.0007 0.0000 -0.0037 0.0041 0.0024  
Y 0.0076 0.0015 -0.0042 -0.0019 0.0130 0.0127  
Z -0.0030 -0.0036 0.0044 0.0001 -0.0093 -0.0092

AT.121 C X 0.0015 -0.0009 0.0005 0.0011 0.0003 -0.0000  
Y 0.0013 0.0006 0.0001 0.0003 -0.0005 -0.0002  
Z -0.0006 -0.0001 -0.0016 -0.0016 -0.0016 -0.0017

AT.122 C X -0.0015 0.0009 0.0005 0.0011 -0.0003 -0.0000  
Y 0.0013 0.0006 -0.0001 -0.0003 -0.0005 0.0002  
Z 0.0006 0.0001 -0.0016 -0.0016 0.0016 -0.0017

AT.123 C X 0.0015 0.0009 -0.0005 0.0011 -0.0003 -0.0000  
Y 0.0013 -0.0006 -0.0001 0.0003 0.0005 -0.0002  
Z -0.0006 0.0001 0.0016 -0.0016 0.0016 -0.0017

AT.124 C X -0.0015 -0.0009 -0.0005 0.0011 0.0003 -0.0000  
Y 0.0013 -0.0006 0.0001 -0.0003 0.0005 0.0002  
Z 0.0006 -0.0001 0.0016 -0.0016 -0.0016 -0.0017

AT.125 H X 0.0021 -0.0011 0.0008 0.0025 -0.0005 -0.0017  
Y -0.0073 0.0042 -0.0012 -0.0056 0.0005 0.0007  
Z 0.0052 -0.0027 -0.0009 0.0022 -0.0023 -0.0021

AT.126 H X -0.0021 0.0011 0.0008 0.0025 0.0005 -0.0017  
Y -0.0073 0.0042 0.0012 0.0056 0.0005 -0.0007  
Z -0.0052 0.0027 -0.0009 0.0022 0.0023 -0.0021

AT.127 H X 0.0021 0.0011 -0.0008 0.0025 0.0005 -0.0017  
Y -0.0073 -0.0042 0.0012 -0.0056 -0.0005 0.0007  
Z 0.0052 0.0027 0.0009 0.0022 0.0023 -0.0021

AT.128 H X -0.0021 -0.0011 -0.0008 0.0025 -0.0005 -0.0017  
Y -0.0073 -0.0042 -0.0012 0.0056 -0.0005 -0.0007  
Z -0.0052 -0.0027 0.0009 0.0022 -0.0023 -0.0021

AT.129 H X -0.0015 -0.0014 -0.0014 -0.0022 -0.0003 0.0001  
Y 0.0037 0.0023 0.0031 0.0045 0.0011 0.0008  
Z -0.0066 0.0016 -0.0014 -0.0039 0.0012 0.0021

AT.130 H X 0.0015 0.0014 -0.0014 -0.0022 0.0003 0.0001  
Y 0.0037 0.0023 -0.0031 -0.0045 0.0011 -0.0008  
Z 0.0066 -0.0016 -0.0014 -0.0039 -0.0012 0.0021

AT.131 H X -0.0015 0.0014 0.0014 -0.0022 0.0003 0.0001  
Y 0.0037 -0.0023 -0.0031 0.0045 -0.0011 0.0008

Z -0.0066 -0.0016 0.0014 -0.0039 -0.0012 0.0021  
AT. 132 H X 0.0015 -0.0014 0.0014 -0.0022 -0.0003 0.0001  
Y 0.0037 -0.0023 0.0031 -0.0045 -0.0011 -0.0008  
Z 0.0066 0.0016 0.0014 -0.0039 0.0012 0.0021  
AT. 133 C X -0.0024 -0.0034 -0.0037 -0.0026 -0.0040 -0.0044  
Y -0.0028 0.0004 -0.0011 -0.0016 0.0004 0.0006  
Z -0.0009 0.0004 -0.0001 -0.0003 -0.0001 0.0000  
AT. 134 C X 0.0024 0.0034 -0.0037 -0.0026 0.0040 -0.0044  
Y -0.0028 0.0004 0.0011 0.0016 0.0004 -0.0006  
Z 0.0009 -0.0004 -0.0001 -0.0003 0.0001 0.0000  
AT. 135 C X -0.0024 0.0034 0.0037 -0.0026 0.0040 -0.0044  
Y -0.0028 -0.0004 0.0011 -0.0016 -0.0004 0.0006  
Z -0.0009 -0.0004 0.0001 -0.0003 0.0001 0.0000  
AT. 136 C X 0.0024 -0.0034 0.0037 -0.0026 -0.0040 -0.0044  
Y -0.0028 -0.0004 -0.0011 0.0016 -0.0004 -0.0006  
Z 0.0009 0.0004 0.0001 -0.0003 -0.0001 0.0000  
AT. 137 C X 0.0039 0.0065 0.0067 0.0046 0.0071 0.0077  
Y -0.0002 -0.0029 -0.0023 -0.0012 -0.0031 -0.0035  
Z -0.0051 -0.0093 -0.0097 -0.0062 -0.0105 -0.0115  
AT. 138 C X -0.0039 -0.0065 0.0067 0.0046 -0.0071 0.0077  
Y -0.0002 -0.0029 0.0023 0.0012 -0.0031 0.0035  
Z 0.0051 0.0093 -0.0097 -0.0062 0.0105 -0.0115  
AT. 139 C X 0.0039 -0.0065 -0.0067 0.0046 -0.0071 0.0077  
Y -0.0002 0.0029 0.0023 -0.0012 0.0031 -0.0035  
Z -0.0051 0.0093 0.0097 -0.0062 0.0105 -0.0115  
AT. 140 C X -0.0039 0.0065 -0.0067 0.0046 0.0071 0.0077  
Y -0.0002 0.0029 -0.0023 0.0012 0.0031 0.0035  
Z 0.0051 -0.0093 0.0097 -0.0062 -0.0105 -0.0115  
AT. 141 H X -0.0174 -0.0326 -0.0315 -0.0212 -0.0340 -0.0376  
Y -0.0028 0.0002 -0.0010 -0.0009 0.0015 0.0021  
Z 0.0165 0.0354 0.0331 0.0222 0.0378 0.0421  
AT. 142 H X 0.0174 0.0326 -0.0315 -0.0212 0.0340 -0.0376

Y -0.0028 0.0002 0.0010 0.0009 0.0015 -0.0021  
Z -0.0165 -0.0354 0.0331 0.0222 -0.0378 0.0421  
AT. 143 H X -0.0174 0.0326 0.0315 -0.0212 0.0340 -0.0376  
Y -0.0028 -0.0002 0.0010 -0.0009 -0.0015 0.0021  
Z 0.0165 -0.0354 -0.0331 0.0222 -0.0378 0.0421  
AT. 144 H X 0.0174 -0.0326 0.0315 -0.0212 -0.0340 -0.0376  
Y -0.0028 -0.0002 -0.0010 0.0009 -0.0015 -0.0021  
Z -0.0165 0.0354 -0.0331 0.0222 0.0378 0.0421  
AT. 145 H X -0.0284 -0.0442 -0.0474 -0.0324 -0.0503 -0.0547  
Y 0.0211 0.0269 0.0313 0.0212 0.0316 0.0341  
Z 0.0418 0.0499 0.0609 0.0398 0.0606 0.0654  
AT. 146 H X 0.0284 0.0442 -0.0474 -0.0324 0.0503 -0.0547  
Y 0.0211 0.0269 -0.0313 -0.0212 0.0316 -0.0341  
Z -0.0418 -0.0499 0.0609 0.0398 -0.0606 0.0654  
AT. 147 H X -0.0284 0.0442 0.0474 -0.0324 0.0503 -0.0547  
Y 0.0211 -0.0269 -0.0313 0.0212 -0.0316 0.0341  
Z 0.0418 -0.0499 -0.0609 0.0398 -0.0606 0.0654  
AT. 148 H X 0.0284 -0.0442 0.0474 -0.0324 -0.0503 -0.0547  
Y 0.0211 -0.0269 0.0313 -0.0212 -0.0316 -0.0341  
Z -0.0418 0.0499 -0.0609 0.0398 0.0606 0.0654  
AT. 149 O X -0.0023 -0.0013 0.0004 -0.0003 0.0026 0.0021  
Y 0.0024 0.0010 -0.0005 0.0004 -0.0028 -0.0023  
Z 0.0003 -0.0001 -0.0003 -0.0003 -0.0002 -0.0002  
AT. 150 O X 0.0023 0.0013 0.0004 -0.0003 -0.0026 0.0021  
Y 0.0024 0.0010 0.0005 -0.0004 -0.0028 0.0023  
Z -0.0003 0.0001 -0.0003 -0.0003 0.0002 -0.0002  
AT. 151 O X -0.0023 0.0013 -0.0004 -0.0003 -0.0026 0.0021  
Y 0.0024 -0.0010 0.0005 0.0004 0.0028 -0.0023  
Z 0.0003 0.0001 0.0003 -0.0003 0.0002 -0.0002  
AT. 152 O X 0.0023 -0.0013 -0.0004 -0.0003 0.0026 0.0021  
Y 0.0024 -0.0010 -0.0005 -0.0004 0.0028 0.0023  
Z -0.0003 -0.0001 0.0003 -0.0003 -0.0002 -0.0002

AT.153 H X -0.0021 -0.0057 -0.0012 -0.0022 0.0050 0.0048  
Y 0.0050 0.0118 0.0017 0.0022 -0.0050 -0.0033  
Z 0.0014 0.0070 0.0017 0.0017 -0.0029 -0.0025

AT.154 H X 0.0021 0.0057 -0.0012 -0.0022 -0.0050 0.0048  
Y 0.0050 0.0118 -0.0017 -0.0022 -0.0050 0.0033  
Z -0.0014 -0.0070 0.0017 0.0017 0.0029 -0.0025

AT.155 H X -0.0021 0.0057 0.0012 -0.0022 -0.0050 0.0048  
Y 0.0050 -0.0118 -0.0017 0.0022 0.0050 -0.0033  
Z 0.0014 -0.0070 -0.0017 0.0017 0.0029 -0.0025

AT.156 H X 0.0021 -0.0057 0.0012 -0.0022 0.0050 0.0048  
Y 0.0050 -0.0118 0.0017 -0.0022 0.0050 0.0033  
Z -0.0014 0.0070 -0.0017 0.0017 -0.0029 -0.0025

AT.157 O X 0.0017 -0.0092 0.0020 0.0018 0.0055 0.0046  
Y 0.0014 -0.0040 0.0010 0.0010 0.0021 0.0018  
Z 0.0006 0.0025 -0.0004 -0.0001 -0.0021 -0.0018

AT.158 O X -0.0017 0.0092 0.0020 0.0018 -0.0055 0.0046  
Y 0.0014 -0.0040 -0.0010 -0.0010 0.0021 -0.0018  
Z -0.0006 -0.0025 -0.0004 -0.0001 0.0021 -0.0018

AT.159 O X 0.0017 0.0092 -0.0020 0.0018 -0.0055 0.0046  
Y 0.0014 0.0040 -0.0010 0.0010 -0.0021 0.0018  
Z 0.0006 -0.0025 0.0004 -0.0001 0.0021 -0.0018

AT.160 O X -0.0017 -0.0092 -0.0020 0.0018 0.0055 0.0046  
Y 0.0014 0.0040 0.0010 -0.0010 -0.0021 -0.0018  
Z -0.0006 0.0025 0.0004 -0.0001 -0.0021 -0.0018

AT.161 O X -0.0002 0.0014 -0.0003 -0.0002 -0.0009 -0.0007  
Y -0.0001 0.0010 -0.0001 -0.0001 -0.0004 -0.0004  
Z -0.0006 0.0013 -0.0005 -0.0004 -0.0008 -0.0006

AT.162 O X 0.0002 -0.0014 -0.0003 -0.0002 0.0009 -0.0007  
Y -0.0001 0.0010 0.0001 0.0001 -0.0004 0.0004  
Z 0.0006 -0.0013 -0.0005 -0.0004 0.0008 -0.0006

AT.163 O X -0.0002 -0.0014 0.0003 -0.0002 0.0009 -0.0007  
Y -0.0001 -0.0010 0.0001 -0.0001 0.0004 -0.0004

Z -0.0006 -0.0013 0.0005 -0.0004 0.0008 -0.0006  
AT.164 O X 0.0002 0.0014 0.0003 -0.0002 -0.0009 -0.0007  
Y -0.0001 -0.0010 -0.0001 0.0001 0.0004 0.0004  
Z 0.0006 0.0013 0.0005 -0.0004 -0.0008 -0.0006  
AT.165 H X 0.0017 -0.0018 -0.0003 0.0003 -0.0017 -0.0017  
Y 0.0007 0.0008 0.0001 -0.0000 -0.0010 -0.0012  
Z -0.0004 -0.0002 0.0032 0.0007 0.0057 0.0041  
AT.166 H X -0.0017 0.0018 -0.0003 0.0003 0.0017 -0.0017  
Y 0.0007 0.0008 -0.0001 0.0000 -0.0010 0.0012  
Z 0.0004 0.0002 0.0032 0.0007 -0.0057 0.0041  
AT.167 H X 0.0017 0.0018 0.0003 0.0003 0.0017 -0.0017  
Y 0.0007 -0.0008 -0.0001 -0.0000 0.0010 -0.0012  
Z -0.0004 0.0002 -0.0032 0.0007 -0.0057 0.0041  
AT.168 H X -0.0017 -0.0018 0.0003 0.0003 -0.0017 -0.0017  
Y 0.0007 -0.0008 0.0001 0.0000 0.0010 0.0012  
Z 0.0004 -0.0002 -0.0032 0.0007 0.0057 0.0041  
AT.169 O X 0.0001 0.0001 -0.0000 0.0001 -0.0002 -0.0002  
Y -0.0001 -0.0001 0.0001 0.0000 0.0001 0.0001  
Z -0.0001 0.0002 -0.0001 -0.0004 -0.0001 0.0001  
AT.170 O X -0.0001 -0.0001 -0.0000 0.0001 0.0002 -0.0002  
Y -0.0001 -0.0001 -0.0001 -0.0000 0.0001 -0.0001  
Z 0.0001 -0.0002 -0.0001 -0.0004 0.0001 0.0001  
AT.171 O X 0.0001 -0.0001 0.0000 0.0001 0.0002 -0.0002  
Y -0.0001 0.0001 -0.0001 0.0000 -0.0001 0.0001  
Z -0.0001 -0.0002 0.0001 -0.0004 0.0001 0.0001  
AT.172 O X -0.0001 0.0001 0.0000 0.0001 -0.0002 -0.0002  
Y -0.0001 0.0001 0.0001 -0.0000 -0.0001 -0.0001  
Z 0.0001 0.0002 0.0001 -0.0004 -0.0001 0.0001  
AT.173 H X -0.0016 0.0021 -0.0006 -0.0032 0.0026 0.0026  
Y -0.0008 -0.0010 -0.0001 -0.0003 -0.0002 -0.0001  
Z 0.0034 0.0003 0.0018 0.0028 -0.0010 -0.0019  
AT.174 H X 0.0016 -0.0021 -0.0006 -0.0032 -0.0026 0.0026

Y -0.0008 -0.0010 0.0001 0.0003 -0.0002 0.0001  
Z -0.0034 -0.0003 0.0018 0.0028 0.0010 -0.0019  
AT. 175 H X -0.0016 -0.0021 0.0006 -0.0032 -0.0026 0.0026  
Y -0.0008 0.0010 0.0001 -0.0003 0.0002 -0.0001  
Z 0.0034 -0.0003 -0.0018 0.0028 0.0010 -0.0019  
AT. 176 H X 0.0016 0.0021 0.0006 -0.0032 0.0026 0.0026  
Y -0.0008 0.0010 -0.0001 0.0003 0.0002 0.0001  
Z -0.0034 0.0003 -0.0018 0.0028 -0.0010 -0.0019

FREQ(CM\*\*-1) 1236.86 1237.86 1270.26 1271.27 1272.50 1273.00

AT. 1 I X -0.0001 -0.0001 0.0000 0.0000 0.0000 0.0000  
Y 0.0002 0.0001 0.0000 -0.0000 0.0000 0.0000  
Z -0.0000 -0.0000 0.0000 -0.0000 0.0000 0.0000  
AT. 2 I X -0.0001 0.0001 -0.0000 0.0000 0.0000 -0.0000  
Y -0.0002 0.0001 0.0000 0.0000 -0.0000 0.0000  
Z -0.0000 0.0000 -0.0000 -0.0000 0.0000 -0.0000  
AT. 3 I X 0.0001 -0.0001 0.0000 0.0000 -0.0000 -0.0000  
Y -0.0002 0.0001 0.0000 -0.0000 -0.0000 -0.0000  
Z 0.0000 -0.0000 0.0000 -0.0000 -0.0000 -0.0000  
AT. 4 I X 0.0001 0.0001 -0.0000 0.0000 -0.0000 0.0000  
Y 0.0002 0.0001 0.0000 0.0000 0.0000 -0.0000  
Z 0.0000 0.0000 -0.0000 -0.0000 -0.0000 0.0000  
AT. 5 I X 0.0002 0.0002 0.0000 -0.0000 0.0000 0.0000  
Y 0.0001 0.0001 -0.0000 0.0000 -0.0000 -0.0000  
Z -0.0000 -0.0000 0.0000 -0.0000 0.0000 0.0000  
AT. 6 I X 0.0002 -0.0002 -0.0000 -0.0000 0.0000 -0.0000  
Y -0.0001 0.0001 -0.0000 -0.0000 0.0000 -0.0000  
Z -0.0000 0.0000 -0.0000 -0.0000 0.0000 -0.0000  
AT. 7 I X -0.0002 0.0002 0.0000 -0.0000 -0.0000 -0.0000  
Y -0.0001 0.0001 -0.0000 0.0000 0.0000 0.0000  
Z 0.0000 -0.0000 0.0000 -0.0000 -0.0000 -0.0000

AT. 8 I X -0.0002 -0.0002 -0.0000 -0.0000 -0.0000 0.0000  
Y 0.0001 0.0001 -0.0000 -0.0000 -0.0000 0.0000  
Z 0.0000 0.0000 -0.0000 -0.0000 -0.0000 0.0000

AT. 9 N X 0.0006 0.0005 0.0033 -0.0026 0.0029 0.0019  
Y 0.0011 0.0012 -0.0011 0.0008 -0.0010 -0.0002  
Z 0.0023 0.0042 0.0036 -0.0020 0.0033 0.0014

AT. 10 N X 0.0006 -0.0005 -0.0033 -0.0026 0.0029 -0.0019  
Y -0.0011 0.0012 -0.0011 -0.0008 0.0010 -0.0002  
Z 0.0023 -0.0042 -0.0036 -0.0020 0.0033 -0.0014

AT. 11 N X -0.0006 0.0005 0.0033 -0.0026 -0.0029 -0.0019  
Y -0.0011 0.0012 -0.0011 0.0008 0.0010 0.0002  
Z -0.0023 0.0042 0.0036 -0.0020 -0.0033 -0.0014

AT. 12 N X -0.0006 -0.0005 -0.0033 -0.0026 -0.0029 0.0019  
Y 0.0011 0.0012 -0.0011 -0.0008 -0.0010 0.0002  
Z -0.0023 -0.0042 -0.0036 -0.0020 -0.0033 0.0014

AT. 13 N X -0.0011 -0.0007 0.0060 -0.0063 0.0063 0.0063  
Y 0.0005 -0.0000 0.0005 -0.0003 0.0002 0.0009  
Z 0.0002 0.0012 0.0109 -0.0120 0.0128 0.0112

AT. 14 N X -0.0011 0.0007 -0.0060 -0.0063 0.0063 -0.0063  
Y -0.0005 -0.0000 0.0005 0.0003 -0.0002 0.0009  
Z 0.0002 -0.0012 -0.0109 -0.0120 0.0128 -0.0112

AT. 15 N X 0.0011 -0.0007 0.0060 -0.0063 -0.0063 -0.0063  
Y -0.0005 -0.0000 0.0005 -0.0003 -0.0002 -0.0009  
Z -0.0002 0.0012 0.0109 -0.0120 -0.0128 -0.0112

AT. 16 N X 0.0011 0.0007 -0.0060 -0.0063 -0.0063 0.0063  
Y 0.0005 -0.0000 0.0005 0.0003 0.0002 -0.0009  
Z -0.0002 -0.0012 -0.0109 -0.0120 -0.0128 0.0112

AT. 17 O X -0.0017 -0.0011 -0.0005 0.0003 -0.0005 -0.0004  
Y -0.0014 -0.0014 -0.0006 0.0004 -0.0005 -0.0003  
Z -0.0023 -0.0016 -0.0017 0.0014 -0.0018 -0.0012

AT. 18 O X -0.0017 0.0011 0.0005 0.0003 -0.0005 0.0004  
Y 0.0014 -0.0014 -0.0006 -0.0004 0.0005 -0.0003



Z -0.0023 0.0016 0.0017 0.0014 -0.0018 0.0012  
AT. 19 O X 0.0017 -0.0011 -0.0005 0.0003 0.0005 0.0004  
Y 0.0014 -0.0014 -0.0006 0.0004 0.0005 0.0003  
Z 0.0023 -0.0016 -0.0017 0.0014 0.0018 0.0012  
AT. 20 O X 0.0017 0.0011 0.0005 0.0003 0.0005 -0.0004  
Y -0.0014 -0.0014 -0.0006 -0.0004 -0.0005 0.0003  
Z 0.0023 0.0016 0.0017 0.0014 0.0018 -0.0012  
AT. 21 O X 0.0009 0.0012 -0.0002 0.0003 -0.0003 -0.0003  
Y -0.0013 -0.0013 0.0013 -0.0014 0.0016 0.0012  
Z 0.0019 0.0023 -0.0033 0.0035 -0.0036 -0.0036  
AT. 22 O X 0.0009 -0.0012 0.0002 0.0003 -0.0003 0.0003  
Y 0.0013 -0.0013 0.0013 0.0014 -0.0016 0.0012  
Z 0.0019 -0.0023 0.0033 0.0035 -0.0036 0.0036  
AT. 23 O X -0.0009 0.0012 -0.0002 0.0003 0.0003 0.0003  
Y 0.0013 -0.0013 0.0013 -0.0014 -0.0016 -0.0012  
Z -0.0019 0.0023 -0.0033 0.0035 0.0036 0.0036  
AT. 24 O X -0.0009 -0.0012 0.0002 0.0003 0.0003 -0.0003  
Y -0.0013 -0.0013 0.0013 0.0014 0.0016 -0.0012  
Z -0.0019 -0.0023 0.0033 0.0035 0.0036 -0.0036  
AT. 25 C X -0.0066 -0.0028 0.0003 -0.0004 0.0004 -0.0002  
Y -0.0000 -0.0004 0.0017 -0.0014 0.0017 0.0007  
Z 0.0104 0.0046 -0.0004 0.0007 -0.0005 0.0001  
AT. 26 C X -0.0066 0.0028 -0.0003 -0.0004 0.0004 0.0002  
Y 0.0000 -0.0004 0.0017 0.0014 -0.0017 0.0007  
Z 0.0104 -0.0046 0.0004 0.0007 -0.0005 -0.0001  
AT. 27 C X 0.0066 -0.0028 0.0003 -0.0004 -0.0004 0.0002  
Y 0.0000 -0.0004 0.0017 -0.0014 -0.0017 -0.0007  
Z -0.0104 0.0046 -0.0004 0.0007 0.0005 -0.0001  
AT. 28 C X 0.0066 0.0028 -0.0003 -0.0004 -0.0004 -0.0002  
Y -0.0000 -0.0004 0.0017 0.0014 0.0017 -0.0007  
Z -0.0104 -0.0046 0.0004 0.0007 0.0005 0.0001  
AT. 29 H X 0.0309 0.0130 -0.0023 0.0025 -0.0027 0.0001

Y -0.0137 -0.0051 -0.0028 0.0012 -0.0031 -0.0013  
Z -0.0430 -0.0179 0.0043 -0.0039 0.0049 0.0001  
AT. 30 H X 0.0309 -0.0130 0.0023 0.0025 -0.0027 -0.0001  
Y 0.0137 -0.0051 -0.0028 -0.0012 0.0031 -0.0013  
Z -0.0430 0.0179 -0.0043 -0.0039 0.0049 -0.0001  
AT. 31 H X -0.0309 0.0130 -0.0023 0.0025 0.0027 -0.0001  
Y 0.0137 -0.0051 -0.0028 0.0012 0.0031 0.0013  
Z 0.0430 -0.0179 0.0043 -0.0039 -0.0049 -0.0001  
AT. 32 H X -0.0309 -0.0130 0.0023 0.0025 0.0027 0.0001  
Y -0.0137 -0.0051 -0.0028 -0.0012 -0.0031 0.0013  
Z 0.0430 0.0179 -0.0043 -0.0039 -0.0049 0.0001  
AT. 33 H X 0.0460 0.0174 0.0038 -0.0015 0.0036 0.0032  
Y 0.0037 0.0010 0.0033 -0.0026 0.0033 0.0015  
Z -0.0509 -0.0190 -0.0096 0.0066 -0.0094 -0.0057  
AT. 34 H X 0.0460 -0.0174 -0.0038 -0.0015 0.0036 -0.0032  
Y -0.0037 0.0010 0.0033 0.0026 -0.0033 0.0015  
Z -0.0509 0.0190 0.0096 0.0066 -0.0094 0.0057  
AT. 35 H X -0.0460 0.0174 0.0038 -0.0015 -0.0036 -0.0032  
Y -0.0037 0.0010 0.0033 -0.0026 -0.0033 -0.0015  
Z 0.0509 -0.0190 -0.0096 0.0066 0.0094 0.0057  
AT. 36 H X -0.0460 -0.0174 -0.0038 -0.0015 -0.0036 0.0032  
Y 0.0037 0.0010 0.0033 0.0026 0.0033 -0.0015  
Z 0.0509 0.0190 0.0096 0.0066 0.0094 -0.0057  
AT. 37 C X 0.0036 0.0017 -0.0007 0.0007 -0.0007 -0.0002  
Y 0.0002 0.0012 -0.0026 0.0024 -0.0025 -0.0010  
Z -0.0008 -0.0007 0.0021 -0.0020 0.0022 0.0013  
AT. 38 C X 0.0036 -0.0017 0.0007 0.0007 -0.0007 0.0002  
Y -0.0002 0.0012 -0.0026 -0.0024 0.0025 -0.0010  
Z -0.0008 0.0007 -0.0021 -0.0020 0.0022 -0.0013  
AT. 39 C X -0.0036 0.0017 -0.0007 0.0007 0.0007 0.0002  
Y -0.0002 0.0012 -0.0026 0.0024 0.0025 0.0010  
Z 0.0008 -0.0007 0.0021 -0.0020 -0.0022 -0.0013

AT. 40 C X -0.0036 -0.0017 0.0007 0.0007 0.0007 -0.0002  
Y 0.0002 0.0012 -0.0026 -0.0024 -0.0025 0.0010  
Z 0.0008 0.0007 -0.0021 -0.0020 -0.0022 0.0013

AT. 41 C X 0.0026 0.0026 -0.0045 0.0034 -0.0033 -0.0028  
Y -0.0008 -0.0010 0.0011 -0.0013 0.0013 0.0004  
Z -0.0015 -0.0034 -0.0023 0.0017 -0.0024 -0.0011

AT. 42 C X 0.0026 -0.0026 0.0045 0.0034 -0.0033 0.0028  
Y 0.0008 -0.0010 0.0011 0.0013 -0.0013 0.0004  
Z -0.0015 0.0034 0.0023 0.0017 -0.0024 0.0011

AT. 43 C X -0.0026 0.0026 -0.0045 0.0034 0.0033 0.0028  
Y 0.0008 -0.0010 0.0011 -0.0013 -0.0013 -0.0004  
Z 0.0015 -0.0034 -0.0023 0.0017 0.0024 0.0011

AT. 44 C X -0.0026 -0.0026 0.0045 0.0034 0.0033 -0.0028  
Y -0.0008 -0.0010 0.0011 0.0013 0.0013 -0.0004  
Z 0.0015 0.0034 0.0023 0.0017 0.0024 -0.0011

AT. 45 H X 0.0103 0.0115 -0.0056 0.0052 -0.0051 -0.0032  
Y 0.0112 0.0129 -0.0117 0.0097 -0.0101 -0.0055  
Z 0.0078 0.0072 -0.0131 0.0109 -0.0120 -0.0061

AT. 46 H X 0.0103 -0.0115 0.0056 0.0052 -0.0051 0.0032  
Y -0.0112 0.0129 -0.0117 -0.0097 0.0101 -0.0055  
Z 0.0078 -0.0072 0.0131 0.0109 -0.0120 0.0061

AT. 47 H X -0.0103 0.0115 -0.0056 0.0052 0.0051 0.0032  
Y -0.0112 0.0129 -0.0117 0.0097 0.0101 0.0055  
Z -0.0078 0.0072 -0.0131 0.0109 0.0120 0.0061

AT. 48 H X -0.0103 -0.0115 0.0056 0.0052 0.0051 -0.0032  
Y 0.0112 0.0129 -0.0117 -0.0097 -0.0101 0.0055  
Z -0.0078 -0.0072 0.0131 0.0109 0.0120 -0.0061

AT. 49 H X -0.0072 -0.0101 0.0038 -0.0032 0.0025 -0.0029  
Y -0.0060 -0.0091 0.0037 -0.0028 0.0023 -0.0019  
Z -0.0130 -0.0144 0.0126 -0.0114 0.0106 0.0044

AT. 50 H X -0.0072 0.0101 -0.0038 -0.0032 0.0025 0.0029  
Y 0.0060 -0.0091 0.0037 0.0028 -0.0023 -0.0019

Z -0.0130 0.0144 -0.0126 -0.0114 0.0106 -0.0044  
AT. 51 H X 0.0072 -0.0101 0.0038 -0.0032 -0.0025 0.0029  
Y 0.0060 -0.0091 0.0037 -0.0028 -0.0023 0.0019  
Z 0.0130 -0.0144 0.0126 -0.0114 -0.0106 -0.0044  
AT. 52 H X 0.0072 0.0101 -0.0038 -0.0032 -0.0025 -0.0029  
Y -0.0060 -0.0091 0.0037 0.0028 0.0023 0.0019  
Z 0.0130 0.0144 -0.0126 -0.0114 -0.0106 0.0044  
AT. 53 C X -0.0088 -0.0087 0.0110 -0.0089 0.0087 0.0085  
Y -0.0006 0.0005 -0.0017 0.0011 -0.0013 0.0016  
Z -0.0034 -0.0010 0.0011 -0.0015 0.0022 0.0005  
AT. 54 C X -0.0088 0.0087 -0.0110 -0.0089 0.0087 -0.0085  
Y 0.0006 0.0005 -0.0017 -0.0011 0.0013 0.0016  
Z -0.0034 0.0010 -0.0011 -0.0015 0.0022 -0.0005  
AT. 55 C X 0.0088 -0.0087 0.0110 -0.0089 -0.0087 -0.0085  
Y 0.0006 0.0005 -0.0017 0.0011 0.0013 -0.0016  
Z 0.0034 -0.0010 0.0011 -0.0015 -0.0022 -0.0005  
AT. 56 C X 0.0088 0.0087 -0.0110 -0.0089 -0.0087 0.0085  
Y -0.0006 0.0005 -0.0017 -0.0011 -0.0013 -0.0016  
Z 0.0034 0.0010 -0.0011 -0.0015 -0.0022 0.0005  
AT. 57 C X 0.0041 0.0043 -0.0041 0.0034 -0.0032 -0.0032  
Y 0.0003 -0.0001 0.0009 -0.0007 0.0007 -0.0003  
Z 0.0006 0.0001 0.0003 -0.0001 -0.0000 0.0007  
AT. 58 C X 0.0041 -0.0043 0.0041 0.0034 -0.0032 0.0032  
Y -0.0003 -0.0001 0.0009 0.0007 -0.0007 -0.0003  
Z 0.0006 -0.0001 -0.0003 -0.0001 -0.0000 -0.0007  
AT. 59 C X -0.0041 0.0043 -0.0041 0.0034 0.0032 0.0032  
Y -0.0003 -0.0001 0.0009 -0.0007 -0.0007 0.0003  
Z -0.0006 0.0001 0.0003 -0.0001 0.0000 -0.0007  
AT. 60 C X -0.0041 -0.0043 0.0041 0.0034 0.0032 -0.0032  
Y 0.0003 -0.0001 0.0009 0.0007 0.0007 0.0003  
Z -0.0006 -0.0001 -0.0003 -0.0001 0.0000 0.0007  
AT. 61 H X -0.0065 -0.0077 0.0070 -0.0064 0.0055 0.0055

Y -0.0061 -0.0072 0.0075 -0.0064 0.0057 0.0055  
Z -0.0042 -0.0069 0.0066 -0.0069 0.0056 0.0016  
AT. 62 H X -0.0065 0.0077 -0.0070 -0.0064 0.0055 -0.0055  
Y 0.0061 -0.0072 0.0075 0.0064 -0.0057 0.0055  
Z -0.0042 0.0069 -0.0066 -0.0069 0.0056 -0.0016  
AT. 63 H X 0.0065 -0.0077 0.0070 -0.0064 -0.0055 -0.0055  
Y 0.0061 -0.0072 0.0075 -0.0064 -0.0057 -0.0055  
Z 0.0042 -0.0069 0.0066 -0.0069 -0.0056 -0.0016  
AT. 64 H X 0.0065 0.0077 -0.0070 -0.0064 -0.0055 0.0055  
Y -0.0061 -0.0072 0.0075 0.0064 0.0057 -0.0055  
Z 0.0042 0.0069 -0.0066 -0.0069 -0.0056 0.0016  
AT. 65 H X 0.0012 0.0012 -0.0007 0.0010 -0.0007 -0.0015  
Y 0.0087 0.0086 -0.0087 0.0063 -0.0067 -0.0048  
Z 0.0134 0.0128 -0.0108 0.0103 -0.0091 -0.0118  
AT. 66 H X 0.0012 -0.0012 0.0007 0.0010 -0.0007 0.0015  
Y -0.0087 0.0086 -0.0087 -0.0063 0.0067 -0.0048  
Z 0.0134 -0.0128 0.0108 0.0103 -0.0091 0.0118  
AT. 67 H X -0.0012 0.0012 -0.0007 0.0010 0.0007 0.0015  
Y -0.0087 0.0086 -0.0087 0.0063 0.0067 0.0048  
Z -0.0134 0.0128 -0.0108 0.0103 0.0091 0.0118  
AT. 68 H X -0.0012 -0.0012 0.0007 0.0010 0.0007 -0.0015  
Y 0.0087 0.0086 -0.0087 -0.0063 -0.0067 0.0048  
Z -0.0134 -0.0128 0.0108 0.0103 0.0091 -0.0118  
AT. 69 H X -0.0082 -0.0090 0.0086 -0.0058 0.0057 0.0057  
Y 0.0033 0.0024 -0.0039 0.0037 -0.0036 -0.0019  
Z 0.0011 0.0000 -0.0016 0.0021 -0.0021 0.0007  
AT. 70 H X -0.0082 0.0090 -0.0086 -0.0058 0.0057 -0.0057  
Y -0.0033 0.0024 -0.0039 -0.0037 0.0036 -0.0019  
Z 0.0011 -0.0000 0.0016 0.0021 -0.0021 -0.0007  
AT. 71 H X 0.0082 -0.0090 0.0086 -0.0058 -0.0057 -0.0057  
Y -0.0033 0.0024 -0.0039 0.0037 0.0036 0.0019  
Z -0.0011 0.0000 -0.0016 0.0021 0.0021 -0.0007

AT. 72 H X 0.0082 0.0090 -0.0086 -0.0058 -0.0057 0.0057  
Y 0.0033 0.0024 -0.0039 -0.0037 -0.0036 0.0019  
Z -0.0011 -0.0000 0.0016 0.0021 0.0021 0.0007

AT. 73 C X -0.0047 -0.0084 -0.0095 0.0085 -0.0100 -0.0096  
Y 0.0048 0.0018 -0.0049 0.0061 -0.0054 -0.0089  
Z 0.0040 0.0052 0.0018 -0.0017 0.0016 0.0013

AT. 74 C X -0.0047 0.0084 0.0095 0.0085 -0.0100 0.0096  
Y -0.0048 0.0018 -0.0049 -0.0061 0.0054 -0.0089  
Z 0.0040 -0.0052 -0.0018 -0.0017 0.0016 -0.0013

AT. 75 C X 0.0047 -0.0084 -0.0095 0.0085 0.0100 0.0096  
Y -0.0048 0.0018 -0.0049 0.0061 0.0054 0.0089  
Z -0.0040 0.0052 0.0018 -0.0017 -0.0016 -0.0013

AT. 76 C X 0.0047 0.0084 0.0095 0.0085 0.0100 -0.0096  
Y 0.0048 0.0018 -0.0049 -0.0061 -0.0054 0.0089  
Z -0.0040 -0.0052 -0.0018 -0.0017 -0.0016 0.0013

AT. 77 C X -0.0003 0.0016 -0.0063 0.0064 -0.0064 -0.0060  
Y 0.0015 0.0021 0.0005 0.0003 0.0004 -0.0008  
Z -0.0016 -0.0024 -0.0019 0.0011 -0.0018 -0.0011

AT. 78 C X -0.0003 -0.0016 0.0063 0.0064 -0.0064 0.0060  
Y -0.0015 0.0021 0.0005 -0.0003 -0.0004 -0.0008  
Z -0.0016 0.0024 0.0019 0.0011 -0.0018 0.0011

AT. 79 C X 0.0003 0.0016 -0.0063 0.0064 0.0064 0.0060  
Y -0.0015 0.0021 0.0005 0.0003 -0.0004 0.0008  
Z 0.0016 -0.0024 -0.0019 0.0011 0.0018 0.0011

AT. 80 C X 0.0003 -0.0016 0.0063 0.0064 0.0064 -0.0060  
Y 0.0015 0.0021 0.0005 -0.0003 0.0004 0.0008  
Z 0.0016 0.0024 0.0019 0.0011 0.0018 -0.0011

AT. 81 H X 0.0047 0.0046 -0.0014 0.0019 -0.0014 -0.0018  
Y 0.0082 0.0063 0.0069 -0.0056 0.0067 0.0045  
Z -0.0115 -0.0078 -0.0116 0.0099 -0.0107 -0.0067

AT. 82 H X 0.0047 -0.0046 0.0014 0.0019 -0.0014 0.0018  
Y -0.0082 0.0063 0.0069 0.0056 -0.0067 0.0045

Z -0.0115 0.0078 0.0116 0.0099 -0.0107 0.0067  
AT. 83 H X -0.0047 0.0046 -0.0014 0.0019 0.0014 0.0018  
Y -0.0082 0.0063 0.0069 -0.0056 -0.0067 -0.0045  
Z 0.0115 -0.0078 -0.0116 0.0099 0.0107 0.0067  
AT. 84 H X -0.0047 -0.0046 0.0014 0.0019 0.0014 -0.0018  
Y 0.0082 0.0063 0.0069 0.0056 0.0067 -0.0045  
Z 0.0115 0.0078 0.0116 0.0099 0.0107 -0.0067  
AT. 85 H X -0.0088 -0.0093 -0.0130 0.0123 -0.0116 -0.0126  
Y -0.0123 -0.0096 -0.0183 0.0173 -0.0182 -0.0173  
Z 0.0123 0.0105 0.0156 -0.0146 0.0151 0.0144  
AT. 86 H X -0.0088 0.0093 0.0130 0.0123 -0.0116 0.0126  
Y 0.0123 -0.0096 -0.0183 -0.0173 0.0182 -0.0173  
Z 0.0123 -0.0105 -0.0156 -0.0146 0.0151 -0.0144  
AT. 87 H X 0.0088 -0.0093 -0.0130 0.0123 0.0116 0.0126  
Y 0.0123 -0.0096 -0.0183 0.0173 0.0182 0.0173  
Z -0.0123 0.0105 0.0156 -0.0146 -0.0151 -0.0144  
AT. 88 H X 0.0088 0.0093 0.0130 0.0123 0.0116 -0.0126  
Y -0.0123 -0.0096 -0.0183 -0.0173 -0.0182 0.0173  
Z -0.0123 -0.0105 -0.0156 -0.0146 -0.0151 0.0144  
AT. 89 C X 0.0010 -0.0022 0.0173 -0.0177 0.0174 0.0166  
Y -0.0025 -0.0007 0.0045 -0.0054 0.0047 0.0070  
Z 0.0024 0.0023 0.0026 -0.0025 0.0029 0.0031  
AT. 90 C X 0.0010 0.0022 -0.0173 -0.0177 0.0174 -0.0166  
Y 0.0025 -0.0007 0.0045 0.0054 -0.0047 0.0070  
Z 0.0024 -0.0023 -0.0026 -0.0025 0.0029 -0.0031  
AT. 91 C X -0.0010 -0.0022 0.0173 -0.0177 -0.0174 -0.0166  
Y 0.0025 -0.0007 0.0045 -0.0054 -0.0047 -0.0070  
Z -0.0024 0.0023 0.0026 -0.0025 -0.0029 -0.0031  
AT. 92 C X -0.0010 0.0022 -0.0173 -0.0177 -0.0174 0.0166  
Y -0.0025 -0.0007 0.0045 0.0054 0.0047 -0.0070  
Z -0.0024 -0.0023 -0.0026 -0.0025 -0.0029 0.0031  
AT. 93 C X -0.0003 0.0011 -0.0063 0.0066 -0.0063 -0.0060

Y 0.0005 -0.0002 -0.0019 0.0023 -0.0021 -0.0029  
Z -0.0007 -0.0010 -0.0012 0.0013 -0.0013 -0.0017  
AT. 94 C X -0.0003 -0.0011 0.0063 0.0066 -0.0063 0.0060  
Y -0.0005 -0.0002 -0.0019 -0.0023 0.0021 -0.0029  
Z -0.0007 0.0010 0.0012 0.0013 -0.0013 0.0017  
AT. 95 C X 0.0003 0.0011 -0.0063 0.0066 0.0063 0.0060  
Y -0.0005 -0.0002 -0.0019 0.0023 0.0021 0.0029  
Z 0.0007 -0.0010 -0.0012 0.0013 0.0013 0.0017  
AT. 96 C X 0.0003 -0.0011 0.0063 0.0066 0.0063 -0.0060  
Y 0.0005 -0.0002 -0.0019 -0.0023 -0.0021 0.0029  
Z 0.0007 0.0010 0.0012 0.0013 0.0013 -0.0017  
AT. 97 H X -0.0006 -0.0021 0.0050 -0.0054 0.0048 0.0047  
Y 0.0013 0.0052 -0.0106 0.0110 -0.0104 -0.0091  
Z -0.0001 -0.0010 0.0195 -0.0213 0.0195 0.0220  
AT. 98 H X -0.0006 0.0021 -0.0050 -0.0054 0.0048 -0.0047  
Y -0.0013 0.0052 -0.0106 -0.0110 0.0104 -0.0091  
Z -0.0001 0.0010 -0.0195 -0.0213 0.0195 -0.0220  
AT. 99 H X 0.0006 -0.0021 0.0050 -0.0054 -0.0048 -0.0047  
Y -0.0013 0.0052 -0.0106 0.0110 0.0104 0.0091  
Z 0.0001 -0.0010 0.0195 -0.0213 -0.0195 -0.0220  
AT. 100 H X 0.0006 0.0021 -0.0050 -0.0054 -0.0048 0.0047  
Y 0.0013 0.0052 -0.0106 -0.0110 -0.0104 0.0091  
Z 0.0001 0.0010 -0.0195 -0.0213 -0.0195 0.0220  
AT. 101 H X 0.0002 -0.0001 0.0094 -0.0099 0.0096 0.0101  
Y 0.0019 -0.0013 0.0146 -0.0148 0.0145 0.0135  
Z -0.0042 0.0007 -0.0039 0.0029 -0.0032 -0.0003  
AT. 102 H X 0.0002 0.0001 -0.0094 -0.0099 0.0096 -0.0101  
Y -0.0019 -0.0013 0.0146 0.0148 -0.0145 0.0135  
Z -0.0042 -0.0007 0.0039 0.0029 -0.0032 0.0003  
AT. 103 H X -0.0002 -0.0001 0.0094 -0.0099 -0.0096 -0.0101  
Y -0.0019 -0.0013 0.0146 -0.0148 -0.0145 -0.0135  
Z 0.0042 0.0007 -0.0039 0.0029 0.0032 0.0003



AT.104 H X -0.0002 0.0001 -0.0094 -0.0099 -0.0096 0.0101  
Y 0.0019 -0.0013 0.0146 0.0148 0.0145 -0.0135  
Z 0.0042 -0.0007 0.0039 0.0029 0.0032 -0.0003

AT.105 H X -0.0015 -0.0053 0.0125 -0.0128 0.0125 0.0108  
Y 0.0014 0.0009 0.0035 -0.0040 0.0038 0.0052  
Z -0.0011 0.0003 -0.0113 0.0122 -0.0117 -0.0130

AT.106 H X -0.0015 0.0053 -0.0125 -0.0128 0.0125 -0.0108  
Y -0.0014 0.0009 0.0035 0.0040 -0.0038 0.0052  
Z -0.0011 -0.0003 0.0113 0.0122 -0.0117 0.0130

AT.107 H X 0.0015 -0.0053 0.0125 -0.0128 -0.0125 -0.0108  
Y -0.0014 0.0009 0.0035 -0.0040 -0.0038 -0.0052  
Z 0.0011 0.0003 -0.0113 0.0122 0.0117 0.0130

AT.108 H X 0.0015 0.0053 -0.0125 -0.0128 -0.0125 0.0108  
Y 0.0014 0.0009 0.0035 0.0040 0.0038 -0.0052  
Z 0.0011 -0.0003 0.0113 0.0122 0.0117 -0.0130

AT.109 C X 0.0040 0.0041 -0.0055 0.0048 -0.0046 -0.0046  
Y -0.0016 -0.0018 -0.0031 0.0037 -0.0037 -0.0044  
Z 0.0004 -0.0004 -0.0045 0.0050 -0.0053 -0.0045

AT.110 C X 0.0040 -0.0041 0.0055 0.0048 -0.0046 0.0046  
Y 0.0016 -0.0018 -0.0031 -0.0037 0.0037 -0.0044  
Z 0.0004 0.0004 0.0045 0.0050 -0.0053 0.0045

AT.111 C X -0.0040 0.0041 -0.0055 0.0048 0.0046 0.0046  
Y 0.0016 -0.0018 -0.0031 0.0037 0.0037 0.0044  
Z -0.0004 -0.0004 -0.0045 0.0050 0.0053 0.0045

AT.112 C X -0.0040 -0.0041 0.0055 0.0048 0.0046 -0.0046  
Y -0.0016 -0.0018 -0.0031 -0.0037 -0.0037 0.0044  
Z -0.0004 0.0004 0.0045 0.0050 0.0053 -0.0045

AT.113 H X -0.0010 0.0006 -0.0000 -0.0005 0.0007 0.0002  
Y 0.0093 0.0062 -0.0156 0.0162 -0.0160 -0.0161  
Z 0.0119 0.0098 -0.0195 0.0216 -0.0205 -0.0212

AT.114 H X -0.0010 -0.0006 0.0000 -0.0005 0.0007 -0.0002  
Y -0.0093 0.0062 -0.0156 -0.0162 0.0160 -0.0161

Z 0.0119 -0.0098 0.0195 0.0216 -0.0205 0.0212  
AT. 115 H X 0.0010 0.0006 -0.0000 -0.0005 -0.0007 -0.0002  
Y -0.0093 0.0062 -0.0156 0.0162 0.0160 0.0161  
Z -0.0119 0.0098 -0.0195 0.0216 0.0205 0.0212  
AT. 116 H X 0.0010 -0.0006 0.0000 -0.0005 -0.0007 0.0002  
Y 0.0093 0.0062 -0.0156 -0.0162 -0.0160 0.0161  
Z -0.0119 -0.0098 0.0195 0.0216 0.0205 -0.0212  
AT. 117 H X 0.0043 0.0016 -0.0035 0.0048 -0.0050 -0.0011  
Y -0.0120 -0.0110 0.0170 -0.0165 0.0159 0.0145  
Z -0.0087 -0.0081 0.0130 -0.0130 0.0122 0.0118  
AT. 118 H X 0.0043 -0.0016 0.0035 0.0048 -0.0050 0.0011  
Y 0.0120 -0.0110 0.0170 0.0165 -0.0159 0.0145  
Z -0.0087 0.0081 -0.0130 -0.0130 0.0122 -0.0118  
AT. 119 H X -0.0043 0.0016 -0.0035 0.0048 0.0050 0.0011  
Y 0.0120 -0.0110 0.0170 -0.0165 -0.0159 -0.0145  
Z 0.0087 -0.0081 0.0130 -0.0130 -0.0122 -0.0118  
AT. 120 H X -0.0043 -0.0016 0.0035 0.0048 0.0050 -0.0011  
Y -0.0120 -0.0110 0.0170 0.0165 0.0159 -0.0145  
Z 0.0087 0.0081 -0.0130 -0.0130 -0.0122 0.0118  
AT. 121 C X -0.0002 0.0009 -0.0079 0.0083 -0.0081 -0.0078  
Y -0.0004 -0.0005 -0.0005 0.0002 -0.0001 -0.0014  
Z -0.0009 -0.0019 -0.0064 0.0070 -0.0074 -0.0069  
AT. 122 C X -0.0002 -0.0009 0.0079 0.0083 -0.0081 0.0078  
Y 0.0004 -0.0005 -0.0005 -0.0002 0.0001 -0.0014  
Z -0.0009 0.0019 0.0064 0.0070 -0.0074 0.0069  
AT. 123 C X 0.0002 0.0009 -0.0079 0.0083 0.0081 0.0078  
Y 0.0004 -0.0005 -0.0005 0.0002 0.0001 0.0014  
Z 0.0009 -0.0019 -0.0064 0.0070 0.0074 0.0069  
AT. 124 C X 0.0002 -0.0009 0.0079 0.0083 0.0081 -0.0078  
Y -0.0004 -0.0005 -0.0005 -0.0002 -0.0001 0.0014  
Z 0.0009 0.0019 0.0064 0.0070 0.0074 -0.0069  
AT. 125 H X -0.0017 -0.0008 -0.0066 0.0066 -0.0067 -0.0082

Y 0.0026 -0.0022 0.0306 -0.0315 0.0312 0.0343  
Z -0.0027 -0.0004 -0.0287 0.0299 -0.0299 -0.0319  
AT. 126 H X -0.0017 0.0008 0.0066 0.0066 -0.0067 0.0082  
Y -0.0026 -0.0022 0.0306 0.0315 -0.0312 0.0343  
Z -0.0027 0.0004 0.0287 0.0299 -0.0299 0.0319  
AT. 127 H X 0.0017 -0.0008 -0.0066 0.0066 0.0067 0.0082  
Y -0.0026 -0.0022 0.0306 -0.0315 -0.0312 -0.0343  
Z 0.0027 -0.0004 -0.0287 0.0299 0.0299 0.0319  
AT. 128 H X 0.0017 0.0008 0.0066 0.0066 0.0067 -0.0082  
Y 0.0026 -0.0022 0.0306 0.0315 0.0312 -0.0343  
Z 0.0027 0.0004 0.0287 0.0299 0.0299 -0.0319  
AT. 129 H X 0.0006 -0.0004 0.0097 -0.0109 0.0096 0.0132  
Y -0.0004 0.0022 -0.0153 0.0167 -0.0147 -0.0197  
Z 0.0030 0.0007 0.0272 -0.0288 0.0270 0.0316  
AT. 130 H X 0.0006 0.0004 -0.0097 -0.0109 0.0096 -0.0132  
Y 0.0004 0.0022 -0.0153 -0.0167 0.0147 -0.0197  
Z 0.0030 -0.0007 -0.0272 -0.0288 0.0270 -0.0316  
AT. 131 H X -0.0006 -0.0004 0.0097 -0.0109 -0.0096 -0.0132  
Y 0.0004 0.0022 -0.0153 0.0167 0.0147 0.0197  
Z -0.0030 0.0007 0.0272 -0.0288 -0.0270 -0.0316  
AT. 132 H X -0.0006 0.0004 -0.0097 -0.0109 -0.0096 0.0132  
Y -0.0004 0.0022 -0.0153 -0.0167 -0.0147 0.0197  
Z -0.0030 -0.0007 -0.0272 -0.0288 -0.0270 0.0316  
AT. 133 C X -0.0035 -0.0046 0.0004 -0.0007 0.0007 0.0009  
Y 0.0008 0.0003 0.0076 -0.0080 0.0074 0.0089  
Z 0.0002 0.0002 0.0052 -0.0053 0.0050 0.0060  
AT. 134 C X -0.0035 0.0046 -0.0004 -0.0007 0.0007 -0.0009  
Y -0.0008 0.0003 0.0076 0.0080 -0.0074 0.0089  
Z 0.0002 -0.0002 -0.0052 -0.0053 0.0050 -0.0060  
AT. 135 C X 0.0035 -0.0046 0.0004 -0.0007 -0.0007 -0.0009  
Y -0.0008 0.0003 0.0076 -0.0080 -0.0074 -0.0089  
Z -0.0002 0.0002 0.0052 -0.0053 -0.0050 -0.0060

AT. 136 C X 0.0035 0.0046 -0.0004 -0.0007 -0.0007 0.0009  
Y 0.0008 0.0003 0.0076 0.0080 0.0074 -0.0089  
Z -0.0002 -0.0002 -0.0052 -0.0053 -0.0050 0.0060

AT. 137 C X 0.0064 0.0083 0.0006 -0.0003 0.0002 0.0002  
Y -0.0029 -0.0036 -0.0054 0.0055 -0.0053 -0.0059  
Z -0.0092 -0.0120 -0.0040 0.0038 -0.0034 -0.0040

AT. 138 C X 0.0064 -0.0083 -0.0006 -0.0003 0.0002 -0.0002  
Y 0.0029 -0.0036 -0.0054 -0.0055 0.0053 -0.0059  
Z -0.0092 0.0120 0.0040 0.0038 -0.0034 0.0040

AT. 139 C X -0.0064 0.0083 0.0006 -0.0003 -0.0002 -0.0002  
Y 0.0029 -0.0036 -0.0054 0.0055 0.0053 0.0059  
Z 0.0092 -0.0120 -0.0040 0.0038 0.0034 0.0040

AT. 140 C X -0.0064 -0.0083 -0.0006 -0.0003 -0.0002 0.0002  
Y -0.0029 -0.0036 -0.0054 -0.0055 -0.0053 0.0059  
Z 0.0092 0.0120 0.0040 0.0038 0.0034 -0.0040

AT. 141 H X -0.0306 -0.0396 -0.0090 0.0076 -0.0062 -0.0075  
Y 0.0015 0.0021 0.0107 -0.0108 0.0104 0.0113  
Z 0.0343 0.0444 0.0174 -0.0159 0.0143 0.0160

AT. 142 H X -0.0306 0.0396 0.0090 0.0076 -0.0062 0.0075  
Y -0.0015 0.0021 0.0107 0.0108 -0.0104 0.0113  
Z 0.0343 -0.0444 -0.0174 -0.0159 0.0143 -0.0160

AT. 143 H X 0.0306 -0.0396 -0.0090 0.0076 0.0062 0.0075  
Y -0.0015 0.0021 0.0107 -0.0108 -0.0104 -0.0113  
Z -0.0343 0.0444 0.0174 -0.0159 -0.0143 -0.0160

AT. 144 H X 0.0306 0.0396 0.0090 0.0076 0.0062 -0.0075  
Y 0.0015 0.0021 0.0107 0.0108 0.0104 -0.0113  
Z -0.0343 -0.0444 -0.0174 -0.0159 -0.0143 0.0160

AT. 145 H X -0.0441 -0.0583 -0.0066 0.0044 -0.0038 -0.0041  
Y 0.0268 0.0362 -0.0043 0.0058 -0.0058 -0.0066  
Z 0.0501 0.0688 -0.0066 0.0094 -0.0091 -0.0108

AT. 146 H X -0.0441 0.0583 0.0066 0.0044 -0.0038 0.0041  
Y -0.0268 0.0362 -0.0043 -0.0058 0.0058 -0.0066

Z 0.0501 -0.0688 0.0066 0.0094 -0.0091 0.0108  
AT. 147 H X 0.0441 -0.0583 -0.0066 0.0044 0.0038 0.0041  
Y -0.0268 0.0362 -0.0043 0.0058 0.0058 0.0066  
Z -0.0501 0.0688 -0.0066 0.0094 0.0091 0.0108  
AT. 148 H X 0.0441 0.0583 0.0066 0.0044 0.0038 -0.0041  
Y 0.0268 0.0362 -0.0043 -0.0058 -0.0058 0.0066  
Z -0.0501 -0.0688 0.0066 0.0094 0.0091 -0.0108  
AT. 149 O X 0.0020 0.0022 0.0007 -0.0003 0.0006 -0.0001  
Y -0.0023 -0.0023 0.0001 -0.0005 0.0002 0.0010  
Z -0.0001 -0.0002 -0.0015 0.0013 -0.0013 -0.0007  
AT. 150 O X 0.0020 -0.0022 -0.0007 -0.0003 0.0006 0.0001  
Y 0.0023 -0.0023 0.0001 0.0005 -0.0002 0.0010  
Z -0.0001 0.0002 0.0015 0.0013 -0.0013 0.0007  
AT. 151 O X -0.0020 0.0022 0.0007 -0.0003 -0.0006 0.0001  
Y 0.0023 -0.0023 0.0001 -0.0005 -0.0002 -0.0010  
Z 0.0001 -0.0002 -0.0015 0.0013 0.0013 0.0007  
AT. 152 O X -0.0020 -0.0022 -0.0007 -0.0003 -0.0006 -0.0001  
Y -0.0023 -0.0023 0.0001 0.0005 0.0002 -0.0010  
Z 0.0001 0.0002 0.0015 0.0013 0.0013 -0.0007  
AT. 153 H X 0.0050 0.0046 -0.0113 0.0111 -0.0109 -0.0081  
Y -0.0026 -0.0039 0.0179 -0.0177 0.0170 0.0130  
Z -0.0025 -0.0026 0.0126 -0.0123 0.0124 0.0089  
AT. 154 H X 0.0050 -0.0046 0.0113 0.0111 -0.0109 0.0081  
Y 0.0026 -0.0039 0.0179 0.0177 -0.0170 0.0130  
Z -0.0025 0.0026 -0.0126 -0.0123 0.0124 -0.0089  
AT. 155 H X -0.0050 0.0046 -0.0113 0.0111 0.0109 0.0081  
Y 0.0026 -0.0039 0.0179 -0.0177 -0.0170 -0.0130  
Z 0.0025 -0.0026 0.0126 -0.0123 -0.0124 -0.0089  
AT. 156 H X -0.0050 -0.0046 0.0113 0.0111 0.0109 -0.0081  
Y -0.0026 -0.0039 0.0179 0.0177 0.0170 -0.0130  
Z 0.0025 0.0026 -0.0126 -0.0123 -0.0124 0.0089  
AT. 157 O X 0.0023 0.0055 0.0035 -0.0033 0.0041 0.0043

Y 0.0006 0.0022 0.0011 -0.0012 0.0014 0.0018  
Z -0.0013 -0.0019 -0.0016 0.0017 -0.0018 -0.0017  
AT. 158 O X 0.0023 -0.0055 -0.0035 -0.0033 0.0041 -0.0043  
Y -0.0006 0.0022 0.0011 0.0012 -0.0014 0.0018  
Z -0.0013 0.0019 0.0016 0.0017 -0.0018 0.0017  
AT. 159 O X -0.0023 0.0055 0.0035 -0.0033 -0.0041 -0.0043  
Y -0.0006 0.0022 0.0011 -0.0012 -0.0014 -0.0018  
Z 0.0013 -0.0019 -0.0016 0.0017 0.0018 0.0017  
AT. 160 O X -0.0023 -0.0055 -0.0035 -0.0033 -0.0041 0.0043  
Y 0.0006 0.0022 0.0011 0.0012 0.0014 -0.0018  
Z 0.0013 0.0019 0.0016 0.0017 0.0018 -0.0017  
AT. 161 O X -0.0005 -0.0008 -0.0001 0.0000 -0.0000 0.0000  
Y -0.0002 -0.0003 -0.0002 0.0001 -0.0001 -0.0002  
Z -0.0003 -0.0008 -0.0000 -0.0001 -0.0001 -0.0001  
AT. 162 O X -0.0005 0.0008 0.0001 0.0000 -0.0000 -0.0000  
Y 0.0002 -0.0003 -0.0002 -0.0001 0.0001 -0.0002  
Z -0.0003 0.0008 0.0000 -0.0001 -0.0001 0.0001  
AT. 163 O X 0.0005 -0.0008 -0.0001 0.0000 0.0000 -0.0000  
Y 0.0002 -0.0003 -0.0002 0.0001 0.0001 0.0002  
Z 0.0003 -0.0008 -0.0000 -0.0001 0.0001 0.0001  
AT. 164 O X 0.0005 0.0008 0.0001 0.0000 0.0000 0.0000  
Y -0.0002 -0.0003 -0.0002 -0.0001 -0.0001 0.0002  
Z 0.0003 0.0008 0.0000 -0.0001 0.0001 -0.0001  
AT. 165 H X -0.0015 -0.0012 -0.0015 0.0017 -0.0017 -0.0012  
Y -0.0006 -0.0010 -0.0014 0.0014 -0.0016 -0.0013  
Z 0.0042 0.0048 0.0004 -0.0001 0.0005 0.0000  
AT. 166 H X -0.0015 0.0012 0.0015 0.0017 -0.0017 0.0012  
Y 0.0006 -0.0010 -0.0014 -0.0014 0.0016 -0.0013  
Z 0.0042 -0.0048 -0.0004 -0.0001 0.0005 -0.0000  
AT. 167 H X 0.0015 -0.0012 -0.0015 0.0017 0.0017 0.0012  
Y 0.0006 -0.0010 -0.0014 0.0014 0.0016 0.0013  
Z -0.0042 0.0048 0.0004 -0.0001 -0.0005 -0.0000

AT.168 H X 0.0015 0.0012 0.0015 0.0017 0.0017 -0.0012  
Y -0.0006 -0.0010 -0.0014 -0.0014 -0.0016 0.0013  
Z -0.0042 -0.0048 -0.0004 -0.0001 -0.0005 0.0000

AT.169 O X -0.0002 -0.0001 -0.0001 0.0002 -0.0001 -0.0001  
Y 0.0000 0.0001 -0.0001 0.0001 -0.0005 -0.0003  
Z 0.0001 0.0000 0.0001 -0.0001 -0.0000 -0.0001

AT.170 O X -0.0002 0.0001 0.0001 0.0002 -0.0001 0.0001  
Y -0.0000 0.0001 -0.0001 -0.0001 0.0005 -0.0003  
Z 0.0001 -0.0000 -0.0001 -0.0001 -0.0000 0.0001

AT.171 O X 0.0002 -0.0001 -0.0001 0.0002 0.0001 0.0001  
Y -0.0000 0.0001 -0.0001 0.0001 0.0005 0.0003  
Z -0.0001 0.0000 0.0001 -0.0001 0.0000 0.0001

AT.172 O X 0.0002 0.0001 0.0001 0.0002 0.0001 -0.0001  
Y 0.0000 0.0001 -0.0001 -0.0001 -0.0005 0.0003  
Z -0.0001 -0.0000 -0.0001 -0.0001 0.0000 -0.0001

AT.173 H X 0.0040 0.0014 0.0008 -0.0010 0.0033 0.0029  
Y -0.0006 0.0001 0.0005 -0.0003 -0.0003 -0.0002  
Z -0.0024 -0.0019 -0.0050 0.0043 -0.0023 -0.0015

AT.174 H X 0.0040 -0.0014 -0.0008 -0.0010 0.0033 -0.0029  
Y 0.0006 0.0001 0.0005 0.0003 0.0003 -0.0002  
Z -0.0024 0.0019 0.0050 0.0043 -0.0023 0.0015

AT.175 H X -0.0040 0.0014 0.0008 -0.0010 -0.0033 -0.0029  
Y 0.0006 0.0001 0.0005 -0.0003 0.0003 0.0002  
Z 0.0024 -0.0019 -0.0050 0.0043 0.0023 0.0015

AT.176 H X -0.0040 -0.0014 -0.0008 -0.0010 -0.0033 0.0029  
Y -0.0006 0.0001 0.0005 0.0003 -0.0003 0.0002  
Z 0.0024 0.0019 0.0050 0.0043 0.0023 -0.0015

FREQ(CM\*\*-1) 1281.74 1282.70 1282.76 1283.33 1285.59 1286.07

AT. 1 I X 0.0000 0.0000 0.0000 -0.0000 0.0000 0.0000  
Y 0.0000 0.0000 0.0000 -0.0000 0.0000 0.0000

Z 0.0000 0.0000 0.0000 -0.0000 0.0000 0.0000  
AT. 2 I X 0.0000 -0.0000 -0.0000 -0.0000 0.0000 -0.0000  
Y -0.0000 0.0000 0.0000 0.0000 -0.0000 0.0000  
Z 0.0000 -0.0000 -0.0000 -0.0000 0.0000 -0.0000  
AT. 3 I X 0.0000 -0.0000 0.0000 0.0000 0.0000 0.0000  
Y 0.0000 -0.0000 0.0000 0.0000 0.0000 0.0000  
Z 0.0000 -0.0000 0.0000 0.0000 0.0000 0.0000  
AT. 4 I X 0.0000 0.0000 -0.0000 0.0000 0.0000 -0.0000  
Y -0.0000 -0.0000 0.0000 -0.0000 -0.0000 0.0000  
Z 0.0000 0.0000 -0.0000 0.0000 0.0000 -0.0000  
AT. 5 I X 0.0000 0.0000 0.0000 -0.0000 -0.0000 -0.0000  
Y 0.0000 0.0000 0.0000 -0.0000 0.0000 0.0000  
Z -0.0000 -0.0000 -0.0000 0.0000 -0.0000 -0.0000  
AT. 6 I X 0.0000 -0.0000 -0.0000 -0.0000 -0.0000 0.0000  
Y -0.0000 0.0000 0.0000 0.0000 -0.0000 0.0000  
Z -0.0000 0.0000 0.0000 0.0000 -0.0000 0.0000  
AT. 7 I X 0.0000 -0.0000 0.0000 0.0000 -0.0000 -0.0000  
Y 0.0000 -0.0000 0.0000 0.0000 0.0000 0.0000  
Z -0.0000 0.0000 -0.0000 -0.0000 -0.0000 -0.0000  
AT. 8 I X 0.0000 0.0000 -0.0000 0.0000 -0.0000 0.0000  
Y -0.0000 -0.0000 0.0000 -0.0000 -0.0000 0.0000  
Z -0.0000 -0.0000 0.0000 -0.0000 -0.0000 0.0000  
AT. 9 N X 0.0064 0.0064 0.0061 -0.0065 -0.0009 0.0009  
Y -0.0022 -0.0011 -0.0014 0.0014 -0.0022 -0.0023  
Z 0.0124 0.0138 0.0128 -0.0138 -0.0057 -0.0020  
AT. 10 N X 0.0064 -0.0064 -0.0061 -0.0065 -0.0009 -0.0009  
Y 0.0022 -0.0011 -0.0014 -0.0014 0.0022 -0.0023  
Z 0.0124 -0.0138 -0.0128 -0.0138 -0.0057 0.0020  
AT. 11 N X 0.0064 -0.0064 0.0061 0.0065 -0.0009 0.0009  
Y -0.0022 0.0011 -0.0014 -0.0014 -0.0022 -0.0023  
Z 0.0124 -0.0138 0.0128 0.0138 -0.0057 -0.0020  
AT. 12 N X 0.0064 0.0064 -0.0061 0.0065 -0.0009 -0.0009



Y 0.0022 0.0011 -0.0014 0.0014 0.0022 -0.0023  
Z 0.0124 0.0138 -0.0128 0.0138 -0.0057 0.0020  
AT. 13 N X -0.0022 -0.0019 -0.0030 0.0025 0.0010 0.0007  
Y -0.0003 0.0019 0.0010 -0.0011 -0.0052 -0.0050  
Z -0.0061 -0.0105 -0.0104 0.0092 0.0144 0.0130  
AT. 14 N X -0.0022 0.0019 0.0030 0.0025 0.0010 -0.0007  
Y 0.0003 0.0019 0.0010 0.0011 0.0052 -0.0050  
Z -0.0061 0.0105 0.0104 0.0092 0.0144 -0.0130  
AT. 15 N X -0.0022 0.0019 -0.0030 -0.0025 0.0010 0.0007  
Y -0.0003 -0.0019 0.0010 0.0011 -0.0052 -0.0050  
Z -0.0061 0.0105 -0.0104 -0.0092 0.0144 0.0130  
AT. 16 N X -0.0022 -0.0019 0.0030 -0.0025 0.0010 -0.0007  
Y 0.0003 -0.0019 0.0010 -0.0011 0.0052 -0.0050  
Z -0.0061 -0.0105 0.0104 -0.0092 0.0144 -0.0130  
AT. 17 O X -0.0013 -0.0015 -0.0013 0.0014 0.0006 0.0002  
Y -0.0016 -0.0020 -0.0017 0.0019 0.0013 0.0008  
Z -0.0033 -0.0034 -0.0030 0.0034 0.0003 -0.0006  
AT. 18 O X -0.0013 0.0015 0.0013 0.0014 0.0006 -0.0002  
Y 0.0016 -0.0020 -0.0017 -0.0019 -0.0013 0.0008  
Z -0.0033 0.0034 0.0030 0.0034 0.0003 0.0006  
AT. 19 O X -0.0013 0.0015 -0.0013 -0.0014 0.0006 0.0002  
Y -0.0016 0.0020 -0.0017 -0.0019 0.0013 0.0008  
Z -0.0033 0.0034 -0.0030 -0.0034 0.0003 -0.0006  
AT. 20 O X -0.0013 -0.0015 0.0013 -0.0014 0.0006 -0.0002  
Y 0.0016 0.0020 -0.0017 0.0019 -0.0013 0.0008  
Z -0.0033 -0.0034 0.0030 -0.0034 0.0003 0.0006  
AT. 21 O X 0.0003 0.0004 0.0004 -0.0003 -0.0000 0.0000  
Y -0.0010 -0.0022 -0.0019 0.0018 0.0037 0.0033  
Z 0.0015 0.0018 0.0022 -0.0019 -0.0017 -0.0013  
AT. 22 O X 0.0003 -0.0004 -0.0004 -0.0003 -0.0000 -0.0000  
Y 0.0010 -0.0022 -0.0019 -0.0018 -0.0037 0.0033  
Z 0.0015 -0.0018 -0.0022 -0.0019 -0.0017 0.0013

AT. 23 O X 0.0003 -0.0004 0.0004 0.0003 -0.0000 0.0000  
Y -0.0010 0.0022 -0.0019 -0.0018 0.0037 0.0033  
Z 0.0015 -0.0018 0.0022 0.0019 -0.0017 -0.0013

AT. 24 O X 0.0003 0.0004 -0.0004 0.0003 -0.0000 -0.0000  
Y 0.0010 0.0022 -0.0019 0.0018 -0.0037 0.0033  
Z 0.0015 0.0018 -0.0022 0.0019 -0.0017 0.0013

AT. 25 C X 0.0010 0.0007 0.0009 -0.0010 0.0006 0.0009  
Y 0.0036 0.0027 0.0029 -0.0030 0.0013 0.0021  
Z -0.0012 -0.0006 -0.0010 0.0011 -0.0015 -0.0019

AT. 26 C X 0.0010 -0.0007 -0.0009 -0.0010 0.0006 -0.0009  
Y -0.0036 0.0027 0.0029 0.0030 -0.0013 0.0021  
Z -0.0012 0.0006 0.0010 0.0011 -0.0015 0.0019

AT. 27 C X 0.0010 -0.0007 0.0009 0.0010 0.0006 0.0009  
Y 0.0036 -0.0027 0.0029 0.0030 0.0013 0.0021  
Z -0.0012 0.0006 -0.0010 -0.0011 -0.0015 -0.0019

AT. 28 C X 0.0010 0.0007 -0.0009 0.0010 0.0006 -0.0009  
Y -0.0036 -0.0027 0.0029 -0.0030 -0.0013 0.0021  
Z -0.0012 -0.0006 0.0010 -0.0011 -0.0015 0.0019

AT. 29 H X -0.0040 -0.0021 -0.0033 0.0036 -0.0040 -0.0045  
Y -0.0047 -0.0042 -0.0036 0.0039 -0.0003 -0.0012  
Z 0.0075 0.0047 0.0064 -0.0069 0.0056 0.0067

AT. 30 H X -0.0040 0.0021 0.0033 0.0036 -0.0040 0.0045  
Y 0.0047 -0.0042 -0.0036 -0.0039 0.0003 -0.0012  
Z 0.0075 -0.0047 -0.0064 -0.0069 0.0056 -0.0067

AT. 31 H X -0.0040 0.0021 -0.0033 -0.0036 -0.0040 -0.0045  
Y -0.0047 0.0042 -0.0036 -0.0039 -0.0003 -0.0012  
Z 0.0075 -0.0047 0.0064 0.0069 0.0056 0.0067

AT. 32 H X -0.0040 -0.0021 0.0033 -0.0036 -0.0040 0.0045  
Y 0.0047 0.0042 -0.0036 0.0039 0.0003 -0.0012  
Z 0.0075 0.0047 -0.0064 0.0069 0.0056 -0.0067

AT. 33 H X 0.0051 0.0048 0.0035 -0.0036 -0.0007 -0.0001  
Y 0.0068 0.0050 0.0055 -0.0056 0.0027 0.0041

Z -0.0178 -0.0133 -0.0137 0.0137 -0.0060 -0.0088  
AT. 34 H X 0.0051 -0.0048 -0.0035 -0.0036 -0.0007 0.0001  
Y -0.0068 0.0050 0.0055 0.0056 -0.0027 0.0041  
Z -0.0178 0.0133 0.0137 0.0137 -0.0060 0.0088  
AT. 35 H X 0.0051 -0.0048 0.0035 0.0036 -0.0007 -0.0001  
Y 0.0068 -0.0050 0.0055 0.0056 0.0027 0.0041  
Z -0.0178 0.0133 -0.0137 -0.0137 -0.0060 -0.0088  
AT. 36 H X 0.0051 0.0048 -0.0035 0.0036 -0.0007 0.0001  
Y -0.0068 -0.0050 0.0055 -0.0056 -0.0027 0.0041  
Z -0.0178 -0.0133 0.0137 -0.0137 -0.0060 0.0088  
AT. 37 C X -0.0013 -0.0006 -0.0010 0.0009 -0.0012 -0.0015  
Y -0.0061 -0.0039 -0.0048 0.0047 -0.0041 -0.0055  
Z 0.0039 0.0030 0.0030 -0.0033 0.0023 0.0033  
AT. 38 C X -0.0013 0.0006 0.0010 0.0009 -0.0012 0.0015  
Y 0.0061 -0.0039 -0.0048 -0.0047 0.0041 -0.0055  
Z 0.0039 -0.0030 -0.0030 -0.0033 0.0023 -0.0033  
AT. 39 C X -0.0013 0.0006 -0.0010 -0.0009 -0.0012 -0.0015  
Y -0.0061 0.0039 -0.0048 -0.0047 -0.0041 -0.0055  
Z 0.0039 -0.0030 0.0030 0.0033 0.0023 0.0033  
AT. 40 C X -0.0013 -0.0006 0.0010 -0.0009 -0.0012 0.0015  
Y 0.0061 0.0039 -0.0048 0.0047 0.0041 -0.0055  
Z 0.0039 0.0030 -0.0030 0.0033 0.0023 -0.0033  
AT. 41 C X -0.0084 -0.0104 -0.0093 0.0094 0.0063 0.0041  
Y 0.0013 -0.0010 -0.0001 0.0000 0.0055 0.0056  
Z -0.0073 -0.0068 -0.0067 0.0073 0.0000 -0.0020  
AT. 42 C X -0.0084 0.0104 0.0093 0.0094 0.0063 -0.0041  
Y -0.0013 -0.0010 -0.0001 -0.0000 -0.0055 0.0056  
Z -0.0073 0.0068 0.0067 0.0073 0.0000 0.0020  
AT. 43 C X -0.0084 0.0104 -0.0093 -0.0094 0.0063 0.0041  
Y 0.0013 0.0010 -0.0001 -0.0000 0.0055 0.0056  
Z -0.0073 0.0068 -0.0067 -0.0073 0.0000 -0.0020  
AT. 44 C X -0.0084 -0.0104 0.0093 -0.0094 0.0063 -0.0041

Y -0.0013 0.0010 -0.0001 0.0000 -0.0055 0.0056  
Z -0.0073 -0.0068 0.0067 -0.0073 0.0000 0.0020  
AT. 45 H X -0.0100 -0.0093 -0.0094 0.0100 -0.0021 -0.0052  
Y -0.0227 -0.0199 -0.0207 0.0215 -0.0038 -0.0101  
Z -0.0276 -0.0233 -0.0245 0.0257 -0.0065 -0.0140  
AT. 46 H X -0.0100 0.0093 0.0094 0.0100 -0.0021 0.0052  
Y 0.0227 -0.0199 -0.0207 -0.0215 0.0038 -0.0101  
Z -0.0276 0.0233 0.0245 0.0257 -0.0065 0.0140  
AT. 47 H X -0.0100 0.0093 -0.0094 -0.0100 -0.0021 -0.0052  
Y -0.0227 0.0199 -0.0207 -0.0215 -0.0038 -0.0101  
Z -0.0276 0.0233 -0.0245 -0.0257 -0.0065 -0.0140  
AT. 48 H X -0.0100 -0.0093 0.0094 -0.0100 -0.0021 0.0052  
Y 0.0227 0.0199 -0.0207 0.0215 0.0038 -0.0101  
Z -0.0276 -0.0233 0.0245 -0.0257 -0.0065 0.0140  
AT. 49 H X 0.0214 0.0125 0.0175 -0.0168 0.0157 0.0215  
Y 0.0162 0.0098 0.0135 -0.0127 0.0107 0.0152  
Z 0.0322 0.0252 0.0283 -0.0284 0.0112 0.0188  
AT. 50 H X 0.0214 -0.0125 -0.0175 -0.0168 0.0157 -0.0215  
Y -0.0162 0.0098 0.0135 0.0127 -0.0107 0.0152  
Z 0.0322 -0.0252 -0.0283 -0.0284 0.0112 -0.0188  
AT. 51 H X 0.0214 -0.0125 0.0175 0.0168 0.0157 0.0215  
Y 0.0162 -0.0098 0.0135 0.0127 0.0107 0.0152  
Z 0.0322 -0.0252 0.0283 0.0284 0.0112 0.0188  
AT. 52 H X 0.0214 0.0125 -0.0175 0.0168 0.0157 -0.0215  
Y -0.0162 -0.0098 0.0135 -0.0127 -0.0107 0.0152  
Z 0.0322 0.0252 -0.0283 0.0284 0.0112 -0.0188  
AT. 53 C X 0.0135 0.0193 0.0158 -0.0163 -0.0156 -0.0127  
Y -0.0120 -0.0079 -0.0098 0.0099 -0.0071 -0.0094  
Z 0.0014 -0.0030 -0.0014 0.0009 0.0108 0.0112  
AT. 54 C X 0.0135 -0.0193 -0.0158 -0.0163 -0.0156 0.0127  
Y 0.0120 -0.0079 -0.0098 -0.0099 0.0071 -0.0094  
Z 0.0014 0.0030 0.0014 0.0009 0.0108 -0.0112

AT. 55 C X 0.0135 -0.0193 0.0158 0.0163 -0.0156 -0.0127  
Y -0.0120 0.0079 -0.0098 -0.0099 -0.0071 -0.0094  
Z 0.0014 0.0030 -0.0014 -0.0009 0.0108 0.0112

AT. 56 C X 0.0135 0.0193 -0.0158 0.0163 -0.0156 0.0127  
Y 0.0120 0.0079 -0.0098 0.0099 0.0071 -0.0094  
Z 0.0014 -0.0030 0.0014 -0.0009 0.0108 -0.0112

AT. 57 C X -0.0041 -0.0059 -0.0048 0.0049 0.0048 0.0039  
Y 0.0046 0.0026 0.0035 -0.0036 0.0035 0.0042  
Z -0.0017 0.0001 -0.0007 0.0008 -0.0039 -0.0043

AT. 58 C X -0.0041 0.0059 0.0048 0.0049 0.0048 -0.0039  
Y -0.0046 0.0026 0.0035 0.0036 -0.0035 0.0042  
Z -0.0017 -0.0001 0.0007 0.0008 -0.0039 0.0043

AT. 59 C X -0.0041 0.0059 -0.0048 -0.0049 0.0048 0.0039  
Y 0.0046 -0.0026 0.0035 0.0036 0.0035 0.0042  
Z -0.0017 -0.0001 -0.0007 -0.0008 -0.0039 -0.0043

AT. 60 C X -0.0041 -0.0059 0.0048 -0.0049 0.0048 -0.0039  
Y -0.0046 -0.0026 0.0035 -0.0036 -0.0035 0.0042  
Z -0.0017 0.0001 0.0007 -0.0008 -0.0039 0.0043

AT. 61 H X 0.0084 0.0143 0.0116 -0.0115 -0.0155 -0.0128  
Y 0.0091 0.0138 0.0116 -0.0115 -0.0128 -0.0105  
Z 0.0230 0.0182 0.0201 -0.0206 0.0057 0.0112

AT. 62 H X 0.0084 -0.0143 -0.0116 -0.0115 -0.0155 0.0128  
Y -0.0091 0.0138 0.0116 0.0115 0.0128 -0.0105  
Z 0.0230 -0.0182 -0.0201 -0.0206 0.0057 -0.0112

AT. 63 H X 0.0084 -0.0143 0.0116 0.0115 -0.0155 -0.0128  
Y 0.0091 -0.0138 0.0116 0.0115 -0.0128 -0.0105  
Z 0.0230 -0.0182 0.0201 0.0206 0.0057 0.0112

AT. 64 H X 0.0084 0.0143 -0.0116 0.0115 -0.0155 0.0128  
Y -0.0091 -0.0138 0.0116 -0.0115 0.0128 -0.0105  
Z 0.0230 0.0182 -0.0201 0.0206 0.0057 -0.0112

AT. 65 H X 0.0018 -0.0006 0.0004 -0.0005 0.0053 0.0053  
Y -0.0130 -0.0122 -0.0115 0.0121 -0.0004 -0.0018

Z -0.0008 -0.0099 -0.0049 0.0053 0.0210 0.0199  
AT. 66 H X 0.0018 0.0006 -0.0004 -0.0005 0.0053 -0.0053  
Y 0.0130 -0.0122 -0.0115 -0.0121 0.0004 -0.0018  
Z -0.0008 0.0099 0.0049 0.0053 0.0210 -0.0199  
AT. 67 H X 0.0018 0.0006 0.0004 0.0005 0.0053 0.0053  
Y -0.0130 0.0122 -0.0115 -0.0121 -0.0004 -0.0018  
Z -0.0008 0.0099 -0.0049 -0.0053 0.0210 0.0199  
AT. 68 H X 0.0018 -0.0006 -0.0004 0.0005 0.0053 -0.0053  
Y 0.0130 0.0122 -0.0115 0.0121 0.0004 -0.0018  
Z -0.0008 -0.0099 0.0049 -0.0053 0.0210 -0.0199  
AT. 69 H X 0.0105 0.0163 0.0133 -0.0131 -0.0139 -0.0136  
Y -0.0079 -0.0047 -0.0060 0.0065 -0.0053 -0.0071  
Z -0.0089 -0.0019 -0.0051 0.0057 -0.0137 -0.0159  
AT. 70 H X 0.0105 -0.0163 -0.0133 -0.0131 -0.0139 0.0136  
Y 0.0079 -0.0047 -0.0060 -0.0065 0.0053 -0.0071  
Z -0.0089 0.0019 0.0051 0.0057 -0.0137 0.0159  
AT. 71 H X 0.0105 -0.0163 0.0133 0.0131 -0.0139 -0.0136  
Y -0.0079 0.0047 -0.0060 -0.0065 -0.0053 -0.0071  
Z -0.0089 0.0019 -0.0051 -0.0057 -0.0137 -0.0159  
AT. 72 H X 0.0105 0.0163 -0.0133 0.0131 -0.0139 0.0136  
Y 0.0079 0.0047 -0.0060 0.0065 0.0053 -0.0071  
Z -0.0089 -0.0019 0.0051 -0.0057 -0.0137 0.0159  
AT. 73 C X -0.0038 -0.0062 -0.0038 0.0047 0.0033 0.0019  
Y 0.0140 0.0089 0.0119 -0.0117 0.0086 0.0109  
Z 0.0013 0.0004 0.0008 -0.0005 0.0016 0.0018  
AT. 74 C X -0.0038 0.0062 0.0038 0.0047 0.0033 -0.0019  
Y -0.0140 0.0089 0.0119 0.0117 -0.0086 0.0109  
Z 0.0013 -0.0004 -0.0008 -0.0005 0.0016 -0.0018  
AT. 75 C X -0.0038 0.0062 -0.0038 -0.0047 0.0033 0.0019  
Y 0.0140 -0.0089 0.0119 0.0117 0.0086 0.0109  
Z 0.0013 -0.0004 0.0008 0.0005 0.0016 0.0018  
AT. 76 C X -0.0038 -0.0062 0.0038 -0.0047 0.0033 -0.0019

Y -0.0140 -0.0089 0.0119 -0.0117 -0.0086 0.0109  
Z 0.0013 0.0004 -0.0008 0.0005 0.0016 -0.0018  
AT. 77 C X 0.0010 0.0015 0.0023 -0.0016 -0.0030 -0.0025  
Y 0.0065 0.0063 0.0062 -0.0065 -0.0005 0.0010  
Z -0.0060 -0.0075 -0.0066 0.0072 0.0048 0.0030  
AT. 78 C X 0.0010 -0.0015 -0.0023 -0.0016 -0.0030 0.0025  
Y -0.0065 0.0063 0.0062 0.0065 0.0005 0.0010  
Z -0.0060 0.0075 0.0066 0.0072 0.0048 -0.0030  
AT. 79 C X 0.0010 -0.0015 0.0023 0.0016 -0.0030 -0.0025  
Y 0.0065 -0.0063 0.0062 0.0065 -0.0005 0.0010  
Z -0.0060 0.0075 -0.0066 -0.0072 0.0048 0.0030  
AT. 80 C X 0.0010 0.0015 -0.0023 0.0016 -0.0030 0.0025  
Y -0.0065 -0.0063 0.0062 -0.0065 0.0005 0.0010  
Z -0.0060 -0.0075 0.0066 -0.0072 0.0048 -0.0030  
AT. 81 H X 0.0072 0.0079 0.0078 -0.0074 -0.0043 -0.0020  
Y 0.0144 0.0139 0.0130 -0.0133 -0.0011 0.0027  
Z -0.0187 -0.0150 -0.0148 0.0148 -0.0066 -0.0105  
AT. 82 H X 0.0072 -0.0079 -0.0078 -0.0074 -0.0043 0.0020  
Y -0.0144 0.0139 0.0130 0.0133 0.0011 0.0027  
Z -0.0187 0.0150 0.0148 0.0148 -0.0066 0.0105  
AT. 83 H X 0.0072 -0.0079 0.0078 0.0074 -0.0043 -0.0020  
Y 0.0144 -0.0139 0.0130 0.0133 -0.0011 0.0027  
Z -0.0187 0.0150 -0.0148 -0.0148 -0.0066 -0.0105  
AT. 84 H X 0.0072 0.0079 -0.0078 0.0074 -0.0043 0.0020  
Y -0.0144 -0.0139 0.0130 -0.0133 0.0011 0.0027  
Z -0.0187 -0.0150 0.0148 -0.0148 -0.0066 0.0105  
AT. 85 H X -0.0037 -0.0078 -0.0046 0.0048 0.0113 0.0094  
Y -0.0090 -0.0115 -0.0073 0.0090 0.0047 0.0024  
Z 0.0083 0.0100 0.0068 -0.0077 -0.0036 -0.0016  
AT. 86 H X -0.0037 0.0078 0.0046 0.0048 0.0113 -0.0094  
Y 0.0090 -0.0115 -0.0073 -0.0090 -0.0047 0.0024  
Z 0.0083 -0.0100 -0.0068 -0.0077 -0.0036 0.0016

AT. 87 H X -0.0037 0.0078 -0.0046 -0.0048 0.0113 0.0094  
Y -0.0090 0.0115 -0.0073 -0.0090 0.0047 0.0024  
Z 0.0083 -0.0100 0.0068 0.0077 -0.0036 -0.0016

AT. 88 H X -0.0037 -0.0078 0.0046 -0.0048 0.0113 -0.0094  
Y 0.0090 0.0115 -0.0073 0.0090 -0.0047 0.0024  
Z 0.0083 0.0100 -0.0068 0.0077 -0.0036 0.0016

AT. 89 C X -0.0034 -0.0045 -0.0067 0.0050 0.0072 0.0056  
Y -0.0076 -0.0043 -0.0065 0.0063 -0.0059 -0.0069  
Z 0.0012 0.0031 0.0019 -0.0026 -0.0048 -0.0038

AT. 90 C X -0.0034 0.0045 0.0067 0.0050 0.0072 -0.0056  
Y 0.0076 -0.0043 -0.0065 -0.0063 0.0059 -0.0069  
Z 0.0012 -0.0031 -0.0019 -0.0026 -0.0048 0.0038

AT. 91 C X -0.0034 0.0045 -0.0067 -0.0050 0.0072 0.0056  
Y -0.0076 0.0043 -0.0065 -0.0063 -0.0059 -0.0069  
Z 0.0012 -0.0031 0.0019 0.0026 -0.0048 -0.0038

AT. 92 C X -0.0034 -0.0045 0.0067 -0.0050 0.0072 -0.0056  
Y 0.0076 0.0043 -0.0065 0.0063 0.0059 -0.0069  
Z 0.0012 0.0031 -0.0019 0.0026 -0.0048 0.0038

AT. 93 C X 0.0005 0.0007 0.0018 -0.0011 -0.0018 -0.0015  
Y 0.0029 0.0016 0.0026 -0.0024 0.0021 0.0025  
Z 0.0006 -0.0002 0.0003 -0.0001 0.0018 0.0018

AT. 94 C X 0.0005 -0.0007 -0.0018 -0.0011 -0.0018 0.0015  
Y -0.0029 0.0016 0.0026 0.0024 -0.0021 0.0025  
Z 0.0006 0.0002 -0.0003 -0.0001 0.0018 -0.0018

AT. 95 C X 0.0005 -0.0007 0.0018 0.0011 -0.0018 -0.0015  
Y 0.0029 -0.0016 0.0026 0.0024 0.0021 0.0025  
Z 0.0006 0.0002 0.0003 0.0001 0.0018 0.0018

AT. 96 C X 0.0005 0.0007 -0.0018 0.0011 -0.0018 0.0015  
Y -0.0029 -0.0016 0.0026 -0.0024 -0.0021 0.0025  
Z 0.0006 -0.0002 -0.0003 0.0001 0.0018 -0.0018

AT. 97 H X -0.0006 -0.0017 -0.0024 0.0022 0.0031 0.0020  
Y -0.0003 0.0027 0.0035 -0.0029 -0.0084 -0.0073



Z -0.0094 -0.0061 -0.0117 0.0103 -0.0028 -0.0062  
AT. 98 H X -0.0006 0.0017 0.0024 0.0022 0.0031 -0.0020  
Y 0.0003 0.0027 0.0035 0.0029 0.0084 -0.0073  
Z -0.0094 0.0061 0.0117 0.0103 -0.0028 0.0062  
AT. 99 H X -0.0006 0.0017 -0.0024 -0.0022 0.0031 0.0020  
Y -0.0003 -0.0027 0.0035 0.0029 -0.0084 -0.0073  
Z -0.0094 0.0061 -0.0117 -0.0103 -0.0028 -0.0062  
AT. 100 H X -0.0006 -0.0017 0.0024 -0.0022 0.0031 -0.0020  
Y 0.0003 -0.0027 0.0035 -0.0029 0.0084 -0.0073  
Z -0.0094 -0.0061 0.0117 -0.0103 -0.0028 0.0062  
AT. 101 H X -0.0042 -0.0029 -0.0049 0.0038 -0.0001 -0.0005  
Y -0.0006 -0.0013 -0.0034 0.0017 0.0049 0.0045  
Z -0.0082 -0.0042 -0.0051 0.0055 -0.0089 -0.0092  
AT. 102 H X -0.0042 0.0029 0.0049 0.0038 -0.0001 0.0005  
Y 0.0006 -0.0013 -0.0034 -0.0017 -0.0049 0.0045  
Z -0.0082 0.0042 0.0051 0.0055 -0.0089 0.0092  
AT. 103 H X -0.0042 0.0029 -0.0049 -0.0038 -0.0001 -0.0005  
Y -0.0006 0.0013 -0.0034 -0.0017 0.0049 0.0045  
Z -0.0082 0.0042 -0.0051 -0.0055 -0.0089 -0.0092  
AT. 104 H X -0.0042 -0.0029 0.0049 -0.0038 -0.0001 0.0005  
Y 0.0006 0.0013 -0.0034 0.0017 -0.0049 0.0045  
Z -0.0082 -0.0042 0.0051 -0.0055 -0.0089 0.0092  
AT. 105 H X 0.0002 -0.0027 -0.0036 0.0022 0.0097 0.0096  
Y -0.0039 -0.0006 -0.0031 0.0028 -0.0065 -0.0064  
Z 0.0053 0.0023 0.0061 -0.0049 0.0040 0.0044  
AT. 106 H X 0.0002 0.0027 0.0036 0.0022 0.0097 -0.0096  
Y 0.0039 -0.0006 -0.0031 -0.0028 0.0065 -0.0064  
Z 0.0053 -0.0023 -0.0061 -0.0049 0.0040 -0.0044  
AT. 107 H X 0.0002 0.0027 -0.0036 -0.0022 0.0097 0.0096  
Y -0.0039 0.0006 -0.0031 -0.0028 -0.0065 -0.0064  
Z 0.0053 -0.0023 0.0061 0.0049 0.0040 0.0044  
AT. 108 H X 0.0002 -0.0027 0.0036 -0.0022 0.0097 -0.0096

Y 0.0039 0.0006 -0.0031 0.0028 0.0065 -0.0064  
Z 0.0053 0.0023 -0.0061 0.0049 0.0040 -0.0044  
AT. 109 C X -0.0040 -0.0060 -0.0046 0.0048 0.0045 0.0037  
Y 0.0053 0.0050 0.0058 -0.0053 -0.0006 0.0003  
Z 0.0029 0.0065 0.0056 -0.0051 -0.0101 -0.0096  
AT. 110 C X -0.0040 0.0060 0.0046 0.0048 0.0045 -0.0037  
Y -0.0053 0.0050 0.0058 0.0053 0.0006 0.0003  
Z 0.0029 -0.0065 -0.0056 -0.0051 -0.0101 0.0096  
AT. 111 C X -0.0040 0.0060 -0.0046 -0.0048 0.0045 0.0037  
Y 0.0053 -0.0050 0.0058 0.0053 -0.0006 0.0003  
Z 0.0029 -0.0065 0.0056 0.0051 -0.0101 -0.0096  
AT. 112 C X -0.0040 -0.0060 0.0046 -0.0048 0.0045 -0.0037  
Y -0.0053 -0.0050 0.0058 -0.0053 0.0006 0.0003  
Z 0.0029 0.0065 -0.0056 0.0051 -0.0101 0.0096  
AT. 113 H X -0.0047 -0.0089 -0.0069 0.0073 0.0124 0.0119  
Y 0.0063 0.0080 0.0090 -0.0087 -0.0102 -0.0103  
Z 0.0042 -0.0004 0.0041 -0.0028 0.0083 0.0076  
AT. 114 H X -0.0047 0.0089 0.0069 0.0073 0.0124 -0.0119  
Y -0.0063 0.0080 0.0090 0.0087 0.0102 -0.0103  
Z 0.0042 0.0004 -0.0041 -0.0028 0.0083 -0.0076  
AT. 115 H X -0.0047 0.0089 -0.0069 -0.0073 0.0124 0.0119  
Y 0.0063 -0.0080 0.0090 0.0087 -0.0102 -0.0103  
Z 0.0042 0.0004 0.0041 0.0028 0.0083 0.0076  
AT. 116 H X -0.0047 -0.0089 0.0069 -0.0073 0.0124 -0.0119  
Y -0.0063 -0.0080 0.0090 -0.0087 0.0102 -0.0103  
Z 0.0042 -0.0004 -0.0041 0.0028 0.0083 -0.0076  
AT. 117 H X -0.0049 0.0039 0.0002 0.0002 -0.0193 -0.0207  
Y 0.0055 0.0020 0.0020 -0.0028 0.0100 0.0116  
Z 0.0032 0.0023 0.0016 -0.0022 0.0029 0.0043  
AT. 118 H X -0.0049 -0.0039 -0.0002 0.0002 -0.0193 0.0207  
Y -0.0055 0.0020 0.0020 0.0028 -0.0100 0.0116  
Z 0.0032 -0.0023 -0.0016 -0.0022 0.0029 -0.0043

AT. 119 H X -0.0049 -0.0039 0.0002 -0.0002 -0.0193 -0.0207  
Y 0.0055 -0.0020 0.0020 0.0028 0.0100 0.0116  
Z 0.0032 -0.0023 0.0016 0.0022 0.0029 0.0043

AT. 120 H X -0.0049 0.0039 -0.0002 -0.0002 -0.0193 0.0207  
Y -0.0055 -0.0020 0.0020 -0.0028 -0.0100 0.0116  
Z 0.0032 0.0023 -0.0016 0.0022 0.0029 -0.0043

AT. 121 C X 0.0027 0.0033 0.0042 -0.0036 -0.0034 -0.0025  
Y -0.0002 -0.0036 -0.0019 0.0020 0.0082 0.0078  
Z 0.0030 0.0045 0.0050 -0.0044 -0.0056 -0.0051

AT. 122 C X 0.0027 -0.0033 -0.0042 -0.0036 -0.0034 0.0025  
Y 0.0002 -0.0036 -0.0019 -0.0020 -0.0082 0.0078  
Z 0.0030 -0.0045 -0.0050 -0.0044 -0.0056 0.0051

AT. 123 C X 0.0027 -0.0033 0.0042 0.0036 -0.0034 -0.0025  
Y -0.0002 0.0036 -0.0019 -0.0020 0.0082 0.0078  
Z 0.0030 -0.0045 0.0050 0.0044 -0.0056 -0.0051

AT. 124 C X 0.0027 0.0033 -0.0042 0.0036 -0.0034 0.0025  
Y 0.0002 0.0036 -0.0019 0.0020 -0.0082 0.0078  
Z 0.0030 0.0045 -0.0050 0.0044 -0.0056 0.0051

AT. 125 H X 0.0000 -0.0046 0.0002 -0.0000 0.0089 0.0090  
Y -0.0102 -0.0010 -0.0117 0.0092 -0.0128 -0.0155  
Z 0.0108 0.0050 0.0131 -0.0105 0.0057 0.0080

AT. 126 H X 0.0000 0.0046 -0.0002 -0.0000 0.0089 -0.0090  
Y 0.0102 -0.0010 -0.0117 -0.0092 0.0128 -0.0155  
Z 0.0108 -0.0050 -0.0131 -0.0105 0.0057 -0.0080

AT. 127 H X 0.0000 0.0046 0.0002 0.0000 0.0089 0.0090  
Y -0.0102 0.0010 -0.0117 -0.0092 -0.0128 -0.0155  
Z 0.0108 -0.0050 0.0131 0.0105 0.0057 0.0080

AT. 128 H X 0.0000 -0.0046 -0.0002 0.0000 0.0089 -0.0090  
Y 0.0102 0.0010 -0.0117 0.0092 0.0128 -0.0155  
Z 0.0108 0.0050 -0.0131 0.0105 0.0057 -0.0080

AT. 129 H X -0.0083 -0.0011 -0.0068 0.0066 -0.0150 -0.0164  
Y 0.0116 0.0013 0.0092 -0.0087 0.0211 0.0233

Z -0.0113 -0.0009 -0.0114 0.0096 -0.0186 -0.0207  
AT. 130 H X -0.0083 0.0011 0.0068 0.0066 -0.0150 0.0164  
Y -0.0116 0.0013 0.0092 0.0087 -0.0211 0.0233  
Z -0.0113 0.0009 0.0114 0.0096 -0.0186 0.0207  
AT. 131 H X -0.0083 0.0011 -0.0068 -0.0066 -0.0150 -0.0164  
Y 0.0116 -0.0013 0.0092 0.0087 0.0211 0.0233  
Z -0.0113 0.0009 -0.0114 -0.0096 -0.0186 -0.0207  
AT. 132 H X -0.0083 -0.0011 0.0068 -0.0066 -0.0150 0.0164  
Y -0.0116 -0.0013 0.0092 -0.0087 -0.0211 0.0233  
Z -0.0113 -0.0009 0.0114 -0.0096 -0.0186 0.0207  
AT. 133 C X -0.0007 -0.0003 -0.0007 0.0006 -0.0010 -0.0012  
Y -0.0024 0.0013 -0.0018 0.0013 -0.0075 -0.0075  
Z -0.0016 0.0005 -0.0013 0.0010 -0.0040 -0.0040  
AT. 134 C X -0.0007 0.0003 0.0007 0.0006 -0.0010 0.0012  
Y 0.0024 0.0013 -0.0018 -0.0013 0.0075 -0.0075  
Z -0.0016 -0.0005 0.0013 0.0010 -0.0040 0.0040  
AT. 135 C X -0.0007 0.0003 -0.0007 -0.0006 -0.0010 -0.0012  
Y -0.0024 -0.0013 -0.0018 -0.0013 -0.0075 -0.0075  
Z -0.0016 -0.0005 -0.0013 -0.0010 -0.0040 -0.0040  
AT. 136 C X -0.0007 -0.0003 0.0007 -0.0006 -0.0010 0.0012  
Y 0.0024 -0.0013 -0.0018 0.0013 0.0075 -0.0075  
Z -0.0016 0.0005 0.0013 -0.0010 -0.0040 0.0040  
AT. 137 C X 0.0004 0.0006 0.0006 -0.0005 -0.0004 -0.0000  
Y 0.0015 -0.0001 0.0014 -0.0010 0.0027 0.0027  
Z -0.0000 -0.0014 -0.0003 0.0004 0.0031 0.0027  
AT. 138 C X 0.0004 -0.0006 -0.0006 -0.0005 -0.0004 0.0000  
Y -0.0015 -0.0001 0.0014 0.0010 -0.0027 0.0027  
Z -0.0000 0.0014 0.0003 0.0004 0.0031 -0.0027  
AT. 139 C X 0.0004 -0.0006 0.0006 0.0005 -0.0004 -0.0000  
Y 0.0015 0.0001 0.0014 0.0010 0.0027 0.0027  
Z -0.0000 0.0014 -0.0003 -0.0004 0.0031 0.0027  
AT. 140 C X 0.0004 0.0006 -0.0006 0.0005 -0.0004 0.0000

Y -0.0015 0.0001 0.0014 -0.0010 -0.0027 0.0027  
Z -0.0000 -0.0014 0.0003 -0.0004 0.0031 -0.0027  
AT. 141 H X -0.0007 -0.0038 -0.0021 0.0019 0.0072 0.0054  
Y -0.0031 -0.0006 -0.0027 0.0020 -0.0041 -0.0035  
Z -0.0019 0.0029 -0.0001 -0.0001 -0.0095 -0.0071  
AT. 142 H X -0.0007 0.0038 0.0021 0.0019 0.0072 -0.0054  
Y 0.0031 -0.0006 -0.0027 -0.0020 0.0041 -0.0035  
Z -0.0019 -0.0029 0.0001 -0.0001 -0.0095 0.0071  
AT. 143 H X -0.0007 0.0038 -0.0021 -0.0019 0.0072 0.0054  
Y -0.0031 0.0006 -0.0027 -0.0020 -0.0041 -0.0035  
Z -0.0019 -0.0029 -0.0001 0.0001 -0.0095 -0.0071  
AT. 144 H X -0.0007 -0.0038 0.0021 -0.0019 0.0072 -0.0054  
Y 0.0031 0.0006 -0.0027 0.0020 0.0041 -0.0035  
Z -0.0019 0.0029 0.0001 0.0001 -0.0095 0.0071  
AT. 145 H X -0.0042 -0.0058 -0.0051 0.0045 0.0044 0.0018  
Y 0.0059 0.0040 0.0059 -0.0050 0.0021 0.0037  
Z 0.0115 0.0073 0.0108 -0.0092 0.0059 0.0086  
AT. 146 H X -0.0042 0.0058 0.0051 0.0045 0.0044 -0.0018  
Y -0.0059 0.0040 0.0059 0.0050 -0.0021 0.0037  
Z 0.0115 -0.0073 -0.0108 -0.0092 0.0059 -0.0086  
AT. 147 H X -0.0042 0.0058 -0.0051 -0.0045 0.0044 0.0018  
Y 0.0059 -0.0040 0.0059 0.0050 0.0021 0.0037  
Z 0.0115 -0.0073 0.0108 0.0092 0.0059 0.0086  
AT. 148 H X -0.0042 -0.0058 0.0051 -0.0045 0.0044 -0.0018  
Y -0.0059 -0.0040 0.0059 -0.0050 -0.0021 0.0037  
Z 0.0115 0.0073 -0.0108 0.0092 0.0059 -0.0086  
AT. 149 O X 0.0030 0.0022 0.0026 -0.0026 0.0015 0.0022  
Y -0.0036 -0.0023 -0.0030 0.0029 -0.0024 -0.0031  
Z -0.0027 -0.0017 -0.0021 0.0021 -0.0016 -0.0021  
AT. 150 O X 0.0030 -0.0022 -0.0026 -0.0026 0.0015 -0.0022  
Y 0.0036 -0.0023 -0.0030 -0.0029 0.0024 -0.0031  
Z -0.0027 0.0017 0.0021 0.0021 -0.0016 0.0021

AT.151 O X 0.0030 -0.0022 0.0026 0.0026 0.0015 0.0022  
Y -0.0036 0.0023 -0.0030 -0.0029 -0.0024 -0.0031  
Z -0.0027 0.0017 -0.0021 -0.0021 -0.0016 -0.0021

AT.152 O X 0.0030 0.0022 -0.0026 0.0026 0.0015 -0.0022  
Y 0.0036 0.0023 -0.0030 0.0029 0.0024 -0.0031  
Z -0.0027 -0.0017 0.0021 -0.0021 -0.0016 0.0021

AT.153 H X -0.0094 -0.0033 -0.0050 0.0058 -0.0131 -0.0154  
Y 0.0139 0.0054 0.0077 -0.0087 0.0165 0.0193  
Z 0.0116 0.0046 0.0065 -0.0076 0.0151 0.0178

AT.154 H X -0.0094 0.0033 0.0050 0.0058 -0.0131 0.0154  
Y -0.0139 0.0054 0.0077 0.0087 -0.0165 0.0193  
Z 0.0116 -0.0046 -0.0065 -0.0076 0.0151 -0.0178

AT.155 H X -0.0094 0.0033 -0.0050 -0.0058 -0.0131 -0.0154  
Y 0.0139 -0.0054 0.0077 0.0087 0.0165 0.0193  
Z 0.0116 -0.0046 0.0065 0.0076 0.0151 0.0178

AT.156 H X -0.0094 -0.0033 0.0050 -0.0058 -0.0131 0.0154  
Y -0.0139 -0.0054 0.0077 -0.0087 -0.0165 0.0193  
Z 0.0116 0.0046 -0.0065 0.0076 0.0151 -0.0178

AT.157 O X -0.0006 0.0006 -0.0004 0.0001 -0.0014 -0.0010  
Y -0.0014 -0.0006 -0.0011 0.0011 -0.0011 -0.0012  
Z 0.0009 0.0012 0.0013 -0.0012 -0.0014 -0.0011

AT.158 O X -0.0006 -0.0006 0.0004 0.0001 -0.0014 0.0010  
Y 0.0014 -0.0006 -0.0011 -0.0011 0.0011 -0.0012  
Z 0.0009 -0.0012 -0.0013 -0.0012 -0.0014 0.0011

AT.159 O X -0.0006 -0.0006 -0.0004 -0.0001 -0.0014 -0.0010  
Y -0.0014 0.0006 -0.0011 -0.0011 -0.0011 -0.0012  
Z 0.0009 -0.0012 0.0013 0.0012 -0.0014 -0.0011

AT.160 O X -0.0006 0.0006 0.0004 -0.0001 -0.0014 0.0010  
Y 0.0014 0.0006 -0.0011 0.0011 0.0011 -0.0012  
Z 0.0009 0.0012 -0.0013 0.0012 -0.0014 0.0011

AT.161 O X -0.0003 -0.0001 -0.0002 0.0002 -0.0003 -0.0004  
Y -0.0000 -0.0001 -0.0001 0.0000 -0.0001 0.0000

Z -0.0002 -0.0004 -0.0003 0.0003 0.0004 0.0002  
AT.162 O X -0.0003 0.0001 0.0002 0.0002 -0.0003 0.0004  
Y 0.0000 -0.0001 -0.0001 -0.0000 0.0001 0.0000  
Z -0.0002 0.0004 0.0003 0.0003 0.0004 -0.0002  
AT.163 O X -0.0003 0.0001 -0.0002 -0.0002 -0.0003 -0.0004  
Y -0.0000 0.0001 -0.0001 -0.0000 -0.0001 0.0000  
Z -0.0002 0.0004 -0.0003 -0.0003 0.0004 0.0002  
AT.164 O X -0.0003 -0.0001 0.0002 -0.0002 -0.0003 0.0004  
Y 0.0000 0.0001 -0.0001 0.0000 0.0001 0.0000  
Z -0.0002 -0.0004 0.0003 -0.0003 0.0004 -0.0002  
AT.165 H X -0.0007 -0.0013 -0.0008 0.0009 0.0014 0.0009  
Y -0.0004 -0.0008 -0.0005 0.0005 0.0007 0.0003  
Z 0.0023 0.0017 0.0018 -0.0023 0.0008 0.0011  
AT.166 H X -0.0007 0.0013 0.0008 0.0009 0.0014 -0.0009  
Y 0.0004 -0.0008 -0.0005 -0.0005 -0.0007 0.0003  
Z 0.0023 -0.0017 -0.0018 -0.0023 0.0008 -0.0011  
AT.167 H X -0.0007 0.0013 -0.0008 -0.0009 0.0014 0.0009  
Y -0.0004 0.0008 -0.0005 -0.0005 0.0007 0.0003  
Z 0.0023 -0.0017 0.0018 0.0023 0.0008 0.0011  
AT.168 H X -0.0007 -0.0013 0.0008 -0.0009 0.0014 -0.0009  
Y 0.0004 0.0008 -0.0005 0.0005 -0.0007 0.0003  
Z 0.0023 0.0017 -0.0018 0.0023 0.0008 -0.0011  
AT.169 O X -0.0001 -0.0000 -0.0000 0.0001 -0.0001 -0.0000  
Y 0.0000 -0.0001 0.0001 0.0002 -0.0002 -0.0001  
Z 0.0002 -0.0001 0.0001 0.0000 0.0001 0.0001  
AT.170 O X -0.0001 0.0000 0.0000 0.0001 -0.0001 0.0000  
Y -0.0000 -0.0001 0.0001 -0.0002 0.0002 -0.0001  
Z 0.0002 0.0001 -0.0001 0.0000 0.0001 -0.0001  
AT.171 O X -0.0001 0.0000 -0.0000 -0.0001 -0.0001 -0.0000  
Y 0.0000 0.0001 0.0001 -0.0002 -0.0002 -0.0001  
Z 0.0002 0.0001 0.0001 -0.0000 0.0001 0.0001  
AT.172 O X -0.0001 -0.0000 0.0000 -0.0001 -0.0001 0.0000

Y -0.0000 0.0001 0.0001 0.0002 0.0002 -0.0001  
Z 0.0002 -0.0001 -0.0001 -0.0000 0.0001 -0.0001  
AT. 173 H X 0.0013 0.0007 0.0006 -0.0009 0.0011 0.0008  
Y 0.0006 0.0003 0.0007 -0.0002 0.0002 0.0006  
Z -0.0063 -0.0010 -0.0048 0.0016 -0.0048 -0.0061  
AT. 174 H X 0.0013 -0.0007 -0.0006 -0.0009 0.0011 -0.0008  
Y -0.0006 0.0003 0.0007 0.0002 -0.0002 0.0006  
Z -0.0063 0.0010 0.0048 0.0016 -0.0048 0.0061  
AT. 175 H X 0.0013 -0.0007 0.0006 0.0009 0.0011 0.0008  
Y 0.0006 -0.0003 0.0007 0.0002 0.0002 0.0006  
Z -0.0063 0.0010 -0.0048 -0.0016 -0.0048 -0.0061  
AT. 176 H X 0.0013 0.0007 -0.0006 0.0009 0.0011 -0.0008  
Y -0.0006 -0.0003 0.0007 -0.0002 -0.0002 0.0006  
Z -0.0063 -0.0010 0.0048 -0.0016 -0.0048 0.0061

FREQ(CM\*\*-1) 1286.91 1287.18 1304.27 1304.48 1305.33 1306.64

AT. 1 I X -0.0000 0.0000 -0.0000 0.0000 -0.0000 -0.0000  
Y 0.0000 0.0000 0.0000 0.0000 0.0000 0.0000  
Z -0.0000 0.0000 -0.0000 -0.0000 -0.0000 -0.0000  
AT. 2 I X -0.0000 -0.0000 0.0000 0.0000 0.0000 -0.0000  
Y -0.0000 0.0000 0.0000 -0.0000 0.0000 -0.0000  
Z -0.0000 -0.0000 0.0000 -0.0000 0.0000 -0.0000  
AT. 3 I X 0.0000 -0.0000 -0.0000 0.0000 0.0000 0.0000  
Y -0.0000 -0.0000 0.0000 0.0000 -0.0000 -0.0000  
Z 0.0000 -0.0000 -0.0000 -0.0000 0.0000 0.0000  
AT. 4 I X 0.0000 0.0000 0.0000 0.0000 -0.0000 0.0000  
Y 0.0000 -0.0000 0.0000 -0.0000 -0.0000 0.0000  
Z 0.0000 0.0000 0.0000 -0.0000 -0.0000 0.0000  
AT. 5 I X 0.0000 -0.0000 -0.0000 0.0000 -0.0000 -0.0000  
Y -0.0000 0.0000 -0.0000 -0.0000 -0.0000 -0.0000  
Z 0.0000 -0.0000 0.0000 -0.0000 0.0000 0.0000



AT. 6 I X 0.0000 0.0000 0.0000 0.0000 0.0000 -0.0000  
Y 0.0000 0.0000 -0.0000 0.0000 -0.0000 0.0000  
Z 0.0000 0.0000 -0.0000 -0.0000 -0.0000 0.0000

AT. 7 I X -0.0000 0.0000 -0.0000 0.0000 0.0000 0.0000  
Y 0.0000 -0.0000 -0.0000 -0.0000 0.0000 0.0000  
Z -0.0000 0.0000 0.0000 -0.0000 -0.0000 -0.0000

AT. 8 I X -0.0000 -0.0000 0.0000 0.0000 -0.0000 0.0000  
Y -0.0000 -0.0000 -0.0000 0.0000 0.0000 -0.0000  
Z -0.0000 -0.0000 -0.0000 -0.0000 0.0000 -0.0000

AT. 9 N X -0.0004 0.0023 0.0033 0.0033 0.0034 0.0033  
Y 0.0025 -0.0028 0.0038 0.0039 0.0039 0.0038  
Z 0.0035 0.0011 0.0189 0.0188 0.0187 0.0180

AT. 10 N X -0.0004 -0.0023 -0.0033 0.0033 -0.0034 0.0033  
Y -0.0025 -0.0028 0.0038 -0.0039 0.0039 -0.0038  
Z 0.0035 -0.0011 -0.0189 0.0188 -0.0187 0.0180

AT. 11 N X 0.0004 -0.0023 0.0033 0.0033 -0.0034 -0.0033  
Y -0.0025 0.0028 0.0038 0.0039 -0.0039 -0.0038  
Z -0.0035 -0.0011 0.0189 0.0188 -0.0187 -0.0180

AT. 12 N X 0.0004 0.0023 -0.0033 0.0033 0.0034 -0.0033  
Y 0.0025 0.0028 0.0038 -0.0039 -0.0039 0.0038  
Z -0.0035 0.0011 -0.0189 0.0188 0.0187 -0.0180

AT. 13 N X -0.0003 0.0011 0.0012 0.0011 0.0012 0.0012  
Y 0.0048 -0.0046 -0.0016 -0.0016 -0.0018 -0.0020  
Z -0.0118 0.0127 0.0075 0.0079 0.0079 0.0082

AT. 14 N X -0.0003 -0.0011 -0.0012 0.0011 -0.0012 0.0012  
Y -0.0048 -0.0046 -0.0016 0.0016 -0.0018 0.0020  
Z -0.0118 -0.0127 -0.0075 0.0079 -0.0079 0.0082

AT. 15 N X 0.0003 -0.0011 0.0012 0.0011 -0.0012 -0.0012  
Y -0.0048 0.0046 -0.0016 -0.0016 0.0018 0.0020  
Z 0.0118 -0.0127 0.0075 0.0079 -0.0079 -0.0082

AT. 16 N X 0.0003 0.0011 -0.0012 0.0011 0.0012 -0.0012  
Y 0.0048 0.0046 -0.0016 0.0016 0.0018 -0.0020

Z 0.0118 0.0127 -0.0075 0.0079 0.0079 -0.0082  
AT. 17 O X -0.0003 -0.0002 -0.0022 -0.0021 -0.0021 -0.0021  
Y -0.0013 0.0005 -0.0042 -0.0042 -0.0042 -0.0041  
Z 0.0003 -0.0016 -0.0034 -0.0034 -0.0033 -0.0033  
AT. 18 O X -0.0003 0.0002 0.0022 -0.0021 0.0021 -0.0021  
Y 0.0013 0.0005 -0.0042 0.0042 -0.0042 0.0041  
Z 0.0003 0.0016 0.0034 -0.0034 0.0033 -0.0033  
AT. 19 O X 0.0003 0.0002 -0.0022 -0.0021 0.0021 0.0021  
Y 0.0013 -0.0005 -0.0042 -0.0042 0.0042 0.0041  
Z -0.0003 0.0016 -0.0034 -0.0034 0.0033 0.0033  
AT. 20 O X 0.0003 -0.0002 0.0022 -0.0021 -0.0021 0.0021  
Y -0.0013 -0.0005 -0.0042 0.0042 0.0042 -0.0041  
Z -0.0003 -0.0016 0.0034 -0.0034 -0.0033 0.0033  
AT. 21 O X -0.0000 0.0000 -0.0002 -0.0001 -0.0002 -0.0002  
Y -0.0032 0.0031 0.0017 0.0019 0.0018 0.0020  
Z 0.0011 -0.0014 -0.0017 -0.0017 -0.0017 -0.0018  
AT. 22 O X -0.0000 -0.0000 0.0002 -0.0001 0.0002 -0.0002  
Y 0.0032 0.0031 0.0017 -0.0019 0.0018 -0.0020  
Z 0.0011 0.0014 0.0017 -0.0017 0.0017 -0.0018  
AT. 23 O X 0.0000 -0.0000 -0.0002 -0.0001 0.0002 0.0002  
Y 0.0032 -0.0031 0.0017 0.0019 -0.0018 -0.0020  
Z -0.0011 0.0014 -0.0017 -0.0017 0.0017 0.0018  
AT. 24 O X 0.0000 0.0000 0.0002 -0.0001 -0.0002 0.0002  
Y -0.0032 -0.0031 0.0017 -0.0019 -0.0018 0.0020  
Z -0.0011 -0.0014 0.0017 -0.0017 -0.0017 0.0018  
AT. 25 C X -0.0009 0.0009 -0.0009 -0.0008 -0.0007 -0.0009  
Y -0.0021 0.0029 -0.0006 -0.0007 -0.0006 -0.0006  
Z 0.0021 -0.0019 0.0022 0.0022 0.0020 0.0021  
AT. 26 C X -0.0009 -0.0009 0.0009 -0.0008 0.0007 -0.0009  
Y 0.0021 0.0029 -0.0006 0.0007 -0.0006 0.0006  
Z 0.0021 0.0019 -0.0022 0.0022 -0.0020 0.0021  
AT. 27 C X 0.0009 -0.0009 -0.0009 -0.0008 0.0007 0.0009

Y 0.0021 -0.0029 -0.0006 -0.0007 0.0006 0.0006  
Z -0.0021 0.0019 0.0022 0.0022 -0.0020 -0.0021  
AT. 28 C X 0.0009 0.0009 0.0009 -0.0008 -0.0007 0.0009  
Y -0.0021 -0.0029 -0.0006 0.0007 0.0006 -0.0006  
Z -0.0021 -0.0019 -0.0022 0.0022 0.0020 -0.0021  
AT. 29 H X 0.0050 -0.0049 0.0053 0.0054 0.0047 0.0055  
Y 0.0009 -0.0031 -0.0038 -0.0037 -0.0031 -0.0037  
Z -0.0072 0.0077 -0.0061 -0.0061 -0.0052 -0.0065  
AT. 30 H X 0.0050 0.0049 -0.0053 0.0054 -0.0047 0.0055  
Y -0.0009 -0.0031 -0.0038 0.0037 -0.0031 0.0037  
Z -0.0072 -0.0077 0.0061 -0.0061 0.0052 -0.0065  
AT. 31 H X -0.0050 0.0049 0.0053 0.0054 -0.0047 -0.0055  
Y -0.0009 0.0031 -0.0038 -0.0037 0.0031 0.0037  
Z 0.0072 -0.0077 -0.0061 -0.0061 0.0052 0.0065  
AT. 32 H X -0.0050 -0.0049 -0.0053 0.0054 0.0047 -0.0055  
Y 0.0009 0.0031 -0.0038 0.0037 0.0031 -0.0037  
Z 0.0072 0.0077 0.0061 -0.0061 -0.0052 0.0065  
AT. 33 H X 0.0008 0.0026 0.0052 0.0047 0.0041 0.0054  
Y -0.0038 0.0055 -0.0017 -0.0018 -0.0016 -0.0015  
Z 0.0076 -0.0137 0.0016 0.0023 0.0024 0.0009  
AT. 34 H X 0.0008 -0.0026 -0.0052 0.0047 -0.0041 0.0054  
Y 0.0038 0.0055 -0.0017 0.0018 -0.0016 0.0015  
Z 0.0076 0.0137 -0.0016 0.0023 -0.0024 0.0009  
AT. 35 H X -0.0008 -0.0026 0.0052 0.0047 -0.0041 -0.0054  
Y 0.0038 -0.0055 -0.0017 -0.0018 0.0016 0.0015  
Z -0.0076 0.0137 0.0016 0.0023 -0.0024 -0.0009  
AT. 36 H X -0.0008 0.0026 -0.0052 0.0047 0.0041 -0.0054  
Y -0.0038 -0.0055 -0.0017 0.0018 0.0016 -0.0015  
Z -0.0076 -0.0137 -0.0016 0.0023 0.0024 -0.0009  
AT. 37 C X 0.0015 -0.0015 0.0019 0.0018 0.0016 0.0016  
Y 0.0056 -0.0065 0.0059 0.0060 0.0057 0.0054  
Z -0.0033 0.0043 -0.0020 -0.0020 -0.0021 -0.0017

AT. 38 C X 0.0015 0.0015 -0.0019 0.0018 -0.0016 0.0016  
Y -0.0056 -0.0065 0.0059 -0.0060 0.0057 -0.0054  
Z -0.0033 -0.0043 0.0020 -0.0020 0.0021 -0.0017

AT. 39 C X -0.0015 0.0015 0.0019 0.0018 -0.0016 -0.0016  
Y -0.0056 0.0065 0.0059 0.0060 -0.0057 -0.0054  
Z 0.0033 -0.0043 -0.0020 -0.0020 0.0021 0.0017

AT. 40 C X -0.0015 -0.0015 -0.0019 0.0018 0.0016 -0.0016  
Y 0.0056 0.0065 0.0059 -0.0060 -0.0057 0.0054  
Z 0.0033 0.0043 0.0020 -0.0020 -0.0021 0.0017

AT. 41 C X -0.0044 0.0020 -0.0012 -0.0010 -0.0010 -0.0005  
Y -0.0057 0.0057 -0.0040 -0.0039 -0.0040 -0.0036  
Z 0.0012 -0.0038 -0.0095 -0.0095 -0.0092 -0.0092

AT. 42 C X -0.0044 -0.0020 0.0012 -0.0010 0.0010 -0.0005  
Y 0.0057 0.0057 -0.0040 0.0039 -0.0040 0.0036  
Z 0.0012 0.0038 0.0095 -0.0095 0.0092 -0.0092

AT. 43 C X 0.0044 -0.0020 -0.0012 -0.0010 0.0010 0.0005  
Y 0.0057 -0.0057 -0.0040 -0.0039 0.0040 0.0036  
Z -0.0012 0.0038 -0.0095 -0.0095 0.0092 0.0092

AT. 44 C X 0.0044 0.0020 0.0012 -0.0010 -0.0010 0.0005  
Y -0.0057 -0.0057 -0.0040 0.0039 0.0040 -0.0036  
Z -0.0012 -0.0038 0.0095 -0.0095 -0.0092 0.0092

AT. 45 H X 0.0057 -0.0091 0.0035 0.0034 0.0018 0.0022  
Y 0.0096 -0.0153 0.0018 0.0015 0.0006 0.0008  
Z 0.0126 -0.0199 -0.0054 -0.0057 -0.0059 -0.0060

AT. 46 H X 0.0057 0.0091 -0.0035 0.0034 -0.0018 0.0022  
Y -0.0096 -0.0153 0.0018 -0.0015 0.0006 -0.0008  
Z 0.0126 0.0199 0.0054 -0.0057 0.0059 -0.0060

AT. 47 H X -0.0057 0.0091 0.0035 0.0034 -0.0018 -0.0022  
Y -0.0096 0.0153 0.0018 0.0015 -0.0006 -0.0008  
Z -0.0126 0.0199 -0.0054 -0.0057 0.0059 0.0060

AT. 48 H X -0.0057 -0.0091 -0.0035 0.0034 0.0018 -0.0022  
Y 0.0096 0.0153 0.0018 -0.0015 -0.0006 0.0008

Z -0.0126 -0.0199 0.0054 -0.0057 -0.0059 0.0060  
AT. 49 H X -0.0213 0.0243 -0.0064 -0.0062 -0.0054 -0.0039  
Y -0.0152 0.0170 -0.0088 -0.0086 -0.0081 -0.0069  
Z -0.0187 0.0256 -0.0093 -0.0094 -0.0089 -0.0081  
AT. 50 H X -0.0213 -0.0243 0.0064 -0.0062 0.0054 -0.0039  
Y 0.0152 0.0170 -0.0088 0.0086 -0.0081 0.0069  
Z -0.0187 -0.0256 0.0093 -0.0094 0.0089 -0.0081  
AT. 51 H X 0.0213 -0.0243 -0.0064 -0.0062 0.0054 0.0039  
Y 0.0152 -0.0170 -0.0088 -0.0086 0.0081 0.0069  
Z 0.0187 -0.0256 -0.0093 -0.0094 0.0089 0.0081  
AT. 52 H X 0.0213 0.0243 0.0064 -0.0062 -0.0054 0.0039  
Y -0.0152 -0.0170 -0.0088 0.0086 0.0081 -0.0069  
Z 0.0187 0.0256 0.0093 -0.0094 -0.0089 0.0081  
AT. 53 C X 0.0124 -0.0081 -0.0051 -0.0056 -0.0056 -0.0072  
Y 0.0091 -0.0107 0.0010 0.0009 0.0011 0.0006  
Z -0.0107 0.0113 0.0065 0.0068 0.0065 0.0074  
AT. 54 C X 0.0124 0.0081 0.0051 -0.0056 0.0056 -0.0072  
Y -0.0091 -0.0107 0.0010 -0.0009 0.0011 -0.0006  
Z -0.0107 -0.0113 -0.0065 0.0068 -0.0065 0.0074  
AT. 55 C X -0.0124 0.0081 -0.0051 -0.0056 0.0056 0.0072  
Y -0.0091 0.0107 0.0010 0.0009 -0.0011 -0.0006  
Z 0.0107 -0.0113 0.0065 0.0068 -0.0065 -0.0074  
AT. 56 C X -0.0124 -0.0081 0.0051 -0.0056 -0.0056 0.0072  
Y 0.0091 0.0107 0.0010 -0.0009 -0.0011 0.0006  
Z 0.0107 0.0113 -0.0065 0.0068 0.0065 -0.0074  
AT. 57 C X -0.0039 0.0024 0.0021 0.0022 0.0022 0.0026  
Y -0.0041 0.0047 0.0004 0.0004 0.0004 0.0005  
Z 0.0044 -0.0042 -0.0007 -0.0008 -0.0006 -0.0010  
AT. 58 C X -0.0039 -0.0024 -0.0021 0.0022 -0.0022 0.0026  
Y 0.0041 0.0047 0.0004 -0.0004 0.0004 -0.0005  
Z 0.0044 0.0042 0.0007 -0.0008 0.0006 -0.0010  
AT. 59 C X 0.0039 -0.0024 0.0021 0.0022 -0.0022 -0.0026

Y 0.0041 -0.0047 0.0004 0.0004 -0.0004 -0.0005  
Z -0.0044 0.0042 -0.0007 -0.0008 0.0006 0.0010  
AT. 60 C X 0.0039 0.0024 -0.0021 0.0022 0.0022 -0.0026  
Y -0.0041 -0.0047 0.0004 -0.0004 -0.0004 0.0005  
Z -0.0044 -0.0042 0.0007 -0.0008 -0.0006 0.0010  
AT. 61 H X 0.0132 -0.0098 -0.0069 -0.0074 -0.0072 -0.0086  
Y 0.0108 -0.0074 -0.0055 -0.0060 -0.0058 -0.0069  
Z -0.0106 0.0141 -0.0052 -0.0058 -0.0055 -0.0058  
AT. 62 H X 0.0132 0.0098 0.0069 -0.0074 0.0072 -0.0086  
Y -0.0108 -0.0074 -0.0055 0.0060 -0.0058 0.0069  
Z -0.0106 -0.0141 0.0052 -0.0058 0.0055 -0.0058  
AT. 63 H X -0.0132 0.0098 -0.0069 -0.0074 0.0072 0.0086  
Y -0.0108 0.0074 -0.0055 -0.0060 0.0058 0.0069  
Z 0.0106 -0.0141 -0.0052 -0.0058 0.0055 0.0058  
AT. 64 H X -0.0132 -0.0098 0.0069 -0.0074 -0.0072 0.0086  
Y 0.0108 0.0074 -0.0055 0.0060 0.0058 -0.0069  
Z 0.0106 0.0141 0.0052 -0.0058 -0.0055 0.0058  
AT. 65 H X -0.0052 0.0051 0.0022 0.0023 0.0022 0.0026  
Y 0.0023 -0.0048 -0.0006 -0.0007 -0.0004 -0.0005  
Z -0.0208 0.0165 0.0021 0.0030 0.0020 0.0047  
AT. 66 H X -0.0052 -0.0051 -0.0022 0.0023 -0.0022 0.0026  
Y -0.0023 -0.0048 -0.0006 0.0007 -0.0004 0.0005  
Z -0.0208 -0.0165 -0.0021 0.0030 -0.0020 0.0047  
AT. 67 H X 0.0052 -0.0051 0.0022 0.0023 -0.0022 -0.0026  
Y -0.0023 0.0048 -0.0006 -0.0007 0.0004 0.0005  
Z 0.0208 -0.0165 0.0021 0.0030 -0.0020 -0.0047  
AT. 68 H X 0.0052 0.0051 -0.0022 0.0023 0.0022 -0.0026  
Y 0.0023 0.0048 -0.0006 0.0007 0.0004 -0.0005  
Z 0.0208 0.0165 -0.0021 0.0030 0.0020 -0.0047  
AT. 69 H X 0.0116 -0.0099 -0.0050 -0.0048 -0.0053 -0.0054  
Y 0.0056 -0.0085 -0.0030 -0.0028 -0.0029 -0.0028  
Z 0.0142 -0.0164 -0.0047 -0.0046 -0.0046 -0.0051

AT. 70 H X 0.0116 0.0099 0.0050 -0.0048 0.0053 -0.0054  
Y -0.0056 -0.0085 -0.0030 0.0028 -0.0029 0.0028  
Z 0.0142 0.0164 0.0047 -0.0046 0.0046 -0.0051

AT. 71 H X -0.0116 0.0099 -0.0050 -0.0048 0.0053 0.0054  
Y -0.0056 0.0085 -0.0030 -0.0028 0.0029 0.0028  
Z -0.0142 0.0164 -0.0047 -0.0046 0.0046 0.0051

AT. 72 H X -0.0116 -0.0099 0.0050 -0.0048 -0.0053 0.0054  
Y 0.0056 0.0085 -0.0030 0.0028 0.0029 -0.0028  
Z -0.0142 -0.0164 0.0047 -0.0046 -0.0046 0.0051

AT. 73 C X -0.0018 -0.0011 0.0123 0.0122 0.0131 0.0136  
Y -0.0125 0.0124 -0.0076 -0.0073 -0.0068 -0.0062  
Z -0.0014 0.0013 -0.0077 -0.0077 -0.0084 -0.0083

AT. 74 C X -0.0018 0.0011 -0.0123 0.0122 -0.0131 0.0136  
Y 0.0125 0.0124 -0.0076 0.0073 -0.0068 0.0062  
Z -0.0014 -0.0013 0.0077 -0.0077 0.0084 -0.0083

AT. 75 C X 0.0018 0.0011 0.0123 0.0122 -0.0131 -0.0136  
Y 0.0125 -0.0124 -0.0076 -0.0073 0.0068 0.0062  
Z 0.0014 -0.0013 -0.0077 -0.0077 0.0084 0.0083

AT. 76 C X 0.0018 -0.0011 -0.0123 0.0122 0.0131 -0.0136  
Y -0.0125 -0.0124 -0.0076 0.0073 0.0068 -0.0062  
Z 0.0014 0.0013 0.0077 -0.0077 -0.0084 0.0083

AT. 77 C X 0.0025 -0.0030 0.0020 0.0018 0.0018 0.0016  
Y -0.0009 0.0024 0.0005 0.0004 0.0001 0.0001  
Z -0.0039 0.0014 -0.0124 -0.0122 -0.0120 -0.0115

AT. 78 C X 0.0025 0.0030 -0.0020 0.0018 -0.0018 0.0016  
Y 0.0009 0.0024 0.0005 -0.0004 0.0001 -0.0001  
Z -0.0039 -0.0014 0.0124 -0.0122 0.0120 -0.0115

AT. 79 C X -0.0025 0.0030 0.0020 0.0018 -0.0018 -0.0016  
Y 0.0009 -0.0024 0.0005 0.0004 -0.0001 -0.0001  
Z 0.0039 -0.0014 -0.0124 -0.0122 0.0120 0.0115

AT. 80 C X -0.0025 -0.0030 -0.0020 0.0018 0.0018 -0.0016  
Y -0.0009 -0.0024 0.0005 -0.0004 -0.0001 0.0001

Z 0.0039 0.0014 0.0124 -0.0122 -0.0120 0.0115  
AT. 81 H X 0.0039 -0.0022 0.0046 0.0042 0.0060 0.0058  
Y -0.0004 0.0044 -0.0004 -0.0009 0.0011 0.0012  
Z 0.0105 -0.0142 0.0210 0.0216 0.0200 0.0190  
AT. 82 H X 0.0039 0.0022 -0.0046 0.0042 -0.0060 0.0058  
Y 0.0004 0.0044 -0.0004 0.0009 0.0011 -0.0012  
Z 0.0105 0.0142 -0.0210 0.0216 -0.0200 0.0190  
AT. 83 H X -0.0039 0.0022 0.0046 0.0042 -0.0060 -0.0058  
Y 0.0004 -0.0044 -0.0004 -0.0009 -0.0011 -0.0012  
Z -0.0105 0.0142 0.0210 0.0216 -0.0200 -0.0190  
AT. 84 H X -0.0039 -0.0022 -0.0046 0.0042 0.0060 -0.0058  
Y -0.0004 -0.0044 -0.0004 0.0009 -0.0011 0.0012  
Z -0.0105 -0.0142 -0.0210 0.0216 0.0200 -0.0190  
AT. 85 H X -0.0109 0.0066 -0.0080 -0.0076 -0.0071 -0.0065  
Y -0.0045 -0.0010 0.0026 0.0031 0.0040 0.0040  
Z 0.0029 0.0015 -0.0107 -0.0113 -0.0122 -0.0119  
AT. 86 H X -0.0109 -0.0066 0.0080 -0.0076 0.0071 -0.0065  
Y 0.0045 -0.0010 0.0026 -0.0031 0.0040 -0.0040  
Z 0.0029 -0.0015 0.0107 -0.0113 0.0122 -0.0119  
AT. 87 H X 0.0109 -0.0066 -0.0080 -0.0076 0.0071 0.0065  
Y 0.0045 0.0010 0.0026 0.0031 -0.0040 -0.0040  
Z -0.0029 -0.0015 -0.0107 -0.0113 0.0122 0.0119  
AT. 88 H X 0.0109 0.0066 0.0080 -0.0076 -0.0071 0.0065  
Y -0.0045 0.0010 0.0026 -0.0031 -0.0040 0.0040  
Z -0.0029 0.0015 0.0107 -0.0113 -0.0122 0.0119  
AT. 89 C X -0.0064 0.0078 -0.0088 -0.0082 -0.0094 -0.0090  
Y 0.0081 -0.0076 0.0059 0.0058 0.0058 0.0054  
Z 0.0048 -0.0030 0.0122 0.0120 0.0121 0.0116  
AT. 90 C X -0.0064 -0.0078 0.0088 -0.0082 0.0094 -0.0090  
Y -0.0081 -0.0076 0.0059 -0.0058 0.0058 -0.0054  
Z 0.0048 0.0030 -0.0122 0.0120 -0.0121 0.0116  
AT. 91 C X 0.0064 -0.0078 -0.0088 -0.0082 0.0094 0.0090



Y -0.0081 0.0076 0.0059 0.0058 -0.0058 -0.0054  
Z -0.0048 0.0030 0.0122 0.0120 -0.0121 -0.0116  
AT. 92 C X 0.0064 0.0078 0.0088 -0.0082 -0.0094 0.0090  
Y 0.0081 0.0076 0.0059 -0.0058 -0.0058 0.0054  
Z -0.0048 -0.0030 -0.0122 0.0120 0.0121 -0.0116  
AT. 93 C X 0.0017 -0.0024 0.0018 0.0017 0.0022 0.0021  
Y -0.0029 0.0027 -0.0020 -0.0020 -0.0019 -0.0018  
Z -0.0023 0.0016 -0.0038 -0.0037 -0.0035 -0.0035  
AT. 94 C X 0.0017 0.0024 -0.0018 0.0017 -0.0022 0.0021  
Y 0.0029 0.0027 -0.0020 0.0020 -0.0019 0.0018  
Z -0.0023 -0.0016 0.0038 -0.0037 0.0035 -0.0035  
AT. 95 C X -0.0017 0.0024 0.0018 0.0017 -0.0022 -0.0021  
Y 0.0029 -0.0027 -0.0020 -0.0020 0.0019 0.0018  
Z 0.0023 -0.0016 -0.0038 -0.0037 0.0035 0.0035  
AT. 96 C X -0.0017 -0.0024 -0.0018 0.0017 0.0022 -0.0021  
Y -0.0029 -0.0027 -0.0020 0.0020 0.0019 -0.0018  
Z 0.0023 0.0016 0.0038 -0.0037 -0.0035 0.0035  
AT. 97 H X -0.0023 0.0029 -0.0038 -0.0041 -0.0039 -0.0035  
Y 0.0086 -0.0085 0.0105 0.0104 0.0106 0.0100  
Z 0.0071 -0.0034 0.0012 0.0004 -0.0001 0.0003  
AT. 98 H X -0.0023 -0.0029 0.0038 -0.0041 0.0039 -0.0035  
Y -0.0086 -0.0085 0.0105 -0.0104 0.0106 -0.0100  
Z 0.0071 0.0034 -0.0012 0.0004 0.0001 0.0003  
AT. 99 H X 0.0023 -0.0029 -0.0038 -0.0041 0.0039 0.0035  
Y -0.0086 0.0085 0.0105 0.0104 -0.0106 -0.0100  
Z -0.0071 0.0034 0.0012 0.0004 0.0001 -0.0003  
AT. 100 H X 0.0023 0.0029 0.0038 -0.0041 -0.0039 0.0035  
Y 0.0086 0.0085 0.0105 -0.0104 -0.0106 0.0100  
Z -0.0071 -0.0034 -0.0012 0.0004 -0.0001 -0.0003  
AT. 101 H X 0.0009 0.0000 0.0028 0.0033 0.0020 0.0019  
Y -0.0052 0.0066 -0.0037 -0.0030 -0.0046 -0.0044  
Z 0.0112 -0.0114 0.0139 0.0135 0.0131 0.0126

AT.102 H X 0.0009 -0.0000 -0.0028 0.0033 -0.0020 0.0019  
Y 0.0052 0.0066 -0.0037 0.0030 -0.0046 0.0044  
Z 0.0112 0.0114 -0.0139 0.0135 -0.0131 0.0126

AT.103 H X -0.0009 -0.0000 0.0028 0.0033 -0.0020 -0.0019  
Y 0.0052 -0.0066 -0.0037 -0.0030 0.0046 0.0044  
Z -0.0112 0.0114 0.0139 0.0135 -0.0131 -0.0126

AT.104 H X -0.0009 0.0000 -0.0028 0.0033 0.0020 -0.0019  
Y -0.0052 -0.0066 -0.0037 0.0030 0.0046 -0.0044  
Z -0.0112 -0.0114 -0.0139 0.0135 0.0131 -0.0126

AT.105 H X -0.0109 0.0105 -0.0068 -0.0058 -0.0077 -0.0072  
Y 0.0071 -0.0065 0.0052 0.0053 0.0060 0.0053  
Z -0.0051 0.0036 -0.0059 -0.0062 -0.0058 -0.0052

AT.106 H X -0.0109 -0.0105 0.0068 -0.0058 0.0077 -0.0072  
Y -0.0071 -0.0065 0.0052 -0.0053 0.0060 -0.0053  
Z -0.0051 -0.0036 0.0059 -0.0062 0.0058 -0.0052

AT.107 H X 0.0109 -0.0105 -0.0068 -0.0058 0.0077 0.0072  
Y -0.0071 0.0065 0.0052 0.0053 -0.0060 -0.0053  
Z 0.0051 -0.0036 -0.0059 -0.0062 0.0058 0.0052

AT.108 H X 0.0109 0.0105 0.0068 -0.0058 -0.0077 0.0072  
Y 0.0071 0.0065 0.0052 -0.0053 -0.0060 0.0053  
Z 0.0051 0.0036 0.0059 -0.0062 -0.0058 0.0052

AT.109 C X -0.0037 0.0019 0.0003 0.0005 0.0004 0.0007  
Y -0.0005 0.0008 0.0002 0.0002 0.0003 0.0003  
Z 0.0088 -0.0089 -0.0041 -0.0046 -0.0042 -0.0049

AT.110 C X -0.0037 -0.0019 -0.0003 0.0005 -0.0004 0.0007  
Y 0.0005 0.0008 0.0002 -0.0002 0.0003 -0.0003  
Z 0.0088 0.0089 0.0041 -0.0046 0.0042 -0.0049

AT.111 C X 0.0037 -0.0019 0.0003 0.0005 -0.0004 -0.0007  
Y 0.0005 -0.0008 0.0002 0.0002 -0.0003 -0.0003  
Z -0.0088 0.0089 -0.0041 -0.0046 0.0042 0.0049

AT.112 C X 0.0037 0.0019 -0.0003 0.0005 0.0004 -0.0007  
Y -0.0005 -0.0008 0.0002 -0.0002 -0.0003 0.0003

Z -0.0088 -0.0089 0.0041 -0.0046 -0.0042 0.0049  
AT. 113 H X -0.0108 0.0105 0.0079 0.0088 0.0080 0.0103  
Y 0.0079 -0.0110 -0.0132 -0.0136 -0.0128 -0.0159  
Z -0.0091 0.0052 -0.0063 -0.0038 -0.0056 -0.0048  
AT. 114 H X -0.0108 -0.0105 -0.0079 0.0088 -0.0080 0.0103  
Y -0.0079 -0.0110 -0.0132 0.0136 -0.0128 0.0159  
Z -0.0091 -0.0052 0.0063 -0.0038 0.0056 -0.0048  
AT. 115 H X 0.0108 -0.0105 0.0079 0.0088 -0.0080 -0.0103  
Y -0.0079 0.0110 -0.0132 -0.0136 0.0128 0.0159  
Z 0.0091 -0.0052 -0.0063 -0.0038 0.0056 0.0048  
AT. 116 H X 0.0108 0.0105 -0.0079 0.0088 0.0080 -0.0103  
Y 0.0079 0.0110 -0.0132 0.0136 0.0128 -0.0159  
Z 0.0091 0.0052 0.0063 -0.0038 -0.0056 0.0048  
AT. 117 H X 0.0190 -0.0197 -0.0043 -0.0043 -0.0041 -0.0049  
Y -0.0100 0.0128 0.0009 0.0014 -0.0007 0.0017  
Z -0.0031 0.0052 -0.0027 -0.0028 -0.0044 -0.0027  
AT. 118 H X 0.0190 0.0197 0.0043 -0.0043 0.0041 -0.0049  
Y 0.0100 0.0128 0.0009 -0.0014 -0.0007 -0.0017  
Z -0.0031 -0.0052 0.0027 -0.0028 0.0044 -0.0027  
AT. 119 H X -0.0190 0.0197 -0.0043 -0.0043 0.0041 0.0049  
Y 0.0100 -0.0128 0.0009 0.0014 0.0007 -0.0017  
Z 0.0031 -0.0052 -0.0027 -0.0028 0.0044 0.0027  
AT. 120 H X -0.0190 -0.0197 0.0043 -0.0043 -0.0041 0.0049  
Y -0.0100 -0.0128 0.0009 -0.0014 0.0007 0.0017  
Z 0.0031 0.0052 0.0027 -0.0028 -0.0044 0.0027  
AT. 121 C X 0.0027 -0.0031 0.0032 0.0032 0.0034 0.0033  
Y -0.0079 0.0070 -0.0013 -0.0011 -0.0012 -0.0008  
Z 0.0042 -0.0051 -0.0052 -0.0052 -0.0053 -0.0053  
AT. 122 C X 0.0027 0.0031 -0.0032 0.0032 -0.0034 0.0033  
Y 0.0079 0.0070 -0.0013 0.0011 -0.0012 0.0008  
Z 0.0042 0.0051 0.0052 -0.0052 0.0053 -0.0053  
AT. 123 C X -0.0027 0.0031 0.0032 0.0032 -0.0034 -0.0033

Y 0.0079 -0.0070 -0.0013 -0.0011 0.0012 0.0008  
Z -0.0042 0.0051 -0.0052 -0.0052 0.0053 0.0053  
AT. 124 C X -0.0027 -0.0031 -0.0032 0.0032 0.0034 -0.0033  
Y -0.0079 -0.0070 -0.0013 0.0011 0.0012 -0.0008  
Z -0.0042 -0.0051 0.0052 -0.0052 -0.0053 0.0053  
AT. 125 H X -0.0089 0.0064 -0.0006 0.0004 -0.0013 -0.0008  
Y 0.0153 -0.0101 0.0017 0.0008 0.0027 0.0013  
Z -0.0088 0.0042 -0.0060 -0.0055 -0.0066 -0.0055  
AT. 126 H X -0.0089 -0.0064 0.0006 0.0004 0.0013 -0.0008  
Y -0.0153 -0.0101 0.0017 -0.0008 0.0027 -0.0013  
Z -0.0088 -0.0042 0.0060 -0.0055 0.0066 -0.0055  
AT. 127 H X 0.0089 -0.0064 -0.0006 0.0004 0.0013 0.0008  
Y -0.0153 0.0101 0.0017 0.0008 -0.0027 -0.0013  
Z 0.0088 -0.0042 -0.0060 -0.0055 0.0066 0.0055  
AT. 128 H X 0.0089 0.0064 0.0006 0.0004 -0.0013 0.0008  
Y 0.0153 0.0101 0.0017 -0.0008 -0.0027 0.0013  
Z 0.0088 0.0042 0.0060 -0.0055 -0.0066 0.0055  
AT. 129 H X 0.0169 -0.0156 -0.0012 -0.0026 -0.0007 -0.0018  
Y -0.0235 0.0218 0.0064 0.0082 0.0059 0.0075  
Z 0.0213 -0.0168 -0.0034 -0.0050 -0.0035 -0.0047  
AT. 130 H X 0.0169 0.0156 0.0012 -0.0026 0.0007 -0.0018  
Y 0.0235 0.0218 0.0064 -0.0082 0.0059 -0.0075  
Z 0.0213 0.0168 0.0034 -0.0050 0.0035 -0.0047  
AT. 131 H X -0.0169 0.0156 -0.0012 -0.0026 0.0007 0.0018  
Y 0.0235 -0.0218 0.0064 0.0082 -0.0059 -0.0075  
Z -0.0213 0.0168 -0.0034 -0.0050 0.0035 0.0047  
AT. 132 H X -0.0169 -0.0156 0.0012 -0.0026 -0.0007 0.0018  
Y -0.0235 -0.0218 0.0064 -0.0082 -0.0059 0.0075  
Z -0.0213 -0.0168 0.0034 -0.0050 -0.0035 0.0047  
AT. 133 C X 0.0012 -0.0009 0.0002 0.0001 0.0000 -0.0000  
Y 0.0079 -0.0063 0.0002 -0.0005 0.0001 -0.0002  
Z 0.0043 -0.0034 0.0003 0.0000 0.0002 0.0003

AT. 134 C X 0.0012 0.0009 -0.0002 0.0001 -0.0000 -0.0000  
Y -0.0079 -0.0063 0.0002 0.0005 0.0001 0.0002  
Z 0.0043 0.0034 -0.0003 0.0000 -0.0002 0.0003

AT. 135 C X -0.0012 0.0009 0.0002 0.0001 -0.0000 0.0000  
Y -0.0079 0.0063 0.0002 -0.0005 -0.0001 0.0002  
Z -0.0043 0.0034 0.0003 0.0000 -0.0002 -0.0003

AT. 136 C X -0.0012 -0.0009 -0.0002 0.0001 0.0000 0.0000  
Y 0.0079 0.0063 0.0002 0.0005 -0.0001 -0.0002  
Z -0.0043 -0.0034 -0.0003 0.0000 0.0002 -0.0003

AT. 137 C X 0.0002 -0.0004 -0.0006 -0.0005 -0.0003 -0.0003  
Y -0.0030 0.0022 -0.0001 0.0000 -0.0003 -0.0002  
Z -0.0030 0.0025 0.0012 0.0013 0.0009 0.0008

AT. 138 C X 0.0002 0.0004 0.0006 -0.0005 0.0003 -0.0003  
Y 0.0030 0.0022 -0.0001 -0.0000 -0.0003 0.0002  
Z -0.0030 -0.0025 -0.0012 0.0013 -0.0009 0.0008

AT. 139 C X -0.0002 0.0004 -0.0006 -0.0005 0.0003 0.0003  
Y 0.0030 -0.0022 -0.0001 0.0000 0.0003 0.0002  
Z 0.0030 -0.0025 0.0012 0.0013 -0.0009 -0.0008

AT. 140 C X -0.0002 -0.0004 0.0006 -0.0005 -0.0003 0.0003  
Y -0.0030 -0.0022 -0.0001 -0.0000 0.0003 -0.0002  
Z 0.0030 0.0025 -0.0012 0.0013 0.0009 -0.0008

AT. 141 H X -0.0062 0.0060 0.0029 0.0024 0.0012 0.0008  
Y 0.0043 -0.0029 -0.0001 -0.0003 0.0003 0.0001  
Z 0.0087 -0.0077 -0.0025 -0.0020 -0.0003 -0.0001

AT. 142 H X -0.0062 -0.0060 -0.0029 0.0024 -0.0012 0.0008  
Y -0.0043 -0.0029 -0.0001 0.0003 0.0003 -0.0001  
Z 0.0087 0.0077 0.0025 -0.0020 0.0003 -0.0001

AT. 143 H X 0.0062 -0.0060 0.0029 0.0024 -0.0012 -0.0008  
Y -0.0043 0.0029 -0.0001 -0.0003 -0.0003 -0.0001  
Z -0.0087 0.0077 -0.0025 -0.0020 0.0003 0.0001

AT. 144 H X 0.0062 0.0060 -0.0029 0.0024 0.0012 -0.0008  
Y 0.0043 0.0029 -0.0001 0.0003 -0.0003 0.0001

Z -0.0087 -0.0077 0.0025 -0.0020 -0.0003 0.0001  
AT. 145 H X -0.0031 0.0031 0.0052 0.0045 0.0034 0.0030  
Y -0.0035 0.0023 -0.0046 -0.0040 -0.0037 -0.0033  
Z -0.0081 0.0066 -0.0095 -0.0085 -0.0081 -0.0073  
AT. 146 H X -0.0031 -0.0031 -0.0052 0.0045 -0.0034 0.0030  
Y 0.0035 0.0023 -0.0046 0.0040 -0.0037 0.0033  
Z -0.0081 -0.0066 0.0095 -0.0085 0.0081 -0.0073  
AT. 147 H X 0.0031 -0.0031 0.0052 0.0045 -0.0034 -0.0030  
Y 0.0035 -0.0023 -0.0046 -0.0040 0.0037 0.0033  
Z 0.0081 -0.0066 -0.0095 -0.0085 0.0081 0.0073  
AT. 148 H X 0.0031 0.0031 -0.0052 0.0045 0.0034 -0.0030  
Y -0.0035 -0.0023 -0.0046 0.0040 0.0037 -0.0033  
Z 0.0081 0.0066 0.0095 -0.0085 -0.0081 0.0073  
AT. 149 O X -0.0024 0.0029 -0.0024 -0.0022 -0.0023 -0.0022  
Y 0.0032 -0.0036 0.0017 0.0016 0.0016 0.0014  
Z 0.0017 -0.0023 -0.0015 -0.0015 -0.0013 -0.0014  
AT. 150 O X -0.0024 -0.0029 0.0024 -0.0022 0.0023 -0.0022  
Y -0.0032 -0.0036 0.0017 -0.0016 0.0016 -0.0014  
Z 0.0017 0.0023 0.0015 -0.0015 0.0013 -0.0014  
AT. 151 O X 0.0024 -0.0029 -0.0024 -0.0022 0.0023 0.0022  
Y -0.0032 0.0036 0.0017 0.0016 -0.0016 -0.0014  
Z -0.0017 0.0023 -0.0015 -0.0015 0.0013 0.0014  
AT. 152 O X 0.0024 0.0029 0.0024 -0.0022 -0.0023 0.0022  
Y 0.0032 0.0036 0.0017 -0.0016 -0.0016 0.0014  
Z -0.0017 -0.0023 0.0015 -0.0015 -0.0013 0.0014  
AT. 153 H X 0.0123 -0.0156 -0.0206 -0.0209 -0.0187 -0.0203  
Y -0.0154 0.0198 0.0254 0.0254 0.0230 0.0249  
Z -0.0149 0.0186 0.0197 0.0201 0.0179 0.0197  
AT. 154 H X 0.0123 0.0156 0.0206 -0.0209 0.0187 -0.0203  
Y 0.0154 0.0198 0.0254 -0.0254 0.0230 -0.0249  
Z -0.0149 -0.0186 -0.0197 0.0201 -0.0179 0.0197  
AT. 155 H X -0.0123 0.0156 -0.0206 -0.0209 0.0187 0.0203

Y 0.0154 -0.0198 0.0254 0.0254 -0.0230 -0.0249  
Z 0.0149 -0.0186 0.0197 0.0201 -0.0179 -0.0197  
AT. 156 H X -0.0123 -0.0156 0.0206 -0.0209 -0.0187 0.0203  
Y -0.0154 -0.0198 0.0254 -0.0254 -0.0230 0.0249  
Z 0.0149 0.0186 -0.0197 0.0201 0.0179 -0.0197  
AT. 157 O X 0.0016 -0.0005 -0.0047 -0.0047 -0.0054 -0.0055  
Y 0.0015 -0.0012 -0.0007 -0.0007 -0.0010 -0.0011  
Z 0.0010 -0.0010 0.0021 0.0020 0.0024 0.0023  
AT. 158 O X 0.0016 0.0005 0.0047 -0.0047 0.0054 -0.0055  
Y -0.0015 -0.0012 -0.0007 0.0007 -0.0010 0.0011  
Z 0.0010 0.0010 -0.0021 0.0020 -0.0024 0.0023  
AT. 159 O X -0.0016 0.0005 -0.0047 -0.0047 0.0054 0.0055  
Y -0.0015 0.0012 -0.0007 -0.0007 0.0010 0.0011  
Z -0.0010 0.0010 0.0021 0.0020 -0.0024 -0.0023  
AT. 160 O X -0.0016 -0.0005 0.0047 -0.0047 -0.0054 0.0055  
Y 0.0015 0.0012 -0.0007 0.0007 0.0010 -0.0011  
Z -0.0010 -0.0010 -0.0021 0.0020 0.0024 -0.0023  
AT. 161 O X 0.0003 -0.0004 0.0009 0.0009 0.0009 0.0009  
Y 0.0001 -0.0000 0.0004 0.0004 0.0004 0.0004  
Z -0.0003 0.0001 0.0005 0.0005 0.0006 0.0006  
AT. 162 O X 0.0003 0.0004 -0.0009 0.0009 -0.0009 0.0009  
Y -0.0001 -0.0000 0.0004 -0.0004 0.0004 -0.0004  
Z -0.0003 -0.0001 -0.0005 0.0005 -0.0006 0.0006  
AT. 163 O X -0.0003 0.0004 0.0009 0.0009 -0.0009 -0.0009  
Y -0.0001 0.0000 0.0004 0.0004 -0.0004 -0.0004  
Z 0.0003 -0.0001 0.0005 0.0005 -0.0006 -0.0006  
AT. 164 O X -0.0003 -0.0004 -0.0009 0.0009 0.0009 -0.0009  
Y 0.0001 0.0000 0.0004 -0.0004 -0.0004 0.0004  
Z 0.0003 0.0001 -0.0005 0.0005 0.0006 -0.0006  
AT. 165 H X -0.0012 0.0004 0.0003 0.0006 0.0001 0.0007  
Y -0.0008 0.0000 0.0008 0.0010 0.0008 0.0012  
Z -0.0017 0.0018 -0.0042 -0.0039 -0.0043 -0.0041

AT.166 H X -0.0012 -0.0004 -0.0003 0.0006 -0.0001 0.0007  
Y 0.0008 0.0000 0.0008 -0.0010 0.0008 -0.0012  
Z -0.0017 -0.0018 0.0042 -0.0039 0.0043 -0.0041

AT.167 H X 0.0012 -0.0004 0.0003 0.0006 -0.0001 -0.0007  
Y 0.0008 -0.0000 0.0008 0.0010 -0.0008 -0.0012  
Z 0.0017 -0.0018 -0.0042 -0.0039 0.0043 0.0041

AT.168 H X 0.0012 0.0004 -0.0003 0.0006 0.0001 -0.0007  
Y -0.0008 -0.0000 0.0008 -0.0010 -0.0008 0.0012  
Z 0.0017 0.0018 0.0042 -0.0039 -0.0043 0.0041

AT.169 O X 0.0000 -0.0000 0.0000 0.0001 0.0002 0.0002  
Y 0.0006 -0.0007 -0.0001 -0.0001 -0.0001 -0.0001  
Z 0.0001 -0.0002 -0.0002 -0.0003 0.0000 -0.0000

AT.170 O X 0.0000 0.0000 -0.0000 0.0001 -0.0002 0.0002  
Y -0.0006 -0.0007 -0.0001 0.0001 -0.0001 0.0001  
Z 0.0001 0.0002 0.0002 -0.0003 -0.0000 -0.0000

AT.171 O X -0.0000 0.0000 0.0000 0.0001 -0.0002 -0.0002  
Y -0.0006 0.0007 -0.0001 -0.0001 0.0001 0.0001  
Z -0.0001 0.0002 -0.0002 -0.0003 -0.0000 0.0000

AT.172 O X -0.0000 -0.0000 -0.0000 0.0001 0.0002 -0.0002  
Y 0.0006 0.0007 -0.0001 0.0001 0.0001 -0.0001  
Z -0.0001 -0.0002 0.0002 -0.0003 0.0000 0.0000

AT.173 H X -0.0021 0.0032 0.0027 0.0022 0.0043 0.0049  
Y 0.0002 -0.0000 -0.0003 -0.0001 -0.0006 -0.0005  
Z 0.0022 -0.0026 0.0015 0.0016 -0.0002 -0.0001

AT.174 H X -0.0021 -0.0032 -0.0027 0.0022 -0.0043 0.0049  
Y -0.0002 -0.0000 -0.0003 0.0001 -0.0006 0.0005  
Z 0.0022 0.0026 -0.0015 0.0016 0.0002 -0.0001

AT.175 H X 0.0021 -0.0032 0.0027 0.0022 -0.0043 -0.0049  
Y -0.0002 0.0000 -0.0003 -0.0001 0.0006 0.0005  
Z -0.0022 0.0026 0.0015 0.0016 0.0002 0.0001

AT.176 H X 0.0021 0.0032 -0.0027 0.0022 0.0043 -0.0049  
Y 0.0002 0.0000 -0.0003 0.0001 0.0006 -0.0005



Z -0.0022 -0.0026 -0.0015 0.0016 -0.0002 0.0001

FREQ(CM\*\*-1) 1323.08 1323.12 1323.33 1323.58 1333.35 1334.01

AT. 1 I X 0.0000 0.0000 -0.0000 -0.0000 -0.0000 -0.0000

Y -0.0000 -0.0000 -0.0000 -0.0000 0.0000 0.0000

Z -0.0000 0.0000 0.0000 0.0000 -0.0000 -0.0000

AT. 2 I X 0.0000 -0.0000 0.0000 -0.0000 -0.0000 0.0000

Y 0.0000 -0.0000 -0.0000 0.0000 -0.0000 0.0000

Z -0.0000 -0.0000 -0.0000 0.0000 -0.0000 0.0000

AT. 3 I X 0.0000 0.0000 0.0000 0.0000 -0.0000 -0.0000

Y -0.0000 -0.0000 0.0000 0.0000 0.0000 0.0000

Z -0.0000 0.0000 -0.0000 -0.0000 -0.0000 -0.0000

AT. 4 I X 0.0000 -0.0000 -0.0000 0.0000 -0.0000 0.0000

Y 0.0000 -0.0000 0.0000 -0.0000 -0.0000 0.0000

Z -0.0000 -0.0000 0.0000 -0.0000 -0.0000 0.0000

AT. 5 I X 0.0000 -0.0000 -0.0000 -0.0000 -0.0000 -0.0000

Y -0.0000 -0.0000 -0.0000 -0.0000 0.0000 0.0000

Z -0.0000 -0.0000 -0.0000 -0.0000 -0.0000 -0.0000

AT. 6 I X 0.0000 0.0000 0.0000 -0.0000 -0.0000 0.0000

Y 0.0000 -0.0000 -0.0000 0.0000 -0.0000 0.0000

Z -0.0000 0.0000 0.0000 -0.0000 -0.0000 0.0000

AT. 7 I X 0.0000 -0.0000 0.0000 0.0000 -0.0000 -0.0000

Y -0.0000 -0.0000 0.0000 0.0000 0.0000 0.0000

Z -0.0000 -0.0000 0.0000 0.0000 -0.0000 -0.0000

AT. 8 I X 0.0000 0.0000 -0.0000 0.0000 -0.0000 0.0000

Y 0.0000 -0.0000 0.0000 -0.0000 -0.0000 0.0000

Z -0.0000 0.0000 -0.0000 0.0000 -0.0000 0.0000

AT. 9 N X -0.0014 -0.0012 -0.0016 -0.0017 -0.0025 -0.0028

Y -0.0015 -0.0016 -0.0017 -0.0017 0.0002 0.0001

Z -0.0054 -0.0058 -0.0059 -0.0058 0.0020 0.0010

AT. 10 N X -0.0014 0.0012 0.0016 -0.0017 -0.0025 0.0028

Y 0.0015 -0.0016 -0.0017 0.0017 -0.0002 0.0001  
Z -0.0054 0.0058 0.0059 -0.0058 0.0020 -0.0010  
AT. 11 N X -0.0014 -0.0012 0.0016 0.0017 -0.0025 -0.0028  
Y -0.0015 -0.0016 0.0017 0.0017 0.0002 0.0001  
Z -0.0054 -0.0058 0.0059 0.0058 0.0020 0.0010  
AT. 12 N X -0.0014 0.0012 -0.0016 0.0017 -0.0025 0.0028  
Y 0.0015 -0.0016 0.0017 -0.0017 -0.0002 0.0001  
Z -0.0054 0.0058 -0.0059 0.0058 0.0020 -0.0010  
AT. 13 N X 0.0021 0.0022 0.0020 0.0018 -0.0023 -0.0022  
Y -0.0037 -0.0039 -0.0039 -0.0037 0.0007 0.0002  
Z 0.0150 0.0147 0.0152 0.0146 0.0023 0.0031  
AT. 14 N X 0.0021 -0.0022 -0.0020 0.0018 -0.0023 0.0022  
Y 0.0037 -0.0039 -0.0039 0.0037 -0.0007 0.0002  
Z 0.0150 -0.0147 -0.0152 0.0146 0.0023 -0.0031  
AT. 15 N X 0.0021 0.0022 -0.0020 -0.0018 -0.0023 -0.0022  
Y -0.0037 -0.0039 0.0039 0.0037 0.0007 0.0002  
Z 0.0150 0.0147 -0.0152 -0.0146 0.0023 0.0031  
AT. 16 N X 0.0021 -0.0022 0.0020 -0.0018 -0.0023 0.0022  
Y 0.0037 -0.0039 0.0039 -0.0037 -0.0007 0.0002  
Z 0.0150 -0.0147 0.0152 -0.0146 0.0023 -0.0031  
AT. 17 O X 0.0009 0.0009 0.0009 0.0009 -0.0003 -0.0003  
Y 0.0015 0.0016 0.0016 0.0015 -0.0009 -0.0007  
Z 0.0014 0.0013 0.0013 0.0013 0.0005 0.0007  
AT. 18 O X 0.0009 -0.0009 -0.0009 0.0009 -0.0003 0.0003  
Y -0.0015 0.0016 0.0016 -0.0015 0.0009 -0.0007  
Z 0.0014 -0.0013 -0.0013 0.0013 0.0005 -0.0007  
AT. 19 O X 0.0009 0.0009 -0.0009 -0.0009 -0.0003 -0.0003  
Y 0.0015 0.0016 -0.0016 -0.0015 -0.0009 -0.0007  
Z 0.0014 0.0013 -0.0013 -0.0013 0.0005 0.0007  
AT. 20 O X 0.0009 -0.0009 0.0009 -0.0009 -0.0003 0.0003  
Y -0.0015 0.0016 -0.0016 0.0015 0.0009 -0.0007  
Z 0.0014 -0.0013 0.0013 -0.0013 0.0005 -0.0007

AT. 21 O X -0.0003 -0.0002 -0.0002 -0.0003 0.0001 0.0001  
Y 0.0035 0.0035 0.0036 0.0035 0.0009 0.0012  
Z -0.0028 -0.0028 -0.0027 -0.0026 0.0010 0.0009

AT. 22 O X -0.0003 0.0002 0.0002 -0.0003 0.0001 -0.0001  
Y -0.0035 0.0035 0.0036 -0.0035 -0.0009 0.0012  
Z -0.0028 0.0028 0.0027 -0.0026 0.0010 -0.0009

AT. 23 O X -0.0003 -0.0002 0.0002 0.0003 0.0001 0.0001  
Y 0.0035 0.0035 -0.0036 -0.0035 0.0009 0.0012  
Z -0.0028 -0.0028 0.0027 0.0026 0.0010 0.0009

AT. 24 O X -0.0003 0.0002 -0.0002 0.0003 0.0001 -0.0001  
Y -0.0035 0.0035 -0.0036 0.0035 -0.0009 0.0012  
Z -0.0028 0.0028 -0.0027 0.0026 0.0010 -0.0009

AT. 25 C X 0.0001 0.0003 0.0002 0.0000 -0.0014 -0.0017  
Y 0.0000 0.0003 0.0001 -0.0001 -0.0028 -0.0028  
Z -0.0003 -0.0006 -0.0005 -0.0002 0.0026 0.0027

AT. 26 C X 0.0001 -0.0003 -0.0002 0.0000 -0.0014 0.0017  
Y -0.0000 0.0003 0.0001 0.0001 0.0028 -0.0028  
Z -0.0003 0.0006 0.0005 -0.0002 0.0026 -0.0027

AT. 27 C X 0.0001 0.0003 -0.0002 -0.0000 -0.0014 -0.0017  
Y 0.0000 0.0003 -0.0001 0.0001 -0.0028 -0.0028  
Z -0.0003 -0.0006 0.0005 0.0002 0.0026 0.0027

AT. 28 C X 0.0001 -0.0003 0.0002 -0.0000 -0.0014 0.0017  
Y -0.0000 0.0003 -0.0001 -0.0001 0.0028 -0.0028  
Z -0.0003 0.0006 -0.0005 0.0002 0.0026 -0.0027

AT. 29 H X -0.0005 -0.0015 -0.0010 -0.0001 0.0065 0.0083  
Y 0.0018 0.0016 0.0017 0.0020 0.0011 0.0012  
Z 0.0002 0.0016 0.0007 -0.0006 -0.0097 -0.0126

AT. 30 H X -0.0005 0.0015 0.0010 -0.0001 0.0065 -0.0083  
Y -0.0018 0.0016 0.0017 -0.0020 -0.0011 0.0012  
Z 0.0002 -0.0016 -0.0007 -0.0006 -0.0097 0.0126

AT. 31 H X -0.0005 -0.0015 0.0010 0.0001 0.0065 0.0083  
Y 0.0018 0.0016 -0.0017 -0.0020 0.0011 0.0012

Z 0.0002 0.0016 -0.0007 0.0006 -0.0097 -0.0126  
AT. 32 H X -0.0005 0.0015 -0.0010 0.0001 0.0065 -0.0083  
Y -0.0018 0.0016 -0.0017 0.0020 -0.0011 0.0012  
Z 0.0002 -0.0016 0.0007 0.0006 -0.0097 0.0126  
AT. 33 H X -0.0021 -0.0023 -0.0023 -0.0020 0.0030 0.0039  
Y 0.0009 0.0015 0.0009 0.0007 -0.0049 -0.0049  
Z -0.0025 -0.0036 -0.0021 -0.0022 0.0076 0.0067  
AT. 34 H X -0.0021 0.0023 0.0023 -0.0020 0.0030 -0.0039  
Y -0.0009 0.0015 0.0009 -0.0007 0.0049 -0.0049  
Z -0.0025 0.0036 0.0021 -0.0022 0.0076 -0.0067  
AT. 35 H X -0.0021 -0.0023 0.0023 0.0020 0.0030 0.0039  
Y 0.0009 0.0015 -0.0009 -0.0007 -0.0049 -0.0049  
Z -0.0025 -0.0036 0.0021 0.0022 0.0076 0.0067  
AT. 36 H X -0.0021 0.0023 -0.0023 0.0020 0.0030 -0.0039  
Y -0.0009 0.0015 -0.0009 0.0007 0.0049 -0.0049  
Z -0.0025 0.0036 -0.0021 0.0022 0.0076 -0.0067  
AT. 37 C X -0.0005 -0.0008 -0.0005 -0.0003 0.0027 0.0028  
Y -0.0019 -0.0029 -0.0021 -0.0015 0.0091 0.0088  
Z 0.0006 0.0011 0.0009 0.0007 -0.0038 -0.0037  
AT. 38 C X -0.0005 0.0008 0.0005 -0.0003 0.0027 -0.0028  
Y 0.0019 -0.0029 -0.0021 0.0015 -0.0091 0.0088  
Z 0.0006 -0.0011 -0.0009 0.0007 -0.0038 0.0037  
AT. 39 C X -0.0005 -0.0008 0.0005 0.0003 0.0027 0.0028  
Y -0.0019 -0.0029 0.0021 0.0015 0.0091 0.0088  
Z 0.0006 0.0011 -0.0009 -0.0007 -0.0038 -0.0037  
AT. 40 C X -0.0005 0.0008 -0.0005 0.0003 0.0027 -0.0028  
Y 0.0019 -0.0029 0.0021 -0.0015 -0.0091 0.0088  
Z 0.0006 -0.0011 0.0009 -0.0007 -0.0038 0.0037  
AT. 41 C X 0.0002 0.0002 0.0002 0.0001 -0.0011 -0.0011  
Y 0.0010 0.0013 0.0012 0.0013 -0.0007 -0.0005  
Z 0.0032 0.0031 0.0034 0.0033 0.0009 0.0012  
AT. 42 C X 0.0002 -0.0002 -0.0002 0.0001 -0.0011 0.0011

Y -0.0010 0.0013 0.0012 -0.0013 0.0007 -0.0005  
Z 0.0032 -0.0031 -0.0034 0.0033 0.0009 -0.0012  
AT. 43 C X 0.0002 0.0002 -0.0002 -0.0001 -0.0011 -0.0011  
Y 0.0010 0.0013 -0.0012 -0.0013 -0.0007 -0.0005  
Z 0.0032 0.0031 -0.0034 -0.0033 0.0009 0.0012  
AT. 44 C X 0.0002 -0.0002 0.0002 -0.0001 -0.0011 0.0011  
Y -0.0010 0.0013 -0.0012 0.0013 0.0007 -0.0005  
Z 0.0032 -0.0031 0.0034 -0.0033 0.0009 -0.0012  
AT. 45 H X 0.0110 0.0097 0.0104 0.0126 0.0145 0.0189  
Y 0.0098 0.0088 0.0092 0.0111 0.0138 0.0156  
Z 0.0096 0.0085 0.0092 0.0103 0.0113 0.0125  
AT. 46 H X 0.0110 -0.0097 -0.0104 0.0126 0.0145 -0.0189  
Y -0.0098 0.0088 0.0092 -0.0111 -0.0138 0.0156  
Z 0.0096 -0.0085 -0.0092 0.0103 0.0113 -0.0125  
AT. 47 H X 0.0110 0.0097 -0.0104 -0.0126 0.0145 0.0189  
Y 0.0098 0.0088 -0.0092 -0.0111 0.0138 0.0156  
Z 0.0096 0.0085 -0.0092 -0.0103 0.0113 0.0125  
AT. 48 H X 0.0110 -0.0097 0.0104 -0.0126 0.0145 -0.0189  
Y -0.0098 0.0088 -0.0092 0.0111 -0.0138 0.0156  
Z 0.0096 -0.0085 0.0092 -0.0103 0.0113 -0.0125  
AT. 49 H X -0.0252 -0.0222 -0.0247 -0.0280 -0.0368 -0.0382  
Y -0.0188 -0.0166 -0.0183 -0.0211 -0.0289 -0.0290  
Z -0.0127 -0.0101 -0.0120 -0.0134 -0.0198 -0.0225  
AT. 50 H X -0.0252 0.0222 0.0247 -0.0280 -0.0368 0.0382  
Y 0.0188 -0.0166 -0.0183 0.0211 0.0289 -0.0290  
Z -0.0127 0.0101 0.0120 -0.0134 -0.0198 0.0225  
AT. 51 H X -0.0252 -0.0222 0.0247 0.0280 -0.0368 -0.0382  
Y -0.0188 -0.0166 0.0183 0.0211 -0.0289 -0.0290  
Z -0.0127 -0.0101 0.0120 0.0134 -0.0198 -0.0225  
AT. 52 H X -0.0252 0.0222 -0.0247 0.0280 -0.0368 0.0382  
Y 0.0188 -0.0166 0.0183 -0.0211 0.0289 -0.0290  
Z -0.0127 0.0101 -0.0120 0.0134 -0.0198 0.0225

AT. 53 C X 0.0101 0.0093 0.0103 0.0112 0.0135 0.0134  
Y -0.0029 -0.0030 -0.0030 -0.0037 -0.0023 -0.0032  
Z 0.0010 0.0012 0.0009 0.0011 -0.0028 -0.0020

AT. 54 C X 0.0101 -0.0093 -0.0103 0.0112 0.0135 -0.0134  
Y 0.0029 -0.0030 -0.0030 0.0037 0.0023 -0.0032  
Z 0.0010 -0.0012 -0.0009 0.0011 -0.0028 0.0020

AT. 55 C X 0.0101 0.0093 -0.0103 -0.0112 0.0135 0.0134  
Y -0.0029 -0.0030 0.0030 0.0037 -0.0023 -0.0032  
Z 0.0010 0.0012 -0.0009 -0.0011 -0.0028 -0.0020

AT. 56 C X 0.0101 -0.0093 0.0103 -0.0112 0.0135 -0.0134  
Y 0.0029 -0.0030 0.0030 -0.0037 0.0023 -0.0032  
Z 0.0010 -0.0012 0.0009 -0.0011 -0.0028 0.0020

AT. 57 C X -0.0039 -0.0036 -0.0040 -0.0043 -0.0042 -0.0043  
Y 0.0010 0.0009 0.0008 0.0012 0.0007 0.0008  
Z -0.0009 -0.0009 -0.0011 -0.0009 0.0004 -0.0000

AT. 58 C X -0.0039 0.0036 0.0040 -0.0043 -0.0042 0.0043  
Y -0.0010 0.0009 0.0008 -0.0012 -0.0007 0.0008  
Z -0.0009 0.0009 0.0011 -0.0009 0.0004 0.0000

AT. 59 C X -0.0039 -0.0036 0.0040 0.0043 -0.0042 -0.0043  
Y 0.0010 0.0009 -0.0008 -0.0012 0.0007 0.0008  
Z -0.0009 -0.0009 0.0011 0.0009 0.0004 -0.0000

AT. 60 C X -0.0039 0.0036 -0.0040 0.0043 -0.0042 0.0043  
Y -0.0010 0.0009 -0.0008 0.0012 -0.0007 0.0008  
Z -0.0009 0.0009 -0.0011 0.0009 0.0004 0.0000

AT. 61 H X 0.0065 0.0072 0.0082 0.0071 0.0086 0.0105  
Y 0.0066 0.0069 0.0076 0.0074 0.0086 0.0097  
Z 0.0081 0.0084 0.0091 0.0090 0.0061 0.0075

AT. 62 H X 0.0065 -0.0072 -0.0082 0.0071 0.0086 -0.0105  
Y -0.0066 0.0069 0.0076 -0.0074 -0.0086 0.0097  
Z 0.0081 -0.0084 -0.0091 0.0090 0.0061 -0.0075

AT. 63 H X 0.0065 0.0072 -0.0082 -0.0071 0.0086 0.0105  
Y 0.0066 0.0069 -0.0076 -0.0074 0.0086 0.0097

Z 0.0081 0.0084 -0.0091 -0.0090 0.0061 0.0075  
AT. 64 H X 0.0065 -0.0072 0.0082 -0.0071 0.0086 -0.0105  
Y -0.0066 0.0069 -0.0076 0.0074 -0.0086 0.0097  
Z 0.0081 -0.0084 0.0091 -0.0090 0.0061 -0.0075  
AT. 65 H X -0.0003 -0.0007 -0.0009 -0.0002 -0.0008 -0.0013  
Y -0.0094 -0.0074 -0.0079 -0.0103 -0.0085 -0.0072  
Z -0.0023 -0.0023 -0.0017 -0.0029 -0.0053 -0.0035  
AT. 66 H X -0.0003 0.0007 0.0009 -0.0002 -0.0008 0.0013  
Y 0.0094 -0.0074 -0.0079 0.0103 0.0085 -0.0072  
Z -0.0023 0.0023 0.0017 -0.0029 -0.0053 0.0035  
AT. 67 H X -0.0003 -0.0007 0.0009 0.0002 -0.0008 -0.0013  
Y -0.0094 -0.0074 0.0079 0.0103 -0.0085 -0.0072  
Z -0.0023 -0.0023 0.0017 0.0029 -0.0053 -0.0035  
AT. 68 H X -0.0003 0.0007 -0.0009 0.0002 -0.0008 0.0013  
Y 0.0094 -0.0074 0.0079 -0.0103 0.0085 -0.0072  
Z -0.0023 0.0023 -0.0017 0.0029 -0.0053 0.0035  
AT. 69 H X 0.0118 0.0102 0.0116 0.0128 0.0138 0.0133  
Y -0.0020 -0.0025 -0.0019 -0.0027 -0.0019 -0.0027  
Z -0.0005 -0.0012 -0.0004 -0.0010 0.0014 0.0002  
AT. 70 H X 0.0118 -0.0102 -0.0116 0.0128 0.0138 -0.0133  
Y 0.0020 -0.0025 -0.0019 0.0027 0.0019 -0.0027  
Z -0.0005 0.0012 0.0004 -0.0010 0.0014 -0.0002  
AT. 71 H X 0.0118 0.0102 -0.0116 -0.0128 0.0138 0.0133  
Y -0.0020 -0.0025 0.0019 0.0027 -0.0019 -0.0027  
Z -0.0005 -0.0012 0.0004 0.0010 0.0014 0.0002  
AT. 72 H X 0.0118 -0.0102 0.0116 -0.0128 0.0138 -0.0133  
Y 0.0020 -0.0025 0.0019 -0.0027 0.0019 -0.0027  
Z -0.0005 0.0012 -0.0004 0.0010 0.0014 -0.0002  
AT. 73 C X 0.0025 0.0027 0.0020 0.0024 -0.0050 -0.0040  
Y 0.0044 0.0045 0.0046 0.0046 -0.0020 -0.0018  
Z -0.0028 -0.0027 -0.0025 -0.0026 0.0028 0.0028  
AT. 74 C X 0.0025 -0.0027 -0.0020 0.0024 -0.0050 0.0040

Y -0.0044 0.0045 0.0046 -0.0046 0.0020 -0.0018  
Z -0.0028 0.0027 0.0025 -0.0026 0.0028 -0.0028  
AT. 75 C X 0.0025 0.0027 -0.0020 -0.0024 -0.0050 -0.0040  
Y 0.0044 0.0045 -0.0046 -0.0046 -0.0020 -0.0018  
Z -0.0028 -0.0027 0.0025 0.0026 0.0028 0.0028  
AT. 76 C X 0.0025 -0.0027 0.0020 -0.0024 -0.0050 0.0040  
Y -0.0044 0.0045 -0.0046 0.0046 0.0020 -0.0018  
Z -0.0028 0.0027 -0.0025 0.0026 0.0028 -0.0028  
AT. 77 C X 0.0033 0.0036 0.0033 0.0031 -0.0031 -0.0027  
Y 0.0010 0.0011 0.0012 0.0010 -0.0016 -0.0015  
Z 0.0032 0.0035 0.0036 0.0034 -0.0019 -0.0016  
AT. 78 C X 0.0033 -0.0036 -0.0033 0.0031 -0.0031 0.0027  
Y -0.0010 0.0011 0.0012 -0.0010 0.0016 -0.0015  
Z 0.0032 -0.0035 -0.0036 0.0034 -0.0019 0.0016  
AT. 79 C X 0.0033 0.0036 -0.0033 -0.0031 -0.0031 -0.0027  
Y 0.0010 0.0011 -0.0012 -0.0010 -0.0016 -0.0015  
Z 0.0032 0.0035 -0.0036 -0.0034 -0.0019 -0.0016  
AT. 80 C X 0.0033 -0.0036 0.0033 -0.0031 -0.0031 0.0027  
Y -0.0010 0.0011 -0.0012 0.0010 0.0016 -0.0015  
Z 0.0032 -0.0035 0.0036 -0.0034 -0.0019 0.0016  
AT. 81 H X 0.0198 0.0214 0.0188 0.0191 -0.0163 -0.0140  
Y 0.0234 0.0254 0.0226 0.0228 -0.0195 -0.0170  
Z -0.0299 -0.0324 -0.0297 -0.0293 0.0249 0.0222  
AT. 82 H X 0.0198 -0.0214 -0.0188 0.0191 -0.0163 0.0140  
Y -0.0234 0.0254 0.0226 -0.0228 0.0195 -0.0170  
Z -0.0299 0.0324 0.0297 -0.0293 0.0249 -0.0222  
AT. 83 H X 0.0198 0.0214 -0.0188 -0.0191 -0.0163 -0.0140  
Y 0.0234 0.0254 -0.0226 -0.0228 -0.0195 -0.0170  
Z -0.0299 -0.0324 0.0297 0.0293 0.0249 0.0222  
AT. 84 H X 0.0198 -0.0214 0.0188 -0.0191 -0.0163 0.0140  
Y -0.0234 0.0254 -0.0226 0.0228 0.0195 -0.0170  
Z -0.0299 0.0324 -0.0297 0.0293 0.0249 -0.0222



AT. 85 H X -0.0044 -0.0050 -0.0033 -0.0037 0.0041 0.0030  
Y -0.0073 -0.0084 -0.0077 -0.0082 0.0042 0.0020  
Z 0.0122 0.0137 0.0126 0.0127 -0.0086 -0.0060

AT. 86 H X -0.0044 0.0050 0.0033 -0.0037 0.0041 -0.0030  
Y 0.0073 -0.0084 -0.0077 0.0082 -0.0042 0.0020  
Z 0.0122 -0.0137 -0.0126 0.0127 -0.0086 0.0060

AT. 87 H X -0.0044 -0.0050 0.0033 0.0037 0.0041 0.0030  
Y -0.0073 -0.0084 0.0077 0.0082 0.0042 0.0020  
Z 0.0122 0.0137 -0.0126 -0.0127 -0.0086 -0.0060

AT. 88 H X -0.0044 0.0050 -0.0033 0.0037 0.0041 -0.0030  
Y 0.0073 -0.0084 0.0077 -0.0082 -0.0042 0.0020  
Z 0.0122 -0.0137 0.0126 -0.0127 -0.0086 0.0060

AT. 89 C X -0.0147 -0.0156 -0.0141 -0.0138 0.0132 0.0117  
Y -0.0019 -0.0019 -0.0022 -0.0019 0.0017 0.0017  
Z 0.0004 0.0004 0.0000 0.0004 0.0008 0.0010

AT. 90 C X -0.0147 0.0156 0.0141 -0.0138 0.0132 -0.0117  
Y 0.0019 -0.0019 -0.0022 0.0019 -0.0017 0.0017  
Z 0.0004 -0.0004 -0.0000 0.0004 0.0008 -0.0010

AT. 91 C X -0.0147 -0.0156 0.0141 0.0138 0.0132 0.0117  
Y -0.0019 -0.0019 0.0022 0.0019 0.0017 0.0017  
Z 0.0004 0.0004 -0.0000 -0.0004 0.0008 0.0010

AT. 92 C X -0.0147 0.0156 -0.0141 0.0138 0.0132 -0.0117  
Y 0.0019 -0.0019 0.0022 -0.0019 -0.0017 0.0017  
Z 0.0004 -0.0004 0.0000 -0.0004 0.0008 -0.0010

AT. 93 C X 0.0052 0.0056 0.0050 0.0050 -0.0042 -0.0037  
Y 0.0006 0.0006 0.0006 0.0006 -0.0006 -0.0005  
Z 0.0003 0.0002 0.0004 0.0001 -0.0006 -0.0009

AT. 94 C X 0.0052 -0.0056 -0.0050 0.0050 -0.0042 0.0037  
Y -0.0006 0.0006 0.0006 -0.0006 0.0006 -0.0005  
Z 0.0003 -0.0002 -0.0004 0.0001 -0.0006 0.0009

AT. 95 C X 0.0052 0.0056 -0.0050 -0.0050 -0.0042 -0.0037  
Y 0.0006 0.0006 -0.0006 -0.0006 -0.0006 -0.0005

Z 0.0003 0.0002 -0.0004 -0.0001 -0.0006 -0.0009  
AT. 96 C X 0.0052 -0.0056 0.0050 -0.0050 -0.0042 0.0037  
Y -0.0006 0.0006 -0.0006 0.0006 0.0006 -0.0005  
Z 0.0003 -0.0002 0.0004 -0.0001 -0.0006 0.0009  
AT. 97 H X -0.0031 -0.0033 -0.0031 -0.0031 0.0019 0.0019  
Y 0.0087 0.0100 0.0084 0.0092 -0.0067 -0.0054  
Z -0.0106 -0.0101 -0.0107 -0.0093 0.0067 0.0072  
AT. 98 H X -0.0031 0.0033 0.0031 -0.0031 0.0019 -0.0019  
Y -0.0087 0.0100 0.0084 -0.0092 0.0067 -0.0054  
Z -0.0106 0.0101 0.0107 -0.0093 0.0067 -0.0072  
AT. 99 H X -0.0031 -0.0033 0.0031 0.0031 0.0019 0.0019  
Y 0.0087 0.0100 -0.0084 -0.0092 -0.0067 -0.0054  
Z -0.0106 -0.0101 0.0107 0.0093 0.0067 0.0072  
AT. 100 H X -0.0031 0.0033 -0.0031 0.0031 0.0019 -0.0019  
Y -0.0087 0.0100 -0.0084 0.0092 0.0067 -0.0054  
Z -0.0106 0.0101 -0.0107 0.0093 0.0067 -0.0072  
AT. 101 H X -0.0076 -0.0079 -0.0074 -0.0067 0.0078 0.0072  
Y -0.0128 -0.0134 -0.0123 -0.0117 0.0111 0.0100  
Z 0.0024 0.0022 0.0019 0.0020 0.0011 0.0016  
AT. 102 H X -0.0076 0.0079 0.0074 -0.0067 0.0078 -0.0072  
Y 0.0128 -0.0134 -0.0123 0.0117 -0.0111 0.0100  
Z 0.0024 -0.0022 -0.0019 0.0020 0.0011 -0.0016  
AT. 103 H X -0.0076 -0.0079 0.0074 0.0067 0.0078 0.0072  
Y -0.0128 -0.0134 0.0123 0.0117 0.0111 0.0100  
Z 0.0024 0.0022 -0.0019 -0.0020 0.0011 0.0016  
AT. 104 H X -0.0076 0.0079 -0.0074 0.0067 0.0078 -0.0072  
Y 0.0128 -0.0134 0.0123 -0.0117 -0.0111 0.0100  
Z 0.0024 -0.0022 0.0019 -0.0020 0.0011 -0.0016  
AT. 105 H X -0.0131 -0.0151 -0.0125 -0.0130 0.0136 0.0115  
Y 0.0006 -0.0000 0.0002 -0.0005 -0.0010 -0.0021  
Z 0.0061 0.0072 0.0063 0.0067 -0.0060 -0.0045  
AT. 106 H X -0.0131 0.0151 0.0125 -0.0130 0.0136 -0.0115

Y -0.0006 -0.0000 0.0002 0.0005 0.0010 -0.0021  
Z 0.0061 -0.0072 -0.0063 0.0067 -0.0060 0.0045  
AT. 107 H X -0.0131 -0.0151 0.0125 0.0130 0.0136 0.0115  
Y 0.0006 -0.0000 -0.0002 0.0005 -0.0010 -0.0021  
Z 0.0061 0.0072 -0.0063 -0.0067 -0.0060 -0.0045  
AT. 108 H X -0.0131 0.0151 -0.0125 0.0130 0.0136 -0.0115  
Y -0.0006 -0.0000 -0.0002 -0.0005 0.0010 -0.0021  
Z 0.0061 -0.0072 0.0063 -0.0067 -0.0060 0.0045  
AT. 109 C X -0.0022 -0.0022 -0.0023 -0.0023 -0.0012 -0.0011  
Y 0.0005 0.0007 0.0008 0.0007 0.0002 0.0006  
Z -0.0075 -0.0072 -0.0075 -0.0077 -0.0029 -0.0035  
AT. 110 C X -0.0022 0.0022 0.0023 -0.0023 -0.0012 0.0011  
Y -0.0005 0.0007 0.0008 -0.0007 -0.0002 0.0006  
Z -0.0075 0.0072 0.0075 -0.0077 -0.0029 0.0035  
AT. 111 C X -0.0022 -0.0022 0.0023 0.0023 -0.0012 -0.0011  
Y 0.0005 0.0007 -0.0008 -0.0007 0.0002 0.0006  
Z -0.0075 -0.0072 0.0075 0.0077 -0.0029 -0.0035  
AT. 112 C X -0.0022 0.0022 -0.0023 0.0023 -0.0012 0.0011  
Y -0.0005 0.0007 -0.0008 0.0007 -0.0002 0.0006  
Z -0.0075 0.0072 -0.0075 0.0077 -0.0029 0.0035  
AT. 113 H X -0.0139 -0.0125 -0.0142 -0.0149 -0.0182 -0.0179  
Y 0.0319 0.0290 0.0328 0.0342 0.0384 0.0390  
Z 0.0394 0.0365 0.0403 0.0417 0.0358 0.0378  
AT. 114 H X -0.0139 0.0125 0.0142 -0.0149 -0.0182 0.0179  
Y -0.0319 0.0290 0.0328 -0.0342 -0.0384 0.0390  
Z 0.0394 -0.0365 -0.0403 0.0417 0.0358 -0.0378  
AT. 115 H X -0.0139 -0.0125 0.0142 0.0149 -0.0182 -0.0179  
Y 0.0319 0.0290 -0.0328 -0.0342 0.0384 0.0390  
Z 0.0394 0.0365 -0.0403 -0.0417 0.0358 0.0378  
AT. 116 H X -0.0139 0.0125 -0.0142 0.0149 -0.0182 0.0179  
Y -0.0319 0.0290 -0.0328 0.0342 -0.0384 0.0390  
Z 0.0394 -0.0365 0.0403 -0.0417 0.0358 -0.0378

AT.117 H X 0.0015 0.0008 0.0013 0.0006 -0.0008 -0.0024  
Y -0.0188 -0.0184 -0.0200 -0.0179 -0.0052 -0.0056  
Z -0.0253 -0.0247 -0.0265 -0.0247 -0.0080 -0.0091

AT.118 H X 0.0015 -0.0008 -0.0013 0.0006 -0.0008 0.0024  
Y 0.0188 -0.0184 -0.0200 0.0179 0.0052 -0.0056  
Z -0.0253 0.0247 0.0265 -0.0247 -0.0080 0.0091

AT.119 H X 0.0015 0.0008 -0.0013 -0.0006 -0.0008 -0.0024  
Y -0.0188 -0.0184 0.0200 0.0179 -0.0052 -0.0056  
Z -0.0253 -0.0247 0.0265 0.0247 -0.0080 -0.0091

AT.120 H X 0.0015 -0.0008 0.0013 -0.0006 -0.0008 0.0024  
Y 0.0188 -0.0184 0.0200 -0.0179 0.0052 -0.0056  
Z -0.0253 0.0247 -0.0265 0.0247 -0.0080 0.0091

AT.121 C X 0.0020 0.0021 0.0019 0.0018 -0.0025 -0.0023  
Y 0.0012 0.0013 0.0015 0.0016 0.0021 0.0024  
Z -0.0069 -0.0069 -0.0068 -0.0066 -0.0003 -0.0006

AT.122 C X 0.0020 -0.0021 -0.0019 0.0018 -0.0025 0.0023  
Y -0.0012 0.0013 0.0015 -0.0016 -0.0021 0.0024  
Z -0.0069 0.0069 0.0068 -0.0066 -0.0003 0.0006

AT.123 C X 0.0020 0.0021 -0.0019 -0.0018 -0.0025 -0.0023  
Y 0.0012 0.0013 -0.0015 -0.0016 0.0021 0.0024  
Z -0.0069 -0.0069 0.0068 0.0066 -0.0003 -0.0006

AT.124 C X 0.0020 -0.0021 0.0019 -0.0018 -0.0025 0.0023  
Y -0.0012 0.0013 -0.0015 0.0016 -0.0021 0.0024  
Z -0.0069 0.0069 -0.0068 0.0066 -0.0003 0.0006

AT.125 H X -0.0233 -0.0235 -0.0228 -0.0200 0.0214 0.0212  
Y 0.0304 0.0308 0.0295 0.0266 -0.0263 -0.0258  
Z -0.0210 -0.0212 -0.0203 -0.0188 0.0134 0.0130

AT.126 H X -0.0233 0.0235 0.0228 -0.0200 0.0214 -0.0212  
Y -0.0304 0.0308 0.0295 -0.0266 0.0263 -0.0258  
Z -0.0210 0.0212 0.0203 -0.0188 0.0134 -0.0130

AT.127 H X -0.0233 -0.0235 0.0228 0.0200 0.0214 0.0212  
Y 0.0304 0.0308 -0.0295 -0.0266 -0.0263 -0.0258

Z -0.0210 -0.0212 0.0203 0.0188 0.0134 0.0130  
AT. 128 H X -0.0233 0.0235 -0.0228 0.0200 0.0214 -0.0212  
Y -0.0304 0.0308 -0.0295 0.0266 0.0263 -0.0258  
Z -0.0210 0.0212 -0.0203 0.0188 0.0134 -0.0130  
AT. 129 H X 0.0210 0.0221 0.0198 0.0188 -0.0228 -0.0215  
Y -0.0221 -0.0236 -0.0206 -0.0197 0.0285 0.0269  
Z 0.0127 0.0129 0.0116 0.0102 -0.0162 -0.0167  
AT. 130 H X 0.0210 -0.0221 -0.0198 0.0188 -0.0228 0.0215  
Y 0.0221 -0.0236 -0.0206 0.0197 -0.0285 0.0269  
Z 0.0127 -0.0129 -0.0116 0.0102 -0.0162 0.0167  
AT. 131 H X 0.0210 0.0221 -0.0198 -0.0188 -0.0228 -0.0215  
Y -0.0221 -0.0236 0.0206 0.0197 0.0285 0.0269  
Z 0.0127 0.0129 -0.0116 -0.0102 -0.0162 -0.0167  
AT. 132 H X 0.0210 -0.0221 0.0198 -0.0188 -0.0228 0.0215  
Y 0.0221 -0.0236 0.0206 -0.0197 -0.0285 0.0269  
Z 0.0127 -0.0129 0.0116 -0.0102 -0.0162 0.0167  
AT. 133 C X -0.0005 -0.0005 -0.0006 -0.0006 -0.0014 -0.0014  
Y -0.0031 -0.0026 -0.0037 -0.0041 -0.0108 -0.0111  
Z -0.0010 -0.0008 -0.0014 -0.0015 -0.0053 -0.0055  
AT. 134 C X -0.0005 0.0005 0.0006 -0.0006 -0.0014 0.0014  
Y 0.0031 -0.0026 -0.0037 0.0041 0.0108 -0.0111  
Z -0.0010 0.0008 0.0014 -0.0015 -0.0053 0.0055  
AT. 135 C X -0.0005 -0.0005 0.0006 0.0006 -0.0014 -0.0014  
Y -0.0031 -0.0026 0.0037 0.0041 -0.0108 -0.0111  
Z -0.0010 -0.0008 0.0014 0.0015 -0.0053 -0.0055  
AT. 136 C X -0.0005 0.0005 -0.0006 0.0006 -0.0014 0.0014  
Y 0.0031 -0.0026 0.0037 -0.0041 0.0108 -0.0111  
Z -0.0010 0.0008 -0.0014 0.0015 -0.0053 0.0055  
AT. 137 C X -0.0004 -0.0005 -0.0005 -0.0004 0.0001 -0.0000  
Y -0.0002 -0.0003 0.0001 0.0003 0.0038 0.0039  
Z 0.0007 0.0006 0.0009 0.0010 0.0029 0.0030  
AT. 138 C X -0.0004 0.0005 0.0005 -0.0004 0.0001 0.0000

Y 0.0002 -0.0003 0.0001 -0.0003 -0.0038 0.0039  
Z 0.0007 -0.0006 -0.0009 0.0010 0.0029 -0.0030  
AT. 139 C X -0.0004 -0.0005 0.0005 0.0004 0.0001 -0.0000  
Y -0.0002 -0.0003 -0.0001 -0.0003 0.0038 0.0039  
Z 0.0007 0.0006 -0.0009 -0.0010 0.0029 0.0030  
AT. 140 C X -0.0004 0.0005 -0.0005 0.0004 0.0001 0.0000  
Y 0.0002 -0.0003 -0.0001 0.0003 -0.0038 0.0039  
Z 0.0007 -0.0006 0.0009 -0.0010 0.0029 -0.0030  
AT. 141 H X 0.0033 0.0032 0.0038 0.0039 0.0056 0.0065  
Y 0.0019 0.0023 0.0017 0.0014 -0.0058 -0.0059  
Z -0.0015 -0.0012 -0.0023 -0.0026 -0.0094 -0.0106  
AT. 142 H X 0.0033 -0.0032 -0.0038 0.0039 0.0056 -0.0065  
Y -0.0019 0.0023 0.0017 -0.0014 0.0058 -0.0059  
Z -0.0015 0.0012 0.0023 -0.0026 -0.0094 0.0106  
AT. 143 H X 0.0033 0.0032 -0.0038 -0.0039 0.0056 0.0065  
Y 0.0019 0.0023 -0.0017 -0.0014 -0.0058 -0.0059  
Z -0.0015 -0.0012 0.0023 0.0026 -0.0094 -0.0106  
AT. 144 H X 0.0033 -0.0032 0.0038 -0.0039 0.0056 -0.0065  
Y -0.0019 0.0023 -0.0017 0.0014 0.0058 -0.0059  
Z -0.0015 0.0012 -0.0023 0.0026 -0.0094 0.0106  
AT. 145 H X 0.0044 0.0047 0.0051 0.0052 0.0009 0.0021  
Y -0.0011 -0.0014 -0.0009 -0.0007 0.0058 0.0057  
Z 0.0028 0.0021 0.0033 0.0032 0.0115 0.0118  
AT. 146 H X 0.0044 -0.0047 -0.0051 0.0052 0.0009 -0.0021  
Y 0.0011 -0.0014 -0.0009 0.0007 -0.0058 0.0057  
Z 0.0028 -0.0021 -0.0033 0.0032 0.0115 -0.0118  
AT. 147 H X 0.0044 0.0047 -0.0051 -0.0052 0.0009 0.0021  
Y -0.0011 -0.0014 0.0009 0.0007 0.0058 0.0057  
Z 0.0028 0.0021 -0.0033 -0.0032 0.0115 0.0118  
AT. 148 H X 0.0044 -0.0047 0.0051 -0.0052 0.0009 -0.0021  
Y 0.0011 -0.0014 0.0009 -0.0007 -0.0058 0.0057  
Z 0.0028 -0.0021 0.0033 -0.0032 0.0115 -0.0118

AT. 149 O X 0.0002 0.0002 0.0002 0.0002 0.0003 0.0002  
Y -0.0006 -0.0006 -0.0006 -0.0007 0.0001 -0.0000  
Z -0.0003 -0.0002 -0.0002 -0.0005 -0.0016 -0.0020

AT. 150 O X 0.0002 -0.0002 -0.0002 0.0002 0.0003 -0.0002  
Y 0.0006 -0.0006 -0.0006 0.0007 -0.0001 -0.0000  
Z -0.0003 0.0002 0.0002 -0.0005 -0.0016 0.0020

AT. 151 O X 0.0002 0.0002 -0.0002 -0.0002 0.0003 0.0002  
Y -0.0006 -0.0006 0.0006 0.0007 0.0001 -0.0000  
Z -0.0003 -0.0002 0.0002 0.0005 -0.0016 -0.0020

AT. 152 O X 0.0002 -0.0002 0.0002 -0.0002 0.0003 -0.0002  
Y 0.0006 -0.0006 0.0006 -0.0007 -0.0001 -0.0000  
Z -0.0003 0.0002 -0.0002 0.0005 -0.0016 0.0020

AT. 153 H X 0.0014 0.0017 0.0021 -0.0004 -0.0113 -0.0137  
Y -0.0034 -0.0040 -0.0045 -0.0009 0.0184 0.0218  
Z -0.0019 -0.0023 -0.0027 -0.0000 0.0124 0.0150

AT. 154 H X 0.0014 -0.0017 -0.0021 -0.0004 -0.0113 0.0137  
Y 0.0034 -0.0040 -0.0045 0.0009 -0.0184 0.0218  
Z -0.0019 0.0023 0.0027 -0.0000 0.0124 -0.0150

AT. 155 H X 0.0014 0.0017 -0.0021 0.0004 -0.0113 -0.0137  
Y -0.0034 -0.0040 0.0045 0.0009 0.0184 0.0218  
Z -0.0019 -0.0023 0.0027 0.0000 0.0124 0.0150

AT. 156 H X 0.0014 -0.0017 0.0021 0.0004 -0.0113 0.0137  
Y 0.0034 -0.0040 0.0045 -0.0009 -0.0184 0.0218  
Z -0.0019 0.0023 -0.0027 0.0000 0.0124 -0.0150

AT. 157 O X -0.0019 -0.0018 -0.0016 -0.0020 0.0009 0.0006  
Y -0.0008 -0.0008 -0.0008 -0.0010 -0.0003 -0.0004  
Z 0.0021 0.0021 0.0020 0.0020 -0.0009 -0.0007

AT. 158 O X -0.0019 0.0018 0.0016 -0.0020 0.0009 -0.0006  
Y 0.0008 -0.0008 -0.0008 0.0010 0.0003 -0.0004  
Z 0.0021 -0.0021 -0.0020 0.0020 -0.0009 0.0007

AT. 159 O X -0.0019 -0.0018 0.0016 0.0020 0.0009 0.0006  
Y -0.0008 -0.0008 0.0008 0.0010 -0.0003 -0.0004

Z 0.0021 0.0021 -0.0020 -0.0020 -0.0009 -0.0007  
AT.160 O X -0.0019 0.0018 -0.0016 0.0020 0.0009 -0.0006  
Y 0.0008 -0.0008 0.0008 -0.0010 0.0003 -0.0004  
Z 0.0021 -0.0021 0.0020 -0.0020 -0.0009 0.0007  
AT.161 O X 0.0001 -0.0000 -0.0001 0.0000 -0.0002 -0.0003  
Y -0.0000 0.0000 0.0000 0.0000 0.0003 0.0003  
Z -0.0003 -0.0003 -0.0004 -0.0003 0.0001 0.0001  
AT.162 O X 0.0001 0.0000 0.0001 0.0000 -0.0002 0.0003  
Y 0.0000 0.0000 0.0000 -0.0000 -0.0003 0.0003  
Z -0.0003 0.0003 0.0004 -0.0003 0.0001 -0.0001  
AT.163 O X 0.0001 -0.0000 0.0001 -0.0000 -0.0002 -0.0003  
Y -0.0000 0.0000 -0.0000 -0.0000 0.0003 0.0003  
Z -0.0003 -0.0003 0.0004 0.0003 0.0001 0.0001  
AT.164 O X 0.0001 0.0000 -0.0001 -0.0000 -0.0002 0.0003  
Y 0.0000 0.0000 -0.0000 0.0000 -0.0003 0.0003  
Z -0.0003 0.0003 -0.0004 0.0003 0.0001 -0.0001  
AT.165 H X 0.0017 0.0015 0.0018 0.0021 0.0030 0.0035  
Y 0.0009 0.0008 0.0009 0.0011 0.0008 0.0010  
Z 0.0007 0.0006 0.0008 0.0009 0.0009 0.0002  
AT.166 H X 0.0017 -0.0015 -0.0018 0.0021 0.0030 -0.0035  
Y -0.0009 0.0008 0.0009 -0.0011 -0.0008 0.0010  
Z 0.0007 -0.0006 -0.0008 0.0009 0.0009 -0.0002  
AT.167 H X 0.0017 0.0015 -0.0018 -0.0021 0.0030 0.0035  
Y 0.0009 0.0008 -0.0009 -0.0011 0.0008 0.0010  
Z 0.0007 0.0006 -0.0008 -0.0009 0.0009 0.0002  
AT.168 H X 0.0017 -0.0015 0.0018 -0.0021 0.0030 -0.0035  
Y -0.0009 0.0008 -0.0009 0.0011 -0.0008 0.0010  
Z 0.0007 -0.0006 0.0008 -0.0009 0.0009 -0.0002  
AT.169 O X 0.0001 0.0001 0.0001 0.0000 -0.0003 -0.0003  
Y -0.0001 -0.0001 0.0000 -0.0000 -0.0002 -0.0003  
Z 0.0001 0.0002 0.0000 0.0000 -0.0004 -0.0003  
AT.170 O X 0.0001 -0.0001 -0.0001 0.0000 -0.0003 0.0003



|                                                              |     |         |         |         |         |         |         |
|--------------------------------------------------------------|-----|---------|---------|---------|---------|---------|---------|
|                                                              | Y   | 0.0001  | -0.0001 | 0.0000  | 0.0000  | 0.0002  | -0.0003 |
|                                                              | Z   | 0.0001  | -0.0002 | -0.0000 | 0.0000  | -0.0004 | 0.0003  |
| AT. 171                                                      | O X | 0.0001  | 0.0001  | -0.0001 | -0.0000 | -0.0003 | -0.0003 |
|                                                              | Y   | -0.0001 | -0.0001 | -0.0000 | 0.0000  | -0.0002 | -0.0003 |
|                                                              | Z   | 0.0001  | 0.0002  | -0.0000 | -0.0000 | -0.0004 | -0.0003 |
| AT. 172                                                      | O X | 0.0001  | -0.0001 | 0.0001  | -0.0000 | -0.0003 | 0.0003  |
|                                                              | Y   | 0.0001  | -0.0001 | -0.0000 | -0.0000 | 0.0002  | -0.0003 |
|                                                              | Z   | 0.0001  | -0.0002 | 0.0000  | -0.0000 | -0.0004 | 0.0003  |
| AT. 173                                                      | H X | -0.0007 | -0.0008 | -0.0020 | -0.0014 | 0.0030  | 0.0034  |
|                                                              | Y   | 0.0003  | 0.0003  | 0.0002  | 0.0002  | -0.0002 | -0.0003 |
|                                                              | Z   | -0.0014 | -0.0018 | 0.0006  | 0.0005  | 0.0019  | 0.0014  |
| AT. 174                                                      | H X | -0.0007 | 0.0008  | 0.0020  | -0.0014 | 0.0030  | -0.0034 |
|                                                              | Y   | -0.0003 | 0.0003  | 0.0002  | -0.0002 | 0.0002  | -0.0003 |
|                                                              | Z   | -0.0014 | 0.0018  | -0.0006 | 0.0005  | 0.0019  | -0.0014 |
| AT. 175                                                      | H X | -0.0007 | -0.0008 | 0.0020  | 0.0014  | 0.0030  | 0.0034  |
|                                                              | Y   | 0.0003  | 0.0003  | -0.0002 | -0.0002 | -0.0002 | -0.0003 |
|                                                              | Z   | -0.0014 | -0.0018 | -0.0006 | -0.0005 | 0.0019  | 0.0014  |
| AT. 176                                                      | H X | -0.0007 | 0.0008  | -0.0020 | 0.0014  | 0.0030  | -0.0034 |
|                                                              | Y   | -0.0003 | 0.0003  | -0.0002 | 0.0002  | 0.0002  | -0.0003 |
|                                                              | Z   | -0.0014 | 0.0018  | 0.0006  | -0.0005 | 0.0019  | -0.0014 |
| FREQ(CM**-1) 1334.82 1335.62 1344.23 1344.34 1345.86 1346.09 |     |         |         |         |         |         |         |
| AT. 1                                                        | I X | 0.0000  | -0.0000 | -0.0000 | -0.0000 | -0.0000 | -0.0000 |
|                                                              | Y   | -0.0000 | 0.0000  | 0.0000  | -0.0000 | 0.0000  | 0.0000  |
|                                                              | Z   | 0.0000  | -0.0000 | -0.0000 | 0.0000  | 0.0000  | -0.0000 |
| AT. 2                                                        | I X | -0.0000 | -0.0000 | -0.0000 | 0.0000  | 0.0000  | -0.0000 |
|                                                              | Y   | -0.0000 | -0.0000 | -0.0000 | -0.0000 | 0.0000  | -0.0000 |
|                                                              | Z   | -0.0000 | -0.0000 | -0.0000 | -0.0000 | -0.0000 | -0.0000 |
| AT. 3                                                        | I X | -0.0000 | 0.0000  | -0.0000 | -0.0000 | 0.0000  | 0.0000  |
|                                                              | Y   | 0.0000  | -0.0000 | 0.0000  | -0.0000 | -0.0000 | -0.0000 |
|                                                              | Z   | -0.0000 | 0.0000  | -0.0000 | 0.0000  | -0.0000 | 0.0000  |

AT. 4 I X 0.0000 0.0000 -0.0000 0.0000 -0.0000 0.0000  
Y 0.0000 0.0000 -0.0000 -0.0000 -0.0000 0.0000  
Z 0.0000 0.0000 -0.0000 -0.0000 0.0000 0.0000

AT. 5 I X 0.0000 -0.0000 -0.0000 0.0000 -0.0000 -0.0000  
Y -0.0000 0.0000 0.0000 -0.0000 0.0000 -0.0000  
Z 0.0000 -0.0000 -0.0000 0.0000 -0.0000 -0.0000

AT. 6 I X -0.0000 -0.0000 -0.0000 -0.0000 0.0000 -0.0000  
Y -0.0000 -0.0000 -0.0000 -0.0000 0.0000 0.0000  
Z -0.0000 -0.0000 -0.0000 -0.0000 0.0000 -0.0000

AT. 7 I X -0.0000 0.0000 -0.0000 0.0000 0.0000 0.0000  
Y 0.0000 -0.0000 0.0000 -0.0000 -0.0000 0.0000  
Z -0.0000 0.0000 -0.0000 0.0000 0.0000 0.0000

AT. 8 I X 0.0000 0.0000 -0.0000 -0.0000 -0.0000 0.0000  
Y 0.0000 0.0000 -0.0000 -0.0000 -0.0000 -0.0000  
Z 0.0000 0.0000 -0.0000 -0.0000 -0.0000 0.0000

AT. 9 N X 0.0022 -0.0022 0.0016 -0.0014 -0.0017 0.0013  
Y -0.0005 0.0008 0.0016 -0.0016 -0.0018 0.0017  
Z -0.0042 0.0034 0.0103 -0.0104 -0.0095 0.0102

AT. 10 N X -0.0022 -0.0022 0.0016 0.0014 0.0017 0.0013  
Y -0.0005 -0.0008 -0.0016 -0.0016 -0.0018 -0.0017  
Z 0.0042 0.0034 0.0103 0.0104 0.0095 0.0102

AT. 11 N X -0.0022 0.0022 0.0016 -0.0014 0.0017 -0.0013  
Y 0.0005 -0.0008 0.0016 -0.0016 0.0018 -0.0017  
Z 0.0042 -0.0034 0.0103 -0.0104 0.0095 -0.0102

AT. 12 N X 0.0022 0.0022 0.0016 0.0014 -0.0017 -0.0013  
Y 0.0005 0.0008 -0.0016 -0.0016 0.0018 0.0017  
Z -0.0042 -0.0034 0.0103 0.0104 -0.0095 -0.0102

AT. 13 N X 0.0020 -0.0024 0.0013 -0.0011 -0.0014 0.0013  
Y -0.0005 0.0009 -0.0008 0.0010 0.0006 -0.0011  
Z -0.0036 0.0018 0.0087 -0.0090 -0.0075 0.0084

AT. 14 N X -0.0020 -0.0024 0.0013 0.0011 0.0014 0.0013  
Y -0.0005 -0.0009 0.0008 0.0010 0.0006 0.0011

Z 0.0036 0.0018 0.0087 0.0090 0.0075 0.0084  
AT. 15 N X -0.0020 0.0024 0.0013 -0.0011 0.0014 -0.0013  
Y 0.0005 -0.0009 -0.0008 0.0010 -0.0006 0.0011  
Z 0.0036 -0.0018 0.0087 -0.0090 0.0075 -0.0084  
AT. 16 N X 0.0020 0.0024 0.0013 0.0011 -0.0014 -0.0013  
Y 0.0005 0.0009 0.0008 0.0010 -0.0006 -0.0011  
Z -0.0036 -0.0018 0.0087 0.0090 -0.0075 -0.0084  
AT. 17 O X 0.0006 -0.0006 -0.0010 0.0010 0.0007 -0.0008  
Y 0.0012 -0.0012 -0.0018 0.0018 0.0019 -0.0021  
Z -0.0004 0.0003 -0.0011 0.0012 0.0009 -0.0009  
AT. 18 O X -0.0006 -0.0006 -0.0010 -0.0010 -0.0007 -0.0008  
Y 0.0012 0.0012 0.0018 0.0018 0.0019 0.0021  
Z 0.0004 0.0003 -0.0011 -0.0012 -0.0009 -0.0009  
AT. 19 O X -0.0006 0.0006 -0.0010 0.0010 -0.0007 0.0008  
Y -0.0012 0.0012 -0.0018 0.0018 -0.0019 0.0021  
Z 0.0004 -0.0003 -0.0011 0.0012 -0.0009 0.0009  
AT. 20 O X 0.0006 0.0006 -0.0010 -0.0010 0.0007 0.0008  
Y -0.0012 -0.0012 0.0018 0.0018 -0.0019 -0.0021  
Z -0.0004 -0.0003 -0.0011 -0.0012 0.0009 0.0009  
AT. 21 O X -0.0001 0.0001 -0.0001 0.0001 0.0001 -0.0001  
Y -0.0012 0.0008 0.0015 -0.0017 -0.0012 0.0015  
Z -0.0010 0.0012 -0.0009 0.0011 0.0011 -0.0011  
AT. 22 O X 0.0001 0.0001 -0.0001 -0.0001 -0.0001 -0.0001  
Y -0.0012 -0.0008 -0.0015 -0.0017 -0.0012 -0.0015  
Z 0.0010 0.0012 -0.0009 -0.0011 -0.0011 -0.0011  
AT. 23 O X 0.0001 -0.0001 -0.0001 0.0001 -0.0001 0.0001  
Y 0.0012 -0.0008 0.0015 -0.0017 0.0012 -0.0015  
Z 0.0010 -0.0012 -0.0009 0.0011 -0.0011 0.0011  
AT. 24 O X -0.0001 -0.0001 -0.0001 -0.0001 0.0001 0.0001  
Y 0.0012 0.0008 -0.0015 -0.0017 0.0012 0.0015  
Z -0.0010 -0.0012 -0.0009 -0.0011 0.0011 0.0011  
AT. 25 C X 0.0016 -0.0016 -0.0002 0.0002 -0.0001 -0.0003

Y 0.0028 -0.0029 0.0001 -0.0001 -0.0003 -0.0002  
Z -0.0030 0.0027 0.0005 -0.0005 -0.0001 0.0007  
AT. 26 C X -0.0016 -0.0016 -0.0002 -0.0002 0.0001 -0.0003  
Y 0.0028 0.0029 -0.0001 -0.0001 -0.0003 0.0002  
Z 0.0030 0.0027 0.0005 0.0005 0.0001 0.0007  
AT. 27 C X -0.0016 0.0016 -0.0002 0.0002 0.0001 0.0003  
Y -0.0028 0.0029 0.0001 -0.0001 0.0003 0.0002  
Z 0.0030 -0.0027 0.0005 -0.0005 0.0001 -0.0007  
AT. 28 C X 0.0016 0.0016 -0.0002 -0.0002 -0.0001 0.0003  
Y -0.0028 -0.0029 -0.0001 -0.0001 0.0003 -0.0002  
Z -0.0030 -0.0027 0.0005 0.0005 -0.0001 -0.0007  
AT. 29 H X -0.0080 0.0076 0.0016 -0.0018 -0.0004 0.0023  
Y -0.0004 0.0007 -0.0025 0.0024 0.0015 -0.0021  
Z 0.0116 -0.0114 -0.0013 0.0017 -0.0002 -0.0024  
AT. 30 H X 0.0080 0.0076 0.0016 0.0018 0.0004 0.0023  
Y -0.0004 -0.0007 0.0025 0.0024 0.0015 0.0021  
Z -0.0116 -0.0114 -0.0013 -0.0017 0.0002 -0.0024  
AT. 31 H X 0.0080 -0.0076 0.0016 -0.0018 0.0004 -0.0023  
Y 0.0004 -0.0007 -0.0025 0.0024 -0.0015 0.0021  
Z -0.0116 0.0114 -0.0013 0.0017 0.0002 0.0024  
AT. 32 H X -0.0080 -0.0076 0.0016 0.0018 -0.0004 -0.0023  
Y 0.0004 0.0007 0.0025 0.0024 -0.0015 -0.0021  
Z 0.0116 0.0114 -0.0013 -0.0017 -0.0002 0.0024  
AT. 33 H X -0.0045 0.0038 0.0031 -0.0027 -0.0008 0.0026  
Y 0.0051 -0.0053 -0.0013 0.0015 0.0011 -0.0018  
Z -0.0073 0.0085 0.0037 -0.0046 -0.0052 0.0051  
AT. 34 H X 0.0045 0.0038 0.0031 0.0027 0.0008 0.0026  
Y 0.0051 0.0053 0.0013 0.0015 0.0011 0.0018  
Z 0.0073 0.0085 0.0037 0.0046 0.0052 0.0051  
AT. 35 H X 0.0045 -0.0038 0.0031 -0.0027 0.0008 -0.0026  
Y -0.0051 0.0053 -0.0013 0.0015 -0.0011 0.0018  
Z 0.0073 -0.0085 0.0037 -0.0046 0.0052 -0.0051

AT. 36 H X -0.0045 -0.0038 0.0031 0.0027 -0.0008 -0.0026  
Y -0.0051 -0.0053 0.0013 0.0015 -0.0011 -0.0018  
Z -0.0073 -0.0085 0.0037 0.0046 -0.0052 -0.0051

AT. 37 C X -0.0029 0.0029 0.0005 -0.0007 -0.0002 0.0007  
Y -0.0096 0.0096 0.0023 -0.0028 -0.0016 0.0031  
Z 0.0045 -0.0041 -0.0017 0.0017 0.0014 -0.0020

AT. 38 C X 0.0029 0.0029 0.0005 0.0007 0.0002 0.0007  
Y -0.0096 -0.0096 -0.0023 -0.0028 -0.0016 -0.0031  
Z -0.0045 -0.0041 -0.0017 -0.0017 -0.0014 -0.0020

AT. 39 C X 0.0029 -0.0029 0.0005 -0.0007 0.0002 -0.0007  
Y 0.0096 -0.0096 0.0023 -0.0028 0.0016 -0.0031  
Z -0.0045 0.0041 -0.0017 0.0017 -0.0014 0.0020

AT. 40 C X -0.0029 -0.0029 0.0005 0.0007 -0.0002 -0.0007  
Y 0.0096 0.0096 -0.0023 -0.0028 0.0016 0.0031  
Z 0.0045 0.0041 -0.0017 -0.0017 0.0014 0.0020

AT. 41 C X 0.0013 -0.0010 -0.0003 0.0002 0.0003 -0.0005  
Y 0.0011 -0.0010 -0.0020 0.0020 0.0023 -0.0024  
Z 0.0001 0.0002 -0.0037 0.0039 0.0035 -0.0037

AT. 42 C X -0.0013 -0.0010 -0.0003 -0.0002 -0.0003 -0.0005  
Y 0.0011 0.0010 0.0020 0.0020 0.0023 0.0024  
Z -0.0001 0.0002 -0.0037 -0.0039 -0.0035 -0.0037

AT. 43 C X -0.0013 0.0010 -0.0003 0.0002 -0.0003 0.0005  
Y -0.0011 0.0010 -0.0020 0.0020 -0.0023 0.0024  
Z -0.0001 -0.0002 -0.0037 0.0039 -0.0035 0.0037

AT. 44 C X 0.0013 0.0010 -0.0003 -0.0002 0.0003 0.0005  
Y -0.0011 -0.0010 0.0020 0.0020 -0.0023 -0.0024  
Z 0.0001 -0.0002 -0.0037 -0.0039 0.0035 0.0037

AT. 45 H X -0.0113 0.0134 -0.0333 0.0324 0.0335 -0.0313  
Y -0.0110 0.0125 -0.0216 0.0198 0.0222 -0.0195  
Z -0.0086 0.0100 -0.0160 0.0147 0.0161 -0.0142

AT. 46 H X 0.0113 0.0134 -0.0333 -0.0324 -0.0335 -0.0313  
Y -0.0110 -0.0125 0.0216 0.0198 0.0222 0.0195

Z 0.0086 0.0100 -0.0160 -0.0147 -0.0161 -0.0142  
AT. 47 H X 0.0113 -0.0134 -0.0333 0.0324 -0.0335 0.0313  
Y 0.0110 -0.0125 -0.0216 0.0198 -0.0222 0.0195  
Z 0.0086 -0.0100 -0.0160 0.0147 -0.0161 0.0142  
AT. 48 H X -0.0113 -0.0134 -0.0333 -0.0324 0.0335 0.0313  
Y 0.0110 0.0125 0.0216 0.0198 -0.0222 -0.0195  
Z -0.0086 -0.0100 -0.0160 -0.0147 0.0161 0.0142  
AT. 49 H X 0.0329 -0.0347 0.0158 -0.0125 -0.0208 0.0144  
Y 0.0262 -0.0272 0.0086 -0.0054 -0.0129 0.0074  
Z 0.0177 -0.0203 0.0133 -0.0121 -0.0147 0.0119  
AT. 50 H X -0.0329 -0.0347 0.0158 0.0125 0.0208 0.0144  
Y 0.0262 0.0272 -0.0086 -0.0054 -0.0129 -0.0074  
Z -0.0177 -0.0203 0.0133 0.0121 0.0147 0.0119  
AT. 51 H X -0.0329 0.0347 0.0158 -0.0125 0.0208 -0.0144  
Y -0.0262 0.0272 0.0086 -0.0054 0.0129 -0.0074  
Z -0.0177 0.0203 0.0133 -0.0121 0.0147 -0.0119  
AT. 52 H X 0.0329 0.0347 0.0158 0.0125 -0.0208 -0.0144  
Y -0.0262 -0.0272 -0.0086 -0.0054 0.0129 0.0074  
Z 0.0177 0.0203 0.0133 0.0121 -0.0147 -0.0119  
AT. 53 C X -0.0125 0.0117 -0.0007 -0.0001 0.0026 -0.0004  
Y 0.0017 -0.0017 0.0068 -0.0064 -0.0077 0.0068  
Z 0.0023 -0.0021 -0.0026 0.0026 0.0033 -0.0032  
AT. 54 C X 0.0125 0.0117 -0.0007 0.0001 -0.0026 -0.0004  
Y 0.0017 0.0017 -0.0068 -0.0064 -0.0077 -0.0068  
Z -0.0023 -0.0021 -0.0026 -0.0026 -0.0033 -0.0032  
AT. 55 C X 0.0125 -0.0117 -0.0007 -0.0001 -0.0026 0.0004  
Y -0.0017 0.0017 0.0068 -0.0064 0.0077 -0.0068  
Z -0.0023 0.0021 -0.0026 0.0026 -0.0033 0.0032  
AT. 56 C X -0.0125 -0.0117 -0.0007 0.0001 0.0026 0.0004  
Y -0.0017 -0.0017 -0.0068 -0.0064 0.0077 0.0068  
Z 0.0023 0.0021 -0.0026 -0.0026 0.0033 0.0032  
AT. 57 C X 0.0039 -0.0037 0.0005 -0.0005 -0.0012 0.0006

Y -0.0003 0.0005 -0.0020 0.0021 0.0023 -0.0019  
Z -0.0002 0.0002 0.0011 -0.0008 -0.0011 0.0011  
AT. 58 C X -0.0039 -0.0037 0.0005 0.0005 0.0012 0.0006  
Y -0.0003 -0.0005 0.0020 0.0021 0.0023 0.0019  
Z 0.0002 0.0002 0.0011 0.0008 0.0011 0.0011  
AT. 59 C X -0.0039 0.0037 0.0005 -0.0005 0.0012 -0.0006  
Y 0.0003 -0.0005 -0.0020 0.0021 -0.0023 0.0019  
Z 0.0002 -0.0002 0.0011 -0.0008 0.0011 -0.0011  
AT. 60 C X 0.0039 0.0037 0.0005 0.0005 -0.0012 -0.0006  
Y 0.0003 0.0005 0.0020 0.0021 -0.0023 -0.0019  
Z -0.0002 -0.0002 0.0011 0.0008 -0.0011 -0.0011  
AT. 61 H X -0.0104 0.0074 0.0027 -0.0035 -0.0026 0.0024  
Y -0.0092 0.0074 0.0016 -0.0016 -0.0011 0.0011  
Z -0.0061 0.0042 -0.0077 0.0053 0.0087 -0.0061  
AT. 62 H X 0.0104 0.0074 0.0027 0.0035 0.0026 0.0024  
Y -0.0092 -0.0074 -0.0016 -0.0016 -0.0011 -0.0011  
Z 0.0061 0.0042 -0.0077 -0.0053 -0.0087 -0.0061  
AT. 63 H X 0.0104 -0.0074 0.0027 -0.0035 0.0026 -0.0024  
Y 0.0092 -0.0074 0.0016 -0.0016 0.0011 -0.0011  
Z 0.0061 -0.0042 -0.0077 0.0053 -0.0087 0.0061  
AT. 64 H X -0.0104 -0.0074 0.0027 0.0035 -0.0026 -0.0024  
Y 0.0092 0.0074 -0.0016 -0.0016 0.0011 0.0011  
Z -0.0061 -0.0042 -0.0077 -0.0053 0.0087 0.0061  
AT. 65 H X 0.0018 -0.0007 -0.0026 0.0029 0.0031 -0.0024  
Y 0.0051 -0.0076 0.0082 -0.0085 -0.0109 0.0078  
Z 0.0046 -0.0035 -0.0044 0.0044 0.0028 -0.0051  
AT. 66 H X -0.0018 -0.0007 -0.0026 -0.0029 -0.0031 -0.0024  
Y 0.0051 0.0076 -0.0082 -0.0085 -0.0109 -0.0078  
Z -0.0046 -0.0035 -0.0044 -0.0044 -0.0028 -0.0051  
AT. 67 H X -0.0018 0.0007 -0.0026 0.0029 -0.0031 0.0024  
Y -0.0051 0.0076 0.0082 -0.0085 0.0109 -0.0078  
Z -0.0046 0.0035 -0.0044 0.0044 -0.0028 0.0051

AT. 68 H X 0.0018 0.0007 -0.0026 -0.0029 0.0031 0.0024  
Y -0.0051 -0.0076 -0.0082 -0.0085 0.0109 0.0078  
Z 0.0046 0.0035 -0.0044 -0.0044 0.0028 0.0051

AT. 69 H X -0.0118 0.0130 -0.0022 0.0027 0.0037 -0.0029  
Y 0.0017 -0.0015 0.0025 -0.0037 -0.0034 0.0035  
Z -0.0012 0.0014 0.0039 -0.0045 -0.0045 0.0044

AT. 70 H X 0.0118 0.0130 -0.0022 -0.0027 -0.0037 -0.0029  
Y 0.0017 0.0015 -0.0025 -0.0037 -0.0034 -0.0035  
Z 0.0012 0.0014 0.0039 0.0045 0.0045 0.0044

AT. 71 H X 0.0118 -0.0130 -0.0022 0.0027 -0.0037 0.0029  
Y -0.0017 0.0015 0.0025 -0.0037 0.0034 -0.0035  
Z 0.0012 -0.0014 0.0039 -0.0045 0.0045 -0.0044

AT. 72 H X -0.0118 -0.0130 -0.0022 -0.0027 0.0037 0.0029  
Y -0.0017 -0.0015 -0.0025 -0.0037 0.0034 0.0035  
Z -0.0012 -0.0014 0.0039 0.0045 -0.0045 -0.0044

AT. 73 C X 0.0050 -0.0043 -0.0054 0.0054 0.0043 -0.0042  
Y 0.0017 -0.0025 0.0037 -0.0037 -0.0028 0.0032  
Z -0.0022 0.0020 -0.0019 0.0018 0.0003 -0.0004

AT. 74 C X -0.0050 -0.0043 -0.0054 -0.0054 -0.0043 -0.0042  
Y 0.0017 0.0025 -0.0037 -0.0037 -0.0028 -0.0032  
Z 0.0022 0.0020 -0.0019 -0.0018 -0.0003 -0.0004

AT. 75 C X -0.0050 0.0043 -0.0054 0.0054 -0.0043 0.0042  
Y -0.0017 0.0025 0.0037 -0.0037 0.0028 -0.0032  
Z 0.0022 -0.0020 -0.0019 0.0018 -0.0003 0.0004

AT. 76 C X 0.0050 0.0043 -0.0054 -0.0054 0.0043 0.0042  
Y -0.0017 -0.0025 -0.0037 -0.0037 0.0028 0.0032  
Z -0.0022 -0.0020 -0.0019 -0.0018 0.0003 0.0004

AT. 77 C X 0.0030 -0.0032 -0.0004 0.0004 -0.0004 0.0002  
Y 0.0017 -0.0022 0.0020 -0.0021 -0.0021 0.0019  
Z 0.0026 -0.0025 -0.0026 0.0028 0.0021 -0.0023

AT. 78 C X -0.0030 -0.0032 -0.0004 -0.0004 0.0004 0.0002  
Y 0.0017 0.0022 -0.0020 -0.0021 -0.0021 -0.0019



Z -0.0026 -0.0025 -0.0026 -0.0028 -0.0021 -0.0023  
AT. 79 C X -0.0030 0.0032 -0.0004 0.0004 0.0004 -0.0002  
Y -0.0017 0.0022 0.0020 -0.0021 0.0021 -0.0019  
Z -0.0026 0.0025 -0.0026 0.0028 -0.0021 0.0023  
AT. 80 C X 0.0030 0.0032 -0.0004 -0.0004 -0.0004 -0.0002  
Y -0.0017 -0.0022 -0.0020 -0.0021 0.0021 0.0019  
Z 0.0026 0.0025 -0.0026 -0.0028 0.0021 0.0023  
AT. 81 H X 0.0196 -0.0173 -0.0252 0.0258 0.0247 -0.0259  
Y 0.0242 -0.0216 -0.0300 0.0307 0.0301 -0.0316  
Z -0.0295 0.0273 0.0301 -0.0313 -0.0288 0.0306  
AT. 82 H X -0.0196 -0.0173 -0.0252 -0.0258 -0.0247 -0.0259  
Y 0.0242 0.0216 0.0300 0.0307 0.0301 0.0316  
Z 0.0295 0.0273 0.0301 0.0313 0.0288 0.0306  
AT. 83 H X -0.0196 0.0173 -0.0252 0.0258 -0.0247 0.0259  
Y -0.0242 0.0216 -0.0300 0.0307 -0.0301 0.0316  
Z 0.0295 -0.0273 0.0301 -0.0313 0.0288 -0.0306  
AT. 84 H X 0.0196 0.0173 -0.0252 -0.0258 0.0247 0.0259  
Y -0.0242 -0.0216 0.0300 0.0307 -0.0301 -0.0316  
Z -0.0295 -0.0273 0.0301 0.0313 -0.0288 -0.0306  
AT. 85 H X -0.0053 0.0025 0.0221 -0.0224 -0.0208 0.0219  
Y -0.0107 0.0077 0.0309 -0.0305 -0.0316 0.0335  
Z 0.0150 -0.0122 -0.0331 0.0329 0.0325 -0.0347  
AT. 86 H X 0.0053 0.0025 0.0221 0.0224 0.0208 0.0219  
Y -0.0107 -0.0077 -0.0309 -0.0305 -0.0316 -0.0335  
Z -0.0150 -0.0122 -0.0331 -0.0329 -0.0325 -0.0347  
AT. 87 H X 0.0053 -0.0025 0.0221 -0.0224 0.0208 -0.0219  
Y 0.0107 -0.0077 0.0309 -0.0305 0.0316 -0.0335  
Z -0.0150 0.0122 -0.0331 0.0329 -0.0325 0.0347  
AT. 88 H X -0.0053 -0.0025 0.0221 0.0224 -0.0208 -0.0219  
Y 0.0107 0.0077 -0.0309 -0.0305 0.0316 0.0335  
Z 0.0150 0.0122 -0.0331 -0.0329 0.0325 0.0347  
AT. 89 C X -0.0137 0.0140 0.0043 -0.0045 -0.0020 0.0026

Y -0.0007 0.0022 -0.0091 0.0092 0.0095 -0.0098  
Z -0.0004 0.0015 -0.0069 0.0068 0.0078 -0.0079  
AT. 90 C X 0.0137 0.0140 0.0043 0.0045 0.0020 0.0026  
Y -0.0007 -0.0022 0.0091 0.0092 0.0095 0.0098  
Z 0.0004 0.0015 -0.0069 -0.0068 -0.0078 -0.0079  
AT. 91 C X 0.0137 -0.0140 0.0043 -0.0045 0.0020 -0.0026  
Y 0.0007 -0.0022 -0.0091 0.0092 -0.0095 0.0098  
Z 0.0004 -0.0015 -0.0069 0.0068 -0.0078 0.0079  
AT. 92 C X -0.0137 -0.0140 0.0043 0.0045 -0.0020 -0.0026  
Y 0.0007 0.0022 0.0091 0.0092 -0.0095 -0.0098  
Z -0.0004 -0.0015 -0.0069 -0.0068 0.0078 0.0079  
AT. 93 C X 0.0042 -0.0043 -0.0007 0.0008 0.0000 -0.0002  
Y 0.0003 -0.0006 0.0017 -0.0018 -0.0018 0.0020  
Z 0.0003 -0.0009 0.0035 -0.0034 -0.0035 0.0036  
AT. 94 C X -0.0042 -0.0043 -0.0007 -0.0008 -0.0000 -0.0002  
Y 0.0003 0.0006 -0.0017 -0.0018 -0.0018 -0.0020  
Z -0.0003 -0.0009 0.0035 0.0034 0.0035 0.0036  
AT. 95 C X -0.0042 0.0043 -0.0007 0.0008 -0.0000 0.0002  
Y -0.0003 0.0006 0.0017 -0.0018 0.0018 -0.0020  
Z -0.0003 0.0009 0.0035 -0.0034 0.0035 -0.0036  
AT. 96 C X 0.0042 0.0043 -0.0007 -0.0008 0.0000 0.0002  
Y -0.0003 -0.0006 -0.0017 -0.0018 0.0018 0.0020  
Z 0.0003 0.0009 0.0035 0.0034 -0.0035 -0.0036  
AT. 97 H X -0.0030 0.0030 0.0015 -0.0017 -0.0017 0.0021  
Y 0.0086 -0.0073 -0.0080 0.0084 0.0079 -0.0089  
Z -0.0065 0.0093 -0.0081 0.0081 0.0089 -0.0094  
AT. 98 H X 0.0030 0.0030 0.0015 0.0017 0.0017 0.0021  
Y 0.0086 0.0073 0.0080 0.0084 0.0079 0.0089  
Z 0.0065 0.0093 -0.0081 -0.0081 -0.0089 -0.0094  
AT. 99 H X 0.0030 -0.0030 0.0015 -0.0017 0.0017 -0.0021  
Y -0.0086 0.0073 -0.0080 0.0084 -0.0079 0.0089  
Z 0.0065 -0.0093 -0.0081 0.0081 -0.0089 0.0094

AT.100 H X -0.0030 -0.0030 0.0015 0.0017 -0.0017 -0.0021  
Y -0.0086 -0.0073 0.0080 0.0084 -0.0079 -0.0089  
Z -0.0065 -0.0093 -0.0081 -0.0081 0.0089 0.0094

AT.101 H X -0.0063 0.0074 -0.0054 0.0054 0.0070 -0.0072  
Y -0.0102 0.0109 -0.0002 0.0001 0.0025 -0.0024  
Z 0.0008 0.0003 -0.0157 0.0151 0.0150 -0.0151

AT.102 H X 0.0063 0.0074 -0.0054 -0.0054 -0.0070 -0.0072  
Y -0.0102 -0.0109 0.0002 0.0001 0.0025 0.0024  
Z -0.0008 0.0003 -0.0157 -0.0151 -0.0150 -0.0151

AT.103 H X 0.0063 -0.0074 -0.0054 0.0054 -0.0070 0.0072  
Y 0.0102 -0.0109 -0.0002 0.0001 -0.0025 0.0024  
Z -0.0008 -0.0003 -0.0157 0.0151 -0.0150 0.0151

AT.104 H X -0.0063 -0.0074 -0.0054 -0.0054 0.0070 0.0072  
Y 0.0102 0.0109 0.0002 0.0001 -0.0025 -0.0024  
Z 0.0008 -0.0003 -0.0157 -0.0151 0.0150 0.0151

AT.105 H X -0.0131 0.0120 0.0027 -0.0032 -0.0009 0.0020  
Y 0.0003 -0.0008 0.0020 -0.0017 -0.0017 0.0014  
Z 0.0060 -0.0060 0.0011 -0.0012 -0.0023 0.0023

AT.106 H X 0.0131 0.0120 0.0027 0.0032 0.0009 0.0020  
Y 0.0003 0.0008 -0.0020 -0.0017 -0.0017 -0.0014  
Z -0.0060 -0.0060 0.0011 0.0012 0.0023 0.0023

AT.107 H X 0.0131 -0.0120 0.0027 -0.0032 0.0009 -0.0020  
Y -0.0003 0.0008 0.0020 -0.0017 0.0017 -0.0014  
Z -0.0060 0.0060 0.0011 -0.0012 0.0023 -0.0023

AT.108 H X -0.0131 -0.0120 0.0027 0.0032 -0.0009 -0.0020  
Y -0.0003 -0.0008 -0.0020 -0.0017 0.0017 0.0014  
Z 0.0060 0.0060 0.0011 0.0012 -0.0023 -0.0023

AT.109 C X 0.0012 -0.0007 -0.0009 0.0008 0.0003 -0.0008  
Y -0.0004 -0.0001 -0.0011 0.0010 0.0015 -0.0012  
Z 0.0032 -0.0029 -0.0016 0.0017 0.0007 -0.0015

AT.110 C X -0.0012 -0.0007 -0.0009 -0.0008 -0.0003 -0.0008  
Y -0.0004 0.0001 0.0011 0.0010 0.0015 0.0012

Z -0.0032 -0.0029 -0.0016 -0.0017 -0.0007 -0.0015  
AT. 111 C X -0.0012 0.0007 -0.0009 0.0008 -0.0003 0.0008  
Y 0.0004 0.0001 -0.0011 0.0010 -0.0015 0.0012  
Z -0.0032 0.0029 -0.0016 0.0017 -0.0007 0.0015  
AT. 112 C X 0.0012 0.0007 -0.0009 -0.0008 0.0003 0.0008  
Y 0.0004 -0.0001 0.0011 0.0010 -0.0015 -0.0012  
Z 0.0032 0.0029 -0.0016 -0.0017 0.0007 0.0015  
AT. 113 H X 0.0173 -0.0168 -0.0054 0.0069 0.0044 -0.0063  
Y -0.0374 0.0360 0.0103 -0.0137 -0.0079 0.0121  
Z -0.0366 0.0334 0.0117 -0.0137 -0.0069 0.0129  
AT. 114 H X -0.0173 -0.0168 -0.0054 -0.0069 -0.0044 -0.0063  
Y -0.0374 -0.0360 -0.0103 -0.0137 -0.0079 -0.0121  
Z 0.0366 0.0334 0.0117 0.0137 0.0069 0.0129  
AT. 115 H X -0.0173 0.0168 -0.0054 0.0069 -0.0044 0.0063  
Y 0.0374 -0.0360 0.0103 -0.0137 0.0079 -0.0121  
Z 0.0366 -0.0334 0.0117 -0.0137 0.0069 -0.0129  
AT. 116 H X 0.0173 0.0168 -0.0054 -0.0069 0.0044 0.0063  
Y 0.0374 0.0360 -0.0103 -0.0137 0.0079 0.0121  
Z -0.0366 -0.0334 0.0117 0.0137 -0.0069 -0.0129  
AT. 117 H X -0.0002 -0.0015 0.0132 -0.0120 -0.0128 0.0130  
Y 0.0084 -0.0037 -0.0270 0.0279 0.0262 -0.0268  
Z 0.0115 -0.0062 -0.0266 0.0275 0.0245 -0.0262  
AT. 118 H X 0.0002 -0.0015 0.0132 0.0120 0.0128 0.0130  
Y 0.0084 0.0037 0.0270 0.0279 0.0262 0.0268  
Z -0.0115 -0.0062 -0.0266 -0.0275 -0.0245 -0.0262  
AT. 119 H X 0.0002 0.0015 0.0132 -0.0120 0.0128 -0.0130  
Y -0.0084 0.0037 -0.0270 0.0279 -0.0262 0.0268  
Z -0.0115 0.0062 -0.0266 0.0275 -0.0245 0.0262  
AT. 120 H X -0.0002 0.0015 0.0132 0.0120 -0.0128 -0.0130  
Y -0.0084 -0.0037 0.0270 0.0279 -0.0262 -0.0268  
Z 0.0115 0.0062 -0.0266 -0.0275 0.0245 0.0262  
AT. 121 C X 0.0025 -0.0028 0.0009 -0.0010 -0.0012 0.0012

Y -0.0024 0.0021 0.0003 -0.0004 -0.0001 0.0005  
Z 0.0005 -0.0001 -0.0011 0.0012 0.0006 -0.0009  
AT. 122 C X -0.0025 -0.0028 0.0009 0.0010 0.0012 0.0012  
Y -0.0024 -0.0021 -0.0003 -0.0004 -0.0001 -0.0005  
Z -0.0005 -0.0001 -0.0011 -0.0012 -0.0006 -0.0009  
AT. 123 C X -0.0025 0.0028 0.0009 -0.0010 0.0012 -0.0012  
Y 0.0024 -0.0021 0.0003 -0.0004 0.0001 -0.0005  
Z -0.0005 0.0001 -0.0011 0.0012 -0.0006 0.0009  
AT. 124 C X 0.0025 0.0028 0.0009 0.0010 -0.0012 -0.0012  
Y 0.0024 0.0021 -0.0003 -0.0004 0.0001 0.0005  
Z 0.0005 0.0001 -0.0011 -0.0012 0.0006 0.0009  
AT. 125 H X -0.0188 0.0244 -0.0305 0.0303 0.0339 -0.0334  
Y 0.0222 -0.0280 0.0345 -0.0337 -0.0385 0.0371  
Z -0.0111 0.0140 -0.0169 0.0165 0.0185 -0.0175  
AT. 126 H X 0.0188 0.0244 -0.0305 -0.0303 -0.0339 -0.0334  
Y 0.0222 0.0280 -0.0345 -0.0337 -0.0385 -0.0371  
Z 0.0111 0.0140 -0.0169 -0.0165 -0.0185 -0.0175  
AT. 127 H X 0.0188 -0.0244 -0.0305 0.0303 -0.0339 0.0334  
Y -0.0222 0.0280 0.0345 -0.0337 0.0385 -0.0371  
Z 0.0111 -0.0140 -0.0169 0.0165 -0.0185 0.0175  
AT. 128 H X -0.0188 -0.0244 -0.0305 -0.0303 0.0339 0.0334  
Y -0.0222 -0.0280 -0.0345 -0.0337 0.0385 0.0371  
Z -0.0111 -0.0140 -0.0169 -0.0165 0.0185 0.0175  
AT. 129 H X 0.0226 -0.0240 -0.0026 0.0036 -0.0027 0.0009  
Y -0.0282 0.0293 0.0068 -0.0084 0.0002 0.0025  
Z 0.0161 -0.0178 0.0032 -0.0024 -0.0067 0.0051  
AT. 130 H X -0.0226 -0.0240 -0.0026 -0.0036 0.0027 0.0009  
Y -0.0282 -0.0293 -0.0068 -0.0084 0.0002 -0.0025  
Z -0.0161 -0.0178 0.0032 0.0024 0.0067 0.0051  
AT. 131 H X -0.0226 0.0240 -0.0026 0.0036 0.0027 -0.0009  
Y 0.0282 -0.0293 0.0068 -0.0084 -0.0002 -0.0025  
Z -0.0161 0.0178 0.0032 -0.0024 0.0067 -0.0051

AT. 132 H X 0.0226 0.0240 -0.0026 -0.0036 -0.0027 -0.0009  
Y 0.0282 0.0293 -0.0068 -0.0084 -0.0002 0.0025  
Z 0.0161 0.0178 0.0032 0.0024 -0.0067 -0.0051

AT. 133 C X 0.0014 -0.0012 -0.0003 0.0004 -0.0000 -0.0002  
Y 0.0110 -0.0106 -0.0019 0.0027 0.0003 -0.0013  
Z 0.0056 -0.0052 -0.0007 0.0007 -0.0003 -0.0002

AT. 134 C X -0.0014 -0.0012 -0.0003 -0.0004 0.0000 -0.0002  
Y 0.0110 0.0106 0.0019 0.0027 0.0003 0.0013  
Z -0.0056 -0.0052 -0.0007 -0.0007 0.0003 -0.0002

AT. 135 C X -0.0014 0.0012 -0.0003 0.0004 0.0000 0.0002  
Y -0.0110 0.0106 -0.0019 0.0027 -0.0003 0.0013  
Z -0.0056 0.0052 -0.0007 0.0007 0.0003 0.0002

AT. 136 C X 0.0014 0.0012 -0.0003 -0.0004 -0.0000 0.0002  
Y -0.0110 -0.0106 0.0019 0.0027 -0.0003 -0.0013  
Z 0.0056 0.0052 -0.0007 -0.0007 -0.0003 0.0002

AT. 137 C X 0.0000 -0.0001 -0.0004 0.0004 0.0004 -0.0004  
Y -0.0039 0.0040 -0.0002 -0.0000 0.0007 -0.0003  
Z -0.0032 0.0030 0.0003 -0.0003 0.0003 0.0000

AT. 138 C X -0.0000 -0.0001 -0.0004 -0.0004 -0.0004 -0.0004  
Y -0.0039 -0.0040 0.0002 -0.0000 0.0007 0.0003  
Z 0.0032 0.0030 0.0003 0.0003 -0.0003 0.0000

AT. 139 C X -0.0000 0.0001 -0.0004 0.0004 -0.0004 0.0004  
Y 0.0039 -0.0040 -0.0002 -0.0000 -0.0007 0.0003  
Z 0.0032 -0.0030 0.0003 -0.0003 -0.0003 -0.0000

AT. 140 C X 0.0000 0.0001 -0.0004 -0.0004 0.0004 0.0004  
Y 0.0039 0.0040 0.0002 -0.0000 -0.0007 -0.0003  
Z -0.0032 -0.0030 0.0003 0.0003 0.0003 -0.0000

AT. 141 H X -0.0064 0.0069 0.0026 -0.0030 -0.0013 0.0019  
Y 0.0058 -0.0062 0.0011 -0.0012 -0.0018 0.0014  
Z 0.0103 -0.0114 -0.0019 0.0024 0.0002 -0.0010

AT. 142 H X 0.0064 0.0069 0.0026 0.0030 0.0013 0.0019  
Y 0.0058 0.0062 -0.0011 -0.0012 -0.0018 -0.0014

Z -0.0103 -0.0114 -0.0019 -0.0024 -0.0002 -0.0010  
AT. 143 H X 0.0064 -0.0069 0.0026 -0.0030 0.0013 -0.0019  
Y -0.0058 0.0062 0.0011 -0.0012 0.0018 -0.0014  
Z -0.0103 0.0114 -0.0019 0.0024 -0.0002 0.0010  
AT. 144 H X -0.0064 -0.0069 0.0026 0.0030 -0.0013 -0.0019  
Y -0.0058 -0.0062 -0.0011 -0.0012 0.0018 0.0014  
Z 0.0103 0.0114 -0.0019 -0.0024 0.0002 0.0010  
AT. 145 H X -0.0027 0.0031 0.0031 -0.0036 -0.0027 0.0032  
Y -0.0051 0.0049 -0.0006 0.0000 0.0012 -0.0007  
Z -0.0106 0.0101 0.0028 -0.0043 -0.0015 0.0026  
AT. 146 H X 0.0027 0.0031 0.0031 0.0036 0.0027 0.0032  
Y -0.0051 -0.0049 0.0006 0.0000 0.0012 0.0007  
Z 0.0106 0.0101 0.0028 0.0043 0.0015 0.0026  
AT. 147 H X 0.0027 -0.0031 0.0031 -0.0036 0.0027 -0.0032  
Y 0.0051 -0.0049 -0.0006 0.0000 -0.0012 0.0007  
Z 0.0106 -0.0101 0.0028 -0.0043 0.0015 -0.0026  
AT. 148 H X -0.0027 -0.0031 0.0031 0.0036 -0.0027 -0.0032  
Y 0.0051 0.0049 0.0006 0.0000 -0.0012 -0.0007  
Z -0.0106 -0.0101 0.0028 0.0043 -0.0015 -0.0026  
AT. 149 O X -0.0002 0.0001 0.0005 -0.0005 -0.0003 0.0003  
Y -0.0002 0.0002 0.0003 -0.0003 -0.0004 0.0004  
Z 0.0012 -0.0015 0.0039 -0.0038 -0.0037 0.0035  
AT. 150 O X 0.0002 0.0001 0.0005 0.0005 0.0003 0.0003  
Y -0.0002 -0.0002 -0.0003 -0.0003 -0.0004 -0.0004  
Z -0.0012 -0.0015 0.0039 0.0038 0.0037 0.0035  
AT. 151 O X 0.0002 -0.0001 0.0005 -0.0005 0.0003 -0.0003  
Y 0.0002 -0.0002 0.0003 -0.0003 0.0004 -0.0004  
Z -0.0012 0.0015 0.0039 -0.0038 0.0037 -0.0035  
AT. 152 O X -0.0002 -0.0001 0.0005 0.0005 -0.0003 -0.0003  
Y 0.0002 0.0002 -0.0003 -0.0003 0.0004 0.0004  
Z 0.0012 0.0015 0.0039 0.0038 -0.0037 -0.0035  
AT. 153 H X 0.0085 -0.0117 0.0288 -0.0282 -0.0281 0.0262

Y -0.0157 0.0193 -0.0364 0.0353 0.0359 -0.0330  
Z -0.0099 0.0130 -0.0287 0.0279 0.0286 -0.0264  
AT. 154 H X -0.0085 -0.0117 0.0288 0.0282 0.0281 0.0262  
Y -0.0157 -0.0193 0.0364 0.0353 0.0359 0.0330  
Z 0.0099 0.0130 -0.0287 -0.0279 -0.0286 -0.0264  
AT. 155 H X -0.0085 0.0117 0.0288 -0.0282 0.0281 -0.0262  
Y 0.0157 -0.0193 -0.0364 0.0353 -0.0359 0.0330  
Z 0.0099 -0.0130 -0.0287 0.0279 -0.0286 0.0264  
AT. 156 H X 0.0085 0.0117 0.0288 0.0282 -0.0281 -0.0262  
Y 0.0157 0.0193 0.0364 0.0353 -0.0359 -0.0330  
Z -0.0099 -0.0130 -0.0287 -0.0279 0.0286 0.0264  
AT. 157 O X -0.0009 0.0007 0.0013 -0.0013 -0.0017 0.0013  
Y 0.0003 -0.0004 -0.0001 0.0002 -0.0002 0.0001  
Z 0.0008 -0.0008 0.0003 -0.0002 0.0000 0.0002  
AT. 158 O X 0.0009 0.0007 0.0013 0.0013 0.0017 0.0013  
Y 0.0003 0.0004 0.0001 0.0002 -0.0002 -0.0001  
Z -0.0008 -0.0008 0.0003 0.0002 -0.0000 0.0002  
AT. 159 O X 0.0009 -0.0007 0.0013 -0.0013 0.0017 -0.0013  
Y -0.0003 0.0004 -0.0001 0.0002 0.0002 -0.0001  
Z -0.0008 0.0008 0.0003 -0.0002 -0.0000 -0.0002  
AT. 160 O X -0.0009 -0.0007 0.0013 0.0013 -0.0017 -0.0013  
Y -0.0003 -0.0004 0.0001 0.0002 0.0002 0.0001  
Z 0.0008 0.0008 0.0003 0.0002 0.0000 -0.0002  
AT. 161 O X 0.0003 -0.0003 -0.0001 0.0003 0.0003 -0.0002  
Y -0.0003 0.0003 -0.0001 0.0000 0.0001 -0.0002  
Z -0.0000 0.0001 -0.0003 0.0004 0.0004 -0.0003  
AT. 162 O X -0.0003 -0.0003 -0.0001 -0.0003 -0.0003 -0.0002  
Y -0.0003 -0.0003 0.0001 0.0000 0.0001 0.0002  
Z 0.0000 0.0001 -0.0003 -0.0004 -0.0004 -0.0003  
AT. 163 O X -0.0003 0.0003 -0.0001 0.0003 -0.0003 0.0002  
Y 0.0003 -0.0003 -0.0001 0.0000 -0.0001 0.0002  
Z 0.0000 -0.0001 -0.0003 0.0004 -0.0004 0.0003



AT.164 O X 0.0003 0.0003 -0.0001 -0.0003 0.0003 0.0002  
Y 0.0003 0.0003 0.0001 0.0000 -0.0001 -0.0002  
Z -0.0000 -0.0001 -0.0003 -0.0004 0.0004 0.0003

AT.165 H X -0.0031 0.0033 0.0005 -0.0016 -0.0007 0.0008  
Y -0.0010 0.0012 -0.0000 -0.0006 -0.0002 0.0000  
Z -0.0008 0.0012 0.0012 -0.0027 -0.0025 0.0006

AT.166 H X 0.0031 0.0033 0.0005 0.0016 0.0007 0.0008  
Y -0.0010 -0.0012 0.0000 -0.0006 -0.0002 -0.0000  
Z 0.0008 0.0012 0.0012 0.0027 0.0025 0.0006

AT.167 H X 0.0031 -0.0033 0.0005 -0.0016 0.0007 -0.0008  
Y 0.0010 -0.0012 -0.0000 -0.0006 0.0002 -0.0000  
Z 0.0008 -0.0012 0.0012 -0.0027 0.0025 -0.0006

AT.168 H X -0.0031 -0.0033 0.0005 0.0016 -0.0007 -0.0008  
Y 0.0010 0.0012 0.0000 -0.0006 0.0002 0.0000  
Z -0.0008 -0.0012 0.0012 0.0027 -0.0025 -0.0006

AT.169 O X 0.0002 -0.0002 -0.0000 0.0001 -0.0000 0.0000  
Y 0.0003 -0.0003 0.0004 -0.0003 -0.0009 0.0009  
Z 0.0002 -0.0003 -0.0002 0.0002 -0.0001 0.0000

AT.170 O X -0.0002 -0.0002 -0.0000 -0.0001 0.0000 0.0000  
Y 0.0003 0.0003 -0.0004 -0.0003 -0.0009 -0.0009  
Z -0.0002 -0.0003 -0.0002 -0.0002 0.0001 0.0000

AT.171 O X -0.0002 0.0002 -0.0000 0.0001 0.0000 -0.0000  
Y -0.0003 0.0003 0.0004 -0.0003 0.0009 -0.0009  
Z -0.0002 0.0003 -0.0002 0.0002 0.0001 -0.0000

AT.172 O X 0.0002 0.0002 -0.0000 -0.0001 -0.0000 -0.0000  
Y -0.0003 -0.0003 -0.0004 -0.0003 0.0009 0.0009  
Z 0.0002 0.0003 -0.0002 -0.0002 -0.0001 -0.0000

AT.173 H X -0.0048 0.0061 0.0001 -0.0007 0.0054 -0.0045  
Y 0.0003 -0.0002 -0.0009 0.0010 -0.0005 0.0005  
Z -0.0006 0.0011 0.0082 -0.0092 -0.0029 0.0034

AT.174 H X 0.0048 0.0061 0.0001 0.0007 -0.0054 -0.0045  
Y 0.0003 0.0002 0.0009 0.0010 -0.0005 -0.0005

Z 0.0006 0.0011 0.0082 0.0092 0.0029 0.0034  
AT. 175 H X 0.0048 -0.0061 0.0001 -0.0007 -0.0054 0.0045  
Y -0.0003 0.0002 -0.0009 0.0010 0.0005 -0.0005  
Z 0.0006 -0.0011 0.0082 -0.0092 0.0029 -0.0034  
AT. 176 H X -0.0048 -0.0061 0.0001 0.0007 0.0054 0.0045  
Y -0.0003 -0.0002 0.0009 0.0010 0.0005 0.0005  
Z -0.0006 -0.0011 0.0082 0.0092 -0.0029 -0.0034

FREQ(CM\*\*-1) 1372.30 1373.16 1374.18 1375.29 1375.93 1376.39

AT. 1 I X -0.0000 -0.0000 -0.0000 -0.0000 -0.0000 -0.0000  
Y -0.0000 -0.0000 -0.0000 0.0000 -0.0000 -0.0000  
Z -0.0000 -0.0000 -0.0000 -0.0000 -0.0000 -0.0000  
AT. 2 I X 0.0000 0.0000 -0.0000 -0.0000 0.0000 0.0000  
Y -0.0000 -0.0000 0.0000 -0.0000 -0.0000 -0.0000  
Z 0.0000 0.0000 -0.0000 -0.0000 0.0000 0.0000  
AT. 3 I X 0.0000 -0.0000 0.0000 -0.0000 -0.0000 0.0000  
Y 0.0000 -0.0000 0.0000 0.0000 -0.0000 0.0000  
Z 0.0000 -0.0000 0.0000 -0.0000 -0.0000 0.0000  
AT. 4 I X -0.0000 0.0000 0.0000 -0.0000 0.0000 -0.0000  
Y 0.0000 -0.0000 -0.0000 -0.0000 -0.0000 0.0000  
Z -0.0000 0.0000 0.0000 -0.0000 0.0000 -0.0000  
AT. 5 I X 0.0000 0.0000 0.0000 0.0000 -0.0000 -0.0000  
Y -0.0000 -0.0000 0.0000 -0.0000 -0.0000 0.0000  
Z 0.0000 0.0000 0.0000 0.0000 -0.0000 0.0000  
AT. 6 I X -0.0000 -0.0000 0.0000 0.0000 0.0000 0.0000  
Y -0.0000 -0.0000 -0.0000 0.0000 -0.0000 0.0000  
Z -0.0000 -0.0000 0.0000 0.0000 0.0000 -0.0000  
AT. 7 I X -0.0000 0.0000 -0.0000 0.0000 -0.0000 0.0000  
Y 0.0000 -0.0000 -0.0000 -0.0000 -0.0000 -0.0000  
Z -0.0000 0.0000 -0.0000 0.0000 -0.0000 -0.0000  
AT. 8 I X 0.0000 -0.0000 -0.0000 0.0000 0.0000 -0.0000

Y 0.0000 -0.0000 0.0000 0.0000 -0.0000 -0.0000  
Z 0.0000 -0.0000 -0.0000 0.0000 0.0000 0.0000  
AT. 9 N X -0.0031 -0.0031 -0.0028 -0.0021 -0.0022 -0.0023  
Y -0.0003 -0.0005 -0.0001 0.0004 -0.0012 -0.0010  
Z 0.0028 0.0024 0.0034 0.0050 -0.0076 -0.0070  
AT. 10 N X 0.0031 0.0031 -0.0028 -0.0021 0.0022 0.0023  
Y -0.0003 -0.0005 0.0001 -0.0004 -0.0012 -0.0010  
Z -0.0028 -0.0024 0.0034 0.0050 0.0076 0.0070  
AT. 11 N X 0.0031 -0.0031 0.0028 -0.0021 -0.0022 0.0023  
Y 0.0003 -0.0005 0.0001 0.0004 -0.0012 0.0010  
Z -0.0028 0.0024 -0.0034 0.0050 -0.0076 0.0070  
AT. 12 N X -0.0031 0.0031 0.0028 -0.0021 0.0022 -0.0023  
Y 0.0003 -0.0005 -0.0001 -0.0004 -0.0012 0.0010  
Z 0.0028 -0.0024 -0.0034 0.0050 0.0076 -0.0070  
AT. 13 N X 0.0013 0.0015 0.0011 0.0009 0.0009 0.0010  
Y -0.0007 -0.0007 -0.0003 -0.0002 -0.0006 -0.0007  
Z -0.0045 -0.0042 -0.0058 -0.0059 0.0050 0.0048  
AT. 14 N X -0.0013 -0.0015 0.0011 0.0009 -0.0009 -0.0010  
Y -0.0007 -0.0007 0.0003 0.0002 -0.0006 -0.0007  
Z 0.0045 0.0042 -0.0058 -0.0059 -0.0050 -0.0048  
AT. 15 N X -0.0013 0.0015 -0.0011 0.0009 0.0009 -0.0010  
Y 0.0007 -0.0007 0.0003 -0.0002 -0.0006 0.0007  
Z 0.0045 -0.0042 0.0058 -0.0059 0.0050 -0.0048  
AT. 16 N X 0.0013 -0.0015 -0.0011 0.0009 -0.0009 0.0010  
Y 0.0007 -0.0007 -0.0003 0.0002 -0.0006 0.0007  
Z -0.0045 0.0042 0.0058 -0.0059 -0.0050 0.0048  
AT. 17 O X 0.0001 0.0001 0.0000 -0.0001 0.0005 0.0004  
Y -0.0005 -0.0003 -0.0007 -0.0008 0.0011 0.0011  
Z 0.0013 0.0016 0.0010 0.0009 0.0011 0.0013  
AT. 18 O X -0.0001 -0.0001 0.0000 -0.0001 -0.0005 -0.0004  
Y -0.0005 -0.0003 0.0007 0.0008 0.0011 0.0011  
Z -0.0013 -0.0016 0.0010 0.0009 -0.0011 -0.0013

AT. 19 O X -0.0001 0.0001 -0.0000 -0.0001 0.0005 -0.0004  
Y 0.0005 -0.0003 0.0007 -0.0008 0.0011 -0.0011  
Z -0.0013 0.0016 -0.0010 0.0009 0.0011 -0.0013

AT. 20 O X 0.0001 -0.0001 -0.0000 -0.0001 -0.0005 0.0004  
Y 0.0005 -0.0003 -0.0007 0.0008 0.0011 -0.0011  
Z 0.0013 -0.0016 -0.0010 0.0009 -0.0011 0.0013

AT. 21 O X -0.0002 -0.0001 -0.0001 -0.0002 0.0002 0.0001  
Y -0.0009 -0.0009 -0.0011 -0.0010 0.0006 0.0006  
Z -0.0011 -0.0009 -0.0011 -0.0011 -0.0001 -0.0002

AT. 22 O X 0.0002 0.0001 -0.0001 -0.0002 -0.0002 -0.0001  
Y -0.0009 -0.0009 0.0011 0.0010 0.0006 0.0006  
Z 0.0011 0.0009 -0.0011 -0.0011 0.0001 0.0002

AT. 23 O X 0.0002 -0.0001 0.0001 -0.0002 0.0002 -0.0001  
Y 0.0009 -0.0009 0.0011 -0.0010 0.0006 -0.0006  
Z 0.0011 -0.0009 0.0011 -0.0011 -0.0001 0.0002

AT. 24 O X -0.0002 0.0001 0.0001 -0.0002 -0.0002 0.0001  
Y 0.0009 -0.0009 -0.0011 0.0010 0.0006 -0.0006  
Z -0.0011 0.0009 0.0011 -0.0011 0.0001 -0.0002

AT. 25 C X -0.0009 -0.0009 -0.0007 -0.0008 0.0001 -0.0000  
Y -0.0024 -0.0024 -0.0022 -0.0020 -0.0011 -0.0013  
Z 0.0022 0.0024 0.0019 0.0019 0.0005 0.0008

AT. 26 C X 0.0009 0.0009 -0.0007 -0.0008 -0.0001 0.0000  
Y -0.0024 -0.0024 0.0022 0.0020 -0.0011 -0.0013  
Z -0.0022 -0.0024 0.0019 0.0019 -0.0005 -0.0008

AT. 27 C X 0.0009 -0.0009 0.0007 -0.0008 0.0001 0.0000  
Y 0.0024 -0.0024 0.0022 -0.0020 -0.0011 0.0013  
Z -0.0022 0.0024 -0.0019 0.0019 0.0005 -0.0008

AT. 28 C X -0.0009 0.0009 0.0007 -0.0008 -0.0001 -0.0000  
Y 0.0024 -0.0024 -0.0022 0.0020 -0.0011 0.0013  
Z 0.0022 -0.0024 -0.0019 0.0019 -0.0005 0.0008

AT. 29 H X 0.0044 0.0041 0.0028 0.0032 0.0009 0.0014  
Y 0.0004 0.0001 -0.0001 -0.0012 0.0047 0.0046

Z -0.0059 -0.0052 -0.0035 -0.0039 -0.0021 -0.0026  
AT. 30 H X -0.0044 -0.0041 0.0028 0.0032 -0.0009 -0.0014  
Y 0.0004 0.0001 0.0001 0.0012 0.0047 0.0046  
Z 0.0059 0.0052 -0.0035 -0.0039 0.0021 0.0026  
AT. 31 H X -0.0044 0.0041 -0.0028 0.0032 0.0009 -0.0014  
Y -0.0004 0.0001 0.0001 -0.0012 0.0047 -0.0046  
Z 0.0059 -0.0052 0.0035 -0.0039 -0.0021 0.0026  
AT. 32 H X 0.0044 -0.0041 -0.0028 0.0032 -0.0009 0.0014  
Y -0.0004 0.0001 -0.0001 0.0012 0.0047 -0.0046  
Z -0.0059 0.0052 0.0035 -0.0039 0.0021 -0.0026  
AT. 33 H X 0.0012 0.0012 0.0008 0.0019 -0.0036 -0.0032  
Y -0.0036 -0.0034 -0.0035 -0.0035 0.0002 -0.0001  
Z 0.0053 0.0045 0.0060 0.0058 -0.0023 -0.0020  
AT. 34 H X -0.0012 -0.0012 0.0008 0.0019 0.0036 0.0032  
Y -0.0036 -0.0034 0.0035 0.0035 0.0002 -0.0001  
Z -0.0053 -0.0045 0.0060 0.0058 0.0023 0.0020  
AT. 35 H X -0.0012 0.0012 -0.0008 0.0019 -0.0036 0.0032  
Y 0.0036 -0.0034 0.0035 -0.0035 0.0002 0.0001  
Z -0.0053 0.0045 -0.0060 0.0058 -0.0023 0.0020  
AT. 36 H X 0.0012 -0.0012 -0.0008 0.0019 0.0036 -0.0032  
Y 0.0036 -0.0034 -0.0035 0.0035 0.0002 0.0001  
Z 0.0053 -0.0045 -0.0060 0.0058 0.0023 -0.0020  
AT. 37 C X 0.0019 0.0017 0.0016 0.0014 0.0005 0.0006  
Y 0.0077 0.0077 0.0076 0.0071 0.0002 0.0009  
Z -0.0049 -0.0055 -0.0045 -0.0048 -0.0002 -0.0009  
AT. 38 C X -0.0019 -0.0017 0.0016 0.0014 -0.0005 -0.0006  
Y 0.0077 0.0077 -0.0076 -0.0071 0.0002 0.0009  
Z 0.0049 0.0055 -0.0045 -0.0048 0.0002 0.0009  
AT. 39 C X -0.0019 0.0017 -0.0016 0.0014 0.0005 -0.0006  
Y -0.0077 0.0077 -0.0076 0.0071 0.0002 -0.0009  
Z 0.0049 -0.0055 0.0045 -0.0048 -0.0002 0.0009  
AT. 40 C X 0.0019 -0.0017 -0.0016 0.0014 -0.0005 0.0006

Y -0.0077 0.0077 0.0076 -0.0071 0.0002 -0.0009  
Z -0.0049 0.0055 0.0045 -0.0048 0.0002 -0.0009  
AT. 41 C X 0.0012 0.0002 0.0022 0.0031 -0.0076 -0.0075  
Y 0.0022 0.0017 0.0029 0.0029 -0.0038 -0.0037  
Z -0.0015 -0.0015 -0.0016 -0.0019 0.0011 0.0009  
AT. 42 C X -0.0012 -0.0002 0.0022 0.0031 0.0076 0.0075  
Y 0.0022 0.0017 -0.0029 -0.0029 -0.0038 -0.0037  
Z 0.0015 0.0015 -0.0016 -0.0019 -0.0011 -0.0009  
AT. 43 C X -0.0012 0.0002 -0.0022 0.0031 -0.0076 0.0075  
Y -0.0022 0.0017 -0.0029 0.0029 -0.0038 0.0037  
Z 0.0015 -0.0015 0.0016 -0.0019 0.0011 -0.0009  
AT. 44 C X 0.0012 -0.0002 -0.0022 0.0031 0.0076 -0.0075  
Y -0.0022 0.0017 0.0029 -0.0029 -0.0038 0.0037  
Z -0.0015 0.0015 0.0016 -0.0019 -0.0011 0.0009  
AT. 45 H X 0.0312 0.0356 0.0248 0.0155 0.0507 0.0530  
Y 0.0220 0.0243 0.0196 0.0148 0.0249 0.0269  
Z 0.0115 0.0131 0.0100 0.0070 0.0168 0.0180  
AT. 46 H X -0.0312 -0.0356 0.0248 0.0155 -0.0507 -0.0530  
Y 0.0220 0.0243 -0.0196 -0.0148 0.0249 0.0269  
Z -0.0115 -0.0131 0.0100 0.0070 -0.0168 -0.0180  
AT. 47 H X -0.0312 0.0356 -0.0248 0.0155 0.0507 -0.0530  
Y -0.0220 0.0243 -0.0196 0.0148 0.0249 -0.0269  
Z -0.0115 0.0131 -0.0100 0.0070 0.0168 -0.0180  
AT. 48 H X 0.0312 -0.0356 -0.0248 0.0155 -0.0507 0.0530  
Y -0.0220 0.0243 0.0196 -0.0148 0.0249 -0.0269  
Z 0.0115 -0.0131 -0.0100 0.0070 -0.0168 0.0180  
AT. 49 H X -0.0355 -0.0315 -0.0400 -0.0404 0.0273 0.0238  
Y -0.0280 -0.0241 -0.0329 -0.0344 0.0302 0.0273  
Z -0.0204 -0.0191 -0.0201 -0.0191 0.0015 -0.0004  
AT. 50 H X 0.0355 0.0315 -0.0400 -0.0404 -0.0273 -0.0238  
Y -0.0280 -0.0241 0.0329 0.0344 0.0302 0.0273  
Z 0.0204 0.0191 -0.0201 -0.0191 -0.0015 0.0004

AT. 51 H X 0.0355 -0.0315 0.0400 -0.0404 0.0273 -0.0238  
Y 0.0280 -0.0241 0.0329 -0.0344 0.0302 -0.0273  
Z 0.0204 -0.0191 0.0201 -0.0191 0.0015 0.0004

AT. 52 H X -0.0355 0.0315 0.0400 -0.0404 -0.0273 0.0238  
Y 0.0280 -0.0241 -0.0329 0.0344 0.0302 -0.0273  
Z -0.0204 0.0191 0.0201 -0.0191 -0.0015 -0.0004

AT. 53 C X 0.0021 0.0024 0.0021 0.0014 0.0016 0.0018  
Y -0.0128 -0.0126 -0.0127 -0.0111 -0.0019 -0.0029  
Z 0.0065 0.0064 0.0065 0.0059 0.0009 0.0012

AT. 54 C X -0.0021 -0.0024 0.0021 0.0014 -0.0016 -0.0018  
Y -0.0128 -0.0126 0.0127 0.0111 -0.0019 -0.0029  
Z -0.0065 -0.0064 0.0065 0.0059 -0.0009 -0.0012

AT. 55 C X -0.0021 0.0024 -0.0021 0.0014 0.0016 -0.0018  
Y 0.0128 -0.0126 0.0127 -0.0111 -0.0019 0.0029  
Z -0.0065 0.0064 -0.0065 0.0059 0.0009 -0.0012

AT. 56 C X 0.0021 -0.0024 -0.0021 0.0014 -0.0016 0.0018  
Y 0.0128 -0.0126 -0.0127 0.0111 -0.0019 0.0029  
Z 0.0065 -0.0064 -0.0065 0.0059 -0.0009 0.0012

AT. 57 C X -0.0006 -0.0006 -0.0006 -0.0006 0.0000 -0.0001  
Y 0.0043 0.0041 0.0038 0.0034 0.0003 0.0005  
Z -0.0025 -0.0028 -0.0029 -0.0026 -0.0010 -0.0010

AT. 58 C X 0.0006 0.0006 -0.0006 -0.0006 -0.0000 0.0001  
Y 0.0043 0.0041 -0.0038 -0.0034 0.0003 0.0005  
Z 0.0025 0.0028 -0.0029 -0.0026 0.0010 0.0010

AT. 59 C X 0.0006 -0.0006 0.0006 -0.0006 0.0000 0.0001  
Y -0.0043 0.0041 -0.0038 0.0034 0.0003 -0.0005  
Z 0.0025 -0.0028 0.0029 -0.0026 -0.0010 0.0010

AT. 60 C X -0.0006 0.0006 0.0006 -0.0006 -0.0000 -0.0001  
Y -0.0043 0.0041 0.0038 -0.0034 0.0003 -0.0005  
Z -0.0025 0.0028 0.0029 -0.0026 0.0010 -0.0010

AT. 61 H X -0.0081 -0.0080 -0.0058 -0.0048 -0.0011 -0.0013  
Y -0.0046 -0.0052 -0.0040 -0.0030 -0.0011 -0.0011

Z 0.0133 0.0155 0.0165 0.0135 0.0022 0.0023  
AT. 62 H X 0.0081 0.0080 -0.0058 -0.0048 0.0011 0.0013  
Y -0.0046 -0.0052 0.0040 0.0030 -0.0011 -0.0011  
Z -0.0133 -0.0155 0.0165 0.0135 -0.0022 -0.0023  
AT. 63 H X 0.0081 -0.0080 0.0058 -0.0048 -0.0011 0.0013  
Y 0.0046 -0.0052 0.0040 -0.0030 -0.0011 0.0011  
Z -0.0133 0.0155 -0.0165 0.0135 0.0022 -0.0023  
AT. 64 H X -0.0081 0.0080 0.0058 -0.0048 0.0011 -0.0013  
Y 0.0046 -0.0052 -0.0040 0.0030 -0.0011 0.0011  
Z 0.0133 -0.0155 -0.0165 0.0135 -0.0022 0.0023  
AT. 65 H X 0.0062 0.0060 0.0050 0.0043 0.0008 0.0011  
Y -0.0171 -0.0169 -0.0144 -0.0127 -0.0028 -0.0036  
Z 0.0087 0.0089 0.0091 0.0090 0.0059 0.0061  
AT. 66 H X -0.0062 -0.0060 0.0050 0.0043 -0.0008 -0.0011  
Y -0.0171 -0.0169 0.0144 0.0127 -0.0028 -0.0036  
Z -0.0087 -0.0089 0.0091 0.0090 -0.0059 -0.0061  
AT. 67 H X -0.0062 0.0060 -0.0050 0.0043 0.0008 -0.0011  
Y 0.0171 -0.0169 0.0144 -0.0127 -0.0028 0.0036  
Z -0.0087 0.0089 -0.0091 0.0090 0.0059 -0.0061  
AT. 68 H X 0.0062 -0.0060 -0.0050 0.0043 -0.0008 0.0011  
Y 0.0171 -0.0169 -0.0144 0.0127 -0.0028 0.0036  
Z 0.0087 -0.0089 -0.0091 0.0090 -0.0059 0.0061  
AT. 69 H X 0.0037 0.0031 0.0027 0.0034 0.0030 0.0035  
Y -0.0040 -0.0020 -0.0018 -0.0023 0.0012 0.0005  
Z -0.0075 -0.0061 -0.0059 -0.0056 0.0007 -0.0000  
AT. 70 H X -0.0037 -0.0031 0.0027 0.0034 -0.0030 -0.0035  
Y -0.0040 -0.0020 0.0018 0.0023 0.0012 0.0005  
Z 0.0075 0.0061 -0.0059 -0.0056 -0.0007 0.0000  
AT. 71 H X -0.0037 0.0031 -0.0027 0.0034 0.0030 -0.0035  
Y 0.0040 -0.0020 0.0018 -0.0023 0.0012 -0.0005  
Z 0.0075 -0.0061 0.0059 -0.0056 0.0007 0.0000  
AT. 72 H X 0.0037 -0.0031 -0.0027 0.0034 -0.0030 0.0035



Y 0.0040 -0.0020 -0.0018 0.0023 0.0012 -0.0005  
Z -0.0075 0.0061 0.0059 -0.0056 -0.0007 -0.0000  
AT. 73 C X -0.0001 -0.0003 -0.0004 -0.0002 -0.0003 -0.0005  
Y 0.0065 0.0066 0.0061 0.0057 0.0010 0.0014  
Z 0.0023 0.0025 0.0019 0.0022 -0.0004 -0.0004  
AT. 74 C X 0.0001 0.0003 -0.0004 -0.0002 0.0003 0.0005  
Y 0.0065 0.0066 -0.0061 -0.0057 0.0010 0.0014  
Z -0.0023 -0.0025 0.0019 0.0022 0.0004 0.0004  
AT. 75 C X 0.0001 -0.0003 0.0004 -0.0002 -0.0003 0.0005  
Y -0.0065 0.0066 -0.0061 0.0057 0.0010 -0.0014  
Z -0.0023 0.0025 -0.0019 0.0022 -0.0004 0.0004  
AT. 76 C X -0.0001 0.0003 0.0004 -0.0002 0.0003 -0.0005  
Y -0.0065 0.0066 0.0061 -0.0057 0.0010 -0.0014  
Z 0.0023 -0.0025 -0.0019 0.0022 0.0004 -0.0004  
AT. 77 C X 0.0010 0.0009 0.0003 -0.0009 0.0053 0.0046  
Y 0.0005 0.0009 -0.0001 -0.0005 0.0038 0.0034  
Z 0.0013 0.0012 0.0016 0.0017 -0.0022 -0.0024  
AT. 78 C X -0.0010 -0.0009 0.0003 -0.0009 -0.0053 -0.0046  
Y 0.0005 0.0009 0.0001 0.0005 0.0038 0.0034  
Z -0.0013 -0.0012 0.0016 0.0017 0.0022 0.0024  
AT. 79 C X -0.0010 0.0009 -0.0003 -0.0009 0.0053 -0.0046  
Y -0.0005 0.0009 0.0001 -0.0005 0.0038 -0.0034  
Z -0.0013 0.0012 -0.0016 0.0017 -0.0022 0.0024  
AT. 80 C X 0.0010 -0.0009 -0.0003 -0.0009 -0.0053 0.0046  
Y -0.0005 0.0009 -0.0001 0.0005 0.0038 -0.0034  
Z 0.0013 -0.0012 -0.0016 0.0017 0.0022 -0.0024  
AT. 81 H X -0.0153 -0.0163 -0.0124 -0.0101 -0.0175 -0.0168  
Y -0.0199 -0.0208 -0.0159 -0.0123 -0.0239 -0.0231  
Z 0.0150 0.0169 0.0112 0.0106 0.0194 0.0216  
AT. 82 H X 0.0153 0.0163 -0.0124 -0.0101 0.0175 0.0168  
Y -0.0199 -0.0208 0.0159 0.0123 -0.0239 -0.0231  
Z -0.0150 -0.0169 0.0112 0.0106 -0.0194 -0.0216

AT. 83 H X 0.0153 -0.0163 0.0124 -0.0101 -0.0175 0.0168  
Y 0.0199 -0.0208 0.0159 -0.0123 -0.0239 0.0231  
Z -0.0150 0.0169 -0.0112 0.0106 0.0194 -0.0216

AT. 84 H X -0.0153 0.0163 0.0124 -0.0101 0.0175 -0.0168  
Y 0.0199 -0.0208 -0.0159 0.0123 -0.0239 0.0231  
Z 0.0150 -0.0169 -0.0112 0.0106 -0.0194 0.0216

AT. 85 H X 0.0179 0.0199 0.0187 0.0259 -0.0226 -0.0188  
Y 0.0258 0.0242 0.0274 0.0314 -0.0256 -0.0242  
Z -0.0246 -0.0237 -0.0265 -0.0324 0.0294 0.0266

AT. 86 H X -0.0179 -0.0199 0.0187 0.0259 0.0226 0.0188  
Y 0.0258 0.0242 -0.0274 -0.0314 -0.0256 -0.0242  
Z 0.0246 0.0237 -0.0265 -0.0324 -0.0294 -0.0266

AT. 87 H X -0.0179 0.0199 -0.0187 0.0259 -0.0226 0.0188  
Y -0.0258 0.0242 -0.0274 0.0314 -0.0256 0.0242  
Z 0.0246 -0.0237 0.0265 -0.0324 0.0294 -0.0266

AT. 88 H X 0.0179 -0.0199 -0.0187 0.0259 0.0226 -0.0188  
Y -0.0258 0.0242 0.0274 -0.0314 -0.0256 0.0242  
Z -0.0246 0.0237 0.0265 -0.0324 -0.0294 0.0266

AT. 89 C X -0.0027 -0.0027 -0.0023 -0.0025 0.0004 0.0007  
Y -0.0097 -0.0100 -0.0091 -0.0097 0.0017 0.0014  
Z -0.0081 -0.0083 -0.0073 -0.0077 0.0001 -0.0005

AT. 90 C X 0.0027 0.0027 -0.0023 -0.0025 -0.0004 -0.0007  
Y -0.0097 -0.0100 0.0091 0.0097 0.0017 0.0014  
Z 0.0081 0.0083 -0.0073 -0.0077 -0.0001 0.0005

AT. 91 C X 0.0027 -0.0027 0.0023 -0.0025 0.0004 -0.0007  
Y 0.0097 -0.0100 0.0091 -0.0097 0.0017 -0.0014  
Z 0.0081 -0.0083 0.0073 -0.0077 0.0001 0.0005

AT. 92 C X -0.0027 0.0027 0.0023 -0.0025 -0.0004 0.0007  
Y 0.0097 -0.0100 -0.0091 0.0097 0.0017 -0.0014  
Z -0.0081 0.0083 0.0073 -0.0077 -0.0001 -0.0005

AT. 93 C X 0.0007 0.0006 0.0006 0.0006 -0.0006 -0.0005  
Y 0.0036 0.0036 0.0034 0.0033 -0.0004 -0.0005

Z 0.0024 0.0025 0.0021 0.0022 0.0002 0.0007  
AT. 94 C X -0.0007 -0.0006 0.0006 0.0006 0.0006 0.0005  
Y 0.0036 0.0036 -0.0034 -0.0033 -0.0004 -0.0005  
Z -0.0024 -0.0025 0.0021 0.0022 -0.0002 -0.0007  
AT. 95 C X -0.0007 0.0006 -0.0006 0.0006 -0.0006 0.0005  
Y -0.0036 0.0036 -0.0034 0.0033 -0.0004 0.0005  
Z -0.0024 0.0025 -0.0021 0.0022 0.0002 -0.0007  
AT. 96 C X 0.0007 -0.0006 -0.0006 0.0006 0.0006 -0.0005  
Y -0.0036 0.0036 0.0034 -0.0033 -0.0004 0.0005  
Z 0.0024 -0.0025 -0.0021 0.0022 -0.0002 0.0007  
AT. 97 H X 0.0045 0.0041 0.0043 0.0037 0.0001 -0.0007  
Y -0.0106 -0.0106 -0.0102 -0.0096 -0.0000 0.0005  
Z -0.0110 -0.0119 -0.0106 -0.0115 0.0025 0.0013  
AT. 98 H X -0.0045 -0.0041 0.0043 0.0037 -0.0001 0.0007  
Y -0.0106 -0.0106 0.0102 0.0096 -0.0000 0.0005  
Z 0.0110 0.0119 -0.0106 -0.0115 -0.0025 -0.0013  
AT. 99 H X -0.0045 0.0041 -0.0043 0.0037 0.0001 0.0007  
Y 0.0106 -0.0106 0.0102 -0.0096 -0.0000 -0.0005  
Z 0.0110 -0.0119 0.0106 -0.0115 0.0025 -0.0013  
AT. 100 H X 0.0045 -0.0041 -0.0043 0.0037 -0.0001 -0.0007  
Y 0.0106 -0.0106 -0.0102 0.0096 -0.0000 -0.0005  
Z -0.0110 0.0119 0.0106 -0.0115 -0.0025 0.0013  
AT. 101 H X -0.0101 -0.0097 -0.0096 -0.0091 0.0014 0.0015  
Y -0.0072 -0.0066 -0.0068 -0.0064 0.0019 0.0023  
Z -0.0067 -0.0068 -0.0062 -0.0053 -0.0009 -0.0034  
AT. 102 H X 0.0101 0.0097 -0.0096 -0.0091 -0.0014 -0.0015  
Y -0.0072 -0.0066 0.0068 0.0064 0.0019 0.0023  
Z 0.0067 0.0068 -0.0062 -0.0053 0.0009 0.0034  
AT. 103 H X 0.0101 -0.0097 0.0096 -0.0091 0.0014 -0.0015  
Y 0.0072 -0.0066 0.0068 -0.0064 0.0019 -0.0023  
Z 0.0067 -0.0068 0.0062 -0.0053 -0.0009 0.0034  
AT. 104 H X -0.0101 0.0097 0.0096 -0.0091 -0.0014 0.0015

Y 0.0072 -0.0066 -0.0068 0.0064 0.0019 -0.0023  
Z -0.0067 0.0068 0.0062 -0.0053 0.0009 -0.0034  
AT. 105 H X 0.0027 0.0037 0.0028 0.0035 0.0004 0.0002  
Y -0.0046 -0.0047 -0.0042 -0.0046 0.0002 0.0013  
Z 0.0068 0.0066 0.0062 0.0062 -0.0005 -0.0010  
AT. 106 H X -0.0027 -0.0037 0.0028 0.0035 -0.0004 -0.0002  
Y -0.0046 -0.0047 0.0042 0.0046 0.0002 0.0013  
Z -0.0068 -0.0066 0.0062 0.0062 0.0005 0.0010  
AT. 107 H X -0.0027 0.0037 -0.0028 0.0035 0.0004 -0.0002  
Y 0.0046 -0.0047 0.0042 -0.0046 0.0002 -0.0013  
Z -0.0068 0.0066 -0.0062 0.0062 -0.0005 0.0010  
AT. 108 H X 0.0027 -0.0037 -0.0028 0.0035 -0.0004 0.0002  
Y 0.0046 -0.0047 -0.0042 0.0046 0.0002 -0.0013  
Z 0.0068 -0.0066 -0.0062 0.0062 0.0005 -0.0010  
AT. 109 C X -0.0011 -0.0015 -0.0002 0.0007 -0.0049 -0.0051  
Y 0.0021 0.0026 0.0011 -0.0002 0.0071 0.0075  
Z 0.0001 0.0005 0.0001 -0.0006 0.0038 0.0040  
AT. 110 C X 0.0011 0.0015 -0.0002 0.0007 0.0049 0.0051  
Y 0.0021 0.0026 -0.0011 0.0002 0.0071 0.0075  
Z -0.0001 -0.0005 0.0001 -0.0006 -0.0038 -0.0040  
AT. 111 C X 0.0011 -0.0015 0.0002 0.0007 -0.0049 0.0051  
Y -0.0021 0.0026 -0.0011 -0.0002 0.0071 -0.0075  
Z -0.0001 0.0005 -0.0001 -0.0006 0.0038 -0.0040  
AT. 112 C X -0.0011 0.0015 0.0002 0.0007 0.0049 -0.0051  
Y -0.0021 0.0026 0.0011 0.0002 0.0071 -0.0075  
Z 0.0001 -0.0005 -0.0001 -0.0006 -0.0038 0.0040  
AT. 113 H X 0.0115 0.0125 0.0091 0.0059 0.0146 0.0157  
Y -0.0249 -0.0272 -0.0202 -0.0131 -0.0322 -0.0347  
Z -0.0199 -0.0209 -0.0197 -0.0142 -0.0235 -0.0253  
AT. 114 H X -0.0115 -0.0125 0.0091 0.0059 -0.0146 -0.0157  
Y -0.0249 -0.0272 0.0202 0.0131 -0.0322 -0.0347  
Z 0.0199 0.0209 -0.0197 -0.0142 0.0235 0.0253

AT. 115 H X -0.0115 0.0125 -0.0091 0.0059 0.0146 -0.0157  
Y 0.0249 -0.0272 0.0202 -0.0131 -0.0322 0.0347  
Z 0.0199 -0.0209 0.0197 -0.0142 -0.0235 0.0253

AT. 116 H X 0.0115 -0.0125 -0.0091 0.0059 -0.0146 0.0157  
Y 0.0249 -0.0272 -0.0202 0.0131 -0.0322 0.0347  
Z -0.0199 0.0209 0.0197 -0.0142 0.0235 -0.0253

AT. 117 H X -0.0139 -0.0117 -0.0180 -0.0188 0.0156 0.0151  
Y 0.0290 0.0267 0.0338 0.0350 -0.0293 -0.0282  
Z 0.0261 0.0236 0.0319 0.0337 -0.0309 -0.0302

AT. 118 H X 0.0139 0.0117 -0.0180 -0.0188 -0.0156 -0.0151  
Y 0.0290 0.0267 -0.0338 -0.0350 -0.0293 -0.0282  
Z -0.0261 -0.0236 0.0319 0.0337 0.0309 0.0302

AT. 119 H X 0.0139 -0.0117 0.0180 -0.0188 0.0156 -0.0151  
Y -0.0290 0.0267 -0.0338 0.0350 -0.0293 0.0282  
Z -0.0261 0.0236 -0.0319 0.0337 -0.0309 0.0302

AT. 120 H X -0.0139 0.0117 0.0180 -0.0188 -0.0156 0.0151  
Y -0.0290 0.0267 0.0338 -0.0350 -0.0293 0.0282  
Z 0.0261 -0.0236 -0.0319 0.0337 0.0309 -0.0302

AT. 121 C X 0.0006 0.0007 -0.0003 -0.0011 0.0059 0.0060  
Y 0.0007 0.0006 0.0012 0.0022 -0.0062 -0.0063  
Z 0.0028 0.0030 0.0030 0.0027 0.0004 0.0005

AT. 122 C X -0.0006 -0.0007 -0.0003 -0.0011 -0.0059 -0.0060  
Y 0.0007 0.0006 -0.0012 -0.0022 -0.0062 -0.0063  
Z -0.0028 -0.0030 0.0030 0.0027 -0.0004 -0.0005

AT. 123 C X -0.0006 0.0007 0.0003 -0.0011 0.0059 -0.0060  
Y -0.0007 0.0006 -0.0012 0.0022 -0.0062 0.0063  
Z -0.0028 0.0030 -0.0030 0.0027 0.0004 -0.0005

AT. 124 C X 0.0006 -0.0007 0.0003 -0.0011 -0.0059 0.0060  
Y -0.0007 0.0006 0.0012 -0.0022 -0.0062 0.0063  
Z 0.0028 -0.0030 -0.0030 0.0027 -0.0004 0.0005

AT. 125 H X -0.0230 -0.0230 -0.0167 -0.0141 -0.0258 -0.0271  
Y 0.0224 0.0243 0.0179 0.0159 0.0228 0.0237

Z -0.0064 -0.0075 -0.0047 -0.0038 -0.0109 -0.0111  
AT. 126 H X 0.0230 0.0230 -0.0167 -0.0141 0.0258 0.0271  
Y 0.0224 0.0243 -0.0179 -0.0159 0.0228 0.0237  
Z 0.0064 0.0075 -0.0047 -0.0038 0.0109 0.0111  
AT. 127 H X 0.0230 -0.0230 0.0167 -0.0141 -0.0258 0.0271  
Y -0.0224 0.0243 -0.0179 0.0159 0.0228 -0.0237  
Z 0.0064 -0.0075 0.0047 -0.0038 -0.0109 0.0111  
AT. 128 H X -0.0230 0.0230 0.0167 -0.0141 0.0258 -0.0271  
Y -0.0224 0.0243 0.0179 -0.0159 0.0228 -0.0237  
Z -0.0064 0.0075 0.0047 -0.0038 0.0109 -0.0111  
AT. 129 H X 0.0163 0.0158 0.0190 0.0236 -0.0295 -0.0297  
Y -0.0209 -0.0208 -0.0261 -0.0326 0.0450 0.0455  
Z 0.0124 0.0109 0.0126 0.0145 -0.0118 -0.0116  
AT. 130 H X -0.0163 -0.0158 0.0190 0.0236 0.0295 0.0297  
Y -0.0209 -0.0208 0.0261 0.0326 0.0450 0.0455  
Z -0.0124 -0.0109 0.0126 0.0145 0.0118 0.0116  
AT. 131 H X -0.0163 0.0158 -0.0190 0.0236 -0.0295 0.0297  
Y 0.0209 -0.0208 0.0261 -0.0326 0.0450 -0.0455  
Z -0.0124 0.0109 -0.0126 0.0145 -0.0118 0.0116  
AT. 132 H X 0.0163 -0.0158 -0.0190 0.0236 0.0295 -0.0297  
Y 0.0209 -0.0208 -0.0261 0.0326 0.0450 -0.0455  
Z 0.0124 -0.0109 -0.0126 0.0145 0.0118 -0.0116  
AT. 133 C X 0.0012 0.0012 0.0014 0.0013 -0.0006 -0.0006  
Y 0.0075 0.0074 0.0076 0.0074 -0.0020 -0.0017  
Z 0.0050 0.0046 0.0054 0.0053 -0.0013 -0.0011  
AT. 134 C X -0.0012 -0.0012 0.0014 0.0013 0.0006 0.0006  
Y 0.0075 0.0074 -0.0076 -0.0074 -0.0020 -0.0017  
Z -0.0050 -0.0046 0.0054 0.0053 0.0013 0.0011  
AT. 135 C X -0.0012 0.0012 -0.0014 0.0013 -0.0006 0.0006  
Y -0.0075 0.0074 -0.0076 0.0074 -0.0020 0.0017  
Z -0.0050 0.0046 -0.0054 0.0053 -0.0013 0.0011  
AT. 136 C X 0.0012 -0.0012 -0.0014 0.0013 0.0006 -0.0006

Y -0.0075 0.0074 0.0076 -0.0074 -0.0020 0.0017  
Z 0.0050 -0.0046 -0.0054 0.0053 0.0013 -0.0011  
AT. 137 C X 0.0001 -0.0001 -0.0001 0.0001 -0.0005 -0.0004  
Y -0.0024 -0.0023 -0.0024 -0.0022 0.0002 0.0001  
Z -0.0021 -0.0021 -0.0024 -0.0021 0.0003 0.0002  
AT. 138 C X -0.0001 0.0001 -0.0001 0.0001 0.0005 0.0004  
Y -0.0024 -0.0023 0.0024 0.0022 0.0002 0.0001  
Z 0.0021 0.0021 -0.0024 -0.0021 -0.0003 -0.0002  
AT. 139 C X -0.0001 -0.0001 0.0001 0.0001 -0.0005 0.0004  
Y 0.0024 -0.0023 0.0024 -0.0022 0.0002 -0.0001  
Z 0.0021 -0.0021 0.0024 -0.0021 0.0003 -0.0002  
AT. 140 C X 0.0001 0.0001 0.0001 0.0001 0.0005 -0.0004  
Y 0.0024 -0.0023 -0.0024 0.0022 0.0002 -0.0001  
Z -0.0021 0.0021 0.0024 -0.0021 -0.0003 0.0002  
AT. 141 H X -0.0042 -0.0035 -0.0038 -0.0044 0.0023 0.0017  
Y 0.0017 0.0019 0.0015 0.0012 0.0022 0.0020  
Z 0.0050 0.0042 0.0041 0.0048 -0.0011 -0.0004  
AT. 142 H X 0.0042 0.0035 -0.0038 -0.0044 -0.0023 -0.0017  
Y 0.0017 0.0019 -0.0015 -0.0012 0.0022 0.0020  
Z -0.0050 -0.0042 0.0041 0.0048 0.0011 0.0004  
AT. 143 H X 0.0042 -0.0035 0.0038 -0.0044 0.0023 -0.0017  
Y -0.0017 0.0019 -0.0015 0.0012 0.0022 -0.0020  
Z -0.0050 0.0042 -0.0041 0.0048 -0.0011 0.0004  
AT. 144 H X -0.0042 0.0035 0.0038 -0.0044 -0.0023 0.0017  
Y -0.0017 0.0019 0.0015 -0.0012 0.0022 -0.0020  
Z 0.0050 -0.0042 -0.0041 0.0048 0.0011 -0.0004  
AT. 145 H X -0.0035 -0.0020 -0.0034 -0.0035 0.0038 0.0030  
Y -0.0022 -0.0026 -0.0021 -0.0022 -0.0001 0.0000  
Z -0.0050 -0.0050 -0.0044 -0.0060 0.0039 0.0037  
AT. 146 H X 0.0035 0.0020 -0.0034 -0.0035 -0.0038 -0.0030  
Y -0.0022 -0.0026 0.0021 0.0022 -0.0001 0.0000  
Z 0.0050 0.0050 -0.0044 -0.0060 -0.0039 -0.0037

AT. 147 H X 0.0035 -0.0020 0.0034 -0.0035 0.0038 -0.0030  
Y 0.0022 -0.0026 0.0021 -0.0022 -0.0001 -0.0000  
Z 0.0050 -0.0050 0.0044 -0.0060 0.0039 -0.0037

AT. 148 H X -0.0035 0.0020 0.0034 -0.0035 -0.0038 0.0030  
Y 0.0022 -0.0026 -0.0021 0.0022 -0.0001 -0.0000  
Z -0.0050 0.0050 0.0044 -0.0060 -0.0039 0.0037

AT. 149 O X 0.0008 0.0008 0.0007 0.0007 0.0001 0.0001  
Y -0.0010 -0.0010 -0.0009 -0.0008 -0.0002 -0.0003  
Z -0.0012 -0.0012 -0.0011 -0.0009 -0.0003 -0.0003

AT. 150 O X -0.0008 -0.0008 0.0007 0.0007 -0.0001 -0.0001  
Y -0.0010 -0.0010 0.0009 0.0008 -0.0002 -0.0003  
Z 0.0012 0.0012 -0.0011 -0.0009 0.0003 0.0003

AT. 151 O X -0.0008 0.0008 -0.0007 0.0007 0.0001 -0.0001  
Y 0.0010 -0.0010 0.0009 -0.0008 -0.0002 0.0003  
Z 0.0012 -0.0012 0.0011 -0.0009 -0.0003 0.0003

AT. 152 O X 0.0008 -0.0008 -0.0007 0.0007 -0.0001 0.0001  
Y 0.0010 -0.0010 -0.0009 0.0008 -0.0002 0.0003  
Z -0.0012 0.0012 0.0011 -0.0009 0.0003 -0.0003

AT. 153 H X -0.0063 -0.0062 -0.0058 -0.0052 -0.0001 0.0000  
Y 0.0080 0.0078 0.0067 0.0051 0.0027 0.0023  
Z 0.0067 0.0066 0.0061 0.0051 0.0008 0.0006

AT. 154 H X 0.0063 0.0062 -0.0058 -0.0052 0.0001 -0.0000  
Y 0.0080 0.0078 -0.0067 -0.0051 0.0027 0.0023  
Z -0.0067 -0.0066 0.0061 0.0051 -0.0008 -0.0006

AT. 155 H X 0.0063 -0.0062 0.0058 -0.0052 -0.0001 -0.0000  
Y -0.0080 0.0078 -0.0067 0.0051 0.0027 -0.0023  
Z -0.0067 0.0066 -0.0061 0.0051 0.0008 -0.0006

AT. 156 H X -0.0063 0.0062 0.0058 -0.0052 0.0001 0.0000  
Y -0.0080 0.0078 0.0067 -0.0051 0.0027 -0.0023  
Z 0.0067 -0.0066 -0.0061 0.0051 -0.0008 0.0006

AT. 157 O X 0.0004 0.0005 0.0005 0.0006 -0.0003 -0.0002  
Y 0.0004 0.0004 0.0003 0.0003 -0.0003 -0.0004



Z -0.0000 -0.0000 -0.0001 -0.0001 0.0001 0.0001  
AT. 158 O X -0.0004 -0.0005 0.0005 0.0006 0.0003 0.0002  
Y 0.0004 0.0004 -0.0003 -0.0003 -0.0003 -0.0004  
Z 0.0000 0.0000 -0.0001 -0.0001 -0.0001 -0.0001  
AT. 159 O X -0.0004 0.0005 -0.0005 0.0006 -0.0003 0.0002  
Y -0.0004 0.0004 -0.0003 0.0003 -0.0003 0.0004  
Z 0.0000 -0.0000 0.0001 -0.0001 0.0001 -0.0001  
AT. 160 O X 0.0004 -0.0005 -0.0005 0.0006 0.0003 -0.0002  
Y -0.0004 0.0004 0.0003 -0.0003 -0.0003 0.0004  
Z -0.0000 0.0000 0.0001 -0.0001 -0.0001 0.0001  
AT. 161 O X -0.0000 -0.0001 -0.0002 -0.0003 0.0000 0.0000  
Y -0.0003 -0.0004 -0.0002 -0.0002 0.0001 0.0001  
Z -0.0000 -0.0001 -0.0001 -0.0002 0.0001 0.0001  
AT. 162 O X 0.0000 0.0001 -0.0002 -0.0003 -0.0000 -0.0000  
Y -0.0003 -0.0004 0.0002 0.0002 0.0001 0.0001  
Z 0.0000 0.0001 -0.0001 -0.0002 -0.0001 -0.0001  
AT. 163 O X 0.0000 -0.0001 0.0002 -0.0003 0.0000 -0.0000  
Y 0.0003 -0.0004 0.0002 -0.0002 0.0001 -0.0001  
Z 0.0000 -0.0001 0.0001 -0.0002 0.0001 -0.0001  
AT. 164 O X -0.0000 0.0001 0.0002 -0.0003 -0.0000 0.0000  
Y 0.0003 -0.0004 -0.0002 0.0002 0.0001 -0.0001  
Z -0.0000 0.0001 0.0001 -0.0002 -0.0001 0.0001  
AT. 165 H X -0.0036 -0.0035 -0.0021 -0.0020 0.0001 0.0000  
Y -0.0026 -0.0023 -0.0015 -0.0012 0.0000 -0.0000  
Z -0.0035 -0.0028 -0.0003 0.0003 -0.0003 -0.0004  
AT. 166 H X 0.0036 0.0035 -0.0021 -0.0020 -0.0001 -0.0000  
Y -0.0026 -0.0023 0.0015 0.0012 0.0000 -0.0000  
Z 0.0035 0.0028 -0.0003 0.0003 0.0003 0.0004  
AT. 167 H X 0.0036 -0.0035 0.0021 -0.0020 0.0001 -0.0000  
Y 0.0026 -0.0023 0.0015 -0.0012 0.0000 0.0000  
Z 0.0035 -0.0028 0.0003 0.0003 -0.0003 0.0004  
AT. 168 H X -0.0036 0.0035 0.0021 -0.0020 -0.0001 0.0000

|                                                              |     |         |         |         |         |         |         |
|--------------------------------------------------------------|-----|---------|---------|---------|---------|---------|---------|
|                                                              | Y   | 0.0026  | -0.0023 | -0.0015 | 0.0012  | 0.0000  | 0.0000  |
|                                                              | Z   | -0.0035 | 0.0028  | 0.0003  | 0.0003  | 0.0003  | -0.0004 |
| AT. 169                                                      | O X | 0.0000  | -0.0002 | 0.0001  | -0.0001 | -0.0000 | -0.0000 |
|                                                              | Y   | -0.0000 | -0.0001 | 0.0000  | -0.0000 | -0.0000 | -0.0002 |
|                                                              | Z   | -0.0002 | -0.0002 | -0.0002 | -0.0003 | 0.0000  | 0.0000  |
| AT. 170                                                      | O X | -0.0000 | 0.0002  | 0.0001  | -0.0001 | 0.0000  | 0.0000  |
|                                                              | Y   | -0.0000 | -0.0001 | -0.0000 | 0.0000  | -0.0000 | -0.0002 |
|                                                              | Z   | 0.0002  | 0.0002  | -0.0002 | -0.0003 | -0.0000 | -0.0000 |
| AT. 171                                                      | O X | -0.0000 | -0.0002 | -0.0001 | -0.0001 | -0.0000 | 0.0000  |
|                                                              | Y   | 0.0000  | -0.0001 | -0.0000 | -0.0000 | -0.0000 | 0.0002  |
|                                                              | Z   | 0.0002  | -0.0002 | 0.0002  | -0.0003 | 0.0000  | -0.0000 |
| AT. 172                                                      | O X | 0.0000  | 0.0002  | -0.0001 | -0.0001 | 0.0000  | -0.0000 |
|                                                              | Y   | 0.0000  | -0.0001 | 0.0000  | 0.0000  | -0.0000 | 0.0002  |
|                                                              | Z   | -0.0002 | 0.0002  | 0.0002  | -0.0003 | -0.0000 | 0.0000  |
| AT. 173                                                      | H X | 0.0008  | 0.0027  | 0.0012  | 0.0028  | -0.0006 | 0.0002  |
|                                                              | Y   | -0.0001 | -0.0010 | 0.0000  | -0.0007 | -0.0001 | -0.0002 |
|                                                              | Z   | 0.0022  | 0.0023  | 0.0029  | 0.0036  | -0.0006 | -0.0013 |
| AT. 174                                                      | H X | -0.0008 | -0.0027 | 0.0012  | 0.0028  | 0.0006  | -0.0002 |
|                                                              | Y   | -0.0001 | -0.0010 | -0.0000 | 0.0007  | -0.0001 | -0.0002 |
|                                                              | Z   | -0.0022 | -0.0023 | 0.0029  | 0.0036  | 0.0006  | 0.0013  |
| AT. 175                                                      | H X | -0.0008 | 0.0027  | -0.0012 | 0.0028  | -0.0006 | -0.0002 |
|                                                              | Y   | 0.0001  | -0.0010 | -0.0000 | -0.0007 | -0.0001 | 0.0002  |
|                                                              | Z   | -0.0022 | 0.0023  | -0.0029 | 0.0036  | -0.0006 | 0.0013  |
| AT. 176                                                      | H X | 0.0008  | -0.0027 | -0.0012 | 0.0028  | 0.0006  | 0.0002  |
|                                                              | Y   | 0.0001  | -0.0010 | 0.0000  | 0.0007  | -0.0001 | 0.0002  |
|                                                              | Z   | 0.0022  | -0.0023 | -0.0029 | 0.0036  | 0.0006  | -0.0013 |
| FREQ(CM**-1) 1376.45 1377.00 1389.11 1389.67 1392.74 1393.30 |     |         |         |         |         |         |         |
| AT. 11                                                       | X   | 0.0000  | 0.0000  | -0.0000 | 0.0000  | 0.0000  | 0.0000  |
|                                                              | Y   | 0.0000  | 0.0000  | 0.0000  | -0.0000 | -0.0000 | -0.0000 |
|                                                              | Z   | -0.0000 | -0.0000 | 0.0000  | -0.0000 | 0.0000  | -0.0000 |

AT. 2 I X 0.0000 0.0000 0.0000 0.0000 0.0000 -0.0000  
Y -0.0000 -0.0000 0.0000 0.0000 0.0000 -0.0000  
Z -0.0000 -0.0000 -0.0000 -0.0000 0.0000 0.0000

AT. 3 I X 0.0000 -0.0000 -0.0000 0.0000 -0.0000 -0.0000  
Y 0.0000 -0.0000 0.0000 -0.0000 0.0000 0.0000  
Z -0.0000 0.0000 0.0000 -0.0000 -0.0000 0.0000

AT. 4 I X 0.0000 -0.0000 0.0000 0.0000 -0.0000 0.0000  
Y -0.0000 0.0000 0.0000 0.0000 -0.0000 0.0000  
Z -0.0000 0.0000 -0.0000 -0.0000 -0.0000 -0.0000

AT. 5 I X -0.0000 -0.0000 0.0000 0.0000 -0.0000 -0.0000  
Y 0.0000 0.0000 -0.0000 -0.0000 0.0000 0.0000  
Z 0.0000 -0.0000 0.0000 -0.0000 0.0000 0.0000

AT. 6 I X -0.0000 -0.0000 -0.0000 0.0000 -0.0000 0.0000  
Y -0.0000 -0.0000 -0.0000 0.0000 -0.0000 0.0000  
Z 0.0000 -0.0000 -0.0000 -0.0000 0.0000 -0.0000

AT. 7 I X -0.0000 0.0000 0.0000 0.0000 0.0000 0.0000  
Y 0.0000 -0.0000 -0.0000 -0.0000 -0.0000 -0.0000  
Z 0.0000 0.0000 0.0000 -0.0000 -0.0000 -0.0000

AT. 8 I X -0.0000 0.0000 -0.0000 0.0000 0.0000 -0.0000  
Y -0.0000 0.0000 -0.0000 0.0000 0.0000 -0.0000  
Z 0.0000 0.0000 -0.0000 -0.0000 -0.0000 0.0000

AT. 9 N X 0.0032 0.0027 0.0005 -0.0004 -0.0003 -0.0003  
Y 0.0012 0.0011 -0.0004 0.0003 0.0004 0.0007  
Z 0.0063 0.0067 -0.0012 0.0011 0.0015 0.0017

AT. 10 N X 0.0032 0.0027 -0.0005 -0.0004 -0.0003 0.0003  
Y -0.0012 -0.0011 -0.0004 -0.0003 -0.0004 0.0007  
Z 0.0063 0.0067 0.0012 0.0011 0.0015 -0.0017

AT. 11 N X 0.0032 -0.0027 0.0005 -0.0004 0.0003 0.0003  
Y 0.0012 -0.0011 -0.0004 0.0003 -0.0004 -0.0007  
Z 0.0063 -0.0067 -0.0012 0.0011 -0.0015 -0.0017

AT. 12 N X 0.0032 -0.0027 -0.0005 -0.0004 0.0003 -0.0003  
Y -0.0012 0.0011 -0.0004 -0.0003 0.0004 -0.0007

Z 0.0063 -0.0067 0.0012 0.0011 -0.0015 0.0017  
AT. 13 N X -0.0012 -0.0011 0.0003 -0.0005 -0.0005 -0.0005  
Y 0.0008 0.0008 -0.0005 0.0007 0.0006 0.0005  
Z -0.0032 -0.0041 -0.0003 0.0002 0.0006 0.0005  
AT. 14 N X -0.0012 -0.0011 -0.0003 -0.0005 -0.0005 0.0005  
Y -0.0008 -0.0008 -0.0005 -0.0007 -0.0006 0.0005  
Z -0.0032 -0.0041 0.0003 0.0002 0.0006 -0.0005  
AT. 15 N X -0.0012 0.0011 0.0003 -0.0005 0.0005 0.0005  
Y 0.0008 -0.0008 -0.0005 0.0007 -0.0006 -0.0005  
Z -0.0032 0.0041 -0.0003 0.0002 -0.0006 -0.0005  
AT. 16 N X -0.0012 0.0011 -0.0003 -0.0005 0.0005 -0.0005  
Y -0.0008 0.0008 -0.0005 -0.0007 0.0006 -0.0005  
Z -0.0032 0.0041 0.0003 0.0002 -0.0006 0.0005  
AT. 17 O X -0.0005 -0.0004 0.0000 0.0000 0.0000 0.0000  
Y -0.0009 -0.0010 0.0002 -0.0001 -0.0002 -0.0003  
Z -0.0016 -0.0014 0.0010 -0.0010 -0.0007 -0.0007  
AT. 18 O X -0.0005 -0.0004 -0.0000 0.0000 0.0000 -0.0000  
Y 0.0009 0.0010 0.0002 0.0001 0.0002 -0.0003  
Z -0.0016 -0.0014 -0.0010 -0.0010 -0.0007 0.0007  
AT. 19 O X -0.0005 0.0004 0.0000 0.0000 -0.0000 -0.0000  
Y -0.0009 0.0010 0.0002 -0.0001 0.0002 0.0003  
Z -0.0016 0.0014 0.0010 -0.0010 0.0007 0.0007  
AT. 20 O X -0.0005 0.0004 -0.0000 0.0000 -0.0000 0.0000  
Y 0.0009 -0.0010 0.0002 0.0001 -0.0002 0.0003  
Z -0.0016 0.0014 -0.0010 -0.0010 0.0007 -0.0007  
AT. 21 O X -0.0001 -0.0001 -0.0001 0.0001 0.0001 0.0001  
Y -0.0004 -0.0005 0.0000 0.0000 0.0001 0.0000  
Z 0.0006 0.0003 0.0001 -0.0002 -0.0002 -0.0001  
AT. 22 O X -0.0001 -0.0001 0.0001 0.0001 0.0001 -0.0001  
Y 0.0004 0.0005 0.0000 -0.0000 -0.0001 0.0000  
Z 0.0006 0.0003 -0.0001 -0.0002 -0.0002 0.0001  
AT. 23 O X -0.0001 0.0001 -0.0001 0.0001 -0.0001 -0.0001

Y -0.0004 0.0005 0.0000 0.0000 -0.0001 -0.0000  
Z 0.0006 -0.0003 0.0001 -0.0002 0.0002 0.0001  
AT. 24 O X -0.0001 0.0001 0.0001 0.0001 -0.0001 0.0001  
Y 0.0004 -0.0005 0.0000 -0.0000 0.0001 -0.0000  
Z 0.0006 -0.0003 -0.0001 -0.0002 0.0002 -0.0001  
AT. 25 C X 0.0003 0.0001 -0.0002 0.0002 0.0002 0.0002  
Y 0.0019 0.0016 -0.0005 0.0007 0.0007 0.0007  
Z -0.0012 -0.0009 0.0005 -0.0005 -0.0003 -0.0005  
AT. 26 C X 0.0003 0.0001 0.0002 0.0002 0.0002 -0.0002  
Y -0.0019 -0.0016 -0.0005 -0.0007 -0.0007 0.0007  
Z -0.0012 -0.0009 -0.0005 -0.0005 -0.0003 0.0005  
AT. 27 C X 0.0003 -0.0001 -0.0002 0.0002 -0.0002 -0.0002  
Y 0.0019 -0.0016 -0.0005 0.0007 -0.0007 -0.0007  
Z -0.0012 0.0009 0.0005 -0.0005 0.0003 0.0005  
AT. 28 C X 0.0003 -0.0001 0.0002 0.0002 -0.0002 0.0002  
Y -0.0019 0.0016 -0.0005 -0.0007 0.0007 -0.0007  
Z -0.0012 0.0009 -0.0005 -0.0005 0.0003 -0.0005  
AT. 29 H X -0.0021 -0.0015 0.0008 -0.0008 -0.0004 -0.0011  
Y -0.0042 -0.0043 -0.0011 0.0011 0.0016 0.0009  
Z 0.0036 0.0028 -0.0009 0.0010 0.0004 0.0015  
AT. 30 H X -0.0021 -0.0015 -0.0008 -0.0008 -0.0004 0.0011  
Y 0.0042 0.0043 -0.0011 -0.0011 -0.0016 0.0009  
Z 0.0036 0.0028 0.0009 0.0010 0.0004 -0.0015  
AT. 31 H X -0.0021 0.0015 0.0008 -0.0008 0.0004 0.0011  
Y -0.0042 0.0043 -0.0011 0.0011 -0.0016 -0.0009  
Z 0.0036 -0.0028 -0.0009 0.0010 -0.0004 -0.0015  
AT. 32 H X -0.0021 0.0015 -0.0008 -0.0008 0.0004 -0.0011  
Y 0.0042 -0.0043 -0.0011 -0.0011 0.0016 -0.0009  
Z 0.0036 -0.0028 0.0009 0.0010 -0.0004 0.0015  
AT. 33 H X 0.0029 0.0032 0.0017 -0.0013 -0.0015 -0.0017  
Y 0.0013 0.0008 -0.0011 0.0013 0.0015 0.0011  
Z -0.0003 0.0006 0.0013 -0.0021 -0.0025 -0.0008

AT. 34 H X 0.0029 0.0032 -0.0017 -0.0013 -0.0015 0.0017  
Y -0.0013 -0.0008 -0.0011 -0.0013 -0.0015 0.0011  
Z -0.0003 0.0006 -0.0013 -0.0021 -0.0025 0.0008

AT. 35 H X 0.0029 -0.0032 0.0017 -0.0013 0.0015 0.0017  
Y 0.0013 -0.0008 -0.0011 0.0013 -0.0015 -0.0011  
Z -0.0003 -0.0006 0.0013 -0.0021 0.0025 0.0008

AT. 36 H X 0.0029 -0.0032 -0.0017 -0.0013 0.0015 -0.0017  
Y -0.0013 0.0008 -0.0011 -0.0013 0.0015 -0.0011  
Z -0.0003 -0.0006 -0.0013 -0.0021 0.0025 -0.0008

AT. 37 C X -0.0010 -0.0009 0.0005 -0.0005 -0.0007 -0.0008  
Y -0.0030 -0.0021 0.0014 -0.0019 -0.0021 -0.0018  
Z 0.0021 0.0014 -0.0018 0.0019 0.0013 0.0013

AT. 38 C X -0.0010 -0.0009 -0.0005 -0.0005 -0.0007 0.0008  
Y 0.0030 0.0021 0.0014 0.0019 0.0021 -0.0018  
Z 0.0021 0.0014 0.0018 0.0019 0.0013 -0.0013

AT. 39 C X -0.0010 0.0009 0.0005 -0.0005 0.0007 0.0008  
Y -0.0030 0.0021 0.0014 -0.0019 0.0021 0.0018  
Z 0.0021 -0.0014 -0.0018 0.0019 -0.0013 -0.0013

AT. 40 C X -0.0010 0.0009 -0.0005 -0.0005 0.0007 -0.0008  
Y 0.0030 -0.0021 0.0014 0.0019 -0.0021 0.0018  
Z 0.0021 -0.0014 0.0018 0.0019 -0.0013 0.0013

AT. 41 C X 0.0070 0.0074 -0.0078 0.0079 0.0083 0.0084  
Y 0.0030 0.0035 -0.0069 0.0070 0.0070 0.0071  
Z -0.0005 -0.0007 0.0001 0.0002 0.0001 0.0003

AT. 42 C X 0.0070 0.0074 0.0078 0.0079 0.0083 -0.0084  
Y -0.0030 -0.0035 -0.0069 -0.0070 -0.0070 0.0071  
Z -0.0005 -0.0007 -0.0001 0.0002 0.0001 -0.0003

AT. 43 C X 0.0070 -0.0074 -0.0078 0.0079 -0.0083 -0.0084  
Y 0.0030 -0.0035 -0.0069 0.0070 -0.0070 -0.0071  
Z -0.0005 0.0007 0.0001 0.0002 -0.0001 -0.0003

AT. 44 C X 0.0070 -0.0074 0.0078 0.0079 -0.0083 0.0084  
Y -0.0030 0.0035 -0.0069 -0.0070 0.0070 -0.0071

Z -0.0005 0.0007 -0.0001 0.0002 -0.0001 0.0003  
AT. 45 H X -0.0598 -0.0570 0.0230 -0.0243 -0.0305 -0.0297  
Y -0.0323 -0.0300 0.0039 -0.0063 -0.0081 -0.0084  
Z -0.0208 -0.0197 0.0039 -0.0056 -0.0062 -0.0065  
AT. 46 H X -0.0598 -0.0570 -0.0230 -0.0243 -0.0305 0.0297  
Y 0.0323 0.0300 0.0039 0.0063 0.0081 -0.0084  
Z -0.0208 -0.0197 -0.0039 -0.0056 -0.0062 0.0065  
AT. 47 H X -0.0598 0.0570 0.0230 -0.0243 0.0305 0.0297  
Y -0.0323 0.0300 0.0039 -0.0063 0.0081 0.0084  
Z -0.0208 0.0197 0.0039 -0.0056 0.0062 0.0065  
AT. 48 H X -0.0598 0.0570 -0.0230 -0.0243 0.0305 -0.0297  
Y 0.0323 -0.0300 0.0039 0.0063 -0.0081 0.0084  
Z -0.0208 0.0197 -0.0039 -0.0056 0.0062 -0.0065  
AT. 49 H X -0.0135 -0.0186 0.0460 -0.0445 -0.0440 -0.0461  
Y -0.0189 -0.0231 0.0441 -0.0425 -0.0433 -0.0446  
Z 0.0055 0.0030 0.0070 -0.0070 -0.0046 -0.0066  
AT. 50 H X -0.0135 -0.0186 -0.0460 -0.0445 -0.0440 0.0461  
Y 0.0189 0.0231 0.0441 0.0425 0.0433 -0.0446  
Z 0.0055 0.0030 -0.0070 -0.0070 -0.0046 0.0066  
AT. 51 H X -0.0135 0.0186 0.0460 -0.0445 0.0440 0.0461  
Y -0.0189 0.0231 0.0441 -0.0425 0.0433 0.0446  
Z 0.0055 -0.0030 0.0070 -0.0070 0.0046 0.0066  
AT. 52 H X -0.0135 0.0186 -0.0460 -0.0445 0.0440 -0.0461  
Y 0.0189 -0.0231 0.0441 0.0425 -0.0433 0.0446  
Z 0.0055 -0.0030 -0.0070 -0.0070 0.0046 -0.0066  
AT. 53 C X -0.0026 -0.0026 -0.0008 0.0005 0.0001 0.0003  
Y 0.0061 0.0045 0.0088 -0.0083 -0.0074 -0.0076  
Z -0.0031 -0.0021 -0.0040 0.0041 0.0027 0.0025  
AT. 54 C X -0.0026 -0.0026 0.0008 0.0005 0.0001 -0.0003  
Y -0.0061 -0.0045 0.0088 0.0083 0.0074 -0.0076  
Z -0.0031 -0.0021 0.0040 0.0041 0.0027 -0.0025  
AT. 55 C X -0.0026 0.0026 -0.0008 0.0005 -0.0001 -0.0003

Y 0.0061 -0.0045 0.0088 -0.0083 0.0074 0.0076  
Z -0.0031 0.0021 -0.0040 0.0041 -0.0027 -0.0025  
AT. 56 C X -0.0026 0.0026 0.0008 0.0005 -0.0001 0.0003  
Y -0.0061 0.0045 0.0088 0.0083 -0.0074 0.0076  
Z -0.0031 0.0021 0.0040 0.0041 -0.0027 0.0025  
AT. 57 C X 0.0004 0.0003 0.0002 -0.0002 -0.0001 -0.0001  
Y -0.0014 -0.0010 -0.0021 0.0017 0.0017 0.0017  
Z 0.0017 0.0014 0.0001 -0.0003 0.0004 0.0003  
AT. 58 C X 0.0004 0.0003 -0.0002 -0.0002 -0.0001 0.0001  
Y 0.0014 0.0010 -0.0021 -0.0017 -0.0017 0.0017  
Z 0.0017 0.0014 -0.0001 -0.0003 0.0004 -0.0003  
AT. 59 C X 0.0004 -0.0003 0.0002 -0.0002 0.0001 0.0001  
Y -0.0014 0.0010 -0.0021 0.0017 -0.0017 -0.0017  
Z 0.0017 -0.0014 0.0001 -0.0003 -0.0004 -0.0003  
AT. 60 C X 0.0004 -0.0003 -0.0002 -0.0002 0.0001 -0.0001  
Y 0.0014 -0.0010 -0.0021 -0.0017 0.0017 -0.0017  
Z 0.0017 -0.0014 -0.0001 -0.0003 -0.0004 0.0003  
AT. 61 H X 0.0019 0.0015 0.0068 -0.0058 -0.0058 -0.0057  
Y 0.0013 0.0012 0.0039 -0.0036 -0.0030 -0.0033  
Z -0.0068 -0.0057 -0.0040 0.0043 0.0015 0.0027  
AT. 62 H X 0.0019 0.0015 -0.0068 -0.0058 -0.0058 0.0057  
Y -0.0013 -0.0012 0.0039 0.0036 0.0030 -0.0033  
Z -0.0068 -0.0057 0.0040 0.0043 0.0015 -0.0027  
AT. 63 H X 0.0019 -0.0015 0.0068 -0.0058 0.0058 0.0057  
Y 0.0013 -0.0012 0.0039 -0.0036 0.0030 0.0033  
Z -0.0068 0.0057 -0.0040 0.0043 -0.0015 -0.0027  
AT. 64 H X 0.0019 -0.0015 -0.0068 -0.0058 0.0058 -0.0057  
Y -0.0013 0.0012 0.0039 0.0036 -0.0030 0.0033  
Z -0.0068 0.0057 0.0040 0.0043 -0.0015 0.0027  
AT. 65 H X -0.0021 -0.0017 -0.0040 0.0033 0.0032 0.0032  
Y 0.0064 0.0052 0.0114 -0.0099 -0.0093 -0.0091  
Z -0.0077 -0.0063 0.0017 -0.0008 -0.0026 -0.0026



AT. 66 H X -0.0021 -0.0017 0.0040 0.0033 0.0032 -0.0032  
Y -0.0064 -0.0052 0.0114 0.0099 0.0093 -0.0091  
Z -0.0077 -0.0063 -0.0017 -0.0008 -0.0026 0.0026

AT. 67 H X -0.0021 0.0017 -0.0040 0.0033 -0.0032 -0.0032  
Y 0.0064 -0.0052 0.0114 -0.0099 0.0093 0.0091  
Z -0.0077 0.0063 0.0017 -0.0008 0.0026 0.0026

AT. 68 H X -0.0021 0.0017 0.0040 0.0033 -0.0032 0.0032  
Y -0.0064 0.0052 0.0114 0.0099 -0.0093 0.0091  
Z -0.0077 0.0063 -0.0017 -0.0008 0.0026 -0.0026

AT. 69 H X -0.0033 -0.0027 -0.0001 0.0004 0.0001 -0.0003  
Y 0.0007 -0.0002 0.0026 -0.0016 -0.0028 -0.0020  
Z 0.0022 0.0010 0.0035 -0.0025 -0.0030 -0.0025

AT. 70 H X -0.0033 -0.0027 0.0001 0.0004 0.0001 0.0003  
Y -0.0007 0.0002 0.0026 0.0016 0.0028 -0.0020  
Z 0.0022 0.0010 -0.0035 -0.0025 -0.0030 0.0025

AT. 71 H X -0.0033 0.0027 -0.0001 0.0004 -0.0001 0.0003  
Y 0.0007 0.0002 0.0026 -0.0016 0.0028 0.0020  
Z 0.0022 -0.0010 0.0035 -0.0025 0.0030 0.0025

AT. 72 H X -0.0033 0.0027 0.0001 0.0004 -0.0001 -0.0003  
Y -0.0007 -0.0002 0.0026 0.0016 -0.0028 0.0020  
Z 0.0022 -0.0010 -0.0035 -0.0025 0.0030 -0.0025

AT. 73 C X 0.0006 0.0007 0.0043 -0.0043 -0.0036 -0.0039  
Y -0.0031 -0.0023 -0.0039 0.0038 0.0031 0.0031  
Z -0.0003 0.0000 0.0119 -0.0123 -0.0109 -0.0108

AT. 74 C X 0.0006 0.0007 -0.0043 -0.0043 -0.0036 0.0039  
Y 0.0031 0.0023 -0.0039 -0.0038 -0.0031 0.0031  
Z -0.0003 0.0000 -0.0119 -0.0123 -0.0109 0.0108

AT. 75 C X 0.0006 -0.0007 0.0043 -0.0043 0.0036 0.0039  
Y -0.0031 0.0023 -0.0039 0.0038 -0.0031 -0.0031  
Z -0.0003 -0.0000 0.0119 -0.0123 0.0109 0.0108

AT. 76 C X 0.0006 -0.0007 -0.0043 -0.0043 0.0036 -0.0039  
Y 0.0031 -0.0023 -0.0039 -0.0038 0.0031 -0.0031

Z -0.0003 -0.0000 -0.0119 -0.0123 0.0109 -0.0108  
AT. 77 C X -0.0052 -0.0048 0.0018 -0.0017 -0.0018 -0.0019  
Y -0.0038 -0.0036 0.0026 -0.0025 -0.0026 -0.0029  
Z 0.0017 0.0022 -0.0000 -0.0000 0.0002 0.0003  
AT. 78 C X -0.0052 -0.0048 -0.0018 -0.0017 -0.0018 0.0019  
Y 0.0038 0.0036 0.0026 0.0025 0.0026 -0.0029  
Z 0.0017 0.0022 0.0000 -0.0000 0.0002 -0.0003  
AT. 79 C X -0.0052 0.0048 0.0018 -0.0017 0.0018 0.0019  
Y -0.0038 0.0036 0.0026 -0.0025 0.0026 0.0029  
Z 0.0017 -0.0022 -0.0000 -0.0000 -0.0002 -0.0003  
AT. 80 C X -0.0052 0.0048 -0.0018 -0.0017 0.0018 -0.0019  
Y 0.0038 -0.0036 0.0026 0.0025 -0.0026 0.0029  
Z 0.0017 -0.0022 0.0000 -0.0000 -0.0002 0.0003  
AT. 81 H X 0.0223 0.0192 -0.0137 0.0138 0.0130 0.0128  
Y 0.0300 0.0262 -0.0174 0.0176 0.0165 0.0162  
Z -0.0245 -0.0235 0.0168 -0.0175 -0.0166 -0.0165  
AT. 82 H X 0.0223 0.0192 0.0137 0.0138 0.0130 -0.0128  
Y -0.0300 -0.0262 -0.0174 -0.0176 -0.0165 0.0162  
Z -0.0245 -0.0235 -0.0168 -0.0175 -0.0166 0.0165  
AT. 83 H X 0.0223 -0.0192 -0.0137 0.0138 -0.0130 -0.0128  
Y 0.0300 -0.0262 -0.0174 0.0176 -0.0165 -0.0162  
Z -0.0245 0.0235 0.0168 -0.0175 0.0166 0.0165  
AT. 84 H X 0.0223 -0.0192 0.0137 0.0138 -0.0130 0.0128  
Y -0.0300 0.0262 -0.0174 -0.0176 0.0165 -0.0162  
Z -0.0245 0.0235 -0.0168 -0.0175 0.0166 -0.0165  
AT. 85 H X 0.0148 0.0169 0.0101 -0.0111 -0.0091 -0.0083  
Y 0.0159 0.0208 0.0053 -0.0061 -0.0036 -0.0016  
Z -0.0195 -0.0236 -0.0048 0.0058 0.0032 0.0012  
AT. 86 H X 0.0148 0.0169 -0.0101 -0.0111 -0.0091 0.0083  
Y -0.0159 -0.0208 0.0053 0.0061 0.0036 -0.0016  
Z -0.0195 -0.0236 0.0048 0.0058 0.0032 -0.0012  
AT. 87 H X 0.0148 -0.0169 0.0101 -0.0111 0.0091 0.0083

Y 0.0159 -0.0208 0.0053 -0.0061 0.0036 0.0016  
Z -0.0195 0.0236 -0.0048 0.0058 -0.0032 -0.0012  
AT. 88 H X 0.0148 -0.0169 -0.0101 -0.0111 0.0091 -0.0083  
Y -0.0159 0.0208 0.0053 0.0061 -0.0036 0.0016  
Z -0.0195 0.0236 0.0048 0.0058 -0.0032 0.0012  
AT. 89 C X 0.0002 -0.0004 -0.0042 0.0041 0.0040 0.0040  
Y 0.0015 -0.0001 -0.0070 0.0071 0.0072 0.0070  
Z 0.0027 0.0015 -0.0038 0.0040 0.0029 0.0027  
AT. 90 C X 0.0002 -0.0004 0.0042 0.0041 0.0040 -0.0040  
Y -0.0015 0.0001 -0.0070 -0.0071 -0.0072 0.0070  
Z 0.0027 0.0015 0.0038 0.0040 0.0029 -0.0027  
AT. 91 C X 0.0002 0.0004 -0.0042 0.0041 -0.0040 -0.0040  
Y 0.0015 0.0001 -0.0070 0.0071 -0.0072 -0.0070  
Z 0.0027 -0.0015 -0.0038 0.0040 -0.0029 -0.0027  
AT. 92 C X 0.0002 0.0004 0.0042 0.0041 -0.0040 0.0040  
Y -0.0015 -0.0001 -0.0070 -0.0071 0.0072 -0.0070  
Z 0.0027 -0.0015 0.0038 0.0040 -0.0029 0.0027  
AT. 93 C X 0.0004 0.0005 0.0001 -0.0001 -0.0000 -0.0001  
Y -0.0006 -0.0002 0.0035 -0.0033 -0.0037 -0.0034  
Z -0.0011 -0.0008 -0.0024 0.0021 0.0027 0.0024  
AT. 94 C X 0.0004 0.0005 -0.0001 -0.0001 -0.0000 0.0001  
Y 0.0006 0.0002 0.0035 0.0033 0.0037 -0.0034  
Z -0.0011 -0.0008 0.0024 0.0021 0.0027 -0.0024  
AT. 95 C X 0.0004 -0.0005 0.0001 -0.0001 0.0000 0.0001  
Y -0.0006 0.0002 0.0035 -0.0033 0.0037 0.0034  
Z -0.0011 0.0008 -0.0024 0.0021 -0.0027 -0.0024  
AT. 96 C X 0.0004 -0.0005 -0.0001 -0.0001 0.0000 -0.0001  
Y 0.0006 -0.0002 0.0035 0.0033 -0.0037 0.0034  
Z -0.0011 0.0008 0.0024 0.0021 -0.0027 0.0024  
AT. 97 H X -0.0007 -0.0006 0.0087 -0.0080 -0.0089 -0.0079  
Y 0.0026 0.0018 -0.0107 0.0107 0.0107 0.0098  
Z 0.0016 -0.0001 0.0015 0.0000 -0.0018 -0.0009

AT. 98 H X -0.0007 -0.0006 -0.0087 -0.0080 -0.0089 0.0079  
Y -0.0026 -0.0018 -0.0107 -0.0107 -0.0107 0.0098  
Z 0.0016 -0.0001 -0.0015 0.0000 -0.0018 0.0009

AT. 99 H X -0.0007 0.0006 0.0087 -0.0080 0.0089 0.0079  
Y 0.0026 -0.0018 -0.0107 0.0107 -0.0107 -0.0098  
Z 0.0016 0.0001 0.0015 0.0000 0.0018 0.0009

AT. 100 H X -0.0007 0.0006 -0.0087 -0.0080 0.0089 -0.0079  
Y -0.0026 0.0018 -0.0107 -0.0107 0.0107 -0.0098  
Z 0.0016 0.0001 -0.0015 0.0000 0.0018 -0.0009

AT. 101 H X 0.0013 0.0001 -0.0074 0.0071 0.0073 0.0067  
Y -0.0003 -0.0011 -0.0083 0.0080 0.0082 0.0077  
Z 0.0043 0.0029 0.0131 -0.0118 -0.0141 -0.0125

AT. 102 H X 0.0013 0.0001 0.0074 0.0071 0.0073 -0.0067  
Y 0.0003 0.0011 -0.0083 -0.0080 -0.0082 0.0077  
Z 0.0043 0.0029 -0.0131 -0.0118 -0.0141 0.0125

AT. 103 H X 0.0013 -0.0001 -0.0074 0.0071 -0.0073 -0.0067  
Y -0.0003 0.0011 -0.0083 0.0080 -0.0082 -0.0077  
Z 0.0043 -0.0029 0.0131 -0.0118 0.0141 0.0125

AT. 104 H X 0.0013 -0.0001 0.0074 0.0071 -0.0073 0.0067  
Y 0.0003 -0.0011 -0.0083 -0.0080 0.0082 -0.0077  
Z 0.0043 -0.0029 -0.0131 -0.0118 0.0141 -0.0125

AT. 105 H X -0.0013 -0.0013 0.0036 -0.0043 -0.0041 -0.0040  
Y 0.0006 0.0003 -0.0133 0.0121 0.0141 0.0126  
Z -0.0012 -0.0004 0.0089 -0.0079 -0.0092 -0.0082

AT. 106 H X -0.0013 -0.0013 -0.0036 -0.0043 -0.0041 0.0040  
Y -0.0006 -0.0003 -0.0133 -0.0121 -0.0141 0.0126  
Z -0.0012 -0.0004 -0.0089 -0.0079 -0.0092 0.0082

AT. 107 H X -0.0013 0.0013 0.0036 -0.0043 0.0041 0.0040  
Y 0.0006 -0.0003 -0.0133 0.0121 -0.0141 -0.0126  
Z -0.0012 0.0004 0.0089 -0.0079 0.0092 0.0082

AT. 108 H X -0.0013 0.0013 -0.0036 -0.0043 0.0041 -0.0040  
Y -0.0006 0.0003 -0.0133 -0.0121 0.0141 -0.0126

Z -0.0012 0.0004 -0.0089 -0.0079 0.0092 -0.0082  
AT. 109 C X 0.0049 0.0051 0.0015 -0.0013 -0.0012 -0.0013  
Y -0.0073 -0.0075 -0.0043 0.0037 0.0038 0.0039  
Z -0.0037 -0.0038 -0.0009 0.0006 0.0009 0.0011  
AT. 110 C X 0.0049 0.0051 -0.0015 -0.0013 -0.0012 0.0013  
Y 0.0073 0.0075 -0.0043 -0.0037 -0.0038 0.0039  
Z -0.0037 -0.0038 0.0009 0.0006 0.0009 -0.0011  
AT. 111 C X 0.0049 -0.0051 0.0015 -0.0013 0.0012 0.0013  
Y -0.0073 0.0075 -0.0043 0.0037 -0.0038 -0.0039  
Z -0.0037 0.0038 -0.0009 0.0006 -0.0009 -0.0011  
AT. 112 C X 0.0049 -0.0051 -0.0015 -0.0013 0.0012 -0.0013  
Y 0.0073 -0.0075 -0.0043 -0.0037 0.0038 -0.0039  
Z -0.0037 0.0038 0.0009 0.0006 -0.0009 0.0011  
AT. 113 H X -0.0170 -0.0159 -0.0121 0.0118 0.0109 0.0109  
Y 0.0379 0.0355 0.0243 -0.0233 -0.0217 -0.0218  
Z 0.0291 0.0265 0.0195 -0.0177 -0.0172 -0.0179  
AT. 114 H X -0.0170 -0.0159 0.0121 0.0118 0.0109 -0.0109  
Y -0.0379 -0.0355 0.0243 0.0233 0.0217 -0.0218  
Z 0.0291 0.0265 -0.0195 -0.0177 -0.0172 0.0179  
AT. 115 H X -0.0170 0.0159 -0.0121 0.0118 -0.0109 -0.0109  
Y 0.0379 -0.0355 0.0243 -0.0233 0.0217 0.0218  
Z 0.0291 -0.0265 0.0195 -0.0177 0.0172 0.0179  
AT. 116 H X -0.0170 0.0159 0.0121 0.0118 -0.0109 0.0109  
Y -0.0379 0.0355 0.0243 0.0233 -0.0217 0.0218  
Z 0.0291 -0.0265 -0.0195 -0.0177 0.0172 -0.0179  
AT. 117 H X -0.0097 -0.0127 0.0061 -0.0059 -0.0044 -0.0049  
Y 0.0180 0.0238 -0.0046 0.0061 0.0019 0.0022  
Z 0.0203 0.0260 -0.0021 0.0036 -0.0001 0.0002  
AT. 118 H X -0.0097 -0.0127 -0.0061 -0.0059 -0.0044 0.0049  
Y -0.0180 -0.0238 -0.0046 -0.0061 -0.0019 0.0022  
Z 0.0203 0.0260 0.0021 0.0036 -0.0001 -0.0002  
AT. 119 H X -0.0097 0.0127 0.0061 -0.0059 0.0044 0.0049

Y 0.0180 -0.0238 -0.0046 0.0061 -0.0019 -0.0022  
Z 0.0203 -0.0260 -0.0021 0.0036 0.0001 -0.0002  
AT. 120 H X -0.0097 0.0127 -0.0061 -0.0059 0.0044 -0.0049  
Y -0.0180 0.0238 -0.0046 -0.0061 0.0019 -0.0022  
Z 0.0203 -0.0260 0.0021 0.0036 0.0001 0.0002  
AT. 121 C X -0.0060 -0.0061 -0.0030 0.0031 0.0036 0.0035  
Y 0.0059 0.0062 0.0062 -0.0064 -0.0067 -0.0066  
Z -0.0014 -0.0009 -0.0003 0.0003 0.0005 0.0005  
AT. 122 C X -0.0060 -0.0061 0.0030 0.0031 0.0036 -0.0035  
Y -0.0059 -0.0062 0.0062 0.0064 0.0067 -0.0066  
Z -0.0014 -0.0009 0.0003 0.0003 0.0005 -0.0005  
AT. 123 C X -0.0060 0.0061 -0.0030 0.0031 -0.0036 -0.0035  
Y 0.0059 -0.0062 0.0062 -0.0064 0.0067 0.0066  
Z -0.0014 0.0009 -0.0003 0.0003 -0.0005 -0.0005  
AT. 124 C X -0.0060 0.0061 0.0030 0.0031 -0.0036 0.0035  
Y -0.0059 0.0062 0.0062 0.0064 -0.0067 0.0066  
Z -0.0014 0.0009 0.0003 0.0003 -0.0005 0.0005  
AT. 125 H X 0.0330 0.0298 0.0034 -0.0040 -0.0072 -0.0072  
Y -0.0296 -0.0266 -0.0015 0.0017 0.0044 0.0044  
Z 0.0126 0.0119 0.0027 -0.0028 -0.0037 -0.0037  
AT. 126 H X 0.0330 0.0298 -0.0034 -0.0040 -0.0072 0.0072  
Y 0.0296 0.0266 -0.0015 -0.0017 -0.0044 0.0044  
Z 0.0126 0.0119 -0.0027 -0.0028 -0.0037 0.0037  
AT. 127 H X 0.0330 -0.0298 0.0034 -0.0040 0.0072 0.0072  
Y -0.0296 0.0266 -0.0015 0.0017 -0.0044 -0.0044  
Z 0.0126 -0.0119 0.0027 -0.0028 0.0037 0.0037  
AT. 128 H X 0.0330 -0.0298 -0.0034 -0.0040 0.0072 -0.0072  
Y 0.0296 -0.0266 -0.0015 -0.0017 0.0044 -0.0044  
Z 0.0126 -0.0119 -0.0027 -0.0028 0.0037 -0.0037  
AT. 129 H X 0.0237 0.0278 0.0295 -0.0299 -0.0316 -0.0308  
Y -0.0376 -0.0429 -0.0412 0.0420 0.0448 0.0437  
Z 0.0074 0.0104 0.0109 -0.0105 -0.0110 -0.0105

AT. 130 H X 0.0237 0.0278 -0.0295 -0.0299 -0.0316 0.0308  
Y 0.0376 0.0429 -0.0412 -0.0420 -0.0448 0.0437  
Z 0.0074 0.0104 -0.0109 -0.0105 -0.0110 0.0105

AT. 131 H X 0.0237 -0.0278 0.0295 -0.0299 0.0316 0.0308  
Y -0.0376 0.0429 -0.0412 0.0420 -0.0448 -0.0437  
Z 0.0074 -0.0104 0.0109 -0.0105 0.0110 0.0105

AT. 132 H X 0.0237 -0.0278 -0.0295 -0.0299 0.0316 -0.0308  
Y 0.0376 -0.0429 -0.0412 -0.0420 0.0448 -0.0437  
Z 0.0074 -0.0104 -0.0109 -0.0105 0.0110 -0.0105

AT. 133 C X 0.0002 0.0004 0.0000 0.0000 -0.0001 -0.0001  
Y -0.0006 0.0008 0.0004 -0.0004 -0.0006 -0.0005  
Z -0.0005 0.0005 -0.0001 0.0004 0.0002 0.0001

AT. 134 C X 0.0002 0.0004 -0.0000 0.0000 -0.0001 0.0001  
Y 0.0006 -0.0008 0.0004 0.0004 0.0006 -0.0005  
Z -0.0005 0.0005 0.0001 0.0004 0.0002 -0.0001

AT. 135 C X 0.0002 -0.0004 0.0000 0.0000 0.0001 0.0001  
Y -0.0006 -0.0008 0.0004 -0.0004 0.0006 0.0005  
Z -0.0005 -0.0005 -0.0001 0.0004 -0.0002 -0.0001

AT. 136 C X 0.0002 -0.0004 -0.0000 0.0000 0.0001 -0.0001  
Y 0.0006 0.0008 0.0004 0.0004 -0.0006 0.0005  
Z -0.0005 -0.0005 0.0001 0.0004 -0.0002 0.0001

AT. 137 C X 0.0004 0.0005 0.0002 -0.0002 -0.0002 -0.0002  
Y 0.0006 0.0002 -0.0001 0.0001 0.0001 0.0001  
Z 0.0004 0.0001 -0.0004 0.0003 0.0003 0.0003

AT. 138 C X 0.0004 0.0005 -0.0002 -0.0002 -0.0002 0.0002  
Y -0.0006 -0.0002 -0.0001 -0.0001 -0.0001 0.0001  
Z 0.0004 0.0001 0.0004 0.0003 0.0003 -0.0003

AT. 139 C X 0.0004 -0.0005 0.0002 -0.0002 0.0002 0.0002  
Y 0.0006 -0.0002 -0.0001 0.0001 -0.0001 -0.0001  
Z 0.0004 -0.0001 -0.0004 0.0003 -0.0003 -0.0003

AT. 140 C X 0.0004 -0.0005 -0.0002 -0.0002 0.0002 -0.0002  
Y -0.0006 0.0002 -0.0001 -0.0001 0.0001 -0.0001

Z 0.0004 -0.0001 0.0004 0.0003 -0.0003 0.0003  
AT. 141 H X -0.0003 -0.0016 -0.0008 0.0008 0.0005 0.0008  
Y -0.0025 -0.0023 0.0008 -0.0007 -0.0007 -0.0007  
Z -0.0011 0.0003 0.0013 -0.0013 -0.0010 -0.0012  
AT. 142 H X -0.0003 -0.0016 0.0008 0.0008 0.0005 -0.0008  
Y 0.0025 0.0023 0.0008 0.0007 0.0007 -0.0007  
Z -0.0011 0.0003 -0.0013 -0.0013 -0.0010 0.0012  
AT. 143 H X -0.0003 0.0016 -0.0008 0.0008 -0.0005 -0.0008  
Y -0.0025 0.0023 0.0008 -0.0007 0.0007 0.0007  
Z -0.0011 -0.0003 0.0013 -0.0013 0.0010 0.0012  
AT. 144 H X -0.0003 0.0016 0.0008 0.0008 -0.0005 0.0008  
Y 0.0025 -0.0023 0.0008 0.0007 -0.0007 0.0007  
Z -0.0011 -0.0003 -0.0013 -0.0013 0.0010 -0.0012  
AT. 145 H X -0.0020 -0.0031 -0.0008 0.0009 0.0006 0.0009  
Y 0.0007 0.0004 0.0007 -0.0007 -0.0004 -0.0006  
Z -0.0019 -0.0033 0.0020 -0.0019 -0.0013 -0.0016  
AT. 146 H X -0.0020 -0.0031 0.0008 0.0009 0.0006 -0.0009  
Y -0.0007 -0.0004 0.0007 0.0007 0.0004 -0.0006  
Z -0.0019 -0.0033 -0.0020 -0.0019 -0.0013 0.0016  
AT. 147 H X -0.0020 0.0031 -0.0008 0.0009 -0.0006 -0.0009  
Y 0.0007 -0.0004 0.0007 -0.0007 0.0004 0.0006  
Z -0.0019 0.0033 0.0020 -0.0019 0.0013 0.0016  
AT. 148 H X -0.0020 0.0031 0.0008 0.0009 -0.0006 0.0009  
Y -0.0007 0.0004 0.0007 0.0007 -0.0004 0.0006  
Z -0.0019 0.0033 -0.0020 -0.0019 0.0013 -0.0016  
AT. 149 O X -0.0004 -0.0003 -0.0000 0.0000 -0.0002 -0.0002  
Y 0.0006 0.0004 -0.0009 0.0009 0.0010 0.0011  
Z 0.0007 0.0005 -0.0045 0.0046 0.0046 0.0046  
AT. 150 O X -0.0004 -0.0003 0.0000 0.0000 -0.0002 0.0002  
Y -0.0006 -0.0004 -0.0009 -0.0009 -0.0010 0.0011  
Z 0.0007 0.0005 0.0045 0.0046 0.0046 -0.0046  
AT. 151 O X -0.0004 0.0003 -0.0000 0.0000 0.0002 0.0002



Y 0.0006 -0.0004 -0.0009 0.0009 -0.0010 -0.0011  
Z 0.0007 -0.0005 -0.0045 0.0046 -0.0046 -0.0046  
AT. 152 O X -0.0004 0.0003 0.0000 0.0000 0.0002 -0.0002  
Y -0.0006 0.0004 -0.0009 -0.0009 0.0010 -0.0011  
Z 0.0007 -0.0005 0.0045 0.0046 -0.0046 0.0046  
AT. 153 H X 0.0022 0.0015 -0.0315 0.0326 0.0328 0.0330  
Y -0.0050 -0.0040 0.0412 -0.0425 -0.0422 -0.0426  
Z -0.0030 -0.0022 0.0321 -0.0331 -0.0337 -0.0340  
AT. 154 H X 0.0022 0.0015 0.0315 0.0326 0.0328 -0.0330  
Y 0.0050 0.0040 0.0412 0.0425 0.0422 -0.0426  
Z -0.0030 -0.0022 -0.0321 -0.0331 -0.0337 0.0340  
AT. 155 H X 0.0022 -0.0015 -0.0315 0.0326 -0.0328 -0.0330  
Y -0.0050 0.0040 0.0412 -0.0425 0.0422 0.0426  
Z -0.0030 0.0022 0.0321 -0.0331 0.0337 0.0340  
AT. 156 H X 0.0022 -0.0015 0.0315 0.0326 -0.0328 0.0330  
Y 0.0050 -0.0040 0.0412 0.0425 -0.0422 0.0426  
Z -0.0030 0.0022 -0.0321 -0.0331 0.0337 -0.0340  
AT. 157 O X 0.0001 0.0001 0.0012 -0.0012 -0.0011 -0.0010  
Y 0.0002 0.0003 0.0009 -0.0010 -0.0009 -0.0008  
Z -0.0001 -0.0001 -0.0013 0.0013 0.0011 0.0011  
AT. 158 O X 0.0001 0.0001 -0.0012 -0.0012 -0.0011 0.0010  
Y -0.0002 -0.0003 0.0009 0.0010 0.0009 -0.0008  
Z -0.0001 -0.0001 0.0013 0.0013 0.0011 -0.0011  
AT. 159 O X 0.0001 -0.0001 0.0012 -0.0012 0.0011 0.0010  
Y 0.0002 -0.0003 0.0009 -0.0010 0.0009 0.0008  
Z -0.0001 0.0001 -0.0013 0.0013 -0.0011 -0.0011  
AT. 160 O X 0.0001 -0.0001 -0.0012 -0.0012 0.0011 -0.0010  
Y -0.0002 0.0003 0.0009 0.0010 -0.0009 0.0008  
Z -0.0001 0.0001 0.0013 0.0013 -0.0011 0.0011  
AT. 161 O X 0.0000 -0.0000 -0.0006 0.0006 0.0005 0.0005  
Y -0.0000 -0.0001 -0.0003 0.0003 0.0003 0.0002  
Z -0.0001 -0.0001 -0.0001 0.0001 0.0001 0.0001

AT.162 O X 0.0000 -0.0000 0.0006 0.0006 0.0005 -0.0005  
Y 0.0000 0.0001 -0.0003 -0.0003 -0.0003 0.0002  
Z -0.0001 -0.0001 0.0001 0.0001 0.0001 -0.0001

AT.163 O X 0.0000 0.0000 -0.0006 0.0006 -0.0005 -0.0005  
Y -0.0000 0.0001 -0.0003 0.0003 -0.0003 -0.0002  
Z -0.0001 0.0001 -0.0001 0.0001 -0.0001 -0.0001

AT.164 O X 0.0000 0.0000 0.0006 0.0006 -0.0005 0.0005  
Y 0.0000 -0.0001 -0.0003 -0.0003 0.0003 -0.0002  
Z -0.0001 0.0001 0.0001 0.0001 -0.0001 0.0001

AT.165 H X 0.0007 0.0003 0.0014 -0.0005 -0.0005 -0.0012  
Y 0.0006 0.0004 0.0006 -0.0000 -0.0001 -0.0005  
Z 0.0013 0.0011 0.0020 -0.0006 -0.0011 -0.0018

AT.166 H X 0.0007 0.0003 -0.0014 -0.0005 -0.0005 0.0012  
Y -0.0006 -0.0004 0.0006 0.0000 0.0001 -0.0005  
Z 0.0013 0.0011 -0.0020 -0.0006 -0.0011 0.0018

AT.167 H X 0.0007 -0.0003 0.0014 -0.0005 0.0005 0.0012  
Y 0.0006 -0.0004 0.0006 -0.0000 0.0001 0.0005  
Z 0.0013 -0.0011 0.0020 -0.0006 0.0011 0.0018

AT.168 H X 0.0007 -0.0003 -0.0014 -0.0005 0.0005 -0.0012  
Y -0.0006 0.0004 0.0006 0.0000 -0.0001 0.0005  
Z 0.0013 -0.0011 -0.0020 -0.0006 0.0011 -0.0018

AT.169 O X 0.0000 0.0000 -0.0001 0.0001 -0.0000 -0.0000  
Y 0.0001 0.0002 -0.0003 0.0003 0.0008 0.0009  
Z 0.0001 0.0000 0.0001 -0.0001 0.0002 0.0001

AT.170 O X 0.0000 0.0000 0.0001 0.0001 -0.0000 0.0000  
Y -0.0001 -0.0002 -0.0003 -0.0003 -0.0008 0.0009  
Z 0.0001 0.0000 -0.0001 -0.0001 0.0002 -0.0001

AT.171 O X 0.0000 -0.0000 -0.0001 0.0001 0.0000 0.0000  
Y 0.0001 -0.0002 -0.0003 0.0003 -0.0008 -0.0009  
Z 0.0001 -0.0000 0.0001 -0.0001 -0.0002 -0.0001

AT.172 O X 0.0000 -0.0000 0.0001 0.0001 0.0000 -0.0000  
Y -0.0001 0.0002 -0.0003 -0.0003 0.0008 -0.0009

Z 0.0001 -0.0000 -0.0001 -0.0001 -0.0002 0.0001  
AT. 173 H X -0.0002 -0.0006 0.0017 -0.0017 -0.0049 -0.0049  
Y 0.0002 0.0001 0.0004 -0.0005 0.0003 0.0004  
Z -0.0007 0.0006 -0.0087 0.0085 0.0015 0.0020  
AT. 174 H X -0.0002 -0.0006 -0.0017 -0.0017 -0.0049 0.0049  
Y -0.0002 -0.0001 0.0004 0.0005 -0.0003 0.0004  
Z -0.0007 0.0006 0.0087 0.0085 0.0015 -0.0020  
AT. 175 H X -0.0002 0.0006 0.0017 -0.0017 0.0049 0.0049  
Y 0.0002 -0.0001 0.0004 -0.0005 -0.0003 -0.0004  
Z -0.0007 -0.0006 -0.0087 0.0085 -0.0015 -0.0020  
AT. 176 H X -0.0002 0.0006 -0.0017 -0.0017 0.0049 -0.0049  
Y -0.0002 0.0001 0.0004 0.0005 0.0003 -0.0004  
Z -0.0007 -0.0006 0.0087 0.0085 -0.0015 0.0020

FREQ(CM\*\*-1) 1407.93 1408.49 1409.51 1409.72 1426.77 1428.72

AT. 1 I X -0.0000 0.0000 0.0000 -0.0000 -0.0000 -0.0000  
Y 0.0000 -0.0000 0.0000 -0.0000 -0.0000 -0.0000  
Z 0.0000 -0.0000 0.0000 0.0000 0.0000 -0.0000  
AT. 2 I X -0.0000 -0.0000 -0.0000 -0.0000 -0.0000 0.0000  
Y -0.0000 -0.0000 0.0000 0.0000 0.0000 -0.0000  
Z 0.0000 0.0000 -0.0000 0.0000 0.0000 0.0000  
AT. 3 I X -0.0000 0.0000 -0.0000 0.0000 -0.0000 -0.0000  
Y 0.0000 -0.0000 -0.0000 0.0000 -0.0000 -0.0000  
Z 0.0000 -0.0000 -0.0000 -0.0000 0.0000 -0.0000  
AT. 4 I X -0.0000 -0.0000 0.0000 0.0000 -0.0000 0.0000  
Y -0.0000 -0.0000 -0.0000 -0.0000 0.0000 -0.0000  
Z 0.0000 0.0000 0.0000 -0.0000 0.0000 0.0000  
AT. 5 I X -0.0000 0.0000 0.0000 -0.0000 -0.0000 -0.0000  
Y 0.0000 -0.0000 -0.0000 -0.0000 0.0000 0.0000  
Z 0.0000 0.0000 -0.0000 -0.0000 0.0000 0.0000  
AT. 6 I X -0.0000 -0.0000 -0.0000 -0.0000 -0.0000 0.0000

Y -0.0000 -0.0000 -0.0000 0.0000 -0.0000 0.0000  
Z 0.0000 -0.0000 0.0000 -0.0000 0.0000 -0.0000  
AT. 7 I X -0.0000 0.0000 -0.0000 0.0000 -0.0000 -0.0000  
Y 0.0000 -0.0000 0.0000 0.0000 0.0000 0.0000  
Z 0.0000 0.0000 0.0000 0.0000 0.0000 0.0000  
AT. 8 I X -0.0000 -0.0000 0.0000 0.0000 -0.0000 0.0000  
Y -0.0000 -0.0000 0.0000 -0.0000 -0.0000 0.0000  
Z 0.0000 -0.0000 -0.0000 0.0000 0.0000 -0.0000  
AT. 9 N X 0.0031 -0.0032 -0.0032 0.0031 -0.0003 0.0001  
Y 0.0007 -0.0008 -0.0008 0.0008 -0.0006 0.0006  
Z 0.0039 -0.0038 -0.0039 0.0039 0.0003 -0.0004  
AT. 10 N X 0.0031 0.0032 0.0032 0.0031 -0.0003 -0.0001  
Y -0.0007 -0.0008 -0.0008 -0.0008 0.0006 0.0006  
Z 0.0039 0.0038 0.0039 0.0039 0.0003 0.0004  
AT. 11 N X 0.0031 -0.0032 0.0032 -0.0031 -0.0003 0.0001  
Y 0.0007 -0.0008 0.0008 -0.0008 -0.0006 0.0006  
Z 0.0039 -0.0038 0.0039 -0.0039 0.0003 -0.0004  
AT. 12 N X 0.0031 0.0032 -0.0032 -0.0031 -0.0003 -0.0001  
Y -0.0007 -0.0008 0.0008 0.0008 0.0006 0.0006  
Z 0.0039 0.0038 -0.0039 -0.0039 0.0003 0.0004  
AT. 13 N X 0.0031 -0.0032 -0.0032 0.0032 0.0008 -0.0005  
Y -0.0013 0.0014 0.0010 -0.0013 -0.0008 0.0002  
Z 0.0029 -0.0031 -0.0027 0.0029 0.0018 -0.0015  
AT. 14 N X 0.0031 0.0032 0.0032 0.0032 0.0008 0.0005  
Y 0.0013 0.0014 0.0010 0.0013 0.0008 0.0002  
Z 0.0029 0.0031 0.0027 0.0029 0.0018 0.0015  
AT. 15 N X 0.0031 -0.0032 0.0032 -0.0032 0.0008 -0.0005  
Y -0.0013 0.0014 -0.0010 0.0013 -0.0008 0.0002  
Z 0.0029 -0.0031 0.0027 -0.0029 0.0018 -0.0015  
AT. 16 N X 0.0031 0.0032 -0.0032 -0.0032 0.0008 0.0005  
Y 0.0013 0.0014 -0.0010 -0.0013 0.0008 0.0002  
Z 0.0029 0.0031 -0.0027 -0.0029 0.0018 0.0015

AT. 17 O X 0.0000 0.0001 -0.0000 -0.0000 0.0000 -0.0001  
Y -0.0005 0.0005 0.0006 -0.0006 0.0000 -0.0001  
Z 0.0013 -0.0010 -0.0010 0.0010 -0.0001 -0.0001

AT. 18 O X 0.0000 -0.0001 0.0000 -0.0000 0.0000 0.0001  
Y 0.0005 0.0005 0.0006 0.0006 -0.0000 -0.0001  
Z 0.0013 0.0010 0.0010 0.0010 -0.0001 0.0001

AT. 19 O X 0.0000 0.0001 0.0000 0.0000 0.0000 -0.0001  
Y -0.0005 0.0005 -0.0006 0.0006 0.0000 -0.0001  
Z 0.0013 -0.0010 0.0010 -0.0010 -0.0001 -0.0001

AT. 20 O X 0.0000 -0.0001 -0.0000 0.0000 0.0000 0.0001  
Y 0.0005 0.0005 -0.0006 -0.0006 -0.0000 -0.0001  
Z 0.0013 0.0010 -0.0010 -0.0010 -0.0001 0.0001

AT. 21 O X 0.0001 -0.0001 -0.0001 0.0001 0.0001 -0.0001  
Y 0.0004 -0.0005 -0.0003 0.0004 -0.0002 0.0003  
Z 0.0011 -0.0011 -0.0011 0.0012 0.0007 -0.0007

AT. 22 O X 0.0001 0.0001 0.0001 0.0001 0.0001 0.0001  
Y -0.0004 -0.0005 -0.0003 -0.0004 0.0002 0.0003  
Z 0.0011 0.0011 0.0011 0.0012 0.0007 0.0007

AT. 23 O X 0.0001 -0.0001 0.0001 -0.0001 0.0001 -0.0001  
Y 0.0004 -0.0005 0.0003 -0.0004 -0.0002 0.0003  
Z 0.0011 -0.0011 0.0011 -0.0012 0.0007 -0.0007

AT. 24 O X 0.0001 0.0001 -0.0001 -0.0001 0.0001 0.0001  
Y -0.0004 -0.0005 0.0003 0.0004 0.0002 0.0003  
Z 0.0011 0.0011 -0.0011 -0.0012 0.0007 0.0007

AT. 25 C X -0.0006 0.0006 0.0005 -0.0006 -0.0001 0.0002  
Y -0.0011 0.0010 0.0010 -0.0011 0.0006 -0.0006  
Z 0.0017 -0.0015 -0.0015 0.0015 -0.0006 0.0005

AT. 26 C X -0.0006 -0.0006 -0.0005 -0.0006 -0.0001 -0.0002  
Y 0.0011 0.0010 0.0010 0.0011 -0.0006 -0.0006  
Z 0.0017 0.0015 0.0015 0.0015 -0.0006 -0.0005

AT. 27 C X -0.0006 0.0006 -0.0005 0.0006 -0.0001 0.0002  
Y -0.0011 0.0010 -0.0010 0.0011 0.0006 -0.0006

Z 0.0017 -0.0015 0.0015 -0.0015 -0.0006 0.0005  
AT. 28 C X -0.0006 -0.0006 0.0005 0.0006 -0.0001 -0.0002  
Y 0.0011 0.0010 -0.0010 -0.0011 -0.0006 -0.0006  
Z 0.0017 0.0015 -0.0015 -0.0015 -0.0006 -0.0005  
AT. 29 H X 0.0020 -0.0021 -0.0019 0.0021 -0.0005 0.0003  
Y -0.0028 0.0027 0.0025 -0.0025 -0.0031 0.0041  
Z -0.0017 0.0019 0.0016 -0.0021 0.0008 -0.0007  
AT. 30 H X 0.0020 0.0021 0.0019 0.0021 -0.0005 -0.0003  
Y 0.0028 0.0027 0.0025 0.0025 0.0031 0.0041  
Z -0.0017 -0.0019 -0.0016 -0.0021 0.0008 0.0007  
AT. 31 H X 0.0020 -0.0021 0.0019 -0.0021 -0.0005 0.0003  
Y -0.0028 0.0027 -0.0025 0.0025 -0.0031 0.0041  
Z -0.0017 0.0019 -0.0016 0.0021 0.0008 -0.0007  
AT. 32 H X 0.0020 0.0021 -0.0019 -0.0021 -0.0005 -0.0003  
Y 0.0028 0.0027 -0.0025 -0.0025 0.0031 0.0041  
Z -0.0017 -0.0019 0.0016 0.0021 0.0008 0.0007  
AT. 33 H X 0.0028 -0.0027 -0.0023 0.0024 0.0025 -0.0035  
Y -0.0022 0.0021 0.0021 -0.0022 -0.0007 0.0008  
Z 0.0028 -0.0029 -0.0030 0.0035 0.0028 -0.0029  
AT. 34 H X 0.0028 0.0027 0.0023 0.0024 0.0025 0.0035  
Y 0.0022 0.0021 0.0021 0.0022 0.0007 0.0008  
Z 0.0028 0.0029 0.0030 0.0035 0.0028 0.0029  
AT. 35 H X 0.0028 -0.0027 0.0023 -0.0024 0.0025 -0.0035  
Y -0.0022 0.0021 -0.0021 0.0022 -0.0007 0.0008  
Z 0.0028 -0.0029 0.0030 -0.0035 0.0028 -0.0029  
AT. 36 H X 0.0028 0.0027 -0.0023 -0.0024 0.0025 0.0035  
Y 0.0022 0.0021 -0.0021 -0.0022 0.0007 0.0008  
Z 0.0028 0.0029 -0.0030 -0.0035 0.0028 0.0029  
AT. 37 C X 0.0006 -0.0006 -0.0005 0.0006 -0.0001 0.0002  
Y 0.0041 -0.0039 -0.0039 0.0041 -0.0001 0.0001  
Z -0.0052 0.0047 0.0047 -0.0047 0.0008 -0.0002  
AT. 38 C X 0.0006 0.0006 0.0005 0.0006 -0.0001 -0.0002

Y -0.0041 -0.0039 -0.0039 -0.0041 0.0001 0.0001  
Z -0.0052 -0.0047 -0.0047 -0.0047 0.0008 0.0002  
AT. 39 C X 0.0006 -0.0006 0.0005 -0.0006 -0.0001 0.0002  
Y 0.0041 -0.0039 0.0039 -0.0041 -0.0001 0.0001  
Z -0.0052 0.0047 -0.0047 0.0047 0.0008 -0.0002  
AT. 40 C X 0.0006 0.0006 -0.0005 -0.0006 -0.0001 -0.0002  
Y -0.0041 -0.0039 0.0039 0.0041 0.0001 0.0001  
Z -0.0052 -0.0047 0.0047 0.0047 0.0008 0.0002  
AT. 41 C X -0.0063 0.0060 0.0059 -0.0057 0.0055 -0.0047  
Y -0.0039 0.0039 0.0036 -0.0035 0.0044 -0.0036  
Z -0.0017 0.0017 0.0017 -0.0018 0.0023 -0.0025  
AT. 42 C X -0.0063 -0.0060 -0.0059 -0.0057 0.0055 0.0047  
Y 0.0039 0.0039 0.0036 0.0035 -0.0044 -0.0036  
Z -0.0017 -0.0017 -0.0017 -0.0018 0.0023 0.0025  
AT. 43 C X -0.0063 0.0060 -0.0059 0.0057 0.0055 -0.0047  
Y -0.0039 0.0039 -0.0036 0.0035 0.0044 -0.0036  
Z -0.0017 0.0017 -0.0017 0.0018 0.0023 -0.0025  
AT. 44 C X -0.0063 -0.0060 0.0059 0.0057 0.0055 0.0047  
Y 0.0039 0.0039 -0.0036 -0.0035 -0.0044 -0.0036  
Z -0.0017 -0.0017 0.0017 0.0018 0.0023 0.0025  
AT. 45 H X 0.0354 -0.0324 -0.0324 0.0320 -0.0321 0.0298  
Y 0.0120 -0.0108 -0.0099 0.0109 -0.0124 0.0137  
Z 0.0051 -0.0045 -0.0036 0.0044 -0.0061 0.0070  
AT. 46 H X 0.0354 0.0324 0.0324 0.0320 -0.0321 -0.0298  
Y -0.0120 -0.0108 -0.0099 -0.0109 0.0124 0.0137  
Z 0.0051 0.0045 0.0036 0.0044 -0.0061 -0.0070  
AT. 47 H X 0.0354 -0.0324 0.0324 -0.0320 -0.0321 0.0298  
Y 0.0120 -0.0108 0.0099 -0.0109 -0.0124 0.0137  
Z 0.0051 -0.0045 0.0036 -0.0044 -0.0061 0.0070  
AT. 48 H X 0.0354 0.0324 -0.0324 -0.0320 -0.0321 -0.0298  
Y -0.0120 -0.0108 0.0099 0.0109 0.0124 0.0137  
Z 0.0051 0.0045 -0.0036 -0.0044 -0.0061 -0.0070

AT. 49 H X 0.0115 -0.0121 -0.0110 0.0095 -0.0234 0.0188  
Y 0.0159 -0.0160 -0.0153 0.0136 -0.0238 0.0188  
Z -0.0086 0.0078 0.0085 -0.0082 0.0013 -0.0002

AT. 50 H X 0.0115 0.0121 0.0110 0.0095 -0.0234 -0.0188  
Y -0.0159 -0.0160 -0.0153 -0.0136 0.0238 0.0188  
Z -0.0086 -0.0078 -0.0085 -0.0082 0.0013 0.0002

AT. 51 H X 0.0115 -0.0121 0.0110 -0.0095 -0.0234 0.0188  
Y 0.0159 -0.0160 0.0153 -0.0136 -0.0238 0.0188  
Z -0.0086 0.0078 -0.0085 0.0082 0.0013 -0.0002

AT. 52 H X 0.0115 0.0121 -0.0110 -0.0095 -0.0234 -0.0188  
Y -0.0159 -0.0160 0.0153 0.0136 0.0238 0.0188  
Z -0.0086 -0.0078 0.0085 0.0082 0.0013 0.0002

AT. 53 C X 0.0021 -0.0016 -0.0016 0.0018 -0.0015 0.0018  
Y -0.0027 0.0021 0.0024 -0.0028 -0.0037 0.0022  
Z 0.0007 0.0002 -0.0005 0.0002 -0.0111 0.0112

AT. 54 C X 0.0021 0.0016 0.0016 0.0018 -0.0015 -0.0018  
Y 0.0027 0.0021 0.0024 0.0028 0.0037 0.0022  
Z 0.0007 -0.0002 0.0005 0.0002 -0.0111 -0.0112

AT. 55 C X 0.0021 -0.0016 0.0016 -0.0018 -0.0015 0.0018  
Y -0.0027 0.0021 -0.0024 0.0028 -0.0037 0.0022  
Z 0.0007 0.0002 0.0005 -0.0002 -0.0111 0.0112

AT. 56 C X 0.0021 0.0016 -0.0016 -0.0018 -0.0015 -0.0018  
Y 0.0027 0.0021 -0.0024 -0.0028 0.0037 0.0022  
Z 0.0007 -0.0002 -0.0005 -0.0002 -0.0111 -0.0112

AT. 57 C X 0.0004 -0.0004 -0.0004 0.0004 0.0017 -0.0018  
Y 0.0003 -0.0003 -0.0002 0.0004 0.0056 -0.0057  
Z -0.0003 -0.0002 0.0006 0.0002 0.0114 -0.0115

AT. 58 C X 0.0004 0.0004 0.0004 0.0004 0.0017 0.0018  
Y -0.0003 -0.0003 -0.0002 -0.0004 -0.0056 -0.0057  
Z -0.0003 0.0002 -0.0006 0.0002 0.0114 0.0115

AT. 59 C X 0.0004 -0.0004 0.0004 -0.0004 0.0017 -0.0018  
Y 0.0003 -0.0003 0.0002 -0.0004 0.0056 -0.0057



Z -0.0003 -0.0002 -0.0006 -0.0002 0.0114 -0.0115  
AT. 60 C X 0.0004 0.0004 -0.0004 -0.0004 0.0017 0.0018  
Y -0.0003 -0.0003 0.0002 0.0004 -0.0056 -0.0057  
Z -0.0003 0.0002 0.0006 -0.0002 0.0114 0.0115  
AT. 61 H X -0.0012 0.0019 0.0023 -0.0011 -0.0152 0.0171  
Y -0.0012 0.0011 0.0021 -0.0007 0.0009 0.0000  
Z 0.0019 0.0016 -0.0018 -0.0003 -0.0391 0.0418  
AT. 62 H X -0.0012 -0.0019 -0.0023 -0.0011 -0.0152 -0.0171  
Y 0.0012 0.0011 0.0021 0.0007 -0.0009 0.0000  
Z 0.0019 -0.0016 0.0018 -0.0003 -0.0391 -0.0418  
AT. 63 H X -0.0012 0.0019 -0.0023 0.0011 -0.0152 0.0171  
Y -0.0012 0.0011 -0.0021 0.0007 0.0009 0.0000  
Z 0.0019 0.0016 0.0018 0.0003 -0.0391 0.0418  
AT. 64 H X -0.0012 -0.0019 0.0023 0.0011 -0.0152 -0.0171  
Y 0.0012 0.0011 -0.0021 -0.0007 -0.0009 0.0000  
Z 0.0019 -0.0016 -0.0018 0.0003 -0.0391 -0.0418  
AT. 65 H X 0.0009 -0.0011 -0.0012 0.0008 0.0079 -0.0086  
Y -0.0015 0.0022 0.0027 -0.0010 -0.0135 0.0158  
Z 0.0020 -0.0020 -0.0038 0.0009 -0.0385 0.0384  
AT. 66 H X 0.0009 0.0011 0.0012 0.0008 0.0079 0.0086  
Y 0.0015 0.0022 0.0027 0.0010 0.0135 0.0158  
Z 0.0020 0.0020 0.0038 0.0009 -0.0385 -0.0384  
AT. 67 H X 0.0009 -0.0011 0.0012 -0.0008 0.0079 -0.0086  
Y -0.0015 0.0022 -0.0027 0.0010 -0.0135 0.0158  
Z 0.0020 -0.0020 0.0038 -0.0009 -0.0385 0.0384  
AT. 68 H X 0.0009 0.0011 -0.0012 -0.0008 0.0079 0.0086  
Y 0.0015 0.0022 -0.0027 -0.0010 0.0135 0.0158  
Z 0.0020 0.0020 -0.0038 -0.0009 -0.0385 -0.0384  
AT. 69 H X -0.0007 -0.0016 -0.0013 -0.0008 -0.0080 0.0057  
Y 0.0003 0.0003 -0.0022 -0.0010 -0.0366 0.0367  
Z -0.0003 -0.0000 -0.0016 -0.0011 -0.0277 0.0274  
AT. 70 H X -0.0007 0.0016 0.0013 -0.0008 -0.0080 -0.0057

Y -0.0003 0.0003 -0.0022 0.0010 0.0366 0.0367  
Z -0.0003 0.0000 0.0016 -0.0011 -0.0277 -0.0274  
AT. 71 H X -0.0007 -0.0016 0.0013 0.0008 -0.0080 0.0057  
Y 0.0003 0.0003 0.0022 0.0010 -0.0366 0.0367  
Z -0.0003 -0.0000 0.0016 0.0011 -0.0277 0.0274  
AT. 72 H X -0.0007 0.0016 -0.0013 0.0008 -0.0080 -0.0057  
Y -0.0003 0.0003 0.0022 -0.0010 0.0366 0.0367  
Z -0.0003 0.0000 -0.0016 0.0011 -0.0277 -0.0274  
AT. 73 C X -0.0045 0.0043 0.0047 -0.0045 0.0031 -0.0038  
Y 0.0008 -0.0005 -0.0007 0.0008 -0.0012 0.0021  
Z -0.0028 0.0021 0.0027 -0.0026 0.0107 -0.0124  
AT. 74 C X -0.0045 -0.0043 -0.0047 -0.0045 0.0031 0.0038  
Y -0.0008 -0.0005 -0.0007 -0.0008 0.0012 0.0021  
Z -0.0028 -0.0021 -0.0027 -0.0026 0.0107 0.0124  
AT. 75 C X -0.0045 0.0043 -0.0047 0.0045 0.0031 -0.0038  
Y 0.0008 -0.0005 0.0007 -0.0008 -0.0012 0.0021  
Z -0.0028 0.0021 -0.0027 0.0026 0.0107 -0.0124  
AT. 76 C X -0.0045 -0.0043 0.0047 0.0045 0.0031 0.0038  
Y -0.0008 -0.0005 0.0007 0.0008 0.0012 0.0021  
Z -0.0028 -0.0021 0.0027 0.0026 0.0107 0.0124  
AT. 77 C X -0.0074 0.0074 0.0072 -0.0072 -0.0005 0.0009  
Y -0.0075 0.0073 0.0073 -0.0073 -0.0004 0.0013  
Z 0.0042 -0.0041 -0.0044 0.0044 0.0015 -0.0024  
AT. 78 C X -0.0074 -0.0074 -0.0072 -0.0072 -0.0005 -0.0009  
Y 0.0075 0.0073 0.0073 0.0073 0.0004 0.0013  
Z 0.0042 0.0041 0.0044 0.0044 0.0015 0.0024  
AT. 79 C X -0.0074 0.0074 -0.0072 0.0072 -0.0005 0.0009  
Y -0.0075 0.0073 -0.0073 0.0073 -0.0004 0.0013  
Z 0.0042 -0.0041 0.0044 -0.0044 0.0015 -0.0024  
AT. 80 C X -0.0074 -0.0074 0.0072 0.0072 -0.0005 -0.0009  
Y 0.0075 0.0073 -0.0073 -0.0073 0.0004 0.0013  
Z 0.0042 0.0041 -0.0044 -0.0044 0.0015 0.0024

AT. 81 H X 0.0255 -0.0254 -0.0247 0.0249 0.0029 -0.0050  
Y 0.0328 -0.0328 -0.0321 0.0323 0.0042 -0.0067  
Z -0.0273 0.0266 0.0276 -0.0280 -0.0055 0.0095

AT. 82 H X 0.0255 0.0254 0.0247 0.0249 0.0029 0.0050  
Y -0.0328 -0.0328 -0.0321 -0.0323 -0.0042 -0.0067  
Z -0.0273 -0.0266 -0.0276 -0.0280 -0.0055 -0.0095

AT. 83 H X 0.0255 -0.0254 0.0247 -0.0249 0.0029 -0.0050  
Y 0.0328 -0.0328 0.0321 -0.0323 0.0042 -0.0067  
Z -0.0273 0.0266 -0.0276 0.0280 -0.0055 0.0095

AT. 84 H X 0.0255 0.0254 -0.0247 -0.0249 0.0029 0.0050  
Y -0.0328 -0.0328 0.0321 0.0323 -0.0042 -0.0067  
Z -0.0273 -0.0266 0.0276 0.0280 -0.0055 -0.0095

AT. 85 H X 0.0205 -0.0212 -0.0208 0.0205 0.0054 -0.0064  
Y 0.0261 -0.0257 -0.0271 0.0272 0.0046 -0.0081  
Z -0.0306 0.0304 0.0312 -0.0312 -0.0044 0.0075

AT. 86 H X 0.0205 0.0212 0.0208 0.0205 0.0054 0.0064  
Y -0.0261 -0.0257 -0.0271 -0.0272 -0.0046 -0.0081  
Z -0.0306 -0.0304 -0.0312 -0.0312 -0.0044 -0.0075

AT. 87 H X 0.0205 -0.0212 0.0208 -0.0205 0.0054 -0.0064  
Y 0.0261 -0.0257 0.0271 -0.0272 0.0046 -0.0081  
Z -0.0306 0.0304 -0.0312 0.0312 -0.0044 0.0075

AT. 88 H X 0.0205 0.0212 -0.0208 -0.0205 0.0054 0.0064  
Y -0.0261 -0.0257 0.0271 0.0272 -0.0046 -0.0081  
Z -0.0306 -0.0304 0.0312 0.0312 -0.0044 -0.0075

AT. 89 C X 0.0027 -0.0026 -0.0025 0.0024 -0.0020 0.0024  
Y 0.0018 -0.0016 -0.0014 0.0015 -0.0006 -0.0005  
Z 0.0011 -0.0011 -0.0010 0.0009 -0.0038 0.0058

AT. 90 C X 0.0027 0.0026 0.0025 0.0024 -0.0020 -0.0024  
Y -0.0018 -0.0016 -0.0014 -0.0015 0.0006 -0.0005  
Z 0.0011 0.0011 0.0010 0.0009 -0.0038 -0.0058

AT. 91 C X 0.0027 -0.0026 0.0025 -0.0024 -0.0020 0.0024  
Y 0.0018 -0.0016 0.0014 -0.0015 -0.0006 -0.0005

Z 0.0011 -0.0011 0.0010 -0.0009 -0.0038 0.0058  
AT. 92 C X 0.0027 0.0026 -0.0025 -0.0024 -0.0020 -0.0024  
Y -0.0018 -0.0016 0.0014 0.0015 0.0006 -0.0005  
Z 0.0011 0.0011 -0.0010 -0.0009 -0.0038 -0.0058  
AT. 93 C X 0.0006 -0.0005 -0.0007 0.0006 -0.0004 0.0002  
Y -0.0014 0.0010 0.0015 -0.0013 0.0022 0.0002  
Z 0.0009 -0.0004 -0.0011 0.0010 -0.0023 -0.0013  
AT. 94 C X 0.0006 0.0005 0.0007 0.0006 -0.0004 -0.0002  
Y 0.0014 0.0010 0.0015 0.0013 -0.0022 0.0002  
Z 0.0009 0.0004 0.0011 0.0010 -0.0023 0.0013  
AT. 95 C X 0.0006 -0.0005 0.0007 -0.0006 -0.0004 0.0002  
Y -0.0014 0.0010 -0.0015 0.0013 0.0022 0.0002  
Z 0.0009 -0.0004 0.0011 -0.0010 -0.0023 -0.0013  
AT. 96 C X 0.0006 0.0005 -0.0007 -0.0006 -0.0004 -0.0002  
Y 0.0014 0.0010 -0.0015 -0.0013 -0.0022 0.0002  
Z 0.0009 0.0004 -0.0011 -0.0010 -0.0023 0.0013  
AT. 97 H X -0.0042 0.0029 0.0048 -0.0042 0.0079 0.0009  
Y 0.0049 -0.0037 -0.0055 0.0045 -0.0082 0.0028  
Z -0.0034 0.0022 0.0046 -0.0046 0.0073 0.0064  
AT. 98 H X -0.0042 -0.0029 -0.0048 -0.0042 0.0079 -0.0009  
Y -0.0049 -0.0037 -0.0055 -0.0045 0.0082 0.0028  
Z -0.0034 -0.0022 -0.0046 -0.0046 0.0073 -0.0064  
AT. 99 H X -0.0042 0.0029 -0.0048 0.0042 0.0079 0.0009  
Y 0.0049 -0.0037 0.0055 -0.0045 -0.0082 0.0028  
Z -0.0034 0.0022 -0.0046 0.0046 0.0073 0.0064  
AT. 100 H X -0.0042 -0.0029 0.0048 0.0042 0.0079 -0.0009  
Y -0.0049 -0.0037 0.0055 0.0045 0.0082 0.0028  
Z -0.0034 -0.0022 0.0046 0.0046 0.0073 -0.0064  
AT. 101 H X 0.0026 -0.0021 -0.0028 0.0024 -0.0040 -0.0010  
Y 0.0022 -0.0015 -0.0025 0.0021 -0.0053 -0.0004  
Z -0.0043 0.0015 0.0052 -0.0040 0.0153 -0.0017  
AT. 102 H X 0.0026 0.0021 0.0028 0.0024 -0.0040 0.0010

Y -0.0022 -0.0015 -0.0025 -0.0021 0.0053 -0.0004  
Z -0.0043 -0.0015 -0.0052 -0.0040 0.0153 0.0017  
AT. 103 H X 0.0026 -0.0021 0.0028 -0.0024 -0.0040 -0.0010  
Y 0.0022 -0.0015 0.0025 -0.0021 -0.0053 -0.0004  
Z -0.0043 0.0015 -0.0052 0.0040 0.0153 -0.0017  
AT. 104 H X 0.0026 0.0021 -0.0028 -0.0024 -0.0040 0.0010  
Y -0.0022 -0.0015 0.0025 0.0021 0.0053 -0.0004  
Z -0.0043 -0.0015 0.0052 0.0040 0.0153 0.0017  
AT. 105 H X -0.0014 0.0008 0.0012 -0.0005 0.0034 -0.0069  
Y 0.0056 -0.0036 -0.0061 0.0054 -0.0130 0.0011  
Z -0.0037 0.0026 0.0040 -0.0038 0.0080 0.0009  
AT. 106 H X -0.0014 -0.0008 -0.0012 -0.0005 0.0034 0.0069  
Y -0.0056 -0.0036 -0.0061 -0.0054 0.0130 0.0011  
Z -0.0037 -0.0026 -0.0040 -0.0038 0.0080 -0.0009  
AT. 107 H X -0.0014 0.0008 -0.0012 0.0005 0.0034 -0.0069  
Y 0.0056 -0.0036 0.0061 -0.0054 -0.0130 0.0011  
Z -0.0037 0.0026 -0.0040 0.0038 0.0080 0.0009  
AT. 108 H X -0.0014 -0.0008 0.0012 0.0005 0.0034 0.0069  
Y -0.0056 -0.0036 0.0061 0.0054 0.0130 0.0011  
Z -0.0037 -0.0026 0.0040 0.0038 0.0080 -0.0009  
AT. 109 C X -0.0051 0.0052 0.0051 -0.0052 -0.0025 0.0018  
Y 0.0087 -0.0088 -0.0085 0.0089 0.0064 -0.0049  
Z 0.0045 -0.0046 -0.0043 0.0047 0.0057 -0.0050  
AT. 110 C X -0.0051 -0.0052 -0.0051 -0.0052 -0.0025 -0.0018  
Y -0.0087 -0.0088 -0.0085 -0.0089 -0.0064 -0.0049  
Z 0.0045 0.0046 0.0043 0.0047 0.0057 0.0050  
AT. 111 C X -0.0051 0.0052 -0.0051 0.0052 -0.0025 0.0018  
Y 0.0087 -0.0088 0.0085 -0.0089 0.0064 -0.0049  
Z 0.0045 -0.0046 0.0043 -0.0047 0.0057 -0.0050  
AT. 112 C X -0.0051 -0.0052 0.0051 0.0052 -0.0025 -0.0018  
Y -0.0087 -0.0088 0.0085 0.0089 -0.0064 -0.0049  
Z 0.0045 0.0046 -0.0043 -0.0047 0.0057 0.0050

AT. 113 H X 0.0163 -0.0166 -0.0169 0.0170 0.0100 -0.0072  
Y -0.0338 0.0341 0.0348 -0.0351 -0.0211 0.0155  
Z -0.0228 0.0224 0.0224 -0.0239 -0.0217 0.0167

AT. 114 H X 0.0163 0.0166 0.0169 0.0170 0.0100 0.0072  
Y 0.0338 0.0341 0.0348 0.0351 0.0211 0.0155  
Z -0.0228 -0.0224 -0.0224 -0.0239 -0.0217 -0.0167

AT. 115 H X 0.0163 -0.0166 0.0169 -0.0170 0.0100 -0.0072  
Y -0.0338 0.0341 -0.0348 0.0351 -0.0211 0.0155  
Z -0.0228 0.0224 -0.0224 0.0239 -0.0217 0.0167

AT. 116 H X 0.0163 0.0166 -0.0169 -0.0170 0.0100 0.0072  
Y 0.0338 0.0341 -0.0348 -0.0351 0.0211 0.0155  
Z -0.0228 -0.0224 0.0224 0.0239 -0.0217 -0.0167

AT. 117 H X 0.0159 -0.0172 -0.0166 0.0164 0.0104 -0.0104  
Y -0.0289 0.0310 0.0281 -0.0301 -0.0292 0.0255  
Z -0.0314 0.0334 0.0306 -0.0325 -0.0273 0.0235

AT. 118 H X 0.0159 0.0172 0.0166 0.0164 0.0104 0.0104  
Y 0.0289 0.0310 0.0281 0.0301 0.0292 0.0255  
Z -0.0314 -0.0334 -0.0306 -0.0325 -0.0273 -0.0235

AT. 119 H X 0.0159 -0.0172 0.0166 -0.0164 0.0104 -0.0104  
Y -0.0289 0.0310 -0.0281 0.0301 -0.0292 0.0255  
Z -0.0314 0.0334 -0.0306 0.0325 -0.0273 0.0235

AT. 120 H X 0.0159 0.0172 -0.0166 -0.0164 0.0104 0.0104  
Y 0.0289 0.0310 -0.0281 -0.0301 0.0292 0.0255  
Z -0.0314 -0.0334 0.0306 0.0325 -0.0273 -0.0235

AT. 121 C X -0.0066 0.0067 0.0068 -0.0065 0.0013 -0.0026  
Y 0.0066 -0.0069 -0.0069 0.0067 -0.0008 0.0022  
Z -0.0021 0.0021 0.0021 -0.0020 0.0013 -0.0013

AT. 122 C X -0.0066 -0.0067 -0.0068 -0.0065 0.0013 0.0026  
Y -0.0066 -0.0069 -0.0069 -0.0067 0.0008 0.0022  
Z -0.0021 -0.0021 -0.0021 -0.0020 0.0013 0.0013

AT. 123 C X -0.0066 0.0067 -0.0068 0.0065 0.0013 -0.0026  
Y 0.0066 -0.0069 0.0069 -0.0067 -0.0008 0.0022

Z -0.0021 0.0021 -0.0021 0.0020 0.0013 -0.0013  
AT. 124 C X -0.0066 -0.0067 0.0068 0.0065 0.0013 0.0026  
Y -0.0066 -0.0069 0.0069 0.0067 0.0008 0.0022  
Z -0.0021 -0.0021 0.0021 0.0020 0.0013 0.0013  
AT. 125 H X 0.0345 -0.0354 -0.0349 0.0344 -0.0053 0.0139  
Y -0.0221 0.0225 0.0219 -0.0214 0.0108 -0.0126  
Z 0.0060 -0.0060 -0.0057 0.0056 -0.0055 0.0047  
AT. 126 H X 0.0345 0.0354 0.0349 0.0344 -0.0053 -0.0139  
Y 0.0221 0.0225 0.0219 0.0214 -0.0108 -0.0126  
Z 0.0060 0.0060 0.0057 0.0056 -0.0055 -0.0047  
AT. 127 H X 0.0345 -0.0354 0.0349 -0.0344 -0.0053 0.0139  
Y -0.0221 0.0225 -0.0219 0.0214 0.0108 -0.0126  
Z 0.0060 -0.0060 0.0057 -0.0056 -0.0055 0.0047  
AT. 128 H X 0.0345 0.0354 -0.0349 -0.0344 -0.0053 -0.0139  
Y 0.0221 0.0225 -0.0219 -0.0214 -0.0108 -0.0126  
Z 0.0060 0.0060 -0.0057 -0.0056 -0.0055 -0.0047  
AT. 129 H X 0.0161 -0.0167 -0.0183 0.0168 -0.0039 0.0074  
Y -0.0295 0.0306 0.0327 -0.0306 0.0043 -0.0120  
Z -0.0040 0.0047 0.0030 -0.0042 -0.0073 0.0034  
AT. 130 H X 0.0161 0.0167 0.0183 0.0168 -0.0039 -0.0074  
Y 0.0295 0.0306 0.0327 0.0306 -0.0043 -0.0120  
Z -0.0040 -0.0047 -0.0030 -0.0042 -0.0073 -0.0034  
AT. 131 H X 0.0161 -0.0167 0.0183 -0.0168 -0.0039 0.0074  
Y -0.0295 0.0306 -0.0327 0.0306 0.0043 -0.0120  
Z -0.0040 0.0047 -0.0030 0.0042 -0.0073 0.0034  
AT. 132 H X 0.0161 0.0167 -0.0183 -0.0168 -0.0039 -0.0074  
Y 0.0295 0.0306 -0.0327 -0.0306 -0.0043 -0.0120  
Z -0.0040 -0.0047 0.0030 0.0042 -0.0073 -0.0034  
AT. 133 C X -0.0008 0.0008 0.0007 -0.0008 -0.0004 0.0006  
Y -0.0041 0.0045 0.0041 -0.0041 -0.0002 0.0003  
Z -0.0045 0.0045 0.0044 -0.0045 -0.0018 0.0017  
AT. 134 C X -0.0008 -0.0008 -0.0007 -0.0008 -0.0004 -0.0006

Y 0.0041 0.0045 0.0041 0.0041 0.0002 0.0003  
Z -0.0045 -0.0045 -0.0044 -0.0045 -0.0018 -0.0017  
AT. 135 C X -0.0008 0.0008 -0.0007 0.0008 -0.0004 0.0006  
Y -0.0041 0.0045 -0.0041 0.0041 -0.0002 0.0003  
Z -0.0045 0.0045 -0.0044 0.0045 -0.0018 0.0017  
AT. 136 C X -0.0008 -0.0008 0.0007 0.0008 -0.0004 -0.0006  
Y 0.0041 0.0045 -0.0041 -0.0041 0.0002 0.0003  
Z -0.0045 -0.0045 0.0044 0.0045 -0.0018 -0.0017  
AT. 137 C X -0.0002 0.0003 0.0003 -0.0003 -0.0005 0.0003  
Y 0.0012 -0.0013 -0.0012 0.0012 -0.0002 0.0001  
Z 0.0013 -0.0012 -0.0012 0.0013 -0.0002 0.0000  
AT. 138 C X -0.0002 -0.0003 -0.0003 -0.0003 -0.0005 -0.0003  
Y -0.0012 -0.0013 -0.0012 -0.0012 0.0002 0.0001  
Z 0.0013 0.0012 0.0012 0.0013 -0.0002 -0.0000  
AT. 139 C X -0.0002 0.0003 -0.0003 0.0003 -0.0005 0.0003  
Y 0.0012 -0.0013 0.0012 -0.0012 -0.0002 0.0001  
Z 0.0013 -0.0012 0.0012 -0.0013 -0.0002 0.0000  
AT. 140 C X -0.0002 -0.0003 0.0003 0.0003 -0.0005 -0.0003  
Y -0.0012 -0.0013 0.0012 0.0012 0.0002 0.0001  
Z 0.0013 0.0012 -0.0012 -0.0013 -0.0002 -0.0000  
AT. 141 H X 0.0034 -0.0042 -0.0037 0.0041 0.0029 -0.0016  
Y 0.0023 -0.0033 -0.0027 0.0026 0.0052 -0.0035  
Z -0.0019 0.0022 0.0019 -0.0024 0.0001 -0.0005  
AT. 142 H X 0.0034 0.0042 0.0037 0.0041 0.0029 0.0016  
Y -0.0023 -0.0033 -0.0027 -0.0026 -0.0052 -0.0035  
Z -0.0019 -0.0022 -0.0019 -0.0024 0.0001 0.0005  
AT. 143 H X 0.0034 -0.0042 0.0037 -0.0041 0.0029 -0.0016  
Y 0.0023 -0.0033 0.0027 -0.0026 0.0052 -0.0035  
Z -0.0019 0.0022 -0.0019 0.0024 0.0001 -0.0005  
AT. 144 H X 0.0034 0.0042 -0.0037 -0.0041 0.0029 0.0016  
Y -0.0023 -0.0033 0.0027 0.0026 -0.0052 -0.0035  
Z -0.0019 -0.0022 0.0019 0.0024 0.0001 0.0005



AT. 145 H X 0.0033 -0.0044 -0.0037 0.0041 0.0051 -0.0032  
Y 0.0012 -0.0014 -0.0011 0.0011 -0.0004 0.0001  
Z 0.0049 -0.0064 -0.0049 0.0051 0.0050 -0.0037

AT. 146 H X 0.0033 0.0044 0.0037 0.0041 0.0051 0.0032  
Y -0.0012 -0.0014 -0.0011 -0.0011 0.0004 0.0001  
Z 0.0049 0.0064 0.0049 0.0051 0.0050 0.0037

AT. 147 H X 0.0033 -0.0044 0.0037 -0.0041 0.0051 -0.0032  
Y 0.0012 -0.0014 0.0011 -0.0011 -0.0004 0.0001  
Z 0.0049 -0.0064 0.0049 -0.0051 0.0050 -0.0037

AT. 148 H X 0.0033 0.0044 -0.0037 -0.0041 0.0051 0.0032  
Y -0.0012 -0.0014 0.0011 0.0011 0.0004 0.0001  
Z 0.0049 0.0064 -0.0049 -0.0051 0.0050 0.0037

AT. 149 O X 0.0004 -0.0003 -0.0004 0.0003 -0.0002 0.0001  
Y 0.0003 -0.0003 -0.0004 0.0003 -0.0006 0.0007  
Z 0.0014 -0.0013 -0.0016 0.0015 -0.0033 0.0039

AT. 150 O X 0.0004 0.0003 0.0004 0.0003 -0.0002 -0.0001  
Y -0.0003 -0.0003 -0.0004 -0.0003 0.0006 0.0007  
Z 0.0014 0.0013 0.0016 0.0015 -0.0033 -0.0039

AT. 151 O X 0.0004 -0.0003 0.0004 -0.0003 -0.0002 0.0001  
Y 0.0003 -0.0003 0.0004 -0.0003 -0.0006 0.0007  
Z 0.0014 -0.0013 0.0016 -0.0015 -0.0033 0.0039

AT. 152 O X 0.0004 0.0003 -0.0004 -0.0003 -0.0002 -0.0001  
Y -0.0003 -0.0003 0.0004 0.0003 0.0006 0.0007  
Z 0.0014 0.0013 -0.0016 -0.0015 -0.0033 -0.0039

AT. 153 H X 0.0105 -0.0097 -0.0118 0.0110 -0.0195 0.0241  
Y -0.0149 0.0138 0.0167 -0.0157 0.0250 -0.0308  
Z -0.0111 0.0103 0.0125 -0.0117 0.0190 -0.0235

AT. 154 H X 0.0105 0.0097 0.0118 0.0110 -0.0195 -0.0241  
Y 0.0149 0.0138 0.0167 0.0157 -0.0250 -0.0308  
Z -0.0111 -0.0103 -0.0125 -0.0117 0.0190 0.0235

AT. 155 H X 0.0105 -0.0097 0.0118 -0.0110 -0.0195 0.0241  
Y -0.0149 0.0138 -0.0167 0.0157 0.0250 -0.0308

Z -0.0111 0.0103 -0.0125 0.0117 0.0190 -0.0235  
AT. 156 H X 0.0105 0.0097 -0.0118 -0.0110 -0.0195 -0.0241  
Y 0.0149 0.0138 -0.0167 -0.0157 -0.0250 -0.0308  
Z -0.0111 -0.0103 0.0125 0.0117 0.0190 0.0235  
AT. 157 O X 0.0010 -0.0011 -0.0012 0.0011 0.0008 -0.0009  
Y -0.0002 0.0003 0.0002 -0.0002 0.0004 -0.0006  
Z 0.0001 0.0001 0.0000 0.0000 -0.0016 0.0019  
AT. 158 O X 0.0010 0.0011 0.0012 0.0011 0.0008 0.0009  
Y 0.0002 0.0003 0.0002 0.0002 -0.0004 -0.0006  
Z 0.0001 -0.0001 -0.0000 0.0000 -0.0016 -0.0019  
AT. 159 O X 0.0010 -0.0011 0.0012 -0.0011 0.0008 -0.0009  
Y -0.0002 0.0003 -0.0002 0.0002 0.0004 -0.0006  
Z 0.0001 0.0001 -0.0000 -0.0000 -0.0016 0.0019  
AT. 160 O X 0.0010 0.0011 -0.0012 -0.0011 0.0008 0.0009  
Y 0.0002 0.0003 -0.0002 -0.0002 -0.0004 -0.0006  
Z 0.0001 -0.0001 0.0000 -0.0000 -0.0016 -0.0019  
AT. 161 O X -0.0001 0.0003 0.0002 -0.0002 -0.0006 0.0006  
Y 0.0000 -0.0001 -0.0001 0.0000 -0.0002 0.0003  
Z -0.0003 0.0004 0.0004 -0.0003 -0.0001 0.0001  
AT. 162 O X -0.0001 -0.0003 -0.0002 -0.0002 -0.0006 -0.0006  
Y -0.0000 -0.0001 -0.0001 -0.0000 0.0002 0.0003  
Z -0.0003 -0.0004 -0.0004 -0.0003 -0.0001 -0.0001  
AT. 163 O X -0.0001 0.0003 -0.0002 0.0002 -0.0006 0.0006  
Y 0.0000 -0.0001 0.0001 -0.0000 -0.0002 0.0003  
Z -0.0003 0.0004 -0.0004 0.0003 -0.0001 0.0001  
AT. 164 O X -0.0001 -0.0003 0.0002 0.0002 -0.0006 -0.0006  
Y -0.0000 -0.0001 0.0001 0.0000 0.0002 0.0003  
Z -0.0003 -0.0004 0.0004 0.0003 -0.0001 -0.0001  
AT. 165 H X 0.0023 -0.0035 -0.0029 0.0028 0.0029 -0.0014  
Y 0.0015 -0.0023 -0.0020 0.0018 0.0018 -0.0009  
Z 0.0031 -0.0052 -0.0049 0.0036 0.0041 -0.0030  
AT. 166 H X 0.0023 0.0035 0.0029 0.0028 0.0029 0.0014

Y -0.0015 -0.0023 -0.0020 -0.0018 -0.0018 -0.0009  
Z 0.0031 0.0052 0.0049 0.0036 0.0041 0.0030  
AT.167 H X 0.0023 -0.0035 0.0029 -0.0028 0.0029 -0.0014  
Y 0.0015 -0.0023 0.0020 -0.0018 0.0018 -0.0009  
Z 0.0031 -0.0052 0.0049 -0.0036 0.0041 -0.0030  
AT.168 H X 0.0023 0.0035 -0.0029 -0.0028 0.0029 0.0014  
Y -0.0015 -0.0023 0.0020 0.0018 -0.0018 -0.0009  
Z 0.0031 0.0052 -0.0049 -0.0036 0.0041 0.0030  
AT.169 O X -0.0000 0.0001 -0.0000 0.0000 -0.0001 0.0000  
Y 0.0003 -0.0002 -0.0006 0.0006 -0.0003 0.0003  
Z -0.0002 0.0002 -0.0001 0.0001 0.0002 -0.0003  
AT.170 O X -0.0000 -0.0001 0.0000 0.0000 -0.0001 -0.0000  
Y -0.0003 -0.0002 -0.0006 -0.0006 0.0003 0.0003  
Z -0.0002 -0.0002 0.0001 0.0001 0.0002 0.0003  
AT.171 O X -0.0000 0.0001 0.0000 -0.0000 -0.0001 0.0000  
Y 0.0003 -0.0002 0.0006 -0.0006 -0.0003 0.0003  
Z -0.0002 0.0002 0.0001 -0.0001 0.0002 -0.0003  
AT.172 O X -0.0000 -0.0001 -0.0000 -0.0000 -0.0001 -0.0000  
Y -0.0003 -0.0002 0.0006 0.0006 0.0003 0.0003  
Z -0.0002 -0.0002 -0.0001 -0.0001 0.0002 0.0003  
AT.173 H X 0.0009 -0.0014 0.0014 -0.0010 0.0003 0.0003  
Y -0.0017 0.0017 0.0006 -0.0005 0.0014 -0.0016  
Z 0.0052 -0.0058 -0.0028 0.0032 -0.0072 0.0099  
AT.174 H X 0.0009 0.0014 -0.0014 -0.0010 0.0003 -0.0003  
Y 0.0017 0.0017 0.0006 0.0005 -0.0014 -0.0016  
Z 0.0052 0.0058 0.0028 0.0032 -0.0072 -0.0099  
AT.175 H X 0.0009 -0.0014 -0.0014 0.0010 0.0003 0.0003  
Y -0.0017 0.0017 -0.0006 0.0005 0.0014 -0.0016  
Z 0.0052 -0.0058 0.0028 -0.0032 -0.0072 0.0099  
AT.176 H X 0.0009 0.0014 0.0014 0.0010 0.0003 -0.0003  
Y 0.0017 0.0017 -0.0006 -0.0005 -0.0014 -0.0016  
Z 0.0052 0.0058 -0.0028 -0.0032 -0.0072 -0.0099

FREQ(CM\*\*-1) 1428.94 1429.37 1436.48 1438.05 1438.79 1440.21

AT. 1 I X -0.0000 0.0000 0.0000 -0.0000 -0.0000 0.0000

Y -0.0000 -0.0000 0.0000 0.0000 0.0000 0.0000

Z -0.0000 -0.0000 -0.0000 0.0000 0.0000 0.0000

AT. 2 I X 0.0000 0.0000 0.0000 0.0000 0.0000 0.0000

Y -0.0000 0.0000 -0.0000 0.0000 0.0000 -0.0000

Z 0.0000 -0.0000 -0.0000 -0.0000 -0.0000 0.0000

AT. 3 I X 0.0000 -0.0000 0.0000 -0.0000 0.0000 -0.0000

Y 0.0000 0.0000 0.0000 0.0000 -0.0000 -0.0000

Z 0.0000 0.0000 -0.0000 0.0000 -0.0000 -0.0000

AT. 4 I X -0.0000 -0.0000 0.0000 0.0000 -0.0000 -0.0000

Y 0.0000 -0.0000 -0.0000 0.0000 -0.0000 0.0000

Z -0.0000 0.0000 -0.0000 -0.0000 0.0000 -0.0000

AT. 5 I X 0.0000 -0.0000 0.0000 0.0000 0.0000 -0.0000

Y -0.0000 0.0000 0.0000 0.0000 0.0000 -0.0000

Z -0.0000 -0.0000 0.0000 -0.0000 0.0000 -0.0000

AT. 6 I X -0.0000 -0.0000 0.0000 -0.0000 -0.0000 -0.0000

Y -0.0000 -0.0000 -0.0000 0.0000 0.0000 0.0000

Z 0.0000 -0.0000 0.0000 0.0000 -0.0000 -0.0000

AT. 7 I X -0.0000 0.0000 0.0000 0.0000 -0.0000 0.0000

Y 0.0000 -0.0000 0.0000 0.0000 -0.0000 0.0000

Z 0.0000 0.0000 0.0000 -0.0000 -0.0000 0.0000

AT. 8 I X 0.0000 0.0000 0.0000 -0.0000 0.0000 0.0000

Y 0.0000 0.0000 -0.0000 0.0000 -0.0000 -0.0000

Z -0.0000 0.0000 0.0000 0.0000 0.0000 0.0000

AT. 9 N X 0.0006 -0.0005 -0.0021 0.0024 0.0020 -0.0020

Y 0.0011 -0.0010 -0.0008 0.0012 0.0003 -0.0004

Z 0.0004 -0.0001 -0.0024 0.0024 0.0021 -0.0018

AT. 10 N X -0.0006 -0.0005 -0.0021 -0.0024 -0.0020 -0.0020

Y 0.0011 0.0010 0.0008 0.0012 0.0003 0.0004

Z -0.0004 -0.0001 -0.0024 -0.0024 -0.0021 -0.0018  
AT. 11 N X -0.0006 0.0005 -0.0021 0.0024 -0.0020 0.0020  
Y -0.0011 0.0010 -0.0008 0.0012 -0.0003 0.0004  
Z -0.0004 0.0001 -0.0024 0.0024 -0.0021 0.0018  
AT. 12 N X 0.0006 0.0005 -0.0021 -0.0024 0.0020 0.0020  
Y -0.0011 -0.0010 0.0008 0.0012 -0.0003 -0.0004  
Z 0.0004 0.0001 -0.0024 -0.0024 0.0021 0.0018  
AT. 13 N X -0.0011 0.0007 0.0014 -0.0016 -0.0012 0.0015  
Y 0.0010 -0.0006 -0.0009 0.0012 0.0009 -0.0013  
Z -0.0021 0.0015 0.0009 -0.0012 -0.0006 0.0015  
AT. 14 N X 0.0011 0.0007 0.0014 0.0016 0.0012 0.0015  
Y 0.0010 0.0006 0.0009 0.0012 0.0009 0.0013  
Z 0.0021 0.0015 0.0009 0.0012 0.0006 0.0015  
AT. 15 N X 0.0011 -0.0007 0.0014 -0.0016 0.0012 -0.0015  
Y -0.0010 0.0006 -0.0009 0.0012 -0.0009 0.0013  
Z 0.0021 -0.0015 0.0009 -0.0012 0.0006 -0.0015  
AT. 16 N X -0.0011 -0.0007 0.0014 0.0016 -0.0012 -0.0015  
Y -0.0010 -0.0006 0.0009 0.0012 -0.0009 -0.0013  
Z -0.0021 -0.0015 0.0009 0.0012 -0.0006 -0.0015  
AT. 17 O X 0.0000 0.0000 -0.0001 0.0001 0.0001 -0.0002  
Y -0.0002 0.0002 0.0001 -0.0002 0.0002 -0.0001  
Z 0.0005 -0.0002 -0.0008 0.0008 0.0008 -0.0010  
AT. 18 O X -0.0000 0.0000 -0.0001 -0.0001 -0.0001 -0.0002  
Y -0.0002 -0.0002 -0.0001 -0.0002 0.0002 0.0001  
Z -0.0005 -0.0002 -0.0008 -0.0008 -0.0008 -0.0010  
AT. 19 O X -0.0000 -0.0000 -0.0001 0.0001 -0.0001 0.0002  
Y 0.0002 -0.0002 0.0001 -0.0002 -0.0002 0.0001  
Z -0.0005 0.0002 -0.0008 0.0008 -0.0008 0.0010  
AT. 20 O X 0.0000 -0.0000 -0.0001 -0.0001 0.0001 0.0002  
Y 0.0002 0.0002 -0.0001 -0.0002 -0.0002 -0.0001  
Z 0.0005 0.0002 -0.0008 -0.0008 0.0008 0.0010  
AT. 21 O X -0.0001 0.0001 -0.0001 0.0000 0.0001 -0.0000

Y 0.0001 -0.0002 0.0002 -0.0002 -0.0003 0.0003  
Z -0.0009 0.0007 0.0004 -0.0006 -0.0002 0.0004  
AT. 22 O X 0.0001 0.0001 -0.0001 -0.0000 -0.0001 -0.0000  
Y 0.0001 0.0002 -0.0002 -0.0002 -0.0003 -0.0003  
Z 0.0009 0.0007 0.0004 0.0006 0.0002 0.0004  
AT. 23 O X 0.0001 -0.0001 -0.0001 0.0000 -0.0001 0.0000  
Y -0.0001 0.0002 0.0002 -0.0002 0.0003 -0.0003  
Z 0.0009 -0.0007 0.0004 -0.0006 0.0002 -0.0004  
AT. 24 O X -0.0001 -0.0001 -0.0001 -0.0000 0.0001 0.0000  
Y -0.0001 -0.0002 -0.0002 -0.0002 0.0003 0.0003  
Z -0.0009 -0.0007 0.0004 0.0006 -0.0002 -0.0004  
AT. 25 C X 0.0001 -0.0002 0.0005 -0.0003 -0.0006 0.0003  
Y -0.0005 0.0007 -0.0005 -0.0000 0.0006 0.0000  
Z 0.0007 -0.0008 -0.0001 0.0005 -0.0001 -0.0005  
AT. 26 C X -0.0001 -0.0002 0.0005 0.0003 0.0006 0.0003  
Y -0.0005 -0.0007 0.0005 -0.0000 0.0006 -0.0000  
Z -0.0007 -0.0008 -0.0001 -0.0005 0.0001 -0.0005  
AT. 27 C X -0.0001 0.0002 0.0005 -0.0003 0.0006 -0.0003  
Y 0.0005 -0.0007 -0.0005 -0.0000 -0.0006 -0.0000  
Z -0.0007 0.0008 -0.0001 0.0005 0.0001 0.0005  
AT. 28 C X 0.0001 0.0002 0.0005 0.0003 -0.0006 -0.0003  
Y 0.0005 0.0007 0.0005 -0.0000 -0.0006 0.0000  
Z 0.0007 0.0008 -0.0001 -0.0005 -0.0001 0.0005  
AT. 29 H X 0.0004 -0.0005 -0.0007 0.0007 0.0008 -0.0006  
Y 0.0025 -0.0045 0.0081 -0.0055 -0.0108 0.0056  
Z -0.0005 0.0009 0.0000 -0.0001 -0.0000 -0.0001  
AT. 30 H X -0.0004 -0.0005 -0.0007 -0.0007 -0.0008 -0.0006  
Y 0.0025 0.0045 -0.0081 -0.0055 -0.0108 -0.0056  
Z 0.0005 0.0009 0.0000 0.0001 0.0000 -0.0001  
AT. 31 H X -0.0004 0.0005 -0.0007 0.0007 -0.0008 0.0006  
Y -0.0025 0.0045 0.0081 -0.0055 0.0108 -0.0056  
Z 0.0005 -0.0009 0.0000 -0.0001 0.0000 0.0001

AT. 32 H X 0.0004 0.0005 -0.0007 -0.0007 0.0008 0.0006  
Y -0.0025 -0.0045 -0.0081 -0.0055 0.0108 0.0056  
Z -0.0005 -0.0009 0.0000 0.0001 -0.0000 0.0001

AT. 33 H X -0.0023 0.0038 -0.0062 0.0038 0.0084 -0.0037  
Y 0.0004 -0.0010 0.0019 -0.0015 -0.0026 0.0015  
Z -0.0019 0.0034 -0.0047 0.0031 0.0062 -0.0033

AT. 34 H X 0.0023 0.0038 -0.0062 -0.0038 -0.0084 -0.0037  
Y 0.0004 0.0010 -0.0019 -0.0015 -0.0026 -0.0015  
Z 0.0019 0.0034 -0.0047 -0.0031 -0.0062 -0.0033

AT. 35 H X 0.0023 -0.0038 -0.0062 0.0038 -0.0084 0.0037  
Y -0.0004 0.0010 0.0019 -0.0015 0.0026 -0.0015  
Z 0.0019 -0.0034 -0.0047 0.0031 -0.0062 0.0033

AT. 36 H X -0.0023 -0.0038 -0.0062 -0.0038 0.0084 0.0037  
Y -0.0004 -0.0010 -0.0019 -0.0015 0.0026 0.0015  
Z -0.0019 -0.0034 -0.0047 -0.0031 0.0062 0.0033

AT. 37 C X -0.0000 -0.0000 0.0003 -0.0001 -0.0002 0.0001  
Y 0.0002 -0.0000 -0.0007 0.0013 0.0010 -0.0014  
Z -0.0015 0.0009 0.0024 -0.0027 -0.0023 0.0030

AT. 38 C X 0.0000 -0.0000 0.0003 0.0001 0.0002 0.0001  
Y 0.0002 0.0000 0.0007 0.0013 0.0010 0.0014  
Z 0.0015 0.0009 0.0024 0.0027 0.0023 0.0030

AT. 39 C X 0.0000 0.0000 0.0003 -0.0001 0.0002 -0.0001  
Y -0.0002 0.0000 -0.0007 0.0013 -0.0010 0.0014  
Z 0.0015 -0.0009 0.0024 -0.0027 0.0023 -0.0030

AT. 40 C X -0.0000 0.0000 0.0003 0.0001 -0.0002 -0.0001  
Y -0.0002 -0.0000 0.0007 0.0013 -0.0010 -0.0014  
Z -0.0015 -0.0009 0.0024 0.0027 -0.0023 -0.0030

AT. 41 C X -0.0052 0.0047 0.0020 -0.0037 -0.0018 0.0039  
Y -0.0043 0.0040 0.0020 -0.0037 -0.0016 0.0037  
Z -0.0022 0.0026 -0.0005 -0.0009 0.0009 0.0007

AT. 42 C X 0.0052 0.0047 0.0020 0.0037 0.0018 0.0039  
Y -0.0043 -0.0040 -0.0020 -0.0037 -0.0016 -0.0037

Z 0.0022 0.0026 -0.0005 0.0009 -0.0009 0.0007  
AT. 43 C X 0.0052 -0.0047 0.0020 -0.0037 0.0018 -0.0039  
Y 0.0043 -0.0040 0.0020 -0.0037 0.0016 -0.0037  
Z 0.0022 -0.0026 -0.0005 -0.0009 -0.0009 -0.0007  
AT. 44 C X -0.0052 -0.0047 0.0020 0.0037 -0.0018 -0.0039  
Y 0.0043 0.0040 -0.0020 -0.0037 0.0016 0.0037  
Z -0.0022 -0.0026 -0.0005 0.0009 0.0009 -0.0007  
AT. 45 H X 0.0318 -0.0281 -0.0079 0.0167 0.0068 -0.0177  
Y 0.0113 -0.0130 0.0067 0.0016 -0.0080 -0.0028  
Z 0.0053 -0.0068 0.0055 0.0000 -0.0063 -0.0011  
AT. 46 H X -0.0318 -0.0281 -0.0079 -0.0167 -0.0068 -0.0177  
Y 0.0113 0.0130 -0.0067 0.0016 -0.0080 0.0028  
Z -0.0053 -0.0068 0.0055 -0.0000 0.0063 -0.0011  
AT. 47 H X -0.0318 0.0281 -0.0079 0.0167 -0.0068 0.0177  
Y -0.0113 0.0130 0.0067 0.0016 0.0080 0.0028  
Z -0.0053 0.0068 0.0055 0.0000 0.0063 0.0011  
AT. 48 H X 0.0318 0.0281 -0.0079 -0.0167 0.0068 0.0177  
Y -0.0113 -0.0130 -0.0067 0.0016 0.0080 -0.0028  
Z 0.0053 0.0068 0.0055 -0.0000 -0.0063 0.0011  
AT. 49 H X 0.0203 -0.0196 -0.0073 0.0137 0.0064 -0.0156  
Y 0.0217 -0.0192 -0.0111 0.0157 0.0107 -0.0173  
Z -0.0040 0.0000 0.0103 -0.0072 -0.0106 0.0054  
AT. 50 H X -0.0203 -0.0196 -0.0073 -0.0137 -0.0064 -0.0156  
Y 0.0217 0.0192 0.0111 0.0157 0.0107 0.0173  
Z 0.0040 0.0000 0.0103 0.0072 0.0106 0.0054  
AT. 51 H X -0.0203 0.0196 -0.0073 0.0137 -0.0064 0.0156  
Y -0.0217 0.0192 -0.0111 0.0157 -0.0107 0.0173  
Z 0.0040 -0.0000 0.0103 -0.0072 0.0106 -0.0054  
AT. 52 H X 0.0203 0.0196 -0.0073 -0.0137 0.0064 0.0156  
Y -0.0217 -0.0192 0.0111 0.0157 -0.0107 -0.0173  
Z -0.0040 -0.0000 0.0103 0.0072 -0.0106 -0.0054  
AT. 53 C X 0.0014 -0.0014 0.0005 0.0002 -0.0006 -0.0003



Y 0.0034 -0.0032 -0.0033 0.0039 0.0027 -0.0038  
Z 0.0107 -0.0107 0.0015 0.0015 -0.0028 -0.0011  
AT. 54 C X -0.0014 -0.0014 0.0005 -0.0002 0.0006 -0.0003  
Y 0.0034 0.0032 0.0033 0.0039 0.0027 0.0038  
Z -0.0107 -0.0107 0.0015 -0.0015 0.0028 -0.0011  
AT. 55 C X -0.0014 0.0014 0.0005 0.0002 0.0006 0.0003  
Y -0.0034 0.0032 -0.0033 0.0039 -0.0027 0.0038  
Z -0.0107 0.0107 0.0015 0.0015 0.0028 0.0011  
AT. 56 C X 0.0014 0.0014 0.0005 -0.0002 -0.0006 0.0003  
Y -0.0034 -0.0032 0.0033 0.0039 -0.0027 -0.0038  
Z 0.0107 0.0107 0.0015 -0.0015 -0.0028 0.0011  
AT. 57 C X -0.0017 0.0019 0.0002 -0.0006 0.0004 -0.0001  
Y -0.0059 0.0061 0.0015 -0.0027 0.0003 0.0001  
Z -0.0115 0.0122 0.0012 -0.0038 0.0021 -0.0005  
AT. 58 C X 0.0017 0.0019 0.0002 0.0006 -0.0004 -0.0001  
Y -0.0059 -0.0061 -0.0015 -0.0027 0.0003 -0.0001  
Z 0.0115 0.0122 0.0012 0.0038 -0.0021 -0.0005  
AT. 59 C X 0.0017 -0.0019 0.0002 -0.0006 -0.0004 0.0001  
Y 0.0059 -0.0061 0.0015 -0.0027 -0.0003 -0.0001  
Z 0.0115 -0.0122 0.0012 -0.0038 -0.0021 0.0005  
AT. 60 C X -0.0017 -0.0019 0.0002 0.0006 0.0004 0.0001  
Y 0.0059 0.0061 -0.0015 -0.0027 -0.0003 0.0001  
Z -0.0115 -0.0122 0.0012 0.0038 0.0021 0.0005  
AT. 61 H X 0.0179 -0.0175 -0.0063 0.0100 0.0007 0.0002  
Y 0.0003 0.0004 -0.0026 0.0026 0.0024 -0.0006  
Z 0.0419 -0.0433 -0.0042 0.0136 -0.0091 0.0046  
AT. 62 H X -0.0179 -0.0175 -0.0063 -0.0100 -0.0007 0.0002  
Y 0.0003 -0.0004 0.0026 0.0026 0.0024 0.0006  
Z -0.0419 -0.0433 -0.0042 -0.0136 0.0091 0.0046  
AT. 63 H X -0.0179 0.0175 -0.0063 0.0100 -0.0007 -0.0002  
Y -0.0003 -0.0004 -0.0026 0.0026 -0.0024 0.0006  
Z -0.0419 0.0433 -0.0042 0.0136 0.0091 -0.0046

AT. 64 H X 0.0179 0.0175 -0.0063 -0.0100 0.0007 -0.0002  
Y -0.0003 0.0004 0.0026 0.0026 -0.0024 -0.0006  
Z 0.0419 0.0433 -0.0042 -0.0136 -0.0091 -0.0046

AT. 65 H X -0.0090 0.0089 0.0031 -0.0049 -0.0004 0.0002  
Y 0.0172 -0.0156 -0.0077 0.0108 0.0028 -0.0009  
Z 0.0382 -0.0429 -0.0057 0.0137 -0.0073 0.0044

AT. 66 H X 0.0090 0.0089 0.0031 0.0049 0.0004 0.0002  
Y 0.0172 0.0156 0.0077 0.0108 0.0028 0.0009  
Z -0.0382 -0.0429 -0.0057 -0.0137 0.0073 0.0044

AT. 67 H X 0.0090 -0.0089 0.0031 -0.0049 0.0004 -0.0002  
Y -0.0172 0.0156 -0.0077 0.0108 -0.0028 0.0009  
Z -0.0382 0.0429 -0.0057 0.0137 0.0073 -0.0044

AT. 68 H X -0.0090 -0.0089 0.0031 0.0049 -0.0004 -0.0002  
Y -0.0172 -0.0156 0.0077 0.0108 -0.0028 -0.0009  
Z 0.0382 0.0429 -0.0057 -0.0137 -0.0073 -0.0044

AT. 69 H X 0.0050 -0.0090 -0.0008 0.0017 -0.0024 0.0014  
Y 0.0370 -0.0405 -0.0052 0.0130 -0.0076 0.0034  
Z 0.0276 -0.0310 -0.0045 0.0102 -0.0057 0.0028

AT. 70 H X -0.0050 -0.0090 -0.0008 -0.0017 0.0024 0.0014  
Y 0.0370 0.0405 0.0052 0.0130 -0.0076 -0.0034  
Z -0.0276 -0.0310 -0.0045 -0.0102 0.0057 0.0028

AT. 71 H X -0.0050 0.0090 -0.0008 0.0017 0.0024 -0.0014  
Y -0.0370 0.0405 -0.0052 0.0130 0.0076 -0.0034  
Z -0.0276 0.0310 -0.0045 0.0102 0.0057 -0.0028

AT. 72 H X 0.0050 0.0090 -0.0008 -0.0017 -0.0024 -0.0014  
Y -0.0370 -0.0405 0.0052 0.0130 0.0076 0.0034  
Z 0.0276 0.0310 -0.0045 -0.0102 -0.0057 -0.0028

AT. 73 C X -0.0024 0.0035 -0.0026 0.0018 0.0028 -0.0015  
Y 0.0007 -0.0014 0.0036 -0.0030 -0.0033 0.0027  
Z -0.0093 0.0114 -0.0082 0.0052 0.0097 -0.0056

AT. 74 C X 0.0024 0.0035 -0.0026 -0.0018 -0.0028 -0.0015  
Y 0.0007 0.0014 -0.0036 -0.0030 -0.0033 -0.0027

Z 0.0093 0.0114 -0.0082 -0.0052 -0.0097 -0.0056  
AT. 75 C X 0.0024 -0.0035 -0.0026 0.0018 -0.0028 0.0015  
Y -0.0007 0.0014 0.0036 -0.0030 0.0033 -0.0027  
Z 0.0093 -0.0114 -0.0082 0.0052 -0.0097 0.0056  
AT. 76 C X -0.0024 -0.0035 -0.0026 -0.0018 0.0028 0.0015  
Y -0.0007 -0.0014 -0.0036 -0.0030 0.0033 0.0027  
Z -0.0093 -0.0114 -0.0082 -0.0052 0.0097 0.0056  
AT. 77 C X -0.0007 0.0002 0.0051 -0.0055 -0.0045 0.0043  
Y -0.0011 0.0001 0.0076 -0.0080 -0.0070 0.0067  
Z -0.0005 0.0016 -0.0060 0.0058 0.0064 -0.0056  
AT. 78 C X 0.0007 0.0002 0.0051 0.0055 0.0045 0.0043  
Y -0.0011 -0.0001 -0.0076 -0.0080 -0.0070 -0.0067  
Z 0.0005 0.0016 -0.0060 -0.0058 -0.0064 -0.0056  
AT. 79 C X 0.0007 -0.0002 0.0051 -0.0055 0.0045 -0.0043  
Y 0.0011 -0.0001 0.0076 -0.0080 0.0070 -0.0067  
Z 0.0005 -0.0016 -0.0060 0.0058 -0.0064 0.0056  
AT. 80 C X -0.0007 -0.0002 0.0051 0.0055 -0.0045 -0.0043  
Y 0.0011 0.0001 -0.0076 -0.0080 0.0070 0.0067  
Z -0.0005 -0.0016 -0.0060 -0.0058 0.0064 0.0056  
AT. 81 H X 0.0024 0.0002 -0.0241 0.0251 0.0220 -0.0209  
Y 0.0021 0.0008 -0.0294 0.0305 0.0272 -0.0254  
Z 0.0018 -0.0064 0.0314 -0.0306 -0.0340 0.0293  
AT. 82 H X -0.0024 0.0002 -0.0241 -0.0251 -0.0220 -0.0209  
Y 0.0021 -0.0008 0.0294 0.0305 0.0272 0.0254  
Z -0.0018 -0.0064 0.0314 0.0306 0.0340 0.0293  
AT. 83 H X -0.0024 -0.0002 -0.0241 0.0251 -0.0220 0.0209  
Y -0.0021 -0.0008 -0.0294 0.0305 -0.0272 0.0254  
Z -0.0018 0.0064 0.0314 -0.0306 0.0340 -0.0293  
AT. 84 H X 0.0024 -0.0002 -0.0241 -0.0251 0.0220 0.0209  
Y -0.0021 0.0008 0.0294 0.0305 -0.0272 -0.0254  
Z 0.0018 0.0064 0.0314 0.0306 -0.0340 -0.0293  
AT. 85 H X -0.0004 0.0024 -0.0142 0.0149 0.0120 -0.0115

Y -0.0003 0.0051 -0.0251 0.0251 0.0265 -0.0230  
Z -0.0010 -0.0033 0.0261 -0.0268 -0.0259 0.0231  
AT. 86 H X 0.0004 0.0024 -0.0142 -0.0149 -0.0120 -0.0115  
Y -0.0003 -0.0051 0.0251 0.0251 0.0265 0.0230  
Z 0.0010 -0.0033 0.0261 0.0268 0.0259 0.0231  
AT. 87 H X 0.0004 -0.0024 -0.0142 0.0149 -0.0120 0.0115  
Y 0.0003 -0.0051 -0.0251 0.0251 -0.0265 0.0230  
Z 0.0010 0.0033 0.0261 -0.0268 0.0259 -0.0231  
AT. 88 H X -0.0004 -0.0024 -0.0142 -0.0149 0.0120 0.0115  
Y 0.0003 0.0051 0.0251 0.0251 -0.0265 -0.0230  
Z -0.0010 0.0033 0.0261 0.0268 -0.0259 -0.0231  
AT. 89 C X 0.0015 -0.0022 0.0016 -0.0011 -0.0020 0.0014  
Y 0.0020 -0.0009 -0.0073 0.0075 0.0065 -0.0065  
Z 0.0017 -0.0042 0.0092 -0.0082 -0.0093 0.0079  
AT. 90 C X -0.0015 -0.0022 0.0016 0.0011 0.0020 0.0014  
Y 0.0020 0.0009 0.0073 0.0075 0.0065 0.0065  
Z -0.0017 -0.0042 0.0092 0.0082 0.0093 0.0079  
AT. 91 C X -0.0015 0.0022 0.0016 -0.0011 0.0020 -0.0014  
Y -0.0020 0.0009 -0.0073 0.0075 -0.0065 0.0065  
Z -0.0017 0.0042 0.0092 -0.0082 0.0093 -0.0079  
AT. 92 C X 0.0015 0.0022 0.0016 0.0011 -0.0020 -0.0014  
Y -0.0020 -0.0009 0.0073 0.0075 -0.0065 -0.0065  
Z 0.0017 0.0042 0.0092 0.0082 -0.0093 -0.0079  
AT. 93 C X 0.0005 -0.0004 -0.0002 0.0002 0.0001 -0.0004  
Y -0.0033 0.0010 0.0053 -0.0050 -0.0050 0.0063  
Z 0.0043 -0.0005 -0.0085 0.0079 0.0084 -0.0102  
AT. 94 C X -0.0005 -0.0004 -0.0002 -0.0002 -0.0001 -0.0004  
Y -0.0033 -0.0010 -0.0053 -0.0050 -0.0050 -0.0063  
Z -0.0043 -0.0005 -0.0085 -0.0079 -0.0084 -0.0102  
AT. 95 C X -0.0005 0.0004 -0.0002 0.0002 -0.0001 0.0004  
Y 0.0033 -0.0010 0.0053 -0.0050 0.0050 -0.0063  
Z -0.0043 0.0005 -0.0085 0.0079 -0.0084 0.0102

AT. 96 C X 0.0005 0.0004 -0.0002 -0.0002 0.0001 0.0004  
Y 0.0033 0.0010 -0.0053 -0.0050 0.0050 0.0063  
Z 0.0043 0.0005 -0.0085 -0.0079 0.0084 0.0102

AT. 97 H X -0.0118 0.0029 0.0174 -0.0162 -0.0176 0.0225  
Y 0.0096 -0.0051 -0.0076 0.0080 0.0072 -0.0115  
Z -0.0146 -0.0008 0.0308 -0.0274 -0.0325 0.0390

AT. 98 H X 0.0118 0.0029 0.0174 0.0162 0.0176 0.0225  
Y 0.0096 0.0051 0.0076 0.0080 0.0072 0.0115  
Z 0.0146 -0.0008 0.0308 0.0274 0.0325 0.0390

AT. 99 H X 0.0118 -0.0029 0.0174 -0.0162 0.0176 -0.0225  
Y -0.0096 0.0051 -0.0076 0.0080 -0.0072 0.0115  
Z 0.0146 0.0008 0.0308 -0.0274 0.0325 -0.0390

AT. 100 H X -0.0118 -0.0029 0.0174 0.0162 -0.0176 -0.0225  
Y -0.0096 -0.0051 0.0076 0.0080 -0.0072 -0.0115  
Z -0.0146 0.0008 0.0308 0.0274 -0.0325 -0.0390

AT. 101 H X 0.0058 -0.0008 -0.0096 0.0089 0.0098 -0.0116  
Y 0.0073 -0.0015 -0.0100 0.0094 0.0102 -0.0128  
Z -0.0207 0.0074 0.0239 -0.0225 -0.0227 0.0325

AT. 102 H X -0.0058 -0.0008 -0.0096 -0.0089 -0.0098 -0.0116  
Y 0.0073 0.0015 0.0100 0.0094 0.0102 0.0128  
Z 0.0207 0.0074 0.0239 0.0225 0.0227 0.0325

AT. 103 H X -0.0058 0.0008 -0.0096 0.0089 -0.0098 0.0116  
Y -0.0073 0.0015 -0.0100 0.0094 -0.0102 0.0128  
Z 0.0207 -0.0074 0.0239 -0.0225 0.0227 -0.0325

AT. 104 H X 0.0058 0.0008 -0.0096 -0.0089 0.0098 0.0116  
Y -0.0073 -0.0015 0.0100 0.0094 -0.0102 -0.0128  
Z -0.0207 -0.0074 0.0239 0.0225 -0.0227 -0.0325

AT. 105 H X -0.0008 0.0059 -0.0116 0.0093 0.0134 -0.0120  
Y 0.0186 -0.0066 -0.0246 0.0231 0.0237 -0.0322  
Z -0.0123 0.0030 0.0196 -0.0181 -0.0195 0.0249

AT. 106 H X 0.0008 0.0059 -0.0116 -0.0093 -0.0134 -0.0120  
Y 0.0186 0.0066 0.0246 0.0231 0.0237 0.0322

Z 0.0123 0.0030 0.0196 0.0181 0.0195 0.0249  
AT. 107 H X 0.0008 -0.0059 -0.0116 0.0093 -0.0134 0.0120  
Y -0.0186 0.0066 -0.0246 0.0231 -0.0237 0.0322  
Z 0.0123 -0.0030 0.0196 -0.0181 0.0195 -0.0249  
AT. 108 H X -0.0008 -0.0059 -0.0116 -0.0093 0.0134 0.0120  
Y -0.0186 -0.0066 0.0246 0.0231 -0.0237 -0.0322  
Z -0.0123 -0.0030 0.0196 0.0181 -0.0195 -0.0249  
AT. 109 C X 0.0026 -0.0020 -0.0016 0.0019 0.0013 -0.0022  
Y -0.0065 0.0053 0.0032 -0.0045 -0.0024 0.0049  
Z -0.0056 0.0050 0.0007 -0.0021 -0.0001 0.0022  
AT. 110 C X -0.0026 -0.0020 -0.0016 -0.0019 -0.0013 -0.0022  
Y -0.0065 -0.0053 -0.0032 -0.0045 -0.0024 -0.0049  
Z 0.0056 0.0050 0.0007 0.0021 0.0001 0.0022  
AT. 111 C X -0.0026 0.0020 -0.0016 0.0019 -0.0013 0.0022  
Y 0.0065 -0.0053 0.0032 -0.0045 0.0024 -0.0049  
Z 0.0056 -0.0050 0.0007 -0.0021 0.0001 -0.0022  
AT. 112 C X 0.0026 0.0020 -0.0016 -0.0019 0.0013 0.0022  
Y 0.0065 0.0053 -0.0032 -0.0045 0.0024 0.0049  
Z -0.0056 -0.0050 0.0007 0.0021 -0.0001 -0.0022  
AT. 113 H X -0.0097 0.0082 0.0068 -0.0085 -0.0057 0.0097  
Y 0.0201 -0.0172 -0.0120 0.0157 0.0101 -0.0184  
Z 0.0195 -0.0174 -0.0045 0.0096 0.0037 -0.0112  
AT. 114 H X 0.0097 0.0082 0.0068 0.0085 0.0057 0.0097  
Y 0.0201 0.0172 0.0120 0.0157 0.0101 0.0184  
Z -0.0195 -0.0174 -0.0045 -0.0096 -0.0037 -0.0112  
AT. 115 H X 0.0097 -0.0082 0.0068 -0.0085 0.0057 -0.0097  
Y -0.0201 0.0172 -0.0120 0.0157 -0.0101 0.0184  
Z -0.0195 0.0174 -0.0045 0.0096 -0.0037 0.0112  
AT. 116 H X -0.0097 -0.0082 0.0068 0.0085 -0.0057 -0.0097  
Y -0.0201 -0.0172 0.0120 0.0157 -0.0101 -0.0184  
Z 0.0195 0.0174 -0.0045 -0.0096 0.0037 0.0112  
AT. 117 H X -0.0116 0.0097 0.0040 -0.0057 -0.0020 0.0067

Y 0.0303 -0.0250 -0.0053 0.0120 0.0018 -0.0134  
Z 0.0288 -0.0233 -0.0074 0.0134 0.0040 -0.0152  
AT. 118 H X 0.0116 0.0097 0.0040 0.0057 0.0020 0.0067  
Y 0.0303 0.0250 0.0053 0.0120 0.0018 0.0134  
Z -0.0288 -0.0233 -0.0074 -0.0134 -0.0040 -0.0152  
AT. 119 H X 0.0116 -0.0097 0.0040 -0.0057 0.0020 -0.0067  
Y -0.0303 0.0250 -0.0053 0.0120 -0.0018 0.0134  
Z -0.0288 0.0233 -0.0074 0.0134 -0.0040 0.0152  
AT. 120 H X -0.0116 -0.0097 0.0040 0.0057 -0.0020 -0.0067  
Y -0.0303 -0.0250 0.0053 0.0120 -0.0018 -0.0134  
Z 0.0288 0.0233 -0.0074 -0.0134 0.0040 0.0152  
AT. 121 C X 0.0002 0.0014 -0.0061 0.0058 0.0056 -0.0050  
Y -0.0012 -0.0004 0.0083 -0.0083 -0.0076 0.0071  
Z -0.0005 0.0007 -0.0029 0.0029 0.0029 -0.0024  
AT. 122 C X -0.0002 0.0014 -0.0061 -0.0058 -0.0056 -0.0050  
Y -0.0012 0.0004 -0.0083 -0.0083 -0.0076 -0.0071  
Z 0.0005 0.0007 -0.0029 -0.0029 -0.0029 -0.0024  
AT. 123 C X -0.0002 -0.0014 -0.0061 0.0058 -0.0056 0.0050  
Y 0.0012 0.0004 0.0083 -0.0083 0.0076 -0.0071  
Z 0.0005 -0.0007 -0.0029 0.0029 -0.0029 0.0024  
AT. 124 C X 0.0002 -0.0014 -0.0061 -0.0058 0.0056 0.0050  
Y 0.0012 -0.0004 -0.0083 -0.0083 0.0076 0.0071  
Z -0.0005 -0.0007 -0.0029 -0.0029 0.0029 0.0024  
AT. 125 H X -0.0024 -0.0082 0.0304 -0.0284 -0.0281 0.0262  
Y -0.0047 0.0073 -0.0209 0.0201 0.0202 -0.0163  
Z 0.0033 -0.0023 0.0069 -0.0071 -0.0069 0.0048  
AT. 126 H X 0.0024 -0.0082 0.0304 0.0284 0.0281 0.0262  
Y -0.0047 -0.0073 0.0209 0.0201 0.0202 0.0163  
Z -0.0033 -0.0023 0.0069 0.0071 0.0069 0.0048  
AT. 127 H X 0.0024 0.0082 0.0304 -0.0284 0.0281 -0.0262  
Y 0.0047 -0.0073 -0.0209 0.0201 -0.0202 0.0163  
Z -0.0033 0.0023 0.0069 -0.0071 0.0069 -0.0048

AT.128 H X -0.0024 0.0082 0.0304 0.0284 -0.0281 -0.0262  
Y 0.0047 0.0073 0.0209 0.0201 -0.0202 -0.0163  
Z 0.0033 0.0023 0.0069 0.0071 -0.0069 -0.0048

AT.129 H X -0.0019 -0.0023 0.0255 -0.0250 -0.0229 0.0201  
Y 0.0048 0.0043 -0.0400 0.0389 0.0357 -0.0322  
Z 0.0069 -0.0025 0.0012 -0.0010 -0.0015 -0.0022

AT.130 H X 0.0019 -0.0023 0.0255 0.0250 0.0229 0.0201  
Y 0.0048 -0.0043 0.0400 0.0389 0.0357 0.0322  
Z -0.0069 -0.0025 0.0012 0.0010 0.0015 -0.0022

AT.131 H X 0.0019 0.0023 0.0255 -0.0250 0.0229 -0.0201  
Y -0.0048 -0.0043 -0.0400 0.0389 -0.0357 0.0322  
Z -0.0069 0.0025 0.0012 -0.0010 0.0015 0.0022

AT.132 H X -0.0019 0.0023 0.0255 0.0250 -0.0229 -0.0201  
Y -0.0048 0.0043 0.0400 0.0389 -0.0357 -0.0322  
Z 0.0069 0.0025 0.0012 0.0010 -0.0015 0.0022

AT.133 C X 0.0006 -0.0004 -0.0000 0.0002 -0.0001 -0.0001  
Y 0.0007 -0.0003 -0.0013 0.0013 0.0011 -0.0014  
Z 0.0025 -0.0017 -0.0019 0.0023 0.0013 -0.0019

AT.134 C X -0.0006 -0.0004 -0.0000 -0.0002 0.0001 -0.0001  
Y 0.0007 0.0003 0.0013 0.0013 0.0011 0.0014  
Z -0.0025 -0.0017 -0.0019 -0.0023 -0.0013 -0.0019

AT.135 C X -0.0006 0.0004 -0.0000 0.0002 0.0001 0.0001  
Y -0.0007 0.0003 -0.0013 0.0013 -0.0011 0.0014  
Z -0.0025 0.0017 -0.0019 0.0023 -0.0013 0.0019

AT.136 C X 0.0006 0.0004 -0.0000 -0.0002 -0.0001 0.0001  
Y -0.0007 -0.0003 0.0013 0.0013 -0.0011 -0.0014  
Z 0.0025 0.0017 -0.0019 -0.0023 0.0013 0.0019

AT.137 C X 0.0005 -0.0003 0.0001 -0.0001 -0.0003 0.0001  
Y -0.0000 -0.0001 0.0006 -0.0006 -0.0006 0.0006  
Z -0.0001 -0.0001 0.0009 -0.0010 -0.0009 0.0009

AT.138 C X -0.0005 -0.0003 0.0001 0.0001 0.0003 0.0001  
Y -0.0000 0.0001 -0.0006 -0.0006 -0.0006 -0.0006



Z 0.0001 -0.0001 0.0009 0.0010 0.0009 0.0009  
AT. 139 C X -0.0005 0.0003 0.0001 -0.0001 0.0003 -0.0001  
Y 0.0000 0.0001 0.0006 -0.0006 0.0006 -0.0006  
Z 0.0001 0.0001 0.0009 -0.0010 0.0009 -0.0009  
AT. 140 C X 0.0005 0.0003 0.0001 0.0001 -0.0003 -0.0001  
Y 0.0000 -0.0001 -0.0006 -0.0006 0.0006 0.0006  
Z -0.0001 0.0001 0.0009 0.0010 -0.0009 -0.0009  
AT. 141 H X -0.0033 0.0021 0.0003 -0.0005 0.0006 0.0006  
Y -0.0051 0.0041 -0.0017 0.0011 0.0034 -0.0011  
Z 0.0003 0.0003 -0.0009 0.0007 0.0010 -0.0008  
AT. 142 H X 0.0033 0.0021 0.0003 0.0005 -0.0006 0.0006  
Y -0.0051 -0.0041 0.0017 0.0011 0.0034 0.0011  
Z -0.0003 0.0003 -0.0009 -0.0007 -0.0010 -0.0008  
AT. 143 H X 0.0033 -0.0021 0.0003 -0.0005 -0.0006 -0.0006  
Y 0.0051 -0.0041 -0.0017 0.0011 -0.0034 0.0011  
Z -0.0003 -0.0003 -0.0009 0.0007 -0.0010 0.0008  
AT. 144 H X -0.0033 -0.0021 0.0003 0.0005 0.0006 -0.0006  
Y 0.0051 0.0041 0.0017 0.0011 -0.0034 -0.0011  
Z 0.0003 -0.0003 -0.0009 -0.0007 0.0010 0.0008  
AT. 145 H X -0.0050 0.0033 -0.0005 0.0002 0.0020 0.0001  
Y 0.0002 0.0000 0.0001 -0.0002 -0.0002 0.0002  
Z -0.0051 0.0045 -0.0024 0.0017 0.0038 -0.0014  
AT. 146 H X 0.0050 0.0033 -0.0005 -0.0002 -0.0020 0.0001  
Y 0.0002 -0.0000 -0.0001 -0.0002 -0.0002 -0.0002  
Z 0.0051 0.0045 -0.0024 -0.0017 -0.0038 -0.0014  
AT. 147 H X 0.0050 -0.0033 -0.0005 0.0002 -0.0020 -0.0001  
Y -0.0002 -0.0000 0.0001 -0.0002 0.0002 -0.0002  
Z 0.0051 -0.0045 -0.0024 0.0017 -0.0038 0.0014  
AT. 148 H X -0.0050 -0.0033 -0.0005 -0.0002 0.0020 -0.0001  
Y -0.0002 0.0000 -0.0001 -0.0002 0.0002 0.0002  
Z -0.0051 -0.0045 -0.0024 -0.0017 0.0038 0.0014  
AT. 149 O X 0.0001 -0.0001 0.0001 -0.0001 0.0001 -0.0001

Y 0.0006 -0.0008 0.0005 -0.0004 -0.0008 0.0006  
Z 0.0030 -0.0039 0.0028 -0.0018 -0.0035 0.0022  
AT. 150 O X -0.0001 -0.0001 0.0001 0.0001 -0.0001 -0.0001  
Y 0.0006 0.0008 -0.0005 -0.0004 -0.0008 -0.0006  
Z -0.0030 -0.0039 0.0028 0.0018 0.0035 0.0022  
AT. 151 O X -0.0001 0.0001 0.0001 -0.0001 -0.0001 0.0001  
Y -0.0006 0.0008 0.0005 -0.0004 0.0008 -0.0006  
Z -0.0030 0.0039 0.0028 -0.0018 0.0035 -0.0022  
AT. 152 O X 0.0001 0.0001 0.0001 0.0001 0.0001 0.0001  
Y -0.0006 -0.0008 -0.0005 -0.0004 0.0008 0.0006  
Z 0.0030 0.0039 0.0028 0.0018 -0.0035 -0.0022  
AT. 153 H X 0.0174 -0.0238 0.0183 -0.0124 -0.0231 0.0151  
Y -0.0225 0.0310 -0.0229 0.0154 0.0290 -0.0185  
Z -0.0173 0.0238 -0.0179 0.0122 0.0231 -0.0150  
AT. 154 H X -0.0174 -0.0238 0.0183 0.0124 0.0231 0.0151  
Y -0.0225 -0.0310 0.0229 0.0154 0.0290 0.0185  
Z 0.0173 0.0238 -0.0179 -0.0122 -0.0231 -0.0150  
AT. 155 H X -0.0174 0.0238 0.0183 -0.0124 0.0231 -0.0151  
Y 0.0225 -0.0310 -0.0229 0.0154 -0.0290 0.0185  
Z 0.0173 -0.0238 -0.0179 0.0122 -0.0231 0.0150  
AT. 156 H X 0.0174 0.0238 0.0183 0.0124 -0.0231 -0.0151  
Y 0.0225 0.0310 0.0229 0.0154 -0.0290 -0.0185  
Z -0.0173 -0.0238 -0.0179 -0.0122 0.0231 0.0150  
AT. 157 O X -0.0008 0.0008 -0.0006 0.0004 0.0008 -0.0005  
Y -0.0003 0.0004 -0.0005 0.0004 0.0005 -0.0004  
Z 0.0014 -0.0016 0.0014 -0.0009 -0.0015 0.0009  
AT. 158 O X 0.0008 0.0008 -0.0006 -0.0004 -0.0008 -0.0005  
Y -0.0003 -0.0004 0.0005 0.0004 0.0005 0.0004  
Z -0.0014 -0.0016 0.0014 0.0009 0.0015 0.0009  
AT. 159 O X 0.0008 -0.0008 -0.0006 0.0004 -0.0008 0.0005  
Y 0.0003 -0.0004 -0.0005 0.0004 -0.0005 0.0004  
Z -0.0014 0.0016 0.0014 -0.0009 0.0015 -0.0009

AT.160 O X -0.0008 -0.0008 -0.0006 -0.0004 0.0008 0.0005  
Y 0.0003 0.0004 0.0005 0.0004 -0.0005 -0.0004  
Z 0.0014 0.0016 0.0014 0.0009 -0.0015 -0.0009

AT.161 O X 0.0006 -0.0007 0.0002 -0.0001 -0.0004 0.0001  
Y 0.0002 -0.0002 0.0001 -0.0001 -0.0002 0.0001  
Z 0.0002 -0.0001 -0.0002 0.0002 0.0001 -0.0001

AT.162 O X -0.0006 -0.0007 0.0002 0.0001 0.0004 0.0001  
Y 0.0002 0.0002 -0.0001 -0.0001 -0.0002 -0.0001  
Z -0.0002 -0.0001 -0.0002 -0.0002 -0.0001 -0.0001

AT.163 O X -0.0006 0.0007 0.0002 -0.0001 0.0004 -0.0001  
Y -0.0002 0.0002 0.0001 -0.0001 0.0002 -0.0001  
Z -0.0002 0.0001 -0.0002 0.0002 -0.0001 0.0001

AT.164 O X 0.0006 0.0007 0.0002 0.0001 -0.0004 -0.0001  
Y -0.0002 -0.0002 -0.0001 -0.0001 0.0002 0.0001  
Z 0.0002 0.0001 -0.0002 -0.0002 0.0001 0.0001

AT.165 H X -0.0029 0.0029 0.0016 -0.0020 -0.0006 0.0020  
Y -0.0021 0.0018 0.0017 -0.0020 -0.0010 0.0018  
Z -0.0054 0.0044 0.0030 -0.0040 -0.0011 0.0025

AT.166 H X 0.0029 0.0029 0.0016 0.0020 0.0006 0.0020  
Y -0.0021 -0.0018 -0.0017 -0.0020 -0.0010 -0.0018  
Z 0.0054 0.0044 0.0030 0.0040 0.0011 0.0025

AT.167 H X 0.0029 -0.0029 0.0016 -0.0020 0.0006 -0.0020  
Y 0.0021 -0.0018 0.0017 -0.0020 0.0010 -0.0018  
Z 0.0054 -0.0044 0.0030 -0.0040 0.0011 -0.0025

AT.168 H X -0.0029 -0.0029 0.0016 0.0020 -0.0006 -0.0020  
Y 0.0021 0.0018 -0.0017 -0.0020 0.0010 0.0018  
Z -0.0054 -0.0044 0.0030 0.0040 -0.0011 -0.0025

AT.169 O X 0.0001 -0.0000 0.0000 -0.0000 0.0001 -0.0001  
Y 0.0005 -0.0007 0.0001 0.0000 -0.0005 0.0003  
Z 0.0002 -0.0002 -0.0001 -0.0000 -0.0000 -0.0000

AT.170 O X -0.0001 -0.0000 0.0000 0.0000 -0.0001 -0.0001  
Y 0.0005 0.0007 -0.0001 0.0000 -0.0005 -0.0003

Z -0.0002 -0.0002 -0.0001 0.0000 0.0000 -0.0000  
 AT.171 O X -0.0001 0.0000 0.0000 -0.0000 -0.0001 0.0001  
 Y -0.0005 0.0007 0.0001 0.0000 0.0005 -0.0003  
 Z -0.0002 0.0002 -0.0001 -0.0000 0.0000 0.0000  
 AT.172 O X 0.0001 0.0000 0.0000 0.0000 0.0001 0.0001  
 Y -0.0005 -0.0007 -0.0001 0.0000 0.0005 0.0003  
 Z 0.0002 0.0002 -0.0001 0.0000 -0.0000 0.0000  
 AT.173 H X -0.0026 0.0038 -0.0010 0.0014 0.0039 -0.0024  
 Y -0.0005 0.0002 0.0004 -0.0008 -0.0006 0.0007  
 Z 0.0006 -0.0015 0.0048 -0.0015 -0.0012 0.0011  
 AT.174 H X 0.0026 0.0038 -0.0010 -0.0014 -0.0039 -0.0024  
 Y -0.0005 -0.0002 -0.0004 -0.0008 -0.0006 -0.0007  
 Z -0.0006 -0.0015 0.0048 0.0015 0.0012 0.0011  
 AT.175 H X 0.0026 -0.0038 -0.0010 0.0014 -0.0039 0.0024  
 Y 0.0005 -0.0002 0.0004 -0.0008 0.0006 -0.0007  
 Z -0.0006 0.0015 0.0048 -0.0015 0.0012 -0.0011  
 AT.176 H X -0.0026 -0.0038 -0.0010 -0.0014 0.0039 0.0024  
 Y 0.0005 0.0002 -0.0004 -0.0008 0.0006 0.0007  
 Z 0.0006 0.0015 0.0048 0.0015 -0.0012 -0.0011

FREQ(CM\*\*-1) 1444.78 1445.11 1446.14 1446.23 1454.37 1455.14

AT. 1 I X 0.0000 -0.0000 -0.0000 -0.0000 -0.0000 0.0000  
 Y -0.0000 -0.0000 -0.0000 0.0000 0.0000 -0.0000  
 Z -0.0000 0.0000 -0.0000 0.0000 -0.0000 -0.0000  
 AT. 2 I X -0.0000 -0.0000 -0.0000 0.0000 -0.0000 -0.0000  
 Y -0.0000 0.0000 0.0000 0.0000 -0.0000 -0.0000  
 Z 0.0000 0.0000 -0.0000 -0.0000 -0.0000 0.0000  
 AT. 3 I X 0.0000 0.0000 -0.0000 0.0000 -0.0000 0.0000  
 Y -0.0000 0.0000 -0.0000 -0.0000 0.0000 -0.0000  
 Z -0.0000 -0.0000 -0.0000 -0.0000 -0.0000 -0.0000  
 AT. 4 I X -0.0000 0.0000 -0.0000 -0.0000 -0.0000 -0.0000

Y -0.0000 -0.0000 0.0000 -0.0000 -0.0000 -0.0000  
Z 0.0000 -0.0000 -0.0000 0.0000 -0.0000 0.0000  
AT. 5 I X 0.0000 -0.0000 -0.0000 -0.0000 -0.0000 -0.0000  
Y 0.0000 0.0000 -0.0000 0.0000 -0.0000 -0.0000  
Z 0.0000 0.0000 0.0000 0.0000 -0.0000 0.0000  
AT. 6 I X -0.0000 -0.0000 -0.0000 0.0000 -0.0000 0.0000  
Y 0.0000 -0.0000 0.0000 0.0000 0.0000 -0.0000  
Z -0.0000 0.0000 0.0000 -0.0000 -0.0000 -0.0000  
AT. 7 I X 0.0000 0.0000 -0.0000 0.0000 -0.0000 -0.0000  
Y 0.0000 -0.0000 -0.0000 -0.0000 -0.0000 -0.0000  
Z 0.0000 -0.0000 0.0000 -0.0000 -0.0000 0.0000  
AT. 8 I X -0.0000 0.0000 -0.0000 -0.0000 -0.0000 0.0000  
Y 0.0000 0.0000 0.0000 -0.0000 0.0000 -0.0000  
Z -0.0000 -0.0000 0.0000 0.0000 -0.0000 -0.0000  
AT. 9 N X -0.0006 0.0013 0.0007 0.0009 0.0017 -0.0014  
Y -0.0003 0.0003 0.0006 0.0005 -0.0006 0.0007  
Z -0.0016 0.0021 0.0014 0.0017 0.0016 -0.0014  
AT. 10 N X 0.0006 0.0013 0.0007 -0.0009 0.0017 0.0014  
Y -0.0003 -0.0003 -0.0006 0.0005 0.0006 0.0007  
Z 0.0016 0.0021 0.0014 -0.0017 0.0016 0.0014  
AT. 11 N X -0.0006 -0.0013 0.0007 -0.0009 0.0017 -0.0014  
Y -0.0003 -0.0003 0.0006 -0.0005 -0.0006 0.0007  
Z -0.0016 -0.0021 0.0014 -0.0017 0.0016 -0.0014  
AT. 12 N X 0.0006 -0.0013 0.0007 0.0009 0.0017 0.0014  
Y -0.0003 0.0003 -0.0006 -0.0005 0.0006 0.0007  
Z 0.0016 -0.0021 0.0014 0.0017 0.0016 0.0014  
AT. 13 N X -0.0001 -0.0002 0.0003 0.0002 -0.0019 0.0017  
Y 0.0000 -0.0000 -0.0002 0.0003 0.0003 -0.0001  
Z -0.0009 0.0008 0.0012 0.0008 -0.0011 0.0009  
AT. 14 N X 0.0001 -0.0002 0.0003 -0.0002 -0.0019 -0.0017  
Y 0.0000 0.0000 0.0002 0.0003 -0.0003 -0.0001  
Z 0.0009 0.0008 0.0012 -0.0008 -0.0011 -0.0009

AT. 15 N X -0.0001 0.0002 0.0003 -0.0002 -0.0019 0.0017  
Y 0.0000 0.0000 -0.0002 -0.0003 0.0003 -0.0001  
Z -0.0009 -0.0008 0.0012 -0.0008 -0.0011 0.0009

AT. 16 N X 0.0001 0.0002 0.0003 0.0002 -0.0019 -0.0017  
Y 0.0000 -0.0000 0.0002 -0.0003 -0.0003 -0.0001  
Z 0.0009 -0.0008 0.0012 0.0008 -0.0011 -0.0009

AT. 17 O X -0.0000 0.0000 -0.0001 -0.0001 0.0002 -0.0002  
Y 0.0001 -0.0001 -0.0002 -0.0002 0.0002 -0.0002  
Z -0.0000 -0.0000 -0.0002 -0.0003 0.0014 -0.0012

AT. 18 O X 0.0000 0.0000 -0.0001 0.0001 0.0002 0.0002  
Y 0.0001 0.0001 0.0002 -0.0002 -0.0002 -0.0002  
Z 0.0000 -0.0000 -0.0002 0.0003 0.0014 0.0012

AT. 19 O X -0.0000 -0.0000 -0.0001 0.0001 0.0002 -0.0002  
Y 0.0001 0.0001 -0.0002 0.0002 0.0002 -0.0002  
Z -0.0000 0.0000 -0.0002 0.0003 0.0014 -0.0012

AT. 20 O X 0.0000 -0.0000 -0.0001 -0.0001 0.0002 0.0002  
Y 0.0001 -0.0001 0.0002 0.0002 -0.0002 -0.0002  
Z 0.0000 0.0000 -0.0002 -0.0003 0.0014 0.0012

AT. 21 O X -0.0001 0.0001 0.0001 0.0001 -0.0001 0.0001  
Y 0.0001 -0.0001 0.0000 -0.0000 0.0002 -0.0002  
Z -0.0001 0.0001 0.0002 0.0000 -0.0011 0.0008

AT. 22 O X 0.0001 0.0001 0.0001 -0.0001 -0.0001 -0.0001  
Y 0.0001 0.0001 -0.0000 -0.0000 -0.0002 -0.0002  
Z 0.0001 0.0001 0.0002 -0.0000 -0.0011 -0.0008

AT. 23 O X -0.0001 -0.0001 0.0001 -0.0001 -0.0001 0.0001  
Y 0.0001 0.0001 0.0000 0.0000 0.0002 -0.0002  
Z -0.0001 -0.0001 0.0002 -0.0000 -0.0011 0.0008

AT. 24 O X 0.0001 -0.0001 0.0001 0.0001 -0.0001 -0.0001  
Y 0.0001 -0.0001 -0.0000 0.0000 -0.0002 -0.0002  
Z 0.0001 -0.0001 0.0002 0.0000 -0.0011 -0.0008

AT. 25 C X 0.0003 -0.0005 -0.0001 -0.0002 -0.0003 0.0003  
Y -0.0011 0.0012 0.0006 0.0007 -0.0008 0.0004

Z 0.0007 -0.0008 -0.0004 -0.0005 0.0011 -0.0007  
AT. 26 C X -0.0003 -0.0005 -0.0001 0.0002 -0.0003 -0.0003  
Y -0.0011 -0.0012 -0.0006 0.0007 0.0008 0.0004  
Z -0.0007 -0.0008 -0.0004 0.0005 0.0011 0.0007  
AT. 27 C X 0.0003 0.0005 -0.0001 0.0002 -0.0003 0.0003  
Y -0.0011 -0.0012 0.0006 -0.0007 -0.0008 0.0004  
Z 0.0007 0.0008 -0.0004 0.0005 0.0011 -0.0007  
AT. 28 C X -0.0003 0.0005 -0.0001 -0.0002 -0.0003 -0.0003  
Y -0.0011 0.0012 -0.0006 -0.0007 0.0008 0.0004  
Z -0.0007 0.0008 -0.0004 -0.0005 0.0011 0.0007  
AT. 29 H X 0.0001 -0.0002 -0.0001 -0.0002 0.0014 -0.0012  
Y 0.0086 -0.0112 -0.0041 -0.0063 -0.0004 0.0036  
Z -0.0009 0.0012 0.0005 0.0008 -0.0013 0.0009  
AT. 30 H X -0.0001 -0.0002 -0.0001 0.0002 0.0014 0.0012  
Y 0.0086 0.0112 0.0041 -0.0063 0.0004 0.0036  
Z 0.0009 0.0012 0.0005 -0.0008 -0.0013 -0.0009  
AT. 31 H X 0.0001 0.0002 -0.0001 0.0002 0.0014 -0.0012  
Y 0.0086 0.0112 -0.0041 0.0063 -0.0004 0.0036  
Z -0.0009 -0.0012 0.0005 -0.0008 -0.0013 0.0009  
AT. 32 H X -0.0001 0.0002 -0.0001 -0.0002 0.0014 0.0012  
Y 0.0086 -0.0112 0.0041 0.0063 0.0004 0.0036  
Z 0.0009 -0.0012 0.0005 0.0008 -0.0013 -0.0009  
AT. 33 H X -0.0062 0.0080 0.0025 0.0042 0.0005 -0.0030  
Y 0.0015 -0.0021 -0.0006 -0.0011 -0.0009 0.0016  
Z -0.0050 0.0066 0.0025 0.0038 0.0007 -0.0026  
AT. 34 H X 0.0062 0.0080 0.0025 -0.0042 0.0005 0.0030  
Y 0.0015 0.0021 0.0006 -0.0011 0.0009 0.0016  
Z 0.0050 0.0066 0.0025 -0.0038 0.0007 0.0026  
AT. 35 H X -0.0062 -0.0080 0.0025 -0.0042 0.0005 -0.0030  
Y 0.0015 0.0021 -0.0006 0.0011 -0.0009 0.0016  
Z -0.0050 -0.0066 0.0025 -0.0038 0.0007 -0.0026  
AT. 36 H X 0.0062 -0.0080 0.0025 0.0042 0.0005 0.0030

Y 0.0015 -0.0021 0.0006 0.0011 0.0009 0.0016  
Z 0.0050 -0.0066 0.0025 0.0038 0.0007 0.0026  
AT. 37 C X 0.0005 -0.0004 -0.0003 -0.0002 0.0003 -0.0002  
Y 0.0005 0.0001 -0.0003 0.0000 0.0024 -0.0021  
Z 0.0000 -0.0004 0.0002 0.0000 -0.0039 0.0034  
AT. 38 C X -0.0005 -0.0004 -0.0003 0.0002 0.0003 0.0002  
Y 0.0005 -0.0001 0.0003 0.0000 -0.0024 -0.0021  
Z -0.0000 -0.0004 0.0002 -0.0000 -0.0039 -0.0034  
AT. 39 C X 0.0005 0.0004 -0.0003 0.0002 0.0003 -0.0002  
Y 0.0005 -0.0001 -0.0003 -0.0000 0.0024 -0.0021  
Z 0.0000 0.0004 0.0002 -0.0000 -0.0039 0.0034  
AT. 40 C X -0.0005 0.0004 -0.0003 -0.0002 0.0003 0.0002  
Y 0.0005 0.0001 0.0003 -0.0000 -0.0024 -0.0021  
Z -0.0000 0.0004 0.0002 0.0000 -0.0039 -0.0034  
AT. 41 C X -0.0034 0.0022 0.0030 0.0025 -0.0052 0.0051  
Y -0.0027 0.0017 0.0018 0.0015 -0.0040 0.0034  
Z -0.0012 0.0013 -0.0000 0.0001 -0.0016 0.0004  
AT. 42 C X 0.0034 0.0022 0.0030 -0.0025 -0.0052 -0.0051  
Y -0.0027 -0.0017 -0.0018 0.0015 0.0040 0.0034  
Z 0.0012 0.0013 -0.0000 -0.0001 -0.0016 -0.0004  
AT. 43 C X -0.0034 -0.0022 0.0030 -0.0025 -0.0052 0.0051  
Y -0.0027 -0.0017 0.0018 -0.0015 -0.0040 0.0034  
Z -0.0012 -0.0013 -0.0000 -0.0001 -0.0016 0.0004  
AT. 44 C X 0.0034 -0.0022 0.0030 0.0025 -0.0052 -0.0051  
Y -0.0027 0.0017 -0.0018 -0.0015 0.0040 0.0034  
Z 0.0012 -0.0013 -0.0000 0.0001 -0.0016 -0.0004  
AT. 45 H X 0.0180 -0.0128 -0.0185 -0.0159 0.0262 -0.0292  
Y 0.0137 -0.0146 -0.0065 -0.0073 0.0098 -0.0043  
Z 0.0097 -0.0107 -0.0040 -0.0049 0.0053 -0.0008  
AT. 46 H X -0.0180 -0.0128 -0.0185 0.0159 0.0262 0.0292  
Y 0.0137 0.0146 0.0065 -0.0073 -0.0098 -0.0043  
Z -0.0097 -0.0107 -0.0040 0.0049 0.0053 0.0008



AT. 47 H X 0.0180 0.0128 -0.0185 0.0159 0.0262 -0.0292  
Y 0.0137 0.0146 -0.0065 0.0073 0.0098 -0.0043  
Z 0.0097 0.0107 -0.0040 0.0049 0.0053 -0.0008

AT. 48 H X -0.0180 0.0128 -0.0185 -0.0159 0.0262 0.0292  
Y 0.0137 -0.0146 0.0065 0.0073 -0.0098 -0.0043  
Z -0.0097 0.0107 -0.0040 -0.0049 0.0053 0.0008

AT. 49 H X 0.0143 -0.0094 -0.0112 -0.0093 0.0195 -0.0176  
Y 0.0124 -0.0065 -0.0130 -0.0104 0.0204 -0.0221  
Z 0.0058 -0.0085 0.0012 -0.0006 -0.0013 0.0081

AT. 50 H X -0.0143 -0.0094 -0.0112 0.0093 0.0195 0.0176  
Y 0.0124 0.0065 0.0130 -0.0104 -0.0204 -0.0221  
Z -0.0058 -0.0085 0.0012 0.0006 -0.0013 -0.0081

AT. 51 H X 0.0143 0.0094 -0.0112 0.0093 0.0195 -0.0176  
Y 0.0124 0.0065 -0.0130 0.0104 0.0204 -0.0221  
Z 0.0058 0.0085 0.0012 0.0006 -0.0013 0.0081

AT. 52 H X -0.0143 0.0094 -0.0112 -0.0093 0.0195 0.0176  
Y 0.0124 -0.0065 0.0130 0.0104 -0.0204 -0.0221  
Z -0.0058 0.0085 0.0012 -0.0006 -0.0013 -0.0081

AT. 53 C X 0.0012 -0.0010 -0.0008 -0.0010 0.0010 -0.0011  
Y 0.0008 0.0005 -0.0002 0.0001 0.0016 -0.0009  
Z 0.0041 -0.0042 -0.0033 -0.0035 0.0052 -0.0051

AT. 54 C X -0.0012 -0.0010 -0.0008 0.0010 0.0010 0.0011  
Y 0.0008 -0.0005 0.0002 0.0001 -0.0016 -0.0009  
Z -0.0041 -0.0042 -0.0033 0.0035 0.0052 0.0051

AT. 55 C X 0.0012 0.0010 -0.0008 0.0010 0.0010 -0.0011  
Y 0.0008 -0.0005 -0.0002 -0.0001 0.0016 -0.0009  
Z 0.0041 0.0042 -0.0033 0.0035 0.0052 -0.0051

AT. 56 C X -0.0012 0.0010 -0.0008 -0.0010 0.0010 0.0011  
Y 0.0008 0.0005 0.0002 -0.0001 -0.0016 -0.0009  
Z -0.0041 0.0042 -0.0033 -0.0035 0.0052 0.0051

AT. 57 C X 0.0012 -0.0013 -0.0018 -0.0016 0.0011 -0.0015  
Y 0.0043 -0.0048 -0.0059 -0.0055 0.0036 -0.0046

Z 0.0073 -0.0075 -0.0094 -0.0090 0.0051 -0.0068  
AT. 58 C X -0.0012 -0.0013 -0.0018 0.0016 0.0011 0.0015  
Y 0.0043 0.0048 0.0059 -0.0055 -0.0036 -0.0046  
Z -0.0073 -0.0075 -0.0094 0.0090 0.0051 0.0068  
AT. 59 C X 0.0012 0.0013 -0.0018 0.0016 0.0011 -0.0015  
Y 0.0043 0.0048 -0.0059 0.0055 0.0036 -0.0046  
Z 0.0073 0.0075 -0.0094 0.0090 0.0051 -0.0068  
AT. 60 C X -0.0012 0.0013 -0.0018 -0.0016 0.0011 0.0015  
Y 0.0043 -0.0048 0.0059 0.0055 -0.0036 -0.0046  
Z -0.0073 0.0075 -0.0094 -0.0090 0.0051 0.0068  
AT. 61 H X -0.0178 0.0201 0.0248 0.0230 -0.0171 0.0202  
Y -0.0034 0.0046 0.0058 0.0050 -0.0050 0.0056  
Z -0.0339 0.0349 0.0421 0.0402 -0.0260 0.0311  
AT. 62 H X 0.0178 0.0201 0.0248 -0.0230 -0.0171 -0.0202  
Y -0.0034 -0.0046 -0.0058 0.0050 0.0050 0.0056  
Z 0.0339 0.0349 0.0421 -0.0402 -0.0260 -0.0311  
AT. 63 H X -0.0178 -0.0201 0.0248 -0.0230 -0.0171 0.0202  
Y -0.0034 -0.0046 0.0058 -0.0050 -0.0050 0.0056  
Z -0.0339 -0.0349 0.0421 -0.0402 -0.0260 0.0311  
AT. 64 H X 0.0178 -0.0201 0.0248 0.0230 -0.0171 -0.0202  
Y -0.0034 0.0046 -0.0058 -0.0050 0.0050 0.0056  
Z 0.0339 -0.0349 0.0421 0.0402 -0.0260 -0.0311  
AT. 65 H X 0.0080 -0.0091 -0.0111 -0.0104 0.0075 -0.0088  
Y -0.0171 0.0201 0.0238 0.0222 -0.0165 0.0185  
Z -0.0347 0.0347 0.0435 0.0423 -0.0272 0.0362  
AT. 66 H X -0.0080 -0.0091 -0.0111 0.0104 0.0075 0.0088  
Y -0.0171 -0.0201 -0.0238 0.0222 0.0165 0.0185  
Z 0.0347 0.0347 0.0435 -0.0423 -0.0272 -0.0362  
AT. 67 H X 0.0080 0.0091 -0.0111 0.0104 0.0075 -0.0088  
Y -0.0171 -0.0201 0.0238 -0.0222 -0.0165 0.0185  
Z -0.0347 -0.0347 0.0435 -0.0423 -0.0272 0.0362  
AT. 68 H X -0.0080 0.0091 -0.0111 -0.0104 0.0075 0.0088

Y -0.0171 0.0201 -0.0238 -0.0222 0.0165 0.0185  
Z 0.0347 -0.0347 0.0435 0.0423 -0.0272 -0.0362  
AT. 69 H X -0.0077 0.0067 0.0097 0.0097 -0.0061 0.0109  
Y -0.0319 0.0325 0.0395 0.0383 -0.0239 0.0308  
Z -0.0257 0.0262 0.0320 0.0310 -0.0199 0.0260  
AT. 70 H X 0.0077 0.0067 0.0097 -0.0097 -0.0061 -0.0109  
Y -0.0319 -0.0325 -0.0395 0.0383 0.0239 0.0308  
Z 0.0257 0.0262 0.0320 -0.0310 -0.0199 -0.0260  
AT. 71 H X -0.0077 -0.0067 0.0097 -0.0097 -0.0061 0.0109  
Y -0.0319 -0.0325 0.0395 -0.0383 -0.0239 0.0308  
Z -0.0257 -0.0262 0.0320 -0.0310 -0.0199 0.0260  
AT. 72 H X 0.0077 -0.0067 0.0097 0.0097 -0.0061 -0.0109  
Y -0.0319 0.0325 -0.0395 -0.0383 0.0239 0.0308  
Z 0.0257 -0.0262 0.0320 0.0310 -0.0199 -0.0260  
AT. 73 C X -0.0015 0.0021 0.0015 0.0018 -0.0023 0.0025  
Y 0.0012 -0.0021 -0.0014 -0.0018 0.0029 -0.0034  
Z -0.0051 0.0073 0.0043 0.0056 -0.0040 0.0047  
AT. 74 C X 0.0015 0.0021 0.0015 -0.0018 -0.0023 -0.0025  
Y 0.0012 0.0021 0.0014 -0.0018 -0.0029 -0.0034  
Z 0.0051 0.0073 0.0043 -0.0056 -0.0040 -0.0047  
AT. 75 C X -0.0015 -0.0021 0.0015 -0.0018 -0.0023 0.0025  
Y 0.0012 0.0021 -0.0014 0.0018 0.0029 -0.0034  
Z -0.0051 -0.0073 0.0043 -0.0056 -0.0040 0.0047  
AT. 76 C X 0.0015 -0.0021 0.0015 0.0018 -0.0023 -0.0025  
Y 0.0012 -0.0021 0.0014 0.0018 -0.0029 -0.0034  
Z 0.0051 -0.0073 0.0043 0.0056 -0.0040 -0.0047  
AT. 77 C X 0.0021 -0.0034 -0.0021 -0.0025 -0.0034 0.0025  
Y 0.0026 -0.0047 -0.0024 -0.0033 -0.0044 0.0035  
Z -0.0023 0.0043 0.0020 0.0031 0.0028 -0.0022  
AT. 78 C X -0.0021 -0.0034 -0.0021 0.0025 -0.0034 -0.0025  
Y 0.0026 0.0047 0.0024 -0.0033 0.0044 0.0035  
Z 0.0023 0.0043 0.0020 -0.0031 0.0028 0.0022

AT. 79 C X 0.0021 0.0034 -0.0021 0.0025 -0.0034 0.0025  
Y 0.0026 0.0047 -0.0024 0.0033 -0.0044 0.0035  
Z -0.0023 -0.0043 0.0020 -0.0031 0.0028 -0.0022

AT. 80 C X -0.0021 0.0034 -0.0021 -0.0025 -0.0034 -0.0025  
Y 0.0026 -0.0047 0.0024 0.0033 0.0044 0.0035  
Z 0.0023 -0.0043 0.0020 0.0031 0.0028 0.0022

AT. 81 H X -0.0077 0.0145 0.0076 0.0097 0.0117 -0.0085  
Y -0.0106 0.0189 0.0101 0.0128 0.0156 -0.0116  
Z 0.0146 -0.0255 -0.0117 -0.0179 -0.0228 0.0203

AT. 82 H X 0.0077 0.0145 0.0076 -0.0097 0.0117 0.0085  
Y -0.0106 -0.0189 -0.0101 0.0128 -0.0156 -0.0116  
Z -0.0146 -0.0255 -0.0117 0.0179 -0.0228 -0.0203

AT. 83 H X -0.0077 -0.0145 0.0076 -0.0097 0.0117 -0.0085  
Y -0.0106 -0.0189 0.0101 -0.0128 0.0156 -0.0116  
Z 0.0146 0.0255 -0.0117 0.0179 -0.0228 0.0203

AT. 84 H X 0.0077 -0.0145 0.0076 0.0097 0.0117 0.0085  
Y -0.0106 0.0189 -0.0101 -0.0128 -0.0156 -0.0116  
Z -0.0146 0.0255 -0.0117 -0.0179 -0.0228 -0.0203

AT. 85 H X -0.0039 0.0071 0.0052 0.0054 0.0017 0.0011  
Y -0.0117 0.0195 0.0100 0.0147 0.0160 -0.0139  
Z 0.0115 -0.0189 -0.0105 -0.0143 -0.0157 0.0128

AT. 86 H X 0.0039 0.0071 0.0052 -0.0054 0.0017 -0.0011  
Y -0.0117 -0.0195 -0.0100 0.0147 -0.0160 -0.0139  
Z -0.0115 -0.0189 -0.0105 0.0143 -0.0157 -0.0128

AT. 87 H X -0.0039 -0.0071 0.0052 -0.0054 0.0017 0.0011  
Y -0.0117 -0.0195 0.0100 -0.0147 0.0160 -0.0139  
Z 0.0115 0.0189 -0.0105 0.0143 -0.0157 0.0128

AT. 88 H X 0.0039 -0.0071 0.0052 0.0054 0.0017 -0.0011  
Y -0.0117 0.0195 -0.0100 -0.0147 -0.0160 -0.0139  
Z -0.0115 0.0189 -0.0105 -0.0143 -0.0157 -0.0128

AT. 89 C X 0.0001 -0.0006 -0.0001 -0.0004 0.0020 -0.0019  
Y -0.0013 0.0032 0.0011 0.0017 0.0023 -0.0016

Z 0.0024 -0.0049 -0.0021 -0.0032 -0.0007 -0.0000  
AT. 90 C X -0.0001 -0.0006 -0.0001 0.0004 0.0020 0.0019  
Y -0.0013 -0.0032 -0.0011 0.0017 -0.0023 -0.0016  
Z -0.0024 -0.0049 -0.0021 0.0032 -0.0007 0.0000  
AT. 91 C X 0.0001 0.0006 -0.0001 0.0004 0.0020 -0.0019  
Y -0.0013 -0.0032 0.0011 -0.0017 0.0023 -0.0016  
Z 0.0024 0.0049 -0.0021 0.0032 -0.0007 -0.0000  
AT. 92 C X -0.0001 0.0006 -0.0001 -0.0004 0.0020 0.0019  
Y -0.0013 0.0032 -0.0011 -0.0017 -0.0023 -0.0016  
Z -0.0024 0.0049 -0.0021 -0.0032 -0.0007 0.0000  
AT. 93 C X 0.0011 -0.0010 -0.0012 -0.0012 -0.0005 0.0006  
Y -0.0061 0.0044 0.0053 0.0051 0.0049 -0.0046  
Z 0.0103 -0.0074 -0.0090 -0.0085 -0.0086 0.0079  
AT. 94 C X -0.0011 -0.0010 -0.0012 0.0012 -0.0005 -0.0006  
Y -0.0061 -0.0044 -0.0053 0.0051 -0.0049 -0.0046  
Z -0.0103 -0.0074 -0.0090 0.0085 -0.0086 -0.0079  
AT. 95 C X 0.0011 0.0010 -0.0012 0.0012 -0.0005 0.0006  
Y -0.0061 -0.0044 0.0053 -0.0051 0.0049 -0.0046  
Z 0.0103 0.0074 -0.0090 0.0085 -0.0086 0.0079  
AT. 96 C X -0.0011 0.0010 -0.0012 -0.0012 -0.0005 -0.0006  
Y -0.0061 0.0044 -0.0053 -0.0051 -0.0049 -0.0046  
Z -0.0103 0.0074 -0.0090 -0.0085 -0.0086 -0.0079  
AT. 97 H X -0.0252 0.0187 0.0215 0.0206 0.0210 -0.0191  
Y 0.0144 -0.0112 -0.0125 -0.0122 -0.0087 0.0085  
Z -0.0449 0.0336 0.0383 0.0364 0.0431 -0.0381  
AT. 98 H X 0.0252 0.0187 0.0215 -0.0206 0.0210 0.0191  
Y 0.0144 0.0112 0.0125 -0.0122 0.0087 0.0085  
Z 0.0449 0.0336 0.0383 -0.0364 0.0431 0.0381  
AT. 99 H X -0.0252 -0.0187 0.0215 -0.0206 0.0210 -0.0191  
Y 0.0144 0.0112 -0.0125 0.0122 -0.0087 0.0085  
Z -0.0449 -0.0336 0.0383 -0.0364 0.0431 -0.0381  
AT. 100 H X 0.0252 -0.0187 0.0215 0.0206 0.0210 0.0191

Y 0.0144 -0.0112 0.0125 0.0122 0.0087 0.0085  
Z 0.0449 -0.0336 0.0383 0.0364 0.0431 0.0381  
AT. 101 H X 0.0090 -0.0052 -0.0063 -0.0056 -0.0077 0.0066  
Y 0.0124 -0.0084 -0.0094 -0.0088 -0.0099 0.0084  
Z -0.0462 0.0381 0.0423 0.0418 0.0344 -0.0325  
AT. 102 H X -0.0090 -0.0052 -0.0063 0.0056 -0.0077 -0.0066  
Y 0.0124 0.0084 0.0094 -0.0088 0.0099 0.0084  
Z 0.0462 0.0381 0.0423 -0.0418 0.0344 0.0325  
AT. 103 H X 0.0090 0.0052 -0.0063 0.0056 -0.0077 0.0066  
Y 0.0124 0.0084 -0.0094 0.0088 -0.0099 0.0084  
Z -0.0462 -0.0381 0.0423 -0.0418 0.0344 -0.0325  
AT. 104 H X -0.0090 0.0052 -0.0063 -0.0056 -0.0077 -0.0066  
Y 0.0124 -0.0084 0.0094 0.0088 0.0099 0.0084  
Z 0.0462 -0.0381 0.0423 0.0418 0.0344 0.0325  
AT. 105 H X 0.0053 -0.0009 -0.0022 -0.0007 -0.0110 0.0082  
Y 0.0438 -0.0354 -0.0393 -0.0388 -0.0363 0.0333  
Z -0.0309 0.0240 0.0269 0.0262 0.0281 -0.0252  
AT. 106 H X -0.0053 -0.0009 -0.0022 0.0007 -0.0110 -0.0082  
Y 0.0438 0.0354 0.0393 -0.0388 0.0363 0.0333  
Z 0.0309 0.0240 0.0269 -0.0262 0.0281 0.0252  
AT. 107 H X 0.0053 0.0009 -0.0022 0.0007 -0.0110 0.0082  
Y 0.0438 0.0354 -0.0393 0.0388 -0.0363 0.0333  
Z -0.0309 -0.0240 0.0269 -0.0262 0.0281 -0.0252  
AT. 108 H X -0.0053 0.0009 -0.0022 -0.0007 -0.0110 -0.0082  
Y 0.0438 -0.0354 0.0393 0.0388 0.0363 0.0333  
Z 0.0309 -0.0240 0.0269 0.0262 0.0281 0.0252  
AT. 109 C X 0.0010 -0.0007 -0.0013 -0.0010 0.0022 -0.0020  
Y -0.0028 0.0018 0.0028 0.0023 -0.0051 0.0047  
Z -0.0029 0.0025 0.0027 0.0026 -0.0041 0.0040  
AT. 110 C X -0.0010 -0.0007 -0.0013 0.0010 0.0022 0.0020  
Y -0.0028 -0.0018 -0.0028 0.0023 0.0051 0.0047  
Z 0.0029 0.0025 0.0027 -0.0026 -0.0041 -0.0040

AT.111 C X 0.0010 0.0007 -0.0013 0.0010 0.0022 -0.0020  
Y -0.0028 -0.0018 0.0028 -0.0023 -0.0051 0.0047  
Z -0.0029 -0.0025 0.0027 -0.0026 -0.0041 0.0040

AT.112 C X -0.0010 0.0007 -0.0013 -0.0010 0.0022 0.0020  
Y -0.0028 0.0018 -0.0028 -0.0023 0.0051 0.0047  
Z 0.0029 -0.0025 0.0027 0.0026 -0.0041 -0.0040

AT.113 H X -0.0044 0.0015 0.0038 0.0035 -0.0078 0.0072  
Y 0.0111 -0.0059 -0.0104 -0.0099 0.0180 -0.0171  
Z 0.0152 -0.0121 -0.0142 -0.0143 0.0203 -0.0206

AT.114 H X 0.0044 0.0015 0.0038 -0.0035 -0.0078 -0.0072  
Y 0.0111 0.0059 0.0104 -0.0099 -0.0180 -0.0171  
Z -0.0152 -0.0121 -0.0142 0.0143 0.0203 0.0206

AT.115 H X -0.0044 -0.0015 0.0038 -0.0035 -0.0078 0.0072  
Y 0.0111 0.0059 -0.0104 0.0099 0.0180 -0.0171  
Z 0.0152 0.0121 -0.0142 0.0143 0.0203 -0.0206

AT.116 H X 0.0044 -0.0015 0.0038 0.0035 -0.0078 -0.0072  
Y 0.0111 -0.0059 0.0104 0.0099 -0.0180 -0.0171  
Z -0.0152 0.0121 -0.0142 -0.0143 0.0203 0.0206

AT.117 H X -0.0018 0.0014 0.0030 0.0020 -0.0056 0.0042  
Y 0.0137 -0.0125 -0.0142 -0.0121 0.0208 -0.0199  
Z 0.0123 -0.0107 -0.0132 -0.0106 0.0200 -0.0187

AT.118 H X 0.0018 0.0014 0.0030 -0.0020 -0.0056 -0.0042  
Y 0.0137 0.0125 0.0142 -0.0121 -0.0208 -0.0199  
Z -0.0123 -0.0107 -0.0132 0.0106 0.0200 0.0187

AT.119 H X -0.0018 -0.0014 0.0030 -0.0020 -0.0056 0.0042  
Y 0.0137 0.0125 -0.0142 0.0121 0.0208 -0.0199  
Z 0.0123 0.0107 -0.0132 0.0106 0.0200 -0.0187

AT.120 H X 0.0018 -0.0014 0.0030 0.0020 -0.0056 -0.0042  
Y 0.0137 -0.0125 0.0142 0.0121 -0.0208 -0.0199  
Z -0.0123 0.0107 -0.0132 -0.0106 0.0200 0.0187

AT.121 C X -0.0024 0.0039 0.0022 0.0028 0.0029 -0.0026  
Y 0.0032 -0.0051 -0.0024 -0.0034 -0.0045 0.0036

Z -0.0015 0.0021 0.0007 0.0011 0.0008 0.0000  
AT. 122 C X 0.0024 0.0039 0.0022 -0.0028 0.0029 0.0026  
Y 0.0032 0.0051 0.0024 -0.0034 0.0045 0.0036  
Z 0.0015 0.0021 0.0007 -0.0011 0.0008 -0.0000  
AT. 123 C X -0.0024 -0.0039 0.0022 -0.0028 0.0029 -0.0026  
Y 0.0032 0.0051 -0.0024 0.0034 -0.0045 0.0036  
Z -0.0015 -0.0021 0.0007 -0.0011 0.0008 0.0000  
AT. 124 C X 0.0024 -0.0039 0.0022 0.0028 0.0029 0.0026  
Y 0.0032 -0.0051 0.0024 0.0034 0.0045 0.0036  
Z 0.0015 -0.0021 0.0007 0.0011 0.0008 -0.0000  
AT. 125 H X 0.0085 -0.0159 -0.0090 -0.0127 -0.0130 0.0130  
Y -0.0129 0.0170 0.0089 0.0114 0.0070 -0.0032  
Z 0.0071 -0.0081 -0.0044 -0.0052 -0.0027 0.0001  
AT. 126 H X -0.0085 -0.0159 -0.0090 0.0127 -0.0130 -0.0130  
Y -0.0129 -0.0170 -0.0089 0.0114 -0.0070 -0.0032  
Z -0.0071 -0.0081 -0.0044 0.0052 -0.0027 -0.0001  
AT. 127 H X 0.0085 0.0159 -0.0090 0.0127 -0.0130 0.0130  
Y -0.0129 -0.0170 0.0089 -0.0114 0.0070 -0.0032  
Z 0.0071 0.0081 -0.0044 0.0052 -0.0027 0.0001  
AT. 128 H X -0.0085 0.0159 -0.0090 -0.0127 -0.0130 -0.0130  
Y -0.0129 0.0170 -0.0089 -0.0114 -0.0070 -0.0032  
Z -0.0071 0.0081 -0.0044 -0.0052 -0.0027 -0.0001  
AT. 129 H X 0.0121 -0.0181 -0.0098 -0.0119 -0.0159 0.0133  
Y -0.0164 0.0261 0.0147 0.0183 0.0249 -0.0226  
Z 0.0086 -0.0082 -0.0050 -0.0041 -0.0009 -0.0025  
AT. 130 H X -0.0121 -0.0181 -0.0098 0.0119 -0.0159 -0.0133  
Y -0.0164 -0.0261 -0.0147 0.0183 -0.0249 -0.0226  
Z -0.0086 -0.0082 -0.0050 0.0041 -0.0009 0.0025  
AT. 131 H X 0.0121 0.0181 -0.0098 0.0119 -0.0159 0.0133  
Y -0.0164 -0.0261 0.0147 -0.0183 0.0249 -0.0226  
Z 0.0086 0.0082 -0.0050 0.0041 -0.0009 -0.0025  
AT. 132 H X -0.0121 0.0181 -0.0098 -0.0119 -0.0159 -0.0133



Y -0.0164 0.0261 -0.0147 -0.0183 -0.0249 -0.0226  
Z -0.0086 0.0082 -0.0050 -0.0041 -0.0009 0.0025  
AT. 133 C X 0.0002 -0.0003 -0.0003 -0.0001 0.0004 -0.0003  
Y -0.0001 0.0005 -0.0003 -0.0002 0.0014 -0.0013  
Z 0.0001 -0.0000 -0.0007 -0.0001 0.0028 -0.0020  
AT. 134 C X -0.0002 -0.0003 -0.0003 0.0001 0.0004 0.0003  
Y -0.0001 -0.0005 0.0003 -0.0002 -0.0014 -0.0013  
Z -0.0001 -0.0000 -0.0007 0.0001 0.0028 0.0020  
AT. 135 C X 0.0002 0.0003 -0.0003 0.0001 0.0004 -0.0003  
Y -0.0001 -0.0005 -0.0003 0.0002 0.0014 -0.0013  
Z 0.0001 0.0000 -0.0007 0.0001 0.0028 -0.0020  
AT. 136 C X -0.0002 0.0003 -0.0003 -0.0001 0.0004 0.0003  
Y -0.0001 0.0005 0.0003 0.0002 -0.0014 -0.0013  
Z -0.0001 0.0000 -0.0007 -0.0001 0.0028 0.0020  
AT. 137 C X 0.0004 -0.0004 -0.0003 -0.0003 0.0003 -0.0004  
Y 0.0003 -0.0004 -0.0000 -0.0002 -0.0004 0.0001  
Z 0.0003 -0.0004 0.0001 -0.0002 -0.0003 -0.0002  
AT. 138 C X -0.0004 -0.0004 -0.0003 0.0003 0.0003 0.0004  
Y 0.0003 0.0004 0.0000 -0.0002 0.0004 0.0001  
Z -0.0003 -0.0004 0.0001 0.0002 -0.0003 0.0002  
AT. 139 C X 0.0004 0.0004 -0.0003 0.0003 0.0003 -0.0004  
Y 0.0003 0.0004 -0.0000 0.0002 -0.0004 0.0001  
Z 0.0003 0.0004 0.0001 0.0002 -0.0003 -0.0002  
AT. 140 C X -0.0004 0.0004 -0.0003 -0.0003 0.0003 0.0004  
Y 0.0003 -0.0004 0.0000 0.0002 0.0004 0.0001  
Z -0.0003 0.0004 0.0001 -0.0002 -0.0003 0.0002  
AT. 141 H X -0.0017 0.0015 0.0012 0.0013 -0.0023 0.0030  
Y -0.0036 0.0038 0.0012 0.0025 -0.0031 0.0058  
Z -0.0003 0.0006 -0.0004 0.0001 0.0006 0.0001  
AT. 142 H X 0.0017 0.0015 0.0012 -0.0013 -0.0023 -0.0030  
Y -0.0036 -0.0038 -0.0012 0.0025 0.0031 0.0058  
Z 0.0003 0.0006 -0.0004 -0.0001 0.0006 -0.0001

AT. 143 H X -0.0017 -0.0015 0.0012 -0.0013 -0.0023 0.0030  
Y -0.0036 -0.0038 0.0012 -0.0025 -0.0031 0.0058  
Z -0.0003 -0.0006 -0.0004 -0.0001 0.0006 0.0001

AT. 144 H X 0.0017 -0.0015 0.0012 0.0013 -0.0023 -0.0030  
Y -0.0036 0.0038 -0.0012 -0.0025 0.0031 0.0058  
Z 0.0003 -0.0006 -0.0004 0.0001 0.0006 -0.0001

AT. 145 H X -0.0035 0.0036 0.0021 0.0026 -0.0034 0.0050  
Y 0.0007 -0.0007 -0.0005 -0.0005 -0.0003 0.0004  
Z -0.0025 0.0028 0.0007 0.0021 -0.0043 0.0069

AT. 146 H X 0.0035 0.0036 0.0021 -0.0026 -0.0034 -0.0050  
Y 0.0007 0.0007 0.0005 -0.0005 0.0003 0.0004  
Z 0.0025 0.0028 0.0007 -0.0021 -0.0043 -0.0069

AT. 147 H X -0.0035 -0.0036 0.0021 -0.0026 -0.0034 0.0050  
Y 0.0007 0.0007 -0.0005 0.0005 -0.0003 0.0004  
Z -0.0025 -0.0028 0.0007 -0.0021 -0.0043 0.0069

AT. 148 H X 0.0035 -0.0036 0.0021 0.0026 -0.0034 -0.0050  
Y 0.0007 -0.0007 0.0005 0.0005 0.0003 0.0004  
Z 0.0025 -0.0028 0.0007 0.0021 -0.0043 -0.0069

AT. 149 O X 0.0002 -0.0002 -0.0003 -0.0003 0.0004 -0.0005  
Y 0.0001 -0.0003 0.0000 -0.0001 -0.0003 0.0003  
Z 0.0014 -0.0022 -0.0011 -0.0017 0.0015 -0.0018

AT. 150 O X -0.0002 -0.0002 -0.0003 0.0003 0.0004 0.0005  
Y 0.0001 0.0003 -0.0000 -0.0001 0.0003 0.0003  
Z -0.0014 -0.0022 -0.0011 0.0017 0.0015 0.0018

AT. 151 O X 0.0002 0.0002 -0.0003 0.0003 0.0004 -0.0005  
Y 0.0001 0.0003 0.0000 0.0001 -0.0003 0.0003  
Z 0.0014 0.0022 -0.0011 0.0017 0.0015 -0.0018

AT. 152 O X -0.0002 0.0002 -0.0003 -0.0003 0.0004 0.0005  
Y 0.0001 -0.0003 -0.0000 0.0001 0.0003 0.0003  
Z -0.0014 0.0022 -0.0011 -0.0017 0.0015 0.0018

AT. 153 H X 0.0062 -0.0120 -0.0054 -0.0088 0.0133 -0.0151  
Y -0.0081 0.0157 0.0072 0.0116 -0.0170 0.0188

Z -0.0062 0.0121 0.0054 0.0089 -0.0127 0.0144  
AT. 154 H X -0.0062 -0.0120 -0.0054 0.0088 0.0133 0.0151  
Y -0.0081 -0.0157 -0.0072 0.0116 0.0170 0.0188  
Z 0.0062 0.0121 0.0054 -0.0089 -0.0127 -0.0144  
AT. 155 H X 0.0062 0.0120 -0.0054 0.0088 0.0133 -0.0151  
Y -0.0081 -0.0157 0.0072 -0.0116 -0.0170 0.0188  
Z -0.0062 -0.0121 0.0054 -0.0089 -0.0127 0.0144  
AT. 156 H X -0.0062 0.0120 -0.0054 -0.0088 0.0133 0.0151  
Y -0.0081 0.0157 -0.0072 -0.0116 0.0170 0.0188  
Z 0.0062 -0.0121 0.0054 0.0089 -0.0127 -0.0144  
AT. 157 O X -0.0003 0.0005 0.0002 0.0003 -0.0003 0.0004  
Y -0.0002 0.0005 0.0004 0.0003 -0.0006 0.0005  
Z 0.0011 -0.0013 -0.0008 -0.0011 0.0004 -0.0006  
AT. 158 O X 0.0003 0.0005 0.0002 -0.0003 -0.0003 -0.0004  
Y -0.0002 -0.0005 -0.0004 0.0003 0.0006 0.0005  
Z -0.0011 -0.0013 -0.0008 0.0011 0.0004 0.0006  
AT. 159 O X -0.0003 -0.0005 0.0002 -0.0003 -0.0003 0.0004  
Y -0.0002 -0.0005 0.0004 -0.0003 -0.0006 0.0005  
Z 0.0011 0.0013 -0.0008 0.0011 0.0004 -0.0006  
AT. 160 O X 0.0003 -0.0005 0.0002 0.0003 -0.0003 -0.0004  
Y -0.0002 0.0005 -0.0004 -0.0003 0.0006 0.0005  
Z -0.0011 0.0013 -0.0008 -0.0011 0.0004 0.0006  
AT. 161 O X 0.0003 -0.0002 -0.0000 -0.0002 0.0001 -0.0003  
Y 0.0001 -0.0002 -0.0002 -0.0001 0.0001 0.0000  
Z -0.0001 0.0003 0.0003 0.0002 0.0000 -0.0002  
AT. 162 O X -0.0003 -0.0002 -0.0000 0.0002 0.0001 0.0003  
Y 0.0001 0.0002 0.0002 -0.0001 -0.0001 0.0000  
Z 0.0001 0.0003 0.0003 -0.0002 0.0000 0.0002  
AT. 163 O X 0.0003 0.0002 -0.0000 0.0002 0.0001 -0.0003  
Y 0.0001 0.0002 -0.0002 0.0001 0.0001 0.0000  
Z -0.0001 -0.0003 0.0003 -0.0002 0.0000 -0.0002  
AT. 164 O X -0.0003 0.0002 -0.0000 -0.0002 0.0001 0.0003

Y 0.0001 -0.0002 0.0002 0.0001 -0.0001 0.0000  
Z 0.0001 -0.0003 0.0003 0.0002 0.0000 0.0002  
AT.165 H X -0.0004 -0.0015 -0.0018 0.0001 -0.0003 0.0025  
Y -0.0001 -0.0013 -0.0013 -0.0002 -0.0003 0.0014  
Z -0.0005 -0.0027 -0.0034 -0.0002 0.0007 0.0026  
AT.166 H X 0.0004 -0.0015 -0.0018 -0.0001 -0.0003 -0.0025  
Y -0.0001 0.0013 0.0013 -0.0002 0.0003 0.0014  
Z 0.0005 -0.0027 -0.0034 0.0002 0.0007 -0.0026  
AT.167 H X -0.0004 0.0015 -0.0018 -0.0001 -0.0003 0.0025  
Y -0.0001 0.0013 -0.0013 0.0002 -0.0003 0.0014  
Z -0.0005 0.0027 -0.0034 0.0002 0.0007 0.0026  
AT.168 H X 0.0004 0.0015 -0.0018 0.0001 -0.0003 -0.0025  
Y -0.0001 -0.0013 0.0013 0.0002 0.0003 0.0014  
Z 0.0005 0.0027 -0.0034 -0.0002 0.0007 -0.0026  
AT.169 O X -0.0000 -0.0000 0.0000 -0.0000 -0.0000 0.0001  
Y 0.0001 -0.0001 -0.0001 -0.0001 0.0002 -0.0002  
Z -0.0002 -0.0001 0.0001 -0.0001 -0.0001 0.0002  
AT.170 O X 0.0000 -0.0000 0.0000 0.0000 -0.0000 -0.0001  
Y 0.0001 0.0001 0.0001 -0.0001 -0.0002 -0.0002  
Z 0.0002 -0.0001 0.0001 0.0001 -0.0001 -0.0002  
AT.171 O X -0.0000 0.0000 0.0000 0.0000 -0.0000 0.0001  
Y 0.0001 0.0001 -0.0001 0.0001 0.0002 -0.0002  
Z -0.0002 0.0001 0.0001 0.0001 -0.0001 0.0002  
AT.172 O X 0.0000 0.0000 0.0000 -0.0000 -0.0000 -0.0001  
Y 0.0001 -0.0001 0.0001 0.0001 -0.0002 -0.0002  
Z 0.0002 0.0001 0.0001 -0.0001 -0.0001 -0.0002  
AT.173 H X 0.0002 0.0021 -0.0000 0.0017 0.0007 -0.0015  
Y -0.0008 -0.0002 0.0007 -0.0000 -0.0013 0.0017  
Z 0.0046 0.0009 -0.0033 0.0011 0.0049 -0.0072  
AT.174 H X -0.0002 0.0021 -0.0000 -0.0017 0.0007 0.0015  
Y -0.0008 0.0002 -0.0007 -0.0000 0.0013 0.0017  
Z -0.0046 0.0009 -0.0033 -0.0011 0.0049 0.0072

AT.175 H X 0.0002 -0.0021 -0.0000 -0.0017 0.0007 -0.0015  
Y -0.0008 0.0002 0.0007 0.0000 -0.0013 0.0017  
Z 0.0046 -0.0009 -0.0033 -0.0011 0.0049 -0.0072

AT.176 H X -0.0002 -0.0021 -0.0000 0.0017 0.0007 0.0015  
Y -0.0008 -0.0002 -0.0007 0.0000 0.0013 0.0017  
Z -0.0046 -0.0009 -0.0033 0.0011 0.0049 0.0072

FREQ(CM\*\*-1) 1455.45 1455.98 1482.57 1482.93 1483.51 1484.81

AT. 1 I X -0.0000 0.0000 -0.0000 -0.0000 0.0000 0.0000  
Y -0.0000 0.0000 0.0000 0.0000 -0.0000 -0.0000  
Z 0.0000 0.0000 0.0000 0.0000 -0.0000 -0.0000

AT. 2 I X -0.0000 -0.0000 -0.0000 0.0000 -0.0000 0.0000  
Y 0.0000 0.0000 -0.0000 0.0000 -0.0000 0.0000  
Z 0.0000 -0.0000 0.0000 -0.0000 0.0000 -0.0000

AT. 3 I X 0.0000 -0.0000 -0.0000 -0.0000 -0.0000 -0.0000  
Y 0.0000 -0.0000 0.0000 0.0000 0.0000 0.0000  
Z -0.0000 -0.0000 0.0000 0.0000 0.0000 0.0000

AT. 4 I X 0.0000 0.0000 -0.0000 0.0000 0.0000 -0.0000  
Y -0.0000 -0.0000 -0.0000 0.0000 0.0000 -0.0000  
Z -0.0000 0.0000 0.0000 -0.0000 -0.0000 0.0000

AT. 5 I X 0.0000 -0.0000 0.0000 -0.0000 -0.0001 0.0001  
Y 0.0000 0.0000 0.0000 -0.0000 -0.0000 0.0000  
Z -0.0000 0.0000 -0.0000 0.0000 0.0000 -0.0000

AT. 6 I X 0.0000 0.0000 0.0000 0.0000 0.0001 0.0001  
Y -0.0000 0.0000 -0.0000 -0.0000 -0.0000 -0.0000  
Z -0.0000 -0.0000 -0.0000 -0.0000 -0.0000 -0.0000

AT. 7 I X -0.0000 0.0000 0.0000 -0.0000 0.0001 -0.0001  
Y -0.0000 -0.0000 0.0000 -0.0000 0.0000 -0.0000  
Z 0.0000 -0.0000 -0.0000 0.0000 -0.0000 0.0000

AT. 8 I X -0.0000 -0.0000 0.0000 0.0000 -0.0001 -0.0001  
Y 0.0000 -0.0000 -0.0000 -0.0000 0.0000 0.0000

Z 0.0000 0.0000 -0.0000 -0.0000 0.0000 0.0000  
AT. 9 N X 0.0014 -0.0017 -0.0017 -0.0015 0.0007 0.0006  
Y -0.0006 0.0003 -0.0052 -0.0043 0.0024 0.0014  
Z 0.0013 -0.0014 0.0009 0.0005 -0.0004 -0.0002  
AT. 10 N X 0.0014 0.0017 -0.0017 0.0015 -0.0007 0.0006  
Y 0.0006 0.0003 0.0052 -0.0043 0.0024 -0.0014  
Z 0.0013 0.0014 0.0009 -0.0005 0.0004 -0.0002  
AT. 11 N X -0.0014 0.0017 -0.0017 -0.0015 -0.0007 -0.0006  
Y 0.0006 -0.0003 -0.0052 -0.0043 -0.0024 -0.0014  
Z -0.0013 0.0014 0.0009 0.0005 0.0004 0.0002  
AT. 12 N X -0.0014 -0.0017 -0.0017 0.0015 0.0007 -0.0006  
Y -0.0006 -0.0003 0.0052 -0.0043 -0.0024 0.0014  
Z -0.0013 -0.0014 0.0009 -0.0005 -0.0004 0.0002  
AT. 13 N X -0.0016 0.0018 0.0001 0.0002 0.0001 -0.0000  
Y 0.0005 0.0001 -0.0027 0.0044 0.0053 -0.0061  
Z -0.0011 0.0009 -0.0002 0.0004 0.0005 -0.0005  
AT. 14 N X -0.0016 -0.0018 0.0001 -0.0002 -0.0001 -0.0000  
Y -0.0005 0.0001 0.0027 0.0044 0.0053 0.0061  
Z -0.0011 -0.0009 -0.0002 -0.0004 -0.0005 -0.0005  
AT. 15 N X 0.0016 -0.0018 0.0001 0.0002 -0.0001 0.0000  
Y -0.0005 -0.0001 -0.0027 0.0044 -0.0053 0.0061  
Z 0.0011 -0.0009 -0.0002 0.0004 -0.0005 0.0005  
AT. 16 N X 0.0016 0.0018 0.0001 -0.0002 0.0001 0.0000  
Y 0.0005 -0.0001 0.0027 0.0044 -0.0053 -0.0061  
Z 0.0011 0.0009 -0.0002 -0.0004 0.0005 0.0005  
AT. 17 O X 0.0002 -0.0002 0.0009 0.0008 -0.0003 -0.0004  
Y -0.0001 0.0001 0.0013 0.0012 -0.0004 -0.0004  
Z 0.0009 -0.0009 0.0019 0.0018 -0.0006 -0.0009  
AT. 18 O X 0.0002 0.0002 0.0009 -0.0008 0.0003 -0.0004  
Y 0.0001 0.0001 -0.0013 0.0012 -0.0004 0.0004  
Z 0.0009 0.0009 0.0019 -0.0018 0.0006 -0.0009  
AT. 19 O X -0.0002 0.0002 0.0009 0.0008 0.0003 0.0004

Y 0.0001 -0.0001 0.0013 0.0012 0.0004 0.0004  
Z -0.0009 0.0009 0.0019 0.0018 0.0006 0.0009  
AT. 20 O X -0.0002 -0.0002 0.0009 -0.0008 -0.0003 0.0004  
Y -0.0001 -0.0001 -0.0013 0.0012 0.0004 -0.0004  
Z -0.0009 -0.0009 0.0019 -0.0018 -0.0006 0.0009  
AT. 21 O X -0.0001 0.0001 -0.0002 0.0003 0.0004 -0.0004  
Y 0.0002 -0.0003 0.0009 -0.0016 -0.0019 0.0021  
Z -0.0010 0.0010 -0.0013 0.0024 0.0027 -0.0031  
AT. 22 O X -0.0001 -0.0001 -0.0002 -0.0003 -0.0004 -0.0004  
Y -0.0002 -0.0003 -0.0009 -0.0016 -0.0019 -0.0021  
Z -0.0010 -0.0010 -0.0013 -0.0024 -0.0027 -0.0031  
AT. 23 O X 0.0001 -0.0001 -0.0002 0.0003 -0.0004 0.0004  
Y -0.0002 0.0003 0.0009 -0.0016 0.0019 -0.0021  
Z 0.0010 -0.0010 -0.0013 0.0024 -0.0027 0.0031  
AT. 24 O X 0.0001 0.0001 -0.0002 -0.0003 0.0004 0.0004  
Y 0.0002 0.0003 -0.0009 -0.0016 0.0019 0.0021  
Z 0.0010 0.0010 -0.0013 -0.0024 0.0027 0.0031  
AT. 25 C X -0.0003 0.0001 -0.0023 -0.0019 0.0012 0.0007  
Y -0.0006 0.0011 0.0057 0.0046 -0.0028 -0.0017  
Z 0.0008 -0.0012 -0.0049 -0.0038 0.0025 0.0013  
AT. 26 C X -0.0003 -0.0001 -0.0023 0.0019 -0.0012 0.0007  
Y 0.0006 0.0011 -0.0057 0.0046 -0.0028 0.0017  
Z 0.0008 0.0012 -0.0049 0.0038 -0.0025 0.0013  
AT. 27 C X 0.0003 -0.0001 -0.0023 -0.0019 -0.0012 -0.0007  
Y 0.0006 -0.0011 0.0057 0.0046 0.0028 0.0017  
Z -0.0008 0.0012 -0.0049 -0.0038 -0.0025 -0.0013  
AT. 28 C X 0.0003 0.0001 -0.0023 0.0019 0.0012 -0.0007  
Y -0.0006 -0.0011 -0.0057 0.0046 0.0028 -0.0017  
Z -0.0008 -0.0012 -0.0049 0.0038 0.0025 -0.0013  
AT. 29 H X 0.0012 -0.0013 -0.0002 0.0001 -0.0001 -0.0002  
Y -0.0011 -0.0026 -0.0631 -0.0514 0.0297 0.0183  
Z -0.0014 0.0015 0.0049 0.0037 -0.0018 -0.0010

AT. 30 H X 0.0012 0.0013 -0.0002 -0.0001 0.0001 -0.0002  
Y 0.0011 -0.0026 0.0631 -0.0514 0.0297 -0.0183  
Z -0.0014 -0.0015 0.0049 -0.0037 0.0018 -0.0010

AT. 31 H X -0.0012 0.0013 -0.0002 0.0001 0.0001 0.0002  
Y 0.0011 0.0026 -0.0631 -0.0514 -0.0297 -0.0183  
Z 0.0014 -0.0015 0.0049 0.0037 0.0018 0.0010

AT. 32 H X -0.0012 -0.0013 -0.0002 -0.0001 -0.0001 0.0002  
Y -0.0011 0.0026 0.0631 -0.0514 -0.0297 0.0183  
Z 0.0014 0.0015 0.0049 -0.0037 -0.0018 0.0010

AT. 33 H X 0.0013 0.0017 0.0427 0.0344 -0.0203 -0.0126  
Y -0.0012 0.0005 -0.0140 -0.0113 0.0067 0.0040  
Z 0.0019 0.0003 0.0424 0.0344 -0.0208 -0.0119

AT. 34 H X 0.0013 -0.0017 0.0427 -0.0344 0.0203 -0.0126  
Y 0.0012 0.0005 0.0140 -0.0113 0.0067 -0.0040  
Z 0.0019 -0.0003 0.0424 -0.0344 0.0208 -0.0119

AT. 35 H X -0.0013 -0.0017 0.0427 0.0344 0.0203 0.0126  
Y 0.0012 -0.0005 -0.0140 -0.0113 -0.0067 -0.0040  
Z -0.0019 -0.0003 0.0424 0.0344 0.0208 0.0119

AT. 36 H X -0.0013 0.0017 0.0427 -0.0344 -0.0203 0.0126  
Y -0.0012 -0.0005 0.0140 -0.0113 -0.0067 0.0040  
Z -0.0019 0.0003 0.0424 -0.0344 -0.0208 0.0119

AT. 37 C X 0.0004 -0.0005 -0.0013 -0.0011 0.0005 0.0005  
Y 0.0023 -0.0026 0.0019 0.0015 -0.0009 -0.0003  
Z -0.0028 0.0032 -0.0019 -0.0021 0.0001 0.0011

AT. 38 C X 0.0004 0.0005 -0.0013 0.0011 -0.0005 0.0005  
Y -0.0023 -0.0026 -0.0019 0.0015 -0.0009 0.0003  
Z -0.0028 -0.0032 -0.0019 0.0021 -0.0001 0.0011

AT. 39 C X -0.0004 0.0005 -0.0013 -0.0011 -0.0005 -0.0005  
Y -0.0023 0.0026 0.0019 0.0015 0.0009 0.0003  
Z 0.0028 -0.0032 -0.0019 -0.0021 -0.0001 -0.0011

AT. 40 C X -0.0004 -0.0005 -0.0013 0.0011 0.0005 -0.0005  
Y 0.0023 0.0026 -0.0019 0.0015 0.0009 -0.0003



Z 0.0028 0.0032 -0.0019 0.0021 0.0001 -0.0011  
AT. 41 C X -0.0052 0.0055 0.0002 -0.0003 -0.0004 0.0002  
Y -0.0034 0.0043 0.0034 0.0022 -0.0019 -0.0006  
Z -0.0005 0.0016 0.0051 0.0036 -0.0029 -0.0013  
AT. 42 C X -0.0052 -0.0055 0.0002 0.0003 0.0004 0.0002  
Y 0.0034 0.0043 -0.0034 0.0022 -0.0019 0.0006  
Z -0.0005 -0.0016 0.0051 -0.0036 0.0029 -0.0013  
AT. 43 C X 0.0052 -0.0055 0.0002 -0.0003 0.0004 -0.0002  
Y 0.0034 -0.0043 0.0034 0.0022 0.0019 0.0006  
Z 0.0005 -0.0016 0.0051 0.0036 0.0029 0.0013  
AT. 44 C X 0.0052 0.0055 0.0002 0.0003 -0.0004 -0.0002  
Y -0.0034 -0.0043 -0.0034 0.0022 0.0019 -0.0006  
Z 0.0005 0.0016 0.0051 -0.0036 -0.0029 0.0013  
AT. 45 H X 0.0293 -0.0284 0.0151 0.0144 -0.0056 -0.0056  
Y 0.0039 -0.0106 -0.0329 -0.0223 0.0195 0.0082  
Z 0.0003 -0.0058 -0.0287 -0.0199 0.0165 0.0072  
AT. 46 H X 0.0293 0.0284 0.0151 -0.0144 0.0056 -0.0056  
Y -0.0039 -0.0106 0.0329 -0.0223 0.0195 -0.0082  
Z 0.0003 0.0058 -0.0287 0.0199 -0.0165 0.0072  
AT. 47 H X -0.0293 0.0284 0.0151 0.0144 0.0056 0.0056  
Y -0.0039 0.0106 -0.0329 -0.0223 -0.0195 -0.0082  
Z -0.0003 0.0058 -0.0287 -0.0199 -0.0165 -0.0072  
AT. 48 H X -0.0293 -0.0284 0.0151 -0.0144 -0.0056 0.0056  
Y 0.0039 0.0106 0.0329 -0.0223 -0.0195 0.0082  
Z -0.0003 -0.0058 -0.0287 0.0199 0.0165 -0.0072  
AT. 49 H X 0.0179 -0.0200 -0.0046 -0.0013 0.0028 -0.0008  
Y 0.0224 -0.0212 0.0138 0.0122 -0.0070 -0.0057  
Z -0.0082 0.0019 -0.0375 -0.0271 0.0203 0.0099  
AT. 50 H X 0.0179 0.0200 -0.0046 0.0013 -0.0028 -0.0008  
Y -0.0224 -0.0212 -0.0138 0.0122 -0.0070 0.0057  
Z -0.0082 -0.0019 -0.0375 0.0271 -0.0203 0.0099  
AT. 51 H X -0.0179 0.0200 -0.0046 -0.0013 -0.0028 0.0008

Y -0.0224 0.0212 0.0138 0.0122 0.0070 0.0057  
Z 0.0082 -0.0019 -0.0375 -0.0271 -0.0203 -0.0099  
AT. 52 H X -0.0179 -0.0200 -0.0046 0.0013 0.0028 0.0008  
Y 0.0224 0.0212 -0.0138 0.0122 0.0070 -0.0057  
Z 0.0082 0.0019 -0.0375 0.0271 0.0203 -0.0099  
AT. 53 C X 0.0008 -0.0013 -0.0000 -0.0000 0.0003 0.0005  
Y 0.0009 -0.0014 -0.0008 -0.0004 -0.0000 -0.0004  
Z 0.0054 -0.0057 -0.0002 0.0012 0.0012 -0.0009  
AT. 54 C X 0.0008 0.0013 -0.0000 0.0000 -0.0003 0.0005  
Y -0.0009 -0.0014 0.0008 -0.0004 -0.0000 0.0004  
Z 0.0054 0.0057 -0.0002 -0.0012 -0.0012 -0.0009  
AT. 55 C X -0.0008 0.0013 -0.0000 -0.0000 -0.0003 -0.0005  
Y -0.0009 0.0014 -0.0008 -0.0004 0.0000 0.0004  
Z -0.0054 0.0057 -0.0002 0.0012 -0.0012 0.0009  
AT. 56 C X -0.0008 -0.0013 -0.0000 0.0000 0.0003 -0.0005  
Y 0.0009 0.0014 0.0008 -0.0004 0.0000 -0.0004  
Z -0.0054 -0.0057 -0.0002 -0.0012 0.0012 0.0009  
AT. 57 C X 0.0015 -0.0012 0.0009 0.0012 -0.0001 -0.0007  
Y 0.0045 -0.0035 -0.0003 0.0001 0.0001 -0.0006  
Z 0.0062 -0.0053 0.0002 0.0004 -0.0002 -0.0001  
AT. 58 C X 0.0015 0.0012 0.0009 -0.0012 0.0001 -0.0007  
Y -0.0045 -0.0035 0.0003 0.0001 0.0001 0.0006  
Z 0.0062 0.0053 0.0002 -0.0004 0.0002 -0.0001  
AT. 59 C X -0.0015 0.0012 0.0009 0.0012 0.0001 0.0007  
Y -0.0045 0.0035 -0.0003 0.0001 -0.0001 0.0006  
Z -0.0062 0.0053 0.0002 0.0004 0.0002 0.0001  
AT. 60 C X -0.0015 -0.0012 0.0009 -0.0012 -0.0001 0.0007  
Y 0.0045 0.0035 0.0003 0.0001 -0.0001 -0.0006  
Z -0.0062 -0.0053 0.0002 -0.0004 -0.0002 0.0001  
AT. 61 H X -0.0214 0.0157 0.0003 -0.0037 0.0002 0.0077  
Y -0.0069 0.0042 -0.0016 -0.0043 0.0002 0.0059  
Z -0.0295 0.0256 0.0062 0.0063 0.0012 -0.0016

AT. 62 H X -0.0214 -0.0157 0.0003 0.0037 -0.0002 0.0077  
Y 0.0069 0.0042 0.0016 -0.0043 0.0002 -0.0059  
Z -0.0295 -0.0256 0.0062 -0.0063 -0.0012 -0.0016

AT. 63 H X 0.0214 -0.0157 0.0003 -0.0037 -0.0002 -0.0077  
Y 0.0069 -0.0042 -0.0016 -0.0043 -0.0002 -0.0059  
Z 0.0295 -0.0256 0.0062 0.0063 -0.0012 0.0016

AT. 64 H X 0.0214 0.0157 0.0003 0.0037 0.0002 -0.0077  
Y -0.0069 -0.0042 0.0016 -0.0043 -0.0002 0.0059  
Z 0.0295 0.0256 0.0062 -0.0063 0.0012 0.0016

AT. 65 H X 0.0092 -0.0068 -0.0011 0.0005 0.0001 -0.0027  
Y -0.0201 0.0140 0.0054 0.0020 -0.0003 0.0061  
Z -0.0329 0.0296 -0.0087 -0.0119 -0.0000 0.0045

AT. 66 H X 0.0092 0.0068 -0.0011 -0.0005 -0.0001 -0.0027  
Y 0.0201 0.0140 -0.0054 0.0020 -0.0003 -0.0061  
Z -0.0329 -0.0296 -0.0087 0.0119 0.0000 0.0045

AT. 67 H X -0.0092 0.0068 -0.0011 0.0005 -0.0001 0.0027  
Y 0.0201 -0.0140 0.0054 0.0020 0.0003 -0.0061  
Z 0.0329 -0.0296 -0.0087 -0.0119 0.0000 -0.0045

AT. 68 H X -0.0092 -0.0068 -0.0011 -0.0005 0.0001 0.0027  
Y -0.0201 -0.0140 -0.0054 0.0020 0.0003 0.0061  
Z 0.0329 0.0296 -0.0087 0.0119 -0.0000 -0.0045

AT. 69 H X -0.0087 0.0093 -0.0125 -0.0150 -0.0005 0.0041  
Y -0.0279 0.0253 0.0020 0.0016 -0.0008 -0.0028  
Z -0.0235 0.0214 -0.0006 -0.0014 -0.0009 -0.0014

AT. 70 H X -0.0087 -0.0093 -0.0125 0.0150 0.0005 0.0041  
Y 0.0279 0.0253 -0.0020 0.0016 -0.0008 0.0028  
Z -0.0235 -0.0214 -0.0006 0.0014 0.0009 -0.0014

AT. 71 H X 0.0087 -0.0093 -0.0125 -0.0150 0.0005 -0.0041  
Y 0.0279 -0.0253 0.0020 0.0016 0.0008 0.0028  
Z 0.0235 -0.0214 -0.0006 -0.0014 0.0009 0.0014

AT. 72 H X 0.0087 0.0093 -0.0125 0.0150 -0.0005 -0.0041  
Y -0.0279 -0.0253 -0.0020 0.0016 0.0008 -0.0028

Z 0.0235 0.0214 -0.0006 0.0014 -0.0009 0.0014  
AT. 73 C X -0.0028 0.0026 -0.0008 0.0003 0.0011 -0.0008  
Y 0.0035 -0.0032 0.0004 0.0006 0.0002 -0.0004  
Z -0.0051 0.0049 -0.0001 -0.0013 -0.0007 0.0014  
AT. 74 C X -0.0028 -0.0026 -0.0008 -0.0003 -0.0011 -0.0008  
Y -0.0035 -0.0032 -0.0004 0.0006 0.0002 0.0004  
Z -0.0051 -0.0049 -0.0001 0.0013 0.0007 0.0014  
AT. 75 C X 0.0028 -0.0026 -0.0008 0.0003 -0.0011 0.0008  
Y -0.0035 0.0032 0.0004 0.0006 -0.0002 0.0004  
Z 0.0051 -0.0049 -0.0001 -0.0013 0.0007 -0.0014  
AT. 76 C X 0.0028 0.0026 -0.0008 -0.0003 0.0011 0.0008  
Y 0.0035 0.0032 -0.0004 0.0006 -0.0002 -0.0004  
Z 0.0051 0.0049 -0.0001 0.0013 -0.0007 -0.0014  
AT. 77 C X -0.0027 0.0035 0.0027 0.0023 -0.0011 -0.0007  
Y -0.0035 0.0044 0.0027 0.0025 -0.0011 -0.0012  
Z 0.0022 -0.0027 -0.0004 -0.0011 0.0001 0.0011  
AT. 78 C X -0.0027 -0.0035 0.0027 -0.0023 0.0011 -0.0007  
Y 0.0035 0.0044 -0.0027 0.0025 -0.0011 0.0012  
Z 0.0022 0.0027 -0.0004 0.0011 -0.0001 0.0011  
AT. 79 C X 0.0027 -0.0035 0.0027 0.0023 0.0011 0.0007  
Y 0.0035 -0.0044 0.0027 0.0025 0.0011 0.0012  
Z -0.0022 0.0027 -0.0004 -0.0011 -0.0001 -0.0011  
AT. 80 C X 0.0027 0.0035 0.0027 -0.0023 -0.0011 0.0007  
Y -0.0035 -0.0044 -0.0027 0.0025 0.0011 -0.0012  
Z -0.0022 -0.0027 -0.0004 0.0011 0.0001 -0.0011  
AT. 81 H X 0.0091 -0.0122 -0.0093 -0.0059 0.0042 0.0010  
Y 0.0125 -0.0161 -0.0094 -0.0063 0.0039 0.0013  
Z -0.0188 0.0206 -0.0127 -0.0047 0.0065 -0.0039  
AT. 82 H X 0.0091 0.0122 -0.0093 0.0059 -0.0042 0.0010  
Y -0.0125 -0.0161 0.0094 -0.0063 0.0039 -0.0013  
Z -0.0188 -0.0206 -0.0127 0.0047 -0.0065 -0.0039  
AT. 83 H X -0.0091 0.0122 -0.0093 -0.0059 -0.0042 -0.0010

Y -0.0125 0.0161 -0.0094 -0.0063 -0.0039 -0.0013  
Z 0.0188 -0.0206 -0.0127 -0.0047 -0.0065 0.0039  
AT. 84 H X -0.0091 -0.0122 -0.0093 0.0059 0.0042 -0.0010  
Y 0.0125 0.0161 0.0094 -0.0063 -0.0039 0.0013  
Z 0.0188 0.0206 -0.0127 0.0047 0.0065 0.0039  
AT. 85 H X 0.0006 -0.0035 -0.0180 -0.0110 0.0089 0.0003  
Y 0.0129 -0.0147 0.0005 -0.0041 -0.0002 0.0052  
Z -0.0125 0.0152 0.0066 0.0078 -0.0032 -0.0044  
AT. 86 H X 0.0006 0.0035 -0.0180 0.0110 -0.0089 0.0003  
Y -0.0129 -0.0147 -0.0005 -0.0041 -0.0002 -0.0052  
Z -0.0125 -0.0152 0.0066 -0.0078 0.0032 -0.0044  
AT. 87 H X -0.0006 0.0035 -0.0180 -0.0110 -0.0089 -0.0003  
Y -0.0129 0.0147 0.0005 -0.0041 0.0002 -0.0052  
Z 0.0125 -0.0152 0.0066 0.0078 0.0032 0.0044  
AT. 88 H X -0.0006 -0.0035 -0.0180 0.0110 0.0089 -0.0003  
Y 0.0129 0.0147 -0.0005 -0.0041 0.0002 0.0052  
Z 0.0125 0.0152 0.0066 -0.0078 -0.0032 0.0044  
AT. 89 C X 0.0019 -0.0021 0.0002 -0.0009 -0.0007 0.0008  
Y 0.0014 -0.0021 -0.0006 -0.0006 -0.0001 0.0005  
Z 0.0002 0.0005 0.0007 0.0009 -0.0004 -0.0007  
AT. 90 C X 0.0019 0.0021 0.0002 0.0009 0.0007 0.0008  
Y -0.0014 -0.0021 0.0006 -0.0006 -0.0001 -0.0005  
Z 0.0002 -0.0005 0.0007 -0.0009 0.0004 -0.0007  
AT. 91 C X -0.0019 0.0021 0.0002 -0.0009 0.0007 -0.0008  
Y -0.0014 0.0021 -0.0006 -0.0006 0.0001 -0.0005  
Z -0.0002 -0.0005 0.0007 0.0009 0.0004 0.0007  
AT. 92 C X -0.0019 -0.0021 0.0002 0.0009 -0.0007 -0.0008  
Y 0.0014 0.0021 0.0006 -0.0006 0.0001 0.0005  
Z -0.0002 0.0005 0.0007 -0.0009 -0.0004 0.0007  
AT. 93 C X -0.0006 0.0004 -0.0003 0.0004 0.0004 -0.0006  
Y 0.0048 -0.0047 0.0001 -0.0008 -0.0004 0.0006  
Z -0.0083 0.0082 -0.0003 0.0005 -0.0002 0.0002

AT. 94 C X -0.0006 -0.0004 -0.0003 -0.0004 -0.0004 -0.0006  
Y -0.0048 -0.0047 -0.0001 -0.0008 -0.0004 -0.0006  
Z -0.0083 -0.0082 -0.0003 -0.0005 0.0002 0.0002

AT. 95 C X 0.0006 -0.0004 -0.0003 0.0004 -0.0004 0.0006  
Y -0.0048 0.0047 0.0001 -0.0008 0.0004 -0.0006  
Z 0.0083 -0.0082 -0.0003 0.0005 0.0002 -0.0002

AT. 96 C X 0.0006 0.0004 -0.0003 -0.0004 0.0004 0.0006  
Y 0.0048 0.0047 -0.0001 -0.0008 0.0004 0.0006  
Z 0.0083 0.0082 -0.0003 -0.0005 -0.0002 -0.0002

AT. 97 H X 0.0197 -0.0197 -0.0001 -0.0044 -0.0029 0.0032  
Y -0.0082 0.0072 -0.0004 0.0077 0.0076 -0.0086  
Z 0.0399 -0.0419 -0.0004 0.0000 0.0043 -0.0051

AT. 98 H X 0.0197 0.0197 -0.0001 0.0044 0.0029 0.0032  
Y 0.0082 0.0072 0.0004 0.0077 0.0076 0.0086  
Z 0.0399 0.0419 -0.0004 -0.0000 -0.0043 -0.0051

AT. 99 H X -0.0197 0.0197 -0.0001 -0.0044 0.0029 -0.0032  
Y 0.0082 -0.0072 -0.0004 0.0077 -0.0076 0.0086  
Z -0.0399 0.0419 -0.0004 0.0000 -0.0043 0.0051

AT. 100 H X -0.0197 -0.0197 -0.0001 0.0044 -0.0029 -0.0032  
Y -0.0082 -0.0072 0.0004 0.0077 -0.0076 -0.0086  
Z -0.0399 -0.0419 -0.0004 -0.0000 0.0043 0.0051

AT. 101 H X -0.0069 0.0071 0.0012 0.0031 0.0033 -0.0028  
Y -0.0088 0.0090 0.0012 0.0035 0.0035 -0.0032  
Z 0.0337 -0.0323 0.0033 -0.0071 -0.0043 0.0065

AT. 102 H X -0.0069 -0.0071 0.0012 -0.0031 -0.0033 -0.0028  
Y 0.0088 0.0090 -0.0012 0.0035 0.0035 0.0032  
Z 0.0337 0.0323 0.0033 0.0071 0.0043 0.0065

AT. 103 H X 0.0069 -0.0071 0.0012 0.0031 -0.0033 0.0028  
Y 0.0088 -0.0090 0.0012 0.0035 -0.0035 0.0032  
Z -0.0337 0.0323 0.0033 -0.0071 0.0043 -0.0065

AT. 104 H X 0.0069 0.0071 0.0012 -0.0031 0.0033 0.0028  
Y -0.0088 -0.0090 -0.0012 0.0035 -0.0035 -0.0032

Z -0.0337 -0.0323 0.0033 0.0071 -0.0043 -0.0065  
AT. 105 H X -0.0092 0.0115 0.0030 -0.0044 -0.0054 0.0078  
Y -0.0350 0.0351 -0.0019 0.0018 -0.0027 0.0010  
Z 0.0267 -0.0275 0.0003 0.0002 0.0036 -0.0031  
AT. 106 H X -0.0092 -0.0115 0.0030 0.0044 0.0054 0.0078  
Y 0.0350 0.0351 0.0019 0.0018 -0.0027 -0.0010  
Z 0.0267 0.0275 0.0003 -0.0002 -0.0036 -0.0031  
AT. 107 H X 0.0092 -0.0115 0.0030 -0.0044 0.0054 -0.0078  
Y 0.0350 -0.0351 -0.0019 0.0018 0.0027 -0.0010  
Z -0.0267 0.0275 0.0003 0.0002 -0.0036 0.0031  
AT. 108 H X 0.0092 0.0115 0.0030 0.0044 -0.0054 -0.0078  
Y -0.0350 -0.0351 0.0019 0.0018 0.0027 0.0010  
Z -0.0267 -0.0275 0.0003 -0.0002 0.0036 0.0031  
AT. 109 C X 0.0019 -0.0020 -0.0012 0.0020 0.0026 -0.0015  
Y -0.0047 0.0048 0.0018 -0.0024 -0.0032 0.0034  
Z -0.0041 0.0041 0.0003 -0.0004 -0.0005 0.0013  
AT. 110 C X 0.0019 0.0020 -0.0012 -0.0020 -0.0026 -0.0015  
Y 0.0047 0.0048 -0.0018 -0.0024 -0.0032 -0.0034  
Z -0.0041 -0.0041 0.0003 0.0004 0.0005 0.0013  
AT. 111 C X -0.0019 0.0020 -0.0012 0.0020 -0.0026 0.0015  
Y 0.0047 -0.0048 0.0018 -0.0024 0.0032 -0.0034  
Z 0.0041 -0.0041 0.0003 -0.0004 0.0005 -0.0013  
AT. 112 C X -0.0019 -0.0020 -0.0012 -0.0020 0.0026 0.0015  
Y -0.0047 -0.0048 -0.0018 -0.0024 0.0032 0.0034  
Z 0.0041 0.0041 0.0003 0.0004 -0.0005 -0.0013  
AT. 113 H X -0.0058 0.0079 0.0048 -0.0067 -0.0096 0.0050  
Y 0.0145 -0.0182 -0.0066 0.0093 0.0133 -0.0060  
Z 0.0206 -0.0210 0.0068 -0.0128 -0.0165 0.0071  
AT. 114 H X -0.0058 -0.0079 0.0048 0.0067 0.0096 0.0050  
Y -0.0145 -0.0182 0.0066 0.0093 0.0133 0.0060  
Z 0.0206 0.0210 0.0068 0.0128 0.0165 0.0071  
AT. 115 H X 0.0058 -0.0079 0.0048 -0.0067 0.0096 -0.0050

Y -0.0145 0.0182 -0.0066 0.0093 -0.0133 0.0060  
Z -0.0206 0.0210 0.0068 -0.0128 0.0165 -0.0071  
AT. 116 H X 0.0058 0.0079 0.0048 0.0067 -0.0096 -0.0050  
Y 0.0145 0.0182 0.0066 0.0093 -0.0133 -0.0060  
Z -0.0206 -0.0210 0.0068 0.0128 -0.0165 -0.0071  
AT. 117 H X -0.0032 0.0049 0.0099 -0.0175 -0.0238 0.0105  
Y 0.0215 -0.0196 -0.0018 0.0031 0.0035 -0.0084  
Z 0.0199 -0.0185 -0.0043 0.0072 0.0091 -0.0105  
AT. 118 H X -0.0032 -0.0049 0.0099 0.0175 0.0238 0.0105  
Y -0.0215 -0.0196 0.0018 0.0031 0.0035 0.0084  
Z 0.0199 0.0185 -0.0043 -0.0072 -0.0091 -0.0105  
AT. 119 H X 0.0032 -0.0049 0.0099 -0.0175 0.0238 -0.0105  
Y -0.0215 0.0196 -0.0018 0.0031 -0.0035 0.0084  
Z -0.0199 0.0185 -0.0043 0.0072 -0.0091 0.0105  
AT. 120 H X 0.0032 0.0049 0.0099 0.0175 -0.0238 -0.0105  
Y 0.0215 0.0196 0.0018 0.0031 -0.0035 -0.0084  
Z -0.0199 -0.0185 -0.0043 -0.0072 0.0091 0.0105  
AT. 121 C X 0.0024 -0.0027 0.0002 -0.0011 -0.0008 0.0013  
Y -0.0035 0.0040 0.0020 -0.0018 -0.0031 0.0029  
Z 0.0001 -0.0006 -0.0034 0.0038 0.0056 -0.0057  
AT. 122 C X 0.0024 0.0027 0.0002 0.0011 0.0008 0.0013  
Y 0.0035 0.0040 -0.0020 -0.0018 -0.0031 -0.0029  
Z 0.0001 0.0006 -0.0034 -0.0038 -0.0056 -0.0057  
AT. 123 C X -0.0024 0.0027 0.0002 -0.0011 0.0008 -0.0013  
Y 0.0035 -0.0040 0.0020 -0.0018 0.0031 -0.0029  
Z -0.0001 0.0006 -0.0034 0.0038 -0.0056 0.0057  
AT. 124 C X -0.0024 -0.0027 0.0002 0.0011 -0.0008 -0.0013  
Y -0.0035 -0.0040 -0.0020 -0.0018 0.0031 0.0029  
Z -0.0001 -0.0006 -0.0034 -0.0038 0.0056 0.0057  
AT. 125 H X -0.0115 0.0119 -0.0136 0.0214 0.0252 -0.0294  
Y 0.0036 -0.0058 -0.0172 0.0191 0.0286 -0.0289  
Z -0.0008 0.0021 0.0148 -0.0180 -0.0253 0.0266



AT.126 H X -0.0115 -0.0119 -0.0136 -0.0214 -0.0252 -0.0294  
Y -0.0036 -0.0058 0.0172 0.0191 0.0286 0.0289  
Z -0.0008 -0.0021 0.0148 0.0180 0.0253 0.0266

AT.127 H X 0.0115 -0.0119 -0.0136 0.0214 -0.0252 0.0294  
Y -0.0036 0.0058 -0.0172 0.0191 -0.0286 0.0289  
Z 0.0008 -0.0021 0.0148 -0.0180 0.0253 -0.0266

AT.128 H X 0.0115 0.0119 -0.0136 -0.0214 0.0252 0.0294  
Y 0.0036 0.0058 0.0172 0.0191 -0.0286 -0.0289  
Z 0.0008 0.0021 0.0148 0.0180 -0.0253 -0.0266

AT.129 H X -0.0123 0.0152 0.0044 -0.0012 -0.0049 0.0035  
Y 0.0205 -0.0238 0.0058 -0.0141 -0.0138 0.0177  
Z 0.0019 0.0009 0.0242 -0.0291 -0.0403 0.0427

AT.130 H X -0.0123 -0.0152 0.0044 0.0012 0.0049 0.0035  
Y -0.0205 -0.0238 -0.0058 -0.0141 -0.0138 -0.0177  
Z 0.0019 -0.0009 0.0242 0.0291 0.0403 0.0427

AT.131 H X 0.0123 -0.0152 0.0044 -0.0012 0.0049 -0.0035  
Y -0.0205 0.0238 0.0058 -0.0141 0.0138 -0.0177  
Z -0.0019 -0.0009 0.0242 -0.0291 0.0403 -0.0427

AT.132 H X 0.0123 0.0152 0.0044 0.0012 -0.0049 -0.0035  
Y 0.0205 0.0238 -0.0058 -0.0141 0.0138 0.0177  
Z -0.0019 0.0009 0.0242 0.0291 -0.0403 -0.0427

AT.133 C X 0.0004 -0.0003 0.0011 -0.0017 -0.0020 0.0022  
Y 0.0011 -0.0015 0.0004 -0.0007 -0.0007 0.0011  
Z 0.0024 -0.0024 0.0012 -0.0028 -0.0028 0.0036

AT.134 C X 0.0004 0.0003 0.0011 0.0017 0.0020 0.0022  
Y -0.0011 -0.0015 -0.0004 -0.0007 -0.0007 -0.0011  
Z 0.0024 0.0024 0.0012 0.0028 0.0028 0.0036

AT.135 C X -0.0004 0.0003 0.0011 -0.0017 0.0020 -0.0022  
Y -0.0011 0.0015 0.0004 -0.0007 0.0007 -0.0011  
Z -0.0024 0.0024 0.0012 -0.0028 0.0028 -0.0036

AT.136 C X -0.0004 -0.0003 0.0011 0.0017 -0.0020 -0.0022  
Y 0.0011 0.0015 -0.0004 -0.0007 0.0007 0.0011

Z -0.0024 -0.0024 0.0012 0.0028 -0.0028 -0.0036  
AT. 137 C X 0.0003 -0.0005 0.0024 -0.0036 -0.0046 0.0050  
Y -0.0002 0.0002 0.0019 -0.0029 -0.0036 0.0039  
Z -0.0001 0.0000 0.0028 -0.0039 -0.0051 0.0055  
AT. 138 C X 0.0003 0.0005 0.0024 0.0036 0.0046 0.0050  
Y 0.0002 0.0002 -0.0019 -0.0029 -0.0036 -0.0039  
Z -0.0001 -0.0000 0.0028 0.0039 0.0051 0.0055  
AT. 139 C X -0.0003 0.0005 0.0024 -0.0036 0.0046 -0.0050  
Y 0.0002 -0.0002 0.0019 -0.0029 0.0036 -0.0039  
Z 0.0001 -0.0000 0.0028 -0.0039 0.0051 -0.0055  
AT. 140 C X -0.0003 -0.0005 0.0024 0.0036 -0.0046 -0.0050  
Y -0.0002 -0.0002 -0.0019 -0.0029 0.0036 0.0039  
Z 0.0001 0.0000 0.0028 0.0039 -0.0051 -0.0055  
AT. 141 H X -0.0027 0.0034 -0.0138 0.0212 0.0265 -0.0294  
Y -0.0042 0.0047 -0.0290 0.0438 0.0548 -0.0604  
Z 0.0003 -0.0009 -0.0015 0.0020 0.0026 -0.0026  
AT. 142 H X -0.0027 -0.0034 -0.0138 -0.0212 -0.0265 -0.0294  
Y 0.0042 0.0047 0.0290 0.0438 0.0548 0.0604  
Z 0.0003 0.0009 -0.0015 -0.0020 -0.0026 -0.0026  
AT. 143 H X 0.0027 -0.0034 -0.0138 0.0212 -0.0265 0.0294  
Y 0.0042 -0.0047 -0.0290 0.0438 -0.0548 0.0604  
Z -0.0003 0.0009 -0.0015 0.0020 -0.0026 0.0026  
AT. 144 H X 0.0027 0.0034 -0.0138 -0.0212 0.0265 0.0294  
Y -0.0042 -0.0047 0.0290 0.0438 -0.0548 -0.0604  
Z -0.0003 -0.0009 -0.0015 -0.0020 0.0026 0.0026  
AT. 145 H X -0.0040 0.0046 -0.0246 0.0369 0.0464 -0.0514  
Y -0.0003 0.0003 0.0023 -0.0036 -0.0046 0.0050  
Z -0.0054 0.0063 -0.0252 0.0368 0.0462 -0.0511  
AT. 146 H X -0.0040 -0.0046 -0.0246 -0.0369 -0.0464 -0.0514  
Y 0.0003 0.0003 -0.0023 -0.0036 -0.0046 -0.0050  
Z -0.0054 -0.0063 -0.0252 -0.0368 -0.0462 -0.0511  
AT. 147 H X 0.0040 -0.0046 -0.0246 0.0369 -0.0464 0.0514

Y 0.0003 -0.0003 0.0023 -0.0036 0.0046 -0.0050  
Z 0.0054 -0.0063 -0.0252 0.0368 -0.0462 0.0511  
AT. 148 H X 0.0040 0.0046 -0.0246 -0.0369 0.0464 0.0514  
Y -0.0003 -0.0003 -0.0023 -0.0036 0.0046 0.0050  
Z 0.0054 0.0063 -0.0252 -0.0368 0.0462 0.0511  
AT. 149 O X 0.0005 -0.0004 0.0002 0.0000 -0.0002 0.0001  
Y -0.0002 0.0002 -0.0002 -0.0001 0.0001 -0.0001  
Z 0.0020 -0.0019 -0.0000 0.0002 0.0001 -0.0004  
AT. 150 O X 0.0005 0.0004 0.0002 -0.0000 0.0002 0.0001  
Y 0.0002 0.0002 0.0002 -0.0001 0.0001 0.0001  
Z 0.0020 0.0019 -0.0000 -0.0002 -0.0001 -0.0004  
AT. 151 O X -0.0005 0.0004 0.0002 0.0000 0.0002 -0.0001  
Y 0.0002 -0.0002 -0.0002 -0.0001 -0.0001 0.0001  
Z -0.0020 0.0019 -0.0000 0.0002 -0.0001 0.0004  
AT. 152 O X -0.0005 -0.0004 0.0002 -0.0000 -0.0002 -0.0001  
Y -0.0002 -0.0002 0.0002 -0.0001 -0.0001 -0.0001  
Z -0.0020 -0.0019 -0.0000 -0.0002 0.0001 0.0004  
AT. 153 H X 0.0170 -0.0162 0.0012 0.0003 -0.0011 -0.0010  
Y -0.0219 0.0208 0.0009 -0.0003 -0.0002 0.0024  
Z -0.0166 0.0158 -0.0004 -0.0003 0.0006 0.0016  
AT. 154 H X 0.0170 0.0162 0.0012 -0.0003 0.0011 -0.0010  
Y 0.0219 0.0208 -0.0009 -0.0003 -0.0002 -0.0024  
Z -0.0166 -0.0158 -0.0004 0.0003 -0.0006 0.0016  
AT. 155 H X -0.0170 0.0162 0.0012 0.0003 0.0011 0.0010  
Y 0.0219 -0.0208 0.0009 -0.0003 0.0002 -0.0024  
Z 0.0166 -0.0158 -0.0004 -0.0003 -0.0006 -0.0016  
AT. 156 H X -0.0170 -0.0162 0.0012 -0.0003 -0.0011 0.0010  
Y -0.0219 -0.0208 -0.0009 -0.0003 0.0002 0.0024  
Z 0.0166 0.0158 -0.0004 0.0003 0.0006 -0.0016  
AT. 157 O X -0.0003 0.0004 0.0001 -0.0001 -0.0002 0.0002  
Y -0.0007 0.0005 0.0006 -0.0013 -0.0015 0.0015  
Z 0.0006 -0.0006 0.0001 0.0001 0.0000 -0.0001

AT.158 O X -0.0003 -0.0004 0.0001 0.0001 0.0002 0.0002  
Y 0.0007 0.0005 -0.0006 -0.0013 -0.0015 -0.0015  
Z 0.0006 0.0006 0.0001 -0.0001 -0.0000 -0.0001

AT.159 O X 0.0003 -0.0004 0.0001 -0.0001 0.0002 -0.0002  
Y 0.0007 -0.0005 0.0006 -0.0013 0.0015 -0.0015  
Z -0.0006 0.0006 0.0001 0.0001 -0.0000 0.0001

AT.160 O X 0.0003 0.0004 0.0001 0.0001 -0.0002 -0.0002  
Y -0.0007 -0.0005 -0.0006 -0.0013 0.0015 0.0015  
Z -0.0006 -0.0006 0.0001 -0.0001 0.0000 0.0001

AT.161 O X 0.0001 -0.0003 0.0006 -0.0012 -0.0014 0.0014  
Y 0.0001 -0.0000 -0.0002 0.0005 0.0006 -0.0006  
Z -0.0000 -0.0002 0.0005 -0.0011 -0.0012 0.0012

AT.162 O X 0.0001 0.0003 0.0006 0.0012 0.0014 0.0014  
Y -0.0001 -0.0000 0.0002 0.0005 0.0006 0.0006  
Z -0.0000 0.0002 0.0005 0.0011 0.0012 0.0012

AT.163 O X -0.0001 0.0003 0.0006 -0.0012 0.0014 -0.0014  
Y -0.0001 0.0000 -0.0002 0.0005 -0.0006 0.0006  
Z 0.0000 0.0002 0.0005 -0.0011 0.0012 -0.0012

AT.164 O X -0.0001 -0.0003 0.0006 0.0012 -0.0014 -0.0014  
Y 0.0001 0.0000 0.0002 0.0005 -0.0006 -0.0006  
Z 0.0000 -0.0002 0.0005 0.0011 -0.0012 -0.0012

AT.165 H X 0.0003 0.0023 -0.0074 0.0157 0.0180 -0.0185  
Y 0.0002 0.0014 -0.0044 0.0099 0.0110 -0.0114  
Z 0.0017 0.0028 -0.0088 0.0212 0.0226 -0.0236

AT.166 H X 0.0003 -0.0023 -0.0074 -0.0157 -0.0180 -0.0185  
Y -0.0002 0.0014 0.0044 0.0099 0.0110 0.0114  
Z 0.0017 -0.0028 -0.0088 -0.0212 -0.0226 -0.0236

AT.167 H X -0.0003 -0.0023 -0.0074 0.0157 -0.0180 0.0185  
Y -0.0002 -0.0014 -0.0044 0.0099 -0.0110 0.0114  
Z -0.0017 -0.0028 -0.0088 0.0212 -0.0226 0.0236

AT.168 H X -0.0003 0.0023 -0.0074 -0.0157 0.0180 0.0185  
Y 0.0002 -0.0014 0.0044 0.0099 -0.0110 -0.0114

Z -0.0017 0.0028 -0.0088 -0.0212 0.0226 0.0236  
 AT.169 O X -0.0000 0.0000 -0.0005 -0.0003 0.0001 -0.0001  
     Y 0.0007 -0.0007 0.0001 0.0001 -0.0003 -0.0001  
     Z 0.0000 -0.0000 -0.0014 -0.0012 0.0002 -0.0000  
 AT.170 O X -0.0000 -0.0000 -0.0005 0.0003 -0.0001 -0.0001  
     Y -0.0007 -0.0007 -0.0001 0.0001 -0.0003 0.0001  
     Z 0.0000 0.0000 -0.0014 0.0012 -0.0002 -0.0000  
 AT.171 O X 0.0000 -0.0000 -0.0005 -0.0003 -0.0001 0.0001  
     Y -0.0007 0.0007 0.0001 0.0001 0.0003 0.0001  
     Z -0.0000 0.0000 -0.0014 -0.0012 -0.0002 0.0000  
 AT.172 O X 0.0000 0.0000 -0.0005 0.0003 0.0001 0.0001  
     Y 0.0007 0.0007 -0.0001 0.0001 0.0003 -0.0001  
     Z -0.0000 -0.0000 -0.0014 0.0012 0.0002 0.0000  
 AT.173 H X -0.0019 0.0019 0.0091 0.0061 -0.0025 0.0007  
     Y -0.0004 0.0004 -0.0056 -0.0045 0.0004 0.0003  
     Z 0.0038 -0.0035 0.0258 0.0212 -0.0034 -0.0009  
 AT.174 H X -0.0019 -0.0019 0.0091 -0.0061 0.0025 0.0007  
     Y 0.0004 0.0004 0.0056 -0.0045 0.0004 -0.0003  
     Z 0.0038 0.0035 0.0258 -0.0212 0.0034 -0.0009  
 AT.175 H X 0.0019 -0.0019 0.0091 0.0061 0.0025 -0.0007  
     Y 0.0004 -0.0004 -0.0056 -0.0045 -0.0004 -0.0003  
     Z -0.0038 0.0035 0.0258 0.0212 0.0034 0.0009  
 AT.176 H X 0.0019 0.0019 0.0091 -0.0061 -0.0025 -0.0007  
     Y -0.0004 -0.0004 0.0056 -0.0045 -0.0004 0.0003  
     Z -0.0038 -0.0035 0.0258 -0.0212 -0.0034 0.0009  
  
 FREQ(CM\*\*-1) 1484.95 1485.64 1486.76 1487.01 1500.11 1500.89  
  
 AT. 1 I X 0.0000 0.0000 -0.0000 0.0000 -0.0000 -0.0000  
     Y -0.0000 -0.0000 0.0000 -0.0000 0.0000 -0.0000  
     Z -0.0000 -0.0000 0.0000 -0.0000 0.0000 0.0000  
 AT. 2 I X -0.0000 0.0000 -0.0000 -0.0000 -0.0000 0.0000

Y -0.0000 0.0000 -0.0000 -0.0000 -0.0000 -0.0000  
Z 0.0000 -0.0000 0.0000 0.0000 0.0000 -0.0000  
AT. 3 I X 0.0000 0.0000 0.0000 -0.0000 -0.0000 -0.0000  
Y -0.0000 -0.0000 -0.0000 0.0000 0.0000 -0.0000  
Z -0.0000 -0.0000 -0.0000 0.0000 0.0000 0.0000  
AT. 4 I X -0.0000 0.0000 0.0000 0.0000 -0.0000 0.0000  
Y -0.0000 0.0000 0.0000 0.0000 -0.0000 -0.0000  
Z 0.0000 -0.0000 -0.0000 -0.0000 0.0000 -0.0000  
AT. 5 I X -0.0000 0.0000 0.0000 0.0000 0.0000 0.0000  
Y -0.0000 0.0000 0.0000 0.0000 -0.0000 -0.0000  
Z 0.0000 -0.0000 -0.0000 -0.0000 -0.0000 -0.0000  
AT. 6 I X 0.0000 0.0000 0.0000 -0.0000 0.0000 -0.0000  
Y -0.0000 -0.0000 -0.0000 0.0000 0.0000 -0.0000  
Z -0.0000 -0.0000 -0.0000 0.0000 -0.0000 0.0000  
AT. 7 I X -0.0000 0.0000 -0.0000 -0.0000 0.0000 0.0000  
Y -0.0000 0.0000 -0.0000 -0.0000 -0.0000 -0.0000  
Z 0.0000 -0.0000 0.0000 0.0000 -0.0000 -0.0000  
AT. 8 I X 0.0000 0.0000 -0.0000 0.0000 0.0000 -0.0000  
Y -0.0000 -0.0000 0.0000 -0.0000 0.0000 -0.0000  
Z -0.0000 -0.0000 0.0000 -0.0000 -0.0000 0.0000  
AT. 9 N X 0.0013 0.0009 -0.0020 0.0019 -0.0012 -0.0013  
Y 0.0040 0.0026 -0.0051 0.0050 -0.0023 -0.0022  
Z -0.0007 -0.0005 0.0009 -0.0010 -0.0019 -0.0021  
AT. 10 N X -0.0013 0.0009 -0.0020 -0.0019 -0.0012 0.0013  
Y 0.0040 -0.0026 0.0051 0.0050 0.0023 -0.0022  
Z 0.0007 -0.0005 0.0009 0.0010 -0.0019 0.0021  
AT. 11 N X 0.0013 0.0009 0.0020 -0.0019 -0.0012 -0.0013  
Y 0.0040 0.0026 0.0051 -0.0050 -0.0023 -0.0022  
Z -0.0007 -0.0005 -0.0009 0.0010 -0.0019 -0.0021  
AT. 12 N X -0.0013 0.0009 0.0020 0.0019 -0.0012 0.0013  
Y 0.0040 -0.0026 -0.0051 -0.0050 0.0023 -0.0022  
Z 0.0007 -0.0005 -0.0009 -0.0010 -0.0019 0.0021

AT. 13 N X -0.0001 -0.0001 0.0001 -0.0002 -0.0000 -0.0002  
Y 0.0039 -0.0056 -0.0011 -0.0027 -0.0012 -0.0009  
Z 0.0004 -0.0004 -0.0003 -0.0003 0.0007 0.0003

AT. 14 N X 0.0001 -0.0001 0.0001 0.0002 -0.0000 0.0002  
Y 0.0039 0.0056 0.0011 -0.0027 0.0012 -0.0009  
Z -0.0004 -0.0004 -0.0003 0.0003 0.0007 -0.0003

AT. 15 N X -0.0001 -0.0001 -0.0001 0.0002 -0.0000 -0.0002  
Y 0.0039 -0.0056 0.0011 0.0027 -0.0012 -0.0009  
Z 0.0004 -0.0004 0.0003 0.0003 0.0007 0.0003

AT. 16 N X 0.0001 -0.0001 -0.0001 -0.0002 -0.0000 0.0002  
Y 0.0039 0.0056 -0.0011 0.0027 0.0012 -0.0009  
Z -0.0004 -0.0004 0.0003 -0.0003 0.0007 -0.0003

AT. 17 O X -0.0007 -0.0005 0.0009 -0.0010 -0.0000 -0.0001  
Y -0.0010 -0.0007 0.0010 -0.0011 0.0002 0.0001  
Z -0.0013 -0.0011 0.0020 -0.0023 -0.0001 -0.0003

AT. 18 O X 0.0007 -0.0005 0.0009 0.0010 -0.0000 0.0001  
Y -0.0010 0.0007 -0.0010 -0.0011 -0.0002 0.0001  
Z 0.0013 -0.0011 0.0020 0.0023 -0.0001 0.0003

AT. 19 O X -0.0007 -0.0005 -0.0009 0.0010 -0.0000 -0.0001  
Y -0.0010 -0.0007 -0.0010 0.0011 0.0002 0.0001  
Z -0.0013 -0.0011 -0.0020 0.0023 -0.0001 -0.0003

AT. 20 O X 0.0007 -0.0005 -0.0009 -0.0010 -0.0000 0.0001  
Y -0.0010 0.0007 0.0010 0.0011 -0.0002 0.0001  
Z 0.0013 -0.0011 -0.0020 -0.0023 -0.0001 0.0003

AT. 21 O X 0.0003 -0.0004 -0.0001 -0.0002 -0.0000 -0.0001  
Y -0.0014 0.0019 0.0005 0.0009 0.0005 0.0005  
Z 0.0019 -0.0029 -0.0006 -0.0014 -0.0009 -0.0009

AT. 22 O X -0.0003 -0.0004 -0.0001 0.0002 -0.0000 0.0001  
Y -0.0014 -0.0019 -0.0005 0.0009 -0.0005 0.0005  
Z -0.0019 -0.0029 -0.0006 0.0014 -0.0009 0.0009

AT. 23 O X 0.0003 -0.0004 0.0001 0.0002 -0.0000 -0.0001  
Y -0.0014 0.0019 -0.0005 -0.0009 0.0005 0.0005

Z 0.0019 -0.0029 0.0006 0.0014 -0.0009 -0.0009  
AT. 24 O X -0.0003 -0.0004 0.0001 -0.0002 -0.0000 0.0001  
Y -0.0014 -0.0019 0.0005 -0.0009 -0.0005 0.0005  
Z -0.0019 -0.0029 0.0006 -0.0014 -0.0009 0.0009  
AT. 25 C X 0.0018 0.0012 -0.0025 0.0023 -0.0009 -0.0007  
Y -0.0048 -0.0031 0.0062 -0.0059 0.0019 0.0015  
Z 0.0042 0.0027 -0.0055 0.0050 -0.0018 -0.0015  
AT. 26 C X -0.0018 0.0012 -0.0025 -0.0023 -0.0009 0.0007  
Y -0.0048 0.0031 -0.0062 -0.0059 -0.0019 0.0015  
Z -0.0042 0.0027 -0.0055 -0.0050 -0.0018 0.0015  
AT. 27 C X 0.0018 0.0012 0.0025 -0.0023 -0.0009 -0.0007  
Y -0.0048 -0.0031 -0.0062 0.0059 0.0019 0.0015  
Z 0.0042 0.0027 0.0055 -0.0050 -0.0018 -0.0015  
AT. 28 C X -0.0018 0.0012 0.0025 0.0023 -0.0009 0.0007  
Y -0.0048 0.0031 0.0062 0.0059 -0.0019 0.0015  
Z -0.0042 0.0027 0.0055 0.0050 -0.0018 0.0015  
AT. 29 H X 0.0004 0.0005 -0.0003 0.0001 -0.0001 0.0004  
Y 0.0520 0.0349 -0.0682 0.0651 -0.0236 -0.0180  
Z -0.0044 -0.0035 0.0052 -0.0050 0.0017 0.0006  
AT. 30 H X -0.0004 0.0005 -0.0003 -0.0001 -0.0001 -0.0004  
Y 0.0520 -0.0349 0.0682 0.0651 0.0236 -0.0180  
Z 0.0044 -0.0035 0.0052 0.0050 0.0017 -0.0006  
AT. 31 H X 0.0004 0.0005 0.0003 -0.0001 -0.0001 0.0004  
Y 0.0520 0.0349 0.0682 -0.0651 -0.0236 -0.0180  
Z -0.0044 -0.0035 -0.0052 0.0050 0.0017 0.0006  
AT. 32 H X -0.0004 0.0005 0.0003 0.0001 -0.0001 -0.0004  
Y 0.0520 -0.0349 -0.0682 -0.0651 0.0236 -0.0180  
Z 0.0044 -0.0035 -0.0052 -0.0050 0.0017 -0.0006  
AT. 33 H X -0.0346 -0.0229 0.0459 -0.0432 0.0157 0.0117  
Y 0.0114 0.0077 -0.0155 0.0147 -0.0055 -0.0043  
Z -0.0352 -0.0236 0.0477 -0.0457 0.0160 0.0130  
AT. 34 H X 0.0346 -0.0229 0.0459 0.0432 0.0157 -0.0117



Y 0.0114 -0.0077 0.0155 0.0147 0.0055 -0.0043  
Z 0.0352 -0.0236 0.0477 0.0457 0.0160 -0.0130  
AT. 35 H X -0.0346 -0.0229 -0.0459 0.0432 0.0157 0.0117  
Y 0.0114 0.0077 0.0155 -0.0147 -0.0055 -0.0043  
Z -0.0352 -0.0236 -0.0477 0.0457 0.0160 0.0130  
AT. 36 H X 0.0346 -0.0229 -0.0459 -0.0432 0.0157 -0.0117  
Y 0.0114 -0.0077 -0.0155 -0.0147 0.0055 -0.0043  
Z 0.0352 -0.0236 -0.0477 -0.0457 0.0160 -0.0130  
AT. 37 C X 0.0012 0.0008 -0.0013 0.0013 0.0003 0.0006  
Y -0.0012 -0.0009 0.0020 -0.0022 0.0016 0.0017  
Z 0.0011 0.0014 -0.0015 0.0023 0.0004 0.0008  
AT. 38 C X -0.0012 0.0008 -0.0013 -0.0013 0.0003 -0.0006  
Y -0.0012 0.0009 -0.0020 -0.0022 -0.0016 0.0017  
Z -0.0011 0.0014 -0.0015 -0.0023 0.0004 -0.0008  
AT. 39 C X 0.0012 0.0008 0.0013 -0.0013 0.0003 0.0006  
Y -0.0012 -0.0009 -0.0020 0.0022 0.0016 0.0017  
Z 0.0011 0.0014 0.0015 -0.0023 0.0004 0.0008  
AT. 40 C X -0.0012 0.0008 0.0013 0.0013 0.0003 -0.0006  
Y -0.0012 0.0009 0.0020 0.0022 -0.0016 0.0017  
Z -0.0011 0.0014 0.0015 0.0023 0.0004 -0.0008  
AT. 41 C X -0.0004 0.0002 0.0000 0.0004 -0.0001 -0.0000  
Y -0.0028 -0.0013 0.0036 -0.0030 0.0002 0.0005  
Z -0.0043 -0.0024 0.0061 -0.0055 -0.0004 0.0000  
AT. 42 C X 0.0004 0.0002 0.0000 -0.0004 -0.0001 0.0000  
Y -0.0028 0.0013 -0.0036 -0.0030 -0.0002 0.0005  
Z 0.0043 -0.0024 0.0061 0.0055 -0.0004 -0.0000  
AT. 43 C X -0.0004 0.0002 -0.0000 -0.0004 -0.0001 -0.0000  
Y -0.0028 -0.0013 -0.0036 0.0030 0.0002 0.0005  
Z -0.0043 -0.0024 -0.0061 0.0055 -0.0004 0.0000  
AT. 44 C X 0.0004 0.0002 -0.0000 0.0004 -0.0001 0.0000  
Y -0.0028 0.0013 0.0036 0.0030 -0.0002 0.0005  
Z 0.0043 -0.0024 -0.0061 -0.0055 -0.0004 -0.0000

AT. 45 H X -0.0107 -0.0095 0.0205 -0.0211 -0.0012 0.0003  
Y 0.0281 0.0156 -0.0389 0.0341 0.0057 0.0041  
Z 0.0243 0.0137 -0.0339 0.0300 0.0048 0.0033

AT. 46 H X 0.0107 -0.0095 0.0205 0.0211 -0.0012 -0.0003  
Y 0.0281 -0.0156 0.0389 0.0341 -0.0057 0.0041  
Z -0.0243 0.0137 -0.0339 -0.0300 0.0048 -0.0033

AT. 47 H X -0.0107 -0.0095 -0.0205 0.0211 -0.0012 0.0003  
Y 0.0281 0.0156 0.0389 -0.0341 0.0057 0.0041  
Z 0.0243 0.0137 0.0339 -0.0300 0.0048 0.0033

AT. 48 H X 0.0107 -0.0095 -0.0205 -0.0211 -0.0012 -0.0003  
Y 0.0281 -0.0156 -0.0389 -0.0341 -0.0057 0.0041  
Z -0.0243 0.0137 0.0339 0.0300 0.0048 -0.0033

AT. 49 H X 0.0041 0.0004 -0.0054 0.0034 0.0040 0.0028  
Y -0.0110 -0.0088 0.0172 -0.0172 0.0010 0.0010  
Z 0.0311 0.0190 -0.0469 0.0424 0.0088 0.0065

AT. 50 H X -0.0041 0.0004 -0.0054 -0.0034 0.0040 -0.0028  
Y -0.0110 0.0088 -0.0172 -0.0172 -0.0010 0.0010  
Z -0.0311 0.0190 -0.0469 -0.0424 0.0088 -0.0065

AT. 51 H X 0.0041 0.0004 0.0054 -0.0034 0.0040 0.0028  
Y -0.0110 -0.0088 -0.0172 0.0172 0.0010 0.0010  
Z 0.0311 0.0190 0.0469 -0.0424 0.0088 0.0065

AT. 52 H X -0.0041 0.0004 0.0054 0.0034 0.0040 -0.0028  
Y -0.0110 0.0088 0.0172 0.0172 -0.0010 0.0010  
Z -0.0311 0.0190 0.0469 0.0424 0.0088 -0.0065

AT. 53 C X 0.0002 0.0002 -0.0000 -0.0002 0.0002 0.0002  
Y 0.0002 -0.0003 -0.0007 0.0006 0.0009 -0.0001  
Z 0.0008 -0.0007 0.0004 -0.0012 0.0004 0.0005

AT. 54 C X -0.0002 0.0002 -0.0000 0.0002 0.0002 -0.0002  
Y 0.0002 0.0003 0.0007 0.0006 -0.0009 -0.0001  
Z -0.0008 -0.0007 0.0004 0.0012 0.0004 -0.0005

AT. 55 C X 0.0002 0.0002 0.0000 0.0002 0.0002 0.0002  
Y 0.0002 -0.0003 0.0007 -0.0006 0.0009 -0.0001

Z 0.0008 -0.0007 -0.0004 0.0012 0.0004 0.0005  
AT. 56 C X -0.0002 0.0002 0.0000 -0.0002 0.0002 -0.0002  
Y 0.0002 0.0003 -0.0007 -0.0006 -0.0009 -0.0001  
Z -0.0008 -0.0007 -0.0004 -0.0012 0.0004 -0.0005  
AT. 57 C X -0.0002 -0.0007 0.0010 -0.0014 -0.0008 0.0000  
Y 0.0005 -0.0003 -0.0005 -0.0000 0.0008 0.0002  
Z 0.0007 0.0007 -0.0002 0.0002 -0.0004 0.0003  
AT. 58 C X 0.0002 -0.0007 0.0010 0.0014 -0.0008 -0.0000  
Y 0.0005 0.0003 0.0005 -0.0000 -0.0008 0.0002  
Z -0.0007 0.0007 -0.0002 -0.0002 -0.0004 -0.0003  
AT. 59 C X -0.0002 -0.0007 -0.0010 0.0014 -0.0008 0.0000  
Y 0.0005 -0.0003 0.0005 0.0000 0.0008 0.0002  
Z 0.0007 0.0007 0.0002 -0.0002 -0.0004 0.0003  
AT. 60 C X 0.0002 -0.0007 -0.0010 -0.0014 -0.0008 -0.0000  
Y 0.0005 0.0003 -0.0005 0.0000 -0.0008 0.0002  
Z -0.0007 0.0007 0.0002 0.0002 -0.0004 -0.0003  
AT. 61 H X -0.0006 0.0070 -0.0006 0.0053 -0.0066 -0.0001  
Y 0.0013 0.0067 -0.0030 0.0067 -0.0029 0.0005  
Z -0.0062 -0.0081 0.0098 -0.0121 -0.0058 -0.0021  
AT. 62 H X 0.0006 0.0070 -0.0006 -0.0053 -0.0066 0.0001  
Y 0.0013 -0.0067 0.0030 0.0067 0.0029 0.0005  
Z 0.0062 -0.0081 0.0098 0.0121 -0.0058 0.0021  
AT. 63 H X -0.0006 0.0070 0.0006 -0.0053 -0.0066 -0.0001  
Y 0.0013 0.0067 0.0030 -0.0067 -0.0029 0.0005  
Z -0.0062 -0.0081 -0.0098 0.0121 -0.0058 -0.0021  
AT. 64 H X 0.0006 0.0070 0.0006 0.0053 -0.0066 0.0001  
Y 0.0013 -0.0067 -0.0030 -0.0067 0.0029 0.0005  
Z 0.0062 -0.0081 -0.0098 -0.0121 -0.0058 0.0021  
AT. 65 H X 0.0008 -0.0022 -0.0010 -0.0008 0.0036 0.0000  
Y -0.0023 0.0048 0.0054 -0.0013 -0.0126 0.0001  
Z 0.0003 0.0042 -0.0099 0.0137 0.0067 -0.0014  
AT. 66 H X -0.0008 -0.0022 -0.0010 0.0008 0.0036 -0.0000

Y -0.0023 -0.0048 -0.0054 -0.0013 0.0126 0.0001  
Z -0.0003 0.0042 -0.0099 -0.0137 0.0067 0.0014  
AT. 67 H X 0.0008 -0.0022 0.0010 0.0008 0.0036 0.0000  
Y -0.0023 0.0048 -0.0054 0.0013 -0.0126 0.0001  
Z 0.0003 0.0042 0.0099 -0.0137 0.0067 -0.0014  
AT. 68 H X -0.0008 -0.0022 0.0010 -0.0008 0.0036 -0.0000  
Y -0.0023 -0.0048 0.0054 0.0013 0.0126 0.0001  
Z -0.0003 0.0042 0.0099 0.0137 0.0067 0.0014  
AT. 69 H X 0.0037 0.0068 -0.0152 0.0186 0.0128 -0.0005  
Y -0.0053 -0.0070 0.0043 -0.0059 0.0012 -0.0025  
Z -0.0034 -0.0039 0.0007 -0.0012 0.0027 -0.0022  
AT. 70 H X -0.0037 0.0068 -0.0152 -0.0186 0.0128 0.0005  
Y -0.0053 0.0070 -0.0043 -0.0059 -0.0012 -0.0025  
Z 0.0034 -0.0039 0.0007 0.0012 0.0027 0.0022  
AT. 71 H X 0.0037 0.0068 0.0152 -0.0186 0.0128 -0.0005  
Y -0.0053 -0.0070 -0.0043 0.0059 0.0012 -0.0025  
Z -0.0034 -0.0039 -0.0007 0.0012 0.0027 -0.0022  
AT. 72 H X -0.0037 0.0068 0.0152 0.0186 0.0128 0.0005  
Y -0.0053 0.0070 0.0043 0.0059 -0.0012 -0.0025  
Z 0.0034 -0.0039 -0.0007 -0.0012 0.0027 0.0022  
AT. 73 C X 0.0008 -0.0006 -0.0007 0.0001 -0.0006 -0.0007  
Y 0.0002 -0.0004 0.0004 -0.0009 0.0005 0.0009  
Z -0.0005 0.0009 -0.0011 0.0019 0.0008 0.0010  
AT. 74 C X -0.0008 -0.0006 -0.0007 -0.0001 -0.0006 0.0007  
Y 0.0002 0.0004 -0.0004 -0.0009 -0.0005 0.0009  
Z 0.0005 0.0009 -0.0011 -0.0019 0.0008 -0.0010  
AT. 75 C X 0.0008 -0.0006 0.0007 -0.0001 -0.0006 -0.0007  
Y 0.0002 -0.0004 -0.0004 0.0009 0.0005 0.0009  
Z -0.0005 0.0009 0.0011 -0.0019 0.0008 0.0010  
AT. 76 C X -0.0008 -0.0006 0.0007 0.0001 -0.0006 0.0007  
Y 0.0002 0.0004 0.0004 0.0009 -0.0005 0.0009  
Z 0.0005 0.0009 0.0011 0.0019 0.0008 -0.0010

AT. 77 C X -0.0023 -0.0017 0.0027 -0.0024 -0.0072 -0.0081  
Y -0.0022 -0.0017 0.0031 -0.0030 0.0008 0.0008  
Z 0.0003 0.0008 -0.0015 0.0017 -0.0043 -0.0047

AT. 78 C X 0.0023 -0.0017 0.0027 0.0024 -0.0072 0.0081  
Y -0.0022 0.0017 -0.0031 -0.0030 -0.0008 0.0008  
Z -0.0003 0.0008 -0.0015 -0.0017 -0.0043 0.0047

AT. 79 C X -0.0023 -0.0017 -0.0027 0.0024 -0.0072 -0.0081  
Y -0.0022 -0.0017 -0.0031 0.0030 0.0008 0.0008  
Z 0.0003 0.0008 0.0015 -0.0017 -0.0043 -0.0047

AT. 80 C X 0.0023 -0.0017 -0.0027 -0.0024 -0.0072 0.0081  
Y -0.0022 0.0017 0.0031 0.0030 -0.0008 0.0008  
Z -0.0003 0.0008 0.0015 0.0017 -0.0043 0.0047

AT. 81 H X 0.0075 0.0048 -0.0084 0.0077 0.0310 0.0349  
Y 0.0077 0.0054 -0.0088 0.0082 0.0368 0.0413  
Z 0.0104 0.0031 -0.0051 0.0029 0.0538 0.0607

AT. 82 H X -0.0075 0.0048 -0.0084 -0.0077 0.0310 -0.0349  
Y 0.0077 -0.0054 0.0088 0.0082 -0.0368 0.0413  
Z -0.0104 0.0031 -0.0051 -0.0029 0.0538 -0.0607

AT. 83 H X 0.0075 0.0048 0.0084 -0.0077 0.0310 0.0349  
Y 0.0077 0.0054 0.0088 -0.0082 0.0368 0.0413  
Z 0.0104 0.0031 0.0051 -0.0029 0.0538 0.0607

AT. 84 H X -0.0075 0.0048 0.0084 0.0077 0.0310 -0.0349  
Y 0.0077 -0.0054 -0.0088 -0.0082 -0.0368 0.0413  
Z -0.0104 0.0031 0.0051 0.0029 0.0538 -0.0607

AT. 85 H X 0.0150 0.0078 -0.0151 0.0124 0.0643 0.0724  
Y -0.0004 0.0016 -0.0051 0.0056 -0.0439 -0.0490  
Z -0.0056 -0.0044 0.0100 -0.0092 0.0145 0.0161

AT. 86 H X -0.0150 0.0078 -0.0151 -0.0124 0.0643 -0.0724  
Y -0.0004 -0.0016 0.0051 0.0056 0.0439 -0.0490  
Z 0.0056 -0.0044 0.0100 0.0092 0.0145 -0.0161

AT. 87 H X 0.0150 0.0078 0.0151 -0.0124 0.0643 0.0724  
Y -0.0004 0.0016 0.0051 -0.0056 -0.0439 -0.0490

Z -0.0056 -0.0044 -0.0100 0.0092 0.0145 0.0161  
AT. 88 H X -0.0150 0.0078 0.0151 0.0124 0.0643 -0.0724  
Y -0.0004 -0.0016 -0.0051 -0.0056 0.0439 -0.0490  
Z 0.0056 -0.0044 -0.0100 -0.0092 0.0145 -0.0161  
AT. 89 C X -0.0001 0.0007 0.0002 -0.0000 0.0001 -0.0002  
Y 0.0001 0.0007 -0.0003 0.0009 0.0004 0.0003  
Z -0.0004 -0.0006 0.0013 -0.0013 -0.0021 -0.0022  
AT. 90 C X 0.0001 0.0007 0.0002 0.0000 0.0001 0.0002  
Y 0.0001 -0.0007 0.0003 0.0009 -0.0004 0.0003  
Z 0.0004 -0.0006 0.0013 0.0013 -0.0021 0.0022  
AT. 91 C X -0.0001 0.0007 -0.0002 0.0000 0.0001 -0.0002  
Y 0.0001 0.0007 0.0003 -0.0009 0.0004 0.0003  
Z -0.0004 -0.0006 -0.0013 0.0013 -0.0021 -0.0022  
AT. 92 C X 0.0001 0.0007 -0.0002 -0.0000 0.0001 0.0002  
Y 0.0001 -0.0007 -0.0003 -0.0009 -0.0004 0.0003  
Z 0.0004 -0.0006 -0.0013 -0.0013 -0.0021 0.0022  
AT. 93 C X 0.0002 -0.0004 0.0005 -0.0006 0.0019 0.0016  
Y 0.0004 0.0006 -0.0005 0.0001 -0.0002 0.0003  
Z -0.0013 0.0008 0.0014 0.0009 0.0003 0.0001  
AT. 94 C X -0.0002 -0.0004 0.0005 0.0006 0.0019 -0.0016  
Y 0.0004 -0.0006 0.0005 0.0001 0.0002 0.0003  
Z 0.0013 0.0008 0.0014 -0.0009 0.0003 -0.0001  
AT. 95 C X 0.0002 -0.0004 -0.0005 0.0006 0.0019 0.0016  
Y 0.0004 0.0006 0.0005 -0.0001 -0.0002 0.0003  
Z -0.0013 0.0008 -0.0014 -0.0009 0.0003 0.0001  
AT. 96 C X -0.0002 -0.0004 -0.0005 -0.0006 0.0019 -0.0016  
Y 0.0004 -0.0006 -0.0005 -0.0001 0.0002 0.0003  
Z 0.0013 0.0008 -0.0014 0.0009 0.0003 -0.0001  
AT. 97 H X 0.0017 0.0038 -0.0005 0.0002 0.0038 0.0052  
Y 0.0031 -0.0111 -0.0022 -0.0065 0.0029 -0.0005  
Z 0.0097 -0.0080 -0.0055 -0.0101 0.0146 0.0127  
AT. 98 H X -0.0017 0.0038 -0.0005 -0.0002 0.0038 -0.0052

Y 0.0031 0.0111 0.0022 -0.0065 -0.0029 -0.0005  
Z -0.0097 -0.0080 -0.0055 0.0101 0.0146 -0.0127  
AT. 99 H X 0.0017 0.0038 0.0005 -0.0002 0.0038 0.0052  
Y 0.0031 -0.0111 0.0022 0.0065 0.0029 -0.0005  
Z 0.0097 -0.0080 0.0055 0.0101 0.0146 0.0127  
AT. 100 H X -0.0017 0.0038 0.0005 0.0002 0.0038 -0.0052  
Y 0.0031 0.0111 -0.0022 0.0065 -0.0029 -0.0005  
Z -0.0097 -0.0080 0.0055 -0.0101 0.0146 -0.0127  
AT. 101 H X 0.0003 -0.0054 -0.0036 -0.0008 -0.0082 -0.0091  
Y 0.0003 -0.0057 -0.0032 -0.0012 -0.0075 -0.0087  
Z 0.0006 0.0043 -0.0076 0.0051 -0.0168 -0.0123  
AT. 102 H X -0.0003 -0.0054 -0.0036 0.0008 -0.0082 0.0091  
Y 0.0003 0.0057 0.0032 -0.0012 0.0075 -0.0087  
Z -0.0006 0.0043 -0.0076 -0.0051 -0.0168 0.0123  
AT. 103 H X 0.0003 -0.0054 0.0036 0.0008 -0.0082 -0.0091  
Y 0.0003 -0.0057 0.0032 0.0012 -0.0075 -0.0087  
Z 0.0006 0.0043 0.0076 -0.0051 -0.0168 -0.0123  
AT. 104 H X -0.0003 -0.0054 0.0036 -0.0008 -0.0082 0.0091  
Y 0.0003 0.0057 -0.0032 0.0012 0.0075 -0.0087  
Z -0.0006 0.0043 0.0076 0.0051 -0.0168 0.0123  
AT. 105 H X -0.0063 0.0074 -0.0024 0.0105 -0.0235 -0.0197  
Y -0.0061 0.0050 0.0095 0.0029 0.0046 0.0033  
Z 0.0062 -0.0057 -0.0056 -0.0053 0.0050 0.0048  
AT. 106 H X 0.0063 0.0074 -0.0024 -0.0105 -0.0235 0.0197  
Y -0.0061 -0.0050 -0.0095 0.0029 -0.0046 0.0033  
Z -0.0062 -0.0057 -0.0056 0.0053 0.0050 -0.0048  
AT. 107 H X -0.0063 0.0074 0.0024 -0.0105 -0.0235 -0.0197  
Y -0.0061 0.0050 -0.0095 -0.0029 0.0046 0.0033  
Z 0.0062 -0.0057 0.0056 0.0053 0.0050 0.0048  
AT. 108 H X 0.0063 0.0074 0.0024 0.0105 -0.0235 0.0197  
Y -0.0061 -0.0050 0.0095 -0.0029 -0.0046 0.0033  
Z -0.0062 -0.0057 0.0056 -0.0053 0.0050 -0.0048

AT. 109 C X 0.0020 -0.0010 -0.0012 -0.0011 0.0029 0.0013  
Y -0.0027 0.0030 0.0010 0.0014 -0.0006 -0.0003  
Z -0.0005 0.0013 -0.0005 0.0004 0.0018 0.0007

AT. 110 C X -0.0020 -0.0010 -0.0012 0.0011 0.0029 -0.0013  
Y -0.0027 -0.0030 -0.0010 0.0014 0.0006 -0.0003  
Z 0.0005 0.0013 -0.0005 -0.0004 0.0018 -0.0007

AT. 111 C X 0.0020 -0.0010 0.0012 0.0011 0.0029 0.0013  
Y -0.0027 0.0030 -0.0010 -0.0014 -0.0006 -0.0003  
Z -0.0005 0.0013 0.0005 -0.0004 0.0018 0.0007

AT. 112 C X -0.0020 -0.0010 0.0012 -0.0011 0.0029 -0.0013  
Y -0.0027 -0.0030 0.0010 -0.0014 0.0006 -0.0003  
Z 0.0005 0.0013 0.0005 0.0004 0.0018 -0.0007

AT. 113 H X -0.0075 0.0039 0.0049 0.0037 -0.0112 -0.0051  
Y 0.0107 -0.0044 -0.0069 -0.0051 0.0172 0.0078  
Z -0.0109 0.0045 0.0085 0.0072 -0.0220 -0.0096

AT. 114 H X 0.0075 0.0039 0.0049 -0.0037 -0.0112 0.0051  
Y 0.0107 0.0044 0.0069 -0.0051 -0.0172 0.0078  
Z 0.0109 0.0045 0.0085 -0.0072 -0.0220 0.0096

AT. 115 H X -0.0075 0.0039 -0.0049 -0.0037 -0.0112 -0.0051  
Y 0.0107 -0.0044 0.0069 0.0051 0.0172 0.0078  
Z -0.0109 0.0045 -0.0085 -0.0072 -0.0220 -0.0096

AT. 116 H X 0.0075 0.0039 -0.0049 0.0037 -0.0112 0.0051  
Y 0.0107 0.0044 -0.0069 0.0051 -0.0172 0.0078  
Z 0.0109 0.0045 -0.0085 0.0072 -0.0220 0.0096

AT. 117 H X -0.0176 0.0070 0.0109 0.0100 -0.0283 -0.0130  
Y 0.0035 -0.0082 0.0023 -0.0023 -0.0122 -0.0053  
Z 0.0076 -0.0095 -0.0009 -0.0045 -0.0041 -0.0018

AT. 118 H X 0.0176 0.0070 0.0109 -0.0100 -0.0283 0.0130  
Y 0.0035 0.0082 -0.0023 -0.0023 0.0122 -0.0053  
Z -0.0076 -0.0095 -0.0009 0.0045 -0.0041 0.0018

AT. 119 H X -0.0176 0.0070 -0.0109 -0.0100 -0.0283 -0.0130  
Y 0.0035 -0.0082 -0.0023 0.0023 -0.0122 -0.0053



Z 0.0076 -0.0095 0.0009 0.0045 -0.0041 -0.0018  
AT. 120 H X 0.0176 0.0070 -0.0109 0.0100 -0.0283 0.0130  
Y 0.0035 0.0082 0.0023 0.0023 0.0122 -0.0053  
Z -0.0076 -0.0095 0.0009 -0.0045 -0.0041 0.0018  
AT. 121 C X -0.0004 0.0012 -0.0003 0.0009 0.0000 0.0004  
Y -0.0027 0.0025 0.0014 0.0008 -0.0006 -0.0008  
Z 0.0044 -0.0049 -0.0019 -0.0019 0.0024 0.0022  
AT. 122 C X 0.0004 0.0012 -0.0003 -0.0009 0.0000 -0.0004  
Y -0.0027 -0.0025 -0.0014 0.0008 0.0006 -0.0008  
Z -0.0044 -0.0049 -0.0019 0.0019 0.0024 -0.0022  
AT. 123 C X -0.0004 0.0012 0.0003 -0.0009 0.0000 0.0004  
Y -0.0027 0.0025 -0.0014 -0.0008 -0.0006 -0.0008  
Z 0.0044 -0.0049 0.0019 0.0019 0.0024 0.0022  
AT. 124 C X 0.0004 0.0012 0.0003 0.0009 0.0000 -0.0004  
Y -0.0027 -0.0025 0.0014 -0.0008 0.0006 -0.0008  
Z -0.0044 -0.0049 0.0019 -0.0019 0.0024 -0.0022  
AT. 125 H X 0.0189 -0.0255 -0.0046 -0.0132 0.0082 0.0056  
Y 0.0233 -0.0248 -0.0111 -0.0099 0.0138 0.0132  
Z -0.0204 0.0230 0.0087 0.0100 -0.0110 -0.0099  
AT. 126 H X -0.0189 -0.0255 -0.0046 0.0132 0.0082 -0.0056  
Y 0.0233 0.0248 0.0111 -0.0099 -0.0138 0.0132  
Z 0.0204 0.0230 0.0087 -0.0100 -0.0110 0.0099  
AT. 127 H X 0.0189 -0.0255 0.0046 0.0132 0.0082 0.0056  
Y 0.0233 -0.0248 0.0111 0.0099 0.0138 0.0132  
Z -0.0204 0.0230 -0.0087 -0.0100 -0.0110 -0.0099  
AT. 128 H X -0.0189 -0.0255 0.0046 -0.0132 0.0082 -0.0056  
Y 0.0233 0.0248 -0.0111 0.0099 -0.0138 0.0132  
Z 0.0204 0.0230 -0.0087 0.0100 -0.0110 0.0099  
AT. 129 H X -0.0053 0.0028 0.0036 -0.0001 -0.0043 -0.0041  
Y -0.0087 0.0156 0.0008 0.0090 -0.0019 -0.0009  
Z -0.0323 0.0366 0.0128 0.0158 -0.0192 -0.0165  
AT. 130 H X 0.0053 0.0028 0.0036 0.0001 -0.0043 0.0041

Y -0.0087 -0.0156 -0.0008 0.0090 0.0019 -0.0009  
Z 0.0323 0.0366 0.0128 -0.0158 -0.0192 0.0165  
AT. 131 H X -0.0053 0.0028 -0.0036 0.0001 -0.0043 -0.0041  
Y -0.0087 0.0156 -0.0008 -0.0090 -0.0019 -0.0009  
Z -0.0323 0.0366 -0.0128 -0.0158 -0.0192 -0.0165  
AT. 132 H X 0.0053 0.0028 -0.0036 -0.0001 -0.0043 0.0041  
Y -0.0087 -0.0156 0.0008 -0.0090 0.0019 -0.0009  
Z 0.0323 0.0366 -0.0128 0.0158 -0.0192 0.0165  
AT. 133 C X -0.0015 0.0020 0.0005 0.0009 0.0005 0.0006  
Y -0.0004 0.0011 -0.0002 0.0006 0.0005 0.0004  
Z -0.0018 0.0033 0.0004 0.0018 0.0014 0.0015  
AT. 134 C X 0.0015 0.0020 0.0005 -0.0009 0.0005 -0.0006  
Y -0.0004 -0.0011 0.0002 0.0006 -0.0005 0.0004  
Z 0.0018 0.0033 0.0004 -0.0018 0.0014 -0.0015  
AT. 135 C X -0.0015 0.0020 -0.0005 -0.0009 0.0005 0.0006  
Y -0.0004 0.0011 0.0002 -0.0006 0.0005 0.0004  
Z -0.0018 0.0033 -0.0004 -0.0018 0.0014 0.0015  
AT. 136 C X 0.0015 0.0020 -0.0005 0.0009 0.0005 -0.0006  
Y -0.0004 -0.0011 -0.0002 -0.0006 -0.0005 0.0004  
Z 0.0018 0.0033 -0.0004 0.0018 0.0014 -0.0015  
AT. 137 C X -0.0034 0.0046 0.0012 0.0019 0.0013 0.0014  
Y -0.0028 0.0036 0.0010 0.0015 0.0009 0.0009  
Z -0.0039 0.0050 0.0014 0.0020 0.0012 0.0012  
AT. 138 C X 0.0034 0.0046 0.0012 -0.0019 0.0013 -0.0014  
Y -0.0028 -0.0036 -0.0010 0.0015 -0.0009 0.0009  
Z 0.0039 0.0050 0.0014 -0.0020 0.0012 -0.0012  
AT. 139 C X -0.0034 0.0046 -0.0012 -0.0019 0.0013 0.0014  
Y -0.0028 0.0036 -0.0010 -0.0015 0.0009 0.0009  
Z -0.0039 0.0050 -0.0014 -0.0020 0.0012 0.0012  
AT. 140 C X 0.0034 0.0046 -0.0012 0.0019 0.0013 -0.0014  
Y -0.0028 -0.0036 0.0010 -0.0015 -0.0009 0.0009  
Z 0.0039 0.0050 -0.0014 0.0020 0.0012 -0.0012

AT. 141 H X 0.0197 -0.0272 -0.0066 -0.0118 -0.0084 -0.0092  
Y 0.0411 -0.0557 -0.0141 -0.0237 -0.0163 -0.0172  
Z 0.0021 -0.0024 -0.0009 -0.0009 -0.0004 -0.0000

AT. 142 H X -0.0197 -0.0272 -0.0066 0.0118 -0.0084 0.0092  
Y 0.0411 0.0557 0.0141 -0.0237 0.0163 -0.0172  
Z -0.0021 -0.0024 -0.0009 0.0009 -0.0004 0.0000

AT. 143 H X 0.0197 -0.0272 0.0066 0.0118 -0.0084 -0.0092  
Y 0.0411 -0.0557 0.0141 0.0237 -0.0163 -0.0172  
Z 0.0021 -0.0024 0.0009 0.0009 -0.0004 -0.0000

AT. 144 H X -0.0197 -0.0272 0.0066 -0.0118 -0.0084 0.0092  
Y 0.0411 0.0557 -0.0141 0.0237 0.0163 -0.0172  
Z -0.0021 -0.0024 0.0009 -0.0009 -0.0004 0.0000

AT. 145 H X 0.0346 -0.0469 -0.0118 -0.0201 -0.0129 -0.0141  
Y -0.0034 0.0044 0.0012 0.0019 0.0012 0.0014  
Z 0.0348 -0.0472 -0.0118 -0.0197 -0.0128 -0.0136

AT. 146 H X -0.0346 -0.0469 -0.0118 0.0201 -0.0129 0.0141  
Y -0.0034 -0.0044 -0.0012 0.0019 -0.0012 0.0014  
Z -0.0348 -0.0472 -0.0118 0.0197 -0.0128 0.0136

AT. 147 H X 0.0346 -0.0469 0.0118 0.0201 -0.0129 -0.0141  
Y -0.0034 0.0044 -0.0012 -0.0019 0.0012 0.0014  
Z 0.0348 -0.0472 0.0118 0.0197 -0.0128 -0.0136

AT. 148 H X -0.0346 -0.0469 0.0118 -0.0201 -0.0129 0.0141  
Y -0.0034 -0.0044 0.0012 -0.0019 -0.0012 0.0014  
Z -0.0348 -0.0472 0.0118 -0.0197 -0.0128 0.0136

AT. 149 O X -0.0002 0.0000 0.0002 -0.0000 0.0004 0.0005  
Y 0.0002 0.0000 -0.0000 -0.0000 -0.0003 -0.0003  
Z 0.0002 -0.0002 0.0004 -0.0006 -0.0001 -0.0001

AT. 150 O X 0.0002 0.0000 0.0002 0.0000 0.0004 -0.0005  
Y 0.0002 -0.0000 0.0000 -0.0000 0.0003 -0.0003  
Z -0.0002 -0.0002 0.0004 0.0006 -0.0001 0.0001

AT. 151 O X -0.0002 0.0000 -0.0002 0.0000 0.0004 0.0005  
Y 0.0002 0.0000 0.0000 0.0000 -0.0003 -0.0003

Z 0.0002 -0.0002 -0.0004 0.0006 -0.0001 -0.0001  
AT. 152 O X 0.0002 0.0000 -0.0002 -0.0000 0.0004 -0.0005  
Y 0.0002 -0.0000 -0.0000 0.0000 0.0003 -0.0003  
Z -0.0002 -0.0002 -0.0004 -0.0006 -0.0001 0.0001  
AT. 153 H X -0.0003 -0.0001 0.0028 -0.0037 -0.0017 -0.0021  
Y -0.0020 0.0002 -0.0024 0.0040 -0.0015 -0.0022  
Z -0.0004 0.0002 -0.0027 0.0039 0.0005 0.0005  
AT. 154 H X 0.0003 -0.0001 0.0028 0.0037 -0.0017 0.0021  
Y -0.0020 -0.0002 0.0024 0.0040 0.0015 -0.0022  
Z 0.0004 0.0002 -0.0027 -0.0039 0.0005 -0.0005  
AT. 155 H X -0.0003 -0.0001 -0.0028 0.0037 -0.0017 -0.0021  
Y -0.0020 0.0002 0.0024 -0.0040 -0.0015 -0.0022  
Z -0.0004 0.0002 0.0027 -0.0039 0.0005 0.0005  
AT. 156 H X 0.0003 -0.0001 -0.0028 -0.0037 -0.0017 0.0021  
Y -0.0020 -0.0002 -0.0024 -0.0040 0.0015 -0.0022  
Z 0.0004 0.0002 0.0027 0.0039 0.0005 -0.0005  
AT. 157 O X -0.0001 0.0001 -0.0000 0.0002 0.0001 0.0002  
Y -0.0011 0.0014 0.0002 0.0009 0.0005 0.0004  
Z 0.0000 -0.0000 0.0002 -0.0002 -0.0001 -0.0001  
AT. 158 O X 0.0001 0.0001 -0.0000 -0.0002 0.0001 -0.0002  
Y -0.0011 -0.0014 -0.0002 0.0009 -0.0005 0.0004  
Z -0.0000 -0.0000 0.0002 0.0002 -0.0001 0.0001  
AT. 159 O X -0.0001 0.0001 0.0000 -0.0002 0.0001 0.0002  
Y -0.0011 0.0014 -0.0002 -0.0009 0.0005 0.0004  
Z 0.0000 -0.0000 -0.0002 0.0002 -0.0001 -0.0001  
AT. 160 O X 0.0001 0.0001 0.0000 0.0002 0.0001 -0.0002  
Y -0.0011 -0.0014 0.0002 -0.0009 -0.0005 0.0004  
Z -0.0000 -0.0000 -0.0002 -0.0002 -0.0001 0.0001  
AT. 161 O X -0.0011 0.0013 0.0003 0.0007 0.0005 0.0003  
Y 0.0005 -0.0006 -0.0001 -0.0003 -0.0002 -0.0002  
Z -0.0009 0.0011 0.0002 0.0006 0.0004 0.0003  
AT. 162 O X 0.0011 0.0013 0.0003 -0.0007 0.0005 -0.0003

Y 0.0005 0.0006 0.0001 -0.0003 0.0002 -0.0002  
Z 0.0009 0.0011 0.0002 -0.0006 0.0004 -0.0003  
AT.163 O X -0.0011 0.0013 -0.0003 -0.0007 0.0005 0.0003  
Y 0.0005 -0.0006 0.0001 0.0003 -0.0002 -0.0002  
Z -0.0009 0.0011 -0.0002 -0.0006 0.0004 0.0003  
AT.164 O X 0.0011 0.0013 -0.0003 0.0007 0.0005 -0.0003  
Y 0.0005 0.0006 -0.0001 0.0003 0.0002 -0.0002  
Z 0.0009 0.0011 -0.0002 0.0006 0.0004 -0.0003  
AT.165 H X 0.0138 -0.0174 -0.0031 -0.0095 -0.0070 -0.0050  
Y 0.0084 -0.0108 -0.0018 -0.0061 -0.0045 -0.0033  
Z 0.0168 -0.0228 -0.0035 -0.0132 -0.0085 -0.0061  
AT.166 H X -0.0138 -0.0174 -0.0031 0.0095 -0.0070 0.0050  
Y 0.0084 0.0108 0.0018 -0.0061 0.0045 -0.0033  
Z -0.0168 -0.0228 -0.0035 0.0132 -0.0085 0.0061  
AT.167 H X 0.0138 -0.0174 0.0031 0.0095 -0.0070 -0.0050  
Y 0.0084 -0.0108 0.0018 0.0061 -0.0045 -0.0033  
Z 0.0168 -0.0228 0.0035 0.0132 -0.0085 -0.0061  
AT.168 H X -0.0138 -0.0174 0.0031 -0.0095 -0.0070 0.0050  
Y 0.0084 0.0108 -0.0018 0.0061 0.0045 -0.0033  
Z -0.0168 -0.0228 0.0035 -0.0132 -0.0085 0.0061  
AT.169 O X 0.0005 0.0002 0.0000 -0.0000 -0.0004 -0.0003  
Y -0.0001 -0.0001 0.0005 -0.0006 0.0002 0.0002  
Z 0.0012 0.0009 -0.0002 0.0002 -0.0010 -0.0008  
AT.170 O X -0.0005 0.0002 0.0000 0.0000 -0.0004 0.0003  
Y -0.0001 0.0001 -0.0005 -0.0006 -0.0002 0.0002  
Z -0.0012 0.0009 -0.0002 -0.0002 -0.0010 0.0008  
AT.171 O X 0.0005 0.0002 -0.0000 0.0000 -0.0004 -0.0003  
Y -0.0001 -0.0001 -0.0005 0.0006 0.0002 0.0002  
Z 0.0012 0.0009 0.0002 -0.0002 -0.0010 -0.0008  
AT.172 O X -0.0005 0.0002 -0.0000 -0.0000 -0.0004 0.0003  
Y -0.0001 0.0001 0.0005 0.0006 -0.0002 0.0002  
Z -0.0012 0.0009 0.0002 0.0002 -0.0010 0.0008

AT.173 H X -0.0082 -0.0038 0.0028 -0.0022 0.0066 0.0050

Y 0.0047 0.0030 -0.0009 0.0011 -0.0040 -0.0030

Z -0.0212 -0.0154 0.0066 -0.0061 0.0178 0.0140

AT.174 H X 0.0082 -0.0038 0.0028 0.0022 0.0066 -0.0050

Y 0.0047 -0.0030 0.0009 0.0011 0.0040 -0.0030

Z 0.0212 -0.0154 0.0066 0.0061 0.0178 -0.0140

AT.175 H X -0.0082 -0.0038 -0.0028 0.0022 0.0066 0.0050

Y 0.0047 0.0030 0.0009 -0.0011 -0.0040 -0.0030

Z -0.0212 -0.0154 -0.0066 0.0061 0.0178 0.0140

AT.176 H X 0.0082 -0.0038 -0.0028 -0.0022 0.0066 -0.0050

Y 0.0047 -0.0030 -0.0009 -0.0011 0.0040 -0.0030

Z 0.0212 -0.0154 -0.0066 -0.0061 0.0178 -0.0140

FREQ(CM\*\*-1) 1502.40 1502.87 1504.85 1505.84 1508.27 1509.28

AT. 1 I X 0.0000 0.0000 0.0000 0.0000 -0.0000 -0.0000

Y -0.0000 0.0000 -0.0000 -0.0000 0.0000 0.0000

Z -0.0000 -0.0000 -0.0000 -0.0000 0.0000 0.0000

AT. 2 I X 0.0000 0.0000 -0.0000 -0.0000 0.0000 -0.0000

Y 0.0000 -0.0000 -0.0000 -0.0000 0.0000 -0.0000

Z -0.0000 -0.0000 0.0000 0.0000 -0.0000 0.0000

AT. 3 I X -0.0000 0.0000 -0.0000 0.0000 0.0000 0.0000

Y 0.0000 0.0000 0.0000 -0.0000 -0.0000 -0.0000

Z 0.0000 -0.0000 0.0000 -0.0000 -0.0000 -0.0000

AT. 4 I X -0.0000 0.0000 0.0000 -0.0000 -0.0000 0.0000

Y -0.0000 -0.0000 0.0000 -0.0000 -0.0000 0.0000

Z 0.0000 -0.0000 -0.0000 0.0000 0.0000 -0.0000

AT. 5 I X -0.0000 0.0000 -0.0000 -0.0000 0.0000 0.0000

Y -0.0000 0.0000 -0.0000 0.0000 -0.0000 -0.0000

Z 0.0000 0.0000 0.0000 -0.0000 -0.0000 -0.0000

AT. 6 I X -0.0000 0.0000 0.0000 0.0000 -0.0000 0.0000

Y 0.0000 -0.0000 -0.0000 0.0000 -0.0000 0.0000

Z 0.0000 0.0000 -0.0000 0.0000 0.0000 -0.0000  
AT. 7 I X 0.0000 0.0000 0.0000 -0.0000 -0.0000 -0.0000  
Y 0.0000 0.0000 0.0000 0.0000 0.0000 0.0000  
Z -0.0000 0.0000 -0.0000 -0.0000 0.0000 0.0000  
AT. 8 I X 0.0000 0.0000 -0.0000 0.0000 0.0000 -0.0000  
Y -0.0000 -0.0000 0.0000 0.0000 0.0000 -0.0000  
Z -0.0000 0.0000 0.0000 0.0000 -0.0000 0.0000  
AT. 9 N X 0.0004 -0.0006 0.0006 -0.0001 -0.0010 -0.0010  
Y 0.0016 0.0001 0.0021 0.0014 -0.0021 -0.0016  
Z 0.0005 -0.0008 0.0008 -0.0002 -0.0012 -0.0014  
AT. 10 N X 0.0004 -0.0006 -0.0006 0.0001 0.0010 -0.0010  
Y -0.0016 -0.0001 0.0021 0.0014 -0.0021 0.0016  
Z 0.0005 -0.0008 -0.0008 0.0002 0.0012 -0.0014  
AT. 11 N X -0.0004 -0.0006 -0.0006 -0.0001 0.0010 0.0010  
Y -0.0016 0.0001 -0.0021 0.0014 0.0021 0.0016  
Z -0.0005 -0.0008 -0.0008 -0.0002 0.0012 0.0014  
AT. 12 N X -0.0004 -0.0006 0.0006 0.0001 -0.0010 0.0010  
Y 0.0016 -0.0001 -0.0021 0.0014 0.0021 -0.0016  
Z -0.0005 -0.0008 0.0008 0.0002 -0.0012 0.0014  
AT. 13 N X -0.0004 -0.0006 -0.0003 -0.0008 -0.0006 -0.0007  
Y 0.0028 0.0024 0.0043 0.0039 0.0022 0.0004  
Z -0.0015 -0.0014 -0.0013 -0.0012 -0.0006 -0.0007  
AT. 14 N X -0.0004 -0.0006 0.0003 0.0008 0.0006 -0.0007  
Y -0.0028 -0.0024 0.0043 0.0039 0.0022 -0.0004  
Z -0.0015 -0.0014 0.0013 0.0012 0.0006 -0.0007  
AT. 15 N X 0.0004 -0.0006 0.0003 -0.0008 0.0006 0.0007  
Y -0.0028 0.0024 -0.0043 0.0039 -0.0022 -0.0004  
Z 0.0015 -0.0014 0.0013 -0.0012 0.0006 0.0007  
AT. 16 N X 0.0004 -0.0006 -0.0003 0.0008 -0.0006 0.0007  
Y 0.0028 -0.0024 -0.0043 0.0039 -0.0022 0.0004  
Z 0.0015 -0.0014 -0.0013 0.0012 -0.0006 0.0007  
AT. 17 O X -0.0004 -0.0004 -0.0004 -0.0004 0.0001 0.0001

Y -0.0006 -0.0005 -0.0007 -0.0006 0.0005 0.0005  
Z -0.0012 -0.0012 -0.0014 -0.0012 0.0007 0.0006  
AT. 18 O X -0.0004 -0.0004 0.0004 0.0004 -0.0001 0.0001  
Y 0.0006 0.0005 -0.0007 -0.0006 0.0005 -0.0005  
Z -0.0012 -0.0012 0.0014 0.0012 -0.0007 0.0006  
AT. 19 O X 0.0004 -0.0004 0.0004 -0.0004 -0.0001 -0.0001  
Y 0.0006 -0.0005 0.0007 -0.0006 -0.0005 -0.0005  
Z 0.0012 -0.0012 0.0014 -0.0012 -0.0007 -0.0006  
AT. 20 O X 0.0004 -0.0004 -0.0004 0.0004 0.0001 -0.0001  
Y -0.0006 0.0005 0.0007 -0.0006 -0.0005 0.0005  
Z 0.0012 -0.0012 -0.0014 0.0012 0.0007 -0.0006  
AT. 21 O X -0.0001 -0.0002 0.0001 -0.0000 -0.0001 -0.0002  
Y -0.0004 0.0000 -0.0005 -0.0001 0.0004 0.0005  
Z 0.0007 -0.0002 0.0012 0.0005 -0.0004 -0.0009  
AT. 22 O X -0.0001 -0.0002 -0.0001 0.0000 0.0001 -0.0002  
Y 0.0004 -0.0000 -0.0005 -0.0001 0.0004 -0.0005  
Z 0.0007 -0.0002 -0.0012 -0.0005 0.0004 -0.0009  
AT. 23 O X 0.0001 -0.0002 -0.0001 -0.0000 0.0001 0.0002  
Y 0.0004 0.0000 0.0005 -0.0001 -0.0004 -0.0005  
Z -0.0007 -0.0002 -0.0012 0.0005 0.0004 0.0009  
AT. 24 O X 0.0001 -0.0002 0.0001 0.0000 -0.0001 0.0002  
Y -0.0004 -0.0000 0.0005 -0.0001 -0.0004 0.0005  
Z -0.0007 -0.0002 0.0012 -0.0005 -0.0004 0.0009  
AT. 25 C X 0.0009 0.0003 0.0009 0.0004 -0.0005 -0.0004  
Y -0.0022 -0.0009 -0.0018 -0.0008 0.0008 0.0007  
Z 0.0018 0.0004 0.0013 0.0004 -0.0006 -0.0007  
AT. 26 C X 0.0009 0.0003 -0.0009 -0.0004 0.0005 -0.0004  
Y 0.0022 0.0009 -0.0018 -0.0008 0.0008 -0.0007  
Z 0.0018 0.0004 -0.0013 -0.0004 0.0006 -0.0007  
AT. 27 C X -0.0009 0.0003 -0.0009 0.0004 0.0005 0.0004  
Y 0.0022 -0.0009 0.0018 -0.0008 -0.0008 -0.0007  
Z -0.0018 0.0004 -0.0013 0.0004 0.0006 0.0007



AT. 28 C X -0.0009 0.0003 0.0009 -0.0004 -0.0005 0.0004  
Y -0.0022 0.0009 0.0018 -0.0008 -0.0008 0.0007  
Z -0.0018 0.0004 0.0013 -0.0004 -0.0006 0.0007

AT. 29 H X 0.0001 -0.0001 -0.0001 0.0003 0.0004 -0.0000  
Y 0.0272 0.0107 0.0243 0.0136 -0.0123 -0.0113  
Z -0.0025 -0.0012 -0.0020 -0.0021 0.0005 0.0010

AT. 30 H X 0.0001 -0.0001 0.0001 -0.0003 -0.0004 -0.0000  
Y -0.0272 -0.0107 0.0243 0.0136 -0.0123 0.0113  
Z -0.0025 -0.0012 0.0020 0.0021 -0.0005 0.0010

AT. 31 H X -0.0001 -0.0001 0.0001 0.0003 -0.0004 0.0000  
Y -0.0272 0.0107 -0.0243 0.0136 0.0123 0.0113  
Z 0.0025 -0.0012 0.0020 -0.0021 -0.0005 -0.0010

AT. 32 H X -0.0001 -0.0001 -0.0001 -0.0003 0.0004 0.0000  
Y 0.0272 -0.0107 -0.0243 0.0136 0.0123 -0.0113  
Z 0.0025 -0.0012 -0.0020 0.0021 0.0005 -0.0010

AT. 33 H X -0.0177 -0.0069 -0.0156 -0.0084 0.0081 0.0072  
Y 0.0059 0.0018 0.0053 0.0028 -0.0028 -0.0027  
Z -0.0174 -0.0051 -0.0153 -0.0072 0.0076 0.0075

AT. 34 H X -0.0177 -0.0069 0.0156 0.0084 -0.0081 0.0072  
Y -0.0059 -0.0018 0.0053 0.0028 -0.0028 0.0027  
Z -0.0174 -0.0051 0.0153 0.0072 -0.0076 0.0075

AT. 35 H X 0.0177 -0.0069 0.0156 -0.0084 -0.0081 -0.0072  
Y -0.0059 0.0018 -0.0053 0.0028 0.0028 0.0027  
Z 0.0174 -0.0051 0.0153 -0.0072 -0.0076 -0.0075

AT. 36 H X 0.0177 -0.0069 -0.0156 0.0084 0.0081 -0.0072  
Y 0.0059 -0.0018 -0.0053 0.0028 0.0028 -0.0027  
Z 0.0174 -0.0051 -0.0153 0.0072 0.0076 -0.0075

AT. 37 C X 0.0006 0.0009 0.0004 0.0006 0.0002 0.0002  
Y -0.0008 0.0006 -0.0014 -0.0009 0.0013 0.0012  
Z 0.0017 0.0021 0.0022 0.0025 -0.0011 -0.0008

AT. 38 C X 0.0006 0.0009 -0.0004 -0.0006 -0.0002 0.0002  
Y 0.0008 -0.0006 -0.0014 -0.0009 0.0013 -0.0012

Z 0.0017 0.0021 -0.0022 -0.0025 0.0011 -0.0008  
AT. 39 C X -0.0006 0.0009 -0.0004 0.0006 -0.0002 -0.0002  
Y 0.0008 0.0006 0.0014 -0.0009 -0.0013 -0.0012  
Z -0.0017 0.0021 -0.0022 0.0025 0.0011 0.0008  
AT. 40 C X -0.0006 0.0009 0.0004 -0.0006 0.0002 -0.0002  
Y -0.0008 -0.0006 0.0014 -0.0009 -0.0013 0.0012  
Z -0.0017 0.0021 0.0022 -0.0025 -0.0011 0.0008  
AT. 41 C X 0.0005 0.0004 0.0003 0.0004 0.0010 0.0008  
Y 0.0004 0.0008 0.0003 0.0009 0.0007 0.0007  
Z 0.0014 0.0017 0.0023 0.0032 -0.0007 -0.0006  
AT. 42 C X 0.0005 0.0004 -0.0003 -0.0004 -0.0010 0.0008  
Y -0.0004 -0.0008 0.0003 0.0009 0.0007 -0.0007  
Z 0.0014 0.0017 -0.0023 -0.0032 0.0007 -0.0006  
AT. 43 C X -0.0005 0.0004 -0.0003 0.0004 -0.0010 -0.0008  
Y -0.0004 0.0008 -0.0003 0.0009 -0.0007 -0.0007  
Z -0.0014 0.0017 -0.0023 0.0032 0.0007 0.0006  
AT. 44 C X -0.0005 0.0004 0.0003 -0.0004 0.0010 -0.0008  
Y 0.0004 -0.0008 -0.0003 0.0009 -0.0007 0.0007  
Z -0.0014 0.0017 0.0023 -0.0032 -0.0007 0.0006  
AT. 45 H X 0.0018 0.0033 0.0032 0.0052 -0.0091 -0.0038  
Y -0.0088 -0.0076 -0.0157 -0.0182 0.0069 0.0073  
Z -0.0072 -0.0062 -0.0125 -0.0145 0.0063 0.0060  
AT. 46 H X 0.0018 0.0033 -0.0032 -0.0052 0.0091 -0.0038  
Y 0.0088 0.0076 -0.0157 -0.0182 0.0069 -0.0073  
Z -0.0072 -0.0062 0.0125 0.0145 -0.0063 0.0060  
AT. 47 H X -0.0018 0.0033 -0.0032 0.0052 0.0091 0.0038  
Y 0.0088 -0.0076 0.0157 -0.0182 -0.0069 -0.0073  
Z 0.0072 -0.0062 0.0125 -0.0145 -0.0063 -0.0060  
AT. 48 H X -0.0018 0.0033 0.0032 -0.0052 -0.0091 0.0038  
Y -0.0088 0.0076 0.0157 -0.0182 -0.0069 0.0073  
Z 0.0072 -0.0062 -0.0125 0.0145 0.0063 -0.0060  
AT. 49 H X -0.0053 -0.0042 -0.0046 -0.0054 0.0004 -0.0002

Y -0.0008 0.0005 0.0032 0.0044 -0.0050 -0.0041  
Z -0.0116 -0.0099 -0.0190 -0.0221 0.0137 0.0103  
AT. 50 H X -0.0053 -0.0042 0.0046 0.0054 -0.0004 -0.0002  
Y 0.0008 -0.0005 0.0032 0.0044 -0.0050 0.0041  
Z -0.0116 -0.0099 0.0190 0.0221 -0.0137 0.0103  
AT. 51 H X 0.0053 -0.0042 0.0046 -0.0054 -0.0004 0.0002  
Y 0.0008 0.0005 -0.0032 0.0044 0.0050 0.0041  
Z 0.0116 -0.0099 0.0190 -0.0221 -0.0137 -0.0103  
AT. 52 H X 0.0053 -0.0042 -0.0046 0.0054 0.0004 0.0002  
Y -0.0008 -0.0005 -0.0032 0.0044 0.0050 -0.0041  
Z 0.0116 -0.0099 -0.0190 0.0221 0.0137 -0.0103  
AT. 53 C X 0.0000 0.0005 -0.0004 -0.0000 0.0002 -0.0003  
Y -0.0016 -0.0016 -0.0003 -0.0004 0.0002 -0.0011  
Z -0.0010 -0.0010 -0.0020 -0.0020 -0.0014 0.0002  
AT. 54 C X 0.0000 0.0005 0.0004 0.0000 -0.0002 -0.0003  
Y 0.0016 0.0016 -0.0003 -0.0004 0.0002 0.0011  
Z -0.0010 -0.0010 0.0020 0.0020 0.0014 0.0002  
AT. 55 C X -0.0000 0.0005 0.0004 -0.0000 -0.0002 0.0003  
Y 0.0016 -0.0016 0.0003 -0.0004 -0.0002 0.0011  
Z 0.0010 -0.0010 0.0020 -0.0020 0.0014 -0.0002  
AT. 56 C X -0.0000 0.0005 -0.0004 0.0000 0.0002 0.0003  
Y -0.0016 0.0016 0.0003 -0.0004 -0.0002 -0.0011  
Z 0.0010 -0.0010 -0.0020 0.0020 -0.0014 -0.0002  
AT. 57 C X 0.0020 0.0026 0.0019 0.0025 0.0012 0.0002  
Y -0.0019 -0.0015 -0.0002 -0.0004 -0.0001 -0.0011  
Z 0.0003 0.0006 0.0002 0.0002 -0.0002 0.0008  
AT. 58 C X 0.0020 0.0026 -0.0019 -0.0025 -0.0012 0.0002  
Y 0.0019 0.0015 -0.0002 -0.0004 -0.0001 0.0011  
Z 0.0003 0.0006 -0.0002 -0.0002 0.0002 0.0008  
AT. 59 C X -0.0020 0.0026 -0.0019 0.0025 -0.0012 -0.0002  
Y 0.0019 -0.0015 0.0002 -0.0004 0.0001 0.0011  
Z -0.0003 0.0006 -0.0002 0.0002 0.0002 -0.0008

AT. 60 C X -0.0020 0.0026 0.0019 -0.0025 0.0012 -0.0002  
Y -0.0019 0.0015 0.0002 -0.0004 0.0001 -0.0011  
Z -0.0003 0.0006 0.0002 -0.0002 -0.0002 -0.0008

AT. 61 H X 0.0119 0.0074 -0.0053 -0.0056 -0.0050 0.0137  
Y 0.0032 -0.0006 -0.0077 -0.0092 -0.0064 0.0095  
Z 0.0190 0.0219 0.0152 0.0201 0.0112 -0.0002

AT. 62 H X 0.0119 0.0074 0.0053 0.0056 0.0050 0.0137  
Y -0.0032 0.0006 -0.0077 -0.0092 -0.0064 -0.0095  
Z 0.0190 0.0219 -0.0152 -0.0201 -0.0112 -0.0002

AT. 63 H X -0.0119 0.0074 0.0053 -0.0056 0.0050 -0.0137  
Y -0.0032 -0.0006 0.0077 -0.0092 0.0064 -0.0095  
Z -0.0190 0.0219 -0.0152 0.0201 -0.0112 0.0002

AT. 64 H X -0.0119 0.0074 -0.0053 0.0056 -0.0050 -0.0137  
Y 0.0032 0.0006 0.0077 -0.0092 0.0064 0.0095  
Z -0.0190 0.0219 0.0152 -0.0201 0.0112 0.0002

AT. 65 H X -0.0074 -0.0060 0.0003 -0.0003 0.0008 -0.0063  
Y 0.0267 0.0243 0.0038 0.0069 0.0004 0.0193  
Z -0.0176 -0.0243 -0.0147 -0.0206 -0.0094 -0.0043

AT. 66 H X -0.0074 -0.0060 -0.0003 0.0003 -0.0008 -0.0063  
Y -0.0267 -0.0243 0.0038 0.0069 0.0004 -0.0193  
Z -0.0176 -0.0243 0.0147 0.0206 0.0094 -0.0043

AT. 67 H X 0.0074 -0.0060 -0.0003 -0.0003 -0.0008 0.0063  
Y -0.0267 0.0243 -0.0038 0.0069 -0.0004 -0.0193  
Z 0.0176 -0.0243 0.0147 -0.0206 0.0094 0.0043

AT. 68 H X 0.0074 -0.0060 0.0003 0.0003 0.0008 0.0063  
Y 0.0267 -0.0243 -0.0038 0.0069 -0.0004 0.0193  
Z 0.0176 -0.0243 -0.0147 0.0206 -0.0094 0.0043

AT. 69 H X -0.0333 -0.0398 -0.0218 -0.0303 -0.0140 -0.0095  
Y 0.0024 0.0040 0.0091 0.0110 0.0079 -0.0084  
Z -0.0031 -0.0031 0.0037 0.0038 0.0037 -0.0079

AT. 70 H X -0.0333 -0.0398 0.0218 0.0303 0.0140 -0.0095  
Y -0.0024 -0.0040 0.0091 0.0110 0.0079 0.0084

Z -0.0031 -0.0031 -0.0037 -0.0038 -0.0037 -0.0079  
AT. 71 H X 0.0333 -0.0398 0.0218 -0.0303 0.0140 0.0095  
Y -0.0024 0.0040 -0.0091 0.0110 -0.0079 0.0084  
Z 0.0031 -0.0031 -0.0037 0.0038 -0.0037 0.0079  
AT. 72 H X 0.0333 -0.0398 -0.0218 0.0303 -0.0140 0.0095  
Y 0.0024 -0.0040 -0.0091 0.0110 -0.0079 -0.0084  
Z 0.0031 -0.0031 0.0037 -0.0038 0.0037 0.0079  
AT. 73 C X 0.0004 -0.0001 0.0008 0.0002 0.0001 -0.0004  
Y -0.0004 0.0005 -0.0003 -0.0001 -0.0000 0.0006  
Z 0.0005 0.0013 0.0004 0.0008 0.0024 0.0018  
AT. 74 C X 0.0004 -0.0001 -0.0008 -0.0002 -0.0001 -0.0004  
Y 0.0004 -0.0005 -0.0003 -0.0001 -0.0000 -0.0006  
Z 0.0005 0.0013 -0.0004 -0.0008 -0.0024 0.0018  
AT. 75 C X -0.0004 -0.0001 -0.0008 0.0002 -0.0001 0.0004  
Y 0.0004 0.0005 0.0003 -0.0001 0.0000 -0.0006  
Z -0.0005 0.0013 -0.0004 0.0008 -0.0024 -0.0018  
AT. 76 C X -0.0004 -0.0001 0.0008 -0.0002 0.0001 0.0004  
Y -0.0004 -0.0005 0.0003 -0.0001 0.0000 0.0006  
Z -0.0005 0.0013 0.0004 -0.0008 0.0024 -0.0018  
AT. 77 C X 0.0022 -0.0040 0.0037 -0.0017 -0.0068 -0.0076  
Y -0.0004 0.0003 -0.0001 0.0001 0.0004 0.0002  
Z 0.0014 -0.0022 0.0017 -0.0014 -0.0034 -0.0037  
AT. 78 C X 0.0022 -0.0040 -0.0037 0.0017 0.0068 -0.0076  
Y 0.0004 -0.0003 -0.0001 0.0001 0.0004 -0.0002  
Z 0.0014 -0.0022 -0.0017 0.0014 0.0034 -0.0037  
AT. 79 C X -0.0022 -0.0040 -0.0037 -0.0017 0.0068 0.0076  
Y 0.0004 0.0003 0.0001 0.0001 -0.0004 -0.0002  
Z -0.0014 -0.0022 -0.0017 -0.0014 0.0034 0.0037  
AT. 80 C X -0.0022 -0.0040 0.0037 0.0017 -0.0068 0.0076  
Y -0.0004 -0.0003 0.0001 0.0001 -0.0004 0.0002  
Z -0.0014 -0.0022 0.0017 0.0014 -0.0034 0.0037  
AT. 81 H X -0.0097 0.0163 -0.0156 0.0075 0.0279 0.0309

Y -0.0115 0.0192 -0.0187 0.0087 0.0331 0.0365  
Z -0.0161 0.0310 -0.0229 0.0160 0.0477 0.0529  
AT. 82 H X -0.0097 0.0163 0.0156 -0.0075 -0.0279 0.0309  
Y 0.0115 -0.0192 -0.0187 0.0087 0.0331 -0.0365  
Z -0.0161 0.0310 0.0229 -0.0160 -0.0477 0.0529  
AT. 83 H X 0.0097 0.0163 0.0156 0.0075 -0.0279 -0.0309  
Y 0.0115 0.0192 0.0187 0.0087 -0.0331 -0.0365  
Z 0.0161 0.0310 0.0229 0.0160 -0.0477 -0.0529  
AT. 84 H X 0.0097 0.0163 -0.0156 -0.0075 0.0279 -0.0309  
Y -0.0115 -0.0192 0.0187 0.0087 -0.0331 0.0365  
Z 0.0161 0.0310 -0.0229 -0.0160 0.0477 -0.0529  
AT. 85 H X -0.0200 0.0370 -0.0307 0.0163 0.0612 0.0673  
Y 0.0137 -0.0222 0.0196 -0.0111 -0.0359 -0.0390  
Z -0.0046 0.0058 -0.0059 0.0033 0.0092 0.0096  
AT. 86 H X -0.0200 0.0370 0.0307 -0.0163 -0.0612 0.0673  
Y -0.0137 0.0222 0.0196 -0.0111 -0.0359 0.0390  
Z -0.0046 0.0058 0.0059 -0.0033 -0.0092 0.0096  
AT. 87 H X 0.0200 0.0370 0.0307 0.0163 -0.0612 -0.0673  
Y -0.0137 -0.0222 -0.0196 -0.0111 0.0359 0.0390  
Z 0.0046 0.0058 0.0059 0.0033 -0.0092 -0.0096  
AT. 88 H X 0.0200 0.0370 -0.0307 -0.0163 0.0612 -0.0673  
Y 0.0137 0.0222 -0.0196 -0.0111 0.0359 -0.0390  
Z 0.0046 0.0058 -0.0059 -0.0033 0.0092 -0.0096  
AT. 89 C X -0.0001 -0.0003 -0.0004 -0.0003 0.0004 0.0007  
Y -0.0001 -0.0005 -0.0008 0.0004 0.0000 0.0002  
Z 0.0008 -0.0014 0.0010 0.0003 -0.0028 -0.0027  
AT. 90 C X -0.0001 -0.0003 0.0004 0.0003 -0.0004 0.0007  
Y 0.0001 0.0005 -0.0008 0.0004 0.0000 -0.0002  
Z 0.0008 -0.0014 -0.0010 -0.0003 0.0028 -0.0027  
AT. 91 C X 0.0001 -0.0003 0.0004 -0.0003 -0.0004 -0.0007  
Y 0.0001 -0.0005 0.0008 0.0004 -0.0000 -0.0002  
Z -0.0008 -0.0014 -0.0010 0.0003 0.0028 0.0027

AT. 92 C X 0.0001 -0.0003 -0.0004 0.0003 0.0004 -0.0007  
Y -0.0001 0.0005 0.0008 0.0004 -0.0000 0.0002  
Z -0.0008 -0.0014 0.0010 -0.0003 -0.0028 0.0027

AT. 93 C X -0.0008 0.0007 -0.0008 0.0001 0.0026 0.0024  
Y 0.0002 -0.0000 -0.0003 0.0008 -0.0007 0.0000  
Z 0.0001 -0.0002 -0.0006 0.0002 0.0003 0.0003

AT. 94 C X -0.0008 0.0007 0.0008 -0.0001 -0.0026 0.0024  
Y -0.0002 0.0000 -0.0003 0.0008 -0.0007 -0.0000  
Z 0.0001 -0.0002 0.0006 -0.0002 -0.0003 0.0003

AT. 95 C X 0.0008 0.0007 0.0008 0.0001 -0.0026 -0.0024  
Y -0.0002 -0.0000 0.0003 0.0008 0.0007 -0.0000  
Z -0.0001 -0.0002 0.0006 0.0002 -0.0003 -0.0003

AT. 96 C X 0.0008 0.0007 -0.0008 -0.0001 0.0026 -0.0024  
Y 0.0002 0.0000 0.0003 0.0008 0.0007 0.0000  
Z -0.0001 -0.0002 -0.0006 -0.0002 0.0003 -0.0003

AT. 97 H X -0.0007 0.0002 -0.0045 0.0052 0.0023 0.0060  
Y -0.0033 0.0041 0.0055 -0.0097 0.0094 0.0023  
Z -0.0073 0.0068 -0.0030 -0.0024 0.0210 0.0196

AT. 98 H X -0.0007 0.0002 0.0045 -0.0052 -0.0023 0.0060  
Y 0.0033 -0.0041 0.0055 -0.0097 0.0094 -0.0023  
Z -0.0073 0.0068 0.0030 0.0024 -0.0210 0.0196

AT. 99 H X 0.0007 0.0002 0.0045 0.0052 -0.0023 -0.0060  
Y 0.0033 0.0041 -0.0055 -0.0097 -0.0094 -0.0023  
Z 0.0073 0.0068 0.0030 -0.0024 -0.0210 -0.0196

AT. 100 H X 0.0007 0.0002 -0.0045 -0.0052 0.0023 -0.0060  
Y -0.0033 -0.0041 -0.0055 -0.0097 -0.0094 0.0023  
Z 0.0073 0.0068 -0.0030 0.0024 0.0210 -0.0196

AT. 101 H X 0.0018 -0.0008 0.0081 -0.0080 -0.0075 -0.0118  
Y 0.0015 -0.0005 0.0079 -0.0081 -0.0063 -0.0106  
Z 0.0069 -0.0056 0.0069 0.0006 -0.0258 -0.0227

AT. 102 H X 0.0018 -0.0008 -0.0081 0.0080 0.0075 -0.0118  
Y -0.0015 0.0005 0.0079 -0.0081 -0.0063 0.0106

Z 0.0069 -0.0056 -0.0069 -0.0006 0.0258 -0.0227  
AT. 103 H X -0.0018 -0.0008 -0.0081 -0.0080 0.0075 0.0118  
Y -0.0015 -0.0005 -0.0079 -0.0081 0.0063 0.0106  
Z -0.0069 -0.0056 -0.0069 0.0006 0.0258 0.0227  
AT. 104 H X -0.0018 -0.0008 0.0081 0.0080 -0.0075 0.0118  
Y 0.0015 0.0005 -0.0079 -0.0081 0.0063 -0.0106  
Z -0.0069 -0.0056 0.0069 -0.0006 -0.0258 0.0227  
AT. 105 H X 0.0104 -0.0091 0.0084 -0.0001 -0.0337 -0.0312  
Y -0.0004 -0.0017 -0.0062 0.0055 0.0052 0.0065  
Z -0.0034 0.0044 0.0012 -0.0037 0.0078 0.0063  
AT. 106 H X 0.0104 -0.0091 -0.0084 0.0001 0.0337 -0.0312  
Y 0.0004 0.0017 -0.0062 0.0055 0.0052 -0.0065  
Z -0.0034 0.0044 -0.0012 0.0037 -0.0078 0.0063  
AT. 107 H X -0.0104 -0.0091 -0.0084 -0.0001 0.0337 0.0312  
Y 0.0004 -0.0017 0.0062 0.0055 -0.0052 -0.0065  
Z 0.0034 0.0044 -0.0012 -0.0037 -0.0078 -0.0063  
AT. 108 H X -0.0104 -0.0091 0.0084 0.0001 -0.0337 0.0312  
Y -0.0004 0.0017 0.0062 0.0055 -0.0052 0.0065  
Z 0.0034 0.0044 0.0012 0.0037 0.0078 -0.0063  
AT. 109 C X -0.0070 -0.0069 -0.0067 -0.0073 -0.0041 -0.0030  
Y 0.0007 0.0006 0.0001 0.0001 -0.0002 0.0002  
Z -0.0045 -0.0045 -0.0044 -0.0049 -0.0026 -0.0023  
AT. 110 C X -0.0070 -0.0069 0.0067 0.0073 0.0041 -0.0030  
Y -0.0007 -0.0006 0.0001 0.0001 -0.0002 -0.0002  
Z -0.0045 -0.0045 0.0044 0.0049 0.0026 -0.0023  
AT. 111 C X 0.0070 -0.0069 0.0067 -0.0073 0.0041 0.0030  
Y -0.0007 0.0006 -0.0001 0.0001 0.0002 -0.0002  
Z 0.0045 -0.0045 0.0044 -0.0049 0.0026 0.0023  
AT. 112 C X 0.0070 -0.0069 -0.0067 0.0073 -0.0041 0.0030  
Y 0.0007 -0.0006 -0.0001 0.0001 0.0002 0.0002  
Z 0.0045 -0.0045 -0.0044 0.0049 -0.0026 0.0023  
AT. 113 H X 0.0253 0.0243 0.0243 0.0259 0.0136 0.0113



Y -0.0391 -0.0373 -0.0374 -0.0396 -0.0210 -0.0171  
Z 0.0545 0.0546 0.0534 0.0596 0.0331 0.0265  
AT. 114 H X 0.0253 0.0243 -0.0243 -0.0259 -0.0136 0.0113  
Y 0.0391 0.0373 -0.0374 -0.0396 -0.0210 0.0171  
Z 0.0545 0.0546 -0.0534 -0.0596 -0.0331 0.0265  
AT. 115 H X -0.0253 0.0243 -0.0243 0.0259 -0.0136 -0.0113  
Y 0.0391 -0.0373 0.0374 -0.0396 0.0210 0.0171  
Z -0.0545 0.0546 -0.0534 0.0596 -0.0331 -0.0265  
AT. 116 H X -0.0253 0.0243 0.0243 -0.0259 0.0136 -0.0113  
Y -0.0391 0.0373 0.0374 -0.0396 0.0210 -0.0171  
Z -0.0545 0.0546 0.0534 -0.0596 0.0331 -0.0265  
AT. 117 H X 0.0680 0.0668 0.0680 0.0742 0.0414 0.0309  
Y 0.0303 0.0298 0.0296 0.0316 0.0171 0.0146  
Z 0.0114 0.0113 0.0116 0.0119 0.0063 0.0059  
AT. 118 H X 0.0680 0.0668 -0.0680 -0.0742 -0.0414 0.0309  
Y -0.0303 -0.0298 0.0296 0.0316 0.0171 -0.0146  
Z 0.0114 0.0113 -0.0116 -0.0119 -0.0063 0.0059  
AT. 119 H X -0.0680 0.0668 -0.0680 0.0742 -0.0414 -0.0309  
Y -0.0303 0.0298 -0.0296 0.0316 -0.0171 -0.0146  
Z -0.0114 0.0113 -0.0116 0.0119 -0.0063 -0.0059  
AT. 120 H X -0.0680 0.0668 0.0680 -0.0742 0.0414 -0.0309  
Y 0.0303 -0.0298 -0.0296 0.0316 -0.0171 0.0146  
Z -0.0114 0.0113 0.0116 -0.0119 0.0063 -0.0059  
AT. 121 C X 0.0005 0.0008 0.0002 0.0002 0.0002 0.0004  
Y -0.0008 -0.0013 -0.0010 -0.0019 -0.0019 -0.0015  
Z -0.0013 0.0003 -0.0005 0.0015 0.0032 0.0029  
AT. 122 C X 0.0005 0.0008 -0.0002 -0.0002 -0.0002 0.0004  
Y 0.0008 0.0013 -0.0010 -0.0019 -0.0019 0.0015  
Z -0.0013 0.0003 0.0005 -0.0015 -0.0032 0.0029  
AT. 123 C X -0.0005 0.0008 -0.0002 0.0002 -0.0002 -0.0004  
Y 0.0008 -0.0013 0.0010 -0.0019 0.0019 0.0015  
Z 0.0013 0.0003 0.0005 0.0015 -0.0032 -0.0029

AT.124 C X -0.0005 0.0008 0.0002 -0.0002 0.0002 -0.0004  
Y -0.0008 0.0013 0.0010 -0.0019 0.0019 -0.0015  
Z 0.0013 0.0003 -0.0005 -0.0015 0.0032 -0.0029

AT.125 H X -0.0099 -0.0076 -0.0056 0.0033 0.0067 0.0057  
Y -0.0084 0.0008 -0.0036 0.0067 0.0164 0.0136  
Z 0.0077 0.0013 0.0033 -0.0056 -0.0123 -0.0100

AT.126 H X -0.0099 -0.0076 0.0056 -0.0033 -0.0067 0.0057  
Y 0.0084 -0.0008 -0.0036 0.0067 0.0164 -0.0136  
Z 0.0077 0.0013 -0.0033 0.0056 0.0123 -0.0100

AT.127 H X 0.0099 -0.0076 0.0056 0.0033 -0.0067 -0.0057  
Y 0.0084 0.0008 0.0036 0.0067 -0.0164 -0.0136  
Z -0.0077 0.0013 -0.0033 -0.0056 0.0123 0.0100

AT.128 H X 0.0099 -0.0076 -0.0056 -0.0033 0.0067 -0.0057  
Y -0.0084 -0.0008 0.0036 0.0067 -0.0164 0.0136  
Z -0.0077 0.0013 0.0033 0.0056 -0.0123 0.0100

AT.129 H X 0.0025 -0.0000 0.0031 -0.0010 -0.0042 -0.0053  
Y 0.0029 0.0024 -0.0012 -0.0025 -0.0026 0.0002  
Z 0.0173 0.0070 0.0116 -0.0048 -0.0170 -0.0164

AT.130 H X 0.0025 -0.0000 -0.0031 0.0010 0.0042 -0.0053  
Y -0.0029 -0.0024 -0.0012 -0.0025 -0.0026 -0.0002  
Z 0.0173 0.0070 -0.0116 0.0048 0.0170 -0.0164

AT.131 H X -0.0025 -0.0000 -0.0031 -0.0010 0.0042 0.0053  
Y -0.0029 0.0024 0.0012 -0.0025 0.0026 -0.0002  
Z -0.0173 0.0070 -0.0116 -0.0048 0.0170 0.0164

AT.132 H X -0.0025 -0.0000 0.0031 0.0010 -0.0042 0.0053  
Y 0.0029 -0.0024 0.0012 -0.0025 0.0026 0.0002  
Z -0.0173 0.0070 0.0116 0.0048 -0.0170 0.0164

AT.133 C X -0.0005 -0.0000 -0.0008 -0.0005 0.0003 0.0005  
Y -0.0017 -0.0018 -0.0028 -0.0030 -0.0023 -0.0007  
Z -0.0009 0.0005 -0.0018 -0.0005 0.0008 0.0017

AT.134 C X -0.0005 -0.0000 0.0008 0.0005 -0.0003 0.0005  
Y 0.0017 0.0018 -0.0028 -0.0030 -0.0023 0.0007

Z -0.0009 0.0005 0.0018 0.0005 -0.0008 0.0017  
AT. 135 C X 0.0005 -0.0000 0.0008 -0.0005 -0.0003 -0.0005  
Y 0.0017 -0.0018 0.0028 -0.0030 0.0023 0.0007  
Z 0.0009 0.0005 0.0018 -0.0005 -0.0008 -0.0017  
AT. 136 C X 0.0005 -0.0000 -0.0008 0.0005 0.0003 -0.0005  
Y -0.0017 0.0018 0.0028 -0.0030 0.0023 -0.0007  
Z 0.0009 0.0005 -0.0018 0.0005 0.0008 -0.0017  
AT. 137 C X -0.0014 -0.0004 -0.0018 -0.0011 0.0004 0.0007  
Y -0.0008 -0.0002 -0.0009 -0.0005 0.0007 0.0006  
Z -0.0013 -0.0006 -0.0016 -0.0012 0.0005 0.0005  
AT. 138 C X -0.0014 -0.0004 0.0018 0.0011 -0.0004 0.0007  
Y 0.0008 0.0002 -0.0009 -0.0005 0.0007 -0.0006  
Z -0.0013 -0.0006 0.0016 0.0012 -0.0005 0.0005  
AT. 139 C X 0.0014 -0.0004 0.0018 -0.0011 -0.0004 -0.0007  
Y 0.0008 -0.0002 0.0009 -0.0005 -0.0007 -0.0006  
Z 0.0013 -0.0006 0.0016 -0.0012 -0.0005 -0.0005  
AT. 140 C X 0.0014 -0.0004 -0.0018 0.0011 0.0004 -0.0007  
Y -0.0008 0.0002 0.0009 -0.0005 -0.0007 0.0006  
Z 0.0013 -0.0006 -0.0016 0.0012 0.0005 -0.0005  
AT. 141 H X 0.0093 0.0024 0.0115 0.0068 -0.0033 -0.0050  
Y 0.0179 0.0055 0.0214 0.0128 -0.0075 -0.0100  
Z 0.0003 0.0005 -0.0002 -0.0002 -0.0011 -0.0007  
AT. 142 H X 0.0093 0.0024 -0.0115 -0.0068 0.0033 -0.0050  
Y -0.0179 -0.0055 0.0214 0.0128 -0.0075 0.0100  
Z 0.0003 0.0005 0.0002 0.0002 0.0011 -0.0007  
AT. 143 H X -0.0093 0.0024 -0.0115 0.0068 0.0033 0.0050  
Y -0.0179 0.0055 -0.0214 0.0128 0.0075 0.0100  
Z -0.0003 0.0005 0.0002 -0.0002 0.0011 0.0007  
AT. 144 H X -0.0093 0.0024 0.0115 -0.0068 -0.0033 0.0050  
Y 0.0179 -0.0055 -0.0214 0.0128 0.0075 -0.0100  
Z -0.0003 0.0005 -0.0002 0.0002 -0.0011 0.0007  
AT. 145 H X 0.0149 0.0041 0.0190 0.0114 -0.0042 -0.0072

Y -0.0011 0.0002 -0.0012 0.0002 0.0011 0.0011  
Z 0.0150 0.0059 0.0193 0.0149 -0.0029 -0.0062  
AT. 146 H X 0.0149 0.0041 -0.0190 -0.0114 0.0042 -0.0072  
Y 0.0011 -0.0002 -0.0012 0.0002 0.0011 -0.0011  
Z 0.0150 0.0059 -0.0193 -0.0149 0.0029 -0.0062  
AT. 147 H X -0.0149 0.0041 -0.0190 0.0114 0.0042 0.0072  
Y 0.0011 0.0002 0.0012 0.0002 -0.0011 -0.0011  
Z -0.0150 0.0059 -0.0193 0.0149 0.0029 0.0062  
AT. 148 H X -0.0149 0.0041 0.0190 -0.0114 -0.0042 0.0072  
Y -0.0011 -0.0002 0.0012 0.0002 -0.0011 0.0011  
Z -0.0150 0.0059 0.0193 -0.0149 -0.0029 0.0062  
AT. 149 O X -0.0002 0.0002 -0.0002 0.0000 0.0003 0.0004  
Y 0.0001 -0.0001 0.0001 0.0000 -0.0003 -0.0003  
Z -0.0002 -0.0003 -0.0002 -0.0001 -0.0006 -0.0004  
AT. 150 O X -0.0002 0.0002 0.0002 -0.0000 -0.0003 0.0004  
Y -0.0001 0.0001 0.0001 0.0000 -0.0003 0.0003  
Z -0.0002 -0.0003 0.0002 0.0001 0.0006 -0.0004  
AT. 151 O X 0.0002 0.0002 0.0002 0.0000 -0.0003 -0.0004  
Y -0.0001 -0.0001 -0.0001 0.0000 0.0003 0.0003  
Z 0.0002 -0.0003 0.0002 -0.0001 0.0006 0.0004  
AT. 152 O X 0.0002 0.0002 -0.0002 -0.0000 0.0003 -0.0004  
Y 0.0001 0.0001 -0.0001 0.0000 0.0003 -0.0003  
Z 0.0002 -0.0003 -0.0002 0.0001 -0.0006 0.0004  
AT. 153 H X -0.0016 -0.0029 -0.0006 -0.0013 -0.0059 -0.0048  
Y 0.0027 0.0008 0.0029 -0.0003 0.0040 0.0016  
Z 0.0018 0.0020 0.0011 0.0004 0.0047 0.0034  
AT. 154 H X -0.0016 -0.0029 0.0006 0.0013 0.0059 -0.0048  
Y -0.0027 -0.0008 0.0029 -0.0003 0.0040 -0.0016  
Z 0.0018 0.0020 -0.0011 -0.0004 -0.0047 0.0034  
AT. 155 H X 0.0016 -0.0029 0.0006 -0.0013 0.0059 0.0048  
Y -0.0027 0.0008 -0.0029 -0.0003 -0.0040 -0.0016  
Z -0.0018 0.0020 -0.0011 0.0004 -0.0047 -0.0034

AT.156 H X 0.0016 -0.0029 -0.0006 0.0013 -0.0059 0.0048  
Y 0.0027 -0.0008 -0.0029 -0.0003 -0.0040 0.0016  
Z -0.0018 0.0020 0.0011 -0.0004 0.0047 -0.0034

AT.157 O X 0.0002 0.0004 -0.0002 -0.0001 0.0001 0.0003  
Y -0.0007 -0.0004 -0.0000 0.0003 0.0007 0.0004  
Z -0.0002 -0.0003 -0.0000 -0.0001 -0.0003 -0.0003

AT.158 O X 0.0002 0.0004 0.0002 0.0001 -0.0001 0.0003  
Y 0.0007 0.0004 -0.0000 0.0003 0.0007 -0.0004  
Z -0.0002 -0.0003 0.0000 0.0001 0.0003 -0.0003

AT.159 O X -0.0002 0.0004 0.0002 -0.0001 -0.0001 -0.0003  
Y 0.0007 -0.0004 0.0000 0.0003 -0.0007 -0.0004  
Z 0.0002 -0.0003 0.0000 -0.0001 0.0003 0.0003

AT.160 O X -0.0002 0.0004 -0.0002 0.0001 0.0001 -0.0003  
Y -0.0007 0.0004 0.0000 0.0003 -0.0007 0.0004  
Z 0.0002 -0.0003 -0.0000 0.0001 -0.0003 0.0003

AT.161 O X -0.0008 -0.0006 0.0000 0.0003 0.0006 0.0002  
Y 0.0004 0.0003 -0.0000 -0.0002 -0.0003 -0.0001  
Z -0.0006 -0.0003 0.0001 0.0003 0.0006 0.0003

AT.162 O X -0.0008 -0.0006 -0.0000 -0.0003 -0.0006 0.0002  
Y -0.0004 -0.0003 -0.0000 -0.0002 -0.0003 0.0001  
Z -0.0006 -0.0003 -0.0001 -0.0003 -0.0006 0.0003

AT.163 O X 0.0008 -0.0006 -0.0000 0.0003 -0.0006 -0.0002  
Y -0.0004 0.0003 0.0000 -0.0002 0.0003 0.0001  
Z 0.0006 -0.0003 -0.0001 0.0003 -0.0006 -0.0003

AT.164 O X 0.0008 -0.0006 0.0000 -0.0003 0.0006 -0.0002  
Y 0.0004 -0.0003 0.0000 -0.0002 0.0003 -0.0001  
Z 0.0006 -0.0003 0.0001 -0.0003 0.0006 -0.0003

AT.165 H X 0.0101 0.0064 0.0005 -0.0035 -0.0086 -0.0042  
Y 0.0060 0.0033 0.0003 -0.0026 -0.0059 -0.0031  
Z 0.0116 0.0064 -0.0005 -0.0061 -0.0128 -0.0060

AT.166 H X 0.0101 0.0064 -0.0005 0.0035 0.0086 -0.0042  
Y -0.0060 -0.0033 0.0003 -0.0026 -0.0059 0.0031

Z 0.0116 0.0064 0.0005 0.0061 0.0128 -0.0060  
AT.167 H X -0.0101 0.0064 -0.0005 -0.0035 0.0086 0.0042  
Y -0.0060 0.0033 -0.0003 -0.0026 0.0059 0.0031  
Z -0.0116 0.0064 0.0005 -0.0061 0.0128 0.0060  
AT.168 H X -0.0101 0.0064 0.0005 0.0035 -0.0086 0.0042  
Y 0.0060 -0.0033 -0.0003 -0.0026 0.0059 -0.0031  
Z -0.0116 0.0064 -0.0005 0.0061 -0.0128 0.0060  
AT.169 O X -0.0000 0.0000 -0.0000 0.0002 0.0001 0.0001  
Y -0.0003 -0.0001 -0.0003 -0.0001 -0.0001 0.0000  
Z 0.0001 0.0001 0.0001 0.0007 -0.0001 -0.0001  
AT.170 O X -0.0000 0.0000 0.0000 -0.0002 -0.0001 0.0001  
Y 0.0003 0.0001 -0.0003 -0.0001 -0.0001 -0.0000  
Z 0.0001 0.0001 -0.0001 -0.0007 0.0001 -0.0001  
AT.171 O X 0.0000 0.0000 0.0000 0.0002 -0.0001 -0.0001  
Y 0.0003 -0.0001 0.0003 -0.0001 0.0001 -0.0000  
Z -0.0001 0.0001 -0.0001 0.0007 0.0001 0.0001  
AT.172 O X 0.0000 0.0000 -0.0000 -0.0002 0.0001 -0.0001  
Y -0.0003 0.0001 0.0003 -0.0001 0.0001 0.0000  
Z -0.0001 0.0001 0.0001 -0.0007 -0.0001 0.0001  
AT.173 H X -0.0011 -0.0008 -0.0007 -0.0040 0.0004 0.0002  
Y 0.0006 0.0011 0.0004 0.0034 0.0003 0.0004  
Z -0.0029 -0.0020 -0.0034 -0.0137 0.0017 0.0025  
AT.174 H X -0.0011 -0.0008 0.0007 0.0040 -0.0004 0.0002  
Y -0.0006 -0.0011 0.0004 0.0034 0.0003 -0.0004  
Z -0.0029 -0.0020 0.0034 0.0137 -0.0017 0.0025  
AT.175 H X 0.0011 -0.0008 0.0007 -0.0040 -0.0004 -0.0002  
Y -0.0006 0.0011 -0.0004 0.0034 -0.0003 -0.0004  
Z 0.0029 -0.0020 0.0034 -0.0137 -0.0017 -0.0025  
AT.176 H X 0.0011 -0.0008 -0.0007 0.0040 0.0004 -0.0002  
Y 0.0006 -0.0011 -0.0004 0.0034 -0.0003 0.0004  
Z 0.0029 -0.0020 -0.0034 0.0137 0.0017 -0.0025

FREQ(CM\*\*-1) 1511.64 1512.93 1513.55 1514.33 1517.31 1518.27

AT. 1 I X -0.0000 -0.0000 -0.0000 0.0000 -0.0000 -0.0000

Y 0.0000 -0.0000 0.0000 -0.0000 0.0000 0.0000

Z 0.0000 0.0000 0.0000 -0.0000 0.0000 0.0000

AT. 2 I X 0.0000 -0.0000 0.0000 0.0000 0.0000 -0.0000

Y 0.0000 0.0000 0.0000 0.0000 0.0000 -0.0000

Z -0.0000 0.0000 -0.0000 -0.0000 -0.0000 0.0000

AT. 3 I X -0.0000 0.0000 0.0000 0.0000 -0.0000 -0.0000

Y 0.0000 0.0000 -0.0000 -0.0000 0.0000 0.0000

Z 0.0000 -0.0000 -0.0000 -0.0000 0.0000 0.0000

AT. 4 I X 0.0000 0.0000 -0.0000 0.0000 0.0000 -0.0000

Y 0.0000 -0.0000 -0.0000 0.0000 0.0000 -0.0000

Z -0.0000 -0.0000 0.0000 -0.0000 -0.0000 0.0000

AT. 5 I X -0.0000 -0.0000 -0.0000 0.0000 -0.0000 -0.0000

Y 0.0000 0.0000 -0.0000 0.0000 0.0000 0.0000

Z 0.0000 0.0000 0.0000 -0.0000 0.0000 -0.0000

AT. 6 I X 0.0000 -0.0000 0.0000 0.0000 0.0000 -0.0000

Y 0.0000 -0.0000 -0.0000 -0.0000 0.0000 -0.0000

Z -0.0000 0.0000 -0.0000 -0.0000 -0.0000 -0.0000

AT. 7 I X -0.0000 0.0000 0.0000 0.0000 -0.0000 -0.0000

Y 0.0000 -0.0000 0.0000 0.0000 0.0000 0.0000

Z 0.0000 -0.0000 -0.0000 -0.0000 0.0000 -0.0000

AT. 8 I X 0.0000 0.0000 -0.0000 0.0000 0.0000 -0.0000

Y 0.0000 0.0000 0.0000 -0.0000 0.0000 -0.0000

Z -0.0000 -0.0000 0.0000 -0.0000 -0.0000 -0.0000

AT. 9 N X -0.0000 -0.0000 0.0003 0.0000 -0.0001 -0.0003

Y -0.0002 -0.0001 0.0008 0.0001 -0.0031 -0.0048

Z 0.0002 0.0008 -0.0001 0.0007 -0.0015 -0.0007

AT. 10 N X 0.0000 -0.0000 -0.0003 0.0000 0.0001 -0.0003

Y -0.0002 0.0001 0.0008 -0.0001 -0.0031 0.0048

Z -0.0002 0.0008 0.0001 0.0007 0.0015 -0.0007

AT. 11 N X -0.0000 0.0000 -0.0003 0.0000 -0.0001 -0.0003  
Y -0.0002 0.0001 -0.0008 0.0001 -0.0031 -0.0048  
Z 0.0002 -0.0008 0.0001 0.0007 -0.0015 -0.0007

AT. 12 N X 0.0000 0.0000 0.0003 0.0000 0.0001 -0.0003  
Y -0.0002 -0.0001 -0.0008 -0.0001 -0.0031 0.0048  
Z -0.0002 -0.0008 -0.0001 0.0007 0.0015 -0.0007

AT. 13 N X -0.0005 0.0000 -0.0008 0.0006 -0.0001 0.0003  
Y 0.0004 -0.0002 0.0000 0.0010 0.0003 0.0011  
Z -0.0009 -0.0008 -0.0006 0.0008 -0.0005 -0.0005

AT. 14 N X 0.0005 0.0000 0.0008 0.0006 0.0001 0.0003  
Y 0.0004 0.0002 0.0000 -0.0010 0.0003 -0.0011  
Z 0.0009 -0.0008 0.0006 0.0008 0.0005 -0.0005

AT. 15 N X -0.0005 -0.0000 0.0008 0.0006 -0.0001 0.0003  
Y 0.0004 0.0002 -0.0000 0.0010 0.0003 0.0011  
Z -0.0009 0.0008 0.0006 0.0008 -0.0005 -0.0005

AT. 16 N X 0.0005 -0.0000 -0.0008 0.0006 0.0001 0.0003  
Y 0.0004 -0.0002 -0.0000 -0.0010 0.0003 -0.0011  
Z 0.0009 0.0008 -0.0006 0.0008 0.0005 -0.0005

AT. 17 O X 0.0001 0.0002 0.0001 -0.0001 0.0007 0.0010  
Y 0.0003 -0.0000 0.0001 -0.0002 0.0010 0.0015  
Z 0.0004 0.0003 0.0001 -0.0000 0.0015 0.0027

AT. 18 O X -0.0001 0.0002 -0.0001 -0.0001 -0.0007 0.0010  
Y 0.0003 0.0000 0.0001 0.0002 0.0010 -0.0015  
Z -0.0004 0.0003 -0.0001 -0.0000 -0.0015 0.0027

AT. 19 O X 0.0001 -0.0002 -0.0001 -0.0001 0.0007 0.0010  
Y 0.0003 0.0000 -0.0001 -0.0002 0.0010 0.0015  
Z 0.0004 -0.0003 -0.0001 -0.0000 0.0015 0.0027

AT. 20 O X -0.0001 -0.0002 0.0001 -0.0001 -0.0007 0.0010  
Y 0.0003 -0.0000 -0.0001 0.0002 0.0010 -0.0015  
Z -0.0004 -0.0003 0.0001 -0.0000 -0.0015 0.0027

AT. 21 O X -0.0000 -0.0000 0.0000 -0.0000 0.0000 -0.0000  
Y 0.0001 0.0000 -0.0001 0.0000 -0.0002 -0.0001



Z 0.0001 -0.0002 0.0003 0.0003 0.0004 0.0002  
AT. 22 O X 0.0000 -0.0000 -0.0000 -0.0000 -0.0000 -0.0000  
Y 0.0001 -0.0000 -0.0001 -0.0000 -0.0002 0.0001  
Z -0.0001 -0.0002 -0.0003 0.0003 -0.0004 0.0002  
AT. 23 O X -0.0000 0.0000 -0.0000 -0.0000 0.0000 -0.0000  
Y 0.0001 -0.0000 0.0001 0.0000 -0.0002 -0.0001  
Z 0.0001 0.0002 -0.0003 0.0003 0.0004 0.0002  
AT. 24 O X 0.0000 0.0000 0.0000 -0.0000 -0.0000 -0.0000  
Y 0.0001 0.0000 0.0001 -0.0000 -0.0002 0.0001  
Z -0.0001 0.0002 0.0003 0.0003 -0.0004 0.0002  
AT. 25 C X -0.0005 -0.0002 -0.0007 0.0006 -0.0012 -0.0011  
Y 0.0014 0.0007 0.0023 -0.0019 0.0022 0.0017  
Z -0.0011 -0.0005 -0.0020 0.0016 -0.0015 -0.0005  
AT. 26 C X 0.0005 -0.0002 0.0007 0.0006 0.0012 -0.0011  
Y 0.0014 -0.0007 0.0023 0.0019 0.0022 -0.0017  
Z 0.0011 -0.0005 0.0020 0.0016 0.0015 -0.0005  
AT. 27 C X -0.0005 0.0002 0.0007 0.0006 -0.0012 -0.0011  
Y 0.0014 -0.0007 -0.0023 -0.0019 0.0022 0.0017  
Z -0.0011 0.0005 0.0020 0.0016 -0.0015 -0.0005  
AT. 28 C X 0.0005 0.0002 -0.0007 0.0006 0.0012 -0.0011  
Y 0.0014 0.0007 -0.0023 0.0019 0.0022 -0.0017  
Z 0.0011 0.0005 -0.0020 0.0016 0.0015 -0.0005  
AT. 29 H X -0.0001 -0.0002 -0.0007 0.0005 -0.0004 0.0004  
Y -0.0161 -0.0077 -0.0231 0.0200 -0.0318 -0.0301  
Z 0.0018 0.0010 0.0028 -0.0024 0.0041 0.0035  
AT. 30 H X 0.0001 -0.0002 0.0007 0.0005 0.0004 0.0004  
Y -0.0161 0.0077 -0.0231 -0.0200 -0.0318 0.0301  
Z -0.0018 0.0010 -0.0028 -0.0024 -0.0041 0.0035  
AT. 31 H X -0.0001 0.0002 0.0007 0.0005 -0.0004 0.0004  
Y -0.0161 0.0077 0.0231 0.0200 -0.0318 -0.0301  
Z 0.0018 -0.0010 -0.0028 -0.0024 0.0041 0.0035  
AT. 32 H X 0.0001 0.0002 -0.0007 0.0005 0.0004 0.0004

Y -0.0161 -0.0077 0.0231 -0.0200 -0.0318 0.0301  
Z -0.0018 -0.0010 0.0028 -0.0024 -0.0041 0.0035  
AT. 33 H X 0.0104 0.0050 0.0146 -0.0124 0.0196 0.0186  
Y -0.0031 -0.0016 -0.0043 0.0038 -0.0063 -0.0060  
Z 0.0089 0.0049 0.0139 -0.0116 0.0167 0.0146  
AT. 34 H X -0.0104 0.0050 -0.0146 -0.0124 -0.0196 0.0186  
Y -0.0031 0.0016 -0.0043 -0.0038 -0.0063 0.0060  
Z -0.0089 0.0049 -0.0139 -0.0116 -0.0167 0.0146  
AT. 35 H X 0.0104 -0.0050 -0.0146 -0.0124 0.0196 0.0186  
Y -0.0031 0.0016 0.0043 0.0038 -0.0063 -0.0060  
Z 0.0089 -0.0049 -0.0139 -0.0116 0.0167 0.0146  
AT. 36 H X -0.0104 -0.0050 0.0146 -0.0124 -0.0196 0.0186  
Y -0.0031 -0.0016 0.0043 -0.0038 -0.0063 0.0060  
Z -0.0089 -0.0049 0.0139 -0.0116 -0.0167 0.0146  
AT. 37 C X -0.0006 -0.0004 -0.0010 0.0007 -0.0007 -0.0008  
Y -0.0003 0.0002 -0.0014 0.0005 0.0017 0.0030  
Z -0.0006 -0.0005 0.0004 -0.0002 -0.0031 -0.0059  
AT. 38 C X 0.0006 -0.0004 0.0010 0.0007 0.0007 -0.0008  
Y -0.0003 -0.0002 -0.0014 -0.0005 0.0017 -0.0030  
Z 0.0006 -0.0005 -0.0004 -0.0002 0.0031 -0.0059  
AT. 39 C X -0.0006 0.0004 0.0010 0.0007 -0.0007 -0.0008  
Y -0.0003 -0.0002 0.0014 0.0005 0.0017 0.0030  
Z -0.0006 0.0005 -0.0004 -0.0002 -0.0031 -0.0059  
AT. 40 C X 0.0006 0.0004 -0.0010 0.0007 0.0007 -0.0008  
Y -0.0003 0.0002 0.0014 -0.0005 0.0017 -0.0030  
Z 0.0006 0.0005 0.0004 -0.0002 0.0031 -0.0059  
AT. 41 C X 0.0012 0.0008 0.0007 -0.0008 0.0007 0.0012  
Y 0.0000 0.0003 -0.0001 -0.0001 -0.0011 -0.0009  
Z -0.0015 -0.0005 -0.0007 0.0015 -0.0066 -0.0080  
AT. 42 C X -0.0012 0.0008 -0.0007 -0.0008 -0.0007 0.0012  
Y 0.0000 -0.0003 -0.0001 0.0001 -0.0011 0.0009  
Z 0.0015 -0.0005 0.0007 0.0015 0.0066 -0.0080

AT. 43 C X 0.0012 -0.0008 -0.0007 -0.0008 0.0007 0.0012  
Y 0.0000 -0.0003 0.0001 -0.0001 -0.0011 -0.0009  
Z -0.0015 0.0005 0.0007 0.0015 -0.0066 -0.0080

AT. 44 C X -0.0012 -0.0008 0.0007 -0.0008 -0.0007 0.0012  
Y 0.0000 0.0003 0.0001 0.0001 -0.0011 0.0009  
Z 0.0015 0.0005 -0.0007 0.0015 0.0066 -0.0080

AT. 45 H X -0.0062 0.0006 -0.0002 0.0006 -0.0254 -0.0313  
Y 0.0056 -0.0013 0.0014 -0.0080 0.0411 0.0483  
Z 0.0043 -0.0020 0.0006 -0.0056 0.0346 0.0403

AT. 46 H X 0.0062 0.0006 0.0002 0.0006 0.0254 -0.0313  
Y 0.0056 0.0013 0.0014 0.0080 0.0411 -0.0483  
Z -0.0043 -0.0020 -0.0006 -0.0056 -0.0346 0.0403

AT. 47 H X -0.0062 -0.0006 0.0002 0.0006 -0.0254 -0.0313  
Y 0.0056 0.0013 -0.0014 -0.0080 0.0411 0.0483  
Z 0.0043 0.0020 -0.0006 -0.0056 0.0346 0.0403

AT. 48 H X 0.0062 -0.0006 -0.0002 0.0006 0.0254 -0.0313  
Y 0.0056 -0.0013 -0.0014 0.0080 0.0411 -0.0483  
Z -0.0043 0.0020 0.0006 -0.0056 -0.0346 0.0403

AT. 49 H X 0.0033 0.0014 0.0030 -0.0027 0.0089 0.0094  
Y -0.0018 0.0012 0.0019 0.0015 -0.0164 -0.0211  
Z 0.0094 -0.0016 0.0007 -0.0078 0.0580 0.0697

AT. 50 H X -0.0033 0.0014 -0.0030 -0.0027 -0.0089 0.0094  
Y -0.0018 -0.0012 0.0019 -0.0015 -0.0164 0.0211  
Z -0.0094 -0.0016 -0.0007 -0.0078 -0.0580 0.0697

AT. 51 H X 0.0033 -0.0014 -0.0030 -0.0027 0.0089 0.0094  
Y -0.0018 -0.0012 -0.0019 0.0015 -0.0164 -0.0211  
Z 0.0094 0.0016 -0.0007 -0.0078 0.0580 0.0697

AT. 52 H X -0.0033 -0.0014 0.0030 -0.0027 -0.0089 0.0094  
Y -0.0018 0.0012 -0.0019 -0.0015 -0.0164 0.0211  
Z -0.0094 0.0016 0.0007 -0.0078 -0.0580 0.0697

AT. 53 C X -0.0041 -0.0040 -0.0041 0.0036 0.0007 0.0005  
Y 0.0008 -0.0003 0.0012 0.0006 0.0013 0.0004

Z 0.0004 0.0012 0.0013 -0.0023 -0.0002 -0.0001  
AT. 54 C X 0.0041 -0.0040 0.0041 0.0036 -0.0007 0.0005  
Y 0.0008 0.0003 0.0012 -0.0006 0.0013 -0.0004  
Z -0.0004 0.0012 -0.0013 -0.0023 0.0002 -0.0001  
AT. 55 C X -0.0041 0.0040 0.0041 0.0036 0.0007 0.0005  
Y 0.0008 0.0003 -0.0012 0.0006 0.0013 0.0004  
Z 0.0004 -0.0012 -0.0013 -0.0023 -0.0002 -0.0001  
AT. 56 C X 0.0041 0.0040 -0.0041 0.0036 -0.0007 0.0005  
Y 0.0008 -0.0003 -0.0012 -0.0006 0.0013 -0.0004  
Z -0.0004 -0.0012 0.0013 -0.0023 0.0002 -0.0001  
AT. 57 C X -0.0049 -0.0049 -0.0054 0.0047 0.0002 0.0003  
Y 0.0006 -0.0006 0.0008 0.0012 0.0009 -0.0001  
Z 0.0000 0.0004 -0.0001 -0.0009 -0.0007 -0.0001  
AT. 58 C X 0.0049 -0.0049 0.0054 0.0047 -0.0002 0.0003  
Y 0.0006 0.0006 0.0008 -0.0012 0.0009 0.0001  
Z -0.0000 0.0004 0.0001 -0.0009 0.0007 -0.0001  
AT. 59 C X -0.0049 0.0049 0.0054 0.0047 0.0002 0.0003  
Y 0.0006 0.0006 -0.0008 0.0012 0.0009 -0.0001  
Z 0.0000 -0.0004 0.0001 -0.0009 -0.0007 -0.0001  
AT. 60 C X 0.0049 0.0049 -0.0054 0.0047 -0.0002 0.0003  
Y 0.0006 -0.0006 -0.0008 -0.0012 0.0009 0.0001  
Z -0.0000 -0.0004 -0.0001 -0.0009 0.0007 -0.0001  
AT. 61 H X 0.0149 0.0279 0.0130 -0.0336 -0.0130 0.0001  
Y 0.0215 0.0305 0.0211 -0.0342 -0.0099 -0.0007  
Z -0.0438 -0.0440 -0.0473 0.0440 0.0036 0.0022  
AT. 62 H X -0.0149 0.0279 -0.0130 -0.0336 0.0130 0.0001  
Y 0.0215 -0.0305 0.0211 0.0342 -0.0099 0.0007  
Z 0.0438 -0.0440 0.0473 0.0440 -0.0036 0.0022  
AT. 63 H X 0.0149 -0.0279 -0.0130 -0.0336 -0.0130 0.0001  
Y 0.0215 -0.0305 -0.0211 -0.0342 -0.0099 -0.0007  
Z -0.0438 0.0440 0.0473 0.0440 0.0036 0.0022  
AT. 64 H X -0.0149 -0.0279 0.0130 -0.0336 0.0130 0.0001

Y 0.0215 0.0305 -0.0211 0.0342 -0.0099 0.0007  
Z 0.0438 0.0440 -0.0473 0.0440 -0.0036 0.0022  
AT. 65 H X -0.0011 -0.0068 0.0002 0.0096 0.0055 -0.0003  
Y -0.0086 0.0083 -0.0136 -0.0171 -0.0160 0.0013  
Z 0.0481 0.0460 0.0516 -0.0420 0.0009 -0.0005  
AT. 66 H X 0.0011 -0.0068 -0.0002 0.0096 -0.0055 -0.0003  
Y -0.0086 -0.0083 -0.0136 0.0171 -0.0160 -0.0013  
Z -0.0481 0.0460 -0.0516 -0.0420 -0.0009 -0.0005  
AT. 67 H X -0.0011 0.0068 -0.0002 0.0096 0.0055 -0.0003  
Y -0.0086 -0.0083 0.0136 -0.0171 -0.0160 0.0013  
Z 0.0481 -0.0460 -0.0516 -0.0420 0.0009 -0.0005  
AT. 68 H X 0.0011 0.0068 0.0002 0.0096 -0.0055 -0.0003  
Y -0.0086 0.0083 0.0136 0.0171 -0.0160 -0.0013  
Z -0.0481 -0.0460 0.0516 -0.0420 -0.0009 -0.0005  
AT. 69 H X 0.0657 0.0589 0.0722 -0.0528 0.0034 -0.0025  
Y -0.0222 -0.0296 -0.0227 0.0334 0.0091 0.0015  
Z -0.0065 -0.0131 -0.0058 0.0169 0.0073 0.0006  
AT. 70 H X -0.0657 0.0589 -0.0722 -0.0528 -0.0034 -0.0025  
Y -0.0222 0.0296 -0.0227 -0.0334 0.0091 -0.0015  
Z 0.0065 -0.0131 0.0058 0.0169 -0.0073 0.0006  
AT. 71 H X 0.0657 -0.0589 -0.0722 -0.0528 0.0034 -0.0025  
Y -0.0222 0.0296 0.0227 0.0334 0.0091 0.0015  
Z -0.0065 0.0131 0.0058 0.0169 0.0073 0.0006  
AT. 72 H X -0.0657 -0.0589 0.0722 -0.0528 -0.0034 -0.0025  
Y -0.0222 -0.0296 0.0227 -0.0334 0.0091 -0.0015  
Z 0.0065 0.0131 -0.0058 0.0169 -0.0073 0.0006  
AT. 73 C X 0.0002 0.0002 -0.0008 0.0009 -0.0003 0.0007  
Y 0.0003 0.0006 0.0000 -0.0005 -0.0006 -0.0011  
Z 0.0009 0.0006 -0.0011 0.0013 -0.0002 0.0011  
AT. 74 C X -0.0002 0.0002 0.0008 0.0009 0.0003 0.0007  
Y 0.0003 -0.0006 0.0000 0.0005 -0.0006 0.0011  
Z -0.0009 0.0006 0.0011 0.0013 0.0002 0.0011

AT. 75 C X 0.0002 -0.0002 0.0008 0.0009 -0.0003 0.0007  
Y 0.0003 -0.0006 -0.0000 -0.0005 -0.0006 -0.0011  
Z 0.0009 -0.0006 0.0011 0.0013 -0.0002 0.0011

AT. 76 C X -0.0002 -0.0002 -0.0008 0.0009 0.0003 0.0007  
Y 0.0003 0.0006 -0.0000 0.0005 -0.0006 0.0011  
Z -0.0009 -0.0006 -0.0011 0.0013 0.0002 0.0011

AT. 77 C X 0.0005 0.0021 0.0000 0.0008 -0.0005 0.0009  
Y 0.0002 0.0003 -0.0002 0.0001 0.0000 0.0001  
Z 0.0004 0.0013 -0.0004 0.0007 0.0001 0.0015

AT. 78 C X -0.0005 0.0021 -0.0000 0.0008 0.0005 0.0009  
Y 0.0002 -0.0003 -0.0002 -0.0001 0.0000 -0.0001  
Z -0.0004 0.0013 0.0004 0.0007 -0.0001 0.0015

AT. 79 C X 0.0005 -0.0021 -0.0000 0.0008 -0.0005 0.0009  
Y 0.0002 -0.0003 0.0002 0.0001 0.0000 0.0001  
Z 0.0004 -0.0013 0.0004 0.0007 0.0001 0.0015

AT. 80 C X -0.0005 -0.0021 0.0000 0.0008 0.0005 0.0009  
Y 0.0002 0.0003 0.0002 -0.0001 0.0000 -0.0001  
Z -0.0004 -0.0013 -0.0004 0.0007 -0.0001 0.0015

AT. 81 H X -0.0039 -0.0120 0.0022 -0.0067 0.0075 -0.0036  
Y -0.0047 -0.0140 0.0024 -0.0078 0.0087 -0.0039  
Z -0.0016 -0.0139 0.0011 -0.0055 0.0002 -0.0153

AT. 82 H X 0.0039 -0.0120 -0.0022 -0.0067 -0.0075 -0.0036  
Y -0.0047 0.0140 0.0024 0.0078 0.0087 0.0039  
Z 0.0016 -0.0139 -0.0011 -0.0055 -0.0002 -0.0153

AT. 83 H X -0.0039 0.0120 -0.0022 -0.0067 0.0075 -0.0036  
Y -0.0047 0.0140 -0.0024 -0.0078 0.0087 -0.0039  
Z -0.0016 0.0139 -0.0011 -0.0055 0.0002 -0.0153

AT. 84 H X 0.0039 0.0120 0.0022 -0.0067 -0.0075 -0.0036  
Y -0.0047 -0.0140 -0.0024 0.0078 0.0087 0.0039  
Z 0.0016 0.0139 0.0011 -0.0055 -0.0002 -0.0153

AT. 85 H X -0.0021 -0.0175 -0.0006 -0.0063 0.0054 -0.0109  
Y 0.0039 0.0137 -0.0030 0.0083 -0.0073 0.0065

Z -0.0022 -0.0051 0.0023 -0.0045 0.0048 -0.0009  
AT. 86 H X 0.0021 -0.0175 0.0006 -0.0063 -0.0054 -0.0109  
Y 0.0039 -0.0137 -0.0030 -0.0083 -0.0073 -0.0065  
Z 0.0022 -0.0051 -0.0023 -0.0045 -0.0048 -0.0009  
AT. 87 H X -0.0021 0.0175 0.0006 -0.0063 0.0054 -0.0109  
Y 0.0039 -0.0137 0.0030 0.0083 -0.0073 0.0065  
Z -0.0022 0.0051 -0.0023 -0.0045 0.0048 -0.0009  
AT. 88 H X 0.0021 0.0175 -0.0006 -0.0063 -0.0054 -0.0109  
Y 0.0039 0.0137 0.0030 -0.0083 -0.0073 -0.0065  
Z 0.0022 0.0051 0.0023 -0.0045 -0.0048 -0.0009  
AT. 89 C X 0.0010 0.0015 -0.0005 0.0010 -0.0024 0.0005  
Y -0.0017 -0.0023 0.0017 -0.0019 0.0011 -0.0005  
Z -0.0018 -0.0017 0.0018 -0.0019 0.0009 -0.0013  
AT. 90 C X -0.0010 0.0015 0.0005 0.0010 0.0024 0.0005  
Y -0.0017 0.0023 0.0017 0.0019 0.0011 0.0005  
Z 0.0018 -0.0017 -0.0018 -0.0019 -0.0009 -0.0013  
AT. 91 C X 0.0010 -0.0015 0.0005 0.0010 -0.0024 0.0005  
Y -0.0017 0.0023 -0.0017 -0.0019 0.0011 -0.0005  
Z -0.0018 0.0017 -0.0018 -0.0019 0.0009 -0.0013  
AT. 92 C X -0.0010 -0.0015 -0.0005 0.0010 0.0024 0.0005  
Y -0.0017 -0.0023 -0.0017 0.0019 0.0011 0.0005  
Z 0.0018 0.0017 0.0018 -0.0019 -0.0009 -0.0013  
AT. 93 C X 0.0019 0.0021 -0.0013 0.0020 -0.0032 0.0013  
Y -0.0027 -0.0033 0.0023 -0.0028 0.0015 -0.0025  
Z -0.0009 -0.0010 0.0005 -0.0008 -0.0004 0.0001  
AT. 94 C X -0.0019 0.0021 0.0013 0.0020 0.0032 0.0013  
Y -0.0027 0.0033 0.0023 0.0028 0.0015 0.0025  
Z 0.0009 -0.0010 -0.0005 -0.0008 0.0004 0.0001  
AT. 95 C X 0.0019 -0.0021 0.0013 0.0020 -0.0032 0.0013  
Y -0.0027 0.0033 -0.0023 -0.0028 0.0015 -0.0025  
Z -0.0009 0.0010 -0.0005 -0.0008 -0.0004 0.0001  
AT. 96 C X -0.0019 -0.0021 -0.0013 0.0020 0.0032 0.0013

Y -0.0027 -0.0033 -0.0023 0.0028 0.0015 0.0025  
Z 0.0009 0.0010 0.0005 -0.0008 0.0004 0.0001  
AT. 97 H X -0.0117 -0.0149 0.0110 -0.0119 0.0002 -0.0107  
Y 0.0354 0.0426 -0.0287 0.0356 -0.0174 0.0263  
Z 0.0269 0.0302 -0.0175 0.0266 -0.0276 0.0140  
AT. 98 H X 0.0117 -0.0149 -0.0110 -0.0119 -0.0002 -0.0107  
Y 0.0354 -0.0426 -0.0287 -0.0356 -0.0174 -0.0263  
Z -0.0269 0.0302 0.0175 0.0266 0.0276 0.0140  
AT. 99 H X -0.0117 0.0149 -0.0110 -0.0119 0.0002 -0.0107  
Y 0.0354 -0.0426 0.0287 0.0356 -0.0174 0.0263  
Z 0.0269 -0.0302 0.0175 0.0266 -0.0276 0.0140  
AT. 100 H X 0.0117 0.0149 0.0110 -0.0119 -0.0002 -0.0107  
Y 0.0354 0.0426 0.0287 -0.0356 -0.0174 -0.0263  
Z -0.0269 -0.0302 -0.0175 0.0266 0.0276 0.0140  
AT. 101 H X 0.0142 0.0182 -0.0137 0.0143 0.0065 0.0116  
Y 0.0159 0.0202 -0.0148 0.0160 0.0041 0.0125  
Z -0.0249 -0.0286 0.0175 -0.0258 0.0384 -0.0186  
AT. 102 H X -0.0142 0.0182 0.0137 0.0143 -0.0065 0.0116  
Y 0.0159 -0.0202 -0.0148 -0.0160 0.0041 -0.0125  
Z 0.0249 -0.0286 -0.0175 -0.0258 -0.0384 -0.0186  
AT. 103 H X 0.0142 -0.0182 0.0137 0.0143 0.0065 0.0116  
Y 0.0159 -0.0202 0.0148 0.0160 0.0041 0.0125  
Z -0.0249 0.0286 -0.0175 -0.0258 0.0384 -0.0186  
AT. 104 H X -0.0142 -0.0182 -0.0137 0.0143 -0.0065 0.0116  
Y 0.0159 0.0202 0.0148 -0.0160 0.0041 -0.0125  
Z 0.0249 0.0286 0.0175 -0.0258 -0.0384 -0.0186  
AT. 105 H X -0.0317 -0.0354 0.0206 -0.0320 0.0457 -0.0194  
Y -0.0098 -0.0118 0.0089 -0.0093 -0.0083 -0.0042  
Z 0.0169 0.0194 -0.0128 0.0166 -0.0093 0.0090  
AT. 106 H X 0.0317 -0.0354 -0.0206 -0.0320 -0.0457 -0.0194  
Y -0.0098 0.0118 0.0089 0.0093 -0.0083 0.0042  
Z -0.0169 0.0194 0.0128 0.0166 0.0093 0.0090



AT.107 H X -0.0317 0.0354 -0.0206 -0.0320 0.0457 -0.0194  
Y -0.0098 0.0118 -0.0089 -0.0093 -0.0083 -0.0042  
Z 0.0169 -0.0194 0.0128 0.0166 -0.0093 0.0090

AT.108 H X 0.0317 0.0354 0.0206 -0.0320 -0.0457 -0.0194  
Y -0.0098 -0.0118 -0.0089 0.0093 -0.0083 0.0042  
Z -0.0169 -0.0194 -0.0128 0.0166 0.0093 0.0090

AT.109 C X -0.0024 -0.0010 -0.0015 0.0016 -0.0019 -0.0018  
Y -0.0005 0.0000 -0.0009 0.0001 -0.0001 0.0002  
Z -0.0025 -0.0009 -0.0025 0.0019 -0.0013 -0.0008

AT.110 C X 0.0024 -0.0010 0.0015 0.0016 0.0019 -0.0018  
Y -0.0005 -0.0000 -0.0009 -0.0001 -0.0001 -0.0002  
Z 0.0025 -0.0009 0.0025 0.0019 0.0013 -0.0008

AT.111 C X -0.0024 0.0010 0.0015 0.0016 -0.0019 -0.0018  
Y -0.0005 -0.0000 0.0009 0.0001 -0.0001 0.0002  
Z -0.0025 0.0009 0.0025 0.0019 -0.0013 -0.0008

AT.112 C X 0.0024 0.0010 -0.0015 0.0016 0.0019 -0.0018  
Y -0.0005 0.0000 0.0009 -0.0001 -0.0001 -0.0002  
Z 0.0025 0.0009 -0.0025 0.0019 0.0013 -0.0008

AT.113 H X 0.0131 0.0080 0.0104 -0.0101 0.0058 0.0053  
Y -0.0194 -0.0126 -0.0150 0.0151 -0.0081 -0.0084  
Z 0.0274 0.0109 0.0239 -0.0201 0.0181 0.0114

AT.114 H X -0.0131 0.0080 -0.0104 -0.0101 -0.0058 0.0053  
Y -0.0194 0.0126 -0.0150 -0.0151 -0.0081 0.0084  
Z -0.0274 0.0109 -0.0239 -0.0201 -0.0181 0.0114

AT.115 H X 0.0131 -0.0080 -0.0104 -0.0101 0.0058 0.0053  
Y -0.0194 0.0126 0.0150 0.0151 -0.0081 -0.0084  
Z 0.0274 -0.0109 -0.0239 -0.0201 0.0181 0.0114

AT.116 H X -0.0131 -0.0080 0.0104 -0.0101 -0.0058 0.0053  
Y -0.0194 -0.0126 0.0150 -0.0151 -0.0081 0.0084  
Z -0.0274 -0.0109 0.0239 -0.0201 -0.0181 0.0114

AT.117 H X 0.0329 0.0158 0.0261 -0.0229 0.0200 0.0156  
Y 0.0161 0.0080 0.0151 -0.0127 0.0080 0.0060

Z 0.0074 0.0039 0.0080 -0.0060 0.0026 0.0018  
AT. 118 H X -0.0329 0.0158 -0.0261 -0.0229 -0.0200 0.0156  
Y 0.0161 -0.0080 0.0151 0.0127 0.0080 -0.0060  
Z -0.0074 0.0039 -0.0080 -0.0060 -0.0026 0.0018  
AT. 119 H X 0.0329 -0.0158 -0.0261 -0.0229 0.0200 0.0156  
Y 0.0161 -0.0080 -0.0151 -0.0127 0.0080 0.0060  
Z 0.0074 -0.0039 -0.0080 -0.0060 0.0026 0.0018  
AT. 120 H X -0.0329 -0.0158 0.0261 -0.0229 -0.0200 0.0156  
Y 0.0161 0.0080 -0.0151 0.0127 0.0080 -0.0060  
Z -0.0074 -0.0039 0.0080 -0.0060 -0.0026 0.0018  
AT. 121 C X -0.0005 -0.0005 -0.0002 -0.0003 0.0011 0.0002  
Y 0.0000 0.0010 -0.0010 0.0005 -0.0004 0.0003  
Z 0.0014 -0.0004 0.0018 0.0000 -0.0019 -0.0016  
AT. 122 C X 0.0005 -0.0005 0.0002 -0.0003 -0.0011 0.0002  
Y 0.0000 -0.0010 -0.0010 -0.0005 -0.0004 -0.0003  
Z -0.0014 -0.0004 -0.0018 0.0000 0.0019 -0.0016  
AT. 123 C X -0.0005 0.0005 0.0002 -0.0003 0.0011 0.0002  
Y 0.0000 -0.0010 0.0010 0.0005 -0.0004 0.0003  
Z 0.0014 0.0004 -0.0018 0.0000 -0.0019 -0.0016  
AT. 124 C X 0.0005 0.0005 -0.0002 -0.0003 -0.0011 0.0002  
Y 0.0000 0.0010 0.0010 -0.0005 -0.0004 -0.0003  
Z -0.0014 0.0004 0.0018 0.0000 0.0019 -0.0016  
AT. 125 H X 0.0032 -0.0051 0.0130 -0.0040 -0.0100 -0.0122  
Y 0.0038 -0.0047 0.0067 0.0021 -0.0091 -0.0091  
Z -0.0024 0.0052 -0.0077 -0.0001 0.0078 0.0092  
AT. 126 H X -0.0032 -0.0051 -0.0130 -0.0040 0.0100 -0.0122  
Y 0.0038 0.0047 0.0067 -0.0021 -0.0091 0.0091  
Z 0.0024 0.0052 0.0077 -0.0001 -0.0078 0.0092  
AT. 127 H X 0.0032 0.0051 -0.0130 -0.0040 -0.0100 -0.0122  
Y 0.0038 0.0047 -0.0067 0.0021 -0.0091 -0.0091  
Z -0.0024 -0.0052 0.0077 -0.0001 0.0078 0.0092  
AT. 128 H X -0.0032 0.0051 0.0130 -0.0040 0.0100 -0.0122

Y 0.0038 -0.0047 -0.0067 -0.0021 -0.0091 0.0091  
Z 0.0024 -0.0052 -0.0077 -0.0001 -0.0078 0.0092  
AT. 129 H X -0.0008 0.0020 -0.0035 0.0019 0.0018 0.0029  
Y -0.0026 -0.0000 -0.0031 -0.0014 0.0046 0.0035  
Z -0.0059 0.0079 -0.0172 0.0040 0.0145 0.0187  
AT. 130 H X 0.0008 0.0020 0.0035 0.0019 -0.0018 0.0029  
Y -0.0026 0.0000 -0.0031 0.0014 0.0046 -0.0035  
Z 0.0059 0.0079 0.0172 0.0040 -0.0145 0.0187  
AT. 131 H X -0.0008 -0.0020 0.0035 0.0019 0.0018 0.0029  
Y -0.0026 0.0000 0.0031 -0.0014 0.0046 0.0035  
Z -0.0059 -0.0079 0.0172 0.0040 0.0145 0.0187  
AT. 132 H X 0.0008 -0.0020 -0.0035 0.0019 -0.0018 0.0029  
Y -0.0026 -0.0000 0.0031 0.0014 0.0046 -0.0035  
Z 0.0059 -0.0079 -0.0172 0.0040 -0.0145 0.0187  
AT. 133 C X 0.0001 0.0001 -0.0001 0.0001 -0.0005 -0.0002  
Y -0.0000 0.0005 0.0007 -0.0014 0.0000 -0.0010  
Z 0.0007 0.0007 0.0006 -0.0012 -0.0004 -0.0006  
AT. 134 C X -0.0001 0.0001 0.0001 0.0001 0.0005 -0.0002  
Y -0.0000 -0.0005 0.0007 0.0014 0.0000 0.0010  
Z -0.0007 0.0007 -0.0006 -0.0012 0.0004 -0.0006  
AT. 135 C X 0.0001 -0.0001 0.0001 0.0001 -0.0005 -0.0002  
Y -0.0000 -0.0005 -0.0007 -0.0014 0.0000 -0.0010  
Z 0.0007 -0.0007 -0.0006 -0.0012 -0.0004 -0.0006  
AT. 136 C X -0.0001 -0.0001 -0.0001 0.0001 0.0005 -0.0002  
Y -0.0000 0.0005 -0.0007 0.0014 0.0000 0.0010  
Z -0.0007 -0.0007 0.0006 -0.0012 0.0004 -0.0006  
AT. 137 C X -0.0008 -0.0005 -0.0011 0.0009 -0.0012 -0.0004  
Y -0.0008 -0.0005 -0.0010 0.0011 -0.0010 -0.0001  
Z -0.0009 -0.0005 -0.0016 0.0017 -0.0014 -0.0001  
AT. 138 C X 0.0008 -0.0005 0.0011 0.0009 0.0012 -0.0004  
Y -0.0008 0.0005 -0.0010 -0.0011 -0.0010 0.0001  
Z 0.0009 -0.0005 0.0016 0.0017 0.0014 -0.0001

AT. 139 C X -0.0008 0.0005 0.0011 0.0009 -0.0012 -0.0004  
Y -0.0008 0.0005 0.0010 0.0011 -0.0010 -0.0001  
Z -0.0009 0.0005 0.0016 0.0017 -0.0014 -0.0001

AT. 140 C X 0.0008 0.0005 -0.0011 0.0009 0.0012 -0.0004  
Y -0.0008 -0.0005 0.0010 -0.0011 -0.0010 0.0001  
Z 0.0009 0.0005 -0.0016 0.0017 0.0014 -0.0001

AT. 141 H X 0.0045 0.0025 0.0062 -0.0051 0.0071 0.0024  
Y 0.0088 0.0052 0.0136 -0.0131 0.0165 0.0048  
Z -0.0000 0.0002 0.0008 -0.0017 0.0020 0.0003

AT. 142 H X -0.0045 0.0025 -0.0062 -0.0051 -0.0071 0.0024  
Y 0.0088 -0.0052 0.0136 0.0131 0.0165 -0.0048  
Z 0.0000 0.0002 -0.0008 -0.0017 -0.0020 0.0003

AT. 143 H X 0.0045 -0.0025 -0.0062 -0.0051 0.0071 0.0024  
Y 0.0088 -0.0052 -0.0136 -0.0131 0.0165 0.0048  
Z -0.0000 -0.0002 -0.0008 -0.0017 0.0020 0.0003

AT. 144 H X -0.0045 -0.0025 0.0062 -0.0051 -0.0071 0.0024  
Y 0.0088 0.0052 -0.0136 0.0131 0.0165 -0.0048  
Z 0.0000 -0.0002 0.0008 -0.0017 -0.0020 0.0003

AT. 145 H X 0.0081 0.0044 0.0113 -0.0090 0.0119 0.0038  
Y -0.0011 -0.0012 -0.0007 0.0005 -0.0009 -0.0005  
Z 0.0074 0.0021 0.0132 -0.0115 0.0131 0.0027

AT. 146 H X -0.0081 0.0044 -0.0113 -0.0090 -0.0119 0.0038  
Y -0.0011 0.0012 -0.0007 -0.0005 -0.0009 0.0005  
Z -0.0074 0.0021 -0.0132 -0.0115 -0.0131 0.0027

AT. 147 H X 0.0081 -0.0044 -0.0113 -0.0090 0.0119 0.0038  
Y -0.0011 0.0012 0.0007 0.0005 -0.0009 -0.0005  
Z 0.0074 -0.0021 -0.0132 -0.0115 0.0131 0.0027

AT. 148 H X -0.0081 -0.0044 0.0113 -0.0090 -0.0119 0.0038  
Y -0.0011 -0.0012 0.0007 -0.0005 -0.0009 0.0005  
Z -0.0074 -0.0021 0.0132 -0.0115 -0.0131 0.0027

AT. 149 O X 0.0001 0.0001 0.0002 -0.0002 -0.0001 -0.0002  
Y -0.0003 -0.0002 -0.0001 0.0002 -0.0000 -0.0000

Z -0.0001 -0.0001 0.0006 -0.0005 0.0001 -0.0005  
AT. 150 O X -0.0001 0.0001 -0.0002 -0.0002 0.0001 -0.0002  
Y -0.0003 0.0002 -0.0001 -0.0002 -0.0000 0.0000  
Z 0.0001 -0.0001 -0.0006 -0.0005 -0.0001 -0.0005  
AT. 151 O X 0.0001 -0.0001 -0.0002 -0.0002 -0.0001 -0.0002  
Y -0.0003 0.0002 0.0001 0.0002 -0.0000 -0.0000  
Z -0.0001 0.0001 -0.0006 -0.0005 0.0001 -0.0005  
AT. 152 O X -0.0001 -0.0001 0.0002 -0.0002 0.0001 -0.0002  
Y -0.0003 -0.0002 0.0001 -0.0002 -0.0000 0.0000  
Z 0.0001 0.0001 0.0006 -0.0005 -0.0001 -0.0005  
AT. 153 H X -0.0013 -0.0012 0.0048 -0.0042 0.0024 -0.0046  
Y 0.0034 0.0036 -0.0072 0.0074 -0.0027 0.0087  
Z 0.0018 0.0018 -0.0051 0.0046 -0.0020 0.0056  
AT. 154 H X 0.0013 -0.0012 -0.0048 -0.0042 -0.0024 -0.0046  
Y 0.0034 -0.0036 -0.0072 -0.0074 -0.0027 -0.0087  
Z -0.0018 0.0018 0.0051 0.0046 0.0020 0.0056  
AT. 155 H X -0.0013 0.0012 -0.0048 -0.0042 0.0024 -0.0046  
Y 0.0034 -0.0036 0.0072 0.0074 -0.0027 0.0087  
Z 0.0018 -0.0018 0.0051 0.0046 -0.0020 0.0056  
AT. 156 H X 0.0013 0.0012 0.0048 -0.0042 -0.0024 -0.0046  
Y 0.0034 0.0036 0.0072 -0.0074 -0.0027 -0.0087  
Z -0.0018 -0.0018 -0.0051 0.0046 0.0020 0.0056  
AT. 157 O X -0.0000 0.0002 -0.0000 -0.0002 0.0002 0.0002  
Y 0.0008 0.0001 0.0007 0.0001 -0.0002 -0.0002  
Z -0.0001 -0.0002 0.0002 0.0000 0.0001 -0.0002  
AT. 158 O X 0.0000 0.0002 0.0000 -0.0002 -0.0002 0.0002  
Y 0.0008 -0.0001 0.0007 -0.0001 -0.0002 0.0002  
Z 0.0001 -0.0002 -0.0002 0.0000 -0.0001 -0.0002  
AT. 159 O X -0.0000 -0.0002 0.0000 -0.0002 0.0002 0.0002  
Y 0.0008 -0.0001 -0.0007 0.0001 -0.0002 -0.0002  
Z -0.0001 0.0002 -0.0002 0.0000 0.0001 -0.0002  
AT. 160 O X 0.0000 -0.0002 -0.0000 -0.0002 -0.0002 0.0002

Y 0.0008 0.0001 -0.0007 -0.0001 -0.0002 0.0002  
Z 0.0001 0.0002 0.0002 0.0000 -0.0001 -0.0002  
AT.161 O X 0.0008 0.0001 0.0008 0.0000 -0.0002 -0.0003  
Y -0.0003 0.0000 -0.0002 -0.0002 0.0001 0.0001  
Z 0.0006 -0.0000 0.0005 0.0002 -0.0002 -0.0002  
AT.162 O X -0.0008 0.0001 -0.0008 0.0000 0.0002 -0.0003  
Y -0.0003 -0.0000 -0.0002 0.0002 0.0001 -0.0001  
Z -0.0006 -0.0000 -0.0005 0.0002 0.0002 -0.0002  
AT.163 O X 0.0008 -0.0001 -0.0008 0.0000 -0.0002 -0.0003  
Y -0.0003 -0.0000 0.0002 -0.0002 0.0001 0.0001  
Z 0.0006 0.0000 -0.0005 0.0002 -0.0002 -0.0002  
AT.164 O X -0.0008 -0.0001 0.0008 0.0000 0.0002 -0.0003  
Y -0.0003 0.0000 0.0002 0.0002 0.0001 -0.0001  
Z -0.0006 0.0000 0.0005 0.0002 0.0002 -0.0002  
AT.165 H X -0.0101 -0.0021 -0.0094 0.0001 0.0029 0.0039  
Y -0.0066 -0.0011 -0.0060 -0.0001 0.0018 0.0023  
Z -0.0144 0.0006 -0.0132 -0.0034 0.0033 0.0048  
AT.166 H X 0.0101 -0.0021 0.0094 0.0001 -0.0029 0.0039  
Y -0.0066 0.0011 -0.0060 0.0001 0.0018 -0.0023  
Z 0.0144 0.0006 0.0132 -0.0034 -0.0033 0.0048  
AT.167 H X -0.0101 0.0021 0.0094 0.0001 0.0029 0.0039  
Y -0.0066 0.0011 0.0060 -0.0001 0.0018 0.0023  
Z -0.0144 -0.0006 0.0132 -0.0034 0.0033 0.0048  
AT.168 H X 0.0101 0.0021 -0.0094 0.0001 -0.0029 0.0039  
Y -0.0066 -0.0011 0.0060 0.0001 0.0018 -0.0023  
Z 0.0144 -0.0006 -0.0132 -0.0034 -0.0033 0.0048  
AT.169 O X -0.0002 0.0000 0.0000 0.0002 -0.0004 -0.0005  
Y 0.0001 -0.0001 0.0003 -0.0002 0.0004 0.0004  
Z -0.0007 0.0001 -0.0001 0.0007 -0.0017 -0.0020  
AT.170 O X 0.0002 0.0000 -0.0000 0.0002 0.0004 -0.0005  
Y 0.0001 0.0001 0.0003 0.0002 0.0004 -0.0004  
Z 0.0007 0.0001 0.0001 0.0007 0.0017 -0.0020

AT.171 O X -0.0002 -0.0000 -0.0000 0.0002 -0.0004 -0.0005  
Y 0.0001 0.0001 -0.0003 -0.0002 0.0004 0.0004  
Z -0.0007 -0.0001 0.0001 0.0007 -0.0017 -0.0020

AT.172 O X 0.0002 -0.0000 0.0000 0.0002 0.0004 -0.0005  
Y 0.0001 -0.0001 -0.0003 0.0002 0.0004 -0.0004  
Z 0.0007 -0.0001 -0.0001 0.0007 0.0017 -0.0020

AT.173 H X 0.0038 0.0009 -0.0004 -0.0038 0.0086 0.0114  
Y -0.0029 -0.0006 -0.0002 0.0030 -0.0076 -0.0092  
Z 0.0118 -0.0018 0.0028 -0.0141 0.0342 0.0372

AT.174 H X -0.0038 0.0009 0.0004 -0.0038 -0.0086 0.0114  
Y -0.0029 0.0006 -0.0002 -0.0030 -0.0076 0.0092  
Z -0.0118 -0.0018 -0.0028 -0.0141 -0.0342 0.0372

AT.175 H X 0.0038 -0.0009 0.0004 -0.0038 0.0086 0.0114  
Y -0.0029 0.0006 0.0002 0.0030 -0.0076 -0.0092  
Z 0.0118 0.0018 -0.0028 -0.0141 0.0342 0.0372

AT.176 H X -0.0038 -0.0009 -0.0004 -0.0038 -0.0086 0.0114  
Y -0.0029 -0.0006 0.0002 -0.0030 -0.0076 0.0092  
Z -0.0118 0.0018 0.0028 -0.0141 -0.0342 0.0372

FREQ(CM\*\*-1) 1518.72 1520.98 1522.16 1522.71 1523.59 1525.15

AT. 1 I X -0.0000 0.0000 -0.0000 -0.0000 0.0000 0.0000  
Y 0.0000 -0.0000 0.0000 0.0000 0.0000 -0.0000  
Z 0.0000 -0.0000 0.0000 0.0000 0.0000 -0.0000

AT. 2 I X -0.0000 -0.0000 0.0000 0.0000 0.0000 0.0000  
Y -0.0000 -0.0000 0.0000 0.0000 -0.0000 0.0000  
Z 0.0000 0.0000 -0.0000 -0.0000 0.0000 -0.0000

AT. 3 I X 0.0000 -0.0000 0.0000 -0.0000 0.0000 -0.0000  
Y -0.0000 0.0000 -0.0000 0.0000 0.0000 0.0000  
Z -0.0000 0.0000 -0.0000 0.0000 0.0000 0.0000

AT. 4 I X 0.0000 0.0000 -0.0000 0.0000 0.0000 -0.0000  
Y 0.0000 0.0000 -0.0000 0.0000 -0.0000 -0.0000

Z -0.0000 -0.0000 0.0000 -0.0000 0.0000 0.0000  
AT. 5 I X -0.0000 0.0000 -0.0000 0.0000 -0.0000 -0.0000  
Y 0.0000 0.0000 -0.0000 0.0000 -0.0000 0.0000  
Z 0.0000 0.0000 0.0000 -0.0000 0.0000 0.0000  
AT. 6 I X -0.0000 -0.0000 0.0000 -0.0000 -0.0000 -0.0000  
Y -0.0000 0.0000 -0.0000 0.0000 0.0000 -0.0000  
Z 0.0000 -0.0000 -0.0000 0.0000 0.0000 0.0000  
AT. 7 I X 0.0000 -0.0000 0.0000 0.0000 -0.0000 0.0000  
Y -0.0000 -0.0000 0.0000 0.0000 -0.0000 -0.0000  
Z -0.0000 -0.0000 -0.0000 -0.0000 0.0000 -0.0000  
AT. 8 I X 0.0000 0.0000 -0.0000 -0.0000 -0.0000 0.0000  
Y 0.0000 -0.0000 0.0000 0.0000 0.0000 0.0000  
Z -0.0000 0.0000 0.0000 0.0000 0.0000 -0.0000  
AT. 9 N X -0.0002 -0.0005 -0.0002 -0.0006 0.0002 0.0003  
Y -0.0029 0.0011 -0.0024 -0.0033 0.0010 0.0022  
Z -0.0008 -0.0004 -0.0008 -0.0002 -0.0008 -0.0000  
AT. 10 N X -0.0002 0.0005 0.0002 0.0006 0.0002 0.0003  
Y 0.0029 0.0011 -0.0024 -0.0033 -0.0010 -0.0022  
Z -0.0008 0.0004 0.0008 0.0002 -0.0008 -0.0000  
AT. 11 N X 0.0002 0.0005 0.0002 -0.0006 0.0002 -0.0003  
Y 0.0029 -0.0011 0.0024 -0.0033 0.0010 -0.0022  
Z 0.0008 0.0004 0.0008 -0.0002 -0.0008 0.0000  
AT. 12 N X 0.0002 -0.0005 -0.0002 0.0006 0.0002 -0.0003  
Y -0.0029 -0.0011 0.0024 -0.0033 -0.0010 0.0022  
Z 0.0008 -0.0004 -0.0008 0.0002 -0.0008 0.0000  
AT. 13 N X 0.0001 0.0000 0.0007 0.0001 0.0009 0.0007  
Y -0.0006 -0.0003 0.0010 0.0007 0.0009 0.0028  
Z -0.0008 -0.0001 -0.0007 -0.0003 -0.0002 -0.0005  
AT. 14 N X 0.0001 -0.0000 -0.0007 -0.0001 0.0009 0.0007  
Y 0.0006 -0.0003 0.0010 0.0007 -0.0009 -0.0028  
Z -0.0008 0.0001 0.0007 0.0003 -0.0002 -0.0005  
AT. 15 N X -0.0001 -0.0000 -0.0007 0.0001 0.0009 -0.0007



Y 0.0006 0.0003 -0.0010 0.0007 0.0009 -0.0028  
Z 0.0008 0.0001 0.0007 -0.0003 -0.0002 0.0005  
AT. 16 N X -0.0001 0.0000 0.0007 -0.0001 0.0009 -0.0007  
Y -0.0006 0.0003 -0.0010 0.0007 -0.0009 0.0028  
Z 0.0008 -0.0001 -0.0007 0.0003 -0.0002 0.0005  
AT. 17 O X 0.0009 -0.0003 0.0008 0.0006 -0.0003 -0.0007  
Y 0.0012 -0.0001 0.0010 0.0008 -0.0003 -0.0007  
Z 0.0029 -0.0008 0.0026 0.0017 -0.0011 -0.0020  
AT. 18 O X 0.0009 0.0003 -0.0008 -0.0006 -0.0003 -0.0007  
Y -0.0012 -0.0001 0.0010 0.0008 0.0003 0.0007  
Z 0.0029 0.0008 -0.0026 -0.0017 -0.0011 -0.0020  
AT. 19 O X -0.0009 0.0003 -0.0008 0.0006 -0.0003 0.0007  
Y -0.0012 0.0001 -0.0010 0.0008 -0.0003 0.0007  
Z -0.0029 0.0008 -0.0026 0.0017 -0.0011 0.0020  
AT. 20 O X -0.0009 -0.0003 0.0008 -0.0006 -0.0003 0.0007  
Y 0.0012 0.0001 -0.0010 0.0008 0.0003 -0.0007  
Z -0.0029 -0.0008 0.0026 -0.0017 -0.0011 0.0020  
AT. 21 O X -0.0000 0.0000 0.0001 -0.0001 0.0002 0.0002  
Y -0.0002 0.0000 -0.0007 0.0006 -0.0010 -0.0009  
Z 0.0001 -0.0004 0.0012 -0.0010 0.0014 0.0014  
AT. 22 O X -0.0000 -0.0000 -0.0001 0.0001 0.0002 0.0002  
Y 0.0002 0.0000 -0.0007 0.0006 0.0010 0.0009  
Z 0.0001 0.0004 -0.0012 0.0010 0.0014 0.0014  
AT. 23 O X 0.0000 -0.0000 -0.0001 -0.0001 0.0002 -0.0002  
Y 0.0002 -0.0000 0.0007 0.0006 -0.0010 0.0009  
Z -0.0001 0.0004 -0.0012 -0.0010 0.0014 -0.0014  
AT. 24 O X 0.0000 0.0000 0.0001 0.0001 0.0002 -0.0002  
Y -0.0002 -0.0000 0.0007 0.0006 0.0010 -0.0009  
Z -0.0001 -0.0004 0.0012 0.0010 0.0014 -0.0014  
AT. 25 C X -0.0016 0.0006 -0.0013 -0.0003 0.0000 0.0007  
Y 0.0033 -0.0010 0.0027 -0.0002 0.0003 -0.0010  
Z -0.0021 0.0007 -0.0018 0.0006 -0.0006 0.0003

AT. 26 C X -0.0016 -0.0006 0.0013 0.0003 0.0000 0.0007  
Y -0.0033 -0.0010 0.0027 -0.0002 -0.0003 0.0010  
Z -0.0021 -0.0007 0.0018 -0.0006 -0.0006 0.0003

AT. 27 C X 0.0016 -0.0006 0.0013 -0.0003 0.0000 -0.0007  
Y -0.0033 0.0010 -0.0027 -0.0002 0.0003 0.0010  
Z 0.0021 -0.0007 0.0018 0.0006 -0.0006 -0.0003

AT. 28 C X 0.0016 0.0006 -0.0013 0.0003 0.0000 -0.0007  
Y 0.0033 0.0010 -0.0027 -0.0002 -0.0003 -0.0010  
Z 0.0021 0.0007 -0.0018 -0.0006 -0.0006 -0.0003

AT. 29 H X -0.0000 0.0003 -0.0006 0.0004 -0.0007 -0.0006  
Y -0.0442 0.0145 -0.0374 -0.0065 -0.0008 0.0173  
Z 0.0048 -0.0020 0.0050 0.0010 0.0007 -0.0014

AT. 30 H X -0.0000 -0.0003 0.0006 -0.0004 -0.0007 -0.0006  
Y 0.0442 0.0145 -0.0374 -0.0065 0.0008 -0.0173  
Z 0.0048 0.0020 -0.0050 -0.0010 0.0007 -0.0014

AT. 31 H X 0.0000 -0.0003 0.0006 0.0004 -0.0007 0.0006  
Y 0.0442 -0.0145 0.0374 -0.0065 -0.0008 -0.0173  
Z -0.0048 0.0020 -0.0050 0.0010 0.0007 0.0014

AT. 32 H X 0.0000 0.0003 -0.0006 -0.0004 -0.0007 0.0006  
Y -0.0442 -0.0145 0.0374 -0.0065 0.0008 0.0173  
Z -0.0048 -0.0020 0.0050 -0.0010 0.0007 0.0014

AT. 33 H X 0.0281 -0.0092 0.0230 0.0037 0.0001 -0.0108  
Y -0.0089 0.0031 -0.0077 -0.0016 -0.0001 0.0037  
Z 0.0249 -0.0085 0.0217 0.0024 0.0012 -0.0095

AT. 34 H X 0.0281 0.0092 -0.0230 -0.0037 0.0001 -0.0108  
Y 0.0089 0.0031 -0.0077 -0.0016 0.0001 -0.0037  
Z 0.0249 0.0085 -0.0217 -0.0024 0.0012 -0.0095

AT. 35 H X -0.0281 0.0092 -0.0230 0.0037 0.0001 0.0108  
Y 0.0089 -0.0031 0.0077 -0.0016 -0.0001 -0.0037  
Z -0.0249 0.0085 -0.0217 0.0024 0.0012 0.0095

AT. 36 H X -0.0281 -0.0092 0.0230 -0.0037 0.0001 0.0108  
Y -0.0089 -0.0031 0.0077 -0.0016 0.0001 0.0037

Z -0.0249 -0.0085 0.0217 -0.0024 0.0012 0.0095  
AT. 37 C X -0.0014 0.0004 -0.0012 -0.0001 0.0002 0.0006  
Y 0.0013 -0.0009 0.0015 0.0026 -0.0007 -0.0016  
Z -0.0047 0.0015 -0.0045 -0.0040 0.0021 0.0036  
AT. 38 C X -0.0014 -0.0004 0.0012 0.0001 0.0002 0.0006  
Y -0.0013 -0.0009 0.0015 0.0026 0.0007 0.0016  
Z -0.0047 -0.0015 0.0045 0.0040 0.0021 0.0036  
AT. 39 C X 0.0014 -0.0004 0.0012 -0.0001 0.0002 -0.0006  
Y -0.0013 0.0009 -0.0015 0.0026 -0.0007 0.0016  
Z 0.0047 -0.0015 0.0045 -0.0040 0.0021 -0.0036  
AT. 40 C X 0.0014 0.0004 -0.0012 0.0001 0.0002 -0.0006  
Y 0.0013 0.0009 -0.0015 0.0026 0.0007 -0.0016  
Z 0.0047 0.0015 -0.0045 0.0040 0.0021 -0.0036  
AT. 41 C X 0.0009 -0.0001 0.0005 0.0008 -0.0006 -0.0002  
Y -0.0008 0.0012 -0.0009 0.0005 -0.0005 0.0003  
Z -0.0060 0.0030 -0.0058 -0.0037 0.0004 0.0038  
AT. 42 C X 0.0009 0.0001 -0.0005 -0.0008 -0.0006 -0.0002  
Y 0.0008 0.0012 -0.0009 0.0005 0.0005 -0.0003  
Z -0.0060 -0.0030 0.0058 0.0037 0.0004 0.0038  
AT. 43 C X -0.0009 0.0001 -0.0005 0.0008 -0.0006 0.0002  
Y 0.0008 -0.0012 0.0009 0.0005 -0.0005 -0.0003  
Z 0.0060 -0.0030 0.0058 -0.0037 0.0004 -0.0038  
AT. 44 C X -0.0009 -0.0001 0.0005 -0.0008 -0.0006 0.0002  
Y -0.0008 -0.0012 0.0009 0.0005 0.0005 0.0003  
Z 0.0060 0.0030 -0.0058 0.0037 0.0004 -0.0038  
AT. 45 H X -0.0207 0.0164 -0.0178 -0.0082 -0.0007 0.0066  
Y 0.0370 -0.0150 0.0383 0.0241 -0.0008 -0.0241  
Z 0.0306 -0.0134 0.0317 0.0188 0.0001 -0.0189  
AT. 46 H X -0.0207 -0.0164 0.0178 0.0082 -0.0007 0.0066  
Y -0.0370 -0.0150 0.0383 0.0241 0.0008 0.0241  
Z 0.0306 0.0134 -0.0317 -0.0188 0.0001 -0.0189  
AT. 47 H X 0.0207 -0.0164 0.0178 -0.0082 -0.0007 -0.0066

Y -0.0370 0.0150 -0.0383 0.0241 -0.0008 0.0241  
Z -0.0306 0.0134 -0.0317 0.0188 0.0001 0.0189  
AT. 48 H X 0.0207 0.0164 -0.0178 0.0082 -0.0007 -0.0066  
Y 0.0370 0.0150 -0.0383 0.0241 0.0008 -0.0241  
Z -0.0306 -0.0134 0.0317 -0.0188 0.0001 0.0189  
AT. 49 H X 0.0072 -0.0070 0.0062 0.0003 0.0021 -0.0020  
Y -0.0147 0.0049 -0.0151 -0.0126 0.0025 0.0103  
Z 0.0498 -0.0263 0.0491 0.0299 0.0002 -0.0277  
AT. 50 H X 0.0072 0.0070 -0.0062 -0.0003 0.0021 -0.0020  
Y 0.0147 0.0049 -0.0151 -0.0126 -0.0025 -0.0103  
Z 0.0498 0.0263 -0.0491 -0.0299 0.0002 -0.0277  
AT. 51 H X -0.0072 0.0070 -0.0062 0.0003 0.0021 0.0020  
Y 0.0147 -0.0049 0.0151 -0.0126 0.0025 -0.0103  
Z -0.0498 0.0263 -0.0491 0.0299 0.0002 0.0277  
AT. 52 H X -0.0072 -0.0070 0.0062 -0.0003 0.0021 0.0020  
Y -0.0147 -0.0049 0.0151 -0.0126 -0.0025 0.0103  
Z -0.0498 -0.0263 0.0491 -0.0299 0.0002 0.0277  
AT. 53 C X -0.0003 0.0002 0.0008 0.0008 0.0005 -0.0012  
Y 0.0007 -0.0037 -0.0005 -0.0041 0.0017 0.0025  
Z 0.0006 0.0022 0.0009 0.0023 -0.0013 -0.0027  
AT. 54 C X -0.0003 -0.0002 -0.0008 -0.0008 0.0005 -0.0012  
Y -0.0007 -0.0037 -0.0005 -0.0041 -0.0017 -0.0025  
Z 0.0006 -0.0022 -0.0009 -0.0023 -0.0013 -0.0027  
AT. 55 C X 0.0003 -0.0002 -0.0008 0.0008 0.0005 0.0012  
Y -0.0007 0.0037 0.0005 -0.0041 0.0017 -0.0025  
Z -0.0006 -0.0022 -0.0009 0.0023 -0.0013 0.0027  
AT. 56 C X 0.0003 0.0002 0.0008 -0.0008 0.0005 0.0012  
Y 0.0007 0.0037 0.0005 -0.0041 -0.0017 0.0025  
Z -0.0006 0.0022 0.0009 -0.0023 -0.0013 0.0027  
AT. 57 C X -0.0012 0.0012 0.0009 0.0020 0.0006 -0.0014  
Y 0.0006 -0.0037 -0.0003 -0.0047 0.0024 0.0032  
Z -0.0006 0.0019 0.0004 0.0022 -0.0011 -0.0019

AT. 58 C X -0.0012 -0.0012 -0.0009 -0.0020 0.0006 -0.0014  
Y -0.0006 -0.0037 -0.0003 -0.0047 -0.0024 -0.0032  
Z -0.0006 -0.0019 -0.0004 -0.0022 -0.0011 -0.0019

AT. 59 C X 0.0012 -0.0012 -0.0009 0.0020 0.0006 0.0014  
Y -0.0006 0.0037 0.0003 -0.0047 0.0024 -0.0032  
Z 0.0006 -0.0019 -0.0004 0.0022 -0.0011 0.0019

AT. 60 C X 0.0012 0.0012 0.0009 -0.0020 0.0006 0.0014  
Y 0.0006 0.0037 0.0003 -0.0047 -0.0024 0.0032  
Z 0.0006 0.0019 0.0004 -0.0022 -0.0011 0.0019

AT. 61 H X -0.0030 0.0387 0.0015 0.0471 -0.0305 -0.0330  
Y 0.0001 0.0249 -0.0003 0.0290 -0.0225 -0.0206  
Z -0.0081 0.0056 0.0044 0.0111 0.0065 -0.0058

AT. 62 H X -0.0030 -0.0387 -0.0015 -0.0471 -0.0305 -0.0330  
Y -0.0001 0.0249 -0.0003 0.0290 0.0225 0.0206  
Z -0.0081 -0.0056 -0.0044 -0.0111 0.0065 -0.0058

AT. 63 H X 0.0030 -0.0387 -0.0015 0.0471 -0.0305 0.0330  
Y -0.0001 -0.0249 0.0003 0.0290 -0.0225 0.0206  
Z 0.0081 -0.0056 -0.0044 0.0111 0.0065 0.0058

AT. 64 H X 0.0030 0.0387 0.0015 -0.0471 -0.0305 0.0330  
Y 0.0001 -0.0249 0.0003 0.0290 0.0225 -0.0206  
Z 0.0081 0.0056 0.0044 -0.0111 0.0065 0.0058

AT. 65 H X 0.0027 -0.0187 -0.0015 -0.0232 0.0129 0.0163  
Y -0.0109 0.0583 0.0066 0.0733 -0.0367 -0.0517  
Z 0.0134 -0.0192 -0.0081 -0.0259 0.0001 0.0216

AT. 66 H X 0.0027 0.0187 0.0015 0.0232 0.0129 0.0163  
Y 0.0109 0.0583 0.0066 0.0733 0.0367 0.0517  
Z 0.0134 0.0192 0.0081 0.0259 0.0001 0.0216

AT. 67 H X -0.0027 0.0187 0.0015 -0.0232 0.0129 -0.0163  
Y 0.0109 -0.0583 -0.0066 0.0733 -0.0367 0.0517  
Z -0.0134 0.0192 0.0081 -0.0259 0.0001 -0.0216

AT. 68 H X -0.0027 -0.0187 -0.0015 0.0232 0.0129 -0.0163  
Y -0.0109 -0.0583 -0.0066 0.0733 0.0367 -0.0517

Z -0.0134 -0.0192 -0.0081 0.0259 0.0001 -0.0216  
AT. 69 H X 0.0183 -0.0366 -0.0119 -0.0497 0.0065 0.0363  
Y -0.0003 -0.0208 -0.0007 -0.0228 0.0186 0.0179  
Z 0.0025 -0.0213 -0.0025 -0.0250 0.0151 0.0193  
AT. 70 H X 0.0183 0.0366 0.0119 0.0497 0.0065 0.0363  
Y 0.0003 -0.0208 -0.0007 -0.0228 -0.0186 -0.0179  
Z 0.0025 0.0213 0.0025 0.0250 0.0151 0.0193  
AT. 71 H X -0.0183 0.0366 0.0119 -0.0497 0.0065 -0.0363  
Y 0.0003 0.0208 0.0007 -0.0228 0.0186 -0.0179  
Z -0.0025 0.0213 0.0025 -0.0250 0.0151 -0.0193  
AT. 72 H X -0.0183 -0.0366 -0.0119 0.0497 0.0065 -0.0363  
Y -0.0003 0.0208 0.0007 -0.0228 -0.0186 0.0179  
Z -0.0025 -0.0213 -0.0025 0.0250 0.0151 -0.0193  
AT. 73 C X -0.0004 -0.0004 0.0003 0.0006 -0.0000 0.0001  
Y 0.0000 0.0017 0.0003 0.0006 0.0001 -0.0007  
Z -0.0009 -0.0016 -0.0011 -0.0001 -0.0003 0.0014  
AT. 74 C X -0.0004 0.0004 -0.0003 -0.0006 -0.0000 0.0001  
Y -0.0000 0.0017 0.0003 0.0006 -0.0001 0.0007  
Z -0.0009 0.0016 0.0011 0.0001 -0.0003 0.0014  
AT. 75 C X 0.0004 0.0004 -0.0003 0.0006 -0.0000 -0.0001  
Y -0.0000 -0.0017 -0.0003 0.0006 0.0001 0.0007  
Z 0.0009 0.0016 0.0011 -0.0001 -0.0003 -0.0014  
AT. 76 C X 0.0004 -0.0004 0.0003 -0.0006 -0.0000 -0.0001  
Y 0.0000 -0.0017 -0.0003 0.0006 -0.0001 -0.0007  
Z 0.0009 -0.0016 -0.0011 0.0001 -0.0003 -0.0014  
AT. 77 C X -0.0008 -0.0027 -0.0008 0.0010 -0.0022 -0.0031  
Y 0.0003 0.0000 0.0001 0.0001 -0.0000 -0.0002  
Z -0.0006 -0.0021 -0.0004 0.0010 -0.0013 -0.0014  
AT. 78 C X -0.0008 0.0027 0.0008 -0.0010 -0.0022 -0.0031  
Y -0.0003 0.0000 0.0001 0.0001 0.0000 0.0002  
Z -0.0006 0.0021 0.0004 -0.0010 -0.0013 -0.0014  
AT. 79 C X 0.0008 0.0027 0.0008 0.0010 -0.0022 0.0031

Y -0.0003 -0.0000 -0.0001 0.0001 -0.0000 0.0002  
Z 0.0006 0.0021 0.0004 0.0010 -0.0013 0.0014  
AT. 80 C X 0.0008 -0.0027 -0.0008 -0.0010 -0.0022 0.0031  
Y 0.0003 -0.0000 -0.0001 0.0001 0.0000 -0.0002  
Z 0.0006 -0.0021 -0.0004 -0.0010 -0.0013 0.0014  
AT. 81 H X 0.0070 0.0141 0.0051 -0.0046 0.0109 0.0100  
Y 0.0080 0.0162 0.0057 -0.0050 0.0125 0.0120  
Z 0.0054 0.0236 0.0050 -0.0133 0.0186 0.0215  
AT. 82 H X 0.0070 -0.0141 -0.0051 0.0046 0.0109 0.0100  
Y -0.0080 0.0162 0.0057 -0.0050 -0.0125 -0.0120  
Z 0.0054 -0.0236 -0.0050 0.0133 0.0186 0.0215  
AT. 83 H X -0.0070 -0.0141 -0.0051 -0.0046 0.0109 -0.0100  
Y -0.0080 -0.0162 -0.0057 -0.0050 0.0125 -0.0120  
Z -0.0054 -0.0236 -0.0050 -0.0133 0.0186 -0.0215  
AT. 84 H X -0.0070 0.0141 0.0051 0.0046 0.0109 -0.0100  
Y 0.0080 -0.0162 -0.0057 -0.0050 -0.0125 0.0120  
Z -0.0054 0.0236 0.0050 0.0133 0.0186 -0.0215  
AT. 85 H X 0.0090 0.0264 0.0078 -0.0117 0.0220 0.0250  
Y -0.0086 -0.0182 -0.0062 0.0066 -0.0134 -0.0126  
Z 0.0043 0.0058 0.0024 -0.0011 0.0035 0.0015  
AT. 86 H X 0.0090 -0.0264 -0.0078 0.0117 0.0220 0.0250  
Y 0.0086 -0.0182 -0.0062 0.0066 0.0134 0.0126  
Z 0.0043 -0.0058 -0.0024 0.0011 0.0035 0.0015  
AT. 87 H X -0.0090 -0.0264 -0.0078 -0.0117 0.0220 -0.0250  
Y 0.0086 0.0182 0.0062 0.0066 -0.0134 0.0126  
Z -0.0043 -0.0058 -0.0024 -0.0011 0.0035 -0.0015  
AT. 88 H X -0.0090 0.0264 0.0078 0.0117 0.0220 -0.0250  
Y -0.0086 0.0182 0.0062 0.0066 0.0134 -0.0126  
Z -0.0043 0.0058 0.0024 0.0011 0.0035 -0.0015  
AT. 89 C X -0.0020 -0.0016 -0.0010 0.0005 -0.0015 0.0013  
Y 0.0004 0.0012 -0.0001 -0.0005 0.0001 0.0005  
Z 0.0007 0.0015 0.0003 -0.0005 0.0004 -0.0004

AT. 90 C X -0.0020 0.0016 0.0010 -0.0005 -0.0015 0.0013  
Y -0.0004 0.0012 -0.0001 -0.0005 -0.0001 -0.0005  
Z 0.0007 -0.0015 -0.0003 0.0005 0.0004 -0.0004

AT. 91 C X 0.0020 0.0016 0.0010 0.0005 -0.0015 -0.0013  
Y -0.0004 -0.0012 0.0001 -0.0005 0.0001 -0.0005  
Z -0.0007 -0.0015 -0.0003 -0.0005 0.0004 0.0004

AT. 92 C X 0.0020 -0.0016 -0.0010 -0.0005 -0.0015 -0.0013  
Y 0.0004 -0.0012 0.0001 -0.0005 -0.0001 0.0005  
Z -0.0007 0.0015 0.0003 0.0005 0.0004 0.0004

AT. 93 C X -0.0030 -0.0022 -0.0016 0.0011 -0.0026 0.0014  
Y 0.0008 0.0034 -0.0001 -0.0008 0.0009 0.0006  
Z -0.0006 0.0006 -0.0001 -0.0004 -0.0004 0.0006

AT. 94 C X -0.0030 0.0022 0.0016 -0.0011 -0.0026 0.0014  
Y -0.0008 0.0034 -0.0001 -0.0008 -0.0009 -0.0006  
Z -0.0006 -0.0006 0.0001 0.0004 -0.0004 0.0006

AT. 95 C X 0.0030 0.0022 0.0016 0.0011 -0.0026 -0.0014  
Y -0.0008 -0.0034 0.0001 -0.0008 0.0009 -0.0006  
Z 0.0006 -0.0006 0.0001 -0.0004 -0.0004 -0.0006

AT. 96 C X 0.0030 -0.0022 -0.0016 -0.0011 -0.0026 -0.0014  
Y 0.0008 -0.0034 0.0001 -0.0008 -0.0009 0.0006  
Z 0.0006 0.0006 -0.0001 0.0004 -0.0004 -0.0006

AT. 97 H X -0.0035 0.0128 -0.0053 -0.0025 -0.0019 0.0079  
Y -0.0087 -0.0386 0.0008 0.0126 -0.0099 -0.0092  
Z -0.0231 -0.0295 -0.0133 0.0139 -0.0211 0.0060

AT. 98 H X -0.0035 -0.0128 0.0053 0.0025 -0.0019 0.0079  
Y 0.0087 -0.0386 0.0008 0.0126 0.0099 0.0092  
Z -0.0231 0.0295 0.0133 -0.0139 -0.0211 0.0060

AT. 99 H X 0.0035 -0.0128 0.0053 -0.0025 -0.0019 -0.0079  
Y 0.0087 0.0386 -0.0008 0.0126 -0.0099 0.0092  
Z 0.0231 0.0295 0.0133 0.0139 -0.0211 -0.0060

AT. 100 H X 0.0035 0.0128 -0.0053 0.0025 -0.0019 -0.0079  
Y -0.0087 0.0386 -0.0008 0.0126 0.0099 -0.0092



Z 0.0231 -0.0295 -0.0133 -0.0139 -0.0211 -0.0060  
AT.101 H X 0.0117 -0.0141 0.0103 0.0024 0.0084 -0.0143  
Y 0.0097 -0.0160 0.0092 0.0032 0.0066 -0.0140  
Z 0.0348 0.0311 0.0176 -0.0130 0.0304 -0.0121  
AT.102 H X 0.0117 0.0141 -0.0103 -0.0024 0.0084 -0.0143  
Y -0.0097 -0.0160 0.0092 0.0032 -0.0066 0.0140  
Z 0.0348 -0.0311 -0.0176 0.0130 0.0304 -0.0121  
AT.103 H X -0.0117 0.0141 -0.0103 0.0024 0.0084 0.0143  
Y -0.0097 0.0160 -0.0092 0.0032 0.0066 0.0140  
Z -0.0348 -0.0311 -0.0176 -0.0130 0.0304 0.0121  
AT.104 H X -0.0117 -0.0141 0.0103 -0.0024 0.0084 0.0143  
Y 0.0097 0.0160 -0.0092 0.0032 -0.0066 -0.0140  
Z -0.0348 0.0311 0.0176 0.0130 0.0304 0.0121  
AT.105 H X 0.0415 0.0371 0.0228 -0.0172 0.0367 -0.0160  
Y -0.0118 0.0063 -0.0077 -0.0021 -0.0088 0.0109  
Z -0.0056 -0.0158 -0.0023 0.0070 -0.0061 -0.0021  
AT.106 H X 0.0415 -0.0371 -0.0228 0.0172 0.0367 -0.0160  
Y 0.0118 0.0063 -0.0077 -0.0021 0.0088 -0.0109  
Z -0.0056 0.0158 0.0023 -0.0070 -0.0061 -0.0021  
AT.107 H X -0.0415 -0.0371 -0.0228 -0.0172 0.0367 0.0160  
Y 0.0118 -0.0063 0.0077 -0.0021 -0.0088 -0.0109  
Z 0.0056 0.0158 0.0023 0.0070 -0.0061 0.0021  
AT.108 H X -0.0415 0.0371 0.0228 0.0172 0.0367 0.0160  
Y -0.0118 -0.0063 0.0077 -0.0021 0.0088 0.0109  
Z 0.0056 -0.0158 -0.0023 -0.0070 -0.0061 0.0021  
AT.109 C X -0.0015 -0.0001 -0.0010 -0.0015 0.0009 -0.0002  
Y 0.0002 0.0008 0.0003 0.0010 -0.0001 -0.0004  
Z -0.0009 -0.0000 -0.0005 -0.0004 0.0013 0.0007  
AT.110 C X -0.0015 0.0001 0.0010 0.0015 0.0009 -0.0002  
Y -0.0002 0.0008 0.0003 0.0010 0.0001 0.0004  
Z -0.0009 0.0000 0.0005 0.0004 0.0013 0.0007  
AT.111 C X 0.0015 0.0001 0.0010 -0.0015 0.0009 0.0002

Y -0.0002 -0.0008 -0.0003 0.0010 -0.0001 0.0004  
Z 0.0009 0.0000 0.0005 -0.0004 0.0013 -0.0007  
AT. 112 C X 0.0015 -0.0001 -0.0010 0.0015 0.0009 0.0002  
Y 0.0002 -0.0008 -0.0003 0.0010 0.0001 -0.0004  
Z 0.0009 -0.0000 -0.0005 0.0004 0.0013 -0.0007  
AT. 113 H X 0.0057 0.0015 0.0034 0.0049 -0.0035 0.0022  
Y -0.0081 -0.0032 -0.0050 -0.0092 0.0052 -0.0040  
Z 0.0138 -0.0041 0.0058 0.0022 -0.0099 -0.0009  
AT. 114 H X 0.0057 -0.0015 -0.0034 -0.0049 -0.0035 0.0022  
Y 0.0081 -0.0032 -0.0050 -0.0092 -0.0052 0.0040  
Z 0.0138 0.0041 -0.0058 -0.0022 -0.0099 -0.0009  
AT. 115 H X -0.0057 -0.0015 -0.0034 0.0049 -0.0035 -0.0022  
Y 0.0081 0.0032 0.0050 -0.0092 0.0052 0.0040  
Z -0.0138 0.0041 -0.0058 0.0022 -0.0099 0.0009  
AT. 116 H X -0.0057 0.0015 0.0034 -0.0049 -0.0035 -0.0022  
Y -0.0081 0.0032 0.0050 -0.0092 -0.0052 -0.0040  
Z -0.0138 -0.0041 0.0058 -0.0022 -0.0099 0.0009  
AT. 117 H X 0.0163 -0.0037 0.0075 0.0063 -0.0083 0.0066  
Y 0.0064 0.0013 0.0048 0.0049 -0.0057 -0.0002  
Z 0.0019 0.0012 0.0023 0.0020 -0.0026 -0.0001  
AT. 118 H X 0.0163 0.0037 -0.0075 -0.0063 -0.0083 0.0066  
Y -0.0064 0.0013 0.0048 0.0049 0.0057 0.0002  
Z 0.0019 -0.0012 -0.0023 -0.0020 -0.0026 -0.0001  
AT. 119 H X -0.0163 0.0037 -0.0075 0.0063 -0.0083 -0.0066  
Y -0.0064 -0.0013 -0.0048 0.0049 -0.0057 0.0002  
Z -0.0019 -0.0012 -0.0023 0.0020 -0.0026 0.0001  
AT. 120 H X -0.0163 -0.0037 0.0075 -0.0063 -0.0083 -0.0066  
Y 0.0064 -0.0013 -0.0048 0.0049 0.0057 -0.0002  
Z -0.0019 0.0012 0.0023 -0.0020 -0.0026 0.0001  
AT. 121 C X 0.0013 0.0007 0.0015 -0.0004 0.0020 0.0012  
Y 0.0004 -0.0006 0.0006 -0.0003 0.0006 -0.0000  
Z -0.0038 -0.0005 -0.0059 0.0016 -0.0070 -0.0050

AT. 122 C X 0.0013 -0.0007 -0.0015 0.0004 0.0020 0.0012  
Y -0.0004 -0.0006 0.0006 -0.0003 -0.0006 0.0000  
Z -0.0038 0.0005 0.0059 -0.0016 -0.0070 -0.0050

AT. 123 C X -0.0013 -0.0007 -0.0015 -0.0004 0.0020 -0.0012  
Y -0.0004 0.0006 -0.0006 -0.0003 0.0006 0.0000  
Z 0.0038 0.0005 0.0059 0.0016 -0.0070 0.0050

AT. 124 C X -0.0013 0.0007 0.0015 0.0004 0.0020 -0.0012  
Y 0.0004 0.0006 -0.0006 -0.0003 -0.0006 -0.0000  
Z 0.0038 -0.0005 -0.0059 -0.0016 -0.0070 0.0050

AT. 125 H X -0.0196 -0.0007 -0.0327 0.0060 -0.0381 -0.0290  
Y -0.0186 -0.0007 -0.0286 0.0077 -0.0313 -0.0233  
Z 0.0166 -0.0001 0.0260 -0.0063 0.0286 0.0215

AT. 126 H X -0.0196 0.0007 0.0327 -0.0060 -0.0381 -0.0290  
Y 0.0186 -0.0007 -0.0286 0.0077 0.0313 0.0233  
Z 0.0166 0.0001 -0.0260 0.0063 0.0286 0.0215

AT. 127 H X 0.0196 0.0007 0.0327 0.0060 -0.0381 0.0290  
Y 0.0186 0.0007 0.0286 0.0077 -0.0313 0.0233  
Z -0.0166 0.0001 -0.0260 -0.0063 0.0286 -0.0215

AT. 128 H X 0.0196 -0.0007 -0.0327 -0.0060 -0.0381 0.0290  
Y -0.0186 0.0007 0.0286 0.0077 0.0313 -0.0233  
Z -0.0166 -0.0001 0.0260 0.0063 0.0286 -0.0215

AT. 129 H X 0.0039 -0.0007 0.0068 -0.0008 0.0075 0.0051  
Y 0.0086 0.0021 0.0133 -0.0038 0.0158 0.0128  
Z 0.0292 -0.0000 0.0499 -0.0093 0.0563 0.0448

AT. 130 H X 0.0039 0.0007 -0.0068 0.0008 0.0075 0.0051  
Y -0.0086 0.0021 0.0133 -0.0038 -0.0158 -0.0128  
Z 0.0292 0.0000 -0.0499 0.0093 0.0563 0.0448

AT. 131 H X -0.0039 0.0007 -0.0068 -0.0008 0.0075 -0.0051  
Y -0.0086 -0.0021 -0.0133 -0.0038 0.0158 -0.0128  
Z -0.0292 0.0000 -0.0499 -0.0093 0.0563 -0.0448

AT. 132 H X -0.0039 -0.0007 0.0068 0.0008 0.0075 -0.0051  
Y 0.0086 -0.0021 -0.0133 -0.0038 -0.0158 0.0128

Z -0.0292 -0.0000 0.0499 0.0093 0.0563 -0.0448  
AT. 133 C X -0.0004 -0.0001 -0.0010 0.0004 -0.0011 -0.0010  
Y 0.0009 0.0006 0.0002 -0.0012 0.0005 -0.0014  
Z 0.0000 0.0007 -0.0021 0.0014 -0.0027 -0.0029  
AT. 134 C X -0.0004 0.0001 0.0010 -0.0004 -0.0011 -0.0010  
Y -0.0009 0.0006 0.0002 -0.0012 -0.0005 0.0014  
Z 0.0000 -0.0007 0.0021 -0.0014 -0.0027 -0.0029  
AT. 135 C X 0.0004 0.0001 0.0010 0.0004 -0.0011 0.0010  
Y -0.0009 -0.0006 -0.0002 -0.0012 0.0005 0.0014  
Z -0.0000 -0.0007 0.0021 0.0014 -0.0027 0.0029  
AT. 136 C X 0.0004 -0.0001 -0.0010 -0.0004 -0.0011 0.0010  
Y 0.0009 -0.0006 -0.0002 -0.0012 -0.0005 -0.0014  
Z -0.0000 0.0007 -0.0021 -0.0014 -0.0027 0.0029  
AT. 137 C X -0.0014 -0.0001 -0.0019 0.0008 -0.0018 -0.0011  
Y -0.0013 -0.0003 -0.0015 0.0008 -0.0013 -0.0005  
Z -0.0017 -0.0005 -0.0018 0.0009 -0.0014 -0.0006  
AT. 138 C X -0.0014 0.0001 0.0019 -0.0008 -0.0018 -0.0011  
Y 0.0013 -0.0003 -0.0015 0.0008 0.0013 0.0005  
Z -0.0017 0.0005 0.0018 -0.0009 -0.0014 -0.0006  
AT. 139 C X 0.0014 0.0001 0.0019 0.0008 -0.0018 0.0011  
Y 0.0013 0.0003 0.0015 0.0008 -0.0013 0.0005  
Z 0.0017 0.0005 0.0018 0.0009 -0.0014 0.0006  
AT. 140 C X 0.0014 -0.0001 -0.0019 -0.0008 -0.0018 0.0011  
Y -0.0013 0.0003 0.0015 0.0008 0.0013 -0.0005  
Z 0.0017 -0.0005 -0.0018 -0.0009 -0.0014 0.0006  
AT. 141 H X 0.0082 0.0005 0.0116 -0.0053 0.0111 0.0073  
Y 0.0194 0.0023 0.0265 -0.0121 0.0247 0.0154  
Z 0.0025 0.0007 0.0034 -0.0016 0.0031 0.0017  
AT. 142 H X 0.0082 -0.0005 -0.0116 0.0053 0.0111 0.0073  
Y -0.0194 0.0023 0.0265 -0.0121 -0.0247 -0.0154  
Z 0.0025 -0.0007 -0.0034 0.0016 0.0031 0.0017  
AT. 143 H X -0.0082 -0.0005 -0.0116 -0.0053 0.0111 -0.0073

Y -0.0194 -0.0023 -0.0265 -0.0121 0.0247 -0.0154  
Z -0.0025 -0.0007 -0.0034 -0.0016 0.0031 -0.0017  
AT. 144 H X -0.0082 0.0005 0.0116 0.0053 0.0111 -0.0073  
Y 0.0194 -0.0023 -0.0265 -0.0121 -0.0247 0.0154  
Z -0.0025 0.0007 0.0034 0.0016 0.0031 -0.0017  
AT. 145 H X 0.0137 0.0006 0.0191 -0.0089 0.0176 0.0111  
Y -0.0017 0.0002 -0.0024 0.0012 -0.0024 -0.0010  
Z 0.0131 0.0023 0.0169 -0.0080 0.0145 0.0101  
AT. 146 H X 0.0137 -0.0006 -0.0191 0.0089 0.0176 0.0111  
Y 0.0017 0.0002 -0.0024 0.0012 0.0024 0.0010  
Z 0.0131 -0.0023 -0.0169 0.0080 0.0145 0.0101  
AT. 147 H X -0.0137 -0.0006 -0.0191 -0.0089 0.0176 -0.0111  
Y 0.0017 -0.0002 0.0024 0.0012 -0.0024 0.0010  
Z -0.0131 -0.0023 -0.0169 -0.0080 0.0145 -0.0101  
AT. 148 H X -0.0137 0.0006 0.0191 0.0089 0.0176 -0.0111  
Y -0.0017 -0.0002 0.0024 0.0012 0.0024 -0.0010  
Z -0.0131 0.0023 0.0169 0.0080 0.0145 -0.0101  
AT. 149 O X -0.0001 0.0002 -0.0002 -0.0001 -0.0000 0.0001  
Y 0.0001 -0.0000 0.0002 -0.0001 0.0001 0.0000  
Z 0.0005 0.0004 0.0004 -0.0004 0.0003 -0.0002  
AT. 150 O X -0.0001 -0.0002 0.0002 0.0001 -0.0000 0.0001  
Y -0.0001 -0.0000 0.0002 -0.0001 -0.0001 -0.0000  
Z 0.0005 -0.0004 -0.0004 0.0004 0.0003 -0.0002  
AT. 151 O X 0.0001 -0.0002 0.0002 -0.0001 -0.0000 -0.0001  
Y -0.0001 0.0000 -0.0002 -0.0001 0.0001 -0.0000  
Z -0.0005 -0.0004 -0.0004 -0.0004 0.0003 0.0002  
AT. 152 O X 0.0001 0.0002 -0.0002 0.0001 -0.0000 -0.0001  
Y 0.0001 0.0000 -0.0002 -0.0001 -0.0001 0.0000  
Z -0.0005 0.0004 0.0004 0.0004 0.0003 0.0002  
AT. 153 H X 0.0052 0.0038 0.0032 -0.0032 0.0032 -0.0029  
Y -0.0068 -0.0084 -0.0042 0.0057 -0.0059 0.0007  
Z -0.0051 -0.0048 -0.0032 0.0038 -0.0037 0.0018

AT. 154 H X 0.0052 -0.0038 -0.0032 0.0032 0.0032 -0.0029  
Y 0.0068 -0.0084 -0.0042 0.0057 0.0059 -0.0007  
Z -0.0051 0.0048 0.0032 -0.0038 -0.0037 0.0018

AT. 155 H X -0.0052 -0.0038 -0.0032 -0.0032 0.0032 0.0029  
Y 0.0068 0.0084 0.0042 0.0057 -0.0059 -0.0007  
Z 0.0051 0.0048 0.0032 0.0038 -0.0037 -0.0018

AT. 156 H X -0.0052 0.0038 0.0032 0.0032 0.0032 0.0029  
Y -0.0068 0.0084 0.0042 0.0057 0.0059 0.0007  
Z 0.0051 -0.0048 -0.0032 -0.0038 -0.0037 -0.0018

AT. 157 O X 0.0002 -0.0001 -0.0000 -0.0001 0.0002 0.0003  
Y -0.0008 -0.0007 -0.0014 -0.0001 -0.0018 -0.0014  
Z 0.0001 0.0000 0.0000 -0.0001 -0.0002 -0.0006

AT. 158 O X 0.0002 0.0001 0.0000 0.0001 0.0002 0.0003  
Y 0.0008 -0.0007 -0.0014 -0.0001 0.0018 0.0014  
Z 0.0001 -0.0000 -0.0000 0.0001 -0.0002 -0.0006

AT. 159 O X -0.0002 0.0001 0.0000 -0.0001 0.0002 -0.0003  
Y 0.0008 0.0007 0.0014 -0.0001 -0.0018 0.0014  
Z -0.0001 -0.0000 -0.0000 -0.0001 -0.0002 0.0006

AT. 160 O X -0.0002 -0.0001 -0.0000 0.0001 0.0002 -0.0003  
Y -0.0008 0.0007 0.0014 -0.0001 0.0018 -0.0014  
Z -0.0001 0.0000 0.0000 0.0001 -0.0002 0.0006

AT. 161 O X -0.0008 -0.0005 -0.0012 0.0000 -0.0016 -0.0014  
Y 0.0004 0.0002 0.0005 -0.0001 0.0007 0.0006  
Z -0.0007 -0.0006 -0.0010 -0.0001 -0.0014 -0.0011

AT. 162 O X -0.0008 0.0005 0.0012 -0.0000 -0.0016 -0.0014  
Y -0.0004 0.0002 0.0005 -0.0001 -0.0007 -0.0006  
Z -0.0007 0.0006 0.0010 0.0001 -0.0014 -0.0011

AT. 163 O X 0.0008 0.0005 0.0012 0.0000 -0.0016 0.0014  
Y -0.0004 -0.0002 -0.0005 -0.0001 0.0007 -0.0006  
Z 0.0007 0.0006 0.0010 -0.0001 -0.0014 0.0011

AT. 164 O X 0.0008 -0.0005 -0.0012 -0.0000 -0.0016 0.0014  
Y 0.0004 -0.0002 -0.0005 -0.0001 -0.0007 0.0006

Z 0.0007 -0.0006 -0.0010 0.0001 -0.0014 0.0011  
AT.165 H X 0.0100 0.0067 0.0163 -0.0007 0.0223 0.0182  
Y 0.0064 0.0047 0.0108 -0.0002 0.0145 0.0115  
Z 0.0151 0.0131 0.0241 0.0025 0.0318 0.0259  
AT.166 H X 0.0100 -0.0067 -0.0163 0.0007 0.0223 0.0182  
Y -0.0064 0.0047 0.0108 -0.0002 -0.0145 -0.0115  
Z 0.0151 -0.0131 -0.0241 -0.0025 0.0318 0.0259  
AT.167 H X -0.0100 -0.0067 -0.0163 -0.0007 0.0223 -0.0182  
Y -0.0064 -0.0047 -0.0108 -0.0002 0.0145 -0.0115  
Z -0.0151 -0.0131 -0.0241 0.0025 0.0318 -0.0259  
AT.168 H X -0.0100 0.0067 0.0163 0.0007 0.0223 -0.0182  
Y 0.0064 -0.0047 -0.0108 -0.0002 -0.0145 0.0115  
Z -0.0151 0.0131 0.0241 -0.0025 0.0318 -0.0259  
AT.169 O X -0.0000 -0.0001 0.0000 -0.0003 -0.0001 0.0000  
Y 0.0006 0.0001 0.0005 0.0002 0.0001 -0.0003  
Z -0.0000 -0.0001 0.0000 -0.0010 -0.0004 -0.0000  
AT.170 O X -0.0000 0.0001 -0.0000 0.0003 -0.0001 0.0000  
Y -0.0006 0.0001 0.0005 0.0002 -0.0001 0.0003  
Z -0.0000 0.0001 -0.0000 0.0010 -0.0004 -0.0000  
AT.171 O X 0.0000 0.0001 -0.0000 -0.0003 -0.0001 -0.0000  
Y -0.0006 -0.0001 -0.0005 0.0002 0.0001 0.0003  
Z 0.0000 0.0001 -0.0000 -0.0010 -0.0004 0.0000  
AT.172 O X 0.0000 -0.0001 0.0000 0.0003 -0.0001 -0.0000  
Y 0.0006 -0.0001 -0.0005 0.0002 -0.0001 -0.0003  
Z 0.0000 -0.0001 0.0000 0.0010 -0.0004 0.0000  
AT.173 H X 0.0024 -0.0013 0.0017 0.0062 0.0010 -0.0020  
Y -0.0017 0.0008 -0.0015 -0.0049 -0.0012 0.0013  
Z 0.0040 0.0013 0.0032 0.0196 0.0092 -0.0008  
AT.174 H X 0.0024 0.0013 -0.0017 -0.0062 0.0010 -0.0020  
Y 0.0017 0.0008 -0.0015 -0.0049 0.0012 -0.0013  
Z 0.0040 -0.0013 -0.0032 -0.0196 0.0092 -0.0008  
AT.175 H X -0.0024 0.0013 -0.0017 0.0062 0.0010 0.0020

Y 0.0017 -0.0008 0.0015 -0.0049 -0.0012 -0.0013  
Z -0.0040 -0.0013 -0.0032 0.0196 0.0092 0.0008  
AT. 176 H X -0.0024 -0.0013 0.0017 -0.0062 0.0010 0.0020  
Y -0.0017 -0.0008 0.0015 -0.0049 0.0012 0.0013  
Z -0.0040 0.0013 0.0032 -0.0196 0.0092 0.0008

FREQ(CM\*\*-1) 1525.41 1526.08 1526.89 1527.74 1528.12 1528.35

AT. 1 I X -0.0000 0.0000 -0.0000 0.0000 0.0000 -0.0000  
Y 0.0000 -0.0000 0.0000 0.0000 -0.0000 0.0000  
Z 0.0000 -0.0000 -0.0000 0.0000 -0.0000 -0.0000

AT. 2 I X 0.0000 -0.0000 -0.0000 -0.0000 -0.0000 -0.0000  
Y 0.0000 -0.0000 -0.0000 0.0000 -0.0000 -0.0000  
Z -0.0000 0.0000 -0.0000 -0.0000 0.0000 -0.0000

AT. 3 I X 0.0000 0.0000 -0.0000 -0.0000 0.0000 -0.0000  
Y -0.0000 -0.0000 0.0000 -0.0000 -0.0000 0.0000  
Z -0.0000 -0.0000 -0.0000 -0.0000 -0.0000 -0.0000

AT. 4 I X -0.0000 -0.0000 -0.0000 0.0000 -0.0000 -0.0000  
Y -0.0000 -0.0000 -0.0000 -0.0000 -0.0000 -0.0000  
Z 0.0000 0.0000 -0.0000 0.0000 0.0000 -0.0000

AT. 5 I X 0.0000 -0.0000 0.0000 -0.0000 0.0000 -0.0000  
Y -0.0000 -0.0000 -0.0000 0.0000 -0.0000 0.0000  
Z -0.0000 0.0000 -0.0000 0.0000 0.0000 -0.0000

AT. 6 I X -0.0000 0.0000 0.0000 0.0000 -0.0000 -0.0000  
Y -0.0000 -0.0000 0.0000 0.0000 -0.0000 -0.0000  
Z 0.0000 -0.0000 -0.0000 -0.0000 -0.0000 -0.0000

AT. 7 I X -0.0000 -0.0000 0.0000 0.0000 0.0000 -0.0000  
Y 0.0000 -0.0000 -0.0000 -0.0000 -0.0000 0.0000  
Z 0.0000 0.0000 -0.0000 -0.0000 0.0000 -0.0000

AT. 8 I X 0.0000 0.0000 0.0000 -0.0000 -0.0000 -0.0000  
Y 0.0000 -0.0000 0.0000 -0.0000 -0.0000 -0.0000  
Z -0.0000 -0.0000 -0.0000 0.0000 -0.0000 -0.0000



AT. 9 N X -0.0003 -0.0005 0.0007 0.0003 -0.0007 0.0003  
Y -0.0027 -0.0002 0.0015 -0.0008 0.0004 -0.0003  
Z 0.0002 -0.0001 0.0007 0.0001 -0.0002 -0.0001

AT. 10 N X 0.0003 0.0005 0.0007 -0.0003 0.0007 0.0003  
Y -0.0027 -0.0002 -0.0015 -0.0008 0.0004 0.0003  
Z -0.0002 0.0001 0.0007 -0.0001 0.0002 -0.0001

AT. 11 N X 0.0003 -0.0005 0.0007 -0.0003 -0.0007 0.0003  
Y 0.0027 -0.0002 0.0015 0.0008 0.0004 -0.0003  
Z -0.0002 -0.0001 0.0007 -0.0001 -0.0002 -0.0001

AT. 12 N X -0.0003 0.0005 0.0007 0.0003 0.0007 0.0003  
Y 0.0027 -0.0002 -0.0015 0.0008 0.0004 0.0003  
Z 0.0002 0.0001 0.0007 0.0001 0.0002 -0.0001

AT. 13 N X -0.0004 0.0013 0.0000 0.0009 -0.0002 0.0009  
Y -0.0005 0.0024 0.0042 0.0055 -0.0039 0.0045  
Z -0.0001 -0.0007 -0.0007 0.0001 -0.0003 0.0009

AT. 14 N X 0.0004 -0.0013 0.0000 -0.0009 0.0002 0.0009  
Y -0.0005 0.0024 -0.0042 0.0055 -0.0039 -0.0045  
Z 0.0001 0.0007 -0.0007 -0.0001 0.0003 0.0009

AT. 15 N X 0.0004 0.0013 0.0000 -0.0009 -0.0002 0.0009  
Y 0.0005 0.0024 0.0042 -0.0055 -0.0039 0.0045  
Z 0.0001 -0.0007 -0.0007 -0.0001 -0.0003 0.0009

AT. 16 N X -0.0004 -0.0013 0.0000 0.0009 0.0002 0.0009  
Y 0.0005 0.0024 -0.0042 -0.0055 -0.0039 -0.0045  
Z -0.0001 0.0007 -0.0007 0.0001 0.0003 0.0009

AT. 17 O X 0.0007 -0.0002 -0.0002 -0.0000 -0.0004 0.0003  
Y 0.0006 -0.0002 -0.0004 -0.0004 -0.0005 0.0003  
Z 0.0020 -0.0002 -0.0003 -0.0006 -0.0014 0.0013

AT. 18 O X -0.0007 0.0002 -0.0002 0.0000 0.0004 0.0003  
Y 0.0006 -0.0002 0.0004 -0.0004 -0.0005 -0.0003  
Z -0.0020 0.0002 -0.0003 0.0006 0.0014 0.0013

AT. 19 O X -0.0007 -0.0002 -0.0002 0.0000 -0.0004 0.0003  
Y -0.0006 -0.0002 -0.0004 0.0004 -0.0005 0.0003

Z -0.0020 -0.0002 -0.0003 0.0006 -0.0014 0.0013  
AT. 20 O X 0.0007 0.0002 -0.0002 -0.0000 0.0004 0.0003  
Y -0.0006 -0.0002 0.0004 0.0004 -0.0005 -0.0003  
Z 0.0020 0.0002 -0.0003 -0.0006 0.0014 0.0013  
AT. 21 O X -0.0001 0.0002 0.0000 0.0003 -0.0002 0.0003  
Y 0.0010 -0.0016 -0.0002 -0.0012 0.0006 -0.0013  
Z -0.0017 0.0024 0.0005 0.0024 -0.0016 0.0028  
AT. 22 O X 0.0001 -0.0002 0.0000 -0.0003 0.0002 0.0003  
Y 0.0010 -0.0016 0.0002 -0.0012 0.0006 0.0013  
Z 0.0017 -0.0024 0.0005 -0.0024 0.0016 0.0028  
AT. 23 O X 0.0001 0.0002 0.0000 -0.0003 -0.0002 0.0003  
Y -0.0010 -0.0016 -0.0002 0.0012 0.0006 -0.0013  
Z 0.0017 0.0024 0.0005 -0.0024 -0.0016 0.0028  
AT. 24 O X -0.0001 -0.0002 0.0000 0.0003 0.0002 0.0003  
Y -0.0010 -0.0016 0.0002 0.0012 0.0006 0.0013  
Z -0.0017 -0.0024 0.0005 0.0024 0.0016 0.0028  
AT. 25 C X -0.0007 0.0001 -0.0001 -0.0000 0.0005 -0.0003  
Y 0.0010 -0.0004 0.0005 -0.0004 -0.0011 0.0008  
Z -0.0004 0.0003 -0.0005 0.0002 0.0006 -0.0003  
AT. 26 C X 0.0007 -0.0001 -0.0001 0.0000 -0.0005 -0.0003  
Y 0.0010 -0.0004 -0.0005 -0.0004 -0.0011 -0.0008  
Z 0.0004 -0.0003 -0.0005 -0.0002 -0.0006 -0.0003  
AT. 27 C X 0.0007 0.0001 -0.0001 0.0000 0.0005 -0.0003  
Y -0.0010 -0.0004 0.0005 0.0004 -0.0011 0.0008  
Z 0.0004 0.0003 -0.0005 -0.0002 0.0006 -0.0003  
AT. 28 C X -0.0007 -0.0001 -0.0001 -0.0000 -0.0005 -0.0003  
Y -0.0010 -0.0004 -0.0005 0.0004 -0.0011 -0.0008  
Z -0.0004 -0.0003 -0.0005 0.0002 -0.0006 -0.0003  
AT. 29 H X 0.0003 0.0001 0.0001 0.0000 0.0003 0.0001  
Y -0.0186 0.0044 -0.0021 0.0022 0.0147 -0.0108  
Z 0.0020 -0.0007 -0.0002 -0.0004 -0.0021 0.0012  
AT. 30 H X -0.0003 -0.0001 0.0001 -0.0000 -0.0003 0.0001

Y -0.0186 0.0044 0.0021 0.0022 0.0147 0.0108  
Z -0.0020 0.0007 -0.0002 0.0004 0.0021 0.0012  
AT. 31 H X -0.0003 0.0001 0.0001 -0.0000 0.0003 0.0001  
Y 0.0186 0.0044 -0.0021 -0.0022 0.0147 -0.0108  
Z -0.0020 -0.0007 -0.0002 0.0004 -0.0021 0.0012  
AT. 32 H X 0.0003 -0.0001 0.0001 0.0000 -0.0003 0.0001  
Y 0.0186 0.0044 0.0021 -0.0022 0.0147 0.0108  
Z 0.0020 0.0007 -0.0002 -0.0004 0.0021 0.0012  
AT. 33 H X 0.0116 -0.0027 0.0017 -0.0017 -0.0093 0.0066  
Y -0.0042 0.0007 -0.0003 0.0001 0.0029 -0.0021  
Z 0.0105 -0.0017 0.0018 -0.0005 -0.0080 0.0060  
AT. 34 H X -0.0116 0.0027 0.0017 0.0017 0.0093 0.0066  
Y -0.0042 0.0007 0.0003 0.0001 0.0029 0.0021  
Z -0.0105 0.0017 0.0018 0.0005 0.0080 0.0060  
AT. 35 H X -0.0116 -0.0027 0.0017 0.0017 -0.0093 0.0066  
Y 0.0042 0.0007 -0.0003 -0.0001 0.0029 -0.0021  
Z -0.0105 -0.0017 0.0018 0.0005 -0.0080 0.0060  
AT. 36 H X 0.0116 0.0027 0.0017 -0.0017 0.0093 0.0066  
Y 0.0042 0.0007 0.0003 -0.0001 0.0029 0.0021  
Z 0.0105 0.0017 0.0018 -0.0005 0.0080 0.0060  
AT. 37 C X -0.0006 0.0004 -0.0002 0.0006 0.0008 -0.0006  
Y 0.0021 0.0005 -0.0011 0.0015 0.0000 0.0002  
Z -0.0039 0.0003 0.0012 0.0006 0.0023 -0.0021  
AT. 38 C X 0.0006 -0.0004 -0.0002 -0.0006 -0.0008 -0.0006  
Y 0.0021 0.0005 0.0011 0.0015 0.0000 -0.0002  
Z 0.0039 -0.0003 0.0012 -0.0006 -0.0023 -0.0021  
AT. 39 C X 0.0006 0.0004 -0.0002 -0.0006 0.0008 -0.0006  
Y -0.0021 0.0005 -0.0011 -0.0015 0.0000 0.0002  
Z 0.0039 0.0003 0.0012 -0.0006 0.0023 -0.0021  
AT. 40 C X -0.0006 -0.0004 -0.0002 0.0006 -0.0008 -0.0006  
Y -0.0021 0.0005 0.0011 -0.0015 0.0000 -0.0002  
Z -0.0039 -0.0003 0.0012 0.0006 -0.0023 -0.0021

AT. 41 C X 0.0008 0.0002 0.0004 0.0001 -0.0002 -0.0003  
Y -0.0001 0.0007 -0.0000 -0.0000 0.0006 -0.0002  
Z -0.0044 0.0012 0.0012 -0.0009 0.0024 -0.0015

AT. 42 C X -0.0008 -0.0002 0.0004 -0.0001 0.0002 -0.0003  
Y -0.0001 0.0007 0.0000 -0.0000 0.0006 0.0002  
Z 0.0044 -0.0012 0.0012 0.0009 -0.0024 -0.0015

AT. 43 C X -0.0008 0.0002 0.0004 -0.0001 -0.0002 -0.0003  
Y 0.0001 0.0007 -0.0000 0.0000 0.0006 -0.0002  
Z 0.0044 0.0012 0.0012 0.0009 0.0024 -0.0015

AT. 44 C X 0.0008 -0.0002 0.0004 0.0001 0.0002 -0.0003  
Y 0.0001 0.0007 0.0000 0.0000 0.0006 0.0002  
Z -0.0044 -0.0012 0.0012 -0.0009 -0.0024 -0.0015

AT. 45 H X -0.0098 0.0063 -0.0028 -0.0016 0.0091 -0.0009  
Y 0.0261 -0.0062 -0.0104 0.0041 -0.0144 0.0119  
Z 0.0205 -0.0058 -0.0078 0.0030 -0.0122 0.0096

AT. 46 H X 0.0098 -0.0063 -0.0028 0.0016 -0.0091 -0.0009  
Y 0.0261 -0.0062 0.0104 0.0041 -0.0144 -0.0119  
Z -0.0205 0.0058 -0.0078 -0.0030 0.0122 0.0096

AT. 47 H X 0.0098 0.0063 -0.0028 0.0016 0.0091 -0.0009  
Y -0.0261 -0.0062 -0.0104 -0.0041 -0.0144 0.0119  
Z -0.0205 -0.0058 -0.0078 -0.0030 -0.0122 0.0096

AT. 48 H X -0.0098 -0.0063 -0.0028 -0.0016 -0.0091 -0.0009  
Y -0.0261 -0.0062 0.0104 -0.0041 -0.0144 -0.0119  
Z 0.0205 0.0058 -0.0078 0.0030 0.0122 0.0096

AT. 49 H X 0.0021 -0.0028 -0.0003 0.0008 -0.0030 -0.0007  
Y -0.0122 0.0019 0.0032 -0.0020 0.0057 -0.0055  
Z 0.0318 -0.0104 -0.0093 0.0058 -0.0193 0.0114

AT. 50 H X -0.0021 0.0028 -0.0003 -0.0008 0.0030 -0.0007  
Y -0.0122 0.0019 -0.0032 -0.0020 0.0057 0.0055  
Z -0.0318 0.0104 -0.0093 -0.0058 0.0193 0.0114

AT. 51 H X -0.0021 -0.0028 -0.0003 -0.0008 -0.0030 -0.0007  
Y 0.0122 0.0019 0.0032 0.0020 0.0057 -0.0055

Z -0.0318 -0.0104 -0.0093 -0.0058 -0.0193 0.0114  
AT. 52 H X 0.0021 0.0028 -0.0003 0.0008 0.0030 -0.0007  
Y 0.0122 0.0019 -0.0032 0.0020 0.0057 0.0055  
Z 0.0318 0.0104 -0.0093 0.0058 0.0193 0.0114  
AT. 53 C X -0.0002 -0.0009 -0.0021 -0.0006 0.0002 0.0017  
Y -0.0028 -0.0019 0.0030 -0.0006 -0.0009 -0.0014  
Z 0.0023 0.0012 -0.0031 0.0003 0.0004 0.0012  
AT. 54 C X 0.0002 0.0009 -0.0021 0.0006 -0.0002 0.0017  
Y -0.0028 -0.0019 -0.0030 -0.0006 -0.0009 0.0014  
Z -0.0023 -0.0012 -0.0031 -0.0003 -0.0004 0.0012  
AT. 55 C X 0.0002 -0.0009 -0.0021 0.0006 0.0002 0.0017  
Y 0.0028 -0.0019 0.0030 0.0006 -0.0009 -0.0014  
Z -0.0023 0.0012 -0.0031 -0.0003 0.0004 0.0012  
AT. 56 C X -0.0002 0.0009 -0.0021 -0.0006 -0.0002 0.0017  
Y 0.0028 -0.0019 -0.0030 0.0006 -0.0009 0.0014  
Z 0.0023 -0.0012 -0.0031 0.0003 -0.0004 0.0012  
AT. 57 C X 0.0000 -0.0007 -0.0024 -0.0002 0.0004 0.0024  
Y -0.0036 -0.0014 0.0033 -0.0011 -0.0007 -0.0018  
Z 0.0016 0.0004 -0.0017 0.0003 0.0002 0.0006  
AT. 58 C X -0.0000 0.0007 -0.0024 0.0002 -0.0004 0.0024  
Y -0.0036 -0.0014 -0.0033 -0.0011 -0.0007 0.0018  
Z -0.0016 -0.0004 -0.0017 -0.0003 -0.0002 0.0006  
AT. 59 C X -0.0000 -0.0007 -0.0024 0.0002 0.0004 0.0024  
Y 0.0036 -0.0014 0.0033 0.0011 -0.0007 -0.0018  
Z -0.0016 0.0004 -0.0017 -0.0003 0.0002 0.0006  
AT. 60 C X 0.0000 0.0007 -0.0024 -0.0002 -0.0004 0.0024  
Y 0.0036 -0.0014 -0.0033 0.0011 -0.0007 0.0018  
Z 0.0016 -0.0004 -0.0017 0.0003 -0.0002 0.0006  
AT. 61 H X 0.0418 0.0194 -0.0306 0.0118 0.0066 0.0095  
Y 0.0293 0.0149 -0.0169 0.0084 0.0037 0.0013  
Z -0.0038 -0.0056 -0.0155 -0.0027 0.0031 0.0192  
AT. 62 H X -0.0418 -0.0194 -0.0306 -0.0118 -0.0066 0.0095

Y 0.0293 0.0149 0.0169 0.0084 0.0037 -0.0013  
Z 0.0038 0.0056 -0.0155 0.0027 -0.0031 0.0192  
AT. 63 H X -0.0418 0.0194 -0.0306 -0.0118 0.0066 0.0095  
Y -0.0293 0.0149 -0.0169 -0.0084 0.0037 0.0013  
Z 0.0038 -0.0056 -0.0155 0.0027 0.0031 0.0192  
AT. 64 H X 0.0418 -0.0194 -0.0306 0.0118 -0.0066 0.0095  
Y -0.0293 0.0149 0.0169 -0.0084 0.0037 -0.0013  
Z -0.0038 0.0056 -0.0155 -0.0027 -0.0031 0.0192  
AT. 65 H X -0.0186 -0.0077 0.0166 -0.0050 -0.0034 -0.0072  
Y 0.0550 0.0215 -0.0547 0.0143 0.0111 0.0268  
Z -0.0061 0.0049 0.0315 0.0019 -0.0054 -0.0252  
AT. 66 H X 0.0186 0.0077 0.0166 0.0050 0.0034 -0.0072  
Y 0.0550 0.0215 0.0547 0.0143 0.0111 -0.0268  
Z 0.0061 -0.0049 0.0315 -0.0019 0.0054 -0.0252  
AT. 67 H X 0.0186 -0.0077 0.0166 0.0050 -0.0034 -0.0072  
Y -0.0550 0.0215 -0.0547 -0.0143 0.0111 0.0268  
Z 0.0061 0.0049 0.0315 -0.0019 -0.0054 -0.0252  
AT. 68 H X -0.0186 0.0077 0.0166 -0.0050 0.0034 -0.0072  
Y -0.0550 0.0215 0.0547 -0.0143 0.0111 -0.0268  
Z -0.0061 -0.0049 0.0315 0.0019 0.0054 -0.0252  
AT. 69 H X -0.0194 0.0005 0.0504 -0.0017 -0.0096 -0.0396  
Y -0.0243 -0.0126 0.0142 -0.0060 -0.0025 0.0015  
Z -0.0215 -0.0096 0.0189 -0.0045 -0.0035 -0.0048  
AT. 70 H X 0.0194 -0.0005 0.0504 0.0017 0.0096 -0.0396  
Y -0.0243 -0.0126 -0.0142 -0.0060 -0.0025 -0.0015  
Z 0.0215 0.0096 0.0189 0.0045 0.0035 -0.0048  
AT. 71 H X 0.0194 0.0005 0.0504 0.0017 -0.0096 -0.0396  
Y 0.0243 -0.0126 0.0142 0.0060 -0.0025 0.0015  
Z 0.0215 -0.0096 0.0189 0.0045 -0.0035 -0.0048  
AT. 72 H X -0.0194 -0.0005 0.0504 -0.0017 0.0096 -0.0396  
Y 0.0243 -0.0126 -0.0142 0.0060 -0.0025 -0.0015  
Z -0.0215 0.0096 0.0189 -0.0045 0.0035 -0.0048

AT. 73 C X 0.0002 0.0006 0.0002 0.0008 -0.0003 0.0004  
Y 0.0004 0.0011 -0.0020 -0.0014 0.0019 -0.0007  
Z -0.0006 -0.0005 0.0018 -0.0001 0.0002 -0.0016

AT. 74 C X -0.0002 -0.0006 0.0002 -0.0008 0.0003 0.0004  
Y 0.0004 0.0011 0.0020 -0.0014 0.0019 0.0007  
Z 0.0006 0.0005 0.0018 0.0001 -0.0002 -0.0016

AT. 75 C X -0.0002 0.0006 0.0002 -0.0008 -0.0003 0.0004  
Y -0.0004 0.0011 -0.0020 0.0014 0.0019 -0.0007  
Z 0.0006 -0.0005 0.0018 0.0001 0.0002 -0.0016

AT. 76 C X 0.0002 -0.0006 0.0002 0.0008 0.0003 0.0004  
Y -0.0004 0.0011 0.0020 0.0014 0.0019 0.0007  
Z -0.0006 0.0005 0.0018 -0.0001 -0.0002 -0.0016

AT. 77 C X 0.0035 -0.0024 0.0002 0.0004 -0.0002 -0.0005  
Y 0.0002 0.0001 -0.0005 -0.0009 0.0011 -0.0008  
Z 0.0020 -0.0014 0.0006 0.0013 -0.0008 -0.0001

AT. 78 C X -0.0035 0.0024 0.0002 -0.0004 0.0002 -0.0005  
Y 0.0002 0.0001 0.0005 -0.0009 0.0011 0.0008  
Z -0.0020 0.0014 0.0006 -0.0013 0.0008 -0.0001

AT. 79 C X -0.0035 -0.0024 0.0002 -0.0004 -0.0002 -0.0005  
Y -0.0002 0.0001 -0.0005 0.0009 0.0011 -0.0008  
Z -0.0020 -0.0014 0.0006 -0.0013 -0.0008 -0.0001

AT. 80 C X 0.0035 0.0024 0.0002 0.0004 0.0002 -0.0005  
Y -0.0002 0.0001 0.0005 0.0009 0.0011 0.0008  
Z 0.0020 0.0014 0.0006 0.0013 0.0008 -0.0001

AT. 81 H X -0.0138 0.0077 -0.0060 -0.0061 0.0047 0.0005  
Y -0.0161 0.0093 -0.0063 -0.0059 0.0046 0.0011  
Z -0.0272 0.0172 -0.0077 -0.0183 0.0151 -0.0048

AT. 82 H X 0.0138 -0.0077 -0.0060 0.0061 -0.0047 0.0005  
Y -0.0161 0.0093 0.0063 -0.0059 0.0046 -0.0011  
Z 0.0272 -0.0172 -0.0077 0.0183 -0.0151 -0.0048

AT. 83 H X 0.0138 0.0077 -0.0060 0.0061 0.0047 0.0005  
Y 0.0161 0.0093 -0.0063 0.0059 0.0046 0.0011

Z 0.0272 0.0172 -0.0077 0.0183 0.0151 -0.0048  
AT. 84 H X -0.0138 -0.0077 -0.0060 -0.0061 -0.0047 0.0005  
Y 0.0161 0.0093 0.0063 0.0059 0.0046 -0.0011  
Z -0.0272 -0.0172 -0.0077 -0.0183 -0.0151 -0.0048  
AT. 85 H X -0.0311 0.0195 -0.0099 -0.0187 0.0168 -0.0064  
Y 0.0172 -0.0115 0.0077 0.0098 -0.0078 0.0002  
Z -0.0032 0.0023 -0.0037 -0.0027 0.0021 0.0006  
AT. 86 H X 0.0311 -0.0195 -0.0099 0.0187 -0.0168 -0.0064  
Y 0.0172 -0.0115 -0.0077 0.0098 -0.0078 -0.0002  
Z 0.0032 -0.0023 -0.0037 0.0027 -0.0021 0.0006  
AT. 87 H X 0.0311 0.0195 -0.0099 0.0187 0.0168 -0.0064  
Y -0.0172 -0.0115 0.0077 -0.0098 -0.0078 0.0002  
Z 0.0032 0.0023 -0.0037 0.0027 0.0021 0.0006  
AT. 88 H X -0.0311 -0.0195 -0.0099 -0.0187 -0.0168 -0.0064  
Y -0.0172 -0.0115 -0.0077 -0.0098 -0.0078 -0.0002  
Z -0.0032 -0.0023 -0.0037 -0.0027 -0.0021 0.0006  
AT. 89 C X -0.0001 0.0010 0.0031 0.0040 -0.0038 0.0022  
Y -0.0010 -0.0005 0.0009 0.0025 -0.0033 0.0031  
Z -0.0001 -0.0003 0.0002 0.0016 -0.0022 0.0027  
AT. 90 C X 0.0001 -0.0010 0.0031 -0.0040 0.0038 0.0022  
Y -0.0010 -0.0005 -0.0009 0.0025 -0.0033 -0.0031  
Z 0.0001 0.0003 0.0002 -0.0016 0.0022 0.0027  
AT. 91 C X 0.0001 0.0010 0.0031 -0.0040 -0.0038 0.0022  
Y 0.0010 -0.0005 0.0009 -0.0025 -0.0033 0.0031  
Z 0.0001 -0.0003 0.0002 -0.0016 -0.0022 0.0027  
AT. 92 C X -0.0001 -0.0010 0.0031 0.0040 0.0038 0.0022  
Y 0.0010 -0.0005 -0.0009 -0.0025 -0.0033 -0.0031  
Z -0.0001 0.0003 0.0002 0.0016 0.0022 0.0027  
AT. 93 C X 0.0007 0.0008 0.0035 0.0048 -0.0041 0.0023  
Y -0.0018 -0.0001 0.0004 0.0027 -0.0037 0.0043  
Z -0.0002 -0.0003 0.0006 0.0016 -0.0019 0.0018  
AT. 94 C X -0.0007 -0.0008 0.0035 -0.0048 0.0041 0.0023



Y -0.0018 -0.0001 -0.0004 0.0027 -0.0037 -0.0043  
Z 0.0002 0.0003 0.0006 -0.0016 0.0019 0.0018  
AT. 95 C X -0.0007 0.0008 0.0035 -0.0048 -0.0041 0.0023  
Y 0.0018 -0.0001 0.0004 -0.0027 -0.0037 0.0043  
Z 0.0002 -0.0003 0.0006 -0.0016 -0.0019 0.0018  
AT. 96 C X 0.0007 -0.0008 0.0035 0.0048 0.0041 0.0023  
Y 0.0018 -0.0001 -0.0004 -0.0027 -0.0037 -0.0043  
Z -0.0002 0.0003 0.0006 0.0016 0.0019 0.0018  
AT. 97 H X -0.0096 0.0016 0.0139 0.0295 -0.0345 0.0322  
Y 0.0213 0.0030 -0.0079 -0.0344 0.0486 -0.0545  
Z 0.0086 0.0092 0.0245 0.0219 -0.0121 -0.0040  
AT. 98 H X 0.0096 -0.0016 0.0139 -0.0295 0.0345 0.0322  
Y 0.0213 0.0030 0.0079 -0.0344 0.0486 0.0545  
Z -0.0086 -0.0092 0.0245 -0.0219 0.0121 -0.0040  
AT. 99 H X 0.0096 0.0016 0.0139 -0.0295 -0.0345 0.0322  
Y -0.0213 0.0030 -0.0079 0.0344 0.0486 -0.0545  
Z -0.0086 0.0092 0.0245 -0.0219 -0.0121 -0.0040  
AT. 100 H X -0.0096 -0.0016 0.0139 0.0295 0.0345 0.0322  
Y -0.0213 0.0030 0.0079 0.0344 0.0486 0.0545  
Z 0.0086 -0.0092 0.0245 0.0219 0.0121 -0.0040  
AT. 101 H X 0.0113 -0.0025 -0.0263 -0.0519 0.0577 -0.0513  
Y 0.0121 -0.0021 -0.0246 -0.0503 0.0566 -0.0513  
Z -0.0112 -0.0068 -0.0355 -0.0423 0.0338 -0.0132  
AT. 102 H X -0.0113 0.0025 -0.0263 0.0519 -0.0577 -0.0513  
Y 0.0121 -0.0021 0.0246 -0.0503 0.0566 0.0513  
Z 0.0112 0.0068 -0.0355 0.0423 -0.0338 -0.0132  
AT. 103 H X -0.0113 -0.0025 -0.0263 0.0519 0.0577 -0.0513  
Y -0.0121 -0.0021 -0.0246 0.0503 0.0566 -0.0513  
Z 0.0112 -0.0068 -0.0355 0.0423 0.0338 -0.0132  
AT. 104 H X 0.0113 0.0025 -0.0263 -0.0519 -0.0577 -0.0513  
Y -0.0121 -0.0021 0.0246 0.0503 0.0566 0.0513  
Z -0.0112 0.0068 -0.0355 -0.0423 -0.0338 -0.0132

AT.105 H X -0.0112 -0.0115 -0.0464 -0.0565 0.0451 -0.0194  
Y -0.0053 -0.0001 0.0208 0.0390 -0.0432 0.0370  
Z 0.0073 0.0038 0.0008 -0.0077 0.0143 -0.0183

AT.106 H X 0.0112 0.0115 -0.0464 0.0565 -0.0451 -0.0194  
Y -0.0053 -0.0001 -0.0208 0.0390 -0.0432 -0.0370  
Z -0.0073 -0.0038 0.0008 0.0077 -0.0143 -0.0183

AT.107 H X 0.0112 -0.0115 -0.0464 0.0565 0.0451 -0.0194  
Y 0.0053 -0.0001 0.0208 -0.0390 -0.0432 0.0370  
Z -0.0073 0.0038 0.0008 0.0077 0.0143 -0.0183

AT.108 H X -0.0112 0.0115 -0.0464 -0.0565 -0.0451 -0.0194  
Y 0.0053 -0.0001 -0.0208 -0.0390 -0.0432 -0.0370  
Z 0.0073 -0.0038 0.0008 -0.0077 -0.0143 -0.0183

AT.109 C X -0.0013 0.0003 -0.0024 -0.0000 0.0002 0.0013  
Y 0.0007 0.0003 -0.0007 -0.0007 0.0009 -0.0008  
Z -0.0007 0.0005 -0.0009 -0.0000 0.0003 0.0005

AT.110 C X 0.0013 -0.0003 -0.0024 0.0000 -0.0002 0.0013  
Y 0.0007 0.0003 0.0007 -0.0007 0.0009 0.0008  
Z 0.0007 -0.0005 -0.0009 0.0000 -0.0003 0.0005

AT.111 C X 0.0013 0.0003 -0.0024 0.0000 0.0002 0.0013  
Y -0.0007 0.0003 -0.0007 0.0007 0.0009 -0.0008  
Z 0.0007 0.0005 -0.0009 0.0000 0.0003 0.0005

AT.112 C X -0.0013 -0.0003 -0.0024 -0.0000 -0.0002 0.0013  
Y -0.0007 0.0003 0.0007 0.0007 0.0009 0.0008  
Z -0.0007 -0.0005 -0.0009 -0.0000 -0.0003 0.0005

AT.113 H X 0.0048 0.0013 0.0108 0.0009 -0.0004 -0.0067  
Y -0.0084 -0.0030 -0.0173 -0.0035 0.0016 0.0084  
Z 0.0056 -0.0086 0.0180 -0.0073 0.0011 -0.0184

AT.114 H X -0.0048 -0.0013 0.0108 -0.0009 0.0004 -0.0067  
Y -0.0084 -0.0030 0.0173 -0.0035 0.0016 -0.0084  
Z -0.0056 0.0086 0.0180 0.0073 -0.0011 -0.0184

AT.115 H X -0.0048 0.0013 0.0108 -0.0009 -0.0004 -0.0067  
Y 0.0084 -0.0030 -0.0173 0.0035 0.0016 0.0084

Z -0.0056 -0.0086 0.0180 0.0073 0.0011 -0.0184  
AT. 116 H X 0.0048 -0.0013 0.0108 0.0009 0.0004 -0.0067  
Y 0.0084 -0.0030 0.0173 0.0035 0.0016 -0.0084  
Z 0.0056 0.0086 0.0180 -0.0073 -0.0011 -0.0184  
AT. 117 H X 0.0082 -0.0058 0.0310 -0.0024 -0.0015 -0.0205  
Y 0.0050 0.0014 0.0100 0.0035 -0.0031 -0.0025  
Z 0.0018 0.0026 0.0040 0.0041 -0.0029 0.0018  
AT. 118 H X -0.0082 0.0058 0.0310 0.0024 0.0015 -0.0205  
Y 0.0050 0.0014 -0.0100 0.0035 -0.0031 0.0025  
Z -0.0018 -0.0026 0.0040 -0.0041 0.0029 0.0018  
AT. 119 H X -0.0082 -0.0058 0.0310 0.0024 -0.0015 -0.0205  
Y -0.0050 0.0014 0.0100 -0.0035 -0.0031 -0.0025  
Z -0.0018 0.0026 0.0040 -0.0041 -0.0029 0.0018  
AT. 120 H X 0.0082 0.0058 0.0310 -0.0024 0.0015 -0.0205  
Y -0.0050 0.0014 -0.0100 -0.0035 -0.0031 0.0025  
Z 0.0018 -0.0026 0.0040 0.0041 0.0029 0.0018  
AT. 121 C X -0.0014 0.0019 -0.0003 0.0000 0.0004 0.0003  
Y 0.0001 0.0006 -0.0009 -0.0011 0.0013 -0.0014  
Z 0.0041 -0.0081 -0.0003 -0.0025 0.0004 -0.0022  
AT. 122 C X 0.0014 -0.0019 -0.0003 -0.0000 -0.0004 0.0003  
Y 0.0001 0.0006 0.0009 -0.0011 0.0013 0.0014  
Z -0.0041 0.0081 -0.0003 0.0025 -0.0004 -0.0022  
AT. 123 C X 0.0014 0.0019 -0.0003 -0.0000 0.0004 0.0003  
Y -0.0001 0.0006 -0.0009 0.0011 0.0013 -0.0014  
Z -0.0041 -0.0081 -0.0003 0.0025 0.0004 -0.0022  
AT. 124 C X -0.0014 -0.0019 -0.0003 0.0000 -0.0004 0.0003  
Y -0.0001 0.0006 0.0009 0.0011 0.0013 0.0014  
Z 0.0041 0.0081 -0.0003 -0.0025 -0.0004 -0.0022  
AT. 125 H X 0.0231 -0.0470 -0.0035 -0.0126 -0.0014 -0.0084  
Y 0.0187 -0.0385 -0.0017 -0.0122 0.0028 -0.0086  
Z -0.0171 0.0359 0.0016 0.0100 -0.0007 0.0062  
AT. 126 H X -0.0231 0.0470 -0.0035 0.0126 0.0014 -0.0084

Y 0.0187 -0.0385 0.0017 -0.0122 0.0028 0.0086  
Z 0.0171 -0.0359 0.0016 -0.0100 0.0007 0.0062  
AT. 127 H X -0.0231 -0.0470 -0.0035 0.0126 -0.0014 -0.0084  
Y -0.0187 -0.0385 -0.0017 0.0122 0.0028 -0.0086  
Z 0.0171 0.0359 0.0016 -0.0100 -0.0007 0.0062  
AT. 128 H X 0.0231 0.0470 -0.0035 -0.0126 0.0014 -0.0084  
Y -0.0187 -0.0385 0.0017 0.0122 0.0028 0.0086  
Z -0.0171 -0.0359 0.0016 0.0100 0.0007 0.0062  
AT. 129 H X -0.0020 0.0083 0.0007 0.0012 0.0024 -0.0000  
Y -0.0130 0.0204 0.0013 0.0083 -0.0045 0.0075  
Z -0.0326 0.0708 0.0091 0.0253 -0.0041 0.0173  
AT. 130 H X 0.0020 -0.0083 0.0007 -0.0012 -0.0024 -0.0000  
Y -0.0130 0.0204 -0.0013 0.0083 -0.0045 -0.0075  
Z 0.0326 -0.0708 0.0091 -0.0253 0.0041 0.0173  
AT. 131 H X 0.0020 0.0083 0.0007 -0.0012 0.0024 -0.0000  
Y 0.0130 0.0204 0.0013 -0.0083 -0.0045 0.0075  
Z 0.0326 0.0708 0.0091 -0.0253 -0.0041 0.0173  
AT. 132 H X -0.0020 -0.0083 0.0007 0.0012 -0.0024 -0.0000  
Y 0.0130 0.0204 -0.0013 -0.0083 -0.0045 -0.0075  
Z -0.0326 -0.0708 0.0091 0.0253 0.0041 0.0173  
AT. 133 C X 0.0009 -0.0014 -0.0003 -0.0012 0.0007 -0.0013  
Y -0.0007 0.0002 -0.0038 -0.0036 0.0032 -0.0026  
Z 0.0030 -0.0044 -0.0013 -0.0049 0.0032 -0.0055  
AT. 134 C X -0.0009 0.0014 -0.0003 0.0012 -0.0007 -0.0013  
Y -0.0007 0.0002 0.0038 -0.0036 0.0032 0.0026  
Z -0.0030 0.0044 -0.0013 0.0049 -0.0032 -0.0055  
AT. 135 C X -0.0009 -0.0014 -0.0003 0.0012 0.0007 -0.0013  
Y 0.0007 0.0002 -0.0038 0.0036 0.0032 -0.0026  
Z -0.0030 -0.0044 -0.0013 0.0049 0.0032 -0.0055  
AT. 136 C X 0.0009 0.0014 -0.0003 -0.0012 -0.0007 -0.0013  
Y 0.0007 0.0002 0.0038 0.0036 0.0032 0.0026  
Z 0.0030 0.0044 -0.0013 -0.0049 -0.0032 -0.0055

AT. 137 C X 0.0012 -0.0022 0.0004 -0.0002 -0.0001 -0.0004  
Y 0.0009 -0.0015 0.0010 0.0007 -0.0008 0.0004  
Z 0.0010 -0.0015 0.0007 0.0006 -0.0006 0.0004

AT. 138 C X -0.0012 0.0022 0.0004 0.0002 0.0001 -0.0004  
Y 0.0009 -0.0015 -0.0010 0.0007 -0.0008 -0.0004  
Z -0.0010 0.0015 0.0007 -0.0006 0.0006 0.0004

AT. 139 C X -0.0012 -0.0022 0.0004 0.0002 -0.0001 -0.0004  
Y -0.0009 -0.0015 0.0010 -0.0007 -0.0008 0.0004  
Z -0.0010 -0.0015 0.0007 -0.0006 -0.0006 0.0004

AT. 140 C X 0.0012 0.0022 0.0004 -0.0002 0.0001 -0.0004  
Y -0.0009 -0.0015 -0.0010 -0.0007 -0.0008 -0.0004  
Z 0.0010 0.0015 0.0007 0.0006 0.0006 0.0004

AT. 141 H X -0.0077 0.0140 -0.0014 0.0034 -0.0010 0.0044  
Y -0.0173 0.0303 -0.0045 0.0049 0.0001 0.0073  
Z -0.0025 0.0036 -0.0010 -0.0001 0.0009 0.0003

AT. 142 H X 0.0077 -0.0140 -0.0014 -0.0034 0.0010 0.0044  
Y -0.0173 0.0303 0.0045 0.0049 0.0001 -0.0073  
Z 0.0025 -0.0036 -0.0010 0.0001 -0.0009 0.0003

AT. 143 H X 0.0077 0.0140 -0.0014 -0.0034 -0.0010 0.0044  
Y 0.0173 0.0303 -0.0045 -0.0049 0.0001 0.0073  
Z 0.0025 0.0036 -0.0010 0.0001 0.0009 0.0003

AT. 144 H X -0.0077 -0.0140 -0.0014 0.0034 0.0010 0.0044  
Y 0.0173 0.0303 0.0045 -0.0049 0.0001 -0.0073  
Z -0.0025 -0.0036 -0.0010 -0.0001 -0.0009 0.0003

AT. 145 H X -0.0123 0.0226 -0.0029 0.0048 -0.0012 0.0066  
Y 0.0015 -0.0033 0.0016 0.0006 -0.0013 0.0002  
Z -0.0109 0.0174 -0.0001 0.0056 -0.0040 0.0071

AT. 146 H X 0.0123 -0.0226 -0.0029 -0.0048 0.0012 0.0066  
Y 0.0015 -0.0033 -0.0016 0.0006 -0.0013 -0.0002  
Z 0.0109 -0.0174 -0.0001 -0.0056 0.0040 0.0071

AT. 147 H X 0.0123 0.0226 -0.0029 -0.0048 -0.0012 0.0066  
Y -0.0015 -0.0033 0.0016 -0.0006 -0.0013 0.0002

Z 0.0109 0.0174 -0.0001 -0.0056 -0.0040 0.0071  
AT. 148 H X -0.0123 -0.0226 -0.0029 0.0048 0.0012 0.0066  
Y -0.0015 -0.0033 -0.0016 -0.0006 -0.0013 -0.0002  
Z -0.0109 -0.0174 -0.0001 0.0056 0.0040 0.0071  
AT. 149 O X -0.0001 -0.0001 -0.0000 -0.0002 0.0002 -0.0002  
Y -0.0001 0.0001 0.0001 0.0002 -0.0002 0.0003  
Z -0.0001 0.0002 -0.0004 -0.0003 0.0002 0.0001  
AT. 150 O X 0.0001 0.0001 -0.0000 0.0002 -0.0002 -0.0002  
Y -0.0001 0.0001 -0.0001 0.0002 -0.0002 -0.0003  
Z 0.0001 -0.0002 -0.0004 0.0003 -0.0002 0.0001  
AT. 151 O X 0.0001 -0.0001 -0.0000 0.0002 0.0002 -0.0002  
Y 0.0001 0.0001 0.0001 -0.0002 -0.0002 0.0003  
Z 0.0001 0.0002 -0.0004 0.0003 0.0002 0.0001  
AT. 152 O X -0.0001 0.0001 -0.0000 -0.0002 -0.0002 -0.0002  
Y 0.0001 0.0001 -0.0001 -0.0002 -0.0002 -0.0003  
Z -0.0001 -0.0002 -0.0004 -0.0003 -0.0002 0.0001  
AT. 153 H X -0.0005 -0.0005 -0.0055 -0.0070 0.0049 -0.0020  
Y 0.0036 -0.0021 0.0061 0.0066 -0.0048 -0.0001  
Z 0.0015 -0.0006 0.0050 0.0062 -0.0043 0.0010  
AT. 154 H X 0.0005 0.0005 -0.0055 0.0070 -0.0049 -0.0020  
Y 0.0036 -0.0021 -0.0061 0.0066 -0.0048 0.0001  
Z -0.0015 0.0006 0.0050 -0.0062 0.0043 0.0010  
AT. 155 H X 0.0005 -0.0005 -0.0055 0.0070 0.0049 -0.0020  
Y -0.0036 -0.0021 0.0061 -0.0066 -0.0048 -0.0001  
Z -0.0015 -0.0006 0.0050 -0.0062 -0.0043 0.0010  
AT. 156 H X -0.0005 0.0005 -0.0055 -0.0070 -0.0049 -0.0020  
Y -0.0036 -0.0021 -0.0061 -0.0066 -0.0048 0.0001  
Z 0.0015 0.0006 0.0050 0.0062 0.0043 0.0010  
AT. 157 O X -0.0001 0.0000 0.0002 -0.0002 0.0002 -0.0005  
Y 0.0009 -0.0021 -0.0002 -0.0008 0.0000 -0.0006  
Z 0.0002 -0.0004 -0.0005 -0.0004 0.0002 0.0000  
AT. 158 O X 0.0001 -0.0000 0.0002 0.0002 -0.0002 -0.0005

Y 0.0009 -0.0021 0.0002 -0.0008 0.0000 0.0006  
Z -0.0002 0.0004 -0.0005 0.0004 -0.0002 0.0000  
AT. 159 O X 0.0001 0.0000 0.0002 0.0002 0.0002 -0.0005  
Y -0.0009 -0.0021 -0.0002 0.0008 0.0000 -0.0006  
Z -0.0002 -0.0004 -0.0005 0.0004 0.0002 0.0000  
AT. 160 O X -0.0001 -0.0000 0.0002 -0.0002 -0.0002 -0.0005  
Y -0.0009 -0.0021 0.0002 0.0008 0.0000 0.0006  
Z 0.0002 0.0004 -0.0005 -0.0004 -0.0002 0.0000  
AT. 161 O X 0.0009 -0.0018 -0.0004 -0.0007 -0.0000 -0.0002  
Y -0.0004 0.0006 0.0003 0.0003 -0.0001 0.0001  
Z 0.0006 -0.0016 -0.0002 -0.0005 -0.0001 -0.0002  
AT. 162 O X -0.0009 0.0018 -0.0004 0.0007 0.0000 -0.0002  
Y -0.0004 0.0006 -0.0003 0.0003 -0.0001 -0.0001  
Z -0.0006 0.0016 -0.0002 0.0005 0.0001 -0.0002  
AT. 163 O X -0.0009 -0.0018 -0.0004 0.0007 -0.0000 -0.0002  
Y 0.0004 0.0006 0.0003 -0.0003 -0.0001 0.0001  
Z -0.0006 -0.0016 -0.0002 0.0005 -0.0001 -0.0002  
AT. 164 O X 0.0009 0.0018 -0.0004 -0.0007 0.0000 -0.0002  
Y 0.0004 0.0006 -0.0003 -0.0003 -0.0001 -0.0001  
Z 0.0006 0.0016 -0.0002 -0.0005 0.0001 -0.0002  
AT. 165 H X -0.0117 0.0241 0.0046 0.0098 -0.0002 0.0050  
Y -0.0074 0.0161 0.0024 0.0066 -0.0001 0.0038  
Z -0.0141 0.0366 0.0053 0.0139 0.0013 0.0063  
AT. 166 H X 0.0117 -0.0241 0.0046 -0.0098 0.0002 0.0050  
Y -0.0074 0.0161 -0.0024 0.0066 -0.0001 -0.0038  
Z 0.0141 -0.0366 0.0053 -0.0139 -0.0013 0.0063  
AT. 167 H X 0.0117 0.0241 0.0046 -0.0098 -0.0002 0.0050  
Y 0.0074 0.0161 0.0024 -0.0066 -0.0001 0.0038  
Z 0.0141 0.0366 0.0053 -0.0139 0.0013 0.0063  
AT. 168 H X -0.0117 -0.0241 0.0046 0.0098 0.0002 0.0050  
Y 0.0074 0.0161 -0.0024 -0.0066 -0.0001 -0.0038  
Z -0.0141 -0.0366 0.0053 0.0139 -0.0013 0.0063

AT.169 O X 0.0000 0.0001 0.0003 0.0003 -0.0001 0.0002  
Y 0.0001 0.0000 -0.0003 -0.0001 0.0000 -0.0000  
Z 0.0001 0.0002 0.0010 -0.0001 -0.0004 0.0007

AT.170 O X -0.0000 -0.0001 0.0003 -0.0003 0.0001 0.0002  
Y 0.0001 0.0000 0.0003 -0.0001 0.0000 0.0000  
Z -0.0001 -0.0002 0.0010 0.0001 0.0004 0.0007

AT.171 O X -0.0000 0.0001 0.0003 -0.0003 -0.0001 0.0002  
Y -0.0001 0.0000 -0.0003 0.0001 0.0000 -0.0000  
Z -0.0001 0.0002 0.0010 0.0001 -0.0004 0.0007

AT.172 O X 0.0000 -0.0001 0.0003 0.0003 0.0001 0.0002  
Y -0.0001 0.0000 0.0003 0.0001 0.0000 0.0000  
Z 0.0001 -0.0002 0.0010 -0.0001 0.0004 0.0007

AT.173 H X 0.0016 -0.0014 -0.0041 -0.0038 -0.0016 -0.0010  
Y -0.0013 0.0009 0.0044 0.0008 -0.0005 0.0018  
Z 0.0003 -0.0034 -0.0211 0.0026 0.0081 -0.0133

AT.174 H X -0.0016 0.0014 -0.0041 0.0038 0.0016 -0.0010  
Y -0.0013 0.0009 -0.0044 0.0008 -0.0005 -0.0018  
Z -0.0003 0.0034 -0.0211 -0.0026 -0.0081 -0.0133

AT.175 H X -0.0016 -0.0014 -0.0041 0.0038 -0.0016 -0.0010  
Y 0.0013 0.0009 0.0044 -0.0008 -0.0005 0.0018  
Z -0.0003 -0.0034 -0.0211 -0.0026 0.0081 -0.0133

AT.176 H X 0.0016 0.0014 -0.0041 -0.0038 0.0016 -0.0010  
Y 0.0013 0.0009 -0.0044 -0.0008 -0.0005 -0.0018  
Z 0.0003 0.0034 -0.0211 0.0026 -0.0081 -0.0133

FREQ(CM\*\*-1) 1529.64 1530.13 1532.00 1532.39 1532.45 1532.47

AT. 1 I X -0.0000 -0.0000 -0.0000 -0.0000 0.0000 0.0000  
Y -0.0000 0.0000 -0.0000 -0.0000 -0.0000 0.0000  
Z 0.0000 -0.0000 0.0000 0.0000 -0.0000 -0.0000

AT. 2 I X -0.0000 -0.0000 0.0000 -0.0000 -0.0000 0.0000  
Y 0.0000 -0.0000 -0.0000 0.0000 -0.0000 -0.0000



Z 0.0000 -0.0000 -0.0000 0.0000 0.0000 -0.0000  
AT. 3 I X 0.0000 0.0000 -0.0000 -0.0000 -0.0000 -0.0000  
Y 0.0000 -0.0000 -0.0000 -0.0000 0.0000 -0.0000  
Z -0.0000 0.0000 0.0000 0.0000 0.0000 0.0000  
AT. 4 I X 0.0000 0.0000 0.0000 -0.0000 0.0000 -0.0000  
Y -0.0000 0.0000 -0.0000 0.0000 0.0000 0.0000  
Z -0.0000 0.0000 -0.0000 0.0000 -0.0000 0.0000  
AT. 5 I X -0.0000 0.0000 0.0000 0.0000 -0.0000 0.0000  
Y 0.0000 -0.0000 0.0000 0.0000 -0.0000 0.0000  
Z 0.0000 -0.0000 0.0000 -0.0000 0.0000 -0.0000  
AT. 6 I X -0.0000 0.0000 -0.0000 0.0000 0.0000 0.0000  
Y -0.0000 0.0000 0.0000 -0.0000 -0.0000 -0.0000  
Z 0.0000 -0.0000 -0.0000 -0.0000 -0.0000 -0.0000  
AT. 7 I X 0.0000 -0.0000 0.0000 0.0000 0.0000 -0.0000  
Y -0.0000 0.0000 0.0000 0.0000 0.0000 -0.0000  
Z -0.0000 0.0000 0.0000 -0.0000 -0.0000 0.0000  
AT. 8 I X 0.0000 -0.0000 -0.0000 0.0000 -0.0000 -0.0000  
Y 0.0000 -0.0000 0.0000 -0.0000 0.0000 0.0000  
Z -0.0000 0.0000 -0.0000 -0.0000 0.0000 0.0000  
AT. 9 N X 0.0002 0.0006 -0.0000 0.0006 -0.0009 0.0002  
Y -0.0020 -0.0013 0.0014 0.0002 -0.0007 0.0017  
Z -0.0001 -0.0000 0.0001 -0.0008 0.0008 0.0000  
AT. 10 N X 0.0002 0.0006 0.0000 0.0006 0.0009 0.0002  
Y 0.0020 0.0013 0.0014 -0.0002 -0.0007 -0.0017  
Z -0.0001 -0.0000 -0.0001 -0.0008 -0.0008 0.0000  
AT. 11 N X -0.0002 -0.0006 -0.0000 0.0006 0.0009 -0.0002  
Y 0.0020 0.0013 0.0014 0.0002 0.0007 -0.0017  
Z 0.0001 0.0000 0.0001 -0.0008 -0.0008 -0.0000  
AT. 12 N X -0.0002 -0.0006 0.0000 0.0006 -0.0009 -0.0002  
Y -0.0020 -0.0013 0.0014 -0.0002 0.0007 0.0017  
Z 0.0001 0.0000 -0.0001 -0.0008 0.0008 -0.0000  
AT. 13 N X 0.0010 -0.0004 -0.0004 -0.0006 0.0000 -0.0007

Y 0.0045 0.0050 -0.0012 0.0030 -0.0047 0.0003  
Z 0.0006 -0.0002 0.0001 0.0004 -0.0011 0.0001  
AT. 14 N X 0.0010 -0.0004 0.0004 -0.0006 -0.0000 -0.0007  
Y -0.0045 -0.0050 -0.0012 -0.0030 -0.0047 -0.0003  
Z 0.0006 -0.0002 -0.0001 0.0004 0.0011 0.0001  
AT. 15 N X -0.0010 0.0004 -0.0004 -0.0006 -0.0000 0.0007  
Y -0.0045 -0.0050 -0.0012 0.0030 0.0047 -0.0003  
Z -0.0006 0.0002 0.0001 0.0004 0.0011 -0.0001  
AT. 16 N X -0.0010 0.0004 0.0004 -0.0006 0.0000 0.0007  
Y 0.0045 0.0050 -0.0012 -0.0030 0.0047 0.0003  
Z -0.0006 0.0002 -0.0001 0.0004 -0.0011 -0.0001  
AT. 17 O X 0.0004 0.0004 -0.0001 0.0002 -0.0002 -0.0003  
Y 0.0001 0.0002 -0.0003 0.0003 -0.0002 -0.0003  
Z 0.0007 0.0007 -0.0004 0.0003 -0.0002 -0.0012  
AT. 18 O X 0.0004 0.0004 0.0001 0.0002 0.0002 -0.0003  
Y -0.0001 -0.0002 -0.0003 -0.0003 -0.0002 0.0003  
Z 0.0007 0.0007 0.0004 0.0003 0.0002 -0.0012  
AT. 19 O X -0.0004 -0.0004 -0.0001 0.0002 0.0002 0.0003  
Y -0.0001 -0.0002 -0.0003 0.0003 0.0002 0.0003  
Z -0.0007 -0.0007 -0.0004 0.0003 0.0002 0.0012  
AT. 20 O X -0.0004 -0.0004 0.0001 0.0002 -0.0002 0.0003  
Y 0.0001 0.0002 -0.0003 -0.0003 0.0002 -0.0003  
Z -0.0007 -0.0007 0.0004 0.0003 -0.0002 0.0012  
AT. 21 O X 0.0003 -0.0001 0.0000 -0.0001 -0.0001 0.0000  
Y -0.0014 0.0006 0.0002 0.0007 0.0001 0.0002  
Z 0.0029 -0.0005 -0.0005 -0.0010 -0.0008 -0.0004  
AT. 22 O X 0.0003 -0.0001 -0.0000 -0.0001 0.0001 0.0000  
Y 0.0014 -0.0006 0.0002 -0.0007 0.0001 -0.0002  
Z 0.0029 -0.0005 0.0005 -0.0010 0.0008 -0.0004  
AT. 23 O X -0.0003 0.0001 0.0000 -0.0001 0.0001 -0.0000  
Y 0.0014 -0.0006 0.0002 0.0007 -0.0001 -0.0002  
Z -0.0029 0.0005 -0.0005 -0.0010 0.0008 0.0004

AT. 24 O X -0.0003 0.0001 -0.0000 -0.0001 -0.0001 -0.0000  
Y -0.0014 0.0006 0.0002 -0.0007 -0.0001 0.0002  
Z -0.0029 0.0005 0.0005 -0.0010 -0.0008 0.0004

AT. 25 C X -0.0004 -0.0005 -0.0000 -0.0004 0.0005 0.0003  
Y 0.0003 0.0010 0.0005 0.0011 -0.0014 -0.0001  
Z -0.0001 -0.0006 -0.0006 -0.0008 0.0011 -0.0001

AT. 26 C X -0.0004 -0.0005 0.0000 -0.0004 -0.0005 0.0003  
Y -0.0003 -0.0010 0.0005 -0.0011 -0.0014 0.0001  
Z -0.0001 -0.0006 0.0006 -0.0008 -0.0011 -0.0001

AT. 27 C X 0.0004 0.0005 -0.0000 -0.0004 -0.0005 -0.0003  
Y -0.0003 -0.0010 0.0005 0.0011 0.0014 0.0001  
Z 0.0001 0.0006 -0.0006 -0.0008 -0.0011 0.0001

AT. 28 C X 0.0004 0.0005 0.0000 -0.0004 0.0005 -0.0003  
Y 0.0003 0.0010 0.0005 -0.0011 0.0014 -0.0001  
Z 0.0001 0.0006 0.0006 -0.0008 0.0011 0.0001

AT. 29 H X 0.0003 0.0000 -0.0002 -0.0002 0.0005 -0.0004  
Y -0.0087 -0.0131 -0.0018 -0.0115 0.0152 0.0071  
Z 0.0007 0.0015 -0.0000 0.0015 -0.0021 -0.0006

AT. 30 H X 0.0003 0.0000 0.0002 -0.0002 -0.0005 -0.0004  
Y 0.0087 0.0131 -0.0018 0.0115 0.0152 -0.0071  
Z 0.0007 0.0015 0.0000 0.0015 0.0021 -0.0006

AT. 31 H X -0.0003 -0.0000 -0.0002 -0.0002 -0.0005 0.0004  
Y 0.0087 0.0131 -0.0018 -0.0115 -0.0152 -0.0071  
Z -0.0007 -0.0015 -0.0000 0.0015 0.0021 0.0006

AT. 32 H X -0.0003 -0.0000 0.0002 -0.0002 0.0005 0.0004  
Y -0.0087 -0.0131 -0.0018 0.0115 -0.0152 0.0071  
Z -0.0007 -0.0015 0.0000 0.0015 -0.0021 0.0006

AT. 33 H X 0.0052 0.0080 0.0014 0.0069 -0.0090 -0.0042  
Y -0.0022 -0.0026 -0.0003 -0.0018 0.0026 0.0018  
Z 0.0056 0.0074 0.0021 0.0054 -0.0080 -0.0043

AT. 34 H X 0.0052 0.0080 -0.0014 0.0069 0.0090 -0.0042  
Y 0.0022 0.0026 -0.0003 0.0018 0.0026 -0.0018

Z 0.0056 0.0074 -0.0021 0.0054 0.0080 -0.0043  
AT. 35 H X -0.0052 -0.0080 0.0014 0.0069 0.0090 0.0042  
Y 0.0022 0.0026 -0.0003 -0.0018 -0.0026 -0.0018  
Z -0.0056 -0.0074 0.0021 0.0054 0.0080 0.0043  
AT. 36 H X -0.0052 -0.0080 -0.0014 0.0069 -0.0090 0.0042  
Y -0.0022 -0.0026 -0.0003 0.0018 -0.0026 0.0018  
Z -0.0056 -0.0074 -0.0021 0.0054 -0.0080 0.0043  
AT. 37 C X 0.0001 -0.0004 -0.0002 -0.0007 0.0007 0.0001  
Y 0.0021 0.0007 -0.0012 -0.0009 0.0009 -0.0017  
Z -0.0017 -0.0013 0.0014 -0.0003 0.0001 0.0026  
AT. 38 C X 0.0001 -0.0004 0.0002 -0.0007 -0.0007 0.0001  
Y -0.0021 -0.0007 -0.0012 0.0009 0.0009 0.0017  
Z -0.0017 -0.0013 -0.0014 -0.0003 -0.0001 0.0026  
AT. 39 C X -0.0001 0.0004 -0.0002 -0.0007 -0.0007 -0.0001  
Y -0.0021 -0.0007 -0.0012 -0.0009 -0.0009 0.0017  
Z 0.0017 0.0013 0.0014 -0.0003 -0.0001 -0.0026  
AT. 40 C X -0.0001 0.0004 0.0002 -0.0007 0.0007 -0.0001  
Y 0.0021 0.0007 -0.0012 0.0009 -0.0009 -0.0017  
Z 0.0017 0.0013 -0.0014 -0.0003 0.0001 -0.0026  
AT. 41 C X 0.0001 0.0003 0.0003 -0.0003 0.0007 0.0003  
Y -0.0004 -0.0007 0.0004 -0.0009 0.0014 0.0004  
Z -0.0030 -0.0028 0.0016 -0.0021 0.0028 0.0023  
AT. 42 C X 0.0001 0.0003 -0.0003 -0.0003 -0.0007 0.0003  
Y 0.0004 0.0007 0.0004 0.0009 0.0014 -0.0004  
Z -0.0030 -0.0028 -0.0016 -0.0021 -0.0028 0.0023  
AT. 43 C X -0.0001 -0.0003 0.0003 -0.0003 -0.0007 -0.0003  
Y 0.0004 0.0007 0.0004 -0.0009 -0.0014 -0.0004  
Z 0.0030 0.0028 0.0016 -0.0021 -0.0028 -0.0023  
AT. 44 C X -0.0001 -0.0003 -0.0003 -0.0003 0.0007 -0.0003  
Y -0.0004 -0.0007 0.0004 0.0009 -0.0014 0.0004  
Z 0.0030 0.0028 -0.0016 -0.0021 0.0028 -0.0023  
AT. 45 H X -0.0067 -0.0171 0.0119 -0.0107 0.0098 0.0098

Y 0.0178 0.0148 -0.0102 0.0143 -0.0195 -0.0158  
Z 0.0142 0.0133 -0.0095 0.0128 -0.0171 -0.0136  
AT. 46 H X -0.0067 -0.0171 -0.0119 -0.0107 -0.0098 0.0098  
Y -0.0178 -0.0148 -0.0102 -0.0143 -0.0195 0.0158  
Z 0.0142 0.0133 0.0095 0.0128 0.0171 -0.0136  
AT. 47 H X 0.0067 0.0171 0.0119 -0.0107 -0.0098 -0.0098  
Y -0.0178 -0.0148 -0.0102 0.0143 0.0195 0.0158  
Z -0.0142 -0.0133 -0.0095 0.0128 0.0171 0.0136  
AT. 48 H X 0.0067 0.0171 -0.0119 -0.0107 0.0098 -0.0098  
Y 0.0178 0.0148 -0.0102 -0.0143 0.0195 -0.0158  
Z -0.0142 -0.0133 0.0095 0.0128 -0.0171 0.0136  
AT. 49 H X 0.0038 0.0062 -0.0037 0.0042 -0.0044 -0.0024  
Y -0.0063 -0.0057 0.0043 -0.0048 0.0063 0.0071  
Z 0.0229 0.0277 -0.0205 0.0218 -0.0255 -0.0237  
AT. 50 H X 0.0038 0.0062 0.0037 0.0042 0.0044 -0.0024  
Y 0.0063 0.0057 0.0043 0.0048 0.0063 -0.0071  
Z 0.0229 0.0277 0.0205 0.0218 0.0255 -0.0237  
AT. 51 H X -0.0038 -0.0062 -0.0037 0.0042 0.0044 0.0024  
Y 0.0063 0.0057 0.0043 -0.0048 -0.0063 -0.0071  
Z -0.0229 -0.0277 -0.0205 0.0218 0.0255 0.0237  
AT. 52 H X -0.0038 -0.0062 0.0037 0.0042 -0.0044 0.0024  
Y -0.0063 -0.0057 0.0043 0.0048 -0.0063 0.0071  
Z -0.0229 -0.0277 0.0205 0.0218 -0.0255 0.0237  
AT. 53 C X -0.0001 -0.0002 -0.0026 0.0016 -0.0024 -0.0029  
Y -0.0013 0.0030 -0.0017 0.0019 -0.0015 0.0002  
Z 0.0018 -0.0030 0.0026 -0.0019 0.0012 0.0009  
AT. 54 C X -0.0001 -0.0002 0.0026 0.0016 0.0024 -0.0029  
Y 0.0013 -0.0030 -0.0017 -0.0019 -0.0015 -0.0002  
Z 0.0018 -0.0030 -0.0026 -0.0019 -0.0012 0.0009  
AT. 55 C X 0.0001 0.0002 -0.0026 0.0016 0.0024 0.0029  
Y 0.0013 -0.0030 -0.0017 0.0019 0.0015 -0.0002  
Z -0.0018 0.0030 0.0026 -0.0019 -0.0012 -0.0009

AT. 56 C X 0.0001 0.0002 0.0026 0.0016 -0.0024 0.0029  
Y -0.0013 0.0030 -0.0017 -0.0019 0.0015 0.0002  
Z -0.0018 0.0030 -0.0026 -0.0019 0.0012 -0.0009

AT. 57 C X 0.0001 0.0001 -0.0032 0.0021 -0.0029 -0.0037  
Y -0.0019 0.0032 -0.0021 0.0022 -0.0015 -0.0002  
Z 0.0008 -0.0015 0.0016 -0.0012 0.0008 0.0007

AT. 58 C X 0.0001 0.0001 0.0032 0.0021 0.0029 -0.0037  
Y 0.0019 -0.0032 -0.0021 -0.0022 -0.0015 0.0002  
Z 0.0008 -0.0015 -0.0016 -0.0012 -0.0008 0.0007

AT. 59 C X -0.0001 -0.0001 -0.0032 0.0021 0.0029 0.0037  
Y 0.0019 -0.0032 -0.0021 0.0022 0.0015 0.0002  
Z -0.0008 0.0015 0.0016 -0.0012 -0.0008 -0.0007

AT. 60 C X -0.0001 -0.0001 0.0032 0.0021 -0.0029 0.0037  
Y -0.0019 0.0032 -0.0021 -0.0022 0.0015 -0.0002  
Z -0.0008 0.0015 -0.0016 -0.0012 0.0008 -0.0007

AT. 61 H X 0.0218 -0.0377 0.0387 -0.0345 0.0306 0.0180  
Y 0.0153 -0.0267 0.0346 -0.0287 0.0276 0.0211  
Z -0.0026 0.0037 -0.0332 0.0209 -0.0269 -0.0353

AT. 62 H X 0.0218 -0.0377 -0.0387 -0.0345 -0.0306 0.0180  
Y -0.0153 0.0267 0.0346 0.0287 0.0276 -0.0211  
Z -0.0026 0.0037 0.0332 0.0209 0.0269 -0.0353

AT. 63 H X -0.0218 0.0377 0.0387 -0.0345 -0.0306 -0.0180  
Y -0.0153 0.0267 0.0346 -0.0287 -0.0276 -0.0211  
Z 0.0026 -0.0037 -0.0332 0.0209 0.0269 0.0353

AT. 64 H X -0.0218 0.0377 -0.0387 -0.0345 0.0306 -0.0180  
Y 0.0153 -0.0267 0.0346 0.0287 -0.0276 0.0211  
Z 0.0026 -0.0037 0.0332 0.0209 -0.0269 0.0353

AT. 65 H X -0.0098 0.0169 -0.0136 0.0131 -0.0103 -0.0037  
Y 0.0291 -0.0497 0.0325 -0.0337 0.0235 0.0021  
Z -0.0029 0.0080 0.0239 -0.0143 0.0238 0.0328

AT. 66 H X -0.0098 0.0169 0.0136 0.0131 0.0103 -0.0037  
Y -0.0291 0.0497 0.0325 0.0337 0.0235 -0.0021

Z -0.0029 0.0080 -0.0239 -0.0143 -0.0238 0.0328  
AT. 67 H X 0.0098 -0.0169 -0.0136 0.0131 0.0103 0.0037  
Y -0.0291 0.0497 0.0325 -0.0337 -0.0235 -0.0021  
Z 0.0029 -0.0080 0.0239 -0.0143 -0.0238 -0.0328  
AT. 68 H X 0.0098 -0.0169 0.0136 0.0131 -0.0103 0.0037  
Y 0.0291 -0.0497 0.0325 0.0337 -0.0235 0.0021  
Z 0.0029 -0.0080 -0.0239 -0.0143 0.0238 -0.0328  
AT. 69 H X -0.0100 0.0188 0.0283 -0.0133 0.0276 0.0458  
Y -0.0133 0.0230 -0.0334 0.0260 -0.0255 -0.0222  
Z -0.0118 0.0206 -0.0210 0.0178 -0.0152 -0.0096  
AT. 70 H X -0.0100 0.0188 -0.0283 -0.0133 -0.0276 0.0458  
Y 0.0133 -0.0230 -0.0334 -0.0260 -0.0255 0.0222  
Z -0.0118 0.0206 0.0210 0.0178 0.0152 -0.0096  
AT. 71 H X 0.0100 -0.0188 0.0283 -0.0133 -0.0276 -0.0458  
Y 0.0133 -0.0230 -0.0334 0.0260 0.0255 0.0222  
Z 0.0118 -0.0206 -0.0210 0.0178 0.0152 0.0096  
AT. 72 H X 0.0100 -0.0188 -0.0283 -0.0133 0.0276 -0.0458  
Y -0.0133 0.0230 -0.0334 -0.0260 0.0255 -0.0222  
Z 0.0118 -0.0206 0.0210 0.0178 -0.0152 0.0096  
AT. 73 C X 0.0006 -0.0002 -0.0008 -0.0009 0.0007 -0.0011  
Y -0.0008 -0.0024 0.0012 -0.0013 0.0015 0.0002  
Z -0.0011 0.0018 -0.0022 0.0003 0.0005 -0.0010  
AT. 74 C X 0.0006 -0.0002 0.0008 -0.0009 -0.0007 -0.0011  
Y 0.0008 0.0024 0.0012 0.0013 0.0015 -0.0002  
Z -0.0011 0.0018 0.0022 0.0003 -0.0005 -0.0010  
AT. 75 C X -0.0006 0.0002 -0.0008 -0.0009 -0.0007 0.0011  
Y 0.0008 0.0024 0.0012 -0.0013 -0.0015 -0.0002  
Z 0.0011 -0.0018 -0.0022 0.0003 -0.0005 0.0010  
AT. 76 C X -0.0006 0.0002 0.0008 -0.0009 0.0007 0.0011  
Y -0.0008 -0.0024 0.0012 0.0013 -0.0015 0.0002  
Z 0.0011 -0.0018 0.0022 0.0003 0.0005 0.0010  
AT. 77 C X 0.0006 0.0023 -0.0001 0.0009 -0.0014 -0.0001

Y -0.0009 -0.0004 -0.0000 -0.0004 0.0008 -0.0002  
Z 0.0013 0.0020 -0.0009 0.0006 -0.0011 -0.0005  
AT. 78 C X 0.0006 0.0023 0.0001 0.0009 0.0014 -0.0001  
Y 0.0009 0.0004 -0.0000 0.0004 0.0008 0.0002  
Z 0.0013 0.0020 0.0009 0.0006 0.0011 -0.0005  
AT. 79 C X -0.0006 -0.0023 -0.0001 0.0009 0.0014 0.0001  
Y 0.0009 0.0004 -0.0000 -0.0004 -0.0008 0.0002  
Z -0.0013 -0.0020 -0.0009 0.0006 0.0011 0.0005  
AT. 80 C X -0.0006 -0.0023 0.0001 0.0009 -0.0014 0.0001  
Y -0.0009 -0.0004 -0.0000 0.0004 -0.0008 -0.0002  
Z -0.0013 -0.0020 0.0009 0.0006 -0.0011 0.0005  
AT. 81 H X -0.0052 -0.0095 0.0043 0.0011 0.0025 0.0041  
Y -0.0049 -0.0106 0.0047 0.0008 0.0032 0.0047  
Z -0.0201 -0.0247 0.0054 -0.0068 0.0143 0.0026  
AT. 82 H X -0.0052 -0.0095 -0.0043 0.0011 -0.0025 0.0041  
Y 0.0049 0.0106 0.0047 -0.0008 0.0032 -0.0047  
Z -0.0201 -0.0247 -0.0054 -0.0068 -0.0143 0.0026  
AT. 83 H X 0.0052 0.0095 0.0043 0.0011 -0.0025 -0.0041  
Y 0.0049 0.0106 0.0047 0.0008 -0.0032 -0.0047  
Z 0.0201 0.0247 0.0054 -0.0068 -0.0143 -0.0026  
AT. 84 H X 0.0052 0.0095 -0.0043 0.0011 0.0025 -0.0041  
Y -0.0049 -0.0106 0.0047 -0.0008 -0.0032 0.0047  
Z 0.0201 0.0247 -0.0054 -0.0068 0.0143 -0.0026  
AT. 85 H X -0.0200 -0.0258 0.0033 -0.0064 0.0157 0.0018  
Y 0.0090 0.0145 -0.0057 0.0018 -0.0069 -0.0041  
Z -0.0016 -0.0030 0.0033 0.0011 0.0005 0.0026  
AT. 86 H X -0.0200 -0.0258 -0.0033 -0.0064 -0.0157 0.0018  
Y -0.0090 -0.0145 -0.0057 -0.0018 -0.0069 0.0041  
Z -0.0016 -0.0030 -0.0033 0.0011 -0.0005 0.0026  
AT. 87 H X 0.0200 0.0258 0.0033 -0.0064 -0.0157 -0.0018  
Y -0.0090 -0.0145 -0.0057 0.0018 0.0069 0.0041  
Z 0.0016 0.0030 0.0033 0.0011 -0.0005 -0.0026



AT. 88 H X 0.0200 0.0258 -0.0033 -0.0064 0.0157 -0.0018  
Y 0.0090 0.0145 -0.0057 -0.0018 0.0069 -0.0041  
Z 0.0016 0.0030 -0.0033 0.0011 0.0005 -0.0026

AT. 89 C X 0.0032 0.0008 -0.0017 -0.0025 0.0013 -0.0015  
Y 0.0027 0.0011 0.0017 0.0017 -0.0025 0.0022  
Z 0.0021 0.0005 0.0023 0.0015 -0.0024 0.0022

AT. 90 C X 0.0032 0.0008 0.0017 -0.0025 -0.0013 -0.0015  
Y -0.0027 -0.0011 0.0017 -0.0017 -0.0025 -0.0022  
Z 0.0021 0.0005 -0.0023 0.0015 0.0024 0.0022

AT. 91 C X -0.0032 -0.0008 -0.0017 -0.0025 -0.0013 0.0015  
Y -0.0027 -0.0011 0.0017 0.0017 0.0025 -0.0022  
Z -0.0021 -0.0005 0.0023 0.0015 0.0024 -0.0022

AT. 92 C X -0.0032 -0.0008 0.0017 -0.0025 0.0013 0.0015  
Y 0.0027 0.0011 0.0017 -0.0017 0.0025 0.0022  
Z -0.0021 -0.0005 -0.0023 0.0015 -0.0024 -0.0022

AT. 93 C X 0.0035 0.0018 -0.0027 -0.0028 0.0016 -0.0022  
Y 0.0033 0.0004 0.0038 0.0024 -0.0035 0.0041  
Z 0.0012 0.0005 0.0010 0.0008 -0.0013 0.0014

AT. 94 C X 0.0035 0.0018 0.0027 -0.0028 -0.0016 -0.0022  
Y -0.0033 -0.0004 0.0038 -0.0024 -0.0035 -0.0041  
Z 0.0012 0.0005 -0.0010 0.0008 0.0013 0.0014

AT. 95 C X -0.0035 -0.0018 -0.0027 -0.0028 -0.0016 0.0022  
Y -0.0033 -0.0004 0.0038 0.0024 0.0035 -0.0041  
Z -0.0012 -0.0005 0.0010 0.0008 0.0013 -0.0014

AT. 96 C X -0.0035 -0.0018 0.0027 -0.0028 0.0016 0.0022  
Y 0.0033 0.0004 0.0038 -0.0024 0.0035 0.0041  
Z -0.0012 -0.0005 -0.0010 0.0008 -0.0013 -0.0014

AT. 97 H X 0.0296 0.0077 0.0143 0.0063 -0.0166 0.0179  
Y -0.0403 -0.0077 -0.0456 -0.0312 0.0456 -0.0512  
Z 0.0125 0.0079 -0.0377 -0.0352 0.0316 -0.0371

AT. 98 H X 0.0296 0.0077 -0.0143 0.0063 0.0166 0.0179  
Y 0.0403 0.0077 -0.0456 0.0312 0.0456 0.0512

Z 0.0125 0.0079 0.0377 -0.0352 -0.0316 -0.0371  
AT. 99 H X -0.0296 -0.0077 0.0143 0.0063 0.0166 -0.0179  
Y 0.0403 0.0077 -0.0456 -0.0312 -0.0456 0.0512  
Z -0.0125 -0.0079 -0.0377 -0.0352 -0.0316 0.0371  
AT. 100 H X -0.0296 -0.0077 -0.0143 0.0063 -0.0166 -0.0179  
Y -0.0403 -0.0077 -0.0456 0.0312 -0.0456 -0.0512  
Z -0.0125 -0.0079 0.0377 -0.0352 0.0316 0.0371  
AT. 101 H X -0.0487 -0.0152 -0.0161 -0.0053 0.0223 -0.0230  
Y -0.0480 -0.0148 -0.0182 -0.0075 0.0242 -0.0251  
Z -0.0272 -0.0162 0.0357 0.0339 -0.0246 0.0309  
AT. 102 H X -0.0487 -0.0152 0.0161 -0.0053 -0.0223 -0.0230  
Y 0.0480 0.0148 -0.0182 0.0075 0.0242 0.0251  
Z -0.0272 -0.0162 -0.0357 0.0339 0.0246 0.0309  
AT. 103 H X 0.0487 0.0152 -0.0161 -0.0053 -0.0223 0.0230  
Y 0.0480 0.0148 -0.0182 -0.0075 -0.0242 0.0251  
Z 0.0272 0.0162 0.0357 0.0339 0.0246 -0.0309  
AT. 104 H X 0.0487 0.0152 0.0161 -0.0053 0.0223 0.0230  
Y -0.0480 -0.0148 -0.0182 0.0075 -0.0242 -0.0251  
Z 0.0272 0.0162 -0.0357 0.0339 -0.0246 -0.0309  
AT. 105 H X -0.0392 -0.0207 0.0452 0.0447 -0.0315 0.0396  
Y 0.0345 0.0130 0.0095 0.0037 -0.0160 0.0155  
Z -0.0103 -0.0022 -0.0208 -0.0172 0.0210 -0.0231  
AT. 106 H X -0.0392 -0.0207 -0.0452 0.0447 0.0315 0.0396  
Y -0.0345 -0.0130 0.0095 -0.0037 -0.0160 -0.0155  
Z -0.0103 -0.0022 0.0208 -0.0172 -0.0210 -0.0231  
AT. 107 H X 0.0392 0.0207 0.0452 0.0447 0.0315 -0.0396  
Y -0.0345 -0.0130 0.0095 0.0037 0.0160 -0.0155  
Z 0.0103 0.0022 -0.0208 -0.0172 -0.0210 0.0231  
AT. 108 H X 0.0392 0.0207 -0.0452 0.0447 -0.0315 -0.0396  
Y 0.0345 0.0130 0.0095 -0.0037 0.0160 0.0155  
Z 0.0103 0.0022 0.0208 -0.0172 0.0210 0.0231  
AT. 109 C X 0.0012 -0.0031 0.0006 -0.0019 0.0005 -0.0004

Y -0.0008 -0.0010 -0.0001 -0.0009 0.0013 -0.0007  
Z 0.0004 -0.0016 -0.0004 -0.0011 0.0004 -0.0010  
AT. 110 C X 0.0012 -0.0031 -0.0006 -0.0019 -0.0005 -0.0004  
Y 0.0008 0.0010 -0.0001 0.0009 0.0013 0.0007  
Z 0.0004 -0.0016 0.0004 -0.0011 -0.0004 -0.0010  
AT. 111 C X -0.0012 0.0031 0.0006 -0.0019 -0.0005 0.0004  
Y 0.0008 0.0010 -0.0001 -0.0009 -0.0013 0.0007  
Z -0.0004 0.0016 -0.0004 -0.0011 -0.0004 0.0010  
AT. 112 C X -0.0012 0.0031 -0.0006 -0.0019 0.0005 0.0004  
Y -0.0008 -0.0010 -0.0001 0.0009 -0.0013 -0.0007  
Z -0.0004 0.0016 0.0004 -0.0011 0.0004 0.0010  
AT. 113 H X -0.0047 0.0105 0.0016 0.0045 0.0021 0.0049  
Y 0.0050 -0.0171 -0.0026 -0.0073 -0.0019 -0.0075  
Z -0.0167 0.0227 -0.0015 0.0140 0.0005 0.0089  
AT. 114 H X -0.0047 0.0105 -0.0016 0.0045 -0.0021 0.0049  
Y -0.0050 0.0171 -0.0026 0.0073 -0.0019 0.0075  
Z -0.0167 0.0227 0.0015 0.0140 -0.0005 0.0089  
AT. 115 H X 0.0047 -0.0105 0.0016 0.0045 -0.0021 -0.0049  
Y -0.0050 0.0171 -0.0026 -0.0073 0.0019 0.0075  
Z 0.0167 -0.0227 -0.0015 0.0140 -0.0005 -0.0089  
AT. 116 H X 0.0047 -0.0105 -0.0016 0.0045 0.0021 -0.0049  
Y 0.0050 -0.0171 -0.0026 0.0073 0.0019 -0.0075  
Z 0.0167 -0.0227 0.0015 0.0140 0.0005 -0.0089  
AT. 117 H X -0.0172 0.0343 -0.0028 0.0189 -0.0014 0.0109  
Y -0.0010 0.0126 0.0029 0.0074 -0.0021 0.0068  
Z 0.0025 0.0054 0.0029 0.0034 -0.0021 0.0042  
AT. 118 H X -0.0172 0.0343 0.0028 0.0189 0.0014 0.0109  
Y 0.0010 -0.0126 0.0029 -0.0074 -0.0021 -0.0068  
Z 0.0025 0.0054 -0.0029 0.0034 0.0021 0.0042  
AT. 119 H X 0.0172 -0.0343 -0.0028 0.0189 0.0014 -0.0109  
Y 0.0010 -0.0126 0.0029 0.0074 0.0021 -0.0068  
Z -0.0025 -0.0054 0.0029 0.0034 0.0021 -0.0042

AT. 120 H X 0.0172 -0.0343 0.0028 0.0189 -0.0014 -0.0109  
Y -0.0010 0.0126 0.0029 -0.0074 0.0021 0.0068  
Z -0.0025 -0.0054 -0.0029 0.0034 -0.0021 -0.0042

AT. 121 C X 0.0002 -0.0012 0.0001 -0.0005 0.0005 -0.0002  
Y -0.0010 -0.0020 -0.0005 -0.0022 0.0024 -0.0013  
Z -0.0028 0.0043 0.0011 0.0045 -0.0033 0.0025

AT. 122 C X 0.0002 -0.0012 -0.0001 -0.0005 -0.0005 -0.0002  
Y 0.0010 0.0020 -0.0005 0.0022 0.0024 0.0013  
Z -0.0028 0.0043 -0.0011 0.0045 0.0033 0.0025

AT. 123 C X -0.0002 0.0012 0.0001 -0.0005 -0.0005 0.0002  
Y 0.0010 0.0020 -0.0005 -0.0022 -0.0024 0.0013  
Z 0.0028 -0.0043 0.0011 0.0045 0.0033 -0.0025

AT. 124 C X -0.0002 0.0012 -0.0001 -0.0005 0.0005 0.0002  
Y -0.0010 -0.0020 -0.0005 0.0022 -0.0024 -0.0013  
Z 0.0028 -0.0043 -0.0011 0.0045 -0.0033 -0.0025

AT. 125 H X -0.0124 0.0213 0.0117 0.0251 -0.0202 0.0182  
Y -0.0131 0.0226 0.0068 0.0270 -0.0221 0.0140  
Z 0.0105 -0.0205 -0.0079 -0.0250 0.0211 -0.0144

AT. 126 H X -0.0124 0.0213 -0.0117 0.0251 0.0202 0.0182  
Y 0.0131 -0.0226 0.0068 -0.0270 -0.0221 -0.0140  
Z 0.0105 -0.0205 0.0079 -0.0250 -0.0211 -0.0144

AT. 127 H X 0.0124 -0.0213 0.0117 0.0251 0.0202 -0.0182  
Y 0.0131 -0.0226 0.0068 0.0270 0.0221 -0.0140  
Z -0.0105 0.0205 -0.0079 -0.0250 -0.0211 0.0144

AT. 128 H X 0.0124 -0.0213 -0.0117 0.0251 -0.0202 -0.0182  
Y -0.0131 0.0226 0.0068 -0.0270 0.0221 0.0140  
Z -0.0105 0.0205 0.0079 -0.0250 0.0211 0.0144

AT. 129 H X 0.0007 -0.0021 -0.0030 -0.0034 0.0029 -0.0044  
Y 0.0092 -0.0126 -0.0023 -0.0133 0.0100 -0.0054  
Z 0.0242 -0.0285 -0.0174 -0.0380 0.0286 -0.0269

AT. 130 H X 0.0007 -0.0021 0.0030 -0.0034 -0.0029 -0.0044  
Y -0.0092 0.0126 -0.0023 0.0133 0.0100 0.0054

Z 0.0242 -0.0285 0.0174 -0.0380 -0.0286 -0.0269  
AT. 131 H X -0.0007 0.0021 -0.0030 -0.0034 -0.0029 0.0044  
Y -0.0092 0.0126 -0.0023 -0.0133 -0.0100 0.0054  
Z -0.0242 0.0285 -0.0174 -0.0380 -0.0286 0.0269  
AT. 132 H X -0.0007 0.0021 0.0030 -0.0034 0.0029 0.0044  
Y 0.0092 -0.0126 -0.0023 0.0133 -0.0100 -0.0054  
Z -0.0242 0.0285 0.0174 -0.0380 0.0286 0.0269  
AT. 133 C X -0.0014 0.0004 0.0002 0.0006 0.0002 0.0002  
Y -0.0024 -0.0054 0.0013 -0.0037 0.0043 -0.0002  
Z -0.0056 0.0002 0.0015 0.0013 0.0021 0.0011  
AT. 134 C X -0.0014 0.0004 -0.0002 0.0006 -0.0002 0.0002  
Y 0.0024 0.0054 0.0013 0.0037 0.0043 0.0002  
Z -0.0056 0.0002 -0.0015 0.0013 -0.0021 0.0011  
AT. 135 C X 0.0014 -0.0004 0.0002 0.0006 -0.0002 -0.0002  
Y 0.0024 0.0054 0.0013 -0.0037 -0.0043 0.0002  
Z 0.0056 -0.0002 0.0015 0.0013 -0.0021 -0.0011  
AT. 136 C X 0.0014 -0.0004 -0.0002 0.0006 0.0002 -0.0002  
Y -0.0024 -0.0054 0.0013 0.0037 -0.0043 -0.0002  
Z 0.0056 -0.0002 -0.0015 0.0013 0.0021 -0.0011  
AT. 137 C X -0.0006 0.0018 -0.0003 0.0017 -0.0014 0.0001  
Y 0.0001 0.0023 -0.0005 0.0018 -0.0019 -0.0000  
Z 0.0001 0.0022 -0.0008 0.0016 -0.0019 -0.0003  
AT. 138 C X -0.0006 0.0018 0.0003 0.0017 0.0014 0.0001  
Y -0.0001 -0.0023 -0.0005 -0.0018 -0.0019 0.0000  
Z 0.0001 0.0022 0.0008 0.0016 0.0019 -0.0003  
AT. 139 C X 0.0006 -0.0018 -0.0003 0.0017 0.0014 -0.0001  
Y -0.0001 -0.0023 -0.0005 0.0018 0.0019 0.0000  
Z -0.0001 -0.0022 -0.0008 0.0016 0.0019 0.0003  
AT. 140 C X 0.0006 -0.0018 0.0003 0.0017 -0.0014 -0.0001  
Y 0.0001 0.0023 -0.0005 -0.0018 0.0019 -0.0000  
Z -0.0001 -0.0022 0.0008 0.0016 -0.0019 0.0003  
AT. 141 H X 0.0055 -0.0096 0.0009 -0.0099 0.0073 -0.0006

Y 0.0108 -0.0242 0.0028 -0.0230 0.0187 -0.0019  
Z 0.0011 -0.0041 0.0001 -0.0033 0.0031 -0.0010  
AT. 142 H X 0.0055 -0.0096 -0.0009 -0.0099 -0.0073 -0.0006  
Y -0.0108 0.0242 0.0028 0.0230 0.0187 0.0019  
Z 0.0011 -0.0041 -0.0001 -0.0033 -0.0031 -0.0010  
AT. 143 H X -0.0055 0.0096 0.0009 -0.0099 -0.0073 0.0006  
Y -0.0108 0.0242 0.0028 -0.0230 -0.0187 0.0019  
Z -0.0011 0.0041 0.0001 -0.0033 -0.0031 0.0010  
AT. 144 H X -0.0055 0.0096 -0.0009 -0.0099 0.0073 0.0006  
Y 0.0108 -0.0242 0.0028 0.0230 -0.0187 -0.0019  
Z -0.0011 0.0041 -0.0001 -0.0033 0.0031 0.0010  
AT. 145 H X 0.0089 -0.0166 0.0019 -0.0169 0.0128 -0.0009  
Y -0.0001 0.0036 0.0000 0.0035 -0.0031 0.0009  
Z 0.0092 -0.0118 0.0038 -0.0109 0.0084 0.0025  
AT. 146 H X 0.0089 -0.0166 -0.0019 -0.0169 -0.0128 -0.0009  
Y 0.0001 -0.0036 0.0000 -0.0035 -0.0031 -0.0009  
Z 0.0092 -0.0118 -0.0038 -0.0109 -0.0084 0.0025  
AT. 147 H X -0.0089 0.0166 0.0019 -0.0169 -0.0128 0.0009  
Y 0.0001 -0.0036 0.0000 0.0035 0.0031 -0.0009  
Z -0.0092 0.0118 0.0038 -0.0109 -0.0084 -0.0025  
AT. 148 H X -0.0089 0.0166 -0.0019 -0.0169 0.0128 0.0009  
Y -0.0001 0.0036 0.0000 -0.0035 0.0031 0.0009  
Z -0.0092 0.0118 -0.0038 -0.0109 0.0084 -0.0025  
AT. 149 O X -0.0002 -0.0001 0.0002 0.0000 0.0001 0.0003  
Y 0.0002 0.0000 -0.0001 0.0000 -0.0001 -0.0001  
Z -0.0000 -0.0006 0.0008 -0.0001 0.0000 0.0004  
AT. 150 O X -0.0002 -0.0001 -0.0002 0.0000 -0.0001 0.0003  
Y -0.0002 -0.0000 -0.0001 -0.0000 -0.0001 0.0001  
Z -0.0000 -0.0006 -0.0008 -0.0001 -0.0000 0.0004  
AT. 151 O X 0.0002 0.0001 0.0002 0.0000 -0.0001 -0.0003  
Y -0.0002 -0.0000 -0.0001 0.0000 0.0001 0.0001  
Z 0.0000 0.0006 0.0008 -0.0001 -0.0000 -0.0004

AT.152 O X 0.0002 0.0001 -0.0002 0.0000 0.0001 -0.0003  
Y 0.0002 0.0000 -0.0001 -0.0000 0.0001 -0.0001  
Z 0.0000 0.0006 -0.0008 -0.0001 0.0000 -0.0004

AT.153 H X -0.0041 -0.0042 0.0068 0.0027 -0.0017 0.0047  
Y 0.0031 0.0071 -0.0114 -0.0023 0.0019 -0.0082  
Z 0.0034 0.0049 -0.0074 -0.0021 0.0014 -0.0052

AT.154 H X -0.0041 -0.0042 -0.0068 0.0027 0.0017 0.0047  
Y -0.0031 -0.0071 -0.0114 0.0023 0.0019 0.0082  
Z 0.0034 0.0049 0.0074 -0.0021 -0.0014 -0.0052

AT.155 H X 0.0041 0.0042 0.0068 0.0027 0.0017 -0.0047  
Y -0.0031 -0.0071 -0.0114 -0.0023 -0.0019 0.0082  
Z -0.0034 -0.0049 -0.0074 -0.0021 -0.0014 0.0052

AT.156 H X 0.0041 0.0042 -0.0068 0.0027 -0.0017 -0.0047  
Y 0.0031 0.0071 -0.0114 0.0023 -0.0019 -0.0082  
Z -0.0034 -0.0049 0.0074 -0.0021 0.0014 0.0052

AT.157 O X -0.0003 0.0003 -0.0001 0.0003 -0.0000 0.0001  
Y -0.0006 0.0009 0.0003 0.0009 -0.0008 0.0009  
Z -0.0002 -0.0002 0.0003 0.0002 -0.0003 0.0002

AT.158 O X -0.0003 0.0003 0.0001 0.0003 0.0000 0.0001  
Y 0.0006 -0.0009 0.0003 -0.0009 -0.0008 -0.0009  
Z -0.0002 -0.0002 -0.0003 0.0002 0.0003 0.0002

AT.159 O X 0.0003 -0.0003 -0.0001 0.0003 0.0000 -0.0001  
Y 0.0006 -0.0009 0.0003 0.0009 0.0008 -0.0009  
Z 0.0002 0.0002 0.0003 0.0002 0.0003 -0.0002

AT.160 O X 0.0003 -0.0003 0.0001 0.0003 -0.0000 -0.0001  
Y -0.0006 0.0009 0.0003 -0.0009 0.0008 0.0009  
Z 0.0002 0.0002 -0.0003 0.0002 -0.0003 -0.0002

AT.161 O X -0.0003 0.0004 0.0004 0.0005 -0.0006 0.0009  
Y 0.0001 0.0000 -0.0001 -0.0001 0.0001 -0.0002  
Z -0.0003 0.0005 0.0001 0.0005 -0.0006 0.0006

AT.162 O X -0.0003 0.0004 -0.0004 0.0005 0.0006 0.0009  
Y -0.0001 -0.0000 -0.0001 0.0001 0.0001 0.0002

Z -0.0003 0.0005 -0.0001 0.0005 0.0006 0.0006  
AT.163 O X 0.0003 -0.0004 0.0004 0.0005 0.0006 -0.0009  
Y -0.0001 -0.0000 -0.0001 -0.0001 -0.0001 0.0002  
Z 0.0003 -0.0005 0.0001 0.0005 0.0006 -0.0006  
AT.164 O X 0.0003 -0.0004 -0.0004 0.0005 -0.0006 -0.0009  
Y 0.0001 0.0000 -0.0001 0.0001 -0.0001 -0.0002  
Z 0.0003 -0.0005 -0.0001 0.0005 -0.0006 -0.0006  
AT.165 H X 0.0055 -0.0066 -0.0054 -0.0072 0.0078 -0.0121  
Y 0.0042 -0.0052 -0.0031 -0.0055 0.0053 -0.0077  
Z 0.0085 -0.0121 -0.0050 -0.0130 0.0135 -0.0152  
AT.166 H X 0.0055 -0.0066 0.0054 -0.0072 -0.0078 -0.0121  
Y -0.0042 0.0052 -0.0031 0.0055 0.0053 0.0077  
Z 0.0085 -0.0121 0.0050 -0.0130 -0.0135 -0.0152  
AT.167 H X -0.0055 0.0066 -0.0054 -0.0072 -0.0078 0.0121  
Y -0.0042 0.0052 -0.0031 -0.0055 -0.0053 0.0077  
Z -0.0085 0.0121 -0.0050 -0.0130 -0.0135 0.0152  
AT.168 H X -0.0055 0.0066 0.0054 -0.0072 0.0078 0.0121  
Y 0.0042 -0.0052 -0.0031 0.0055 -0.0053 -0.0077  
Z -0.0085 0.0121 0.0050 -0.0130 0.0135 0.0152  
AT.169 O X 0.0003 0.0001 0.0003 -0.0001 -0.0000 -0.0000  
Y 0.0001 -0.0000 -0.0001 0.0001 -0.0003 0.0001  
Z -0.0001 -0.0000 0.0010 -0.0003 0.0001 -0.0001  
AT.170 O X 0.0003 0.0001 -0.0003 -0.0001 0.0000 -0.0000  
Y -0.0001 0.0000 -0.0001 -0.0001 -0.0003 -0.0001  
Z -0.0001 -0.0000 -0.0010 -0.0003 -0.0001 -0.0001  
AT.171 O X -0.0003 -0.0001 0.0003 -0.0001 0.0000 0.0000  
Y -0.0001 0.0000 -0.0001 0.0001 0.0003 -0.0001  
Z 0.0001 0.0000 0.0010 -0.0003 -0.0001 0.0001  
AT.172 O X -0.0003 -0.0001 -0.0003 -0.0001 -0.0000 0.0000  
Y 0.0001 -0.0000 -0.0001 -0.0001 0.0003 0.0001  
Z 0.0001 0.0000 -0.0010 -0.0003 0.0001 0.0001  
AT.173 H X -0.0034 -0.0002 -0.0055 0.0024 0.0004 -0.0019



|                           |     |         |         |         |         |         |         |
|---------------------------|-----|---------|---------|---------|---------|---------|---------|
|                           | Y   | 0.0001  | -0.0004 | 0.0041  | -0.0020 | 0.0002  | 0.0009  |
|                           | Z   | 0.0034  | 0.0005  | -0.0184 | 0.0076  | -0.0032 | 0.0020  |
| AT. 174                   | H X | -0.0034 | -0.0002 | 0.0055  | 0.0024  | -0.0004 | -0.0019 |
|                           | Y   | -0.0001 | 0.0004  | 0.0041  | 0.0020  | 0.0002  | -0.0009 |
|                           | Z   | 0.0034  | 0.0005  | 0.0184  | 0.0076  | 0.0032  | 0.0020  |
| AT. 175                   | H X | 0.0034  | 0.0002  | -0.0055 | 0.0024  | -0.0004 | 0.0019  |
|                           | Y   | -0.0001 | 0.0004  | 0.0041  | -0.0020 | -0.0002 | -0.0009 |
|                           | Z   | -0.0034 | -0.0005 | -0.0184 | 0.0076  | 0.0032  | -0.0020 |
| AT. 176                   | H X | 0.0034  | 0.0002  | 0.0055  | 0.0024  | 0.0004  | 0.0019  |
|                           | Y   | 0.0001  | -0.0004 | 0.0041  | 0.0020  | -0.0002 | 0.0009  |
|                           | Z   | -0.0034 | -0.0005 | 0.0184  | 0.0076  | -0.0032 | -0.0020 |
|                           |     |         |         |         |         |         |         |
| FREQ(CM** <sup>-1</sup> ) |     | 1542.51 | 1543.66 | 1551.69 | 1553.25 | 1554.27 | 1554.37 |
|                           |     |         |         |         |         |         |         |
| AT. 1                     | I X | 0.0000  | 0.0000  | -0.0000 | 0.0000  | -0.0000 | 0.0000  |
|                           | Y   | -0.0000 | 0.0000  | -0.0000 | 0.0000  | 0.0000  | -0.0000 |
|                           | Z   | -0.0000 | -0.0000 | 0.0000  | 0.0000  | -0.0000 | -0.0000 |
| AT. 2                     | I X | 0.0000  | -0.0000 | 0.0000  | 0.0000  | -0.0000 | -0.0000 |
|                           | Y   | 0.0000  | 0.0000  | -0.0000 | -0.0000 | -0.0000 | -0.0000 |
|                           | Z   | -0.0000 | 0.0000  | -0.0000 | 0.0000  | -0.0000 | 0.0000  |
| AT. 3                     | I X | 0.0000  | 0.0000  | 0.0000  | -0.0000 | -0.0000 | 0.0000  |
|                           | Y   | -0.0000 | 0.0000  | 0.0000  | -0.0000 | 0.0000  | -0.0000 |
|                           | Z   | -0.0000 | -0.0000 | -0.0000 | -0.0000 | -0.0000 | -0.0000 |
| AT. 4                     | I X | 0.0000  | -0.0000 | -0.0000 | -0.0000 | -0.0000 | -0.0000 |
|                           | Y   | 0.0000  | 0.0000  | 0.0000  | 0.0000  | -0.0000 | -0.0000 |
|                           | Z   | -0.0000 | 0.0000  | 0.0000  | -0.0000 | -0.0000 | 0.0000  |
| AT. 5                     | I X | -0.0000 | 0.0000  | -0.0000 | 0.0000  | 0.0000  | -0.0000 |
|                           | Y   | 0.0000  | 0.0000  | -0.0000 | 0.0000  | 0.0000  | -0.0000 |
|                           | Z   | -0.0000 | -0.0000 | 0.0000  | -0.0000 | -0.0000 | 0.0000  |
| AT. 6                     | I X | -0.0000 | -0.0000 | 0.0000  | 0.0000  | 0.0000  | 0.0000  |
|                           | Y   | -0.0000 | 0.0000  | -0.0000 | -0.0000 | -0.0000 | -0.0000 |
|                           | Z   | -0.0000 | 0.0000  | -0.0000 | -0.0000 | -0.0000 | -0.0000 |

AT. 7 I X -0.0000 0.0000 0.0000 -0.0000 0.0000 -0.0000  
Y 0.0000 0.0000 0.0000 -0.0000 0.0000 -0.0000  
Z -0.0000 -0.0000 -0.0000 0.0000 -0.0000 0.0000

AT. 8 I X -0.0000 -0.0000 -0.0000 -0.0000 0.0000 0.0000  
Y -0.0000 0.0000 0.0000 0.0000 -0.0000 -0.0000  
Z -0.0000 0.0000 0.0000 0.0000 -0.0000 -0.0000

AT. 9 N X -0.0008 -0.0014 0.0020 -0.0012 -0.0023 -0.0008  
Y -0.0031 -0.0054 0.0080 -0.0042 -0.0094 -0.0026  
Z 0.0001 0.0003 -0.0010 0.0003 0.0012 0.0006

AT. 10 N X -0.0008 0.0014 -0.0020 -0.0012 -0.0023 0.0008  
Y 0.0031 -0.0054 0.0080 0.0042 0.0094 -0.0026  
Z 0.0001 -0.0003 0.0010 0.0003 0.0012 -0.0006

AT. 11 N X -0.0008 -0.0014 -0.0020 0.0012 -0.0023 -0.0008  
Y -0.0031 -0.0054 -0.0080 0.0042 -0.0094 -0.0026  
Z 0.0001 0.0003 0.0010 -0.0003 0.0012 0.0006

AT. 12 N X -0.0008 0.0014 0.0020 0.0012 -0.0023 0.0008  
Y 0.0031 -0.0054 -0.0080 -0.0042 0.0094 -0.0026  
Z 0.0001 -0.0003 -0.0010 -0.0003 0.0012 -0.0006

AT. 13 N X 0.0005 0.0008 -0.0022 0.0026 0.0024 -0.0022  
Y 0.0041 0.0067 -0.0179 0.0195 0.0186 -0.0190  
Z 0.0005 0.0008 -0.0018 0.0025 0.0021 -0.0021

AT. 14 N X 0.0005 -0.0008 0.0022 0.0026 0.0024 0.0022  
Y -0.0041 0.0067 -0.0179 -0.0195 -0.0186 -0.0190  
Z 0.0005 -0.0008 0.0018 0.0025 0.0021 0.0021

AT. 15 N X 0.0005 0.0008 0.0022 -0.0026 0.0024 -0.0022  
Y 0.0041 0.0067 0.0179 -0.0195 0.0186 -0.0190  
Z 0.0005 0.0008 0.0018 -0.0025 0.0021 -0.0021

AT. 16 N X 0.0005 -0.0008 -0.0022 -0.0026 0.0024 0.0022  
Y -0.0041 0.0067 0.0179 0.0195 -0.0186 -0.0190  
Z 0.0005 -0.0008 -0.0018 -0.0025 0.0021 0.0021

AT. 17 O X -0.0007 -0.0004 -0.0007 0.0001 0.0010 0.0004  
Y 0.0003 0.0006 -0.0009 0.0003 0.0009 0.0008

Z -0.0026 -0.0016 -0.0026 0.0009 0.0037 0.0010  
AT. 18 O X -0.0007 0.0004 0.0007 0.0001 0.0010 -0.0004  
Y -0.0003 0.0006 -0.0009 -0.0003 -0.0009 0.0008  
Z -0.0026 0.0016 0.0026 0.0009 0.0037 -0.0010  
AT. 19 O X -0.0007 -0.0004 0.0007 -0.0001 0.0010 0.0004  
Y 0.0003 0.0006 0.0009 -0.0003 0.0009 0.0008  
Z -0.0026 -0.0016 0.0026 -0.0009 0.0037 0.0010  
AT. 20 O X -0.0007 0.0004 -0.0007 -0.0001 0.0010 -0.0004  
Y -0.0003 0.0006 0.0009 0.0003 -0.0009 0.0008  
Z -0.0026 0.0016 -0.0026 -0.0009 0.0037 -0.0010  
AT. 21 O X 0.0002 0.0003 -0.0005 0.0006 0.0007 -0.0005  
Y -0.0007 -0.0010 0.0025 -0.0028 -0.0025 0.0023  
Z 0.0014 0.0022 -0.0053 0.0063 0.0060 -0.0053  
AT. 22 O X 0.0002 -0.0003 0.0005 0.0006 0.0007 0.0005  
Y 0.0007 -0.0010 0.0025 0.0028 0.0025 0.0023  
Z 0.0014 -0.0022 0.0053 0.0063 0.0060 0.0053  
AT. 23 O X 0.0002 0.0003 0.0005 -0.0006 0.0007 -0.0005  
Y -0.0007 -0.0010 -0.0025 0.0028 -0.0025 0.0023  
Z 0.0014 0.0022 0.0053 -0.0063 0.0060 -0.0053  
AT. 24 O X 0.0002 -0.0003 -0.0005 -0.0006 0.0007 0.0005  
Y 0.0007 -0.0010 -0.0025 -0.0028 0.0025 0.0023  
Z 0.0014 -0.0022 -0.0053 -0.0063 0.0060 0.0053  
AT. 25 C X 0.0013 0.0011 -0.0001 0.0000 -0.0001 0.0004  
Y -0.0036 -0.0040 0.0021 -0.0011 -0.0019 -0.0015  
Z 0.0027 0.0033 -0.0021 0.0009 0.0021 0.0016  
AT. 26 C X 0.0013 -0.0011 0.0001 0.0000 -0.0001 -0.0004  
Y 0.0036 -0.0040 0.0021 0.0011 0.0019 -0.0015  
Z 0.0027 -0.0033 0.0021 0.0009 0.0021 -0.0016  
AT. 27 C X 0.0013 0.0011 0.0001 -0.0000 -0.0001 0.0004  
Y -0.0036 -0.0040 -0.0021 0.0011 -0.0019 -0.0015  
Z 0.0027 0.0033 0.0021 -0.0009 0.0021 0.0016  
AT. 28 C X 0.0013 -0.0011 -0.0001 -0.0000 -0.0001 -0.0004

Y 0.0036 -0.0040 -0.0021 -0.0011 0.0019 -0.0015  
Z 0.0027 -0.0033 -0.0021 -0.0009 0.0021 -0.0016  
AT. 29 H X 0.0001 0.0012 -0.0013 0.0010 0.0015 0.0003  
Y 0.0383 0.0387 -0.0113 0.0055 0.0069 0.0131  
Z -0.0035 -0.0048 0.0020 -0.0016 -0.0017 -0.0010  
AT. 30 H X 0.0001 -0.0012 0.0013 0.0010 0.0015 -0.0003  
Y -0.0383 0.0387 -0.0113 -0.0055 -0.0069 0.0131  
Z -0.0035 0.0048 -0.0020 -0.0016 -0.0017 0.0010  
AT. 31 H X 0.0001 0.0012 0.0013 -0.0010 0.0015 0.0003  
Y 0.0383 0.0387 0.0113 -0.0055 0.0069 0.0131  
Z -0.0035 -0.0048 -0.0020 0.0016 -0.0017 -0.0010  
AT. 32 H X 0.0001 -0.0012 -0.0013 -0.0010 0.0015 -0.0003  
Y -0.0383 0.0387 0.0113 0.0055 -0.0069 0.0131  
Z -0.0035 0.0048 0.0020 0.0016 -0.0017 0.0010  
AT. 33 H X -0.0245 -0.0238 0.0063 -0.0031 -0.0034 -0.0079  
Y 0.0081 0.0077 -0.0006 0.0000 -0.0009 0.0026  
Z -0.0256 -0.0258 0.0044 -0.0013 -0.0001 -0.0094  
AT. 34 H X -0.0245 0.0238 -0.0063 -0.0031 -0.0034 0.0079  
Y -0.0081 0.0077 -0.0006 -0.0000 0.0009 0.0026  
Z -0.0256 0.0258 -0.0044 -0.0013 -0.0001 0.0094  
AT. 35 H X -0.0245 -0.0238 -0.0063 0.0031 -0.0034 -0.0079  
Y 0.0081 0.0077 0.0006 -0.0000 -0.0009 0.0026  
Z -0.0256 -0.0258 -0.0044 0.0013 -0.0001 -0.0094  
AT. 36 H X -0.0245 0.0238 0.0063 0.0031 -0.0034 0.0079  
Y -0.0081 0.0077 0.0006 0.0000 0.0009 0.0026  
Z -0.0256 0.0258 0.0044 0.0013 -0.0001 0.0094  
AT. 37 C X 0.0020 0.0021 -0.0013 0.0010 0.0012 0.0001  
Y 0.0021 0.0036 -0.0058 0.0034 0.0071 0.0012  
Z 0.0018 -0.0002 0.0057 -0.0022 -0.0074 -0.0028  
AT. 38 C X 0.0020 -0.0021 0.0013 0.0010 0.0012 -0.0001  
Y -0.0021 0.0036 -0.0058 -0.0034 -0.0071 0.0012  
Z 0.0018 0.0002 -0.0057 -0.0022 -0.0074 0.0028

AT. 39 C X 0.0020 0.0021 0.0013 -0.0010 0.0012 0.0001  
Y 0.0021 0.0036 0.0058 -0.0034 0.0071 0.0012  
Z 0.0018 -0.0002 -0.0057 0.0022 -0.0074 -0.0028

AT. 40 C X 0.0020 -0.0021 -0.0013 -0.0010 0.0012 -0.0001  
Y -0.0021 0.0036 0.0058 0.0034 -0.0071 0.0012  
Z 0.0018 0.0002 0.0057 0.0022 -0.0074 0.0028

AT. 41 C X 0.0002 0.0007 -0.0009 0.0005 0.0009 0.0003  
Y 0.0013 0.0021 -0.0024 0.0014 0.0026 0.0009  
Z 0.0021 0.0022 -0.0006 0.0004 0.0003 0.0008

AT. 42 C X 0.0002 -0.0007 0.0009 0.0005 0.0009 -0.0003  
Y -0.0013 0.0021 -0.0024 -0.0014 -0.0026 0.0009  
Z 0.0021 -0.0022 0.0006 0.0004 0.0003 -0.0008

AT. 43 C X 0.0002 0.0007 0.0009 -0.0005 0.0009 0.0003  
Y 0.0013 0.0021 0.0024 -0.0014 0.0026 0.0009  
Z 0.0021 0.0022 0.0006 -0.0004 0.0003 0.0008

AT. 44 C X 0.0002 -0.0007 -0.0009 -0.0005 0.0009 -0.0003  
Y -0.0013 0.0021 0.0024 0.0014 -0.0026 0.0009  
Z 0.0021 -0.0022 -0.0006 -0.0004 0.0003 -0.0008

AT. 45 H X 0.0013 -0.0010 0.0032 0.0001 -0.0036 -0.0019  
Y -0.0164 -0.0196 0.0102 -0.0053 -0.0087 -0.0072  
Z -0.0138 -0.0167 0.0099 -0.0053 -0.0091 -0.0060

AT. 46 H X 0.0013 0.0010 -0.0032 0.0001 -0.0036 0.0019  
Y 0.0164 -0.0196 0.0102 0.0053 0.0087 -0.0072  
Z -0.0138 0.0167 -0.0099 -0.0053 -0.0091 0.0060

AT. 47 H X 0.0013 -0.0010 -0.0032 -0.0001 -0.0036 -0.0019  
Y -0.0164 -0.0196 -0.0102 0.0053 -0.0087 -0.0072  
Z -0.0138 -0.0167 -0.0099 0.0053 -0.0091 -0.0060

AT. 48 H X 0.0013 0.0010 0.0032 -0.0001 -0.0036 0.0019  
Y 0.0164 -0.0196 -0.0102 -0.0053 0.0087 -0.0072  
Z -0.0138 0.0167 0.0099 0.0053 -0.0091 0.0060

AT. 49 H X 0.0010 0.0017 -0.0041 0.0013 0.0048 -0.0001  
Y 0.0066 0.0074 -0.0050 0.0024 0.0047 0.0017

Z -0.0115 -0.0107 -0.0012 -0.0006 0.0041 -0.0030  
AT. 50 H X 0.0010 -0.0017 0.0041 0.0013 0.0048 0.0001  
Y -0.0066 0.0074 -0.0050 -0.0024 -0.0047 0.0017  
Z -0.0115 0.0107 0.0012 -0.0006 0.0041 0.0030  
AT. 51 H X 0.0010 0.0017 0.0041 -0.0013 0.0048 -0.0001  
Y 0.0066 0.0074 0.0050 -0.0024 0.0047 0.0017  
Z -0.0115 -0.0107 0.0012 0.0006 0.0041 -0.0030  
AT. 52 H X 0.0010 -0.0017 -0.0041 -0.0013 0.0048 0.0001  
Y -0.0066 0.0074 0.0050 0.0024 -0.0047 0.0017  
Z -0.0115 0.0107 -0.0012 0.0006 0.0041 0.0030  
AT. 53 C X -0.0007 -0.0015 0.0023 -0.0015 -0.0021 0.0009  
Y 0.0003 0.0004 0.0003 -0.0011 -0.0007 0.0007  
Z -0.0007 -0.0006 -0.0005 0.0006 0.0009 -0.0000  
AT. 54 C X -0.0007 0.0015 -0.0023 -0.0015 -0.0021 -0.0009  
Y -0.0003 0.0004 0.0003 0.0011 0.0007 0.0007  
Z -0.0007 0.0006 0.0005 0.0006 0.0009 0.0000  
AT. 55 C X -0.0007 -0.0015 -0.0023 0.0015 -0.0021 0.0009  
Y 0.0003 0.0004 -0.0003 0.0011 -0.0007 0.0007  
Z -0.0007 -0.0006 0.0005 -0.0006 0.0009 -0.0000  
AT. 56 C X -0.0007 0.0015 0.0023 0.0015 -0.0021 -0.0009  
Y -0.0003 0.0004 -0.0003 -0.0011 0.0007 0.0007  
Z -0.0007 0.0006 -0.0005 -0.0006 0.0009 0.0000  
AT. 57 C X -0.0001 -0.0006 0.0010 -0.0001 -0.0005 0.0003  
Y -0.0001 0.0001 -0.0004 -0.0006 -0.0002 -0.0004  
Z -0.0002 -0.0003 -0.0000 0.0001 0.0003 -0.0000  
AT. 58 C X -0.0001 0.0006 -0.0010 -0.0001 -0.0005 -0.0003  
Y 0.0001 0.0001 -0.0004 0.0006 0.0002 -0.0004  
Z -0.0002 0.0003 0.0000 0.0001 0.0003 0.0000  
AT. 59 C X -0.0001 -0.0006 -0.0010 0.0001 -0.0005 0.0003  
Y -0.0001 0.0001 0.0004 0.0006 -0.0002 -0.0004  
Z -0.0002 -0.0003 0.0000 -0.0001 0.0003 -0.0000  
AT. 60 C X -0.0001 0.0006 0.0010 0.0001 -0.0005 -0.0003

Y 0.0001 0.0001 0.0004 -0.0006 0.0002 -0.0004  
Z -0.0002 0.0003 -0.0000 -0.0001 0.0003 0.0000  
AT. 61 H X 0.0002 0.0005 -0.0030 0.0082 0.0078 0.0008  
Y 0.0003 0.0018 -0.0051 0.0064 0.0077 -0.0007  
Z -0.0011 -0.0061 0.0122 -0.0036 -0.0101 0.0040  
AT. 62 H X 0.0002 -0.0005 0.0030 0.0082 0.0078 -0.0008  
Y -0.0003 0.0018 -0.0051 -0.0064 -0.0077 -0.0007  
Z -0.0011 0.0061 -0.0122 -0.0036 -0.0101 -0.0040  
AT. 63 H X 0.0002 0.0005 0.0030 -0.0082 0.0078 0.0008  
Y 0.0003 0.0018 0.0051 -0.0064 0.0077 -0.0007  
Z -0.0011 -0.0061 -0.0122 0.0036 -0.0101 0.0040  
AT. 64 H X 0.0002 -0.0005 -0.0030 -0.0082 0.0078 -0.0008  
Y -0.0003 0.0018 0.0051 0.0064 -0.0077 -0.0007  
Z -0.0011 0.0061 0.0122 0.0036 -0.0101 -0.0040  
AT. 65 H X -0.0000 0.0006 -0.0002 -0.0035 -0.0027 -0.0010  
Y -0.0003 -0.0031 0.0024 0.0103 0.0068 0.0033  
Z 0.0031 0.0095 -0.0138 0.0045 0.0091 -0.0060  
AT. 66 H X -0.0000 -0.0006 0.0002 -0.0035 -0.0027 0.0010  
Y 0.0003 -0.0031 0.0024 -0.0103 -0.0068 0.0033  
Z 0.0031 -0.0095 0.0138 0.0045 0.0091 0.0060  
AT. 67 H X -0.0000 0.0006 0.0002 0.0035 -0.0027 -0.0010  
Y -0.0003 -0.0031 -0.0024 -0.0103 0.0068 0.0033  
Z 0.0031 0.0095 0.0138 -0.0045 0.0091 -0.0060  
AT. 68 H X -0.0000 -0.0006 -0.0002 0.0035 -0.0027 0.0010  
Y 0.0003 -0.0031 -0.0024 0.0103 -0.0068 0.0033  
Z 0.0031 -0.0095 -0.0138 -0.0045 0.0091 0.0060  
AT. 69 H X 0.0028 0.0113 -0.0169 0.0009 0.0090 -0.0069  
Y 0.0005 -0.0012 0.0067 -0.0054 -0.0088 0.0015  
Z 0.0009 0.0008 0.0026 -0.0039 -0.0055 -0.0002  
AT. 70 H X 0.0028 -0.0113 0.0169 0.0009 0.0090 0.0069  
Y -0.0005 -0.0012 0.0067 0.0054 0.0088 0.0015  
Z 0.0009 -0.0008 -0.0026 -0.0039 -0.0055 0.0002

AT. 71 H X 0.0028 0.0113 0.0169 -0.0009 0.0090 -0.0069  
Y 0.0005 -0.0012 -0.0067 0.0054 -0.0088 0.0015  
Z 0.0009 0.0008 -0.0026 0.0039 -0.0055 -0.0002

AT. 72 H X 0.0028 -0.0113 -0.0169 -0.0009 0.0090 0.0069  
Y -0.0005 -0.0012 -0.0067 -0.0054 0.0088 0.0015  
Z 0.0009 -0.0008 0.0026 0.0039 -0.0055 0.0002

AT. 73 C X 0.0003 0.0002 -0.0003 0.0002 -0.0002 0.0000  
Y -0.0007 -0.0005 -0.0005 0.0011 0.0009 -0.0008  
Z 0.0015 0.0014 -0.0000 -0.0002 -0.0002 0.0004

AT. 74 C X 0.0003 -0.0002 0.0003 0.0002 -0.0002 -0.0000  
Y 0.0007 -0.0005 -0.0005 -0.0011 -0.0009 -0.0008  
Z 0.0015 -0.0014 0.0000 -0.0002 -0.0002 -0.0004

AT. 75 C X 0.0003 0.0002 0.0003 -0.0002 -0.0002 0.0000  
Y -0.0007 -0.0005 0.0005 -0.0011 0.0009 -0.0008  
Z 0.0015 0.0014 0.0000 0.0002 -0.0002 0.0004

AT. 76 C X 0.0003 -0.0002 -0.0003 -0.0002 -0.0002 -0.0000  
Y 0.0007 -0.0005 0.0005 0.0011 -0.0009 -0.0008  
Z 0.0015 -0.0014 -0.0000 0.0002 -0.0002 -0.0004

AT. 77 C X 0.0004 0.0003 -0.0003 0.0000 0.0001 -0.0003  
Y 0.0006 0.0012 -0.0019 0.0012 0.0021 0.0004  
Z 0.0007 0.0002 0.0008 -0.0006 -0.0010 -0.0003

AT. 78 C X 0.0004 -0.0003 0.0003 0.0000 0.0001 0.0003  
Y -0.0006 0.0012 -0.0019 -0.0012 -0.0021 0.0004  
Z 0.0007 -0.0002 -0.0008 -0.0006 -0.0010 0.0003

AT. 79 C X 0.0004 0.0003 0.0003 -0.0000 0.0001 -0.0003  
Y 0.0006 0.0012 0.0019 -0.0012 0.0021 0.0004  
Z 0.0007 0.0002 -0.0008 0.0006 -0.0010 -0.0003

AT. 80 C X 0.0004 -0.0003 -0.0003 -0.0000 0.0001 0.0003  
Y -0.0006 0.0012 0.0019 0.0012 -0.0021 0.0004  
Z 0.0007 -0.0002 0.0008 0.0006 -0.0010 0.0003

AT. 81 H X -0.0008 0.0014 -0.0034 0.0034 0.0041 0.0003  
Y 0.0004 0.0033 -0.0053 0.0045 0.0063 0.0010



Z -0.0109 -0.0094 0.0027 0.0022 -0.0022 -0.0012  
AT. 82 H X -0.0008 -0.0014 0.0034 0.0034 0.0041 -0.0003  
Y -0.0004 0.0033 -0.0053 -0.0045 -0.0063 0.0010  
Z -0.0109 0.0094 -0.0027 0.0022 -0.0022 0.0012  
AT. 83 H X -0.0008 0.0014 0.0034 -0.0034 0.0041 0.0003  
Y 0.0004 0.0033 0.0053 -0.0045 0.0063 0.0010  
Z -0.0109 -0.0094 -0.0027 -0.0022 -0.0022 -0.0012  
AT. 84 H X -0.0008 -0.0014 -0.0034 -0.0034 0.0041 -0.0003  
Y -0.0004 0.0033 0.0053 0.0045 -0.0063 0.0010  
Z -0.0109 0.0094 0.0027 -0.0022 -0.0022 0.0012  
AT. 85 H X -0.0059 -0.0033 -0.0024 0.0055 0.0034 -0.0009  
Y 0.0019 -0.0024 0.0071 -0.0058 -0.0087 -0.0028  
Z 0.0013 0.0043 -0.0061 0.0038 0.0072 0.0025  
AT. 86 H X -0.0059 0.0033 0.0024 0.0055 0.0034 0.0009  
Y -0.0019 -0.0024 0.0071 0.0058 0.0087 -0.0028  
Z 0.0013 -0.0043 0.0061 0.0038 0.0072 -0.0025  
AT. 87 H X -0.0059 -0.0033 0.0024 -0.0055 0.0034 -0.0009  
Y 0.0019 -0.0024 -0.0071 0.0058 -0.0087 -0.0028  
Z 0.0013 0.0043 0.0061 -0.0038 0.0072 0.0025  
AT. 88 H X -0.0059 0.0033 -0.0024 -0.0055 0.0034 0.0009  
Y -0.0019 -0.0024 -0.0071 -0.0058 0.0087 -0.0028  
Z 0.0013 -0.0043 -0.0061 -0.0038 0.0072 -0.0025  
AT. 89 C X -0.0001 -0.0010 0.0023 -0.0025 -0.0022 0.0017  
Y 0.0006 0.0005 0.0009 -0.0013 -0.0009 0.0013  
Z 0.0000 0.0002 -0.0002 0.0004 0.0003 -0.0006  
AT. 90 C X -0.0001 0.0010 -0.0023 -0.0025 -0.0022 -0.0017  
Y -0.0006 0.0005 0.0009 0.0013 0.0009 0.0013  
Z 0.0000 -0.0002 0.0002 0.0004 0.0003 0.0006  
AT. 91 C X -0.0001 -0.0010 -0.0023 0.0025 -0.0022 0.0017  
Y 0.0006 0.0005 -0.0009 0.0013 -0.0009 0.0013  
Z 0.0000 0.0002 0.0002 -0.0004 0.0003 -0.0006  
AT. 92 C X -0.0001 0.0010 0.0023 0.0025 -0.0022 -0.0017

Y -0.0006 0.0005 -0.0009 -0.0013 0.0009 0.0013  
Z 0.0000 -0.0002 -0.0002 -0.0004 0.0003 0.0006  
AT. 93 C X 0.0007 0.0000 0.0007 -0.0010 -0.0007 0.0007  
Y 0.0009 0.0011 0.0008 -0.0005 -0.0008 0.0004  
Z 0.0002 0.0001 0.0007 -0.0008 -0.0007 0.0007  
AT. 94 C X 0.0007 -0.0000 -0.0007 -0.0010 -0.0007 -0.0007  
Y -0.0009 0.0011 0.0008 0.0005 0.0008 0.0004  
Z 0.0002 -0.0001 -0.0007 -0.0008 -0.0007 -0.0007  
AT. 95 C X 0.0007 0.0000 -0.0007 0.0010 -0.0007 0.0007  
Y 0.0009 0.0011 -0.0008 0.0005 -0.0008 0.0004  
Z 0.0002 0.0001 -0.0007 0.0008 -0.0007 0.0007  
AT. 96 C X 0.0007 -0.0000 0.0007 0.0010 -0.0007 -0.0007  
Y -0.0009 0.0011 -0.0008 -0.0005 0.0008 0.0004  
Z 0.0002 -0.0001 0.0007 0.0008 -0.0007 -0.0007  
AT. 97 H X 0.0066 0.0050 0.0081 -0.0079 -0.0080 0.0062  
Y -0.0100 -0.0111 -0.0114 0.0093 0.0111 -0.0082  
Z 0.0009 -0.0058 0.0040 -0.0074 -0.0044 0.0046  
AT. 98 H X 0.0066 -0.0050 -0.0081 -0.0079 -0.0080 -0.0062  
Y 0.0100 -0.0111 -0.0114 -0.0093 -0.0111 -0.0082  
Z 0.0009 0.0058 -0.0040 -0.0074 -0.0044 -0.0046  
AT. 99 H X 0.0066 0.0050 -0.0081 0.0079 -0.0080 0.0062  
Y -0.0100 -0.0111 0.0114 -0.0093 0.0111 -0.0082  
Z 0.0009 -0.0058 -0.0040 0.0074 -0.0044 0.0046  
AT. 100 H X 0.0066 -0.0050 0.0081 0.0079 -0.0080 -0.0062  
Y 0.0100 -0.0111 0.0114 0.0093 -0.0111 -0.0082  
Z 0.0009 0.0058 0.0040 0.0074 -0.0044 -0.0046  
AT. 101 H X -0.0110 -0.0075 -0.0131 0.0135 0.0127 -0.0102  
Y -0.0113 -0.0084 -0.0123 0.0127 0.0120 -0.0098  
Z -0.0037 0.0048 -0.0103 0.0141 0.0105 -0.0091  
AT. 102 H X -0.0110 0.0075 0.0131 0.0135 0.0127 0.0102  
Y 0.0113 -0.0084 -0.0123 -0.0127 -0.0120 -0.0098  
Z -0.0037 -0.0048 0.0103 0.0141 0.0105 0.0091

AT.103 H X -0.0110 -0.0075 0.0131 -0.0135 0.0127 -0.0102  
Y -0.0113 -0.0084 0.0123 -0.0127 0.0120 -0.0098  
Z -0.0037 0.0048 0.0103 -0.0141 0.0105 -0.0091

AT.104 H X -0.0110 0.0075 -0.0131 -0.0135 0.0127 0.0102  
Y 0.0113 -0.0084 0.0123 0.0127 -0.0120 -0.0098  
Z -0.0037 -0.0048 -0.0103 -0.0141 0.0105 0.0091

AT.105 H X -0.0063 0.0041 -0.0112 0.0161 0.0112 -0.0102  
Y 0.0070 0.0039 0.0102 -0.0115 -0.0099 0.0084  
Z -0.0025 -0.0039 -0.0030 0.0023 0.0028 -0.0020

AT.106 H X -0.0063 -0.0041 0.0112 0.0161 0.0112 0.0102  
Y -0.0070 0.0039 0.0102 0.0115 0.0099 0.0084  
Z -0.0025 0.0039 0.0030 0.0023 0.0028 0.0020

AT.107 H X -0.0063 0.0041 0.0112 -0.0161 0.0112 -0.0102  
Y 0.0070 0.0039 -0.0102 0.0115 -0.0099 0.0084  
Z -0.0025 -0.0039 0.0030 -0.0023 0.0028 -0.0020

AT.108 H X -0.0063 -0.0041 -0.0112 -0.0161 0.0112 0.0102  
Y -0.0070 0.0039 -0.0102 -0.0115 0.0099 0.0084  
Z -0.0025 0.0039 -0.0030 -0.0023 0.0028 0.0020

AT.109 C X 0.0002 0.0001 0.0000 0.0002 0.0001 0.0005  
Y -0.0008 -0.0014 0.0037 -0.0038 -0.0038 0.0038  
Z 0.0002 -0.0002 0.0012 -0.0008 -0.0009 0.0014

AT.110 C X 0.0002 -0.0001 -0.0000 0.0002 0.0001 -0.0005  
Y 0.0008 -0.0014 0.0037 0.0038 0.0038 0.0038  
Z 0.0002 0.0002 -0.0012 -0.0008 -0.0009 -0.0014

AT.111 C X 0.0002 0.0001 -0.0000 -0.0002 0.0001 0.0005  
Y -0.0008 -0.0014 -0.0037 0.0038 -0.0038 0.0038  
Z 0.0002 -0.0002 -0.0012 0.0008 -0.0009 0.0014

AT.112 C X 0.0002 -0.0001 0.0000 -0.0002 0.0001 -0.0005  
Y 0.0008 -0.0014 -0.0037 -0.0038 0.0038 0.0038  
Z 0.0002 0.0002 0.0012 0.0008 -0.0009 -0.0014

AT.113 H X -0.0004 0.0007 -0.0020 -0.0003 0.0006 -0.0022  
Y -0.0012 -0.0037 0.0093 -0.0071 -0.0079 0.0098

Z -0.0061 -0.0068 0.0145 -0.0215 -0.0187 0.0128  
AT. 114 H X -0.0004 -0.0007 0.0020 -0.0003 0.0006 0.0022  
Y 0.0012 -0.0037 0.0093 0.0071 0.0079 0.0098  
Z -0.0061 0.0068 -0.0145 -0.0215 -0.0187 -0.0128  
AT. 115 H X -0.0004 0.0007 0.0020 0.0003 0.0006 -0.0022  
Y -0.0012 -0.0037 -0.0093 0.0071 -0.0079 0.0098  
Z -0.0061 -0.0068 -0.0145 0.0215 -0.0187 0.0128  
AT. 116 H X -0.0004 -0.0007 -0.0020 0.0003 0.0006 0.0022  
Y 0.0012 -0.0037 -0.0093 -0.0071 0.0079 0.0098  
Z -0.0061 0.0068 0.0145 0.0215 -0.0187 -0.0128  
AT. 117 H X -0.0022 -0.0007 0.0020 -0.0076 -0.0054 -0.0001  
Y 0.0007 0.0036 -0.0134 0.0112 0.0119 -0.0145  
Z 0.0019 0.0045 -0.0146 0.0135 0.0138 -0.0149  
AT. 118 H X -0.0022 0.0007 -0.0020 -0.0076 -0.0054 0.0001  
Y -0.0007 0.0036 -0.0134 -0.0112 -0.0119 -0.0145  
Z 0.0019 -0.0045 0.0146 0.0135 0.0138 0.0149  
AT. 119 H X -0.0022 -0.0007 -0.0020 0.0076 -0.0054 -0.0001  
Y 0.0007 0.0036 0.0134 -0.0112 0.0119 -0.0145  
Z 0.0019 0.0045 0.0146 -0.0135 0.0138 -0.0149  
AT. 120 H X -0.0022 0.0007 0.0020 0.0076 -0.0054 0.0001  
Y -0.0007 0.0036 0.0134 0.0112 -0.0119 -0.0145  
Z 0.0019 -0.0045 -0.0146 -0.0135 0.0138 0.0149  
AT. 121 C X 0.0000 0.0001 -0.0002 0.0002 0.0001 0.0001  
Y -0.0013 -0.0021 0.0049 -0.0051 -0.0048 0.0050  
Z 0.0003 0.0004 -0.0003 0.0001 -0.0003 -0.0008  
AT. 122 C X 0.0000 -0.0001 0.0002 0.0002 0.0001 -0.0001  
Y 0.0013 -0.0021 0.0049 0.0051 0.0048 0.0050  
Z 0.0003 -0.0004 0.0003 0.0001 -0.0003 0.0008  
AT. 123 C X 0.0000 0.0001 0.0002 -0.0002 0.0001 0.0001  
Y -0.0013 -0.0021 -0.0049 0.0051 -0.0048 0.0050  
Z 0.0003 0.0004 0.0003 -0.0001 -0.0003 -0.0008  
AT. 124 C X 0.0000 -0.0001 -0.0002 -0.0002 0.0001 -0.0001

Y 0.0013 -0.0021 -0.0049 -0.0051 0.0048 0.0050  
Z 0.0003 -0.0004 -0.0003 -0.0001 -0.0003 0.0008  
AT. 125 H X -0.0006 -0.0010 0.0086 -0.0099 -0.0107 0.0053  
Y 0.0047 0.0084 -0.0189 0.0199 0.0156 -0.0219  
Z -0.0038 -0.0069 0.0146 -0.0155 -0.0122 0.0176  
AT. 126 H X -0.0006 0.0010 -0.0086 -0.0099 -0.0107 -0.0053  
Y -0.0047 0.0084 -0.0189 -0.0199 -0.0156 -0.0219  
Z -0.0038 0.0069 -0.0146 -0.0155 -0.0122 -0.0176  
AT. 127 H X -0.0006 -0.0010 -0.0086 0.0099 -0.0107 0.0053  
Y 0.0047 0.0084 0.0189 -0.0199 0.0156 -0.0219  
Z -0.0038 -0.0069 -0.0146 0.0155 -0.0122 0.0176  
AT. 128 H X -0.0006 0.0010 0.0086 0.0099 -0.0107 -0.0053  
Y -0.0047 0.0084 0.0189 0.0199 -0.0156 -0.0219  
Z -0.0038 0.0069 0.0146 0.0155 -0.0122 -0.0176  
AT. 129 H X 0.0009 0.0023 -0.0087 0.0097 0.0098 -0.0086  
Y -0.0019 -0.0044 0.0120 -0.0129 -0.0118 0.0140  
Z 0.0014 0.0022 -0.0144 0.0164 0.0190 -0.0101  
AT. 130 H X 0.0009 -0.0023 0.0087 0.0097 0.0098 0.0086  
Y 0.0019 -0.0044 0.0120 0.0129 0.0118 0.0140  
Z 0.0014 -0.0022 0.0144 0.0164 0.0190 0.0101  
AT. 131 H X 0.0009 0.0023 0.0087 -0.0097 0.0098 -0.0086  
Y -0.0019 -0.0044 -0.0120 0.0129 -0.0118 0.0140  
Z 0.0014 0.0022 0.0144 -0.0164 0.0190 -0.0101  
AT. 132 H X 0.0009 -0.0023 -0.0087 -0.0097 0.0098 0.0086  
Y 0.0019 -0.0044 -0.0120 -0.0129 0.0118 0.0140  
Z 0.0014 -0.0022 -0.0144 -0.0164 0.0190 0.0101  
AT. 133 C X -0.0006 -0.0009 0.0020 -0.0024 -0.0024 0.0020  
Y -0.0028 -0.0044 0.0119 -0.0130 -0.0128 0.0134  
Z -0.0030 -0.0048 0.0122 -0.0142 -0.0131 0.0125  
AT. 134 C X -0.0006 0.0009 -0.0020 -0.0024 -0.0024 -0.0020  
Y 0.0028 -0.0044 0.0119 0.0130 0.0128 0.0134  
Z -0.0030 0.0048 -0.0122 -0.0142 -0.0131 -0.0125

AT. 135 C X -0.0006 -0.0009 -0.0020 0.0024 -0.0024 0.0020  
Y -0.0028 -0.0044 -0.0119 0.0130 -0.0128 0.0134  
Z -0.0030 -0.0048 -0.0122 0.0142 -0.0131 0.0125

AT. 136 C X -0.0006 0.0009 0.0020 0.0024 -0.0024 -0.0020  
Y 0.0028 -0.0044 -0.0119 -0.0130 0.0128 0.0134  
Z -0.0030 0.0048 0.0122 0.0142 -0.0131 -0.0125

AT. 137 C X 0.0005 0.0007 -0.0026 0.0026 0.0018 -0.0029  
Y 0.0009 0.0013 -0.0042 0.0046 0.0038 -0.0047  
Z 0.0011 0.0016 -0.0052 0.0056 0.0045 -0.0056

AT. 138 C X 0.0005 -0.0007 0.0026 0.0026 0.0018 0.0029  
Y -0.0009 0.0013 -0.0042 -0.0046 -0.0038 -0.0047  
Z 0.0011 -0.0016 0.0052 0.0056 0.0045 0.0056

AT. 139 C X 0.0005 0.0007 0.0026 -0.0026 0.0018 -0.0029  
Y 0.0009 0.0013 0.0042 -0.0046 0.0038 -0.0047  
Z 0.0011 0.0016 0.0052 -0.0056 0.0045 -0.0056

AT. 140 C X 0.0005 -0.0007 -0.0026 -0.0026 0.0018 0.0029  
Y -0.0009 0.0013 0.0042 0.0046 -0.0038 -0.0047  
Z 0.0011 -0.0016 -0.0052 -0.0056 0.0045 0.0056

AT. 141 H X -0.0016 -0.0024 0.0108 -0.0104 -0.0063 0.0125  
Y -0.0054 -0.0076 0.0293 -0.0301 -0.0202 0.0339  
Z -0.0010 -0.0011 0.0035 -0.0040 -0.0030 0.0043

AT. 142 H X -0.0016 0.0024 -0.0108 -0.0104 -0.0063 -0.0125  
Y 0.0054 -0.0076 0.0293 0.0301 0.0202 0.0339  
Z -0.0010 0.0011 -0.0035 -0.0040 -0.0030 -0.0043

AT. 143 H X -0.0016 -0.0024 -0.0108 0.0104 -0.0063 0.0125  
Y -0.0054 -0.0076 -0.0293 0.0301 -0.0202 0.0339  
Z -0.0010 -0.0011 -0.0035 0.0040 -0.0030 0.0043

AT. 144 H X -0.0016 0.0024 0.0108 0.0104 -0.0063 -0.0125  
Y 0.0054 -0.0076 -0.0293 -0.0301 0.0202 0.0339  
Z -0.0010 0.0011 0.0035 0.0040 -0.0030 -0.0043

AT. 145 H X -0.0038 -0.0053 0.0207 -0.0205 -0.0127 0.0241  
Y 0.0013 0.0019 -0.0049 0.0051 0.0046 -0.0058

Z -0.0021 -0.0030 0.0178 -0.0175 -0.0087 0.0193  
AT. 146 H X -0.0038 0.0053 -0.0207 -0.0205 -0.0127 -0.0241  
Y -0.0013 0.0019 -0.0049 -0.0051 -0.0046 -0.0058  
Z -0.0021 0.0030 -0.0178 -0.0175 -0.0087 -0.0193  
AT. 147 H X -0.0038 -0.0053 -0.0207 0.0205 -0.0127 0.0241  
Y 0.0013 0.0019 0.0049 -0.0051 0.0046 -0.0058  
Z -0.0021 -0.0030 -0.0178 0.0175 -0.0087 0.0193  
AT. 148 H X -0.0038 0.0053 0.0207 0.0205 -0.0127 -0.0241  
Y -0.0013 0.0019 0.0049 0.0051 -0.0046 -0.0058  
Z -0.0021 0.0030 0.0178 0.0175 -0.0087 -0.0193  
AT. 149 O X 0.0002 0.0003 -0.0001 0.0001 0.0001 -0.0000  
Y -0.0003 -0.0003 0.0001 -0.0002 -0.0002 0.0001  
Z -0.0008 -0.0007 -0.0000 0.0001 0.0002 -0.0002  
AT. 150 O X 0.0002 -0.0003 0.0001 0.0001 0.0001 0.0000  
Y 0.0003 -0.0003 0.0001 0.0002 0.0002 0.0001  
Z -0.0008 0.0007 0.0000 0.0001 0.0002 0.0002  
AT. 151 O X 0.0002 0.0003 0.0001 -0.0001 0.0001 -0.0000  
Y -0.0003 -0.0003 -0.0001 0.0002 -0.0002 0.0001  
Z -0.0008 -0.0007 0.0000 -0.0001 0.0002 -0.0002  
AT. 152 O X 0.0002 -0.0003 -0.0001 -0.0001 0.0001 0.0000  
Y 0.0003 -0.0003 -0.0001 -0.0002 0.0002 0.0001  
Z -0.0008 0.0007 -0.0000 -0.0001 0.0002 0.0002  
AT. 153 H X -0.0060 -0.0048 -0.0014 0.0018 0.0027 -0.0025  
Y 0.0097 0.0076 0.0013 -0.0017 -0.0038 0.0028  
Z 0.0069 0.0056 0.0010 -0.0013 -0.0026 0.0020  
AT. 154 H X -0.0060 0.0048 0.0014 0.0018 0.0027 0.0025  
Y -0.0097 0.0076 0.0013 0.0017 0.0038 0.0028  
Z 0.0069 -0.0056 -0.0010 -0.0013 -0.0026 -0.0020  
AT. 155 H X -0.0060 -0.0048 0.0014 -0.0018 0.0027 -0.0025  
Y 0.0097 0.0076 -0.0013 0.0017 -0.0038 0.0028  
Z 0.0069 0.0056 -0.0010 0.0013 -0.0026 0.0020  
AT. 156 H X -0.0060 0.0048 -0.0014 -0.0018 0.0027 0.0025

Y -0.0097 0.0076 -0.0013 -0.0017 0.0038 0.0028  
Z 0.0069 -0.0056 0.0010 0.0013 -0.0026 -0.0020  
AT. 157 O X 0.0003 0.0004 -0.0003 0.0002 0.0001 -0.0002  
Y -0.0000 -0.0001 0.0013 -0.0011 0.0000 0.0014  
Z -0.0003 -0.0003 0.0003 -0.0001 0.0000 0.0002  
AT. 158 O X 0.0003 -0.0004 0.0003 0.0002 0.0001 0.0002  
Y 0.0000 -0.0001 0.0013 0.0011 -0.0000 0.0014  
Z -0.0003 0.0003 -0.0003 -0.0001 0.0000 -0.0002  
AT. 159 O X 0.0003 0.0004 0.0003 -0.0002 0.0001 -0.0002  
Y -0.0000 -0.0001 -0.0013 0.0011 0.0000 0.0014  
Z -0.0003 -0.0003 -0.0003 0.0001 0.0000 0.0002  
AT. 160 O X 0.0003 -0.0004 -0.0003 -0.0002 0.0001 0.0002  
Y 0.0000 -0.0001 -0.0013 -0.0011 -0.0000 0.0014  
Z -0.0003 0.0003 0.0003 0.0001 0.0000 -0.0002  
AT. 161 O X -0.0002 -0.0003 0.0015 -0.0012 -0.0001 0.0014  
Y 0.0001 0.0001 -0.0006 0.0004 0.0001 -0.0006  
Z -0.0001 -0.0002 0.0012 -0.0010 -0.0001 0.0012  
AT. 162 O X -0.0002 0.0003 -0.0015 -0.0012 -0.0001 -0.0014  
Y -0.0001 0.0001 -0.0006 -0.0004 -0.0001 -0.0006  
Z -0.0001 0.0002 -0.0012 -0.0010 -0.0001 -0.0012  
AT. 163 O X -0.0002 -0.0003 -0.0015 0.0012 -0.0001 0.0014  
Y 0.0001 0.0001 0.0006 -0.0004 0.0001 -0.0006  
Z -0.0001 -0.0002 -0.0012 0.0010 -0.0001 0.0012  
AT. 164 O X -0.0002 0.0003 0.0015 0.0012 -0.0001 -0.0014  
Y -0.0001 0.0001 0.0006 0.0004 -0.0001 -0.0006  
Z -0.0001 0.0002 0.0012 0.0010 -0.0001 -0.0012  
AT. 165 H X 0.0020 0.0033 -0.0209 0.0163 0.0013 -0.0211  
Y 0.0011 0.0020 -0.0130 0.0103 0.0007 -0.0126  
Z 0.0025 0.0040 -0.0288 0.0226 0.0008 -0.0279  
AT. 166 H X 0.0020 -0.0033 0.0209 0.0163 0.0013 0.0211  
Y -0.0011 0.0020 -0.0130 -0.0103 -0.0007 -0.0126  
Z 0.0025 -0.0040 0.0288 0.0226 0.0008 0.0279



AT.167 H X 0.0020 0.0033 0.0209 -0.0163 0.0013 -0.0211  
Y 0.0011 0.0020 0.0130 -0.0103 0.0007 -0.0126  
Z 0.0025 0.0040 0.0288 -0.0226 0.0008 -0.0279  
AT.168 H X 0.0020 -0.0033 -0.0209 -0.0163 0.0013 0.0211  
Y -0.0011 0.0020 0.0130 0.0103 -0.0007 -0.0126  
Z 0.0025 -0.0040 -0.0288 -0.0226 0.0008 0.0279  
AT.169 O X -0.0016 -0.0015 0.0001 -0.0001 0.0004 -0.0004  
Y 0.0008 0.0007 -0.0001 0.0002 -0.0002 0.0003  
Z -0.0056 -0.0052 -0.0000 -0.0001 0.0014 -0.0015  
AT.170 O X -0.0016 0.0015 -0.0001 -0.0001 0.0004 0.0004  
Y -0.0008 0.0007 -0.0001 -0.0002 0.0002 0.0003  
Z -0.0056 0.0052 0.0000 -0.0001 0.0014 0.0015  
AT.171 O X -0.0016 -0.0015 -0.0001 0.0001 0.0004 -0.0004  
Y 0.0008 0.0007 0.0001 -0.0002 -0.0002 0.0003  
Z -0.0056 -0.0052 0.0000 0.0001 0.0014 -0.0015  
AT.172 O X -0.0016 0.0015 0.0001 0.0001 0.0004 0.0004  
Y -0.0008 0.0007 0.0001 0.0002 0.0002 0.0003  
Z -0.0056 0.0052 -0.0000 0.0001 0.0014 0.0015  
AT.173 H X 0.0312 0.0286 -0.0018 0.0026 -0.0083 0.0084  
Y -0.0211 -0.0198 0.0007 -0.0003 0.0050 -0.0066  
Z 0.1076 0.1004 -0.0013 0.0024 -0.0269 0.0293  
AT.174 H X 0.0312 -0.0286 0.0018 0.0026 -0.0083 -0.0084  
Y 0.0211 -0.0198 0.0007 0.0003 -0.0050 -0.0066  
Z 0.1076 -0.1004 0.0013 0.0024 -0.0269 -0.0293  
AT.175 H X 0.0312 0.0286 0.0018 -0.0026 -0.0083 0.0084  
Y -0.0211 -0.0198 -0.0007 0.0003 0.0050 -0.0066  
Z 0.1076 0.1004 0.0013 -0.0024 -0.0269 0.0293  
AT.176 H X 0.0312 -0.0286 -0.0018 -0.0026 -0.0083 -0.0084  
Y 0.0211 -0.0198 -0.0007 -0.0003 -0.0050 -0.0066  
Z 0.1076 -0.1004 -0.0013 -0.0024 -0.0269 -0.0293

FREQ(CM\*\*-1) 1560.33 1561.56 1561.58 1561.80 1563.12 1563.41

AT. 1 I X 0.0000 -0.0000 0.0000 -0.0000 -0.0000 -0.0000  
Y 0.0000 -0.0000 -0.0000 0.0000 -0.0000 0.0000  
Z -0.0000 0.0000 -0.0000 0.0000 0.0000 -0.0000

AT. 2 I X -0.0000 -0.0000 0.0000 0.0000 -0.0000 -0.0000  
Y 0.0000 0.0000 0.0000 0.0000 0.0000 -0.0000  
Z 0.0000 0.0000 -0.0000 -0.0000 0.0000 -0.0000

AT. 3 I X -0.0000 0.0000 0.0000 -0.0000 -0.0000 0.0000  
Y -0.0000 0.0000 -0.0000 0.0000 -0.0000 -0.0000  
Z 0.0000 -0.0000 -0.0000 0.0000 0.0000 0.0000

AT. 4 I X 0.0000 0.0000 0.0000 0.0000 -0.0000 0.0000  
Y -0.0000 -0.0000 0.0000 0.0000 0.0000 0.0000  
Z -0.0000 -0.0000 -0.0000 -0.0000 0.0000 0.0000

AT. 5 I X -0.0000 -0.0000 0.0000 -0.0000 0.0000 0.0000  
Y 0.0000 0.0000 -0.0000 0.0000 0.0000 -0.0000  
Z 0.0000 -0.0000 -0.0000 0.0000 -0.0000 -0.0000

AT. 6 I X 0.0000 -0.0000 0.0000 0.0000 0.0000 0.0000  
Y 0.0000 -0.0000 0.0000 0.0000 -0.0000 0.0000  
Z -0.0000 -0.0000 -0.0000 -0.0000 -0.0000 -0.0000

AT. 7 I X 0.0000 0.0000 0.0000 -0.0000 0.0000 -0.0000  
Y -0.0000 -0.0000 -0.0000 0.0000 0.0000 0.0000  
Z -0.0000 0.0000 -0.0000 0.0000 -0.0000 0.0000

AT. 8 I X -0.0000 0.0000 0.0000 0.0000 0.0000 -0.0000  
Y -0.0000 0.0000 0.0000 0.0000 -0.0000 -0.0000  
Z 0.0000 0.0000 -0.0000 -0.0000 -0.0000 0.0000

AT. 9 N X -0.0042 0.0051 -0.0004 -0.0042 0.0044 0.0005  
Y -0.0174 0.0207 -0.0014 -0.0174 0.0178 0.0021  
Z 0.0026 -0.0031 0.0004 0.0028 -0.0031 -0.0001

AT. 10 N X 0.0042 0.0051 -0.0004 0.0042 0.0044 0.0005  
Y -0.0174 -0.0207 0.0014 -0.0174 -0.0178 -0.0021  
Z -0.0026 -0.0031 0.0004 -0.0028 -0.0031 -0.0001

AT. 11 N X 0.0042 -0.0051 -0.0004 -0.0042 0.0044 -0.0005

Y 0.0174 -0.0207 -0.0014 -0.0174 0.0178 -0.0021  
Z -0.0026 0.0031 0.0004 0.0028 -0.0031 0.0001  
AT. 12 N X -0.0042 -0.0051 -0.0004 0.0042 0.0044 -0.0005  
Y 0.0174 0.0207 0.0014 -0.0174 -0.0178 0.0021  
Z 0.0026 0.0031 0.0004 -0.0028 -0.0031 0.0001  
AT. 13 N X 0.0001 0.0004 -0.0005 0.0010 0.0011 -0.0010  
Y -0.0021 0.0043 -0.0036 0.0054 0.0090 -0.0074  
Z -0.0002 0.0007 0.0001 0.0006 0.0014 -0.0004  
AT. 14 N X -0.0001 0.0004 -0.0005 -0.0010 0.0011 -0.0010  
Y -0.0021 -0.0043 0.0036 0.0054 -0.0090 0.0074  
Z 0.0002 0.0007 0.0001 -0.0006 0.0014 -0.0004  
AT. 15 N X -0.0001 -0.0004 -0.0005 0.0010 0.0011 0.0010  
Y 0.0021 -0.0043 -0.0036 0.0054 0.0090 0.0074  
Z 0.0002 -0.0007 0.0001 0.0006 0.0014 0.0004  
AT. 16 N X 0.0001 -0.0004 -0.0005 -0.0010 0.0011 0.0010  
Y 0.0021 0.0043 0.0036 0.0054 -0.0090 -0.0074  
Z -0.0002 -0.0007 0.0001 -0.0006 0.0014 0.0004  
AT. 17 O X 0.0020 -0.0021 0.0003 0.0022 -0.0024 -0.0000  
Y 0.0023 -0.0024 0.0003 0.0021 -0.0027 -0.0001  
Z 0.0066 -0.0072 0.0008 0.0077 -0.0080 -0.0004  
AT. 18 O X -0.0020 -0.0021 0.0003 -0.0022 -0.0024 -0.0000  
Y 0.0023 0.0024 -0.0003 0.0021 0.0027 0.0001  
Z -0.0066 -0.0072 0.0008 -0.0077 -0.0080 -0.0004  
AT. 19 O X -0.0020 0.0021 0.0003 0.0022 -0.0024 0.0000  
Y -0.0023 0.0024 0.0003 0.0021 -0.0027 0.0001  
Z -0.0066 0.0072 0.0008 0.0077 -0.0080 0.0004  
AT. 20 O X 0.0020 0.0021 0.0003 -0.0022 -0.0024 0.0000  
Y -0.0023 -0.0024 -0.0003 0.0021 0.0027 -0.0001  
Z 0.0066 0.0072 0.0008 -0.0077 -0.0080 0.0004  
AT. 21 O X 0.0001 0.0003 -0.0006 0.0003 0.0004 -0.0007  
Y 0.0008 -0.0010 -0.0005 -0.0001 -0.0017 -0.0001  
Z -0.0005 0.0022 -0.0015 0.0016 0.0036 -0.0026

AT. 22 O X -0.0001 0.0003 -0.0006 -0.0003 0.0004 -0.0007  
Y 0.0008 0.0010 0.0005 -0.0001 0.0017 0.0001  
Z 0.0005 0.0022 -0.0015 -0.0016 0.0036 -0.0026

AT. 23 O X -0.0001 -0.0003 -0.0006 0.0003 0.0004 0.0007  
Y -0.0008 0.0010 -0.0005 -0.0001 -0.0017 0.0001  
Z 0.0005 -0.0022 -0.0015 0.0016 0.0036 0.0026

AT. 24 O X 0.0001 -0.0003 -0.0006 -0.0003 0.0004 0.0007  
Y -0.0008 -0.0010 0.0005 -0.0001 0.0017 -0.0001  
Z -0.0005 -0.0022 -0.0015 -0.0016 0.0036 0.0026

AT. 25 C X 0.0002 -0.0004 0.0000 -0.0000 -0.0003 0.0001  
Y -0.0044 0.0054 -0.0003 -0.0037 0.0044 0.0006  
Z 0.0047 -0.0055 0.0005 0.0042 -0.0049 -0.0004

AT. 26 C X -0.0002 -0.0004 0.0000 0.0000 -0.0003 0.0001  
Y -0.0044 -0.0054 0.0003 -0.0037 -0.0044 -0.0006  
Z -0.0047 -0.0055 0.0005 -0.0042 -0.0049 -0.0004

AT. 27 C X -0.0002 0.0004 0.0000 -0.0000 -0.0003 -0.0001  
Y 0.0044 -0.0054 -0.0003 -0.0037 0.0044 -0.0006  
Z -0.0047 0.0055 0.0005 0.0042 -0.0049 0.0004

AT. 28 C X 0.0002 0.0004 0.0000 0.0000 -0.0003 -0.0001  
Y 0.0044 0.0054 0.0003 -0.0037 -0.0044 0.0006  
Z 0.0047 0.0055 0.0005 -0.0042 -0.0049 0.0004

AT. 29 H X 0.0028 -0.0034 0.0004 0.0030 -0.0030 -0.0007  
Y 0.0221 -0.0285 0.0013 0.0140 -0.0215 -0.0029  
Z -0.0035 0.0047 -0.0005 -0.0031 0.0033 0.0011

AT. 30 H X -0.0028 -0.0034 0.0004 -0.0030 -0.0030 -0.0007  
Y 0.0221 0.0285 -0.0013 0.0140 0.0215 0.0029  
Z 0.0035 0.0047 -0.0005 0.0031 0.0033 0.0011

AT. 31 H X -0.0028 0.0034 0.0004 0.0030 -0.0030 0.0007  
Y -0.0221 0.0285 0.0013 0.0140 -0.0215 0.0029  
Z 0.0035 -0.0047 -0.0005 -0.0031 0.0033 -0.0011

AT. 32 H X 0.0028 0.0034 0.0004 -0.0030 -0.0030 0.0007  
Y -0.0221 -0.0285 -0.0013 0.0140 0.0215 -0.0029

Z -0.0035 -0.0047 -0.0005 0.0031 0.0033 -0.0011  
AT. 33 H X -0.0123 0.0165 -0.0009 -0.0070 0.0121 0.0011  
Y 0.0009 -0.0013 0.0001 -0.0012 -0.0007 0.0001  
Z -0.0089 0.0107 -0.0006 -0.0023 0.0083 0.0007  
AT. 34 H X 0.0123 0.0165 -0.0009 0.0070 0.0121 0.0011  
Y 0.0009 0.0013 -0.0001 -0.0012 0.0007 -0.0001  
Z 0.0089 0.0107 -0.0006 0.0023 0.0083 0.0007  
AT. 35 H X 0.0123 -0.0165 -0.0009 -0.0070 0.0121 -0.0011  
Y -0.0009 0.0013 0.0001 -0.0012 -0.0007 -0.0001  
Z 0.0089 -0.0107 -0.0006 -0.0023 0.0083 -0.0007  
AT. 36 H X -0.0123 -0.0165 -0.0009 0.0070 0.0121 -0.0011  
Y -0.0009 -0.0013 -0.0001 -0.0012 0.0007 0.0001  
Z -0.0089 -0.0107 -0.0006 0.0023 0.0083 -0.0007  
AT. 37 C X 0.0021 -0.0029 0.0000 0.0018 -0.0015 -0.0005  
Y 0.0125 -0.0154 0.0009 0.0127 -0.0122 -0.0018  
Z -0.0144 0.0160 -0.0017 -0.0154 0.0167 0.0011  
AT. 38 C X -0.0021 -0.0029 0.0000 -0.0018 -0.0015 -0.0005  
Y 0.0125 0.0154 -0.0009 0.0127 0.0122 0.0018  
Z 0.0144 0.0160 -0.0017 0.0154 0.0167 0.0011  
AT. 39 C X -0.0021 0.0029 0.0000 0.0018 -0.0015 0.0005  
Y -0.0125 0.0154 0.0009 0.0127 -0.0122 0.0018  
Z 0.0144 -0.0160 -0.0017 -0.0154 0.0167 -0.0011  
AT. 40 C X 0.0021 0.0029 0.0000 -0.0018 -0.0015 0.0005  
Y -0.0125 -0.0154 -0.0009 0.0127 0.0122 -0.0018  
Z -0.0144 -0.0160 -0.0017 0.0154 0.0167 -0.0011  
AT. 41 C X 0.0015 -0.0018 0.0001 0.0015 -0.0017 -0.0002  
Y 0.0045 -0.0053 0.0003 0.0044 -0.0049 -0.0007  
Z 0.0003 -0.0006 -0.0003 0.0001 -0.0006 -0.0003  
AT. 42 C X -0.0015 -0.0018 0.0001 -0.0015 -0.0017 -0.0002  
Y 0.0045 0.0053 -0.0003 0.0044 0.0049 0.0007  
Z -0.0003 -0.0006 -0.0003 -0.0001 -0.0006 -0.0003  
AT. 43 C X -0.0015 0.0018 0.0001 0.0015 -0.0017 0.0002

Y -0.0045 0.0053 0.0003 0.0044 -0.0049 0.0007  
Z -0.0003 0.0006 -0.0003 0.0001 -0.0006 0.0003  
AT. 44 C X 0.0015 0.0018 0.0001 -0.0015 -0.0017 0.0002  
Y -0.0045 -0.0053 -0.0003 0.0044 0.0049 -0.0007  
Z 0.0003 0.0006 -0.0003 -0.0001 -0.0006 0.0003  
AT. 45 H X -0.0125 0.0135 -0.0011 -0.0115 0.0133 0.0015  
Y -0.0159 0.0209 0.0000 -0.0145 0.0186 0.0029  
Z -0.0156 0.0204 -0.0004 -0.0147 0.0179 0.0025  
AT. 46 H X 0.0125 0.0135 -0.0011 0.0115 0.0133 0.0015  
Y -0.0159 -0.0209 -0.0000 -0.0145 -0.0186 -0.0029  
Z 0.0156 0.0204 -0.0004 0.0147 0.0179 0.0025  
AT. 47 H X 0.0125 -0.0135 -0.0011 -0.0115 0.0133 -0.0015  
Y 0.0159 -0.0209 0.0000 -0.0145 0.0186 -0.0029  
Z 0.0156 -0.0204 -0.0004 -0.0147 0.0179 -0.0025  
AT. 48 H X -0.0125 -0.0135 -0.0011 0.0115 0.0133 -0.0015  
Y 0.0159 0.0209 -0.0000 -0.0145 -0.0186 0.0029  
Z -0.0156 -0.0204 -0.0004 0.0147 0.0179 -0.0025  
AT. 49 H X 0.0093 -0.0105 0.0006 0.0094 -0.0078 -0.0009  
Y 0.0072 -0.0091 -0.0003 0.0070 -0.0068 -0.0013  
Z 0.0120 -0.0110 0.0021 0.0122 -0.0095 -0.0006  
AT. 50 H X -0.0093 -0.0105 0.0006 -0.0094 -0.0078 -0.0009  
Y 0.0072 0.0091 0.0003 0.0070 0.0068 0.0013  
Z -0.0120 -0.0110 0.0021 -0.0122 -0.0095 -0.0006  
AT. 51 H X -0.0093 0.0105 0.0006 0.0094 -0.0078 0.0009  
Y -0.0072 0.0091 -0.0003 0.0070 -0.0068 0.0013  
Z -0.0120 0.0110 0.0021 0.0122 -0.0095 0.0006  
AT. 52 H X 0.0093 0.0105 0.0006 -0.0094 -0.0078 0.0009  
Y -0.0072 -0.0091 0.0003 0.0070 0.0068 -0.0013  
Z 0.0120 0.0110 0.0021 -0.0122 -0.0095 0.0006  
AT. 53 C X -0.0007 0.0012 0.0001 -0.0012 0.0005 0.0003  
Y 0.0012 -0.0014 0.0001 0.0009 -0.0017 0.0002  
Z 0.0007 -0.0008 0.0005 0.0009 -0.0004 0.0004

AT. 54 C X 0.0007 0.0012 0.0001 0.0012 0.0005 0.0003  
Y 0.0012 0.0014 -0.0001 0.0009 0.0017 -0.0002  
Z -0.0007 -0.0008 0.0005 -0.0009 -0.0004 0.0004

AT. 55 C X 0.0007 -0.0012 0.0001 -0.0012 0.0005 -0.0003  
Y -0.0012 0.0014 0.0001 0.0009 -0.0017 -0.0002  
Z -0.0007 0.0008 0.0005 0.0009 -0.0004 -0.0004

AT. 56 C X -0.0007 -0.0012 0.0001 0.0012 0.0005 -0.0003  
Y -0.0012 -0.0014 -0.0001 0.0009 0.0017 0.0002  
Z 0.0007 0.0008 0.0005 -0.0009 -0.0004 -0.0004

AT. 57 C X 0.0005 0.0001 -0.0003 0.0002 -0.0002 -0.0006  
Y -0.0004 0.0002 -0.0008 -0.0003 -0.0000 -0.0006  
Z -0.0006 0.0009 -0.0005 -0.0006 0.0011 -0.0002

AT. 58 C X -0.0005 0.0001 -0.0003 -0.0002 -0.0002 -0.0006  
Y -0.0004 -0.0002 0.0008 -0.0003 0.0000 0.0006  
Z 0.0006 0.0009 -0.0005 0.0006 0.0011 -0.0002

AT. 59 C X -0.0005 -0.0001 -0.0003 0.0002 -0.0002 0.0006  
Y 0.0004 -0.0002 -0.0008 -0.0003 -0.0000 0.0006  
Z 0.0006 -0.0009 -0.0005 -0.0006 0.0011 0.0002

AT. 60 C X 0.0005 -0.0001 -0.0003 -0.0002 -0.0002 0.0006  
Y 0.0004 0.0002 0.0008 -0.0003 0.0000 -0.0006  
Z -0.0006 -0.0009 -0.0005 0.0006 0.0011 0.0002

AT. 61 H X -0.0021 0.0013 0.0070 -0.0009 0.0069 0.0066  
Y -0.0027 0.0012 0.0046 -0.0011 0.0061 0.0049  
Z 0.0028 0.0009 0.0012 -0.0001 -0.0039 -0.0011

AT. 62 H X 0.0021 0.0013 0.0070 0.0009 0.0069 0.0066  
Y -0.0027 -0.0012 -0.0046 -0.0011 -0.0061 -0.0049  
Z -0.0028 0.0009 0.0012 0.0001 -0.0039 -0.0011

AT. 63 H X 0.0021 -0.0013 0.0070 -0.0009 0.0069 -0.0066  
Y 0.0027 -0.0012 0.0046 -0.0011 0.0061 -0.0049  
Z -0.0028 -0.0009 0.0012 -0.0001 -0.0039 0.0011

AT. 64 H X -0.0021 -0.0013 0.0070 0.0009 0.0069 -0.0066  
Y 0.0027 0.0012 -0.0046 -0.0011 -0.0061 0.0049

Z 0.0028 -0.0009 0.0012 0.0001 -0.0039 0.0011  
AT. 65 H X 0.0001 -0.0006 -0.0030 0.0001 -0.0026 -0.0025  
Y 0.0004 0.0023 0.0079 -0.0001 0.0077 0.0059  
Z -0.0013 -0.0062 0.0039 0.0027 -0.0024 0.0047  
AT. 66 H X -0.0001 -0.0006 -0.0030 -0.0001 -0.0026 -0.0025  
Y 0.0004 -0.0023 -0.0079 -0.0001 -0.0077 -0.0059  
Z 0.0013 -0.0062 0.0039 -0.0027 -0.0024 0.0047  
AT. 67 H X -0.0001 0.0006 -0.0030 0.0001 -0.0026 0.0025  
Y -0.0004 -0.0023 0.0079 -0.0001 0.0077 -0.0059  
Z 0.0013 0.0062 0.0039 0.0027 -0.0024 -0.0047  
AT. 68 H X 0.0001 0.0006 -0.0030 -0.0001 -0.0026 0.0025  
Y -0.0004 0.0023 -0.0079 -0.0001 -0.0077 0.0059  
Z -0.0013 0.0062 0.0039 -0.0027 -0.0024 -0.0047  
AT. 69 H X -0.0034 -0.0053 0.0001 0.0013 -0.0016 0.0031  
Y 0.0040 -0.0028 -0.0014 0.0023 -0.0079 -0.0026  
Z 0.0023 -0.0026 -0.0010 0.0018 -0.0061 -0.0014  
AT. 70 H X 0.0034 -0.0053 0.0001 -0.0013 -0.0016 0.0031  
Y 0.0040 0.0028 0.0014 0.0023 0.0079 0.0026  
Z -0.0023 -0.0026 -0.0010 -0.0018 -0.0061 -0.0014  
AT. 71 H X 0.0034 0.0053 0.0001 0.0013 -0.0016 -0.0031  
Y -0.0040 0.0028 -0.0014 0.0023 -0.0079 0.0026  
Z -0.0023 0.0026 -0.0010 0.0018 -0.0061 0.0014  
AT. 72 H X -0.0034 0.0053 0.0001 -0.0013 -0.0016 -0.0031  
Y -0.0040 -0.0028 0.0014 0.0023 0.0079 -0.0026  
Z 0.0023 0.0026 -0.0010 -0.0018 -0.0061 0.0014  
AT. 73 C X -0.0003 -0.0001 0.0009 -0.0003 -0.0001 0.0007  
Y -0.0007 0.0012 -0.0009 -0.0002 0.0014 -0.0010  
Z 0.0000 -0.0002 -0.0004 -0.0005 0.0001 -0.0004  
AT. 74 C X 0.0003 -0.0001 0.0009 0.0003 -0.0001 0.0007  
Y -0.0007 -0.0012 0.0009 -0.0002 -0.0014 0.0010  
Z -0.0000 -0.0002 -0.0004 0.0005 0.0001 -0.0004  
AT. 75 C X 0.0003 0.0001 0.0009 -0.0003 -0.0001 -0.0007



Y 0.0007 -0.0012 -0.0009 -0.0002 0.0014 0.0010  
Z -0.0000 0.0002 -0.0004 -0.0005 0.0001 0.0004  
AT. 76 C X -0.0003 0.0001 0.0009 0.0003 -0.0001 -0.0007  
Y 0.0007 0.0012 0.0009 -0.0002 -0.0014 -0.0010  
Z 0.0000 0.0002 -0.0004 0.0005 0.0001 0.0004  
AT. 77 C X 0.0005 -0.0005 0.0004 0.0002 -0.0002 0.0004  
Y 0.0033 -0.0039 0.0002 0.0034 -0.0035 -0.0006  
Z -0.0013 0.0014 0.0001 -0.0017 0.0018 0.0005  
AT. 78 C X -0.0005 -0.0005 0.0004 -0.0002 -0.0002 0.0004  
Y 0.0033 0.0039 -0.0002 0.0034 0.0035 0.0006  
Z 0.0013 0.0014 0.0001 0.0017 0.0018 0.0005  
AT. 79 C X -0.0005 0.0005 0.0004 0.0002 -0.0002 -0.0004  
Y -0.0033 0.0039 0.0002 0.0034 -0.0035 0.0006  
Z 0.0013 -0.0014 0.0001 -0.0017 0.0018 -0.0005  
AT. 80 C X 0.0005 0.0005 0.0004 -0.0002 -0.0002 -0.0004  
Y -0.0033 -0.0039 -0.0002 0.0034 0.0035 -0.0006  
Z -0.0013 -0.0014 0.0001 0.0017 0.0018 -0.0005  
AT. 81 H X 0.0038 -0.0040 -0.0011 0.0050 -0.0042 -0.0021  
Y 0.0075 -0.0083 -0.0011 0.0086 -0.0078 -0.0029  
Z -0.0130 0.0145 -0.0035 -0.0089 0.0087 -0.0028  
AT. 82 H X -0.0038 -0.0040 -0.0011 -0.0050 -0.0042 -0.0021  
Y 0.0075 0.0083 0.0011 0.0086 0.0078 0.0029  
Z 0.0130 0.0145 -0.0035 0.0089 0.0087 -0.0028  
AT. 83 H X -0.0038 0.0040 -0.0011 0.0050 -0.0042 0.0021  
Y -0.0075 0.0083 -0.0011 0.0086 -0.0078 0.0029  
Z 0.0130 -0.0145 -0.0035 -0.0089 0.0087 0.0028  
AT. 84 H X 0.0038 0.0040 -0.0011 -0.0050 -0.0042 0.0021  
Y -0.0075 -0.0083 0.0011 0.0086 0.0078 -0.0029  
Z -0.0130 -0.0145 -0.0035 0.0089 0.0087 0.0028  
AT. 85 H X -0.0049 0.0050 -0.0037 -0.0006 0.0024 -0.0047  
Y -0.0114 0.0132 0.0009 -0.0129 0.0140 0.0039  
Z 0.0123 -0.0143 0.0006 0.0121 -0.0134 -0.0018

AT. 86 H X 0.0049 0.0050 -0.0037 0.0006 0.0024 -0.0047  
Y -0.0114 -0.0132 -0.0009 -0.0129 -0.0140 -0.0039  
Z -0.0123 -0.0143 0.0006 -0.0121 -0.0134 -0.0018

AT. 87 H X 0.0049 -0.0050 -0.0037 -0.0006 0.0024 0.0047  
Y 0.0114 -0.0132 0.0009 -0.0129 0.0140 -0.0039  
Z -0.0123 0.0143 0.0006 0.0121 -0.0134 0.0018

AT. 88 H X -0.0049 -0.0050 -0.0037 0.0006 0.0024 0.0047  
Y 0.0114 0.0132 -0.0009 -0.0129 -0.0140 0.0039  
Z 0.0123 0.0143 0.0006 -0.0121 -0.0134 0.0018

AT. 89 C X -0.0006 0.0006 -0.0000 -0.0011 0.0001 0.0004  
Y 0.0013 -0.0013 0.0005 0.0005 -0.0018 0.0008  
Z 0.0002 0.0004 -0.0003 0.0001 0.0001 -0.0003

AT. 90 C X 0.0006 0.0006 -0.0000 0.0011 0.0001 0.0004  
Y 0.0013 0.0013 -0.0005 0.0005 0.0018 -0.0008  
Z -0.0002 0.0004 -0.0003 -0.0001 0.0001 -0.0003

AT. 91 C X 0.0006 -0.0006 -0.0000 -0.0011 0.0001 -0.0004  
Y -0.0013 0.0013 0.0005 0.0005 -0.0018 -0.0008  
Z -0.0002 -0.0004 -0.0003 0.0001 0.0001 0.0003

AT. 92 C X -0.0006 -0.0006 -0.0000 0.0011 0.0001 -0.0004  
Y -0.0013 -0.0013 -0.0005 0.0005 0.0018 0.0008  
Z 0.0002 -0.0004 -0.0003 -0.0001 0.0001 0.0003

AT. 93 C X -0.0000 -0.0002 0.0000 -0.0001 -0.0001 -0.0000  
Y 0.0003 0.0001 -0.0001 -0.0006 -0.0003 0.0003  
Z 0.0005 -0.0005 0.0004 0.0000 -0.0008 0.0006

AT. 94 C X 0.0000 -0.0002 0.0000 0.0001 -0.0001 -0.0000  
Y 0.0003 -0.0001 0.0001 -0.0006 0.0003 -0.0003  
Z -0.0005 -0.0005 0.0004 -0.0000 -0.0008 0.0006

AT. 95 C X 0.0000 0.0002 0.0000 -0.0001 -0.0001 0.0000  
Y -0.0003 -0.0001 -0.0001 -0.0006 -0.0003 -0.0003  
Z -0.0005 0.0005 0.0004 0.0000 -0.0008 -0.0006

AT. 96 C X -0.0000 0.0002 0.0000 0.0001 -0.0001 0.0000  
Y -0.0003 0.0001 0.0001 -0.0006 0.0003 0.0003

Z 0.0005 0.0005 0.0004 -0.0000 -0.0008 -0.0006  
AT. 97 H X 0.0030 -0.0003 -0.0001 -0.0033 -0.0042 0.0024  
Y -0.0081 0.0020 -0.0004 0.0042 0.0103 -0.0058  
Z -0.0055 0.0021 -0.0003 -0.0022 0.0049 -0.0023  
AT. 98 H X -0.0030 -0.0003 -0.0001 0.0033 -0.0042 0.0024  
Y -0.0081 -0.0020 0.0004 0.0042 -0.0103 0.0058  
Z 0.0055 0.0021 -0.0003 0.0022 0.0049 -0.0023  
AT. 99 H X -0.0030 0.0003 -0.0001 -0.0033 -0.0042 -0.0024  
Y 0.0081 -0.0020 -0.0004 0.0042 0.0103 0.0058  
Z 0.0055 -0.0021 -0.0003 -0.0022 0.0049 0.0023  
AT. 100 H X 0.0030 0.0003 -0.0001 0.0033 -0.0042 -0.0024  
Y 0.0081 0.0020 0.0004 0.0042 -0.0103 -0.0058  
Z -0.0055 -0.0021 -0.0003 0.0022 0.0049 0.0023  
AT. 101 H X -0.0048 0.0016 -0.0006 0.0044 0.0070 -0.0042  
Y -0.0055 0.0020 -0.0004 0.0039 0.0075 -0.0039  
Z 0.0036 0.0001 -0.0023 0.0030 -0.0006 -0.0020  
AT. 102 H X 0.0048 0.0016 -0.0006 -0.0044 0.0070 -0.0042  
Y -0.0055 -0.0020 0.0004 0.0039 -0.0075 0.0039  
Z -0.0036 0.0001 -0.0023 -0.0030 -0.0006 -0.0020  
AT. 103 H X 0.0048 -0.0016 -0.0006 0.0044 0.0070 0.0042  
Y 0.0055 -0.0020 -0.0004 0.0039 0.0075 0.0039  
Z -0.0036 -0.0001 -0.0023 0.0030 -0.0006 0.0020  
AT. 104 H X -0.0048 -0.0016 -0.0006 -0.0044 0.0070 0.0042  
Y 0.0055 0.0020 0.0004 0.0039 -0.0075 -0.0039  
Z 0.0036 -0.0001 -0.0023 -0.0030 -0.0006 0.0020  
AT. 105 H X 0.0042 -0.0005 -0.0009 0.0033 -0.0019 0.0002  
Y 0.0042 -0.0022 0.0016 -0.0020 -0.0074 0.0043  
Z -0.0041 0.0013 -0.0006 0.0002 0.0055 -0.0028  
AT. 106 H X -0.0042 -0.0005 -0.0009 -0.0033 -0.0019 0.0002  
Y 0.0042 0.0022 -0.0016 -0.0020 0.0074 -0.0043  
Z 0.0041 0.0013 -0.0006 -0.0002 0.0055 -0.0028  
AT. 107 H X -0.0042 0.0005 -0.0009 0.0033 -0.0019 -0.0002

Y -0.0042 0.0022 0.0016 -0.0020 -0.0074 -0.0043  
Z 0.0041 -0.0013 -0.0006 0.0002 0.0055 0.0028  
AT. 108 H X 0.0042 0.0005 -0.0009 -0.0033 -0.0019 -0.0002  
Y -0.0042 -0.0022 -0.0016 -0.0020 0.0074 0.0043  
Z -0.0041 -0.0013 -0.0006 -0.0002 0.0055 0.0028  
AT. 109 C X 0.0007 -0.0002 0.0001 0.0005 -0.0000 -0.0000  
Y 0.0004 -0.0007 0.0003 -0.0012 -0.0017 0.0009  
Z 0.0009 -0.0003 -0.0002 0.0003 -0.0005 -0.0001  
AT. 110 C X -0.0007 -0.0002 0.0001 -0.0005 -0.0000 -0.0000  
Y 0.0004 0.0007 -0.0003 -0.0012 0.0017 -0.0009  
Z -0.0009 -0.0003 -0.0002 -0.0003 -0.0005 -0.0001  
AT. 111 C X -0.0007 0.0002 0.0001 0.0005 -0.0000 0.0000  
Y -0.0004 0.0007 0.0003 -0.0012 -0.0017 -0.0009  
Z -0.0009 0.0003 -0.0002 0.0003 -0.0005 0.0001  
AT. 112 C X 0.0007 0.0002 0.0001 -0.0005 -0.0000 0.0000  
Y -0.0004 -0.0007 -0.0003 -0.0012 0.0017 0.0009  
Z 0.0009 0.0003 -0.0002 -0.0003 -0.0005 0.0001  
AT. 113 H X -0.0025 -0.0001 -0.0012 -0.0019 -0.0006 -0.0009  
Y 0.0041 -0.0009 0.0017 0.0006 -0.0021 0.0026  
Z -0.0051 -0.0025 0.0015 -0.0103 -0.0084 0.0064  
AT. 114 H X 0.0025 -0.0001 -0.0012 0.0019 -0.0006 -0.0009  
Y 0.0041 0.0009 -0.0017 0.0006 0.0021 -0.0026  
Z 0.0051 -0.0025 0.0015 0.0103 -0.0084 0.0064  
AT. 115 H X 0.0025 0.0001 -0.0012 -0.0019 -0.0006 0.0009  
Y -0.0041 0.0009 0.0017 0.0006 -0.0021 -0.0026  
Z 0.0051 0.0025 0.0015 -0.0103 -0.0084 -0.0064  
AT. 116 H X -0.0025 0.0001 -0.0012 0.0019 -0.0006 0.0009  
Y -0.0041 -0.0009 -0.0017 0.0006 0.0021 0.0026  
Z -0.0051 0.0025 0.0015 0.0103 -0.0084 -0.0064  
AT. 117 H X -0.0054 -0.0010 -0.0010 -0.0059 -0.0039 0.0013  
Y -0.0058 0.0038 -0.0019 0.0001 0.0060 -0.0030  
Z -0.0040 0.0038 -0.0028 0.0021 0.0068 -0.0046

AT.118 H X 0.0054 -0.0010 -0.0010 0.0059 -0.0039 0.0013  
Y -0.0058 -0.0038 0.0019 0.0001 -0.0060 0.0030  
Z 0.0040 0.0038 -0.0028 -0.0021 0.0068 -0.0046

AT.119 H X 0.0054 0.0010 -0.0010 -0.0059 -0.0039 -0.0013  
Y 0.0058 -0.0038 -0.0019 0.0001 0.0060 0.0030  
Z 0.0040 -0.0038 -0.0028 0.0021 0.0068 0.0046

AT.120 H X -0.0054 0.0010 -0.0010 0.0059 -0.0039 -0.0013  
Y 0.0058 0.0038 0.0019 0.0001 -0.0060 -0.0030  
Z -0.0040 -0.0038 -0.0028 -0.0021 0.0068 0.0046

AT.121 C X 0.0000 -0.0000 -0.0000 -0.0000 -0.0001 -0.0000  
Y 0.0008 -0.0010 0.0002 -0.0011 -0.0022 0.0010  
Z -0.0011 -0.0001 0.0022 -0.0011 0.0001 0.0024

AT.122 C X -0.0000 -0.0000 -0.0000 0.0000 -0.0001 -0.0000  
Y 0.0008 0.0010 -0.0002 -0.0011 0.0022 -0.0010  
Z 0.0011 -0.0001 0.0022 0.0011 0.0001 0.0024

AT.123 C X -0.0000 0.0000 -0.0000 -0.0000 -0.0001 0.0000  
Y -0.0008 0.0010 0.0002 -0.0011 -0.0022 -0.0010  
Z 0.0011 0.0001 0.0022 -0.0011 0.0001 -0.0024

AT.124 C X 0.0000 0.0000 -0.0000 0.0000 -0.0001 0.0000  
Y -0.0008 -0.0010 -0.0002 -0.0011 0.0022 0.0010  
Z -0.0011 0.0001 0.0022 0.0011 0.0001 -0.0024

AT.125 H X -0.0019 -0.0029 0.0103 -0.0054 -0.0047 0.0128  
Y -0.0085 0.0038 0.0093 -0.0008 0.0090 0.0071  
Z 0.0063 -0.0028 -0.0076 0.0004 -0.0069 -0.0060

AT.126 H X 0.0019 -0.0029 0.0103 0.0054 -0.0047 0.0128  
Y -0.0085 -0.0038 -0.0093 -0.0008 -0.0090 -0.0071  
Z -0.0063 -0.0028 -0.0076 -0.0004 -0.0069 -0.0060

AT.127 H X 0.0019 0.0029 0.0103 -0.0054 -0.0047 -0.0128  
Y 0.0085 -0.0038 0.0093 -0.0008 0.0090 -0.0071  
Z -0.0063 0.0028 -0.0076 0.0004 -0.0069 0.0060

AT.128 H X -0.0019 0.0029 0.0103 0.0054 -0.0047 -0.0128  
Y 0.0085 0.0038 -0.0093 -0.0008 -0.0090 0.0071

Z 0.0063 0.0028 -0.0076 -0.0004 -0.0069 0.0060  
AT. 129 H X 0.0003 0.0020 -0.0050 0.0042 0.0042 -0.0073  
Y 0.0026 -0.0022 -0.0005 -0.0026 -0.0057 0.0018  
Z 0.0052 0.0043 -0.0195 0.0115 0.0074 -0.0244  
AT. 130 H X -0.0003 0.0020 -0.0050 -0.0042 0.0042 -0.0073  
Y 0.0026 0.0022 0.0005 -0.0026 0.0057 -0.0018  
Z -0.0052 0.0043 -0.0195 -0.0115 0.0074 -0.0244  
AT. 131 H X -0.0003 -0.0020 -0.0050 0.0042 0.0042 0.0073  
Y -0.0026 0.0022 -0.0005 -0.0026 -0.0057 -0.0018  
Z -0.0052 -0.0043 -0.0195 0.0115 0.0074 0.0244  
AT. 132 H X 0.0003 -0.0020 -0.0050 -0.0042 0.0042 0.0073  
Y -0.0026 -0.0022 0.0005 -0.0026 0.0057 0.0018  
Z 0.0052 -0.0043 -0.0195 -0.0115 0.0074 0.0244  
AT. 133 C X -0.0001 -0.0007 0.0008 -0.0007 -0.0013 0.0014  
Y 0.0004 -0.0025 0.0045 -0.0052 -0.0056 0.0075  
Z 0.0019 -0.0044 0.0014 -0.0029 -0.0078 0.0040  
AT. 134 C X 0.0001 -0.0007 0.0008 0.0007 -0.0013 0.0014  
Y 0.0004 0.0025 -0.0045 -0.0052 0.0056 -0.0075  
Z -0.0019 -0.0044 0.0014 0.0029 -0.0078 0.0040  
AT. 135 C X 0.0001 0.0007 0.0008 -0.0007 -0.0013 -0.0014  
Y -0.0004 0.0025 0.0045 -0.0052 -0.0056 -0.0075  
Z -0.0019 0.0044 0.0014 -0.0029 -0.0078 -0.0040  
AT. 136 C X -0.0001 0.0007 0.0008 0.0007 -0.0013 -0.0014  
Y -0.0004 -0.0025 -0.0045 -0.0052 0.0056 0.0075  
Z 0.0019 0.0044 0.0014 0.0029 -0.0078 -0.0040  
AT. 137 C X -0.0016 0.0004 0.0024 -0.0006 0.0013 0.0018  
Y -0.0015 0.0008 0.0011 0.0005 0.0021 0.0002  
Z -0.0021 0.0012 0.0021 0.0001 0.0027 0.0011  
AT. 138 C X 0.0016 0.0004 0.0024 0.0006 0.0013 0.0018  
Y -0.0015 -0.0008 -0.0011 0.0005 -0.0021 -0.0002  
Z 0.0021 0.0012 0.0021 -0.0001 0.0027 0.0011  
AT. 139 C X 0.0016 -0.0004 0.0024 -0.0006 0.0013 -0.0018

Y 0.0015 -0.0008 0.0011 0.0005 0.0021 -0.0002  
Z 0.0021 -0.0012 0.0021 0.0001 0.0027 -0.0011  
AT. 140 C X -0.0016 -0.0004 0.0024 0.0006 0.0013 -0.0018  
Y 0.0015 0.0008 -0.0011 0.0005 -0.0021 0.0002  
Z -0.0021 -0.0012 0.0021 -0.0001 0.0027 -0.0011  
AT. 141 H X 0.0087 -0.0009 -0.0145 0.0044 -0.0046 -0.0123  
Y 0.0198 -0.0035 -0.0269 0.0055 -0.0141 -0.0219  
Z 0.0016 -0.0004 0.0003 -0.0014 -0.0019 0.0004  
AT. 142 H X -0.0087 -0.0009 -0.0145 -0.0044 -0.0046 -0.0123  
Y 0.0198 0.0035 0.0269 0.0055 0.0141 0.0219  
Z -0.0016 -0.0004 0.0003 0.0014 -0.0019 0.0004  
AT. 143 H X -0.0087 0.0009 -0.0145 0.0044 -0.0046 0.0123  
Y -0.0198 0.0035 -0.0269 0.0055 -0.0141 0.0219  
Z -0.0016 0.0004 0.0003 -0.0014 -0.0019 -0.0004  
AT. 144 H X 0.0087 0.0009 -0.0145 -0.0044 -0.0046 0.0123  
Y -0.0198 -0.0035 0.0269 0.0055 0.0141 -0.0219  
Z 0.0016 0.0004 0.0003 0.0014 -0.0019 -0.0004  
AT. 145 H X 0.0163 -0.0021 -0.0253 0.0073 -0.0097 -0.0212  
Y -0.0013 0.0008 0.0009 0.0008 0.0024 -0.0005  
Z 0.0176 -0.0016 -0.0280 0.0095 -0.0084 -0.0261  
AT. 146 H X -0.0163 -0.0021 -0.0253 -0.0073 -0.0097 -0.0212  
Y -0.0013 -0.0008 -0.0009 0.0008 -0.0024 0.0005  
Z -0.0176 -0.0016 -0.0280 -0.0095 -0.0084 -0.0261  
AT. 147 H X -0.0163 0.0021 -0.0253 0.0073 -0.0097 0.0212  
Y 0.0013 -0.0008 0.0009 0.0008 0.0024 0.0005  
Z -0.0176 0.0016 -0.0280 0.0095 -0.0084 0.0261  
AT. 148 H X 0.0163 0.0021 -0.0253 -0.0073 -0.0097 0.0212  
Y 0.0013 0.0008 -0.0009 0.0008 -0.0024 -0.0005  
Z 0.0176 0.0016 -0.0280 -0.0095 -0.0084 0.0261  
AT. 149 O X -0.0000 0.0001 -0.0003 -0.0001 0.0002 -0.0003  
Y 0.0001 -0.0002 0.0004 0.0001 -0.0003 0.0004  
Z 0.0001 -0.0000 0.0000 0.0004 -0.0002 0.0000

AT.150 O X 0.0000 0.0001 -0.0003 0.0001 0.0002 -0.0003  
Y 0.0001 0.0002 -0.0004 0.0001 0.0003 -0.0004  
Z -0.0001 -0.0000 0.0000 -0.0004 -0.0002 0.0000

AT.151 O X 0.0000 -0.0001 -0.0003 -0.0001 0.0002 0.0003  
Y -0.0001 0.0002 0.0004 0.0001 -0.0003 -0.0004  
Z -0.0001 0.0000 0.0000 0.0004 -0.0002 -0.0000

AT.152 O X -0.0000 -0.0001 -0.0003 0.0001 0.0002 0.0003  
Y -0.0001 -0.0002 -0.0004 0.0001 0.0003 0.0004  
Z 0.0001 0.0000 0.0000 -0.0004 -0.0002 -0.0000

AT.153 H X 0.0011 0.0007 -0.0011 0.0035 -0.0002 -0.0012  
Y -0.0018 0.0007 0.0003 -0.0049 0.0027 0.0003  
Z -0.0013 -0.0002 0.0008 -0.0038 0.0012 0.0009

AT.154 H X -0.0011 0.0007 -0.0011 -0.0035 -0.0002 -0.0012  
Y -0.0018 -0.0007 -0.0003 -0.0049 -0.0027 -0.0003  
Z 0.0013 -0.0002 0.0008 0.0038 0.0012 0.0009

AT.155 H X -0.0011 -0.0007 -0.0011 0.0035 -0.0002 0.0012  
Y 0.0018 -0.0007 0.0003 -0.0049 0.0027 -0.0003  
Z 0.0013 0.0002 0.0008 -0.0038 0.0012 -0.0009

AT.156 H X 0.0011 -0.0007 -0.0011 -0.0035 -0.0002 0.0012  
Y 0.0018 0.0007 -0.0003 -0.0049 -0.0027 0.0003  
Z -0.0013 0.0002 0.0008 0.0038 0.0012 -0.0009

AT.157 O X -0.0002 -0.0002 0.0006 -0.0002 -0.0000 0.0006  
Y 0.0025 0.0000 -0.0043 0.0020 -0.0005 -0.0042  
Z 0.0005 0.0002 -0.0010 0.0005 -0.0000 -0.0010

AT.158 O X 0.0002 -0.0002 0.0006 0.0002 -0.0000 0.0006  
Y 0.0025 -0.0000 0.0043 0.0020 0.0005 0.0042  
Z -0.0005 0.0002 -0.0010 -0.0005 -0.0000 -0.0010

AT.159 O X 0.0002 0.0002 0.0006 -0.0002 -0.0000 -0.0006  
Y -0.0025 -0.0000 -0.0043 0.0020 -0.0005 0.0042  
Z -0.0005 -0.0002 -0.0010 0.0005 -0.0000 0.0010

AT.160 O X -0.0002 0.0002 0.0006 0.0002 -0.0000 -0.0006  
Y -0.0025 0.0000 0.0043 0.0020 0.0005 -0.0042



Z 0.0005 -0.0002 -0.0010 -0.0005 -0.0000 0.0010  
AT.161 O X 0.0023 0.0002 -0.0043 0.0019 -0.0004 -0.0041  
Y -0.0009 -0.0001 0.0018 -0.0007 0.0001 0.0017  
Z 0.0020 0.0002 -0.0037 0.0016 -0.0003 -0.0036  
AT.162 O X -0.0023 0.0002 -0.0043 -0.0019 -0.0004 -0.0041  
Y -0.0009 0.0001 -0.0018 -0.0007 -0.0001 -0.0017  
Z -0.0020 0.0002 -0.0037 -0.0016 -0.0003 -0.0036  
AT.163 O X -0.0023 -0.0002 -0.0043 0.0019 -0.0004 0.0041  
Y 0.0009 0.0001 0.0018 -0.0007 0.0001 -0.0017  
Z -0.0020 -0.0002 -0.0037 0.0016 -0.0003 0.0036  
AT.164 O X 0.0023 -0.0002 -0.0043 -0.0019 -0.0004 0.0041  
Y 0.0009 -0.0001 -0.0018 -0.0007 -0.0001 0.0017  
Z 0.0020 -0.0002 -0.0037 -0.0016 -0.0003 0.0036  
AT.165 H X -0.0337 -0.0032 0.0635 -0.0271 0.0050 0.0607  
Y -0.0209 -0.0017 0.0394 -0.0170 0.0031 0.0377  
Z -0.0494 -0.0041 0.0925 -0.0410 0.0072 0.0894  
AT.166 H X 0.0337 -0.0032 0.0635 0.0271 0.0050 0.0607  
Y -0.0209 0.0017 -0.0394 -0.0170 -0.0031 -0.0377  
Z 0.0494 -0.0041 0.0925 0.0410 0.0072 0.0894  
AT.167 H X 0.0337 0.0032 0.0635 -0.0271 0.0050 -0.0607  
Y 0.0209 0.0017 0.0394 -0.0170 0.0031 -0.0377  
Z 0.0494 0.0041 0.0925 -0.0410 0.0072 -0.0894  
AT.168 H X -0.0337 0.0032 0.0635 0.0271 0.0050 -0.0607  
Y 0.0209 -0.0017 -0.0394 -0.0170 -0.0031 0.0377  
Z -0.0494 0.0041 0.0925 0.0410 0.0072 -0.0894  
AT.169 O X 0.0000 -0.0001 0.0001 0.0005 -0.0002 0.0001  
Y 0.0003 -0.0005 -0.0000 -0.0003 0.0000 -0.0000  
Z -0.0000 0.0002 0.0003 0.0020 -0.0007 0.0000  
AT.170 O X -0.0000 -0.0001 0.0001 -0.0005 -0.0002 0.0001  
Y 0.0003 0.0005 0.0000 -0.0003 -0.0000 0.0000  
Z 0.0000 0.0002 0.0003 -0.0020 -0.0007 0.0000  
AT.171 O X -0.0000 0.0001 0.0001 0.0005 -0.0002 -0.0001

Y -0.0003 0.0005 -0.0000 -0.0003 0.0000 0.0000  
Z 0.0000 -0.0002 0.0003 0.0020 -0.0007 -0.0000  
AT. 172 O X 0.0000 0.0001 0.0001 -0.0005 -0.0002 -0.0001  
Y -0.0003 -0.0005 0.0000 -0.0003 -0.0000 -0.0000  
Z -0.0000 -0.0002 0.0003 -0.0020 -0.0007 -0.0000  
AT. 173 H X -0.0001 -0.0016 -0.0014 -0.0108 0.0040 -0.0008  
Y -0.0012 0.0012 0.0008 0.0064 -0.0012 -0.0000  
Z 0.0047 -0.0084 -0.0051 -0.0383 0.0132 -0.0007  
AT. 174 H X 0.0001 -0.0016 -0.0014 0.0108 0.0040 -0.0008  
Y -0.0012 -0.0012 -0.0008 0.0064 0.0012 0.0000  
Z -0.0047 -0.0084 -0.0051 0.0383 0.0132 -0.0007  
AT. 175 H X 0.0001 0.0016 -0.0014 -0.0108 0.0040 0.0008  
Y 0.0012 -0.0012 0.0008 0.0064 -0.0012 0.0000  
Z -0.0047 0.0084 -0.0051 -0.0383 0.0132 0.0007  
AT. 176 H X -0.0001 0.0016 -0.0014 0.0108 0.0040 0.0008  
Y 0.0012 0.0012 -0.0008 0.0064 0.0012 -0.0000  
Z 0.0047 0.0084 -0.0051 0.0383 0.0132 0.0007

FREQ(CM\*\*-1) 1565.47 1567.46 1679.05 1683.64 1696.47 1698.71

AT. 1 I X -0.0000 0.0000 0.0000 -0.0000 -0.0000 0.0000  
Y 0.0000 0.0000 -0.0000 0.0000 -0.0000 -0.0000  
Z -0.0000 0.0000 -0.0000 0.0000 -0.0000 -0.0000  
AT. 2 I X 0.0000 -0.0000 -0.0000 -0.0000 -0.0000 -0.0000  
Y 0.0000 0.0000 -0.0000 -0.0000 0.0000 -0.0000  
Z 0.0000 -0.0000 0.0000 0.0000 -0.0000 0.0000  
AT. 3 I X -0.0000 -0.0000 -0.0000 0.0000 -0.0000 0.0000  
Y 0.0000 -0.0000 0.0000 -0.0000 -0.0000 -0.0000  
Z -0.0000 -0.0000 0.0000 -0.0000 -0.0000 -0.0000  
AT. 4 I X 0.0000 0.0000 0.0000 0.0000 -0.0000 -0.0000  
Y 0.0000 -0.0000 0.0000 0.0000 0.0000 -0.0000  
Z 0.0000 0.0000 -0.0000 -0.0000 -0.0000 0.0000

AT. 5 I X 0.0000 0.0000 -0.0000 -0.0000 -0.0000 -0.0000  
Y -0.0000 -0.0000 -0.0000 -0.0000 0.0000 -0.0000  
Z -0.0000 0.0000 -0.0000 0.0000 -0.0000 -0.0000

AT. 6 I X -0.0000 -0.0000 0.0000 -0.0000 -0.0000 0.0000  
Y -0.0000 -0.0000 -0.0000 0.0000 -0.0000 -0.0000  
Z 0.0000 -0.0000 0.0000 0.0000 -0.0000 0.0000

AT. 7 I X 0.0000 -0.0000 0.0000 0.0000 -0.0000 -0.0000  
Y -0.0000 0.0000 0.0000 0.0000 0.0000 -0.0000  
Z -0.0000 -0.0000 0.0000 -0.0000 -0.0000 -0.0000

AT. 8 I X -0.0000 0.0000 -0.0000 0.0000 -0.0000 0.0000  
Y -0.0000 0.0000 0.0000 -0.0000 -0.0000 -0.0000  
Z 0.0000 0.0000 -0.0000 -0.0000 -0.0000 0.0000

AT. 9 N X -0.0023 -0.0020 -0.0027 -0.0024 -0.0027 -0.0029  
Y -0.0093 -0.0083 -0.0072 -0.0064 -0.0087 -0.0090  
Z 0.0018 0.0015 -0.0032 -0.0035 -0.0028 -0.0030

AT. 10 N X 0.0023 0.0020 0.0027 -0.0024 -0.0027 0.0029  
Y -0.0093 -0.0083 -0.0072 0.0064 0.0087 -0.0090  
Z -0.0018 -0.0015 0.0032 -0.0035 -0.0028 0.0030

AT. 11 N X -0.0023 0.0020 0.0027 0.0024 -0.0027 -0.0029  
Y -0.0093 0.0083 0.0072 0.0064 -0.0087 -0.0090  
Z 0.0018 -0.0015 0.0032 0.0035 -0.0028 -0.0030

AT. 12 N X 0.0023 -0.0020 -0.0027 0.0024 -0.0027 0.0029  
Y -0.0093 0.0083 0.0072 -0.0064 0.0087 -0.0090  
Z -0.0018 0.0015 -0.0032 0.0035 -0.0028 0.0030

AT. 13 N X -0.0013 -0.0018 0.0001 0.0001 0.0002 0.0001  
Y -0.0072 -0.0109 -0.0002 -0.0008 0.0018 -0.0003  
Z -0.0011 -0.0015 -0.0004 -0.0003 -0.0013 -0.0008

AT. 14 N X 0.0013 0.0018 -0.0001 0.0001 0.0002 -0.0001  
Y -0.0072 -0.0109 -0.0002 0.0008 -0.0018 -0.0003  
Z 0.0011 0.0015 0.0004 -0.0003 -0.0013 0.0008

AT. 15 N X -0.0013 0.0018 -0.0001 -0.0001 0.0002 0.0001  
Y -0.0072 0.0109 0.0002 0.0008 0.0018 -0.0003

Z -0.0011 0.0015 0.0004 0.0003 -0.0013 -0.0008  
AT. 16 N X 0.0013 -0.0018 0.0001 -0.0001 0.0002 -0.0001  
Y -0.0072 0.0109 0.0002 -0.0008 -0.0018 -0.0003  
Z 0.0011 -0.0015 -0.0004 0.0003 -0.0013 0.0008  
AT. 17 O X 0.0014 0.0012 -0.0043 -0.0045 -0.0045 -0.0048  
Y 0.0014 0.0013 -0.0055 -0.0057 -0.0063 -0.0066  
Z 0.0046 0.0036 -0.0121 -0.0126 -0.0118 -0.0126  
AT. 18 O X -0.0014 -0.0012 0.0043 -0.0045 -0.0045 0.0048  
Y 0.0014 0.0013 -0.0055 0.0057 0.0063 -0.0066  
Z -0.0046 -0.0036 0.0121 -0.0126 -0.0118 0.0126  
AT. 19 O X 0.0014 -0.0012 0.0043 0.0045 -0.0045 -0.0048  
Y 0.0014 -0.0013 0.0055 0.0057 -0.0063 -0.0066  
Z 0.0046 -0.0036 0.0121 0.0126 -0.0118 -0.0126  
AT. 20 O X -0.0014 0.0012 -0.0043 0.0045 -0.0045 0.0048  
Y 0.0014 -0.0013 0.0055 -0.0057 0.0063 -0.0066  
Z -0.0046 0.0036 -0.0121 0.0126 -0.0118 0.0126  
AT. 21 O X -0.0008 -0.0009 -0.0001 -0.0000 -0.0006 -0.0003  
Y 0.0006 0.0011 0.0006 0.0001 0.0029 0.0011  
Z -0.0034 -0.0046 -0.0012 -0.0004 -0.0050 -0.0022  
AT. 22 O X 0.0008 0.0009 0.0001 -0.0000 -0.0006 0.0003  
Y 0.0006 0.0011 0.0006 -0.0001 -0.0029 0.0011  
Z 0.0034 0.0046 0.0012 -0.0004 -0.0050 0.0022  
AT. 23 O X -0.0008 0.0009 0.0001 0.0000 -0.0006 -0.0003  
Y 0.0006 -0.0011 -0.0006 -0.0001 0.0029 0.0011  
Z -0.0034 0.0046 0.0012 0.0004 -0.0050 -0.0022  
AT. 24 O X 0.0008 -0.0009 -0.0001 0.0000 -0.0006 0.0003  
Y 0.0006 -0.0011 -0.0006 0.0001 -0.0029 0.0011  
Z 0.0034 -0.0046 -0.0012 0.0004 -0.0050 0.0022  
AT. 25 C X 0.0001 0.0001 -0.0009 -0.0011 -0.0013 -0.0013  
Y -0.0020 -0.0020 -0.0011 -0.0007 -0.0010 -0.0010  
Z 0.0024 0.0023 -0.0020 -0.0024 -0.0022 -0.0024  
AT. 26 C X -0.0001 -0.0001 0.0009 -0.0011 -0.0013 0.0013

Y -0.0020 -0.0020 -0.0011 0.0007 0.0010 -0.0010  
Z -0.0024 -0.0023 0.0020 -0.0024 -0.0022 0.0024  
AT. 27 C X 0.0001 -0.0001 0.0009 0.0011 -0.0013 -0.0013  
Y -0.0020 0.0020 0.0011 0.0007 -0.0010 -0.0010  
Z 0.0024 -0.0023 0.0020 0.0024 -0.0022 -0.0024  
AT. 28 C X -0.0001 0.0001 -0.0009 0.0011 -0.0013 0.0013  
Y -0.0020 0.0020 0.0011 -0.0007 0.0010 -0.0010  
Z -0.0024 0.0023 -0.0020 0.0024 -0.0022 0.0024  
AT. 29 H X 0.0015 0.0015 0.0020 0.0017 0.0027 0.0027  
Y 0.0080 0.0096 0.0037 0.0022 0.0007 0.0013  
Z -0.0013 -0.0017 -0.0069 -0.0068 -0.0079 -0.0082  
AT. 30 H X -0.0015 -0.0015 -0.0020 0.0017 0.0027 -0.0027  
Y 0.0080 0.0096 0.0037 -0.0022 -0.0007 0.0013  
Z 0.0013 0.0017 0.0069 -0.0068 -0.0079 0.0082  
AT. 31 H X 0.0015 -0.0015 -0.0020 -0.0017 0.0027 0.0027  
Y 0.0080 -0.0096 -0.0037 -0.0022 0.0007 0.0013  
Z -0.0013 0.0017 0.0069 0.0068 -0.0079 -0.0082  
AT. 32 H X -0.0015 0.0015 0.0020 -0.0017 0.0027 -0.0027  
Y 0.0080 -0.0096 -0.0037 0.0022 -0.0007 0.0013  
Z 0.0013 -0.0017 -0.0069 0.0068 -0.0079 0.0082  
AT. 33 H X -0.0045 -0.0055 -0.0011 0.0009 0.0019 0.0013  
Y -0.0002 0.0004 -0.0036 -0.0036 -0.0052 -0.0052  
Z -0.0024 -0.0043 0.0119 0.0117 0.0166 0.0174  
AT. 34 H X 0.0045 0.0055 0.0011 0.0009 0.0019 -0.0013  
Y -0.0002 0.0004 -0.0036 0.0036 0.0052 -0.0052  
Z 0.0024 0.0043 -0.0119 0.0117 0.0166 -0.0174  
AT. 35 H X -0.0045 0.0055 0.0011 -0.0009 0.0019 0.0013  
Y -0.0002 -0.0004 0.0036 0.0036 -0.0052 -0.0052  
Z -0.0024 0.0043 -0.0119 -0.0117 0.0166 0.0174  
AT. 36 H X 0.0045 -0.0055 -0.0011 -0.0009 0.0019 -0.0013  
Y -0.0002 -0.0004 0.0036 -0.0036 0.0052 -0.0052  
Z 0.0024 -0.0043 0.0119 -0.0117 0.0166 -0.0174

AT. 37 C X 0.0006 0.0007 0.0093 0.0093 0.0103 0.0108  
Y 0.0063 0.0056 0.0154 0.0146 0.0180 0.0188  
Z -0.0092 -0.0078 0.0192 0.0205 0.0197 0.0210

AT. 38 C X -0.0006 -0.0007 -0.0093 0.0093 0.0103 -0.0108  
Y 0.0063 0.0056 0.0154 -0.0146 -0.0180 0.0188  
Z 0.0092 0.0078 -0.0192 0.0205 0.0197 -0.0210

AT. 39 C X 0.0006 -0.0007 -0.0093 -0.0093 0.0103 0.0108  
Y 0.0063 -0.0056 -0.0154 -0.0146 0.0180 0.0188  
Z -0.0092 0.0078 -0.0192 -0.0205 0.0197 0.0210

AT. 40 C X -0.0006 0.0007 0.0093 -0.0093 0.0103 -0.0108  
Y 0.0063 -0.0056 -0.0154 0.0146 -0.0180 0.0188  
Z 0.0092 -0.0078 0.0192 -0.0205 0.0197 -0.0210

AT. 41 C X 0.0010 0.0009 -0.0004 -0.0004 -0.0006 -0.0005  
Y 0.0024 0.0021 0.0003 0.0001 0.0003 0.0003  
Z -0.0001 -0.0003 -0.0002 -0.0002 -0.0004 -0.0003

AT. 42 C X -0.0010 -0.0009 0.0004 -0.0004 -0.0006 0.0005  
Y 0.0024 0.0021 0.0003 -0.0001 -0.0003 0.0003  
Z 0.0001 0.0003 0.0002 -0.0002 -0.0004 0.0003

AT. 43 C X 0.0010 -0.0009 0.0004 0.0004 -0.0006 -0.0005  
Y 0.0024 -0.0021 -0.0003 -0.0001 0.0003 0.0003  
Z -0.0001 0.0003 0.0002 0.0002 -0.0004 -0.0003

AT. 44 C X -0.0010 0.0009 -0.0004 0.0004 -0.0006 0.0005  
Y 0.0024 -0.0021 -0.0003 0.0001 -0.0003 0.0003  
Z 0.0001 -0.0003 -0.0002 0.0002 -0.0004 0.0003

AT. 45 H X -0.0074 -0.0084 -0.0014 -0.0016 -0.0017 -0.0015  
Y -0.0085 -0.0062 0.0020 0.0027 0.0022 0.0017  
Z -0.0086 -0.0063 0.0014 0.0022 0.0014 0.0009

AT. 46 H X 0.0074 0.0084 0.0014 -0.0016 -0.0017 0.0015  
Y -0.0085 -0.0062 0.0020 -0.0027 -0.0022 0.0017  
Z 0.0086 0.0063 -0.0014 0.0022 0.0014 -0.0009

AT. 47 H X -0.0074 0.0084 0.0014 0.0016 -0.0017 -0.0015  
Y -0.0085 0.0062 -0.0020 -0.0027 0.0022 0.0017

Z -0.0086 0.0063 -0.0014 -0.0022 0.0014 0.0009  
AT. 48 H X 0.0074 -0.0084 -0.0014 0.0016 -0.0017 0.0015  
Y -0.0085 0.0062 -0.0020 0.0027 -0.0022 0.0017  
Z 0.0086 -0.0063 0.0014 -0.0022 0.0014 -0.0009  
AT. 49 H X 0.0046 0.0044 0.0063 0.0062 0.0075 0.0072  
Y 0.0031 0.0019 0.0026 0.0022 0.0032 0.0032  
Z 0.0062 0.0085 0.0094 0.0099 0.0107 0.0101  
AT. 50 H X -0.0046 -0.0044 -0.0063 0.0062 0.0075 -0.0072  
Y 0.0031 0.0019 0.0026 -0.0022 -0.0032 0.0032  
Z -0.0062 -0.0085 -0.0094 0.0099 0.0107 -0.0101  
AT. 51 H X 0.0046 -0.0044 -0.0063 -0.0062 0.0075 0.0072  
Y 0.0031 -0.0019 -0.0026 -0.0022 0.0032 0.0032  
Z 0.0062 -0.0085 -0.0094 -0.0099 0.0107 0.0101  
AT. 52 H X -0.0046 0.0044 0.0063 -0.0062 0.0075 -0.0072  
Y 0.0031 -0.0019 -0.0026 0.0022 -0.0032 0.0032  
Z -0.0062 0.0085 0.0094 -0.0099 0.0107 -0.0101  
AT. 53 C X -0.0007 -0.0001 -0.0001 -0.0001 -0.0002 -0.0002  
Y 0.0012 0.0014 0.0003 0.0003 0.0003 0.0003  
Z 0.0005 0.0002 0.0005 0.0005 0.0005 0.0006  
AT. 54 C X 0.0007 0.0001 0.0001 -0.0001 -0.0002 0.0002  
Y 0.0012 0.0014 0.0003 -0.0003 -0.0003 0.0003  
Z -0.0005 -0.0002 -0.0005 0.0005 0.0005 -0.0006  
AT. 55 C X -0.0007 0.0001 0.0001 0.0001 -0.0002 -0.0002  
Y 0.0012 -0.0014 -0.0003 -0.0003 0.0003 0.0003  
Z 0.0005 -0.0002 -0.0005 -0.0005 0.0005 0.0006  
AT. 56 C X 0.0007 -0.0001 -0.0001 0.0001 -0.0002 0.0002  
Y 0.0012 -0.0014 -0.0003 0.0003 -0.0003 0.0003  
Z -0.0005 0.0002 0.0005 -0.0005 0.0005 -0.0006  
AT. 57 C X -0.0007 -0.0002 0.0002 0.0001 0.0003 0.0002  
Y 0.0004 0.0003 -0.0000 -0.0000 -0.0003 0.0000  
Z -0.0009 -0.0012 -0.0002 -0.0002 -0.0001 -0.0001  
AT. 58 C X 0.0007 0.0002 -0.0002 0.0001 0.0003 -0.0002

Y 0.0004 0.0003 -0.0000 0.0000 0.0003 0.0000  
Z 0.0009 0.0012 0.0002 -0.0002 -0.0001 0.0001  
AT. 59 C X -0.0007 0.0002 -0.0002 -0.0001 0.0003 0.0002  
Y 0.0004 -0.0003 0.0000 0.0000 -0.0003 0.0000  
Z -0.0009 0.0012 0.0002 0.0002 -0.0001 -0.0001  
AT. 60 C X 0.0007 -0.0002 0.0002 -0.0001 0.0003 -0.0002  
Y 0.0004 -0.0003 0.0000 -0.0000 0.0003 0.0000  
Z 0.0009 -0.0012 -0.0002 0.0002 -0.0001 0.0001  
AT. 61 H X -0.0030 -0.0057 -0.0000 0.0000 0.0011 -0.0001  
Y -0.0013 -0.0046 -0.0002 -0.0002 0.0005 -0.0001  
Z -0.0036 0.0029 0.0001 0.0003 -0.0001 -0.0008  
AT. 62 H X 0.0030 0.0057 0.0000 0.0000 0.0011 0.0001  
Y -0.0013 -0.0046 -0.0002 0.0002 -0.0005 -0.0001  
Z 0.0036 -0.0029 -0.0001 0.0003 -0.0001 0.0008  
AT. 63 H X -0.0030 0.0057 0.0000 -0.0000 0.0011 -0.0001  
Y -0.0013 0.0046 0.0002 0.0002 0.0005 -0.0001  
Z -0.0036 -0.0029 -0.0001 -0.0003 -0.0001 -0.0008  
AT. 64 H X 0.0030 -0.0057 -0.0000 -0.0000 0.0011 0.0001  
Y -0.0013 0.0046 0.0002 -0.0002 -0.0005 -0.0001  
Z 0.0036 0.0029 0.0001 -0.0003 -0.0001 0.0008  
AT. 65 H X 0.0023 0.0027 -0.0000 -0.0001 -0.0008 0.0000  
Y -0.0084 -0.0088 0.0004 0.0005 0.0033 0.0003  
Z 0.0106 0.0061 0.0012 0.0008 -0.0003 0.0012  
AT. 66 H X -0.0023 -0.0027 0.0000 -0.0001 -0.0008 -0.0000  
Y -0.0084 -0.0088 0.0004 -0.0005 -0.0033 0.0003  
Z -0.0106 -0.0061 -0.0012 0.0008 -0.0003 -0.0012  
AT. 67 H X 0.0023 -0.0027 0.0000 0.0001 -0.0008 0.0000  
Y -0.0084 0.0088 -0.0004 -0.0005 0.0033 0.0003  
Z 0.0106 -0.0061 -0.0012 -0.0008 -0.0003 0.0012  
AT. 68 H X -0.0023 0.0027 -0.0000 0.0001 -0.0008 -0.0000  
Y -0.0084 0.0088 -0.0004 0.0005 -0.0033 0.0003  
Z -0.0106 0.0061 0.0012 -0.0008 -0.0003 -0.0012



AT. 69 H X 0.0123 0.0054 -0.0002 -0.0003 -0.0020 0.0003  
Y 0.0019 0.0064 0.0001 0.0000 -0.0003 -0.0005  
Z 0.0031 0.0055 -0.0002 -0.0002 -0.0006 -0.0006

AT. 70 H X -0.0123 -0.0054 0.0002 -0.0003 -0.0020 -0.0003  
Y 0.0019 0.0064 0.0001 -0.0000 0.0003 -0.0005  
Z -0.0031 -0.0055 0.0002 -0.0002 -0.0006 0.0006

AT. 71 H X 0.0123 -0.0054 0.0002 0.0003 -0.0020 0.0003  
Y 0.0019 -0.0064 -0.0001 -0.0000 -0.0003 -0.0005  
Z 0.0031 -0.0055 0.0002 0.0002 -0.0006 -0.0006

AT. 72 H X -0.0123 0.0054 -0.0002 0.0003 -0.0020 -0.0003  
Y 0.0019 -0.0064 -0.0001 0.0000 0.0003 -0.0005  
Z -0.0031 0.0055 -0.0002 0.0002 -0.0006 0.0006

AT. 73 C X 0.0008 0.0007 0.0000 -0.0001 -0.0002 -0.0002  
Y -0.0016 -0.0019 -0.0001 -0.0002 0.0000 -0.0001  
Z -0.0003 -0.0001 -0.0000 0.0001 -0.0002 0.0000

AT. 74 C X -0.0008 -0.0007 -0.0000 -0.0001 -0.0002 0.0002  
Y -0.0016 -0.0019 -0.0001 0.0002 -0.0000 -0.0001  
Z 0.0003 0.0001 0.0000 0.0001 -0.0002 -0.0000

AT. 75 C X 0.0008 -0.0007 -0.0000 0.0001 -0.0002 -0.0002  
Y -0.0016 0.0019 0.0001 0.0002 0.0000 -0.0001  
Z -0.0003 0.0001 0.0000 -0.0001 -0.0002 0.0000

AT. 76 C X -0.0008 0.0007 0.0000 0.0001 -0.0002 0.0002  
Y -0.0016 0.0019 0.0001 -0.0002 -0.0000 -0.0001  
Z 0.0003 -0.0001 -0.0000 -0.0001 -0.0002 -0.0000

AT. 77 C X 0.0004 0.0007 0.0002 0.0002 0.0004 0.0004  
Y 0.0016 0.0013 0.0004 0.0002 0.0007 0.0007  
Z -0.0008 -0.0003 0.0019 0.0021 0.0023 0.0024

AT. 78 C X -0.0004 -0.0007 -0.0002 0.0002 0.0004 -0.0004  
Y 0.0016 0.0013 0.0004 -0.0002 -0.0007 0.0007  
Z 0.0008 0.0003 -0.0019 0.0021 0.0023 -0.0024

AT. 79 C X 0.0004 -0.0007 -0.0002 -0.0002 0.0004 0.0004  
Y 0.0016 -0.0013 -0.0004 -0.0002 0.0007 0.0007

Z -0.0008 0.0003 -0.0019 -0.0021 0.0023 0.0024  
AT. 80 C X -0.0004 0.0007 0.0002 -0.0002 0.0004 -0.0004  
Y 0.0016 -0.0013 -0.0004 0.0002 -0.0007 0.0007  
Z 0.0008 -0.0003 0.0019 -0.0021 0.0023 -0.0024  
AT. 81 H X 0.0014 -0.0002 0.0031 0.0031 0.0013 0.0012  
Y 0.0030 0.0010 0.0039 0.0038 0.0033 0.0032  
Z -0.0069 -0.0101 -0.0076 -0.0084 -0.0163 -0.0164  
AT. 82 H X -0.0014 0.0002 -0.0031 0.0031 0.0013 -0.0012  
Y 0.0030 0.0010 0.0039 -0.0038 -0.0033 0.0032  
Z 0.0069 0.0101 0.0076 -0.0084 -0.0163 0.0164  
AT. 83 H X 0.0014 0.0002 -0.0031 -0.0031 0.0013 0.0012  
Y 0.0030 -0.0010 -0.0039 -0.0038 0.0033 0.0032  
Z -0.0069 0.0101 0.0076 0.0084 -0.0163 -0.0164  
AT. 84 H X -0.0014 -0.0002 0.0031 -0.0031 0.0013 -0.0012  
Y 0.0030 -0.0010 -0.0039 0.0038 -0.0033 0.0032  
Z 0.0069 -0.0101 -0.0076 0.0084 -0.0163 0.0164  
AT. 85 H X -0.0038 -0.0078 0.0013 0.0008 -0.0029 -0.0027  
Y -0.0056 -0.0027 0.0016 0.0024 0.0052 0.0052  
Z 0.0064 0.0053 0.0016 0.0012 0.0000 0.0002  
AT. 86 H X 0.0038 0.0078 -0.0013 0.0008 -0.0029 0.0027  
Y -0.0056 -0.0027 0.0016 -0.0024 -0.0052 0.0052  
Z -0.0064 -0.0053 -0.0016 0.0012 0.0000 -0.0002  
AT. 87 H X -0.0038 0.0078 -0.0013 -0.0008 -0.0029 -0.0027  
Y -0.0056 0.0027 -0.0016 -0.0024 0.0052 0.0052  
Z 0.0064 -0.0053 -0.0016 -0.0012 0.0000 0.0002  
AT. 88 H X 0.0038 -0.0078 0.0013 -0.0008 -0.0029 0.0027  
Y -0.0056 0.0027 -0.0016 0.0024 -0.0052 0.0052  
Z -0.0064 0.0053 0.0016 -0.0012 0.0000 -0.0002  
AT. 89 C X -0.0000 0.0002 -0.0007 -0.0006 -0.0006 -0.0005  
Y 0.0013 0.0017 0.0003 0.0004 0.0002 0.0002  
Z -0.0005 -0.0004 -0.0009 -0.0009 -0.0007 -0.0010  
AT. 90 C X 0.0000 -0.0002 0.0007 -0.0006 -0.0006 0.0005

Y 0.0013 0.0017 0.0003 -0.0004 -0.0002 0.0002  
Z 0.0005 0.0004 0.0009 -0.0009 -0.0007 0.0010  
AT. 91 C X -0.0000 -0.0002 0.0007 0.0006 -0.0006 -0.0005  
Y 0.0013 -0.0017 -0.0003 -0.0004 0.0002 0.0002  
Z -0.0005 0.0004 0.0009 0.0009 -0.0007 -0.0010  
AT. 92 C X 0.0000 0.0002 -0.0007 0.0006 -0.0006 0.0005  
Y 0.0013 -0.0017 -0.0003 0.0004 -0.0002 0.0002  
Z 0.0005 -0.0004 -0.0009 0.0009 -0.0007 0.0010  
AT. 93 C X 0.0000 0.0000 0.0001 0.0002 0.0005 0.0006  
Y -0.0002 0.0003 -0.0004 -0.0004 0.0001 0.0002  
Z 0.0006 0.0009 0.0003 0.0002 0.0002 0.0001  
AT. 94 C X -0.0000 -0.0000 -0.0001 0.0002 0.0005 -0.0006  
Y -0.0002 0.0003 -0.0004 0.0004 -0.0001 0.0002  
Z -0.0006 -0.0009 -0.0003 0.0002 0.0002 -0.0001  
AT. 95 C X 0.0000 -0.0000 -0.0001 -0.0002 0.0005 0.0006  
Y -0.0002 -0.0003 0.0004 0.0004 0.0001 0.0002  
Z 0.0006 -0.0009 -0.0003 -0.0002 0.0002 0.0001  
AT. 96 C X -0.0000 0.0000 0.0001 -0.0002 0.0005 -0.0006  
Y -0.0002 -0.0003 0.0004 -0.0004 -0.0001 0.0002  
Z -0.0006 0.0009 0.0003 -0.0002 0.0002 -0.0001  
AT. 97 H X 0.0004 0.0036 -0.0025 -0.0021 0.0003 0.0005  
Y -0.0020 -0.0084 0.0028 0.0030 -0.0008 -0.0002  
Z -0.0014 -0.0033 -0.0032 -0.0015 -0.0016 0.0004  
AT. 98 H X -0.0004 -0.0036 0.0025 -0.0021 0.0003 -0.0005  
Y -0.0020 -0.0084 0.0028 -0.0030 0.0008 -0.0002  
Z 0.0014 0.0033 0.0032 -0.0015 -0.0016 -0.0004  
AT. 99 H X 0.0004 -0.0036 0.0025 0.0021 0.0003 0.0005  
Y -0.0020 0.0084 -0.0028 -0.0030 -0.0008 -0.0002  
Z -0.0014 0.0033 0.0032 0.0015 -0.0016 0.0004  
AT. 100 H X -0.0004 0.0036 -0.0025 0.0021 0.0003 -0.0005  
Y -0.0020 0.0084 -0.0028 0.0030 0.0008 -0.0002  
Z 0.0014 -0.0033 -0.0032 0.0015 -0.0016 -0.0004

AT.101 H X -0.0015 -0.0062 0.0031 0.0026 -0.0019 -0.0020  
Y -0.0014 -0.0062 0.0029 0.0024 -0.0021 -0.0022  
Z -0.0023 -0.0020 0.0011 0.0003 -0.0004 -0.0011

AT.102 H X 0.0015 0.0062 -0.0031 0.0026 -0.0019 0.0020  
Y -0.0014 -0.0062 0.0029 -0.0024 0.0021 -0.0022  
Z 0.0023 0.0020 -0.0011 0.0003 -0.0004 0.0011

AT.103 H X -0.0015 0.0062 -0.0031 -0.0026 -0.0019 -0.0020  
Y -0.0014 0.0062 -0.0029 -0.0024 -0.0021 -0.0022  
Z -0.0023 0.0020 -0.0011 -0.0003 -0.0004 -0.0011

AT.104 H X 0.0015 -0.0062 0.0031 -0.0026 -0.0019 0.0020  
Y -0.0014 0.0062 -0.0029 0.0024 0.0021 -0.0022  
Z 0.0023 -0.0020 0.0011 -0.0003 -0.0004 0.0011

AT.105 H X -0.0004 0.0003 0.0028 0.0010 -0.0010 -0.0026  
Y 0.0032 0.0065 -0.0004 -0.0004 0.0012 0.0006  
Z -0.0019 -0.0043 -0.0005 0.0002 -0.0003 0.0009

AT.106 H X 0.0004 -0.0003 -0.0028 0.0010 -0.0010 0.0026  
Y 0.0032 0.0065 -0.0004 0.0004 -0.0012 0.0006  
Z 0.0019 0.0043 0.0005 0.0002 -0.0003 -0.0009

AT.107 H X -0.0004 -0.0003 -0.0028 -0.0010 -0.0010 -0.0026  
Y 0.0032 -0.0065 0.0004 0.0004 0.0012 0.0006  
Z -0.0019 0.0043 0.0005 -0.0002 -0.0003 0.0009

AT.108 H X 0.0004 0.0003 0.0028 -0.0010 -0.0010 0.0026  
Y 0.0032 -0.0065 0.0004 -0.0004 -0.0012 0.0006  
Z 0.0019 -0.0043 -0.0005 -0.0002 -0.0003 -0.0009

AT.109 C X -0.0010 -0.0011 -0.0000 -0.0000 0.0001 -0.0000  
Y 0.0011 0.0019 0.0000 0.0001 -0.0002 0.0001  
Z -0.0011 -0.0008 0.0001 0.0000 0.0008 0.0003

AT.110 C X 0.0010 0.0011 0.0000 -0.0000 0.0001 0.0000  
Y 0.0011 0.0019 0.0000 -0.0001 0.0002 0.0001  
Z 0.0011 0.0008 -0.0001 0.0000 0.0008 -0.0003

AT.111 C X -0.0010 0.0011 0.0000 0.0000 0.0001 -0.0000  
Y 0.0011 -0.0019 -0.0000 -0.0001 -0.0002 0.0001

Z -0.0011 0.0008 -0.0001 -0.0000 0.0008 0.0003  
AT. 112 C X 0.0010 -0.0011 -0.0000 0.0000 0.0001 0.0000  
Y 0.0011 -0.0019 -0.0000 0.0001 0.0002 0.0001  
Z 0.0011 -0.0008 0.0001 -0.0000 0.0008 -0.0003  
AT. 113 H X 0.0049 0.0047 0.0001 -0.0000 -0.0008 0.0002  
Y -0.0043 -0.0030 -0.0006 -0.0002 -0.0004 -0.0007  
Z 0.0195 0.0226 -0.0004 -0.0001 -0.0063 -0.0012  
AT. 114 H X -0.0049 -0.0047 -0.0001 -0.0000 -0.0008 -0.0002  
Y -0.0043 -0.0030 -0.0006 0.0002 0.0004 -0.0007  
Z -0.0195 -0.0226 0.0004 -0.0001 -0.0063 0.0012  
AT. 115 H X 0.0049 -0.0047 -0.0001 0.0000 -0.0008 0.0002  
Y -0.0043 0.0030 0.0006 0.0002 -0.0004 -0.0007  
Z 0.0195 -0.0226 0.0004 0.0001 -0.0063 -0.0012  
AT. 116 H X -0.0049 0.0047 0.0001 0.0000 -0.0008 -0.0002  
Y -0.0043 0.0030 0.0006 -0.0002 0.0004 -0.0007  
Z -0.0195 0.0226 -0.0004 0.0001 -0.0063 0.0012  
AT. 117 H X 0.0147 0.0159 -0.0000 -0.0004 -0.0031 -0.0002  
Y 0.0023 -0.0004 -0.0002 -0.0001 -0.0022 -0.0008  
Z -0.0018 -0.0049 -0.0000 -0.0001 -0.0003 -0.0003  
AT. 118 H X -0.0147 -0.0159 0.0000 -0.0004 -0.0031 0.0002  
Y 0.0023 -0.0004 -0.0002 0.0001 0.0022 -0.0008  
Z 0.0018 0.0049 0.0000 -0.0001 -0.0003 0.0003  
AT. 119 H X 0.0147 -0.0159 0.0000 0.0004 -0.0031 -0.0002  
Y 0.0023 0.0004 0.0002 0.0001 -0.0022 -0.0008  
Z -0.0018 0.0049 0.0000 0.0001 -0.0003 -0.0003  
AT. 120 H X -0.0147 0.0159 -0.0000 0.0004 -0.0031 0.0002  
Y 0.0023 0.0004 0.0002 -0.0001 0.0022 -0.0008  
Z 0.0018 -0.0049 -0.0000 0.0001 -0.0003 0.0003  
AT. 121 C X 0.0001 0.0001 0.0000 -0.0000 -0.0002 -0.0001  
Y 0.0009 0.0018 -0.0000 0.0000 0.0002 0.0002  
Z 0.0021 0.0023 0.0002 0.0003 0.0000 0.0002  
AT. 122 C X -0.0001 -0.0001 -0.0000 -0.0000 -0.0002 0.0001

Y 0.0009 0.0018 -0.0000 -0.0000 -0.0002 0.0002  
Z -0.0021 -0.0023 -0.0002 0.0003 0.0000 -0.0002  
AT. 123 C X 0.0001 -0.0001 -0.0000 0.0000 -0.0002 -0.0001  
Y 0.0009 -0.0018 0.0000 -0.0000 0.0002 0.0002  
Z 0.0021 -0.0023 -0.0002 -0.0003 0.0000 0.0002  
AT. 124 C X -0.0001 0.0001 0.0000 0.0000 -0.0002 0.0001  
Y 0.0009 -0.0018 0.0000 0.0000 -0.0002 0.0002  
Z -0.0021 0.0023 0.0002 -0.0003 0.0000 -0.0002  
AT. 125 H X 0.0104 0.0138 0.0005 0.0005 -0.0001 0.0000  
Y 0.0041 0.0017 0.0004 0.0003 -0.0005 -0.0004  
Z -0.0033 -0.0017 -0.0002 -0.0000 0.0006 0.0008  
AT. 126 H X -0.0104 -0.0138 -0.0005 0.0005 -0.0001 -0.0000  
Y 0.0041 0.0017 0.0004 -0.0003 0.0005 -0.0004  
Z 0.0033 0.0017 0.0002 -0.0000 0.0006 -0.0008  
AT. 127 H X 0.0104 -0.0138 -0.0005 -0.0005 -0.0001 0.0000  
Y 0.0041 -0.0017 -0.0004 -0.0003 -0.0005 -0.0004  
Z -0.0033 0.0017 0.0002 0.0000 0.0006 0.0008  
AT. 128 H X -0.0104 0.0138 0.0005 -0.0005 -0.0001 -0.0000  
Y 0.0041 -0.0017 -0.0004 0.0003 0.0005 -0.0004  
Z 0.0033 -0.0017 -0.0002 0.0000 0.0006 -0.0008  
AT. 129 H X -0.0068 -0.0086 0.0000 -0.0003 0.0016 0.0004  
Y 0.0030 0.0043 -0.0005 -0.0002 -0.0016 -0.0007  
Z -0.0198 -0.0253 -0.0006 -0.0010 0.0020 0.0005  
AT. 130 H X 0.0068 0.0086 -0.0000 -0.0003 0.0016 -0.0004  
Y 0.0030 0.0043 -0.0005 0.0002 0.0016 -0.0007  
Z 0.0198 0.0253 0.0006 -0.0010 0.0020 -0.0005  
AT. 131 H X -0.0068 0.0086 -0.0000 0.0003 0.0016 0.0004  
Y 0.0030 -0.0043 0.0005 0.0002 -0.0016 -0.0007  
Z -0.0198 0.0253 0.0006 0.0010 0.0020 0.0005  
AT. 132 H X 0.0068 -0.0086 0.0000 0.0003 0.0016 -0.0004  
Y 0.0030 -0.0043 0.0005 -0.0002 0.0016 -0.0007  
Z 0.0198 -0.0253 -0.0006 0.0010 0.0020 -0.0005

AT. 133 C X 0.0015 0.0020 0.0003 0.0001 0.0010 0.0006  
Y 0.0062 0.0087 -0.0005 0.0007 -0.0060 -0.0011  
Z 0.0057 0.0085 0.0022 0.0010 0.0086 0.0040

AT. 134 C X -0.0015 -0.0020 -0.0003 0.0001 0.0010 -0.0006  
Y 0.0062 0.0087 -0.0005 -0.0007 0.0060 -0.0011  
Z -0.0057 -0.0085 -0.0022 0.0010 0.0086 -0.0040

AT. 135 C X 0.0015 -0.0020 -0.0003 -0.0001 0.0010 0.0006  
Y 0.0062 -0.0087 0.0005 -0.0007 -0.0060 -0.0011  
Z 0.0057 -0.0085 -0.0022 -0.0010 0.0086 0.0040

AT. 136 C X -0.0015 0.0020 0.0003 -0.0001 0.0010 -0.0006  
Y 0.0062 -0.0087 0.0005 0.0007 0.0060 -0.0011  
Z -0.0057 0.0085 0.0022 -0.0010 0.0086 -0.0040

AT. 137 C X 0.0013 0.0008 -0.0002 -0.0002 -0.0005 -0.0004  
Y -0.0001 -0.0010 -0.0002 -0.0003 0.0002 -0.0002  
Z 0.0003 -0.0008 -0.0004 -0.0003 -0.0010 -0.0006

AT. 138 C X -0.0013 -0.0008 0.0002 -0.0002 -0.0005 0.0004  
Y -0.0001 -0.0010 -0.0002 0.0003 -0.0002 -0.0002  
Z -0.0003 0.0008 0.0004 -0.0003 -0.0010 0.0006

AT. 139 C X 0.0013 -0.0008 0.0002 0.0002 -0.0005 -0.0004  
Y -0.0001 0.0010 0.0002 0.0003 0.0002 -0.0002  
Z 0.0003 0.0008 0.0004 0.0003 -0.0010 -0.0006

AT. 140 C X -0.0013 0.0008 -0.0002 0.0002 -0.0005 0.0004  
Y -0.0001 0.0010 0.0002 -0.0003 -0.0002 -0.0002  
Z -0.0003 -0.0008 -0.0004 0.0003 -0.0010 0.0006

AT. 141 H X -0.0097 -0.0073 0.0018 0.0015 0.0025 0.0021  
Y -0.0163 -0.0099 0.0016 0.0019 0.0007 0.0018  
Z 0.0004 0.0011 -0.0012 -0.0005 -0.0035 -0.0017

AT. 142 H X 0.0097 0.0073 -0.0018 0.0015 0.0025 -0.0021  
Y -0.0163 -0.0099 0.0016 -0.0019 -0.0007 0.0018  
Z -0.0004 -0.0011 0.0012 -0.0005 -0.0035 0.0017

AT. 143 H X -0.0097 0.0073 -0.0018 -0.0015 0.0025 0.0021  
Y -0.0163 0.0099 -0.0016 -0.0019 0.0007 0.0018

Z 0.0004 -0.0011 0.0012 0.0005 -0.0035 -0.0017  
AT. 144 H X 0.0097 -0.0073 0.0018 -0.0015 0.0025 -0.0021  
Y -0.0163 0.0099 -0.0016 0.0019 -0.0007 0.0018  
Z -0.0004 0.0011 -0.0012 0.0005 -0.0035 0.0017  
AT. 145 H X -0.0163 -0.0118 0.0019 0.0017 0.0029 0.0026  
Y -0.0004 -0.0016 -0.0001 -0.0004 0.0009 -0.0002  
Z -0.0195 -0.0157 0.0018 0.0010 0.0059 0.0024  
AT. 146 H X 0.0163 0.0118 -0.0019 0.0017 0.0029 -0.0026  
Y -0.0004 -0.0016 -0.0001 0.0004 -0.0009 -0.0002  
Z 0.0195 0.0157 -0.0018 0.0010 0.0059 -0.0024  
AT. 147 H X -0.0163 0.0118 -0.0019 -0.0017 0.0029 0.0026  
Y -0.0004 0.0016 0.0001 0.0004 0.0009 -0.0002  
Z -0.0195 0.0157 -0.0018 -0.0010 0.0059 0.0024  
AT. 148 H X 0.0163 -0.0118 0.0019 -0.0017 0.0029 -0.0026  
Y -0.0004 0.0016 0.0001 -0.0004 -0.0009 -0.0002  
Z 0.0195 -0.0157 0.0018 -0.0010 0.0059 -0.0024  
AT. 149 O X -0.0004 -0.0004 0.0000 0.0001 0.0000 0.0000  
Y 0.0005 0.0005 0.0001 0.0000 0.0001 0.0001  
Z 0.0002 0.0000 0.0003 0.0003 0.0003 0.0002  
AT. 150 O X 0.0004 0.0004 -0.0000 0.0001 0.0000 -0.0000  
Y 0.0005 0.0005 0.0001 -0.0000 -0.0001 0.0001  
Z -0.0002 -0.0000 -0.0003 0.0003 0.0003 -0.0002  
AT. 151 O X -0.0004 0.0004 -0.0000 -0.0001 0.0000 0.0000  
Y 0.0005 -0.0005 -0.0001 -0.0000 0.0001 0.0001  
Z 0.0002 -0.0000 -0.0003 -0.0003 0.0003 0.0002  
AT. 152 O X 0.0004 -0.0004 0.0000 -0.0001 0.0000 -0.0000  
Y 0.0005 -0.0005 -0.0001 0.0000 -0.0001 0.0001  
Z -0.0002 0.0000 0.0003 -0.0003 0.0003 -0.0002  
AT. 153 H X 0.0003 -0.0010 0.0025 0.0023 0.0015 0.0008  
Y -0.0016 -0.0001 -0.0010 -0.0007 -0.0037 -0.0034  
Z -0.0009 0.0005 -0.0033 -0.0031 -0.0026 -0.0022  
AT. 154 H X -0.0003 0.0010 -0.0025 0.0023 0.0015 -0.0008



Y -0.0016 -0.0001 -0.0010 0.0007 0.0037 -0.0034  
Z 0.0009 -0.0005 0.0033 -0.0031 -0.0026 0.0022  
AT. 155 H X 0.0003 0.0010 -0.0025 -0.0023 0.0015 0.0008  
Y -0.0016 0.0001 0.0010 0.0007 -0.0037 -0.0034  
Z -0.0009 -0.0005 0.0033 0.0031 -0.0026 -0.0022  
AT. 156 H X -0.0003 -0.0010 0.0025 -0.0023 0.0015 -0.0008  
Y -0.0016 0.0001 0.0010 -0.0007 0.0037 -0.0034  
Z 0.0009 0.0005 -0.0033 0.0031 -0.0026 0.0022  
AT. 157 O X 0.0005 0.0005 0.0001 0.0002 0.0001 0.0001  
Y -0.0035 -0.0032 -0.0001 0.0000 -0.0001 -0.0000  
Z -0.0009 -0.0009 -0.0001 -0.0001 -0.0001 -0.0001  
AT. 158 O X -0.0005 -0.0005 -0.0001 0.0002 0.0001 -0.0001  
Y -0.0035 -0.0032 -0.0001 -0.0000 0.0001 -0.0000  
Z 0.0009 0.0009 0.0001 -0.0001 -0.0001 0.0001  
AT. 159 O X 0.0005 -0.0005 -0.0001 -0.0002 0.0001 0.0001  
Y -0.0035 0.0032 0.0001 -0.0000 -0.0001 -0.0000  
Z -0.0009 0.0009 0.0001 0.0001 -0.0001 -0.0001  
AT. 160 O X -0.0005 0.0005 0.0001 -0.0002 0.0001 -0.0001  
Y -0.0035 0.0032 0.0001 0.0000 0.0001 -0.0000  
Z 0.0009 -0.0009 -0.0001 0.0001 -0.0001 0.0001  
AT. 161 O X -0.0035 -0.0032 -0.0001 -0.0000 -0.0002 -0.0001  
Y 0.0015 0.0014 0.0001 0.0000 0.0003 0.0001  
Z -0.0030 -0.0028 -0.0001 -0.0001 -0.0001 -0.0001  
AT. 162 O X 0.0035 0.0032 0.0001 -0.0000 -0.0002 0.0001  
Y 0.0015 0.0014 0.0001 -0.0000 -0.0003 0.0001  
Z 0.0030 0.0028 0.0001 -0.0001 -0.0001 0.0001  
AT. 163 O X -0.0035 0.0032 0.0001 0.0000 -0.0002 -0.0001  
Y 0.0015 -0.0014 -0.0001 -0.0000 0.0003 0.0001  
Z -0.0030 0.0028 0.0001 0.0001 -0.0001 -0.0001  
AT. 164 O X 0.0035 -0.0032 -0.0001 0.0000 -0.0002 0.0001  
Y 0.0015 -0.0014 -0.0001 0.0000 -0.0003 0.0001  
Z 0.0030 -0.0028 -0.0001 0.0001 -0.0001 0.0001

AT.165 H X 0.0525 0.0488 0.0016 0.0005 0.0036 0.0017  
Y 0.0322 0.0299 0.0005 0.0002 0.0002 0.0004  
Z 0.0760 0.0709 0.0017 0.0011 0.0030 0.0021

AT.166 H X -0.0525 -0.0488 -0.0016 0.0005 0.0036 -0.0017  
Y 0.0322 0.0299 0.0005 -0.0002 -0.0002 0.0004  
Z -0.0760 -0.0709 -0.0017 0.0011 0.0030 -0.0021

AT.167 H X 0.0525 -0.0488 -0.0016 -0.0005 0.0036 0.0017  
Y 0.0322 -0.0299 -0.0005 -0.0002 0.0002 0.0004  
Z 0.0760 -0.0709 -0.0017 -0.0011 0.0030 0.0021

AT.168 H X -0.0525 0.0488 0.0016 -0.0005 0.0036 -0.0017  
Y 0.0322 -0.0299 -0.0005 0.0002 -0.0002 0.0004  
Z -0.0760 0.0709 0.0017 -0.0011 0.0030 -0.0021

AT.169 O X 0.0002 0.0001 0.0001 0.0001 -0.0001 -0.0001  
Y -0.0001 0.0002 0.0034 0.0033 -0.0011 -0.0011  
Z 0.0008 0.0000 -0.0016 -0.0016 0.0004 0.0002

AT.170 O X -0.0002 -0.0001 -0.0001 0.0001 -0.0001 0.0001  
Y -0.0001 0.0002 0.0034 -0.0033 0.0011 -0.0011  
Z -0.0008 -0.0000 0.0016 -0.0016 0.0004 -0.0002

AT.171 O X 0.0002 -0.0001 -0.0001 -0.0001 -0.0001 -0.0001  
Y -0.0001 -0.0002 -0.0034 -0.0033 -0.0011 -0.0011  
Z 0.0008 -0.0000 0.0016 0.0016 0.0004 0.0002

AT.172 O X -0.0002 0.0001 0.0001 -0.0001 -0.0001 0.0001  
Y -0.0001 -0.0002 -0.0034 0.0033 0.0011 -0.0011  
Z -0.0008 0.0000 -0.0016 0.0016 0.0004 -0.0002

AT.173 H X -0.0039 -0.0006 0.0180 0.0171 -0.0016 -0.0017  
Y 0.0017 -0.0008 -0.0006 -0.0006 0.0110 0.0114  
Z -0.0148 0.0023 0.0644 0.0613 -0.0104 -0.0092

AT.174 H X 0.0039 0.0006 -0.0180 0.0171 -0.0016 0.0017  
Y 0.0017 -0.0008 -0.0006 0.0006 -0.0110 0.0114  
Z 0.0148 -0.0023 -0.0644 0.0613 -0.0104 0.0092

AT.175 H X -0.0039 0.0006 -0.0180 -0.0171 -0.0016 -0.0017  
Y 0.0017 0.0008 0.0006 0.0006 0.0110 0.0114

Z -0.0148 -0.0023 -0.0644 -0.0613 -0.0104 -0.0092  
AT. 176 H X 0.0039 -0.0006 0.0180 -0.0171 -0.0016 0.0017  
Y 0.0017 0.0008 0.0006 -0.0006 -0.0110 0.0114  
Z 0.0148 0.0023 0.0644 -0.0613 -0.0104 0.0092

FREQ(CM\*\*-1) 1707.84 1710.49 1715.76 1717.92 1736.12 1736.20

AT. 1 I X -0.0000 -0.0000 -0.0000 -0.0000 0.0000 -0.0000  
Y 0.0000 0.0000 0.0000 0.0000 0.0000 0.0000  
Z 0.0000 -0.0000 -0.0000 0.0000 -0.0000 0.0000

AT. 2 I X 0.0000 0.0000 -0.0000 -0.0000 -0.0000 -0.0000  
Y 0.0000 0.0000 -0.0000 -0.0000 0.0000 -0.0000  
Z -0.0000 0.0000 -0.0000 0.0000 0.0000 0.0000

AT. 3 I X 0.0000 -0.0000 0.0000 -0.0000 -0.0000 0.0000  
Y -0.0000 0.0000 -0.0000 0.0000 -0.0000 -0.0000  
Z -0.0000 -0.0000 0.0000 0.0000 0.0000 -0.0000

AT. 4 I X -0.0000 0.0000 0.0000 -0.0000 0.0000 0.0000  
Y -0.0000 0.0000 0.0000 -0.0000 -0.0000 0.0000  
Z 0.0000 0.0000 0.0000 0.0000 -0.0000 -0.0000

AT. 5 I X 0.0000 0.0000 0.0000 0.0000 0.0000 0.0000  
Y 0.0000 0.0000 -0.0000 0.0000 0.0000 0.0000  
Z -0.0000 -0.0000 -0.0000 -0.0000 -0.0000 -0.0000

AT. 6 I X -0.0000 -0.0000 0.0000 0.0000 -0.0000 0.0000  
Y 0.0000 0.0000 0.0000 -0.0000 0.0000 -0.0000  
Z 0.0000 0.0000 -0.0000 -0.0000 0.0000 -0.0000

AT. 7 I X -0.0000 0.0000 -0.0000 0.0000 -0.0000 -0.0000  
Y -0.0000 0.0000 0.0000 0.0000 -0.0000 -0.0000  
Z 0.0000 -0.0000 0.0000 -0.0000 0.0000 0.0000

AT. 8 I X 0.0000 -0.0000 -0.0000 0.0000 0.0000 -0.0000  
Y -0.0000 0.0000 -0.0000 -0.0000 -0.0000 0.0000  
Z -0.0000 0.0000 0.0000 -0.0000 -0.0000 0.0000

AT. 9 N X 0.0003 0.0007 0.0001 0.0014 0.0018 0.0017

Y 0.0004 0.0018 0.0001 0.0039 0.0052 0.0051  
Z -0.0001 0.0001 -0.0005 0.0008 0.0013 0.0012  
AT. 10 N X -0.0003 -0.0007 0.0001 0.0014 -0.0018 0.0017  
Y 0.0004 0.0018 -0.0001 -0.0039 0.0052 -0.0051  
Z 0.0001 -0.0001 -0.0005 0.0008 -0.0013 0.0012  
AT. 11 N X -0.0003 0.0007 -0.0001 0.0014 -0.0018 -0.0017  
Y -0.0004 0.0018 -0.0001 0.0039 -0.0052 -0.0051  
Z 0.0001 0.0001 0.0005 0.0008 -0.0013 -0.0012  
AT. 12 N X 0.0003 -0.0007 -0.0001 0.0014 0.0018 -0.0017  
Y -0.0004 0.0018 0.0001 -0.0039 -0.0052 0.0051  
Z -0.0001 -0.0001 0.0005 0.0008 0.0013 -0.0012  
AT. 13 N X -0.0000 -0.0001 0.0001 0.0001 -0.0001 -0.0001  
Y 0.0078 0.0075 0.0077 0.0079 0.0012 0.0016  
Z -0.0033 -0.0034 -0.0031 -0.0028 -0.0002 -0.0004  
AT. 14 N X 0.0000 0.0001 0.0001 0.0001 0.0001 -0.0001  
Y 0.0078 0.0075 -0.0077 -0.0079 0.0012 -0.0016  
Z 0.0033 0.0034 -0.0031 -0.0028 0.0002 -0.0004  
AT. 15 N X 0.0000 -0.0001 -0.0001 0.0001 0.0001 0.0001  
Y -0.0078 0.0075 -0.0077 0.0079 -0.0012 -0.0016  
Z 0.0033 -0.0034 0.0031 -0.0028 0.0002 0.0004  
AT. 16 N X -0.0000 0.0001 -0.0001 0.0001 -0.0001 0.0001  
Y -0.0078 0.0075 0.0077 -0.0079 -0.0012 0.0016  
Z -0.0033 0.0034 0.0031 -0.0028 -0.0002 0.0004  
AT. 17 O X -0.0000 0.0005 -0.0004 0.0016 0.0023 0.0021  
Y -0.0001 0.0008 -0.0006 0.0023 0.0041 0.0039  
Z -0.0000 0.0012 -0.0010 0.0039 0.0053 0.0048  
AT. 18 O X 0.0000 -0.0005 -0.0004 0.0016 -0.0023 0.0021  
Y -0.0001 0.0008 0.0006 -0.0023 0.0041 -0.0039  
Z 0.0000 -0.0012 -0.0010 0.0039 -0.0053 0.0048  
AT. 19 O X 0.0000 0.0005 0.0004 0.0016 -0.0023 -0.0021  
Y 0.0001 0.0008 0.0006 0.0023 -0.0041 -0.0039  
Z 0.0000 0.0012 0.0010 0.0039 -0.0053 -0.0048

AT. 20 O X -0.0000 -0.0005 0.0004 0.0016 0.0023 -0.0021  
Y 0.0001 0.0008 -0.0006 -0.0023 -0.0041 0.0039  
Z -0.0000 -0.0012 0.0010 0.0039 0.0053 -0.0048

AT. 21 O X -0.0016 -0.0016 -0.0016 -0.0015 -0.0001 -0.0002  
Y 0.0083 0.0083 0.0081 0.0077 0.0009 0.0014  
Z -0.0136 -0.0137 -0.0135 -0.0126 -0.0013 -0.0021

AT. 22 O X 0.0016 0.0016 -0.0016 -0.0015 0.0001 -0.0002  
Y 0.0083 0.0083 -0.0081 -0.0077 0.0009 -0.0014  
Z 0.0136 0.0137 -0.0135 -0.0126 0.0013 -0.0021

AT. 23 O X 0.0016 -0.0016 0.0016 -0.0015 0.0001 0.0002  
Y -0.0083 0.0083 -0.0081 0.0077 -0.0009 -0.0014  
Z 0.0136 -0.0137 0.0135 -0.0126 0.0013 0.0021

AT. 24 O X -0.0016 0.0016 0.0016 -0.0015 -0.0001 0.0002  
Y -0.0083 0.0083 0.0081 -0.0077 -0.0009 0.0014  
Z -0.0136 0.0137 0.0135 -0.0126 -0.0013 0.0021

AT. 25 C X -0.0001 0.0001 -0.0002 0.0004 0.0008 0.0008  
Y 0.0002 0.0003 0.0002 0.0006 0.0003 0.0004  
Z -0.0001 0.0002 -0.0003 0.0007 0.0014 0.0012

AT. 26 C X 0.0001 -0.0001 -0.0002 0.0004 -0.0008 0.0008  
Y 0.0002 0.0003 -0.0002 -0.0006 0.0003 -0.0004  
Z 0.0001 -0.0002 -0.0003 0.0007 -0.0014 0.0012

AT. 27 C X 0.0001 0.0001 0.0002 0.0004 -0.0008 -0.0008  
Y -0.0002 0.0003 -0.0002 0.0006 -0.0003 -0.0004  
Z 0.0001 0.0002 0.0003 0.0007 -0.0014 -0.0012

AT. 28 C X -0.0001 -0.0001 0.0002 0.0004 0.0008 -0.0008  
Y -0.0002 0.0003 0.0002 -0.0006 -0.0003 0.0004  
Z -0.0001 -0.0002 0.0003 0.0007 0.0014 -0.0012

AT. 29 H X 0.0015 0.0010 0.0014 0.0006 -0.0013 -0.0013  
Y -0.0011 -0.0007 -0.0016 -0.0011 0.0025 0.0023  
Z -0.0020 -0.0009 -0.0023 0.0006 0.0040 0.0037

AT. 30 H X -0.0015 -0.0010 0.0014 0.0006 0.0013 -0.0013  
Y -0.0011 -0.0007 0.0016 0.0011 0.0025 -0.0023

Z 0.0020 0.0009 -0.0023 0.0006 -0.0040 0.0037  
AT. 31 H X -0.0015 0.0010 -0.0014 0.0006 0.0013 0.0013  
Y 0.0011 -0.0007 0.0016 -0.0011 -0.0025 -0.0023  
Z 0.0020 -0.0009 0.0023 0.0006 -0.0040 -0.0037  
AT. 32 H X 0.0015 -0.0010 -0.0014 0.0006 -0.0013 0.0013  
Y 0.0011 -0.0007 -0.0016 0.0011 -0.0025 0.0023  
Z -0.0020 0.0009 0.0023 0.0006 0.0040 -0.0037  
AT. 33 H X 0.0010 0.0004 0.0015 -0.0000 -0.0031 -0.0030  
Y -0.0003 0.0007 -0.0007 0.0019 0.0040 0.0040  
Z 0.0007 -0.0023 0.0022 -0.0060 -0.0138 -0.0132  
AT. 34 H X -0.0010 -0.0004 0.0015 -0.0000 0.0031 -0.0030  
Y -0.0003 0.0007 0.0007 -0.0019 0.0040 -0.0040  
Z -0.0007 0.0023 0.0022 -0.0060 0.0138 -0.0132  
AT. 35 H X -0.0010 0.0004 -0.0015 -0.0000 0.0031 0.0030  
Y 0.0003 0.0007 0.0007 0.0019 -0.0040 -0.0040  
Z -0.0007 -0.0023 -0.0022 -0.0060 0.0138 0.0132  
AT. 36 H X 0.0010 -0.0004 -0.0015 -0.0000 -0.0031 0.0030  
Y 0.0003 0.0007 -0.0007 -0.0019 -0.0040 0.0040  
Z 0.0007 0.0023 -0.0022 -0.0060 -0.0138 0.0132  
AT. 37 C X 0.0001 -0.0014 0.0008 -0.0037 -0.0059 -0.0055  
Y -0.0005 -0.0031 0.0006 -0.0074 -0.0109 -0.0106  
Z 0.0005 -0.0019 0.0023 -0.0063 -0.0102 -0.0094  
AT. 38 C X -0.0001 0.0014 0.0008 -0.0037 0.0059 -0.0055  
Y -0.0005 -0.0031 -0.0006 0.0074 -0.0109 0.0106  
Z -0.0005 0.0019 0.0023 -0.0063 0.0102 -0.0094  
AT. 39 C X -0.0001 -0.0014 -0.0008 -0.0037 0.0059 0.0055  
Y 0.0005 -0.0031 -0.0006 -0.0074 0.0109 0.0106  
Z -0.0005 -0.0019 -0.0023 -0.0063 0.0102 0.0094  
AT. 40 C X 0.0001 0.0014 -0.0008 -0.0037 -0.0059 0.0055  
Y 0.0005 -0.0031 0.0006 0.0074 0.0109 -0.0106  
Z 0.0005 0.0019 -0.0023 -0.0063 -0.0102 0.0094  
AT. 41 C X -0.0000 0.0000 -0.0001 0.0001 0.0002 0.0002

Y -0.0001 -0.0001 -0.0002 -0.0003 -0.0003 -0.0003  
Z 0.0002 0.0003 0.0002 0.0004 0.0002 0.0002  
AT. 42 C X 0.0000 -0.0000 -0.0001 0.0001 -0.0002 0.0002  
Y -0.0001 -0.0001 0.0002 0.0003 -0.0003 0.0003  
Z -0.0002 -0.0003 0.0002 0.0004 -0.0002 0.0002  
AT. 43 C X 0.0000 0.0000 0.0001 0.0001 -0.0002 -0.0002  
Y 0.0001 -0.0001 0.0002 -0.0003 0.0003 0.0003  
Z -0.0002 0.0003 -0.0002 0.0004 -0.0002 -0.0002  
AT. 44 C X -0.0000 -0.0000 0.0001 0.0001 0.0002 -0.0002  
Y 0.0001 -0.0001 -0.0002 0.0003 0.0003 -0.0003  
Z 0.0002 -0.0003 -0.0002 0.0004 0.0002 -0.0002  
AT. 45 H X 0.0004 0.0006 0.0004 0.0010 0.0007 0.0006  
Y -0.0011 -0.0010 -0.0001 -0.0015 -0.0011 -0.0008  
Z -0.0006 -0.0004 0.0003 -0.0007 -0.0005 -0.0002  
AT. 46 H X -0.0004 -0.0006 0.0004 0.0010 -0.0007 0.0006  
Y -0.0011 -0.0010 0.0001 0.0015 -0.0011 0.0008  
Z 0.0006 0.0004 0.0003 -0.0007 0.0005 -0.0002  
AT. 47 H X -0.0004 0.0006 -0.0004 0.0010 -0.0007 -0.0006  
Y 0.0011 -0.0010 0.0001 -0.0015 0.0011 0.0008  
Z 0.0006 -0.0004 -0.0003 -0.0007 0.0005 0.0002  
AT. 48 H X 0.0004 -0.0006 -0.0004 0.0010 0.0007 -0.0006  
Y 0.0011 -0.0010 -0.0001 0.0015 0.0011 -0.0008  
Z -0.0006 0.0004 -0.0003 -0.0007 -0.0005 0.0002  
AT. 49 H X 0.0003 -0.0008 0.0007 -0.0024 -0.0035 -0.0031  
Y 0.0009 0.0003 0.0008 -0.0004 -0.0014 -0.0012  
Z -0.0012 -0.0023 0.0000 -0.0048 -0.0053 -0.0048  
AT. 50 H X -0.0003 0.0008 0.0007 -0.0024 0.0035 -0.0031  
Y 0.0009 0.0003 -0.0008 0.0004 -0.0014 0.0012  
Z 0.0012 0.0023 0.0000 -0.0048 0.0053 -0.0048  
AT. 51 H X -0.0003 -0.0008 -0.0007 -0.0024 0.0035 0.0031  
Y -0.0009 0.0003 -0.0008 -0.0004 0.0014 0.0012  
Z 0.0012 -0.0023 -0.0000 -0.0048 0.0053 0.0048

AT. 52 H X 0.0003 0.0008 -0.0007 -0.0024 -0.0035 0.0031  
Y -0.0009 0.0003 0.0008 0.0004 0.0014 -0.0012  
Z -0.0012 0.0023 -0.0000 -0.0048 -0.0053 0.0048

AT. 53 C X -0.0007 -0.0007 -0.0005 -0.0006 -0.0000 -0.0000  
Y -0.0001 -0.0002 -0.0002 -0.0004 -0.0002 -0.0002  
Z -0.0009 -0.0010 -0.0007 -0.0010 -0.0005 -0.0005

AT. 54 C X 0.0007 0.0007 -0.0005 -0.0006 0.0000 -0.0000  
Y -0.0001 -0.0002 0.0002 0.0004 -0.0002 0.0002  
Z 0.0009 0.0010 -0.0007 -0.0010 0.0005 -0.0005

AT. 55 C X 0.0007 -0.0007 0.0005 -0.0006 0.0000 0.0000  
Y 0.0001 -0.0002 0.0002 -0.0004 0.0002 0.0002  
Z 0.0009 -0.0010 0.0007 -0.0010 0.0005 0.0005

AT. 56 C X -0.0007 0.0007 0.0005 -0.0006 -0.0000 0.0000  
Y 0.0001 -0.0002 -0.0002 0.0004 0.0002 -0.0002  
Z -0.0009 0.0010 0.0007 -0.0010 -0.0005 0.0005

AT. 57 C X 0.0002 0.0002 0.0002 0.0001 -0.0001 -0.0000  
Y 0.0003 0.0002 -0.0006 -0.0006 0.0000 -0.0001  
Z 0.0003 0.0002 0.0003 0.0004 0.0002 0.0001

AT. 58 C X -0.0002 -0.0002 0.0002 0.0001 0.0001 -0.0000  
Y 0.0003 0.0002 0.0006 0.0006 0.0000 0.0001  
Z -0.0003 -0.0002 0.0003 0.0004 -0.0002 0.0001

AT. 59 C X -0.0002 0.0002 -0.0002 0.0001 0.0001 0.0000  
Y -0.0003 0.0002 0.0006 -0.0006 -0.0000 0.0001  
Z -0.0003 0.0002 -0.0003 0.0004 -0.0002 -0.0001

AT. 60 C X 0.0002 -0.0002 -0.0002 0.0001 -0.0001 0.0000  
Y -0.0003 0.0002 -0.0006 0.0006 -0.0000 -0.0001  
Z 0.0003 -0.0002 -0.0003 0.0004 0.0002 -0.0001

AT. 61 H X -0.0022 -0.0022 0.0034 0.0035 -0.0001 0.0005  
Y -0.0010 -0.0011 0.0025 0.0027 0.0001 0.0004  
Z -0.0035 -0.0025 -0.0013 -0.0018 -0.0007 -0.0001

AT. 62 H X 0.0022 0.0022 0.0034 0.0035 0.0001 0.0005  
Y -0.0010 -0.0011 -0.0025 -0.0027 0.0001 -0.0004



Z 0.0035 0.0025 -0.0013 -0.0018 0.0007 -0.0001  
AT. 63 H X 0.0022 -0.0022 -0.0034 0.0035 0.0001 -0.0005  
Y 0.0010 -0.0011 -0.0025 0.0027 -0.0001 -0.0004  
Z 0.0035 -0.0025 0.0013 -0.0018 0.0007 0.0001  
AT. 64 H X -0.0022 0.0022 -0.0034 0.0035 -0.0001 -0.0005  
Y 0.0010 -0.0011 0.0025 -0.0027 -0.0001 0.0004  
Z -0.0035 0.0025 0.0013 -0.0018 -0.0007 0.0001  
AT. 65 H X 0.0013 0.0013 -0.0019 -0.0018 0.0001 -0.0002  
Y -0.0035 -0.0033 0.0066 0.0061 -0.0006 0.0008  
Z 0.0018 0.0013 -0.0015 -0.0010 -0.0003 -0.0008  
AT. 66 H X -0.0013 -0.0013 -0.0019 -0.0018 -0.0001 -0.0002  
Y -0.0035 -0.0033 -0.0066 -0.0061 -0.0006 -0.0008  
Z -0.0018 -0.0013 -0.0015 -0.0010 0.0003 -0.0008  
AT. 67 H X -0.0013 0.0013 0.0019 -0.0018 -0.0001 0.0002  
Y 0.0035 -0.0033 -0.0066 0.0061 0.0006 -0.0008  
Z -0.0018 0.0013 0.0015 -0.0010 0.0003 0.0008  
AT. 68 H X 0.0013 -0.0013 0.0019 -0.0018 0.0001 0.0002  
Y 0.0035 -0.0033 0.0066 -0.0061 0.0006 0.0008  
Z 0.0018 -0.0013 0.0015 -0.0010 -0.0003 0.0008  
AT. 69 H X 0.0025 0.0019 -0.0023 -0.0014 0.0006 -0.0004  
Y -0.0008 -0.0005 -0.0016 -0.0019 -0.0002 -0.0002  
Z -0.0001 0.0001 -0.0011 -0.0013 0.0000 0.0000  
AT. 70 H X -0.0025 -0.0019 -0.0023 -0.0014 -0.0006 -0.0004  
Y -0.0008 -0.0005 0.0016 0.0019 -0.0002 0.0002  
Z 0.0001 -0.0001 -0.0011 -0.0013 -0.0000 0.0000  
AT. 71 H X -0.0025 0.0019 0.0023 -0.0014 -0.0006 0.0004  
Y 0.0008 -0.0005 0.0016 -0.0019 0.0002 0.0002  
Z 0.0001 0.0001 0.0011 -0.0013 -0.0000 -0.0000  
AT. 72 H X 0.0025 -0.0019 0.0023 -0.0014 0.0006 0.0004  
Y 0.0008 -0.0005 -0.0016 0.0019 0.0002 -0.0002  
Z -0.0001 -0.0001 0.0011 -0.0013 0.0000 -0.0000  
AT. 73 C X 0.0003 0.0004 0.0003 0.0005 0.0001 0.0002

Y 0.0006 0.0006 0.0006 0.0007 0.0000 -0.0000  
Z -0.0000 0.0001 -0.0001 -0.0001 0.0002 0.0002  
AT. 74 C X -0.0003 -0.0004 0.0003 0.0005 -0.0001 0.0002  
Y 0.0006 0.0006 -0.0006 -0.0007 0.0000 0.0000  
Z 0.0000 -0.0001 -0.0001 -0.0001 -0.0002 0.0002  
AT. 75 C X -0.0003 0.0004 -0.0003 0.0005 -0.0001 -0.0002  
Y -0.0006 0.0006 -0.0006 0.0007 -0.0000 0.0000  
Z 0.0000 0.0001 0.0001 -0.0001 -0.0002 -0.0002  
AT. 76 C X 0.0003 -0.0004 -0.0003 0.0005 0.0001 -0.0002  
Y -0.0006 0.0006 0.0006 -0.0007 -0.0000 -0.0000  
Z -0.0000 -0.0001 0.0001 -0.0001 0.0002 -0.0002  
AT. 77 C X -0.0001 -0.0001 -0.0001 -0.0002 0.0002 0.0002  
Y -0.0001 -0.0002 -0.0001 -0.0003 -0.0004 -0.0004  
Z -0.0001 -0.0003 0.0001 -0.0008 -0.0009 -0.0008  
AT. 78 C X 0.0001 0.0001 -0.0001 -0.0002 -0.0002 0.0002  
Y -0.0001 -0.0002 0.0001 0.0003 -0.0004 0.0004  
Z 0.0001 0.0003 0.0001 -0.0008 0.0009 -0.0008  
AT. 79 C X 0.0001 -0.0001 0.0001 -0.0002 -0.0002 -0.0002  
Y 0.0001 -0.0002 0.0001 -0.0003 0.0004 0.0004  
Z 0.0001 -0.0003 -0.0001 -0.0008 0.0009 0.0008  
AT. 80 C X -0.0001 0.0001 0.0001 -0.0002 0.0002 -0.0002  
Y 0.0001 -0.0002 -0.0001 0.0003 0.0004 -0.0004  
Z -0.0001 0.0003 -0.0001 -0.0008 -0.0009 0.0008  
AT. 81 H X 0.0004 0.0000 0.0007 -0.0006 -0.0029 -0.0028  
Y 0.0007 -0.0000 0.0010 -0.0010 -0.0037 -0.0036  
Z -0.0004 0.0018 -0.0012 0.0048 0.0055 0.0050  
AT. 82 H X -0.0004 -0.0000 0.0007 -0.0006 0.0029 -0.0028  
Y 0.0007 -0.0000 -0.0010 0.0010 -0.0037 0.0036  
Z 0.0004 -0.0018 -0.0012 0.0048 -0.0055 0.0050  
AT. 83 H X -0.0004 0.0000 -0.0007 -0.0006 0.0029 0.0028  
Y -0.0007 -0.0000 -0.0010 -0.0010 0.0037 0.0036  
Z 0.0004 0.0018 0.0012 0.0048 -0.0055 -0.0050

AT. 84 H X 0.0004 -0.0000 -0.0007 -0.0006 -0.0029 0.0028  
Y -0.0007 -0.0000 0.0010 0.0010 0.0037 -0.0036  
Z -0.0004 -0.0018 0.0012 0.0048 0.0055 -0.0050

AT. 85 H X -0.0001 -0.0002 -0.0001 0.0000 -0.0016 -0.0018  
Y 0.0000 -0.0005 0.0004 -0.0014 -0.0009 -0.0007  
Z -0.0001 -0.0000 -0.0001 -0.0001 -0.0007 -0.0006

AT. 86 H X 0.0001 0.0002 -0.0001 0.0000 0.0016 -0.0018  
Y 0.0000 -0.0005 -0.0004 0.0014 -0.0009 0.0007  
Z 0.0001 0.0000 -0.0001 -0.0001 0.0007 -0.0006

AT. 87 H X 0.0001 -0.0002 0.0001 0.0000 0.0016 0.0018  
Y -0.0000 -0.0005 -0.0004 -0.0014 0.0009 0.0007  
Z 0.0001 -0.0000 0.0001 -0.0001 0.0007 0.0006

AT. 88 H X -0.0001 0.0002 0.0001 0.0000 -0.0016 0.0018  
Y -0.0000 -0.0005 0.0004 0.0014 0.0009 -0.0007  
Z -0.0001 0.0000 0.0001 -0.0001 -0.0007 0.0006

AT. 89 C X -0.0001 -0.0001 -0.0002 0.0000 0.0003 0.0003  
Y -0.0003 -0.0003 -0.0003 -0.0005 -0.0002 -0.0002  
Z 0.0007 0.0008 0.0006 0.0010 0.0005 0.0006

AT. 90 C X 0.0001 0.0001 -0.0002 0.0000 -0.0003 0.0003  
Y -0.0003 -0.0003 0.0003 0.0005 -0.0002 0.0002  
Z -0.0007 -0.0008 0.0006 0.0010 -0.0005 0.0006

AT. 91 C X 0.0001 -0.0001 0.0002 0.0000 -0.0003 -0.0003  
Y 0.0003 -0.0003 0.0003 -0.0005 0.0002 0.0002  
Z -0.0007 0.0008 -0.0006 0.0010 -0.0005 -0.0006

AT. 92 C X -0.0001 0.0001 0.0002 0.0000 0.0003 -0.0003  
Y 0.0003 -0.0003 -0.0003 0.0005 0.0002 -0.0002  
Z 0.0007 -0.0008 -0.0006 0.0010 0.0005 -0.0006

AT. 93 C X 0.0001 0.0001 0.0001 0.0000 0.0000 0.0000  
Y 0.0000 -0.0000 0.0001 -0.0000 -0.0001 -0.0001  
Z -0.0002 -0.0002 -0.0002 -0.0003 -0.0001 -0.0000

AT. 94 C X -0.0001 -0.0001 0.0001 0.0000 -0.0000 0.0000  
Y 0.0000 -0.0000 -0.0001 0.0000 -0.0001 0.0001

Z 0.0002 0.0002 -0.0002 -0.0003 0.0001 -0.0000  
AT. 95 C X -0.0001 0.0001 -0.0001 0.0000 -0.0000 -0.0000  
Y -0.0000 -0.0000 -0.0001 -0.0000 0.0001 0.0001  
Z 0.0002 -0.0002 0.0002 -0.0003 0.0001 0.0000  
AT. 96 C X 0.0001 -0.0001 -0.0001 0.0000 0.0000 -0.0000  
Y -0.0000 -0.0000 0.0001 0.0000 0.0001 -0.0001  
Z -0.0002 0.0002 0.0002 -0.0003 -0.0001 0.0000  
AT. 97 H X 0.0004 0.0003 0.0004 0.0001 0.0000 0.0001  
Y -0.0004 -0.0003 -0.0007 0.0005 0.0009 0.0004  
Z -0.0001 -0.0000 -0.0008 0.0009 0.0019 0.0010  
AT. 98 H X -0.0004 -0.0003 0.0004 0.0001 -0.0000 0.0001  
Y -0.0004 -0.0003 0.0007 -0.0005 0.0009 -0.0004  
Z 0.0001 0.0000 -0.0008 0.0009 -0.0019 0.0010  
AT. 99 H X -0.0004 0.0003 -0.0004 0.0001 -0.0000 -0.0001  
Y 0.0004 -0.0003 0.0007 0.0005 -0.0009 -0.0004  
Z 0.0001 -0.0000 0.0008 0.0009 -0.0019 -0.0010  
AT. 100 H X 0.0004 -0.0003 -0.0004 0.0001 0.0000 -0.0001  
Y 0.0004 -0.0003 -0.0007 -0.0005 -0.0009 0.0004  
Z -0.0001 0.0000 0.0008 0.0009 0.0019 -0.0010  
AT. 101 H X -0.0006 -0.0003 -0.0006 0.0002 0.0000 -0.0002  
Y -0.0009 -0.0007 -0.0011 0.0000 0.0005 0.0003  
Z 0.0012 0.0011 0.0014 0.0007 -0.0021 -0.0016  
AT. 102 H X 0.0006 0.0003 -0.0006 0.0002 -0.0000 -0.0002  
Y -0.0009 -0.0007 0.0011 -0.0000 0.0005 -0.0003  
Z -0.0012 -0.0011 0.0014 0.0007 0.0021 -0.0016  
AT. 103 H X 0.0006 -0.0003 0.0006 0.0002 -0.0000 0.0002  
Y 0.0009 -0.0007 0.0011 0.0000 -0.0005 -0.0003  
Z -0.0012 0.0011 -0.0014 0.0007 0.0021 0.0016  
AT. 104 H X -0.0006 0.0003 0.0006 0.0002 0.0000 0.0002  
Y 0.0009 -0.0007 -0.0011 -0.0000 -0.0005 0.0003  
Z 0.0012 -0.0011 -0.0014 0.0007 -0.0021 0.0016  
AT. 105 H X -0.0000 0.0000 0.0004 -0.0004 -0.0022 -0.0016

Y 0.0002 0.0002 0.0005 -0.0003 0.0003 0.0007  
Z -0.0003 -0.0004 -0.0006 0.0001 0.0002 -0.0004  
AT. 106 H X 0.0000 -0.0000 0.0004 -0.0004 0.0022 -0.0016  
Y 0.0002 0.0002 -0.0005 0.0003 0.0003 -0.0007  
Z 0.0003 0.0004 -0.0006 0.0001 -0.0002 -0.0004  
AT. 107 H X 0.0000 0.0000 -0.0004 -0.0004 0.0022 0.0016  
Y -0.0002 0.0002 -0.0005 -0.0003 -0.0003 -0.0007  
Z 0.0003 -0.0004 0.0006 0.0001 -0.0002 0.0004  
AT. 108 H X -0.0000 -0.0000 -0.0004 -0.0004 -0.0022 0.0016  
Y -0.0002 0.0002 0.0005 0.0003 -0.0003 0.0007  
Z -0.0003 0.0004 0.0006 0.0001 0.0002 0.0004  
AT. 109 C X 0.0003 0.0004 0.0004 0.0004 0.0001 0.0001  
Y -0.0007 -0.0006 -0.0007 -0.0007 -0.0001 -0.0001  
Z 0.0022 0.0023 0.0023 0.0022 0.0003 0.0004  
AT. 110 C X -0.0003 -0.0004 0.0004 0.0004 -0.0001 0.0001  
Y -0.0007 -0.0006 0.0007 0.0007 -0.0001 0.0001  
Z -0.0022 -0.0023 0.0023 0.0022 -0.0003 0.0004  
AT. 111 C X -0.0003 0.0004 -0.0004 0.0004 -0.0001 -0.0001  
Y 0.0007 -0.0006 0.0007 -0.0007 0.0001 0.0001  
Z -0.0022 0.0023 -0.0023 0.0022 -0.0003 -0.0004  
AT. 112 C X 0.0003 -0.0004 -0.0004 0.0004 0.0001 -0.0001  
Y 0.0007 -0.0006 -0.0007 0.0007 0.0001 -0.0001  
Z 0.0022 -0.0023 -0.0023 0.0022 0.0003 -0.0004  
AT. 113 H X 0.0001 0.0001 -0.0012 -0.0009 -0.0000 -0.0002  
Y -0.0023 -0.0024 -0.0017 -0.0017 -0.0000 -0.0001  
Z -0.0120 -0.0122 -0.0155 -0.0149 -0.0013 -0.0024  
AT. 114 H X -0.0001 -0.0001 -0.0012 -0.0009 0.0000 -0.0002  
Y -0.0023 -0.0024 0.0017 0.0017 -0.0000 0.0001  
Z 0.0120 0.0122 -0.0155 -0.0149 0.0013 -0.0024  
AT. 115 H X -0.0001 0.0001 0.0012 -0.0009 0.0000 0.0002  
Y 0.0023 -0.0024 0.0017 -0.0017 0.0000 0.0001  
Z 0.0120 -0.0122 0.0155 -0.0149 0.0013 0.0024

AT. 116 H X 0.0001 -0.0001 0.0012 -0.0009 -0.0000 0.0002  
Y 0.0023 -0.0024 -0.0017 0.0017 0.0000 -0.0001  
Z -0.0120 0.0122 0.0155 -0.0149 -0.0013 0.0024

AT. 117 H X -0.0023 -0.0025 -0.0052 -0.0046 -0.0002 -0.0006  
Y -0.0033 -0.0034 -0.0046 -0.0044 -0.0005 -0.0008  
Z 0.0011 0.0011 0.0003 0.0002 0.0001 -0.0000

AT. 118 H X 0.0023 0.0025 -0.0052 -0.0046 0.0002 -0.0006  
Y -0.0033 -0.0034 0.0046 0.0044 -0.0005 0.0008  
Z -0.0011 -0.0011 0.0003 0.0002 -0.0001 -0.0000

AT. 119 H X 0.0023 -0.0025 0.0052 -0.0046 0.0002 0.0006  
Y 0.0033 -0.0034 0.0046 -0.0044 0.0005 0.0008  
Z -0.0011 0.0011 -0.0003 0.0002 -0.0001 0.0000

AT. 120 H X -0.0023 0.0025 0.0052 -0.0046 -0.0002 0.0006  
Y 0.0033 -0.0034 -0.0046 0.0044 0.0005 -0.0008  
Z 0.0011 -0.0011 -0.0003 0.0002 0.0001 0.0000

AT. 121 C X -0.0002 -0.0002 -0.0002 -0.0002 -0.0000 -0.0000  
Y -0.0001 -0.0000 -0.0001 -0.0001 -0.0000 -0.0000  
Z -0.0004 -0.0004 -0.0003 -0.0004 -0.0001 -0.0001

AT. 122 C X 0.0002 0.0002 -0.0002 -0.0002 0.0000 -0.0000  
Y -0.0001 -0.0000 0.0001 0.0001 -0.0000 0.0000  
Z 0.0004 0.0004 -0.0003 -0.0004 0.0001 -0.0001

AT. 123 C X 0.0002 -0.0002 0.0002 -0.0002 0.0000 0.0000  
Y 0.0001 -0.0000 0.0001 -0.0001 0.0000 0.0000  
Z 0.0004 -0.0004 0.0003 -0.0004 0.0001 0.0001

AT. 124 C X -0.0002 0.0002 0.0002 -0.0002 -0.0000 0.0000  
Y 0.0001 -0.0000 -0.0001 0.0001 0.0000 -0.0000  
Z -0.0004 0.0004 0.0003 -0.0004 -0.0001 0.0001

AT. 125 H X -0.0021 -0.0024 -0.0019 -0.0021 -0.0005 -0.0004  
Y -0.0021 -0.0023 -0.0018 -0.0022 -0.0004 -0.0004  
Z 0.0016 0.0019 0.0013 0.0015 0.0003 0.0002

AT. 126 H X 0.0021 0.0024 -0.0019 -0.0021 0.0005 -0.0004  
Y -0.0021 -0.0023 0.0018 0.0022 -0.0004 0.0004

Z -0.0016 -0.0019 0.0013 0.0015 -0.0003 0.0002  
AT. 127 H X 0.0021 -0.0024 0.0019 -0.0021 0.0005 0.0004  
Y 0.0021 -0.0023 0.0018 -0.0022 0.0004 0.0004  
Z -0.0016 0.0019 -0.0013 0.0015 -0.0003 -0.0002  
AT. 128 H X -0.0021 0.0024 0.0019 -0.0021 -0.0005 0.0004  
Y 0.0021 -0.0023 -0.0018 0.0022 0.0004 -0.0004  
Z 0.0016 -0.0019 -0.0013 0.0015 0.0003 -0.0002  
AT. 129 H X 0.0046 0.0047 0.0043 0.0046 0.0006 0.0007  
Y -0.0029 -0.0028 -0.0027 -0.0029 -0.0001 -0.0003  
Z 0.0088 0.0090 0.0079 0.0087 0.0014 0.0015  
AT. 130 H X -0.0046 -0.0047 0.0043 0.0046 -0.0006 0.0007  
Y -0.0029 -0.0028 0.0027 0.0029 -0.0001 0.0003  
Z -0.0088 -0.0090 0.0079 0.0087 -0.0014 0.0015  
AT. 131 H X -0.0046 0.0047 -0.0043 0.0046 -0.0006 -0.0007  
Y 0.0029 -0.0028 0.0027 -0.0029 0.0001 0.0003  
Z -0.0088 0.0090 -0.0079 0.0087 -0.0014 -0.0015  
AT. 132 H X 0.0046 -0.0047 -0.0043 0.0046 0.0006 -0.0007  
Y 0.0029 -0.0028 -0.0027 0.0029 0.0001 -0.0003  
Z 0.0088 -0.0090 -0.0079 0.0087 0.0014 -0.0015  
AT. 133 C X 0.0026 0.0027 0.0025 0.0023 0.0002 0.0003  
Y -0.0201 -0.0197 -0.0196 -0.0193 -0.0026 -0.0036  
Z 0.0229 0.0231 0.0225 0.0209 0.0021 0.0035  
AT. 134 C X -0.0026 -0.0027 0.0025 0.0023 -0.0002 0.0003  
Y -0.0201 -0.0197 0.0196 0.0193 -0.0026 0.0036  
Z -0.0229 -0.0231 0.0225 0.0209 -0.0021 0.0035  
AT. 135 C X -0.0026 0.0027 -0.0025 0.0023 -0.0002 -0.0003  
Y 0.0201 -0.0197 0.0196 -0.0193 0.0026 0.0036  
Z -0.0229 0.0231 -0.0225 0.0209 -0.0021 -0.0035  
AT. 136 C X 0.0026 -0.0027 -0.0025 0.0023 0.0002 -0.0003  
Y 0.0201 -0.0197 -0.0196 0.0193 0.0026 -0.0036  
Z 0.0229 -0.0231 -0.0225 0.0209 0.0021 -0.0035  
AT. 137 C X -0.0008 -0.0009 -0.0008 -0.0006 -0.0000 -0.0001

Y 0.0012 0.0011 0.0013 0.0012 0.0002 0.0003  
Z -0.0026 -0.0027 -0.0025 -0.0023 -0.0002 -0.0004  
AT. 138 C X 0.0008 0.0009 -0.0008 -0.0006 0.0000 -0.0001  
Y 0.0012 0.0011 -0.0013 -0.0012 0.0002 -0.0003  
Z 0.0026 0.0027 -0.0025 -0.0023 0.0002 -0.0004  
AT. 139 C X 0.0008 -0.0009 0.0008 -0.0006 0.0000 0.0001  
Y -0.0012 0.0011 -0.0013 0.0012 -0.0002 -0.0003  
Z 0.0026 -0.0027 0.0025 -0.0023 0.0002 0.0004  
AT. 140 C X -0.0008 0.0009 0.0008 -0.0006 -0.0000 0.0001  
Y -0.0012 0.0011 0.0013 -0.0012 -0.0002 0.0003  
Z -0.0026 0.0027 0.0025 -0.0023 -0.0002 0.0004  
AT. 141 H X 0.0022 0.0022 0.0021 0.0013 -0.0004 -0.0001  
Y -0.0017 -0.0012 -0.0022 -0.0024 -0.0005 -0.0004  
Z -0.0074 -0.0073 -0.0076 -0.0066 -0.0004 -0.0008  
AT. 142 H X -0.0022 -0.0022 0.0021 0.0013 0.0004 -0.0001  
Y -0.0017 -0.0012 0.0022 0.0024 -0.0005 0.0004  
Z 0.0074 0.0073 -0.0076 -0.0066 0.0004 -0.0008  
AT. 143 H X -0.0022 0.0022 -0.0021 0.0013 0.0004 0.0001  
Y 0.0017 -0.0012 0.0022 -0.0024 0.0005 0.0004  
Z 0.0074 -0.0073 0.0076 -0.0066 0.0004 0.0008  
AT. 144 H X 0.0022 -0.0022 -0.0021 0.0013 -0.0004 0.0001  
Y 0.0017 -0.0012 -0.0022 0.0024 0.0005 -0.0004  
Z -0.0074 0.0073 0.0076 -0.0066 -0.0004 0.0008  
AT. 145 H X 0.0038 0.0043 0.0038 0.0024 -0.0003 0.0001  
Y 0.0042 0.0039 0.0039 0.0042 0.0007 0.0008  
Z 0.0167 0.0166 0.0155 0.0153 0.0019 0.0028  
AT. 146 H X -0.0038 -0.0043 0.0038 0.0024 0.0003 0.0001  
Y 0.0042 0.0039 -0.0039 -0.0042 0.0007 -0.0008  
Z -0.0167 -0.0166 0.0155 0.0153 -0.0019 0.0028  
AT. 147 H X -0.0038 0.0043 -0.0038 0.0024 0.0003 -0.0001  
Y -0.0042 0.0039 -0.0039 0.0042 -0.0007 -0.0008  
Z -0.0167 0.0166 -0.0155 0.0153 -0.0019 -0.0028



AT. 148 H X 0.0038 -0.0043 -0.0038 0.0024 -0.0003 -0.0001  
Y -0.0042 0.0039 0.0039 -0.0042 -0.0007 0.0008  
Z 0.0167 -0.0166 -0.0155 0.0153 0.0019 -0.0028

AT. 149 O X 0.0000 0.0000 0.0000 0.0000 0.0001 0.0001  
Y -0.0002 -0.0002 -0.0002 -0.0003 -0.0002 -0.0002  
Z -0.0000 -0.0001 -0.0000 -0.0001 -0.0002 -0.0002

AT. 150 O X -0.0000 -0.0000 0.0000 0.0000 -0.0001 0.0001  
Y -0.0002 -0.0002 0.0002 0.0003 -0.0002 0.0002  
Z 0.0000 0.0001 -0.0000 -0.0001 0.0002 -0.0002

AT. 151 O X -0.0000 0.0000 -0.0000 0.0000 -0.0001 -0.0001  
Y 0.0002 -0.0002 0.0002 -0.0003 0.0002 0.0002  
Z 0.0000 -0.0001 0.0000 -0.0001 0.0002 0.0002

AT. 152 O X 0.0000 -0.0000 -0.0000 0.0000 0.0001 -0.0001  
Y 0.0002 -0.0002 -0.0002 0.0003 0.0002 -0.0002  
Z -0.0000 0.0001 0.0000 -0.0001 -0.0002 0.0002

AT. 153 H X -0.0003 -0.0007 -0.0002 -0.0010 -0.0013 -0.0010  
Y 0.0002 0.0014 -0.0003 0.0022 0.0061 0.0059  
Z 0.0002 0.0008 0.0000 0.0016 0.0029 0.0026

AT. 154 H X 0.0003 0.0007 -0.0002 -0.0010 0.0013 -0.0010  
Y 0.0002 0.0014 0.0003 -0.0022 0.0061 -0.0059  
Z -0.0002 -0.0008 0.0000 0.0016 -0.0029 0.0026

AT. 155 H X 0.0003 -0.0007 0.0002 -0.0010 0.0013 0.0010  
Y -0.0002 0.0014 0.0003 0.0022 -0.0061 -0.0059  
Z -0.0002 0.0008 -0.0000 0.0016 -0.0029 -0.0026

AT. 156 H X -0.0003 0.0007 0.0002 -0.0010 -0.0013 0.0010  
Y -0.0002 0.0014 -0.0003 -0.0022 -0.0061 0.0059  
Z 0.0002 -0.0008 -0.0000 0.0016 0.0029 -0.0026

AT. 157 O X -0.0002 -0.0002 -0.0002 -0.0003 0.0000 -0.0000  
Y -0.0005 -0.0005 -0.0006 -0.0006 -0.0001 -0.0001  
Z -0.0001 -0.0001 -0.0001 -0.0001 -0.0000 -0.0000

AT. 158 O X 0.0002 0.0002 -0.0002 -0.0003 -0.0000 -0.0000  
Y -0.0005 -0.0005 0.0006 0.0006 -0.0001 0.0001

Z 0.0001 0.0001 -0.0001 -0.0001 0.0000 -0.0000  
AT. 159 O X 0.0002 -0.0002 0.0002 -0.0003 -0.0000 0.0000  
Y 0.0005 -0.0005 0.0006 -0.0006 0.0001 0.0001  
Z 0.0001 -0.0001 0.0001 -0.0001 0.0000 0.0000  
AT. 160 O X -0.0002 0.0002 0.0002 -0.0003 0.0000 0.0000  
Y 0.0005 -0.0005 -0.0006 0.0006 0.0001 -0.0001  
Z -0.0001 0.0001 0.0001 -0.0001 -0.0000 0.0000  
AT. 161 O X -0.0006 -0.0006 -0.0007 -0.0007 -0.0001 -0.0001  
Y 0.0008 0.0008 0.0008 0.0007 0.0001 0.0001  
Z -0.0002 -0.0002 -0.0004 -0.0003 0.0000 -0.0000  
AT. 162 O X 0.0006 0.0006 -0.0007 -0.0007 0.0001 -0.0001  
Y 0.0008 0.0008 -0.0008 -0.0007 0.0001 -0.0001  
Z 0.0002 0.0002 -0.0004 -0.0003 -0.0000 -0.0000  
AT. 163 O X 0.0006 -0.0006 0.0007 -0.0007 0.0001 0.0001  
Y -0.0008 0.0008 -0.0008 0.0007 -0.0001 -0.0001  
Z 0.0002 -0.0002 0.0004 -0.0003 -0.0000 0.0000  
AT. 164 O X -0.0006 0.0006 0.0007 -0.0007 -0.0001 0.0001  
Y -0.0008 0.0008 0.0008 -0.0007 -0.0001 0.0001  
Z -0.0002 0.0002 0.0004 -0.0003 0.0000 0.0000  
AT. 165 H X 0.0087 0.0083 0.0112 0.0105 0.0004 0.0015  
Y -0.0008 -0.0007 0.0008 0.0006 -0.0004 -0.0001  
Z 0.0046 0.0048 0.0090 0.0076 -0.0001 0.0010  
AT. 166 H X -0.0087 -0.0083 0.0112 0.0105 -0.0004 0.0015  
Y -0.0008 -0.0007 -0.0008 -0.0006 -0.0004 0.0001  
Z -0.0046 -0.0048 0.0090 0.0076 0.0001 0.0010  
AT. 167 H X -0.0087 0.0083 -0.0112 0.0105 -0.0004 -0.0015  
Y 0.0008 -0.0007 -0.0008 0.0006 0.0004 0.0001  
Z -0.0046 0.0048 -0.0090 0.0076 0.0001 -0.0010  
AT. 168 H X 0.0087 -0.0083 -0.0112 0.0105 0.0004 -0.0015  
Y 0.0008 -0.0007 0.0008 -0.0006 0.0004 -0.0001  
Z 0.0046 -0.0048 -0.0090 0.0076 -0.0001 -0.0010  
AT. 169 O X -0.0001 0.0000 -0.0001 0.0001 0.0007 0.0007

Y -0.0010 0.0002 -0.0012 0.0003 0.0065 0.0065  
 Z 0.0003 -0.0002 0.0003 -0.0001 -0.0017 -0.0017  
 AT.170 O X 0.0001 -0.0000 -0.0001 0.0001 -0.0007 0.0007  
 Y -0.0010 0.0002 0.0012 -0.0003 0.0065 -0.0065  
 Z -0.0003 0.0002 0.0003 -0.0001 0.0017 -0.0017  
 AT.171 O X 0.0001 0.0000 0.0001 0.0001 -0.0007 -0.0007  
 Y 0.0010 0.0002 0.0012 0.0003 -0.0065 -0.0065  
 Z -0.0003 -0.0002 -0.0003 -0.0001 0.0017 0.0017  
 AT.172 O X -0.0001 -0.0000 0.0001 0.0001 0.0007 -0.0007  
 Y 0.0010 0.0002 -0.0012 -0.0003 -0.0065 0.0065  
 Z 0.0003 0.0002 -0.0003 -0.0001 -0.0017 0.0017  
 AT.173 H X -0.0040 0.0005 -0.0051 0.0004 0.0289 0.0289  
 Y 0.0016 -0.0018 0.0023 -0.0038 -0.0139 -0.0141  
 Z -0.0154 0.0032 -0.0185 0.0039 0.1024 0.1033  
 AT.174 H X 0.0040 -0.0005 -0.0051 0.0004 -0.0289 0.0289  
 Y 0.0016 -0.0018 -0.0023 0.0038 -0.0139 0.0141  
 Z 0.0154 -0.0032 -0.0185 0.0039 -0.1024 0.1033  
 AT.175 H X 0.0040 0.0005 0.0051 0.0004 -0.0289 -0.0289  
 Y -0.0016 -0.0018 -0.0023 -0.0038 0.0139 0.0141  
 Z 0.0154 0.0032 0.0185 0.0039 -0.1024 -0.1033  
 AT.176 H X -0.0040 -0.0005 0.0051 0.0004 0.0289 -0.0289  
 Y -0.0016 -0.0018 0.0023 0.0038 0.0139 -0.0141  
 Z -0.0154 -0.0032 0.0185 0.0039 0.1024 -0.1033

FREQ(CM\*\*-1) 2971.44 2975.59 3061.60 3065.58 3086.74 3086.74

AT. 1 I X 0.0000 0.0000 0.0000 0.0000 -0.0000 0.0000  
 Y 0.0000 0.0000 -0.0000 -0.0000 -0.0000 -0.0000  
 Z -0.0000 -0.0000 -0.0000 -0.0000 -0.0000 -0.0000  
 AT. 2 I X -0.0000 0.0000 -0.0000 0.0000 -0.0000 -0.0000  
 Y 0.0000 -0.0000 -0.0000 0.0000 0.0000 -0.0000  
 Z 0.0000 -0.0000 0.0000 -0.0000 -0.0000 0.0000

AT. 3 I X 0.0000 0.0000 -0.0000 -0.0000 -0.0000 -0.0000  
Y 0.0000 0.0000 0.0000 0.0000 -0.0000 0.0000  
Z -0.0000 -0.0000 0.0000 0.0000 -0.0000 0.0000

AT. 4 I X -0.0000 0.0000 0.0000 -0.0000 -0.0000 0.0000  
Y 0.0000 -0.0000 0.0000 -0.0000 0.0000 0.0000  
Z 0.0000 -0.0000 -0.0000 0.0000 -0.0000 -0.0000

AT. 5 I X -0.0000 0.0000 0.0000 0.0000 -0.0000 0.0000  
Y 0.0000 -0.0000 -0.0000 0.0000 -0.0000 -0.0000  
Z -0.0000 -0.0000 0.0000 0.0000 -0.0000 -0.0000

AT. 6 I X 0.0000 0.0000 -0.0000 0.0000 -0.0000 -0.0000  
Y 0.0000 0.0000 -0.0000 -0.0000 0.0000 -0.0000  
Z 0.0000 -0.0000 -0.0000 0.0000 -0.0000 0.0000

AT. 7 I X -0.0000 0.0000 -0.0000 -0.0000 -0.0000 -0.0000  
Y 0.0000 -0.0000 0.0000 -0.0000 -0.0000 0.0000  
Z -0.0000 -0.0000 -0.0000 -0.0000 -0.0000 0.0000

AT. 8 I X 0.0000 0.0000 0.0000 -0.0000 -0.0000 0.0000  
Y 0.0000 0.0000 0.0000 0.0000 0.0000 0.0000  
Z 0.0000 -0.0000 0.0000 -0.0000 -0.0000 -0.0000

AT. 9 N X 0.0003 -0.0003 0.0002 -0.0002 0.0000 0.0000  
Y 0.0006 -0.0006 0.0004 -0.0004 -0.0000 0.0000  
Z 0.0002 -0.0002 0.0002 -0.0002 0.0000 0.0000

AT. 10 N X -0.0003 -0.0003 -0.0002 -0.0002 0.0000 -0.0000  
Y 0.0006 0.0006 0.0004 0.0004 0.0000 0.0000  
Z -0.0002 -0.0002 -0.0002 -0.0002 0.0000 -0.0000

AT. 11 N X 0.0003 -0.0003 -0.0002 0.0002 0.0000 -0.0000  
Y 0.0006 -0.0006 -0.0004 0.0004 -0.0000 -0.0000  
Z 0.0002 -0.0002 -0.0002 0.0002 0.0000 -0.0000

AT. 12 N X -0.0003 -0.0003 0.0002 0.0002 0.0000 0.0000  
Y 0.0006 0.0006 -0.0004 -0.0004 0.0000 -0.0000  
Z -0.0002 -0.0002 0.0002 0.0002 0.0000 0.0000

AT. 13 N X 0.0000 -0.0000 0.0000 -0.0000 0.0000 0.0000  
Y -0.0000 0.0000 -0.0000 0.0000 -0.0000 0.0000

Z -0.0000 -0.0000 -0.0000 0.0000 0.0000 0.0000  
AT. 14 N X -0.0000 -0.0000 -0.0000 -0.0000 0.0000 -0.0000  
Y -0.0000 -0.0000 -0.0000 -0.0000 0.0000 0.0000  
Z 0.0000 -0.0000 0.0000 0.0000 0.0000 -0.0000  
AT. 15 N X 0.0000 -0.0000 -0.0000 0.0000 0.0000 -0.0000  
Y -0.0000 0.0000 0.0000 -0.0000 -0.0000 -0.0000  
Z -0.0000 -0.0000 0.0000 -0.0000 0.0000 -0.0000  
AT. 16 N X -0.0000 -0.0000 0.0000 0.0000 0.0000 0.0000  
Y -0.0000 -0.0000 0.0000 0.0000 0.0000 -0.0000  
Z 0.0000 -0.0000 -0.0000 -0.0000 0.0000 0.0000  
AT. 17 O X 0.0004 -0.0004 0.0003 -0.0002 -0.0000 0.0000  
Y 0.0006 -0.0006 0.0003 -0.0003 -0.0000 0.0000  
Z 0.0009 -0.0009 0.0007 -0.0006 -0.0000 0.0000  
AT. 18 O X -0.0004 -0.0004 -0.0003 -0.0002 -0.0000 -0.0000  
Y 0.0006 0.0006 0.0003 0.0003 0.0000 0.0000  
Z -0.0009 -0.0009 -0.0007 -0.0006 -0.0000 -0.0000  
AT. 19 O X 0.0004 -0.0004 -0.0003 0.0002 -0.0000 -0.0000  
Y 0.0006 -0.0006 -0.0003 0.0003 -0.0000 -0.0000  
Z 0.0009 -0.0009 -0.0007 0.0006 -0.0000 -0.0000  
AT. 20 O X -0.0004 -0.0004 0.0003 0.0002 -0.0000 0.0000  
Y 0.0006 0.0006 -0.0003 -0.0003 0.0000 -0.0000  
Z -0.0009 -0.0009 0.0007 0.0006 -0.0000 0.0000  
AT. 21 O X 0.0000 -0.0000 0.0000 -0.0000 -0.0000 0.0000  
Y -0.0000 0.0000 -0.0000 0.0000 0.0000 0.0000  
Z -0.0000 -0.0000 0.0000 0.0000 0.0000 -0.0000  
AT. 22 O X -0.0000 -0.0000 -0.0000 -0.0000 -0.0000 -0.0000  
Y -0.0000 -0.0000 -0.0000 -0.0000 -0.0000 0.0000  
Z 0.0000 -0.0000 -0.0000 0.0000 0.0000 0.0000  
AT. 23 O X 0.0000 -0.0000 -0.0000 0.0000 -0.0000 -0.0000  
Y -0.0000 0.0000 0.0000 -0.0000 0.0000 -0.0000  
Z -0.0000 -0.0000 -0.0000 -0.0000 0.0000 0.0000  
AT. 24 O X -0.0000 -0.0000 0.0000 0.0000 -0.0000 0.0000

Y -0.0000 -0.0000 0.0000 0.0000 -0.0000 -0.0000  
Z 0.0000 -0.0000 0.0000 -0.0000 0.0000 -0.0000  
AT. 25 C X 0.0001 -0.0001 0.0001 -0.0000 -0.0000 -0.0000  
Y 0.0001 -0.0002 0.0002 -0.0002 0.0000 0.0000  
Z 0.0001 -0.0001 0.0001 -0.0001 -0.0000 -0.0000  
AT. 26 C X -0.0001 -0.0001 -0.0001 -0.0000 -0.0000 0.0000  
Y 0.0001 0.0002 0.0002 0.0002 -0.0000 0.0000  
Z -0.0001 -0.0001 -0.0001 -0.0001 -0.0000 0.0000  
AT. 27 C X 0.0001 -0.0001 -0.0001 0.0000 -0.0000 0.0000  
Y 0.0001 -0.0002 -0.0002 0.0002 0.0000 -0.0000  
Z 0.0001 -0.0001 -0.0001 0.0001 -0.0000 0.0000  
AT. 28 C X -0.0001 -0.0001 0.0001 0.0000 -0.0000 -0.0000  
Y 0.0001 0.0002 -0.0002 -0.0002 -0.0000 -0.0000  
Z -0.0001 -0.0001 0.0001 0.0001 -0.0000 -0.0000  
AT. 29 H X 0.0001 0.0001 -0.0000 -0.0004 0.0002 0.0003  
Y -0.0001 0.0002 -0.0002 0.0002 -0.0000 -0.0000  
Z 0.0006 -0.0006 0.0005 -0.0006 0.0002 0.0002  
AT. 30 H X -0.0001 0.0001 0.0000 -0.0004 0.0002 -0.0003  
Y -0.0001 -0.0002 -0.0002 -0.0002 0.0000 -0.0000  
Z -0.0006 -0.0006 -0.0005 -0.0006 0.0002 -0.0002  
AT. 31 H X 0.0001 0.0001 0.0000 0.0004 0.0002 -0.0003  
Y -0.0001 0.0002 0.0002 -0.0002 -0.0000 0.0000  
Z 0.0006 -0.0006 -0.0005 0.0006 0.0002 -0.0002  
AT. 32 H X -0.0001 0.0001 -0.0000 0.0004 0.0002 0.0003  
Y -0.0001 -0.0002 0.0002 0.0002 0.0000 0.0000  
Z -0.0006 -0.0006 0.0005 0.0006 0.0002 0.0002  
AT. 33 H X -0.0005 0.0003 -0.0005 0.0002 -0.0000 -0.0000  
Y -0.0010 0.0013 -0.0014 0.0021 -0.0001 -0.0003  
Z -0.0006 0.0008 -0.0002 0.0007 -0.0000 -0.0000  
AT. 34 H X 0.0005 0.0003 0.0005 0.0002 -0.0000 0.0000  
Y -0.0010 -0.0013 -0.0014 -0.0021 0.0001 -0.0003  
Z 0.0006 0.0008 0.0002 0.0007 -0.0000 0.0000

AT. 35 H X -0.0005 0.0003 0.0005 -0.0002 -0.0000 0.0000  
Y -0.0010 0.0013 0.0014 -0.0021 -0.0001 0.0003  
Z -0.0006 0.0008 0.0002 -0.0007 -0.0000 0.0000

AT. 36 H X 0.0005 0.0003 -0.0005 -0.0002 -0.0000 -0.0000  
Y -0.0010 -0.0013 0.0014 0.0021 0.0001 0.0003  
Z 0.0006 0.0008 -0.0002 -0.0007 -0.0000 -0.0000

AT. 37 C X -0.0006 0.0006 -0.0004 0.0004 -0.0000 -0.0000  
Y -0.0008 0.0009 -0.0005 0.0006 -0.0000 -0.0000  
Z -0.0015 0.0014 -0.0011 0.0010 0.0000 -0.0000

AT. 38 C X 0.0006 0.0006 0.0004 0.0004 -0.0000 0.0000  
Y -0.0008 -0.0009 -0.0005 -0.0006 0.0000 -0.0000  
Z 0.0015 0.0014 0.0011 0.0010 0.0000 0.0000

AT. 39 C X -0.0006 0.0006 0.0004 -0.0004 -0.0000 0.0000  
Y -0.0008 0.0009 0.0005 -0.0006 -0.0000 0.0000  
Z -0.0015 0.0014 0.0011 -0.0010 0.0000 0.0000

AT. 40 C X 0.0006 0.0006 -0.0004 -0.0004 -0.0000 -0.0000  
Y -0.0008 -0.0009 0.0005 0.0006 0.0000 0.0000  
Z 0.0015 0.0014 -0.0011 -0.0010 0.0000 -0.0000

AT. 41 C X -0.0001 0.0001 -0.0003 0.0002 -0.0002 -0.0003  
Y 0.0000 -0.0000 0.0001 -0.0001 0.0001 0.0001  
Z -0.0000 0.0001 0.0001 -0.0000 0.0003 0.0004

AT. 42 C X 0.0001 0.0001 0.0003 0.0002 -0.0002 0.0003  
Y 0.0000 0.0000 0.0001 0.0001 -0.0001 0.0001  
Z 0.0000 0.0001 -0.0001 -0.0000 0.0003 -0.0004

AT. 43 C X -0.0001 0.0001 0.0003 -0.0002 -0.0002 0.0003  
Y 0.0000 -0.0000 -0.0001 0.0001 0.0001 -0.0001  
Z -0.0000 0.0001 -0.0001 0.0000 0.0003 -0.0004

AT. 44 C X 0.0001 0.0001 -0.0003 -0.0002 -0.0002 -0.0003  
Y 0.0000 0.0000 -0.0001 -0.0001 -0.0001 -0.0001  
Z 0.0000 0.0001 0.0001 0.0000 0.0003 0.0004

AT. 45 H X -0.0001 0.0001 -0.0002 0.0002 -0.0005 -0.0006  
Y 0.0005 -0.0005 0.0013 -0.0010 0.0022 0.0023

Z -0.0006 0.0005 -0.0012 0.0009 -0.0025 -0.0026  
AT. 46 H X 0.0001 0.0001 0.0002 0.0002 -0.0005 0.0006  
Y 0.0005 0.0005 0.0013 0.0010 -0.0022 0.0023  
Z 0.0006 0.0005 0.0012 0.0009 -0.0025 0.0026  
AT. 47 H X -0.0001 0.0001 0.0002 -0.0002 -0.0005 0.0006  
Y 0.0005 -0.0005 -0.0013 0.0010 0.0022 -0.0023  
Z -0.0006 0.0005 0.0012 -0.0009 -0.0025 0.0026  
AT. 48 H X 0.0001 0.0001 -0.0002 -0.0002 -0.0005 -0.0006  
Y 0.0005 0.0005 -0.0013 -0.0010 -0.0022 -0.0023  
Z 0.0006 0.0005 -0.0012 -0.0009 -0.0025 -0.0026  
AT. 49 H X 0.0010 -0.0011 0.0030 -0.0021 0.0032 0.0037  
Y -0.0007 0.0006 -0.0029 0.0019 -0.0034 -0.0039  
Z 0.0000 -0.0001 -0.0008 0.0003 -0.0012 -0.0014  
AT. 50 H X -0.0010 -0.0011 -0.0030 -0.0021 0.0032 -0.0037  
Y -0.0007 -0.0006 -0.0029 -0.0019 0.0034 -0.0039  
Z -0.0000 -0.0001 0.0008 0.0003 -0.0012 0.0014  
AT. 51 H X 0.0010 -0.0011 -0.0030 0.0021 0.0032 -0.0037  
Y -0.0007 0.0006 0.0029 -0.0019 -0.0034 0.0039  
Z 0.0000 -0.0001 0.0008 -0.0003 -0.0012 0.0014  
AT. 52 H X -0.0010 -0.0011 0.0030 0.0021 0.0032 0.0037  
Y -0.0007 -0.0006 0.0029 0.0019 0.0034 0.0039  
Z -0.0000 -0.0001 -0.0008 -0.0003 -0.0012 -0.0014  
AT. 53 C X -0.0000 0.0000 -0.0000 0.0000 0.0000 0.0000  
Y 0.0000 -0.0000 0.0000 -0.0000 0.0001 0.0001  
Z 0.0000 -0.0000 0.0000 -0.0000 0.0000 0.0000  
AT. 54 C X 0.0000 0.0000 0.0000 0.0000 0.0000 -0.0000  
Y 0.0000 0.0000 0.0000 0.0000 -0.0001 0.0001  
Z -0.0000 -0.0000 -0.0000 -0.0000 0.0000 -0.0000  
AT. 55 C X -0.0000 0.0000 0.0000 -0.0000 0.0000 -0.0000  
Y 0.0000 -0.0000 -0.0000 0.0000 0.0001 -0.0001  
Z 0.0000 -0.0000 -0.0000 0.0000 0.0000 -0.0000  
AT. 56 C X 0.0000 0.0000 -0.0000 -0.0000 0.0000 0.0000



Y 0.0000 0.0000 -0.0000 -0.0000 -0.0001 -0.0001  
Z -0.0000 -0.0000 0.0000 0.0000 0.0000 0.0000  
AT. 57 C X 0.0000 -0.0000 -0.0000 -0.0000 0.0009 0.0009  
Y 0.0000 -0.0000 0.0000 -0.0000 0.0000 0.0000  
Z 0.0000 -0.0000 0.0000 0.0001 -0.0052 -0.0052  
AT. 58 C X -0.0000 -0.0000 0.0000 -0.0000 0.0009 -0.0009  
Y 0.0000 0.0000 0.0000 0.0000 -0.0000 0.0000  
Z -0.0000 -0.0000 -0.0000 0.0001 -0.0052 0.0052  
AT. 59 C X 0.0000 -0.0000 0.0000 0.0000 0.0009 -0.0009  
Y 0.0000 -0.0000 -0.0000 0.0000 0.0000 -0.0000  
Z 0.0000 -0.0000 -0.0000 -0.0001 -0.0052 0.0052  
AT. 60 C X -0.0000 -0.0000 -0.0000 0.0000 0.0009 0.0009  
Y 0.0000 0.0000 -0.0000 -0.0000 -0.0000 -0.0000  
Z -0.0000 -0.0000 0.0000 -0.0001 -0.0052 -0.0052  
AT. 61 H X 0.0002 -0.0001 0.0004 0.0003 -0.0276 -0.0278  
Y -0.0003 0.0000 -0.0005 -0.0004 0.0379 0.0382  
Z -0.0001 0.0000 -0.0000 -0.0001 0.0056 0.0057  
AT. 62 H X -0.0002 -0.0001 -0.0004 0.0003 -0.0276 0.0278  
Y -0.0003 -0.0000 -0.0005 0.0004 -0.0379 0.0382  
Z 0.0001 0.0000 0.0000 -0.0001 0.0056 -0.0057  
AT. 63 H X 0.0002 -0.0001 -0.0004 -0.0003 -0.0276 0.0278  
Y -0.0003 0.0000 0.0005 0.0004 0.0379 -0.0382  
Z -0.0001 0.0000 0.0000 0.0001 0.0056 -0.0057  
AT. 64 H X -0.0002 -0.0001 0.0004 -0.0003 -0.0276 -0.0278  
Y -0.0003 -0.0000 0.0005 -0.0004 -0.0379 -0.0382  
Z 0.0001 0.0000 -0.0000 0.0001 0.0056 0.0057  
AT. 65 H X -0.0003 0.0000 -0.0002 -0.0004 0.0260 0.0263  
Y -0.0000 -0.0001 -0.0000 -0.0002 0.0086 0.0087  
Z 0.0001 -0.0000 0.0001 -0.0000 -0.0009 -0.0009  
AT. 66 H X 0.0003 0.0000 0.0002 -0.0004 0.0260 -0.0263  
Y -0.0000 0.0001 -0.0000 0.0002 -0.0086 0.0087  
Z -0.0001 -0.0000 -0.0001 -0.0000 -0.0009 0.0009

AT. 67 H X -0.0003 0.0000 0.0002 0.0004 0.0260 -0.0263  
Y -0.0000 -0.0001 0.0000 0.0002 0.0086 -0.0087  
Z 0.0001 -0.0000 -0.0001 0.0000 -0.0009 0.0009

AT. 68 H X 0.0003 0.0000 -0.0002 0.0004 0.0260 0.0263  
Y -0.0000 0.0001 0.0000 -0.0002 -0.0086 -0.0087  
Z -0.0001 -0.0000 0.0001 0.0000 -0.0009 -0.0009

AT. 69 H X 0.0000 0.0000 0.0000 0.0003 -0.0100 -0.0101  
Y 0.0002 -0.0001 0.0002 0.0010 -0.0478 -0.0482  
Z -0.0003 0.0001 -0.0002 -0.0012 0.0552 0.0556

AT. 70 H X -0.0000 0.0000 -0.0000 0.0003 -0.0100 0.0101  
Y 0.0002 0.0001 0.0002 -0.0010 0.0478 -0.0482  
Z 0.0003 0.0001 0.0002 -0.0012 0.0552 -0.0556

AT. 71 H X 0.0000 0.0000 -0.0000 -0.0003 -0.0100 0.0101  
Y 0.0002 -0.0001 -0.0002 -0.0010 -0.0478 0.0482  
Z -0.0003 0.0001 0.0002 0.0012 0.0552 -0.0556

AT. 72 H X -0.0000 0.0000 0.0000 -0.0003 -0.0100 -0.0101  
Y 0.0002 0.0001 -0.0002 0.0010 0.0478 0.0482  
Z 0.0003 0.0001 -0.0002 0.0012 0.0552 0.0556

AT. 73 C X 0.0000 -0.0000 0.0001 -0.0001 0.0000 0.0000  
Y -0.0000 0.0000 -0.0001 0.0001 -0.0000 -0.0000  
Z 0.0000 0.0000 -0.0001 0.0001 0.0001 0.0001

AT. 74 C X -0.0000 -0.0000 -0.0001 -0.0001 0.0000 -0.0000  
Y -0.0000 -0.0000 -0.0001 -0.0001 0.0000 -0.0000  
Z -0.0000 0.0000 0.0001 0.0001 0.0001 -0.0001

AT. 75 C X 0.0000 -0.0000 -0.0001 0.0001 0.0000 -0.0000  
Y -0.0000 0.0000 0.0001 -0.0001 -0.0000 0.0000  
Z 0.0000 0.0000 0.0001 -0.0001 0.0001 -0.0001

AT. 76 C X -0.0000 -0.0000 0.0001 0.0001 0.0000 0.0000  
Y -0.0000 -0.0000 0.0001 0.0001 0.0000 0.0000  
Z -0.0000 0.0000 -0.0001 -0.0001 0.0001 0.0001

AT. 77 C X -0.0001 0.0001 -0.0001 0.0000 0.0001 0.0000  
Y -0.0000 0.0000 0.0000 -0.0000 -0.0000 -0.0000

Z 0.0000 -0.0000 0.0001 -0.0001 0.0000 0.0000  
AT. 78 C X 0.0001 0.0001 0.0001 0.0000 0.0001 -0.0000  
Y -0.0000 -0.0000 0.0000 0.0000 0.0000 -0.0000  
Z -0.0000 -0.0000 -0.0001 -0.0001 0.0000 -0.0000  
AT. 79 C X -0.0001 0.0001 0.0001 -0.0000 0.0001 -0.0000  
Y -0.0000 0.0000 -0.0000 0.0000 -0.0000 0.0000  
Z 0.0000 -0.0000 -0.0001 0.0001 0.0000 -0.0000  
AT. 80 C X 0.0001 0.0001 -0.0001 -0.0000 0.0001 0.0000  
Y -0.0000 -0.0000 -0.0000 -0.0000 0.0000 0.0000  
Z -0.0000 -0.0000 0.0001 0.0001 0.0000 0.0000  
AT. 81 H X 0.0013 -0.0015 0.0009 -0.0006 -0.0007 -0.0005  
Y -0.0008 0.0009 -0.0012 0.0009 0.0007 0.0005  
Z 0.0003 -0.0002 -0.0004 0.0005 0.0001 0.0000  
AT. 82 H X -0.0013 -0.0015 -0.0009 -0.0006 -0.0007 0.0005  
Y -0.0008 -0.0009 -0.0012 -0.0009 -0.0007 0.0005  
Z -0.0003 -0.0002 0.0004 0.0005 0.0001 -0.0000  
AT. 83 H X 0.0013 -0.0015 -0.0009 0.0006 -0.0007 0.0005  
Y -0.0008 0.0009 0.0012 -0.0009 0.0007 -0.0005  
Z 0.0003 -0.0002 0.0004 -0.0005 0.0001 -0.0000  
AT. 84 H X -0.0013 -0.0015 0.0009 0.0006 -0.0007 -0.0005  
Y -0.0008 -0.0009 0.0012 0.0009 -0.0007 -0.0005  
Z -0.0003 -0.0002 -0.0004 -0.0005 0.0001 0.0000  
AT. 85 H X 0.0002 -0.0002 -0.0004 0.0005 -0.0001 -0.0001  
Y -0.0001 -0.0000 -0.0002 0.0004 -0.0004 -0.0003  
Z 0.0009 -0.0011 0.0001 0.0002 -0.0005 -0.0004  
AT. 86 H X -0.0002 -0.0002 0.0004 0.0005 -0.0001 0.0001  
Y -0.0001 0.0000 -0.0002 -0.0004 0.0004 -0.0003  
Z -0.0009 -0.0011 -0.0001 0.0002 -0.0005 0.0004  
AT. 87 H X 0.0002 -0.0002 0.0004 -0.0005 -0.0001 0.0001  
Y -0.0001 -0.0000 0.0002 -0.0004 -0.0004 0.0003  
Z 0.0009 -0.0011 -0.0001 -0.0002 -0.0005 0.0004  
AT. 88 H X -0.0002 -0.0002 -0.0004 -0.0005 -0.0001 -0.0001

Y -0.0001 0.0000 0.0002 0.0004 0.0004 0.0003  
Z -0.0009 -0.0011 0.0001 -0.0002 -0.0005 -0.0004  
AT. 89 C X -0.0000 0.0000 -0.0000 0.0000 0.0000 0.0000  
Y 0.0000 -0.0000 0.0000 -0.0000 -0.0000 -0.0000  
Z 0.0000 0.0000 0.0000 -0.0000 0.0000 0.0000  
AT. 90 C X 0.0000 0.0000 0.0000 0.0000 0.0000 -0.0000  
Y 0.0000 0.0000 0.0000 0.0000 0.0000 -0.0000  
Z -0.0000 0.0000 -0.0000 -0.0000 0.0000 -0.0000  
AT. 91 C X -0.0000 0.0000 0.0000 -0.0000 0.0000 -0.0000  
Y 0.0000 -0.0000 -0.0000 0.0000 -0.0000 0.0000  
Z 0.0000 0.0000 -0.0000 0.0000 0.0000 -0.0000  
AT. 92 C X 0.0000 0.0000 -0.0000 -0.0000 0.0000 0.0000  
Y 0.0000 0.0000 -0.0000 -0.0000 0.0000 0.0000  
Z -0.0000 0.0000 0.0000 0.0000 0.0000 0.0000  
AT. 93 C X -0.0001 0.0001 0.0005 -0.0005 -0.0001 -0.0000  
Y 0.0001 -0.0001 -0.0004 0.0004 0.0002 0.0002  
Z -0.0001 0.0000 0.0007 -0.0008 -0.0016 -0.0013  
AT. 94 C X 0.0001 0.0001 -0.0005 -0.0005 -0.0001 0.0000  
Y 0.0001 0.0001 -0.0004 -0.0004 -0.0002 0.0002  
Z 0.0001 0.0000 -0.0007 -0.0008 -0.0016 0.0013  
AT. 95 C X -0.0001 0.0001 -0.0005 0.0005 -0.0001 0.0000  
Y 0.0001 -0.0001 0.0004 -0.0004 0.0002 -0.0002  
Z -0.0001 0.0000 -0.0007 0.0008 -0.0016 0.0013  
AT. 96 C X 0.0001 0.0001 0.0005 0.0005 -0.0001 -0.0000  
Y 0.0001 0.0001 0.0004 0.0004 -0.0002 -0.0002  
Z 0.0001 0.0000 0.0007 0.0008 -0.0016 -0.0013  
AT. 97 H X -0.0006 0.0003 0.0054 -0.0059 -0.0131 -0.0116  
Y -0.0001 -0.0001 0.0031 -0.0034 -0.0072 -0.0063  
Z 0.0001 0.0001 -0.0014 0.0015 0.0035 0.0031  
AT. 98 H X 0.0006 0.0003 -0.0054 -0.0059 -0.0131 0.0116  
Y -0.0001 0.0001 0.0031 0.0034 0.0072 -0.0063  
Z -0.0001 0.0001 0.0014 0.0015 0.0035 -0.0031

AT. 99 H X -0.0006 0.0003 -0.0054 0.0059 -0.0131 0.0116  
Y -0.0001 -0.0001 -0.0031 0.0034 -0.0072 0.0063  
Z 0.0001 0.0001 0.0014 -0.0015 0.0035 -0.0031

AT. 100 H X 0.0006 0.0003 0.0054 0.0059 -0.0131 -0.0116  
Y -0.0001 0.0001 -0.0031 -0.0034 0.0072 0.0063  
Z -0.0001 0.0001 -0.0014 -0.0015 0.0035 0.0031

AT. 101 H X 0.0015 -0.0015 -0.0078 0.0085 0.0086 0.0072  
Y -0.0012 0.0010 0.0073 -0.0080 -0.0080 -0.0067  
Z -0.0003 0.0004 0.0013 -0.0015 -0.0016 -0.0014

AT. 102 H X -0.0015 -0.0015 0.0078 0.0085 0.0086 -0.0072  
Y -0.0012 -0.0010 0.0073 0.0080 0.0080 -0.0067  
Z 0.0003 0.0004 -0.0013 -0.0015 -0.0016 0.0014

AT. 103 H X 0.0015 -0.0015 0.0078 -0.0085 0.0086 -0.0072  
Y -0.0012 0.0010 -0.0073 0.0080 -0.0080 0.0067  
Z -0.0003 0.0004 -0.0013 0.0015 -0.0016 0.0014

AT. 104 H X -0.0015 -0.0015 -0.0078 -0.0085 0.0086 0.0072  
Y -0.0012 -0.0010 -0.0073 -0.0080 0.0080 0.0067  
Z 0.0003 0.0004 0.0013 0.0015 -0.0016 -0.0014

AT. 105 H X 0.0005 -0.0004 -0.0030 0.0033 0.0056 0.0047  
Y 0.0008 -0.0005 -0.0064 0.0070 0.0129 0.0110  
Z 0.0011 -0.0008 -0.0081 0.0089 0.0163 0.0139

AT. 106 H X -0.0005 -0.0004 0.0030 0.0033 0.0056 -0.0047  
Y 0.0008 0.0005 -0.0064 -0.0070 -0.0129 0.0110  
Z -0.0011 -0.0008 0.0081 0.0089 0.0163 -0.0139

AT. 107 H X 0.0005 -0.0004 0.0030 -0.0033 0.0056 -0.0047  
Y 0.0008 -0.0005 0.0064 -0.0070 0.0129 -0.0110  
Z 0.0011 -0.0008 0.0081 -0.0089 0.0163 -0.0139

AT. 108 H X -0.0005 -0.0004 -0.0030 -0.0033 0.0056 0.0047  
Y 0.0008 0.0005 0.0064 0.0070 -0.0129 -0.0110  
Z -0.0011 -0.0008 -0.0081 -0.0089 0.0163 0.0139

AT. 109 C X 0.0000 -0.0000 0.0001 -0.0001 0.0004 0.0006  
Y 0.0000 -0.0000 0.0000 -0.0000 0.0001 0.0002

Z -0.0000 0.0000 -0.0000 0.0000 0.0001 0.0001  
AT. 110 C X -0.0000 -0.0000 -0.0001 -0.0001 0.0004 -0.0006  
Y 0.0000 0.0000 0.0000 0.0000 -0.0001 0.0002  
Z 0.0000 0.0000 0.0000 0.0000 0.0001 -0.0001  
AT. 111 C X 0.0000 -0.0000 -0.0001 0.0001 0.0004 -0.0006  
Y 0.0000 -0.0000 -0.0000 0.0000 0.0001 -0.0002  
Z -0.0000 0.0000 0.0000 -0.0000 0.0001 -0.0001  
AT. 112 C X -0.0000 -0.0000 0.0001 0.0001 0.0004 0.0006  
Y 0.0000 0.0000 -0.0000 -0.0000 -0.0001 -0.0002  
Z 0.0000 0.0000 -0.0000 -0.0000 0.0001 0.0001  
AT. 113 H X -0.0003 0.0006 -0.0005 0.0009 -0.0044 -0.0072  
Y -0.0003 0.0003 -0.0004 0.0006 -0.0026 -0.0043  
Z 0.0000 -0.0000 0.0001 -0.0001 0.0006 0.0010  
AT. 114 H X 0.0003 0.0006 0.0005 0.0009 -0.0044 0.0072  
Y -0.0003 -0.0003 -0.0004 -0.0006 0.0026 -0.0043  
Z -0.0000 -0.0000 -0.0001 -0.0001 0.0006 -0.0010  
AT. 115 H X -0.0003 0.0006 0.0005 -0.0009 -0.0044 0.0072  
Y -0.0003 0.0003 0.0004 -0.0006 -0.0026 0.0043  
Z 0.0000 -0.0000 -0.0001 0.0001 0.0006 -0.0010  
AT. 116 H X 0.0003 0.0006 -0.0005 -0.0009 -0.0044 -0.0072  
Y -0.0003 -0.0003 0.0004 0.0006 0.0026 0.0043  
Z -0.0000 -0.0000 0.0001 0.0001 0.0006 0.0010  
AT. 117 H X -0.0000 0.0001 -0.0001 0.0001 -0.0001 -0.0001  
Y 0.0001 -0.0000 0.0003 -0.0002 0.0012 0.0020  
Z -0.0001 0.0001 -0.0003 0.0001 -0.0014 -0.0025  
AT. 118 H X 0.0000 0.0001 0.0001 0.0001 -0.0001 0.0001  
Y 0.0001 0.0000 0.0003 0.0002 -0.0012 0.0020  
Z 0.0001 0.0001 0.0003 0.0001 -0.0014 0.0025  
AT. 119 H X -0.0000 0.0001 0.0001 -0.0001 -0.0001 0.0001  
Y 0.0001 -0.0000 -0.0003 0.0002 0.0012 -0.0020  
Z -0.0001 0.0001 0.0003 -0.0001 -0.0014 0.0025  
AT. 120 H X 0.0000 0.0001 -0.0001 -0.0001 -0.0001 -0.0001

Y 0.0001 0.0000 -0.0003 -0.0002 -0.0012 -0.0020  
Z 0.0001 0.0001 -0.0003 -0.0001 -0.0014 -0.0025  
AT. 121 C X 0.0000 -0.0000 0.0001 -0.0001 0.0000 0.0001  
Y 0.0000 -0.0000 0.0000 -0.0001 0.0000 0.0000  
Z 0.0000 -0.0000 -0.0000 0.0000 -0.0000 -0.0000  
AT. 122 C X -0.0000 -0.0000 -0.0001 -0.0001 0.0000 -0.0001  
Y 0.0000 0.0000 0.0000 0.0001 -0.0000 0.0000  
Z -0.0000 -0.0000 0.0000 0.0000 -0.0000 0.0000  
AT. 123 C X 0.0000 -0.0000 -0.0001 0.0001 0.0000 -0.0001  
Y 0.0000 -0.0000 -0.0000 0.0001 0.0000 -0.0000  
Z 0.0000 -0.0000 0.0000 -0.0000 -0.0000 0.0000  
AT. 124 C X -0.0000 -0.0000 0.0001 0.0001 0.0000 0.0001  
Y 0.0000 0.0000 -0.0000 -0.0001 -0.0000 -0.0000  
Z -0.0000 -0.0000 -0.0000 -0.0000 -0.0000 -0.0000  
AT. 125 H X -0.0000 0.0000 0.0001 -0.0000 -0.0001 0.0000  
Y 0.0000 0.0001 0.0002 -0.0002 -0.0000 0.0001  
Z 0.0001 0.0000 0.0004 -0.0003 -0.0000 0.0002  
AT. 126 H X 0.0000 0.0000 -0.0001 -0.0000 -0.0001 -0.0000  
Y 0.0000 -0.0001 0.0002 0.0002 0.0000 0.0001  
Z -0.0001 0.0000 -0.0004 -0.0003 -0.0000 -0.0002  
AT. 127 H X -0.0000 0.0000 -0.0001 0.0000 -0.0001 -0.0000  
Y 0.0000 0.0001 -0.0002 0.0002 -0.0000 -0.0001  
Z 0.0001 0.0000 -0.0004 0.0003 -0.0000 -0.0002  
AT. 128 H X 0.0000 0.0000 0.0001 0.0000 -0.0001 0.0000  
Y 0.0000 -0.0001 -0.0002 -0.0002 0.0000 -0.0001  
Z -0.0001 0.0000 0.0004 0.0003 -0.0000 0.0002  
AT. 129 H X -0.0003 0.0002 -0.0008 0.0010 -0.0005 -0.0011  
Y -0.0002 0.0001 -0.0006 0.0007 -0.0003 -0.0007  
Z 0.0001 -0.0000 0.0002 -0.0003 0.0002 0.0004  
AT. 130 H X 0.0003 0.0002 0.0008 0.0010 -0.0005 0.0011  
Y -0.0002 -0.0001 -0.0006 -0.0007 0.0003 -0.0007  
Z -0.0001 -0.0000 -0.0002 -0.0003 0.0002 -0.0004

AT. 131 H X -0.0003 0.0002 0.0008 -0.0010 -0.0005 0.0011  
Y -0.0002 0.0001 0.0006 -0.0007 -0.0003 0.0007  
Z 0.0001 -0.0000 -0.0002 0.0003 0.0002 -0.0004

AT. 132 H X 0.0003 0.0002 -0.0008 -0.0010 -0.0005 -0.0011  
Y -0.0002 -0.0001 0.0006 0.0007 0.0003 0.0007  
Z -0.0001 -0.0000 0.0002 0.0003 0.0002 0.0004

AT. 133 C X -0.0000 0.0000 -0.0000 0.0000 -0.0000 0.0000  
Y 0.0000 -0.0000 0.0000 -0.0000 -0.0000 -0.0000  
Z 0.0000 0.0000 -0.0000 -0.0000 -0.0000 0.0000

AT. 134 C X 0.0000 0.0000 0.0000 0.0000 -0.0000 -0.0000  
Y 0.0000 0.0000 0.0000 0.0000 0.0000 -0.0000  
Z -0.0000 0.0000 0.0000 -0.0000 -0.0000 -0.0000

AT. 135 C X -0.0000 0.0000 0.0000 -0.0000 -0.0000 -0.0000  
Y 0.0000 -0.0000 -0.0000 0.0000 -0.0000 0.0000  
Z 0.0000 0.0000 0.0000 0.0000 -0.0000 -0.0000

AT. 136 C X 0.0000 0.0000 -0.0000 -0.0000 -0.0000 0.0000  
Y 0.0000 0.0000 -0.0000 -0.0000 0.0000 0.0000  
Z -0.0000 0.0000 -0.0000 0.0000 -0.0000 0.0000

AT. 137 C X 0.0001 -0.0000 0.0000 -0.0001 -0.0000 -0.0000  
Y 0.0000 -0.0000 0.0000 -0.0000 -0.0000 0.0000  
Z 0.0000 -0.0000 -0.0000 -0.0000 0.0000 -0.0000

AT. 138 C X -0.0001 -0.0000 -0.0000 -0.0001 -0.0000 0.0000  
Y 0.0000 0.0000 0.0000 0.0000 0.0000 0.0000  
Z -0.0000 -0.0000 0.0000 -0.0000 0.0000 0.0000

AT. 139 C X 0.0001 -0.0000 -0.0000 0.0001 -0.0000 0.0000  
Y 0.0000 -0.0000 -0.0000 0.0000 -0.0000 -0.0000  
Z 0.0000 -0.0000 0.0000 0.0000 0.0000 0.0000

AT. 140 C X -0.0001 -0.0000 0.0000 0.0001 -0.0000 -0.0000  
Y 0.0000 0.0000 -0.0000 -0.0000 0.0000 -0.0000  
Z -0.0000 -0.0000 -0.0000 0.0000 0.0000 -0.0000

AT. 141 H X -0.0007 0.0004 -0.0003 0.0007 0.0000 0.0000  
Y 0.0004 -0.0001 0.0002 -0.0005 -0.0000 -0.0000



Z -0.0003 0.0001 -0.0001 0.0004 0.0000 0.0000  
AT. 142 H X 0.0007 0.0004 0.0003 0.0007 0.0000 -0.0000  
Y 0.0004 0.0001 0.0002 0.0005 0.0000 -0.0000  
Z 0.0003 0.0001 0.0001 0.0004 0.0000 -0.0000  
AT. 143 H X -0.0007 0.0004 0.0003 -0.0007 0.0000 -0.0000  
Y 0.0004 -0.0001 -0.0002 0.0005 -0.0000 0.0000  
Z -0.0003 0.0001 0.0001 -0.0004 0.0000 -0.0000  
AT. 144 H X 0.0007 0.0004 -0.0003 -0.0007 0.0000 0.0000  
Y 0.0004 0.0001 -0.0002 -0.0005 0.0000 0.0000  
Z 0.0003 0.0001 -0.0001 -0.0004 0.0000 0.0000  
AT. 145 H X -0.0001 0.0002 -0.0001 0.0001 0.0000 -0.0000  
Y -0.0005 0.0005 -0.0005 0.0007 0.0000 -0.0000  
Z 0.0002 -0.0001 0.0002 -0.0003 -0.0000 0.0000  
AT. 146 H X 0.0001 0.0002 0.0001 0.0001 0.0000 0.0000  
Y -0.0005 -0.0005 -0.0005 -0.0007 -0.0000 -0.0000  
Z -0.0002 -0.0001 -0.0002 -0.0003 -0.0000 -0.0000  
AT. 147 H X -0.0001 0.0002 0.0001 -0.0001 0.0000 0.0000  
Y -0.0005 0.0005 0.0005 -0.0007 0.0000 0.0000  
Z 0.0002 -0.0001 -0.0002 0.0003 -0.0000 -0.0000  
AT. 148 H X 0.0001 0.0002 -0.0001 -0.0001 0.0000 -0.0000  
Y -0.0005 -0.0005 0.0005 0.0007 -0.0000 0.0000  
Z -0.0002 -0.0001 0.0002 0.0003 -0.0000 0.0000  
AT. 149 O X 0.0001 -0.0001 0.0002 -0.0002 0.0000 0.0000  
Y -0.0001 0.0001 -0.0001 0.0001 -0.0000 -0.0000  
Z 0.0001 -0.0002 0.0005 -0.0005 0.0000 0.0000  
AT. 150 O X -0.0001 -0.0001 -0.0002 -0.0002 0.0000 -0.0000  
Y -0.0001 -0.0001 -0.0001 -0.0001 0.0000 -0.0000  
Z -0.0001 -0.0002 -0.0005 -0.0005 0.0000 -0.0000  
AT. 151 O X 0.0001 -0.0001 -0.0002 0.0002 0.0000 -0.0000  
Y -0.0001 0.0001 0.0001 -0.0001 -0.0000 0.0000  
Z 0.0001 -0.0002 -0.0005 0.0005 0.0000 -0.0000  
AT. 152 O X -0.0001 -0.0001 0.0002 0.0002 0.0000 0.0000

Y -0.0001 -0.0001 0.0001 0.0001 0.0000 0.0000  
Z -0.0001 -0.0002 0.0005 0.0005 0.0000 0.0000  
AT. 153 H X -0.0009 0.0007 -0.0023 0.0023 -0.0000 -0.0002  
Y 0.0006 -0.0006 0.0010 -0.0011 0.0001 0.0002  
Z -0.0020 0.0021 -0.0067 0.0069 -0.0000 -0.0004  
AT. 154 H X 0.0009 0.0007 0.0023 0.0023 -0.0000 0.0002  
Y 0.0006 0.0006 0.0010 0.0011 -0.0001 0.0002  
Z 0.0020 0.0021 0.0067 0.0069 -0.0000 0.0004  
AT. 155 H X -0.0009 0.0007 0.0023 -0.0023 -0.0000 0.0002  
Y 0.0006 -0.0006 -0.0010 0.0011 0.0001 -0.0002  
Z -0.0020 0.0021 0.0067 -0.0069 -0.0000 0.0004  
AT. 156 H X 0.0009 0.0007 -0.0023 -0.0023 -0.0000 -0.0002  
Y 0.0006 0.0006 -0.0010 -0.0011 -0.0001 -0.0002  
Z 0.0020 0.0021 -0.0067 -0.0069 -0.0000 -0.0004  
AT. 157 O X 0.0000 -0.0000 -0.0000 0.0000 0.0000 -0.0000  
Y -0.0000 0.0000 -0.0000 -0.0000 0.0000 0.0000  
Z -0.0000 0.0000 0.0000 -0.0000 0.0000 -0.0000  
AT. 158 O X -0.0000 -0.0000 0.0000 0.0000 0.0000 0.0000  
Y -0.0000 -0.0000 -0.0000 0.0000 -0.0000 0.0000  
Z 0.0000 0.0000 -0.0000 -0.0000 0.0000 0.0000  
AT. 159 O X 0.0000 -0.0000 0.0000 -0.0000 0.0000 0.0000  
Y -0.0000 0.0000 0.0000 0.0000 0.0000 -0.0000  
Z -0.0000 0.0000 -0.0000 0.0000 0.0000 0.0000  
AT. 160 O X -0.0000 -0.0000 -0.0000 -0.0000 0.0000 -0.0000  
Y -0.0000 -0.0000 0.0000 -0.0000 -0.0000 -0.0000  
Z 0.0000 0.0000 0.0000 0.0000 0.0000 -0.0000  
AT. 161 O X -0.0000 0.0000 -0.0000 0.0000 0.0000 -0.0000  
Y 0.0000 -0.0001 0.0000 -0.0001 -0.0001 -0.0000  
Z -0.0000 0.0000 -0.0000 0.0000 0.0000 0.0000  
AT. 162 O X 0.0000 0.0000 0.0000 0.0000 0.0000 0.0000  
Y 0.0000 0.0001 0.0000 0.0001 0.0001 -0.0000  
Z 0.0000 0.0000 0.0000 0.0000 0.0000 -0.0000

AT.163 O X -0.0000 0.0000 0.0000 -0.0000 0.0000 0.0000  
Y 0.0000 -0.0001 -0.0000 0.0001 -0.0001 0.0000  
Z -0.0000 0.0000 0.0000 -0.0000 0.0000 -0.0000

AT.164 O X 0.0000 0.0000 -0.0000 -0.0000 0.0000 -0.0000  
Y 0.0000 0.0001 -0.0000 -0.0001 0.0001 0.0000  
Z 0.0000 0.0000 -0.0000 -0.0000 0.0000 0.0000

AT.165 H X 0.0002 -0.0004 0.0004 -0.0004 -0.0002 -0.0001  
Y -0.0005 0.0009 -0.0005 0.0007 0.0005 -0.0000  
Z 0.0001 -0.0000 0.0000 -0.0001 -0.0001 -0.0000

AT.166 H X -0.0002 -0.0004 -0.0004 -0.0004 -0.0002 0.0001  
Y -0.0005 -0.0009 -0.0005 -0.0007 -0.0005 -0.0000  
Z -0.0001 -0.0000 -0.0000 -0.0001 -0.0001 0.0000

AT.167 H X 0.0002 -0.0004 -0.0004 0.0004 -0.0002 0.0001  
Y -0.0005 0.0009 0.0005 -0.0007 0.0005 0.0000  
Z 0.0001 -0.0000 -0.0000 0.0001 -0.0001 0.0000

AT.168 H X -0.0002 -0.0004 0.0004 0.0004 -0.0002 -0.0001  
Y -0.0005 -0.0009 0.0005 0.0007 -0.0005 0.0000  
Z -0.0001 -0.0000 0.0000 0.0001 -0.0001 -0.0000

AT.169 O X -0.0015 0.0015 -0.0016 0.0016 0.0000 -0.0001  
Y -0.0063 0.0064 -0.0061 0.0061 0.0000 -0.0003  
Z -0.0010 0.0010 -0.0014 0.0014 0.0000 -0.0001

AT.170 O X 0.0015 0.0015 0.0016 0.0016 0.0000 0.0001  
Y -0.0063 -0.0064 -0.0061 -0.0061 -0.0000 -0.0003  
Z 0.0010 0.0010 0.0014 0.0014 0.0000 0.0001

AT.171 O X -0.0015 0.0015 0.0016 -0.0016 0.0000 0.0001  
Y -0.0063 0.0064 0.0061 -0.0061 0.0000 0.0003  
Z -0.0010 0.0010 0.0014 -0.0014 0.0000 0.0001

AT.172 O X 0.0015 0.0015 -0.0016 -0.0016 0.0000 -0.0001  
Y -0.0063 -0.0064 0.0061 0.0061 -0.0000 0.0003  
Z 0.0010 0.0010 -0.0014 -0.0014 0.0000 -0.0001

AT.173 H X 0.0208 -0.0209 0.0195 -0.0195 -0.0001 0.0009  
Y 0.0931 -0.0930 0.0907 -0.0903 -0.0004 0.0040

Z 0.0132 -0.0131 0.0094 -0.0096 -0.0001 0.0005  
AT. 174 H X -0.0208 -0.0209 -0.0195 -0.0195 -0.0001 -0.0009  
Y 0.0931 0.0930 0.0907 0.0903 0.0004 0.0040  
Z -0.0132 -0.0131 -0.0094 -0.0096 -0.0001 -0.0005  
AT. 175 H X 0.0208 -0.0209 -0.0195 0.0195 -0.0001 -0.0009  
Y 0.0931 -0.0930 -0.0907 0.0903 -0.0004 -0.0040  
Z 0.0132 -0.0131 -0.0094 0.0096 -0.0001 -0.0005  
AT. 176 H X -0.0208 -0.0209 0.0195 0.0195 -0.0001 0.0009  
Y 0.0931 0.0930 -0.0907 -0.0903 0.0004 -0.0040  
Z -0.0132 -0.0131 0.0094 0.0096 -0.0001 0.0005

FREQ(CM\*\*-1) 3087.01 3087.15 3091.71 3091.80 3092.46 3092.54

AT. 1 I X 0.0000 0.0000 -0.0000 -0.0000 -0.0000 0.0000  
Y 0.0000 -0.0000 -0.0000 -0.0000 0.0000 -0.0000  
Z -0.0000 -0.0000 0.0000 -0.0000 0.0000 -0.0000  
AT. 2 I X -0.0000 0.0000 0.0000 -0.0000 -0.0000 -0.0000  
Y 0.0000 0.0000 -0.0000 0.0000 -0.0000 -0.0000  
Z 0.0000 -0.0000 -0.0000 -0.0000 0.0000 0.0000  
AT. 3 I X 0.0000 -0.0000 -0.0000 -0.0000 0.0000 -0.0000  
Y 0.0000 0.0000 -0.0000 -0.0000 -0.0000 0.0000  
Z -0.0000 0.0000 0.0000 -0.0000 -0.0000 0.0000  
AT. 4 I X -0.0000 -0.0000 0.0000 -0.0000 0.0000 0.0000  
Y 0.0000 -0.0000 -0.0000 0.0000 0.0000 0.0000  
Z 0.0000 0.0000 -0.0000 -0.0000 -0.0000 -0.0000  
AT. 5 I X 0.0000 -0.0000 0.0000 -0.0000 -0.0000 0.0000  
Y 0.0000 0.0000 -0.0000 0.0000 0.0000 0.0000  
Z 0.0000 0.0000 0.0000 -0.0000 -0.0000 0.0000  
AT. 6 I X -0.0000 -0.0000 -0.0000 -0.0000 -0.0000 -0.0000  
Y 0.0000 -0.0000 -0.0000 -0.0000 -0.0000 0.0000  
Z -0.0000 0.0000 -0.0000 -0.0000 -0.0000 -0.0000  
AT. 7 I X 0.0000 0.0000 0.0000 -0.0000 0.0000 -0.0000

Y 0.0000 -0.0000 -0.0000 0.0000 -0.0000 -0.0000  
Z 0.0000 -0.0000 0.0000 -0.0000 0.0000 -0.0000  
AT. 8 I X -0.0000 0.0000 -0.0000 -0.0000 0.0000 0.0000  
Y 0.0000 0.0000 -0.0000 -0.0000 0.0000 -0.0000  
Z -0.0000 -0.0000 -0.0000 -0.0000 0.0000 0.0000  
AT. 9 N X -0.0000 -0.0000 0.0000 -0.0000 0.0000 0.0000  
Y -0.0000 -0.0000 0.0000 -0.0000 0.0001 0.0001  
Z 0.0000 0.0000 0.0000 -0.0000 0.0000 0.0000  
AT. 10 N X 0.0000 -0.0000 -0.0000 -0.0000 0.0000 -0.0000  
Y -0.0000 0.0000 0.0000 0.0000 -0.0001 0.0001  
Z -0.0000 0.0000 -0.0000 -0.0000 0.0000 -0.0000  
AT. 11 N X -0.0000 0.0000 0.0000 -0.0000 -0.0000 -0.0000  
Y -0.0000 0.0000 0.0000 -0.0000 -0.0001 -0.0001  
Z 0.0000 -0.0000 0.0000 -0.0000 -0.0000 -0.0000  
AT. 12 N X 0.0000 0.0000 -0.0000 -0.0000 -0.0000 0.0000  
Y -0.0000 -0.0000 0.0000 0.0000 0.0001 -0.0001  
Z -0.0000 -0.0000 -0.0000 -0.0000 -0.0000 0.0000  
AT. 13 N X -0.0000 0.0000 -0.0000 -0.0000 0.0000 0.0000  
Y -0.0000 -0.0000 0.0000 0.0000 0.0000 -0.0000  
Z 0.0000 0.0000 0.0000 0.0000 0.0000 0.0000  
AT. 14 N X 0.0000 0.0000 0.0000 -0.0000 0.0000 -0.0000  
Y -0.0000 0.0000 0.0000 -0.0000 -0.0000 -0.0000  
Z -0.0000 0.0000 -0.0000 0.0000 0.0000 -0.0000  
AT. 15 N X -0.0000 -0.0000 -0.0000 -0.0000 -0.0000 -0.0000  
Y -0.0000 0.0000 0.0000 0.0000 -0.0000 0.0000  
Z 0.0000 -0.0000 0.0000 0.0000 -0.0000 -0.0000  
AT. 16 N X 0.0000 -0.0000 0.0000 -0.0000 -0.0000 0.0000  
Y -0.0000 -0.0000 0.0000 -0.0000 0.0000 0.0000  
Z -0.0000 -0.0000 -0.0000 0.0000 -0.0000 0.0000  
AT. 17 O X 0.0000 -0.0000 -0.0000 -0.0000 0.0001 0.0000  
Y 0.0000 -0.0000 -0.0000 -0.0000 0.0001 0.0000  
Z 0.0000 -0.0000 -0.0000 -0.0000 0.0001 0.0001

AT. 18 O X -0.0000 -0.0000 0.0000 -0.0000 0.0001 -0.0000  
Y 0.0000 0.0000 -0.0000 0.0000 -0.0001 0.0000  
Z -0.0000 -0.0000 0.0000 -0.0000 0.0001 -0.0001

AT. 19 O X 0.0000 0.0000 -0.0000 -0.0000 -0.0001 -0.0000  
Y 0.0000 0.0000 -0.0000 -0.0000 -0.0001 -0.0000  
Z 0.0000 0.0000 -0.0000 -0.0000 -0.0001 -0.0001

AT. 20 O X -0.0000 0.0000 0.0000 -0.0000 -0.0001 0.0000  
Y 0.0000 -0.0000 -0.0000 0.0000 0.0001 -0.0000  
Z -0.0000 0.0000 0.0000 -0.0000 -0.0001 0.0001

AT. 21 O X 0.0000 -0.0000 0.0000 0.0000 0.0000 0.0000  
Y -0.0000 -0.0000 -0.0000 -0.0000 -0.0000 -0.0000  
Z -0.0000 0.0000 0.0000 0.0000 0.0000 0.0000

AT. 22 O X -0.0000 -0.0000 -0.0000 0.0000 0.0000 -0.0000  
Y -0.0000 0.0000 -0.0000 0.0000 0.0000 -0.0000  
Z 0.0000 0.0000 -0.0000 0.0000 0.0000 -0.0000

AT. 23 O X 0.0000 0.0000 0.0000 0.0000 -0.0000 -0.0000  
Y -0.0000 0.0000 -0.0000 -0.0000 0.0000 0.0000  
Z -0.0000 -0.0000 0.0000 0.0000 -0.0000 -0.0000

AT. 24 O X -0.0000 0.0000 -0.0000 0.0000 -0.0000 0.0000  
Y -0.0000 -0.0000 -0.0000 0.0000 -0.0000 0.0000  
Z 0.0000 -0.0000 -0.0000 0.0000 -0.0000 0.0000

AT. 25 C X -0.0000 -0.0000 -0.0000 0.0000 -0.0000 0.0000  
Y 0.0000 -0.0000 -0.0000 -0.0000 0.0000 0.0000  
Z -0.0000 -0.0000 -0.0000 0.0000 0.0000 0.0000

AT. 26 C X 0.0000 -0.0000 0.0000 0.0000 -0.0000 -0.0000  
Y 0.0000 0.0000 -0.0000 0.0000 -0.0000 0.0000  
Z 0.0000 -0.0000 0.0000 0.0000 0.0000 -0.0000

AT. 27 C X -0.0000 0.0000 -0.0000 0.0000 0.0000 -0.0000  
Y 0.0000 0.0000 -0.0000 -0.0000 -0.0000 -0.0000  
Z -0.0000 0.0000 -0.0000 0.0000 -0.0000 -0.0000

AT. 28 C X 0.0000 0.0000 0.0000 0.0000 0.0000 0.0000  
Y 0.0000 -0.0000 -0.0000 0.0000 0.0000 -0.0000

Z 0.0000 0.0000 0.0000 0.0000 -0.0000 0.0000  
AT. 29 H X 0.0003 0.0005 -0.0000 -0.0001 0.0002 -0.0000  
Y -0.0000 0.0000 -0.0000 0.0000 -0.0000 -0.0000  
Z 0.0002 0.0003 -0.0000 -0.0001 0.0002 0.0001  
AT. 30 H X -0.0003 0.0005 0.0000 -0.0001 0.0002 0.0000  
Y -0.0000 -0.0000 -0.0000 -0.0000 0.0000 -0.0000  
Z -0.0002 0.0003 0.0000 -0.0001 0.0002 -0.0001  
AT. 31 H X 0.0003 -0.0005 -0.0000 -0.0001 -0.0002 0.0000  
Y -0.0000 -0.0000 -0.0000 0.0000 0.0000 0.0000  
Z 0.0002 -0.0003 -0.0000 -0.0001 -0.0002 -0.0001  
AT. 32 H X -0.0003 -0.0005 0.0000 -0.0001 -0.0002 -0.0000  
Y -0.0000 0.0000 -0.0000 -0.0000 -0.0000 0.0000  
Z -0.0002 -0.0003 0.0000 -0.0001 -0.0002 0.0001  
AT. 33 H X -0.0000 -0.0000 0.0000 0.0000 -0.0001 -0.0001  
Y -0.0001 -0.0001 0.0001 0.0001 -0.0004 -0.0003  
Z -0.0000 0.0000 0.0000 0.0000 -0.0001 -0.0001  
AT. 34 H X 0.0000 -0.0000 -0.0000 0.0000 -0.0001 0.0001  
Y -0.0001 0.0001 0.0001 -0.0001 0.0004 -0.0003  
Z 0.0000 0.0000 -0.0000 0.0000 -0.0001 0.0001  
AT. 35 H X -0.0000 0.0000 0.0000 0.0000 0.0001 0.0001  
Y -0.0001 0.0001 0.0001 0.0001 0.0004 0.0003  
Z -0.0000 -0.0000 0.0000 0.0000 0.0001 0.0001  
AT. 36 H X 0.0000 0.0000 -0.0000 0.0000 0.0001 -0.0001  
Y -0.0001 -0.0001 0.0001 -0.0001 -0.0004 0.0003  
Z 0.0000 -0.0000 -0.0000 0.0000 0.0001 -0.0001  
AT. 37 C X -0.0000 0.0000 0.0000 0.0000 -0.0001 -0.0001  
Y -0.0000 0.0000 0.0000 0.0000 -0.0001 -0.0001  
Z -0.0000 0.0000 0.0000 0.0000 -0.0002 -0.0002  
AT. 38 C X 0.0000 0.0000 -0.0000 0.0000 -0.0001 0.0001  
Y -0.0000 -0.0000 0.0000 -0.0000 0.0001 -0.0001  
Z 0.0000 0.0000 -0.0000 0.0000 -0.0002 0.0002  
AT. 39 C X -0.0000 -0.0000 0.0000 0.0000 0.0001 0.0001

Y -0.0000 -0.0000 0.0000 0.0000 0.0001 0.0001  
Z -0.0000 -0.0000 0.0000 0.0000 0.0002 0.0002  
AT. 40 C X 0.0000 -0.0000 -0.0000 0.0000 0.0001 -0.0001  
Y -0.0000 0.0000 0.0000 -0.0000 -0.0001 0.0001  
Z 0.0000 -0.0000 -0.0000 0.0000 0.0002 -0.0002  
AT. 41 C X -0.0003 -0.0002 -0.0003 0.0004 -0.0004 0.0002  
Y 0.0001 0.0001 0.0002 -0.0002 0.0003 -0.0002  
Z 0.0004 0.0004 0.0003 -0.0003 0.0003 -0.0003  
AT. 42 C X 0.0003 -0.0002 0.0003 0.0004 -0.0004 -0.0002  
Y 0.0001 -0.0001 0.0002 0.0002 -0.0003 -0.0002  
Z -0.0004 0.0004 -0.0003 -0.0003 0.0003 0.0003  
AT. 43 C X -0.0003 0.0002 -0.0003 0.0004 0.0004 -0.0002  
Y 0.0001 -0.0001 0.0002 -0.0002 -0.0003 0.0002  
Z 0.0004 -0.0004 0.0003 -0.0003 -0.0003 0.0003  
AT. 44 C X 0.0003 0.0002 0.0003 0.0004 0.0004 0.0002  
Y 0.0001 0.0001 0.0002 0.0002 0.0003 0.0002  
Z -0.0004 -0.0004 -0.0003 -0.0003 -0.0003 -0.0003  
AT. 45 H X -0.0006 -0.0006 -0.0003 0.0004 -0.0004 0.0003  
Y 0.0024 0.0024 0.0016 -0.0019 0.0019 -0.0013  
Z -0.0027 -0.0027 -0.0017 0.0022 -0.0021 0.0015  
AT. 46 H X 0.0006 -0.0006 0.0003 0.0004 -0.0004 -0.0003  
Y 0.0024 -0.0024 0.0016 0.0019 -0.0019 -0.0013  
Z 0.0027 -0.0027 0.0017 0.0022 -0.0021 -0.0015  
AT. 47 H X -0.0006 0.0006 -0.0003 0.0004 0.0004 -0.0003  
Y 0.0024 -0.0024 0.0016 -0.0019 -0.0019 0.0013  
Z -0.0027 0.0027 -0.0017 0.0022 0.0021 -0.0015  
AT. 48 H X 0.0006 0.0006 0.0003 0.0004 0.0004 0.0003  
Y 0.0024 0.0024 0.0016 0.0019 0.0019 0.0013  
Z 0.0027 0.0027 0.0017 0.0022 0.0021 0.0015  
AT. 49 H X 0.0038 0.0037 0.0041 -0.0048 0.0051 -0.0032  
Y -0.0040 -0.0039 -0.0042 0.0048 -0.0052 0.0033  
Z -0.0015 -0.0015 -0.0016 0.0019 -0.0019 0.0014



AT. 50 H X -0.0038 0.0037 -0.0041 -0.0048 0.0051 0.0032  
Y -0.0040 0.0039 -0.0042 -0.0048 0.0052 0.0033  
Z 0.0015 -0.0015 0.0016 0.0019 -0.0019 -0.0014

AT. 51 H X 0.0038 -0.0037 0.0041 -0.0048 -0.0051 0.0032  
Y -0.0040 0.0039 -0.0042 0.0048 0.0052 -0.0033  
Z -0.0015 0.0015 -0.0016 0.0019 0.0019 -0.0014

AT. 52 H X -0.0038 -0.0037 -0.0041 -0.0048 -0.0051 -0.0032  
Y -0.0040 -0.0039 -0.0042 -0.0048 -0.0052 -0.0033  
Z 0.0015 0.0015 0.0016 0.0019 0.0019 0.0014

AT. 53 C X 0.0000 0.0000 0.0000 -0.0000 -0.0000 -0.0000  
Y 0.0001 0.0001 0.0000 -0.0000 0.0000 -0.0000  
Z 0.0000 0.0000 -0.0000 -0.0000 0.0000 -0.0000

AT. 54 C X -0.0000 0.0000 -0.0000 -0.0000 -0.0000 0.0000  
Y 0.0001 -0.0001 0.0000 0.0000 -0.0000 -0.0000  
Z -0.0000 0.0000 0.0000 -0.0000 0.0000 0.0000

AT. 55 C X 0.0000 -0.0000 0.0000 -0.0000 0.0000 0.0000  
Y 0.0001 -0.0001 0.0000 -0.0000 -0.0000 0.0000  
Z 0.0000 -0.0000 -0.0000 -0.0000 -0.0000 0.0000

AT. 56 C X -0.0000 -0.0000 -0.0000 -0.0000 0.0000 -0.0000  
Y 0.0001 0.0001 0.0000 0.0000 0.0000 0.0000  
Z -0.0000 -0.0000 0.0000 -0.0000 -0.0000 -0.0000

AT. 57 C X 0.0009 0.0009 0.0002 -0.0002 0.0001 -0.0002  
Y 0.0000 0.0000 -0.0000 0.0000 0.0000 0.0000  
Z -0.0052 -0.0053 -0.0012 0.0016 -0.0010 0.0013

AT. 58 C X -0.0009 0.0009 -0.0002 -0.0002 0.0001 0.0002  
Y 0.0000 -0.0000 -0.0000 -0.0000 -0.0000 0.0000  
Z 0.0052 -0.0053 0.0012 0.0016 -0.0010 -0.0013

AT. 59 C X 0.0009 -0.0009 0.0002 -0.0002 -0.0001 0.0002  
Y 0.0000 -0.0000 -0.0000 0.0000 -0.0000 -0.0000  
Z -0.0052 0.0053 -0.0012 0.0016 0.0010 -0.0013

AT. 60 C X -0.0009 -0.0009 -0.0002 -0.0002 -0.0001 -0.0002  
Y 0.0000 0.0000 -0.0000 -0.0000 0.0000 -0.0000

Z 0.0052 0.0053 0.0012 0.0016 0.0010 0.0013  
AT. 61 H X -0.0279 -0.0283 -0.0066 0.0084 -0.0053 0.0072  
Y 0.0383 0.0389 0.0091 -0.0116 0.0074 -0.0100  
Z 0.0057 0.0058 0.0013 -0.0017 0.0011 -0.0014  
AT. 62 H X 0.0279 -0.0283 0.0066 0.0084 -0.0053 -0.0072  
Y 0.0383 -0.0389 0.0091 0.0116 -0.0074 -0.0100  
Z -0.0057 0.0058 -0.0013 -0.0017 0.0011 0.0014  
AT. 63 H X -0.0279 0.0283 -0.0066 0.0084 0.0053 -0.0072  
Y 0.0383 -0.0389 0.0091 -0.0116 -0.0074 0.0100  
Z 0.0057 -0.0058 0.0013 -0.0017 -0.0011 0.0014  
AT. 64 H X 0.0279 0.0283 0.0066 0.0084 0.0053 0.0072  
Y 0.0383 0.0389 0.0091 0.0116 0.0074 0.0100  
Z -0.0057 -0.0058 -0.0013 -0.0017 -0.0011 -0.0014  
AT. 65 H X 0.0265 0.0268 0.0066 -0.0082 0.0054 -0.0072  
Y 0.0088 0.0089 0.0022 -0.0028 0.0018 -0.0024  
Z -0.0009 -0.0010 -0.0002 0.0003 -0.0002 0.0002  
AT. 66 H X -0.0265 0.0268 -0.0066 -0.0082 0.0054 0.0072  
Y 0.0088 -0.0089 0.0022 0.0028 -0.0018 -0.0024  
Z 0.0009 -0.0010 0.0002 0.0003 -0.0002 -0.0002  
AT. 67 H X 0.0265 -0.0268 0.0066 -0.0082 -0.0054 0.0072  
Y 0.0088 -0.0089 0.0022 -0.0028 -0.0018 0.0024  
Z -0.0009 0.0010 -0.0002 0.0003 0.0002 -0.0002  
AT. 68 H X -0.0265 -0.0268 -0.0066 -0.0082 -0.0054 -0.0072  
Y 0.0088 0.0089 0.0022 0.0028 0.0018 0.0024  
Z 0.0009 0.0010 0.0002 0.0003 0.0002 0.0002  
AT. 69 H X -0.0101 -0.0102 -0.0025 0.0031 -0.0021 0.0027  
Y -0.0484 -0.0489 -0.0115 0.0146 -0.0095 0.0126  
Z 0.0558 0.0565 0.0132 -0.0169 0.0109 -0.0146  
AT. 70 H X 0.0101 -0.0102 0.0025 0.0031 -0.0021 -0.0027  
Y -0.0484 0.0489 -0.0115 -0.0146 0.0095 0.0126  
Z -0.0558 0.0565 -0.0132 -0.0169 0.0109 0.0146  
AT. 71 H X -0.0101 0.0102 -0.0025 0.0031 0.0021 -0.0027

Y -0.0484 0.0489 -0.0115 0.0146 0.0095 -0.0126  
Z 0.0558 -0.0565 0.0132 -0.0169 -0.0109 0.0146  
AT. 72 H X 0.0101 0.0102 0.0025 0.0031 0.0021 0.0027  
Y -0.0484 -0.0489 -0.0115 -0.0146 -0.0095 -0.0126  
Z -0.0558 -0.0565 -0.0132 -0.0169 -0.0109 -0.0146  
AT. 73 C X 0.0000 0.0000 0.0000 0.0000 0.0000 0.0000  
Y -0.0001 -0.0001 0.0000 0.0001 0.0000 0.0000  
Z 0.0000 0.0000 0.0000 0.0000 0.0000 0.0000  
AT. 74 C X -0.0000 0.0000 -0.0000 0.0000 0.0000 -0.0000  
Y -0.0001 0.0001 0.0000 -0.0001 -0.0000 0.0000  
Z -0.0000 0.0000 -0.0000 0.0000 0.0000 -0.0000  
AT. 75 C X 0.0000 -0.0000 0.0000 0.0000 -0.0000 -0.0000  
Y -0.0001 0.0001 0.0000 0.0001 -0.0000 -0.0000  
Z 0.0000 -0.0000 0.0000 0.0000 -0.0000 -0.0000  
AT. 76 C X -0.0000 -0.0000 -0.0000 0.0000 -0.0000 0.0000  
Y -0.0001 -0.0001 0.0000 -0.0001 0.0000 -0.0000  
Z -0.0000 -0.0000 -0.0000 0.0000 -0.0000 0.0000  
AT. 77 C X -0.0001 -0.0000 0.0003 0.0002 0.0002 0.0002  
Y 0.0000 0.0000 -0.0001 -0.0001 -0.0001 -0.0001  
Z -0.0000 -0.0000 0.0001 0.0001 0.0002 0.0001  
AT. 78 C X 0.0001 -0.0000 -0.0003 0.0002 0.0002 -0.0002  
Y 0.0000 -0.0000 -0.0001 0.0001 0.0001 -0.0001  
Z 0.0000 -0.0000 -0.0001 0.0001 0.0002 -0.0001  
AT. 79 C X -0.0001 0.0000 0.0003 0.0002 -0.0002 -0.0002  
Y 0.0000 -0.0000 -0.0001 -0.0001 0.0001 0.0001  
Z -0.0000 0.0000 0.0001 0.0001 -0.0002 -0.0001  
AT. 80 C X 0.0001 0.0000 -0.0003 0.0002 -0.0002 0.0002  
Y 0.0000 0.0000 -0.0001 0.0001 -0.0001 0.0001  
Z 0.0000 0.0000 -0.0001 0.0001 -0.0002 0.0001  
AT. 81 H X 0.0007 0.0003 -0.0028 -0.0024 -0.0026 -0.0020  
Y -0.0006 -0.0002 0.0026 0.0022 0.0023 0.0018  
Z -0.0000 0.0000 0.0002 0.0002 0.0002 0.0001

AT. 82 H X -0.0007 0.0003 0.0028 -0.0024 -0.0026 0.0020  
Y -0.0006 0.0002 0.0026 -0.0022 -0.0023 0.0018  
Z 0.0000 0.0000 -0.0002 0.0002 0.0002 -0.0001

AT. 83 H X 0.0007 -0.0003 -0.0028 -0.0024 0.0026 0.0020  
Y -0.0006 0.0002 0.0026 0.0022 -0.0023 -0.0018  
Z -0.0000 -0.0000 0.0002 0.0002 -0.0002 -0.0001

AT. 84 H X -0.0007 -0.0003 0.0028 -0.0024 0.0026 -0.0020  
Y -0.0006 -0.0002 0.0026 -0.0022 0.0023 -0.0018  
Z 0.0000 -0.0000 -0.0002 0.0002 -0.0002 0.0001

AT. 85 H X 0.0001 0.0001 -0.0004 -0.0003 -0.0004 -0.0004  
Y 0.0004 0.0002 -0.0016 -0.0014 -0.0016 -0.0013  
Z 0.0005 0.0003 -0.0020 -0.0018 -0.0020 -0.0017

AT. 86 H X -0.0001 0.0001 0.0004 -0.0003 -0.0004 0.0004  
Y 0.0004 -0.0002 -0.0016 0.0014 0.0016 -0.0013  
Z -0.0005 0.0003 0.0020 -0.0018 -0.0020 0.0017

AT. 87 H X 0.0001 -0.0001 -0.0004 -0.0003 0.0004 0.0004  
Y 0.0004 -0.0002 -0.0016 -0.0014 0.0016 0.0013  
Z 0.0005 -0.0003 -0.0020 -0.0018 0.0020 0.0017

AT. 88 H X -0.0001 -0.0001 0.0004 -0.0003 0.0004 -0.0004  
Y 0.0004 0.0002 -0.0016 0.0014 -0.0016 0.0013  
Z -0.0005 -0.0003 0.0020 -0.0018 0.0020 -0.0017

AT. 89 C X -0.0000 -0.0000 0.0000 0.0000 0.0000 0.0000  
Y 0.0000 0.0000 -0.0001 -0.0001 -0.0001 -0.0001  
Z -0.0000 -0.0000 0.0000 0.0000 0.0000 0.0000

AT. 90 C X 0.0000 -0.0000 -0.0000 0.0000 0.0000 -0.0000  
Y 0.0000 -0.0000 -0.0001 0.0001 0.0001 -0.0001  
Z 0.0000 -0.0000 -0.0000 0.0000 0.0000 -0.0000

AT. 91 C X -0.0000 0.0000 0.0000 0.0000 -0.0000 -0.0000  
Y 0.0000 -0.0000 -0.0001 -0.0001 0.0001 0.0001  
Z -0.0000 0.0000 0.0000 0.0000 -0.0000 -0.0000

AT. 92 C X 0.0000 0.0000 -0.0000 0.0000 -0.0000 0.0000  
Y 0.0000 0.0000 -0.0001 0.0001 -0.0001 0.0001

Z 0.0000 0.0000 -0.0000 0.0000 -0.0000 0.0000  
AT. 93 C X 0.0000 -0.0001 -0.0009 -0.0009 -0.0008 -0.0008  
Y -0.0002 -0.0002 0.0004 0.0004 0.0004 0.0004  
Z 0.0012 0.0010 -0.0050 -0.0049 -0.0050 -0.0050  
AT. 94 C X -0.0000 -0.0001 0.0009 -0.0009 -0.0008 0.0008  
Y -0.0002 0.0002 0.0004 -0.0004 -0.0004 0.0004  
Z -0.0012 0.0010 0.0050 -0.0049 -0.0050 0.0050  
AT. 95 C X 0.0000 0.0001 -0.0009 -0.0009 0.0008 0.0008  
Y -0.0002 0.0002 0.0004 0.0004 -0.0004 -0.0004  
Z 0.0012 -0.0010 -0.0050 -0.0049 0.0050 0.0050  
AT. 96 C X -0.0000 0.0001 0.0009 -0.0009 0.0008 -0.0008  
Y -0.0002 -0.0002 0.0004 -0.0004 0.0004 -0.0004  
Z -0.0012 -0.0010 0.0050 -0.0049 0.0050 -0.0050  
AT. 97 H X 0.0110 0.0092 -0.0366 -0.0360 -0.0367 -0.0361  
Y 0.0060 0.0050 -0.0205 -0.0201 -0.0205 -0.0201  
Z -0.0030 -0.0025 0.0095 0.0093 0.0095 0.0093  
AT. 98 H X -0.0110 0.0092 0.0366 -0.0360 -0.0367 0.0361  
Y 0.0060 -0.0050 -0.0205 0.0201 0.0205 -0.0201  
Z 0.0030 -0.0025 -0.0095 0.0093 0.0095 -0.0093  
AT. 99 H X 0.0110 -0.0092 -0.0366 -0.0360 0.0367 0.0361  
Y 0.0060 -0.0050 -0.0205 -0.0201 0.0205 0.0201  
Z -0.0030 0.0025 0.0095 0.0093 -0.0095 -0.0093  
AT. 100 H X -0.0110 -0.0092 0.0366 -0.0360 0.0367 -0.0361  
Y 0.0060 0.0050 -0.0205 0.0201 -0.0205 0.0201  
Z 0.0030 0.0025 -0.0095 0.0093 -0.0095 0.0093  
AT. 101 H X -0.0069 -0.0052 0.0285 0.0281 0.0276 0.0274  
Y 0.0064 0.0048 -0.0270 -0.0266 -0.0261 -0.0259  
Z 0.0013 0.0010 -0.0054 -0.0053 -0.0052 -0.0052  
AT. 102 H X 0.0069 -0.0052 -0.0285 0.0281 0.0276 -0.0274  
Y 0.0064 -0.0048 -0.0270 0.0266 0.0261 -0.0259  
Z -0.0013 0.0010 0.0054 -0.0053 -0.0052 0.0052  
AT. 103 H X -0.0069 0.0052 0.0285 0.0281 -0.0276 -0.0274

Y 0.0064 -0.0048 -0.0270 -0.0266 0.0261 0.0259  
Z 0.0013 -0.0010 -0.0054 -0.0053 0.0052 0.0052  
AT.104 H X 0.0069 0.0052 -0.0285 0.0281 -0.0276 0.0274  
Y 0.0064 0.0048 -0.0270 0.0266 -0.0261 0.0259  
Z -0.0013 -0.0010 0.0054 -0.0053 0.0052 -0.0052  
AT.105 H X -0.0044 -0.0035 0.0188 0.0185 0.0187 0.0185  
Y -0.0101 -0.0081 0.0432 0.0426 0.0432 0.0428  
Z -0.0129 -0.0103 0.0548 0.0540 0.0548 0.0542  
AT.106 H X 0.0044 -0.0035 -0.0188 0.0185 0.0187 -0.0185  
Y -0.0101 0.0081 0.0432 -0.0426 -0.0432 0.0428  
Z 0.0129 -0.0103 -0.0548 0.0540 0.0548 -0.0542  
AT.107 H X -0.0044 0.0035 0.0188 0.0185 -0.0187 -0.0185  
Y -0.0101 0.0081 0.0432 0.0426 -0.0432 -0.0428  
Z -0.0129 0.0103 0.0548 0.0540 -0.0548 -0.0542  
AT.108 H X 0.0044 0.0035 -0.0188 0.0185 -0.0187 0.0185  
Y -0.0101 -0.0081 0.0432 -0.0426 0.0432 -0.0428  
Z 0.0129 0.0103 -0.0548 0.0540 -0.0548 0.0542  
AT.109 C X 0.0007 0.0005 0.0003 -0.0001 0.0002 -0.0003  
Y 0.0002 0.0002 0.0001 -0.0000 0.0001 -0.0001  
Z 0.0001 0.0001 0.0000 -0.0000 0.0000 -0.0001  
AT.110 C X -0.0007 0.0005 -0.0003 -0.0001 0.0002 0.0003  
Y 0.0002 -0.0002 0.0001 0.0000 -0.0001 -0.0001  
Z -0.0001 0.0001 -0.0000 -0.0000 0.0000 0.0001  
AT.111 C X 0.0007 -0.0005 0.0003 -0.0001 -0.0002 0.0003  
Y 0.0002 -0.0002 0.0001 -0.0000 -0.0001 0.0001  
Z 0.0001 -0.0001 0.0000 -0.0000 -0.0000 0.0001  
AT.112 C X -0.0007 -0.0005 -0.0003 -0.0001 -0.0002 -0.0003  
Y 0.0002 0.0002 0.0001 0.0000 0.0001 0.0001  
Z -0.0001 -0.0001 -0.0000 -0.0000 -0.0000 -0.0001  
AT.113 H X -0.0079 -0.0057 -0.0040 0.0011 -0.0022 0.0033  
Y -0.0047 -0.0034 -0.0023 0.0007 -0.0013 0.0019  
Z 0.0011 0.0008 0.0006 -0.0001 0.0003 -0.0004

AT.114 H X 0.0079 -0.0057 0.0040 0.0011 -0.0022 -0.0033  
Y -0.0047 0.0034 -0.0023 -0.0007 0.0013 0.0019  
Z -0.0011 0.0008 -0.0006 -0.0001 0.0003 0.0004

AT.115 H X -0.0079 0.0057 -0.0040 0.0011 0.0022 -0.0033  
Y -0.0047 0.0034 -0.0023 0.0007 0.0013 -0.0019  
Z 0.0011 -0.0008 0.0006 -0.0001 -0.0003 0.0004

AT.116 H X 0.0079 0.0057 0.0040 0.0011 0.0022 0.0033  
Y -0.0047 -0.0034 -0.0023 -0.0007 -0.0013 -0.0019  
Z -0.0011 -0.0008 -0.0006 -0.0001 -0.0003 -0.0004

AT.117 H X -0.0001 -0.0002 -0.0001 0.0000 -0.0001 0.0000  
Y 0.0022 0.0015 0.0010 -0.0003 0.0005 -0.0008  
Z -0.0027 -0.0017 -0.0011 0.0004 -0.0005 0.0010

AT.118 H X 0.0001 -0.0002 0.0001 0.0000 -0.0001 -0.0000  
Y 0.0022 -0.0015 0.0010 0.0003 -0.0005 -0.0008  
Z 0.0027 -0.0017 0.0011 0.0004 -0.0005 -0.0010

AT.119 H X -0.0001 0.0002 -0.0001 0.0000 0.0001 -0.0000  
Y 0.0022 -0.0015 0.0010 -0.0003 -0.0005 0.0008  
Z -0.0027 0.0017 -0.0011 0.0004 0.0005 -0.0010

AT.120 H X 0.0001 0.0002 0.0001 0.0000 0.0001 0.0000  
Y 0.0022 0.0015 0.0010 0.0003 0.0005 0.0008  
Z 0.0027 0.0017 0.0011 0.0004 0.0005 0.0010

AT.121 C X -0.0001 -0.0001 -0.0005 -0.0005 -0.0005 -0.0005  
Y -0.0000 -0.0001 -0.0002 -0.0002 -0.0002 -0.0002  
Z 0.0000 0.0000 0.0004 0.0004 0.0004 0.0004

AT.122 C X 0.0001 -0.0001 0.0005 -0.0005 -0.0005 0.0005  
Y -0.0000 0.0001 -0.0002 0.0002 0.0002 -0.0002  
Z -0.0000 0.0000 -0.0004 0.0004 0.0004 -0.0004

AT.123 C X -0.0001 0.0001 -0.0005 -0.0005 0.0005 0.0005  
Y -0.0000 0.0001 -0.0002 -0.0002 0.0002 0.0002  
Z 0.0000 -0.0000 0.0004 0.0004 -0.0004 -0.0004

AT.124 C X 0.0001 0.0001 0.0005 -0.0005 0.0005 -0.0005  
Y -0.0000 -0.0001 -0.0002 0.0002 -0.0002 0.0002

Z -0.0000 -0.0000 -0.0004 0.0004 -0.0004 0.0004  
AT. 125 H X 0.0001 -0.0000 -0.0011 -0.0010 -0.0011 -0.0010  
Y 0.0001 -0.0002 -0.0022 -0.0021 -0.0021 -0.0021  
Z 0.0002 -0.0002 -0.0031 -0.0030 -0.0031 -0.0029  
AT. 126 H X -0.0001 -0.0000 0.0011 -0.0010 -0.0011 0.0010  
Y 0.0001 0.0002 -0.0022 0.0021 0.0021 -0.0021  
Z -0.0002 -0.0002 0.0031 -0.0030 -0.0031 0.0029  
AT. 127 H X 0.0001 0.0000 -0.0011 -0.0010 0.0011 0.0010  
Y 0.0001 0.0002 -0.0022 -0.0021 0.0021 0.0021  
Z 0.0002 0.0002 -0.0031 -0.0030 0.0031 0.0029  
AT. 128 H X -0.0001 0.0000 0.0011 -0.0010 0.0011 -0.0010  
Y 0.0001 -0.0002 -0.0022 0.0021 -0.0021 0.0021  
Z -0.0002 0.0002 0.0031 -0.0030 0.0031 -0.0029  
AT. 129 H X 0.0007 0.0015 0.0069 0.0065 0.0067 0.0066  
Y 0.0004 0.0009 0.0045 0.0042 0.0044 0.0043  
Z -0.0002 -0.0004 -0.0017 -0.0016 -0.0016 -0.0016  
AT. 130 H X -0.0007 0.0015 -0.0069 0.0065 0.0067 -0.0066  
Y 0.0004 -0.0009 0.0045 -0.0042 -0.0044 0.0043  
Z 0.0002 -0.0004 0.0017 -0.0016 -0.0016 0.0016  
AT. 131 H X 0.0007 -0.0015 0.0069 0.0065 -0.0067 -0.0066  
Y 0.0004 -0.0009 0.0045 0.0042 -0.0044 -0.0043  
Z -0.0002 0.0004 -0.0017 -0.0016 0.0016 0.0016  
AT. 132 H X -0.0007 -0.0015 -0.0069 0.0065 -0.0067 0.0066  
Y 0.0004 0.0009 0.0045 -0.0042 0.0044 -0.0043  
Z 0.0002 0.0004 0.0017 -0.0016 0.0016 -0.0016  
AT. 133 C X 0.0000 -0.0000 -0.0000 -0.0000 -0.0000 -0.0000  
Y 0.0000 0.0000 0.0000 0.0000 0.0000 0.0000  
Z 0.0000 -0.0000 -0.0000 -0.0000 -0.0000 -0.0000  
AT. 134 C X -0.0000 -0.0000 0.0000 -0.0000 -0.0000 0.0000  
Y 0.0000 -0.0000 0.0000 -0.0000 -0.0000 0.0000  
Z -0.0000 -0.0000 0.0000 -0.0000 -0.0000 0.0000  
AT. 135 C X 0.0000 0.0000 -0.0000 -0.0000 0.0000 0.0000



Y 0.0000 -0.0000 0.0000 0.0000 -0.0000 -0.0000  
Z 0.0000 0.0000 -0.0000 -0.0000 0.0000 0.0000  
AT. 136 C X -0.0000 0.0000 0.0000 -0.0000 0.0000 -0.0000  
Y 0.0000 0.0000 0.0000 -0.0000 0.0000 -0.0000  
Z -0.0000 0.0000 0.0000 -0.0000 0.0000 -0.0000  
AT. 137 C X 0.0000 0.0000 -0.0000 -0.0000 -0.0000 -0.0000  
Y -0.0000 -0.0000 0.0000 0.0000 0.0000 0.0000  
Z 0.0000 0.0000 -0.0000 -0.0000 -0.0000 -0.0000  
AT. 138 C X -0.0000 0.0000 0.0000 -0.0000 -0.0000 0.0000  
Y -0.0000 0.0000 0.0000 -0.0000 -0.0000 0.0000  
Z -0.0000 0.0000 0.0000 -0.0000 -0.0000 0.0000  
AT. 139 C X 0.0000 -0.0000 -0.0000 -0.0000 0.0000 0.0000  
Y -0.0000 0.0000 0.0000 0.0000 -0.0000 -0.0000  
Z 0.0000 -0.0000 -0.0000 -0.0000 0.0000 0.0000  
AT. 140 C X -0.0000 -0.0000 0.0000 -0.0000 0.0000 -0.0000  
Y -0.0000 -0.0000 0.0000 -0.0000 0.0000 -0.0000  
Z -0.0000 -0.0000 0.0000 -0.0000 0.0000 -0.0000  
AT. 141 H X -0.0001 -0.0000 0.0003 0.0002 0.0001 0.0002  
Y 0.0001 0.0000 -0.0002 -0.0001 -0.0000 -0.0001  
Z -0.0001 -0.0000 0.0003 0.0002 0.0001 0.0002  
AT. 142 H X 0.0001 -0.0000 -0.0003 0.0002 0.0001 -0.0002  
Y 0.0001 -0.0000 -0.0002 0.0001 0.0000 -0.0001  
Z 0.0001 -0.0000 -0.0003 0.0002 0.0001 -0.0002  
AT. 143 H X -0.0001 0.0000 0.0003 0.0002 -0.0001 -0.0002  
Y 0.0001 -0.0000 -0.0002 -0.0001 0.0000 0.0001  
Z -0.0001 0.0000 0.0003 0.0002 -0.0001 -0.0002  
AT. 144 H X 0.0001 0.0000 -0.0003 0.0002 -0.0001 0.0002  
Y 0.0001 0.0000 -0.0002 0.0001 -0.0000 0.0001  
Z 0.0001 0.0000 -0.0003 0.0002 -0.0001 0.0002  
AT. 145 H X 0.0001 0.0000 0.0000 0.0000 -0.0000 0.0000  
Y 0.0000 0.0001 0.0002 0.0001 -0.0000 0.0001  
Z -0.0000 -0.0000 -0.0001 -0.0001 -0.0000 -0.0001

AT. 146 H X -0.0001 0.0000 -0.0000 0.0000 -0.0000 -0.0000  
Y 0.0000 -0.0001 0.0002 -0.0001 0.0000 0.0001  
Z 0.0000 -0.0000 0.0001 -0.0001 -0.0000 0.0001

AT. 147 H X 0.0001 -0.0000 0.0000 0.0000 0.0000 -0.0000  
Y 0.0000 -0.0001 0.0002 0.0001 0.0000 -0.0001  
Z -0.0000 0.0000 -0.0001 -0.0001 0.0000 0.0001

AT. 148 H X -0.0001 -0.0000 -0.0000 0.0000 0.0000 0.0000  
Y 0.0000 0.0001 0.0002 -0.0001 -0.0000 -0.0001  
Z 0.0000 0.0000 0.0001 -0.0001 0.0000 -0.0001

AT. 149 O X 0.0000 -0.0000 0.0000 0.0000 0.0001 0.0001  
Y 0.0000 0.0000 -0.0000 -0.0000 -0.0000 -0.0000  
Z 0.0000 -0.0000 0.0000 0.0000 0.0001 0.0001

AT. 150 O X -0.0000 -0.0000 -0.0000 0.0000 0.0001 -0.0001  
Y 0.0000 -0.0000 -0.0000 0.0000 0.0000 -0.0000  
Z -0.0000 -0.0000 -0.0000 0.0000 0.0001 -0.0001

AT. 151 O X 0.0000 0.0000 0.0000 0.0000 -0.0001 -0.0001  
Y 0.0000 -0.0000 -0.0000 -0.0000 0.0000 0.0000  
Z 0.0000 0.0000 0.0000 0.0000 -0.0001 -0.0001

AT. 152 O X -0.0000 0.0000 -0.0000 0.0000 -0.0001 0.0001  
Y 0.0000 0.0000 -0.0000 0.0000 -0.0000 0.0000  
Z -0.0000 0.0000 -0.0000 0.0000 -0.0001 0.0001

AT. 153 H X -0.0000 0.0001 0.0000 0.0000 -0.0005 -0.0005  
Y 0.0001 -0.0000 0.0000 0.0000 0.0003 0.0002  
Z -0.0001 0.0005 -0.0001 -0.0001 -0.0015 -0.0014

AT. 154 H X 0.0000 0.0001 -0.0000 0.0000 -0.0005 0.0005  
Y 0.0001 0.0000 0.0000 -0.0000 -0.0003 0.0002  
Z 0.0001 0.0005 0.0001 -0.0001 -0.0015 0.0014

AT. 155 H X -0.0000 -0.0001 0.0000 0.0000 0.0005 0.0005  
Y 0.0001 0.0000 0.0000 0.0000 -0.0003 -0.0002  
Z -0.0001 -0.0005 -0.0001 -0.0001 0.0015 0.0014

AT. 156 H X 0.0000 -0.0001 -0.0000 0.0000 0.0005 -0.0005  
Y 0.0001 -0.0000 0.0000 -0.0000 0.0003 -0.0002

Z 0.0001 -0.0005 0.0001 -0.0001 0.0015 -0.0014  
AT. 157 O X -0.0000 -0.0000 0.0000 0.0000 0.0000 0.0000  
Y 0.0000 0.0000 0.0000 -0.0000 0.0000 -0.0000  
Z -0.0000 -0.0000 0.0000 0.0000 0.0000 0.0000  
AT. 158 O X 0.0000 -0.0000 -0.0000 0.0000 0.0000 -0.0000  
Y 0.0000 -0.0000 0.0000 0.0000 -0.0000 -0.0000  
Z 0.0000 -0.0000 -0.0000 0.0000 0.0000 -0.0000  
AT. 159 O X -0.0000 0.0000 0.0000 0.0000 -0.0000 -0.0000  
Y 0.0000 -0.0000 0.0000 -0.0000 -0.0000 0.0000  
Z -0.0000 0.0000 0.0000 0.0000 -0.0000 -0.0000  
AT. 160 O X 0.0000 0.0000 -0.0000 0.0000 -0.0000 0.0000  
Y 0.0000 0.0000 0.0000 0.0000 0.0000 0.0000  
Z 0.0000 0.0000 -0.0000 0.0000 -0.0000 0.0000  
AT. 161 O X 0.0000 0.0000 -0.0000 -0.0000 -0.0000 -0.0000  
Y -0.0000 -0.0001 0.0000 0.0000 0.0000 0.0000  
Z 0.0000 0.0000 0.0000 -0.0000 0.0000 -0.0000  
AT. 162 O X -0.0000 0.0000 0.0000 -0.0000 -0.0000 0.0000  
Y -0.0000 0.0001 0.0000 -0.0000 -0.0000 0.0000  
Z -0.0000 0.0000 -0.0000 -0.0000 0.0000 0.0000  
AT. 163 O X 0.0000 -0.0000 -0.0000 -0.0000 0.0000 0.0000  
Y -0.0000 0.0001 0.0000 0.0000 -0.0000 -0.0000  
Z 0.0000 -0.0000 0.0000 -0.0000 -0.0000 0.0000  
AT. 164 O X -0.0000 -0.0000 0.0000 -0.0000 0.0000 -0.0000  
Y -0.0000 -0.0001 0.0000 -0.0000 0.0000 -0.0000  
Z -0.0000 -0.0000 -0.0000 -0.0000 -0.0000 -0.0000  
AT. 165 H X -0.0001 -0.0003 0.0001 0.0001 0.0001 0.0002  
Y 0.0001 0.0006 -0.0002 -0.0003 -0.0003 -0.0003  
Z -0.0000 -0.0001 -0.0000 0.0000 -0.0000 0.0000  
AT. 166 H X 0.0001 -0.0003 -0.0001 0.0001 0.0001 -0.0002  
Y 0.0001 -0.0006 -0.0002 0.0003 0.0003 -0.0003  
Z 0.0000 -0.0001 0.0000 0.0000 -0.0000 -0.0000  
AT. 167 H X -0.0001 0.0003 0.0001 0.0001 -0.0001 -0.0002

|         |     |         |         |         |         |         |         |
|---------|-----|---------|---------|---------|---------|---------|---------|
|         | Y   | 0.0001  | -0.0006 | -0.0002 | -0.0003 | 0.0003  | 0.0003  |
|         | Z   | -0.0000 | 0.0001  | -0.0000 | 0.0000  | 0.0000  | -0.0000 |
| AT. 168 | H X | 0.0001  | 0.0003  | -0.0001 | 0.0001  | -0.0001 | 0.0002  |
|         | Y   | 0.0001  | 0.0006  | -0.0002 | 0.0003  | -0.0003 | 0.0003  |
|         | Z   | 0.0000  | 0.0001  | 0.0000  | 0.0000  | 0.0000  | 0.0000  |
| AT. 169 | O X | -0.0000 | 0.0001  | 0.0000  | 0.0000  | -0.0003 | -0.0003 |
|         | Y   | -0.0001 | 0.0003  | 0.0001  | 0.0001  | -0.0010 | -0.0010 |
|         | Z   | -0.0000 | 0.0001  | 0.0000  | 0.0000  | -0.0002 | -0.0002 |
| AT. 170 | O X | 0.0000  | 0.0001  | -0.0000 | 0.0000  | -0.0003 | 0.0003  |
|         | Y   | -0.0001 | -0.0003 | 0.0001  | -0.0001 | 0.0010  | -0.0010 |
|         | Z   | 0.0000  | 0.0001  | -0.0000 | 0.0000  | -0.0002 | 0.0002  |
| AT. 171 | O X | -0.0000 | -0.0001 | 0.0000  | 0.0000  | 0.0003  | 0.0003  |
|         | Y   | -0.0001 | -0.0003 | 0.0001  | 0.0001  | 0.0010  | 0.0010  |
|         | Z   | -0.0000 | -0.0001 | 0.0000  | 0.0000  | 0.0002  | 0.0002  |
| AT. 172 | O X | 0.0000  | -0.0001 | -0.0000 | 0.0000  | 0.0003  | -0.0003 |
|         | Y   | -0.0001 | 0.0003  | 0.0001  | -0.0001 | -0.0010 | 0.0010  |
|         | Z   | 0.0000  | -0.0001 | -0.0000 | 0.0000  | 0.0002  | -0.0002 |
| AT. 173 | H X | 0.0003  | -0.0011 | -0.0005 | -0.0004 | 0.0034  | 0.0032  |
|         | Y   | 0.0008  | -0.0050 | -0.0018 | -0.0012 | 0.0154  | 0.0146  |
|         | Z   | 0.0001  | -0.0006 | -0.0003 | -0.0002 | 0.0017  | 0.0016  |
| AT. 174 | H X | -0.0003 | -0.0011 | 0.0005  | -0.0004 | 0.0034  | -0.0032 |
|         | Y   | 0.0008  | 0.0050  | -0.0018 | 0.0012  | -0.0154 | 0.0146  |
|         | Z   | -0.0001 | -0.0006 | 0.0003  | -0.0002 | 0.0017  | -0.0016 |
| AT. 175 | H X | 0.0003  | 0.0011  | -0.0005 | -0.0004 | -0.0034 | -0.0032 |
|         | Y   | 0.0008  | 0.0050  | -0.0018 | -0.0012 | -0.0154 | -0.0146 |
|         | Z   | 0.0001  | 0.0006  | -0.0003 | -0.0002 | -0.0017 | -0.0016 |
| AT. 176 | H X | -0.0003 | 0.0011  | 0.0005  | -0.0004 | -0.0034 | 0.0032  |
|         | Y   | 0.0008  | -0.0050 | -0.0018 | 0.0012  | 0.0154  | -0.0146 |
|         | Z   | -0.0001 | 0.0006  | 0.0003  | -0.0002 | -0.0017 | 0.0016  |

FREQ(CM\*\*-1) 3095.83 3095.87 3095.90 3096.00 3108.71 3108.71

AT. 1 I X -0.0000 -0.0000 0.0000 0.0000 -0.0000 0.0000  
Y -0.0000 -0.0000 -0.0000 0.0000 0.0000 -0.0000  
Z -0.0000 0.0000 0.0000 -0.0000 -0.0000 0.0000

AT. 2 I X 0.0000 -0.0000 0.0000 -0.0000 0.0000 0.0000  
Y -0.0000 0.0000 0.0000 0.0000 0.0000 0.0000  
Z 0.0000 0.0000 0.0000 0.0000 0.0000 0.0000

AT. 3 I X 0.0000 0.0000 0.0000 0.0000 0.0000 0.0000  
Y 0.0000 0.0000 -0.0000 0.0000 -0.0000 -0.0000  
Z 0.0000 -0.0000 0.0000 -0.0000 0.0000 0.0000

AT. 4 I X -0.0000 0.0000 0.0000 -0.0000 -0.0000 0.0000  
Y 0.0000 -0.0000 0.0000 0.0000 -0.0000 0.0000  
Z -0.0000 -0.0000 0.0000 0.0000 -0.0000 0.0000

AT. 5 I X 0.0000 0.0000 -0.0000 -0.0000 0.0000 0.0000  
Y 0.0000 0.0000 -0.0000 -0.0000 0.0000 -0.0000  
Z -0.0000 -0.0000 0.0000 0.0000 -0.0000 0.0000

AT. 6 I X -0.0000 0.0000 -0.0000 0.0000 -0.0000 0.0000  
Y 0.0000 -0.0000 0.0000 -0.0000 0.0000 0.0000  
Z 0.0000 -0.0000 0.0000 -0.0000 0.0000 0.0000

AT. 7 I X -0.0000 -0.0000 -0.0000 -0.0000 -0.0000 0.0000  
Y -0.0000 -0.0000 -0.0000 -0.0000 -0.0000 -0.0000  
Z 0.0000 0.0000 0.0000 0.0000 0.0000 0.0000

AT. 8 I X 0.0000 -0.0000 -0.0000 0.0000 0.0000 0.0000  
Y -0.0000 0.0000 0.0000 -0.0000 -0.0000 0.0000  
Z -0.0000 0.0000 0.0000 -0.0000 -0.0000 0.0000

AT. 9 N X 0.0000 0.0000 -0.0000 0.0000 0.0000 0.0000  
Y 0.0000 -0.0000 -0.0000 -0.0000 0.0000 0.0000  
Z 0.0000 0.0000 0.0000 0.0000 0.0000 0.0000

AT. 10 N X -0.0000 0.0000 -0.0000 -0.0000 -0.0000 0.0000  
Y 0.0000 0.0000 0.0000 -0.0000 0.0000 -0.0000  
Z -0.0000 0.0000 0.0000 -0.0000 -0.0000 0.0000

AT. 11 N X -0.0000 -0.0000 -0.0000 0.0000 -0.0000 0.0000  
Y -0.0000 0.0000 -0.0000 -0.0000 -0.0000 0.0000

Z -0.0000 -0.0000 0.0000 0.0000 -0.0000 0.0000  
AT. 12 N X 0.0000 -0.0000 -0.0000 -0.0000 0.0000 0.0000  
Y -0.0000 -0.0000 0.0000 -0.0000 -0.0000 -0.0000  
Z 0.0000 -0.0000 0.0000 -0.0000 0.0000 0.0000  
AT. 13 N X 0.0000 0.0000 0.0000 0.0000 0.0001 0.0001  
Y -0.0001 -0.0001 -0.0001 -0.0001 -0.0001 -0.0001  
Z -0.0001 -0.0001 -0.0001 -0.0001 0.0001 0.0001  
AT. 14 N X -0.0000 0.0000 0.0000 -0.0000 -0.0001 0.0001  
Y -0.0001 0.0001 0.0001 -0.0001 -0.0001 0.0001  
Z 0.0001 -0.0001 -0.0001 0.0001 -0.0001 0.0001  
AT. 15 N X -0.0000 -0.0000 0.0000 0.0000 -0.0001 0.0001  
Y 0.0001 0.0001 -0.0001 -0.0001 0.0001 -0.0001  
Z 0.0001 0.0001 -0.0001 -0.0001 -0.0001 0.0001  
AT. 16 N X 0.0000 -0.0000 0.0000 -0.0000 0.0001 0.0001  
Y 0.0001 -0.0001 0.0001 -0.0001 0.0001 0.0001  
Z -0.0001 0.0001 -0.0001 0.0001 0.0001 0.0001  
AT. 17 O X -0.0000 0.0000 -0.0000 -0.0000 -0.0000 -0.0000  
Y -0.0000 -0.0000 -0.0000 0.0000 -0.0000 0.0000  
Z -0.0000 0.0000 -0.0000 -0.0000 -0.0000 0.0000  
AT. 18 O X 0.0000 0.0000 -0.0000 0.0000 0.0000 -0.0000  
Y -0.0000 0.0000 0.0000 0.0000 -0.0000 -0.0000  
Z 0.0000 0.0000 -0.0000 0.0000 0.0000 0.0000  
AT. 19 O X 0.0000 -0.0000 -0.0000 -0.0000 0.0000 -0.0000  
Y 0.0000 0.0000 -0.0000 0.0000 0.0000 0.0000  
Z 0.0000 -0.0000 -0.0000 -0.0000 0.0000 0.0000  
AT. 20 O X -0.0000 -0.0000 -0.0000 0.0000 -0.0000 -0.0000  
Y 0.0000 -0.0000 0.0000 0.0000 0.0000 -0.0000  
Z -0.0000 -0.0000 -0.0000 0.0000 -0.0000 0.0000  
AT. 21 O X 0.0000 0.0000 0.0000 0.0000 -0.0000 -0.0000  
Y -0.0000 -0.0000 -0.0000 -0.0000 -0.0000 -0.0000  
Z 0.0000 0.0000 0.0000 0.0000 0.0000 0.0000  
AT. 22 O X -0.0000 0.0000 0.0000 -0.0000 0.0000 -0.0000

Y -0.0000 0.0000 0.0000 -0.0000 -0.0000 0.0000  
Z -0.0000 0.0000 0.0000 -0.0000 -0.0000 0.0000  
AT. 23 O X -0.0000 -0.0000 0.0000 0.0000 0.0000 -0.0000  
Y 0.0000 0.0000 -0.0000 -0.0000 0.0000 -0.0000  
Z -0.0000 -0.0000 0.0000 0.0000 -0.0000 0.0000  
AT. 24 O X 0.0000 -0.0000 0.0000 -0.0000 -0.0000 -0.0000  
Y 0.0000 -0.0000 0.0000 -0.0000 0.0000 0.0000  
Z 0.0000 -0.0000 0.0000 -0.0000 0.0000 0.0000  
AT. 25 C X -0.0000 -0.0000 -0.0000 -0.0000 -0.0000 -0.0000  
Y -0.0000 0.0000 0.0000 -0.0000 0.0000 0.0000  
Z -0.0000 -0.0000 -0.0000 -0.0000 -0.0000 -0.0000  
AT. 26 C X 0.0000 -0.0000 -0.0000 0.0000 0.0000 -0.0000  
Y -0.0000 -0.0000 -0.0000 -0.0000 0.0000 -0.0000  
Z 0.0000 -0.0000 -0.0000 0.0000 0.0000 -0.0000  
AT. 27 C X 0.0000 0.0000 -0.0000 -0.0000 0.0000 -0.0000  
Y 0.0000 -0.0000 0.0000 -0.0000 -0.0000 0.0000  
Z 0.0000 0.0000 -0.0000 -0.0000 0.0000 -0.0000  
AT. 28 C X -0.0000 0.0000 -0.0000 0.0000 -0.0000 -0.0000  
Y 0.0000 0.0000 -0.0000 -0.0000 -0.0000 -0.0000  
Z -0.0000 0.0000 -0.0000 0.0000 -0.0000 -0.0000  
AT. 29 H X 0.0001 0.0003 0.0002 0.0000 0.0003 0.0005  
Y -0.0000 0.0000 0.0000 -0.0000 0.0000 0.0000  
Z 0.0000 0.0002 0.0001 0.0000 0.0002 0.0003  
AT. 30 H X -0.0001 0.0003 0.0002 -0.0000 -0.0003 0.0005  
Y -0.0000 -0.0000 -0.0000 -0.0000 0.0000 -0.0000  
Z -0.0000 0.0002 0.0001 -0.0000 -0.0002 0.0003  
AT. 31 H X -0.0001 -0.0003 0.0002 0.0000 -0.0003 0.0005  
Y 0.0000 -0.0000 0.0000 -0.0000 -0.0000 0.0000  
Z -0.0000 -0.0002 0.0001 0.0000 -0.0002 0.0003  
AT. 32 H X 0.0001 -0.0003 0.0002 -0.0000 0.0003 0.0005  
Y 0.0000 0.0000 -0.0000 -0.0000 -0.0000 -0.0000  
Z 0.0000 -0.0002 0.0001 -0.0000 0.0002 0.0003

AT. 33 H X -0.0000 -0.0000 -0.0000 -0.0000 -0.0000 -0.0000  
Y -0.0000 -0.0001 -0.0001 0.0000 -0.0001 -0.0002  
Z -0.0000 -0.0000 -0.0000 -0.0000 -0.0000 -0.0001

AT. 34 H X 0.0000 -0.0000 -0.0000 0.0000 0.0000 -0.0000  
Y -0.0000 0.0001 0.0001 0.0000 -0.0001 0.0002  
Z 0.0000 -0.0000 -0.0000 0.0000 0.0000 -0.0001

AT. 35 H X 0.0000 0.0000 -0.0000 -0.0000 0.0000 -0.0000  
Y 0.0000 0.0001 -0.0001 0.0000 0.0001 -0.0002  
Z 0.0000 0.0000 -0.0000 -0.0000 0.0000 -0.0001

AT. 36 H X -0.0000 0.0000 -0.0000 0.0000 -0.0000 -0.0000  
Y 0.0000 -0.0001 0.0001 0.0000 0.0001 0.0002  
Z -0.0000 0.0000 -0.0000 0.0000 -0.0000 -0.0001

AT. 37 C X 0.0000 -0.0000 0.0000 -0.0000 -0.0000 -0.0000  
Y 0.0000 0.0000 0.0000 0.0000 -0.0000 -0.0000  
Z 0.0000 -0.0000 0.0000 0.0000 0.0000 0.0000

AT. 38 C X -0.0000 -0.0000 0.0000 0.0000 0.0000 -0.0000  
Y 0.0000 -0.0000 -0.0000 0.0000 -0.0000 0.0000  
Z -0.0000 -0.0000 0.0000 -0.0000 -0.0000 0.0000

AT. 39 C X -0.0000 0.0000 0.0000 -0.0000 0.0000 -0.0000  
Y -0.0000 -0.0000 0.0000 0.0000 0.0000 -0.0000  
Z -0.0000 0.0000 0.0000 0.0000 -0.0000 0.0000

AT. 40 C X 0.0000 0.0000 0.0000 0.0000 -0.0000 -0.0000  
Y -0.0000 0.0000 -0.0000 0.0000 0.0000 0.0000  
Z 0.0000 0.0000 0.0000 -0.0000 0.0000 0.0000

AT. 41 C X -0.0002 -0.0002 -0.0002 -0.0002 -0.0006 -0.0005  
Y 0.0002 0.0002 0.0002 0.0002 0.0004 0.0004  
Z 0.0003 0.0002 0.0002 0.0003 0.0005 0.0004

AT. 42 C X 0.0002 -0.0002 -0.0002 0.0002 0.0006 -0.0005  
Y 0.0002 -0.0002 -0.0002 0.0002 0.0004 -0.0004  
Z -0.0003 0.0002 0.0002 -0.0003 -0.0005 0.0004

AT. 43 C X 0.0002 0.0002 -0.0002 -0.0002 0.0006 -0.0005  
Y -0.0002 -0.0002 0.0002 0.0002 -0.0004 0.0004



Z -0.0003 -0.0002 0.0002 0.0003 -0.0005 0.0004  
AT. 44 C X -0.0002 0.0002 -0.0002 0.0002 -0.0006 -0.0005  
Y -0.0002 0.0002 -0.0002 0.0002 -0.0004 -0.0004  
Z 0.0003 -0.0002 0.0002 -0.0003 0.0005 0.0004  
AT. 45 H X -0.0003 -0.0003 -0.0003 -0.0003 -0.0005 -0.0005  
Y 0.0015 0.0015 0.0013 0.0016 0.0025 0.0022  
Z -0.0017 -0.0017 -0.0014 -0.0018 -0.0028 -0.0025  
AT. 46 H X 0.0003 -0.0003 -0.0003 0.0003 0.0005 -0.0005  
Y 0.0015 -0.0015 -0.0013 0.0016 0.0025 -0.0022  
Z 0.0017 -0.0017 -0.0014 0.0018 0.0028 -0.0025  
AT. 47 H X 0.0003 0.0003 -0.0003 -0.0003 0.0005 -0.0005  
Y -0.0015 -0.0015 0.0013 0.0016 -0.0025 0.0022  
Z 0.0017 0.0017 -0.0014 -0.0018 0.0028 -0.0025  
AT. 48 H X -0.0003 0.0003 -0.0003 0.0003 -0.0005 -0.0005  
Y -0.0015 0.0015 -0.0013 0.0016 -0.0025 -0.0022  
Z -0.0017 0.0017 -0.0014 0.0018 -0.0028 -0.0025  
AT. 49 H X 0.0037 0.0037 0.0032 0.0038 0.0073 0.0064  
Y -0.0038 -0.0037 -0.0032 -0.0039 -0.0074 -0.0064  
Z -0.0014 -0.0014 -0.0012 -0.0014 -0.0028 -0.0024  
AT. 50 H X -0.0037 0.0037 0.0032 -0.0038 -0.0073 0.0064  
Y -0.0038 0.0037 0.0032 -0.0039 -0.0074 0.0064  
Z 0.0014 -0.0014 -0.0012 0.0014 0.0028 -0.0024  
AT. 51 H X -0.0037 -0.0037 0.0032 0.0038 -0.0073 0.0064  
Y 0.0038 0.0037 -0.0032 -0.0039 0.0074 -0.0064  
Z 0.0014 0.0014 -0.0012 -0.0014 0.0028 -0.0024  
AT. 52 H X 0.0037 -0.0037 0.0032 -0.0038 0.0073 0.0064  
Y 0.0038 -0.0037 0.0032 -0.0039 0.0074 0.0064  
Z -0.0014 0.0014 -0.0012 0.0014 -0.0028 -0.0024  
AT. 53 C X -0.0000 -0.0000 -0.0000 -0.0000 -0.0000 -0.0000  
Y -0.0001 -0.0001 -0.0001 -0.0001 0.0000 0.0000  
Z 0.0000 0.0000 0.0000 0.0000 0.0000 0.0000  
AT. 54 C X 0.0000 -0.0000 -0.0000 0.0000 0.0000 -0.0000

Y -0.0001 0.0001 0.0001 -0.0001 0.0000 -0.0000  
Z -0.0000 0.0000 0.0000 -0.0000 -0.0000 0.0000  
AT. 55 C X 0.0000 0.0000 -0.0000 -0.0000 0.0000 -0.0000  
Y 0.0001 0.0001 -0.0001 -0.0001 -0.0000 0.0000  
Z -0.0000 -0.0000 0.0000 0.0000 -0.0000 0.0000  
AT. 56 C X -0.0000 0.0000 -0.0000 0.0000 -0.0000 -0.0000  
Y 0.0001 -0.0001 0.0001 -0.0001 -0.0000 -0.0000  
Z 0.0000 -0.0000 0.0000 -0.0000 0.0000 0.0000  
AT. 57 C X 0.0002 0.0001 0.0001 0.0002 -0.0000 -0.0000  
Y 0.0001 0.0000 0.0000 0.0001 0.0001 0.0001  
Z -0.0006 -0.0004 -0.0003 -0.0006 -0.0002 -0.0002  
AT. 58 C X -0.0002 0.0001 0.0001 -0.0002 0.0000 -0.0000  
Y 0.0001 -0.0000 -0.0000 0.0001 0.0001 -0.0001  
Z 0.0006 -0.0004 -0.0003 0.0006 0.0002 -0.0002  
AT. 59 C X -0.0002 -0.0001 0.0001 0.0002 0.0000 -0.0000  
Y -0.0001 -0.0000 0.0000 0.0001 -0.0001 0.0001  
Z 0.0006 0.0004 -0.0003 -0.0006 0.0002 -0.0002  
AT. 60 C X 0.0002 -0.0001 0.0001 -0.0002 -0.0000 -0.0000  
Y -0.0001 0.0000 -0.0000 0.0001 -0.0001 -0.0001  
Z -0.0006 0.0004 -0.0003 0.0006 -0.0002 -0.0002  
AT. 61 H X -0.0026 -0.0021 -0.0016 -0.0029 -0.0004 -0.0003  
Y 0.0037 0.0033 0.0025 0.0042 0.0006 0.0004  
Z 0.0006 0.0005 0.0004 0.0006 -0.0000 -0.0000  
AT. 62 H X 0.0026 -0.0021 -0.0016 0.0029 0.0004 -0.0003  
Y 0.0037 -0.0033 -0.0025 0.0042 0.0006 -0.0004  
Z -0.0006 0.0005 0.0004 -0.0006 0.0000 -0.0000  
AT. 63 H X 0.0026 0.0021 -0.0016 -0.0029 0.0004 -0.0003  
Y -0.0037 -0.0033 0.0025 0.0042 -0.0006 0.0004  
Z -0.0006 -0.0005 0.0004 0.0006 0.0000 -0.0000  
AT. 64 H X -0.0026 0.0021 -0.0016 0.0029 -0.0004 -0.0003  
Y -0.0037 0.0033 -0.0025 0.0042 -0.0006 -0.0004  
Z 0.0006 -0.0005 0.0004 -0.0006 -0.0000 -0.0000

AT. 65 H X 0.0010 0.0013 0.0006 0.0014 0.0008 0.0009  
Y 0.0004 0.0007 0.0005 0.0005 0.0003 0.0003  
Z 0.0001 0.0001 0.0002 0.0000 -0.0000 -0.0000

AT. 66 H X -0.0010 0.0013 0.0006 -0.0014 -0.0008 0.0009  
Y 0.0004 -0.0007 -0.0005 0.0005 0.0003 -0.0003  
Z -0.0001 0.0001 0.0002 -0.0000 0.0000 -0.0000

AT. 67 H X -0.0010 -0.0013 0.0006 0.0014 -0.0008 0.0009  
Y -0.0004 -0.0007 0.0005 0.0005 -0.0003 0.0003  
Z -0.0001 -0.0001 0.0002 0.0000 0.0000 -0.0000

AT. 68 H X 0.0010 -0.0013 0.0006 -0.0014 0.0008 0.0009  
Y -0.0004 0.0007 -0.0005 0.0005 -0.0003 -0.0003  
Z 0.0001 -0.0001 0.0002 -0.0000 -0.0000 -0.0000

AT. 69 H X -0.0010 -0.0008 -0.0006 -0.0012 -0.0004 -0.0003  
Y -0.0052 -0.0039 -0.0027 -0.0059 -0.0021 -0.0017  
Z 0.0060 0.0045 0.0031 0.0069 0.0024 0.0019

AT. 70 H X 0.0010 -0.0008 -0.0006 0.0012 0.0004 -0.0003  
Y -0.0052 0.0039 0.0027 -0.0059 -0.0021 0.0017  
Z -0.0060 0.0045 0.0031 -0.0069 -0.0024 0.0019

AT. 71 H X 0.0010 0.0008 -0.0006 -0.0012 0.0004 -0.0003  
Y 0.0052 0.0039 -0.0027 -0.0059 0.0021 -0.0017  
Z -0.0060 -0.0045 0.0031 0.0069 -0.0024 0.0019

AT. 72 H X -0.0010 0.0008 -0.0006 0.0012 -0.0004 -0.0003  
Y 0.0052 -0.0039 0.0027 -0.0059 0.0021 0.0017  
Z 0.0060 -0.0045 0.0031 -0.0069 0.0024 0.0019

AT. 73 C X -0.0000 -0.0000 -0.0000 -0.0000 -0.0000 -0.0000  
Y -0.0000 -0.0000 -0.0000 -0.0000 -0.0000 -0.0000  
Z 0.0000 0.0000 0.0000 0.0000 -0.0000 -0.0000

AT. 74 C X 0.0000 -0.0000 -0.0000 0.0000 0.0000 -0.0000  
Y -0.0000 0.0000 0.0000 -0.0000 -0.0000 0.0000  
Z -0.0000 0.0000 0.0000 -0.0000 0.0000 -0.0000

AT. 75 C X 0.0000 0.0000 -0.0000 -0.0000 0.0000 -0.0000  
Y 0.0000 0.0000 -0.0000 -0.0000 0.0000 -0.0000

Z -0.0000 -0.0000 0.0000 0.0000 0.0000 -0.0000  
AT. 76 C X -0.0000 0.0000 -0.0000 0.0000 -0.0000 -0.0000  
Y 0.0000 -0.0000 0.0000 -0.0000 0.0000 0.0000  
Z 0.0000 -0.0000 0.0000 -0.0000 -0.0000 -0.0000  
AT. 77 C X -0.0000 -0.0000 -0.0000 -0.0000 -0.0003 -0.0003  
Y 0.0000 0.0000 0.0000 0.0000 0.0002 0.0002  
Z -0.0000 0.0000 -0.0000 0.0000 -0.0001 -0.0001  
AT. 78 C X 0.0000 -0.0000 -0.0000 0.0000 0.0003 -0.0003  
Y 0.0000 -0.0000 -0.0000 0.0000 0.0002 -0.0002  
Z 0.0000 0.0000 -0.0000 -0.0000 0.0001 -0.0001  
AT. 79 C X 0.0000 0.0000 -0.0000 -0.0000 0.0003 -0.0003  
Y -0.0000 -0.0000 0.0000 0.0000 -0.0002 0.0002  
Z 0.0000 -0.0000 -0.0000 0.0000 0.0001 -0.0001  
AT. 80 C X -0.0000 0.0000 -0.0000 0.0000 -0.0003 -0.0003  
Y -0.0000 0.0000 -0.0000 0.0000 -0.0002 -0.0002  
Z -0.0000 -0.0000 -0.0000 -0.0000 -0.0001 -0.0001  
AT. 81 H X 0.0004 0.0002 0.0003 0.0001 0.0034 0.0034  
Y -0.0004 -0.0002 -0.0003 -0.0001 -0.0031 -0.0031  
Z -0.0000 -0.0000 -0.0000 0.0000 -0.0003 -0.0003  
AT. 82 H X -0.0004 0.0002 0.0003 -0.0001 -0.0034 0.0034  
Y -0.0004 0.0002 0.0003 -0.0001 -0.0031 0.0031  
Z 0.0000 -0.0000 -0.0000 -0.0000 0.0003 -0.0003  
AT. 83 H X -0.0004 -0.0002 0.0003 0.0001 -0.0034 0.0034  
Y 0.0004 0.0002 -0.0003 -0.0001 0.0031 -0.0031  
Z 0.0000 0.0000 -0.0000 0.0000 0.0003 -0.0003  
AT. 84 H X 0.0004 -0.0002 0.0003 -0.0001 0.0034 0.0034  
Y 0.0004 -0.0002 0.0003 -0.0001 0.0031 0.0031  
Z -0.0000 0.0000 -0.0000 -0.0000 -0.0003 -0.0003  
AT. 85 H X 0.0001 0.0000 0.0000 0.0000 0.0003 0.0003  
Y 0.0002 0.0000 0.0001 0.0000 0.0012 0.0012  
Z 0.0002 0.0000 0.0001 0.0000 0.0015 0.0015  
AT. 86 H X -0.0001 0.0000 0.0000 -0.0000 -0.0003 0.0003

Y 0.0002 -0.0000 -0.0001 0.0000 0.0012 -0.0012  
Z -0.0002 0.0000 0.0001 -0.0000 -0.0015 0.0015  
AT. 87 H X -0.0001 -0.0000 0.0000 0.0000 -0.0003 0.0003  
Y -0.0002 -0.0000 0.0001 0.0000 -0.0012 0.0012  
Z -0.0002 -0.0000 0.0001 0.0000 -0.0015 0.0015  
AT. 88 H X 0.0001 -0.0000 0.0000 -0.0000 0.0003 0.0003  
Y -0.0002 0.0000 -0.0001 0.0000 -0.0012 -0.0012  
Z 0.0002 -0.0000 0.0001 -0.0000 0.0015 0.0015  
AT. 89 C X 0.0000 -0.0000 -0.0000 -0.0000 -0.0000 -0.0000  
Y 0.0000 0.0000 0.0000 0.0000 -0.0000 -0.0000  
Z -0.0000 -0.0000 -0.0000 -0.0000 0.0000 0.0000  
AT. 90 C X -0.0000 -0.0000 -0.0000 0.0000 0.0000 -0.0000  
Y 0.0000 -0.0000 -0.0000 0.0000 -0.0000 0.0000  
Z 0.0000 -0.0000 -0.0000 0.0000 -0.0000 0.0000  
AT. 91 C X -0.0000 0.0000 -0.0000 -0.0000 0.0000 -0.0000  
Y -0.0000 -0.0000 0.0000 0.0000 0.0000 -0.0000  
Z 0.0000 0.0000 -0.0000 -0.0000 -0.0000 0.0000  
AT. 92 C X 0.0000 0.0000 -0.0000 0.0000 -0.0000 -0.0000  
Y -0.0000 0.0000 -0.0000 0.0000 0.0000 0.0000  
Z -0.0000 0.0000 -0.0000 0.0000 0.0000 0.0000  
AT. 93 C X 0.0000 -0.0000 -0.0000 -0.0000 0.0002 0.0002  
Y 0.0000 -0.0000 0.0000 0.0000 0.0001 0.0001  
Z 0.0001 -0.0001 -0.0001 -0.0001 0.0004 0.0004  
AT. 94 C X -0.0000 -0.0000 -0.0000 0.0000 -0.0002 0.0002  
Y 0.0000 0.0000 -0.0000 0.0000 0.0001 -0.0001  
Z -0.0001 -0.0001 -0.0001 0.0001 -0.0004 0.0004  
AT. 95 C X -0.0000 0.0000 -0.0000 -0.0000 -0.0002 0.0002  
Y -0.0000 0.0000 0.0000 0.0000 -0.0001 0.0001  
Z -0.0001 0.0001 -0.0001 -0.0001 -0.0004 0.0004  
AT. 96 C X 0.0000 0.0000 -0.0000 0.0000 0.0002 0.0002  
Y -0.0000 -0.0000 -0.0000 0.0000 -0.0001 -0.0001  
Z 0.0001 0.0001 -0.0001 0.0001 0.0004 0.0004

AT. 97 H X 0.0001 -0.0004 -0.0005 -0.0009 0.0015 0.0015  
Y 0.0001 -0.0002 -0.0003 -0.0005 0.0010 0.0010  
Z -0.0000 0.0001 0.0001 0.0002 -0.0005 -0.0005

AT. 98 H X -0.0001 -0.0004 -0.0005 0.0009 -0.0015 0.0015  
Y 0.0001 0.0002 0.0003 -0.0005 0.0010 -0.0010  
Z 0.0000 0.0001 0.0001 -0.0002 0.0005 -0.0005

AT. 99 H X -0.0001 0.0004 -0.0005 -0.0009 -0.0015 0.0015  
Y -0.0001 0.0002 -0.0003 -0.0005 -0.0010 0.0010  
Z 0.0000 -0.0001 0.0001 0.0002 0.0005 -0.0005

AT. 100 H X 0.0001 0.0004 -0.0005 0.0009 0.0015 0.0015  
Y -0.0001 -0.0002 0.0003 -0.0005 -0.0010 -0.0010  
Z -0.0000 -0.0001 0.0001 -0.0002 -0.0005 -0.0005

AT. 101 H X -0.0002 0.0004 0.0004 0.0009 -0.0024 -0.0023  
Y 0.0002 -0.0004 -0.0003 -0.0009 0.0024 0.0024  
Z 0.0000 -0.0001 -0.0001 -0.0002 0.0003 0.0003

AT. 102 H X 0.0002 0.0004 0.0004 -0.0009 0.0024 -0.0023  
Y 0.0002 0.0004 0.0003 -0.0009 0.0024 -0.0024  
Z -0.0000 -0.0001 -0.0001 0.0002 -0.0003 0.0003

AT. 103 H X 0.0002 -0.0004 0.0004 0.0009 0.0024 -0.0023  
Y -0.0002 0.0004 -0.0003 -0.0009 -0.0024 0.0024  
Z -0.0000 0.0001 -0.0001 -0.0002 -0.0003 0.0003

AT. 104 H X -0.0002 -0.0004 0.0004 -0.0009 -0.0024 -0.0023  
Y -0.0002 -0.0004 0.0003 -0.0009 -0.0024 -0.0024  
Z 0.0000 0.0001 -0.0001 0.0002 0.0003 0.0003

AT. 105 H X -0.0002 0.0003 0.0002 0.0006 -0.0018 -0.0017  
Y -0.0005 0.0007 0.0005 0.0012 -0.0040 -0.0038  
Z -0.0006 0.0008 0.0006 0.0016 -0.0052 -0.0049

AT. 106 H X 0.0002 0.0003 0.0002 -0.0006 0.0018 -0.0017  
Y -0.0005 -0.0007 -0.0005 0.0012 -0.0040 0.0038  
Z 0.0006 0.0008 0.0006 -0.0016 0.0052 -0.0049

AT. 107 H X 0.0002 -0.0003 0.0002 0.0006 0.0018 -0.0017  
Y 0.0005 -0.0007 0.0005 0.0012 0.0040 -0.0038

Z 0.0006 -0.0008 0.0006 0.0016 0.0052 -0.0049  
AT. 108 H X -0.0002 -0.0003 0.0002 -0.0006 -0.0018 -0.0017  
Y 0.0005 0.0007 -0.0005 0.0012 0.0040 0.0038  
Z -0.0006 -0.0008 0.0006 -0.0016 -0.0052 -0.0049  
AT. 109 C X -0.0068 -0.0068 -0.0068 -0.0068 -0.0004 -0.0004  
Y -0.0023 -0.0023 -0.0024 -0.0024 -0.0002 -0.0001  
Z -0.0007 -0.0007 -0.0007 -0.0006 -0.0001 -0.0001  
AT. 110 C X 0.0068 -0.0068 -0.0068 0.0068 0.0004 -0.0004  
Y -0.0023 0.0023 0.0024 -0.0024 -0.0002 0.0001  
Z 0.0007 -0.0007 -0.0007 0.0006 0.0001 -0.0001  
AT. 111 C X 0.0068 0.0068 -0.0068 -0.0068 0.0004 -0.0004  
Y 0.0023 0.0023 -0.0024 -0.0024 0.0002 -0.0001  
Z 0.0007 0.0007 -0.0007 -0.0006 0.0001 -0.0001  
AT. 112 C X -0.0068 0.0068 -0.0068 0.0068 -0.0004 -0.0004  
Y 0.0023 -0.0023 0.0024 -0.0024 0.0002 0.0001  
Z -0.0007 0.0007 -0.0007 0.0006 -0.0001 -0.0001  
AT. 113 H X 0.0776 0.0777 0.0779 0.0775 0.0044 0.0041  
Y 0.0457 0.0458 0.0459 0.0457 0.0027 0.0025  
Z -0.0106 -0.0106 -0.0107 -0.0106 -0.0003 -0.0003  
AT. 114 H X -0.0776 0.0777 0.0779 -0.0775 -0.0044 0.0041  
Y 0.0457 -0.0458 -0.0459 0.0457 0.0027 -0.0025  
Z 0.0106 -0.0106 -0.0107 0.0106 0.0003 -0.0003  
AT. 115 H X -0.0776 -0.0777 0.0779 0.0775 -0.0044 0.0041  
Y -0.0457 -0.0458 0.0459 0.0457 -0.0027 0.0025  
Z 0.0106 0.0106 -0.0107 -0.0106 0.0003 -0.0003  
AT. 116 H X 0.0776 -0.0777 0.0779 -0.0775 0.0044 0.0041  
Y -0.0457 0.0458 -0.0459 0.0457 -0.0027 -0.0025  
Z -0.0106 0.0106 -0.0107 0.0106 -0.0003 -0.0003  
AT. 117 H X 0.0017 0.0017 0.0017 0.0017 0.0002 0.0002  
Y -0.0168 -0.0169 -0.0169 -0.0167 -0.0009 -0.0008  
Z 0.0188 0.0189 0.0189 0.0187 0.0011 0.0010  
AT. 118 H X -0.0017 0.0017 0.0017 -0.0017 -0.0002 0.0002

Y -0.0168 0.0169 0.0169 -0.0167 -0.0009 0.0008  
Z -0.0188 0.0189 0.0189 -0.0187 -0.0011 0.0010  
AT. 119 H X -0.0017 -0.0017 0.0017 0.0017 -0.0002 0.0002  
Y 0.0168 0.0169 -0.0169 -0.0167 0.0009 -0.0008  
Z -0.0188 -0.0189 0.0189 0.0187 -0.0011 0.0010  
AT. 120 H X 0.0017 -0.0017 0.0017 -0.0017 0.0002 0.0002  
Y 0.0168 -0.0169 0.0169 -0.0167 0.0009 0.0008  
Z 0.0188 -0.0189 0.0189 -0.0187 0.0011 0.0010  
AT. 121 C X 0.0004 0.0004 0.0004 0.0003 -0.0057 -0.0057  
Y 0.0002 0.0001 0.0001 0.0001 -0.0025 -0.0025  
Z -0.0002 -0.0002 -0.0002 -0.0001 0.0034 0.0034  
AT. 122 C X -0.0004 0.0004 0.0004 -0.0003 0.0057 -0.0057  
Y 0.0002 -0.0001 -0.0001 0.0001 -0.0025 0.0025  
Z 0.0002 -0.0002 -0.0002 0.0001 -0.0034 0.0034  
AT. 123 C X -0.0004 -0.0004 0.0004 0.0003 0.0057 -0.0057  
Y -0.0002 -0.0001 0.0001 0.0001 0.0025 -0.0025  
Z 0.0002 0.0002 -0.0002 -0.0001 -0.0034 0.0034  
AT. 124 C X 0.0004 -0.0004 0.0004 -0.0003 -0.0057 -0.0057  
Y -0.0002 0.0001 -0.0001 0.0001 0.0025 0.0025  
Z -0.0002 0.0002 -0.0002 0.0001 0.0034 0.0034  
AT. 125 H X 0.0006 0.0005 0.0005 0.0004 -0.0073 -0.0073  
Y 0.0013 0.0012 0.0011 0.0009 -0.0164 -0.0165  
Z 0.0016 0.0014 0.0014 0.0010 -0.0222 -0.0222  
AT. 126 H X -0.0006 0.0005 0.0005 -0.0004 0.0073 -0.0073  
Y 0.0013 -0.0012 -0.0011 0.0009 -0.0164 0.0165  
Z -0.0016 0.0014 0.0014 -0.0010 0.0222 -0.0222  
AT. 127 H X -0.0006 -0.0005 0.0005 0.0004 0.0073 -0.0073  
Y -0.0013 -0.0012 0.0011 0.0009 0.0164 -0.0165  
Z -0.0016 -0.0014 0.0014 0.0010 0.0222 -0.0222  
AT. 128 H X 0.0006 -0.0005 0.0005 -0.0004 -0.0073 -0.0073  
Y -0.0013 0.0012 -0.0011 0.0009 0.0164 0.0165  
Z 0.0016 -0.0014 0.0014 -0.0010 -0.0222 -0.0222



AT. 129 H X -0.0053 -0.0047 -0.0046 -0.0037 0.0735 0.0737  
Y -0.0032 -0.0028 -0.0027 -0.0022 0.0467 0.0468  
Z 0.0010 0.0008 0.0008 0.0006 -0.0180 -0.0180

AT. 130 H X 0.0053 -0.0047 -0.0046 0.0037 -0.0735 0.0737  
Y -0.0032 0.0028 0.0027 -0.0022 0.0467 -0.0468  
Z -0.0010 0.0008 0.0008 -0.0006 0.0180 -0.0180

AT. 131 H X 0.0053 0.0047 -0.0046 -0.0037 -0.0735 0.0737  
Y 0.0032 0.0028 -0.0027 -0.0022 -0.0467 0.0468  
Z -0.0010 -0.0008 0.0008 0.0006 0.0180 -0.0180

AT. 132 H X -0.0053 0.0047 -0.0046 0.0037 0.0735 0.0737  
Y 0.0032 -0.0028 0.0027 -0.0022 -0.0467 -0.0468  
Z 0.0010 -0.0008 0.0008 -0.0006 -0.0180 -0.0180

AT. 133 C X -0.0000 -0.0000 -0.0000 -0.0000 -0.0000 -0.0000  
Y 0.0001 0.0001 0.0001 0.0002 0.0002 0.0002  
Z -0.0000 -0.0000 -0.0000 -0.0000 -0.0000 -0.0000

AT. 134 C X 0.0000 -0.0000 -0.0000 0.0000 0.0000 -0.0000  
Y 0.0001 -0.0001 -0.0001 0.0002 0.0002 -0.0002  
Z 0.0000 -0.0000 -0.0000 0.0000 0.0000 -0.0000

AT. 135 C X 0.0000 0.0000 -0.0000 -0.0000 0.0000 -0.0000  
Y -0.0001 -0.0001 0.0001 0.0002 -0.0002 0.0002  
Z 0.0000 0.0000 -0.0000 -0.0000 0.0000 -0.0000

AT. 136 C X -0.0000 0.0000 -0.0000 0.0000 -0.0000 -0.0000  
Y -0.0001 0.0001 -0.0001 0.0002 -0.0002 -0.0002  
Z -0.0000 0.0000 -0.0000 0.0000 -0.0000 -0.0000

AT. 137 C X 0.0000 0.0000 0.0000 0.0000 -0.0002 -0.0002  
Y -0.0000 -0.0000 -0.0000 -0.0000 0.0000 0.0000  
Z 0.0000 0.0000 0.0000 0.0000 -0.0001 -0.0001

AT. 138 C X -0.0000 0.0000 0.0000 -0.0000 0.0002 -0.0002  
Y -0.0000 0.0000 0.0000 -0.0000 0.0000 -0.0000  
Z -0.0000 0.0000 0.0000 -0.0000 0.0001 -0.0001

AT. 139 C X -0.0000 -0.0000 0.0000 0.0000 0.0002 -0.0002  
Y 0.0000 0.0000 -0.0000 -0.0000 -0.0000 0.0000

Z -0.0000 -0.0000 0.0000 0.0000 0.0001 -0.0001  
AT. 140 C X 0.0000 -0.0000 0.0000 -0.0000 -0.0002 -0.0002  
Y 0.0000 -0.0000 0.0000 -0.0000 -0.0000 -0.0000  
Z 0.0000 -0.0000 0.0000 -0.0000 -0.0001 -0.0001  
AT. 141 H X -0.0001 -0.0001 -0.0002 -0.0002 0.0018 0.0018  
Y 0.0000 0.0000 0.0001 0.0001 -0.0009 -0.0009  
Z -0.0001 -0.0001 -0.0001 -0.0001 0.0015 0.0016  
AT. 142 H X 0.0001 -0.0001 -0.0002 0.0002 -0.0018 0.0018  
Y 0.0000 -0.0000 -0.0001 0.0001 -0.0009 0.0009  
Z 0.0001 -0.0001 -0.0001 0.0001 -0.0015 0.0016  
AT. 143 H X 0.0001 0.0001 -0.0002 -0.0002 -0.0018 0.0018  
Y -0.0000 -0.0000 0.0001 0.0001 0.0009 -0.0009  
Z 0.0001 0.0001 -0.0001 -0.0001 -0.0015 0.0016  
AT. 144 H X -0.0001 0.0001 -0.0002 0.0002 0.0018 0.0018  
Y -0.0000 0.0000 -0.0001 0.0001 0.0009 0.0009  
Z -0.0001 0.0001 -0.0001 0.0001 0.0015 0.0016  
AT. 145 H X -0.0000 -0.0000 -0.0000 -0.0000 0.0002 0.0002  
Y -0.0001 -0.0001 -0.0001 -0.0001 0.0009 0.0009  
Z -0.0000 -0.0000 -0.0000 -0.0000 -0.0003 -0.0003  
AT. 146 H X 0.0000 -0.0000 -0.0000 0.0000 -0.0002 0.0002  
Y -0.0001 0.0001 0.0001 -0.0001 0.0009 -0.0009  
Z 0.0000 -0.0000 -0.0000 0.0000 0.0003 -0.0003  
AT. 147 H X 0.0000 0.0000 -0.0000 -0.0000 -0.0002 0.0002  
Y 0.0001 0.0001 -0.0001 -0.0001 -0.0009 0.0009  
Z 0.0000 0.0000 -0.0000 -0.0000 0.0003 -0.0003  
AT. 148 H X -0.0000 0.0000 -0.0000 0.0000 0.0002 0.0002  
Y 0.0001 -0.0001 0.0001 -0.0001 -0.0009 -0.0009  
Z -0.0000 0.0000 -0.0000 0.0000 -0.0003 -0.0003  
AT. 149 O X 0.0000 0.0000 0.0000 0.0000 0.0000 0.0000  
Y 0.0000 0.0000 0.0000 0.0000 0.0000 0.0000  
Z -0.0000 0.0000 0.0000 -0.0000 -0.0000 0.0000  
AT. 150 O X -0.0000 0.0000 0.0000 -0.0000 -0.0000 0.0000

Y 0.0000 -0.0000 -0.0000 0.0000 0.0000 -0.0000  
Z 0.0000 0.0000 0.0000 0.0000 0.0000 0.0000  
AT. 151 O X -0.0000 -0.0000 0.0000 0.0000 -0.0000 0.0000  
Y -0.0000 -0.0000 0.0000 0.0000 -0.0000 0.0000  
Z 0.0000 -0.0000 0.0000 -0.0000 0.0000 0.0000  
AT. 152 O X 0.0000 -0.0000 0.0000 -0.0000 0.0000 0.0000  
Y -0.0000 0.0000 -0.0000 0.0000 -0.0000 -0.0000  
Z -0.0000 -0.0000 0.0000 0.0000 -0.0000 0.0000  
AT. 153 H X -0.0000 -0.0000 -0.0000 -0.0000 0.0000 -0.0000  
Y 0.0000 0.0000 0.0000 -0.0000 -0.0000 -0.0000  
Z 0.0000 -0.0001 -0.0001 0.0000 0.0000 -0.0000  
AT. 154 H X 0.0000 -0.0000 -0.0000 0.0000 -0.0000 -0.0000  
Y 0.0000 -0.0000 -0.0000 -0.0000 -0.0000 0.0000  
Z -0.0000 -0.0001 -0.0001 -0.0000 -0.0000 -0.0000  
AT. 155 H X 0.0000 0.0000 -0.0000 -0.0000 -0.0000 -0.0000  
Y -0.0000 -0.0000 0.0000 -0.0000 0.0000 -0.0000  
Z -0.0000 0.0001 -0.0001 0.0000 -0.0000 -0.0000  
AT. 156 H X -0.0000 0.0000 -0.0000 0.0000 0.0000 -0.0000  
Y -0.0000 0.0000 -0.0000 -0.0000 0.0000 0.0000  
Z 0.0000 0.0001 -0.0001 -0.0000 0.0000 -0.0000  
AT. 157 O X 0.0000 0.0000 0.0000 0.0000 0.0000 0.0000  
Y -0.0000 -0.0000 -0.0000 -0.0000 -0.0000 -0.0000  
Z 0.0000 -0.0000 -0.0000 0.0000 -0.0000 -0.0000  
AT. 158 O X -0.0000 0.0000 0.0000 -0.0000 -0.0000 0.0000  
Y -0.0000 0.0000 0.0000 -0.0000 -0.0000 0.0000  
Z -0.0000 -0.0000 -0.0000 -0.0000 0.0000 -0.0000  
AT. 159 O X -0.0000 -0.0000 0.0000 0.0000 -0.0000 0.0000  
Y 0.0000 0.0000 -0.0000 -0.0000 0.0000 -0.0000  
Z -0.0000 0.0000 -0.0000 0.0000 0.0000 -0.0000  
AT. 160 O X 0.0000 -0.0000 0.0000 -0.0000 0.0000 0.0000  
Y 0.0000 -0.0000 0.0000 -0.0000 0.0000 0.0000  
Z 0.0000 0.0000 -0.0000 -0.0000 -0.0000 -0.0000

AT.161 O X -0.0000 -0.0000 -0.0000 -0.0000 -0.0000 -0.0000  
Y 0.0001 0.0000 0.0001 0.0001 0.0001 0.0001  
Z 0.0000 -0.0000 -0.0000 0.0000 -0.0000 -0.0000

AT.162 O X 0.0000 -0.0000 -0.0000 0.0000 0.0000 -0.0000  
Y 0.0001 -0.0000 -0.0001 0.0001 0.0001 -0.0001  
Z -0.0000 -0.0000 -0.0000 -0.0000 0.0000 -0.0000

AT.163 O X 0.0000 0.0000 -0.0000 -0.0000 0.0000 -0.0000  
Y -0.0001 -0.0000 0.0001 0.0001 -0.0001 0.0001  
Z -0.0000 0.0000 -0.0000 0.0000 0.0000 -0.0000

AT.164 O X -0.0000 0.0000 -0.0000 0.0000 -0.0000 -0.0000  
Y -0.0001 0.0000 -0.0001 0.0001 -0.0001 -0.0001  
Z 0.0000 0.0000 -0.0000 -0.0000 -0.0000 -0.0000

AT.165 H X 0.0003 0.0005 0.0005 0.0003 0.0004 0.0004  
Y -0.0009 -0.0006 -0.0007 -0.0009 -0.0009 -0.0009  
Z -0.0001 0.0003 0.0003 -0.0001 0.0000 0.0000

AT.166 H X -0.0003 0.0005 0.0005 -0.0003 -0.0004 0.0004  
Y -0.0009 0.0006 0.0007 -0.0009 -0.0009 0.0009  
Z 0.0001 0.0003 0.0003 0.0001 -0.0000 0.0000

AT.167 H X -0.0003 -0.0005 0.0005 0.0003 -0.0004 0.0004  
Y 0.0009 0.0006 -0.0007 -0.0009 0.0009 -0.0009  
Z 0.0001 -0.0003 0.0003 -0.0001 -0.0000 0.0000

AT.168 H X 0.0003 -0.0005 0.0005 -0.0003 0.0004 0.0004  
Y 0.0009 -0.0006 0.0007 -0.0009 0.0009 0.0009  
Z -0.0001 -0.0003 0.0003 0.0001 0.0000 0.0000

AT.169 O X -0.0000 -0.0000 -0.0000 -0.0000 0.0000 0.0000  
Y -0.0000 -0.0001 -0.0000 -0.0000 0.0000 -0.0000  
Z -0.0000 -0.0000 -0.0000 -0.0000 0.0000 -0.0000

AT.170 O X 0.0000 -0.0000 -0.0000 0.0000 -0.0000 0.0000  
Y -0.0000 0.0001 0.0000 -0.0000 0.0000 0.0000  
Z 0.0000 -0.0000 -0.0000 0.0000 -0.0000 -0.0000

AT.171 O X 0.0000 0.0000 -0.0000 -0.0000 -0.0000 0.0000  
Y 0.0000 0.0001 -0.0000 -0.0000 -0.0000 -0.0000

Z 0.0000 0.0000 -0.0000 -0.0000 -0.0000 -0.0000  
AT.172 O X -0.0000 0.0000 -0.0000 0.0000 0.0000 0.0000  
Y 0.0000 -0.0001 0.0000 -0.0000 -0.0000 0.0000  
Z -0.0000 0.0000 -0.0000 0.0000 0.0000 -0.0000  
AT.173 H X 0.0001 0.0002 0.0001 0.0001 -0.0001 0.0000  
Y 0.0003 0.0009 0.0005 0.0003 -0.0006 0.0001  
Z 0.0000 0.0001 0.0001 0.0000 -0.0001 0.0000  
AT.174 H X -0.0001 0.0002 0.0001 -0.0001 0.0001 0.0000  
Y 0.0003 -0.0009 -0.0005 0.0003 -0.0006 -0.0001  
Z -0.0000 0.0001 0.0001 -0.0000 0.0001 0.0000  
AT.175 H X -0.0001 -0.0002 0.0001 0.0001 0.0001 0.0000  
Y -0.0003 -0.0009 0.0005 0.0003 0.0006 0.0001  
Z -0.0000 -0.0001 0.0001 0.0000 0.0001 0.0000  
AT.176 H X 0.0001 -0.0002 0.0001 -0.0001 -0.0001 0.0000  
Y -0.0003 0.0009 -0.0005 0.0003 0.0006 -0.0001  
Z 0.0000 -0.0001 0.0001 -0.0000 -0.0001 0.0000

FREQ(CM\*\*-1) 3108.76 3108.86 3112.60 3112.62 3112.66 3112.79

AT. 1 I X 0.0000 0.0000 -0.0000 0.0000 0.0000 -0.0000  
Y -0.0000 0.0000 -0.0000 -0.0000 -0.0000 -0.0000  
Z 0.0000 0.0000 -0.0000 0.0000 0.0000 -0.0000  
AT. 2 I X 0.0000 -0.0000 -0.0000 -0.0000 -0.0000 -0.0000  
Y 0.0000 0.0000 0.0000 -0.0000 -0.0000 0.0000  
Z 0.0000 -0.0000 -0.0000 -0.0000 -0.0000 -0.0000  
AT. 3 I X -0.0000 0.0000 -0.0000 0.0000 -0.0000 0.0000  
Y 0.0000 0.0000 -0.0000 -0.0000 0.0000 0.0000  
Z -0.0000 0.0000 -0.0000 0.0000 -0.0000 0.0000  
AT. 4 I X -0.0000 -0.0000 -0.0000 -0.0000 0.0000 0.0000  
Y -0.0000 0.0000 0.0000 -0.0000 0.0000 -0.0000  
Z -0.0000 -0.0000 -0.0000 -0.0000 0.0000 0.0000  
AT. 5 I X 0.0000 -0.0000 -0.0000 -0.0000 -0.0000 -0.0000

Y 0.0000 0.0000 0.0000 -0.0000 0.0000 -0.0000  
Z 0.0000 -0.0000 0.0000 -0.0000 0.0000 -0.0000  
AT. 6 I X 0.0000 0.0000 -0.0000 0.0000 0.0000 -0.0000  
Y -0.0000 0.0000 -0.0000 -0.0000 0.0000 0.0000  
Z 0.0000 0.0000 0.0000 0.0000 -0.0000 -0.0000  
AT. 7 I X -0.0000 -0.0000 -0.0000 -0.0000 0.0000 0.0000  
Y -0.0000 0.0000 0.0000 -0.0000 -0.0000 0.0000  
Z -0.0000 -0.0000 0.0000 -0.0000 -0.0000 0.0000  
AT. 8 I X -0.0000 0.0000 -0.0000 0.0000 -0.0000 0.0000  
Y 0.0000 0.0000 -0.0000 -0.0000 -0.0000 -0.0000  
Z -0.0000 0.0000 0.0000 0.0000 0.0000 0.0000  
AT. 9 N X -0.0000 -0.0000 0.0001 0.0001 0.0001 0.0001  
Y -0.0000 -0.0000 0.0001 0.0001 0.0001 0.0001  
Z -0.0000 -0.0000 0.0001 0.0001 0.0001 0.0001  
AT. 10 N X -0.0000 0.0000 0.0001 -0.0001 -0.0001 0.0001  
Y 0.0000 -0.0000 -0.0001 0.0001 0.0001 -0.0001  
Z -0.0000 0.0000 0.0001 -0.0001 -0.0001 0.0001  
AT. 11 N X 0.0000 -0.0000 0.0001 0.0001 -0.0001 -0.0001  
Y 0.0000 -0.0000 0.0001 0.0001 -0.0001 -0.0001  
Z 0.0000 -0.0000 0.0001 0.0001 -0.0001 -0.0001  
AT. 12 N X 0.0000 0.0000 0.0001 -0.0001 0.0001 -0.0001  
Y -0.0000 -0.0000 -0.0001 0.0001 -0.0001 0.0001  
Z 0.0000 0.0000 0.0001 -0.0001 0.0001 -0.0001  
AT. 13 N X 0.0001 0.0001 -0.0000 -0.0000 -0.0000 -0.0000  
Y -0.0001 -0.0001 0.0000 0.0000 0.0000 0.0000  
Z 0.0000 0.0000 0.0000 0.0000 0.0000 0.0000  
AT. 14 N X 0.0001 -0.0001 -0.0000 0.0000 0.0000 -0.0000  
Y 0.0001 -0.0001 -0.0000 0.0000 0.0000 -0.0000  
Z 0.0000 -0.0000 0.0000 -0.0000 -0.0000 0.0000  
AT. 15 N X -0.0001 0.0001 -0.0000 -0.0000 0.0000 0.0000  
Y 0.0001 -0.0001 0.0000 0.0000 -0.0000 -0.0000  
Z -0.0000 0.0000 0.0000 0.0000 -0.0000 -0.0000

AT. 16 N X -0.0001 -0.0001 -0.0000 0.0000 -0.0000 0.0000  
Y -0.0001 -0.0001 -0.0000 0.0000 -0.0000 0.0000  
Z -0.0000 -0.0000 0.0000 -0.0000 0.0000 -0.0000

AT. 17 O X -0.0000 -0.0000 0.0000 0.0000 -0.0000 -0.0000  
Y -0.0000 -0.0000 0.0000 0.0000 0.0000 0.0000  
Z -0.0000 -0.0000 0.0000 0.0000 -0.0000 -0.0000

AT. 18 O X -0.0000 0.0000 0.0000 -0.0000 0.0000 -0.0000  
Y 0.0000 -0.0000 -0.0000 0.0000 0.0000 -0.0000  
Z -0.0000 0.0000 0.0000 -0.0000 0.0000 -0.0000

AT. 19 O X 0.0000 -0.0000 0.0000 0.0000 0.0000 0.0000  
Y 0.0000 -0.0000 0.0000 0.0000 -0.0000 -0.0000  
Z 0.0000 -0.0000 0.0000 0.0000 0.0000 0.0000

AT. 20 O X 0.0000 0.0000 0.0000 -0.0000 -0.0000 0.0000  
Y -0.0000 -0.0000 -0.0000 0.0000 -0.0000 0.0000  
Z 0.0000 0.0000 0.0000 -0.0000 -0.0000 0.0000

AT. 21 O X -0.0000 -0.0000 0.0000 -0.0000 -0.0000 -0.0000  
Y -0.0000 -0.0000 0.0000 0.0000 0.0000 0.0000  
Z 0.0000 0.0000 -0.0000 -0.0000 -0.0000 -0.0000

AT. 22 O X -0.0000 0.0000 0.0000 0.0000 0.0000 -0.0000  
Y 0.0000 -0.0000 -0.0000 0.0000 0.0000 -0.0000  
Z 0.0000 -0.0000 -0.0000 0.0000 0.0000 -0.0000

AT. 23 O X 0.0000 -0.0000 0.0000 -0.0000 0.0000 0.0000  
Y 0.0000 -0.0000 0.0000 0.0000 -0.0000 -0.0000  
Z -0.0000 0.0000 -0.0000 -0.0000 0.0000 0.0000

AT. 24 O X 0.0000 0.0000 0.0000 0.0000 -0.0000 0.0000  
Y -0.0000 -0.0000 -0.0000 0.0000 -0.0000 0.0000  
Z -0.0000 -0.0000 -0.0000 0.0000 -0.0000 0.0000

AT. 25 C X -0.0000 0.0000 -0.0002 -0.0002 -0.0002 -0.0002  
Y -0.0000 0.0000 0.0001 0.0001 0.0001 0.0001  
Z -0.0000 -0.0000 -0.0001 -0.0001 -0.0002 -0.0001

AT. 26 C X -0.0000 -0.0000 -0.0002 0.0002 0.0002 -0.0002  
Y 0.0000 0.0000 -0.0001 0.0001 0.0001 -0.0001

Z -0.0000 0.0000 -0.0001 0.0001 0.0002 -0.0001  
AT. 27 C X 0.0000 0.0000 -0.0002 -0.0002 0.0002 0.0002  
Y 0.0000 0.0000 0.0001 0.0001 -0.0001 -0.0001  
Z 0.0000 -0.0000 -0.0001 -0.0001 0.0002 0.0001  
AT. 28 C X 0.0000 -0.0000 -0.0002 0.0002 -0.0002 0.0002  
Y -0.0000 0.0000 -0.0001 0.0001 -0.0001 0.0001  
Z 0.0000 0.0000 -0.0001 0.0001 -0.0002 0.0001  
AT. 29 H X 0.0001 0.0000 0.0027 0.0026 0.0027 0.0026  
Y 0.0000 0.0000 0.0001 0.0001 0.0001 0.0001  
Z 0.0001 -0.0000 0.0017 0.0017 0.0017 0.0016  
AT. 30 H X 0.0001 -0.0000 0.0027 -0.0026 -0.0027 0.0026  
Y -0.0000 0.0000 -0.0001 0.0001 0.0001 -0.0001  
Z 0.0001 0.0000 0.0017 -0.0017 -0.0017 0.0016  
AT. 31 H X -0.0001 0.0000 0.0027 0.0026 -0.0027 -0.0026  
Y -0.0000 0.0000 0.0001 0.0001 -0.0001 -0.0001  
Z -0.0001 -0.0000 0.0017 0.0017 -0.0017 -0.0016  
AT. 32 H X -0.0001 -0.0000 0.0027 -0.0026 0.0027 -0.0026  
Y 0.0000 0.0000 -0.0001 0.0001 -0.0001 0.0001  
Z -0.0001 0.0000 0.0017 -0.0017 0.0017 -0.0016  
AT. 33 H X 0.0000 -0.0000 -0.0002 -0.0002 -0.0002 -0.0002  
Y -0.0000 -0.0000 -0.0011 -0.0011 -0.0010 -0.0010  
Z 0.0000 0.0000 -0.0003 -0.0003 -0.0003 -0.0003  
AT. 34 H X 0.0000 0.0000 -0.0002 0.0002 0.0002 -0.0002  
Y 0.0000 -0.0000 0.0011 -0.0011 -0.0010 0.0010  
Z 0.0000 -0.0000 -0.0003 0.0003 0.0003 -0.0003  
AT. 35 H X -0.0000 -0.0000 -0.0002 -0.0002 0.0002 0.0002  
Y 0.0000 -0.0000 -0.0011 -0.0011 0.0010 0.0010  
Z -0.0000 0.0000 -0.0003 -0.0003 0.0003 0.0003  
AT. 36 H X -0.0000 0.0000 -0.0002 0.0002 -0.0002 0.0002  
Y -0.0000 -0.0000 0.0011 -0.0011 0.0010 -0.0010  
Z -0.0000 -0.0000 -0.0003 0.0003 -0.0003 0.0003  
AT. 37 C X 0.0000 0.0000 -0.0000 -0.0000 -0.0000 -0.0000



Y 0.0000 0.0000 -0.0001 -0.0001 -0.0001 -0.0001  
Z 0.0000 0.0000 0.0000 0.0000 0.0001 0.0001  
AT. 38 C X 0.0000 -0.0000 -0.0000 0.0000 0.0000 -0.0000  
Y -0.0000 0.0000 0.0001 -0.0001 -0.0001 0.0001  
Z 0.0000 -0.0000 0.0000 -0.0000 -0.0001 0.0001  
AT. 39 C X -0.0000 0.0000 -0.0000 -0.0000 0.0000 0.0000  
Y -0.0000 0.0000 -0.0001 -0.0001 0.0001 0.0001  
Z -0.0000 0.0000 0.0000 0.0000 -0.0001 -0.0001  
AT. 40 C X -0.0000 -0.0000 -0.0000 0.0000 -0.0000 0.0000  
Y 0.0000 0.0000 0.0001 -0.0001 0.0001 -0.0001  
Z -0.0000 -0.0000 0.0000 -0.0000 0.0001 -0.0001  
AT. 41 C X 0.0000 0.0000 -0.0047 -0.0048 -0.0047 -0.0048  
Y -0.0000 0.0000 0.0034 0.0034 0.0034 0.0034  
Z -0.0000 -0.0000 0.0038 0.0038 0.0038 0.0038  
AT. 42 C X 0.0000 -0.0000 -0.0047 0.0048 0.0047 -0.0048  
Y 0.0000 0.0000 -0.0034 0.0034 0.0034 -0.0034  
Z -0.0000 0.0000 0.0038 -0.0038 -0.0038 0.0038  
AT. 43 C X -0.0000 0.0000 -0.0047 -0.0048 0.0047 0.0048  
Y 0.0000 0.0000 0.0034 0.0034 -0.0034 -0.0034  
Z 0.0000 -0.0000 0.0038 0.0038 -0.0038 -0.0038  
AT. 44 C X -0.0000 -0.0000 -0.0047 0.0048 -0.0047 0.0048  
Y -0.0000 0.0000 -0.0034 0.0034 -0.0034 0.0034  
Z 0.0000 0.0000 0.0038 -0.0038 0.0038 -0.0038  
AT. 45 H X 0.0000 0.0000 -0.0042 -0.0042 -0.0042 -0.0042  
Y -0.0001 -0.0001 0.0199 0.0200 0.0199 0.0200  
Z 0.0001 0.0001 -0.0223 -0.0224 -0.0222 -0.0224  
AT. 46 H X 0.0000 -0.0000 -0.0042 0.0042 0.0042 -0.0042  
Y 0.0001 -0.0001 -0.0199 0.0200 0.0199 -0.0200  
Z 0.0001 -0.0001 -0.0223 0.0224 0.0222 -0.0224  
AT. 47 H X -0.0000 0.0000 -0.0042 -0.0042 0.0042 0.0042  
Y 0.0001 -0.0001 0.0199 0.0200 -0.0199 -0.0200  
Z -0.0001 0.0001 -0.0223 -0.0224 0.0222 0.0224

AT. 48 H X -0.0000 -0.0000 -0.0042 0.0042 -0.0042 0.0042  
Y -0.0001 -0.0001 -0.0199 0.0200 -0.0199 0.0200  
Z -0.0001 -0.0001 -0.0223 0.0224 -0.0222 0.0224

AT. 49 H X -0.0001 -0.0001 0.0600 0.0604 0.0600 0.0604  
Y 0.0001 0.0001 -0.0605 -0.0609 -0.0605 -0.0609  
Z 0.0001 0.0000 -0.0223 -0.0225 -0.0223 -0.0225

AT. 50 H X -0.0001 0.0001 0.0600 -0.0604 -0.0600 0.0604  
Y -0.0001 0.0001 0.0605 -0.0609 -0.0605 0.0609  
Z 0.0001 -0.0000 -0.0223 0.0225 0.0223 -0.0225

AT. 51 H X 0.0001 -0.0001 0.0600 0.0604 -0.0600 -0.0604  
Y -0.0001 0.0001 -0.0605 -0.0609 0.0605 0.0609  
Z -0.0001 0.0000 -0.0223 -0.0225 0.0223 0.0225

AT. 52 H X 0.0001 0.0001 0.0600 -0.0604 0.0600 -0.0604  
Y 0.0001 0.0001 0.0605 -0.0609 0.0605 -0.0609  
Z -0.0001 -0.0000 -0.0223 0.0225 -0.0223 0.0225

AT. 53 C X 0.0000 0.0000 -0.0000 -0.0000 -0.0000 -0.0000  
Y -0.0000 -0.0000 0.0001 0.0001 0.0001 0.0001  
Z 0.0000 0.0000 0.0000 0.0000 0.0000 0.0000

AT. 54 C X 0.0000 -0.0000 -0.0000 0.0000 0.0000 -0.0000  
Y 0.0000 -0.0000 -0.0001 0.0001 0.0001 -0.0001  
Z 0.0000 -0.0000 0.0000 -0.0000 -0.0000 0.0000

AT. 55 C X -0.0000 0.0000 -0.0000 -0.0000 0.0000 0.0000  
Y 0.0000 -0.0000 0.0001 0.0001 -0.0001 -0.0001  
Z -0.0000 0.0000 0.0000 0.0000 -0.0000 -0.0000

AT. 56 C X -0.0000 -0.0000 -0.0000 0.0000 -0.0000 0.0000  
Y -0.0000 -0.0000 -0.0001 0.0001 -0.0001 0.0001  
Z -0.0000 -0.0000 0.0000 -0.0000 0.0000 -0.0000

AT. 57 C X 0.0000 0.0000 -0.0000 -0.0000 -0.0000 -0.0000  
Y -0.0001 -0.0001 -0.0001 -0.0001 -0.0001 -0.0001  
Z 0.0002 0.0001 0.0005 0.0005 0.0005 0.0005

AT. 58 C X 0.0000 -0.0000 -0.0000 0.0000 0.0000 -0.0000  
Y 0.0001 -0.0001 0.0001 -0.0001 -0.0001 0.0001

Z 0.0002 -0.0001 0.0005 -0.0005 -0.0005 0.0005  
AT. 59 C X -0.0000 0.0000 -0.0000 -0.0000 0.0000 0.0000  
Y 0.0001 -0.0001 -0.0001 -0.0001 0.0001 0.0001  
Z -0.0002 0.0001 0.0005 0.0005 -0.0005 -0.0005  
AT. 60 C X -0.0000 -0.0000 -0.0000 0.0000 -0.0000 0.0000  
Y -0.0001 -0.0001 0.0001 -0.0001 0.0001 -0.0001  
Z -0.0002 -0.0001 0.0005 -0.0005 0.0005 -0.0005  
AT. 61 H X 0.0004 0.0002 0.0017 0.0018 0.0017 0.0018  
Y -0.0005 -0.0003 -0.0026 -0.0027 -0.0026 -0.0027  
Z 0.0000 0.0001 -0.0004 -0.0005 -0.0004 -0.0005  
AT. 62 H X 0.0004 -0.0002 0.0017 -0.0018 -0.0017 0.0018  
Y 0.0005 -0.0003 0.0026 -0.0027 -0.0026 0.0027  
Z 0.0000 -0.0001 -0.0004 0.0005 0.0004 -0.0005  
AT. 63 H X -0.0004 0.0002 0.0017 0.0018 -0.0017 -0.0018  
Y 0.0005 -0.0003 -0.0026 -0.0027 0.0026 0.0027  
Z -0.0000 0.0001 -0.0004 -0.0005 0.0004 0.0005  
AT. 64 H X -0.0004 -0.0002 0.0017 -0.0018 0.0017 -0.0018  
Y -0.0005 -0.0003 0.0026 -0.0027 0.0026 -0.0027  
Z -0.0000 -0.0001 -0.0004 0.0005 -0.0004 0.0005  
AT. 65 H X -0.0010 -0.0010 -0.0024 -0.0024 -0.0023 -0.0025  
Y -0.0003 -0.0003 -0.0009 -0.0009 -0.0009 -0.0010  
Z 0.0000 0.0000 -0.0000 -0.0000 -0.0000 -0.0000  
AT. 66 H X -0.0010 0.0010 -0.0024 0.0024 0.0023 -0.0025  
Y 0.0003 -0.0003 0.0009 -0.0009 -0.0009 0.0010  
Z 0.0000 -0.0000 -0.0000 0.0000 0.0000 -0.0000  
AT. 67 H X 0.0010 -0.0010 -0.0024 -0.0024 0.0023 0.0025  
Y 0.0003 -0.0003 -0.0009 -0.0009 0.0009 0.0010  
Z -0.0000 0.0000 -0.0000 -0.0000 0.0000 0.0000  
AT. 68 H X 0.0010 0.0010 -0.0024 0.0024 -0.0023 0.0025  
Y -0.0003 -0.0003 0.0009 -0.0009 0.0009 -0.0010  
Z -0.0000 -0.0000 -0.0000 0.0000 -0.0000 0.0000  
AT. 69 H X 0.0004 0.0003 0.0009 0.0009 0.0009 0.0009

Y 0.0019 0.0015 0.0046 0.0048 0.0048 0.0048  
Z -0.0022 -0.0017 -0.0055 -0.0057 -0.0057 -0.0056  
AT. 70 H X 0.0004 -0.0003 0.0009 -0.0009 -0.0009 0.0009  
Y -0.0019 0.0015 -0.0046 0.0048 0.0048 -0.0048  
Z -0.0022 0.0017 -0.0055 0.0057 0.0057 -0.0056  
AT. 71 H X -0.0004 0.0003 0.0009 0.0009 -0.0009 -0.0009  
Y -0.0019 0.0015 0.0046 0.0048 -0.0048 -0.0048  
Z 0.0022 -0.0017 -0.0055 -0.0057 0.0057 0.0056  
AT. 72 H X -0.0004 -0.0003 0.0009 -0.0009 0.0009 -0.0009  
Y 0.0019 0.0015 -0.0046 0.0048 -0.0048 0.0048  
Z 0.0022 0.0017 -0.0055 0.0057 -0.0057 0.0056  
AT. 73 C X -0.0000 -0.0000 -0.0000 -0.0000 -0.0000 -0.0000  
Y -0.0000 -0.0000 0.0000 0.0000 0.0000 0.0000  
Z -0.0000 -0.0000 -0.0000 -0.0000 -0.0000 -0.0000  
AT. 74 C X -0.0000 0.0000 -0.0000 0.0000 0.0000 -0.0000  
Y 0.0000 -0.0000 -0.0000 0.0000 0.0000 -0.0000  
Z -0.0000 0.0000 -0.0000 0.0000 0.0000 -0.0000  
AT. 75 C X 0.0000 -0.0000 -0.0000 -0.0000 0.0000 0.0000  
Y 0.0000 -0.0000 0.0000 0.0000 -0.0000 -0.0000  
Z 0.0000 -0.0000 -0.0000 -0.0000 0.0000 0.0000  
AT. 76 C X 0.0000 0.0000 -0.0000 0.0000 -0.0000 0.0000  
Y -0.0000 -0.0000 -0.0000 0.0000 -0.0000 0.0000  
Z 0.0000 0.0000 -0.0000 0.0000 -0.0000 0.0000  
AT. 77 C X -0.0003 -0.0004 0.0007 0.0006 0.0006 0.0005  
Y 0.0002 0.0002 -0.0003 -0.0003 -0.0003 -0.0002  
Z -0.0001 -0.0001 0.0002 0.0001 0.0001 0.0001  
AT. 78 C X -0.0003 0.0004 0.0007 -0.0006 -0.0006 0.0005  
Y -0.0002 0.0002 0.0003 -0.0003 -0.0003 0.0002  
Z -0.0001 0.0001 0.0002 -0.0001 -0.0001 0.0001  
AT. 79 C X 0.0003 -0.0004 0.0007 0.0006 -0.0006 -0.0005  
Y -0.0002 0.0002 -0.0003 -0.0003 0.0003 0.0002  
Z 0.0001 -0.0001 0.0002 0.0001 -0.0001 -0.0001

AT. 80 C X 0.0003 0.0004 0.0007 -0.0006 0.0006 -0.0005  
Y 0.0002 0.0002 0.0003 -0.0003 0.0003 -0.0002  
Z 0.0001 0.0001 0.0002 -0.0001 0.0001 -0.0001

AT. 81 H X 0.0040 0.0044 -0.0078 -0.0062 -0.0067 -0.0050  
Y -0.0036 -0.0039 0.0068 0.0054 0.0059 0.0044  
Z -0.0004 -0.0004 0.0009 0.0008 0.0009 0.0007

AT. 82 H X 0.0040 -0.0044 -0.0078 0.0062 0.0067 -0.0050  
Y 0.0036 -0.0039 -0.0068 0.0054 0.0059 -0.0044  
Z -0.0004 0.0004 0.0009 -0.0008 -0.0009 0.0007

AT. 83 H X -0.0040 0.0044 -0.0078 -0.0062 0.0067 0.0050  
Y 0.0036 -0.0039 0.0068 0.0054 -0.0059 -0.0044  
Z 0.0004 -0.0004 0.0009 0.0008 -0.0009 -0.0007

AT. 84 H X -0.0040 -0.0044 -0.0078 0.0062 -0.0067 0.0050  
Y -0.0036 -0.0039 -0.0068 0.0054 -0.0059 0.0044  
Z 0.0004 0.0004 0.0009 -0.0008 0.0009 -0.0007

AT. 85 H X 0.0004 0.0004 -0.0007 -0.0005 -0.0005 -0.0004  
Y 0.0014 0.0016 -0.0027 -0.0021 -0.0023 -0.0016  
Z 0.0018 0.0020 -0.0031 -0.0024 -0.0026 -0.0018

AT. 86 H X 0.0004 -0.0004 -0.0007 0.0005 0.0005 -0.0004  
Y -0.0014 0.0016 0.0027 -0.0021 -0.0023 0.0016  
Z 0.0018 -0.0020 -0.0031 0.0024 0.0026 -0.0018

AT. 87 H X -0.0004 0.0004 -0.0007 -0.0005 0.0005 0.0004  
Y -0.0014 0.0016 -0.0027 -0.0021 0.0023 0.0016  
Z -0.0018 0.0020 -0.0031 -0.0024 0.0026 0.0018

AT. 88 H X -0.0004 -0.0004 -0.0007 0.0005 -0.0005 0.0004  
Y 0.0014 0.0016 0.0027 -0.0021 0.0023 -0.0016  
Z -0.0018 -0.0020 -0.0031 0.0024 -0.0026 0.0018

AT. 89 C X -0.0000 -0.0000 -0.0000 0.0000 0.0000 0.0000  
Y -0.0000 -0.0000 -0.0000 -0.0000 -0.0000 0.0000  
Z 0.0000 0.0000 0.0000 0.0000 0.0000 0.0000

AT. 90 C X -0.0000 0.0000 -0.0000 -0.0000 -0.0000 0.0000  
Y 0.0000 -0.0000 0.0000 -0.0000 -0.0000 -0.0000

Z 0.0000 -0.0000 0.0000 -0.0000 -0.0000 0.0000  
AT. 91 C X 0.0000 -0.0000 -0.0000 0.0000 -0.0000 -0.0000  
Y 0.0000 -0.0000 -0.0000 -0.0000 0.0000 -0.0000  
Z -0.0000 0.0000 0.0000 0.0000 -0.0000 -0.0000  
AT. 92 C X 0.0000 0.0000 -0.0000 -0.0000 0.0000 -0.0000  
Y -0.0000 -0.0000 0.0000 -0.0000 0.0000 0.0000  
Z -0.0000 -0.0000 0.0000 -0.0000 0.0000 -0.0000  
AT. 93 C X 0.0002 0.0002 -0.0002 0.0001 -0.0002 0.0001  
Y 0.0000 0.0000 0.0000 -0.0000 0.0000 0.0000  
Z 0.0005 0.0005 -0.0003 0.0003 -0.0002 0.0003  
AT. 94 C X 0.0002 -0.0002 -0.0002 -0.0001 0.0002 0.0001  
Y -0.0000 0.0000 -0.0000 -0.0000 0.0000 -0.0000  
Z 0.0005 -0.0005 -0.0003 -0.0003 0.0002 0.0003  
AT. 95 C X -0.0002 0.0002 -0.0002 0.0001 0.0002 -0.0001  
Y -0.0000 0.0000 0.0000 -0.0000 -0.0000 -0.0000  
Z -0.0005 0.0005 -0.0003 0.0003 0.0002 -0.0003  
AT. 96 C X -0.0002 -0.0002 -0.0002 -0.0001 -0.0002 -0.0001  
Y 0.0000 0.0000 -0.0000 -0.0000 -0.0000 0.0000  
Z -0.0005 -0.0005 -0.0003 -0.0003 -0.0002 -0.0003  
AT. 97 H X 0.0018 0.0019 -0.0013 0.0014 -0.0007 0.0020  
Y 0.0012 0.0012 -0.0008 0.0008 -0.0004 0.0011  
Z -0.0005 -0.0005 0.0002 -0.0002 0.0001 -0.0004  
AT. 98 H X 0.0018 -0.0019 -0.0013 -0.0014 0.0007 0.0020  
Y -0.0012 0.0012 0.0008 0.0008 -0.0004 -0.0011  
Z -0.0005 0.0005 0.0002 0.0002 -0.0001 -0.0004  
AT. 99 H X -0.0018 0.0019 -0.0013 0.0014 0.0007 -0.0020  
Y -0.0012 0.0012 -0.0008 0.0008 0.0004 -0.0011  
Z 0.0005 -0.0005 0.0002 -0.0002 -0.0001 0.0004  
AT. 100 H X -0.0018 -0.0019 -0.0013 -0.0014 -0.0007 -0.0020  
Y 0.0012 0.0012 0.0008 0.0008 0.0004 0.0011  
Z 0.0005 0.0005 0.0002 0.0002 0.0001 0.0004  
AT. 101 H X -0.0027 -0.0028 0.0022 -0.0021 0.0021 -0.0021

Y 0.0027 0.0028 -0.0021 0.0020 -0.0020 0.0020  
Z 0.0004 0.0004 -0.0004 0.0004 -0.0004 0.0004  
AT. 102 H X -0.0027 0.0028 0.0022 0.0021 -0.0021 -0.0021  
Y -0.0027 0.0028 0.0021 0.0020 -0.0020 -0.0020  
Z 0.0004 -0.0004 -0.0004 -0.0004 0.0004 0.0004  
AT. 103 H X 0.0027 -0.0028 0.0022 -0.0021 -0.0021 0.0021  
Y -0.0027 0.0028 -0.0021 0.0020 0.0020 -0.0020  
Z -0.0004 0.0004 -0.0004 0.0004 0.0004 -0.0004  
AT. 104 H X 0.0027 0.0028 0.0022 0.0021 0.0021 0.0021  
Y 0.0027 0.0028 0.0021 0.0020 0.0020 0.0020  
Z -0.0004 -0.0004 -0.0004 -0.0004 -0.0004 -0.0004  
AT. 105 H X -0.0019 -0.0019 0.0013 -0.0012 0.0011 -0.0014  
Y -0.0043 -0.0043 0.0029 -0.0027 0.0024 -0.0032  
Z -0.0055 -0.0056 0.0037 -0.0034 0.0031 -0.0041  
AT. 106 H X -0.0019 0.0019 0.0013 0.0012 -0.0011 -0.0014  
Y 0.0043 -0.0043 -0.0029 -0.0027 0.0024 0.0032  
Z -0.0055 0.0056 0.0037 0.0034 -0.0031 -0.0041  
AT. 107 H X 0.0019 -0.0019 0.0013 -0.0012 -0.0011 0.0014  
Y 0.0043 -0.0043 0.0029 -0.0027 -0.0024 0.0032  
Z 0.0055 -0.0056 0.0037 -0.0034 -0.0031 0.0041  
AT. 108 H X 0.0019 0.0019 0.0013 0.0012 0.0011 0.0014  
Y -0.0043 -0.0043 -0.0029 -0.0027 -0.0024 -0.0032  
Z 0.0055 0.0056 0.0037 0.0034 0.0031 0.0041  
AT. 109 C X -0.0004 -0.0004 0.0004 0.0004 0.0004 0.0004  
Y -0.0002 -0.0001 0.0001 0.0001 0.0002 0.0001  
Z -0.0001 -0.0001 -0.0000 -0.0000 -0.0000 -0.0000  
AT. 110 C X -0.0004 0.0004 0.0004 -0.0004 -0.0004 0.0004  
Y 0.0002 -0.0001 -0.0001 0.0001 0.0002 -0.0001  
Z -0.0001 0.0001 -0.0000 0.0000 0.0000 -0.0000  
AT. 111 C X 0.0004 -0.0004 0.0004 0.0004 -0.0004 -0.0004  
Y 0.0002 -0.0001 0.0001 0.0001 -0.0002 -0.0001  
Z 0.0001 -0.0001 -0.0000 -0.0000 0.0000 0.0000

AT. 112 C X 0.0004 0.0004 0.0004 -0.0004 0.0004 -0.0004  
Y -0.0002 -0.0001 -0.0001 0.0001 -0.0002 0.0001  
Z 0.0001 0.0001 -0.0000 0.0000 -0.0000 0.0000

AT. 113 H X 0.0050 0.0041 -0.0042 -0.0041 -0.0047 -0.0042  
Y 0.0030 0.0025 -0.0024 -0.0024 -0.0027 -0.0024  
Z -0.0004 -0.0003 0.0005 0.0006 0.0006 0.0006

AT. 114 H X 0.0050 -0.0041 -0.0042 0.0041 0.0047 -0.0042  
Y -0.0030 0.0025 0.0024 -0.0024 -0.0027 0.0024  
Z -0.0004 0.0003 0.0005 -0.0006 -0.0006 0.0006

AT. 115 H X -0.0050 0.0041 -0.0042 -0.0041 0.0047 0.0042  
Y -0.0030 0.0025 -0.0024 -0.0024 0.0027 0.0024  
Z 0.0004 -0.0003 0.0005 0.0006 -0.0006 -0.0006

AT. 116 H X -0.0050 -0.0041 -0.0042 0.0041 -0.0047 0.0042  
Y 0.0030 0.0025 0.0024 -0.0024 0.0027 -0.0024  
Z 0.0004 0.0003 0.0005 -0.0006 0.0006 -0.0006

AT. 117 H X 0.0002 0.0002 -0.0001 -0.0001 -0.0001 -0.0001  
Y -0.0010 -0.0008 0.0006 0.0005 0.0006 0.0006  
Z 0.0013 0.0010 -0.0006 -0.0005 -0.0006 -0.0006

AT. 118 H X 0.0002 -0.0002 -0.0001 0.0001 0.0001 -0.0001  
Y 0.0010 -0.0008 -0.0006 0.0005 0.0006 -0.0006  
Z 0.0013 -0.0010 -0.0006 0.0005 0.0006 -0.0006

AT. 119 H X -0.0002 0.0002 -0.0001 -0.0001 0.0001 0.0001  
Y 0.0010 -0.0008 0.0006 0.0005 -0.0006 -0.0006  
Z -0.0013 0.0010 -0.0006 -0.0005 0.0006 0.0006

AT. 120 H X -0.0002 -0.0002 -0.0001 0.0001 -0.0001 0.0001  
Y -0.0010 -0.0008 -0.0006 0.0005 -0.0006 0.0006  
Z -0.0013 -0.0010 -0.0006 0.0005 -0.0006 0.0006

AT. 121 C X -0.0057 -0.0057 0.0005 -0.0000 0.0006 -0.0000  
Y -0.0025 -0.0025 0.0002 -0.0000 0.0003 -0.0000  
Z 0.0034 0.0034 -0.0003 0.0000 -0.0004 -0.0000

AT. 122 C X -0.0057 0.0057 0.0005 0.0000 -0.0006 -0.0000  
Y 0.0025 -0.0025 -0.0002 -0.0000 0.0003 0.0000



Z 0.0034 -0.0034 -0.0003 -0.0000 0.0004 -0.0000  
AT. 123 C X 0.0057 -0.0057 0.0005 -0.0000 -0.0006 0.0000  
Y 0.0025 -0.0025 0.0002 -0.0000 -0.0003 0.0000  
Z -0.0034 0.0034 -0.0003 0.0000 0.0004 0.0000  
AT. 124 C X 0.0057 0.0057 0.0005 0.0000 0.0006 0.0000  
Y -0.0025 -0.0025 -0.0002 -0.0000 -0.0003 -0.0000  
Z -0.0034 -0.0034 -0.0003 -0.0000 -0.0004 0.0000  
AT. 125 H X -0.0073 -0.0073 0.0006 0.0000 0.0008 0.0000  
Y -0.0165 -0.0165 0.0014 -0.0000 0.0017 0.0000  
Z -0.0223 -0.0222 0.0019 -0.0000 0.0023 0.0001  
AT. 126 H X -0.0073 0.0073 0.0006 -0.0000 -0.0008 0.0000  
Y 0.0165 -0.0165 -0.0014 -0.0000 0.0017 -0.0000  
Z -0.0223 0.0222 0.0019 0.0000 -0.0023 0.0001  
AT. 127 H X 0.0073 -0.0073 0.0006 0.0000 -0.0008 -0.0000  
Y 0.0165 -0.0165 0.0014 -0.0000 -0.0017 -0.0000  
Z 0.0223 -0.0222 0.0019 -0.0000 -0.0023 -0.0001  
AT. 128 H X 0.0073 0.0073 0.0006 -0.0000 0.0008 -0.0000  
Y -0.0165 -0.0165 -0.0014 -0.0000 -0.0017 0.0000  
Z 0.0223 0.0222 0.0019 0.0000 0.0023 -0.0001  
AT. 129 H X 0.0740 0.0740 -0.0065 0.0003 -0.0077 0.0002  
Y 0.0470 0.0470 -0.0042 0.0002 -0.0049 0.0001  
Z -0.0181 -0.0181 0.0016 -0.0001 0.0019 -0.0000  
AT. 130 H X 0.0740 -0.0740 -0.0065 -0.0003 0.0077 0.0002  
Y -0.0470 0.0470 0.0042 0.0002 -0.0049 -0.0001  
Z -0.0181 0.0181 0.0016 0.0001 -0.0019 -0.0000  
AT. 131 H X -0.0740 0.0740 -0.0065 0.0003 0.0077 -0.0002  
Y -0.0470 0.0470 -0.0042 0.0002 0.0049 -0.0001  
Z 0.0181 -0.0181 0.0016 -0.0001 -0.0019 0.0000  
AT. 132 H X -0.0740 -0.0740 -0.0065 -0.0003 -0.0077 -0.0002  
Y 0.0470 0.0470 0.0042 0.0002 0.0049 0.0001  
Z 0.0181 0.0181 0.0016 0.0001 0.0019 0.0000  
AT. 133 C X -0.0000 -0.0000 0.0000 0.0000 0.0000 0.0000

Y 0.0002 0.0002 -0.0000 -0.0000 -0.0000 -0.0000  
Z -0.0000 -0.0000 0.0000 0.0000 0.0000 0.0000  
AT. 134 C X -0.0000 0.0000 0.0000 -0.0000 -0.0000 0.0000  
Y -0.0002 0.0002 0.0000 -0.0000 -0.0000 0.0000  
Z -0.0000 0.0000 0.0000 -0.0000 -0.0000 0.0000  
AT. 135 C X 0.0000 -0.0000 0.0000 0.0000 -0.0000 -0.0000  
Y -0.0002 0.0002 -0.0000 -0.0000 0.0000 0.0000  
Z 0.0000 -0.0000 0.0000 0.0000 -0.0000 -0.0000  
AT. 136 C X 0.0000 0.0000 0.0000 -0.0000 0.0000 -0.0000  
Y 0.0002 0.0002 0.0000 -0.0000 0.0000 -0.0000  
Z 0.0000 0.0000 0.0000 -0.0000 0.0000 -0.0000  
AT. 137 C X -0.0002 -0.0002 0.0000 -0.0000 0.0000 -0.0000  
Y 0.0000 0.0000 -0.0000 -0.0000 -0.0000 -0.0000  
Z -0.0001 -0.0001 0.0000 -0.0000 0.0000 -0.0000  
AT. 138 C X -0.0002 0.0002 0.0000 0.0000 -0.0000 -0.0000  
Y -0.0000 0.0000 0.0000 -0.0000 -0.0000 0.0000  
Z -0.0001 0.0001 0.0000 0.0000 -0.0000 -0.0000  
AT. 139 C X 0.0002 -0.0002 0.0000 -0.0000 -0.0000 0.0000  
Y -0.0000 0.0000 -0.0000 -0.0000 0.0000 0.0000  
Z 0.0001 -0.0001 0.0000 -0.0000 -0.0000 0.0000  
AT. 140 C X 0.0002 0.0002 0.0000 0.0000 0.0000 0.0000  
Y 0.0000 0.0000 0.0000 -0.0000 0.0000 -0.0000  
Z 0.0001 0.0001 0.0000 0.0000 0.0000 0.0000  
AT. 141 H X 0.0018 0.0018 -0.0001 0.0001 -0.0001 0.0001  
Y -0.0009 -0.0008 0.0000 -0.0001 0.0000 -0.0001  
Z 0.0016 0.0015 -0.0001 0.0001 -0.0001 0.0001  
AT. 142 H X 0.0018 -0.0018 -0.0001 -0.0001 0.0001 0.0001  
Y 0.0009 -0.0008 -0.0000 -0.0001 0.0000 0.0001  
Z 0.0016 -0.0015 -0.0001 -0.0001 0.0001 0.0001  
AT. 143 H X -0.0018 0.0018 -0.0001 0.0001 0.0001 -0.0001  
Y 0.0009 -0.0008 0.0000 -0.0001 -0.0000 0.0001  
Z -0.0016 0.0015 -0.0001 0.0001 0.0001 -0.0001

AT. 144 H X -0.0018 -0.0018 -0.0001 -0.0001 -0.0001 -0.0001  
Y -0.0009 -0.0008 -0.0000 -0.0001 -0.0000 -0.0001  
Z -0.0016 -0.0015 -0.0001 -0.0001 -0.0001 -0.0001

AT. 145 H X 0.0002 0.0002 0.0000 0.0000 0.0000 0.0000  
Y 0.0009 0.0009 0.0000 0.0001 0.0001 0.0002  
Z -0.0003 -0.0003 0.0000 0.0000 -0.0000 -0.0000

AT. 146 H X 0.0002 -0.0002 0.0000 -0.0000 -0.0000 0.0000  
Y -0.0009 0.0009 -0.0000 0.0001 0.0001 -0.0002  
Z -0.0003 0.0003 0.0000 -0.0000 0.0000 -0.0000

AT. 147 H X -0.0002 0.0002 0.0000 0.0000 -0.0000 -0.0000  
Y -0.0009 0.0009 0.0000 0.0001 -0.0001 -0.0002  
Z 0.0003 -0.0003 0.0000 0.0000 0.0000 0.0000

AT. 148 H X -0.0002 -0.0002 0.0000 -0.0000 0.0000 -0.0000  
Y 0.0009 0.0009 -0.0000 0.0001 -0.0001 0.0002  
Z 0.0003 0.0003 0.0000 -0.0000 -0.0000 0.0000

AT. 149 O X 0.0000 0.0000 0.0000 0.0000 0.0000 0.0000  
Y 0.0000 0.0000 0.0000 0.0000 0.0000 0.0000  
Z 0.0000 0.0000 -0.0000 -0.0000 -0.0000 -0.0000

AT. 150 O X 0.0000 -0.0000 0.0000 -0.0000 -0.0000 0.0000  
Y -0.0000 0.0000 -0.0000 0.0000 0.0000 -0.0000  
Z 0.0000 -0.0000 -0.0000 0.0000 0.0000 -0.0000

AT. 151 O X -0.0000 0.0000 0.0000 0.0000 -0.0000 -0.0000  
Y -0.0000 0.0000 0.0000 0.0000 -0.0000 -0.0000  
Z -0.0000 0.0000 -0.0000 -0.0000 0.0000 0.0000

AT. 152 O X -0.0000 -0.0000 0.0000 -0.0000 0.0000 -0.0000  
Y 0.0000 0.0000 -0.0000 0.0000 -0.0000 0.0000  
Z -0.0000 -0.0000 -0.0000 0.0000 -0.0000 0.0000

AT. 153 H X -0.0000 -0.0001 -0.0001 -0.0001 0.0000 0.0000  
Y -0.0000 0.0000 0.0000 0.0000 -0.0000 -0.0000  
Z -0.0000 -0.0001 -0.0002 -0.0001 0.0001 0.0001

AT. 154 H X -0.0000 0.0001 -0.0001 0.0001 -0.0000 0.0000  
Y 0.0000 0.0000 -0.0000 0.0000 -0.0000 0.0000

Z -0.0000 0.0001 -0.0002 0.0001 -0.0001 0.0001  
AT. 155 H X 0.0000 -0.0001 -0.0001 -0.0001 -0.0000 -0.0000  
Y 0.0000 0.0000 0.0000 0.0000 0.0000 0.0000  
Z 0.0000 -0.0001 -0.0002 -0.0001 -0.0001 -0.0001  
AT. 156 H X 0.0000 0.0001 -0.0001 0.0001 0.0000 -0.0000  
Y -0.0000 0.0000 -0.0000 0.0000 0.0000 -0.0000  
Z 0.0000 0.0001 -0.0002 0.0001 0.0001 -0.0001  
AT. 157 O X 0.0000 0.0000 -0.0000 0.0000 0.0000 0.0000  
Y -0.0000 -0.0000 -0.0000 -0.0000 0.0000 -0.0000  
Z -0.0000 -0.0000 0.0000 0.0000 0.0000 0.0000  
AT. 158 O X 0.0000 -0.0000 -0.0000 -0.0000 -0.0000 0.0000  
Y 0.0000 -0.0000 0.0000 -0.0000 0.0000 0.0000  
Z -0.0000 0.0000 0.0000 -0.0000 -0.0000 0.0000  
AT. 159 O X -0.0000 0.0000 -0.0000 0.0000 -0.0000 -0.0000  
Y 0.0000 -0.0000 -0.0000 -0.0000 -0.0000 0.0000  
Z 0.0000 -0.0000 0.0000 0.0000 -0.0000 -0.0000  
AT. 160 O X -0.0000 -0.0000 -0.0000 -0.0000 0.0000 -0.0000  
Y -0.0000 -0.0000 0.0000 -0.0000 -0.0000 -0.0000  
Z 0.0000 0.0000 0.0000 -0.0000 0.0000 -0.0000  
AT. 161 O X -0.0000 -0.0000 0.0000 0.0000 0.0000 0.0000  
Y 0.0001 0.0001 -0.0000 -0.0000 -0.0000 -0.0000  
Z -0.0000 -0.0000 -0.0000 -0.0000 -0.0000 -0.0000  
AT. 162 O X -0.0000 0.0000 0.0000 -0.0000 -0.0000 0.0000  
Y -0.0001 0.0001 0.0000 -0.0000 -0.0000 0.0000  
Z -0.0000 0.0000 -0.0000 0.0000 0.0000 -0.0000  
AT. 163 O X 0.0000 -0.0000 0.0000 0.0000 -0.0000 -0.0000  
Y -0.0001 0.0001 -0.0000 -0.0000 0.0000 0.0000  
Z 0.0000 -0.0000 -0.0000 -0.0000 0.0000 0.0000  
AT. 164 O X 0.0000 0.0000 0.0000 -0.0000 0.0000 -0.0000  
Y 0.0001 0.0001 0.0000 -0.0000 0.0000 -0.0000  
Z 0.0000 0.0000 -0.0000 0.0000 -0.0000 0.0000  
AT. 165 H X 0.0004 0.0004 -0.0001 -0.0001 -0.0001 -0.0001

Y -0.0009 -0.0008 0.0002 0.0001 0.0003 0.0001  
Z 0.0001 0.0001 -0.0000 0.0000 -0.0000 0.0000  
AT.166 H X 0.0004 -0.0004 -0.0001 0.0001 0.0001 -0.0001  
Y 0.0009 -0.0008 -0.0002 0.0001 0.0003 -0.0001  
Z 0.0001 -0.0001 -0.0000 -0.0000 0.0000 0.0000  
AT.167 H X -0.0004 0.0004 -0.0001 -0.0001 0.0001 0.0001  
Y 0.0009 -0.0008 0.0002 0.0001 -0.0003 -0.0001  
Z -0.0001 0.0001 -0.0000 0.0000 0.0000 -0.0000  
AT.168 H X -0.0004 -0.0004 -0.0001 0.0001 -0.0001 0.0001  
Y -0.0009 -0.0008 -0.0002 0.0001 -0.0003 0.0001  
Z -0.0001 -0.0001 -0.0000 -0.0000 -0.0000 -0.0000  
AT.169 O X 0.0000 -0.0000 0.0000 0.0000 0.0001 0.0001  
Y 0.0000 -0.0000 0.0001 0.0001 0.0002 0.0003  
Z 0.0000 -0.0000 0.0000 0.0000 0.0001 0.0001  
AT.170 O X 0.0000 0.0000 0.0000 -0.0000 -0.0001 0.0001  
Y -0.0000 -0.0000 -0.0001 0.0001 0.0002 -0.0003  
Z 0.0000 0.0000 0.0000 -0.0000 -0.0001 0.0001  
AT.171 O X -0.0000 -0.0000 0.0000 0.0000 -0.0001 -0.0001  
Y -0.0000 -0.0000 0.0001 0.0001 -0.0002 -0.0003  
Z -0.0000 -0.0000 0.0000 0.0000 -0.0001 -0.0001  
AT.172 O X -0.0000 0.0000 0.0000 -0.0000 0.0001 -0.0001  
Y 0.0000 -0.0000 -0.0001 0.0001 -0.0002 0.0003  
Z -0.0000 0.0000 0.0000 -0.0000 0.0001 -0.0001  
AT.173 H X -0.0000 0.0001 -0.0003 -0.0003 -0.0008 -0.0009  
Y -0.0001 0.0005 -0.0012 -0.0011 -0.0037 -0.0040  
Z -0.0000 0.0001 -0.0002 -0.0001 -0.0004 -0.0004  
AT.174 H X -0.0000 -0.0001 -0.0003 0.0003 0.0008 -0.0009  
Y 0.0001 0.0005 0.0012 -0.0011 -0.0037 0.0040  
Z -0.0000 -0.0001 -0.0002 0.0001 0.0004 -0.0004  
AT.175 H X 0.0000 0.0001 -0.0003 -0.0003 0.0008 0.0009  
Y 0.0001 0.0005 -0.0012 -0.0011 0.0037 0.0040  
Z 0.0000 0.0001 -0.0002 -0.0001 0.0004 0.0004

AT.176 H X 0.0000 -0.0001 -0.0003 0.0003 -0.0008 0.0009  
Y -0.0001 0.0005 0.0012 -0.0011 0.0037 -0.0040  
Z 0.0000 -0.0001 -0.0002 0.0001 -0.0004 0.0004

FREQ(CM\*\*-1) 3122.77 3122.83 3123.01 3123.07 3162.85 3162.94

AT. 1 I X 0.0000 -0.0000 0.0000 -0.0000 0.0000 -0.0000  
Y -0.0000 -0.0000 0.0000 -0.0000 0.0000 0.0000  
Z -0.0000 0.0000 -0.0000 0.0000 0.0000 0.0000

AT. 2 I X -0.0000 -0.0000 -0.0000 -0.0000 -0.0000 0.0000  
Y -0.0000 0.0000 0.0000 0.0000 0.0000 0.0000  
Z 0.0000 0.0000 0.0000 0.0000 -0.0000 -0.0000

AT. 3 I X 0.0000 -0.0000 -0.0000 0.0000 0.0000 0.0000  
Y -0.0000 -0.0000 -0.0000 0.0000 0.0000 -0.0000  
Z -0.0000 0.0000 0.0000 -0.0000 0.0000 -0.0000

AT. 4 I X -0.0000 -0.0000 0.0000 0.0000 -0.0000 -0.0000  
Y -0.0000 0.0000 -0.0000 -0.0000 0.0000 -0.0000  
Z 0.0000 0.0000 -0.0000 -0.0000 -0.0000 0.0000

AT. 5 I X 0.0000 -0.0000 -0.0000 -0.0000 -0.0000 -0.0000  
Y -0.0000 0.0000 -0.0000 -0.0000 -0.0000 0.0000  
Z -0.0000 -0.0000 -0.0000 -0.0000 -0.0000 0.0000

AT. 6 I X -0.0000 -0.0000 0.0000 -0.0000 0.0000 0.0000  
Y -0.0000 -0.0000 -0.0000 0.0000 -0.0000 0.0000  
Z 0.0000 -0.0000 0.0000 -0.0000 0.0000 -0.0000

AT. 7 I X 0.0000 -0.0000 0.0000 0.0000 -0.0000 0.0000  
Y -0.0000 0.0000 0.0000 0.0000 -0.0000 -0.0000  
Z -0.0000 -0.0000 0.0000 0.0000 -0.0000 -0.0000

AT. 8 I X -0.0000 -0.0000 -0.0000 0.0000 0.0000 -0.0000  
Y -0.0000 -0.0000 0.0000 -0.0000 -0.0000 -0.0000  
Z 0.0000 -0.0000 -0.0000 0.0000 0.0000 0.0000

AT. 9 N X 0.0001 0.0001 0.0001 0.0001 -0.0000 -0.0000  
Y 0.0001 0.0001 0.0001 0.0001 0.0000 0.0000

Z -0.0001 -0.0001 -0.0001 -0.0001 -0.0000 0.0000  
AT. 10 N X -0.0001 0.0001 -0.0001 0.0001 0.0000 0.0000  
Y 0.0001 -0.0001 0.0001 -0.0001 0.0000 0.0000  
Z 0.0001 -0.0001 0.0001 -0.0001 0.0000 -0.0000  
AT. 11 N X 0.0001 0.0001 -0.0001 -0.0001 -0.0000 0.0000  
Y 0.0001 0.0001 -0.0001 -0.0001 0.0000 -0.0000  
Z -0.0001 -0.0001 0.0001 0.0001 -0.0000 -0.0000  
AT. 12 N X -0.0001 0.0001 0.0001 -0.0001 0.0000 -0.0000  
Y 0.0001 -0.0001 -0.0001 0.0001 0.0000 -0.0000  
Z 0.0001 -0.0001 -0.0001 0.0001 0.0000 0.0000  
AT. 13 N X -0.0000 -0.0000 -0.0000 -0.0000 -0.0000 0.0000  
Y 0.0000 0.0000 0.0000 0.0000 -0.0000 -0.0000  
Z -0.0000 -0.0000 -0.0000 -0.0000 -0.0000 -0.0000  
AT. 14 N X 0.0000 -0.0000 0.0000 -0.0000 0.0000 -0.0000  
Y 0.0000 -0.0000 0.0000 -0.0000 -0.0000 -0.0000  
Z 0.0000 -0.0000 0.0000 -0.0000 0.0000 0.0000  
AT. 15 N X -0.0000 -0.0000 0.0000 0.0000 -0.0000 -0.0000  
Y 0.0000 0.0000 -0.0000 -0.0000 -0.0000 0.0000  
Z -0.0000 -0.0000 0.0000 0.0000 -0.0000 0.0000  
AT. 16 N X 0.0000 -0.0000 -0.0000 0.0000 0.0000 0.0000  
Y 0.0000 -0.0000 -0.0000 0.0000 -0.0000 0.0000  
Z 0.0000 -0.0000 -0.0000 0.0000 0.0000 -0.0000  
AT. 17 O X -0.0000 -0.0000 0.0000 0.0000 -0.0000 0.0000  
Y -0.0000 -0.0000 -0.0000 -0.0000 -0.0000 -0.0000  
Z -0.0000 -0.0000 0.0001 0.0001 -0.0000 -0.0000  
AT. 18 O X 0.0000 -0.0000 -0.0000 0.0000 0.0000 -0.0000  
Y -0.0000 0.0000 -0.0000 0.0000 -0.0000 -0.0000  
Z 0.0000 -0.0000 -0.0001 0.0001 0.0000 0.0000  
AT. 19 O X -0.0000 -0.0000 -0.0000 -0.0000 -0.0000 -0.0000  
Y -0.0000 -0.0000 0.0000 0.0000 -0.0000 0.0000  
Z -0.0000 -0.0000 -0.0001 -0.0001 -0.0000 0.0000  
AT. 20 O X 0.0000 -0.0000 0.0000 -0.0000 0.0000 0.0000

Y -0.0000 0.0000 0.0000 -0.0000 -0.0000 0.0000  
Z 0.0000 -0.0000 0.0001 -0.0001 0.0000 -0.0000  
AT. 21 O X 0.0000 -0.0000 0.0000 0.0000 0.0000 0.0000  
Y 0.0000 0.0000 0.0000 0.0000 -0.0000 -0.0000  
Z -0.0000 -0.0000 -0.0000 -0.0000 0.0000 0.0000  
AT. 22 O X -0.0000 -0.0000 -0.0000 0.0000 -0.0000 -0.0000  
Y 0.0000 -0.0000 0.0000 -0.0000 -0.0000 -0.0000  
Z 0.0000 -0.0000 0.0000 -0.0000 -0.0000 -0.0000  
AT. 23 O X 0.0000 -0.0000 -0.0000 -0.0000 0.0000 -0.0000  
Y 0.0000 0.0000 -0.0000 -0.0000 -0.0000 0.0000  
Z -0.0000 -0.0000 0.0000 0.0000 0.0000 -0.0000  
AT. 24 O X -0.0000 -0.0000 0.0000 -0.0000 -0.0000 0.0000  
Y 0.0000 -0.0000 -0.0000 0.0000 -0.0000 0.0000  
Z 0.0000 -0.0000 -0.0000 0.0000 -0.0000 0.0000  
AT. 25 C X -0.0000 -0.0000 -0.0000 -0.0000 0.0002 0.0003  
Y 0.0000 -0.0000 0.0000 0.0000 -0.0001 -0.0002  
Z -0.0000 -0.0000 -0.0000 -0.0000 0.0001 0.0002  
AT. 26 C X 0.0000 -0.0000 0.0000 -0.0000 -0.0002 -0.0003  
Y 0.0000 0.0000 0.0000 -0.0000 -0.0001 -0.0002  
Z 0.0000 -0.0000 0.0000 -0.0000 -0.0001 -0.0002  
AT. 27 C X -0.0000 -0.0000 0.0000 0.0000 0.0002 -0.0003  
Y 0.0000 -0.0000 -0.0000 -0.0000 -0.0001 0.0002  
Z -0.0000 -0.0000 0.0000 0.0000 0.0001 -0.0002  
AT. 28 C X 0.0000 -0.0000 -0.0000 0.0000 -0.0002 0.0003  
Y 0.0000 0.0000 -0.0000 0.0000 -0.0001 0.0002  
Z 0.0000 -0.0000 -0.0000 0.0000 -0.0001 0.0002  
AT. 29 H X 0.0001 0.0001 0.0002 -0.0000 -0.0024 -0.0038  
Y -0.0000 -0.0000 -0.0000 -0.0000 -0.0003 -0.0004  
Z 0.0000 0.0000 0.0001 0.0000 -0.0016 -0.0025  
AT. 30 H X -0.0001 0.0001 -0.0002 -0.0000 0.0024 0.0038  
Y -0.0000 0.0000 -0.0000 0.0000 -0.0003 -0.0004  
Z -0.0000 0.0000 -0.0001 0.0000 0.0016 0.0025



AT. 31 H X 0.0001 0.0001 -0.0002 0.0000 -0.0024 0.0038  
Y -0.0000 -0.0000 0.0000 0.0000 -0.0003 0.0004  
Z 0.0000 0.0000 -0.0001 -0.0000 -0.0016 0.0025

AT. 32 H X -0.0001 0.0001 0.0002 0.0000 0.0024 -0.0038  
Y -0.0000 0.0000 0.0000 -0.0000 -0.0003 0.0004  
Z -0.0000 0.0000 0.0001 -0.0000 0.0016 -0.0025

AT. 33 H X 0.0000 0.0000 -0.0000 0.0000 0.0003 0.0005  
Y 0.0001 0.0001 -0.0000 0.0000 0.0014 0.0023  
Z -0.0000 -0.0000 -0.0001 -0.0001 0.0003 0.0006

AT. 34 H X -0.0000 0.0000 0.0000 0.0000 -0.0003 -0.0005  
Y 0.0001 -0.0001 -0.0000 -0.0000 0.0014 0.0023  
Z 0.0000 -0.0000 0.0001 -0.0001 -0.0003 -0.0006

AT. 35 H X 0.0000 0.0000 0.0000 -0.0000 0.0003 -0.0005  
Y 0.0001 0.0001 0.0000 -0.0000 0.0014 -0.0023  
Z -0.0000 -0.0000 0.0001 0.0001 0.0003 -0.0006

AT. 36 H X -0.0000 0.0000 -0.0000 -0.0000 -0.0003 0.0005  
Y 0.0001 -0.0001 0.0000 0.0000 0.0014 -0.0023  
Z 0.0000 -0.0000 -0.0001 0.0001 -0.0003 0.0006

AT. 37 C X -0.0001 -0.0001 -0.0001 -0.0001 -0.0000 0.0000  
Y -0.0001 -0.0001 -0.0001 -0.0002 0.0000 0.0000  
Z 0.0000 0.0000 -0.0000 -0.0001 -0.0000 -0.0000

AT. 38 C X 0.0001 -0.0001 0.0001 -0.0001 0.0000 -0.0000  
Y -0.0001 0.0001 -0.0001 0.0002 0.0000 0.0000  
Z -0.0000 0.0000 0.0000 -0.0001 0.0000 0.0000

AT. 39 C X -0.0001 -0.0001 0.0001 0.0001 -0.0000 -0.0000  
Y -0.0001 -0.0001 0.0001 0.0002 0.0000 -0.0000  
Z 0.0000 0.0000 0.0000 0.0001 -0.0000 0.0000

AT. 40 C X 0.0001 -0.0001 -0.0001 0.0001 0.0000 0.0000  
Y -0.0001 0.0001 0.0001 -0.0002 0.0000 -0.0000  
Z -0.0000 0.0000 -0.0000 0.0001 0.0000 -0.0000

AT. 41 C X -0.0004 -0.0005 -0.0004 -0.0004 -0.0001 -0.0001  
Y 0.0003 0.0004 0.0003 0.0003 0.0003 0.0003

Z 0.0004 0.0004 0.0004 0.0003 -0.0003 -0.0003  
AT. 42 C X 0.0004 -0.0005 0.0004 -0.0004 0.0001 0.0001  
Y 0.0003 -0.0004 0.0003 -0.0003 0.0003 0.0003  
Z -0.0004 0.0004 -0.0004 0.0003 0.0003 0.0003  
AT. 43 C X -0.0004 -0.0005 0.0004 0.0004 -0.0001 0.0001  
Y 0.0003 0.0004 -0.0003 -0.0003 0.0003 -0.0003  
Z 0.0004 0.0004 -0.0004 -0.0003 -0.0003 0.0003  
AT. 44 C X 0.0004 -0.0005 -0.0004 0.0004 0.0001 -0.0001  
Y 0.0003 -0.0004 -0.0003 0.0003 0.0003 -0.0003  
Z -0.0004 0.0004 0.0004 -0.0003 0.0003 -0.0003  
AT. 45 H X -0.0004 -0.0004 -0.0003 -0.0003 0.0006 0.0007  
Y 0.0017 0.0020 0.0017 0.0015 -0.0032 -0.0034  
Z -0.0021 -0.0024 -0.0020 -0.0017 0.0037 0.0040  
AT. 46 H X 0.0004 -0.0004 0.0003 -0.0003 -0.0006 -0.0007  
Y 0.0017 -0.0020 0.0017 -0.0015 -0.0032 -0.0034  
Z 0.0021 -0.0024 0.0020 -0.0017 -0.0037 -0.0040  
AT. 47 H X -0.0004 -0.0004 0.0003 0.0003 0.0006 -0.0007  
Y 0.0017 0.0020 -0.0017 -0.0015 -0.0032 0.0034  
Z -0.0021 -0.0024 0.0020 0.0017 0.0037 -0.0040  
AT. 48 H X 0.0004 -0.0004 -0.0003 0.0003 -0.0006 0.0007  
Y 0.0017 -0.0020 -0.0017 0.0015 -0.0032 0.0034  
Z 0.0021 -0.0024 -0.0020 0.0017 -0.0037 0.0040  
AT. 49 H X 0.0057 0.0065 0.0055 0.0047 0.0003 0.0003  
Y -0.0059 -0.0067 -0.0057 -0.0048 -0.0004 -0.0004  
Z -0.0024 -0.0027 -0.0023 -0.0020 -0.0001 -0.0001  
AT. 50 H X -0.0057 0.0065 -0.0055 0.0047 -0.0003 -0.0003  
Y -0.0059 0.0067 -0.0057 0.0048 -0.0004 -0.0004  
Z 0.0024 -0.0027 0.0023 -0.0020 0.0001 0.0001  
AT. 51 H X 0.0057 0.0065 -0.0055 -0.0047 0.0003 -0.0003  
Y -0.0059 -0.0067 0.0057 0.0048 -0.0004 0.0004  
Z -0.0024 -0.0027 0.0023 0.0020 -0.0001 0.0001  
AT. 52 H X -0.0057 0.0065 0.0055 -0.0047 -0.0003 0.0003

Y -0.0059 0.0067 0.0057 -0.0048 -0.0004 0.0004  
Z 0.0024 -0.0027 -0.0023 0.0020 0.0001 -0.0001  
AT. 53 C X -0.0000 -0.0000 -0.0000 -0.0000 0.0001 0.0001  
Y 0.0000 0.0000 0.0000 0.0000 -0.0001 -0.0001  
Z -0.0000 -0.0000 -0.0000 -0.0000 0.0000 0.0000  
AT. 54 C X 0.0000 -0.0000 0.0000 -0.0000 -0.0001 -0.0001  
Y 0.0000 -0.0000 0.0000 -0.0000 -0.0001 -0.0001  
Z 0.0000 -0.0000 0.0000 -0.0000 -0.0000 -0.0000  
AT. 55 C X -0.0000 -0.0000 0.0000 0.0000 0.0001 -0.0001  
Y 0.0000 0.0000 -0.0000 -0.0000 -0.0001 0.0001  
Z -0.0000 -0.0000 0.0000 0.0000 0.0000 -0.0000  
AT. 56 C X 0.0000 -0.0000 -0.0000 0.0000 -0.0001 0.0001  
Y 0.0000 -0.0000 -0.0000 0.0000 -0.0001 0.0001  
Z 0.0000 -0.0000 -0.0000 0.0000 -0.0000 0.0000  
AT. 57 C X -0.0000 0.0000 -0.0000 -0.0000 0.0016 0.0016  
Y -0.0000 -0.0000 -0.0000 -0.0000 -0.0076 -0.0078  
Z 0.0000 0.0001 0.0001 0.0000 0.0022 0.0022  
AT. 58 C X 0.0000 0.0000 0.0000 -0.0000 -0.0016 -0.0016  
Y -0.0000 0.0000 -0.0000 0.0000 -0.0076 -0.0078  
Z -0.0000 0.0001 -0.0001 0.0000 -0.0022 -0.0022  
AT. 59 C X -0.0000 0.0000 0.0000 0.0000 0.0016 -0.0016  
Y -0.0000 -0.0000 0.0000 0.0000 -0.0076 0.0078  
Z 0.0000 0.0001 -0.0001 -0.0000 0.0022 -0.0022  
AT. 60 C X 0.0000 0.0000 -0.0000 0.0000 -0.0016 0.0016  
Y -0.0000 0.0000 0.0000 -0.0000 -0.0076 0.0078  
Z -0.0000 0.0001 0.0001 -0.0000 -0.0022 0.0022  
AT. 61 H X 0.0000 0.0001 0.0001 -0.0000 -0.0426 -0.0432  
Y -0.0001 -0.0002 -0.0001 0.0000 0.0565 0.0573  
Z -0.0000 -0.0000 -0.0000 -0.0000 0.0100 0.0102  
AT. 62 H X -0.0000 0.0001 -0.0001 -0.0000 0.0426 0.0432  
Y -0.0001 0.0002 -0.0001 -0.0000 0.0565 0.0573  
Z 0.0000 -0.0000 0.0000 -0.0000 -0.0100 -0.0102

AT. 63 H X 0.0000 0.0001 -0.0001 0.0000 -0.0426 0.0432  
Y -0.0001 -0.0002 0.0001 -0.0000 0.0565 -0.0573  
Z -0.0000 -0.0000 0.0000 0.0000 0.0100 -0.0102

AT. 64 H X -0.0000 0.0001 0.0001 0.0000 0.0426 -0.0432  
Y -0.0001 0.0002 0.0001 0.0000 0.0565 -0.0573  
Z 0.0000 -0.0000 -0.0000 0.0000 -0.0100 0.0102

AT. 65 H X -0.0000 -0.0003 -0.0002 0.0000 0.0160 0.0161  
Y -0.0000 -0.0002 -0.0001 -0.0000 0.0036 0.0036  
Z -0.0000 -0.0000 -0.0000 -0.0000 0.0006 0.0006

AT. 66 H X 0.0000 -0.0003 0.0002 0.0000 -0.0160 -0.0161  
Y -0.0000 0.0002 -0.0001 0.0000 0.0036 0.0036  
Z 0.0000 -0.0000 0.0000 -0.0000 -0.0006 -0.0006

AT. 67 H X -0.0000 -0.0003 0.0002 -0.0000 0.0160 -0.0161  
Y -0.0000 -0.0002 0.0001 0.0000 0.0036 -0.0036  
Z -0.0000 -0.0000 0.0000 0.0000 0.0006 -0.0006

AT. 68 H X 0.0000 -0.0003 -0.0002 -0.0000 -0.0160 0.0161  
Y -0.0000 0.0002 0.0001 -0.0000 0.0036 -0.0036  
Z 0.0000 -0.0000 -0.0000 0.0000 -0.0006 0.0006

AT. 69 H X 0.0001 0.0002 0.0002 0.0000 0.0073 0.0074  
Y 0.0004 0.0008 0.0008 0.0001 0.0313 0.0319  
Z -0.0005 -0.0009 -0.0009 -0.0002 -0.0372 -0.0378

AT. 70 H X -0.0001 0.0002 -0.0002 0.0000 -0.0073 -0.0074  
Y 0.0004 -0.0008 0.0008 -0.0001 0.0313 0.0319  
Z 0.0005 -0.0009 0.0009 -0.0002 0.0372 0.0378

AT. 71 H X 0.0001 0.0002 -0.0002 -0.0000 0.0073 -0.0074  
Y 0.0004 0.0008 -0.0008 -0.0001 0.0313 -0.0319  
Z -0.0005 -0.0009 0.0009 0.0002 -0.0372 0.0378

AT. 72 H X -0.0001 0.0002 0.0002 -0.0000 -0.0073 0.0074  
Y 0.0004 -0.0008 -0.0008 0.0001 0.0313 -0.0319  
Z 0.0005 -0.0009 -0.0009 0.0002 0.0372 -0.0378

AT. 73 C X -0.0000 -0.0000 -0.0000 -0.0000 0.0000 0.0000  
Y 0.0000 0.0000 0.0000 0.0000 -0.0000 -0.0000

Z 0.0000 0.0000 0.0000 0.0000 -0.0001 -0.0000  
AT. 74 C X 0.0000 -0.0000 0.0000 -0.0000 -0.0000 -0.0000  
Y 0.0000 -0.0000 0.0000 -0.0000 -0.0000 -0.0000  
Z -0.0000 0.0000 -0.0000 0.0000 0.0001 0.0000  
AT. 75 C X -0.0000 -0.0000 0.0000 0.0000 0.0000 -0.0000  
Y 0.0000 0.0000 -0.0000 -0.0000 -0.0000 0.0000  
Z 0.0000 0.0000 -0.0000 -0.0000 -0.0001 0.0000  
AT. 76 C X 0.0000 -0.0000 -0.0000 0.0000 -0.0000 0.0000  
Y 0.0000 -0.0000 -0.0000 0.0000 -0.0000 0.0000  
Z -0.0000 0.0000 0.0000 -0.0000 0.0001 -0.0000  
AT. 77 C X -0.0060 -0.0060 -0.0060 -0.0060 -0.0000 0.0000  
Y 0.0031 0.0031 0.0031 0.0031 -0.0001 0.0000  
Z -0.0015 -0.0015 -0.0015 -0.0015 -0.0001 0.0001  
AT. 78 C X 0.0060 -0.0060 0.0060 -0.0060 0.0000 -0.0000  
Y 0.0031 -0.0031 0.0031 -0.0031 -0.0001 0.0000  
Z 0.0015 -0.0015 0.0015 -0.0015 0.0001 -0.0001  
AT. 79 C X -0.0060 -0.0060 0.0060 0.0060 -0.0000 -0.0000  
Y 0.0031 0.0031 -0.0031 -0.0031 -0.0001 -0.0000  
Z -0.0015 -0.0015 0.0015 0.0015 -0.0001 -0.0001  
AT. 80 C X 0.0060 -0.0060 -0.0060 0.0060 0.0000 0.0000  
Y 0.0031 -0.0031 -0.0031 0.0031 -0.0001 -0.0000  
Z 0.0015 -0.0015 -0.0015 0.0015 0.0001 0.0001  
AT. 81 H X 0.0658 0.0657 0.0659 0.0660 -0.0001 -0.0003  
Y -0.0583 -0.0582 -0.0583 -0.0584 0.0001 0.0003  
Z -0.0060 -0.0060 -0.0060 -0.0060 0.0000 0.0000  
AT. 82 H X -0.0658 0.0657 -0.0659 0.0660 0.0001 0.0003  
Y -0.0583 0.0582 -0.0583 0.0584 0.0001 0.0003  
Z 0.0060 -0.0060 0.0060 -0.0060 -0.0000 -0.0000  
AT. 83 H X 0.0658 0.0657 -0.0659 -0.0660 -0.0001 0.0003  
Y -0.0583 -0.0582 0.0583 0.0584 0.0001 -0.0003  
Z -0.0060 -0.0060 0.0060 0.0060 0.0000 -0.0000  
AT. 84 H X -0.0658 0.0657 0.0659 -0.0660 0.0001 -0.0003

Y -0.0583 0.0582 0.0583 -0.0584 0.0001 -0.0003  
Z 0.0060 -0.0060 -0.0060 0.0060 -0.0000 0.0000  
AT. 85 H X 0.0057 0.0057 0.0056 0.0056 0.0002 -0.0002  
Y 0.0208 0.0208 0.0208 0.0208 0.0006 -0.0006  
Z 0.0245 0.0245 0.0246 0.0246 0.0008 -0.0008  
AT. 86 H X -0.0057 0.0057 -0.0056 0.0056 -0.0002 0.0002  
Y 0.0208 -0.0208 0.0208 -0.0208 0.0006 -0.0006  
Z -0.0245 0.0245 -0.0246 0.0246 -0.0008 0.0008  
AT. 87 H X 0.0057 0.0057 -0.0056 -0.0056 0.0002 0.0002  
Y 0.0208 0.0208 -0.0208 -0.0208 0.0006 0.0006  
Z 0.0245 0.0245 -0.0246 -0.0246 0.0008 0.0008  
AT. 88 H X -0.0057 0.0057 0.0056 -0.0056 -0.0002 -0.0002  
Y 0.0208 -0.0208 -0.0208 0.0208 0.0006 0.0006  
Z -0.0245 0.0245 0.0246 -0.0246 -0.0008 -0.0008  
AT. 89 C X -0.0000 -0.0000 -0.0000 -0.0000 0.0000 -0.0000  
Y 0.0001 0.0001 0.0001 0.0001 0.0000 -0.0000  
Z 0.0000 0.0000 0.0000 0.0000 0.0000 -0.0000  
AT. 90 C X 0.0000 -0.0000 0.0000 -0.0000 -0.0000 0.0000  
Y 0.0001 -0.0001 0.0001 -0.0001 0.0000 -0.0000  
Z -0.0000 0.0000 -0.0000 0.0000 -0.0000 0.0000  
AT. 91 C X -0.0000 -0.0000 0.0000 0.0000 0.0000 0.0000  
Y 0.0001 0.0001 -0.0001 -0.0001 0.0000 0.0000  
Z 0.0000 0.0000 -0.0000 -0.0000 0.0000 0.0000  
AT. 92 C X 0.0000 -0.0000 -0.0000 0.0000 -0.0000 -0.0000  
Y 0.0001 -0.0001 -0.0001 0.0001 0.0000 0.0000  
Z -0.0000 0.0000 0.0000 -0.0000 -0.0000 -0.0000  
AT. 93 C X 0.0001 0.0001 0.0001 0.0001 0.0006 -0.0005  
Y -0.0002 -0.0002 -0.0001 -0.0001 0.0023 -0.0018  
Z -0.0003 -0.0004 -0.0003 -0.0003 0.0009 -0.0007  
AT. 94 C X -0.0001 0.0001 -0.0001 0.0001 -0.0006 0.0005  
Y -0.0002 0.0002 -0.0001 0.0001 0.0023 -0.0018  
Z 0.0003 -0.0004 0.0003 -0.0003 -0.0009 0.0007

AT. 95 C X 0.0001 0.0001 -0.0001 -0.0001 0.0006 0.0005  
Y -0.0002 -0.0002 0.0001 0.0001 0.0023 0.0018  
Z -0.0003 -0.0004 0.0003 0.0003 0.0009 0.0007

AT. 96 C X -0.0001 0.0001 0.0001 -0.0001 -0.0006 -0.0005  
Y -0.0002 0.0002 0.0001 -0.0001 0.0023 0.0018  
Z 0.0003 -0.0004 -0.0003 0.0003 -0.0009 -0.0007

AT. 97 H X -0.0020 -0.0020 -0.0017 -0.0019 -0.0133 0.0111  
Y -0.0013 -0.0013 -0.0011 -0.0012 -0.0070 0.0059  
Z 0.0006 0.0006 0.0005 0.0006 0.0039 -0.0033

AT. 98 H X 0.0020 -0.0020 0.0017 -0.0019 0.0133 -0.0111  
Y -0.0013 0.0013 -0.0011 0.0012 -0.0070 0.0059  
Z -0.0006 0.0006 -0.0005 0.0006 -0.0039 0.0033

AT. 99 H X -0.0020 -0.0020 0.0017 0.0019 -0.0133 -0.0111  
Y -0.0013 -0.0013 0.0011 0.0012 -0.0070 -0.0059  
Z 0.0006 0.0006 -0.0005 -0.0006 0.0039 0.0033

AT. 100 H X 0.0020 -0.0020 -0.0017 0.0019 0.0133 0.0111  
Y -0.0013 0.0013 0.0011 -0.0012 -0.0070 -0.0059  
Z -0.0006 0.0006 0.0005 -0.0006 -0.0039 -0.0033

AT. 101 H X -0.0003 -0.0001 -0.0001 -0.0003 0.0113 -0.0088  
Y 0.0001 -0.0001 -0.0000 0.0001 -0.0099 0.0077  
Z 0.0001 0.0001 0.0001 0.0001 -0.0015 0.0012

AT. 102 H X 0.0003 -0.0001 0.0001 -0.0003 -0.0113 0.0088  
Y 0.0001 0.0001 -0.0000 -0.0001 -0.0099 0.0077  
Z -0.0001 0.0001 -0.0001 0.0001 0.0015 -0.0012

AT. 103 H X -0.0003 -0.0001 0.0001 0.0003 0.0113 0.0088  
Y 0.0001 -0.0001 0.0000 -0.0001 -0.0099 -0.0077  
Z 0.0001 0.0001 -0.0001 -0.0001 -0.0015 -0.0012

AT. 104 H X 0.0003 -0.0001 -0.0001 0.0003 -0.0113 -0.0088  
Y 0.0001 0.0001 0.0000 0.0001 -0.0099 -0.0077  
Z -0.0001 0.0001 0.0001 -0.0001 0.0015 0.0012

AT. 105 H X 0.0012 0.0013 0.0012 0.0011 -0.0044 0.0035  
Y 0.0027 0.0029 0.0026 0.0025 -0.0099 0.0079

Z 0.0035 0.0038 0.0035 0.0033 -0.0129 0.0103  
AT. 106 H X -0.0012 0.0013 -0.0012 0.0011 0.0044 -0.0035  
Y 0.0027 -0.0029 0.0026 -0.0025 -0.0099 0.0079  
Z -0.0035 0.0038 -0.0035 0.0033 0.0129 -0.0103  
AT. 107 H X 0.0012 0.0013 -0.0012 -0.0011 -0.0044 -0.0035  
Y 0.0027 0.0029 -0.0026 -0.0025 -0.0099 -0.0079  
Z 0.0035 0.0038 -0.0035 -0.0033 -0.0129 -0.0103  
AT. 108 H X -0.0012 0.0013 0.0012 -0.0011 0.0044 0.0035  
Y 0.0027 -0.0029 -0.0026 0.0025 -0.0099 -0.0079  
Z -0.0035 0.0038 0.0035 -0.0033 0.0129 0.0103  
AT. 109 C X 0.0001 0.0001 0.0001 0.0001 -0.0001 -0.0001  
Y 0.0000 0.0000 0.0000 0.0000 0.0001 0.0001  
Z 0.0000 0.0000 -0.0000 0.0000 -0.0001 -0.0001  
AT. 110 C X -0.0001 0.0001 -0.0001 0.0001 0.0001 0.0001  
Y 0.0000 -0.0000 0.0000 -0.0000 0.0001 0.0001  
Z -0.0000 0.0000 0.0000 0.0000 0.0001 0.0001  
AT. 111 C X 0.0001 0.0001 -0.0001 -0.0001 -0.0001 0.0001  
Y 0.0000 0.0000 -0.0000 -0.0000 0.0001 -0.0001  
Z 0.0000 0.0000 0.0000 -0.0000 -0.0001 0.0001  
AT. 112 C X -0.0001 0.0001 0.0001 -0.0001 0.0001 -0.0001  
Y 0.0000 -0.0000 -0.0000 0.0000 0.0001 -0.0001  
Z -0.0000 0.0000 -0.0000 -0.0000 0.0001 -0.0001  
AT. 113 H X -0.0009 -0.0010 -0.0012 -0.0009 0.0004 0.0005  
Y -0.0005 -0.0006 -0.0007 -0.0005 0.0003 0.0003  
Z 0.0001 0.0001 0.0001 0.0001 -0.0001 -0.0001  
AT. 114 H X 0.0009 -0.0010 0.0012 -0.0009 -0.0004 -0.0005  
Y -0.0005 0.0006 -0.0007 0.0005 0.0003 0.0003  
Z -0.0001 0.0001 -0.0001 0.0001 0.0001 0.0001  
AT. 115 H X -0.0009 -0.0010 0.0012 0.0009 0.0004 -0.0005  
Y -0.0005 -0.0006 0.0007 0.0005 0.0003 -0.0003  
Z 0.0001 0.0001 -0.0001 -0.0001 -0.0001 0.0001  
AT. 116 H X 0.0009 -0.0010 -0.0012 0.0009 -0.0004 0.0005



Y -0.0005 0.0006 0.0007 -0.0005 0.0003 -0.0003  
Z -0.0001 0.0001 0.0001 -0.0001 0.0001 -0.0001  
AT. 117 H X -0.0000 -0.0000 -0.0000 -0.0000 0.0001 0.0001  
Y 0.0002 0.0002 0.0001 0.0001 -0.0009 -0.0009  
Z -0.0002 -0.0003 -0.0001 -0.0002 0.0012 0.0012  
AT. 118 H X 0.0000 -0.0000 0.0000 -0.0000 -0.0001 -0.0001  
Y 0.0002 -0.0002 0.0001 -0.0001 -0.0009 -0.0009  
Z 0.0002 -0.0003 0.0001 -0.0002 -0.0012 -0.0012  
AT. 119 H X -0.0000 -0.0000 0.0000 0.0000 0.0001 -0.0001  
Y 0.0002 0.0002 -0.0001 -0.0001 -0.0009 0.0009  
Z -0.0002 -0.0003 0.0001 0.0002 0.0012 -0.0012  
AT. 120 H X 0.0000 -0.0000 -0.0000 0.0000 -0.0001 0.0001  
Y 0.0002 -0.0002 -0.0001 0.0001 -0.0009 0.0009  
Z 0.0002 -0.0003 -0.0001 0.0002 -0.0012 0.0012  
AT. 121 C X 0.0004 0.0004 0.0004 0.0004 0.0000 -0.0001  
Y 0.0002 0.0002 0.0002 0.0002 -0.0000 -0.0000  
Z -0.0002 -0.0002 -0.0002 -0.0002 -0.0001 0.0001  
AT. 122 C X -0.0004 0.0004 -0.0004 0.0004 -0.0000 0.0001  
Y 0.0002 -0.0002 0.0002 -0.0002 -0.0000 -0.0000  
Z 0.0002 -0.0002 0.0002 -0.0002 0.0001 -0.0001  
AT. 123 C X 0.0004 0.0004 -0.0004 -0.0004 0.0000 0.0001  
Y 0.0002 0.0002 -0.0002 -0.0002 -0.0000 0.0000  
Z -0.0002 -0.0002 0.0002 0.0002 -0.0001 -0.0001  
AT. 124 C X -0.0004 0.0004 0.0004 -0.0004 -0.0000 -0.0001  
Y 0.0002 -0.0002 -0.0002 0.0002 -0.0000 0.0000  
Z 0.0002 -0.0002 -0.0002 0.0002 0.0001 0.0001  
AT. 125 H X 0.0003 0.0003 0.0003 0.0002 0.0004 -0.0003  
Y 0.0008 0.0007 0.0008 0.0007 0.0008 -0.0006  
Z 0.0010 0.0009 0.0010 0.0009 0.0011 -0.0009  
AT. 126 H X -0.0003 0.0003 -0.0003 0.0002 -0.0004 0.0003  
Y 0.0008 -0.0007 0.0008 -0.0007 0.0008 -0.0006  
Z -0.0010 0.0009 -0.0010 0.0009 -0.0011 0.0009

AT.127 H X 0.0003 0.0003 -0.0003 -0.0002 0.0004 0.0003  
Y 0.0008 0.0007 -0.0008 -0.0007 0.0008 0.0006  
Z 0.0010 0.0009 -0.0010 -0.0009 0.0011 0.0009

AT.128 H X -0.0003 0.0003 0.0003 -0.0002 -0.0004 -0.0003  
Y 0.0008 -0.0007 -0.0008 0.0007 0.0008 0.0006  
Z -0.0010 0.0009 0.0010 -0.0009 -0.0011 -0.0009

AT.129 H X -0.0047 -0.0045 -0.0045 -0.0043 -0.0007 0.0011  
Y -0.0030 -0.0028 -0.0028 -0.0027 -0.0005 0.0007  
Z 0.0012 0.0011 0.0011 0.0011 0.0001 -0.0002

AT.130 H X 0.0047 -0.0045 0.0045 -0.0043 0.0007 -0.0011  
Y -0.0030 0.0028 -0.0028 0.0027 -0.0005 0.0007  
Z -0.0012 0.0011 -0.0011 0.0011 -0.0001 0.0002

AT.131 H X -0.0047 -0.0045 0.0045 0.0043 -0.0007 -0.0011  
Y -0.0030 -0.0028 0.0028 0.0027 -0.0005 -0.0007  
Z 0.0012 0.0011 -0.0011 -0.0011 0.0001 0.0002

AT.132 H X 0.0047 -0.0045 -0.0045 0.0043 0.0007 0.0011  
Y -0.0030 0.0028 0.0028 -0.0027 -0.0005 -0.0007  
Z -0.0012 0.0011 0.0011 -0.0011 -0.0001 -0.0002

AT.133 C X 0.0000 0.0000 -0.0000 -0.0000 0.0000 0.0000  
Y -0.0000 -0.0000 -0.0000 -0.0000 0.0000 0.0000  
Z -0.0000 0.0000 0.0000 0.0000 -0.0000 -0.0000

AT.134 C X -0.0000 0.0000 0.0000 -0.0000 -0.0000 -0.0000  
Y -0.0000 0.0000 -0.0000 0.0000 0.0000 0.0000  
Z 0.0000 0.0000 -0.0000 0.0000 0.0000 0.0000

AT.135 C X 0.0000 0.0000 0.0000 0.0000 0.0000 -0.0000  
Y -0.0000 -0.0000 0.0000 0.0000 0.0000 -0.0000  
Z -0.0000 0.0000 -0.0000 -0.0000 -0.0000 0.0000

AT.136 C X -0.0000 0.0000 -0.0000 0.0000 -0.0000 0.0000  
Y -0.0000 0.0000 0.0000 -0.0000 0.0000 -0.0000  
Z 0.0000 0.0000 0.0000 -0.0000 0.0000 -0.0000

AT.137 C X 0.0000 0.0000 0.0000 0.0000 0.0000 0.0000  
Y -0.0000 -0.0000 -0.0000 -0.0000 -0.0000 0.0000

Z 0.0000 0.0000 0.0000 0.0000 0.0000 -0.0000  
AT. 138 C X -0.0000 0.0000 -0.0000 0.0000 -0.0000 -0.0000  
Y -0.0000 0.0000 -0.0000 0.0000 -0.0000 0.0000  
Z -0.0000 0.0000 -0.0000 0.0000 -0.0000 0.0000  
AT. 139 C X 0.0000 0.0000 -0.0000 -0.0000 0.0000 -0.0000  
Y -0.0000 -0.0000 0.0000 0.0000 -0.0000 -0.0000  
Z 0.0000 0.0000 -0.0000 -0.0000 0.0000 0.0000  
AT. 140 C X -0.0000 0.0000 0.0000 -0.0000 -0.0000 0.0000  
Y -0.0000 0.0000 0.0000 -0.0000 -0.0000 -0.0000  
Z -0.0000 0.0000 0.0000 -0.0000 -0.0000 -0.0000  
AT. 141 H X -0.0001 -0.0001 -0.0001 -0.0000 -0.0002 0.0000  
Y 0.0000 0.0001 0.0000 0.0000 0.0001 -0.0000  
Z -0.0001 -0.0001 -0.0001 -0.0001 -0.0002 0.0000  
AT. 142 H X 0.0001 -0.0001 0.0001 -0.0000 0.0002 -0.0000  
Y 0.0000 -0.0001 0.0000 -0.0000 0.0001 -0.0000  
Z 0.0001 -0.0001 0.0001 -0.0001 0.0002 -0.0000  
AT. 143 H X -0.0001 -0.0001 0.0001 0.0000 -0.0002 -0.0000  
Y 0.0000 0.0001 -0.0000 -0.0000 0.0001 0.0000  
Z -0.0001 -0.0001 0.0001 0.0001 -0.0002 -0.0000  
AT. 144 H X 0.0001 -0.0001 -0.0001 0.0000 0.0002 0.0000  
Y 0.0000 -0.0001 -0.0000 0.0000 0.0001 0.0000  
Z 0.0001 -0.0001 -0.0001 0.0001 0.0002 0.0000  
AT. 145 H X -0.0000 0.0000 0.0000 0.0000 -0.0000 -0.0000  
Y 0.0000 0.0000 0.0001 0.0000 -0.0001 -0.0001  
Z 0.0000 0.0000 -0.0000 -0.0000 -0.0000 0.0000  
AT. 146 H X 0.0000 0.0000 -0.0000 0.0000 0.0000 0.0000  
Y 0.0000 -0.0000 0.0001 -0.0000 -0.0001 -0.0001  
Z -0.0000 0.0000 0.0000 -0.0000 0.0000 -0.0000  
AT. 147 H X -0.0000 0.0000 -0.0000 -0.0000 -0.0000 0.0000  
Y 0.0000 0.0000 -0.0001 -0.0000 -0.0001 0.0001  
Z 0.0000 0.0000 0.0000 0.0000 -0.0000 -0.0000  
AT. 148 H X 0.0000 0.0000 0.0000 -0.0000 0.0000 -0.0000

Y 0.0000 -0.0000 -0.0001 0.0000 -0.0001 0.0001  
Z -0.0000 0.0000 -0.0000 0.0000 0.0000 0.0000  
AT. 149 O X 0.0001 0.0001 0.0001 0.0001 -0.0000 -0.0000  
Y 0.0000 0.0000 0.0000 0.0000 0.0000 0.0000  
Z 0.0000 0.0000 0.0000 0.0000 0.0000 0.0000  
AT. 150 O X -0.0001 0.0001 -0.0001 0.0001 0.0000 0.0000  
Y 0.0000 -0.0000 0.0000 -0.0000 0.0000 0.0000  
Z -0.0000 0.0000 -0.0000 0.0000 -0.0000 -0.0000  
AT. 151 O X 0.0001 0.0001 -0.0001 -0.0001 -0.0000 0.0000  
Y 0.0000 0.0000 -0.0000 -0.0000 0.0000 -0.0000  
Z 0.0000 0.0000 -0.0000 -0.0000 0.0000 -0.0000  
AT. 152 O X -0.0001 0.0001 0.0001 -0.0001 0.0000 -0.0000  
Y 0.0000 -0.0000 -0.0000 0.0000 0.0000 -0.0000  
Z -0.0000 0.0000 0.0000 -0.0000 -0.0000 0.0000  
AT. 153 H X -0.0001 -0.0001 -0.0001 -0.0001 0.0001 0.0000  
Y -0.0002 -0.0002 -0.0002 -0.0002 -0.0000 0.0001  
Z -0.0002 -0.0002 -0.0001 -0.0002 0.0001 0.0003  
AT. 154 H X 0.0001 -0.0001 0.0001 -0.0001 -0.0001 -0.0000  
Y -0.0002 0.0002 -0.0002 0.0002 -0.0000 0.0001  
Z 0.0002 -0.0002 0.0001 -0.0002 -0.0001 -0.0003  
AT. 155 H X -0.0001 -0.0001 0.0001 0.0001 0.0001 -0.0000  
Y -0.0002 -0.0002 0.0002 0.0002 -0.0000 -0.0001  
Z -0.0002 -0.0002 0.0001 0.0002 0.0001 -0.0003  
AT. 156 H X 0.0001 -0.0001 -0.0001 0.0001 -0.0001 0.0000  
Y -0.0002 0.0002 0.0002 -0.0002 -0.0000 -0.0001  
Z 0.0002 -0.0002 -0.0001 0.0002 -0.0001 0.0003  
AT. 157 O X 0.0000 0.0000 0.0000 0.0000 -0.0000 -0.0000  
Y 0.0000 0.0000 0.0000 0.0000 -0.0000 -0.0000  
Z 0.0000 0.0000 -0.0000 -0.0000 0.0000 -0.0000  
AT. 158 O X -0.0000 0.0000 -0.0000 0.0000 0.0000 0.0000  
Y 0.0000 -0.0000 0.0000 -0.0000 -0.0000 -0.0000  
Z -0.0000 0.0000 0.0000 -0.0000 -0.0000 0.0000

AT.159 O X 0.0000 0.0000 -0.0000 -0.0000 -0.0000 0.0000  
Y 0.0000 0.0000 -0.0000 -0.0000 -0.0000 0.0000  
Z 0.0000 0.0000 0.0000 0.0000 0.0000 0.0000

AT.160 O X -0.0000 0.0000 0.0000 -0.0000 0.0000 -0.0000  
Y 0.0000 -0.0000 -0.0000 0.0000 -0.0000 0.0000  
Z -0.0000 0.0000 -0.0000 0.0000 -0.0000 -0.0000

AT.161 O X 0.0000 0.0000 0.0000 0.0000 -0.0000 -0.0001  
Y -0.0000 -0.0000 -0.0000 -0.0000 0.0001 0.0001  
Z 0.0000 -0.0000 -0.0000 0.0000 0.0000 0.0000

AT.162 O X -0.0000 0.0000 -0.0000 0.0000 0.0000 0.0001  
Y -0.0000 0.0000 -0.0000 0.0000 0.0001 0.0001  
Z -0.0000 -0.0000 0.0000 0.0000 -0.0000 -0.0000

AT.163 O X 0.0000 0.0000 -0.0000 -0.0000 -0.0000 0.0001  
Y -0.0000 -0.0000 0.0000 0.0000 0.0001 -0.0001  
Z 0.0000 -0.0000 0.0000 -0.0000 0.0000 -0.0000

AT.164 O X -0.0000 0.0000 0.0000 -0.0000 0.0000 -0.0001  
Y -0.0000 0.0000 0.0000 -0.0000 0.0001 -0.0001  
Z -0.0000 -0.0000 -0.0000 -0.0000 -0.0000 0.0000

AT.165 H X -0.0001 -0.0001 -0.0001 -0.0001 0.0006 0.0007  
Y 0.0001 0.0003 0.0002 0.0001 -0.0009 -0.0012  
Z -0.0000 -0.0000 -0.0000 -0.0000 -0.0000 0.0000

AT.166 H X 0.0001 -0.0001 0.0001 -0.0001 -0.0006 -0.0007  
Y 0.0001 -0.0003 0.0002 -0.0001 -0.0009 -0.0012  
Z 0.0000 -0.0000 0.0000 -0.0000 0.0000 -0.0000

AT.167 H X -0.0001 -0.0001 0.0001 0.0001 0.0006 -0.0007  
Y 0.0001 0.0003 -0.0002 -0.0001 -0.0009 0.0012  
Z -0.0000 -0.0000 0.0000 0.0000 -0.0000 -0.0000

AT.168 H X 0.0001 -0.0001 -0.0001 0.0001 -0.0006 0.0007  
Y 0.0001 -0.0003 -0.0002 0.0001 -0.0009 0.0012  
Z 0.0000 -0.0000 -0.0000 0.0000 0.0000 0.0000

AT.169 O X 0.0000 0.0000 0.0000 0.0000 -0.0000 0.0000  
Y 0.0001 0.0001 0.0001 0.0000 0.0000 0.0000

Z 0.0000 0.0000 0.0000 0.0000 0.0000 0.0000  
AT.170 O X -0.0000 0.0000 -0.0000 0.0000 0.0000 -0.0000  
Y 0.0001 -0.0001 0.0001 -0.0000 0.0000 0.0000  
Z -0.0000 0.0000 -0.0000 0.0000 -0.0000 -0.0000  
AT.171 O X 0.0000 0.0000 -0.0000 -0.0000 -0.0000 -0.0000  
Y 0.0001 0.0001 -0.0001 -0.0000 0.0000 -0.0000  
Z 0.0000 0.0000 -0.0000 -0.0000 0.0000 -0.0000  
AT.172 O X -0.0000 0.0000 0.0000 -0.0000 0.0000 0.0000  
Y 0.0001 -0.0001 -0.0001 0.0000 0.0000 -0.0000  
Z -0.0000 0.0000 0.0000 -0.0000 -0.0000 0.0000  
AT.173 H X -0.0004 -0.0004 -0.0003 -0.0001 -0.0001 -0.0001  
Y -0.0017 -0.0019 -0.0012 -0.0005 0.0000 -0.0001  
Z -0.0003 -0.0003 0.0000 0.0001 0.0000 -0.0000  
AT.174 H X 0.0004 -0.0004 0.0003 -0.0001 0.0001 0.0001  
Y -0.0017 0.0019 -0.0012 0.0005 0.0000 -0.0001  
Z 0.0003 -0.0003 -0.0000 0.0001 -0.0000 0.0000  
AT.175 H X -0.0004 -0.0004 0.0003 0.0001 -0.0001 0.0001  
Y -0.0017 -0.0019 0.0012 0.0005 0.0000 0.0001  
Z -0.0003 -0.0003 -0.0000 -0.0001 0.0000 0.0000  
AT.176 H X 0.0004 -0.0004 -0.0003 0.0001 0.0001 -0.0001  
Y -0.0017 0.0019 0.0012 -0.0005 0.0000 0.0001  
Z 0.0003 -0.0003 0.0000 -0.0001 -0.0000 -0.0000

FREQ(CM\*\*-1) 3162.96 3163.02 3165.85 3165.95 3166.07 3166.13

AT. 1 I X 0.0000 -0.0000 -0.0000 0.0000 0.0000 -0.0000  
Y -0.0000 -0.0000 -0.0000 0.0000 0.0000 -0.0000  
Z -0.0000 0.0000 0.0000 0.0000 0.0000 -0.0000  
AT. 2 I X 0.0000 -0.0000 -0.0000 -0.0000 0.0000 0.0000  
Y 0.0000 0.0000 0.0000 0.0000 -0.0000 -0.0000  
Z -0.0000 0.0000 0.0000 -0.0000 0.0000 0.0000  
AT. 3 I X -0.0000 -0.0000 -0.0000 0.0000 -0.0000 0.0000

Y 0.0000 -0.0000 -0.0000 0.0000 -0.0000 0.0000  
Z 0.0000 0.0000 0.0000 0.0000 -0.0000 0.0000  
AT. 4 I X -0.0000 -0.0000 -0.0000 -0.0000 -0.0000 -0.0000  
Y -0.0000 0.0000 0.0000 0.0000 0.0000 0.0000  
Z 0.0000 0.0000 0.0000 -0.0000 -0.0000 -0.0000  
AT. 5 I X 0.0000 -0.0000 -0.0000 -0.0000 0.0000 -0.0000  
Y 0.0000 -0.0000 0.0000 0.0000 0.0000 0.0000  
Z 0.0000 -0.0000 0.0000 0.0000 0.0000 0.0000  
AT. 6 I X 0.0000 -0.0000 -0.0000 0.0000 0.0000 0.0000  
Y -0.0000 0.0000 -0.0000 0.0000 -0.0000 0.0000  
Z 0.0000 -0.0000 0.0000 -0.0000 0.0000 -0.0000  
AT. 7 I X -0.0000 -0.0000 -0.0000 -0.0000 -0.0000 0.0000  
Y -0.0000 -0.0000 0.0000 0.0000 -0.0000 -0.0000  
Z -0.0000 -0.0000 0.0000 0.0000 -0.0000 -0.0000  
AT. 8 I X -0.0000 -0.0000 -0.0000 0.0000 -0.0000 -0.0000  
Y 0.0000 0.0000 -0.0000 0.0000 0.0000 -0.0000  
Z -0.0000 -0.0000 0.0000 -0.0000 -0.0000 0.0000  
AT. 9 N X 0.0000 0.0000 0.0000 0.0000 0.0000 0.0000  
Y -0.0000 -0.0000 -0.0000 -0.0000 -0.0000 0.0000  
Z 0.0000 0.0000 -0.0000 -0.0000 -0.0000 -0.0000  
AT. 10 N X 0.0000 0.0000 0.0000 -0.0000 0.0000 -0.0000  
Y 0.0000 0.0000 0.0000 -0.0000 0.0000 0.0000  
Z 0.0000 0.0000 -0.0000 0.0000 -0.0000 0.0000  
AT. 11 N X -0.0000 0.0000 0.0000 0.0000 -0.0000 -0.0000  
Y 0.0000 -0.0000 -0.0000 -0.0000 0.0000 -0.0000  
Z -0.0000 0.0000 -0.0000 -0.0000 0.0000 0.0000  
AT. 12 N X -0.0000 0.0000 0.0000 -0.0000 -0.0000 0.0000  
Y -0.0000 0.0000 0.0000 -0.0000 -0.0000 -0.0000  
Z -0.0000 0.0000 -0.0000 0.0000 0.0000 -0.0000  
AT. 13 N X 0.0000 -0.0000 -0.0000 -0.0000 -0.0000 -0.0000  
Y 0.0000 0.0000 -0.0000 -0.0000 0.0000 -0.0000  
Z -0.0000 -0.0000 0.0000 -0.0000 -0.0000 -0.0000

AT. 14 N X 0.0000 -0.0000 -0.0000 0.0000 -0.0000 0.0000  
Y -0.0000 -0.0000 0.0000 -0.0000 -0.0000 -0.0000  
Z -0.0000 -0.0000 0.0000 0.0000 -0.0000 0.0000

AT. 15 N X -0.0000 -0.0000 -0.0000 -0.0000 0.0000 0.0000  
Y -0.0000 0.0000 -0.0000 -0.0000 -0.0000 0.0000  
Z 0.0000 -0.0000 0.0000 -0.0000 0.0000 0.0000

AT. 16 N X -0.0000 -0.0000 -0.0000 0.0000 0.0000 -0.0000  
Y 0.0000 -0.0000 0.0000 -0.0000 0.0000 0.0000  
Z 0.0000 -0.0000 0.0000 0.0000 0.0000 -0.0000

AT. 17 O X -0.0000 -0.0000 -0.0000 -0.0000 0.0000 0.0000  
Y -0.0000 0.0000 -0.0000 -0.0000 0.0000 0.0000  
Z -0.0000 0.0000 -0.0000 0.0000 0.0000 0.0000

AT. 18 O X -0.0000 -0.0000 -0.0000 0.0000 0.0000 -0.0000  
Y 0.0000 -0.0000 0.0000 -0.0000 -0.0000 0.0000  
Z -0.0000 0.0000 -0.0000 -0.0000 0.0000 -0.0000

AT. 19 O X 0.0000 -0.0000 -0.0000 -0.0000 -0.0000 -0.0000  
Y 0.0000 0.0000 -0.0000 -0.0000 -0.0000 -0.0000  
Z 0.0000 0.0000 -0.0000 0.0000 -0.0000 -0.0000

AT. 20 O X 0.0000 -0.0000 -0.0000 0.0000 -0.0000 0.0000  
Y -0.0000 -0.0000 0.0000 -0.0000 0.0000 -0.0000  
Z 0.0000 0.0000 -0.0000 -0.0000 -0.0000 0.0000

AT. 21 O X -0.0000 -0.0000 -0.0000 -0.0000 -0.0000 -0.0000  
Y 0.0000 0.0000 0.0000 0.0000 0.0000 0.0000  
Z -0.0000 -0.0000 0.0000 -0.0000 -0.0000 -0.0000

AT. 22 O X -0.0000 -0.0000 -0.0000 0.0000 -0.0000 0.0000  
Y -0.0000 -0.0000 -0.0000 0.0000 -0.0000 0.0000  
Z -0.0000 -0.0000 0.0000 0.0000 -0.0000 0.0000

AT. 23 O X 0.0000 -0.0000 -0.0000 -0.0000 0.0000 0.0000  
Y -0.0000 0.0000 0.0000 0.0000 -0.0000 -0.0000  
Z 0.0000 -0.0000 0.0000 -0.0000 0.0000 0.0000

AT. 24 O X 0.0000 -0.0000 -0.0000 0.0000 0.0000 -0.0000  
Y 0.0000 -0.0000 -0.0000 0.0000 0.0000 -0.0000



Z 0.0000 -0.0000 0.0000 0.0000 0.0000 -0.0000  
AT. 25 C X -0.0003 -0.0002 0.0002 -0.0003 -0.0004 0.0001  
Y 0.0001 0.0001 -0.0001 0.0002 0.0003 -0.0001  
Z -0.0002 -0.0001 0.0001 -0.0002 -0.0003 0.0001  
AT. 26 C X -0.0003 -0.0002 0.0002 0.0003 -0.0004 -0.0001  
Y -0.0001 -0.0001 0.0001 0.0002 -0.0003 -0.0001  
Z -0.0002 -0.0001 0.0001 0.0002 -0.0003 -0.0001  
AT. 27 C X 0.0003 -0.0002 0.0002 -0.0003 0.0004 -0.0001  
Y -0.0001 0.0001 -0.0001 0.0002 -0.0003 0.0001  
Z 0.0002 -0.0001 0.0001 -0.0002 0.0003 -0.0001  
AT. 28 C X 0.0003 -0.0002 0.0002 0.0003 0.0004 0.0001  
Y 0.0001 -0.0001 0.0001 0.0002 0.0003 0.0001  
Z 0.0002 -0.0001 0.0001 0.0002 0.0003 0.0001  
AT. 29 H X 0.0034 0.0022 -0.0024 0.0042 0.0057 -0.0011  
Y 0.0004 0.0002 -0.0003 0.0005 0.0007 -0.0001  
Z 0.0022 0.0014 -0.0016 0.0028 0.0038 -0.0007  
AT. 30 H X 0.0034 0.0022 -0.0024 -0.0042 0.0057 0.0011  
Y -0.0004 -0.0002 0.0003 0.0005 -0.0007 -0.0001  
Z 0.0022 0.0014 -0.0016 -0.0028 0.0038 0.0007  
AT. 31 H X -0.0034 0.0022 -0.0024 0.0042 -0.0057 0.0011  
Y -0.0004 0.0002 -0.0003 0.0005 -0.0007 0.0001  
Z -0.0022 0.0014 -0.0016 0.0028 -0.0038 0.0007  
AT. 32 H X -0.0034 0.0022 -0.0024 -0.0042 -0.0057 -0.0011  
Y 0.0004 -0.0002 0.0003 0.0005 0.0007 0.0001  
Z -0.0022 0.0014 -0.0016 -0.0028 -0.0038 -0.0007  
AT. 33 H X -0.0004 -0.0003 0.0003 -0.0005 -0.0008 0.0002  
Y -0.0020 -0.0013 0.0016 -0.0028 -0.0039 0.0008  
Z -0.0005 -0.0003 0.0004 -0.0006 -0.0009 0.0002  
AT. 34 H X -0.0004 -0.0003 0.0003 0.0005 -0.0008 -0.0002  
Y 0.0020 0.0013 -0.0016 -0.0028 0.0039 0.0008  
Z -0.0005 -0.0003 0.0004 0.0006 -0.0009 -0.0002  
AT. 35 H X 0.0004 -0.0003 0.0003 -0.0005 0.0008 -0.0002

Y 0.0020 -0.0013 0.0016 -0.0028 0.0039 -0.0008  
Z 0.0005 -0.0003 0.0004 -0.0006 0.0009 -0.0002  
AT. 36 H X 0.0004 -0.0003 0.0003 0.0005 0.0008 0.0002  
Y -0.0020 0.0013 -0.0016 -0.0028 -0.0039 -0.0008  
Z 0.0005 -0.0003 0.0004 0.0006 0.0009 0.0002  
AT. 37 C X 0.0000 -0.0000 -0.0000 -0.0000 -0.0000 -0.0000  
Y -0.0000 -0.0000 -0.0000 -0.0000 -0.0000 -0.0000  
Z 0.0000 0.0000 -0.0000 0.0000 -0.0000 -0.0000  
AT. 38 C X 0.0000 -0.0000 -0.0000 0.0000 -0.0000 0.0000  
Y 0.0000 0.0000 0.0000 -0.0000 0.0000 -0.0000  
Z 0.0000 0.0000 -0.0000 -0.0000 -0.0000 0.0000  
AT. 39 C X -0.0000 -0.0000 -0.0000 -0.0000 0.0000 0.0000  
Y 0.0000 -0.0000 -0.0000 -0.0000 0.0000 0.0000  
Z -0.0000 0.0000 -0.0000 0.0000 0.0000 0.0000  
AT. 40 C X -0.0000 -0.0000 -0.0000 0.0000 0.0000 -0.0000  
Y -0.0000 0.0000 0.0000 -0.0000 -0.0000 0.0000  
Z -0.0000 0.0000 -0.0000 -0.0000 0.0000 -0.0000  
AT. 41 C X 0.0001 0.0001 -0.0001 0.0001 0.0001 -0.0001  
Y -0.0003 -0.0003 0.0002 -0.0002 -0.0002 0.0001  
Z 0.0003 0.0003 -0.0001 0.0002 0.0002 -0.0001  
AT. 42 C X 0.0001 0.0001 -0.0001 -0.0001 0.0001 0.0001  
Y 0.0003 0.0003 -0.0002 -0.0002 0.0002 0.0001  
Z 0.0003 0.0003 -0.0001 -0.0002 0.0002 0.0001  
AT. 43 C X -0.0001 0.0001 -0.0001 0.0001 -0.0001 0.0001  
Y 0.0003 -0.0003 0.0002 -0.0002 0.0002 -0.0001  
Z -0.0003 0.0003 -0.0001 0.0002 -0.0002 0.0001  
AT. 44 C X -0.0001 0.0001 -0.0001 -0.0001 -0.0001 -0.0001  
Y -0.0003 0.0003 -0.0002 -0.0002 -0.0002 -0.0001  
Z -0.0003 0.0003 -0.0001 -0.0002 -0.0002 -0.0001  
AT. 45 H X -0.0006 -0.0007 0.0002 -0.0003 -0.0003 0.0002  
Y 0.0032 0.0032 -0.0012 0.0018 0.0019 -0.0012  
Z -0.0038 -0.0038 0.0014 -0.0021 -0.0022 0.0013

AT. 46 H X -0.0006 -0.0007 0.0002 0.0003 -0.0003 -0.0002  
Y -0.0032 -0.0032 0.0012 0.0018 -0.0019 -0.0012  
Z -0.0038 -0.0038 0.0014 0.0021 -0.0022 -0.0013

AT. 47 H X 0.0006 -0.0007 0.0002 -0.0003 0.0003 -0.0002  
Y -0.0032 0.0032 -0.0012 0.0018 -0.0019 0.0012  
Z 0.0038 -0.0038 0.0014 -0.0021 0.0022 -0.0013

AT. 48 H X 0.0006 -0.0007 0.0002 0.0003 0.0003 0.0002  
Y 0.0032 -0.0032 0.0012 0.0018 0.0019 0.0012  
Z 0.0038 -0.0038 0.0014 0.0021 0.0022 0.0013

AT. 49 H X -0.0003 -0.0002 0.0006 -0.0005 -0.0006 0.0005  
Y 0.0004 0.0003 -0.0006 0.0005 0.0007 -0.0005  
Z 0.0002 0.0001 -0.0003 0.0002 0.0003 -0.0002

AT. 50 H X -0.0003 -0.0002 0.0006 0.0005 -0.0006 -0.0005  
Y -0.0004 -0.0003 0.0006 0.0005 -0.0007 -0.0005  
Z 0.0002 0.0001 -0.0003 -0.0002 0.0003 0.0002

AT. 51 H X 0.0003 -0.0002 0.0006 -0.0005 0.0006 -0.0005  
Y -0.0004 0.0003 -0.0006 0.0005 -0.0007 0.0005  
Z -0.0002 0.0001 -0.0003 0.0002 -0.0003 0.0002

AT. 52 H X 0.0003 -0.0002 0.0006 0.0005 0.0006 0.0005  
Y 0.0004 -0.0003 0.0006 0.0005 0.0007 0.0005  
Z -0.0002 0.0001 -0.0003 -0.0002 -0.0003 -0.0002

AT. 53 C X -0.0000 -0.0001 0.0000 -0.0000 -0.0000 0.0000  
Y 0.0001 0.0001 -0.0000 0.0000 0.0000 -0.0000  
Z -0.0000 -0.0000 0.0000 -0.0000 -0.0000 0.0000

AT. 54 C X -0.0000 -0.0001 0.0000 0.0000 -0.0000 -0.0000  
Y -0.0001 -0.0001 0.0000 0.0000 -0.0000 -0.0000  
Z -0.0000 -0.0000 0.0000 0.0000 -0.0000 -0.0000

AT. 55 C X 0.0000 -0.0001 0.0000 -0.0000 0.0000 -0.0000  
Y -0.0001 0.0001 -0.0000 0.0000 -0.0000 0.0000  
Z 0.0000 -0.0000 0.0000 -0.0000 0.0000 -0.0000

AT. 56 C X 0.0000 -0.0001 0.0000 0.0000 0.0000 0.0000  
Y 0.0001 -0.0001 0.0000 0.0000 0.0000 0.0000

Z 0.0000 -0.0000 0.0000 0.0000 0.0000 0.0000  
AT. 57 C X -0.0016 -0.0016 0.0004 -0.0005 -0.0005 0.0004  
Y 0.0076 0.0077 -0.0020 0.0023 0.0024 -0.0019  
Z -0.0022 -0.0022 0.0006 -0.0007 -0.0008 0.0006  
AT. 58 C X -0.0016 -0.0016 0.0004 0.0005 -0.0005 -0.0004  
Y -0.0076 -0.0077 0.0020 0.0023 -0.0024 -0.0019  
Z -0.0022 -0.0022 0.0006 0.0007 -0.0008 -0.0006  
AT. 59 C X 0.0016 -0.0016 0.0004 -0.0005 0.0005 -0.0004  
Y -0.0076 0.0077 -0.0020 0.0023 -0.0024 0.0019  
Z 0.0022 -0.0022 0.0006 -0.0007 0.0008 -0.0006  
AT. 60 C X 0.0016 -0.0016 0.0004 0.0005 0.0005 0.0004  
Y 0.0076 -0.0077 0.0020 0.0023 0.0024 0.0019  
Z 0.0022 -0.0022 0.0006 0.0007 0.0008 0.0006  
AT. 61 H X 0.0424 0.0431 -0.0107 0.0126 0.0129 -0.0101  
Y -0.0562 -0.0571 0.0142 -0.0168 -0.0171 0.0134  
Z -0.0100 -0.0101 0.0025 -0.0030 -0.0031 0.0024  
AT. 62 H X 0.0424 0.0431 -0.0107 -0.0126 0.0129 0.0101  
Y 0.0562 0.0571 -0.0142 -0.0168 0.0171 0.0134  
Z -0.0100 -0.0101 0.0025 0.0030 -0.0031 -0.0024  
AT. 63 H X -0.0424 0.0431 -0.0107 0.0126 -0.0129 0.0101  
Y 0.0562 -0.0571 0.0142 -0.0168 0.0171 -0.0134  
Z 0.0100 -0.0101 0.0025 -0.0030 0.0031 -0.0024  
AT. 64 H X -0.0424 0.0431 -0.0107 -0.0126 -0.0129 -0.0101  
Y -0.0562 0.0571 -0.0142 -0.0168 -0.0171 -0.0134  
Z 0.0100 -0.0101 0.0025 0.0030 0.0031 0.0024  
AT. 65 H X -0.0159 -0.0161 0.0034 -0.0042 -0.0043 0.0033  
Y -0.0035 -0.0036 0.0007 -0.0008 -0.0009 0.0007  
Z -0.0006 -0.0006 0.0002 -0.0002 -0.0002 0.0001  
AT. 66 H X -0.0159 -0.0161 0.0034 0.0042 -0.0043 -0.0033  
Y 0.0035 0.0036 -0.0007 -0.0008 0.0009 0.0007  
Z -0.0006 -0.0006 0.0002 0.0002 -0.0002 -0.0001  
AT. 67 H X 0.0159 -0.0161 0.0034 -0.0042 0.0043 -0.0033

Y 0.0035 -0.0036 0.0007 -0.0008 0.0009 -0.0007  
Z 0.0006 -0.0006 0.0002 -0.0002 0.0002 -0.0001  
AT. 68 H X 0.0159 -0.0161 0.0034 0.0042 0.0043 0.0033  
Y -0.0035 0.0036 -0.0007 -0.0008 -0.0009 -0.0007  
Z 0.0006 -0.0006 0.0002 0.0002 0.0002 0.0001  
AT. 69 H X -0.0073 -0.0074 0.0021 -0.0025 -0.0025 0.0021  
Y -0.0313 -0.0319 0.0089 -0.0104 -0.0105 0.0086  
Z 0.0371 0.0378 -0.0106 0.0123 0.0125 -0.0102  
AT. 70 H X -0.0073 -0.0074 0.0021 0.0025 -0.0025 -0.0021  
Y 0.0313 0.0319 -0.0089 -0.0104 0.0105 0.0086  
Z 0.0371 0.0378 -0.0106 -0.0123 0.0125 0.0102  
AT. 71 H X 0.0073 -0.0074 0.0021 -0.0025 0.0025 -0.0021  
Y 0.0313 -0.0319 0.0089 -0.0104 0.0105 -0.0086  
Z -0.0371 0.0378 -0.0106 0.0123 -0.0125 0.0102  
AT. 72 H X 0.0073 -0.0074 0.0021 0.0025 0.0025 0.0021  
Y -0.0313 0.0319 -0.0089 -0.0104 -0.0105 -0.0086  
Z -0.0371 0.0378 -0.0106 -0.0123 -0.0125 -0.0102  
AT. 73 C X 0.0000 -0.0000 -0.0000 -0.0000 -0.0000 -0.0000  
Y 0.0000 0.0000 0.0000 0.0001 0.0001 0.0000  
Z 0.0001 0.0000 -0.0001 -0.0000 -0.0000 -0.0001  
AT. 74 C X 0.0000 -0.0000 -0.0000 0.0000 -0.0000 0.0000  
Y -0.0000 -0.0000 -0.0000 0.0001 -0.0001 0.0000  
Z 0.0001 0.0000 -0.0001 0.0000 -0.0000 0.0001  
AT. 75 C X -0.0000 -0.0000 -0.0000 -0.0000 0.0000 0.0000  
Y -0.0000 0.0000 0.0000 0.0001 -0.0001 -0.0000  
Z -0.0001 0.0000 -0.0001 -0.0000 0.0000 0.0001  
AT. 76 C X -0.0000 -0.0000 -0.0000 0.0000 0.0000 -0.0000  
Y 0.0000 -0.0000 -0.0000 0.0001 0.0001 -0.0000  
Z -0.0001 0.0000 -0.0001 0.0000 0.0000 -0.0001  
AT. 77 C X 0.0000 -0.0000 -0.0001 -0.0001 -0.0001 -0.0001  
Y 0.0001 -0.0000 -0.0002 -0.0002 -0.0002 -0.0002  
Z 0.0001 -0.0001 -0.0002 -0.0003 -0.0003 -0.0003

AT. 78 C X 0.0000 -0.0000 -0.0001 0.0001 -0.0001 0.0001  
Y -0.0001 0.0000 0.0002 -0.0002 0.0002 -0.0002  
Z 0.0001 -0.0001 -0.0002 0.0003 -0.0003 0.0003

AT. 79 C X -0.0000 -0.0000 -0.0001 -0.0001 0.0001 0.0001  
Y -0.0001 -0.0000 -0.0002 -0.0002 0.0002 0.0002  
Z -0.0001 -0.0001 -0.0002 -0.0003 0.0003 0.0003

AT. 80 C X -0.0000 -0.0000 -0.0001 0.0001 0.0001 -0.0001  
Y 0.0001 0.0000 0.0002 -0.0002 -0.0002 0.0002  
Z -0.0001 -0.0001 -0.0002 0.0003 0.0003 -0.0003

AT. 81 H X -0.0000 0.0003 0.0003 0.0004 0.0003 0.0002  
Y -0.0000 -0.0002 -0.0002 -0.0003 -0.0002 -0.0001  
Z 0.0000 -0.0000 -0.0000 -0.0001 -0.0000 -0.0000

AT. 82 H X -0.0000 0.0003 0.0003 -0.0004 0.0003 -0.0002  
Y 0.0000 0.0002 0.0002 -0.0003 0.0002 -0.0001  
Z 0.0000 -0.0000 -0.0000 0.0001 -0.0000 0.0000

AT. 83 H X 0.0000 0.0003 0.0003 0.0004 -0.0003 -0.0002  
Y 0.0000 -0.0002 -0.0002 -0.0003 0.0002 0.0001  
Z -0.0000 -0.0000 -0.0000 -0.0001 0.0000 0.0000

AT. 84 H X 0.0000 0.0003 0.0003 -0.0004 -0.0003 0.0002  
Y -0.0000 0.0002 0.0002 -0.0003 -0.0002 0.0001  
Z -0.0000 -0.0000 -0.0000 0.0001 0.0000 -0.0000

AT. 85 H X -0.0002 0.0002 0.0007 0.0008 0.0007 0.0007  
Y -0.0006 0.0006 0.0025 0.0025 0.0025 0.0025  
Z -0.0008 0.0008 0.0031 0.0032 0.0031 0.0032

AT. 86 H X -0.0002 0.0002 0.0007 -0.0008 0.0007 -0.0007  
Y 0.0006 -0.0006 -0.0025 0.0025 -0.0025 0.0025  
Z -0.0008 0.0008 0.0031 -0.0032 0.0031 -0.0032

AT. 87 H X 0.0002 0.0002 0.0007 0.0008 -0.0007 -0.0007  
Y 0.0006 0.0006 0.0025 0.0025 -0.0025 -0.0025  
Z 0.0008 0.0008 0.0031 0.0032 -0.0031 -0.0032

AT. 88 H X 0.0002 0.0002 0.0007 -0.0008 -0.0007 0.0007  
Y -0.0006 -0.0006 -0.0025 0.0025 0.0025 -0.0025

Z 0.0008 0.0008 0.0031 -0.0032 -0.0031 0.0032  
AT. 89 C X -0.0000 0.0000 0.0000 0.0000 0.0000 0.0000  
Y -0.0000 0.0000 0.0000 0.0000 0.0000 0.0000  
Z -0.0000 0.0000 0.0001 0.0001 0.0001 0.0001  
AT. 90 C X -0.0000 0.0000 0.0000 -0.0000 0.0000 -0.0000  
Y 0.0000 -0.0000 -0.0000 0.0000 -0.0000 0.0000  
Z -0.0000 0.0000 0.0001 -0.0001 0.0001 -0.0001  
AT. 91 C X 0.0000 0.0000 0.0000 0.0000 -0.0000 -0.0000  
Y 0.0000 0.0000 0.0000 0.0000 -0.0000 -0.0000  
Z 0.0000 0.0000 0.0001 0.0001 -0.0001 -0.0001  
AT. 92 C X 0.0000 0.0000 0.0000 -0.0000 -0.0000 0.0000  
Y -0.0000 -0.0000 -0.0000 0.0000 0.0000 -0.0000  
Z 0.0000 0.0000 0.0001 -0.0001 -0.0001 0.0001  
AT. 93 C X -0.0006 0.0005 0.0013 0.0013 0.0013 0.0014  
Y -0.0023 0.0019 0.0074 0.0073 0.0073 0.0074  
Z -0.0009 0.0007 0.0029 0.0029 0.0028 0.0029  
AT. 94 C X -0.0006 0.0005 0.0013 -0.0013 0.0013 -0.0014  
Y 0.0023 -0.0019 -0.0074 0.0073 -0.0073 0.0074  
Z -0.0009 0.0007 0.0029 -0.0029 0.0028 -0.0029  
AT. 95 C X 0.0006 0.0005 0.0013 0.0013 -0.0013 -0.0014  
Y 0.0023 0.0019 0.0074 0.0073 -0.0073 -0.0074  
Z 0.0009 0.0007 0.0029 0.0029 -0.0028 -0.0029  
AT. 96 C X 0.0006 0.0005 0.0013 -0.0013 -0.0013 0.0014  
Y -0.0023 -0.0019 -0.0074 0.0073 0.0073 -0.0074  
Z 0.0009 0.0007 0.0029 -0.0029 -0.0028 0.0029  
AT. 97 H X 0.0139 -0.0116 -0.0402 -0.0396 -0.0398 -0.0406  
Y 0.0074 -0.0062 -0.0211 -0.0208 -0.0209 -0.0214  
Z -0.0041 0.0034 0.0119 0.0117 0.0118 0.0120  
AT. 98 H X 0.0139 -0.0116 -0.0402 0.0396 -0.0398 0.0406  
Y -0.0074 0.0062 0.0211 -0.0208 0.0209 -0.0214  
Z -0.0041 0.0034 0.0119 -0.0117 0.0118 -0.0120  
AT. 99 H X -0.0139 -0.0116 -0.0402 -0.0396 0.0398 0.0406

Y -0.0074 -0.0062 -0.0211 -0.0208 0.0209 0.0214  
Z 0.0041 0.0034 0.0119 0.0117 -0.0118 -0.0120  
AT.100 H X -0.0139 -0.0116 -0.0402 0.0396 0.0398 -0.0406  
Y 0.0074 0.0062 0.0211 -0.0208 -0.0209 0.0214  
Z 0.0041 0.0034 0.0119 -0.0117 -0.0118 0.0120  
AT.101 H X -0.0114 0.0093 0.0394 0.0388 0.0385 0.0394  
Y 0.0101 -0.0082 -0.0349 -0.0344 -0.0341 -0.0349  
Z 0.0016 -0.0012 -0.0055 -0.0054 -0.0053 -0.0055  
AT.102 H X -0.0114 0.0093 0.0394 -0.0388 0.0385 -0.0394  
Y -0.0101 0.0082 0.0349 -0.0344 0.0341 -0.0349  
Z 0.0016 -0.0012 -0.0055 0.0054 -0.0053 0.0055  
AT.103 H X 0.0114 0.0093 0.0394 0.0388 -0.0385 -0.0394  
Y -0.0101 -0.0082 -0.0349 -0.0344 0.0341 0.0349  
Z -0.0016 -0.0012 -0.0055 -0.0054 0.0053 0.0055  
AT.104 H X 0.0114 0.0093 0.0394 -0.0388 -0.0385 0.0394  
Y 0.0101 0.0082 0.0349 -0.0344 -0.0341 0.0349  
Z -0.0016 -0.0012 -0.0055 0.0054 0.0053 -0.0055  
AT.105 H X 0.0045 -0.0037 -0.0145 -0.0143 -0.0142 -0.0145  
Y 0.0101 -0.0083 -0.0322 -0.0318 -0.0315 -0.0322  
Z 0.0132 -0.0109 -0.0420 -0.0414 -0.0411 -0.0420  
AT.106 H X 0.0045 -0.0037 -0.0145 0.0143 -0.0142 0.0145  
Y -0.0101 0.0083 0.0322 -0.0318 0.0315 -0.0322  
Z 0.0132 -0.0109 -0.0420 0.0414 -0.0411 0.0420  
AT.107 H X -0.0045 -0.0037 -0.0145 -0.0143 0.0142 0.0145  
Y -0.0101 -0.0083 -0.0322 -0.0318 0.0315 0.0322  
Z -0.0132 -0.0109 -0.0420 -0.0414 0.0411 0.0420  
AT.108 H X -0.0045 -0.0037 -0.0145 0.0143 0.0142 -0.0145  
Y 0.0101 0.0083 0.0322 -0.0318 -0.0315 0.0322  
Z -0.0132 -0.0109 -0.0420 0.0414 0.0411 -0.0420  
AT.109 C X 0.0000 0.0000 0.0000 0.0000 0.0000 0.0000  
Y -0.0001 -0.0002 0.0000 -0.0000 -0.0000 0.0000  
Z 0.0001 0.0001 -0.0000 0.0000 0.0000 -0.0000



AT.110 C X 0.0000 0.0000 0.0000 -0.0000 0.0000 -0.0000  
Y 0.0001 0.0002 -0.0000 -0.0000 0.0000 0.0000  
Z 0.0001 0.0001 -0.0000 -0.0000 0.0000 0.0000

AT.111 C X -0.0000 0.0000 0.0000 0.0000 -0.0000 -0.0000  
Y 0.0001 -0.0002 0.0000 -0.0000 0.0000 -0.0000  
Z -0.0001 0.0001 -0.0000 0.0000 -0.0000 0.0000

AT.112 C X -0.0000 0.0000 0.0000 -0.0000 -0.0000 0.0000  
Y -0.0001 0.0002 -0.0000 -0.0000 -0.0000 -0.0000  
Z -0.0001 0.0001 -0.0000 -0.0000 -0.0000 -0.0000

AT.113 H X 0.0003 0.0003 -0.0001 -0.0003 0.0000 -0.0001  
Y 0.0002 0.0003 -0.0001 -0.0002 0.0000 -0.0000  
Z -0.0001 -0.0001 0.0000 0.0000 -0.0000 0.0000

AT.114 H X 0.0003 0.0003 -0.0001 0.0003 0.0000 0.0001  
Y -0.0002 -0.0003 0.0001 -0.0002 -0.0000 -0.0000  
Z -0.0001 -0.0001 0.0000 -0.0000 -0.0000 -0.0000

AT.115 H X -0.0003 0.0003 -0.0001 -0.0003 -0.0000 0.0001  
Y -0.0002 0.0003 -0.0001 -0.0002 -0.0000 0.0000  
Z 0.0001 -0.0001 0.0000 0.0000 0.0000 -0.0000

AT.116 H X -0.0003 0.0003 -0.0001 0.0003 -0.0000 -0.0001  
Y 0.0002 -0.0003 0.0001 -0.0002 0.0000 0.0000  
Z 0.0001 -0.0001 0.0000 -0.0000 0.0000 0.0000

AT.117 H X -0.0002 -0.0002 0.0000 -0.0000 -0.0001 0.0000  
Y 0.0011 0.0012 -0.0002 0.0001 0.0003 -0.0001  
Z -0.0014 -0.0016 0.0002 -0.0002 -0.0004 0.0001

AT.118 H X -0.0002 -0.0002 0.0000 0.0000 -0.0001 -0.0000  
Y -0.0011 -0.0012 0.0002 0.0001 -0.0003 -0.0001  
Z -0.0014 -0.0016 0.0002 0.0002 -0.0004 -0.0001

AT.119 H X 0.0002 -0.0002 0.0000 -0.0000 0.0001 -0.0000  
Y -0.0011 0.0012 -0.0002 0.0001 -0.0003 0.0001  
Z 0.0014 -0.0016 0.0002 -0.0002 0.0004 -0.0001

AT.120 H X 0.0002 -0.0002 0.0000 0.0000 0.0001 0.0000  
Y 0.0011 -0.0012 0.0002 0.0001 0.0003 0.0001

Z 0.0014 -0.0016 0.0002 0.0002 0.0004 0.0001  
AT.121 C X -0.0000 0.0001 -0.0001 -0.0001 -0.0001 -0.0001  
Y 0.0000 -0.0000 -0.0002 -0.0002 -0.0002 -0.0002  
Z 0.0001 -0.0001 -0.0003 -0.0003 -0.0003 -0.0003  
AT.122 C X -0.0000 0.0001 -0.0001 0.0001 -0.0001 0.0001  
Y -0.0000 0.0000 0.0002 -0.0002 0.0002 -0.0002  
Z 0.0001 -0.0001 -0.0003 0.0003 -0.0003 0.0003  
AT.123 C X 0.0000 0.0001 -0.0001 -0.0001 0.0001 0.0001  
Y -0.0000 -0.0000 -0.0002 -0.0002 0.0002 0.0002  
Z -0.0001 -0.0001 -0.0003 -0.0003 0.0003 0.0003  
AT.124 C X 0.0000 0.0001 -0.0001 0.0001 0.0001 -0.0001  
Y 0.0000 0.0000 0.0002 -0.0002 -0.0002 0.0002  
Z -0.0001 -0.0001 -0.0003 0.0003 0.0003 -0.0003  
AT.125 H X -0.0004 0.0004 0.0011 0.0011 0.0011 0.0011  
Y -0.0008 0.0007 0.0024 0.0024 0.0023 0.0025  
Z -0.0011 0.0010 0.0034 0.0034 0.0034 0.0036  
AT.126 H X -0.0004 0.0004 0.0011 -0.0011 0.0011 -0.0011  
Y 0.0008 -0.0007 -0.0024 0.0024 -0.0023 0.0025  
Z -0.0011 0.0010 0.0034 -0.0034 0.0034 -0.0036  
AT.127 H X 0.0004 0.0004 0.0011 0.0011 -0.0011 -0.0011  
Y 0.0008 0.0007 0.0024 0.0024 -0.0023 -0.0025  
Z 0.0011 0.0010 0.0034 0.0034 -0.0034 -0.0036  
AT.128 H X 0.0004 0.0004 0.0011 -0.0011 -0.0011 0.0011  
Y -0.0008 -0.0007 -0.0024 0.0024 0.0023 -0.0025  
Z 0.0011 0.0010 0.0034 -0.0034 -0.0034 0.0036  
AT.129 H X 0.0008 -0.0009 0.0002 0.0003 0.0002 0.0002  
Y 0.0006 -0.0006 0.0002 0.0002 0.0002 0.0002  
Z -0.0002 0.0002 -0.0001 -0.0001 -0.0001 -0.0001  
AT.130 H X 0.0008 -0.0009 0.0002 -0.0003 0.0002 -0.0002  
Y -0.0006 0.0006 -0.0002 0.0002 -0.0002 0.0002  
Z -0.0002 0.0002 -0.0001 0.0001 -0.0001 0.0001  
AT.131 H X -0.0008 -0.0009 0.0002 0.0003 -0.0002 -0.0002

Y -0.0006 -0.0006 0.0002 0.0002 -0.0002 -0.0002  
Z 0.0002 0.0002 -0.0001 -0.0001 0.0001 0.0001  
AT. 132 H X -0.0008 -0.0009 0.0002 -0.0003 -0.0002 0.0002  
Y 0.0006 0.0006 -0.0002 0.0002 0.0002 -0.0002  
Z 0.0002 0.0002 -0.0001 0.0001 0.0001 -0.0001  
AT. 133 C X 0.0000 0.0000 -0.0000 -0.0000 0.0000 0.0000  
Y -0.0000 -0.0000 -0.0000 -0.0000 -0.0000 -0.0000  
Z 0.0000 0.0000 -0.0000 0.0000 0.0000 0.0000  
AT. 134 C X 0.0000 0.0000 -0.0000 0.0000 0.0000 -0.0000  
Y 0.0000 0.0000 0.0000 -0.0000 0.0000 -0.0000  
Z 0.0000 0.0000 -0.0000 -0.0000 0.0000 -0.0000  
AT. 135 C X -0.0000 0.0000 -0.0000 -0.0000 -0.0000 -0.0000  
Y 0.0000 -0.0000 -0.0000 -0.0000 0.0000 0.0000  
Z -0.0000 0.0000 -0.0000 0.0000 -0.0000 -0.0000  
AT. 136 C X -0.0000 0.0000 -0.0000 0.0000 -0.0000 0.0000  
Y -0.0000 0.0000 0.0000 -0.0000 -0.0000 0.0000  
Z -0.0000 0.0000 -0.0000 -0.0000 -0.0000 0.0000  
AT. 137 C X -0.0000 0.0000 0.0000 0.0000 0.0000 0.0000  
Y 0.0000 -0.0000 -0.0000 -0.0001 -0.0000 -0.0000  
Z -0.0000 0.0000 0.0000 0.0000 0.0000 0.0000  
AT. 138 C X -0.0000 0.0000 0.0000 -0.0000 0.0000 -0.0000  
Y -0.0000 0.0000 0.0000 -0.0001 0.0000 -0.0000  
Z -0.0000 0.0000 0.0000 -0.0000 0.0000 -0.0000  
AT. 139 C X 0.0000 0.0000 0.0000 0.0000 -0.0000 -0.0000  
Y -0.0000 -0.0000 -0.0000 -0.0001 0.0000 0.0000  
Z 0.0000 0.0000 0.0000 0.0000 -0.0000 -0.0000  
AT. 140 C X 0.0000 0.0000 0.0000 -0.0000 -0.0000 0.0000  
Y 0.0000 0.0000 0.0000 -0.0001 -0.0000 0.0000  
Z 0.0000 0.0000 0.0000 -0.0000 -0.0000 0.0000  
AT. 141 H X 0.0003 -0.0001 -0.0003 -0.0003 -0.0002 -0.0003  
Y -0.0002 0.0001 0.0001 0.0001 0.0001 0.0001  
Z 0.0003 -0.0001 -0.0003 -0.0003 -0.0002 -0.0003

AT.142 H X 0.0003 -0.0001 -0.0003 0.0003 -0.0002 0.0003  
Y 0.0002 -0.0001 -0.0001 0.0001 -0.0001 0.0001  
Z 0.0003 -0.0001 -0.0003 0.0003 -0.0002 0.0003

AT.143 H X -0.0003 -0.0001 -0.0003 -0.0003 0.0002 0.0003  
Y 0.0002 0.0001 0.0001 0.0001 -0.0001 -0.0001  
Z -0.0003 -0.0001 -0.0003 -0.0003 0.0002 0.0003

AT.144 H X -0.0003 -0.0001 -0.0003 0.0003 0.0002 -0.0003  
Y -0.0002 -0.0001 -0.0001 0.0001 0.0001 -0.0001  
Z -0.0003 -0.0001 -0.0003 0.0003 0.0002 -0.0003

AT.145 H X 0.0001 0.0000 0.0001 0.0001 0.0001 0.0001  
Y 0.0002 0.0001 0.0003 0.0004 0.0004 0.0003  
Z -0.0000 -0.0000 -0.0002 -0.0002 -0.0002 -0.0002

AT.146 H X 0.0001 0.0000 0.0001 -0.0001 0.0001 -0.0001  
Y -0.0002 -0.0001 -0.0003 0.0004 -0.0004 0.0003  
Z -0.0000 -0.0000 -0.0002 0.0002 -0.0002 0.0002

AT.147 H X -0.0001 0.0000 0.0001 0.0001 -0.0001 -0.0001  
Y -0.0002 0.0001 0.0003 0.0004 -0.0004 -0.0003  
Z 0.0000 -0.0000 -0.0002 -0.0002 0.0002 0.0002

AT.148 H X -0.0001 0.0000 0.0001 -0.0001 -0.0001 0.0001  
Y 0.0002 -0.0001 -0.0003 0.0004 0.0004 -0.0003  
Z 0.0000 -0.0000 -0.0002 0.0002 0.0002 -0.0002

AT.149 O X -0.0000 0.0000 0.0000 0.0000 0.0000 0.0000  
Y -0.0000 -0.0000 -0.0000 -0.0000 -0.0000 -0.0000  
Z -0.0000 -0.0000 0.0000 0.0000 0.0000 0.0001

AT.150 O X -0.0000 0.0000 0.0000 -0.0000 0.0000 -0.0000  
Y 0.0000 0.0000 0.0000 -0.0000 0.0000 -0.0000  
Z -0.0000 -0.0000 0.0000 -0.0000 0.0000 -0.0001

AT.151 O X 0.0000 0.0000 0.0000 0.0000 -0.0000 -0.0000  
Y 0.0000 -0.0000 -0.0000 -0.0000 0.0000 0.0000  
Z 0.0000 -0.0000 0.0000 0.0000 -0.0000 -0.0001

AT.152 O X 0.0000 0.0000 0.0000 -0.0000 -0.0000 0.0000  
Y -0.0000 0.0000 0.0000 -0.0000 -0.0000 0.0000

Z 0.0000 -0.0000 0.0000 -0.0000 -0.0000 0.0001  
AT. 153 H X -0.0001 0.0000 0.0003 0.0002 0.0000 0.0001  
Y -0.0000 -0.0001 -0.0001 -0.0002 -0.0001 -0.0001  
Z 0.0001 -0.0003 -0.0002 -0.0003 -0.0008 -0.0007  
AT. 154 H X -0.0001 0.0000 0.0003 -0.0002 0.0000 -0.0001  
Y 0.0000 0.0001 0.0001 -0.0002 0.0001 -0.0001  
Z 0.0001 -0.0003 -0.0002 0.0003 -0.0008 0.0007  
AT. 155 H X 0.0001 0.0000 0.0003 0.0002 -0.0000 -0.0001  
Y 0.0000 -0.0001 -0.0001 -0.0002 0.0001 0.0001  
Z -0.0001 -0.0003 -0.0002 -0.0003 0.0008 0.0007  
AT. 156 H X 0.0001 0.0000 0.0003 -0.0002 -0.0000 0.0001  
Y -0.0000 0.0001 0.0001 -0.0002 -0.0001 0.0001  
Z -0.0001 -0.0003 -0.0002 0.0003 0.0008 -0.0007  
AT. 157 O X 0.0000 0.0000 0.0000 0.0000 0.0000 0.0000  
Y 0.0000 0.0000 -0.0000 0.0000 0.0000 -0.0000  
Z -0.0000 0.0000 0.0000 0.0000 0.0000 0.0000  
AT. 158 O X 0.0000 0.0000 0.0000 -0.0000 0.0000 -0.0000  
Y -0.0000 -0.0000 0.0000 0.0000 -0.0000 -0.0000  
Z -0.0000 0.0000 0.0000 -0.0000 0.0000 -0.0000  
AT. 159 O X -0.0000 0.0000 0.0000 0.0000 -0.0000 -0.0000  
Y -0.0000 0.0000 -0.0000 0.0000 -0.0000 0.0000  
Z 0.0000 0.0000 0.0000 0.0000 -0.0000 -0.0000  
AT. 160 O X -0.0000 0.0000 0.0000 -0.0000 -0.0000 0.0000  
Y 0.0000 -0.0000 0.0000 0.0000 0.0000 0.0000  
Z 0.0000 0.0000 0.0000 -0.0000 -0.0000 0.0000  
AT. 161 O X 0.0000 0.0000 0.0000 0.0000 0.0000 0.0000  
Y -0.0001 -0.0001 -0.0000 -0.0001 -0.0001 -0.0000  
Z -0.0000 -0.0000 0.0000 0.0000 0.0000 0.0000  
AT. 162 O X 0.0000 0.0000 0.0000 -0.0000 0.0000 -0.0000  
Y 0.0001 0.0001 0.0000 -0.0001 0.0001 -0.0000  
Z -0.0000 -0.0000 0.0000 -0.0000 0.0000 -0.0000  
AT. 163 O X -0.0000 0.0000 0.0000 0.0000 -0.0000 -0.0000

Y 0.0001 -0.0001 -0.0000 -0.0001 0.0001 0.0000  
Z 0.0000 -0.0000 0.0000 0.0000 -0.0000 -0.0000  
AT.164 O X -0.0000 0.0000 0.0000 -0.0000 -0.0000 0.0000  
Y -0.0001 0.0001 0.0000 -0.0001 -0.0001 0.0000  
Z 0.0000 -0.0000 0.0000 -0.0000 -0.0000 0.0000  
AT.165 H X -0.0004 -0.0006 -0.0001 -0.0005 -0.0004 -0.0001  
Y 0.0009 0.0011 0.0002 0.0009 0.0009 0.0002  
Z 0.0000 0.0000 -0.0001 -0.0001 -0.0001 -0.0001  
AT.166 H X -0.0004 -0.0006 -0.0001 0.0005 -0.0004 0.0001  
Y -0.0009 -0.0011 -0.0002 0.0009 -0.0009 0.0002  
Z 0.0000 0.0000 -0.0001 0.0001 -0.0001 0.0001  
AT.167 H X 0.0004 -0.0006 -0.0001 -0.0005 0.0004 0.0001  
Y -0.0009 0.0011 0.0002 0.0009 -0.0009 -0.0002  
Z -0.0000 0.0000 -0.0001 -0.0001 0.0001 0.0001  
AT.168 H X 0.0004 -0.0006 -0.0001 0.0005 0.0004 -0.0001  
Y 0.0009 -0.0011 -0.0002 0.0009 0.0009 -0.0002  
Z -0.0000 0.0000 -0.0001 0.0001 0.0001 -0.0001  
AT.169 O X 0.0000 -0.0000 -0.0000 -0.0000 -0.0001 -0.0001  
Y 0.0001 0.0000 0.0000 0.0001 -0.0002 -0.0002  
Z 0.0000 0.0000 0.0000 0.0000 -0.0000 -0.0000  
AT.170 O X 0.0000 -0.0000 -0.0000 0.0000 -0.0001 0.0001  
Y -0.0001 -0.0000 -0.0000 0.0001 0.0002 -0.0002  
Z 0.0000 0.0000 0.0000 -0.0000 -0.0000 0.0000  
AT.171 O X -0.0000 -0.0000 -0.0000 -0.0000 0.0001 0.0001  
Y -0.0001 0.0000 0.0000 0.0001 0.0002 0.0002  
Z -0.0000 0.0000 0.0000 0.0000 0.0000 0.0000  
AT.172 O X -0.0000 -0.0000 -0.0000 0.0000 0.0001 -0.0001  
Y 0.0001 -0.0000 -0.0000 0.0001 -0.0002 0.0002  
Z -0.0000 0.0000 0.0000 -0.0000 0.0000 -0.0000  
AT.173 H X -0.0003 -0.0001 -0.0003 -0.0003 0.0007 0.0008  
Y -0.0013 -0.0001 -0.0005 -0.0005 0.0025 0.0028  
Z -0.0002 -0.0000 -0.0001 -0.0001 0.0003 0.0003

AT.174 H X -0.0003 -0.0001 -0.0003 0.0003 0.0007 -0.0008

Y 0.0013 0.0001 0.0005 -0.0005 -0.0025 0.0028

Z -0.0002 -0.0000 -0.0001 0.0001 0.0003 -0.0003

AT.175 H X 0.0003 -0.0001 -0.0003 -0.0003 -0.0007 -0.0008

Y 0.0013 -0.0001 -0.0005 -0.0005 -0.0025 -0.0028

Z 0.0002 -0.0000 -0.0001 -0.0001 -0.0003 -0.0003

AT.176 H X 0.0003 -0.0001 -0.0003 0.0003 -0.0007 0.0008

Y -0.0013 0.0001 0.0005 -0.0005 0.0025 -0.0028

Z 0.0002 -0.0000 -0.0001 0.0001 -0.0003 0.0003

FREQ(CM\*\*-1) 3168.26 3168.32 3168.40 3168.68 3191.14 3191.17

AT. 1 I X 0.0000 0.0000 0.0000 0.0000 0.0000 -0.0000

Y -0.0000 -0.0000 -0.0000 -0.0000 -0.0000 0.0000

Z 0.0000 0.0000 0.0000 0.0000 0.0000 -0.0000

AT. 2 I X -0.0000 -0.0000 0.0000 0.0000 0.0000 0.0000

Y -0.0000 -0.0000 0.0000 0.0000 0.0000 0.0000

Z -0.0000 -0.0000 0.0000 0.0000 0.0000 0.0000

AT. 3 I X 0.0000 -0.0000 0.0000 -0.0000 -0.0000 0.0000

Y -0.0000 0.0000 -0.0000 0.0000 0.0000 -0.0000

Z 0.0000 -0.0000 0.0000 -0.0000 -0.0000 0.0000

AT. 4 I X -0.0000 0.0000 0.0000 -0.0000 -0.0000 -0.0000

Y -0.0000 0.0000 0.0000 -0.0000 -0.0000 -0.0000

Z -0.0000 0.0000 0.0000 -0.0000 -0.0000 -0.0000

AT. 5 I X 0.0000 -0.0000 0.0000 0.0000 0.0000 0.0000

Y -0.0000 0.0000 0.0000 -0.0000 0.0000 0.0000

Z 0.0000 -0.0000 -0.0000 0.0000 -0.0000 -0.0000

AT. 6 I X -0.0000 0.0000 0.0000 0.0000 0.0000 -0.0000

Y -0.0000 0.0000 -0.0000 0.0000 -0.0000 0.0000

Z -0.0000 0.0000 -0.0000 0.0000 -0.0000 0.0000

AT. 7 I X 0.0000 0.0000 0.0000 -0.0000 -0.0000 -0.0000

Y -0.0000 -0.0000 0.0000 0.0000 -0.0000 -0.0000

Z 0.0000 0.0000 -0.0000 -0.0000 0.0000 0.0000  
AT. 8 I X -0.0000 -0.0000 0.0000 -0.0000 -0.0000 0.0000  
Y -0.0000 -0.0000 -0.0000 -0.0000 0.0000 -0.0000  
Z -0.0000 -0.0000 -0.0000 -0.0000 0.0000 -0.0000  
AT. 9 N X -0.0000 -0.0000 -0.0000 -0.0000 0.0000 0.0000  
Y -0.0000 -0.0000 -0.0000 -0.0000 0.0000 0.0000  
Z -0.0000 -0.0000 -0.0000 -0.0000 0.0000 0.0000  
AT. 10 N X 0.0000 0.0000 -0.0000 -0.0000 0.0000 -0.0000  
Y -0.0000 -0.0000 0.0000 0.0000 -0.0000 0.0000  
Z 0.0000 0.0000 -0.0000 -0.0000 0.0000 -0.0000  
AT. 11 N X -0.0000 0.0000 -0.0000 0.0000 -0.0000 -0.0000  
Y -0.0000 0.0000 -0.0000 0.0000 -0.0000 -0.0000  
Z -0.0000 0.0000 -0.0000 0.0000 -0.0000 -0.0000  
AT. 12 N X 0.0000 -0.0000 -0.0000 0.0000 -0.0000 0.0000  
Y -0.0000 0.0000 0.0000 -0.0000 0.0000 -0.0000  
Z 0.0000 -0.0000 -0.0000 0.0000 -0.0000 0.0000  
AT. 13 N X -0.0000 -0.0000 -0.0000 -0.0000 -0.0000 -0.0000  
Y -0.0000 -0.0000 -0.0000 -0.0000 0.0000 0.0000  
Z -0.0000 0.0000 0.0000 -0.0000 -0.0000 -0.0000  
AT. 14 N X 0.0000 0.0000 -0.0000 -0.0000 -0.0000 0.0000  
Y -0.0000 -0.0000 0.0000 0.0000 -0.0000 0.0000  
Z 0.0000 -0.0000 0.0000 -0.0000 -0.0000 0.0000  
AT. 15 N X -0.0000 0.0000 -0.0000 0.0000 0.0000 0.0000  
Y -0.0000 0.0000 -0.0000 0.0000 -0.0000 -0.0000  
Z -0.0000 -0.0000 0.0000 0.0000 0.0000 0.0000  
AT. 16 N X 0.0000 -0.0000 -0.0000 0.0000 0.0000 -0.0000  
Y -0.0000 0.0000 0.0000 -0.0000 0.0000 -0.0000  
Z 0.0000 0.0000 0.0000 0.0000 0.0000 -0.0000  
AT. 17 O X -0.0000 -0.0000 -0.0000 -0.0000 -0.0000 -0.0000  
Y -0.0000 -0.0000 -0.0000 -0.0000 0.0000 0.0000  
Z 0.0000 0.0000 0.0000 0.0000 0.0000 0.0000  
AT. 18 O X 0.0000 0.0000 -0.0000 -0.0000 -0.0000 0.0000



Y -0.0000 -0.0000 0.0000 0.0000 -0.0000 0.0000  
Z -0.0000 -0.0000 0.0000 0.0000 0.0000 -0.0000  
AT. 19 O X -0.0000 0.0000 -0.0000 0.0000 0.0000 0.0000  
Y -0.0000 0.0000 -0.0000 0.0000 -0.0000 -0.0000  
Z 0.0000 -0.0000 0.0000 -0.0000 -0.0000 -0.0000  
AT. 20 O X 0.0000 -0.0000 -0.0000 0.0000 0.0000 -0.0000  
Y -0.0000 0.0000 0.0000 -0.0000 0.0000 -0.0000  
Z -0.0000 0.0000 0.0000 -0.0000 -0.0000 0.0000  
AT. 21 O X -0.0000 -0.0000 -0.0000 -0.0000 0.0000 -0.0000  
Y -0.0000 -0.0000 -0.0000 -0.0000 -0.0000 -0.0000  
Z 0.0000 0.0000 0.0000 0.0000 0.0000 0.0000  
AT. 22 O X 0.0000 0.0000 -0.0000 -0.0000 0.0000 0.0000  
Y -0.0000 -0.0000 0.0000 0.0000 0.0000 -0.0000  
Z -0.0000 -0.0000 0.0000 0.0000 0.0000 -0.0000  
AT. 23 O X -0.0000 0.0000 -0.0000 0.0000 -0.0000 0.0000  
Y -0.0000 0.0000 -0.0000 0.0000 0.0000 0.0000  
Z 0.0000 -0.0000 0.0000 -0.0000 -0.0000 -0.0000  
AT. 24 O X 0.0000 -0.0000 -0.0000 0.0000 -0.0000 -0.0000  
Y -0.0000 0.0000 0.0000 -0.0000 -0.0000 0.0000  
Z -0.0000 0.0000 0.0000 -0.0000 -0.0000 0.0000  
AT. 25 C X -0.0048 -0.0048 -0.0049 -0.0048 0.0000 0.0001  
Y 0.0033 0.0033 0.0033 0.0033 0.0000 -0.0000  
Z -0.0030 -0.0030 -0.0030 -0.0030 0.0000 0.0000  
AT. 26 C X 0.0048 0.0048 -0.0049 -0.0048 0.0000 -0.0001  
Y 0.0033 0.0033 -0.0033 -0.0033 -0.0000 -0.0000  
Z 0.0030 0.0030 -0.0030 -0.0030 0.0000 -0.0000  
AT. 27 C X -0.0048 0.0048 -0.0049 0.0048 -0.0000 -0.0001  
Y 0.0033 -0.0033 0.0033 -0.0033 -0.0000 0.0000  
Z -0.0030 0.0030 -0.0030 0.0030 -0.0000 -0.0000  
AT. 28 C X 0.0048 -0.0048 -0.0049 0.0048 -0.0000 0.0001  
Y 0.0033 -0.0033 -0.0033 0.0033 0.0000 0.0000  
Z 0.0030 -0.0030 -0.0030 0.0030 -0.0000 0.0000

AT. 29 H X 0.0663 0.0663 0.0664 0.0661 -0.0002 -0.0007  
Y 0.0084 0.0084 0.0084 0.0084 -0.0000 -0.0001  
Z 0.0440 0.0440 0.0441 0.0439 -0.0002 -0.0004

AT. 30 H X -0.0663 -0.0663 0.0664 0.0661 -0.0002 0.0007  
Y 0.0084 0.0084 -0.0084 -0.0084 0.0000 -0.0001  
Z -0.0440 -0.0440 0.0441 0.0439 -0.0002 0.0004

AT. 31 H X 0.0663 -0.0663 0.0664 -0.0661 0.0002 0.0007  
Y 0.0084 -0.0084 0.0084 -0.0084 0.0000 0.0001  
Z 0.0440 -0.0440 0.0441 -0.0439 0.0002 0.0004

AT. 32 H X -0.0663 0.0663 0.0664 -0.0661 0.0002 -0.0007  
Y 0.0084 -0.0084 -0.0084 0.0084 -0.0000 0.0001  
Z -0.0440 0.0440 0.0441 -0.0439 0.0002 -0.0004

AT. 33 H X -0.0092 -0.0092 -0.0092 -0.0092 0.0000 0.0001  
Y -0.0458 -0.0459 -0.0457 -0.0455 0.0001 0.0003  
Z -0.0108 -0.0108 -0.0107 -0.0107 0.0000 0.0001

AT. 34 H X 0.0092 0.0092 -0.0092 -0.0092 0.0000 -0.0001  
Y -0.0458 -0.0459 0.0457 0.0455 -0.0001 0.0003  
Z 0.0108 0.0108 -0.0107 -0.0107 0.0000 -0.0001

AT. 35 H X -0.0092 0.0092 -0.0092 0.0092 -0.0000 -0.0001  
Y -0.0458 0.0459 -0.0457 0.0455 -0.0001 -0.0003  
Z -0.0108 0.0108 -0.0107 0.0107 -0.0000 -0.0001

AT. 36 H X 0.0092 -0.0092 -0.0092 0.0092 -0.0000 0.0001  
Y -0.0458 0.0459 0.0457 -0.0455 0.0001 -0.0003  
Z 0.0108 -0.0108 -0.0107 0.0107 -0.0000 0.0001

AT. 37 C X 0.0000 0.0000 0.0000 0.0000 -0.0000 -0.0000  
Y -0.0001 -0.0001 -0.0001 -0.0001 -0.0000 -0.0000  
Z 0.0001 0.0001 0.0001 0.0002 -0.0000 -0.0000

AT. 38 C X -0.0000 -0.0000 0.0000 0.0000 -0.0000 0.0000  
Y -0.0001 -0.0001 0.0001 0.0001 0.0000 -0.0000  
Z -0.0001 -0.0001 0.0001 0.0002 -0.0000 0.0000

AT. 39 C X 0.0000 -0.0000 0.0000 -0.0000 0.0000 0.0000  
Y -0.0001 0.0001 -0.0001 0.0001 0.0000 0.0000

Z 0.0001 -0.0001 0.0001 -0.0002 0.0000 0.0000  
AT. 40 C X -0.0000 0.0000 0.0000 -0.0000 0.0000 -0.0000  
Y -0.0001 0.0001 0.0001 -0.0001 -0.0000 0.0000  
Z -0.0001 0.0001 0.0001 -0.0002 0.0000 -0.0000  
AT. 41 C X 0.0005 0.0005 0.0005 0.0005 -0.0000 0.0000  
Y -0.0010 -0.0010 -0.0010 -0.0009 0.0000 -0.0000  
Z 0.0005 0.0005 0.0005 0.0005 -0.0000 -0.0000  
AT. 42 C X -0.0005 -0.0005 0.0005 0.0005 -0.0000 -0.0000  
Y -0.0010 -0.0010 0.0010 0.0009 -0.0000 -0.0000  
Z -0.0005 -0.0005 0.0005 0.0005 -0.0000 0.0000  
AT. 43 C X 0.0005 -0.0005 0.0005 -0.0005 0.0000 -0.0000  
Y -0.0010 0.0010 -0.0010 0.0009 -0.0000 0.0000  
Z 0.0005 -0.0005 0.0005 -0.0005 0.0000 0.0000  
AT. 44 C X -0.0005 0.0005 0.0005 -0.0005 0.0000 0.0000  
Y -0.0010 0.0010 0.0010 -0.0009 0.0000 0.0000  
Z -0.0005 0.0005 0.0005 -0.0005 0.0000 -0.0000  
AT. 45 H X -0.0010 -0.0010 -0.0010 -0.0009 0.0000 -0.0000  
Y 0.0065 0.0065 0.0065 0.0065 -0.0003 0.0001  
Z -0.0077 -0.0077 -0.0077 -0.0076 0.0004 -0.0001  
AT. 46 H X 0.0010 0.0010 -0.0010 -0.0009 0.0000 0.0000  
Y 0.0065 0.0065 -0.0065 -0.0065 0.0003 0.0001  
Z 0.0077 0.0077 -0.0077 -0.0076 0.0004 0.0001  
AT. 47 H X -0.0010 0.0010 -0.0010 0.0009 -0.0000 0.0000  
Y 0.0065 -0.0065 0.0065 -0.0065 0.0003 -0.0001  
Z -0.0077 0.0077 -0.0077 0.0076 -0.0004 0.0001  
AT. 48 H X 0.0010 -0.0010 -0.0010 0.0009 -0.0000 -0.0000  
Y 0.0065 -0.0065 -0.0065 0.0065 -0.0003 -0.0001  
Z 0.0077 -0.0077 -0.0077 0.0076 -0.0004 -0.0001  
AT. 49 H X -0.0046 -0.0047 -0.0047 -0.0046 0.0001 -0.0003  
Y 0.0045 0.0046 0.0046 0.0045 -0.0001 0.0003  
Z 0.0018 0.0018 0.0018 0.0018 -0.0000 0.0001  
AT. 50 H X 0.0046 0.0047 -0.0047 -0.0046 0.0001 0.0003

Y 0.0045 0.0046 -0.0046 -0.0045 0.0001 0.0003  
Z -0.0018 -0.0018 0.0018 0.0018 -0.0000 -0.0001  
AT. 51 H X -0.0046 0.0047 -0.0047 0.0046 -0.0001 0.0003  
Y 0.0045 -0.0046 0.0046 -0.0045 0.0001 -0.0003  
Z 0.0018 -0.0018 0.0018 -0.0018 0.0000 -0.0001  
AT. 52 H X 0.0046 -0.0047 -0.0047 0.0046 -0.0001 -0.0003  
Y 0.0045 -0.0046 -0.0046 0.0045 -0.0001 -0.0003  
Z -0.0018 0.0018 0.0018 -0.0018 0.0000 0.0001  
AT. 53 C X 0.0000 0.0000 0.0000 0.0000 0.0000 0.0000  
Y -0.0000 -0.0000 -0.0000 -0.0000 0.0000 0.0000  
Z 0.0000 0.0000 0.0000 0.0000 -0.0000 -0.0000  
AT. 54 C X -0.0000 -0.0000 0.0000 0.0000 0.0000 -0.0000  
Y -0.0000 -0.0000 0.0000 0.0000 -0.0000 0.0000  
Z -0.0000 -0.0000 0.0000 0.0000 -0.0000 0.0000  
AT. 55 C X 0.0000 -0.0000 0.0000 -0.0000 -0.0000 -0.0000  
Y -0.0000 0.0000 -0.0000 0.0000 -0.0000 -0.0000  
Z 0.0000 -0.0000 0.0000 -0.0000 0.0000 0.0000  
AT. 56 C X -0.0000 0.0000 0.0000 -0.0000 -0.0000 0.0000  
Y -0.0000 0.0000 0.0000 -0.0000 0.0000 -0.0000  
Z -0.0000 0.0000 0.0000 -0.0000 0.0000 -0.0000  
AT. 57 C X 0.0001 0.0001 0.0001 0.0001 -0.0000 -0.0000  
Y -0.0005 -0.0005 -0.0004 -0.0006 -0.0000 -0.0000  
Z 0.0002 0.0002 0.0001 0.0002 0.0000 -0.0000  
AT. 58 C X -0.0001 -0.0001 0.0001 0.0001 -0.0000 0.0000  
Y -0.0005 -0.0005 0.0004 0.0006 0.0000 -0.0000  
Z -0.0002 -0.0002 0.0001 0.0002 0.0000 0.0000  
AT. 59 C X 0.0001 -0.0001 0.0001 -0.0001 0.0000 0.0000  
Y -0.0005 0.0005 -0.0004 0.0006 0.0000 0.0000  
Z 0.0002 -0.0002 0.0001 -0.0002 -0.0000 0.0000  
AT. 60 C X -0.0001 0.0001 0.0001 -0.0001 0.0000 -0.0000  
Y -0.0005 0.0005 0.0004 -0.0006 -0.0000 0.0000  
Z -0.0002 0.0002 0.0001 -0.0002 -0.0000 -0.0000

AT. 61 H X -0.0025 -0.0027 -0.0019 -0.0033 -0.0001 -0.0000  
Y 0.0033 0.0037 0.0026 0.0044 0.0001 0.0000  
Z 0.0006 0.0007 0.0005 0.0008 0.0001 -0.0000

AT. 62 H X 0.0025 0.0027 -0.0019 -0.0033 -0.0001 0.0000  
Y 0.0033 0.0037 -0.0026 -0.0044 -0.0001 0.0000  
Z -0.0006 -0.0007 0.0005 0.0008 0.0001 0.0000

AT. 63 H X -0.0025 0.0027 -0.0019 0.0033 0.0001 0.0000  
Y 0.0033 -0.0037 0.0026 -0.0044 -0.0001 -0.0000  
Z 0.0006 -0.0007 0.0005 -0.0008 -0.0001 0.0000

AT. 64 H X 0.0025 -0.0027 -0.0019 0.0033 0.0001 -0.0000  
Y 0.0033 -0.0037 -0.0026 0.0044 0.0001 -0.0000  
Z -0.0006 0.0007 0.0005 -0.0008 -0.0001 -0.0000

AT. 65 H X 0.0008 0.0010 0.0006 0.0011 0.0001 0.0004  
Y 0.0002 0.0002 0.0001 0.0002 0.0000 0.0002  
Z 0.0000 0.0000 0.0000 0.0001 -0.0000 -0.0000

AT. 66 H X -0.0008 -0.0010 0.0006 0.0011 0.0001 -0.0004  
Y 0.0002 0.0002 -0.0001 -0.0002 -0.0000 0.0002  
Z -0.0000 -0.0000 0.0000 0.0001 -0.0000 0.0000

AT. 67 H X 0.0008 -0.0010 0.0006 -0.0011 -0.0001 -0.0004  
Y 0.0002 -0.0002 0.0001 -0.0002 -0.0000 -0.0002  
Z 0.0000 -0.0000 0.0000 -0.0001 0.0000 0.0000

AT. 68 H X -0.0008 0.0010 0.0006 -0.0011 -0.0001 0.0004  
Y 0.0002 -0.0002 -0.0001 0.0002 0.0000 -0.0002  
Z -0.0000 0.0000 0.0000 -0.0001 0.0000 -0.0000

AT. 69 H X 0.0005 0.0005 0.0004 0.0007 0.0000 -0.0001  
Y 0.0020 0.0023 0.0017 0.0030 0.0002 -0.0002  
Z -0.0025 -0.0027 -0.0020 -0.0035 -0.0002 0.0002

AT. 70 H X -0.0005 -0.0005 0.0004 0.0007 0.0000 0.0001  
Y 0.0020 0.0023 -0.0017 -0.0030 -0.0002 -0.0002  
Z 0.0025 0.0027 -0.0020 -0.0035 -0.0002 -0.0002

AT. 71 H X 0.0005 -0.0005 0.0004 -0.0007 -0.0000 0.0001  
Y 0.0020 -0.0023 0.0017 -0.0030 -0.0002 0.0002

Z -0.0025 0.0027 -0.0020 0.0035 0.0002 -0.0002  
AT. 72 H X -0.0005 0.0005 0.0004 -0.0007 -0.0000 -0.0001  
Y 0.0020 -0.0023 -0.0017 0.0030 0.0002 0.0002  
Z 0.0025 -0.0027 -0.0020 0.0035 0.0002 0.0002  
AT. 73 C X 0.0000 0.0000 0.0000 -0.0000 0.0000 0.0000  
Y 0.0000 0.0000 0.0000 0.0000 -0.0001 -0.0001  
Z -0.0000 -0.0000 -0.0000 -0.0000 -0.0000 -0.0000  
AT. 74 C X -0.0000 -0.0000 0.0000 -0.0000 0.0000 -0.0000  
Y 0.0000 0.0000 -0.0000 -0.0000 0.0001 -0.0001  
Z 0.0000 0.0000 -0.0000 -0.0000 -0.0000 0.0000  
AT. 75 C X 0.0000 -0.0000 0.0000 0.0000 -0.0000 -0.0000  
Y 0.0000 -0.0000 0.0000 -0.0000 0.0001 0.0001  
Z -0.0000 0.0000 -0.0000 0.0000 0.0000 0.0000  
AT. 76 C X -0.0000 0.0000 0.0000 0.0000 -0.0000 0.0000  
Y 0.0000 -0.0000 -0.0000 0.0000 -0.0001 0.0001  
Z 0.0000 -0.0000 -0.0000 0.0000 0.0000 -0.0000  
AT. 77 C X -0.0000 -0.0000 -0.0000 -0.0000 0.0000 0.0000  
Y 0.0000 -0.0000 -0.0000 -0.0000 -0.0003 -0.0002  
Z -0.0000 -0.0000 -0.0000 -0.0000 -0.0002 -0.0002  
AT. 78 C X 0.0000 0.0000 -0.0000 -0.0000 0.0000 -0.0000  
Y 0.0000 -0.0000 0.0000 0.0000 0.0003 -0.0002  
Z 0.0000 0.0000 -0.0000 -0.0000 -0.0002 0.0002  
AT. 79 C X -0.0000 0.0000 -0.0000 0.0000 -0.0000 -0.0000  
Y 0.0000 0.0000 -0.0000 0.0000 0.0003 0.0002  
Z -0.0000 0.0000 -0.0000 0.0000 0.0002 0.0002  
AT. 80 C X 0.0000 -0.0000 -0.0000 0.0000 -0.0000 0.0000  
Y 0.0000 0.0000 0.0000 -0.0000 -0.0003 0.0002  
Z 0.0000 -0.0000 -0.0000 0.0000 0.0002 -0.0002  
AT. 81 H X 0.0001 -0.0000 0.0001 -0.0001 -0.0010 -0.0008  
Y -0.0001 0.0000 -0.0001 0.0001 0.0008 0.0006  
Z -0.0000 -0.0000 -0.0000 -0.0000 -0.0000 -0.0000  
AT. 82 H X -0.0001 0.0000 0.0001 -0.0001 -0.0010 0.0008

Y -0.0001 0.0000 0.0001 -0.0001 -0.0008 0.0006  
Z 0.0000 0.0000 -0.0000 -0.0000 -0.0000 0.0000  
AT. 83 H X 0.0001 0.0000 0.0001 0.0001 0.0010 0.0008  
Y -0.0001 -0.0000 -0.0001 -0.0001 -0.0008 -0.0006  
Z -0.0000 0.0000 -0.0000 0.0000 0.0000 0.0000  
AT. 84 H X -0.0001 -0.0000 0.0001 0.0001 0.0010 -0.0008  
Y -0.0001 -0.0000 0.0001 0.0001 0.0008 -0.0006  
Z 0.0000 -0.0000 -0.0000 0.0000 0.0000 -0.0000  
AT. 85 H X 0.0000 0.0001 0.0001 0.0001 0.0006 0.0005  
Y 0.0002 0.0003 0.0004 0.0004 0.0022 0.0020  
Z 0.0002 0.0003 0.0004 0.0004 0.0027 0.0024  
AT. 86 H X -0.0000 -0.0001 0.0001 0.0001 0.0006 -0.0005  
Y 0.0002 0.0003 -0.0004 -0.0004 -0.0022 0.0020  
Z -0.0002 -0.0003 0.0004 0.0004 0.0027 -0.0024  
AT. 87 H X 0.0000 -0.0001 0.0001 -0.0001 -0.0006 -0.0005  
Y 0.0002 -0.0003 0.0004 -0.0004 -0.0022 -0.0020  
Z 0.0002 -0.0003 0.0004 -0.0004 -0.0027 -0.0024  
AT. 88 H X -0.0000 0.0001 0.0001 -0.0001 -0.0006 0.0005  
Y 0.0002 -0.0003 -0.0004 0.0004 0.0022 -0.0020  
Z -0.0002 0.0003 0.0004 -0.0004 -0.0027 0.0024  
AT. 89 C X 0.0000 0.0000 0.0000 0.0000 0.0000 0.0000  
Y -0.0000 -0.0000 0.0000 -0.0000 0.0000 0.0000  
Z -0.0000 -0.0000 0.0000 -0.0000 0.0000 0.0000  
AT. 90 C X -0.0000 -0.0000 0.0000 0.0000 0.0000 -0.0000  
Y -0.0000 -0.0000 -0.0000 0.0000 -0.0000 0.0000  
Z 0.0000 0.0000 0.0000 -0.0000 0.0000 -0.0000  
AT. 91 C X 0.0000 -0.0000 0.0000 -0.0000 -0.0000 -0.0000  
Y -0.0000 0.0000 0.0000 0.0000 -0.0000 -0.0000  
Z -0.0000 0.0000 0.0000 0.0000 -0.0000 -0.0000  
AT. 92 C X -0.0000 0.0000 0.0000 -0.0000 -0.0000 0.0000  
Y -0.0000 0.0000 -0.0000 -0.0000 0.0000 -0.0000  
Z 0.0000 -0.0000 0.0000 0.0000 -0.0000 0.0000

AT. 93 C X -0.0001 -0.0000 0.0001 -0.0001 -0.0014 -0.0015  
Y -0.0004 0.0000 0.0002 -0.0005 0.0003 0.0004  
Z -0.0002 0.0000 0.0001 -0.0002 0.0004 0.0004

AT. 94 C X 0.0001 0.0000 0.0001 -0.0001 -0.0014 0.0015  
Y -0.0004 0.0000 -0.0002 0.0005 -0.0003 0.0004  
Z 0.0002 -0.0000 0.0001 -0.0002 0.0004 -0.0004

AT. 95 C X -0.0001 0.0000 0.0001 0.0001 0.0014 0.0015  
Y -0.0004 -0.0000 0.0002 0.0005 -0.0003 -0.0004  
Z -0.0002 -0.0000 0.0001 0.0002 -0.0004 -0.0004

AT. 96 C X 0.0001 -0.0000 0.0001 0.0001 0.0014 -0.0015  
Y -0.0004 -0.0000 -0.0002 -0.0005 0.0003 -0.0004  
Z 0.0002 0.0000 0.0001 0.0002 -0.0004 0.0004

AT. 97 H X 0.0019 0.0001 -0.0013 0.0029 0.0087 0.0090  
Y 0.0010 0.0001 -0.0007 0.0015 0.0050 0.0051  
Z -0.0006 -0.0000 0.0004 -0.0009 -0.0024 -0.0025

AT. 98 H X -0.0019 -0.0001 -0.0013 0.0029 0.0087 -0.0090  
Y 0.0010 0.0001 0.0007 -0.0015 -0.0050 0.0051  
Z 0.0006 0.0000 0.0004 -0.0009 -0.0024 0.0025

AT. 99 H X 0.0019 -0.0001 -0.0013 -0.0029 -0.0087 -0.0090  
Y 0.0010 -0.0001 -0.0007 -0.0015 -0.0050 -0.0051  
Z -0.0006 0.0000 0.0004 0.0009 0.0024 0.0025

AT. 100 H X -0.0019 0.0001 -0.0013 -0.0029 -0.0087 0.0090  
Y 0.0010 -0.0001 0.0007 0.0015 0.0050 -0.0051  
Z 0.0006 -0.0000 0.0004 0.0009 0.0024 -0.0025

AT. 101 H X -0.0020 0.0003 0.0009 -0.0025 0.0088 0.0091  
Y 0.0018 -0.0002 -0.0008 0.0022 -0.0084 -0.0087  
Z 0.0003 -0.0000 -0.0001 0.0003 -0.0015 -0.0015

AT. 102 H X 0.0020 -0.0003 0.0009 -0.0025 0.0088 -0.0091  
Y 0.0018 -0.0002 0.0008 -0.0022 0.0084 -0.0087  
Z -0.0003 0.0000 -0.0001 0.0003 -0.0015 0.0015

AT. 103 H X -0.0020 -0.0003 0.0009 0.0025 -0.0088 -0.0091  
Y 0.0018 0.0002 -0.0008 -0.0022 0.0084 0.0087



Z 0.0003 0.0000 -0.0001 -0.0003 0.0015 0.0015  
AT.104 H X 0.0020 0.0003 0.0009 0.0025 -0.0088 0.0091  
Y 0.0018 0.0002 0.0008 0.0022 -0.0084 0.0087  
Z -0.0003 -0.0000 -0.0001 -0.0003 0.0015 -0.0015  
AT.105 H X 0.0008 -0.0001 -0.0004 0.0011 -0.0007 -0.0007  
Y 0.0018 -0.0003 -0.0010 0.0024 -0.0007 -0.0007  
Z 0.0024 -0.0003 -0.0013 0.0031 -0.0011 -0.0011  
AT.106 H X -0.0008 0.0001 -0.0004 0.0011 -0.0007 0.0007  
Y 0.0018 -0.0003 0.0010 -0.0024 0.0007 -0.0007  
Z -0.0024 0.0003 -0.0013 0.0031 -0.0011 0.0011  
AT.107 H X 0.0008 0.0001 -0.0004 -0.0011 0.0007 0.0007  
Y 0.0018 0.0003 -0.0010 -0.0024 0.0007 0.0007  
Z 0.0024 0.0003 -0.0013 -0.0031 0.0011 0.0011  
AT.108 H X -0.0008 -0.0001 -0.0004 -0.0011 0.0007 -0.0007  
Y 0.0018 0.0003 0.0010 0.0024 -0.0007 0.0007  
Z -0.0024 -0.0003 -0.0013 -0.0031 0.0011 -0.0011  
AT.109 C X -0.0000 -0.0000 0.0000 -0.0000 -0.0000 0.0000  
Y -0.0000 -0.0000 0.0000 -0.0000 0.0000 0.0001  
Z 0.0000 0.0000 0.0000 0.0000 -0.0001 -0.0001  
AT.110 C X 0.0000 0.0000 0.0000 -0.0000 -0.0000 -0.0000  
Y -0.0000 -0.0000 -0.0000 0.0000 -0.0000 0.0001  
Z -0.0000 -0.0000 0.0000 0.0000 -0.0001 0.0001  
AT.111 C X -0.0000 0.0000 0.0000 0.0000 0.0000 -0.0000  
Y -0.0000 0.0000 0.0000 0.0000 -0.0000 -0.0001  
Z 0.0000 -0.0000 0.0000 -0.0000 0.0001 0.0001  
AT.112 C X 0.0000 -0.0000 0.0000 0.0000 0.0000 0.0000  
Y -0.0000 0.0000 -0.0000 -0.0000 0.0000 -0.0001  
Z -0.0000 0.0000 0.0000 -0.0000 0.0001 -0.0001  
AT.113 H X 0.0002 0.0001 -0.0001 -0.0000 -0.0001 -0.0004  
Y 0.0001 0.0001 -0.0000 -0.0000 -0.0001 -0.0002  
Z -0.0001 -0.0000 -0.0000 -0.0000 -0.0001 -0.0000  
AT.114 H X -0.0002 -0.0001 -0.0001 -0.0000 -0.0001 0.0004

Y 0.0001 0.0001 0.0000 0.0000 0.0001 -0.0002  
Z 0.0001 0.0000 -0.0000 -0.0000 -0.0001 0.0000  
AT. 115 H X 0.0002 -0.0001 -0.0001 0.0000 0.0001 0.0004  
Y 0.0001 -0.0001 -0.0000 0.0000 0.0001 0.0002  
Z -0.0001 0.0000 -0.0000 0.0000 0.0001 0.0000  
AT. 116 H X -0.0002 0.0001 -0.0001 0.0000 0.0001 -0.0004  
Y 0.0001 -0.0001 0.0000 -0.0000 -0.0001 0.0002  
Z 0.0001 -0.0000 -0.0000 0.0000 0.0001 -0.0000  
AT. 117 H X -0.0001 -0.0001 -0.0001 -0.0001 0.0001 0.0002  
Y -0.0000 0.0000 -0.0000 0.0002 -0.0005 -0.0011  
Z 0.0000 -0.0000 0.0000 -0.0001 0.0006 0.0013  
AT. 118 H X 0.0001 0.0001 -0.0001 -0.0001 0.0001 -0.0002  
Y -0.0000 0.0000 0.0000 -0.0002 0.0005 -0.0011  
Z -0.0000 0.0000 0.0000 -0.0001 0.0006 -0.0013  
AT. 119 H X -0.0001 0.0001 -0.0001 0.0001 -0.0001 -0.0002  
Y -0.0000 -0.0000 -0.0000 -0.0002 0.0005 0.0011  
Z 0.0000 0.0000 0.0000 0.0001 -0.0006 -0.0013  
AT. 120 H X 0.0001 -0.0001 -0.0001 0.0001 -0.0001 0.0002  
Y -0.0000 -0.0000 0.0000 0.0002 -0.0005 0.0011  
Z -0.0000 -0.0000 0.0000 0.0001 -0.0006 0.0013  
AT. 121 C X 0.0000 0.0000 0.0000 0.0000 0.0023 0.0023  
Y 0.0000 0.0000 0.0000 0.0000 0.0033 0.0033  
Z 0.0000 0.0000 0.0000 0.0000 0.0033 0.0033  
AT. 122 C X -0.0000 -0.0000 0.0000 0.0000 0.0023 -0.0023  
Y 0.0000 0.0000 -0.0000 -0.0000 -0.0033 0.0033  
Z -0.0000 -0.0000 0.0000 0.0000 0.0033 -0.0033  
AT. 123 C X 0.0000 -0.0000 0.0000 -0.0000 -0.0023 -0.0023  
Y 0.0000 -0.0000 0.0000 -0.0000 -0.0033 -0.0033  
Z 0.0000 -0.0000 0.0000 -0.0000 -0.0033 -0.0033  
AT. 124 C X -0.0000 0.0000 0.0000 -0.0000 -0.0023 0.0023  
Y 0.0000 -0.0000 -0.0000 0.0000 0.0033 -0.0033  
Z -0.0000 0.0000 0.0000 -0.0000 -0.0033 0.0033

AT. 125 H X -0.0001 -0.0001 -0.0000 -0.0001 -0.0121 -0.0122  
Y -0.0001 -0.0002 -0.0001 -0.0001 -0.0306 -0.0307  
Z -0.0002 -0.0002 -0.0001 -0.0002 -0.0423 -0.0424

AT. 126 H X 0.0001 0.0001 -0.0000 -0.0001 -0.0121 0.0122  
Y -0.0001 -0.0002 0.0001 0.0001 0.0306 -0.0307  
Z 0.0002 0.0002 -0.0001 -0.0002 -0.0423 0.0424

AT. 127 H X -0.0001 0.0001 -0.0000 0.0001 0.0121 0.0122  
Y -0.0001 0.0002 -0.0001 0.0001 0.0306 0.0307  
Z -0.0002 0.0002 -0.0001 0.0002 0.0423 0.0424

AT. 128 H X 0.0001 -0.0001 -0.0000 0.0001 0.0121 -0.0122  
Y -0.0001 0.0002 0.0001 -0.0001 -0.0306 0.0307  
Z 0.0002 -0.0002 -0.0001 0.0002 0.0423 -0.0424

AT. 129 H X -0.0000 -0.0000 -0.0003 -0.0002 -0.0149 -0.0149  
Y -0.0000 0.0000 -0.0002 -0.0001 -0.0090 -0.0090  
Z 0.0000 0.0000 0.0001 0.0000 0.0042 0.0042

AT. 130 H X 0.0000 0.0000 -0.0003 -0.0002 -0.0149 0.0149  
Y -0.0000 0.0000 0.0002 0.0001 0.0090 -0.0090  
Z -0.0000 -0.0000 0.0001 0.0000 0.0042 -0.0042

AT. 131 H X -0.0000 0.0000 -0.0003 0.0002 0.0149 0.0149  
Y -0.0000 -0.0000 -0.0002 0.0001 0.0090 0.0090  
Z 0.0000 -0.0000 0.0001 -0.0000 -0.0042 -0.0042

AT. 132 H X 0.0000 -0.0000 -0.0003 0.0002 0.0149 -0.0149  
Y -0.0000 -0.0000 0.0002 -0.0001 -0.0090 0.0090  
Z -0.0000 0.0000 0.0001 -0.0000 -0.0042 0.0042

AT. 133 C X 0.0000 -0.0000 -0.0000 0.0000 0.0000 0.0000  
Y 0.0000 0.0000 0.0000 0.0000 0.0001 0.0001  
Z -0.0000 -0.0000 -0.0000 -0.0000 0.0001 0.0001

AT. 134 C X -0.0000 0.0000 -0.0000 0.0000 0.0000 -0.0000  
Y 0.0000 0.0000 -0.0000 -0.0000 -0.0001 0.0001  
Z 0.0000 0.0000 -0.0000 -0.0000 0.0001 -0.0001

AT. 135 C X 0.0000 0.0000 -0.0000 -0.0000 -0.0000 -0.0000  
Y 0.0000 -0.0000 0.0000 -0.0000 -0.0001 -0.0001

Z -0.0000 0.0000 -0.0000 0.0000 -0.0001 -0.0001  
AT. 136 C X -0.0000 -0.0000 -0.0000 -0.0000 -0.0000 0.0000  
Y 0.0000 -0.0000 -0.0000 0.0000 0.0001 -0.0001  
Z 0.0000 -0.0000 -0.0000 0.0000 -0.0001 0.0001  
AT. 137 C X -0.0000 -0.0000 -0.0000 -0.0000 -0.0041 -0.0041  
Y -0.0000 -0.0000 -0.0000 -0.0000 -0.0017 -0.0017  
Z -0.0000 -0.0000 -0.0000 -0.0000 -0.0020 -0.0020  
AT. 138 C X 0.0000 0.0000 -0.0000 -0.0000 -0.0041 0.0041  
Y -0.0000 -0.0000 0.0000 0.0000 0.0017 -0.0017  
Z 0.0000 0.0000 -0.0000 -0.0000 -0.0020 0.0020  
AT. 139 C X -0.0000 0.0000 -0.0000 0.0000 0.0041 0.0041  
Y -0.0000 0.0000 -0.0000 0.0000 0.0017 0.0017  
Z -0.0000 0.0000 -0.0000 0.0000 0.0020 0.0020  
AT. 140 C X 0.0000 -0.0000 -0.0000 0.0000 0.0041 -0.0041  
Y -0.0000 0.0000 0.0000 -0.0000 -0.0017 0.0017  
Z 0.0000 -0.0000 -0.0000 0.0000 0.0020 -0.0020  
AT. 141 H X 0.0002 0.0004 0.0005 0.0002 0.0369 0.0368  
Y -0.0001 -0.0003 -0.0003 -0.0001 -0.0234 -0.0234  
Z 0.0001 0.0004 0.0005 0.0001 0.0333 0.0332  
AT. 142 H X -0.0002 -0.0004 0.0005 0.0002 0.0369 -0.0368  
Y -0.0001 -0.0003 0.0003 0.0001 0.0234 -0.0234  
Z -0.0001 -0.0004 0.0005 0.0001 0.0333 -0.0332  
AT. 143 H X 0.0002 -0.0004 0.0005 -0.0002 -0.0369 -0.0368  
Y -0.0001 0.0003 -0.0003 0.0001 0.0234 0.0234  
Z 0.0001 -0.0004 0.0005 -0.0001 -0.0333 -0.0332  
AT. 144 H X -0.0002 0.0004 0.0005 -0.0002 -0.0369 0.0368  
Y -0.0001 0.0003 0.0003 -0.0001 -0.0234 0.0234  
Z -0.0001 0.0004 0.0005 -0.0001 -0.0333 0.0332  
AT. 145 H X 0.0001 0.0001 0.0001 0.0001 0.0121 0.0120  
Y 0.0002 0.0003 0.0004 0.0002 0.0442 0.0439  
Z -0.0001 -0.0001 -0.0001 -0.0001 -0.0118 -0.0118  
AT. 146 H X -0.0001 -0.0001 0.0001 0.0001 0.0121 -0.0120

Y 0.0002 0.0003 -0.0004 -0.0002 -0.0442 0.0439  
Z 0.0001 0.0001 -0.0001 -0.0001 -0.0118 0.0118  
AT. 147 H X 0.0001 -0.0001 0.0001 -0.0001 -0.0121 -0.0120  
Y 0.0002 -0.0003 0.0004 -0.0002 -0.0442 -0.0439  
Z -0.0001 0.0001 -0.0001 0.0001 0.0118 0.0118  
AT. 148 H X -0.0001 0.0001 0.0001 -0.0001 -0.0121 0.0120  
Y 0.0002 -0.0003 -0.0004 0.0002 0.0442 -0.0439  
Z 0.0001 -0.0001 -0.0001 0.0001 0.0118 -0.0118  
AT. 149 O X -0.0000 -0.0000 -0.0000 -0.0000 0.0000 -0.0000  
Y 0.0000 0.0000 0.0000 0.0000 0.0000 0.0000  
Z 0.0000 0.0000 0.0000 -0.0000 0.0000 0.0000  
AT. 150 O X 0.0000 0.0000 -0.0000 -0.0000 0.0000 0.0000  
Y 0.0000 0.0000 -0.0000 -0.0000 -0.0000 0.0000  
Z -0.0000 -0.0000 0.0000 -0.0000 0.0000 -0.0000  
AT. 151 O X -0.0000 0.0000 -0.0000 0.0000 -0.0000 0.0000  
Y 0.0000 -0.0000 0.0000 -0.0000 -0.0000 -0.0000  
Z 0.0000 -0.0000 0.0000 0.0000 -0.0000 -0.0000  
AT. 152 O X 0.0000 -0.0000 -0.0000 0.0000 -0.0000 -0.0000  
Y 0.0000 -0.0000 -0.0000 0.0000 0.0000 -0.0000  
Z -0.0000 0.0000 0.0000 0.0000 -0.0000 0.0000  
AT. 153 H X -0.0000 -0.0000 -0.0000 -0.0000 -0.0001 -0.0001  
Y -0.0000 0.0000 -0.0000 -0.0000 -0.0001 -0.0001  
Z 0.0001 0.0001 0.0001 0.0002 -0.0001 -0.0001  
AT. 154 H X 0.0000 0.0000 -0.0000 -0.0000 -0.0001 0.0001  
Y -0.0000 0.0000 0.0000 0.0000 0.0001 -0.0001  
Z -0.0001 -0.0001 0.0001 0.0002 -0.0001 0.0001  
AT. 155 H X -0.0000 0.0000 -0.0000 0.0000 0.0001 0.0001  
Y -0.0000 -0.0000 -0.0000 0.0000 0.0001 0.0001  
Z 0.0001 -0.0001 0.0001 -0.0002 0.0001 0.0001  
AT. 156 H X 0.0000 -0.0000 -0.0000 0.0000 0.0001 -0.0001  
Y -0.0000 -0.0000 0.0000 -0.0000 -0.0001 0.0001  
Z -0.0001 0.0001 0.0001 -0.0002 0.0001 -0.0001

AT.157 O X -0.0000 -0.0000 -0.0000 -0.0000 -0.0000 -0.0000  
Y 0.0000 -0.0000 -0.0000 0.0000 0.0000 0.0000  
Z 0.0000 0.0000 0.0000 -0.0000 0.0000 0.0000

AT.158 O X 0.0000 0.0000 -0.0000 -0.0000 -0.0000 0.0000  
Y 0.0000 -0.0000 0.0000 -0.0000 -0.0000 0.0000  
Z -0.0000 -0.0000 0.0000 -0.0000 0.0000 -0.0000

AT.159 O X -0.0000 0.0000 -0.0000 0.0000 0.0000 0.0000  
Y 0.0000 0.0000 -0.0000 -0.0000 -0.0000 -0.0000  
Z 0.0000 -0.0000 0.0000 0.0000 -0.0000 -0.0000

AT.160 O X 0.0000 -0.0000 -0.0000 0.0000 0.0000 -0.0000  
Y 0.0000 0.0000 0.0000 0.0000 0.0000 -0.0000  
Z -0.0000 0.0000 0.0000 0.0000 -0.0000 0.0000

AT.161 O X 0.0000 0.0000 -0.0000 0.0000 -0.0000 -0.0000  
Y -0.0000 -0.0000 0.0000 -0.0000 0.0001 0.0001  
Z 0.0000 0.0000 0.0000 -0.0000 -0.0000 -0.0000

AT.162 O X -0.0000 -0.0000 -0.0000 0.0000 -0.0000 0.0000  
Y -0.0000 -0.0000 -0.0000 0.0000 -0.0001 0.0001  
Z -0.0000 -0.0000 0.0000 -0.0000 -0.0000 0.0000

AT.163 O X 0.0000 -0.0000 -0.0000 -0.0000 0.0000 0.0000  
Y -0.0000 0.0000 0.0000 0.0000 -0.0001 -0.0001  
Z 0.0000 -0.0000 0.0000 0.0000 0.0000 0.0000

AT.164 O X -0.0000 0.0000 -0.0000 -0.0000 0.0000 -0.0000  
Y -0.0000 0.0000 -0.0000 -0.0000 0.0001 -0.0001  
Z -0.0000 0.0000 0.0000 0.0000 0.0000 -0.0000

AT.165 H X -0.0002 -0.0000 0.0001 -0.0001 0.0007 0.0007  
Y 0.0005 0.0001 -0.0001 0.0002 -0.0013 -0.0012  
Z -0.0000 -0.0000 -0.0000 0.0000 0.0001 0.0001

AT.166 H X 0.0002 0.0000 0.0001 -0.0001 0.0007 -0.0007  
Y 0.0005 0.0001 0.0001 -0.0002 0.0013 -0.0012  
Z 0.0000 0.0000 -0.0000 0.0000 0.0001 -0.0001

AT.167 H X -0.0002 0.0000 0.0001 0.0001 -0.0007 -0.0007  
Y 0.0005 -0.0001 -0.0001 -0.0002 0.0013 0.0012

Z -0.0000 0.0000 -0.0000 -0.0000 -0.0001 -0.0001  
AT.168 H X 0.0002 -0.0000 0.0001 0.0001 -0.0007 0.0007  
Y 0.0005 -0.0001 0.0001 0.0002 -0.0013 0.0012  
Z 0.0000 -0.0000 -0.0000 -0.0000 -0.0001 0.0001  
AT.169 O X 0.0000 0.0000 0.0000 0.0000 -0.0000 -0.0000  
Y 0.0000 0.0000 0.0000 0.0001 -0.0001 -0.0001  
Z 0.0000 0.0000 0.0000 0.0000 -0.0000 -0.0000  
AT.170 O X -0.0000 -0.0000 0.0000 0.0000 -0.0000 0.0000  
Y 0.0000 0.0000 -0.0000 -0.0001 0.0001 -0.0001  
Z -0.0000 -0.0000 0.0000 0.0000 -0.0000 0.0000  
AT.171 O X 0.0000 -0.0000 0.0000 -0.0000 0.0000 0.0000  
Y 0.0000 -0.0000 0.0000 -0.0001 0.0001 0.0001  
Z 0.0000 -0.0000 0.0000 -0.0000 0.0000 0.0000  
AT.172 O X -0.0000 0.0000 0.0000 -0.0000 0.0000 -0.0000  
Y 0.0000 -0.0000 -0.0000 0.0001 -0.0001 0.0001  
Z -0.0000 0.0000 0.0000 -0.0000 0.0000 -0.0000  
AT.173 H X -0.0002 -0.0001 -0.0002 -0.0004 0.0004 0.0003  
Y -0.0008 -0.0007 -0.0008 -0.0016 0.0014 0.0011  
Z -0.0001 -0.0001 -0.0001 -0.0002 0.0002 0.0001  
AT.174 H X 0.0002 0.0001 -0.0002 -0.0004 0.0004 -0.0003  
Y -0.0008 -0.0007 0.0008 0.0016 -0.0014 0.0011  
Z 0.0001 0.0001 -0.0001 -0.0002 0.0002 -0.0001  
AT.175 H X -0.0002 0.0001 -0.0002 0.0004 -0.0004 -0.0003  
Y -0.0008 0.0007 -0.0008 0.0016 -0.0014 -0.0011  
Z -0.0001 0.0001 -0.0001 0.0002 -0.0002 -0.0001  
AT.176 H X 0.0002 -0.0001 -0.0002 0.0004 -0.0004 0.0003  
Y -0.0008 0.0007 0.0008 -0.0016 0.0014 -0.0011  
Z 0.0001 -0.0001 -0.0001 0.0002 -0.0002 0.0001

FREQ(CM\*\*-1) 3191.19 3191.25 3193.08 3193.09 3193.28 3193.35

AT. 11 X -0.0000 0.0000 0.0000 -0.0000 0.0000 -0.0000

Y 0.0000 -0.0000 -0.0000 0.0000 -0.0000 0.0000  
Z -0.0000 0.0000 -0.0000 0.0000 -0.0000 0.0000  
AT. 2 I X -0.0000 -0.0000 0.0000 0.0000 -0.0000 -0.0000  
Y -0.0000 -0.0000 0.0000 0.0000 -0.0000 -0.0000  
Z -0.0000 -0.0000 -0.0000 -0.0000 0.0000 0.0000  
AT. 3 I X -0.0000 0.0000 0.0000 -0.0000 -0.0000 0.0000  
Y 0.0000 -0.0000 -0.0000 0.0000 0.0000 -0.0000  
Z -0.0000 0.0000 -0.0000 0.0000 0.0000 -0.0000  
AT. 4 I X -0.0000 -0.0000 0.0000 0.0000 0.0000 0.0000  
Y -0.0000 -0.0000 0.0000 0.0000 0.0000 0.0000  
Z -0.0000 -0.0000 -0.0000 -0.0000 -0.0000 -0.0000  
AT. 5 I X 0.0000 0.0000 -0.0000 -0.0000 -0.0000 -0.0000  
Y 0.0000 0.0000 -0.0000 -0.0000 -0.0000 -0.0000  
Z 0.0000 -0.0000 -0.0000 -0.0000 -0.0000 -0.0000  
AT. 6 I X 0.0000 -0.0000 -0.0000 0.0000 0.0000 -0.0000  
Y -0.0000 0.0000 0.0000 -0.0000 -0.0000 0.0000  
Z 0.0000 0.0000 -0.0000 0.0000 0.0000 -0.0000  
AT. 7 I X 0.0000 0.0000 -0.0000 -0.0000 0.0000 0.0000  
Y 0.0000 0.0000 -0.0000 -0.0000 0.0000 0.0000  
Z 0.0000 -0.0000 -0.0000 -0.0000 0.0000 0.0000  
AT. 8 I X 0.0000 -0.0000 -0.0000 0.0000 -0.0000 0.0000  
Y -0.0000 0.0000 0.0000 -0.0000 0.0000 -0.0000  
Z 0.0000 0.0000 -0.0000 0.0000 -0.0000 0.0000  
AT. 9 N X 0.0000 0.0000 -0.0000 0.0000 0.0000 0.0000  
Y 0.0000 0.0000 -0.0000 -0.0000 0.0000 0.0000  
Z 0.0000 -0.0000 -0.0000 -0.0000 0.0000 0.0000  
AT. 10 N X 0.0000 -0.0000 -0.0000 -0.0000 -0.0000 0.0000  
Y -0.0000 0.0000 0.0000 -0.0000 0.0000 -0.0000  
Z 0.0000 0.0000 -0.0000 0.0000 -0.0000 0.0000  
AT. 11 N X 0.0000 0.0000 -0.0000 0.0000 -0.0000 -0.0000  
Y 0.0000 0.0000 -0.0000 -0.0000 -0.0000 -0.0000  
Z 0.0000 -0.0000 -0.0000 -0.0000 -0.0000 -0.0000



AT. 12 N X 0.0000 -0.0000 -0.0000 -0.0000 0.0000 -0.0000  
Y -0.0000 0.0000 0.0000 -0.0000 -0.0000 0.0000  
Z 0.0000 0.0000 -0.0000 0.0000 0.0000 -0.0000

AT. 13 N X -0.0000 -0.0000 0.0000 0.0000 0.0000 0.0000  
Y 0.0000 0.0000 -0.0000 -0.0000 -0.0000 -0.0000  
Z -0.0000 -0.0000 0.0000 0.0000 0.0000 0.0000

AT. 14 N X -0.0000 0.0000 0.0000 -0.0000 -0.0000 0.0000  
Y -0.0000 0.0000 0.0000 -0.0000 -0.0000 0.0000  
Z -0.0000 0.0000 0.0000 -0.0000 -0.0000 0.0000

AT. 15 N X -0.0000 -0.0000 0.0000 0.0000 -0.0000 -0.0000  
Y 0.0000 0.0000 -0.0000 -0.0000 0.0000 0.0000  
Z -0.0000 -0.0000 0.0000 0.0000 -0.0000 -0.0000

AT. 16 N X -0.0000 0.0000 0.0000 -0.0000 0.0000 -0.0000  
Y -0.0000 0.0000 0.0000 -0.0000 0.0000 -0.0000  
Z -0.0000 0.0000 0.0000 -0.0000 0.0000 -0.0000

AT. 17 O X -0.0000 -0.0000 -0.0000 -0.0000 0.0000 0.0000  
Y 0.0000 0.0000 -0.0000 -0.0000 0.0000 0.0000  
Z 0.0000 0.0000 -0.0000 -0.0000 0.0000 0.0000

AT. 18 O X -0.0000 0.0000 -0.0000 0.0000 -0.0000 0.0000  
Y -0.0000 0.0000 0.0000 -0.0000 0.0000 -0.0000  
Z 0.0000 -0.0000 -0.0000 0.0000 -0.0000 0.0000

AT. 19 O X -0.0000 -0.0000 -0.0000 -0.0000 -0.0000 -0.0000  
Y 0.0000 0.0000 -0.0000 -0.0000 -0.0000 -0.0000  
Z 0.0000 0.0000 -0.0000 -0.0000 -0.0000 -0.0000

AT. 20 O X -0.0000 0.0000 -0.0000 0.0000 0.0000 -0.0000  
Y -0.0000 0.0000 0.0000 -0.0000 -0.0000 0.0000  
Z 0.0000 -0.0000 -0.0000 0.0000 0.0000 -0.0000

AT. 21 O X -0.0000 -0.0000 -0.0000 -0.0000 0.0000 0.0000  
Y -0.0000 -0.0000 -0.0000 -0.0000 -0.0000 -0.0000  
Z 0.0000 0.0000 -0.0000 -0.0000 -0.0000 -0.0000

AT. 22 O X -0.0000 0.0000 -0.0000 0.0000 -0.0000 0.0000  
Y 0.0000 -0.0000 0.0000 -0.0000 -0.0000 0.0000

Z 0.0000 -0.0000 -0.0000 0.0000 0.0000 -0.0000  
AT. 23 O X -0.0000 -0.0000 -0.0000 -0.0000 -0.0000 -0.0000  
Y -0.0000 -0.0000 -0.0000 -0.0000 0.0000 0.0000  
Z 0.0000 0.0000 -0.0000 -0.0000 0.0000 0.0000  
AT. 24 O X -0.0000 0.0000 -0.0000 0.0000 0.0000 -0.0000  
Y 0.0000 -0.0000 0.0000 -0.0000 0.0000 -0.0000  
Z 0.0000 -0.0000 -0.0000 0.0000 -0.0000 0.0000  
AT. 25 C X 0.0000 0.0000 -0.0000 -0.0000 0.0000 0.0000  
Y -0.0000 -0.0000 -0.0000 -0.0000 0.0000 0.0000  
Z 0.0000 0.0000 -0.0000 -0.0000 0.0000 0.0000  
AT. 26 C X 0.0000 -0.0000 -0.0000 0.0000 -0.0000 0.0000  
Y 0.0000 -0.0000 0.0000 -0.0000 0.0000 -0.0000  
Z 0.0000 -0.0000 -0.0000 0.0000 -0.0000 0.0000  
AT. 27 C X 0.0000 0.0000 -0.0000 -0.0000 -0.0000 -0.0000  
Y -0.0000 -0.0000 -0.0000 -0.0000 -0.0000 -0.0000  
Z 0.0000 0.0000 -0.0000 -0.0000 -0.0000 -0.0000  
AT. 28 C X 0.0000 -0.0000 -0.0000 0.0000 0.0000 -0.0000  
Y 0.0000 -0.0000 0.0000 -0.0000 -0.0000 0.0000  
Z 0.0000 -0.0000 -0.0000 0.0000 0.0000 -0.0000  
AT. 29 H X -0.0006 -0.0001 0.0003 0.0003 -0.0003 -0.0003  
Y -0.0001 -0.0000 0.0000 0.0000 -0.0000 -0.0000  
Z -0.0004 -0.0001 0.0002 0.0002 -0.0002 -0.0002  
AT. 30 H X -0.0006 0.0001 0.0003 -0.0003 0.0003 -0.0003  
Y 0.0001 -0.0000 -0.0000 0.0000 -0.0000 0.0000  
Z -0.0004 0.0001 0.0002 -0.0002 0.0002 -0.0002  
AT. 31 H X -0.0006 -0.0001 0.0003 0.0003 0.0003 0.0003  
Y -0.0001 -0.0000 0.0000 0.0000 0.0000 0.0000  
Z -0.0004 -0.0001 0.0002 0.0002 0.0002 0.0002  
AT. 32 H X -0.0006 0.0001 0.0003 -0.0003 -0.0003 0.0003  
Y 0.0001 -0.0000 -0.0000 0.0000 0.0000 -0.0000  
Z -0.0004 0.0001 0.0002 -0.0002 -0.0002 0.0002  
AT. 33 H X 0.0001 0.0000 0.0000 0.0000 -0.0000 -0.0000

Y 0.0004 0.0001 0.0000 0.0001 -0.0000 -0.0001  
Z 0.0001 0.0000 0.0000 0.0000 -0.0000 -0.0000  
AT. 34 H X 0.0001 -0.0000 0.0000 -0.0000 0.0000 -0.0000  
Y -0.0004 0.0001 -0.0000 0.0001 -0.0000 0.0001  
Z 0.0001 -0.0000 0.0000 -0.0000 0.0000 -0.0000  
AT. 35 H X 0.0001 0.0000 0.0000 0.0000 0.0000 0.0000  
Y 0.0004 0.0001 0.0000 0.0001 0.0000 0.0001  
Z 0.0001 0.0000 0.0000 0.0000 0.0000 0.0000  
AT. 36 H X 0.0001 -0.0000 0.0000 -0.0000 -0.0000 0.0000  
Y -0.0004 0.0001 -0.0000 0.0001 0.0000 -0.0001  
Z 0.0001 -0.0000 0.0000 -0.0000 -0.0000 0.0000  
AT. 37 C X -0.0000 -0.0000 0.0000 0.0000 -0.0000 -0.0000  
Y -0.0000 -0.0000 0.0000 0.0000 -0.0000 -0.0000  
Z -0.0000 -0.0000 0.0000 0.0000 -0.0000 -0.0000  
AT. 38 C X -0.0000 0.0000 0.0000 -0.0000 0.0000 -0.0000  
Y 0.0000 -0.0000 -0.0000 0.0000 -0.0000 0.0000  
Z -0.0000 0.0000 0.0000 -0.0000 0.0000 -0.0000  
AT. 39 C X -0.0000 -0.0000 0.0000 0.0000 0.0000 0.0000  
Y -0.0000 -0.0000 0.0000 0.0000 0.0000 0.0000  
Z -0.0000 -0.0000 0.0000 0.0000 0.0000 0.0000  
AT. 40 C X -0.0000 0.0000 0.0000 -0.0000 -0.0000 0.0000  
Y 0.0000 -0.0000 -0.0000 0.0000 0.0000 -0.0000  
Z -0.0000 0.0000 0.0000 -0.0000 -0.0000 0.0000  
AT. 41 C X 0.0000 -0.0000 0.0001 -0.0001 0.0001 -0.0001  
Y -0.0000 0.0001 -0.0002 0.0001 -0.0001 0.0001  
Z -0.0000 -0.0000 0.0001 -0.0000 0.0000 -0.0000  
AT. 42 C X 0.0000 0.0000 0.0001 0.0001 -0.0001 -0.0001  
Y 0.0000 0.0001 0.0002 0.0001 -0.0001 -0.0001  
Z -0.0000 0.0000 0.0001 0.0000 -0.0000 -0.0000  
AT. 43 C X 0.0000 -0.0000 0.0001 -0.0001 -0.0001 0.0001  
Y -0.0000 0.0001 -0.0002 0.0001 0.0001 -0.0001  
Z -0.0000 -0.0000 0.0001 -0.0000 -0.0000 0.0000

AT. 44 C X 0.0000 0.0000 0.0001 0.0001 0.0001 0.0001  
Y 0.0000 0.0001 0.0002 0.0001 0.0001 0.0001  
Z -0.0000 0.0000 0.0001 0.0000 0.0000 0.0000

AT. 45 H X -0.0000 0.0001 -0.0001 0.0000 -0.0001 0.0000  
Y 0.0000 -0.0004 0.0009 -0.0003 0.0008 -0.0002  
Z -0.0000 0.0005 -0.0011 0.0004 -0.0009 0.0003

AT. 46 H X -0.0000 -0.0001 -0.0001 -0.0000 0.0001 0.0000  
Y -0.0000 -0.0004 -0.0009 -0.0003 0.0008 0.0002  
Z -0.0000 -0.0005 -0.0011 -0.0004 0.0009 0.0003

AT. 47 H X -0.0000 0.0001 -0.0001 0.0000 0.0001 -0.0000  
Y 0.0000 -0.0004 0.0009 -0.0003 -0.0008 0.0002  
Z -0.0000 0.0005 -0.0011 0.0004 0.0009 -0.0003

AT. 48 H X -0.0000 -0.0001 -0.0001 -0.0000 -0.0001 -0.0000  
Y -0.0000 -0.0004 -0.0009 -0.0003 -0.0008 -0.0002  
Z -0.0000 -0.0005 -0.0011 -0.0004 -0.0009 -0.0003

AT. 49 H X -0.0002 0.0002 -0.0009 0.0009 -0.0009 0.0007  
Y 0.0002 -0.0002 0.0009 -0.0009 0.0010 -0.0007  
Z 0.0001 -0.0001 0.0003 -0.0003 0.0003 -0.0002

AT. 50 H X -0.0002 -0.0002 -0.0009 -0.0009 0.0009 0.0007  
Y -0.0002 -0.0002 -0.0009 -0.0009 0.0010 0.0007  
Z 0.0001 0.0001 0.0003 0.0003 -0.0003 -0.0002

AT. 51 H X -0.0002 0.0002 -0.0009 0.0009 0.0009 -0.0007  
Y 0.0002 -0.0002 0.0009 -0.0009 -0.0010 0.0007  
Z 0.0001 -0.0001 0.0003 -0.0003 -0.0003 0.0002

AT. 52 H X -0.0002 -0.0002 -0.0009 -0.0009 -0.0009 -0.0007  
Y -0.0002 -0.0002 -0.0009 -0.0009 -0.0010 -0.0007  
Z 0.0001 0.0001 0.0003 0.0003 0.0003 0.0002

AT. 53 C X 0.0000 0.0000 -0.0000 0.0000 -0.0000 -0.0000  
Y 0.0000 0.0000 0.0000 -0.0000 0.0000 -0.0000  
Z -0.0000 -0.0000 -0.0000 -0.0000 0.0000 0.0000

AT. 54 C X 0.0000 -0.0000 -0.0000 -0.0000 0.0000 -0.0000  
Y -0.0000 0.0000 -0.0000 -0.0000 0.0000 0.0000

Z -0.0000 0.0000 -0.0000 0.0000 -0.0000 0.0000  
AT. 55 C X 0.0000 0.0000 -0.0000 0.0000 0.0000 0.0000  
Y 0.0000 0.0000 0.0000 -0.0000 -0.0000 0.0000  
Z -0.0000 -0.0000 -0.0000 -0.0000 -0.0000 -0.0000  
AT. 56 C X 0.0000 -0.0000 -0.0000 -0.0000 -0.0000 0.0000  
Y -0.0000 0.0000 -0.0000 -0.0000 -0.0000 -0.0000  
Z -0.0000 0.0000 -0.0000 0.0000 0.0000 -0.0000  
AT. 57 C X -0.0000 0.0000 -0.0002 0.0002 -0.0002 0.0002  
Y 0.0000 -0.0000 0.0001 -0.0001 0.0001 -0.0001  
Z -0.0000 0.0000 -0.0001 0.0001 -0.0001 0.0001  
AT. 58 C X -0.0000 -0.0000 -0.0002 -0.0002 0.0002 0.0002  
Y -0.0000 -0.0000 -0.0001 -0.0001 0.0001 0.0001  
Z -0.0000 -0.0000 -0.0001 -0.0001 0.0001 0.0001  
AT. 59 C X -0.0000 0.0000 -0.0002 0.0002 0.0002 -0.0002  
Y 0.0000 -0.0000 0.0001 -0.0001 -0.0001 0.0001  
Z -0.0000 0.0000 -0.0001 0.0001 0.0001 -0.0001  
AT. 60 C X -0.0000 -0.0000 -0.0002 -0.0002 -0.0002 -0.0002  
Y -0.0000 -0.0000 -0.0001 -0.0001 -0.0001 -0.0001  
Z -0.0000 -0.0000 -0.0001 -0.0001 -0.0001 -0.0001  
AT. 61 H X 0.0001 -0.0002 0.0005 -0.0004 0.0005 -0.0005  
Y -0.0001 0.0002 -0.0007 0.0005 -0.0007 0.0006  
Z -0.0000 0.0001 -0.0002 0.0001 -0.0002 0.0002  
AT. 62 H X 0.0001 0.0002 0.0005 0.0004 -0.0005 -0.0005  
Y 0.0001 0.0002 0.0007 0.0005 -0.0007 -0.0006  
Z -0.0000 -0.0001 -0.0002 -0.0001 0.0002 0.0002  
AT. 63 H X 0.0001 -0.0002 0.0005 -0.0004 -0.0005 0.0005  
Y -0.0001 0.0002 -0.0007 0.0005 0.0007 -0.0006  
Z -0.0000 0.0001 -0.0002 0.0001 0.0002 -0.0002  
AT. 64 H X 0.0001 0.0002 0.0005 0.0004 0.0005 0.0005  
Y 0.0001 0.0002 0.0007 0.0005 0.0007 0.0006  
Z -0.0000 -0.0001 -0.0002 -0.0001 -0.0002 -0.0002  
AT. 65 H X 0.0004 -0.0004 0.0015 -0.0017 0.0015 -0.0018

Y 0.0002 -0.0001 0.0005 -0.0006 0.0006 -0.0006  
Z -0.0000 0.0000 -0.0000 -0.0000 0.0000 0.0000  
AT. 66 H X 0.0004 0.0004 0.0015 0.0017 -0.0015 -0.0018  
Y -0.0002 -0.0001 -0.0005 -0.0006 0.0006 0.0006  
Z -0.0000 -0.0000 -0.0000 0.0000 -0.0000 0.0000  
AT. 67 H X 0.0004 -0.0004 0.0015 -0.0017 -0.0015 0.0018  
Y 0.0002 -0.0001 0.0005 -0.0006 -0.0006 0.0006  
Z -0.0000 0.0000 -0.0000 -0.0000 -0.0000 -0.0000  
AT. 68 H X 0.0004 0.0004 0.0015 0.0017 0.0015 0.0018  
Y -0.0002 -0.0001 -0.0005 -0.0006 -0.0006 -0.0006  
Z -0.0000 -0.0000 -0.0000 0.0000 0.0000 -0.0000  
AT. 69 H X -0.0001 0.0001 -0.0004 0.0004 -0.0004 0.0004  
Y -0.0003 0.0002 -0.0014 0.0014 -0.0015 0.0014  
Z 0.0003 -0.0002 0.0017 -0.0017 0.0017 -0.0017  
AT. 70 H X -0.0001 -0.0001 -0.0004 -0.0004 0.0004 0.0004  
Y 0.0003 0.0002 0.0014 0.0014 -0.0015 -0.0014  
Z 0.0003 0.0002 0.0017 0.0017 -0.0017 -0.0017  
AT. 71 H X -0.0001 0.0001 -0.0004 0.0004 0.0004 -0.0004  
Y -0.0003 0.0002 -0.0014 0.0014 0.0015 -0.0014  
Z 0.0003 -0.0002 0.0017 -0.0017 -0.0017 0.0017  
AT. 72 H X -0.0001 -0.0001 -0.0004 -0.0004 -0.0004 -0.0004  
Y 0.0003 0.0002 0.0014 0.0014 0.0015 0.0014  
Z 0.0003 0.0002 0.0017 0.0017 0.0017 0.0017  
AT. 73 C X 0.0000 0.0000 -0.0000 -0.0000 -0.0000 -0.0000  
Y -0.0000 -0.0000 0.0000 0.0000 0.0000 0.0000  
Z -0.0000 -0.0000 0.0000 0.0000 0.0000 0.0000  
AT. 74 C X 0.0000 -0.0000 -0.0000 0.0000 0.0000 -0.0000  
Y 0.0000 -0.0000 -0.0000 0.0000 0.0000 -0.0000  
Z -0.0000 0.0000 0.0000 -0.0000 -0.0000 0.0000  
AT. 75 C X 0.0000 0.0000 -0.0000 -0.0000 0.0000 0.0000  
Y -0.0000 -0.0000 0.0000 0.0000 -0.0000 -0.0000  
Z -0.0000 -0.0000 0.0000 0.0000 -0.0000 -0.0000

AT. 76 C X 0.0000 -0.0000 -0.0000 0.0000 -0.0000 0.0000  
Y 0.0000 -0.0000 -0.0000 0.0000 -0.0000 0.0000  
Z -0.0000 0.0000 0.0000 -0.0000 0.0000 -0.0000

AT. 77 C X 0.0000 0.0000 -0.0001 -0.0001 -0.0001 -0.0001  
Y -0.0002 -0.0003 -0.0002 -0.0002 -0.0002 -0.0002  
Z -0.0002 -0.0002 -0.0003 -0.0003 -0.0003 -0.0003

AT. 78 C X 0.0000 -0.0000 -0.0001 0.0001 0.0001 -0.0001  
Y 0.0002 -0.0003 0.0002 -0.0002 -0.0002 0.0002  
Z -0.0002 0.0002 -0.0003 0.0003 0.0003 -0.0003

AT. 79 C X 0.0000 0.0000 -0.0001 -0.0001 0.0001 0.0001  
Y -0.0002 -0.0003 -0.0002 -0.0002 0.0002 0.0002  
Z -0.0002 -0.0002 -0.0003 -0.0003 0.0003 0.0003

AT. 80 C X 0.0000 -0.0000 -0.0001 0.0001 -0.0001 0.0001  
Y 0.0002 -0.0003 0.0002 -0.0002 0.0002 -0.0002  
Z -0.0002 0.0002 -0.0003 0.0003 -0.0003 0.0003

AT. 81 H X -0.0009 -0.0010 0.0004 0.0003 0.0002 0.0004  
Y 0.0007 0.0008 -0.0002 -0.0001 -0.0001 -0.0002  
Z -0.0000 0.0000 -0.0001 -0.0001 -0.0001 -0.0001

AT. 82 H X -0.0009 0.0010 0.0004 -0.0003 -0.0002 0.0004  
Y -0.0007 0.0008 0.0002 -0.0001 -0.0001 0.0002  
Z -0.0000 -0.0000 -0.0001 0.0001 0.0001 -0.0001

AT. 83 H X -0.0009 -0.0010 0.0004 0.0003 -0.0002 -0.0004  
Y 0.0007 0.0008 -0.0002 -0.0001 0.0001 0.0002  
Z -0.0000 0.0000 -0.0001 -0.0001 0.0001 0.0001

AT. 84 H X -0.0009 0.0010 0.0004 -0.0003 0.0002 -0.0004  
Y -0.0007 0.0008 0.0002 -0.0001 0.0001 -0.0002  
Z -0.0000 -0.0000 -0.0001 0.0001 -0.0001 0.0001

AT. 85 H X 0.0005 0.0006 0.0009 0.0009 0.0009 0.0008  
Y 0.0021 0.0024 0.0025 0.0028 0.0028 0.0026  
Z 0.0026 0.0029 0.0030 0.0032 0.0033 0.0030

AT. 86 H X 0.0005 -0.0006 0.0009 -0.0009 -0.0009 0.0008  
Y -0.0021 0.0024 -0.0025 0.0028 0.0028 -0.0026

Z 0.0026 -0.0029 0.0030 -0.0032 -0.0033 0.0030  
AT. 87 H X 0.0005 0.0006 0.0009 0.0009 -0.0009 -0.0008  
Y 0.0021 0.0024 0.0025 0.0028 -0.0028 -0.0026  
Z 0.0026 0.0029 0.0030 0.0032 -0.0033 -0.0030  
AT. 88 H X 0.0005 -0.0006 0.0009 -0.0009 0.0009 -0.0008  
Y -0.0021 0.0024 -0.0025 0.0028 -0.0028 0.0026  
Z 0.0026 -0.0029 0.0030 -0.0032 0.0033 -0.0030  
AT. 89 C X 0.0000 0.0000 -0.0001 -0.0001 -0.0001 -0.0001  
Y 0.0000 0.0000 -0.0000 -0.0000 -0.0000 -0.0000  
Z 0.0000 0.0000 0.0000 0.0000 0.0000 0.0000  
AT. 90 C X 0.0000 -0.0000 -0.0001 0.0001 0.0001 -0.0001  
Y -0.0000 0.0000 0.0000 -0.0000 -0.0000 0.0000  
Z 0.0000 -0.0000 0.0000 -0.0000 -0.0000 0.0000  
AT. 91 C X 0.0000 0.0000 -0.0001 -0.0001 0.0001 0.0001  
Y 0.0000 0.0000 -0.0000 -0.0000 0.0000 0.0000  
Z 0.0000 0.0000 0.0000 0.0000 -0.0000 -0.0000  
AT. 92 C X 0.0000 -0.0000 -0.0001 0.0001 -0.0001 0.0001  
Y -0.0000 0.0000 0.0000 -0.0000 0.0000 -0.0000  
Z 0.0000 -0.0000 0.0000 -0.0000 0.0000 -0.0000  
AT. 93 C X -0.0016 -0.0016 -0.0083 -0.0083 -0.0083 -0.0083  
Y 0.0003 0.0004 0.0007 0.0007 0.0008 0.0008  
Z 0.0004 0.0004 0.0015 0.0015 0.0015 0.0015  
AT. 94 C X -0.0016 0.0016 -0.0083 0.0083 0.0083 -0.0083  
Y -0.0003 0.0004 -0.0007 0.0007 0.0008 -0.0008  
Z 0.0004 -0.0004 0.0015 -0.0015 -0.0015 0.0015  
AT. 95 C X -0.0016 -0.0016 -0.0083 -0.0083 0.0083 0.0083  
Y 0.0003 0.0004 0.0007 0.0007 -0.0008 -0.0008  
Z 0.0004 0.0004 0.0015 0.0015 -0.0015 -0.0015  
AT. 96 C X -0.0016 0.0016 -0.0083 0.0083 -0.0083 0.0083  
Y -0.0003 0.0004 -0.0007 0.0007 -0.0008 0.0008  
Z 0.0004 -0.0004 0.0015 -0.0015 0.0015 -0.0015  
AT. 97 H X 0.0097 0.0101 0.0546 0.0545 0.0545 0.0544



Y 0.0055 0.0057 0.0311 0.0310 0.0310 0.0310  
Z -0.0027 -0.0028 -0.0152 -0.0151 -0.0151 -0.0151  
AT. 98 H X 0.0097 -0.0101 0.0546 -0.0545 -0.0545 0.0544  
Y -0.0055 0.0057 -0.0311 0.0310 0.0310 -0.0310  
Z -0.0027 0.0028 -0.0152 0.0151 0.0151 -0.0151  
AT. 99 H X 0.0097 0.0101 0.0546 0.0545 -0.0545 -0.0544  
Y 0.0055 0.0057 0.0311 0.0310 -0.0310 -0.0310  
Z -0.0027 -0.0028 -0.0152 -0.0151 0.0151 0.0151  
AT. 100 H X 0.0097 -0.0101 0.0546 -0.0545 0.0545 -0.0544  
Y -0.0055 0.0057 -0.0311 0.0310 -0.0310 0.0310  
Z -0.0027 0.0028 -0.0152 0.0151 -0.0151 0.0151  
AT. 101 H X 0.0095 0.0098 0.0450 0.0450 0.0452 0.0454  
Y -0.0091 -0.0094 -0.0428 -0.0427 -0.0430 -0.0431  
Z -0.0016 -0.0016 -0.0071 -0.0071 -0.0071 -0.0072  
AT. 102 H X 0.0095 -0.0098 0.0450 -0.0450 -0.0452 0.0454  
Y 0.0091 -0.0094 0.0428 -0.0427 -0.0430 0.0431  
Z -0.0016 0.0016 -0.0071 0.0071 0.0071 -0.0072  
AT. 103 H X 0.0095 0.0098 0.0450 0.0450 -0.0452 -0.0454  
Y -0.0091 -0.0094 -0.0428 -0.0427 0.0430 0.0431  
Z -0.0016 -0.0016 -0.0071 -0.0071 0.0071 0.0072  
AT. 104 H X 0.0095 -0.0098 0.0450 -0.0450 0.0452 -0.0454  
Y 0.0091 -0.0094 0.0428 -0.0427 0.0430 -0.0431  
Z -0.0016 0.0016 -0.0071 0.0071 -0.0071 0.0072  
AT. 105 H X -0.0007 -0.0007 -0.0001 -0.0001 -0.0001 -0.0002  
Y -0.0006 -0.0007 0.0031 0.0031 0.0031 0.0030  
Z -0.0010 -0.0011 0.0040 0.0040 0.0040 0.0039  
AT. 106 H X -0.0007 0.0007 -0.0001 0.0001 0.0001 -0.0002  
Y 0.0006 -0.0007 -0.0031 0.0031 0.0031 -0.0030  
Z -0.0010 0.0011 0.0040 -0.0040 -0.0040 0.0039  
AT. 107 H X -0.0007 -0.0007 -0.0001 -0.0001 0.0001 0.0002  
Y -0.0006 -0.0007 0.0031 0.0031 -0.0031 -0.0030  
Z -0.0010 -0.0011 0.0040 0.0040 -0.0040 -0.0039

AT.108 H X -0.0007 0.0007 -0.0001 0.0001 -0.0001 0.0002  
Y 0.0006 -0.0007 -0.0031 0.0031 -0.0031 0.0030  
Z -0.0010 0.0011 0.0040 -0.0040 0.0040 -0.0039

AT.109 C X -0.0000 -0.0000 -0.0000 0.0000 -0.0000 0.0000  
Y 0.0001 0.0000 -0.0000 0.0000 -0.0000 0.0000  
Z -0.0001 -0.0001 0.0000 -0.0000 0.0000 -0.0000

AT.110 C X -0.0000 0.0000 -0.0000 -0.0000 0.0000 0.0000  
Y -0.0001 0.0000 0.0000 0.0000 -0.0000 -0.0000  
Z -0.0001 0.0001 0.0000 0.0000 -0.0000 -0.0000

AT.111 C X -0.0000 -0.0000 -0.0000 0.0000 0.0000 -0.0000  
Y 0.0001 0.0000 -0.0000 0.0000 0.0000 -0.0000  
Z -0.0001 -0.0001 0.0000 -0.0000 -0.0000 0.0000

AT.112 C X -0.0000 0.0000 -0.0000 -0.0000 -0.0000 -0.0000  
Y -0.0001 0.0000 0.0000 0.0000 0.0000 0.0000  
Z -0.0001 0.0001 0.0000 0.0000 0.0000 0.0000

AT.113 H X -0.0002 -0.0001 0.0001 -0.0000 0.0001 -0.0001  
Y -0.0001 -0.0001 0.0000 -0.0000 0.0001 -0.0001  
Z -0.0000 -0.0000 0.0000 0.0000 -0.0000 0.0000

AT.114 H X -0.0002 0.0001 0.0001 0.0000 -0.0001 -0.0001  
Y 0.0001 -0.0001 -0.0000 -0.0000 0.0001 0.0001  
Z -0.0000 0.0000 0.0000 -0.0000 0.0000 0.0000

AT.115 H X -0.0002 -0.0001 0.0001 -0.0000 -0.0001 0.0001  
Y -0.0001 -0.0001 0.0000 -0.0000 -0.0001 0.0001  
Z -0.0000 -0.0000 0.0000 0.0000 0.0000 -0.0000

AT.116 H X -0.0002 0.0001 0.0001 0.0000 0.0001 0.0001  
Y 0.0001 -0.0001 -0.0000 -0.0000 -0.0001 -0.0001  
Z -0.0000 0.0000 0.0000 -0.0000 -0.0000 -0.0000

AT.117 H X 0.0001 0.0001 -0.0000 0.0000 -0.0000 0.0001  
Y -0.0008 -0.0005 0.0002 -0.0001 0.0001 -0.0004  
Z 0.0010 0.0006 -0.0003 0.0001 -0.0002 0.0005

AT.118 H X 0.0001 -0.0001 -0.0000 -0.0000 0.0000 0.0001  
Y 0.0008 -0.0005 -0.0002 -0.0001 0.0001 0.0004

Z 0.0010 -0.0006 -0.0003 -0.0001 0.0002 0.0005  
AT. 119 H X 0.0001 0.0001 -0.0000 0.0000 0.0000 -0.0001  
Y -0.0008 -0.0005 0.0002 -0.0001 -0.0001 0.0004  
Z 0.0010 0.0006 -0.0003 0.0001 0.0002 -0.0005  
AT. 120 H X 0.0001 -0.0001 -0.0000 -0.0000 -0.0000 -0.0001  
Y 0.0008 -0.0005 -0.0002 -0.0001 -0.0001 -0.0004  
Z 0.0010 -0.0006 -0.0003 -0.0001 -0.0002 -0.0005  
AT. 121 C X 0.0023 0.0023 -0.0004 -0.0004 -0.0004 -0.0004  
Y 0.0033 0.0033 -0.0005 -0.0005 -0.0005 -0.0005  
Z 0.0033 0.0033 -0.0004 -0.0004 -0.0004 -0.0003  
AT. 122 C X 0.0023 -0.0023 -0.0004 0.0004 0.0004 -0.0004  
Y -0.0033 0.0033 0.0005 -0.0005 -0.0005 0.0005  
Z 0.0033 -0.0033 -0.0004 0.0004 0.0004 -0.0003  
AT. 123 C X 0.0023 0.0023 -0.0004 -0.0004 0.0004 0.0004  
Y 0.0033 0.0033 -0.0005 -0.0005 0.0005 0.0005  
Z 0.0033 0.0033 -0.0004 -0.0004 0.0004 0.0003  
AT. 124 C X 0.0023 -0.0023 -0.0004 0.0004 -0.0004 0.0004  
Y -0.0033 0.0033 0.0005 -0.0005 0.0005 -0.0005  
Z 0.0033 -0.0033 -0.0004 0.0004 -0.0004 0.0003  
AT. 125 H X -0.0122 -0.0122 0.0016 0.0017 0.0014 0.0013  
Y -0.0309 -0.0307 0.0040 0.0043 0.0037 0.0034  
Z -0.0426 -0.0424 0.0057 0.0060 0.0052 0.0048  
AT. 126 H X -0.0122 0.0122 0.0016 -0.0017 -0.0014 0.0013  
Y 0.0309 -0.0307 -0.0040 0.0043 0.0037 -0.0034  
Z -0.0426 0.0424 0.0057 -0.0060 -0.0052 0.0048  
AT. 127 H X -0.0122 -0.0122 0.0016 0.0017 -0.0014 -0.0013  
Y -0.0309 -0.0307 0.0040 0.0043 -0.0037 -0.0034  
Z -0.0426 -0.0424 0.0057 0.0060 -0.0052 -0.0048  
AT. 128 H X -0.0122 0.0122 0.0016 -0.0017 0.0014 -0.0013  
Y 0.0309 -0.0307 -0.0040 0.0043 -0.0037 0.0034  
Z -0.0426 0.0424 0.0057 -0.0060 0.0052 -0.0048  
AT. 129 H X -0.0150 -0.0148 0.0033 0.0035 0.0032 0.0031

Y -0.0090 -0.0089 0.0019 0.0020 0.0018 0.0017  
Z 0.0042 0.0041 -0.0008 -0.0009 -0.0008 -0.0008  
AT. 130 H X -0.0150 0.0148 0.0033 -0.0035 -0.0032 0.0031  
Y 0.0090 -0.0089 -0.0019 0.0020 0.0018 -0.0017  
Z 0.0042 -0.0041 -0.0008 0.0009 0.0008 -0.0008  
AT. 131 H X -0.0150 -0.0148 0.0033 0.0035 -0.0032 -0.0031  
Y -0.0090 -0.0089 0.0019 0.0020 -0.0018 -0.0017  
Z 0.0042 0.0041 -0.0008 -0.0009 0.0008 0.0008  
AT. 132 H X -0.0150 0.0148 0.0033 -0.0035 0.0032 -0.0031  
Y 0.0090 -0.0089 -0.0019 0.0020 -0.0018 0.0017  
Z 0.0042 -0.0041 -0.0008 0.0009 -0.0008 0.0008  
AT. 133 C X 0.0000 0.0000 -0.0000 -0.0000 -0.0000 -0.0000  
Y 0.0001 0.0001 -0.0000 -0.0000 -0.0000 -0.0000  
Z 0.0001 0.0001 -0.0000 -0.0000 -0.0000 -0.0000  
AT. 134 C X 0.0000 -0.0000 -0.0000 0.0000 0.0000 -0.0000  
Y -0.0001 0.0001 0.0000 -0.0000 -0.0000 0.0000  
Z 0.0001 -0.0001 -0.0000 0.0000 0.0000 -0.0000  
AT. 135 C X 0.0000 0.0000 -0.0000 -0.0000 0.0000 0.0000  
Y 0.0001 0.0001 -0.0000 -0.0000 0.0000 0.0000  
Z 0.0001 0.0001 -0.0000 -0.0000 0.0000 0.0000  
AT. 136 C X 0.0000 -0.0000 -0.0000 0.0000 -0.0000 0.0000  
Y -0.0001 0.0001 0.0000 -0.0000 0.0000 -0.0000  
Z 0.0001 -0.0001 -0.0000 0.0000 -0.0000 0.0000  
AT. 137 C X -0.0041 -0.0041 0.0009 0.0010 0.0009 0.0009  
Y -0.0017 -0.0017 0.0004 0.0004 0.0004 0.0004  
Z -0.0019 -0.0019 0.0004 0.0004 0.0004 0.0004  
AT. 138 C X -0.0041 0.0041 0.0009 -0.0010 -0.0009 0.0009  
Y 0.0017 -0.0017 -0.0004 0.0004 0.0004 -0.0004  
Z -0.0019 0.0019 0.0004 -0.0004 -0.0004 0.0004  
AT. 139 C X -0.0041 -0.0041 0.0009 0.0010 -0.0009 -0.0009  
Y -0.0017 -0.0017 0.0004 0.0004 -0.0004 -0.0004  
Z -0.0019 -0.0019 0.0004 0.0004 -0.0004 -0.0004

AT. 140 C X -0.0041 0.0041 0.0009 -0.0010 0.0009 -0.0009  
Y 0.0017 -0.0017 -0.0004 0.0004 -0.0004 0.0004  
Z -0.0019 0.0019 0.0004 -0.0004 0.0004 -0.0004

AT. 141 H X 0.0366 0.0366 -0.0081 -0.0084 -0.0077 -0.0076  
Y -0.0232 -0.0232 0.0052 0.0053 0.0049 0.0048  
Z 0.0330 0.0330 -0.0073 -0.0076 -0.0070 -0.0068

AT. 142 H X 0.0366 -0.0366 -0.0081 0.0084 0.0077 -0.0076  
Y 0.0232 -0.0232 -0.0052 0.0053 0.0049 -0.0048  
Z 0.0330 -0.0330 -0.0073 0.0076 0.0070 -0.0068

AT. 143 H X 0.0366 0.0366 -0.0081 -0.0084 0.0077 0.0076  
Y -0.0232 -0.0232 0.0052 0.0053 -0.0049 -0.0048  
Z 0.0330 0.0330 -0.0073 -0.0076 0.0070 0.0068

AT. 144 H X 0.0366 -0.0366 -0.0081 0.0084 -0.0077 0.0076  
Y 0.0232 -0.0232 -0.0052 0.0053 -0.0049 0.0048  
Z 0.0330 -0.0330 -0.0073 0.0076 -0.0070 0.0068

AT. 145 H X 0.0120 0.0120 -0.0028 -0.0029 -0.0027 -0.0027  
Y 0.0437 0.0438 -0.0102 -0.0106 -0.0099 -0.0097  
Z -0.0117 -0.0118 0.0027 0.0028 0.0026 0.0026

AT. 146 H X 0.0120 -0.0120 -0.0028 0.0029 0.0027 -0.0027  
Y -0.0437 0.0438 0.0102 -0.0106 -0.0099 0.0097  
Z -0.0117 0.0118 0.0027 -0.0028 -0.0026 0.0026

AT. 147 H X 0.0120 0.0120 -0.0028 -0.0029 0.0027 0.0027  
Y 0.0437 0.0438 -0.0102 -0.0106 0.0099 0.0097  
Z -0.0117 -0.0118 0.0027 0.0028 -0.0026 -0.0026

AT. 148 H X 0.0120 -0.0120 -0.0028 0.0029 -0.0027 0.0027  
Y -0.0437 0.0438 0.0102 -0.0106 0.0099 -0.0097  
Z -0.0117 0.0118 0.0027 -0.0028 0.0026 -0.0026

AT. 149 O X -0.0000 -0.0000 0.0000 0.0000 0.0000 0.0000  
Y 0.0000 0.0000 -0.0000 -0.0000 -0.0000 -0.0000  
Z -0.0000 -0.0000 0.0000 0.0000 0.0001 0.0001

AT. 150 O X -0.0000 0.0000 0.0000 -0.0000 -0.0000 0.0000  
Y -0.0000 0.0000 0.0000 -0.0000 -0.0000 0.0000

Z -0.0000 0.0000 0.0000 -0.0000 -0.0001 0.0001  
AT. 151 O X -0.0000 -0.0000 0.0000 0.0000 -0.0000 -0.0000  
Y 0.0000 0.0000 -0.0000 -0.0000 0.0000 0.0000  
Z -0.0000 -0.0000 0.0000 0.0000 -0.0001 -0.0001  
AT. 152 O X -0.0000 0.0000 0.0000 -0.0000 0.0000 -0.0000  
Y -0.0000 0.0000 0.0000 -0.0000 0.0000 -0.0000  
Z -0.0000 0.0000 0.0000 -0.0000 0.0001 -0.0001  
AT. 153 H X 0.0000 -0.0000 0.0002 0.0002 -0.0000 -0.0000  
Y -0.0001 -0.0001 -0.0002 -0.0002 -0.0001 -0.0001  
Z 0.0001 0.0000 -0.0002 -0.0003 -0.0008 -0.0008  
AT. 154 H X 0.0000 0.0000 0.0002 -0.0002 0.0000 -0.0000  
Y 0.0001 -0.0001 0.0002 -0.0002 -0.0001 0.0001  
Z 0.0001 -0.0000 -0.0002 0.0003 0.0008 -0.0008  
AT. 155 H X 0.0000 -0.0000 0.0002 0.0002 0.0000 0.0000  
Y -0.0001 -0.0001 -0.0002 -0.0002 0.0001 0.0001  
Z 0.0001 0.0000 -0.0002 -0.0003 0.0008 0.0008  
AT. 156 H X 0.0000 0.0000 0.0002 -0.0002 -0.0000 0.0000  
Y 0.0001 -0.0001 0.0002 -0.0002 0.0001 -0.0001  
Z 0.0001 -0.0000 -0.0002 0.0003 -0.0008 0.0008  
AT. 157 O X -0.0000 -0.0000 -0.0000 0.0000 -0.0000 0.0000  
Y 0.0000 0.0000 -0.0000 -0.0000 -0.0000 -0.0000  
Z 0.0000 0.0000 -0.0000 -0.0000 -0.0000 -0.0000  
AT. 158 O X -0.0000 0.0000 -0.0000 -0.0000 0.0000 0.0000  
Y -0.0000 0.0000 0.0000 -0.0000 -0.0000 0.0000  
Z 0.0000 -0.0000 -0.0000 0.0000 0.0000 -0.0000  
AT. 159 O X -0.0000 -0.0000 -0.0000 0.0000 0.0000 -0.0000  
Y 0.0000 0.0000 -0.0000 -0.0000 0.0000 0.0000  
Z 0.0000 0.0000 -0.0000 -0.0000 0.0000 0.0000  
AT. 160 O X -0.0000 0.0000 -0.0000 -0.0000 -0.0000 -0.0000  
Y -0.0000 0.0000 0.0000 -0.0000 0.0000 -0.0000  
Z 0.0000 -0.0000 -0.0000 0.0000 -0.0000 0.0000  
AT. 161 O X -0.0000 -0.0000 -0.0000 -0.0000 -0.0000 -0.0000

Y 0.0001 0.0001 0.0000 0.0000 0.0000 0.0000  
Z -0.0000 -0.0000 -0.0000 -0.0000 -0.0000 -0.0000  
AT.162 O X -0.0000 0.0000 -0.0000 0.0000 0.0000 -0.0000  
Y -0.0001 0.0001 -0.0000 0.0000 0.0000 -0.0000  
Z -0.0000 0.0000 -0.0000 0.0000 0.0000 -0.0000  
AT.163 O X -0.0000 -0.0000 -0.0000 -0.0000 0.0000 0.0000  
Y 0.0001 0.0001 0.0000 0.0000 -0.0000 -0.0000  
Z -0.0000 -0.0000 -0.0000 -0.0000 0.0000 0.0000  
AT.164 O X -0.0000 0.0000 -0.0000 0.0000 -0.0000 0.0000  
Y -0.0001 0.0001 -0.0000 0.0000 -0.0000 0.0000  
Z -0.0000 0.0000 -0.0000 0.0000 -0.0000 0.0000  
AT.165 H X 0.0007 0.0007 -0.0000 -0.0000 0.0001 0.0001  
Y -0.0012 -0.0012 -0.0000 -0.0000 -0.0002 -0.0002  
Z 0.0001 0.0001 0.0000 0.0000 0.0000 0.0000  
AT.166 H X 0.0007 -0.0007 -0.0000 0.0000 -0.0001 0.0001  
Y 0.0012 -0.0012 0.0000 -0.0000 -0.0002 0.0002  
Z 0.0001 -0.0001 0.0000 -0.0000 -0.0000 0.0000  
AT.167 H X 0.0007 0.0007 -0.0000 -0.0000 -0.0001 -0.0001  
Y -0.0012 -0.0012 -0.0000 -0.0000 0.0002 0.0002  
Z 0.0001 0.0001 0.0000 0.0000 -0.0000 -0.0000  
AT.168 H X 0.0007 -0.0007 -0.0000 0.0000 0.0001 -0.0001  
Y 0.0012 -0.0012 0.0000 -0.0000 0.0002 -0.0002  
Z 0.0001 -0.0001 0.0000 -0.0000 0.0000 -0.0000  
AT.169 O X -0.0000 -0.0000 -0.0000 -0.0000 -0.0001 -0.0001  
Y -0.0000 -0.0000 0.0001 0.0001 -0.0002 -0.0002  
Z 0.0000 -0.0000 0.0000 0.0000 -0.0000 -0.0000  
AT.170 O X -0.0000 0.0000 -0.0000 0.0000 0.0001 -0.0001  
Y 0.0000 -0.0000 -0.0001 0.0001 -0.0002 0.0002  
Z 0.0000 0.0000 0.0000 -0.0000 0.0000 -0.0000  
AT.171 O X -0.0000 -0.0000 -0.0000 -0.0000 0.0001 0.0001  
Y -0.0000 -0.0000 0.0001 0.0001 0.0002 0.0002  
Z 0.0000 -0.0000 0.0000 0.0000 0.0000 0.0000

AT.172 O X -0.0000 0.0000 -0.0000 0.0000 -0.0001 0.0001  
Y 0.0000 -0.0000 -0.0001 0.0001 0.0002 -0.0002  
Z 0.0000 0.0000 0.0000 -0.0000 -0.0000 0.0000

AT.173 H X 0.0000 0.0001 -0.0004 -0.0004 0.0008 0.0009  
Y 0.0001 0.0005 -0.0012 -0.0011 0.0033 0.0036  
Z 0.0000 0.0001 -0.0002 -0.0002 0.0004 0.0005

AT.174 H X 0.0000 -0.0001 -0.0004 0.0004 -0.0008 0.0009  
Y -0.0001 0.0005 0.0012 -0.0011 0.0033 -0.0036  
Z 0.0000 -0.0001 -0.0002 0.0002 -0.0004 0.0005

AT.175 H X 0.0000 0.0001 -0.0004 -0.0004 -0.0008 -0.0009  
Y 0.0001 0.0005 -0.0012 -0.0011 -0.0033 -0.0036  
Z 0.0000 0.0001 -0.0002 -0.0002 -0.0004 -0.0005

AT.176 H X 0.0000 -0.0001 -0.0004 0.0004 0.0008 -0.0009  
Y -0.0001 0.0005 0.0012 -0.0011 -0.0033 0.0036  
Z 0.0000 -0.0001 -0.0002 0.0002 0.0004 -0.0005

FREQ(CM\*\*-1) 3201.56 3201.56 3201.60 3201.63 3204.06 3204.08

AT. 1 I X 0.0000 -0.0000 0.0000 -0.0000 0.0000 0.0000  
Y 0.0000 0.0000 0.0000 0.0000 0.0000 0.0000  
Z -0.0000 -0.0000 0.0000 -0.0000 0.0000 0.0000

AT. 2 I X 0.0000 0.0000 -0.0000 -0.0000 -0.0000 -0.0000  
Y -0.0000 0.0000 0.0000 -0.0000 0.0000 0.0000  
Z -0.0000 0.0000 -0.0000 -0.0000 -0.0000 -0.0000

AT. 3 I X 0.0000 -0.0000 -0.0000 0.0000 0.0000 -0.0000  
Y 0.0000 0.0000 -0.0000 -0.0000 0.0000 -0.0000  
Z -0.0000 -0.0000 -0.0000 0.0000 0.0000 -0.0000

AT. 4 I X 0.0000 0.0000 0.0000 0.0000 -0.0000 0.0000  
Y -0.0000 0.0000 -0.0000 0.0000 0.0000 -0.0000  
Z -0.0000 0.0000 0.0000 0.0000 -0.0000 0.0000

AT. 5 I X -0.0000 -0.0000 -0.0000 -0.0000 0.0000 -0.0000  
Y -0.0000 0.0000 -0.0000 -0.0000 0.0000 -0.0000



Z -0.0000 -0.0000 -0.0000 -0.0000 -0.0000 0.0000  
AT. 6 I X -0.0000 0.0000 0.0000 -0.0000 -0.0000 0.0000  
Y 0.0000 0.0000 -0.0000 0.0000 0.0000 -0.0000  
Z -0.0000 0.0000 0.0000 -0.0000 0.0000 -0.0000  
AT. 7 I X -0.0000 -0.0000 0.0000 0.0000 0.0000 0.0000  
Y -0.0000 0.0000 0.0000 0.0000 0.0000 0.0000  
Z -0.0000 -0.0000 0.0000 0.0000 -0.0000 -0.0000  
AT. 8 I X -0.0000 0.0000 -0.0000 0.0000 -0.0000 -0.0000  
Y 0.0000 0.0000 0.0000 -0.0000 0.0000 0.0000  
Z -0.0000 0.0000 -0.0000 0.0000 0.0000 0.0000  
AT. 9 N X -0.0000 -0.0000 -0.0000 -0.0000 0.0000 0.0000  
Y 0.0000 0.0000 0.0000 0.0000 -0.0000 -0.0000  
Z -0.0000 -0.0000 -0.0000 -0.0000 0.0000 0.0000  
AT. 10 N X -0.0000 0.0000 0.0000 -0.0000 -0.0000 -0.0000  
Y -0.0000 0.0000 0.0000 -0.0000 -0.0000 -0.0000  
Z -0.0000 0.0000 0.0000 -0.0000 -0.0000 -0.0000  
AT. 11 N X -0.0000 -0.0000 0.0000 0.0000 0.0000 -0.0000  
Y 0.0000 0.0000 -0.0000 -0.0000 -0.0000 0.0000  
Z -0.0000 -0.0000 0.0000 0.0000 0.0000 -0.0000  
AT. 12 N X -0.0000 0.0000 -0.0000 0.0000 -0.0000 0.0000  
Y -0.0000 0.0000 -0.0000 0.0000 -0.0000 0.0000  
Z -0.0000 0.0000 -0.0000 0.0000 -0.0000 0.0000  
AT. 13 N X -0.0000 -0.0000 -0.0000 -0.0000 0.0000 0.0000  
Y 0.0000 0.0000 0.0000 0.0000 0.0000 0.0000  
Z -0.0000 -0.0000 -0.0000 -0.0000 -0.0000 -0.0000  
AT. 14 N X -0.0000 0.0000 0.0000 -0.0000 -0.0000 -0.0000  
Y -0.0000 0.0000 0.0000 -0.0000 0.0000 0.0000  
Z -0.0000 0.0000 0.0000 -0.0000 0.0000 0.0000  
AT. 15 N X -0.0000 -0.0000 0.0000 0.0000 0.0000 -0.0000  
Y 0.0000 0.0000 -0.0000 -0.0000 0.0000 -0.0000  
Z -0.0000 -0.0000 0.0000 0.0000 -0.0000 0.0000  
AT. 16 N X -0.0000 0.0000 -0.0000 0.0000 -0.0000 0.0000

Y -0.0000 0.0000 -0.0000 0.0000 0.0000 -0.0000  
Z -0.0000 0.0000 -0.0000 0.0000 0.0000 -0.0000  
AT. 17 O X -0.0000 -0.0000 -0.0000 -0.0000 -0.0000 -0.0000  
Y -0.0001 -0.0001 -0.0001 -0.0001 -0.0000 0.0000  
Z 0.0000 0.0001 0.0000 0.0001 0.0000 -0.0000  
AT. 18 O X -0.0000 0.0000 0.0000 -0.0000 0.0000 0.0000  
Y 0.0001 -0.0001 -0.0001 0.0001 -0.0000 0.0000  
Z 0.0000 -0.0001 -0.0000 0.0001 -0.0000 0.0000  
AT. 19 O X -0.0000 -0.0000 0.0000 0.0000 -0.0000 0.0000  
Y -0.0001 -0.0001 0.0001 0.0001 -0.0000 -0.0000  
Z 0.0000 0.0001 -0.0000 -0.0001 0.0000 0.0000  
AT. 20 O X -0.0000 0.0000 -0.0000 0.0000 0.0000 -0.0000  
Y 0.0001 -0.0001 0.0001 -0.0001 -0.0000 -0.0000  
Z 0.0000 -0.0001 0.0000 -0.0001 -0.0000 -0.0000  
AT. 21 O X -0.0000 -0.0000 -0.0000 -0.0000 -0.0000 -0.0000  
Y -0.0000 -0.0000 -0.0000 -0.0000 -0.0000 -0.0000  
Z -0.0000 -0.0000 -0.0000 -0.0000 -0.0000 -0.0000  
AT. 22 O X -0.0000 0.0000 0.0000 -0.0000 0.0000 0.0000  
Y 0.0000 -0.0000 -0.0000 0.0000 -0.0000 -0.0000  
Z -0.0000 0.0000 0.0000 -0.0000 0.0000 0.0000  
AT. 23 O X -0.0000 -0.0000 0.0000 0.0000 -0.0000 0.0000  
Y -0.0000 -0.0000 0.0000 0.0000 -0.0000 0.0000  
Z -0.0000 -0.0000 0.0000 0.0000 -0.0000 0.0000  
AT. 24 O X -0.0000 0.0000 -0.0000 0.0000 0.0000 -0.0000  
Y 0.0000 -0.0000 0.0000 -0.0000 -0.0000 0.0000  
Z -0.0000 0.0000 -0.0000 0.0000 0.0000 -0.0000  
AT. 25 C X -0.0000 -0.0000 0.0000 0.0000 -0.0003 -0.0003  
Y 0.0001 0.0001 0.0001 0.0001 0.0007 0.0006  
Z -0.0000 -0.0000 0.0000 0.0000 -0.0001 -0.0001  
AT. 26 C X -0.0000 0.0000 -0.0000 0.0000 0.0003 0.0003  
Y -0.0001 0.0001 0.0001 -0.0001 0.0007 0.0006  
Z -0.0000 0.0000 -0.0000 0.0000 0.0001 0.0001

AT. 27 C X -0.0000 -0.0000 -0.0000 -0.0000 -0.0003 0.0003  
Y 0.0001 0.0001 -0.0001 -0.0001 0.0007 -0.0006  
Z -0.0000 -0.0000 -0.0000 -0.0000 -0.0001 0.0001

AT. 28 C X -0.0000 0.0000 0.0000 -0.0000 0.0003 -0.0003  
Y -0.0001 0.0001 -0.0001 0.0001 0.0007 -0.0006  
Z -0.0000 0.0000 0.0000 -0.0000 0.0001 -0.0001

AT. 29 H X 0.0004 0.0003 0.0002 0.0001 0.0049 0.0046  
Y 0.0001 0.0001 0.0001 0.0001 0.0010 0.0010  
Z 0.0003 0.0002 0.0002 0.0001 0.0034 0.0032

AT. 30 H X 0.0004 -0.0003 -0.0002 0.0001 -0.0049 -0.0046  
Y -0.0001 0.0001 0.0001 -0.0001 0.0010 0.0010  
Z 0.0003 -0.0002 -0.0002 0.0001 -0.0034 -0.0032

AT. 31 H X 0.0004 0.0003 -0.0002 -0.0001 0.0049 -0.0046  
Y 0.0001 0.0001 -0.0001 -0.0001 0.0010 -0.0010  
Z 0.0003 0.0002 -0.0002 -0.0001 0.0034 -0.0032

AT. 32 H X 0.0004 -0.0003 0.0002 -0.0001 -0.0049 0.0046  
Y -0.0001 0.0001 -0.0001 0.0001 0.0010 -0.0010  
Z 0.0003 -0.0002 0.0002 -0.0001 -0.0034 0.0032

AT. 33 H X -0.0002 -0.0001 -0.0002 -0.0001 -0.0015 -0.0013  
Y -0.0009 -0.0008 -0.0010 -0.0007 -0.0081 -0.0073  
Z -0.0002 -0.0002 -0.0002 -0.0002 -0.0018 -0.0016

AT. 34 H X -0.0002 0.0001 0.0002 -0.0001 0.0015 0.0013  
Y 0.0009 -0.0008 -0.0010 0.0007 -0.0081 -0.0073  
Z -0.0002 0.0002 0.0002 -0.0002 0.0018 0.0016

AT. 35 H X -0.0002 -0.0001 0.0002 0.0001 -0.0015 0.0013  
Y -0.0009 -0.0008 0.0010 0.0007 -0.0081 0.0073  
Z -0.0002 -0.0002 0.0002 0.0002 -0.0018 0.0016

AT. 36 H X -0.0002 0.0001 -0.0002 0.0001 0.0015 -0.0013  
Y 0.0009 -0.0008 0.0010 -0.0007 -0.0081 0.0073  
Z -0.0002 0.0002 -0.0002 0.0002 0.0018 -0.0016

AT. 37 C X -0.0000 -0.0000 -0.0000 -0.0000 0.0000 0.0000  
Y -0.0000 -0.0000 -0.0000 -0.0000 0.0000 0.0000

Z -0.0001 -0.0001 -0.0001 -0.0001 -0.0000 0.0000  
AT. 38 C X -0.0000 0.0000 0.0000 -0.0000 -0.0000 -0.0000  
Y 0.0000 -0.0000 -0.0000 0.0000 0.0000 0.0000  
Z -0.0001 0.0001 0.0001 -0.0001 0.0000 -0.0000  
AT. 39 C X -0.0000 -0.0000 0.0000 0.0000 0.0000 -0.0000  
Y -0.0000 -0.0000 0.0000 0.0000 0.0000 -0.0000  
Z -0.0001 -0.0001 0.0001 0.0001 -0.0000 -0.0000  
AT. 40 C X -0.0000 0.0000 -0.0000 0.0000 -0.0000 0.0000  
Y 0.0000 -0.0000 0.0000 -0.0000 0.0000 -0.0000  
Z -0.0001 0.0001 -0.0001 0.0001 0.0000 0.0000  
AT. 41 C X -0.0002 -0.0002 -0.0002 -0.0002 -0.0019 -0.0017  
Y 0.0006 0.0005 0.0005 0.0005 0.0048 0.0043  
Z -0.0004 -0.0003 -0.0004 -0.0004 -0.0039 -0.0035  
AT. 42 C X -0.0002 0.0002 0.0002 -0.0002 0.0019 0.0017  
Y -0.0006 0.0005 0.0005 -0.0005 0.0048 0.0043  
Z -0.0004 0.0003 0.0004 -0.0004 0.0039 0.0035  
AT. 43 C X -0.0002 -0.0002 0.0002 0.0002 -0.0019 0.0017  
Y 0.0006 0.0005 -0.0005 -0.0005 0.0048 -0.0043  
Z -0.0004 -0.0003 0.0004 0.0004 -0.0039 0.0035  
AT. 44 C X -0.0002 0.0002 -0.0002 0.0002 0.0019 -0.0017  
Y -0.0006 0.0005 -0.0005 0.0005 0.0048 -0.0043  
Z -0.0004 0.0003 -0.0004 0.0004 0.0039 -0.0035  
AT. 45 H X 0.0009 0.0007 0.0008 0.0008 0.0075 0.0068  
Y -0.0051 -0.0043 -0.0046 -0.0046 -0.0436 -0.0396  
Z 0.0059 0.0050 0.0054 0.0054 0.0503 0.0457  
AT. 46 H X 0.0009 -0.0007 -0.0008 0.0008 -0.0075 -0.0068  
Y 0.0051 -0.0043 -0.0046 0.0046 -0.0436 -0.0396  
Z 0.0059 -0.0050 -0.0054 0.0054 -0.0503 -0.0457  
AT. 47 H X 0.0009 0.0007 -0.0008 -0.0008 0.0075 -0.0068  
Y -0.0051 -0.0043 0.0046 0.0046 -0.0436 0.0396  
Z 0.0059 0.0050 -0.0054 -0.0054 0.0503 -0.0457  
AT. 48 H X 0.0009 -0.0007 0.0008 -0.0008 -0.0075 0.0068

Y 0.0051 -0.0043 0.0046 -0.0046 -0.0436 0.0396  
Z 0.0059 -0.0050 0.0054 -0.0054 -0.0503 0.0457  
AT. 49 H X 0.0019 0.0016 0.0017 0.0017 0.0150 0.0137  
Y -0.0018 -0.0015 -0.0017 -0.0016 -0.0143 -0.0131  
Z -0.0007 -0.0006 -0.0006 -0.0006 -0.0061 -0.0056  
AT. 50 H X 0.0019 -0.0016 -0.0017 0.0017 -0.0150 -0.0137  
Y 0.0018 -0.0015 -0.0017 0.0016 -0.0143 -0.0131  
Z -0.0007 0.0006 0.0006 -0.0006 0.0061 0.0056  
AT. 51 H X 0.0019 0.0016 -0.0017 -0.0017 0.0150 -0.0137  
Y -0.0018 -0.0015 0.0017 0.0016 -0.0143 0.0131  
Z -0.0007 -0.0006 0.0006 0.0006 -0.0061 0.0056  
AT. 52 H X 0.0019 -0.0016 0.0017 -0.0017 -0.0150 0.0137  
Y 0.0018 -0.0015 0.0017 -0.0016 -0.0143 0.0131  
Z -0.0007 0.0006 -0.0006 0.0006 0.0061 -0.0056  
AT. 53 C X -0.0000 -0.0000 -0.0000 -0.0000 -0.0001 -0.0001  
Y 0.0000 0.0000 0.0000 0.0000 0.0000 0.0000  
Z -0.0000 -0.0000 -0.0000 -0.0000 -0.0000 -0.0000  
AT. 54 C X -0.0000 0.0000 0.0000 -0.0000 0.0001 0.0001  
Y -0.0000 0.0000 0.0000 -0.0000 0.0000 0.0000  
Z -0.0000 0.0000 0.0000 -0.0000 0.0000 0.0000  
AT. 55 C X -0.0000 -0.0000 0.0000 0.0000 -0.0001 0.0001  
Y 0.0000 0.0000 -0.0000 -0.0000 0.0000 -0.0000  
Z -0.0000 -0.0000 0.0000 0.0000 -0.0000 0.0000  
AT. 56 C X -0.0000 0.0000 -0.0000 0.0000 0.0001 -0.0001  
Y -0.0000 0.0000 -0.0000 0.0000 0.0000 -0.0000  
Z -0.0000 0.0000 -0.0000 0.0000 0.0000 -0.0000  
AT. 57 C X 0.0000 -0.0001 -0.0000 -0.0000 -0.0003 -0.0002  
Y 0.0000 0.0000 0.0000 0.0000 0.0002 0.0002  
Z -0.0000 -0.0000 0.0000 -0.0000 -0.0001 -0.0001  
AT. 58 C X 0.0000 0.0001 0.0000 -0.0000 0.0003 0.0002  
Y -0.0000 0.0000 0.0000 -0.0000 0.0002 0.0002  
Z -0.0000 0.0000 -0.0000 -0.0000 0.0001 0.0001

AT. 59 C X 0.0000 -0.0001 0.0000 0.0000 -0.0003 0.0002  
Y 0.0000 0.0000 -0.0000 -0.0000 0.0002 -0.0002  
Z -0.0000 -0.0000 -0.0000 0.0000 -0.0001 0.0001

AT. 60 C X 0.0000 0.0001 -0.0000 0.0000 0.0003 -0.0002  
Y -0.0000 0.0000 -0.0000 0.0000 0.0002 -0.0002  
Z -0.0000 0.0000 0.0000 0.0000 0.0001 -0.0001

AT. 61 H X 0.0000 0.0002 0.0001 0.0002 0.0016 0.0014  
Y -0.0001 -0.0003 -0.0002 -0.0003 -0.0022 -0.0019  
Z -0.0000 -0.0000 -0.0000 -0.0000 -0.0005 -0.0004

AT. 62 H X 0.0000 -0.0002 -0.0001 0.0002 -0.0016 -0.0014  
Y 0.0001 -0.0003 -0.0002 0.0003 -0.0022 -0.0019  
Z -0.0000 0.0000 0.0000 -0.0000 0.0005 0.0004

AT. 63 H X 0.0000 0.0002 -0.0001 -0.0002 0.0016 -0.0014  
Y -0.0001 -0.0003 0.0002 0.0003 -0.0022 0.0019  
Z -0.0000 -0.0000 0.0000 0.0000 -0.0005 0.0004

AT. 64 H X 0.0000 -0.0002 0.0001 -0.0002 -0.0016 0.0014  
Y 0.0001 -0.0003 0.0002 -0.0003 -0.0022 0.0019  
Z -0.0000 0.0000 -0.0000 0.0000 0.0005 -0.0004

AT. 65 H X -0.0001 0.0006 0.0002 0.0002 0.0019 0.0018  
Y -0.0000 0.0002 0.0000 0.0001 0.0006 0.0006  
Z -0.0000 0.0000 -0.0000 -0.0000 0.0001 0.0001

AT. 66 H X -0.0001 -0.0006 -0.0002 0.0002 -0.0019 -0.0018  
Y 0.0000 0.0002 0.0000 -0.0001 0.0006 0.0006  
Z -0.0000 -0.0000 0.0000 -0.0000 -0.0001 -0.0001

AT. 67 H X -0.0001 0.0006 -0.0002 -0.0002 0.0019 -0.0018  
Y -0.0000 0.0002 -0.0000 -0.0001 0.0006 -0.0006  
Z -0.0000 0.0000 0.0000 0.0000 0.0001 -0.0001

AT. 68 H X -0.0001 -0.0006 0.0002 -0.0002 -0.0019 0.0018  
Y 0.0000 0.0002 -0.0000 0.0001 0.0006 -0.0006  
Z -0.0000 -0.0000 -0.0000 0.0000 -0.0001 0.0001

AT. 69 H X -0.0000 -0.0000 0.0000 -0.0001 -0.0002 -0.0002  
Y -0.0000 -0.0002 -0.0000 -0.0003 -0.0012 -0.0011

Z 0.0001 0.0002 0.0000 0.0003 0.0014 0.0012  
AT. 70 H X -0.0000 0.0000 -0.0000 -0.0001 0.0002 0.0002  
Y 0.0000 -0.0002 -0.0000 0.0003 -0.0012 -0.0011  
Z 0.0001 -0.0002 -0.0000 0.0003 -0.0014 -0.0012  
AT. 71 H X -0.0000 -0.0000 -0.0000 0.0001 -0.0002 0.0002  
Y -0.0000 -0.0002 0.0000 0.0003 -0.0012 0.0011  
Z 0.0001 0.0002 -0.0000 -0.0003 0.0014 -0.0012  
AT. 72 H X -0.0000 0.0000 0.0000 0.0001 0.0002 -0.0002  
Y 0.0000 -0.0002 0.0000 -0.0003 -0.0012 0.0011  
Z 0.0001 -0.0002 0.0000 -0.0003 -0.0014 0.0012  
AT. 73 C X 0.0001 0.0001 0.0001 0.0001 -0.0001 -0.0001  
Y 0.0000 0.0000 -0.0000 -0.0000 0.0000 -0.0000  
Z -0.0000 -0.0000 -0.0000 -0.0000 0.0000 0.0000  
AT. 74 C X 0.0001 -0.0001 -0.0001 0.0001 0.0001 0.0001  
Y -0.0000 0.0000 -0.0000 0.0000 0.0000 -0.0000  
Z -0.0000 0.0000 0.0000 -0.0000 -0.0000 -0.0000  
AT. 75 C X 0.0001 0.0001 -0.0001 -0.0001 -0.0001 0.0001  
Y 0.0000 0.0000 0.0000 0.0000 0.0000 0.0000  
Z -0.0000 -0.0000 0.0000 0.0000 0.0000 -0.0000  
AT. 76 C X 0.0001 -0.0001 0.0001 -0.0001 0.0001 -0.0001  
Y -0.0000 0.0000 0.0000 -0.0000 0.0000 0.0000  
Z -0.0000 0.0000 -0.0000 0.0000 -0.0000 0.0000  
AT. 77 C X 0.0004 0.0004 0.0004 0.0003 0.0000 -0.0001  
Y -0.0051 -0.0052 -0.0050 -0.0050 -0.0001 0.0018  
Z -0.0048 -0.0048 -0.0046 -0.0046 -0.0000 0.0018  
AT. 78 C X 0.0004 -0.0004 -0.0004 0.0003 -0.0000 0.0001  
Y 0.0051 -0.0052 -0.0050 0.0050 -0.0001 0.0018  
Z -0.0048 0.0048 0.0046 -0.0046 0.0000 -0.0018  
AT. 79 C X 0.0004 0.0004 -0.0004 -0.0003 0.0000 0.0001  
Y -0.0051 -0.0052 0.0050 0.0050 -0.0001 -0.0018  
Z -0.0048 -0.0048 0.0046 0.0046 -0.0000 -0.0018  
AT. 80 C X 0.0004 -0.0004 0.0004 -0.0003 -0.0000 -0.0001

Y 0.0051 -0.0052 0.0050 -0.0050 -0.0001 -0.0018  
Z -0.0048 0.0048 -0.0046 0.0046 0.0000 0.0018  
AT. 81 H X -0.0200 -0.0202 -0.0191 -0.0192 -0.0003 0.0071  
Y 0.0166 0.0168 0.0160 0.0161 0.0003 -0.0059  
Z 0.0012 0.0012 0.0012 0.0012 0.0001 -0.0004  
AT. 82 H X -0.0200 0.0202 0.0191 -0.0192 0.0003 -0.0071  
Y -0.0166 0.0168 0.0160 -0.0161 0.0003 -0.0059  
Z 0.0012 -0.0012 -0.0012 0.0012 -0.0001 0.0004  
AT. 83 H X -0.0200 -0.0202 0.0191 0.0192 -0.0003 -0.0071  
Y 0.0166 0.0168 -0.0160 -0.0161 0.0003 0.0059  
Z 0.0012 0.0012 -0.0012 -0.0012 0.0001 0.0004  
AT. 84 H X -0.0200 0.0202 -0.0191 0.0192 0.0003 0.0071  
Y -0.0166 0.0168 -0.0160 0.0161 0.0003 0.0059  
Z 0.0012 -0.0012 0.0012 -0.0012 -0.0001 -0.0004  
AT. 85 H X 0.0152 0.0154 0.0146 0.0147 0.0003 -0.0055  
Y 0.0455 0.0460 0.0438 0.0440 0.0007 -0.0165  
Z 0.0550 0.0555 0.0529 0.0532 0.0008 -0.0198  
AT. 86 H X 0.0152 -0.0154 -0.0146 0.0147 -0.0003 0.0055  
Y -0.0455 0.0460 0.0438 -0.0440 0.0007 -0.0165  
Z 0.0550 -0.0555 -0.0529 0.0532 -0.0008 0.0198  
AT. 87 H X 0.0152 0.0154 -0.0146 -0.0147 0.0003 0.0055  
Y 0.0455 0.0460 -0.0438 -0.0440 0.0007 0.0165  
Z 0.0550 0.0555 -0.0529 -0.0532 0.0008 0.0198  
AT. 88 H X 0.0152 -0.0154 0.0146 -0.0147 -0.0003 -0.0055  
Y -0.0455 0.0460 -0.0438 0.0440 0.0007 0.0165  
Z 0.0550 -0.0555 0.0529 -0.0532 -0.0008 -0.0198  
AT. 89 C X 0.0001 0.0001 0.0001 0.0001 -0.0000 -0.0000  
Y -0.0000 -0.0000 -0.0000 -0.0000 -0.0000 0.0000  
Z -0.0000 -0.0000 -0.0000 -0.0000 -0.0000 0.0000  
AT. 90 C X 0.0001 -0.0001 -0.0001 0.0001 0.0000 0.0000  
Y 0.0000 -0.0000 -0.0000 0.0000 -0.0000 0.0000  
Z -0.0000 0.0000 0.0000 -0.0000 0.0000 -0.0000



AT. 91 C X 0.0001 0.0001 -0.0001 -0.0001 -0.0000 0.0000  
Y -0.0000 -0.0000 0.0000 0.0000 -0.0000 -0.0000  
Z -0.0000 -0.0000 0.0000 0.0000 -0.0000 -0.0000

AT. 92 C X 0.0001 -0.0001 0.0001 -0.0001 0.0000 -0.0000  
Y 0.0000 -0.0000 0.0000 -0.0000 -0.0000 -0.0000  
Z -0.0000 0.0000 -0.0000 0.0000 0.0000 0.0000

AT. 93 C X 0.0005 0.0005 0.0005 0.0005 -0.0000 -0.0001  
Y -0.0002 -0.0002 -0.0001 -0.0001 -0.0000 0.0001  
Z -0.0002 -0.0002 -0.0002 -0.0002 -0.0000 0.0001

AT. 94 C X 0.0005 -0.0005 -0.0005 0.0005 0.0000 0.0001  
Y 0.0002 -0.0002 -0.0001 0.0001 -0.0000 0.0001  
Z -0.0002 0.0002 0.0002 -0.0002 0.0000 -0.0001

AT. 95 C X 0.0005 0.0005 -0.0005 -0.0005 -0.0000 0.0001  
Y -0.0002 -0.0002 0.0001 0.0001 -0.0000 -0.0001  
Z -0.0002 -0.0002 0.0002 0.0002 -0.0000 -0.0001

AT. 96 C X 0.0005 -0.0005 0.0005 -0.0005 0.0000 -0.0001  
Y 0.0002 -0.0002 0.0001 -0.0001 -0.0000 -0.0001  
Z -0.0002 0.0002 -0.0002 0.0002 0.0000 0.0001

AT. 97 H X -0.0027 -0.0031 -0.0031 -0.0031 0.0001 0.0003  
Y -0.0015 -0.0017 -0.0017 -0.0017 0.0000 0.0002  
Z 0.0009 0.0010 0.0010 0.0010 -0.0001 -0.0001

AT. 98 H X -0.0027 0.0031 0.0031 -0.0031 -0.0001 -0.0003  
Y 0.0015 -0.0017 -0.0017 0.0017 0.0000 0.0002  
Z 0.0009 -0.0010 -0.0010 0.0010 0.0001 0.0001

AT. 99 H X -0.0027 -0.0031 0.0031 0.0031 0.0001 -0.0003  
Y -0.0015 -0.0017 0.0017 0.0017 0.0000 -0.0002  
Z 0.0009 0.0010 -0.0010 -0.0010 -0.0001 0.0001

AT. 100 H X -0.0027 0.0031 -0.0031 0.0031 -0.0001 0.0003  
Y 0.0015 -0.0017 0.0017 -0.0017 0.0000 -0.0002  
Z 0.0009 -0.0010 0.0010 -0.0010 0.0001 -0.0001

AT. 101 H X -0.0033 -0.0035 -0.0033 -0.0033 0.0001 0.0013  
Y 0.0031 0.0033 0.0031 0.0031 -0.0001 -0.0012

Z 0.0004 0.0004 0.0004 0.0004 0.0000 -0.0002  
AT.102 H X -0.0033 0.0035 0.0033 -0.0033 -0.0001 -0.0013  
Y -0.0031 0.0033 0.0031 -0.0031 -0.0001 -0.0012  
Z 0.0004 -0.0004 -0.0004 0.0004 -0.0000 0.0002  
AT.103 H X -0.0033 -0.0035 0.0033 0.0033 0.0001 -0.0013  
Y 0.0031 0.0033 -0.0031 -0.0031 -0.0001 0.0012  
Z 0.0004 0.0004 -0.0004 -0.0004 0.0000 0.0002  
AT.104 H X -0.0033 0.0035 -0.0033 0.0033 -0.0001 0.0013  
Y -0.0031 0.0033 -0.0031 0.0031 -0.0001 0.0012  
Z 0.0004 -0.0004 0.0004 -0.0004 -0.0000 -0.0002  
AT.105 H X 0.0003 0.0003 0.0002 0.0002 0.0000 -0.0004  
Y 0.0006 0.0006 0.0004 0.0004 0.0001 -0.0007  
Z 0.0009 0.0009 0.0007 0.0006 0.0001 -0.0011  
AT.106 H X 0.0003 -0.0003 -0.0002 0.0002 -0.0000 0.0004  
Y -0.0006 0.0006 0.0004 -0.0004 0.0001 -0.0007  
Z 0.0009 -0.0009 -0.0007 0.0006 -0.0001 0.0011  
AT.107 H X 0.0003 0.0003 -0.0002 -0.0002 0.0000 0.0004  
Y 0.0006 0.0006 -0.0004 -0.0004 0.0001 0.0007  
Z 0.0009 0.0009 -0.0007 -0.0006 0.0001 0.0011  
AT.108 H X 0.0003 -0.0003 0.0002 -0.0002 -0.0000 -0.0004  
Y -0.0006 0.0006 -0.0004 0.0004 0.0001 0.0007  
Z 0.0009 -0.0009 0.0007 -0.0006 -0.0001 -0.0011  
AT.109 C X -0.0001 -0.0001 -0.0001 -0.0001 -0.0005 -0.0005  
Y -0.0004 -0.0004 -0.0004 -0.0004 -0.0035 -0.0034  
Z 0.0004 0.0003 0.0003 0.0004 0.0035 0.0034  
AT.110 C X -0.0001 0.0001 0.0001 -0.0001 0.0005 0.0005  
Y 0.0004 -0.0004 -0.0004 0.0004 -0.0035 -0.0034  
Z 0.0004 -0.0003 -0.0003 0.0004 -0.0035 -0.0034  
AT.111 C X -0.0001 -0.0001 0.0001 0.0001 -0.0005 0.0005  
Y -0.0004 -0.0004 0.0004 0.0004 -0.0035 0.0034  
Z 0.0004 0.0003 -0.0003 -0.0004 0.0035 -0.0034  
AT.112 C X -0.0001 0.0001 -0.0001 0.0001 0.0005 -0.0005

Y 0.0004 -0.0004 0.0004 -0.0004 -0.0035 0.0034  
Z 0.0004 -0.0003 0.0003 -0.0004 -0.0035 0.0034  
AT. 113 H X 0.0015 0.0012 0.0012 0.0014 0.0121 0.0119  
Y 0.0009 0.0007 0.0007 0.0008 0.0067 0.0066  
Z -0.0002 -0.0002 -0.0002 -0.0002 -0.0014 -0.0014  
AT. 114 H X 0.0015 -0.0012 -0.0012 0.0014 -0.0121 -0.0119  
Y -0.0009 0.0007 0.0007 -0.0008 0.0067 0.0066  
Z -0.0002 0.0002 0.0002 -0.0002 0.0014 0.0014  
AT. 115 H X 0.0015 0.0012 -0.0012 -0.0014 0.0121 -0.0119  
Y 0.0009 0.0007 -0.0007 -0.0008 0.0067 -0.0066  
Z -0.0002 -0.0002 0.0002 0.0002 -0.0014 0.0014  
AT. 116 H X 0.0015 -0.0012 0.0012 -0.0014 -0.0121 0.0119  
Y -0.0009 0.0007 -0.0007 0.0008 0.0067 -0.0066  
Z -0.0002 0.0002 -0.0002 0.0002 0.0014 -0.0014  
AT. 117 H X -0.0007 -0.0006 -0.0006 -0.0007 -0.0057 -0.0056  
Y 0.0044 0.0037 0.0037 0.0040 0.0352 0.0344  
Z -0.0049 -0.0041 -0.0041 -0.0045 -0.0397 -0.0389  
AT. 118 H X -0.0007 0.0006 0.0006 -0.0007 0.0057 0.0056  
Y -0.0044 0.0037 0.0037 -0.0040 0.0352 0.0344  
Z -0.0049 0.0041 0.0041 -0.0045 0.0397 0.0389  
AT. 119 H X -0.0007 -0.0006 0.0006 0.0007 -0.0057 0.0056  
Y 0.0044 0.0037 -0.0037 -0.0040 0.0352 -0.0344  
Z -0.0049 -0.0041 0.0041 0.0045 -0.0397 0.0389  
AT. 120 H X -0.0007 0.0006 -0.0006 0.0007 0.0057 -0.0056  
Y -0.0044 0.0037 -0.0037 0.0040 0.0352 -0.0344  
Z -0.0049 0.0041 -0.0041 0.0045 0.0397 -0.0389  
AT. 121 C X 0.0013 0.0013 0.0015 0.0015 -0.0006 0.0008  
Y 0.0020 0.0020 0.0022 0.0022 -0.0008 0.0011  
Z 0.0022 0.0021 0.0024 0.0023 -0.0009 0.0012  
AT. 122 C X 0.0013 -0.0013 -0.0015 0.0015 0.0006 -0.0008  
Y -0.0020 0.0020 0.0022 -0.0022 -0.0008 0.0011  
Z 0.0022 -0.0021 -0.0024 0.0023 0.0009 -0.0012

AT. 123 C X 0.0013 0.0013 -0.0015 -0.0015 -0.0006 -0.0008  
Y 0.0020 0.0020 -0.0022 -0.0022 -0.0008 -0.0011  
Z 0.0022 0.0021 -0.0024 -0.0023 -0.0009 -0.0012

AT. 124 C X 0.0013 -0.0013 0.0015 -0.0015 0.0006 0.0008  
Y -0.0020 0.0020 -0.0022 0.0022 -0.0008 -0.0011  
Z 0.0022 -0.0021 0.0024 -0.0023 0.0009 0.0012

AT. 125 H X -0.0082 -0.0080 -0.0091 -0.0089 0.0033 -0.0044  
Y -0.0200 -0.0195 -0.0222 -0.0218 0.0083 -0.0111  
Z -0.0275 -0.0269 -0.0306 -0.0300 0.0114 -0.0153

AT. 126 H X -0.0082 0.0080 0.0091 -0.0089 -0.0033 0.0044  
Y 0.0200 -0.0195 -0.0222 0.0218 0.0083 -0.0111  
Z -0.0275 0.0269 0.0306 -0.0300 -0.0114 0.0153

AT. 127 H X -0.0082 -0.0080 0.0091 0.0089 0.0033 0.0044  
Y -0.0200 -0.0195 0.0222 0.0218 0.0083 0.0111  
Z -0.0275 -0.0269 0.0306 0.0300 0.0114 0.0153

AT. 128 H X -0.0082 0.0080 -0.0091 0.0089 -0.0033 -0.0044  
Y 0.0200 -0.0195 0.0222 -0.0218 0.0083 0.0111  
Z -0.0275 0.0269 -0.0306 0.0300 -0.0114 -0.0153

AT. 129 H X -0.0082 -0.0081 -0.0092 -0.0090 0.0033 -0.0046  
Y -0.0049 -0.0048 -0.0054 -0.0053 0.0020 -0.0028  
Z 0.0024 0.0024 0.0027 0.0026 -0.0010 0.0012

AT. 130 H X -0.0082 0.0081 0.0092 -0.0090 -0.0033 0.0046  
Y 0.0049 -0.0048 -0.0054 0.0053 0.0020 -0.0028  
Z 0.0024 -0.0024 -0.0027 0.0026 0.0010 -0.0012

AT. 131 H X -0.0082 -0.0081 0.0092 0.0090 0.0033 0.0046  
Y -0.0049 -0.0048 0.0054 0.0053 0.0020 0.0028  
Z 0.0024 0.0024 -0.0027 -0.0026 -0.0010 -0.0012

AT. 132 H X -0.0082 0.0081 -0.0092 0.0090 -0.0033 -0.0046  
Y 0.0049 -0.0048 0.0054 -0.0053 0.0020 0.0028  
Z 0.0024 -0.0024 0.0027 -0.0026 0.0010 0.0012

AT. 133 C X -0.0000 -0.0000 -0.0000 -0.0000 0.0000 0.0000  
Y -0.0000 -0.0000 -0.0000 -0.0000 -0.0000 -0.0000

Z -0.0000 -0.0000 -0.0000 -0.0000 0.0000 0.0000  
AT. 134 C X -0.0000 0.0000 0.0000 -0.0000 -0.0000 -0.0000  
Y 0.0000 -0.0000 -0.0000 0.0000 -0.0000 -0.0000  
Z -0.0000 0.0000 0.0000 -0.0000 -0.0000 -0.0000  
AT. 135 C X -0.0000 -0.0000 0.0000 0.0000 0.0000 -0.0000  
Y -0.0000 -0.0000 0.0000 0.0000 -0.0000 0.0000  
Z -0.0000 -0.0000 0.0000 0.0000 0.0000 -0.0000  
AT. 136 C X -0.0000 0.0000 -0.0000 0.0000 -0.0000 0.0000  
Y 0.0000 -0.0000 0.0000 -0.0000 -0.0000 0.0000  
Z -0.0000 0.0000 -0.0000 0.0000 -0.0000 0.0000  
AT. 137 C X 0.0018 0.0017 0.0019 0.0019 -0.0007 0.0007  
Y 0.0011 0.0011 0.0012 0.0012 -0.0005 0.0006  
Z 0.0007 0.0007 0.0007 0.0007 -0.0002 0.0002  
AT. 138 C X 0.0018 -0.0017 -0.0019 0.0019 0.0007 -0.0007  
Y -0.0011 0.0011 0.0012 -0.0012 -0.0005 0.0006  
Z 0.0007 -0.0007 -0.0007 0.0007 0.0002 -0.0002  
AT. 139 C X 0.0018 0.0017 -0.0019 -0.0019 -0.0007 -0.0007  
Y 0.0011 0.0011 -0.0012 -0.0012 -0.0005 -0.0006  
Z 0.0007 0.0007 -0.0007 -0.0007 -0.0002 -0.0002  
AT. 140 C X 0.0018 -0.0017 0.0019 -0.0019 0.0007 0.0007  
Y -0.0011 0.0011 -0.0012 0.0012 -0.0005 -0.0006  
Z 0.0007 -0.0007 0.0007 -0.0007 0.0002 0.0002  
AT. 141 H X -0.0147 -0.0145 -0.0158 -0.0157 0.0053 -0.0060  
Y 0.0098 0.0097 0.0106 0.0105 -0.0036 0.0040  
Z -0.0135 -0.0133 -0.0145 -0.0144 0.0049 -0.0055  
AT. 142 H X -0.0147 0.0145 0.0158 -0.0157 -0.0053 0.0060  
Y -0.0098 0.0097 0.0106 -0.0105 -0.0036 0.0040  
Z -0.0135 0.0133 0.0145 -0.0144 -0.0049 0.0055  
AT. 143 H X -0.0147 -0.0145 0.0158 0.0157 0.0053 0.0060  
Y 0.0098 0.0097 -0.0106 -0.0105 -0.0036 -0.0040  
Z -0.0135 -0.0133 0.0145 0.0144 0.0049 0.0055  
AT. 144 H X -0.0147 0.0145 -0.0158 0.0157 -0.0053 -0.0060

Y -0.0098 0.0097 -0.0106 0.0105 -0.0036 -0.0040  
Z -0.0135 0.0133 -0.0145 0.0144 -0.0049 -0.0055  
AT. 145 H X -0.0062 -0.0061 -0.0067 -0.0067 0.0024 -0.0029  
Y -0.0223 -0.0220 -0.0240 -0.0240 0.0086 -0.0101  
Z 0.0059 0.0058 0.0063 0.0063 -0.0023 0.0027  
AT. 146 H X -0.0062 0.0061 0.0067 -0.0067 -0.0024 0.0029  
Y 0.0223 -0.0220 -0.0240 0.0240 0.0086 -0.0101  
Z 0.0059 -0.0058 -0.0063 0.0063 0.0023 -0.0027  
AT. 147 H X -0.0062 -0.0061 0.0067 0.0067 0.0024 0.0029  
Y -0.0223 -0.0220 0.0240 0.0240 0.0086 0.0101  
Z 0.0059 0.0058 -0.0063 -0.0063 -0.0023 -0.0027  
AT. 148 H X -0.0062 0.0061 -0.0067 0.0067 -0.0024 -0.0029  
Y 0.0223 -0.0220 0.0240 -0.0240 0.0086 0.0101  
Z 0.0059 -0.0058 0.0063 -0.0063 0.0023 0.0027  
AT. 149 O X -0.0000 -0.0000 -0.0000 -0.0000 0.0000 0.0000  
Y -0.0000 -0.0000 -0.0000 -0.0000 0.0000 0.0000  
Z -0.0000 -0.0000 -0.0000 -0.0000 -0.0000 -0.0000  
AT. 150 O X -0.0000 0.0000 0.0000 -0.0000 -0.0000 -0.0000  
Y 0.0000 -0.0000 -0.0000 0.0000 0.0000 0.0000  
Z -0.0000 0.0000 0.0000 -0.0000 0.0000 0.0000  
AT. 151 O X -0.0000 -0.0000 0.0000 0.0000 0.0000 -0.0000  
Y -0.0000 -0.0000 0.0000 0.0000 0.0000 -0.0000  
Z -0.0000 -0.0000 0.0000 0.0000 -0.0000 0.0000  
AT. 152 O X -0.0000 0.0000 -0.0000 0.0000 -0.0000 0.0000  
Y 0.0000 -0.0000 0.0000 -0.0000 0.0000 -0.0000  
Z -0.0000 0.0000 -0.0000 0.0000 0.0000 -0.0000  
AT. 153 H X 0.0000 0.0001 0.0000 0.0001 -0.0001 -0.0001  
Y 0.0001 0.0001 0.0001 0.0001 0.0000 0.0000  
Z 0.0000 0.0000 0.0000 0.0000 -0.0001 -0.0002  
AT. 154 H X 0.0000 -0.0001 -0.0000 0.0001 0.0001 0.0001  
Y -0.0001 0.0001 0.0001 -0.0001 0.0000 0.0000  
Z 0.0000 -0.0000 -0.0000 0.0000 0.0001 0.0002

AT.155 H X 0.0000 0.0001 -0.0000 -0.0001 -0.0001 0.0001  
Y 0.0001 0.0001 -0.0001 -0.0001 0.0000 -0.0000  
Z 0.0000 0.0000 -0.0000 -0.0000 -0.0001 0.0002

AT.156 H X 0.0000 -0.0001 0.0000 -0.0001 0.0001 -0.0001  
Y -0.0001 0.0001 -0.0001 0.0001 0.0000 -0.0000  
Z 0.0000 -0.0000 0.0000 -0.0000 0.0001 -0.0002

AT.157 O X -0.0000 -0.0000 -0.0000 -0.0000 0.0000 0.0000  
Y 0.0000 0.0000 0.0000 0.0000 -0.0000 -0.0000  
Z 0.0000 0.0000 0.0000 0.0000 -0.0000 -0.0000

AT.158 O X -0.0000 0.0000 0.0000 -0.0000 -0.0000 -0.0000  
Y -0.0000 0.0000 0.0000 -0.0000 -0.0000 -0.0000  
Z 0.0000 -0.0000 -0.0000 0.0000 0.0000 0.0000

AT.159 O X -0.0000 -0.0000 0.0000 0.0000 0.0000 -0.0000  
Y 0.0000 0.0000 -0.0000 -0.0000 -0.0000 0.0000  
Z 0.0000 0.0000 -0.0000 -0.0000 -0.0000 0.0000

AT.160 O X -0.0000 0.0000 -0.0000 0.0000 -0.0000 0.0000  
Y -0.0000 0.0000 -0.0000 0.0000 -0.0000 0.0000  
Z 0.0000 -0.0000 0.0000 -0.0000 0.0000 -0.0000

AT.161 O X 0.0000 0.0000 0.0000 0.0000 -0.0000 -0.0000  
Y -0.0001 -0.0001 -0.0001 -0.0001 0.0001 0.0000  
Z 0.0000 0.0000 0.0000 0.0000 -0.0000 -0.0000

AT.162 O X 0.0000 -0.0000 -0.0000 0.0000 0.0000 0.0000  
Y 0.0001 -0.0001 -0.0001 0.0001 0.0001 0.0000  
Z 0.0000 -0.0000 -0.0000 0.0000 0.0000 0.0000

AT.163 O X 0.0000 0.0000 -0.0000 -0.0000 -0.0000 0.0000  
Y -0.0001 -0.0001 0.0001 0.0001 0.0001 -0.0000  
Z 0.0000 0.0000 -0.0000 -0.0000 -0.0000 0.0000

AT.164 O X 0.0000 -0.0000 0.0000 -0.0000 0.0000 -0.0000  
Y 0.0001 -0.0001 0.0001 -0.0001 0.0001 -0.0000  
Z 0.0000 -0.0000 0.0000 -0.0000 0.0000 -0.0000

AT.165 H X -0.0005 -0.0004 -0.0004 -0.0005 0.0007 0.0003  
Y 0.0010 0.0008 0.0008 0.0010 -0.0012 -0.0005

Z -0.0001 -0.0000 -0.0000 -0.0000 0.0001 0.0001  
AT.166 H X -0.0005 0.0004 0.0004 -0.0005 -0.0007 -0.0003  
Y -0.0010 0.0008 0.0008 -0.0010 -0.0012 -0.0005  
Z -0.0001 0.0000 0.0000 -0.0000 -0.0001 -0.0001  
AT.167 H X -0.0005 -0.0004 0.0004 0.0005 0.0007 -0.0003  
Y 0.0010 0.0008 -0.0008 -0.0010 -0.0012 0.0005  
Z -0.0001 -0.0000 0.0000 0.0000 0.0001 -0.0001  
AT.168 H X -0.0005 0.0004 -0.0004 0.0005 -0.0007 0.0003  
Y -0.0010 0.0008 -0.0008 0.0010 -0.0012 0.0005  
Z -0.0001 0.0000 -0.0000 0.0000 -0.0001 0.0001  
AT.169 O X 0.0000 0.0000 0.0000 0.0000 -0.0000 0.0000  
Y 0.0000 0.0000 -0.0000 -0.0000 -0.0000 0.0000  
Z 0.0000 0.0000 -0.0000 -0.0000 -0.0000 0.0000  
AT.170 O X 0.0000 -0.0000 -0.0000 0.0000 0.0000 -0.0000  
Y -0.0000 0.0000 -0.0000 0.0000 -0.0000 0.0000  
Z 0.0000 -0.0000 0.0000 -0.0000 0.0000 -0.0000  
AT.171 O X 0.0000 0.0000 -0.0000 -0.0000 -0.0000 -0.0000  
Y 0.0000 0.0000 0.0000 0.0000 -0.0000 -0.0000  
Z 0.0000 0.0000 0.0000 0.0000 -0.0000 -0.0000  
AT.172 O X 0.0000 -0.0000 0.0000 -0.0000 0.0000 0.0000  
Y -0.0000 0.0000 0.0000 -0.0000 -0.0000 -0.0000  
Z 0.0000 -0.0000 -0.0000 0.0000 0.0000 0.0000  
AT.173 H X -0.0001 -0.0001 -0.0000 -0.0000 0.0001 -0.0001  
Y -0.0004 -0.0004 0.0001 0.0001 0.0002 -0.0003  
Z -0.0000 -0.0000 0.0000 0.0000 0.0000 -0.0001  
AT.174 H X -0.0001 0.0001 0.0000 -0.0000 -0.0001 0.0001  
Y 0.0004 -0.0004 0.0001 -0.0001 0.0002 -0.0003  
Z -0.0000 0.0000 -0.0000 0.0000 -0.0000 0.0001  
AT.175 H X -0.0001 -0.0001 0.0000 0.0000 0.0001 0.0001  
Y -0.0004 -0.0004 -0.0001 -0.0001 0.0002 0.0003  
Z -0.0000 -0.0000 -0.0000 -0.0000 0.0000 0.0001  
AT.176 H X -0.0001 0.0001 -0.0000 0.0000 -0.0001 -0.0001



Y 0.0004 -0.0004 -0.0001 0.0001 0.0002 0.0003  
Z -0.0000 0.0000 0.0000 -0.0000 -0.0000 -0.0001

FREQ(CM\*\*-1) 3204.14 3204.21 3204.33 3204.39 3204.50 3204.51

AT. 1 I X 0.0000 0.0000 -0.0000 0.0000 -0.0000 0.0000

Y 0.0000 0.0000 0.0000 -0.0000 0.0000 -0.0000

Z 0.0000 0.0000 -0.0000 0.0000 -0.0000 0.0000

AT. 2 I X 0.0000 0.0000 0.0000 0.0000 -0.0000 -0.0000

Y -0.0000 -0.0000 0.0000 0.0000 -0.0000 -0.0000

Z 0.0000 0.0000 0.0000 0.0000 -0.0000 -0.0000

AT. 3 I X 0.0000 -0.0000 0.0000 -0.0000 -0.0000 0.0000

Y 0.0000 -0.0000 -0.0000 0.0000 0.0000 -0.0000

Z 0.0000 -0.0000 0.0000 -0.0000 -0.0000 0.0000

AT. 4 I X 0.0000 -0.0000 -0.0000 -0.0000 -0.0000 -0.0000

Y -0.0000 0.0000 -0.0000 -0.0000 -0.0000 -0.0000

Z 0.0000 -0.0000 -0.0000 -0.0000 -0.0000 -0.0000

AT. 5 I X -0.0000 0.0000 0.0000 0.0000 0.0000 0.0000

Y -0.0000 0.0000 -0.0000 -0.0000 0.0000 -0.0000

Z 0.0000 -0.0000 0.0000 0.0000 -0.0000 0.0000

AT. 6 I X -0.0000 0.0000 -0.0000 0.0000 0.0000 -0.0000

Y 0.0000 -0.0000 -0.0000 0.0000 -0.0000 -0.0000

Z 0.0000 -0.0000 -0.0000 0.0000 -0.0000 -0.0000

AT. 7 I X -0.0000 -0.0000 -0.0000 -0.0000 0.0000 0.0000

Y -0.0000 -0.0000 0.0000 0.0000 0.0000 -0.0000

Z 0.0000 0.0000 -0.0000 -0.0000 -0.0000 0.0000

AT. 8 I X -0.0000 -0.0000 0.0000 -0.0000 0.0000 -0.0000

Y 0.0000 0.0000 0.0000 -0.0000 -0.0000 -0.0000

Z 0.0000 0.0000 0.0000 -0.0000 -0.0000 -0.0000

AT. 9 N X 0.0000 0.0000 0.0000 -0.0000 -0.0000 -0.0000

Y -0.0000 0.0000 0.0000 0.0000 0.0000 0.0000

Z 0.0000 0.0000 0.0000 -0.0000 -0.0000 -0.0000

AT. 10 N X 0.0000 0.0000 -0.0000 -0.0000 -0.0000 0.0000  
Y 0.0000 -0.0000 0.0000 -0.0000 -0.0000 0.0000  
Z 0.0000 0.0000 -0.0000 -0.0000 -0.0000 0.0000

AT. 11 N X 0.0000 -0.0000 -0.0000 0.0000 -0.0000 -0.0000  
Y -0.0000 -0.0000 -0.0000 -0.0000 0.0000 0.0000  
Z 0.0000 -0.0000 -0.0000 0.0000 -0.0000 -0.0000

AT. 12 N X 0.0000 -0.0000 0.0000 0.0000 -0.0000 0.0000  
Y 0.0000 0.0000 -0.0000 0.0000 -0.0000 0.0000  
Z 0.0000 -0.0000 0.0000 0.0000 -0.0000 0.0000

AT. 13 N X 0.0000 0.0000 0.0000 -0.0000 0.0000 0.0000  
Y 0.0000 0.0000 -0.0000 -0.0000 -0.0000 -0.0000  
Z -0.0000 -0.0000 0.0000 0.0000 0.0000 0.0000

AT. 14 N X 0.0000 0.0000 -0.0000 -0.0000 0.0000 -0.0000  
Y -0.0000 -0.0000 -0.0000 0.0000 0.0000 -0.0000  
Z -0.0000 -0.0000 -0.0000 0.0000 0.0000 -0.0000

AT. 15 N X 0.0000 -0.0000 -0.0000 0.0000 0.0000 0.0000  
Y 0.0000 -0.0000 0.0000 0.0000 -0.0000 -0.0000  
Z -0.0000 0.0000 -0.0000 -0.0000 0.0000 0.0000

AT. 16 N X 0.0000 -0.0000 0.0000 0.0000 0.0000 -0.0000  
Y -0.0000 0.0000 0.0000 -0.0000 0.0000 -0.0000  
Z -0.0000 0.0000 0.0000 -0.0000 0.0000 -0.0000

AT. 17 O X -0.0000 -0.0000 -0.0000 -0.0000 -0.0000 -0.0000  
Y -0.0000 -0.0000 -0.0000 -0.0000 -0.0000 -0.0000  
Z -0.0000 0.0000 0.0001 0.0001 0.0001 0.0001

AT. 18 O X -0.0000 -0.0000 0.0000 -0.0000 -0.0000 0.0000  
Y 0.0000 0.0000 -0.0000 0.0000 0.0000 -0.0000  
Z -0.0000 0.0000 -0.0001 0.0001 0.0001 -0.0001

AT. 19 O X -0.0000 0.0000 0.0000 0.0000 -0.0000 -0.0000  
Y -0.0000 0.0000 0.0000 0.0000 -0.0000 -0.0000  
Z -0.0000 -0.0000 -0.0001 -0.0001 0.0001 0.0001

AT. 20 O X -0.0000 0.0000 -0.0000 0.0000 -0.0000 0.0000  
Y 0.0000 -0.0000 0.0000 -0.0000 0.0000 -0.0000

Z -0.0000 -0.0000 0.0001 -0.0001 0.0001 -0.0001  
AT. 21 O X -0.0000 -0.0000 -0.0000 0.0000 0.0000 0.0000  
Y -0.0000 -0.0000 0.0000 0.0000 0.0000 0.0000  
Z -0.0000 -0.0000 0.0000 0.0000 0.0000 0.0000  
AT. 22 O X -0.0000 -0.0000 0.0000 0.0000 0.0000 -0.0000  
Y 0.0000 0.0000 0.0000 -0.0000 -0.0000 0.0000  
Z -0.0000 -0.0000 -0.0000 0.0000 0.0000 -0.0000  
AT. 23 O X -0.0000 0.0000 0.0000 -0.0000 0.0000 0.0000  
Y -0.0000 0.0000 -0.0000 -0.0000 0.0000 0.0000  
Z -0.0000 0.0000 -0.0000 -0.0000 0.0000 0.0000  
AT. 24 O X -0.0000 0.0000 -0.0000 -0.0000 0.0000 -0.0000  
Y 0.0000 -0.0000 -0.0000 0.0000 -0.0000 0.0000  
Z -0.0000 0.0000 0.0000 -0.0000 0.0000 -0.0000  
AT. 25 C X -0.0003 -0.0002 -0.0001 0.0001 0.0001 0.0001  
Y 0.0007 0.0007 0.0003 -0.0002 -0.0000 -0.0001  
Z -0.0001 -0.0001 -0.0000 0.0001 0.0000 0.0000  
AT. 26 C X -0.0003 -0.0002 0.0001 0.0001 0.0001 -0.0001  
Y -0.0007 -0.0007 0.0003 0.0002 0.0000 -0.0001  
Z -0.0001 -0.0001 0.0000 0.0001 0.0000 -0.0000  
AT. 27 C X -0.0003 0.0002 0.0001 -0.0001 0.0001 0.0001  
Y 0.0007 -0.0007 -0.0003 0.0002 -0.0000 -0.0001  
Z -0.0001 0.0001 0.0000 -0.0001 0.0000 0.0000  
AT. 28 C X -0.0003 0.0002 -0.0001 -0.0001 0.0001 -0.0001  
Y -0.0007 0.0007 -0.0003 -0.0002 0.0000 -0.0001  
Z -0.0001 0.0001 -0.0000 -0.0001 0.0000 -0.0000  
AT. 29 H X 0.0049 0.0045 0.0018 -0.0020 -0.0007 -0.0011  
Y 0.0011 0.0010 0.0004 -0.0004 -0.0001 -0.0002  
Z 0.0034 0.0031 0.0013 -0.0014 -0.0004 -0.0007  
AT. 30 H X 0.0049 0.0045 -0.0018 -0.0020 -0.0007 0.0011  
Y -0.0011 -0.0010 0.0004 0.0004 0.0001 -0.0002  
Z 0.0034 0.0031 -0.0013 -0.0014 -0.0004 0.0007  
AT. 31 H X 0.0049 -0.0045 -0.0018 0.0020 -0.0007 -0.0011

Y 0.0011 -0.0010 -0.0004 0.0004 -0.0001 -0.0002  
Z 0.0034 -0.0031 -0.0013 0.0014 -0.0004 -0.0007  
AT. 32 H X 0.0049 -0.0045 0.0018 0.0020 -0.0007 0.0011  
Y -0.0011 0.0010 -0.0004 -0.0004 0.0001 -0.0002  
Z 0.0034 -0.0031 0.0013 0.0014 -0.0004 0.0007  
AT. 33 H X -0.0015 -0.0014 -0.0007 0.0005 0.0001 0.0002  
Y -0.0081 -0.0078 -0.0037 0.0028 0.0005 0.0012  
Z -0.0018 -0.0018 -0.0009 0.0006 0.0001 0.0002  
AT. 34 H X -0.0015 -0.0014 0.0007 0.0005 0.0001 -0.0002  
Y 0.0081 0.0078 -0.0037 -0.0028 -0.0005 0.0012  
Z -0.0018 -0.0018 0.0009 0.0006 0.0001 -0.0002  
AT. 35 H X -0.0015 0.0014 0.0007 -0.0005 0.0001 0.0002  
Y -0.0081 0.0078 0.0037 -0.0028 0.0005 0.0012  
Z -0.0018 0.0018 0.0009 -0.0006 0.0001 0.0002  
AT. 36 H X -0.0015 0.0014 -0.0007 -0.0005 0.0001 -0.0002  
Y 0.0081 -0.0078 0.0037 0.0028 -0.0005 0.0012  
Z -0.0018 0.0018 -0.0009 -0.0006 0.0001 -0.0002  
AT. 37 C X 0.0000 -0.0000 -0.0000 -0.0000 -0.0000 -0.0000  
Y 0.0000 -0.0000 -0.0000 -0.0001 -0.0000 -0.0000  
Z -0.0000 -0.0000 -0.0001 -0.0001 -0.0001 -0.0001  
AT. 38 C X 0.0000 -0.0000 0.0000 -0.0000 -0.0000 0.0000  
Y -0.0000 0.0000 -0.0000 0.0001 0.0000 -0.0000  
Z -0.0000 -0.0000 0.0001 -0.0001 -0.0001 0.0001  
AT. 39 C X 0.0000 0.0000 0.0000 0.0000 -0.0000 -0.0000  
Y 0.0000 0.0000 0.0000 0.0001 -0.0000 -0.0000  
Z -0.0000 0.0000 0.0001 0.0001 -0.0001 -0.0001  
AT. 40 C X 0.0000 0.0000 -0.0000 0.0000 -0.0000 0.0000  
Y -0.0000 -0.0000 0.0000 -0.0001 0.0000 -0.0000  
Z -0.0000 0.0000 -0.0001 0.0001 -0.0001 0.0001  
AT. 41 C X -0.0019 -0.0018 -0.0008 0.0006 0.0001 0.0003  
Y 0.0048 0.0046 0.0021 -0.0015 -0.0003 -0.0007  
Z -0.0039 -0.0038 -0.0017 0.0013 0.0003 0.0006

AT. 42 C X -0.0019 -0.0018 0.0008 0.0006 0.0001 -0.0003  
Y -0.0048 -0.0046 0.0021 0.0015 0.0003 -0.0007  
Z -0.0039 -0.0038 0.0017 0.0013 0.0003 -0.0006

AT. 43 C X -0.0019 0.0018 0.0008 -0.0006 0.0001 0.0003  
Y 0.0048 -0.0046 -0.0021 0.0015 -0.0003 -0.0007  
Z -0.0039 0.0038 0.0017 -0.0013 0.0003 0.0006

AT. 44 C X -0.0019 0.0018 -0.0008 -0.0006 0.0001 -0.0003  
Y -0.0048 0.0046 -0.0021 -0.0015 0.0003 -0.0007  
Z -0.0039 0.0038 -0.0017 -0.0013 0.0003 -0.0006

AT. 45 H X 0.0075 0.0073 0.0033 -0.0024 -0.0005 -0.0011  
Y -0.0439 -0.0425 -0.0194 0.0140 0.0027 0.0066  
Z 0.0506 0.0490 0.0224 -0.0161 -0.0031 -0.0076

AT. 46 H X 0.0075 0.0073 -0.0033 -0.0024 -0.0005 0.0011  
Y 0.0439 0.0425 -0.0194 -0.0140 -0.0027 0.0066  
Z 0.0506 0.0490 -0.0224 -0.0161 -0.0031 0.0076

AT. 47 H X 0.0075 -0.0073 -0.0033 0.0024 -0.0005 -0.0011  
Y -0.0439 0.0425 0.0194 -0.0140 0.0027 0.0066  
Z 0.0506 -0.0490 -0.0224 0.0161 -0.0031 -0.0076

AT. 48 H X 0.0075 -0.0073 0.0033 0.0024 -0.0005 0.0011  
Y 0.0439 -0.0425 0.0194 0.0140 -0.0027 0.0066  
Z 0.0506 -0.0490 0.0224 0.0161 -0.0031 0.0076

AT. 49 H X 0.0151 0.0146 0.0067 -0.0048 -0.0009 -0.0022  
Y -0.0144 -0.0139 -0.0063 0.0046 0.0008 0.0021  
Z -0.0062 -0.0059 -0.0026 0.0020 0.0004 0.0009

AT. 50 H X 0.0151 0.0146 -0.0067 -0.0048 -0.0009 0.0022  
Y 0.0144 0.0139 -0.0063 -0.0046 -0.0008 0.0021  
Z -0.0062 -0.0059 0.0026 0.0020 0.0004 -0.0009

AT. 51 H X 0.0151 -0.0146 -0.0067 0.0048 -0.0009 -0.0022  
Y -0.0144 0.0139 0.0063 -0.0046 0.0008 0.0021  
Z -0.0062 0.0059 0.0026 -0.0020 0.0004 0.0009

AT. 52 H X 0.0151 -0.0146 0.0067 0.0048 -0.0009 0.0022  
Y 0.0144 -0.0139 0.0063 0.0046 -0.0008 0.0021

Z -0.0062 0.0059 -0.0026 -0.0020 0.0004 -0.0009  
AT. 53 C X -0.0001 -0.0001 -0.0000 0.0000 0.0000 0.0000  
Y 0.0000 0.0000 0.0000 -0.0000 -0.0000 -0.0000  
Z -0.0000 -0.0000 -0.0000 0.0000 0.0000 0.0000  
AT. 54 C X -0.0001 -0.0001 0.0000 0.0000 0.0000 -0.0000  
Y -0.0000 -0.0000 0.0000 0.0000 0.0000 -0.0000  
Z -0.0000 -0.0000 0.0000 0.0000 0.0000 -0.0000  
AT. 55 C X -0.0001 0.0001 0.0000 -0.0000 0.0000 0.0000  
Y 0.0000 -0.0000 -0.0000 0.0000 -0.0000 -0.0000  
Z -0.0000 0.0000 0.0000 -0.0000 0.0000 0.0000  
AT. 56 C X -0.0001 0.0001 -0.0000 -0.0000 0.0000 -0.0000  
Y -0.0000 0.0000 -0.0000 -0.0000 0.0000 -0.0000  
Z -0.0000 0.0000 -0.0000 -0.0000 0.0000 -0.0000  
AT. 57 C X 0.0001 0.0001 -0.0001 -0.0001 -0.0000 0.0001  
Y 0.0002 0.0002 0.0001 -0.0001 0.0000 -0.0001  
Z -0.0001 -0.0001 -0.0001 0.0001 0.0000 0.0000  
AT. 58 C X 0.0001 0.0001 0.0001 -0.0001 -0.0000 -0.0001  
Y -0.0002 -0.0002 0.0001 0.0001 -0.0000 -0.0001  
Z -0.0001 -0.0001 0.0001 0.0001 0.0000 -0.0000  
AT. 59 C X 0.0001 -0.0001 0.0001 0.0001 -0.0000 0.0001  
Y 0.0002 -0.0002 -0.0001 0.0001 0.0000 -0.0001  
Z -0.0001 0.0001 0.0001 -0.0001 0.0000 0.0000  
AT. 60 C X 0.0001 -0.0001 -0.0001 0.0001 -0.0000 -0.0001  
Y -0.0002 0.0002 -0.0001 -0.0001 -0.0000 -0.0001  
Z -0.0001 0.0001 -0.0001 -0.0001 0.0000 -0.0000  
AT. 61 H X 0.0006 0.0005 0.0009 -0.0003 0.0001 -0.0004  
Y -0.0008 -0.0007 -0.0012 0.0003 -0.0002 0.0005  
Z -0.0002 -0.0002 -0.0002 0.0001 -0.0000 0.0001  
AT. 62 H X 0.0006 0.0005 -0.0009 -0.0003 0.0001 0.0004  
Y 0.0008 0.0007 -0.0012 -0.0003 0.0002 0.0005  
Z -0.0002 -0.0002 0.0002 0.0001 -0.0000 -0.0001  
AT. 63 H X 0.0006 -0.0005 -0.0009 0.0003 0.0001 -0.0004

Y -0.0008 0.0007 0.0012 -0.0003 -0.0002 0.0005  
Z -0.0002 0.0002 0.0002 -0.0001 -0.0000 0.0001  
AT. 64 H X 0.0006 -0.0005 0.0009 0.0003 0.0001 0.0004  
Y 0.0008 -0.0007 0.0012 0.0003 0.0002 0.0005  
Z -0.0002 0.0002 -0.0002 -0.0001 -0.0000 -0.0001  
AT. 65 H X -0.0016 -0.0014 0.0008 0.0009 0.0000 -0.0006  
Y -0.0006 -0.0005 0.0002 0.0003 0.0000 -0.0002  
Z 0.0000 0.0000 0.0000 -0.0000 -0.0000 -0.0000  
AT. 66 H X -0.0016 -0.0014 -0.0008 0.0009 0.0000 0.0006  
Y 0.0006 0.0005 0.0002 -0.0003 -0.0000 -0.0002  
Z 0.0000 0.0000 -0.0000 -0.0000 -0.0000 0.0000  
AT. 67 H X -0.0016 0.0014 -0.0008 -0.0009 0.0000 -0.0006  
Y -0.0006 0.0005 -0.0002 -0.0003 0.0000 -0.0002  
Z 0.0000 -0.0000 -0.0000 0.0000 -0.0000 -0.0000  
AT. 68 H X -0.0016 0.0014 0.0008 -0.0009 0.0000 0.0006  
Y 0.0006 -0.0005 -0.0002 0.0003 -0.0000 -0.0002  
Z 0.0000 -0.0000 0.0000 0.0000 -0.0000 0.0000  
AT. 69 H X -0.0003 -0.0003 -0.0002 0.0001 -0.0000 0.0001  
Y -0.0016 -0.0015 -0.0007 0.0007 0.0000 0.0003  
Z 0.0019 0.0017 0.0008 -0.0008 -0.0000 -0.0003  
AT. 70 H X -0.0003 -0.0003 0.0002 0.0001 -0.0000 -0.0001  
Y 0.0016 0.0015 -0.0007 -0.0007 -0.0000 0.0003  
Z 0.0019 0.0017 -0.0008 -0.0008 -0.0000 0.0003  
AT. 71 H X -0.0003 0.0003 0.0002 -0.0001 -0.0000 0.0001  
Y -0.0016 0.0015 0.0007 -0.0007 0.0000 0.0003  
Z 0.0019 -0.0017 -0.0008 0.0008 -0.0000 -0.0003  
AT. 72 H X -0.0003 0.0003 -0.0002 -0.0001 -0.0000 -0.0001  
Y 0.0016 -0.0015 0.0007 0.0007 -0.0000 0.0003  
Z 0.0019 -0.0017 0.0008 0.0008 -0.0000 0.0003  
AT. 73 C X -0.0001 -0.0001 -0.0000 0.0000 0.0000 0.0000  
Y -0.0000 0.0000 0.0000 0.0000 0.0000 0.0000  
Z 0.0000 0.0000 0.0000 0.0000 0.0000 0.0000

AT. 74 C X -0.0001 -0.0001 0.0000 0.0000 0.0000 -0.0000  
Y 0.0000 -0.0000 0.0000 -0.0000 -0.0000 0.0000  
Z 0.0000 0.0000 -0.0000 0.0000 0.0000 -0.0000

AT. 75 C X -0.0001 0.0001 0.0000 -0.0000 0.0000 0.0000  
Y -0.0000 -0.0000 -0.0000 -0.0000 0.0000 0.0000  
Z 0.0000 -0.0000 -0.0000 -0.0000 0.0000 0.0000

AT. 76 C X -0.0001 0.0001 -0.0000 -0.0000 0.0000 -0.0000  
Y 0.0000 0.0000 -0.0000 0.0000 -0.0000 0.0000  
Z 0.0000 -0.0000 0.0000 -0.0000 0.0000 -0.0000

AT. 77 C X -0.0000 0.0001 0.0002 0.0002 0.0002 0.0002  
Y 0.0003 -0.0008 -0.0030 -0.0034 -0.0032 -0.0032  
Z 0.0004 -0.0007 -0.0028 -0.0032 -0.0030 -0.0030

AT. 78 C X -0.0000 0.0001 -0.0002 0.0002 0.0002 -0.0002  
Y -0.0003 0.0008 -0.0030 0.0034 0.0032 -0.0032  
Z 0.0004 -0.0007 0.0028 -0.0032 -0.0030 0.0030

AT. 79 C X -0.0000 -0.0001 -0.0002 -0.0002 0.0002 0.0002  
Y 0.0003 0.0008 0.0030 0.0034 -0.0032 -0.0032  
Z 0.0004 0.0007 0.0028 0.0032 -0.0030 -0.0030

AT. 80 C X -0.0000 -0.0001 0.0002 -0.0002 0.0002 -0.0002  
Y -0.0003 -0.0008 0.0030 -0.0034 0.0032 -0.0032  
Z 0.0004 0.0007 -0.0028 0.0032 -0.0030 0.0030

AT. 81 H X 0.0013 -0.0028 -0.0115 -0.0130 -0.0123 -0.0121  
Y -0.0010 0.0024 0.0097 0.0109 0.0103 0.0101  
Z -0.0000 0.0002 0.0008 0.0008 0.0008 0.0008

AT. 82 H X 0.0013 -0.0028 0.0115 -0.0130 -0.0123 0.0121  
Y 0.0010 -0.0024 0.0097 -0.0109 -0.0103 0.0101  
Z -0.0000 0.0002 -0.0008 0.0008 0.0008 -0.0008

AT. 83 H X 0.0013 0.0028 0.0115 0.0130 -0.0123 -0.0121  
Y -0.0010 -0.0024 -0.0097 -0.0109 0.0103 0.0101  
Z -0.0000 -0.0002 -0.0008 -0.0008 0.0008 0.0008

AT. 84 H X 0.0013 0.0028 -0.0115 0.0130 -0.0123 0.0121  
Y 0.0010 0.0024 -0.0097 0.0109 -0.0103 0.0101



Z -0.0000 -0.0002 0.0008 -0.0008 0.0008 -0.0008  
AT. 85 H X -0.0010 0.0023 0.0091 0.0103 0.0098 0.0096  
Y -0.0031 0.0069 0.0271 0.0306 0.0291 0.0285  
Z -0.0037 0.0083 0.0326 0.0368 0.0349 0.0342  
AT. 86 H X -0.0010 0.0023 -0.0091 0.0103 0.0098 -0.0096  
Y 0.0031 -0.0069 0.0271 -0.0306 -0.0291 0.0285  
Z -0.0037 0.0083 -0.0326 0.0368 0.0349 -0.0342  
AT. 87 H X -0.0010 -0.0023 -0.0091 -0.0103 0.0098 0.0096  
Y -0.0031 -0.0069 -0.0271 -0.0306 0.0291 0.0285  
Z -0.0037 -0.0083 -0.0326 -0.0368 0.0349 0.0342  
AT. 88 H X -0.0010 -0.0023 0.0091 -0.0103 0.0098 -0.0096  
Y 0.0031 0.0069 -0.0271 0.0306 -0.0291 0.0285  
Z -0.0037 -0.0083 0.0326 -0.0368 0.0349 -0.0342  
AT. 89 C X -0.0000 -0.0000 -0.0000 -0.0000 -0.0000 -0.0000  
Y 0.0000 -0.0000 -0.0001 -0.0001 -0.0001 -0.0001  
Z 0.0000 -0.0000 -0.0000 -0.0000 -0.0000 -0.0000  
AT. 90 C X -0.0000 -0.0000 0.0000 -0.0000 -0.0000 0.0000  
Y -0.0000 0.0000 -0.0001 0.0001 0.0001 -0.0001  
Z 0.0000 -0.0000 0.0000 -0.0000 -0.0000 0.0000  
AT. 91 C X -0.0000 0.0000 0.0000 0.0000 -0.0000 -0.0000  
Y 0.0000 0.0000 0.0001 0.0001 -0.0001 -0.0001  
Z 0.0000 0.0000 0.0000 0.0000 -0.0000 -0.0000  
AT. 92 C X -0.0000 0.0000 -0.0000 0.0000 -0.0000 0.0000  
Y -0.0000 -0.0000 0.0001 -0.0001 0.0001 -0.0001  
Z 0.0000 0.0000 -0.0000 0.0000 -0.0000 0.0000  
AT. 93 C X -0.0002 -0.0001 -0.0002 -0.0001 -0.0002 -0.0001  
Y -0.0000 -0.0001 -0.0004 -0.0004 -0.0004 -0.0004  
Z 0.0000 -0.0000 -0.0002 -0.0002 -0.0002 -0.0002  
AT. 94 C X -0.0002 -0.0001 0.0002 -0.0001 -0.0002 0.0001  
Y 0.0000 0.0001 -0.0004 0.0004 0.0004 -0.0004  
Z 0.0000 -0.0000 0.0002 -0.0002 -0.0002 0.0002  
AT. 95 C X -0.0002 0.0001 0.0002 0.0001 -0.0002 -0.0001

Y -0.0000 0.0001 0.0004 0.0004 -0.0004 -0.0004  
Z 0.0000 0.0000 0.0002 0.0002 -0.0002 -0.0002  
AT. 96 C X -0.0002 0.0001 -0.0002 0.0001 -0.0002 0.0001  
Y 0.0000 -0.0001 0.0004 -0.0004 0.0004 -0.0004  
Z 0.0000 0.0000 -0.0002 0.0002 -0.0002 0.0002  
AT. 97 H X 0.0015 0.0008 0.0024 0.0019 0.0022 0.0021  
Y 0.0008 0.0004 0.0014 0.0010 0.0012 0.0011  
Z -0.0004 -0.0003 -0.0007 -0.0006 -0.0007 -0.0006  
AT. 98 H X 0.0015 0.0008 -0.0024 0.0019 0.0022 -0.0021  
Y -0.0008 -0.0004 0.0014 -0.0010 -0.0012 0.0011  
Z -0.0004 -0.0003 0.0007 -0.0006 -0.0007 0.0006  
AT. 99 H X 0.0015 -0.0008 -0.0024 -0.0019 0.0022 0.0021  
Y 0.0008 -0.0004 -0.0014 -0.0010 0.0012 0.0011  
Z -0.0004 0.0003 0.0007 0.0006 -0.0007 -0.0006  
AT. 100 H X 0.0015 -0.0008 0.0024 -0.0019 0.0022 -0.0021  
Y -0.0008 0.0004 -0.0014 0.0010 -0.0012 0.0011  
Z -0.0004 0.0003 -0.0007 0.0006 -0.0007 0.0006  
AT. 101 H X 0.0007 0.0000 -0.0011 -0.0014 -0.0012 -0.0014  
Y -0.0007 -0.0000 0.0011 0.0013 0.0011 0.0013  
Z -0.0001 0.0000 0.0002 0.0002 0.0002 0.0002  
AT. 102 H X 0.0007 0.0000 0.0011 -0.0014 -0.0012 0.0014  
Y 0.0007 0.0000 0.0011 -0.0013 -0.0011 0.0013  
Z -0.0001 0.0000 -0.0002 0.0002 0.0002 -0.0002  
AT. 103 H X 0.0007 -0.0000 0.0011 0.0014 -0.0012 -0.0014  
Y -0.0007 0.0000 -0.0011 -0.0013 0.0011 0.0013  
Z -0.0001 -0.0000 -0.0002 -0.0002 0.0002 0.0002  
AT. 104 H X 0.0007 -0.0000 -0.0011 0.0014 -0.0012 0.0014  
Y 0.0007 -0.0000 -0.0011 0.0013 -0.0011 0.0013  
Z -0.0001 -0.0000 0.0002 -0.0002 0.0002 -0.0002  
AT. 105 H X 0.0001 0.0003 0.0010 0.0011 0.0011 0.0011  
Y 0.0003 0.0006 0.0021 0.0022 0.0022 0.0023  
Z 0.0004 0.0008 0.0031 0.0032 0.0032 0.0033

AT.106 H X 0.0001 0.0003 -0.0010 0.0011 0.0011 -0.0011  
Y -0.0003 -0.0006 0.0021 -0.0022 -0.0022 0.0023  
Z 0.0004 0.0008 -0.0031 0.0032 0.0032 -0.0033

AT.107 H X 0.0001 -0.0003 -0.0010 -0.0011 0.0011 0.0011  
Y 0.0003 -0.0006 -0.0021 -0.0022 0.0022 0.0023  
Z 0.0004 -0.0008 -0.0031 -0.0032 0.0032 0.0033

AT.108 H X 0.0001 -0.0003 0.0010 -0.0011 0.0011 -0.0011  
Y -0.0003 0.0006 -0.0021 0.0022 -0.0022 0.0023  
Z 0.0004 -0.0008 0.0031 -0.0032 0.0032 -0.0033

AT.109 C X -0.0005 -0.0004 -0.0001 0.0002 0.0001 0.0001  
Y -0.0036 -0.0031 -0.0011 0.0016 0.0004 0.0009  
Z 0.0036 0.0032 0.0012 -0.0015 -0.0003 -0.0008

AT.110 C X -0.0005 -0.0004 0.0001 0.0002 0.0001 -0.0001  
Y 0.0036 0.0031 -0.0011 -0.0016 -0.0004 0.0009  
Z 0.0036 0.0032 -0.0012 -0.0015 -0.0003 0.0008

AT.111 C X -0.0005 0.0004 0.0001 -0.0002 0.0001 0.0001  
Y -0.0036 0.0031 0.0011 -0.0016 0.0004 0.0009  
Z 0.0036 -0.0032 -0.0012 0.0015 -0.0003 -0.0008

AT.112 C X -0.0005 0.0004 -0.0001 -0.0002 0.0001 -0.0001  
Y 0.0036 -0.0031 0.0011 0.0016 -0.0004 0.0009  
Z 0.0036 -0.0032 0.0012 0.0015 -0.0003 0.0008

AT.113 H X 0.0124 0.0110 0.0039 -0.0055 -0.0013 -0.0030  
Y 0.0068 0.0061 0.0021 -0.0030 -0.0008 -0.0017  
Z -0.0014 -0.0012 -0.0004 0.0007 0.0002 0.0004

AT.114 H X 0.0124 0.0110 -0.0039 -0.0055 -0.0013 0.0030  
Y -0.0068 -0.0061 0.0021 0.0030 0.0008 -0.0017  
Z -0.0014 -0.0012 0.0004 0.0007 0.0002 -0.0004

AT.115 H X 0.0124 -0.0110 -0.0039 0.0055 -0.0013 -0.0030  
Y 0.0068 -0.0061 -0.0021 0.0030 -0.0008 -0.0017  
Z -0.0014 0.0012 0.0004 -0.0007 0.0002 0.0004

AT.116 H X 0.0124 -0.0110 0.0039 0.0055 -0.0013 0.0030  
Y -0.0068 0.0061 -0.0021 -0.0030 0.0008 -0.0017

Z -0.0014 0.0012 -0.0004 -0.0007 0.0002 -0.0004  
AT. 117 H X -0.0059 -0.0052 -0.0018 0.0026 0.0007 0.0015  
Y 0.0360 0.0318 0.0114 -0.0158 -0.0038 -0.0088  
Z -0.0406 -0.0360 -0.0129 0.0178 0.0043 0.0100  
AT. 118 H X -0.0059 -0.0052 0.0018 0.0026 0.0007 -0.0015  
Y -0.0360 -0.0318 0.0114 0.0158 0.0038 -0.0088  
Z -0.0406 -0.0360 0.0129 0.0178 0.0043 -0.0100  
AT. 119 H X -0.0059 0.0052 0.0018 -0.0026 0.0007 0.0015  
Y 0.0360 -0.0318 -0.0114 0.0158 -0.0038 -0.0088  
Z -0.0406 0.0360 0.0129 -0.0178 0.0043 0.0100  
AT. 120 H X -0.0059 0.0052 -0.0018 -0.0026 0.0007 -0.0015  
Y -0.0360 0.0318 -0.0114 -0.0158 0.0038 -0.0088  
Z -0.0406 0.0360 -0.0129 -0.0178 0.0043 -0.0100  
AT. 121 C X -0.0003 -0.0010 -0.0021 -0.0020 -0.0023 -0.0022  
Y -0.0005 -0.0014 -0.0031 -0.0030 -0.0034 -0.0033  
Z -0.0005 -0.0015 -0.0033 -0.0032 -0.0036 -0.0036  
AT. 122 C X -0.0003 -0.0010 0.0021 -0.0020 -0.0023 0.0022  
Y 0.0005 0.0014 -0.0031 0.0030 0.0034 -0.0033  
Z -0.0005 -0.0015 0.0033 -0.0032 -0.0036 0.0036  
AT. 123 C X -0.0003 0.0010 0.0021 0.0020 -0.0023 -0.0022  
Y -0.0005 0.0014 0.0031 0.0030 -0.0034 -0.0033  
Z -0.0005 0.0015 0.0033 0.0032 -0.0036 -0.0036  
AT. 124 C X -0.0003 0.0010 -0.0021 0.0020 -0.0023 0.0022  
Y 0.0005 -0.0014 0.0031 -0.0030 0.0034 -0.0033  
Z -0.0005 0.0015 -0.0033 0.0032 -0.0036 0.0036  
AT. 125 H X 0.0019 0.0056 0.0123 0.0119 0.0134 0.0133  
Y 0.0047 0.0142 0.0310 0.0301 0.0338 0.0336  
Z 0.0065 0.0194 0.0425 0.0414 0.0464 0.0461  
AT. 126 H X 0.0019 0.0056 -0.0123 0.0119 0.0134 -0.0133  
Y -0.0047 -0.0142 0.0310 -0.0301 -0.0338 0.0336  
Z 0.0065 0.0194 -0.0425 0.0414 0.0464 -0.0461  
AT. 127 H X 0.0019 -0.0056 -0.0123 -0.0119 0.0134 0.0133

Y 0.0047 -0.0142 -0.0310 -0.0301 0.0338 0.0336  
Z 0.0065 -0.0194 -0.0425 -0.0414 0.0464 0.0461  
AT. 128 H X 0.0019 -0.0056 0.0123 -0.0119 0.0134 -0.0133  
Y -0.0047 0.0142 -0.0310 0.0301 -0.0338 0.0336  
Z 0.0065 -0.0194 0.0425 -0.0414 0.0464 -0.0461  
AT. 129 H X 0.0019 0.0057 0.0126 0.0122 0.0137 0.0135  
Y 0.0011 0.0034 0.0075 0.0073 0.0082 0.0081  
Z -0.0006 -0.0016 -0.0035 -0.0034 -0.0038 -0.0038  
AT. 130 H X 0.0019 0.0057 -0.0126 0.0122 0.0137 -0.0135  
Y -0.0011 -0.0034 0.0075 -0.0073 -0.0082 0.0081  
Z -0.0006 -0.0016 0.0035 -0.0034 -0.0038 0.0038  
AT. 131 H X 0.0019 -0.0057 -0.0126 -0.0122 0.0137 0.0135  
Y 0.0011 -0.0034 -0.0075 -0.0073 0.0082 0.0081  
Z -0.0006 0.0016 0.0035 0.0034 -0.0038 -0.0038  
AT. 132 H X 0.0019 -0.0057 0.0126 -0.0122 0.0137 -0.0135  
Y -0.0011 0.0034 -0.0075 0.0073 -0.0082 0.0081  
Z -0.0006 0.0016 -0.0035 0.0034 -0.0038 0.0038  
AT. 133 C X 0.0000 0.0000 0.0000 -0.0000 0.0000 0.0000  
Y -0.0000 -0.0000 0.0000 0.0000 0.0000 0.0000  
Z 0.0001 0.0001 0.0000 -0.0000 0.0000 0.0000  
AT. 134 C X 0.0000 0.0000 -0.0000 -0.0000 0.0000 -0.0000  
Y 0.0000 0.0000 0.0000 -0.0000 -0.0000 0.0000  
Z 0.0001 0.0001 -0.0000 -0.0000 0.0000 -0.0000  
AT. 135 C X 0.0000 -0.0000 -0.0000 0.0000 0.0000 0.0000  
Y -0.0000 0.0000 -0.0000 -0.0000 0.0000 0.0000  
Z 0.0001 -0.0001 -0.0000 0.0000 0.0000 0.0000  
AT. 136 C X 0.0000 -0.0000 0.0000 0.0000 0.0000 -0.0000  
Y 0.0000 -0.0000 -0.0000 0.0000 -0.0000 0.0000  
Z 0.0001 -0.0001 0.0000 0.0000 0.0000 -0.0000  
AT. 137 C X -0.0005 -0.0011 -0.0024 -0.0022 -0.0026 -0.0025  
Y -0.0003 -0.0008 -0.0017 -0.0016 -0.0018 -0.0018  
Z -0.0002 -0.0004 -0.0008 -0.0008 -0.0009 -0.0009

AT. 138 C X -0.0005 -0.0011 0.0024 -0.0022 -0.0026 0.0025  
Y 0.0003 0.0008 -0.0017 0.0016 0.0018 -0.0018  
Z -0.0002 -0.0004 0.0008 -0.0008 -0.0009 0.0009

AT. 139 C X -0.0005 0.0011 0.0024 0.0022 -0.0026 -0.0025  
Y -0.0003 0.0008 0.0017 0.0016 -0.0018 -0.0018  
Z -0.0002 0.0004 0.0008 0.0008 -0.0009 -0.0009

AT. 140 C X -0.0005 0.0011 -0.0024 0.0022 -0.0026 0.0025  
Y 0.0003 -0.0008 0.0017 -0.0016 0.0018 -0.0018  
Z -0.0002 0.0004 -0.0008 0.0008 -0.0009 0.0009

AT. 141 H X 0.0037 0.0088 0.0191 0.0179 0.0208 0.0203  
Y -0.0025 -0.0059 -0.0127 -0.0119 -0.0138 -0.0136  
Z 0.0034 0.0081 0.0175 0.0164 0.0190 0.0187

AT. 142 H X 0.0037 0.0088 -0.0191 0.0179 0.0208 -0.0203  
Y 0.0025 0.0059 -0.0127 0.0119 0.0138 -0.0136  
Z 0.0034 0.0081 -0.0175 0.0164 0.0190 -0.0187

AT. 143 H X 0.0037 -0.0088 -0.0191 -0.0179 0.0208 0.0203  
Y -0.0025 0.0059 0.0127 0.0119 -0.0138 -0.0136  
Z 0.0034 -0.0081 -0.0175 -0.0164 0.0190 0.0187

AT. 144 H X 0.0037 -0.0088 0.0191 -0.0179 0.0208 -0.0203  
Y 0.0025 -0.0059 0.0127 -0.0119 0.0138 -0.0136  
Z 0.0034 -0.0081 0.0175 -0.0164 0.0190 -0.0187

AT. 145 H X 0.0016 0.0040 0.0089 0.0084 0.0097 0.0094  
Y 0.0057 0.0144 0.0316 0.0297 0.0343 0.0336  
Z -0.0015 -0.0038 -0.0083 -0.0078 -0.0090 -0.0088

AT. 146 H X 0.0016 0.0040 -0.0089 0.0084 0.0097 -0.0094  
Y -0.0057 -0.0144 0.0316 -0.0297 -0.0343 0.0336  
Z -0.0015 -0.0038 0.0083 -0.0078 -0.0090 0.0088

AT. 147 H X 0.0016 -0.0040 -0.0089 -0.0084 0.0097 0.0094  
Y 0.0057 -0.0144 -0.0316 -0.0297 0.0343 0.0336  
Z -0.0015 0.0038 0.0083 0.0078 -0.0090 -0.0088

AT. 148 H X 0.0016 -0.0040 0.0089 -0.0084 0.0097 -0.0094  
Y -0.0057 0.0144 -0.0316 0.0297 -0.0343 0.0336

Z -0.0015 0.0038 -0.0083 0.0078 -0.0090 0.0088  
AT. 149 O X 0.0000 0.0000 -0.0000 -0.0000 -0.0000 -0.0000  
Y 0.0000 0.0000 0.0000 -0.0000 0.0000 0.0000  
Z -0.0000 -0.0000 -0.0000 -0.0000 -0.0000 -0.0000  
AT. 150 O X 0.0000 0.0000 0.0000 -0.0000 -0.0000 0.0000  
Y -0.0000 -0.0000 0.0000 0.0000 -0.0000 0.0000  
Z -0.0000 -0.0000 0.0000 -0.0000 -0.0000 0.0000  
AT. 151 O X 0.0000 -0.0000 0.0000 0.0000 -0.0000 -0.0000  
Y 0.0000 -0.0000 -0.0000 0.0000 0.0000 0.0000  
Z -0.0000 0.0000 0.0000 0.0000 -0.0000 -0.0000  
AT. 152 O X 0.0000 -0.0000 -0.0000 0.0000 -0.0000 0.0000  
Y -0.0000 0.0000 -0.0000 -0.0000 -0.0000 0.0000  
Z -0.0000 0.0000 -0.0000 0.0000 -0.0000 0.0000  
AT. 153 H X -0.0001 -0.0001 -0.0000 0.0001 0.0000 0.0001  
Y 0.0000 0.0000 0.0000 -0.0000 -0.0000 -0.0000  
Z -0.0001 -0.0001 0.0001 0.0002 0.0002 0.0003  
AT. 154 H X -0.0001 -0.0001 0.0000 0.0001 0.0000 -0.0001  
Y -0.0000 -0.0000 0.0000 0.0000 0.0000 -0.0000  
Z -0.0001 -0.0001 -0.0001 0.0002 0.0002 -0.0003  
AT. 155 H X -0.0001 0.0001 0.0000 -0.0001 0.0000 0.0001  
Y 0.0000 -0.0000 -0.0000 0.0000 -0.0000 -0.0000  
Z -0.0001 0.0001 -0.0001 -0.0002 0.0002 0.0003  
AT. 156 H X -0.0001 0.0001 -0.0000 -0.0001 0.0000 -0.0001  
Y -0.0000 0.0000 -0.0000 -0.0000 0.0000 -0.0000  
Z -0.0001 0.0001 0.0001 -0.0002 0.0002 -0.0003  
AT. 157 O X 0.0000 0.0000 0.0000 -0.0000 0.0000 0.0000  
Y -0.0000 -0.0000 -0.0000 -0.0000 -0.0000 -0.0000  
Z 0.0000 0.0000 -0.0000 -0.0000 -0.0000 0.0000  
AT. 158 O X 0.0000 0.0000 -0.0000 -0.0000 0.0000 -0.0000  
Y 0.0000 0.0000 -0.0000 0.0000 0.0000 -0.0000  
Z 0.0000 0.0000 0.0000 -0.0000 -0.0000 -0.0000  
AT. 159 O X 0.0000 -0.0000 -0.0000 0.0000 0.0000 0.0000

Y -0.0000 0.0000 0.0000 0.0000 -0.0000 -0.0000  
Z 0.0000 -0.0000 0.0000 0.0000 -0.0000 0.0000  
AT.160 O X 0.0000 -0.0000 0.0000 0.0000 0.0000 -0.0000  
Y 0.0000 -0.0000 0.0000 -0.0000 0.0000 -0.0000  
Z 0.0000 -0.0000 -0.0000 0.0000 -0.0000 -0.0000  
AT.161 O X 0.0000 0.0000 -0.0000 -0.0001 -0.0000 -0.0000  
Y -0.0000 -0.0000 0.0001 0.0001 0.0001 0.0001  
Z 0.0000 0.0000 -0.0000 -0.0000 -0.0000 0.0000  
AT.162 O X 0.0000 0.0000 0.0000 -0.0001 -0.0000 0.0000  
Y 0.0000 0.0000 0.0001 -0.0001 -0.0001 0.0001  
Z 0.0000 0.0000 0.0000 -0.0000 -0.0000 -0.0000  
AT.163 O X 0.0000 -0.0000 0.0000 0.0001 -0.0000 -0.0000  
Y -0.0000 0.0000 -0.0001 -0.0001 0.0001 0.0001  
Z 0.0000 -0.0000 0.0000 0.0000 -0.0000 0.0000  
AT.164 O X 0.0000 -0.0000 -0.0000 0.0001 -0.0000 0.0000  
Y 0.0000 -0.0000 -0.0001 0.0001 -0.0001 0.0001  
Z 0.0000 -0.0000 -0.0000 0.0000 -0.0000 -0.0000  
AT.165 H X -0.0004 -0.0002 0.0007 0.0009 0.0008 0.0006  
Y 0.0007 0.0003 -0.0014 -0.0016 -0.0015 -0.0013  
Z -0.0001 -0.0001 0.0001 0.0001 0.0001 0.0000  
AT.166 H X -0.0004 -0.0002 -0.0007 0.0009 0.0008 -0.0006  
Y -0.0007 -0.0003 -0.0014 0.0016 0.0015 -0.0013  
Z -0.0001 -0.0001 -0.0001 0.0001 0.0001 -0.0000  
AT.167 H X -0.0004 0.0002 -0.0007 -0.0009 0.0008 0.0006  
Y 0.0007 -0.0003 0.0014 0.0016 -0.0015 -0.0013  
Z -0.0001 0.0001 -0.0001 -0.0001 0.0001 0.0000  
AT.168 H X -0.0004 0.0002 0.0007 -0.0009 0.0008 -0.0006  
Y -0.0007 0.0003 0.0014 -0.0016 0.0015 -0.0013  
Z -0.0001 0.0001 0.0001 -0.0001 0.0001 -0.0000  
AT.169 O X -0.0000 -0.0000 -0.0000 -0.0000 -0.0000 -0.0000  
Y -0.0000 -0.0000 -0.0000 -0.0001 -0.0000 -0.0000  
Z -0.0000 -0.0000 -0.0000 -0.0000 -0.0000 -0.0000



AT.170 O X -0.0000 -0.0000 0.0000 -0.0000 -0.0000 0.0000  
Y 0.0000 0.0000 -0.0000 0.0001 0.0000 -0.0000  
Z -0.0000 -0.0000 0.0000 -0.0000 -0.0000 0.0000

AT.171 O X -0.0000 0.0000 0.0000 0.0000 -0.0000 -0.0000  
Y -0.0000 0.0000 0.0000 0.0001 -0.0000 -0.0000  
Z -0.0000 0.0000 0.0000 0.0000 -0.0000 -0.0000

AT.172 O X -0.0000 0.0000 -0.0000 0.0000 -0.0000 0.0000  
Y 0.0000 -0.0000 0.0000 -0.0001 0.0000 -0.0000  
Z -0.0000 0.0000 -0.0000 0.0000 -0.0000 0.0000

AT.173 H X 0.0001 0.0001 0.0002 0.0003 0.0001 0.0001  
Y 0.0002 0.0005 0.0006 0.0010 0.0002 0.0003  
Z 0.0000 0.0000 0.0001 0.0001 0.0000 0.0001

AT.174 H X 0.0001 0.0001 -0.0002 0.0003 0.0001 -0.0001  
Y -0.0002 -0.0005 0.0006 -0.0010 -0.0002 0.0003  
Z 0.0000 0.0000 -0.0001 0.0001 0.0000 -0.0001

AT.175 H X 0.0001 -0.0001 -0.0002 -0.0003 0.0001 0.0001  
Y 0.0002 -0.0005 -0.0006 -0.0010 0.0002 0.0003  
Z 0.0000 -0.0000 -0.0001 -0.0001 0.0000 0.0001

AT.176 H X 0.0001 -0.0001 0.0002 -0.0003 0.0001 -0.0001  
Y -0.0002 0.0005 -0.0006 0.0010 -0.0002 0.0003  
Z 0.0000 -0.0000 0.0001 -0.0001 0.0000 -0.0001

FREQ(CM\*\*-1) 3207.70 3207.73 3207.80 3207.83 3227.09 3227.12

AT. 1 I X 0.0000 0.0000 0.0000 0.0000 0.0000 -0.0000  
Y 0.0000 0.0000 0.0000 0.0000 -0.0000 0.0000  
Z 0.0000 0.0000 0.0000 0.0000 -0.0000 0.0000

AT. 2 I X -0.0000 0.0000 0.0000 -0.0000 -0.0000 0.0000  
Y 0.0000 -0.0000 -0.0000 0.0000 -0.0000 0.0000  
Z -0.0000 0.0000 0.0000 -0.0000 0.0000 -0.0000

AT. 3 I X -0.0000 0.0000 -0.0000 0.0000 0.0000 0.0000  
Y -0.0000 0.0000 -0.0000 0.0000 -0.0000 -0.0000

Z -0.0000 0.0000 -0.0000 0.0000 -0.0000 -0.0000  
AT. 4 I X 0.0000 0.0000 -0.0000 -0.0000 -0.0000 -0.0000  
Y -0.0000 -0.0000 0.0000 0.0000 -0.0000 -0.0000  
Z 0.0000 0.0000 -0.0000 -0.0000 0.0000 0.0000  
AT. 5 I X -0.0000 -0.0000 -0.0000 0.0000 -0.0000 0.0000  
Y -0.0000 -0.0000 0.0000 0.0000 -0.0000 0.0000  
Z -0.0000 -0.0000 0.0000 0.0000 -0.0000 -0.0000  
AT. 6 I X 0.0000 -0.0000 -0.0000 -0.0000 0.0000 -0.0000  
Y -0.0000 0.0000 -0.0000 0.0000 -0.0000 0.0000  
Z 0.0000 -0.0000 0.0000 -0.0000 0.0000 0.0000  
AT. 7 I X 0.0000 -0.0000 0.0000 0.0000 -0.0000 -0.0000  
Y 0.0000 -0.0000 -0.0000 0.0000 -0.0000 -0.0000  
Z 0.0000 -0.0000 -0.0000 0.0000 -0.0000 0.0000  
AT. 8 I X -0.0000 -0.0000 0.0000 -0.0000 0.0000 0.0000  
Y 0.0000 0.0000 0.0000 0.0000 -0.0000 -0.0000  
Z -0.0000 -0.0000 -0.0000 -0.0000 0.0000 -0.0000  
AT. 9 N X 0.0000 0.0000 0.0000 0.0000 0.0000 0.0000  
Y 0.0000 -0.0000 -0.0000 -0.0000 0.0000 0.0000  
Z 0.0000 0.0000 0.0000 0.0000 0.0000 0.0000  
AT. 10 N X -0.0000 0.0000 0.0000 -0.0000 -0.0000 -0.0000  
Y 0.0000 0.0000 0.0000 -0.0000 0.0000 0.0000  
Z -0.0000 0.0000 0.0000 -0.0000 -0.0000 -0.0000  
AT. 11 N X -0.0000 0.0000 -0.0000 0.0000 0.0000 -0.0000  
Y -0.0000 -0.0000 0.0000 -0.0000 0.0000 -0.0000  
Z -0.0000 0.0000 -0.0000 0.0000 0.0000 -0.0000  
AT. 12 N X 0.0000 0.0000 -0.0000 -0.0000 -0.0000 0.0000  
Y -0.0000 0.0000 -0.0000 -0.0000 0.0000 -0.0000  
Z 0.0000 0.0000 -0.0000 -0.0000 -0.0000 0.0000  
AT. 13 N X -0.0000 -0.0000 -0.0000 -0.0000 0.0000 0.0000  
Y -0.0000 -0.0000 -0.0000 -0.0000 0.0000 0.0000  
Z 0.0000 0.0000 0.0000 0.0000 -0.0000 -0.0000  
AT. 14 N X 0.0000 -0.0000 -0.0000 0.0000 -0.0000 -0.0000

Y -0.0000 0.0000 0.0000 -0.0000 0.0000 0.0000  
Z -0.0000 0.0000 0.0000 -0.0000 0.0000 0.0000  
AT. 15 N X 0.0000 -0.0000 0.0000 -0.0000 0.0000 -0.0000  
Y 0.0000 -0.0000 0.0000 -0.0000 0.0000 -0.0000  
Z -0.0000 0.0000 -0.0000 0.0000 -0.0000 0.0000  
AT. 16 N X -0.0000 -0.0000 0.0000 0.0000 -0.0000 0.0000  
Y 0.0000 0.0000 -0.0000 -0.0000 0.0000 -0.0000  
Z 0.0000 0.0000 -0.0000 -0.0000 0.0000 -0.0000  
AT. 17 O X -0.0000 -0.0000 -0.0000 -0.0000 0.0000 -0.0000  
Y -0.0000 -0.0000 -0.0000 -0.0000 -0.0000 -0.0000  
Z -0.0000 0.0000 -0.0000 0.0000 -0.0000 -0.0000  
AT. 18 O X 0.0000 -0.0000 -0.0000 0.0000 -0.0000 0.0000  
Y -0.0000 0.0000 0.0000 -0.0000 -0.0000 -0.0000  
Z 0.0000 0.0000 -0.0000 -0.0000 0.0000 0.0000  
AT. 19 O X 0.0000 -0.0000 0.0000 -0.0000 0.0000 0.0000  
Y 0.0000 -0.0000 0.0000 -0.0000 -0.0000 0.0000  
Z 0.0000 0.0000 0.0000 0.0000 -0.0000 0.0000  
AT. 20 O X -0.0000 -0.0000 0.0000 0.0000 -0.0000 -0.0000  
Y 0.0000 0.0000 -0.0000 -0.0000 -0.0000 0.0000  
Z -0.0000 0.0000 0.0000 -0.0000 0.0000 -0.0000  
AT. 21 O X 0.0000 0.0000 0.0000 0.0000 0.0000 0.0000  
Y 0.0001 0.0000 0.0000 0.0001 -0.0000 -0.0000  
Z 0.0000 0.0001 0.0000 0.0000 0.0000 0.0000  
AT. 22 O X -0.0000 0.0000 0.0000 -0.0000 -0.0000 -0.0000  
Y 0.0001 -0.0000 -0.0000 0.0001 -0.0000 -0.0000  
Z -0.0000 0.0001 0.0000 -0.0000 -0.0000 -0.0000  
AT. 23 O X -0.0000 0.0000 -0.0000 0.0000 0.0000 -0.0000  
Y -0.0001 0.0000 -0.0000 0.0001 -0.0000 0.0000  
Z -0.0000 0.0001 -0.0000 0.0000 0.0000 -0.0000  
AT. 24 O X 0.0000 0.0000 -0.0000 -0.0000 -0.0000 0.0000  
Y -0.0001 -0.0000 0.0000 0.0001 -0.0000 0.0000  
Z 0.0000 0.0001 -0.0000 -0.0000 -0.0000 0.0000

AT. 25 C X -0.0002 -0.0002 -0.0002 -0.0002 -0.0000 -0.0000  
Y 0.0006 0.0006 0.0006 0.0006 -0.0000 -0.0000  
Z -0.0001 -0.0001 -0.0001 -0.0001 -0.0000 -0.0000

AT. 26 C X 0.0002 -0.0002 -0.0002 0.0002 0.0000 0.0000  
Y 0.0006 -0.0006 -0.0006 0.0006 -0.0000 -0.0000  
Z 0.0001 -0.0001 -0.0001 0.0001 0.0000 0.0000

AT. 27 C X 0.0002 -0.0002 0.0002 -0.0002 -0.0000 0.0000  
Y -0.0006 0.0006 -0.0006 0.0006 -0.0000 0.0000  
Z 0.0001 -0.0001 0.0001 -0.0001 -0.0000 0.0000

AT. 28 C X -0.0002 -0.0002 0.0002 0.0002 0.0000 -0.0000  
Y -0.0006 -0.0006 0.0006 0.0006 -0.0000 0.0000  
Z -0.0001 -0.0001 0.0001 0.0001 0.0000 -0.0000

AT. 29 H X 0.0037 0.0036 0.0038 0.0036 0.0001 0.0001  
Y 0.0008 0.0008 0.0008 0.0008 0.0000 0.0000  
Z 0.0026 0.0026 0.0027 0.0025 0.0001 0.0001

AT. 30 H X -0.0037 0.0036 0.0038 -0.0036 -0.0001 -0.0001  
Y 0.0008 -0.0008 -0.0008 0.0008 0.0000 0.0000  
Z -0.0026 0.0026 0.0027 -0.0025 -0.0001 -0.0001

AT. 31 H X -0.0037 0.0036 -0.0038 0.0036 0.0001 -0.0001  
Y -0.0008 0.0008 -0.0008 0.0008 0.0000 -0.0000  
Z -0.0026 0.0026 -0.0027 0.0025 0.0001 -0.0001

AT. 32 H X 0.0037 0.0036 -0.0038 -0.0036 -0.0001 0.0001  
Y -0.0008 -0.0008 0.0008 0.0008 0.0000 -0.0000  
Z 0.0026 0.0026 -0.0027 -0.0025 -0.0001 0.0001

AT. 33 H X -0.0013 -0.0013 -0.0013 -0.0013 0.0000 0.0000  
Y -0.0072 -0.0071 -0.0071 -0.0072 0.0001 0.0003  
Z -0.0016 -0.0016 -0.0016 -0.0016 0.0000 0.0001

AT. 34 H X 0.0013 -0.0013 -0.0013 0.0013 -0.0000 -0.0000  
Y -0.0072 0.0071 0.0071 -0.0072 0.0001 0.0003  
Z 0.0016 -0.0016 -0.0016 0.0016 -0.0000 -0.0001

AT. 35 H X 0.0013 -0.0013 0.0013 -0.0013 0.0000 -0.0000  
Y 0.0072 -0.0071 0.0071 -0.0072 0.0001 -0.0003

Z 0.0016 -0.0016 0.0016 -0.0016 0.0000 -0.0001  
AT. 36 H X -0.0013 -0.0013 0.0013 0.0013 -0.0000 0.0000  
Y 0.0072 0.0071 -0.0071 -0.0072 0.0001 -0.0003  
Z -0.0016 -0.0016 0.0016 0.0016 -0.0000 0.0001  
AT. 37 C X 0.0000 -0.0000 -0.0000 -0.0000 -0.0000 0.0000  
Y 0.0000 0.0000 0.0000 0.0000 -0.0000 0.0000  
Z -0.0000 -0.0000 -0.0000 -0.0000 0.0000 0.0000  
AT. 38 C X -0.0000 -0.0000 -0.0000 0.0000 0.0000 -0.0000  
Y 0.0000 -0.0000 -0.0000 0.0000 -0.0000 0.0000  
Z 0.0000 -0.0000 -0.0000 0.0000 -0.0000 -0.0000  
AT. 39 C X -0.0000 -0.0000 0.0000 -0.0000 -0.0000 -0.0000  
Y -0.0000 0.0000 -0.0000 0.0000 -0.0000 -0.0000  
Z 0.0000 -0.0000 0.0000 -0.0000 0.0000 -0.0000  
AT. 40 C X 0.0000 -0.0000 0.0000 0.0000 0.0000 0.0000  
Y -0.0000 -0.0000 0.0000 0.0000 -0.0000 -0.0000  
Z -0.0000 -0.0000 0.0000 0.0000 -0.0000 0.0000  
AT. 41 C X -0.0015 -0.0015 -0.0015 -0.0015 0.0000 0.0000  
Y 0.0038 0.0038 0.0037 0.0038 0.0000 0.0000  
Z -0.0031 -0.0031 -0.0030 -0.0031 0.0000 0.0000  
AT. 42 C X 0.0015 -0.0015 -0.0015 0.0015 -0.0000 -0.0000  
Y 0.0038 -0.0038 -0.0037 0.0038 0.0000 0.0000  
Z 0.0031 -0.0031 -0.0030 0.0031 -0.0000 -0.0000  
AT. 43 C X 0.0015 -0.0015 0.0015 -0.0015 0.0000 -0.0000  
Y -0.0038 0.0038 -0.0037 0.0038 0.0000 -0.0000  
Z 0.0031 -0.0031 0.0030 -0.0031 0.0000 -0.0000  
AT. 44 C X -0.0015 -0.0015 0.0015 0.0015 -0.0000 0.0000  
Y -0.0038 -0.0038 0.0037 0.0038 0.0000 -0.0000  
Z -0.0031 -0.0031 0.0030 0.0031 -0.0000 0.0000  
AT. 45 H X 0.0058 0.0058 0.0056 0.0058 -0.0000 -0.0000  
Y -0.0348 -0.0349 -0.0341 -0.0349 0.0002 0.0003  
Z 0.0402 0.0404 0.0394 0.0403 -0.0002 -0.0003  
AT. 46 H X -0.0058 0.0058 0.0056 -0.0058 0.0000 0.0000

Y -0.0348 0.0349 0.0341 -0.0349 0.0002 0.0003  
Z -0.0402 0.0404 0.0394 -0.0403 0.0002 0.0003  
AT. 47 H X -0.0058 0.0058 -0.0056 0.0058 -0.0000 0.0000  
Y 0.0348 -0.0349 0.0341 -0.0349 0.0002 -0.0003  
Z -0.0402 0.0404 -0.0394 0.0403 -0.0002 0.0003  
AT. 48 H X 0.0058 0.0058 -0.0056 -0.0058 0.0000 -0.0000  
Y 0.0348 0.0349 -0.0341 -0.0349 0.0002 -0.0003  
Z 0.0402 0.0404 -0.0394 -0.0403 0.0002 -0.0003  
AT. 49 H X 0.0115 0.0116 0.0113 0.0116 0.0002 0.0002  
Y -0.0110 -0.0111 -0.0108 -0.0111 -0.0001 -0.0001  
Z -0.0046 -0.0047 -0.0045 -0.0046 -0.0000 0.0000  
AT. 50 H X -0.0115 0.0116 0.0113 -0.0116 -0.0002 -0.0002  
Y -0.0110 0.0111 0.0108 -0.0111 -0.0001 -0.0001  
Z 0.0046 -0.0047 -0.0045 0.0046 0.0000 -0.0000  
AT. 51 H X -0.0115 0.0116 -0.0113 0.0116 0.0002 -0.0002  
Y 0.0110 -0.0111 0.0108 -0.0111 -0.0001 0.0001  
Z 0.0046 -0.0047 0.0045 -0.0046 -0.0000 -0.0000  
AT. 52 H X 0.0115 0.0116 -0.0113 -0.0116 -0.0002 0.0002  
Y 0.0110 0.0111 -0.0108 -0.0111 -0.0001 0.0001  
Z -0.0046 -0.0047 0.0045 0.0046 0.0000 0.0000  
AT. 53 C X 0.0000 -0.0000 0.0000 0.0000 -0.0001 -0.0001  
Y 0.0001 0.0001 0.0001 0.0001 0.0000 0.0000  
Z -0.0000 -0.0000 -0.0000 -0.0000 0.0001 0.0001  
AT. 54 C X -0.0000 -0.0000 0.0000 -0.0000 0.0001 0.0001  
Y 0.0001 -0.0001 -0.0001 0.0001 0.0000 0.0000  
Z 0.0000 -0.0000 -0.0000 0.0000 -0.0001 -0.0001  
AT. 55 C X -0.0000 -0.0000 -0.0000 0.0000 -0.0001 0.0001  
Y -0.0001 0.0001 -0.0001 0.0001 0.0000 -0.0000  
Z 0.0000 -0.0000 0.0000 -0.0000 0.0001 -0.0001  
AT. 56 C X 0.0000 -0.0000 -0.0000 -0.0000 0.0001 -0.0001  
Y -0.0001 -0.0001 0.0001 0.0001 0.0000 -0.0000  
Z -0.0000 -0.0000 0.0000 0.0000 -0.0001 0.0001

AT. 57 C X 0.0002 -0.0004 -0.0004 0.0002 -0.0083 -0.0083  
Y 0.0003 0.0003 0.0003 0.0004 -0.0010 -0.0010  
Z -0.0002 -0.0001 -0.0001 -0.0002 0.0010 0.0010

AT. 58 C X -0.0002 -0.0004 -0.0004 -0.0002 0.0083 0.0083  
Y 0.0003 -0.0003 -0.0003 0.0004 -0.0010 -0.0010  
Z 0.0002 -0.0001 -0.0001 0.0002 -0.0010 -0.0010

AT. 59 C X -0.0002 -0.0004 0.0004 0.0002 -0.0083 0.0083  
Y -0.0003 0.0003 -0.0003 0.0004 -0.0010 0.0010  
Z 0.0002 -0.0001 0.0001 -0.0002 0.0010 -0.0010

AT. 60 C X 0.0002 -0.0004 0.0004 -0.0002 0.0083 -0.0083  
Y -0.0003 -0.0003 0.0003 0.0004 -0.0010 0.0010  
Z -0.0002 -0.0001 0.0001 0.0002 -0.0010 0.0010

AT. 61 H X 0.0009 0.0023 0.0023 0.0008 0.0157 0.0157  
Y -0.0012 -0.0032 -0.0031 -0.0011 -0.0226 -0.0225  
Z -0.0002 -0.0005 -0.0005 -0.0002 -0.0034 -0.0034

AT. 62 H X -0.0009 0.0023 0.0023 -0.0008 -0.0157 -0.0157  
Y -0.0012 0.0032 0.0031 -0.0011 -0.0226 -0.0225  
Z 0.0002 -0.0005 -0.0005 0.0002 0.0034 0.0034

AT. 63 H X -0.0009 0.0023 -0.0023 0.0008 0.0157 -0.0157  
Y 0.0012 -0.0032 0.0031 -0.0011 -0.0226 0.0225  
Z 0.0002 -0.0005 0.0005 -0.0002 -0.0034 0.0034

AT. 64 H X 0.0009 0.0023 -0.0023 -0.0008 -0.0157 0.0157  
Y 0.0012 0.0032 -0.0031 -0.0011 -0.0226 0.0225  
Z -0.0002 -0.0005 0.0005 0.0002 0.0034 -0.0034

AT. 65 H X -0.0024 0.0025 0.0027 -0.0028 0.0821 0.0822  
Y -0.0008 0.0009 0.0009 -0.0009 0.0268 0.0268  
Z -0.0000 0.0001 0.0001 -0.0000 0.0000 0.0000

AT. 66 H X 0.0024 0.0025 0.0027 0.0028 -0.0821 -0.0822  
Y -0.0008 -0.0009 -0.0009 -0.0009 0.0268 0.0268  
Z 0.0000 0.0001 0.0001 0.0000 -0.0000 -0.0000

AT. 67 H X 0.0024 0.0025 -0.0027 -0.0028 0.0821 -0.0822  
Y 0.0008 0.0009 -0.0009 -0.0009 0.0268 -0.0268

Z 0.0000 0.0001 -0.0001 -0.0000 0.0000 -0.0000  
AT. 68 H X -0.0024 0.0025 -0.0027 0.0028 -0.0821 0.0822  
Y 0.0008 -0.0009 0.0009 -0.0009 0.0268 -0.0268  
Z -0.0000 0.0001 -0.0001 0.0000 -0.0000 0.0000  
AT. 69 H X -0.0005 -0.0005 -0.0005 -0.0006 0.0008 0.0009  
Y -0.0024 -0.0020 -0.0019 -0.0025 0.0083 0.0083  
Z 0.0030 0.0026 0.0024 0.0032 -0.0094 -0.0094  
AT. 70 H X 0.0005 -0.0005 -0.0005 0.0006 -0.0008 -0.0009  
Y -0.0024 0.0020 0.0019 -0.0025 0.0083 0.0083  
Z -0.0030 0.0026 0.0024 -0.0032 0.0094 0.0094  
AT. 71 H X 0.0005 -0.0005 0.0005 -0.0006 0.0008 -0.0009  
Y 0.0024 -0.0020 0.0019 -0.0025 0.0083 -0.0083  
Z -0.0030 0.0026 -0.0024 0.0032 -0.0094 0.0094  
AT. 72 H X -0.0005 -0.0005 0.0005 0.0006 -0.0008 0.0009  
Y 0.0024 0.0020 -0.0019 -0.0025 0.0083 -0.0083  
Z 0.0030 0.0026 -0.0024 -0.0032 0.0094 -0.0094  
AT. 73 C X 0.0000 0.0000 0.0000 0.0000 -0.0000 -0.0000  
Y -0.0001 -0.0001 -0.0001 -0.0001 0.0000 0.0000  
Z 0.0000 0.0000 0.0000 0.0000 -0.0000 -0.0000  
AT. 74 C X -0.0000 0.0000 0.0000 -0.0000 0.0000 0.0000  
Y -0.0001 0.0001 0.0001 -0.0001 0.0000 0.0000  
Z -0.0000 0.0000 0.0000 -0.0000 0.0000 0.0000  
AT. 75 C X -0.0000 0.0000 -0.0000 0.0000 -0.0000 0.0000  
Y 0.0001 -0.0001 0.0001 -0.0001 0.0000 -0.0000  
Z -0.0000 0.0000 -0.0000 0.0000 -0.0000 0.0000  
AT. 76 C X 0.0000 0.0000 -0.0000 -0.0000 0.0000 -0.0000  
Y 0.0001 0.0001 -0.0001 -0.0001 0.0000 -0.0000  
Z 0.0000 0.0000 -0.0000 -0.0000 0.0000 -0.0000  
AT. 77 C X 0.0000 -0.0000 -0.0000 -0.0000 -0.0000 0.0000  
Y 0.0002 0.0001 0.0002 0.0001 0.0000 0.0000  
Z 0.0003 0.0001 0.0002 0.0002 0.0000 0.0000  
AT. 78 C X -0.0000 -0.0000 -0.0000 0.0000 0.0000 -0.0000



Y 0.0002 -0.0001 -0.0002 0.0001 0.0000 0.0000  
Z -0.0003 0.0001 0.0002 -0.0002 -0.0000 -0.0000  
AT. 79 C X -0.0000 -0.0000 0.0000 -0.0000 -0.0000 -0.0000  
Y -0.0002 0.0001 -0.0002 0.0001 0.0000 -0.0000  
Z -0.0003 0.0001 -0.0002 0.0002 0.0000 -0.0000  
AT. 80 C X 0.0000 -0.0000 0.0000 0.0000 0.0000 0.0000  
Y -0.0002 -0.0001 0.0002 0.0001 0.0000 -0.0000  
Z 0.0003 0.0001 -0.0002 -0.0002 -0.0000 0.0000  
AT. 81 H X 0.0008 0.0003 0.0008 0.0005 0.0000 0.0000  
Y -0.0006 -0.0002 -0.0007 -0.0004 -0.0000 0.0000  
Z -0.0000 0.0000 -0.0000 -0.0000 -0.0000 0.0000  
AT. 82 H X -0.0008 0.0003 0.0008 -0.0005 -0.0000 -0.0000  
Y -0.0006 0.0002 0.0007 -0.0004 -0.0000 0.0000  
Z 0.0000 0.0000 -0.0000 0.0000 0.0000 -0.0000  
AT. 83 H X -0.0008 0.0003 -0.0008 0.0005 0.0000 -0.0000  
Y 0.0006 -0.0002 0.0007 -0.0004 -0.0000 -0.0000  
Z 0.0000 0.0000 0.0000 -0.0000 -0.0000 -0.0000  
AT. 84 H X 0.0008 0.0003 -0.0008 -0.0005 -0.0000 0.0000  
Y 0.0006 0.0002 -0.0007 -0.0004 -0.0000 -0.0000  
Z -0.0000 0.0000 0.0000 0.0000 0.0000 0.0000  
AT. 85 H X -0.0007 -0.0002 -0.0006 -0.0004 -0.0000 -0.0000  
Y -0.0022 -0.0005 -0.0020 -0.0013 -0.0001 -0.0001  
Z -0.0026 -0.0006 -0.0023 -0.0015 -0.0002 -0.0002  
AT. 86 H X 0.0007 -0.0002 -0.0006 0.0004 0.0000 0.0000  
Y -0.0022 0.0005 0.0020 -0.0013 -0.0001 -0.0001  
Z 0.0026 -0.0006 -0.0023 0.0015 0.0002 0.0002  
AT. 87 H X 0.0007 -0.0002 0.0006 -0.0004 -0.0000 0.0000  
Y 0.0022 -0.0005 0.0020 -0.0013 -0.0001 0.0001  
Z 0.0026 -0.0006 0.0023 -0.0015 -0.0002 0.0002  
AT. 88 H X -0.0007 -0.0002 0.0006 0.0004 0.0000 -0.0000  
Y 0.0022 0.0005 -0.0020 -0.0013 -0.0001 0.0001  
Z -0.0026 -0.0006 0.0023 0.0015 0.0002 -0.0002

AT. 89 C X 0.0000 0.0000 0.0000 0.0000 -0.0000 -0.0000  
Y 0.0000 0.0000 0.0000 0.0000 -0.0000 -0.0000  
Z 0.0000 0.0000 0.0000 -0.0000 0.0000 -0.0000

AT. 90 C X -0.0000 0.0000 0.0000 -0.0000 0.0000 0.0000  
Y 0.0000 -0.0000 -0.0000 0.0000 -0.0000 -0.0000  
Z -0.0000 0.0000 0.0000 0.0000 -0.0000 0.0000

AT. 91 C X -0.0000 0.0000 -0.0000 0.0000 -0.0000 0.0000  
Y -0.0000 0.0000 -0.0000 0.0000 -0.0000 0.0000  
Z -0.0000 0.0000 -0.0000 -0.0000 0.0000 0.0000

AT. 92 C X 0.0000 0.0000 -0.0000 -0.0000 0.0000 -0.0000  
Y -0.0000 -0.0000 0.0000 0.0000 -0.0000 0.0000  
Z 0.0000 0.0000 -0.0000 0.0000 -0.0000 -0.0000

AT. 93 C X -0.0001 -0.0001 0.0001 0.0001 -0.0001 0.0001  
Y 0.0000 0.0000 0.0000 0.0000 -0.0000 0.0000  
Z 0.0000 0.0000 0.0000 0.0000 0.0000 -0.0000

AT. 94 C X 0.0001 -0.0001 0.0001 -0.0001 0.0001 -0.0001  
Y 0.0000 -0.0000 -0.0000 0.0000 -0.0000 0.0000  
Z -0.0000 0.0000 0.0000 -0.0000 -0.0000 0.0000

AT. 95 C X 0.0001 -0.0001 -0.0001 0.0001 -0.0001 -0.0001  
Y -0.0000 0.0000 -0.0000 0.0000 -0.0000 -0.0000  
Z -0.0000 0.0000 -0.0000 0.0000 0.0000 0.0000

AT. 96 C X -0.0001 -0.0001 -0.0001 -0.0001 0.0001 0.0001  
Y -0.0000 -0.0000 0.0000 0.0000 -0.0000 -0.0000  
Z 0.0000 0.0000 -0.0000 -0.0000 -0.0000 -0.0000

AT. 97 H X 0.0006 0.0006 -0.0008 -0.0006 0.0013 -0.0011  
Y 0.0003 0.0004 -0.0004 -0.0004 0.0007 -0.0007  
Z -0.0001 -0.0001 0.0002 0.0002 -0.0003 0.0003

AT. 98 H X -0.0006 0.0006 -0.0008 0.0006 -0.0013 0.0011  
Y 0.0003 -0.0004 0.0004 -0.0004 0.0007 -0.0007  
Z 0.0001 -0.0001 0.0002 -0.0002 0.0003 -0.0003

AT. 99 H X -0.0006 0.0006 0.0008 -0.0006 0.0013 0.0011  
Y -0.0003 0.0004 0.0004 -0.0004 0.0007 0.0007

Z 0.0001 -0.0001 -0.0002 0.0002 -0.0003 -0.0003  
AT.100 H X 0.0006 0.0006 0.0008 0.0006 -0.0013 -0.0011  
Y -0.0003 -0.0004 -0.0004 -0.0004 0.0007 0.0007  
Z -0.0001 -0.0001 -0.0002 -0.0002 0.0003 0.0003  
AT.101 H X 0.0004 0.0005 -0.0003 -0.0002 0.0006 -0.0006  
Y -0.0004 -0.0004 0.0003 0.0002 -0.0005 0.0005  
Z -0.0001 -0.0001 0.0000 0.0000 -0.0001 0.0001  
AT.102 H X -0.0004 0.0005 -0.0003 0.0002 -0.0006 0.0006  
Y -0.0004 0.0004 -0.0003 0.0002 -0.0005 0.0005  
Z 0.0001 -0.0001 0.0000 -0.0000 0.0001 -0.0001  
AT.103 H X -0.0004 0.0005 0.0003 -0.0002 0.0006 0.0006  
Y 0.0004 -0.0004 -0.0003 0.0002 -0.0005 -0.0005  
Z 0.0001 -0.0001 -0.0000 0.0000 -0.0001 -0.0001  
AT.104 H X 0.0004 0.0005 0.0003 0.0002 -0.0006 -0.0006  
Y 0.0004 0.0004 0.0003 0.0002 -0.0005 -0.0005  
Z -0.0001 -0.0001 -0.0000 -0.0000 0.0001 0.0001  
AT.105 H X -0.0000 -0.0000 -0.0001 -0.0001 -0.0000 0.0001  
Y -0.0001 0.0000 -0.0003 -0.0002 -0.0000 0.0000  
Z -0.0001 0.0000 -0.0004 -0.0003 0.0000 0.0000  
AT.106 H X 0.0000 -0.0000 -0.0001 0.0001 0.0000 -0.0001  
Y -0.0001 -0.0000 0.0003 -0.0002 -0.0000 0.0000  
Z 0.0001 0.0000 -0.0004 0.0003 -0.0000 -0.0000  
AT.107 H X 0.0000 -0.0000 0.0001 -0.0001 -0.0000 -0.0001  
Y 0.0001 0.0000 0.0003 -0.0002 -0.0000 -0.0000  
Z 0.0001 0.0000 0.0004 -0.0003 0.0000 -0.0000  
AT.108 H X -0.0000 -0.0000 0.0001 0.0001 0.0000 0.0001  
Y 0.0001 -0.0000 -0.0003 -0.0002 -0.0000 -0.0000  
Z -0.0001 0.0000 0.0004 0.0003 -0.0000 0.0000  
AT.109 C X 0.0006 0.0006 0.0007 0.0006 -0.0001 -0.0001  
Y 0.0045 0.0045 0.0046 0.0045 0.0002 0.0002  
Z -0.0046 -0.0046 -0.0047 -0.0046 -0.0003 -0.0002  
AT.110 C X -0.0006 0.0006 0.0007 -0.0006 0.0001 0.0001

Y 0.0045 -0.0045 -0.0046 0.0045 0.0002 0.0002  
Z 0.0046 -0.0046 -0.0047 0.0046 0.0003 0.0002  
AT. 111 C X -0.0006 0.0006 -0.0007 0.0006 -0.0001 0.0001  
Y -0.0045 0.0045 -0.0046 0.0045 0.0002 -0.0002  
Z 0.0046 -0.0046 0.0047 -0.0046 -0.0003 0.0002  
AT. 112 C X 0.0006 0.0006 -0.0007 -0.0006 0.0001 -0.0001  
Y -0.0045 -0.0045 0.0046 0.0045 0.0002 -0.0002  
Z -0.0046 -0.0046 0.0047 0.0046 0.0003 -0.0002  
AT. 113 H X -0.0155 -0.0154 -0.0157 -0.0154 0.0005 0.0006  
Y -0.0086 -0.0086 -0.0088 -0.0086 0.0002 0.0002  
Z 0.0019 0.0019 0.0019 0.0019 -0.0001 -0.0001  
AT. 114 H X 0.0155 -0.0154 -0.0157 0.0154 -0.0005 -0.0006  
Y -0.0086 0.0086 0.0088 -0.0086 0.0002 0.0002  
Z -0.0019 0.0019 0.0019 -0.0019 0.0001 0.0001  
AT. 115 H X 0.0155 -0.0154 0.0157 -0.0154 0.0005 -0.0006  
Y 0.0086 -0.0086 0.0088 -0.0086 0.0002 -0.0002  
Z -0.0019 0.0019 -0.0019 0.0019 -0.0001 0.0001  
AT. 116 H X -0.0155 -0.0154 0.0157 0.0154 -0.0005 0.0006  
Y 0.0086 0.0086 -0.0088 -0.0086 0.0002 -0.0002  
Z 0.0019 0.0019 -0.0019 -0.0019 0.0001 -0.0001  
AT. 117 H X 0.0078 0.0078 0.0079 0.0078 0.0006 0.0005  
Y -0.0461 -0.0462 -0.0467 -0.0461 -0.0030 -0.0026  
Z 0.0520 0.0520 0.0526 0.0520 0.0031 0.0027  
AT. 118 H X -0.0078 0.0078 0.0079 -0.0078 -0.0006 -0.0005  
Y -0.0461 0.0462 0.0467 -0.0461 -0.0030 -0.0026  
Z -0.0520 0.0520 0.0526 -0.0520 -0.0031 -0.0027  
AT. 119 H X -0.0078 0.0078 -0.0079 0.0078 0.0006 -0.0005  
Y 0.0461 -0.0462 0.0467 -0.0461 -0.0030 0.0026  
Z -0.0520 0.0520 -0.0526 0.0520 0.0031 -0.0027  
AT. 120 H X 0.0078 0.0078 -0.0079 -0.0078 -0.0006 0.0005  
Y 0.0461 0.0462 -0.0467 -0.0461 -0.0030 0.0026  
Z 0.0520 0.0520 -0.0526 -0.0520 -0.0031 0.0027

AT.121 C X 0.0001 0.0000 0.0001 0.0001 -0.0000 0.0000  
Y 0.0002 0.0000 0.0002 0.0001 -0.0000 0.0000  
Z 0.0002 0.0001 0.0003 0.0002 0.0000 -0.0000

AT.122 C X -0.0001 0.0000 0.0001 -0.0001 0.0000 -0.0000  
Y 0.0002 -0.0000 -0.0002 0.0001 -0.0000 0.0000  
Z -0.0002 0.0001 0.0003 -0.0002 -0.0000 0.0000

AT.123 C X -0.0001 0.0000 -0.0001 0.0001 -0.0000 -0.0000  
Y -0.0002 0.0000 -0.0002 0.0001 -0.0000 -0.0000  
Z -0.0002 0.0001 -0.0003 0.0002 0.0000 0.0000

AT.124 C X 0.0001 0.0000 -0.0001 -0.0001 0.0000 0.0000  
Y -0.0002 -0.0000 0.0002 0.0001 -0.0000 -0.0000  
Z 0.0002 0.0001 -0.0003 -0.0002 -0.0000 -0.0000

AT.125 H X -0.0007 -0.0002 -0.0008 -0.0005 -0.0000 0.0000  
Y -0.0017 -0.0005 -0.0021 -0.0013 0.0000 0.0000  
Z -0.0023 -0.0005 -0.0027 -0.0017 0.0000 0.0000

AT.126 H X 0.0007 -0.0002 -0.0008 0.0005 0.0000 -0.0000  
Y -0.0017 0.0005 0.0021 -0.0013 0.0000 0.0000  
Z 0.0023 -0.0005 -0.0027 0.0017 -0.0000 -0.0000

AT.127 H X 0.0007 -0.0002 0.0008 -0.0005 -0.0000 -0.0000  
Y 0.0017 -0.0005 0.0021 -0.0013 0.0000 -0.0000  
Z 0.0023 -0.0005 0.0027 -0.0017 0.0000 -0.0000

AT.128 H X -0.0007 -0.0002 0.0008 0.0005 0.0000 0.0000  
Y 0.0017 0.0005 -0.0021 -0.0013 0.0000 -0.0000  
Z -0.0023 -0.0005 0.0027 0.0017 -0.0000 0.0000

AT.129 H X -0.0005 -0.0001 -0.0008 -0.0005 0.0004 -0.0002  
Y -0.0003 -0.0001 -0.0005 -0.0003 0.0002 -0.0001  
Z 0.0002 0.0001 0.0003 0.0002 -0.0001 0.0000

AT.130 H X 0.0005 -0.0001 -0.0008 0.0005 -0.0004 0.0002  
Y -0.0003 0.0001 0.0005 -0.0003 0.0002 -0.0001  
Z -0.0002 0.0001 0.0003 -0.0002 0.0001 -0.0000

AT.131 H X 0.0005 -0.0001 0.0008 -0.0005 0.0004 0.0002  
Y 0.0003 -0.0001 0.0005 -0.0003 0.0002 0.0001

Z -0.0002 0.0001 -0.0003 0.0002 -0.0001 -0.0000  
AT. 132 H X -0.0005 -0.0001 0.0008 0.0005 -0.0004 -0.0002  
Y 0.0003 0.0001 -0.0005 -0.0003 0.0002 0.0001  
Z 0.0002 0.0001 -0.0003 -0.0002 0.0001 0.0000  
AT. 133 C X -0.0000 -0.0000 -0.0000 -0.0000 0.0000 0.0000  
Y 0.0000 0.0000 0.0000 0.0000 0.0000 0.0000  
Z -0.0001 -0.0001 -0.0001 -0.0001 0.0000 0.0000  
AT. 134 C X 0.0000 -0.0000 -0.0000 0.0000 -0.0000 -0.0000  
Y 0.0000 -0.0000 -0.0000 0.0000 0.0000 0.0000  
Z 0.0001 -0.0001 -0.0001 0.0001 -0.0000 -0.0000  
AT. 135 C X 0.0000 -0.0000 0.0000 -0.0000 0.0000 -0.0000  
Y -0.0000 0.0000 -0.0000 0.0000 0.0000 -0.0000  
Z 0.0001 -0.0001 0.0001 -0.0001 0.0000 -0.0000  
AT. 136 C X -0.0000 -0.0000 0.0000 0.0000 -0.0000 0.0000  
Y -0.0000 -0.0000 0.0000 0.0000 0.0000 -0.0000  
Z -0.0001 -0.0001 0.0001 0.0001 -0.0000 0.0000  
AT. 137 C X 0.0002 0.0001 0.0002 0.0002 -0.0000 0.0000  
Y 0.0001 0.0001 0.0001 0.0001 -0.0000 0.0000  
Z 0.0001 0.0000 0.0001 0.0001 -0.0000 0.0000  
AT. 138 C X -0.0002 0.0001 0.0002 -0.0002 0.0000 -0.0000  
Y 0.0001 -0.0001 -0.0001 0.0001 -0.0000 0.0000  
Z -0.0001 0.0000 0.0001 -0.0001 0.0000 -0.0000  
AT. 139 C X -0.0002 0.0001 -0.0002 0.0002 -0.0000 -0.0000  
Y -0.0001 0.0001 -0.0001 0.0001 -0.0000 -0.0000  
Z -0.0001 0.0000 -0.0001 0.0001 -0.0000 -0.0000  
AT. 140 C X 0.0002 0.0001 -0.0002 -0.0002 0.0000 0.0000  
Y -0.0001 -0.0001 0.0001 0.0001 -0.0000 -0.0000  
Z 0.0001 0.0000 -0.0001 -0.0001 0.0000 0.0000  
AT. 141 H X -0.0018 -0.0010 -0.0018 -0.0013 0.0000 -0.0002  
Y 0.0012 0.0006 0.0012 0.0009 -0.0000 0.0001  
Z -0.0016 -0.0009 -0.0016 -0.0012 0.0000 -0.0002  
AT. 142 H X 0.0018 -0.0010 -0.0018 0.0013 -0.0000 0.0002

Y 0.0012 -0.0006 -0.0012 0.0009 -0.0000 0.0001  
Z 0.0016 -0.0009 -0.0016 0.0012 -0.0000 0.0002  
AT. 143 H X 0.0018 -0.0010 0.0018 -0.0013 0.0000 0.0002  
Y -0.0012 0.0006 -0.0012 0.0009 -0.0000 -0.0001  
Z 0.0016 -0.0009 0.0016 -0.0012 0.0000 0.0002  
AT. 144 H X -0.0018 -0.0010 0.0018 0.0013 -0.0000 -0.0002  
Y -0.0012 -0.0006 0.0012 0.0009 -0.0000 -0.0001  
Z -0.0016 -0.0009 0.0016 0.0012 -0.0000 -0.0002  
AT. 145 H X -0.0008 -0.0004 -0.0007 -0.0005 0.0000 -0.0001  
Y -0.0028 -0.0013 -0.0026 -0.0019 0.0002 -0.0002  
Z 0.0008 0.0004 0.0007 0.0005 -0.0001 0.0000  
AT. 146 H X 0.0008 -0.0004 -0.0007 0.0005 -0.0000 0.0001  
Y -0.0028 0.0013 0.0026 -0.0019 0.0002 -0.0002  
Z -0.0008 0.0004 0.0007 -0.0005 0.0001 -0.0000  
AT. 147 H X 0.0008 -0.0004 0.0007 -0.0005 0.0000 0.0001  
Y 0.0028 -0.0013 0.0026 -0.0019 0.0002 0.0002  
Z -0.0008 0.0004 -0.0007 0.0005 -0.0001 -0.0000  
AT. 148 H X -0.0008 -0.0004 0.0007 0.0005 -0.0000 -0.0001  
Y 0.0028 0.0013 -0.0026 -0.0019 0.0002 0.0002  
Z 0.0008 0.0004 -0.0007 -0.0005 0.0001 0.0000  
AT. 149 O X 0.0000 0.0000 0.0000 0.0000 0.0000 0.0000  
Y -0.0000 -0.0000 -0.0000 -0.0000 -0.0000 0.0000  
Z 0.0000 0.0000 0.0000 0.0000 -0.0000 -0.0000  
AT. 150 O X -0.0000 0.0000 0.0000 -0.0000 -0.0000 -0.0000  
Y -0.0000 0.0000 0.0000 -0.0000 -0.0000 0.0000  
Z -0.0000 0.0000 0.0000 -0.0000 0.0000 0.0000  
AT. 151 O X -0.0000 0.0000 -0.0000 0.0000 0.0000 -0.0000  
Y 0.0000 -0.0000 0.0000 -0.0000 -0.0000 -0.0000  
Z -0.0000 0.0000 -0.0000 0.0000 -0.0000 0.0000  
AT. 152 O X 0.0000 0.0000 -0.0000 -0.0000 -0.0000 0.0000  
Y 0.0000 0.0000 -0.0000 -0.0000 -0.0000 -0.0000  
Z 0.0000 0.0000 -0.0000 -0.0000 0.0000 -0.0000

AT.153 H X -0.0001 -0.0001 -0.0000 -0.0000 -0.0000 0.0000  
Y 0.0000 -0.0000 -0.0000 -0.0000 -0.0000 -0.0000  
Z -0.0001 -0.0001 -0.0000 -0.0001 -0.0001 -0.0000

AT.154 H X 0.0001 -0.0001 -0.0000 0.0000 0.0000 -0.0000  
Y 0.0000 0.0000 0.0000 -0.0000 -0.0000 -0.0000  
Z 0.0001 -0.0001 -0.0000 0.0001 0.0001 0.0000

AT.155 H X 0.0001 -0.0001 0.0000 -0.0000 -0.0000 -0.0000  
Y -0.0000 -0.0000 0.0000 -0.0000 -0.0000 0.0000  
Z 0.0001 -0.0001 0.0000 -0.0001 -0.0001 0.0000

AT.156 H X -0.0001 -0.0001 0.0000 0.0000 0.0000 0.0000  
Y -0.0000 0.0000 -0.0000 -0.0000 -0.0000 0.0000  
Z -0.0001 -0.0001 0.0000 0.0001 0.0001 -0.0000

AT.157 O X 0.0000 -0.0000 -0.0000 0.0000 -0.0000 -0.0000  
Y 0.0000 -0.0000 -0.0000 0.0000 -0.0000 -0.0000  
Z 0.0000 -0.0000 -0.0000 0.0000 -0.0000 -0.0000

AT.158 O X -0.0000 -0.0000 -0.0000 -0.0000 0.0000 0.0000  
Y 0.0000 0.0000 0.0000 0.0000 -0.0000 -0.0000  
Z -0.0000 -0.0000 -0.0000 -0.0000 0.0000 0.0000

AT.159 O X -0.0000 -0.0000 0.0000 0.0000 -0.0000 0.0000  
Y -0.0000 -0.0000 0.0000 0.0000 -0.0000 0.0000  
Z -0.0000 -0.0000 0.0000 0.0000 -0.0000 0.0000

AT.160 O X 0.0000 -0.0000 0.0000 -0.0000 0.0000 -0.0000  
Y -0.0000 0.0000 -0.0000 0.0000 -0.0000 0.0000  
Z 0.0000 -0.0000 0.0000 -0.0000 0.0000 -0.0000

AT.161 O X 0.0001 -0.0000 -0.0000 0.0001 -0.0001 -0.0001  
Y -0.0001 0.0000 0.0000 -0.0001 0.0001 0.0001  
Z 0.0000 -0.0000 -0.0000 0.0000 0.0001 0.0001

AT.162 O X -0.0001 -0.0000 -0.0000 -0.0001 0.0001 0.0001  
Y -0.0001 -0.0000 -0.0000 -0.0001 0.0001 0.0001  
Z -0.0000 -0.0000 -0.0000 -0.0000 -0.0001 -0.0001

AT.163 O X -0.0001 -0.0000 0.0000 0.0001 -0.0001 0.0001  
Y 0.0001 0.0000 -0.0000 -0.0001 0.0001 -0.0001



Z -0.0000 -0.0000 0.0000 0.0000 0.0001 -0.0001  
AT.164 O X 0.0001 -0.0000 0.0000 -0.0001 0.0001 -0.0001  
Y 0.0001 -0.0000 0.0000 -0.0001 0.0001 -0.0001  
Z 0.0000 -0.0000 0.0000 -0.0000 -0.0001 0.0001  
AT.165 H X -0.0011 0.0005 0.0003 -0.0012 0.0010 0.0010  
Y 0.0019 -0.0006 -0.0002 0.0022 -0.0023 -0.0023  
Z -0.0002 0.0002 0.0002 -0.0002 0.0001 0.0002  
AT.166 H X 0.0011 0.0005 0.0003 0.0012 -0.0010 -0.0010  
Y 0.0019 0.0006 0.0002 0.0022 -0.0023 -0.0023  
Z 0.0002 0.0002 0.0002 0.0002 -0.0001 -0.0002  
AT.167 H X 0.0011 0.0005 -0.0003 -0.0012 0.0010 -0.0010  
Y -0.0019 -0.0006 0.0002 0.0022 -0.0023 0.0023  
Z 0.0002 0.0002 -0.0002 -0.0002 0.0001 -0.0002  
AT.168 H X -0.0011 0.0005 -0.0003 0.0012 -0.0010 0.0010  
Y -0.0019 0.0006 -0.0002 0.0022 -0.0023 0.0023  
Z -0.0002 0.0002 -0.0002 0.0002 -0.0001 0.0002  
AT.169 O X -0.0000 0.0000 0.0000 -0.0000 -0.0000 0.0000  
Y -0.0000 0.0000 0.0000 -0.0000 -0.0000 0.0000  
Z -0.0000 0.0000 0.0000 0.0000 -0.0000 0.0000  
AT.170 O X 0.0000 0.0000 0.0000 0.0000 0.0000 -0.0000  
Y -0.0000 -0.0000 -0.0000 -0.0000 -0.0000 0.0000  
Z 0.0000 0.0000 0.0000 -0.0000 0.0000 -0.0000  
AT.171 O X 0.0000 0.0000 -0.0000 -0.0000 -0.0000 -0.0000  
Y 0.0000 0.0000 -0.0000 -0.0000 -0.0000 -0.0000  
Z 0.0000 0.0000 -0.0000 0.0000 -0.0000 -0.0000  
AT.172 O X -0.0000 0.0000 -0.0000 0.0000 0.0000 0.0000  
Y 0.0000 -0.0000 0.0000 -0.0000 -0.0000 -0.0000  
Z -0.0000 0.0000 -0.0000 -0.0000 0.0000 0.0000  
AT.173 H X 0.0000 -0.0000 -0.0001 0.0000 0.0000 -0.0000  
Y 0.0002 -0.0001 -0.0003 0.0000 0.0001 -0.0000  
Z -0.0000 -0.0000 -0.0001 -0.0000 0.0000 -0.0000  
AT.174 H X -0.0000 -0.0000 -0.0001 -0.0000 -0.0000 0.0000

|         |     |         |         |         |         |         |         |
|---------|-----|---------|---------|---------|---------|---------|---------|
|         | Y   | 0.0002  | 0.0001  | 0.0003  | 0.0000  | 0.0001  | -0.0000 |
|         | Z   | 0.0000  | -0.0000 | -0.0001 | 0.0000  | -0.0000 | 0.0000  |
| AT. 175 | H X | -0.0000 | -0.0000 | 0.0001  | 0.0000  | 0.0000  | 0.0000  |
|         | Y   | -0.0002 | -0.0001 | 0.0003  | 0.0000  | 0.0001  | 0.0000  |
|         | Z   | 0.0000  | -0.0000 | 0.0001  | -0.0000 | 0.0000  | 0.0000  |
| AT. 176 | H X | 0.0000  | -0.0000 | 0.0001  | -0.0000 | -0.0000 | -0.0000 |
|         | Y   | -0.0002 | 0.0001  | -0.0003 | 0.0000  | 0.0001  | 0.0000  |
|         | Z   | -0.0000 | -0.0000 | 0.0001  | 0.0000  | -0.0000 | -0.0000 |

FREQ(CM\*\*-1) 3227.15 3227.18 3247.76 3247.80 3247.94 3247.99

|       |     |         |         |         |         |         |         |
|-------|-----|---------|---------|---------|---------|---------|---------|
| AT. 1 | I X | 0.0000  | -0.0000 | -0.0000 | -0.0000 | 0.0000  | 0.0000  |
|       | Y   | 0.0000  | 0.0000  | -0.0000 | -0.0000 | 0.0000  | 0.0000  |
|       | Z   | -0.0000 | -0.0000 | -0.0000 | -0.0000 | 0.0000  | 0.0000  |
| AT. 2 | I X | 0.0000  | -0.0000 | -0.0000 | -0.0000 | -0.0000 | -0.0000 |
|       | Y   | -0.0000 | -0.0000 | 0.0000  | 0.0000  | 0.0000  | 0.0000  |
|       | Z   | -0.0000 | -0.0000 | -0.0000 | -0.0000 | -0.0000 | -0.0000 |
| AT. 3 | I X | 0.0000  | 0.0000  | 0.0000  | -0.0000 | 0.0000  | -0.0000 |
|       | Y   | 0.0000  | -0.0000 | 0.0000  | -0.0000 | 0.0000  | -0.0000 |
|       | Z   | -0.0000 | 0.0000  | 0.0000  | -0.0000 | 0.0000  | -0.0000 |
| AT. 4 | I X | 0.0000  | 0.0000  | 0.0000  | -0.0000 | -0.0000 | 0.0000  |
|       | Y   | -0.0000 | 0.0000  | -0.0000 | 0.0000  | 0.0000  | -0.0000 |
|       | Z   | -0.0000 | 0.0000  | 0.0000  | -0.0000 | -0.0000 | 0.0000  |
| AT. 5 | I X | 0.0000  | 0.0000  | -0.0000 | 0.0000  | 0.0000  | -0.0000 |
|       | Y   | 0.0000  | -0.0000 | 0.0000  | -0.0000 | -0.0000 | 0.0000  |
|       | Z   | 0.0000  | -0.0000 | -0.0000 | 0.0000  | 0.0000  | -0.0000 |
| AT. 6 | I X | 0.0000  | 0.0000  | -0.0000 | 0.0000  | -0.0000 | 0.0000  |
|       | Y   | -0.0000 | 0.0000  | -0.0000 | 0.0000  | -0.0000 | 0.0000  |
|       | Z   | 0.0000  | -0.0000 | -0.0000 | 0.0000  | -0.0000 | 0.0000  |
| AT. 7 | I X | 0.0000  | -0.0000 | 0.0000  | 0.0000  | 0.0000  | 0.0000  |
|       | Y   | 0.0000  | 0.0000  | -0.0000 | -0.0000 | -0.0000 | -0.0000 |
|       | Z   | 0.0000  | 0.0000  | 0.0000  | 0.0000  | 0.0000  | 0.0000  |

AT. 8 I X 0.0000 -0.0000 0.0000 0.0000 -0.0000 -0.0000  
Y -0.0000 -0.0000 0.0000 0.0000 -0.0000 -0.0000  
Z 0.0000 0.0000 0.0000 0.0000 -0.0000 -0.0000

AT. 9 N X 0.0000 0.0000 -0.0000 -0.0000 0.0000 0.0000  
Y 0.0000 0.0000 -0.0000 -0.0000 0.0000 0.0000  
Z 0.0000 0.0000 0.0000 0.0000 -0.0000 -0.0000

AT. 10 N X 0.0000 0.0000 -0.0000 -0.0000 -0.0000 -0.0000  
Y -0.0000 -0.0000 0.0000 0.0000 0.0000 0.0000  
Z 0.0000 0.0000 0.0000 0.0000 0.0000 0.0000

AT. 11 N X 0.0000 -0.0000 0.0000 -0.0000 0.0000 -0.0000  
Y 0.0000 -0.0000 0.0000 -0.0000 0.0000 -0.0000  
Z 0.0000 -0.0000 -0.0000 0.0000 -0.0000 0.0000

AT. 12 N X 0.0000 -0.0000 0.0000 -0.0000 -0.0000 0.0000  
Y -0.0000 0.0000 -0.0000 0.0000 0.0000 -0.0000  
Z 0.0000 -0.0000 -0.0000 0.0000 0.0000 -0.0000

AT. 13 N X 0.0000 0.0000 0.0000 0.0000 -0.0000 -0.0000  
Y -0.0000 -0.0000 0.0000 -0.0000 -0.0000 0.0000  
Z 0.0000 0.0000 0.0000 -0.0000 -0.0000 0.0000

AT. 14 N X 0.0000 0.0000 0.0000 0.0000 0.0000 0.0000  
Y 0.0000 0.0000 -0.0000 0.0000 -0.0000 0.0000  
Z 0.0000 0.0000 0.0000 -0.0000 0.0000 -0.0000

AT. 15 N X 0.0000 -0.0000 -0.0000 0.0000 -0.0000 0.0000  
Y -0.0000 0.0000 -0.0000 -0.0000 -0.0000 -0.0000  
Z 0.0000 -0.0000 -0.0000 -0.0000 -0.0000 -0.0000

AT. 16 N X 0.0000 -0.0000 -0.0000 0.0000 0.0000 -0.0000  
Y 0.0000 -0.0000 0.0000 0.0000 -0.0000 -0.0000  
Z 0.0000 -0.0000 -0.0000 -0.0000 0.0000 0.0000

AT. 17 O X 0.0000 -0.0000 -0.0000 -0.0000 0.0000 0.0000  
Y -0.0000 0.0000 -0.0000 -0.0000 0.0000 0.0000  
Z -0.0000 -0.0000 -0.0001 -0.0001 0.0001 0.0001

AT. 18 O X 0.0000 -0.0000 -0.0000 -0.0000 -0.0000 -0.0000  
Y 0.0000 -0.0000 0.0000 0.0000 0.0000 0.0000

Z -0.0000 -0.0000 -0.0001 -0.0001 -0.0001 -0.0001  
AT. 19 O X 0.0000 0.0000 0.0000 -0.0000 0.0000 -0.0000  
Y -0.0000 -0.0000 0.0000 -0.0000 0.0000 -0.0000  
Z -0.0000 0.0000 0.0001 -0.0001 0.0001 -0.0001  
AT. 20 O X 0.0000 0.0000 0.0000 -0.0000 -0.0000 0.0000  
Y 0.0000 0.0000 -0.0000 0.0000 0.0000 -0.0000  
Z -0.0000 0.0000 0.0001 -0.0001 -0.0001 0.0001  
AT. 21 O X -0.0000 -0.0000 0.0000 0.0000 -0.0000 -0.0000  
Y -0.0000 0.0000 -0.0000 0.0000 0.0000 0.0000  
Z -0.0000 -0.0000 -0.0000 -0.0000 0.0000 0.0000  
AT. 22 O X -0.0000 -0.0000 0.0000 0.0000 0.0000 0.0000  
Y 0.0000 -0.0000 0.0000 -0.0000 0.0000 0.0000  
Z -0.0000 -0.0000 -0.0000 -0.0000 -0.0000 -0.0000  
AT. 23 O X -0.0000 0.0000 -0.0000 0.0000 -0.0000 0.0000  
Y -0.0000 -0.0000 0.0000 0.0000 0.0000 -0.0000  
Z -0.0000 0.0000 0.0000 -0.0000 0.0000 -0.0000  
AT. 24 O X -0.0000 0.0000 -0.0000 0.0000 0.0000 -0.0000  
Y 0.0000 0.0000 -0.0000 -0.0000 0.0000 -0.0000  
Z -0.0000 0.0000 0.0000 -0.0000 -0.0000 0.0000  
AT. 25 C X -0.0000 -0.0000 0.0044 0.0044 -0.0044 -0.0044  
Y -0.0000 -0.0000 0.0066 0.0066 -0.0066 -0.0066  
Z -0.0000 -0.0000 0.0035 0.0035 -0.0035 -0.0035  
AT. 26 C X -0.0000 -0.0000 0.0044 0.0044 0.0044 0.0044  
Y 0.0000 0.0000 -0.0066 -0.0066 -0.0066 -0.0066  
Z -0.0000 -0.0000 0.0035 0.0035 0.0035 0.0035  
AT. 27 C X -0.0000 0.0000 -0.0044 0.0044 -0.0044 0.0044  
Y -0.0000 0.0000 -0.0066 0.0066 -0.0066 0.0066  
Z -0.0000 0.0000 -0.0035 0.0035 -0.0035 0.0035  
AT. 28 C X -0.0000 0.0000 -0.0044 0.0044 0.0044 -0.0044  
Y 0.0000 -0.0000 0.0066 -0.0066 -0.0066 0.0066  
Z -0.0000 0.0000 -0.0035 0.0035 0.0035 -0.0035  
AT. 29 H X 0.0001 0.0001 -0.0385 -0.0384 0.0385 0.0386

Y 0.0000 0.0000 -0.0038 -0.0038 0.0038 0.0038  
Z 0.0001 0.0001 -0.0253 -0.0253 0.0254 0.0254  
AT. 30 H X 0.0001 0.0001 -0.0385 -0.0384 -0.0385 -0.0386  
Y -0.0000 -0.0000 0.0038 0.0038 0.0038 0.0038  
Z 0.0001 0.0001 -0.0253 -0.0253 -0.0254 -0.0254  
AT. 31 H X 0.0001 -0.0001 0.0385 -0.0384 0.0385 -0.0386  
Y 0.0000 -0.0000 0.0038 -0.0038 0.0038 -0.0038  
Z 0.0001 -0.0001 0.0253 -0.0253 0.0254 -0.0254  
AT. 32 H X 0.0001 -0.0001 0.0385 -0.0384 -0.0385 0.0386  
Y -0.0000 0.0000 -0.0038 0.0038 0.0038 -0.0038  
Z 0.0001 -0.0001 0.0253 -0.0253 -0.0254 0.0254  
AT. 33 H X 0.0001 0.0001 -0.0135 -0.0135 0.0135 0.0135  
Y 0.0004 0.0005 -0.0752 -0.0752 0.0751 0.0751  
Z 0.0001 0.0001 -0.0170 -0.0170 0.0170 0.0170  
AT. 34 H X 0.0001 0.0001 -0.0135 -0.0135 -0.0135 -0.0135  
Y -0.0004 -0.0005 0.0752 0.0752 0.0751 0.0751  
Z 0.0001 0.0001 -0.0170 -0.0170 -0.0170 -0.0170  
AT. 35 H X 0.0001 -0.0001 0.0135 -0.0135 0.0135 -0.0135  
Y 0.0004 -0.0005 0.0752 -0.0752 0.0751 -0.0751  
Z 0.0001 -0.0001 0.0170 -0.0170 0.0170 -0.0170  
AT. 36 H X 0.0001 -0.0001 0.0135 -0.0135 -0.0135 0.0135  
Y -0.0004 0.0005 -0.0752 0.0752 0.0751 -0.0751  
Z 0.0001 -0.0001 0.0170 -0.0170 -0.0170 0.0170  
AT. 37 C X 0.0000 0.0000 0.0000 0.0000 -0.0000 -0.0000  
Y 0.0000 -0.0000 0.0001 0.0001 -0.0001 -0.0001  
Z 0.0000 0.0000 0.0001 0.0001 -0.0001 -0.0001  
AT. 38 C X 0.0000 0.0000 0.0000 0.0000 0.0000 0.0000  
Y -0.0000 0.0000 -0.0001 -0.0001 -0.0001 -0.0001  
Z 0.0000 0.0000 0.0001 0.0001 0.0001 0.0001  
AT. 39 C X 0.0000 -0.0000 -0.0000 0.0000 -0.0000 0.0000  
Y 0.0000 0.0000 -0.0001 0.0001 -0.0001 0.0001  
Z 0.0000 -0.0000 -0.0001 0.0001 -0.0001 0.0001

AT. 40 C X 0.0000 -0.0000 -0.0000 0.0000 0.0000 -0.0000  
Y -0.0000 -0.0000 0.0001 -0.0001 -0.0001 0.0001  
Z 0.0000 -0.0000 -0.0001 0.0001 0.0001 -0.0001

AT. 41 C X 0.0000 0.0000 0.0001 0.0001 -0.0001 -0.0001  
Y -0.0000 -0.0000 -0.0004 -0.0004 0.0004 0.0004  
Z 0.0001 0.0001 0.0003 0.0003 -0.0003 -0.0003

AT. 42 C X 0.0000 0.0000 0.0001 0.0001 0.0001 0.0001  
Y 0.0000 0.0000 0.0004 0.0004 0.0004 0.0004  
Z 0.0001 0.0001 0.0003 0.0003 0.0003 0.0003

AT. 43 C X 0.0000 -0.0000 -0.0001 0.0001 -0.0001 0.0001  
Y -0.0000 0.0000 0.0004 -0.0004 0.0004 -0.0004  
Z 0.0001 -0.0001 -0.0003 0.0003 -0.0003 0.0003

AT. 44 C X 0.0000 -0.0000 -0.0001 0.0001 0.0001 -0.0001  
Y 0.0000 -0.0000 -0.0004 0.0004 0.0004 -0.0004  
Z 0.0001 -0.0001 -0.0003 0.0003 0.0003 -0.0003

AT. 45 H X -0.0000 -0.0001 -0.0007 -0.0007 0.0007 0.0007  
Y 0.0005 0.0006 0.0037 0.0037 -0.0038 -0.0038  
Z -0.0005 -0.0006 -0.0044 -0.0044 0.0044 0.0044

AT. 46 H X -0.0000 -0.0001 -0.0007 -0.0007 -0.0007 -0.0007  
Y -0.0005 -0.0006 -0.0037 -0.0037 -0.0038 -0.0038  
Z -0.0005 -0.0006 -0.0044 -0.0044 -0.0044 -0.0044

AT. 47 H X -0.0000 0.0001 0.0007 -0.0007 0.0007 -0.0007  
Y 0.0005 -0.0006 -0.0037 0.0037 -0.0038 0.0038  
Z -0.0005 0.0006 0.0044 -0.0044 0.0044 -0.0044

AT. 48 H X -0.0000 0.0001 0.0007 -0.0007 -0.0007 0.0007  
Y -0.0005 0.0006 0.0037 -0.0037 -0.0038 0.0038  
Z -0.0005 0.0006 0.0044 -0.0044 -0.0044 0.0044

AT. 49 H X 0.0002 0.0002 -0.0008 -0.0008 0.0008 0.0008  
Y -0.0001 -0.0001 0.0008 0.0007 -0.0008 -0.0007  
Z 0.0000 0.0000 0.0003 0.0003 -0.0003 -0.0003

AT. 50 H X 0.0002 0.0002 -0.0008 -0.0008 -0.0008 -0.0008  
Y 0.0001 0.0001 -0.0008 -0.0007 -0.0008 -0.0007

Z 0.0000 0.0000 0.0003 0.0003 0.0003 0.0003  
AT. 51 H X 0.0002 -0.0002 0.0008 -0.0008 0.0008 -0.0008  
Y -0.0001 0.0001 -0.0008 0.0007 -0.0008 0.0007  
Z 0.0000 -0.0000 -0.0003 0.0003 -0.0003 0.0003  
AT. 52 H X 0.0002 -0.0002 0.0008 -0.0008 -0.0008 0.0008  
Y 0.0001 -0.0001 0.0008 -0.0007 -0.0008 0.0007  
Z 0.0000 -0.0000 -0.0003 0.0003 0.0003 -0.0003  
AT. 53 C X -0.0001 -0.0001 -0.0000 -0.0000 0.0000 0.0000  
Y -0.0000 -0.0000 -0.0000 -0.0000 -0.0000 0.0000  
Z 0.0001 0.0001 -0.0000 -0.0000 0.0000 0.0000  
AT. 54 C X -0.0001 -0.0001 -0.0000 -0.0000 -0.0000 -0.0000  
Y 0.0000 0.0000 0.0000 0.0000 -0.0000 0.0000  
Z 0.0001 0.0001 -0.0000 -0.0000 -0.0000 -0.0000  
AT. 55 C X -0.0001 0.0001 0.0000 -0.0000 0.0000 -0.0000  
Y -0.0000 0.0000 0.0000 -0.0000 -0.0000 -0.0000  
Z 0.0001 -0.0001 0.0000 -0.0000 0.0000 -0.0000  
AT. 56 C X -0.0001 0.0001 0.0000 -0.0000 -0.0000 0.0000  
Y 0.0000 -0.0000 -0.0000 0.0000 -0.0000 -0.0000  
Z 0.0001 -0.0001 0.0000 -0.0000 -0.0000 0.0000  
AT. 57 C X -0.0083 -0.0083 -0.0000 -0.0000 0.0000 0.0000  
Y -0.0010 -0.0010 -0.0000 -0.0000 0.0000 0.0000  
Z 0.0010 0.0010 0.0000 0.0000 -0.0000 -0.0000  
AT. 58 C X -0.0083 -0.0083 -0.0000 -0.0000 -0.0000 -0.0000  
Y 0.0010 0.0010 0.0000 0.0000 0.0000 0.0000  
Z 0.0010 0.0010 0.0000 0.0000 0.0000 0.0000  
AT. 59 C X -0.0083 0.0083 0.0000 -0.0000 0.0000 -0.0000  
Y -0.0010 0.0010 0.0000 -0.0000 0.0000 -0.0000  
Z 0.0010 -0.0010 -0.0000 0.0000 -0.0000 0.0000  
AT. 60 C X -0.0083 0.0083 0.0000 -0.0000 -0.0000 0.0000  
Y 0.0010 -0.0010 -0.0000 0.0000 0.0000 -0.0000  
Z 0.0010 -0.0010 -0.0000 0.0000 0.0000 -0.0000  
AT. 61 H X 0.0156 0.0156 0.0001 0.0000 0.0000 -0.0000

Y -0.0225 -0.0225 -0.0001 -0.0000 0.0000 0.0001  
Z -0.0034 -0.0034 -0.0000 -0.0000 0.0000 0.0000  
AT. 62 H X 0.0156 0.0156 0.0001 0.0000 -0.0000 0.0000  
Y 0.0225 0.0225 0.0001 0.0000 0.0000 0.0001  
Z -0.0034 -0.0034 -0.0000 -0.0000 -0.0000 -0.0000  
AT. 63 H X 0.0156 -0.0156 -0.0001 0.0000 0.0000 0.0000  
Y -0.0225 0.0225 0.0001 -0.0000 0.0000 -0.0001  
Z -0.0034 0.0034 0.0000 -0.0000 0.0000 -0.0000  
AT. 64 H X 0.0156 -0.0156 -0.0001 0.0000 -0.0000 -0.0000  
Y 0.0225 -0.0225 -0.0001 0.0000 0.0000 -0.0001  
Z -0.0034 0.0034 0.0000 -0.0000 -0.0000 0.0000  
AT. 65 H X 0.0822 0.0822 0.0004 0.0003 -0.0002 -0.0003  
Y 0.0268 0.0268 0.0001 0.0001 -0.0001 -0.0001  
Z 0.0000 0.0000 -0.0000 -0.0000 -0.0000 0.0000  
AT. 66 H X 0.0822 0.0822 0.0004 0.0003 0.0002 0.0003  
Y -0.0268 -0.0268 -0.0001 -0.0001 -0.0001 -0.0001  
Z 0.0000 0.0000 -0.0000 -0.0000 0.0000 -0.0000  
AT. 67 H X 0.0822 -0.0822 -0.0004 0.0003 -0.0002 0.0003  
Y 0.0268 -0.0268 -0.0001 0.0001 -0.0001 0.0001  
Z 0.0000 -0.0000 0.0000 -0.0000 -0.0000 -0.0000  
AT. 68 H X 0.0822 -0.0822 -0.0004 0.0003 0.0002 -0.0003  
Y -0.0268 0.0268 0.0001 -0.0001 -0.0001 0.0001  
Z 0.0000 -0.0000 0.0000 -0.0000 0.0000 0.0000  
AT. 69 H X 0.0009 0.0009 -0.0000 0.0000 -0.0000 -0.0000  
Y 0.0083 0.0084 0.0001 0.0002 -0.0001 -0.0001  
Z -0.0095 -0.0096 -0.0001 -0.0002 0.0001 0.0002  
AT. 70 H X 0.0009 0.0009 -0.0000 0.0000 0.0000 0.0000  
Y -0.0083 -0.0084 -0.0001 -0.0002 -0.0001 -0.0001  
Z -0.0095 -0.0096 -0.0001 -0.0002 -0.0001 -0.0002  
AT. 71 H X 0.0009 -0.0009 0.0000 0.0000 -0.0000 0.0000  
Y 0.0083 -0.0084 -0.0001 0.0002 -0.0001 0.0001  
Z -0.0095 0.0096 0.0001 -0.0002 0.0001 -0.0002



AT. 72 H X 0.0009 -0.0009 0.0000 0.0000 0.0000 -0.0000  
Y -0.0083 0.0084 0.0001 -0.0002 -0.0001 0.0001  
Z -0.0095 0.0096 0.0001 -0.0002 -0.0001 0.0002

AT. 73 C X -0.0000 -0.0000 -0.0000 -0.0000 0.0000 0.0000  
Y 0.0000 0.0000 0.0000 0.0000 -0.0000 -0.0000  
Z -0.0000 -0.0000 0.0000 0.0000 -0.0000 -0.0000

AT. 74 C X -0.0000 -0.0000 -0.0000 -0.0000 -0.0000 -0.0000  
Y -0.0000 -0.0000 -0.0000 -0.0000 -0.0000 -0.0000  
Z -0.0000 -0.0000 0.0000 0.0000 0.0000 0.0000

AT. 75 C X -0.0000 0.0000 0.0000 -0.0000 0.0000 -0.0000  
Y 0.0000 -0.0000 -0.0000 0.0000 -0.0000 0.0000  
Z -0.0000 0.0000 -0.0000 0.0000 -0.0000 0.0000

AT. 76 C X -0.0000 0.0000 0.0000 -0.0000 -0.0000 0.0000  
Y -0.0000 0.0000 0.0000 -0.0000 -0.0000 0.0000  
Z -0.0000 0.0000 -0.0000 0.0000 0.0000 -0.0000

AT. 77 C X -0.0000 -0.0000 0.0000 -0.0000 0.0000 0.0000  
Y 0.0000 0.0000 0.0000 0.0000 -0.0000 -0.0000  
Z 0.0000 0.0000 0.0000 0.0000 -0.0000 -0.0000

AT. 78 C X -0.0000 -0.0000 0.0000 -0.0000 -0.0000 -0.0000  
Y -0.0000 -0.0000 -0.0000 -0.0000 -0.0000 -0.0000  
Z 0.0000 0.0000 0.0000 0.0000 0.0000 0.0000

AT. 79 C X -0.0000 0.0000 -0.0000 -0.0000 0.0000 -0.0000  
Y 0.0000 -0.0000 -0.0000 0.0000 -0.0000 0.0000  
Z 0.0000 -0.0000 -0.0000 0.0000 -0.0000 0.0000

AT. 80 C X -0.0000 0.0000 -0.0000 -0.0000 -0.0000 0.0000  
Y -0.0000 0.0000 0.0000 -0.0000 -0.0000 0.0000  
Z 0.0000 -0.0000 -0.0000 0.0000 0.0000 -0.0000

AT. 81 H X 0.0000 0.0001 0.0000 0.0001 -0.0001 -0.0001  
Y -0.0000 -0.0001 0.0000 -0.0001 0.0000 0.0001  
Z -0.0000 -0.0000 0.0000 -0.0000 0.0000 0.0000

AT. 82 H X 0.0000 0.0001 0.0000 0.0001 0.0001 0.0001  
Y 0.0000 0.0001 -0.0000 0.0001 0.0000 0.0001

Z -0.0000 -0.0000 0.0000 -0.0000 -0.0000 -0.0000  
AT. 83 H X 0.0000 -0.0001 -0.0000 0.0001 -0.0001 0.0001  
Y -0.0000 0.0001 -0.0000 -0.0001 0.0000 -0.0001  
Z -0.0000 0.0000 -0.0000 -0.0000 0.0000 -0.0000  
AT. 84 H X 0.0000 -0.0001 -0.0000 0.0001 0.0001 -0.0001  
Y 0.0000 -0.0001 0.0000 0.0001 0.0000 -0.0001  
Z -0.0000 0.0000 -0.0000 -0.0000 -0.0000 0.0000  
AT. 85 H X -0.0000 -0.0001 -0.0000 -0.0000 0.0000 0.0001  
Y -0.0001 -0.0002 -0.0001 -0.0001 0.0001 0.0003  
Z -0.0001 -0.0003 -0.0002 -0.0002 0.0002 0.0004  
AT. 86 H X -0.0000 -0.0001 -0.0000 -0.0000 -0.0000 -0.0001  
Y 0.0001 0.0002 0.0001 0.0001 0.0001 0.0003  
Z -0.0001 -0.0003 -0.0002 -0.0002 -0.0002 -0.0004  
AT. 87 H X -0.0000 0.0001 0.0000 -0.0000 0.0000 -0.0001  
Y -0.0001 0.0002 0.0001 -0.0001 0.0001 -0.0003  
Z -0.0001 0.0003 0.0002 -0.0002 0.0002 -0.0004  
AT. 88 H X -0.0000 0.0001 0.0000 -0.0000 -0.0000 0.0001  
Y 0.0001 -0.0002 -0.0001 0.0001 0.0001 -0.0003  
Z -0.0001 0.0003 0.0002 -0.0002 -0.0002 0.0004  
AT. 89 C X -0.0000 -0.0000 0.0000 0.0000 -0.0000 -0.0000  
Y -0.0000 -0.0000 -0.0000 -0.0000 0.0000 -0.0000  
Z 0.0000 0.0000 -0.0000 -0.0000 0.0000 -0.0000  
AT. 90 C X -0.0000 -0.0000 0.0000 0.0000 0.0000 0.0000  
Y 0.0000 0.0000 0.0000 0.0000 0.0000 -0.0000  
Z 0.0000 0.0000 -0.0000 -0.0000 -0.0000 0.0000  
AT. 91 C X -0.0000 0.0000 -0.0000 0.0000 -0.0000 0.0000  
Y -0.0000 0.0000 0.0000 -0.0000 0.0000 0.0000  
Z 0.0000 -0.0000 0.0000 -0.0000 0.0000 0.0000  
AT. 92 C X -0.0000 0.0000 -0.0000 0.0000 0.0000 -0.0000  
Y 0.0000 -0.0000 -0.0000 0.0000 0.0000 0.0000  
Z 0.0000 -0.0000 0.0000 -0.0000 -0.0000 -0.0000  
AT. 93 C X 0.0001 -0.0002 0.0000 -0.0000 0.0000 -0.0000

Y 0.0000 -0.0000 -0.0000 0.0000 -0.0000 -0.0000  
Z -0.0000 0.0000 0.0000 -0.0000 -0.0000 -0.0000  
AT. 94 C X 0.0001 -0.0002 0.0000 -0.0000 -0.0000 0.0000  
Y -0.0000 0.0000 0.0000 -0.0000 -0.0000 -0.0000  
Z -0.0000 0.0000 0.0000 -0.0000 0.0000 0.0000  
AT. 95 C X 0.0001 0.0002 -0.0000 -0.0000 0.0000 0.0000  
Y 0.0000 0.0000 0.0000 0.0000 -0.0000 0.0000  
Z -0.0000 -0.0000 -0.0000 -0.0000 -0.0000 0.0000  
AT. 96 C X 0.0001 0.0002 -0.0000 -0.0000 -0.0000 -0.0000  
Y -0.0000 -0.0000 -0.0000 -0.0000 -0.0000 0.0000  
Z -0.0000 -0.0000 -0.0000 -0.0000 0.0000 -0.0000  
AT. 97 H X -0.0012 0.0013 -0.0000 0.0000 -0.0002 0.0002  
Y -0.0007 0.0008 -0.0000 -0.0000 -0.0001 0.0001  
Z 0.0003 -0.0003 0.0000 -0.0000 0.0000 -0.0000  
AT. 98 H X -0.0012 0.0013 -0.0000 0.0000 0.0002 -0.0002  
Y 0.0007 -0.0008 0.0000 0.0000 -0.0001 0.0001  
Z 0.0003 -0.0003 0.0000 -0.0000 -0.0000 0.0000  
AT. 99 H X -0.0012 -0.0013 0.0000 0.0000 -0.0002 -0.0002  
Y -0.0007 -0.0008 0.0000 -0.0000 -0.0001 -0.0001  
Z 0.0003 0.0003 -0.0000 -0.0000 0.0000 0.0000  
AT. 100 H X -0.0012 -0.0013 0.0000 0.0000 0.0002 0.0002  
Y 0.0007 0.0008 -0.0000 0.0000 -0.0001 -0.0001  
Z 0.0003 0.0003 -0.0000 -0.0000 -0.0000 -0.0000  
AT. 101 H X -0.0005 0.0006 -0.0001 0.0000 -0.0002 0.0001  
Y 0.0005 -0.0006 0.0001 -0.0001 0.0002 -0.0001  
Z 0.0001 -0.0001 0.0000 -0.0000 0.0000 -0.0000  
AT. 102 H X -0.0005 0.0006 -0.0001 0.0000 0.0002 -0.0001  
Y -0.0005 0.0006 -0.0001 0.0001 0.0002 -0.0001  
Z 0.0001 -0.0001 0.0000 -0.0000 -0.0000 0.0000  
AT. 103 H X -0.0005 -0.0006 0.0001 0.0000 -0.0002 -0.0001  
Y 0.0005 0.0006 -0.0001 -0.0001 0.0002 0.0001  
Z 0.0001 0.0001 -0.0000 -0.0000 0.0000 0.0000

AT.104 H X -0.0005 -0.0006 0.0001 0.0000 0.0002 0.0001  
Y -0.0005 -0.0006 0.0001 0.0001 0.0002 0.0001  
Z 0.0001 0.0001 -0.0000 -0.0000 -0.0000 -0.0000

AT.105 H X 0.0000 -0.0000 0.0000 -0.0000 0.0000 0.0000  
Y 0.0000 0.0000 -0.0000 0.0000 -0.0000 0.0001  
Z -0.0000 0.0000 -0.0000 0.0000 -0.0000 0.0001

AT.106 H X 0.0000 -0.0000 0.0000 -0.0000 -0.0000 -0.0000  
Y -0.0000 -0.0000 0.0000 -0.0000 -0.0000 0.0001  
Z -0.0000 0.0000 -0.0000 0.0000 0.0000 -0.0001

AT.107 H X 0.0000 0.0000 -0.0000 -0.0000 0.0000 -0.0000  
Y 0.0000 -0.0000 0.0000 0.0000 -0.0000 -0.0001  
Z -0.0000 -0.0000 0.0000 0.0000 -0.0000 -0.0001

AT.108 H X 0.0000 0.0000 -0.0000 -0.0000 -0.0000 0.0000  
Y -0.0000 0.0000 -0.0000 -0.0000 -0.0000 -0.0001  
Z -0.0000 -0.0000 0.0000 0.0000 0.0000 0.0001

AT.109 C X -0.0001 -0.0001 -0.0000 -0.0000 0.0000 0.0000  
Y -0.0002 -0.0002 -0.0000 -0.0000 0.0000 0.0000  
Z 0.0002 0.0002 0.0000 0.0000 -0.0000 -0.0000

AT.110 C X -0.0001 -0.0001 -0.0000 -0.0000 -0.0000 -0.0000  
Y 0.0002 0.0002 0.0000 0.0000 0.0000 0.0000  
Z 0.0002 0.0002 0.0000 0.0000 0.0000 0.0000

AT.111 C X -0.0001 0.0001 0.0000 -0.0000 0.0000 -0.0000  
Y -0.0002 0.0002 0.0000 -0.0000 0.0000 -0.0000  
Z 0.0002 -0.0002 -0.0000 0.0000 -0.0000 0.0000

AT.112 C X -0.0001 0.0001 0.0000 -0.0000 -0.0000 0.0000  
Y 0.0002 -0.0002 -0.0000 0.0000 0.0000 -0.0000  
Z 0.0002 -0.0002 -0.0000 0.0000 0.0000 -0.0000

AT.113 H X 0.0015 0.0015 0.0002 0.0001 -0.0001 -0.0001  
Y 0.0007 0.0008 0.0001 0.0001 -0.0001 -0.0001  
Z -0.0002 -0.0002 -0.0000 -0.0000 0.0000 0.0000

AT.114 H X 0.0015 0.0015 0.0002 0.0001 0.0001 0.0001  
Y -0.0007 -0.0008 -0.0001 -0.0001 -0.0001 -0.0001

Z -0.0002 -0.0002 -0.0000 -0.0000 -0.0000 -0.0000  
AT. 115 H X 0.0015 -0.0015 -0.0002 0.0001 -0.0001 0.0001  
Y 0.0007 -0.0008 -0.0001 0.0001 -0.0001 0.0001  
Z -0.0002 0.0002 0.0000 -0.0000 0.0000 -0.0000  
AT. 116 H X 0.0015 -0.0015 -0.0002 0.0001 0.0001 -0.0001  
Y -0.0007 0.0008 0.0001 -0.0001 -0.0001 0.0001  
Z -0.0002 0.0002 0.0000 -0.0000 -0.0000 0.0000  
AT. 117 H X -0.0005 -0.0005 -0.0000 -0.0001 0.0001 0.0001  
Y 0.0022 0.0023 0.0003 0.0004 -0.0005 -0.0004  
Z -0.0024 -0.0025 -0.0004 -0.0004 0.0005 0.0005  
AT. 118 H X -0.0005 -0.0005 -0.0000 -0.0001 -0.0001 -0.0001  
Y -0.0022 -0.0023 -0.0003 -0.0004 -0.0005 -0.0004  
Z -0.0024 -0.0025 -0.0004 -0.0004 -0.0005 -0.0005  
AT. 119 H X -0.0005 0.0005 0.0000 -0.0001 0.0001 -0.0001  
Y 0.0022 -0.0023 -0.0003 0.0004 -0.0005 0.0004  
Z -0.0024 0.0025 0.0004 -0.0004 0.0005 -0.0005  
AT. 120 H X -0.0005 0.0005 0.0000 -0.0001 -0.0001 0.0001  
Y -0.0022 0.0023 0.0003 -0.0004 -0.0005 0.0004  
Z -0.0024 0.0025 0.0004 -0.0004 -0.0005 0.0005  
AT. 121 C X 0.0000 -0.0000 -0.0000 0.0000 -0.0000 0.0000  
Y 0.0000 -0.0000 -0.0000 0.0000 -0.0000 -0.0000  
Z -0.0000 -0.0000 0.0000 0.0000 -0.0000 -0.0000  
AT. 122 C X 0.0000 -0.0000 -0.0000 0.0000 0.0000 -0.0000  
Y -0.0000 0.0000 0.0000 -0.0000 -0.0000 -0.0000  
Z -0.0000 -0.0000 0.0000 0.0000 0.0000 0.0000  
AT. 123 C X 0.0000 0.0000 0.0000 0.0000 -0.0000 -0.0000  
Y 0.0000 0.0000 0.0000 0.0000 -0.0000 0.0000  
Z -0.0000 0.0000 -0.0000 0.0000 -0.0000 0.0000  
AT. 124 C X 0.0000 0.0000 0.0000 0.0000 0.0000 0.0000  
Y -0.0000 -0.0000 -0.0000 -0.0000 -0.0000 0.0000  
Z -0.0000 0.0000 -0.0000 0.0000 0.0000 -0.0000  
AT. 125 H X 0.0001 0.0000 0.0000 -0.0001 0.0000 0.0000

Y 0.0002 0.0001 -0.0000 -0.0001 0.0001 0.0000  
Z 0.0003 0.0002 -0.0000 -0.0001 0.0001 0.0000  
AT. 126 H X 0.0001 0.0000 0.0000 -0.0001 -0.0000 -0.0000  
Y -0.0002 -0.0001 0.0000 0.0001 0.0001 0.0000  
Z 0.0003 0.0002 -0.0000 -0.0001 -0.0001 -0.0000  
AT. 127 H X 0.0001 -0.0000 -0.0000 -0.0001 0.0000 -0.0000  
Y 0.0002 -0.0001 0.0000 -0.0001 0.0001 -0.0000  
Z 0.0003 -0.0002 0.0000 -0.0001 0.0001 -0.0000  
AT. 128 H X 0.0001 -0.0000 -0.0000 -0.0001 -0.0000 0.0000  
Y -0.0002 0.0001 -0.0000 0.0001 0.0001 -0.0000  
Z 0.0003 -0.0002 0.0000 -0.0001 -0.0001 0.0000  
AT. 129 H X -0.0003 0.0003 0.0000 0.0000 0.0000 0.0000  
Y -0.0002 0.0002 0.0000 0.0000 0.0000 0.0000  
Z 0.0000 -0.0001 -0.0000 0.0000 -0.0000 0.0000  
AT. 130 H X -0.0003 0.0003 0.0000 0.0000 -0.0000 -0.0000  
Y 0.0002 -0.0002 -0.0000 -0.0000 0.0000 0.0000  
Z 0.0000 -0.0001 -0.0000 0.0000 0.0000 -0.0000  
AT. 131 H X -0.0003 -0.0003 -0.0000 0.0000 0.0000 -0.0000  
Y -0.0002 -0.0002 -0.0000 0.0000 0.0000 -0.0000  
Z 0.0000 0.0001 0.0000 0.0000 -0.0000 -0.0000  
AT. 132 H X -0.0003 -0.0003 -0.0000 0.0000 -0.0000 0.0000  
Y 0.0002 0.0002 0.0000 -0.0000 0.0000 -0.0000  
Z 0.0000 0.0001 0.0000 0.0000 0.0000 0.0000  
AT. 133 C X -0.0000 -0.0000 -0.0000 0.0000 0.0000 -0.0000  
Y 0.0000 0.0000 -0.0000 0.0000 0.0000 -0.0000  
Z -0.0000 -0.0000 -0.0000 0.0000 -0.0000 -0.0000  
AT. 134 C X -0.0000 -0.0000 -0.0000 0.0000 -0.0000 0.0000  
Y -0.0000 -0.0000 0.0000 -0.0000 0.0000 -0.0000  
Z -0.0000 -0.0000 -0.0000 0.0000 0.0000 0.0000  
AT. 135 C X -0.0000 0.0000 0.0000 0.0000 0.0000 0.0000  
Y 0.0000 -0.0000 0.0000 0.0000 0.0000 0.0000  
Z -0.0000 0.0000 0.0000 0.0000 -0.0000 0.0000

AT. 136 C X -0.0000 0.0000 0.0000 0.0000 -0.0000 -0.0000  
Y -0.0000 0.0000 -0.0000 -0.0000 0.0000 0.0000  
Z -0.0000 0.0000 0.0000 0.0000 0.0000 -0.0000

AT. 137 C X 0.0000 0.0000 0.0000 0.0000 -0.0000 -0.0000  
Y -0.0000 0.0000 -0.0000 -0.0001 0.0000 0.0001  
Z 0.0000 0.0000 0.0000 0.0000 -0.0000 -0.0000

AT. 138 C X 0.0000 0.0000 0.0000 0.0000 0.0000 0.0000  
Y 0.0000 -0.0000 0.0000 0.0001 0.0000 0.0001  
Z 0.0000 0.0000 0.0000 0.0000 0.0000 0.0000

AT. 139 C X 0.0000 -0.0000 -0.0000 0.0000 -0.0000 0.0000  
Y -0.0000 -0.0000 0.0000 -0.0001 0.0000 -0.0001  
Z 0.0000 -0.0000 -0.0000 0.0000 -0.0000 0.0000

AT. 140 C X 0.0000 -0.0000 -0.0000 0.0000 0.0000 -0.0000  
Y 0.0000 0.0000 -0.0000 0.0001 0.0000 -0.0001  
Z 0.0000 -0.0000 -0.0000 0.0000 0.0000 -0.0000

AT. 141 H X -0.0001 -0.0000 -0.0002 -0.0005 0.0003 0.0003  
Y 0.0000 0.0000 0.0001 0.0003 -0.0002 -0.0002  
Z -0.0000 -0.0000 -0.0001 -0.0005 0.0002 0.0003

AT. 142 H X -0.0001 -0.0000 -0.0002 -0.0005 -0.0003 -0.0003  
Y -0.0000 -0.0000 -0.0001 -0.0003 -0.0002 -0.0002  
Z -0.0000 -0.0000 -0.0001 -0.0005 -0.0002 -0.0003

AT. 143 H X -0.0001 0.0000 0.0002 -0.0005 0.0003 -0.0003  
Y 0.0000 -0.0000 -0.0001 0.0003 -0.0002 0.0002  
Z -0.0000 0.0000 0.0001 -0.0005 0.0002 -0.0003

AT. 144 H X -0.0001 0.0000 0.0002 -0.0005 -0.0003 0.0003  
Y -0.0000 0.0000 0.0001 -0.0003 -0.0002 0.0002  
Z -0.0000 0.0000 0.0001 -0.0005 -0.0002 0.0003

AT. 145 H X 0.0000 -0.0001 0.0001 0.0002 -0.0001 -0.0002  
Y 0.0002 -0.0001 0.0003 0.0006 -0.0003 -0.0004  
Z -0.0000 0.0000 -0.0001 -0.0002 0.0001 0.0001

AT. 146 H X 0.0000 -0.0001 0.0001 0.0002 0.0001 0.0002  
Y -0.0002 0.0001 -0.0003 -0.0006 -0.0003 -0.0004

Z -0.0000 0.0000 -0.0001 -0.0002 -0.0001 -0.0001  
AT. 147 H X 0.0000 0.0001 -0.0001 0.0002 -0.0001 0.0002  
Y 0.0002 0.0001 -0.0003 0.0006 -0.0003 0.0004  
Z -0.0000 -0.0000 0.0001 -0.0002 0.0001 -0.0001  
AT. 148 H X 0.0000 0.0001 -0.0001 0.0002 0.0001 -0.0002  
Y -0.0002 -0.0001 0.0003 -0.0006 -0.0003 0.0004  
Z -0.0000 -0.0000 0.0001 -0.0002 -0.0001 0.0001  
AT. 149 O X 0.0000 0.0000 -0.0000 0.0000 -0.0000 -0.0000  
Y -0.0000 -0.0000 0.0000 0.0000 -0.0000 -0.0000  
Z -0.0000 -0.0000 0.0000 0.0000 -0.0000 -0.0000  
AT. 150 O X 0.0000 0.0000 -0.0000 0.0000 0.0000 0.0000  
Y 0.0000 0.0000 -0.0000 -0.0000 -0.0000 -0.0000  
Z -0.0000 -0.0000 0.0000 0.0000 0.0000 0.0000  
AT. 151 O X 0.0000 -0.0000 0.0000 0.0000 -0.0000 0.0000  
Y -0.0000 0.0000 -0.0000 0.0000 -0.0000 0.0000  
Z -0.0000 0.0000 -0.0000 0.0000 -0.0000 0.0000  
AT. 152 O X 0.0000 -0.0000 0.0000 0.0000 0.0000 -0.0000  
Y 0.0000 -0.0000 0.0000 -0.0000 -0.0000 0.0000  
Z -0.0000 0.0000 -0.0000 0.0000 0.0000 -0.0000  
AT. 153 H X 0.0000 -0.0000 -0.0001 -0.0001 0.0002 0.0001  
Y -0.0000 -0.0000 0.0000 0.0000 -0.0001 -0.0000  
Z -0.0000 -0.0001 0.0001 0.0000 0.0001 -0.0001  
AT. 154 H X 0.0000 -0.0000 -0.0001 -0.0001 -0.0002 -0.0001  
Y 0.0000 0.0000 -0.0000 -0.0000 -0.0001 -0.0000  
Z -0.0000 -0.0001 0.0001 0.0000 -0.0001 0.0001  
AT. 155 H X 0.0000 0.0000 0.0001 -0.0001 0.0002 -0.0001  
Y -0.0000 0.0000 -0.0000 0.0000 -0.0001 0.0000  
Z -0.0000 0.0001 -0.0001 0.0000 0.0001 0.0001  
AT. 156 H X 0.0000 0.0000 0.0001 -0.0001 -0.0002 0.0001  
Y 0.0000 -0.0000 0.0000 -0.0000 -0.0001 0.0000  
Z -0.0000 0.0001 -0.0001 0.0000 -0.0001 -0.0001  
AT. 157 O X 0.0000 0.0000 -0.0000 -0.0000 0.0000 -0.0000



Y 0.0000 0.0000 0.0000 0.0000 -0.0000 -0.0000  
Z -0.0000 -0.0000 0.0000 0.0000 0.0000 0.0000  
AT. 158 O X 0.0000 0.0000 -0.0000 -0.0000 -0.0000 0.0000  
Y -0.0000 -0.0000 -0.0000 -0.0000 -0.0000 -0.0000  
Z -0.0000 -0.0000 0.0000 0.0000 -0.0000 -0.0000  
AT. 159 O X 0.0000 -0.0000 0.0000 -0.0000 0.0000 0.0000  
Y 0.0000 -0.0000 -0.0000 0.0000 -0.0000 0.0000  
Z -0.0000 0.0000 -0.0000 0.0000 0.0000 -0.0000  
AT. 160 O X 0.0000 -0.0000 0.0000 -0.0000 -0.0000 -0.0000  
Y -0.0000 0.0000 0.0000 -0.0000 -0.0000 0.0000  
Z -0.0000 0.0000 -0.0000 0.0000 -0.0000 0.0000  
AT. 161 O X -0.0000 -0.0000 0.0000 0.0000 0.0000 -0.0000  
Y -0.0001 -0.0001 -0.0000 -0.0001 -0.0000 0.0000  
Z 0.0001 0.0001 0.0000 0.0000 0.0000 0.0000  
AT. 162 O X -0.0000 -0.0000 0.0000 0.0000 -0.0000 0.0000  
Y 0.0001 0.0001 0.0000 0.0001 -0.0000 0.0000  
Z 0.0001 0.0001 0.0000 0.0000 -0.0000 -0.0000  
AT. 163 O X -0.0000 0.0000 -0.0000 0.0000 0.0000 0.0000  
Y -0.0001 0.0001 0.0000 -0.0001 -0.0000 -0.0000  
Z 0.0001 -0.0001 -0.0000 0.0000 0.0000 -0.0000  
AT. 164 O X -0.0000 0.0000 -0.0000 0.0000 -0.0000 -0.0000  
Y 0.0001 -0.0001 -0.0000 0.0001 -0.0000 -0.0000  
Z 0.0001 -0.0001 -0.0000 0.0000 -0.0000 0.0000  
AT. 165 H X -0.0001 -0.0001 -0.0002 -0.0005 -0.0000 0.0002  
Y 0.0003 0.0002 0.0004 0.0010 0.0000 -0.0004  
Z 0.0000 0.0000 -0.0001 -0.0001 0.0000 0.0000  
AT. 166 H X -0.0001 -0.0001 -0.0002 -0.0005 0.0000 -0.0002  
Y -0.0003 -0.0002 -0.0004 -0.0010 0.0000 -0.0004  
Z 0.0000 0.0000 -0.0001 -0.0001 -0.0000 -0.0000  
AT. 167 H X -0.0001 0.0001 0.0002 -0.0005 -0.0000 -0.0002  
Y 0.0003 -0.0002 -0.0004 0.0010 0.0000 0.0004  
Z 0.0000 -0.0000 0.0001 -0.0001 0.0000 -0.0000

AT.168 H X -0.0001 0.0001 0.0002 -0.0005 0.0000 0.0002  
Y -0.0003 0.0002 0.0004 -0.0010 0.0000 0.0004  
Z 0.0000 -0.0000 0.0001 -0.0001 -0.0000 0.0000

AT.169 O X 0.0000 -0.0000 0.0000 0.0000 -0.0000 -0.0000  
Y 0.0000 -0.0000 0.0001 0.0001 -0.0001 -0.0001  
Z -0.0000 -0.0000 0.0000 0.0000 -0.0000 -0.0000

AT.170 O X 0.0000 -0.0000 0.0000 0.0000 0.0000 0.0000  
Y -0.0000 0.0000 -0.0001 -0.0001 -0.0001 -0.0001  
Z -0.0000 -0.0000 0.0000 0.0000 0.0000 0.0000

AT.171 O X 0.0000 0.0000 -0.0000 0.0000 -0.0000 0.0000  
Y 0.0000 0.0000 -0.0001 0.0001 -0.0001 0.0001  
Z -0.0000 0.0000 -0.0000 0.0000 -0.0000 0.0000

AT.172 O X 0.0000 0.0000 -0.0000 0.0000 0.0000 -0.0000  
Y -0.0000 -0.0000 0.0001 -0.0001 -0.0001 0.0001  
Z -0.0000 0.0000 -0.0000 0.0000 0.0000 -0.0000

AT.173 H X 0.0000 0.0000 -0.0004 -0.0003 0.0002 0.0003  
Y -0.0000 0.0001 -0.0016 -0.0011 0.0009 0.0013  
Z -0.0000 0.0000 -0.0002 -0.0002 0.0001 0.0002

AT.174 H X 0.0000 0.0000 -0.0004 -0.0003 -0.0002 -0.0003  
Y 0.0000 -0.0001 0.0016 0.0011 0.0009 0.0013  
Z -0.0000 0.0000 -0.0002 -0.0002 -0.0001 -0.0002

AT.175 H X 0.0000 -0.0000 0.0004 -0.0003 0.0002 -0.0003  
Y -0.0000 -0.0001 0.0016 -0.0011 0.0009 -0.0013  
Z -0.0000 -0.0000 0.0002 -0.0002 0.0001 -0.0002

AT.176 H X 0.0000 -0.0000 0.0004 -0.0003 -0.0002 0.0003  
Y 0.0000 0.0001 -0.0016 0.0011 0.0009 -0.0013  
Z -0.0000 -0.0000 0.0002 -0.0002 -0.0001 0.0002

FREQ(CM\*\*-1) 3266.57 3266.66 3266.75 3266.81 3309.56 3311.34

AT. 1 I X 0.0000 -0.0000 -0.0000 0.0000 -0.0000 -0.0000  
Y -0.0000 0.0000 -0.0000 -0.0000 0.0000 0.0000

Z 0.0000 -0.0000 -0.0000 0.0000 -0.0000 0.0000  
AT. 2 I X -0.0000 -0.0000 0.0000 0.0000 0.0000 0.0000  
Y -0.0000 -0.0000 -0.0000 0.0000 0.0000 0.0000  
Z -0.0000 -0.0000 0.0000 0.0000 0.0000 -0.0000  
AT. 3 I X -0.0000 -0.0000 -0.0000 -0.0000 0.0000 -0.0000  
Y 0.0000 0.0000 -0.0000 0.0000 -0.0000 0.0000  
Z -0.0000 -0.0000 -0.0000 -0.0000 0.0000 0.0000  
AT. 4 I X 0.0000 -0.0000 0.0000 -0.0000 -0.0000 0.0000  
Y 0.0000 -0.0000 -0.0000 -0.0000 -0.0000 0.0000  
Z 0.0000 -0.0000 0.0000 -0.0000 -0.0000 -0.0000  
AT. 5 I X -0.0000 0.0000 -0.0000 0.0000 -0.0000 0.0000  
Y 0.0000 -0.0000 0.0000 -0.0000 0.0000 -0.0000  
Z -0.0000 0.0000 -0.0000 0.0000 -0.0000 -0.0000  
AT. 6 I X 0.0000 0.0000 0.0000 0.0000 0.0000 -0.0000  
Y 0.0000 0.0000 0.0000 0.0000 0.0000 -0.0000  
Z 0.0000 0.0000 0.0000 0.0000 0.0000 0.0000  
AT. 7 I X 0.0000 0.0000 -0.0000 -0.0000 0.0000 0.0000  
Y -0.0000 -0.0000 0.0000 0.0000 -0.0000 -0.0000  
Z 0.0000 0.0000 -0.0000 -0.0000 0.0000 -0.0000  
AT. 8 I X -0.0000 0.0000 0.0000 -0.0000 -0.0000 -0.0000  
Y -0.0000 0.0000 0.0000 -0.0000 -0.0000 -0.0000  
Z -0.0000 0.0000 0.0000 -0.0000 -0.0000 0.0000  
AT. 9 N X 0.0000 -0.0000 0.0000 -0.0000 -0.0000 -0.0000  
Y 0.0000 -0.0000 -0.0000 0.0000 0.0000 0.0000  
Z -0.0000 -0.0000 0.0000 -0.0000 -0.0000 0.0000  
AT. 10 N X -0.0000 -0.0000 -0.0000 -0.0000 0.0000 0.0000  
Y 0.0000 0.0000 -0.0000 -0.0000 0.0000 0.0000  
Z 0.0000 -0.0000 -0.0000 -0.0000 0.0000 -0.0000  
AT. 11 N X -0.0000 -0.0000 0.0000 0.0000 0.0000 -0.0000  
Y -0.0000 -0.0000 -0.0000 -0.0000 -0.0000 0.0000  
Z 0.0000 -0.0000 0.0000 0.0000 0.0000 0.0000  
AT. 12 N X 0.0000 -0.0000 -0.0000 0.0000 -0.0000 0.0000

Y -0.0000 0.0000 -0.0000 0.0000 -0.0000 0.0000  
Z -0.0000 -0.0000 -0.0000 0.0000 -0.0000 -0.0000  
AT. 13 N X 0.0000 -0.0000 0.0000 -0.0000 0.0000 0.0000  
Y 0.0000 -0.0000 0.0000 -0.0000 0.0003 0.0003  
Z 0.0000 -0.0000 0.0000 -0.0000 -0.0001 -0.0001  
AT. 14 N X -0.0000 -0.0000 -0.0000 -0.0000 -0.0000 -0.0000  
Y 0.0000 0.0000 0.0000 0.0000 0.0003 0.0003  
Z -0.0000 -0.0000 -0.0000 -0.0000 0.0001 0.0001  
AT. 15 N X -0.0000 -0.0000 0.0000 0.0000 -0.0000 0.0000  
Y -0.0000 -0.0000 0.0000 0.0000 -0.0003 0.0003  
Z -0.0000 -0.0000 0.0000 0.0000 0.0001 -0.0001  
AT. 16 N X 0.0000 -0.0000 -0.0000 0.0000 0.0000 -0.0000  
Y -0.0000 0.0000 0.0000 -0.0000 -0.0003 0.0003  
Z 0.0000 -0.0000 -0.0000 0.0000 -0.0001 0.0001  
AT. 17 O X 0.0000 -0.0000 0.0000 -0.0000 -0.0000 -0.0000  
Y 0.0000 -0.0000 0.0000 -0.0000 0.0000 0.0000  
Z -0.0000 0.0000 -0.0000 0.0000 0.0000 0.0000  
AT. 18 O X -0.0000 -0.0000 -0.0000 -0.0000 0.0000 0.0000  
Y 0.0000 0.0000 0.0000 0.0000 0.0000 0.0000  
Z 0.0000 0.0000 0.0000 0.0000 -0.0000 -0.0000  
AT. 19 O X -0.0000 -0.0000 0.0000 0.0000 0.0000 -0.0000  
Y -0.0000 -0.0000 0.0000 0.0000 -0.0000 0.0000  
Z 0.0000 0.0000 -0.0000 -0.0000 -0.0000 0.0000  
AT. 20 O X 0.0000 -0.0000 -0.0000 0.0000 -0.0000 0.0000  
Y -0.0000 0.0000 0.0000 -0.0000 -0.0000 0.0000  
Z -0.0000 0.0000 0.0000 -0.0000 0.0000 -0.0000  
AT. 21 O X 0.0000 -0.0000 0.0000 -0.0000 -0.0001 -0.0001  
Y -0.0000 -0.0000 0.0000 -0.0000 0.0004 0.0004  
Z -0.0000 0.0000 -0.0000 0.0000 -0.0004 -0.0004  
AT. 22 O X -0.0000 -0.0000 -0.0000 -0.0000 0.0001 0.0001  
Y -0.0000 0.0000 0.0000 0.0000 0.0004 0.0004  
Z 0.0000 0.0000 0.0000 0.0000 0.0004 0.0004

AT. 23 O X -0.0000 -0.0000 0.0000 0.0000 0.0001 -0.0001  
Y 0.0000 -0.0000 0.0000 0.0000 -0.0004 0.0004  
Z 0.0000 0.0000 -0.0000 -0.0000 0.0004 -0.0004

AT. 24 O X 0.0000 -0.0000 -0.0000 0.0000 -0.0001 0.0001  
Y 0.0000 0.0000 0.0000 -0.0000 -0.0004 0.0004  
Z -0.0000 0.0000 0.0000 -0.0000 -0.0004 0.0004

AT. 25 C X -0.0000 0.0001 -0.0000 0.0000 -0.0000 0.0000  
Y -0.0000 0.0001 -0.0000 0.0000 -0.0000 -0.0000  
Z -0.0000 0.0000 -0.0000 0.0000 -0.0000 0.0000

AT. 26 C X 0.0000 0.0001 0.0000 0.0000 0.0000 -0.0000  
Y -0.0000 -0.0001 -0.0000 -0.0000 -0.0000 -0.0000  
Z 0.0000 0.0000 0.0000 0.0000 0.0000 -0.0000

AT. 27 C X 0.0000 0.0001 -0.0000 -0.0000 0.0000 0.0000  
Y 0.0000 0.0001 -0.0000 -0.0000 0.0000 -0.0000  
Z 0.0000 0.0000 -0.0000 -0.0000 0.0000 0.0000

AT. 28 C X -0.0000 0.0001 0.0000 -0.0000 -0.0000 -0.0000  
Y 0.0000 -0.0001 -0.0000 0.0000 0.0000 -0.0000  
Z -0.0000 0.0000 0.0000 -0.0000 -0.0000 -0.0000

AT. 29 H X 0.0004 -0.0005 0.0002 -0.0001 0.0001 -0.0004  
Y 0.0000 -0.0000 0.0000 -0.0000 -0.0000 -0.0001  
Z 0.0003 -0.0003 0.0001 -0.0001 -0.0001 -0.0005

AT. 30 H X -0.0004 -0.0005 -0.0002 -0.0001 -0.0001 0.0004  
Y 0.0000 0.0000 0.0000 0.0000 -0.0000 -0.0001  
Z -0.0003 -0.0003 -0.0001 -0.0001 0.0001 0.0005

AT. 31 H X -0.0004 -0.0005 0.0002 0.0001 -0.0001 -0.0004  
Y -0.0000 -0.0000 0.0000 0.0000 0.0000 -0.0001  
Z -0.0003 -0.0003 0.0001 0.0001 0.0001 -0.0005

AT. 32 H X 0.0004 -0.0005 -0.0002 0.0001 0.0001 0.0004  
Y -0.0000 0.0000 0.0000 -0.0000 0.0000 -0.0001  
Z 0.0003 -0.0003 -0.0001 0.0001 -0.0001 0.0005

AT. 33 H X 0.0001 -0.0001 0.0001 -0.0000 0.0001 0.0001  
Y 0.0005 -0.0006 0.0004 -0.0003 0.0005 0.0004

Z 0.0001 -0.0001 0.0001 -0.0001 0.0001 0.0001  
AT. 34 H X -0.0001 -0.0001 -0.0001 -0.0000 -0.0001 -0.0001  
Y 0.0005 0.0006 0.0004 0.0003 0.0005 0.0004  
Z -0.0001 -0.0001 -0.0001 -0.0001 -0.0001 -0.0001  
AT. 35 H X -0.0001 -0.0001 0.0001 0.0000 -0.0001 0.0001  
Y -0.0005 -0.0006 0.0004 0.0003 -0.0005 0.0004  
Z -0.0001 -0.0001 0.0001 0.0001 -0.0001 0.0001  
AT. 36 H X 0.0001 -0.0001 -0.0001 0.0000 0.0001 -0.0001  
Y -0.0005 0.0006 0.0004 -0.0003 -0.0005 0.0004  
Z 0.0001 -0.0001 -0.0001 0.0001 0.0001 -0.0001  
AT. 37 C X -0.0000 0.0000 -0.0000 0.0000 0.0000 0.0000  
Y -0.0000 0.0000 0.0000 0.0000 -0.0000 -0.0000  
Z 0.0000 -0.0000 -0.0000 0.0000 -0.0000 -0.0000  
AT. 38 C X 0.0000 0.0000 0.0000 0.0000 -0.0000 -0.0000  
Y -0.0000 -0.0000 0.0000 -0.0000 -0.0000 -0.0000  
Z -0.0000 -0.0000 0.0000 0.0000 0.0000 0.0000  
AT. 39 C X 0.0000 0.0000 -0.0000 -0.0000 -0.0000 0.0000  
Y 0.0000 0.0000 0.0000 -0.0000 0.0000 -0.0000  
Z -0.0000 -0.0000 -0.0000 -0.0000 0.0000 -0.0000  
AT. 40 C X -0.0000 0.0000 0.0000 -0.0000 0.0000 -0.0000  
Y 0.0000 -0.0000 0.0000 0.0000 0.0000 -0.0000  
Z 0.0000 -0.0000 0.0000 -0.0000 -0.0000 0.0000  
AT. 41 C X -0.0000 -0.0000 -0.0000 -0.0000 0.0000 0.0000  
Y 0.0000 0.0000 0.0000 -0.0000 -0.0000 -0.0000  
Z -0.0000 0.0000 0.0000 -0.0000 -0.0000 0.0000  
AT. 42 C X 0.0000 -0.0000 0.0000 -0.0000 -0.0000 -0.0000  
Y 0.0000 -0.0000 0.0000 0.0000 -0.0000 -0.0000  
Z 0.0000 0.0000 -0.0000 -0.0000 0.0000 -0.0000  
AT. 43 C X 0.0000 -0.0000 -0.0000 0.0000 -0.0000 0.0000  
Y -0.0000 0.0000 0.0000 0.0000 0.0000 -0.0000  
Z 0.0000 0.0000 0.0000 0.0000 0.0000 0.0000  
AT. 44 C X -0.0000 -0.0000 0.0000 0.0000 0.0000 -0.0000

Y -0.0000 -0.0000 0.0000 -0.0000 0.0000 -0.0000  
Z -0.0000 0.0000 -0.0000 0.0000 -0.0000 -0.0000  
AT. 45 H X -0.0000 0.0000 0.0000 -0.0000 0.0001 0.0000  
Y -0.0000 0.0000 0.0000 -0.0000 0.0002 0.0004  
Z 0.0000 -0.0000 0.0000 0.0000 -0.0003 -0.0004  
AT. 46 H X 0.0000 0.0000 -0.0000 -0.0000 -0.0001 -0.0000  
Y -0.0000 -0.0000 0.0000 0.0000 0.0002 0.0004  
Z -0.0000 -0.0000 -0.0000 0.0000 0.0003 0.0004  
AT. 47 H X 0.0000 0.0000 0.0000 0.0000 -0.0001 0.0000  
Y 0.0000 0.0000 0.0000 0.0000 -0.0002 0.0004  
Z -0.0000 -0.0000 0.0000 -0.0000 0.0003 -0.0004  
AT. 48 H X -0.0000 0.0000 -0.0000 0.0000 0.0001 -0.0000  
Y 0.0000 -0.0000 0.0000 -0.0000 -0.0002 0.0004  
Z 0.0000 -0.0000 -0.0000 -0.0000 -0.0003 0.0004  
AT. 49 H X -0.0000 0.0000 0.0000 0.0000 -0.0002 -0.0002  
Y -0.0000 0.0000 -0.0000 0.0000 0.0001 0.0001  
Z -0.0000 -0.0000 0.0000 0.0000 0.0001 0.0001  
AT. 50 H X 0.0000 0.0000 -0.0000 0.0000 0.0002 0.0002  
Y -0.0000 -0.0000 -0.0000 -0.0000 0.0001 0.0001  
Z 0.0000 -0.0000 -0.0000 0.0000 -0.0001 -0.0001  
AT. 51 H X 0.0000 0.0000 0.0000 -0.0000 0.0002 -0.0002  
Y 0.0000 0.0000 -0.0000 -0.0000 -0.0001 0.0001  
Z 0.0000 -0.0000 0.0000 -0.0000 -0.0001 0.0001  
AT. 52 H X -0.0000 0.0000 -0.0000 -0.0000 -0.0002 0.0002  
Y 0.0000 -0.0000 -0.0000 0.0000 -0.0001 0.0001  
Z -0.0000 -0.0000 -0.0000 -0.0000 0.0001 -0.0001  
AT. 53 C X 0.0000 0.0000 0.0000 -0.0000 0.0000 0.0000  
Y 0.0000 -0.0000 0.0000 -0.0000 -0.0000 -0.0000  
Z -0.0000 0.0000 -0.0000 0.0000 0.0000 0.0000  
AT. 54 C X -0.0000 0.0000 -0.0000 -0.0000 -0.0000 -0.0000  
Y 0.0000 0.0000 0.0000 0.0000 -0.0000 -0.0000  
Z 0.0000 0.0000 0.0000 0.0000 -0.0000 -0.0000

AT. 55 C X -0.0000 0.0000 0.0000 0.0000 -0.0000 0.0000  
Y -0.0000 -0.0000 0.0000 0.0000 0.0000 -0.0000  
Z 0.0000 0.0000 -0.0000 -0.0000 -0.0000 0.0000

AT. 56 C X 0.0000 0.0000 -0.0000 0.0000 0.0000 -0.0000  
Y -0.0000 0.0000 0.0000 -0.0000 0.0000 -0.0000  
Z -0.0000 0.0000 0.0000 -0.0000 0.0000 -0.0000

AT. 57 C X 0.0000 -0.0000 0.0000 0.0000 -0.0002 -0.0002  
Y 0.0000 -0.0000 0.0000 -0.0000 -0.0001 -0.0001  
Z -0.0000 0.0000 0.0000 -0.0000 0.0000 0.0000

AT. 58 C X -0.0000 -0.0000 -0.0000 0.0000 0.0002 0.0002  
Y 0.0000 0.0000 0.0000 0.0000 -0.0001 -0.0001  
Z 0.0000 0.0000 -0.0000 -0.0000 -0.0000 -0.0000

AT. 59 C X -0.0000 -0.0000 0.0000 -0.0000 0.0002 -0.0002  
Y -0.0000 -0.0000 0.0000 0.0000 0.0001 -0.0001  
Z 0.0000 0.0000 0.0000 0.0000 -0.0000 0.0000

AT. 60 C X 0.0000 -0.0000 -0.0000 -0.0000 -0.0002 0.0002  
Y -0.0000 0.0000 0.0000 -0.0000 0.0001 -0.0001  
Z -0.0000 0.0000 -0.0000 0.0000 0.0000 -0.0000

AT. 61 H X -0.0000 0.0000 -0.0000 -0.0001 -0.0003 -0.0003  
Y 0.0000 -0.0000 0.0000 0.0001 0.0002 0.0002  
Z -0.0000 0.0000 0.0000 0.0000 0.0001 0.0002

AT. 62 H X 0.0000 0.0000 0.0000 -0.0001 0.0003 0.0003  
Y 0.0000 0.0000 0.0000 -0.0001 0.0002 0.0002  
Z 0.0000 0.0000 -0.0000 0.0000 -0.0001 -0.0002

AT. 63 H X 0.0000 0.0000 -0.0000 0.0001 0.0003 -0.0003  
Y -0.0000 -0.0000 0.0000 -0.0001 -0.0002 0.0002  
Z 0.0000 0.0000 0.0000 -0.0000 -0.0001 0.0002

AT. 64 H X -0.0000 0.0000 0.0000 0.0001 -0.0003 0.0003  
Y -0.0000 0.0000 0.0000 0.0001 -0.0002 0.0002  
Z -0.0000 0.0000 -0.0000 -0.0000 0.0001 -0.0002

AT. 65 H X -0.0003 0.0001 -0.0004 -0.0001 0.0026 0.0025  
Y -0.0001 0.0000 -0.0001 -0.0000 0.0005 0.0005



Z -0.0000 0.0000 -0.0000 0.0000 0.0003 0.0003  
AT. 66 H X 0.0003 0.0001 0.0004 -0.0001 -0.0026 -0.0025  
Y -0.0001 -0.0000 -0.0001 0.0000 0.0005 0.0005  
Z 0.0000 0.0000 0.0000 0.0000 -0.0003 -0.0003  
AT. 67 H X 0.0003 0.0001 -0.0004 0.0001 -0.0026 0.0025  
Y 0.0001 0.0000 -0.0001 0.0000 -0.0005 0.0005  
Z 0.0000 0.0000 -0.0000 -0.0000 -0.0003 0.0003  
AT. 68 H X -0.0003 0.0001 0.0004 0.0001 0.0026 -0.0025  
Y 0.0001 -0.0000 -0.0001 -0.0000 -0.0005 0.0005  
Z -0.0000 0.0000 0.0000 -0.0000 0.0003 -0.0003  
AT. 69 H X -0.0000 0.0000 -0.0000 0.0000 0.0002 0.0002  
Y -0.0001 0.0001 0.0000 -0.0000 0.0007 0.0008  
Z 0.0001 -0.0001 -0.0000 -0.0000 -0.0008 -0.0008  
AT. 70 H X 0.0000 0.0000 0.0000 0.0000 -0.0002 -0.0002  
Y -0.0001 -0.0001 0.0000 0.0000 0.0007 0.0008  
Z -0.0001 -0.0001 0.0000 -0.0000 0.0008 0.0008  
AT. 71 H X 0.0000 0.0000 -0.0000 -0.0000 -0.0002 0.0002  
Y 0.0001 0.0001 0.0000 0.0000 -0.0007 0.0008  
Z -0.0001 -0.0001 -0.0000 0.0000 0.0008 -0.0008  
AT. 72 H X -0.0000 0.0000 0.0000 -0.0000 0.0002 -0.0002  
Y 0.0001 -0.0001 0.0000 -0.0000 -0.0007 0.0008  
Z 0.0001 -0.0001 0.0000 0.0000 -0.0008 0.0008  
AT. 73 C X 0.0000 -0.0000 0.0000 -0.0000 -0.0003 -0.0003  
Y -0.0000 0.0000 -0.0000 0.0000 -0.0001 -0.0001  
Z -0.0000 0.0000 -0.0000 0.0000 0.0001 0.0001  
AT. 74 C X -0.0000 -0.0000 -0.0000 -0.0000 0.0003 0.0003  
Y -0.0000 -0.0000 -0.0000 -0.0000 -0.0001 -0.0001  
Z 0.0000 0.0000 0.0000 0.0000 -0.0001 -0.0001  
AT. 75 C X -0.0000 -0.0000 0.0000 0.0000 0.0003 -0.0003  
Y 0.0000 0.0000 -0.0000 -0.0000 0.0001 -0.0001  
Z 0.0000 0.0000 -0.0000 -0.0000 -0.0001 0.0001  
AT. 76 C X 0.0000 -0.0000 -0.0000 0.0000 -0.0003 0.0003

Y 0.0000 -0.0000 -0.0000 0.0000 0.0001 -0.0001  
Z -0.0000 0.0000 0.0000 -0.0000 0.0001 -0.0001  
AT. 77 C X 0.0000 -0.0000 -0.0000 0.0000 0.0000 0.0000  
Y 0.0001 -0.0001 0.0001 -0.0001 0.0000 0.0000  
Z 0.0001 -0.0001 0.0000 -0.0000 0.0000 0.0000  
AT. 78 C X -0.0000 -0.0000 0.0000 0.0000 -0.0000 -0.0000  
Y 0.0001 0.0001 0.0001 0.0001 0.0000 0.0000  
Z -0.0001 -0.0001 -0.0000 -0.0000 -0.0000 -0.0000  
AT. 79 C X -0.0000 -0.0000 -0.0000 -0.0000 -0.0000 0.0000  
Y -0.0001 -0.0001 0.0001 0.0001 -0.0000 0.0000  
Z -0.0001 -0.0001 0.0000 0.0000 -0.0000 0.0000  
AT. 80 C X 0.0000 -0.0000 0.0000 -0.0000 0.0000 -0.0000  
Y -0.0001 0.0001 0.0001 -0.0001 -0.0000 0.0000  
Z 0.0001 -0.0001 -0.0000 0.0000 0.0000 -0.0000  
AT. 81 H X 0.0002 -0.0002 0.0002 -0.0002 -0.0001 -0.0001  
Y -0.0001 0.0001 -0.0002 0.0001 0.0001 0.0001  
Z -0.0000 0.0000 -0.0000 0.0000 -0.0000 -0.0000  
AT. 82 H X -0.0002 -0.0002 -0.0002 -0.0002 0.0001 0.0001  
Y -0.0001 -0.0001 -0.0002 -0.0001 0.0001 0.0001  
Z 0.0000 0.0000 0.0000 0.0000 0.0000 0.0000  
AT. 83 H X -0.0002 -0.0002 0.0002 0.0002 0.0001 -0.0001  
Y 0.0001 0.0001 -0.0002 -0.0001 -0.0001 0.0001  
Z 0.0000 0.0000 -0.0000 -0.0000 0.0000 -0.0000  
AT. 84 H X 0.0002 -0.0002 -0.0002 0.0002 -0.0001 0.0001  
Y 0.0001 -0.0001 -0.0002 0.0001 -0.0001 0.0001  
Z -0.0000 0.0000 0.0000 -0.0000 -0.0000 0.0000  
AT. 85 H X -0.0002 0.0002 -0.0001 0.0001 0.0001 0.0001  
Y -0.0006 0.0006 -0.0005 0.0005 -0.0001 0.0000  
Z -0.0007 0.0007 -0.0006 0.0006 -0.0001 -0.0001  
AT. 86 H X 0.0002 0.0002 0.0001 0.0001 -0.0001 -0.0001  
Y -0.0006 -0.0006 -0.0005 -0.0005 -0.0001 0.0000  
Z 0.0007 0.0007 0.0006 0.0006 0.0001 0.0001

AT. 87 H X 0.0002 0.0002 -0.0001 -0.0001 -0.0001 0.0001  
Y 0.0006 0.0006 -0.0005 -0.0005 0.0001 0.0000  
Z 0.0007 0.0007 -0.0006 -0.0006 0.0001 -0.0001

AT. 88 H X -0.0002 0.0002 0.0001 -0.0001 0.0001 -0.0001  
Y 0.0006 -0.0006 -0.0005 0.0005 0.0001 0.0000  
Z -0.0007 0.0007 0.0006 -0.0006 -0.0001 0.0001

AT. 89 C X -0.0000 0.0000 -0.0000 0.0000 0.0000 0.0001  
Y -0.0000 0.0000 -0.0000 0.0000 -0.0000 -0.0000  
Z 0.0000 -0.0000 0.0000 -0.0000 -0.0001 -0.0001

AT. 90 C X 0.0000 0.0000 0.0000 0.0000 -0.0000 -0.0001  
Y -0.0000 -0.0000 -0.0000 -0.0000 -0.0000 -0.0000  
Z -0.0000 -0.0000 -0.0000 -0.0000 0.0001 0.0001

AT. 91 C X 0.0000 0.0000 -0.0000 -0.0000 -0.0000 0.0001  
Y 0.0000 0.0000 -0.0000 -0.0000 0.0000 -0.0000  
Z -0.0000 -0.0000 0.0000 0.0000 0.0001 -0.0001

AT. 92 C X -0.0000 0.0000 0.0000 -0.0000 0.0000 -0.0001  
Y 0.0000 -0.0000 -0.0000 0.0000 0.0000 -0.0000  
Z 0.0000 -0.0000 -0.0000 0.0000 -0.0001 0.0001

AT. 93 C X -0.0000 0.0000 -0.0000 0.0000 -0.0001 -0.0001  
Y -0.0000 0.0000 -0.0000 0.0000 -0.0000 -0.0000  
Z 0.0000 -0.0000 -0.0000 -0.0000 -0.0000 -0.0000

AT. 94 C X 0.0000 0.0000 0.0000 0.0000 0.0001 0.0001  
Y -0.0000 -0.0000 -0.0000 -0.0000 -0.0000 -0.0000  
Z -0.0000 -0.0000 0.0000 -0.0000 0.0000 0.0000

AT. 95 C X 0.0000 0.0000 -0.0000 -0.0000 0.0001 -0.0001  
Y 0.0000 0.0000 -0.0000 -0.0000 0.0000 -0.0000  
Z -0.0000 -0.0000 -0.0000 0.0000 0.0000 -0.0000

AT. 96 C X -0.0000 0.0000 0.0000 -0.0000 -0.0001 0.0001  
Y 0.0000 -0.0000 -0.0000 0.0000 0.0000 -0.0000  
Z 0.0000 -0.0000 0.0000 0.0000 -0.0000 0.0000

AT. 97 H X 0.0002 -0.0002 0.0001 -0.0002 0.0005 0.0005  
Y 0.0001 -0.0001 0.0000 -0.0001 0.0003 0.0003

Z -0.0001 0.0001 -0.0001 0.0001 -0.0003 -0.0003  
AT. 98 H X -0.0002 -0.0002 -0.0001 -0.0002 -0.0005 -0.0005  
Y 0.0001 0.0001 0.0000 0.0001 0.0003 0.0003  
Z 0.0001 0.0001 0.0001 0.0001 0.0003 0.0003  
AT. 99 H X -0.0002 -0.0002 0.0001 0.0002 -0.0005 0.0005  
Y -0.0001 -0.0001 0.0000 0.0001 -0.0003 0.0003  
Z 0.0001 0.0001 -0.0001 -0.0001 0.0003 -0.0003  
AT. 100 H X 0.0002 -0.0002 -0.0001 0.0002 0.0005 -0.0005  
Y -0.0001 0.0001 0.0000 -0.0001 -0.0003 0.0003  
Z -0.0001 0.0001 0.0001 -0.0001 -0.0003 0.0003  
AT. 101 H X -0.0000 0.0001 -0.0001 -0.0000 0.0000 -0.0000  
Y -0.0000 -0.0000 0.0000 0.0000 0.0000 0.0001  
Z -0.0000 0.0000 -0.0000 0.0000 -0.0001 -0.0001  
AT. 102 H X 0.0000 0.0001 0.0001 -0.0000 -0.0000 0.0000  
Y -0.0000 0.0000 0.0000 -0.0000 0.0000 0.0001  
Z 0.0000 0.0000 0.0000 0.0000 0.0001 0.0001  
AT. 103 H X 0.0000 0.0001 -0.0001 0.0000 -0.0000 -0.0000  
Y 0.0000 -0.0000 0.0000 -0.0000 -0.0000 0.0001  
Z 0.0000 0.0000 -0.0000 -0.0000 0.0001 -0.0001  
AT. 104 H X -0.0000 0.0001 0.0001 0.0000 0.0000 0.0000  
Y 0.0000 0.0000 0.0000 0.0000 -0.0000 0.0001  
Z -0.0000 0.0000 0.0000 -0.0000 -0.0001 0.0001  
AT. 105 H X 0.0000 -0.0000 0.0000 -0.0000 0.0001 0.0002  
Y 0.0001 -0.0000 0.0001 -0.0000 0.0003 0.0003  
Z 0.0000 -0.0000 0.0001 -0.0000 0.0004 0.0004  
AT. 106 H X -0.0000 -0.0000 -0.0000 -0.0000 -0.0001 -0.0002  
Y 0.0001 0.0000 0.0001 0.0000 0.0003 0.0003  
Z -0.0000 -0.0000 -0.0001 -0.0000 -0.0004 -0.0004  
AT. 107 H X -0.0000 -0.0000 0.0000 0.0000 -0.0001 0.0002  
Y -0.0001 -0.0000 0.0001 0.0000 -0.0003 0.0003  
Z -0.0000 -0.0000 0.0001 0.0000 -0.0004 0.0004  
AT. 108 H X 0.0000 -0.0000 -0.0000 0.0000 0.0001 -0.0002

Y -0.0001 0.0000 0.0001 -0.0000 -0.0003 0.0003  
Z 0.0000 -0.0000 -0.0001 0.0000 0.0004 -0.0004  
AT. 109 C X 0.0000 -0.0000 0.0000 -0.0000 -0.0001 -0.0001  
Y 0.0000 -0.0000 0.0000 0.0000 -0.0002 -0.0002  
Z -0.0000 -0.0000 -0.0000 -0.0000 0.0001 0.0001  
AT. 110 C X -0.0000 -0.0000 -0.0000 -0.0000 0.0001 0.0001  
Y 0.0000 0.0000 0.0000 -0.0000 -0.0002 -0.0002  
Z 0.0000 -0.0000 0.0000 -0.0000 -0.0001 -0.0001  
AT. 111 C X -0.0000 -0.0000 0.0000 0.0000 0.0001 -0.0001  
Y -0.0000 -0.0000 0.0000 -0.0000 0.0002 -0.0002  
Z 0.0000 -0.0000 -0.0000 0.0000 -0.0001 0.0001  
AT. 112 C X 0.0000 -0.0000 -0.0000 0.0000 -0.0001 0.0001  
Y -0.0000 0.0000 0.0000 0.0000 0.0002 -0.0002  
Z -0.0000 -0.0000 0.0000 0.0000 0.0001 -0.0001  
AT. 113 H X -0.0001 0.0000 -0.0001 -0.0000 0.0013 0.0013  
Y -0.0001 0.0000 -0.0001 -0.0000 0.0008 0.0008  
Z -0.0000 -0.0000 0.0000 0.0000 -0.0001 -0.0000  
AT. 114 H X 0.0001 0.0000 0.0001 -0.0000 -0.0013 -0.0013  
Y -0.0001 -0.0000 -0.0001 0.0000 0.0008 0.0008  
Z 0.0000 -0.0000 -0.0000 0.0000 0.0001 0.0000  
AT. 115 H X 0.0001 0.0000 -0.0001 0.0000 -0.0013 0.0013  
Y 0.0001 0.0000 -0.0001 0.0000 -0.0008 0.0008  
Z 0.0000 -0.0000 0.0000 -0.0000 0.0001 -0.0000  
AT. 116 H X -0.0001 0.0000 0.0001 0.0000 0.0013 -0.0013  
Y 0.0001 -0.0000 -0.0001 -0.0000 -0.0008 0.0008  
Z -0.0000 -0.0000 -0.0000 -0.0000 -0.0001 0.0000  
AT. 117 H X 0.0000 0.0000 0.0000 0.0000 -0.0005 -0.0005  
Y -0.0002 -0.0001 -0.0001 -0.0001 0.0009 0.0011  
Z 0.0002 0.0001 0.0001 0.0002 -0.0015 -0.0016  
AT. 118 H X -0.0000 0.0000 -0.0000 0.0000 0.0005 0.0005  
Y -0.0002 0.0001 -0.0001 0.0001 0.0009 0.0011  
Z -0.0002 0.0001 -0.0001 0.0002 0.0015 0.0016

AT.119 H X -0.0000 0.0000 0.0000 -0.0000 0.0005 -0.0005  
Y 0.0002 -0.0001 -0.0001 0.0001 -0.0009 0.0011  
Z -0.0002 0.0001 0.0001 -0.0002 0.0015 -0.0016

AT.120 H X 0.0000 0.0000 -0.0000 -0.0000 -0.0005 0.0005  
Y 0.0002 0.0001 -0.0001 -0.0001 -0.0009 0.0011  
Z 0.0002 0.0001 -0.0001 -0.0002 -0.0015 0.0016

AT.121 C X 0.0002 -0.0002 0.0002 -0.0002 -0.0000 -0.0000  
Y 0.0003 -0.0003 0.0003 -0.0003 -0.0000 -0.0001  
Z 0.0004 -0.0004 0.0004 -0.0004 0.0001 0.0001

AT.122 C X -0.0002 -0.0002 -0.0002 -0.0002 0.0000 0.0000  
Y 0.0003 0.0003 0.0003 0.0003 -0.0000 -0.0001  
Z -0.0004 -0.0004 -0.0004 -0.0004 -0.0001 -0.0001

AT.123 C X -0.0002 -0.0002 0.0002 0.0002 0.0000 -0.0000  
Y -0.0003 -0.0003 0.0003 0.0003 0.0000 -0.0001  
Z -0.0004 -0.0004 0.0004 0.0004 -0.0001 0.0001

AT.124 C X 0.0002 -0.0002 -0.0002 0.0002 -0.0000 0.0000  
Y -0.0003 0.0003 0.0003 -0.0003 0.0000 -0.0001  
Z 0.0004 -0.0004 -0.0004 0.0004 0.0001 -0.0001

AT.125 H X -0.0016 0.0016 -0.0016 0.0016 -0.0001 -0.0000  
Y -0.0038 0.0038 -0.0037 0.0038 -0.0002 0.0001  
Z -0.0052 0.0052 -0.0051 0.0052 -0.0004 -0.0001

AT.126 H X 0.0016 0.0016 0.0016 0.0016 0.0001 0.0000  
Y -0.0038 -0.0038 -0.0037 -0.0038 -0.0002 0.0001  
Z 0.0052 0.0052 0.0051 0.0052 0.0004 0.0001

AT.127 H X 0.0016 0.0016 -0.0016 -0.0016 0.0001 -0.0000  
Y 0.0038 0.0038 -0.0037 -0.0038 0.0002 0.0001  
Z 0.0052 0.0052 -0.0051 -0.0052 0.0004 -0.0001

AT.128 H X -0.0016 0.0016 0.0016 -0.0016 -0.0001 0.0000  
Y 0.0038 -0.0038 -0.0037 0.0038 0.0002 0.0001  
Z -0.0052 0.0052 0.0051 -0.0052 -0.0004 0.0001

AT.129 H X -0.0008 0.0008 -0.0008 0.0008 0.0007 0.0007  
Y -0.0005 0.0004 -0.0004 0.0004 0.0005 0.0005

Z 0.0002 -0.0002 0.0002 -0.0002 -0.0004 -0.0005  
AT. 130 H X 0.0008 0.0008 0.0008 0.0008 -0.0007 -0.0007  
Y -0.0005 -0.0004 -0.0004 -0.0004 0.0005 0.0005  
Z -0.0002 -0.0002 -0.0002 -0.0002 0.0004 0.0005  
AT. 131 H X 0.0008 0.0008 -0.0008 -0.0008 -0.0007 0.0007  
Y 0.0005 0.0004 -0.0004 -0.0004 -0.0005 0.0005  
Z -0.0002 -0.0002 0.0002 0.0002 0.0004 -0.0005  
AT. 132 H X -0.0008 0.0008 0.0008 -0.0008 0.0007 -0.0007  
Y 0.0005 -0.0004 -0.0004 0.0004 -0.0005 0.0005  
Z 0.0002 -0.0002 -0.0002 0.0002 -0.0004 0.0005  
AT. 133 C X -0.0000 0.0000 -0.0000 0.0000 0.0001 0.0000  
Y -0.0000 0.0001 -0.0001 0.0001 -0.0006 -0.0006  
Z -0.0000 0.0000 -0.0000 0.0000 0.0008 0.0007  
AT. 134 C X 0.0000 0.0000 0.0000 0.0000 -0.0001 -0.0000  
Y -0.0000 -0.0001 -0.0001 -0.0001 -0.0006 -0.0006  
Z 0.0000 0.0000 0.0000 0.0000 -0.0008 -0.0007  
AT. 135 C X 0.0000 0.0000 -0.0000 -0.0000 -0.0001 0.0000  
Y 0.0000 0.0001 -0.0001 -0.0001 0.0006 -0.0006  
Z 0.0000 0.0000 -0.0000 -0.0000 -0.0008 0.0007  
AT. 136 C X -0.0000 0.0000 0.0000 -0.0000 0.0001 -0.0000  
Y 0.0000 -0.0001 -0.0001 0.0001 0.0006 -0.0006  
Z -0.0000 0.0000 0.0000 -0.0000 0.0008 -0.0007  
AT. 137 C X 0.0020 -0.0020 0.0020 -0.0020 0.0000 0.0000  
Y -0.0072 0.0072 -0.0072 0.0072 -0.0007 -0.0006  
Z 0.0044 -0.0044 0.0044 -0.0044 0.0003 0.0002  
AT. 138 C X -0.0020 -0.0020 -0.0020 -0.0020 -0.0000 -0.0000  
Y -0.0072 -0.0072 -0.0072 -0.0072 -0.0007 -0.0006  
Z -0.0044 -0.0044 -0.0044 -0.0044 -0.0003 -0.0002  
AT. 139 C X -0.0020 -0.0020 0.0020 0.0020 -0.0000 0.0000  
Y 0.0072 0.0072 -0.0072 -0.0072 0.0007 -0.0006  
Z -0.0044 -0.0044 0.0044 0.0044 -0.0003 0.0002  
AT. 140 C X 0.0020 -0.0020 -0.0020 0.0020 0.0000 -0.0000

Y 0.0072 -0.0072 -0.0072 0.0072 0.0007 -0.0006  
Z 0.0044 -0.0044 -0.0044 0.0044 0.0003 -0.0002  
AT. 141 H X -0.0423 0.0423 -0.0424 0.0423 -0.0028 -0.0023  
Y 0.0262 -0.0262 0.0262 -0.0262 0.0016 0.0013  
Z -0.0377 0.0378 -0.0378 0.0378 -0.0029 -0.0022  
AT. 142 H X 0.0423 0.0423 0.0424 0.0423 0.0028 0.0023  
Y 0.0262 0.0262 0.0262 0.0262 0.0016 0.0013  
Z 0.0377 0.0378 0.0378 0.0378 0.0029 0.0022  
AT. 143 H X 0.0423 0.0423 -0.0424 -0.0423 0.0028 -0.0023  
Y -0.0262 -0.0262 0.0262 0.0262 -0.0016 0.0013  
Z 0.0377 0.0378 -0.0378 -0.0378 0.0029 -0.0022  
AT. 144 H X -0.0423 0.0423 0.0424 -0.0423 -0.0028 0.0023  
Y -0.0262 0.0262 0.0262 -0.0262 -0.0016 0.0013  
Z -0.0377 0.0378 0.0378 -0.0378 -0.0029 0.0022  
AT. 145 H X 0.0181 -0.0181 0.0181 -0.0181 0.0021 0.0018  
Y 0.0605 -0.0605 0.0605 -0.0605 0.0071 0.0065  
Z -0.0155 0.0155 -0.0155 0.0155 -0.0014 -0.0013  
AT. 146 H X -0.0181 -0.0181 -0.0181 -0.0181 -0.0021 -0.0018  
Y 0.0605 0.0605 0.0605 0.0605 0.0071 0.0065  
Z 0.0155 0.0155 0.0155 0.0155 0.0014 0.0013  
AT. 147 H X -0.0181 -0.0181 0.0181 0.0181 -0.0021 0.0018  
Y -0.0605 -0.0605 0.0605 0.0605 -0.0071 0.0065  
Z 0.0155 0.0155 -0.0155 -0.0155 0.0014 -0.0013  
AT. 148 H X 0.0181 -0.0181 -0.0181 0.0181 0.0021 -0.0018  
Y -0.0605 0.0605 0.0605 -0.0605 -0.0071 0.0065  
Z -0.0155 0.0155 0.0155 -0.0155 -0.0014 0.0013  
AT. 149 O X -0.0000 0.0000 -0.0000 0.0000 0.0000 0.0000  
Y 0.0000 -0.0000 0.0000 -0.0000 -0.0000 -0.0000  
Z -0.0000 0.0000 -0.0000 0.0000 -0.0001 -0.0001  
AT. 150 O X 0.0000 0.0000 0.0000 0.0000 -0.0000 -0.0000  
Y 0.0000 0.0000 0.0000 0.0000 -0.0000 -0.0000  
Z 0.0000 0.0000 0.0000 0.0000 0.0001 0.0001



AT.151 O X 0.0000 0.0000 -0.0000 -0.0000 -0.0000 0.0000  
Y -0.0000 -0.0000 0.0000 0.0000 0.0000 -0.0000  
Z 0.0000 0.0000 -0.0000 -0.0000 0.0001 -0.0001

AT.152 O X -0.0000 0.0000 0.0000 -0.0000 0.0000 -0.0000  
Y -0.0000 0.0000 0.0000 -0.0000 0.0000 -0.0000  
Z -0.0000 0.0000 0.0000 -0.0000 -0.0001 0.0001

AT.153 H X -0.0001 0.0001 -0.0000 0.0001 0.0004 0.0004  
Y -0.0001 0.0001 -0.0001 0.0001 -0.0001 -0.0001  
Z 0.0002 -0.0002 0.0002 -0.0001 0.0007 0.0008

AT.154 H X 0.0001 0.0001 0.0000 0.0001 -0.0004 -0.0004  
Y -0.0001 -0.0001 -0.0001 -0.0001 -0.0001 -0.0001  
Z -0.0002 -0.0002 -0.0002 -0.0001 -0.0007 -0.0008

AT.155 H X 0.0001 0.0001 -0.0000 -0.0001 -0.0004 0.0004  
Y 0.0001 0.0001 -0.0001 -0.0001 0.0001 -0.0001  
Z -0.0002 -0.0002 0.0002 0.0001 -0.0007 0.0008

AT.156 H X -0.0001 0.0001 0.0000 -0.0001 0.0004 -0.0004  
Y 0.0001 -0.0001 -0.0001 0.0001 0.0001 -0.0001  
Z 0.0002 -0.0002 -0.0002 0.0001 0.0007 -0.0008

AT.157 O X -0.0000 0.0000 -0.0000 0.0000 0.0002 0.0002  
Y -0.0000 0.0000 -0.0000 0.0000 0.0002 0.0002  
Z -0.0000 0.0000 0.0000 0.0000 0.0001 0.0001

AT.158 O X 0.0000 0.0000 0.0000 0.0000 -0.0002 -0.0002  
Y -0.0000 -0.0000 -0.0000 -0.0000 0.0002 0.0002  
Z 0.0000 0.0000 -0.0000 0.0000 -0.0001 -0.0001

AT.159 O X 0.0000 0.0000 -0.0000 -0.0000 -0.0002 0.0002  
Y 0.0000 0.0000 -0.0000 -0.0000 -0.0002 0.0002  
Z 0.0000 0.0000 0.0000 -0.0000 -0.0001 0.0001

AT.160 O X -0.0000 0.0000 0.0000 -0.0000 0.0002 -0.0002  
Y 0.0000 -0.0000 -0.0000 0.0000 -0.0002 0.0002  
Z -0.0000 0.0000 -0.0000 -0.0000 0.0001 -0.0001

AT.161 O X -0.0002 0.0002 -0.0002 0.0002 0.0023 0.0024  
Y 0.0005 -0.0005 0.0005 -0.0005 -0.0056 -0.0056

Z -0.0000 0.0000 -0.0000 0.0000 0.0001 0.0001  
AT.162 O X 0.0002 0.0002 0.0002 0.0002 -0.0023 -0.0024  
Y 0.0005 0.0005 0.0005 0.0005 -0.0056 -0.0056  
Z 0.0000 0.0000 0.0000 0.0000 -0.0001 -0.0001  
AT.163 O X 0.0002 0.0002 -0.0002 -0.0002 -0.0023 0.0024  
Y -0.0005 -0.0005 0.0005 0.0005 0.0056 -0.0056  
Z 0.0000 0.0000 -0.0000 -0.0000 -0.0001 0.0001  
AT.164 O X -0.0002 0.0002 0.0002 -0.0002 0.0023 -0.0024  
Y -0.0005 0.0005 0.0005 -0.0005 0.0056 -0.0056  
Z -0.0000 0.0000 0.0000 -0.0000 0.0001 -0.0001  
AT.165 H X 0.0037 -0.0033 0.0032 -0.0035 -0.0388 -0.0388  
Y -0.0076 0.0068 -0.0066 0.0071 0.0824 0.0825  
Z 0.0004 -0.0003 0.0003 -0.0004 -0.0045 -0.0045  
AT.166 H X -0.0037 -0.0033 -0.0032 -0.0035 0.0388 0.0388  
Y -0.0076 -0.0068 -0.0066 -0.0071 0.0824 0.0825  
Z -0.0004 -0.0003 -0.0003 -0.0004 0.0045 0.0045  
AT.167 H X -0.0037 -0.0033 0.0032 0.0035 0.0388 -0.0388  
Y 0.0076 0.0068 -0.0066 -0.0071 -0.0824 0.0825  
Z -0.0004 -0.0003 0.0003 0.0004 0.0045 -0.0045  
AT.168 H X 0.0037 -0.0033 -0.0032 0.0035 -0.0388 0.0388  
Y 0.0076 -0.0068 -0.0066 0.0071 -0.0824 0.0825  
Z 0.0004 -0.0003 -0.0003 0.0004 -0.0045 0.0045  
AT.169 O X -0.0000 -0.0000 0.0000 -0.0000 -0.0000 -0.0000  
Y -0.0000 0.0000 0.0000 -0.0000 -0.0000 -0.0000  
Z -0.0000 -0.0000 0.0000 -0.0000 -0.0000 -0.0000  
AT.170 O X 0.0000 -0.0000 -0.0000 -0.0000 0.0000 0.0000  
Y -0.0000 -0.0000 0.0000 0.0000 -0.0000 -0.0000  
Z 0.0000 -0.0000 -0.0000 -0.0000 0.0000 0.0000  
AT.171 O X 0.0000 -0.0000 0.0000 0.0000 0.0000 -0.0000  
Y 0.0000 0.0000 0.0000 0.0000 0.0000 -0.0000  
Z 0.0000 -0.0000 0.0000 0.0000 0.0000 -0.0000  
AT.172 O X -0.0000 -0.0000 -0.0000 0.0000 -0.0000 0.0000

|             |         |         |         |         |         |         |
|-------------|---------|---------|---------|---------|---------|---------|
| Y           | 0.0000  | -0.0000 | 0.0000  | -0.0000 | 0.0000  | -0.0000 |
| Z           | -0.0000 | -0.0000 | -0.0000 | 0.0000  | -0.0000 | 0.0000  |
| AT. 173 H X | 0.0000  | -0.0000 | -0.0001 | 0.0000  | 0.0002  | 0.0001  |
| Y           | 0.0001  | -0.0001 | -0.0002 | 0.0001  | 0.0007  | 0.0005  |
| Z           | 0.0000  | -0.0000 | -0.0001 | 0.0000  | 0.0001  | 0.0001  |
| AT. 174 H X | -0.0000 | -0.0000 | 0.0001  | 0.0000  | -0.0002 | -0.0001 |
| Y           | 0.0001  | 0.0001  | -0.0002 | -0.0001 | 0.0007  | 0.0005  |
| Z           | -0.0000 | -0.0000 | 0.0001  | 0.0000  | -0.0001 | -0.0001 |
| AT. 175 H X | -0.0000 | -0.0000 | -0.0001 | -0.0000 | -0.0002 | 0.0001  |
| Y           | -0.0001 | -0.0001 | -0.0002 | -0.0001 | -0.0007 | 0.0005  |
| Z           | -0.0000 | -0.0000 | -0.0001 | -0.0000 | -0.0001 | 0.0001  |
| AT. 176 H X | 0.0000  | -0.0000 | 0.0001  | -0.0000 | 0.0002  | -0.0001 |
| Y           | -0.0001 | 0.0001  | -0.0002 | 0.0001  | -0.0007 | 0.0005  |
| Z           | 0.0000  | -0.0000 | 0.0001  | -0.0000 | 0.0001  | -0.0001 |

FREQ(CM\*\*-1) 3311.40 3314.78 3698.54 3699.00 3714.34 3714.74

|           |         |         |         |         |         |         |
|-----------|---------|---------|---------|---------|---------|---------|
| AT. 1 I X | 0.0000  | 0.0000  | -0.0000 | -0.0000 | -0.0000 | 0.0000  |
| Y         | -0.0000 | -0.0000 | 0.0000  | -0.0000 | 0.0000  | -0.0000 |
| Z         | -0.0000 | 0.0000  | -0.0000 | -0.0000 | 0.0000  | -0.0000 |
| AT. 2 I X | 0.0000  | 0.0000  | -0.0000 | 0.0000  | -0.0000 | -0.0000 |
| Y         | 0.0000  | 0.0000  | -0.0000 | -0.0000 | -0.0000 | -0.0000 |
| Z         | -0.0000 | 0.0000  | -0.0000 | 0.0000  | 0.0000  | 0.0000  |
| AT. 3 I X | -0.0000 | 0.0000  | -0.0000 | -0.0000 | 0.0000  | -0.0000 |
| Y         | 0.0000  | -0.0000 | 0.0000  | -0.0000 | -0.0000 | 0.0000  |
| Z         | 0.0000  | 0.0000  | -0.0000 | -0.0000 | -0.0000 | 0.0000  |
| AT. 4 I X | -0.0000 | 0.0000  | -0.0000 | 0.0000  | 0.0000  | 0.0000  |
| Y         | -0.0000 | 0.0000  | -0.0000 | -0.0000 | 0.0000  | 0.0000  |
| Z         | 0.0000  | 0.0000  | -0.0000 | 0.0000  | -0.0000 | -0.0000 |
| AT. 5 I X | 0.0000  | -0.0000 | -0.0000 | -0.0000 | 0.0000  | 0.0000  |
| Y         | -0.0000 | 0.0000  | 0.0000  | 0.0000  | -0.0000 | -0.0000 |
| Z         | -0.0000 | 0.0000  | -0.0000 | -0.0000 | -0.0000 | -0.0000 |

AT. 6 I X 0.0000 -0.0000 -0.0000 0.0000 0.0000 -0.0000  
Y 0.0000 -0.0000 -0.0000 0.0000 0.0000 -0.0000  
Z -0.0000 0.0000 -0.0000 0.0000 -0.0000 0.0000

AT. 7 I X -0.0000 -0.0000 -0.0000 -0.0000 -0.0000 -0.0000  
Y 0.0000 0.0000 0.0000 0.0000 0.0000 0.0000  
Z 0.0000 0.0000 -0.0000 -0.0000 0.0000 0.0000

AT. 8 I X -0.0000 -0.0000 -0.0000 0.0000 -0.0000 0.0000  
Y -0.0000 -0.0000 -0.0000 0.0000 -0.0000 0.0000  
Z 0.0000 0.0000 -0.0000 0.0000 0.0000 -0.0000

AT. 9 N X 0.0000 -0.0000 -0.0000 -0.0000 -0.0000 -0.0000  
Y -0.0000 -0.0000 -0.0000 -0.0000 -0.0000 -0.0000  
Z -0.0000 0.0000 -0.0000 -0.0000 -0.0000 -0.0000

AT. 10 N X 0.0000 -0.0000 -0.0000 0.0000 -0.0000 0.0000  
Y 0.0000 0.0000 0.0000 -0.0000 0.0000 -0.0000  
Z -0.0000 0.0000 -0.0000 0.0000 -0.0000 0.0000

AT. 11 N X -0.0000 -0.0000 -0.0000 -0.0000 0.0000 0.0000  
Y 0.0000 -0.0000 -0.0000 -0.0000 0.0000 0.0000  
Z 0.0000 0.0000 -0.0000 -0.0000 0.0000 0.0000

AT. 12 N X -0.0000 -0.0000 -0.0000 0.0000 0.0000 -0.0000  
Y -0.0000 0.0000 0.0000 -0.0000 -0.0000 0.0000  
Z 0.0000 0.0000 -0.0000 0.0000 0.0000 -0.0000

AT. 13 N X -0.0000 -0.0000 0.0000 -0.0000 -0.0000 -0.0000  
Y -0.0003 -0.0003 -0.0000 -0.0000 0.0000 0.0000  
Z 0.0001 0.0001 -0.0000 -0.0000 -0.0000 -0.0000

AT. 14 N X -0.0000 -0.0000 0.0000 0.0000 -0.0000 0.0000  
Y 0.0003 0.0003 0.0000 -0.0000 -0.0000 0.0000  
Z 0.0001 0.0001 -0.0000 0.0000 -0.0000 0.0000

AT. 15 N X 0.0000 -0.0000 0.0000 -0.0000 0.0000 0.0000  
Y 0.0003 -0.0003 -0.0000 -0.0000 -0.0000 -0.0000  
Z -0.0001 0.0001 -0.0000 -0.0000 0.0000 0.0000

AT. 16 N X 0.0000 -0.0000 0.0000 0.0000 0.0000 -0.0000  
Y -0.0003 0.0003 0.0000 -0.0000 0.0000 -0.0000

Z -0.0001 0.0001 -0.0000 0.0000 0.0000 -0.0000  
AT. 17 O X 0.0000 0.0000 -0.0000 -0.0000 -0.0000 -0.0000  
Y -0.0000 -0.0000 -0.0000 -0.0000 -0.0001 -0.0001  
Z -0.0000 -0.0000 -0.0000 -0.0000 -0.0000 -0.0000  
AT. 18 O X 0.0000 0.0000 -0.0000 0.0000 -0.0000 0.0000  
Y 0.0000 0.0000 0.0000 -0.0000 0.0001 -0.0001  
Z -0.0000 -0.0000 -0.0000 0.0000 -0.0000 0.0000  
AT. 19 O X -0.0000 0.0000 -0.0000 -0.0000 0.0000 0.0000  
Y 0.0000 -0.0000 -0.0000 -0.0000 0.0001 0.0001  
Z 0.0000 -0.0000 -0.0000 -0.0000 0.0000 0.0000  
AT. 20 O X -0.0000 0.0000 -0.0000 0.0000 0.0000 -0.0000  
Y -0.0000 0.0000 0.0000 -0.0000 -0.0001 0.0001  
Z 0.0000 -0.0000 -0.0000 0.0000 0.0000 -0.0000  
AT. 21 O X 0.0001 0.0001 0.0000 -0.0000 0.0000 -0.0000  
Y -0.0004 -0.0004 0.0000 0.0000 0.0000 0.0000  
Z 0.0004 0.0004 0.0000 -0.0000 -0.0000 -0.0000  
AT. 22 O X 0.0001 0.0001 0.0000 0.0000 0.0000 0.0000  
Y 0.0004 0.0004 -0.0000 0.0000 -0.0000 0.0000  
Z 0.0004 0.0004 0.0000 0.0000 -0.0000 0.0000  
AT. 23 O X -0.0001 0.0001 0.0000 -0.0000 -0.0000 0.0000  
Y 0.0004 -0.0004 0.0000 0.0000 -0.0000 -0.0000  
Z -0.0004 0.0004 0.0000 -0.0000 0.0000 0.0000  
AT. 24 O X -0.0001 0.0001 0.0000 0.0000 -0.0000 -0.0000  
Y -0.0004 0.0004 -0.0000 0.0000 0.0000 -0.0000  
Z -0.0004 0.0004 0.0000 0.0000 0.0000 -0.0000  
AT. 25 C X -0.0000 0.0000 0.0000 0.0000 -0.0000 0.0000  
Y 0.0000 0.0001 -0.0000 0.0000 0.0000 0.0000  
Z 0.0000 0.0000 -0.0000 0.0000 -0.0000 0.0000  
AT. 26 C X -0.0000 0.0000 0.0000 -0.0000 -0.0000 -0.0000  
Y -0.0000 -0.0001 0.0000 0.0000 -0.0000 0.0000  
Z 0.0000 0.0000 -0.0000 -0.0000 -0.0000 -0.0000  
AT. 27 C X 0.0000 0.0000 0.0000 0.0000 0.0000 -0.0000

Y -0.0000 0.0001 -0.0000 0.0000 -0.0000 -0.0000  
Z -0.0000 0.0000 -0.0000 0.0000 0.0000 -0.0000  
AT. 28 C X 0.0000 0.0000 0.0000 -0.0000 0.0000 0.0000  
Y 0.0000 -0.0001 0.0000 0.0000 0.0000 -0.0000  
Z -0.0000 0.0000 -0.0000 -0.0000 0.0000 0.0000  
AT. 29 H X -0.0000 -0.0006 -0.0001 -0.0001 -0.0000 0.0000  
Y 0.0001 -0.0000 -0.0000 -0.0000 -0.0000 -0.0000  
Z 0.0002 -0.0002 -0.0000 -0.0001 -0.0001 0.0000  
AT. 30 H X -0.0000 -0.0006 -0.0001 0.0001 -0.0000 -0.0000  
Y -0.0001 0.0000 0.0000 -0.0000 0.0000 -0.0000  
Z 0.0002 -0.0002 -0.0000 0.0001 -0.0001 -0.0000  
AT. 31 H X 0.0000 -0.0006 -0.0001 -0.0001 0.0000 -0.0000  
Y -0.0001 -0.0000 -0.0000 -0.0000 0.0000 0.0000  
Z -0.0002 -0.0002 -0.0000 -0.0001 0.0001 -0.0000  
AT. 32 H X 0.0000 -0.0006 -0.0001 0.0001 0.0000 0.0000  
Y 0.0001 0.0000 0.0000 -0.0000 -0.0000 0.0000  
Z -0.0002 -0.0002 -0.0000 0.0001 0.0001 0.0000  
AT. 33 H X -0.0001 -0.0002 0.0001 0.0001 0.0002 0.0000  
Y -0.0006 -0.0009 -0.0001 -0.0002 -0.0001 -0.0001  
Z -0.0001 -0.0002 -0.0000 -0.0000 0.0000 0.0001  
AT. 34 H X -0.0001 -0.0002 0.0001 -0.0001 0.0002 -0.0000  
Y 0.0006 0.0009 0.0001 -0.0002 0.0001 -0.0001  
Z -0.0001 -0.0002 -0.0000 0.0000 0.0000 -0.0001  
AT. 35 H X 0.0001 -0.0002 0.0001 0.0001 -0.0002 -0.0000  
Y 0.0006 -0.0009 -0.0001 -0.0002 0.0001 0.0001  
Z 0.0001 -0.0002 -0.0000 -0.0000 -0.0000 -0.0001  
AT. 36 H X 0.0001 -0.0002 0.0001 -0.0001 -0.0002 0.0000  
Y -0.0006 0.0009 0.0001 -0.0002 -0.0001 0.0001  
Z 0.0001 -0.0002 -0.0000 0.0000 -0.0000 0.0001  
AT. 37 C X -0.0000 -0.0000 0.0000 0.0000 0.0000 0.0000  
Y 0.0000 0.0000 0.0000 0.0000 0.0000 0.0001  
Z 0.0000 0.0000 0.0000 0.0000 0.0001 0.0000

AT. 38 C X -0.0000 -0.0000 0.0000 -0.0000 0.0000 -0.0000  
Y -0.0000 -0.0000 -0.0000 0.0000 -0.0000 0.0001  
Z 0.0000 0.0000 0.0000 -0.0000 0.0001 -0.0000

AT. 39 C X 0.0000 -0.0000 0.0000 0.0000 -0.0000 -0.0000  
Y -0.0000 0.0000 0.0000 0.0000 -0.0000 -0.0001  
Z -0.0000 0.0000 0.0000 0.0000 -0.0001 -0.0000

AT. 40 C X 0.0000 -0.0000 0.0000 -0.0000 -0.0000 0.0000  
Y 0.0000 -0.0000 -0.0000 0.0000 0.0000 -0.0001  
Z -0.0000 0.0000 0.0000 -0.0000 -0.0001 0.0000

AT. 41 C X -0.0000 -0.0000 -0.0000 -0.0000 -0.0000 -0.0000  
Y 0.0000 0.0000 0.0000 0.0000 0.0000 0.0000  
Z -0.0000 0.0000 0.0000 0.0000 0.0000 0.0000

AT. 42 C X -0.0000 -0.0000 -0.0000 0.0000 -0.0000 0.0000  
Y -0.0000 -0.0000 -0.0000 0.0000 -0.0000 0.0000  
Z -0.0000 0.0000 0.0000 -0.0000 0.0000 -0.0000

AT. 43 C X 0.0000 -0.0000 -0.0000 -0.0000 0.0000 0.0000  
Y -0.0000 0.0000 0.0000 0.0000 -0.0000 -0.0000  
Z 0.0000 0.0000 0.0000 0.0000 -0.0000 -0.0000

AT. 44 C X 0.0000 -0.0000 -0.0000 0.0000 0.0000 -0.0000  
Y 0.0000 -0.0000 -0.0000 0.0000 0.0000 -0.0000  
Z 0.0000 0.0000 0.0000 -0.0000 -0.0000 0.0000

AT. 45 H X -0.0000 -0.0001 0.0000 0.0000 -0.0000 0.0000  
Y -0.0003 -0.0001 -0.0001 -0.0001 -0.0001 -0.0001  
Z 0.0004 0.0001 0.0000 0.0000 -0.0000 0.0000

AT. 46 H X -0.0000 -0.0001 0.0000 -0.0000 -0.0000 -0.0000  
Y 0.0003 0.0001 0.0001 -0.0001 0.0001 -0.0001  
Z 0.0004 0.0001 0.0000 -0.0000 -0.0000 -0.0000

AT. 47 H X 0.0000 -0.0001 0.0000 0.0000 0.0000 -0.0000  
Y 0.0003 -0.0001 -0.0001 -0.0001 0.0001 0.0001  
Z -0.0004 0.0001 0.0000 0.0000 0.0000 -0.0000

AT. 48 H X 0.0000 -0.0001 0.0000 -0.0000 0.0000 0.0000  
Y -0.0003 0.0001 0.0001 -0.0001 -0.0001 0.0001

Z -0.0004 0.0001 0.0000 -0.0000 0.0000 0.0000  
AT. 49 H X 0.0002 0.0002 0.0002 0.0002 0.0002 0.0002  
Y -0.0001 -0.0002 -0.0001 -0.0001 -0.0001 -0.0001  
Z -0.0001 -0.0001 -0.0001 -0.0001 -0.0001 -0.0001  
AT. 50 H X 0.0002 0.0002 0.0002 -0.0002 0.0002 -0.0002  
Y 0.0001 0.0002 0.0001 -0.0001 0.0001 -0.0001  
Z -0.0001 -0.0001 -0.0001 0.0001 -0.0001 0.0001  
AT. 51 H X -0.0002 0.0002 0.0002 0.0002 -0.0002 -0.0002  
Y 0.0001 -0.0002 -0.0001 -0.0001 0.0001 0.0001  
Z 0.0001 -0.0001 -0.0001 -0.0001 0.0001 0.0001  
AT. 52 H X -0.0002 0.0002 0.0002 -0.0002 -0.0002 0.0002  
Y -0.0001 0.0002 0.0001 -0.0001 -0.0001 0.0001  
Z 0.0001 -0.0001 -0.0001 0.0001 0.0001 -0.0001  
AT. 53 C X -0.0000 -0.0000 0.0000 0.0000 0.0000 0.0000  
Y 0.0000 0.0000 -0.0000 -0.0000 -0.0000 -0.0000  
Z 0.0000 0.0000 -0.0000 -0.0000 -0.0000 -0.0000  
AT. 54 C X -0.0000 -0.0000 0.0000 -0.0000 0.0000 -0.0000  
Y -0.0000 -0.0000 0.0000 -0.0000 0.0000 -0.0000  
Z 0.0000 0.0000 -0.0000 0.0000 -0.0000 0.0000  
AT. 55 C X 0.0000 -0.0000 0.0000 0.0000 -0.0000 -0.0000  
Y -0.0000 0.0000 -0.0000 -0.0000 0.0000 0.0000  
Z -0.0000 0.0000 -0.0000 -0.0000 0.0000 0.0000  
AT. 56 C X 0.0000 -0.0000 0.0000 -0.0000 -0.0000 0.0000  
Y 0.0000 -0.0000 0.0000 -0.0000 -0.0000 0.0000  
Z -0.0000 0.0000 -0.0000 0.0000 0.0000 -0.0000  
AT. 57 C X -0.0000 -0.0000 -0.0000 -0.0000 -0.0000 -0.0000  
Y 0.0001 0.0001 0.0000 0.0000 0.0000 0.0000  
Z -0.0000 -0.0000 -0.0000 -0.0000 0.0000 -0.0000  
AT. 58 C X -0.0000 -0.0000 -0.0000 0.0000 -0.0000 0.0000  
Y -0.0001 -0.0001 -0.0000 0.0000 -0.0000 0.0000  
Z -0.0000 -0.0000 -0.0000 0.0000 0.0000 0.0000  
AT. 59 C X 0.0000 -0.0000 -0.0000 -0.0000 0.0000 0.0000



Y -0.0001 0.0001 0.0000 0.0000 -0.0000 -0.0000  
Z 0.0000 -0.0000 -0.0000 -0.0000 -0.0000 0.0000  
AT. 60 C X 0.0000 -0.0000 -0.0000 0.0000 0.0000 -0.0000  
Y 0.0001 -0.0001 -0.0000 0.0000 0.0000 -0.0000  
Z 0.0000 -0.0000 -0.0000 0.0000 -0.0000 -0.0000  
AT. 61 H X 0.0004 0.0004 0.0001 0.0000 0.0001 0.0001  
Y -0.0006 -0.0006 -0.0001 -0.0001 -0.0001 -0.0000  
Z -0.0002 -0.0002 -0.0001 -0.0001 -0.0001 -0.0001  
AT. 62 H X 0.0004 0.0004 0.0001 -0.0000 0.0001 -0.0001  
Y 0.0006 0.0006 0.0001 -0.0001 0.0001 -0.0000  
Z -0.0002 -0.0002 -0.0001 0.0001 -0.0001 0.0001  
AT. 63 H X -0.0004 0.0004 0.0001 0.0000 -0.0001 -0.0001  
Y 0.0006 -0.0006 -0.0001 -0.0001 0.0001 0.0000  
Z 0.0002 -0.0002 -0.0001 -0.0001 0.0001 0.0001  
AT. 64 H X -0.0004 0.0004 0.0001 -0.0000 -0.0001 0.0001  
Y -0.0006 0.0006 0.0001 -0.0001 -0.0001 0.0000  
Z 0.0002 -0.0002 -0.0001 0.0001 0.0001 -0.0001  
AT. 65 H X 0.0001 0.0002 -0.0000 0.0000 0.0000 -0.0000  
Y 0.0002 0.0002 0.0000 0.0000 0.0000 -0.0000  
Z -0.0002 -0.0002 -0.0000 -0.0000 -0.0000 -0.0000  
AT. 66 H X 0.0001 0.0002 -0.0000 -0.0000 0.0000 0.0000  
Y -0.0002 -0.0002 -0.0000 0.0000 -0.0000 -0.0000  
Z -0.0002 -0.0002 -0.0000 0.0000 -0.0000 0.0000  
AT. 67 H X -0.0001 0.0002 -0.0000 0.0000 -0.0000 0.0000  
Y -0.0002 0.0002 0.0000 0.0000 -0.0000 0.0000  
Z 0.0002 -0.0002 -0.0000 -0.0000 0.0000 0.0000  
AT. 68 H X -0.0001 0.0002 -0.0000 -0.0000 -0.0000 -0.0000  
Y 0.0002 -0.0002 -0.0000 0.0000 0.0000 0.0000  
Z 0.0002 -0.0002 -0.0000 0.0000 0.0000 -0.0000  
AT. 69 H X -0.0003 -0.0003 -0.0000 0.0000 -0.0000 0.0000  
Y -0.0007 -0.0006 -0.0001 -0.0001 -0.0001 -0.0001  
Z 0.0008 0.0008 0.0001 0.0001 0.0001 0.0001

AT. 70 H X -0.0003 -0.0003 -0.0000 -0.0000 -0.0000 -0.0000  
Y 0.0007 0.0006 0.0001 -0.0001 0.0001 -0.0001  
Z 0.0008 0.0008 0.0001 -0.0001 0.0001 -0.0001

AT. 71 H X 0.0003 -0.0003 -0.0000 0.0000 0.0000 -0.0000  
Y 0.0007 -0.0006 -0.0001 -0.0001 0.0001 0.0001  
Z -0.0008 0.0008 0.0001 0.0001 -0.0001 -0.0001

AT. 72 H X 0.0003 -0.0003 -0.0000 -0.0000 0.0000 0.0000  
Y -0.0007 0.0006 0.0001 -0.0001 -0.0001 0.0001  
Z -0.0008 0.0008 0.0001 -0.0001 -0.0001 0.0001

AT. 73 C X 0.0003 0.0003 -0.0001 -0.0001 -0.0001 -0.0001  
Y 0.0001 0.0001 0.0001 0.0001 0.0001 0.0001  
Z -0.0001 -0.0002 0.0000 0.0000 -0.0000 -0.0000

AT. 74 C X 0.0003 0.0003 -0.0001 0.0001 -0.0001 0.0001  
Y -0.0001 -0.0001 -0.0001 0.0001 -0.0001 0.0001  
Z -0.0001 -0.0002 0.0000 -0.0000 -0.0000 0.0000

AT. 75 C X -0.0003 0.0003 -0.0001 -0.0001 0.0001 0.0001  
Y -0.0001 0.0001 0.0001 0.0001 -0.0001 -0.0001  
Z 0.0001 -0.0002 0.0000 0.0000 0.0000 0.0000

AT. 76 C X -0.0003 0.0003 -0.0001 0.0001 0.0001 -0.0001  
Y 0.0001 -0.0001 -0.0001 0.0001 0.0001 -0.0001  
Z 0.0001 -0.0002 0.0000 -0.0000 0.0000 -0.0000

AT. 77 C X -0.0000 -0.0000 0.0000 -0.0000 0.0000 0.0000  
Y -0.0000 -0.0000 0.0000 0.0000 0.0000 0.0000  
Z -0.0000 -0.0000 -0.0000 -0.0000 -0.0000 -0.0000

AT. 78 C X -0.0000 -0.0000 0.0000 0.0000 0.0000 -0.0000  
Y 0.0000 0.0000 -0.0000 0.0000 -0.0000 0.0000  
Z -0.0000 -0.0000 -0.0000 0.0000 -0.0000 0.0000

AT. 79 C X 0.0000 -0.0000 0.0000 -0.0000 -0.0000 -0.0000  
Y 0.0000 -0.0000 0.0000 0.0000 -0.0000 -0.0000  
Z 0.0000 -0.0000 -0.0000 -0.0000 0.0000 0.0000

AT. 80 C X 0.0000 -0.0000 0.0000 0.0000 -0.0000 0.0000  
Y -0.0000 0.0000 -0.0000 0.0000 0.0000 -0.0000

Z 0.0000 -0.0000 -0.0000 0.0000 0.0000 -0.0000  
AT. 81 H X 0.0001 0.0001 0.0002 0.0002 0.0002 0.0001  
Y -0.0001 -0.0001 -0.0001 -0.0001 -0.0002 -0.0002  
Z 0.0000 0.0000 0.0001 0.0001 0.0001 0.0001  
AT. 82 H X 0.0001 0.0001 0.0002 -0.0002 0.0002 -0.0001  
Y 0.0001 0.0001 0.0001 -0.0001 0.0002 -0.0002  
Z 0.0000 0.0000 0.0001 -0.0001 0.0001 -0.0001  
AT. 83 H X -0.0001 0.0001 0.0002 0.0002 -0.0002 -0.0001  
Y 0.0001 -0.0001 -0.0001 -0.0001 0.0002 0.0002  
Z -0.0000 0.0000 0.0001 0.0001 -0.0001 -0.0001  
AT. 84 H X -0.0001 0.0001 0.0002 -0.0002 -0.0002 0.0001  
Y -0.0001 0.0001 0.0001 -0.0001 -0.0002 0.0002  
Z -0.0000 0.0000 0.0001 -0.0001 -0.0001 0.0001  
AT. 85 H X -0.0001 -0.0001 -0.0000 -0.0000 -0.0001 -0.0000  
Y -0.0000 0.0001 -0.0001 -0.0001 -0.0000 -0.0000  
Z 0.0000 0.0001 -0.0000 -0.0000 -0.0000 -0.0000  
AT. 86 H X -0.0001 -0.0001 -0.0000 0.0000 -0.0001 0.0000  
Y 0.0000 -0.0001 0.0001 -0.0001 0.0000 -0.0000  
Z 0.0000 0.0001 -0.0000 0.0000 -0.0000 0.0000  
AT. 87 H X 0.0001 -0.0001 -0.0000 -0.0000 0.0001 0.0000  
Y 0.0000 0.0001 -0.0001 -0.0001 0.0000 0.0000  
Z -0.0000 0.0001 -0.0000 -0.0000 0.0000 0.0000  
AT. 88 H X 0.0001 -0.0001 -0.0000 0.0000 0.0001 -0.0000  
Y -0.0000 -0.0001 0.0001 -0.0001 -0.0000 0.0000  
Z -0.0000 0.0001 -0.0000 0.0000 0.0000 -0.0000  
AT. 89 C X -0.0000 -0.0001 0.0000 0.0000 0.0000 0.0000  
Y 0.0000 0.0000 -0.0000 -0.0000 -0.0000 -0.0000  
Z 0.0001 0.0001 0.0000 0.0000 0.0000 0.0000  
AT. 90 C X -0.0000 -0.0001 0.0000 -0.0000 0.0000 -0.0000  
Y -0.0000 -0.0000 0.0000 -0.0000 0.0000 -0.0000  
Z 0.0001 0.0001 0.0000 -0.0000 0.0000 -0.0000  
AT. 91 C X 0.0000 -0.0001 0.0000 0.0000 -0.0000 -0.0000

Y -0.0000 0.0000 -0.0000 -0.0000 0.0000 0.0000  
Z -0.0001 0.0001 0.0000 0.0000 -0.0000 -0.0000  
AT. 92 C X 0.0000 -0.0001 0.0000 -0.0000 -0.0000 0.0000  
Y 0.0000 -0.0000 0.0000 -0.0000 -0.0000 0.0000  
Z -0.0001 0.0001 0.0000 -0.0000 -0.0000 0.0000  
AT. 93 C X 0.0001 0.0001 0.0000 0.0000 0.0000 0.0000  
Y 0.0000 0.0000 -0.0000 -0.0000 -0.0000 -0.0000  
Z 0.0000 0.0000 0.0000 0.0000 0.0000 0.0000  
AT. 94 C X 0.0001 0.0001 0.0000 -0.0000 0.0000 -0.0000  
Y -0.0000 -0.0000 0.0000 -0.0000 0.0000 -0.0000  
Z 0.0000 0.0000 0.0000 -0.0000 0.0000 -0.0000  
AT. 95 C X -0.0001 0.0001 0.0000 0.0000 -0.0000 -0.0000  
Y -0.0000 0.0000 -0.0000 -0.0000 0.0000 0.0000  
Z -0.0000 0.0000 0.0000 0.0000 -0.0000 -0.0000  
AT. 96 C X -0.0001 0.0001 0.0000 -0.0000 -0.0000 0.0000  
Y 0.0000 -0.0000 0.0000 -0.0000 -0.0000 0.0000  
Z -0.0000 0.0000 0.0000 -0.0000 -0.0000 0.0000  
AT. 97 H X -0.0005 -0.0004 -0.0001 -0.0000 -0.0001 -0.0002  
Y -0.0002 -0.0003 0.0000 0.0001 0.0001 0.0001  
Z 0.0003 0.0002 0.0000 0.0001 0.0001 0.0001  
AT. 98 H X -0.0005 -0.0004 -0.0001 0.0000 -0.0001 0.0002  
Y 0.0002 0.0003 -0.0000 0.0001 -0.0001 0.0001  
Z 0.0003 0.0002 0.0000 -0.0001 0.0001 -0.0001  
AT. 99 H X 0.0005 -0.0004 -0.0001 -0.0000 0.0001 0.0002  
Y 0.0002 -0.0003 0.0000 0.0001 -0.0001 -0.0001  
Z -0.0003 0.0002 0.0000 0.0001 -0.0001 -0.0001  
AT. 100 H X 0.0005 -0.0004 -0.0001 0.0000 0.0001 -0.0002  
Y -0.0002 0.0003 -0.0000 0.0001 0.0001 -0.0001  
Z -0.0003 0.0002 0.0000 -0.0001 -0.0001 0.0001  
AT. 101 H X 0.0000 -0.0000 0.0000 0.0000 0.0005 0.0004  
Y -0.0000 -0.0001 -0.0001 -0.0001 -0.0004 -0.0003  
Z 0.0001 0.0001 -0.0006 -0.0006 -0.0006 -0.0005

AT.102 H X 0.0000 -0.0000 0.0000 -0.0000 0.0005 -0.0004  
Y 0.0000 0.0001 0.0001 -0.0001 0.0004 -0.0003  
Z 0.0001 0.0001 -0.0006 0.0006 -0.0006 0.0005

AT.103 H X -0.0000 -0.0000 0.0000 0.0000 -0.0005 -0.0004  
Y 0.0000 -0.0001 -0.0001 -0.0001 0.0004 0.0003  
Z -0.0001 0.0001 -0.0006 -0.0006 0.0006 0.0005

AT.104 H X -0.0000 -0.0000 0.0000 -0.0000 -0.0005 0.0004  
Y -0.0000 0.0001 0.0001 -0.0001 -0.0004 0.0003  
Z -0.0001 0.0001 -0.0006 0.0006 0.0006 -0.0005

AT.105 H X -0.0002 -0.0002 -0.0001 -0.0002 -0.0002 -0.0002  
Y -0.0003 -0.0002 0.0001 0.0001 0.0002 0.0002  
Z -0.0005 -0.0004 0.0000 -0.0000 0.0000 0.0001

AT.106 H X -0.0002 -0.0002 -0.0001 0.0002 -0.0002 0.0002  
Y 0.0003 0.0002 -0.0001 0.0001 -0.0002 0.0002  
Z -0.0005 -0.0004 0.0000 0.0000 0.0000 -0.0001

AT.107 H X 0.0002 -0.0002 -0.0001 -0.0002 0.0002 0.0002  
Y 0.0003 -0.0002 0.0001 0.0001 -0.0002 -0.0002  
Z 0.0005 -0.0004 0.0000 -0.0000 -0.0000 -0.0001

AT.108 H X 0.0002 -0.0002 -0.0001 0.0002 0.0002 -0.0002  
Y -0.0003 0.0002 -0.0001 0.0001 0.0002 -0.0002  
Z 0.0005 -0.0004 0.0000 0.0000 -0.0000 0.0001

AT.109 C X 0.0001 0.0001 -0.0000 -0.0000 -0.0000 0.0000  
Y 0.0000 -0.0000 -0.0000 -0.0000 -0.0000 -0.0000  
Z 0.0001 0.0001 0.0000 0.0000 0.0000 0.0000

AT.110 C X 0.0001 0.0001 -0.0000 0.0000 -0.0000 -0.0000  
Y -0.0000 0.0000 0.0000 -0.0000 0.0000 -0.0000  
Z 0.0001 0.0001 0.0000 -0.0000 0.0000 -0.0000

AT.111 C X -0.0001 0.0001 -0.0000 -0.0000 0.0000 -0.0000  
Y -0.0000 -0.0000 -0.0000 -0.0000 0.0000 0.0000  
Z -0.0001 0.0001 0.0000 0.0000 -0.0000 -0.0000

AT.112 C X -0.0001 0.0001 -0.0000 0.0000 0.0000 0.0000  
Y 0.0000 0.0000 0.0000 -0.0000 -0.0000 0.0000

Z -0.0001 0.0001 0.0000 -0.0000 -0.0000 0.0000  
AT. 113 H X -0.0005 -0.0006 0.0000 -0.0000 -0.0000 -0.0001  
Y -0.0001 -0.0002 0.0001 -0.0000 0.0000 -0.0000  
Z -0.0000 -0.0000 -0.0000 0.0000 -0.0000 0.0000  
AT. 114 H X -0.0005 -0.0006 0.0000 0.0000 -0.0000 0.0001  
Y 0.0001 0.0002 -0.0001 -0.0000 -0.0000 -0.0000  
Z -0.0000 -0.0000 -0.0000 -0.0000 -0.0000 -0.0000  
AT. 115 H X 0.0005 -0.0006 0.0000 -0.0000 0.0000 0.0001  
Y 0.0001 -0.0002 0.0001 -0.0000 -0.0000 0.0000  
Z 0.0000 -0.0000 -0.0000 0.0000 0.0000 -0.0000  
AT. 116 H X 0.0005 -0.0006 0.0000 0.0000 0.0000 -0.0001  
Y -0.0001 0.0002 -0.0001 -0.0000 0.0000 0.0000  
Z 0.0000 -0.0000 -0.0000 -0.0000 0.0000 0.0000  
AT. 117 H X -0.0003 -0.0003 -0.0000 0.0001 -0.0000 0.0001  
Y 0.0009 0.0010 -0.0000 -0.0000 -0.0000 -0.0000  
Z -0.0009 -0.0011 -0.0001 -0.0001 -0.0001 -0.0000  
AT. 118 H X -0.0003 -0.0003 -0.0000 -0.0001 -0.0000 -0.0001  
Y -0.0009 -0.0010 0.0000 -0.0000 0.0000 -0.0000  
Z -0.0009 -0.0011 -0.0001 0.0001 -0.0001 0.0000  
AT. 119 H X 0.0003 -0.0003 -0.0000 0.0001 0.0000 -0.0001  
Y -0.0009 0.0010 -0.0000 -0.0000 0.0000 0.0000  
Z 0.0009 -0.0011 -0.0001 -0.0001 0.0001 0.0000  
AT. 120 H X 0.0003 -0.0003 -0.0000 -0.0001 0.0000 0.0001  
Y 0.0009 -0.0010 0.0000 -0.0000 -0.0000 0.0000  
Z 0.0009 -0.0011 -0.0001 0.0001 0.0001 -0.0000  
AT. 121 C X 0.0000 0.0000 -0.0000 -0.0000 -0.0000 -0.0000  
Y 0.0000 0.0001 -0.0000 -0.0000 -0.0000 -0.0000  
Z -0.0001 -0.0001 -0.0000 -0.0000 -0.0000 -0.0000  
AT. 122 C X 0.0000 0.0000 -0.0000 0.0000 -0.0000 0.0000  
Y -0.0000 -0.0001 0.0000 -0.0000 0.0000 -0.0000  
Z -0.0001 -0.0001 -0.0000 0.0000 -0.0000 0.0000  
AT. 123 C X -0.0000 0.0000 -0.0000 -0.0000 0.0000 0.0000

Y -0.0000 0.0001 -0.0000 -0.0000 0.0000 0.0000  
Z 0.0001 -0.0001 -0.0000 -0.0000 0.0000 0.0000  
AT. 124 C X -0.0000 0.0000 -0.0000 0.0000 0.0000 -0.0000  
Y 0.0000 -0.0001 0.0000 -0.0000 -0.0000 0.0000  
Z 0.0001 -0.0001 -0.0000 0.0000 0.0000 -0.0000  
AT. 125 H X 0.0001 0.0001 0.0001 0.0000 0.0001 0.0001  
Y 0.0001 0.0001 -0.0001 -0.0002 -0.0001 -0.0001  
Z 0.0003 0.0003 -0.0000 -0.0001 -0.0000 -0.0001  
AT. 126 H X 0.0001 0.0001 0.0001 -0.0000 0.0001 -0.0001  
Y -0.0001 -0.0001 0.0001 -0.0002 0.0001 -0.0001  
Z 0.0003 0.0003 -0.0000 0.0001 -0.0000 0.0001  
AT. 127 H X -0.0001 0.0001 0.0001 0.0000 -0.0001 -0.0001  
Y -0.0001 0.0001 -0.0001 -0.0002 0.0001 0.0001  
Z -0.0003 0.0003 -0.0000 -0.0001 0.0000 0.0001  
AT. 128 H X -0.0001 0.0001 0.0001 -0.0000 -0.0001 0.0001  
Y 0.0001 -0.0001 0.0001 -0.0002 -0.0001 0.0001  
Z -0.0003 0.0003 -0.0000 0.0001 0.0000 -0.0001  
AT. 129 H X -0.0007 -0.0008 -0.0000 0.0000 0.0000 -0.0000  
Y -0.0005 -0.0005 0.0000 0.0001 0.0000 0.0000  
Z 0.0005 0.0005 0.0000 0.0000 0.0000 0.0000  
AT. 130 H X -0.0007 -0.0008 -0.0000 -0.0000 0.0000 0.0000  
Y 0.0005 0.0005 -0.0000 0.0001 -0.0000 0.0000  
Z 0.0005 0.0005 0.0000 -0.0000 0.0000 -0.0000  
AT. 131 H X 0.0007 -0.0008 -0.0000 0.0000 -0.0000 0.0000  
Y 0.0005 -0.0005 0.0000 0.0001 -0.0000 -0.0000  
Z -0.0005 0.0005 0.0000 0.0000 -0.0000 -0.0000  
AT. 132 H X 0.0007 -0.0008 -0.0000 -0.0000 -0.0000 -0.0000  
Y -0.0005 0.0005 -0.0000 0.0001 0.0000 -0.0000  
Z -0.0005 0.0005 0.0000 -0.0000 -0.0000 0.0000  
AT. 133 C X -0.0001 -0.0001 -0.0000 0.0000 -0.0000 0.0000  
Y 0.0006 0.0006 0.0000 0.0000 0.0000 -0.0000  
Z -0.0008 -0.0007 0.0000 0.0000 0.0000 0.0000

AT. 134 C X -0.0001 -0.0001 -0.0000 -0.0000 -0.0000 -0.0000  
Y -0.0006 -0.0006 -0.0000 0.0000 -0.0000 -0.0000  
Z -0.0008 -0.0007 0.0000 -0.0000 0.0000 -0.0000

AT. 135 C X 0.0001 -0.0001 -0.0000 0.0000 0.0000 -0.0000  
Y -0.0006 0.0006 0.0000 0.0000 -0.0000 0.0000  
Z 0.0008 -0.0007 0.0000 0.0000 -0.0000 -0.0000

AT. 136 C X 0.0001 -0.0001 -0.0000 -0.0000 0.0000 0.0000  
Y 0.0006 -0.0006 -0.0000 0.0000 0.0000 0.0000  
Z 0.0008 -0.0007 0.0000 -0.0000 -0.0000 0.0000

AT. 137 C X -0.0000 -0.0000 -0.0000 -0.0000 0.0000 0.0000  
Y 0.0007 0.0006 0.0000 0.0000 0.0000 0.0000  
Z -0.0003 -0.0002 -0.0000 -0.0000 -0.0000 -0.0000

AT. 138 C X -0.0000 -0.0000 -0.0000 0.0000 0.0000 -0.0000  
Y -0.0007 -0.0006 -0.0000 0.0000 -0.0000 0.0000  
Z -0.0003 -0.0002 -0.0000 0.0000 -0.0000 0.0000

AT. 139 C X 0.0000 -0.0000 -0.0000 -0.0000 -0.0000 -0.0000  
Y -0.0007 0.0006 0.0000 0.0000 -0.0000 -0.0000  
Z 0.0003 -0.0002 -0.0000 -0.0000 0.0000 0.0000

AT. 140 C X 0.0000 -0.0000 -0.0000 0.0000 -0.0000 0.0000  
Y 0.0007 -0.0006 -0.0000 0.0000 0.0000 -0.0000  
Z 0.0003 -0.0002 -0.0000 0.0000 0.0000 -0.0000

AT. 141 H X 0.0024 0.0024 0.0001 0.0001 0.0000 0.0000  
Y -0.0014 -0.0013 0.0000 0.0000 0.0001 0.0001  
Z 0.0026 0.0023 -0.0000 0.0000 -0.0000 0.0000

AT. 142 H X 0.0024 0.0024 0.0001 -0.0001 0.0000 -0.0000  
Y 0.0014 0.0013 -0.0000 0.0000 -0.0001 0.0001  
Z 0.0026 0.0023 -0.0000 -0.0000 -0.0000 -0.0000

AT. 143 H X -0.0024 0.0024 0.0001 0.0001 -0.0000 -0.0000  
Y 0.0014 -0.0013 0.0000 0.0000 -0.0001 -0.0001  
Z -0.0026 0.0023 -0.0000 0.0000 0.0000 -0.0000

AT. 144 H X -0.0024 0.0024 0.0001 -0.0001 -0.0000 0.0000  
Y -0.0014 0.0013 -0.0000 0.0000 0.0001 -0.0001



Z -0.0026 0.0023 -0.0000 -0.0000 0.0000 0.0000  
AT. 145 H X -0.0020 -0.0018 -0.0000 0.0000 0.0000 0.0000  
Y -0.0068 -0.0065 -0.0003 -0.0003 -0.0002 -0.0002  
Z 0.0014 0.0013 0.0001 0.0002 0.0002 0.0002  
AT. 146 H X -0.0020 -0.0018 -0.0000 -0.0000 0.0000 -0.0000  
Y 0.0068 0.0065 0.0003 -0.0003 0.0002 -0.0002  
Z 0.0014 0.0013 0.0001 -0.0002 0.0002 -0.0002  
AT. 147 H X 0.0020 -0.0018 -0.0000 0.0000 -0.0000 -0.0000  
Y 0.0068 -0.0065 -0.0003 -0.0003 0.0002 0.0002  
Z -0.0014 0.0013 0.0001 0.0002 -0.0002 -0.0002  
AT. 148 H X 0.0020 -0.0018 -0.0000 -0.0000 -0.0000 0.0000  
Y -0.0068 0.0065 0.0003 -0.0003 -0.0002 0.0002  
Z -0.0014 0.0013 0.0001 -0.0002 -0.0002 0.0002  
AT. 149 O X -0.0000 -0.0000 -0.0030 -0.0030 -0.0030 -0.0030  
Y 0.0000 0.0000 0.0017 0.0017 0.0017 0.0017  
Z 0.0001 0.0001 -0.0043 -0.0043 -0.0043 -0.0043  
AT. 150 O X -0.0000 -0.0000 -0.0030 0.0030 -0.0030 0.0030  
Y -0.0000 -0.0000 -0.0017 0.0017 -0.0017 0.0017  
Z 0.0001 0.0001 -0.0043 0.0043 -0.0043 0.0043  
AT. 151 O X 0.0000 -0.0000 -0.0030 -0.0030 0.0030 0.0030  
Y -0.0000 0.0000 0.0017 0.0017 -0.0017 -0.0017  
Z -0.0001 0.0001 -0.0043 -0.0043 0.0043 0.0043  
AT. 152 O X 0.0000 -0.0000 -0.0030 0.0030 0.0030 -0.0030  
Y 0.0000 -0.0000 -0.0017 0.0017 0.0017 -0.0017  
Z -0.0001 0.0001 -0.0043 0.0043 0.0043 -0.0043  
AT. 153 H X -0.0003 -0.0004 0.0458 0.0458 0.0459 0.0460  
Y 0.0001 0.0000 -0.0256 -0.0255 -0.0256 -0.0256  
Z -0.0006 -0.0007 0.0696 0.0696 0.0689 0.0689  
AT. 154 H X -0.0003 -0.0004 0.0458 -0.0458 0.0459 -0.0460  
Y -0.0001 -0.0000 0.0256 -0.0255 0.0256 -0.0256  
Z -0.0006 -0.0007 0.0696 -0.0696 0.0689 -0.0689  
AT. 155 H X 0.0003 -0.0004 0.0458 0.0458 -0.0459 -0.0460

Y -0.0001 0.0000 -0.0256 -0.0255 0.0256 0.0256  
Z 0.0006 -0.0007 0.0696 0.0696 -0.0689 -0.0689  
AT. 156 H X 0.0003 -0.0004 0.0458 -0.0458 -0.0459 0.0460  
Y 0.0001 -0.0000 0.0256 -0.0255 -0.0256 0.0256  
Z 0.0006 -0.0007 0.0696 -0.0696 -0.0689 0.0689  
AT. 157 O X -0.0002 -0.0002 0.0001 0.0001 0.0001 0.0001  
Y -0.0002 -0.0002 -0.0000 -0.0000 -0.0000 -0.0000  
Z -0.0001 -0.0001 -0.0000 -0.0000 -0.0000 -0.0000  
AT. 158 O X -0.0002 -0.0002 0.0001 -0.0001 0.0001 -0.0001  
Y 0.0002 0.0002 0.0000 -0.0000 0.0000 -0.0000  
Z -0.0001 -0.0001 -0.0000 0.0000 -0.0000 0.0000  
AT. 159 O X 0.0002 -0.0002 0.0001 0.0001 -0.0001 -0.0001  
Y 0.0002 -0.0002 -0.0000 -0.0000 0.0000 0.0000  
Z 0.0001 -0.0001 -0.0000 -0.0000 0.0000 0.0000  
AT. 160 O X 0.0002 -0.0002 0.0001 -0.0001 -0.0001 0.0001  
Y -0.0002 0.0002 0.0000 -0.0000 -0.0000 0.0000  
Z 0.0001 -0.0001 -0.0000 0.0000 0.0000 -0.0000  
AT. 161 O X -0.0023 -0.0023 -0.0000 -0.0000 -0.0000 -0.0000  
Y 0.0056 0.0056 0.0000 0.0000 0.0000 0.0000  
Z -0.0001 -0.0001 -0.0000 -0.0000 -0.0000 -0.0000  
AT. 162 O X -0.0023 -0.0023 -0.0000 0.0000 -0.0000 0.0000  
Y -0.0056 -0.0056 -0.0000 0.0000 -0.0000 0.0000  
Z -0.0001 -0.0001 -0.0000 0.0000 -0.0000 0.0000  
AT. 163 O X 0.0023 -0.0023 -0.0000 -0.0000 0.0000 0.0000  
Y -0.0056 0.0056 0.0000 0.0000 -0.0000 -0.0000  
Z 0.0001 -0.0001 -0.0000 -0.0000 0.0000 0.0000  
AT. 164 O X 0.0023 -0.0023 -0.0000 0.0000 0.0000 -0.0000  
Y 0.0056 -0.0056 -0.0000 0.0000 0.0000 -0.0000  
Z 0.0001 -0.0001 -0.0000 0.0000 0.0000 -0.0000  
AT. 165 H X 0.0387 0.0387 0.0001 0.0002 0.0001 0.0002  
Y -0.0825 -0.0825 -0.0007 -0.0008 -0.0007 -0.0007  
Z 0.0045 0.0045 0.0000 0.0001 0.0000 0.0001

AT.166 H X 0.0387 0.0387 0.0001 -0.0002 0.0001 -0.0002  
Y 0.0825 0.0825 0.0007 -0.0008 0.0007 -0.0007  
Z 0.0045 0.0045 0.0000 -0.0001 0.0000 -0.0001

AT.167 H X -0.0387 0.0387 0.0001 0.0002 -0.0001 -0.0002  
Y 0.0825 -0.0825 -0.0007 -0.0008 0.0007 0.0007  
Z -0.0045 0.0045 0.0000 0.0001 -0.0000 -0.0001

AT.168 H X -0.0387 0.0387 0.0001 -0.0002 -0.0001 0.0002  
Y -0.0825 0.0825 0.0007 -0.0008 -0.0007 0.0007  
Z -0.0045 0.0045 0.0000 -0.0001 -0.0000 0.0001

AT.169 O X 0.0000 0.0000 0.0000 0.0001 -0.0001 -0.0001  
Y 0.0001 0.0001 -0.0001 -0.0001 -0.0003 -0.0003  
Z 0.0000 0.0000 -0.0000 -0.0000 -0.0001 -0.0001

AT.170 O X 0.0000 0.0000 0.0000 -0.0001 -0.0001 0.0001  
Y -0.0001 -0.0001 0.0001 -0.0001 0.0003 -0.0003  
Z 0.0000 0.0000 -0.0000 0.0000 -0.0001 0.0001

AT.171 O X -0.0000 0.0000 0.0000 0.0001 0.0001 0.0001  
Y -0.0001 0.0001 -0.0001 -0.0001 0.0003 0.0003  
Z -0.0000 0.0000 -0.0000 -0.0000 0.0001 0.0001

AT.172 O X -0.0000 0.0000 0.0000 -0.0001 0.0001 -0.0001  
Y 0.0001 -0.0001 0.0001 -0.0001 -0.0003 0.0003  
Z -0.0000 0.0000 -0.0000 0.0000 0.0001 -0.0001

AT.173 H X -0.0002 -0.0003 0.0001 0.0001 0.0014 0.0013  
Y -0.0009 -0.0009 0.0021 0.0021 0.0065 0.0063  
Z -0.0001 -0.0001 0.0005 0.0005 0.0012 0.0011

AT.174 H X -0.0002 -0.0003 0.0001 -0.0001 0.0014 -0.0013  
Y 0.0009 0.0009 -0.0021 0.0021 -0.0065 0.0063  
Z -0.0001 -0.0001 0.0005 -0.0005 0.0012 -0.0011

AT.175 H X 0.0002 -0.0003 0.0001 0.0001 -0.0014 -0.0013  
Y 0.0009 -0.0009 0.0021 0.0021 -0.0065 -0.0063  
Z 0.0001 -0.0001 0.0005 0.0005 -0.0012 -0.0011

AT.176 H X 0.0002 -0.0003 0.0001 -0.0001 -0.0014 0.0013  
Y -0.0009 0.0009 -0.0021 0.0021 0.0065 -0.0063

Z 0.0001 -0.0001 0.0005 -0.0005 -0.0012 0.0011

ESTIMATED NUMBER OF IMAGINARY FREQS 4

\*\*\*\*\*

VIBRATIONAL TEMPERATURES (K) [MODE NUMBER;IRREP]

TO MODES

36.0 [ 8;Bu ] 36.4 [ 9;Au ] 39.5 [ 10;Ag ] 41.0 [ 11;Bg ]  
42.7 [ 12;Ag ] 43.5 [ 13;Au ] 46.4 [ 14;Bu ] 48.9 [ 15;Bg ]  
53.2 [ 16;Bg ] 56.4 [ 17;Ag ] 56.7 [ 18;Bu ] 60.3 [ 19;Bg ]  
62.0 [ 20;Au ] 62.4 [ 21;Ag ] 68.3 [ 22;Au ] 68.6 [ 23;Bg ]  
68.6 [ 24;Bu ] 70.0 [ 25;Ag ] 73.4 [ 26;Bg ] 75.3 [ 27;Au ]  
75.6 [ 28;Bu ] 79.4 [ 29;Ag ] 84.7 [ 30;Au ] 87.2 [ 31;Bg ]  
93.2 [ 32;Bu ] 97.5 [ 33;Au ] 104.2 [ 34;Ag ] 105.4 [ 35;Bg ]  
109.1 [ 36;Ag ] 113.3 [ 37;Au ] 118.1 [ 38;Ag ] 121.8 [ 39;Bu ]  
122.7 [ 40;Au ] 123.4 [ 41;Bg ] 123.7 [ 42;Bu ] 127.6 [ 43;Ag ]  
131.0 [ 44;Au ] 131.1 [ 45;Bg ] 142.2 [ 46;Bu ] 144.3 [ 47;Bg ]  
145.0 [ 48;Bu ] 147.2 [ 49;Ag ] 151.1 [ 50;Bg ] 152.8 [ 51;Au ]  
154.4 [ 52;Ag ] 189.1 [ 53;Au ] 192.0 [ 54;Bu ] 196.1 [ 55;Au ]  
199.5 [ 56;Bu ] 200.0 [ 57;Bg ] 204.1 [ 58;Ag ] 224.5 [ 59;Bu ]  
226.5 [ 60;Au ] 228.8 [ 61;Bg ] 228.8 [ 62;Ag ] 231.1 [ 63;Bu ]  
236.3 [ 64;Au ] 248.1 [ 65;Bu ] 248.5 [ 66;Bg ] 250.7 [ 67;Ag ]  
251.8 [ 68;Au ] 263.4 [ 69;Ag ] 264.9 [ 70;Bg ] 269.9 [ 71;Bu ]  
273.5 [ 72;Au ] 275.8 [ 73;Ag ] 280.0 [ 74;Bg ] 303.6 [ 75;Bu ]  
306.1 [ 76;Au ] 320.2 [ 77;Ag ] 324.8 [ 78;Bg ] 336.5 [ 79;Bu ]  
337.3 [ 80;Au ] 338.3 [ 81;Ag ] 339.6 [ 82;Bg ] 345.1 [ 83;Bu ]  
346.4 [ 84;Au ] 360.6 [ 85;Bg ] 362.4 [ 86;Au ] 364.8 [ 87;Ag ]  
366.6 [ 88;Bu ] 383.1 [ 89;Bg ] 384.4 [ 90;Ag ] 385.8 [ 91;Bg ]  
386.6 [ 92;Bu ] 388.1 [ 93;Au ] 392.2 [ 94;Au ] 392.3 [ 95;Bu ]

393.0 [ 96;Ag ] 413.9 [ 97;Ag ] 415.1 [ 98;Bg ] 415.9 [ 99;Au ]  
420.3 [ 100;Bu ] 423.8 [ 101;Ag ] 426.9 [ 102;Bg ] 453.5 [ 103;Au ]  
453.9 [ 104;Ag ] 454.6 [ 105;Bu ] 457.7 [ 106;Bu ] 458.5 [ 107;Bg ]  
459.5 [ 108;Au ] 479.1 [ 109;Ag ] 480.0 [ 110;Bg ] 492.0 [ 111;Au ]  
496.1 [ 112;Bu ] 499.7 [ 113;Bg ] 501.6 [ 114;Ag ] 502.8 [ 115;Bg ]  
503.0 [ 116;Ag ] 504.4 [ 117;Bu ] 504.5 [ 118;Au ] 527.7 [ 119;Ag ]  
528.3 [ 120;Bu ] 531.4 [ 121;Au ] 533.5 [ 122;Bg ] 540.8 [ 123;Ag ]  
541.4 [ 124;Bg ] 541.5 [ 125;Au ] 542.0 [ 126;Bu ] 546.6 [ 127;Au ]  
550.2 [ 128;Bu ] 551.7 [ 129;Bg ] 552.2 [ 130;Ag ] 554.8 [ 131;Bu ]  
555.2 [ 132;Au ] 571.9 [ 133;Ag ] 573.7 [ 134;Bg ] 591.3 [ 135;Bu ]  
591.5 [ 136;Au ] 594.8 [ 137;Ag ] 595.5 [ 138;Bg ] 624.5 [ 139;Bu ]  
624.9 [ 140;Au ] 626.4 [ 141;Bg ] 626.6 [ 142;Ag ] 674.0 [ 143;Ag ]  
674.3 [ 144;Bu ] 674.4 [ 145;Au ] 674.5 [ 146;Bg ] 683.9 [ 147;Au ]  
684.3 [ 148;Bu ] 687.3 [ 149;Ag ] 688.4 [ 150;Bg ] 702.9 [ 151;Au ]  
703.1 [ 152;Bu ] 712.4 [ 153;Bg ] 713.6 [ 154;Ag ] 728.6 [ 155;Bu ]  
729.2 [ 156;Au ] 731.3 [ 157;Bg ] 733.9 [ 158;Ag ] 752.2 [ 159;Ag ]  
752.3 [ 160;Bu ] 752.7 [ 161;Bg ] 753.4 [ 162;Au ] 791.0 [ 163;Bg ]  
791.1 [ 164;Bu ] 791.6 [ 165;Au ] 792.6 [ 166;Ag ] 796.3 [ 167;Bu ]  
796.5 [ 168;Bg ] 797.0 [ 169;Au ] 797.4 [ 170;Ag ] 830.0 [ 171;Ag ]  
830.6 [ 172;Bg ] 830.8 [ 173;Au ] 832.8 [ 174;Bu ] 854.2 [ 175;Au ]  
854.3 [ 176;Bu ] 854.5 [ 177;Bg ] 855.6 [ 178;Ag ] 868.0 [ 179;Bu ]  
868.4 [ 180;Au ] 871.7 [ 181;Bg ] 874.0 [ 182;Ag ] 917.6 [ 183;Bg ]  
918.3 [ 184;Ag ] 918.9 [ 185;Bu ] 919.5 [ 186;Au ] 964.5 [ 187;Ag ]  
965.6 [ 188;Bu ] 966.0 [ 189;Au ] 966.0 [ 190;Bg ] 973.2 [ 191;Au ]  
973.3 [ 192;Bu ] 975.2 [ 193;Bg ] 975.6 [ 194;Ag ] 1087.4 [ 195;Ag ]  
1090.2 [ 196;Au ] 1090.8 [ 197;Bu ] 1094.4 [ 198;Bg ] 1100.7 [ 199;Au ]  
1101.2 [ 200;Ag ] 1101.5 [ 201;Bu ] 1103.0 [ 202;Bg ] 1116.5 [ 203;Au ]  
1116.7 [ 204;Bg ] 1116.9 [ 205;Ag ] 1117.3 [ 206;Bu ] 1169.6 [ 207;Bg ]  
1169.8 [ 208;Bu ] 1170.6 [ 209;Au ] 1170.7 [ 210;Ag ] 1176.4 [ 211;Ag ]  
1176.4 [ 212;Bu ] 1176.8 [ 213;Au ] 1178.6 [ 214;Bg ] 1215.8 [ 215;Bu ]  
1218.3 [ 216;Ag ] 1219.0 [ 217;Au ] 1219.1 [ 218;Bg ] 1241.2 [ 219;Au ]  
1241.2 [ 220;Bg ] 1241.6 [ 221;Bu ] 1243.7 [ 222;Ag ] 1263.3 [ 223;Bu ]

1263.8 [ 224;Ag ] 1264.6 [ 225;Au ] 1266.2 [ 226;Bg ] 1272.0 [ 227;Au ]  
1273.3 [ 228;Bg ] 1273.5 [ 229;Ag ] 1273.7 [ 230;Bu ] 1287.8 [ 231;Au ]  
1290.6 [ 232;Bu ] 1301.7 [ 233;Ag ] 1303.4 [ 234;Bg ] 1306.9 [ 235;Bu ]  
1307.8 [ 236;Au ] 1340.1 [ 237;Bg ] 1340.8 [ 238;Ag ] 1343.5 [ 239;Au ]  
1343.7 [ 240;Bu ] 1348.9 [ 241;Bg ] 1350.1 [ 242;Ag ] 1354.3 [ 243;Bg ]  
1355.6 [ 244;Au ] 1356.3 [ 245;Bu ] 1358.8 [ 246;Ag ] 1384.6 [ 247;Au ]  
1385.2 [ 248;Bu ] 1386.8 [ 249;Bg ] 1387.1 [ 250;Ag ] 1411.5 [ 251;Ag ]  
1411.5 [ 252;Au ] 1411.6 [ 253;Bu ] 1411.9 [ 254;Bg ] 1440.8 [ 255;Bg ]  
1441.8 [ 256;Au ] 1442.3 [ 257;Bu ] 1442.3 [ 258;Ag ] 1454.0 [ 259;Au ]  
1454.3 [ 260;Ag ] 1458.1 [ 261;Bg ] 1458.4 [ 262;Bu ] 1463.3 [ 263;Bg ]  
1463.3 [ 264;Ag ] 1472.1 [ 265;Bu ] 1472.6 [ 266;Ag ] 1473.7 [ 267;Au ]  
1474.4 [ 268;Bg ] 1511.3 [ 269;Ag ] 1511.3 [ 270;Bu ] 1512.7 [ 271;Au ]  
1513.6 [ 272;Bg ] 1534.0 [ 273;Bu ] 1534.1 [ 274;Ag ] 1534.6 [ 275;Bg ]  
1535.0 [ 276;Au ] 1544.9 [ 277;Bg ] 1545.7 [ 278;Au ] 1545.9 [ 279;Ag ]  
1546.5 [ 280;Bu ] 1645.6 [ 281;Au ] 1645.8 [ 282;Bu ] 1646.9 [ 283;Bg ]  
1647.1 [ 284;Ag ] 1666.0 [ 285;Bu ] 1666.9 [ 286;Au ] 1667.2 [ 287;Ag ]  
1667.9 [ 288;Bg ] 1672.1 [ 289;Bu ] 1672.9 [ 290;Au ] 1677.1 [ 291;Bg ]  
1679.3 [ 292;Ag ] 1690.3 [ 293;Bu ] 1690.4 [ 294;Au ] 1691.7 [ 295;Ag ]  
1691.7 [ 296;Bg ] 1701.2 [ 297;Bg ] 1702.2 [ 298;Bu ] 1702.2 [ 299;Au ]  
1703.0 [ 300;Ag ] 1744.4 [ 301;Au ] 1744.5 [ 302;Bu ] 1744.7 [ 303;Bg ]  
1745.5 [ 304;Ag ] 1750.4 [ 305;Au ] 1750.7 [ 306;Ag ] 1752.4 [ 307;Bu ]  
1755.2 [ 308;Bg ] 1759.1 [ 309;Bu ] 1759.5 [ 310;Au ] 1765.8 [ 311;Ag ]  
1766.2 [ 312;Bg ] 1767.7 [ 313;Au ] 1769.5 [ 314;Ag ] 1771.9 [ 315;Bg ]  
1774.9 [ 316;Bu ] 1777.5 [ 317;Ag ] 1779.1 [ 318;Bu ] 1779.6 [ 319;Bg ]  
1781.0 [ 320;Au ] 1827.6 [ 321;Au ] 1829.1 [ 322;Bu ] 1830.8 [ 323;Bg ]  
1831.6 [ 324;Ag ] 1844.1 [ 325;Bu ] 1845.5 [ 326;Ag ] 1845.6 [ 327;Au ]  
1846.4 [ 328;Bg ] 1849.7 [ 329;Bu ] 1850.4 [ 330;Au ] 1851.6 [ 331;Bg ]  
1852.0 [ 332;Ag ] 1876.6 [ 333;Au ] 1876.8 [ 334;Bu ] 1878.1 [ 335;Ag ]  
1880.0 [ 336;Bg ] 1903.6 [ 337;Bu ] 1903.7 [ 338;Au ] 1904.0 [ 339;Ag ]  
1904.3 [ 340;Bg ] 1918.4 [ 341;Bu ] 1919.3 [ 342;Au ] 1920.5 [ 343;Ag ]  
1921.7 [ 344;Bg ] 1934.0 [ 345;Bu ] 1934.2 [ 346;Au ] 1936.4 [ 347;Ag ]  
1936.7 [ 348;Bg ] 1974.4 [ 349;Ag ] 1975.7 [ 350;Au ] 1977.1 [ 351;Bg ]

1978.7 [ 352;Bu ] 1979.7 [ 353;Au ] 1980.3 [ 354;Ag ] 1980.4 [ 355;Bu ]  
1981.2 [ 356;Bg ] 1998.6 [ 357;Au ] 1999.4 [ 358;Bu ] 2003.8 [ 359;Bg ]  
2004.6 [ 360;Ag ] 2025.7 [ 361;Bu ] 2026.5 [ 362;Au ] 2028.0 [ 363;Ag ]  
2028.3 [ 364;Bg ] 2052.8 [ 365;Bu ] 2055.6 [ 366;Au ] 2055.9 [ 367;Ag ]  
2056.5 [ 368;Bg ] 2066.8 [ 369;Bu ] 2069.0 [ 370;Au ] 2070.1 [ 371;Ag ]  
2072.1 [ 372;Bg ] 2078.7 [ 373;Au ] 2079.2 [ 374;Bg ] 2080.7 [ 375;Bu ]  
2080.8 [ 376;Ag ] 2092.5 [ 377;Bu ] 2093.6 [ 378;Au ] 2094.1 [ 379;Bg ]  
2094.8 [ 380;Ag ] 2133.1 [ 381;Bu ] 2133.6 [ 382;Au ] 2134.4 [ 383;Ag ]  
2136.3 [ 384;Bg ] 2136.5 [ 385;Au ] 2137.5 [ 386;Bu ] 2139.1 [ 387;Bg ]  
2139.5 [ 388;Ag ] 2158.3 [ 389;Bu ] 2159.4 [ 390;Au ] 2161.6 [ 391;Bg ]  
2162.3 [ 392;Bu ] 2165.1 [ 393;Ag ] 2166.6 [ 394;Au ] 2170.1 [ 395;Ag ]  
2171.5 [ 396;Bg ] 2174.9 [ 397;Au ] 2176.8 [ 398;Bg ] 2177.7 [ 399;Ag ]  
2178.8 [ 400;Bu ] 2183.1 [ 401;Au ] 2184.5 [ 402;Bu ] 2185.1 [ 403;Bg ]  
2188.3 [ 404;Ag ] 2190.0 [ 405;Ag ] 2190.8 [ 406;Au ] 2192.1 [ 407;Bu ]  
2194.3 [ 408;Bg ] 2194.7 [ 409;Ag ] 2195.7 [ 410;Au ] 2196.8 [ 411;Bu ]  
2198.1 [ 412;Ag ] 2198.6 [ 413;Au ] 2198.9 [ 414;Bu ] 2200.8 [ 415;Bg ]  
2201.5 [ 416;Bg ] 2204.2 [ 417;Au ] 2204.8 [ 418;Bu ] 2204.8 [ 419;Ag ]  
2204.9 [ 420;Bg ] 2219.3 [ 421;Bu ] 2221.0 [ 422;Au ] 2232.5 [ 423;Ag ]  
2234.8 [ 424;Bg ] 2236.3 [ 425;Bu ] 2236.4 [ 426;Au ] 2245.0 [ 427;Ag ]  
2246.7 [ 428;Bg ] 2246.8 [ 429;Bu ] 2247.1 [ 430;Au ] 2249.0 [ 431;Bu ]  
2249.4 [ 432;Bg ] 2252.4 [ 433;Au ] 2255.2 [ 434;Ag ] 2415.8 [ 435;Ag ]  
2422.4 [ 436;Bg ] 2440.8 [ 437;Bu ] 2444.1 [ 438;Au ] 2457.2 [ 439;Ag ]  
2461.0 [ 440;Au ] 2468.6 [ 441;Bg ] 2471.7 [ 442;Bu ] 2497.9 [ 443;Ag ]  
2498.0 [ 444;Bg ] 4275.2 [ 445;Au ] 4281.2 [ 446;Bu ] 4405.0 [ 447;Ag ]  
4410.7 [ 448;Bg ] 4441.1 [ 449;Bu ] 4441.1 [ 450;Ag ] 4441.5 [ 451;Au ]  
4441.7 [ 452;Bg ] 4448.3 [ 453;Au ] 4448.4 [ 454;Bu ] 4449.3 [ 455;Bg ]  
4449.5 [ 456;Ag ] 4454.2 [ 457;Ag ] 4454.3 [ 458;Bg ] 4454.3 [ 459;Bu ]  
4454.4 [ 460;Au ] 4472.7 [ 461;Ag ] 4472.7 [ 462;Bu ] 4472.8 [ 463;Bg ]  
4473.0 [ 464;Au ] 4478.3 [ 465;Bu ] 4478.4 [ 466;Au ] 4478.4 [ 467;Ag ]  
4478.6 [ 468;Bg ] 4493.0 [ 469;Au ] 4493.1 [ 470;Bu ] 4493.3 [ 471;Ag ]  
4493.4 [ 472;Bg ] 4550.6 [ 473;Au ] 4550.8 [ 474;Ag ] 4550.8 [ 475;Bg ]  
4550.9 [ 476;Bu ] 4554.9 [ 477;Bu ] 4555.1 [ 478;Au ] 4555.3 [ 479;Bg ]

4555.3 [ 480;Ag ] 4558.4 [ 481;Au ] 4558.5 [ 482;Ag ] 4558.6 [ 483;Bu ]  
 4559.0 [ 484;Bg ] 4591.3 [ 485;Bg ] 4591.4 [ 486;Ag ] 4591.4 [ 487;Bu ]  
 4591.5 [ 488;Au ] 4594.1 [ 489;Bu ] 4594.1 [ 490;Au ] 4594.4 [ 491;Ag ]  
 4594.5 [ 492;Bg ] 4606.3 [ 493;Bu ] 4606.3 [ 494;Au ] 4606.4 [ 495;Ag ]  
 4606.4 [ 496;Bg ] 4609.9 [ 497;Au ] 4610.0 [ 498;Ag ] 4610.0 [ 499;Bu ]  
 4610.1 [ 500;Bg ] 4610.3 [ 501;Ag ] 4610.4 [ 502;Bg ] 4610.6 [ 503;Bu ]  
 4610.6 [ 504;Au ] 4615.2 [ 505;Ag ] 4615.2 [ 506;Bu ] 4615.3 [ 507;Bg ]  
 4615.3 [ 508;Au ] 4643.1 [ 509;Au ] 4643.1 [ 510;Ag ] 4643.1 [ 511;Bu ]  
 4643.2 [ 512;Bg ] 4672.8 [ 513;Bg ] 4672.8 [ 514;Bu ] 4673.1 [ 515;Au ]  
 4673.1 [ 516;Ag ] 4699.9 [ 517;Ag ] 4700.0 [ 518;Bu ] 4700.1 [ 519;Au ]  
 4700.2 [ 520;Bg ] 4761.7 [ 521;Ag ] 4764.3 [ 522;Au ] 4764.4 [ 523;Bg ]  
 4769.2 [ 524;Bu ] 5321.4 [ 525;Bu ] 5322.0 [ 526;Au ] 5344.1 [ 527;Bg ]  
 5344.7 [ 528;Ag ]

\*\*\*\*\*

HARMONIC VIBRATIONAL CONTRIBUTIONS TO THERMODYNAMIC FUNCTIONS AT GIVEN  
TEMPERATURE AND PRESSURE:

(EL = ELECTRONIC ENERGY

E0 = ZERO-POINT ENERGY

ET = THERMAL CONTRIBUTION TO THE VIBRATIONAL ENERGY

PV = PRESSURE \* VOLUME

TS = TEMPERATURE \* ENTROPY)

|    | AU/CELL              | EV/CELL              | KJ/MOL             |
|----|----------------------|----------------------|--------------------|
| EL | : -6638.594319815614 | -180645.335273564880 | -17429626.93039599 |
| E0 | : 1.445257836552     | 39.327465102283      | 3794.52391512      |

\*\*\*\*\*



THERMODYNAMIC FUNCTIONS WITH VIBRATIONAL CONTRIBUTIONS

AT (T = 298.15 K, P = 0.10132500E+00 MPA):

|                 | AU/CELL            | EV/CELL              | KJ/MOL             |
|-----------------|--------------------|----------------------|--------------------|
| ET              | : 0.092707938723   | 2.522711264816       | 243.40465882       |
| PV              | : 0.000040630306   | 0.001105606825       | 0.10667485         |
| TS              | : 0.187078096958   | 5.090653822075       | 491.17347435       |
| ET+PV-TS        | : -0.094329527930  | -2.566836950433      | -247.66214068      |
| EL+E0+ET+PV-TS: | -6637.243391506991 | -180608.574645413028 | -17426080.06862155 |

OTHER THERMODYNAMIC FUNCTIONS:

|                 | mHARTREE/(CELL*K) | mEV/(CELL*K)    | J/(MOL*K)     |
|-----------------|-------------------|-----------------|---------------|
| ENTROPY         | : 0.627463011767  | 17.074136582508 | 1647.40390523 |
| HEAT CAPACITY : | 0.573165539567    | 15.596627248822 | 1504.84591206 |

\*\*\*\*\*

TTTTTTTTTTTTTTTTTTTTTTTTTTTTTTTTTTTTTTTT END TELAPSE 2002192.28 TCPU 1994397.01

EEEEEEEEEE TERMINATION DATE 26 10 2023 TIME 16:29:24.7

NODE 0 CPU TIME = 1994397.006

NODE 1 CPU TIME = 1994812.351

NODE 2 CPU TIME = 1994630.814

NODE 3 CPU TIME = 1994923.906

NODE 4 CPU TIME = 1994790.600

NODE 5 CPU TIME = 1995437.083

NODE 6 CPU TIME = 1995177.278

NODE 7 CPU TIME = 1994561.275

TOTAL CPU TIME = 15958730.313

# Crystal 6 CAM-B3LYP

PROCESS 0 OF 8 WORKING  
PROCESS 1 OF 8 WORKING  
PROCESS 2 OF 8 WORKING  
PROCESS 3 OF 8 WORKING  
PROCESS 4 OF 8 WORKING  
PROCESS 5 OF 8 WORKING  
PROCESS 6 OF 8 WORKING  
PROCESS 7 OF 8 WORKING

\*\*\*\*\*

```
*
*
*          CRYSTAL17          *
*
*   public : 1.0.1 - Jun 21st, 2017          *
*
*   HTTP://WWW.CRYSTAL.UNITO.IT          *
*
*
*          MAIN AUTHORS          *
*
*
*   R. DOVESI(1,11), V.R. SAUNDERS(2), C. ROETTI(1,11), R. ORLANDO(1,11), *
*   C.M. ZICOVICH-WILSON(1,3), F. PASCALE(4), B. CIVALLERI(1,11),          *
*   K. DOLL(5), N.M. HARRISON(2,6), I.J. BUSH(7), Ph. D'ARCO(8),          *
*   M. LLUNELL(9), M. CAUSA'(10), Y. NOEL(8), L. MASCHIO(1,11), A. ERBA(1,11) *
*   M. RE'RAT(14), S. CASASSA(1,11)          *
*
*
*   CONTRIBUTIONS TO THE CODE HAVE ALSO BEEN GIVEN BY          *
*
*
*   M. FERRABONE(1,11), M. DE LA PIERRE(1,11), M. FERRERO(1,11),          *
*   J. BAIMA(1,11), E. ALBANESE(1,11), M.F. PEINTINGER(12), R. BAST(13),          *
*   B. KIRTMAN(15), V. LACIVITA(1,11), R. DEMICHELIS(1,16)          *
*   G. BRANDEBURG(17), S. SALUSTRO(1,11), G. SANSONE(1,11)          *
*   M.T. RUGGIERO(18)          *
```

- \* \* \*
- \* (1) THEORETICAL CHEMISTRY GROUP - UNIVERSITA' DI TORINO - TORINO (ITALY) \*
  - \* (2) COMPUTATIONAL SCIENCE & ENGINEERING DEPARTMENT - STFC DARESBUURY (UK) \*
  - \* (3) UNIVERSIDAD AUTONOMA DEL ESTADO DE MORELOS - CUERNAVACA (MEXICO) \*
  - \* (4) UNIVERSITE' DE LORRAINE - NANCY (FRANCE) \*
  - \* (5) UNIVERSITAET STUTT GART- STUTT GART (GERMANY) \*
  - \* (6) IMPERIAL COLLEGE - LONDON (UK) \*
  - \* (7) OXFORD E-RESEARCH CENTRE - OXFORD (UK) \*
  - \* (8) UPMC - SORBONNE UNIVERSITES - PARIS (FRANCE) \*
  - \* (9) UNIVERSIDAD DE BARCELONA - BARCELONA (SPAIN) \*
  - \* (10) UNIVERSITA' DI NAPOLI "FEDERICO II" - NAPOLI (ITALY) \*
  - \* (11) NIS - NANOSTRUCTURED INTERFACES AND SURFACES - TORINO (ITALY) \*
  - \* (12) MPI FUER CHEMISCHE ENERGIEKONVERSION - MUELHEIM AN DER RUHR (GERMANY) \*
  - \* (13) UNIVERSITY OF TROMSO - TROMSO (NORWAY) \*
  - \* (14) UNIVERSITE' DE PAU ET DES PAYS DE L'ADOUR - PAU (FRANCE) \*
  - \* (15) UNIVERSITY OF CALIFORNIA SANTA BARBARA - SANTA BARBARA (USA) \*
  - \* (16) CURTIN UNIVERSITY - PERTH (AUSTRALIA) \*
  - \* (17) UNIVERSITY COLLEGE LONDON - LONDON (UK) \*
  - \* (18) CAMBRIDGE UNIVERSITY - CAMBRIDGE (UK) \*
- \* \* \*

\*\*\*\*\*

EEEEEEEEEE STARTING DATE 30 10 2023 TIME 13:44:44.2

\* Geometry was taken from WUTWAY.cif, del O4B O5B, B3LYP CHNO 6-31G\*\*\* I -pobTZV

GEOMETRY INPUT FROM EXTERNAL FILE (FORTRAN UNIT 34)

3D - CRYSTAL

\*\*\*\*\*

LATTICE PARAMETERS (ANGSTROMS AND DEGREES) - PRIMITIVE CELL

| A        | B        | C       | ALPHA    | BETA     | GAMMA     | VOLUME      |
|----------|----------|---------|----------|----------|-----------|-------------|
| 13.88703 | 13.88703 | 8.25010 | 82.83480 | 97.16520 | 137.76671 | 1059.808453 |

NUMBER OF IRREDUCIBLE ATOMS IN THE CELL: 22

CARTESIAN COORDINATES (ANGSTROM) - IRREDUCIBLE ATOMS AND SYMMETRY RELATED

| AT.IRR. | AT | AT.N. | X                   | Y                   | Z                   |
|---------|----|-------|---------------------|---------------------|---------------------|
| 1       | 1  | 253   | -2.757790740450E-01 | 9.109995568800E-02  | 2.044004715734E+00  |
| 1       | 2  | 253   | 2.757790740450E-01  | -9.109995568800E-02 | -2.044004715734E+00 |
| 3       | 3  | 253   | 2.594130052034E+00  | -4.651256966388E+00 | 2.999402173856E+00  |
| 3       | 4  | 253   | -3.145688200124E+00 | -4.651256966388E+00 | 1.088607257613E+00  |
| 3       | 5  | 253   | -2.594130052034E+00 | 4.651256966388E+00  | -2.999402173856E+00 |
| 3       | 6  | 253   | 3.145688200124E+00  | 4.651256966388E+00  | -1.088607257613E+00 |
| 7       | 7  | 8     | 2.935777307343E+00  | 2.079112102662E+00  | 1.933460157773E+00  |
| 7       | 8  | 8     | -3.487335455433E+00 | 2.079112102662E+00  | 2.154549273696E+00  |
| 7       | 9  | 8     | -2.935777307343E+00 | -2.079112102662E+00 | -1.933460157773E+00 |
| 7       | 10 | 8     | 3.487335455433E+00  | -2.079112102662E+00 | -2.154549273696E+00 |
| 11      | 11 | 8     | 2.130189095055E+00  | 1.774482689767E+00  | 3.927845652365E+00  |
| 11      | 12 | 8     | -2.681747243145E+00 | 1.774482689767E+00  | 1.601637791040E-01  |
| 11      | 13 | 8     | -2.130189095055E+00 | -1.774482689767E+00 | -3.927845652365E+00 |
| 11      | 14 | 8     | 2.681747243145E+00  | -1.774482689767E+00 | -1.601637791040E-01 |
| 15      | 15 | 8     | -1.565710341580E-01 | -3.020638045987E+00 | 9.696937993610E-01  |
| 15      | 16 | 8     | -3.949871139310E-01 | -3.020638045987E+00 | 3.118315632108E+00  |
| 15      | 17 | 8     | 1.565710341580E-01  | 3.020638045987E+00  | -9.696937993610E-01 |
| 15      | 18 | 8     | 3.949871139310E-01  | 3.020638045987E+00  | -3.118315632108E+00 |
| 19      | 19 | 7     | 2.072929315098E+00  | 2.188154759571E+00  | 2.785612297605E+00  |
| 19      | 20 | 7     | -2.624487463188E+00 | 2.188154759571E+00  | 1.302397133864E+00  |
| 19      | 21 | 7     | -2.072929315098E+00 | -2.188154759571E+00 | -2.785612297605E+00 |
| 19      | 22 | 7     | 2.624487463188E+00  | -2.188154759571E+00 | -1.302397133864E+00 |
| 23      | 23 | 7     | -2.757790740450E-01 | -3.581480292928E+00 | 2.044004715734E+00  |
| 23      | 24 | 7     | 2.757790740450E-01  | 3.581480292928E+00  | -2.044004715734E+00 |
| 25      | 25 | 6     | -2.757790740450E-01 | 2.179118639935E+00  | 2.044004715734E+00  |
| 25      | 26 | 6     | 2.757790740450E-01  | -2.179118639935E+00 | -2.044004715734E+00 |

27 27 6 8.528445983450E-01 2.907426590009E+00 2.396098603663E+00  
27 28 6 -1.404402746435E+00 2.907426590009E+00 1.691910827805E+00  
27 29 6 -8.528445983450E-01 -2.907426590009E+00 -2.396098603663E+00  
27 30 6 1.404402746435E+00 -2.907426590009E+00 -1.691910827805E+00  
31 31 6 8.861988814770E-01 4.294461825228E+00 2.416963569511E+00  
31 32 6 -1.437757029566E+00 4.294461825228E+00 1.671045861958E+00  
31 33 6 -8.861988814770E-01 -4.294461825228E+00 -2.416963569511E+00  
31 34 6 1.437757029566E+00 -4.294461825228E+00 -1.671045861958E+00  
35 35 6 -2.757790740450E-01 4.954136980618E+00 2.044004715734E+00  
35 36 6 2.757790740450E-01 -4.954136980618E+00 -2.044004715734E+00  
37 37 8 4.751103046008E+00 -3.056496734951E+00 3.750762319410E+00  
37 38 8 -5.302661194097E+00 -3.056496734951E+00 3.372471120590E-01  
37 39 8 -4.751103046008E+00 3.056496734951E+00 -3.750762319410E+00  
37 40 8 5.302661194097E+00 3.056496734951E+00 -3.372471120590E-01  
41 41 8 5.936592171755E+00 -1.144269463313E+00 4.177465983968E+00  
41 42 8 -6.488150319845E+00 -1.144269463313E+00 -8.945655250000E-02  
41 43 8 -5.936592171755E+00 1.144269463313E+00 -4.177465983968E+00  
41 44 8 6.488150319845E+00 1.144269463313E+00 8.945655250000E-02  
45 45 6 5.910612848959E+00 -1.980652262346E+00 1.874604995417E+00  
45 46 6 -6.462170997049E+00 -1.980652262346E+00 2.213404436051E+00  
45 47 6 -5.910612848959E+00 1.980652262346E+00 -1.874604995417E+00  
45 48 6 6.462170997049E+00 1.980652262346E+00 -2.213404436051E+00  
49 49 1 5.276236968491E+00 -2.524132204175E+00 1.171271556442E+00  
49 50 1 -5.827795116580E+00 -2.524132204175E+00 2.916737875027E+00  
49 51 1 -5.276236968491E+00 2.524132204175E+00 -1.171271556442E+00  
49 52 1 5.827795116580E+00 2.524132204175E+00 -2.916737875027E+00  
53 53 1 -6.112907257403E+00 2.478606496159E+00 2.018642368296E+00  
53 54 1 5.561349109313E+00 2.478606496159E+00 2.069367063172E+00  
53 55 1 6.112907257403E+00 -2.478606496159E+00 -2.018642368296E+00  
53 56 1 -5.561349109313E+00 -2.478606496159E+00 -2.069367063172E+00  
57 57 1 6.133209388252E+00 -9.973932852160E-01 1.455488652764E+00  
57 58 1 -6.684767536341E+00 -9.973932852160E-01 2.632520778705E+00

57 59 1 -6.133209388252E+00 9.973932852160E-01 -1.455488652764E+00  
57 60 1 6.684767536341E+00 9.973932852160E-01 -2.632520778705E+00  
61 61 6 5.159927970542E+00 -1.803954837360E+00 3.179372417997E+00  
61 62 6 -5.711486118631E+00 -1.803954837360E+00 9.086370134710E-01  
61 63 6 -5.159927970542E+00 1.803954837360E+00 -3.179372417997E+00  
61 64 6 5.711486118631E+00 1.803954837360E+00 -9.086370134710E-01  
65 65 6 3.891238658667E+00 -9.901125704200E-01 3.060183791926E+00  
65 66 6 -4.442796806756E+00 -9.901125704200E-01 1.027825639543E+00  
65 67 6 -3.891238658667E+00 9.901125704200E-01 -3.060183791926E+00  
65 68 6 4.442796806756E+00 9.901125704200E-01 -1.027825639543E+00  
69 69 1 3.364071405399E+00 -9.598169827060E-01 4.013501206602E+00  
69 70 1 -3.915629553489E+00 -9.598169827060E-01 7.450822486600E-02  
69 71 1 -3.364071405399E+00 9.598169827060E-01 -4.013501206602E+00  
69 72 1 3.915629553489E+00 9.598169827060E-01 -7.450822486600E-02  
73 73 1 3.245253459772E+00 -1.428958815625E+00 2.298785107948E+00  
73 74 1 -3.796811607861E+00 -1.428958815625E+00 1.789224323521E+00  
73 75 1 -3.245253459772E+00 1.428958815625E+00 -2.298785107948E+00  
73 76 1 3.796811607861E+00 1.428958815625E+00 -1.789224323521E+00  
77 77 1 4.139493247235E+00 2.605644383800E-02 2.754120364378E+00  
77 78 1 -4.691051395325E+00 2.605644383800E-02 1.333889067090E+00  
77 79 1 -4.139493247235E+00 -2.605644383800E-02 -2.754120364378E+00  
77 80 1 4.691051395325E+00 -2.605644383800E-02 -1.333889067090E+00

SPACE GROUP N. : 0

NUMBER OF SYMMETRY OPERATORS : 4

\*\*\*\*\*

LATTICE PARAMETERS (ANGSTROMS AND DEGREES) - BOHR = 0.5291772083 ANGSTROM

PRIMITIVE CELL - CENTRING CODE 4/0 VOLUME= 1059.808453 - DENSITY 2.315 g/cm<sup>3</sup>

A B C ALPHA BETA GAMMA

13.88702918 13.88702918 8.25010000 82.834795 97.165205 137.766708

\*\*\*\*\*

ATOMS IN THE ASYMMETRIC UNIT 22 - ATOMS IN THE UNIT CELL: 80

ATOM X/A Y/B Z/C

\*\*\*\*\*

1 T 253 I 9.104441859261E-03 9.104441859271E-03 2.499999999999E-01  
2 F 253 I -9.104441859261E-03 -9.104441859271E-03 -2.499999999999E-01  
3 T 253 I -3.490981054839E-01 4.194138196207E-01 3.668536269469E-01  
4 F 253 I 4.194138196207E-01 -3.490981054839E-01 1.331463730530E-01  
5 F 253 I 3.490981054839E-01 -4.194138196207E-01 -3.668536269469E-01  
6 F 253 I -4.194138196207E-01 3.490981054839E-01 -1.331463730530E-01  
7 T 8 O 3.311640442736E-01 8.440487921547E-02 2.364794150044E-01  
8 F 8 O 8.440487921547E-02 3.311640442736E-01 2.635205849955E-01  
9 F 8 O -3.311640442736E-01 -8.440487921547E-02 -2.364794150044E-01  
10 F 8 O -8.440487921547E-02 -3.311640442736E-01 -2.635205849955E-01  
11 T 8 O 2.800124367545E-01 7.466774628720E-02 4.804105418799E-01  
12 F 8 O 7.466774628719E-02 2.800124367546E-01 1.958945812001E-02  
13 F 8 O -2.800124367545E-01 -7.466774628720E-02 -4.804105418799E-01  
14 F 8 O -7.466774628719E-02 -2.800124367546E-01 -1.958945812001E-02  
15 T 8 O -3.028730972737E-01 -3.008862187410E-01 1.186021969392E-01  
16 F 8 O -3.008862187409E-01 -3.028730972737E-01 3.813978030607E-01  
17 F 8 O 3.028730972737E-01 3.008862187410E-01 -1.186021969392E-01  
18 F 8 O 3.008862187409E-01 3.028730972737E-01 -3.813978030607E-01  
19 T 7 N 3.131962176173E-01 1.241679421594E-01 3.407052190439E-01  
20 F 7 N 1.241679421594E-01 3.131962176173E-01 1.592947809560E-01  
21 F 7 N -3.131962176173E-01 -1.241679421594E-01 -3.407052190439E-01  
22 F 7 N -1.241679421594E-01 -3.131962176173E-01 -1.592947809560E-01  
23 T 7 N -3.579296921806E-01 -3.579296921806E-01 2.499999999999E-01  
24 F 7 N 3.579296921806E-01 3.579296921806E-01 -2.499999999999E-01  
25 T 6 C 2.177790187920E-01 2.177790187920E-01 2.499999999999E-01  
26 F 6 C -2.177790187920E-01 -2.177790187920E-01 -2.499999999999E-01  
27 T 6 C 3.359600073668E-01 2.451708208298E-01 2.930642215766E-01  
28 F 6 C 2.451708208298E-01 3.359600073668E-01 2.069357784232E-01  
29 F 6 C -3.359600073668E-01 -2.451708208298E-01 -2.930642215766E-01  
30 F 6 C -2.451708208298E-01 -3.359600073668E-01 -2.069357784232E-01

31 T 6 C 4.759749903139E-01 3.823937697880E-01 2.956161929208E-01  
32 F 6 C 3.823937697881E-01 4.759749903139E-01 2.043838070791E-01  
33 F 6 C -4.759749903139E-01 -3.823937697880E-01 -2.956161929208E-01  
34 F 6 C -3.823937697881E-01 -4.759749903139E-01 -2.043838070791E-01  
35 T 6 C 4.951116799370E-01 4.951116799370E-01 2.499999999999E-01  
36 F 6 C -4.951116799370E-01 -4.951116799370E-01 -2.499999999999E-01  
37 T 8 O -1.025547187291E-01 4.916280370148E-01 4.587516714781E-01  
38 F 8 O 4.916280370148E-01 -1.025547187292E-01 4.124832852180E-02  
39 F 8 O 1.025547187291E-01 -4.916280370148E-01 -4.587516714781E-01  
40 F 8 O -4.916280370148E-01 1.025547187292E-01 -4.124832852180E-02  
41 T 8 O 1.365293715749E-01 -3.652437484676E-01 -4.890586660822E-01  
42 F 8 O -3.652437484677E-01 1.365293715750E-01 -1.094133391809E-02  
43 F 8 O -1.365293715749E-01 3.652437484676E-01 4.890586660822E-01  
44 F 8 O 3.652437484677E-01 -1.365293715750E-01 1.094133391809E-02  
45 T 6 C 3.994723129135E-02 -4.358361914948E-01 2.292809039267E-01  
46 F 6 C -4.358361914948E-01 3.994723129136E-02 2.707190960730E-01  
47 F 6 C -3.994723129135E-02 4.358361914948E-01 -2.292809039267E-01  
48 F 6 C 4.358361914948E-01 -3.994723129136E-02 -2.707190960730E-01  
49 T 1 H -4.251500439178E-02 -4.620036800457E-01 1.432569537909E-01  
50 F 1 H -4.620036800457E-01 -4.251500439181E-02 3.567430462089E-01  
51 F 1 H 4.251500439178E-02 4.620036800457E-01 -1.432569537909E-01  
52 F 1 H 4.620036800457E-01 4.251500439181E-02 -3.567430462089E-01  
53 T 1 H 2.228401529492E-02 4.731350782898E-01 2.468979587909E-01  
54 F 1 H 4.731350782898E-01 2.228401529493E-02 2.531020412088E-01  
55 F 1 H -2.228401529492E-02 -4.731350782898E-01 -2.468979587909E-01  
56 F 1 H -4.731350782898E-01 -2.228401529493E-02 -2.531020412088E-01  
57 T 1 H 1.446221165219E-01 -3.439791657650E-01 1.780192386005E-01  
58 F 1 H -3.439791657650E-01 1.446221165218E-01 3.219807613994E-01  
59 F 1 H -1.446221165219E-01 3.439791657650E-01 -1.780192386005E-01  
60 F 1 H 3.439791657650E-01 -1.446221165218E-01 -3.219807613994E-01  
61 T 6 C 3.542686614213E-02 -3.959978852925E-01 3.888655923249E-01  
62 F 6 C -3.959978852924E-01 3.542686614210E-02 1.111344076748E-01



63 F 6 C -3.542686614213E-02 3.959978852925E-01 -3.888655923249E-01  
64 F 6 C 3.959978852924E-01 -3.542686614210E-02 -1.111344076748E-01  
65 T 6 C 6.717367697533E-02 -2.650754709650E-01 3.742877607337E-01  
66 F 6 C -2.650754709650E-01 6.717367697530E-02 1.257122392662E-01  
67 F 6 C -6.717367697533E-02 2.650754709650E-01 -3.742877607337E-01  
68 F 6 C 2.650754709650E-01 -6.717367697530E-02 -1.257122392662E-01  
69 T 1 H 5.481890574515E-02 -2.466652760005E-01 4.908869798227E-01  
70 F 1 H -2.466652760005E-01 5.481890574516E-02 9.113020177061E-03  
71 F 1 H -5.481890574515E-02 2.466652760005E-01 -4.908869798227E-01  
72 F 1 H 2.466652760005E-01 -5.481890574516E-02 -9.113020177061E-03  
73 T 1 H -5.582022744388E-03 -2.800355136834E-01 2.811619134550E-01  
74 F 1 H -2.800355136834E-01 -5.582022744422E-03 2.188380865449E-01  
75 F 1 H 5.582022744388E-03 2.800355136834E-01 -2.811619134550E-01  
76 F 1 H 2.800355136834E-01 5.582022744422E-03 -2.188380865449E-01  
77 T 1 H 1.767165961375E-01 -1.715084843181E-01 3.368534748448E-01  
78 F 1 H -1.715084843181E-01 1.767165961375E-01 1.631465251550E-01  
79 F 1 H -1.767165961375E-01 1.715084843181E-01 -3.368534748448E-01  
80 F 1 H 1.715084843181E-01 -1.767165961375E-01 -1.631465251550E-01

TRANSFORMATION MATRIX PRIMITIVE-CRYSTALLOGRAPHIC CELL

1.0000 1.0000 0.0000 -1.0000 1.0000 0.0000 0.0000 0.0000 1.0000

\*\*\*\*\*

CRYSTALLOGRAPHIC CELL (VOLUME= 2119.61690528)

| A           | B           | C          | ALPHA     | BETA      | GAMMA     |
|-------------|-------------|------------|-----------|-----------|-----------|
| 25.90900000 | 10.00610000 | 8.25010000 | 90.000000 | 97.684000 | 90.000000 |

COORDINATES IN THE CRYSTALLOGRAPHIC CELL

| ATOM | X/A | Y/B | Z/C |
|------|-----|-----|-----|
|------|-----|-----|-----|

\*\*\*\*\*

|           |                     |                     |                     |
|-----------|---------------------|---------------------|---------------------|
| 1 T 253 I | -5.205905151406E-15 | 9.104441859266E-03  | 2.499999999999E-01  |
| 2 F 253 I | 5.205905151406E-15  | -9.104441859266E-03 | -2.499999999999E-01 |

3 T 253 I 1.157440374477E-01 -4.648421429316E-01 3.668536269469E-01  
4 F 253 I -1.157440374477E-01 -4.648421429316E-01 1.331463730530E-01  
5 F 253 I -1.157440374477E-01 4.648421429316E-01 -3.668536269469E-01  
6 F 253 I 1.157440374477E-01 4.648421429316E-01 -1.331463730530E-01  
7 T 8 O 1.233795825291E-01 2.077844617445E-01 2.364794150044E-01  
8 F 8 O -1.233795825291E-01 2.077844617445E-01 2.635205849955E-01  
9 F 8 O -1.233795825291E-01 -2.077844617445E-01 -2.364794150044E-01  
10 F 8 O 1.233795825291E-01 -2.077844617445E-01 -2.635205849955E-01  
11 T 8 O 1.026723452337E-01 1.773400915209E-01 4.804105418799E-01  
12 F 8 O -1.026723452337E-01 1.773400915209E-01 1.958945812001E-02  
13 F 8 O -1.026723452337E-01 -1.773400915209E-01 -4.804105418799E-01  
14 F 8 O 1.026723452337E-01 -1.773400915209E-01 -1.958945812001E-02  
15 T 8 O -9.934392663407E-04 -3.018796580073E-01 1.186021969392E-01  
16 F 8 O 9.934392663741E-04 -3.018796580073E-01 3.813978030607E-01  
17 F 8 O 9.934392663407E-04 3.018796580073E-01 -1.186021969392E-01  
18 F 8 O -9.934392663741E-04 3.018796580073E-01 -3.813978030607E-01  
19 T 7 N 9.451413772893E-02 2.186820798884E-01 3.407052190439E-01  
20 F 7 N -9.451413772894E-02 2.186820798884E-01 1.592947809560E-01  
21 F 7 N -9.451413772893E-02 -2.186820798884E-01 -3.407052190439E-01  
22 F 7 N 9.451413772894E-02 -2.186820798884E-01 -1.592947809560E-01  
23 T 7 N -5.205905151406E-15 -3.579296921806E-01 2.499999999999E-01  
24 F 7 N 5.205905151406E-15 3.579296921806E-01 -2.499999999999E-01  
25 T 6 C -5.205905151406E-15 2.177790187920E-01 2.499999999999E-01  
26 F 6 C 5.205905151406E-15 -2.177790187920E-01 -2.499999999999E-01  
27 T 6 C 4.539459326850E-02 2.905654140983E-01 2.930642215766E-01  
28 F 6 C -4.539459326851E-02 2.905654140983E-01 2.069357784232E-01  
29 F 6 C -4.539459326850E-02 -2.905654140983E-01 -2.930642215766E-01  
30 F 6 C 4.539459326851E-02 -2.905654140983E-01 -2.069357784232E-01  
31 T 6 C 4.679061026294E-02 4.291843800510E-01 2.956161929208E-01  
32 F 6 C -4.679061026291E-02 4.291843800510E-01 2.043838070791E-01  
33 F 6 C -4.679061026294E-02 -4.291843800510E-01 -2.956161929208E-01  
34 F 6 C 4.679061026291E-02 -4.291843800510E-01 -2.043838070791E-01

35 T 6 C -5.205905151406E-15 4.951116799370E-01 2.499999999999E-01  
36 F 6 C 5.205905151406E-15 -4.951116799370E-01 -2.499999999999E-01  
37 T 8 O 2.029086221280E-01 -3.054633408572E-01 4.587516714781E-01  
38 F 8 O -2.029086221280E-01 -3.054633408572E-01 4.124832852180E-02  
39 F 8 O -2.029086221280E-01 3.054633408572E-01 -4.587516714781E-01  
40 F 8 O 2.029086221280E-01 3.054633408572E-01 -4.124832852180E-02  
41 T 8 O 2.508865600213E-01 -1.143571884463E-01 -4.890586660822E-01  
42 F 8 O -2.508865600213E-01 -1.143571884463E-01 -1.094133391809E-02  
43 F 8 O -2.508865600213E-01 1.143571884463E-01 4.890586660822E-01  
44 F 8 O 2.508865600213E-01 1.143571884463E-01 1.094133391809E-02  
45 T 6 C 2.378917113931E-01 -1.979444801017E-01 2.292809039267E-01  
46 F 6 C -2.378917113931E-01 -1.979444801017E-01 2.707190960730E-01  
47 F 6 C -2.378917113931E-01 1.979444801017E-01 -2.292809039267E-01  
48 F 6 C 2.378917113931E-01 1.979444801017E-01 -2.707190960730E-01  
49 T 1 H 2.097443378270E-01 -2.522593422187E-01 1.432569537909E-01  
50 F 1 H -2.097443378269E-01 -2.522593422187E-01 3.567430462089E-01  
51 F 1 H -2.097443378270E-01 2.522593422187E-01 -1.432569537909E-01  
52 F 1 H 2.097443378269E-01 2.522593422187E-01 -3.567430462089E-01  
53 T 1 H -2.254255314974E-01 2.477095467924E-01 2.468979587909E-01  
54 F 1 H 2.254255314974E-01 2.477095467924E-01 2.531020412088E-01  
55 F 1 H 2.254255314974E-01 -2.477095467924E-01 -2.468979587909E-01  
56 F 1 H -2.254255314974E-01 -2.477095467924E-01 -2.531020412088E-01  
57 T 1 H 2.443006411435E-01 -9.967852462158E-02 1.780192386005E-01  
58 F 1 H -2.443006411434E-01 -9.967852462158E-02 3.219807613994E-01  
59 F 1 H -2.443006411435E-01 9.967852462158E-02 -1.780192386005E-01  
60 F 1 H 2.443006411434E-01 9.967852462158E-02 -3.219807613994E-01  
61 T 6 C 2.157123757173E-01 -1.802855095752E-01 3.888655923249E-01  
62 F 6 C -2.157123757173E-01 -1.802855095752E-01 1.111344076748E-01  
63 F 6 C -2.157123757173E-01 1.802855095752E-01 -3.888655923249E-01  
64 F 6 C 2.157123757173E-01 1.802855095752E-01 -1.111344076748E-01  
65 T 6 C 1.661245739702E-01 -9.895089699483E-02 3.742877607337E-01  
66 F 6 C -1.661245739701E-01 -9.895089699483E-02 1.257122392662E-01



GEOMETRY FOR WAVE FUNCTION - DIMENSIONALITY OF THE SYSTEM 3

(NON PERIODIC DIRECTION: LATTICE PARAMETER FORMALLY SET TO 500)

\*\*\*\*\*

LATTICE PARAMETERS (ANGSTROMS AND DEGREES) - BOHR = 0.5291772083 ANGSTROM

PRIMITIVE CELL - CENTRING CODE 4/0 VOLUME= 1059.808453 - DENSITY 2.315 g/cm<sup>3</sup>

| A | B | C | ALPHA | BETA | GAMMA |
|---|---|---|-------|------|-------|
|---|---|---|-------|------|-------|

|             |             |            |           |           |            |
|-------------|-------------|------------|-----------|-----------|------------|
| 13.88702918 | 13.88702918 | 8.25010000 | 82.834795 | 97.165205 | 137.766708 |
|-------------|-------------|------------|-----------|-----------|------------|

\*\*\*\*\*

ATOMS IN THE ASYMMETRIC UNIT 22 - ATOMS IN THE UNIT CELL: 80

| ATOM | X/A | Y/B | Z/C |
|------|-----|-----|-----|
|------|-----|-----|-----|

\*\*\*\*\*

|           |                     |                     |                     |
|-----------|---------------------|---------------------|---------------------|
| 1 T 253 I | 9.104441859285E-03  | 9.104441859247E-03  | 2.500000000000E-01  |
| 2 F 253 I | -9.104441859285E-03 | -9.104441859247E-03 | -2.500000000000E-01 |
| 3 T 253 I | -3.490981054839E-01 | 4.194138196207E-01  | 3.668536269469E-01  |
| 4 F 253 I | 4.194138196207E-01  | -3.490981054840E-01 | 1.331463730531E-01  |
| 5 F 253 I | 3.490981054839E-01  | -4.194138196207E-01 | -3.668536269469E-01 |
| 6 F 253 I | -4.194138196207E-01 | 3.490981054839E-01  | -1.331463730531E-01 |
| 7 T 8 O   | 3.311640442736E-01  | 8.440487921547E-02  | 2.364794150044E-01  |
| 8 F 8 O   | 8.440487921551E-02  | 3.311640442736E-01  | 2.635205849956E-01  |
| 9 F 8 O   | -3.311640442736E-01 | -8.440487921547E-02 | -2.364794150044E-01 |
| 10 F 8 O  | -8.440487921544E-02 | -3.311640442736E-01 | -2.635205849956E-01 |
| 11 T 8 O  | 2.800124367545E-01  | 7.466774628719E-02  | 4.804105418799E-01  |
| 12 F 8 O  | 7.466774628723E-02  | 2.800124367545E-01  | 1.958945812014E-02  |
| 13 F 8 O  | -2.800124367545E-01 | -7.466774628719E-02 | -4.804105418799E-01 |
| 14 F 8 O  | -7.466774628716E-02 | -2.800124367546E-01 | -1.958945812014E-02 |
| 15 T 8 O  | -3.028730972737E-01 | -3.008862187410E-01 | 1.186021969392E-01  |
| 16 F 8 O  | -3.008862187409E-01 | -3.028730972737E-01 | 3.813978030608E-01  |
| 17 F 8 O  | 3.028730972737E-01  | 3.008862187410E-01  | -1.186021969392E-01 |
| 18 F 8 O  | 3.008862187410E-01  | 3.028730972736E-01  | -3.813978030608E-01 |
| 19 T 7 N  | 3.131962176173E-01  | 1.241679421594E-01  | 3.407052190439E-01  |
| 20 F 7 N  | 1.241679421595E-01  | 3.131962176173E-01  | 1.592947809561E-01  |
| 21 F 7 N  | -3.131962176173E-01 | -1.241679421594E-01 | -3.407052190439E-01 |

22 F 7 N -1.241679421594E-01 -3.131962176173E-01 -1.592947809561E-01  
23 T 7 N -3.579296921806E-01 -3.579296921806E-01 2.500000000000E-01  
24 F 7 N 3.579296921806E-01 3.579296921806E-01 -2.500000000000E-01  
25 T 6 C 2.177790187921E-01 2.177790187920E-01 2.500000000000E-01  
26 F 6 C -2.177790187921E-01 -2.177790187920E-01 -2.500000000000E-01  
27 T 6 C 3.359600073668E-01 2.451708208298E-01 2.930642215766E-01  
28 F 6 C 2.451708208298E-01 3.359600073668E-01 2.069357784234E-01  
29 F 6 C -3.359600073668E-01 -2.451708208298E-01 -2.930642215766E-01  
30 F 6 C -2.451708208298E-01 -3.359600073668E-01 -2.069357784234E-01  
31 T 6 C 4.759749903139E-01 3.823937697880E-01 2.956161929208E-01  
32 F 6 C 3.823937697881E-01 4.759749903139E-01 2.043838070792E-01  
33 F 6 C -4.759749903139E-01 -3.823937697880E-01 -2.956161929208E-01  
34 F 6 C -3.823937697880E-01 -4.759749903140E-01 -2.043838070792E-01  
35 T 6 C 4.951116799371E-01 4.951116799370E-01 2.500000000000E-01  
36 F 6 C -4.951116799371E-01 -4.951116799370E-01 -2.500000000000E-01  
37 T 8 O -1.025547187291E-01 4.916280370148E-01 4.587516714781E-01  
38 F 8 O 4.916280370148E-01 -1.025547187292E-01 4.124832852192E-02  
39 F 8 O 1.025547187291E-01 -4.916280370148E-01 -4.587516714781E-01  
40 F 8 O -4.916280370147E-01 1.025547187291E-01 -4.124832852192E-02  
41 T 8 O 1.365293715749E-01 -3.652437484676E-01 -4.890586660822E-01  
42 F 8 O -3.652437484676E-01 1.365293715749E-01 -1.094133391784E-02  
43 F 8 O -1.365293715749E-01 3.652437484676E-01 4.890586660822E-01  
44 F 8 O 3.652437484677E-01 -1.365293715750E-01 1.094133391784E-02  
45 T 6 C 3.994723129135E-02 -4.358361914948E-01 2.292809039267E-01  
46 F 6 C -4.358361914948E-01 3.994723129131E-02 2.707190960733E-01  
47 F 6 C -3.994723129135E-02 4.358361914948E-01 -2.292809039267E-01  
48 F 6 C 4.358361914949E-01 -3.994723129139E-02 -2.707190960733E-01  
49 T 1 H -4.251500439178E-02 -4.620036800457E-01 1.432569537909E-01  
50 F 1 H -4.620036800457E-01 -4.251500439182E-02 3.567430462091E-01  
51 F 1 H 4.251500439178E-02 4.620036800457E-01 -1.432569537909E-01  
52 F 1 H 4.620036800458E-01 4.251500439174E-02 -3.567430462091E-01  
53 T 1 H 2.228401529492E-02 4.731350782898E-01 2.468979587909E-01

54 F 1 H 4.731350782898E-01 2.228401529488E-02 2.531020412091E-01  
55 F 1 H -2.228401529492E-02 -4.731350782898E-01 -2.468979587909E-01  
56 F 1 H -4.731350782898E-01 -2.228401529496E-02 -2.531020412091E-01  
57 T 1 H 1.446221165219E-01 -3.439791657650E-01 1.780192386005E-01  
58 F 1 H -3.439791657650E-01 1.446221165218E-01 3.219807613995E-01  
59 F 1 H -1.446221165219E-01 3.439791657650E-01 -1.780192386005E-01  
60 F 1 H 3.439791657651E-01 -1.446221165219E-01 -3.219807613995E-01  
61 T 6 C 3.542686614213E-02 -3.959978852925E-01 3.888655923249E-01  
62 F 6 C -3.959978852924E-01 3.542686614209E-02 1.111344076751E-01  
63 F 6 C -3.542686614213E-02 3.959978852925E-01 -3.888655923249E-01  
64 F 6 C 3.959978852925E-01 -3.542686614217E-02 -1.111344076751E-01  
65 T 6 C 6.717367697533E-02 -2.650754709650E-01 3.742877607337E-01  
66 F 6 C -2.650754709650E-01 6.717367697529E-02 1.257122392663E-01  
67 F 6 C -6.717367697533E-02 2.650754709650E-01 -3.742877607337E-01  
68 F 6 C 2.650754709650E-01 -6.717367697537E-02 -1.257122392663E-01  
69 T 1 H 5.481890574515E-02 -2.466652760005E-01 4.908869798227E-01  
70 F 1 H -2.466652760005E-01 5.481890574511E-02 9.113020177305E-03  
71 F 1 H -5.481890574515E-02 2.466652760005E-01 -4.908869798227E-01  
72 F 1 H 2.466652760005E-01 -5.481890574519E-02 -9.113020177305E-03  
73 T 1 H -5.582022744388E-03 -2.800355136834E-01 2.811619134550E-01  
74 F 1 H -2.800355136834E-01 -5.582022744427E-03 2.188380865450E-01  
75 F 1 H 5.582022744388E-03 2.800355136834E-01 -2.811619134550E-01  
76 F 1 H 2.800355136834E-01 5.582022744350E-03 -2.188380865450E-01  
77 T 1 H 1.767165961375E-01 -1.715084843181E-01 3.368534748448E-01  
78 F 1 H -1.715084843180E-01 1.767165961374E-01 1.631465251552E-01  
79 F 1 H -1.767165961375E-01 1.715084843181E-01 -3.368534748448E-01  
80 F 1 H 1.715084843181E-01 -1.767165961375E-01 -1.631465251552E-01

TRANSFORMATION MATRIX PRIMITIVE-CRYSTALLOGRAPHIC CELL

1.0000 1.0000 0.0000 -1.0000 1.0000 0.0000 0.0000 0.0000 1.0000

\*\*\*\*\*

CRYSTALLOGRAPHIC CELL (VOLUME= 2119.61690528)

| A           | B           | C          | ALPHA     | BETA      | GAMMA     |
|-------------|-------------|------------|-----------|-----------|-----------|
| 25.90900000 | 10.00610000 | 8.25010000 | 90.000000 | 97.684000 | 90.000000 |

COORDINATES IN THE CRYSTALLOGRAPHIC CELL

| ATOM | X/A | Y/B | Z/C |
|------|-----|-----|-----|
|------|-----|-----|-----|

\*\*\*\*\*

|           |                     |                     |                     |
|-----------|---------------------|---------------------|---------------------|
| 1 T 253 I | 1.929879867024E-14  | 9.104441859266E-03  | 2.500000000000E-01  |
| 2 F 253 I | -1.930053339372E-14 | -9.104441859266E-03 | -2.500000000000E-01 |
| 3 T 253 I | 1.157440374477E-01  | -4.648421429316E-01 | 3.668536269469E-01  |
| 4 F 253 I | -1.157440374476E-01 | -4.648421429316E-01 | 1.331463730531E-01  |
| 5 F 253 I | -1.157440374477E-01 | 4.648421429316E-01  | -3.668536269469E-01 |
| 6 F 253 I | 1.157440374477E-01  | 4.648421429316E-01  | -1.331463730531E-01 |
| 7 T 8 O   | 1.233795825291E-01  | 2.077844617445E-01  | 2.364794150044E-01  |
| 8 F 8 O   | -1.233795825290E-01 | 2.077844617445E-01  | 2.635205849956E-01  |
| 9 F 8 O   | -1.233795825291E-01 | -2.077844617445E-01 | -2.364794150044E-01 |
| 10 F 8 O  | 1.233795825291E-01  | -2.077844617445E-01 | -2.635205849956E-01 |
| 11 T 8 O  | 1.026723452337E-01  | 1.773400915209E-01  | 4.804105418799E-01  |
| 12 F 8 O  | -1.026723452336E-01 | 1.773400915209E-01  | 1.958945812014E-02  |
| 13 F 8 O  | -1.026723452337E-01 | -1.773400915209E-01 | -4.804105418799E-01 |
| 14 F 8 O  | 1.026723452337E-01  | -1.773400915209E-01 | -1.958945812014E-02 |
| 15 T 8 O  | -9.934392663408E-04 | -3.018796580073E-01 | 1.186021969392E-01  |
| 16 F 8 O  | 9.934392663793E-04  | -3.018796580073E-01 | 3.813978030608E-01  |
| 17 F 8 O  | 9.934392663408E-04  | 3.018796580073E-01  | -1.186021969392E-01 |
| 18 F 8 O  | -9.934392663021E-04 | 3.018796580073E-01  | -3.813978030608E-01 |
| 19 T 7 N  | 9.451413772893E-02  | 2.186820798884E-01  | 3.407052190439E-01  |
| 20 F 7 N  | -9.451413772889E-02 | 2.186820798884E-01  | 1.592947809561E-01  |
| 21 F 7 N  | -9.451413772893E-02 | -2.186820798884E-01 | -3.407052190439E-01 |
| 22 F 7 N  | 9.451413772897E-02  | -2.186820798884E-01 | -1.592947809561E-01 |
| 23 T 7 N  | 1.930400284067E-14  | -3.579296921806E-01 | 2.500000000000E-01  |
| 24 F 7 N  | -1.930226811719E-14 | 3.579296921806E-01  | -2.500000000000E-01 |
| 25 T 6 C  | 1.932135007543E-14  | 2.177790187920E-01  | 2.500000000000E-01  |



26 F 6 C -1.931961535195E-14 -2.177790187920E-01 -2.500000000000E-01  
27 T 6 C 4.539459326850E-02 2.905654140983E-01 2.930642215766E-01  
28 F 6 C -4.539459326846E-02 2.905654140983E-01 2.069357784234E-01  
29 F 6 C -4.539459326850E-02 -2.905654140983E-01 -2.930642215766E-01  
30 F 6 C 4.539459326853E-02 -2.905654140983E-01 -2.069357784234E-01  
31 T 6 C 4.679061026294E-02 4.291843800510E-01 2.956161929208E-01  
32 F 6 C -4.679061026291E-02 4.291843800510E-01 2.043838070792E-01  
33 F 6 C -4.679061026294E-02 -4.291843800510E-01 -2.956161929208E-01  
34 F 6 C 4.679061026298E-02 -4.291843800510E-01 -2.043838070792E-01  
35 T 6 C 1.930400284067E-14 4.951116799370E-01 2.500000000000E-01  
36 F 6 C -1.937512650318E-14 -4.951116799370E-01 -2.500000000000E-01  
37 T 8 O 2.029086221280E-01 -3.054633408572E-01 4.587516714781E-01  
38 F 8 O -2.029086221280E-01 -3.054633408572E-01 4.124832852192E-02  
39 F 8 O -2.029086221280E-01 3.054633408572E-01 -4.587516714781E-01  
40 F 8 O 2.029086221281E-01 3.054633408572E-01 -4.124832852192E-02  
41 T 8 O 2.508865600213E-01 -1.143571884463E-01 -4.890586660822E-01  
42 F 8 O -2.508865600213E-01 -1.143571884463E-01 -1.094133391784E-02  
43 F 8 O -2.508865600213E-01 1.143571884463E-01 4.890586660822E-01  
44 F 8 O 2.508865600213E-01 1.143571884463E-01 1.094133391784E-02  
45 T 6 C 2.378917113931E-01 -1.979444801017E-01 2.292809039267E-01  
46 F 6 C -2.378917113930E-01 -1.979444801017E-01 2.707190960733E-01  
47 F 6 C -2.378917113931E-01 1.979444801017E-01 -2.292809039267E-01  
48 F 6 C 2.378917113931E-01 1.979444801017E-01 -2.707190960733E-01  
49 T 1 H 2.097443378270E-01 -2.522593422187E-01 1.432569537909E-01  
50 F 1 H -2.097443378269E-01 -2.522593422187E-01 3.567430462091E-01  
51 F 1 H -2.097443378270E-01 2.522593422187E-01 -1.432569537909E-01  
52 F 1 H 2.097443378270E-01 2.522593422187E-01 -3.567430462091E-01  
53 T 1 H -2.254255314974E-01 2.477095467924E-01 2.468979587909E-01  
54 F 1 H 2.254255314975E-01 2.477095467924E-01 2.531020412091E-01  
55 F 1 H 2.254255314974E-01 -2.477095467924E-01 -2.468979587909E-01  
56 F 1 H -2.254255314974E-01 -2.477095467924E-01 -2.531020412091E-01  
57 T 1 H 2.443006411435E-01 -9.967852462158E-02 1.780192386005E-01

58 F 1 H -2.443006411434E-01 -9.967852462158E-02 3.219807613995E-01  
 59 F 1 H -2.443006411435E-01 9.967852462158E-02 -1.780192386005E-01  
 60 F 1 H 2.443006411435E-01 9.967852462158E-02 -3.219807613995E-01  
 61 T 6 C 2.157123757173E-01 -1.802855095752E-01 3.888655923249E-01  
 62 F 6 C -2.157123757173E-01 -1.802855095752E-01 1.111344076751E-01  
 63 F 6 C -2.157123757173E-01 1.802855095752E-01 -3.888655923249E-01  
 64 F 6 C 2.157123757173E-01 1.802855095752E-01 -1.111344076751E-01  
 65 T 6 C 1.661245739702E-01 -9.895089699483E-02 3.742877607337E-01  
 66 F 6 C -1.661245739701E-01 -9.895089699483E-02 1.257122392663E-01  
 67 F 6 C -1.661245739702E-01 9.895089699483E-02 -3.742877607337E-01  
 68 F 6 C 1.661245739702E-01 9.895089699483E-02 -1.257122392663E-01  
 69 T 1 H 1.507420908728E-01 -9.592318512767E-02 4.908869798227E-01  
 70 F 1 H -1.507420908728E-01 -9.592318512767E-02 9.113020177305E-03  
 71 F 1 H -1.507420908728E-01 9.592318512767E-02 -4.908869798227E-01  
 72 F 1 H 1.507420908729E-01 9.592318512767E-02 -9.113020177305E-03  
 73 T 1 H 1.372267454695E-01 -1.428087682139E-01 2.811619134550E-01  
 74 F 1 H -1.372267454695E-01 -1.428087682139E-01 2.188380865450E-01  
 75 F 1 H -1.372267454695E-01 1.428087682139E-01 -2.811619134550E-01  
 76 F 1 H 1.372267454695E-01 1.428087682139E-01 -2.188380865450E-01  
 77 T 1 H 1.741125402278E-01 2.604055909695E-03 3.368534748448E-01  
 78 F 1 H -1.741125402277E-01 2.604055909695E-03 1.631465251552E-01  
 79 F 1 H -1.741125402278E-01 -2.604055909695E-03 -3.368534748448E-01  
 80 F 1 H 1.741125402278E-01 -2.604055909695E-03 -1.631465251552E-01

T = ATOM BELONGING TO THE ASYMMETRIC UNIT

\*\*\*\* 4 SYMMOPS - TRANSLATORS IN FRACTIONAL UNITS

\*\*\*\* MATRICES AND TRANSLATORS IN THE CRYSTALLOGRAPHIC REFERENCE FRAME

| V INV | ROTATION MATRICES |      |      |      |       |      |      |      | TRANSLATORS |       |      |       |      |
|-------|-------------------|------|------|------|-------|------|------|------|-------------|-------|------|-------|------|
| 1 1   | 1.00              | 0.00 | 0.00 | 0.00 | 1.00  | 0.00 | 0.00 | 0.00 | 0.00        | 1.00  | 0.00 | 0.00  | 0.00 |
| 2 2   | -0.00             | 1.00 | 0.00 | 1.00 | 0.00  | 0.00 | 0.00 | 0.00 | 0.00        | -1.00 | 0.00 | -0.00 | 0.50 |
| 3 3   | -1.00             | 0.00 | 0.00 | 0.00 | -1.00 | 0.00 | 0.00 | 0.00 | 0.00        | -1.00 | 0.00 | 0.00  | 0.00 |

4 4 0.00 -1.00 -0.00 -1.00 -0.00 0.00 0.00 0.00 1.00 0.00 -0.00 0.50

DIRECT LATTICE VECTORS CARTESIAN COMPONENTS (ANGSTROM)

| X                   | Y                  | Z                  |
|---------------------|--------------------|--------------------|
| 0.129545000000E+02  | 0.500305000000E+01 | 0.000000000000E+00 |
| -0.129545000000E+02 | 0.500305000000E+01 | 0.000000000000E+00 |
| -0.110311629618E+01 | 0.505172927882E-15 | 0.817601886294E+01 |

CARTESIAN COORDINATES - PRIMITIVE CELL

\*\*\*\*\*

| * ATOM | X(ANGSTROM) | Y(ANGSTROM) | Z(ANGSTROM) |
|--------|-------------|-------------|-------------|
|--------|-------------|-------------|-------------|

\*\*\*\*\*

|    |       |                     |                     |                     |
|----|-------|---------------------|---------------------|---------------------|
| 1  | 253 I | -2.757790740445E-01 | 9.109995568800E-02  | 2.044004715735E+00  |
| 2  | 253 I | 2.757790740445E-01  | -9.109995568800E-02 | -2.044004715735E+00 |
| 3  | 253 I | 2.594130052034E+00  | -4.651256966388E+00 | 2.999402173856E+00  |
| 4  | 253 I | -3.145688200123E+00 | -4.651256966388E+00 | 1.088607257614E+00  |
| 5  | 253 I | -2.594130052034E+00 | 4.651256966388E+00  | -2.999402173856E+00 |
| 6  | 253 I | 3.145688200125E+00  | 4.651256966388E+00  | -1.088607257614E+00 |
| 7  | 8 O   | 2.935777307343E+00  | 2.079112102662E+00  | 1.933460157773E+00  |
| 8  | 8 O   | -3.487335455432E+00 | 2.079112102662E+00  | 2.154549273697E+00  |
| 9  | 8 O   | -2.935777307343E+00 | -2.079112102662E+00 | -1.933460157773E+00 |
| 10 | 8 O   | 3.487335455434E+00  | -2.079112102662E+00 | -2.154549273697E+00 |
| 11 | 8 O   | 2.130189095055E+00  | 1.774482689767E+00  | 3.927845652365E+00  |
| 12 | 8 O   | -2.681747243144E+00 | 1.774482689767E+00  | 1.601637791050E-01  |
| 13 | 8 O   | -2.130189095055E+00 | -1.774482689767E+00 | -3.927845652365E+00 |
| 14 | 8 O   | 2.681747243146E+00  | -1.774482689767E+00 | -1.601637791050E-01 |
| 15 | 8 O   | -1.565710341580E-01 | -3.020638045987E+00 | 9.696937993610E-01  |
| 16 | 8 O   | -3.949871139310E-01 | -3.020638045987E+00 | 3.118315632109E+00  |
| 17 | 8 O   | 1.565710341580E-01  | 3.020638045987E+00  | -9.696937993610E-01 |
| 18 | 8 O   | 3.949871139330E-01  | 3.020638045987E+00  | -3.118315632109E+00 |
| 19 | 7 N   | 2.072929315098E+00  | 2.188154759571E+00  | 2.785612297605E+00  |

20 7 N -2.624487463187E+00 2.188154759571E+00 1.302397133865E+00  
21 7 N -2.072929315098E+00 -2.188154759571E+00 -2.785612297605E+00  
22 7 N 2.624487463189E+00 -2.188154759571E+00 -1.302397133865E+00  
23 7 N -2.757790740445E-01 -3.581480292928E+00 2.044004715735E+00  
24 7 N 2.757790740445E-01 3.581480292928E+00 -2.044004715735E+00  
25 6 C -2.757790740445E-01 2.179118639935E+00 2.044004715735E+00  
26 6 C 2.757790740445E-01 -2.179118639935E+00 -2.044004715735E+00  
27 6 C 8.528445983450E-01 2.907426590009E+00 2.396098603663E+00  
28 6 C -1.404402746434E+00 2.907426590009E+00 1.691910827807E+00  
29 6 C -8.528445983450E-01 -2.907426590009E+00 -2.396098603663E+00  
30 6 C 1.404402746436E+00 -2.907426590009E+00 -1.691910827807E+00  
31 6 C 8.861988814770E-01 4.294461825228E+00 2.416963569511E+00  
32 6 C -1.437757029566E+00 4.294461825228E+00 1.671045861959E+00  
33 6 C -8.861988814770E-01 -4.294461825228E+00 -2.416963569511E+00  
34 6 C 1.437757029568E+00 -4.294461825228E+00 -1.671045861959E+00  
35 6 C -2.757790740445E-01 4.954136980618E+00 2.044004715735E+00  
36 6 C 2.757790740445E-01 -4.954136980618E+00 -2.044004715735E+00  
37 8 O 4.751103046008E+00 -3.056496734951E+00 3.750762319410E+00  
38 8 O -5.302661194097E+00 -3.056496734951E+00 3.372471120600E-01  
39 8 O -4.751103046008E+00 3.056496734951E+00 -3.750762319410E+00  
40 8 O 5.302661194099E+00 3.056496734951E+00 -3.372471120600E-01  
41 8 O 5.936592171755E+00 -1.144269463313E+00 4.177465983968E+00  
42 8 O -6.488150319844E+00 -1.144269463313E+00 -8.945655249800E-02  
43 8 O -5.936592171755E+00 1.144269463313E+00 -4.177465983968E+00  
44 8 O 6.488150319846E+00 1.144269463313E+00 8.945655249800E-02  
45 6 C 5.910612848959E+00 -1.980652262346E+00 1.874604995417E+00  
46 6 C -6.462170997048E+00 -1.980652262346E+00 2.213404436053E+00  
47 6 C -5.910612848959E+00 1.980652262346E+00 -1.874604995417E+00  
48 6 C 6.462170997050E+00 1.980652262346E+00 -2.213404436053E+00  
49 1 H 5.276236968491E+00 -2.524132204175E+00 1.171271556442E+00  
50 1 H -5.827795116580E+00 -2.524132204175E+00 2.916737875028E+00  
51 1 H -5.276236968491E+00 2.524132204175E+00 -1.171271556442E+00

52 1 H 5.827795116582E+00 2.524132204175E+00 -2.916737875028E+00  
53 1 H -6.112907257403E+00 2.478606496159E+00 2.018642368296E+00  
54 1 H 5.561349109314E+00 2.478606496159E+00 2.069367063174E+00  
55 1 H 6.112907257403E+00 -2.478606496159E+00 -2.018642368296E+00  
56 1 H -5.561349109312E+00 -2.478606496159E+00 -2.069367063174E+00  
57 1 H 6.133209388252E+00 -9.973932852160E-01 1.455488652764E+00  
58 1 H -6.684767536341E+00 -9.973932852160E-01 2.632520778706E+00  
59 1 H -6.133209388252E+00 9.973932852160E-01 -1.455488652764E+00  
60 1 H 6.684767536343E+00 9.973932852160E-01 -2.632520778706E+00  
61 6 C 5.159927970542E+00 -1.803954837360E+00 3.179372417997E+00  
62 6 C -5.711486118631E+00 -1.803954837360E+00 9.086370134730E-01  
63 6 C -5.159927970542E+00 1.803954837360E+00 -3.179372417997E+00  
64 6 C 5.711486118633E+00 1.803954837360E+00 -9.086370134730E-01  
65 6 C 3.891238658667E+00 -9.901125704200E-01 3.060183791926E+00  
66 6 C -4.442796806756E+00 -9.901125704200E-01 1.027825639544E+00  
67 6 C -3.891238658667E+00 9.901125704200E-01 -3.060183791926E+00  
68 6 C 4.442796806758E+00 9.901125704200E-01 -1.027825639544E+00  
69 1 H 3.364071405399E+00 -9.598169827060E-01 4.013501206602E+00  
70 1 H -3.915629553488E+00 -9.598169827060E-01 7.450822486800E-02  
71 1 H -3.364071405399E+00 9.598169827060E-01 -4.013501206602E+00  
72 1 H 3.915629553490E+00 9.598169827060E-01 -7.450822486800E-02  
73 1 H 3.245253459772E+00 -1.428958815625E+00 2.298785107948E+00  
74 1 H -3.796811607861E+00 -1.428958815625E+00 1.789224323522E+00  
75 1 H -3.245253459772E+00 1.428958815625E+00 -2.298785107948E+00  
76 1 H 3.796811607863E+00 1.428958815625E+00 -1.789224323522E+00  
77 1 H 4.139493247235E+00 2.605644383800E-02 2.754120364378E+00  
78 1 H -4.691051395324E+00 2.605644383800E-02 1.333889067092E+00  
79 1 H -4.139493247235E+00 -2.605644383800E-02 -2.754120364378E+00  
80 1 H 4.691051395326E+00 -2.605644383800E-02 -1.333889067092E+00

\*\*\*\*\*

\*\*\* PSEUDOPOTENTIAL INFORMATION \*\*\*

\*\*\*\*\*

ATOMIC NUMBER 53, NUCLEAR CHARGE 25.000, GIVEN IN INPUT PSEUDOPOTENTIAL

| TYPE   | EXPONENT   | COEFF.      | N | EXPONENT   | COEFF.      | N |
|--------|------------|-------------|---|------------|-------------|---|
| P0 TMS | 40.0333760 | 49.9896490  | 0 | 17.3005760 | 281.0065560 | 0 |
|        | 8.8517200  | 61.4167390  | 0 |            |             |   |
| P1 TMS | 15.7201410 | 67.4162390  | 0 | 15.2082220 | 134.8076960 | 0 |
|        | 8.2941860  | 14.5665480  | 0 | 7.7539490  | 28.9684220  | 0 |
| P2 TMS | 13.8177510 | 35.5387560  | 0 | 13.5878050 | 53.3397590  | 0 |
|        | 6.9476300  | 9.7164660   | 0 | 6.9600990  | 14.9775000  | 0 |
| P3 TMS | 18.5229500 | -20.1766180 | 0 | 18.2510350 | -26.0880770 | 0 |
|        | 7.5579010  | -0.2204340  | 0 | 7.5974040  | -0.2216460  | 0 |

\*\*\*\*\*

LOCAL ATOMIC FUNCTIONS BASIS SET

\*\*\*\*\*

| ATOM | X(AU) | Y(AU) | Z(AU) | N. | TYPE | EXPONENT | S COEF | P COEF | D/F/G COEF |
|------|-------|-------|-------|----|------|----------|--------|--------|------------|
|------|-------|-------|-------|----|------|----------|--------|--------|------------|

\*\*\*\*\*

|     |        |       |       |  |  |  |  |  |  |
|-----|--------|-------|-------|--|--|--|--|--|--|
| 1 I | -0.521 | 0.172 | 3.863 |  |  |  |  |  |  |
|-----|--------|-------|-------|--|--|--|--|--|--|

1 S

5.900E+03 2.419E-04 0.000E+00 0.000E+00

8.985E+02 1.547E-03 0.000E+00 0.000E+00

2.004E+02 4.284E-03 0.000E+00 0.000E+00

3.142E+01-3.942E-02 0.000E+00 0.000E+00

1.565E+01 9.609E-01 0.000E+00 0.000E+00

2 S

1.182E+01 7.596E-01 0.000E+00 0.000E+00

6.461E+00 4.250E-01 0.000E+00 0.000E+00

3 S

1.793E+00 1.000E+00 0.000E+00 0.000E+00

4 S

2.229E-01 1.000E+00 0.000E+00 0.000E+00

5- 7 P

1.973E+02 0.000E+00 7.395E-04 0.000E+00

2.006E+01 0.000E+00 6.617E-02 0.000E+00

9.763E+00 0.000E+00 -2.855E-01 0.000E+00

8- 10 P

1.298E+01 0.000E+00 -4.910E-02 0.000E+00

3.620E+00 0.000E+00 3.891E-01 0.000E+00

2.023E+00 0.000E+00 6.561E-01 0.000E+00

1.037E+00 0.000E+00 3.180E-01 0.000E+00

11- 13 P

4.758E-01 0.000E+00 1.000E+00 0.000E+00

14- 16 P

1.500E-01 0.000E+00 1.000E+00 0.000E+00

17- 21 D

1.191E+02 0.000E+00 0.000E+00 8.260E-04

3.340E+01 0.000E+00 0.000E+00 6.838E-03

1.781E+01 0.000E+00 0.000E+00 -1.031E-02

4.899E+00 0.000E+00 0.000E+00 2.267E-01

2.452E+00 0.000E+00 0.000E+00 4.418E-01

1.182E+00 0.000E+00 0.000E+00 3.678E-01

22- 26 D

2.537E+00 0.000E+00 0.000E+00 1.000E+00

27- 31 D

6.887E-01 0.000E+00 0.000E+00 1.000E+00

32- 36 D

2.068E-01 0.000E+00 0.000E+00 1.000E+00

2 I 0.521 -0.172 -3.863

3 I 4.902 -8.790 5.668

4 I -5.944 -8.790 2.057

5 I -4.902 8.790 -5.668

6 I 5.944 8.790 -2.057

7 O 5.548 3.929 3.654

217 S

5.485E+03 1.831E-03 0.000E+00 0.000E+00  
8.252E+02 1.395E-02 0.000E+00 0.000E+00  
1.880E+02 6.845E-02 0.000E+00 0.000E+00  
5.296E+01 2.327E-01 0.000E+00 0.000E+00  
1.690E+01 4.702E-01 0.000E+00 0.000E+00  
5.800E+00 3.585E-01 0.000E+00 0.000E+00

218- 221 SP

1.554E+01-1.108E-01 7.087E-02 0.000E+00  
3.600E+00-1.480E-01 3.398E-01 0.000E+00  
1.014E+00 1.131E+00 7.272E-01 0.000E+00

222- 225 SP

2.700E-01 1.000E+00 1.000E+00 0.000E+00

226- 230 D

8.000E-01 0.000E+00 0.000E+00 1.000E+00

8 O -6.590 3.929 4.072  
9 O -5.548 -3.929 -3.654  
10 O 6.590 -3.929 -4.072  
11 O 4.025 3.353 7.423  
12 O -5.068 3.353 0.303  
13 O -4.025 -3.353 -7.423  
14 O 5.068 -3.353 -0.303  
15 O -0.296 -5.708 1.832  
16 O -0.746 -5.708 5.893  
17 O 0.296 5.708 -1.832  
18 O 0.746 5.708 -5.893  
19 N 3.917 4.135 5.264

385 S

4.174E+03 1.835E-03 0.000E+00 0.000E+00  
6.275E+02 1.400E-02 0.000E+00 0.000E+00  
1.429E+02 6.859E-02 0.000E+00 0.000E+00  
4.023E+01 2.322E-01 0.000E+00 0.000E+00



1.282E+01 4.691E-01 0.000E+00 0.000E+00  
 4.390E+00 3.605E-01 0.000E+00 0.000E+00  
 386- 389 SP  
 1.163E+01-1.150E-01 6.758E-02 0.000E+00  
 2.716E+00-1.691E-01 3.239E-01 0.000E+00  
 7.722E-01 1.146E+00 7.409E-01 0.000E+00  
 390- 393 SP  
 2.120E-01 1.000E+00 1.000E+00 0.000E+00  
 394- 398 D  
 8.000E-01 0.000E+00 0.000E+00 1.000E+00  
 20 N -4.960 4.135 2.461  
 21 N -3.917 -4.135 -5.264  
 22 N 4.960 -4.135 -2.461  
 23 N -0.521 -6.768 3.863  
 24 N 0.521 6.768 -3.863  
 25 C -0.521 4.118 3.863  
 469 S  
 3.048E+03 1.835E-03 0.000E+00 0.000E+00  
 4.574E+02 1.404E-02 0.000E+00 0.000E+00  
 1.039E+02 6.884E-02 0.000E+00 0.000E+00  
 2.921E+01 2.322E-01 0.000E+00 0.000E+00  
 9.287E+00 4.679E-01 0.000E+00 0.000E+00  
 3.164E+00 3.623E-01 0.000E+00 0.000E+00  
 470- 473 SP  
 7.868E+00-1.193E-01 6.900E-02 0.000E+00  
 1.881E+00-1.609E-01 3.164E-01 0.000E+00  
 5.442E-01 1.143E+00 7.443E-01 0.000E+00  
 474- 477 SP  
 1.687E-01 1.000E+00 1.000E+00 0.000E+00  
 478- 482 D  
 8.000E-01 0.000E+00 0.000E+00 1.000E+00  
 26 C 0.521 -4.118 -3.863

27 C 1.612 5.494 4.528  
28 C -2.654 5.494 3.197  
29 C -1.612 -5.494 -4.528  
30 C 2.654 -5.494 -3.197  
31 C 1.675 8.115 4.567  
32 C -2.717 8.115 3.158  
33 C -1.675 -8.115 -4.567  
34 C 2.717 -8.115 -3.158  
35 C -0.521 9.362 3.863  
36 C 0.521 -9.362 -3.863  
37 O 8.978 -5.776 7.088  
38 O -10.021 -5.776 0.637  
39 O -8.978 5.776 -7.088  
40 O 10.021 5.776 -0.637  
41 O 11.219 -2.162 7.894  
42 O -12.261 -2.162 -0.169  
43 O -11.219 2.162 -7.894  
44 O 12.261 2.162 0.169  
45 C 11.169 -3.743 3.542  
46 C -12.212 -3.743 4.183  
47 C -11.169 3.743 -3.542  
48 C 12.212 3.743 -4.183  
49 H 9.971 -4.770 2.213

805 S

1.873E+01 3.349E-02 0.000E+00 0.000E+00

2.825E+00 2.347E-01 0.000E+00 0.000E+00

6.401E-01 8.138E-01 0.000E+00 0.000E+00

806 S

1.613E-01 1.000E+00 0.000E+00 0.000E+00

807- 809 P

1.100E+00 0.000E+00 1.000E+00 0.000E+00

50 H -11.013 -4.770 5.512

51 H -9.971 4.770 -2.213  
52 H 11.013 4.770 -5.512  
53 H -11.552 4.684 3.815  
54 H 10.509 4.684 3.911  
55 H 11.552 -4.684 -3.815  
56 H -10.509 -4.684 -3.911  
57 H 11.590 -1.885 2.750  
58 H -12.632 -1.885 4.975  
59 H -11.590 1.885 -2.750  
60 H 12.632 1.885 -4.975  
61 C 9.751 -3.409 6.008  
62 C -10.793 -3.409 1.717  
63 C -9.751 3.409 -6.008  
64 C 10.793 3.409 -1.717  
65 C 7.353 -1.871 5.783  
66 C -8.396 -1.871 1.942  
67 C -7.353 1.871 -5.783  
68 C 8.396 1.871 -1.942  
69 H 6.357 -1.814 7.584  
70 H -7.399 -1.814 0.141  
71 H -6.357 1.814 -7.584  
72 H 7.399 1.814 -0.141  
73 H 6.133 -2.700 4.344  
74 H -7.175 -2.700 3.381  
75 H -6.133 2.700 -4.344  
76 H 7.175 2.700 -3.381  
77 H 7.823 0.049 5.205  
78 H -8.865 0.049 2.521  
79 H -7.823 -0.049 -5.205  
80 H 8.865 -0.049 -2.521

INFORMATION \*\*\*\*\* SET\_MPP \*\*\*\*\* PCRYSTAL CALCULATION

INFORMATION \*\*\*\*\* READM2 \*\*\*\*\* NEW DEFAULT: FOCK/KS MATRIX MIXING SET TO 30 %

INFORMATION \*\*\*\* READM2 \*\*\*\* NEW DEFAULT: FULL DIRECT SCF MODE  
INFORMATION \*\*\*\* READM2 \*\*\*\* NEW DEFAULT: COULOMB BIPOLAR BUFFER SET TO 32 Mb  
INFORMATION \*\*\*\* READM2 \*\*\*\* NEW DEFAULT: EXCHANGE BIPOLAR BUFFER SET TO 32 Mb

\*\*\*\*\*

NEW DEFAULT: DFT INTEGRATION GRID INCREASED TO XLGRID

NEW DEFAULT: DIIS ACCELERATOR ACTIVE

USE KEYWORD NODIIS TO TURN IT OFF

\*\*\*\*\*

WARNING \*\*\*\* RDDFTP \*\*\*\* CAM-B3LYP ACTIVE

RANGE SEPARATION - OMEGA: 0.3300000000000000

Alpha(Beta) FOCK EXCHANGE IN CAM-B3LYP: 0.19000( 0.46000)

INFORMATION \*\*\*\* BIPOSIZE \*\*\*\* COULOMB BIPOLAR BUFFER SET TO 20000000

INFORMATION \*\*\*\* EXCHSIZE \*\*\*\* EXCHANGE BIPOLAR BUFFER SIZE SET TO 20000000

INFORMATION \*\*\*\* LEVSHIFT \*\*\*\* LEVEL SHIFTER ACTIVE

INFORMATION \*\*\*\* TOLDEE \*\*\*\* SCF TOL ON TOTAL ENERGY SET TO 11

INFORMATION \*\*\*\* READM2 \*\*\*\* FULL DIRECT SCF (MONO AND BIEL INT) SELECTED

INFORMATION \*\*\*\* MAXCYCLE \*\*\*\* MAX NUMBER OF SCF CYCLES SET TO 300

INFORMATION \*\*\*\* READM2 \*\*\*\* LEVSHIFT DISABLED BECAUSE NOT COMPATIBLE WITH DIIS

INFORMATION \*\*\*\* READM2 \*\*\*\* TO MAKE LEVSHIFT EFFECTIVE YOU MUST SET NODIIS

\*\*\*\*\*

N. OF ATOMS PER CELL 80 COULOMB OVERLAP TOL (T1) 10\*\* -6

NUMBER OF SHELLS 344 COULOMB PENETRATION TOL (T2) 10\*\* -6

NUMBER OF AO 1036 EXCHANGE OVERLAP TOL (T3) 10\*\* -6

N. OF ELECTRONS PER CELL 520 EXCHANGE PSEUDO OVP (F(G)) (T4) 10\*\* -6

CORE ELECTRONS PER CELL 100 EXCHANGE PSEUDO OVP (P(G)) (T5) 10\*\* -12

N. OF SYMMETRY OPERATORS 4 POLE ORDER IN MONO ZONE 4

\*\*\*\*\*

TYPE OF CALCULATION : RESTRICTED CLOSED SHELL

KOHN-SHAM HAMILTONIAN



MATRIX SIZE: P(G) 929636, F(G) 163200, P(G) IRR 120001, F(G) IRR 42961

MAX G-VECTOR INDEX FOR 1- AND 2-ELECTRON INTEGRALS 41

TTTTTTTTTTTTTTTTTTTTTTTTTTTTTTTTTTTT INPUT TELAPSE 1.06 TCPU 0.04

### NEIGHBORS OF THE NON-EQUIVALENT ATOMS

N = NUMBER OF NEIGHBORS AT DISTANCE R

| ATOM | N | R/ANG  | R/AU   | NEIGHBORS (ATOM LABELS AND CELL INDICES) |
|------|---|--------|--------|------------------------------------------|
| 1 I  | 1 | 2.0880 | 3.9458 | 25 C 0 0 0                               |
| 1 I  | 2 | 3.0544 | 5.7720 | 27 C 0 0 0 28 C 0 0 0                    |
| 1 I  | 2 | 3.2348 | 6.1129 | 19 N 0 0 0 20 N 0 0 0                    |
| 1 I  | 2 | 3.2941 | 6.2250 | 15 O 0 0 0 16 O 0 0 0                    |
| 1 I  | 2 | 3.4887 | 6.5928 | 11 O 0 0 0 12 O 0 0 0                    |
| 1 I  | 1 | 3.6726 | 6.9402 | 23 N 0 0 0                               |
| 3 I  | 1 | 2.0930 | 3.9552 | 31 C -1-1 0                              |
| 3 I  | 1 | 2.7857 | 5.2643 | 37 O 0 0 0                               |
| 3 I  | 1 | 3.0512 | 5.7659 | 35 C -1-1 0                              |
| 3 I  | 1 | 3.0636 | 5.7894 | 27 C -1-1 0                              |
| 3 I  | 1 | 3.2084 | 6.0629 | 23 N 0 0 0                               |
| 3 I  | 1 | 3.2164 | 6.0781 | 19 N -1-1 0                              |
| 7 O  | 1 | 1.2176 | 2.3009 | 19 N 0 0 0                               |
| 7 O  | 1 | 2.1724 | 4.1053 | 11 O 0 0 0                               |
| 7 O  | 1 | 2.2888 | 4.3253 | 27 C 0 0 0                               |
| 7 O  | 1 | 2.4990 | 4.7224 | 72 H 0 0 0                               |
| 7 O  | 1 | 2.5174 | 4.7573 | 77 H 0 0 0                               |
| 7 O  | 1 | 2.6593 | 5.0253 | 54 H 0 0 0                               |
| 11 O | 1 | 1.2162 | 2.2983 | 19 N 0 0 0                               |
| 11 O | 1 | 2.1724 | 4.1053 | 7 O 0 0 0                                |

11 O 1 2.2938 4.3346 27 C 000  
11 O 1 2.5462 4.8117 76 H 001  
11 O 1 2.9107 5.5003 77 H 000  
11 O 1 3.0010 5.6711 69 H 000  
  
15 O 1 1.2177 2.3012 23 N 000  
15 O 1 2.1618 4.0852 16 O 000  
15 O 1 2.3010 4.3483 35 C -1-10  
15 O 1 3.0618 5.7860 32 C -1-10  
15 O 1 3.0877 5.8348 30 C 000  
15 O 1 3.1587 5.9691 26 C 000  
  
19 N 1 1.2162 2.2983 11 O 000  
19 N 1 1.2176 2.3009 7 O 000  
19 N 1 1.4689 2.7758 27 C 000  
19 N 1 2.4456 4.6214 31 C 000  
19 N 1 2.4630 4.6544 25 C 000  
19 N 1 2.9910 5.6523 77 H 000  
  
23 N 2 1.2177 2.3012 15 O 000 16 O 000  
23 N 1 1.4705 2.7788 35 C -1-10  
23 N 2 2.4550 4.6392 31 C -1-10 32 C -1-10  
23 N 2 3.2084 6.0629 3 I 000 4 I 000  
23 N 1 3.6726 6.9402 1 I 000  
23 N 2 3.7106 7.0120 27 C -1-10 28 C -1-10  
  
25 C 2 1.3886 2.6241 27 C 000 28 C 000  
25 C 1 2.0880 3.9458 1 I 000  
25 C 2 2.4421 4.6149 31 C 000 32 C 000  
25 C 2 2.4630 4.6544 19 N 000 20 N 000  
25 C 1 2.7750 5.2440 35 C 000  
25 C 2 3.0824 5.8249 11 O 000 12 O 000

27 C 1 1.3876 2.6222 31 C 0 0 0  
27 C 1 1.3886 2.6241 25 C 0 0 0  
27 C 1 1.4689 2.7758 19 N 0 0 0  
27 C 1 2.2888 4.3253 7 O 0 0 0  
27 C 1 2.2938 4.3346 11 O 0 0 0  
27 C 1 2.3636 4.4666 35 C 0 0 0  
  
31 C 1 1.3872 2.6215 35 C 0 0 0  
31 C 1 1.3876 2.6222 27 C 0 0 0  
31 C 1 2.0930 3.9552 3 I 1 1 0  
31 C 1 2.4407 4.6123 32 C 0 0 0  
31 C 1 2.4421 4.6149 25 C 0 0 0  
31 C 1 2.4456 4.6214 19 N 0 0 0  
  
35 C 2 1.3872 2.6215 31 C 0 0 0 32 C 0 0 0  
35 C 1 1.4705 2.7788 23 N 1 1 0  
35 C 2 2.3010 4.3483 15 O 1 1 0 16 O 1 1 0  
35 C 2 2.3636 4.4666 27 C 0 0 0 28 C 0 0 0  
35 C 1 2.7750 5.2440 25 C 0 0 0  
35 C 2 3.0512 5.7659 3 I 1 1 0 4 I 1 1 0  
  
37 O 1 1.4350 2.7118 43 O 0-1 1  
37 O 1 1.4361 2.7139 61 C 0 0 0  
37 O 1 2.2900 4.3275 41 O 0 0 0  
37 O 1 2.3103 4.3659 63 C 0-1 1  
37 O 1 2.3423 4.4262 65 C 0 0 0  
37 O 1 2.4540 4.6373 45 C 0 0 0  
  
41 O 1 1.4264 2.6955 61 C 0 0 0  
41 O 1 1.4350 2.7118 39 O 0-1 1  
41 O 1 2.2900 4.3275 37 O 0 0 0



|      |   |        |        |      |       |
|------|---|--------|--------|------|-------|
| 41 O | 1 | 2.3357 | 4.4139 | 65 C | 0 0 0 |
| 41 O | 1 | 2.3373 | 4.4169 | 63 C | 0-1 1 |
| 41 O | 1 | 2.4502 | 4.6302 | 45 C | 0 0 0 |
|      |   |        |        |      |       |
| 45 C | 1 | 1.0877 | 2.0555 | 53 H | 0-1 0 |
| 45 C | 1 | 1.0918 | 2.0632 | 57 H | 0 0 0 |
| 45 C | 1 | 1.0920 | 2.0636 | 49 H | 0 0 0 |
| 45 C | 1 | 1.5156 | 2.8641 | 61 C | 0 0 0 |
| 45 C | 1 | 2.4502 | 4.6302 | 41 O | 0 0 0 |
| 45 C | 1 | 2.4540 | 4.6373 | 37 O | 0 0 0 |
|      |   |        |        |      |       |
| 49 H | 1 | 1.0920 | 2.0636 | 45 C | 0 0 0 |
| 49 H | 1 | 1.7737 | 3.3519 | 57 H | 0 0 0 |
| 49 H | 1 | 1.7800 | 3.3637 | 53 H | 0-1 0 |
| 49 H | 1 | 2.1365 | 4.0374 | 61 C | 0 0 0 |
| 49 H | 1 | 2.5682 | 4.8532 | 73 H | 0 0 0 |
| 49 H | 1 | 2.6857 | 5.0752 | 37 O | 0 0 0 |
|      |   |        |        |      |       |
| 53 H | 1 | 1.0877 | 2.0555 | 45 C | 0 1 0 |
| 53 H | 1 | 1.7751 | 3.3544 | 57 H | 0 1 0 |
| 53 H | 1 | 1.7800 | 3.3637 | 49 H | 0 1 0 |
| 53 H | 1 | 2.1667 | 4.0944 | 61 C | 0 1 0 |
| 53 H | 1 | 2.4885 | 4.7026 | 39 O | 0 0 1 |
| 53 H | 1 | 2.5611 | 4.8399 | 43 O | 0 0 1 |
|      |   |        |        |      |       |
| 57 H | 1 | 1.0918 | 2.0632 | 45 C | 0 0 0 |
| 57 H | 1 | 1.7737 | 3.3519 | 49 H | 0 0 0 |
| 57 H | 1 | 1.7751 | 3.3544 | 53 H | 0-1 0 |
| 57 H | 1 | 2.1377 | 4.0396 | 61 C | 0 0 0 |
| 57 H | 1 | 2.5649 | 4.8470 | 44 O | 0 0 0 |
| 57 H | 1 | 2.5901 | 4.8946 | 77 H | 0 0 0 |

|      |   |        |        |      |       |
|------|---|--------|--------|------|-------|
| 61 C | 1 | 1.4264 | 2.6955 | 41 O | 0 0 0 |
| 61 C | 1 | 1.4361 | 2.7139 | 37 O | 0 0 0 |
| 61 C | 1 | 1.5120 | 2.8572 | 65 C | 0 0 0 |
| 61 C | 1 | 1.5156 | 2.8641 | 45 C | 0 0 0 |
| 61 C | 1 | 2.1365 | 4.0374 | 49 H | 0 0 0 |
| 61 C | 1 | 2.1377 | 4.0396 | 57 H | 0 0 0 |
|      |   |        |        |      |       |
| 65 C | 1 | 1.0898 | 2.0594 | 69 H | 0 0 0 |
| 65 C | 1 | 1.0899 | 2.0596 | 77 H | 0 0 0 |
| 65 C | 1 | 1.0907 | 2.0611 | 73 H | 0 0 0 |
| 65 C | 1 | 1.5120 | 2.8572 | 61 C | 0 0 0 |
| 65 C | 1 | 2.3357 | 4.4139 | 41 O | 0 0 0 |
| 65 C | 1 | 2.3423 | 4.4262 | 37 O | 0 0 0 |
|      |   |        |        |      |       |
| 69 H | 1 | 1.0898 | 2.0594 | 65 C | 0 0 0 |
| 69 H | 1 | 1.7774 | 3.3589 | 77 H | 0 0 0 |
| 69 H | 1 | 1.7817 | 3.3669 | 73 H | 0 0 0 |
| 69 H | 1 | 2.1525 | 4.0677 | 61 C | 0 0 0 |
| 69 H | 1 | 2.4990 | 4.7224 | 10 O | 0 0 1 |
| 69 H | 1 | 2.5276 | 4.7765 | 37 O | 0 0 0 |
|      |   |        |        |      |       |
| 73 H | 1 | 1.0907 | 2.0611 | 65 C | 0 0 0 |
| 73 H | 1 | 1.7675 | 3.3401 | 77 H | 0 0 0 |
| 73 H | 1 | 1.7817 | 3.3669 | 69 H | 0 0 0 |
| 73 H | 1 | 2.1406 | 4.0451 | 61 C | 0 0 0 |
| 73 H | 1 | 2.5462 | 4.8117 | 14 O | 0 0 0 |
| 73 H | 1 | 2.5682 | 4.8532 | 49 H | 0 0 0 |
|      |   |        |        |      |       |
| 77 H | 1 | 1.0899 | 2.0596 | 65 C | 0 0 0 |
| 77 H | 1 | 1.7675 | 3.3401 | 73 H | 0 0 0 |
| 77 H | 1 | 1.7774 | 3.3589 | 69 H | 0 0 0 |
| 77 H | 1 | 2.1380 | 4.0402 | 61 C | 0 0 0 |

77 H 1 2.5174 4.7573 7 O 0 0 0

77 H 1 2.5739 4.8640 41 O 0 0 0

SYMMETRY ALLOWED INTERNAL DEGREE(S) OF FREEDOM: 58

TTTTTTTTTTTTTTTTTTTTTTTTTTTTTTTTTTTT SYMM TELAPSE 1.07 TCPU 0.04

TTTTTTTTTTTTTTTTTTTTTTTTTTTTTTTTTTTT INT\_SCREEN TELAPSE 1.08 TCPU 0.06

\*\*\*\*\*

```
*
*
*   FFFF RRRR EEEE QQQ U U EEEE N N CCC Y Y   *
*   F  R R E  Q Q U U E  NN N C  YY   *
*   FFF  RRRR EEEE Q  Q U U EEEE N N N C  Y   *
*   F  R R E  Q QQ U U E  N NN C  Y   *
*   F  R R EEEE QQQ UUU EEEE N N CCC Y   *
```

```
*
*
* CALCULATION OF PHONON FREQUENCIES AT THE GAMMA POINT.   *
```

```
*
*
* SYMMETRY IS EXPLOITED TO BUILD THE TOTAL HESSIAN MATRIX.   *
* (F. PASCALE PHD THESIS TURIN-PARIS 2002)   *
```

```
*
*
```

\*\*\*\*\*

```
* INTENSITIES COMPUTED VIA THE BERRY PHASE APPROACH   *
```

```
*
*
* REFERENCES TO BE QUOTED WHEN USING THIS MODULE:   *
```

```
*
*
```

```
* F. Pascale, C.M. Zicovich-Wilson, F. Lopez, B. Civalleri   *
```

```
* R. Orlando, R. Dovesi   *
```

\* The calculation of the vibration frequencies of crystalline \*  
 \* compounds and its implementation in the CRYSTAL code \*  
 \* J. Comput. Chem. 25 (2004) 888-897 \*  
 \* \*  
 \* C.M. Zicovich-Wilson, F. Pascale, C. Roetti, V.R. Saunders, \*  
 \* R. Orlando, R. Dovesi \*  
 \* The calculation of the vibration frequencies of alpha-quartz: \*  
 \* the effect of hamiltonian and basis set \*  
 \* J. Comput. Chem. 25 (2004) 1873-1881 \*

\*\*\*\*\*

#### ATOMS ISOTOPIC MASS (AMU) FOR FREQUENCY CALCULATION

|      |          |      |          |      |          |      |          |
|------|----------|------|----------|------|----------|------|----------|
| 1 I  | 126.9044 | 2 I  | 126.9044 | 3 I  | 126.9044 | 4 I  | 126.9044 |
| 5 I  | 126.9044 | 6 I  | 126.9044 | 7 O  | 15.9949  | 8 O  | 15.9949  |
| 9 O  | 15.9949  | 10 O | 15.9949  | 11 O | 15.9949  | 12 O | 15.9949  |
| 13 O | 15.9949  | 14 O | 15.9949  | 15 O | 15.9949  | 16 O | 15.9949  |
| 17 O | 15.9949  | 18 O | 15.9949  | 19 N | 14.0031  | 20 N | 14.0031  |
| 21 N | 14.0031  | 22 N | 14.0031  | 23 N | 14.0031  | 24 N | 14.0031  |
| 25 C | 12.0000  | 26 C | 12.0000  | 27 C | 12.0000  | 28 C | 12.0000  |
| 29 C | 12.0000  | 30 C | 12.0000  | 31 C | 12.0000  | 32 C | 12.0000  |
| 33 C | 12.0000  | 34 C | 12.0000  | 35 C | 12.0000  | 36 C | 12.0000  |
| 37 O | 15.9949  | 38 O | 15.9949  | 39 O | 15.9949  | 40 O | 15.9949  |
| 41 O | 15.9949  | 42 O | 15.9949  | 43 O | 15.9949  | 44 O | 15.9949  |
| 45 C | 12.0000  | 46 C | 12.0000  | 47 C | 12.0000  | 48 C | 12.0000  |
| 49 H | 1.0078   | 50 H | 1.0078   | 51 H | 1.0078   | 52 H | 1.0078   |
| 53 H | 1.0078   | 54 H | 1.0078   | 55 H | 1.0078   | 56 H | 1.0078   |
| 57 H | 1.0078   | 58 H | 1.0078   | 59 H | 1.0078   | 60 H | 1.0078   |
| 61 C | 12.0000  | 62 C | 12.0000  | 63 C | 12.0000  | 64 C | 12.0000  |
| 65 C | 12.0000  | 66 C | 12.0000  | 67 C | 12.0000  | 68 C | 12.0000  |

|      |        |      |        |      |        |      |        |
|------|--------|------|--------|------|--------|------|--------|
| 69 H | 1.0078 | 70 H | 1.0078 | 71 H | 1.0078 | 72 H | 1.0078 |
| 73 H | 1.0078 | 74 H | 1.0078 | 75 H | 1.0078 | 76 H | 1.0078 |
| 77 H | 1.0078 | 78 H | 1.0078 | 79 H | 1.0078 | 80 H | 1.0078 |

INFORMATION CONCERNING THE SCF+GRADIENT CALCULATIONS REQUIRED FOR GENERATING FREQUENCIES. IN PRINCIPLE 3N+1 SCF + GRADIENT CALCULATIONS ARE REQUIRED; FOR EACH OF THEM THE REMAINING POINT SYMMETRY IS INDICATED. POINT SYMMETRY PERMITS TO GENERATE GRADIENTS FOR DISPLACEMENT B STARTING FROM THE GRADIENT GENERATED BY DISPLACEMENT A.

N LABEL SYMBOL DISPLACEMENT SYM.

1 EQUILIBRIUM GEOMETRY 4

|    |    |   |    |   |
|----|----|---|----|---|
| 2  | 1  | I | DX | 1 |
| 3  | 1  | I | DY | 2 |
| 4  | 1  | I | DZ | 1 |
| 5  | 3  | I | DX | 1 |
| 6  | 3  | I | DY | 1 |
| 7  | 3  | I | DZ | 1 |
| 8  | 7  | O | DX | 1 |
| 9  | 7  | O | DY | 1 |
| 10 | 7  | O | DZ | 1 |
| 11 | 11 | O | DX | 1 |
| 12 | 11 | O | DY | 1 |
| 13 | 11 | O | DZ | 1 |
| 14 | 15 | O | DX | 1 |
| 15 | 15 | O | DY | 1 |
| 16 | 15 | O | DZ | 1 |
| 17 | 19 | N | DX | 1 |
| 18 | 19 | N | DY | 1 |

|    |    |   |    |   |
|----|----|---|----|---|
| 19 | 19 | N | DZ | 1 |
| 20 | 23 | N | DX | 1 |
| 21 | 23 | N | DY | 2 |
| 22 | 23 | N | DZ | 1 |
| 23 | 25 | C | DX | 1 |
| 24 | 25 | C | DY | 2 |
| 25 | 25 | C | DZ | 1 |
| 26 | 27 | C | DX | 1 |
| 27 | 27 | C | DY | 1 |
| 28 | 27 | C | DZ | 1 |
| 29 | 31 | C | DX | 1 |
| 30 | 31 | C | DY | 1 |
| 31 | 31 | C | DZ | 1 |
| 32 | 35 | C | DX | 1 |
| 33 | 35 | C | DY | 2 |
| 34 | 35 | C | DZ | 1 |
| 35 | 37 | O | DX | 1 |
| 36 | 37 | O | DY | 1 |
| 37 | 37 | O | DZ | 1 |
| 38 | 41 | O | DX | 1 |
| 39 | 41 | O | DY | 1 |
| 40 | 41 | O | DZ | 1 |
| 41 | 45 | C | DX | 1 |
| 42 | 45 | C | DY | 1 |
| 43 | 45 | C | DZ | 1 |
| 44 | 49 | H | DX | 1 |
| 45 | 49 | H | DY | 1 |
| 46 | 49 | H | DZ | 1 |
| 47 | 53 | H | DX | 1 |
| 48 | 53 | H | DY | 1 |
| 49 | 53 | H | DZ | 1 |
| 50 | 57 | H | DX | 1 |

|    |    |   |    |   |
|----|----|---|----|---|
| 51 | 57 | H | DY | 1 |
| 52 | 57 | H | DZ | 1 |
| 53 | 61 | C | DX | 1 |
| 54 | 61 | C | DY | 1 |
| 55 | 61 | C | DZ | 1 |
| 56 | 65 | C | DX | 1 |
| 57 | 65 | C | DY | 1 |
| 58 | 65 | C | DZ | 1 |
| 59 | 69 | H | DX | 1 |
| 60 | 69 | H | DY | 1 |
| 61 | 69 | H | DZ | 1 |
| 62 | 73 | H | DX | 1 |
| 63 | 73 | H | DY | 1 |
| 64 | 73 | H | DZ | 1 |
| 65 | 77 | H | DX | 1 |
| 66 | 77 | H | DY | 1 |
| 67 | 77 | H | DZ | 1 |

#### USE OF RESIDUAL SYMMETRY AFTER DISPLACEMENT

NUMERICAL GRADIENT COMPUTED WITH A SINGLE DISPLACEMENT (+DX) FOR EACH  
CARTESIAN COORDINATE WITH RESPECT TO THE EQUILIBRIUM CONFIGURATION

DX= 0.003 ANGSTROM

NUMBER OF IRREDUCIBLE ATOMS            22

NUMBER OF SCF+GRADIENT CALCULATIONS    67

#### ATOM SYMOP ORDER

|    |   |   |
|----|---|---|
| 1  | 2 | 2 |
| 3  | 1 | 1 |
| 7  | 1 | 1 |
| 11 | 1 | 1 |
| 15 | 1 | 1 |
| 19 | 1 | 1 |

23 2 2  
25 2 2  
27 1 1  
31 1 1  
35 2 2  
37 1 1  
41 1 1  
45 1 1  
49 1 1  
53 1 1  
57 1 1  
61 1 1  
65 1 1  
69 1 1  
73 1 1  
77 1 1

ATOM : IRREDUCIBLE ATOM

SYMOP : NUMBER OF SYMMETRY OPERATORS THAT DOESN'T MOVE THE IRREDUCIBLE ATOM

ORDER : MAXIMUM ORDER AMONG THE OPERATORS OF THE IRREDUCIBLE ATOM

\*\*\*\*\*

GCALCO - MAX INDICES DIRECT LATTICE VECTOR 14 14 16

NO.OF VECTORS CREATED 6999 STARS 1811 RMAX 228.60674 BOHR

CAPPA:IS1 3;IS2 3;IS3 3; K PTS MONK NET 10; SYMMOPS:K SPACE 4;G SPACE 4

TTTTTTTTTTTTTTTTTTTTTTTTTTTTTTTTTTTTTTT gordsh1 TELAPSE 1.12 TCPU 0.09

MATRIX SIZE: P(G) 929636, F(G) 163200, P(G) IRR 120001, F(G) IRR 42961



MAX G-VECTOR INDEX FOR 1- AND 2-ELECTRON INTEGRALS 41

TTTTTTTTTTTTTTTTTTTTTTTTTTTTTTTTTTTTTTTT INPUT TELAPSE 1.14 TCPU 0.11

SYMMETRY ALLOWED INTERNAL DEGREE(S) OF FREEDOM: 58

TTTTTTTTTTTTTTTTTTTTTTTTTTTTTTTTTTTTTTTT SYMM TELAPSE 1.15 TCPU 0.12

TTTTTTTTTTTTTTTTTTTTTTTTTTTTTTTTTTTTTTTT INT\_SCREEN TELAPSE 1.16 TCPU 0.13

DFT PARAMETERS

| ATOM    | ELECTRONS | NET CHARGE | R(ANGSTROM) |
|---------|-----------|------------|-------------|
| 1 253 I | 25.0000   | 0.0000     | 1.33000000  |
| 7 8 O   | 8.0000    | 0.0000     | 0.74000000  |
| 19 7 N  | 7.0000    | 0.0000     | 0.74000000  |
| 25 6 C  | 6.0000    | 0.0000     | 0.77000000  |
| 49 1 H  | 1.0000    | 0.0000     | 1.11000000  |

SIZE OF GRID= 572594

TTTTTTTTTTTTTTTTTTTTTTTTTTTTTTTTTTTTTTTT MAKE\_GRID2 TELAPSE 3.84 TCPU 2.78

BECKE WEIGHT FUNCTION

RADSAFE = 2.00

TOLERANCES - DENSITY:10\*\*- 6; POTENTIAL:10\*\*- 9; GRID WGT:10\*\*-14

RADIAL INTEGRATION - INTERVALS (POINTS,UPPER LIMIT): 1( 75, 4.0\*R)

ANGULAR INTEGRATION - INTERVALS (ACCURACY LEVEL [N. POINTS] UPPER LIMIT):

1( 4[ 86] 0.2) 2( 8[ 194] 0.5) 3( 12[ 350] 0.9) 4( 16[ 974] 3.5)

5( 12[ 350]9999.0)

TTTTTTTTTTTTTTTTTTTTTTTTTTTTTTTTTTTTTTTT INT\_CALC TELAPSE 3.88 TCPU 2.83

\*\*\*\*\*

\* Geometry was taken from WUTWAY.cif, del O4B O5B, B3LYP CHNO 6-31G\*\*\* I -pobTZV

CRYSTAL - SCF - TYPE OF CALCULATION : RESTRICTED CLOSED SHELL

\*\*\*\*\*

CAPPA:IS1 3;IS2 3;IS3 3; K PTS MONK NET 10; SYMMOPS:K SPACE 4;G SPACE 4

TTTTTTTTTTTTTTTTTTTTTTTTTTTTTTTTTTTT SDIK TELAPSE 5.10 TCPU 3.86

AAAAAAAAAAAAAAAAAAAAAAAAAAAAAAAAAAAAAAAAAAAAAAAAAAAAAAAAAAAAAAAAAAAA  
AAAAAA

ATOMIC WAVEFUNCTION(S)

NUCLEAR CHARGE 25.0 SYMMETRY SPECIES S P D  
N. ELECTRONS 25.0 NUMBER OF PRIMITIVE GTOS 9 9 9  
NUMBER OF CONTRACTED GTOS 4 4 4  
NUMBER OF CLOSED SHELLS 2 1 1  
OPEN SHELL OCCUPATION 0 5 0

ZNUC SCFIT TOTAL HF ENERGY KINETIC ENERGY VIRIAL THEOREM ACCURACY  
25.0 10 -2.945808324E+02 1.112323824E+02 -3.648336986E+00 1.4E-06

NUCLEAR CHARGE 8.0 SYMMETRY SPECIES S P  
N. ELECTRONS 8.0 NUMBER OF PRIMITIVE GTOS 10 4  
NUMBER OF CONTRACTED GTOS 3 2  
NUMBER OF CLOSED SHELLS 2 0  
OPEN SHELL OCCUPATION 0 4

ZNUC SCFIT TOTAL HF ENERGY KINETIC ENERGY VIRIAL THEOREM ACCURACY  
8.0 12 -7.477688628E+01 7.468135682E+01 -2.001279161E+00 3.5E-06

NUCLEAR CHARGE 7.0 SYMMETRY SPECIES S P  
N. ELECTRONS 7.0 NUMBER OF PRIMITIVE GTOS 10 4

NUMBER OF CONTRACTED GTOS 3 2  
NUMBER OF CLOSED SHELLS 2 0  
OPEN SHELL OCCUPATION 0 3

ZNUC SCFIT TOTAL HF ENERGY KINETIC ENERGY VIRIAL THEOREM ACCURACY  
7.0 9 -5.438205114E+01 5.431262244E+01 -2.001278316E+00 1.7E-06

NUCLEAR CHARGE 6.0 SYMMETRY SPECIES S P

N. ELECTRONS 6.0 NUMBER OF PRIMITIVE GTOS 10 4

NUMBER OF CONTRACTED GTOS 3 2  
NUMBER OF CLOSED SHELLS 2 0  
OPEN SHELL OCCUPATION 0 2

ZNUC SCFIT TOTAL HF ENERGY KINETIC ENERGY VIRIAL THEOREM ACCURACY  
6.0 9 -3.767686565E+01 3.769049035E+01 -1.999638511E+00 3.3E-06

NUCLEAR CHARGE 1.0 SYMMETRY SPECIES S

N. ELECTRONS 1.0 NUMBER OF PRIMITIVE GTOS 4

NUMBER OF CONTRACTED GTOS 2  
NUMBER OF CLOSED SHELLS 0  
OPEN SHELL OCCUPATION 1

ZNUC SCFIT TOTAL HF ENERGY KINETIC ENERGY VIRIAL THEOREM ACCURACY  
1.0 1 -4.982329107E-01 5.098666918E-01 -1.977182700E+00 4.7E-17

AAAAAAAAAAAAAAAAAAAAAAAAAAAAAAAAAAAAAAAAAAAAAAAAAAAAAAAAAAAAAAAAAAAA  
AAAAAA

TTTTTTTTTTTTTTTTTTTTTTTTTTTTTTTTTTTT MOQGAD TELAPSE 6.87 TCPU 5.47  
TTTTTTTTTTTTTTTTTTTTTTTTTTTTTTTTTTTT SHELLXN TELAPSE 30.56 TCPU 28.80  
TTTTTTTTTTTTTTTTTTTTTTTTTTTTTTTTTTTT MONMO3 TELAPSE 33.37 TCPU 31.38  
NUMERICALLY INTEGRATED DENSITY 519.9999498532

```

TTTTTTTTTTTTTTTTTTTTTTTTTTTTTTTTTTTTTTTT NUMDFT  TELAPSE  36.00 TCPU  33.82
CYC 0 ETOT(AU) -4.547630400344E+03 DETOT -4.55E+03 tst 0.00E+00 PX 1.00E+00
TTTTTTTTTTTTTTTTTTTTTTTTTTTTTTTTTTTTTTTT DIIS    TELAPSE  36.08 TCPU  33.90
TTTTTTTTTTTTTTTTTTTTTTTTTTTTTTTTTTTTTTTT FDIK    TELAPSE  95.51 TCPU  92.61
INSULATING STATE
TOP OF VALENCE BANDS - BAND 260; K 2; EIG -2.4341178E-01 AU
TOP OF VALENCE BANDS - BAND 260; K 1; EIG -2.4492854E-01 AU
BOTTOM OF VIRTUAL BANDS - BAND 261; K 2; EIG -1.1199728E-01 AU
DIRECT ENERGY BAND GAP: 3.5760 eV
BOTTOM OF VIRTUAL BANDS - BAND 261; K 1; EIG -1.1120565E-01 AU
TTTTTTTTTTTTTTTTTTTTTTTTTTTTTTTTTTTTTTTT PDIG    TELAPSE  96.71 TCPU  93.80
TTTTTTTTTTTTTTTTTTTTTTTTTTTTTTTTTTTTTTTT MOQGAD  TELAPSE  96.74 TCPU  93.83
TTTTTTTTTTTTTTTTTTTTTTTTTTTTTTTTTTTTTTTT SHELLXN  TELAPSE  121.42 TCPU  118.30
TTTTTTTTTTTTTTTTTTTTTTTTTTTTTTTTTTTTTTTT MONMO3  TELAPSE  123.64 TCPU  120.50
NUMERICALLY INTEGRATED DENSITY 519.9999500953
TTTTTTTTTTTTTTTTTTTTTTTTTTTTTTTTTTTTTTTT NUMDFT  TELAPSE  129.14 TCPU  125.93
CYC 1 ETOT(AU) -4.532309614053E+03 DETOT 1.53E+01 tst 0.00E+00 PX 1.00E+00
TTTTTTTTTTTTTTTTTTTTTTTTTTTTTTTTTTTTTTTT DIIS    TELAPSE  135.52 TCPU  132.23
DIIS TEST: 0.71760E+01 AT SCF CYCLE 1 - MIX 25 %
TTTTTTTTTTTTTTTTTTTTTTTTTTTTTTTTTTTTTTTT FDIK    TELAPSE  151.99 TCPU  148.49
INSULATING STATE
TOP OF VALENCE BANDS - BAND 260; K 3; EIG -2.8505349E-01 AU
TOP OF VALENCE BANDS - BAND 260; K 1; EIG -2.8614275E-01 AU
BOTTOM OF VIRTUAL BANDS - BAND 261; K 1; EIG -1.3662393E-01 AU
INDIRECT ENERGY BAND GAP: 4.0390 eV
TTTTTTTTTTTTTTTTTTTTTTTTTTTTTTTTTTTTTTTT PDIG    TELAPSE  153.19 TCPU  149.69
TTTTTTTTTTTTTTTTTTTTTTTTTTTTTTTTTTTTTTTT MOQGAD  TELAPSE  153.22 TCPU  149.72
TTTTTTTTTTTTTTTTTTTTTTTTTTTTTTTTTTTTTTTT SHELLXN  TELAPSE  177.90 TCPU  174.17
TTTTTTTTTTTTTTTTTTTTTTTTTTTTTTTTTTTTTTTT MONMO3  TELAPSE  180.13 TCPU  176.37
NUMERICALLY INTEGRATED DENSITY 519.9999447373
TTTTTTTTTTTTTTTTTTTTTTTTTTTTTTTTTTTTTTTT NUMDFT  TELAPSE  185.65 TCPU  181.81
CYC 2 ETOT(AU) -4.532582419207E+03 DETOT -2.73E-01 tst 2.75E-02 PX 3.88E-01

```









































































































































































































INFORMATION \*\*\*\* GENPOG \*\*\*\* BIPO BUFFER LENGTH (WORDS) = 1780800

TTTTTTTTTTTTTTTTTTTTTTTTTTTTTTTTTTTTTTTT SHELXG TELAPSE 10045.69 TCPU 9976.43

CARTESIAN FORCES IN HARTREE/BOHR (ANALYTICAL)

| ATOM  | X                   | Y                   | Z                   |
|-------|---------------------|---------------------|---------------------|
| 1 253 | 5.975386851986E-12  | 2.371569441983E-05  | 2.504139257065E-12  |
| 2 253 | 6.809330876933E-12  | -2.371570519522E-05 | 8.201425649723E-13  |
| 3 253 | -3.247189683364E-05 | -1.047025857588E-04 | -1.954698951590E-05 |
| 4 253 | 3.247189527755E-05  | -1.047025860705E-04 | 1.954699147788E-05  |
| 5 253 | 3.247190391420E-05  | 1.047025790601E-04  | 1.954698283946E-05  |
| 6 253 | -3.247191433786E-05 | 1.047025781586E-04  | -1.954698853623E-05 |
| 7 8   | 4.212540384430E-05  | -8.692625021212E-05 | -8.676615848202E-05 |
| 8 8   | -4.212540440385E-05 | -8.692624979467E-05 | 8.676615808412E-05  |
| 9 8   | -4.212539843707E-05 | 8.692625034890E-05  | 8.676615466641E-05  |
| 10 8  | 4.212539361603E-05  | 8.692625236062E-05  | -8.676615441772E-05 |
| 11 8  | -2.150999144934E-05 | 2.866850381000E-05  | 7.802213649555E-05  |
| 12 8  | 2.150999021477E-05  | 2.866850480743E-05  | -7.802213430530E-05 |
| 13 8  | 2.150999500294E-05  | -2.866850490779E-05 | -7.802213489683E-05 |
| 14 8  | -2.150999715589E-05 | -2.866850298755E-05 | 7.802213071884E-05  |
| 15 8  | 1.747763039424E-04  | 6.761916528930E-06  | 7.424856385185E-05  |
| 16 8  | -1.747763001383E-04 | 6.761916697684E-06  | -7.424856260307E-05 |
| 17 8  | -1.747762977138E-04 | -6.761912626274E-06 | -7.424857020411E-05 |
| 18 8  | 1.747763205072E-04  | -6.761910253061E-06 | 7.424857520277E-05  |
| 19 7  | -3.881929076899E-05 | 7.169081262726E-05  | 5.073808105094E-05  |
| 20 7  | 3.881929089067E-05  | 7.169081308112E-05  | -5.073808025780E-05 |
| 21 7  | 3.881929531957E-05  | -7.169081356162E-05 | -5.073808201383E-05 |
| 22 7  | -3.881929998295E-05 | -7.169081034197E-05 | 5.073807913014E-05  |
| 23 7  | 1.282193101693E-12  | -9.846491363374E-07 | 4.340594723928E-13  |
| 24 7  | -1.127915816301E-11 | 9.846514390510E-07  | -3.375097076819E-12 |
| 25 6  | 1.185031239803E-12  | 1.342518314660E-04  | 4.247249253686E-13  |
| 26 6  | 1.309731489929E-11  | -1.342518431309E-04 | 6.660250476132E-12  |
| 27 6  | -1.238101753209E-05 | 6.473882043800E-05  | -2.829741094523E-05 |

28 6 1.238101910017E-05 6.473882062075E-05 2.829741172937E-05  
29 6 1.238102527013E-05 -6.473882175140E-05 2.829741183857E-05  
30 6 -1.238103003254E-05 -6.473881144631E-05 -2.829741710789E-05  
31 6 -1.927559304180E-04 -6.901079454974E-06 -1.128542146381E-04  
32 6 1.927559318431E-04 -6.901079387209E-06 1.128542153956E-04  
33 6 1.927559370447E-04 6.901079843545E-06 1.128542151008E-04  
34 6 -1.927559434662E-04 6.901071119315E-06 -1.128542207937E-04  
35 6 1.021370488186E-12 -4.312807658331E-05 3.530895194281E-13  
36 6 1.247262015891E-11 4.312808729162E-05 6.601439880849E-12  
37 8 -4.438886162372E-05 5.049559862114E-05 -1.350508266520E-04  
38 8 4.438885960578E-05 5.049559836001E-05 1.350508266191E-04  
39 8 4.438886425451E-05 -5.049559882986E-05 1.350508236196E-04  
40 8 -4.438886662150E-05 -5.049559911718E-05 -1.350508242051E-04  
41 8 -3.048964934305E-05 -9.018505355129E-05 5.195822791126E-06  
42 8 3.048964706931E-05 -9.018505365077E-05 -5.195823043369E-06  
43 8 3.048965130059E-05 9.018505372538E-05 -5.195825748761E-06  
44 8 -3.048965363073E-05 9.018505351754E-05 5.195825404147E-06  
45 6 -5.202673863369E-05 -2.950597181313E-05 9.107563718036E-05  
46 6 5.202673714377E-05 -2.950597193530E-05 -9.107563751254E-05  
47 6 5.202674204297E-05 2.950597266538E-05 -9.107563647426E-05  
48 6 -5.202674400540E-05 2.950597244727E-05 9.107563634814E-05  
49 1 -7.248835687268E-05 1.154790760127E-05 2.723129272209E-05  
50 1 7.248835662366E-05 1.154790756785E-05 -2.723129279425E-05  
51 1 7.248835746043E-05 -1.154790753566E-05 -2.723129220605E-05  
52 1 -7.248835777679E-05 -1.154790757230E-05 2.723129220139E-05  
53 1 -3.458957074565E-05 -5.147644229697E-05 7.123510228280E-05  
54 1 3.458957049607E-05 -5.147644232451E-05 -7.123510233531E-05  
55 1 3.458957170888E-05 5.147644237591E-05 -7.123510231055E-05  
56 1 -3.458957204017E-05 5.147644233627E-05 7.123510228901E-05  
57 1 -3.558548821586E-05 7.977345970911E-06 2.302171571600E-05  
58 1 3.558548796034E-05 7.977345961363E-06 -2.302171577373E-05  
59 1 3.558548866373E-05 -7.977345676702E-06 -2.302171556567E-05

60 1 -3.558548898785E-05 -7.977345699350E-06 2.302171554680E-05  
61 6 7.349362800113E-06 -1.475854763200E-04 4.049945893225E-05  
62 6 -7.349364320008E-06 -1.475854764399E-04 -4.049945909212E-05  
63 6 -7.349360934050E-06 1.475854772028E-04 -4.049946026274E-05  
64 6 7.349358963182E-06 1.475854769515E-04 4.049945993678E-05  
65 6 -8.697602715424E-05 4.327849906982E-05 -1.290326026915E-06  
66 6 8.697602581575E-05 4.327849894015E-05 1.290326159920E-06  
67 6 8.697602777330E-05 -4.327849691066E-05 1.290324803227E-06  
68 6 -8.697603044494E-05 -4.327849742225E-05 -1.290325561287E-06  
69 1 5.270175090111E-06 -9.352763800619E-05 5.615362960865E-05  
70 1 -5.270175393202E-06 -9.352763804349E-05 -5.615362948097E-05  
71 1 -5.270175117311E-06 9.352763852732E-05 -5.615363001721E-05  
72 1 5.270174765482E-06 9.352763843684E-05 5.615362977629E-05  
73 1 3.446365564475E-05 -2.326867835832E-05 9.503092694763E-06  
74 1 -3.446365577409E-05 -2.326867839814E-05 -9.503092715635E-06  
75 1 -3.446365569426E-05 2.326867868996E-05 -9.503092716523E-06  
76 1 3.446365514714E-05 2.326867849839E-05 9.503092658569E-06  
77 1 -1.041327922979E-05 1.218774079657E-04 1.371276457525E-04  
78 1 1.041327900819E-05 1.218774079736E-04 -1.371276457631E-04  
79 1 1.041327935980E-05 -1.218774075171E-04 -1.371276460083E-04  
80 1 -1.041327984397E-05 -1.218774075340E-04 1.371276459196E-04

RESULTANT FORCE -2.383163111297E-14 -2.783884234248E-14 -1.585060208087E-14

SYMMETRY ALLOWED FORCES (ANALYTICAL) (DIRECTION, FORCE)

1 3.3539064E-05 2 -6.4943805E-05 3 -2.0940516E-04 4 -3.9093976E-05  
5 8.4250800E-05 6 -1.7385250E-04 7 -1.7353231E-04 8 -4.3019987E-05  
9 5.7337008E-05 10 1.5604427E-04 11 3.4955261E-04 12 1.3523828E-05  
13 1.4849714E-04 14 -7.7638588E-05 15 1.4338162E-04 16 1.0147616E-04  
17 -1.3925058E-06 18 1.8986077E-04 19 -2.4762046E-05 20 1.2947764E-04  
21 -5.6594826E-05 22 -3.8551187E-04 23 -1.3802155E-05 24 -2.2570843E-04





11 O DX 7.1366E-04 -4.533747108499E+03 63 2.1040E-06 1  
11 O DY 1.2956E-03 -4.533747108214E+03 132 2.3899E-06 1  
11 O DZ 3.8048E-03 -4.533747099768E+03 195 1.0836E-05 1  
15 O DX 4.1691E-04 -4.533747111575E+03 84 -9.7175E-07 1  
15 O DY 1.5062E-03 -4.533747104644E+03 92 5.9593E-06 1

ERROR \*\*\*\* FREQUENCY \*\*\*\* SCF FAILED - FREQUENCY CALCULATION ABORTED

TTTTTTTTTTTTTTTTTTTTTTTTTTTTTTTTTTTTTTTT ERR TELAPSE 334125.47 TCPU 332630.10

-----  
Sorry! You were supposed to get help about:

mpi-abort

But I couldn't open the help file:

/opt/openmpi-1.6.3/share/openmpi/help-mpi-api.txt: No such file or directory. Sorry!

-----  
-----  
Sorry! You were supposed to get help about:

mpi-abort

But I couldn't open the help file:

/opt/openmpi-1.6.3/share/openmpi/help-mpi-api.txt: No such file or directory. Sorry!

-----  
-----  
Sorry! You were supposed to get help about:

mpi-abort

But I couldn't open the help file:

/opt/openmpi-1.6.3/share/openmpi/help-mpi-api.txt: No such file or directory. Sorry!

-----  
-----  
Sorry! You were supposed to get help about:

mpi-abort

But I couldn't open the help file:

/opt/openmpi-1.6.3/share/openmpi/help-mpi-api.txt: No such file or directory. Sorry!

Sorry! You were supposed to get help about:

mpi-abort

But I couldn't open the help file:

/opt/openmpi-1.6.3/share/openmpi/help-mpi-api.txt: No such file or directory. Sorry!

-----

-----

Sorry! You were supposed to get help about:

mpi-abort

But I couldn't open the help file:

/opt/openmpi-1.6.3/share/openmpi/help-mpi-api.txt: No such file or directory. Sorry!

-----

-----

Sorry! You were supposed to get help about:

mpi-abort

But I couldn't open the help file:

/opt/openmpi-1.6.3/share/openmpi/help-mpi-api.txt: No such file or directory. Sorry!

-----

-----

Sorry! You were supposed to get help about:

mpi-abort

But I couldn't open the help file:

/opt/openmpi-1.6.3/share/openmpi/help-mpi-api.txt: No such file or directory. Sorry!

-----

-----

mpirun has exited due to process rank 6 with PID 7454 on  
node K524super exiting improperly. There are two reasons this could occur:

1. this process did not call "init" before exiting, but others in the job did. This can cause a job to hang indefinitely while it waits for all processes to call "init". By rule, if one process calls "init", then ALL processes must call "init" prior to termination.

2. this process called "init", but exited without calling "finalize".  
By rule, all processes that call "init" MUST call "finalize" prior to exiting or it will be considered an "abnormal termination"

This may have caused other processes in the application to be terminated by signals sent by mpirun (as reported here).

-----
